# Supplementary material
Source: PubMed Central journal article supplement (PMC3348545)
Supplement: NIHMS263168-supplement-3.pdf [file NIHMS263168-supplement-3.pdf]

Table S1 - Summary of genes bound in ChIP-Seq studies

| CHROM      | START   | STOP    | STRAND | ID1          | ID2       | WM262 SetDB1 10E-12 |             | WM262 H3K9me3 10E-9 |             | WM262 MCAF1 10E-9 |             | WM451Lu SetDB1 10E-12 |             | WM451Lu H3K9me3 10E-9 |             |
|------------|---------|---------|--------|--------------|-----------|---------------------|-------------|---------------------|-------------|-------------------|-------------|-----------------------|-------------|-----------------------|-------------|
|            |         |         |        |              |           | Bound ± 10kb TSS    | Peak Height | Bound ± 10kb TSS    | Peak Height | Bound ± 10kb TSS  | Peak Height | Bound ± 10kb TSS      | Peak Height | Bound ± 10kb TSS      | Peak Height |
| 5_random   | 25728   | 12668   | -1     | NM_152283    | ZFP62     | 0                   | NA          | 0                   | NA          | 0                 | NA          | 0                     | NA          | 0                     | NA          |
| 5_random   | 64158   | 115938  | 1      | NM_001040462 | BTNL8     | 0                   | NA          | 0                   | NA          | 0                 | NA          | 0                     | NA          | 0                     | NA          |
| 21_random  | 164670  | 103279  | -1     | NM_001033515 | LOC389833 | 0                   | NA          | 0                   | NA          | 0                 | NA          | 0                     | NA          | 0                     | NA          |
| 2_random   | 54450   | 1615    | -1     | NM_015963    | THAP4     | 0                   | NA          | 0                   | NA          | 0                 | NA          | 0                     | NA          | 0                     | NA          |
| 2_random   | 54821   | 91067   | 1      | NM_013325    | ATG4B     | 0                   | NA          | 0                   | NA          | 0                 | NA          | 0                     | NA          | 0                     | NA          |
| 2_random   | 54821   | 91067   | 1      | NM_178326    | ATG4B     | 0                   | NA          | 0                   | NA          | 0                 | NA          | 0                     | NA          | 0                     | NA          |
| 2_random   | 104023  | 92952   | -1     | NM_012145    | DTYMK     | 0                   | NA          | 0                   | NA          | 0                 | NA          | 0                     | NA          | 0                     | NA          |
| 2_random   | 151161  | 183729  | 1      | NM_152783    | D2HGDH    | 0                   | NA          | 0                   | NA          | 0                 | NA          | 0                     | NA          | 0                     | NA          |
| 15_random  | 258250  | 271611  | 1      | NM_001012420 | GOLGA8G   | 0                   | NA          | 0                   | NA          | 0                 | NA          | 0                     | NA          | 0                     | NA          |
| 15_random  | 258305  | 269666  | 1      | NM_001012452 | FLJ32679  | 0                   | NA          | 0                   | NA          | 0                 | NA          | 0                     | NA          | 0                     | NA          |
| 16_random  | 44635   | 41077   | -1     | NM_175900    | C16orf54  | 0                   | NA          | 0                   | NA          | 0                 | NA          | 0                     | NA          | 0                     | NA          |
| 16_random  | 77877   | 79135   | 1      | NM_152338    | ZG16      | 0                   | NA          | 0                   | NA          | 0                 | NA          | 0                     | NA          | 0                     | NA          |
| 16_random  | 89374   | 104032  | 1      | NM_007317    | KIF22     | 0                   | NA          | 0                   | NA          | 0                 | NA          | 0                     | NA          | 0                     | NA          |
| 6_cox_hap1 | 13824   | 0       | -1     | NM_052923    | ZNF452    | 0                   | NA          | 0                   | NA          | 0                 | NA          | 0                     | NA          | 0                     | NA          |
| 6_cox_hap1 | 351303  | 330309  | -1     | NM_006510    | TRIM27    | 0                   | NA          | 0                   | NA          | 0                 | NA          | 0                     | NA          | 0                     | NA          |
| 6_cox_hap1 | 428353  | 417899  | -1     | NM_001010877 | ZNF311    | 0                   | NA          | 0                   | NA          | 0                 | NA          | 0                     | NA          | 0                     | NA          |
| 6_cox_hap1 | 468276  | 467313  | -1     | NM_030903    | OR2W1     | 0                   | NA          | 0                   | NA          | 0                 | NA          | 0                     | NA          | 0                     | NA          |
| 6_cox_hap1 | 510405  | 509463  | -1     | NM_001005226 | OR2B3P    | 0                   | NA          | 0                   | NA          | 0                 | NA          | 0                     | NA          | 0                     | NA          |
| 6_cox_hap1 | 535051  | 535987  | 1      | NM_001005216 | OR2J3     | 0                   | NA          | 0                   | NA          | 0                 | NA          | 0                     | NA          | 0                     | NA          |
| 6_cox_hap1 | 596689  | 597730  | 1      | NM_030905    | OR2J2     | 0                   | NA          | 0                   | NA          | 0                 | NA          | 0                     | NA          | 0                     | NA          |
| 6_cox_hap1 | 687260  | 685883  | -1     | NM_001080842 | LOC651503 | 0                   | NA          | 0                   | NA          | 0                 | NA          | 0                     | NA          | 0                     | NA          |
| 6_cox_hap1 | 729892  | 730858  | 1      | NM_030946    | OR14J1    | 0                   | NA          | 0                   | NA          | 0                 | NA          | 0                     | NA          | 0                     | NA          |
| 6_cox_hap1 | 779480  | 778432  | -1     | NM_030876    | OR5V1     | 0                   | NA          | 0                   | NA          | 0                 | NA          | 0                     | NA          | 0                     | NA          |
| 6_cox_hap1 | 798509  | 796640  | -1     | NM_030959    | OR12D3    | 0                   | NA          | 0                   | NA          | 0                 | NA          | 0                     | NA          | 0                     | NA          |
| 6_cox_hap1 | 819712  | 820745  | 1      | NM_013936    | OR12D2    | 0                   | NA          | 0                   | NA          | 0                 | NA          | 0                     | NA          | 0                     | NA          |
| 6_cox_hap1 | 850794  | 848565  | -1     | NM_013937    | OR11A1    | 0                   | NA          | 0                   | NA          | 0                 | NA          | 0                     | NA          | 0                     | NA          |
| 6_cox_hap1 | 863077  | 864016  | 1      | NM_013941    | OR10C1    | 0                   | NA          | 0                   | NA          | 0                 | NA          | 0                     | NA          | 0                     | NA          |
| 6_cox_hap1 | 881518  | 887387  | 1      | NM_030883    | OR2H1     | 0                   | NA          | 0                   | NA          | 0                 | NA          | 0                     | NA          | 0                     | NA          |
| 6_cox_hap1 | 910967  | 909830  | -1     | NM_052967    | MAS1L     | 0                   | NA          | 0                   | NA          | 0                 | NA          | 0                     | NA          | 0                     | NA          |
| 6_cox_hap1 | 983019  | 978724  | -1     | NM_006398    | UBD       | 0                   | NA          | 0                   | NA          | 0                 | NA          | 0                     | NA          | 0                     | NA          |
| 6_cox_hap1 | 1010998 | 1012061 | 1      | NM_007160    | OR2H2     | 0                   | NA          | 0                   | NA          | 0                 | NA          | 0                     | NA          | 0                     | NA          |
| 6_cox_hap1 | 1051322 | 1025320 | -1     | NM_021903    | GABBR1    | 0                   | NA          | 0                   | NA          | 0                 | NA          | 0                     | NA          | 0                     | NA          |
| 6_cox_hap1 | 1056279 | 1025320 | -1     | NM_001470    | GABBR1    | 0                   | NA          | 0                   | NA          | 0                 | NA          | 0                     | NA          | 0                     | NA          |
| 6_cox_hap1 | 1056279 | 1025320 | -1     | NM_021904    | GABBR1    | 0                   | NA          | 0                   | NA          | 0                 | NA          | 0                     | NA          | 0                     | NA          |
| 6_cox_hap1 | 1056279 | 1025320 | -1     | NM_021905    | GABBR1    | 0                   | NA          | 0                   | NA          | 0                 | NA          | 0                     | NA          | 0                     | NA          |
| 6_cox_hap1 | 1080116 | 1095458 | 1      | NM_001008228 | MOG       | 0                   | NA          | 0                   | NA          | 0                 | NA          | 0                     | NA          | 0                     | NA          |
| 6_cox_hap1 | 1080116 | 1095458 | 1      | NM_001008229 | MOG       | 0                   | NA          | 0                   | NA          | 0                 | NA          | 0                     | NA          | 0                     | NA          |
| 6_cox_hap1 | 1080116 | 1095458 | 1      | NM_002433    | MOG       | 0                   | NA          | 0                   | NA          | 0                 | NA          | 0                     | NA          | 0                     | NA          |
| 6_cox_hap1 | 1080116 | 1095458 | 1      | NM_206809    | MOG       | 0                   | NA          | 0                   | NA          | 0                 | NA          | 0                     | NA          | 0                     | NA          |
| 6_cox_hap1 | 1080116 | 1095458 | -1     | NM_206810    | MOG       | 0                   | NA          | 0                   | NA          | 0                 | NA          | 0                     | NA          | 0                     | NA          |
| 6_cox_hap1 | 1080116 | 1095458 | 1      | NM_206811    | MOG       | 0                   | NA          | 0                   | NA          | 0                 | NA          | 0                     | NA          | 0                     | NA          |
| 6_cox_hap1 | 1080116 | 1095458 | 1      | NM_206812    | MOG       | 0                   | NA          | 0                   | NA          | 0                 | NA          | 0                     | NA          | 0                     | NA          |
| 6_cox_hap1 | 1080116 | 1095458 | 1      | NM_206813    | MOG       | 0                   | NA          | 0                   | NA          | 0                 | NA          | 0                     | NA          | 0                     | NA          |
| 6_cox_hap1 | 1080116 | 1095458 | 1      | NM_206814    | MOG       | 0                   | NA          | 0                   | NA          | 0                 | NA          | 0                     | NA          | 0                     | NA          |
| 6_cox_hap1 | 1104231 | 1095568 | -1     | NM_00109809  | ZFP57     | 0                   | NA          | 0                   | NA          | 0                 | NA          | 0                     | NA          | 0                     | NA          |
| 6_cox_hap1 | 1143812 | 1146999 | 1      | NM_001098478 | HLA-F     | 0                   | NA          | 0                   | NA          | 0                 | NA          | 0                     | NA          | 0                     | NA          |
| 6_cox_hap1 | 1143812 | 1146999 | 1      | NM_018950    | HLA-F     | 0                   | NA          | 0                   | NA          | 0                 | NA          | 0                     | NA          | 0                     | NA          |
| 6_cox_hap1 | 1143812 | 1147765 | 1      | NM_001098479 | HLA-F     | 0                   | NA          | 0                   | NA          | 0                 | NA          | 0                     | NA          | 0                     | NA          |
| 6_cox_hap1 | 1247153 | 1251311 | 1      | NM_002127    | HLA-G     | 0                   | NA          | 0                   | NA          | 0                 | NA          | 0                     | NA          | 0                     | NA          |
| 6_cox_hap1 | 1358583 | 1361323 | 1      | NM_001080840 | HLA-A29.1 | 0                   | NA          | 0                   | NA          | 0                 | NA          | 0                     | NA          | 0                     | NA          |
| 6_cox_hap1 | 1358588 | 1361913 | 1      | NM_002116    | HLA-A     | 0                   | NA          | 0                   | NA          | 0                 | NA          | 0                     | NA          | 0                     | NA          |
| 6_cox_hap1 | 1391101 | 1394388 | 1      | NM_005844    | HCG9      | 0                   | NA          | 0                   | NA          | 0                 | NA          | 0                     | NA          | 0                     | NA          |
| 6_cox_hap1 | 1477648 | 1481293 | 1      | NM_014596    | ZNRD1     | 0                   | NA          | 0                   | NA          | 0                 | NA          | 0                     | NA          | 0                     | NA          |
| 6_cox_hap1 | 1477648 | 1481293 | 1      | NM_170783    | ZNRD1     | 0                   | NA          | 0                   | NA          | 0                 | NA          | 0                     | NA          | 0                     | NA          |
| 6_cox_hap1 | 1483538 | 1486715 | 1      | NM_021959    | PPP1R11   | 0                   | NA          | 0                   | NA          | 0                 | NA          | 0                     | NA          | 0                     | NA          |
| 6_cox_hap1 | 1492235 | 1486649 | -1     | NM_025236    | RNF39     | 0                   | NA          | 0                   | NA          | 0                 | NA          | 0                     | NA          | 0                     | NA          |
| 6_cox_hap1 | 1492235 | 1486649 | -1     | NM_170769    | RNF39     | 0                   | NA          | 0                   | NA          | 0                 | NA          | 0                     | NA          | 0                     | NA          |
| 6_cox_hap1 | 1529502 | 1519302 | -1     | NM_007028    | TRIM31    | 0                   | NA          | 0                   | NA          | 0                 | NA          | 0                     | NA          | 0                     | NA          |
| 6_cox_hap1 | 1553150 | 1565156 | 1      | NM_138700    | TRIM40    | 0                   | NA          | 0                   | NA          | 0                 | NA          | 0                     | NA          | 0                     | NA          |
| 6_cox_hap1 | 1577353 | 1568367 | -1     | NM_006778    | TRIM10    | 0                   | NA          | 0                   | NA          | 0                 | NA          | 0                     | NA          | 0                     | NA          |
| 6_cox_hap1 | 1577353 | 1568367 | -1     | NM_052828    | TRIM10    | 0                   | NA          | 0                   | NA          | 0                 | NA          | 0                     | NA          | 0                     | NA          |
| 6_cox_hap1 | 1579616 | 1589107 | 1      | NM_033229    | TRIM15    | 0                   | NA          | 0                   | NA          | 0                 | NA          | 0                     | NA          | 0                     | NA          |

|            |         |         |    |              |          |   |    |   |    |   |    |   |    |   |    |
|------------|---------|---------|----|--------------|----------|---|----|---|----|---|----|---|----|---|----|
| 6_cox_hap1 | 1629760 | 1600847 | -1 | NM_003449    | TRIM26   | 0 | NA | 0 | NA | 0 | NA | 0 | NA | 0 | NA |
| 6_cox_hap1 | 1675976 | 1683259 | 1  | NM_001004349 | FLJ45422 | 0 | NA | 0 | NA | 0 | NA | 0 | NA | 0 | NA |
| 6_cox_hap1 | 1743552 | 1760023 | 1  | NM_021253    | TRIM39   | 0 | NA | 0 | NA | 0 | NA | 0 | NA | 0 | NA |
| 6_cox_hap1 | 1743552 | 1760023 | 1  | NM_172016    | TRIM39   | 0 | NA | 0 | NA | 0 | NA | 0 | NA | 0 | NA |
| 6_cox_hap1 | 1761453 | 1763149 | 1  | NM_024839    | RPP21    | 0 | NA | 0 | NA | 0 | NA | 0 | NA | 0 | NA |
| 6_cox_hap1 | 1905841 | 1909664 | 1  | NM_005516    | HLA-E    | 0 | NA | 0 | NA | 0 | NA | 0 | NA | 0 | NA |
| 6_cox_hap1 | 1973311 | 1980736 | 1  | NM_001077497 | PRR3     | 0 | NA | 0 | NA | 0 | NA | 0 | NA | 0 | NA |
| 6_cox_hap1 | 1973311 | 1980736 | 1  | NM_025263    | PRR3     | 0 | NA | 0 | NA | 0 | NA | 0 | NA | 0 | NA |
| 6_cox_hap1 | 1973564 | 1962248 | -1 | NM_005275    | GNL1     | 0 | NA | 0 | NA | 0 | NA | 0 | NA | 0 | NA |
| 6_cox_hap1 | 1987727 | 2007863 | 1  | NM_001025091 | ABCF1    | 0 | NA | 0 | NA | 0 | NA | 0 | NA | 0 | NA |
| 6_cox_hap1 | 1987727 | 2007863 | 1  | NM_001090    | ABCF1    | 0 | NA | 0 | NA | 0 | NA | 0 | NA | 0 | NA |
| 6_cox_hap1 | 2033580 | 2016741 | -1 | NM_002714    | PPP1R10  | 0 | NA | 0 | NA | 0 | NA | 0 | NA | 0 | NA |
| 6_cox_hap1 | 2034045 | 2042734 | 1  | NM_014046    | MRPS18B  | 0 | NA | 0 | NA | 0 | NA | 0 | NA | 0 | NA |
| 6_cox_hap1 | 2043172 | 2061006 | 1  | NM_024909    | C6orf134 | 0 | NA | 0 | NA | 0 | NA | 0 | NA | 0 | NA |
| 6_cox_hap1 | 2063358 | 2069532 | 1  | NM_001109938 | C6orf136 | 0 | NA | 0 | NA | 0 | NA | 0 | NA | 0 | NA |
| 6_cox_hap1 | 2063755 | 2069532 | 1  | NM_145029    | C6orf136 | 0 | NA | 0 | NA | 0 | NA | 0 | NA | 0 | NA |
| 6_cox_hap1 | 2089337 | 2069456 | -1 | NM_003567    | DHX16    | 0 | NA | 0 | NA | 0 | NA | 0 | NA | 0 | NA |
| 6_cox_hap1 | 2102564 | 2092745 | -1 | NM_133471    | KIAA1949 | 0 | NA | 0 | NA | 0 | NA | 0 | NA | 0 | NA |
| 6_cox_hap1 | 2107349 | 2104405 | -1 | NM_007243    | NRM      | 0 | NA | 0 | NA | 0 | NA | 0 | NA | 0 | NA |
| 6_cox_hap1 | 2134034 | 2116159 | -1 | NM_014641    | MDC1     | 0 | NA | 0 | NA | 0 | NA | 0 | NA | 0 | NA |
| 6_cox_hap1 | 2136731 | 2141770 | 1  | NM_178014    | TUBB     | 0 | NA | 0 | NA | 0 | NA | 0 | NA | 0 | NA |
| 6_cox_hap1 | 2159029 | 2144083 | -1 | NM_005803    | FLOT1    | 0 | NA | 0 | NA | 0 | NA | 0 | NA | 0 | NA |
| 6_cox_hap1 | 2160903 | 2159551 | -1 | NM_003897    | IER3     | 0 | NA | 0 | NA | 0 | NA | 0 | NA | 0 | NA |
| 6_cox_hap1 | 2300465 | 2316540 | 1  | NM_001954    | DDR1     | 0 | NA | 0 | NA | 0 | NA | 0 | NA | 0 | NA |
| 6_cox_hap1 | 2300931 | 2316540 | 1  | NM_013993    | DDR1     | 0 | NA | 0 | NA | 0 | NA | 0 | NA | 0 | NA |
| 6_cox_hap1 | 2305069 | 2316540 | 1  | NM_013994    | DDR1     | 0 | NA | 0 | NA | 0 | NA | 0 | NA | 0 | NA |
| 6_cox_hap1 | 2324558 | 2330462 | 1  | NM_001517    | GTF2H4   | 0 | NA | 0 | NA | 0 | NA | 0 | NA | 0 | NA |
| 6_cox_hap1 | 2330563 | 2342667 | 1  | NM_020442    | VARS2    | 0 | NA | 0 | NA | 0 | NA | 0 | NA | 0 | NA |
| 6_cox_hap1 | 2348382 | 2347556 | -1 | NM_205854    | SFTPG    | 0 | NA | 0 | NA | 0 | NA | 0 | NA | 0 | NA |
| 6_cox_hap1 | 2367969 | 2370408 | 1  | NM_080870    | DPCR1    | 0 | NA | 0 | NA | 0 | NA | 0 | NA | 0 | NA |
| 6_cox_hap1 | 2399891 | 2406092 | 1  | NM_001010909 | C6orf205 | 0 | NA | 0 | NA | 0 | NA | 0 | NA | 0 | NA |
| 6_cox_hap1 | 2531543 | 2530210 | -1 | NM_014070    | C6orf15  | 0 | NA | 0 | NA | 0 | NA | 0 | NA | 0 | NA |
| 6_cox_hap1 | 2533833 | 2559066 | 1  | NM_014068    | PSORS1C1 | 0 | NA | 0 | NA | 0 | NA | 0 | NA | 0 | NA |
| 6_cox_hap1 | 2539435 | 2534080 | -1 | NM_001264    | CDSN     | 0 | NA | 0 | NA | 0 | NA | 0 | NA | 0 | NA |
| 6_cox_hap1 | 2558356 | 2556539 | -1 | NM_014069    | PSORS1C2 | 0 | NA | 0 | NA | 0 | NA | 0 | NA | 0 | NA |
| 6_cox_hap1 | 2576830 | 2561482 | -1 | NM_001105563 | CCHCR1   | 0 | NA | 0 | NA | 0 | NA | 0 | NA | 0 | NA |
| 6_cox_hap1 | 2576830 | 2561482 | -1 | NM_001105564 | CCHCR1   | 0 | NA | 0 | NA | 0 | NA | 0 | NA | 0 | NA |
| 6_cox_hap1 | 2577279 | 2561482 | -1 | NM_019052    | CCHCR1   | 0 | NA | 0 | NA | 0 | NA | 0 | NA | 0 | NA |
| 6_cox_hap1 | 2577566 | 2583252 | 1  | NM_001077511 | TCF19    | 0 | NA | 0 | NA | 0 | NA | 0 | NA | 0 | NA |
| 6_cox_hap1 | 2577566 | 2583252 | 1  | NM_007109    | TCF19    | 0 | NA | 0 | NA | 0 | NA | 0 | NA | 0 | NA |
| 6_cox_hap1 | 2585297 | 2583373 | -1 | NM_203289    | POU5F1   | 0 | NA | 0 | NA | 0 | NA | 0 | NA | 0 | NA |
| 6_cox_hap1 | 2589729 | 2583373 | -1 | NM_002701    | POU5F1   | 0 | NA | 0 | NA | 0 | NA | 0 | NA | 0 | NA |
| 6_cox_hap1 | 2616878 | 2623022 | 1  | NM_181717    | HCG27    | 0 | NA | 0 | NA | 0 | NA | 0 | NA | 0 | NA |
| 6_cox_hap1 | 2689617 | 2686290 | -1 | NM_002117    | HLA-C    | 0 | NA | 0 | NA | 0 | NA | 0 | NA | 0 | NA |
| 6_cox_hap1 | 2774184 | 2770844 | -1 | NM_005514    | HLA-B    | 0 | NA | 0 | NA | 0 | NA | 0 | NA | 0 | NA |
| 6_cox_hap1 | 2820576 | 2832297 | 1  | NM_000247    | MICA     | 0 | NA | 0 | NA | 0 | NA | 0 | NA | 0 | NA |
| 6_cox_hap1 | 2877119 | 2879643 | 1  | NM_006674    | HCP5     | 0 | NA | 0 | NA | 0 | NA | 0 | NA | 0 | NA |
| 6_cox_hap1 | 2912030 | 2925077 | 1  | NM_005931    | MICB     | 0 | NA | 0 | NA | 0 | NA | 0 | NA | 0 | NA |
| 6_cox_hap1 | 2942907 | 2944177 | 1  | NM_001011700 | MCCD1    | 0 | NA | 0 | NA | 0 | NA | 0 | NA | 0 | NA |
| 6_cox_hap1 | 2956391 | 2944164 | -1 | NM_004640    | BAT1     | 0 | NA | 0 | NA | 0 | NA | 0 | NA | 0 | NA |
| 6_cox_hap1 | 2956391 | 2944164 | -1 | NM_080598    | BAT1     | 0 | NA | 0 | NA | 0 | NA | 0 | NA | 0 | NA |
| 6_cox_hap1 | 2960789 | 2958405 | -1 | NM_130463    | ATP6V1G2 | 0 | NA | 0 | NA | 0 | NA | 0 | NA | 0 | NA |
| 6_cox_hap1 | 2960789 | 2958405 | -1 | NM_138282    | ATP6V1G2 | 0 | NA | 0 | NA | 0 | NA | 0 | NA | 0 | NA |
| 6_cox_hap1 | 2961532 | 2972755 | 1  | NM_005007    | NFKBIL1  | 0 | NA | 0 | NA | 0 | NA | 0 | NA | 0 | NA |
| 6_cox_hap1 | 2986215 | 2988221 | 1  | NM_000595    | LTA      | 0 | NA | 0 | NA | 0 | NA | 0 | NA | 0 | NA |
| 6_cox_hap1 | 2989472 | 2992235 | 1  | NM_000594    | TNF      | 0 | NA | 0 | NA | 0 | NA | 0 | NA | 0 | NA |
| 6_cox_hap1 | 2996325 | 2994458 | -1 | NM_002341    | LTB      | 0 | NA | 0 | NA | 0 | NA | 0 | NA | 0 | NA |
| 6_cox_hap1 | 2996325 | 2994458 | -1 | NM_009588    | LTB      | 0 | NA | 0 | NA | 0 | NA | 0 | NA | 0 | NA |
| 6_cox_hap1 | 3000093 | 3002805 | 1  | NM_007161    | LST1     | 0 | NA | 0 | NA | 0 | NA | 0 | NA | 0 | NA |
| 6_cox_hap1 | 3000093 | 3002805 | 1  | NM_205838    | LST1     | 0 | NA | 0 | NA | 0 | NA | 0 | NA | 0 | NA |
| 6_cox_hap1 | 3000093 | 3002805 | 1  | NM_205839    | LST1     | 0 | NA | 0 | NA | 0 | NA | 0 | NA | 0 | NA |
| 6_cox_hap1 | 3000093 | 3002805 | 1  | NM_205840    | LST1     | 0 | NA | 0 | NA | 0 | NA | 0 | NA | 0 | NA |
| 6_cox_hap1 | 3000747 | 3002805 | 1  | NM_205837    | LST1     | 0 | NA | 0 | NA | 0 | NA | 0 | NA | 0 | NA |
| 6_cox_hap1 | 3006881 | 3002790 | -1 | NM_147130    | NCR3     | 0 | NA | 0 | NA | 0 | NA | 0 | NA | 0 | NA |
| 6_cox_hap1 | 3029157 | 3030923 | 1  | NM_001623    | AIF1     | 0 | NA | 0 | NA | 0 | NA | 0 | NA | 0 | NA |

|            |         |         |    |              |         |   |    |   |    |   |    |   |    |   |    |
|------------|---------|---------|----|--------------|---------|---|----|---|----|---|----|---|----|---|----|
| 6_cox_hap1 | 3029913 | 3030923 | 1  | NM_032955    | AIF1    | 0 | NA | 0 | NA | 0 | NA | 0 | NA | 0 | NA |
| 6_cox_hap1 | 3034573 | 3051677 | 1  | NM_080686    | BAT2    | 0 | NA | 0 | NA | 0 | NA | 0 | NA | 0 | NA |
| 6_cox_hap1 | 3066296 | 3052922 | -1 | NM_001098534 | BAT3    | 0 | NA | 0 | NA | 0 | NA | 0 | NA | 0 | NA |
| 6_cox_hap1 | 3066603 | 3052922 | -1 | NM_004639    | BAT3    | 0 | NA | 0 | NA | 0 | NA | 0 | NA | 0 | NA |
| 6_cox_hap1 | 3066603 | 3052922 | -1 | NM_080702    | BAT3    | 0 | NA | 0 | NA | 0 | NA | 0 | NA | 0 | NA |
| 6_cox_hap1 | 3066603 | 3052922 | -1 | NM_080703    | BAT3    | 0 | NA | 0 | NA | 0 | NA | 0 | NA | 0 | NA |
| 6_cox_hap1 | 3069795 | 3072112 | 1  | NM_019101    | APOM    | 0 | NA | 0 | NA | 0 | NA | 0 | NA | 0 | NA |
| 6_cox_hap1 | 3074675 | 3072199 | -1 | NM_021184    | C6orf47 | 0 | NA | 0 | NA | 0 | NA | 0 | NA | 0 | NA |
| 6_cox_hap1 | 3079290 | 3075987 | -1 | NM_033177    | BAT4    | 0 | NA | 0 | NA | 0 | NA | 0 | NA | 0 | NA |
| 6_cox_hap1 | 3079783 | 3083970 | 1  | NM_001320    | CSNK2B  | 0 | NA | 0 | NA | 0 | NA | 0 | NA | 0 | NA |
| 6_cox_hap1 | 3084854 | 3086354 | 1  | NM_021221    | LY6G5B  | 0 | NA | 0 | NA | 0 | NA | 0 | NA | 0 | NA |
| 6_cox_hap1 | 3094288 | 3090587 | -1 | NM_025262    | LY6G5C  | 0 | NA | 0 | NA | 0 | NA | 0 | NA | 0 | NA |
| 6_cox_hap1 | 3117213 | 3100861 | -1 | NM_021160    | BAT5    | 0 | NA | 0 | NA | 0 | NA | 0 | NA | 0 | NA |
| 6_cox_hap1 | 3120809 | 3124498 | 1  | NM_001003693 | C6orf21 | 0 | NA | 0 | NA | 0 | NA | 0 | NA | 0 | NA |
| 6_cox_hap1 | 3129252 | 3131705 | 1  | NM_021246    | LY6G6D  | 0 | NA | 0 | NA | 0 | NA | 0 | NA | 0 | NA |
| 6_cox_hap1 | 3135634 | 3132548 | -1 | NM_025261    | LY6G6C  | 0 | NA | 0 | NA | 0 | NA | 0 | NA | 0 | NA |
| 6_cox_hap1 | 3137284 | 3138975 | 1  | NM_025260    | C6orf25 | 0 | NA | 0 | NA | 0 | NA | 0 | NA | 0 | NA |
| 6_cox_hap1 | 3137284 | 3138975 | 1  | NM_138272    | C6orf25 | 0 | NA | 0 | NA | 0 | NA | 0 | NA | 0 | NA |
| 6_cox_hap1 | 3137284 | 3138975 | 1  | NM_138273    | C6orf25 | 0 | NA | 0 | NA | 0 | NA | 0 | NA | 0 | NA |
| 6_cox_hap1 | 3137284 | 3138975 | 1  | NM_138274    | C6orf25 | 0 | NA | 0 | NA | 0 | NA | 0 | NA | 0 | NA |
| 6_cox_hap1 | 3137284 | 3138975 | 1  | NM_138275    | C6orf25 | 0 | NA | 0 | NA | 0 | NA | 0 | NA | 0 | NA |
| 6_cox_hap1 | 3137284 | 3138975 | 1  | NM_138277    | C6orf25 | 0 | NA | 0 | NA | 0 | NA | 0 | NA | 0 | NA |
| 6_cox_hap1 | 3144163 | 3140940 | -1 | NM_013974    | DDAH2   | 0 | NA | 0 | NA | 0 | NA | 0 | NA | 0 | NA |
| 6_cox_hap1 | 3150469 | 3144481 | -1 | NM_001288    | CLIC1   | 0 | NA | 0 | NA | 0 | NA | 0 | NA | 0 | NA |
| 6_cox_hap1 | 3153889 | 3176545 | 1  | NM_002441    | MSH5    | 0 | NA | 0 | NA | 0 | NA | 0 | NA | 0 | NA |
| 6_cox_hap1 | 3153889 | 3176545 | 1  | NM_025259    | MSH5    | 0 | NA | 0 | NA | 0 | NA | 0 | NA | 0 | NA |
| 6_cox_hap1 | 3153889 | 3176545 | 1  | NM_172165    | MSH5    | 0 | NA | 0 | NA | 0 | NA | 0 | NA | 0 | NA |
| 6_cox_hap1 | 3153889 | 3176545 | 1  | NM_172166    | MSH5    | 0 | NA | 0 | NA | 0 | NA | 0 | NA | 0 | NA |
| 6_cox_hap1 | 3176865 | 3178718 | 1  | NM_001039651 | C6orf26 | 0 | NA | 0 | NA | 0 | NA | 0 | NA | 0 | NA |
| 6_cox_hap1 | 3191186 | 3179464 | -1 | NM_025258    | C6orf27 | 0 | NA | 0 | NA | 0 | NA | 0 | NA | 0 | NA |
| 6_cox_hap1 | 3209788 | 3191374 | -1 | NM_006295    | VAR5    | 0 | NA | 0 | NA | 0 | NA | 0 | NA | 0 | NA |
| 6_cox_hap1 | 3220821 | 3211248 | -1 | NM_021177    | LSM2    | 0 | NA | 0 | NA | 0 | NA | 0 | NA | 0 | NA |
| 6_cox_hap1 | 3228922 | 3223483 | -1 | NM_005527    | HSPA1L  | 0 | NA | 0 | NA | 0 | NA | 0 | NA | 0 | NA |
| 6_cox_hap1 | 3229423 | 3231806 | 1  | NM_005345    | HSPA1A  | 0 | NA | 0 | NA | 0 | NA | 0 | NA | 0 | NA |
| 6_cox_hap1 | 3241600 | 3244123 | 1  | NM_005346    | HSPA1B  | 0 | NA | 0 | NA | 0 | NA | 0 | NA | 0 | NA |
| 6_cox_hap1 | 3248775 | 3253619 | 1  | NM_001040437 | C6orf48 | 0 | NA | 0 | NA | 0 | NA | 0 | NA | 0 | NA |
| 6_cox_hap1 | 3248775 | 3253619 | 1  | NM_001040438 | C6orf48 | 0 | NA | 0 | NA | 0 | NA | 0 | NA | 0 | NA |
| 6_cox_hap1 | 3276937 | 3273205 | -1 | NM_000434    | NEU1    | 0 | NA | 0 | NA | 0 | NA | 0 | NA | 0 | NA |
| 6_cox_hap1 | 3293084 | 3277223 | -1 | NM_025257    | SLC44A4 | 0 | NA | 0 | NA | 0 | NA | 0 | NA | 0 | NA |
| 6_cox_hap1 | 3311725 | 3293796 | -1 | NM_006709    | EHMT2   | 0 | NA | 0 | NA | 0 | NA | 0 | NA | 0 | NA |
| 6_cox_hap1 | 3311725 | 3293796 | -1 | NM_025256    | EHMT2   | 0 | NA | 0 | NA | 0 | NA | 0 | NA | 0 | NA |
| 6_cox_hap1 | 3316030 | 3313654 | -1 | NM_181842    | ZBTB12  | 0 | NA | 0 | NA | 0 | NA | 0 | NA | 0 | NA |
| 6_cox_hap1 | 3341756 | 3359711 | 1  | NM_000063    | C2      | 0 | NA | 0 | NA | 0 | NA | 0 | NA | 0 | NA |
| 6_cox_hap1 | 3360035 | 3366123 | 1  | NM_001710    | CFB     | 0 | NA | 0 | NA | 0 | NA | 0 | NA | 0 | NA |
| 6_cox_hap1 | 3372843 | 3383795 | 1  | NM_006929    | SKIV2L  | 0 | NA | 0 | NA | 0 | NA | 0 | NA | 0 | NA |
| 6_cox_hap1 | 3373127 | 3366126 | -1 | NM_002904    | RDBP    | 0 | NA | 0 | NA | 0 | NA | 0 | NA | 0 | NA |
| 6_cox_hap1 | 3385908 | 3395486 | 1  | NM_004197    | STK19   | 0 | NA | 0 | NA | 0 | NA | 0 | NA | 0 | NA |
| 6_cox_hap1 | 3385908 | 3395486 | 1  | NM_032454    | STK19   | 0 | NA | 0 | NA | 0 | NA | 0 | NA | 0 | NA |
| 6_cox_hap1 | 3386295 | 3383850 | -1 | NM_005510    | DOM3Z   | 0 | NA | 0 | NA | 0 | NA | 0 | NA | 0 | NA |
| 6_cox_hap1 | 3396096 | 3410352 | 1  | NM_007293    | C4A     | 0 | NA | 0 | NA | 0 | NA | 0 | NA | 0 | NA |
| 6_cox_hap1 | 3396096 | 3410353 | 1  | NM_001002029 | C4B     | 0 | NA | 0 | NA | 0 | NA | 0 | NA | 0 | NA |
| 6_cox_hap1 | 3413239 | 3416577 | 1  | NM_000500    | CYP21A2 | 0 | NA | 0 | NA | 0 | NA | 0 | NA | 0 | NA |
| 6_cox_hap1 | 3421063 | 3416089 | -1 | NM_032470    | TNXB    | 0 | NA | 0 | NA | 0 | NA | 0 | NA | 0 | NA |
| 6_cox_hap1 | 3484322 | 3416089 | -1 | NM_019105    | TNXB    | 0 | NA | 0 | NA | 0 | NA | 0 | NA | 0 | NA |
| 6_cox_hap1 | 3503184 | 3490213 | -1 | NM_004381    | CREBL1  | 0 | NA | 0 | NA | 0 | NA | 0 | NA | 0 | NA |
| 6_cox_hap1 | 3505234 | 3503650 | -1 | NM_022110    | FKBPL   | 0 | NA | 0 | NA | 0 | NA | 0 | NA | 0 | NA |
| 6_cox_hap1 | 3526893 | 3523312 | -1 | NM_030651    | PRRT1   | 0 | NA | 0 | NA | 0 | NA | 0 | NA | 0 | NA |
| 6_cox_hap1 | 3528475 | 3538640 | 1  | NM_138717    | PPT2    | 0 | NA | 0 | NA | 0 | NA | 0 | NA | 0 | NA |
| 6_cox_hap1 | 3528796 | 3538640 | 1  | NM_005155    | PPT2    | 0 | NA | 0 | NA | 0 | NA | 0 | NA | 0 | NA |
| 6_cox_hap1 | 3539592 | 3543250 | 1  | NM_030652    | EGFL8   | 0 | NA | 0 | NA | 0 | NA | 0 | NA | 0 | NA |
| 6_cox_hap1 | 3551087 | 3543176 | -1 | NM_006411    | AGPAT1  | 0 | NA | 0 | NA | 0 | NA | 0 | NA | 0 | NA |
| 6_cox_hap1 | 3553030 | 3543176 | -1 | NM_032741    | AGPAT1  | 0 | NA | 0 | NA | 0 | NA | 0 | NA | 0 | NA |
| 6_cox_hap1 | 3553349 | 3555788 | 1  | NM_006913    | RNF5    | 0 | NA | 0 | NA | 0 | NA | 0 | NA | 0 | NA |
| 6_cox_hap1 | 3559211 | 3555933 | -1 | NM_001136    | AGER    | 0 | NA | 0 | NA | 0 | NA | 0 | NA | 0 | NA |
| 6_cox_hap1 | 3559211 | 3555933 | -1 | NM_172197    | AGER    | 0 | NA | 0 | NA | 0 | NA | 0 | NA | 0 | NA |

|            |         |         |    |              |          |   |    |   |    |   |    |   |    |   |    |
|------------|---------|---------|----|--------------|----------|---|----|---|----|---|----|---|----|---|----|
| 6_cox_hap1 | 3565148 | 3559697 | -1 | NM_002586    | PBX2     | 0 | NA | 0 | NA | 0 | NA | 0 | NA | 0 | NA |
| 6_cox_hap1 | 3570485 | 3565727 | -1 | NM_022107    | GPSM3    | 0 | NA | 0 | NA | 0 | NA | 0 | NA | 0 | NA |
| 6_cox_hap1 | 3599027 | 3569804 | -1 | NM_004557    | NOTCH4   | 0 | NA | 0 | NA | 0 | NA | 0 | NA | 0 | NA |
| 6_cox_hap1 | 3746623 | 3667759 | -1 | NM_006781    | C6orf10  | 0 | NA | 0 | NA | 0 | NA | 0 | NA | 0 | NA |
| 6_cox_hap1 | 3781814 | 3769440 | -1 | NM_019602    | BTNL2    | 0 | NA | 0 | NA | 0 | NA | 0 | NA | 0 | NA |
| 6_cox_hap1 | 3814608 | 3819750 | 1  | NM_019111    | HLA-DRA  | 0 | NA | 0 | NA | 0 | NA | 0 | NA | 0 | NA |
| 6_cox_hap1 | 3883702 | 3870633 | -1 | NM_022555    | HLA-DRB3 | 0 | NA | 0 | NA | 0 | NA | 0 | NA | 0 | NA |
| 6_cox_hap1 | 3948009 | 3870631 | -1 | NM_002124    | HLA-DRB1 | 0 | NA | 0 | NA | 0 | NA | 0 | NA | 0 | NA |
| 6_cox_hap1 | 4091390 | 4097451 | 1  | NM_020056    | HLA-DQA2 | 0 | NA | 0 | NA | 0 | NA | 0 | NA | 0 | NA |
| 6_cox_hap1 | 4165682 | 4161396 | -1 | NM_002120    | HLA-DOB  | 0 | NA | 0 | NA | 0 | NA | 0 | NA | 0 | NA |
| 6_cox_hap1 | 4187402 | 4170466 | -1 | NM_018833    | TAP2     | 0 | NA | 0 | NA | 0 | NA | 0 | NA | 0 | NA |
| 6_cox_hap1 | 4187402 | 4174042 | -1 | NM_000544    | TAP2     | 0 | NA | 0 | NA | 0 | NA | 0 | NA | 0 | NA |
| 6_cox_hap1 | 4192671 | 4189348 | -1 | NM_148919    | PSMB8    | 0 | NA | 0 | NA | 0 | NA | 0 | NA | 0 | NA |
| 6_cox_hap1 | 4193567 | 4189348 | -1 | NM_004159    | PSMB8    | 0 | NA | 0 | NA | 0 | NA | 0 | NA | 0 | NA |
| 6_cox_hap1 | 4202603 | 4193840 | -1 | NM_000593    | TAP1     | 0 | NA | 0 | NA | 0 | NA | 0 | NA | 0 | NA |
| 6_cox_hap1 | 4202792 | 4208485 | 1  | NM_002800    | PSMB9    | 0 | NA | 0 | NA | 0 | NA | 0 | NA | 0 | NA |
| 6_cox_hap1 | 4202792 | 4208485 | 1  | NM_148954    | PSMB9    | 0 | NA | 0 | NA | 0 | NA | 0 | NA | 0 | NA |
| 6_cox_hap1 | 4289668 | 4283265 | -1 | NM_002118    | HLA-DMB  | 0 | NA | 0 | NA | 0 | NA | 0 | NA | 0 | NA |
| 6_cox_hap1 | 4301709 | 4297247 | -1 | NM_006120    | HLA-DMA  | 0 | NA | 0 | NA | 0 | NA | 0 | NA | 0 | NA |
| 6_cox_hap1 | 4317301 | 4330153 | 1  | NM_005104    | BRD2     | 0 | NA | 0 | NA | 0 | NA | 0 | NA | 0 | NA |
| 6_cox_hap1 | 4319542 | 4330153 | 1  | NM_001113182 | BRD2     | 0 | NA | 0 | NA | 0 | NA | 0 | NA | 0 | NA |
| 6_cox_hap1 | 4358213 | 4352783 | -1 | NM_002119    | HLA-DOA  | 0 | NA | 0 | NA | 0 | NA | 0 | NA | 0 | NA |
| 6_cox_hap1 | 4421885 | 4413300 | -1 | NM_033554    | HLA-DPA1 | 0 | NA | 0 | NA | 0 | NA | 0 | NA | 0 | NA |
| 6_cox_hap1 | 4424266 | 4435418 | 1  | NM_002121    | HLA-DPB1 | 0 | NA | 0 | NA | 0 | NA | 0 | NA | 0 | NA |
| 6_cox_hap1 | 4540408 | 4510632 | -1 | NM_080679    | COL11A2  | 0 | NA | 0 | NA | 0 | NA | 0 | NA | 0 | NA |
| 6_cox_hap1 | 4540408 | 4510632 | -1 | NM_080680    | COL11A2  | 0 | NA | 0 | NA | 0 | NA | 0 | NA | 0 | NA |
| 6_cox_hap1 | 4540408 | 4510632 | -1 | NM_080681    | COL11A2  | 0 | NA | 0 | NA | 0 | NA | 0 | NA | 0 | NA |
| 6_cox_hap1 | 4548593 | 4541527 | -1 | NM_021976    | RXR8     | 0 | NA | 0 | NA | 0 | NA | 0 | NA | 0 | NA |
| 6_cox_hap1 | 4548763 | 4552375 | 1  | NM_001077516 | SLC39A7  | 0 | NA | 0 | NA | 0 | NA | 0 | NA | 0 | NA |
| 6_cox_hap1 | 4548763 | 4552375 | 1  | NM_006979    | SLC39A7  | 0 | NA | 0 | NA | 0 | NA | 0 | NA | 0 | NA |
| 6_cox_hap1 | 4552579 | 4554764 | 1  | NM_014234    | HSD17B8  | 0 | NA | 0 | NA | 0 | NA | 0 | NA | 0 | NA |
| 6_cox_hap1 | 4556442 | 4560656 | 1  | NM_002931    | RING1    | 0 | NA | 0 | NA | 0 | NA | 0 | NA | 0 | NA |
| 6_cox_hap1 | 4619799 | 4598201 | -1 | NM_022553    | VPS52    | 0 | NA | 0 | NA | 0 | NA | 0 | NA | 0 | NA |
| 6_cox_hap1 | 4619988 | 4624418 | 1  | NM_022551    | RPS18    | 0 | NA | 0 | NA | 0 | NA | 0 | NA | 0 | NA |
| 6_cox_hap1 | 4625053 | 4626739 | 1  | NM_003782    | B3GALT4  | 0 | NA | 0 | NA | 0 | NA | 0 | NA | 0 | NA |
| 6_cox_hap1 | 4637132 | 4627021 | -1 | NM_005452    | WDR46    | 0 | NA | 0 | NA | 0 | NA | 0 | NA | 0 | NA |
| 6_cox_hap1 | 4637518 | 4638852 | 1  | NM_014260    | PFDN6    | 0 | NA | 0 | NA | 0 | NA | 0 | NA | 0 | NA |
| 6_cox_hap1 | 4646879 | 4639576 | -1 | NM_004761    | RGL2     | 0 | NA | 0 | NA | 0 | NA | 0 | NA | 0 | NA |
| 6_cox_hap1 | 4662128 | 4647612 | -1 | NM_003190    | TAPBP    | 0 | NA | 0 | NA | 0 | NA | 0 | NA | 0 | NA |
| 6_cox_hap1 | 4662128 | 4651565 | -1 | NM_172208    | TAPBP    | 0 | NA | 0 | NA | 0 | NA | 0 | NA | 0 | NA |
| 6_cox_hap1 | 4662128 | 4652194 | -1 | NM_172209    | TAPBP    | 0 | NA | 0 | NA | 0 | NA | 0 | NA | 0 | NA |
| 6_cox_hap1 | 4665636 | 4662333 | -1 | NM_005453    | ZBTB22   | 0 | NA | 0 | NA | 0 | NA | 0 | NA | 0 | NA |
| 6_cox_hap1 | 4670849 | 4666543 | -1 | NM_001350    | DAXX     | 0 | NA | 0 | NA | 0 | NA | 0 | NA | 0 | NA |
| 9_random   | 1126637 | 1127706 | 1  | NM_031297    | RNF208   | 0 | NA | 0 | NA | 0 | NA | 0 | NA | 0 | NA |
| 9_random   | 1131586 | 1130466 | -1 | NM_199001    | MGC59937 | 0 | NA | 0 | NA | 0 | NA | 0 | NA | 0 | NA |
| 20         | 16350   | 25296   | 1  | NM_153325    | DEFB125  | 0 | NA | 0 | NA | 0 | NA | 0 | NA | 0 | NA |
| 20         | 71251   | 74392   | 1  | NM_030931    | DEFB126  | 0 | NA | 0 | NA | 0 | NA | 1 | 14 | 1 | 13 |
| 20         | 86185   | 87804   | 1  | NM_139074    | DEFB127  | 0 | NA | 0 | NA | 0 | NA | 0 | NA | 1 | 13 |
| 20         | 118264  | 116526  | -1 | NM_001037732 | DEFB128  | 0 | NA | 0 | NA | 0 | NA | 0 | NA | 1 | 12 |
| 20         | 155924  | 158527  | 1  | NM_080831    | DEFB129  | 0 | NA | 0 | NA | 0 | NA | 0 | NA | 0 | NA |
| 20         | 186376  | 189735  | 1  | NM_207469    | DEFB132  | 0 | NA | 1 | 12 | 0 | NA | 0 | NA | 0 | NA |
| 20         | 219390  | 199523  | -1 | NM_153269    | C20orf96 | 1 | 21 | 0 | NA | 1 | 12 | 1 | 13 | 0 | NA |
| 20         | 226203  | 228963  | 1  | NM_033089    | ZCCHC3   | 1 | 13 | 0 | NA | 1 | 12 | 1 | 13 | 0 | NA |
| 20         | 254238  | 258867  | 1  | NM_006943    | SOX12    | 0 | NA | 0 | NA | 1 | 14 | 0 | NA | 0 | NA |
| 20         | 277892  | 283506  | 1  | NM_024958    | NRSN2    | 1 | 17 | 1 | 18 | 0 | NA | 1 | 15 | 0 | NA |
| 20         | 309307  | 326203  | 1  | NM_021158    | TRIB3    | 1 | 27 | 0 | NA | 1 | 13 | 0 | NA | 0 | NA |
| 20         | 336708  | 359610  | 1  | NM_006462    | RBCK1    | 1 | 12 | 0 | NA | 1 | 16 | 0 | NA | 0 | NA |
| 20         | 336708  | 359610  | 1  | NM_031229    | RBCK1    | 1 | 12 | 0 | NA | 1 | 16 | 0 | NA | 0 | NA |
| 20         | 391187  | 364123  | -1 | NM_144628    | TBC1D20  | 0 | NA | 0 | NA | 0 | NA | 0 | NA | 0 | NA |
| 20         | 472482  | 411337  | -1 | NM_001895    | CSNK2A1  | 1 | 20 | 1 | 17 | 1 | 12 | 1 | 18 | 0 | NA |
| 20         | 472482  | 411337  | -1 | NM_177559    | CSNK2A1  | 1 | 20 | 1 | 17 | 1 | 12 | 1 | 18 | 0 | NA |
| 20         | 472482  | 411337  | -1 | NM_177560    | CSNK2A1  | 1 | 20 | 1 | 17 | 1 | 12 | 1 | 18 | 0 | NA |
| 20         | 538910  | 532636  | -1 | NM_004609    | TCF15    | 0 | NA | 0 | NA | 0 | NA | 0 | NA | 0 | NA |
| 20         | 581890  | 575267  | -1 | NM_080725    | SRXN1    | 0 | NA | 0 | NA | 0 | NA | 0 | NA | 0 | NA |
| 20         | 604823  | 590239  | -1 | NM_033129    | SCRT2    | 0 | NA | 0 | NA | 0 | NA | 0 | NA | 0 | NA |



|    |         |         |    |              |           |   |    |   |    |   |    |   |    |   |    |
|----|---------|---------|----|--------------|-----------|---|----|---|----|---|----|---|----|---|----|
| 20 | 697228  | 688723  | -1 | NM_033409    | C20orf54  | 0 | NA | 1 | 16 | 0 | NA | 0 | NA | 0 | NA |
| 20 | 762355  | 774922  | 1  | NM_001042353 | FAM110A   | 1 | 11 | 0 | NA | 0 | NA | 0 | NA | 0 | NA |
| 20 | 764710  | 774922  | 1  | NM_207121    | FAM110A   | 1 | 11 | 0 | NA | 0 | NA | 0 | NA | 0 | NA |
| 20 | 773284  | 774922  | 1  | NM_031424    | FAM110A   | 0 | NA | 0 | NA | 0 | NA | 0 | NA | 0 | NA |
| 20 | 844960  | 801296  | -1 | NM_015985    | ANGPT4    | 0 | NA | 0 | NA | 0 | NA | 0 | NA | 0 | NA |
| 20 | 930904  | 887095  | -1 | NM_001029871 | RSPO4     | 0 | NA | 0 | NA | 0 | NA | 0 | NA | 1 | 14 |
| 20 | 930904  | 887095  | -1 | NM_001040007 | RSPO4     | 0 | NA | 0 | NA | 0 | NA | 0 | NA | 1 | 14 |
| 20 | 1041905 | 1096426 | 1  | NM_178578    | PSMF1     | 0 | NA | 0 | NA | 0 | NA | 0 | NA | 0 | NA |
| 20 | 1047239 | 1096426 | 1  | NM_006814    | PSMF1     | 0 | NA | 0 | NA | 0 | NA | 0 | NA | 0 | NA |
| 20 | 1113117 | 1109214 | -1 | NM_018354    | C20orf46  | 0 | NA | 0 | NA | 0 | NA | 0 | NA | 0 | NA |
| 20 | 1132097 | 1136918 | 1  | NM_001009612 | LOC400831 | 0 | NA | 1 | 14 | 0 | NA | 0 | NA | 1 | 12 |
| 20 | 1194959 | 1237971 | 1  | NM_014723    | SNPH      | 0 | NA | 0 | NA | 0 | NA | 0 | NA | 0 | NA |
| 20 | 1242303 | 1238620 | -1 | NM_015685    | SDCBP2    | 0 | NA | 0 | NA | 0 | NA | 0 | NA | 0 | NA |
| 20 | 1257838 | 1238620 | -1 | NM_080489    | SDCBP2    | 0 | NA | 0 | NA | 0 | NA | 0 | NA | 0 | NA |
| 20 | 1321745 | 1297621 | -1 | NM_000801    | FKBP1A    | 0 | NA | 0 | NA | 1 | 15 | 0 | NA | 0 | NA |
| 20 | 1321745 | 1300375 | -1 | NM_054014    | FKBP1A    | 0 | NA | 0 | NA | 1 | 15 | 0 | NA | 0 | NA |
| 20 | 1396417 | 1370810 | -1 | NM_016143    | NSFL1C    | 0 | NA | 0 | NA | 1 | 13 | 0 | NA | 0 | NA |
| 20 | 1396417 | 1370810 | -1 | NM_018839    | NSFL1C    | 0 | NA | 0 | NA | 1 | 13 | 0 | NA | 0 | NA |
| 20 | 1396417 | 1370810 | -1 | NM_182483    | NSFL1C    | 0 | NA | 0 | NA | 1 | 13 | 0 | NA | 0 | NA |
| 20 | 1420233 | 1403235 | -1 | NM_001122962 | SIRPB2    | 0 | NA | 1 | 16 | 0 | NA | 0 | NA | 0 | NA |
| 20 | 1486343 | 1462896 | -1 | NM_178460    | SIRPD     | 0 | NA | 0 | NA | 0 | NA | 0 | NA | 1 | 14 |
| 20 | 1548689 | 1493028 | -1 | NM_001083910 | SIRPB1    | 0 | NA | 0 | NA | 0 | NA | 0 | NA | 0 | NA |
| 20 | 1548689 | 1493028 | -1 | NM_006065    | SIRPB1    | 0 | NA | 0 | NA | 0 | NA | 0 | NA | 0 | NA |
| 20 | 1586425 | 1557797 | -1 | NM_001039508 | SIRPG     | 0 | NA | 0 | NA | 0 | NA | 0 | NA | 1 | 12 |
| 20 | 1586425 | 1557797 | -1 | NM_018556    | SIRPG     | 0 | NA | 0 | NA | 0 | NA | 0 | NA | 1 | 12 |
| 20 | 1586425 | 1557797 | -1 | NM_080816    | SIRPG     | 0 | NA | 0 | NA | 0 | NA | 0 | NA | 1 | 12 |
| 20 | 1822812 | 1868540 | 1  | NM_001040022 | SIRPA     | 1 | 11 | 0 | NA | 0 | NA | 1 | 16 | 0 | NA |
| 20 | 1823424 | 1868540 | 1  | NM_080792    | SIRPA     | 1 | 11 | 0 | NA | 0 | NA | 1 | 16 | 0 | NA |
| 20 | 1823825 | 1868540 | 1  | NM_001040023 | SIRPA     | 1 | 11 | 0 | NA | 0 | NA | 1 | 16 | 0 | NA |
| 20 | 1922702 | 1907401 | -1 | NM_024411    | PDYN      | 0 | NA | 0 | NA | 0 | NA | 0 | NA | 1 | 12 |
| 20 | 2031518 | 2077198 | 1  | NM_080836    | STK35     | 1 | 20 | 0 | NA | 0 | NA | 0 | NA | 0 | NA |
| 20 | 2224674 | 2269725 | 1  | NM_003245    | TGM3      | 0 | NA | 0 | NA | 0 | NA | 0 | NA | 1 | 15 |
| 20 | 2309553 | 2361399 | 1  | NM_198994    | TGM6      | 0 | NA | 1 | 14 | 0 | NA | 1 | 17 | 1 | 12 |
| 20 | 2399499 | 2390280 | -1 | NM_003091    | SNRPB     | 0 | NA | 0 | NA | 0 | NA | 1 | 19 | 0 | NA |
| 20 | 2399499 | 2390280 | -1 | NM_198216    | SNRPB     | 0 | NA | 0 | NA | 0 | NA | 1 | 19 | 0 | NA |
| 20 | 2437778 | 2410466 | -1 | NM_024325    | ZNF343    | 0 | NA | 0 | NA | 0 | NA | 1 | 11 | 0 | NA |
| 20 | 2465252 | 2570430 | 1  | NM_080751    | TMC2      | 0 | NA | 0 | NA | 0 | NA | 0 | NA | 0 | NA |
| 20 | 2581253 | 2587039 | 1  | NM_006392    | NOL5A     | 1 | 15 | 0 | NA | 0 | NA | 0 | NA | 0 | NA |
| 20 | 2592843 | 2587040 | -1 | NM_006899    | IDH3B     | 0 | NA | 0 | NA | 0 | NA | 0 | NA | 0 | NA |
| 20 | 2592843 | 2587040 | -1 | NM_174855    | IDH3B     | 0 | NA | 0 | NA | 0 | NA | 0 | NA | 0 | NA |
| 20 | 2592843 | 2587040 | -1 | NM_174856    | IDH3B     | 0 | NA | 0 | NA | 0 | NA | 0 | NA | 0 | NA |
| 20 | 2621523 | 2688754 | 1  | NM_001110514 | EBF4      | 0 | NA | 0 | NA | 0 | NA | 0 | NA | 1 | 12 |
| 20 | 2729282 | 2722714 | -1 | NM_019609    | CPXM1     | 0 | NA | 1 | 14 | 1 | 13 | 0 | NA | 1 | 20 |
| 20 | 2743656 | 2744476 | 1  | NM_080739    | C20orf141 | 0 | NA | 0 | NA | 1 | 13 | 0 | NA | 1 | 14 |
| 20 | 2769332 | 2763970 | -1 | NM_022760    | FAM113A   | 0 | NA | 0 | NA | 0 | NA | 1 | 14 | 0 | NA |
| 20 | 2769372 | 2795378 | 1  | NM_022575    | VPS16     | 0 | NA | 0 | NA | 0 | NA | 1 | 14 | 0 | NA |
| 20 | 2769372 | 2795378 | 1  | NM_080413    | VPS16     | 0 | NA | 0 | NA | 0 | NA | 1 | 14 | 0 | NA |
| 20 | 2792592 | 2795380 | 1  | NM_080414    | VPS16     | 0 | NA | 0 | NA | 1 | 17 | 0 | NA | 0 | NA |
| 20 | 2792840 | 2967315 | 1  | NM_002836    | PTPRA     | 0 | NA | 0 | NA | 1 | 17 | 0 | NA | 0 | NA |
| 20 | 2802141 | 2967315 | 1  | NM_080840    | PTPRA     | 0 | NA | 0 | NA | 1 | 17 | 0 | NA | 0 | NA |
| 20 | 2851852 | 2967315 | 1  | NM_080841    | PTPRA     | 0 | NA | 0 | NA | 1 | 13 | 0 | NA | 0 | NA |
| 20 | 2972267 | 2974391 | 1  | NM_001501    | GNRH2     | 0 | NA | 0 | NA | 0 | NA | 0 | NA | 0 | NA |
| 20 | 2972267 | 2974391 | 1  | NM_178331    | GNRH2     | 0 | NA | 0 | NA | 0 | NA | 0 | NA | 0 | NA |
| 20 | 2972267 | 2974391 | 1  | NM_178332    | GNRH2     | 0 | NA | 0 | NA | 0 | NA | 0 | NA | 0 | NA |
| 20 | 2974674 | 2978896 | 1  | NM_030811    | MRPS26    | 0 | NA | 0 | NA | 0 | NA | 0 | NA | 0 | NA |
| 20 | 3000265 | 3001162 | 1  | NM_000915    | OXT       | 0 | NA | 0 | NA | 0 | NA | 0 | NA | 0 | NA |
| 20 | 3013370 | 3011201 | -1 | NM_000490    | AVP       | 0 | NA | 0 | NA | 0 | NA | 0 | NA | 0 | NA |
| 20 | 3088532 | 3075164 | -1 | NM_021826    | FASTKD5   | 0 | NA | 0 | NA | 0 | NA | 0 | NA | 0 | NA |
| 20 | 3088540 | 3036218 | -1 | NM_014948    | UBOX5     | 0 | NA | 0 | NA | 0 | NA | 0 | NA | 0 | NA |
| 20 | 3088540 | 3036218 | -1 | NM_199415    | UBOX5     | 0 | NA | 0 | NA | 0 | NA | 0 | NA | 0 | NA |
| 20 | 3097207 | 3091272 | -1 | NM_014731    | ProSAPIP1 | 1 | 16 | 0 | NA | 0 | NA | 1 | 11 | 0 | NA |
| 20 | 3133295 | 3119011 | -1 | NM_023935    | C20orf116 | 1 | 14 | 0 | NA | 0 | NA | 1 | 23 | 0 | NA |
| 20 | 3138055 | 3152506 | 1  | NM_033453    | ITPA      | 1 | 14 | 0 | NA | 0 | NA | 1 | 23 | 0 | NA |
| 20 | 3138055 | 3152506 | 1  | NM_181493    | ITPA      | 1 | 14 | 0 | NA | 0 | NA | 1 | 23 | 0 | NA |
| 20 | 3166373 | 3156062 | -1 | NM_032034    | SLC4A11   | 0 | NA | 0 | NA | 0 | NA | 0 | NA | 1 | 12 |

|    |         |         |    |              |              |   |    |   |    |   |    |   |    |   |    |
|----|---------|---------|----|--------------|--------------|---|----|---|----|---|----|---|----|---|----|
| 20 | 3336255 | 3177947 | -1 | NM_00100984  | C20orf194    | 1 | 13 | 0 | NA | 0 | NA | 0 | NA | 0 | NA |
| 20 | 3399675 | 3544693 | 1  | NM_139322    | ATRN         | 0 | NA | 0 | NA | 0 | NA | 0 | NA | 0 | NA |
| 20 | 3399675 | 3579762 | 1  | NM_139321    | ATRN         | 0 | NA | 0 | NA | 0 | NA | 0 | NA | 0 | NA |
| 20 | 3592046 | 3587938 | -1 | NM_022139    | GFRA4        | 0 | NA | 0 | NA | 0 | NA | 0 | NA | 0 | NA |
| 20 | 3592046 | 3587938 | -1 | NM_145762    | GFRA4        | 0 | NA | 0 | NA | 0 | NA | 0 | NA | 0 | NA |
| 20 | 3610738 | 3596619 | -1 | NM_025220    | ADAM33       | 0 | NA | 0 | NA | 0 | NA | 0 | NA | 1 | 12 |
| 20 | 3610738 | 3596619 | -1 | NM_153202    | ADAM33       | 0 | NA | 0 | NA | 0 | NA | 0 | NA | 1 | 12 |
| 20 | 3635775 | 3615616 | -1 | NM_023068    | SIGLEC1      | 0 | NA | 0 | NA | 0 | NA | 0 | NA | 0 | NA |
| 20 | 3661355 | 3681758 | 1  | NM_052970    | HSPA12B      | 0 | NA | 0 | NA | 0 | NA | 0 | NA | 0 | NA |
| 20 | 3696452 | 3682157 | -1 | NM_001039140 | C20orf27     | 1 | 13 | 0 | NA | 0 | NA | 1 | 11 | 0 | NA |
| 20 | 3710102 | 3706150 | -1 | NM_015417    | SPEF1        | 0 | NA | 0 | NA | 0 | NA | 0 | NA | 0 | NA |
| 20 | 3715337 | 3712497 | -1 | NM_001810    | CENPB        | 0 | NA | 0 | NA | 0 | NA | 0 | NA | 0 | NA |
| 20 | 3724400 | 3734761 | 1  | NM_004358    | CDC25B       | 0 | NA | 0 | NA | 0 | NA | 0 | NA | 0 | NA |
| 20 | 3724400 | 3734761 | 1  | NM_021872    | CDC25B       | 0 | NA | 0 | NA | 0 | NA | 0 | NA | 0 | NA |
| 20 | 3724400 | 3734761 | 1  | NM_021873    | CDC25B       | 0 | NA | 0 | NA | 0 | NA | 0 | NA | 0 | NA |
| 20 | 3749202 | 3753954 | 1  | NM_018347    | C20orf29     | 1 | 23 | 0 | NA | 1 | 21 | 0 | NA | 0 | NA |
| 20 | 3775483 | 3795973 | 1  | NM_020746    | VISA         | 0 | NA | 0 | NA | 0 | NA | 1 | 15 | 0 | NA |
| 20 | 3817485 | 3852502 | 1  | NM_024960    | PANK2        | 0 | NA | 0 | NA | 0 | NA | 0 | NA | 0 | NA |
| 20 | 3817741 | 3852502 | 1  | NM_153638    | PANK2        | 0 | NA | 0 | NA | 0 | NA | 0 | NA | 0 | NA |
| 20 | 3818462 | 3852502 | 1  | NM_153640    | PANK2        | 0 | NA | 0 | NA | 0 | NA | 0 | NA | 0 | NA |
| 20 | 3944036 | 3861729 | -1 | NM_007219    | RNF24        | 1 | 11 | 0 | NA | 1 | 12 | 0 | NA | 0 | NA |
| 20 | 4077449 | 4116369 | 1  | NM_175839    | SMOX         | 0 | NA | 0 | NA | 0 | NA | 1 | 12 | 0 | NA |
| 20 | 4077449 | 4116369 | 1  | NM_175840    | SMOX         | 0 | NA | 0 | NA | 0 | NA | 1 | 12 | 0 | NA |
| 20 | 4077449 | 4116369 | 1  | NM_175841    | SMOX         | 0 | NA | 0 | NA | 0 | NA | 1 | 12 | 0 | NA |
| 20 | 4077449 | 4116369 | 1  | NM_175842    | SMOX         | 0 | NA | 0 | NA | 0 | NA | 1 | 12 | 0 | NA |
| 20 | 4177659 | 4149277 | -1 | NM_000678    | ADRA1D       | 0 | NA | 0 | NA | 0 | NA | 0 | NA | 0 | NA |
| 20 | 4614796 | 4630234 | 1  | NM_000311    | PRNP         | 0 | NA | 0 | NA | 1 | 12 | 1 | 12 | 1 | 12 |
| 20 | 4614796 | 4630234 | 1  | NM_001080121 | PRNP         | 0 | NA | 0 | NA | 1 | 12 | 1 | 12 | 1 | 12 |
| 20 | 4614796 | 4630234 | 1  | NM_001080122 | PRNP         | 0 | NA | 0 | NA | 1 | 12 | 1 | 12 | 1 | 12 |
| 20 | 4614796 | 4630234 | 1  | NM_183079    | PRNP         | 0 | NA | 0 | NA | 1 | 12 | 1 | 12 | 1 | 12 |
| 20 | 4615156 | 4630234 | 1  | NM_001080123 | PRNP         | 0 | NA | 0 | NA | 1 | 12 | 1 | 12 | 1 | 12 |
| 20 | 4650555 | 4657106 | 1  | NM_012409    | PRND         | 0 | NA | 0 | NA | 0 | NA | 0 | NA | 1 | 13 |
| 20 | 4669314 | 4659927 | -1 | NM_177549    | PRNT         | 0 | NA | 1 | 13 | 0 | NA | 0 | NA | 1 | 12 |
| 20 | 4743769 | 4708668 | -1 | NM_170774    | RASSF2       | 0 | NA | 0 | NA | 0 | NA | 0 | NA | 0 | NA |
| 20 | 4752291 | 4708669 | -1 | NM_014737    | RASSF2       | 0 | NA | 0 | NA | 0 | NA | 0 | NA | 0 | NA |
| 20 | 4930145 | 4781001 | -1 | NM_005116    | SLC23A2      | 1 | 11 | 0 | NA | 1 | 14 | 1 | 14 | 0 | NA |
| 20 | 4938939 | 4781001 | -1 | NM_203327    | SLC23A2      | 1 | 11 | 0 | NA | 1 | 14 | 1 | 14 | 0 | NA |
| 20 | 5041733 | 5028483 | -1 | NM_001009923 | C20orf30     | 0 | NA | 0 | NA | 0 | NA | 0 | NA | 0 | NA |
| 20 | 5041733 | 5028483 | -1 | NM_001009924 | C20orf30     | 0 | NA | 0 | NA | 0 | NA | 0 | NA | 0 | NA |
| 20 | 5041733 | 5028483 | -1 | NM_001009925 | C20orf30     | 0 | NA | 0 | NA | 0 | NA | 0 | NA | 0 | NA |
| 20 | 5041733 | 5028483 | -1 | NM_014145    | C20orf30     | 0 | NA | 0 | NA | 0 | NA | 0 | NA | 0 | NA |
| 20 | 5048647 | 5043598 | -1 | NM_182649    | PCNA         | 0 | NA | 0 | NA | 0 | NA | 0 | NA | 0 | NA |
| 20 | 5055268 | 5043598 | -1 | NM_002592    | PCNA         | 0 | NA | 0 | NA | 0 | NA | 0 | NA | 0 | NA |
| 20 | 5055481 | 5119989 | 1  | NM_003818    | CDS2         | 0 | NA | 0 | NA | 0 | NA | 0 | NA | 0 | NA |
| 20 | 5243015 | 5230685 | -1 | NM_144773    | PROKR2       | 0 | NA | 1 | 13 | 1 | 14 | 0 | NA | 1 | 14 |
| 20 | 5539672 | 5473079 | -1 | NM_019593    | RP5-1022P6.2 | 0 | NA | 0 | NA | 1 | 14 | 0 | NA | 0 | NA |
| 20 | 5679042 | 5792559 | 1  | NM_152504    | C20orf196    | 1 | 12 | 0 | NA | 0 | NA | 0 | NA | 0 | NA |
| 20 | 5840167 | 5854003 | 1  | NM_001819    | CHGB         | 0 | NA | 0 | NA | 0 | NA | 1 | 11 | 0 | NA |
| 20 | 5879173 | 5866485 | -1 | NM_015939    | TRMT6        | 0 | NA | 0 | NA | 0 | NA | 0 | NA | 0 | NA |
| 20 | 5879297 | 5923831 | 1  | NM_032485    | MCM8         | 0 | NA | 0 | NA | 0 | NA | 0 | NA | 0 | NA |
| 20 | 5879297 | 5923831 | 1  | NM_182802    | MCM8         | 0 | NA | 0 | NA | 0 | NA | 0 | NA | 0 | NA |
| 20 | 5934878 | 5966040 | 1  | NM_019095    | CRLS1        | 0 | NA | 0 | NA | 0 | NA | 0 | NA | 0 | NA |
| 20 | 5982676 | 5969424 | -1 | NM_152611    | C20orf75     | 0 | NA | 0 | NA | 0 | NA | 0 | NA | 0 | NA |
| 20 | 6052191 | 6003491 | -1 | NM_017671    | FERMT1       | 0 | NA | 0 | NA | 0 | NA | 0 | NA | 0 | NA |
| 20 | 6696744 | 6708910 | 1  | NM_001200    | BMP2         | 0 | NA | 0 | NA | 1 | 12 | 0 | NA | 0 | NA |
| 20 | 7869093 | 7811630 | -1 | NM_017545    | HAO1         | 1 | 14 | 0 | NA | 1 | 18 | 0 | NA | 0 | NA |
| 20 | 7948393 | 7909715 | -1 | NM_021156    | TXNDC13      | 1 | 17 | 0 | NA | 0 | NA | 0 | NA | 0 | NA |
| 20 | 8061295 | 8813547 | 1  | NM_015192    | PLCB1        | 1 | 15 | 0 | NA | 0 | NA | 0 | NA | 0 | NA |
| 20 | 8061295 | 8813547 | 1  | NM_182734    | PLCB1        | 1 | 15 | 0 | NA | 0 | NA | 0 | NA | 0 | NA |
| 20 | 9024931 | 9409462 | 1  | NM_000933    | PLCB4        | 0 | NA | 0 | NA | 0 | NA | 0 | NA | 0 | NA |
| 20 | 9024931 | 9409462 | 1  | NM_182797    | PLCB4        | 0 | NA | 0 | NA | 0 | NA | 0 | NA | 0 | NA |
| 20 | 9443270 | 9459171 | 1  | NM_012261    | C20orf103    | 0 | NA | 0 | NA | 0 | NA | 0 | NA | 1 | 12 |
| 20 | 9767522 | 9466036 | -1 | NM_020341    | PAK7         | 0 | NA | 0 | NA | 0 | NA | 0 | NA | 1 | 13 |
| 20 | 9767522 | 9466036 | -1 | NM_177990    | PAK7         | 0 | NA | 0 | NA | 0 | NA | 0 | NA | 1 | 13 |
| 20 | 9963696 | 9985407 | 1  | NM_022096    | ANKRD5       | 0 | NA | 0 | NA | 0 | NA | 0 | NA | 0 | NA |

|    |          |          |    |              |          |   |    |   |    |   |    |   |    |   |    |
|----|----------|----------|----|--------------|----------|---|----|---|----|---|----|---|----|---|----|
| 20 | 9963696  | 9985407  | 1  | NM_198798    | ANKRD5   | 0 | NA | 0 | NA | 0 | NA | 0 | NA | 0 | NA |
| 20 | 10147476 | 10236065 | 1  | NM_003081    | SNAP25   | 0 | NA | 0 | NA | 1 | 12 | 0 | NA | 0 | NA |
| 20 | 10147476 | 10236065 | 1  | NM_130811    | SNAP25   | 0 | NA | 0 | NA | 1 | 12 | 0 | NA | 0 | NA |
| 20 | 10360570 | 10333832 | -1 | NM_018848    | MKKS     | 1 | 14 | 0 | NA | 0 | NA | 1 | 12 | 0 | NA |
| 20 | 10362866 | 10333832 | -1 | NM_170784    | MKKS     | 1 | 14 | 0 | NA | 0 | NA | 1 | 12 | 0 | NA |
| 20 | 10363950 | 10552027 | 1  | NM_001009608 | C20orf94 | 1 | 34 | 0 | NA | 0 | NA | 1 | 12 | 0 | NA |
| 20 | 10602694 | 10566331 | -1 | NM_000214    | JAG1     | 0 | NA | 0 | NA | 1 | 12 | 0 | NA | 0 | NA |
| 20 | 11819476 | 11855243 | 1  | NM_181443    | BTBD3    | 0 | NA | 1 | 12 | 1 | 12 | 1 | 11 | 1 | 18 |
| 20 | 11846564 | 11855243 | 1  | NM_014962    | BTBD3    | 0 | NA | 0 | NA | 0 | NA | 1 | 15 | 0 | NA |
| 20 | 12937626 | 13095411 | 1  | NM_018327    | SPTLC3   | 0 | NA | 0 | NA | 0 | NA | 0 | NA | 0 | NA |
| 20 | 13150417 | 13229297 | 1  | NM_080826    | C20orf82 | 0 | NA | 1 | 18 | 0 | NA | 0 | NA | 0 | NA |
| 20 | 13587583 | 13318035 | -1 | NM_017714    | TASP1    | 0 | NA | 0 | NA | 0 | NA | 0 | NA | 0 | NA |
| 20 | 13713532 | 13642968 | -1 | NM_016649    | ESF1     | 0 | NA | 0 | NA | 0 | NA | 1 | 19 | 0 | NA |
| 20 | 13713681 | 13745874 | 1  | NM_001039375 | C20orf7  | 0 | NA | 0 | NA | 0 | NA | 1 | 19 | 0 | NA |
| 20 | 13713681 | 13745874 | 1  | NM_024120    | C20orf7  | 0 | NA | 0 | NA | 0 | NA | 1 | 19 | 0 | NA |
| 20 | 13919262 | 13778049 | -1 | NM_025229    | SEL1L2   | 0 | NA | 0 | NA | 0 | NA | 1 | 11 | 1 | 12 |
| 20 | 13924145 | 15981841 | 1  | NM_080676    | MACROD2  | 0 | NA | 0 | NA | 0 | NA | 1 | 11 | 1 | 12 |
| 20 | 14266260 | 14252642 | -1 | NM_013281    | FLRT3    | 0 | NA | 0 | NA | 0 | NA | 0 | NA | 0 | NA |
| 20 | 14266270 | 14252642 | -1 | NM_198391    | FLRT3    | 0 | NA | 0 | NA | 0 | NA | 0 | NA | 0 | NA |
| 20 | 15125503 | 15981841 | 1  | NM_001033087 | MACROD2  | 0 | NA | 0 | NA | 0 | NA | 0 | NA | 0 | NA |
| 20 | 16502078 | 16200748 | -1 | NM_024704    | KIF16B   | 1 | 25 | 0 | NA | 1 | 28 | 0 | NA | 0 | NA |
| 20 | 16658628 | 16670037 | 1  | NM_003092    | SNRPB2   | 1 | 44 | 1 | 16 | 1 | 12 | 1 | 14 | 0 | NA |
| 20 | 16658628 | 16670037 | 1  | NM_198220    | SNRPB2   | 1 | 44 | 1 | 16 | 1 | 12 | 1 | 14 | 0 | NA |
| 20 | 16677002 | 16680809 | 1  | NM_020157    | OTOR     | 0 | NA | 1 | 12 | 0 | NA | 0 | NA | 1 | 12 |
| 20 | 17155630 | 17413222 | 1  | NM_002594    | PCSK2    | 0 | NA | 0 | NA | 0 | NA | 0 | NA | 0 | NA |
| 20 | 17459974 | 17422549 | -1 | NM_001195    | BFSP1    | 1 | 11 | 0 | NA | 0 | NA | 0 | NA | 0 | NA |
| 20 | 17498598 | 17536652 | 1  | NM_001011546 | DSTN     | 0 | NA | 0 | NA | 0 | NA | 0 | NA | 0 | NA |
| 20 | 17498598 | 17536652 | 1  | NM_006870    | DSTN     | 0 | NA | 0 | NA | 0 | NA | 0 | NA | 0 | NA |
| 20 | 17610928 | 17542322 | -1 | NM_001042576 | RRBP1    | 0 | NA | 1 | 14 | 0 | NA | 1 | 11 | 1 | 15 |
| 20 | 17610928 | 17542322 | -1 | NM_004587    | RRBP1    | 0 | NA | 1 | 14 | 0 | NA | 1 | 11 | 1 | 15 |
| 20 | 17628592 | 17664513 | 1  | NM_001014977 | BANF2    | 0 | NA | 0 | NA | 0 | NA | 1 | 11 | 1 | 16 |
| 20 | 17628604 | 17664515 | 1  | NM_178477    | BANF2    | 0 | NA | 0 | NA | 0 | NA | 1 | 11 | 1 | 16 |
| 20 | 17897154 | 17870243 | -1 | NM_014426    | SNX5     | 0 | NA | 0 | NA | 0 | NA | 1 | 21 | 0 | NA |
| 20 | 17897490 | 17870243 | -1 | NM_152227    | SNX5     | 0 | NA | 0 | NA | 0 | NA | 1 | 21 | 0 | NA |
| 20 | 17897761 | 17919762 | 1  | NM_052865    | C20orf72 | 0 | NA | 0 | NA | 0 | NA | 1 | 21 | 0 | NA |
| 20 | 17986521 | 17952795 | -1 | NM_021220    | OVOL2    | 0 | NA | 1 | 12 | 0 | NA | 0 | NA | 1 | 12 |
| 20 | 18066526 | 18117016 | 1  | NM_020536    | CSRP2BP  | 1 | 15 | 0 | NA | 0 | NA | 1 | 15 | 0 | NA |
| 20 | 18073742 | 18117016 | 1  | NM_177926    | CSRP2BP  | 1 | 15 | 0 | NA | 0 | NA | 1 | 15 | 0 | NA |
| 20 | 18217120 | 18245640 | 1  | NM_001083330 | ZNF133   | 1 | 17 | 0 | NA | 0 | NA | 0 | NA | 1 | 12 |
| 20 | 18217120 | 18245640 | 1  | NM_003434    | ZNF133   | 1 | 17 | 0 | NA | 0 | NA | 0 | NA | 1 | 12 |
| 20 | 18395829 | 18312010 | -1 | NM_001099407 | C20orf12 | 1 | 11 | 0 | NA | 0 | NA | 0 | NA | 0 | NA |
| 20 | 18396032 | 18413286 | 1  | NM_006466    | POLR3F   | 1 | 11 | 0 | NA | 0 | NA | 0 | NA | 0 | NA |
| 20 | 18425887 | 18415187 | -1 | NM_006606    | RBBP9    | 0 | NA | 0 | NA | 0 | NA | 1 | 14 | 0 | NA |
| 20 | 18436187 | 18490050 | 1  | NM_006363    | SEC23B   | 1 | 18 | 0 | NA | 0 | NA | 0 | NA | 0 | NA |
| 20 | 18436187 | 18490050 | 1  | NM_032985    | SEC23B   | 1 | 18 | 0 | NA | 0 | NA | 0 | NA | 0 | NA |
| 20 | 18436187 | 18490050 | 1  | NM_032986    | SEC23B   | 1 | 18 | 0 | NA | 0 | NA | 0 | NA | 0 | NA |
| 20 | 18516555 | 18692560 | 1  | NM_080820    | DTD1     | 0 | NA | 0 | NA | 0 | NA | 0 | NA | 0 | NA |
| 20 | 18742369 | 18743035 | 1  | NM_178483    | C20orf79 | 0 | NA | 0 | NA | 0 | NA | 0 | NA | 1 | 13 |
| 20 | 19141289 | 19651541 | 1  | NM_020689    | SLC24A3  | 0 | NA | 0 | NA | 0 | NA | 0 | NA | 0 | NA |
| 20 | 19818209 | 19931100 | 1  | NM_018993    | RIN2     | 1 | 13 | 0 | NA | 1 | 12 | 0 | NA | 0 | NA |
| 20 | 19945936 | 19962269 | 1  | NM_016100    | NAT5     | 0 | NA | 0 | NA | 0 | NA | 0 | NA | 0 | NA |
| 20 | 19945936 | 19962269 | 1  | NM_181528    | NAT5     | 0 | NA | 0 | NA | 0 | NA | 0 | NA | 0 | NA |
| 20 | 19946542 | 19962269 | 1  | NM_181527    | NAT5     | 0 | NA | 0 | NA | 0 | NA | 0 | NA | 0 | NA |
| 20 | 19981195 | 20289346 | 1  | NM_015585    | C20orf26 | 0 | NA | 0 | NA | 0 | NA | 1 | 14 | 0 | NA |
| 20 | 19984690 | 19963011 | -1 | NM_016652    | CRNKL1   | 0 | NA | 0 | NA | 0 | NA | 1 | 14 | 0 | NA |
| 20 | 20296764 | 20299592 | 1  | NM_002196    | INSM1    | 0 | NA | 1 | 17 | 0 | NA | 0 | NA | 0 | NA |
| 20 | 20641266 | 20321410 | -1 | NM_020343    | C20orf74 | 0 | NA | 0 | NA | 0 | NA | 0 | NA | 0 | NA |
| 20 | 21054645 | 21175258 | 1  | NM_018474    | C20orf19 | 0 | NA | 0 | NA | 0 | NA | 0 | NA | 0 | NA |
| 20 | 21231941 | 21318463 | 1  | NM_012255    | XRN2     | 0 | NA | 0 | NA | 0 | NA | 1 | 11 | 0 | NA |
| 20 | 21326047 | 21324004 | -1 | NM_033176    | NKX2-4   | 0 | NA | 1 | 12 | 0 | NA | 0 | NA | 0 | NA |
| 20 | 21442664 | 21439651 | -1 | NM_002509    | NKX2-2   | 0 | NA | 0 | NA | 0 | NA | 0 | NA | 0 | NA |
| 20 | 21634296 | 21644620 | 1  | NM_006192    | PAX1     | 0 | NA | 0 | NA | 0 | NA | 0 | NA | 1 | 12 |
| 20 | 22513101 | 22509822 | -1 | NM_021784    | FOXA2    | 0 | NA | 0 | NA | 0 | NA | 0 | NA | 0 | NA |
| 20 | 22514102 | 22509822 | -1 | NM_153675    | FOXA2    | 0 | NA | 0 | NA | 0 | NA | 0 | NA | 0 | NA |
| 20 | 22964056 | 22965314 | 1  | NM_001052    | SSTR4    | 0 | NA | 1 | 12 | 0 | NA | 0 | NA | 0 | NA |

|    |          |          |    |              |           |   |    |   |    |   |    |   |    |   |    |
|----|----------|----------|----|--------------|-----------|---|----|---|----|---|----|---|----|---|----|
| 20 | 22978301 | 22974269 | -1 | NM_000361    | THBD      | 0 | NA | 0 | NA | 0 | NA | 0 | NA | 1 | 15 |
| 20 | 23014977 | 23007992 | -1 | NM_012072    | CD93      | 0 | NA | 0 | NA | 0 | NA | 0 | NA | 1 | 15 |
| 20 | 23279372 | 23283408 | 1  | NM_013248    | NXT1      | 0 | NA | 0 | NA | 0 | NA | 0 | NA | 0 | NA |
| 20 | 23293020 | 23301683 | 1  | NM_022482    | GZF1      | 0 | NA | 0 | NA | 0 | NA | 0 | NA | 0 | NA |
| 20 | 23350081 | 23303184 | -1 | NM_022080    | NAPB      | 0 | NA | 1 | 13 | 0 | NA | 0 | NA | 0 | NA |
| 20 | 23368321 | 23373567 | 1  | NM_138283    | CSTL1     | 0 | NA | 0 | NA | 0 | NA | 0 | NA | 0 | NA |
| 20 | 23381482 | 23379040 | -1 | NM_080830    | CST11     | 0 | NA | 0 | NA | 0 | NA | 0 | NA | 0 | NA |
| 20 | 23381482 | 23379040 | -1 | NM_130794    | CST11     | 0 | NA | 0 | NA | 0 | NA | 0 | NA | 0 | NA |
| 20 | 23419785 | 23424655 | 1  | NM_005492    | CST8      | 0 | NA | 0 | NA | 0 | NA | 0 | NA | 0 | NA |
| 20 | 23497386 | 23493369 | -1 | NM_080610    | CST9L     | 0 | NA | 0 | NA | 0 | NA | 0 | NA | 1 | 13 |
| 20 | 23534513 | 23531046 | -1 | NM_001008693 | CST9      | 0 | NA | 0 | NA | 0 | NA | 0 | NA | 0 | NA |
| 20 | 23586574 | 23562293 | -1 | NM_000099    | CST3      | 0 | NA | 0 | NA | 0 | NA | 0 | NA | 0 | NA |
| 20 | 23617862 | 23614276 | -1 | NM_001899    | CST4      | 0 | NA | 0 | NA | 0 | NA | 0 | NA | 0 | NA |
| 20 | 23679574 | 23676189 | -1 | NM_001898    | CST1      | 0 | NA | 0 | NA | 0 | NA | 0 | NA | 0 | NA |
| 20 | 23755312 | 23752403 | -1 | NM_001322    | CST2      | 0 | NA | 0 | NA | 0 | NA | 0 | NA | 0 | NA |
| 20 | 23808380 | 23804571 | -1 | NM_001900    | CST5      | 0 | NA | 0 | NA | 0 | NA | 0 | NA | 0 | NA |
| 20 | 23915512 | 23913686 | -1 | NM_080920    | GGTLC1    | 0 | NA | 0 | NA | 0 | NA | 0 | NA | 0 | NA |
| 20 | 23915512 | 23913686 | -1 | NM_178312    | GGTLC1    | 0 | NA | 0 | NA | 0 | NA | 0 | NA | 0 | NA |
| 20 | 23917416 | 23913686 | -1 | NM_178311    | GGTLC1    | 0 | NA | 0 | NA | 0 | NA | 0 | NA | 0 | NA |
| 20 | 24397834 | 24595167 | 1  | NM_024893    | C20orf39  | 0 | NA | 0 | NA | 0 | NA | 0 | NA | 0 | NA |
| 20 | 24877865 | 24888562 | 1  | NM_003650    | CST7      | 0 | NA | 0 | NA | 0 | NA | 0 | NA | 1 | 13 |
| 20 | 24921425 | 24891579 | -1 | NM_020531    | C20orf3   | 0 | NA | 0 | NA | 0 | NA | 1 | 11 | 0 | NA |
| 20 | 24987616 | 24934872 | -1 | NM_032501    | ACSS1     | 1 | 12 | 1 | 15 | 1 | 12 | 1 | 11 | 1 | 12 |
| 20 | 25010767 | 25004098 | -1 | NM_014588    | VSX1      | 0 | NA | 1 | 13 | 0 | NA | 0 | NA | 1 | 14 |
| 20 | 25010767 | 25007194 | -1 | NM_199425    | VSX1      | 0 | NA | 1 | 13 | 0 | NA | 0 | NA | 1 | 14 |
| 20 | 25124338 | 25155360 | 1  | NM_00114089  | ENTPD6    | 0 | NA | 0 | NA | 0 | NA | 0 | NA | 0 | NA |
| 20 | 25124338 | 25155360 | 1  | NM_001247    | ENTPD6    | 0 | NA | 0 | NA | 0 | NA | 0 | NA | 0 | NA |
| 20 | 25176705 | 25226648 | 1  | NM_002862    | PYGB      | 1 | 11 | 0 | NA | 1 | 15 | 1 | 12 | 0 | NA |
| 20 | 25319477 | 25223378 | -1 | NM_015600    | ABHD12    | 0 | NA | 0 | NA | 0 | NA | 0 | NA | 0 | NA |
| 20 | 25319477 | 25228849 | -1 | NM_001042472 | ABHD12    | 0 | NA | 0 | NA | 0 | NA | 0 | NA | 0 | NA |
| 20 | 25336322 | 25377191 | 1  | NM_021067    | GINS1     | 1 | 13 | 0 | NA | 0 | NA | 1 | 25 | 0 | NA |
| 20 | 25514153 | 25381337 | -1 | NM_025176    | NLP       | 0 | NA | 0 | NA | 0 | NA | 0 | NA | 0 | NA |
| 20 | 25552614 | 25543000 | -1 | NM_152667    | NANP      | 1 | 15 | 0 | NA | 0 | NA | 1 | 17 | 0 | NA |
| 20 | 25625469 | 25602850 | -1 | NM_015655    | ZNF337    | 1 | 13 | 0 | NA | 0 | NA | 0 | NA | 0 | NA |
| 20 | 29309127 | 29311096 | 1  | NM_001037730 | DEFB115   | 0 | NA | 0 | NA | 0 | NA | 0 | NA | 0 | NA |
| 20 | 29360049 | 29354675 | -1 | NM_001037731 | DEFB116   | 0 | NA | 0 | NA | 0 | NA | 0 | NA | 0 | NA |
| 20 | 29420088 | 29424825 | 1  | NM_054112    | DEFB118   | 0 | NA | 0 | NA | 0 | NA | 0 | NA | 0 | NA |
| 20 | 29442067 | 29428627 | -1 | NM_153289    | DEFB119   | 0 | NA | 0 | NA | 0 | NA | 0 | NA | 0 | NA |
| 20 | 29442067 | 29428627 | -1 | NM_173460    | DEFB119   | 0 | NA | 0 | NA | 0 | NA | 0 | NA | 0 | NA |
| 20 | 29442067 | 29440431 | -1 | NM_153323    | DEFB119   | 0 | NA | 0 | NA | 0 | NA | 0 | NA | 0 | NA |
| 20 | 29457651 | 29456360 | -1 | NM_001011878 | DEFB121   | 0 | NA | 0 | NA | 0 | NA | 0 | NA | 0 | NA |
| 20 | 29492071 | 29501721 | 1  | NM_153324    | DEFB123   | 0 | NA | 0 | NA | 1 | 14 | 0 | NA | 0 | NA |
| 20 | 29524477 | 29516969 | -1 | NM_001037500 | DEFB124   | 0 | NA | 0 | NA | 1 | 18 | 0 | NA | 0 | NA |
| 20 | 29526765 | 29536369 | 1  | NM_014012    | REM1      | 0 | NA | 0 | NA | 1 | 18 | 0 | NA | 0 | NA |
| 20 | 29565901 | 29591257 | 1  | NM_178582    | HM13      | 1 | 15 | 0 | NA | 0 | NA | 1 | 21 | 1 | 12 |
| 20 | 29565901 | 29621031 | 1  | NM_030789    | HM13      | 1 | 15 | 0 | NA | 0 | NA | 1 | 21 | 1 | 12 |
| 20 | 29565901 | 29621031 | 1  | NM_178580    | HM13      | 1 | 15 | 0 | NA | 0 | NA | 1 | 21 | 1 | 12 |
| 20 | 29565901 | 29621031 | 1  | NM_178581    | HM13      | 1 | 15 | 0 | NA | 0 | NA | 1 | 21 | 1 | 12 |
| 20 | 29656752 | 29657974 | 1  | NM_002165    | ID1       | 1 | 21 | 0 | NA | 1 | 12 | 1 | 11 | 0 | NA |
| 20 | 29656752 | 29657974 | 1  | NM_181353    | ID1       | 1 | 21 | 0 | NA | 1 | 12 | 1 | 11 | 0 | NA |
| 20 | 29689351 | 29696461 | 1  | NM_032609    | COX4I2    | 0 | NA | 0 | NA | 0 | NA | 0 | NA | 0 | NA |
| 20 | 29774317 | 29715921 | -1 | NM_001191    | BCL2L1    | 0 | NA | 0 | NA | 1 | 13 | 1 | 12 | 0 | NA |
| 20 | 29774317 | 29715921 | -1 | NM_138578    | BCL2L1    | 0 | NA | 0 | NA | 1 | 13 | 1 | 12 | 0 | NA |
| 20 | 29790564 | 29853264 | 1  | NM_012112    | TPX2      | 0 | NA | 0 | NA | 0 | NA | 0 | NA | 0 | NA |
| 20 | 29870838 | 29886161 | 1  | NM_033118    | MYLK2     | 0 | NA | 0 | NA | 0 | NA | 0 | NA | 0 | NA |
| 20 | 29897081 | 29895763 | -1 | NM_004118    | FOXS1     | 0 | NA | 0 | NA | 0 | NA | 1 | 11 | 0 | NA |
| 20 | 29921462 | 29912530 | -1 | NM_001012644 | DUSP15    | 0 | NA | 0 | NA | 0 | NA | 0 | NA | 0 | NA |
| 20 | 29921672 | 29912530 | -1 | NM_177991    | DUSP15    | 0 | NA | 0 | NA | 0 | NA | 0 | NA | 0 | NA |
| 20 | 29922140 | 29912530 | -1 | NM_080611    | DUSP15    | 0 | NA | 0 | NA | 0 | NA | 1 | 12 | 0 | NA |
| 20 | 29922165 | 29994519 | 1  | NM_001008409 | TLL9      | 0 | NA | 0 | NA | 1 | 12 | 1 | 12 | 0 | NA |
| 20 | 30003544 | 29996418 | -1 | NM_030815    | PDRG1     | 0 | NA | 0 | NA | 0 | NA | 0 | NA | 1 | 17 |
| 20 | 30019465 | 30048917 | 1  | NM_001011718 | XKR7      | 0 | NA | 0 | NA | 0 | NA | 0 | NA | 0 | NA |
| 20 | 30061905 | 30083645 | 1  | NM_080625    | C20orf160 | 1 | 11 | 0 | NA | 0 | NA | 0 | NA | 0 | NA |
| 20 | 30103717 | 30153318 | 1  | NM_002110    | HCK       | 0 | NA | 1 | 12 | 0 | NA | 0 | NA | 0 | NA |
| 20 | 30160969 | 30218722 | 1  | NM_014742    | TM9SF4    | 1 | 13 | 0 | NA | 0 | NA | 1 | 24 | 0 | NA |

|    |          |          |    |              |           |   |    |   |    |   |    |   |    |   |    |
|----|----------|----------|----|--------------|-----------|---|----|---|----|---|----|---|----|---|----|
| 20 | 30259207 | 30243967 | -1 | NM_002657    | PLAGL2    | 0 | NA | 0 | NA | 0 | NA | 0 | NA | 0 | NA |
| 20 | 30259356 | 30289387 | 1  | NM_172236    | POFUT1    | 0 | NA | 0 | NA | 0 | NA | 0 | NA | 0 | NA |
| 20 | 30259356 | 30290128 | 1  | NM_015352    | POFUT1    | 0 | NA | 0 | NA | 0 | NA | 0 | NA | 0 | NA |
| 20 | 30329127 | 30386472 | 1  | NM_004798    | KIF3B     | 0 | NA | 0 | NA | 0 | NA | 0 | NA | 0 | NA |
| 20 | 30409813 | 30490783 | 1  | NM_015338    | ASXL1     | 1 | 19 | 0 | NA | 0 | NA | 0 | NA | 0 | NA |
| 20 | 30534849 | 30498329 | -1 | NM_080616    | C20orf112 | 0 | NA | 0 | NA | 0 | NA | 0 | NA | 0 | NA |
| 20 | 30795475 | 30754153 | -1 | NM_001099339 | COMMD7    | 0 | NA | 0 | NA | 0 | NA | 0 | NA | 0 | NA |
| 20 | 30795475 | 30754153 | -1 | NM_053041    | COMMD7    | 0 | NA | 0 | NA | 0 | NA | 0 | NA | 0 | NA |
| 20 | 30813851 | 30860823 | 1  | NM_006892    | DNMT3B    | 0 | NA | 0 | NA | 0 | NA | 0 | NA | 0 | NA |
| 20 | 30813851 | 30860823 | 1  | NM_175848    | DNMT3B    | 0 | NA | 0 | NA | 0 | NA | 0 | NA | 0 | NA |
| 20 | 30813851 | 30860823 | 1  | NM_175849    | DNMT3B    | 0 | NA | 0 | NA | 0 | NA | 0 | NA | 0 | NA |
| 20 | 30831318 | 30860823 | 1  | NM_175850    | DNMT3B    | 0 | NA | 0 | NA | 1 | 15 | 0 | NA | 0 | NA |
| 20 | 30871434 | 30901867 | 1  | NM_012325    | MAPRE1    | 0 | NA | 0 | NA | 1 | 12 | 1 | 11 | 0 | NA |
| 20 | 31055900 | 31035241 | -1 | NM_080675    | SPAG4L    | 1 | 14 | 1 | 13 | 0 | NA | 1 | 14 | 1 | 12 |
| 20 | 31059067 | 31075176 | 1  | NM_025227    | BPIL1     | 1 | 14 | 1 | 13 | 0 | NA | 1 | 14 | 0 | NA |
| 20 | 31083114 | 31095514 | 1  | NM_174897    | BPIL3     | 0 | NA | 1 | 15 | 0 | NA | 0 | NA | 1 | 16 |
| 20 | 31106890 | 31125095 | 1  | NM_182658    | C20orf185 | 0 | NA | 1 | 12 | 1 | 12 | 1 | 12 | 0 | NA |
| 20 | 31134415 | 31163218 | 1  | NM_182519    | C20orf186 | 0 | NA | 1 | 13 | 0 | NA | 0 | NA | 1 | 12 |
| 20 | 31219620 | 31232884 | 1  | NM_080574    | C20orf70  | 0 | NA | 1 | 14 | 0 | NA | 0 | NA | 1 | 13 |
| 20 | 31268795 | 31279220 | 1  | NM_001042439 | C20orf71  | 0 | NA | 0 | NA | 0 | NA | 0 | NA | 1 | 12 |
| 20 | 31268795 | 31279220 | 1  | NM_178466    | C20orf71  | 0 | NA | 0 | NA | 0 | NA | 0 | NA | 1 | 12 |
| 20 | 31287462 | 31294776 | 1  | NM_016583    | PLUNC     | 0 | NA | 0 | NA | 0 | NA | 0 | NA | 0 | NA |
| 20 | 31287462 | 31294776 | 1  | NM_130852    | PLUNC     | 0 | NA | 0 | NA | 0 | NA | 0 | NA | 0 | NA |
| 20 | 31334601 | 31361345 | 1  | NM_033197    | C20orf114 | 1 | 18 | 1 | 14 | 0 | NA | 0 | NA | 1 | 12 |
| 20 | 31452998 | 31410305 | -1 | NM_016082    | CDK5RAP1  | 1 | 12 | 0 | NA | 0 | NA | 0 | NA | 0 | NA |
| 20 | 31452998 | 31410305 | -1 | NM_016408    | CDK5RAP1  | 1 | 12 | 0 | NA | 0 | NA | 0 | NA | 0 | NA |
| 20 | 31495359 | 31459423 | -1 | NM_003098    | SNTA1     | 0 | NA | 0 | NA | 0 | NA | 0 | NA | 0 | NA |
| 20 | 31541588 | 31701498 | 1  | NM_001032999 | CBFA2T2   | 0 | NA | 0 | NA | 0 | NA | 0 | NA | 0 | NA |
| 20 | 31613831 | 31701498 | 1  | NM_001039709 | CBFA2T2   | 0 | NA | 0 | NA | 1 | 16 | 0 | NA | 0 | NA |
| 20 | 31613831 | 31701498 | 1  | NM_005093    | CBFA2T2   | 0 | NA | 0 | NA | 1 | 16 | 0 | NA | 0 | NA |
| 20 | 31713780 | 31715381 | 1  | NM_080825    | C20orf144 | 0 | NA | 0 | NA | 0 | NA | 1 | 11 | 0 | NA |
| 20 | 31717964 | 31719992 | 1  | NM_001024675 | C20orf134 | 1 | 13 | 0 | NA | 0 | NA | 1 | 11 | 0 | NA |
| 20 | 31725925 | 31708553 | -1 | NM_031231    | NECAB3    | 1 | 13 | 0 | NA | 0 | NA | 0 | NA | 0 | NA |
| 20 | 31725925 | 31708553 | -1 | NM_031232    | NECAB3    | 1 | 13 | 0 | NA | 0 | NA | 0 | NA | 0 | NA |
| 20 | 31737871 | 31728952 | -1 | NM_005225    | EZF1      | 0 | NA | 0 | NA | 0 | NA | 0 | NA | 0 | NA |
| 20 | 31771797 | 31754210 | -1 | NM_007238    | PXMP4     | 0 | NA | 0 | NA | 1 | 13 | 1 | 11 | 0 | NA |
| 20 | 31771797 | 31754210 | -1 | NM_183397    | PXMP4     | 0 | NA | 0 | NA | 1 | 13 | 1 | 11 | 0 | NA |
| 20 | 31783468 | 31843736 | 1  | NM_032819    | ZNF341    | 0 | NA | 1 | 12 | 0 | NA | 1 | 42 | 0 | NA |
| 20 | 31862779 | 31905831 | 1  | NM_176812    | CHMP4B    | 0 | NA | 0 | NA | 0 | NA | 1 | 20 | 0 | NA |
| 20 | 32045392 | 32131728 | 1  | NM_007367    | RALY      | 0 | NA | 0 | NA | 0 | NA | 1 | 18 | 0 | NA |
| 20 | 32045392 | 32131728 | 1  | NM_016732    | RALY      | 0 | NA | 0 | NA | 0 | NA | 1 | 18 | 0 | NA |
| 20 | 32163746 | 32139775 | -1 | NM_003908    | EIF2S2    | 0 | NA | 0 | NA | 0 | NA | 0 | NA | 0 | NA |
| 20 | 32311831 | 32320809 | 1  | NM_001672    | ASIP      | 0 | NA | 0 | NA | 0 | NA | 0 | NA | 0 | NA |
| 20 | 32354784 | 32331736 | -1 | NM_000687    | AHCY      | 1 | 12 | 0 | NA | 0 | NA | 0 | NA | 0 | NA |
| 20 | 32414722 | 32562858 | 1  | NM_031483    | ITCH      | 1 | 11 | 0 | NA | 0 | NA | 0 | NA | 0 | NA |
| 20 | 32567864 | 32592423 | 1  | NM_014183    | DYNLRB1   | 0 | NA | 0 | NA | 0 | NA | 0 | NA | 0 | NA |
| 20 | 32598352 | 32611810 | 1  | NM_181509    | MAP1LC3A  | 0 | NA | 0 | NA | 0 | NA | 0 | NA | 0 | NA |
| 20 | 32610179 | 32611810 | 1  | NM_032514    | MAP1LC3A  | 0 | NA | 0 | NA | 0 | NA | 0 | NA | 0 | NA |
| 20 | 32728750 | 32612006 | -1 | NM_080476    | PIGU      | 0 | NA | 0 | NA | 0 | NA | 0 | NA | 0 | NA |
| 20 | 32755808 | 32764898 | 1  | NM_021202    | TP53INP2  | 1 | 11 | 0 | NA | 1 | 12 | 1 | 11 | 0 | NA |
| 20 | 32877094 | 32766238 | -1 | NM_014071    | NCOA6     | 0 | NA | 0 | NA | 0 | NA | 1 | 16 | 0 | NA |
| 20 | 32924322 | 32896183 | -1 | NM_178026    | GGT7      | 1 | 13 | 0 | NA | 0 | NA | 0 | NA | 1 | 12 |
| 20 | 32926405 | 32979423 | 1  | NM_001076552 | ACSS2     | 1 | 13 | 0 | NA | 0 | NA | 0 | NA | 1 | 12 |
| 20 | 32928035 | 32979423 | 1  | NM_018677    | ACSS2     | 1 | 13 | 0 | NA | 0 | NA | 0 | NA | 1 | 12 |
| 20 | 33007262 | 32979896 | -1 | NM_000178    | GSS       | 0 | NA | 0 | NA | 0 | NA | 1 | 14 | 0 | NA |
| 20 | 33026866 | 33053897 | 1  | NM_020884    | MYH7B     | 0 | NA | 0 | NA | 0 | NA | 0 | NA | 0 | NA |
| 20 | 33144279 | 33053867 | -1 | NM_015638    | TRPC4AP   | 0 | NA | 0 | NA | 0 | NA | 0 | NA | 0 | NA |
| 20 | 33144279 | 33053867 | -1 | NM_199368    | TRPC4AP   | 0 | NA | 0 | NA | 0 | NA | 0 | NA | 0 | NA |
| 20 | 33198804 | 33166830 | -1 | NM_018217    | EDEM2     | 0 | NA | 0 | NA | 1 | 12 | 0 | NA | 0 | NA |
| 20 | 33223434 | 33228826 | 1  | NM_006404    | PROCR     | 0 | NA | 0 | NA | 0 | NA | 1 | 12 | 0 | NA |
| 20 | 33278116 | 33282818 | 1  | NM_006690    | MMP24     | 0 | NA | 0 | NA | 0 | NA | 0 | NA | 1 | 12 |
| 20 | 33335920 | 33330138 | -1 | NM_181468    | EIF6      | 0 | NA | 0 | NA | 0 | NA | 0 | NA | 0 | NA |
| 20 | 33336008 | 33330138 | -1 | NM_002212    | EIF6      | 0 | NA | 0 | NA | 0 | NA | 0 | NA | 0 | NA |
| 20 | 33336008 | 33330138 | -1 | NM_181466    | EIF6      | 0 | NA | 0 | NA | 0 | NA | 0 | NA | 0 | NA |
| 20 | 33343639 | 33336947 | -1 | NM_178468    | FAM83C    | 0 | NA | 0 | NA | 0 | NA | 0 | NA | 0 | NA |

|    |          |          |    |              |           |   |    |   |    |   |    |   |    |   |    |
|----|----------|----------|----|--------------|-----------|---|----|---|----|---|----|---|----|---|----|
| 20 | 33463247 | 33353794 | -1 | NM_018244    | UQCC      | 0 | NA | 0 | NA | 0 | NA | 1 | 13 | 0 | NA |
| 20 | 33463247 | 33353794 | -1 | NM_199487    | UQCC      | 0 | NA | 0 | NA | 0 | NA | 1 | 13 | 0 | NA |
| 20 | 33489441 | 33484562 | -1 | NM_000557    | GDF5      | 0 | NA | 0 | NA | 1 | 13 | 0 | NA | 0 | NA |
| 20 | 33506563 | 33563217 | 1  | NM_001035518 | CEP250    | 0 | NA | 0 | NA | 1 | 13 | 0 | NA | 0 | NA |
| 20 | 33506563 | 33563217 | 1  | NM_007186    | CEP250    | 0 | NA | 0 | NA | 1 | 13 | 0 | NA | 0 | NA |
| 20 | 33593191 | 33608819 | 1  | NM_015966    | ERIGC3    | 0 | NA | 0 | NA | 0 | NA | 1 | 23 | 0 | NA |
| 20 | 33593191 | 33608819 | 1  | NM_198398    | ERIGC3    | 0 | NA | 0 | NA | 0 | NA | 1 | 23 | 0 | NA |
| 20 | 33667222 | 33672379 | 1  | NM_003116    | SPAG4     | 1 | 23 | 0 | NA | 0 | NA | 1 | 11 | 0 | NA |
| 20 | 33705245 | 33677379 | -1 | NM_003915    | CPNE1     | 0 | NA | 0 | NA | 0 | NA | 0 | NA | 0 | NA |
| 20 | 33716252 | 33700292 | -1 | NM_006047    | RBM12     | 0 | NA | 0 | NA | 0 | NA | 0 | NA | 0 | NA |
| 20 | 33716252 | 33700292 | -1 | NM_152838    | RBM12     | 0 | NA | 0 | NA | 0 | NA | 0 | NA | 0 | NA |
| 20 | 33716262 | 33677379 | -1 | NM_152925    | CPNE1     | 0 | NA | 0 | NA | 0 | NA | 0 | NA | 0 | NA |
| 20 | 33716262 | 33677379 | -1 | NM_152926    | CPNE1     | 0 | NA | 0 | NA | 0 | NA | 0 | NA | 0 | NA |
| 20 | 33716262 | 33677379 | -1 | NM_152927    | CPNE1     | 0 | NA | 0 | NA | 0 | NA | 0 | NA | 0 | NA |
| 20 | 33716262 | 33677379 | -1 | NM_152928    | CPNE1     | 0 | NA | 0 | NA | 0 | NA | 0 | NA | 0 | NA |
| 20 | 33716262 | 33677379 | -1 | NM_152929    | CPNE1     | 0 | NA | 0 | NA | 0 | NA | 0 | NA | 0 | NA |
| 20 | 33716262 | 33677379 | -1 | NM_152930    | CPNE1     | 0 | NA | 0 | NA | 0 | NA | 0 | NA | 0 | NA |
| 20 | 33716262 | 33677379 | -1 | NM_152931    | CPNE1     | 0 | NA | 0 | NA | 0 | NA | 0 | NA | 0 | NA |
| 20 | 33750645 | 33752316 | 1  | NM_080748    | C20orf52  | 0 | NA | 0 | NA | 0 | NA | 1 | 14 | 0 | NA |
| 20 | 33750688 | 33720024 | -1 | NM_021100    | NFS1      | 0 | NA | 0 | NA | 0 | NA | 1 | 14 | 0 | NA |
| 20 | 33793607 | 33754944 | -1 | NM_004902    | RBM39     | 1 | 38 | 0 | NA | 0 | NA | 0 | NA | 0 | NA |
| 20 | 33793607 | 33754944 | -1 | NM_184234    | RBM39     | 1 | 38 | 0 | NA | 0 | NA | 0 | NA | 0 | NA |
| 20 | 33823336 | 34001702 | 1  | NM_016436    | PHF20     | 1 | 30 | 1 | 12 | 0 | NA | 1 | 20 | 0 | NA |
| 20 | 34005842 | 34004959 | -1 | NM_016558    | SCAND1    | 0 | NA | 0 | NA | 0 | NA | 0 | NA | 0 | NA |
| 20 | 34005842 | 34004959 | -1 | NM_033630    | SCAND1    | 0 | NA | 0 | NA | 0 | NA | 0 | NA | 0 | NA |
| 20 | 34019942 | 34082036 | 1  | NM_080834    | C20orf152 | 0 | NA | 0 | NA | 1 | 13 | 0 | NA | 0 | NA |
| 20 | 34163761 | 34284135 | 1  | NM_177996    | EPB41L1   | 0 | NA | 0 | NA | 0 | NA | 0 | NA | 0 | NA |
| 20 | 34206075 | 34284135 | 1  | NM_012156    | EPB41L1   | 0 | NA | 0 | NA | 0 | NA | 0 | NA | 0 | NA |
| 20 | 34287860 | 34308267 | 1  | NM_015511    | C20orf4   | 0 | NA | 0 | NA | 0 | NA | 0 | NA | 0 | NA |
| 20 | 34357716 | 34590454 | 1  | NM_014902    | DLGAP4    | 0 | NA | 0 | NA | 0 | NA | 0 | NA | 0 | NA |
| 20 | 34523282 | 34590454 | 1  | NM_001042486 | DLGAP4    | 1 | 14 | 0 | NA | 0 | NA | 1 | 28 | 0 | NA |
| 20 | 34523555 | 34590454 | 1  | NM_183006    | DLGAP4    | 1 | 14 | 0 | NA | 0 | NA | 1 | 28 | 0 | NA |
| 20 | 34603310 | 34611640 | 1  | NM_006097    | MYL9      | 0 | NA | 0 | NA | 0 | NA | 0 | NA | 0 | NA |
| 20 | 34603310 | 34611640 | 1  | NM_181526    | MYL9      | 0 | NA | 0 | NA | 0 | NA | 0 | NA | 0 | NA |
| 20 | 34635423 | 34655766 | 1  | NM_021809    | TGIF2     | 0 | NA | 0 | NA | 0 | NA | 1 | 11 | 0 | NA |
| 20 | 34667580 | 34674374 | 1  | NM_018840    | C20orf24  | 0 | NA | 0 | NA | 0 | NA | 1 | 22 | 0 | NA |
| 20 | 34667580 | 34674374 | 1  | NM_199483    | C20orf24  | 0 | NA | 0 | NA | 0 | NA | 1 | 22 | 0 | NA |
| 20 | 34707972 | 34674335 | -1 | NM_032214    | SLA2      | 0 | NA | 0 | NA | 0 | NA | 0 | NA | 0 | NA |
| 20 | 34707972 | 34674335 | -1 | NM_175077    | SLA2      | 0 | NA | 0 | NA | 0 | NA | 0 | NA | 0 | NA |
| 20 | 34807895 | 34713582 | -1 | NM_022477    | NDRG3     | 1 | 11 | 0 | NA | 0 | NA | 0 | NA | 0 | NA |
| 20 | 34807895 | 34713582 | -1 | NM_032013    | NDRG3     | 1 | 11 | 0 | NA | 0 | NA | 0 | NA | 0 | NA |
| 20 | 34835563 | 34813861 | -1 | NM_024918    | DSN1      | 0 | NA | 0 | NA | 0 | NA | 1 | 20 | 0 | NA |
| 20 | 34921690 | 34839258 | -1 | NM_199181    | C20orf117 | 0 | NA | 0 | NA | 0 | NA | 0 | NA | 0 | NA |
| 20 | 34937983 | 34956046 | 1  | NM_080628    | C20orf118 | 0 | NA | 0 | NA | 0 | NA | 0 | NA | 0 | NA |
| 20 | 35013590 | 34954058 | -1 | NM_015474    | SAMHD1    | 0 | NA | 0 | NA | 0 | NA | 0 | NA | 0 | NA |
| 20 | 35157824 | 35059591 | -1 | NM_002895    | RBL1      | 0 | NA | 0 | NA | 0 | NA | 1 | 11 | 0 | NA |
| 20 | 35157824 | 35065390 | -1 | NM_183404    | RBL1      | 0 | NA | 0 | NA | 0 | NA | 1 | 11 | 0 | NA |
| 20 | 35240887 | 35303439 | 1  | NM_002951    | RPN2      | 0 | NA | 0 | NA | 0 | NA | 0 | NA | 0 | NA |
| 20 | 35241388 | 35163042 | -1 | NM_152503    | C20orf132 | 0 | NA | 0 | NA | 0 | NA | 0 | NA | 0 | NA |
| 20 | 35241388 | 35190637 | -1 | NM_213631    | C20orf132 | 0 | NA | 0 | NA | 0 | NA | 0 | NA | 0 | NA |
| 20 | 35241388 | 35190637 | -1 | NM_213632    | C20orf132 | 0 | NA | 0 | NA | 0 | NA | 0 | NA | 0 | NA |
| 20 | 35318706 | 35312903 | -1 | NM_021081    | GHRH      | 0 | NA | 0 | NA | 0 | NA | 0 | NA | 0 | NA |
| 20 | 35351464 | 35379077 | 1  | NM_001003897 | MANBAL    | 1 | 11 | 0 | NA | 0 | NA | 0 | NA | 0 | NA |
| 20 | 35351464 | 35379077 | 1  | NM_022077    | MANBAL    | 1 | 11 | 0 | NA | 0 | NA | 0 | NA | 0 | NA |
| 20 | 35406501 | 35467235 | 1  | NM_005417    | SRC       | 0 | NA | 0 | NA | 0 | NA | 0 | NA | 0 | NA |
| 20 | 35407970 | 35467235 | 1  | NM_198291    | SRC       | 0 | NA | 0 | NA | 0 | NA | 0 | NA | 0 | NA |
| 20 | 35583020 | 35585504 | 1  | NM_005386    | NNAT      | 0 | NA | 0 | NA | 0 | NA | 0 | NA | 0 | NA |
| 20 | 35583020 | 35585504 | 1  | NM_181689    | NNAT      | 0 | NA | 0 | NA | 0 | NA | 0 | NA | 0 | NA |
| 20 | 35589717 | 35579232 | -1 | NM_006698    | BLCAP     | 0 | NA | 0 | NA | 0 | NA | 0 | NA | 0 | NA |
| 20 | 35755847 | 35933934 | 1  | NM_030877    | CTNNB1    | 0 | NA | 0 | NA | 0 | NA | 0 | NA | 0 | NA |
| 20 | 35964912 | 36007161 | 1  | NM_080607    | VSTM2L    | 0 | NA | 0 | NA | 0 | NA | 0 | NA | 0 | NA |
| 20 | 36095247 | 36044836 | -1 | NM_014657    | KIAA0406  | 0 | NA | 0 | NA | 0 | NA | 0 | NA | 0 | NA |
| 20 | 36095361 | 36154180 | 1  | NM_021215    | C20orf77  | 0 | NA | 0 | NA | 0 | NA | 0 | NA | 0 | NA |
| 20 | 36227114 | 36190277 | -1 | NM_004613    | TGM2      | 0 | NA | 0 | NA | 0 | NA | 1 | 17 | 0 | NA |
| 20 | 36227114 | 36199764 | -1 | NM_198951    | TGM2      | 0 | NA | 0 | NA | 0 | NA | 1 | 17 | 0 | NA |

|    |          |          |    |              |           |   |    |   |    |   |    |   |    |   |    |
|----|----------|----------|----|--------------|-----------|---|----|---|----|---|----|---|----|---|----|
| 20 | 36322588 | 36272320 | -1 | NM_001029864 | KIAA1755  | 0 | NA | 0 | NA | 0 | NA | 0 | NA | 1 | 12 |
| 20 | 36365965 | 36399319 | 1  | NM_001725    | BPI       | 0 | NA | 1 | 15 | 0 | NA | 0 | NA | 1 | 15 |
| 20 | 36408298 | 36439067 | 1  | NM_004139    | LBP       | 1 | 16 | 1 | 31 | 1 | 21 | 1 | 55 | 1 | 12 |
| 20 | 36534899 | 36640918 | 1  | NM_020336    | KIAA1219  | 0 | NA | 0 | NA | 0 | NA | 0 | NA | 0 | NA |
| 20 | 36643251 | 36650518 | 1  | NM_001018082 | ADIG      | 0 | NA | 0 | NA | 0 | NA | 0 | NA | 0 | NA |
| 20 | 36786518 | 36791429 | 1  | NM_080552    | SLC32A1   | 0 | NA | 1 | 12 | 0 | NA | 0 | NA | 1 | 14 |
| 20 | 36810510 | 36834503 | 1  | NM_024855    | ACTR5     | 0 | NA | 0 | NA | 0 | NA | 0 | NA | 0 | NA |
| 20 | 36867761 | 36985081 | 1  | NM_015568    | PPP1R16B  | 0 | NA | 0 | NA | 0 | NA | 0 | NA | 0 | NA |
| 20 | 36988368 | 37015117 | 1  | NM_030919    | FAM83D    | 1 | 11 | 0 | NA | 1 | 15 | 1 | 16 | 0 | NA |
| 20 | 37024413 | 37101778 | 1  | NM_021931    | DHX35     | 0 | NA | 0 | NA | 0 | NA | 0 | NA | 0 | NA |
| 20 | 38751290 | 38747930 | -1 | NM_005461    | MAFB      | 0 | NA | 0 | NA | 0 | NA | 0 | NA | 0 | NA |
| 20 | 39090875 | 39186540 | 1  | NM_003286    | TOP1      | 0 | NA | 0 | NA | 0 | NA | 0 | NA | 0 | NA |
| 20 | 39199574 | 39237771 | 1  | NM_002860    | PLCG1     | 0 | NA | 0 | NA | 0 | NA | 1 | 12 | 0 | NA |
| 20 | 39199574 | 39237771 | 1  | NM_182811    | PLCG1     | 0 | NA | 0 | NA | 0 | NA | 1 | 12 | 0 | NA |
| 20 | 39362153 | 39240502 | -1 | NM_015035    | ZHX3      | 0 | NA | 0 | NA | 0 | NA | 0 | NA | 0 | NA |
| 20 | 39402973 | 39422636 | 1  | NM_022896    | LPIN3     | 1 | 12 | 0 | NA | 0 | NA | 0 | NA | 0 | NA |
| 20 | 39428912 | 39422019 | -1 | NM_052846    | EMILIN3   | 0 | NA | 0 | NA | 0 | NA | 0 | NA | 1 | 12 |
| 20 | 39680547 | 39464583 | -1 | NM_032221    | CHD6      | 0 | NA | 0 | NA | 0 | NA | 0 | NA | 0 | NA |
| 20 | 41251971 | 40134805 | -1 | NM_007050    | PTPRT     | 0 | NA | 0 | NA | 0 | NA | 0 | NA | 0 | NA |
| 20 | 41251971 | 40134805 | -1 | NM_133170    | PTPRT     | 0 | NA | 0 | NA | 0 | NA | 0 | NA | 0 | NA |
| 20 | 41519931 | 41525655 | 1  | NM_006275    | SFRS6     | 1 | 15 | 0 | NA | 0 | NA | 1 | 24 | 0 | NA |
| 20 | 41576466 | 41603949 | 1  | NM_015478    | L3MBTL    | 0 | NA | 1 | 12 | 0 | NA | 1 | 11 | 0 | NA |
| 20 | 41576466 | 41603949 | 1  | NM_032107    | L3MBTL    | 0 | NA | 1 | 12 | 0 | NA | 1 | 11 | 0 | NA |
| 20 | 41621099 | 41647687 | 1  | NM_170693    | SGK2      | 0 | NA | 0 | NA | 0 | NA | 0 | NA | 0 | NA |
| 20 | 41628150 | 41647687 | 1  | NM_016276    | SGK2      | 0 | NA | 0 | NA | 0 | NA | 0 | NA | 0 | NA |
| 20 | 41652992 | 41709276 | 1  | NM_016004    | IFT52     | 0 | NA | 0 | NA | 0 | NA | 0 | NA | 0 | NA |
| 20 | 41729122 | 41778536 | 1  | NM_002466    | MYBL2     | 0 | NA | 0 | NA | 0 | NA | 0 | NA | 0 | NA |
| 20 | 41789056 | 41788214 | -1 | NM_001008901 | GTSF1L    | 0 | NA | 0 | NA | 0 | NA | 0 | NA | 1 | 14 |
| 20 | 41789056 | 41788214 | -1 | NM_176791    | GTSF1L    | 0 | NA | 0 | NA | 0 | NA | 0 | NA | 1 | 14 |
| 20 | 41976905 | 42131668 | 1  | NM_001098797 | TOX2      | 0 | NA | 1 | 12 | 0 | NA | 1 | 12 | 1 | 18 |
| 20 | 41978195 | 42131668 | 1  | NM_001098796 | TOX2      | 1 | 11 | 1 | 12 | 0 | NA | 1 | 12 | 1 | 18 |
| 20 | 41978195 | 42131668 | 1  | NM_032883    | TOX2      | 1 | 11 | 1 | 12 | 0 | NA | 1 | 12 | 1 | 18 |
| 20 | 42007949 | 42131668 | 1  | NM_001098798 | TOX2      | 0 | NA | 0 | NA | 1 | 12 | 1 | 13 | 0 | NA |
| 20 | 42249632 | 42173750 | -1 | NM_020433    | JPH2      | 0 | NA | 0 | NA | 0 | NA | 0 | NA | 0 | NA |
| 20 | 42249632 | 42238870 | -1 | NM_175913    | JPH2      | 0 | NA | 0 | NA | 0 | NA | 0 | NA | 0 | NA |
| 20 | 42272845 | 42258549 | -1 | NM_016470    | C20orf111 | 0 | NA | 0 | NA | 0 | NA | 0 | NA | 0 | NA |
| 20 | 42309321 | 42342427 | 1  | NM_024034    | GDAP1L1   | 0 | NA | 0 | NA | 0 | NA | 0 | NA | 0 | NA |
| 20 | 42373303 | 42368610 | -1 | NM_001080472 | C20orf142 | 0 | NA | 0 | NA | 0 | NA | 0 | NA | 0 | NA |
| 20 | 42399039 | 42413289 | 1  | NM_178491    | R3HDML    | 0 | NA | 0 | NA | 0 | NA | 1 | 12 | 0 | NA |
| 20 | 42417854 | 42486433 | 1  | NM_001030004 | HNF4A     | 0 | NA | 0 | NA | 0 | NA | 0 | NA | 0 | NA |
| 20 | 42417854 | 42491725 | 1  | NM_001030003 | HNF4A     | 0 | NA | 0 | NA | 0 | NA | 0 | NA | 0 | NA |
| 20 | 42417854 | 42491725 | 1  | NM_175914    | HNF4A     | 0 | NA | 0 | NA | 0 | NA | 0 | NA | 0 | NA |
| 20 | 42463337 | 42486690 | 1  | NM_178850    | HNF4A     | 0 | NA | 1 | 13 | 0 | NA | 0 | NA | 0 | NA |
| 20 | 42463337 | 42493444 | 1  | NM_000457    | HNF4A     | 0 | NA | 1 | 13 | 0 | NA | 0 | NA | 0 | NA |
| 20 | 42463337 | 42493444 | 1  | NM_178849    | HNF4A     | 0 | NA | 1 | 13 | 0 | NA | 0 | NA | 0 | NA |
| 20 | 42537960 | 42556658 | 1  | NM_001039199 | C20orf121 | 0 | NA | 0 | NA | 0 | NA | 0 | NA | 0 | NA |
| 20 | 42537960 | 42556658 | 1  | NM_024331    | C20orf121 | 0 | NA | 0 | NA | 0 | NA | 0 | NA | 0 | NA |
| 20 | 42584140 | 42558277 | -1 | NM_198941    | SERINC3   | 0 | NA | 0 | NA | 0 | NA | 0 | NA | 0 | NA |
| 20 | 42584140 | 42561314 | -1 | NM_006811    | SERINC3   | 0 | NA | 0 | NA | 0 | NA | 0 | NA | 0 | NA |
| 20 | 42593849 | 42681092 | 1  | NM_007066    | PKIG      | 0 | NA | 0 | NA | 1 | 12 | 0 | NA | 0 | NA |
| 20 | 42593849 | 42681092 | 1  | NM_181804    | PKIG      | 0 | NA | 0 | NA | 1 | 12 | 0 | NA | 0 | NA |
| 20 | 42593849 | 42681092 | 1  | NM_181805    | PKIG      | 0 | NA | 0 | NA | 1 | 12 | 0 | NA | 0 | NA |
| 20 | 42713790 | 42681576 | -1 | NM_000022    | ADA       | 0 | NA | 0 | NA | 1 | 12 | 0 | NA | 1 | 15 |
| 20 | 42777298 | 42789866 | 1  | NM_003881    | WISP2     | 1 | 14 | 0 | NA | 0 | NA | 0 | NA | 0 | NA |
| 20 | 42807901 | 42813082 | 1  | NM_022358    | KCNK15    | 0 | NA | 1 | 12 | 0 | NA | 0 | NA | 0 | NA |
| 20 | 42872326 | 42813862 | -1 | NM_182970    | RIMS4     | 0 | NA | 1 | 22 | 0 | NA | 0 | NA | 1 | 25 |
| 20 | 42947757 | 42970575 | 1  | NM_003404    | YWHAB     | 1 | 13 | 0 | NA | 0 | NA | 0 | NA | 0 | NA |
| 20 | 42947757 | 42970575 | 1  | NM_139323    | YWHAB     | 1 | 13 | 0 | NA | 0 | NA | 0 | NA | 0 | NA |
| 20 | 42972116 | 43001376 | 1  | NM_001124756 | PABPC1L   | 0 | NA | 0 | NA | 1 | 13 | 0 | NA | 0 | NA |
| 20 | 43022528 | 43004184 | -1 | NM_006809    | TOMM34    | 0 | NA | 0 | NA | 0 | NA | 1 | 14 | 0 | NA |
| 20 | 43028533 | 43142007 | 1  | NM_006282    | STK4      | 0 | NA | 0 | NA | 0 | NA | 1 | 14 | 0 | NA |
| 20 | 43163167 | 43154383 | -1 | NM_002251    | KCNS1     | 1 | 11 | 1 | 15 | 0 | NA | 1 | 11 | 0 | NA |
| 20 | 43177217 | 43171506 | -1 | NM_145652    | WFDC5     | 0 | NA | 1 | 13 | 0 | NA | 1 | 11 | 0 | NA |
| 20 | 43186520 | 43185480 | -1 | NM_080869    | WFDC12    | 0 | NA | 1 | 13 | 0 | NA | 0 | NA | 0 | NA |
| 20 | 43236911 | 43238599 | 1  | NM_002638    | PI3       | 0 | NA | 1 | 15 | 0 | NA | 0 | NA | 1 | 15 |

|    |          |          |    |              |           |   |    |   |    |   |    |   |    |   |    |
|----|----------|----------|----|--------------|-----------|---|----|---|----|---|----|---|----|---|----|
| 20 | 43269087 | 43271823 | 1  | NM_003007    | SEMG1     | 0 | NA | 1 | 12 | 0 | NA | 0 | NA | 0 | NA |
| 20 | 43269087 | 43271823 | 1  | NM_198139    | SEMG1     | 0 | NA | 1 | 12 | 0 | NA | 0 | NA | 0 | NA |
| 20 | 43283423 | 43286513 | 1  | NM_003008    | SEMG2     | 0 | NA | 0 | NA | 0 | NA | 1 | 13 | 1 | 12 |
| 20 | 43316620 | 43314292 | -1 | NM_003064    | SLPI      | 0 | NA | 0 | NA | 0 | NA | 0 | NA | 1 | 14 |
| 20 | 43367645 | 43355500 | -1 | NM_003833    | MATN4     | 1 | 11 | 0 | NA | 0 | NA | 0 | NA | 0 | NA |
| 20 | 43367645 | 43355500 | -1 | NM_030590    | MATN4     | 1 | 11 | 0 | NA | 0 | NA | 0 | NA | 0 | NA |
| 20 | 43367645 | 43355500 | -1 | NM_030592    | MATN4     | 1 | 11 | 0 | NA | 0 | NA | 0 | NA | 0 | NA |
| 20 | 43368904 | 43379878 | 1  | NM_014276    | RBPJL     | 1 | 11 | 0 | NA | 0 | NA | 0 | NA | 0 | NA |
| 20 | 43410478 | 43387342 | -1 | NM_002999    | SDC4      | 1 | 15 | 0 | NA | 1 | 13 | 0 | NA | 0 | NA |
| 20 | 43425114 | 43431263 | 1  | NM_033542    | SYS1      | 0 | NA | 0 | NA | 0 | NA | 0 | NA | 0 | NA |
| 20 | 43440371 | 43435933 | -1 | NM_014477    | C20orf10  | 0 | NA | 0 | NA | 0 | NA | 0 | NA | 0 | NA |
| 20 | 43468084 | 43472661 | 1  | NM_001048221 | DBNDD2    | 0 | NA | 0 | NA | 0 | NA | 1 | 40 | 0 | NA |
| 20 | 43468084 | 43472661 | 1  | NM_001048222 | DBNDD2    | 0 | NA | 0 | NA | 0 | NA | 1 | 40 | 0 | NA |
| 20 | 43468650 | 43472661 | 1  | NM_001048223 | DBNDD2    | 0 | NA | 0 | NA | 0 | NA | 1 | 40 | 0 | NA |
| 20 | 43468650 | 43472661 | 1  | NM_001048224 | DBNDD2    | 0 | NA | 0 | NA | 0 | NA | 1 | 40 | 0 | NA |
| 20 | 43470328 | 43472661 | 1  | NM_001048225 | DBNDD2    | 0 | NA | 0 | NA | 0 | NA | 1 | 40 | 0 | NA |
| 20 | 43470328 | 43472661 | 1  | NM_001048226 | DBNDD2    | 0 | NA | 0 | NA | 0 | NA | 1 | 40 | 0 | NA |
| 20 | 43478137 | 43488298 | 1  | NM_015937    | PIGT      | 0 | NA | 0 | NA | 0 | NA | 0 | NA | 0 | NA |
| 20 | 43531807 | 43543586 | 1  | NM_006103    | WFDC2     | 0 | NA | 0 | NA | 0 | NA | 0 | NA | 1 | 16 |
| 20 | 43601548 | 43596249 | -1 | NM_080827    | WFDC6     | 0 | NA | 0 | NA | 0 | NA | 0 | NA | 0 | NA |
| 20 | 43608430 | 43602678 | -1 | NM_181502    | SPINLW1   | 0 | NA | 0 | NA | 0 | NA | 0 | NA | 0 | NA |
| 20 | 43609442 | 43602678 | -1 | NM_020398    | SPINLW1   | 0 | NA | 0 | NA | 0 | NA | 0 | NA | 0 | NA |
| 20 | 43641379 | 43613204 | -1 | NM_181510    | WFDC8     | 0 | NA | 0 | NA | 0 | NA | 0 | NA | 1 | 12 |
| 20 | 43641379 | 43613814 | -1 | NM_130896    | WFDC8     | 0 | NA | 0 | NA | 0 | NA | 0 | NA | 1 | 12 |
| 20 | 43691798 | 43693245 | 1  | NM_080753    | WFDC10A   | 0 | NA | 0 | NA | 0 | NA | 0 | NA | 0 | NA |
| 20 | 43693321 | 43669991 | -1 | NM_147198    | WFDC9     | 0 | NA | 0 | NA | 0 | NA | 0 | NA | 0 | NA |
| 20 | 43732292 | 43710615 | -1 | NM_147197    | WFDC11    | 0 | NA | 0 | NA | 0 | NA | 0 | NA | 0 | NA |
| 20 | 43764068 | 43770870 | 1  | NM_172005    | WFDC13    | 0 | NA | 0 | NA | 0 | NA | 0 | NA | 1 | 15 |
| 20 | 43767072 | 43746703 | -1 | NM_172006    | WFDC10B   | 0 | NA | 0 | NA | 0 | NA | 0 | NA | 1 | 15 |
| 20 | 43767072 | 43746703 | -1 | NM_172131    | WFDC10B   | 0 | NA | 0 | NA | 0 | NA | 0 | NA | 1 | 15 |
| 20 | 43784401 | 43787749 | 1  | NM_178455    | SPINT4    | 0 | NA | 0 | NA | 0 | NA | 0 | NA | 1 | 12 |
| 20 | 43853954 | 43836253 | -1 | NM_080614    | WFDC3     | 0 | NA | 0 | NA | 1 | 12 | 0 | NA | 0 | NA |
| 20 | 43853982 | 43873473 | 1  | NM_052951    | DNTTIP1   | 0 | NA | 0 | NA | 1 | 12 | 0 | NA | 0 | NA |
| 20 | 43874661 | 43879003 | 1  | NM_007019    | UBE2C     | 0 | NA | 0 | NA | 0 | NA | 0 | NA | 0 | NA |
| 20 | 43874661 | 43879003 | 1  | NM_181799    | UBE2C     | 0 | NA | 0 | NA | 0 | NA | 0 | NA | 0 | NA |
| 20 | 43874661 | 43879003 | 1  | NM_181800    | UBE2C     | 0 | NA | 0 | NA | 0 | NA | 0 | NA | 0 | NA |
| 20 | 43874661 | 43879003 | 1  | NM_181802    | UBE2C     | 0 | NA | 0 | NA | 0 | NA | 0 | NA | 0 | NA |
| 20 | 43874661 | 43879003 | 1  | NM_181803    | UBE2C     | 0 | NA | 0 | NA | 0 | NA | 0 | NA | 0 | NA |
| 20 | 43875060 | 43879003 | 1  | NM_181801    | UBE2C     | 0 | NA | 0 | NA | 0 | NA | 0 | NA | 0 | NA |
| 20 | 43889360 | 43885261 | -1 | NM_003279    | TNC2      | 0 | NA | 0 | NA | 0 | NA | 0 | NA | 1 | 12 |
| 20 | 43895876 | 43905321 | 1  | NM_001042632 | SNX21     | 0 | NA | 0 | NA | 0 | NA | 0 | NA | 1 | 12 |
| 20 | 43895876 | 43905321 | 1  | NM_001042633 | SNX21     | 0 | NA | 0 | NA | 0 | NA | 0 | NA | 1 | 12 |
| 20 | 43895876 | 43905321 | 1  | NM_033421    | SNX21     | 0 | NA | 0 | NA | 0 | NA | 0 | NA | 1 | 12 |
| 20 | 43895876 | 43905321 | 1  | NM_152897    | SNX21     | 0 | NA | 0 | NA | 0 | NA | 0 | NA | 1 | 12 |
| 20 | 43919442 | 43903767 | -1 | NM_005469    | ACOT8     | 0 | NA | 0 | NA | 0 | NA | 0 | NA | 0 | NA |
| 20 | 43919442 | 43903767 | -1 | NM_183386    | ACOT8     | 0 | NA | 0 | NA | 0 | NA | 0 | NA | 0 | NA |
| 20 | 43919668 | 43941176 | 1  | NM_080752    | ZSWIM3    | 0 | NA | 0 | NA | 0 | NA | 0 | NA | 0 | NA |
| 20 | 43943286 | 43947312 | 1  | NM_080603    | ZSWIM1    | 0 | NA | 0 | NA | 0 | NA | 0 | NA | 0 | NA |
| 20 | 43949645 | 43948536 | -1 | NM_080608    | C20orf165 | 0 | NA | 0 | NA | 0 | NA | 0 | NA | 0 | NA |
| 20 | 43952997 | 43960865 | 1  | NM_000308    | CTSA      | 0 | NA | 0 | NA | 0 | NA | 0 | NA | 0 | NA |
| 20 | 43953308 | 43950673 | -1 | NM_080749    | NEURL2    | 0 | NA | 0 | NA | 0 | NA | 0 | NA | 0 | NA |
| 20 | 43974193 | 43960803 | -1 | NM_006227    | PLTP      | 1 | 11 | 0 | NA | 1 | 12 | 0 | NA | 0 | NA |
| 20 | 43974193 | 43960803 | -1 | NM_182676    | PLTP      | 1 | 11 | 0 | NA | 1 | 12 | 0 | NA | 0 | NA |
| 20 | 43996723 | 44010069 | 1  | NM_022104    | PCIF1     | 0 | NA | 0 | NA | 0 | NA | 1 | 14 | 0 | NA |
| 20 | 44034240 | 44010698 | -1 | NM_022095    | ZNF335    | 1 | 27 | 0 | NA | 1 | 19 | 0 | NA | 1 | 12 |
| 20 | 44070953 | 44078607 | 1  | NM_004994    | MMP9      | 0 | NA | 1 | 16 | 0 | NA | 0 | NA | 0 | NA |
| 20 | 44091244 | 44122196 | 1  | NM_020708    | SLC12A5   | 0 | NA | 1 | 14 | 0 | NA | 0 | NA | 0 | NA |
| 20 | 44151987 | 44123032 | -1 | NM_020967    | NCOA5     | 0 | NA | 0 | NA | 0 | NA | 1 | 24 | 0 | NA |
| 20 | 44180312 | 44191791 | 1  | NM_001250    | CD40      | 0 | NA | 1 | 12 | 0 | NA | 0 | NA | 1 | 12 |
| 20 | 44180312 | 44191791 | 1  | NM_152854    | CD40      | 0 | NA | 1 | 12 | 0 | NA | 0 | NA | 1 | 12 |
| 20 | 44313741 | 44235782 | -1 | NM_021248    | CDH22     | 0 | NA | 0 | NA | 0 | NA | 0 | NA | 0 | NA |
| 20 | 44426471 | 44411583 | -1 | NM_015945    | SLC35C2   | 1 | 22 | 0 | NA | 1 | 14 | 0 | NA | 0 | NA |
| 20 | 44426471 | 44411583 | -1 | NM_173073    | SLC35C2   | 1 | 22 | 0 | NA | 1 | 14 | 0 | NA | 0 | NA |
| 20 | 44426471 | 44411583 | -1 | NM_173179    | SLC35C2   | 1 | 22 | 0 | NA | 1 | 14 | 0 | NA | 0 | NA |
| 20 | 44468678 | 44428096 | -1 | NM_133171    | ELMO2     | 1 | 13 | 0 | NA | 0 | NA | 0 | NA | 0 | NA |



|    |          |          |    |              |                |   |    |   |    |   |    |   |    |   |    |   |    |
|----|----------|----------|----|--------------|----------------|---|----|---|----|---|----|---|----|---|----|---|----|
| 20 | 44468678 | 44428096 | -1 | NM_182764    | ELMO2          | 1 | 13 | 0 | NA | 0 | NA | 0 | NA | 0 | NA | 0 | NA |
| 20 | 44575601 | 44563113 | -1 | NM_018102    | ZNF334         | 0 | NA | 1 | 20 | 1 | 14 | 1 | 11 | 0 | NA | 0 | NA |
| 20 | 44575601 | 44563113 | -1 | NM_199441    | ZNF334         | 0 | NA | 1 | 20 | 1 | 14 | 1 | 11 | 0 | NA | 0 | NA |
| 20 | 44713505 | 44619869 | -1 | NM_022829    | SLC13A3        | 0 | NA | 0 | NA | 0 | NA | 0 | NA | 0 | NA | 0 | NA |
| 20 | 44746514 | 44619869 | -1 | NM_001011554 | SLC13A3        | 0 | NA | 0 | NA | 0 | NA | 0 | NA | 0 | NA | 0 | NA |
| 20 | 44751683 | 44746410 | -1 | NM_033550    | TP53RK         | 1 | 20 | 0 | NA | 0 | NA | 0 | NA | 0 | NA | 0 | NA |
| 20 | 44771685 | 44798392 | 1  | NM_030777    | SLC2A10        | 1 | 20 | 1 | 14 | 1 | 12 | 0 | NA | 0 | NA | 0 | NA |
| 20 | 44956915 | 45250899 | 1  | NM_005244    | EYA2           | 0 | NA | 0 | NA | 0 | NA | 0 | NA | 0 | NA | 1 | 13 |
| 20 | 44956915 | 45250899 | 1  | NM_172110    | EYA2           | 0 | NA | 0 | NA | 0 | NA | 0 | NA | 0 | NA | 1 | 13 |
| 20 | 45040280 | 45250899 | 1  | NM_172113    | EYA2           | 0 | NA | 0 | NA | 0 | NA | 0 | NA | 0 | NA | 0 | NA |
| 20 | 45041528 | 45250899 | 1  | NM_172111    | EYA2           | 0 | NA | 0 | NA | 0 | NA | 0 | NA | 0 | NA | 0 | NA |
| 20 | 45041737 | 45250899 | 1  | NM_172112    | EYA2           | 0 | NA | 0 | NA | 0 | NA | 0 | NA | 0 | NA | 0 | NA |
| 20 | 45418881 | 45271787 | -1 | NM_012408    | ZMYND8         | 1 | 15 | 0 | NA | 1 | 13 | 1 | 14 | 0 | NA | 0 | NA |
| 20 | 45418881 | 45271787 | -1 | NM_183047    | ZMYND8         | 1 | 15 | 0 | NA | 1 | 13 | 1 | 14 | 0 | NA | 0 | NA |
| 20 | 45418881 | 45271787 | -1 | NM_183048    | ZMYND8         | 1 | 15 | 0 | NA | 1 | 13 | 1 | 14 | 0 | NA | 0 | NA |
| 20 | 45564063 | 45719021 | 1  | NM_006534    | NCOA3          | 0 | NA | 0 | NA | 0 | NA | 1 | 17 | 0 | NA | 0 | NA |
| 20 | 45564063 | 45719021 | 1  | NM_181659    | NCOA3          | 0 | NA | 0 | NA | 0 | NA | 1 | 17 | 0 | NA | 0 | NA |
| 20 | 45848215 | 45719558 | -1 | NM_018837    | SULF2          | 0 | NA | 1 | 13 | 0 | NA | 0 | NA | 0 | NA | 0 | NA |
| 20 | 45848215 | 45719558 | -1 | NM_198596    | SULF2          | 0 | NA | 1 | 13 | 0 | NA | 0 | NA | 0 | NA | 0 | NA |
| 20 | 46877827 | 46674199 | -1 | NM_020820    | PREX1          | 0 | NA | 0 | NA | 0 | NA | 1 | 14 | 0 | NA | 0 | NA |
| 20 | 46971681 | 47086637 | 1  | NM_006420    | ARFGEF2        | 0 | NA | 0 | NA | 1 | 13 | 0 | NA | 0 | NA | 0 | NA |
| 20 | 47096244 | 47146893 | 1  | NM_001316    | CSE1L          | 0 | NA | 0 | NA | 0 | NA | 0 | NA | 0 | NA | 0 | NA |
| 20 | 47238311 | 47163282 | -1 | NM_001037328 | STAU1          | 1 | 12 | 0 | NA | 0 | NA | 0 | NA | 0 | NA | 0 | NA |
| 20 | 47238311 | 47163282 | -1 | NM_004602    | STAU1          | 1 | 12 | 0 | NA | 0 | NA | 0 | NA | 0 | NA | 0 | NA |
| 20 | 47238311 | 47163282 | -1 | NM_017452    | STAU1          | 1 | 12 | 0 | NA | 0 | NA | 0 | NA | 0 | NA | 0 | NA |
| 20 | 47238311 | 47163282 | -1 | NM_017453    | STAU1          | 1 | 12 | 0 | NA | 0 | NA | 0 | NA | 0 | NA | 0 | NA |
| 20 | 47238311 | 47163282 | -1 | NM_017454    | STAU1          | 1 | 12 | 0 | NA | 0 | NA | 0 | NA | 0 | NA | 0 | NA |
| 20 | 47269290 | 47294021 | 1  | NM_017895    | DDX27          | 0 | NA | 0 | NA | 0 | NA | 0 | NA | 0 | NA | 0 | NA |
| 20 | 47328163 | 47295845 | -1 | NM_021035    | ZNFX1          | 1 | 45 | 1 | 26 | 1 | 12 | 1 | 13 | 1 | 12 | 0 | NA |
| 20 | 47532588 | 47421911 | -1 | NM_004975    | KCNB1          | 0 | NA | 0 | NA | 0 | NA | 0 | NA | 0 | NA | 0 | NA |
| 20 | 47618114 | 47553817 | -1 | NM_000961    | PTGIS          | 0 | NA | 0 | NA | 0 | NA | 0 | NA | 1 | 12 | 0 | NA |
| 20 | 47763828 | 47682889 | -1 | NM_004776    | B4GALT5        | 0 | NA | 0 | NA | 0 | NA | 1 | 14 | 0 | NA | 0 | NA |
| 20 | 47862656 | 47942179 | 1  | NM_015266    | SLC9A8         | 0 | NA | 0 | NA | 0 | NA | 0 | NA | 0 | NA | 0 | NA |
| 20 | 47965475 | 47953335 | -1 | NM_006038    | SPATA2         | 0 | NA | 0 | NA | 0 | NA | 1 | 12 | 0 | NA | 0 | NA |
| 20 | 47986320 | 48003829 | 1  | NM_018683    | ZNF313         | 0 | NA | 0 | NA | 0 | NA | 0 | NA | 0 | NA | 0 | NA |
| 20 | 48032933 | 48038827 | 1  | NM_005985    | SNAI1          | 1 | 12 | 0 | NA | 1 | 22 | 1 | 11 | 0 | NA | 0 | NA |
| 20 | 48163117 | 48131067 | -1 | NM_001032288 | UBE2V1         | 0 | NA | 0 | NA | 0 | NA | 1 | 11 | 0 | NA | 0 | NA |
| 20 | 48165898 | 48131067 | -1 | NM_022442    | UBE2V1         | 0 | NA | 0 | NA | 0 | NA | 1 | 13 | 0 | NA | 0 | NA |
| 20 | 48165901 | 48131067 | -1 | NM_021988    | UBE2V1         | 0 | NA | 0 | NA | 0 | NA | 1 | 13 | 0 | NA | 0 | NA |
| 20 | 48165901 | 48131067 | -1 | NM_199144    | UBE2V1         | 0 | NA | 0 | NA | 0 | NA | 1 | 13 | 0 | NA | 0 | NA |
| 20 | 48179589 | 48131067 | -1 | NM_003349    | TMEM189-UBE2V1 | 0 | NA | 0 | NA | 0 | NA | 0 | NA | 0 | NA | 0 | NA |
| 20 | 48203667 | 48131067 | -1 | NM_199203    | TMEM189-UBE2V1 | 0 | NA | 0 | NA | 0 | NA | 0 | NA | 0 | NA | 0 | NA |
| 20 | 48203667 | 48173714 | -1 | NM_199129    | TMEM189        | 0 | NA | 0 | NA | 0 | NA | 0 | NA | 0 | NA | 0 | NA |
| 20 | 48240782 | 48242619 | 1  | NM_005194    | CEBPB          | 0 | NA | 0 | NA | 0 | NA | 0 | NA | 0 | NA | 0 | NA |
| 20 | 48560297 | 48634493 | 1  | NM_002827    | PTPN1          | 0 | NA | 0 | NA | 1 | 13 | 0 | NA | 0 | NA | 0 | NA |
| 20 | 48686833 | 48636052 | -1 | NM_080829    | C20orf175      | 0 | NA | 0 | NA | 0 | NA | 0 | NA | 0 | NA | 0 | NA |
| 20 | 48781487 | 48803685 | 1  | NM_032521    | PARDB6         | 1 | 11 | 0 | NA | 1 | 17 | 1 | 17 | 0 | NA | 0 | NA |
| 20 | 48844873 | 48927121 | 1  | NM_001010974 | BCAS4          | 0 | NA | 0 | NA | 0 | NA | 0 | NA | 0 | NA | 0 | NA |
| 20 | 48844873 | 48927121 | 1  | NM_017843    | BCAS4          | 0 | NA | 0 | NA | 0 | NA | 0 | NA | 0 | NA | 0 | NA |
| 20 | 48844873 | 48927121 | 1  | NM_198799    | BCAS4          | 0 | NA | 0 | NA | 0 | NA | 0 | NA | 0 | NA | 0 | NA |
| 20 | 48980934 | 48940289 | -1 | NM_015339    | ADNP           | 0 | NA | 0 | NA | 0 | NA | 0 | NA | 0 | NA | 0 | NA |
| 20 | 48980934 | 48940289 | -1 | NM_181442    | ADNP           | 0 | NA | 0 | NA | 0 | NA | 0 | NA | 0 | NA | 0 | NA |
| 20 | 49008467 | 48984811 | -1 | NM_003859    | DPM1           | 0 | NA | 0 | NA | 0 | NA | 0 | NA | 0 | NA | 0 | NA |
| 20 | 49008769 | 49011227 | 1  | NM_014484    | MOCS3          | 0 | NA | 0 | NA | 0 | NA | 0 | NA | 0 | NA | 0 | NA |
| 20 | 49073082 | 49053599 | -1 | NM_002237    | KCNG1          | 0 | NA | 1 | 12 | 0 | NA | 0 | NA | 1 | 12 | 0 | NA |
| 20 | 49592665 | 49441171 | -1 | NM_012340    | NFATC2         | 0 | NA | 0 | NA | 0 | NA | 0 | NA | 0 | NA | 0 | NA |
| 20 | 49592665 | 49441171 | -1 | NM_173091    | NFATC2         | 0 | NA | 0 | NA | 0 | NA | 0 | NA | 0 | NA | 0 | NA |
| 20 | 49818315 | 49646720 | -1 | NM_006045    | ATP9A          | 0 | NA | 0 | NA | 0 | NA | 0 | NA | 0 | NA | 0 | NA |
| 20 | 49852455 | 49833989 | -1 | NM_020436    | SALL4          | 1 | 17 | 0 | NA | 0 | NA | 0 | NA | 0 | NA | 0 | NA |
| 20 | 50241931 | 50133956 | -1 | NM_199427    | ZFP64          | 0 | NA | 0 | NA | 0 | NA | 0 | NA | 0 | NA | 0 | NA |
| 20 | 50241931 | 50201223 | -1 | NM_018197    | ZFP64          | 0 | NA | 0 | NA | 0 | NA | 0 | NA | 0 | NA | 0 | NA |
| 20 | 50241931 | 50201223 | -1 | NM_022088    | ZFP64          | 0 | NA | 0 | NA | 0 | NA | 0 | NA | 0 | NA | 0 | NA |
| 20 | 50241931 | 50201223 | -1 | NM_199426    | ZFP64          | 0 | NA | 0 | NA | 0 | NA | 0 | NA | 0 | NA | 0 | NA |
| 20 | 51022283 | 51537372 | 1  | NM_173485    | TSH22          | 0 | NA | 1 | 13 | 0 | NA | 0 | NA | 0 | NA | 0 | NA |
| 20 | 51633043 | 51617016 | -1 | NM_006526    | ZNF217         | 1 | 11 | 0 | NA | 0 | NA | 0 | NA | 0 | NA | 0 | NA |

|    |          |          |    |              |           |   |    |   |    |   |    |   |    |   |    |
|----|----------|----------|----|--------------|-----------|---|----|---|----|---|----|---|----|---|----|
| 20 | 52120490 | 51993923 | -1 | NM_003657    | BCAS1     | 0 | NA | 0 | NA | 0 | NA | 0 | NA | 0 | NA |
| 20 | 52223931 | 52203394 | -1 | NM_000782    | CYP24A1   | 0 | NA | 1 | 24 | 0 | NA | 0 | NA | 1 | 25 |
| 20 | 52257908 | 52269899 | 1  | NM_002623    | PFDN4     | 1 | 17 | 0 | NA | 0 | NA | 0 | NA | 0 | NA |
| 20 | 52525672 | 52701117 | 1  | NM_018431    | DOK5      | 0 | NA | 0 | NA | 0 | NA | 0 | NA | 1 | 14 |
| 20 | 54013419 | 54005902 | -1 | NM_080617    | CBLN4     | 0 | NA | 0 | NA | 0 | NA | 0 | NA | 1 | 21 |
| 20 | 54257194 | 54258278 | 1  | NM_019888    | MC3R      | 0 | NA | 1 | 14 | 0 | NA | 0 | NA | 1 | 21 |
| 20 | 54367389 | 54377125 | 1  | NM_080821    | C20orf108 | 0 | NA | 0 | NA | 0 | NA | 0 | NA | 0 | NA |
| 20 | 54400758 | 54377851 | -1 | NM_003600    | AURKA     | 0 | NA | 0 | NA | 0 | NA | 0 | NA | 0 | NA |
| 20 | 54400758 | 54377851 | -1 | NM_198433    | AURKA     | 0 | NA | 0 | NA | 0 | NA | 0 | NA | 0 | NA |
| 20 | 54400758 | 54377851 | -1 | NM_198434    | AURKA     | 0 | NA | 0 | NA | 0 | NA | 0 | NA | 0 | NA |
| 20 | 54400758 | 54377851 | -1 | NM_198435    | AURKA     | 0 | NA | 0 | NA | 0 | NA | 0 | NA | 0 | NA |
| 20 | 54400758 | 54377851 | -1 | NM_198436    | AURKA     | 0 | NA | 0 | NA | 0 | NA | 0 | NA | 0 | NA |
| 20 | 54400758 | 54377851 | -1 | NM_198437    | AURKA     | 0 | NA | 0 | NA | 0 | NA | 0 | NA | 0 | NA |
| 20 | 54400833 | 54412989 | 1  | NM_001033521 | CSTF1     | 0 | NA | 0 | NA | 0 | NA | 0 | NA | 0 | NA |
| 20 | 54400980 | 54412989 | 1  | NM_001324    | CSTF1     | 0 | NA | 0 | NA | 0 | NA | 0 | NA | 0 | NA |
| 20 | 54401113 | 54412989 | 1  | NM_001033522 | CSTF1     | 0 | NA | 0 | NA | 0 | NA | 0 | NA | 0 | NA |
| 20 | 54420770 | 54467243 | 1  | NM_020356    | CASS4     | 0 | NA | 0 | NA | 0 | NA | 0 | NA | 0 | NA |
| 20 | 54477091 | 54527343 | 1  | NM_016407    | C20orf43  | 0 | NA | 0 | NA | 1 | 14 | 0 | NA | 0 | NA |
| 20 | 54532954 | 54534605 | 1  | NM_001012971 | C20orf106 | 0 | NA | 1 | 20 | 0 | NA | 0 | NA | 0 | NA |
| 20 | 54541708 | 54544983 | 1  | NM_001013646 | C20orf107 | 0 | NA | 0 | NA | 0 | NA | 0 | NA | 0 | NA |
| 20 | 54637764 | 54647745 | 1  | NM_003222    | TFAP2C    | 1 | 14 | 0 | NA | 0 | NA | 0 | NA | 0 | NA |
| 20 | 55275114 | 55177215 | -1 | NM_001719    | BMP7      | 0 | NA | 0 | NA | 0 | NA | 0 | NA | 0 | NA |
| 20 | 55338237 | 55352456 | 1  | NM_012444    | SPO11     | 0 | NA | 0 | NA | 0 | NA | 0 | NA | 0 | NA |
| 20 | 55338237 | 55352456 | 1  | NM_198265    | SPO11     | 0 | NA | 0 | NA | 0 | NA | 0 | NA | 0 | NA |
| 20 | 55359551 | 55386926 | 1  | NM_003610    | RAE1      | 0 | NA | 0 | NA | 0 | NA | 0 | NA | 0 | NA |
| 20 | 55360024 | 55386926 | 1  | NM_001015885 | RAE1      | 0 | NA | 0 | NA | 0 | NA | 0 | NA | 0 | NA |
| 20 | 55399869 | 55417792 | 1  | NM_017495    | RBM38     | 0 | NA | 0 | NA | 0 | NA | 0 | NA | 0 | NA |
| 20 | 55399869 | 55417792 | 1  | NM_183425    | RBM38     | 0 | NA | 0 | NA | 0 | NA | 0 | NA | 0 | NA |
| 20 | 55497489 | 55496853 | -1 | NM_001008735 | HMG1L1    | 0 | NA | 0 | NA | 0 | NA | 0 | NA | 1 | 14 |
| 20 | 55533560 | 55505629 | -1 | NM_080618    | CTCF1     | 0 | NA | 1 | 14 | 0 | NA | 0 | NA | 1 | 15 |
| 20 | 55569542 | 55574919 | 1  | NM_002591    | PCK1      | 0 | NA | 1 | 12 | 0 | NA | 0 | NA | 1 | 14 |
| 20 | 55628935 | 55612307 | -1 | NM_030776    | ZBP1      | 0 | NA | 0 | NA | 0 | NA | 0 | NA | 0 | NA |
| 20 | 55718437 | 55656857 | -1 | NM_020182    | PMEPA1    | 0 | NA | 0 | NA | 0 | NA | 0 | NA | 0 | NA |
| 20 | 55719031 | 55656857 | -1 | NM_199169    | PMEPA1    | 0 | NA | 0 | NA | 0 | NA | 0 | NA | 0 | NA |
| 20 | 55719031 | 55656857 | -1 | NM_199170    | PMEPA1    | 0 | NA | 0 | NA | 0 | NA | 0 | NA | 0 | NA |
| 20 | 55719947 | 55656857 | -1 | NM_199171    | PMEPA1    | 0 | NA | 0 | NA | 0 | NA | 0 | NA | 0 | NA |
| 20 | 56159388 | 56169589 | 1  | NM_178456    | C20orf85  | 0 | NA | 1 | 16 | 0 | NA | 0 | NA | 1 | 18 |
| 20 | 56318176 | 56375969 | 1  | NM_020673    | RAB22A    | 0 | NA | 0 | NA | 0 | NA | 0 | NA | 0 | NA |
| 20 | 56397650 | 56455369 | 1  | NM_004738    | VAPB      | 1 | 11 | 1 | 12 | 1 | 14 | 0 | NA | 1 | 13 |
| 20 | 56523355 | 56467831 | -1 | NM_153360    | APCDD1L   | 0 | NA | 1 | 15 | 1 | 12 | 0 | NA | 0 | NA |
| 20 | 56659733 | 56687988 | 1  | NM_001001433 | STX16     | 1 | 16 | 0 | NA | 0 | NA | 1 | 14 | 0 | NA |
| 20 | 56659733 | 56687988 | 1  | NM_003763    | STX16     | 1 | 16 | 0 | NA | 0 | NA | 1 | 14 | 0 | NA |
| 20 | 56701267 | 56724307 | 1  | NM_024663    | NPEPL1    | 0 | NA | 1 | 16 | 0 | NA | 0 | NA | 1 | 15 |
| 20 | 56848189 | 56919645 | 1  | NM_016592    | GNAS      | 1 | 19 | 1 | 16 | 1 | 21 | 0 | NA | 0 | NA |
| 20 | 56861430 | 56919645 | 1  | NM_001077490 | GNAS      | 0 | NA | 1 | 15 | 0 | NA | 0 | NA | 1 | 12 |
| 20 | 56861430 | 56919645 | 1  | NM_080425    | GNAS      | 0 | NA | 1 | 15 | 0 | NA | 0 | NA | 1 | 12 |
| 20 | 56899819 | 56919645 | 1  | NM_001077489 | GNAS      | 0 | NA | 0 | NA | 0 | NA | 0 | NA | 0 | NA |
| 20 | 56899820 | 56919645 | 1  | NM_000516    | GNAS      | 0 | NA | 0 | NA | 0 | NA | 0 | NA | 0 | NA |
| 20 | 56899820 | 56919645 | 1  | NM_080426    | GNAS      | 0 | NA | 0 | NA | 0 | NA | 0 | NA | 0 | NA |
| 20 | 56900163 | 56919645 | 1  | NM_001077488 | GNAS      | 0 | NA | 0 | NA | 0 | NA | 0 | NA | 0 | NA |
| 20 | 56989705 | 57003583 | 1  | NM_198976    | TH1L      | 0 | NA | 0 | NA | 0 | NA | 0 | NA | 0 | NA |
| 20 | 57015680 | 57003634 | -1 | NM_001336    | CTSZ      | 1 | 12 | 0 | NA | 1 | 13 | 0 | NA | 0 | NA |
| 20 | 57027703 | 57035104 | 1  | NM_030773    | TUBB1     | 1 | 15 | 0 | NA | 1 | 14 | 0 | NA | 0 | NA |
| 20 | 57040795 | 57037127 | -1 | NM_006886    | ATP5E     | 0 | NA | 0 | NA | 1 | 14 | 1 | 14 | 0 | NA |
| 20 | 57040817 | 57037127 | -1 | NM_001001977 | ATP5E     | 0 | NA | 0 | NA | 1 | 14 | 1 | 14 | 0 | NA |
| 20 | 57051296 | 57041594 | -1 | NM_016045    | SLMO2     | 0 | NA | 0 | NA | 0 | NA | 1 | 14 | 0 | NA |
| 20 | 57199469 | 57267562 | 1  | NM_178457    | ZNF831    | 0 | NA | 0 | NA | 0 | NA | 0 | NA | 1 | 12 |
| 20 | 57308893 | 57334442 | 1  | NM_000114    | EDN3      | 0 | NA | 0 | NA | 0 | NA | 0 | NA | 1 | 12 |
| 20 | 57308893 | 57334442 | 1  | NM_207032    | EDN3      | 0 | NA | 0 | NA | 0 | NA | 0 | NA | 1 | 12 |
| 20 | 57308893 | 57334442 | 1  | NM_207033    | EDN3      | 0 | NA | 0 | NA | 0 | NA | 0 | NA | 1 | 12 |
| 20 | 57308893 | 57334442 | 1  | NM_207034    | EDN3      | 0 | NA | 0 | NA | 0 | NA | 0 | NA | 1 | 12 |
| 20 | 57612997 | 57856161 | 1  | NM_080672    | PHACTR3   | 0 | NA | 1 | 12 | 0 | NA | 0 | NA | 0 | NA |
| 20 | 57729659 | 57856161 | 1  | NM_183244    | PHACTR3   | 0 | NA | 0 | NA | 1 | 12 | 0 | NA | 0 | NA |
| 20 | 57729659 | 57856161 | 1  | NM_183246    | PHACTR3   | 0 | NA | 0 | NA | 1 | 12 | 0 | NA | 0 | NA |
| 20 | 57940604 | 57872012 | -1 | NM_014258    | SYCP2     | 0 | NA | 0 | NA | 0 | NA | 0 | NA | 0 | NA |

|    |          |          |    |              |           |           |       |   |    |   |    |   |    |   |    |
|----|----------|----------|----|--------------|-----------|-----------|-------|---|----|---|----|---|----|---|----|
| 20 | 57948747 | 57945281 | -1 | NM_006242    | PPP1R3D   | 0         | NA    | 0 | NA | 0 | NA | 0 | NA | 0 | NA |
| 20 | 57948950 | 57955956 | 1  | NM_022106    | C20orf177 | 0         | NA    | 0 | NA | 0 | NA | 0 | NA | 0 | NA |
| 20 | 57966876 | 58021563 | 1  | NM_177980    | CDH26     | 0         | NA    | 0 | NA | 0 | NA | 0 | NA | 0 | NA |
| 20 | 58004823 | 58021563 | 1  | NM_021810    | CDH26     | 0         | NA    | 0 | NA | 0 | NA | 0 | NA | 0 | NA |
| 20 | 58064374 | 58081403 | 1  | NM_173644    | C20orf197 | 1         | 12    | 0 | NA | 0 | NA | 0 | NA | 0 | NA |
| 20 | 59260953 | 59945694 | 1  | NM_001794    | CDH4      | 0         | NA    | 0 | NA | 0 | NA | 0 | NA | 0 | NA |
| 20 | 60074261 | 59983248 | -1 | NM_003185    | TAF4      | 0         | NA    | 1 | 13 | 0 | NA | 1 | 11 | 0 | NA |
| 20 | 60130911 | 60143829 | 1  | NM_144703    | LSM14B    | 0         | NA    | 1 | 13 | 0 | NA | 1 | 12 | 1 | 17 |
| 20 | 60151869 | 60145185 | -1 | NM_002792    | PSMA7     | 0         | NA    | 0 | NA | 0 | NA | 1 | 15 | 0 | NA |
| 20 | 60152216 | 60190961 | 1  | NM_198935    | SS18L1    | 0         | NA    | 0 | NA | 0 | NA | 1 | 15 | 0 | NA |
| 20 | 60191475 | 60211205 | 1  | NM_015666    | GTPBP5    | 0         | NA    | 0 | NA | 0 | NA | 0 | NA | 0 | NA |
| 20 | 60228707 | 60223420 | -1 | NM_007232    | HRH3      | 0         | NA    | 1 | 13 | 0 | NA | 0 | NA | 1 | 12 |
| 20 | 60246974 | 60304664 | 1  | NM_014835    | OSBPL2    | 0         | NA    | 1 | 12 | 0 | NA | 0 | NA | 0 | NA |
| 20 | 60246974 | 60304664 | 1  | NM_144498    | OSBPL2    | 0         | NA    | 1 | 12 | 0 | NA | 0 | NA | 0 | NA |
| 20 | 60311421 | 60317313 | 1  | NM_007002    | ADRM1     | 0         | NA    | 0 | NA | 0 | NA | 1 | 20 | 0 | NA |
| 20 | 60311421 | 60317313 | 1  | NM_175573    | ADRM1     | 0         | NA    | 0 | NA | 0 | NA | 1 | 20 | 0 | NA |
| 20 | 60375763 | 60317515 | -1 | NM_005560    | LAMA5     | 0         | NA    | 0 | NA | 0 | NA | 0 | NA | 0 | NA |
| 20 | 60395515 | 60396971 | 1  | NM_001024    | RPS21     | 0         | NA    | 0 | NA | 0 | NA | 1 | 12 | 0 | NA |
| 20 | 60415734 | 60397080 | -1 | NM_031215    | CABLES2   | 0         | NA    | 0 | NA | 0 | NA | 0 | NA | 0 | NA |
| 20 | 60435984 | 60418687 | -1 | NM_080833    | C20orf151 | 0         | NA    | 1 | 12 | 0 | NA | 0 | NA | 1 | 13 |
| 20 | 60484421 | 60471947 | -1 | NM_080473    | GATA5     | 0         | NA    | 0 | NA | 0 | NA | 0 | NA | 0 | NA |
| 20 | 60558104 | 60578409 | 1  | NM_178463    | C20orf166 | 0         | NA    | 1 | 12 | 0 | NA | 0 | NA | 1 | 13 |
| 20 | 60559176 | 60552198 | -1 | NM_152757    | C20orf200 | 0         | NA    | 1 | 12 | 0 | NA | 0 | NA | 1 | 13 |
| 20 | 60744241 | 60774092 | 1  | NM_016354    | SLC04A1   | 1         | 17    | 0 | NA | 0 | NA | 1 | 18 | 0 | NA |
| 20 | 60810633 | 60864568 | 1  | NM_002531    | NTSR1     | 0         | NA    | 0 | NA | 1 | 12 | 0 | NA | 1 | 17 |
| 20 | 60898282 | 60902390 | 1  | NM_018270    | C20orf20  | 1         | 11    | 0 | NA | 0 | NA | 1 | 11 | 0 | NA |
| 20 | 60906621 | 60915797 | 1  | NM_007346    | OGFR      | 1         | 11    | 0 | NA | 0 | NA | 1 | 11 | 0 | NA |
| 20 | 60918858 | 60942956 | 1  | NM_001853    | COL3A3    | 1         | 13    | 0 | NA | 0 | NA | 0 | NA | 0 | NA |
| 20 | 60963560 | 60942911 | -1 | NM_006602    | TCFL5     | 0         | NA    | 0 | NA | 0 | NA | 1 | 14 | 1 | 17 |
| 20 | 61028290 | 61006799 | -1 | NM_080796    | DIDO1     | 0         | NA    | 0 | NA | 0 | NA | 0 | NA | 0 | NA |
| 20 | 61039719 | 60979534 | -1 | NM_033081    | DIDO1     | 0         | NA    | 0 | NA | 0 | NA | 0 | NA | 1 | 12 |
| 20 | 61039719 | 60989013 | -1 | NM_080797    | DIDO1     | 0         | NA    | 0 | NA | 0 | NA | 0 | NA | 1 | 12 |
| 20 | 61039719 | 61006799 | -1 | NM_022105    | DIDO1     | 0         | NA    | 0 | NA | 0 | NA | 0 | NA | 1 | 12 |
| 20 | 61039885 | 61050272 | 1  | NM_017896    | C20orf11  | 0         | NA    | 0 | NA | 0 | NA | 0 | NA | 1 | 12 |
| 20 | 61054443 | 61070394 | 1  | NM_022082    | C20orf59  | 0         | NA    | 0 | NA | 0 | NA | 0 | NA | 1 | 12 |
| 20 | 61108787 | 61107845 | -1 | NM_080606    | BHLHB4    | 0         | NA    | 0 | NA | 0 | NA | 1 | 11 | 1 | 15 |
| 20 | 61317983 | 61297226 | -1 | NM_017798    | YTHDF1    | 0         | NA    | 0 | NA | 0 | NA | 0 | NA | 0 | NA |
| 20 | 61337720 | 61342299 | 1  | NM_022161    | BIRC7     | 0         | NA    | 0 | NA | 0 | NA | 1 | 23 | 0 | NA |
| 20 | 61337720 | 61342299 | 1  | NM_139317    | BIRC7     | 0         | NA    | 0 | NA | 0 | NA | 1 | 23 | 0 | NA |
| 20 | 61356335 | 61342583 | -1 | NM_152864    | NKAIN4    | 0         | NA    | 1 | 12 | 0 | NA | 0 | NA | 1 | 12 |
| 20 | 61374609 | 61391587 | 1  | NM_018209    | ARFGAP1   | 0         | NA    | 0 | NA | 0 | NA | 0 | NA | 0 | NA |
| 20 | 61374609 | 61391587 | 1  | NM_175609    | ARFGAP1   | 0         | NA    | 0 | NA | 0 | NA | 0 | NA | 0 | NA |
| 20 | 61394982 | 61432729 | 1  | NM_020882    | COL20A1   | 1         | 19    | 1 | 17 | 0 | NA | 0 | NA | 0 | NA |
| 20 | 61498688 | 61501860 | 1  | NM_000744    | CHRNA4    | 0         | NA    | 1 | 21 | 0 | NA | 0 | NA | 1 | 13 |
| 20 | 61574437 | 61507985 | -1 | NM_172106    | KCNQ2     | 0         | NA    | 1 | 12 | 0 | NA | 0 | NA | 0 | NA |
| 20 | 61574437 | 61507985 | -1 | NM_172107    | KCNQ2     | 0         | NA    | 1 | 12 | 0 | NA | 0 | NA | 0 | NA |
| 20 | 61574437 | 61508231 | -1 | NM_172108    | KCNQ2     | 0         | NA    | 1 | 12 | 0 | NA | 0 | NA | 0 | NA |
| 20 | 61574437 | 61508247 | -1 | NM_004518    | KCNQ2     | 0         | NA    | 1 | 12 | 0 | NA | 0 | NA | 0 | NA |
| 20 | 61574437 | 61535475 | -1 | NM_172109    | KCNQ2     | 0         | NA    | 1 | 12 | 0 | NA | 0 | NA | 0 | NA |
| 20 | 61600949 | 61589809 | -1 | NM_001958    | EEF1A2    | 0         | NA    | 1 | 21 | 0 | NA | 0 | NA | 1 | 12 |
| 20 | 61622576 | 61623968 | 1  | NM_024299    | C20orf149 | 0         | NA    | 1 | 12 | 0 | NA | 0 | NA | 0 | NA |
| 20 | 61639151 | 61630219 | -1 | NM_005975    | PTK6      | 0         | NA    | 0 | NA | 1 | 18 | 0 | NA | 0 | NA |
| 20 | 61649301 | 61642606 | -1 | NM_080823    | SRMS      | 0         | NA    | 0 | NA | 1 | 18 | 0 | NA | 0 | NA |
| 20 | 61654816 | 61658479 | 1  | NM_024059    | C20orf195 | 0         | NA    | 0 | NA | 0 | NA | 0 | NA | 0 | NA |
| 20 | 61669551 | 61659882 | -1 | NM_033405    | PRIC285   | 0         | NA    | 0 | NA | 0 | NA | 0 | NA | 0 | NA |
| 20 | 61676036 | 61659882 | -1 | NM_001037335 | PRIC285   | 0         | NA    | 0 | NA | 0 | NA | 0 | NA | 0 | NA |
| 20 | 61721673 | 61689398 | 0  | NA           | -1        | NM_012384 | GMEB2 | 0 | NA | 1 | 14 | 0 | NA | 0 | NA |
| 20 | 61755224 | 61741504 | -1 | NM_015894    | STMN3     | 1         | 11    | 0 | NA | 0 | NA | 1 | 11 | 0 | NA |
| 20 | 61760090 | 61798041 | 1  | NM_016434    | RTEL1     | 1         | 18    | 0 | NA | 0 | NA | 1 | 30 | 0 | NA |
| 20 | 61760090 | 61798045 | 1  | NM_032957    | RTEL1     | 1         | 18    | 0 | NA | 0 | NA | 1 | 30 | 0 | NA |
| 20 | 61796731 | 61800479 | 1  | NM_032945    | TNFRSF6B  | 0         | NA    | 0 | NA | 1 | 12 | 0 | NA | 0 | NA |
| 20 | 61798464 | 61800479 | 1  | NM_003823    | TNFRSF6B  | 0         | NA    | 0 | NA | 1 | 12 | 1 | 14 | 0 | NA |
| 20 | 61809237 | 61837938 | 1  | NM_001083113 | ZGPAT     | 0         | NA    | 0 | NA | 0 | NA | 1 | 14 | 0 | NA |
| 20 | 61809809 | 61801252 | -1 | NM_003224    | ARFRP1    | 0         | NA    | 0 | NA | 0 | NA | 1 | 14 | 0 | NA |
| 20 | 61809823 | 61837938 | 1  | NM_181485    | ZGPAT     | 0         | NA    | 0 | NA | 0 | NA | 1 | 14 | 0 | NA |

|    |          |          |    |              |           |   |    |   |    |   |    |   |    |   |    |
|----|----------|----------|----|--------------|-----------|---|----|---|----|---|----|---|----|---|----|
| 20 | 61809834 | 61837938 | 1  | NM_032527    | ZGPAT     | 0 | NA | 0 | NA | 0 | NA | 1 | 14 | 0 | NA |
| 20 | 61838421 | 61840904 | 1  | NM_017806    | LIME1     | 0 | NA | 0 | NA | 0 | NA | 1 | 11 | 0 | NA |
| 20 | 61841654 | 61845847 | 1  | NM_020062    | SLC2A4RG  | 0 | NA | 0 | NA | 0 | NA | 1 | 11 | 0 | NA |
| 20 | 61907300 | 61846321 | -1 | NM_025224    | ZBTB46    | 0 | NA | 1 | 19 | 0 | NA | 0 | NA | 0 | NA |
| 20 | 61963009 | 61964785 | 1  | NM_080622    | C20orf135 | 0 | NA | 0 | NA | 0 | NA | 1 | 11 | 0 | NA |
| 20 | 61967033 | 61993334 | 1  | NM_003288    | TPD52L2   | 0 | NA | 0 | NA | 0 | NA | 0 | NA | 0 | NA |
| 20 | 61967033 | 61993334 | 1  | NM_199359    | TPD52L2   | 0 | NA | 0 | NA | 0 | NA | 0 | NA | 0 | NA |
| 20 | 61967033 | 61993334 | 1  | NM_199360    | TPD52L2   | 0 | NA | 0 | NA | 0 | NA | 0 | NA | 0 | NA |
| 20 | 61967033 | 61993334 | 1  | NM_199361    | TPD52L2   | 0 | NA | 0 | NA | 0 | NA | 0 | NA | 0 | NA |
| 20 | 61967033 | 61993334 | 1  | NM_199362    | TPD52L2   | 0 | NA | 0 | NA | 0 | NA | 0 | NA | 0 | NA |
| 20 | 61967033 | 61993334 | 1  | NM_199363    | TPD52L2   | 0 | NA | 0 | NA | 0 | NA | 0 | NA | 0 | NA |
| 20 | 61996961 | 62035839 | 1  | NM_025219    | DNAJC5    | 0 | NA | 0 | NA | 0 | NA | 0 | NA | 0 | NA |
| 20 | 62058212 | 62041631 | -1 | NM_017859    | UCKL1     | 0 | NA | 0 | NA | 0 | NA | 0 | NA | 0 | NA |
| 20 | 62071662 | 62058498 | -1 | NM_020713    | ZNF512B   | 0 | NA | 0 | NA | 0 | NA | 0 | NA | 0 | NA |
| 20 | 62081439 | 62075909 | -1 | NM_080621    | SAMD10    | 0 | NA | 0 | NA | 0 | NA | 1 | 14 | 0 | NA |
| 20 | 62082874 | 62134897 | 1  | NM_012469    | PRPF6     | 0 | NA | 0 | NA | 0 | NA | 1 | 14 | 0 | NA |
| 20 | 62139936 | 62141575 | 1  | NM_207349    | PRR17     | 0 | NA | 0 | NA | 0 | NA | 0 | NA | 0 | NA |
| 20 | 62151423 | 62149522 | -1 | NM_018419    | SOX18     | 0 | NA | 0 | NA | 0 | NA | 0 | NA | 0 | NA |
| 20 | 62158882 | 62174144 | 1  | NM_198723    | TCEA2     | 0 | NA | 0 | NA | 0 | NA | 1 | 19 | 0 | NA |
| 20 | 62164453 | 62174144 | 1  | NM_003195    | TCEA2     | 0 | NA | 0 | NA | 0 | NA | 1 | 19 | 0 | NA |
| 20 | 62181289 | 62174978 | -1 | NM_005873    | RGS19     | 0 | NA | 0 | NA | 1 | 12 | 0 | NA | 0 | NA |
| 20 | 62181768 | 62174978 | -1 | NM_001039467 | RGS19     | 0 | NA | 0 | NA | 1 | 12 | 0 | NA | 0 | NA |
| 20 | 62181931 | 62202440 | 1  | NM_000913    | OPRL1     | 0 | NA | 0 | NA | 1 | 12 | 0 | NA | 0 | NA |
| 20 | 62181931 | 62202440 | 1  | NM_182647    | OPRL1     | 0 | NA | 0 | NA | 1 | 12 | 0 | NA | 0 | NA |
| 20 | 62186156 | 62185176 | -1 | NM_001007125 | LOC198437 | 0 | NA | 0 | NA | 1 | 12 | 0 | NA | 0 | NA |
| 20 | 62208628 | 62207626 | -1 | NM_005286    | NPBWR2    | 0 | NA | 1 | 12 | 0 | NA | 0 | NA | 0 | NA |
| 20 | 62266270 | 62344050 | 1  | NM_004535    | MYT1      | 0 | NA | 1 | 12 | 0 | NA | 0 | NA | 1 | 16 |
| 20 | 62357491 | 62378023 | 1  | NM_001104925 | PCMTD2    | 0 | NA | 0 | NA | 0 | NA | 0 | NA | 1 | 12 |
| 20 | 62357491 | 62378023 | 1  | NM_018257    | PCMTD2    | 0 | NA | 0 | NA | 0 | NA | 0 | NA | 1 | 12 |
| 21 | 10012791 | 9928613  | -1 | NM_199259    | TPTE      | 0 | NA | 1 | 12 | 0 | NA | 0 | NA | 0 | NA |
| 21 | 10012791 | 9928613  | -1 | NM_199260    | TPTE      | 0 | NA | 1 | 12 | 0 | NA | 0 | NA | 0 | NA |
| 21 | 10012791 | 9928613  | -1 | NM_199261    | TPTE      | 0 | NA | 1 | 12 | 0 | NA | 0 | NA | 0 | NA |
| 21 | 10120796 | 10042712 | -1 | NM_181704    | BAGE4     | 1 | 30 | 0 | NA | 1 | 12 | 0 | NA | 0 | NA |
| 21 | 10120796 | 10042712 | -1 | NM_182481    | BAGE3     | 1 | 30 | 0 | NA | 1 | 12 | 0 | NA | 0 | NA |
| 21 | 10120796 | 10042712 | -1 | NM_182482    | BAGE2     | 1 | 30 | 0 | NA | 1 | 12 | 0 | NA | 0 | NA |
| 21 | 10120796 | 10042712 | -1 | NM_182484    | BAGE5     | 1 | 30 | 0 | NA | 1 | 12 | 0 | NA | 0 | NA |
| 21 | 10120808 | 10079666 | -1 | NM_001187    | BAGE      | 1 | 30 | 0 | NA | 1 | 12 | 0 | NA | 0 | NA |
| 21 | 13904368 | 13935777 | 1  | NM_174981    | A26B3     | 0 | NA | 0 | NA | 0 | NA | 0 | NA | 0 | NA |
| 21 | 13975330 | 13973491 | -1 | NM_001013729 | LOC441956 | 0 | NA | 0 | NA | 0 | NA | 0 | NA | 0 | NA |
| 21 | 14501125 | 14403005 | -1 | NM_198996    | LIPI      | 0 | NA | 0 | NA | 0 | NA | 0 | NA | 0 | NA |
| 21 | 14510336 | 14522564 | 1  | NM_144770    | RBM11     | 0 | NA | 0 | NA | 0 | NA | 0 | NA | 0 | NA |
| 21 | 14677380 | 14665307 | -1 | NM_006948    | STCH      | 0 | NA | 0 | NA | 0 | NA | 0 | NA | 0 | NA |
| 21 | 14840535 | 14779419 | -1 | NM_022136    | SAMSN1    | 0 | NA | 0 | NA | 0 | NA | 0 | NA | 0 | NA |
| 21 | 15262718 | 15255426 | -1 | NM_003489    | NRIP1     | 0 | NA | 0 | NA | 0 | NA | 0 | NA | 0 | NA |
| 21 | 16024366 | 16174248 | 1  | NM_013396    | USP25     | 0 | NA | 0 | NA | 0 | NA | 0 | NA | 0 | NA |
| 21 | 16364712 | 16901413 | 1  | NM_001005732 | C21orf34  | 0 | NA | 0 | NA | 0 | NA | 0 | NA | 0 | NA |
| 21 | 16364712 | 16901413 | 1  | NM_001005733 | C21orf34  | 0 | NA | 0 | NA | 0 | NA | 0 | NA | 0 | NA |
| 21 | 16488569 | 16901413 | 1  | NM_001005734 | C21orf34  | 0 | NA | 0 | NA | 1 | 12 | 0 | NA | 0 | NA |
| 21 | 17807200 | 17861137 | 1  | NM_001338    | CXADR     | 0 | NA | 0 | NA | 0 | NA | 1 | 12 | 0 | NA |
| 21 | 17907033 | 17887841 | -1 | NM_006806    | BTG3      | 0 | NA | 0 | NA | 0 | NA | 0 | NA | 0 | NA |
| 21 | 18113574 | 18083154 | -1 | NM_001100420 | C21orf91  | 0 | NA | 0 | NA | 0 | NA | 0 | NA | 0 | NA |
| 21 | 18113574 | 18083154 | -1 | NM_001100421 | C21orf91  | 0 | NA | 0 | NA | 0 | NA | 0 | NA | 0 | NA |
| 21 | 18113574 | 18083154 | -1 | NM_017447    | C21orf91  | 0 | NA | 0 | NA | 0 | NA | 0 | NA | 0 | NA |
| 21 | 18539020 | 18561558 | 1  | NM_024944    | CHODL     | 0 | NA | 0 | NA | 0 | NA | 0 | NA | 0 | NA |
| 21 | 18697844 | 18563560 | -1 | NM_002772    | PRSS7     | 0 | NA | 0 | NA | 0 | NA | 0 | NA | 0 | NA |
| 21 | 21292503 | 21833085 | 1  | NM_004540    | NGAM2     | 0 | NA | 0 | NA | 0 | NA | 0 | NA | 0 | NA |
| 21 | 25901672 | 25879838 | -1 | NM_017446    | MRPL39    | 0 | NA | 0 | NA | 0 | NA | 0 | NA | 0 | NA |
| 21 | 25901672 | 25879838 | -1 | NM_080794    | MRPL39    | 0 | NA | 0 | NA | 0 | NA | 0 | NA | 0 | NA |
| 21 | 25933459 | 26009106 | 1  | NM_021219    | JAM2      | 0 | NA | 0 | NA | 0 | NA | 0 | NA | 0 | NA |
| 21 | 26029199 | 26066642 | 1  | NM_002040    | GABPA     | 0 | NA | 0 | NA | 0 | NA | 1 | 11 | 0 | NA |
| 21 | 26029836 | 26018661 | -1 | NM_001003696 | ATP5J     | 0 | NA | 0 | NA | 0 | NA | 1 | 11 | 0 | NA |
| 21 | 26029836 | 26018661 | -1 | NM_001003697 | ATP5J     | 0 | NA | 0 | NA | 0 | NA | 1 | 11 | 0 | NA |
| 21 | 26029836 | 26018661 | -1 | NM_001003701 | ATP5J     | 0 | NA | 0 | NA | 0 | NA | 1 | 11 | 0 | NA |
| 21 | 26029836 | 26018661 | -1 | NM_001003703 | ATP5J     | 0 | NA | 0 | NA | 0 | NA | 1 | 11 | 0 | NA |
| 21 | 26029836 | 26018661 | -1 | NM_001685    | ATP5J     | 0 | NA | 0 | NA | 0 | NA | 1 | 11 | 0 | NA |

|    |          |          |    |              |           |   |    |   |    |   |    |   |    |   |    |
|----|----------|----------|----|--------------|-----------|---|----|---|----|---|----|---|----|---|----|
| 21 | 26465003 | 26174731 | -1 | NM_000484    | APP       | 0 | NA | 0 | NA | 0 | NA | 1 | 11 | 0 | NA |
| 21 | 26465003 | 26174731 | -1 | NM_201413    | APP       | 0 | NA | 0 | NA | 0 | NA | 1 | 11 | 0 | NA |
| 21 | 26465003 | 26174731 | -1 | NM_201414    | APP       | 0 | NA | 0 | NA | 0 | NA | 1 | 11 | 0 | NA |
| 21 | 26867452 | 26760398 | -1 | NM_052954    | CYR1      | 0 | NA | 0 | NA | 0 | NA | 0 | NA | 0 | NA |
| 21 | 27139599 | 27130476 | -1 | NM_006988    | ADAMTS1   | 0 | NA | 0 | NA | 0 | NA | 0 | NA | 0 | NA |
| 21 | 27260703 | 27212111 | -1 | NM_007038    | ADAMTS5   | 0 | NA | 0 | NA | 0 | NA | 0 | NA | 0 | NA |
| 21 | 29179564 | 29166383 | -1 | NM_013240    | NGAMT1    | 1 | 31 | 0 | NA | 0 | NA | 1 | 26 | 0 | NA |
| 21 | 29179564 | 29166383 | -1 | NM_182749    | NGAMT1    | 1 | 31 | 0 | NA | 0 | NA | 1 | 26 | 0 | NA |
| 21 | 29287095 | 29222336 | -1 | NM_015565    | ZNF294    | 1 | 18 | 0 | NA | 1 | 17 | 0 | NA | 0 | NA |
| 21 | 29313554 | 29299950 | -1 | NM_016940    | RWDD2B    | 0 | NA | 0 | NA | 0 | NA | 1 | 19 | 0 | NA |
| 21 | 29318808 | 29348678 | 1  | NM_001001992 | USP16     | 0 | NA | 0 | NA | 0 | NA | 1 | 19 | 0 | NA |
| 21 | 29318808 | 29348678 | 1  | NM_001032410 | USP16     | 0 | NA | 0 | NA | 0 | NA | 1 | 19 | 0 | NA |
| 21 | 29318808 | 29348678 | 1  | NM_006447    | USP16     | 0 | NA | 0 | NA | 0 | NA | 1 | 19 | 0 | NA |
| 21 | 29367881 | 29350518 | -1 | NM_006585    | CCT8      | 0 | NA | 0 | NA | 0 | NA | 0 | NA | 0 | NA |
| 21 | 29374743 | 29470073 | 1  | NM_020152    | C21orf7   | 0 | NA | 0 | NA | 0 | NA | 0 | NA | 0 | NA |
| 21 | 29593090 | 29640340 | 1  | NM_001186    | BACH1     | 0 | NA | 0 | NA | 0 | NA | 0 | NA | 0 | NA |
| 21 | 29593607 | 29640340 | 1  | NM_206866    | BACH1     | 0 | NA | 0 | NA | 0 | NA | 0 | NA | 0 | NA |
| 21 | 29599430 | 29656086 | 1  | NM_001011545 | BACH1     | 0 | NA | 0 | NA | 0 | NA | 0 | NA | 0 | NA |
| 21 | 30234153 | 29831124 | -1 | NM_175611    | GRIK1     | 0 | NA | 0 | NA | 0 | NA | 0 | NA | 0 | NA |
| 21 | 30234153 | 29847736 | -1 | NM_000830    | GRIK1     | 0 | NA | 0 | NA | 0 | NA | 0 | NA | 0 | NA |
| 21 | 30460806 | 30460131 | -1 | NM_012131    | CLDN17    | 0 | NA | 0 | NA | 0 | NA | 0 | NA | 0 | NA |
| 21 | 30510189 | 30508200 | -1 | NM_199328    | CLDN8     | 0 | NA | 0 | NA | 0 | NA | 0 | NA | 0 | NA |
| 21 | 30577147 | 30575497 | -1 | NM_001085455 | KRTAP24-1 | 0 | NA | 0 | NA | 0 | NA | 0 | NA | 0 | NA |
| 21 | 30614478 | 30613320 | -1 | NM_203405    | KRTAP26-1 | 0 | NA | 0 | NA | 0 | NA | 0 | NA | 0 | NA |
| 21 | 30631883 | 30631201 | -1 | NM_001077711 | KRTAP27-1 | 0 | NA | 0 | NA | 0 | NA | 0 | NA | 0 | NA |
| 21 | 30642795 | 30642587 | -1 | NM_181624    | KRTAP23-1 | 0 | NA | 0 | NA | 0 | NA | 0 | NA | 0 | NA |
| 21 | 30666428 | 30665579 | -1 | NM_181621    | KRTAP13-2 | 0 | NA | 0 | NA | 0 | NA | 0 | NA | 0 | NA |
| 21 | 30690262 | 30691009 | 1  | NM_181599    | KRTAP13-1 | 0 | NA | 0 | NA | 0 | NA | 0 | NA | 0 | NA |
| 21 | 30720101 | 30719581 | -1 | NM_181622    | KRTAP13-3 | 0 | NA | 0 | NA | 0 | NA | 0 | NA | 0 | NA |
| 21 | 30724464 | 30724947 | 1  | NM_181600    | KRTAP13-4 | 0 | NA | 0 | NA | 0 | NA | 0 | NA | 0 | NA |
| 21 | 30734516 | 30734969 | 1  | NM_181623    | KRTAP15-1 | 0 | NA | 0 | NA | 0 | NA | 0 | NA | 0 | NA |
| 21 | 30774507 | 30774234 | -1 | NM_181607    | KRTAP19-1 | 0 | NA | 0 | NA | 1 | 31 | 0 | NA | 0 | NA |
| 21 | 30781538 | 30781379 | -1 | NM_181608    | KRTAP19-2 | 0 | NA | 0 | NA | 0 | NA | 1 | 31 | 0 | NA |
| 21 | 30786146 | 30785652 | -1 | NM_181609    | KRTAP19-3 | 0 | NA | 0 | NA | 0 | NA | 1 | 31 | 0 | NA |
| 21 | 30791299 | 30791044 | -1 | NM_181610    | KRTAP19-4 | 0 | NA | 0 | NA | 0 | NA | 0 | NA | 0 | NA |
| 21 | 30796279 | 30796060 | -1 | NM_181611    | KRTAP19-5 | 0 | NA | 0 | NA | 0 | NA | 0 | NA | 0 | NA |
| 21 | 30836052 | 30835724 | -1 | NM_181612    | KRTAP19-6 | 0 | NA | 0 | NA | 0 | NA | 0 | NA | 0 | NA |
| 21 | 30855479 | 30855287 | -1 | NM_181614    | KRTAP19-7 | 0 | NA | 0 | NA | 0 | NA | 0 | NA | 0 | NA |
| 21 | 30886629 | 30887245 | 1  | NM_181605    | KRTAP6-3  | 0 | NA | 0 | NA | 0 | NA | 0 | NA | 0 | NA |
| 21 | 30893064 | 30892875 | -1 | NM_181604    | KRTAP6-2  | 0 | NA | 0 | NA | 0 | NA | 0 | NA | 0 | NA |
| 21 | 30895310 | 30895457 | 1  | NM_181620    | KRTAP22-1 | 0 | NA | 0 | NA | 0 | NA | 0 | NA | 0 | NA |
| 21 | 30908094 | 30907875 | -1 | NM_181602    | KRTAP6-1  | 0 | NA | 0 | NA | 0 | NA | 0 | NA | 0 | NA |
| 21 | 30910644 | 30910815 | -1 | NM_181615    | KRTAP20-1 | 0 | NA | 0 | NA | 0 | NA | 0 | NA | 0 | NA |
| 21 | 30929453 | 30929651 | 1  | NM_181616    | KRTAP20-2 | 0 | NA | 0 | NA | 0 | NA | 0 | NA | 0 | NA |
| 21 | 31041391 | 31041139 | -1 | NM_181617    | KRTAP21-2 | 0 | NA | 0 | NA | 0 | NA | 0 | NA | 0 | NA |
| 21 | 31049567 | 31049327 | -1 | NM_181619    | KRTAP21-1 | 0 | NA | 0 | NA | 0 | NA | 0 | NA | 0 | NA |
| 21 | 31107441 | 31106885 | -1 | NM_175857    | KRTAP8-1  | 0 | NA | 0 | NA | 0 | NA | 0 | NA | 0 | NA |
| 21 | 31175745 | 31174834 | -1 | NM_175858    | KRTAP11-1 | 0 | NA | 0 | NA | 0 | NA | 0 | NA | 0 | NA |
| 21 | 31332666 | 31332348 | -1 | NM_001099219 | KRTAP19-8 | 0 | NA | 0 | NA | 0 | NA | 0 | NA | 0 | NA |
| 21 | 31853161 | 31412606 | -1 | NM_003253    | TIAM1     | 0 | NA | 0 | NA | 0 | NA | 0 | NA | 0 | NA |
| 21 | 31953805 | 31963114 | 1  | NM_000454    | SOD1      | 1 | 11 | 0 | NA | 0 | NA | 0 | NA | 0 | NA |
| 21 | 32026133 | 31965417 | -1 | NM_020706    | SFRS15    | 0 | NA | 0 | NA | 0 | NA | 0 | NA | 0 | NA |
| 21 | 32167498 | 32298248 | 1  | NM_014586    | HUNK      | 0 | NA | 0 | NA | 0 | NA | 0 | NA | 0 | NA |
| 21 | 32573247 | 32562400 | -1 | NM_018944    | C21orf45  | 0 | NA | 0 | NA | 0 | NA | 0 | NA | 0 | NA |
| 21 | 32585994 | 32606470 | 1  | NM_178817    | MRAP      | 0 | NA | 0 | NA | 0 | NA | 0 | NA | 1 | 12 |
| 21 | 32585994 | 32608965 | 1  | NM_206898    | MRAP      | 0 | NA | 0 | NA | 0 | NA | 0 | NA | 1 | 12 |
| 21 | 32706622 | 32809568 | 1  | NM_058187    | C21orf63  | 0 | NA | 0 | NA | 0 | NA | 0 | NA | 0 | NA |
| 21 | 32879714 | 32870732 | -1 | NM_144659    | TCP10L    | 0 | NA | 0 | NA | 0 | NA | 1 | 11 | 1 | 12 |
| 21 | 32906537 | 32895977 | -1 | NM_021254    | C21orf59  | 1 | 14 | 0 | NA | 0 | NA | 0 | NA | 0 | NA |
| 21 | 33022105 | 32922943 | -1 | NM_203446    | SYNJ1     | 1 | 11 | 0 | NA | 0 | NA | 0 | NA | 0 | NA |
| 21 | 33022148 | 32922943 | -1 | NM_003895    | SYNJ1     | 1 | 11 | 0 | NA | 0 | NA | 0 | NA | 0 | NA |
| 21 | 33066040 | 33028080 | -1 | NM_016631    | C21orf66  | 1 | 24 | 0 | NA | 1 | 17 | 0 | NA | 0 | NA |
| 21 | 33066040 | 33035520 | -1 | NM_013329    | C21orf66  | 1 | 24 | 0 | NA | 1 | 17 | 0 | NA | 0 | NA |
| 21 | 33066040 | 33049593 | -1 | NM_058191    | C21orf66  | 1 | 24 | 0 | NA | 1 | 17 | 0 | NA | 0 | NA |
| 21 | 33107876 | 33084854 | -1 | NM_019596    | C21orf62  | 0 | NA | 0 | NA | 0 | NA | 0 | NA | 0 | NA |

|    |          |          |    |              |          |   |    |   |    |   |    |   |    |   |    |
|----|----------|----------|----|--------------|----------|---|----|---|----|---|----|---|----|---|----|
| 21 | 33320108 | 33323370 | 1  | NM_005806    | OLIG2    | 0 | NA | 1 | 31 | 0 | NA | 0 | NA | 1 | 15 |
| 21 | 33364442 | 33366596 | 1  | NM_138983    | OLIG1    | 1 | 15 | 0 | NA | 0 | NA | 1 | 13 | 0 | NA |
| 21 | 33524100 | 33556932 | 1  | NM_000674    | IFNAR2   | 0 | NA | 0 | NA | 0 | NA | 0 | NA | 0 | NA |
| 21 | 33524100 | 33556932 | 1  | NM_207584    | IFNAR2   | 0 | NA | 0 | NA | 0 | NA | 0 | NA | 0 | NA |
| 21 | 33524100 | 33558690 | 1  | NM_207585    | IFNAR2   | 0 | NA | 0 | NA | 0 | NA | 0 | NA | 0 | NA |
| 21 | 33560541 | 33591390 | 1  | NM_000628    | IL10RB   | 0 | NA | 0 | NA | 0 | NA | 0 | NA | 0 | NA |
| 21 | 33619083 | 33653998 | 1  | NM_000629    | IFNAR1   | 0 | NA | 0 | NA | 0 | NA | 1 | 16 | 0 | NA |
| 21 | 33697071 | 33731698 | 1  | NM_005534    | IFNGR2   | 0 | NA | 0 | NA | 0 | NA | 0 | NA | 0 | NA |
| 21 | 33774151 | 33743317 | -1 | NM_006134    | TMEM50B  | 0 | NA | 0 | NA | 0 | NA | 0 | NA | 0 | NA |
| 21 | 33785660 | 33782107 | -1 | NM_017833    | C21orf55 | 0 | NA | 0 | NA | 0 | NA | 0 | NA | 0 | NA |
| 21 | 33785893 | 33782107 | -1 | NM_001040192 | C21orf55 | 0 | NA | 0 | NA | 0 | NA | 0 | NA | 0 | NA |
| 21 | 33836286 | 33798141 | -1 | NM_000819    | GART     | 0 | NA | 0 | NA | 0 | NA | 0 | NA | 0 | NA |
| 21 | 33836286 | 33818186 | -1 | NM_175085    | GART     | 0 | NA | 0 | NA | 0 | NA | 0 | NA | 0 | NA |
| 21 | 33837219 | 33854843 | 1  | NM_032195    | SON      | 0 | NA | 0 | NA | 0 | NA | 0 | NA | 0 | NA |
| 21 | 33837219 | 33871682 | 1  | NM_138927    | SON      | 0 | NA | 0 | NA | 0 | NA | 0 | NA | 0 | NA |
| 21 | 33882884 | 33872080 | -1 | NM_017613    | DONSON   | 0 | NA | 0 | NA | 0 | NA | 0 | NA | 0 | NA |
| 21 | 33936030 | 33883517 | -1 | NM_145858    | CRYZL1   | 0 | NA | 0 | NA | 0 | NA | 0 | NA | 0 | NA |
| 21 | 33936653 | 34132672 | 1  | NM_001001132 | ITSN1    | 0 | NA | 0 | NA | 0 | NA | 0 | NA | 0 | NA |
| 21 | 33936653 | 34183479 | 1  | NM_003024    | ITSN1    | 0 | NA | 0 | NA | 0 | NA | 0 | NA | 0 | NA |
| 21 | 34210028 | 34197626 | -1 | NM_001697    | ATP5O    | 1 | 11 | 0 | NA | 0 | NA | 1 | 18 | 0 | NA |
| 21 | 34367692 | 34437204 | 1  | NM_032476    | MRPS6    | 0 | NA | 0 | NA | 0 | NA | 0 | NA | 0 | NA |
| 21 | 34367739 | 34400431 | 1  | NM_006933    | SLC5A3   | 0 | NA | 0 | NA | 0 | NA | 0 | NA | 0 | NA |
| 21 | 34658192 | 34665310 | 1  | NM_172201    | KCNE2    | 0 | NA | 0 | NA | 0 | NA | 0 | NA | 0 | NA |
| 21 | 34669618 | 34683322 | 1  | NM_058182    | C21orf51 | 0 | NA | 0 | NA | 0 | NA | 0 | NA | 0 | NA |
| 21 | 34806443 | 34740857 | -1 | NM_000219    | KCNE1    | 0 | NA | 0 | NA | 0 | NA | 0 | NA | 0 | NA |
| 21 | 34821131 | 34810653 | -1 | NM_203418    | RCAN1    | 0 | NA | 0 | NA | 0 | NA | 1 | 13 | 0 | NA |
| 21 | 34908615 | 34810653 | -1 | NM_203417    | RCAN1    | 0 | NA | 0 | NA | 0 | NA | 0 | NA | 0 | NA |
| 21 | 34909252 | 34810653 | -1 | NM_004414    | RCAN1    | 0 | NA | 0 | NA | 0 | NA | 0 | NA | 0 | NA |
| 21 | 34963557 | 35012389 | 1  | NM_053277    | CLIC6    | 0 | NA | 1 | 14 | 0 | NA | 0 | NA | 0 | NA |
| 21 | 35182857 | 35081967 | -1 | NM_001001890 | RUNX1    | 1 | 11 | 0 | NA | 0 | NA | 0 | NA | 0 | NA |
| 21 | 35182857 | 35115443 | -1 | NM_001122607 | RUNX1    | 1 | 11 | 0 | NA | 0 | NA | 0 | NA | 0 | NA |
| 21 | 35343465 | 35081967 | -1 | NM_001754    | RUNX1    | 0 | NA | 0 | NA | 1 | 14 | 0 | NA | 0 | NA |
| 21 | 36354481 | 36337851 | -1 | NM_001007259 | SETD4    | 1 | 19 | 1 | 15 | 0 | NA | 1 | 16 | 1 | 13 |
| 21 | 36358576 | 36328708 | -1 | NM_017438    | SETD4    | 1 | 19 | 1 | 15 | 0 | NA | 1 | 16 | 1 | 13 |
| 21 | 36364154 | 36367332 | 1  | NM_001757    | CBR1     | 1 | 19 | 1 | 15 | 0 | NA | 1 | 13 | 1 | 13 |
| 21 | 36429132 | 36440730 | 1  | NM_001236    | CBR3     | 0 | NA | 0 | NA | 0 | NA | 1 | 12 | 0 | NA |
| 21 | 36458708 | 36598442 | 1  | NM_005128    | DOPEY2   | 0 | NA | 0 | NA | 0 | NA | 0 | NA | 0 | NA |
| 21 | 36614375 | 36670814 | 1  | NM_015358    | MORC3    | 1 | 14 | 0 | NA | 0 | NA | 0 | NA | 0 | NA |
| 21 | 36679558 | 36710995 | 1  | NM_005441    | CHAF1B   | 0 | NA | 0 | NA | 0 | NA | 0 | NA | 0 | NA |
| 21 | 36760595 | 36754789 | -1 | NM_012130    | CLDN14   | 0 | NA | 0 | NA | 0 | NA | 0 | NA | 0 | NA |
| 21 | 36774258 | 36754789 | -1 | NM_144492    | CLDN14   | 0 | NA | 1 | 12 | 0 | NA | 0 | NA | 0 | NA |
| 21 | 36993860 | 37040485 | 1  | NM_009586    | SIM2     | 0 | NA | 1 | 13 | 0 | NA | 0 | NA | 1 | 12 |
| 21 | 36993860 | 37044088 | 1  | NM_005069    | SIM2     | 0 | NA | 1 | 13 | 0 | NA | 0 | NA | 1 | 12 |
| 21 | 37284373 | 37045058 | -1 | NM_000411    | HLCS     | 0 | NA | 0 | NA | 0 | NA | 0 | NA | 0 | NA |
| 21 | 37300732 | 37313828 | 1  | NM_018962    | DSCR6    | 0 | NA | 0 | NA | 0 | NA | 0 | NA | 0 | NA |
| 21 | 37366973 | 37359533 | -1 | NM_153681    | PIGP     | 0 | NA | 0 | NA | 0 | NA | 1 | 11 | 0 | NA |
| 21 | 37367328 | 37359533 | -1 | NM_153682    | PIGP     | 0 | NA | 0 | NA | 0 | NA | 1 | 11 | 0 | NA |
| 21 | 37367440 | 37497278 | 1  | NM_001001894 | TTC3     | 0 | NA | 0 | NA | 0 | NA | 1 | 11 | 0 | NA |
| 21 | 37377116 | 37497278 | 1  | NM_003316    | TTC3     | 0 | NA | 0 | NA | 0 | NA | 0 | NA | 0 | NA |
| 21 | 37561703 | 37517595 | -1 | NM_006052    | DSCR3    | 0 | NA | 0 | NA | 0 | NA | 0 | NA | 0 | NA |
| 21 | 37661728 | 37809549 | 1  | NM_101395    | DYRK1A   | 0 | NA | 0 | NA | 0 | NA | 0 | NA | 0 | NA |
| 21 | 37713076 | 37809549 | 1  | NM_130436    | DYRK1A   | 0 | NA | 0 | NA | 0 | NA | 0 | NA | 0 | NA |
| 21 | 37714470 | 37809549 | 1  | NM_130437    | DYRK1A   | 0 | NA | 0 | NA | 0 | NA | 0 | NA | 0 | NA |
| 21 | 37714470 | 37809549 | 1  | NM_130438    | DYRK1A   | 0 | NA | 0 | NA | 0 | NA | 0 | NA | 0 | NA |
| 21 | 37714471 | 37809549 | 1  | NM_001396    | DYRK1A   | 0 | NA | 0 | NA | 0 | NA | 0 | NA | 0 | NA |
| 21 | 38210566 | 37918656 | -1 | NM_002240    | KCNJ6    | 0 | NA | 0 | NA | 0 | NA | 0 | NA | 0 | NA |
| 21 | 38415324 | 38348182 | -1 | NM_005867    | DSCR4    | 0 | NA | 0 | NA | 0 | NA | 0 | NA | 0 | NA |
| 21 | 38550533 | 38595616 | 1  | NM_002243    | KCNJ15   | 0 | NA | 0 | NA | 0 | NA | 0 | NA | 0 | NA |
| 21 | 38550739 | 38595616 | 1  | NM_170736    | KCNJ15   | 0 | NA | 0 | NA | 0 | NA | 0 | NA | 0 | NA |
| 21 | 38566298 | 38595616 | 1  | NM_170737    | KCNJ15   | 0 | NA | 0 | NA | 0 | NA | 0 | NA | 0 | NA |
| 21 | 38792267 | 38675670 | -1 | NM_182918    | ERG      | 0 | NA | 0 | NA | 0 | NA | 0 | NA | 0 | NA |
| 21 | 38955488 | 38675670 | -1 | NM_004449    | ERG      | 1 | 11 | 0 | NA | 0 | NA | 0 | NA | 0 | NA |
| 21 | 39099718 | 39118748 | 1  | NM_005239    | ETS2     | 0 | NA | 0 | NA | 0 | NA | 0 | NA | 0 | NA |
| 21 | 39232223 | 39171084 | -1 | NM_001001692 | FLJ45139 | 1 | 12 | 0 | NA | 0 | NA | 0 | NA | 0 | NA |
| 21 | 39477310 | 39469253 | -1 | NM_003720    | PSMG1    | 0 | NA | 0 | NA | 0 | NA | 0 | NA | 0 | NA |

|    |          |          |    |              |         |   |    |   |    |   |    |   |    |   |    |
|----|----------|----------|----|--------------|---------|---|----|---|----|---|----|---|----|---|----|
| 21 | 39477310 | 39469253 | -1 | NM_203433    | PSMG1   | 0 | NA | 0 | NA | 0 | NA | 0 | NA | 0 | NA |
| 21 | 39607426 | 39479273 | -1 | NM_018963    | BRWD1   | 1 | 13 | 0 | NA | 0 | NA | 0 | NA | 0 | NA |
| 21 | 39607426 | 39484017 | -1 | NM_033656    | BRWD1   | 1 | 13 | 0 | NA | 0 | NA | 0 | NA | 0 | NA |
| 21 | 39607426 | 39590234 | -1 | NM_001007246 | BRWD1   | 1 | 13 | 0 | NA | 0 | NA | 0 | NA | 0 | NA |
| 21 | 39642917 | 39636110 | -1 | NM_004965    | HMG1    | 0 | NA | 0 | NA | 0 | NA | 0 | NA | 0 | NA |
| 21 | 39674139 | 39691486 | 1  | NM_004627    | WRB     | 0 | NA | 0 | NA | 0 | NA | 0 | NA | 0 | NA |
| 21 | 39737998 | 39699639 | -1 | NM_152505    | LCA5L   | 0 | NA | 0 | NA | 0 | NA | 0 | NA | 0 | NA |
| 21 | 39739666 | 39809303 | 1  | NM_001001713 | SH3BGR  | 0 | NA | 0 | NA | 0 | NA | 0 | NA | 0 | NA |
| 21 | 39745649 | 39809303 | 1  | NM_007341    | SH3BGR  | 0 | NA | 0 | NA | 0 | NA | 0 | NA | 0 | NA |
| 21 | 39951123 | 39956685 | 1  | NM_006057    | B3GALT5 | 0 | NA | 0 | NA | 0 | NA | 0 | NA | 0 | NA |
| 21 | 39951123 | 39956685 | 1  | NM_033170    | B3GALT5 | 0 | NA | 0 | NA | 0 | NA | 0 | NA | 0 | NA |
| 21 | 39951123 | 39956685 | 1  | NM_033171    | B3GALT5 | 0 | NA | 0 | NA | 0 | NA | 0 | NA | 0 | NA |
| 21 | 39951123 | 39956685 | 1  | NM_033172    | B3GALT5 | 0 | NA | 0 | NA | 0 | NA | 0 | NA | 0 | NA |
| 21 | 39951123 | 39956685 | 1  | NM_033173    | B3GALT5 | 0 | NA | 0 | NA | 0 | NA | 0 | NA | 0 | NA |
| 21 | 40039203 | 40095893 | 1  | NM_001080444 | IGSF5   | 0 | NA | 0 | NA | 0 | NA | 0 | NA | 1 | 15 |
| 21 | 40161216 | 40223192 | 1  | NM_006198    | PCP4    | 0 | NA | 0 | NA | 0 | NA | 0 | NA | 0 | NA |
| 21 | 41140909 | 40306212 | -1 | NM_001389    | DSCAM   | 0 | NA | 0 | NA | 0 | NA | 0 | NA | 0 | NA |
| 21 | 41461597 | 41570394 | 1  | NM_012105    | BACE2   | 0 | NA | 0 | NA | 0 | NA | 0 | NA | 0 | NA |
| 21 | 41461597 | 41570394 | 1  | NM_138991    | BACE2   | 0 | NA | 0 | NA | 0 | NA | 0 | NA | 0 | NA |
| 21 | 41461597 | 41570394 | 1  | NM_138992    | BACE2   | 0 | NA | 0 | NA | 0 | NA | 0 | NA | 0 | NA |
| 21 | 41479036 | 41469027 | -1 | NM_182832    | PLAC4   | 0 | NA | 0 | NA | 0 | NA | 0 | NA | 0 | NA |
| 21 | 41610530 | 41651524 | 1  | NM_058186    | FAM3B   | 0 | NA | 0 | NA | 0 | NA | 0 | NA | 0 | NA |
| 21 | 41610530 | 41651524 | 1  | NM_206964    | FAM3B   | 0 | NA | 0 | NA | 0 | NA | 0 | NA | 0 | NA |
| 21 | 41655819 | 41702739 | 1  | NM_002463    | MX2     | 0 | NA | 0 | NA | 0 | NA | 0 | NA | 1 | 12 |
| 21 | 41720023 | 41753008 | 1  | NM_002462    | MX1     | 0 | NA | 0 | NA | 1 | 12 | 0 | NA | 1 | 14 |
| 21 | 41801948 | 41758350 | -1 | NM_005656    | TMPRSS2 | 0 | NA | 0 | NA | 0 | NA | 0 | NA | 0 | NA |
| 21 | 42060318 | 42032597 | -1 | NM_020639    | RIPK4   | 0 | NA | 0 | NA | 0 | NA | 0 | NA | 0 | NA |
| 21 | 42172651 | 42091453 | -1 | NM_001040424 | PRDM15  | 0 | NA | 0 | NA | 0 | NA | 0 | NA | 0 | NA |
| 21 | 42172660 | 42094393 | -1 | NM_022115    | PRDM15  | 0 | NA | 0 | NA | 0 | NA | 0 | NA | 0 | NA |
| 21 | 42219868 | 42178287 | -1 | NM_199050    | C2CD2   | 0 | NA | 0 | NA | 0 | NA | 0 | NA | 0 | NA |
| 21 | 42247068 | 42178287 | -1 | NM_015500    | C2CD2   | 0 | NA | 0 | NA | 0 | NA | 0 | NA | 0 | NA |
| 21 | 42303565 | 42280008 | -1 | NM_001098402 | ZNF295  | 1 | 15 | 0 | NA | 0 | NA | 0 | NA | 0 | NA |
| 21 | 42303565 | 42280008 | -1 | NM_001098403 | ZNF295  | 1 | 15 | 0 | NA | 0 | NA | 0 | NA | 0 | NA |
| 21 | 42303565 | 42280008 | -1 | NM_020727    | ZNF295  | 1 | 15 | 0 | NA | 0 | NA | 0 | NA | 0 | NA |
| 21 | 42364494 | 42436174 | 1  | NM_001004416 | UMODL1  | 0 | NA | 0 | NA | 0 | NA | 0 | NA | 0 | NA |
| 21 | 42364494 | 42436174 | 1  | NM_173568    | UMODL1  | 0 | NA | 0 | NA | 0 | NA | 0 | NA | 0 | NA |
| 21 | 42492867 | 42590423 | 1  | NM_207627    | ABCG1   | 0 | NA | 0 | NA | 0 | NA | 0 | NA | 0 | NA |
| 21 | 42492990 | 42590423 | 1  | NM_207628    | ABCG1   | 0 | NA | 0 | NA | 0 | NA | 0 | NA | 0 | NA |
| 21 | 42509255 | 42590423 | 1  | NM_207629    | ABCG1   | 0 | NA | 0 | NA | 0 | NA | 0 | NA | 1 | 12 |
| 21 | 42512335 | 42590423 | 1  | NM_004915    | ABCG1   | 0 | NA | 0 | NA | 0 | NA | 0 | NA | 1 | 18 |
| 21 | 42512335 | 42590423 | 1  | NM_016818    | ABCG1   | 0 | NA | 0 | NA | 0 | NA | 0 | NA | 1 | 18 |
| 21 | 42513076 | 42590423 | 1  | NM_207174    | ABCG1   | 0 | NA | 0 | NA | 0 | NA | 0 | NA | 1 | 18 |
| 21 | 42608775 | 42605231 | -1 | NM_003226    | TFF3    | 0 | NA | 0 | NA | 0 | NA | 0 | NA | 1 | 19 |
| 21 | 42644176 | 42639535 | -1 | NM_005423    | TFF2    | 0 | NA | 0 | NA | 0 | NA | 0 | NA | 1 | 13 |
| 21 | 42659713 | 42655459 | -1 | NM_003225    | TFF1    | 0 | NA | 0 | NA | 0 | NA | 0 | NA | 1 | 16 |
| 21 | 42682296 | 42665067 | -1 | NM_032404    | TMPRSS3 | 0 | NA | 0 | NA | 0 | NA | 0 | NA | 0 | NA |
| 21 | 42683596 | 42665067 | -1 | NM_032401    | TMPRSS3 | 0 | NA | 0 | NA | 0 | NA | 0 | NA | 0 | NA |
| 21 | 42689269 | 42665067 | -1 | NM_024022    | TMPRSS3 | 0 | NA | 0 | NA | 0 | NA | 0 | NA | 0 | NA |
| 21 | 42689269 | 42675053 | -1 | NM_032405    | TMPRSS3 | 0 | NA | 0 | NA | 0 | NA | 0 | NA | 0 | NA |
| 21 | 42697087 | 42740843 | 1  | NM_001001895 | UBASH3A | 0 | NA | 0 | NA | 0 | NA | 0 | NA | 0 | NA |
| 21 | 42697087 | 42740843 | 1  | NM_018961    | UBASH3A | 0 | NA | 0 | NA | 0 | NA | 0 | NA | 0 | NA |
| 21 | 42789470 | 42765665 | -1 | NM_080860    | RSPH1   | 0 | NA | 0 | NA | 0 | NA | 0 | NA | 0 | NA |
| 21 | 42792810 | 42674619 | 1  | NM_018964    | SLC37A1 | 0 | NA | 0 | NA | 0 | NA | 0 | NA | 0 | NA |
| 21 | 42946930 | 43068687 | 1  | NM_001001567 | PDE9A   | 0 | NA | 0 | NA | 0 | NA | 0 | NA | 0 | NA |
| 21 | 42946930 | 43068687 | 1  | NM_001001568 | PDE9A   | 0 | NA | 0 | NA | 0 | NA | 0 | NA | 0 | NA |
| 21 | 42946930 | 43068687 | 1  | NM_001001569 | PDE9A   | 0 | NA | 0 | NA | 0 | NA | 0 | NA | 0 | NA |
| 21 | 42946930 | 43068687 | 1  | NM_001001570 | PDE9A   | 0 | NA | 0 | NA | 0 | NA | 0 | NA | 0 | NA |
| 21 | 42946930 | 43068687 | 1  | NM_001001571 | PDE9A   | 0 | NA | 0 | NA | 0 | NA | 0 | NA | 0 | NA |
| 21 | 42946930 | 43068687 | 1  | NM_001001572 | PDE9A   | 0 | NA | 0 | NA | 0 | NA | 0 | NA | 0 | NA |
| 21 | 42946930 | 43068687 | 1  | NM_001001573 | PDE9A   | 0 | NA | 0 | NA | 0 | NA | 0 | NA | 0 | NA |
| 21 | 42946930 | 43068687 | 1  | NM_001001574 | PDE9A   | 0 | NA | 0 | NA | 0 | NA | 0 | NA | 0 | NA |
| 21 | 42946930 | 43068687 | 1  | NM_001001575 | PDE9A   | 0 | NA | 0 | NA | 0 | NA | 0 | NA | 0 | NA |
| 21 | 42946930 | 43068687 | 1  | NM_001001576 | PDE9A   | 0 | NA | 0 | NA | 0 | NA | 0 | NA | 0 | NA |
| 21 | 42946930 | 43068687 | 1  | NM_001001577 | PDE9A   | 0 | NA | 0 | NA | 0 | NA | 0 | NA | 0 | NA |
| 21 | 42946930 | 43068687 | 1  | NM_001001578 | PDE9A   | 0 | NA | 0 | NA | 0 | NA | 0 | NA | 0 | NA |

|    |          |          |    |              |            |   |    |   |    |   |    |   |    |   |    |
|----|----------|----------|----|--------------|------------|---|----|---|----|---|----|---|----|---|----|
| 21 | 42946930 | 43068687 | 1  | NM_001001579 | PDE9A      | 0 | NA | 0 | NA | 0 | NA | 0 | NA | 0 | NA |
| 21 | 42946930 | 43068687 | 1  | NM_001001580 | PDE9A      | 0 | NA | 0 | NA | 0 | NA | 0 | NA | 0 | NA |
| 21 | 42946930 | 43068687 | 1  | NM_001001581 | PDE9A      | 0 | NA | 0 | NA | 0 | NA | 0 | NA | 0 | NA |
| 21 | 42946930 | 43068687 | 1  | NM_001001582 | PDE9A      | 0 | NA | 0 | NA | 0 | NA | 0 | NA | 0 | NA |
| 21 | 42946930 | 43068687 | 1  | NM_001001583 | PDE9A      | 0 | NA | 0 | NA | 0 | NA | 0 | NA | 0 | NA |
| 21 | 42946930 | 43068687 | 1  | NM_001001584 | PDE9A      | 0 | NA | 0 | NA | 0 | NA | 0 | NA | 0 | NA |
| 21 | 42946930 | 43068687 | 1  | NM_001001585 | PDE9A      | 0 | NA | 0 | NA | 0 | NA | 0 | NA | 0 | NA |
| 21 | 42946930 | 43068687 | 1  | NM_002606    | PDE9A      | 0 | NA | 0 | NA | 0 | NA | 0 | NA | 0 | NA |
| 21 | 43172747 | 43136272 | -1 | NM_033661    | WDR4       | 0 | NA | 0 | NA | 0 | NA | 0 | NA | 0 | NA |
| 21 | 43172747 | 43142404 | -1 | NM_018669    | WDR4       | 0 | NA | 0 | NA | 0 | NA | 0 | NA | 0 | NA |
| 21 | 43186446 | 43202842 | 1  | NM_001001503 | NDUFV3     | 0 | NA | 0 | NA | 0 | NA | 0 | NA | 0 | NA |
| 21 | 43186446 | 43202842 | 1  | NM_021075    | NDUFV3     | 0 | NA | 0 | NA | 0 | NA | 0 | NA | 0 | NA |
| 21 | 43267711 | 43326757 | 1  | NM_004571    | PKNOX1     | 0 | NA | 0 | NA | 0 | NA | 0 | NA | 0 | NA |
| 21 | 43369493 | 43346369 | -1 | NM_000071    | CBS        | 1 | 12 | 0 | NA | 0 | NA | 0 | NA | 0 | NA |
| 21 | 43400757 | 43386134 | -1 | NM_001025203 | UZAF1      | 0 | NA | 0 | NA | 0 | NA | 0 | NA | 0 | NA |
| 21 | 43400757 | 43386134 | -1 | NM_001025204 | UZAF1      | 0 | NA | 0 | NA | 0 | NA | 0 | NA | 0 | NA |
| 21 | 43400757 | 43386134 | -1 | NM_006758    | UZAF1      | 0 | NA | 0 | NA | 0 | NA | 0 | NA | 0 | NA |
| 21 | 43462209 | 43465982 | 1  | NM_000394    | CRYAA      | 0 | NA | 0 | NA | 1 | 14 | 0 | NA | 0 | NA |
| 21 | 43671430 | 43658826 | -1 | NM_173354    | SNF1LK     | 0 | NA | 0 | NA | 0 | NA | 0 | NA | 0 | NA |
| 21 | 43903802 | 43773499 | -1 | NM_007031    | HSF2BP     | 1 | 11 | 0 | NA | 0 | NA | 0 | NA | 0 | NA |
| 21 | 43903859 | 43940388 | 1  | NM_015056    | RRP1B      | 1 | 11 | 0 | NA | 0 | NA | 0 | NA | 0 | NA |
| 21 | 43963405 | 44006616 | 1  | NM_003681    | PDXK       | 0 | NA | 0 | NA | 0 | NA | 0 | NA | 0 | NA |
| 21 | 44020687 | 44018258 | -1 | NM_000100    | CSTB       | 0 | NA | 0 | NA | 0 | NA | 0 | NA | 0 | NA |
| 21 | 44033845 | 44048411 | 1  | NM_003683    | RRP1       | 0 | NA | 0 | NA | 0 | NA | 0 | NA | 1 | 12 |
| 21 | 44109543 | 44231903 | 1  | NM_020132    | AGPAT3     | 0 | NA | 0 | NA | 0 | NA | 0 | NA | 0 | NA |
| 21 | 44169706 | 44231903 | 1  | NM_001037553 | AGPAT3     | 0 | NA | 0 | NA | 0 | NA | 0 | NA | 0 | NA |
| 21 | 44256633 | 44350860 | 1  | NM_003274    | TMEM1      | 0 | NA | 0 | NA | 0 | NA | 1 | 12 | 0 | NA |
| 21 | 44351635 | 44375491 | 1  | NM_005049    | PWP2       | 0 | NA | 0 | NA | 0 | NA | 0 | NA | 0 | NA |
| 21 | 44377921 | 44390033 | 1  | NM_004649    | C21orf33   | 0 | NA | 0 | NA | 0 | NA | 0 | NA | 0 | NA |
| 21 | 44377921 | 44390033 | 1  | NM_198155    | C21orf33   | 0 | NA | 0 | NA | 0 | NA | 0 | NA | 0 | NA |
| 21 | 44485262 | 44471149 | -1 | NM_015259    | ICOSLG     | 0 | NA | 0 | NA | 0 | NA | 0 | NA | 0 | NA |
| 21 | 44506527 | 44490650 | -1 | NM_013369    | DNMT3L     | 0 | NA | 0 | NA | 0 | NA | 0 | NA | 0 | NA |
| 21 | 44506527 | 44490650 | -1 | NM_175867    | DNMT3L     | 0 | NA | 0 | NA | 0 | NA | 0 | NA | 0 | NA |
| 21 | 44530190 | 44542530 | 1  | NM_000383    | AIRE       | 0 | NA | 0 | NA | 0 | NA | 0 | NA | 0 | NA |
| 21 | 44534575 | 44542300 | 1  | NM_000658    | AIRE       | 0 | NA | 0 | NA | 0 | NA | 0 | NA | 0 | NA |
| 21 | 44544357 | 44571684 | 1  | NM_001002021 | PFKL       | 0 | NA | 0 | NA | 0 | NA | 0 | NA | 0 | NA |
| 21 | 44544357 | 44571684 | 1  | NM_002626    | PFKL       | 0 | NA | 0 | NA | 0 | NA | 0 | NA | 0 | NA |
| 21 | 44583713 | 44573254 | -1 | NM_004928    | C21orf2    | 0 | NA | 0 | NA | 0 | NA | 0 | NA | 0 | NA |
| 21 | 44597911 | 44687392 | 1  | NM_003307    | TRPM2      | 0 | NA | 0 | NA | 0 | NA | 0 | NA | 0 | NA |
| 21 | 4469820  | 44703167 | 1  | NM_030891    | LRRC3      | 0 | NA | 1 | 17 | 0 | NA | 0 | NA | 1 | 14 |
| 21 | 44784506 | 44783495 | -1 | NM_198691    | KRTAP10-1  | 0 | NA | 1 | 12 | 0 | NA | 0 | NA | 1 | 12 |
| 21 | 44795816 | 44794745 | -1 | NM_198693    | KRTAP10-2  | 0 | NA | 0 | NA | 0 | NA | 0 | NA | 0 | NA |
| 21 | 44803071 | 44802333 | -1 | NM_198696    | KRTAP10-3  | 0 | NA | 0 | NA | 0 | NA | 0 | NA | 0 | NA |
| 21 | 44818033 | 44819415 | 1  | NM_198687    | KRTAP10-4  | 0 | NA | 1 | 13 | 0 | NA | 0 | NA | 1 | 12 |
| 21 | 44824909 | 44823991 | -1 | NM_198694    | KRTAP10-5  | 0 | NA | 1 | 12 | 0 | NA | 0 | NA | 1 | 12 |
| 21 | 44836814 | 44835576 | -1 | NM_198688    | KRTAP10-6  | 0 | NA | 0 | NA | 0 | NA | 0 | NA | 0 | NA |
| 21 | 44844924 | 44846519 | 1  | NM_198689    | KRTAP10-7  | 0 | NA | 0 | NA | 0 | NA | 0 | NA | 1 | 15 |
| 21 | 44856423 | 44857299 | 1  | NM_198695    | KRTAP10-8  | 0 | NA | 0 | NA | 0 | NA | 0 | NA | 1 | 13 |
| 21 | 44871467 | 44872723 | 1  | NM_198690    | KRTAP10-9  | 0 | NA | 0 | NA | 0 | NA | 0 | NA | 1 | 12 |
| 21 | 44881700 | 44882800 | 1  | NM_181688    | KRTAP10-10 | 0 | NA | 0 | NA | 0 | NA | 0 | NA | 1 | 12 |
| 21 | 44890758 | 44891994 | 1  | NM_198692    | KRTAP10-11 | 0 | NA | 0 | NA | 0 | NA | 0 | NA | 0 | NA |
| 21 | 44899004 | 44898557 | -1 | NM_198698    | KRTAP12-4  | 0 | NA | 0 | NA | 0 | NA | 0 | NA | 1 | 14 |
| 21 | 44902276 | 44902686 | 1  | NM_198697    | KRTAP12-3  | 0 | NA | 0 | NA | 0 | NA | 0 | NA | 1 | 14 |
| 21 | 44911272 | 44910533 | -1 | NM_181684    | KRTAP12-2  | 0 | NA | 1 | 14 | 0 | NA | 0 | NA | 1 | 14 |
| 21 | 44926506 | 44925918 | -1 | NM_181686    | KRTAP12-1  | 0 | NA | 0 | NA | 0 | NA | 0 | NA | 0 | NA |
| 21 | 44941514 | 44942387 | 1  | NM_198699    | KRTAP10-12 | 0 | NA | 0 | NA | 0 | NA | 0 | NA | 1 | 12 |
| 21 | 44955923 | 44742202 | -1 | NM_144991    | C21orf29   | 0 | NA | 0 | NA | 0 | NA | 0 | NA | 1 | 12 |
| 21 | 45046166 | 45013382 | -1 | NM_003343    | UBE2G2     | 0 | NA | 0 | NA | 0 | NA | 0 | NA | 0 | NA |
| 21 | 45046166 | 45013382 | -1 | NM_182688    | UBE2G2     | 0 | NA | 0 | NA | 0 | NA | 0 | NA | 0 | NA |
| 21 | 45062472 | 45049959 | -1 | NM_006936    | SUMO3      | 0 | NA | 0 | NA | 0 | NA | 0 | NA | 1 | 12 |
| 21 | 45118169 | 45093940 | -1 | NM_004339    | PTTG1IP    | 0 | NA | 0 | NA | 0 | NA | 1 | 12 | 0 | NA |
| 21 | 45185303 | 45130296 | -1 | NM_000211    | ITGB2      | 0 | NA | 0 | NA | 0 | NA | 0 | NA | 1 | 12 |
| 21 | 45184382 | 45221316 | 1  | NM_058190    | C21orf70   | 0 | NA | 0 | NA | 0 | NA | 0 | NA | 0 | NA |
| 21 | 45318942 | 45470902 | 1  | NM_001033049 | ADARB1     | 0 | NA | 0 | NA | 0 | NA | 0 | NA | 0 | NA |
| 21 | 45318942 | 45470902 | 1  | NM_001112    | ADARB1     | 0 | NA | 0 | NA | 0 | NA | 0 | NA | 0 | NA |



|    |          |          |    |              |           |   |    |   |    |   |    |   |    |   |    |
|----|----------|----------|----|--------------|-----------|---|----|---|----|---|----|---|----|---|----|
| 21 | 45318942 | 45470902 | 1  | NM_015833    | ADARB1    | 0 | NA | 0 | NA | 0 | NA | 0 | NA | 0 | NA |
| 21 | 45318942 | 45470902 | 1  | NM_015834    | ADARB1    | 0 | NA | 0 | NA | 0 | NA | 0 | NA | 0 | NA |
| 21 | 45532239 | 45508270 | -1 | NM_015227    | POFUT2    | 1 | 17 | 0 | NA | 0 | NA | 0 | NA | 0 | NA |
| 21 | 45532239 | 45508270 | -1 | NM_133635    | POFUT2    | 1 | 17 | 0 | NA | 0 | NA | 0 | NA | 0 | NA |
| 21 | 45649524 | 45758062 | 1  | NM_130445    | COL18A1   | 0 | NA | 0 | NA | 0 | NA | 0 | NA | 1 | 12 |
| 21 | 45669413 | 45664058 | -1 | NM_199175    | C21orf123 | 1 | 15 | 0 | NA | 0 | NA | 0 | NA | 0 | NA |
| 21 | 45699851 | 45758062 | 1  | NM_030582    | COL18A1   | 0 | NA | 0 | NA | 0 | NA | 0 | NA | 1 | 12 |
| 21 | 45786779 | 45759056 | -1 | NM_194255    | SLC19A1   | 0 | NA | 0 | NA | 0 | NA | 0 | NA | 0 | NA |
| 21 | 46094302 | 46186795 | 1  | NM_020528    | PCBP3     | 0 | NA | 0 | NA | 0 | NA | 0 | NA | 1 | 12 |
| 21 | 46226090 | 46249391 | 1  | NM_001848    | COL6A1    | 0 | NA | 0 | NA | 0 | NA | 1 | 12 | 0 | NA |
| 21 | 46342460 | 46374147 | 1  | NM_058174    | COL6A2    | 0 | NA | 0 | NA | 0 | NA | 0 | NA | 0 | NA |
| 21 | 46342460 | 46374147 | 1  | NM_058175    | COL6A2    | 0 | NA | 0 | NA | 0 | NA | 0 | NA | 0 | NA |
| 21 | 46342460 | 46377191 | 1  | NM_001849    | COL6A2    | 0 | NA | 0 | NA | 0 | NA | 0 | NA | 0 | NA |
| 21 | 46399909 | 46380603 | -1 | NM_006657    | FTCD      | 0 | NA | 0 | NA | 0 | NA | 0 | NA | 0 | NA |
| 21 | 46399909 | 46381121 | -1 | NM_206965    | FTCD      | 0 | NA | 0 | NA | 0 | NA | 0 | NA | 0 | NA |
| 21 | 46428729 | 46405497 | -1 | NM_032261    | C21orf56  | 0 | NA | 0 | NA | 0 | NA | 0 | NA | 0 | NA |
| 21 | 46473119 | 46432787 | -1 | NM_001001438 | LSS       | 0 | NA | 0 | NA | 1 | 12 | 0 | NA | 0 | NA |
| 21 | 46473119 | 46433466 | -1 | NM_002340    | LSS       | 0 | NA | 0 | NA | 1 | 12 | 0 | NA | 0 | NA |
| 21 | 46529664 | 46479475 | -1 | NM_003906    | MCM3AP    | 0 | NA | 0 | NA | 0 | NA | 0 | NA | 0 | NA |
| 21 | 46530694 | 46536539 | 1  | NM_001006114 | C21orf57  | 0 | NA | 0 | NA | 0 | NA | 0 | NA | 0 | NA |
| 21 | 46530694 | 46542093 | 1  | NM_058181    | C21orf57  | 0 | NA | 0 | NA | 0 | NA | 0 | NA | 0 | NA |
| 21 | 46568213 | 46545474 | -1 | NM_058180    | C21orf58  | 0 | NA | 0 | NA | 0 | NA | 0 | NA | 0 | NA |
| 21 | 46568482 | 46690110 | 1  | NM_006031    | PCNT      | 0 | NA | 0 | NA | 0 | NA | 0 | NA | 0 | NA |
| 21 | 46703317 | 46790647 | 1  | NM_206891    | DIP2A     | 0 | NA | 0 | NA | 0 | NA | 0 | NA | 0 | NA |
| 21 | 46703317 | 46791548 | 1  | NM_206890    | DIP2A     | 0 | NA | 0 | NA | 0 | NA | 0 | NA | 0 | NA |
| 21 | 46703317 | 46794451 | 1  | NM_206889    | DIP2A     | 0 | NA | 0 | NA | 0 | NA | 0 | NA | 0 | NA |
| 21 | 46703317 | 46813028 | 1  | NM_015151    | DIP2A     | 0 | NA | 0 | NA | 0 | NA | 0 | NA | 0 | NA |
| 21 | 46849463 | 46842958 | -1 | NM_006272    | S100B     | 1 | 20 | 1 | 16 | 1 | 16 | 0 | NA | 0 | NA |
| 21 | 46879954 | 46909291 | 1  | NM_001535    | PRMT2     | 0 | NA | 1 | 12 | 0 | NA | 1 | 11 | 0 | NA |
| 21 | 46879954 | 46909291 | 1  | NM_206962    | PRMT2     | 0 | NA | 1 | 12 | 0 | NA | 1 | 11 | 0 | NA |
| 22 | 14667937 | 14636331 | -1 | NM_001004053 | A2B6C3    | 0 | NA | 0 | NA | 0 | NA | 0 | NA | 0 | NA |
| 22 | 14829804 | 14828823 | -1 | NM_001005239 | OR11H1    | 0 | NA | 0 | NA | 0 | NA | 0 | NA | 0 | NA |
| 22 | 15453700 | 15451647 | -1 | NM_014406    | CCT8L2    | 0 | NA | 0 | NA | 0 | NA | 0 | NA | 0 | NA |
| 22 | 15682584 | 15644305 | -1 | NM_175878    | XKR3      | 0 | NA | 0 | NA | 0 | NA | 0 | NA | 0 | NA |
| 22 | 15869112 | 15822826 | -1 | NM_001037814 | GAB4      | 0 | NA | 0 | NA | 1 | 11 | 0 | NA | 0 | NA |
| 22 | 15945848 | 15971389 | 1  | NM_014339    | IL17RA    | 0 | NA | 0 | NA | 0 | NA | 0 | NA | 0 | NA |
| 22 | 15982143 | 15977189 | -1 | NM_031890    | CECR6     | 0 | NA | 0 | NA | 0 | NA | 1 | 12 | 0 | NA |
| 22 | 16020169 | 15998409 | -1 | NM_033070    | CECR5     | 0 | NA | 0 | NA | 0 | NA | 0 | NA | 0 | NA |
| 22 | 16026177 | 15998409 | -1 | NM_017829    | CECR5     | 0 | NA | 0 | NA | 0 | NA | 0 | NA | 0 | NA |
| 22 | 16060545 | 16040191 | -1 | NM_177405    | CECR1     | 0 | NA | 0 | NA | 0 | NA | 0 | NA | 0 | NA |
| 22 | 16070779 | 16040193 | -1 | NM_017424    | CECR1     | 0 | NA | 0 | NA | 0 | NA | 0 | NA | 0 | NA |
| 22 | 16336627 | 16413845 | 1  | NM_031413    | CECR2     | 0 | NA | 0 | NA | 0 | NA | 0 | NA | 0 | NA |
| 22 | 16423182 | 16453647 | 1  | NM_031481    | SLC25A18  | 0 | NA | 0 | NA | 0 | NA | 1 | 11 | 0 | NA |
| 22 | 16491588 | 16454902 | -1 | NM_001039366 | ATP6V1E1  | 0 | NA | 0 | NA | 0 | NA | 0 | NA | 0 | NA |
| 22 | 16491588 | 16454902 | -1 | NM_001039367 | ATP6V1E1  | 0 | NA | 0 | NA | 0 | NA | 0 | NA | 0 | NA |
| 22 | 16491588 | 16454902 | -1 | NM_001696    | ATP6V1E1  | 0 | NA | 0 | NA | 0 | NA | 0 | NA | 0 | NA |
| 22 | 16501484 | 16591989 | 1  | NM_015367    | BCL2L13   | 0 | NA | 0 | NA | 0 | NA | 0 | NA | 0 | NA |
| 22 | 16636779 | 16596905 | -1 | NM_197966    | BID       | 0 | NA | 0 | NA | 0 | NA | 0 | NA | 0 | NA |
| 22 | 16637258 | 16596905 | -1 | NM_001196    | BID       | 0 | NA | 0 | NA | 0 | NA | 0 | NA | 0 | NA |
| 22 | 16637258 | 16596905 | -1 | NM_197967    | BID       | 0 | NA | 0 | NA | 0 | NA | 0 | NA | 0 | NA |
| 22 | 16887325 | 16697100 | -1 | NM_001122731 | MICAL3    | 0 | NA | 0 | NA | 0 | NA | 0 | NA | 0 | NA |
| 22 | 16940704 | 16952207 | 1  | NM_017929    | PEX26     | 0 | NA | 0 | NA | 0 | NA | 0 | NA | 0 | NA |
| 22 | 16973558 | 16994498 | 1  | NM_018943    | TUBA8     | 0 | NA | 0 | NA | 0 | NA | 0 | NA | 1 | 13 |
| 22 | 17012757 | 17040162 | 1  | NM_017414    | USP18     | 0 | NA | 0 | NA | 0 | NA | 0 | NA | 0 | NA |
| 22 | 17273778 | 17279601 | 1  | NM_005675    | DGCR6     | 0 | NA | 0 | NA | 0 | NA | 0 | NA | 0 | NA |
| 22 | 17303814 | 17280293 | -1 | NM_016335    | PRODH     | 0 | NA | 1 | 12 | 0 | NA | 0 | NA | 0 | NA |
| 22 | 17489967 | 17403794 | -1 | NM_005137    | DGCR2     | 0 | NA | 0 | NA | 0 | NA | 1 | 13 | 0 | NA |
| 22 | 17498789 | 17500136 | 1  | NM_053006    | TSSK2     | 0 | NA | 0 | NA | 0 | NA | 1 | 13 | 0 | NA |
| 22 | 17512190 | 17497791 | -1 | NM_022719    | DGCR14    | 0 | NA | 0 | NA | 0 | NA | 0 | NA | 0 | NA |
| 22 | 17517796 | 17516503 | -1 | NM_005315    | GSC2      | 0 | NA | 0 | NA | 0 | NA | 0 | NA | 0 | NA |
| 22 | 17546285 | 17543094 | -1 | NM_005984    | SLC25A1   | 0 | NA | 0 | NA | 0 | NA | 0 | NA | 0 | NA |
| 22 | 17659239 | 17546986 | -1 | NM_007098    | CLTCL1    | 0 | NA | 0 | NA | 1 | 12 | 1 | 11 | 1 | 16 |
| 22 | 17799219 | 17698223 | -1 | NM_003325    | HIRA      | 0 | NA | 0 | NA | 0 | NA | 0 | NA | 0 | NA |
| 22 | 17800035 | 17803596 | 1  | NM_003776    | MRPL40    | 0 | NA | 0 | NA | 0 | NA | 0 | NA | 0 | NA |
| 22 | 17816220 | 17810894 | -1 | NM_173793    | C22orf39  | 0 | NA | 0 | NA | 0 | NA | 0 | NA | 0 | NA |

|    |          |          |    |              |          |   |    |   |    |   |    |   |    |   |    |
|----|----------|----------|----|--------------|----------|---|----|---|----|---|----|---|----|---|----|
| 22 | 17846726 | 17817700 | -1 | NM_001035247 | UFD1L    | 0 | NA | 0 | NA | 0 | NA | 0 | NA | 0 | NA |
| 22 | 17846726 | 17817700 | -1 | NM_005659    | UFD1L    | 0 | NA | 0 | NA | 0 | NA | 0 | NA | 0 | NA |
| 22 | 17847415 | 17888135 | 1  | NM_003504    | CDC45L   | 0 | NA | 0 | NA | 0 | NA | 0 | NA | 0 | NA |
| 22 | 17892860 | 17890549 | -1 | NM_003277    | CLDN5    | 0 | NA | 0 | NA | 0 | NA | 0 | NA | 0 | NA |
| 22 | 18081986 | 18092297 | 1  | NM_002688    | SEPT5    | 0 | NA | 1 | 13 | 0 | NA | 0 | NA | 0 | NA |
| 22 | 18091065 | 18092297 | 1  | NM_000407    | GP1BB    | 0 | NA | 1 | 13 | 0 | NA | 0 | NA | 0 | NA |
| 22 | 18124225 | 18134855 | 1  | NM_080647    | TBX1     | 0 | NA | 0 | NA | 0 | NA | 0 | NA | 1 | 12 |
| 22 | 18124225 | 18147068 | 1  | NM_080646    | TBX1     | 0 | NA | 0 | NA | 0 | NA | 0 | NA | 1 | 12 |
| 22 | 18124225 | 18151112 | 1  | NM_005992    | TBX1     | 0 | NA | 0 | NA | 0 | NA | 0 | NA | 1 | 12 |
| 22 | 18222371 | 18213660 | -1 | NM_024627    | C22orf29 | 0 | NA | 0 | NA | 0 | NA | 1 | 15 | 0 | NA |
| 22 | 18222462 | 18155933 | -1 | NM_053004    | GNB1L    | 0 | NA | 0 | NA | 0 | NA | 1 | 15 | 0 | NA |
| 22 | 18309308 | 18336530 | 1  | NM_000754    | COMT     | 1 | 13 | 0 | NA | 0 | NA | 0 | NA | 0 | NA |
| 22 | 18309359 | 18243039 | -1 | NM_006440    | TXNRD2   | 1 | 13 | 0 | NA | 0 | NA | 0 | NA | 0 | NA |
| 22 | 18330069 | 18336530 | 1  | NM_007310    | COMT     | 0 | NA | 0 | NA | 0 | NA | 0 | NA | 0 | NA |
| 22 | 18384309 | 18337418 | -1 | NM_001670    | ARVCF    | 0 | NA | 0 | NA | 0 | NA | 0 | NA | 0 | NA |
| 22 | 18388630 | 18433447 | 1  | NM_152906    | C22orf25 | 0 | NA | 0 | NA | 0 | NA | 0 | NA | 0 | NA |
| 22 | 18447833 | 18479400 | 1  | NM_022720    | DGCR8    | 0 | NA | 0 | NA | 0 | NA | 1 | 15 | 0 | NA |
| 22 | 18484768 | 18479397 | -1 | NM_022727    | HTF9C    | 0 | NA | 0 | NA | 0 | NA | 1 | 11 | 0 | NA |
| 22 | 18484768 | 18479397 | -1 | NM_182984    | HTF9C    | 0 | NA | 0 | NA | 0 | NA | 1 | 11 | 0 | NA |
| 22 | 18485023 | 18494704 | 1  | NM_002882    | RANBP1   | 0 | NA | 0 | NA | 0 | NA | 1 | 11 | 0 | NA |
| 22 | 18499364 | 18513974 | 1  | NM_013373    | ZDHHC8   | 0 | NA | 0 | NA | 0 | NA | 0 | NA | 0 | NA |
| 22 | 18635816 | 18608937 | -1 | NM_023004    | RTN4R    | 0 | NA | 0 | NA | 0 | NA | 0 | NA | 0 | NA |
| 22 | 18687608 | 18681799 | -1 | NM_033257    | DGCR6L   | 0 | NA | 0 | NA | 0 | NA | 0 | NA | 0 | NA |
| 22 | 18841786 | 18835993 | -1 | NM_015672    | RIMBP3   | 0 | NA | 0 | NA | 0 | NA | 0 | NA | 0 | NA |
| 22 | 19078479 | 19092752 | 1  | NM_003426    | ZNF74    | 0 | NA | 0 | NA | 0 | NA | 0 | NA | 0 | NA |
| 22 | 19122146 | 19108874 | -1 | NM_153334    | SCARF2   | 0 | NA | 0 | NA | 0 | NA | 0 | NA | 0 | NA |
| 22 | 19122146 | 19108874 | -1 | NM_182895    | SCARF2   | 0 | NA | 0 | NA | 0 | NA | 0 | NA | 0 | NA |
| 22 | 19180122 | 19125805 | -1 | NM_032775    | KLHL22   | 0 | NA | 0 | NA | 0 | NA | 1 | 16 | 1 | 15 |
| 22 | 19191885 | 19271919 | 1  | NM_001003891 | MED15    | 1 | 12 | 0 | NA | 0 | NA | 0 | NA | 0 | NA |
| 22 | 19191885 | 19271919 | 1  | NM_015889    | MED15    | 1 | 12 | 0 | NA | 0 | NA | 0 | NA | 0 | NA |
| 22 | 19418955 | 19391978 | -1 | NM_002650    | PI4KA    | 0 | NA | 0 | NA | 0 | NA | 0 | NA | 0 | NA |
| 22 | 19458382 | 1942008  | 1  | NM_000185    | SERPIND1 | 0 | NA | 0 | NA | 0 | NA | 0 | NA | 0 | NA |
| 22 | 19543070 | 19391978 | -1 | NM_058004    | PI4KA    | 0 | NA | 0 | NA | 0 | NA | 0 | NA | 0 | NA |
| 22 | 19543291 | 19574109 | 1  | NM_004782    | SNAP29   | 0 | NA | 0 | NA | 0 | NA | 0 | NA | 0 | NA |
| 22 | 19601713 | 19637890 | 1  | NM_005207    | CRKL     | 0 | NA | 0 | NA | 0 | NA | 0 | NA | 0 | NA |
| 22 | 19649433 | 19665649 | 1  | NM_144704    | AIFM3    | 1 | 13 | 0 | NA | 0 | NA | 0 | NA | 0 | NA |
| 22 | 19649450 | 19665647 | 1  | NM_001018060 | AIFM3    | 1 | 13 | 0 | NA | 0 | NA | 0 | NA | 0 | NA |
| 22 | 19666557 | 19683326 | 1  | NM_006767    | LZTR1    | 0 | NA | 1 | 14 | 1 | 15 | 0 | NA | 1 | 19 |
| 22 | 19686404 | 19684060 | -1 | NM_001008695 | THAP7    | 0 | NA | 0 | NA | 0 | NA | 1 | 14 | 0 | NA |
| 22 | 19686404 | 19684060 | -1 | NM_030573    | THAP7    | 0 | NA | 0 | NA | 0 | NA | 1 | 14 | 0 | NA |
| 22 | 19699463 | 19712302 | 1  | NM_005446    | P2RX6    | 0 | NA | 0 | NA | 1 | 14 | 1 | 13 | 0 | NA |
| 22 | 19716847 | 19713006 | -1 | NM_004173    | SLC7A4   | 0 | NA | 0 | NA | 0 | NA | 0 | NA | 0 | NA |
| 22 | 20101692 | 20135750 | 1  | NM_015094    | HIC2     | 0 | NA | 0 | NA | 0 | NA | 0 | NA | 0 | NA |
| 22 | 20251956 | 20308323 | 1  | NM_003347    | UBE2L3   | 0 | NA | 0 | NA | 0 | NA | 0 | NA | 0 | NA |
| 22 | 20251956 | 20308323 | 1  | NM_198157    | UBE2L3   | 0 | NA | 0 | NA | 0 | NA | 0 | NA | 0 | NA |
| 22 | 20314340 | 20312378 | -1 | NM_001017964 | YDJC     | 0 | NA | 0 | NA | 0 | NA | 0 | NA | 0 | NA |
| 22 | 20317085 | 20321616 | 1  | NM_152612    | CCDC116  | 0 | NA | 0 | NA | 0 | NA | 0 | NA | 0 | NA |
| 22 | 20326541 | 20328588 | 1  | NM_022044    | SDF2L1   | 1 | 16 | 0 | NA | 0 | NA | 1 | 25 | 0 | NA |
| 22 | 20350272 | 20382202 | 1  | NM_014337    | PPIL2    | 0 | NA | 1 | 12 | 0 | NA | 0 | NA | 0 | NA |
| 22 | 20350272 | 20382202 | 1  | NM_148175    | PPIL2    | 0 | NA | 1 | 12 | 0 | NA | 0 | NA | 0 | NA |
| 22 | 20350272 | 20382202 | 1  | NM_148176    | PPIL2    | 0 | NA | 1 | 12 | 0 | NA | 0 | NA | 0 | NA |
| 22 | 20420071 | 20381825 | -1 | NM_013313    | YPEL1    | 0 | NA | 0 | NA | 0 | NA | 0 | NA | 0 | NA |
| 22 | 20551970 | 20443946 | -1 | NM_002745    | MAPK1    | 0 | NA | 0 | NA | 0 | NA | 0 | NA | 0 | NA |
| 22 | 20551970 | 20453318 | -1 | NM_138957    | MAPK1    | 0 | NA | 0 | NA | 0 | NA | 0 | NA | 0 | NA |
| 22 | 20637217 | 20603792 | -1 | NM_014634    | PPM1F    | 0 | NA | 1 | 13 | 0 | NA | 1 | 11 | 0 | NA |
| 22 | 20667147 | 20641402 | -1 | NM_003935    | TOP3B    | 0 | NA | 0 | NA | 0 | NA | 0 | NA | 0 | NA |
| 22 | 20929199 | 20929926 | 1  | NM_007128    | VPREB1   | 0 | NA | 0 | NA | 0 | NA | 0 | NA | 0 | NA |
| 22 | 21193505 | 21168771 | -1 | NM_080764    | ZNF280B  | 0 | NA | 1 | 17 | 0 | NA | 1 | 12 | 0 | NA |
| 22 | 21204613 | 21198060 | -1 | NM_080740    | ZNF280A  | 0 | NA | 0 | NA | 0 | NA | 0 | NA | 0 | NA |
| 22 | 21231550 | 21220122 | -1 | NM_206955    | PRAME    | 1 | 18 | 0 | NA | 0 | NA | 0 | NA | 0 | NA |
| 22 | 21231550 | 21220122 | -1 | NM_206956    | PRAME    | 1 | 18 | 0 | NA | 0 | NA | 0 | NA | 0 | NA |
| 22 | 21231696 | 21220122 | -1 | NM_006115    | PRAME    | 1 | 18 | 0 | NA | 0 | NA | 0 | NA | 0 | NA |
| 22 | 21231696 | 21220122 | -1 | NM_206953    | PRAME    | 1 | 18 | 0 | NA | 0 | NA | 0 | NA | 0 | NA |
| 22 | 21231696 | 21220122 | -1 | NM_206954    | PRAME    | 1 | 18 | 0 | NA | 0 | NA | 0 | NA | 0 | NA |
| 22 | 21318779 | 21320368 | 1  | NM_199127    | GGTLC2   | 0 | NA | 0 | NA | 0 | NA | 0 | NA | 0 | NA |

|    |          |          |    |              |          |   |    |   |    |   |    |   |    |   |    |
|----|----------|----------|----|--------------|----------|---|----|---|----|---|----|---|----|---|----|
| 22 | 21742668 | 21797221 | 1  | NM_002073    | GNAZ     | 0 | NA | 1 | 12 | 0 | NA | 0 | NA | 1 | 16 |
| 22 | 21814241 | 21731592 | -1 | NM_014433    | RTDR1    | 0 | NA | 0 | NA | 0 | NA | 0 | NA | 0 | NA |
| 22 | 21817512 | 21836531 | 1  | NM_004914    | RAB36    | 0 | NA | 0 | NA | 0 | NA | 0 | NA | 0 | NA |
| 22 | 21852551 | 21990224 | 1  | NM_004327    | BCR      | 0 | NA | 1 | 12 | 0 | NA | 0 | NA | 0 | NA |
| 22 | 21852551 | 21990224 | 1  | NM_021574    | BCR      | 0 | NA | 1 | 12 | 0 | NA | 0 | NA | 0 | NA |
| 22 | 22252495 | 22245312 | -1 | NM_020070    | IGLL1    | 0 | NA | 0 | NA | 0 | NA | 0 | NA | 0 | NA |
| 22 | 22252495 | 22245312 | -1 | NM_152855    | IGLL1    | 0 | NA | 0 | NA | 0 | NA | 0 | NA | 0 | NA |
| 22 | 22304487 | 22280638 | -1 | NM_016449    | LOC51233 | 0 | NA | 0 | NA | 0 | NA | 0 | NA | 0 | NA |
| 22 | 22363047 | 22371363 | 1  | NM_153615    | RGL4     | 0 | NA | 0 | NA | 0 | NA | 0 | NA | 0 | NA |
| 22 | 22423279 | 22413771 | -1 | NM_021916    | ZNF70    | 0 | NA | 0 | NA | 0 | NA | 0 | NA | 0 | NA |
| 22 | 22426592 | 22424931 | -1 | NM_013378    | VPREB3   | 0 | NA | 0 | NA | 0 | NA | 0 | NA | 0 | NA |
| 22 | 22435207 | 22438047 | 1  | NM_182520    | C22orf15 | 1 | 17 | 0 | NA | 0 | NA | 1 | 11 | 0 | NA |
| 22 | 22440141 | 22438020 | -1 | NM_213720    | C22orf16 | 1 | 17 | 0 | NA | 0 | NA | 1 | 11 | 0 | NA |
| 22 | 22445035 | 22456503 | 1  | NM_005940    | MMP11    | 1 | 17 | 0 | NA | 0 | NA | 1 | 11 | 0 | NA |
| 22 | 22459149 | 22506705 | 1  | NM_001007468 | SMARCB1  | 0 | NA | 0 | NA | 0 | NA | 1 | 12 | 0 | NA |
| 22 | 22459149 | 22506705 | 1  | NM_003073    | SMARCB1  | 0 | NA | 0 | NA | 0 | NA | 1 | 12 | 0 | NA |
| 22 | 22511201 | 22506689 | -1 | NM_001002862 | DERL3    | 1 | 24 | 1 | 14 | 0 | NA | 1 | 23 | 1 | 14 |
| 22 | 22511201 | 22506689 | -1 | NM_198440    | DERL3    | 1 | 24 | 1 | 14 | 0 | NA | 1 | 23 | 1 | 14 |
| 22 | 22529058 | 22557054 | 1  | NM_001024938 | SLC2A11  | 0 | NA | 0 | NA | 1 | 12 | 1 | 12 | 0 | NA |
| 22 | 22529058 | 22557389 | 1  | NM_030807    | SLC2A11  | 0 | NA | 0 | NA | 1 | 12 | 1 | 12 | 0 | NA |
| 22 | 22530149 | 22557090 | 1  | NM_001024939 | SLC2A11  | 0 | NA | 0 | NA | 1 | 12 | 1 | 12 | 0 | NA |
| 22 | 22566564 | 22567409 | 1  | NM_002415    | MIF      | 0 | NA | 0 | NA | 0 | NA | 0 | NA | 0 | NA |
| 22 | 22633368 | 22629600 | -1 | NM_001080843 | GSTT2B   | 0 | NA | 0 | NA | 0 | NA | 0 | NA | 0 | NA |
| 22 | 22633393 | 22629600 | -1 | NM_000854    | GSTT2    | 0 | NA | 0 | NA | 0 | NA | 0 | NA | 0 | NA |
| 22 | 22639025 | 22644748 | 1  | NM_001084393 | DDTL     | 0 | NA | 0 | NA | 0 | NA | 1 | 11 | 0 | NA |
| 22 | 22646680 | 22643553 | -1 | NM_001084392 | DDT      | 0 | NA | 0 | NA | 0 | NA | 1 | 11 | 0 | NA |
| 22 | 22652019 | 22643553 | -1 | NM_001355    | DDT      | 0 | NA | 0 | NA | 1 | 13 | 1 | 11 | 0 | NA |
| 22 | 22652313 | 22656106 | 1  | NM_000854    | GSTT2    | 0 | NA | 0 | NA | 1 | 13 | 1 | 11 | 0 | NA |
| 22 | 22714284 | 22706138 | -1 | NM_000853    | GSTT1    | 0 | NA | 0 | NA | 0 | NA | 0 | NA | 0 | NA |
| 22 | 22737764 | 22904596 | 1  | NM_012295    | CABIN1   | 1 | 11 | 0 | NA | 0 | NA | 0 | NA | 0 | NA |
| 22 | 22907443 | 22915074 | 1  | NM_019601    | SUSD2    | 0 | NA | 0 | NA | 0 | NA | 0 | NA | 0 | NA |
| 22 | 22971110 | 22945621 | -1 | NM_001099781 | GGT5     | 1 | 12 | 0 | NA | 0 | NA | 0 | NA | 0 | NA |
| 22 | 22971110 | 22945621 | -1 | NM_001099782 | GGT5     | 1 | 12 | 0 | NA | 0 | NA | 0 | NA | 0 | NA |
| 22 | 22971110 | 22945621 | -1 | NM_004121    | GGT5     | 1 | 12 | 0 | NA | 0 | NA | 0 | NA | 0 | NA |
| 22 | 22996865 | 23143221 | 1  | NM_015330    | SPECC1L  | 0 | NA | 0 | NA | 0 | NA | 0 | NA | 0 | NA |
| 22 | 23153529 | 23168325 | 1  | NM_000675    | ADORA2A  | 0 | NA | 0 | NA | 0 | NA | 0 | NA | 0 | NA |
| 22 | 23221250 | 23252553 | 1  | NM_016327    | UPB1     | 0 | NA | 1 | 23 | 0 | NA | 0 | NA | 1 | 12 |
| 22 | 23281275 | 23266407 | -1 | NM_031444    | C22orf13 | 0 | NA | 0 | NA | 0 | NA | 1 | 32 | 0 | NA |
| 22 | 23281617 | 23298509 | 1  | NM_004175    | SNRPD3   | 0 | NA | 0 | NA | 0 | NA | 1 | 32 | 0 | NA |
| 22 | 23309717 | 23354972 | 1  | NM_013430    | GGT1     | 0 | NA | 0 | NA | 0 | NA | 1 | 17 | 0 | NA |
| 22 | 23319035 | 23311590 | -1 | NM_207644    | C22orf36 | 0 | NA | 0 | NA | 0 | NA | 1 | 17 | 0 | NA |
| 22 | 23329179 | 23354972 | 1  | NM_001032364 | GGT1     | 0 | NA | 0 | NA | 0 | NA | 0 | NA | 0 | NA |
| 22 | 23329179 | 23354972 | 1  | NM_005265    | GGT1     | 0 | NA | 0 | NA | 0 | NA | 0 | NA | 0 | NA |
| 22 | 23333654 | 23354972 | 1  | NM_001032365 | GGT1     | 0 | NA | 0 | NA | 0 | NA | 0 | NA | 0 | NA |
| 22 | 23500683 | 23445000 | -1 | NM_001008496 | PIWIL3   | 0 | NA | 0 | NA | 0 | NA | 0 | NA | 0 | NA |
| 22 | 23532135 | 23652813 | 1  | NM_001039948 | SGSM1    | 0 | NA | 0 | NA | 0 | NA | 0 | NA | 0 | NA |
| 22 | 23532135 | 23652813 | 1  | NM_001098497 | SGSM1    | 0 | NA | 0 | NA | 0 | NA | 0 | NA | 0 | NA |
| 22 | 23532135 | 23652813 | 1  | NM_001098498 | SGSM1    | 0 | NA | 0 | NA | 0 | NA | 0 | NA | 0 | NA |
| 22 | 23532135 | 23652813 | 1  | NM_133454    | SGSM1    | 0 | NA | 0 | NA | 0 | NA | 0 | NA | 0 | NA |
| 22 | 23665314 | 23661207 | -1 | NM_001001663 | bA9F11.1 | 0 | NA | 0 | NA | 0 | NA | 0 | NA | 0 | NA |
| 22 | 23925824 | 23933324 | 1  | NM_004076    | CRYBB3   | 0 | NA | 0 | NA | 0 | NA | 0 | NA | 0 | NA |
| 22 | 23945611 | 23957836 | 1  | NM_000496    | CRYBB2   | 0 | NA | 0 | NA | 0 | NA | 0 | NA | 0 | NA |
| 22 | 24043887 | 24046192 | 1  | NM_001013618 | IGLL3    | 0 | NA | 0 | NA | 0 | NA | 0 | NA | 0 | NA |
| 22 | 24088524 | 24077426 | -1 | NM_182492    | LRP5L    | 0 | NA | 0 | NA | 0 | NA | 0 | NA | 0 | NA |
| 22 | 24290860 | 24455258 | 1  | NM_005160    | ADRBK2   | 0 | NA | 0 | NA | 0 | NA | 0 | NA | 0 | NA |
| 22 | 24468119 | 24757007 | 1  | NM_032608    | MYO18B   | 0 | NA | 0 | NA | 0 | NA | 0 | NA | 0 | NA |
| 22 | 24895479 | 25106436 | 1  | NM_021115    | SEZ6L    | 0 | NA | 0 | NA | 0 | NA | 0 | NA | 0 | NA |
| 22 | 25155301 | 25169571 | 1  | NM_020437    | ASPHD2   | 0 | NA | 0 | NA | 0 | NA | 0 | NA | 1 | 12 |
| 22 | 25205551 | 25177445 | -1 | NM_152841    | HPS4     | 0 | NA | 0 | NA | 0 | NA | 0 | NA | 0 | NA |
| 22 | 25209820 | 25177445 | -1 | NM_022081    | HPS4     | 0 | NA | 0 | NA | 0 | NA | 0 | NA | 0 | NA |
| 22 | 25209849 | 25217904 | 1  | NM_001013694 | SRRD     | 0 | NA | 0 | NA | 0 | NA | 0 | NA | 0 | NA |
| 22 | 25238437 | 25217894 | -1 | NM_001008697 | TFIP11   | 1 | 15 | 0 | NA | 0 | NA | 0 | NA | 0 | NA |
| 22 | 25238437 | 25217894 | -1 | NM_012143    | TFIP11   | 1 | 15 | 0 | NA | 0 | NA | 0 | NA | 0 | NA |
| 22 | 25291370 | 25251713 | -1 | NM_001008566 | TPST2    | 0 | NA | 0 | NA | 0 | NA | 0 | NA | 0 | NA |
| 22 | 25316089 | 25251713 | -1 | NM_003595    | TPST2    | 0 | NA | 0 | NA | 0 | NA | 0 | NA | 0 | NA |

|    |          |          |    |              |           |   |    |   |    |   |    |   |    |   |    |
|----|----------|----------|----|--------------|-----------|---|----|---|----|---|----|---|----|---|----|
| 22 | 25343991 | 25325361 | -1 | NM_001887    | CRYBB1    | 0 | NA | 0 | NA | 0 | NA | 0 | NA | 0 | NA |
| 22 | 25347927 | 25356636 | 1  | NM_001886    | CRYBA4    | 0 | NA | 0 | NA | 0 | NA | 0 | NA | 0 | NA |
| 22 | 26527486 | 26474264 | -1 | NM_002430    | MN1       | 0 | NA | 0 | NA | 0 | NA | 0 | NA | 0 | NA |
| 22 | 26645255 | 26577656 | -1 | NM_012399    | PITPNB    | 0 | NA | 0 | NA | 0 | NA | 1 | 11 | 0 | NA |
| 22 | 27467822 | 27413730 | -1 | NM_001005735 | CHEK2     | 1 | 11 | 0 | NA | 0 | NA | 0 | NA | 0 | NA |
| 22 | 27467822 | 27413730 | -1 | NM_007194    | CHEK2     | 1 | 11 | 0 | NA | 0 | NA | 0 | NA | 0 | NA |
| 22 | 27467822 | 27413730 | -1 | NM_145862    | CHEK2     | 1 | 11 | 0 | NA | 0 | NA | 0 | NA | 0 | NA |
| 22 | 27468042 | 27483496 | 1  | NM_172002    | HSCB      | 1 | 11 | 0 | NA | 0 | NA | 0 | NA | 0 | NA |
| 22 | 27498706 | 27515278 | 1  | NM_173510    | CCDC117   | 0 | NA | 0 | NA | 0 | NA | 0 | NA | 0 | NA |
| 22 | 27526560 | 27520547 | -1 | NM_001079539 | XBP1      | 0 | NA | 0 | NA | 0 | NA | 0 | NA | 0 | NA |
| 22 | 27526560 | 27520547 | -1 | NM_005080    | XBP1      | 0 | NA | 0 | NA | 0 | NA | 0 | NA | 0 | NA |
| 22 | 27609889 | 27783475 | 1  | NM_032173    | ZNRF3     | 0 | NA | 0 | NA | 0 | NA | 1 | 21 | 0 | NA |
| 22 | 27787907 | 27784659 | -1 | NM_015370    | C22orf31  | 0 | NA | 0 | NA | 0 | NA | 0 | NA | 0 | NA |
| 22 | 27799105 | 27872808 | 1  | NM_001039570 | KREMEN1   | 0 | NA | 0 | NA | 0 | NA | 0 | NA | 0 | NA |
| 22 | 27799105 | 27872808 | 1  | NM_001039571 | KREMEN1   | 0 | NA | 0 | NA | 0 | NA | 0 | NA | 0 | NA |
| 22 | 27931952 | 27985586 | 1  | NM_133455    | EMID1     | 0 | NA | 0 | NA | 1 | 12 | 0 | NA | 0 | NA |
| 22 | 27993914 | 27985843 | -1 | NM_012265    | RHBD3     | 0 | NA | 0 | NA | 0 | NA | 0 | NA | 0 | NA |
| 22 | 27994016 | 28026515 | 1  | NM_005243    | EWSR1     | 0 | NA | 0 | NA | 0 | NA | 0 | NA | 0 | NA |
| 22 | 27994016 | 28026515 | 1  | NM_013986    | EWSR1     | 0 | NA | 0 | NA | 0 | NA | 0 | NA | 0 | NA |
| 22 | 28032996 | 28038774 | 1  | NM_006478    | GAS2L1    | 0 | NA | 0 | NA | 0 | NA | 1 | 12 | 0 | NA |
| 22 | 28032996 | 28038774 | 1  | NM_152236    | GAS2L1    | 0 | NA | 0 | NA | 0 | NA | 1 | 12 | 0 | NA |
| 22 | 28032996 | 28038774 | 1  | NM_152237    | GAS2L1    | 0 | NA | 0 | NA | 0 | NA | 1 | 12 | 0 | NA |
| 22 | 28041748 | 28038921 | -1 | NM_001007279 | RASL10A   | 0 | NA | 0 | NA | 0 | NA | 1 | 12 | 0 | NA |
| 22 | 28041748 | 28038921 | -1 | NM_006477    | RASL10A   | 0 | NA | 0 | NA | 0 | NA | 1 | 12 | 0 | NA |
| 22 | 28114569 | 28053668 | -1 | NM_001127    | AP1B1     | 0 | NA | 0 | NA | 0 | NA | 0 | NA | 0 | NA |
| 22 | 28114569 | 28053668 | -1 | NM_145730    | AP1B1     | 0 | NA | 0 | NA | 0 | NA | 0 | NA | 0 | NA |
| 22 | 28164571 | 28168444 | 1  | NM_021026    | RFPL1     | 0 | NA | 0 | NA | 0 | NA | 0 | NA | 0 | NA |
| 22 | 28206218 | 28217277 | 1  | NM_021076    | NEFH      | 0 | NA | 1 | 12 | 0 | NA | 0 | NA | 0 | NA |
| 22 | 28279644 | 28234155 | -1 | NM_001002878 | THOC5     | 0 | NA | 0 | NA | 0 | NA | 1 | 15 | 0 | NA |
| 22 | 28279644 | 28234155 | -1 | NM_001002879 | THOC5     | 0 | NA | 0 | NA | 0 | NA | 1 | 15 | 0 | NA |
| 22 | 28279736 | 28234155 | -1 | NM_001002877 | THOC5     | 0 | NA | 0 | NA | 0 | NA | 1 | 15 | 0 | NA |
| 22 | 28279736 | 28234155 | -1 | NM_003678    | THOC5     | 0 | NA | 0 | NA | 0 | NA | 1 | 15 | 0 | NA |
| 22 | 28307326 | 28280799 | -1 | NM_003634    | NIPSNAP1  | 0 | NA | 0 | NA | 0 | NA | 0 | NA | 0 | NA |
| 22 | 28329544 | 28409904 | 1  | NM_181825    | NF2       | 1 | 11 | 0 | NA | 0 | NA | 1 | 19 | 0 | NA |
| 22 | 28329544 | 28409904 | 1  | NM_181831    | NF2       | 1 | 11 | 0 | NA | 0 | NA | 1 | 19 | 0 | NA |
| 22 | 28329544 | 28424589 | 1  | NM_000268    | NF2       | 1 | 11 | 0 | NA | 0 | NA | 1 | 19 | 0 | NA |
| 22 | 28329544 | 28424589 | 1  | NM_016418    | NF2       | 1 | 11 | 0 | NA | 0 | NA | 1 | 19 | 0 | NA |
| 22 | 28329544 | 28424589 | 1  | NM_181828    | NF2       | 1 | 11 | 0 | NA | 0 | NA | 1 | 19 | 0 | NA |
| 22 | 28329544 | 28424589 | 1  | NM_181829    | NF2       | 1 | 11 | 0 | NA | 0 | NA | 1 | 19 | 0 | NA |
| 22 | 28329544 | 28424589 | 1  | NM_181830    | NF2       | 1 | 11 | 0 | NA | 0 | NA | 1 | 19 | 0 | NA |
| 22 | 28329544 | 28424589 | 1  | NM_181832    | NF2       | 1 | 11 | 0 | NA | 0 | NA | 1 | 19 | 0 | NA |
| 22 | 28329544 | 28424589 | 1  | NM_181833    | NF2       | 1 | 11 | 0 | NA | 0 | NA | 1 | 19 | 0 | NA |
| 22 | 28446343 | 28457820 | 1  | NM_182527    | CABP7     | 0 | NA | 0 | NA | 0 | NA | 0 | NA | 0 | NA |
| 22 | 28492969 | 28456944 | -1 | NM_001003692 | ZMAT5     | 0 | NA | 0 | NA | 0 | NA | 0 | NA | 0 | NA |
| 22 | 28492969 | 28456944 | -1 | NM_019103    | ZMAT5     | 0 | NA | 0 | NA | 0 | NA | 0 | NA | 0 | NA |
| 22 | 28493357 | 28496402 | 1  | NM_001003684 | UCRC      | 0 | NA | 0 | NA | 0 | NA | 0 | NA | 0 | NA |
| 22 | 28493357 | 28496402 | 1  | NM_013387    | UCRC      | 0 | NA | 0 | NA | 0 | NA | 0 | NA | 0 | NA |
| 22 | 28564254 | 28514600 | -1 | NM_032204    | ASCC2     | 1 | 18 | 0 | NA | 0 | NA | 0 | NA | 0 | NA |
| 22 | 28609157 | 28756857 | 1  | NM_021090    | MTMR3     | 0 | NA | 0 | NA | 0 | NA | 0 | NA | 0 | NA |
| 22 | 28609157 | 28756857 | 1  | NM_153050    | MTMR3     | 0 | NA | 0 | NA | 0 | NA | 0 | NA | 0 | NA |
| 22 | 28609157 | 28756857 | 1  | NM_153051    | MTMR3     | 0 | NA | 0 | NA | 0 | NA | 0 | NA | 0 | NA |
| 22 | 28806452 | 28903062 | 1  | NM_152510    | HORMAD2   | 0 | NA | 0 | NA | 0 | NA | 0 | NA | 0 | NA |
| 22 | 28972748 | 28966442 | -1 | NM_002309    | LIF       | 1 | 11 | 0 | NA | 0 | NA | 1 | 12 | 0 | NA |
| 22 | 28992840 | 28988818 | -1 | NM_020530    | OSM       | 0 | NA | 0 | NA | 1 | 12 | 0 | NA | 0 | NA |
| 22 | 29015502 | 29011106 | -1 | NM_001037666 | LOC652968 | 0 | NA | 0 | NA | 0 | NA | 0 | NA | 0 | NA |
| 22 | 29052894 | 29017978 | -1 | NM_031937    | TBC1D10A  | 1 | 14 | 0 | NA | 0 | NA | 1 | 13 | 0 | NA |
| 22 | 29082913 | 29057976 | -1 | NM_001005409 | SF3A1     | 0 | NA | 0 | NA | 0 | NA | 0 | NA | 0 | NA |
| 22 | 29082913 | 29057976 | -1 | NM_005877    | SF3A1     | 0 | NA | 0 | NA | 0 | NA | 0 | NA | 0 | NA |
| 22 | 29083035 | 29102818 | 1  | NM_001017437 | LOC550631 | 0 | NA | 0 | NA | 0 | NA | 0 | NA | 0 | NA |
| 22 | 29113302 | 29104802 | -1 | NM_001017981 | RNF215    | 0 | NA | 0 | NA | 0 | NA | 1 | 21 | 0 | NA |
| 22 | 29122932 | 29149828 | 1  | NM_012429    | SEC14L2   | 0 | NA | 0 | NA | 0 | NA | 1 | 21 | 0 | NA |
| 22 | 29151719 | 29155041 | 1  | NM_001003704 | MTP18     | 1 | 12 | 0 | NA | 0 | NA | 0 | NA | 0 | NA |
| 22 | 29151719 | 29155041 | 1  | NM_016498    | MTP18     | 1 | 12 | 0 | NA | 0 | NA | 0 | NA | 0 | NA |
| 22 | 29198017 | 29185218 | -1 | NM_174975    | SEC14L3   | 0 | NA | 0 | NA | 0 | NA | 0 | NA | 1 | 12 |
| 22 | 29231682 | 29214899 | -1 | NM_174977    | SEC14L4   | 0 | NA | 0 | NA | 0 | NA | 0 | NA | 0 | NA |

|    |          |          |    |              |           |   |    |   |    |   |    |   |    |   |    |
|----|----------|----------|----|--------------|-----------|---|----|---|----|---|----|---|----|---|----|
| 22 | 29290876 | 29280623 | -1 | NM_004861    | GAL3ST1   | 0 | NA | 0 | NA | 0 | NA | 0 | NA | 0 | NA |
| 22 | 29317894 | 29302611 | -1 | NM_014303    | PES1      | 0 | NA | 0 | NA | 0 | NA | 0 | NA | 0 | NA |
| 22 | 29333160 | 29353047 | 1  | NM_000355    | TCN2      | 0 | NA | 0 | NA | 0 | NA | 0 | NA | 0 | NA |
| 22 | 29361792 | 29373862 | 1  | NM_001001479 | SLC35E4   | 0 | NA | 0 | NA | 0 | NA | 1 | 16 | 0 | NA |
| 22 | 29393872 | 29388038 | -1 | NM_152511    | DUSP18    | 1 | 11 | 0 | NA | 0 | NA | 0 | NA | 0 | NA |
| 22 | 29420792 | 29633811 | 1  | NM_030758    | OSBP2     | 0 | NA | 0 | NA | 0 | NA | 0 | NA | 0 | NA |
| 22 | 29694187 | 29652599 | -1 | NM_014941    | MORC2     | 1 | 16 | 1 | 25 | 1 | 14 | 1 | 51 | 1 | 22 |
| 22 | 29807304 | 29830609 | 1  | NM_006932    | SMTN      | 1 | 13 | 0 | NA | 0 | NA | 0 | NA | 0 | NA |
| 22 | 29807304 | 29830609 | 1  | NM_134269    | SMTN      | 1 | 13 | 0 | NA | 0 | NA | 0 | NA | 0 | NA |
| 22 | 29807304 | 29830609 | 1  | NM_134270    | SMTN      | 1 | 13 | 0 | NA | 0 | NA | 0 | NA | 0 | NA |
| 22 | 29833551 | 29830762 | -1 | NM_080430    | SELM      | 0 | NA | 0 | NA | 0 | NA | 0 | NA | 0 | NA |
| 22 | 29848960 | 29860683 | 1  | NM_001002837 | PIB5PA    | 0 | NA | 0 | NA | 0 | NA | 0 | NA | 0 | NA |
| 22 | 29866469 | 29860792 | -1 | NM_015715    | PLA2G3    | 0 | NA | 0 | NA | 0 | NA | 0 | NA | 0 | NA |
| 22 | 29886178 | 29933000 | 1  | NM_152267    | RNF185    | 0 | NA | 0 | NA | 0 | NA | 0 | NA | 0 | NA |
| 22 | 29938249 | 30006066 | 1  | NM_005569    | LIMK2     | 0 | NA | 0 | NA | 0 | NA | 0 | NA | 0 | NA |
| 22 | 29974347 | 30003624 | 1  | NM_001031801 | LIMK2     | 0 | NA | 0 | NA | 1 | 16 | 1 | 12 | 0 | NA |
| 22 | 29974347 | 30006066 | 1  | NM_016733    | LIMK2     | 0 | NA | 0 | NA | 1 | 16 | 1 | 12 | 0 | NA |
| 22 | 30018474 | 30007578 | -1 | NM_052880    | PIK3IP1   | 1 | 15 | 0 | NA | 1 | 12 | 0 | NA | 0 | NA |
| 22 | 30072249 | 30051789 | -1 | NM_014323    | PATZ1     | 0 | NA | 0 | NA | 0 | NA | 0 | NA | 0 | NA |
| 22 | 30072249 | 30051789 | -1 | NM_032050    | PATZ1     | 0 | NA | 0 | NA | 0 | NA | 0 | NA | 0 | NA |
| 22 | 30072249 | 30051789 | -1 | NM_032052    | PATZ1     | 0 | NA | 0 | NA | 0 | NA | 0 | NA | 0 | NA |
| 22 | 30072249 | 30066664 | -1 | NM_032051    | PATZ1     | 0 | NA | 0 | NA | 0 | NA | 0 | NA | 0 | NA |
| 22 | 30125538 | 30160172 | 1  | NM_004147    | DRG1      | 0 | NA | 1 | 12 | 0 | NA | 1 | 16 | 0 | NA |
| 22 | 30215704 | 30165354 | -1 | NM_019843    | EIF4ENIF1 | 0 | NA | 0 | NA | 0 | NA | 1 | 14 | 0 | NA |
| 22 | 30222260 | 30344534 | 1  | NM_001007467 | SF11      | 0 | NA | 0 | NA | 0 | NA | 1 | 14 | 0 | NA |
| 22 | 30222260 | 30344534 | 1  | NM_014775    | SF11      | 0 | NA | 0 | NA | 0 | NA | 1 | 14 | 0 | NA |
| 22 | 30356810 | 30344478 | -1 | NM_014338    | PISD      | 0 | NA | 0 | NA | 1 | 13 | 0 | NA | 0 | NA |
| 22 | 30438731 | 30402241 | -1 | NM_173566    | C22orf30  | 0 | NA | 0 | NA | 0 | NA | 0 | NA | 0 | NA |
| 22 | 30480068 | 30541974 | 1  | NM_001007188 | DEPDC5    | 1 | 15 | 0 | NA | 0 | NA | 1 | 11 | 0 | NA |
| 22 | 30480068 | 30633001 | 1  | NM_014662    | DEPDC5    | 1 | 15 | 0 | NA | 0 | NA | 1 | 11 | 0 | NA |
| 22 | 30670478 | 30683590 | 1  | NM_003405    | YWHAH     | 0 | NA | 0 | NA | 0 | NA | 0 | NA | 0 | NA |
| 22 | 30671336 | 30659506 | -1 | NM_015372    | C22orf24  | 0 | NA | 0 | NA | 0 | NA | 0 | NA | 0 | NA |
| 22 | 30765434 | 30765974 | 1  | NM_001080499 | LOC402057 | 0 | NA | 0 | NA | 0 | NA | 0 | NA | 0 | NA |
| 22 | 30769258 | 30836645 | 1  | NM_000343    | SLC5A1    | 0 | NA | 0 | NA | 0 | NA | 0 | NA | 0 | NA |
| 22 | 30885243 | 30875518 | -1 | NM_001010859 | LOC150297 | 0 | NA | 1 | 12 | 0 | NA | 0 | NA | 0 | NA |
| 22 | 30919179 | 30916424 | -1 | NM_001098527 | RFPL2     | 0 | NA | 0 | NA | 0 | NA | 0 | NA | 0 | NA |
| 22 | 30919466 | 30916424 | -1 | NM_006605    | RFPL2     | 0 | NA | 0 | NA | 0 | NA | 0 | NA | 0 | NA |
| 22 | 30981319 | 30944462 | -1 | NM_014227    | SLC5A4    | 0 | NA | 0 | NA | 0 | NA | 0 | NA | 1 | 13 |
| 22 | 31080871 | 31087148 | 1  | NM_006604    | RFPL3     | 0 | NA | 1 | 14 | 0 | NA | 0 | NA | 1 | 18 |
| 22 | 31083853 | 31087148 | 1  | NM_001098535 | RFPL3     | 0 | NA | 1 | 14 | 0 | NA | 0 | NA | 1 | 18 |
| 22 | 31138274 | 31113561 | -1 | NM_014306    | C22orf28  | 0 | NA | 0 | NA | 0 | NA | 0 | NA | 0 | NA |
| 22 | 31183373 | 31140289 | -1 | NM_174932    | BPIL2     | 0 | NA | 0 | NA | 0 | NA | 0 | NA | 0 | NA |
| 22 | 31200706 | 31224818 | 1  | NM_012179    | FBX07     | 0 | NA | 0 | NA | 1 | 13 | 0 | NA | 0 | NA |
| 22 | 31201223 | 31224818 | 1  | NM_001033024 | FBX07     | 0 | NA | 0 | NA | 1 | 13 | 0 | NA | 0 | NA |
| 22 | 31526801 | 31589028 | 1  | NM_000362    | TIMP3     | 0 | NA | 0 | NA | 1 | 13 | 0 | NA | 0 | NA |
| 22 | 31732683 | 31238539 | -1 | NM_003490    | SYN3      | 1 | 12 | 1 | 14 | 0 | NA | 1 | 19 | 1 | 20 |
| 22 | 31732683 | 31238539 | -1 | NM_133633    | SYN3      | 1 | 12 | 1 | 14 | 0 | NA | 1 | 19 | 1 | 20 |
| 22 | 32646410 | 31999062 | -1 | NM_004737    | LARGE     | 1 | 14 | 0 | NA | 0 | NA | 1 | 13 | 0 | NA |
| 22 | 32646410 | 31999062 | -1 | NM_133642    | LARGE     | 1 | 14 | 0 | NA | 0 | NA | 1 | 13 | 0 | NA |
| 22 | 33792129 | 33813380 | 1  | NM_001008494 | ISX       | 0 | NA | 0 | NA | 0 | NA | 0 | NA | 0 | NA |
| 22 | 33983488 | 34021800 | 1  | NM_001003681 | HMG2L1    | 0 | NA | 0 | NA | 0 | NA | 0 | NA | 0 | NA |
| 22 | 33983488 | 34021800 | 1  | NM_005487    | HMG2L1    | 0 | NA | 0 | NA | 0 | NA | 0 | NA | 0 | NA |
| 22 | 33983488 | 34021800 | 1  | NM_014250    | HMG2L1    | 0 | NA | 0 | NA | 0 | NA | 0 | NA | 0 | NA |
| 22 | 34025860 | 34073973 | 1  | NM_005488    | TOM1      | 0 | NA | 0 | NA | 0 | NA | 0 | NA | 0 | NA |
| 22 | 34107086 | 34120194 | 1  | NM_002133    | HMOX1     | 0 | NA | 0 | NA | 0 | NA | 0 | NA | 0 | NA |
| 22 | 34126115 | 34150495 | 1  | NM_006739    | MCM5      | 0 | NA | 0 | NA | 0 | NA | 1 | 12 | 0 | NA |
| 22 | 34267297 | 34279991 | 1  | NM_014310    | RASD2     | 0 | NA | 0 | NA | 0 | NA | 0 | NA | 1 | 12 |
| 22 | 34343330 | 34332756 | -1 | NM_005368    | MB        | 0 | NA | 0 | NA | 0 | NA | 0 | NA | 0 | NA |
| 22 | 34343501 | 34332756 | -1 | NM_203378    | MB        | 0 | NA | 0 | NA | 0 | NA | 0 | NA | 0 | NA |
| 22 | 34349347 | 34332756 | -1 | NM_203377    | MB        | 0 | NA | 0 | NA | 0 | NA | 1 | 11 | 0 | NA |
| 22 | 34374369 | 34394402 | 1  | NM_030641    | APOL6     | 3 | NA | 0 | NA | 0 | NA | 0 | NA | 0 | NA |
| 22 | 34443864 | 34455475 | 1  | NM_030642    | APOL5     | 0 | NA | 0 | NA | 0 | NA | 0 | NA | 1 | 13 |
| 22 | 34566576 | 34464728 | -1 | NM_001031695 | RBM9      | 0 | NA | 0 | NA | 1 | 15 | 0 | NA | 0 | NA |
| 22 | 34566576 | 34464728 | -1 | NM_001082576 | RBM9      | 0 | NA | 0 | NA | 1 | 15 | 0 | NA | 0 | NA |
| 22 | 34566576 | 34464728 | -1 | NM_001082577 | RBM9      | 0 | NA | 0 | NA | 1 | 15 | 0 | NA | 0 | NA |

|    |          |          |    |              |          |   |    |   |    |   |    |   |    |   |    |
|----|----------|----------|----|--------------|----------|---|----|---|----|---|----|---|----|---|----|
| 22 | 34566576 | 34464728 | -1 | NM_014309    | RBM9     | 0 | NA | 0 | NA | 1 | 15 | 0 | NA | 0 | NA |
| 22 | 34754531 | 34464728 | -1 | NM_001082578 | RBM9     | 1 | 12 | 0 | NA | 0 | NA | 0 | NA | 0 | NA |
| 22 | 34754531 | 34464728 | -1 | NM_001082579 | RBM9     | 1 | 12 | 0 | NA | 0 | NA | 0 | NA | 0 | NA |
| 22 | 34886923 | 34866322 | -1 | NM_014349    | APOL3    | 0 | NA | 0 | NA | 0 | NA | 0 | NA | 0 | NA |
| 22 | 34886923 | 34866322 | -1 | NM_030644    | APOL3    | 0 | NA | 0 | NA | 0 | NA | 0 | NA | 0 | NA |
| 22 | 34886923 | 34866322 | -1 | NM_145639    | APOL3    | 0 | NA | 0 | NA | 0 | NA | 0 | NA | 0 | NA |
| 22 | 34886923 | 34866322 | -1 | NM_145640    | APOL3    | 0 | NA | 0 | NA | 0 | NA | 0 | NA | 0 | NA |
| 22 | 34892171 | 34866322 | -1 | NM_145641    | APOL3    | 0 | NA | 0 | NA | 0 | NA | 0 | NA | 0 | NA |
| 22 | 34892171 | 34866322 | -1 | NM_145642    | APOL3    | 0 | NA | 0 | NA | 0 | NA | 0 | NA | 0 | NA |
| 22 | 34930825 | 34915121 | -1 | NM_030643    | APOL4    | 0 | NA | 0 | NA | 0 | NA | 0 | NA | 0 | NA |
| 22 | 34930825 | 34915121 | -1 | NM_145660    | APOL4    | 0 | NA | 0 | NA | 0 | NA | 0 | NA | 0 | NA |
| 22 | 34965635 | 34952200 | -1 | NM_030882    | APOL2    | 0 | NA | 0 | NA | 0 | NA | 1 | 16 | 0 | NA |
| 22 | 34965946 | 34952200 | -1 | NM_145637    | APOL2    | 0 | NA | 0 | NA | 0 | NA | 1 | 16 | 0 | NA |
| 22 | 34979069 | 34993523 | 1  | NM_003661    | APOL1    | 0 | NA | 0 | NA | 0 | NA | 0 | NA | 0 | NA |
| 22 | 34979069 | 34993523 | 1  | NM_145343    | APOL1    | 0 | NA | 0 | NA | 0 | NA | 0 | NA | 0 | NA |
| 22 | 35113927 | 35007271 | -1 | NM_002473    | MYH9     | 0 | NA | 0 | NA | 0 | NA | 0 | NA | 0 | NA |
| 22 | 35207633 | 35193038 | -1 | NM_012473    | TXN2     | 1 | 11 | 0 | NA | 0 | NA | 1 | 24 | 0 | NA |
| 22 | 35233036 | 35213178 | -1 | NM_024955    | FOXRED2  | 0 | NA | 0 | NA | 0 | NA | 0 | NA | 0 | NA |
| 22 | 35233094 | 35213178 | -1 | NM_001102371 | FOXRED2  | 0 | NA | 0 | NA | 0 | NA | 0 | NA | 0 | NA |
| 22 | 35255223 | 35236842 | -1 | NM_003753    | EIF3D    | 0 | NA | 0 | NA | 0 | NA | 0 | NA | 0 | NA |
| 22 | 35428849 | 35290049 | -1 | NM_006078    | CACNG2   | 0 | NA | 0 | NA | 0 | NA | 0 | NA | 0 | NA |
| 22 | 35502060 | 35484200 | -1 | NM_006860    | RABL4    | 0 | NA | 0 | NA | 0 | NA | 1 | 13 | 0 | NA |
| 22 | 35545463 | 35526690 | -1 | NM_002854    | PVALB    | 0 | NA | 0 | NA | 0 | NA | 0 | NA | 0 | NA |
| 22 | 35586975 | 35604005 | 1  | NM_000631    | NCF4     | 0 | NA | 0 | NA | 0 | NA | 0 | NA | 1 | 13 |
| 22 | 35586975 | 35604005 | 1  | NM_013416    | NCF4     | 0 | NA | 0 | NA | 0 | NA | 0 | NA | 1 | 13 |
| 22 | 35639620 | 35666425 | 1  | NM_000395    | CSF2RB   | 0 | NA | 0 | NA | 0 | NA | 0 | NA | 1 | 13 |
| 22 | 35733785 | 35717116 | -1 | NM_178552    | C22orf33 | 0 | NA | 0 | NA | 0 | NA | 0 | NA | 0 | NA |
| 22 | 35745437 | 35736851 | -1 | NM_003312    | TST      | 0 | NA | 0 | NA | 0 | NA | 0 | NA | 0 | NA |
| 22 | 35745647 | 35755809 | 1  | NM_001013436 | MPST     | 0 | NA | 0 | NA | 0 | NA | 0 | NA | 0 | NA |
| 22 | 35745647 | 35755809 | 1  | NM_001013440 | MPST     | 0 | NA | 0 | NA | 0 | NA | 0 | NA | 0 | NA |
| 22 | 35745647 | 35755809 | 1  | NM_021126    | MPST     | 0 | NA | 0 | NA | 0 | NA | 0 | NA | 0 | NA |
| 22 | 35777724 | 35789376 | 1  | NM_024681    | KCTD17   | 0 | NA | 0 | NA | 0 | NA | 0 | NA | 0 | NA |
| 22 | 35829639 | 35791424 | -1 | NM_153609    | TMPRSS6  | 0 | NA | 0 | NA | 0 | NA | 0 | NA | 0 | NA |
| 22 | 35875908 | 35851825 | -1 | NM_000878    | IL2RB    | 1 | 13 | 1 | 13 | 0 | NA | 0 | NA | 0 | NA |
| 22 | 35914276 | 35906151 | -1 | NM_031910    | C1QTNF6  | 0 | NA | 0 | NA | 0 | NA | 0 | NA | 0 | NA |
| 22 | 35914276 | 35906151 | -1 | NM_182486    | C1QTNF6  | 0 | NA | 0 | NA | 0 | NA | 0 | NA | 0 | NA |
| 22 | 35938299 | 35932190 | -1 | NM_001051    | SSTR3    | 0 | NA | 1 | 19 | 0 | NA | 0 | NA | 0 | NA |
| 22 | 35970251 | 35951255 | -1 | NM_002872    | RAC2     | 0 | NA | 0 | NA | 0 | NA | 0 | NA | 0 | NA |
| 22 | 36008369 | 36041328 | 1  | NM_013385    | PSCD4    | 0 | NA | 1 | 16 | 0 | NA | 0 | NA | 1 | 14 |
| 22 | 36153451 | 36093945 | -1 | NM_052906    | ELFN2    | 0 | NA | 1 | 14 | 0 | NA | 1 | 18 | 0 | NA |
| 22 | 36212331 | 36195048 | -1 | NM_002405    | MFNG     | 0 | NA | 0 | NA | 0 | NA | 0 | NA | 0 | NA |
| 22 | 36245156 | 36216345 | -1 | NM_014550    | CARD10   | 1 | 17 | 0 | NA | 0 | NA | 0 | NA | 0 | NA |
| 22 | 36286416 | 36295356 | 1  | NM_152243    | CDC42EP1 | 1 | 11 | 0 | NA | 0 | NA | 1 | 12 | 1 | 12 |
| 22 | 36305970 | 36296198 | -1 | NM_006498    | LGALS2   | 0 | NA | 0 | NA | 0 | NA | 0 | NA | 0 | NA |
| 22 | 36334448 | 36344077 | 1  | NM_001001561 | GGA1     | 1 | 17 | 0 | NA | 0 | NA | 1 | 11 | 0 | NA |
| 22 | 36334448 | 36359517 | 1  | NM_001001560 | GGA1     | 1 | 17 | 0 | NA | 0 | NA | 1 | 11 | 0 | NA |
| 22 | 36334448 | 36359517 | 1  | NM_013365    | GGA1     | 1 | 17 | 0 | NA | 0 | NA | 1 | 11 | 0 | NA |
| 22 | 36365629 | 36381996 | 1  | NM_018957    | SH3BP1   | 0 | NA | 0 | NA | 1 | 12 | 0 | NA | 0 | NA |
| 22 | 36384682 | 36392885 | 1  | NM_020315    | PDXP     | 1 | 26 | 0 | NA | 0 | NA | 0 | NA | 0 | NA |
| 22 | 36401558 | 36405755 | 1  | NM_002305    | LGALS1   | 0 | NA | 0 | NA | 1 | 17 | 0 | NA | 0 | NA |
| 22 | 36412289 | 36419431 | 1  | NM_024313    | NOL12    | 1 | 25 | 0 | NA | 0 | NA | 0 | NA | 0 | NA |
| 22 | 36423573 | 36502509 | 1  | NM_001039141 | TRIOBP   | 0 | NA | 0 | NA | 0 | NA | 1 | 14 | 0 | NA |
| 22 | 36472186 | 36485907 | 1  | NM_138632    | TRIOBP   | 1 | 34 | 1 | 12 | 1 | 12 | 0 | NA | 0 | NA |
| 22 | 36472186 | 36502509 | 1  | NM_007032    | TRIOBP   | 1 | 34 | 1 | 12 | 1 | 12 | 0 | NA | 0 | NA |
| 22 | 36531059 | 36533389 | 1  | NM_005318    | H1FO     | 0 | NA | 0 | NA | 1 | 15 | 0 | NA | 0 | NA |
| 22 | 36533900 | 36542850 | 1  | NM_014291    | GCAT     | 0 | NA | 0 | NA | 1 | 15 | 0 | NA | 0 | NA |
| 22 | 36549334 | 36551448 | 1  | NM_003614    | GALR3    | 0 | NA | 0 | NA | 0 | NA | 0 | NA | 0 | NA |
| 22 | 36570249 | 36556807 | -1 | NM_138797    | ANKRD54  | 1 | 18 | 0 | NA | 0 | NA | 1 | 24 | 0 | NA |
| 22 | 36575315 | 36614584 | 1  | NM_016091    | EIF3EIP  | 1 | 18 | 0 | NA | 0 | NA | 1 | 24 | 0 | NA |
| 22 | 36632291 | 36667972 | 1  | NM_033386    | MICALL1  | 0 | NA | 0 | NA | 1 | 26 | 0 | NA | 0 | NA |
| 22 | 36679549 | 36669478 | -1 | NM_032561    | C22orf23 | 0 | NA | 0 | NA | 0 | NA | 0 | NA | 0 | NA |
| 22 | 36679663 | 36693752 | 1  | NM_021974    | POLR2F   | 0 | NA | 0 | NA | 0 | NA | 0 | NA | 0 | NA |
| 22 | 36710485 | 36698264 | -1 | NM_006941    | SOX10    | 1 | 11 | 0 | NA | 0 | NA | 0 | NA | 0 | NA |
| 22 | 36783207 | 36801654 | 1  | NM_001039583 | PICK1    | 0 | NA | 0 | NA | 0 | NA | 1 | 16 | 0 | NA |
| 22 | 36783207 | 36801654 | 1  | NM_001039584 | PICK1    | 0 | NA | 0 | NA | 0 | NA | 1 | 16 | 0 | NA |

|    |          |          |    |              |           |   |    |   |    |   |    |   |    |   |    |
|----|----------|----------|----|--------------|-----------|---|----|---|----|---|----|---|----|---|----|
| 22 | 36783207 | 36801654 | 1  | NM_012407    | PICK1     | 0 | NA | 0 | NA | 0 | NA | 1 | 16 | 0 | NA |
| 22 | 36809116 | 36804089 | -1 | NM_013356    | SLC16A8   | 0 | NA | 0 | NA | 0 | NA | 0 | NA | 0 | NA |
| 22 | 36836622 | 36810841 | -1 | NM_025045    | BAIAP2L2  | 0 | NA | 0 | NA | 0 | NA | 0 | NA | 0 | NA |
| 22 | 36907707 | 36837447 | -1 | NM_001004426 | PLA2G6    | 0 | NA | 0 | NA | 1 | 15 | 1 | 13 | 0 | NA |
| 22 | 36907707 | 36837447 | -1 | NM_003560    | PLA2G6    | 0 | NA | 0 | NA | 1 | 15 | 1 | 13 | 0 | NA |
| 22 | 36927943 | 36942460 | 1  | NM_012323    | MAFF      | 0 | NA | 0 | NA | 0 | NA | 0 | NA | 0 | NA |
| 22 | 36939487 | 36942460 | 1  | NM_152878    | MAFF      | 1 | 14 | 0 | NA | 0 | NA | 0 | NA | 0 | NA |
| 22 | 36998962 | 36945243 | -1 | NM_012264    | TMEM184B  | 0 | NA | 0 | NA | 0 | NA | 0 | NA | 0 | NA |
| 22 | 37043359 | 37016642 | -1 | NM_152221    | CSNK1E    | 0 | NA | 0 | NA | 1 | 12 | 0 | NA | 0 | NA |
| 22 | 37044035 | 37016642 | -1 | NM_001894    | CSNK1E    | 0 | NA | 0 | NA | 1 | 12 | 0 | NA | 0 | NA |
| 22 | 37169979 | 37152278 | -1 | NM_004981    | KCNJ4     | 0 | NA | 0 | NA | 0 | NA | 0 | NA | 0 | NA |
| 22 | 37181149 | 37152278 | -1 | NM_152868    | KCNJ4     | 0 | NA | 0 | NA | 0 | NA | 1 | 12 | 0 | NA |
| 22 | 37194028 | 37207583 | 1  | NM_016657    | KDEL3     | 0 | NA | 0 | NA | 0 | NA | 1 | 12 | 0 | NA |
| 22 | 37194028 | 37209391 | 1  | NM_006855    | KDEL3     | 0 | NA | 0 | NA | 0 | NA | 1 | 12 | 0 | NA |
| 22 | 37214481 | 37209388 | -1 | NM_001098505 | DDX17     | 1 | 18 | 0 | NA | 0 | NA | 0 | NA | 0 | NA |
| 22 | 37214481 | 37209388 | -1 | NM_030881    | DDX17     | 1 | 18 | 0 | NA | 0 | NA | 0 | NA | 0 | NA |
| 22 | 37232291 | 37209388 | -1 | NM_001098504 | DDX17     | 0 | NA | 0 | NA | 0 | NA | 0 | NA | 0 | NA |
| 22 | 37232291 | 37209388 | -1 | NM_006386    | DDX17     | 0 | NA | 0 | NA | 0 | NA | 0 | NA | 0 | NA |
| 22 | 37296135 | 37244899 | -1 | NM_007068    | DMC1      | 0 | NA | 0 | NA | 1 | 12 | 0 | NA | 0 | NA |
| 22 | 37382603 | 37399801 | 1  | NM_001002880 | CBY1      | 0 | NA | 0 | NA | 1 | 13 | 0 | NA | 0 | NA |
| 22 | 37382603 | 37399801 | 1  | NM_015373    | CBY1      | 0 | NA | 0 | NA | 1 | 13 | 0 | NA | 0 | NA |
| 22 | 37407899 | 37410711 | 1  | NM_020243    | TOMM22    | 0 | NA | 0 | NA | 1 | 12 | 1 | 17 | 0 | NA |
| 22 | 37426215 | 37411571 | -1 | NM_014876    | JOSD1     | 0 | NA | 0 | NA | 0 | NA | 1 | 15 | 0 | NA |
| 22 | 37431752 | 37459538 | 1  | NM_004286    | GTPBP1    | 0 | NA | 0 | NA | 0 | NA | 1 | 15 | 0 | NA |
| 22 | 37481893 | 37460680 | -1 | NM_015374    | UNC84B    | 0 | NA | 0 | NA | 0 | NA | 0 | NA | 0 | NA |
| 22 | 37520107 | 37504458 | -1 | NM_005740    | DNAL4     | 0 | NA | 1 | 12 | 0 | NA | 0 | NA | 1 | 14 |
| 22 | 37569963 | 37544402 | -1 | NM_014293    | NPTXR     | 0 | NA | 0 | NA | 0 | NA | 0 | NA | 0 | NA |
| 22 | 37598204 | 37590193 | -1 | NM_014292    | CBX6      | 0 | NA | 0 | NA | 0 | NA | 0 | NA | 0 | NA |
| 22 | 37683568 | 37689134 | 1  | NM_145699    | APOBEC3A  | 0 | NA | 0 | NA | 0 | NA | 0 | NA | 0 | NA |
| 22 | 37708350 | 37718729 | 1  | NM_004900    | APOBEC3B  | 1 | 11 | 1 | 12 | 0 | NA | 0 | NA | 0 | NA |
| 22 | 37740210 | 37744771 | 1  | NM_014508    | APOBEC3C  | 1 | 11 | 0 | NA | 0 | NA | 0 | NA | 0 | NA |
| 22 | 37747063 | 37759202 | 1  | NM_152426    | APOBEC3D  | 1 | 11 | 0 | NA | 0 | NA | 0 | NA | 0 | NA |
| 22 | 37766618 | 37770374 | 1  | NM_001006666 | APOBEC3F  | 0 | NA | 0 | NA | 0 | NA | 0 | NA | 0 | NA |
| 22 | 37766618 | 37781921 | 1  | NM_145298    | APOBEC3F  | 0 | NA | 0 | NA | 0 | NA | 0 | NA | 0 | NA |
| 22 | 37803081 | 37813694 | 1  | NM_021822    | APOBEC3G  | 0 | NA | 0 | NA | 0 | NA | 0 | NA | 0 | NA |
| 22 | 37823235 | 37829946 | 1  | NM_181773    | APOBEC3H  | 0 | NA | 0 | NA | 0 | NA | 0 | NA | 0 | NA |
| 22 | 37878484 | 37856724 | -1 | NM_175709    | CBX7      | 0 | NA | 1 | 12 | 0 | NA | 1 | 13 | 0 | NA |
| 22 | 37966865 | 37949664 | -1 | NM_033016    | PDGFB     | 0 | NA | 0 | NA | 0 | NA | 1 | 12 | 0 | NA |
| 22 | 37970936 | 37949664 | -1 | NM_002608    | PDGFB     | 0 | NA | 0 | NA | 0 | NA | 1 | 12 | 0 | NA |
| 22 | 38045616 | 38038832 | -1 | NM_000967    | RPL3      | 1 | 18 | 0 | NA | 0 | NA | 1 | 38 | 0 | NA |
| 22 | 38045616 | 38038832 | -1 | NM_001033853 | RPL3      | 1 | 18 | 0 | NA | 0 | NA | 1 | 38 | 0 | NA |
| 22 | 38075899 | 38104340 | 1  | NM_145731    | SYNGR1    | 0 | NA | 0 | NA | 0 | NA | 1 | 12 | 0 | NA |
| 22 | 38075899 | 38111539 | 1  | NM_004711    | SYNGR1    | 0 | NA | 0 | NA | 0 | NA | 1 | 12 | 0 | NA |
| 22 | 38090120 | 38104340 | 1  | NM_145738    | SYNGR1    | 0 | NA | 0 | NA | 0 | NA | 0 | NA | 0 | NA |
| 22 | 38125704 | 38157833 | 1  | NM_006116    | MAP3K7IP1 | 0 | NA | 0 | NA | 0 | NA | 0 | NA | 0 | NA |
| 22 | 38125704 | 38163078 | 1  | NM_153497    | MAP3K7IP1 | 0 | NA | 0 | NA | 0 | NA | 0 | NA | 0 | NA |
| 22 | 38183270 | 38218145 | 1  | NM_002409    | MGAT3     | 0 | NA | 0 | NA | 0 | NA | 0 | NA | 1 | 13 |
| 22 | 38213174 | 38218145 | 1  | NM_001098270 | MGAT3     | 0 | NA | 0 | NA | 0 | NA | 0 | NA | 0 | NA |
| 22 | 38228229 | 38244083 | 1  | NM_019008    | SMCR7L    | 0 | NA | 0 | NA | 1 | 13 | 0 | NA | 0 | NA |
| 22 | 38246514 | 38248637 | 1  | NM_001675    | ATF4      | 1 | 22 | 0 | NA | 0 | NA | 1 | 12 | 0 | NA |
| 22 | 38246514 | 38248637 | 1  | NM_182810    | ATF4      | 1 | 22 | 0 | NA | 0 | NA | 1 | 12 | 0 | NA |
| 22 | 38258806 | 38255043 | -1 | NM_194326    | RPS19BP1  | 0 | NA | 0 | NA | 0 | NA | 0 | NA | 0 | NA |
| 22 | 38296703 | 38415687 | 1  | NM_001003406 | CACNA1I   | 0 | NA | 1 | 13 | 0 | NA | 0 | NA | 1 | 13 |
| 22 | 38296703 | 38415687 | 1  | NM_021096    | CACNA1I   | 0 | NA | 1 | 13 | 0 | NA | 0 | NA | 1 | 13 |
| 22 | 38619740 | 38468994 | -1 | NM_152512    | ENTHD1    | 0 | NA | 0 | NA | 0 | NA | 0 | NA | 0 | NA |
| 22 | 38627031 | 38697330 | 1  | NM_004810    | GRAP2     | 0 | NA | 0 | NA | 0 | NA | 0 | NA | 0 | NA |
| 22 | 38720898 | 38755989 | 1  | NM_138435    | FAM83F    | 0 | NA | 0 | NA | 0 | NA | 1 | 16 | 0 | NA |
| 22 | 38770766 | 39061758 | 1  | NM_001024843 | TNRC6B    | 0 | NA | 0 | NA | 0 | NA | 0 | NA | 0 | NA |
| 22 | 38903874 | 39061758 | 1  | NM_015088    | TNRC6B    | 0 | NA | 0 | NA | 0 | NA | 0 | NA | 0 | NA |
| 22 | 39072449 | 39092521 | 1  | NM_000026    | ADSL      | 0 | NA | 0 | NA | 0 | NA | 0 | NA | 0 | NA |
| 22 | 39072449 | 39092521 | 1  | NM_001123378 | ADSL      | 0 | NA | 0 | NA | 0 | NA | 0 | NA | 0 | NA |
| 22 | 39096540 | 39136239 | 1  | NM_015705    | SGSM3     | 0 | NA | 0 | NA | 0 | NA | 0 | NA | 0 | NA |
| 22 | 39362636 | 39136237 | -1 | NM_020831    | MKL1      | 0 | NA | 0 | NA | 0 | NA | 0 | NA | 0 | NA |
| 22 | 39405127 | 39408764 | 1  | NM_005297    | MCHR1     | 1 | 14 | 1 | 14 | 1 | 14 | 0 | NA | 0 | NA |
| 22 | 39545338 | 39495584 | -1 | NM_006358    | SLC25A17  | 0 | NA | 0 | NA | 0 | NA | 0 | NA | 0 | NA |

|    |          |          |    |              |           |   |    |   |    |   |    |   |    |   |    |
|----|----------|----------|----|--------------|-----------|---|----|---|----|---|----|---|----|---|----|
| 22 | 39582633 | 39560546 | -1 | NM_003932    | ST13      | 0 | NA | 0 | NA | 0 | NA | 0 | NA | 0 | NA |
| 22 | 39583039 | 39653826 | 1  | NM_022098    | XPNPEP3   | 0 | NA | 0 | NA | 0 | NA | 0 | NA | 0 | NA |
| 22 | 39588076 | 39585499 | -1 | NM_145174    | DNAJB7    | 0 | NA | 0 | NA | 0 | NA | 0 | NA | 0 | NA |
| 22 | 39677330 | 39698614 | 1  | NM_014248    | RBX1      | 0 | NA | 0 | NA | 0 | NA | 0 | NA | 0 | NA |
| 22 | 39818552 | 39906024 | 1  | NM_001429    | EP300     | 0 | NA | 0 | NA | 0 | NA | 0 | NA | 0 | NA |
| 22 | 39931258 | 39957221 | 1  | NM_031488    | L3MBTL2   | 0 | NA | 0 | NA | 0 | NA | 1 | 11 | 0 | NA |
| 22 | 40012162 | 39971560 | -1 | NM_002883    | RANGAP1   | 1 | 23 | 0 | NA | 0 | NA | 0 | NA | 0 | NA |
| 22 | 40027512 | 40086097 | 1  | NM_017590    | ZC3H7B    | 0 | NA | 0 | NA | 0 | NA | 0 | NA | 0 | NA |
| 22 | 40107908 | 40125276 | 1  | NM_003216    | TEF       | 0 | NA | 0 | NA | 0 | NA | 0 | NA | 0 | NA |
| 22 | 40172973 | 40159437 | -1 | NM_016272    | TOB2      | 1 | 15 | 0 | NA | 0 | NA | 1 | 25 | 0 | NA |
| 22 | 40194654 | 40185666 | -1 | NM_032758    | PHF5A     | 0 | NA | 0 | NA | 0 | NA | 1 | 18 | 0 | NA |
| 22 | 40195074 | 40254939 | 1  | NM_001098    | ACO2      | 0 | NA | 0 | NA | 0 | NA | 1 | 18 | 0 | NA |
| 22 | 40270410 | 40251751 | -1 | NM_138338    | POLR3H    | 0 | NA | 0 | NA | 0 | NA | 0 | NA | 0 | NA |
| 22 | 40270412 | 40251751 | -1 | NM_001018050 | POLR3H    | 0 | NA | 0 | NA | 0 | NA | 0 | NA | 0 | NA |
| 22 | 40270412 | 40251751 | -1 | NM_001018052 | POLR3H    | 0 | NA | 0 | NA | 0 | NA | 0 | NA | 0 | NA |
| 22 | 40286959 | 40302616 | 1  | NM_014460    | CSDC2     | 0 | NA | 0 | NA | 0 | NA | 0 | NA | 0 | NA |
| 22 | 40315759 | 40302857 | -1 | NM_002676    | PMM1      | 0 | NA | 0 | NA | 0 | NA | 0 | NA | 0 | NA |
| 22 | 40346862 | 40326881 | -1 | NM_015704    | FAM152B   | 0 | NA | 0 | NA | 0 | NA | 0 | NA | 0 | NA |
| 22 | 40347240 | 40389998 | 1  | NM_001469    | XRCC6     | 0 | NA | 0 | NA | 0 | NA | 0 | NA | 0 | NA |
| 22 | 40408502 | 40399882 | -1 | NM_005008    | NHP2L1    | 0 | NA | 0 | NA | 0 | NA | 1 | 12 | 0 | NA |
| 22 | 40414859 | 40399882 | -1 | NM_001003796 | NHP2L1    | 0 | NA | 0 | NA | 0 | NA | 1 | 12 | 0 | NA |
| 22 | 40425463 | 40525405 | 1  | NM_152513    | MEI1      | 0 | NA | 1 | 13 | 0 | NA | 0 | NA | 0 | NA |
| 22 | 40526623 | 40552249 | 1  | NM_024821    | CCDC134   | 0 | NA | 0 | NA | 0 | NA | 0 | NA | 0 | NA |
| 22 | 40559051 | 40632321 | 1  | NM_004599    | SREBF2    | 1 | 36 | 0 | NA | 1 | 21 | 0 | NA | 0 | NA |
| 22 | 40652767 | 40650981 | -1 | NM_052945    | TNFRSF13C | 0 | NA | 0 | NA | 0 | NA | 0 | NA | 0 | NA |
| 22 | 40666169 | 40664686 | -1 | NM_001110215 | CENPM     | 0 | NA | 0 | NA | 0 | NA | 1 | 24 | 0 | NA |
| 22 | 40673094 | 40664686 | -1 | NM_001002876 | CENPM     | 0 | NA | 0 | NA | 0 | NA | 1 | 24 | 0 | NA |
| 22 | 40673094 | 40664686 | -1 | NM_024053    | CENPM     | 0 | NA | 0 | NA | 0 | NA | 1 | 24 | 0 | NA |
| 22 | 40702876 | 40724171 | 1  | NM_019106    | SEPT3     | 0 | NA | 0 | NA | 0 | NA | 0 | NA | 1 | 13 |
| 22 | 40702876 | 40724171 | 1  | NM_145733    | SEPT3     | 0 | NA | 0 | NA | 0 | NA | 0 | NA | 1 | 13 |
| 22 | 40724737 | 40754423 | 1  | NM_152613    | WBP2NL    | 1 | 28 | 0 | NA | 0 | NA | 0 | NA | 0 | NA |
| 22 | 40796792 | 40784283 | -1 | NM_000262    | NAGA      | 0 | NA | 0 | NA | 0 | NA | 1 | 12 | 0 | NA |
| 22 | 40800200 | 40805388 | 1  | NM_001002034 | FAM109B   | 0 | NA | 0 | NA | 0 | NA | 1 | 12 | 0 | NA |
| 22 | 40805644 | 40810234 | 1  | NM_033318    | C22orf32  | 0 | NA | 0 | NA | 0 | NA | 1 | 12 | 0 | NA |
| 22 | 40816834 | 40811475 | -1 | NM_002490    | NDUFA6    | 0 | NA | 0 | NA | 0 | NA | 1 | 20 | 0 | NA |
| 22 | 40856827 | 40852444 | -1 | NM_000106    | CYP2D6    | 0 | NA | 0 | NA | 0 | NA | 0 | NA | 0 | NA |
| 22 | 40856827 | 40852444 | -1 | NM_001025161 | CYP2D6    | 0 | NA | 0 | NA | 0 | NA | 0 | NA | 0 | NA |
| 22 | 40941389 | 40885962 | -1 | NM_005650    | TCF20     | 0 | NA | 0 | NA | 0 | NA | 0 | NA | 0 | NA |
| 22 | 40941389 | 40885962 | -1 | NM_181492    | TCF20     | 0 | NA | 0 | NA | 0 | NA | 0 | NA | 0 | NA |
| 22 | 41158345 | 41106357 | -1 | NM_145912    | NFAM1     | 0 | NA | 0 | NA | 0 | NA | 0 | NA | 0 | NA |
| 22 | 41226539 | 41238510 | 1  | NM_170694    | SERHL     | 0 | NA | 0 | NA | 0 | NA | 0 | NA | 0 | NA |
| 22 | 41245752 | 41238513 | -1 | NM_015703    | CGI-96    | 0 | NA | 0 | NA | 0 | NA | 0 | NA | 0 | NA |
| 22 | 41279868 | 41300332 | 1  | NM_014509    | SERHL2    | 0 | NA | 0 | NA | 0 | NA | 0 | NA | 0 | NA |
| 22 | 41340906 | 41309670 | -1 | NM_032311    | POLDIP3   | 1 | 15 | 0 | NA | 0 | NA | 0 | NA | 0 | NA |
| 22 | 41340906 | 41309670 | -1 | NM_178136    | POLDIP3   | 1 | 15 | 0 | NA | 0 | NA | 0 | NA | 0 | NA |
| 22 | 41372962 | 41344762 | -1 | NM_007326    | CY5R3     | 0 | NA | 0 | NA | 0 | NA | 0 | NA | 0 | NA |
| 22 | 41375349 | 41344762 | -1 | NM_000398    | CY5R3     | 0 | NA | 0 | NA | 0 | NA | 0 | NA | 0 | NA |
| 22 | 41446820 | 41418070 | -1 | NM_017436    | A4GALT    | 0 | NA | 0 | NA | 0 | NA | 0 | NA | 1 | 14 |
| 22 | 41583244 | 41522475 | -1 | NM_014570    | ARFGAP3   | 1 | 11 | 1 | 14 | 0 | NA | 1 | 12 | 1 | 15 |
| 22 | 41672991 | 41596880 | -1 | NM_007229    | PACSIN2   | 0 | NA | 0 | NA | 1 | 15 | 0 | NA | 0 | NA |
| 22 | 41815373 | 41765588 | -1 | NM_001008572 | TTL1      | 1 | 18 | 1 | 15 | 0 | NA | 1 | 21 | 0 | NA |
| 22 | 41815373 | 41765588 | -1 | NM_012263    | TTL1      | 1 | 18 | 1 | 15 | 0 | NA | 1 | 21 | 0 | NA |
| 22 | 41836700 | 41855662 | 1  | NM_001197    | BIK       | 0 | NA | 0 | NA | 0 | NA | 0 | NA | 0 | NA |
| 22 | 41869347 | 41858155 | -1 | NM_014507    | MCAT      | 0 | NA | 0 | NA | 0 | NA | 1 | 15 | 0 | NA |
| 22 | 41869347 | 41858155 | -1 | NM_173467    | MCAT      | 0 | NA | 0 | NA | 0 | NA | 1 | 15 | 0 | NA |
| 22 | 41877478 | 41889192 | 1  | NM_000714    | TSP0      | 0 | NA | 0 | NA | 0 | NA | 1 | 15 | 0 | NA |
| 22 | 41877478 | 41889192 | 1  | NM_007311    | TSP0      | 0 | NA | 0 | NA | 0 | NA | 1 | 15 | 0 | NA |
| 22 | 41913051 | 41892571 | -1 | NM_015140    | TTL12     | 1 | 11 | 0 | NA | 0 | NA | 1 | 17 | 0 | NA |
| 22 | 42069299 | 41929173 | -1 | NM_173050    | SCUBE1    | 0 | NA | 1 | 12 | 0 | NA | 0 | NA | 1 | 12 |
| 22 | 42137963 | 42234129 | 1  | NM_001044370 | MPPED1    | 0 | NA | 0 | NA | 0 | NA | 0 | NA | 1 | 13 |
| 22 | 42539451 | 42255986 | -1 | NM_022785    | EFCAB6    | 0 | NA | 0 | NA | 0 | NA | 0 | NA | 0 | NA |
| 22 | 42539451 | 42255986 | -1 | NM_198856    | EFCAB6    | 0 | NA | 0 | NA | 0 | NA | 0 | NA | 0 | NA |
| 22 | 42589711 | 42551719 | -1 | NM_014351    | SULT4A1   | 0 | NA | 1 | 12 | 0 | NA | 0 | NA | 1 | 17 |
| 22 | 42619190 | 42606890 | -1 | NM_138814    | PNPLA5    | 0 | NA | 0 | NA | 0 | NA | 0 | NA | 0 | NA |
| 22 | 42650951 | 42674781 | 1  | NM_025225    | PNPLA3    | 0 | NA | 0 | NA | 0 | NA | 0 | NA | 0 | NA |



|    |          |          |    |              |           |   |    |   |    |   |    |   |    |   |    |
|----|----------|----------|----|--------------|-----------|---|----|---|----|---|----|---|----|---|----|
| 22 | 42682633 | 42723745 | 1  | NM_015380    | SAMM50    | 0 | NA | 0 | NA | 0 | NA | 1 | 17 | 0 | NA |
| 22 | 42726505 | 42896436 | 1  | NM_001003828 | PARVB     | 0 | NA | 0 | NA | 0 | NA | 0 | NA | 0 | NA |
| 22 | 42751500 | 42896436 | 1  | NM_013327    | PARVB     | 0 | NA | 0 | NA | 0 | NA | 0 | NA | 0 | NA |
| 22 | 42908189 | 42933868 | 1  | NM_022141    | PARVG     | 0 | NA | 0 | NA | 0 | NA | 0 | NA | 0 | NA |
| 22 | 43040064 | 42970889 | -1 | NM_001099294 | KJAA1644  | 0 | NA | 0 | NA | 0 | NA | 1 | 12 | 0 | NA |
| 22 | 43272869 | 43267113 | -1 | NM_032287    | LDOC1L    | 0 | NA | 0 | NA | 0 | NA | 0 | NA | 1 | 14 |
| 22 | 43343882 | 43346993 | 1  | NM_001012986 | LOC388910 | 0 | NA | 0 | NA | 0 | NA | 0 | NA | 1 | 13 |
| 22 | 43443256 | 43512225 | 1  | NM_001017528 | PRR5      | 0 | NA | 0 | NA | 0 | NA | 0 | NA | 0 | NA |
| 22 | 43443256 | 43512225 | 1  | NM_001017529 | PRR5      | 0 | NA | 0 | NA | 0 | NA | 0 | NA | 0 | NA |
| 22 | 43451351 | 43512225 | 1  | NM_001017530 | PRR5      | 1 | 11 | 0 | NA | 0 | NA | 0 | NA | 0 | NA |
| 22 | 43451351 | 43512225 | 1  | NM_015366    | PRR5      | 1 | 11 | 0 | NA | 0 | NA | 0 | NA | 0 | NA |
| 22 | 43476746 | 43512225 | 1  | NM_181333    | PRR5      | 0 | NA | 0 | NA | 0 | NA | 1 | 25 | 0 | NA |
| 22 | 43489132 | 43637328 | 1  | NM_181334    | LOC553158 | 0 | NA | 0 | NA | 0 | NA | 0 | NA | 0 | NA |
| 22 | 43527101 | 43637328 | 1  | NM_001017526 | ARHGAP8   | 0 | NA | 1 | 13 | 0 | NA | 1 | 11 | 1 | 13 |
| 22 | 43527101 | 43637328 | 1  | NM_181335    | ARHGAP8   | 0 | NA | 1 | 13 | 0 | NA | 1 | 11 | 1 | 13 |
| 22 | 43784245 | 43655705 | -1 | NM_138415    | PHF21B    | 0 | NA | 0 | NA | 0 | NA | 0 | NA | 1 | 15 |
| 22 | 43938389 | 43962554 | 1  | NM_007172    | NUP50     | 0 | NA | 0 | NA | 0 | NA | 0 | NA | 0 | NA |
| 22 | 43939215 | 43962554 | 1  | NM_153645    | NUP50     | 0 | NA | 0 | NA | 0 | NA | 0 | NA | 0 | NA |
| 22 | 43987011 | 43966786 | -1 | NM_015264    | C22orf9   | 0 | NA | 0 | NA | 0 | NA | 1 | 15 | 0 | NA |
| 22 | 44015314 | 43966786 | -1 | NM_001009880 | C22orf9   | 0 | NA | 0 | NA | 0 | NA | 1 | 15 | 0 | NA |
| 22 | 44059552 | 44070419 | 1  | NM_006953    | UPK3A     | 0 | NA | 0 | NA | 0 | NA | 1 | 11 | 1 | 15 |
| 22 | 44083744 | 44116500 | 1  | NM_001104595 | FAM118A   | 1 | 13 | 0 | NA | 0 | NA | 0 | NA | 0 | NA |
| 22 | 44084448 | 44116500 | 1  | NM_017911    | FAM118A   | 1 | 13 | 0 | NA | 0 | NA | 0 | NA | 0 | NA |
| 22 | 44188164 | 44118608 | -1 | NM_148674    | SMC1B     | 0 | NA | 0 | NA | 0 | NA | 0 | NA | 1 | 18 |
| 22 | 44188243 | 44206966 | 1  | NM_015653    | RIBC2     | 0 | NA | 0 | NA | 0 | NA | 0 | NA | 1 | 18 |
| 22 | 44277382 | 44333255 | 1  | NM_006487    | FBLN1     | 0 | NA | 0 | NA | 0 | NA | 0 | NA | 0 | NA |
| 22 | 44277382 | 44337906 | 1  | NM_001996    | FBLN1     | 0 | NA | 0 | NA | 0 | NA | 0 | NA | 0 | NA |
| 22 | 44277382 | 44340245 | 1  | NM_006485    | FBLN1     | 0 | NA | 0 | NA | 0 | NA | 0 | NA | 0 | NA |
| 22 | 44277382 | 44375678 | 1  | NM_006486    | FBLN1     | 0 | NA | 0 | NA | 0 | NA | 0 | NA | 0 | NA |
| 22 | 44446350 | 44619493 | 1  | NM_013236    | ATXN10    | 0 | NA | 0 | NA | 0 | NA | 0 | NA | 0 | NA |
| 22 | 44751395 | 44696320 | -1 | NM_058238    | WNT7B     | 0 | NA | 1 | 25 | 0 | NA | 0 | NA | 1 | 12 |
| 22 | 44828688 | 44825002 | -1 | NM_018280    | C22orf26  | 0 | NA | 0 | NA | 0 | NA | 0 | NA | 0 | NA |
| 22 | 44925162 | 45018317 | 1  | NM_001001928 | PPARA     | 0 | NA | 0 | NA | 0 | NA | 0 | NA | 1 | 12 |
| 22 | 44925162 | 45018317 | 1  | NM_005036    | PPARA     | 0 | NA | 0 | NA | 0 | NA | 0 | NA | 1 | 12 |
| 22 | 45024857 | 45018573 | -1 | NM_207327    | LOC150383 | 0 | NA | 1 | 15 | 0 | NA | 0 | NA | 1 | 19 |
| 22 | 45037883 | 45030223 | -1 | NM_006071    | PKDREJ    | 0 | NA | 1 | 14 | 0 | NA | 0 | NA | 1 | 19 |
| 22 | 45042524 | 45068569 | 1  | NM_017931    | FLJ20699  | 0 | NA | 1 | 14 | 0 | NA | 1 | 11 | 1 | 19 |
| 22 | 45071475 | 45108259 | 1  | NM_016426    | GTSE1     | 0 | NA | 0 | NA | 0 | NA | 0 | NA | 0 | NA |
| 22 | 45109961 | 45131901 | 1  | NM_018006    | TRMU      | 0 | NA | 0 | NA | 0 | NA | 0 | NA | 0 | NA |
| 22 | 45311731 | 45135394 | -1 | NM_014246    | CELSR1    | 1 | 12 | 1 | 15 | 1 | 12 | 1 | 14 | 1 | 15 |
| 22 | 45401321 | 45454352 | 1  | NM_015124    | GRAMD4    | 1 | 11 | 0 | NA | 0 | NA | 0 | NA | 0 | NA |
| 22 | 45512816 | 45458970 | -1 | NM_022766    | CERK      | 0 | NA | 0 | NA | 1 | 12 | 0 | NA | 0 | NA |
| 22 | 45537212 | 45948388 | 1  | NM_014346    | TBC1D22A  | 0 | NA | 0 | NA | 0 | NA | 1 | 22 | 0 | NA |
| 22 | 47263951 | 47533750 | 1  | NM_001082967 | FAM19A5   | 0 | NA | 0 | NA | 0 | NA | 1 | 16 | 0 | NA |
| 22 | 47350781 | 47533750 | 1  | NM_015381    | FAM19A5   | 0 | NA | 1 | 13 | 0 | NA | 0 | NA | 1 | 14 |
| 22 | 48604456 | 48552940 | -1 | NM_014577    | BRD1      | 0 | NA | 1 | 12 | 0 | NA | 0 | NA | 0 | NA |
| 22 | 48633500 | 48669730 | 1  | NM_014838    | ZBED4     | 0 | NA | 1 | 12 | 1 | 14 | 0 | NA | 0 | NA |
| 22 | 48698110 | 48682856 | -1 | NM_024105    | ALG12     | 0 | NA | 0 | NA | 0 | NA | 0 | NA | 0 | NA |
| 22 | 48698347 | 48707180 | 1  | NM_024324    | CRELD2    | 0 | NA | 0 | NA | 0 | NA | 0 | NA | 0 | NA |
| 22 | 48740164 | 48743724 | 1  | NM_001001852 | PIM3      | 0 | NA | 0 | NA | 0 | NA | 0 | NA | 0 | NA |
| 22 | 48793182 | 48775068 | -1 | NM_001001694 | IL17REL   | 0 | NA | 1 | 12 | 0 | NA | 0 | NA | 0 | NA |
| 22 | 48835182 | 48795678 | -1 | NM_001080447 | TTL8      | 0 | NA | 1 | 15 | 0 | NA | 0 | NA | 0 | NA |
| 22 | 48865908 | 48839946 | -1 | NM_139202    | MLC1      | 0 | NA | 1 | 13 | 0 | NA | 0 | NA | 1 | 30 |
| 22 | 48866485 | 48839946 | -1 | NM_015166    | MLC1      | 0 | NA | 1 | 13 | 0 | NA | 0 | NA | 1 | 30 |
| 22 | 48870620 | 48942243 | 1  | NM_018995    | MOV10L1   | 0 | NA | 1 | 13 | 0 | NA | 0 | NA | 1 | 17 |
| 22 | 48951286 | 48960851 | 1  | NM_052839    | PANX2     | 0 | NA | 0 | NA | 0 | NA | 0 | NA | 0 | NA |
| 22 | 48966486 | 48980154 | 1  | NM_025204    | TRABD     | 0 | NA | 0 | NA | 0 | NA | 0 | NA | 0 | NA |
| 22 | 48981534 | 48998172 | 1  | NM_031454    | SELO      | 1 | 11 | 0 | NA | 0 | NA | 0 | NA | 0 | NA |
| 22 | 49025527 | 48998244 | -1 | NM_020461    | TUBGCP8   | 0 | NA | 0 | NA | 0 | NA | 0 | NA | 0 | NA |
| 22 | 49031941 | 49025739 | -1 | NM_032019    | HDAC10    | 0 | NA | 0 | NA | 0 | NA | 0 | NA | 0 | NA |
| 22 | 49042216 | 49033457 | -1 | NM_002969    | MAPK12    | 0 | NA | 0 | NA | 0 | NA | 0 | NA | 0 | NA |
| 22 | 49050906 | 49044288 | -1 | NM_002751    | MAPK11    | 0 | NA | 0 | NA | 0 | NA | 1 | 12 | 0 | NA |
| 22 | 49075336 | 49055534 | -1 | NM_012401    | PLXNB2    | 0 | NA | 0 | NA | 0 | NA | 0 | NA | 0 | NA |
| 22 | 49100010 | 49092963 | -1 | NM_001001794 | FAM116B   | 0 | NA | 0 | NA | 0 | NA | 0 | NA | 0 | NA |
| 22 | 49128625 | 49230380 | 1  | NM_014678    | SAPS2     | 0 | NA | 0 | NA | 0 | NA | 0 | NA | 0 | NA |

|           |          |          |    |              |           |   |    |   |    |   |    |   |    |   |    |   |    |
|-----------|----------|----------|----|--------------|-----------|---|----|---|----|---|----|---|----|---|----|---|----|
| 22        | 49260320 | 49232100 | -1 | NM_002972    | SBF1      | 1 | 15 | 0 | NA | 0 | NA | 0 | NA | 0 | NA | 0 | NA |
| 22        | 49266877 | 49271732 | 1  | NM_024866    | ADM2      | 1 | 15 | 0 | NA | 0 | NA | 0 | NA | 0 | NA | 0 | NA |
| 22        | 49272078 | 49275616 | 1  | NM_017584    | MIOX      | 0 | NA | 0 | NA | 0 | NA | 0 | NA | 0 | NA | 0 | NA |
| 22        | 49292979 | 49282245 | -1 | NM_033200    | LMF2      | 0 | NA | 0 | NA | 0 | NA | 1 | 11 | 0 | NA | 0 | NA |
| 22        | 49293510 | 49305057 | 1  | NM_014551    | NCAPH2    | 0 | NA | 0 | NA | 0 | NA | 1 | 11 | 0 | NA | 0 | NA |
| 22        | 49293510 | 49308779 | 1  | NM_152299    | NCAPH2    | 0 | NA | 0 | NA | 0 | NA | 1 | 11 | 0 | NA | 0 | NA |
| 22        | 49310900 | 49308862 | -1 | NM_005138    | SCO2      | 0 | NA | 0 | NA | 0 | NA | 0 | NA | 0 | NA | 0 | NA |
| 22        | 49315124 | 49311047 | -1 | NM_001113756 | TYMP      | 0 | NA | 0 | NA | 1 | 13 | 0 | NA | 0 | NA | 0 | NA |
| 22        | 49315380 | 49311047 | -1 | NM_001113755 | TYMP      | 0 | NA | 0 | NA | 1 | 13 | 0 | NA | 0 | NA | 0 | NA |
| 22        | 49315380 | 49311047 | -1 | NM_001953    | TYMP      | 0 | NA | 0 | NA | 1 | 13 | 0 | NA | 0 | NA | 0 | NA |
| 22        | 49317874 | 49315720 | -1 | NM_001014440 | LOC440836 | 0 | NA | 0 | NA | 1 | 13 | 0 | NA | 0 | NA | 0 | NA |
| 22        | 49333327 | 49335409 | 1  | NM_138433    | KLHDC7B   | 0 | NA | 0 | NA | 1 | 13 | 0 | NA | 0 | NA | 0 | NA |
| 22        | 49348194 | 49336406 | -1 | NM_001123225 | LOC644186 | 0 | NA | 0 | NA | 0 | NA | 0 | NA | 0 | NA | 0 | NA |
| 22        | 49363744 | 49354155 | -1 | NM_004377    | CPT1B     | 0 | NA | 0 | NA | 0 | NA | 0 | NA | 0 | NA | 0 | NA |
| 22        | 49363744 | 49354155 | -1 | NM_152246    | CPT1B     | 0 | NA | 0 | NA | 0 | NA | 0 | NA | 0 | NA | 0 | NA |
| 22        | 49363862 | 49354155 | -1 | NM_152245    | CPT1B     | 0 | NA | 0 | NA | 0 | NA | 0 | NA | 0 | NA | 0 | NA |
| 22        | 49368260 | 49354155 | -1 | NM_152247    | CPT1B     | 0 | NA | 0 | NA | 0 | NA | 0 | NA | 0 | NA | 0 | NA |
| 22        | 49368260 | 49354155 | -1 | NM_152253    | CHKB      | 0 | NA | 0 | NA | 0 | NA | 0 | NA | 0 | NA | 0 | NA |
| 22        | 49368260 | 49364252 | -1 | NM_005198    | CHKB      | 0 | NA | 0 | NA | 0 | NA | 0 | NA | 0 | NA | 0 | NA |
| 22        | 49365996 | 49396845 | 1  | NM_012324    | MAPK8IP2  | 0 | NA | 0 | NA | 0 | NA | 0 | NA | 0 | NA | 0 | NA |
| 22        | 49388427 | 49396845 | 1  | NM_016431    | MAPK8IP2  | 0 | NA | 0 | NA | 0 | NA | 0 | NA | 0 | NA | 0 | NA |
| 22        | 49413473 | 49410314 | -1 | NM_000487    | ARSA      | 0 | NA | 0 | NA | 0 | NA | 1 | 11 | 0 | NA | 0 | NA |
| 22        | 49413473 | 49410314 | -1 | NM_001085425 | ARSA      | 0 | NA | 0 | NA | 0 | NA | 1 | 11 | 0 | NA | 0 | NA |
| 22        | 49413473 | 49410314 | -1 | NM_001085426 | ARSA      | 0 | NA | 0 | NA | 0 | NA | 1 | 11 | 0 | NA | 0 | NA |
| 22        | 49413473 | 49410314 | -1 | NM_001085427 | ARSA      | 0 | NA | 0 | NA | 0 | NA | 1 | 11 | 0 | NA | 0 | NA |
| 22        | 49413473 | 49410314 | -1 | NM_001085428 | ARSA      | 0 | NA | 0 | NA | 0 | NA | 1 | 11 | 0 | NA | 0 | NA |
| 22        | 49459935 | 49518507 | 1  | NM_001080420 | SHANK3    | 0 | NA | 1 | 21 | 0 | NA | 0 | NA | 1 | 15 | 0 | NA |
| 22        | 49523517 | 49530593 | 1  | NM_001097    | ACR       | 0 | NA | 1 | 12 | 0 | NA | 0 | NA | 0 | NA | 0 | NA |
| 22        | 49542379 | 49584800 | 1  | NM_203477    | MGC70863  | 0 | NA | 0 | NA | 0 | NA | 0 | NA | 0 | NA | 0 | NA |
| 22        | 49568953 | 49552785 | -1 | NM_001003789 | RABL2B    | 0 | NA | 0 | NA | 0 | NA | 0 | NA | 0 | NA | 0 | NA |
| 22        | 49568953 | 49552785 | -1 | NM_007081    | RABL2B    | 0 | NA | 0 | NA | 0 | NA | 0 | NA | 0 | NA | 0 | NA |
| 22        | 49569090 | 49584800 | 1  | NM_203302    | MGC70863  | 0 | NA | 0 | NA | 0 | NA | 0 | NA | 0 | NA | 0 | NA |
| 22_random | 13497    | 15367    | 1  | NM_000039    | APQA1     | 0 | NA | 0 | NA | 0 | NA | 0 | NA | 0 | NA | 0 | NA |
| 1         | 58953    | 59871    | 1  | NM_001005484 | OR4F5     | 0 | NA | 0 | NA | 0 | NA | 0 | NA | 0 | NA | 0 | NA |
| 1         | 357521   | 358460   | 1  | NM_001005221 | OR4F29    | 0 | NA | 0 | NA | 0 | NA | 0 | NA | 0 | NA | 0 | NA |
| 1         | 357521   | 358460   | 1  | NM_001005224 | OR4F3     | 0 | NA | 0 | NA | 0 | NA | 0 | NA | 0 | NA | 0 | NA |
| 1         | 357521   | 358460   | 1  | NM_001005277 | OR4F16    | 0 | NA | 0 | NA | 0 | NA | 0 | NA | 0 | NA | 0 | NA |
| 1         | 611897   | 610958   | -1 | NM_001005221 | OR4F29    | 0 | NA | 0 | NA | 0 | NA | 0 | NA | 0 | NA | 0 | NA |
| 1         | 611897   | 610958   | -1 | NM_001005224 | OR4F3     | 0 | NA | 0 | NA | 0 | NA | 0 | NA | 0 | NA | 0 | NA |
| 1         | 611897   | 610958   | -1 | NM_001005277 | OR4F16    | 0 | NA | 0 | NA | 0 | NA | 0 | NA | 0 | NA | 0 | NA |
| 1         | 850983   | 869824   | 1  | NM_152486    | SAMD11    | 0 | NA | 1 | 13 | 0 | NA | 0 | NA | 0 | NA | 0 | NA |
| 1         | 884542   | 869445   | -1 | NM_015658    | NOC2L     | 0 | NA | 0 | NA | 0 | NA | 0 | NA | 0 | NA | 0 | NA |
| 1         | 885829   | 890958   | 1  | NM_198317    | KLHL17    | 0 | NA | 0 | NA | 0 | NA | 0 | NA | 0 | NA | 0 | NA |
| 1         | 891739   | 900347   | 1  | NM_032129    | PLEKHN1   | 0 | NA | 0 | NA | 0 | NA | 0 | NA | 0 | NA | 0 | NA |
| 1         | 925333   | 924206   | -1 | NM_021170    | HES4      | 0 | NA | 1 | 12 | 0 | NA | 0 | NA | 0 | NA | 0 | NA |
| 1         | 938741   | 939780   | 1  | NM_005101    | ISG15     | 0 | NA | 0 | NA | 0 | NA | 0 | NA | 0 | NA | 0 | NA |
| 1         | 945365   | 981355   | 1  | NM_198576    | AGRN      | 0 | NA | 0 | NA | 0 | NA | 0 | NA | 0 | NA | 0 | NA |
| 1         | 1041486  | 1007060  | -1 | NM_001114103 | C1orf159  | 0 | NA | 1 | 25 | 0 | NA | 0 | NA | 1 | 12 | 0 | NA |
| 1         | 1041486  | 1007060  | -1 | NM_017891    | C1orf159  | 0 | NA | 1 | 25 | 0 | NA | 0 | NA | 1 | 12 | 0 | NA |
| 1         | 1104939  | 1111104  | 1  | NM_153254    | TLL10     | 0 | NA | 1 | 12 | 0 | NA | 0 | NA | 0 | NA | 0 | NA |
| 1         | 1131952  | 1128750  | -1 | NM_004195    | TNFRSF18  | 0 | NA | 0 | NA | 0 | NA | 0 | NA | 0 | NA | 0 | NA |
| 1         | 1131952  | 1128750  | -1 | NM_148901    | TNFRSF18  | 0 | NA | 0 | NA | 0 | NA | 0 | NA | 0 | NA | 0 | NA |
| 1         | 1131952  | 1128750  | -1 | NM_148902    | TNFRSF18  | 0 | NA | 0 | NA | 0 | NA | 0 | NA | 0 | NA | 0 | NA |
| 1         | 1139375  | 1138568  | -1 | NM_003327    | TNFRSF4   | 0 | NA | 0 | NA | 0 | NA | 0 | NA | 0 | NA | 0 | NA |
| 1         | 1157310  | 1142150  | -1 | NM_016176    | SDF4      | 0 | NA | 0 | NA | 0 | NA | 0 | NA | 0 | NA | 0 | NA |
| 1         | 1157310  | 1142150  | -1 | NM_016547    | SDF4      | 0 | NA | 0 | NA | 0 | NA | 0 | NA | 0 | NA | 0 | NA |
| 1         | 1157491  | 1160283  | 1  | NM_080605    | B3GALT6   | 0 | NA | 0 | NA | 0 | NA | 0 | NA | 0 | NA | 0 | NA |
| 1         | 1171965  | 1167695  | -1 | NM_001014980 | FAM132A   | 0 | NA | 0 | NA | 0 | NA | 0 | NA | 0 | NA | 0 | NA |
| 1         | 1199097  | 1179154  | -1 | NM_058167    | UBE2J2    | 0 | NA | 0 | NA | 0 | NA | 0 | NA | 0 | NA | 0 | NA |
| 1         | 1199097  | 1179154  | -1 | NM_194315    | UBE2J2    | 0 | NA | 0 | NA | 0 | NA | 0 | NA | 0 | NA | 0 | NA |
| 1         | 1199097  | 1179154  | -1 | NM_194457    | UBE2J2    | 0 | NA | 0 | NA | 0 | NA | 0 | NA | 0 | NA | 0 | NA |
| 1         | 1199097  | 1179154  | -1 | NM_194458    | UBE2J2    | 0 | NA | 0 | NA | 0 | NA | 0 | NA | 0 | NA | 0 | NA |
| 1         | 1207438  | 1217272  | 1  | NM_002978    | SCNN1D    | 0 | NA | 0 | NA | 0 | NA | 0 | NA | 0 | NA | 0 | NA |
| 1         | 1228503  | 1218806  | -1 | NM_030649    | CENTB5    | 0 | NA | 0 | NA | 0 | NA | 1 | 12 | 0 | NA | 0 | NA |
| 1         | 1233856  | 1236920  | 1  | NM_153339    | PUSL1     | 0 | NA | 0 | NA | 0 | NA | 1 | 12 | 0 | NA | 0 | NA |

|   |         |         |    |              |           |   |    |   |    |   |    |   |    |   |    |
|---|---------|---------|----|--------------|-----------|---|----|---|----|---|----|---|----|---|----|
| 1 | 1249909 | 1236827 | -1 | NM_017871    | CPSF3L    | 0 | NA | 1 | 13 | 0 | NA | 0 | NA | 0 | NA |
| 1 | 1250005 | 1254139 | 1  | NM_001029885 | GLTPD1    | 0 | NA | 1 | 13 | 0 | NA | 0 | NA | 0 | NA |
| 1 | 1256588 | 1259707 | 1  | NM_152228    | TAS1R3    | 0 | NA | 1 | 13 | 0 | NA | 0 | NA | 0 | NA |
| 1 | 1274355 | 1260520 | -1 | NM_004421    | DVL1      | 0 | NA | 0 | NA | 0 | NA | 0 | NA | 0 | NA |
| 1 | 1283778 | 1277933 | -1 | NM_032348    | MXRA8     | 0 | NA | 0 | NA | 0 | NA | 0 | NA | 0 | NA |
| 1 | 1300425 | 1298973 | -1 | NM_001127230 | AURKAIP1  | 1 | 14 | 0 | NA | 0 | NA | 0 | NA | 0 | NA |
| 1 | 1300443 | 1298972 | -1 | NM_001127229 | AURKAIP1  | 1 | 14 | 0 | NA | 0 | NA | 0 | NA | 0 | NA |
| 1 | 1300681 | 1298972 | -1 | NM_017900    | AURKAIP1  | 1 | 14 | 0 | NA | 0 | NA | 0 | NA | 0 | NA |
| 1 | 1324552 | 1310953 | -1 | NM_001039577 | CCNL2     | 0 | NA | 0 | NA | 1 | 13 | 0 | NA | 0 | NA |
| 1 | 1324553 | 1310953 | -1 | NM_030937    | CCNL2     | 0 | NA | 0 | NA | 1 | 13 | 0 | NA | 0 | NA |
| 1 | 1332556 | 1327138 | -1 | NM_017971    | MRPL20    | 0 | NA | 0 | NA | 1 | 13 | 0 | NA | 0 | NA |
| 1 | 1360771 | 1366009 | 1  | NM_022834    | VWA1      | 0 | NA | 0 | NA | 0 | NA | 0 | NA | 0 | NA |
| 1 | 1360771 | 1366009 | 1  | NM_199121    | VWA1      | 0 | NA | 0 | NA | 0 | NA | 0 | NA | 0 | NA |
| 1 | 1387909 | 1395401 | 1  | NM_001039211 | ATAD3C    | 0 | NA | 0 | NA | 0 | NA | 0 | NA | 0 | NA |
| 1 | 1397026 | 1421445 | 1  | NM_031921    | ATAD3B    | 0 | NA | 0 | NA | 0 | NA | 0 | NA | 0 | NA |
| 1 | 1437417 | 1459927 | 1  | NM_018188    | ATAD3A    | 0 | NA | 0 | NA | 0 | NA | 0 | NA | 0 | NA |
| 1 | 1465603 | 1460020 | -1 | NM_00114748  | C1orf70   | 0 | NA | 0 | NA | 0 | NA | 0 | NA | 0 | NA |
| 1 | 1500125 | 1468915 | -1 | NM_014188    | SSU72     | 0 | NA | 0 | NA | 0 | NA | 1 | 15 | 0 | NA |
| 1 | 1540746 | 1555848 | 1  | NM_080875    | MIB2      | 0 | NA | 0 | NA | 0 | NA | 0 | NA | 0 | NA |
| 1 | 1557422 | 1559893 | 1  | NM_006983    | MMP23B    | 0 | NA | 0 | NA | 0 | NA | 0 | NA | 0 | NA |
| 1 | 1614103 | 1582801 | -1 | NM_001110781 | LOC728661 | 0 | NA | 0 | NA | 0 | NA | 0 | NA | 0 | NA |
| 1 | 1645635 | 1560962 | -1 | NM_033486    | CDC2L1    | 0 | NA | 0 | NA | 0 | NA | 0 | NA | 0 | NA |
| 1 | 1645635 | 1560962 | -1 | NM_033487    | CDC2L1    | 0 | NA | 0 | NA | 0 | NA | 0 | NA | 0 | NA |
| 1 | 1645635 | 1560962 | -1 | NM_033488    | CDC2L1    | 0 | NA | 0 | NA | 0 | NA | 0 | NA | 0 | NA |
| 1 | 1645635 | 1560962 | -1 | NM_033489    | CDC2L1    | 0 | NA | 0 | NA | 0 | NA | 0 | NA | 0 | NA |
| 1 | 1645635 | 1560962 | -1 | NM_033492    | CDC2L1    | 0 | NA | 0 | NA | 0 | NA | 0 | NA | 0 | NA |
| 1 | 1645635 | 1560962 | -1 | NM_033493    | CDC2L1    | 0 | NA | 0 | NA | 0 | NA | 0 | NA | 0 | NA |
| 1 | 1645651 | 1624029 | -1 | NM_024011    | CDC2L2    | 0 | NA | 0 | NA | 0 | NA | 0 | NA | 0 | NA |
| 1 | 1645651 | 1624029 | -1 | NM_033529    | CDC2L2    | 0 | NA | 0 | NA | 0 | NA | 0 | NA | 0 | NA |
| 1 | 1667291 | 1653540 | -1 | NM_182838    | SLC35E2   | 0 | NA | 0 | NA | 0 | NA | 0 | NA | 0 | NA |
| 1 | 1699769 | 1672530 | -1 | NM_023018    | NADK      | 0 | NA | 0 | NA | 0 | NA | 0 | NA | 0 | NA |
| 1 | 1812355 | 1706588 | -1 | NM_002074    | GNB1      | 0 | NA | 0 | NA | 0 | NA | 0 | NA | 0 | NA |
| 1 | 1836125 | 1838593 | 1  | NM_138705    | CALML6    | 0 | NA | 0 | NA | 0 | NA | 0 | NA | 0 | NA |
| 1 | 1840567 | 1838889 | -1 | NM_178545    | TMEM52    | 0 | NA | 0 | NA | 0 | NA | 0 | NA | 0 | NA |
| 1 | 1849228 | 1843255 | -1 | NM_001003808 | C1orf222  | 0 | NA | 1 | 14 | 0 | NA | 0 | NA | 0 | NA |
| 1 | 1925136 | 1874611 | -1 | NM_001080484 | KIAA1751  | 0 | NA | 1 | 15 | 0 | NA | 0 | NA | 0 | NA |
| 1 | 1940702 | 1952052 | 1  | NM_000815    | GABRD     | 0 | NA | 0 | NA | 0 | NA | 0 | NA | 0 | NA |
| 1 | 1971768 | 2106694 | 1  | NM_002744    | PRKCZ     | 0 | NA | 0 | NA | 0 | NA | 0 | NA | 0 | NA |
| 1 | 1994945 | 2106694 | 1  | NM_001033581 | PRKCZ     | 0 | NA | 1 | 12 | 0 | NA | 1 | 11 | 0 | NA |
| 1 | 2026014 | 2106694 | 1  | NM_001033582 | PRKCZ     | 0 | NA | 1 | 12 | 0 | NA | 0 | NA | 0 | NA |
| 1 | 2116074 | 2110847 | -1 | NM_182533    | C1orf86   | 0 | NA | 0 | NA | 0 | NA | 0 | NA | 0 | NA |
| 1 | 2149993 | 2231416 | 1  | NM_003036    | SKI       | 0 | NA | 0 | NA | 0 | NA | 1 | 17 | 0 | NA |
| 1 | 2312853 | 2242555 | -1 | NM_024848    | MORN1     | 0 | NA | 0 | NA | 0 | NA | 0 | NA | 0 | NA |
| 1 | 2313073 | 2326734 | 1  | NM_007033    | RER1      | 0 | NA | 0 | NA | 0 | NA | 0 | NA | 0 | NA |
| 1 | 2333870 | 2326100 | -1 | NM_002617    | PEX10     | 0 | NA | 0 | NA | 0 | NA | 0 | NA | 0 | NA |
| 1 | 2333870 | 2326100 | -1 | NM_153818    | PEX10     | 0 | NA | 0 | NA | 0 | NA | 0 | NA | 0 | NA |
| 1 | 2397613 | 2428624 | 1  | NM_014638    | PLCH2     | 0 | NA | 0 | NA | 0 | NA | 0 | NA | 0 | NA |
| 1 | 2447895 | 2429834 | -1 | NM_018216    | PANK4     | 0 | NA | 0 | NA | 0 | NA | 0 | NA | 0 | NA |
| 1 | 2451544 | 2450043 | -1 | NM_001010926 | HESS      | 0 | NA | 0 | NA | 0 | NA | 0 | NA | 0 | NA |
| 1 | 2486613 | 2479150 | -1 | NM_003820    | TNFRSF14  | 0 | NA | 0 | NA | 0 | NA | 0 | NA | 0 | NA |
| 1 | 2508108 | 2512762 | 1  | NM_152371    | C1orf93   | 0 | NA | 0 | NA | 0 | NA | 0 | NA | 0 | NA |
| 1 | 2554289 | 2511940 | -1 | NM_033467    | MMEL1     | 0 | NA | 1 | 21 | 0 | NA | 1 | 11 | 1 | 12 |
| 1 | 2927905 | 2929327 | 1  | NM_080431    | ACTRT2    | 0 | NA | 0 | NA | 0 | NA | 0 | NA | 0 | NA |
| 1 | 2975603 | 3345045 | 1  | NM_022114    | PRDM16    | 0 | NA | 0 | NA | 0 | NA | 0 | NA | 0 | NA |
| 1 | 2975603 | 3345045 | 1  | NM_199454    | PRDM16    | 0 | NA | 0 | NA | 0 | NA | 0 | NA | 0 | NA |
| 1 | 3361006 | 3387537 | 1  | NM_014448    | ARHGEF16  | 0 | NA | 0 | NA | 0 | NA | 0 | NA | 0 | NA |
| 1 | 3517919 | 3394365 | -1 | NM_001409    | MEGF6     | 0 | NA | 0 | NA | 0 | NA | 0 | NA | 0 | NA |
| 1 | 3531415 | 3536554 | 1  | NM_182752    | TPRG1L    | 0 | NA | 0 | NA | 0 | NA | 0 | NA | 0 | NA |
| 1 | 3556497 | 3537198 | -1 | NM_017818    | WDR8      | 0 | NA | 0 | NA | 0 | NA | 0 | NA | 0 | NA |
| 1 | 3558988 | 3640327 | 1  | NM_005427    | TP73      | 0 | NA | 0 | NA | 0 | NA | 0 | NA | 0 | NA |
| 1 | 3597095 | 3640327 | 1  | NM_001126240 | TP73      | 0 | NA | 0 | NA | 0 | NA | 0 | NA | 0 | NA |
| 1 | 3597095 | 3640327 | 1  | NM_001126241 | TP73      | 0 | NA | 0 | NA | 0 | NA | 0 | NA | 0 | NA |
| 1 | 3597095 | 3640327 | 1  | NM_001126242 | TP73      | 0 | NA | 0 | NA | 0 | NA | 0 | NA | 0 | NA |
| 1 | 3653746 | 3642407 | -1 | NM_207306    | KIAA0495  | 0 | NA | 0 | NA | 0 | NA | 0 | NA | 0 | NA |
| 1 | 3658821 | 3678069 | 1  | NM_152492    | CCDC27    | 0 | NA | 0 | NA | 0 | NA | 0 | NA | 0 | NA |

|   |         |         |    |              |          |   |    |   |    |   |    |   |    |   |    |
|---|---------|---------|----|--------------|----------|---|----|---|----|---|----|---|----|---|----|
| 1 | 3702928 | 3686643 | -1 | NM_020710    | LRRC47   | 0 | NA | 0 | NA | 0 | NA | 0 | NA | 0 | NA |
| 1 | 3763657 | 3721203 | -1 | NM_014704    | KIAA0562 | 1 | 12 | 0 | NA | 0 | NA | 0 | NA | 0 | NA |
| 1 | 3763704 | 3791853 | 1  | NM_004402    | DFFB     | 1 | 12 | 0 | NA | 0 | NA | 0 | NA | 0 | NA |
| 1 | 3806709 | 3795556 | -1 | NM_207356    | C1orf174 | 1 | 15 | 0 | NA | 0 | NA | 0 | NA | 0 | NA |
| 1 | 4614964 | 4737714 | 1  | NM_001042478 | AJAP1    | 0 | NA | 0 | NA | 0 | NA | 0 | NA | 0 | NA |
| 1 | 4614964 | 4743711 | 1  | NM_018836    | AJAP1    | 0 | NA | 0 | NA | 0 | NA | 0 | NA | 0 | NA |
| 1 | 5975118 | 5845456 | -1 | NM_015102    | NPHP4    | 0 | NA | 0 | NA | 0 | NA | 0 | NA | 0 | NA |
| 1 | 6008966 | 6083110 | 1  | NM_003636    | KCNAB2   | 0 | NA | 0 | NA | 0 | NA | 1 | 12 | 0 | NA |
| 1 | 6008966 | 6083110 | 1  | NM_172130    | KCNAB2   | 0 | NA | 0 | NA | 0 | NA | 1 | 12 | 0 | NA |
| 1 | 6162770 | 6084439 | -1 | NM_015557    | CHD5     | 0 | NA | 0 | NA | 0 | NA | 0 | NA | 0 | NA |
| 1 | 6182266 | 6167666 | -1 | NM_000983    | RPL22    | 1 | 11 | 0 | NA | 0 | NA | 0 | NA | 0 | NA |
| 1 | 6188775 | 6203946 | 1  | NM_207396    | RNF207   | 1 | 11 | 0 | NA | 0 | NA | 0 | NA | 0 | NA |
| 1 | 6218631 | 6203839 | -1 | NM_012405    | ICMT     | 0 | NA | 0 | NA | 0 | NA | 0 | NA | 0 | NA |
| 1 | 6226848 | 6228225 | 1  | NM_001024598 | HES3     | 0 | NA | 0 | NA | 0 | NA | 0 | NA | 0 | NA |
| 1 | 6243622 | 6231442 | -1 | NM_207370    | GPR153   | 0 | NA | 0 | NA | 0 | NA | 0 | NA | 0 | NA |
| 1 | 6341591 | 6246918 | -1 | NM_181866    | ACOT7    | 0 | NA | 0 | NA | 0 | NA | 1 | 13 | 0 | NA |
| 1 | 6343351 | 6246918 | -1 | NM_181865    | ACOT7    | 0 | NA | 0 | NA | 0 | NA | 1 | 13 | 0 | NA |
| 1 | 6368470 | 6246918 | -1 | NM_181864    | ACOT7    | 0 | NA | 0 | NA | 0 | NA | 0 | NA | 0 | NA |
| 1 | 6376413 | 6246918 | -1 | NM_007274    | ACOT7    | 0 | NA | 0 | NA | 0 | NA | 0 | NA | 0 | NA |
| 1 | 6402566 | 6397882 | -1 | NM_019089    | HES2     | 1 | 12 | 0 | NA | 0 | NA | 0 | NA | 0 | NA |
| 1 | 6407434 | 6443591 | 1  | NM_031475    | ESPN     | 1 | 12 | 0 | NA | 0 | NA | 0 | NA | 0 | NA |
| 1 | 6448842 | 6443800 | -1 | NM_003790    | TNFRSF25 | 0 | NA | 0 | NA | 0 | NA | 0 | NA | 0 | NA |
| 1 | 6448842 | 6443800 | -1 | NM_148965    | TNFRSF25 | 0 | NA | 0 | NA | 0 | NA | 0 | NA | 0 | NA |
| 1 | 6448842 | 6443800 | -1 | NM_148966    | TNFRSF25 | 0 | NA | 0 | NA | 0 | NA | 0 | NA | 0 | NA |
| 1 | 6448842 | 6443800 | -1 | NM_148967    | TNFRSF25 | 0 | NA | 0 | NA | 0 | NA | 0 | NA | 0 | NA |
| 1 | 6448842 | 6443800 | -1 | NM_148970    | TNFRSF25 | 0 | NA | 0 | NA | 0 | NA | 0 | NA | 0 | NA |
| 1 | 6448842 | 6446757 | -1 | NM_001039664 | TNFRSF25 | 0 | NA | 0 | NA | 0 | NA | 0 | NA | 0 | NA |
| 1 | 6468601 | 6448738 | -1 | NM_001042665 | PLEKHG5  | 1 | 15 | 0 | NA | 1 | 12 | 0 | NA | 0 | NA |
| 1 | 6473227 | 6448738 | -1 | NM_001042664 | PLEKHG5  | 1 | 15 | 0 | NA | 1 | 12 | 0 | NA | 0 | NA |
| 1 | 6474347 | 6448738 | -1 | NM_020631    | PLEKHG5  | 1 | 15 | 0 | NA | 1 | 12 | 0 | NA | 0 | NA |
| 1 | 6480071 | 6448738 | -1 | NM_001042663 | PLEKHG5  | 1 | 15 | 0 | NA | 1 | 12 | 0 | NA | 0 | NA |
| 1 | 6502656 | 6448738 | -1 | NM_198681    | PLEKHG5  | 0 | NA | 0 | NA | 0 | NA | 0 | NA | 0 | NA |
| 1 | 6537168 | 6507794 | -1 | NM_024654    | NOL9     | 0 | NA | 0 | NA | 1 | 12 | 1 | 18 | 0 | NA |
| 1 | 6538020 | 6562404 | 1  | NM_138697    | TAS1R1   | 0 | NA | 0 | NA | 1 | 12 | 1 | 18 | 0 | NA |
| 1 | 6538020 | 6562404 | 1  | NM_177539    | TAS1R1   | 0 | NA | 0 | NA | 1 | 12 | 1 | 18 | 0 | NA |
| 1 | 6538020 | 6562404 | 1  | NM_177540    | TAS1R1   | 0 | NA | 0 | NA | 1 | 12 | 1 | 18 | 0 | NA |
| 1 | 6538020 | 6562404 | 1  | NM_177541    | TAS1R1   | 0 | NA | 0 | NA | 1 | 12 | 1 | 18 | 0 | NA |
| 1 | 6562697 | 6571926 | 1  | NM_005341    | ZBTB48   | 0 | NA | 0 | NA | 0 | NA | 0 | NA | 0 | NA |
| 1 | 6585516 | 6573370 | -1 | NM_014851    | KLHL21   | 0 | NA | 0 | NA | 0 | NA | 0 | NA | 0 | NA |
| 1 | 6596342 | 6606680 | 1  | NM_153812    | PHF13    | 0 | NA | 0 | NA | 0 | NA | 0 | NA | 0 | NA |
| 1 | 6607838 | 6618232 | 1  | NM_138350    | THAP3    | 0 | NA | 0 | NA | 0 | NA | 0 | NA | 0 | NA |
| 1 | 6684460 | 6616817 | -1 | NM_018198    | DNAJC11  | 0 | NA | 0 | NA | 0 | NA | 0 | NA | 0 | NA |
| 1 | 6767970 | 7752351 | 1  | NM_015215    | CAMTA1   | 0 | NA | 0 | NA | 0 | NA | 0 | NA | 0 | NA |
| 1 | 7753915 | 7764079 | 1  | NM_004781    | VAMP3    | 0 | NA | 0 | NA | 0 | NA | 0 | NA | 0 | NA |
| 1 | 7767349 | 7827824 | 1  | NM_016831    | PER3     | 1 | 14 | 0 | NA | 0 | NA | 1 | 17 | 0 | NA |
| 1 | 7835682 | 7830261 | -1 | NM_006786    | UTS2     | 0 | NA | 0 | NA | 0 | NA | 0 | NA | 0 | NA |
| 1 | 7836159 | 7830261 | -1 | NM_021995    | UTS2     | 0 | NA | 0 | NA | 0 | NA | 0 | NA | 0 | NA |
| 1 | 7923474 | 7902493 | -1 | NM_001561    | TNFRSF9  | 0 | NA | 1 | 13 | 0 | NA | 0 | NA | 0 | NA |
| 1 | 7944300 | 7967929 | 1  | NM_001123377 | PARK7    | 0 | NA | 0 | NA | 0 | NA | 0 | NA | 0 | NA |
| 1 | 7944300 | 7967929 | 1  | NM_007262    | PARK7    | 0 | NA | 0 | NA | 0 | NA | 0 | NA | 0 | NA |
| 1 | 8008943 | 7994380 | -1 | NM_018948    | ERRF1    | 0 | NA | 1 | 13 | 0 | NA | 0 | NA | 0 | NA |
| 1 | 8306976 | 8326814 | 1  | NM_001080397 | SLC45A1  | 0 | NA | 0 | NA | 0 | NA | 0 | NA | 0 | NA |
| 1 | 8406334 | 8335050 | -1 | NM_001042682 | RERE     | 0 | NA | 0 | NA | 0 | NA | 0 | NA | 0 | NA |
| 1 | 8800286 | 8335050 | -1 | NM_001042681 | RERE     | 0 | NA | 0 | NA | 0 | NA | 0 | NA | 0 | NA |
| 1 | 8800286 | 8335050 | -1 | NM_012102    | RERE     | 0 | NA | 0 | NA | 0 | NA | 0 | NA | 0 | NA |
| 1 | 8861367 | 8843649 | -1 | NM_001428    | ENO1     | 1 | 14 | 0 | NA | 0 | NA | 0 | NA | 0 | NA |
| 1 | 8928508 | 8957735 | 1  | NM_001215    | CA6      | 1 | 14 | 0 | NA | 0 | NA | 0 | NA | 0 | NA |
| 1 | 9008991 | 8985945 | -1 | NM_207420    | SLC2A7   | 0 | NA | 1 | 12 | 0 | NA | 0 | NA | 0 | NA |
| 1 | 9052257 | 9019593 | -1 | NM_003039    | SLC2A5   | 0 | NA | 0 | NA | 0 | NA | 0 | NA | 0 | NA |
| 1 | 9111816 | 9087062 | -1 | NM_024980    | GPR157   | 0 | NA | 0 | NA | 0 | NA | 0 | NA | 0 | NA |
| 1 | 9217449 | 9253981 | 1  | NM_004285    | H6PD     | 1 | 12 | 0 | NA | 0 | NA | 0 | NA | 0 | NA |
| 1 | 9275570 | 9352177 | 1  | NM_025106    | SPSB1    | 1 | 12 | 0 | NA | 0 | NA | 1 | 11 | 0 | NA |
| 1 | 9522114 | 9565418 | 1  | NM_032315    | SLC25A33 | 0 | NA | 0 | NA | 0 | NA | 0 | NA | 0 | NA |
| 1 | 9571566 | 9587594 | 1  | NM_001010866 | TMEM201  | 0 | NA | 0 | NA | 0 | NA | 0 | NA | 0 | NA |
| 1 | 9634376 | 9711759 | 1  | NM_005026    | PIK3CD   | 0 | NA | 0 | NA | 0 | NA | 0 | NA | 0 | NA |

|   |          |          |    |              |          |   |    |   |    |   |    |   |    |   |    |
|---|----------|----------|----|--------------|----------|---|----|---|----|---|----|---|----|---|----|
| 1 | 9807137  | 9711665  | -1 | NM_001009566 | CLSTN1   | 0 | NA | 0 | NA | 0 | NA | 0 | NA | 0 | NA |
| 1 | 9807137  | 9711665  | -1 | NM_014944    | CLSTN1   | 0 | NA | 0 | NA | 0 | NA | 0 | NA | 0 | NA |
| 1 | 9892903  | 9830920  | -1 | NM_001012329 | CTNNBIP1 | 0 | NA | 0 | NA | 0 | NA | 0 | NA | 0 | NA |
| 1 | 9892903  | 9830920  | -1 | NM_020248    | CTNNBIP1 | 0 | NA | 0 | NA | 0 | NA | 0 | NA | 0 | NA |
| 1 | 9925413  | 9912362  | -1 | NM_032368    | LZIC     | 0 | NA | 0 | NA | 0 | NA | 0 | NA | 0 | NA |
| 1 | 9926072  | 9968143  | 1  | NM_022787    | NMNAT1   | 0 | NA | 0 | NA | 0 | NA | 0 | NA | 0 | NA |
| 1 | 9979860  | 9998665  | 1  | NM_052960    | RBP7     | 0 | NA | 0 | NA | 0 | NA | 0 | NA | 0 | NA |
| 1 | 10015602 | 10163883 | 1  | NM_001105562 | UBE4B    | 0 | NA | 0 | NA | 0 | NA | 0 | NA | 0 | NA |
| 1 | 10015602 | 10163883 | 1  | NM_006048    | UBE4B    | 0 | NA | 0 | NA | 0 | NA | 0 | NA | 0 | NA |
| 1 | 10193417 | 10289404 | 1  | NM_183416    | KIF1B    | 0 | NA | 0 | NA | 0 | NA | 0 | NA | 0 | NA |
| 1 | 10193417 | 10364242 | 1  | NM_015074    | KIF1B    | 0 | NA | 0 | NA | 0 | NA | 0 | NA | 0 | NA |
| 1 | 10381671 | 10402788 | 1  | NM_002631    | PGD      | 0 | NA | 0 | NA | 0 | NA | 0 | NA | 0 | NA |
| 1 | 10412745 | 10425452 | 1  | NM_199294    | APITD1   | 0 | NA | 0 | NA | 0 | NA | 0 | NA | 0 | NA |
| 1 | 10412745 | 10434797 | 1  | NM_198544    | APITD1   | 0 | NA | 0 | NA | 0 | NA | 0 | NA | 0 | NA |
| 1 | 10413386 | 10425452 | 1  | NM_199295    | APITD1   | 0 | NA | 0 | NA | 0 | NA | 0 | NA | 0 | NA |
| 1 | 10432557 | 10434546 | 1  | NM_001302    | CORT     | 0 | NA | 0 | NA | 0 | NA | 0 | NA | 0 | NA |
| 1 | 10455200 | 10443189 | -1 | NM_004401    | DFFA     | 0 | NA | 0 | NA | 0 | NA | 0 | NA | 0 | NA |
| 1 | 10455200 | 10443189 | -1 | NM_213566    | DFFA     | 0 | NA | 0 | NA | 0 | NA | 0 | NA | 0 | NA |
| 1 | 10457589 | 10613405 | 1  | NM_004565    | PEX14    | 0 | NA | 0 | NA | 0 | NA | 0 | NA | 0 | NA |
| 1 | 10779294 | 10619252 | -1 | NM_001079843 | CASZ1    | 0 | NA | 0 | NA | 0 | NA | 0 | NA | 0 | NA |
| 1 | 10779294 | 10629856 | -1 | NM_017766    | CASZ1    | 0 | NA | 0 | NA | 0 | NA | 0 | NA | 0 | NA |
| 1 | 10946845 | 10929119 | -1 | NM_173507    | C1orf127 | 0 | NA | 0 | NA | 0 | NA | 0 | NA | 0 | NA |
| 1 | 10995265 | 11008136 | 1  | NM_007375    | TARDBP   | 0 | NA | 0 | NA | 0 | NA | 0 | NA | 0 | NA |
| 1 | 11029872 | 11009166 | -1 | NM_006610    | MASP2    | 0 | NA | 0 | NA | 0 | NA | 0 | NA | 0 | NA |
| 1 | 11029872 | 11027441 | -1 | NM_139208    | MASP2    | 0 | NA | 0 | NA | 0 | NA | 0 | NA | 0 | NA |
| 1 | 11042678 | 11037235 | -1 | NM_003132    | SRM      | 0 | NA | 0 | NA | 1 | 18 | 0 | NA | 0 | NA |
| 1 | 11082525 | 11049262 | -1 | NM_001001998 | EXOSC10  | 0 | NA | 0 | NA | 0 | NA | 0 | NA | 0 | NA |
| 1 | 11082525 | 11049262 | -1 | NM_002685    | EXOSC10  | 0 | NA | 0 | NA | 0 | NA | 0 | NA | 0 | NA |
| 1 | 11171984 | 11178625 | 1  | NM_021146    | ANGPTL7  | 0 | NA | 1 | 17 | 1 | 12 | 0 | NA | 0 | NA |
| 1 | 11245151 | 11089178 | -1 | NM_004958    | FRAP1    | 1 | 21 | 0 | NA | 0 | NA | 0 | NA | 0 | NA |
| 1 | 11255865 | 11268929 | 1  | NM_013319    | UBIAD1   | 0 | NA | 0 | NA | 0 | NA | 0 | NA | 0 | NA |
| 1 | 11461881 | 11520227 | 1  | NM_020780    | PTCHD2   | 0 | NA | 0 | NA | 0 | NA | 0 | NA | 0 | NA |
| 1 | 11637018 | 11645971 | 1  | NM_183412    | FBXO44   | 0 | NA | 0 | NA | 0 | NA | 0 | NA | 0 | NA |
| 1 | 11637326 | 11631034 | -1 | NM_012168    | FBXO2    | 0 | NA | 0 | NA | 0 | NA | 0 | NA | 0 | NA |
| 1 | 11637500 | 11645971 | 1  | NM_001014765 | FBXO44   | 0 | NA | 0 | NA | 0 | NA | 0 | NA | 0 | NA |
| 1 | 11637500 | 11645971 | 1  | NM_033182    | FBXO44   | 0 | NA | 0 | NA | 0 | NA | 0 | NA | 0 | NA |
| 1 | 11637500 | 11645971 | 1  | NM_183413    | FBXO44   | 0 | NA | 0 | NA | 0 | NA | 0 | NA | 0 | NA |
| 1 | 11646767 | 11656996 | 1  | NM_018438    | FBXO6    | 0 | NA | 0 | NA | 0 | NA | 0 | NA | 0 | NA |
| 1 | 11663858 | 11657123 | -1 | NM_006341    | MAD2L2   | 0 | NA | 0 | NA | 0 | NA | 0 | NA | 0 | NA |
| 1 | 11674265 | 11657123 | -1 | NM_001127325 | MAD2L2   | 0 | NA | 0 | NA | 0 | NA | 0 | NA | 0 | NA |
| 1 | 11674367 | 11702923 | 1  | NM_198545    | C1orf187 | 0 | NA | 0 | NA | 0 | NA | 0 | NA | 0 | NA |
| 1 | 11718728 | 11733415 | 1  | NM_001040194 | AGTRAP   | 0 | NA | 0 | NA | 0 | NA | 0 | NA | 0 | NA |
| 1 | 11718728 | 11733415 | 1  | NM_001040195 | AGTRAP   | 0 | NA | 0 | NA | 0 | NA | 0 | NA | 0 | NA |
| 1 | 11718728 | 11733415 | 1  | NM_001040196 | AGTRAP   | 0 | NA | 0 | NA | 0 | NA | 0 | NA | 0 | NA |
| 1 | 11718728 | 11733415 | 1  | NM_001040197 | AGTRAP   | 0 | NA | 0 | NA | 0 | NA | 0 | NA | 0 | NA |
| 1 | 11718728 | 11733415 | 1  | NM_020350    | AGTRAP   | 0 | NA | 0 | NA | 0 | NA | 0 | NA | 0 | NA |
| 1 | 11788702 | 11768373 | -1 | NM_005957    | MTHFR    | 0 | NA | 0 | NA | 0 | NA | 0 | NA | 0 | NA |
| 1 | 11788793 | 11810862 | 1  | NM_021735    | CLCN6    | 0 | NA | 0 | NA | 0 | NA | 0 | NA | 0 | NA |
| 1 | 11788793 | 11810862 | 1  | NM_021737    | CLCN6    | 0 | NA | 0 | NA | 0 | NA | 0 | NA | 0 | NA |
| 1 | 11788793 | 11811947 | 1  | NM_021736    | CLCN6    | 0 | NA | 0 | NA | 0 | NA | 0 | NA | 0 | NA |
| 1 | 11788793 | 11825788 | 1  | NM_001286    | CLCN6    | 0 | NA | 0 | NA | 0 | NA | 0 | NA | 0 | NA |
| 1 | 11830422 | 11828362 | -1 | NM_006172    | NPPA     | 0 | NA | 0 | NA | 0 | NA | 0 | NA | 0 | NA |
| 1 | 11841579 | 11840107 | -1 | NM_002521    | NPPB     | 0 | NA | 0 | NA | 0 | NA | 0 | NA | 0 | NA |
| 1 | 11909067 | 11902709 | -1 | NM_138346    | KIAA2013 | 0 | NA | 0 | NA | 0 | NA | 0 | NA | 0 | NA |
| 1 | 11917332 | 11958181 | 1  | NM_000302    | PLOD1    | 0 | NA | 0 | NA | 0 | NA | 0 | NA | 0 | NA |
| 1 | 11962955 | 11996152 | 1  | NM_014874    | MFN2     | 0 | NA | 0 | NA | 0 | NA | 0 | NA | 0 | NA |
| 1 | 12002098 | 12014693 | 1  | NM_021933    | IIP45    | 0 | NA | 0 | NA | 0 | NA | 0 | NA | 0 | NA |
| 1 | 12046020 | 12126851 | 1  | NM_001243    | TNFRSF8  | 0 | NA | 1 | 13 | 0 | NA | 0 | NA | 1 | 12 |
| 1 | 12108544 | 12126851 | 1  | NM_152942    | TNFRSF8  | 0 | NA | 0 | NA | 0 | NA | 0 | NA | 0 | NA |
| 1 | 12149646 | 12191864 | 1  | NM_001066    | TNFRSF1B | 0 | NA | 0 | NA | 1 | 11 | 0 | NA | 0 | NA |
| 1 | 12212699 | 12494685 | 1  | NM_015378    | VPS13D   | 0 | NA | 0 | NA | 0 | NA | 0 | NA | 0 | NA |
| 1 | 12212699 | 12494685 | 1  | NM_018156    | VPS13D   | 0 | NA | 0 | NA | 0 | NA | 0 | NA | 0 | NA |
| 1 | 12600407 | 12550525 | -1 | NM_004753    | DHRS3    | 1 | 12 | 0 | NA | 1 | 13 | 0 | NA | 0 | NA |
| 1 | 12627152 | 12649684 | 1  | NM_001013630 | AADACL4  | 1 | 11 | 0 | NA | 0 | NA | 1 | 30 | 0 | NA |
| 1 | 12698704 | 12711313 | 1  | NM_001103169 | AADACL3  | 0 | NA | 0 | NA | 0 | NA | 0 | NA | 0 | NA |

|   |          |          |    |              |           |   |    |   |    |   |    |   |    |   |    |
|---|----------|----------|----|--------------|-----------|---|----|---|----|---|----|---|----|---|----|
| 1 | 12698704 | 12711313 | 1  | NM_001103170 | AADACL3   | 0 | NA | 0 | NA | 0 | NA | 0 | NA | 0 | NA |
| 1 | 12728749 | 12743689 | 1  | NM_152290    | C1orf158  | 0 | NA | 0 | NA | 0 | NA | 0 | NA | 0 | NA |
| 1 | 12757570 | 12760635 | 1  | NM_001080830 | PRAMEF12  | 0 | NA | 0 | NA | 0 | NA | 0 | NA | 0 | NA |
| 1 | 12774132 | 12778810 | 1  | NM_023013    | PRAMEF1   | 0 | NA | 0 | NA | 0 | NA | 0 | NA | 0 | NA |
| 1 | 12831165 | 12829847 | -1 | NM_001013631 | HNRNPCL1  | 0 | NA | 0 | NA | 0 | NA | 0 | NA | 0 | NA |
| 1 | 12839527 | 12844351 | 1  | NM_023014    | PRAMEF2   | 0 | NA | 0 | NA | 0 | NA | 0 | NA | 0 | NA |
| 1 | 12868612 | 12861619 | -1 | NM_001009611 | PRAMEF4   | 0 | NA | 0 | NA | 0 | NA | 0 | NA | 0 | NA |
| 1 | 12880675 | 12875313 | -1 | NM_001039361 | PRAMEF10  | 0 | NA | 0 | NA | 0 | NA | 0 | NA | 0 | NA |
| 1 | 12899036 | 12903155 | 1  | NM_001012276 | PRAMEF8   | 0 | NA | 0 | NA | 0 | NA | 0 | NA | 0 | NA |
| 1 | 12900099 | 12902820 | 1  | NM_001012277 | PRAMEF7   | 0 | NA | 0 | NA | 0 | NA | 0 | NA | 0 | NA |
| 1 | 12929993 | 12920888 | -1 | NM_001010889 | PRAMEF6   | 0 | NA | 0 | NA | 0 | NA | 0 | NA | 0 | NA |
| 1 | 12958129 | 12960988 | 1  | NM_001100631 | LOC653606 | 0 | NA | 0 | NA | 0 | NA | 0 | NA | 0 | NA |
| 1 | 13040338 | 13031100 | -1 | NM_001013407 | PRAMEF5   | 0 | NA | 0 | NA | 0 | NA | 0 | NA | 0 | NA |
| 1 | 13204258 | 13201419 | -1 | NM_001100631 | LOC653606 | 0 | NA | 0 | NA | 0 | NA | 0 | NA | 0 | NA |
| 1 | 13204279 | 13200782 | -1 | NM_001013692 | PRAMEF3   | 0 | NA | 0 | NA | 0 | NA | 0 | NA | 0 | NA |
| 1 | 13232405 | 13241644 | 1  | NM_001013407 | PRAMEF5   | 0 | NA | 0 | NA | 0 | NA | 0 | NA | 0 | NA |
| 1 | 13232419 | 13241523 | 1  | NM_001010889 | PRAMEF6   | 0 | NA | 0 | NA | 0 | NA | 0 | NA | 0 | NA |
| 1 | 13263352 | 13259233 | -1 | NM_001012276 | PRAMEF8   | 0 | NA | 0 | NA | 0 | NA | 0 | NA | 0 | NA |
| 1 | 13293762 | 13300777 | 1  | NM_001098376 | PRAMEF15  | 0 | NA | 0 | NA | 0 | NA | 0 | NA | 0 | NA |
| 1 | 13293762 | 13300778 | 1  | NM_001010890 | PRAMEF9   | 0 | NA | 0 | NA | 0 | NA | 0 | NA | 0 | NA |
| 1 | 13325243 | 13320000 | -1 | NM_001099854 | PRAMEF14  | 0 | NA | 0 | NA | 0 | NA | 0 | NA | 0 | NA |
| 1 | 13350156 | 13346639 | -1 | NM_001099790 | PRAMEF19  | 0 | NA | 0 | NA | 0 | NA | 0 | NA | 0 | NA |
| 1 | 13350156 | 13346639 | -1 | NM_001099850 | PRAMEF18  | 0 | NA | 0 | NA | 0 | NA | 0 | NA | 0 | NA |
| 1 | 13367840 | 13370846 | 1  | NM_001045480 | PRAMEF16  | 0 | NA | 0 | NA | 0 | NA | 0 | NA | 0 | NA |
| 1 | 13388652 | 13399530 | 1  | NM_001099852 | PRAMEF20  | 0 | NA | 0 | NA | 0 | NA | 0 | NA | 0 | NA |
| 1 | 13394549 | 13399530 | 1  | NM_001100114 | PRAMEF21  | 0 | NA | 0 | NA | 0 | NA | 0 | NA | 0 | NA |
| 1 | 13483074 | 13480353 | -1 | NM_001012277 | PRAMEF7   | 0 | NA | 0 | NA | 0 | NA | 0 | NA | 0 | NA |
| 1 | 13484137 | 13480018 | -1 | NM_001012276 | PRAMEF8   | 0 | NA | 0 | NA | 0 | NA | 0 | NA | 0 | NA |
| 1 | 13514559 | 13521574 | 1  | NM_001098376 | PRAMEF15  | 0 | NA | 0 | NA | 0 | NA | 0 | NA | 0 | NA |
| 1 | 13514559 | 13521575 | 1  | NM_001010890 | PRAMEF9   | 0 | NA | 0 | NA | 0 | NA | 0 | NA | 0 | NA |
| 1 | 13546098 | 13540855 | -1 | NM_001024661 | PRAMEF13  | 0 | NA | 0 | NA | 0 | NA | 0 | NA | 0 | NA |
| 1 | 13546098 | 13540855 | -1 | NM_001099854 | PRAMEF14  | 0 | NA | 0 | NA | 0 | NA | 0 | NA | 0 | NA |
| 1 | 13570992 | 13567475 | -1 | NM_001099790 | PRAMEF19  | 0 | NA | 0 | NA | 0 | NA | 0 | NA | 0 | NA |
| 1 | 13570992 | 13567475 | -1 | NM_001099850 | PRAMEF18  | 0 | NA | 0 | NA | 0 | NA | 0 | NA | 0 | NA |
| 1 | 13588674 | 13591651 | 1  | NM_001099851 | PRAMEF17  | 0 | NA | 0 | NA | 0 | NA | 0 | NA | 0 | NA |
| 1 | 13609493 | 13620390 | 1  | NM_001099852 | PRAMEF20  | 0 | NA | 0 | NA | 0 | NA | 0 | NA | 0 | NA |
| 1 | 13615388 | 13620390 | 1  | NM_001100114 | PRAMEF21  | 0 | NA | 0 | NA | 0 | NA | 0 | NA | 0 | NA |
| 1 | 13782838 | 13817039 | 1  | NM_006474    | PDPN      | 0 | NA | 0 | NA | 0 | NA | 0 | NA | 0 | NA |
| 1 | 13782838 | 13817039 | 1  | NM_198389    | PDPN      | 0 | NA | 0 | NA | 0 | NA | 0 | NA | 0 | NA |
| 1 | 13784553 | 13817039 | 1  | NM_001006624 | PDPN      | 0 | NA | 0 | NA | 0 | NA | 0 | NA | 0 | NA |
| 1 | 13784553 | 13817039 | 1  | NM_001006625 | PDPN      | 0 | NA | 0 | NA | 0 | NA | 0 | NA | 0 | NA |
| 1 | 13903936 | 13987158 | 1  | NM_015866    | PRDM2     | 0 | NA | 0 | NA | 0 | NA | 0 | NA | 0 | NA |
| 1 | 13903936 | 14024162 | 1  | NM_012231    | PRDM2     | 0 | NA | 0 | NA | 0 | NA | 0 | NA | 0 | NA |
| 1 | 13948462 | 13987158 | 1  | NM_001007257 | PRDM2     | 0 | NA | 0 | NA | 0 | NA | 0 | NA | 0 | NA |
| 1 | 14797799 | 15267238 | 1  | NM_015209    | KIAA1026  | 0 | NA | 0 | NA | 0 | NA | 0 | NA | 0 | NA |
| 1 | 14797799 | 15317131 | 1  | NM_201628    | KIAA1026  | 0 | NA | 0 | NA | 0 | NA | 0 | NA | 0 | NA |
| 1 | 15123211 | 15267238 | 1  | NM_001018000 | KIAA1026  | 0 | NA | 0 | NA | 0 | NA | 0 | NA | 0 | NA |
| 1 | 15128882 | 15267238 | 1  | NM_001018001 | KIAA1026  | 0 | NA | 0 | NA | 0 | NA | 0 | NA | 0 | NA |
| 1 | 15145001 | 15267238 | 1  | NM_001017999 | KIAA1026  | 0 | NA | 0 | NA | 0 | NA | 0 | NA | 0 | NA |
| 1 | 15352815 | 15419459 | 1  | NM_018022    | TMEM51    | 0 | NA | 0 | NA | 0 | NA | 0 | NA | 0 | NA |
| 1 | 15609027 | 15629422 | 1  | NM_024329    | EFHD2     | 0 | NA | 0 | NA | 0 | NA | 0 | NA | 0 | NA |
| 1 | 15637524 | 15645740 | 1  | NM_007272    | CTRC      | 0 | NA | 0 | NA | 0 | NA | 0 | NA | 0 | NA |
| 1 | 15655810 | 15671169 | 1  | NM_033440    | ELA2A     | 0 | NA | 0 | NA | 0 | NA | 0 | NA | 0 | NA |
| 1 | 15675182 | 15690482 | 1  | NM_015849    | ELA2B     | 0 | NA | 0 | NA | 0 | NA | 0 | NA | 0 | NA |
| 1 | 15723377 | 15691381 | -1 | NM_001229    | CASP9     | 0 | NA | 0 | NA | 0 | NA | 0 | NA | 0 | NA |
| 1 | 15723377 | 15691381 | -1 | NM_032996    | CASP9     | 0 | NA | 0 | NA | 0 | NA | 0 | NA | 0 | NA |
| 1 | 15725938 | 15770815 | 1  | NM_015291    | DNAJC16   | 0 | NA | 0 | NA | 0 | NA | 0 | NA | 0 | NA |
| 1 | 15784192 | 15771738 | -1 | NM_024758    | AGMAT     | 0 | NA | 0 | NA | 0 | NA | 0 | NA | 0 | NA |
| 1 | 15816656 | 15859335 | 1  | NM_032341    | DDI2      | 0 | NA | 0 | NA | 0 | NA | 0 | NA | 0 | NA |
| 1 | 15858950 | 15860804 | 1  | NM_006511    | RSC1A1    | 0 | NA | 0 | NA | 0 | NA | 0 | NA | 0 | NA |
| 1 | 15880612 | 15933851 | 1  | NM_015164    | PLEKHM2   | 0 | NA | 0 | NA | 0 | NA | 0 | NA | 0 | NA |
| 1 | 15935395 | 15940471 | 1  | NM_207348    | SLC25A34  | 0 | NA | 0 | NA | 0 | NA | 0 | NA | 0 | NA |
| 1 | 15941503 | 15947064 | 1  | NM_001013641 | TMEM82    | 0 | NA | 0 | NA | 0 | NA | 0 | NA | 0 | NA |
| 1 | 15957841 | 15985671 | 1  | NM_017556    | FBLM1     | 0 | NA | 0 | NA | 0 | NA | 0 | NA | 0 | NA |
| 1 | 15963580 | 15974302 | 1  | NM_001024215 | FBLM1     | 0 | NA | 0 | NA | 0 | NA | 0 | NA | 0 | NA |

|   |          |          |    |              |           |   |    |   |    |   |    |   |    |   |    |
|---|----------|----------|----|--------------|-----------|---|----|---|----|---|----|---|----|---|----|
| 1 | 15964045 | 15985671 | 1  | NM_001024216 | FBLM1     | 0 | NA | 0 | NA | 0 | NA | 0 | NA | 0 | NA |
| 1 | 16006781 | 16006243 | -1 | NM_001089591 | LOC440567 | 0 | NA | 0 | NA | 0 | NA | 0 | NA | 0 | NA |
| 1 | 16046945 | 16139537 | 1  | NM_015001    | SPEN      | 1 | 12 | 0 | NA | 0 | NA | 1 | 12 | 0 | NA |
| 1 | 16175214 | 16140950 | -1 | NM_003443    | ZBTB17    | 0 | NA | 0 | NA | 0 | NA | 0 | NA | 0 | NA |
| 1 | 16203317 | 16205771 | 1  | NM_178840    | C1orf64   | 0 | NA | 0 | NA | 0 | NA | 0 | NA | 0 | NA |
| 1 | 16217872 | 16213109 | -1 | NM_014424    | HSPB7     | 0 | NA | 0 | NA | 0 | NA | 0 | NA | 0 | NA |
| 1 | 16221072 | 16233132 | 1  | NM_001042704 | CLCNKA    | 0 | NA | 0 | NA | 0 | NA | 0 | NA | 0 | NA |
| 1 | 16221072 | 16233132 | 1  | NM_004070    | CLCNKA    | 0 | NA | 0 | NA | 0 | NA | 0 | NA | 0 | NA |
| 1 | 16242833 | 16256390 | 1  | NM_000085    | CLCNKB    | 0 | NA | 0 | NA | 0 | NA | 0 | NA | 0 | NA |
| 1 | 16272714 | 16256850 | -1 | NM_182623    | FAM131C   | 0 | NA | 0 | NA | 0 | NA | 0 | NA | 0 | NA |
| 1 | 16355151 | 16323418 | -1 | NM_004431    | EPHA2     | 0 | NA | 0 | NA | 0 | NA | 0 | NA | 0 | NA |
| 1 | 16411691 | 16397185 | -1 | NM_153213    | ARHGFE19  | 0 | NA | 0 | NA | 0 | NA | 0 | NA | 0 | NA |
| 1 | 16436033 | 16430781 | -1 | NM_030907    | C1orf89   | 0 | NA | 0 | NA | 0 | NA | 0 | NA | 0 | NA |
| 1 | 16551535 | 16449145 | -1 | NM_018994    | FBXO42    | 0 | NA | 0 | NA | 0 | NA | 0 | NA | 0 | NA |
| 1 | 16566169 | 16597227 | 1  | NM_001114600 | C1orf144  | 0 | NA | 0 | NA | 0 | NA | 0 | NA | 0 | NA |
| 1 | 16566169 | 16597227 | 1  | NM_015609    | C1orf144  | 0 | NA | 0 | NA | 0 | NA | 0 | NA | 0 | NA |
| 1 | 16636506 | 16597724 | -1 | NM_198546    | SPATA21   | 0 | NA | 0 | NA | 0 | NA | 0 | NA | 0 | NA |
| 1 | 16639819 | 16659160 | 1  | NM_018090    | NECAP2    | 0 | NA | 0 | NA | 0 | NA | 0 | NA | 0 | NA |
| 1 | 16791276 | 16762998 | -1 | NM_001039703 | NBPF10    | 0 | NA | 0 | NA | 0 | NA | 0 | NA | 0 | NA |
| 1 | 16812569 | 16762998 | -1 | NM_017940    | NBPF1     | 1 | 16 | 0 | NA | 0 | NA | 1 | 11 | 0 | NA |
| 1 | 17121031 | 17172061 | 1  | NM_014675    | CROCC     | 0 | NA | 0 | NA | 0 | NA | 0 | NA | 0 | NA |
| 1 | 17179726 | 17173585 | -1 | NM_002403    | MFAP2     | 0 | NA | 0 | NA | 0 | NA | 0 | NA | 0 | NA |
| 1 | 17180668 | 17173585 | -1 | NM_017459    | MFAP2     | 0 | NA | 0 | NA | 0 | NA | 0 | NA | 0 | NA |
| 1 | 17210854 | 17185039 | -1 | NM_022089    | ATP13A2   | 0 | NA | 0 | NA | 0 | NA | 0 | NA | 0 | NA |
| 1 | 17253252 | 17217811 | -1 | NM_003000    | SDHB      | 1 | 13 | 0 | NA | 0 | NA | 0 | NA | 0 | NA |
| 1 | 17318535 | 17265842 | -1 | NM_007365    | PADI2     | 0 | NA | 0 | NA | 0 | NA | 0 | NA | 0 | NA |
| 1 | 17404207 | 17445088 | 1  | NM_013358    | PADI1     | 0 | NA | 0 | NA | 0 | NA | 0 | NA | 0 | NA |
| 1 | 17448179 | 17483314 | 1  | NM_016233    | PADI3     | 1 | 12 | 0 | NA | 0 | NA | 0 | NA | 0 | NA |
| 1 | 17507278 | 17563082 | 1  | NM_012387    | PADI4     | 0 | NA | 0 | NA | 0 | NA | 0 | NA | 0 | NA |
| 1 | 17571327 | 17600782 | 1  | NM_207421    | PADI6     | 0 | NA | 0 | NA | 0 | NA | 0 | NA | 0 | NA |
| 1 | 17638807 | 17605865 | -1 | NM_018715    | RCC2      | 0 | NA | 0 | NA | 0 | NA | 0 | NA | 0 | NA |
| 1 | 17738916 | 17896957 | 1  | NM_018125    | ARHGFE10L | 1 | 13 | 0 | NA | 0 | NA | 0 | NA | 0 | NA |
| 1 | 17779634 | 17896957 | 1  | NM_001011722 | ARHGFE10L | 0 | NA | 0 | NA | 0 | NA | 0 | NA | 0 | NA |
| 1 | 17954430 | 18026145 | 1  | NM_030812    | ACTL8     | 0 | NA | 1 | 19 | 0 | NA | 1 | 16 | 0 | NA |
| 1 | 18306826 | 18577563 | 1  | NM_032880    | IGSF21    | 0 | NA | 0 | NA | 0 | NA | 0 | NA | 0 | NA |
| 1 | 18680010 | 18685067 | 1  | NM_152375    | KLHDC7A   | 0 | NA | 0 | NA | 0 | NA | 0 | NA | 0 | NA |
| 1 | 18830086 | 18935219 | 1  | NM_002584    | PAX7      | 0 | NA | 0 | NA | 0 | NA | 0 | NA | 0 | NA |
| 1 | 18830086 | 18935219 | 1  | NM_013945    | PAX7      | 0 | NA | 0 | NA | 0 | NA | 0 | NA | 0 | NA |
| 1 | 19058742 | 19038679 | -1 | NM_152232    | TAS1R2    | 0 | NA | 0 | NA | 0 | NA | 0 | NA | 0 | NA |
| 1 | 19101659 | 19070512 | -1 | NM_003748    | ALDH4A1   | 0 | NA | 0 | NA | 0 | NA | 0 | NA | 0 | NA |
| 1 | 19101659 | 19070512 | -1 | NM_170726    | ALDH4A1   | 0 | NA | 0 | NA | 0 | NA | 0 | NA | 0 | NA |
| 1 | 19409333 | 19273586 | -1 | NM_020765    | UBR4      | 0 | NA | 0 | NA | 0 | NA | 0 | NA | 0 | NA |
| 1 | 19450633 | 19417170 | -1 | NM_015047    | KIAA0090  | 0 | NA | 0 | NA | 0 | NA | 0 | NA | 0 | NA |
| 1 | 19450661 | 19459209 | 1  | NM_016183    | MRT04     | 0 | NA | 0 | NA | 0 | NA | 0 | NA | 0 | NA |
| 1 | 19473022 | 19465062 | -1 | NM_201252    | AFAR3     | 0 | NA | 0 | NA | 0 | NA | 0 | NA | 0 | NA |
| 1 | 19487867 | 19481643 | -1 | NM_012067    | AKR7A3    | 0 | NA | 0 | NA | 0 | NA | 0 | NA | 0 | NA |
| 1 | 19511227 | 19503048 | -1 | NM_003689    | AKR7A2    | 0 | NA | 0 | NA | 0 | NA | 0 | NA | 0 | NA |
| 1 | 19511326 | 19528381 | 1  | NM_001040125 | PQLC2     | 0 | NA | 0 | NA | 0 | NA | 0 | NA | 0 | NA |
| 1 | 19511326 | 19528381 | 1  | NM_001040126 | PQLC2     | 0 | NA | 0 | NA | 0 | NA | 0 | NA | 0 | NA |
| 1 | 19511326 | 19528381 | 1  | NM_017765    | PQLC2     | 0 | NA | 0 | NA | 0 | NA | 0 | NA | 0 | NA |
| 1 | 19684579 | 19537859 | -1 | NM_004930    | CAP2B     | 1 | 11 | 0 | NA | 0 | NA | 0 | NA | 0 | NA |
| 1 | 19796053 | 19827761 | 1  | NM_001032363 | C1orf151  | 0 | NA | 0 | NA | 0 | NA | 0 | NA | 0 | NA |
| 1 | 19842312 | 19857532 | 1  | NM_182744    | NBL1      | 1 | 11 | 0 | NA | 0 | NA | 1 | 12 | 0 | NA |
| 1 | 19843394 | 19857532 | 1  | NM_005380    | NBL1      | 1 | 11 | 0 | NA | 0 | NA | 1 | 12 | 0 | NA |
| 1 | 19884366 | 19878642 | 1  | NM_000871    | HTR6      | 0 | NA | 0 | NA | 0 | NA | 0 | NA | 0 | NA |
| 1 | 19998997 | 19881319 | -1 | NM_181719    | TMCO4     | 0 | NA | 0 | NA | 0 | NA | 0 | NA | 0 | NA |
| 1 | 20014358 | 20013108 | -1 | NM_019062    | RNF186    | 0 | NA | 0 | NA | 0 | NA | 0 | NA | 0 | NA |
| 1 | 20081474 | 20112024 | 1  | NM_015207    | OTUD3     | 0 | NA | 0 | NA | 0 | NA | 0 | NA | 0 | NA |
| 1 | 20122697 | 20119386 | -1 | NM_014589    | PLA2G2E   | 0 | NA | 0 | NA | 0 | NA | 0 | NA | 0 | NA |
| 1 | 20179496 | 20174517 | -1 | NM_000300    | PLA2G2A   | 0 | NA | 0 | NA | 1 | 12 | 0 | NA | 0 | NA |
| 1 | 20269287 | 20290981 | 1  | NM_000929    | PLA2G5    | 0 | NA | 0 | NA | 0 | NA | 0 | NA | 0 | NA |
| 1 | 20318595 | 20311020 | -1 | NM_012400    | PLA2G2D   | 0 | NA | 0 | NA | 0 | NA | 0 | NA | 0 | NA |
| 1 | 20338409 | 20349466 | 1  | NM_022819    | PLA2G2F   | 0 | NA | 0 | NA | 0 | NA | 0 | NA | 0 | NA |
| 1 | 20374274 | 20363070 | -1 | NM_001105572 | PLA2G2C   | 0 | NA | 0 | NA | 0 | NA | 0 | NA | 0 | NA |
| 1 | 20385164 | 20392529 | 1  | NM_152376    | UBXD3     | 0 | NA | 0 | NA | 0 | NA | 0 | NA | 0 | NA |

|   |          |          |    |              |          |   |    |   |    |   |    |   |    |   |    |
|---|----------|----------|----|--------------|----------|---|----|---|----|---|----|---|----|---|----|
| 1 | 20685315 | 20681470 | -1 | NM_018584    | CAMK2N1  | 0 | NA | 0 | NA | 0 | NA | 0 | NA | 0 | NA |
| 1 | 20707261 | 20698527 | -1 | NM_024544    | MUL1     | 1 | 14 | 0 | NA | 0 | NA | 0 | NA | 0 | NA |
| 1 | 20751518 | 20754087 | 1  | NM_207334    | FAM43B   | 0 | NA | 1 | 15 | 0 | NA | 0 | NA | 0 | NA |
| 1 | 20788030 | 20817987 | 1  | NM_001785    | CDA      | 0 | NA | 1 | 16 | 0 | NA | 0 | NA | 0 | NA |
| 1 | 20832534 | 20850591 | 1  | NM_032409    | PINK1    | 0 | NA | 0 | NA | 0 | NA | 0 | NA | 0 | NA |
| 1 | 20860624 | 20850846 | -1 | NM_005216    | DDOST    | 1 | 14 | 0 | NA | 0 | NA | 0 | NA | 0 | NA |
| 1 | 20916904 | 20863093 | -1 | NM_001122819 | KIF17    | 0 | NA | 0 | NA | 0 | NA | 0 | NA | 0 | NA |
| 1 | 20916904 | 20863093 | -1 | NM_020816    | KIF17    | 0 | NA | 0 | NA | 0 | NA | 0 | NA | 0 | NA |
| 1 | 20931720 | 20918811 | -1 | NM_001103160 | SH2D5    | 0 | NA | 0 | NA | 0 | NA | 0 | NA | 0 | NA |
| 1 | 20931720 | 20918811 | -1 | NM_001103161 | SH2D5    | 0 | NA | 0 | NA | 0 | NA | 0 | NA | 0 | NA |
| 1 | 20985768 | 20941757 | -1 | NM_016287    | HP1BP3   | 0 | NA | 0 | NA | 0 | NA | 0 | NA | 0 | NA |
| 1 | 21375927 | 21005560 | -1 | NM_003760    | EIF4G3   | 0 | NA | 0 | NA | 0 | NA | 0 | NA | 0 | NA |
| 1 | 21478770 | 21416326 | -1 | NM_001113347 | ECE1     | 0 | NA | 0 | NA | 0 | NA | 0 | NA | 0 | NA |
| 1 | 21489353 | 21416326 | -1 | NM_001113349 | ECE1     | 0 | NA | 0 | NA | 0 | NA | 0 | NA | 0 | NA |
| 1 | 21489569 | 21416326 | -1 | NM_001397    | ECE1     | 0 | NA | 0 | NA | 0 | NA | 0 | NA | 0 | NA |
| 1 | 21544621 | 21416326 | -1 | NM_001113348 | ECE1     | 0 | NA | 0 | NA | 0 | NA | 0 | NA | 0 | NA |
| 1 | 21639217 | 21683980 | 1  | NM_032264    | NBPF3    | 0 | NA | 0 | NA | 0 | NA | 0 | NA | 0 | NA |
| 1 | 21708444 | 21777492 | 1  | NM_000478    | ALPL     | 0 | NA | 0 | NA | 0 | NA | 0 | NA | 0 | NA |
| 1 | 21868386 | 21795301 | -1 | NM_002885    | RAP1GAP  | 0 | NA | 0 | NA | 0 | NA | 0 | NA | 0 | NA |
| 1 | 21982275 | 21877378 | -1 | NM_032236    | USP48    | 0 | NA | 0 | NA | 0 | NA | 0 | NA | 0 | NA |
| 1 | 21982275 | 21926925 | -1 | NM_001032730 | USP48    | 0 | NA | 0 | NA | 0 | NA | 0 | NA | 0 | NA |
| 1 | 22011344 | 22024301 | 1  | NM_001013693 | LDLRAD2  | 0 | NA | 0 | NA | 0 | NA | 0 | NA | 0 | NA |
| 1 | 22136337 | 22021323 | -1 | NM_005529    | HSPG2    | 1 | 11 | 0 | NA | 1 | 12 | 1 | 11 | 0 | NA |
| 1 | 22176004 | 22188434 | 1  | NM_007352    | ELA3B    | 0 | NA | 0 | NA | 0 | NA | 0 | NA | 0 | NA |
| 1 | 22200735 | 22211622 | 1  | NM_005747    | ELA3A    | 0 | NA | 0 | NA | 0 | NA | 0 | NA | 0 | NA |
| 1 | 22251706 | 22289883 | 1  | NM_044472    | CDC42    | 0 | NA | 0 | NA | 0 | NA | 0 | NA | 0 | NA |
| 1 | 22251706 | 22292023 | 1  | NM_001039802 | CDC42    | 0 | NA | 0 | NA | 0 | NA | 0 | NA | 0 | NA |
| 1 | 22251706 | 22292023 | 1  | NM_001791    | CDC42    | 0 | NA | 0 | NA | 0 | NA | 0 | NA | 0 | NA |
| 1 | 22342106 | 22316384 | -1 | NM_030761    | WNT4     | 0 | NA | 0 | NA | 0 | NA | 0 | NA | 0 | NA |
| 1 | 22650930 | 22730237 | 1  | NM_001083621 | ZBTB40   | 1 | 11 | 0 | NA | 0 | NA | 0 | NA | 0 | NA |
| 1 | 22650930 | 22730237 | 1  | NM_014870    | ZBTB40   | 1 | 11 | 0 | NA | 0 | NA | 0 | NA | 0 | NA |
| 1 | 22762590 | 22788699 | 1  | NM_001006943 | EPHA8    | 0 | NA | 0 | NA | 0 | NA | 0 | NA | 0 | NA |
| 1 | 22762590 | 22802674 | 1  | NM_020526    | EPHA8    | 0 | NA | 0 | NA | 0 | NA | 0 | NA | 0 | NA |
| 1 | 22835704 | 22838762 | 1  | NM_015991    | C1QA     | 0 | NA | 0 | NA | 0 | NA | 0 | NA | 0 | NA |
| 1 | 22842704 | 22847190 | 1  | NM_001114101 | C1QC     | 0 | NA | 0 | NA | 0 | NA | 0 | NA | 0 | NA |
| 1 | 22842704 | 22847190 | 1  | NM_172369    | C1QC     | 0 | NA | 0 | NA | 0 | NA | 0 | NA | 0 | NA |
| 1 | 22852268 | 22860616 | 1  | NM_000491    | C1QB     | 0 | NA | 0 | NA | 0 | NA | 0 | NA | 0 | NA |
| 1 | 22909917 | 23114410 | 1  | NM_004442    | EPHB2    | 0 | NA | 0 | NA | 0 | NA | 0 | NA | 0 | NA |
| 1 | 22909917 | 23114410 | 1  | NM_017449    | EPHB2    | 0 | NA | 0 | NA | 0 | NA | 0 | NA | 0 | NA |
| 1 | 23218532 | 23282771 | 1  | NM_015013    | AOF2     | 0 | NA | 0 | NA | 0 | NA | 0 | NA | 0 | NA |
| 1 | 23367925 | 23284037 | -1 | NM_033631    | LUZP1    | 0 | NA | 0 | NA | 0 | NA | 0 | NA | 0 | NA |
| 1 | 23393809 | 23390974 | -1 | NM_000864    | HTR1D    | 0 | NA | 0 | NA | 0 | NA | 0 | NA | 0 | NA |
| 1 | 23543440 | 23508862 | -1 | NM_001102397 | HNRNPR   | 1 | 11 | 0 | NA | 0 | NA | 0 | NA | 0 | NA |
| 1 | 23543440 | 23508862 | -1 | NM_001102398 | HNRNPR   | 1 | 11 | 0 | NA | 0 | NA | 0 | NA | 0 | NA |
| 1 | 23543440 | 23508862 | -1 | NM_001102399 | HNRNPR   | 1 | 11 | 0 | NA | 0 | NA | 0 | NA | 0 | NA |
| 1 | 23543440 | 23508862 | -1 | NM_005826    | HNRNPR   | 1 | 11 | 0 | NA | 0 | NA | 0 | NA | 0 | NA |
| 1 | 23567466 | 23558527 | -1 | NM_030634    | ZNF436   | 1 | 13 | 1 | 16 | 1 | 16 | 1 | 44 | 1 | 15 |
| 1 | 23568050 | 23570866 | 1  | NM_001008896 | C1orf213 | 1 | 13 | 1 | 16 | 1 | 16 | 1 | 44 | 1 | 15 |
| 1 | 23568050 | 23570866 | 1  | NM_138479    | C1orf213 | 1 | 13 | 1 | 16 | 1 | 16 | 1 | 44 | 1 | 15 |
| 1 | 23568944 | 23558527 | -1 | NM_001077195 | ZNF436   | 1 | 13 | 1 | 16 | 1 | 16 | 1 | 44 | 1 | 15 |
| 1 | 23623848 | 23580141 | -1 | NM_003196    | TCEA3    | 0 | NA | 0 | NA | 0 | NA | 0 | NA | 0 | NA |
| 1 | 23683258 | 23627642 | -1 | NM_017707    | DDEF1    | 0 | NA | 0 | NA | 0 | NA | 0 | NA | 0 | NA |
| 1 | 23730300 | 23705508 | -1 | NM_004091    | EZF2     | 0 | NA | 0 | NA | 1 | 12 | 1 | 13 | 0 | NA |
| 1 | 23758909 | 23756995 | -1 | NM_002167    | ID3      | 1 | 16 | 0 | NA | 0 | NA | 1 | 11 | 0 | NA |
| 1 | 23890880 | 23895502 | 1  | NM_000975    | RPL11    | 0 | NA | 0 | NA | 0 | NA | 0 | NA | 0 | NA |
| 1 | 23942548 | 23958970 | 1  | NM_003198    | TCEB3    | 0 | NA | 0 | NA | 0 | NA | 0 | NA | 0 | NA |
| 1 | 23977474 | 23987309 | 1  | NM_020362    | C1orf128 | 0 | NA | 0 | NA | 0 | NA | 0 | NA | 0 | NA |
| 1 | 23990232 | 23994616 | 1  | NM_007260    | LYPLA2   | 0 | NA | 0 | NA | 0 | NA | 1 | 16 | 0 | NA |
| 1 | 23999621 | 23994675 | -1 | NM_000403    | GALE     | 0 | NA | 0 | NA | 0 | NA | 1 | 11 | 0 | NA |
| 1 | 23999881 | 23994675 | -1 | NM_001008216 | GALE     | 0 | NA | 0 | NA | 0 | NA | 1 | 11 | 0 | NA |
| 1 | 24024536 | 24000953 | -1 | NM_000191    | HMGCL    | 0 | NA | 0 | NA | 0 | NA | 0 | NA | 0 | NA |
| 1 | 24067408 | 24044158 | -1 | NM_000147    | FUCA1    | 0 | NA | 0 | NA | 0 | NA | 0 | NA | 0 | NA |
| 1 | 24112404 | 24073046 | -1 | NM_001841    | CNR2     | 0 | NA | 0 | NA | 0 | NA | 0 | NA | 0 | NA |
| 1 | 24158916 | 24162518 | 1  | NM_017761    | PNRC2    | 1 | 18 | 0 | NA | 0 | NA | 0 | NA | 0 | NA |
| 1 | 24179408 | 24165525 | -1 | NM_006625    | FUSIP1   | 0 | NA | 0 | NA | 0 | NA | 0 | NA | 0 | NA |



|   |          |          |    |              |           |   |    |   |    |   |    |   |    |   |    |
|---|----------|----------|----|--------------|-----------|---|----|---|----|---|----|---|----|---|----|
| 1 | 24179408 | 24168159 | -1 | NM_054016    | FUSIP1    | 0 | NA | 0 | NA | 0 | NA | 0 | NA | 0 | NA |
| 1 | 24311252 | 24255117 | -1 | NM_152372    | MYOM3     | 0 | NA | 0 | NA | 0 | NA | 0 | NA | 0 | NA |
| 1 | 24342198 | 24318847 | -1 | NM_021258    | IL22RA1   | 0 | NA | 0 | NA | 0 | NA | 0 | NA | 0 | NA |
| 1 | 24386338 | 24353233 | -1 | NM_170743    | IL28RA    | 0 | NA | 0 | NA | 0 | NA | 0 | NA | 0 | NA |
| 1 | 24386338 | 24353233 | -1 | NM_173064    | IL28RA    | 0 | NA | 0 | NA | 0 | NA | 0 | NA | 0 | NA |
| 1 | 24386338 | 24353233 | -1 | NM_173065    | IL28RA    | 0 | NA | 0 | NA | 0 | NA | 0 | NA | 0 | NA |
| 1 | 24518467 | 24554395 | 1  | NM_198173    | GRHL3     | 0 | NA | 0 | NA | 0 | NA | 0 | NA | 0 | NA |
| 1 | 24522116 | 24554395 | 1  | NM_021180    | GRHL3     | 0 | NA | 0 | NA | 0 | NA | 0 | NA | 0 | NA |
| 1 | 24522116 | 24554395 | 1  | NM_198174    | GRHL3     | 0 | NA | 0 | NA | 0 | NA | 0 | NA | 0 | NA |
| 1 | 24600536 | 24566075 | -1 | NM_178122    | C1orf201  | 0 | NA | 0 | NA | 0 | NA | 0 | NA | 0 | NA |
| 1 | 24614904 | 24671987 | 1  | NM_020448    | NPAL3     | 0 | NA | 0 | NA | 0 | NA | 0 | NA | 0 | NA |
| 1 | 24701973 | 24735014 | 1  | NM_013441    | RCAN3     | 0 | NA | 0 | NA | 0 | NA | 0 | NA | 0 | NA |
| 1 | 24755188 | 24808403 | 1  | NM_001010980 | C1orf130  | 0 | NA | 0 | NA | 1 | 14 | 0 | NA | 0 | NA |
| 1 | 24842180 | 24872359 | 1  | NM_005839    | SRRM1     | 1 | 11 | 0 | NA | 0 | NA | 1 | 14 | 0 | NA |
| 1 | 24944434 | 25043346 | 1  | NM_013943    | CLIC4     | 0 | NA | 0 | NA | 0 | NA | 0 | NA | 0 | NA |
| 1 | 25129357 | 25098588 | -1 | NM_004350    | RUNX3     | 0 | NA | 0 | NA | 0 | NA | 0 | NA | 0 | NA |
| 1 | 25164088 | 25098588 | -1 | NM_001031680 | RUNX3     | 0 | NA | 0 | NA | 0 | NA | 1 | 11 | 0 | NA |
| 1 | 25431600 | 25421353 | -1 | NM_015484    | SYF2      | 1 | 15 | 0 | NA | 0 | NA | 0 | NA | 0 | NA |
| 1 | 25431600 | 25421353 | -1 | NM_207170    | SYF2      | 1 | 15 | 0 | NA | 0 | NA | 0 | NA | 0 | NA |
| 1 | 25446572 | 25441326 | -1 | NM_020317    | C1orf63   | 0 | NA | 0 | NA | 0 | NA | 0 | NA | 0 | NA |
| 1 | 25471567 | 25529523 | 1  | NM_016124    | RHD       | 0 | NA | 0 | NA | 0 | NA | 0 | NA | 0 | NA |
| 1 | 25537397 | 25561439 | 1  | NM_014313    | TMEM50A   | 0 | NA | 0 | NA | 0 | NA | 0 | NA | 0 | NA |
| 1 | 25619950 | 25561326 | -1 | NM_020485    | RHCE      | 0 | NA | 0 | NA | 0 | NA | 0 | NA | 0 | NA |
| 1 | 25619950 | 25561326 | -1 | NM_138616    | RHCE      | 0 | NA | 0 | NA | 0 | NA | 0 | NA | 0 | NA |
| 1 | 25619950 | 25561326 | -1 | NM_138617    | RHCE      | 0 | NA | 0 | NA | 0 | NA | 0 | NA | 0 | NA |
| 1 | 25619950 | 25561326 | -1 | NM_138618    | RHCE      | 0 | NA | 0 | NA | 0 | NA | 0 | NA | 0 | NA |
| 1 | 25630005 | 25698516 | 1  | NM_018202    | TMEM57    | 0 | NA | 0 | NA | 0 | NA | 0 | NA | 0 | NA |
| 1 | 25742662 | 25767964 | 1  | NM_015627    | LDLRAP1   | 0 | NA | 0 | NA | 0 | NA | 1 | 11 | 0 | NA |
| 1 | 25816545 | 25983845 | 1  | NM_020379    | MAN1C1    | 0 | NA | 0 | NA | 0 | NA | 0 | NA | 0 | NA |
| 1 | 25999253 | 26017300 | 1  | NM_020451    | SEPN1     | 0 | NA | 0 | NA | 0 | NA | 0 | NA | 0 | NA |
| 1 | 25999253 | 26017300 | 1  | NM_206926    | SEPN1     | 0 | NA | 0 | NA | 0 | NA | 0 | NA | 0 | NA |
| 1 | 26018983 | 26032020 | 1  | NM_001099625 | FAM54B    | 0 | NA | 0 | NA | 0 | NA | 0 | NA | 0 | NA |
| 1 | 26018983 | 26032020 | 1  | NM_001099627 | FAM54B    | 0 | NA | 0 | NA | 0 | NA | 0 | NA | 0 | NA |
| 1 | 26019270 | 26032020 | 1  | NM_019557    | FAM54B    | 0 | NA | 0 | NA | 0 | NA | 0 | NA | 0 | NA |
| 1 | 26019905 | 26032020 | 1  | NM_001099626 | FAM54B    | 0 | NA | 0 | NA | 0 | NA | 0 | NA | 0 | NA |
| 1 | 26058435 | 26033083 | -1 | NM_024037    | C1orf135  | 0 | NA | 0 | NA | 0 | NA | 0 | NA | 0 | NA |
| 1 | 26070331 | 26060561 | -1 | NM_178422    | PAQR7     | 0 | NA | 0 | NA | 0 | NA | 0 | NA | 0 | NA |
| 1 | 26105231 | 26099193 | -1 | NM_203401    | STMN1     | 0 | NA | 0 | NA | 0 | NA | 0 | NA | 0 | NA |
| 1 | 26105580 | 26099193 | -1 | NM_005563    | STMN1     | 0 | NA | 0 | NA | 0 | NA | 0 | NA | 0 | NA |
| 1 | 26105955 | 26099193 | -1 | NM_203399    | STMN1     | 0 | NA | 0 | NA | 0 | NA | 0 | NA | 0 | NA |
| 1 | 26197235 | 26158844 | -1 | NM_000437    | PAFAH2    | 1 | 22 | 0 | NA | 0 | NA | 0 | NA | 0 | NA |
| 1 | 26220857 | 26235541 | 1  | NM_004455    | EXTL1     | 0 | NA | 0 | NA | 1 | 12 | 1 | 12 | 0 | NA |
| 1 | 26245191 | 26237100 | -1 | NM_001004434 | SLC30A2   | 0 | NA | 0 | NA | 0 | NA | 0 | NA | 0 | NA |
| 1 | 26245191 | 26237100 | -1 | NM_032513    | SLC30A2   | 0 | NA | 0 | NA | 0 | NA | 0 | NA | 0 | NA |
| 1 | 26266708 | 26250384 | -1 | NM_032588    | TRIM63    | 0 | NA | 0 | NA | 0 | NA | 0 | NA | 0 | NA |
| 1 | 26310912 | 26324626 | 1  | NM_152835    | PDIK1L    | 0 | NA | 0 | NA | 0 | NA | 0 | NA | 0 | NA |
| 1 | 26358097 | 26361706 | 1  | NM_024869    | GRRP1     | 0 | NA | 0 | NA | 0 | NA | 0 | NA | 0 | NA |
| 1 | 26368974 | 26369951 | 1  | NM_015871    | ZNF593    | 0 | NA | 0 | NA | 0 | NA | 0 | NA | 0 | NA |
| 1 | 26376589 | 26388962 | 1  | NM_006314    | CNKSR1    | 0 | NA | 0 | NA | 0 | NA | 0 | NA | 0 | NA |
| 1 | 26389705 | 26401620 | 1  | NM_198137    | CATSPER4  | 0 | NA | 0 | NA | 0 | NA | 0 | NA | 0 | NA |
| 1 | 26433279 | 26477886 | 1  | NM_022778    | CDC21     | 0 | NA | 0 | NA | 0 | NA | 0 | NA | 0 | NA |
| 1 | 26478799 | 26480600 | 1  | NM_031286    | SH3BGR1L3 | 0 | NA | 0 | NA | 0 | NA | 0 | NA | 0 | NA |
| 1 | 26505782 | 26481359 | -1 | NM_001077262 | UBXD5     | 0 | NA | 0 | NA | 0 | NA | 0 | NA | 0 | NA |
| 1 | 26505782 | 26481359 | -1 | NM_183008    | UBXD5     | 0 | NA | 0 | NA | 0 | NA | 0 | NA | 0 | NA |
| 1 | 26516997 | 26519601 | 1  | NM_001803    | CD52      | 0 | NA | 0 | NA | 0 | NA | 0 | NA | 0 | NA |
| 1 | 26517343 | 26481359 | -1 | NM_145345    | UBXD5     | 0 | NA | 0 | NA | 0 | NA | 0 | NA | 0 | NA |
| 1 | 26543030 | 26520936 | -1 | NM_001039775 | AIM1L     | 0 | NA | 0 | NA | 0 | NA | 0 | NA | 0 | NA |
| 1 | 26571853 | 26560711 | -1 | NM_001114759 | ZNF683    | 0 | NA | 0 | NA | 0 | NA | 0 | NA | 0 | NA |
| 1 | 26571853 | 26560711 | -1 | NM_173574    | ZNF683    | 0 | NA | 0 | NA | 0 | NA | 0 | NA | 0 | NA |
| 1 | 26609855 | 26628806 | 1  | NM_024674    | LIN28     | 1 | 12 | 0 | NA | 0 | NA | 0 | NA | 0 | NA |
| 1 | 26631388 | 26670382 | 1  | NM_024887    | DHDDS     | 0 | NA | 0 | NA | 0 | NA | 0 | NA | 0 | NA |
| 1 | 26631388 | 26670382 | 1  | NM_205861    | DHDDS     | 0 | NA | 0 | NA | 0 | NA | 0 | NA | 0 | NA |
| 1 | 26671488 | 26675720 | 1  | NM_005517    | HMG2      | 0 | NA | 0 | NA | 0 | NA | 0 | NA | 0 | NA |
| 1 | 26728835 | 26774107 | 1  | NM_002953    | RPS6KA1   | 0 | NA | 0 | NA | 0 | NA | 0 | NA | 0 | NA |
| 1 | 26744929 | 26774107 | 1  | NM_001006665 | RPS6KA1   | 0 | NA | 0 | NA | 0 | NA | 1 | 11 | 0 | NA |

|   |          |          |    |              |            |   |    |   |    |   |    |   |    |   |    |
|---|----------|----------|----|--------------|------------|---|----|---|----|---|----|---|----|---|----|
| 1 | 26895108 | 26981188 | 1  | NM_006015    | ARID1A     | 1 | 14 | 0 | NA | 1 | 12 | 0 | NA | 0 | NA |
| 1 | 26895108 | 26981188 | 1  | NM_139135    | ARID1A     | 1 | 14 | 0 | NA | 1 | 12 | 0 | NA | 0 | NA |
| 1 | 26987072 | 26997474 | 1  | NM_017837    | PIGV       | 0 | NA | 0 | NA | 0 | NA | 0 | NA | 0 | NA |
| 1 | 27025787 | 27054795 | 1  | NM_032283    | ZDHHC18    | 0 | NA | 0 | NA | 0 | NA | 0 | NA | 0 | NA |
| 1 | 27062219 | 27063534 | 1  | NM_006142    | SFN        | 0 | NA | 0 | NA | 0 | NA | 0 | NA | 0 | NA |
| 1 | 27089456 | 27078459 | -1 | NM_018066    | GPN2       | 0 | NA | 0 | NA | 0 | NA | 0 | NA | 0 | NA |
| 1 | 27099544 | 27089566 | -1 | NM_022078    | GPATC3     | 0 | NA | 0 | NA | 0 | NA | 0 | NA | 0 | NA |
| 1 | 27113047 | 27110565 | -1 | NM_021969    | NR0B2      | 0 | NA | 0 | NA | 0 | NA | 0 | NA | 0 | NA |
| 1 | 27120810 | 27145474 | 1  | NM_006600    | NUDC       | 0 | NA | 0 | NA | 0 | NA | 0 | NA | 0 | NA |
| 1 | 27159484 | 27148647 | -1 | NM_152365    | C1orf172   | 0 | NA | 0 | NA | 0 | NA | 0 | NA | 0 | NA |
| 1 | 27192781 | 27199964 | 1  | NM_001013642 | L0C388610  | 0 | NA | 0 | NA | 0 | NA | 1 | 11 | 0 | NA |
| 1 | 27211914 | 27204097 | -1 | NM_052943    | FAM46B     | 0 | NA | 0 | NA | 0 | NA | 0 | NA | 0 | NA |
| 1 | 27353988 | 27297893 | -1 | NM_003047    | SLC9A1     | 0 | NA | 0 | NA | 0 | NA | 0 | NA | 0 | NA |
| 1 | 27433745 | 27507322 | 1  | NM_015023    | WDTC1      | 0 | NA | 0 | NA | 0 | NA | 0 | NA | 0 | NA |
| 1 | 27521222 | 27535478 | 1  | NM_032125    | C1orf160   | 0 | NA | 0 | NA | 0 | NA | 0 | NA | 0 | NA |
| 1 | 27541099 | 27553008 | 1  | NM_032872    | SYTL1      | 0 | NA | 0 | NA | 0 | NA | 0 | NA | 0 | NA |
| 1 | 27565924 | 27554256 | -1 | NM_004672    | MAP3K6     | 0 | NA | 0 | NA | 0 | NA | 0 | NA | 0 | NA |
| 1 | 27573902 | 27568187 | -1 | NM_003665    | FCN3       | 0 | NA | 0 | NA | 0 | NA | 0 | NA | 0 | NA |
| 1 | 27573902 | 27568187 | -1 | NM_173452    | FCN3       | 0 | NA | 0 | NA | 0 | NA | 0 | NA | 0 | NA |
| 1 | 27582392 | 27578182 | -1 | NM_207397    | CD164L2    | 1 | 12 | 0 | NA | 0 | NA | 1 | 12 | 0 | NA |
| 1 | 27591738 | 27594904 | 1  | NM_005281    | GPR3       | 1 | 12 | 0 | NA | 0 | NA | 1 | 12 | 0 | NA |
| 1 | 27689256 | 27604712 | -1 | NM_006990    | WASF2      | 1 | 13 | 0 | NA | 0 | NA | 0 | NA | 0 | NA |
| 1 | 27802730 | 27733342 | -1 | NM_001029882 | AHDC1      | 0 | NA | 0 | NA | 0 | NA | 0 | NA | 0 | NA |
| 1 | 27825338 | 27811387 | -1 | NM_001042747 | FGR        | 0 | NA | 0 | NA | 0 | NA | 0 | NA | 0 | NA |
| 1 | 27825693 | 27811387 | -1 | NM_001042729 | FGR        | 0 | NA | 0 | NA | 0 | NA | 0 | NA | 0 | NA |
| 1 | 27834314 | 27811387 | -1 | NM_005248    | FGR        | 0 | NA | 0 | NA | 0 | NA | 0 | NA | 0 | NA |
| 1 | 27871311 | 27865158 | -1 | NM_002038    | IFI6       | 0 | NA | 0 | NA | 0 | NA | 0 | NA | 0 | NA |
| 1 | 27871311 | 27865158 | -1 | NM_022872    | IFI6       | 0 | NA | 0 | NA | 0 | NA | 0 | NA | 0 | NA |
| 1 | 27871311 | 27865158 | -1 | NM_022873    | IFI6       | 0 | NA | 0 | NA | 0 | NA | 0 | NA | 0 | NA |
| 1 | 27925076 | 27960702 | 1  | NM_152660    | FAM76A     | 1 | 14 | 0 | NA | 0 | NA | 1 | 11 | 0 | NA |
| 1 | 27972280 | 28023550 | 1  | NM_177424    | STX12      | 0 | NA | 0 | NA | 0 | NA | 0 | NA | 0 | NA |
| 1 | 28029879 | 28050770 | 1  | NM_002713    | PPP1R8     | 0 | NA | 0 | NA | 0 | NA | 1 | 20 | 0 | NA |
| 1 | 28029879 | 28050770 | 1  | NM_014110    | PPP1R8     | 0 | NA | 0 | NA | 0 | NA | 1 | 20 | 0 | NA |
| 1 | 28029879 | 28050770 | 1  | NM_138558    | PPP1R8     | 0 | NA | 0 | NA | 0 | NA | 1 | 20 | 0 | NA |
| 1 | 28071641 | 28085780 | 1  | NM_001039477 | C1orf38    | 0 | NA | 0 | NA | 0 | NA | 0 | NA | 0 | NA |
| 1 | 28071641 | 28085780 | 1  | NM_001105556 | C1orf38    | 0 | NA | 0 | NA | 0 | NA | 0 | NA | 0 | NA |
| 1 | 28071641 | 28085780 | 1  | NM_004848    | C1orf38    | 0 | NA | 0 | NA | 0 | NA | 0 | NA | 0 | NA |
| 1 | 28113823 | 28090635 | -1 | NM_002946    | RPA2       | 1 | 57 | 0 | NA | 1 | 16 | 1 | 15 | 0 | NA |
| 1 | 28134090 | 28155578 | 1  | NM_001009568 | SMPDL3B    | 0 | NA | 0 | NA | 0 | NA | 0 | NA | 0 | NA |
| 1 | 28134090 | 28158250 | 1  | NM_014474    | SMPDL3B    | 0 | NA | 0 | NA | 0 | NA | 0 | NA | 0 | NA |
| 1 | 28159090 | 28167191 | 1  | NM_018053    | XKR8       | 0 | NA | 0 | NA | 0 | NA | 0 | NA | 0 | NA |
| 1 | 28287718 | 28173405 | -1 | NM_001990    | EYA3       | 0 | NA | 0 | NA | 0 | NA | 0 | NA | 0 | NA |
| 1 | 28375778 | 28349448 | -1 | NM_000952    | PTAFR      | 0 | NA | 0 | NA | 0 | NA | 0 | NA | 0 | NA |
| 1 | 28432129 | 28399376 | -1 | NM_014280    | DNAJC8     | 0 | NA | 0 | NA | 0 | NA | 0 | NA | 0 | NA |
| 1 | 28435197 | 28437198 | 1  | NM_016311    | ATPIF1     | 0 | NA | 0 | NA | 0 | NA | 0 | NA | 0 | NA |
| 1 | 28435197 | 28437198 | 1  | NM_178190    | ATPIF1     | 0 | NA | 0 | NA | 0 | NA | 0 | NA | 0 | NA |
| 1 | 28435197 | 28437198 | 1  | NM_178191    | ATPIF1     | 0 | NA | 0 | NA | 0 | NA | 0 | NA | 0 | NA |
| 1 | 28458592 | 28481589 | 1  | NM_031459    | SES2       | 0 | NA | 0 | NA | 0 | NA | 0 | NA | 0 | NA |
| 1 | 28528135 | 28535063 | 1  | NM_017638    | MED18      | 0 | NA | 0 | NA | 0 | NA | 0 | NA | 0 | NA |
| 1 | 28568679 | 28699468 | 1  | NM_001048183 | PHACTR4    | 0 | NA | 0 | NA | 0 | NA | 0 | NA | 0 | NA |
| 1 | 28637247 | 28699468 | 1  | NM_023923    | PHACTR4    | 0 | NA | 0 | NA | 0 | NA | 0 | NA | 0 | NA |
| 1 | 28705082 | 28738194 | 1  | NM_001048197 | SNHG3-RCC1 | 0 | NA | 0 | NA | 0 | NA | 0 | NA | 0 | NA |
| 1 | 28705082 | 28738194 | 1  | NM_001048198 | SNHG3-RCC1 | 0 | NA | 0 | NA | 0 | NA | 0 | NA | 0 | NA |
| 1 | 28705082 | 28738194 | 1  | NM_001048199 | SNHG3-RCC1 | 0 | NA | 0 | NA | 0 | NA | 0 | NA | 0 | NA |
| 1 | 28717331 | 28738194 | 1  | NM_001048194 | RCC1       | 0 | NA | 0 | NA | 0 | NA | 0 | NA | 0 | NA |
| 1 | 28717331 | 28738194 | 1  | NM_001048195 | RCC1       | 0 | NA | 0 | NA | 0 | NA | 0 | NA | 0 | NA |
| 1 | 28717331 | 28738194 | 1  | NM_001269    | RCC1       | 0 | NA | 0 | NA | 0 | NA | 0 | NA | 0 | NA |
| 1 | 28752115 | 28777644 | 1  | NM_017846    | TRSPAP1    | 0 | NA | 0 | NA | 0 | NA | 0 | NA | 0 | NA |
| 1 | 28791298 | 28793675 | 1  | NM_152304    | RAB42      | 0 | NA | 0 | NA | 0 | NA | 0 | NA | 0 | NA |
| 1 | 28842172 | 28802199 | -1 | NM_005644    | TAF12      | 0 | NA | 0 | NA | 0 | NA | 1 | 11 | 0 | NA |
| 1 | 28867830 | 28913972 | 1  | NM_006582    | GMEB1      | 0 | NA | 0 | NA | 0 | NA | 0 | NA | 0 | NA |
| 1 | 28867830 | 28913974 | 1  | NM_024482    | GMEB1      | 0 | NA | 0 | NA | 0 | NA | 0 | NA | 0 | NA |
| 1 | 28935722 | 28968874 | 1  | NM_016258    | YTHDF2     | 0 | NA | 0 | NA | 0 | NA | 0 | NA | 0 | NA |
| 1 | 29011240 | 29062795 | 1  | NM_000911    | OPRD1      | 0 | NA | 0 | NA | 0 | NA | 0 | NA | 0 | NA |
| 1 | 29086214 | 29319545 | 1  | NM_004437    | EPB41      | 0 | NA | 0 | NA | 0 | NA | 0 | NA | 0 | NA |

|   |          |          |    |              |          |   |    |   |    |   |    |   |    |   |    |
|---|----------|----------|----|--------------|----------|---|----|---|----|---|----|---|----|---|----|
| 1 | 29086214 | 29319545 | 1  | NM_203342    | EPB41    | 0 | NA | 0 | NA | 0 | NA | 0 | NA | 0 | NA |
| 1 | 29086214 | 29319545 | 1  | NM_203343    | EPB41    | 0 | NA | 0 | NA | 0 | NA | 0 | NA | 0 | NA |
| 1 | 29322994 | 29318526 | -1 | NM_001003682 | TMEM200B | 0 | NA | 0 | NA | 0 | NA | 0 | NA | 0 | NA |
| 1 | 29380948 | 29346949 | -1 | NM_005626    | SFRS4    | 0 | NA | 0 | NA | 0 | NA | 0 | NA | 0 | NA |
| 1 | 29430041 | 29391971 | -1 | NM_001024732 | MECR     | 0 | NA | 1 | 14 | 0 | NA | 0 | NA | 0 | NA |
| 1 | 29430041 | 29391971 | -1 | NM_016011    | MECR     | 0 | NA | 1 | 14 | 0 | NA | 0 | NA | 0 | NA |
| 1 | 29435633 | 29525903 | 1  | NM_005704    | PTPRU    | 0 | NA | 1 | 14 | 0 | NA | 0 | NA | 0 | NA |
| 1 | 29435633 | 29525903 | 1  | NM_133177    | PTPRU    | 0 | NA | 1 | 14 | 0 | NA | 0 | NA | 0 | NA |
| 1 | 29435633 | 29525903 | 1  | NM_133178    | PTPRU    | 0 | NA | 1 | 14 | 0 | NA | 0 | NA | 0 | NA |
| 1 | 30969474 | 30958582 | -1 | NM_002379    | MATN1    | 1 | 26 | 0 | NA | 0 | NA | 0 | NA | 0 | NA |
| 1 | 31003254 | 30977902 | -1 | NM_006762    | LAPTMS   | 1 | 11 | 0 | NA | 0 | NA | 1 | 11 | 0 | NA |
| 1 | 31154067 | 31114899 | -1 | NM_014654    | SDC3     | 0 | NA | 0 | NA | 0 | NA | 0 | NA | 0 | NA |
| 1 | 31311151 | 31176939 | -1 | NM_001020658 | PUM1     | 0 | NA | 0 | NA | 0 | NA | 0 | NA | 0 | NA |
| 1 | 31311151 | 31176939 | -1 | NM_014676    | PUM1     | 0 | NA | 0 | NA | 0 | NA | 0 | NA | 0 | NA |
| 1 | 31433587 | 31425179 | -1 | NM_024522    | NKAIN1   | 0 | NA | 0 | NA | 0 | NA | 0 | NA | 0 | NA |
| 1 | 31542231 | 31505001 | -1 | NM_004814    | WDR57    | 0 | NA | 0 | NA | 0 | NA | 1 | 11 | 0 | NA |
| 1 | 31542428 | 31610367 | 1  | NM_016505    | ZCCHC17  | 0 | NA | 0 | NA | 0 | NA | 1 | 11 | 0 | NA |
| 1 | 31618510 | 31610686 | -1 | NM_004102    | FABP3    | 0 | NA | 0 | NA | 0 | NA | 0 | NA | 0 | NA |
| 1 | 31658549 | 31680112 | 1  | NM_178865    | SERINC2  | 0 | NA | 0 | NA | 1 | 12 | 0 | NA | 0 | NA |
| 1 | 31814746 | 31825874 | 1  | NM_022164    | TINAGL1  | 0 | NA | 0 | NA | 0 | NA | 0 | NA | 0 | NA |
| 1 | 31857227 | 31865301 | 1  | NM_001525    | HCRTR1   | 0 | NA | 0 | NA | 0 | NA | 0 | NA | 0 | NA |
| 1 | 31883064 | 31868057 | -1 | NM_012392    | PEF1     | 0 | NA | 0 | NA | 0 | NA | 0 | NA | 0 | NA |
| 1 | 31942355 | 31890434 | -1 | NM_001856    | COL16A1  | 1 | 14 | 0 | NA | 0 | NA | 0 | NA | 0 | NA |
| 1 | 32002235 | 31965304 | -1 | NM_001703    | BAI2     | 0 | NA | 1 | 12 | 0 | NA | 0 | NA | 0 | NA |
| 1 | 32054167 | 32028611 | -1 | NM_144569    | SPOCD1   | 0 | NA | 0 | NA | 0 | NA | 0 | NA | 0 | NA |
| 1 | 32176575 | 32146379 | -1 | NM_080391    | PTP4A2   | 1 | 12 | 0 | NA | 0 | NA | 0 | NA | 0 | NA |
| 1 | 32176575 | 32146379 | -1 | NM_080392    | PTP4A2   | 1 | 12 | 0 | NA | 0 | NA | 0 | NA | 0 | NA |
| 1 | 32252077 | 32282059 | 1  | NM_006559    | KHDRBS1  | 0 | NA | 0 | NA | 0 | NA | 1 | 12 | 0 | NA |
| 1 | 32311089 | 32341054 | 1  | NM_018056    | TMEM39B  | 0 | NA | 0 | NA | 0 | NA | 0 | NA | 0 | NA |
| 1 | 32346230 | 32414755 | 1  | NM_012316    | KPNA6    | 0 | NA | 0 | NA | 0 | NA | 0 | NA | 0 | NA |
| 1 | 32417931 | 32436473 | 1  | NM_175852    | TXLNA    | 0 | NA | 0 | NA | 0 | NA | 1 | 13 | 0 | NA |
| 1 | 32438788 | 32443578 | 1  | NM_024296    | CCDC28B  | 0 | NA | 0 | NA | 0 | NA | 0 | NA | 0 | NA |
| 1 | 32443858 | 32446875 | 1  | NM_018134    | IQCC     | 0 | NA | 0 | NA | 0 | NA | 0 | NA | 0 | NA |
| 1 | 32447281 | 32454384 | 1  | NM_001099434 | DCDC2B   | 0 | NA | 0 | NA | 0 | NA | 0 | NA | 0 | NA |
| 1 | 32460513 | 32454384 | -1 | NM_019118    | C1orf91  | 0 | NA | 0 | NA | 1 | 17 | 0 | NA | 0 | NA |
| 1 | 32460557 | 32469792 | 1  | NM_003757    | EIF3I    | 0 | NA | 0 | NA | 0 | NA | 1 | 17 | 0 | NA |
| 1 | 32485404 | 32487048 | 1  | NM_032648    | C1orf90  | 0 | NA | 0 | NA | 0 | NA | 1 | 12 | 0 | NA |
| 1 | 32489426 | 32524353 | 1  | NM_005356    | LCK      | 0 | NA | 0 | NA | 0 | NA | 0 | NA | 0 | NA |
| 1 | 32512298 | 32524353 | 1  | NM_001042771 | LCK      | 0 | NA | 0 | NA | 0 | NA | 0 | NA | 0 | NA |
| 1 | 32530294 | 32571811 | 1  | NM_004964    | HDAC1    | 0 | NA | 0 | NA | 0 | NA | 0 | NA | 0 | NA |
| 1 | 32574410 | 32572026 | -1 | NM_023009    | MARCKSL1 | 0 | NA | 0 | NA | 0 | NA | 0 | NA | 0 | NA |
| 1 | 32600448 | 32602511 | 1  | NM_052841    | TSSK3    | 0 | NA | 0 | NA | 0 | NA | 0 | NA | 0 | NA |
| 1 | 32632614 | 32603362 | -1 | NM_018045    | BSDC1    | 0 | NA | 0 | NA | 0 | NA | 0 | NA | 0 | NA |
| 1 | 32777358 | 32844129 | 1  | NM_001040441 | ZBTB8    | 0 | NA | 0 | NA | 0 | NA | 0 | NA | 0 | NA |
| 1 | 32888772 | 32859893 | -1 | NM_178547    | ZBTB8OS  | 0 | NA | 0 | NA | 1 | 21 | 1 | 16 | 0 | NA |
| 1 | 32889410 | 32918841 | 1  | NM_005610    | RBBP4    | 0 | NA | 0 | NA | 1 | 21 | 1 | 16 | 0 | NA |
| 1 | 32940948 | 32918093 | -1 | NM_030786    | SYNC1    | 1 | 12 | 0 | NA | 0 | NA | 0 | NA | 0 | NA |
| 1 | 32980098 | 33013158 | 1  | NM_020888    | KIAA1522 | 0 | NA | 0 | NA | 0 | NA | 0 | NA | 0 | NA |
| 1 | 33055762 | 33073252 | 1  | NM_001017406 | S100BPB  | 0 | NA | 0 | NA | 0 | NA | 0 | NA | 0 | NA |
| 1 | 33055762 | 33097063 | 1  | NM_022753    | S100BPB  | 0 | NA | 0 | NA | 0 | NA | 0 | NA | 0 | NA |
| 1 | 33056220 | 33013426 | -1 | NM_003680    | YARS     | 0 | NA | 0 | NA | 0 | NA | 0 | NA | 0 | NA |
| 1 | 33108934 | 33100463 | -1 | NM_153756    | FNDG5    | 0 | NA | 0 | NA | 0 | NA | 0 | NA | 0 | NA |
| 1 | 33124684 | 33132834 | 1  | NM_002143    | HPCA     | 0 | NA | 1 | 24 | 0 | NA | 0 | NA | 0 | NA |
| 1 | 33139540 | 33132782 | -1 | NM_033504    | TMEM54   | 0 | NA | 1 | 24 | 0 | NA | 0 | NA | 0 | NA |
| 1 | 33202301 | 33174633 | -1 | NM_153341    | RNF19B   | 0 | NA | 0 | NA | 0 | NA | 0 | NA | 0 | NA |
| 1 | 33275058 | 33251169 | -1 | NM_001625    | AK2      | 1 | 11 | 0 | NA | 0 | NA | 0 | NA | 0 | NA |
| 1 | 33275079 | 33246172 | -1 | NM_013411    | AK2      | 1 | 11 | 0 | NA | 0 | NA | 0 | NA | 0 | NA |
| 1 | 33319300 | 33358582 | 1  | NM_052998    | ADC      | 1 | 11 | 0 | NA | 0 | NA | 0 | NA | 0 | NA |
| 1 | 33419854 | 33383590 | -1 | NM_018207    | TRIM62   | 0 | NA | 0 | NA | 0 | NA | 0 | NA | 0 | NA |
| 1 | 33494760 | 33538907 | 1  | NM_152493    | ZNF362   | 0 | NA | 0 | NA | 0 | NA | 0 | NA | 0 | NA |
| 1 | 33559286 | 33544953 | -1 | NM_001080438 | A3GALT2  | 0 | NA | 0 | NA | 0 | NA | 0 | NA | 0 | NA |
| 1 | 33588086 | 33561810 | -1 | NM_004427    | PHC2     | 0 | NA | 0 | NA | 0 | NA | 1 | 13 | 0 | NA |
| 1 | 33613781 | 33561810 | -1 | NM_198040    | PHC2     | 0 | NA | 0 | NA | 1 | 12 | 0 | NA | 0 | NA |
| 1 | 33710818 | 33734582 | 1  | NM_145238    | ZSCAN20  | 0 | NA | 0 | NA | 0 | NA | 0 | NA | 0 | NA |
| 1 | 34098662 | 34102979 | 1  | NM_145205    | HMG84    | 0 | NA | 0 | NA | 0 | NA | 0 | NA | 0 | NA |

|   |          |          |    |              |           |   |    |   |    |   |    |   |    |   |    |
|---|----------|----------|----|--------------|-----------|---|----|---|----|---|----|---|----|---|----|
| 1 | 34102217 | 34102979 | 1  | NM_001008728 | HMGB4     | 0 | NA | 0 | NA | 0 | NA | 0 | NA | 0 | NA |
| 1 | 34404030 | 33752195 | -1 | NM_052896    | CSMD2     | 0 | NA | 0 | NA | 0 | NA | 0 | NA | 0 | NA |
| 1 | 34415857 | 34457318 | 1  | NM_032884    | C1orf94   | 0 | NA | 0 | NA | 0 | NA | 0 | NA | 0 | NA |
| 1 | 34993307 | 34996699 | 1  | NM_005268    | GJB5      | 0 | NA | 0 | NA | 0 | NA | 0 | NA | 1 | 13 |
| 1 | 34999364 | 35000515 | 1  | NM_153212    | GJB4      | 0 | NA | 0 | NA | 0 | NA | 0 | NA | 1 | 13 |
| 1 | 35019376 | 35024552 | 1  | NM_024009    | GJB3      | 0 | NA | 0 | NA | 0 | NA | 0 | NA | 0 | NA |
| 1 | 35020497 | 35024554 | 1  | NM_001005752 | GJB3      | 0 | NA | 0 | NA | 0 | NA | 0 | NA | 0 | NA |
| 1 | 35031185 | 35033935 | 1  | NM_002060    | GJA4      | 0 | NA | 0 | NA | 0 | NA | 0 | NA | 0 | NA |
| 1 | 35097932 | 35091710 | -1 | NM_138428    | C1orf212  | 0 | NA | 0 | NA | 0 | NA | 0 | NA | 0 | NA |
| 1 | 35143571 | 35103623 | -1 | NM_001080418 | DLGAP3    | 0 | NA | 0 | NA | 0 | NA | 0 | NA | 0 | NA |
| 1 | 35270156 | 35224353 | -1 | NM_007167    | ZMYM6     | 0 | NA | 0 | NA | 1 | 14 | 0 | NA | 0 | NA |
| 1 | 35317558 | 35354042 | 1  | NM_024772    | ZMYM1     | 0 | NA | 0 | NA | 0 | NA | 0 | NA | 0 | NA |
| 1 | 35431322 | 35421787 | -1 | NM_005066    | SFPQ      | 0 | NA | 0 | NA | 0 | NA | 0 | NA | 0 | NA |
| 1 | 35507154 | 35660132 | 1  | NM_005095    | ZMYM4     | 0 | NA | 0 | NA | 0 | NA | 0 | NA | 0 | NA |
| 1 | 35795591 | 35671677 | -1 | NM_024874    | KIAA0319L | 0 | NA | 0 | NA | 0 | NA | 0 | NA | 0 | NA |
| 1 | 35795591 | 35676729 | -1 | NM_182686    | KIAA0319L | 0 | NA | 0 | NA | 0 | NA | 0 | NA | 0 | NA |
| 1 | 35795979 | 35804967 | 1  | NM_001014839 | NCDN      | 0 | NA | 0 | NA | 0 | NA | 0 | NA | 0 | NA |
| 1 | 35795979 | 35804967 | 1  | NM_001014841 | NCDN      | 0 | NA | 0 | NA | 0 | NA | 0 | NA | 0 | NA |
| 1 | 35795979 | 35804967 | 1  | NM_014284    | NCDN      | 0 | NA | 0 | NA | 0 | NA | 0 | NA | 0 | NA |
| 1 | 35811557 | 35833514 | 1  | NM_178548    | TFAP2E    | 0 | NA | 0 | NA | 0 | NA | 0 | NA | 0 | NA |
| 1 | 35879730 | 35841325 | -1 | NM_002794    | PSMB2     | 0 | NA | 0 | NA | 0 | NA | 0 | NA | 0 | NA |
| 1 | 35957377 | 35952063 | -1 | NM_152374    | C1orf216  | 0 | NA | 0 | NA | 0 | NA | 0 | NA | 0 | NA |
| 1 | 36008138 | 35974404 | -1 | NM_022111    | CLSPN     | 0 | NA | 0 | NA | 0 | NA | 1 | 11 | 0 | NA |
| 1 | 36046414 | 36093775 | 1  | NM_017629    | EIF2C4    | 0 | NA | 0 | NA | 0 | NA | 0 | NA | 0 | NA |
| 1 | 36121396 | 36162486 | 1  | NM_012199    | EIF2C1    | 0 | NA | 0 | NA | 0 | NA | 0 | NA | 0 | NA |
| 1 | 36169358 | 36294650 | 1  | NM_024852    | EIF2C3    | 0 | NA | 0 | NA | 0 | NA | 0 | NA | 0 | NA |
| 1 | 36169358 | 36294650 | 1  | NM_177422    | EIF2C3    | 0 | NA | 0 | NA | 0 | NA | 0 | NA | 0 | NA |
| 1 | 36322262 | 36326463 | 1  | NM_014466    | TEKT2     | 0 | NA | 0 | NA | 0 | NA | 0 | NA | 0 | NA |
| 1 | 36327072 | 36332120 | 1  | NM_017825    | ADPRHL2   | 0 | NA | 0 | NA | 0 | NA | 0 | NA | 0 | NA |
| 1 | 36338437 | 36333432 | -1 | NM_005202    | COL8A2    | 0 | NA | 0 | NA | 0 | NA | 0 | NA | 0 | NA |
| 1 | 36387654 | 36374759 | -1 | NM_014408    | TRAPPC3   | 0 | NA | 0 | NA | 0 | NA | 0 | NA | 0 | NA |
| 1 | 36394389 | 36419028 | 1  | NM_018067    | MAP7D1    | 0 | NA | 0 | NA | 0 | NA | 0 | NA | 0 | NA |
| 1 | 36462603 | 36543544 | 1  | NM_005119    | THRAP3    | 0 | NA | 0 | NA | 1 | 12 | 0 | NA | 0 | NA |
| 1 | 36545304 | 36563073 | 1  | NM_024676    | C1orf113  | 1 | 11 | 0 | NA | 0 | NA | 0 | NA | 0 | NA |
| 1 | 36562342 | 36560218 | -1 | NM_018166    | C1orf78   | 0 | NA | 0 | NA | 0 | NA | 0 | NA | 0 | NA |
| 1 | 36624072 | 36577811 | -1 | NM_032017    | STK40     | 1 | 13 | 0 | NA | 0 | NA | 0 | NA | 0 | NA |
| 1 | 36636080 | 36631617 | -1 | NM_032881    | LSM10     | 0 | NA | 0 | NA | 0 | NA | 1 | 11 | 0 | NA |
| 1 | 36688639 | 36686093 | -1 | NM_145047    | C1orf102  | 0 | NA | 0 | NA | 0 | NA | 1 | 13 | 0 | NA |
| 1 | 36688639 | 36664487 | -1 | NM_206837    | C1orf102  | 0 | NA | 0 | NA | 0 | NA | 1 | 13 | 0 | NA |
| 1 | 36702627 | 36693948 | -1 | NM_031280    | MRPS15    | 0 | NA | 0 | NA | 0 | NA | 0 | NA | 0 | NA |
| 1 | 36721096 | 36704230 | -1 | NM_000760    | CSF3R     | 0 | NA | 0 | NA | 0 | NA | 0 | NA | 0 | NA |
| 1 | 36721096 | 36704230 | -1 | NM_156038    | CSF3R     | 0 | NA | 0 | NA | 0 | NA | 0 | NA | 0 | NA |
| 1 | 36721096 | 36704230 | -1 | NM_156039    | CSF3R     | 0 | NA | 0 | NA | 0 | NA | 0 | NA | 0 | NA |
| 1 | 36721096 | 36704230 | -1 | NM_172313    | CSF3R     | 0 | NA | 0 | NA | 0 | NA | 0 | NA | 0 | NA |
| 1 | 37272431 | 37033714 | -1 | NM_000831    | GRIK3     | 0 | NA | 0 | NA | 0 | NA | 0 | NA | 0 | NA |
| 1 | 37712705 | 37722565 | 1  | NM_025079    | ZC3H12A   | 0 | NA | 0 | NA | 0 | NA | 0 | NA | 0 | NA |
| 1 | 37752951 | 37730762 | -1 | NM_022756    | C1orf149  | 0 | NA | 0 | NA | 0 | NA | 0 | NA | 0 | NA |
| 1 | 37792490 | 37774728 | -1 | NM_024700    | SNIP1     | 1 | 14 | 0 | NA | 0 | NA | 0 | NA | 0 | NA |
| 1 | 37795106 | 37805045 | 1  | NM_003462    | DNAL1     | 1 | 14 | 0 | NA | 0 | NA | 0 | NA | 0 | NA |
| 1 | 37834083 | 37805003 | -1 | NM_013285    | GNL2      | 1 | 13 | 0 | NA | 0 | NA | 0 | NA | 0 | NA |
| 1 | 37873078 | 37849537 | -1 | NM_001038633 | RSP01     | 0 | NA | 0 | NA | 0 | NA | 0 | NA | 0 | NA |
| 1 | 37928779 | 37919828 | -1 | NM_017850    | C1orf109  | 1 | 15 | 0 | NA | 0 | NA | 0 | NA | 0 | NA |
| 1 | 37930745 | 37947978 | 1  | NM_018101    | CDC48     | 1 | 15 | 0 | NA | 0 | NA | 0 | NA | 0 | NA |
| 1 | 38003411 | 37954232 | -1 | NM_001099439 | EPHA10    | 0 | NA | 0 | NA | 0 | NA | 0 | NA | 0 | NA |
| 1 | 38003411 | 37998531 | -1 | NM_173641    | EPHA10    | 0 | NA | 0 | NA | 0 | NA | 0 | NA | 0 | NA |
| 1 | 38032360 | 38039865 | 1  | NM_001031740 | MANEAL    | 0 | NA | 0 | NA | 0 | NA | 0 | NA | 0 | NA |
| 1 | 38032360 | 38039865 | 1  | NM_001113482 | MANEAL    | 0 | NA | 0 | NA | 0 | NA | 0 | NA | 0 | NA |
| 1 | 38033746 | 38039865 | 1  | NM_152496    | MANEAL    | 0 | NA | 0 | NA | 0 | NA | 0 | NA | 0 | NA |
| 1 | 38046452 | 38041200 | -1 | NM_024640    | YRDC      | 0 | NA | 0 | NA | 0 | NA | 0 | NA | 0 | NA |
| 1 | 38046555 | 38047713 | 1  | NM_198446    | C1orf122  | 0 | NA | 0 | NA | 0 | NA | 0 | NA | 0 | NA |
| 1 | 38097879 | 38047825 | -1 | NM_005955    | MTF1      | 1 | 14 | 0 | NA | 0 | NA | 0 | NA | 0 | NA |
| 1 | 38185316 | 38098955 | -1 | NM_005540    | INPP5B    | 0 | NA | 0 | NA | 0 | NA | 0 | NA | 0 | NA |
| 1 | 38228348 | 38195238 | -1 | NM_006802    | SF3A3     | 0 | NA | 0 | NA | 0 | NA | 0 | NA | 0 | NA |
| 1 | 38243821 | 38235028 | -1 | NM_004468    | FHL3      | 1 | 52 | 0 | NA | 1 | 47 | 0 | NA | 0 | NA |
| 1 | 38250970 | 38263084 | 1  | NM_016037    | UTP11L    | 1 | 52 | 0 | NA | 1 | 47 | 0 | NA | 0 | NA |

|   |          |          |    |              |           |   |    |   |    |   |    |   |    |   |    |
|---|----------|----------|----|--------------|-----------|---|----|---|----|---|----|---|----|---|----|
| 1 | 38285037 | 38282109 | -1 | NM_002699    | POU3F1    | 0 | NA | 1 | 12 | 0 | NA | 0 | NA | 0 | NA |
| 1 | 39097927 | 39077605 | -1 | NM_022157    | RRAGC     | 0 | NA | 0 | NA | 0 | NA | 0 | NA | 0 | NA |
| 1 | 39111637 | 39101222 | -1 | NM_012333    | MYCBP     | 0 | NA | 0 | NA | 0 | NA | 0 | NA | 0 | NA |
| 1 | 39119876 | 39112325 | -1 | NM_030772    | GJA9      | 0 | NA | 0 | NA | 0 | NA | 0 | NA | 0 | NA |
| 1 | 39180043 | 39124065 | -1 | NM_017821    | RHBDL2    | 0 | NA | 0 | NA | 0 | NA | 0 | NA | 0 | NA |
| 1 | 39229503 | 39243566 | 1  | NM_024595    | C1orf108  | 0 | NA | 0 | NA | 0 | NA | 0 | NA | 0 | NA |
| 1 | 39264592 | 39272874 | 1  | NM_004552    | NDUFS5    | 1 | 14 | 0 | NA | 0 | NA | 0 | NA | 0 | NA |
| 1 | 39319704 | 39725376 | 1  | NM_012090    | MACF1     | 0 | NA | 0 | NA | 0 | NA | 0 | NA | 0 | NA |
| 1 | 39569396 | 39725376 | 1  | NM_033044    | MACF1     | 0 | NA | 0 | NA | 0 | NA | 0 | NA | 0 | NA |
| 1 | 39647762 | 39654741 | 1  | NM_015038    | KIAA0754  | 1 | 11 | 0 | NA | 0 | NA | 0 | NA | 0 | NA |
| 1 | 39729904 | 39768128 | 1  | NM_181809    | BMP8A     | 0 | NA | 0 | NA | 0 | NA | 0 | NA | 0 | NA |
| 1 | 39815003 | 39799074 | -1 | NM_003819    | PABPC4    | 0 | NA | 0 | NA | 0 | NA | 0 | NA | 0 | NA |
| 1 | 39877935 | 39861689 | -1 | NM_014571    | HEYL      | 0 | NA | 0 | NA | 0 | NA | 0 | NA | 0 | NA |
| 1 | 39910297 | 39897379 | -1 | NM_032526    | NT5C1A    | 0 | NA | 0 | NA | 0 | NA | 0 | NA | 0 | NA |
| 1 | 39929676 | 39917231 | -1 | NM_016257    | HPCAL4    | 0 | NA | 0 | NA | 0 | NA | 0 | NA | 0 | NA |
| 1 | 39977116 | 39991965 | 1  | NM_006112    | PPIE      | 0 | NA | 0 | NA | 0 | NA | 0 | NA | 0 | NA |
| 1 | 39977116 | 39991965 | 1  | NM_203457    | PPIE      | 0 | NA | 0 | NA | 0 | NA | 0 | NA | 0 | NA |
| 1 | 39977116 | 40002173 | 1  | NM_203456    | PPIE      | 0 | NA | 0 | NA | 0 | NA | 0 | NA | 0 | NA |
| 1 | 40009607 | 40007783 | -1 | NM_022120    | OXCT2     | 0 | NA | 0 | NA | 0 | NA | 0 | NA | 0 | NA |
| 1 | 40027120 | 39996489 | -1 | NM_001720    | BMP8B     | 0 | NA | 0 | NA | 0 | NA | 0 | NA | 0 | NA |
| 1 | 40121764 | 40079314 | -1 | NM_017646    | TRIT1     | 0 | NA | 0 | NA | 0 | NA | 0 | NA | 0 | NA |
| 1 | 40140274 | 40133684 | -1 | NM_001033081 | MYCL1     | 0 | NA | 0 | NA | 0 | NA | 0 | NA | 0 | NA |
| 1 | 40140274 | 40133684 | -1 | NM_001033082 | MYCL1     | 0 | NA | 0 | NA | 0 | NA | 0 | NA | 0 | NA |
| 1 | 40140274 | 40137872 | -1 | NM_005376    | MYCL1     | 0 | NA | 0 | NA | 0 | NA | 0 | NA | 0 | NA |
| 1 | 40193396 | 40208215 | 1  | NM_032793    | MFSD2     | 0 | NA | 0 | NA | 0 | NA | 0 | NA | 0 | NA |
| 1 | 40278841 | 40310908 | 1  | NM_001105530 | CAP1      | 1 | 12 | 0 | NA | 0 | NA | 0 | NA | 0 | NA |
| 1 | 40278841 | 40310908 | 1  | NM_006367    | CAP1      | 1 | 12 | 0 | NA | 0 | NA | 0 | NA | 0 | NA |
| 1 | 40335555 | 40310970 | -1 | NM_000310    | PPT1      | 0 | NA | 0 | NA | 0 | NA | 1 | 12 | 0 | NA |
| 1 | 40399627 | 40479180 | 1  | NM_012421    | RLF       | 0 | NA | 0 | NA | 0 | NA | 0 | NA | 0 | NA |
| 1 | 40486159 | 40489952 | 1  | NM_001008740 | TMC02     | 0 | NA | 0 | NA | 0 | NA | 0 | NA | 0 | NA |
| 1 | 40496319 | 40532443 | 1  | NM_005857    | ZMPSTE24  | 0 | NA | 0 | NA | 0 | NA | 0 | NA | 0 | NA |
| 1 | 40555526 | 40538749 | -1 | NM_001852    | COL9A2    | 0 | NA | 0 | NA | 0 | NA | 0 | NA | 0 | NA |
| 1 | 40612314 | 40661581 | 1  | NM_022733    | SMAP2     | 0 | NA | 0 | NA | 1 | 12 | 0 | NA | 0 | NA |
| 1 | 40688365 | 40701939 | 1  | NM_023070    | ZNF643    | 0 | NA | 0 | NA | 0 | NA | 0 | NA | 0 | NA |
| 1 | 40715888 | 40734602 | 1  | NM_198494    | ZNF642    | 0 | NA | 0 | NA | 0 | NA | 0 | NA | 0 | NA |
| 1 | 40747019 | 40754801 | 1  | NM_022774    | C1orf176  | 1 | 18 | 0 | NA | 0 | NA | 1 | 12 | 0 | NA |
| 1 | 40769819 | 40786426 | 1  | NM_152373    | ZNF684    | 0 | NA | 0 | NA | 0 | NA | 0 | NA | 0 | NA |
| 1 | 40903911 | 40858938 | -1 | NM_014747    | RIMS3     | 0 | NA | 0 | NA | 0 | NA | 0 | NA | 0 | NA |
| 1 | 40929828 | 41009862 | 1  | NM_014223    | NFYC      | 0 | NA | 0 | NA | 0 | NA | 0 | NA | 0 | NA |
| 1 | 41022270 | 41076947 | 1  | NM_004700    | KCNQ4     | 0 | NA | 0 | NA | 0 | NA | 0 | NA | 0 | NA |
| 1 | 41022270 | 41076947 | 1  | NM_172163    | KCNQ4     | 0 | NA | 0 | NA | 0 | NA | 0 | NA | 0 | NA |
| 1 | 41100605 | 41099314 | -1 | NM_133467    | CITED4    | 0 | NA | 0 | NA | 1 | 13 | 0 | NA | 0 | NA |
| 1 | 41217593 | 41250822 | 1  | NM_001905    | CTPS      | 0 | NA | 0 | NA | 0 | NA | 0 | NA | 0 | NA |
| 1 | 41259974 | 41253855 | -1 | NM_144990    | SLFN1     | 0 | NA | 0 | NA | 0 | NA | 0 | NA | 0 | NA |
| 1 | 41399633 | 41265460 | -1 | NM_001031694 | SCMH1     | 0 | NA | 0 | NA | 0 | NA | 0 | NA | 0 | NA |
| 1 | 41480375 | 41265463 | -1 | NM_012236    | SCMH1     | 0 | NA | 0 | NA | 0 | NA | 0 | NA | 0 | NA |
| 1 | 41722884 | 41717032 | -1 | NM_001956    | EDN2      | 0 | NA | 0 | NA | 0 | NA | 0 | NA | 0 | NA |
| 1 | 42156782 | 41748270 | -1 | NM_024503    | HIVEP3    | 0 | NA | 0 | NA | 0 | NA | 0 | NA | 0 | NA |
| 1 | 42391678 | 42394082 | 1  | NM_007102    | GUCA2B    | 0 | NA | 0 | NA | 0 | NA | 0 | NA | 0 | NA |
| 1 | 42402982 | 42400948 | -1 | NM_033553    | GUCA2A    | 0 | NA | 0 | NA | 0 | NA | 0 | NA | 0 | NA |
| 1 | 42573490 | 42414796 | -1 | NM_014947    | FOXJ3     | 1 | 11 | 0 | NA | 0 | NA | 0 | NA | 0 | NA |
| 1 | 42619054 | 42662487 | 1  | NM_173642    | FAM80A    | 0 | NA | 0 | NA | 0 | NA | 0 | NA | 0 | NA |
| 1 | 42694514 | 42668680 | -1 | NM_032257    | ZMYND12   | 0 | NA | 0 | NA | 0 | NA | 0 | NA | 0 | NA |
| 1 | 42694759 | 42698673 | 1  | NM_001077447 | PPCS      | 0 | NA | 0 | NA | 0 | NA | 0 | NA | 0 | NA |
| 1 | 42694759 | 42698673 | 1  | NM_024664    | PPCS      | 0 | NA | 0 | NA | 0 | NA | 0 | NA | 0 | NA |
| 1 | 42773146 | 42892922 | 1  | NM_001080850 | LOC728621 | 0 | NA | 0 | NA | 0 | NA | 0 | NA | 0 | NA |
| 1 | 42896634 | 42915016 | 1  | NM_006347    | PPIH      | 1 | 22 | 0 | NA | 0 | NA | 0 | NA | 0 | NA |
| 1 | 42920652 | 42940607 | 1  | NM_004559    | YBX1      | 0 | NA | 0 | NA | 0 | NA | 0 | NA | 0 | NA |
| 1 | 42978512 | 42971350 | -1 | NM_001123395 | CLDN19    | 0 | NA | 0 | NA | 0 | NA | 0 | NA | 0 | NA |
| 1 | 42978512 | 42971350 | -1 | NM_148960    | CLDN19    | 0 | NA | 0 | NA | 0 | NA | 0 | NA | 0 | NA |
| 1 | 43005342 | 42984592 | -1 | NM_022356    | LEPRE1    | 0 | NA | 0 | NA | 0 | NA | 0 | NA | 0 | NA |
| 1 | 43005502 | 43014002 | 1  | NM_024097    | C1orf50   | 0 | NA | 0 | NA | 0 | NA | 0 | NA | 0 | NA |
| 1 | 43055362 | 43083247 | 1  | NM_001017922 | ERMAP     | 0 | NA | 0 | NA | 0 | NA | 1 | 12 | 0 | NA |
| 1 | 43055510 | 43045319 | -1 | NM_199342    | CCDC23    | 0 | NA | 0 | NA | 0 | NA | 1 | 12 | 0 | NA |
| 1 | 43063835 | 43083247 | 1  | NM_018538    | ERMAP     | 0 | NA | 0 | NA | 0 | NA | 1 | 12 | 0 | NA |

|   |          |          |    |              |           |   |    |   |    |   |    |   |    |   |    |
|---|----------|----------|----|--------------|-----------|---|----|---|----|---|----|---|----|---|----|
| 1 | 43084866 | 43090733 | 1  | NM_015911    | ZNF691    | 0 | NA | 0 | NA | 0 | NA | 0 | NA | 0 | NA |
| 1 | 43197434 | 43163632 | -1 | NM_006516    | SLC2A1    | 0 | NA | 0 | NA | 0 | NA | 0 | NA | 0 | NA |
| 1 | 43386180 | 43394654 | 1  | NM_001101376 | LOC440585 | 0 | NA | 0 | NA | 0 | NA | 0 | NA | 0 | NA |
| 1 | 43410518 | 43402441 | -1 | NM_006824    | EBNA1BP2  | 0 | NA | 0 | NA | 0 | NA | 1 | 15 | 0 | NA |
| 1 | 43410612 | 43449136 | 1  | NM_152498    | WDR65     | 0 | NA | 0 | NA | 0 | NA | 1 | 15 | 0 | NA |
| 1 | 43508993 | 43512260 | 1  | NM_144626    | TMEM125   | 0 | NA | 0 | NA | 0 | NA | 0 | NA | 0 | NA |
| 1 | 43523837 | 43520143 | -1 | NM_182517    | C1orf210  | 0 | NA | 0 | NA | 0 | NA | 0 | NA | 0 | NA |
| 1 | 43539250 | 43561366 | 1  | NM_005424    | TIE1      | 0 | NA | 0 | NA | 0 | NA | 0 | NA | 0 | NA |
| 1 | 43576061 | 43592722 | 1  | NM_005373    | MPL       | 0 | NA | 0 | NA | 0 | NA | 0 | NA | 0 | NA |
| 1 | 43597212 | 43601460 | 1  | NM_001255    | CDC20     | 0 | NA | 0 | NA | 0 | NA | 0 | NA | 0 | NA |
| 1 | 43606286 | 43601658 | -1 | NM_022821    | ELOVL1    | 0 | NA | 0 | NA | 0 | NA | 0 | NA | 0 | NA |
| 1 | 43628070 | 43622174 | -1 | NM_052877    | MED8      | 1 | 13 | 0 | NA | 1 | 14 | 0 | NA | 0 | NA |
| 1 | 43628070 | 43622983 | -1 | NM_201542    | MED8      | 1 | 13 | 0 | NA | 1 | 14 | 0 | NA | 0 | NA |
| 1 | 43628142 | 43645152 | 1  | NM_001012961 | C1orf84   | 1 | 13 | 0 | NA | 1 | 14 | 0 | NA | 0 | NA |
| 1 | 43661383 | 43690891 | 1  | NM_015284    | KIAA0467  | 0 | NA | 0 | NA | 0 | NA | 0 | NA | 0 | NA |
| 1 | 43692505 | 43689415 | -1 | NM_031207    | HYI       | 0 | NA | 0 | NA | 0 | NA | 0 | NA | 0 | NA |
| 1 | 43769133 | 43861930 | 1  | NM_002840    | PTPRF     | 0 | NA | 0 | NA | 0 | NA | 0 | NA | 0 | NA |
| 1 | 43769133 | 43861930 | 1  | NM_130440    | PTPRF     | 0 | NA | 0 | NA | 0 | NA | 0 | NA | 0 | NA |
| 1 | 43888383 | 43943776 | 1  | NM_014663    | JMJD2A    | 0 | NA | 0 | NA | 1 | 13 | 0 | NA | 0 | NA |
| 1 | 43945804 | 44169418 | 1  | NM_006279    | ST3GAL3   | 0 | NA | 0 | NA | 0 | NA | 0 | NA | 0 | NA |
| 1 | 43945804 | 44169418 | 1  | NM_174963    | ST3GAL3   | 0 | NA | 0 | NA | 0 | NA | 0 | NA | 0 | NA |
| 1 | 43945804 | 44169418 | 1  | NM_174964    | ST3GAL3   | 0 | NA | 0 | NA | 0 | NA | 0 | NA | 0 | NA |
| 1 | 43945804 | 44169418 | 1  | NM_174965    | ST3GAL3   | 0 | NA | 0 | NA | 0 | NA | 0 | NA | 0 | NA |
| 1 | 43945804 | 44169418 | 1  | NM_174966    | ST3GAL3   | 0 | NA | 0 | NA | 0 | NA | 0 | NA | 0 | NA |
| 1 | 43945804 | 44169418 | 1  | NM_174967    | ST3GAL3   | 0 | NA | 0 | NA | 0 | NA | 0 | NA | 0 | NA |
| 1 | 43945804 | 44169418 | 1  | NM_174968    | ST3GAL3   | 0 | NA | 0 | NA | 0 | NA | 0 | NA | 0 | NA |
| 1 | 43945804 | 44169418 | 1  | NM_174969    | ST3GAL3   | 0 | NA | 0 | NA | 0 | NA | 0 | NA | 0 | NA |
| 1 | 43945804 | 44169418 | 1  | NM_174970    | ST3GAL3   | 0 | NA | 0 | NA | 0 | NA | 0 | NA | 0 | NA |
| 1 | 43945804 | 44169418 | 1  | NM_174971    | ST3GAL3   | 0 | NA | 0 | NA | 0 | NA | 0 | NA | 0 | NA |
| 1 | 44171578 | 44175471 | 1  | NM_057091    | ARTN      | 0 | NA | 0 | NA | 0 | NA | 0 | NA | 0 | NA |
| 1 | 44173617 | 44175471 | 1  | NM_003976    | ARTN      | 0 | NA | 0 | NA | 0 | NA | 0 | NA | 0 | NA |
| 1 | 44173887 | 44175471 | 1  | NM_057090    | ARTN      | 0 | NA | 0 | NA | 0 | NA | 0 | NA | 0 | NA |
| 1 | 44174240 | 44175471 | 1  | NM_057160    | ARTN      | 0 | NA | 0 | NA | 0 | NA | 0 | NA | 0 | NA |
| 1 | 44185229 | 44206012 | 1  | NM_014652    | IPO13     | 0 | NA | 0 | NA | 0 | NA | 0 | NA | 0 | NA |
| 1 | 44208239 | 44211630 | 1  | NM_001039589 | DPH2      | 0 | NA | 0 | NA | 0 | NA | 0 | NA | 0 | NA |
| 1 | 44208239 | 44211630 | 1  | NM_001384    | DPH2      | 0 | NA | 0 | NA | 0 | NA | 0 | NA | 0 | NA |
| 1 | 44213188 | 44216559 | 1  | NM_001039457 | ATP6V0B   | 0 | NA | 0 | NA | 0 | NA | 0 | NA | 0 | NA |
| 1 | 44213188 | 44216559 | 1  | NM_004047    | ATP6V0B   | 0 | NA | 0 | NA | 0 | NA | 0 | NA | 0 | NA |
| 1 | 44217452 | 44229427 | 1  | NM_003780    | B4GALT2   | 0 | NA | 0 | NA | 0 | NA | 0 | NA | 0 | NA |
| 1 | 44218769 | 44229427 | 1  | NM_001005417 | B4GALT2   | 0 | NA | 0 | NA | 0 | NA | 0 | NA | 0 | NA |
| 1 | 44229866 | 44234785 | 1  | NM_152499    | CCDC24    | 0 | NA | 0 | NA | 0 | NA | 0 | NA | 0 | NA |
| 1 | 44255584 | 44234741 | -1 | NM_006934    | SLC6A9    | 0 | NA | 0 | NA | 0 | NA | 0 | NA | 0 | NA |
| 1 | 44255584 | 44234741 | -1 | NM_201649    | SLC6A9    | 0 | NA | 0 | NA | 0 | NA | 0 | NA | 0 | NA |
| 1 | 44269721 | 44234741 | -1 | NM_001024845 | SLC6A9    | 0 | NA | 0 | NA | 0 | NA | 0 | NA | 0 | NA |
| 1 | 44357108 | 44373396 | 1  | NM_173484    | KLF17     | 0 | NA | 0 | NA | 0 | NA | 0 | NA | 1 | 12 |
| 1 | 44451711 | 44458938 | 1  | NM_001034023 | DMAP1     | 1 | 12 | 0 | NA | 0 | NA | 1 | 12 | 0 | NA |
| 1 | 44451711 | 44458938 | 1  | NM_001034024 | DMAP1     | 1 | 12 | 0 | NA | 0 | NA | 1 | 12 | 0 | NA |
| 1 | 44451711 | 44458938 | 1  | NM_019100    | DMAP1     | 1 | 12 | 0 | NA | 0 | NA | 1 | 12 | 0 | NA |
| 1 | 44593526 | 44459328 | -1 | NM_024066    | PRNPIP    | 0 | NA | 0 | NA | 0 | NA | 0 | NA | 0 | NA |
| 1 | 44643546 | 44889983 | 1  | NM_018150    | C1orf164  | 0 | NA | 1 | 16 | 0 | NA | 0 | NA | 0 | NA |
| 1 | 44912686 | 44892087 | -1 | NM_024587    | TMEM53    | 0 | NA | 0 | NA | 0 | NA | 1 | 13 | 0 | NA |
| 1 | 44978076 | 45006025 | 1  | NM_006845    | KIF2C     | 0 | NA | 0 | NA | 0 | NA | 0 | NA | 0 | NA |
| 1 | 45013832 | 45016999 | 1  | NM_001012    | RPS8      | 0 | NA | 0 | NA | 0 | NA | 0 | NA | 0 | NA |
| 1 | 45026013 | 45021843 | -1 | NM_153274    | BEST4     | 0 | NA | 0 | NA | 1 | 12 | 0 | NA | 0 | NA |
| 1 | 45038622 | 45044254 | 1  | NM_004073    | PLK3      | 0 | NA | 0 | NA | 0 | NA | 0 | NA | 0 | NA |
| 1 | 45045544 | 45044172 | -1 | NM_001013632 | TCTEX1D4  | 0 | NA | 0 | NA | 0 | NA | 0 | NA | 0 | NA |
| 1 | 45081203 | 45060673 | -1 | NM_003738    | PTCH2     | 0 | NA | 0 | NA | 0 | NA | 0 | NA | 0 | NA |
| 1 | 45224869 | 45089036 | -1 | NM_020365    | EIF2B3    | 0 | NA | 0 | NA | 0 | NA | 1 | 14 | 0 | NA |
| 1 | 45249614 | 45240806 | -1 | NM_024602    | HECTD3    | 1 | 13 | 0 | NA | 0 | NA | 0 | NA | 0 | NA |
| 1 | 45250416 | 45253928 | 1  | NM_000374    | UROD      | 1 | 13 | 0 | NA | 0 | NA | 0 | NA | 0 | NA |
| 1 | 45444837 | 45254662 | -1 | NM_020883    | ZSWIM5    | 0 | NA | 0 | NA | 0 | NA | 0 | NA | 0 | NA |
| 1 | 45565131 | 45566933 | 1  | NM_032756    | HPDL      | 0 | NA | 0 | NA | 1 | 14 | 0 | NA | 0 | NA |
| 1 | 45577928 | 45582237 | 1  | NM_025077    | TOE1      | 0 | NA | 0 | NA | 0 | NA | 1 | 11 | 0 | NA |
| 1 | 45578216 | 45567500 | -1 | NM_001048174 | MUTYH     | 0 | NA | 0 | NA | 0 | NA | 1 | 11 | 0 | NA |
| 1 | 45578374 | 45567500 | -1 | NM_001048172 | MUTYH     | 0 | NA | 0 | NA | 0 | NA | 1 | 11 | 0 | NA |

|   |          |          |    |              |           |   |    |   |    |   |    |   |    |   |    |
|---|----------|----------|----|--------------|-----------|---|----|---|----|---|----|---|----|---|----|
| 1 | 45578374 | 45567500 | -1 | NM_001048173 | MUTYH     | 0 | NA | 0 | NA | 0 | NA | 1 | 11 | 0 | NA |
| 1 | 45578729 | 45567500 | -1 | NM_001048171 | MUTYH     | 0 | NA | 0 | NA | 0 | NA | 1 | 11 | 0 | NA |
| 1 | 45578729 | 45567500 | -1 | NM_012222    | MUTYH     | 0 | NA | 0 | NA | 0 | NA | 1 | 11 | 0 | NA |
| 1 | 45729427 | 45582141 | -1 | NM_007170    | TESK2     | 0 | NA | 0 | NA | 0 | NA | 0 | NA | 0 | NA |
| 1 | 45738233 | 45733167 | -1 | NM_001102601 | LOC126861 | 0 | NA | 0 | NA | 0 | NA | 0 | NA | 0 | NA |
| 1 | 45738442 | 45749326 | 1  | NM_015506    | MMACHC    | 0 | NA | 0 | NA | 0 | NA | 0 | NA | 0 | NA |
| 1 | 45760196 | 45749293 | -1 | NM_002574    | PRDX1     | 1 | 14 | 0 | NA | 0 | NA | 0 | NA | 0 | NA |
| 1 | 45760196 | 45749293 | -1 | NM_181696    | PRDX1     | 1 | 14 | 0 | NA | 0 | NA | 0 | NA | 0 | NA |
| 1 | 45760196 | 45749293 | -1 | NM_181697    | PRDX1     | 1 | 14 | 0 | NA | 0 | NA | 0 | NA | 0 | NA |
| 1 | 45789084 | 45808308 | 1  | NM_006066    | AKR1A1    | 0 | NA | 0 | NA | 0 | NA | 0 | NA | 0 | NA |
| 1 | 45789084 | 45808308 | 1  | NM_153326    | AKR1A1    | 0 | NA | 0 | NA | 0 | NA | 0 | NA | 0 | NA |
| 1 | 45822303 | 45857154 | 1  | NM_002482    | NASP      | 1 | 21 | 0 | NA | 0 | NA | 1 | 20 | 0 | NA |
| 1 | 45822303 | 45857154 | 1  | NM_152298    | NASP      | 1 | 21 | 0 | NA | 0 | NA | 1 | 20 | 0 | NA |
| 1 | 45822303 | 45857154 | 1  | NM_172164    | NASP      | 1 | 21 | 0 | NA | 0 | NA | 1 | 20 | 0 | NA |
| 1 | 45862316 | 45858302 | -1 | NM_00114938  | CCDC17    | 0 | NA | 0 | NA | 0 | NA | 0 | NA | 0 | NA |
| 1 | 45899398 | 45865567 | -1 | NM_021639    | GPBP1L1   | 0 | NA | 0 | NA | 0 | NA | 0 | NA | 0 | NA |
| 1 | 45926433 | 45932695 | 1  | NM_016486    | TMEM69    | 0 | NA | 0 | NA | 0 | NA | 0 | NA | 0 | NA |
| 1 | 45984720 | 45936993 | -1 | NM_005897    | IPP       | 0 | NA | 0 | NA | 0 | NA | 0 | NA | 0 | NA |
| 1 | 46041871 | 46274383 | 1  | NM_015112    | MAST2     | 0 | NA | 0 | NA | 0 | NA | 0 | NA | 0 | NA |
| 1 | 46370967 | 46278398 | -1 | NM_003629    | PIK3R3    | 0 | NA | 0 | NA | 0 | NA | 0 | NA | 0 | NA |
| 1 | 46371295 | 46278398 | -1 | NM_001114172 | PIK3R3    | 0 | NA | 0 | NA | 0 | NA | 0 | NA | 0 | NA |
| 1 | 46418798 | 46424217 | 1  | NM_005727    | TSPAN1    | 0 | NA | 0 | NA | 0 | NA | 0 | NA | 0 | NA |
| 1 | 46436708 | 46426939 | -1 | NM_017739    | POMGNT1   | 0 | NA | 0 | NA | 0 | NA | 1 | 15 | 0 | NA |
| 1 | 46441592 | 46509912 | 1  | NM_001013615 | C1orf190  | 0 | NA | 0 | NA | 0 | NA | 1 | 15 | 0 | NA |
| 1 | 46486003 | 46516732 | 1  | NM_003579    | RAD54L    | 0 | NA | 0 | NA | 0 | NA | 1 | 20 | 0 | NA |
| 1 | 46541625 | 46516658 | -1 | NM_006369    | LRRC41    | 0 | NA | 0 | NA | 1 | 13 | 1 | 13 | 0 | NA |
| 1 | 46541966 | 46555034 | 1  | NM_006004    | UQCRH     | 0 | NA | 0 | NA | 1 | 13 | 1 | 13 | 0 | NA |
| 1 | 46578976 | 46603277 | 1  | NM_199044    | NSUN4     | 0 | NA | 0 | NA | 0 | NA | 0 | NA | 0 | NA |
| 1 | 46632525 | 46652107 | 1  | NM_001441    | FAAH      | 1 | 13 | 1 | 16 | 0 | NA | 0 | NA | 0 | NA |
| 1 | 46745254 | 46752473 | 1  | NM_147192    | DMBX1     | 0 | NA | 0 | NA | 0 | NA | 0 | NA | 0 | NA |
| 1 | 46745254 | 46752473 | 1  | NM_172225    | DMBX1     | 0 | NA | 0 | NA | 0 | NA | 0 | NA | 0 | NA |
| 1 | 46789474 | 46783902 | -1 | NM_001097611 | KNCN      | 0 | NA | 0 | NA | 0 | NA | 1 | 11 | 0 | NA |
| 1 | 46832405 | 46796839 | -1 | NM_198973    | MKNK1     | 0 | NA | 0 | NA | 0 | NA | 0 | NA | 0 | NA |
| 1 | 46842473 | 46795676 | -1 | NM_003684    | MKNK1     | 0 | NA | 0 | NA | 0 | NA | 0 | NA | 0 | NA |
| 1 | 46853392 | 46845973 | -1 | NM_145279    | MOBK2C    | 0 | NA | 0 | NA | 0 | NA | 0 | NA | 0 | NA |
| 1 | 46855150 | 46845973 | -1 | NM_201403    | MOBK2C    | 0 | NA | 0 | NA | 0 | NA | 0 | NA | 0 | NA |
| 1 | 46906686 | 46870997 | -1 | NM_001042546 | ATPAF1    | 0 | NA | 0 | NA | 0 | NA | 0 | NA | 0 | NA |
| 1 | 46906686 | 46870997 | -1 | NM_022745    | ATPAF1    | 0 | NA | 0 | NA | 0 | NA | 0 | NA | 0 | NA |
| 1 | 46957323 | 46913417 | -1 | NM_014774    | KIAA0494  | 0 | NA | 0 | NA | 0 | NA | 0 | NA | 0 | NA |
| 1 | 47037256 | 47057608 | 1  | NM_000779    | CYP4B1    | 0 | NA | 0 | NA | 0 | NA | 0 | NA | 0 | NA |
| 1 | 47037256 | 47057608 | 1  | NM_001099772 | CYP4B1    | 0 | NA | 0 | NA | 0 | NA | 0 | NA | 0 | NA |
| 1 | 47179743 | 47167432 | -1 | NM_000778    | CYP4A11   | 0 | NA | 0 | NA | 0 | NA | 0 | NA | 0 | NA |
| 1 | 47261826 | 47289010 | 1  | NM_178033    | CYP4X1    | 0 | NA | 0 | NA | 0 | NA | 0 | NA | 0 | NA |
| 1 | 47305746 | 47356579 | 1  | NM_178134    | CYP4Z1    | 0 | NA | 0 | NA | 0 | NA | 0 | NA | 0 | NA |
| 1 | 47375693 | 47387113 | 1  | NM_001010969 | CYP4A22   | 0 | NA | 0 | NA | 0 | NA | 0 | NA | 0 | NA |
| 1 | 47428358 | 47421847 | -1 | NM_005764    | PDZK11P1  | 0 | NA | 0 | NA | 0 | NA | 0 | NA | 0 | NA |
| 1 | 47468030 | 47454550 | -1 | NM_003189    | TAL1      | 0 | NA | 1 | 12 | 0 | NA | 0 | NA | 1 | 13 |
| 1 | 47552406 | 47488397 | -1 | NM_001048166 | STIL      | 0 | NA | 0 | NA | 0 | NA | 0 | NA | 0 | NA |
| 1 | 47552406 | 47488397 | -1 | NM_003035    | STIL      | 0 | NA | 0 | NA | 0 | NA | 0 | NA | 0 | NA |
| 1 | 47572174 | 47617098 | 1  | NM_016308    | CMPK1     | 0 | NA | 0 | NA | 0 | NA | 0 | NA | 0 | NA |
| 1 | 47654330 | 47656311 | 1  | NM_012186    | FOXE3     | 0 | NA | 0 | NA | 0 | NA | 0 | NA | 0 | NA |
| 1 | 47674275 | 47678950 | 1  | NM_004474    | FOXD2     | 0 | NA | 0 | NA | 1 | 12 | 0 | NA | 0 | NA |
| 1 | 48460990 | 48486903 | 1  | NM_001011547 | SLC5A9    | 0 | NA | 1 | 12 | 0 | NA | 0 | NA | 0 | NA |
| 1 | 48710432 | 48536864 | -1 | NM_019073    | SPATA6    | 1 | 11 | 0 | NA | 0 | NA | 0 | NA | 0 | NA |
| 1 | 49015134 | 48966126 | -1 | NM_024603    | C1orf165  | 0 | NA | 0 | NA | 0 | NA | 0 | NA | 0 | NA |
| 1 | 49283906 | 48825046 | -1 | NM_032785    | AGBL4     | 0 | NA | 0 | NA | 0 | NA | 0 | NA | 0 | NA |
| 1 | 50347224 | 50439643 | 1  | NM_021952    | ELAVL4    | 0 | NA | 0 | NA | 0 | NA | 0 | NA | 0 | NA |
| 1 | 50661729 | 50655813 | -1 | NM_032110    | DMRTA2    | 0 | NA | 0 | NA | 0 | NA | 0 | NA | 0 | NA |
| 1 | 51198524 | 50679522 | -1 | NM_007051    | FAF1      | 0 | NA | 0 | NA | 0 | NA | 0 | NA | 0 | NA |
| 1 | 51206954 | 51212894 | 1  | NM_001262    | CDKN2C    | 0 | NA | 0 | NA | 0 | NA | 0 | NA | 0 | NA |
| 1 | 51208229 | 51212897 | 1  | NM_078626    | CDKN2C    | 0 | NA | 0 | NA | 0 | NA | 0 | NA | 0 | NA |
| 1 | 51474532 | 51511707 | 1  | NM_014372    | RNF11     | 0 | NA | 0 | NA | 0 | NA | 0 | NA | 0 | NA |
| 1 | 51560526 | 51525369 | -1 | NM_001080494 | C1orf34   | 0 | NA | 0 | NA | 0 | NA | 0 | NA | 0 | NA |
| 1 | 51757583 | 51592522 | -1 | NM_001981    | EPS15     | 0 | NA | 0 | NA | 0 | NA | 0 | NA | 0 | NA |
| 1 | 51855351 | 52026726 | 1  | NM_024586    | OSBPL9    | 0 | NA | 0 | NA | 0 | NA | 0 | NA | 0 | NA |

|   |          |          |    |              |           |   |    |   |    |   |    |   |    |   |    |
|---|----------|----------|----|--------------|-----------|---|----|---|----|---|----|---|----|---|----|
| 1 | 51855351 | 52026726 | 1  | NM_148906    | OSBPL9    | 0 | NA | 0 | NA | 0 | NA | 0 | NA | 0 | NA |
| 1 | 51855351 | 52026726 | 1  | NM_148908    | OSBPL9    | 0 | NA | 0 | NA | 0 | NA | 0 | NA | 0 | NA |
| 1 | 51855351 | 52026726 | 1  | NM_148909    | OSBPL9    | 0 | NA | 0 | NA | 0 | NA | 0 | NA | 0 | NA |
| 1 | 51968080 | 52026726 | 1  | NM_148904    | OSBPL9    | 0 | NA | 0 | NA | 0 | NA | 0 | NA | 0 | NA |
| 1 | 51968080 | 52026726 | 1  | NM_148905    | OSBPL9    | 0 | NA | 0 | NA | 0 | NA | 0 | NA | 0 | NA |
| 1 | 51968110 | 52026726 | 1  | NM_148907    | OSBPL9    | 0 | NA | 0 | NA | 0 | NA | 0 | NA | 0 | NA |
| 1 | 52117197 | 52027453 | -1 | NM_001101662 | NRD1      | 0 | NA | 0 | NA | 0 | NA | 0 | NA | 0 | NA |
| 1 | 52117197 | 52027453 | -1 | NM_002525    | NRD1      | 0 | NA | 0 | NA | 0 | NA | 0 | NA | 0 | NA |
| 1 | 52228936 | 52157422 | -1 | NM_002867    | RAB3B     | 0 | NA | 0 | NA | 0 | NA | 0 | NA | 0 | NA |
| 1 | 52272060 | 52270364 | -1 | NM_138417    | KTI12     | 0 | NA | 0 | NA | 0 | NA | 0 | NA | 0 | NA |
| 1 | 52293635 | 52258391 | -1 | NM_015913    | TXNDC12   | 0 | NA | 0 | NA | 0 | NA | 1 | 11 | 0 | NA |
| 1 | 52294560 | 52326650 | 1  | NM_152265    | BTF3L4    | 0 | NA | 0 | NA | 0 | NA | 1 | 11 | 0 | NA |
| 1 | 52380633 | 52502307 | 1  | NM_007323    | ZFYVE9    | 0 | NA | 0 | NA | 0 | NA | 0 | NA | 0 | NA |
| 1 | 52380633 | 52584946 | 1  | NM_004799    | ZFYVE9    | 0 | NA | 0 | NA | 0 | NA | 0 | NA | 0 | NA |
| 1 | 52380633 | 52584946 | 1  | NM_007324    | ZFYVE9    | 0 | NA | 0 | NA | 0 | NA | 0 | NA | 0 | NA |
| 1 | 52604452 | 52588854 | -1 | NM_032449    | CC2D1B    | 0 | NA | 0 | NA | 0 | NA | 0 | NA | 0 | NA |
| 1 | 52642719 | 52611088 | -1 | NM_004153    | ORC1L     | 0 | NA | 0 | NA | 0 | NA | 0 | NA | 0 | NA |
| 1 | 52642806 | 52656580 | 1  | NM_032864    | PRPF38A   | 0 | NA | 0 | NA | 0 | NA | 0 | NA | 0 | NA |
| 1 | 52791331 | 52661535 | -1 | NM_001009881 | ZCCHC11   | 0 | NA | 0 | NA | 0 | NA | 0 | NA | 0 | NA |
| 1 | 52791331 | 52661535 | -1 | NM_001009882 | ZCCHC11   | 0 | NA | 0 | NA | 0 | NA | 0 | NA | 0 | NA |
| 1 | 52791331 | 52661535 | -1 | NM_015269    | ZCCHC11   | 0 | NA | 0 | NA | 0 | NA | 0 | NA | 0 | NA |
| 1 | 52840631 | 52847310 | 1  | NM_015696    | GPX7      | 1 | 13 | 0 | NA | 0 | NA | 0 | NA | 0 | NA |
| 1 | 52871653 | 52895325 | 1  | NM_001042693 | MGC52498  | 0 | NA | 1 | 14 | 0 | NA | 0 | NA | 0 | NA |
| 1 | 52936626 | 52925101 | -1 | NM_023077    | C1orf163  | 0 | NA | 0 | NA | 0 | NA | 0 | NA | 0 | NA |
| 1 | 52964768 | 53063913 | 1  | NM_024646    | ZYG11B    | 0 | NA | 0 | NA | 0 | NA | 0 | NA | 0 | NA |
| 1 | 53160034 | 53134491 | -1 | NM_018281    | ECHDC2    | 0 | NA | 0 | NA | 0 | NA | 0 | NA | 0 | NA |
| 1 | 53165535 | 53232492 | 1  | NM_001007098 | SCP2      | 0 | NA | 0 | NA | 0 | NA | 0 | NA | 0 | NA |
| 1 | 53165535 | 53289870 | 1  | NM_002979    | SCP2      | 0 | NA | 0 | NA | 0 | NA | 0 | NA | 0 | NA |
| 1 | 53253197 | 53289870 | 1  | NM_001007099 | SCP2      | 0 | NA | 0 | NA | 0 | NA | 0 | NA | 0 | NA |
| 1 | 53253197 | 53289870 | 1  | NM_001007100 | SCP2      | 0 | NA | 0 | NA | 0 | NA | 0 | NA | 0 | NA |
| 1 | 53253197 | 53289870 | 1  | NM_001007250 | SCP2      | 0 | NA | 0 | NA | 0 | NA | 0 | NA | 0 | NA |
| 1 | 53300472 | 53323762 | 1  | NM_153703    | PODN      | 0 | NA | 0 | NA | 0 | NA | 0 | NA | 0 | NA |
| 1 | 53380837 | 53325442 | -1 | NM_006671    | SLC1A7    | 0 | NA | 0 | NA | 0 | NA | 0 | NA | 0 | NA |
| 1 | 53434688 | 53452457 | 1  | NM_000098    | CPT2      | 0 | NA | 0 | NA | 0 | NA | 1 | 22 | 0 | NA |
| 1 | 53458877 | 53452359 | -1 | NM_017887    | C1orf123  | 0 | NA | 0 | NA | 0 | NA | 0 | NA | 0 | NA |
| 1 | 53476795 | 53465151 | -1 | NM_002370    | MAGOH     | 0 | NA | 0 | NA | 0 | NA | 0 | NA | 0 | NA |
| 1 | 53566314 | 53483804 | -1 | NM_001018054 | LRP8      | 0 | NA | 0 | NA | 0 | NA | 0 | NA | 0 | NA |
| 1 | 53566314 | 53483804 | -1 | NM_004631    | LRP8      | 0 | NA | 0 | NA | 0 | NA | 0 | NA | 0 | NA |
| 1 | 53566314 | 53483804 | -1 | NM_017522    | LRP8      | 0 | NA | 0 | NA | 0 | NA | 0 | NA | 0 | NA |
| 1 | 53566409 | 53483799 | -1 | NM_033300    | LRP8      | 0 | NA | 0 | NA | 0 | NA | 0 | NA | 0 | NA |
| 1 | 53697659 | 53705746 | 1  | NM_033067    | DMRTB1    | 0 | NA | 0 | NA | 0 | NA | 0 | NA | 0 | NA |
| 1 | 53972465 | 53744493 | -1 | NM_147193    | GLIS1     | 0 | NA | 0 | NA | 0 | NA | 0 | NA | 0 | NA |
| 1 | 54076763 | 54005975 | -1 | NM_018087    | TMEM48    | 0 | NA | 0 | NA | 0 | NA | 1 | 27 | 0 | NA |
| 1 | 54128041 | 54089993 | -1 | NM_018982    | YIPF1     | 0 | NA | 0 | NA | 0 | NA | 0 | NA | 0 | NA |
| 1 | 54132448 | 54149347 | 1  | NM_000792    | DIO1      | 0 | NA | 0 | NA | 0 | NA | 0 | NA | 0 | NA |
| 1 | 54132448 | 54149347 | 1  | NM_001039715 | DIO1      | 0 | NA | 0 | NA | 0 | NA | 0 | NA | 0 | NA |
| 1 | 54132448 | 54149347 | 1  | NM_001039716 | DIO1      | 0 | NA | 0 | NA | 0 | NA | 0 | NA | 0 | NA |
| 1 | 54132448 | 54149347 | 1  | NM_213593    | DIO1      | 0 | NA | 0 | NA | 0 | NA | 0 | NA | 0 | NA |
| 1 | 54183876 | 54159821 | -1 | NM_016126    | C1orf41   | 0 | NA | 0 | NA | 0 | NA | 0 | NA | 0 | NA |
| 1 | 54184624 | 54206427 | 1  | NM_052940    | LRRC42    | 0 | NA | 0 | NA | 0 | NA | 0 | NA | 0 | NA |
| 1 | 54256391 | 54247093 | -1 | NM_001010978 | LDLRAD1   | 0 | NA | 0 | NA | 0 | NA | 0 | NA | 0 | NA |
| 1 | 54291699 | 54289936 | -1 | NM_004872    | TMEM59    | 0 | NA | 0 | NA | 0 | NA | 0 | NA | 0 | NA |
| 1 | 54291861 | 54338004 | 1  | NM_153035    | C1orf83   | 0 | NA | 0 | NA | 0 | NA | 0 | NA | 0 | NA |
| 1 | 54392031 | 54377255 | -1 | NM_201546    | CDCP2     | 0 | NA | 0 | NA | 0 | NA | 0 | NA | 0 | NA |
| 1 | 54438334 | 54410614 | -1 | NM_001031672 | LOC606495 | 0 | NA | 0 | NA | 0 | NA | 0 | NA | 0 | NA |
| 1 | 54438427 | 54456644 | 1  | NM_016491    | MRPL37    | 0 | NA | 0 | NA | 0 | NA | 0 | NA | 0 | NA |
| 1 | 54644567 | 54464782 | -1 | NM_018070    | SSBP3     | 0 | NA | 0 | NA | 0 | NA | 0 | NA | 0 | NA |
| 1 | 54644567 | 54464782 | -1 | NM_145716    | SSBP3     | 0 | NA | 0 | NA | 0 | NA | 0 | NA | 0 | NA |
| 1 | 54644680 | 54464782 | -1 | NM_001009955 | SSBP3     | 0 | NA | 0 | NA | 0 | NA | 0 | NA | 0 | NA |
| 1 | 54786488 | 54848588 | 1  | NM_147161    | ACOT11    | 0 | NA | 0 | NA | 0 | NA | 0 | NA | 0 | NA |
| 1 | 54786488 | 54873005 | 1  | NM_015547    | ACOT11    | 0 | NA | 0 | NA | 0 | NA | 0 | NA | 0 | NA |
| 1 | 54861786 | 54847441 | -1 | NM_176782    | FAM151A   | 0 | NA | 0 | NA | 0 | NA | 0 | NA | 0 | NA |
| 1 | 54880031 | 54948527 | 1  | NM_001039464 | C1orf175  | 0 | NA | 0 | NA | 0 | NA | 0 | NA | 0 | NA |
| 1 | 54954116 | 54980569 | 1  | NM_004623    | TTC4      | 1 | 12 | 0 | NA | 0 | NA | 0 | NA | 0 | NA |
| 1 | 55002775 | 54995158 | -1 | NM_152268    | PARS2     | 0 | NA | 0 | NA | 0 | NA | 0 | NA | 0 | NA |



|   |          |          |    |              |           |   |    |   |    |   |    |   |    |   |    |
|---|----------|----------|----|--------------|-----------|---|----|---|----|---|----|---|----|---|----|
| 1 | 55039529 | 55019339 | -1 | NM_001114108 | TTC22     | 0 | NA | 0 | NA | 0 | NA | 0 | NA | 0 | NA |
| 1 | 55039529 | 55022811 | -1 | NM_017904    | TTC22     | 0 | NA | 0 | NA | 0 | NA | 0 | NA | 0 | NA |
| 1 | 55044323 | 55080525 | 1  | NM_001110533 | C1orf177  | 0 | NA | 0 | NA | 0 | NA | 0 | NA | 0 | NA |
| 1 | 55044323 | 55080525 | 1  | NM_152607    | C1orf177  | 0 | NA | 0 | NA | 0 | NA | 0 | NA | 0 | NA |
| 1 | 55125509 | 55087897 | -1 | NM_014762    | DHCR24    | 0 | NA | 0 | NA | 0 | NA | 1 | 12 | 0 | NA |
| 1 | 55219052 | 55230554 | 1  | NM_182532    | TMEM61    | 0 | NA | 0 | NA | 0 | NA | 0 | NA | 0 | NA |
| 1 | 55237204 | 55247053 | 1  | NM_057176    | BSND      | 0 | NA | 1 | 12 | 0 | NA | 0 | NA | 0 | NA |
| 1 | 55277807 | 55303111 | 1  | NM_174936    | PCSK9     | 0 | NA | 0 | NA | 0 | NA | 0 | NA | 0 | NA |
| 1 | 55453350 | 55304619 | -1 | NM_015306    | USP24     | 0 | NA | 0 | NA | 0 | NA | 0 | NA | 0 | NA |
| 1 | 56817845 | 56733020 | -1 | NM_003713    | PPAP2B    | 1 | 12 | 0 | NA | 0 | NA | 0 | NA | 0 | NA |
| 1 | 56817845 | 56733020 | -1 | NM_177414    | PPAP2B    | 1 | 12 | 0 | NA | 0 | NA | 0 | NA | 0 | NA |
| 1 | 56883577 | 56953596 | 1  | NM_006252    | PRKAA2    | 0 | NA | 0 | NA | 0 | NA | 0 | NA | 0 | NA |
| 1 | 57057957 | 56957064 | -1 | NM_001004303 | C1orf168  | 0 | NA | 0 | NA | 0 | NA | 0 | NA | 0 | NA |
| 1 | 57093066 | 57156482 | 1  | NM_000562    | C8A       | 0 | NA | 0 | NA | 0 | NA | 0 | NA | 0 | NA |
| 1 | 57204276 | 57167470 | -1 | NM_000066    | C8B       | 0 | NA | 0 | NA | 0 | NA | 0 | NA | 0 | NA |
| 1 | 58294767 | 58294296 | -1 | NM_001093732 | LOC644928 | 0 | NA | 0 | NA | 0 | NA | 0 | NA | 0 | NA |
| 1 | 58488799 | 57236166 | -1 | NM_021080    | DAB1      | 0 | NA | 0 | NA | 0 | NA | 0 | NA | 0 | NA |
| 1 | 58785034 | 58718978 | -1 | NM_145243    | OMA1      | 0 | NA | 0 | NA | 1 | 13 | 0 | NA | 0 | NA |
| 1 | 58815754 | 58813682 | -1 | NM_002353    | TACSTD2   | 0 | NA | 0 | NA | 0 | NA | 0 | NA | 0 | NA |
| 1 | 58938335 | 58898177 | -1 | NM_001085487 | MYSM1     | 1 | 19 | 0 | NA | 0 | NA | 0 | NA | 0 | NA |
| 1 | 59022373 | 59019050 | -1 | NM_002228    | JUN       | 0 | NA | 0 | NA | 0 | NA | 0 | NA | 0 | NA |
| 1 | 59535212 | 60000990 | 1  | NM_001113411 | FGGY      | 0 | NA | 0 | NA | 0 | NA | 0 | NA | 0 | NA |
| 1 | 59535212 | 60000990 | 1  | NM_018291    | FGGY      | 0 | NA | 0 | NA | 0 | NA | 0 | NA | 0 | NA |
| 1 | 60053120 | 60114638 | 1  | NM_015888    | HOOK1     | 0 | NA | 0 | NA | 0 | NA | 0 | NA | 0 | NA |
| 1 | 60165011 | 60131567 | -1 | NM_000775    | CYP2J2    | 0 | NA | 0 | NA | 0 | NA | 0 | NA | 0 | NA |
| 1 | 60312014 | 60228653 | -1 | NM_152377    | C1orf87   | 0 | NA | 1 | 14 | 0 | NA | 0 | NA | 0 | NA |
| 1 | 61320882 | 61694624 | 1  | NM_005595    | NFIA      | 0 | NA | 0 | NA | 0 | NA | 0 | NA | 0 | NA |
| 1 | 61963683 | 61919306 | -1 | NM_032027    | TM2D1     | 0 | NA | 0 | NA | 0 | NA | 1 | 12 | 0 | NA |
| 1 | 61980736 | 62402179 | 1  | NM_176877    | INADL     | 0 | NA | 0 | NA | 0 | NA | 0 | NA | 0 | NA |
| 1 | 62433083 | 62450588 | 1  | NM_019079    | LITD1     | 0 | NA | 0 | NA | 0 | NA | 0 | NA | 0 | NA |
| 1 | 62557671 | 62474424 | -1 | NM_181712    | KANK4     | 0 | NA | 0 | NA | 0 | NA | 0 | NA | 0 | NA |
| 1 | 62674562 | 62690063 | 1  | NM_001017415 | USP1      | 1 | 20 | 0 | NA | 0 | NA | 0 | NA | 0 | NA |
| 1 | 62674562 | 62690063 | 1  | NM_001017416 | USP1      | 1 | 20 | 0 | NA | 0 | NA | 0 | NA | 0 | NA |
| 1 | 62674970 | 62690063 | 1  | NM_003368    | USP1      | 1 | 20 | 0 | NA | 0 | NA | 0 | NA | 0 | NA |
| 1 | 62835774 | 62843768 | 1  | NM_014495    | ANGPTL3   | 0 | NA | 0 | NA | 0 | NA | 0 | NA | 0 | NA |
| 1 | 62926557 | 62692984 | -1 | NM_033407    | DOCK7     | 0 | NA | 0 | NA | 0 | NA | 0 | NA | 0 | NA |
| 1 | 63022390 | 63102638 | 1  | NM_032852    | ATG4C     | 0 | NA | 0 | NA | 0 | NA | 0 | NA | 0 | NA |
| 1 | 63022390 | 63102638 | 1  | NM_178221    | ATG4C     | 0 | NA | 0 | NA | 0 | NA | 0 | NA | 0 | NA |
| 1 | 63561317 | 63563385 | 1  | NM_012183    | FOXO3     | 0 | NA | 0 | NA | 0 | NA | 0 | NA | 0 | NA |
| 1 | 63605885 | 63675466 | 1  | NM_013339    | ALG6      | 1 | 11 | 0 | NA | 0 | NA | 0 | NA | 0 | NA |
| 1 | 63761423 | 63679049 | -1 | NM_014288    | ITGB3BP   | 0 | NA | 0 | NA | 1 | 19 | 1 | 18 | 0 | NA |
| 1 | 63761855 | 63810952 | 1  | NM_032437    | EFCAB7    | 0 | NA | 0 | NA | 1 | 19 | 1 | 18 | 0 | NA |
| 1 | 63831534 | 63898505 | 1  | NM_002633    | PGM1      | 0 | NA | 0 | NA | 0 | NA | 0 | NA | 0 | NA |
| 1 | 64012277 | 64381640 | 1  | NM_001083592 | ROR1      | 0 | NA | 0 | NA | 0 | NA | 0 | NA | 0 | NA |
| 1 | 64012277 | 64417295 | 1  | NM_005012    | ROR1      | 0 | NA | 0 | NA | 0 | NA | 0 | NA | 0 | NA |
| 1 | 64442077 | 64482615 | 1  | NM_152489    | UBE2U     | 0 | NA | 0 | NA | 0 | NA | 0 | NA | 0 | NA |
| 1 | 64709063 | 64931329 | 1  | NM_020925    | CACHD1    | 0 | NA | 0 | NA | 0 | NA | 0 | NA | 0 | NA |
| 1 | 64983365 | 65071500 | 1  | NM_018211    | RAVER2    | 0 | NA | 0 | NA | 0 | NA | 0 | NA | 0 | NA |
| 1 | 65204775 | 65071493 | -1 | NM_002227    | JAK1      | 0 | NA | 0 | NA | 0 | NA | 0 | NA | 0 | NA |
| 1 | 65385819 | 65465763 | 1  | NM_203464    | AK3L1     | 0 | NA | 0 | NA | 0 | NA | 0 | NA | 0 | NA |
| 1 | 65386100 | 65465763 | 1  | NM_001005353 | AK3L1     | 0 | NA | 0 | NA | 0 | NA | 0 | NA | 0 | NA |
| 1 | 65386473 | 65465763 | 1  | NM_013410    | AK3L1     | 0 | NA | 0 | NA | 0 | NA | 0 | NA | 0 | NA |
| 1 | 65503017 | 65654140 | 1  | NM_014787    | DNAJC6    | 0 | NA | 0 | NA | 0 | NA | 0 | NA | 0 | NA |
| 1 | 65658905 | 65868683 | 1  | NM_001003680 | LEPR      | 0 | NA | 0 | NA | 0 | NA | 0 | NA | 0 | NA |
| 1 | 65658905 | 65873699 | 1  | NM_001003679 | LEPR      | 0 | NA | 0 | NA | 0 | NA | 0 | NA | 0 | NA |
| 1 | 65658905 | 65875410 | 1  | NM_002303    | LEPR      | 0 | NA | 0 | NA | 0 | NA | 0 | NA | 0 | NA |
| 1 | 65658906 | 65670839 | 1  | NM_017526    | LEPROT    | 0 | NA | 0 | NA | 0 | NA | 0 | NA | 0 | NA |
| 1 | 66030780 | 66612850 | 1  | NM_001037341 | PDE4B     | 0 | NA | 0 | NA | 0 | NA | 0 | NA | 0 | NA |
| 1 | 66031443 | 66612850 | 1  | NM_002600    | PDE4B     | 0 | NA | 0 | NA | 0 | NA | 0 | NA | 0 | NA |
| 1 | 66230977 | 66612850 | 1  | NM_001037340 | PDE4B     | 0 | NA | 0 | NA | 0 | NA | 0 | NA | 0 | NA |
| 1 | 66570380 | 66612850 | 1  | NM_001037339 | PDE4B     | 0 | NA | 0 | NA | 0 | NA | 0 | NA | 0 | NA |
| 1 | 66772412 | 66983356 | 1  | NM_032291    | SGIP1     | 1 | 11 | 0 | NA | 0 | NA | 0 | NA | 0 | NA |
| 1 | 66990729 | 67017058 | 1  | NM_152665    | TCTEX1D1  | 0 | NA | 0 | NA | 0 | NA | 0 | NA | 0 | NA |
| 1 | 67039527 | 67036011 | -1 | NM_005478    | INSL5     | 0 | NA | 0 | NA | 0 | NA | 0 | NA | 0 | NA |
| 1 | 67163158 | 67051159 | -1 | NM_024763    | WDR78     | 0 | NA | 0 | NA | 0 | NA | 0 | NA | 0 | NA |

|   |          |          |    |              |            |   |    |   |    |   |    |   |    |   |    |
|---|----------|----------|----|--------------|------------|---|----|---|----|---|----|---|----|---|----|
| 1 | 67163158 | 67075873 | -1 | NM_207014    | WDR78      | 0 | NA | 0 | NA | 0 | NA | 0 | NA | 0 | NA |
| 1 | 67163229 | 67224941 | 1  | NM_001077702 | MIER1      | 0 | NA | 0 | NA | 0 | NA | 0 | NA | 0 | NA |
| 1 | 67163229 | 67224941 | 1  | NM_001077703 | MIER1      | 0 | NA | 0 | NA | 0 | NA | 0 | NA | 0 | NA |
| 1 | 67163229 | 67226890 | 1  | NM_001077700 | MIER1      | 0 | NA | 0 | NA | 0 | NA | 0 | NA | 0 | NA |
| 1 | 67163229 | 67226890 | 1  | NM_020948    | MIER1      | 0 | NA | 0 | NA | 0 | NA | 0 | NA | 0 | NA |
| 1 | 67168513 | 67224941 | 1  | NM_001077704 | MIER1      | 0 | NA | 0 | NA | 0 | NA | 0 | NA | 0 | NA |
| 1 | 67168513 | 67226890 | 1  | NM_001077701 | MIER1      | 0 | NA | 0 | NA | 0 | NA | 0 | NA | 0 | NA |
| 1 | 67292316 | 67242439 | -1 | NM_015139    | SLC35D1    | 0 | NA | 0 | NA | 0 | NA | 0 | NA | 0 | NA |
| 1 | 67366808 | 67330446 | -1 | NM_001013674 | C1orf114   | 0 | NA | 0 | NA | 0 | NA | 0 | NA | 0 | NA |
| 1 | 67404756 | 67498238 | 1  | NM_144701    | IL23R      | 0 | NA | 0 | NA | 0 | NA | 0 | NA | 0 | NA |
| 1 | 67545634 | 67635171 | 1  | NM_001559    | IL12RB2    | 0 | NA | 0 | NA | 0 | NA | 0 | NA | 0 | NA |
| 1 | 67668711 | 67646080 | -1 | NM_001018067 | SERBP1     | 0 | NA | 0 | NA | 0 | NA | 1 | 12 | 0 | NA |
| 1 | 67668711 | 67646080 | -1 | NM_001018068 | SERBP1     | 0 | NA | 0 | NA | 0 | NA | 1 | 12 | 0 | NA |
| 1 | 67668711 | 67646080 | -1 | NM_001018069 | SERBP1     | 0 | NA | 0 | NA | 0 | NA | 1 | 12 | 0 | NA |
| 1 | 67668711 | 67646080 | -1 | NM_015640    | SERBP1     | 0 | NA | 0 | NA | 0 | NA | 1 | 12 | 0 | NA |
| 1 | 67923470 | 67926607 | 1  | NM_001924    | GADD45A    | 0 | NA | 0 | NA | 0 | NA | 0 | NA | 0 | NA |
| 1 | 68071730 | 67939736 | -1 | NM_018841    | GNG12      | 0 | NA | 0 | NA | 0 | NA | 0 | NA | 0 | NA |
| 1 | 68289048 | 68284232 | -1 | NM_004675    | DIRAS3     | 0 | NA | 0 | NA | 0 | NA | 0 | NA | 0 | NA |
| 1 | 68470841 | 68336738 | -1 | NM_001002292 | GPR177     | 0 | NA | 0 | NA | 0 | NA | 1 | 11 | 0 | NA |
| 1 | 68470841 | 68336328 | -1 | NM_024911    | GPR177     | 0 | NA | 0 | NA | 0 | NA | 1 | 11 | 0 | NA |
| 1 | 68688230 | 68667094 | -1 | NM_000329    | RPE65      | 0 | NA | 0 | NA | 0 | NA | 0 | NA | 0 | NA |
| 1 | 68735387 | 68712422 | -1 | NM_001114120 | DEPDC1     | 0 | NA | 0 | NA | 0 | NA | 0 | NA | 0 | NA |
| 1 | 68735387 | 68712422 | -1 | NM_017779    | DEPDC1     | 0 | NA | 0 | NA | 0 | NA | 0 | NA | 0 | NA |
| 1 | 69998445 | 70361759 | 1  | NM_020794    | LRRC7      | 0 | NA | 0 | NA | 0 | NA | 0 | NA | 0 | NA |
| 1 | 70443863 | 70383084 | -1 | NM_017768    | LRRC40     | 1 | 15 | 0 | NA | 0 | NA | 1 | 25 | 0 | NA |
| 1 | 70443952 | 70490272 | 1  | NM_004768    | SFRS11     | 1 | 15 | 0 | NA | 0 | NA | 1 | 25 | 0 | NA |
| 1 | 70593005 | 70497272 | -1 | NM_030816    | ANKRD13C   | 0 | NA | 0 | NA | 0 | NA | 0 | NA | 0 | NA |
| 1 | 70593080 | 70606293 | 1  | NM_001031693 | HHLA3      | 0 | NA | 0 | NA | 0 | NA | 0 | NA | 0 | NA |
| 1 | 70593080 | 70606293 | 1  | NM_001036645 | HHLA3      | 0 | NA | 0 | NA | 0 | NA | 0 | NA | 0 | NA |
| 1 | 70593080 | 70606293 | 1  | NM_001036646 | HHLA3      | 0 | NA | 0 | NA | 0 | NA | 0 | NA | 0 | NA |
| 1 | 70593080 | 70606293 | 1  | NM_007071    | HHLA3      | 0 | NA | 0 | NA | 0 | NA | 0 | NA | 0 | NA |
| 1 | 70649542 | 70677841 | 1  | NM_001902    | CTH        | 0 | NA | 0 | NA | 0 | NA | 0 | NA | 0 | NA |
| 1 | 70649542 | 70677841 | 1  | NM_153742    | CTH        | 0 | NA | 0 | NA | 0 | NA | 0 | NA | 0 | NA |
| 1 | 71286079 | 71090623 | -1 | NM_000957    | PTGER3     | 0 | NA | 1 | 21 | 0 | NA | 0 | NA | 0 | NA |
| 1 | 71286079 | 71090623 | -1 | NM_198712    | PTGER3     | 0 | NA | 1 | 21 | 0 | NA | 0 | NA | 0 | NA |
| 1 | 71286079 | 71090623 | -1 | NM_198713    | PTGER3     | 0 | NA | 1 | 21 | 0 | NA | 0 | NA | 0 | NA |
| 1 | 71286079 | 71090623 | -1 | NM_198714    | PTGER3     | 0 | NA | 1 | 21 | 0 | NA | 0 | NA | 0 | NA |
| 1 | 71286079 | 71090623 | -1 | NM_198716    | PTGER3     | 0 | NA | 1 | 21 | 0 | NA | 0 | NA | 0 | NA |
| 1 | 71286079 | 71090623 | -1 | NM_198717    | PTGER3     | 0 | NA | 1 | 21 | 0 | NA | 0 | NA | 0 | NA |
| 1 | 71286079 | 71190702 | -1 | NM_001126044 | PTGER3     | 0 | NA | 1 | 21 | 0 | NA | 0 | NA | 0 | NA |
| 1 | 71286079 | 71190702 | -1 | NM_198718    | PTGER3     | 0 | NA | 1 | 21 | 0 | NA | 0 | NA | 0 | NA |
| 1 | 71286079 | 71209051 | -1 | NM_198719    | PTGER3     | 0 | NA | 1 | 21 | 0 | NA | 0 | NA | 0 | NA |
| 1 | 71286079 | 71244124 | -1 | NM_198715    | PTGER3     | 0 | NA | 1 | 21 | 0 | NA | 0 | NA | 0 | NA |
| 1 | 71319333 | 71301561 | -1 | NM_005455    | ZRANB2     | 1 | 28 | 0 | NA | 0 | NA | 1 | 16 | 0 | NA |
| 1 | 71319333 | 71301561 | -1 | NM_203350    | ZRANB2     | 1 | 28 | 0 | NA | 0 | NA | 1 | 16 | 0 | NA |
| 1 | 72520865 | 71641212 | -1 | NM_173808    | NEGR1      | 0 | NA | 0 | NA | 0 | NA | 0 | NA | 0 | NA |
| 1 | 74436459 | 74264289 | -1 | NM_001105659 | LRRC44     | 0 | NA | 0 | NA | 0 | NA | 0 | NA | 0 | NA |
| 1 | 74436513 | 74445708 | 1  | NM_003838    | FPGT       | 0 | NA | 0 | NA | 0 | NA | 0 | NA | 0 | NA |
| 1 | 74436534 | 74782696 | 1  | NM_001112808 | TNNI3K     | 0 | NA | 0 | NA | 0 | NA | 0 | NA | 0 | NA |
| 1 | 74473672 | 74782696 | 1  | NM_015978    | TNNI3K     | 0 | NA | 0 | NA | 0 | NA | 0 | NA | 0 | NA |
| 1 | 74912010 | 74806382 | -1 | NM_001002912 | C1orf173   | 0 | NA | 0 | NA | 0 | NA | 0 | NA | 0 | NA |
| 1 | 74971315 | 74943771 | -1 | NM_001889    | CRYZ       | 0 | NA | 0 | NA | 1 | 12 | 1 | 11 | 0 | NA |
| 1 | 74971427 | 75003896 | 1  | NM_138467    | TYW3       | 0 | NA | 0 | NA | 1 | 12 | 1 | 11 | 0 | NA |
| 1 | 75366706 | 75399806 | 1  | NM_001001933 | LHX8       | 0 | NA | 1 | 13 | 0 | NA | 0 | NA | 0 | NA |
| 1 | 75849357 | 75444868 | -1 | NM_152697    | SLC44A5    | 0 | NA | 0 | NA | 0 | NA | 0 | NA | 0 | NA |
| 1 | 75962630 | 76001943 | 1  | NM_000016    | ACADM      | 0 | NA | 0 | NA | 0 | NA | 0 | NA | 0 | NA |
| 1 | 75962630 | 76001943 | 1  | NM_001127328 | ACADM      | 0 | NA | 0 | NA | 0 | NA | 0 | NA | 0 | NA |
| 1 | 76024473 | 76033352 | 1  | NM_004582    | RABGGTB    | 0 | NA | 1 | 12 | 0 | NA | 1 | 15 | 0 | NA |
| 1 | 76035217 | 76151511 | 1  | NM_002440    | MSH4       | 0 | NA | 0 | NA | 0 | NA | 0 | NA | 0 | NA |
| 1 | 76170704 | 76157147 | -1 | NM_080868    | ASB17      | 0 | NA | 0 | NA | 0 | NA | 0 | NA | 0 | NA |
| 1 | 76312991 | 76869220 | 1  | NM_152996    | ST6GALNAC3 | 0 | NA | 0 | NA | 0 | NA | 0 | NA | 0 | NA |
| 1 | 77105773 | 77302325 | 1  | NM_030965    | ST6GALNAC5 | 0 | NA | 0 | NA | 0 | NA | 0 | NA | 0 | NA |
| 1 | 77366632 | 77367995 | 1  | NM_001093734 | LOC645441  | 0 | NA | 0 | NA | 0 | NA | 0 | NA | 0 | NA |
| 1 | 77457720 | 77327254 | -1 | NM_005482    | PIGK       | 0 | NA | 0 | NA | 0 | NA | 0 | NA | 0 | NA |
| 1 | 77520329 | 77798242 | 1  | NM_174858    | AK5        | 0 | NA | 1 | 14 | 0 | NA | 0 | NA | 0 | NA |

|   |          |          |    |              |          |   |    |   |    |   |    |   |    |   |    |
|---|----------|----------|----|--------------|----------|---|----|---|----|---|----|---|----|---|----|
| 1 | 77520874 | 77798242 | 1  | NM_012093    | AK5      | 0 | NA | 1 | 14 | 0 | NA | 0 | NA | 0 | NA |
| 1 | 77920931 | 77802777 | -1 | NM_015534    | ZZZ3     | 0 | NA | 0 | NA | 0 | NA | 0 | NA | 0 | NA |
| 1 | 77998125 | 77934261 | -1 | NM_015017    | USP33    | 0 | NA | 0 | NA | 0 | NA | 0 | NA | 0 | NA |
| 1 | 77998125 | 77934261 | -1 | NM_201624    | USP33    | 0 | NA | 0 | NA | 0 | NA | 0 | NA | 0 | NA |
| 1 | 77998125 | 77949925 | -1 | NM_201626    | USP33    | 0 | NA | 0 | NA | 0 | NA | 0 | NA | 0 | NA |
| 1 | 78017896 | 78116669 | 1  | NM_198549    | FAM73A   | 0 | NA | 0 | NA | 0 | NA | 0 | NA | 0 | NA |
| 1 | 78126787 | 78182166 | 1  | NM_144573    | NEXN     | 0 | NA | 0 | NA | 0 | NA | 0 | NA | 0 | NA |
| 1 | 78217365 | 78186178 | -1 | NM_003902    | FUBP1    | 1 | 15 | 0 | NA | 1 | 18 | 0 | NA | 0 | NA |
| 1 | 78243223 | 78255583 | 1  | NM_007034    | DNAJB4   | 0 | NA | 0 | NA | 0 | NA | 0 | NA | 0 | NA |
| 1 | 78284176 | 78375700 | 1  | NM_017655    | GIPC2    | 0 | NA | 0 | NA | 0 | NA | 0 | NA | 0 | NA |
| 1 | 78729315 | 78778974 | 1  | NM_000959    | PTGFR    | 0 | NA | 0 | NA | 0 | NA | 0 | NA | 0 | NA |
| 1 | 78729315 | 78778974 | 1  | NM_001039585 | PTGFR    | 0 | NA | 0 | NA | 0 | NA | 0 | NA | 0 | NA |
| 1 | 78858675 | 78884418 | 1  | NM_006820    | IFI44L   | 1 | 11 | 0 | NA | 1 | 12 | 0 | NA | 0 | NA |
| 1 | 78888064 | 78902351 | 1  | NM_006417    | IFI44    | 0 | NA | 0 | NA | 0 | NA | 0 | NA | 0 | NA |
| 1 | 79245083 | 79128036 | -1 | NM_022159    | ELTD1    | 0 | NA | 0 | NA | 0 | NA | 0 | NA | 0 | NA |
| 1 | 82038669 | 82230695 | 1  | NM_012302    | LPHN2    | 0 | NA | 0 | NA | 0 | NA | 0 | NA | 0 | NA |
| 1 | 84237421 | 84107644 | -1 | NM_024686    | TLL7     | 0 | NA | 0 | NA | 0 | NA | 0 | NA | 0 | NA |
| 1 | 84316332 | 84443567 | 1  | NM_207578    | PRKACB   | 0 | NA | 0 | NA | 0 | NA | 0 | NA | 0 | NA |
| 1 | 84316332 | 84476769 | 1  | NM_002731    | PRKACB   | 0 | NA | 0 | NA | 0 | NA | 0 | NA | 0 | NA |
| 1 | 84382539 | 84476769 | 1  | NM_182948    | PRKACB   | 0 | NA | 0 | NA | 0 | NA | 0 | NA | 0 | NA |
| 1 | 84536636 | 84589067 | 1  | NM_001010971 | SAMD13   | 0 | NA | 0 | NA | 0 | NA | 0 | NA | 0 | NA |
| 1 | 84636802 | 84653279 | 1  | NM_021233    | DNASE2B  | 0 | NA | 0 | NA | 0 | NA | 0 | NA | 0 | NA |
| 1 | 84646621 | 84653279 | 1  | NM_058248    | DNASE2B  | 0 | NA | 0 | NA | 0 | NA | 0 | NA | 0 | NA |
| 1 | 84717507 | 84736621 | 1  | NM_025065    | BXDC5    | 1 | 34 | 0 | NA | 1 | 15 | 0 | NA | 0 | NA |
| 1 | 84744561 | 84804463 | 1  | NM_001081472 | SPATA1   | 0 | NA | 0 | NA | 0 | NA | 1 | 13 | 0 | NA |
| 1 | 84744850 | 84736593 | -1 | NM_005274    | GNG5     | 0 | NA | 0 | NA | 0 | NA | 1 | 13 | 0 | NA |
| 1 | 84812686 | 84792809 | -1 | NM_004388    | CTBS     | 0 | NA | 0 | NA | 0 | NA | 0 | NA | 0 | NA |
| 1 | 84928768 | 84882184 | -1 | NM_014021    | SSX2IP   | 1 | 14 | 0 | NA | 0 | NA | 0 | NA | 0 | NA |
| 1 | 85131484 | 85051673 | -1 | NM_012152    | LPAR3    | 0 | NA | 0 | NA | 0 | NA | 1 | 12 | 0 | NA |
| 1 | 85235384 | 85163853 | -1 | NM_153259    | MCOLN2   | 0 | NA | 0 | NA | 0 | NA | 0 | NA | 0 | NA |
| 1 | 85286757 | 85256352 | -1 | NM_018298    | MCOLN3   | 0 | NA | 0 | NA | 0 | NA | 0 | NA | 0 | NA |
| 1 | 85300594 | 85371407 | 1  | NM_145172    | WDR63    | 0 | NA | 0 | NA | 0 | NA | 0 | NA | 0 | NA |
| 1 | 85439316 | 85395943 | -1 | NM_032184    | SYDE2    | 0 | NA | 0 | NA | 0 | NA | 0 | NA | 0 | NA |
| 1 | 85497913 | 85490243 | -1 | NM_196077    | C1orf52  | 0 | NA | 0 | NA | 0 | NA | 0 | NA | 0 | NA |
| 1 | 85516171 | 85504047 | -1 | NM_003921    | BCL10    | 0 | NA | 0 | NA | 0 | NA | 0 | NA | 0 | NA |
| 1 | 85703411 | 85567555 | -1 | NM_012137    | DDAH1    | 0 | NA | 0 | NA | 0 | NA | 0 | NA | 0 | NA |
| 1 | 85819047 | 85821978 | 1  | NM_001554    | CYR61    | 1 | 14 | 0 | NA | 0 | NA | 0 | NA | 0 | NA |
| 1 | 85946689 | 85891078 | -1 | NM_017953    | C1orf181 | 0 | NA | 0 | NA | 0 | NA | 1 | 12 | 0 | NA |
| 1 | 86394709 | 85967503 | -1 | NM_152890    | COL24A1  | 0 | NA | 0 | NA | 0 | NA | 0 | NA | 0 | NA |
| 1 | 86634591 | 86587007 | -1 | NM_001007022 | ODF2L    | 1 | 11 | 0 | NA | 0 | NA | 0 | NA | 0 | NA |
| 1 | 86634591 | 86587007 | -1 | NM_020729    | ODF2L    | 1 | 11 | 0 | NA | 0 | NA | 0 | NA | 0 | NA |
| 1 | 86662356 | 86694828 | 1  | NM_006536    | CLCA2    | 0 | NA | 0 | NA | 1 | 13 | 0 | NA | 0 | NA |
| 1 | 86707113 | 86738562 | 1  | NM_001285    | CLCA1    | 0 | NA | 0 | NA | 0 | NA | 0 | NA | 0 | NA |
| 1 | 86785346 | 86819020 | 1  | NM_012128    | CLCA4    | 0 | NA | 1 | 14 | 0 | NA | 0 | NA | 0 | NA |
| 1 | 86872546 | 86893647 | 1  | NM_004921    | CLCA3    | 0 | NA | 0 | NA | 0 | NA | 0 | NA | 0 | NA |
| 1 | 86942844 | 86986455 | 1  | NM_016009    | SH3GLB1  | 1 | 14 | 0 | NA | 0 | NA | 0 | NA | 0 | NA |
| 1 | 87152695 | 87100715 | -1 | NM_004261    | SEPT15   | 0 | NA | 0 | NA | 0 | NA | 0 | NA | 0 | NA |
| 1 | 87152695 | 87100715 | -1 | NM_203341    | SEPT15   | 0 | NA | 0 | NA | 0 | NA | 0 | NA | 0 | NA |
| 1 | 87152949 | 87348252 | 1  | NM_012262    | HS2T1    | 0 | NA | 0 | NA | 0 | NA | 0 | NA | 0 | NA |
| 1 | 87566738 | 87583851 | 1  | NM_006769    | LMO4     | 1 | 11 | 0 | NA | 0 | NA | 0 | NA | 0 | NA |
| 1 | 88922509 | 89074526 | 1  | NM_006256    | PKN2     | 0 | NA | 0 | NA | 0 | NA | 0 | NA | 0 | NA |
| 1 | 89129889 | 89090908 | -1 | NM_001514    | GTF2B    | 0 | NA | 0 | NA | 0 | NA | 0 | NA | 0 | NA |
| 1 | 89231104 | 89174043 | -1 | NM_001008661 | CCBL2    | 1 | 15 | 0 | NA | 1 | 14 | 0 | NA | 0 | NA |
| 1 | 89231104 | 89174043 | -1 | NM_001008662 | CCBL2    | 1 | 15 | 0 | NA | 1 | 14 | 0 | NA | 0 | NA |
| 1 | 89231104 | 89218709 | -1 | NM_019610    | CCBL2    | 1 | 15 | 0 | NA | 1 | 14 | 0 | NA | 0 | NA |
| 1 | 89261137 | 89244947 | -1 | NM_018284    | GBP3     | 0 | NA | 0 | NA | 0 | NA | 0 | NA | 0 | NA |
| 1 | 89303631 | 89290574 | -1 | NM_002053    | GBP1     | 0 | NA | 0 | NA | 0 | NA | 0 | NA | 0 | NA |
| 1 | 89364387 | 89345897 | -1 | NM_004120    | GBP2     | 0 | NA | 0 | NA | 0 | NA | 0 | NA | 0 | NA |
| 1 | 89414311 | 89370021 | -1 | NM_207398    | GBP7     | 0 | NA | 0 | NA | 0 | NA | 0 | NA | 0 | NA |
| 1 | 89437150 | 89420045 | -1 | NM_052941    | GBP4     | 0 | NA | 0 | NA | 0 | NA | 0 | NA | 0 | NA |
| 1 | 89511119 | 89498852 | -1 | NM_052942    | GBP5     | 0 | NA | 0 | NA | 0 | NA | 0 | NA | 0 | NA |
| 1 | 89602023 | 89626307 | 1  | NM_198460    | GBP6     | 0 | NA | 0 | NA | 0 | NA | 0 | NA | 0 | NA |
| 1 | 89796859 | 89831803 | 1  | NM_015350    | LRRC8B   | 0 | NA | 0 | NA | 0 | NA | 0 | NA | 0 | NA |
| 1 | 89871349 | 89953169 | 1  | NM_032270    | LRRC8C   | 0 | NA | 0 | NA | 0 | NA | 0 | NA | 0 | NA |
| 1 | 90060100 | 90174148 | 1  | NM_018103    | LRRC8D   | 0 | NA | 0 | NA | 0 | NA | 0 | NA | 0 | NA |

|   |           |           |    |              |          |   |    |   |    |   |    |   |    |   |    |
|---|-----------|-----------|----|--------------|----------|---|----|---|----|---|----|---|----|---|----|
| 1 | 90233265  | 90244588  | 1  | NM_182975    | ZNF326   | 0 | NA | 0 | NA | 0 | NA | 1 | 11 | 0 | NA |
| 1 | 90233265  | 90266682  | 1  | NM_182976    | ZNF326   | 0 | NA | 0 | NA | 0 | NA | 1 | 11 | 0 | NA |
| 1 | 90955382  | 90950166  | -1 | NM_020063    | BARHL2   | 1 | 11 | 1 | 19 | 0 | NA | 0 | NA | 0 | NA |
| 1 | 91259618  | 91153444  | -1 | NM_016620    | ZNF644   | 1 | 15 | 0 | NA | 0 | NA | 0 | NA | 0 | NA |
| 1 | 91260259  | 91153444  | -1 | NM_032186    | ZNF644   | 1 | 15 | 0 | NA | 0 | NA | 0 | NA | 0 | NA |
| 1 | 91260259  | 91153444  | -1 | NM_201269    | ZNF644   | 1 | 15 | 0 | NA | 0 | NA | 0 | NA | 0 | NA |
| 1 | 91643014  | 91498910  | -1 | NM_001017975 | HFM1     | 0 | NA | 0 | NA | 0 | NA | 0 | NA | 0 | NA |
| 1 | 91739031  | 91763902  | 1  | NM_003503    | CDC7     | 0 | NA | 0 | NA | 1 | 15 | 0 | NA | 0 | NA |
| 1 | 92124243  | 91920574  | -1 | NM_003243    | TGFBR3   | 0 | NA | 0 | NA | 0 | NA | 0 | NA | 0 | NA |
| 1 | 92187515  | 92252573  | 1  | NM_207189    | BRDT     | 0 | NA | 0 | NA | 0 | NA | 0 | NA | 0 | NA |
| 1 | 92190296  | 92252573  | 1  | NM_001726    | BRDT     | 0 | NA | 0 | NA | 0 | NA | 0 | NA | 0 | NA |
| 1 | 92268145  | 92301681  | 1  | NM_173567    | ABHD7    | 0 | NA | 0 | NA | 0 | NA | 0 | NA | 0 | NA |
| 1 | 92318480  | 92385985  | 1  | NM_183242    | BTBD8    | 0 | NA | 0 | NA | 0 | NA | 0 | NA | 0 | NA |
| 1 | 92456160  | 92483955  | 1  | NM_001012425 | C1orf146 | 0 | NA | 0 | NA | 0 | NA | 0 | NA | 0 | NA |
| 1 | 92537154  | 92484542  | -1 | NM_053274    | GLMN     | 0 | NA | 0 | NA | 0 | NA | 0 | NA | 0 | NA |
| 1 | 92537194  | 92626317  | 1  | NM_024813    | RPAP2    | 0 | NA | 0 | NA | 0 | NA | 0 | NA | 0 | NA |
| 1 | 92721944  | 92712905  | -1 | NM_001127215 | GFI1     | 0 | NA | 0 | NA | 0 | NA | 0 | NA | 0 | NA |
| 1 | 92724216  | 92712905  | -1 | NM_001127216 | GFI1     | 0 | NA | 0 | NA | 0 | NA | 0 | NA | 0 | NA |
| 1 | 92725021  | 92712905  | -1 | NM_005263    | GFI1     | 0 | NA | 0 | NA | 0 | NA | 0 | NA | 0 | NA |
| 1 | 93030549  | 92748840  | -1 | NM_005665    | EVIS     | 0 | NA | 0 | NA | 0 | NA | 0 | NA | 0 | NA |
| 1 | 93070181  | 93080069  | 1  | NM_000969    | RPL5     | 0 | NA | 0 | NA | 0 | NA | 0 | NA | 0 | NA |
| 1 | 93199667  | 93080308  | -1 | NM_001006605 | FAM69A   | 0 | NA | 0 | NA | 0 | NA | 0 | NA | 0 | NA |
| 1 | 93317379  | 93377226  | 1  | NM_007358    | MTF2     | 0 | NA | 0 | NA | 0 | NA | 1 | 15 | 0 | NA |
| 1 | 93418507  | 93516856  | 1  | NM_206886    | CCDC18   | 0 | NA | 0 | NA | 0 | NA | 0 | NA | 0 | NA |
| 1 | 93418834  | 93389996  | -1 | NM_016040    | TMED5    | 0 | NA | 0 | NA | 0 | NA | 0 | NA | 0 | NA |
| 1 | 93584065  | 93600736  | 1  | NM_001938    | DR1      | 0 | NA | 0 | NA | 0 | NA | 0 | NA | 0 | NA |
| 1 | 93686426  | 93792806  | 1  | NM_001024948 | FNBP1L   | 0 | NA | 0 | NA | 0 | NA | 0 | NA | 0 | NA |
| 1 | 93686426  | 93792806  | 1  | NM_017737    | FNBP1L   | 0 | NA | 0 | NA | 0 | NA | 0 | NA | 0 | NA |
| 1 | 93919973  | 93799936  | -1 | NM_003567    | BCAR3    | 1 | 14 | 0 | NA | 0 | NA | 0 | NA | 0 | NA |
| 1 | 94117330  | 94107923  | -1 | NM_014597    | DNITIP2  | 0 | NA | 0 | NA | 0 | NA | 0 | NA | 0 | NA |
| 1 | 94147600  | 94125177  | -1 | NM_002061    | GCLM     | 0 | NA | 0 | NA | 0 | NA | 0 | NA | 0 | NA |
| 1 | 94359293  | 94230981  | -1 | NM_000350    | ABCA4    | 0 | NA | 0 | NA | 0 | NA | 0 | NA | 0 | NA |
| 1 | 94475895  | 94407050  | -1 | NM_004815    | ARHGAP29 | 0 | NA | 0 | NA | 0 | NA | 0 | NA | 0 | NA |
| 1 | 94656520  | 94716848  | 1  | NM_001122674 | ABCD3    | 1 | 13 | 0 | NA | 0 | NA | 0 | NA | 0 | NA |
| 1 | 94656520  | 94756807  | 1  | NM_002858    | ABCD3    | 1 | 13 | 0 | NA | 0 | NA | 0 | NA | 0 | NA |
| 1 | 94779903  | 94767460  | -1 | NM_001993    | F3       | 0 | NA | 0 | NA | 0 | NA | 0 | NA | 0 | NA |
| 1 | 95058488  | 95133390  | 1  | NM_001114106 | SLC44A3  | 0 | NA | 0 | NA | 0 | NA | 0 | NA | 0 | NA |
| 1 | 95058687  | 95133390  | 1  | NM_152369    | SLC44A3  | 0 | NA | 0 | NA | 0 | NA | 0 | NA | 0 | NA |
| 1 | 95165323  | 95135094  | -1 | NM_001839    | CNN3     | 0 | NA | 0 | NA | 0 | NA | 0 | NA | 0 | NA |
| 1 | 95311071  | 95220884  | -1 | NM_144988    | ALG14    | 0 | NA | 0 | NA | 0 | NA | 0 | NA | 0 | NA |
| 1 | 95355571  | 95431462  | 1  | NM_152487    | TMEM56   | 0 | NA | 0 | NA | 0 | NA | 0 | NA | 0 | NA |
| 1 | 95472298  | 95485369  | 1  | NM_015485    | RWDD3    | 1 | 17 | 0 | NA | 0 | NA | 0 | NA | 0 | NA |
| 1 | 96959965  | 97052936  | 1  | NM_021190    | PTBP2    | 0 | NA | 0 | NA | 0 | NA | 0 | NA | 0 | NA |
| 1 | 98159203  | 97315887  | -1 | NM_000110    | DPYD     | 0 | NA | 0 | NA | 0 | NA | 0 | NA | 0 | NA |
| 1 | 98899800  | 98998642  | 1  | NM_015976    | SNX7     | 0 | NA | 0 | NA | 0 | NA | 0 | NA | 0 | NA |
| 1 | 98900005  | 98998644  | 1  | NM_152238    | SNX7     | 0 | NA | 0 | NA | 0 | NA | 0 | NA | 0 | NA |
| 1 | 99243037  | 99128388  | -1 | NM_001010861 | PAP2D    | 0 | NA | 0 | NA | 0 | NA | 0 | NA | 0 | NA |
| 1 | 99243037  | 99128388  | -1 | NM_001037317 | PAP2D    | 0 | NA | 0 | NA | 0 | NA | 0 | NA | 0 | NA |
| 1 | 99502487  | 99547726  | 1  | NM_014839    | LPPR4    | 0 | NA | 0 | NA | 0 | NA | 0 | NA | 0 | NA |
| 1 | 99884185  | 99932847  | 1  | NM_017734    | PALMD    | 0 | NA | 0 | NA | 0 | NA | 0 | NA | 0 | NA |
| 1 | 100003937 | 99946846  | -1 | NM_001013660 | FRRS1    | 0 | NA | 0 | NA | 0 | NA | 0 | NA | 0 | NA |
| 1 | 100088227 | 100162167 | 1  | NM_000642    | AGL      | 0 | NA | 0 | NA | 0 | NA | 0 | NA | 0 | NA |
| 1 | 100088632 | 100162167 | 1  | NM_000028    | AGL      | 0 | NA | 0 | NA | 0 | NA | 0 | NA | 0 | NA |
| 1 | 100088632 | 100162167 | 1  | NM_000643    | AGL      | 0 | NA | 0 | NA | 0 | NA | 0 | NA | 0 | NA |
| 1 | 100088632 | 100162167 | 1  | NM_000644    | AGL      | 0 | NA | 0 | NA | 0 | NA | 0 | NA | 0 | NA |
| 1 | 100089118 | 100162167 | 1  | NM_000640    | AGL      | 0 | NA | 0 | NA | 0 | NA | 0 | NA | 0 | NA |
| 1 | 100099353 | 100162167 | 1  | NM_000645    | AGL      | 0 | NA | 0 | NA | 0 | NA | 0 | NA | 0 | NA |
| 1 | 100208127 | 100261594 | 1  | NM_012243    | SLC35A3  | 0 | NA | 0 | NA | 0 | NA | 0 | NA | 0 | NA |
| 1 | 100276376 | 100321517 | 1  | NM_033055    | HIAT1    | 0 | NA | 0 | NA | 0 | NA | 0 | NA | 0 | NA |
| 1 | 100371099 | 100321689 | -1 | NM_194292    | SASS6    | 0 | NA | 0 | NA | 0 | NA | 0 | NA | 0 | NA |
| 1 | 100371306 | 100386641 | 1  | NM_019083    | CCDC76   | 0 | NA | 0 | NA | 0 | NA | 0 | NA | 0 | NA |
| 1 | 100416359 | 100387000 | -1 | NM_144620    | LRRC39   | 0 | NA | 0 | NA | 0 | NA | 0 | NA | 0 | NA |
| 1 | 100487997 | 100425065 | -1 | NM_001918    | DBT      | 1 | 15 | 0 | NA | 0 | NA | 0 | NA | 0 | NA |
| 1 | 100504350 | 100529915 | 1  | NM_003729    | RTCD1    | 0 | NA | 0 | NA | 0 | NA | 0 | NA | 0 | NA |
| 1 | 100590610 | 100723514 | 1  | NM_033313    | CDC14A   | 0 | NA | 0 | NA | 0 | NA | 0 | NA | 0 | NA |

|   |           |           |    |              |          |   |    |   |    |   |    |   |    |   |    |
|---|-----------|-----------|----|--------------|----------|---|----|---|----|---|----|---|----|---|----|
| 1 | 100590610 | 100737609 | 1  | NM_033312    | CDC14A   | 0 | NA | 0 | NA | 0 | NA | 0 | NA | 0 | NA |
| 1 | 100590610 | 100758421 | 1  | NM_003672    | CDC14A   | 0 | NA | 0 | NA | 0 | NA | 0 | NA | 0 | NA |
| 1 | 100776315 | 100780171 | 1  | NM_022049    | GPR88    | 0 | NA | 0 | NA | 0 | NA | 0 | NA | 0 | NA |
| 1 | 100957884 | 100977189 | 1  | NM_001078    | VCAM1    | 0 | NA | 0 | NA | 0 | NA | 0 | NA | 0 | NA |
| 1 | 100957884 | 100977189 | 1  | NM_080682    | VCAM1    | 0 | NA | 0 | NA | 0 | NA | 0 | NA | 0 | NA |
| 1 | 101133006 | 101110528 | -1 | NM_001033025 | EXTL2    | 1 | 18 | 0 | NA | 1 | 15 | 1 | 21 | 0 | NA |
| 1 | 101133006 | 101110528 | -1 | NM_001439    | EXTL2    | 1 | 18 | 0 | NA | 1 | 15 | 1 | 21 | 0 | NA |
| 1 | 101134265 | 101217582 | 1  | NM_133496    | SLC30A7  | 1 | 18 | 0 | NA | 1 | 15 | 1 | 21 | 0 | NA |
| 1 | 101263950 | 101227768 | -1 | NM_001077394 | DPH5     | 1 | 16 | 0 | NA | 0 | NA | 0 | NA | 0 | NA |
| 1 | 101263950 | 101227768 | -1 | NM_001077395 | DPH5     | 1 | 16 | 0 | NA | 0 | NA | 0 | NA | 0 | NA |
| 1 | 101263950 | 101227768 | -1 | NM_015958    | DPH5     | 1 | 16 | 0 | NA | 0 | NA | 0 | NA | 0 | NA |
| 1 | 101474892 | 101479664 | 1  | NM_001400    | S1PR1    | 0 | NA | 0 | NA | 0 | NA | 0 | NA | 0 | NA |
| 1 | 102235378 | 102040714 | -1 | NM_098170    | OLFM3    | 0 | NA | 0 | NA | 0 | NA | 0 | NA | 0 | NA |
| 1 | 103346640 | 103114610 | -1 | NM_001854    | COL11A1  | 1 | 12 | 0 | NA | 1 | 14 | 0 | NA | 0 | NA |
| 1 | 103346640 | 103114610 | -1 | NM_080629    | COL11A1  | 1 | 12 | 0 | NA | 1 | 14 | 0 | NA | 0 | NA |
| 1 | 103346640 | 103114610 | -1 | NM_080630    | COL11A1  | 1 | 12 | 0 | NA | 1 | 14 | 0 | NA | 0 | NA |
| 1 | 103841165 | 103899382 | 1  | NM_017619    | RNPC3    | 0 | NA | 0 | NA | 0 | NA | 0 | NA | 0 | NA |
| 1 | 103898844 | 103923672 | 1  | NM_020978    | AMY2B    | 0 | NA | 0 | NA | 0 | NA | 0 | NA | 0 | NA |
| 1 | 103961521 | 103969923 | 1  | NM_000699    | AMY2A    | 0 | NA | 0 | NA | 0 | NA | 0 | NA | 0 | NA |
| 1 | 103999663 | 104008696 | 1  | NM_001008221 | AMY1A    | 0 | NA | 0 | NA | 0 | NA | 0 | NA | 0 | NA |
| 1 | 103999824 | 104008696 | 1  | NM_004038    | AMY1A    | 0 | NA | 0 | NA | 0 | NA | 0 | NA | 0 | NA |
| 1 | 103999825 | 104008695 | 1  | NM_001008219 | AMY1C    | 0 | NA | 0 | NA | 0 | NA | 0 | NA | 0 | NA |
| 1 | 103999847 | 104008695 | 1  | NM_001008218 | AMY1B    | 0 | NA | 0 | NA | 0 | NA | 0 | NA | 0 | NA |
| 1 | 104040412 | 104031563 | -1 | NM_001008218 | AMY1B    | 0 | NA | 0 | NA | 0 | NA | 0 | NA | 0 | NA |
| 1 | 104040434 | 104031563 | -1 | NM_001008219 | AMY1C    | 0 | NA | 0 | NA | 0 | NA | 0 | NA | 0 | NA |
| 1 | 104040435 | 104031562 | -1 | NM_004038    | AMY1A    | 0 | NA | 0 | NA | 0 | NA | 0 | NA | 0 | NA |
| 1 | 104040596 | 104031562 | -1 | NM_001008221 | AMY1A    | 0 | NA | 0 | NA | 0 | NA | 0 | NA | 0 | NA |
| 1 | 104093801 | 104102834 | 1  | NM_001008221 | AMY1A    | 0 | NA | 0 | NA | 0 | NA | 0 | NA | 0 | NA |
| 1 | 104093962 | 104102834 | 1  | NM_004038    | AMY1A    | 0 | NA | 0 | NA | 0 | NA | 0 | NA | 0 | NA |
| 1 | 104093963 | 104102833 | 1  | NM_001008219 | AMY1C    | 0 | NA | 0 | NA | 0 | NA | 0 | NA | 0 | NA |
| 1 | 104093985 | 104102833 | 1  | NM_001008218 | AMY1B    | 0 | NA | 0 | NA | 0 | NA | 0 | NA | 0 | NA |
| 1 | 107400931 | 107403437 | 1  | NM_018137    | PRMT6    | 0 | NA | 0 | NA | 0 | NA | 1 | 14 | 0 | NA |
| 1 | 107484151 | 107825998 | 1  | NM_001113226 | NTNG1    | 0 | NA | 0 | NA | 0 | NA | 0 | NA | 0 | NA |
| 1 | 107484151 | 107825998 | 1  | NM_001113228 | NTNG1    | 0 | NA | 0 | NA | 0 | NA | 0 | NA | 0 | NA |
| 1 | 107484267 | 107825998 | 1  | NM_014917    | NTNG1    | 0 | NA | 0 | NA | 0 | NA | 0 | NA | 0 | NA |
| 1 | 108032649 | 107915304 | -1 | NM_001079874 | VAV3     | 0 | NA | 0 | NA | 0 | NA | 0 | NA | 0 | NA |
| 1 | 108309068 | 107915304 | -1 | NM_006113    | VAV3     | 0 | NA | 1 | 12 | 0 | NA | 0 | NA | 0 | NA |
| 1 | 108536886 | 108478969 | -1 | NM_213651    | SLC25A24 | 0 | NA | 0 | NA | 0 | NA | 0 | NA | 0 | NA |
| 1 | 108544497 | 108478969 | -1 | NM_013386    | SLC25A24 | 0 | NA | 0 | NA | 0 | NA | 0 | NA | 0 | NA |
| 1 | 108904493 | 108983472 | 1  | NM_001010883 | FAM102B  | 0 | NA | 0 | NA | 0 | NA | 0 | NA | 0 | NA |
| 1 | 109005267 | 108992432 | -1 | NM_001102592 | C1orf59  | 0 | NA | 0 | NA | 0 | NA | 0 | NA | 0 | NA |
| 1 | 109005671 | 108992432 | -1 | NM_144584    | C1orf59  | 0 | NA | 0 | NA | 0 | NA | 0 | NA | 0 | NA |
| 1 | 109036454 | 109045945 | 1  | NM_018061    | PRPF38B  | 1 | 14 | 0 | NA | 0 | NA | 0 | NA | 0 | NA |
| 1 | 109066555 | 109086888 | 1  | NM_173532    | FNDC7    | 1 | 11 | 0 | NA | 0 | NA | 0 | NA | 0 | NA |
| 1 | 109090807 | 109153671 | 1  | NM_007269    | STXBP3   | 0 | NA | 0 | NA | 0 | NA | 1 | 11 | 0 | NA |
| 1 | 109201239 | 109160047 | -1 | NM_152763    | C1orf62  | 0 | NA | 0 | NA | 0 | NA | 0 | NA | 0 | NA |
| 1 | 109221125 | 109274567 | 1  | NM_013296    | GPSM2    | 1 | 11 | 0 | NA | 0 | NA | 0 | NA | 0 | NA |
| 1 | 109307634 | 109273652 | -1 | NM_001048210 | CLCC1    | 1 | 13 | 0 | NA | 0 | NA | 0 | NA | 0 | NA |
| 1 | 109307634 | 109273652 | -1 | NM_015127    | CLCC1    | 1 | 13 | 0 | NA | 0 | NA | 0 | NA | 0 | NA |
| 1 | 109386258 | 109314358 | -1 | NM_014969    | WDR47    | 0 | NA | 0 | NA | 0 | NA | 0 | NA | 0 | NA |
| 1 | 109420147 | 109408520 | -1 | NM_005645    | TAF13    | 0 | NA | 0 | NA | 0 | NA | 0 | NA | 0 | NA |
| 1 | 109434925 | 109441077 | 1  | NM_020141    | C1orf119 | 1 | 35 | 0 | NA | 0 | NA | 1 | 18 | 0 | NA |
| 1 | 109458002 | 109450095 | -1 | NM_001122961 | C1orf194 | 0 | NA | 0 | NA | 0 | NA | 0 | NA | 0 | NA |
| 1 | 109458055 | 109547377 | 1  | NM_020775    | KIAA1324 | 0 | NA | 0 | NA | 0 | NA | 0 | NA | 0 | NA |
| 1 | 109558062 | 109582308 | 1  | NM_006513    | SARS     | 0 | NA | 0 | NA | 0 | NA | 0 | NA | 0 | NA |
| 1 | 109594163 | 109619901 | 1  | NM_001408    | CELSR2   | 0 | NA | 0 | NA | 0 | NA | 0 | NA | 0 | NA |
| 1 | 109627294 | 109623700 | -1 | NM_001005290 | PSRC1    | 1 | 14 | 0 | NA | 0 | NA | 1 | 26 | 0 | NA |
| 1 | 109627294 | 109623700 | -1 | NM_001032290 | PSRC1    | 1 | 14 | 0 | NA | 0 | NA | 1 | 26 | 0 | NA |
| 1 | 109627294 | 109623700 | -1 | NM_001032291 | PSRC1    | 1 | 14 | 0 | NA | 0 | NA | 1 | 26 | 0 | NA |
| 1 | 109627294 | 109623700 | -1 | NM_032636    | PSRC1    | 1 | 14 | 0 | NA | 0 | NA | 1 | 26 | 0 | NA |
| 1 | 109651186 | 109636509 | -1 | NM_001010985 | MYBPHL   | 1 | 15 | 0 | NA | 0 | NA | 0 | NA | 0 | NA |
| 1 | 109742086 | 109653714 | -1 | NM_002959    | SORT1    | 0 | NA | 0 | NA | 1 | 12 | 0 | NA | 0 | NA |
| 1 | 109770560 | 109745994 | -1 | NM_002790    | PSMA5    | 0 | NA | 0 | NA | 0 | NA | 0 | NA | 0 | NA |
| 1 | 109810622 | 109826287 | 1  | NM_001040709 | SYPL2    | 0 | NA | 0 | NA | 0 | NA | 0 | NA | 0 | NA |
| 1 | 109828083 | 109836879 | 1  | NM_153340    | ATXN7L2  | 0 | NA | 0 | NA | 0 | NA | 0 | NA | 0 | NA |

|   |           |           |    |              |          |   |    |    |    |    |    |    |    |    |    |    |
|---|-----------|-----------|----|--------------|----------|---|----|----|----|----|----|----|----|----|----|----|
| 1 | 109838244 | 109843000 | 1  | NM_182580    | CYB561D1 | 0 | NA | 0  | NA | 0  | NA | 0  | NA | 0  | NA |    |
| 1 | 109853859 | 109850968 | -1 | NM_020703    | AMIGO1   | 0 | NA | 0  | NA | 0  | NA | 0  | NA | 0  | NA |    |
| 1 | 109884016 | 109889978 | 1  | NM_031936    | GPR61    | 0 | NA | 0  | NA | 0  | NA | 0  | NA | 0  | NA |    |
| 1 | 109892708 | 109939975 | 1  | NM_006496    | GNAI3    | 0 | NA | 0  | NA | 0  | NA | 0  | NA | 0  | NA |    |
| 1 | 109957228 | 109947411 | -1 | NM_005272    | GNAT2    | 0 | NA | 0  | NA | 0  | NA | 0  | NA | 0  | NA |    |
| 1 | 109963981 | 109976200 | 1  | NM_139156    | AMPD2    | 0 | NA | 0  | NA | 0  | NA | 0  | NA | 0  | NA |    |
| 1 | 109964798 | 109976200 | 1  | NM_004037    | AMPD2    | 0 | NA | 0  | NA | 0  | NA | 0  | NA | 0  | NA |    |
| 1 | 109969571 | 109976200 | 1  | NM_203404    | AMPD2    | 0 | NA | 0  | NA | 0  | NA | 0  | NA | 0  | NA |    |
| 1 | 110000225 | 110005845 | 1  | NM_000850    | GSTM4    | 0 | NA | 0  | NA | 0  | NA | 0  | NA | 0  | NA |    |
| 1 | 110000225 | 110009648 | 1  | NM_147148    | GSTM4    | 0 | NA | 0  | NA | 0  | NA | 0  | NA | 0  | NA |    |
| 1 | 110012213 | 110019431 | 1  | NM_000848    | GSTM2    | 0 | NA | 0  | NA | 0  | NA | 0  | NA | 0  | NA |    |
| 1 | 110031964 | 110037890 | 1  | NM_000561    | GSTM1    | 0 | NA | 0  | NA | 0  | NA | 0  | NA | 0  | NA |    |
| 1 | 110031964 | 110037890 | 1  | NM_146421    | GSTM1    | 0 | NA | 0  | NA | 0  | NA | 0  | NA | 0  | NA |    |
| 1 | 110056387 | 110062411 | 1  | NM_000851    | GSTM5    | 0 | NA | 0  | NA | 0  | NA | 0  | NA | 0  | NA |    |
| 1 | 110084563 | 110078076 | -1 | NM_000849    | GSTM3    | 0 | NA | 0  | NA | 0  | NA | 0  | NA | 0  | NA |    |
| 1 | 110108087 | 110094224 | -1 | NM_024526    | EPS8L3   | 0 | NA | 0  | NA | 0  | NA | 0  | NA | 0  | NA |    |
| 1 | 110108087 | 110094224 | -1 | NM_133181    | EPS8L3   | 0 | NA | 0  | NA | 0  | NA | 0  | NA | 0  | NA |    |
| 1 | 110108087 | 110094224 | -1 | NM_139053    | EPS8L3   | 0 | NA | 0  | NA | 0  | NA | 0  | NA | 0  | NA |    |
| 1 | 110254755 | 110289347 | 1  | NM_172210    | CSF1     | 0 | NA | 0  | NA | 0  | NA | 0  | NA | 0  | NA |    |
| 1 | 110254755 | 110270888 | 1  | NM_172212    | CSF1     | 0 | NA | 0  | NA | 0  | NA | 0  | NA | 0  | NA |    |
| 1 | 110254755 | 110273878 | 1  | NM_000757    | CSF1     | 0 | NA | 0  | NA | 0  | NA | 0  | NA | 0  | NA |    |
| 1 | 110254755 | 110273878 | 1  | NM_172211    | CSF1     | 0 | NA | 0  | NA | 0  | NA | 0  | NA | 0  | NA |    |
| 1 | 110328830 | 110367887 | 1  | NM_006621    | AHCYL1   | 0 | NA | 0  | NA | 0  | NA | 0  | NA | 0  | NA |    |
| 1 | 110378763 | 110398786 | 1  | NM_033088    | FAM40A   | 0 | NA | 0  | NA | 0  | NA | 0  | NA | 0  | NA |    |
| 1 | 110414845 | 110404519 | -1 | NM_006492    | ALX3     | 0 | NA | 0  | NA | 0  | NA | 0  | NA | 0  | NA |    |
| 1 | 110456584 | 110458092 | 1  | NM_203412    | UBL4B    | 0 | NA | 0  | NA | 0  | NA | 0  | NA | 0  | NA |    |
| 1 | 110494654 | 110546346 | 1  | NM_001010898 | SLC6A17  | 0 | NA | 0  | NA | 0  | NA | 0  | NA | 0  | NA |    |
| 1 | 110555587 | 110568228 | 1  | NM_153763    | KCNC4    | 0 | NA | 0  | NA | 0  | NA | 0  | NA | 0  | NA |    |
| 1 | 110555587 | 110578189 | 1  | NM_001039574 | KCNC4    | 0 | NA | 0  | NA | 0  | NA | 0  | NA | 0  | NA |    |
| 1 | 110555587 | 110578189 | 1  | NM_004978    | KCNC4    | 0 | NA | 0  | NA | 0  | NA | 0  | NA | 0  | NA |    |
| 1 | 110683467 | 110690826 | 1  | NM_022768    | RBM15    | 1 | 12 | 0  | NA | 0  | NA | 0  | NA | 0  | NA |    |
| 1 | 110735159 | 110707027 | -1 | NM_004696    | SLC16A4  | 0 | NA | 0  | NA | 0  | NA | 0  | NA | 0  | NA |    |
| 1 | 110752069 | 110745399 | -1 | NM_006402    | HBXIP    | 0 | NA | 0  | NA | 0  | NA | 0  | NA | 0  | NA |    |
| 1 | 110795310 | 110801499 | 1  | NM_032414    | PROK1    | 0 | NA | 0  | NA | 0  | NA | 0  | NA | 0  | NA |    |
| 1 | 110863320 | 110861361 | -1 | NM_005549    | KCNA10   | 0 | NA | 0  | NA | 0  | NA | 0  | NA | 1  | 14 |    |
| 1 | 110949868 | 110947298 | -1 | NM_004974    | KCNA2    | 0 | NA | 0  | NA | 0  | NA | 0  | NA | 0  | NA |    |
| 1 | 111019178 | 111015832 | -1 | NM_002232    | KCNA3    | 0 | 1  | 12 | 0  | NA | 0  | NA | 0  | NA | 0  | NA |
| 1 | 111215343 | 111244081 | 1  | NM_001040033 | CD53     | 0 | NA | 0  | NA | 0  | NA | 0  | NA | 0  | NA |    |
| 1 | 111217244 | 111244081 | 1  | NM_000560    | CD53     | 0 | NA | 0  | NA | 0  | NA | 0  | NA | 0  | NA |    |
| 1 | 111308089 | 111291334 | -1 | NM_001006945 | C1orf103 | 1 | 31 | 0  | NA | 1  | 32 | 1  | 46 | 0  | NA |    |
| 1 | 111308089 | 111291334 | -1 | NM_018372    | C1orf103 | 1 | 31 | 0  | NA | 1  | 32 | 1  | 46 | 0  | NA |    |
| 1 | 111483771 | 111529247 | 1  | NM_001007794 | CEPT1    | 0 | NA | 0  | NA | 0  | NA | 0  | NA | 0  | NA |    |
| 1 | 111484355 | 111529247 | 1  | NM_006090    | CEPT1    | 0 | NA | 0  | NA | 0  | NA | 0  | NA | 0  | NA |    |
| 1 | 111484361 | 111461476 | -1 | NM_178454    | TMEM77   | 0 | NA | 0  | NA | 0  | NA | 0  | NA | 0  | NA |    |
| 1 | 111544804 | 111531323 | -1 | NM_024901    | DENND2D  | 0 | NA | 0  | NA | 0  | NA | 0  | NA | 0  | NA |    |
| 1 | 111571803 | 111587585 | 1  | NM_001025197 | CHI3L2   | 0 | NA | 0  | NA | 0  | NA | 0  | NA | 0  | NA |    |
| 1 | 111571803 | 111587585 | 1  | NM_004000    | CHI3L2   | 0 | NA | 0  | NA | 0  | NA | 0  | NA | 0  | NA |    |
| 1 | 111573855 | 111587585 | 1  | NM_001025199 | CHI3L2   | 0 | NA | 0  | NA | 0  | NA | 0  | NA | 0  | NA |    |
| 1 | 111635006 | 111664708 | 1  | NM_021797    | CHIA     | 0 | NA | 0  | NA | 0  | NA | 0  | NA | 0  | NA |    |
| 1 | 111635060 | 111664708 | 1  | NM_201653    | CHIA     | 0 | NA | 0  | NA | 0  | NA | 0  | NA | 0  | NA |    |
| 1 | 111690717 | 111697162 | 1  | NM_181643    | C1orf88  | 0 | NA | 0  | NA | 0  | NA | 0  | NA | 0  | NA |    |
| 1 | 111771922 | 111758459 | -1 | NM_002557    | OVGP1    | 0 | NA | 0  | NA | 0  | NA | 0  | NA | 0  | NA |    |
| 1 | 111793265 | 111806048 | 1  | NM_001688    | ATP5F1   | 0 | NA | 0  | NA | 0  | NA | 0  | NA | 0  | NA |    |
| 1 | 111793353 | 111784034 | -1 | NM_024102    | WDR77    | 0 | NA | 0  | NA | 0  | NA | 0  | NA | 0  | NA |    |
| 1 | 111818126 | 111822657 | 1  | NM_174896    | C1orf162 | 0 | NA | 0  | NA | 0  | NA | 0  | NA | 0  | NA |    |
| 1 | 111848266 | 111827492 | -1 | NM_020683    | ADORA3   | 1 | 16 | 0  | NA | 0  | NA | 0  | NA | 0  | NA |    |
| 1 | 111848266 | 111843573 | -1 | NM_000677    | ADORA3   | 1 | 16 | 0  | NA | 0  | NA | 0  | NA | 0  | NA |    |
| 1 | 111908120 | 111827492 | -1 | NM_001081976 | ADORA3   | 0 | NA | 0  | NA | 0  | NA | 0  | NA | 0  | NA |    |
| 1 | 111963927 | 112057624 | 1  | NM_001010935 | RAP1A    | 0 | NA | 0  | NA | 0  | NA | 0  | NA | 0  | NA |    |
| 1 | 111963927 | 112057624 | 1  | NM_002884    | RAP1A    | 0 | NA | 0  | NA | 0  | NA | 0  | NA | 0  | NA |    |
| 1 | 112083545 | 112069892 | -1 | NM_019099    | C1orf183 | 0 | NA | 0  | NA | 0  | NA | 1  | 13 | 0  | NA |    |
| 1 | 112099776 | 112111722 | 1  | NM_007204    | DDX20    | 0 | NA | 0  | NA | 0  | NA | 0  | NA | 0  | NA |    |
| 1 | 112099942 | 112069892 | -1 | NM_198926    | C1orf183 | 0 | NA | 0  | NA | 0  | NA | 0  | NA | 0  | NA |    |
| 1 | 112333300 | 112119976 | -1 | NM_004980    | KCND3    | 0 | NA | 0  | NA | 0  | NA | 0  | NA | 1  | 14 |    |
| 1 | 112333300 | 112119976 | -1 | NM_172198    | KCND3    | 0 | NA | 0  | NA | 0  | NA | 0  | NA | 1  | 14 |    |

|   |           |           |    |              |           |   |    |   |    |   |    |   |    |   |    |
|---|-----------|-----------|----|--------------|-----------|---|----|---|----|---|----|---|----|---|----|
| 1 | 112740382 | 112803739 | 1  | NM_018704    | CTTNBP2NL | 0 | NA | 0 | NA | 0 | NA | 1 | 12 | 0 | NA |
| 1 | 112811562 | 112865428 | 1  | NM_004185    | WNT2B     | 0 | NA | 0 | NA | 0 | NA | 0 | NA | 0 | NA |
| 1 | 112853388 | 112865428 | 1  | NM_024494    | WNT2B     | 0 | NA | 0 | NA | 0 | NA | 0 | NA | 0 | NA |
| 1 | 112963563 | 112867663 | -1 | NM_017744    | ST7L      | 0 | NA | 0 | NA | 0 | NA | 0 | NA | 0 | NA |
| 1 | 112963563 | 112867663 | -1 | NM_138727    | ST7L      | 0 | NA | 0 | NA | 0 | NA | 0 | NA | 0 | NA |
| 1 | 112963563 | 112867663 | -1 | NM_138728    | ST7L      | 0 | NA | 0 | NA | 0 | NA | 0 | NA | 0 | NA |
| 1 | 112963563 | 112885935 | -1 | NM_138729    | ST7L      | 0 | NA | 0 | NA | 0 | NA | 0 | NA | 0 | NA |
| 1 | 112963597 | 113015764 | 1  | NM_006135    | CAPZA1    | 0 | NA | 0 | NA | 0 | NA | 0 | NA | 0 | NA |
| 1 | 113018989 | 113044882 | 1  | NM_020963    | MOV10     | 1 | 17 | 0 | NA | 0 | NA | 0 | NA | 0 | NA |
| 1 | 113051201 | 113045271 | -1 | NM_001042679 | RHOC      | 1 | 11 | 0 | NA | 0 | NA | 0 | NA | 0 | NA |
| 1 | 113051548 | 113045271 | -1 | NM_001042678 | RHOC      | 1 | 11 | 0 | NA | 0 | NA | 0 | NA | 0 | NA |
| 1 | 113051548 | 113045271 | -1 | NM_175744    | RHOC      | 1 | 11 | 0 | NA | 0 | NA | 0 | NA | 0 | NA |
| 1 | 113059473 | 113054138 | -1 | NM_005167    | PPM1J     | 0 | NA | 0 | NA | 0 | NA | 0 | NA | 0 | NA |
| 1 | 113064711 | 113071379 | 1  | NM_001004440 | FAM19A3   | 0 | NA | 0 | NA | 0 | NA | 0 | NA | 0 | NA |
| 1 | 113064711 | 113071379 | 1  | NM_182759    | FAM19A3   | 0 | NA | 0 | NA | 0 | NA | 0 | NA | 0 | NA |
| 1 | 113300498 | 113255992 | -1 | NM_003051    | SLC16A1   | 0 | NA | 0 | NA | 0 | NA | 0 | NA | 0 | NA |
| 1 | 113417353 | 113468865 | 1  | NM_014813    | LRIG2     | 0 | NA | 0 | NA | 1 | 12 | 0 | NA | 0 | NA |
| 1 | 113734997 | 114030068 | 1  | NM_152900    | MAG3      | 0 | NA | 0 | NA | 0 | NA | 0 | NA | 0 | NA |
| 1 | 114103300 | 114041346 | -1 | NM_006608    | PHTF1     | 0 | NA | 0 | NA | 1 | 14 | 0 | NA | 0 | NA |
| 1 | 114156593 | 114105976 | -1 | NM_018364    | RSBN1     | 1 | 12 | 0 | NA | 0 | NA | 0 | NA | 0 | NA |
| 1 | 114215840 | 114177091 | -1 | NM_012411    | PTPN22    | 0 | NA | 0 | NA | 0 | NA | 0 | NA | 0 | NA |
| 1 | 114215857 | 114157960 | -1 | NM_015967    | PTPN22    | 0 | NA | 0 | NA | 0 | NA | 0 | NA | 0 | NA |
| 1 | 114231692 | 114220958 | -1 | NM_001010922 | BCL2L15   | 0 | NA | 0 | NA | 0 | NA | 0 | NA | 0 | NA |
| 1 | 114249264 | 114239199 | -1 | NM_006594    | AP4B1     | 1 | 13 | 0 | NA | 1 | 13 | 0 | NA | 0 | NA |
| 1 | 114249560 | 114258217 | 1  | NM_022836    | DCLRE1B   | 1 | 13 | 0 | NA | 1 | 13 | 0 | NA | 0 | NA |
| 1 | 114273518 | 114316218 | 1  | NM_152696    | HIPK1     | 0 | NA | 0 | NA | 0 | NA | 0 | NA | 0 | NA |
| 1 | 114273518 | 114321945 | 1  | NM_198268    | HIPK1     | 0 | NA | 0 | NA | 0 | NA | 0 | NA | 0 | NA |
| 1 | 114295289 | 114321945 | 1  | NM_198269    | HIPK1     | 0 | NA | 0 | NA | 0 | NA | 0 | NA | 0 | NA |
| 1 | 114298021 | 114321945 | 1  | NM_181358    | HIPK1     | 0 | NA | 0 | NA | 0 | NA | 0 | NA | 0 | NA |
| 1 | 114323552 | 114326398 | 1  | NM_020190    | OLFML3    | 0 | NA | 0 | NA | 0 | NA | 0 | NA | 0 | NA |
| 1 | 114497995 | 114433436 | -1 | NM_205848    | SYT6      | 0 | NA | 0 | NA | 0 | NA | 0 | NA | 0 | NA |
| 1 | 114855304 | 114736921 | -1 | NM_015906    | TRIM33    | 0 | NA | 0 | NA | 0 | NA | 0 | NA | 0 | NA |
| 1 | 114855304 | 114736921 | -1 | NM_033020    | TRIM33    | 0 | NA | 0 | NA | 0 | NA | 0 | NA | 0 | NA |
| 1 | 114925788 | 114911703 | -1 | NM_005872    | BCAS2     | 0 | NA | 0 | NA | 0 | NA | 0 | NA | 0 | NA |
| 1 | 115014255 | 114928718 | -1 | NM_198459    | DENND2C   | 0 | NA | 0 | NA | 0 | NA | 0 | NA | 0 | NA |
| 1 | 115039699 | 115017244 | -1 | NM_000036    | AMPD1     | 0 | NA | 0 | NA | 0 | NA | 0 | NA | 0 | NA |
| 1 | 115061038 | 115048600 | -1 | NM_002524    | NRAS      | 0 | NA | 0 | NA | 0 | NA | 0 | NA | 0 | NA |
| 1 | 115102147 | 115061059 | -1 | NM_007158    | CSDE1     | 0 | NA | 0 | NA | 0 | NA | 0 | NA | 0 | NA |
| 1 | 115102147 | 115061060 | -1 | NM_001007553 | CSDE1     | 0 | NA | 0 | NA | 0 | NA | 0 | NA | 0 | NA |
| 1 | 115124831 | 115113627 | -1 | NM_001102396 | SIKE      | 0 | NA | 0 | NA | 0 | NA | 0 | NA | 0 | NA |
| 1 | 115124831 | 115113627 | -1 | NM_025073    | SIKE      | 0 | NA | 0 | NA | 0 | NA | 0 | NA | 0 | NA |
| 1 | 115198977 | 115339513 | 1  | NM_003176    | SYQP1     | 0 | NA | 0 | NA | 0 | NA | 0 | NA | 0 | NA |
| 1 | 115373937 | 115378464 | 1  | NM_000549    | TSHB      | 0 | NA | 0 | NA | 0 | NA | 0 | NA | 0 | NA |
| 1 | 115433638 | 115392155 | -1 | NM_005725    | TSPAN2    | 0 | NA | 1 | 13 | 0 | NA | 0 | NA | 0 | NA |
| 1 | 115682380 | 115630059 | -1 | NM_002506    | NGF       | 0 | NA | 0 | NA | 0 | NA | 0 | NA | 0 | NA |
| 1 | 115986096 | 116042368 | 1  | NM_138959    | VANGL1    | 0 | NA | 1 | 22 | 0 | NA | 0 | NA | 0 | NA |
| 1 | 116112929 | 116044148 | -1 | NM_001232    | CASQ2     | 0 | NA | 0 | NA | 0 | NA | 0 | NA | 0 | NA |
| 1 | 116184856 | 116180521 | -1 | NM_001111061 | NHLH2     | 0 | NA | 0 | NA | 0 | NA | 0 | NA | 0 | NA |
| 1 | 116185270 | 116180521 | -1 | NM_005599    | NHLH2     | 0 | NA | 0 | NA | 0 | NA | 0 | NA | 0 | NA |
| 1 | 116320641 | 116414198 | 1  | NM_018420    | SLC22A15  | 0 | NA | 1 | 12 | 0 | NA | 0 | NA | 0 | NA |
| 1 | 116455898 | 116479384 | 1  | NM_152367    | C1orf161  | 0 | NA | 0 | NA | 0 | NA | 0 | NA | 0 | NA |
| 1 | 116717358 | 116748919 | 1  | NM_000701    | ATP1A1    | 0 | NA | 0 | NA | 1 | 13 | 0 | NA | 0 | NA |
| 1 | 116717358 | 116748919 | 1  | NM_001001586 | ATP1A1    | 0 | NA | 0 | NA | 1 | 13 | 0 | NA | 0 | NA |
| 1 | 116915126 | 116886679 | -1 | NM_001779    | CD58      | 0 | NA | 0 | NA | 0 | NA | 0 | NA | 0 | NA |
| 1 | 117011837 | 116918553 | -1 | NM_001007237 | IGSF3     | 0 | NA | 0 | NA | 0 | NA | 0 | NA | 0 | NA |
| 1 | 117011837 | 116918553 | -1 | NM_001542    | IGSF3     | 0 | NA | 0 | NA | 0 | NA | 0 | NA | 0 | NA |
| 1 | 117098608 | 117113374 | 1  | NM_001767    | CD2       | 0 | NA | 1 | 13 | 0 | NA | 0 | NA | 0 | NA |
| 1 | 117254211 | 117334495 | 1  | NM_020440    | PTGFRN    | 0 | NA | 0 | NA | 0 | NA | 1 | 12 | 0 | NA |
| 1 | 117345904 | 117380690 | 1  | NM_004258    | IGSF2     | 0 | NA | 0 | NA | 0 | NA | 0 | NA | 0 | NA |
| 1 | 117404471 | 117447014 | 1  | NM_003594    | TTF2      | 0 | NA | 0 | NA | 0 | NA | 0 | NA | 0 | NA |
| 1 | 117465934 | 117455210 | -1 | NM_025188    | TRIM45    | 0 | NA | 0 | NA | 0 | NA | 0 | NA | 0 | NA |
| 1 | 117555072 | 117487731 | -1 | NM_024626    | VTCN1     | 0 | NA | 0 | NA | 0 | NA | 0 | NA | 0 | NA |
| 1 | 117711607 | 117869843 | 1  | NM_006699    | MAN1A2    | 0 | NA | 0 | NA | 0 | NA | 0 | NA | 0 | NA |
| 1 | 117950126 | 117972534 | 1  | NM_017709    | FAM46C    | 0 | NA | 0 | NA | 0 | NA | 0 | NA | 0 | NA |
| 1 | 118273729 | 118213562 | -1 | NM_017686    | GDAP2     | 0 | NA | 0 | NA | 0 | NA | 0 | NA | 0 | NA |

|   |           |           |    |              |           |   |    |   |    |   |    |   |    |   |    |
|---|-----------|-----------|----|--------------|-----------|---|----|---|----|---|----|---|----|---|----|
| 1 | 118273913 | 118304572 | 1  | NM_006784    | WDR3      | 0 | NA | 0 | NA | 0 | NA | 0 | NA | 0 | NA |
| 1 | 118529357 | 118297810 | -1 | NM_206996    | SPAG17    | 0 | NA | 0 | NA | 0 | NA | 0 | NA | 0 | NA |
| 1 | 119333702 | 119227188 | -1 | NM_152380    | TBX15     | 0 | NA | 1 | 17 | 0 | NA | 0 | NA | 0 | NA |
| 1 | 119484818 | 119375361 | -1 | NM_015836    | WARS2     | 1 | 11 | 0 | NA | 0 | NA | 0 | NA | 0 | NA |
| 1 | 119484818 | 119375361 | -1 | NM_201263    | WARS2     | 1 | 11 | 0 | NA | 0 | NA | 0 | NA | 0 | NA |
| 1 | 119712924 | 119738274 | 1  | NM_001005783 | HAO2      | 0 | NA | 0 | NA | 0 | NA | 0 | NA | 0 | NA |
| 1 | 119712924 | 119738274 | 1  | NM_016527    | HAO2      | 0 | NA | 0 | NA | 0 | NA | 0 | NA | 0 | NA |
| 1 | 119759295 | 119767174 | 1  | NM_000198    | HSD3B2    | 0 | NA | 0 | NA | 0 | NA | 0 | NA | 0 | NA |
| 1 | 119851348 | 119859204 | 1  | NM_000862    | HSD3B1    | 0 | NA | 0 | NA | 0 | NA | 0 | NA | 0 | NA |
| 1 | 119991913 | 119963522 | -1 | NM_001080470 | ZNF697    | 0 | NA | 0 | NA | 0 | NA | 0 | NA | 0 | NA |
| 1 | 120056032 | 120088361 | 1  | NM_006623    | PHGDH     | 0 | NA | 0 | NA | 0 | NA | 1 | 22 | 0 | NA |
| 1 | 120113041 | 120092525 | -1 | NM_005518    | HMGCS2    | 0 | NA | 1 | 17 | 0 | NA | 0 | NA | 0 | NA |
| 1 | 120155726 | 120138230 | -1 | NM_032044    | REG4      | 0 | NA | 0 | NA | 0 | NA | 0 | NA | 0 | NA |
| 1 | 120189302 | 120178910 | -1 | NM_001047980 | NBPF7     | 0 | NA | 0 | NA | 0 | NA | 0 | NA | 0 | NA |
| 1 | 120240636 | 120237678 | -1 | NM_021794    | ADAM30    | 0 | NA | 0 | NA | 0 | NA | 0 | NA | 0 | NA |
| 1 | 120413799 | 120255698 | -1 | NM_024408    | NOTCH2    | 0 | NA | 0 | NA | 0 | NA | 0 | NA | 0 | NA |
| 1 | 120640527 | 120657204 | 1  | NM_001100910 | FAM72B    | 0 | NA | 0 | NA | 0 | NA | 0 | NA | 0 | NA |
| 1 | 120737417 | 120728656 | -1 | NM_001004340 | FCGR1B    | 0 | NA | 0 | NA | 0 | NA | 0 | NA | 0 | NA |
| 1 | 120737417 | 120728656 | -1 | NM_001017986 | FCGR1B    | 0 | NA | 0 | NA | 0 | NA | 0 | NA | 0 | NA |
| 1 | 142559404 | 142558666 | -1 | NM_001123068 | LOC844591 | 0 | NA | 0 | NA | 0 | NA | 0 | NA | 0 | NA |
| 1 | 143075603 | 143074943 | -1 | NM_178230    | PPIAL4    | 0 | NA | 0 | NA | 0 | NA | 0 | NA | 0 | NA |
| 1 | 143326315 | 143540167 | 1  | NM_001037675 | NBPF20    | 0 | NA | 0 | NA | 0 | NA | 0 | NA | 0 | NA |
| 1 | 143643389 | 143601947 | -1 | NM_001002811 | PDE4DIP   | 0 | NA | 0 | NA | 0 | NA | 0 | NA | 0 | NA |
| 1 | 143706379 | 143562783 | -1 | NM_014644    | PDE4DIP   | 0 | NA | 0 | NA | 0 | NA | 0 | NA | 1 | 12 |
| 1 | 143706379 | 143601947 | -1 | NM_001002812 | PDE4DIP   | 0 | NA | 0 | NA | 0 | NA | 0 | NA | 1 | 12 |
| 1 | 143706379 | 143663117 | -1 | NM_001002810 | PDE4DIP   | 0 | NA | 0 | NA | 0 | NA | 0 | NA | 1 | 12 |
| 1 | 143787436 | 143663117 | -1 | NM_022359    | PDE4DIP   | 0 | NA | 1 | 14 | 0 | NA | 0 | NA | 1 | 12 |
| 1 | 143807763 | 143828279 | 1  | NM_004892    | SEC22B    | 1 | 20 | 0 | NA | 0 | NA | 0 | NA | 0 | NA |
| 1 | 143920467 | 143997269 | 1  | NM_203458    | NOTCH2NL  | 0 | NA | 0 | NA | 0 | NA | 0 | NA | 0 | NA |
| 1 | 144124547 | 144128902 | 1  | NM_145277    | HFE2      | 0 | NA | 0 | NA | 0 | NA | 0 | NA | 0 | NA |
| 1 | 144124547 | 144128902 | 1  | NM_202004    | HFE2      | 0 | NA | 0 | NA | 0 | NA | 0 | NA | 0 | NA |
| 1 | 144124547 | 144128902 | 1  | NM_213652    | HFE2      | 0 | NA | 0 | NA | 0 | NA | 0 | NA | 0 | NA |
| 1 | 144124547 | 144128902 | 1  | NM_213653    | HFE2      | 0 | NA | 0 | NA | 0 | NA | 0 | NA | 0 | NA |
| 1 | 144149818 | 144153985 | 1  | NM_006472    | TXNIP     | 0 | NA | 0 | NA | 1 | 13 | 0 | NA | 0 | NA |
| 1 | 144181744 | 144167592 | -1 | NM_032305    | POLR3GL   | 1 | 21 | 0 | NA | 0 | NA | 1 | 11 | 0 | NA |
| 1 | 144181864 | 144187004 | 1  | NM_001039888 | ANKRD34A  | 1 | 21 | 0 | NA | 0 | NA | 1 | 11 | 0 | NA |
| 1 | 144188441 | 144210448 | 1  | NM_153713    | LIX1L     | 1 | 21 | 0 | NA | 0 | NA | 1 | 11 | 0 | NA |
| 1 | 144218994 | 144222801 | 1  | NM_005105    | RBM8A     | 0 | NA | 0 | NA | 0 | NA | 0 | NA | 0 | NA |
| 1 | 144227739 | 144235088 | 1  | NM_003846    | PEX11B    | 0 | NA | 0 | NA | 0 | NA | 0 | NA | 0 | NA |
| 1 | 144236346 | 144255225 | 1  | NM_003637    | ITGA10    | 0 | NA | 0 | NA | 0 | NA | 0 | NA | 0 | NA |
| 1 | 144260565 | 144279883 | 1  | NM_144698    | ANKRD35   | 1 | 26 | 1 | 12 | 0 | NA | 0 | NA | 0 | NA |
| 1 | 144287344 | 144297903 | 1  | NM_006099    | PIAS3     | 1 | 14 | 0 | NA | 0 | NA | 0 | NA | 0 | NA |
| 1 | 144300792 | 144297849 | -1 | NM_001012758 | NUDT17    | 0 | NA | 0 | NA | 0 | NA | 0 | NA | 0 | NA |
| 1 | 144322241 | 144303961 | -1 | NM_006468    | POLR3C    | 0 | NA | 0 | NA | 0 | NA | 0 | NA | 0 | NA |
| 1 | 144322392 | 144400084 | 1  | NM_014455    | ZNF364    | 0 | NA | 0 | NA | 0 | NA | 0 | NA | 0 | NA |
| 1 | 144426922 | 144407154 | -1 | NM_007053    | CD160     | 0 | NA | 0 | NA | 0 | NA | 0 | NA | 0 | NA |
| 1 | 144439082 | 144475430 | 1  | NM_002614    | PDZK1     | 0 | NA | 0 | NA | 0 | NA | 0 | NA | 0 | NA |
| 1 | 144538460 | 144475951 | -1 | NM_001097612 | GPR89A    | 0 | NA | 0 | NA | 0 | NA | 0 | NA | 0 | NA |
| 1 | 144538460 | 144475951 | -1 | NM_001097613 | GPR89A    | 0 | NA | 0 | NA | 0 | NA | 0 | NA | 0 | NA |
| 1 | 144595224 | 144635406 | 1  | NM_001097616 | GPR89C    | 0 | NA | 0 | NA | 0 | NA | 0 | NA | 0 | NA |
| 1 | 144779602 | 144743898 | -1 | NM_183372    | NBPF11    | 0 | NA | 0 | NA | 0 | NA | 0 | NA | 0 | NA |
| 1 | 144779602 | 144745375 | -1 | NM_001101663 | LOC728912 | 0 | NA | 0 | NA | 0 | NA | 0 | NA | 0 | NA |
| 1 | 144786832 | 144791590 | 1  | NM_001080422 | FAM108A3  | 0 | NA | 0 | NA | 0 | NA | 0 | NA | 0 | NA |
| 1 | 145110753 | 145093308 | -1 | NM_005399    | PRKAB2    | 1 | 18 | 0 | NA | 0 | NA | 0 | NA | 0 | NA |
| 1 | 145163546 | 145124461 | -1 | NM_001461    | FMO5      | 0 | NA | 0 | NA | 0 | NA | 0 | NA | 0 | NA |
| 1 | 145180914 | 145234067 | 1  | NM_004284    | CHD1L     | 0 | NA | 1 | 15 | 0 | NA | 1 | 12 | 0 | NA |
| 1 | 145479805 | 145564639 | 1  | NM_004326    | BCL9      | 0 | NA | 0 | NA | 0 | NA | 0 | NA | 0 | NA |
| 1 | 145609258 | 145585791 | -1 | NM_016361    | ACP6      | 1 | 29 | 0 | NA | 1 | 13 | 1 | 23 | 0 | NA |
| 1 | 145699338 | 145694955 | -1 | NM_181703    | GJA5      | 0 | NA | 0 | NA | 0 | NA | 0 | NA | 0 | NA |
| 1 | 145712108 | 145694955 | -1 | NM_005266    | GJA5      | 0 | NA | 0 | NA | 0 | NA | 0 | NA | 0 | NA |
| 1 | 145841559 | 145848017 | 1  | NM_005267    | GJA8      | 0 | NA | 1 | 27 | 0 | NA | 0 | NA | 0 | NA |
| 1 | 145867129 | 145932377 | 1  | NM_016334    | GPR89B    | 0 | NA | 0 | NA | 0 | NA | 0 | NA | 0 | NA |
| 1 | 145892190 | 145932379 | 1  | NM_001097616 | GPR89C    | 0 | NA | 0 | NA | 0 | NA | 0 | NA | 0 | NA |
| 1 | 146076705 | 146040946 | -1 | NM_183372    | NBPF11    | 0 | NA | 0 | NA | 0 | NA | 0 | NA | 0 | NA |
| 1 | 146076705 | 146042423 | -1 | NM_001101663 | LOC728912 | 0 | NA | 0 | NA | 0 | NA | 0 | NA | 0 | NA |



|   |           |           |    |              |            |   |    |   |    |   |    |   |    |   |    |
|---|-----------|-----------|----|--------------|------------|---|----|---|----|---|----|---|----|---|----|
| 1 | 146422043 | 146421383 | -1 | NM_178230    | PPIAL4     | 0 | NA | 0 | NA | 0 | NA | 0 | NA | 0 | NA |
| 1 | 146492472 | 146470265 | -1 | NM_015383    | NBPF14     | 0 | NA | 0 | NA | 0 | NA | 0 | NA | 0 | NA |
| 1 | 146713553 | 146618472 | -1 | NM_001039703 | NBPF10     | 0 | NA | 0 | NA | 0 | NA | 0 | NA | 0 | NA |
| 1 | 146827613 | 146862782 | 1  | NM_173638    | NBPF15     | 0 | NA | 1 | 13 | 0 | NA | 0 | NA | 1 | 15 |
| 1 | 146843980 | 146862891 | 1  | NM_001102663 | NBPF16     | 0 | NA | 0 | NA | 0 | NA | 0 | NA | 0 | NA |
| 1 | 147006065 | 147024935 | 1  | NM_001102663 | NBPF16     | 0 | NA | 0 | NA | 0 | NA | 0 | NA | 0 | NA |
| 1 | 147819626 | 147820286 | 1  | NM_178230    | PPIAL4     | 0 | NA | 0 | NA | 0 | NA | 0 | NA | 0 | NA |
| 1 | 148020873 | 148030698 | 1  | NM_000566    | FCGR1A     | 0 | NA | 0 | NA | 0 | NA | 0 | NA | 0 | NA |
| 1 | 148050535 | 148048740 | -1 | NM_001024599 | HIST2H2BF  | 1 | 16 | 0 | NA | 0 | NA | 0 | NA | 0 | NA |
| 1 | 148051860 | 148051449 | -1 | NM_001123375 | HIST2H3D   | 1 | 16 | 0 | NA | 0 | NA | 0 | NA | 0 | NA |
| 1 | 148070844 | 148071240 | 1  | NM_001034077 | HIST2H4B   | 0 | NA | 0 | NA | 0 | NA | 0 | NA | 0 | NA |
| 1 | 148070844 | 148071240 | 1  | NM_003548    | HIST2H4A   | 0 | NA | 0 | NA | 0 | NA | 0 | NA | 0 | NA |
| 1 | 148079389 | 148078882 | -1 | NM_001005464 | HIST2H3A   | 0 | NA | 0 | NA | 0 | NA | 0 | NA | 0 | NA |
| 1 | 148079389 | 148078882 | -1 | NM_021059    | HIST2H3C   | 0 | NA | 0 | NA | 0 | NA | 0 | NA | 0 | NA |
| 1 | 148080942 | 148080408 | -1 | NM_001040874 | HIST2H2AA4 | 0 | NA | 0 | NA | 0 | NA | 0 | NA | 0 | NA |
| 1 | 148080942 | 148080408 | -1 | NM_003516    | HIST2H2AA3 | 0 | NA | 0 | NA | 0 | NA | 0 | NA | 0 | NA |
| 1 | 148089251 | 148089785 | 1  | NM_001040874 | HIST2H2AA4 | 0 | NA | 0 | NA | 0 | NA | 0 | NA | 0 | NA |
| 1 | 148089251 | 148089785 | 1  | NM_003516    | HIST2H2AA3 | 0 | NA | 0 | NA | 0 | NA | 0 | NA | 0 | NA |
| 1 | 148090804 | 148091311 | 1  | NM_001005464 | HIST2H3A   | 0 | NA | 0 | NA | 0 | NA | 0 | NA | 0 | NA |
| 1 | 148090804 | 148091311 | 1  | NM_021059    | HIST2H3C   | 0 | NA | 0 | NA | 0 | NA | 0 | NA | 0 | NA |
| 1 | 148099349 | 148098953 | -1 | NM_001034077 | HIST2H4B   | 0 | NA | 0 | NA | 0 | NA | 0 | NA | 0 | NA |
| 1 | 148099349 | 148098953 | -1 | NM_003548    | HIST2H4A   | 0 | NA | 0 | NA | 0 | NA | 0 | NA | 0 | NA |
| 1 | 148124856 | 148122633 | -1 | NM_003528    | HIST2H2BE  | 1 | 15 | 0 | NA | 1 | 21 | 0 | NA | 0 | NA |
| 1 | 148125148 | 148125585 | 1  | NM_003517    | HIST2H2AC  | 1 | 15 | 0 | NA | 1 | 21 | 0 | NA | 0 | NA |
| 1 | 148126090 | 148125642 | -1 | NM_175065    | HIST2H2AB  | 1 | 15 | 0 | NA | 1 | 21 | 0 | NA | 0 | NA |
| 1 | 148137824 | 148138969 | 1  | NM_016074    | BOLA1      | 0 | NA | 0 | NA | 0 | NA | 0 | NA | 0 | NA |
| 1 | 148156054 | 148141858 | -1 | NM_014849    | SV2A       | 0 | NA | 0 | NA | 0 | NA | 0 | NA | 0 | NA |
| 1 | 148166326 | 148161834 | -1 | NM_005850    | SF3B4      | 0 | NA | 0 | NA | 0 | NA | 0 | NA | 0 | NA |
| 1 | 148174867 | 148167167 | -1 | NM_181873    | MTMR11     | 0 | NA | 0 | NA | 0 | NA | 0 | NA | 0 | NA |
| 1 | 148249310 | 148178855 | -1 | NM_020205    | OTUD7B     | 0 | NA | 0 | NA | 0 | NA | 0 | NA | 0 | NA |
| 1 | 148305965 | 148384129 | 1  | NM_007259    | VPS45      | 1 | 16 | 0 | NA | 0 | NA | 0 | NA | 0 | NA |
| 1 | 148388793 | 148398449 | 1  | NM_016274    | PLEKHO1    | 0 | NA | 0 | NA | 0 | NA | 0 | NA | 0 | NA |
| 1 | 148475084 | 148457478 | -1 | NM_030920    | ANP32E     | 1 | 12 | 0 | NA | 0 | NA | 1 | 14 | 0 | NA |
| 1 | 148496841 | 148504102 | 1  | NM_012113    | CA14       | 0 | NA | 0 | NA | 0 | NA | 0 | NA | 0 | NA |
| 1 | 148508156 | 148504422 | -1 | NM_001077628 | APH1A      | 1 | 11 | 0 | NA | 0 | NA | 0 | NA | 0 | NA |
| 1 | 148508156 | 148504422 | -1 | NM_016022    | APH1A      | 1 | 11 | 0 | NA | 0 | NA | 0 | NA | 0 | NA |
| 1 | 148511821 | 148519951 | 1  | NM_024579    | C1orf54    | 1 | 11 | 0 | NA | 0 | NA | 0 | NA | 0 | NA |
| 1 | 148521852 | 148526125 | 1  | NM_144697    | C1orf51    | 0 | NA | 0 | NA | 0 | NA | 0 | NA | 0 | NA |
| 1 | 148532892 | 148547443 | 1  | NM_018997    | MRPS21     | 1 | 13 | 0 | NA | 0 | NA | 0 | NA | 0 | NA |
| 1 | 148532892 | 148547443 | 1  | NM_031901    | MRPS21     | 1 | 13 | 0 | NA | 0 | NA | 0 | NA | 0 | NA |
| 1 | 148560641 | 148592294 | 1  | NM_004698    | PRPF3      | 0 | NA | 0 | NA | 0 | NA | 1 | 15 | 0 | NA |
| 1 | 148603613 | 148715665 | 1  | NM_015203    | KIAA0460   | 1 | 14 | 0 | NA | 0 | NA | 0 | NA | 0 | NA |
| 1 | 148726543 | 148746373 | 1  | NM_025150    | TARS2      | 0 | NA | 0 | NA | 0 | NA | 0 | NA | 0 | NA |
| 1 | 148747206 | 148752660 | 1  | NM_004425    | ECM1       | 0 | NA | 0 | NA | 1 | 14 | 0 | NA | 0 | NA |
| 1 | 148747206 | 148752660 | 1  | NM_022664    | ECM1       | 0 | NA | 0 | NA | 1 | 14 | 0 | NA | 0 | NA |
| 1 | 148788521 | 148797847 | 1  | NM_025008    | ADAMTSL4   | 0 | NA | 0 | NA | 0 | NA | 0 | NA | 0 | NA |
| 1 | 148788521 | 148800036 | 1  | NM_019032    | ADAMTSL4   | 0 | NA | 0 | NA | 0 | NA | 0 | NA | 0 | NA |
| 1 | 148818760 | 148813658 | -1 | NM_021960    | MCL1       | 0 | NA | 0 | NA | 1 | 13 | 0 | NA | 0 | NA |
| 1 | 148818760 | 148813658 | -1 | NM_182763    | MCL1       | 0 | NA | 0 | NA | 1 | 13 | 0 | NA | 0 | NA |
| 1 | 148868233 | 148861222 | -1 | NM_207045    | ENSA       | 1 | 12 | 0 | NA | 0 | NA | 0 | NA | 0 | NA |
| 1 | 148868233 | 148861222 | -1 | NM_207046    | ENSA       | 1 | 12 | 0 | NA | 0 | NA | 0 | NA | 0 | NA |
| 1 | 148868233 | 148862377 | -1 | NM_207047    | ENSA       | 1 | 12 | 0 | NA | 0 | NA | 0 | NA | 0 | NA |
| 1 | 148868722 | 148861222 | -1 | NM_004436    | ENSA       | 1 | 12 | 0 | NA | 0 | NA | 0 | NA | 0 | NA |
| 1 | 148868722 | 148861222 | -1 | NM_207042    | ENSA       | 1 | 12 | 0 | NA | 0 | NA | 0 | NA | 0 | NA |
| 1 | 148868722 | 148862377 | -1 | NM_207043    | ENSA       | 1 | 12 | 0 | NA | 0 | NA | 0 | NA | 0 | NA |
| 1 | 148868722 | 148862377 | -1 | NM_207044    | ENSA       | 1 | 12 | 0 | NA | 0 | NA | 0 | NA | 0 | NA |
| 1 | 148868722 | 148866145 | -1 | NM_207168    | ENSA       | 1 | 12 | 0 | NA | 0 | NA | 0 | NA | 0 | NA |
| 1 | 148936257 | 148885329 | -1 | NM_018178    | GOLPH3L    | 0 | NA | 0 | NA | 0 | NA | 0 | NA | 0 | NA |
| 1 | 148959976 | 148937165 | -1 | NM_032132    | HORMAD1    | 0 | NA | 0 | NA | 0 | NA | 0 | NA | 0 | NA |
| 1 | 149004929 | 148969175 | -1 | NM_004079    | CTSS       | 0 | NA | 0 | NA | 0 | NA | 0 | NA | 0 | NA |
| 1 | 149047436 | 149035310 | -1 | NM_000396    | CTSK       | 0 | NA | 0 | NA | 0 | NA | 0 | NA | 0 | NA |
| 1 | 149115810 | 149048809 | -1 | NM_001668    | ARNT       | 0 | NA | 0 | NA | 0 | NA | 0 | NA | 0 | NA |
| 1 | 149115810 | 149048809 | -1 | NM_178426    | ARNT       | 0 | NA | 0 | NA | 0 | NA | 0 | NA | 0 | NA |
| 1 | 149115810 | 149048809 | -1 | NM_178427    | ARNT       | 0 | NA | 0 | NA | 0 | NA | 0 | NA | 0 | NA |
| 1 | 149165511 | 149203837 | 1  | NM_012432    | SETDB1     | 0 | NA | 0 | NA | 0 | NA | 0 | NA | 0 | NA |

|   |           |           |    |              |           |   |    |   |    |   |    |   |    |   |    |
|---|-----------|-----------|----|--------------|-----------|---|----|---|----|---|----|---|----|---|----|
| 1 | 149214064 | 149204272 | -1 | NM_022075    | LASS2     | 0 | NA | 0 | NA | 0 | NA | 0 | NA | 0 | NA |
| 1 | 149214064 | 149204272 | -1 | NM_181746    | LASS2     | 0 | NA | 0 | NA | 0 | NA | 0 | NA | 0 | NA |
| 1 | 149221122 | 149234738 | 1  | NM_003568    | ANXA9     | 0 | NA | 0 | NA | 0 | NA | 0 | NA | 0 | NA |
| 1 | 149245897 | 149234172 | -1 | NM_018379    | FAM63A    | 0 | NA | 0 | NA | 0 | NA | 0 | NA | 0 | NA |
| 1 | 149245957 | 149235660 | -1 | NM_001040217 | FAM63A    | 0 | NA | 0 | NA | 0 | NA | 0 | NA | 0 | NA |
| 1 | 149247596 | 149274813 | 1  | NM_021222    | PRUNE     | 0 | NA | 0 | NA | 0 | NA | 0 | NA | 0 | NA |
| 1 | 149275657 | 149286698 | 1  | NM_138278    | BNPL      | 0 | NA | 0 | NA | 0 | NA | 0 | NA | 0 | NA |
| 1 | 149286882 | 149290495 | 1  | NM_017860    | C1orf56   | 0 | NA | 0 | NA | 0 | NA | 0 | NA | 0 | NA |
| 1 | 149298749 | 149290070 | -1 | NM_001038707 | CDC42SE1  | 0 | NA | 0 | NA | 1 | 13 | 0 | NA | 0 | NA |
| 1 | 149298749 | 149290070 | -1 | NM_020239    | CDC42SE1  | 0 | NA | 0 | NA | 1 | 13 | 0 | NA | 0 | NA |
| 1 | 149298774 | 149307597 | 1  | NM_006818    | MLLT11    | 0 | NA | 0 | NA | 1 | 13 | 0 | NA | 0 | NA |
| 1 | 149309703 | 149359022 | 1  | NM_144618    | MGC29891  | 0 | NA | 0 | NA | 0 | NA | 0 | NA | 0 | NA |
| 1 | 149385728 | 149370786 | -1 | NM_030913    | SEMA6C    | 1 | 12 | 0 | NA | 0 | NA | 1 | 12 | 0 | NA |
| 1 | 149395728 | 149398849 | 1  | NM_024575    | TNFAIP8L2 | 1 | 12 | 0 | NA | 1 | 17 | 0 | NA | 0 | NA |
| 1 | 149404960 | 149398847 | -1 | NM_212551    | LYSMD1    | 0 | NA | 0 | NA | 1 | 17 | 0 | NA | 0 | NA |
| 1 | 149405140 | 149408238 | 1  | NM_024041    | SCNM1     | 0 | NA | 0 | NA | 1 | 17 | 0 | NA | 0 | NA |
| 1 | 149415171 | 149409086 | -1 | NM_013353    | TMOD4     | 0 | NA | 0 | NA | 1 | 17 | 0 | NA | 0 | NA |
| 1 | 149429264 | 149415557 | -1 | NM_005997    | VPST2     | 1 | 20 | 0 | NA | 0 | NA | 0 | NA | 0 | NA |
| 1 | 149437895 | 149488629 | 1  | NM_003557    | PIP5K1A   | 1 | 20 | 0 | NA | 0 | NA | 0 | NA | 0 | NA |
| 1 | 149493820 | 149506578 | 1  | NM_002810    | PSMD4     | 0 | NA | 0 | NA | 0 | NA | 0 | NA | 0 | NA |
| 1 | 149521414 | 149531005 | 1  | NM_020832    | ZNF687    | 0 | NA | 0 | NA | 0 | NA | 0 | NA | 0 | NA |
| 1 | 149565348 | 149531036 | -1 | NM_002651    | PI4KB     | 0 | NA | 0 | NA | 0 | NA | 0 | NA | 0 | NA |
| 1 | 149586393 | 149579739 | -1 | NM_000449    | RFX5      | 0 | NA | 0 | NA | 0 | NA | 0 | NA | 0 | NA |
| 1 | 149586393 | 149579739 | -1 | NM_001025603 | RFX5      | 0 | NA | 0 | NA | 0 | NA | 0 | NA | 0 | NA |
| 1 | 149611788 | 149603403 | -1 | NM_003944    | SELENBP1  | 0 | NA | 0 | NA | 0 | NA | 0 | NA | 0 | NA |
| 1 | 149638664 | 149641036 | 1  | NM_002796    | PSMB4     | 0 | NA | 0 | NA | 0 | NA | 0 | NA | 0 | NA |
| 1 | 149698556 | 149641823 | -1 | NM_015100    | POGZ      | 1 | 18 | 0 | NA | 1 | 18 | 0 | NA | 0 | NA |
| 1 | 149698556 | 149641823 | -1 | NM_207171    | POGZ      | 1 | 18 | 0 | NA | 1 | 18 | 0 | NA | 0 | NA |
| 1 | 149698556 | 149666067 | -1 | NM_145796    | POGZ      | 1 | 18 | 0 | NA | 1 | 18 | 0 | NA | 0 | NA |
| 1 | 149750485 | 149777791 | 1  | NM_020770    | CGN       | 0 | NA | 0 | NA | 0 | NA | 0 | NA | 0 | NA |
| 1 | 149779404 | 149822683 | 1  | NM_001126337 | TUFT1     | 1 | 11 | 0 | NA | 0 | NA | 1 | 13 | 0 | NA |
| 1 | 149779404 | 149822683 | 1  | NM_020127    | TUFT1     | 1 | 11 | 0 | NA | 0 | NA | 1 | 13 | 0 | NA |
| 1 | 149851285 | 149938183 | 1  | NM_030918    | SNX27     | 0 | NA | 0 | NA | 0 | NA | 0 | NA | 0 | NA |
| 1 | 149955914 | 149941453 | -1 | NM_007185    | TNRC4     | 0 | NA | 1 | 12 | 0 | NA | 0 | NA | 0 | NA |
| 1 | 150002664 | 149998746 | -1 | NM_031420    | MRPL9     | 1 | 12 | 0 | NA | 1 | 12 | 1 | 20 | 0 | NA |
| 1 | 150005754 | 150010430 | 1  | NM_016178    | OAZ3      | 1 | 12 | 0 | NA | 1 | 12 | 1 | 20 | 0 | NA |
| 1 | 150029634 | 150010664 | -1 | NM_006862    | TDRKH     | 0 | NA | 0 | NA | 0 | NA | 0 | NA | 0 | NA |
| 1 | 150029634 | 150012579 | -1 | NM_001083963 | TDRKH     | 0 | NA | 0 | NA | 0 | NA | 0 | NA | 0 | NA |
| 1 | 150029634 | 150012579 | -1 | NM_001083964 | TDRKH     | 0 | NA | 0 | NA | 0 | NA | 0 | NA | 0 | NA |
| 1 | 150029634 | 150012579 | -1 | NM_001083965 | TDRKH     | 0 | NA | 0 | NA | 0 | NA | 0 | NA | 0 | NA |
| 1 | 150044506 | 150039388 | -1 | NM_001004432 | LINGO4    | 0 | NA | 0 | NA | 0 | NA | 0 | NA | 0 | NA |
| 1 | 150065177 | 150045170 | -1 | NM_001001523 | RORC      | 0 | NA | 0 | NA | 0 | NA | 0 | NA | 0 | NA |
| 1 | 150070972 | 150045170 | -1 | NM_005060    | RORC      | 1 | 11 | 0 | NA | 0 | NA | 0 | NA | 0 | NA |
| 1 | 150092797 | 150086200 | -1 | NM_182578    | THEM5     | 0 | NA | 1 | 12 | 0 | NA | 0 | NA | 0 | NA |
| 1 | 150148737 | 150112683 | -1 | NM_053055    | THEM4     | 1 | 11 | 1 | 19 | 0 | NA | 0 | NA | 0 | NA |
| 1 | 150233338 | 150222009 | -1 | NM_002966    | S100A10   | 1 | 15 | 0 | NA | 0 | NA | 0 | NA | 0 | NA |
| 1 | 150276135 | 150271605 | -1 | NM_005620    | S100A11   | 0 | NA | 0 | NA | 0 | NA | 0 | NA | 0 | NA |
| 1 | 150328164 | 150323243 | -1 | NM_001008536 | TCHHL1    | 0 | NA | 0 | NA | 0 | NA | 0 | NA | 0 | NA |
| 1 | 150353180 | 150345416 | -1 | NM_007113    | TCHH      | 0 | NA | 1 | 17 | 0 | NA | 0 | NA | 1 | 15 |
| 1 | 150398328 | 150392694 | -1 | NM_001122965 | RPTN      | 0 | NA | 0 | NA | 0 | NA | 0 | NA | 0 | NA |
| 1 | 150463293 | 150451181 | -1 | NM_001009931 | HRNR      | 0 | NA | 0 | NA | 0 | NA | 0 | NA | 0 | NA |
| 1 | 150564303 | 150541274 | -1 | NM_002016    | FLG       | 0 | NA | 0 | NA | 0 | NA | 0 | NA | 0 | NA |
| 1 | 150599106 | 150587836 | -1 | NM_001014342 | FLG2      | 0 | NA | 0 | NA | 0 | NA | 0 | NA | 0 | NA |
| 1 | 150653352 | 150648342 | -1 | NM_016190    | CRNN      | 0 | NA | 0 | NA | 0 | NA | 0 | NA | 0 | NA |
| 1 | 150749943 | 150751277 | 1  | NM_178438    | LCE5A     | 0 | NA | 0 | NA | 0 | NA | 0 | NA | 0 | NA |
| 1 | 150753601 | 150755105 | 1  | NM_019060    | CRCT1     | 0 | NA | 0 | NA | 0 | NA | 0 | NA | 0 | NA |
| 1 | 150805872 | 150804753 | -1 | NM_178435    | LCE3E     | 0 | NA | 0 | NA | 0 | NA | 0 | NA | 0 | NA |
| 1 | 150819604 | 150818483 | -1 | NM_032563    | LCE3D     | 0 | NA | 0 | NA | 0 | NA | 0 | NA | 0 | NA |
| 1 | 150839831 | 150840116 | 1  | NM_178434    | LCE3C     | 0 | NA | 0 | NA | 0 | NA | 0 | NA | 0 | NA |
| 1 | 150852910 | 150853198 | 1  | NM_178433    | LCE3B     | 0 | NA | 0 | NA | 0 | NA | 0 | NA | 0 | NA |
| 1 | 150862203 | 150861933 | -1 | NM_178431    | LCE3A     | 0 | NA | 0 | NA | 0 | NA | 0 | NA | 0 | NA |
| 1 | 150902495 | 150903759 | 1  | NM_178430    | LCE2D     | 0 | NA | 0 | NA | 0 | NA | 1 | 11 | 0 | NA |
| 1 | 150914394 | 150915673 | 1  | NM_178429    | LCE2C     | 0 | NA | 0 | NA | 0 | NA | 0 | NA | 0 | NA |
| 1 | 150925222 | 150926500 | 1  | NM_014357    | LCE2B     | 0 | NA | 0 | NA | 0 | NA | 0 | NA | 0 | NA |
| 1 | 150937463 | 150938542 | 1  | NM_178428    | LCE2A     | 0 | NA | 0 | NA | 0 | NA | 0 | NA | 0 | NA |

|   |           |           |    |              |          |   |    |   |    |   |    |   |    |   |    |
|---|-----------|-----------|----|--------------|----------|---|----|---|----|---|----|---|----|---|----|
| 1 | 150948146 | 150948534 | 1  | NM_178356    | LCE4A    | 0 | NA | 0 | NA | 0 | NA | 0 | NA | 0 | NA |
| 1 | 150997129 | 151001153 | 1  | NM_001025231 | KPRP     | 0 | NA | 0 | NA | 0 | NA | 0 | NA | 0 | NA |
| 1 | 151015471 | 151015828 | 1  | NM_178354    | LCE1F    | 0 | NA | 0 | NA | 0 | NA | 0 | NA | 0 | NA |
| 1 | 151025376 | 151027525 | 1  | NM_178353    | LCE1E    | 0 | NA | 0 | NA | 0 | NA | 0 | NA | 0 | NA |
| 1 | 151035850 | 151037281 | 1  | NM_178352    | LCE1D    | 0 | NA | 0 | NA | 0 | NA | 0 | NA | 0 | NA |
| 1 | 151045731 | 151043934 | -1 | NM_178351    | LCE1C    | 0 | NA | 0 | NA | 0 | NA | 0 | NA | 0 | NA |
| 1 | 151051070 | 151052209 | 1  | NM_178349    | LCE1B    | 0 | NA | 0 | NA | 0 | NA | 0 | NA | 0 | NA |
| 1 | 151066572 | 151066905 | 1  | NM_178348    | LCE1A    | 0 | NA | 0 | NA | 0 | NA | 0 | NA | 0 | NA |
| 1 | 151117421 | 151124147 | 1  | NM_030663    | SMCP     | 0 | NA | 0 | NA | 0 | NA | 0 | NA | 0 | NA |
| 1 | 151147662 | 151150986 | 1  | NM_005547    | IVL      | 0 | NA | 0 | NA | 0 | NA | 0 | NA | 0 | NA |
| 1 | 151209751 | 151211693 | 1  | NM_173080    | SPRR4    | 0 | NA | 0 | NA | 0 | NA | 0 | NA | 0 | NA |
| 1 | 151223180 | 151224914 | 1  | NM_005987    | SPRR1A   | 0 | NA | 0 | NA | 0 | NA | 0 | NA | 0 | NA |
| 1 | 151240846 | 151242956 | 1  | NM_001097589 | SPRR3    | 0 | NA | 0 | NA | 0 | NA | 0 | NA | 0 | NA |
| 1 | 151240846 | 151242956 | 1  | NM_005416    | SPRR3    | 0 | NA | 0 | NA | 0 | NA | 0 | NA | 0 | NA |
| 1 | 151270302 | 151272000 | 1  | NM_003125    | SPRR1B   | 0 | NA | 0 | NA | 0 | NA | 0 | NA | 0 | NA |
| 1 | 151280218 | 151278824 | -1 | NM_006945    | SPRR2D   | 0 | NA | 0 | NA | 0 | NA | 0 | NA | 0 | NA |
| 1 | 151296612 | 151295219 | -1 | NM_005988    | SPRR2A   | 0 | NA | 0 | NA | 0 | NA | 0 | NA | 0 | NA |
| 1 | 151310708 | 151309340 | -1 | NM_001017418 | SPRR2B   | 0 | NA | 0 | NA | 0 | NA | 0 | NA | 0 | NA |
| 1 | 151333625 | 151332234 | -1 | NM_001024209 | SPRR2E   | 0 | NA | 0 | NA | 0 | NA | 0 | NA | 0 | NA |
| 1 | 151352613 | 151351236 | -1 | NM_001014450 | SPRR2F   | 0 | NA | 0 | NA | 0 | NA | 0 | NA | 0 | NA |
| 1 | 151389231 | 151386681 | -1 | NM_001014291 | SPRR2G   | 0 | NA | 0 | NA | 0 | NA | 0 | NA | 0 | NA |
| 1 | 151442542 | 151444220 | 1  | NM_001010857 | LELP1    | 0 | NA | 0 | NA | 0 | NA | 0 | NA | 0 | NA |
| 1 | 151498802 | 151501224 | 1  | NM_000427    | LOR      | 0 | NA | 0 | NA | 0 | NA | 0 | NA | 0 | NA |
| 1 | 151549818 | 151536961 | -1 | NM_052891    | PGLYRP3  | 0 | NA | 0 | NA | 0 | NA | 0 | NA | 0 | NA |
| 1 | 151587646 | 151569220 | -1 | NM_020393    | PGLYRP4  | 0 | NA | 0 | NA | 0 | NA | 0 | NA | 0 | NA |
| 1 | 151596953 | 151600127 | 1  | NM_002965    | S100A9   | 0 | NA | 0 | NA | 0 | NA | 0 | NA | 0 | NA |
| 1 | 151614699 | 151612807 | -1 | NM_005621    | S100A12  | 0 | NA | 0 | NA | 0 | NA | 0 | NA | 1 | 15 |
| 1 | 151630173 | 151629131 | -1 | NM_002964    | S100A8   | 0 | NA | 0 | NA | 0 | NA | 0 | NA | 0 | NA |
| 1 | 151655623 | 151662325 | 1  | NM_176823    | S100A7A  | 0 | NA | 0 | NA | 0 | NA | 0 | NA | 0 | NA |
| 1 | 151679127 | 151676094 | -1 | NM_001045479 | S100A7L2 | 0 | NA | 0 | NA | 0 | NA | 0 | NA | 0 | NA |
| 1 | 151699761 | 151696843 | -1 | NM_002963    | S100A7   | 0 | NA | 0 | NA | 0 | NA | 0 | NA | 0 | NA |
| 1 | 151775341 | 151773699 | -1 | NM_014624    | S100A6   | 0 | NA | 0 | NA | 0 | NA | 0 | NA | 0 | NA |
| 1 | 151780865 | 151776246 | -1 | NM_002962    | S100A5   | 0 | NA | 0 | NA | 0 | NA | 0 | NA | 0 | NA |
| 1 | 151784906 | 151782718 | -1 | NM_019554    | S100A4   | 0 | NA | 0 | NA | 0 | NA | 0 | NA | 0 | NA |
| 1 | 151784906 | 151782721 | -1 | NM_002961    | S100A4   | 0 | NA | 0 | NA | 0 | NA | 0 | NA | 0 | NA |
| 1 | 151788358 | 151786432 | -1 | NM_002960    | S100A3   | 0 | NA | 0 | NA | 0 | NA | 0 | NA | 0 | NA |
| 1 | 151804930 | 151800208 | -1 | NM_005978    | S100A2   | 1 | 15 | 0 | NA | 0 | NA | 0 | NA | 0 | NA |
| 1 | 151852138 | 151845990 | -1 | NM_080388    | S100A16  | 0 | NA | 0 | NA | 0 | NA | 0 | NA | 0 | NA |
| 1 | 151855414 | 151853355 | -1 | NM_020672    | S100A14  | 0 | NA | 0 | NA | 0 | NA | 0 | NA | 0 | NA |
| 1 | 151866148 | 151857899 | -1 | NM_001024213 | S100A13  | 1 | 13 | 0 | NA | 0 | NA | 0 | NA | 0 | NA |
| 1 | 151866368 | 151857899 | -1 | NM_001024212 | S100A13  | 1 | 13 | 0 | NA | 0 | NA | 0 | NA | 0 | NA |
| 1 | 151866741 | 151857899 | -1 | NM_001024211 | S100A13  | 1 | 13 | 0 | NA | 0 | NA | 0 | NA | 0 | NA |
| 1 | 151867339 | 151857899 | -1 | NM_005979    | S100A13  | 1 | 13 | 0 | NA | 0 | NA | 0 | NA | 0 | NA |
| 1 | 151867496 | 151871137 | 1  | NM_006271    | S100A1   | 1 | 13 | 0 | NA | 0 | NA | 0 | NA | 0 | NA |
| 1 | 151873148 | 151884603 | 1  | NM_015807    | C1orf77  | 1 | 15 | 0 | NA | 0 | NA | 0 | NA | 0 | NA |
| 1 | 151873192 | 151857899 | -1 | NM_001024210 | S100A13  | 1 | 15 | 0 | NA | 0 | NA | 0 | NA | 0 | NA |
| 1 | 151897823 | 151900930 | 1  | NM_012437    | SNAPIN   | 0 | NA | 0 | NA | 0 | NA | 0 | NA | 0 | NA |
| 1 | 151910103 | 151901137 | -1 | NM_004515    | ILF2     | 0 | NA | 0 | NA | 0 | NA | 0 | NA | 0 | NA |
| 1 | 151917787 | 151933092 | 1  | NM_000906    | NPR1     | 0 | NA | 0 | NA | 0 | NA | 0 | NA | 0 | NA |
| 1 | 151967190 | 152013179 | 1  | NM_023015    | INTS3    | 1 | 20 | 0 | NA | 0 | NA | 0 | NA | 0 | NA |
| 1 | 152014391 | 152019257 | 1  | NM_024330    | SLC27A3  | 0 | NA | 0 | NA | 0 | NA | 1 | 16 | 0 | NA |
| 1 | 152162075 | 152043826 | -1 | NM_020699    | GATAD2B  | 1 | 11 | 0 | NA | 0 | NA | 1 | 11 | 0 | NA |
| 1 | 152185778 | 152166600 | -1 | NM_014856    | DENND4B  | 0 | NA | 0 | NA | 0 | NA | 0 | NA | 0 | NA |
| 1 | 152197667 | 152186775 | -1 | NM_181715    | CRTC2    | 1 | 11 | 0 | NA | 0 | NA | 1 | 15 | 0 | NA |
| 1 | 152206812 | 152198211 | -1 | NM_014437    | SLC39A1  | 1 | 19 | 0 | NA | 0 | NA | 1 | 15 | 0 | NA |
| 1 | 152207020 | 152213456 | 1  | NM_130898    | CREB3L4  | 1 | 19 | 0 | NA | 0 | NA | 1 | 15 | 0 | NA |
| 1 | 152217075 | 152213368 | -1 | NM_006694    | JTB      | 0 | NA | 0 | NA | 0 | NA | 0 | NA | 0 | NA |
| 1 | 152225430 | 152220751 | -1 | NM_002870    | RAB13    | 0 | NA | 0 | NA | 0 | NA | 0 | NA | 0 | NA |
| 1 | 152229852 | 152231249 | 1  | NM_001030    | RPS27    | 0 | NA | 0 | NA | 0 | NA | 0 | NA | 0 | NA |
| 1 | 152394216 | 152231789 | -1 | NM_207308    | NUP210L  | 1 | 14 | 0 | NA | 0 | NA | 0 | NA | 0 | NA |
| 1 | 152422349 | 152394403 | -1 | NM_001043351 | TPM3     | 0 | NA | 0 | NA | 0 | NA | 0 | NA | 0 | NA |
| 1 | 152422349 | 152394403 | -1 | NM_001043352 | TPM3     | 0 | NA | 0 | NA | 0 | NA | 0 | NA | 0 | NA |
| 1 | 152422349 | 152394403 | -1 | NM_001043353 | TPM3     | 0 | NA | 0 | NA | 0 | NA | 0 | NA | 0 | NA |
| 1 | 152422349 | 152394403 | -1 | NM_153649    | TPM3     | 0 | NA | 0 | NA | 0 | NA | 0 | NA | 0 | NA |
| 1 | 152431233 | 152400913 | -1 | NM_152263    | TPM3     | 0 | NA | 0 | NA | 0 | NA | 0 | NA | 0 | NA |

|   |           |           |    |              |          |   |    |   |    |   |    |   |    |   |    |
|---|-----------|-----------|----|--------------|----------|---|----|---|----|---|----|---|----|---|----|
| 1 | 152445433 | 152438471 | -1 | NM_001010979 | C1orf189 | 0 | NA | 0 | NA | 0 | NA | 0 | NA | 0 | NA |
| 1 | 152459897 | 152445806 | -1 | NM_001098616 | C1orf43  | 0 | NA | 0 | NA | 0 | NA | 1 | 14 | 0 | NA |
| 1 | 152459897 | 152445806 | -1 | NM_015449    | C1orf43  | 0 | NA | 0 | NA | 0 | NA | 1 | 14 | 0 | NA |
| 1 | 152459897 | 152445806 | -1 | NM_138740    | C1orf43  | 0 | NA | 0 | NA | 0 | NA | 1 | 14 | 0 | NA |
| 1 | 152464181 | 152509953 | 1  | NM_014847    | UBAP2L   | 0 | NA | 0 | NA | 0 | NA | 1 | 14 | 0 | NA |
| 1 | 152511662 | 152514975 | 1  | NM_001018837 | HAX1     | 0 | NA | 0 | NA | 0 | NA | 0 | NA | 0 | NA |
| 1 | 152511662 | 152514975 | 1  | NM_006118    | HAX1     | 0 | NA | 0 | NA | 0 | NA | 0 | NA | 0 | NA |
| 1 | 152560215 | 152564425 | 1  | NM_080429    | AQP10    | 0 | NA | 0 | NA | 0 | NA | 0 | NA | 0 | NA |
| 1 | 152564659 | 152576947 | 1  | NM_001005855 | ATP8B2   | 0 | NA | 0 | NA | 0 | NA | 0 | NA | 0 | NA |
| 1 | 152566899 | 152590404 | 1  | NM_020452    | ATP8B2   | 0 | NA | 0 | NA | 0 | NA | 0 | NA | 0 | NA |
| 1 | 152644292 | 152706812 | 1  | NM_000565    | IL6R     | 1 | 15 | 0 | NA | 0 | NA | 0 | NA | 0 | NA |
| 1 | 152644292 | 152706812 | 1  | NM_181359    | IL6R     | 1 | 15 | 0 | NA | 0 | NA | 0 | NA | 0 | NA |
| 1 | 152741213 | 152718582 | -1 | NM_001010846 | SHE      | 0 | NA | 1 | 12 | 0 | NA | 1 | 13 | 0 | NA |
| 1 | 152741318 | 152787247 | 1  | NM_001098475 | TDRD10   | 0 | NA | 1 | 12 | 0 | NA | 1 | 13 | 0 | NA |
| 1 | 152741318 | 152787247 | 1  | NM_182499    | TDRD10   | 0 | NA | 1 | 12 | 0 | NA | 1 | 13 | 0 | NA |
| 1 | 152797744 | 152787674 | -1 | NM_017582    | UBE2Q1   | 1 | 20 | 0 | NA | 0 | NA | 0 | NA | 0 | NA |
| 1 | 152806880 | 152818977 | 1  | NM_000748    | CHRN2    | 1 | 14 | 0 | NA | 0 | NA | 0 | NA | 0 | NA |
| 1 | 152847306 | 152821157 | 1  | NM_001111    | ADAR     | 0 | NA | 0 | NA | 1 | 13 | 0 | NA | 0 | NA |
| 1 | 152847306 | 152821157 | -1 | NM_015840    | ADAR     | 0 | NA | 0 | NA | 1 | 13 | 0 | NA | 0 | NA |
| 1 | 152847306 | 152821157 | -1 | NM_015841    | ADAR     | 0 | NA | 0 | NA | 1 | 13 | 0 | NA | 0 | NA |
| 1 | 152867061 | 152821157 | -1 | NM_001025107 | ADAR     | 0 | NA | 0 | NA | 0 | NA | 0 | NA | 0 | NA |
| 1 | 153098962 | 152946536 | -1 | NM_170782    | KCNN3    | 0 | NA | 0 | NA | 0 | NA | 0 | NA | 0 | NA |
| 1 | 153109378 | 152946536 | -1 | NM_002249    | KCNN3    | 0 | NA | 0 | NA | 0 | NA | 0 | NA | 0 | NA |
| 1 | 153176108 | 153163831 | -1 | NM_006556    | PMVK     | 0 | NA | 0 | NA | 0 | NA | 0 | NA | 0 | NA |
| 1 | 153195191 | 153183179 | -1 | NM_020524    | PBXIP1   | 0 | NA | 0 | NA | 0 | NA | 1 | 14 | 0 | NA |
| 1 | 153200882 | 153196125 | -1 | NM_138300    | PYG02    | 1 | 11 | 0 | NA | 0 | NA | 1 | 14 | 0 | NA |
| 1 | 153209626 | 153202902 | -1 | NM_183001    | SHC1     | 1 | 11 | 0 | NA | 1 | 17 | 0 | NA | 0 | NA |
| 1 | 153213464 | 153201397 | -1 | NM_003029    | SHC1     | 1 | 11 | 0 | NA | 1 | 17 | 1 | 16 | 0 | NA |
| 1 | 153213837 | 153218346 | 1  | NM_001826    | CKS1B    | 1 | 11 | 0 | NA | 1 | 17 | 1 | 16 | 0 | NA |
| 1 | 153222440 | 153232211 | 1  | NM_025207    | FLAD1    | 0 | NA | 0 | NA | 0 | NA | 1 | 16 | 0 | NA |
| 1 | 153222440 | 153232211 | 1  | NM_201398    | FLAD1    | 0 | NA | 0 | NA | 0 | NA | 1 | 16 | 0 | NA |
| 1 | 153232685 | 153233415 | 1  | NM_018655    | LENEP    | 0 | NA | 0 | NA | 0 | NA | 0 | NA | 0 | NA |
| 1 | 153241735 | 153257623 | 1  | NM_015872    | ZBTB7B   | 0 | NA | 0 | NA | 0 | NA | 0 | NA | 0 | NA |
| 1 | 153272881 | 153257626 | -1 | NM_144622    | DCST2    | 0 | NA | 0 | NA | 0 | NA | 0 | NA | 0 | NA |
| 1 | 153272923 | 153290030 | 1  | NM_152494    | DCST1    | 0 | NA | 0 | NA | 0 | NA | 0 | NA | 0 | NA |
| 1 | 153290385 | 153301876 | 1  | NM_003815    | ADAM15   | 0 | NA | 0 | NA | 1 | 14 | 0 | NA | 0 | NA |
| 1 | 153290385 | 153301876 | 1  | NM_207191    | ADAM15   | 0 | NA | 0 | NA | 1 | 14 | 0 | NA | 0 | NA |
| 1 | 153290385 | 153301876 | 1  | NM_207194    | ADAM15   | 0 | NA | 0 | NA | 1 | 14 | 0 | NA | 0 | NA |
| 1 | 153290385 | 153301876 | 1  | NM_207195    | ADAM15   | 0 | NA | 0 | NA | 1 | 14 | 0 | NA | 0 | NA |
| 1 | 153290385 | 153301876 | 1  | NM_207196    | ADAM15   | 0 | NA | 0 | NA | 1 | 14 | 0 | NA | 0 | NA |
| 1 | 153290385 | 153301876 | 1  | NM_207197    | ADAM15   | 0 | NA | 0 | NA | 1 | 14 | 0 | NA | 0 | NA |
| 1 | 153302836 | 153308653 | 1  | NM_005227    | EFNA4    | 0 | NA | 0 | NA | 0 | NA | 0 | NA | 0 | NA |
| 1 | 153302836 | 153308653 | 1  | NM_182689    | EFNA4    | 0 | NA | 0 | NA | 0 | NA | 0 | NA | 0 | NA |
| 1 | 153302836 | 153308653 | 1  | NM_182690    | EFNA4    | 0 | NA | 0 | NA | 0 | NA | 0 | NA | 0 | NA |
| 1 | 153317971 | 153326638 | 1  | NM_004952    | EFNA3    | 1 | 13 | 1 | 12 | 0 | NA | 0 | NA | 0 | NA |
| 1 | 153366972 | 153374010 | 1  | NM_004428    | EFNA1    | 1 | 11 | 0 | NA | 0 | NA | 0 | NA | 0 | NA |
| 1 | 153366972 | 153374010 | 1  | NM_182685    | EFNA1    | 1 | 11 | 0 | NA | 0 | NA | 0 | NA | 0 | NA |
| 1 | 153374911 | 153377958 | 1  | NM_001122837 | RAG1AP1  | 1 | 11 | 0 | NA | 0 | NA | 0 | NA | 0 | NA |
| 1 | 153374911 | 153377958 | 1  | NM_001122839 | RAG1AP1  | 1 | 11 | 0 | NA | 0 | NA | 0 | NA | 0 | NA |
| 1 | 153374911 | 153377958 | 1  | NM_018845    | RAG1AP1  | 1 | 11 | 0 | NA | 0 | NA | 0 | NA | 0 | NA |
| 1 | 153379507 | 153378990 | -1 | NM_018973    | DPM3     | 0 | NA | 0 | NA | 0 | NA | 0 | NA | 0 | NA |
| 1 | 153379620 | 153378990 | -1 | NM_153741    | DPM3     | 0 | NA | 0 | NA | 0 | NA | 0 | NA | 0 | NA |
| 1 | 153412428 | 153408507 | -1 | NM_173852    | KRTCAP2  | 0 | NA | 0 | NA | 0 | NA | 1 | 17 | 0 | NA |
| 1 | 153412983 | 153424069 | 0  | NM_025058    | TRIM46   | 0 | NA | 0 | NA | 0 | NA | 1 | 17 | 0 | NA |
| 1 | 153429324 | 153424923 | -1 | NM_001018016 | MUC1     | 0 | NA | 0 | NA | 1 | 12 | 1 | 11 | 0 | NA |
| 1 | 153429324 | 153424923 | -1 | NM_001018017 | MUC1     | 0 | NA | 0 | NA | 1 | 12 | 1 | 11 | 0 | NA |
| 1 | 153429324 | 153424923 | -1 | NM_001044390 | MUC1     | 0 | NA | 0 | NA | 1 | 12 | 1 | 11 | 0 | NA |
| 1 | 153429324 | 153424923 | -1 | NM_001044391 | MUC1     | 0 | NA | 0 | NA | 1 | 12 | 1 | 11 | 0 | NA |
| 1 | 153429324 | 153424923 | -1 | NM_001044392 | MUC1     | 0 | NA | 0 | NA | 1 | 12 | 1 | 11 | 0 | NA |
| 1 | 153429324 | 153424923 | -1 | NM_001044393 | MUC1     | 0 | NA | 0 | NA | 1 | 12 | 1 | 11 | 0 | NA |
| 1 | 153429324 | 153424923 | -1 | NM_002456    | MUC1     | 0 | NA | 0 | NA | 1 | 12 | 1 | 11 | 0 | NA |
| 1 | 153444314 | 153432002 | -1 | NM_007112    | THBS3    | 0 | NA | 0 | NA | 0 | NA | 1 | 12 | 0 | NA |
| 1 | 153445113 | 153450238 | 1  | NM_002455    | MTX1     | 0 | NA | 0 | NA | 0 | NA | 1 | 12 | 0 | NA |
| 1 | 153445113 | 153450248 | 1  | NM_198883    | MTX1     | 0 | NA | 0 | NA | 0 | NA | 1 | 12 | 0 | NA |
| 1 | 153477677 | 153470866 | -1 | NM_000157    | GBA      | 1 | 24 | 0 | NA | 1 | 16 | 0 | NA | 0 | NA |

|   |           |           |    |              |          |   |    |   |    |   |    |   |    |   |    |
|---|-----------|-----------|----|--------------|----------|---|----|---|----|---|----|---|----|---|----|
| 1 | 153481112 | 153470866 | -1 | NM_001005741 | GBA      | 1 | 24 | 0 | NA | 1 | 16 | 0 | NA | 0 | NA |
| 1 | 153481112 | 153470866 | -1 | NM_001005742 | GBA      | 1 | 24 | 0 | NA | 1 | 16 | 0 | NA | 0 | NA |
| 1 | 153481112 | 153470866 | -1 | NM_001005749 | GBA      | 1 | 24 | 0 | NA | 1 | 16 | 0 | NA | 0 | NA |
| 1 | 153481112 | 153470866 | -1 | NM_001005750 | GBA      | 1 | 24 | 0 | NA | 1 | 16 | 0 | NA | 0 | NA |
| 1 | 153491898 | 153483619 | -1 | NM_006589    | C1orf2   | 0 | NA | 0 | NA | 0 | NA | 0 | NA | 0 | NA |
| 1 | 153491898 | 153483619 | -1 | NM_198264    | C1orf2   | 0 | NA | 0 | NA | 0 | NA | 0 | NA | 0 | NA |
| 1 | 153498819 | 153492393 | -1 | NM_005698    | SCAMP3   | 0 | NA | 0 | NA | 0 | NA | 0 | NA | 0 | NA |
| 1 | 153498819 | 153492395 | -1 | NM_052837    | SCAMP3   | 0 | NA | 0 | NA | 0 | NA | 0 | NA | 0 | NA |
| 1 | 153509905 | 153499282 | -1 | NM_003993    | CLK2     | 0 | NA | 0 | NA | 1 | 12 | 0 | NA | 0 | NA |
| 1 | 153513997 | 153526262 | 1  | NM_020897    | HCN3     | 0 | NA | 0 | NA | 1 | 12 | 0 | NA | 0 | NA |
| 1 | 153537370 | 153526253 | -1 | NM_181871    | PKLR     | 0 | NA | 1 | 12 | 0 | NA | 0 | NA | 0 | NA |
| 1 | 153537835 | 153526253 | -1 | NM_000298    | PKLR     | 0 | NA | 1 | 12 | 0 | NA | 0 | NA | 0 | NA |
| 1 | 153946200 | 153557080 | 1  | NM_002004    | FDPS     | 0 | NA | 0 | NA | 0 | NA | 0 | NA | 0 | NA |
| 1 | 153557263 | 153567533 | 1  | NM_001105203 | RUSC1    | 1 | 11 | 0 | NA | 0 | NA | 0 | NA | 0 | NA |
| 1 | 153557263 | 153567533 | 1  | NM_001105204 | RUSC1    | 1 | 11 | 0 | NA | 0 | NA | 0 | NA | 0 | NA |
| 1 | 153560351 | 153567533 | 1  | NM_001105205 | RUSC1    | 1 | 11 | 0 | NA | 0 | NA | 0 | NA | 0 | NA |
| 1 | 153560562 | 15356874  | -1 | NM_001039517 | C1orf104 | 1 | 11 | 0 | NA | 0 | NA | 0 | NA | 0 | NA |
| 1 | 153560841 | 153567533 | 1  | NM_014328    | RUSC1    | 1 | 11 | 0 | NA | 0 | NA | 0 | NA | 0 | NA |
| 1 | 153798948 | 153571675 | -1 | NM_018489    | ASH1L    | 0 | NA | 0 | NA | 0 | NA | 0 | NA | 0 | NA |
| 1 | 153846630 | 153851382 | 1  | NM_018116    | MSTO1    | 0 | NA | 0 | NA | 0 | NA | 0 | NA | 0 | NA |
| 1 | 153925189 | 153895856 | -1 | NM_139119    | YY1AP1   | 0 | NA | 0 | NA | 0 | NA | 0 | NA | 0 | NA |
| 1 | 153925415 | 153895869 | -1 | NM_139118    | YY1AP1   | 0 | NA | 0 | NA | 0 | NA | 0 | NA | 0 | NA |
| 1 | 153925497 | 153974941 | 1  | NM_033657    | DAP3     | 0 | NA | 0 | NA | 0 | NA | 0 | NA | 0 | NA |
| 1 | 153925497 | 153974943 | 1  | NM_004632    | DAP3     | 0 | NA | 0 | NA | 0 | NA | 0 | NA | 0 | NA |
| 1 | 154093596 | 153986133 | -1 | NM_001037533 | GON4L    | 0 | NA | 0 | NA | 0 | NA | 0 | NA | 0 | NA |
| 1 | 154093596 | 154001199 | -1 | NM_032292    | GON4L    | 0 | NA | 0 | NA | 0 | NA | 0 | NA | 0 | NA |
| 1 | 154095923 | 154121463 | 1  | NM_152280    | SYT11    | 0 | NA | 0 | NA | 0 | NA | 0 | NA | 0 | NA |
| 1 | 154147801 | 154134224 | -1 | NM_006912    | RIT1     | 1 | 14 | 0 | NA | 0 | NA | 0 | NA | 0 | NA |
| 1 | 154170812 | 154149459 | -1 | NM_014949    | KIAA0907 | 0 | NA | 0 | NA | 0 | NA | 0 | NA | 0 | NA |
| 1 | 154178103 | 154179249 | 1  | NM_181885    | RXFP4    | 0 | NA | 0 | NA | 0 | NA | 0 | NA | 0 | NA |
| 1 | 154214575 | 154183268 | -1 | NM_004723    | ARHGEF2  | 1 | 17 | 0 | NA | 0 | NA | 0 | NA | 0 | NA |
| 1 | 154257382 | 154245462 | -1 | NM_003145    | SSR2     | 0 | NA | 0 | NA | 0 | NA | 0 | NA | 0 | NA |
| 1 | 154290140 | 154271715 | -1 | NM_020131    | UBQLN4   | 0 | NA | 0 | NA | 0 | NA | 0 | NA | 0 | NA |
| 1 | 154291228 | 154294923 | 1  | NM_014017    | MAPBP1P  | 0 | NA | 0 | NA | 0 | NA | 0 | NA | 0 | NA |
| 1 | 154297589 | 154306919 | 1  | NM_020387    | RAB25    | 0 | NA | 0 | NA | 0 | NA | 0 | NA | 0 | NA |
| 1 | 154318413 | 154308427 | -1 | NM_001093725 | MEX3A    | 0 | NA | 0 | NA | 0 | NA | 0 | NA | 0 | NA |
| 1 | 154351084 | 154374281 | 1  | NM_005572    | LMNA     | 1 | 11 | 1 | 15 | 1 | 12 | 1 | 16 | 0 | NA |
| 1 | 154351084 | 154376502 | 1  | NM_170707    | LMNA     | 1 | 11 | 1 | 15 | 1 | 12 | 1 | 16 | 0 | NA |
| 1 | 154351084 | 154376502 | 1  | NM_170708    | LMNA     | 1 | 11 | 1 | 15 | 1 | 12 | 1 | 16 | 0 | NA |
| 1 | 154390011 | 154414159 | 1  | NM_022367    | SEMA4A   | 1 | 17 | 0 | NA | 1 | 12 | 0 | NA | 0 | NA |
| 1 | 154430522 | 154449211 | 1  | NM_014655    | SLC25A44 | 1 | 12 | 0 | NA | 1 | 18 | 0 | NA | 0 | NA |
| 1 | 154449407 | 154476457 | 1  | NM_007221    | PMF1     | 1 | 17 | 0 | NA | 0 | NA | 1 | 29 | 0 | NA |
| 1 | 154478574 | 154479736 | 1  | NM_199173    | BGLAP    | 0 | NA | 0 | NA | 1 | 14 | 0 | NA | 0 | NA |
| 1 | 154484416 | 154479833 | -1 | NM_198406    | PAQR6    | 0 | NA | 0 | NA | 1 | 14 | 0 | NA | 0 | NA |
| 1 | 154484467 | 154479830 | -1 | NM_024897    | PAQR6    | 0 | NA | 0 | NA | 1 | 14 | 0 | NA | 0 | NA |
| 1 | 154519244 | 154485638 | -1 | NM_015327    | SMG5     | 1 | 15 | 0 | NA | 0 | NA | 0 | NA | 0 | NA |
| 1 | 154519362 | 154528858 | 1  | NM_032323    | TMEM79   | 1 | 15 | 0 | NA | 0 | NA | 0 | NA | 0 | NA |
| 1 | 154532073 | 154529107 | -1 | NM_144580    | C1orf85  | 1 | 11 | 0 | NA | 0 | NA | 0 | NA | 0 | NA |
| 1 | 154535714 | 154535038 | -1 | NM_001004319 | VHLL     | 1 | 11 | 0 | NA | 0 | NA | 0 | NA | 0 | NA |
| 1 | 154573728 | 154583409 | 1  | NM_144627    | C1orf182 | 0 | NA | 0 | NA | 0 | NA | 0 | NA | 0 | NA |
| 1 | 154574819 | 154545375 | -1 | NM_001008800 | CCT3     | 0 | NA | 0 | NA | 0 | NA | 0 | NA | 0 | NA |
| 1 | 154574819 | 154545375 | -1 | NM_001008883 | CCT3     | 0 | NA | 0 | NA | 0 | NA | 0 | NA | 0 | NA |
| 1 | 154574819 | 154545375 | -1 | NM_005998    | CCT3     | 0 | NA | 0 | NA | 0 | NA | 0 | NA | 0 | NA |
| 1 | 154605626 | 154621635 | 1  | NM_020407    | RHBG     | 0 | NA | 0 | NA | 0 | NA | 1 | 11 | 0 | NA |
| 1 | 154665808 | 154640678 | -1 | NM_006365    | C1orf61  | 0 | NA | 1 | 13 | 0 | NA | 0 | NA | 0 | NA |
| 1 | 154737153 | 154700142 | -1 | NM_005920    | MEF2D    | 1 | 27 | 0 | NA | 0 | NA | 1 | 14 | 0 | NA |
| 1 | 154809020 | 154761820 | -1 | NM_178229    | IQGAP3   | 0 | NA | 0 | NA | 0 | NA | 0 | NA | 0 | NA |
| 1 | 154818645 | 154823526 | 1  | NM_001105669 | TTC24    | 0 | NA | 0 | NA | 0 | NA | 0 | NA | 0 | NA |
| 1 | 154828181 | 154830715 | 1  | NM_144772    | APOA1BP  | 1 | 12 | 0 | NA | 0 | NA | 0 | NA | 0 | NA |
| 1 | 154837894 | 154830902 | -1 | NM_015590    | GPATCH4  | 1 | 12 | 0 | NA | 0 | NA | 0 | NA | 0 | NA |
| 1 | 154837894 | 154830902 | -1 | NM_182679    | GPATCH4  | 1 | 12 | 0 | NA | 0 | NA | 0 | NA | 0 | NA |
| 1 | 154855709 | 154862141 | 1  | NM_021817    | HAPLN2   | 0 | NA | 0 | NA | 0 | NA | 0 | NA | 0 | NA |
| 1 | 154878363 | 154889888 | 1  | NM_198427    | BCAN     | 0 | NA | 0 | NA | 0 | NA | 0 | NA | 0 | NA |
| 1 | 154878363 | 154895944 | 1  | NM_021948    | BCAN     | 0 | NA | 0 | NA | 0 | NA | 0 | NA | 0 | NA |
| 1 | 154913813 | 154905179 | -1 | NM_006617    | NES      | 1 | 13 | 0 | NA | 0 | NA | 0 | NA | 0 | NA |

|   |           |           |    |              |          |   |    |   |    |   |    |   |    |   |    |
|---|-----------|-----------|----|--------------|----------|---|----|---|----|---|----|---|----|---|----|
| 1 | 154941999 | 154936029 | -1 | NM_001878    | CRABP2   | 1 | 11 | 0 | NA | 0 | NA | 0 | NA | 0 | NA |
| 1 | 154964329 | 154959036 | -1 | NM_030980    | ISG20L2  | 0 | NA | 0 | NA | 0 | NA | 0 | NA | 0 | NA |
| 1 | 154964901 | 154973365 | 1  | NM_015997    | C1orf66  | 0 | NA | 0 | NA | 0 | NA | 0 | NA | 0 | NA |
| 1 | 154977547 | 154973717 | -1 | NM_024540    | MRPL24   | 0 | NA | 0 | NA | 0 | NA | 0 | NA | 0 | NA |
| 1 | 154977547 | 154973717 | -1 | NM_145729    | MRPL24   | 0 | NA | 0 | NA | 0 | NA | 0 | NA | 0 | NA |
| 1 | 154988167 | 154978522 | -1 | NM_004494    | HDFG     | 0 | NA | 0 | NA | 0 | NA | 0 | NA | 0 | NA |
| 1 | 154988648 | 154978522 | -1 | NM_001126051 | HDFG     | 0 | NA | 0 | NA | 0 | NA | 0 | NA | 0 | NA |
| 1 | 154988864 | 154978522 | -1 | NM_001126050 | HDFG     | 0 | NA | 0 | NA | 0 | NA | 0 | NA | 0 | NA |
| 1 | 155003897 | 155037233 | 1  | NM_005973    | PRCC     | 1 | 15 | 0 | NA | 1 | 21 | 0 | NA | 0 | NA |
| 1 | 155003897 | 155037233 | 1  | NM_199416    | PRCC     | 1 | 15 | 0 | NA | 1 | 21 | 0 | NA | 0 | NA |
| 1 | 155052165 | 155118266 | 1  | NM_001007792 | NTRK1    | 0 | NA | 0 | NA | 0 | NA | 0 | NA | 0 | NA |
| 1 | 155053226 | 155042658 | -1 | NM_003975    | SH2D2A   | 0 | NA | 0 | NA | 0 | NA | 0 | NA | 0 | NA |
| 1 | 155095290 | 155077288 | -1 | NM_014215    | INSRR    | 0 | NA | 0 | NA | 0 | NA | 0 | NA | 0 | NA |
| 1 | 155097294 | 155118266 | 1  | NM_001012331 | NTRK1    | 0 | NA | 0 | NA | 0 | NA | 0 | NA | 0 | NA |
| 1 | 155097294 | 155118266 | 1  | NM_002529    | NTRK1    | 0 | NA | 0 | NA | 0 | NA | 0 | NA | 0 | NA |
| 1 | 155130146 | 155152850 | 1  | NM_001080471 | PEAR1    | 0 | NA | 0 | NA | 0 | NA | 0 | NA | 0 | NA |
| 1 | 155157047 | 155169504 | 1  | NM_144702    | C1orf92  | 0 | NA | 0 | NA | 0 | NA | 0 | NA | 0 | NA |
| 1 | 155281786 | 155171255 | -1 | NM_014784    | ARHGEF11 | 0 | NA | 0 | NA | 0 | NA | 0 | NA | 0 | NA |
| 1 | 155281786 | 155171255 | -1 | NM_198236    | ARHGEF11 | 0 | NA | 0 | NA | 0 | NA | 0 | NA | 0 | NA |
| 1 | 155336224 | 155328459 | -1 | NM_001004341 | ETV3L    | 0 | NA | 0 | NA | 1 | 13 | 0 | NA | 0 | NA |
| 1 | 155374801 | 155369599 | -1 | NM_005240    | ETV3     | 0 | NA | 0 | NA | 0 | NA | 0 | NA | 0 | NA |
| 1 | 155788934 | 155749790 | -1 | NM_031281    | FCRL5    | 0 | NA | 0 | NA | 0 | NA | 0 | NA | 0 | NA |
| 1 | 155834494 | 155810162 | -1 | NM_031282    | FCRL4    | 0 | NA | 0 | NA | 0 | NA | 0 | NA | 0 | NA |
| 1 | 155937271 | 155914601 | -1 | NM_052939    | FCRL3    | 0 | NA | 0 | NA | 0 | NA | 0 | NA | 0 | NA |
| 1 | 156004339 | 155982149 | -1 | NM_138738    | FCRL2    | 0 | NA | 0 | NA | 0 | NA | 0 | NA | 0 | NA |
| 1 | 156013533 | 155982149 | -1 | NM_030764    | FCRL2    | 0 | NA | 0 | NA | 0 | NA | 0 | NA | 0 | NA |
| 1 | 156056515 | 156031276 | -1 | NM_052938    | FCRL1    | 0 | NA | 0 | NA | 0 | NA | 0 | NA | 0 | NA |
| 1 | 156078258 | 156067327 | -1 | NM_005894    | CD5L     | 0 | NA | 0 | NA | 0 | NA | 0 | NA | 0 | NA |
| 1 | 156229686 | 156332468 | 1  | NM_018240    | KIRREL   | 1 | 11 | 0 | NA | 0 | NA | 0 | NA | 0 | NA |
| 1 | 156416360 | 156422840 | 1  | NM_001766    | CD1D     | 0 | NA | 1 | 12 | 0 | NA | 0 | NA | 1 | 14 |
| 1 | 156490550 | 156494682 | 1  | NM_001763    | CD1A     | 0 | NA | 0 | NA | 0 | NA | 0 | NA | 0 | NA |
| 1 | 156526186 | 156531188 | 1  | NM_001765    | CD1C     | 0 | NA | 0 | NA | 0 | NA | 0 | NA | 0 | NA |
| 1 | 156567945 | 156564363 | -1 | NM_001764    | CD1B     | 0 | NA | 0 | NA | 0 | NA | 0 | NA | 0 | NA |
| 1 | 156590163 | 156593967 | 1  | NM_001042583 | CD1E     | 0 | NA | 0 | NA | 0 | NA | 0 | NA | 0 | NA |
| 1 | 156590163 | 156593967 | 1  | NM_001042584 | CD1E     | 0 | NA | 0 | NA | 0 | NA | 0 | NA | 0 | NA |
| 1 | 156590163 | 156593967 | 1  | NM_001042585 | CD1E     | 0 | NA | 0 | NA | 0 | NA | 0 | NA | 0 | NA |
| 1 | 156590163 | 156593967 | 1  | NM_001042586 | CD1E     | 0 | NA | 0 | NA | 0 | NA | 0 | NA | 0 | NA |
| 1 | 156590163 | 156593967 | 1  | NM_001042587 | CD1E     | 0 | NA | 0 | NA | 0 | NA | 0 | NA | 0 | NA |
| 1 | 156590163 | 156593967 | 1  | NM_030893    | CD1E     | 0 | NA | 0 | NA | 0 | NA | 0 | NA | 0 | NA |
| 1 | 156635880 | 156634935 | -1 | NM_001004475 | OR10T2   | 0 | NA | 0 | NA | 0 | NA | 0 | NA | 0 | NA |
| 1 | 156657280 | 156656341 | -1 | NM_001004476 | OR10K2   | 0 | NA | 0 | NA | 0 | NA | 0 | NA | 0 | NA |
| 1 | 156701975 | 156702917 | 1  | NM_001004473 | OR10K1   | 0 | NA | 0 | NA | 0 | NA | 0 | NA | 0 | NA |
| 1 | 156716291 | 156717299 | 1  | NM_001004472 | OR10R2   | 0 | NA | 0 | NA | 0 | NA | 0 | NA | 0 | NA |
| 1 | 156784519 | 156783541 | -1 | NM_001005189 | OR6Y1    | 0 | NA | 0 | NA | 0 | NA | 0 | NA | 0 | NA |
| 1 | 156816313 | 156815332 | -1 | NM_001004477 | OR10X1   | 0 | NA | 0 | NA | 0 | NA | 0 | NA | 0 | NA |
| 1 | 156842852 | 156843794 | 1  | NM_001004478 | OR10Z1   | 0 | NA | 0 | NA | 0 | NA | 0 | NA | 0 | NA |
| 1 | 156923130 | 156847119 | -1 | NM_003126    | SPTA1    | 0 | NA | 0 | NA | 0 | NA | 0 | NA | 0 | NA |
| 1 | 156937066 | 156936091 | -1 | NM_001005279 | OR6K2    | 0 | NA | 0 | NA | 0 | NA | 0 | NA | 0 | NA |
| 1 | 156954577 | 156953581 | -1 | NM_001005327 | OR6K3    | 0 | NA | 0 | NA | 0 | NA | 0 | NA | 0 | NA |
| 1 | 156991229 | 156992261 | 1  | NM_001005184 | OR6K6    | 0 | NA | 0 | NA | 0 | NA | 0 | NA | 0 | NA |
| 1 | 157003096 | 157002157 | -1 | NM_001005185 | OR6N1    | 0 | NA | 0 | NA | 0 | NA | 0 | NA | 0 | NA |
| 1 | 157014049 | 157013095 | -1 | NM_001005278 | OR6N2    | 0 | NA | 0 | NA | 0 | NA | 0 | NA | 0 | NA |
| 1 | 157067791 | 157085894 | 1  | NM_002432    | MNDA     | 0 | NA | 0 | NA | 0 | NA | 0 | NA | 0 | NA |
| 1 | 157167965 | 157213467 | 1  | NM_152501    | PYHIN1   | 0 | NA | 0 | NA | 0 | NA | 0 | NA | 0 | NA |
| 1 | 157167965 | 157213467 | 1  | NM_198928    | PYHIN1   | 0 | NA | 0 | NA | 0 | NA | 0 | NA | 0 | NA |
| 1 | 157167965 | 157213467 | 1  | NM_198929    | PYHIN1   | 0 | NA | 0 | NA | 0 | NA | 0 | NA | 0 | NA |
| 1 | 157167965 | 157213467 | 1  | NM_198930    | PYHIN1   | 0 | NA | 0 | NA | 0 | NA | 0 | NA | 0 | NA |
| 1 | 157246305 | 157291569 | 1  | NM_005531    | IFI16    | 0 | NA | 0 | NA | 1 | 22 | 1 | 13 | 0 | NA |
| 1 | 157313271 | 157298898 | -1 | NM_004833    | AIM2     | 1 | 14 | 0 | NA | 0 | NA | 0 | NA | 0 | NA |
| 1 | 157408000 | 157439556 | 1  | NM_021189    | CADM3    | 0 | NA | 0 | NA | 0 | NA | 0 | NA | 0 | NA |
| 1 | 157408037 | 157439556 | 1  | NM_001127173 | CADM3    | 0 | NA | 0 | NA | 0 | NA | 0 | NA | 0 | NA |
| 1 | 157441133 | 157442914 | 1  | NM_002036    | DARC     | 0 | NA | 0 | NA | 0 | NA | 0 | NA | 0 | NA |
| 1 | 157441824 | 157442914 | 1  | NM_001122951 | DARC     | 0 | NA | 0 | NA | 0 | NA | 0 | NA | 0 | NA |
| 1 | 157526127 | 157544638 | 1  | NM_002001    | FCER1A   | 0 | NA | 0 | NA | 0 | NA | 0 | NA | 0 | NA |
| 1 | 157551073 | 157550083 | -1 | NM_001004467 | OR10J3   | 0 | NA | 0 | NA | 0 | NA | 0 | NA | 0 | NA |

|   |           |           |    |              |              |   |    |   |    |   |    |   |    |   |    |
|---|-----------|-----------|----|--------------|--------------|---|----|---|----|---|----|---|----|---|----|
| 1 | 157676172 | 157677135 | 1  | NM_012351    | OR10J1       | 0 | NA | 0 | NA | 0 | NA | 0 | NA | 0 | NA |
| 1 | 157772421 | 157771491 | -1 | NM_001004469 | OR10J5       | 0 | NA | 0 | NA | 0 | NA | 0 | NA | 0 | NA |
| 1 | 157824239 | 157825285 | 1  | NM_001639    | APCS         | 0 | NA | 0 | NA | 0 | NA | 0 | NA | 0 | NA |
| 1 | 157951003 | 157948702 | -1 | NM_000567    | CRP          | 0 | NA | 0 | NA | 0 | NA | 0 | NA | 0 | NA |
| 1 | 158017382 | 158018957 | 1  | NM_017823    | DUSP23       | 1 | 17 | 0 | NA | 0 | NA | 0 | NA | 0 | NA |
| 1 | 158038796 | 158052671 | 1  | NM_001004310 | FCRL6        | 0 | NA | 0 | NA | 1 | 15 | 0 | NA | 0 | NA |
| 1 | 158063102 | 158073906 | 1  | NM_020125    | SLAMF8       | 0 | NA | 0 | NA | 0 | NA | 0 | NA | 0 | NA |
| 1 | 158099071 | 158090729 | -1 | NM_001013661 | VSI8         | 0 | NA | 0 | NA | 0 | NA | 0 | NA | 0 | NA |
| 1 | 158136530 | 158108777 | -1 | NM_012337    | CCDC19       | 0 | NA | 0 | NA | 1 | 26 | 0 | NA | 0 | NA |
| 1 | 158161908 | 158154526 | -1 | NM_003564    | TAGLN2       | 0 | NA | 0 | NA | 0 | NA | 1 | 15 | 0 | NA |
| 1 | 158182010 | 158163454 | -1 | NM_020789    | IGSF9        | 0 | NA | 0 | NA | 0 | NA | 0 | NA | 0 | NA |
| 1 | 158190634 | 158187907 | -1 | NM_033438    | SLAMF9       | 0 | NA | 0 | NA | 0 | NA | 0 | NA | 0 | NA |
| 1 | 158268407 | 158264085 | -1 | NM_145167    | PIGM         | 1 | 18 | 0 | NA | 0 | NA | 0 | NA | 0 | NA |
| 1 | 158306585 | 158274656 | -1 | NM_002241    | KCNJ10       | 0 | NA | 0 | NA | 0 | NA | 0 | NA | 0 | NA |
| 1 | 158317983 | 158325836 | 1  | NM_004983    | KCNJ9        | 0 | NA | 0 | NA | 0 | NA | 0 | NA | 0 | NA |
| 1 | 158335032 | 158327753 | -1 | NM_052868    | IGSF8        | 0 | NA | 0 | NA | 0 | NA | 0 | NA | 0 | NA |
| 1 | 158352171 | 158379998 | 1  | NM_000702    | ATP1A2       | 0 | NA | 0 | NA | 0 | NA | 0 | NA | 0 | NA |
| 1 | 158387975 | 158423391 | 1  | NM_144699    | ATP1A4       | 0 | NA | 1 | 16 | 0 | NA | 0 | NA | 0 | NA |
| 1 | 158413824 | 158423391 | 1  | NM_001001734 | ATP1A4       | 1 | 13 | 0 | NA | 0 | NA | 0 | NA | 0 | NA |
| 1 | 158426988 | 158438300 | 1  | NM_001231    | CASQ1        | 0 | NA | 0 | NA | 0 | NA | 0 | NA | 0 | NA |
| 1 | 158441750 | 158451786 | 1  | NM_003768    | PEA15        | 0 | NA | 0 | NA | 0 | NA | 0 | NA | 0 | NA |
| 1 | 158498603 | 158452128 | -1 | NM_015726    | WDR42A       | 0 | NA | 0 | NA | 0 | NA | 1 | 12 | 0 | NA |
| 1 | 158521555 | 158513225 | -1 | NM_002857    | PEX19        | 0 | NA | 0 | NA | 0 | NA | 0 | NA | 0 | NA |
| 1 | 158579686 | 158595366 | 1  | NM_015331    | NCSTN        | 0 | NA | 0 | NA | 0 | NA | 0 | NA | 0 | NA |
| 1 | 158579978 | 158525000 | -1 | NM_001098398 | COPA         | 0 | NA | 0 | NA | 0 | NA | 0 | NA | 0 | NA |
| 1 | 158579978 | 158525000 | -1 | NM_004371    | COPA         | 0 | NA | 0 | NA | 0 | NA | 0 | NA | 0 | NA |
| 1 | 158603484 | 158609262 | 1  | NM_005598    | NHLH1        | 0 | NA | 0 | NA | 0 | NA | 0 | NA | 0 | NA |
| 1 | 158636990 | 158665088 | 1  | NM_020335    | VANGL2       | 0 | NA | 0 | NA | 0 | NA | 0 | NA | 0 | NA |
| 1 | 158759666 | 158721443 | -1 | NM_052931    | SLAMF6       | 0 | NA | 0 | NA | 0 | NA | 0 | NA | 0 | NA |
| 1 | 158815875 | 158782410 | -1 | NM_003874    | CD84         | 0 | NA | 0 | NA | 0 | NA | 0 | NA | 0 | NA |
| 1 | 158883705 | 158846514 | -1 | NM_003037    | SLAMF1       | 0 | NA | 0 | NA | 0 | NA | 0 | NA | 0 | NA |
| 1 | 158948209 | 158915159 | -1 | NM_001778    | CD48         | 0 | NA | 0 | NA | 0 | NA | 0 | NA | 0 | NA |
| 1 | 158975700 | 158991225 | 1  | NM_021181    | SLAMF7       | 0 | NA | 0 | NA | 0 | NA | 0 | NA | 0 | NA |
| 1 | 159032551 | 159039107 | 1  | NM_001033667 | LY9          | 0 | NA | 0 | NA | 0 | NA | 0 | NA | 0 | NA |
| 1 | 159032551 | 159064669 | 1  | NM_002348    | LY9          | 0 | NA | 0 | NA | 0 | NA | 0 | NA | 0 | NA |
| 1 | 159099269 | 159066573 | -1 | NM_016382    | CD244        | 0 | NA | 0 | NA | 0 | NA | 0 | NA | 0 | NA |
| 1 | 159121584 | 159112953 | -1 | NM_017625    | ITLN1        | 0 | NA | 0 | NA | 0 | NA | 0 | NA | 0 | NA |
| 1 | 159191213 | 159181439 | -1 | NM_080878    | ITLN2        | 0 | NA | 0 | NA | 1 | 12 | 0 | NA | 0 | NA |
| 1 | 159257757 | 159231624 | -1 | NM_016946    | F11R         | 0 | NA | 1 | 17 | 0 | NA | 0 | NA | 0 | NA |
| 1 | 159275398 | 159274044 | -1 | NM_00113205  | LOC100134860 | 0 | NA | 0 | NA | 1 | 21 | 1 | 12 | 0 | NA |
| 1 | 159275398 | 159274044 | -1 | NM_00113206  | LOC100134860 | 0 | NA | 0 | NA | 1 | 21 | 1 | 12 | 0 | NA |
| 1 | 159275398 | 159274044 | -1 | NM_00113207  | LOC100134860 | 0 | NA | 0 | NA | 1 | 21 | 1 | 12 | 0 | NA |
| 1 | 159275404 | 159274044 | -1 | NM_001126312 | LOC100131187 | 0 | NA | 0 | NA | 1 | 21 | 1 | 12 | 0 | NA |
| 1 | 159282381 | 159275664 | -1 | NM_007122    | USF1         | 0 | NA | 0 | NA | 1 | 21 | 1 | 12 | 1 | 12 |
| 1 | 159282381 | 159275664 | -1 | NM_207005    | USF1         | 0 | NA | 0 | NA | 1 | 21 | 1 | 12 | 1 | 12 |
| 1 | 159306384 | 159283355 | -1 | NM_001025598 | ARHGAP30     | 0 | NA | 0 | NA | 0 | NA | 0 | NA | 0 | NA |
| 1 | 159306384 | 159283355 | -1 | NM_181720    | ARHGAP30     | 0 | NA | 0 | NA | 0 | NA | 0 | NA | 0 | NA |
| 1 | 159325966 | 159308119 | -1 | NM_030916    | PVRL4        | 0 | NA | 0 | NA | 0 | NA | 0 | NA | 0 | NA |
| 1 | 159334777 | 159336760 | 1  | NM_001007255 | KLHDC9       | 0 | NA | 0 | NA | 0 | NA | 0 | NA | 0 | NA |
| 1 | 159334777 | 159336760 | 1  | NM_001007256 | KLHDC9       | 0 | NA | 0 | NA | 0 | NA | 0 | NA | 0 | NA |
| 1 | 159334777 | 159336760 | 1  | NM_152366    | KLHDC9       | 0 | NA | 0 | NA | 0 | NA | 0 | NA | 0 | NA |
| 1 | 159354490 | 159336969 | -1 | NM_012394    | PFDN2        | 0 | NA | 0 | NA | 0 | NA | 0 | NA | 0 | NA |
| 1 | 159354514 | 159357481 | 1  | NM_005600    | NIT1         | 0 | NA | 0 | NA | 0 | NA | 0 | NA | 0 | NA |
| 1 | 159368880 | 159357391 | -1 | NM_001039712 | DEDD         | 0 | NA | 0 | NA | 1 | 14 | 0 | NA | 0 | NA |
| 1 | 159369102 | 159357391 | -1 | NM_001039711 | DEDD         | 0 | NA | 0 | NA | 1 | 14 | 0 | NA | 0 | NA |
| 1 | 159369102 | 159357391 | -1 | NM_032998    | DEDD         | 0 | NA | 0 | NA | 1 | 14 | 0 | NA | 0 | NA |
| 1 | 159390157 | 159395270 | 1  | NM_016406    | UFC1         | 0 | NA | 0 | NA | 1 | 17 | 1 | 11 | 0 | NA |
| 1 | 159395877 | 159402140 | 1  | NM_001014443 | USP21        | 0 | NA | 0 | NA | 1 | 17 | 1 | 11 | 0 | NA |
| 1 | 159395877 | 159402140 | 1  | NM_012475    | USP21        | 0 | NA | 0 | NA | 1 | 17 | 1 | 11 | 0 | NA |
| 1 | 159402804 | 159407634 | 1  | NM_000309    | PPOX         | 0 | NA | 0 | NA | 0 | NA | 0 | NA | 0 | NA |
| 1 | 159402804 | 159407634 | 1  | NM_001122764 | PPOX         | 0 | NA | 0 | NA | 0 | NA | 0 | NA | 0 | NA |
| 1 | 159413938 | 159407724 | -1 | NM_003779    | BAGALT3      | 0 | NA | 0 | NA | 0 | NA | 0 | NA | 0 | NA |
| 1 | 159435469 | 159426161 | -1 | NM_005099    | ADAMT54      | 1 | 14 | 0 | NA | 0 | NA | 0 | NA | 0 | NA |
| 1 | 159435728 | 159450808 | 1  | NM_004550    | NDUFS2       | 1 | 14 | 0 | NA | 0 | NA | 0 | NA | 0 | NA |
| 1 | 159451710 | 159455662 | 1  | NM_004106    | FCER1G       | 0 | NA | 0 | NA | 0 | NA | 0 | NA | 0 | NA |

|   |           |           |    |              |           |   |    |   |    |   |    |   |    |   |    |
|---|-----------|-----------|----|--------------|-----------|---|----|---|----|---|----|---|----|---|----|
| 1 | 159460042 | 159458706 | -1 | NM_001643    | APOA2     | 1 | 17 | 0 | NA | 0 | NA | 0 | NA | 0 | NA |
| 1 | 159462456 | 159467031 | 1  | NM_032174    | TOMM40L   | 1 | 17 | 0 | NA | 0 | NA | 0 | NA | 0 | NA |
| 1 | 159474624 | 159466079 | -1 | NM_001077469 | NR113     | 0 | NA | 0 | NA | 0 | NA | 0 | NA | 0 | NA |
| 1 | 159474624 | 159466079 | -1 | NM_001077470 | NR113     | 0 | NA | 0 | NA | 0 | NA | 0 | NA | 0 | NA |
| 1 | 159474624 | 159466079 | -1 | NM_001077471 | NR113     | 0 | NA | 0 | NA | 0 | NA | 0 | NA | 0 | NA |
| 1 | 159474624 | 159466079 | -1 | NM_001077472 | NR113     | 0 | NA | 0 | NA | 0 | NA | 0 | NA | 0 | NA |
| 1 | 159474624 | 159466079 | -1 | NM_001077473 | NR113     | 0 | NA | 0 | NA | 0 | NA | 0 | NA | 0 | NA |
| 1 | 159474624 | 159466079 | -1 | NM_001077474 | NR113     | 0 | NA | 0 | NA | 0 | NA | 0 | NA | 0 | NA |
| 1 | 159474624 | 159466079 | -1 | NM_001077475 | NR113     | 0 | NA | 0 | NA | 0 | NA | 0 | NA | 0 | NA |
| 1 | 159474624 | 159466079 | -1 | NM_001077476 | NR113     | 0 | NA | 0 | NA | 0 | NA | 0 | NA | 0 | NA |
| 1 | 159474624 | 159466079 | -1 | NM_001077477 | NR113     | 0 | NA | 0 | NA | 0 | NA | 0 | NA | 0 | NA |
| 1 | 159474624 | 159466079 | -1 | NM_001077478 | NR113     | 0 | NA | 0 | NA | 0 | NA | 0 | NA | 0 | NA |
| 1 | 159474624 | 159466079 | -1 | NM_001077479 | NR113     | 0 | NA | 0 | NA | 0 | NA | 0 | NA | 0 | NA |
| 1 | 159474624 | 159466079 | -1 | NM_001077480 | NR113     | 0 | NA | 0 | NA | 0 | NA | 0 | NA | 0 | NA |
| 1 | 159474624 | 159466079 | -1 | NM_001077481 | NR113     | 0 | NA | 0 | NA | 0 | NA | 0 | NA | 0 | NA |
| 1 | 159474624 | 159466079 | -1 | NM_001077482 | NR113     | 0 | NA | 0 | NA | 0 | NA | 0 | NA | 0 | NA |
| 1 | 159474624 | 159466079 | -1 | NM_005122    | NR113     | 0 | NA | 0 | NA | 0 | NA | 0 | NA | 0 | NA |
| 1 | 159495140 | 159521864 | 1  | NM_001102566 | PCP4L1    | 0 | NA | 0 | NA | 0 | NA | 0 | NA | 0 | NA |
| 1 | 159546377 | 159541150 | -1 | NM_000530    | MPZ       | 0 | NA | 0 | NA | 0 | NA | 0 | NA | 0 | NA |
| 1 | 159550789 | 159601159 | 1  | NM_001035511 | SDHC      | 0 | NA | 0 | NA | 0 | NA | 0 | NA | 0 | NA |
| 1 | 159550789 | 159601159 | 1  | NM_001035512 | SDHC      | 0 | NA | 0 | NA | 0 | NA | 0 | NA | 0 | NA |
| 1 | 159550789 | 159601159 | 1  | NM_001035513 | SDHC      | 0 | NA | 0 | NA | 0 | NA | 0 | NA | 0 | NA |
| 1 | 159550789 | 159601159 | 1  | NM_003001    | SDHC      | 0 | NA | 0 | NA | 0 | NA | 0 | NA | 0 | NA |
| 1 | 159550819 | 159598847 | 1  | NM_001089593 | LOC642502 | 0 | NA | 0 | NA | 0 | NA | 0 | NA | 0 | NA |
| 1 | 159604288 | 159601144 | -1 | NM_001013625 | C1orf192  | 0 | NA | 0 | NA | 0 | NA | 0 | NA | 0 | NA |
| 1 | 159741843 | 159755984 | 1  | NM_021642    | FCGR2A    | 1 | 16 | 0 | NA | 1 | 22 | 0 | NA | 0 | NA |
| 1 | 159760659 | 159763311 | 1  | NM_002155    | HSPA6     | 0 | NA | 0 | NA | 0 | NA | 0 | NA | 0 | NA |
| 1 | 159786442 | 159778174 | -1 | NM_000569    | FCGR3A    | 0 | NA | 0 | NA | 0 | NA | 0 | NA | 0 | NA |
| 1 | 159817761 | 159836656 | 1  | NM_001005410 | FCGR2C    | 0 | NA | 0 | NA | 0 | NA | 0 | NA | 0 | NA |
| 1 | 159817761 | 159836656 | 1  | NM_001005411 | FCGR2C    | 0 | NA | 0 | NA | 0 | NA | 0 | NA | 0 | NA |
| 1 | 159817761 | 159836656 | 1  | NM_201563    | FCGR2C    | 0 | NA | 0 | NA | 0 | NA | 0 | NA | 0 | NA |
| 1 | 159867782 | 159859611 | -1 | NM_000570    | FCGR3B    | 1 | 11 | 0 | NA | 0 | NA | 0 | NA | 0 | NA |
| 1 | 159899563 | 159914575 | 1  | NM_001002273 | FCGR2B    | 0 | NA | 0 | NA | 0 | NA | 0 | NA | 0 | NA |
| 1 | 159899563 | 159914575 | 1  | NM_001002274 | FCGR2B    | 0 | NA | 0 | NA | 0 | NA | 0 | NA | 0 | NA |
| 1 | 159899563 | 159914575 | 1  | NM_001002275 | FCGR2B    | 0 | NA | 0 | NA | 0 | NA | 0 | NA | 0 | NA |
| 1 | 159899563 | 159914575 | 1  | NM_004001    | FCGR2B    | 0 | NA | 0 | NA | 0 | NA | 0 | NA | 0 | NA |
| 1 | 159943385 | 159950766 | 1  | NM_032738    | FCRLA     | 0 | NA | 0 | NA | 0 | NA | 0 | NA | 0 | NA |
| 1 | 159959080 | 159964557 | 1  | NM_001002901 | FCRLB     | 0 | NA | 0 | NA | 0 | NA | 0 | NA | 0 | NA |
| 1 | 159986204 | 159993576 | 1  | NM_007240    | DUSP12    | 1 | 15 | 0 | NA | 0 | NA | 0 | NA | 0 | NA |
| 1 | 160002707 | 160195476 | 1  | NM_007348    | ATF6      | 0 | NA | 0 | NA | 0 | NA | 0 | NA | 0 | NA |
| 1 | 160260268 | 160219605 | -1 | NM_015441    | OLFML2B   | 0 | NA | 0 | NA | 0 | NA | 0 | NA | 0 | NA |
| 1 | 160306204 | 160606437 | 1  | NM_014697    | NOS1AP    | 0 | NA | 0 | NA | 0 | NA | 0 | NA | 0 | NA |
| 1 | 160599396 | 160606437 | 1  | NM_001126060 | NOS1AP    | 0 | NA | 0 | NA | 0 | NA | 0 | NA | 0 | NA |
| 1 | 160613268 | 160610430 | -1 | NM_182581    | C1orf111  | 0 | NA | 0 | NA | 0 | NA | 0 | NA | 0 | NA |
| 1 | 160618143 | 160623232 | 1  | NM_001085375 | FLJ13137  | 0 | NA | 0 | NA | 0 | NA | 0 | NA | 0 | NA |
| 1 | 160648552 | 160631679 | -1 | NM_053282    | SH2D1B    | 0 | NA | 0 | NA | 0 | NA | 0 | NA | 0 | NA |
| 1 | 160734278 | 160760468 | 1  | NM_175866    | UHMK1     | 0 | NA | 0 | NA | 0 | NA | 0 | NA | 0 | NA |
| 1 | 160797919 | 160836257 | 1  | NM_003115    | UAP1      | 0 | NA | 0 | NA | 0 | NA | 0 | NA | 0 | NA |
| 1 | 160868851 | 161016871 | 1  | NM_001014796 | DDR2      | 0 | NA | 0 | NA | 0 | NA | 0 | NA | 0 | NA |
| 1 | 160868851 | 161016871 | 1  | NM_006182    | DDR2      | 0 | NA | 0 | NA | 0 | NA | 0 | NA | 0 | NA |
| 1 | 161027119 | 161049232 | 1  | NM_016371    | HSD17B7   | 0 | NA | 0 | NA | 0 | NA | 0 | NA | 0 | NA |
| 1 | 161105229 | 161090710 | -1 | NM_178550    | C1orf110  | 0 | NA | 0 | NA | 0 | NA | 0 | NA | 0 | NA |
| 1 | 161305019 | 161313216 | 1  | NM_001102445 | RGS4      | 0 | NA | 0 | NA | 0 | NA | 0 | NA | 0 | NA |
| 1 | 161305387 | 161313216 | 1  | NM_005613    | RGS4      | 0 | NA | 0 | NA | 0 | NA | 0 | NA | 0 | NA |
| 1 | 161305667 | 161313216 | 1  | NM_001113381 | RGS4      | 0 | NA | 0 | NA | 0 | NA | 0 | NA | 0 | NA |
| 1 | 161308318 | 161313216 | 1  | NM_001113380 | RGS4      | 0 | NA | 0 | NA | 0 | NA | 0 | NA | 0 | NA |
| 1 | 161439496 | 161378720 | -1 | NM_003617    | RGS5      | 0 | NA | 0 | NA | 0 | NA | 0 | NA | 0 | NA |
| 1 | 161558346 | 161592177 | 1  | NM_031423    | NUF2      | 1 | 38 | 0 | NA | 1 | 14 | 0 | NA | 0 | NA |
| 1 | 161558346 | 161592177 | 1  | NM_145697    | NUF2      | 1 | 38 | 0 | NA | 1 | 14 | 0 | NA | 0 | NA |
| 1 | 162795560 | 163082934 | 1  | NM_002585    | PBX1      | 1 | 13 | 0 | NA | 0 | NA | 0 | NA | 0 | NA |
| 1 | 163449136 | 163437728 | -1 | NM_001033507 | LMX1A     | 0 | NA | 0 | NA | 0 | NA | 0 | NA | 0 | NA |
| 1 | 163449136 | 163437728 | -1 | NM_177399    | LMX1A     | 0 | NA | 0 | NA | 0 | NA | 0 | NA | 0 | NA |
| 1 | 163591641 | 163437728 | -1 | NM_177398    | LMX1A     | 0 | NA | 1 | 17 | 0 | NA | 0 | NA | 1 | 12 |
| 1 | 163681054 | 163636973 | -1 | NM_006917    | RXRG      | 0 | NA | 0 | NA | 1 | 13 | 0 | NA | 0 | NA |
| 1 | 163681054 | 163672788 | -1 | NM_001009598 | RXRG      | 0 | NA | 0 | NA | 1 | 13 | 0 | NA | 0 | NA |



|   |           |           |    |              |          |   |    |   |    |   |    |   |    |   |    |
|---|-----------|-----------|----|--------------|----------|---|----|---|----|---|----|---|----|---|----|
| 1 | 163779867 | 163798822 | 1  | NM_001005214 | LRRCS2   | 1 | 27 | 0 | NA | 1 | 25 | 0 | NA | 0 | NA |
| 1 | 163867073 | 163891479 | 1  | NM_004528    | MGST3    | 0 | NA | 0 | NA | 1 | 23 | 0 | NA | 0 | NA |
| 1 | 163934524 | 163898072 | -1 | NM_000696    | ALDH9A1  | 0 | NA | 0 | NA | 0 | NA | 0 | NA | 0 | NA |
| 1 | 164004759 | 16390151  | -1 | NM_019026    | TMCO1    | 0 | NA | 0 | NA | 0 | NA | 0 | NA | 0 | NA |
| 1 | 164063513 | 164143963 | 1  | NM_012474    | UCK2     | 0 | NA | 0 | NA | 1 | 14 | 0 | NA | 0 | NA |
| 1 | 164402830 | 164305879 | -1 | NM_001017961 | FAM78B   | 1 | 14 | 0 | NA | 1 | 16 | 0 | NA | 0 | NA |
| 1 | 165075347 | 165090333 | 0  | NM_017542    | POGK     | 0 | NA | 0 | NA | 0 | NA | 0 | NA | 0 | NA |
| 1 | 165112103 | 165092372 | -1 | NM_053053    | TADA1L   | 0 | NA | 0 | NA | 0 | NA | 0 | NA | 0 | NA |
| 1 | 165211185 | 165154619 | -1 | NM_199351    | C1orf32  | 0 | NA | 0 | NA | 0 | NA | 0 | NA | 0 | NA |
| 1 | 165225142 | 165258071 | 1  | NM_032858    | MAEL     | 1 | 22 | 1 | 23 | 0 | NA | 0 | NA | 0 | NA |
| 1 | 165326492 | 165288705 | -1 | NM_005814    | GPA33    | 0 | NA | 0 | NA | 0 | NA | 0 | NA | 0 | NA |
| 1 | 165330710 | 165385026 | 1  | NM_001080426 | DUSP27   | 0 | NA | 0 | NA | 0 | NA | 0 | NA | 0 | NA |
| 1 | 165446766 | 165651950 | 1  | NM_002697    | POU2F1   | 0 | NA | 0 | NA | 1 | 12 | 0 | NA | 0 | NA |
| 1 | 165754471 | 165666500 | -1 | NM_000734    | CD247    | 0 | NA | 0 | NA | 0 | NA | 0 | NA | 0 | NA |
| 1 | 165754471 | 165666500 | -1 | NM_198053    | CD247    | 0 | NA | 0 | NA | 0 | NA | 0 | NA | 0 | NA |
| 1 | 165789680 | 165776874 | -1 | NM_003851    | CREG1    | 0 | NA | 0 | NA | 0 | NA | 0 | NA | 0 | NA |
| 1 | 165865953 | 165942110 | 1  | NM_052862    | RCSD1    | 0 | NA | 0 | NA | 0 | NA | 0 | NA | 0 | NA |
| 1 | 165957831 | 166026684 | 1  | NM_003953    | MPZL1    | 0 | NA | 0 | NA | 0 | NA | 0 | NA | 0 | NA |
| 1 | 165957831 | 166026684 | 1  | NM_024569    | MPZL1    | 0 | NA | 0 | NA | 0 | NA | 0 | NA | 0 | NA |
| 1 | 166149964 | 166045505 | -1 | NM_018417    | SAC      | 0 | NA | 0 | NA | 0 | NA | 0 | NA | 0 | NA |
| 1 | 166171857 | 166153933 | -1 | NM_015415    | BRP44    | 0 | NA | 0 | NA | 0 | NA | 1 | 13 | 0 | NA |
| 1 | 166172531 | 166311705 | 1  | NM_001017977 | IQWD1    | 0 | NA | 0 | NA | 0 | NA | 1 | 13 | 0 | NA |
| 1 | 166172531 | 166311705 | 1  | NM_018442    | IQWD1    | 0 | NA | 0 | NA | 0 | NA | 1 | 13 | 0 | NA |
| 1 | 166372248 | 166320620 | -1 | NM_153832    | GPR161   | 0 | NA | 0 | NA | 0 | NA | 0 | NA | 0 | NA |
| 1 | 166414794 | 166428257 | 1  | NM_001031800 | TIPRL    | 0 | NA | 0 | NA | 0 | NA | 0 | NA | 0 | NA |
| 1 | 166414794 | 166437975 | 1  | NM_152902    | TIPRL    | 0 | NA | 0 | NA | 0 | NA | 0 | NA | 0 | NA |
| 1 | 166461878 | 166478712 | 1  | NM_199344    | SFT2D2   | 1 | 12 | 0 | NA | 1 | 12 | 0 | NA | 0 | NA |
| 1 | 166516901 | 166550288 | 1  | NM_005149    | TBX19    | 0 | NA | 0 | NA | 0 | NA | 0 | NA | 0 | NA |
| 1 | 166779859 | 166776626 | -1 | NM_003175    | XCL2     | 0 | NA | 0 | NA | 0 | NA | 0 | NA | 0 | NA |
| 1 | 166812479 | 166817939 | 1  | NM_002995    | XCL1     | 0 | NA | 0 | NA | 0 | NA | 0 | NA | 0 | NA |
| 1 | 166965052 | 166931329 | -1 | NM_001937    | DPT      | 0 | NA | 1 | 13 | 0 | NA | 0 | NA | 0 | NA |
| 1 | 167342570 | 167368584 | 1  | NM_001001787 | ATP1B1   | 1 | 18 | 0 | NA | 0 | NA | 0 | NA | 0 | NA |
| 1 | 167342570 | 167368584 | 1  | NM_001677    | ATP1B1   | 1 | 18 | 0 | NA | 0 | NA | 0 | NA | 0 | NA |
| 1 | 167603810 | 167368392 | -1 | NM_013330    | NME7     | 1 | 25 | 0 | NA | 1 | 12 | 0 | NA | 0 | NA |
| 1 | 167603810 | 167368396 | -1 | NM_197972    | NME7     | 1 | 25 | 0 | NA | 1 | 12 | 0 | NA | 0 | NA |
| 1 | 167603817 | 167632404 | 1  | NM_003666    | BLZF1    | 1 | 25 | 0 | NA | 1 | 12 | 0 | NA | 0 | NA |
| 1 | 167663294 | 167630737 | -1 | NM_021179    | C1orf114 | 0 | NA | 0 | NA | 0 | NA | 0 | NA | 0 | NA |
| 1 | 167721832 | 167699772 | -1 | NM_006996    | SLC19A2  | 0 | NA | 0 | NA | 1 | 13 | 0 | NA | 0 | NA |
| 1 | 167822393 | 167747815 | -1 | NM_000130    | F5       | 0 | NA | 0 | NA | 0 | NA | 0 | NA | 0 | NA |
| 1 | 167866001 | 167824711 | -1 | NM_003005    | SELP     | 0 | NA | 0 | NA | 0 | NA | 0 | NA | 0 | NA |
| 1 | 167947461 | 167926431 | -1 | NM_000655    | SELL     | 0 | NA | 0 | NA | 0 | NA | 0 | NA | 0 | NA |
| 1 | 167969844 | 167958404 | -1 | NM_000450    | SELE     | 0 | NA | 0 | NA | 0 | NA | 0 | NA | 0 | NA |
| 1 | 168030655 | 168028295 | -1 | NM_033418    | C1orf156 | 1 | 20 | 0 | NA | 0 | NA | 0 | NA | 0 | NA |
| 1 | 168031173 | 168088853 | 1  | NM_018186    | C1orf112 | 1 | 20 | 0 | NA | 0 | NA | 0 | NA | 0 | NA |
| 1 | 168129700 | 168088427 | -1 | NM_020423    | SCYL3    | 1 | 12 | 0 | NA | 0 | NA | 1 | 13 | 0 | NA |
| 1 | 168129700 | 168088427 | -1 | NM_181093    | SCYL3    | 1 | 12 | 0 | NA | 0 | NA | 1 | 13 | 0 | NA |
| 1 | 168310503 | 168157093 | -1 | NM_014970    | KIFAP3   | 0 | NA | 0 | NA | 0 | NA | 0 | NA | 0 | NA |
| 1 | 168767893 | 168789208 | 1  | NM_152281    | SCYL1BP1 | 1 | 22 | 0 | NA | 0 | NA | 0 | NA | 0 | NA |
| 1 | 168899936 | 168975165 | 1  | NM_006902    | PRRX1    | 0 | NA | 1 | 26 | 1 | 12 | 0 | NA | 0 | NA |
| 1 | 168899936 | 168975165 | 1  | NM_022716    | PRRX1    | 0 | NA | 1 | 26 | 1 | 12 | 0 | NA | 0 | NA |
| 1 | 169171259 | 169234570 | 1  | NM_025063    | C1orf129 | 0 | NA | 0 | NA | 0 | NA | 0 | NA | 0 | NA |
| 1 | 169326659 | 169353583 | 1  | NM_001002294 | FMO3     | 0 | NA | 0 | NA | 0 | NA | 0 | NA | 0 | NA |
| 1 | 169326659 | 169353583 | 1  | NM_006894    | FMO3     | 0 | NA | 0 | NA | 0 | NA | 0 | NA | 0 | NA |
| 1 | 169421011 | 169448446 | 1  | NM_001460    | FMO2     | 0 | NA | 0 | NA | 0 | NA | 0 | NA | 0 | NA |
| 1 | 169484286 | 169521737 | 1  | NM_002021    | FMO1     | 1 | 13 | 0 | NA | 0 | NA | 0 | NA | 0 | NA |
| 1 | 169550109 | 169577847 | 1  | NM_002022    | FMO4     | 0 | NA | 1 | 14 | 0 | NA | 0 | NA | 0 | NA |
| 1 | 169721289 | 169829273 | 1  | NM_015172    | BAT2D1   | 0 | NA | 0 | NA | 0 | NA | 0 | NA | 0 | NA |
| 1 | 169888396 | 169871179 | -1 | NM_000261    | MYOC     | 0 | NA | 0 | NA | 0 | NA | 0 | NA | 0 | NA |
| 1 | 169977837 | 169938782 | -1 | NM_003762    | VAMP4    | 1 | 16 | 0 | NA | 1 | 12 | 0 | NA | 0 | NA |
| 1 | 170017383 | 170033479 | 1  | NM_001007239 | KIAA0859 | 0 | NA | 0 | NA | 0 | NA | 0 | NA | 0 | NA |
| 1 | 170017383 | 170033479 | 1  | NM_014955    | KIAA0859 | 0 | NA | 0 | NA | 0 | NA | 0 | NA | 0 | NA |
| 1 | 170017383 | 170033479 | 1  | NM_015935    | KIAA0859 | 0 | NA | 0 | NA | 0 | NA | 0 | NA | 0 | NA |
| 1 | 170077260 | 170648480 | 1  | NM_015569    | DNM3     | 0 | NA | 0 | NA | 0 | NA | 0 | NA | 0 | NA |
| 1 | 170656452 | 170704589 | 1  | NM_139240    | C1orf105 | 0 | NA | 0 | NA | 0 | NA | 0 | NA | 0 | NA |
| 1 | 170679853 | 170677219 | -1 | NM_002642    | PIGC     | 0 | NA | 0 | NA | 0 | NA | 0 | NA | 0 | NA |

|   |           |           |    |              |          |   |    |   |    |   |    |   |    |   |    |
|---|-----------|-----------|----|--------------|----------|---|----|---|----|---|----|---|----|---|----|
| 1 | 170679853 | 170677219 | -1 | NM_153747    | PIGC     | 0 | NA | 0 | NA | 0 | NA | 0 | NA | 0 | NA |
| 1 | 170768882 | 170847596 | 1  | NM_014283    | C1orf9   | 1 | 25 | 0 | NA | 1 | 13 | 0 | NA | 0 | NA |
| 1 | 170768939 | 170847596 | 1  | NM_016227    | C1orf9   | 1 | 25 | 0 | NA | 1 | 13 | 0 | NA | 0 | NA |
| 1 | 170894807 | 170902635 | 1  | NM_000639    | FASLG    | 0 | NA | 0 | NA | 0 | NA | 0 | NA | 0 | NA |
| 1 | 171286726 | 171276982 | -1 | NM_005092    | TNFSF18  | 0 | NA | 0 | NA | 0 | NA | 0 | NA | 0 | NA |
| 1 | 171443094 | 171419492 | -1 | NM_003326    | TNFSF4   | 0 | NA | 0 | NA | 0 | NA | 0 | NA | 0 | NA |
| 1 | 171713108 | 171724569 | 1  | NM_004905    | PRDX6    | 0 | NA | 0 | NA | 0 | NA | 0 | NA | 0 | NA |
| 1 | 171838803 | 171736225 | -1 | NM_178527    | SLC9A11  | 0 | NA | 0 | NA | 0 | NA | 0 | NA | 0 | NA |
| 1 | 171905624 | 171844097 | -1 | NM_198493    | ANKRD45  | 0 | NA | 0 | NA | 0 | NA | 0 | NA | 0 | NA |
| 1 | 171950702 | 172022463 | 1  | NM_014458    | KLHL20   | 0 | NA | 0 | NA | 0 | NA | 0 | NA | 0 | NA |
| 1 | 172060580 | 172094305 | 1  | NM_018122    | DARS2    | 0 | NA | 0 | NA | 0 | NA | 0 | NA | 0 | NA |
| 1 | 172060649 | 172035310 | -1 | NM_001127181 | CENPL    | 0 | NA | 0 | NA | 0 | NA | 0 | NA | 0 | NA |
| 1 | 172060649 | 172035618 | -1 | NM_033319    | CENPL    | 0 | NA | 0 | NA | 0 | NA | 0 | NA | 0 | NA |
| 1 | 172104115 | 172109401 | 1  | NM_032522    | ZBTB37   | 0 | NA | 0 | NA | 0 | NA | 0 | NA | 0 | NA |
| 1 | 172104115 | 172122397 | 1  | NM_001122770 | ZBTB37   | 0 | NA | 0 | NA | 0 | NA | 0 | NA | 0 | NA |
| 1 | 172153096 | 172139564 | -1 | NM_000488    | SERPINC1 | 0 | NA | 0 | NA | 0 | NA | 0 | NA | 0 | NA |
| 1 | 172228833 | 172166974 | -1 | NM_172071    | RC3H1    | 0 | NA | 0 | NA | 0 | NA | 0 | NA | 0 | NA |
| 1 | 172395256 | 173193950 | 1  | NM_014857    | RABGAP1L | 0 | NA | 0 | NA | 1 | 13 | 0 | NA | 0 | NA |
| 1 | 172683834 | 172685306 | 1  | NM_005684    | GPR52    | 0 | NA | 0 | NA | 0 | NA | 0 | NA | 0 | NA |
| 1 | 173111306 | 173193950 | 1  | NM_001035230 | RABGAP1L | 0 | NA | 0 | NA | 0 | NA | 0 | NA | 0 | NA |
| 1 | 173235193 | 173247786 | 1  | NM_001007214 | CACYBP   | 1 | 23 | 0 | NA | 0 | NA | 0 | NA | 0 | NA |
| 1 | 173235193 | 173247786 | 1  | NM_014412    | CACYBP   | 1 | 23 | 0 | NA | 0 | NA | 0 | NA | 0 | NA |
| 1 | 173259184 | 173249750 | -1 | NM_022100    | MRPS14   | 1 | 20 | 0 | NA | 1 | 12 | 0 | NA | 0 | NA |
| 1 | 173303616 | 173383825 | 1  | NM_022093    | TNN      | 1 | 11 | 1 | 16 | 0 | NA | 0 | NA | 0 | NA |
| 1 | 173979375 | 173568557 | -1 | NM_003285    | TNR      | 0 | NA | 0 | NA | 0 | NA | 0 | NA | 0 | NA |
| 1 | 174442993 | 174180589 | -1 | NM_001001740 | RFWD2    | 0 | NA | 0 | NA | 0 | NA | 0 | NA | 0 | NA |
| 1 | 174442993 | 174180589 | -1 | NM_022457    | RFWD2    | 0 | NA | 0 | NA | 0 | NA | 0 | NA | 0 | NA |
| 1 | 174698929 | 174926964 | 1  | NM_021936    | PAPPA2   | 0 | NA | 0 | NA | 0 | NA | 0 | NA | 0 | NA |
| 1 | 174698929 | 175078593 | 1  | NM_020318    | PAPPA2   | 0 | NA | 0 | NA | 0 | NA | 0 | NA | 0 | NA |
| 1 | 175400647 | 175096825 | -1 | NM_004319    | ASTN1    | 0 | NA | 0 | NA | 0 | NA | 0 | NA | 0 | NA |
| 1 | 175400647 | 175104576 | -1 | NM_207108    | ASTN1    | 0 | NA | 0 | NA | 0 | NA | 0 | NA | 0 | NA |
| 1 | 175407255 | 175518181 | 1  | NM_021165    | FAM5B    | 0 | NA | 0 | NA | 0 | NA | 0 | NA | 0 | NA |
| 1 | 176205673 | 176164864 | -1 | NM_033127    | SEC16B   | 0 | NA | 0 | NA | 1 | 12 | 0 | NA | 0 | NA |
| 1 | 176330252 | 176710180 | 1  | NM_170692    | RASAL2   | 1 | 15 | 0 | NA | 0 | NA | 0 | NA | 0 | NA |
| 1 | 176577228 | 176710180 | 1  | NM_004841    | RASAL2   | 0 | NA | 0 | NA | 0 | NA | 0 | NA | 0 | NA |
| 1 | 176748834 | 176758407 | 1  | NM_032126    | C1orf49  | 0 | NA | 0 | NA | 0 | NA | 0 | NA | 0 | NA |
| 1 | 176778553 | 176784647 | 1  | NM_207467    | C1orf220 | 0 | NA | 0 | NA | 0 | NA | 0 | NA | 0 | NA |
| 1 | 176960922 | 177152465 | 1  | NM_152863    | RALGPS2  | 0 | NA | 0 | NA | 0 | NA | 0 | NA | 0 | NA |
| 1 | 176961001 | 177115546 | 1  | NM_018037    | RALGPS2  | 0 | NA | 0 | NA | 0 | NA | 0 | NA | 0 | NA |
| 1 | 177106838 | 177085292 | -1 | NM_004673    | ANGPTL1  | 0 | NA | 0 | NA | 1 | 15 | 0 | NA | 0 | NA |
| 1 | 177261696 | 177312321 | 1  | NM_014864    | FAM20B   | 0 | NA | 0 | NA | 0 | NA | 0 | NA | 0 | NA |
| 1 | 177317734 | 177331752 | 1  | NM_022371    | TOR3A    | 0 | NA | 0 | NA | 0 | NA | 0 | NA | 0 | NA |
| 1 | 177378834 | 177335084 | -1 | NM_001100108 | ABL2     | 0 | NA | 0 | NA | 0 | NA | 0 | NA | 0 | NA |
| 1 | 177378834 | 177335084 | -1 | NM_005158    | ABL2     | 0 | NA | 0 | NA | 0 | NA | 0 | NA | 0 | NA |
| 1 | 177465390 | 177335084 | -1 | NM_007314    | ABL2     | 0 | NA | 0 | NA | 0 | NA | 0 | NA | 0 | NA |
| 1 | 177529639 | 177591076 | 1  | NM_003101    | SOAT1    | 0 | NA | 0 | NA | 0 | NA | 0 | NA | 0 | NA |
| 1 | 177601737 | 177790493 | 1  | NM_144696    | C1orf125 | 1 | 15 | 0 | NA | 0 | NA | 0 | NA | 0 | NA |
| 1 | 177601737 | 177790493 | 1  | NM_182766    | C1orf125 | 1 | 15 | 0 | NA | 0 | NA | 0 | NA | 0 | NA |
| 1 | 177811707 | 177786296 | -1 | NM_014625    | NPHS2    | 0 | NA | 0 | NA | 0 | NA | 0 | NA | 1 | 12 |
| 1 | 177827647 | 177927021 | 1  | NM_173533    | TDSD5    | 0 | NA | 0 | NA | 0 | NA | 0 | NA | 0 | NA |
| 1 | 177978920 | 178051957 | 1  | NM_173509    | C1orf76  | 0 | NA | 1 | 12 | 0 | NA | 0 | NA | 0 | NA |
| 1 | 178100934 | 178100538 | -1 | NM_022347    | IFRG15   | 0 | NA | 0 | NA | 0 | NA | 0 | NA | 0 | NA |
| 1 | 178113557 | 178080575 | -1 | NM_145034    | TOR1AIP2 | 1 | 22 | 0 | NA | 0 | NA | 0 | NA | 0 | NA |
| 1 | 178118042 | 178155834 | 1  | NM_015602    | TOR1AIP1 | 1 | 22 | 0 | NA | 0 | NA | 0 | NA | 0 | NA |
| 1 | 178190530 | 178350638 | 1  | NM_014810    | CEP350   | 0 | NA | 0 | NA | 0 | NA | 0 | NA | 0 | NA |
| 1 | 178390590 | 178433792 | 1  | NM_001004128 | QSOX1    | 0 | NA | 0 | NA | 0 | NA | 0 | NA | 0 | NA |
| 1 | 178390590 | 178433792 | 1  | NM_002826    | QSOX1    | 0 | NA | 0 | NA | 0 | NA | 0 | NA | 0 | NA |
| 1 | 178466064 | 178510811 | 1  | NM_033343    | LHX4     | 0 | NA | 1 | 17 | 0 | NA | 0 | NA | 0 | NA |
| 1 | 178738102 | 178523987 | -1 | NM_032360    | ACBD6    | 1 | 23 | 0 | NA | 0 | NA | 1 | 16 | 0 | NA |
| 1 | 178867795 | 179122103 | 1  | NM_004736    | XPR1     | 0 | NA | 0 | NA | 0 | NA | 0 | NA | 0 | NA |
| 1 | 179148935 | 179181862 | 1  | NM_020950    | KIAA1614 | 0 | NA | 0 | NA | 0 | NA | 0 | NA | 0 | NA |
| 1 | 179258669 | 179208798 | -1 | NM_005819    | STX6     | 0 | NA | 0 | NA | 0 | NA | 0 | NA | 0 | NA |
| 1 | 179269761 | 179291256 | 1  | NM_001531    | MR1      | 0 | NA | 0 | NA | 0 | NA | 0 | NA | 0 | NA |
| 1 | 179324260 | 179326602 | 1  | NM_016545    | IER5     | 1 | 14 | 0 | NA | 0 | NA | 0 | NA | 0 | NA |
| 1 | 179719338 | 180037338 | 1  | NM_000721    | CACNA1E  | 0 | NA | 0 | NA | 0 | NA | 0 | NA | 0 | NA |

|   |           |           |    |              |          |   |    |   |    |   |    |   |    |   |    |
|---|-----------|-----------|----|--------------|----------|---|----|---|----|---|----|---|----|---|----|
| 1 | 180297470 | 180290327 | -1 | NM_001009992 | ZNF648   | 0 | NA | 0 | NA | 0 | NA | 0 | NA | 0 | NA |
| 1 | 180627131 | 180618291 | -1 | NM_001033056 | GLUL     | 0 | NA | 0 | NA | 0 | NA | 0 | NA | 0 | NA |
| 1 | 180627573 | 180618291 | -1 | NM_001033044 | GLUL     | 0 | NA | 0 | NA | 0 | NA | 0 | NA | 0 | NA |
| 1 | 180627573 | 180618291 | -1 | NM_002065    | GLUL     | 0 | NA | 0 | NA | 0 | NA | 0 | NA | 0 | NA |
| 1 | 180636374 | 180633874 | -1 | NM_172000    | TEDDM1   | 0 | NA | 0 | NA | 1 | 12 | 0 | NA | 0 | NA |
| 1 | 180822731 | 180809394 | -1 | NM_021133    | RNASEL   | 0 | NA | 0 | NA | 0 | NA | 0 | NA | 0 | NA |
| 1 | 180840171 | 180834380 | -1 | NM_002928    | RGS16    | 0 | NA | 0 | NA | 0 | NA | 0 | NA | 0 | NA |
| 1 | 180908690 | 180882414 | -1 | NM_001102450 | RGS8     | 0 | NA | 0 | NA | 0 | NA | 0 | NA | 0 | NA |
| 1 | 180908690 | 180882414 | -1 | NM_033345    | RGS8     | 0 | NA | 0 | NA | 0 | NA | 0 | NA | 0 | NA |
| 1 | 181028016 | 181065211 | 1  | NM_030769    | NPL      | 0 | NA | 0 | NA | 0 | NA | 1 | 11 | 0 | NA |
| 1 | 181075073 | 181123507 | 1  | NM_001357    | DHX9     | 0 | NA | 0 | NA | 1 | 12 | 0 | NA | 0 | NA |
| 1 | 181189176 | 181135622 | -1 | NM_030933    | C1orf14  | 0 | NA | 0 | NA | 0 | NA | 0 | NA | 0 | NA |
| 1 | 181259217 | 181381350 | 1  | NM_002293    | LAMC1    | 0 | NA | 0 | NA | 0 | NA | 0 | NA | 0 | NA |
| 1 | 181421796 | 181477029 | 1  | NM_018891    | LAMC2    | 1 | 13 | 0 | NA | 0 | NA | 0 | NA | 0 | NA |
| 1 | 181421796 | 181480885 | 1  | NM_005562    | LAMC2    | 1 | 13 | 0 | NA | 0 | NA | 0 | NA | 0 | NA |
| 1 | 181540632 | 181484001 | -1 | NM_170706    | NMNAT2   | 0 | NA | 0 | NA | 0 | NA | 0 | NA | 0 | NA |
| 1 | 181654360 | 181484001 | -1 | NM_015039    | NMNAT2   | 0 | NA | 1 | 16 | 0 | NA | 0 | NA | 0 | NA |
| 1 | 181708256 | 181789949 | 1  | NM_173156    | SMG7     | 1 | 27 | 0 | NA | 0 | NA | 1 | 18 | 0 | NA |
| 1 | 181708256 | 181789949 | 1  | NM_201568    | SMG7     | 1 | 27 | 0 | NA | 0 | NA | 1 | 18 | 0 | NA |
| 1 | 181708256 | 181789949 | 1  | NM_201569    | SMG7     | 1 | 27 | 0 | NA | 0 | NA | 1 | 18 | 0 | NA |
| 1 | 181826339 | 181791319 | -1 | NM_000433    | NCF2     | 0 | NA | 0 | NA | 1 | 12 | 0 | NA | 0 | NA |
| 1 | 181871608 | 181861954 | -1 | NM_005717    | ARPC5    | 1 | 11 | 0 | NA | 1 | 12 | 0 | NA | 0 | NA |
| 1 | 181871830 | 182164289 | 1  | NM_015149    | RGL1     | 1 | 11 | 0 | NA | 1 | 12 | 0 | NA | 0 | NA |
| 1 | 181889071 | 181882033 | -1 | NM_203454    | APOBEC4  | 0 | NA | 0 | NA | 0 | NA | 0 | NA | 0 | NA |
| 1 | 182273486 | 182171588 | -1 | NM_015101    | GLT25D2  | 1 | 11 | 0 | NA | 1 | 12 | 0 | NA | 0 | NA |
| 1 | 182287468 | 182309967 | 1  | NM_052965    | C1orf19  | 0 | NA | 0 | NA | 0 | NA | 0 | NA | 0 | NA |
| 1 | 182622772 | 182864778 | 1  | NM_030806    | C1orf21  | 0 | NA | 0 | NA | 0 | NA | 0 | NA | 0 | NA |
| 1 | 182990664 | 182926247 | -1 | NM_025191    | EDEM3    | 0 | NA | 0 | NA | 0 | NA | 1 | 11 | 0 | NA |
| 1 | 183210305 | 183026788 | -1 | NM_052966    | FAM129A  | 0 | NA | 0 | NA | 0 | NA | 0 | NA | 0 | NA |
| 1 | 183281173 | 183338363 | 1  | NM_007212    | RNF2     | 0 | NA | 0 | NA | 0 | NA | 0 | NA | 0 | NA |
| 1 | 183392739 | 183353840 | -1 | NM_030934    | C1orf25  | 0 | NA | 0 | NA | 0 | NA | 0 | NA | 0 | NA |
| 1 | 183392814 | 183527536 | 1  | NM_001105518 | C1orf26  | 0 | NA | 0 | NA | 0 | NA | 0 | NA | 0 | NA |
| 1 | 183392913 | 183527536 | 1  | NM_017673    | C1orf26  | 0 | NA | 0 | NA | 0 | NA | 0 | NA | 0 | NA |
| 1 | 183553084 | 183532144 | -1 | NM_006469    | IVNS1ABP | 0 | NA | 0 | NA | 0 | NA | 0 | NA | 0 | NA |
| 1 | 183970305 | 184426708 | 1  | NM_031935    | HMCN1    | 1 | 12 | 0 | NA | 1 | 13 | 0 | NA | 0 | NA |
| 1 | 184532600 | 184550311 | 1  | NM_005807    | PRG4     | 0 | NA | 0 | NA | 0 | NA | 0 | NA | 0 | NA |
| 1 | 184611080 | 184547408 | -1 | NM_003292    | TPR      | 1 | 16 | 0 | NA | 1 | 25 | 1 | 15 | 0 | NA |
| 1 | 184611623 | 184657126 | 1  | NM_017847    | C1orf27  | 1 | 16 | 0 | NA | 1 | 25 | 1 | 15 | 0 | NA |
| 1 | 184636326 | 184637210 | 1  | NM_022375    | OCLM     | 0 | NA | 0 | NA | 0 | NA | 0 | NA | 0 | NA |
| 1 | 184684479 | 184679337 | -1 | NM_022576    | PDC      | 0 | NA | 0 | NA | 0 | NA | 0 | NA | 0 | NA |
| 1 | 184696862 | 184679337 | -1 | NM_002597    | PDC      | 0 | NA | 0 | NA | 0 | NA | 0 | NA | 0 | NA |
| 1 | 184916179 | 184907591 | -1 | NM_000963    | PTGS2    | 0 | NA | 0 | NA | 1 | 14 | 0 | NA | 0 | NA |
| 1 | 185064654 | 185224736 | 1  | NM_024420    | PLA2G4A  | 0 | NA | 0 | NA | 1 | 14 | 0 | NA | 0 | NA |
| 1 | 188713382 | 188333419 | -1 | NM_199051    | FAM5C    | 0 | NA | 0 | NA | 0 | NA | 0 | NA | 0 | NA |
| 1 | 190394214 | 190421568 | 1  | NM_130782    | RGS18    | 0 | NA | 0 | NA | 0 | NA | 0 | NA | 0 | NA |
| 1 | 190552744 | 190603037 | 1  | NM_001039152 | RGS21    | 0 | NA | 0 | NA | 0 | NA | 0 | NA | 0 | NA |
| 1 | 190811479 | 190815782 | 1  | NM_002922    | RGS1     | 0 | NA | 0 | NA | 0 | NA | 0 | NA | 0 | NA |
| 1 | 190871904 | 190896012 | 1  | NM_002927    | RGS13    | 0 | NA | 0 | NA | 0 | NA | 0 | NA | 0 | NA |
| 1 | 190871904 | 190896012 | 1  | NM_144766    | RGS13    | 0 | NA | 0 | NA | 0 | NA | 0 | NA | 0 | NA |
| 1 | 191044793 | 191048026 | 1  | NM_002923    | RGS2     | 0 | NA | 0 | NA | 0 | NA | 0 | NA | 0 | NA |
| 1 | 191295144 | 191251521 | -1 | NM_015984    | UCHL5    | 0 | NA | 0 | NA | 0 | NA | 0 | NA | 0 | NA |
| 1 | 191295375 | 191320732 | 1  | NM_001042370 | TROVE2   | 0 | NA | 0 | NA | 0 | NA | 0 | NA | 0 | NA |
| 1 | 191295579 | 191322066 | 1  | NM_004600    | TROVE2   | 0 | NA | 0 | NA | 0 | NA | 0 | NA | 0 | NA |
| 1 | 191295579 | 191327529 | 1  | NM_001042369 | TROVE2   | 0 | NA | 0 | NA | 0 | NA | 0 | NA | 0 | NA |
| 1 | 191341179 | 191332222 | -1 | NM_197962    | GLRX2    | 0 | NA | 0 | NA | 0 | NA | 0 | NA | 0 | NA |
| 1 | 191341867 | 191332223 | -1 | NM_016066    | GLRX2    | 0 | NA | 0 | NA | 0 | NA | 0 | NA | 0 | NA |
| 1 | 191357783 | 191487679 | 1  | NM_024529    | CDC73    | 1 | 11 | 0 | NA | 1 | 15 | 0 | NA | 0 | NA |
| 1 | 191422347 | 191414798 | -1 | NM_003783    | B3GALT2  | 0 | NA | 0 | NA | 0 | NA | 0 | NA | 0 | NA |
| 1 | 194844122 | 194461535 | -1 | NM_198503    | KCNT2    | 0 | NA | 0 | NA | 0 | NA | 0 | NA | 0 | NA |
| 1 | 194887630 | 194937318 | 1  | NM_001014975 | CFH      | 0 | NA | 0 | NA | 0 | NA | 0 | NA | 0 | NA |
| 1 | 194887630 | 194983257 | 1  | NM_000186    | CFH      | 0 | NA | 0 | NA | 0 | NA | 0 | NA | 0 | NA |
| 1 | 195010552 | 195029496 | 1  | NM_021023    | CFHR3    | 0 | NA | 0 | NA | 0 | NA | 0 | NA | 0 | NA |
| 1 | 195005483 | 195067942 | 1  | NM_002113    | CFHR1    | 0 | NA | 0 | NA | 0 | NA | 0 | NA | 0 | NA |
| 1 | 195123834 | 195154386 | 1  | NM_006684    | CFHR4    | 0 | NA | 0 | NA | 0 | NA | 0 | NA | 0 | NA |
| 1 | 195179556 | 195194979 | 1  | NM_005666    | CFHR2    | 0 | NA | 0 | NA | 0 | NA | 0 | NA | 0 | NA |

|   |           |           |    |              |           |   |    |   |    |   |    |   |    |   |    |
|---|-----------|-----------|----|--------------|-----------|---|----|---|----|---|----|---|----|---|----|
| 1 | 195213289 | 195245426 | 1  | NM_030787    | CFHR5     | 0 | NA | 0 | NA | 0 | NA | 0 | NA | 0 | NA |
| 1 | 195303020 | 195274943 | -1 | NM_001994    | F13B      | 0 | NA | 0 | NA | 0 | NA | 0 | NA | 0 | NA |
| 1 | 195382287 | 195319996 | -1 | NM_018136    | ASPM      | 0 | NA | 0 | NA | 0 | NA | 0 | NA | 0 | NA |
| 1 | 195436295 | 195389436 | -1 | NM_194314    | ZBTB41    | 1 | 15 | 0 | NA | 0 | NA | 0 | NA | 0 | NA |
| 1 | 195504030 | 195714208 | 1  | NM_201253    | CRB1      | 0 | NA | 0 | NA | 0 | NA | 0 | NA | 0 | NA |
| 1 | 195818928 | 195745394 | -1 | NM_019049    | C1orf218  | 0 | NA | 0 | NA | 0 | NA | 0 | NA | 0 | NA |
| 1 | 196010945 | 195788007 | -1 | NM_144977    | DENND1B   | 0 | NA | 0 | NA | 0 | NA | 0 | NA | 0 | NA |
| 1 | 196138399 | 196143120 | 1  | NM_001024594 | C1orf53   | 0 | NA | 1 | 18 | 0 | NA | 0 | NA | 0 | NA |
| 1 | 196148257 | 196165896 | 1  | NM_001014434 | LHX9      | 0 | NA | 1 | 13 | 0 | NA | 0 | NA | 0 | NA |
| 1 | 196153139 | 196165896 | 1  | NM_020204    | LHX9      | 0 | NA | 1 | 16 | 0 | NA | 0 | NA | 0 | NA |
| 1 | 196468304 | 196555392 | 1  | NM_133494    | NEK7      | 0 | NA | 0 | NA | 0 | NA | 0 | NA | 0 | NA |
| 1 | 196776698 | 196758974 | -1 | NM_133262    | ATP6V1G3  | 0 | NA | 0 | NA | 0 | NA | 0 | NA | 0 | NA |
| 1 | 196776698 | 196758974 | -1 | NM_133326    | ATP6V1G3  | 0 | NA | 0 | NA | 0 | NA | 0 | NA | 0 | NA |
| 1 | 196874759 | 196928957 | 1  | NM_080923    | PTPRC     | 0 | NA | 0 | NA | 0 | NA | 0 | NA | 0 | NA |
| 1 | 196874759 | 196993168 | 1  | NM_002838    | PTPRC     | 0 | NA | 0 | NA | 0 | NA | 0 | NA | 0 | NA |
| 1 | 196874759 | 196993168 | 1  | NM_080921    | PTPRC     | 0 | NA | 0 | NA | 0 | NA | 0 | NA | 0 | NA |
| 1 | 196874759 | 196993168 | 1  | NM_080922    | PTPRC     | 0 | NA | 0 | NA | 0 | NA | 0 | NA | 0 | NA |
| 1 | 198263392 | 198413173 | 1  | NM_003822    | NR5A2     | 1 | 15 | 1 | 14 | 0 | NA | 0 | NA | 0 | NA |
| 1 | 198263392 | 198413173 | 1  | NM_205860    | NR5A2     | 1 | 15 | 1 | 14 | 0 | NA | 0 | NA | 0 | NA |
| 1 | 198449278 | 198450266 | 1  | NM_001105517 | FAM58B    | 0 | NA | 1 | 16 | 0 | NA | 0 | NA | 0 | NA |
| 1 | 198645789 | 198642042 | -1 | NM_012482    | ZNF281    | 0 | NA | 0 | NA | 0 | NA | 0 | NA | 0 | NA |
| 1 | 198856485 | 198787929 | -1 | NM_014875    | KIF14     | 0 | NA | 0 | NA | 0 | NA | 0 | NA | 0 | NA |
| 1 | 198905658 | 198859663 | -1 | NM_031306    | DDX59     | 0 | NA | 0 | NA | 1 | 12 | 0 | NA | 0 | NA |
| 1 | 198905749 | 198879875 | -1 | NM_001031725 | DDX59     | 0 | NA | 0 | NA | 1 | 12 | 0 | NA | 0 | NA |
| 1 | 198975308 | 199096454 | 1  | NM_203459    | CAMSAP1L1 | 0 | NA | 0 | NA | 0 | NA | 0 | NA | 0 | NA |
| 1 | 199108788 | 199109874 | 1  | NM_005298    | GPR25     | 0 | NA | 0 | NA | 1 | 12 | 0 | NA | 0 | NA |
| 1 | 199127291 | 199151488 | 1  | NM_018265    | C1orf108  | 1 | 11 | 0 | NA | 0 | NA | 0 | NA | 0 | NA |
| 1 | 199259451 | 199205142 | -1 | NM_017596    | KIF21B    | 0 | NA | 0 | NA | 0 | NA | 0 | NA | 0 | NA |
| 1 | 199348317 | 199275262 | -1 | NM_000069    | CACNA1S   | 0 | NA | 0 | NA | 0 | NA | 0 | NA | 0 | NA |
| 1 | 199390241 | 199370522 | -1 | NM_016456    | TMEM9     | 0 | NA | 0 | NA | 0 | NA | 1 | 11 | 0 | NA |
| 1 | 199448392 | 199464697 | 1  | NM_178275    | IGFN1     | 0 | NA | 0 | NA | 0 | NA | 0 | NA | 0 | NA |
| 1 | 199519202 | 199568740 | 1  | NM_000299    | PKP1      | 0 | NA | 1 | 14 | 0 | NA | 0 | NA | 0 | NA |
| 1 | 199519202 | 199568740 | 1  | NM_001005337 | PKP1      | 0 | NA | 1 | 14 | 0 | NA | 0 | NA | 0 | NA |
| 1 | 199613428 | 199594764 | -1 | NM_000364    | TNNT2     | 0 | NA | 1 | 14 | 0 | NA | 0 | NA | 0 | NA |
| 1 | 199613428 | 199594764 | -1 | NM_001001430 | TNNT2     | 0 | NA | 1 | 14 | 0 | NA | 0 | NA | 0 | NA |
| 1 | 199613428 | 199594764 | -1 | NM_001001431 | TNNT2     | 0 | NA | 1 | 14 | 0 | NA | 0 | NA | 0 | NA |
| 1 | 199613428 | 199594764 | -1 | NM_001001432 | TNNT2     | 0 | NA | 1 | 14 | 0 | NA | 0 | NA | 0 | NA |
| 1 | 199635292 | 199616888 | -1 | NM_005558    | LAD1      | 1 | 12 | 1 | 14 | 0 | NA | 0 | NA | 0 | NA |
| 1 | 199657497 | 199639517 | -1 | NM_003281    | TNNI1     | 0 | NA | 1 | 12 | 0 | NA | 0 | NA | 0 | NA |
| 1 | 199704922 | 199701244 | -1 | NM_012396    | PHLDA3    | 0 | NA | 0 | NA | 0 | NA | 0 | NA | 0 | NA |
| 1 | 199742873 | 199719282 | -1 | NM_004078    | CSRP1     | 0 | NA | 0 | NA | 1 | 12 | 0 | NA | 0 | NA |
| 1 | 199884072 | 200062720 | 1  | NM_020443    | NAV1      | 1 | 18 | 1 | 12 | 0 | NA | 0 | NA | 0 | NA |
| 1 | 200064910 | 200120045 | 1  | NM_018085    | IPO9      | 0 | NA | 0 | NA | 0 | NA | 0 | NA | 0 | NA |
| 1 | 200124654 | 200128050 | 1  | NM_198149    | SHISA4    | 0 | NA | 0 | NA | 0 | NA | 0 | NA | 0 | NA |
| 1 | 200182339 | 200132206 | -1 | NM_012134    | LMOD1     | 1 | 12 | 0 | NA | 0 | NA | 0 | NA | 0 | NA |
| 1 | 200191270 | 200206412 | 1  | NM_006335    | TIMM17A   | 1 | 12 | 0 | NA | 0 | NA | 0 | NA | 0 | NA |
| 1 | 200218388 | 200241898 | 1  | NM_020216    | RNPEP     | 0 | NA | 0 | NA | 0 | NA | 0 | NA | 0 | NA |
| 1 | 200246312 | 200252938 | 1  | NM_001114309 | ELF3      | 0 | NA | 0 | NA | 0 | NA | 0 | NA | 0 | NA |
| 1 | 200246312 | 200252938 | 1  | NM_004433    | ELF3      | 0 | NA | 0 | NA | 0 | NA | 0 | NA | 0 | NA |
| 1 | 200358651 | 200365257 | 1  | NM_004767    | GPR37L1   | 0 | NA | 0 | NA | 0 | NA | 0 | NA | 0 | NA |
| 1 | 200380489 | 200368599 | -1 | NM_138795    | ARL8A     | 0 | NA | 0 | NA | 0 | NA | 0 | NA | 0 | NA |
| 1 | 200395742 | 200382765 | -1 | NM_080588    | PTPN7     | 0 | NA | 0 | NA | 0 | NA | 0 | NA | 0 | NA |
| 1 | 200396374 | 200382765 | -1 | NM_002832    | PTPN7     | 0 | NA | 0 | NA | 0 | NA | 0 | NA | 0 | NA |
| 1 | 200429740 | 200555512 | 1  | NM_001017403 | LGR6      | 0 | NA | 0 | NA | 0 | NA | 0 | NA | 0 | NA |
| 1 | 200439527 | 200555512 | 1  | NM_021636    | LGR6      | 0 | NA | 1 | 17 | 0 | NA | 0 | NA | 0 | NA |
| 1 | 200449905 | 200555512 | 1  | NM_001017404 | LGR6      | 0 | NA | 1 | 17 | 0 | NA | 0 | NA | 0 | NA |
| 1 | 200577707 | 200567407 | -1 | NM_014176    | UBE2T     | 1 | 20 | 0 | NA | 0 | NA | 0 | NA | 0 | NA |
| 1 | 200584458 | 200824320 | 1  | NM_002481    | PPP1R12B  | 1 | 20 | 0 | NA | 0 | NA | 0 | NA | 0 | NA |
| 1 | 200584458 | 200824320 | 1  | NM_032105    | PPP1R12B  | 1 | 20 | 0 | NA | 0 | NA | 0 | NA | 0 | NA |
| 1 | 200698493 | 200816903 | 1  | NM_032103    | PPP1R12B  | 0 | NA | 0 | NA | 0 | NA | 0 | NA | 0 | NA |
| 1 | 200698493 | 200816903 | 1  | NM_032104    | PPP1R12B  | 0 | NA | 0 | NA | 0 | NA | 0 | NA | 0 | NA |
| 1 | 200946168 | 200831510 | -1 | NM_177402    | SYT2      | 0 | NA | 1 | 12 | 0 | NA | 0 | NA | 0 | NA |
| 1 | 201044172 | 200963154 | -1 | NM_006618    | JARID1B   | 1 | 25 | 0 | NA | 0 | NA | 0 | NA | 0 | NA |
| 1 | 201124886 | 201114708 | -1 | NM_002871    | RAB1F     | 0 | NA | 0 | NA | 0 | NA | 0 | NA | 0 | NA |
| 1 | 201162994 | 201126852 | -1 | NM_021633    | KLHL12    | 1 | 15 | 0 | NA | 1 | 19 | 1 | 13 | 0 | NA |

|   |           |           |    |              |          |   |    |   |    |   |    |   |    |   |    |
|---|-----------|-----------|----|--------------|----------|---|----|---|----|---|----|---|----|---|----|
| 1 | 201194034 | 201176575 | -1 | NM_015999    | ADIPOR1  | 1 | 12 | 0 | NA | 0 | NA | 0 | NA | 0 | NA |
| 1 | 201203027 | 201197624 | -1 | NM_016243    | CYBSR1   | 1 | 12 | 0 | NA | 0 | NA | 0 | NA | 0 | NA |
| 1 | 201243156 | 201259820 | 1  | NM_138391    | TMEM183A | 0 | NA | 0 | NA | 0 | NA | 0 | NA | 0 | NA |
| 1 | 201243158 | 201259291 | 1  | NM_001079809 | TMEM183B | 0 | NA | 0 | NA | 0 | NA | 0 | NA | 0 | NA |
| 1 | 201286933 | 201314487 | 1  | NM_015053    | PPFIA4   | 1 | 13 | 0 | NA | 0 | NA | 0 | NA | 0 | NA |
| 1 | 201322000 | 201318879 | -1 | NM_002479    | MYOG     | 0 | NA | 0 | NA | 0 | NA | 0 | NA | 0 | NA |
| 1 | 201363458 | 201403156 | 1  | NM_000674    | ADORA1   | 1 | 11 | 0 | NA | 0 | NA | 0 | NA | 0 | NA |
| 1 | 201363458 | 201403156 | 1  | NM_001048230 | ADORA1   | 1 | 11 | 0 | NA | 0 | NA | 0 | NA | 0 | NA |
| 1 | 201411565 | 201403561 | -1 | NM_004997    | MYBPH    | 0 | NA | 0 | NA | 0 | NA | 0 | NA | 0 | NA |
| 1 | 201422545 | 201414681 | -1 | NM_001276    | CHI3L1   | 0 | NA | 0 | NA | 0 | NA | 0 | NA | 0 | NA |
| 1 | 201465483 | 201451829 | -1 | NM_003465    | CHIT1    | 0 | NA | 0 | NA | 0 | NA | 0 | NA | 0 | NA |
| 1 | 201541286 | 201545352 | 1  | NM_006763    | BTG2     | 0 | NA | 0 | NA | 0 | NA | 0 | NA | 0 | NA |
| 1 | 201586912 | 201576374 | -1 | NM_002023    | FMOD     | 0 | NA | 1 | 14 | 0 | NA | 0 | NA | 0 | NA |
| 1 | 201711505 | 201727102 | 1  | NM_002725    | PRELP    | 0 | NA | 0 | NA | 0 | NA | 0 | NA | 0 | NA |
| 1 | 201711505 | 201727102 | 1  | NM_201348    | PRELP    | 0 | NA | 0 | NA | 0 | NA | 0 | NA | 0 | NA |
| 1 | 201729893 | 201744700 | 1  | NM_014359    | OPTC     | 0 | NA | 0 | NA | 0 | NA | 0 | NA | 0 | NA |
| 1 | 201862550 | 201979832 | 1  | NM_001001396 | ATP2B4   | 1 | 11 | 0 | NA | 1 | 12 | 0 | NA | 0 | NA |
| 1 | 201862550 | 201979832 | 1  | NM_001684    | ATP2B4   | 1 | 11 | 0 | NA | 1 | 12 | 0 | NA | 0 | NA |
| 1 | 202000959 | 202012103 | 1  | NM_017773    | LAX1     | 0 | NA | 0 | NA | 0 | NA | 0 | NA | 0 | NA |
| 1 | 202031373 | 202089879 | 1  | NM_014827    | ZC3H11A  | 1 | 16 | 0 | NA | 1 | 12 | 1 | 17 | 0 | NA |
| 1 | 202097362 | 202106903 | 1  | NM_003094    | SNRPE    | 0 | NA | 0 | NA | 1 | 13 | 0 | NA | 0 | NA |
| 1 | 202277011 | 202268197 | -1 | NM_182579    | C1orf157 | 0 | NA | 0 | NA | 0 | NA | 0 | NA | 0 | NA |
| 1 | 202308668 | 202363494 | 1  | NM_005686    | SOX13    | 0 | NA | 0 | NA | 0 | NA | 0 | NA | 0 | NA |
| 1 | 202387930 | 202366812 | -1 | NM_018208    | ETNK2    | 0 | NA | 0 | NA | 0 | NA | 0 | NA | 0 | NA |
| 1 | 202402088 | 202390570 | -1 | NM_000537    | REN      | 0 | NA | 0 | NA | 0 | NA | 0 | NA | 0 | NA |
| 1 | 202432242 | 202426091 | -1 | NM_002256    | KISS1    | 0 | NA | 0 | NA | 0 | NA | 0 | NA | 1 | 14 |
| 1 | 202449843 | 202433910 | -1 | NM_198447    | GOLT1A   | 0 | NA | 0 | NA | 0 | NA | 0 | NA | 0 | NA |
| 1 | 202595667 | 202454603 | -1 | NM_014935    | PLEKHA6  | 0 | NA | 0 | NA | 0 | NA | 1 | 11 | 0 | NA |
| 1 | 202647542 | 202639142 | -1 | NM_032833    | PPP1R15B | 1 | 25 | 0 | NA | 0 | NA | 0 | NA | 0 | NA |
| 1 | 202726097 | 202658388 | -1 | NM_002646    | PIK3C2B  | 0 | NA | 0 | NA | 1 | 13 | 0 | NA | 0 | NA |
| 1 | 202752133 | 202786349 | 1  | NM_002393    | MDM4     | 1 | 15 | 0 | NA | 1 | 13 | 0 | NA | 0 | NA |
| 1 | 202921104 | 202852925 | -1 | NM_006338    | LRRN2    | 0 | NA | 0 | NA | 0 | NA | 0 | NA | 0 | NA |
| 1 | 202921220 | 202852925 | -1 | NM_201630    | LRRN2    | 0 | NA | 0 | NA | 0 | NA | 0 | NA | 0 | NA |
| 1 | 203064445 | 203258572 | 1  | NM_015090    | NFASC    | 0 | NA | 0 | NA | 0 | NA | 0 | NA | 0 | NA |
| 1 | 203278962 | 203313761 | 1  | NM_005076    | CNTN2    | 0 | NA | 1 | 12 | 0 | NA | 0 | NA | 0 | NA |
| 1 | 203320211 | 203318879 | -1 | NM_203376    | TMEM81   | 0 | NA | 0 | NA | 0 | NA | 0 | NA | 0 | NA |
| 1 | 203357754 | 203322601 | -1 | NM_005057    | RBBP5    | 0 | NA | 0 | NA | 1 | 13 | 1 | 11 | 0 | NA |
| 1 | 203447313 | 203378255 | -1 | NM_015375    | RIPK5    | 0 | NA | 0 | NA | 0 | NA | 0 | NA | 0 | NA |
| 1 | 203447313 | 203378255 | -1 | NM_199462    | RIPK5    | 0 | NA | 0 | NA | 0 | NA | 0 | NA | 0 | NA |
| 1 | 203463713 | 203509093 | 1  | NM_014858    | TMCC2    | 0 | NA | 0 | NA | 0 | NA | 0 | NA | 0 | NA |
| 1 | 203557506 | 203537813 | -1 | NM_030952    | NUAK2    | 0 | NA | 0 | NA | 1 | 12 | 0 | NA | 0 | NA |
| 1 | 203592662 | 203572270 | -1 | NM_018203    | KLHDC8A  | 1 | 13 | 0 | NA | 0 | NA | 0 | NA | 0 | NA |
| 1 | 203657804 | 203617135 | -1 | NM_001001552 | LEMD1    | 0 | NA | 0 | NA | 0 | NA | 0 | NA | 0 | NA |
| 1 | 203740349 | 203768540 | 1  | NM_002596    | PCTK3    | 0 | NA | 0 | NA | 0 | NA | 0 | NA | 0 | NA |
| 1 | 203740349 | 203768540 | 1  | NM_212502    | PCTK3    | 0 | NA | 0 | NA | 0 | NA | 0 | NA | 0 | NA |
| 1 | 203740349 | 203768540 | 1  | NM_212503    | PCTK3    | 0 | NA | 0 | NA | 0 | NA | 0 | NA | 0 | NA |
| 1 | 203804734 | 203838669 | 1  | NM_181644    | MFSD4    | 0 | NA | 1 | 13 | 0 | NA | 0 | NA | 0 | NA |
| 1 | 203868623 | 203851857 | -1 | NM_001973    | ELK4     | 0 | NA | 0 | NA | 0 | NA | 0 | NA | 0 | NA |
| 1 | 203868623 | 203855018 | -1 | NM_021795    | ELK4     | 0 | NA | 0 | NA | 0 | NA | 0 | NA | 0 | NA |
| 1 | 203916253 | 203893603 | -1 | NM_033102    | SLC45A3  | 0 | NA | 0 | NA | 0 | NA | 0 | NA | 0 | NA |
| 1 | 203985984 | 203948569 | -1 | NM_022731    | NUCKS1   | 1 | 18 | 0 | NA | 0 | NA | 0 | NA | 0 | NA |
| 1 | 204010747 | 204004300 | -1 | NM_003929    | RAB7L1   | 0 | NA | 0 | NA | 0 | NA | 0 | NA | 0 | NA |
| 1 | 204048784 | 204024843 | -1 | NM_173854    | SLC41A1  | 0 | NA | 0 | NA | 0 | NA | 0 | NA | 0 | NA |
| 1 | 204085868 | 204063775 | -1 | NM_152491    | PM20D1   | 0 | NA | 1 | 21 | 0 | NA | 0 | NA | 0 | NA |
| 1 | 204179211 | 204148799 | -1 | NM_052934    | SLC26A9  | 0 | NA | 0 | NA | 1 | 18 | 0 | NA | 0 | NA |
| 1 | 204179211 | 204148799 | -1 | NM_134325    | SLC26A9  | 0 | NA | 0 | NA | 1 | 18 | 0 | NA | 0 | NA |
| 1 | 204305533 | 204321697 | 1  | NM_001123168 | FAM72A   | 0 | NA | 0 | NA | 0 | NA | 0 | NA | 0 | NA |
| 1 | 204390905 | 204398105 | 1  | NM_000707    | AVPR1B   | 0 | NA | 1 | 13 | 0 | NA | 0 | NA | 0 | NA |
| 1 | 204455270 | 204405494 | -1 | NM_001007544 | C1orf186 | 0 | NA | 0 | NA | 0 | NA | 0 | NA | 0 | NA |
| 1 | 204484081 | 204498727 | 1  | NM_001910    | CTSE     | 0 | NA | 0 | NA | 0 | NA | 0 | NA | 0 | NA |
| 1 | 204484081 | 204498727 | 1  | NM_148964    | CTSE     | 0 | NA | 0 | NA | 0 | NA | 0 | NA | 0 | NA |
| 1 | 204582822 | 204696128 | 1  | NM_001042758 | SRGAP2   | 0 | NA | 0 | NA | 0 | NA | 0 | NA | 0 | NA |
| 1 | 204582822 | 204704406 | 1  | NM_015326    | SRGAP2   | 0 | NA | 0 | NA | 0 | NA | 0 | NA | 0 | NA |
| 1 | 204710418 | 204736845 | 1  | NM_014002    | IKBKE    | 0 | NA | 0 | NA | 1 | 12 | 0 | NA | 0 | NA |
| 1 | 204747501 | 204829239 | 1  | NM_182663    | RASSF5   | 1 | 11 | 0 | NA | 0 | NA | 0 | NA | 0 | NA |

|   |           |           |    |              |           |   |    |   |    |   |    |   |    |   |    |
|---|-----------|-----------|----|--------------|-----------|---|----|---|----|---|----|---|----|---|----|
| 1 | 204747501 | 204829239 | 1  | NM_182664    | RASSF5    | 1 | 11 | 0 | NA | 0 | NA | 0 | NA | 0 | NA |
| 1 | 204797114 | 204829239 | 1  | NM_182665    | RASSF5    | 0 | NA | 0 | NA | 0 | NA | 0 | NA | 0 | NA |
| 1 | 204852527 | 204831597 | -1 | NM_006893    | LGTN      | 0 | NA | 0 | NA | 0 | NA | 0 | NA | 0 | NA |
| 1 | 204875503 | 204889165 | 1  | NM_001004023 | DYRK3     | 1 | 11 | 0 | NA | 1 | 13 | 0 | NA | 0 | NA |
| 1 | 204875503 | 204889165 | 1  | NM_003582    | DYRK3     | 1 | 11 | 0 | NA | 1 | 13 | 0 | NA | 0 | NA |
| 1 | 204924911 | 204974249 | 1  | NM_004759    | MAPKAPK2  | 0 | NA | 0 | NA | 0 | NA | 0 | NA | 0 | NA |
| 1 | 204924911 | 204974249 | 1  | NM_032960    | MAPKAPK2  | 0 | NA | 0 | NA | 0 | NA | 0 | NA | 0 | NA |
| 1 | 205012462 | 205007570 | -1 | NM_000572    | IL10      | 0 | NA | 0 | NA | 0 | NA | 0 | NA | 0 | NA |
| 1 | 205038837 | 205082947 | 1  | NM_153758    | IL19      | 0 | NA | 0 | NA | 1 | 12 | 0 | NA | 0 | NA |
| 1 | 205068844 | 205082948 | 1  | NM_013371    | IL19      | 0 | NA | 0 | NA | 0 | NA | 0 | NA | 0 | NA |
| 1 | 205105776 | 205109191 | 1  | NM_018724    | IL20      | 0 | NA | 0 | NA | 0 | NA | 0 | NA | 0 | NA |
| 1 | 205137411 | 205144107 | 1  | NM_006850    | IL24      | 1 | 14 | 0 | NA | 1 | 16 | 1 | 13 | 0 | NA |
| 1 | 205137411 | 205144107 | 1  | NM_181339    | IL24      | 1 | 14 | 0 | NA | 1 | 16 | 1 | 13 | 0 | NA |
| 1 | 205161966 | 205144353 | -1 | NM_005449    | FAIM3     | 0 | NA | 1 | 14 | 0 | NA | 0 | NA | 1 | 13 |
| 1 | 205186430 | 205168494 | -1 | NM_002644    | PIGR      | 0 | NA | 0 | NA | 0 | NA | 0 | NA | 0 | NA |
| 1 | 205210593 | 205198026 | -1 | NM_001122979 | FCAMR     | 0 | NA | 0 | NA | 0 | NA | 0 | NA | 0 | NA |
| 1 | 205210593 | 205198026 | -1 | NM_001122980 | FCAMR     | 0 | NA | 0 | NA | 0 | NA | 0 | NA | 0 | NA |
| 1 | 205210593 | 205198026 | -1 | NM_032029    | FCAMR     | 0 | NA | 0 | NA | 0 | NA | 0 | NA | 0 | NA |
| 1 | 205272724 | 205258488 | -1 | NM_001083924 | C1orf116  | 0 | NA | 0 | NA | 0 | NA | 0 | NA | 0 | NA |
| 1 | 205272724 | 205258488 | -1 | NM_023938    | C1orf116  | 0 | NA | 0 | NA | 0 | NA | 0 | NA | 0 | NA |
| 1 | 205291045 | 205283816 | -1 | NM_018566    | YOD1      | 1 | 21 | 0 | NA | 1 | 33 | 0 | NA | 0 | NA |
| 1 | 205293242 | 205317785 | 1  | NM_006212    | PFKFB2    | 1 | 21 | 0 | NA | 1 | 33 | 0 | NA | 0 | NA |
| 1 | 205293242 | 205320991 | 1  | NM_001018053 | PFKFB2    | 1 | 21 | 0 | NA | 1 | 33 | 0 | NA | 0 | NA |
| 1 | 205328834 | 205339960 | 1  | NM_001017365 | C4BPB     | 0 | NA | 0 | NA | 0 | NA | 0 | NA | 0 | NA |
| 1 | 205328834 | 205339960 | 1  | NM_001017366 | C4BPB     | 0 | NA | 0 | NA | 0 | NA | 0 | NA | 0 | NA |
| 1 | 205329206 | 205339960 | 1  | NM_000716    | C4BPB     | 0 | NA | 0 | NA | 0 | NA | 0 | NA | 0 | NA |
| 1 | 205329206 | 205339960 | 1  | NM_001017364 | C4BPB     | 0 | NA | 0 | NA | 0 | NA | 0 | NA | 0 | NA |
| 1 | 205329250 | 205339960 | 1  | NM_001017367 | C4BPB     | 0 | NA | 0 | NA | 0 | NA | 0 | NA | 0 | NA |
| 1 | 205344229 | 205384940 | 1  | NM_000715    | C4BPA     | 0 | NA | 0 | NA | 0 | NA | 0 | NA | 0 | NA |
| 1 | 205561439 | 205600934 | 1  | NM_000574    | CD55      | 0 | NA | 0 | NA | 0 | NA | 0 | NA | 0 | NA |
| 1 | 205561439 | 205600934 | 1  | NM_001114752 | CD55      | 0 | NA | 0 | NA | 0 | NA | 0 | NA | 0 | NA |
| 1 | 205694292 | 205729863 | 1  | NM_001006658 | CR2       | 0 | NA | 0 | NA | 0 | NA | 0 | NA | 0 | NA |
| 1 | 205694292 | 205729863 | 1  | NM_001877    | CR2       | 0 | NA | 0 | NA | 0 | NA | 0 | NA | 0 | NA |
| 1 | 205736095 | 205881733 | 1  | NM_000573    | CR1       | 0 | NA | 1 | 12 | 0 | NA | 0 | NA | 0 | NA |
| 1 | 205736095 | 205881733 | 1  | NM_000651    | CR1       | 0 | NA | 1 | 12 | 0 | NA | 0 | NA | 0 | NA |
| 1 | 205885080 | 205963659 | 1  | NM_175710    | CR1L      | 0 | NA | 1 | 12 | 0 | NA | 0 | NA | 1 | 13 |
| 1 | 205992024 | 206035481 | 1  | NM_002389    | CD46      | 0 | NA | 0 | NA | 1 | 12 | 0 | NA | 0 | NA |
| 1 | 205992024 | 206035481 | 1  | NM_153826    | CD46      | 0 | NA | 0 | NA | 1 | 12 | 0 | NA | 0 | NA |
| 1 | 205992024 | 206035481 | 1  | NM_172350    | CD46      | 0 | NA | 0 | NA | 1 | 12 | 0 | NA | 0 | NA |
| 1 | 205992024 | 206035481 | 1  | NM_172351    | CD46      | 0 | NA | 0 | NA | 1 | 12 | 0 | NA | 0 | NA |
| 1 | 205992024 | 206035481 | 1  | NM_172352    | CD46      | 0 | NA | 0 | NA | 1 | 12 | 0 | NA | 0 | NA |
| 1 | 205992024 | 206035481 | 1  | NM_172353    | CD46      | 0 | NA | 0 | NA | 1 | 12 | 0 | NA | 0 | NA |
| 1 | 205992024 | 206035481 | 1  | NM_172354    | CD46      | 0 | NA | 0 | NA | 1 | 12 | 0 | NA | 0 | NA |
| 1 | 205992024 | 206035481 | 1  | NM_172355    | CD46      | 0 | NA | 0 | NA | 1 | 12 | 0 | NA | 0 | NA |
| 1 | 205992024 | 206035481 | 1  | NM_172356    | CD46      | 0 | NA | 0 | NA | 1 | 12 | 0 | NA | 0 | NA |
| 1 | 205992024 | 206035481 | 1  | NM_172357    | CD46      | 0 | NA | 0 | NA | 1 | 12 | 0 | NA | 0 | NA |
| 1 | 205992024 | 206035481 | 1  | NM_172358    | CD46      | 0 | NA | 0 | NA | 1 | 12 | 0 | NA | 0 | NA |
| 1 | 205992024 | 206035481 | 1  | NM_172359    | CD46      | 0 | NA | 0 | NA | 1 | 12 | 0 | NA | 0 | NA |
| 1 | 205992024 | 206035481 | 1  | NM_172360    | CD46      | 0 | NA | 0 | NA | 1 | 12 | 0 | NA | 0 | NA |
| 1 | 205992024 | 206035481 | 1  | NM_172361    | CD46      | 0 | NA | 0 | NA | 1 | 12 | 0 | NA | 0 | NA |
| 1 | 206151306 | 206126505 | -1 | NM_001025109 | CD34      | 0 | NA | 0 | NA | 0 | NA | 0 | NA | 0 | NA |
| 1 | 206151306 | 206126505 | -1 | NM_001773    | CD34      | 0 | NA | 0 | NA | 0 | NA | 0 | NA | 0 | NA |
| 1 | 206484288 | 206262210 | -1 | NM_025179    | PLXNA2    | 0 | NA | 0 | NA | 0 | NA | 0 | NA | 0 | NA |
| 1 | 207668790 | 207672515 | 1  | NM_001104548 | LOC642587 | 0 | NA | 1 | 12 | 0 | NA | 0 | NA | 0 | NA |
| 1 | 207823867 | 207853907 | 1  | NM_020439    | CAMK1G    | 0 | NA | 0 | NA | 1 | 12 | 0 | NA | 0 | NA |
| 1 | 207891302 | 207854840 | -1 | NM_001017402 | LAMB3     | 0 | NA | 0 | NA | 0 | NA | 0 | NA | 0 | NA |
| 1 | 207892443 | 207854840 | -1 | NM_000228    | LAMB3     | 0 | NA | 0 | NA | 0 | NA | 0 | NA | 0 | NA |
| 1 | 207915292 | 207916358 | 1  | NM_015714    | G0S2      | 0 | NA | 1 | 12 | 0 | NA | 0 | NA | 0 | NA |
| 1 | 207926172 | 207974918 | 1  | NM_181755    | HSD11B1   | 0 | NA | 0 | NA | 0 | NA | 0 | NA | 0 | NA |
| 1 | 207944813 | 207974918 | 1  | NM_005525    | HSD11B1   | 0 | NA | 0 | NA | 0 | NA | 0 | NA | 0 | NA |
| 1 | 207996146 | 208022288 | 1  | NM_025228    | TRAF3IP3  | 0 | NA | 0 | NA | 0 | NA | 1 | 15 | 0 | NA |
| 1 | 208024513 | 208022284 | -1 | NM_152485    | C1orf74   | 1 | 28 | 0 | NA | 0 | NA | 0 | NA | 0 | NA |
| 1 | 208046102 | 208027884 | -1 | NM_006147    | IRF6      | 0 | NA | 0 | NA | 0 | NA | 0 | NA | 0 | NA |
| 1 | 208067955 | 208097531 | 1  | NM_014388    | C1orf107  | 1 | 11 | 0 | NA | 1 | 16 | 0 | NA | 0 | NA |
| 1 | 208178160 | 208404256 | 1  | NM_153262    | SYT14     | 0 | NA | 0 | NA | 0 | NA | 0 | NA | 0 | NA |

|   |           |           |    |              |           |   |    |   |    |   |    |   |    |   |    |
|---|-----------|-----------|----|--------------|-----------|---|----|---|----|---|----|---|----|---|----|
| 1 | 208472817 | 208483063 | 1  | NM_019605    | SERTAD4   | 0 | NA | 0 | NA | 1 | 12 | 1 | 12 | 0 | NA |
| 1 | 208568228 | 208916255 | 1  | NM_001122834 | HHAT      | 0 | NA | 0 | NA | 0 | NA | 0 | NA | 0 | NA |
| 1 | 208568886 | 208916255 | 1  | NM_018194    | HHAT      | 0 | NA | 0 | NA | 0 | NA | 0 | NA | 0 | NA |
| 1 | 209374080 | 208923177 | -1 | NM_002238    | KCNH1     | 0 | NA | 0 | NA | 0 | NA | 0 | NA | 0 | NA |
| 1 | 209374080 | 208923177 | -1 | NM_172362    | KCNH1     | 0 | NA | 0 | NA | 0 | NA | 0 | NA | 0 | NA |
| 1 | 209499948 | 209556200 | 1  | NM_018254    | RCOR3     | 0 | NA | 0 | NA | 0 | NA | 0 | NA | 0 | NA |
| 1 | 209566579 | 209614909 | 1  | NM_004619    | TRAF5     | 0 | NA | 0 | NA | 0 | NA | 0 | NA | 0 | NA |
| 1 | 209566801 | 209614909 | 1  | NM_001033910 | TRAF5     | 0 | NA | 0 | NA | 0 | NA | 0 | NA | 0 | NA |
| 1 | 209586328 | 209614909 | 1  | NM_145759    | TRAF5     | 0 | NA | 0 | NA | 0 | NA | 0 | NA | 0 | NA |
| 1 | 209732882 | 209717403 | -1 | NM_183059    | RD3       | 0 | NA | 0 | NA | 0 | NA | 0 | NA | 0 | NA |
| 1 | 209818722 | 209815003 | -1 | NM_021194    | SLC30A1   | 0 | NA | 0 | NA | 0 | NA | 0 | NA | 0 | NA |
| 1 | 209915590 | 209902744 | -1 | NM_002497    | NEK2      | 0 | NA | 0 | NA | 1 | 12 | 0 | NA | 0 | NA |
| 1 | 210070737 | 209984951 | -1 | NM_014873    | LPGAT1    | 0 | NA | 0 | NA | 0 | NA | 0 | NA | 0 | NA |
| 1 | 210275507 | 210181320 | -1 | NM_015434    | INTS7     | 0 | NA | 0 | NA | 0 | NA | 0 | NA | 0 | NA |
| 1 | 210275753 | 210344809 | 1  | NM_016448    | DTL       | 0 | NA | 0 | NA | 0 | NA | 0 | NA | 0 | NA |
| 1 | 210525501 | 210601828 | 1  | NM_006243    | PPP2R5A   | 1 | 16 | 0 | NA | 0 | NA | 0 | NA | 0 | NA |
| 1 | 210654890 | 210604438 | -1 | NM_018252    | TMEM206   | 1 | 11 | 0 | NA | 1 | 13 | 0 | NA | 0 | NA |
| 1 | 210672902 | 210686344 | 1  | NM_013349    | NENF      | 0 | NA | 0 | NA | 0 | NA | 0 | NA | 0 | NA |
| 1 | 210805319 | 210860739 | 1  | NM_001030287 | ATF3      | 0 | NA | 0 | NA | 1 | 14 | 0 | NA | 0 | NA |
| 1 | 210848616 | 210860739 | 1  | NM_001040619 | ATF3      | 0 | NA | 1 | 12 | 0 | NA | 0 | NA | 0 | NA |
| 1 | 210848616 | 210860739 | 1  | NM_001674    | ATF3      | 0 | NA | 1 | 12 | 0 | NA | 0 | NA | 0 | NA |
| 1 | 210848616 | 210860739 | 1  | NM_004024    | ATF3      | 0 | NA | 1 | 12 | 0 | NA | 0 | NA | 0 | NA |
| 1 | 210864438 | 210866740 | 1  | NM_153606    | FAM71A    | 0 | NA | 1 | 14 | 0 | NA | 0 | NA | 0 | NA |
| 1 | 210939950 | 210926382 | -1 | NM_018664    | BATF3     | 0 | NA | 0 | NA | 0 | NA | 0 | NA | 0 | NA |
| 1 | 211031762 | 210966117 | -1 | NM_001042549 | NSL1      | 1 | 11 | 0 | NA | 1 | 12 | 0 | NA | 0 | NA |
| 1 | 211031762 | 210966117 | -1 | NM_015471    | NSL1      | 1 | 11 | 0 | NA | 1 | 12 | 0 | NA | 0 | NA |
| 1 | 211031807 | 211056591 | 1  | NM_001042552 | TATDN3    | 1 | 11 | 0 | NA | 1 | 12 | 0 | NA | 0 | NA |
| 1 | 211031807 | 211056591 | 1  | NM_001042553 | TATDN3    | 1 | 11 | 0 | NA | 1 | 12 | 0 | NA | 0 | NA |
| 1 | 211087614 | 211070107 | -1 | NM_001024601 | LOC149643 | 0 | NA | 0 | NA | 0 | NA | 0 | NA | 0 | NA |
| 1 | 211098219 | 211135379 | 1  | NM_014053    | FLVCR1    | 0 | NA | 0 | NA | 0 | NA | 0 | NA | 0 | NA |
| 1 | 211190599 | 211230871 | 1  | NM_024749    | VASH2     | 1 | 25 | 0 | NA | 0 | NA | 0 | NA | 0 | NA |
| 1 | 211255791 | 211232146 | -1 | NM_144567    | ANGEL2    | 0 | NA | 0 | NA | 0 | NA | 0 | NA | 0 | NA |
| 1 | 211291219 | 211513431 | 1  | NM_012424    | RPS6KC1   | 1 | 11 | 0 | NA | 0 | NA | 0 | NA | 0 | NA |
| 1 | 212228482 | 212276385 | 1  | NM_002763    | PROX1     | 0 | NA | 0 | NA | 0 | NA | 0 | NA | 0 | NA |
| 1 | 212521198 | 212577097 | 1  | NM_020197    | SMYD2     | 1 | 12 | 0 | NA | 0 | NA | 0 | NA | 0 | NA |
| 1 | 212791265 | 212597633 | -1 | NM_005401    | PTPN14    | 0 | NA | 0 | NA | 0 | NA | 0 | NA | 0 | NA |
| 1 | 212843154 | 212904537 | 1  | NM_016343    | CENPF     | 1 | 15 | 0 | NA | 0 | NA | 0 | NA | 0 | NA |
| 1 | 213245507 | 213477059 | 1  | NM_001017424 | KCNK2     | 0 | NA | 0 | NA | 0 | NA | 0 | NA | 0 | NA |
| 1 | 213323182 | 213477059 | 1  | NM_001017425 | KCNK2     | 1 | 11 | 0 | NA | 0 | NA | 0 | NA | 0 | NA |
| 1 | 213323182 | 213477059 | 1  | NM_014217    | KCNK2     | 1 | 11 | 0 | NA | 0 | NA | 0 | NA | 0 | NA |
| 1 | 213807357 | 213861772 | 1  | NM_016121    | KCTD3     | 1 | 14 | 0 | NA | 0 | NA | 0 | NA | 0 | NA |
| 1 | 214663361 | 213862858 | -1 | NM_206933    | USH2A     | 0 | NA | 0 | NA | 0 | NA | 0 | NA | 0 | NA |
| 1 | 214663361 | 214413914 | -1 | NM_007123    | USH2A     | 0 | NA | 0 | NA | 0 | NA | 0 | NA | 0 | NA |
| 1 | 214963430 | 214743210 | -1 | NM_001438    | ESRRG     | 0 | NA | 0 | NA | 0 | NA | 0 | NA | 0 | NA |
| 1 | 215329599 | 214743210 | -1 | NM_206594    | ESRRG     | 0 | NA | 0 | NA | 0 | NA | 0 | NA | 0 | NA |
| 1 | 215329599 | 214743210 | -1 | NM_206595    | ESRRG     | 0 | NA | 0 | NA | 0 | NA | 0 | NA | 0 | NA |
| 1 | 215871032 | 215670456 | -1 | NM_018040    | GPATCH2   | 1 | 13 | 0 | NA | 0 | NA | 0 | NA | 0 | NA |
| 1 | 215871317 | 216107107 | 1  | NM_138796    | SPATA17   | 1 | 13 | 0 | NA | 0 | NA | 0 | NA | 0 | NA |
| 1 | 216525251 | 216577948 | 1  | NM_016052    | RRP15     | 0 | NA | 0 | NA | 0 | NA | 0 | NA | 0 | NA |
| 1 | 216586490 | 216681593 | 1  | NM_003238    | TGF2      | 0 | NA | 0 | NA | 0 | NA | 0 | NA | 0 | NA |
| 1 | 217413814 | 217452830 | 1  | NM_138794    | LYPLAL1   | 1 | 18 | 0 | NA | 0 | NA | 0 | NA | 0 | NA |
| 1 | 218168616 | 218154228 | -1 | NM_018713    | SLC30A10  | 0 | NA | 0 | NA | 0 | NA | 0 | NA | 0 | NA |
| 1 | 218286623 | 218208564 | -1 | NM_004446    | EPRS      | 1 | 11 | 0 | NA | 0 | NA | 0 | NA | 0 | NA |
| 1 | 218329814 | 218297446 | -1 | NM_006085    | BPNT1     | 0 | NA | 0 | NA | 0 | NA | 0 | NA | 0 | NA |
| 1 | 218334077 | 218388006 | 1  | NM_018060    | IARS2     | 0 | NA | 0 | NA | 0 | NA | 0 | NA | 0 | NA |
| 1 | 218512375 | 218390349 | -1 | NM_012414    | RAB3GAP2  | 1 | 25 | 0 | NA | 1 | 14 | 0 | NA | 0 | NA |
| 1 | 218768190 | 218904422 | 1  | NM_018650    | MARK1     | 0 | NA | 1 | 14 | 0 | NA | 0 | NA | 0 | NA |
| 1 | 218930250 | 218939122 | 1  | NM_024709    | C1orf115  | 0 | NA | 1 | 12 | 0 | NA | 1 | 12 | 0 | NA |
| 1 | 218988298 | 219024219 | 1  | NM_017898    | MOSC2     | 0 | NA | 0 | NA | 0 | NA | 0 | NA | 0 | NA |
| 1 | 219026893 | 219054353 | 1  | NM_022746    | MOSC1     | 1 | 12 | 0 | NA | 0 | NA | 0 | NA | 0 | NA |
| 1 | 219119365 | 219125023 | 1  | NM_021958    | HLX       | 0 | NA | 1 | 12 | 0 | NA | 0 | NA | 0 | NA |
| 1 | 219977425 | 219941388 | -1 | NM_144728    | DUSP10    | 1 | 27 | 0 | NA | 0 | NA | 0 | NA | 0 | NA |
| 1 | 219982084 | 219941388 | -1 | NM_007207    | DUSP10    | 1 | 27 | 0 | NA | 0 | NA | 0 | NA | 0 | NA |
| 1 | 219982084 | 219941388 | -1 | NM_144729    | DUSP10    | 1 | 27 | 0 | NA | 0 | NA | 0 | NA | 0 | NA |
| 1 | 220788067 | 220762224 | -1 | NM_024746    | HHIPL2    | 0 | NA | 0 | NA | 0 | NA | 0 | NA | 0 | NA |

|   |           |           |    |              |          |   |    |    |    |   |    |   |    |   |    |
|---|-----------|-----------|----|--------------|----------|---|----|----|----|---|----|---|----|---|----|
| 1 | 220829878 | 220798287 | -1 | NM_005681    | TAF1A    | 0 | NA | 0  | NA | 0 | NA | 0 | NA | 0 | NA |
| 1 | 220829878 | 220798287 | -1 | NM_139352    | TAF1A    | 0 | NA | 0  | NA | 0 | NA | 0 | NA | 0 | NA |
| 1 | 220858066 | 220907974 | 1  | NM_198551    | MIA3     | 0 | NA | 0  | NA | 0 | NA | 0 | NA | 0 | NA |
| 1 | 220952487 | 220907977 | -1 | NM_022831    | C1orf80  | 0 | NA | 0  | NA | 0 | NA | 0 | NA | 0 | NA |
| 1 | 220952528 | 220972729 | 1  | NM_144695    | C1orf58  | 0 | NA | 0  | NA | 0 | NA | 0 | NA | 0 | NA |
| 1 | 220977180 | 220990625 | 1  | NM_207468    | FLJ43505 | 0 | NA | 0  | NA | 0 | NA | 0 | NA | 0 | NA |
| 1 | 221168405 | 221245958 | 1  | NM_032890    | DISP1    | 0 | NA | 0  | NA | 0 | NA | 0 | NA | 0 | NA |
| 1 | 221383247 | 221350206 | -1 | NM_003268    | TLR5     | 1 | 12 | 0  | NA | 0 | NA | 0 | NA | 0 | NA |
| 1 | 221604167 | 221460783 | -1 | NM_017982    | SUSD4    | 0 | NA | 0  | NA | 0 | NA | 0 | NA | 0 | NA |
| 1 | 221604167 | 221474874 | -1 | NM_001037175 | SUSD4    | 0 | NA | 0  | NA | 0 | NA | 0 | NA | 0 | NA |
| 1 | 221633390 | 221635435 | 1  | NM_152610    | C1orf65  | 0 | NA | 1  | 15 | 0 | NA | 0 | NA | 0 | NA |
| 1 | 221966741 | 222030343 | 1  | NM_001748    | CAPN2    | 0 | NA | 0  | NA | 0 | NA | 0 | NA | 0 | NA |
| 1 | 222100297 | 222034217 | -1 | NM_001031685 | TP53BP2  | 0 | NA | 0  | NA | 1 | 15 | 0 | NA | 0 | NA |
| 1 | 222100297 | 222034217 | -1 | NM_005426    | TP53BP2  | 0 | NA | 0  | NA | 1 | 15 | 0 | NA | 0 | NA |
| 1 | 222368435 | 222413869 | 1  | NM_015176    | FBXQ28   | 0 | NA | 0  | NA | 0 | NA | 0 | NA | 0 | NA |
| 1 | 222437550 | 222447765 | 1  | NM_003676    | DEGS1    | 0 | NA | 0  | NA | 0 | NA | 0 | NA | 0 | NA |
| 1 | 222437550 | 222447765 | 1  | NM_144780    | DEGS1    | 0 | NA | 0  | NA | 0 | NA | 0 | NA | 0 | NA |
| 1 | 222584495 | 222481658 | -1 | NM_002533    | NVL      | 1 | 25 | -1 | NA | 0 | NA | 0 | NA | 0 | NA |
| 1 | 222584495 | 222481658 | -1 | NM_206840    | NVL      | 1 | 25 | 0  | NA | 0 | NA | 0 | NA | 0 | NA |
| 1 | 222611217 | 222630318 | 1  | NM_014184    | CNIH4    | 0 | NA | 0  | NA | 0 | NA | 0 | NA | 0 | NA |
| 1 | 222688355 | 222639467 | -1 | NM_001115113 | WDR26    | 0 | NA | 0  | NA | 1 | 12 | 0 | NA | 0 | NA |
| 1 | 222688355 | 222639467 | -1 | NM_025160    | WDR26    | 0 | NA | 0  | NA | 1 | 12 | 0 | NA | 0 | NA |
| 1 | 222870801 | 222994872 | 1  | NM_152495    | CNIH3    | 0 | NA | 0  | NA | 0 | NA | 0 | NA | 0 | NA |
| 1 | 223183985 | 223222249 | 1  | NM_144989    | C1orf67  | 0 | NA | 0  | NA | 1 | 12 | 0 | NA | 0 | NA |
| 1 | 223682407 | 223655826 | -1 | NM_002296    | LBR      | 0 | NA | 0  | NA | 1 | 13 | 0 | NA | 0 | NA |
| 1 | 223683142 | 223655826 | -1 | NM_194442    | LBR      | 0 | NA | 0  | NA | 1 | 13 | 0 | NA | 0 | NA |
| 1 | 223907468 | 223741156 | -1 | NM_001008493 | ENAH     | 0 | NA | 0  | NA | 1 | 15 | 0 | NA | 0 | NA |
| 1 | 223907468 | 223741156 | -1 | NM_018212    | ENAH     | 0 | NA | 0  | NA | 1 | 15 | 0 | NA | 0 | NA |
| 1 | 224032153 | 224044787 | 1  | NM_003133    | SRP9     | 1 | 14 | 0  | NA | 0 | NA | 1 | 14 | 0 | NA |
| 1 | 224079598 | 224099884 | 1  | NM_000120    | EPHX1    | 1 | 15 | 0  | NA | 0 | NA | 0 | NA | 0 | NA |
| 1 | 224136671 | 224099862 | -1 | NM_014698    | TMEM63A  | 0 | NA | 0  | NA | 0 | NA | 0 | NA | 0 | NA |
| 1 | 224143459 | 224140604 | -1 | NM_020997    | LEFTY1   | 0 | NA | 0  | NA | 0 | NA | 0 | NA | 0 | NA |
| 1 | 224178588 | 224174202 | -1 | NM_013328    | PYCR2    | 0 | NA | 0  | NA | 0 | NA | 0 | NA | 0 | NA |
| 1 | 224195543 | 224190925 | -1 | NM_003240    | LEFTY2   | 0 | NA | 0  | NA | 0 | NA | 0 | NA | 0 | NA |
| 1 | 224253689 | 224237025 | -1 | NM_152608    | C1orf55  | 1 | 14 | 0  | NA | 0 | NA | 0 | NA | 0 | NA |
| 1 | 224317043 | 224326326 | 1  | NM_002107    | H3F3A    | 0 | NA | 0  | NA | 0 | NA | 1 | 11 | 0 | NA |
| 1 | 224441046 | 224399002 | -1 | NM_022735    | ACBD3    | 0 | NA | 0  | NA | 0 | NA | 0 | NA | 0 | NA |
| 1 | 224478005 | 224480136 | 1  | NM_031944    | MIXL1    | 0 | NA | 0  | NA | 0 | NA | 0 | NA | 0 | NA |
| 1 | 224563821 | 224485485 | -1 | NM_173083    | LIN9     | 0 | NA | 0  | NA | 0 | NA | 0 | NA | 0 | NA |
| 1 | 224662424 | 224615014 | -1 | NM_001618    | PARP1    | 1 | 23 | 0  | NA | 0 | NA | 1 | 12 | 0 | NA |
| 1 | 224803123 | 224859926 | 1  | NM_001003665 | C1orf95  | 0 | NA | 1  | 15 | 0 | NA | 0 | NA | 0 | NA |
| 1 | 224991818 | 224886013 | -1 | NM_002221    | ITPKB    | 0 | NA | 0  | NA | 0 | NA | 0 | NA | 0 | NA |
| 1 | 225124895 | 225150427 | 1  | NM_000447    | PSEN2    | 0 | NA | 0  | NA | 0 | NA | 1 | 15 | 0 | NA |
| 1 | 225124895 | 225150427 | 1  | NM_012486    | PSEN2    | 0 | NA | 0  | NA | 0 | NA | 1 | 15 | 0 | NA |
| 1 | 225194560 | 225241869 | 1  | NM_020247    | CABC1    | 0 | NA | 0  | NA | 1 | 13 | 0 | NA | 0 | NA |
| 1 | 225572449 | 225244188 | -1 | NM_003607    | CDC42BPA | 0 | NA | 0  | NA | 0 | NA | 0 | NA | 0 | NA |
| 1 | 225572449 | 225244188 | -1 | NM_014826    | CDC42BPA | 0 | NA | 0  | NA | 0 | NA | 0 | NA | 0 | NA |
| 1 | 225817866 | 225910748 | 1  | NM_178549    | ZNF678   | 0 | NA | 1  | 13 | 0 | NA | 0 | NA | 0 | NA |
| 1 | 225989319 | 226035550 | 1  | NM_053052    | C1orf142 | 0 | NA | 0  | NA | 0 | NA | 0 | NA | 0 | NA |
| 1 | 225989735 | 225985557 | -1 | NM_023007    | JMJD4    | 0 | NA | 0  | NA | 0 | NA | 0 | NA | 0 | NA |
| 1 | 226070040 | 226100794 | 1  | NM_183062    | MPN2     | 0 | NA | 1  | 14 | 0 | NA | 0 | NA | 0 | NA |
| 1 | 226202222 | 226175319 | -1 | NM_003395    | WNT9A    | 0 | NA | 0  | NA | 0 | NA | 0 | NA | 0 | NA |
| 1 | 226261374 | 226315584 | 1  | NM_033131    | WNT3A    | 0 | NA | 1  | 12 | 0 | NA | 0 | NA | 0 | NA |
| 1 | 226336983 | 226353536 | 1  | NM_001024226 | ARF1     | 0 | NA | 0  | NA | 0 | NA | 0 | NA | 1 | 16 |
| 1 | 226336983 | 226353536 | 1  | NM_001658    | ARF1     | 0 | NA | 0  | NA | 0 | NA | 0 | NA | 1 | 16 |
| 1 | 226337473 | 226353536 | 1  | NM_001024227 | ARF1     | 0 | NA | 0  | NA | 0 | NA | 0 | NA | 1 | 16 |
| 1 | 226337473 | 226353536 | 1  | NM_001024228 | ARF1     | 0 | NA | 0  | NA | 0 | NA | 0 | NA | 1 | 16 |
| 1 | 226357645 | 226355050 | -1 | NM_024319    | C1orf35  | 1 | 11 | 1  | 14 | 1 | 13 | 1 | 12 | 1 | 16 |
| 1 | 226363636 | 226361002 | -1 | NM_181441    | MRPL55   | 1 | 11 | 0  | NA | 1 | 16 | 0 | NA | 0 | NA |
| 1 | 226363636 | 226361002 | -1 | NM_181454    | MRPL55   | 1 | 11 | 0  | NA | 1 | 16 | 0 | NA | 0 | NA |
| 1 | 226363636 | 226361002 | -1 | NM_181455    | MRPL55   | 1 | 11 | 0  | NA | 1 | 16 | 0 | NA | 0 | NA |
| 1 | 226363636 | 226361002 | -1 | NM_181456    | MRPL55   | 1 | 11 | 0  | NA | 1 | 16 | 0 | NA | 0 | NA |
| 1 | 226363636 | 226361002 | -1 | NM_181462    | MRPL55   | 1 | 11 | 0  | NA | 1 | 16 | 0 | NA | 0 | NA |
| 1 | 226363636 | 226361002 | -1 | NM_181463    | MRPL55   | 1 | 11 | 0  | NA | 1 | 16 | 0 | NA | 0 | NA |
| 1 | 226363636 | 226361002 | -1 | NM_181464    | MRPL55   | 1 | 11 | 0  | NA | 1 | 16 | 0 | NA | 0 | NA |



|   |           |           |    |              |           |   |    |   |    |   |    |   |    |   |    |
|---|-----------|-----------|----|--------------|-----------|---|----|---|----|---|----|---|----|---|----|
| 1 | 226363636 | 226361002 | -1 | NM_181465    | MRPL55    | 1 | 11 | 0 | NA | 1 | 16 | 0 | NA | 0 | NA |
| 1 | 226394604 | 226403275 | 1  | NM_000858    | GUK1      | 0 | NA | 0 | NA | 0 | NA | 0 | NA | 0 | NA |
| 1 | 226404175 | 226414150 | 1  | NM_020435    | GJC2      | 0 | NA | 1 | 16 | 0 | NA | 0 | NA | 0 | NA |
| 1 | 226420051 | 226436581 | 1  | NM_001010867 | C1orf69   | 1 | 14 | 1 | 16 | 0 | NA | 0 | NA | 0 | NA |
| 1 | 226462483 | 226615574 | 1  | NM_052843    | OBSCN     | 0 | NA | 1 | 13 | 0 | NA | 0 | NA | 0 | NA |
| 1 | 226462483 | 226633198 | 1  | NM_001098623 | OBSCN     | 0 | NA | 1 | 13 | 0 | NA | 0 | NA | 0 | NA |
| 1 | 226661140 | 226647999 | -1 | NM_145214    | TRIM11    | 0 | NA | 0 | NA | 0 | NA | 0 | NA | 0 | NA |
| 1 | 226670977 | 226662263 | -1 | NM_001024940 | TRIM17    | 0 | NA | 0 | NA | 0 | NA | 0 | NA | 0 | NA |
| 1 | 226670977 | 226662263 | -1 | NM_001024941 | TRIM17    | 0 | NA | 0 | NA | 0 | NA | 0 | NA | 0 | NA |
| 1 | 226670977 | 226662263 | -1 | NM_016102    | TRIM17    | 0 | NA | 0 | NA | 0 | NA | 0 | NA | 0 | NA |
| 1 | 226679649 | 226679168 | -1 | NM_003493    | HIST3H3   | 0 | NA | 0 | NA | 0 | NA | 0 | NA | 0 | NA |
| 1 | 226712183 | 226711687 | -1 | NM_033445    | HIST3H2A  | 1 | 14 | 0 | NA | 1 | 12 | 0 | NA | 0 | NA |
| 1 | 226712430 | 226712882 | 1  | NM_175055    | HIST3H2BB | 1 | 14 | 0 | NA | 1 | 12 | 0 | NA | 0 | NA |
| 1 | 226937491 | 226949034 | 1  | NM_021205    | RHOU      | 0 | NA | 1 | 12 | 0 | NA | 0 | NA | 0 | NA |
| 1 | 227473501 | 227507141 | 1  | NM_004578    | RAB4A     | 0 | NA | 1 | 31 | 0 | NA | 1 | 12 | 0 | NA |
| 1 | 227506751 | 227507873 | 1  | NM_006542    | SPHAR     | 0 | NA | 0 | NA | 0 | NA | 0 | NA | 0 | NA |
| 1 | 227545358 | 227523381 | -1 | NM_145257    | C1orf96   | 0 | NA | 0 | NA | 0 | NA | 0 | NA | 0 | NA |
| 1 | 227636466 | 227633615 | -1 | NM_001100    | ACTA1     | 0 | NA | 1 | 12 | 0 | NA | 0 | NA | 1 | 13 |
| 1 | 227710711 | 227643666 | -1 | NM_018230    | NUP133    | 0 | NA | 0 | NA | 0 | NA | 1 | 11 | 0 | NA |
| 1 | 227761065 | 227718951 | -1 | NM_012089    | ABCB10    | 0 | NA | 0 | NA | 0 | NA | 0 | NA | 0 | NA |
| 1 | 227828417 | 227795486 | -1 | NM_014409    | TAF5L     | 0 | NA | 0 | NA | 0 | NA | 0 | NA | 0 | NA |
| 1 | 227828417 | 227801563 | -1 | NM_001025247 | TAF5L     | 0 | NA | 0 | NA | 0 | NA | 0 | NA | 0 | NA |
| 1 | 227828603 | 227862569 | 1  | NM_014777    | KIAA0133  | 0 | NA | 0 | NA | 0 | NA | 0 | NA | 0 | NA |
| 1 | 228269650 | 228484569 | 1  | NM_004481    | GALNT2    | 0 | NA | 0 | NA | 0 | NA | 0 | NA | 0 | NA |
| 1 | 228579990 | 228524014 | -1 | NM_024554    | PGBD5     | 0 | NA | 1 | 12 | 0 | NA | 0 | NA | 0 | NA |
| 1 | 228844880 | 228896351 | 1  | NM_007357    | COG2      | 0 | NA | 0 | NA | 1 | 12 | 0 | NA | 0 | NA |
| 1 | 228916564 | 228904891 | -1 | NM_000029    | AGT       | 0 | NA | 0 | NA | 0 | NA | 0 | NA | 0 | NA |
| 1 | 228949752 | 229004141 | 1  | NM_006615    | CAPN9     | 0 | NA | 0 | NA | 0 | NA | 0 | NA | 0 | NA |
| 1 | 228949783 | 229004372 | 1  | NM_016452    | CAPN9     | 0 | NA | 0 | NA | 0 | NA | 0 | NA | 0 | NA |
| 1 | 229070900 | 229039488 | -1 | NM_032800    | C1orf198  | 1 | 19 | 0 | NA | 0 | NA | 0 | NA | 0 | NA |
| 1 | 229181230 | 229108611 | -1 | NM_001122835 | TTC13     | 0 | NA | 0 | NA | 0 | NA | 0 | NA | 0 | NA |
| 1 | 229181230 | 229108611 | -1 | NM_024525    | TTC13     | 0 | NA | 0 | NA | 0 | NA | 0 | NA | 0 | NA |
| 1 | 229181445 | 229203102 | 1  | NM_022786    | ARV1      | 0 | NA | 0 | NA | 0 | NA | 0 | NA | 0 | NA |
| 1 | 229242608 | 229221555 | -1 | NM_196552    | FAM89A    | 0 | NA | 1 | 13 | 0 | NA | 0 | NA | 0 | NA |
| 1 | 229365296 | 229423937 | 1  | NM_001004342 | TRIM67    | 0 | NA | 0 | NA | 0 | NA | 0 | NA | 0 | NA |
| 1 | 229443541 | 229480342 | 1  | NM_014236    | GNPAT     | 0 | NA | 0 | NA | 0 | NA | 0 | NA | 0 | NA |
| 1 | 229443547 | 229426131 | -1 | NM_152379    | C1orf131  | 0 | NA | 0 | NA | 0 | NA | 0 | NA | 0 | NA |
| 1 | 229540201 | 229535104 | -1 | NM_175876    | EXOC8     | 0 | NA | 0 | NA | 0 | NA | 0 | NA | 0 | NA |
| 1 | 229540304 | 229556612 | 1  | NM_001010984 | C1orf124  | 0 | NA | 0 | NA | 0 | NA | 0 | NA | 0 | NA |
| 1 | 229540304 | 229556612 | 1  | NM_032018    | C1orf124  | 0 | NA | 0 | NA | 0 | NA | 0 | NA | 0 | NA |
| 1 | 229627413 | 229568053 | -1 | NM_022051    | EGLN1     | 1 | 12 | 0 | NA | 1 | 13 | 0 | NA | 0 | NA |
| 1 | 229731021 | 229768892 | 1  | NM_005999    | TSNAX     | 0 | NA | 0 | NA | 0 | NA | 0 | NA | 0 | NA |
| 1 | 229829183 | 229926443 | 1  | NM_001012958 | DISC1     | 1 | 16 | 0 | NA | 0 | NA | 0 | NA | 0 | NA |
| 1 | 229829183 | 230069075 | 1  | NM_001012959 | DISC1     | 1 | 16 | 0 | NA | 0 | NA | 0 | NA | 0 | NA |
| 1 | 229829183 | 230243641 | 1  | NM_001012957 | DISC1     | 1 | 16 | 0 | NA | 0 | NA | 0 | NA | 0 | NA |
| 1 | 229829183 | 230243641 | 1  | NM_018662    | DISC1     | 1 | 16 | 0 | NA | 0 | NA | 0 | NA | 0 | NA |
| 1 | 230717866 | 230600334 | -1 | NM_020808    | SIPA1L2   | 0 | NA | 0 | NA | 1 | 13 | 0 | NA | 0 | NA |
| 1 | 231007260 | 231012715 | 1  | NM_019090    | KIAA1383  | 0 | NA | 1 | 13 | 0 | NA | 0 | NA | 0 | NA |
| 1 | 231152992 | 231180842 | 1  | NM_032324    | C1orf57   | 0 | NA | 0 | NA | 0 | NA | 0 | NA | 0 | NA |
| 1 | 231498082 | 231186504 | -1 | NM_014801    | PCNXL2    | 0 | NA | 0 | NA | 0 | NA | 0 | NA | 0 | NA |
| 1 | 231530136 | 231587517 | 1  | NM_032435    | KIAA1804  | 0 | NA | 0 | NA | 0 | NA | 0 | NA | 0 | NA |
| 1 | 231816372 | 231874607 | 1  | NM_002245    | KCNK1     | 0 | NA | 0 | NA | 0 | NA | 0 | NA | 0 | NA |
| 1 | 232107301 | 232526885 | 1  | NM_173508    | SLC35F3   | 0 | NA | 0 | NA | 0 | NA | 0 | NA | 0 | NA |
| 1 | 232576051 | 232586414 | 1  | NM_001012985 | C1orf31   | 0 | NA | 0 | NA | 0 | NA | 0 | NA | 0 | NA |
| 1 | 232681472 | 232593681 | -1 | NM_005646    | TARBP1    | 0 | NA | 0 | NA | 0 | NA | 0 | NA | 0 | NA |
| 1 | 232811894 | 232806637 | -1 | NM_001077397 | IRF2BP2   | 1 | 11 | 0 | NA | 1 | 13 | 0 | NA | 0 | NA |
| 1 | 232811894 | 232806637 | -1 | NM_182972    | IRF2BP2   | 1 | 11 | 0 | NA | 1 | 13 | 0 | NA | 0 | NA |
| 1 | 233358754 | 233339282 | -1 | NM_014765    | TOMM20    | 0 | NA | 0 | NA | 0 | NA | 0 | NA | 0 | NA |
| 1 | 233391194 | 233361571 | -1 | NM_015014    | RBM34     | 0 | NA | 0 | NA | 1 | 12 | 0 | NA | 0 | NA |
| 1 | 233558155 | 233396832 | -1 | NM_016374    | ARID4B    | 1 | 12 | 0 | NA | 0 | NA | 0 | NA | 0 | NA |
| 1 | 233558155 | 233396832 | -1 | NM_031371    | ARID4B    | 1 | 12 | 0 | NA | 0 | NA | 0 | NA | 0 | NA |
| 1 | 233558375 | 233574467 | 1  | NM_001037277 | GGPS1     | 1 | 12 | 0 | NA | 0 | NA | 0 | NA | 0 | NA |
| 1 | 233558491 | 233574467 | 1  | NM_001037278 | GGPS1     | 1 | 12 | 0 | NA | 0 | NA | 0 | NA | 0 | NA |
| 1 | 233558491 | 233574467 | 1  | NM_004837    | GGPS1     | 1 | 12 | 0 | NA | 0 | NA | 0 | NA | 0 | NA |
| 1 | 233597350 | 233678903 | 1  | NM_001079515 | TBCE      | 1 | 15 | 0 | NA | 0 | NA | 0 | NA | 0 | NA |

|   |           |           |    |              |          |   |    |   |    |   |    |   |    |   |    |
|---|-----------|-----------|----|--------------|----------|---|----|---|----|---|----|---|----|---|----|
| 1 | 233597350 | 233678903 | 1  | NM_003193    | TBCE     | 1 | 15 | 0 | NA | 0 | NA | 0 | NA | 0 | NA |
| 1 | 233734404 | 233679867 | -1 | NM_152490    | B3GALNT2 | 0 | NA | 0 | NA | 0 | NA | 0 | NA | 0 | NA |
| 1 | 233879916 | 233777607 | -1 | NM_001098722 | GNG4     | 1 | 16 | 0 | NA | 0 | NA | 0 | NA | 0 | NA |
| 1 | 233880677 | 233777607 | -1 | NM_001098721 | GNG4     | 1 | 16 | 0 | NA | 0 | NA | 0 | NA | 0 | NA |
| 1 | 233880677 | 233777607 | -1 | NM_004485    | GNG4     | 1 | 16 | 0 | NA | 0 | NA | 0 | NA | 0 | NA |
| 1 | 234096843 | 233890968 | -1 | NM_000081    | LYST     | 0 | NA | 0 | NA | 0 | NA | 0 | NA | 0 | NA |
| 1 | 234295104 | 234205754 | -1 | NM_002508    | NID1     | 0 | NA | 0 | NA | 0 | NA | 0 | NA | 0 | NA |
| 1 | 234372496 | 234438829 | 1  | NM_003272    | GPR137B  | 0 | NA | 0 | NA | 0 | NA | 1 | 11 | 0 | NA |
| 1 | 234511908 | 234447082 | -1 | NM_019891    | ERO1LB   | 0 | NA | 0 | NA | 0 | NA | 0 | NA | 0 | NA |
| 1 | 234624302 | 234714631 | 1  | NM_145861    | EDARADD  | 0 | NA | 0 | NA | 0 | NA | 0 | NA | 0 | NA |
| 1 | 234625338 | 234714631 | 1  | NM_080738    | EDARADD  | 0 | NA | 0 | NA | 0 | NA | 0 | NA | 0 | NA |
| 1 | 234748187 | 234779619 | 1  | NM_201545    | LGALS8   | 0 | NA | 0 | NA | 0 | NA | 0 | NA | 0 | NA |
| 1 | 234753361 | 234779619 | 1  | NM_006499    | LGALS8   | 0 | NA | 0 | NA | 0 | NA | 0 | NA | 0 | NA |
| 1 | 234753361 | 234779619 | 1  | NM_201543    | LGALS8   | 0 | NA | 0 | NA | 0 | NA | 0 | NA | 0 | NA |
| 1 | 234753699 | 234779619 | 1  | NM_201544    | LGALS8   | 0 | NA | 0 | NA | 0 | NA | 0 | NA | 0 | NA |
| 1 | 234834437 | 234780593 | -1 | NM_018072    | HEATR1   | 0 | NA | 0 | NA | 0 | NA | 0 | NA | 0 | NA |
| 1 | 234916392 | 234994181 | 1  | NM_001103    | ACTN2    | 0 | NA | 1 | 12 | 0 | NA | 0 | NA | 0 | NA |
| 1 | 235025203 | 235133904 | 1  | NM_000254    | MTR      | 0 | NA | 1 | 17 | 1 | 12 | 0 | NA | 0 | NA |
| 1 | 235272324 | 236063911 | 1  | NM_001035    | RZR2     | 0 | NA | 1 | 13 | 0 | NA | 0 | NA | 0 | NA |
| 1 | 236120558 | 236112332 | -1 | NM_021186    | ZP4      | 0 | NA | 0 | NA | 1 | 15 | 0 | NA | 0 | NA |
| 1 | 237858995 | 238139340 | 1  | NM_000740    | CHRM3    | 0 | NA | 0 | NA | 0 | NA | 0 | NA | 0 | NA |
| 1 | 238321807 | 238705112 | 1  | NM_020066    | FMN2     | 0 | NA | 0 | NA | 0 | NA | 0 | NA | 0 | NA |
| 1 | 238842085 | 238719495 | -1 | NM_022469    | GREM2    | 0 | NA | 0 | NA | 0 | NA | 0 | NA | 0 | NA |
| 1 | 239587101 | 239005439 | -1 | NM_002924    | RGS7     | 0 | NA | 0 | NA | 0 | NA | 0 | NA | 0 | NA |
| 1 | 239749677 | 239727526 | -1 | NM_000143    | FH       | 0 | NA | 0 | NA | 1 | 14 | 0 | NA | 0 | NA |
| 1 | 239762302 | 239825667 | 1  | NM_003679    | KMO      | 0 | NA | 0 | NA | 0 | NA | 0 | NA | 0 | NA |
| 1 | 239865855 | 239858789 | -1 | NM_001821    | CHML     | 0 | NA | 0 | NA | 1 | 13 | 0 | NA | 0 | NA |
| 1 | 239870324 | 239823074 | -1 | NM_014322    | OPN3     | 0 | NA | 0 | NA | 1 | 13 | 0 | NA | 0 | NA |
| 1 | 239913504 | 240031580 | 1  | NM_144625    | WDR64    | 0 | NA | 0 | NA | 0 | NA | 0 | NA | 0 | NA |
| 1 | 240078157 | 240119671 | 1  | NM_003686    | EXO1     | 0 | NA | 0 | NA | 0 | NA | 0 | NA | 0 | NA |
| 1 | 240078157 | 240119671 | 1  | NM_006027    | EXO1     | 0 | NA | 0 | NA | 0 | NA | 0 | NA | 0 | NA |
| 1 | 240078157 | 240119671 | 1  | NM_130398    | EXO1     | 0 | NA | 0 | NA | 0 | NA | 0 | NA | 0 | NA |
| 1 | 240228998 | 240225414 | -1 | NM_001004343 | MAP1LC3C | 0 | NA | 0 | NA | 0 | NA | 0 | NA | 0 | NA |
| 1 | 240754621 | 240318894 | -1 | NM_152666    | PLD5     | 0 | NA | 0 | NA | 0 | NA | 0 | NA | 0 | NA |
| 1 | 241485331 | 241354352 | -1 | NM_001042404 | CEP170   | 0 | NA | 0 | NA | 0 | NA | 0 | NA | 0 | NA |
| 1 | 241485331 | 241354352 | -1 | NM_001042405 | CEP170   | 0 | NA | 0 | NA | 0 | NA | 0 | NA | 0 | NA |
| 1 | 241485331 | 241354352 | -1 | NM_014812    | CEP170   | 0 | NA | 0 | NA | 0 | NA | 0 | NA | 0 | NA |
| 1 | 241485942 | 241730016 | 1  | NM_006642    | SDCCAG8  | 0 | NA | 0 | NA | 0 | NA | 0 | NA | 0 | NA |
| 1 | 242073176 | 241718157 | -1 | NM_181690    | AKT3     | 0 | NA | 0 | NA | 1 | 12 | 1 | 12 | 0 | NA |
| 1 | 242073176 | 241733106 | -1 | NM_005465    | AKT3     | 0 | NA | 0 | NA | 1 | 12 | 1 | 12 | 0 | NA |
| 1 | 242281183 | 242287403 | 1  | NM_205768    | ZNF238   | 1 | 11 | 0 | NA | 0 | NA | 0 | NA | 0 | NA |
| 1 | 242283204 | 242287403 | 1  | NM_006352    | ZNF238   | 1 | 11 | 0 | NA | 0 | NA | 0 | NA | 0 | NA |
| 1 | 242582559 | 242619016 | 1  | NM_001012970 | C1orf100 | 0 | NA | 0 | NA | 0 | NA | 0 | NA | 0 | NA |
| 1 | 242682036 | 242638418 | -1 | NM_001126    | ADSS     | 1 | 25 | 0 | NA | 0 | NA | 0 | NA | 0 | NA |
| 1 | 242691315 | 242870285 | 1  | NM_173807    | C1orf101 | 1 | 25 | 0 | NA | 0 | NA | 0 | NA | 0 | NA |
| 1 | 242882974 | 242938957 | 1  | NM_016076    | FAM152A  | 0 | NA | 1 | 12 | 0 | NA | 0 | NA | 0 | NA |
| 1 | 243065261 | 243074982 | 1  | NM_198076    | FAM36A   | 0 | NA | 0 | NA | 0 | NA | 1 | 20 | 0 | NA |
| 1 | 243094450 | 243080224 | -1 | NM_004501    | HNRNPU   | 0 | NA | 0 | NA | 0 | NA | 0 | NA | 0 | NA |
| 1 | 243094450 | 243080224 | -1 | NM_031844    | HNRNPU   | 0 | NA | 0 | NA | 0 | NA | 0 | NA | 0 | NA |
| 1 | 243200314 | 243317761 | 1  | NM_032328    | EFCAB2   | 0 | NA | 0 | NA | 1 | 12 | 0 | NA | 0 | NA |
| 1 | 243384909 | 243933051 | 1  | NM_018012    | KIF26B   | 0 | NA | 0 | NA | 0 | NA | 0 | NA | 0 | NA |
| 1 | 244647334 | 243979266 | -1 | NM_022743    | SMYD3    | 0 | NA | 0 | NA | 0 | NA | 0 | NA | 0 | NA |
| 1 | 244796186 | 244770488 | -1 | NM_022366    | TFB2M    | 1 | 12 | 0 | NA | 0 | NA | 0 | NA | 0 | NA |
| 1 | 244796428 | 244897049 | 1  | NM_152609    | C1orf71  | 1 | 12 | 0 | NA | 0 | NA | 0 | NA | 0 | NA |
| 1 | 244954000 | 244998062 | 1  | NM_016002    | SCCPDH   | 0 | NA | 0 | NA | 1 | 12 | 0 | NA | 0 | NA |
| 1 | 245148302 | 245069024 | -1 | NM_015446    | AHCTF1   | 0 | NA | 0 | NA | 0 | NA | 0 | NA | 0 | NA |
| 1 | 245237978 | 245215248 | -1 | NM_020394    | ZNF695   | 0 | NA | 0 | NA | 0 | NA | 0 | NA | 0 | NA |
| 1 | 245308692 | 245266709 | -1 | NM_033213    | ZNF670   | 1 | 16 | 1 | 12 | 0 | NA | 1 | 13 | 0 | NA |
| 1 | 245334251 | 245329915 | -1 | NM_024804    | ZNF669   | 1 | 21 | 1 | 12 | 0 | NA | 0 | NA | 0 | NA |
| 1 | 245342342 | 245340084 | -1 | NM_207401    | FLJ45717 | 1 | 21 | 0 | NA | 0 | NA | 0 | NA | 0 | NA |
| 1 | 245401941 | 245385825 | -1 | NM_003431    | ZNF124   | 0 | NA | 0 | NA | 0 | NA | 0 | NA | 0 | NA |
| 1 | 245485996 | 245487070 | 1  | NM_173858    | VN1R5    | 0 | NA | 0 | NA | 0 | NA | 0 | NA | 0 | NA |
| 1 | 245561668 | 245530244 | -1 | NM_032752    | ZNF496   | 0 | NA | 0 | NA | 0 | NA | 0 | NA | 0 | NA |
| 1 | 245646097 | 245679029 | 1  | NM_001079821 | NLRP3    | 0 | NA | 1 | 19 | 0 | NA | 0 | NA | 0 | NA |
| 1 | 245647973 | 245679029 | 1  | NM_004895    | NLRP3    | 0 | NA | 0 | NA | 0 | NA | 0 | NA | 0 | NA |

|   |           |           |    |              |           |   |    |   |    |   |    |   |    |   |    |
|---|-----------|-----------|----|--------------|-----------|---|----|---|----|---|----|---|----|---|----|
| 1 | 245647973 | 245679029 | 1  | NM_183395    | NLRP3     | 0 | NA | 0 | NA | 0 | NA | 0 | NA | 0 | NA |
| 1 | 245681907 | 245680953 | -1 | NM_001004492 | OR2B11    | 0 | NA | 1 | 15 | 0 | NA | 0 | NA | 0 | NA |
| 1 | 245721052 | 245722015 | 1  | NM_001004698 | OR2W5     | 0 | NA | 0 | NA | 0 | NA | 0 | NA | 0 | NA |
| 1 | 245763764 | 245760056 | -1 | NM_198074    | OR2C3     | 0 | NA | 0 | NA | 0 | NA | 0 | NA | 0 | NA |
| 1 | 245779073 | 245806471 | 1  | NM_145278    | C1orf150  | 0 | NA | 0 | NA | 0 | NA | 0 | NA | 0 | NA |
| 1 | 245818284 | 245819238 | 1  | NM_001001915 | OR2G2     | 0 | NA | 0 | NA | 0 | NA | 0 | NA | 0 | NA |
| 1 | 245835510 | 245836440 | 1  | NM_001001914 | OR2G3     | 0 | NA | 0 | NA | 0 | NA | 0 | NA | 0 | NA |
| 1 | 245902966 | 245902042 | -1 | NM_001005487 | OR13G1    | 0 | NA | 0 | NA | 0 | NA | 0 | NA | 0 | NA |
| 1 | 245942680 | 245941753 | -1 | NM_001005286 | OR6F1     | 0 | NA | 0 | NA | 0 | NA | 0 | NA | 0 | NA |
| 1 | 245988331 | 245987386 | -1 | NM_012353    | OR1C1     | 0 | NA | 0 | NA | 0 | NA | 0 | NA | 0 | NA |
| 1 | 246045654 | 246044724 | -1 | NM_001001966 | OR14A16   | 0 | NA | 0 | NA | 0 | NA | 0 | NA | 0 | NA |
| 1 | 246071821 | 246070852 | -1 | NM_001001959 | OR11L1    | 0 | NA | 1 | 13 | 0 | NA | 0 | NA | 0 | NA |
| 1 | 246087123 | 246110061 | 1  | NM_015431    | TRIM58    | 0 | NA | 0 | NA | 0 | NA | 0 | NA | 0 | NA |
| 1 | 246125511 | 246126456 | 1  | NM_001001957 | OR2W3     | 0 | NA | 0 | NA | 0 | NA | 0 | NA | 0 | NA |
| 1 | 246150942 | 246151881 | 1  | NM_001005522 | OR2T8     | 0 | NA | 0 | NA | 0 | NA | 1 | 11 | 0 | NA |
| 1 | 246167115 | 246330847 | 1  | NM_175911    | OR2L13    | 0 | NA | 1 | 19 | 0 | NA | 0 | NA | 0 | NA |
| 1 | 246178782 | 246179721 | 1  | NM_001001963 | OR2L8     | 0 | NA | 0 | NA | 0 | NA | 0 | NA | 0 | NA |
| 1 | 246195256 | 246196264 | 1  | NM_001004491 | OR2AK2    | 0 | NA | 0 | NA | 0 | NA | 0 | NA | 0 | NA |
| 1 | 246268096 | 246269230 | 1  | NM_001004686 | OR2L2     | 0 | NA | 0 | NA | 0 | NA | 0 | NA | 0 | NA |
| 1 | 246290606 | 246291545 | 1  | NM_001004687 | OR2L3     | 0 | NA | 0 | NA | 0 | NA | 0 | NA | 0 | NA |
| 1 | 246375072 | 246376011 | 1  | NM_001004690 | OR2M5     | 0 | NA | 0 | NA | 0 | NA | 0 | NA | 0 | NA |
| 1 | 246409910 | 246410954 | 1  | NM_001004688 | OR2M2     | 0 | NA | 0 | NA | 0 | NA | 0 | NA | 0 | NA |
| 1 | 246432992 | 246433931 | 1  | NM_001004689 | OR2M3     | 0 | NA | 0 | NA | 0 | NA | 0 | NA | 0 | NA |
| 1 | 246468853 | 246469789 | 1  | NM_017504    | OR2M4     | 0 | NA | 0 | NA | 0 | NA | 0 | NA | 0 | NA |
| 1 | 246503739 | 246502776 | -1 | NM_001004695 | OR2T33    | 0 | NA | 0 | NA | 0 | NA | 0 | NA | 0 | NA |
| 1 | 246525503 | 246524540 | -1 | NM_001004692 | OR2T12    | 0 | NA | 0 | NA | 0 | NA | 0 | NA | 0 | NA |
| 1 | 246554493 | 246553554 | -1 | NM_001004691 | OR2M7     | 0 | NA | 0 | NA | 0 | NA | 0 | NA | 0 | NA |
| 1 | 246578699 | 246579638 | 1  | NM_001001918 | OR14C36   | 0 | NA | 0 | NA | 0 | NA | 0 | NA | 0 | NA |
| 1 | 246591505 | 246592552 | 1  | NM_001004696 | OR2T4     | 0 | NA | 0 | NA | 0 | NA | 0 | NA | 0 | NA |
| 1 | 246617532 | 246618459 | 1  | NM_001005471 | OR2T6     | 0 | NA | 0 | NA | 0 | NA | 0 | NA | 0 | NA |
| 1 | 246635918 | 246637028 | 1  | NM_030904    | OR2T1     | 0 | NA | 1 | 18 | 0 | NA | 0 | NA | 1 | 12 |
| 1 | 246682721 | 246683696 | 1  | NM_001004136 | OR2T2     | 0 | NA | 0 | NA | 0 | NA | 0 | NA | 0 | NA |
| 1 | 246703274 | 246704231 | 1  | NM_001005495 | OR2T3     | 0 | NA | 0 | NA | 0 | NA | 0 | NA | 0 | NA |
| 1 | 246718512 | 246719460 | 1  | NM_001004697 | OR2T5     | 0 | NA | 0 | NA | 0 | NA | 0 | NA | 0 | NA |
| 1 | 246751570 | 246752521 | 1  | NM_001013355 | OR2G6     | 0 | NA | 0 | NA | 0 | NA | 0 | NA | 0 | NA |
| 1 | 246789397 | 246788467 | -1 | NM_001004694 | OR2T29    | 0 | NA | 0 | NA | 0 | NA | 0 | NA | 0 | NA |
| 1 | 246804681 | 246803724 | -1 | NM_001001821 | OR2T34    | 0 | NA | 0 | NA | 0 | NA | 0 | NA | 0 | NA |
| 1 | 246823692 | 246822753 | -1 | NM_001004693 | OR2T10    | 0 | NA | 0 | NA | 0 | NA | 0 | NA | 0 | NA |
| 1 | 246857052 | 246856101 | -1 | NM_001001964 | OR2T11    | 0 | NA | 0 | NA | 0 | NA | 0 | NA | 0 | NA |
| 1 | 246869182 | 246868210 | -1 | NM_001001827 | OR2T35    | 0 | NA | 0 | NA | 0 | NA | 0 | NA | 0 | NA |
| 1 | 246880808 | 246879854 | -1 | NM_001001824 | OR2T27    | 0 | NA | 0 | NA | 0 | NA | 0 | NA | 0 | NA |
| 1 | 246912228 | 246911292 | -1 | NM_001004734 | OR14I1    | 0 | NA | 1 | 12 | 0 | NA | 0 | NA | 0 | NA |
| 1 | 246969774 | 246969339 | -1 | NM_001085474 | LOC646627 | 0 | NA | 0 | NA | 1 | 19 | 0 | NA | 0 | NA |
| 1 | 247086777 | 247071273 | -1 | NM_030645    | SH3BP5L   | 1 | 17 | 0 | NA | 0 | NA | 0 | NA | 0 | NA |
| 1 | 247099152 | 247110337 | 1  | NM_024836    | ZNF672    | 0 | NA | 0 | NA | 0 | NA | 1 | 12 | 0 | NA |
| 1 | 247119894 | 247110827 | -1 | NM_017865    | ZNF692    | 0 | NA | 0 | NA | 0 | NA | 0 | NA | 0 | NA |
| 1 | 247167064 | 247179968 | 1  | NM_001017434 | PGBD2     | 1 | 41 | 1 | 13 | 1 | 15 | 0 | NA | 0 | NA |
| 1 | 247167064 | 247179968 | 1  | NM_170725    | PGBD2     | 1 | 41 | 1 | 13 | 1 | 15 | 0 | NA | 0 | NA |
| 3 | 213649    | 426097    | 1  | NM_006614    | CHL1      | 0 | NA | 0 | NA | 0 | NA | 0 | NA | 0 | NA |
| 3 | 1109628   | 1420278   | 1  | NM_014461    | CNTN6     | 0 | NA | 0 | NA | 0 | NA | 0 | NA | 0 | NA |
| 3 | 2117246   | 3074645   | 1  | NM_175607    | CNTN4     | 0 | NA | 0 | NA | 0 | NA | 0 | NA | 0 | NA |
| 3 | 2908920   | 3073040   | 1  | NM_175613    | CNTN4     | 0 | NA | 0 | NA | 0 | NA | 0 | NA | 0 | NA |
| 3 | 3056307   | 3074645   | 1  | NM_175612    | CNTN4     | 0 | NA | 0 | NA | 0 | NA | 0 | NA | 0 | NA |
| 3 | 3127031   | 3086420   | -1 | NM_000564    | ILSRA     | 0 | NA | 0 | NA | 0 | NA | 0 | NA | 0 | NA |
| 3 | 3127031   | 3086420   | -1 | NM_175726    | ILSRA     | 0 | NA | 0 | NA | 0 | NA | 0 | NA | 0 | NA |
| 3 | 3127031   | 3106856   | -1 | NM_175725    | ILSRA     | 0 | NA | 0 | NA | 0 | NA | 0 | NA | 0 | NA |
| 3 | 3127031   | 3106856   | -1 | NM_175728    | ILSRA     | 0 | NA | 0 | NA | 0 | NA | 0 | NA | 0 | NA |
| 3 | 3127031   | 3108493   | -1 | NM_175724    | ILSRA     | 0 | NA | 0 | NA | 0 | NA | 0 | NA | 0 | NA |
| 3 | 3127031   | 3108493   | -1 | NM_175727    | ILSRA     | 0 | NA | 0 | NA | 0 | NA | 0 | NA | 0 | NA |
| 3 | 3143599   | 3165706   | 1  | NM_182916    | TRNT1     | 1 | 12 | 0 | NA | 0 | NA | 0 | NA | 0 | NA |
| 3 | 3196390   | 3166695   | -1 | NM_016302    | CRBN      | 0 | NA | 0 | NA | 0 | NA | 0 | NA | 0 | NA |
| 3 | 3816120   | 3864387   | 1  | NM_020873    | LRRN1     | 0 | NA | 0 | NA | 0 | NA | 0 | NA | 0 | NA |
| 3 | 4320015   | 4333949   | 1  | NM_006515    | SETMAR    | 0 | NA | 0 | NA | 0 | NA | 0 | NA | 0 | NA |
| 3 | 4483954   | 4377829   | -1 | NM_182760    | SUMF1     | 0 | NA | 0 | NA | 0 | NA | 0 | NA | 0 | NA |
| 3 | 4510033   | 4864286   | 1  | NM_001099952 | ITPR1     | 0 | NA | 0 | NA | 0 | NA | 0 | NA | 0 | NA |

|   |          |          |    |              |           |   |    |   |    |   |    |   |    |   |    |
|---|----------|----------|----|--------------|-----------|---|----|---|----|---|----|---|----|---|----|
| 3 | 4510033  | 4864286  | 1  | NM_002222    | ITPR1     | 0 | NA | 0 | NA | 0 | NA | 0 | NA | 0 | NA |
| 3 | 4996207  | 5001861  | 1  | NM_003670    | BHLHB2    | 1 | 21 | 0 | NA | 0 | NA | 1 | 11 | 0 | NA |
| 3 | 5138929  | 5197601  | 1  | NM_018184    | ARL8B     | 0 | NA | 0 | NA | 0 | NA | 0 | NA | 0 | NA |
| 3 | 5204432  | 5236642  | 1  | NM_014674    | EDEM1     | 0 | NA | 0 | NA | 0 | NA | 0 | NA | 0 | NA |
| 3 | 6877926  | 7758217  | 1  | NM_000844    | GRM7      | 0 | NA | 0 | NA | 0 | NA | 0 | NA | 0 | NA |
| 3 | 6877926  | 7758217  | 1  | NM_181874    | GRM7      | 0 | NA | 0 | NA | 0 | NA | 0 | NA | 0 | NA |
| 3 | 8518510  | 8584806  | 1  | NM_014583    | LMCD1     | 1 | 14 | 0 | NA | 1 | 14 | 0 | NA | 0 | NA |
| 3 | 8668737  | 8636319  | -1 | NM_015931    | C3orf32   | 0 | NA | 0 | NA | 0 | NA | 0 | NA | 0 | NA |
| 3 | 8750495  | 8763451  | 1  | NM_001234    | CAV3      | 0 | NA | 0 | NA | 0 | NA | 0 | NA | 0 | NA |
| 3 | 8750495  | 8763451  | 1  | NM_033337    | CAV3      | 0 | NA | 0 | NA | 0 | NA | 0 | NA | 0 | NA |
| 3 | 8786300  | 8767094  | -1 | NM_000916    | OXTR      | 0 | NA | 0 | NA | 0 | NA | 0 | NA | 0 | NA |
| 3 | 8990146  | 8896559  | -1 | NM_020165    | RAD18     | 0 | NA | 0 | NA | 0 | NA | 0 | NA | 0 | NA |
| 3 | 9266311  | 8997277  | -1 | NM_001033117 | SRGAP3    | 0 | NA | 0 | NA | 0 | NA | 0 | NA | 0 | NA |
| 3 | 9266311  | 8997277  | -1 | NM_014850    | SRGAP3    | 0 | NA | 0 | NA | 0 | NA | 0 | NA | 0 | NA |
| 3 | 9379716  | 9403475  | 1  | NM_001114092 | THUMPD3   | 1 | 32 | 0 | NA | 1 | 13 | 0 | NA | 0 | NA |
| 3 | 9379716  | 9403475  | 1  | NM_015453    | THUMPD3   | 1 | 32 | 0 | NA | 1 | 13 | 0 | NA | 0 | NA |
| 3 | 9414402  | 9494838  | 1  | NM_001080517 | SETD5     | 1 | 13 | 0 | NA | 1 | 12 | 0 | NA | 0 | NA |
| 3 | 9570486  | 9515044  | -1 | NM_198560    | LHFPL4    | 0 | NA | 0 | NA | 0 | NA | 0 | NA | 0 | NA |
| 3 | 9666143  | 9719077  | 1  | NM_001077525 | MTMR14    | 1 | 22 | 0 | NA | 0 | NA | 0 | NA | 0 | NA |
| 3 | 9666143  | 9719077  | 1  | NM_001077526 | MTMR14    | 1 | 22 | 0 | NA | 0 | NA | 0 | NA | 0 | NA |
| 3 | 9666143  | 9719077  | 1  | NM_022485    | MTMR14    | 1 | 22 | 0 | NA | 0 | NA | 0 | NA | 0 | NA |
| 3 | 9720509  | 9746592  | 1  | NM_153635    | CPNE9     | 0 | NA | 0 | NA | 0 | NA | 0 | NA | 0 | NA |
| 3 | 9748433  | 9764699  | 1  | NM_001003694 | BRPF1     | 0 | NA | 0 | NA | 0 | NA | 0 | NA | 0 | NA |
| 3 | 9748433  | 9764699  | 1  | NM_004634    | BRPF1     | 0 | NA | 0 | NA | 0 | NA | 0 | NA | 0 | NA |
| 3 | 9765704  | 9774087  | 1  | NM_002542    | OGG1      | 1 | 19 | 0 | NA | 0 | NA | 1 | 11 | 0 | NA |
| 3 | 9765704  | 9774087  | 1  | NM_016819    | OGG1      | 1 | 19 | 0 | NA | 0 | NA | 1 | 11 | 0 | NA |
| 3 | 9765704  | 9774087  | 1  | NM_016820    | OGG1      | 1 | 19 | 0 | NA | 0 | NA | 1 | 11 | 0 | NA |
| 3 | 9766653  | 9783315  | 1  | NM_016826    | OGG1      | 1 | 19 | 0 | NA | 0 | NA | 1 | 11 | 0 | NA |
| 3 | 9766653  | 9783315  | 1  | NM_016827    | OGG1      | 1 | 19 | 0 | NA | 0 | NA | 1 | 11 | 0 | NA |
| 3 | 9766653  | 9783315  | 1  | NM_016828    | OGG1      | 1 | 19 | 0 | NA | 0 | NA | 1 | 11 | 0 | NA |
| 3 | 9766653  | 9783315  | 1  | NM_016829    | OGG1      | 1 | 19 | 0 | NA | 0 | NA | 1 | 11 | 0 | NA |
| 3 | 9766660  | 9783342  | 1  | NM_016821    | OGG1      | 1 | 19 | 0 | NA | 0 | NA | 1 | 11 | 0 | NA |
| 3 | 9786661  | 9774030  | -1 | NM_003656    | CAMK1     | 0 | NA | 0 | NA | 0 | NA | 0 | NA | 0 | NA |
| 3 | 9809226  | 9823789  | 1  | NM_001024959 | ARPC4     | 1 | 21 | 0 | NA | 1 | 13 | 0 | NA | 0 | NA |
| 3 | 9809226  | 9823789  | 1  | NM_001024960 | ARPC4     | 1 | 21 | 0 | NA | 1 | 13 | 0 | NA | 0 | NA |
| 3 | 9809226  | 9823789  | 1  | NM_005718    | ARPC4     | 1 | 21 | 0 | NA | 1 | 13 | 0 | NA | 0 | NA |
| 3 | 9809420  | 9796653  | -1 | NM_006354    | TADA3L    | 1 | 21 | 0 | NA | 1 | 13 | 0 | NA | 0 | NA |
| 3 | 9809420  | 9799811  | -1 | NM_133480    | TADA3L    | 1 | 21 | 0 | NA | 1 | 13 | 0 | NA | 0 | NA |
| 3 | 9826903  | 9853040  | 1  | NM_001025930 | TLL3      | 0 | NA | 0 | NA | 0 | NA | 0 | NA | 0 | NA |
| 3 | 9860676  | 9854532  | -1 | NM_173659    | RPU3D3    | 0 | NA | 0 | NA | 0 | NA | 0 | NA | 0 | NA |
| 3 | 9895740  | 9883397  | -1 | NM_022094    | CIDEC     | 0 | NA | 0 | NA | 0 | NA | 0 | NA | 0 | NA |
| 3 | 9907271  | 9911029  | 1  | NM_032492    | JAGN1     | 0 | NA | 0 | NA | 0 | NA | 0 | NA | 0 | NA |
| 3 | 9919302  | 9933084  | 1  | NM_153483    | IL17RE    | 0 | NA | 0 | NA | 0 | NA | 0 | NA | 0 | NA |
| 3 | 9919511  | 9933084  | 1  | NM_153480    | IL17RE    | 0 | NA | 0 | NA | 0 | NA | 0 | NA | 0 | NA |
| 3 | 9919511  | 9933084  | 1  | NM_153481    | IL17RE    | 0 | NA | 0 | NA | 0 | NA | 0 | NA | 0 | NA |
| 3 | 9933781  | 9950314  | 1  | NM_032732    | IL17RC    | 0 | NA | 0 | NA | 0 | NA | 0 | NA | 0 | NA |
| 3 | 9933781  | 9950314  | 1  | NM_153460    | IL17RC    | 0 | NA | 0 | NA | 0 | NA | 0 | NA | 0 | NA |
| 3 | 9933781  | 9950314  | 1  | NM_153461    | IL17RC    | 0 | NA | 0 | NA | 0 | NA | 0 | NA | 0 | NA |
| 3 | 9950505  | 9962090  | 1  | NM_001031717 | CRELD1    | 0 | NA | 0 | NA | 0 | NA | 0 | NA | 0 | NA |
| 3 | 9950505  | 9962090  | 1  | NM_001077415 | CRELD1    | 0 | NA | 0 | NA | 0 | NA | 0 | NA | 0 | NA |
| 3 | 9950505  | 9962090  | 1  | NM_015513    | CRELD1    | 0 | NA | 0 | NA | 0 | NA | 0 | NA | 0 | NA |
| 3 | 9969078  | 9962225  | -1 | NM_207351    | PRRT3     | 0 | NA | 0 | NA | 0 | NA | 0 | NA | 0 | NA |
| 3 | 10003522 | 9980635  | -1 | NM_018447    | TMEM111   | 0 | NA | 0 | NA | 0 | NA | 0 | NA | 0 | NA |
| 3 | 10027779 | 10023101 | -1 | NM_001008737 | LOC401052 | 0 | NA | 0 | NA | 0 | NA | 0 | NA | 0 | NA |
| 3 | 10043112 | 10116344 | 1  | NM_033084    | FANCD2    | 0 | NA | 0 | NA | 0 | NA | 0 | NA | 0 | NA |
| 3 | 10043112 | 10118614 | 1  | NM_001018115 | FANCD2    | 0 | NA | 0 | NA | 0 | NA | 0 | NA | 0 | NA |
| 3 | 10124915 | 10098003 | -1 | NM_173472    | C3orf24   | 0 | NA | 0 | NA | 0 | NA | 0 | NA | 0 | NA |
| 3 | 10132332 | 10143874 | 1  | NM_018462    | C3orf10   | 0 | NA | 0 | NA | 0 | NA | 0 | NA | 0 | NA |
| 3 | 10158318 | 10168746 | 1  | NM_000551    | VHL       | 0 | NA | 0 | NA | 0 | NA | 0 | NA | 0 | NA |
| 3 | 10158318 | 10168746 | 1  | NM_198156    | VHL       | 0 | NA | 0 | NA | 0 | NA | 0 | NA | 0 | NA |
| 3 | 10181562 | 10260427 | 1  | NM_001570    | IRAK2     | 1 | 11 | 0 | NA | 0 | NA | 0 | NA | 0 | NA |
| 3 | 10265595 | 10297902 | 1  | NM_014760    | TATDN2    | 1 | 19 | 0 | NA | 0 | NA | 1 | 12 | 0 | NA |
| 3 | 10307409 | 10302433 | -1 | NM_016362    | GHRL      | 0 | NA | 0 | NA | 0 | NA | 0 | NA | 0 | NA |
| 3 | 10337855 | 10317614 | -1 | NM_183352    | SEC13     | 0 | NA | 0 | NA | 0 | NA | 0 | NA | 0 | NA |
| 3 | 10466546 | 10342743 | -1 | NM_001001331 | ATP2B2    | 0 | NA | 0 | NA | 0 | NA | 0 | NA | 0 | NA |

|   |          |          |    |              |         |   |    |   |    |   |    |   |    |   |    |
|---|----------|----------|----|--------------|---------|---|----|---|----|---|----|---|----|---|----|
| 3 | 10466546 | 10342743 | -1 | NM_001683    | ATP2B2  | 0 | NA | 0 | NA | 0 | NA | 0 | NA | 0 | NA |
| 3 | 10832916 | 10955146 | 1  | NM_014229    | SLC6A11 | 0 | NA | 0 | NA | 0 | NA | 0 | NA | 0 | NA |
| 3 | 11009455 | 11056935 | 1  | NM_003042    | SLC6A1  | 0 | NA | 0 | NA | 0 | NA | 0 | NA | 0 | NA |
| 3 | 11153778 | 11279939 | 1  | NM_001098213 | HRH1    | 0 | NA | 0 | NA | 0 | NA | 0 | NA | 0 | NA |
| 3 | 11171213 | 11279939 | 1  | NM_001098212 | HRH1    | 0 | NA | 0 | NA | 0 | NA | 0 | NA | 0 | NA |
| 3 | 11242668 | 11279939 | 1  | NM_001098211 | HRH1    | 0 | NA | 0 | NA | 0 | NA | 0 | NA | 0 | NA |
| 3 | 11269384 | 11279939 | 1  | NM_000861    | HRH1    | 0 | NA | 0 | NA | 1 | 13 | 0 | NA | 0 | NA |
| 3 | 11289101 | 11571557 | 1  | NM_006395    | ATG7    | 0 | NA | 0 | NA | 0 | NA | 1 | 14 | 0 | NA |
| 3 | 11737037 | 11572543 | -1 | NM_014667    | VGLL4   | 0 | NA | 0 | NA | 0 | NA | 0 | NA | 0 | NA |
| 3 | 11863352 | 11806918 | -1 | NM_138807    | C3orf31 | 0 | NA | 0 | NA | 0 | NA | 0 | NA | 0 | NA |
| 3 | 12020861 | 12202226 | 1  | NM_003178    | SYN2    | 0 | NA | 0 | NA | 0 | NA | 0 | NA | 0 | NA |
| 3 | 12020861 | 12208532 | 1  | NM_133625    | SYN2    | 0 | NA | 0 | NA | 0 | NA | 0 | NA | 0 | NA |
| 3 | 12175647 | 12169567 | -1 | NM_003256    | TIMP4   | 0 | NA | 0 | NA | 0 | NA | 0 | NA | 0 | NA |
| 3 | 12304348 | 12450855 | 1  | NM_005037    | PPARG   | 0 | NA | 0 | NA | 0 | NA | 0 | NA | 0 | NA |
| 3 | 12304348 | 12450855 | 1  | NM_138712    | PPARG   | 0 | NA | 0 | NA | 0 | NA | 0 | NA | 0 | NA |
| 3 | 12305435 | 12450855 | 1  | NM_138711    | PPARG   | 0 | NA | 0 | NA | 0 | NA | 0 | NA | 0 | NA |
| 3 | 12368000 | 12450855 | 1  | NM_015869    | PPARG   | 0 | NA | 0 | NA | 0 | NA | 0 | NA | 0 | NA |
| 3 | 12501027 | 12549812 | 1  | NM_025265    | TSEN2   | 0 | NA | 0 | NA | 0 | NA | 0 | NA | 0 | NA |
| 3 | 12573593 | 12600210 | 1  | NM_014160    | MKRN2   | 0 | NA | 0 | NA | 0 | NA | 0 | NA | 0 | NA |
| 3 | 12680678 | 12600107 | -1 | NM_002880    | RAF1    | 0 | NA | 0 | NA | 0 | NA | 0 | NA | 0 | NA |
| 3 | 12775808 | 12750391 | -1 | NM_018306    | TMEM40  | 0 | NA | 0 | NA | 0 | NA | 0 | NA | 0 | NA |
| 3 | 12813170 | 12851301 | 1  | NM_012298    | CAND2   | 0 | NA | 0 | NA | 0 | NA | 0 | NA | 0 | NA |
| 3 | 12856949 | 12851443 | -1 | NM_001007074 | RPL32   | 0 | NA | 0 | NA | 0 | NA | 0 | NA | 0 | NA |
| 3 | 12858081 | 12851443 | -1 | NM_000994    | RPL32   | 0 | NA | 0 | NA | 0 | NA | 0 | NA | 0 | NA |
| 3 | 12858081 | 12851443 | -1 | NM_001007073 | RPL32   | 0 | NA | 0 | NA | 0 | NA | 0 | NA | 0 | NA |
| 3 | 12983960 | 12914373 | -1 | NM_014969    | IQSEC1  | 0 | NA | 0 | NA | 0 | NA | 0 | NA | 0 | NA |
| 3 | 13436809 | 13332736 | -1 | NM_024923    | NUP210  | 0 | NA | 0 | NA | 0 | NA | 0 | NA | 0 | NA |
| 3 | 13496823 | 13521834 | 1  | NM_024827    | HDAC11  | 0 | NA | 0 | NA | 0 | NA | 0 | NA | 0 | NA |
| 3 | 13565624 | 13654923 | 1  | NM_001004019 | FBLN2   | 0 | NA | 0 | NA | 0 | NA | 0 | NA | 0 | NA |
| 3 | 13565624 | 13654923 | 1  | NM_001998    | FBLN2   | 0 | NA | 0 | NA | 0 | NA | 0 | NA | 0 | NA |
| 3 | 13896619 | 13835082 | -1 | NM_004625    | WNT7A   | 0 | NA | 0 | NA | 0 | NA | 0 | NA | 0 | NA |
| 3 | 14141372 | 14128577 | -1 | NM_001098502 | CHCHD4  | 0 | NA | 0 | NA | 0 | NA | 0 | NA | 0 | NA |
| 3 | 14141372 | 14128577 | -1 | NM_144636    | CHCHD4  | 0 | NA | 0 | NA | 0 | NA | 0 | NA | 0 | NA |
| 3 | 14141545 | 14160180 | 1  | NM_024334    | TMEM43  | 0 | NA | 0 | NA | 0 | NA | 0 | NA | 0 | NA |
| 3 | 14195143 | 14161648 | -1 | NM_004628    | XPC     | 0 | NA | 0 | NA | 0 | NA | 0 | NA | 0 | NA |
| 3 | 14195340 | 14214842 | 1  | NM_014463    | LSM3    | 0 | NA | 0 | NA | 0 | NA | 0 | NA | 0 | NA |
| 3 | 14419109 | 14505861 | 1  | NM_003043    | SLC6A6  | 0 | NA | 0 | NA | 0 | NA | 0 | NA | 0 | NA |
| 3 | 14558592 | 14510176 | -1 | NM_001080423 | GRIP2   | 0 | NA | 0 | NA | 0 | NA | 0 | NA | 0 | NA |
| 3 | 14668256 | 14689170 | 1  | NM_016474    | C3orf19 | 0 | NA | 0 | NA | 0 | NA | 0 | NA | 0 | NA |
| 3 | 14691657 | 14789545 | 1  | NM_032137    | C3orf20 | 0 | NA | 1 | 12 | 0 | NA | 1 | 12 | 0 | NA |
| 3 | 14635809 | 14950899 | 1  | NM_152536    | FGD5    | 0 | NA | 1 | 13 | 0 | NA | 0 | NA | 1 | 12 |
| 3 | 14964239 | 15065784 | 1  | NM_003298    | NR2C2   | 0 | NA | 0 | NA | 0 | NA | 0 | NA | 0 | NA |
| 3 | 15081820 | 15065022 | -1 | NM_022497    | MRPS25  | 0 | NA | 0 | NA | 0 | NA | 0 | NA | 0 | NA |
| 3 | 15115659 | 15086583 | -1 | NM_022340    | ZFYVE20 | 1 | 16 | 0 | NA | 1 | 13 | 0 | NA | 0 | NA |
| 3 | 15222736 | 15269427 | 1  | NM_014296    | CAPN7   | 0 | NA | 0 | NA | 0 | NA | 0 | NA | 0 | NA |
| 3 | 15349108 | 15271360 | -1 | NM_004844    | SH3BP5  | 0 | NA | 0 | NA | 0 | NA | 0 | NA | 0 | NA |
| 3 | 15357905 | 15271360 | -1 | NM_001018009 | SH3BP5  | 0 | NA | 0 | NA | 0 | NA | 0 | NA | 0 | NA |
| 3 | 15444046 | 15426380 | -1 | NM_152396    | METTL6  | 0 | NA | 0 | NA | 0 | NA | 0 | NA | 0 | NA |
| 3 | 15444067 | 15459124 | 1  | NM_033083    | EAF1    | 0 | NA | 0 | NA | 0 | NA | 0 | NA | 0 | NA |
| 3 | 15515383 | 15466643 | -1 | NM_080538    | COLQ    | 0 | NA | 0 | NA | 0 | NA | 0 | NA | 0 | NA |
| 3 | 15538262 | 15466643 | -1 | NM_005677    | COLQ    | 0 | NA | 0 | NA | 0 | NA | 0 | NA | 0 | NA |
| 3 | 15538262 | 15466643 | -1 | NM_080539    | COLQ    | 0 | NA | 0 | NA | 0 | NA | 0 | NA | 0 | NA |
| 3 | 15538262 | 15466643 | -1 | NM_080541    | COLQ    | 0 | NA | 0 | NA | 0 | NA | 0 | NA | 0 | NA |
| 3 | 15538262 | 15466643 | -1 | NM_080544    | COLQ    | 0 | NA | 0 | NA | 0 | NA | 0 | NA | 0 | NA |
| 3 | 15618134 | 15577243 | -1 | NM_012260    | HACL1   | 0 | NA | 0 | NA | 0 | NA | 0 | NA | 0 | NA |
| 3 | 15618258 | 15662329 | 1  | NM_000060    | BTD     | 0 | NA | 0 | NA | 0 | NA | 0 | NA | 0 | NA |
| 3 | 15876057 | 15683747 | -1 | NM_015199    | ANKRD28 | 0 | NA | 0 | NA | 0 | NA | 0 | NA | 0 | NA |
| 3 | 16191159 | 16245153 | 1  | NM_054110    | GALNTL2 | 0 | NA | 0 | NA | 0 | NA | 0 | NA | 0 | NA |
| 3 | 16281409 | 16277013 | -1 | NM_206831    | DPH3    | 0 | NA | 0 | NA | 0 | NA | 0 | NA | 0 | NA |
| 3 | 16281490 | 16276968 | -1 | NM_001047434 | DPH3    | 0 | NA | 0 | NA | 0 | NA | 0 | NA | 0 | NA |
| 3 | 16281717 | 16322598 | 1  | NM_138381    | OXNAD1  | 0 | NA | 0 | NA | 0 | NA | 0 | NA | 0 | NA |
| 3 | 16530226 | 16332355 | -1 | NM_015150    | RFTN1   | 0 | NA | 0 | NA | 0 | NA | 0 | NA | 0 | NA |
| 3 | 16622010 | 16603304 | -1 | NM_001351    | DAZL    | 0 | NA | 0 | NA | 0 | NA | 0 | NA | 0 | NA |
| 3 | 16901672 | 17107102 | 1  | NM_015184    | PLCL2   | 0 | NA | 0 | NA | 0 | NA | 0 | NA | 0 | NA |
| 3 | 17757403 | 17174902 | -1 | NM_014744    | TBC1D5  | 0 | NA | 0 | NA | 0 | NA | 0 | NA | 0 | NA |

|   |          |          |    |              |          |   |    |   |    |   |    |   |    |   |    |
|---|----------|----------|----|--------------|----------|---|----|---|----|---|----|---|----|---|----|
| 3 | 18440344 | 18364437 | -1 | NM_002971    | SATB1    | 0 | NA | 0 | NA | 0 | NA | 0 | NA | 0 | NA |
| 3 | 19165020 | 19552139 | 1  | NM_144633    | KCNH8    | 0 | NA | 0 | NA | 0 | NA | 0 | NA | 0 | NA |
| 3 | 19950710 | 19895969 | -1 | NM_144715    | EFHB     | 0 | NA | 0 | NA | 1 | 12 | 0 | NA | 0 | NA |
| 3 | 19963762 | 20001647 | 1  | NM_004162    | RAB5A    | 0 | NA | 0 | NA | 0 | NA | 0 | NA | 0 | NA |
| 3 | 20056527 | 20170900 | 1  | NM_003884    | PCAF     | 0 | NA | 0 | NA | 0 | NA | 0 | NA | 0 | NA |
| 3 | 20202687 | 20177088 | -1 | NM_001012410 | SGOL1    | 1 | 12 | 0 | NA | 0 | NA | 0 | NA | 0 | NA |
| 3 | 20202687 | 20177088 | -1 | NM_001012412 | SGOL1    | 1 | 12 | 0 | NA | 0 | NA | 0 | NA | 0 | NA |
| 3 | 20202687 | 20177088 | -1 | NM_138484    | SGOL1    | 1 | 12 | 0 | NA | 0 | NA | 0 | NA | 0 | NA |
| 3 | 20202687 | 20186980 | -1 | NM_001012409 | SGOL1    | 1 | 12 | 0 | NA | 0 | NA | 0 | NA | 0 | NA |
| 3 | 20202687 | 20186980 | -1 | NM_001012411 | SGOL1    | 1 | 12 | 0 | NA | 0 | NA | 0 | NA | 0 | NA |
| 3 | 20202687 | 20186980 | -1 | NM_001012413 | SGOL1    | 1 | 12 | 0 | NA | 0 | NA | 0 | NA | 0 | NA |
| 3 | 21787820 | 21437651 | -1 | NM_024697    | ZNF385D  | 0 | NA | 0 | NA | 0 | NA | 0 | NA | 0 | NA |
| 3 | 23219811 | 23607074 | 1  | NM_152653    | UBE2E2   | 0 | NA | 0 | NA | 0 | NA | 0 | NA | 0 | NA |
| 3 | 23822442 | 23907811 | 1  | NM_003341    | UBE2E1   | 0 | NA | 0 | NA | 0 | NA | 0 | NA | 0 | NA |
| 3 | 23822442 | 23907811 | 1  | NM_182666    | UBE2E1   | 0 | NA | 0 | NA | 0 | NA | 0 | NA | 0 | NA |
| 3 | 23933541 | 23908575 | -1 | NM_020345    | NKIRAS1  | 0 | NA | 0 | NA | 0 | NA | 0 | NA | 0 | NA |
| 3 | 23933642 | 23937336 | 1  | NM_002948    | RPL15    | 0 | NA | 0 | NA | 0 | NA | 0 | NA | 0 | NA |
| 3 | 23961809 | 23996241 | 1  | NM_005126    | NR1D2    | 0 | NA | 0 | NA | 0 | NA | 0 | NA | 0 | NA |
| 3 | 24511317 | 24134708 | -1 | NM_000461    | THRB     | 0 | NA | 0 | NA | 0 | NA | 0 | NA | 0 | NA |
| 3 | 25444757 | 25614424 | 1  | NM_000965    | RARB     | 0 | NA | 0 | NA | 1 | 13 | 0 | NA | 0 | NA |
| 3 | 25444757 | 25614424 | 1  | NM_016152    | RARB     | 0 | NA | 0 | NA | 1 | 13 | 0 | NA | 0 | NA |
| 3 | 25680792 | 25614478 | -1 | NM_001068    | TOP2B    | 0 | NA | 0 | NA | 0 | NA | 0 | NA | 0 | NA |
| 3 | 25799926 | 25735778 | -1 | NM_016297    | NGLY1    | 0 | NA | 0 | NA | 0 | NA | 1 | 19 | 0 | NA |
| 3 | 25806574 | 25811029 | 1  | NM_017897    | OXSM     | 0 | NA | 0 | NA | 0 | NA | 1 | 19 | 0 | NA |
| 3 | 26639303 | 26727269 | 1  | NM_052953    | LRRC3B   | 0 | NA | 0 | NA | 0 | NA | 0 | NA | 0 | NA |
| 3 | 27232970 | 27127397 | -1 | NM_001031741 | NEK10    | 0 | NA | 0 | NA | 0 | NA | 0 | NA | 0 | NA |
| 3 | 27307988 | 27178760 | -1 | NM_152534    | NEK10    | 0 | NA | 1 | 14 | 0 | NA | 0 | NA | 0 | NA |
| 3 | 27473249 | 27389217 | -1 | NM_003615    | SLC4A7   | 0 | NA | 0 | NA | 0 | NA | 0 | NA | 0 | NA |
| 3 | 27738789 | 27732889 | -1 | NM_005442    | EOMES    | 0 | NA | 0 | NA | 0 | NA | 0 | NA | 0 | NA |
| 3 | 28258127 | 28336267 | 1  | NM_182523    | C3orf68  | 0 | NA | 0 | NA | 0 | NA | 0 | NA | 0 | NA |
| 3 | 28365579 | 28339089 | -1 | NM_022461    | AZ12     | 1 | 12 | 0 | NA | 0 | NA | 1 | 13 | 0 | NA |
| 3 | 28406990 | 28541636 | 1  | NM_001040432 | ZCWPW2   | 0 | NA | 0 | NA | 0 | NA | 0 | NA | 0 | NA |
| 3 | 29297946 | 30007813 | 1  | NM_014483    | RBMS3    | 1 | 12 | 0 | NA | 1 | 12 | 0 | NA | 0 | NA |
| 3 | 29297946 | 30021624 | 1  | NM_001003792 | RBMS3    | 1 | 12 | 0 | NA | 1 | 12 | 0 | NA | 0 | NA |
| 3 | 29297946 | 30021624 | 1  | NM_001003793 | RBMS3    | 1 | 12 | 0 | NA | 1 | 12 | 0 | NA | 0 | NA |
| 3 | 30622997 | 30710637 | 1  | NM_001024847 | TGFBR2   | 0 | NA | 0 | NA | 0 | NA | 0 | NA | 0 | NA |
| 3 | 30622997 | 30710637 | 1  | NM_003242    | TGFBR2   | 0 | NA | 0 | NA | 0 | NA | 0 | NA | 0 | NA |
| 3 | 30867341 | 30742695 | -1 | NM_207359    | GADL1    | 0 | NA | 0 | NA | 0 | NA | 0 | NA | 0 | NA |
| 3 | 31549494 | 31652560 | 1  | NM_178862    | STT3B    | 0 | NA | 0 | NA | 1 | 12 | 0 | NA | 0 | NA |
| 3 | 31998242 | 31677320 | -1 | NM_017784    | OSBPL10  | 0 | NA | 0 | NA | 0 | NA | 1 | 14 | 0 | NA |
| 3 | 32123147 | 32185204 | 1  | NM_015141    | GPD1L    | 0 | NA | 0 | NA | 0 | NA | 0 | NA | 0 | NA |
| 3 | 32255174 | 32386817 | 1  | NM_178868    | CMTM8    | 0 | NA | 0 | NA | 1 | 12 | 1 | 17 | 0 | NA |
| 3 | 32408166 | 32471337 | 1  | NM_138410    | CMTM7    | 0 | NA | 0 | NA | 0 | NA | 0 | NA | 0 | NA |
| 3 | 32408166 | 32471337 | 1  | NM_181472    | CMTM7    | 0 | NA | 0 | NA | 0 | NA | 0 | NA | 0 | NA |
| 3 | 32519407 | 32497807 | -1 | NM_017801    | CMTM6    | 0 | NA | 0 | NA | 0 | NA | 0 | NA | 0 | NA |
| 3 | 32587354 | 32542470 | -1 | NM_016141    | DYNC1L1  | 0 | NA | 0 | NA | 0 | NA | 0 | NA | 0 | NA |
| 3 | 32701701 | 32790358 | 1  | NM_015442    | CNOT10   | 0 | NA | 0 | NA | 0 | NA | 0 | NA | 0 | NA |
| 3 | 32834513 | 32908775 | 1  | NM_001039111 | TRIM71   | 0 | NA | 0 | NA | 0 | NA | 0 | NA | 0 | NA |
| 3 | 32968069 | 32971407 | 1  | NM_005508    | CCR4     | 0 | NA | 0 | NA | 0 | NA | 0 | NA | 0 | NA |
| 3 | 33113297 | 33106920 | -1 | NM_001039770 | FLJ45032 | 0 | NA | 0 | NA | 0 | NA | 0 | NA | 0 | NA |
| 3 | 33113318 | 33013103 | -1 | NM_001079811 | GLB1     | 0 | NA | 0 | NA | 0 | NA | 0 | NA | 0 | NA |
| 3 | 33113698 | 33013103 | -1 | NM_000404    | GLB1     | 0 | NA | 0 | NA | 0 | NA | 0 | NA | 0 | NA |
| 3 | 33130453 | 33164269 | 1  | NM_006371    | CRTAP    | 0 | NA | 0 | NA | 0 | NA | 0 | NA | 0 | NA |
| 3 | 33235711 | 33166540 | -1 | NM_015551    | SUSD5    | 0 | NA | 0 | NA | 0 | NA | 0 | NA | 0 | NA |
| 3 | 33293937 | 33403123 | 1  | NM_012157    | FBXL2    | 0 | NA | 0 | NA | 0 | NA | 0 | NA | 0 | NA |
| 3 | 33456874 | 33404834 | -1 | NM_014517    | UBP1     | 0 | NA | 0 | NA | 1 | 12 | 0 | NA | 0 | NA |
| 3 | 33734852 | 33512741 | -1 | NM_015097    | CLASP2   | 0 | NA | 0 | NA | 0 | NA | 0 | NA | 0 | NA |
| 3 | 33814560 | 33886198 | 1  | NM_013374    | PDCD6IP  | 1 | 13 | 0 | NA | 0 | NA | 0 | NA | 0 | NA |
| 3 | 35658852 | 35810992 | 1  | NM_016300    | ARPP-21  | 0 | NA | 0 | NA | 0 | NA | 0 | NA | 0 | NA |
| 3 | 35696119 | 35702383 | 1  | NM_001025068 | ARPP-21  | 0 | NA | 0 | NA | 0 | NA | 0 | NA | 0 | NA |
| 3 | 35696119 | 35702383 | 1  | NM_001025069 | ARPP-21  | 0 | NA | 0 | NA | 0 | NA | 0 | NA | 0 | NA |
| 3 | 35697432 | 35702383 | 1  | NM_198399    | ARPP-21  | 0 | NA | 0 | NA | 0 | NA | 0 | NA | 0 | NA |
| 3 | 36397100 | 36564500 | 1  | NM_003149    | STAC     | 0 | NA | 0 | NA | 0 | NA | 0 | NA | 0 | NA |
| 3 | 36756356 | 36728916 | -1 | NM_033403    | DCLK3    | 0 | NA | 0 | NA | 1 | 12 | 0 | NA | 0 | NA |
| 3 | 36877415 | 36843314 | -1 | NM_014831    | LBA1     | 0 | NA | 0 | NA | 0 | NA | 0 | NA | 0 | NA |

|   |          |          |    |              |          |   |    |   |    |   |    |   |    |   |    |
|---|----------|----------|----|--------------|----------|---|----|---|----|---|----|---|----|---|----|
| 3 | 37009799 | 37004232 | -1 | NM_014805    | EPM2AIP1 | 0 | NA | 0 | NA | 0 | NA | 0 | NA | 0 | NA |
| 3 | 37009982 | 37067341 | 1  | NM_000249    | MLH1     | 0 | NA | 0 | NA | 0 | NA | 0 | NA | 0 | NA |
| 3 | 37191059 | 37070180 | -1 | NM_006309    | LRRFIP2  | 0 | NA | 0 | NA | 0 | NA | 0 | NA | 0 | NA |
| 3 | 37191086 | 37069501 | -1 | NM_017724    | LRRFIP2  | 0 | NA | 0 | NA | 0 | NA | 0 | NA | 0 | NA |
| 3 | 37259741 | 37383246 | 1  | NM_002078    | GOLGA4   | 0 | NA | 0 | NA | 0 | NA | 0 | NA | 0 | NA |
| 3 | 37415971 | 37434869 | 1  | NM_178342    | C3orf35  | 0 | NA | 0 | NA | 0 | NA | 0 | NA | 0 | NA |
| 3 | 37415971 | 37451992 | 1  | NM_178339    | C3orf35  | 0 | NA | 0 | NA | 0 | NA | 0 | NA | 0 | NA |
| 3 | 37468816 | 37836285 | 1  | NM_002207    | ITGA9    | 0 | NA | 0 | NA | 0 | NA | 0 | NA | 0 | NA |
| 3 | 37878672 | 38000964 | 1  | NM_001008392 | CTDSPL   | 1 | 14 | 0 | NA | 1 | 12 | 1 | 13 | 0 | NA |
| 3 | 37878672 | 38000964 | 1  | NM_005808    | CTDSPL   | 1 | 14 | 0 | NA | 1 | 12 | 1 | 13 | 0 | NA |
| 3 | 38010081 | 38023680 | 1  | NM_015873    | VILL     | 0 | NA | 0 | NA | 0 | NA | 0 | NA | 0 | NA |
| 3 | 38046137 | 38023990 | -1 | NM_006225    | PLCD1    | 0 | NA | 0 | NA | 0 | NA | 0 | NA | 0 | NA |
| 3 | 38055699 | 38139232 | 1  | NM_007335    | DLEC1    | 0 | NA | 0 | NA | 0 | NA | 0 | NA | 0 | NA |
| 3 | 38055699 | 38139232 | 1  | NM_007337    | DLEC1    | 0 | NA | 0 | NA | 0 | NA | 0 | NA | 0 | NA |
| 3 | 38153619 | 38139210 | -1 | NM_001607    | ACAA1    | 0 | NA | 0 | NA | 0 | NA | 1 | 11 | 0 | NA |
| 3 | 38155008 | 38159516 | 1  | NM_002468    | MYD88    | 0 | NA | 0 | NA | 0 | NA | 1 | 11 | 0 | NA |
| 3 | 38182029 | 38271983 | 1  | NM_005109    | OXSR1    | 0 | NA | 0 | NA | 0 | NA | 0 | NA | 0 | NA |
| 3 | 38282306 | 38294810 | 1  | NM_004256    | SLC22A13 | 0 | NA | 0 | NA | 0 | NA | 0 | NA | 0 | NA |
| 3 | 38322448 | 38334863 | 1  | NM_004803    | SLC22A14 | 0 | NA | 0 | NA | 0 | NA | 0 | NA | 0 | NA |
| 3 | 38363243 | 38431471 | 1  | NM_005108    | XYLB     | 0 | NA | 0 | NA | 0 | NA | 0 | NA | 0 | NA |
| 3 | 38470793 | 38509637 | 1  | NM_001106    | ACVR2B   | 0 | NA | 0 | NA | 0 | NA | 0 | NA | 0 | NA |
| 3 | 38512836 | 38541183 | 1  | NM_005107    | ENDOGL1  | 0 | NA | 0 | NA | 0 | NA | 1 | 12 | 0 | NA |
| 3 | 38666167 | 38564556 | -1 | NM_000335    | SCN5A    | 0 | NA | 1 | 14 | 0 | NA | 0 | NA | 0 | NA |
| 3 | 38666167 | 38564556 | -1 | NM_001099404 | SCN5A    | 0 | NA | 1 | 14 | 0 | NA | 0 | NA | 0 | NA |
| 3 | 38666167 | 38564556 | -1 | NM_001099405 | SCN5A    | 0 | NA | 1 | 14 | 0 | NA | 0 | NA | 0 | NA |
| 3 | 38666167 | 38564556 | -1 | NM_198056    | SCN5A    | 0 | NA | 1 | 14 | 0 | NA | 0 | NA | 0 | NA |
| 3 | 38810505 | 38713840 | -1 | NM_006514    | SCN10A   | 0 | NA | 0 | NA | 0 | NA | 0 | NA | 0 | NA |
| 3 | 38967056 | 38862263 | -1 | NM_014139    | SCN11A   | 0 | NA | 0 | NA | 0 | NA | 0 | NA | 0 | NA |
| 3 | 39068510 | 39112885 | 1  | NM_020839    | WDR48    | 0 | NA | 0 | NA | 0 | NA | 0 | NA | 0 | NA |
| 3 | 39124134 | 39113094 | -1 | NM_031899    | GORASP1  | 0 | NA | 0 | NA | 0 | NA | 0 | NA | 0 | NA |
| 3 | 39124155 | 39155398 | 1  | NM_001105513 | TTC21A   | 0 | NA | 0 | NA | 0 | NA | 0 | NA | 0 | NA |
| 3 | 39124155 | 39155398 | 1  | NM_145755    | TTC21A   | 0 | NA | 0 | NA | 0 | NA | 0 | NA | 0 | NA |
| 3 | 39170105 | 39158349 | -1 | NM_033027    | AXUD1    | 0 | NA | 0 | NA | 0 | NA | 0 | NA | 0 | NA |
| 3 | 39209081 | 39199710 | -1 | NM_194293    | XIRP1    | 0 | NA | 0 | NA | 0 | NA | 0 | NA | 0 | NA |
| 3 | 39296531 | 39279988 | -1 | NM_001337    | CX3CR1   | 0 | NA | 0 | NA | 0 | NA | 0 | NA | 0 | NA |
| 3 | 39346218 | 39351077 | 1  | NM_005201    | CCR8     | 0 | NA | 0 | NA | 0 | NA | 0 | NA | 0 | NA |
| 3 | 39399818 | 39413823 | 1  | NM_017875    | SLC25A38 | 0 | NA | 0 | NA | 0 | NA | 0 | NA | 0 | NA |
| 3 | 39423207 | 39429036 | 1  | NM_002295    | RPSA     | 0 | NA | 0 | NA | 0 | NA | 0 | NA | 0 | NA |
| 3 | 39424114 | 39429036 | 1  | NM_001012321 | RPSA     | 0 | NA | 0 | NA | 0 | NA | 0 | NA | 0 | NA |
| 3 | 39484073 | 39532498 | 1  | NM_182935    | MOBP     | 0 | NA | 0 | NA | 0 | NA | 0 | NA | 0 | NA |
| 3 | 39626306 | 40276815 | 1  | NM_015460    | MYRIP    | 0 | NA | 0 | NA | 0 | NA | 0 | NA | 0 | NA |
| 3 | 40326176 | 40328919 | 1  | NM_005875    | EIF1B    | 0 | NA | 0 | NA | 0 | NA | 0 | NA | 0 | NA |
| 3 | 40403676 | 40445114 | 1  | NM_001248    | ENTPD3   | 0 | NA | 0 | NA | 0 | NA | 0 | NA | 0 | NA |
| 3 | 40473804 | 40478863 | 1  | NM_003973    | RPL14    | 0 | NA | 0 | NA | 0 | NA | 0 | NA | 0 | NA |
| 3 | 40473833 | 40478863 | 1  | NM_001034996 | RPL14    | 0 | NA | 0 | NA | 0 | NA | 0 | NA | 0 | NA |
| 3 | 40493640 | 40504881 | 1  | NM_173656    | ZNF619   | 0 | NA | 0 | NA | 0 | NA | 0 | NA | 0 | NA |
| 3 | 40522533 | 40534042 | 1  | NM_175888    | ZNF620   | 0 | NA | 0 | NA | 0 | NA | 0 | NA | 0 | NA |
| 3 | 40541379 | 40556047 | 1  | NM_001098414 | ZNF621   | 0 | NA | 0 | NA | 0 | NA | 0 | NA | 0 | NA |
| 3 | 40541379 | 40556047 | 1  | NM_198484    | ZNF621   | 0 | NA | 0 | NA | 0 | NA | 0 | NA | 0 | NA |
| 3 | 41215945 | 41256943 | 1  | NM_001098209 | CTNNB1   | 0 | NA | 0 | NA | 0 | NA | 0 | NA | 0 | NA |
| 3 | 41215945 | 41256943 | 1  | NM_001098210 | CTNNB1   | 0 | NA | 0 | NA | 0 | NA | 0 | NA | 0 | NA |
| 3 | 41215945 | 41256943 | 1  | NM_001904    | CTNNB1   | 0 | NA | 0 | NA | 0 | NA | 0 | NA | 0 | NA |
| 3 | 41978664 | 41263093 | -1 | NM_017886    | ULK4     | 1 | 20 | 0 | NA | 0 | NA | 0 | NA | 0 | NA |
| 3 | 42107749 | 42242272 | 1  | NM_001042646 | TRAK1    | 0 | NA | 0 | NA | 0 | NA | 0 | NA | 0 | NA |
| 3 | 42176664 | 42229113 | 1  | NM_014965    | TRAK1    | 0 | NA | 0 | NA | 0 | NA | 0 | NA | 0 | NA |
| 3 | 42281399 | 42274321 | -1 | NM_000729    | CCK      | 0 | NA | 0 | NA | 0 | NA | 0 | NA | 1 | 16 |
| 3 | 42427069 | 42413578 | -1 | NM_144634    | LYZL4    | 0 | NA | 0 | NA | 0 | NA | 0 | NA | 0 | NA |
| 3 | 42519120 | 42554064 | 1  | NM_004624    | VIPR1    | 0 | NA | 0 | NA | 0 | NA | 0 | NA | 0 | NA |
| 3 | 42598432 | 42564476 | -1 | NM_004206    | SEC22C   | 0 | NA | 0 | NA | 0 | NA | 0 | NA | 0 | NA |
| 3 | 42598432 | 42569395 | -1 | NM_032970    | SEC22C   | 0 | NA | 0 | NA | 0 | NA | 0 | NA | 0 | NA |
| 3 | 42607301 | 42611494 | 1  | NM_016305    | SS18L2   | 1 | 11 | 0 | NA | 0 | NA | 0 | NA | 0 | NA |
| 3 | 42617150 | 42665237 | 1  | NM_005385    | NKTR     | 1 | 12 | 0 | NA | 0 | NA | 0 | NA | 0 | NA |
| 3 | 42675877 | 42684076 | 1  | NM_145166    | ZBTB47   | 0 | NA | 0 | NA | 0 | NA | 0 | NA | 0 | NA |
| 3 | 42702014 | 42708942 | 1  | NM_152393    | KBTD5    | 0 | NA | 0 | NA | 0 | NA | 0 | NA | 0 | NA |
| 3 | 42718017 | 42709158 | -1 | NM_020707    | HHATL    | 0 | NA | 0 | NA | 0 | NA | 0 | NA | 0 | NA |

|   |          |          |    |              |           |   |    |   |    |   |    |   |    |   |    |
|---|----------|----------|----|--------------|-----------|---|----|---|----|---|----|---|----|---|----|
| 3 | 42789749 | 42724877 | -1 | NM_144719    | CCDC13    | 0 | NA | 0 | NA | 0 | NA | 0 | NA | 0 | NA |
| 3 | 42820938 | 42799403 | -1 | NM_001099668 | HIGD1A    | 1 | 11 | 0 | NA | 0 | NA | 0 | NA | 0 | NA |
| 3 | 42821031 | 42799403 | -1 | NM_001099669 | HIGD1A    | 1 | 11 | 0 | NA | 0 | NA | 0 | NA | 0 | NA |
| 3 | 42821031 | 42799403 | -1 | NM_014056    | HIGD1A    | 1 | 11 | 0 | NA | 0 | NA | 0 | NA | 0 | NA |
| 3 | 42825967 | 42883779 | 1  | NM_001296    | CCBP2     | 1 | 11 | 0 | NA | 0 | NA | 0 | NA | 0 | NA |
| 3 | 42892637 | 42888687 | -1 | NM_004391    | CYP8B1    | 0 | NA | 0 | NA | 0 | NA | 0 | NA | 0 | NA |
| 3 | 42922405 | 42934136 | 1  | NM_207404    | ZNF662    | 0 | NA | 0 | NA | 0 | NA | 1 | 14 | 1 | 12 |
| 3 | 43122569 | 43095732 | -1 | NM_032806    | C3orf39   | 0 | NA | 0 | NA | 0 | NA | 0 | NA | 0 | NA |
| 3 | 43303007 | 43367638 | 1  | NM_001100594 | SNRK      | 0 | NA | 0 | NA | 0 | NA | 0 | NA | 0 | NA |
| 3 | 43303007 | 43367638 | 1  | NM_017719    | SNRK      | 0 | NA | 0 | NA | 0 | NA | 0 | NA | 0 | NA |
| 3 | 43638564 | 43382821 | -1 | NM_018075    | TMEM16K   | 0 | NA | 0 | NA | 0 | NA | 0 | NA | 0 | NA |
| 3 | 43707378 | 43735296 | 1  | NM_016006    | ABHD5     | 0 | NA | 0 | NA | 0 | NA | 0 | NA | 0 | NA |
| 3 | 44354614 | 44376298 | 1  | NM_001029840 | C3orf23   | 1 | 17 | 0 | NA | 0 | NA | 0 | NA | 0 | NA |
| 3 | 44354947 | 44425944 | 1  | NM_173826    | C3orf23   | 1 | 17 | 0 | NA | 0 | NA | 0 | NA | 0 | NA |
| 3 | 44354947 | 44425944 | 1  | NM_173826    | C3orf23   | 1 | 17 | 0 | NA | 0 | NA | 0 | NA | 0 | NA |
| 3 | 44354947 | 44425944 | 1  | NM_173826    | C3orf23   | 1 | 17 | 0 | NA | 0 | NA | 0 | NA | 0 | NA |
| 3 | 44494166 | 44456265 | -1 | NM_181489    | ZNF445    | 0 | NA | 0 | NA | 0 | NA | 0 | NA | 0 | NA |
| 3 | 44571716 | 44588654 | 1  | NM_018651    | ZNF167    | 0 | NA | 0 | NA | 0 | NA | 0 | NA | 0 | NA |
| 3 | 44571716 | 44599977 | 1  | NM_025169    | ZNF167    | 0 | NA | 0 | NA | 0 | NA | 0 | NA | 0 | NA |
| 3 | 44601459 | 44612561 | 1  | NM_173658    | ZNF660    | 0 | NA | 1 | 12 | 0 | NA | 0 | NA | 0 | NA |
| 3 | 44641514 | 44661756 | 1  | NM_006991    | ZNF197    | 0 | NA | 0 | NA | 0 | NA | 0 | NA | 0 | NA |
| 3 | 44641514 | 44664967 | 1  | NM_001024855 | ZNF197    | 0 | NA | 0 | NA | 0 | NA | 0 | NA | 0 | NA |
| 3 | 44665236 | 44677287 | 1  | NM_003420    | ZNF35     | 0 | NA | 0 | NA | 0 | NA | 0 | NA | 0 | NA |
| 3 | 44729141 | 44740327 | 1  | NM_033210    | ZNF502    | 1 | 23 | 1 | 12 | 1 | 23 | 0 | NA | 1 | 12 |
| 3 | 44746127 | 44753579 | 1  | NM_145044    | ZNF501    | 1 | 21 | 0 | NA | 0 | NA | 0 | NA | 0 | NA |
| 3 | 44778158 | 44769530 | -1 | NM_020696    | KIAA1143  | 0 | NA | 0 | NA | 0 | NA | 1 | 12 | 0 | NA |
| 3 | 44778288 | 44869749 | 1  | NM_020242    | KIF15     | 0 | NA | 0 | NA | 0 | NA | 1 | 12 | 0 | NA |
| 3 | 44878411 | 44882158 | 1  | NM_144638    | TMEM42    | 0 | NA | 0 | NA | 0 | NA | 0 | NA | 0 | NA |
| 3 | 44891101 | 44931092 | 1  | NM_003241    | TGM4      | 0 | NA | 0 | NA | 0 | NA | 0 | NA | 0 | NA |
| 3 | 44992618 | 44941664 | -1 | NM_016598    | ZDHHC3    | 0 | NA | 0 | NA | 0 | NA | 0 | NA | 0 | NA |
| 3 | 44992767 | 45027966 | 1  | NM_015004    | EXOSC7    | 0 | NA | 0 | NA | 0 | NA | 0 | NA | 0 | NA |
| 3 | 45042762 | 45052567 | 1  | NM_003278    | CLEC3B    | 0 | NA | 0 | NA | 0 | NA | 0 | NA | 0 | NA |
| 3 | 45162918 | 45098772 | -1 | NM_022842    | CDCP1     | 0 | NA | 0 | NA | 0 | NA | 0 | NA | 0 | NA |
| 3 | 45162918 | 45126734 | -1 | NM_178181    | CDCP1     | 0 | NA | 0 | NA | 0 | NA | 0 | NA | 0 | NA |
| 3 | 45242818 | 45240959 | -1 | NM_015444    | TMEM158   | 0 | NA | 0 | NA | 0 | NA | 0 | NA | 0 | NA |
| 3 | 45405078 | 45565332 | 1  | NM_015340    | LARS2     | 1 | 20 | 0 | NA | 0 | NA | 0 | NA | 0 | NA |
| 3 | 45611326 | 45697759 | 1  | NM_014240    | LIMD1     | 1 | 11 | 0 | NA | 0 | NA | 0 | NA | 0 | NA |
| 3 | 45705946 | 45761905 | 1  | NM_014016    | SACM1L    | 0 | NA | 0 | NA | 0 | NA | 0 | NA | 0 | NA |
| 3 | 45812966 | 45771951 | -1 | NM_020208    | SLC6A20   | 0 | NA | 0 | NA | 0 | NA | 0 | NA | 0 | NA |
| 3 | 45812966 | 45771951 | -1 | NM_022405    | SLC6A20   | 0 | NA | 0 | NA | 0 | NA | 0 | NA | 0 | NA |
| 3 | 45858625 | 45840449 | -1 | NM_020347    | LZTFL1    | 1 | 18 | 0 | NA | 0 | NA | 0 | NA | 0 | NA |
| 3 | 45903022 | 45919671 | 1  | NM_031200    | CCR9      | 0 | NA | 0 | NA | 0 | NA | 0 | NA | 0 | NA |
| 3 | 45903054 | 45919670 | 1  | NM_006641    | CCR9      | 0 | NA | 0 | NA | 0 | NA | 0 | NA | 0 | NA |
| 3 | 45959976 | 45964849 | 1  | NM_006564    | CXCR6     | 0 | NA | 0 | NA | 0 | NA | 0 | NA | 0 | NA |
| 3 | 46012311 | 45934398 | -1 | NM_024513    | FYCO1     | 0 | NA | 0 | NA | 0 | NA | 0 | NA | 0 | NA |
| 3 | 46043983 | 46037294 | -1 | NM_001024644 | XCR1      | 0 | NA | 0 | NA | 0 | NA | 0 | NA | 0 | NA |
| 3 | 46043983 | 46037294 | -1 | NM_005283    | XCR1      | 0 | NA | 0 | NA | 0 | NA | 0 | NA | 0 | NA |
| 3 | 46224836 | 46218203 | -1 | NM_001295    | CCR1      | 0 | NA | 0 | NA | 0 | NA | 0 | NA | 0 | NA |
| 3 | 46258691 | 46283166 | 1  | NM_001837    | CCR3      | 0 | NA | 0 | NA | 0 | NA | 0 | NA | 0 | NA |
| 3 | 46258691 | 46283166 | 1  | NM_178329    | CCR3      | 0 | NA | 0 | NA | 0 | NA | 0 | NA | 0 | NA |
| 3 | 46370238 | 46375872 | 1  | NM_001123396 | FLJ78302  | 0 | NA | 0 | NA | 0 | NA | 0 | NA | 0 | NA |
| 3 | 46370238 | 46377417 | 1  | NM_001123041 | FLJ78302  | 0 | NA | 0 | NA | 0 | NA | 0 | NA | 0 | NA |
| 3 | 46370363 | 46376154 | 1  | NM_000648    | CCR2      | 0 | NA | 0 | NA | 0 | NA | 0 | NA | 0 | NA |
| 3 | 46370363 | 46377429 | 1  | NM_000647    | CCR2      | 0 | NA | 0 | NA | 0 | NA | 0 | NA | 0 | NA |
| 3 | 46386636 | 46392701 | 1  | NM_000579    | CCR5      | 0 | NA | 0 | NA | 0 | NA | 0 | NA | 0 | NA |
| 3 | 46386636 | 46392701 | 1  | NM_001100168 | CCR5      | 0 | NA | 0 | NA | 0 | NA | 0 | NA | 0 | NA |
| 3 | 46387440 | 46392700 | 1  | NM_001105536 | LOC727797 | 0 | NA | 0 | NA | 0 | NA | 0 | NA | 0 | NA |
| 3 | 46423657 | 46426018 | 1  | NM_001097632 | LOC727811 | 0 | NA | 0 | NA | 0 | NA | 0 | NA | 0 | NA |
| 3 | 46423724 | 46426018 | 1  | NM_003965    | CCRL2     | 0 | NA | 0 | NA | 0 | NA | 0 | NA | 0 | NA |
| 3 | 46481399 | 46452499 | -1 | NM_002343    | LTF       | 0 | NA | 1 | 12 | 0 | NA | 0 | NA | 0 | NA |
| 3 | 46514488 | 46517443 | 1  | NM_031440    | RTP3      | 0 | NA | 0 | NA | 0 | NA | 0 | NA | 0 | NA |
| 3 | 46582818 | 46531916 | -1 | NM_024512    | LRRC2     | 0 | NA | 0 | NA | 0 | NA | 0 | NA | 0 | NA |
| 3 | 46594216 | 46598956 | 1  | NM_003212    | IDGF1     | 0 | NA | 0 | NA | 0 | NA | 0 | NA | 0 | NA |
| 3 | 46596576 | 46534871 | -1 | NM_024750    | LRRC2     | 0 | NA | 0 | NA | 0 | NA | 0 | NA | 0 | NA |
| 3 | 46693903 | 46685682 | -1 | NM_182775    | ALS2CL    | 0 | NA | 0 | NA | 0 | NA | 0 | NA | 0 | NA |
| 3 | 46710175 | 46685682 | -1 | NM_147129    | ALS2CL    | 0 | NA | 0 | NA | 0 | NA | 0 | NA | 0 | NA |



|   |          |          |    |              |            |   |    |   |    |   |    |   |    |   |    |
|---|----------|----------|----|--------------|------------|---|----|---|----|---|----|---|----|---|----|
| 3 | 46717826 | 46727417 | 1  | NM_147196    | TMIE       | 0 | NA | 0 | NA | 0 | NA | 0 | NA | 0 | NA |
| 3 | 46734377 | 46728609 | -1 | NM_013270    | TSP50      | 0 | NA | 0 | NA | 0 | NA | 0 | NA | 0 | NA |
| 3 | 46761249 | 46758584 | -1 | NM_199183    | TESSP5     | 0 | NA | 1 | 14 | 0 | NA | 0 | NA | 0 | NA |
| 3 | 46850589 | 46846897 | -1 | NM_182702    | TESSP2     | 0 | NA | 1 | 14 | 0 | NA | 0 | NA | 0 | NA |
| 3 | 46879977 | 46874360 | -1 | NM_000258    | MYL3       | 0 | NA | 0 | NA | 0 | NA | 0 | NA | 0 | NA |
| 3 | 46894239 | 46920293 | 1  | NM_000316    | PTHR1      | 0 | NA | 0 | NA | 0 | NA | 0 | NA | 0 | NA |
| 3 | 46993243 | 46938224 | -1 | NM_144716    | CCDC12     | 0 | NA | 0 | NA | 0 | NA | 0 | NA | 0 | NA |
| 3 | 46996176 | 47026197 | 1  | NM_015175    | NBEAL2     | 0 | NA | 0 | NA | 0 | NA | 0 | NA | 0 | NA |
| 3 | 47140744 | 47032909 | -1 | NM_014159    | SETD2      | 0 | NA | 0 | NA | 0 | NA | 0 | NA | 0 | NA |
| 3 | 47299042 | 47244890 | -1 | NM_022342    | KIF9       | 0 | NA | 0 | NA | 0 | NA | 0 | NA | 0 | NA |
| 3 | 47299044 | 47256056 | -1 | NM_182903    | KIF9       | 0 | NA | 0 | NA | 0 | NA | 0 | NA | 0 | NA |
| 3 | 47299092 | 47244888 | -1 | NM_182902    | KIF9       | 0 | NA | 0 | NA | 0 | NA | 0 | NA | 0 | NA |
| 3 | 47299443 | 47363310 | 1  | NM_025010    | KLHL18     | 0 | NA | 0 | NA | 0 | NA | 0 | NA | 0 | NA |
| 3 | 47397494 | 47429935 | 1  | NM_015466    | PTPN23     | 0 | NA | 0 | NA | 0 | NA | 0 | NA | 0 | NA |
| 3 | 47492449 | 47430187 | -1 | NM_012235    | SCAP       | 0 | NA | 0 | NA | 0 | NA | 0 | NA | 0 | NA |
| 3 | 47530203 | 47512133 | -1 | NM_001031703 | TMEM103    | 0 | NA | 0 | NA | 0 | NA | 0 | NA | 0 | NA |
| 3 | 47595363 | 47578731 | -1 | NM_006574    | CSPG5      | 0 | NA | 0 | NA | 0 | NA | 0 | NA | 0 | NA |
| 3 | 47798410 | 47602390 | -1 | NM_003074    | SMARCC1    | 0 | NA | 0 | NA | 1 | 12 | 0 | NA | 0 | NA |
| 3 | 47819654 | 47866687 | 1  | NM_014966    | DHX30      | 0 | NA | 0 | NA | 0 | NA | 0 | NA | 0 | NA |
| 3 | 47819654 | 47866687 | 1  | NM_138615    | DHX30      | 0 | NA | 0 | NA | 0 | NA | 0 | NA | 0 | NA |
| 3 | 47926807 | 47867188 | -1 | NM_030884    | MAP4       | 0 | NA | 0 | NA | 0 | NA | 0 | NA | 0 | NA |
| 3 | 48105714 | 47989572 | -1 | NM_030885    | MAP4       | 1 | 16 | 0 | NA | 0 | NA | 0 | NA | 0 | NA |
| 3 | 48105715 | 47867188 | -1 | NM_002375    | MAP4       | 1 | 16 | 0 | NA | 0 | NA | 0 | NA | 0 | NA |
| 3 | 48204805 | 48173671 | -1 | NM_001789    | CDC25A     | 0 | NA | 0 | NA | 0 | NA | 0 | NA | 0 | NA |
| 3 | 48204805 | 48173671 | -1 | NM_201567    | CDC25A     | 0 | NA | 0 | NA | 0 | NA | 0 | NA | 0 | NA |
| 3 | 48239865 | 48241979 | 1  | NM_004345    | CAMP       | 0 | NA | 0 | NA | 0 | NA | 0 | NA | 0 | NA |
| 3 | 48257599 | 48287483 | 1  | NM_016089    | ZNF589     | 0 | NA | 0 | NA | 0 | NA | 0 | NA | 0 | NA |
| 3 | 48317852 | 48310592 | -1 | NM_005793    | NME6       | 1 | 22 | 0 | NA | 0 | NA | 0 | NA | 0 | NA |
| 3 | 48344835 | 48323339 | -1 | NM_001080525 | SPINK8     | 0 | NA | 0 | NA | 0 | NA | 0 | NA | 0 | NA |
| 3 | 48388712 | 48411194 | 1  | NM_207102    | FBXW12     | 0 | NA | 0 | NA | 0 | NA | 0 | NA | 0 | NA |
| 3 | 48441746 | 48420266 | -1 | NM_002673    | PLXNB1     | 1 | 14 | 0 | NA | 0 | NA | 0 | NA | 0 | NA |
| 3 | 48456533 | 48448583 | -1 | NM_024661    | CCDC51     | 0 | NA | 0 | NA | 0 | NA | 0 | NA | 0 | NA |
| 3 | 48456689 | 48460541 | 1  | NM_015933    | CCDC72     | 0 | NA | 0 | NA | 0 | NA | 0 | NA | 0 | NA |
| 3 | 48463221 | 48482058 | 1  | NM_032166    | ATRIP      | 0 | NA | 0 | NA | 0 | NA | 0 | NA | 0 | NA |
| 3 | 48463221 | 48482058 | 1  | NM_130384    | ATRIP      | 0 | NA | 0 | NA | 0 | NA | 0 | NA | 0 | NA |
| 3 | 48482232 | 48484048 | 1  | NM_016381    | TREX1      | 0 | NA | 0 | NA | 0 | NA | 0 | NA | 0 | NA |
| 3 | 48482232 | 48484048 | 1  | NM_033629    | TREX1      | 0 | NA | 0 | NA | 0 | NA | 0 | NA | 0 | NA |
| 3 | 48516665 | 48484200 | -1 | NM_016479    | SHISA5     | 0 | NA | 0 | NA | 0 | NA | 0 | NA | 0 | NA |
| 3 | 48569231 | 48530120 | -1 | NM_004567    | PFKFB4     | 0 | NA | 0 | NA | 0 | NA | 1 | 14 | 0 | NA |
| 3 | 48576205 | 48574154 | -1 | NM_033199    | UCN2       | 0 | NA | 0 | NA | 1 | 14 | 0 | NA | 0 | NA |
| 3 | 48607597 | 48576509 | -1 | NM_000094    | COL7A1     | 0 | NA | 0 | NA | 0 | NA | 0 | NA | 0 | NA |
| 3 | 48622102 | 48611435 | -1 | NM_003365    | UQCRC1     | 1 | 21 | 0 | NA | 0 | NA | 1 | 45 | 0 | NA |
| 3 | 48634193 | 48633278 | -1 | NM_001008269 | TMEM89     | 1 | 21 | 0 | NA | 0 | NA | 1 | 45 | 0 | NA |
| 3 | 48646283 | 48638159 | -1 | NM_001040454 | SLC26A6    | 0 | NA | 0 | NA | 0 | NA | 0 | NA | 0 | NA |
| 3 | 48647930 | 48638159 | -1 | NM_022911    | SLC26A6    | 0 | NA | 0 | NA | 0 | NA | 0 | NA | 0 | NA |
| 3 | 48647930 | 48638159 | -1 | NM_134263    | SLC26A6    | 0 | NA | 0 | NA | 0 | NA | 0 | NA | 0 | NA |
| 3 | 48647930 | 48638159 | -1 | NM_134426    | SLC26A6    | 0 | NA | 0 | NA | 0 | NA | 0 | NA | 0 | NA |
| 3 | 48675352 | 48648899 | -1 | NM_001407    | CELSR3     | 1 | 16 | 0 | NA | 0 | NA | 1 | 18 | 0 | NA |
| 3 | 48698338 | 48686281 | -1 | NM_016453    | NCKIPSD    | 0 | NA | 0 | NA | 0 | NA | 0 | NA | 0 | NA |
| 3 | 48698338 | 48686281 | -1 | NM_184231    | NCKIPSD    | 0 | NA | 0 | NA | 0 | NA | 0 | NA | 0 | NA |
| 3 | 48729710 | 48700439 | -1 | NM_001005909 | IHPK2      | 0 | NA | 0 | NA | 0 | NA | 0 | NA | 0 | NA |
| 3 | 48729710 | 48700439 | -1 | NM_016291    | IHPK2      | 0 | NA | 0 | NA | 0 | NA | 0 | NA | 0 | NA |
| 3 | 48729710 | 48705886 | -1 | NM_001005910 | IHPK2      | 0 | NA | 0 | NA | 0 | NA | 0 | NA | 0 | NA |
| 3 | 48729710 | 48705886 | -1 | NM_001005911 | IHPK2      | 0 | NA | 0 | NA | 0 | NA | 0 | NA | 0 | NA |
| 3 | 48860274 | 48763096 | -1 | NM_004157    | PRKAR2A    | 0 | NA | 0 | NA | 0 | NA | 0 | NA | 0 | NA |
| 3 | 48911333 | 48869367 | -1 | NM_000387    | SLC25A20   | 0 | NA | 0 | NA | 0 | NA | 0 | NA | 0 | NA |
| 3 | 48931284 | 48997975 | 1  | NM_006321    | ARIH2      | 0 | NA | 0 | NA | 0 | NA | 0 | NA | 0 | NA |
| 3 | 48931822 | 48930224 | -1 | NM_001123040 | LOC4646450 | 0 | NA | 0 | NA | 0 | NA | 0 | NA | 0 | NA |
| 3 | 49002344 | 49019585 | 1  | NM_177938    | PH-4       | 0 | NA | 0 | NA | 0 | NA | 0 | NA | 0 | NA |
| 3 | 49002344 | 49019585 | 1  | NM_177939    | PH-4       | 0 | NA | 0 | NA | 0 | NA | 0 | NA | 0 | NA |
| 3 | 49019829 | 49028386 | 1  | NM_018031    | WDR6       | 0 | NA | 0 | NA | 1 | 23 | 0 | NA | 0 | NA |
| 3 | 49031021 | 49027438 | -1 | NM_001009996 | DALRD3     | 0 | NA | 0 | NA | 0 | NA | 0 | NA | 0 | NA |
| 3 | 49032911 | 49035930 | 1  | NM_199074    | C3orf60    | 0 | NA | 0 | NA | 0 | NA | 0 | NA | 0 | NA |
| 3 | 49033471 | 49027438 | -1 | NM_018114    | DALRD3     | 0 | NA | 0 | NA | 0 | NA | 0 | NA | 0 | NA |
| 3 | 49033621 | 49035930 | 1  | NM_199073    | C3orf60    | 0 | NA | 0 | NA | 0 | NA | 0 | NA | 0 | NA |

|   |          |          |    |              |           |   |    |   |    |   |    |   |    |   |    |
|---|----------|----------|----|--------------|-----------|---|----|---|----|---|----|---|----|---|----|
| 3 | 49034077 | 49035930 | 1  | NM_199069    | C3orf60   | 0 | NA | 0 | NA | 0 | NA | 0 | NA | 0 | NA |
| 3 | 49034077 | 49035930 | 1  | NM_199070    | C3orf60   | 0 | NA | 0 | NA | 0 | NA | 0 | NA | 0 | NA |
| 3 | 49034077 | 49035930 | 1  | NM_199417    | C3orf60   | 0 | NA | 0 | NA | 0 | NA | 0 | NA | 0 | NA |
| 3 | 49041879 | 49036765 | -1 | NM_000884    | IMPDH2    | 0 | NA | 0 | NA | 0 | NA | 0 | NA | 0 | NA |
| 3 | 49106508 | 49042145 | -1 | NM_017730    | QRICH1    | 1 | 11 | 0 | NA | 0 | NA | 1 | 11 | 0 | NA |
| 3 | 49106508 | 49042145 | -1 | NM_198880    | QRICH1    | 1 | 11 | 0 | NA | 0 | NA | 1 | 11 | 0 | NA |
| 3 | 49117175 | 49108368 | -1 | NM_005051    | QARS      | 1 | 13 | 0 | NA | 0 | NA | 0 | NA | 0 | NA |
| 3 | 49133217 | 49121111 | -1 | NM_006677    | USP19     | 0 | NA | 0 | NA | 0 | NA | 0 | NA | 0 | NA |
| 3 | 49145603 | 49133550 | -1 | NM_002292    | LAMB2     | 0 | NA | 0 | NA | 0 | NA | 0 | NA | 0 | NA |
| 3 | 49178789 | 49174971 | -1 | NM_022903    | CCDC71    | 1 | 14 | 0 | NA | 0 | NA | 0 | NA | 0 | NA |
| 3 | 49184071 | 49188923 | 1  | NM_173546    | KLHDC8B   | 1 | 16 | 0 | NA | 0 | NA | 0 | NA | 0 | NA |
| 3 | 49202426 | 49190072 | -1 | NM_001080528 | LOC646498 | 0 | NA | 0 | NA | 0 | NA | 0 | NA | 0 | NA |
| 3 | 49210864 | 49270160 | 1  | NM_178173    | CCDC36    | 0 | NA | 0 | NA | 0 | NA | 0 | NA | 0 | NA |
| 3 | 49289456 | 49281222 | -1 | NM_198562    | C3orf62   | 0 | NA | 0 | NA | 0 | NA | 0 | NA | 0 | NA |
| 3 | 49352519 | 49289997 | -1 | NM_003363    | USP4      | 1 | 16 | 0 | NA | 0 | NA | 0 | NA | 0 | NA |
| 3 | 49352519 | 49289997 | -1 | NM_199443    | USP4      | 1 | 16 | 0 | NA | 0 | NA | 0 | NA | 0 | NA |
| 3 | 49370795 | 49369612 | -1 | NM_000581    | GPX1      | 1 | 16 | 0 | NA | 0 | NA | 1 | 13 | 0 | NA |
| 3 | 49370795 | 49369612 | -1 | NM_201397    | GPX1      | 1 | 16 | 0 | NA | 0 | NA | 1 | 13 | 0 | NA |
| 3 | 49424530 | 49371582 | -1 | NM_001664    | RHOA      | 1 | 25 | 0 | NA | 0 | NA | 0 | NA | 0 | NA |
| 3 | 49424642 | 49428913 | 1  | NM_022171    | TCTA      | 1 | 25 | 0 | NA | 0 | NA | 0 | NA | 0 | NA |
| 3 | 49435016 | 49429214 | -1 | NM_000481    | AMT       | 0 | NA | 0 | NA | 0 | NA | 0 | NA | 0 | NA |
| 3 | 49441761 | 49434769 | -1 | NM_032316    | NICN1     | 0 | NA | 0 | NA | 0 | NA | 0 | NA | 0 | NA |
| 3 | 49482568 | 49548052 | 1  | NM_004393    | DAG1      | 0 | NA | 0 | NA | 0 | NA | 0 | NA | 0 | NA |
| 3 | 49566925 | 49683986 | 1  | NM_003458    | BSN       | 0 | NA | 0 | NA | 0 | NA | 0 | NA | 0 | NA |
| 3 | 49686438 | 49695938 | 1  | NM_001640    | APEH      | 1 | 37 | 0 | NA | 1 | 22 | 1 | 24 | 0 | NA |
| 3 | 49701099 | 49696391 | -1 | NM_020998    | MST1      | 0 | NA | 0 | NA | 0 | NA | 0 | NA | 0 | NA |
| 3 | 49701993 | 49733966 | 1  | NM_022064    | RNF123    | 0 | NA | 0 | NA | 0 | NA | 0 | NA | 0 | NA |
| 3 | 49732127 | 49729968 | -1 | NM_198722    | AMIGO3    | 0 | NA | 0 | NA | 0 | NA | 0 | NA | 0 | NA |
| 3 | 49736388 | 49733935 | -1 | NM_013334    | GMPPB     | 0 | NA | 0 | NA | 0 | NA | 0 | NA | 0 | NA |
| 3 | 49736388 | 49733935 | -1 | NM_021971    | GMPPB     | 0 | NA | 0 | NA | 0 | NA | 0 | NA | 0 | NA |
| 3 | 49798977 | 49736731 | -1 | NM_001006115 | IHPK1     | 0 | NA | 0 | NA | 0 | NA | 0 | NA | 0 | NA |
| 3 | 49798977 | 49736731 | -1 | NM_153273    | IHPK1     | 0 | NA | 0 | NA | 0 | NA | 0 | NA | 0 | NA |
| 3 | 49812272 | 49810668 | -1 | NM_001007540 | LOC389118 | 0 | NA | 0 | NA | 0 | NA | 0 | NA | 0 | NA |
| 3 | 49815690 | 49817467 | 1  | NM_203370    | C3orf54   | 0 | NA | 0 | NA | 0 | NA | 0 | NA | 0 | NA |
| 3 | 49826395 | 49817641 | -1 | NM_003335    | UBA7      | 0 | NA | 0 | NA | 0 | NA | 0 | NA | 0 | NA |
| 3 | 49868996 | 49841031 | -1 | NM_005879    | TRAIPI    | 0 | NA | 0 | NA | 0 | NA | 0 | NA | 0 | NA |
| 3 | 49882373 | 49870425 | -1 | NM_024046    | CAMKV     | 0 | NA | 0 | NA | 0 | NA | 0 | NA | 0 | NA |
| 3 | 49916310 | 49899439 | -1 | NM_002447    | MST1R     | 0 | NA | 0 | NA | 0 | NA | 0 | NA | 0 | NA |
| 3 | 49942261 | 49921309 | -1 | NM_032355    | MON1A     | 0 | NA | 0 | NA | 0 | NA | 0 | NA | 0 | NA |
| 3 | 49952595 | 50089686 | 1  | NM_005777    | RBM6      | 1 | 11 | 0 | NA | 0 | NA | 0 | NA | 0 | NA |
| 3 | 50101371 | 50131396 | 1  | NM_005778    | RBM5      | 0 | NA | 0 | NA | 0 | NA | 0 | NA | 0 | NA |
| 3 | 50167851 | 50201512 | 1  | NM_004186    | SEMA3F    | 0 | NA | 0 | NA | 0 | NA | 0 | NA | 0 | NA |
| 3 | 50204046 | 50208953 | 1  | NM_000172    | GNAT1     | 1 | 11 | 1 | 12 | 0 | NA | 0 | NA | 0 | NA |
| 3 | 50204046 | 50208953 | 1  | NM_144499    | GNAT1     | 1 | 11 | 1 | 12 | 0 | NA | 0 | NA | 0 | NA |
| 3 | 50217695 | 50233410 | 1  | NM_006841    | SLC38A3   | 0 | NA | 0 | NA | 0 | NA | 0 | NA | 0 | NA |
| 3 | 50248650 | 50271790 | 1  | NM_002070    | GNAI2     | 0 | NA | 0 | NA | 0 | NA | 0 | NA | 0 | NA |
| 3 | 50280043 | 50289576 | 1  | NM_001005914 | SEMA3B    | 1 | 12 | 0 | NA | 0 | NA | 1 | 13 | 0 | NA |
| 3 | 50280043 | 50289576 | 1  | NM_004636    | SEMA3B    | 1 | 12 | 0 | NA | 0 | NA | 1 | 13 | 0 | NA |
| 3 | 50291521 | 50300549 | 1  | NM_153215    | C3orf45   | 0 | NA | 0 | NA | 0 | NA | 0 | NA | 0 | NA |
| 3 | 50304923 | 50300123 | -1 | NM_006764    | IFRD2     | 0 | NA | 0 | NA | 1 | 12 | 0 | NA | 0 | NA |
| 3 | 50311716 | 50308836 | -1 | NM_012191    | NAT6      | 0 | NA | 0 | NA | 1 | 12 | 0 | NA | 0 | NA |
| 3 | 50311903 | 50305265 | -1 | NM_003549    | HYAL3     | 0 | NA | 0 | NA | 1 | 12 | 0 | NA | 0 | NA |
| 3 | 50316008 | 50312323 | -1 | NM_033159    | HYAL1     | 0 | NA | 0 | NA | 1 | 12 | 0 | NA | 0 | NA |
| 3 | 50316008 | 50312323 | -1 | NM_153282    | HYAL1     | 0 | NA | 0 | NA | 1 | 12 | 0 | NA | 0 | NA |
| 3 | 50316008 | 50312323 | -1 | NM_153283    | HYAL1     | 0 | NA | 0 | NA | 1 | 12 | 0 | NA | 0 | NA |
| 3 | 50316008 | 50312323 | -1 | NM_153285    | HYAL1     | 0 | NA | 0 | NA | 1 | 12 | 0 | NA | 0 | NA |
| 3 | 50316008 | 50312324 | -1 | NM_007312    | HYAL1     | 0 | NA | 0 | NA | 1 | 12 | 0 | NA | 0 | NA |
| 3 | 50324816 | 50312323 | -1 | NM_153281    | HYAL1     | 1 | 17 | 0 | NA | 0 | NA | 1 | 15 | 0 | NA |
| 3 | 50333903 | 50330243 | -1 | NM_033158    | HYAL2     | 1 | 17 | 0 | NA | 0 | NA | 1 | 15 | 0 | NA |
| 3 | 50335146 | 50330243 | -1 | NM_003773    | HYAL2     | 1 | 15 | 0 | NA | 0 | NA | 1 | 15 | 0 | NA |
| 3 | 50340672 | 50337344 | -1 | NM_007275    | TUSC2     | 1 | 15 | 0 | NA | 0 | NA | 1 | 14 | 0 | NA |
| 3 | 50349899 | 50342220 | -1 | NM_170713    | RASSF1    | 0 | NA | 0 | NA | 0 | NA | 1 | 14 | 0 | NA |
| 3 | 50350668 | 50342220 | -1 | NM_170712    | RASSF1    | 0 | NA | 0 | NA | 0 | NA | 1 | 14 | 0 | NA |
| 3 | 50353371 | 50342220 | -1 | NM_007182    | RASSF1    | 0 | NA | 0 | NA | 0 | NA | 1 | 16 | 0 | NA |
| 3 | 50353371 | 50342220 | -1 | NM_170714    | RASSF1    | 0 | NA | 0 | NA | 0 | NA | 1 | 16 | 0 | NA |

|   |          |          |    |              |              |   |    |   |    |   |    |   |    |   |    |
|---|----------|----------|----|--------------|--------------|---|----|---|----|---|----|---|----|---|----|
| 3 | 50358160 | 50353540 | -1 | NM_015896    | ZMYND10      | 0 | NA | 0 | NA | 0 | NA | 1 | 16 | 0 | NA |
| 3 | 50363300 | 50366500 | 1  | NM_007022    | CYB561D2     | 0 | NA | 0 | NA | 0 | NA | 1 | 16 | 0 | NA |
| 3 | 50363490 | 50359922 | -1 | NM_006545    | TUSC4        | 0 | NA | 0 | NA | 0 | NA | 1 | 16 | 0 | NA |
| 3 | 50371943 | 50367183 | -1 | NM_007024    | TMEM115      | 0 | NA | 0 | NA | 0 | NA | 1 | 16 | 0 | NA |
| 3 | 50515896 | 50375234 | -1 | NM_001005505 | CACNA2D2     | 0 | NA | 0 | NA | 0 | NA | 0 | NA | 0 | NA |
| 3 | 50515896 | 50375234 | -1 | NM_006030    | CACNA2D2     | 0 | NA | 0 | NA | 0 | NA | 0 | NA | 0 | NA |
| 3 | 50580186 | 50570465 | -1 | NM_016210    | C3orf18      | 1 | 15 | 0 | NA | 0 | NA | 1 | 13 | 0 | NA |
| 3 | 50581912 | 50597425 | 1  | NM_016173    | HEMK1        | 1 | 15 | 0 | NA | 0 | NA | 1 | 13 | 0 | NA |
| 3 | 50624207 | 50618929 | -1 | NM_145071    | CISH         | 0 | NA | 0 | NA | 0 | NA | 0 | NA | 0 | NA |
| 3 | 50629604 | 50661723 | 1  | NM_004635    | MAPKAPK3     | 0 | NA | 0 | NA | 0 | NA | 0 | NA | 0 | NA |
| 3 | 50687675 | 51396669 | 1  | NM_004947    | DOCK3        | 0 | NA | 0 | NA | 0 | NA | 0 | NA | 0 | NA |
| 3 | 51397742 | 51401815 | 1  | NM_006010    | ARMET        | 1 | 82 | 0 | NA | 1 | 12 | 0 | NA | 0 | NA |
| 3 | 51403770 | 51410376 | 1  | NM_013286    | RBM15B       | 1 | 82 | 0 | NA | 1 | 12 | 0 | NA | 0 | NA |
| 3 | 51509041 | 51408337 | -1 | NM_014703    | VPRBP        | 1 | 15 | 0 | NA | 0 | NA | 0 | NA | 0 | NA |
| 3 | 51550635 | 51672652 | 1  | NM_015106    | RAD54L2      | 0 | NA | 0 | NA | 0 | NA | 0 | NA | 0 | NA |
| 3 | 51680329 | 51713377 | 1  | NM_015926    | TEX264       | 0 | NA | 0 | NA | 0 | NA | 0 | NA | 0 | NA |
| 3 | 51718003 | 51727665 | 1  | NM_000839    | GRM2         | 1 | 11 | 0 | NA | 0 | NA | 0 | NA | 0 | NA |
| 3 | 51837608 | 51839916 | 1  | NM_001085479 | IQCF3        | 0 | NA | 0 | NA | 0 | NA | 0 | NA | 0 | NA |
| 3 | 51870684 | 51872480 | 1  | NM_203424    | IQCF2        | 0 | NA | 0 | NA | 0 | NA | 0 | NA | 0 | NA |
| 3 | 51912391 | 51903931 | -1 | NM_152397    | IQCF1        | 0 | NA | 0 | NA | 0 | NA | 0 | NA | 0 | NA |
| 3 | 51950962 | 51942485 | -1 | NM_004704    | RRP9         | 0 | NA | 0 | NA | 0 | NA | 0 | NA | 0 | NA |
| 3 | 51951400 | 51957923 | 1  | NM_001003931 | PARP3        | 0 | NA | 0 | NA | 0 | NA | 0 | NA | 0 | NA |
| 3 | 51951400 | 51957923 | 1  | NM_001003935 | PARP3        | 0 | NA | 0 | NA | 0 | NA | 0 | NA | 0 | NA |
| 3 | 51951400 | 51957923 | 1  | NM_005485    | PARP3        | 0 | NA | 0 | NA | 0 | NA | 0 | NA | 0 | NA |
| 3 | 51964369 | 51966560 | 1  | NM_080865    | GPR62        | 0 | NA | 0 | NA | 0 | NA | 0 | NA | 0 | NA |
| 3 | 51970692 | 51966513 | -1 | NM_020418    | PCBP4        | 0 | NA | 0 | NA | 0 | NA | 0 | NA | 0 | NA |
| 3 | 51970692 | 51966513 | -1 | NM_033009    | PCBP4        | 0 | NA | 0 | NA | 0 | NA | 0 | NA | 0 | NA |
| 3 | 51971948 | 51966513 | -1 | NM_033010    | PCBP4        | 0 | NA | 0 | NA | 0 | NA | 0 | NA | 0 | NA |
| 3 | 51976509 | 51966513 | -1 | NM_033008    | PCBP4        | 0 | NA | 0 | NA | 0 | NA | 0 | NA | 0 | NA |
| 3 | 51983070 | 51977570 | -1 | NM_032750    | ABHD14B      | 0 | NA | 0 | NA | 0 | NA | 0 | NA | 0 | NA |
| 3 | 51984123 | 51990252 | 1  | NM_015407    | ABHD14A      | 0 | NA | 0 | NA | 0 | NA | 0 | NA | 0 | NA |
| 3 | 51992602 | 51998258 | 1  | NM_000666    | ACY1         | 0 | NA | 0 | NA | 0 | NA | 0 | NA | 0 | NA |
| 3 | 52004998 | 52002683 | -1 | NM_000992    | RPL29        | 0 | NA | 0 | NA | 0 | NA | 0 | NA | 0 | NA |
| 3 | 52065329 | 52059798 | -1 | NM_001947    | DUSP7        | 1 | 11 | 0 | NA | 1 | 13 | 0 | NA | 0 | NA |
| 3 | 52074168 | 52071149 | -1 | NM_001123039 | LOC100128378 | 0 | NA | 0 | NA | 1 | 13 | 0 | NA | 0 | NA |
| 3 | 52163460 | 52084309 | -1 | NM_015426    | WDR51A       | 0 | NA | 0 | NA | 0 | NA | 0 | NA | 0 | NA |
| 3 | 52207155 | 52223383 | 1  | NM_199166    | ALAS1        | 1 | 12 | 0 | NA | 0 | NA | 0 | NA | 0 | NA |
| 3 | 52207183 | 52223383 | 1  | NM_000688    | ALAS1        | 1 | 12 | 0 | NA | 0 | NA | 0 | NA | 0 | NA |
| 3 | 52235219 | 52230137 | -1 | NM_017442    | TLR9         | 0 | NA | 0 | NA | 0 | NA | 0 | NA | 0 | NA |
| 3 | 52248223 | 52237665 | -1 | NM_007284    | TWF2         | 0 | NA | 0 | NA | 0 | NA | 0 | NA | 0 | NA |
| 3 | 52255264 | 52259655 | 1  | NM_001122870 | PPM1M        | 0 | NA | 0 | NA | 0 | NA | 0 | NA | 0 | NA |
| 3 | 52255264 | 52259655 | 1  | NM_144641    | PPM1M        | 0 | NA | 0 | NA | 0 | NA | 0 | NA | 0 | NA |
| 3 | 52287699 | 52263477 | -1 | NM_025222    | WDR82        | 0 | NA | 0 | NA | 1 | 12 | 0 | NA | 0 | NA |
| 3 | 52296911 | 52302532 | 1  | NM_145262    | GLYCTK       | 0 | NA | 0 | NA | 0 | NA | 1 | 12 | 0 | NA |
| 3 | 52325559 | 52409547 | 1  | NM_015512    | DNAH1        | 0 | NA | 0 | NA | 0 | NA | 0 | NA | 0 | NA |
| 3 | 52419049 | 52410064 | -1 | NM_004656    | BAP1         | 0 | NA | 0 | NA | 0 | NA | 0 | NA | 0 | NA |
| 3 | 52419566 | 52432697 | 1  | NM_016483    | PHF7         | 0 | NA | 0 | NA | 0 | NA | 0 | NA | 0 | NA |
| 3 | 52419566 | 52432697 | 1  | NM_173341    | PHF7         | 0 | NA | 0 | NA | 0 | NA | 0 | NA | 0 | NA |
| 3 | 52454083 | 52442307 | -1 | NM_020163    | SEMA3G       | 0 | NA | 0 | NA | 0 | NA | 0 | NA | 0 | NA |
| 3 | 52463098 | 52460157 | -1 | NM_003280    | TNNC1        | 0 | NA | 0 | NA | 0 | NA | 0 | NA | 0 | NA |
| 3 | 52464563 | 52502128 | 1  | NM_007184    | NISCH        | 0 | NA | 0 | NA | 0 | NA | 0 | NA | 0 | NA |
| 3 | 52504395 | 52533551 | 1  | NM_015136    | STAB1        | 0 | NA | 0 | NA | 0 | NA | 0 | NA | 0 | NA |
| 3 | 52544110 | 52533442 | -1 | NM_022908    | NT5DC2       | 0 | NA | 0 | NA | 0 | NA | 0 | NA | 0 | NA |
| 3 | 52545660 | 52549626 | 0  | NM_001124767 | LOC440957    | 0 | NA | 0 | NA | 0 | NA | 0 | NA | 0 | NA |
| 3 | 52688779 | 52554407 | -1 | NM_018165    | PBRM1        | 0 | NA | 0 | NA | 0 | NA | 0 | NA | 0 | NA |
| 3 | 52688779 | 52554407 | -1 | NM_181042    | PBRM1        | 0 | NA | 0 | NA | 0 | NA | 0 | NA | 0 | NA |
| 3 | 52694906 | 52554407 | -1 | NM_018313    | PBRM1        | 0 | NA | 0 | NA | 0 | NA | 0 | NA | 0 | NA |
| 3 | 52694975 | 52703550 | 1  | NM_014366    | GNL3         | 0 | NA | 0 | NA | 0 | NA | 0 | NA | 0 | NA |
| 3 | 52694975 | 52703550 | 1  | NM_206825    | GNL3         | 0 | NA | 0 | NA | 0 | NA | 0 | NA | 0 | NA |
| 3 | 52694975 | 52703550 | 1  | NM_206826    | GNL3         | 0 | NA | 0 | NA | 0 | NA | 0 | NA | 0 | NA |
| 3 | 52712662 | 52703543 | -1 | NM_152932    | GLT8D1       | 0 | NA | 0 | NA | 0 | NA | 0 | NA | 0 | NA |
| 3 | 52714896 | 52717249 | 1  | NM_014041    | SPCS1        | 0 | NA | 0 | NA | 0 | NA | 0 | NA | 0 | NA |
| 3 | 52715088 | 52703543 | -1 | NM_001010983 | GLT8D1       | 0 | NA | 0 | NA | 0 | NA | 0 | NA | 0 | NA |
| 3 | 52715088 | 52703543 | -1 | NM_018446    | GLT8D1       | 0 | NA | 0 | NA | 0 | NA | 0 | NA | 0 | NA |
| 3 | 52779991 | 52719840 | -1 | NM_003157    | NEK4         | 0 | NA | 0 | NA | 0 | NA | 0 | NA | 0 | NA |

|   |          |          |    |              |          |   |    |   |    |   |    |   |    |   |    |
|---|----------|----------|----|--------------|----------|---|----|---|----|---|----|---|----|---|----|
| 3 | 52786647 | 52801117 | 1  | NM_002215    | ITIH1    | 0 | NA | 0 | NA | 0 | NA | 0 | NA | 0 | NA |
| 3 | 52803823 | 52818065 | 1  | NM_002217    | ITIH3    | 0 | NA | 0 | NA | 0 | NA | 0 | NA | 0 | NA |
| 3 | 52839734 | 52822045 | -1 | NM_002218    | ITIH4    | 0 | NA | 0 | NA | 0 | NA | 0 | NA | 0 | NA |
| 3 | 52844260 | 52842176 | -1 | NM_205853    | MUSTN1   | 0 | NA | 0 | NA | 0 | NA | 0 | NA | 0 | NA |
| 3 | 52906587 | 52848937 | -1 | NM_198563    | TMEM110  | 0 | NA | 0 | NA | 0 | NA | 0 | NA | 0 | NA |
| 3 | 53054321 | 52913666 | -1 | NM_001005159 | SFMBT1   | 0 | NA | 0 | NA | 0 | NA | 0 | NA | 0 | NA |
| 3 | 53055110 | 52913666 | -1 | NM_001005158 | SFMBT1   | 0 | NA | 0 | NA | 0 | NA | 0 | NA | 0 | NA |
| 3 | 53055110 | 52913666 | -1 | NM_016329    | SFMBT1   | 0 | NA | 0 | NA | 0 | NA | 0 | NA | 0 | NA |
| 3 | 53139503 | 53099849 | -1 | NM_052859    | RFT1     | 0 | NA | 0 | NA | 1 | 14 | 0 | NA | 0 | NA |
| 3 | 53170262 | 53201773 | 1  | NM_006254    | PRKCD    | 1 | 11 | 0 | NA | 0 | NA | 0 | NA | 0 | NA |
| 3 | 53170262 | 53201773 | 1  | NM_212539    | PRKCD    | 1 | 11 | 0 | NA | 0 | NA | 0 | NA | 0 | NA |
| 3 | 53284998 | 53234703 | -1 | NM_001064    | TKT      | 0 | NA | 0 | NA | 0 | NA | 0 | NA | 0 | NA |
| 3 | 53356677 | 53292488 | -1 | NM_018403    | DGP1A    | 0 | NA | 0 | NA | 0 | NA | 0 | NA | 0 | NA |
| 3 | 53504115 | 53821001 | 1  | NM_000720    | CACNA1D  | 0 | NA | 0 | NA | 0 | NA | 0 | NA | 0 | NA |
| 3 | 53855216 | 53826678 | -1 | NM_018397    | CHDH     | 0 | NA | 0 | NA | 0 | NA | 0 | NA | 0 | NA |
| 3 | 53855616 | 53874867 | 1  | NM_018725    | IL17RB   | 0 | NA | 0 | NA | 0 | NA | 0 | NA | 0 | NA |
| 3 | 53891227 | 53876194 | -1 | NM_022899    | ACTR8    | 1 | 17 | 0 | NA | 0 | NA | 0 | NA | 0 | NA |
| 3 | 53901029 | 53894265 | -1 | NM_021237    | SELK     | 1 | 17 | 0 | NA | 0 | NA | 0 | NA | 0 | NA |
| 3 | 54131732 | 55083624 | 1  | NM_018398    | CACNA2D3 | 0 | NA | 0 | NA | 0 | NA | 0 | NA | 0 | NA |
| 3 | 54937112 | 54927420 | -1 | NM_020678    | LRTM1    | 0 | NA | 0 | NA | 0 | NA | 0 | NA | 0 | NA |
| 3 | 55496371 | 55474782 | -1 | NM_003392    | WNT5A    | 1 | 11 | 0 | NA | 0 | NA | 0 | NA | 0 | NA |
| 3 | 56477431 | 55517375 | -1 | NM_015576    | ERC2     | 0 | NA | 0 | NA | 0 | NA | 0 | NA | 0 | NA |
| 3 | 56566230 | 56630874 | 1  | NM_001012506 | CCDC66   | 1 | 24 | 0 | NA | 0 | NA | 0 | NA | 0 | NA |
| 3 | 56673114 | 56629199 | -1 | NM_015224    | C3orf63  | 0 | NA | 0 | NA | 0 | NA | 0 | NA | 0 | NA |
| 3 | 56692175 | 56629199 | -1 | NM_001112736 | C3orf63  | 1 | 20 | 1 | 22 | 1 | 14 | 1 | 16 | 1 | 13 |
| 3 | 56810993 | 56736485 | -1 | NM_019555    | ARHGEF3  | 0 | NA | 0 | NA | 0 | NA | 0 | NA | 0 | NA |
| 3 | 57069508 | 57084500 | 1  | NM_181727    | SPATA12  | 0 | NA | 0 | NA | 0 | NA | 0 | NA | 0 | NA |
| 3 | 57174443 | 57099049 | -1 | NM_017563    | IL17RD   | 0 | NA | 0 | NA | 0 | NA | 0 | NA | 0 | NA |
| 3 | 57209320 | 57206983 | -1 | NM_003865    | HESX1    | 0 | NA | 0 | NA | 0 | NA | 0 | NA | 0 | NA |
| 3 | 57236804 | 57282538 | 1  | NM_012096    | APPL1    | 1 | 11 | 0 | NA | 0 | NA | 0 | NA | 0 | NA |
| 3 | 57288020 | 57277418 | -1 | NM_130387    | ASB14    | 0 | NA | 0 | NA | 0 | NA | 0 | NA | 0 | NA |
| 3 | 57505108 | 57458770 | -1 | NM_198564    | DNAH12L  | 0 | NA | 0 | NA | 0 | NA | 0 | NA | 0 | NA |
| 3 | 57517043 | 57522723 | 1  | NM_177966    | PDE12    | 0 | NA | 0 | NA | 0 | NA | 0 | NA | 0 | NA |
| 3 | 57558255 | 57532129 | -1 | NM_001660    | ARF4     | 0 | NA | 0 | NA | 0 | NA | 0 | NA | 0 | NA |
| 3 | 57653844 | 57586224 | -1 | NM_152678    | FAM116A  | 0 | NA | 0 | NA | 0 | NA | 0 | NA | 0 | NA |
| 3 | 57718213 | 57889934 | 1  | NM_007159    | SLMAP    | 0 | NA | 0 | NA | 0 | NA | 0 | NA | 0 | NA |
| 3 | 57969166 | 58133017 | 1  | NM_001457    | FLNB     | 0 | NA | 0 | NA | 0 | NA | 0 | NA | 0 | NA |
| 3 | 58175438 | 58153393 | -1 | NM_004944    | DNASE1L3 | 0 | NA | 0 | NA | 0 | NA | 0 | NA | 0 | NA |
| 3 | 58198348 | 58255501 | 1  | NM_020676    | ABHD6    | 0 | NA | 0 | NA | 0 | NA | 0 | NA | 0 | NA |
| 3 | 58267011 | 58280960 | 1  | NM_001098783 | RPP14    | 1 | 19 | 0 | NA | 1 | 12 | 0 | NA | 0 | NA |
| 3 | 58267013 | 58280960 | 1  | NM_007042    | RPP14    | 1 | 19 | 0 | NA | 1 | 12 | 0 | NA | 0 | NA |
| 3 | 58293656 | 58385918 | 1  | NM_017771    | PXK      | 0 | NA | 0 | NA | 0 | NA | 0 | NA | 0 | NA |
| 3 | 58394605 | 58388393 | -1 | NM_000925    | PDHB     | 0 | NA | 0 | NA | 0 | NA | 0 | NA | 0 | NA |
| 3 | 58459131 | 58463119 | 1  | NM_153331    | KCTD6    | 0 | NA | 0 | NA | 0 | NA | 0 | NA | 0 | NA |
| 3 | 58497996 | 58465902 | -1 | NM_003500    | ACOX2    | 0 | NA | 0 | NA | 0 | NA | 0 | NA | 0 | NA |
| 3 | 58538531 | 58524884 | -1 | NM_001076778 | FAM107A  | 0 | NA | 0 | NA | 0 | NA | 0 | NA | 0 | NA |
| 3 | 58538531 | 58524884 | -1 | NM_007177    | FAM107A  | 0 | NA | 0 | NA | 0 | NA | 0 | NA | 0 | NA |
| 3 | 58627601 | 58594709 | -1 | NM_138805    | FAM3D    | 0 | NA | 0 | NA | 0 | NA | 0 | NA | 0 | NA |
| 3 | 59010755 | 58702776 | -1 | NM_198463    | C3orf67  | 0 | NA | 0 | NA | 0 | NA | 0 | NA | 0 | NA |
| 3 | 61212173 | 59710075 | -1 | NM_002012    | FHIT     | 0 | NA | 0 | NA | 0 | NA | 1 | 28 | 1 | 15 |
| 3 | 61522284 | 62254738 | 1  | NM_002841    | PTPRG    | 1 | 12 | 0 | NA | 0 | NA | 1 | 45 | 1 | 14 |
| 3 | 62280435 | 62294360 | 1  | NM_020685    | C3orf14  | 1 | 12 | 0 | NA | 0 | NA | 1 | 81 | 1 | 20 |
| 3 | 62334230 | 62330386 | -1 | NM_018008    | FEZF2    | 0 | NA | 0 | NA | 0 | NA | 0 | NA | 1 | 13 |
| 3 | 62836094 | 62359060 | -1 | NM_003716    | CADPS    | 0 | NA | 0 | NA | 0 | NA | 1 | 13 | 1 | 14 |
| 3 | 62836094 | 62359060 | -1 | NM_183393    | CADPS    | 0 | NA | 0 | NA | 0 | NA | 1 | 13 | 1 | 14 |
| 3 | 62836094 | 62359060 | -1 | NM_183394    | CADPS    | 0 | NA | 0 | NA | 0 | NA | 1 | 13 | 1 | 14 |
| 3 | 63404063 | 63577637 | 1  | NM_144642    | SYNPR    | 0 | NA | 0 | NA | 0 | NA | 0 | NA | 0 | NA |
| 3 | 63613383 | 63625931 | 1  | NM_001080537 | FLJ44379 | 0 | NA | 0 | NA | 0 | NA | 0 | NA | 1 | 12 |
| 3 | 63824637 | 63794585 | -1 | NM_025075    | THOC7    | 0 | NA | 0 | NA | 0 | NA | 0 | NA | 0 | NA |
| 3 | 63825272 | 63961367 | 1  | NM_000333    | ATXN7    | 0 | NA | 0 | NA | 0 | NA | 0 | NA | 0 | NA |
| 3 | 63984160 | 63971270 | -1 | NM_014814    | PSMD6    | 0 | NA | 0 | NA | 0 | NA | 1 | 13 | 0 | NA |
| 3 | 64186171 | 64054588 | -1 | NM_198859    | PRICKLE2 | 0 | NA | 0 | NA | 0 | NA | 1 | 15 | 0 | NA |
| 3 | 64648405 | 64476370 | -1 | NM_182920    | ADAMT59  | 0 | NA | 0 | NA | 1 | 15 | 0 | NA | 0 | NA |
| 3 | 65999549 | 65314945 | -1 | NM_001033057 | MAG1     | 0 | NA | 0 | NA | 0 | NA | 1 | 18 | 0 | NA |
| 3 | 65999549 | 65314945 | -1 | NM_015520    | MAG1     | 0 | NA | 0 | NA | 0 | NA | 1 | 18 | 0 | NA |

|   |          |          |    |              |               |   |    |    |    |    |    |    |    |    |    |
|---|----------|----------|----|--------------|---------------|---|----|----|----|----|----|----|----|----|----|
| 3 | 6599549  | 65319983 | -1 | NM_004742    | MAG11         | 0 | NA | 0  | NA | 0  | NA | 1  | 18 | 0  | NA |
| 3 | 66376316 | 66512041 | 1  | NM_173471    | SLC25A26      | 0 | NA | 0  | NA | 0  | NA | 0  | NA | 0  | NA |
| 3 | 66633535 | 66511910 | -1 | NM_015541    | LRIG1         | 0 | NA | 0  | NA | 0  | NA | 0  | NA | 1  | 34 |
| 3 | 67132092 | 67144322 | 1  | NM_032505    | KBTBD8        | 0 | NA | 0  | NA | 0  | NA | 1  | 15 | 0  | NA |
| 3 | 67787728 | 67507832 | -1 | NM_003848    | SUCLG2        | 0 | NA | 1  | 12 | 0  | NA | 1  | 19 | 1  | 14 |
| 3 | 68136143 | 68677461 | 1  | NM_213609    | FAM19A1       | 0 | NA | 0  | NA | 0  | NA | 0  | NA | 0  | NA |
| 3 | 69064401 | 68863606 | -1 | NM_001005527 | FAM19A4       | 0 | NA | 1  | 12 | 0  | NA | 0  | NA | 1  | 12 |
| 3 | 69064401 | 68863606 | -1 | NM_182522    | FAM19A4       | 0 | NA | 1  | 12 | 0  | NA | 0  | NA | 1  | 12 |
| 3 | 69145464 | 69107057 | -1 | NM_173654    | C3orf64       | 1 | 11 | 0  | NA | 0  | NA | 1  | 12 | 0  | NA |
| 3 | 69184174 | 69151667 | -1 | NM_007114    | TMF1          | 0 | NA | 0  | NA | 0  | NA | 0  | NA | 0  | NA |
| 3 | 69212214 | 69186570 | -1 | NM_003968    | UBA3          | 0 | NA | 0  | NA | 1  | 13 | 0  | NA | 0  | NA |
| 3 | 69212214 | 69186570 | -1 | NM_198195    | UBA3          | 0 | NA | 0  | NA | 1  | 13 | 0  | NA | 0  | NA |
| 3 | 69216779 | 69237929 | 1  | NM_006407    | ARL6IP5       | 0 | NA | 0  | NA | 1  | 13 | 0  | NA | 0  | NA |
| 3 | 69254407 | 69238729 | -1 | NM_198271    | LMOD3         | 0 | NA | 0  | NA | 0  | NA | 0  | NA | 1  | 12 |
| 3 | 69518120 | 69301835 | -1 | NM_015123    | FRMD4B        | 0 | NA | 0  | NA | 0  | NA | 1  | 12 | 1  | 12 |
| 3 | 69671322 | 70100177 | 1  | NM_198159    | MITF          | 0 | NA | 0  | NA | 0  | NA | 0  | NA | 1  | 12 |
| 3 | 69895651 | 70100177 | 1  | NM_006722    | MITF          | 0 | NA | 0  | NA | 0  | NA | 0  | NA | 1  | 12 |
| 3 | 69998131 | 70100177 | 1  | NM_198177    | MITF          | 0 | NA | 0  | NA | 0  | NA | 0  | NA | 0  | NA |
| 3 | 70010945 | 70100177 | 1  | NM_198178    | MITF          | 0 | NA | 0  | NA | 0  | NA | 0  | NA | 1  | 22 |
| 3 | 70068442 | 70100177 | 1  | NM_000248    | MITF          | 0 | NA | 0  | NA | 0  | NA | 1  | 12 | 0  | NA |
| 3 | 70068442 | 70100177 | 1  | NM_198158    | MITF          | 0 | NA | 0  | NA | 0  | NA | 1  | 12 | 0  | NA |
| 3 | 71715830 | 71087425 | -1 | NM_032682    | FOXP1         | 0 | NA | 0  | NA | 0  | NA | 0  | NA | 1  | 19 |
| 3 | 71715830 | 71329723 | -1 | NM_001012505 | FOXP1         | 0 | NA | 0  | NA | 0  | NA | 0  | NA | 1  | 19 |
| 3 | 71885465 | 71814567 | -1 | NM_173359    | EIF4E3        | 0 | NA | 0  | NA | 0  | NA | 0  | NA | 1  | 22 |
| 3 | 71885890 | 71887018 | 1  | NM_018971    | GPR27         | 0 | NA | 0  | NA | 0  | NA | 0  | NA | 1  | 22 |
| 3 | 71917047 | 71903495 | -1 | NM_001126128 | PROK2         | 0 | NA | 0  | NA | 0  | NA | 0  | NA | 1  | 15 |
| 3 | 71917047 | 71903495 | -1 | NM_021935    | PROK2         | 0 | NA | 0  | NA | 0  | NA | 0  | NA | 1  | 15 |
| 3 | 72578464 | 72506438 | -1 | NM_012234    | RYBP          | 0 | NA | 0  | NA | 0  | NA | 1  | 15 | 1  | 12 |
| 3 | 72980288 | 72881117 | -1 | NM_018130    | SHQ1          | 1 | 15 | 0  | NA | 0  | NA | 1  | 15 | 0  | NA |
| 3 | 73020074 | 73107212 | 1  | NM_001080393 | GLT8D4        | 0 | NA | 0  | NA | 1  | 12 | 1  | 21 | 1  | 14 |
| 3 | 73128808 | 73197701 | 1  | NM_174907    | PPP4R2        | 0 | NA | 0  | NA | 0  | NA | 1  | 23 | 0  | NA |
| 3 | 73193499 | 73195161 | 1  | NM_018029    | FLJ10213      | 0 | NA | 0  | NA | 0  | NA | 0  | NA | 0  | NA |
| 3 | 73756762 | 73514341 | -1 | NM_015009    | PDZRN3        | 0 | NA | 0  | NA | 0  | NA | 1  | 22 | 1  | 15 |
| 3 | 74653033 | 74394411 | -1 | NM_020872    | CNTN3         | 0 | NA | 0  | NA | 0  | NA | 0  | NA | 0  | NA |
| 3 | 75796176 | 75799058 | 1  | NM_001124759 | FRG2C         | 1 | 12 | 19 | 0  | NA | 0  | NA | 1  | 13 | 13 |
| 3 | 77171983 | 77779351 | 1  | NM_002942    | ROBO2         | 0 | NA | 0  | NA | 0  | NA | 0  | NA | 0  | NA |
| 3 | 79151264 | 78729079 | -1 | NM_133631    | ROBO1         | 1 | 14 | 0  | NA | 0  | NA | 0  | NA | 0  | NA |
| 3 | 79721751 | 78729079 | -1 | NM_002941    | ROBO1         | 0 | NA | 0  | NA | 0  | NA | 0  | NA | 0  | NA |
| 3 | 81893640 | 81621540 | -1 | NM_000158    | GBE1          | 0 | NA | 0  | NA | 0  | NA | 0  | NA | 0  | NA |
| 3 | 85858321 | 86200640 | 1  | NM_153184    | CADM2         | 0 | NA | 0  | NA | 0  | NA | 0  | NA | 0  | NA |
| 3 | 87122947 | 87069812 | -1 | NM_016206    | VGLL3         | 0 | NA | 0  | NA | 0  | NA | 0  | NA | 0  | NA |
| 3 | 87359102 | 87387388 | 1  | NM_014043    | CHMP2B        | 0 | NA | 0  | NA | 0  | NA | 0  | NA | 0  | NA |
| 3 | 87408427 | 87391472 | -1 | NM_000306    | POU1F1        | 0 | NA | 0  | NA | 0  | NA | 0  | NA | 0  | NA |
| 3 | 87408427 | 87391472 | -1 | NM_001122757 | POU1F1        | 0 | NA | 0  | NA | 0  | NA | 0  | NA | 0  | NA |
| 3 | 88114415 | 88125609 | 1  | NM_000866    | HTR1F         | 0 | NA | 1  | 12 | 0  | NA | 0  | NA | 1  | 13 |
| 3 | 88190836 | 88183789 | -1 | NM_001008390 | CGGBP1        | 0 | NA | 0  | NA | 0  | NA | 0  | NA | 0  | NA |
| 3 | 88190836 | 88183789 | -1 | NM_003663    | CGGBP1        | 0 | NA | 0  | NA | 0  | NA | 0  | NA | 0  | NA |
| 3 | 88270951 | 88276504 | 1  | NM_018293    | ZNF654        | 0 | NA | 0  | NA | 0  | NA | 0  | NA | 0  | NA |
| 3 | 88281798 | 88288755 | 1  | NM_173824    | C3orf38       | 0 | NA | 0  | NA | 0  | NA | 0  | NA | 0  | NA |
| 3 | 89239363 | 89532185 | 1  | NM_182644    | EPHA3         | 1 | 12 | 0  | NA | 0  | NA | 1  | 18 | 0  | NA |
| 3 | 89239363 | 89613974 | 1  | NM_005233    | EPHA3         | 1 | 12 | 0  | NA | 0  | NA | 1  | 18 | 0  | NA |
| 3 | 95175395 | 95074646 | -1 | NM_000313    | PROS1         | 0 | NA | 0  | NA | 0  | NA | 0  | NA | 0  | NA |
| 3 | 95181671 | 95256813 | 1  | NM_144996    | ARL13B        | 0 | NA | 0  | NA | 0  | NA | 0  | NA | 0  | NA |
| 3 | 95181671 | 95256813 | 1  | NM_182896    | ARL13B        | 0 | NA | 0  | NA | 0  | NA | 0  | NA | 0  | NA |
| 3 | 95230144 | 95215904 | -1 | NM_001001850 | STX19         | 0 | NA | 0  | NA | 0  | NA | 0  | NA | 0  | NA |
| 3 | 95264350 | 95259455 | -1 | NM_176815    | DHFR1L1       | 0 | NA | 0  | NA | 0  | NA | 0  | NA | 0  | NA |
| 3 | 95264544 | 95328320 | 1  | NM_022072    | NSUN3         | 0 | NA | 0  | NA | 0  | NA | 0  | NA | 0  | NA |
| 3 | 98016114 | 98950476 | 1  | NM_001080448 | EPHA6         | 0 | NA | 0  | NA | 0  | NA | 0  | NA | 0  | NA |
| 3 | 98641179 | 98850111 | 1  | NM_173655    | EPHA6         | 0 | NA | 0  | NA | 0  | NA | 0  | NA | 0  | NA |
| 3 | 98966284 | 99000063 | 1  | NM_032146    | ARL6          | 0 | NA | 0  | NA | 0  | NA | 0  | NA | 0  | NA |
| 3 | 98966284 | 99000063 | 1  | NM_177976    | ARL6          | 0 | NA | 0  | NA | 0  | NA | 0  | NA | 0  | NA |
| 3 | 99078508 | 99148500 | 1  | NM_153605    | DKFZp667G2110 | 0 | NA | 0  | NA | 1  | 14 | 0  | NA | 0  | NA |
| 3 | 99173914 | 99143350 | -1 | NM_001042533 | MINA          | 0 | NA | 0  | NA | 0  | NA | 0  | NA | 0  | NA |
| 3 | 99173914 | 99143350 | -1 | NM_032778    | MINA          | 0 | NA | 0  | NA | 0  | NA | 0  | NA | 0  | NA |
| 3 | 99173985 | 99143350 | -1 | NM_153182    | MINA          | 0 | NA | 0  | NA | 0  | NA | 0  | NA | 0  | NA |

|   |           |           |    |              |           |   |    |   |    |   |    |   |    |   |    |
|---|-----------|-----------|----|--------------|-----------|---|----|---|----|---|----|---|----|---|----|
| 3 | 99236521  | 99188216  | -1 | NM_001105580 | GABRR3    | 0 | NA | 0 | NA | 0 | NA | 0 | NA | 0 | NA |
| 3 | 99288706  | 99289636  | 1  | NM_054106    | OR5AC2    | 0 | NA | 0 | NA | 0 | NA | 0 | NA | 1 | 15 |
| 3 | 99334231  | 99335173  | 1  | NM_001005338 | OR5H1     | 0 | NA | 0 | NA | 0 | NA | 0 | NA | 0 | NA |
| 3 | 99350919  | 99351852  | 1  | NM_001005514 | OR5H14    | 0 | NA | 0 | NA | 0 | NA | 0 | NA | 0 | NA |
| 3 | 99370233  | 99371175  | 1  | NM_001005515 | OR5H15    | 0 | NA | 0 | NA | 0 | NA | 0 | NA | 0 | NA |
| 3 | 99465818  | 99466796  | 1  | NM_001005479 | OR5H6     | 0 | NA | 0 | NA | 0 | NA | 0 | NA | 0 | NA |
| 3 | 99484421  | 99485366  | 1  | NM_001005482 | OR5H2     | 0 | NA | 0 | NA | 0 | NA | 0 | NA | 0 | NA |
| 3 | 99555387  | 99556353  | 1  | NM_001005517 | OR5K4     | 0 | NA | 0 | NA | 0 | NA | 0 | NA | 0 | NA |
| 3 | 99592199  | 99593165  | 1  | NM_001005516 | OR5K3     | 0 | NA | 0 | NA | 0 | NA | 0 | NA | 0 | NA |
| 3 | 99671110  | 99672062  | 1  | NM_001004736 | OR5K1     | 0 | NA | 0 | NA | 0 | NA | 0 | NA | 0 | NA |
| 3 | 99699214  | 99700165  | 1  | NM_001004737 | OR5K2     | 0 | NA | 0 | NA | 0 | NA | 0 | NA | 0 | NA |
| 3 | 99724600  | 99717006  | -1 | NM_001040181 | CLDND1    | 0 | NA | 0 | NA | 0 | NA | 0 | NA | 0 | NA |
| 3 | 99724600  | 99717006  | -1 | NM_001040182 | CLDND1    | 0 | NA | 0 | NA | 0 | NA | 0 | NA | 0 | NA |
| 3 | 99724600  | 99717006  | -1 | NM_001040183 | CLDND1    | 0 | NA | 0 | NA | 0 | NA | 0 | NA | 0 | NA |
| 3 | 99724600  | 99717006  | -1 | NM_001040199 | CLDND1    | 0 | NA | 0 | NA | 0 | NA | 0 | NA | 0 | NA |
| 3 | 99724600  | 99717006  | -1 | NM_001040200 | CLDND1    | 0 | NA | 0 | NA | 0 | NA | 0 | NA | 0 | NA |
| 3 | 99724600  | 99717006  | -1 | NM_019895    | CLDND1    | 0 | NA | 0 | NA | 0 | NA | 0 | NA | 0 | NA |
| 3 | 99733567  | 99734650  | 1  | NM_005290    | GPR15     | 0 | NA | 0 | NA | 0 | NA | 0 | NA | 0 | NA |
| 3 | 99795131  | 99780979  | -1 | NM_000097    | CPOX      | 0 | NA | 0 | NA | 0 | NA | 1 | 11 | 0 | NA |
| 3 | 99934261  | 99995926  | 1  | NM_006100    | ST3GAL6   | 0 | NA | 0 | NA | 0 | NA | 0 | NA | 0 | NA |
| 3 | 100103223 | 99997503  | -1 | NM_080927    | DCBLD2    | 1 | 12 | 0 | NA | 0 | NA | 0 | NA | 0 | NA |
| 3 | 100840143 | 100997848 | 1  | NM_001850    | COL8A1    | 0 | NA | 0 | NA | 1 | 12 | 0 | NA | 0 | NA |
| 3 | 100840143 | 100997848 | 1  | NM_020351    | COL8A1    | 0 | NA | 0 | NA | 1 | 12 | 0 | NA | 0 | NA |
| 3 | 101019370 | 101380137 | 1  | NM_032359    | C3orf26   | 0 | NA | 0 | NA | 0 | NA | 1 | 18 | 0 | NA |
| 3 | 101077736 | 101049461 | -1 | NM_014890    | FILIP1L   | 0 | NA | 0 | NA | 0 | NA | 0 | NA | 0 | NA |
| 3 | 101316039 | 101034677 | -1 | NM_182909    | FILIP1L   | 0 | NA | 0 | NA | 0 | NA | 0 | NA | 0 | NA |
| 3 | 101316039 | 101049461 | -1 | NM_001042459 | FILIP1L   | 0 | NA | 0 | NA | 0 | NA | 0 | NA | 0 | NA |
| 3 | 101462545 | 101525205 | 1  | NM_018309    | TBC1D23   | 0 | NA | 0 | NA | 0 | NA | 1 | 12 | 0 | NA |
| 3 | 101536257 | 101556883 | 1  | NM_020202    | NIT2      | 0 | NA | 0 | NA | 1 | 12 | 0 | NA | 0 | NA |
| 3 | 101602726 | 101657860 | 1  | NM_001085451 | LNP1      | 0 | NA | 0 | NA | 0 | NA | 1 | 18 | 0 | NA |
| 3 | 101602915 | 101564996 | -1 | NM_014820    | TOMM70A   | 0 | NA | 0 | NA | 0 | NA | 1 | 18 | 0 | NA |
| 3 | 101694152 | 101778975 | 1  | NM_018004    | TMEM45A   | 0 | NA | 0 | NA | 0 | NA | 0 | NA | 0 | NA |
| 3 | 101811134 | 101896955 | 1  | NM_032787    | GPR128    | 0 | NA | 0 | NA | 0 | NA | 0 | NA | 0 | NA |
| 3 | 101910849 | 101950501 | 1  | NM_001007565 | TFG       | 0 | NA | 0 | NA | 0 | NA | 0 | NA | 0 | NA |
| 3 | 101910849 | 101950501 | 1  | NM_006070    | TFG       | 0 | NA | 0 | NA | 0 | NA | 0 | NA | 0 | NA |
| 3 | 102195004 | 101950868 | -1 | NM_015429    | ABI3BP    | 0 | NA | 0 | NA | 0 | NA | 0 | NA | 0 | NA |
| 3 | 102522109 | 102427977 | -1 | NM_016247    | IMP2      | 0 | NA | 0 | NA | 0 | NA | 0 | NA | 0 | NA |
| 3 | 102714775 | 102525807 | -1 | NM_001077203 | SENP7     | 1 | 21 | 0 | NA | 0 | NA | 0 | NA | 0 | NA |
| 3 | 102714775 | 102525807 | -1 | NM_020654    | SENP7     | 1 | 21 | 0 | NA | 0 | NA | 0 | NA | 0 | NA |
| 3 | 102763401 | 102767779 | 1  | NM_017819    | RG9MTD1   | 0 | NA | 0 | NA | 0 | NA | 0 | NA | 0 | NA |
| 3 | 102775731 | 102795971 | 1  | NM_020357    | PCNP      | 0 | NA | 0 | NA | 0 | NA | 0 | NA | 0 | NA |
| 3 | 102778525 | 102777969 | -1 | NM_001093779 | LOC730754 | 0 | NA | 0 | NA | 0 | NA | 0 | NA | 0 | NA |
| 3 | 102878678 | 102850972 | -1 | NM_014415    | ZBTB11    | 1 | 25 | 0 | NA | 0 | NA | 0 | NA | 0 | NA |
| 3 | 102888253 | 102882623 | -1 | NM_000986    | RPL24     | 1 | 25 | 0 | NA | 0 | NA | 0 | NA | 0 | NA |
| 3 | 102926183 | 102968871 | 1  | NM_024548    | CEP97     | 0 | NA | 0 | NA | 0 | NA | 0 | NA | 0 | NA |
| 3 | 102980763 | 103025146 | 1  | NM_145037    | FAM55C    | 0 | NA | 0 | NA | 0 | NA | 0 | NA | 0 | NA |
| 3 | 103029546 | 103062556 | 1  | NM_001005474 | NFKBIZ    | 0 | NA | 0 | NA | 0 | NA | 0 | NA | 0 | NA |
| 3 | 103051047 | 103062556 | 1  | NM_031419    | NFKBIZ    | 0 | NA | 0 | NA | 0 | NA | 0 | NA | 0 | NA |
| 3 | 103636548 | 103681375 | 1  | NM_175056    | ZPLD1     | 0 | NA | 0 | NA | 0 | NA | 0 | NA | 0 | NA |
| 3 | 106568402 | 106778434 | 1  | NM_001627    | ALCAM     | 0 | NA | 0 | NA | 0 | NA | 0 | NA | 0 | NA |
| 3 | 107070577 | 106859798 | -1 | NM_170662    | CBLB      | 0 | NA | 0 | NA | 0 | NA | 0 | NA | 0 | NA |
| 3 | 108578877 | 108580171 | 1  | NM_032600    | CCDC54    | 0 | NA | 0 | NA | 0 | NA | 0 | NA | 0 | NA |
| 3 | 108724479 | 109007395 | 1  | NM_020235    | BBX       | 0 | NA | 0 | NA | 0 | NA | 0 | NA | 0 | NA |
| 3 | 109292625 | 109244630 | -1 | NM_001025079 | CD47      | 0 | NA | 0 | NA | 0 | NA | 0 | NA | 0 | NA |
| 3 | 109292625 | 109244630 | -1 | NM_001777    | CD47      | 0 | NA | 0 | NA | 0 | NA | 0 | NA | 0 | NA |
| 3 | 109292625 | 109244630 | -1 | NM_198793    | CD47      | 0 | NA | 0 | NA | 0 | NA | 0 | NA | 0 | NA |
| 3 | 109424107 | 109362348 | -1 | NM_018010    | IFT57     | 0 | NA | 0 | NA | 0 | NA | 0 | NA | 0 | NA |
| 3 | 109504021 | 109579816 | 1  | NM_007072    | HHLA2     | 0 | NA | 0 | NA | 0 | NA | 0 | NA | 0 | NA |
| 3 | 109730859 | 109581905 | -1 | NM_014981    | MYH15     | 0 | NA | 0 | NA | 0 | NA | 0 | NA | 0 | NA |
| 3 | 109790980 | 109752093 | -1 | NM_020890    | KIAA1524  | 1 | 19 | 0 | NA | 1 | 14 | 1 | 18 | 0 | NA |
| 3 | 109791273 | 109896383 | 1  | NM_014648    | DZIP3     | 1 | 19 | 0 | NA | 1 | 14 | 1 | 18 | 0 | NA |
| 3 | 109958820 | 109957175 | -1 | NM_032579    | RETNLB    | 0 | NA | 0 | NA | 0 | NA | 0 | NA | 0 | NA |
| 3 | 110024320 | 110056404 | 1  | NM_016388    | TRAT1     | 0 | NA | 0 | NA | 0 | NA | 0 | NA | 0 | NA |
| 3 | 110155310 | 110109339 | -1 | NM_005459    | GUCA1C    | 0 | NA | 0 | NA | 0 | NA | 0 | NA | 0 | NA |
| 3 | 110319658 | 110159776 | -1 | NM_014429    | MORC1     | 0 | NA | 0 | NA | 0 | NA | 0 | NA | 0 | NA |

|   |           |           |    |              |          |   |    |   |    |   |    |   |    |   |    |
|---|-----------|-----------|----|--------------|----------|---|----|---|----|---|----|---|----|---|----|
| 3 | 110518054 | 110495330 | -1 | NM_138815    | DPPA2    | 0 | NA | 0 | NA | 0 | NA | 0 | NA | 0 | NA |
| 3 | 110539109 | 110527677 | -1 | NM_018189    | DPPA4    | 0 | NA | 0 | NA | 0 | NA | 0 | NA | 0 | NA |
| 3 | 112273554 | 112335752 | 1  | NM_015480    | PVRL3    | 0 | NA | 0 | NA | 0 | NA | 1 | 11 | 0 | NA |
| 3 | 112743615 | 112853896 | 1  | NM_005816    | CD96     | 0 | NA | 0 | NA | 0 | NA | 0 | NA | 0 | NA |
| 3 | 112743615 | 112853896 | 1  | NM_198196    | CD96     | 0 | NA | 0 | NA | 0 | NA | 0 | NA | 0 | NA |
| 3 | 112796856 | 112794436 | -1 | NM_024508    | ZBED2    | 0 | NA | 0 | NA | 0 | NA | 0 | NA | 0 | NA |
| 3 | 112876212 | 113047984 | 1  | NM_153268    | PLCXD2   | 0 | NA | 0 | NA | 0 | NA | 0 | NA | 0 | NA |
| 3 | 113085499 | 113177826 | 1  | NM_145753    | PHLDB2   | 0 | NA | 0 | NA | 0 | NA | 0 | NA | 0 | NA |
| 3 | 113180517 | 113194900 | 1  | NM_018394    | ABHD10   | 1 | 17 | 0 | NA | 1 | 15 | 0 | NA | 0 | NA |
| 3 | 113200275 | 113215425 | 1  | NM_001008272 | TAGLN3   | 1 | 12 | 0 | NA | 0 | NA | 0 | NA | 0 | NA |
| 3 | 113200275 | 113215425 | 1  | NM_013259    | TAGLN3   | 1 | 12 | 0 | NA | 0 | NA | 0 | NA | 0 | NA |
| 3 | 113200696 | 113215425 | 1  | NM_001008273 | TAGLN3   | 1 | 12 | 0 | NA | 0 | NA | 0 | NA | 0 | NA |
| 3 | 113241154 | 113282806 | 1  | NM_001042575 | TMPPRS57 | 0 | NA | 0 | NA | 0 | NA | 0 | NA | 0 | NA |
| 3 | 113287928 | 113319734 | 1  | NM_024616    | C3orf52  | 0 | NA | 0 | NA | 0 | NA | 0 | NA | 0 | NA |
| 3 | 113334807 | 113322377 | -1 | NM_001008756 | GCET2    | 0 | NA | 0 | NA | 0 | NA | 0 | NA | 0 | NA |
| 3 | 113334807 | 113322377 | -1 | NM_152785    | GCET2    | 0 | NA | 0 | NA | 0 | NA | 0 | NA | 0 | NA |
| 3 | 113495764 | 113342441 | -1 | NM_183061    | SLC9A10  | 0 | NA | 0 | NA | 0 | NA | 1 | 13 | 0 | NA |
| 3 | 113534605 | 113564348 | 1  | NM_001004196 | CD200    | 0 | NA | 0 | NA | 0 | NA | 0 | NA | 0 | NA |
| 3 | 113534605 | 113564348 | 1  | NM_005944    | CD200    | 0 | NA | 0 | NA | 0 | NA | 0 | NA | 0 | NA |
| 3 | 113701098 | 113665502 | -1 | NM_001085357 | BTLA     | 0 | NA | 0 | NA | 0 | NA | 0 | NA | 0 | NA |
| 3 | 113701098 | 113665502 | -1 | NM_181780    | BTLA     | 0 | NA | 0 | NA | 0 | NA | 0 | NA | 0 | NA |
| 3 | 113763175 | 113734048 | -1 | NM_022488    | ATG3     | 0 | NA | 0 | NA | 0 | NA | 0 | NA | 0 | NA |
| 3 | 113763584 | 113785693 | 1  | NM_017945    | SLC35A5  | 0 | NA | 0 | NA | 0 | NA | 0 | NA | 0 | NA |
| 3 | 113842667 | 113806098 | -1 | NM_199511    | CCDC80   | 0 | NA | 0 | NA | 1 | 11 | 1 | 11 | 1 | 12 |
| 3 | 113842667 | 113806098 | -1 | NM_199512    | CCDC80   | 0 | NA | 0 | NA | 0 | NA | 1 | 11 | 1 | 12 |
| 3 | 114047487 | 114017245 | -1 | NM_001008784 | CD200R2  | 0 | NA | 0 | NA | 0 | NA | 0 | NA | 0 | NA |
| 3 | 114176627 | 114124221 | -1 | NM_138806    | CD200R1  | 0 | NA | 0 | NA | 0 | NA | 0 | NA | 0 | NA |
| 3 | 114176627 | 114124221 | -1 | NM_170780    | CD200R1  | 0 | NA | 0 | NA | 0 | NA | 0 | NA | 0 | NA |
| 3 | 114176627 | 114130454 | -1 | NM_138939    | CD200R1  | 0 | NA | 0 | NA | 0 | NA | 0 | NA | 0 | NA |
| 3 | 114176627 | 114130454 | -1 | NM_138940    | CD200R1  | 0 | NA | 0 | NA | 0 | NA | 0 | NA | 0 | NA |
| 3 | 114192489 | 114202911 | 1  | NM_014170    | GTPBP8   | 0 | NA | 0 | NA | 0 | NA | 0 | NA | 0 | NA |
| 3 | 114192489 | 114202911 | 1  | NM_138485    | GTPBP8   | 0 | NA | 0 | NA | 0 | NA | 0 | NA | 0 | NA |
| 3 | 114221245 | 114203981 | -1 | NM_001025072 | C3orf17  | 1 | 23 | 0 | NA | 1 | 14 | 1 | 11 | 0 | NA |
| 3 | 114221245 | 114203981 | -1 | NM_001025073 | C3orf17  | 1 | 23 | 0 | NA | 1 | 14 | 1 | 11 | 0 | NA |
| 3 | 114221245 | 114203981 | -1 | NM_015412    | C3orf17  | 1 | 23 | 0 | NA | 1 | 14 | 1 | 11 | 0 | NA |
| 3 | 114414064 | 114488995 | 1  | NM_033254    | BOC      | 0 | NA | 0 | NA | 0 | NA | 0 | NA | 0 | NA |
| 3 | 114643030 | 114564401 | -1 | NM_018338    | WDR52    | 0 | NA | 0 | NA | 0 | NA | 0 | NA | 0 | NA |
| 3 | 114716693 | 114644258 | -1 | NM_144718    | CCDC52   | 0 | NA | 0 | NA | 0 | NA | 0 | NA | 0 | NA |
| 3 | 114733907 | 114831112 | 1  | NM_017699    | SIDT1    | 0 | NA | 1 | 12 | 0 | NA | 0 | NA | 1 | 14 |
| 3 | 114898183 | 114849922 | -1 | NM_001009899 | KIAA2018 | 0 | NA | 0 | NA | 0 | NA | 0 | NA | 0 | NA |
| 3 | 114947786 | 114920530 | -1 | NM_025146    | NAT13    | 0 | NA | 0 | NA | 0 | NA | 0 | NA | 0 | NA |
| 3 | 114948597 | 115013593 | 1  | NM_001690    | ATP6V1A  | 0 | NA | 0 | NA | 0 | NA | 0 | NA | 0 | NA |
| 3 | 115040370 | 115148711 | 1  | NM_017577    | GRAMD1C  | 0 | NA | 0 | NA | 0 | NA | 0 | NA | 0 | NA |
| 3 | 115149437 | 115164517 | 1  | NM_173570    | ZDHHC23  | 0 | NA | 0 | NA | 0 | NA | 0 | NA | 0 | NA |
| 3 | 115258150 | 115165673 | -1 | NM_020817    | KIAA1407 | 0 | NA | 0 | NA | 0 | NA | 0 | NA | 0 | NA |
| 3 | 115258300 | 115289958 | 1  | NM_024638    | QTRTD1   | 0 | NA | 0 | NA | 0 | NA | 0 | NA | 0 | NA |
| 3 | 115380589 | 115330246 | -1 | NM_000796    | DRD3     | 0 | NA | 0 | NA | 0 | NA | 0 | NA | 0 | NA |
| 3 | 115380589 | 115330246 | -1 | NM_033663    | DRD3     | 0 | NA | 0 | NA | 0 | NA | 0 | NA | 0 | NA |
| 3 | 115439115 | 115436169 | -1 | NM_007136    | ZNF80    | 0 | NA | 0 | NA | 0 | NA | 0 | NA | 0 | NA |
| 3 | 115495564 | 115511038 | 1  | NM_173799    | VSTM3    | 0 | NA | 0 | NA | 0 | NA | 0 | NA | 0 | NA |
| 3 | 116348817 | 115540212 | -1 | NM_015642    | ZBTB20   | 0 | NA | 0 | NA | 1 | 12 | 0 | NA | 0 | NA |
| 3 | 116825141 | 116922842 | 1  | NM_002045    | GAP43    | 0 | NA | 0 | NA | 0 | NA | 0 | NA | 0 | NA |
| 3 | 117647068 | 117011831 | -1 | NM_002338    | LSAMP    | 0 | NA | 0 | NA | 0 | NA | 0 | NA | 0 | NA |
| 3 | 120236366 | 120102168 | -1 | NM_001015887 | IGSF11   | 0 | NA | 0 | NA | 0 | NA | 0 | NA | 0 | NA |
| 3 | 120347588 | 120102168 | -1 | NM_152538    | IGSF11   | 0 | NA | 0 | NA | 0 | NA | 0 | NA | 0 | NA |
| 3 | 120347686 | 120352992 | 1  | NM_152539    | C3orf30  | 0 | NA | 0 | NA | 0 | NA | 0 | NA | 0 | NA |
| 3 | 120375114 | 120406690 | 1  | NM_006952    | UPK1B    | 0 | NA | 0 | NA | 0 | NA | 0 | NA | 0 | NA |
| 3 | 120442442 | 120413278 | -1 | NM_003778    | B4GALT4  | 0 | NA | 0 | NA | 0 | NA | 0 | NA | 0 | NA |
| 3 | 120442442 | 120413278 | -1 | NM_212543    | B4GALT4  | 0 | NA | 0 | NA | 0 | NA | 0 | NA | 0 | NA |
| 3 | 120495909 | 120621013 | 1  | NM_020754    | CDGAP    | 0 | NA | 0 | NA | 0 | NA | 0 | NA | 1 | 12 |
| 3 | 120665161 | 120632390 | -1 | NM_018266    | TMEM39A  | 0 | NA | 0 | NA | 0 | NA | 1 | 18 | 0 | NA |
| 3 | 120670488 | 120694685 | 1  | NM_020231    | KTELC1   | 0 | NA | 0 | NA | 0 | NA | 1 | 18 | 0 | NA |
| 3 | 120670488 | 120696244 | 1  | NM_152305    | KTELC1   | 0 | NA | 0 | NA | 0 | NA | 1 | 18 | 0 | NA |
| 3 | 120700057 | 120725815 | 1  | NM_016589    | C3orf1   | 0 | NA | 0 | NA | 0 | NA | 0 | NA | 0 | NA |
| 3 | 120761171 | 120725829 | -1 | NM_005191    | CD80     | 0 | NA | 0 | NA | 0 | NA | 0 | NA | 0 | NA |

|   |           |           |    |              |              |   |    |   |    |   |    |   |    |   |    |
|---|-----------|-----------|----|--------------|--------------|---|----|---|----|---|----|---|----|---|----|
| 3 | 120781212 | 120791482 | 1  | NM_001125    | ADPRH        | 0 | NA | 0 | NA | 0 | NA | 0 | NA | 0 | NA |
| 3 | 120799434 | 120831342 | 1  | NM_015900    | PLA1A        | 0 | NA | 0 | NA | 0 | NA | 0 | NA | 0 | NA |
| 3 | 120862094 | 120843597 | -1 | NM_022135    | POPCD2       | 0 | NA | 0 | NA | 0 | NA | 0 | NA | 0 | NA |
| 3 | 120878933 | 120871061 | -1 | NM_005694    | COX17        | 0 | NA | 0 | NA | 0 | NA | 0 | NA | 0 | NA |
| 3 | 120904558 | 120988639 | 1  | NM_033364    | C3orf15      | 0 | NA | 0 | NA | 0 | NA | 0 | NA | 0 | NA |
| 3 | 120982020 | 121020022 | 1  | NM_003889    | NR112        | 0 | NA | 0 | NA | 0 | NA | 0 | NA | 0 | NA |
| 3 | 120982020 | 121020022 | 1  | NM_033013    | NR112        | 0 | NA | 0 | NA | 0 | NA | 0 | NA | 0 | NA |
| 3 | 120984246 | 121020022 | 1  | NM_022002    | NR112        | 0 | NA | 0 | NA | 0 | NA | 0 | NA | 0 | NA |
| 3 | 121295203 | 121028235 | -1 | NM_002093    | GSK3B        | 1 | 13 | 0 | NA | 0 | NA | 0 | NA | 0 | NA |
| 3 | 121445635 | 121368568 | -1 | NM_153002    | GPR156       | 0 | NA | 0 | NA | 0 | NA | 0 | NA | 0 | NA |
| 3 | 121550876 | 121526265 | -1 | NM_001099678 | LRRC58       | 0 | NA | 0 | NA | 0 | NA | 0 | NA | 0 | NA |
| 3 | 121652515 | 121595815 | -1 | NM_007085    | FSTL1        | 0 | NA | 0 | NA | 0 | NA | 0 | NA | 0 | NA |
| 3 | 121797817 | 121803865 | 1  | NM_004547    | NDUFB4       | 0 | NA | 0 | NA | 1 | 12 | 0 | NA | 0 | NA |
| 3 | 121884018 | 121829704 | -1 | NM_000187    | HGD          | 0 | NA | 0 | NA | 0 | NA | 0 | NA | 0 | NA |
| 3 | 121944074 | 121888217 | -1 | NM_173825    | RABL3        | 0 | NA | 0 | NA | 0 | NA | 0 | NA | 0 | NA |
| 3 | 121944247 | 121984606 | 1  | NM_005513    | GTF2E1       | 0 | NA | 0 | NA | 0 | NA | 0 | NA | 0 | NA |
| 3 | 122109739 | 122626298 | 1  | NM_014980    | STXBPSL      | 0 | NA | 1 | 13 | 0 | NA | 0 | NA | 0 | NA |
| 3 | 122747543 | 122632962 | -1 | NM_199420    | POLQ         | 0 | NA | 0 | NA | 0 | NA | 0 | NA | 0 | NA |
| 3 | 122769467 | 122792159 | 1  | NM_001012659 | ARGFX        | 0 | NA | 0 | NA | 0 | NA | 0 | NA | 0 | NA |
| 3 | 122794859 | 122831829 | 1  | NM_016298    | FBXO40       | 0 | NA | 0 | NA | 0 | NA | 0 | NA | 0 | NA |
| 3 | 122862481 | 122832935 | -1 | NM_005335    | HCLS1        | 0 | NA | 0 | NA | 0 | NA | 0 | NA | 0 | NA |
| 3 | 122951292 | 122864737 | -1 | NM_004487    | GOLGB1       | 1 | 14 | 0 | NA | 0 | NA | 0 | NA | 0 | NA |
| 3 | 123036616 | 122971299 | -1 | NM_001023570 | IQCB1        | 0 | NA | 0 | NA | 0 | NA | 1 | 13 | 0 | NA |
| 3 | 123036616 | 122971299 | -1 | NM_001023571 | IQCB1        | 0 | NA | 0 | NA | 0 | NA | 1 | 13 | 0 | NA |
| 3 | 123036723 | 123088063 | 1  | NM_018456    | EAF2         | 0 | NA | 0 | NA | 0 | NA | 1 | 13 | 0 | NA |
| 3 | 123095976 | 123143148 | 1  | NM_021082    | SLC15A2      | 0 | NA | 0 | NA | 0 | NA | 0 | NA | 0 | NA |
| 3 | 123223720 | 123188859 | -1 | NM_175924    | ILD1         | 0 | NA | 0 | NA | 0 | NA | 0 | NA | 0 | NA |
| 3 | 123256910 | 123322673 | 1  | NM_175862    | CD86         | 0 | NA | 0 | NA | 0 | NA | 0 | NA | 0 | NA |
| 3 | 123279439 | 123322673 | 1  | NM_006889    | CD86         | 0 | NA | 0 | NA | 0 | NA | 0 | NA | 0 | NA |
| 3 | 123385219 | 123488032 | 1  | NM_000388    | CASR         | 0 | NA | 0 | NA | 0 | NA | 0 | NA | 0 | NA |
| 3 | 123526700 | 123543505 | 1  | NM_005213    | CSTA         | 0 | NA | 0 | NA | 0 | NA | 0 | NA | 0 | NA |
| 3 | 123584764 | 123561125 | -1 | NM_001017928 | CCDC58       | 1 | 13 | 0 | NA | 0 | NA | 0 | NA | 0 | NA |
| 3 | 123585712 | 123611651 | 1  | NM_014367    | C3orf28      | 1 | 13 | 0 | NA | 0 | NA | 0 | NA | 0 | NA |
| 3 | 123617572 | 123613389 | -1 | NM_019069    | WDR5B        | 0 | NA | 0 | NA | 0 | NA | 0 | NA | 0 | NA |
| 3 | 123716474 | 123623437 | -1 | NM_002264    | KPNA1        | 0 | NA | 0 | NA | 0 | NA | 0 | NA | 0 | NA |
| 3 | 123765955 | 123775968 | 1  | NM_138287    | DTX3L        | 1 | 11 | 0 | NA | 1 | 16 | 1 | 41 | 0 | NA |
| 3 | 123766114 | 123729460 | -1 | NM_031458    | PARP9        | 0 | NA | 1 | 16 | 1 | 16 | 1 | 41 | 0 | NA |
| 3 | 123779138 | 123838226 | 1  | NM_001113523 | PARP15       | 1 | 11 | 0 | NA | 0 | NA | 1 | 41 | 0 | NA |
| 3 | 123817214 | 123838226 | 1  | NM_152615    | PARP15       | 0 | NA | 0 | NA | 0 | NA | 0 | NA | 0 | NA |
| 3 | 123882361 | 123932377 | 1  | NM_017554    | PARP14       | 0 | NA | 0 | NA | 0 | NA | 0 | NA | 0 | NA |
| 3 | 123995340 | 123941535 | -1 | NM_024610    | HSPBAP1      | 0 | NA | 0 | NA | 0 | NA | 0 | NA | 0 | NA |
| 3 | 123996590 | 124082676 | 1  | NM_032839    | DIRC2        | 0 | NA | 0 | NA | 0 | NA | 0 | NA | 0 | NA |
| 3 | 124088049 | 124093953 | 1  | NM_001123328 | LOC100129550 | 0 | NA | 0 | NA | 0 | NA | 0 | NA | 0 | NA |
| 3 | 124229266 | 124110732 | -1 | NM_001031702 | SEMA5B       | 0 | NA | 1 | 12 | 0 | NA | 0 | NA | 0 | NA |
| 3 | 124288654 | 124363965 | 1  | NM_006810    | PDIAS        | 0 | NA | 0 | NA | 0 | NA | 0 | NA | 0 | NA |
| 3 | 124403464 | 124474045 | 1  | NM_012430    | SEC22A       | 0 | NA | 0 | NA | 0 | NA | 0 | NA | 0 | NA |
| 3 | 124650082 | 124486088 | -1 | NM_183357    | ADCY5        | 0 | NA | 1 | 12 | 0 | NA | 0 | NA | 0 | NA |
| 3 | 124786614 | 124696052 | -1 | NM_198402    | PTPLB        | 0 | NA | 0 | NA | 0 | NA | 1 | 47 | 0 | NA |
| 3 | 124822220 | 124813832 | -1 | NM_053031    | MYLK         | 0 | NA | 0 | NA | 1 | 15 | 0 | NA | 0 | NA |
| 3 | 124822220 | 124813832 | -1 | NM_053032    | MYLK         | 0 | NA | 0 | NA | 1 | 15 | 0 | NA | 0 | NA |
| 3 | 125085839 | 124813832 | -1 | NM_053025    | MYLK         | 0 | NA | 0 | NA | 0 | NA | 0 | NA | 0 | NA |
| 3 | 125085839 | 124813832 | -1 | NM_053026    | MYLK         | 0 | NA | 0 | NA | 0 | NA | 0 | NA | 0 | NA |
| 3 | 125085839 | 124813832 | -1 | NM_053027    | MYLK         | 0 | NA | 0 | NA | 0 | NA | 0 | NA | 0 | NA |
| 3 | 125085839 | 124813832 | -1 | NM_053028    | MYLK         | 0 | NA | 0 | NA | 0 | NA | 0 | NA | 0 | NA |
| 3 | 125162945 | 125114963 | -1 | NM_022757    | CCDC14       | 1 | 13 | 0 | NA | 0 | NA | 0 | NA | 0 | NA |
| 3 | 125192889 | 125170568 | -1 | NM_017578    | ROPN1        | 0 | NA | 0 | NA | 0 | NA | 0 | NA | 1 | 12 |
| 3 | 125296274 | 125721388 | 1  | NM_003947    | KALRN        | 0 | NA | 0 | NA | 0 | NA | 0 | NA | 1 | 13 |
| 3 | 125296274 | 125922726 | 1  | NM_001024660 | KALRN        | 0 | NA | 0 | NA | 0 | NA | 0 | NA | 1 | 13 |
| 3 | 125786218 | 125922726 | 1  | NM_007064    | KALRN        | 0 | NA | 0 | NA | 0 | NA | 0 | NA | 0 | NA |
| 3 | 125931902 | 125946730 | 1  | NM_000373    | UMPS         | 0 | NA | 0 | NA | 0 | NA | 0 | NA | 0 | NA |
| 3 | 126088834 | 125964484 | -1 | NM_002213    | ITGB5        | 0 | NA | 0 | NA | 0 | NA | 0 | NA | 0 | NA |
| 3 | 126136270 | 126106978 | -1 | NM_033049    | MUC13        | 0 | NA | 0 | NA | 0 | NA | 0 | NA | 0 | NA |
| 3 | 126257492 | 126167243 | -1 | NM_020733    | HEG1         | 0 | NA | 0 | NA | 0 | NA | 0 | NA | 0 | NA |
| 3 | 126414299 | 126284169 | -1 | NM_024628    | SLC12A8      | 0 | NA | 0 | NA | 0 | NA | 0 | NA | 0 | NA |
| 3 | 126576888 | 126427202 | -1 | NM_021964    | ZNF148       | 0 | NA | 0 | NA | 0 | NA | 0 | NA | 0 | NA |



|   |           |           |    |              |           |   |    |   |    |   |    |   |    |   |    |
|---|-----------|-----------|----|--------------|-----------|---|----|---|----|---|----|---|----|---|----|
| 3 | 126721748 | 126648183 | -1 | NM_003794    | SNX4      | 0 | NA | 0 | NA | 0 | NA | 0 | NA | 0 | NA |
| 3 | 126796624 | 126730391 | -1 | NM_022776    | OSBPL11   | 0 | NA | 0 | NA | 0 | NA | 0 | NA | 0 | NA |
| 3 | 127138572 | 127130807 | -1 | NM_001015050 | LOC200810 | 0 | NA | 0 | NA | 0 | NA | 0 | NA | 0 | NA |
| 3 | 127170717 | 127184986 | 1  | NM_001012337 | ROPN1B    | 0 | NA | 0 | NA | 0 | NA | 0 | NA | 0 | NA |
| 3 | 127258308 | 127207889 | -1 | NM_001008487 | SLC41A3   | 0 | NA | 0 | NA | 0 | NA | 0 | NA | 0 | NA |
| 3 | 127285824 | 127207889 | -1 | NM_001008485 | SLC41A3   | 0 | NA | 0 | NA | 0 | NA | 0 | NA | 0 | NA |
| 3 | 127285824 | 127207889 | -1 | NM_001008486 | SLC41A3   | 0 | NA | 0 | NA | 0 | NA | 0 | NA | 0 | NA |
| 3 | 127285824 | 127207889 | -1 | NM_017836    | SLC41A3   | 0 | NA | 0 | NA | 0 | NA | 0 | NA | 0 | NA |
| 3 | 127382175 | 127305097 | -1 | NM_012190    | ALDH1L1   | 0 | NA | 0 | NA | 0 | NA | 0 | NA | 0 | NA |
| 3 | 127558927 | 127544167 | -1 | NM_014079    | KLF15     | 0 | NA | 0 | NA | 0 | NA | 0 | NA | 0 | NA |
| 3 | 127596471 | 127638088 | 1  | NM_182628    | CCDC37    | 0 | NA | 0 | NA | 0 | NA | 0 | NA | 0 | NA |
| 3 | 127677452 | 127639133 | -1 | NM_025112    | ZXDC      | 0 | NA | 0 | NA | 0 | NA | 1 | 12 | 0 | NA |
| 3 | 127677452 | 127660360 | -1 | NM_001040653 | ZXDC      | 0 | NA | 0 | NA | 0 | NA | 1 | 12 | 0 | NA |
| 3 | 127719284 | 127682813 | -1 | NM_144639    | URO1      | 0 | NA | 0 | NA | 0 | NA | 0 | NA | 0 | NA |
| 3 | 127725865 | 127744824 | 1  | NM_152889    | CHST13    | 0 | NA | 0 | NA | 0 | NA | 0 | NA | 0 | NA |
| 3 | 127760448 | 127751208 | -1 | NM_152533    | C3orf22   | 0 | NA | 0 | NA | 0 | NA | 0 | NA | 0 | NA |
| 3 | 127810088 | 127773311 | -1 | NM_001039783 | TR21T1    | 0 | NA | 0 | NA | 0 | NA | 0 | NA | 0 | NA |
| 3 | 127905807 | 128161934 | 1  | NM_032343    | CHCHD6    | 0 | NA | 0 | NA | 0 | NA | 0 | NA | 0 | NA |
| 3 | 128190191 | 128238920 | 1  | NM_032242    | PLXNA1    | 0 | NA | 0 | NA | 0 | NA | 0 | NA | 0 | NA |
| 3 | 128394663 | 128399715 | 1  | NM_001007534 | C3orf56   | 0 | NA | 0 | NA | 0 | NA | 0 | NA | 1 | 16 |
| 3 | 128781970 | 128774604 | -1 | NM_016372    | GPR175    | 0 | NA | 0 | NA | 0 | NA | 0 | NA | 0 | NA |
| 3 | 128799942 | 128823968 | 1  | NM_004526    | MCM2      | 0 | NA | 0 | NA | 0 | NA | 0 | NA | 0 | NA |
| 3 | 128830728 | 128874342 | 1  | NM_015720    | PODXL2    | 0 | NA | 1 | 16 | 0 | NA | 0 | NA | 1 | 18 |
| 3 | 128874470 | 128882453 | 1  | NM_032548    | ABTB1     | 0 | NA | 0 | NA | 0 | NA | 0 | NA | 0 | NA |
| 3 | 128874470 | 128882453 | 1  | NM_172027    | ABTB1     | 0 | NA | 0 | NA | 0 | NA | 0 | NA | 0 | NA |
| 3 | 128874470 | 128882453 | 1  | NM_172028    | ABTB1     | 0 | NA | 0 | NA | 0 | NA | 0 | NA | 0 | NA |
| 3 | 129024391 | 128890598 | -1 | NM_007283    | MGLL      | 0 | NA | 0 | NA | 0 | NA | 0 | NA | 1 | 13 |
| 3 | 129024741 | 128890598 | -1 | NM_001003794 | MGLL      | 0 | NA | 0 | NA | 0 | NA | 0 | NA | 1 | 13 |
| 3 | 129124591 | 129189204 | 1  | NM_207335    | KLHDC6    | 0 | NA | 0 | NA | 0 | NA | 0 | NA | 0 | NA |
| 3 | 129253901 | 129273216 | 1  | NM_013336    | SEC61A1   | 0 | NA | 0 | NA | 0 | NA | 0 | NA | 0 | NA |
| 3 | 129325332 | 129282492 | -1 | NM_003707    | RUVBL1    | 0 | NA | 0 | NA | 0 | NA | 0 | NA | 0 | NA |
| 3 | 129355002 | 129610179 | 1  | NM_021937    | EEFSEC    | 1 | 15 | 0 | NA | 0 | NA | 0 | NA | 0 | NA |
| 3 | 129668781 | 129663971 | -1 | NM_153330    | DNAJB8    | 0 | NA | 1 | 13 | 0 | NA | 0 | NA | 0 | NA |
| 3 | 129694718 | 129680959 | -1 | NM_032638    | GATA2     | 0 | NA | 0 | NA | 0 | NA | 0 | NA | 1 | 12 |
| 3 | 129777619 | 129773532 | -1 | NM_007354    | C3orf27   | 0 | NA | 0 | NA | 0 | NA | 0 | NA | 1 | 12 |
| 3 | 129852409 | 129821502 | -1 | NM_002950    | RPN1      | 1 | 14 | 0 | NA | 1 | 12 | 0 | NA | 0 | NA |
| 3 | 129927668 | 130016331 | 1  | NM_004637    | RAB7A     | 1 | 13 | 0 | NA | 0 | NA | 0 | NA | 0 | NA |
| 3 | 130081143 | 130114647 | 1  | NM_014049    | ACAD9     | 0 | NA | 0 | NA | 0 | NA | 1 | 16 | 0 | NA |
| 3 | 130195676 | 130172471 | -1 | NM_020741    | KIAA1257  | 0 | NA | 0 | NA | 0 | NA | 0 | NA | 1 | 13 |
| 3 | 130231981 | 130242273 | 1  | NM_024768    | CCDC48    | 1 | 16 | 0 | NA | 0 | NA | 1 | 14 | 0 | NA |
| 3 | 130262334 | 130263939 | 1  | NM_000174    | GP9       | 0 | NA | 0 | NA | 0 | NA | 0 | NA | 0 | NA |
| 3 | 130323309 | 130289107 | -1 | NM_198490    | RAB43     | 0 | NA | 0 | NA | 0 | NA | 0 | NA | 0 | NA |
| 3 | 130362719 | 130330924 | -1 | NM_020701    | ISY1      | 0 | NA | 0 | NA | 0 | NA | 1 | 17 | 0 | NA |
| 3 | 130385500 | 130369347 | -1 | NM_001127192 | CNBP      | 0 | NA | 0 | NA | 0 | NA | 0 | NA | 0 | NA |
| 3 | 130385500 | 130369347 | -1 | NM_001127193 | CNBP      | 0 | NA | 0 | NA | 0 | NA | 0 | NA | 0 | NA |
| 3 | 130385500 | 130369347 | -1 | NM_001127194 | CNBP      | 0 | NA | 0 | NA | 0 | NA | 0 | NA | 0 | NA |
| 3 | 130385500 | 130369347 | -1 | NM_001127195 | CNBP      | 0 | NA | 0 | NA | 0 | NA | 0 | NA | 0 | NA |
| 3 | 130385500 | 130369347 | -1 | NM_001127196 | CNBP      | 0 | NA | 0 | NA | 0 | NA | 0 | NA | 0 | NA |
| 3 | 130385500 | 130369347 | -1 | NM_003418    | CNBP      | 0 | NA | 0 | NA | 0 | NA | 0 | NA | 0 | NA |
| 3 | 130451142 | 130479306 | 1  | NM_016128    | COPG      | 0 | NA | 0 | NA | 0 | NA | 0 | NA | 0 | NA |
| 3 | 130480373 | 130506825 | 1  | NM_020187    | C3orf37   | 0 | NA | 0 | NA | 0 | NA | 0 | NA | 0 | NA |
| 3 | 130480506 | 130506825 | 1  | NM_001006109 | C3orf37   | 0 | NA | 0 | NA | 0 | NA | 0 | NA | 0 | NA |
| 3 | 130517807 | 130516304 | -1 | NM_006026    | H1FX      | 0 | NA | 0 | NA | 0 | NA | 1 | 11 | 0 | NA |
| 3 | 130630184 | 130602853 | -1 | NM_207307    | C3orf25   | 0 | NA | 0 | NA | 0 | NA | 0 | NA | 0 | NA |
| 3 | 130641542 | 130632482 | -1 | NM_003925    | MBD4      | 0 | NA | 0 | NA | 0 | NA | 0 | NA | 0 | NA |
| 3 | 130641657 | 130721880 | 1  | NM_018262    | IFT122    | 0 | NA | 0 | NA | 0 | NA | 0 | NA | 0 | NA |
| 3 | 130641657 | 130721881 | 1  | NM_052985    | IFT122    | 0 | NA | 0 | NA | 0 | NA | 0 | NA | 0 | NA |
| 3 | 130641657 | 130721881 | 1  | NM_052989    | IFT122    | 0 | NA | 0 | NA | 0 | NA | 0 | NA | 0 | NA |
| 3 | 130641657 | 130721881 | 1  | NM_052990    | IFT122    | 0 | NA | 0 | NA | 0 | NA | 0 | NA | 0 | NA |
| 3 | 130730171 | 130736877 | 1  | NM_000539    | RHO       | 0 | NA | 0 | NA | 0 | NA | 0 | NA | 0 | NA |
| 3 | 130744746 | 130752894 | 1  | NM_153833    | H1FOO     | 0 | NA | 0 | NA | 0 | NA | 0 | NA | 0 | NA |
| 3 | 130808272 | 130756745 | -1 | NM_015103    | PLXND1    | 0 | NA | 0 | NA | 0 | NA | 1 | 20 | 0 | NA |
| 3 | 130889772 | 130849324 | -1 | NM_015008    | TMCC1     | 0 | NA | 0 | NA | 0 | NA | 0 | NA | 0 | NA |
| 3 | 131081999 | 130849324 | -1 | NM_001017395 | TMCC1     | 0 | NA | 0 | NA | 0 | NA | 0 | NA | 0 | NA |
| 3 | 131176252 | 131179470 | 1  | NM_007117    | TRH       | 0 | NA | 0 | NA | 0 | NA | 1 | 12 | 0 | NA |

|   |           |           |    |              |         |   |    |   |    |   |    |   |    |   |    |
|---|-----------|-----------|----|--------------|---------|---|----|---|----|---|----|---|----|---|----|
| 3 | 131547048 | 131686378 | 1  | NM_153264    | COL29A1 | 0 | NA | 0 | NA | 0 | NA | 0 | NA | 0 | NA |
| 3 | 131761867 | 131878578 | 1  | NM_001102808 | COL6A6  | 0 | NA | 0 | NA | 0 | NA | 0 | NA | 1 | 13 |
| 3 | 131948386 | 131880467 | -1 | NM_014602    | PIK3R4  | 0 | NA | 0 | NA | 0 | NA | 0 | NA | 0 | NA |
| 3 | 132096123 | 132204684 | 1  | NM_014382    | ATP2C1  | 0 | NA | 0 | NA | 0 | NA | 0 | NA | 0 | NA |
| 3 | 132096123 | 132218245 | 1  | NM_001001485 | ATP2C1  | 0 | NA | 0 | NA | 0 | NA | 0 | NA | 0 | NA |
| 3 | 132096123 | 132218245 | 1  | NM_001001486 | ATP2C1  | 0 | NA | 0 | NA | 0 | NA | 0 | NA | 0 | NA |
| 3 | 132096123 | 132218245 | 1  | NM_001001487 | ATP2C1  | 0 | NA | 0 | NA | 0 | NA | 0 | NA | 0 | NA |
| 3 | 132228336 | 132215410 | -1 | NM_014065    | ASTE1   | 1 | 11 | 0 | NA | 0 | NA | 0 | NA | 0 | NA |
| 3 | 132228416 | 132376664 | 1  | NM_145910    | NEK11   | 1 | 11 | 0 | NA | 0 | NA | 0 | NA | 0 | NA |
| 3 | 132228416 | 132551993 | 1  | NM_024800    | NEK11   | 1 | 11 | 0 | NA | 0 | NA | 0 | NA | 0 | NA |
| 3 | 132583396 | 132587619 | 1  | NM_152395    | NUDT16  | 0 | NA | 0 | NA | 0 | NA | 0 | NA | 0 | NA |
| 3 | 132704519 | 132683734 | -1 | NM_007208    | MRPL3   | 1 | 24 | 0 | NA | 1 | 41 | 0 | NA | 0 | NA |
| 3 | 133236534 | 132736266 | -1 | NM_130808    | CPNE4   | 0 | NA | 0 | NA | 0 | NA | 0 | NA | 0 | NA |
| 3 | 133518901 | 133560379 | 1  | NM_001099    | ACPP    | 0 | NA | 0 | NA | 0 | NA | 0 | NA | 0 | NA |
| 3 | 133619242 | 133740566 | 1  | NM_015268    | DNAJC13 | 0 | NA | 0 | NA | 0 | NA | 0 | NA | 0 | NA |
| 3 | 133798783 | 133804072 | 1  | NM_016557    | CCRL1   | 0 | NA | 0 | NA | 0 | NA | 0 | NA | 0 | NA |
| 3 | 133801670 | 133804072 | 1  | NM_178445    | CCRL1   | 0 | NA | 0 | NA | 0 | NA | 0 | NA | 0 | NA |
| 3 | 133855979 | 133879634 | 1  | NM_198329    | UBA5    | 0 | NA | 0 | NA | 0 | NA | 0 | NA | 0 | NA |
| 3 | 133861665 | 133759671 | -1 | NM_032169    | ACAD11  | 0 | NA | 0 | NA | 0 | NA | 0 | NA | 0 | NA |
| 3 | 133861829 | 133879634 | 1  | NM_024818    | UBA5    | 0 | NA | 0 | NA | 0 | NA | 0 | NA | 0 | NA |
| 3 | 133923966 | 133882143 | -1 | NM_153240    | NPHP3   | 0 | NA | 0 | NA | 0 | NA | 0 | NA | 0 | NA |
| 3 | 134239942 | 134597747 | 1  | NM_023943    | TMEM108 | 0 | NA | 1 | 15 | 0 | NA | 0 | NA | 0 | NA |
| 3 | 134601479 | 134676746 | 1  | NM_003571    | BFSP2   | 0 | NA | 0 | NA | 0 | NA | 0 | NA | 0 | NA |
| 3 | 134775263 | 134791795 | 1  | NM_017548    | CDV3    | 0 | NA | 0 | NA | 0 | NA | 0 | NA | 0 | NA |
| 3 | 134863380 | 134802176 | -1 | NM_007027    | TOPBP1  | 0 | NA | 0 | NA | 0 | NA | 0 | NA | 0 | NA |
| 3 | 134947924 | 134980325 | 1  | NM_001063    | TF      | 0 | NA | 0 | NA | 0 | NA | 0 | NA | 0 | NA |
| 3 | 135007366 | 135022213 | 1  | NM_021203    | SRPRB   | 0 | NA | 0 | NA | 0 | NA | 0 | NA | 0 | NA |
| 3 | 135097381 | 135025769 | -1 | NM_016577    | RAB6B   | 0 | NA | 0 | NA | 0 | NA | 0 | NA | 0 | NA |
| 3 | 135131346 | 135129679 | -1 | NM_025041    | C3orf36 | 0 | NA | 0 | NA | 0 | NA | 0 | NA | 0 | NA |
| 3 | 135231418 | 135134229 | -1 | NM_005630    | SLCO2A1 | 0 | NA | 0 | NA | 0 | NA | 0 | NA | 0 | NA |
| 3 | 135452276 | 135358667 | -1 | NM_001005861 | RYK     | 0 | NA | 0 | NA | 0 | NA | 1 | 12 | 0 | NA |
| 3 | 135452276 | 135358667 | -1 | NM_002958    | RYK     | 0 | NA | 0 | NA | 0 | NA | 1 | 12 | 0 | NA |
| 3 | 135576096 | 135556879 | -1 | NM_016201    | AMOTL2  | 1 | 13 | 0 | NA | 0 | NA | 1 | 12 | 0 | NA |
| 3 | 135687264 | 135766560 | 1  | NM_001042383 | CEP63   | 1 | 22 | 0 | NA | 1 | 12 | 1 | 11 | 0 | NA |
| 3 | 135687264 | 135776545 | 1  | NM_001042384 | CEP63   | 1 | 22 | 0 | NA | 1 | 12 | 1 | 11 | 0 | NA |
| 3 | 135687519 | 135679239 | -1 | NM_015391    | ANAPC13 | 1 | 22 | 0 | NA | 1 | 12 | 1 | 11 | 0 | NA |
| 3 | 135687586 | 135766560 | 1  | NM_001042400 | CEP63   | 1 | 22 | 0 | NA | 1 | 12 | 1 | 11 | 0 | NA |
| 3 | 135687736 | 135766560 | 1  | NM_025180    | CEP63   | 1 | 22 | 0 | NA | 1 | 12 | 1 | 11 | 0 | NA |
| 3 | 135852554 | 135801454 | -1 | NM_178554    | KY      | 0 | NA | 0 | NA | 0 | NA | 0 | NA | 0 | NA |
| 3 | 135996949 | 136461997 | 0  | NM_004441    | EPHB1   | 0 | NA | 0 | NA | 0 | NA | 0 | NA | 0 | NA |
| 3 | 137167256 | 137349423 | 1  | NM_002718    | PPP2R3A | 0 | NA | 0 | NA | 0 | NA | 0 | NA | 0 | NA |
| 3 | 137224271 | 137349423 | 1  | NM_181897    | PPP2R3A | 0 | NA | 0 | NA | 0 | NA | 0 | NA | 0 | NA |
| 3 | 137397378 | 137350449 | -1 | NM_018133    | MSL2L1  | 1 | 16 | 0 | NA | 0 | NA | 0 | NA | 0 | NA |
| 3 | 137451856 | 137531701 | 1  | NM_000532    | PCCB    | 0 | NA | 0 | NA | 0 | NA | 0 | NA | 0 | NA |
| 3 | 137953935 | 137538688 | -1 | NM_005862    | STAG1   | 0 | NA | 0 | NA | 0 | NA | 1 | 11 | 0 | NA |
| 3 | 138020550 | 138057424 | 1  | NM_001097599 | TMEM22  | 0 | NA | 0 | NA | 0 | NA | 0 | NA | 0 | NA |
| 3 | 138020550 | 138057424 | 1  | NM_001097600 | TMEM22  | 0 | NA | 0 | NA | 0 | NA | 0 | NA | 0 | NA |
| 3 | 138020550 | 138057424 | 1  | NM_025246    | TMEM22  | 0 | NA | 0 | NA | 0 | NA | 0 | NA | 0 | NA |
| 3 | 138063762 | 138150658 | 1  | NM_006153    | NCK1    | 0 | NA | 0 | NA | 1 | 13 | 0 | NA | 0 | NA |
| 3 | 138159396 | 138212610 | 1  | NM_144717    | IL20RB  | 0 | NA | 0 | NA | 0 | NA | 0 | NA | 0 | NA |
| 3 | 138966268 | 138967086 | 1  | NM_004189    | SOX14   | 0 | NA | 0 | NA | 0 | NA | 0 | NA | 1 | 13 |
| 3 | 139200347 | 139235184 | 1  | NM_001002026 | CLDN18  | 0 | NA | 0 | NA | 0 | NA | 1 | 12 | 0 | NA |
| 3 | 139211695 | 139235184 | 1  | NM_016369    | CLDN18  | 0 | NA | 0 | NA | 0 | NA | 0 | NA | 0 | NA |
| 3 | 139317141 | 139263521 | -1 | NM_173543    | DZIP1L  | 0 | NA | 0 | NA | 0 | NA | 0 | NA | 0 | NA |
| 3 | 139333919 | 139325249 | -1 | NM_016161    | A4GNT   | 0 | NA | 0 | NA | 0 | NA | 0 | NA | 0 | NA |
| 3 | 139376463 | 139362541 | -1 | NM_016216    | DBR1    | 0 | NA | 0 | NA | 0 | NA | 0 | NA | 0 | NA |
| 3 | 139388837 | 139448419 | 1  | NM_014154    | ARMC8   | 0 | NA | 0 | NA | 0 | NA | 0 | NA | 0 | NA |
| 3 | 139388837 | 139448419 | 1  | NM_213654    | ARMC8   | 0 | NA | 0 | NA | 0 | NA | 0 | NA | 0 | NA |
| 3 | 139388837 | 139498909 | 1  | NM_015396    | ARMC8   | 0 | NA | 0 | NA | 0 | NA | 0 | NA | 0 | NA |
| 3 | 139531418 | 139462968 | -1 | NM_178130    | TXNDC6  | 0 | NA | 0 | NA | 0 | NA | 0 | NA | 0 | NA |
| 3 | 139549314 | 139607067 | 1  | NM_012219    | MRAS    | 0 | NA | 0 | NA | 0 | NA | 0 | NA | 0 | NA |
| 3 | 139550197 | 139607067 | 1  | NM_001085049 | MRAS    | 0 | NA | 0 | NA | 0 | NA | 0 | NA | 0 | NA |
| 3 | 139636108 | 139678399 | 1  | NM_031913    | FAM62C  | 0 | NA | 1 | 14 | 0 | NA | 0 | NA | 0 | NA |
| 3 | 139795819 | 139695876 | -1 | NM_024491    | CEP70   | 1 | 19 | 0 | NA | 0 | NA | 0 | NA | 0 | NA |
| 3 | 139810231 | 139834903 | 1  | NM_001033030 | FAIM    | 0 | NA | 0 | NA | 0 | NA | 0 | NA | 0 | NA |

|   |           |           |    |              |           |   |    |    |           |    |    |    |    |    |    |    |
|---|-----------|-----------|----|--------------|-----------|---|----|----|-----------|----|----|----|----|----|----|----|
| 3 | 139810231 | 139834903 | 1  | NM_001033031 | FAIM      | 0 | NA | 0  | NA        | 0  | NA | 0  | NA | 0  | NA |    |
| 3 | 139810231 | 139834903 | 1  | NM_001033032 | FAIM      | 0 | NA | 0  | NA        | 0  | NA | 0  | NA | 0  | NA |    |
| 3 | 139810608 | 139834903 | 1  | NM_018147    | FAIM      | 0 | NA | 0  | NA        | 0  | NA | 0  | NA | 0  | NA |    |
| 3 | 139960875 | 139856920 | -1 | NM_006219    | PIK3CB    | 1 | 17 | -1 | NM_006219 | 14 | 0  | NA | 1  | 27 | 0  | NA |
| 3 | 140148491 | 140145755 | -1 | NM_023067    | FOX2      | 0 | NA | 1  | 12        | 1  | 14 | 0  | NA | 0  | NA |    |
| 3 | 140148765 | 140155520 | 1  | NM_001040061 | LOC401089 | 0 | NA | 1  | 12        | 1  | 14 | 0  | NA | 0  | NA |    |
| 3 | 140222458 | 140220562 | -1 | NM_001013650 | LOC389151 | 0 | NA | 0  | NA        | 0  | NA | 0  | NA | 0  | NA |    |
| 3 | 140545550 | 140558577 | 1  | NM_020191    | MRPS22    | 0 | NA | 0  | NA        | 0  | NA | 1  | 11 | 0  | NA |    |
| 3 | 140591151 | 140559122 | -1 | NM_004766    | COPB2     | 0 | NA | 0  | NA        | 0  | NA | 0  | NA | 0  | NA |    |
| 3 | 140678042 | 140654415 | -1 | NM_004164    | RBP2      | 0 | NA | 0  | NA        | 0  | NA | 0  | NA | 0  | NA |    |
| 3 | 140741180 | 140718971 | -1 | NM_002899    | RBP1      | 0 | NA | 1  | 12        | 1  | 13 | 0  | NA | 0  | NA |    |
| 3 | 140879530 | 140781722 | -1 | NM_178177    | NMNAT3    | 0 | NA | 0  | NA        | 0  | NA | 0  | NA | 0  | NA |    |
| 3 | 141136896 | 141769322 | 1  | NM_022131    | CLSTN2    | 0 | NA | 0  | NA        | 0  | NA | 0  | NA | 0  | NA |    |
| 3 | 141879570 | 141902681 | 1  | NM_152616    | TRIM42    | 0 | NA | 0  | NA        | 0  | NA | 0  | NA | 0  | NA |    |
| 3 | 142143351 | 142181475 | 1  | NM_001104647 | SLC25A36  | 0 | NA | 0  | NA        | 0  | NA | 1  | 16 | 0  | NA |    |
| 3 | 142143351 | 142181475 | 1  | NM_018155    | SLC25A36  | 0 | NA | 0  | NA        | 0  | NA | 1  | 16 | 0  | NA |    |
| 3 | 142253432 | 142350143 | 1  | NM_080862    | SPSB4     | 0 | NA | 0  | NA        | 0  | NA | 0  | NA | 0  | NA |    |
| 3 | 142433371 | 142496176 | 1  | NM_001037172 | ACPL2     | 0 | NA | 0  | NA        | 0  | NA | 0  | NA | 0  | NA |    |
| 3 | 142433371 | 142496176 | 1  | NM_152282    | ACPL2     | 0 | NA | 0  | NA        | 0  | NA | 0  | NA | 0  | NA |    |
| 3 | 142525744 | 142651322 | 1  | NM_001080412 | ZBTB38    | 0 | NA | 0  | NA        | 0  | NA | 0  | NA | 0  | NA |    |
| 3 | 142688615 | 142813887 | 1  | NM_006506    | RASA2     | 0 | NA | 0  | NA        | 0  | NA | 0  | NA | 0  | NA |    |
| 3 | 142939740 | 142947933 | 1  | NM_014245    | RNF7      | 0 | NA | 0  | NA        | 0  | NA | 0  | NA | 0  | NA |    |
| 3 | 142939740 | 142947933 | 1  | NM_183237    | RNF7      | 0 | NA | 0  | NA        | 0  | NA | 0  | NA | 0  | NA |    |
| 3 | 142979732 | 143018582 | 1  | NM_139209    | GRK7      | 0 | NA | 0  | NA        | 0  | NA | 0  | NA | 0  | NA |    |
| 3 | 143078159 | 143128072 | 1  | NM_001679    | ATP1B3    | 1 | 12 | 0  | NA        | 0  | NA | 0  | NA | 0  | NA |    |
| 3 | 143207067 | 143154017 | -1 | NM_006286    | TFDP2     | 0 | NA | 0  | NA        | 0  | NA | 0  | NA | 0  | NA |    |
| 3 | 143427118 | 143359058 | -1 | NM_001039547 | GK5       | 0 | NA | 0  | NA        | 1  | 12 | 0  | NA | 0  | NA |    |
| 3 | 143649543 | 143508138 | -1 | NM_001042604 | XRN1      | 0 | NA | 0  | NA        | 0  | NA | 0  | NA | 0  | NA |    |
| 3 | 143649543 | 143508138 | -1 | NM_019001    | XRN1      | 0 | NA | 0  | NA        | 0  | NA | 0  | NA | 0  | NA |    |
| 3 | 143780358 | 143650766 | -1 | NM_001184    | ATR       | 1 | 29 | 0  | NA        | 0  | NA | 0  | NA | 0  | NA |    |
| 3 | 143825033 | 143915191 | 1  | NM_002670    | PLS1      | 0 | NA | 0  | NA        | 0  | NA | 0  | NA | 0  | NA |    |
| 3 | 143925955 | 144009419 | 1  | NM_003304    | TRPC1     | 0 | NA | 0  | NA        | 0  | NA | 0  | NA | 0  | NA |    |
| 3 | 144090624 | 144019400 | -1 | NM_013363    | PCOLCE2   | 0 | NA | 0  | NA        | 0  | NA | 0  | NA | 0  | NA |    |
| 3 | 144164868 | 144162763 | -1 | NM_198504    | PAQR9     | 0 | NA | 1  | 16        | 0  | NA | 0  | NA | 0  | NA |    |
| 3 | 144203061 | 144262257 | 1  | NM_001080415 | SR140     | 0 | NA | 1  | 29        | 1  | 15 | 1  | 17 | 0  | NA |    |
| 3 | 144321357 | 144324502 | 1  | NM_004267    | CHST2     | 0 | NA | 1  | 12        | 0  | NA | 0  | NA | 0  | NA |    |
| 3 | 145049979 | 144486753 | -1 | NM_173653    | SLC9A9    | 0 | NA | 0  | NA        | 0  | NA | 0  | NA | 0  | NA |    |
| 3 | 145173602 | 145193895 | 1  | NM_173552    | C3orf58   | 0 | NA | 0  | NA        | 0  | NA | 1  | 11 | 0  | NA |    |
| 3 | 147361972 | 147269917 | -1 | NM_000935    | PLOD2     | 0 | NA | 0  | NA        | 1  | 12 | 0  | NA | 0  | NA |    |
| 3 | 147361972 | 147269917 | -1 | NM_182943    | PLOD2     | 0 | NA | 0  | NA        | 1  | 12 | 0  | NA | 0  | NA |    |
| 3 | 147451560 | 147392815 | -1 | NM_020353    | PLSCR4    | 0 | NA | 0  | NA        | 0  | NA | 0  | NA | 0  | NA |    |
| 3 | 147696412 | 147633771 | -1 | NM_020359    | PLSCR2    | 0 | NA | 0  | NA        | 0  | NA | 0  | NA | 0  | NA |    |
| 3 | 147745318 | 147715656 | -1 | NM_021105    | PLSCR1    | 0 | NA | 0  | NA        | 0  | NA | 0  | NA | 0  | NA |    |
| 3 | 147806893 | 147786314 | -1 | NM_001085420 | PLSCR5    | 0 | NA | 0  | NA        | 0  | NA | 0  | NA | 0  | NA |    |
| 3 | 148607097 | 148586526 | -1 | NM_032153    | ZIC4      | 0 | NA | 1  | 12        | 0  | NA | 0  | NA | 0  | NA |    |
| 3 | 148609870 | 148617196 | 1  | NM_003412    | ZIC1      | 0 | NA | 1  | 12        | 0  | NA | 0  | NA | 0  | NA |    |
| 3 | 149898347 | 149943480 | 1  | NM_000685    | AGTR1     | 0 | NA | 0  | NA        | 0  | NA | 0  | NA | 0  | NA |    |
| 3 | 149898347 | 149943480 | 1  | NM_004835    | AGTR1     | 0 | NA | 0  | NA        | 0  | NA | 0  | NA | 0  | NA |    |
| 3 | 149898347 | 149943480 | 1  | NM_009585    | AGTR1     | 0 | NA | 0  | NA        | 0  | NA | 0  | NA | 0  | NA |    |
| 3 | 149898347 | 149943480 | 1  | NM_031850    | AGTR1     | 0 | NA | 0  | NA        | 0  | NA | 0  | NA | 0  | NA |    |
| 3 | 149930656 | 149943480 | 1  | NM_032049    | AGTR1     | 0 | NA | 0  | NA        | 0  | NA | 0  | NA | 0  | NA |    |
| 3 | 150028277 | 150060862 | 1  | NM_001871    | CPB1      | 0 | NA | 0  | NA        | 0  | NA | 0  | NA | 0  | NA |    |
| 3 | 150065773 | 150097552 | 1  | NM_001870    | CPA3      | 0 | NA | 0  | NA        | 0  | NA | 0  | NA | 0  | NA |    |
| 3 | 150192064 | 150228109 | 1  | NM_004130    | GYG1      | 0 | NA | 0  | NA        | 0  | NA | 0  | NA | 0  | NA |    |
| 3 | 150287031 | 150230593 | -1 | NM_003071    | HLTF      | 1 | 29 | 0  | NA        | 0  | NA | 1  | 25 | 0  | NA |    |
| 3 | 150287031 | 150230593 | -1 | NM_139048    | HLTF      | 1 | 29 | 0  | NA        | 0  | NA | 1  | 25 | 0  | NA |    |
| 3 | 150330060 | 150373995 | 1  | NM_032383    | HPS3      | 0 | NA | 0  | NA        | 0  | NA | 0  | NA | 0  | NA |    |
| 3 | 150422519 | 150373221 | -1 | NM_000096    | CP        | 0 | NA | 0  | NA        | 1  | 12 | 0  | NA | 0  | NA |    |
| 3 | 150534109 | 150521544 | -1 | NM_138786    | TM4SF18   | 1 | 19 | 0  | NA        | 0  | NA | 0  | NA | 0  | NA |    |
| 3 | 150578258 | 150569494 | -1 | NM_014220    | TM4SF1    | 0 | NA | 0  | NA        | 0  | NA | 0  | NA | 0  | NA |    |
| 3 | 150675123 | 150703758 | 1  | NM_004617    | TM4SF4    | 0 | NA | 0  | NA        | 0  | NA | 0  | NA | 0  | NA |    |
| 3 | 150858472 | 150720721 | -1 | NM_015472    | WWTR1     | 0 | NA | 0  | NA        | 0  | NA | 0  | NA | 0  | NA |    |
| 3 | 150952968 | 150941220 | -1 | NM_016094    | COMMD2    | 0 | NA | 0  | NA        | 0  | NA | 0  | NA | 0  | NA |    |
| 3 | 151013164 | 151162615 | 1  | NM_007282    | RNF13     | 0 | NA | 0  | NA        | 0  | NA | 0  | NA | 0  | NA |    |
| 3 | 151013164 | 151162615 | 1  | NM_183381    | RNF13     | 0 | NA | 0  | NA        | 0  | NA | 0  | NA | 0  | NA |    |

|   |           |           |    |              |           |   |    |   |    |   |    |   |    |   |    |
|---|-----------|-----------|----|--------------|-----------|---|----|---|----|---|----|---|----|---|----|
| 3 | 151171431 | 151165380 | -1 | NM_002628    | PFN2      | 0 | NA | 0 | NA | 0 | NA | 0 | NA | 0 | NA |
| 3 | 151171431 | 151165380 | -1 | NM_053024    | PFN2      | 0 | NA | 0 | NA | 0 | NA | 0 | NA | 0 | NA |
| 3 | 151609477 | 151660305 | 1  | NM_014779    | TSC2D2    | 0 | NA | 0 | NA | 0 | NA | 0 | NA | 0 | NA |
| 3 | 151747118 | 151742469 | -1 | NM_014445    | SERP1     | 0 | NA | 0 | NA | 0 | NA | 0 | NA | 0 | NA |
| 3 | 151747263 | 151786493 | 1  | NM_032025    | EIF2A     | 0 | NA | 0 | NA | 0 | NA | 0 | NA | 0 | NA |
| 3 | 151803755 | 151830924 | 1  | NM_016275    | SELT      | 0 | NA | 0 | NA | 0 | NA | 0 | NA | 0 | NA |
| 3 | 151904432 | 151860364 | -1 | NM_152394    | C3orf44   | 0 | NA | 1 | 12 | 0 | NA | 0 | NA | 0 | NA |
| 3 | 151963953 | 151941599 | -1 | NM_005067    | SIAH2     | 0 | NA | 0 | NA | 0 | NA | 0 | NA | 0 | NA |
| 3 | 152144713 | 152126639 | -1 | NM_052995    | CLRN1     | 0 | NA | 0 | NA | 0 | NA | 0 | NA | 0 | NA |
| 3 | 152173476 | 152127043 | -1 | NM_174878    | CLRN1     | 0 | NA | 0 | NA | 0 | NA | 0 | NA | 0 | NA |
| 3 | 152287365 | 152634500 | 1  | NM_053002    | MED12L    | 0 | NA | 0 | NA | 0 | NA | 0 | NA | 0 | NA |
| 3 | 152403678 | 152398308 | -1 | NM_013308    | GPR171    | 0 | NA | 0 | NA | 0 | NA | 0 | NA | 0 | NA |
| 3 | 152449688 | 152412594 | -1 | NM_001081455 | P2RY14    | 0 | NA | 0 | NA | 0 | NA | 0 | NA | 0 | NA |
| 3 | 152478920 | 152412594 | -1 | NM_014879    | P2RY14    | 0 | NA | 0 | NA | 0 | NA | 0 | NA | 0 | NA |
| 3 | 152517326 | 152494586 | -1 | NM_023915    | GPR87     | 0 | NA | 0 | NA | 0 | NA | 0 | NA | 0 | NA |
| 3 | 152529643 | 152526785 | -1 | NM_023914    | P2RY13    | 0 | NA | 0 | NA | 0 | NA | 0 | NA | 0 | NA |
| 3 | 152530025 | 152526785 | -1 | NM_176894    | P2RY13    | 0 | NA | 0 | NA | 0 | NA | 0 | NA | 0 | NA |
| 3 | 152541275 | 152538065 | -1 | NM_176876    | P2RY12    | 0 | NA | 0 | NA | 0 | NA | 0 | NA | 0 | NA |
| 3 | 152585234 | 152538065 | -1 | NM_022788    | P2RY12    | 0 | NA | 0 | NA | 0 | NA | 0 | NA | 0 | NA |
| 3 | 152659187 | 152637166 | -1 | NM_178822    | IGSF10    | 0 | NA | 0 | NA | 0 | NA | 0 | NA | 0 | NA |
| 3 | 152934404 | 152958242 | 1  | NM_207365    | AADACL2   | 0 | NA | 0 | NA | 0 | NA | 0 | NA | 0 | NA |
| 3 | 153014550 | 153028966 | 1  | NM_001086    | AADAC     | 0 | NA | 0 | NA | 0 | NA | 0 | NA | 0 | NA |
| 3 | 153074126 | 153082340 | 1  | NM_033050    | SUCNR1    | 0 | NA | 0 | NA | 0 | NA | 0 | NA | 0 | NA |
| 3 | 153468518 | 153666258 | 1  | NM_021038    | MBNL1     | 1 | 13 | 0 | NA | 0 | NA | 1 | 17 | 0 | NA |
| 3 | 153468518 | 153666258 | 1  | NM_207292    | MBNL1     | 1 | 13 | 0 | NA | 0 | NA | 1 | 17 | 0 | NA |
| 3 | 153499883 | 153666259 | 1  | NM_207293    | MBNL1     | 0 | NA | 0 | NA | 1 | 12 | 0 | NA | 0 | NA |
| 3 | 153499883 | 153666259 | 1  | NM_207294    | MBNL1     | 0 | NA | 0 | NA | 1 | 12 | 0 | NA | 0 | NA |
| 3 | 153499883 | 153666259 | 1  | NM_207295    | MBNL1     | 0 | NA | 0 | NA | 1 | 12 | 0 | NA | 0 | NA |
| 3 | 153499883 | 153666259 | 1  | NM_207296    | MBNL1     | 0 | NA | 0 | NA | 1 | 12 | 0 | NA | 0 | NA |
| 3 | 153499883 | 153666259 | 1  | NM_207297    | MBNL1     | 0 | NA | 0 | NA | 1 | 12 | 0 | NA | 0 | NA |
| 3 | 153541469 | 153540176 | -1 | NM_001123228 | LOC645843 | 0 | NA | 0 | NA | 0 | NA | 0 | NA | 0 | NA |
| 3 | 154035425 | 154038533 | 1  | NM_002563    | P2RY1     | 0 | NA | 0 | NA | 0 | NA | 0 | NA | 0 | NA |
| 3 | 154362718 | 154368953 | 1  | NM_002886    | RAP2B     | 0 | NA | 0 | NA | 0 | NA | 0 | NA | 0 | NA |
| 3 | 154684973 | 154703176 | 1  | NM_001101337 | LOC152118 | 0 | NA | 0 | NA | 0 | NA | 0 | NA | 0 | NA |
| 3 | 155321883 | 155457031 | 1  | NM_015595    | SGEF      | 0 | NA | 0 | NA | 0 | NA | 0 | NA | 0 | NA |
| 3 | 155524980 | 155476150 | -1 | NM_001114397 | DHX36     | 0 | NA | 0 | NA | 0 | NA | 0 | NA | 0 | NA |
| 3 | 155524980 | 155476150 | -1 | NM_020865    | DHX36     | 0 | NA | 0 | NA | 0 | NA | 0 | NA | 0 | NA |
| 3 | 155630198 | 155538154 | -1 | NM_001038705 | GPR149    | 0 | NA | 0 | NA | 0 | NA | 0 | NA | 1 | 12 |
| 3 | 156280129 | 156384212 | 1  | NM_000902    | MME       | 0 | NA | 0 | NA | 0 | NA | 0 | NA | 0 | NA |
| 3 | 156280398 | 156384212 | 1  | NM_007287    | MME       | 0 | NA | 0 | NA | 0 | NA | 0 | NA | 0 | NA |
| 3 | 156280646 | 156384212 | 1  | NM_007288    | MME       | 0 | NA | 0 | NA | 0 | NA | 0 | NA | 0 | NA |
| 3 | 156280772 | 156384212 | 1  | NM_007289    | MME       | 0 | NA | 0 | NA | 0 | NA | 0 | NA | 0 | NA |
| 3 | 156796861 | 156680364 | -1 | NM_014996    | PLCH1     | 0 | NA | 0 | NA | 0 | NA | 0 | NA | 0 | NA |
| 3 | 157006749 | 156963094 | -1 | NM_173657    | C3orf33   | 0 | NA | 0 | NA | 0 | NA | 0 | NA | 0 | NA |
| 3 | 157054861 | 157028064 | -1 | NM_004733    | SLC33A1   | 1 | 48 | 0 | NA | 0 | NA | 0 | NA | 0 | NA |
| 3 | 157071018 | 157138214 | 1  | NM_003875    | GMPS      | 1 | 16 | 0 | NA | 0 | NA | 0 | NA | 0 | NA |
| 3 | 157321030 | 157739621 | 1  | NM_172160    | KCNAB1    | 0 | NA | 0 | NA | 0 | NA | 0 | NA | 0 | NA |
| 3 | 157343444 | 157739621 | 1  | NM_003471    | KCNAB1    | 0 | NA | 0 | NA | 0 | NA | 0 | NA | 0 | NA |
| 3 | 157491469 | 157739621 | 1  | NM_172159    | KCNAB1    | 0 | NA | 0 | NA | 0 | NA | 0 | NA | 0 | NA |
| 3 | 157755629 | 157741236 | -1 | NM_007107    | SSR3      | 0 | NA | 0 | NA | 0 | NA | 0 | NA | 0 | NA |
| 3 | 157875072 | 157907228 | 1  | NM_015508    | TIPARP    | 0 | NA | 0 | NA | 0 | NA | 1 | 11 | 0 | NA |
| 3 | 158026789 | 158246612 | 1  | NM_001004316 | LEKR1     | 1 | 17 | 0 | NA | 0 | NA | 0 | NA | 0 | NA |
| 3 | 158361176 | 158348279 | -1 | NM_020307    | CCNL1     | 0 | NA | 0 | NA | 0 | NA | 0 | NA | 0 | NA |
| 3 | 158637273 | 158644111 | 1  | NM_002852    | PTX3      | 1 | 11 | 0 | NA | 0 | NA | 0 | NA | 0 | NA |
| 3 | 158700037 | 158461391 | -1 | NM_024621    | VEPH1     | 0 | NA | 0 | NA | 0 | NA | 0 | NA | 0 | NA |
| 3 | 158743859 | 158779237 | 1  | NM_001099777 | C3orf55   | 0 | NA | 0 | NA | 0 | NA | 0 | NA | 0 | NA |
| 3 | 159303520 | 159296493 | -1 | NM_003030    | SHOX2     | 0 | NA | 0 | NA | 0 | NA | 0 | NA | 0 | NA |
| 3 | 159306630 | 159296493 | -1 | NM_006884    | SHOX2     | 0 | NA | 0 | NA | 0 | NA | 0 | NA | 0 | NA |
| 3 | 159310585 | 159745270 | 1  | NM_016625    | RSRC1     | 0 | NA | 0 | NA | 0 | NA | 0 | NA | 0 | NA |
| 3 | 159771677 | 159805877 | 1  | NM_022443    | MLF1      | 0 | NA | 0 | NA | 0 | NA | 0 | NA | 0 | NA |
| 3 | 159845010 | 159893054 | 1  | NM_024996    | GFM1      | 0 | NA | 0 | NA | 0 | NA | 1 | 11 | 0 | NA |
| 3 | 159873176 | 159866899 | -1 | NM_020169    | LXN       | 0 | NA | 0 | NA | 0 | NA | 0 | NA | 0 | NA |
| 3 | 159932969 | 159897590 | -1 | NM_206963    | RARRES1   | 0 | NA | 0 | NA | 0 | NA | 0 | NA | 0 | NA |
| 3 | 159932969 | 159905133 | -1 | NM_002888    | RARRES1   | 0 | NA | 0 | NA | 0 | NA | 0 | NA | 0 | NA |
| 3 | 160002605 | 160030198 | 1  | NM_022736    | MFSDF1    | 0 | NA | 0 | NA | 0 | NA | 0 | NA | 0 | NA |

|   |           |           |    |              |           |   |    |   |    |   |    |   |    |   |    |
|---|-----------|-----------|----|--------------|-----------|---|----|---|----|---|----|---|----|---|----|
| 3 | 160269810 | 160464229 | 1  | NM_001042706 | IQCJ      | 0 | NA | 0 | NA | 0 | NA | 0 | NA | 0 | NA |
| 3 | 160269810 | 160466186 | 1  | NM_001042705 | IQCJ      | 0 | NA | 0 | NA | 0 | NA | 0 | NA | 0 | NA |
| 3 | 160474237 | 161097833 | 1  | NM_014575    | SCHIP1    | 0 | NA | 0 | NA | 0 | NA | 0 | NA | 0 | NA |
| 3 | 161189322 | 161196500 | 1  | NM_000882    | IL12A     | 0 | NA | 1 | 12 | 0 | NA | 0 | NA | 0 | NA |
| 3 | 161600014 | 161457481 | -1 | NM_020800    | IFT80     | 0 | NA | 0 | NA | 0 | NA | 0 | NA | 0 | NA |
| 3 | 161600123 | 161635435 | 1  | NM_001002800 | SMC4      | 0 | NA | 0 | NA | 0 | NA | 0 | NA | 0 | NA |
| 3 | 161601040 | 161635435 | 1  | NM_005496    | SMC4      | 0 | NA | 0 | NA | 0 | NA | 0 | NA | 0 | NA |
| 3 | 161650320 | 161635984 | -1 | NM_173084    | TRIM59    | 0 | NA | 1 | 13 | 0 | NA | 0 | NA | 0 | NA |
| 3 | 161786070 | 161700655 | -1 | NM_002268    | KPNA4     | 1 | 24 | 0 | NA | 0 | NA | 1 | 12 | 0 | NA |
| 3 | 161877640 | 161878929 | 1  | NM_025047    | ARL14     | 0 | NA | 0 | NA | 0 | NA | 0 | NA | 0 | NA |
| 3 | 161956689 | 162271511 | 1  | NM_139245    | PPM1L     | 1 | 13 | 1 | 12 | 1 | 15 | 0 | NA | 0 | NA |
| 3 | 162305377 | 162284364 | -1 | NM_033169    | B3GALNT1  | 0 | NA | 0 | NA | 1 | 12 | 0 | NA | 0 | NA |
| 3 | 162305854 | 162284364 | -1 | NM_001038628 | B3GALNT1  | 0 | NA | 0 | NA | 1 | 12 | 0 | NA | 0 | NA |
| 3 | 162305854 | 162284364 | -1 | NM_003781    | B3GALNT1  | 0 | NA | 0 | NA | 1 | 12 | 0 | NA | 0 | NA |
| 3 | 162305854 | 162284364 | -1 | NM_033167    | B3GALNT1  | 0 | NA | 0 | NA | 1 | 12 | 0 | NA | 0 | NA |
| 3 | 162305854 | 162284364 | -1 | NM_033168    | B3GALNT1  | 0 | NA | 0 | NA | 1 | 12 | 0 | NA | 0 | NA |
| 3 | 162421792 | 162452489 | 1  | NM_015938    | NMD3      | 1 | 14 | 0 | NA | 0 | NA | 0 | NA | 0 | NA |
| 3 | 162572565 | 162545273 | -1 | NM_001040100 | C3orf57   | 0 | NA | 0 | NA | 0 | NA | 0 | NA | 0 | NA |
| 3 | 162697289 | 162704424 | 1  | NM_001080440 | OTOL1     | 0 | NA | 0 | NA | 0 | NA | 0 | NA | 0 | NA |
| 3 | 166278976 | 166179379 | -1 | NM_001041    | SI        | 0 | NA | 0 | NA | 0 | NA | 0 | NA | 0 | NA |
| 3 | 166397163 | 166387201 | -1 | NM_014926    | SLITRK3   | 0 | NA | 1 | 13 | 0 | NA | 0 | NA | 0 | NA |
| 3 | 167037947 | 166973385 | -1 | NM_000055    | BCHE      | 0 | NA | 0 | NA | 0 | NA | 0 | NA | 0 | NA |
| 3 | 168580765 | 168440770 | -1 | NM_024687    | ZBBX      | 0 | NA | 0 | NA | 0 | NA | 0 | NA | 0 | NA |
| 3 | 168674512 | 168642416 | -1 | NM_006217    | SERPINI2  | 0 | NA | 0 | NA | 0 | NA | 0 | NA | 0 | NA |
| 3 | 168853983 | 168679166 | -1 | NM_178824    | WDR49     | 0 | NA | 0 | NA | 0 | NA | 0 | NA | 0 | NA |
| 3 | 168935288 | 168884388 | -1 | NM_007217    | PDCD10    | 0 | NA | 0 | NA | 0 | NA | 0 | NA | 0 | NA |
| 3 | 168935324 | 168884388 | -1 | NM_145860    | PDCD10    | 0 | NA | 0 | NA | 0 | NA | 0 | NA | 0 | NA |
| 3 | 168935345 | 168884388 | -1 | NM_145859    | PDCD10    | 0 | NA | 0 | NA | 0 | NA | 0 | NA | 0 | NA |
| 3 | 168936125 | 169026051 | 1  | NM_001122752 | SERPINI1  | 0 | NA | 0 | NA | 0 | NA | 0 | NA | 0 | NA |
| 3 | 168936204 | 169026051 | 1  | NM_005025    | SERPINI1  | 0 | NA | 0 | NA | 0 | NA | 0 | NA | 0 | NA |
| 3 | 169296111 | 169210347 | -1 | NM_014498    | GOLIM4    | 0 | NA | 0 | NA | 0 | NA | 0 | NA | 0 | NA |
| 3 | 170346761 | 170283980 | -1 | NM_001105077 | EV1       | 0 | NA | 0 | NA | 0 | NA | 0 | NA | 0 | NA |
| 3 | 170346761 | 170283980 | -1 | NM_005241    | EV1       | 0 | NA | 0 | NA | 0 | NA | 0 | NA | 0 | NA |
| 3 | 170346761 | 170283980 | -1 | NM_001105078 | EV1       | 0 | NA | 0 | NA | 0 | NA | 0 | NA | 0 | NA |
| 3 | 170884168 | 170349579 | -1 | NM_004991    | MDS1      | 0 | NA | 1 | 12 | 0 | NA | 0 | NA | 0 | NA |
| 3 | 170970377 | 170967406 | -1 | NM_032487    | ARPM1     | 1 | 24 | 0 | NA | 0 | NA | 1 | 15 | 0 | NA |
| 3 | 170973546 | 170988031 | 1  | NM_018657    | MYNN      | 1 | 24 | 0 | NA | 0 | NA | 1 | 15 | 0 | NA |
| 3 | 171013006 | 170993957 | -1 | NM_153353    | LRRC34    | 0 | NA | 0 | NA | 0 | NA | 0 | NA | 0 | NA |
| 3 | 171022403 | 171038254 | 1  | NM_001080460 | LOC344657 | 0 | NA | 0 | NA | 0 | NA | 0 | NA | 0 | NA |
| 3 | 171070354 | 171039722 | -1 | NM_024727    | LRRC31    | 0 | NA | 0 | NA | 0 | NA | 0 | NA | 0 | NA |
| 3 | 171112175 | 171139642 | 1  | NM_182610    | SAMD7     | 0 | NA | 0 | NA | 0 | NA | 0 | NA | 0 | NA |
| 3 | 171167273 | 171198855 | 1  | NM_003262    | SEC62     | 1 | 14 | 0 | NA | 0 | NA | 0 | NA | 0 | NA |
| 3 | 171239396 | 171285877 | 1  | NM_014373    | GPR160    | 0 | NA | 0 | NA | 0 | NA | 0 | NA | 0 | NA |
| 3 | 171382231 | 171288061 | -1 | NM_024947    | PHC3      | 0 | NA | 0 | NA | 0 | NA | 0 | NA | 0 | NA |
| 3 | 171422913 | 171506484 | 1  | NM_002740    | PRKCI     | 0 | NA | 0 | NA | 0 | NA | 1 | 25 | 0 | NA |
| 3 | 171558209 | 171593228 | 1  | NM_005414    | SKIL      | 0 | NA | 0 | NA | 0 | NA | 0 | NA | 0 | NA |
| 3 | 171619358 | 171634579 | 1  | NM_005602    | CLDN11    | 0 | NA | 0 | NA | 0 | NA | 0 | NA | 0 | NA |
| 3 | 171786557 | 171660035 | -1 | NM_020949    | SLC7A14   | 0 | NA | 0 | NA | 0 | NA | 0 | NA | 1 | 12 |
| 3 | 172070739 | 172065358 | -1 | NM_001099645 | RPL22L1   | 1 | 19 | 0 | NA | 1 | 13 | 0 | NA | 0 | NA |
| 3 | 172109120 | 172088897 | -1 | NM_020390    | EIF5A2    | 1 | 29 | 1 | 36 | 0 | NA | 1 | 22 | 1 | 15 |
| 3 | 172227462 | 172196830 | -1 | NM_000340    | SLC2A2    | 0 | NA | 0 | NA | 0 | NA | 0 | NA | 0 | NA |
| 3 | 172660546 | 172264363 | -1 | NM_015028    | TNIK      | 0 | NA | 0 | NA | 0 | NA | 1 | 17 | 0 | NA |
| 3 | 172938566 | 172801338 | -1 | NM_002662    | PLD1      | 0 | NA | 0 | NA | 0 | NA | 0 | NA | 0 | NA |
| 3 | 173241079 | 173601181 | 1  | NM_022763    | FNDC3B    | 0 | NA | 0 | NA | 0 | NA | 0 | NA | 0 | NA |
| 3 | 173648897 | 173645644 | -1 | NM_198407    | GHSR      | 0 | NA | 1 | 20 | 0 | NA | 0 | NA | 1 | 12 |
| 3 | 173648897 | 173648027 | -1 | NM_004122    | GHSR      | 0 | NA | 1 | 20 | 0 | NA | 0 | NA | 1 | 12 |
| 3 | 173723963 | 173706157 | -1 | NM_003810    | TNFSF10   | 0 | NA | 0 | NA | 0 | NA | 0 | NA | 0 | NA |
| 3 | 173911700 | 173831128 | -1 | NM_020792    | AADA1L1   | 0 | NA | 0 | NA | 0 | NA | 0 | NA | 0 | NA |
| 3 | 173954991 | 174021957 | 1  | NM_018098    | ECT2      | 0 | NA | 0 | NA | 0 | NA | 0 | NA | 0 | NA |
| 3 | 174341695 | 174089843 | -1 | NM_031955    | SPATA16   | 0 | NA | 0 | NA | 0 | NA | 0 | NA | 1 | 13 |
| 3 | 174598937 | 175483810 | 1  | NM_014932    | NLGN1     | 1 | 15 | 0 | NA | 0 | NA | 1 | 12 | 0 | NA |
| 3 | 176059804 | 177006122 | 1  | NM_207015    | NAALADL2  | 0 | NA | 0 | NA | 0 | NA | 0 | NA | 0 | NA |
| 3 | 178397742 | 178221235 | -1 | NM_024665    | TBL1XR1   | 0 | NA | 0 | NA | 0 | NA | 0 | NA | 0 | NA |
| 3 | 179736917 | 180044911 | 1  | NM_181361    | KCNMB2    | 0 | NA | 0 | NA | 0 | NA | 0 | NA | 0 | NA |
| 3 | 179759311 | 180044911 | 1  | NM_005832    | KCNMB2    | 0 | NA | 0 | NA | 0 | NA | 0 | NA | 0 | NA |

|   |           |           |    |              |         |   |    |   |    |   |    |   |    |   |    |
|---|-----------|-----------|----|--------------|---------|---|----|---|----|---|----|---|----|---|----|
| 3 | 180272278 | 180224218 | -1 | NM_022470    | ZMAT3   | 0 | NA | 0 | NA | 0 | NA | 0 | NA | 0 | NA |
| 3 | 180272278 | 180224218 | -1 | NM_152240    | ZMAT3   | 0 | NA | 0 | NA | 0 | NA | 0 | NA | 0 | NA |
| 3 | 180349004 | 180435191 | 1  | NM_006218    | PIK3CA  | 0 | NA | 0 | NA | 0 | NA | 0 | NA | 0 | NA |
| 3 | 180452097 | 180443247 | -1 | NM_014407    | KCNMB3  | 0 | NA | 0 | NA | 0 | NA | 0 | NA | 0 | NA |
| 3 | 180452339 | 180443247 | -1 | NM_171830    | KCNMB3  | 0 | NA | 0 | NA | 0 | NA | 1 | 11 | 0 | NA |
| 3 | 180460226 | 180443247 | -1 | NM_171829    | KCNMB3  | 0 | NA | 0 | NA | 0 | NA | 1 | 11 | 0 | NA |
| 3 | 180467532 | 180443287 | -1 | NM_171828    | KCNMB3  | 0 | NA | 0 | NA | 0 | NA | 1 | 11 | 0 | NA |
| 3 | 180524244 | 180536014 | 1  | NM_016331    | ZNF639  | 0 | NA | 0 | NA | 0 | NA | 0 | NA | 0 | NA |
| 3 | 180548173 | 180593702 | 1  | NM_033540    | MFN1    | 0 | NA | 0 | NA | 0 | NA | 0 | NA | 0 | NA |
| 3 | 180652065 | 180596569 | -1 | NM_021629    | GNB4    | 0 | NA | 0 | NA | 0 | NA | 0 | NA | 0 | NA |
| 3 | 180763401 | 180788887 | 1  | NM_004301    | ACTL6A  | 0 | NA | 0 | NA | 0 | NA | 0 | NA | 0 | NA |
| 3 | 180763401 | 180788887 | 1  | NM_177989    | ACTL6A  | 0 | NA | 0 | NA | 0 | NA | 0 | NA | 0 | NA |
| 3 | 180763401 | 180788887 | 1  | NM_178042    | ACTL6A  | 0 | NA | 0 | NA | 0 | NA | 0 | NA | 0 | NA |
| 3 | 180805128 | 180788948 | -1 | NM_020409    | MRPL47  | 0 | NA | 0 | NA | 0 | NA | 0 | NA | 0 | NA |
| 3 | 180805128 | 180788948 | -1 | NM_177988    | MRPL47  | 0 | NA | 0 | NA | 0 | NA | 0 | NA | 0 | NA |
| 3 | 180805268 | 180824982 | 1  | NM_002492    | NDUFB5  | 0 | NA | 0 | NA | 0 | NA | 0 | NA | 0 | NA |
| 3 | 180853634 | 180984675 | 1  | NM_003940    | USP13   | 0 | NA | 0 | NA | 0 | NA | 0 | NA | 0 | NA |
| 3 | 181237211 | 181000743 | -1 | NM_016559    | PEX5L   | 0 | NA | 0 | NA | 0 | NA | 0 | NA | 0 | NA |
| 3 | 181802624 | 181811595 | 1  | NM_001042601 | TTC14   | 1 | 36 | 0 | NA | 0 | NA | 1 | 20 | 0 | NA |
| 3 | 181802624 | 181811595 | 1  | NM_133462    | TTC14   | 1 | 36 | 0 | NA | 0 | NA | 1 | 20 | 0 | NA |
| 3 | 181879977 | 181814489 | -1 | NM_181426    | CCDC39  | 0 | NA | 1 | 15 | 0 | NA | 0 | NA | 0 | NA |
| 3 | 182113145 | 182177647 | 1  | NM_001013438 | FXR1    | 0 | NA | 0 | NA | 0 | NA | 0 | NA | 0 | NA |
| 3 | 182113145 | 182177647 | 1  | NM_001013439 | FXR1    | 0 | NA | 0 | NA | 0 | NA | 0 | NA | 0 | NA |
| 3 | 182113145 | 182177647 | 1  | NM_005087    | FXR1    | 0 | NA | 0 | NA | 0 | NA | 0 | NA | 0 | NA |
| 3 | 182190224 | 182184197 | -1 | NM_145261    | DNAJC19 | 0 | NA | 0 | NA | 0 | NA | 0 | NA | 0 | NA |
| 3 | 182912415 | 182914917 | 1  | NM_003106    | SOX2    | 0 | NA | 0 | NA | 1 | 19 | 0 | NA | 1 | 15 |
| 3 | 183993984 | 184122115 | 1  | NM_014616    | ATP11B  | 1 | 12 | 0 | NA | 0 | NA | 0 | NA | 0 | NA |
| 3 | 184181020 | 184143252 | -1 | NM_020640    | DCUN1D1 | 0 | NA | 0 | NA | 0 | NA | 0 | NA | 0 | NA |
| 3 | 184300059 | 184215699 | -1 | NM_020166    | MCCC1   | 0 | NA | 0 | NA | 0 | NA | 0 | NA | 0 | NA |
| 3 | 184363361 | 184322696 | -1 | NM_014398    | LAMP3   | 0 | NA | 0 | NA | 0 | NA | 0 | NA | 0 | NA |
| 3 | 184453725 | 184473873 | 1  | NM_032047    | B3GNT5  | 0 | NA | 0 | NA | 0 | NA | 0 | NA | 0 | NA |
| 3 | 184628549 | 184378524 | -1 | NM_015078    | MCF2L2  | 0 | NA | 0 | NA | 0 | NA | 0 | NA | 0 | NA |
| 3 | 184756193 | 184688012 | -1 | NM_130446    | KLHL6   | 0 | NA | 0 | NA | 0 | NA | 1 | 11 | 0 | NA |
| 3 | 184836104 | 184884998 | 1  | NM_017644    | KLHL24  | 0 | NA | 0 | NA | 0 | NA | 0 | NA | 0 | NA |
| 3 | 184898299 | 185013102 | 1  | NM_018023    | YEATS2  | 0 | NA | 0 | NA | 0 | NA | 0 | NA | 0 | NA |
| 3 | 185026059 | 185016363 | -1 | NM_024871    | MAP6D1  | 0 | NA | 0 | NA | 0 | NA | 0 | NA | 0 | NA |
| 3 | 185085387 | 185029866 | -1 | NM_001037639 | PARL    | 0 | NA | 0 | NA | 0 | NA | 0 | NA | 0 | NA |
| 3 | 185085387 | 185029866 | -1 | NM_018622    | PARL    | 0 | NA | 0 | NA | 0 | NA | 0 | NA | 0 | NA |
| 3 | 185218421 | 185120417 | -1 | NM_005688    | ABCC5   | 0 | NA | 0 | NA | 0 | NA | 0 | NA | 0 | NA |
| 3 | 185218421 | 185184234 | -1 | NM_001023587 | ABCC5   | 0 | NA | 0 | NA | 0 | NA | 0 | NA | 0 | NA |
| 3 | 185232025 | 185239851 | 1  | NM_182537    | HTR3D   | 0 | NA | 0 | NA | 0 | NA | 0 | NA | 0 | NA |
| 3 | 185253528 | 185261155 | 1  | NM_130770    | HTR3C   | 0 | NA | 0 | NA | 0 | NA | 0 | NA | 0 | NA |
| 3 | 185300660 | 185307477 | 1  | NM_182589    | HTR3E   | 0 | NA | 0 | NA | 0 | NA | 0 | NA | 0 | NA |
| 3 | 185335503 | 185345793 | 1  | NM_003907    | EIF2B5  | 1 | 12 | 0 | NA | 0 | NA | 0 | NA | 0 | NA |
| 3 | 185335977 | 185374008 | 1  | NM_004423    | DVL3    | 0 | NA | 0 | NA | 0 | NA | 0 | NA | 0 | NA |
| 3 | 185375327 | 185384573 | 1  | NM_001025205 | AP2M1   | 1 | 11 | 0 | NA | 0 | NA | 0 | NA | 0 | NA |
| 3 | 185375327 | 185384573 | 1  | NM_004068    | AP2M1   | 1 | 11 | 0 | NA | 0 | NA | 0 | NA | 0 | NA |
| 3 | 185386556 | 185394489 | 1  | NM_018358    | ABCF3   | 1 | 11 | 0 | NA | 0 | NA | 0 | NA | 0 | NA |
| 3 | 185449440 | 185442810 | -1 | NM_005787    | ALG3    | 0 | NA | 0 | NA | 0 | NA | 0 | NA | 0 | NA |
| 3 | 185450138 | 185459241 | 1  | NM_032331    | ECE2    | 0 | NA | 0 | NA | 0 | NA | 0 | NA | 0 | NA |
| 3 | 185450138 | 185493513 | 1  | NM_014693    | ECE2    | 0 | NA | 0 | NA | 0 | NA | 0 | NA | 0 | NA |
| 3 | 185461945 | 185459896 | -1 | NM_032259    | CAMK2N2 | 0 | NA | 0 | NA | 0 | NA | 0 | NA | 0 | NA |
| 3 | 185476492 | 185493513 | 1  | NM_001037324 | ECE2    | 0 | NA | 1 | 12 | 0 | NA | 0 | NA | 0 | NA |
| 3 | 185476492 | 185493513 | 1  | NM_001100120 | ECE2    | 0 | NA | 1 | 12 | 0 | NA | 0 | NA | 0 | NA |
| 3 | 185476492 | 185493513 | 1  | NM_001100121 | ECE2    | 0 | NA | 1 | 12 | 0 | NA | 0 | NA | 0 | NA |
| 3 | 185499715 | 185509534 | 1  | NM_002808    | PSMD2   | 0 | NA | 0 | NA | 0 | NA | 0 | NA | 0 | NA |
| 3 | 185515049 | 185535840 | 1  | NM_198241    | EIF4G1  | 0 | NA | 0 | NA | 0 | NA | 0 | NA | 0 | NA |
| 3 | 185515049 | 185535840 | 1  | NM_198242    | EIF4G1  | 0 | NA | 0 | NA | 0 | NA | 0 | NA | 0 | NA |
| 3 | 185515049 | 185535840 | 1  | NM_198244    | EIF4G1  | 0 | NA | 0 | NA | 0 | NA | 0 | NA | 0 | NA |
| 3 | 185515664 | 185535840 | 1  | NM_182917    | EIF4G1  | 0 | NA | 0 | NA | 0 | NA | 0 | NA | 0 | NA |
| 3 | 185520956 | 185535840 | 1  | NM_004953    | EIF4G1  | 0 | NA | 0 | NA | 0 | NA | 0 | NA | 0 | NA |
| 3 | 185540951 | 185546757 | 1  | NM_144635    | FAM131A | 1 | 12 | 0 | NA | 0 | NA | 0 | NA | 0 | NA |
| 3 | 185562085 | 185547033 | -1 | NM_004366    | CLCN2   | 0 | NA | 0 | NA | 0 | NA | 0 | NA | 0 | NA |
| 3 | 185563887 | 185569057 | 1  | NM_006232    | POLR2H  | 0 | NA | 0 | NA | 0 | NA | 0 | NA | 0 | NA |
| 3 | 185578626 | 185572466 | -1 | NM_000460    | THPO    | 0 | NA | 1 | 13 | 0 | NA | 0 | NA | 0 | NA |

|   |           |           |    |              |           |   |    |   |    |   |    |   |    |   |    |
|---|-----------|-----------|----|--------------|-----------|---|----|---|----|---|----|---|----|---|----|
| 3 | 185580554 | 185590311 | 1  | NM_003741    | CHRD      | 0 | NA | 1 | 13 | 0 | NA | 0 | NA | 0 | NA |
| 3 | 185762280 | 185782890 | 1  | NM_004443    | EPHB3     | 0 | NA | 0 | NA | 0 | NA | 0 | NA | 0 | NA |
| 3 | 185912530 | 185910848 | -1 | NM_022149    | MAGEF1    | 0 | NA | 0 | NA | 0 | NA | 0 | NA | 0 | NA |
| 3 | 186012624 | 186253096 | 1  | NM_001009921 | VPS8      | 0 | NA | 0 | NA | 0 | NA | 0 | NA | 0 | NA |
| 3 | 186012624 | 186253096 | 1  | NM_015303    | VPS8      | 0 | NA | 0 | NA | 0 | NA | 0 | NA | 0 | NA |
| 3 | 186353496 | 186278531 | -1 | NM_001025266 | LOC285382 | 0 | NA | 0 | NA | 0 | NA | 0 | NA | 0 | NA |
| 3 | 186454531 | 186391105 | -1 | NM_001966    | EH-HADH   | 0 | NA | 0 | NA | 0 | NA | 0 | NA | 0 | NA |
| 3 | 186563663 | 186683322 | 1  | NM_004721    | MAP3K13   | 0 | NA | 0 | NA | 0 | NA | 0 | NA | 0 | NA |
| 3 | 186699496 | 186691492 | -1 | NM_080652    | TMEM41A   | 1 | 14 | 0 | NA | 0 | NA | 1 | 14 | 1 | 12 |
| 3 | 186753063 | 186708263 | -1 | NM_139248    | LIPH      | 0 | NA | 0 | NA | 0 | NA | 0 | NA | 0 | NA |
| 3 | 186786724 | 186831579 | 1  | NM_021627    | SENP2     | 0 | NA | 0 | NA | 0 | NA | 0 | NA | 0 | NA |
| 3 | 186913773 | 186918649 | 1  | NM_001039788 | C3orf65   | 0 | NA | 0 | NA | 0 | NA | 0 | NA | 0 | NA |
| 3 | 187025521 | 186844220 | -1 | NM_001007225 | IGF2BP2   | 1 | 13 | 0 | NA | 0 | NA | 0 | NA | 0 | NA |
| 3 | 187025521 | 186844220 | -1 | NM_006548    | IGF2BP2   | 1 | 13 | 0 | NA | 0 | NA | 0 | NA | 0 | NA |
| 3 | 187138450 | 187117228 | -1 | NM_004593    | SFRS10    | 1 | 14 | 0 | NA | 1 | 14 | 1 | 13 | 0 | NA |
| 3 | 187309571 | 187246803 | -1 | NM_004454    | ETV5      | 0 | NA | 0 | NA | 0 | NA | 1 | 12 | 0 | NA |
| 3 | 187562717 | 187347683 | -1 | NM_001080744 | DGKG      | 0 | NA | 0 | NA | 0 | NA | 1 | 12 | 0 | NA |
| 3 | 187562717 | 187347683 | -1 | NM_001080745 | DGKG      | 0 | NA | 0 | NA | 0 | NA | 1 | 12 | 0 | NA |
| 3 | 187562717 | 187347683 | -1 | NM_001346    | DGKG      | 0 | NA | 0 | NA | 0 | NA | 1 | 12 | 0 | NA |
| 3 | 187744861 | 187738925 | -1 | NM_017541    | CRYGS     | 0 | NA | 0 | NA | 0 | NA | 0 | NA | 0 | NA |
| 3 | 187767806 | 187746823 | -1 | NM_018138    | TBCCD1    | 1 | 11 | 0 | NA | 0 | NA | 0 | NA | 0 | NA |
| 3 | 187771160 | 187786283 | 1  | NM_016306    | DNAJB11   | 1 | 11 | 0 | NA | 0 | NA | 0 | NA | 0 | NA |
| 3 | 187813543 | 187821802 | 1  | NM_001622    | AHSG      | 1 | 12 | 0 | NA | 0 | NA | 0 | NA | 0 | NA |
| 3 | 187840842 | 187853491 | 1  | NM_014375    | FETUB     | 0 | NA | 0 | NA | 0 | NA | 0 | NA | 0 | NA |
| 3 | 187866491 | 187878717 | 1  | NM_000412    | HRG       | 0 | NA | 0 | NA | 0 | NA | 0 | NA | 0 | NA |
| 3 | 187917813 | 187942814 | 1  | NM_001102416 | KNG1      | 0 | NA | 0 | NA | 0 | NA | 1 | 11 | 0 | NA |
| 3 | 187917813 | 187944437 | 1  | NM_000893    | KNG1      | 0 | NA | 0 | NA | 0 | NA | 1 | 11 | 0 | NA |
| 3 | 187984054 | 187990379 | 1  | NM_001967    | EIF4A2    | 1 | 16 | 0 | NA | 0 | NA | 1 | 18 | 0 | NA |
| 3 | 188006984 | 187990375 | -1 | NM_002916    | RFC4      | 0 | NA | 0 | NA | 0 | NA | 0 | NA | 0 | NA |
| 3 | 188006984 | 187990375 | -1 | NM_181573    | RFC4      | 0 | NA | 0 | NA | 0 | NA | 0 | NA | 0 | NA |
| 3 | 188043156 | 188058946 | 1  | NM_004797    | ADIPOQ    | 0 | NA | 0 | NA | 0 | NA | 0 | NA | 0 | NA |
| 3 | 188131209 | 188279035 | 1  | NM_173216    | ST6GAL1   | 1 | 14 | 0 | NA | 0 | NA | 0 | NA | 0 | NA |
| 3 | 188131209 | 188279035 | 1  | NM_173217    | ST6GAL1   | 1 | 14 | 0 | NA | 0 | NA | 0 | NA | 0 | NA |
| 3 | 188222358 | 188279035 | 1  | NM_003032    | ST6GAL1   | 0 | NA | 0 | NA | 0 | NA | 0 | NA | 0 | NA |
| 3 | 188339957 | 188321434 | -1 | NM_052969    | RPL39L    | 0 | NA | 0 | NA | 0 | NA | 1 | 13 | 0 | NA |
| 3 | 188397967 | 188401947 | 1  | NM_153708    | RTP1      | 0 | NA | 0 | NA | 0 | NA | 0 | NA | 0 | NA |
| 3 | 188492446 | 188418631 | -1 | NM_001879    | MASP1     | 0 | NA | 0 | NA | 0 | NA | 0 | NA | 0 | NA |
| 3 | 188492446 | 188434565 | -1 | NM_139125    | MASP1     | 0 | NA | 0 | NA | 0 | NA | 0 | NA | 0 | NA |
| 3 | 188492446 | 188447299 | -1 | NM_001031849 | MASP1     | 0 | NA | 0 | NA | 0 | NA | 0 | NA | 0 | NA |
| 3 | 188568861 | 188572063 | 1  | NM_022147    | RTP4      | 0 | NA | 0 | NA | 1 | 16 | 0 | NA | 0 | NA |
| 3 | 188870895 | 188869387 | -1 | NM_001048    | SST       | 0 | NA | 0 | NA | 0 | NA | 0 | NA | 0 | NA |
| 3 | 188903039 | 188898740 | -1 | NM_001004312 | RTP2      | 0 | NA | 0 | NA | 0 | NA | 0 | NA | 0 | NA |
| 3 | 188946169 | 188921858 | -1 | NM_001706    | BCL6      | 1 | 24 | 0 | NA | 0 | NA | 0 | NA | 0 | NA |
| 3 | 189413414 | 190080135 | 1  | NM_005578    | LPP       | 0 | NA | 0 | NA | 0 | NA | 0 | NA | 0 | NA |
| 3 | 190372456 | 190523964 | 1  | NM_198485    | TPRG1     | 0 | NA | 0 | NA | 0 | NA | 0 | NA | 0 | NA |
| 3 | 190831909 | 191081978 | 1  | NM_001114979 | TP63      | 0 | NA | 0 | NA | 0 | NA | 0 | NA | 0 | NA |
| 3 | 190831909 | 191097762 | 1  | NM_001114978 | TP63      | 0 | NA | 0 | NA | 0 | NA | 0 | NA | 0 | NA |
| 3 | 190831909 | 191097762 | 1  | NM_003722    | TP63      | 0 | NA | 0 | NA | 0 | NA | 0 | NA | 0 | NA |
| 3 | 190990142 | 191081978 | 1  | NM_001114982 | TP63      | 0 | NA | 0 | NA | 0 | NA | 0 | NA | 0 | NA |
| 3 | 190990142 | 191097762 | 1  | NM_001114980 | TP63      | 0 | NA | 0 | NA | 0 | NA | 0 | NA | 0 | NA |
| 3 | 190990142 | 191097762 | 1  | NM_001114981 | TP63      | 0 | NA | 0 | NA | 0 | NA | 0 | NA | 0 | NA |
| 3 | 191321412 | 191157315 | -1 | NM_018192    | LEPREL1   | 0 | NA | 0 | NA | 0 | NA | 0 | NA | 0 | NA |
| 3 | 191522909 | 191506186 | -1 | NM_021101    | CLDN1     | 0 | NA | 0 | NA | 0 | NA | 0 | NA | 0 | NA |
| 3 | 191588534 | 191611027 | 1  | NM_006580    | CLDN16    | 0 | NA | 0 | NA | 0 | NA | 0 | NA | 0 | NA |
| 3 | 191650359 | 191629139 | -1 | NM_207316    | TMEM207   | 0 | NA | 0 | NA | 0 | NA | 0 | NA | 0 | NA |
| 3 | 191714584 | 191830767 | 1  | NM_134470    | IL1RAP    | 0 | NA | 0 | NA | 0 | NA | 0 | NA | 0 | NA |
| 3 | 191714584 | 191851995 | 1  | NM_002182    | IL1RAP    | 0 | NA | 0 | NA | 0 | NA | 0 | NA | 0 | NA |
| 3 | 192413015 | 192450604 | 1  | NM_198184    | OSTN      | 0 | NA | 0 | NA | 0 | NA | 0 | NA | 0 | NA |
| 3 | 192482734 | 192468044 | -1 | NM_198152    | UTS2D     | 0 | NA | 0 | NA | 0 | NA | 0 | NA | 0 | NA |
| 3 | 192529567 | 192592658 | 1  | NM_174908    | CCDC50    | 0 | NA | 0 | NA | 0 | NA | 0 | NA | 0 | NA |
| 3 | 192529567 | 192592658 | 1  | NM_178335    | CCDC50    | 0 | NA | 0 | NA | 0 | NA | 0 | NA | 0 | NA |
| 3 | 192661645 | 192661939 | 1  | NM_001083308 | POP2      | 0 | NA | 0 | NA | 0 | NA | 0 | NA | 0 | NA |
| 3 | 193608706 | 193342421 | -1 | NM_021032    | FGF12     | 0 | NA | 0 | NA | 0 | NA | 0 | NA | 0 | NA |
| 3 | 193928066 | 193342421 | -1 | NM_004113    | FGF12     | 0 | NA | 0 | NA | 0 | NA | 0 | NA | 0 | NA |
| 3 | 194118644 | 193997298 | -1 | NM_178496    | C3orf59   | 0 | NA | 0 | NA | 0 | NA | 0 | NA | 0 | NA |

|   |           |           |    |              |          |   |    |   |    |   |    |   |    |   |    |
|---|-----------|-----------|----|--------------|----------|---|----|---|----|---|----|---|----|---|----|
| 3 | 194441611 | 194471338 | 1  | NM_020386    | HRASLS   | 0 | NA | 0 | NA | 0 | NA | 0 | NA | 0 | NA |
| 3 | 194579208 | 194475524 | -1 | NM_198505    | ATP13A5  | 0 | NA | 0 | NA | 0 | NA | 0 | NA | 0 | NA |
| 3 | 194755390 | 194602559 | -1 | NM_032279    | ATP13A4  | 0 | NA | 0 | NA | 1 | 15 | 0 | NA | 1 | 13 |
| 3 | 194793805 | 194898009 | 1  | NM_015560    | OPA1     | 0 | NA | 0 | NA | 0 | NA | 0 | NA | 0 | NA |
| 3 | 194793805 | 194898009 | 1  | NM_130831    | OPA1     | 0 | NA | 0 | NA | 0 | NA | 0 | NA | 0 | NA |
| 3 | 194793805 | 194898009 | 1  | NM_130832    | OPA1     | 0 | NA | 0 | NA | 0 | NA | 0 | NA | 0 | NA |
| 3 | 194793805 | 194898009 | 1  | NM_130833    | OPA1     | 0 | NA | 0 | NA | 0 | NA | 0 | NA | 0 | NA |
| 3 | 194793805 | 194898009 | 1  | NM_130834    | OPA1     | 0 | NA | 0 | NA | 0 | NA | 0 | NA | 0 | NA |
| 3 | 194793805 | 194898009 | 1  | NM_130835    | OPA1     | 0 | NA | 0 | NA | 0 | NA | 0 | NA | 0 | NA |
| 3 | 194793805 | 194898009 | 1  | NM_130836    | OPA1     | 0 | NA | 0 | NA | 0 | NA | 0 | NA | 0 | NA |
| 3 | 194793805 | 194898009 | 1  | NM_130837    | OPA1     | 0 | NA | 0 | NA | 0 | NA | 0 | NA | 0 | NA |
| 3 | 195336627 | 195339090 | 1  | NM_005524    | HES1     | 0 | NA | 0 | NA | 0 | NA | 1 | 15 | 1 | 13 |
| 3 | 195553350 | 195542188 | -1 | NM_001080513 | CPN2     | 0 | NA | 0 | NA | 1 | 14 | 0 | NA | 1 | 15 |
| 3 | 195571761 | 195557272 | -1 | NM_130830    | LRRC15   | 0 | NA | 0 | NA | 0 | NA | 0 | NA | 0 | NA |
| 3 | 195601284 | 195596838 | -1 | NM_004488    | GP5      | 0 | NA | 0 | NA | 0 | NA | 0 | NA | 0 | NA |
| 3 | 195670257 | 195604691 | -1 | NM_024524    | ATP13A3  | 0 | NA | 0 | NA | 0 | NA | 0 | NA | 0 | NA |
| 3 | 195835402 | 195789690 | -1 | NM_001011655 | TMEM44   | 0 | NA | 0 | NA | 0 | NA | 0 | NA | 0 | NA |
| 3 | 195835402 | 195789690 | -1 | NM_138399    | TMEM44   | 0 | NA | 0 | NA | 0 | NA | 0 | NA | 0 | NA |
| 3 | 195874200 | 195842808 | -1 | NM_018385    | LSG1     | 0 | NA | 0 | NA | 0 | NA | 1 | 12 | 0 | NA |
| 3 | 195887910 | 195891055 | 1  | NM_153690    | FAM43A   | 1 | 15 | 0 | NA | 1 | 12 | 1 | 11 | 0 | NA |
| 3 | 196473184 | 196270301 | -1 | NM_152531    | C3orf21  | 0 | NA | 0 | NA | 0 | NA | 0 | NA | 0 | NA |
| 3 | 196645106 | 196476762 | -1 | NM_012287    | CENTB2   | 0 | NA | 0 | NA | 0 | NA | 0 | NA | 0 | NA |
| 3 | 196751362 | 196722512 | -1 | NM_006241    | PPP1R2   | 0 | NA | 0 | NA | 0 | NA | 0 | NA | 0 | NA |
| 3 | 196792278 | 196776864 | -1 | NM_001647    | APOD     | 0 | NA | 0 | NA | 0 | NA | 0 | NA | 0 | NA |
| 3 | 196933423 | 196950211 | 1  | NM_152673    | MUC20    | 0 | NA | 1 | 12 | 0 | NA | 0 | NA | 0 | NA |
| 3 | 196936768 | 196950211 | 1  | NM_001098516 | MUC20    | 0 | NA | 1 | 12 | 0 | NA | 0 | NA | 0 | NA |
| 3 | 197023545 | 196959308 | -1 | NM_004532    | MUC4     | 0 | NA | 0 | NA | 0 | NA | 0 | NA | 0 | NA |
| 3 | 197023545 | 196959308 | -1 | NM_018406    | MUC4     | 0 | NA | 0 | NA | 0 | NA | 0 | NA | 0 | NA |
| 3 | 197023545 | 196959308 | -1 | NM_138297    | MUC4     | 0 | NA | 0 | NA | 0 | NA | 0 | NA | 0 | NA |
| 3 | 197106829 | 197074632 | -1 | NM_001010938 | TNK2     | 0 | NA | 0 | NA | 1 | 12 | 0 | NA | 0 | NA |
| 3 | 197120277 | 197074632 | -1 | NM_005781    | TNK2     | 0 | NA | 0 | NA | 0 | NA | 0 | NA | 0 | NA |
| 3 | 197293338 | 197260746 | -1 | NM_003234    | TFRC     | 1 | 15 | 0 | NA | 0 | NA | 0 | NA | 0 | NA |
| 3 | 197422697 | 197408719 | -1 | NM_001039617 | ZDHHC19  | 0 | NA | 1 | 12 | 0 | NA | 0 | NA | 0 | NA |
| 3 | 197427779 | 197444698 | 1  | NM_152672    | OSTalpha | 0 | NA | 1 | 12 | 0 | NA | 0 | NA | 0 | NA |
| 3 | 197498981 | 197449649 | -1 | NM_005017    | PCYT1A   | 0 | NA | 0 | NA | 1 | 12 | 1 | 12 | 0 | NA |
| 3 | 197529542 | 197502494 | -1 | NM_152773    | TCTEX1D2 | 0 | NA | 0 | NA | 0 | NA | 0 | NA | 0 | NA |
| 3 | 197549655 | 197534815 | -1 | NM_138461    | TM4SF19  | 0 | NA | 0 | NA | 0 | NA | 0 | NA | 0 | NA |
| 3 | 197643742 | 197564765 | -1 | NM_015562    | UBXD7    | 0 | NA | 0 | NA | 0 | NA | 0 | NA | 0 | NA |
| 3 | 197714979 | 197683024 | -1 | NM_152617    | RNF168   | 0 | NA | 1 | 12 | 0 | NA | 1 | 19 | 1 | 16 |
| 3 | 197726634 | 197718146 | -1 | NM_001077657 | C3orf43  | 1 | 22 | 1 | 12 | 1 | 12 | 1 | 67 | 1 | 16 |
| 3 | 197779810 | 197765455 | -1 | NM_182627    | WDR53    | 0 | NA | 0 | NA | 0 | NA | 0 | NA | 0 | NA |
| 3 | 197780121 | 197800327 | 1  | NM_001105573 | FBXO45   | 0 | NA | 0 | NA | 0 | NA | 0 | NA | 0 | NA |
| 3 | 197851052 | 197873271 | 1  | NM_198565    | LRRC33   | 0 | NA | 0 | NA | 0 | NA | 0 | NA | 0 | NA |
| 3 | 197923491 | 197918315 | -1 | NM_032898    | C3orf34  | 0 | NA | 0 | NA | 0 | NA | 0 | NA | 0 | NA |
| 3 | 197923642 | 197947273 | 1  | NM_017861    | PIGX     | 0 | NA | 0 | NA | 0 | NA | 0 | NA | 0 | NA |
| 3 | 197951311 | 198043751 | 1  | NM_002577    | PAK2     | 0 | NA | 0 | NA | 0 | NA | 0 | NA | 0 | NA |
| 3 | 198079123 | 198145981 | 1  | NM_152699    | SENP5    | 0 | NA | 0 | NA | 0 | NA | 0 | NA | 0 | NA |
| 3 | 198153861 | 198146669 | -1 | NM_001042540 | NCBP2    | 0 | NA | 0 | NA | 0 | NA | 0 | NA | 0 | NA |
| 3 | 198153861 | 198146669 | -1 | NM_007362    | NCBP2    | 0 | NA | 0 | NA | 0 | NA | 0 | NA | 0 | NA |
| 3 | 198180101 | 198157610 | -1 | NM_025163    | PIGZ     | 0 | NA | 0 | NA | 0 | NA | 0 | NA | 0 | NA |
| 3 | 198241083 | 198214552 | -1 | NM_005929    | MF12     | 0 | NA | 0 | NA | 1 | 14 | 1 | 16 | 0 | NA |
| 3 | 198241083 | 198230220 | -1 | NM_033316    | MF12     | 0 | NA | 0 | NA | 1 | 14 | 1 | 16 | 0 | NA |
| 3 | 198509844 | 198253827 | -1 | NM_001098424 | DLG1     | 0 | NA | 0 | NA | 0 | NA | 0 | NA | 0 | NA |
| 3 | 198509844 | 198253827 | -1 | NM_004087    | DLG1     | 0 | NA | 0 | NA | 0 | NA | 0 | NA | 0 | NA |
| 3 | 198767255 | 198721050 | -1 | NM_004051    | BDH1     | 0 | NA | 0 | NA | 0 | NA | 0 | NA | 0 | NA |
| 3 | 198767255 | 198721050 | -1 | NM_203314    | BDH1     | 0 | NA | 0 | NA | 0 | NA | 0 | NA | 0 | NA |
| 3 | 198784591 | 198721050 | -1 | NM_203315    | BDH1     | 0 | NA | 0 | NA | 0 | NA | 0 | NA | 0 | NA |
| 3 | 198948170 | 198882655 | -1 | NM_014687    | KIAA0226 | 0 | NA | 0 | NA | 0 | NA | 0 | NA | 0 | NA |
| 3 | 198961079 | 198995583 | 1  | NM_001011537 | FYTTD1   | 0 | NA | 0 | NA | 0 | NA | 0 | NA | 0 | NA |
| 3 | 198961079 | 198995583 | 1  | NM_032288    | FYTTD1   | 0 | NA | 0 | NA | 0 | NA | 0 | NA | 0 | NA |
| 3 | 199002541 | 199082853 | 1  | NM_032773    | LRCH3    | 0 | NA | 0 | NA | 0 | NA | 0 | NA | 0 | NA |
| 3 | 199161448 | 199167118 | 1  | NM_000996    | RPL35A   | 1 | 13 | 0 | NA | 0 | NA | 1 | 11 | 0 | NA |
| 3 | 199171271 | 199100344 | -1 | NM_032263    | IQQG     | 1 | 13 | 0 | NA | 0 | NA | 1 | 11 | 0 | NA |
| 3 | 199171467 | 199254988 | 1  | NM_033029    | LMLN     | 0 | NA | 0 | NA | 0 | NA | 1 | 11 | 0 | NA |
| 2 | 36385     | 31607     | -1 | NM_001077710 | FAM110C  | 0 | NA | 0 | NA | 0 | NA | 0 | NA | 1 | 12 |



|   |          |          |    |              |           |   |    |   |    |   |    |   |    |   |    |
|---|----------|----------|----|--------------|-----------|---|----|---|----|---|----|---|----|---|----|
| 2 | 246341   | 208154   | -1 | NM_015677    | SH3YL1    | 0 | NA | 0 | NA | 0 | NA | 0 | NA | 0 | NA |
| 2 | 254871   | 262481   | 1  | NM_001040649 | ACP1      | 0 | NA | 0 | NA | 0 | NA | 0 | NA | 0 | NA |
| 2 | 254895   | 268282   | 1  | NM_004300    | ACP1      | 0 | NA | 0 | NA | 0 | NA | 0 | NA | 0 | NA |
| 2 | 254895   | 268282   | 1  | NM_007099    | ACP1      | 0 | NA | 0 | NA | 0 | NA | 0 | NA | 0 | NA |
| 2 | 278308   | 269560   | -1 | NM_001002919 | FAM150B   | 0 | NA | 0 | NA | 0 | NA | 0 | NA | 0 | NA |
| 2 | 667439   | 657972   | -1 | NM_152834    | TMEM18    | 1 | 11 | 0 | NA | 0 | NA | 0 | NA | 0 | NA |
| 2 | 896011   | 892822   | -1 | NM_001013662 | LOC391343 | 0 | NA | 0 | NA | 0 | NA | 0 | NA | 0 | NA |
| 2 | 936554   | 1350391  | 1  | NM_018968    | SNTG2     | 0 | NA | 0 | NA | 0 | NA | 0 | NA | 0 | NA |
| 2 | 1396241  | 1525502  | 1  | NM_000547    | TPO       | 0 | NA | 0 | NA | 0 | NA | 0 | NA | 0 | NA |
| 2 | 1396241  | 1525502  | 1  | NM_175719    | TPO       | 0 | NA | 0 | NA | 0 | NA | 0 | NA | 0 | NA |
| 2 | 1396241  | 1525502  | 1  | NM_175721    | TPO       | 0 | NA | 0 | NA | 0 | NA | 0 | NA | 0 | NA |
| 2 | 1396241  | 1525502  | 1  | NM_175722    | TPO       | 0 | NA | 0 | NA | 0 | NA | 0 | NA | 0 | NA |
| 2 | 1727298  | 1614665  | -1 | NM_012293    | PXDN      | 1 | 15 | 1 | 21 | 0 | NA | 0 | NA | 1 | 19 |
| 2 | 2314052  | 1771891  | -1 | NM_015025    | MYT1L     | 0 | NA | 0 | NA | 0 | NA | 0 | NA | 0 | NA |
| 2 | 3360605  | 3171749  | -1 | NM_003310    | TSSC1     | 1 | 17 | 0 | NA | 0 | NA | 1 | 13 | 0 | NA |
| 2 | 3362452  | 3462349  | 1  | NM_016030    | TTC15     | 1 | 17 | 0 | NA | 0 | NA | 1 | 13 | 0 | NA |
| 2 | 3502354  | 3480696  | -1 | NM_018269    | ADI1      | 0 | NA | 0 | NA | 0 | NA | 0 | NA | 0 | NA |
| 2 | 3583815  | 3570565  | -1 | NM_002936    | RNASEH1   | 0 | NA | 0 | NA | 0 | NA | 1 | 14 | 0 | NA |
| 2 | 3600727  | 3606384  | 1  | NM_001011    | RPS7      | 0 | NA | 0 | NA | 0 | NA | 0 | NA | 0 | NA |
| 2 | 3620511  | 3669922  | 1  | NM_024027    | COLEC11   | 0 | NA | 0 | NA | 0 | NA | 0 | NA | 0 | NA |
| 2 | 3620511  | 3669922  | 1  | NM_199235    | COLEC11   | 0 | NA | 0 | NA | 0 | NA | 0 | NA | 0 | NA |
| 2 | 3683660  | 3728135  | 1  | NM_018436    | ALLC      | 0 | NA | 0 | NA | 0 | NA | 1 | 14 | 0 | NA |
| 2 | 5750249  | 5758968  | 1  | NM_003108    | SOX11     | 0 | NA | 0 | NA | 0 | NA | 0 | NA | 0 | NA |
| 2 | 6923387  | 6905901  | -1 | NM_207315    | CMPK2     | 0 | NA | 0 | NA | 0 | NA | 0 | NA | 0 | NA |
| 2 | 6935246  | 6955814  | 1  | NM_080657    | RSAD2     | 0 | NA | 0 | NA | 0 | NA | 0 | NA | 1 | 12 |
| 2 | 6974973  | 7101760  | 1  | NM_014746    | RNF144A   | 0 | NA | 0 | NA | 0 | NA | 0 | NA | 0 | NA |
| 2 | 8739563  | 8742034  | 1  | NM_002166    | ID2       | 1 | 14 | 1 | 13 | 0 | NA | 0 | NA | 0 | NA |
| 2 | 8895181  | 8786510  | -1 | NM_020738    | KIDINS220 | 0 | NA | 0 | NA | 0 | NA | 0 | NA | 0 | NA |
| 2 | 9061327  | 8914151  | -1 | NM_138799    | MBOAT2    | 0 | NA | 0 | NA | 0 | NA | 0 | NA | 0 | NA |
| 2 | 9264344  | 9463257  | 1  | NM_003887    | DDEF2     | 0 | NA | 0 | NA | 0 | NA | 0 | NA | 0 | NA |
| 2 | 9481094  | 9463265  | -1 | NM_004763    | ITGB1BP1  | 0 | NA | 0 | NA | 0 | NA | 0 | NA | 0 | NA |
| 2 | 9481094  | 9463265  | -1 | NM_022334    | ITGB1BP1  | 0 | NA | 0 | NA | 0 | NA | 0 | NA | 0 | NA |
| 2 | 9481318  | 9530678  | 1  | NM_016207    | CPSF3     | 0 | NA | 0 | NA | 0 | NA | 0 | NA | 0 | NA |
| 2 | 9532120  | 9546042  | 1  | NM_001039613 | IAH1      | 0 | NA | 0 | NA | 0 | NA | 0 | NA | 0 | NA |
| 2 | 9613368  | 9546861  | -1 | NM_003183    | ADAM17    | 0 | NA | 0 | NA | 0 | NA | 0 | NA | 0 | NA |
| 2 | 9688557  | 9641556  | -1 | NM_006826    | YWHAQ     | 0 | NA | 0 | NA | 0 | NA | 1 | 24 | 0 | NA |
| 2 | 9901023  | 9991996  | 1  | NM_005680    | TAF1B     | 0 | NA | 0 | NA | 0 | NA | 0 | NA | 0 | NA |
| 2 | 10009272 | 10059856 | 1  | NM_014552    | GRHL1     | 0 | NA | 0 | NA | 0 | NA | 0 | NA | 0 | NA |
| 2 | 10018744 | 10059856 | 1  | NM_198182    | GRHL1     | 0 | NA | 0 | NA | 0 | NA | 0 | NA | 0 | NA |
| 2 | 10101132 | 10112414 | 1  | NM_003597    | KLF11     | 0 | NA | 1 | 17 | 0 | NA | 1 | 14 | 1 | 12 |
| 2 | 10137989 | 10116316 | -1 | NM_001037160 | CYS1      | 0 | NA | 0 | NA | 0 | NA | 0 | NA | 0 | NA |
| 2 | 10180185 | 10188074 | 1  | NM_001034    | RRM2      | 0 | NA | 0 | NA | 1 | 13 | 1 | 11 | 0 | NA |
| 2 | 10198959 | 10269307 | 1  | NM_182626    | C2orf48   | 0 | NA | 0 | NA | 0 | NA | 1 | 16 | 0 | NA |
| 2 | 10360490 | 10485194 | 1  | NM_002149    | HPCAL1    | 1 | 11 | 0 | NA | 1 | 12 | 0 | NA | 0 | NA |
| 2 | 10361276 | 10485194 | 1  | NM_134421    | HPCAL1    | 1 | 11 | 0 | NA | 1 | 12 | 0 | NA | 0 | NA |
| 2 | 10505904 | 10497958 | -1 | NM_002539    | ODC1      | 0 | NA | 0 | NA | 0 | NA | 0 | NA | 0 | NA |
| 2 | 10747563 | 10628344 | -1 | NM_024894    | NOL10     | 0 | NA | 0 | NA | 0 | NA | 0 | NA | 0 | NA |
| 2 | 10779225 | 10842687 | 1  | NM_001039362 | ATP6V1C2  | 0 | NA | 0 | NA | 0 | NA | 0 | NA | 0 | NA |
| 2 | 10779225 | 10842687 | 1  | NM_144583    | ATP6V1C2  | 0 | NA | 0 | NA | 0 | NA | 0 | NA | 0 | NA |
| 2 | 10870411 | 10840967 | -1 | NM_005742    | PDIA6     | 0 | NA | 0 | NA | 0 | NA | 0 | NA | 0 | NA |
| 2 | 10969513 | 10971802 | 1  | NM_002236    | KCNF1     | 0 | NA | 1 | 14 | 0 | NA | 0 | NA | 1 | 13 |
| 2 | 11190629 | 11203601 | 1  | NM_182500    | C2orf50   | 0 | NA | 0 | NA | 0 | NA | 0 | NA | 0 | NA |
| 2 | 11212990 | 11236449 | 1  | NM_152391    | PQLC3     | 0 | NA | 0 | NA | 0 | NA | 1 | 12 | 0 | NA |
| 2 | 11402162 | 11239228 | -1 | NM_004850    | ROCK2     | 1 | 11 | 0 | NA | 0 | NA | 0 | NA | 0 | NA |
| 2 | 11523748 | 11501951 | -1 | NM_198256    | E2F6      | 0 | NA | 0 | NA | 0 | NA | 0 | NA | 0 | NA |
| 2 | 11591692 | 11700363 | 1  | NM_014668    | GREB1     | 0 | NA | 0 | NA | 0 | NA | 0 | NA | 0 | NA |
| 2 | 11597530 | 11645806 | 1  | NM_148903    | GREB1     | 0 | NA | 0 | NA | 0 | NA | 0 | NA | 0 | NA |
| 2 | 11600301 | 11649723 | 1  | NM_033090    | GREB1     | 0 | NA | 0 | NA | 0 | NA | 0 | NA | 0 | NA |
| 2 | 11727780 | 11715754 | -1 | NM_012344    | NTSR2     | 0 | NA | 1 | 12 | 0 | NA | 0 | NA | 0 | NA |
| 2 | 11804190 | 11884984 | 1  | NM_145693    | LPIN1     | 1 | 12 | 0 | NA | 1 | 14 | 1 | 11 | 0 | NA |
| 2 | 12774448 | 12800309 | 1  | NM_021643    | TRIB2     | 0 | NA | 0 | NA | 0 | NA | 0 | NA | 0 | NA |
| 2 | 14690306 | 14693998 | 1  | NM_145175    | FAM84A    | 0 | NA | 1 | 15 | 0 | NA | 0 | NA | 1 | 12 |
| 2 | 15618905 | 15224482 | -1 | NM_015909    | NAG       | 1 | 12 | 0 | NA | 0 | NA | 1 | 11 | 0 | NA |
| 2 | 15649220 | 15688676 | 1  | NM_004939    | DDX1      | 1 | 17 | 0 | NA | 1 | 12 | 0 | NA | 0 | NA |
| 2 | 15998133 | 16004580 | 1  | NM_005378    | MYCN      | 0 | NA | 0 | NA | 1 | 13 | 0 | NA | 0 | NA |

|   |          |          |    |              |           |   |    |   |    |   |    |   |    |   |    |
|---|----------|----------|----|--------------|-----------|---|----|---|----|---|----|---|----|---|----|
| 2 | 16710577 | 16597381 | -1 | NM_030797    | FAM49A    | 0 | NA | 0 | NA | 0 | NA | 0 | NA | 0 | NA |
| 2 | 17563187 | 17555466 | -1 | NM_001099218 | RAD51AP2  | 1 | 16 | 0 | NA | 0 | NA | 0 | NA | 0 | NA |
| 2 | 17585287 | 17701187 | 1  | NM_003385    | VSNL1     | 0 | NA | 0 | NA | 0 | NA | 0 | NA | 0 | NA |
| 2 | 17798541 | 17708561 | -1 | NM_024624    | SMC6      | 0 | NA | 0 | NA | 0 | NA | 0 | NA | 0 | NA |
| 2 | 17798660 | 17826911 | 1  | NM_182625    | GEN1      | 0 | NA | 0 | NA | 0 | NA | 0 | NA | 0 | NA |
| 2 | 17861266 | 17861848 | 1  | NM_001105569 | MSGN1     | 0 | NA | 0 | NA | 0 | NA | 0 | NA | 0 | NA |
| 2 | 17923425 | 17977706 | 1  | NM_002252    | KCNS3     | 0 | NA | 0 | NA | 0 | NA | 0 | NA | 0 | NA |
| 2 | 18605381 | 18599477 | -1 | NM_020905    | RDH14     | 0 | NA | 0 | NA | 0 | NA | 0 | NA | 0 | NA |
| 2 | 18634319 | 18607617 | -1 | NM_001002006 | NT5C1B    | 0 | NA | 0 | NA | 0 | NA | 0 | NA | 0 | NA |
| 2 | 18634319 | 18607617 | -1 | NM_033253    | NT5C1B    | 0 | NA | 0 | NA | 0 | NA | 0 | NA | 0 | NA |
| 2 | 19421853 | 19414726 | -1 | NM_145260    | OSR1      | 0 | NA | 0 | NA | 0 | NA | 0 | NA | 0 | NA |
| 2 | 19865225 | 19959994 | -1 | NM_001008237 | TTC32     | 1 | 24 | 0 | NA | 0 | NA | 0 | NA | 0 | NA |
| 2 | 20053365 | 19973509 | -1 | NM_001006657 | WDR35     | 0 | NA | 0 | NA | 0 | NA | 0 | NA | 0 | NA |
| 2 | 20053365 | 19973509 | -1 | NM_020779    | WDR35     | 0 | NA | 0 | NA | 0 | NA | 0 | NA | 0 | NA |
| 2 | 20075936 | 20055293 | -1 | NM_002381    | MATN3     | 0 | NA | 0 | NA | 0 | NA | 0 | NA | 0 | NA |
| 2 | 20114926 | 20095893 | -1 | NM_014713    | LAPTM4A   | 0 | NA | 0 | NA | 0 | NA | 0 | NA | 0 | NA |
| 2 | 20288408 | 20264038 | -1 | NM_002997    | SDC1      | 0 | NA | 0 | NA | 0 | NA | 0 | NA | 0 | NA |
| 2 | 20288675 | 20264038 | -1 | NM_001006946 | SDC1      | 0 | NA | 0 | NA | 0 | NA | 0 | NA | 0 | NA |
| 2 | 20390625 | 20311933 | -1 | NM_015317    | PUM2      | 0 | NA | 0 | NA | 0 | NA | 0 | NA | 0 | NA |
| 2 | 20510315 | 20512682 | 1  | NM_004040    | RHOB      | 0 | NA | 0 | NA | 0 | NA | 0 | NA | 0 | NA |
| 2 | 20714345 | 20681044 | -1 | NM_022460    | HS1BP3    | 0 | NA | 0 | NA | 0 | NA | 0 | NA | 0 | NA |
| 2 | 20729904 | 20734731 | 1  | NM_182828    | GDF7      | 0 | NA | 0 | NA | 0 | NA | 0 | NA | 0 | NA |
| 2 | 20866308 | 20748298 | -1 | NM_021925    | C2orf43   | 0 | NA | 0 | NA | 0 | NA | 1 | 16 | 0 | NA |
| 2 | 21120450 | 21077805 | -1 | NM_000384    | APOB      | 0 | NA | 0 | NA | 0 | NA | 0 | NA | 0 | NA |
| 2 | 24003438 | 23825037 | -1 | NM_017552    | ATAD2B    | 0 | NA | 0 | NA | 0 | NA | 0 | NA | 0 | NA |
| 2 | 24016879 | 24077197 | 1  | NM_181713    | UBXD4     | 0 | NA | 0 | NA | 0 | NA | 0 | NA | 0 | NA |
| 2 | 24086456 | 24100649 | 1  | NM_001080473 | LOC388931 | 0 | NA | 0 | NA | 0 | NA | 0 | NA | 0 | NA |
| 2 | 24123727 | 24105749 | -1 | NM_025203    | C2orf44   | 0 | NA | 0 | NA | 0 | NA | 0 | NA | 0 | NA |
| 2 | 24126131 | 24140054 | 1  | NM_004116    | FKBP1B    | 0 | NA | 0 | NA | 0 | NA | 0 | NA | 0 | NA |
| 2 | 24126131 | 24140054 | 1  | NM_054033    | FKBP1B    | 0 | NA | 0 | NA | 0 | NA | 0 | NA | 0 | NA |
| 2 | 24152818 | 24143957 | -1 | NM_016047    | SF3B14    | 1 | 25 | 0 | NA | 0 | NA | 1 | 19 | 0 | NA |
| 2 | 24161159 | 24153809 | -1 | NM_147184    | TP53I3    | 1 | 25 | 0 | NA | 0 | NA | 1 | 19 | 0 | NA |
| 2 | 24161232 | 24153808 | -1 | NM_004881    | TP53I3    | 1 | 25 | 0 | NA | 0 | NA | 1 | 19 | 0 | NA |
| 2 | 24199655 | 24191747 | -1 | NM_199346    | PFN4      | 0 | NA | 0 | NA | 0 | NA | 0 | NA | 0 | NA |
| 2 | 24251475 | 24268071 | 1  | NM_001040710 | FLJ30851  | 0 | NA | 0 | NA | 0 | NA | 0 | NA | 0 | NA |
| 2 | 24436881 | 24279238 | -1 | NM_006277    | ITSN2     | 0 | NA | 0 | NA | 0 | NA | 0 | NA | 0 | NA |
| 2 | 24436881 | 24279239 | -1 | NM_019595    | ITSN2     | 0 | NA | 0 | NA | 0 | NA | 0 | NA | 0 | NA |
| 2 | 24436881 | 24296696 | -1 | NM_147152    | ITSN2     | 0 | NA | 0 | NA | 0 | NA | 0 | NA | 0 | NA |
| 2 | 24660849 | 24847074 | 1  | NM_003743    | NCOA1     | 0 | NA | 0 | NA | 0 | NA | 0 | NA | 0 | NA |
| 2 | 24660849 | 24847074 | 1  | NM_147223    | NCOA1     | 0 | NA | 0 | NA | 0 | NA | 0 | NA | 0 | NA |
| 2 | 24660849 | 24847074 | 1  | NM_147233    | NCOA1     | 0 | NA | 0 | NA | 0 | NA | 0 | NA | 0 | NA |
| 2 | 24869755 | 24866639 | -1 | NM_001013663 | LOC391356 | 1 | 20 | 0 | NA | 0 | NA | 0 | NA | 0 | NA |
| 2 | 24869836 | 24896288 | 1  | NM_024322    | CENPO     | 1 | 20 | 0 | NA | 0 | NA | 0 | NA | 0 | NA |
| 2 | 24995559 | 24895541 | -1 | NM_004036    | ADCY3     | 0 | NA | 0 | NA | 1 | 14 | 0 | NA | 0 | NA |
| 2 | 25048328 | 25020008 | -1 | NM_016544    | RBJ       | 0 | NA | 0 | NA | 0 | NA | 1 | 14 | 0 | NA |
| 2 | 25245063 | 25237225 | -1 | NM_000939    | POMC      | 0 | NA | 1 | 12 | 0 | NA | 0 | NA | 0 | NA |
| 2 | 25245063 | 25237225 | -1 | NM_001035256 | POMC      | 0 | NA | 1 | 12 | 0 | NA | 0 | NA | 0 | NA |
| 2 | 25328684 | 25309348 | -1 | NM_153759    | DNMT3A    | 0 | NA | 0 | NA | 0 | NA | 0 | NA | 0 | NA |
| 2 | 25418278 | 25309348 | -1 | NM_022552    | DNMT3A    | 0 | NA | 0 | NA | 0 | NA | 0 | NA | 0 | NA |
| 2 | 25418963 | 25309348 | -1 | NM_175629    | DNMT3A    | 0 | NA | 0 | NA | 0 | NA | 0 | NA | 0 | NA |
| 2 | 25418963 | 25367824 | -1 | NM_175630    | DNMT3A    | 0 | NA | 0 | NA | 0 | NA | 0 | NA | 0 | NA |
| 2 | 25750007 | 25453615 | -1 | NM_021907    | DTNB      | 0 | NA | 0 | NA | 0 | NA | 0 | NA | 0 | NA |
| 2 | 25750007 | 25453615 | -1 | NM_033147    | DTNB      | 0 | NA | 0 | NA | 0 | NA | 0 | NA | 0 | NA |
| 2 | 25750007 | 25453615 | -1 | NM_033148    | DTNB      | 0 | NA | 0 | NA | 0 | NA | 0 | NA | 0 | NA |
| 2 | 25750007 | 25453615 | -1 | NM_183360    | DTNB      | 0 | NA | 0 | NA | 0 | NA | 0 | NA | 0 | NA |
| 2 | 25750007 | 25453615 | -1 | NM_183361    | DTNB      | 0 | NA | 0 | NA | 0 | NA | 0 | NA | 0 | NA |
| 2 | 25954816 | 25815756 | -1 | NM_018263    | ASXL2     | 1 | 19 | 0 | NA | 0 | NA | 0 | NA | 0 | NA |
| 2 | 26058947 | 26002958 | -1 | NM_002254    | KIF3C     | 0 | NA | 0 | NA | 0 | NA | 0 | NA | 0 | NA |
| 2 | 26110477 | 26213782 | 1  | NM_016131    | RAB10     | 0 | NA | 0 | NA | 0 | NA | 0 | NA | 0 | NA |
| 2 | 26321098 | 26267007 | -1 | NM_000182    | HADHA     | 0 | NA | 0 | NA | 0 | NA | 0 | NA | 0 | NA |
| 2 | 26321119 | 26366837 | 1  | NM_000183    | HADHB     | 0 | NA | 0 | NA | 0 | NA | 0 | NA | 0 | NA |
| 2 | 26422457 | 26472283 | 1  | NM_033505    | SELI      | 0 | NA | 0 | NA | 0 | NA | 0 | NA | 0 | NA |
| 2 | 26423189 | 26384544 | -1 | NM_153835    | GPR113    | 0 | NA | 0 | NA | 0 | NA | 0 | NA | 0 | NA |
| 2 | 26478287 | 26533082 | 1  | NM_145038    | C2orf39   | 0 | NA | 0 | NA | 0 | NA | 0 | NA | 0 | NA |
| 2 | 26554414 | 26533574 | -1 | NM_004802    | OTOF      | 0 | NA | 0 | NA | 0 | NA | 0 | NA | 0 | NA |

|   |          |          |    |              |          |   |    |   |    |   |    |   |    |   |    |
|---|----------|----------|----|--------------|----------|---|----|---|----|---|----|---|----|---|----|
| 2 | 26554414 | 26533574 | -1 | NM_194322    | OTOF     | 0 | NA | 0 | NA | 0 | NA | 0 | NA | 0 | NA |
| 2 | 26554414 | 26533574 | -1 | NM_194323    | OTOF     | 0 | NA | 0 | NA | 0 | NA | 0 | NA | 0 | NA |
| 2 | 26635070 | 26533574 | -1 | NM_194248    | OTOF     | 0 | NA | 0 | NA | 0 | NA | 0 | NA | 0 | NA |
| 2 | 26638984 | 26655899 | 1  | NM_001105519 | LCC39778 | 0 | NA | 0 | NA | 0 | NA | 0 | NA | 0 | NA |
| 2 | 26717715 | 26657576 | -1 | NM_001029881 | CIB4     | 0 | NA | 0 | NA | 0 | NA | 0 | NA | 1 | 12 |
| 2 | 26769122 | 26806209 | 1  | NM_002246    | KCNK3    | 0 | NA | 0 | NA | 0 | NA | 0 | NA | 0 | NA |
| 2 | 26840645 | 26857603 | 1  | NM_017877    | C2orf18  | 0 | NA | 0 | NA | 1 | 13 | 0 | NA | 0 | NA |
| 2 | 26862385 | 26870959 | 1  | NM_001809    | CENPA    | 1 | 24 | 0 | NA | 1 | 12 | 1 | 25 | 0 | NA |
| 2 | 26862386 | 26870959 | 1  | NM_001042426 | CENPA    | 1 | 24 | 0 | NA | 1 | 12 | 1 | 25 | 0 | NA |
| 2 | 26924472 | 27026723 | 1  | NM_020134    | DPYSL5   | 0 | NA | 0 | NA | 0 | NA | 0 | NA | 0 | NA |
| 2 | 27047028 | 27103591 | 1  | NM_012326    | MAPRE3   | 0 | NA | 0 | NA | 0 | NA | 0 | NA | 0 | NA |
| 2 | 27109277 | 27118069 | 1  | NM_001083590 | FLJ20254 | 0 | NA | 0 | NA | 0 | NA | 0 | NA | 0 | NA |
| 2 | 27109277 | 27118069 | 1  | NM_017727    | FLJ20254 | 0 | NA | 0 | NA | 0 | NA | 0 | NA | 0 | NA |
| 2 | 27127994 | 27135907 | 1  | NM_001035507 | AGBL5    | 1 | 23 | 0 | NA | 1 | 14 | 1 | 17 | 0 | NA |
| 2 | 27127994 | 27146994 | 1  | NM_021831    | AGBL5    | 1 | 23 | 0 | NA | 1 | 14 | 1 | 17 | 0 | NA |
| 2 | 27155009 | 27162769 | 1  | NM_007046    | EMILIN1  | 0 | NA | 0 | NA | 0 | NA | 1 | 12 | 0 | NA |
| 2 | 27163114 | 27171723 | 1  | NM_000221    | KHK      | 0 | NA | 0 | NA | 0 | NA | 0 | NA | 0 | NA |
| 2 | 27163114 | 27171723 | 1  | NM_006488    | KHK      | 0 | NA | 0 | NA | 0 | NA | 0 | NA | 0 | NA |
| 2 | 27195475 | 27176972 | -1 | NM_006569    | CGREF1   | 0 | NA | 0 | NA | 0 | NA | 0 | NA | 0 | NA |
| 2 | 27200160 | 27207184 | 1  | NM_032804    | ABHD1    | 0 | NA | 0 | NA | 0 | NA | 0 | NA | 0 | NA |
| 2 | 27211046 | 27207128 | -1 | NM_013388    | PREB     | 0 | NA | 0 | NA | 0 | NA | 0 | NA | 0 | NA |
| 2 | 27215836 | 27213218 | -1 | NM_178553    | C2orf53  | 0 | NA | 0 | NA | 0 | NA | 0 | NA | 0 | NA |
| 2 | 27225505 | 27229239 | 1  | NM_175769    | TCF23    | 0 | NA | 0 | NA | 0 | NA | 0 | NA | 0 | NA |
| 2 | 27288402 | 27293557 | 1  | NM_016085    | C2orf28  | 0 | NA | 0 | NA | 0 | NA | 0 | NA | 0 | NA |
| 2 | 27288402 | 27293557 | 1  | NM_080592    | C2orf28  | 0 | NA | 0 | NA | 0 | NA | 0 | NA | 0 | NA |
| 2 | 27288575 | 27275961 | -1 | NM_021095    | SLC5A6   | 0 | NA | 0 | NA | 0 | NA | 0 | NA | 0 | NA |
| 2 | 27293761 | 27320158 | 1  | NM_004341    | CAD      | 0 | NA | 0 | NA | 0 | NA | 0 | NA | 0 | NA |
| 2 | 27339464 | 27330943 | -1 | NM_003459    | SLC30A3  | 0 | NA | 1 | 12 | 0 | NA | 0 | NA | 0 | NA |
| 2 | 27351792 | 27357800 | 1  | NM_173650    | DNAJC5G  | 0 | NA | 0 | NA | 0 | NA | 0 | NA | 0 | NA |
| 2 | 27359103 | 27383811 | 1  | NM_032546    | TRIM54   | 0 | NA | 0 | NA | 0 | NA | 0 | NA | 0 | NA |
| 2 | 27359103 | 27383811 | 1  | NM_187841    | TRIM54   | 0 | NA | 0 | NA | 0 | NA | 0 | NA | 0 | NA |
| 2 | 27384634 | 27383768 | -1 | NM_003353    | UCN      | 0 | NA | 0 | NA | 0 | NA | 0 | NA | 0 | NA |
| 2 | 27399473 | 27385863 | -1 | NM_002437    | MPV17    | 0 | NA | 0 | NA | 0 | NA | 0 | NA | 0 | NA |
| 2 | 27433372 | 27402224 | -1 | NM_001035521 | GTF3C2   | 0 | NA | 0 | NA | 0 | NA | 0 | NA | 0 | NA |
| 2 | 27433372 | 27402224 | -1 | NM_001521    | GTF3C2   | 0 | NA | 0 | NA | 0 | NA | 0 | NA | 0 | NA |
| 2 | 27446423 | 27440722 | -1 | NM_172195    | EIF2B4   | 0 | NA | 0 | NA | 0 | NA | 0 | NA | 0 | NA |
| 2 | 27446828 | 27440722 | -1 | NM_001034116 | EIF2B4   | 0 | NA | 0 | NA | 0 | NA | 0 | NA | 0 | NA |
| 2 | 27446828 | 27440722 | -1 | NM_015636    | EIF2B4   | 0 | NA | 0 | NA | 0 | NA | 0 | NA | 0 | NA |
| 2 | 27446892 | 27453498 | 1  | NM_014748    | SNX17    | 0 | NA | 0 | NA | 0 | NA | 0 | NA | 0 | NA |
| 2 | 27457097 | 27453606 | -1 | NM_144631    | ZNF513   | 0 | NA | 0 | NA | 0 | NA | 0 | NA | 0 | NA |
| 2 | 27485953 | 27457564 | -1 | NM_002707    | PPM1G    | 0 | NA | 0 | NA | 0 | NA | 0 | NA | 0 | NA |
| 2 | 27486000 | 27457564 | -1 | NM_177983    | PPM1G    | 0 | NA | 0 | NA | 0 | NA | 0 | NA | 0 | NA |
| 2 | 27504976 | 27518628 | 1  | NM_013392    | NRBP1    | 0 | NA | 0 | NA | 0 | NA | 0 | NA | 0 | NA |
| 2 | 27518766 | 27520668 | 1  | NM_173853    | KRTCAP3  | 0 | NA | 0 | NA | 0 | NA | 0 | NA | 0 | NA |
| 2 | 27566075 | 27520743 | -1 | NM_015662    | IFT172   | 0 | NA | 0 | NA | 0 | NA | 0 | NA | 0 | NA |
| 2 | 27571590 | 27568253 | -1 | NM_022823    | FNDC4    | 0 | NA | 0 | NA | 0 | NA | 0 | NA | 0 | NA |
| 2 | 27573209 | 27600054 | 1  | NM_001486    | GCKR     | 0 | NA | 0 | NA | 0 | NA | 0 | NA | 0 | NA |
| 2 | 27652892 | 27659093 | 1  | NM_032266    | C2orf16  | 1 | 12 | 1 | 12 | 0 | NA | 1 | 19 | 0 | NA |
| 2 | 27659396 | 27699467 | 1  | NM_032434    | ZNF512   | 1 | 12 | 1 | 12 | 0 | NA | 1 | 19 | 0 | NA |
| 2 | 27705383 | 27702009 | -1 | NM_024584    | CCDC121  | 0 | NA | 0 | NA | 0 | NA | 0 | NA | 0 | NA |
| 2 | 27705406 | 27727217 | 1  | NM_007266    | GPN1     | 0 | NA | 0 | NA | 0 | NA | 0 | NA | 0 | NA |
| 2 | 27739841 | 27771351 | 1  | NM_018158    | SLC4A1AP | 0 | NA | 0 | NA | 1 | 13 | 0 | NA | 0 | NA |
| 2 | 27739953 | 27727182 | -1 | NM_014860    | SUPT17L  | 0 | NA | 0 | NA | 1 | 13 | 0 | NA | 0 | NA |
| 2 | 27848087 | 27856112 | 1  | NM_004891    | MRPL33   | 1 | 12 | 0 | NA | 0 | NA | 1 | 16 | 0 | NA |
| 2 | 27848087 | 27856112 | 1  | NM_145330    | MRPL33   | 1 | 12 | 0 | NA | 0 | NA | 1 | 16 | 0 | NA |
| 2 | 27966727 | 27857769 | -1 | NM_022128    | RBKS     | 1 | 15 | 0 | NA | 0 | NA | 0 | NA | 0 | NA |
| 2 | 27966985 | 28415271 | 1  | NM_199193    | BRE      | 1 | 15 | 0 | NA | 0 | NA | 0 | NA | 0 | NA |
| 2 | 27966985 | 28415271 | 1  | NM_199194    | BRE      | 1 | 15 | 0 | NA | 0 | NA | 0 | NA | 0 | NA |
| 2 | 27967060 | 28415271 | 1  | NM_004899    | BRE      | 1 | 15 | 0 | NA | 0 | NA | 0 | NA | 0 | NA |
| 2 | 27967060 | 28415271 | 1  | NM_199191    | BRE      | 1 | 15 | 0 | NA | 0 | NA | 0 | NA | 0 | NA |
| 2 | 27967060 | 28415271 | 1  | NM_199192    | BRE      | 1 | 15 | 0 | NA | 0 | NA | 0 | NA | 0 | NA |
| 2 | 28469282 | 28491020 | 1  | NM_005253    | FOSL2    | 0 | NA | 0 | NA | 0 | NA | 1 | 13 | 0 | NA |
| 2 | 28572485 | 28720117 | 1  | NM_153021    | PLB1     | 0 | NA | 0 | NA | 0 | NA | 0 | NA | 0 | NA |
| 2 | 28828117 | 28879310 | 1  | NM_206876    | PPP1CB   | 0 | NA | 0 | NA | 0 | NA | 0 | NA | 0 | NA |
| 2 | 28828129 | 28879310 | 1  | NM_002709    | PPP1CB   | 0 | NA | 0 | NA | 0 | NA | 0 | NA | 0 | NA |

|   |          |          |    |              |           |   |    |   |    |   |    |   |    |   |    |
|---|----------|----------|----|--------------|-----------|---|----|---|----|---|----|---|----|---|----|
| 2 | 28887220 | 28926979 | 1  | NM_182756    | SPDYA     | 0 | NA | 0 | NA | 0 | NA | 0 | NA | 0 | NA |
| 2 | 28892366 | 28917179 | 1  | NM_001008779 | SPDYA     | 0 | NA | 0 | NA | 0 | NA | 0 | NA | 0 | NA |
| 2 | 28946669 | 28926191 | -1 | NM_017910    | FLJ20628  | 1 | 11 | 0 | NA | 0 | NA | 0 | NA | 0 | NA |
| 2 | 28971036 | 29024584 | 1  | NM_015131    | WDR43     | 1 | 18 | 0 | NA | 0 | NA | 0 | NA | 0 | NA |
| 2 | 29057667 | 29128600 | 1  | NM_199280    | LOC165186 | 0 | NA | 0 | NA | 0 | NA | 0 | NA | 0 | NA |
| 2 | 29150631 | 29138061 | -1 | NM_001029883 | FLJ34931  | 0 | NA | 0 | NA | 0 | NA | 1 | 18 | 1 | 12 |
| 2 | 29191821 | 29260178 | 1  | NM_024692    | CLIP4     | 0 | NA | 0 | NA | 0 | NA | 0 | NA | 0 | NA |
| 2 | 29997936 | 29269143 | -1 | NM_004304    | ALK       | 0 | NA | 0 | NA | 0 | NA | 0 | NA | 0 | NA |
| 2 | 30223331 | 30236903 | 1  | NM_016061    | YPEL5     | 0 | NA | 0 | NA | 0 | NA | 0 | NA | 0 | NA |
| 2 | 30307900 | 30336403 | 1  | NM_030915    | LBH       | 0 | NA | 0 | NA | 0 | NA | 0 | NA | 0 | NA |
| 2 | 30523626 | 30720595 | 1  | NM_182551    | LYCAT     | 0 | NA | 0 | NA | 0 | NA | 1 | 17 | 0 | NA |
| 2 | 30523640 | 30720595 | 1  | NM_001002257 | LYCAT     | 0 | NA | 0 | NA | 0 | NA | 1 | 17 | 0 | NA |
| 2 | 30883815 | 30799141 | -1 | NM_144575    | CAPN13    | 0 | NA | 0 | NA | 0 | NA | 0 | NA | 0 | NA |
| 2 | 31215075 | 30986836 | -1 | NM_024572    | GALNT14   | 0 | NA | 0 | NA | 0 | NA | 0 | NA | 0 | NA |
| 2 | 31310706 | 31344764 | 1  | NM_014600    | EHD3      | 1 | 11 | 0 | NA | 0 | NA | 0 | NA | 0 | NA |
| 2 | 31491115 | 31410691 | -1 | NM_000379    | XDH       | 0 | NA | 0 | NA | 0 | NA | 0 | NA | 0 | NA |
| 2 | 31659544 | 31603159 | -1 | NM_000348    | SRD5A2    | 0 | NA | 0 | NA | 0 | NA | 0 | NA | 0 | NA |
| 2 | 32089202 | 31946397 | -1 | NM_015955    | MEMO1     | 0 | NA | 0 | NA | 0 | NA | 0 | NA | 0 | NA |
| 2 | 32118348 | 32102475 | -1 | NM_032574    | DPY30     | 0 | NA | 0 | NA | 0 | NA | 0 | NA | 0 | NA |
| 2 | 32142183 | 32236210 | 1  | NM_014946    | SPAST     | 1 | 14 | 0 | NA | 0 | NA | 0 | NA | 0 | NA |
| 2 | 32142183 | 32236210 | 1  | NM_199436    | SPAST     | 1 | 14 | 0 | NA | 0 | NA | 0 | NA | 0 | NA |
| 2 | 32244436 | 32300313 | 1  | NM_017964    | SLC30A6   | 1 | 17 | 0 | NA | 0 | NA | 0 | NA | 0 | NA |
| 2 | 32344305 | 32303021 | -1 | NM_021209    | NLRG4     | 0 | NA | 0 | NA | 0 | NA | 0 | NA | 0 | NA |
| 2 | 32356534 | 32385145 | 1  | NM_032312    | YIPF4     | 0 | NA | 0 | NA | 0 | NA | 0 | NA | 0 | NA |
| 2 | 32435599 | 32697469 | 1  | NM_016252    | BIRC6     | 0 | NA | 0 | NA | 0 | NA | 1 | 15 | 0 | NA |
| 2 | 32706632 | 32899622 | 1  | NM_017735    | TTC27     | 0 | NA | 0 | NA | 0 | NA | 0 | NA | 0 | NA |
| 2 | 33025895 | 33478079 | 1  | NM_206943    | LTBP1     | 0 | NA | 0 | NA | 0 | NA | 0 | NA | 0 | NA |
| 2 | 33213180 | 33478079 | 1  | NM_000627    | LTBP1     | 0 | NA | 0 | NA | 0 | NA | 0 | NA | 0 | NA |
| 2 | 33514919 | 33643162 | 1  | NM_170672    | RASGRP3   | 0 | NA | 0 | NA | 0 | NA | 0 | NA | 0 | NA |
| 2 | 33677866 | 33662232 | -1 | NM_015475    | FAM98A    | 0 | NA | 0 | NA | 0 | NA | 0 | NA | 0 | NA |
| 2 | 36436900 | 36631782 | 1  | NM_016441    | CRIM1     | 0 | NA | 0 | NA | 0 | NA | 0 | NA | 0 | NA |
| 2 | 36678836 | 36632904 | -1 | NM_001042548 | FEZ2      | 0 | NA | 0 | NA | 0 | NA | 0 | NA | 0 | NA |
| 2 | 36678836 | 36632904 | -1 | NM_005102    | FEZ2      | 0 | NA | 0 | NA | 0 | NA | 0 | NA | 0 | NA |
| 2 | 36777417 | 36895434 | 1  | NM_053276    | VIT       | 0 | NA | 0 | NA | 0 | NA | 0 | NA | 0 | NA |
| 2 | 37047119 | 36928975 | -1 | NM_003162    | STRN      | 0 | NA | 0 | NA | 0 | NA | 0 | NA | 0 | NA |
| 2 | 37164989 | 37061656 | -1 | NM_019024    | HEATR5B   | 0 | NA | 0 | NA | 0 | NA | 0 | NA | 0 | NA |
| 2 | 37165097 | 37177242 | 1  | NM_174931    | CCDC75    | 0 | NA | 0 | NA | 0 | NA | 0 | NA | 0 | NA |
| 2 | 37229907 | 37187202 | -1 | NM_002759    | EIF2AK2   | 0 | NA | 0 | NA | 0 | NA | 0 | NA | 0 | NA |
| 2 | 37269194 | 37248466 | -1 | NM_001032377 | SULT6B1   | 1 | 17 | 0 | NA | 0 | NA | 0 | NA | 0 | NA |
| 2 | 37312244 | 37282278 | -1 | NM_005760    | CEBPZ     | 1 | 15 | 0 | NA | 0 | NA | 1 | 12 | 0 | NA |
| 2 | 37312277 | 37329807 | 1  | NM_001083946 | C2orf56   | 1 | 15 | 0 | NA | 0 | NA | 1 | 12 | 0 | NA |
| 2 | 37312277 | 37329807 | 1  | NM_144736    | C2orf56   | 1 | 15 | 0 | NA | 0 | NA | 1 | 12 | 0 | NA |
| 2 | 37397726 | 37331149 | -1 | NM_005813    | PRKD3     | 0 | NA | 0 | NA | 0 | NA | 0 | NA | 0 | NA |
| 2 | 37425256 | 37453969 | 1  | NM_012413    | QPCT      | 0 | NA | 0 | NA | 0 | NA | 0 | NA | 0 | NA |
| 2 | 37752830 | 37724246 | -1 | NM_006449    | CDC42EP3  | 0 | NA | 0 | NA | 0 | NA | 0 | NA | 0 | NA |
| 2 | 38031109 | 38147784 | 1  | NM_144713    | FAM82A    | 0 | NA | 0 | NA | 0 | NA | 0 | NA | 0 | NA |
| 2 | 38156796 | 38148249 | -1 | NM_000104    | CYP1B1    | 0 | NA | 1 | 18 | 0 | NA | 0 | NA | 0 | NA |
| 2 | 38457919 | 38376627 | -1 | NM_022374    | ARL6IP2   | 0 | NA | 0 | NA | 0 | NA | 0 | NA | 0 | NA |
| 2 | 38683528 | 38644678 | -1 | NM_138394    | HNRPLL    | 0 | NA | 0 | NA | 0 | NA | 0 | NA | 0 | NA |
| 2 | 38746742 | 38815031 | 1  | NM_138801    | GALM      | 1 | 11 | 0 | NA | 0 | NA | 0 | NA | 0 | NA |
| 2 | 38832005 | 38824244 | -1 | NM_001031684 | SFRS7     | 0 | NA | 0 | NA | 0 | NA | 0 | NA | 0 | NA |
| 2 | 38858830 | 38862610 | 1  | NM_024775    | GEMIN6    | 0 | NA | 0 | NA | 0 | NA | 0 | NA | 0 | NA |
| 2 | 38956525 | 38878378 | -1 | NM_198963    | DHX57     | 0 | NA | 0 | NA | 0 | NA | 0 | NA | 0 | NA |
| 2 | 39201108 | 39062193 | -1 | NM_005633    | SOS1      | 0 | NA | 0 | NA | 0 | NA | 0 | NA | 0 | NA |
| 2 | 39310177 | 39259191 | -1 | NM_001009565 | CDKL4     | 0 | NA | 0 | NA | 0 | NA | 0 | NA | 0 | NA |
| 2 | 39517723 | 39329925 | -1 | NM_003618    | MAP4K3    | 1 | 12 | 0 | NA | 0 | NA | 1 | 13 | 0 | NA |
| 2 | 39746596 | 39798607 | 1  | NM_152390    | TMEM178   | 0 | NA | 0 | NA | 0 | NA | 0 | NA | 1 | 13 |
| 2 | 39859881 | 39816948 | -1 | NM_025264    | THUMP2    | 0 | NA | 0 | NA | 0 | NA | 0 | NA | 0 | NA |
| 2 | 40510948 | 40192789 | -1 | NM_001112800 | SLC8A1    | 0 | NA | 0 | NA | 0 | NA | 0 | NA | 0 | NA |
| 2 | 40510948 | 40192789 | -1 | NM_001112801 | SLC8A1    | 0 | NA | 0 | NA | 0 | NA | 0 | NA | 0 | NA |
| 2 | 40510948 | 40192789 | -1 | NM_021097    | SLC8A1    | 0 | NA | 0 | NA | 0 | NA | 0 | NA | 0 | NA |
| 2 | 40593079 | 40192789 | -1 | NM_001112802 | SLC8A1    | 0 | NA | 0 | NA | 0 | NA | 0 | NA | 0 | NA |
| 2 | 42129256 | 42139142 | 1  | NM_138370    | LOC91461  | 0 | NA | 0 | NA | 0 | NA | 0 | NA | 0 | NA |
| 2 | 42250019 | 42413192 | 1  | NM_019063    | EML4      | 0 | NA | 0 | NA | 0 | NA | 1 | 13 | 1 | 14 |
| 2 | 42441860 | 42431147 | -1 | NM_004718    | COX7A2L   | 1 | 15 | 0 | NA | 0 | NA | 0 | NA | 0 | NA |

|   |          |          |    |              |               |   |    |   |    |   |    |   |    |   |    |
|---|----------|----------|----|--------------|---------------|---|----|---|----|---|----|---|----|---|----|
| 2 | 42574741 | 42522660 | -1 | NM_133329    | KCNG3         | 0 | NA | 0 | NA | 1 | 14 | 0 | NA | 0 | NA |
| 2 | 42574741 | 42522660 | -1 | NM_172344    | KCNG3         | 0 | NA | 0 | NA | 1 | 14 | 0 | NA | 0 | NA |
| 2 | 42649174 | 42789857 | 1  | NM_020744    | MTA3          | 0 | NA | 0 | NA | 0 | NA | 0 | NA | 0 | NA |
| 2 | 42844905 | 42843142 | -1 | NM_148962    | OXER1         | 0 | NA | 0 | NA | 0 | NA | 0 | NA | 0 | NA |
| 2 | 42873219 | 42847733 | -1 | NM_012205    | HAAS          | 0 | NA | 0 | NA | 0 | NA | 0 | NA | 0 | NA |
| 2 | 43307249 | 43304209 | -1 | NM_006887    | ZFP36L2       | 1 | 17 | 0 | NA | 0 | NA | 0 | NA | 0 | NA |
| 2 | 43676617 | 43311478 | -1 | NM_001083953 | THADA         | 1 | 17 | 0 | NA | 0 | NA | 0 | NA | 0 | NA |
| 2 | 43676689 | 43311478 | -1 | NM_022065    | THADA         | 1 | 17 | 0 | NA | 0 | NA | 0 | NA | 0 | NA |
| 2 | 43717950 | 43848630 | 1  | NM_172069    | PLEKHH2       | 0 | NA | 0 | NA | 0 | NA | 0 | NA | 0 | NA |
| 2 | 43756965 | 43755795 | -1 | NM_001101330 | LOC728819     | 0 | NA | 0 | NA | 0 | NA | 0 | NA | 0 | NA |
| 2 | 43854685 | 43875820 | 1  | NM_015522    | DYNC2L1       | 1 | 12 | 0 | NA | 0 | NA | 0 | NA | 0 | NA |
| 2 | 43854685 | 43886198 | 1  | NM_001012665 | DYNC2L1       | 1 | 12 | 0 | NA | 0 | NA | 0 | NA | 0 | NA |
| 2 | 43854685 | 43890653 | 1  | NM_016008    | DYNC2L1       | 1 | 12 | 0 | NA | 0 | NA | 0 | NA | 0 | NA |
| 2 | 43919462 | 43893114 | -1 | NM_022436    | ABCG5         | 0 | NA | 0 | NA | 0 | NA | 0 | NA | 0 | NA |
| 2 | 43919606 | 43959109 | 1  | NM_022437    | ABCG8         | 0 | NA | 0 | NA | 0 | NA | 0 | NA | 0 | NA |
| 2 | 44076648 | 43966866 | -1 | NM_133259    | LRPPRC        | 0 | NA | 0 | NA | 0 | NA | 0 | NA | 0 | NA |
| 2 | 44249503 | 44290075 | 1  | NM_001033556 | PPM1B         | 0 | NA | 0 | NA | 0 | NA | 0 | NA | 0 | NA |
| 2 | 44249503 | 44312115 | 1  | NM_001033557 | PPM1B         | 0 | NA | 0 | NA | 0 | NA | 0 | NA | 0 | NA |
| 2 | 44249503 | 44312115 | 1  | NM_002706    | PPM1B         | 0 | NA | 0 | NA | 0 | NA | 0 | NA | 0 | NA |
| 2 | 44249503 | 44312115 | 1  | NM_177969    | PPM1B         | 0 | NA | 0 | NA | 0 | NA | 0 | NA | 0 | NA |
| 2 | 44249503 | 44315246 | 1  | NM_177968    | PPM1B         | 0 | NA | 0 | NA | 0 | NA | 0 | NA | 0 | NA |
| 2 | 44356100 | 44401466 | 1  | NM_000341    | SLC3A1        | 1 | 12 | 0 | NA | 0 | NA | 0 | NA | 0 | NA |
| 2 | 44440393 | 44399405 | -1 | NM_001042385 | PREPL         | 1 | 12 | 0 | NA | 0 | NA | 1 | 18 | 0 | NA |
| 2 | 44440393 | 44399405 | -1 | NM_001042386 | PREPL         | 1 | 12 | 0 | NA | 0 | NA | 1 | 18 | 0 | NA |
| 2 | 44440393 | 44399405 | -1 | NM_006036    | PREPL         | 1 | 12 | 0 | NA | 0 | NA | 1 | 18 | 0 | NA |
| 2 | 44442606 | 44853233 | 1  | NM_024766    | C2orf34       | 1 | 12 | 0 | NA | 0 | NA | 1 | 18 | 0 | NA |
| 2 | 45022540 | 45025894 | 1  | NM_005413    | SIX3          | 0 | NA | 0 | NA | 0 | NA | 0 | NA | 0 | NA |
| 2 | 45090026 | 45085846 | -1 | NM_016932    | SIX2          | 0 | NA | 1 | 22 | 0 | NA | 0 | NA | 0 | NA |
| 2 | 45691907 | 45469323 | -1 | NM_018079    | SRBD1         | 1 | 15 | 0 | NA | 0 | NA | 0 | NA | 0 | NA |
| 2 | 45732546 | 46268633 | 1  | NM_005400    | PRKCE         | 1 | 15 | 0 | NA | 0 | NA | 0 | NA | 0 | NA |
| 2 | 46378066 | 46467340 | 1  | NM_001430    | EPAS1         | 0 | NA | 1 | 12 | 0 | NA | 1 | 12 | 0 | NA |
| 2 | 46600600 | 46592489 | -1 | NM_080653    | ATP6V1E2      | 0 | NA | 0 | NA | 0 | NA | 0 | NA | 0 | NA |
| 2 | 46623370 | 46665331 | 1  | NM_012249    | RHOQ          | 0 | NA | 0 | NA | 1 | 12 | 1 | 31 | 0 | NA |
| 2 | 46697755 | 46661916 | -1 | NM_002643    | PIGF          | 0 | NA | 0 | NA | 0 | NA | 0 | NA | 0 | NA |
| 2 | 46697755 | 46661916 | -1 | NM_173074    | PIGF          | 0 | NA | 0 | NA | 0 | NA | 0 | NA | 0 | NA |
| 2 | 46697811 | 46705687 | 1  | NM_014171    | CRIP1         | 0 | NA | 0 | NA | 0 | NA | 0 | NA | 0 | NA |
| 2 | 46779602 | 46843431 | 1  | NM_014011    | SOC5          | 0 | NA | 0 | NA | 0 | NA | 1 | 14 | 0 | NA |
| 2 | 46779852 | 46843431 | 1  | NM_144949    | SOC5          | 0 | NA | 0 | NA | 0 | NA | 1 | 14 | 0 | NA |
| 2 | 46996453 | 46982518 | -1 | NM_139279    | MCFD2         | 0 | NA | 0 | NA | 0 | NA | 0 | NA | 0 | NA |
| 2 | 47021816 | 47156779 | 1  | NM_020458    | TTC7A         | 0 | NA | 0 | NA | 0 | NA | 0 | NA | 0 | NA |
| 2 | 47235930 | 47209090 | -1 | NM_173649    | C2orf61       | 0 | NA | 0 | NA | 0 | NA | 0 | NA | 0 | NA |
| 2 | 47257154 | 47240808 | -1 | NM_001743    | CALM2         | 0 | NA | 0 | NA | 0 | NA | 0 | NA | 0 | NA |
| 2 | 47449970 | 47467661 | 1  | NM_002354    | TACSTD1       | 0 | NA | 0 | NA | 1 | 12 | 0 | NA | 0 | NA |
| 2 | 47483766 | 47563864 | 1  | NM_000251    | MSH2          | 0 | NA | 0 | NA | 0 | NA | 0 | NA | 0 | NA |
| 2 | 47650974 | 47601418 | -1 | NM_022055    | KCNK12        | 0 | NA | 0 | NA | 0 | NA | 0 | NA | 0 | NA |
| 2 | 47863724 | 47887596 | 1  | NM_000179    | MSH6          | 0 | NA | 0 | NA | 0 | NA | 0 | NA | 0 | NA |
| 2 | 47986318 | 47887562 | -1 | NM_025133    | FBXO11        | 0 | NA | 0 | NA | 0 | NA | 0 | NA | 0 | NA |
| 2 | 47986318 | 47893491 | -1 | NM_018693    | FBXO11        | 0 | NA | 0 | NA | 0 | NA | 0 | NA | 0 | NA |
| 2 | 47986318 | 47899228 | -1 | NM_012167    | FBXO11        | 0 | NA | 0 | NA | 0 | NA | 0 | NA | 0 | NA |
| 2 | 48395298 | 48459938 | 1  | NM_002158    | FOXN2         | 0 | NA | 0 | NA | 0 | NA | 1 | 17 | 0 | NA |
| 2 | 48521411 | 48596026 | 1  | NM_152994    | CCDC128       | 0 | NA | 0 | NA | 0 | NA | 0 | NA | 0 | NA |
| 2 | 48610025 | 48612560 | 1  | NM_001007546 | FLJ46838      | 0 | NA | 0 | NA | 1 | 12 | 0 | NA | 0 | NA |
| 2 | 48649662 | 48760246 | 1  | NM_172311    | STON1-GTF2A1L | 0 | NA | 0 | NA | 0 | NA | 0 | NA | 0 | NA |
| 2 | 48661266 | 48679539 | 1  | NM_006873    | STON1         | 0 | NA | 0 | NA | 0 | NA | 0 | NA | 0 | NA |
| 2 | 48698451 | 48760250 | 1  | NM_006872    | GTF2A1L       | 0 | NA | 0 | NA | 0 | NA | 0 | NA | 0 | NA |
| 2 | 48698451 | 48813790 | 1  | NM_172196    | GTF2A1L       | 0 | NA | 0 | NA | 0 | NA | 0 | NA | 0 | NA |
| 2 | 48836367 | 48767416 | -1 | NM_000233    | LHCGR         | 0 | NA | 0 | NA | 0 | NA | 0 | NA | 0 | NA |
| 2 | 49235134 | 49043155 | -1 | NM_000145    | FSHR          | 0 | NA | 0 | NA | 0 | NA | 0 | NA | 0 | NA |
| 2 | 49235134 | 49043155 | -1 | NM_181446    | FSHR          | 0 | NA | 0 | NA | 0 | NA | 0 | NA | 0 | NA |
| 2 | 50428398 | 50000991 | -1 | NM_138735    | NRXN1         | 0 | NA | 0 | NA | 0 | NA | 0 | NA | 0 | NA |
| 2 | 51113178 | 50000991 | -1 | NM_004801    | NRXN1         | 0 | NA | 0 | NA | 0 | NA | 0 | NA | 0 | NA |
| 2 | 53848432 | 53855791 | 1  | NM_001008708 | CHAC2         | 1 | 17 | 0 | NA | 0 | NA | 0 | NA | 0 | NA |
| 2 | 53867583 | 53750621 | -1 | NM_016115    | ASB3          | 0 | NA | 0 | NA | 0 | NA | 0 | NA | 0 | NA |
| 2 | 53867583 | 53750621 | -1 | NM_145863    | ASB3          | 0 | NA | 0 | NA | 0 | NA | 0 | NA | 0 | NA |
| 2 | 53867720 | 53899437 | 1  | NM_015701    | C2orf30       | 0 | NA | 0 | NA | 0 | NA | 0 | NA | 0 | NA |

|   |          |          |    |              |          |   |    |   |    |   |    |   |    |   |    |
|---|----------|----------|----|--------------|----------|---|----|---|----|---|----|---|----|---|----|
| 2 | 53940572 | 53933553 | -1 | NM_006794    | GPR75    | 0 | NA | 0 | NA | 0 | NA | 0 | NA | 0 | NA |
| 2 | 54051481 | 53944707 | -1 | NM_014614    | PSME4    | 0 | NA | 0 | NA | 0 | NA | 0 | NA | 0 | NA |
| 2 | 54195913 | 5436939  | 1  | NM_138448    | ACYF2    | 0 | NA | 0 | NA | 0 | NA | 1 | 15 | 0 | NA |
| 2 | 54336913 | 54333818 | -1 | NM_001003937 | TSPYL6   | 0 | NA | 0 | NA | 0 | NA | 0 | NA | 0 | NA |
| 2 | 54411574 | 54442218 | 1  | NM_001100396 | FLJ40298 | 0 | NA | 0 | NA | 0 | NA | 0 | NA | 0 | NA |
| 2 | 54536957 | 54752087 | 1  | NM_003128    | SPTBN1   | 0 | NA | 0 | NA | 0 | NA | 0 | NA | 1 | 12 |
| 2 | 54639034 | 54742949 | 1  | NM_178313    | SPTBN1   | 0 | NA | 0 | NA | 0 | NA | 0 | NA | 0 | NA |
| 2 | 55090974 | 55052830 | -1 | NM_007008    | RTN4     | 0 | NA | 0 | NA | 0 | NA | 0 | NA | 0 | NA |
| 2 | 55129830 | 55052830 | -1 | NM_207521    | RTN4     | 1 | 14 | 0 | NA | 0 | NA | 1 | 12 | 0 | NA |
| 2 | 55131238 | 55052830 | -1 | NM_020532    | RTN4     | 1 | 14 | 0 | NA | 0 | NA | 1 | 12 | 0 | NA |
| 2 | 55131238 | 55052830 | -1 | NM_153828    | RTN4     | 1 | 14 | 0 | NA | 0 | NA | 1 | 12 | 0 | NA |
| 2 | 55131238 | 55052830 | -1 | NM_207520    | RTN4     | 1 | 14 | 0 | NA | 0 | NA | 1 | 12 | 0 | NA |
| 2 | 55312953 | 55296288 | -1 | NM_152385    | CZorf63  | 0 | NA | 0 | NA | 0 | NA | 0 | NA | 0 | NA |
| 2 | 55313327 | 55316249 | 1  | NM_002954    | RPS27A   | 0 | NA | 0 | NA | 0 | NA | 0 | NA | 0 | NA |
| 2 | 55349819 | 55317259 | -1 | NM_001005369 | MTIF2    | 1 | 11 | 0 | NA | 1 | 12 | 0 | NA | 0 | NA |
| 2 | 55349888 | 55317259 | -1 | NM_002453    | MTIF2    | 1 | 11 | 0 | NA | 1 | 12 | 0 | NA | 0 | NA |
| 2 | 55500467 | 55368481 | -1 | NM_018084    | CCDC88A  | 0 | NA | 0 | NA | 1 | 12 | 0 | NA | 0 | NA |
| 2 | 55600243 | 55625720 | 1  | NM_080667    | CCDC104  | 1 | 19 | 0 | NA | 0 | NA | 1 | 11 | 0 | NA |
| 2 | 55698300 | 55629017 | -1 | NM_001122964 | SMEK2    | 0 | NA | 0 | NA | 0 | NA | 0 | NA | 0 | NA |
| 2 | 55698300 | 55629017 | -1 | NM_020463    | SMEK2    | 0 | NA | 0 | NA | 0 | NA | 0 | NA | 0 | NA |
| 2 | 55774463 | 55715968 | -1 | NM_033109    | PNPT1    | 1 | 12 | 0 | NA | 0 | NA | 0 | NA | 0 | NA |
| 2 | 56003860 | 55946605 | -1 | NM_004105    | EFEMP1   | 0 | NA | 0 | NA | 0 | NA | 0 | NA | 0 | NA |
| 2 | 56004436 | 55946605 | -1 | NM_001039348 | EFEMP1   | 0 | NA | 0 | NA | 0 | NA | 0 | NA | 0 | NA |
| 2 | 56004436 | 55946605 | -1 | NM_001039349 | EFEMP1   | 0 | NA | 0 | NA | 0 | NA | 0 | NA | 0 | NA |
| 2 | 56264761 | 56466813 | 1  | NM_001080433 | CCDC85A  | 0 | NA | 0 | NA | 0 | NA | 0 | NA | 0 | NA |
| 2 | 58127223 | 58240509 | 1  | NM_006296    | VRK2     | 0 | NA | 0 | NA | 0 | NA | 0 | NA | 0 | NA |
| 2 | 58322019 | 58239881 | -1 | NM_001114636 | FANCL    | 0 | NA | 0 | NA | 0 | NA | 0 | NA | 0 | NA |
| 2 | 58322019 | 58239881 | -1 | NM_018062    | FANCL    | 0 | NA | 0 | NA | 0 | NA | 0 | NA | 0 | NA |
| 2 | 60634137 | 60531805 | -1 | NM_018014    | BCL11A   | 0 | NA | 0 | NA | 0 | NA | 0 | NA | 0 | NA |
| 2 | 60634137 | 60531805 | -1 | NM_138559    | BCL11A   | 0 | NA | 0 | NA | 0 | NA | 0 | NA | 0 | NA |
| 2 | 60634137 | 60537832 | -1 | NM_022893    | BCL11A   | 0 | NA | 0 | NA | 0 | NA | 0 | NA | 0 | NA |
| 2 | 60836886 | 60879602 | 1  | NM_022894    | PAPOLG   | 0 | NA | 0 | NA | 0 | NA | 0 | NA | 0 | NA |
| 2 | 60962255 | 61003682 | 1  | NM_002908    | REL      | 0 | NA | 0 | NA | 0 | NA | 1 | 14 | 0 | NA |
| 2 | 61098373 | 61129896 | 1  | NM_002618    | PEX13    | 1 | 17 | 0 | NA | 0 | NA | 0 | NA | 0 | NA |
| 2 | 61098712 | 61022607 | -1 | NM_144709    | PUS10    | 1 | 17 | 0 | NA | 0 | NA | 0 | NA | 0 | NA |
| 2 | 61146866 | 61218673 | 1  | NM_032506    | KIAA1841 | 0 | NA | 0 | NA | 0 | NA | 0 | NA | 0 | NA |
| 2 | 61258324 | 61267582 | 1  | NM_152392    | AHSA2    | 0 | NA | 0 | NA | 0 | NA | 0 | NA | 0 | NA |
| 2 | 61551353 | 61268093 | -1 | NM_014709    | USP34    | 0 | NA | 0 | NA | 0 | NA | 0 | NA | 0 | NA |
| 2 | 61618922 | 61558572 | -1 | NM_003400    | XPO1     | 0 | NA | 0 | NA | 0 | NA | 1 | 15 | 0 | NA |
| 2 | 61934782 | 61905486 | -1 | NM_032180    | FLJ13305 | 0 | NA | 0 | NA | 1 | 14 | 0 | NA | 0 | NA |
| 2 | 61969295 | 61948765 | -1 | NM_006430    | CCT4     | 0 | NA | 0 | NA | 0 | NA | 0 | NA | 0 | NA |
| 2 | 61986306 | 62216709 | 1  | NM_152516    | COMMD1   | 0 | NA | 0 | NA | 0 | NA | 1 | 12 | 0 | NA |
| 2 | 62276765 | 62305370 | 1  | NM_006577    | B3GNT2   | 0 | NA | 0 | NA | 0 | NA | 0 | NA | 0 | NA |
| 2 | 62586980 | 62581263 | -1 | NM_198276    | TMEM17   | 0 | NA | 0 | NA | 0 | NA | 0 | NA | 0 | NA |
| 2 | 62786636 | 63127125 | 1  | NM_015252    | EHBP1    | 0 | NA | 0 | NA | 0 | NA | 0 | NA | 0 | NA |
| 2 | 63131468 | 63137816 | 1  | NM_014562    | OTX1     | 0 | NA | 1 | 12 | 0 | NA | 0 | NA | 0 | NA |
| 2 | 63518590 | 63202038 | -1 | NM_001042692 | LOC51057 | 0 | NA | 0 | NA | 0 | NA | 0 | NA | 0 | NA |
| 2 | 63669355 | 63202038 | -1 | NM_015910    | LOC51057 | 0 | NA | 0 | NA | 0 | NA | 0 | NA | 0 | NA |
| 2 | 63669625 | 63687832 | 1  | NM_005917    | MDH1     | 0 | NA | 0 | NA | 0 | NA | 0 | NA | 0 | NA |
| 2 | 63921601 | 63972200 | 1  | NM_001001521 | UGP2     | 1 | 14 | 0 | NA | 0 | NA | 0 | NA | 0 | NA |
| 2 | 63922517 | 63972200 | 1  | NM_006759    | UGP2     | 1 | 14 | 0 | NA | 0 | NA | 0 | NA | 0 | NA |
| 2 | 64099718 | 63973170 | -1 | NM_001005739 | VPSS4    | 0 | NA | 0 | NA | 1 | 12 | 1 | 14 | 0 | NA |
| 2 | 64099718 | 63973170 | -1 | NM_016516    | VPSS4    | 0 | NA | 0 | NA | 1 | 12 | 1 | 14 | 0 | NA |
| 2 | 64192987 | 64173498 | -1 | NM_020651    | PEL1     | 0 | NA | 0 | NA | 0 | NA | 0 | NA | 0 | NA |
| 2 | 64534830 | 64542021 | 1  | NM_014181    | HSPC159  | 0 | NA | 0 | NA | 0 | NA | 0 | NA | 0 | NA |
| 2 | 64604968 | 64673642 | 1  | NM_001002243 | AFTPH    | 0 | NA | 0 | NA | 0 | NA | 0 | NA | 0 | NA |
| 2 | 64604968 | 64673642 | 1  | NM_017657    | AFTPH    | 0 | NA | 0 | NA | 0 | NA | 0 | NA | 0 | NA |
| 2 | 64604968 | 64673642 | 1  | NM_203437    | AFTPH    | 0 | NA | 0 | NA | 0 | NA | 0 | NA | 0 | NA |
| 2 | 64734550 | 64712259 | -1 | NM_014755    | SERTAD2  | 0 | NA | 0 | NA | 0 | NA | 0 | NA | 0 | NA |
| 2 | 65070097 | 65104503 | 1  | NM_003038    | SLC1A4   | 0 | NA | 0 | NA | 0 | NA | 1 | 12 | 0 | NA |
| 2 | 65136998 | 65167646 | 1  | NM_015147    | CEP68    | 0 | NA | 0 | NA | 0 | NA | 0 | NA | 0 | NA |
| 2 | 65210793 | 65167492 | -1 | NM_004161    | RAB1A    | 0 | NA | 0 | NA | 0 | NA | 0 | NA | 0 | NA |
| 2 | 65308405 | 65351891 | 1  | NM_001005386 | ACTR2    | 0 | NA | 0 | NA | 0 | NA | 0 | NA | 0 | NA |
| 2 | 65308405 | 65351891 | 1  | NM_005722    | ACTR2    | 0 | NA | 0 | NA | 0 | NA | 0 | NA | 0 | NA |
| 2 | 65512814 | 65391488 | -1 | NM_181784    | SPRED2   | 1 | 16 | 0 | NA | 0 | NA | 1 | 14 | 0 | NA |

|   |          |          |    |              |           |   |    |   |    |   |    |   |    |   |    |   |    |
|---|----------|----------|----|--------------|-----------|---|----|---|----|---|----|---|----|---|----|---|----|
| 2 | 66516035 | 66653395 | 1  | NM_002398    | MEIS1     | 1 | 14 | 0 | NA | 0 | NA | 0 | NA | 0 | NA | 0 | NA |
| 2 | 67477945 | 67491037 | 1  | NM_019002    | ETAA1     | 0 | NA | 0 | NA | 0 | NA | 0 | NA | 0 | NA | 0 | NA |
| 2 | 68143634 | 68122839 | -1 | NM_006333    | C1D       | 1 | 12 | 0 | NA | 0 | NA | 0 | NA | 0 | NA | 0 | NA |
| 2 | 68143634 | 68122839 | -1 | NM_173177    | C1D       | 1 | 12 | 0 | NA | 0 | NA | 0 | NA | 0 | NA | 0 | NA |
| 2 | 68238160 | 68210784 | -1 | NM_138458    | WDR92     | 0 | NA | 0 | NA | 0 | NA | 0 | NA | 0 | NA | 0 | NA |
| 2 | 68238508 | 68256595 | 1  | NM_020143    | PNO1      | 0 | NA | 0 | NA | 0 | NA | 0 | NA | 0 | NA | 0 | NA |
| 2 | 68333155 | 68259492 | -1 | NM_000945    | PPP3R1    | 0 | NA | 0 | NA | 0 | NA | 1 | 14 | 0 | NA | 0 | NA |
| 2 | 68400687 | 68364806 | -1 | NM_00111101  | CNRIP1    | 1 | 12 | 0 | NA | 0 | NA | 1 | 11 | 0 | NA | 0 | NA |
| 2 | 68400687 | 68373645 | -1 | NM_015463    | CNRIP1    | 1 | 12 | 0 | NA | 0 | NA | 1 | 11 | 0 | NA | 0 | NA |
| 2 | 68445825 | 68478089 | 1  | NM_002664    | PLEK      | 0 | NA | 0 | NA | 0 | NA | 1 | 11 | 0 | NA | 0 | NA |
| 2 | 68547894 | 68543008 | -1 | NM_001024680 | FBXO4B    | 0 | NA | 0 | NA | 0 | NA | 1 | 13 | 0 | NA | 0 | NA |
| 2 | 68548245 | 68660798 | 1  | NM_173545    | C2orf13   | 0 | NA | 0 | NA | 0 | NA | 1 | 13 | 0 | NA | 0 | NA |
| 2 | 68726457 | 68736212 | 1  | NM_138964    | PROKR1    | 0 | NA | 0 | NA | 0 | NA | 0 | NA | 1 | 13 | 0 | NA |
| 2 | 68815471 | 68907461 | 1  | NM_001007231 | ARHGAP25  | 0 | NA | 0 | NA | 0 | NA | 0 | NA | 0 | NA | 0 | NA |
| 2 | 68855436 | 68907461 | 1  | NM_014882    | ARHGAP25  | 0 | NA | 0 | NA | 0 | NA | 0 | NA | 0 | NA | 0 | NA |
| 2 | 68952153 | 68946116 | -1 | NM_014482    | BMP10     | 0 | NA | 0 | NA | 0 | NA | 0 | NA | 1 | 13 | 0 | NA |
| 2 | 69033606 | 69025867 | -1 | NM_182536    | GKN2      | 1 | 11 | 0 | NA | 0 | NA | 0 | NA | 0 | NA | 0 | NA |
| 2 | 69055208 | 69061616 | 1  | NM_019617    | GKN1      | 0 | NA | 0 | NA | 0 | NA | 0 | NA | 0 | NA | 0 | NA |
| 2 | 69093992 | 69226992 | 1  | NM_018153    | ANTXR1    | 0 | NA | 0 | NA | 0 | NA | 0 | NA | 0 | NA | 0 | NA |
| 2 | 69093992 | 69253193 | 1  | NM_053034    | ANTXR1    | 0 | NA | 0 | NA | 0 | NA | 0 | NA | 0 | NA | 0 | NA |
| 2 | 69093992 | 69329806 | 1  | NM_032208    | ANTXR1    | 0 | NA | 0 | NA | 0 | NA | 0 | NA | 0 | NA | 0 | NA |
| 2 | 69467829 | 69405910 | -1 | NM_002056    | GFPT1     | 0 | NA | 0 | NA | 0 | NA | 0 | NA | 0 | NA | 0 | NA |
| 2 | 69518257 | 69476756 | -1 | NM_001002755 | NFU1      | 0 | NA | 0 | NA | 0 | NA | 1 | 11 | 0 | NA | 0 | NA |
| 2 | 69518257 | 69476756 | -1 | NM_001002756 | NFU1      | 0 | NA | 0 | NA | 0 | NA | 1 | 11 | 0 | NA | 0 | NA |
| 2 | 69518257 | 69476756 | -1 | NM_001002757 | NFU1      | 0 | NA | 0 | NA | 0 | NA | 1 | 11 | 0 | NA | 0 | NA |
| 2 | 69518257 | 69476756 | -1 | NM_015700    | NFU1      | 0 | NA | 0 | NA | 0 | NA | 1 | 11 | 0 | NA | 0 | NA |
| 2 | 69724481 | 69538630 | -1 | NM_014911    | AAK1      | 0 | NA | 0 | NA | 0 | NA | 0 | NA | 0 | NA | 0 | NA |
| 2 | 69822630 | 69907100 | 1  | NM_001153    | ANXA4     | 0 | NA | 0 | NA | 0 | NA | 0 | NA | 0 | NA | 0 | NA |
| 2 | 69910321 | 69960231 | 1  | NM_178439    | GMCL1     | 0 | NA | 0 | NA | 0 | NA | 0 | NA | 0 | NA | 0 | NA |
| 2 | 69974593 | 69985853 | 1  | NM_006857    | RY1       | 0 | NA | 0 | NA | 0 | NA | 0 | NA | 0 | NA | 0 | NA |
| 2 | 69995706 | 70023580 | 1  | NM_002357    | MXD1      | 0 | NA | 0 | NA | 0 | NA | 0 | NA | 0 | NA | 0 | NA |
| 2 | 70042901 | 70040729 | -1 | NM_152792    | ASPRV1    | 0 | NA | 1 | 13 | 0 | NA | 0 | NA | 0 | NA | 0 | NA |
| 2 | 70168204 | 70169836 | 1  | NM_006196    | PCBP1     | 1 | 12 | 0 | NA | 0 | NA | 1 | 14 | 1 | 12 | 0 | NA |
| 2 | 70271655 | 70230520 | -1 | NM_017880    | C2orf42   | 0 | NA | 0 | NA | 0 | NA | 1 | 17 | 0 | NA | 0 | NA |
| 2 | 70329251 | 70292317 | -1 | NM_022037    | TIA1      | 0 | NA | 0 | NA | 1 | 12 | 1 | 12 | 0 | NA | 0 | NA |
| 2 | 70329251 | 70292317 | -1 | NM_022173    | TIA1      | 0 | NA | 0 | NA | 1 | 12 | 1 | 12 | 0 | NA | 0 | NA |
| 2 | 70338734 | 70361821 | 1  | NM_016297    | PCYOX1    | 0 | NA | 0 | NA | 1 | 12 | 1 | 12 | 0 | NA | 0 | NA |
| 2 | 70374373 | 70362009 | -1 | NM_003096    | SNRPG     | 0 | NA | 0 | NA | 0 | NA | 1 | 11 | 0 | NA | 0 | NA |
| 2 | 70382705 | 70376612 | -1 | NM_032822    | FAM136A   | 0 | NA | 0 | NA | 0 | NA | 1 | 11 | 0 | NA | 0 | NA |
| 2 | 70634613 | 70527924 | -1 | NM_001099691 | TGFA      | 0 | NA | 0 | NA | 0 | NA | 0 | NA | 0 | NA | 0 | NA |
| 2 | 70634613 | 70527924 | -1 | NM_003236    | TGFA      | 0 | NA | 0 | NA | 0 | NA | 0 | NA | 0 | NA | 0 | NA |
| 2 | 70848837 | 70742770 | -1 | NM_001617    | ADD2      | 0 | NA | 0 | NA | 0 | NA | 0 | NA | 1 | 15 | 0 | NA |
| 2 | 70848837 | 70742770 | -1 | NM_017483    | ADD2      | 0 | NA | 0 | NA | 0 | NA | 0 | NA | 1 | 15 | 0 | NA |
| 2 | 70848837 | 70742770 | -1 | NM_017488    | ADD2      | 0 | NA | 0 | NA | 0 | NA | 0 | NA | 1 | 15 | 0 | NA |
| 2 | 70848837 | 70755730 | -1 | NM_017482    | ADD2      | 0 | NA | 0 | NA | 0 | NA | 0 | NA | 1 | 15 | 0 | NA |
| 2 | 70848837 | 70755730 | -1 | NM_017484    | ADD2      | 0 | NA | 0 | NA | 0 | NA | 0 | NA | 1 | 15 | 0 | NA |
| 2 | 70871283 | 70857949 | -1 | NM_001004311 | FIGLA     | 0 | NA | 1 | 12 | 0 | NA | 0 | NA | 0 | NA | 0 | NA |
| 2 | 70901240 | 70889284 | -1 | NM_173535    | CLEC4F    | 0 | NA | 0 | NA | 0 | NA | 0 | NA | 1 | 12 | 0 | NA |
| 2 | 70916461 | 70910854 | -1 | NM_015717    | CD207     | 0 | NA | 1 | 13 | 0 | NA | 0 | NA | 1 | 13 | 0 | NA |
| 2 | 70981227 | 71014083 | 1  | NM_012476    | VAX2      | 0 | NA | 0 | NA | 0 | NA | 0 | NA | 0 | NA | 0 | NA |
| 2 | 71016505 | 71046069 | 1  | NM_001692    | ATP6V1B1  | 0 | NA | 0 | NA | 0 | NA | 0 | NA | 0 | NA | 0 | NA |
| 2 | 71059082 | 71086137 | 1  | NM_001115116 | ANKRD53   | 0 | NA | 0 | NA | 0 | NA | 0 | NA | 0 | NA | 0 | NA |
| 2 | 71059082 | 71066137 | 1  | NM_024933    | ANKRD53   | 0 | NA | 0 | NA | 0 | NA | 0 | NA | 0 | NA | 0 | NA |
| 2 | 71075509 | 71066575 | -1 | NM_144582    | TEX261    | 0 | NA | 0 | NA | 0 | NA | 0 | NA | 0 | NA | 0 | NA |
| 2 | 71148954 | 71159279 | 1  | NM_017567    | NAGK      | 0 | NA | 0 | NA | 0 | NA | 0 | NA | 0 | NA | 0 | NA |
| 2 | 71210867 | 71190326 | -1 | NM_032601    | MCEE      | 1 | 20 | 0 | NA | 0 | NA | 0 | NA | 0 | NA | 0 | NA |
| 2 | 71210951 | 71230738 | 1  | NM_005791    | MPHOSPH10 | 1 | 20 | 0 | NA | 0 | NA | 0 | NA | 0 | NA | 0 | NA |
| 2 | 71307741 | 71263375 | -1 | NM_020459    | PAIP2B    | 0 | NA | 0 | NA | 0 | NA | 0 | NA | 0 | NA | 0 | NA |
| 2 | 71412396 | 71515697 | 1  | NM_001014972 | ZNF638    | 0 | NA | 0 | NA | 0 | NA | 0 | NA | 0 | NA | 0 | NA |
| 2 | 71412396 | 71515697 | 1  | NM_014497    | ZNF638    | 0 | NA | 0 | NA | 0 | NA | 0 | NA | 0 | NA | 0 | NA |
| 2 | 71534267 | 71767401 | 1  | NM_003494    | DYSF      | 0 | NA | 1 | 12 | 0 | NA | 0 | NA | 0 | NA | 0 | NA |
| 2 | 72228471 | 72209874 | -1 | NM_019885    | CYP26B1   | 0 | NA | 1 | 14 | 0 | NA | 0 | NA | 1 | 12 | 0 | NA |
| 2 | 72906685 | 72259951 | -1 | NM_015189    | EXOC6B    | 0 | NA | 0 | NA | 0 | NA | 0 | NA | 0 | NA | 0 | NA |
| 2 | 72968019 | 72972797 | 1  | NM_003124    | SPR       | 0 | NA | 0 | NA | 0 | NA | 0 | NA | 0 | NA | 0 | NA |
| 2 | 72998111 | 73015528 | 1  | NM_004097    | EMX1      | 0 | NA | 0 | NA | 0 | NA | 0 | NA | 0 | NA | 0 | NA |

|   |          |          |    |              |           |   |    |   |    |   |    |   |    |   |    |
|---|----------|----------|----|--------------|-----------|---|----|---|----|---|----|---|----|---|----|
| 2 | 73152473 | 73022672 | -1 | NM_144579    | SFXN5     | 0 | NA | 0 | NA | 0 | NA | 0 | NA | 0 | NA |
| 2 | 73193654 | 73154017 | -1 | NM_015470    | RAB11FIP5 | 0 | NA | 0 | NA | 0 | NA | 0 | NA | 0 | NA |
| 2 | 73294873 | 73307863 | 1  | NM_006062    | SMYD5     | 0 | NA | 0 | NA | 0 | NA | 1 | 14 | 0 | NA |
| 2 | 73313864 | 73308641 | -1 | NM_032319    | C2orf7    | 0 | NA | 0 | NA | 0 | NA | 0 | NA | 0 | NA |
| 2 | 73314912 | 73333654 | 1  | NM_001009570 | CCT7      | 0 | NA | 0 | NA | 0 | NA | 0 | NA | 0 | NA |
| 2 | 73314912 | 73333654 | 1  | NM_006429    | CCT7      | 0 | NA | 0 | NA | 0 | NA | 0 | NA | 0 | NA |
| 2 | 73351551 | 73335307 | -1 | NM_001080410 | FBXO41    | 0 | NA | 0 | NA | 0 | NA | 0 | NA | 0 | NA |
| 2 | 73374181 | 73371564 | -1 | NM_001965    | EGR4      | 0 | NA | 0 | NA | 0 | NA | 0 | NA | 0 | NA |
| 2 | 73466393 | 73690554 | 1  | NM_015120    | ALMS1     | 0 | NA | 0 | NA | 0 | NA | 0 | NA | 0 | NA |
| 2 | 73723045 | 73721357 | -1 | NM_003960    | NAT8      | 0 | NA | 1 | 14 | 0 | NA | 0 | NA | 0 | NA |
| 2 | 73781975 | 73781143 | -1 | NM_016347    | NAT8B     | 0 | NA | 0 | NA | 0 | NA | 0 | NA | 0 | NA |
| 2 | 73818021 | 73810509 | -1 | NM_016058    | TPRKB     | 0 | NA | 0 | NA | 0 | NA | 0 | NA | 0 | NA |
| 2 | 73860730 | 73842836 | -1 | NM_003584    | DUSP11    | 0 | NA | 0 | NA | 0 | NA | 0 | NA | 0 | NA |
| 2 | 73864823 | 73897782 | 1  | NM_001080474 | FLJ43987  | 0 | NA | 0 | NA | 0 | NA | 0 | NA | 0 | NA |
| 2 | 73909593 | 73943519 | 1  | NM_201647    | STAMPB    | 0 | NA | 0 | NA | 0 | NA | 0 | NA | 0 | NA |
| 2 | 73909634 | 73943519 | 1  | NM_006463    | STAMPB    | 0 | NA | 0 | NA | 0 | NA | 0 | NA | 0 | NA |
| 2 | 73909654 | 73943519 | 1  | NM_213622    | STAMPB    | 0 | NA | 0 | NA | 0 | NA | 0 | NA | 0 | NA |
| 2 | 73973600 | 74000288 | 1  | NM_001615    | ACTG2     | 0 | NA | 0 | NA | 0 | NA | 0 | NA | 0 | NA |
| 2 | 74007460 | 74039596 | 1  | NM_080916    | DGUOK     | 1 | 20 | 0 | NA | 0 | NA | 0 | NA | 0 | NA |
| 2 | 74007460 | 74039596 | 1  | NM_080918    | DGUOK     | 1 | 20 | 0 | NA | 0 | NA | 0 | NA | 0 | NA |
| 2 | 74126957 | 74188810 | 1  | NM_144993    | TET3      | 0 | NA | 0 | NA | 0 | NA | 0 | NA | 0 | NA |
| 2 | 74228547 | 74216035 | -1 | NM_001035505 | BOLA3     | 0 | NA | 0 | NA | 0 | NA | 0 | NA | 0 | NA |
| 2 | 74228547 | 74216035 | -1 | NM_212552    | BOLA3     | 0 | NA | 0 | NA | 0 | NA | 0 | NA | 0 | NA |
| 2 | 74259503 | 74236718 | -1 | NM_018221    | MOBK1B    | 0 | NA | 0 | NA | 0 | NA | 0 | NA | 0 | NA |
| 2 | 74279197 | 74295932 | 1  | NM_001040409 | MTHFD2    | 0 | NA | 0 | NA | 0 | NA | 0 | NA | 0 | NA |
| 2 | 74279197 | 74295932 | 1  | NM_006636    | MTHFD2    | 0 | NA | 0 | NA | 0 | NA | 0 | NA | 0 | NA |
| 2 | 74395660 | 74302068 | -1 | NM_021196    | SLC4A5    | 0 | NA | 0 | NA | 0 | NA | 0 | NA | 0 | NA |
| 2 | 74424042 | 74296876 | -1 | NM_133478    | SLC4A5    | 0 | NA | 0 | NA | 0 | NA | 0 | NA | 0 | NA |
| 2 | 74454987 | 74441789 | -1 | NM_023019    | DCTN1     | 0 | NA | 0 | NA | 0 | NA | 0 | NA | 0 | NA |
| 2 | 74461472 | 74441789 | -1 | NM_004082    | DCTN1     | 0 | NA | 0 | NA | 0 | NA | 0 | NA | 0 | NA |
| 2 | 74502392 | 74506390 | 1  | NM_032118    | WDR54     | 0 | NA | 0 | NA | 0 | NA | 0 | NA | 0 | NA |
| 2 | 74521218 | 74506495 | -1 | NM_001015056 | RTKN      | 0 | NA | 0 | NA | 0 | NA | 0 | NA | 0 | NA |
| 2 | 74521218 | 74506495 | -1 | NM_033046    | RTKN      | 0 | NA | 0 | NA | 0 | NA | 0 | NA | 0 | NA |
| 2 | 74522568 | 74506495 | -1 | NM_001015055 | RTKN      | 0 | NA | 0 | NA | 0 | NA | 0 | NA | 0 | NA |
| 2 | 74535706 | 74538595 | 1  | NM_031288    | ZNHIT4    | 0 | NA | 0 | NA | 0 | NA | 0 | NA | 0 | NA |
| 2 | 74539084 | 74541518 | 1  | NM_012477    | WBP1      | 0 | NA | 0 | NA | 0 | NA | 0 | NA | 0 | NA |
| 2 | 74546045 | 74541691 | -1 | NM_006302    | GCS1      | 1 | 19 | 0 | NA | 0 | NA | 0 | NA | 0 | NA |
| 2 | 74553435 | 74552616 | -1 | NM_053050    | MRPL53    | 1 | 19 | 0 | NA | 0 | NA | 0 | NA | 0 | NA |
| 2 | 74563631 | 74554736 | -1 | NM_032779    | CCDC142   | 1 | 11 | 0 | NA | 0 | NA | 0 | NA | 0 | NA |
| 2 | 74563723 | 74575191 | 1  | NM_022492    | ITIC31    | 1 | 11 | 0 | NA | 0 | NA | 0 | NA | 0 | NA |
| 2 | 74583951 | 74578151 | -1 | NM_001009812 | LBX2      | 1 | 11 | 1 | 12 | 0 | NA | 1 | 11 | 0 | NA |
| 2 | 74588329 | 74585677 | -1 | NM_032673    | PCGF1     | 1 | 11 | 1 | 12 | 0 | NA | 1 | 11 | 0 | NA |
| 2 | 74595118 | 74597398 | -1 | NM_016170    | TLX2      | 0 | NA | 0 | NA | 0 | NA | 1 | 11 | 0 | NA |
| 2 | 74606916 | 74598765 | -1 | NM_133637    | DQX1      | 1 | 11 | 0 | NA | 0 | NA | 0 | NA | 0 | NA |
| 2 | 74610039 | 74614191 | 1  | NM_013247    | HTRA2     | 1 | 11 | 0 | NA | 0 | NA | 0 | NA | 0 | NA |
| 2 | 74610039 | 74614191 | 1  | NM_145074    | HTRA2     | 1 | 11 | 0 | NA | 0 | NA | 0 | NA | 0 | NA |
| 2 | 74610482 | 74607282 | -1 | NM_181575    | AUP1      | 1 | 11 | 0 | NA | 0 | NA | 0 | NA | 0 | NA |
| 2 | 74634570 | 74613453 | -1 | NM_032603    | LOXL3     | 0 | NA | 0 | NA | 1 | 14 | 0 | NA | 0 | NA |
| 2 | 74635367 | 74638171 | 1  | NM_001381    | DOK1      | 0 | NA | 0 | NA | 1 | 14 | 0 | NA | 0 | NA |
| 2 | 74728672 | 74638517 | -1 | NM_138804    | C2orf65   | 0 | NA | 0 | NA | 0 | NA | 0 | NA | 0 | NA |
| 2 | 74734900 | 74762693 | 1  | NM_004263    | SEMA4F    | 0 | NA | 0 | NA | 0 | NA | 0 | NA | 0 | NA |
| 2 | 74913289 | 74973989 | 1  | NM_000189    | HK2       | 0 | NA | 0 | NA | 0 | NA | 0 | NA | 0 | NA |
| 2 | 75039282 | 75050367 | 1  | NM_019896    | POLE4     | 0 | NA | 0 | NA | 1 | 19 | 1 | 15 | 0 | NA |
| 2 | 75279691 | 75131670 | -1 | NM_015727    | TACR1     | 0 | NA | 0 | NA | 0 | NA | 0 | NA | 0 | NA |
| 2 | 75279781 | 75129737 | -1 | NM_001058    | TACR1     | 0 | NA | 0 | NA | 0 | NA | 0 | NA | 0 | NA |
| 2 | 75650356 | 75572951 | -1 | NM_032181    | TMEM166   | 0 | NA | 0 | NA | 0 | NA | 0 | NA | 0 | NA |
| 2 | 75727416 | 75742842 | 1  | NM_014763    | MRPL19    | 1 | 14 | 0 | NA | 0 | NA | 1 | 11 | 0 | NA |
| 2 | 75791830 | 75742801 | -1 | NM_003203    | C2orf3    | 0 | NA | 0 | NA | 0 | NA | 0 | NA | 0 | NA |
| 2 | 77603010 | 77597294 | -1 | NM_024993    | LRRTM4    | 0 | NA | 0 | NA | 0 | NA | 0 | NA | 0 | NA |
| 2 | 79106333 | 79109136 | 1  | NM_198448    | REG3G     | 0 | NA | 0 | NA | 0 | NA | 0 | NA | 0 | NA |
| 2 | 79106333 | 79109139 | 1  | NM_001008387 | REG3G     | 0 | NA | 0 | NA | 0 | NA | 0 | NA | 0 | NA |
| 2 | 79188627 | 79165658 | -1 | NM_006507    | REG1B     | 0 | NA | 0 | NA | 0 | NA | 0 | NA | 0 | NA |
| 2 | 79201091 | 79204053 | 1  | NM_002909    | REG1A     | 0 | NA | 0 | NA | 0 | NA | 0 | NA | 0 | NA |
| 2 | 79240294 | 79237640 | -1 | NM_138938    | REG3A     | 0 | NA | 0 | NA | 0 | NA | 0 | NA | 0 | NA |
| 2 | 79240387 | 79237640 | -1 | NM_002580    | REG3A     | 0 | NA | 0 | NA | 0 | NA | 0 | NA | 0 | NA |



|   |          |          |    |              |           |   |    |   |    |   |    |   |    |   |    |
|---|----------|----------|----|--------------|-----------|---|----|---|----|---|----|---|----|---|----|
| 2 | 79240387 | 79237640 | -1 | NM_138937    | REG3A     | 0 | NA | 0 | NA | 0 | NA | 0 | NA | 0 | NA |
| 2 | 79593633 | 80729416 | 1  | NM_004389    | CTNNA2    | 0 | NA | 0 | NA | 0 | NA | 0 | NA | 0 | NA |
| 2 | 80384998 | 80382513 | -1 | NM_178839    | LRR1M1    | 0 | NA | 0 | NA | 0 | NA | 0 | NA | 1 | 19 |
| 2 | 84540097 | 84504162 | -1 | NM_003849    | SUCLG1    | 0 | NA | 0 | NA | 0 | NA | 0 | NA | 0 | NA |
| 2 | 84597089 | 84665489 | 1  | NM_173645    | DNHL1     | 0 | NA | 0 | NA | 0 | NA | 0 | NA | 0 | NA |
| 2 | 84961763 | 84902306 | -1 | NM_001080824 | LOC129293 | 0 | NA | 0 | NA | 0 | NA | 1 | 12 | 0 | NA |
| 2 | 84986273 | 84987310 | 1  | NM_021103    | TMSB10    | 0 | NA | 0 | NA | 0 | NA | 0 | NA | 1 | 13 |
| 2 | 85051741 | 85140106 | 1  | NM_020122    | KCMF1     | 0 | NA | 0 | NA | 1 | 12 | 1 | 11 | 0 | NA |
| 2 | 85214244 | 85391016 | 1  | NM_031283    | TCF7L1    | 0 | NA | 0 | NA | 0 | NA | 0 | NA | 0 | NA |
| 2 | 85408885 | 85398656 | -1 | NM_006464    | TGOLN2    | 0 | NA | 0 | NA | 0 | NA | 0 | NA | 0 | NA |
| 2 | 85435166 | 85422732 | -1 | NM_017750    | RETSAT    | 0 | NA | 0 | NA | 0 | NA | 0 | NA | 0 | NA |
| 2 | 85435446 | 85472382 | 1  | NM_032213    | RBED1     | 0 | NA | 0 | NA | 0 | NA | 0 | NA | 0 | NA |
| 2 | 85491187 | 85475381 | -1 | NM_001747    | CAPG      | 0 | NA | 0 | NA | 0 | NA | 0 | NA | 0 | NA |
| 2 | 85515428 | 85517663 | 1  | NM_198482    | SH2D6     | 0 | NA | 0 | NA | 0 | NA | 0 | NA | 0 | NA |
| 2 | 85619798 | 85625914 | 1  | NM_005911    | MAT2A     | 0 | NA | 0 | NA | 1 | 12 | 1 | 19 | 0 | NA |
| 2 | 85642090 | 85629713 | -1 | NM_000821    | GGCX      | 1 | 14 | 0 | NA | 0 | NA | 0 | NA | 0 | NA |
| 2 | 85658158 | 85662667 | 1  | NM_003761    | VAMP8     | 0 | NA | 0 | NA | 0 | NA | 0 | NA | 0 | NA |
| 2 | 85665041 | 85674022 | 1  | NM_006634    | VAMP5     | 0 | NA | 0 | NA | 0 | NA | 0 | NA | 0 | NA |
| 2 | 85676347 | 85678342 | 1  | NM_016494    | RNF181    | 0 | NA | 0 | NA | 0 | NA | 0 | NA | 0 | NA |
| 2 | 85683293 | 85679182 | -1 | NM_001031738 | TMEM150   | 1 | 18 | 0 | NA | 0 | NA | 0 | NA | 0 | NA |
| 2 | 85683332 | 85679181 | -1 | NM_153342    | TMEM150   | 1 | 18 | 0 | NA | 0 | NA | 0 | NA | 0 | NA |
| 2 | 85692663 | 85687287 | -1 | NM_001013649 | LOC388969 | 1 | 18 | 0 | NA | 0 | NA | 0 | NA | 0 | NA |
| 2 | 85696793 | 85729917 | 1  | NM_006590    | USP39     | 1 | 18 | 0 | NA | 0 | NA | 0 | NA | 0 | NA |
| 2 | 85748820 | 85739494 | -1 | NM_000542    | SFTPB     | 0 | NA | 0 | NA | 0 | NA | 0 | NA | 0 | NA |
| 2 | 85748823 | 85737950 | -1 | NM_198843    | SFTPB     | 0 | NA | 0 | NA | 0 | NA | 0 | NA | 0 | NA |
| 2 | 85774924 | 85779386 | 1  | NM_006433    | GNLY      | 0 | NA | 0 | NA | 0 | NA | 0 | NA | 0 | NA |
| 2 | 85774924 | 85779386 | 1  | NM_012483    | GNLY      | 0 | NA | 0 | NA | 0 | NA | 0 | NA | 0 | NA |
| 2 | 85834532 | 85868698 | 1  | NM_032827    | ATOH8     | 0 | NA | 0 | NA | 1 | 14 | 1 | 12 | 0 | NA |
| 2 | 85948304 | 85919782 | -1 | NM_001042437 | ST3GAL5   | 0 | NA | 0 | NA | 0 | NA | 0 | NA | 0 | NA |
| 2 | 85969668 | 85919781 | -1 | NM_003896    | ST3GAL5   | 0 | NA | 0 | NA | 0 | NA | 0 | NA | 0 | NA |
| 2 | 86186789 | 86106961 | -1 | NM_015425    | POLR1A    | 1 | 12 | 0 | NA | 0 | NA | 0 | NA | 0 | NA |
| 2 | 86186848 | 86222791 | 1  | NM_017952    | PTCD3     | 1 | 12 | 0 | NA | 0 | NA | 0 | NA | 0 | NA |
| 2 | 86276404 | 86224565 | -1 | NM_001100169 | IMMT      | 1 | 11 | 0 | NA | 0 | NA | 0 | NA | 0 | NA |
| 2 | 86276404 | 86224565 | -1 | NM_001100170 | IMMT      | 1 | 11 | 0 | NA | 0 | NA | 0 | NA | 0 | NA |
| 2 | 86276404 | 86224565 | -1 | NM_006839    | IMMT      | 1 | 11 | 0 | NA | 0 | NA | 0 | NA | 0 | NA |
| 2 | 86280066 | 86293988 | 1  | NM_016622    | MRPL35    | 1 | 11 | 0 | NA | 0 | NA | 0 | NA | 0 | NA |
| 2 | 86280066 | 86293988 | 1  | NM_145644    | MRPL35    | 1 | 11 | 0 | NA | 0 | NA | 0 | NA | 0 | NA |
| 2 | 86418288 | 86294630 | -1 | NM_022912    | REEP1     | 0 | NA | 0 | NA | 0 | NA | 0 | NA | 0 | NA |
| 2 | 86521864 | 86573350 | 1  | NM_018433    | JMJD1A    | 1 | 40 | 0 | NA | 1 | 22 | 1 | 26 | 0 | NA |
| 2 | 86644111 | 86584063 | -1 | NM_001005753 | VPS24     | 1 | 12 | 0 | NA | 0 | NA | 1 | 13 | 0 | NA |
| 2 | 86644111 | 86584063 | -1 | NM_016079    | VPS24     | 1 | 12 | 0 | NA | 0 | NA | 1 | 13 | 0 | NA |
| 2 | 86704489 | 86684026 | -1 | NM_005667    | RNF103    | 0 | NA | 0 | NA | 0 | NA | 0 | NA | 0 | NA |
| 2 | 86801203 | 86855943 | 1  | NM_022780    | RMND5A    | 0 | NA | 0 | NA | 0 | NA | 0 | NA | 0 | NA |
| 2 | 86871638 | 86865238 | -1 | NM_001768    | CD8A      | 0 | NA | 1 | 19 | 0 | NA | 0 | NA | 0 | NA |
| 2 | 86871638 | 86865238 | -1 | NM_171827    | CD8A      | 0 | NA | 1 | 19 | 0 | NA | 0 | NA | 0 | NA |
| 2 | 86942549 | 86895970 | -1 | NM_172101    | CD8B      | 0 | NA | 0 | NA | 0 | NA | 0 | NA | 0 | NA |
| 2 | 86942549 | 86895970 | -1 | NM_172102    | CD8B      | 0 | NA | 0 | NA | 0 | NA | 0 | NA | 0 | NA |
| 2 | 86942549 | 86895970 | -1 | NM_172213    | CD8B      | 0 | NA | 0 | NA | 0 | NA | 0 | NA | 0 | NA |
| 2 | 86942549 | 86922199 | -1 | NM_004931    | CD8B      | 0 | NA | 0 | NA | 0 | NA | 0 | NA | 0 | NA |
| 2 | 86942549 | 86922199 | -1 | NM_172099    | CD8B      | 0 | NA | 0 | NA | 0 | NA | 0 | NA | 0 | NA |
| 2 | 86994416 | 87094610 | 1  | NM_001024457 | RGPD1     | 0 | NA | 0 | NA | 0 | NA | 0 | NA | 0 | NA |
| 2 | 87056847 | 87093372 | 1  | NM_001078170 | RGPD2     | 0 | NA | 0 | NA | 0 | NA | 0 | NA | 0 | NA |
| 2 | 87102480 | 87091098 | -1 | NM_001032392 | PLGLB1    | 0 | NA | 0 | NA | 0 | NA | 0 | NA | 0 | NA |
| 2 | 87102484 | 87091098 | -1 | NM_002665    | PLGLB2    | 0 | NA | 0 | NA | 0 | NA | 0 | NA | 0 | NA |
| 2 | 87828720 | 87840109 | 1  | NM_002665    | PLGLB2    | 0 | NA | 0 | NA | 0 | NA | 0 | NA | 0 | NA |
| 2 | 87828724 | 87840109 | 1  | NM_001032392 | PLGLB1    | 0 | NA | 0 | NA | 0 | NA | 0 | NA | 0 | NA |
| 2 | 87874341 | 87837834 | -1 | NM_001078170 | RGPD2     | 0 | NA | 0 | NA | 0 | NA | 0 | NA | 0 | NA |
| 2 | 87906430 | 87836593 | -1 | NM_001024457 | RGPD1     | 0 | NA | 0 | NA | 0 | NA | 0 | NA | 0 | NA |
| 2 | 88136363 | 88107838 | -1 | NM_016618    | KRCC1     | 1 | 12 | 0 | NA | 0 | NA | 0 | NA | 0 | NA |
| 2 | 88148496 | 88194017 | 1  | NM_198274    | SMYD1     | 0 | NA | 0 | NA | 0 | NA | 0 | NA | 0 | NA |
| 2 | 88208693 | 88203624 | -1 | NM_001443    | FABP1     | 0 | NA | 0 | NA | 0 | NA | 0 | NA | 0 | NA |
| 2 | 88250949 | 88267261 | 1  | NM_018271    | THNSL2    | 0 | NA | 0 | NA | 0 | NA | 0 | NA | 0 | NA |
| 2 | 88605283 | 88610217 | 1  | NM_152670    | C2orf51   | 0 | NA | 0 | NA | 0 | NA | 0 | NA | 0 | NA |
| 2 | 88708109 | 88637373 | -1 | NM_004836    | EIF2AK3   | 0 | NA | 0 | NA | 0 | NA | 0 | NA | 0 | NA |
| 2 | 88772290 | 88831567 | 1  | NM_144563    | RPIA      | 1 | 11 | 0 | NA | 0 | NA | 0 | NA | 0 | NA |

|   |          |          |    |              |           |   |    |   |    |   |    |   |    |   |    |
|---|----------|----------|----|--------------|-----------|---|----|---|----|---|----|---|----|---|----|
| 2 | 94900958 | 94906295 | 1  | NM_144705    | TEKT4     | 0 | NA | 1 | 14 | 1 | 13 | 1 | 14 | 1 | 13 |
| 2 | 95055205 | 95083462 | 1  | NM_002371    | MAL       | 0 | NA | 0 | NA | 0 | NA | 0 | NA | 0 | NA |
| 2 | 95055205 | 95083462 | 1  | NM_022438    | MAL       | 0 | NA | 0 | NA | 0 | NA | 0 | NA | 0 | NA |
| 2 | 95055205 | 95083462 | 1  | NM_022439    | MAL       | 0 | NA | 0 | NA | 0 | NA | 0 | NA | 0 | NA |
| 2 | 95055205 | 95083462 | 1  | NM_022440    | MAL       | 0 | NA | 0 | NA | 0 | NA | 0 | NA | 0 | NA |
| 2 | 95151481 | 95116678 | -1 | NM_031902    | MRPS5     | 0 | NA | 0 | NA | 0 | NA | 0 | NA | 1 | 12 |
| 2 | 95188990 | 95177126 | -1 | NM_032788    | ZNF514    | 1 | 17 | 0 | NA | 1 | 12 | 1 | 16 | 0 | NA |
| 2 | 95194909 | 95213791 | 1  | NM_001017396 | ZNF2      | 1 | 17 | 0 | NA | 0 | NA | 1 | 16 | 0 | NA |
| 2 | 95194909 | 95213791 | 1  | NM_021088    | ZNF2      | 1 | 17 | 0 | NA | 0 | NA | 1 | 16 | 0 | NA |
| 2 | 95303927 | 95320781 | 1  | NM_144707    | PROM2     | 0 | NA | 0 | NA | 0 | NA | 0 | NA | 1 | 12 |
| 2 | 95326798 | 95415552 | 1  | NM_013434    | KCNIP3    | 0 | NA | 0 | NA | 0 | NA | 0 | NA | 0 | NA |
| 2 | 95376494 | 95415552 | 1  | NM_001034914 | KCNIP3    | 0 | NA | 0 | NA | 0 | NA | 1 | 11 | 0 | NA |
| 2 | 95432174 | 95442606 | 1  | NM_016044    | FAHD2A    | 0 | NA | 0 | NA | 0 | NA | 0 | NA | 0 | NA |
| 2 | 95621492 | 95629196 | 1  | NM_138800    | TRIM43    | 0 | NA | 0 | NA | 0 | NA | 0 | NA | 0 | NA |
| 2 | 96064454 | 96051420 | -1 | NM_207328    | LOC150763 | 0 | NA | 0 | NA | 0 | NA | 0 | NA | 0 | NA |
| 2 | 96145615 | 96142349 | -1 | NM_000682    | ADRA2B    | 0 | NA | 0 | NA | 0 | NA | 0 | NA | 0 | NA |
| 2 | 96167902 | 96153315 | -1 | NM_001002036 | ASTL      | 0 | NA | 0 | NA | 0 | NA | 0 | NA | 0 | NA |
| 2 | 96174906 | 96172634 | -1 | NM_004418    | DUSP2     | 1 | 14 | 0 | NA | 0 | NA | 0 | NA | 0 | NA |
| 2 | 96238300 | 96214329 | -1 | NM_020151    | STARD7    | 0 | NA | 0 | NA | 0 | NA | 0 | NA | 0 | NA |
| 2 | 96269703 | 96271428 | 1  | NM_001037228 | LOC285033 | 1 | 11 | 0 | NA | 0 | NA | 0 | NA | 0 | NA |
| 2 | 96295459 | 96280038 | -1 | NM_017849    | TMEM127   | 0 | NA | 0 | NA | 0 | NA | 0 | NA | 0 | NA |
| 2 | 96295610 | 96303627 | 1  | NM_004804    | CIAO1     | 0 | NA | 0 | NA | 0 | NA | 0 | NA | 0 | NA |
| 2 | 96334988 | 96303800 | -1 | NM_014014    | ASCC3L1   | 0 | NA | 0 | NA | 0 | NA | 0 | NA | 0 | NA |
| 2 | 96354872 | 96357806 | 1  | NM_001008949 | KIAA1754L | 0 | NA | 0 | NA | 0 | NA | 1 | 12 | 0 | NA |
| 2 | 96355687 | 96357806 | 1  | NM_178495    | KIAA1754L | 0 | NA | 0 | NA | 0 | NA | 1 | 12 | 0 | NA |
| 2 | 96365210 | 96405001 | 1  | NM_015341    | NCAFP     | 0 | NA | 0 | NA | 0 | NA | 1 | 12 | 0 | NA |
| 2 | 96534821 | 96527106 | -1 | NM_001080535 | LINCR     | 0 | NA | 0 | NA | 0 | NA | 0 | NA | 0 | NA |
| 2 | 96566190 | 96582098 | 1  | NM_212481    | ARID5A    | 1 | 12 | 0 | NA | 0 | NA | 0 | NA | 0 | NA |
| 2 | 96667842 | 96622633 | -1 | NM_001115016 | KIAA1310  | 0 | NA | 0 | NA | 0 | NA | 0 | NA | 0 | NA |
| 2 | 96667842 | 96622633 | -1 | NM_017991    | KIAA1310  | 0 | NA | 0 | NA | 0 | NA | 0 | NA | 0 | NA |
| 2 | 96672300 | 96734351 | 1  | NM_001113382 | FER1L5    | 0 | NA | 0 | NA | 0 | NA | 0 | NA | 0 | NA |
| 2 | 96724920 | 96734207 | 1  | NM_001077400 | FER1L5    | 0 | NA | 0 | NA | 0 | NA | 0 | NA | 0 | NA |
| 2 | 96769528 | 96735393 | -1 | NM_030805    | LMAN2L    | 0 | NA | 0 | NA | 0 | NA | 0 | NA | 0 | NA |
| 2 | 96790365 | 96841355 | 1  | NM_020184    | CNNM4     | 0 | NA | 0 | NA | 0 | NA | 1 | 11 | 0 | NA |
| 2 | 96845717 | 96864848 | 1  | NM_017623    | CNNM3     | 0 | NA | 0 | NA | 0 | NA | 0 | NA | 0 | NA |
| 2 | 96845717 | 96864848 | 1  | NM_199078    | CNNM3     | 0 | NA | 0 | NA | 0 | NA | 0 | NA | 0 | NA |
| 2 | 96873485 | 96867377 | -1 | NM_144994    | ANKRD23   | 0 | NA | 0 | NA | 0 | NA | 0 | NA | 0 | NA |
| 2 | 96887483 | 96877450 | -1 | NM_016466    | ANKRD39   | 0 | NA | 0 | NA | 0 | NA | 1 | 11 | 0 | NA |
| 2 | 96899462 | 96889199 | -1 | NM_017789    | SEMA4C    | 0 | NA | 0 | NA | 0 | NA | 1 | 14 | 0 | NA |
| 2 | 96927558 | 96905348 | -1 | NM_016490    | LOC51252  | 0 | NA | 0 | NA | 0 | NA | 0 | NA | 0 | NA |
| 2 | 97016028 | 96905345 | -1 | NM_001122646 | LOC51252  | 0 | NA | 0 | NA | 0 | NA | 0 | NA | 0 | NA |
| 2 | 97124309 | 97113049 | -1 | NM_199336    | FAHD2B    | 0 | NA | 0 | NA | 0 | NA | 0 | NA | 0 | NA |
| 2 | 97143080 | 97148109 | 1  | NM_198555    | ANKRD36   | 0 | NA | 0 | NA | 0 | NA | 0 | NA | 0 | NA |
| 2 | 97572761 | 97487692 | -1 | NM_025190    | ANKRD36B  | 0 | NA | 0 | NA | 0 | NA | 0 | NA | 0 | NA |
| 2 | 97628952 | 97631089 | 1  | NM_001862    | COX5B     | 0 | NA | 0 | NA | 0 | NA | 0 | NA | 0 | NA |
| 2 | 97646816 | 97638862 | -1 | NM_005735    | ACTR1B    | 0 | NA | 0 | NA | 0 | NA | 0 | NA | 0 | NA |
| 2 | 97696462 | 97722755 | 1  | NM_001079    | ZAP70     | 0 | NA | 0 | NA | 0 | NA | 0 | NA | 0 | NA |
| 2 | 97717300 | 97722755 | 1  | NM_207519    | ZAP70     | 0 | NA | 0 | NA | 0 | NA | 0 | NA | 0 | NA |
| 2 | 97978786 | 97739232 | -1 | NM_015348    | TMEM131   | 0 | NA | 0 | NA | 0 | NA | 0 | NA | 0 | NA |
| 2 | 98070026 | 98295842 | 1  | NM_144992    | VWA3B     | 0 | NA | 1 | 14 | 0 | NA | 0 | NA | 0 | NA |
| 2 | 98329049 | 98381496 | 1  | NM_001079878 | CNGA3     | 0 | NA | 0 | NA | 0 | NA | 0 | NA | 1 | 14 |
| 2 | 98329049 | 98381496 | 1  | NM_001298    | CNGA3     | 0 | NA | 0 | NA | 0 | NA | 0 | NA | 1 | 14 |
| 2 | 98427844 | 98564716 | 1  | NM_001566    | INPP4A    | 0 | NA | 0 | NA | 0 | NA | 0 | NA | 0 | NA |
| 2 | 98427844 | 98570598 | 1  | NM_004027    | INPP4A    | 0 | NA | 0 | NA | 0 | NA | 0 | NA | 0 | NA |
| 2 | 98591387 | 98582296 | -1 | NM_001008215 | C2orf64   | 0 | NA | 0 | NA | 0 | NA | 0 | NA | 0 | NA |
| 2 | 98591473 | 98601409 | 1  | NM_014044    | UNC50     | 0 | NA | 0 | NA | 0 | NA | 0 | NA | 0 | NA |
| 2 | 98714021 | 98602000 | -1 | NM_012214    | MGAT4A    | 0 | NA | 0 | NA | 0 | NA | 0 | NA | 0 | NA |
| 2 | 98919116 | 98776740 | -1 | NM_207362    | C2orf55   | 0 | NA | 0 | NA | 0 | NA | 0 | NA | 0 | NA |
| 2 | 99101674 | 98980782 | -1 | NM_025244    | TSGA10    | 0 | NA | 0 | NA | 0 | NA | 0 | NA | 0 | NA |
| 2 | 99124467 | 98980786 | -1 | NM_182911    | TSGA10    | 0 | NA | 0 | NA | 1 | 17 | 1 | 17 | 1 | 12 |
| 2 | 99124616 | 99134360 | 1  | NM_144706    | C2orf15   | 0 | NA | 0 | NA | 0 | NA | 1 | 13 | 1 | 12 |
| 2 | 99137849 | 99146045 | 1  | NM_015929    | LIPT1     | 1 | 11 | 0 | NA | 0 | NA | 0 | NA | 0 | NA |
| 2 | 99137849 | 99146045 | 1  | NM_145196    | LIPT1     | 1 | 11 | 0 | NA | 0 | NA | 0 | NA | 0 | NA |
| 2 | 99137849 | 99146045 | 1  | NM_145197    | LIPT1     | 1 | 11 | 0 | NA | 0 | NA | 0 | NA | 0 | NA |
| 2 | 99137849 | 99146045 | 1  | NM_145198    | LIPT1     | 1 | 11 | 0 | NA | 0 | NA | 0 | NA | 0 | NA |

|   |           |           |    |              |           |   |    |   |    |   |    |   |    |   |    |
|---|-----------|-----------|----|--------------|-----------|---|----|---|----|---|----|---|----|---|----|
| 2 | 99137849  | 99146045  | 1  | NM_145199    | LIPT1     | 1 | 11 | 0 | NA | 0 | NA | 0 | NA | 0 | NA |
| 2 | 99163924  | 99152157  | -1 | NM_138798    | MITD1     | 0 | NA | 0 | NA | 0 | NA | 1 | 15 | 0 | NA |
| 2 | 99164009  | 99180521  | 1  | NM_145212    | MRPL30    | 0 | NA | 0 | NA | 0 | NA | 1 | 15 | 0 | NA |
| 2 | 99164009  | 99180521  | 1  | NM_145213    | MRPL30    | 0 | NA | 0 | NA | 0 | NA | 1 | 15 | 0 | NA |
| 2 | 99238002  | 99225142  | -1 | NM_175735    | LYG2      | 0 | NA | 0 | NA | 0 | NA | 0 | NA | 0 | NA |
| 2 | 99284071  | 99267132  | -1 | NM_174898    | LYG1      | 0 | NA | 0 | NA | 0 | NA | 0 | NA | 0 | NA |
| 2 | 99319292  | 99301918  | -1 | NM_005783    | TXNDC9    | 0 | NA | 0 | NA | 0 | NA | 0 | NA | 0 | NA |
| 2 | 99320265  | 99383160  | 1  | NM_015904    | EIF5B     | 0 | NA | 0 | NA | 0 | NA | 0 | NA | 0 | NA |
| 2 | 99472912  | 99383369  | -1 | NM_001037872 | REV1      | 0 | NA | 0 | NA | 0 | NA | 0 | NA | 0 | NA |
| 2 | 99472912  | 99383369  | -1 | NM_016316    | REV1      | 0 | NA | 0 | NA | 0 | NA | 0 | NA | 0 | NA |
| 2 | 100088477 | 99530147  | -1 | NM_001025108 | AFF3      | 0 | NA | 0 | NA | 0 | NA | 0 | NA | 0 | NA |
| 2 | 100125469 | 99530147  | -1 | NM_002285    | AFF3      | 0 | NA | 0 | NA | 0 | NA | 0 | NA | 0 | NA |
| 2 | 100305627 | 100256184 | -1 | NM_198461    | LONRF2    | 1 | 11 | 0 | NA | 0 | NA | 0 | NA | 0 | NA |
| 2 | 100400523 | 100374753 | -1 | NM_004854    | CHST10    | 0 | NA | 0 | NA | 0 | NA | 0 | NA | 0 | NA |
| 2 | 100453375 | 100466174 | 1  | NM_001011717 | NMS       | 0 | NA | 0 | NA | 0 | NA | 0 | NA | 0 | NA |
| 2 | 100492170 | 100493126 | 1  | NM_001101386 | LOC643896 | 0 | NA | 0 | NA | 0 | NA | 0 | NA | 0 | NA |
| 2 | 100545849 | 100559633 | 1  | NM_024065    | PDCL3     | 1 | 13 | 0 | NA | 0 | NA | 1 | 12 | 0 | NA |
| 2 | 100803044 | 100979719 | 1  | NM_002518    | NPAS2     | 0 | NA | 0 | NA | 0 | NA | 0 | NA | 0 | NA |
| 2 | 100985122 | 100989317 | 1  | NM_000993    | RPL31     | 1 | 15 | 0 | NA | 1 | 22 | 1 | 29 | 1 | 14 |
| 2 | 100985122 | 100989317 | 1  | NM_001099693 | RPL31     | 1 | 15 | 0 | NA | 1 | 22 | 1 | 29 | 1 | 14 |
| 2 | 100985122 | 101002587 | 1  | NM_001098577 | RPL31     | 1 | 15 | 0 | NA | 1 | 22 | 1 | 29 | 1 | 14 |
| 2 | 101134278 | 100990121 | -1 | NM_001102426 | TBC1D8    | 0 | NA | 0 | NA | 0 | NA | 1 | 11 | 0 | NA |
| 2 | 101235809 | 101253208 | 1  | NM_017546    | C2orf29   | 0 | NA | 0 | NA | 0 | NA | 0 | NA | 0 | NA |
| 2 | 101291584 | 101258984 | -1 | NM_173647    | RNF149    | 0 | NA | 0 | NA | 0 | NA | 0 | NA | 0 | NA |
| 2 | 101370489 | 101331656 | -1 | NM_153836    | CREG2     | 0 | NA | 0 | NA | 0 | NA | 0 | NA | 0 | NA |
| 2 | 101680919 | 101877584 | 1  | NM_004834    | MAP4K4    | 0 | NA | 0 | NA | 0 | NA | 0 | NA | 0 | NA |
| 2 | 101680919 | 101877584 | 1  | NM_145686    | MAP4K4    | 0 | NA | 0 | NA | 0 | NA | 0 | NA | 0 | NA |
| 2 | 101680919 | 101877584 | 1  | NM_145687    | MAP4K4    | 0 | NA | 0 | NA | 0 | NA | 0 | NA | 0 | NA |
| 2 | 101974737 | 102011316 | 1  | NM_004633    | IL1R2     | 0 | NA | 0 | NA | 0 | NA | 0 | NA | 0 | NA |
| 2 | 101981890 | 102011316 | 1  | NM_173343    | IL1R2     | 0 | NA | 0 | NA | 0 | NA | 0 | NA | 0 | NA |
| 2 | 102136833 | 102162766 | 1  | NM_000877    | IL1R1     | 0 | NA | 0 | NA | 0 | NA | 0 | NA | 0 | NA |
| 2 | 102169864 | 102222243 | 1  | NM_003854    | IL1RL2    | 0 | NA | 0 | NA | 0 | NA | 0 | NA | 0 | NA |
| 2 | 102294393 | 102334929 | 1  | NM_016232    | IL1RL1    | 0 | NA | 0 | NA | 0 | NA | 0 | NA | 0 | NA |
| 2 | 102320148 | 102327614 | 1  | NM_003856    | IL1RL1    | 0 | NA | 0 | NA | 0 | NA | 0 | NA | 0 | NA |
| 2 | 102345528 | 102381649 | 1  | NM_003855    | IL18R1    | 0 | NA | 0 | NA | 0 | NA | 0 | NA | 0 | NA |
| 2 | 102401685 | 102435456 | 1  | NM_003853    | IL18RAP   | 0 | NA | 0 | NA | 0 | NA | 0 | NA | 0 | NA |
| 2 | 102456193 | 102516863 | 1  | NM_001011552 | SLC9A4    | 0 | NA | 0 | NA | 0 | NA | 0 | NA | 0 | NA |
| 2 | 102602597 | 102694241 | 1  | NM_003048    | SLC9A2    | 0 | NA | 0 | NA | 0 | NA | 0 | NA | 0 | NA |
| 2 | 102719745 | 102700097 | -1 | NM_032718    | MFSD9     | 0 | NA | 0 | NA | 0 | NA | 0 | NA | 0 | NA |
| 2 | 102744966 | 102800302 | 1  | NM_144632    | TMEM182   | 0 | NA | 0 | NA | 0 | NA | 0 | NA | 0 | NA |
| 2 | 104836400 | 104839903 | 1  | NM_006236    | POU3F3    | 1 | 11 | 1 | 15 | 0 | NA | 0 | NA | 0 | NA |
| 2 | 105020914 | 105082850 | 1  | NM_182640    | MRPS9     | 0 | NA | 0 | NA | 0 | NA | 0 | NA | 0 | NA |
| 2 | 105224631 | 105226356 | 1  | NM_007227    | GPR45     | 0 | NA | 0 | NA | 0 | NA | 0 | NA | 0 | NA |
| 2 | 105312561 | 105249971 | -1 | NM_004257    | TGFBRAP1  | 1 | 11 | 0 | NA | 0 | NA | 0 | NA | 0 | NA |
| 2 | 105320444 | 105328416 | 1  | NM_024093    | C2orf49   | 1 | 11 | 0 | NA | 0 | NA | 0 | NA | 0 | NA |
| 2 | 105381942 | 105343716 | -1 | NM_001039492 | FHL2      | 1 | 11 | 0 | NA | 0 | NA | 1 | 14 | 0 | NA |
| 2 | 105382113 | 105343714 | -1 | NM_001450    | FHL2      | 1 | 11 | 0 | NA | 0 | NA | 1 | 14 | 0 | NA |
| 2 | 105382113 | 105343714 | -1 | NM_201555    | FHL2      | 1 | 11 | 0 | NA | 0 | NA | 1 | 14 | 0 | NA |
| 2 | 105421392 | 105343716 | -1 | NM_201557    | FHL2      | 0 | NA | 0 | NA | 0 | NA | 0 | NA | 0 | NA |
| 2 | 105727785 | 105877160 | 1  | NM_001004722 | NCK2      | 0 | NA | 0 | NA | 0 | NA | 0 | NA | 0 | NA |
| 2 | 105727785 | 105877160 | 1  | NM_003581    | NCK2      | 0 | NA | 0 | NA | 0 | NA | 0 | NA | 0 | NA |
| 2 | 105834736 | 105877160 | 1  | NM_001004720 | NCK2      | 0 | NA | 0 | NA | 0 | NA | 0 | NA | 0 | NA |
| 2 | 106048544 | 106061037 | 1  | NM_032411    | C2orf40   | 0 | NA | 0 | NA | 0 | NA | 0 | NA | 0 | NA |
| 2 | 106177227 | 106076190 | -1 | NM_025076    | UXS1      | 0 | NA | 0 | NA | 0 | NA | 0 | NA | 0 | NA |
| 2 | 106869982 | 106789537 | -1 | NM_032528    | ST6GAL2   | 0 | NA | 0 | NA | 0 | NA | 0 | NA | 0 | NA |
| 2 | 107969426 | 107996875 | 1  | NM_021815    | SLC5A7    | 0 | NA | 0 | NA | 0 | NA | 0 | NA | 0 | NA |
| 2 | 108230082 | 108248239 | 1  | NM_001008743 | SULT1C3   | 0 | NA | 0 | NA | 0 | NA | 0 | NA | 0 | NA |
| 2 | 108271526 | 108292803 | 1  | NM_001056    | SULT1C2   | 0 | NA | 0 | NA | 0 | NA | 0 | NA | 0 | NA |
| 2 | 108271526 | 108292803 | 1  | NM_176825    | SULT1C2   | 0 | NA | 0 | NA | 0 | NA | 0 | NA | 0 | NA |
| 2 | 108380852 | 108370702 | 1  | NM_006588    | SULT1C4   | 0 | NA | 0 | NA | 0 | NA | 0 | NA | 0 | NA |
| 2 | 108432067 | 108492286 | 1  | NM_014635    | GCC2      | 0 | NA | 0 | NA | 0 | NA | 0 | NA | 0 | NA |
| 2 | 108432067 | 108492286 | 1  | NM_181453    | GCC2      | 0 | NA | 0 | NA | 0 | NA | 0 | NA | 0 | NA |
| 2 | 108571198 | 108667321 | 1  | NM_004987    | LIMS1     | 0 | NA | 0 | NA | 1 | 12 | 0 | NA | 0 | NA |
| 2 | 108702368 | 108768699 | 1  | NM_006267    | RANBP2    | 0 | NA | 0 | NA | 0 | NA | 0 | NA | 0 | NA |
| 2 | 108769650 | 108859279 | 1  | NM_144978    | CCDC138   | 0 | NA | 0 | NA | 0 | NA | 0 | NA | 0 | NA |

|   |           |           |    |              |         |   |    |   |    |   |    |   |    |   |    |
|---|-----------|-----------|----|--------------|---------|---|----|---|----|---|----|---|----|---|----|
| 2 | 108972260 | 108877360 | -1 | NM_022336    | EDAR    | 0 | NA | 0 | NA | 0 | NA | 0 | NA | 0 | NA |
| 2 | 109112428 | 109619489 | 1  | NM_001099289 | SH3MD4  | 0 | NA | 0 | NA | 0 | NA | 0 | NA | 0 | NA |
| 2 | 109729072 | 109657664 | -1 | NM_144710    | SEPT10  | 0 | NA | 0 | NA | 1 | 13 | 0 | NA | 0 | NA |
| 2 | 109729072 | 109657664 | -1 | NM_178584    | SEPT10  | 0 | NA | 0 | NA | 1 | 13 | 0 | NA | 0 | NA |
| 2 | 109729199 | 109733853 | 1  | NM_023016    | ANKRD57 | 0 | NA | 0 | NA | 1 | 13 | 0 | NA | 0 | NA |
| 2 | 109907623 | 109947885 | 1  | NM_001037866 | RGPD7   | 0 | NA | 0 | NA | 0 | NA | 0 | NA | 0 | NA |
| 2 | 109907623 | 109947885 | 1  | NM_032260    | RGPD5   | 0 | NA | 0 | NA | 0 | NA | 0 | NA | 0 | NA |
| 2 | 109908324 | 109972779 | 1  | NM_001123363 | RGPD6   | 0 | NA | 0 | NA | 0 | NA | 0 | NA | 0 | NA |
| 2 | 109909254 | 109972552 | 1  | NM_005054    | RGPD5   | 0 | NA | 0 | NA | 0 | NA | 0 | NA | 0 | NA |
| 2 | 110013557 | 110021316 | 1  | NM_033514    | LIMS3   | 0 | NA | 0 | NA | 0 | NA | 0 | NA | 0 | NA |
| 2 | 110230937 | 110198735 | -1 | NM_005434    | MALL    | 0 | NA | 0 | NA | 0 | NA | 0 | NA | 0 | NA |
| 2 | 110319883 | 110237192 | -1 | NM_000272    | NPHP1   | 0 | NA | 0 | NA | 0 | NA | 1 | 16 | 0 | NA |
| 2 | 110319883 | 110292913 | -1 | NM_207181    | NPHP1   | 0 | NA | 0 | NA | 0 | NA | 1 | 16 | 0 | NA |
| 2 | 110664929 | 110657170 | -1 | NM_033514    | LIMS3   | 0 | NA | 0 | NA | 0 | NA | 0 | NA | 0 | NA |
| 2 | 110769671 | 110705934 | -1 | NM_005054    | RGPD5   | 0 | NA | 0 | NA | 0 | NA | 0 | NA | 0 | NA |
| 2 | 110770601 | 110705707 | -1 | NM_001123363 | RGPD6   | 0 | NA | 0 | NA | 0 | NA | 0 | NA | 0 | NA |
| 2 | 110771303 | 110730601 | -1 | NM_001037866 | RGPD7   | 0 | NA | 0 | NA | 0 | NA | 0 | NA | 0 | NA |
| 2 | 110771303 | 110730601 | -1 | NM_032260    | RGPD5   | 0 | NA | 0 | NA | 0 | NA | 0 | NA | 0 | NA |
| 2 | 111052778 | 111012127 | -1 | NM_001037866 | RGPD7   | 0 | NA | 0 | NA | 0 | NA | 0 | NA | 0 | NA |
| 2 | 111052778 | 111012127 | -1 | NM_032260    | RGPD5   | 0 | NA | 0 | NA | 0 | NA | 0 | NA | 0 | NA |
| 2 | 111152135 | 11111880  | -1 | NM_004336    | BUB1    | 1 | 11 | 0 | NA | 0 | NA | 0 | NA | 0 | NA |
| 2 | 111206679 | 111568392 | 1  | NM_001105516 | ACOXL   | 0 | NA | 0 | NA | 0 | NA | 0 | NA | 0 | NA |
| 2 | 111594961 | 111602894 | 1  | NM_207002    | BCL2L11 | 0 | NA | 1 | 17 | 0 | NA | 1 | 15 | 0 | NA |
| 2 | 111594961 | 111642493 | 1  | NM_006538    | BCL2L11 | 0 | NA | 1 | 17 | 0 | NA | 1 | 15 | 0 | NA |
| 2 | 111594961 | 111642493 | 1  | NM_138621    | BCL2L11 | 0 | NA | 1 | 17 | 0 | NA | 1 | 15 | 0 | NA |
| 2 | 112358212 | 112243110 | -1 | NM_022662    | ANAPC1  | 0 | NA | 0 | NA | 0 | NA | 0 | NA | 0 | NA |
| 2 | 112372661 | 112503416 | 1  | NM_006343    | MERTK   | 0 | NA | 0 | NA | 0 | NA | 0 | NA | 0 | NA |
| 2 | 112529284 | 112591101 | 1  | NM_032824    | TMEM87B | 0 | NA | 0 | NA | 0 | NA | 0 | NA | 0 | NA |
| 2 | 112612432 | 112662262 | 1  | NM_153214    | FBLN7   | 0 | NA | 0 | NA | 0 | NA | 0 | NA | 1 | 14 |
| 2 | 112729121 | 112689910 | -1 | NM_032494    | ZC3H8   | 0 | NA | 0 | NA | 0 | NA | 0 | NA | 0 | NA |
| 2 | 112749648 | 112814111 | 1  | NM_198581    | ZC3H6   | 0 | NA | 0 | NA | 0 | NA | 0 | NA | 0 | NA |
| 2 | 112956213 | 113006693 | 1  | NM_153712    | TTL     | 0 | NA | 0 | NA | 0 | NA | 0 | NA | 0 | NA |
| 2 | 113016083 | 113051879 | 1  | NM_019014    | POLR1B  | 0 | NA | 0 | NA | 0 | NA | 0 | NA | 0 | NA |
| 2 | 113058506 | 113063088 | 1  | NM_032309    | CHCHD5  | 0 | NA | 0 | NA | 0 | NA | 0 | NA | 0 | NA |
| 2 | 113119997 | 113137871 | 1  | NM_005415    | SLC20A1 | 1 | 12 | 0 | NA | 0 | NA | 1 | 18 | 0 | NA |
| 2 | 113238725 | 113211914 | -1 | NM_152515    | CKAP2L  | 0 | NA | 0 | NA | 0 | NA | 1 | 13 | 0 | NA |
| 2 | 113259442 | 113247962 | -1 | NM_000575    | IL1A    | 0 | NA | 0 | NA | 0 | NA | 0 | NA | 0 | NA |
| 2 | 113310827 | 113303807 | -1 | NM_000576    | IL1B    | 0 | NA | 0 | NA | 0 | NA | 0 | NA | 0 | NA |
| 2 | 113387018 | 113392929 | 1  | NM_014439    | IL1F7   | 0 | NA | 0 | NA | 1 | 15 | 0 | NA | 0 | NA |
| 2 | 113387018 | 113392929 | 1  | NM_173202    | IL1F7   | 0 | NA | 0 | NA | 1 | 15 | 0 | NA | 0 | NA |
| 2 | 113387018 | 113392929 | 1  | NM_173203    | IL1F7   | 0 | NA | 0 | NA | 1 | 15 | 0 | NA | 0 | NA |
| 2 | 113387018 | 113392929 | 1  | NM_173204    | IL1F7   | 0 | NA | 0 | NA | 1 | 15 | 0 | NA | 0 | NA |
| 2 | 113389240 | 113392929 | 1  | NM_173205    | IL1F7   | 0 | NA | 0 | NA | 1 | 15 | 0 | NA | 0 | NA |
| 2 | 113452076 | 113459698 | 1  | NM_019618    | IL1F9   | 0 | NA | 0 | NA | 0 | NA | 0 | NA | 0 | NA |
| 2 | 113479919 | 113482092 | 1  | NM_014440    | IL1F6   | 0 | NA | 0 | NA | 0 | NA | 0 | NA | 0 | NA |
| 2 | 113526911 | 113496138 | -1 | NM_014438    | IL1F8   | 0 | NA | 0 | NA | 0 | NA | 0 | NA | 1 | 18 |
| 2 | 113526911 | 113501606 | -1 | NM_173178    | IL1F8   | 0 | NA | 0 | NA | 0 | NA | 0 | NA | 1 | 18 |
| 2 | 113532685 | 113538791 | 1  | NM_173170    | IL1F5   | 0 | NA | 0 | NA | 0 | NA | 0 | NA | 1 | 18 |
| 2 | 113533155 | 113538791 | 1  | NM_012275    | IL1F5   | 0 | NA | 0 | NA | 0 | NA | 0 | NA | 1 | 18 |
| 2 | 113542017 | 113549898 | 1  | NM_173161    | IL1F10  | 0 | NA | 0 | NA | 0 | NA | 0 | NA | 1 | 13 |
| 2 | 113546365 | 113549898 | 1  | NM_032556    | IL1F10  | 0 | NA | 0 | NA | 0 | NA | 0 | NA | 1 | 13 |
| 2 | 113591940 | 113608064 | 1  | NM_000577    | IL1RN   | 0 | NA | 0 | NA | 0 | NA | 0 | NA | 0 | NA |
| 2 | 113591940 | 113608064 | 1  | NM_173841    | IL1RN   | 0 | NA | 0 | NA | 0 | NA | 0 | NA | 0 | NA |
| 2 | 113591940 | 113608064 | 1  | NM_173843    | IL1RN   | 0 | NA | 0 | NA | 0 | NA | 0 | NA | 0 | NA |
| 2 | 113601608 | 113608064 | 1  | NM_173842    | IL1RN   | 0 | NA | 0 | NA | 0 | NA | 0 | NA | 0 | NA |
| 2 | 113648030 | 113677148 | 1  | NM_012455    | PSD4    | 0 | NA | 0 | NA | 0 | NA | 0 | NA | 0 | NA |
| 2 | 113752968 | 113690044 | -1 | NM_003466    | PAX8    | 0 | NA | 1 | 15 | 0 | NA | 0 | NA | 0 | NA |
| 2 | 113752968 | 113690044 | -1 | NM_013951    | PAX8    | 0 | NA | 1 | 15 | 0 | NA | 0 | NA | 0 | NA |
| 2 | 113752968 | 113690044 | -1 | NM_013952    | PAX8    | 0 | NA | 1 | 15 | 0 | NA | 0 | NA | 0 | NA |
| 2 | 113752968 | 113690044 | -1 | NM_013953    | PAX8    | 0 | NA | 1 | 15 | 0 | NA | 0 | NA | 0 | NA |
| 2 | 113752968 | 113690044 | -1 | NM_013992    | PAX8    | 0 | NA | 1 | 15 | 0 | NA | 0 | NA | 0 | NA |
| 2 | 113911852 | 113970216 | 1  | NM_172003    | CBWD2   | 0 | NA | 0 | NA | 0 | NA | 0 | NA | 0 | NA |
| 2 | 113973130 | 113975197 | 1  | NM_012184    | FOXD4L1 | 0 | NA | 0 | NA | 0 | NA | 0 | NA | 0 | NA |
| 2 | 114101286 | 114117445 | 1  | NM_007082    | RABL2A  | 0 | NA | 0 | NA | 0 | NA | 0 | NA | 0 | NA |
| 2 | 114101286 | 114117445 | 1  | NM_013412    | RABL2A  | 0 | NA | 0 | NA | 0 | NA | 0 | NA | 0 | NA |

|   |           |           |    |              |           |   |    |   |    |   |    |   |    |   |    |
|---|-----------|-----------|----|--------------|-----------|---|----|---|----|---|----|---|----|---|----|
| 2 | 114230870 | 114188402 | -1 | NM_025181    | SLC35F5   | 0 | NA | 0 | NA | 0 | NA | 0 | NA | 0 | NA |
| 2 | 114364006 | 114432637 | 1  | NM_005721    | ACTR3     | 0 | NA | 0 | NA | 0 | NA | 0 | NA | 0 | NA |
| 2 | 114916368 | 116318406 | 1  | NM_020868    | DPP10     | 0 | NA | 0 | NA | 0 | NA | 0 | NA | 0 | NA |
| 2 | 115636201 | 116318406 | 1  | NM_001004360 | DPP10     | 0 | NA | 0 | NA | 0 | NA | 0 | NA | 0 | NA |
| 2 | 118288724 | 118306423 | 1  | NM_006773    | DDX18     | 0 | NA | 0 | NA | 0 | NA | 0 | NA | 0 | NA |
| 2 | 118488167 | 118389616 | -1 | NM_019044    | CCDC93    | 0 | NA | 0 | NA | 0 | NA | 1 | 25 | 0 | NA |
| 2 | 118562519 | 118584067 | 1  | NM_016133    | INSIG2    | 0 | NA | 0 | NA | 0 | NA | 0 | NA | 0 | NA |
| 2 | 119322229 | 119316216 | -1 | NM_001426    | EN1       | 0 | NA | 1 | 13 | 0 | NA | 0 | NA | 0 | NA |
| 2 | 119416214 | 119468706 | 1  | NM_006770    | MARCO     | 0 | NA | 0 | NA | 0 | NA | 0 | NA | 0 | NA |
| 2 | 119632941 | 119630288 | -1 | NM_182528    | C1QL2     | 0 | NA | 0 | NA | 0 | NA | 0 | NA | 0 | NA |
| 2 | 119697853 | 119739697 | 1  | NM_001008410 | STEAP3    | 0 | NA | 0 | NA | 0 | NA | 0 | NA | 0 | NA |
| 2 | 119697853 | 119739697 | 1  | NM_018234    | STEAP3    | 0 | NA | 0 | NA | 0 | NA | 0 | NA | 0 | NA |
| 2 | 119697853 | 119739697 | 1  | NM_182915    | STEAP3    | 0 | NA | 0 | NA | 0 | NA | 0 | NA | 0 | NA |
| 2 | 119840728 | 119776489 | -1 | NM_001017927 | LOC130355 | 0 | NA | 0 | NA | 1 | 18 | 0 | NA | 0 | NA |
| 2 | 119840973 | 119846592 | 1  | NM_001079862 | DBI       | 0 | NA | 0 | NA | 1 | 18 | 0 | NA | 0 | NA |
| 2 | 119841075 | 119846592 | 1  | NM_020548    | DBI       | 0 | NA | 0 | NA | 1 | 18 | 0 | NA | 0 | NA |
| 2 | 119841720 | 119846592 | 1  | NM_001079863 | DBI       | 0 | NA | 0 | NA | 1 | 18 | 0 | NA | 0 | NA |
| 2 | 119905915 | 119912566 | 1  | NM_183240    | TMEM37    | 1 | 14 | 0 | NA | 0 | NA | 0 | NA | 0 | NA |
| 2 | 119998498 | 119913888 | -1 | NM_002980    | SCTR      | 0 | NA | 0 | NA | 0 | NA | 0 | NA | 0 | NA |
| 2 | 120018516 | 120130707 | 1  | NM_001029996 | PCDP1     | 0 | NA | 0 | NA | 0 | NA | 0 | NA | 0 | NA |
| 2 | 120153212 | 120156164 | 1  | NM_001105198 | TMEM177   | 0 | NA | 0 | NA | 0 | NA | 0 | NA | 0 | NA |
| 2 | 120153212 | 120156164 | 1  | NM_001105199 | TMEM177   | 0 | NA | 0 | NA | 0 | NA | 0 | NA | 0 | NA |
| 2 | 120153212 | 120156164 | 1  | NM_030577    | TMEM177   | 0 | NA | 0 | NA | 0 | NA | 0 | NA | 0 | NA |
| 2 | 120233676 | 120451507 | 1  | NM_002830    | PTPN4     | 0 | NA | 0 | NA | 0 | NA | 1 | 15 | 0 | NA |
| 2 | 120487138 | 120653165 | 1  | NM_020909    | EPB41L5   | 0 | NA | 0 | NA | 0 | NA | 0 | NA | 0 | NA |
| 2 | 120726883 | 120768756 | 1  | NM_002881    | RALB      | 0 | NA | 0 | NA | 0 | NA | 1 | 12 | 0 | NA |
| 2 | 120820188 | 120825853 | 1  | NM_002193    | INHBB     | 0 | NA | 0 | NA | 0 | NA | 0 | NA | 0 | NA |
| 2 | 121266326 | 121466321 | 1  | NM_005270    | GLI2      | 0 | NA | 0 | NA | 0 | NA | 0 | NA | 0 | NA |
| 2 | 121759245 | 121695003 | -1 | NM_014553    | TFCP2L1   | 0 | NA | 0 | NA | 0 | NA | 0 | NA | 0 | NA |
| 2 | 122123522 | 121811824 | -1 | NM_015282    | CLASP1    | 1 | 16 | 0 | NA | 1 | 13 | 0 | NA | 0 | NA |
| 2 | 122210938 | 122201023 | -1 | NM_032390    | MKI67IP   | 0 | NA | 0 | NA | 0 | NA | 0 | NA | 0 | NA |
| 2 | 122229590 | 122241898 | 1  | NM_004622    | TSN       | 0 | NA | 0 | NA | 0 | NA | 0 | NA | 0 | NA |
| 2 | 124499333 | 125389333 | 1  | NM_130773    | CNTNAP5   | 0 | NA | 0 | NA | 0 | NA | 0 | NA | 0 | NA |
| 2 | 127130153 | 127170716 | 1  | NM_002101    | GYPC      | 0 | NA | 0 | NA | 0 | NA | 1 | 13 | 0 | NA |
| 2 | 127130153 | 127170716 | 1  | NM_016815    | GYPC      | 0 | NA | 0 | NA | 0 | NA | 1 | 13 | 0 | NA |
| 2 | 127581334 | 127522077 | -1 | NM_139348    | BIN1      | 0 | NA | 0 | NA | 0 | NA | 0 | NA | 0 | NA |
| 2 | 127581334 | 127522077 | -1 | NM_004305    | BIN1      | 0 | NA | 0 | NA | 0 | NA | 0 | NA | 0 | NA |
| 2 | 127581334 | 127522077 | -1 | NM_139343    | BIN1      | 0 | NA | 0 | NA | 0 | NA | 0 | NA | 0 | NA |
| 2 | 127581334 | 127522077 | -1 | NM_139344    | BIN1      | 0 | NA | 0 | NA | 0 | NA | 0 | NA | 0 | NA |
| 2 | 127581334 | 127522077 | -1 | NM_139345    | BIN1      | 0 | NA | 0 | NA | 0 | NA | 0 | NA | 0 | NA |
| 2 | 127581334 | 127522077 | -1 | NM_139346    | BIN1      | 0 | NA | 0 | NA | 0 | NA | 0 | NA | 0 | NA |
| 2 | 127581334 | 127522077 | -1 | NM_139347    | BIN1      | 0 | NA | 0 | NA | 0 | NA | 0 | NA | 0 | NA |
| 2 | 127581334 | 127522077 | -1 | NM_139349    | BIN1      | 0 | NA | 0 | NA | 0 | NA | 0 | NA | 0 | NA |
| 2 | 127581334 | 127522077 | -1 | NM_139350    | BIN1      | 0 | NA | 0 | NA | 0 | NA | 0 | NA | 0 | NA |
| 2 | 127581334 | 127522077 | -1 | NM_139351    | BIN1      | 0 | NA | 0 | NA | 0 | NA | 0 | NA | 0 | NA |
| 2 | 127679813 | 127657881 | -1 | NM_001001665 | CYP27C1   | 0 | NA | 0 | NA | 0 | NA | 0 | NA | 0 | NA |
| 2 | 127768222 | 127731335 | -1 | NM_000122    | ERCC3     | 0 | NA | 0 | NA | 0 | NA | 0 | NA | 0 | NA |
| 2 | 127817240 | 127778608 | -1 | NM_006609    | MAP3K2    | 0 | NA | 0 | NA | 0 | NA | 0 | NA | 0 | NA |
| 2 | 127892486 | 127903288 | 1  | NM_000312    | PROC      | 0 | NA | 0 | NA | 0 | NA | 0 | NA | 0 | NA |
| 2 | 128000514 | 127954859 | -1 | NM_017969    | IWS1      | 0 | NA | 0 | NA | 0 | NA | 0 | NA | 0 | NA |
| 2 | 128009847 | 128111773 | 1  | NM_001080527 | MYO7B     | 0 | NA | 0 | NA | 0 | NA | 0 | NA | 0 | NA |
| 2 | 128120216 | 128126683 | 1  | NM_005291    | GPR17     | 0 | NA | 0 | NA | 0 | NA | 1 | 11 | 0 | NA |
| 2 | 128138583 | 128112470 | -1 | NM_017980    | LIMS2     | 0 | NA | 0 | NA | 0 | NA | 0 | NA | 0 | NA |
| 2 | 128175066 | 128177877 | 1  | NM_032740    | SFT2D3    | 0 | NA | 0 | NA | 0 | NA | 0 | NA | 0 | NA |
| 2 | 128285215 | 128178277 | -1 | NM_018383    | WDR33     | 0 | NA | 0 | NA | 0 | NA | 1 | 12 | 0 | NA |
| 2 | 128285215 | 128209431 | -1 | NM_001006623 | WDR33     | 0 | NA | 0 | NA | 0 | NA | 1 | 12 | 0 | NA |
| 2 | 128285215 | 128238511 | -1 | NM_001006622 | WDR33     | 0 | NA | 0 | NA | 0 | NA | 1 | 12 | 0 | NA |
| 2 | 128332174 | 128320704 | -1 | NM_004805    | POLR2D    | 0 | NA | 0 | NA | 0 | NA | 0 | NA | 0 | NA |
| 2 | 128358904 | 128335675 | -1 | NM_031445    | AMMECR1L  | 0 | NA | 0 | NA | 0 | NA | 0 | NA | 0 | NA |
| 2 | 128501337 | 128415265 | -1 | NM_024545    | SAP130    | 1 | 20 | 0 | NA | 1 | 13 | 1 | 32 | 1 | 12 |
| 2 | 128565254 | 128665461 | 1  | NM_001025777 | UGCGL1    | 0 | NA | 1 | 13 | 0 | NA | 0 | NA | 0 | NA |
| 2 | 128565363 | 128665461 | 1  | NM_020120    | UGCGL1    | 0 | NA | 1 | 13 | 0 | NA | 0 | NA | 0 | NA |
| 2 | 128792641 | 128739523 | -1 | NM_004807    | HS6ST1    | 0 | NA | 0 | NA | 0 | NA | 0 | NA | 0 | NA |
| 2 | 130453704 | 130456781 | 1  | NM_032144    | RAB6C     | 0 | NA | 0 | NA | 0 | NA | 0 | NA | 0 | NA |
| 2 | 130594610 | 130547577 | -1 | NM_001099771 | A26C1B    | 0 | NA | 0 | NA | 0 | NA | 0 | NA | 0 | NA |

|   |           |           |    |              |           |   |    |   |    |   |    |   |    |   |    |
|---|-----------|-----------|----|--------------|-----------|---|----|---|----|---|----|---|----|---|----|
| 2 | 130619101 | 130613331 | -1 | NM_207310    | CCDC74B   | 0 | NA | 0 | NA | 0 | NA | 0 | NA | 0 | NA |
| 2 | 130656164 | 130625449 | -1 | NM_017751    | SMPD4     | 0 | NA | 0 | NA | 0 | NA | 0 | NA | 0 | NA |
| 2 | 130656164 | 130625449 | -1 | NM_017951    | SMPD4     | 0 | NA | 0 | NA | 0 | NA | 0 | NA | 0 | NA |
| 2 | 130656172 | 130664770 | 1  | NM_025029    | FAM128B   | 0 | NA | 0 | NA | 0 | NA | 0 | NA | 0 | NA |
| 2 | 130672504 | 130665787 | -1 | NM_207312    | TUBA3E    | 0 | NA | 0 | NA | 0 | NA | 0 | NA | 0 | NA |
| 2 | 130816392 | 130812285 | -1 | NM_032357    | CCDC115   | 0 | NA | 0 | NA | 0 | NA | 1 | 16 | 0 | NA |
| 2 | 130816958 | 130820667 | 1  | NM_033416    | IMP4      | 0 | NA | 0 | NA | 0 | NA | 1 | 16 | 0 | NA |
| 2 | 130830087 | 130848614 | 1  | NM_014369    | PTPN18    | 0 | NA | 0 | NA | 0 | NA | 0 | NA | 0 | NA |
| 2 | 130995136 | 131002035 | 1  | NM_001079530 | CFC1B     | 0 | NA | 0 | NA | 0 | NA | 0 | NA | 0 | NA |
| 2 | 130995305 | 131002053 | 1  | NM_032545    | CFC1      | 0 | NA | 0 | NA | 0 | NA | 0 | NA | 0 | NA |
| 2 | 131073552 | 131066804 | -1 | NM_032545    | CFC1      | 0 | NA | 0 | NA | 0 | NA | 0 | NA | 0 | NA |
| 2 | 131073721 | 131066822 | -1 | NM_001079530 | CFC1B     | 0 | NA | 0 | NA | 0 | NA | 0 | NA | 0 | NA |
| 2 | 131203192 | 131204379 | 1  | NM_207364    | GPR148    | 0 | NA | 0 | NA | 0 | NA | 0 | NA | 0 | NA |
| 2 | 131229546 | 131242177 | 1  | NM_152698    | FAM123C   | 0 | NA | 0 | NA | 0 | NA | 0 | NA | 0 | NA |
| 2 | 131229693 | 131242177 | 1  | NM_001105193 | FAM123C   | 0 | NA | 0 | NA | 0 | NA | 0 | NA | 0 | NA |
| 2 | 131230333 | 131242177 | 1  | NM_001105194 | FAM123C   | 0 | NA | 0 | NA | 0 | NA | 0 | NA | 0 | NA |
| 2 | 131230333 | 131242177 | 1  | NM_001105195 | FAM123C   | 0 | NA | 0 | NA | 0 | NA | 0 | NA | 0 | NA |
| 2 | 131390693 | 131521306 | 1  | NM_015320    | ARHGFE4   | 0 | NA | 0 | NA | 0 | NA | 0 | NA | 0 | NA |
| 2 | 131390693 | 131521306 | 1  | NM_032995    | ARHGFE4   | 0 | NA | 0 | NA | 0 | NA | 0 | NA | 0 | NA |
| 2 | 131567474 | 131521918 | -1 | NM_001009993 | LOC130074 | 0 | NA | 0 | NA | 0 | NA | 0 | NA | 0 | NA |
| 2 | 131578889 | 131623895 | 1  | NM_001100623 | PLEKHB2   | 0 | NA | 0 | NA | 0 | NA | 0 | NA | 0 | NA |
| 2 | 131578889 | 131623895 | 1  | NM_017958    | PLEKHB2   | 0 | NA | 0 | NA | 0 | NA | 0 | NA | 0 | NA |
| 2 | 131692393 | 131738886 | 1  | NM_001083538 | A26C1A    | 0 | NA | 0 | NA | 0 | NA | 0 | NA | 0 | NA |
| 2 | 131838201 | 131834534 | -1 | NM_001077637 | LOC150786 | 0 | NA | 0 | NA | 0 | NA | 0 | NA | 0 | NA |
| 2 | 131950135 | 131956977 | 1  | NM_080386    | TUBA3D    | 0 | NA | 0 | NA | 0 | NA | 0 | NA | 0 | NA |
| 2 | 131966534 | 131958002 | -1 | NM_001085365 | FAM128A   | 0 | NA | 0 | NA | 0 | NA | 0 | NA | 0 | NA |
| 2 | 132001961 | 132007709 | 1  | NM_138770    | CCDC74A   | 0 | NA | 0 | NA | 0 | NA | 0 | NA | 0 | NA |
| 2 | 132196533 | 132241447 | 1  | NM_013310    | C2orf27   | 0 | NA | 0 | NA | 0 | NA | 0 | NA | 0 | NA |
| 2 | 132275704 | 132289003 | -1 | NM_214461    | MGC50273  | 0 | NA | 0 | NA | 0 | NA | 0 | NA | 0 | NA |
| 2 | 132890616 | 133120639 | 1  | NM_001508    | GPR39     | 1 | 19 | 0 | NA | 0 | NA | 0 | NA | 1 | 14 |
| 2 | 133144951 | 133118806 | -1 | NM_144586    | LYPD1     | 1 | 13 | 0 | NA | 0 | NA | 0 | NA | 0 | NA |
| 2 | 133145540 | 133118806 | -1 | NM_001077427 | LYPD1     | 1 | 13 | 0 | NA | 0 | NA | 0 | NA | 0 | NA |
| 2 | 134042501 | 133145841 | -1 | NM_207363    | NAP5      | 0 | NA | 0 | NA | 0 | NA | 0 | NA | 0 | NA |
| 2 | 134042501 | 133145841 | -1 | NM_207481    | NAP5      | 0 | NA | 0 | NA | 0 | NA | 0 | NA | 0 | NA |
| 2 | 134728299 | 134922938 | 1  | NM_002410    | MGAT5     | 0 | NA | 0 | NA | 0 | NA | 0 | NA | 0 | NA |
| 2 | 135193040 | 134930029 | -1 | NM_030923    | TMEM163   | 0 | NA | 0 | NA | 0 | NA | 0 | NA | 0 | NA |
| 2 | 135312655 | 135376072 | 1  | NM_138326    | ACMSD     | 0 | NA | 0 | NA | 0 | NA | 0 | NA | 0 | NA |
| 2 | 135392862 | 135431054 | 1  | NM_001241    | CCNT2     | 1 | 12 | 0 | NA | 0 | NA | 0 | NA | 0 | NA |
| 2 | 135392862 | 135431054 | 1  | NM_058241    | CCNT2     | 1 | 12 | 0 | NA | 0 | NA | 0 | NA | 0 | NA |
| 2 | 135498718 | 135438742 | -1 | NM_001018046 | YSK4      | 0 | NA | 0 | NA | 0 | NA | 0 | NA | 0 | NA |
| 2 | 135498718 | 135438742 | -1 | NM_025052    | YSK4      | 0 | NA | 0 | NA | 0 | NA | 0 | NA | 0 | NA |
| 2 | 135526322 | 135644016 | 1  | NM_012233    | RAB3GAP1  | 0 | NA | 0 | NA | 0 | NA | 0 | NA | 0 | NA |
| 2 | 136005276 | 135674043 | -1 | NM_032143    | ZRANB3    | 0 | NA | 0 | NA | 0 | NA | 0 | NA | 0 | NA |
| 2 | 136005552 | 136199309 | 1  | NM_015361    | R3HDM1    | 0 | NA | 0 | NA | 0 | NA | 0 | NA | 0 | NA |
| 2 | 136215658 | 136259103 | 1  | NM_014807    | UBXD2     | 0 | NA | 0 | NA | 0 | NA | 0 | NA | 0 | NA |
| 2 | 136311220 | 136261884 | -1 | NM_002299    | LCT       | 0 | NA | 0 | NA | 0 | NA | 0 | NA | 0 | NA |
| 2 | 136350481 | 136313665 | -1 | NM_005915    | MCM6      | 0 | NA | 0 | NA | 0 | NA | 1 | 14 | 0 | NA |
| 2 | 136459692 | 136380723 | -1 | NM_001349    | DARS      | 1 | 11 | 0 | NA | 0 | NA | 0 | NA | 0 | NA |
| 2 | 136590283 | 136588388 | -1 | NM_001008540 | CXCR4     | 0 | NA | 0 | NA | 0 | NA | 0 | NA | 0 | NA |
| 2 | 136592195 | 136588388 | -1 | NM_003467    | CXCR4     | 0 | NA | 0 | NA | 0 | NA | 0 | NA | 0 | NA |
| 2 | 137464931 | 138151757 | 1  | NM_001080427 | THSD7B    | 0 | NA | 0 | NA | 0 | NA | 0 | NA | 0 | NA |
| 2 | 138438277 | 138441484 | 1  | NM_001024074 | HNMT      | 1 | 11 | 0 | NA | 1 | 15 | 1 | 12 | 0 | NA |
| 2 | 138438277 | 138455718 | 1  | NM_001024075 | HNMT      | 1 | 11 | 0 | NA | 1 | 15 | 1 | 12 | 0 | NA |
| 2 | 138438277 | 138490404 | 1  | NM_006895    | HNMT      | 1 | 11 | 0 | NA | 1 | 15 | 1 | 12 | 0 | NA |
| 2 | 138975840 | 139047271 | 1  | NM_001001664 | SPOPL     | 0 | NA | 0 | NA | 0 | NA | 0 | NA | 0 | NA |
| 2 | 139254281 | 139144920 | -1 | NM_007226    | NXPH2     | 0 | NA | 0 | NA | 0 | NA | 0 | NA | 0 | NA |
| 2 | 142605740 | 140705465 | -1 | NM_018557    | LRP1B     | 0 | NA | 0 | NA | 0 | NA | 0 | NA | 0 | NA |
| 2 | 143351664 | 143463576 | 1  | NM_001032998 | KYNU      | 0 | NA | 0 | NA | 1 | 12 | 0 | NA | 0 | NA |
| 2 | 143351664 | 143516355 | 1  | NM_003937    | KYNU      | 0 | NA | 0 | NA | 1 | 12 | 0 | NA | 0 | NA |
| 2 | 143603432 | 144242391 | 1  | NM_018460    | ARHGAP15  | 0 | NA | 0 | NA | 0 | NA | 0 | NA | 0 | NA |
| 2 | 144768530 | 144420052 | -1 | NM_001006636 | GTDC1     | 0 | NA | 0 | NA | 0 | NA | 0 | NA | 0 | NA |
| 2 | 144806499 | 144420050 | -1 | NM_024659    | GTDC1     | 0 | NA | 0 | NA | 0 | NA | 0 | NA | 0 | NA |
| 2 | 144994386 | 144862052 | -1 | NM_014795    | ZEB2      | 1 | 13 | 0 | NA | 1 | 15 | 1 | 13 | 0 | NA |
| 2 | 148319039 | 148404863 | 1  | NM_001616    | ACVR2A    | 0 | NA | 0 | NA | 0 | NA | 0 | NA | 0 | NA |
| 2 | 148494789 | 148408201 | -1 | NM_002552    | ORC4L     | 0 | NA | 0 | NA | 0 | NA | 0 | NA | 0 | NA |

|   |           |           |    |              |           |   |    |   |    |   |    |   |    |   |    |
|---|-----------|-----------|----|--------------|-----------|---|----|---|----|---|----|---|----|---|----|
| 2 | 148494789 | 148408201 | -1 | NM_181741    | ORC4L     | 0 | NA | 0 | NA | 0 | NA | 0 | NA | 0 | NA |
| 2 | 148495606 | 148408201 | -1 | NM_181742    | ORC4L     | 0 | NA | 0 | NA | 0 | NA | 0 | NA | 0 | NA |
| 2 | 148932507 | 148987514 | 1  | NM_018328    | MBD5      | 0 | NA | 0 | NA | 0 | NA | 0 | NA | 0 | NA |
| 2 | 149119037 | 149261606 | 1  | NM_015630    | EPC2      | 0 | NA | 0 | NA | 0 | NA | 1 | 14 | 0 | NA |
| 2 | 149349288 | 149591519 | 1  | NM_004522    | KIF5C     | 0 | NA | 1 | 12 | 0 | NA | 0 | NA | 0 | NA |
| 2 | 149603226 | 149780018 | 1  | NM_177964    | LOC130576 | 0 | NA | 0 | NA | 0 | NA | 0 | NA | 0 | NA |
| 2 | 149895358 | 150038384 | 1  | NM_194317    | LYPD6     | 0 | NA | 0 | NA | 0 | NA | 0 | NA | 0 | NA |
| 2 | 150152517 | 150134396 | -1 | NM_015702    | C2orf25   | 0 | NA | 0 | NA | 0 | NA | 0 | NA | 0 | NA |
| 2 | 151052426 | 151032954 | -1 | NM_005168    | RND3      | 0 | NA | 0 | NA | 1 | 14 | 0 | NA | 0 | NA |
| 2 | 151826623 | 151814155 | -1 | NM_198557    | RBM43     | 0 | NA | 0 | NA | 0 | NA | 0 | NA | 0 | NA |
| 2 | 151854620 | 151835230 | -1 | NM_004688    | NMI       | 0 | NA | 0 | NA | 0 | NA | 0 | NA | 0 | NA |
| 2 | 151922350 | 151944806 | 1  | NM_007115    | TNFAIP6   | 0 | NA | 0 | NA | 0 | NA | 0 | NA | 0 | NA |
| 2 | 151974673 | 152040665 | 1  | NM_018151    | RIF1      | 0 | NA | 0 | NA | 0 | NA | 0 | NA | 0 | NA |
| 2 | 152299235 | 152050098 | -1 | NM_004543    | NEB       | 0 | NA | 0 | NA | 0 | NA | 0 | NA | 0 | NA |
| 2 | 152393255 | 152365725 | -1 | NM_001037174 | ARL5A     | 0 | NA | 0 | NA | 0 | NA | 1 | 11 | 0 | NA |
| 2 | 152393255 | 152365725 | -1 | NM_012097    | ARL5A     | 0 | NA | 0 | NA | 0 | NA | 1 | 11 | 0 | NA |
| 2 | 152393255 | 152365725 | -1 | NM_177985    | ARL5A     | 0 | NA | 0 | NA | 0 | NA | 1 | 11 | 0 | NA |
| 2 | 152538700 | 152402386 | -1 | NM_001005747 | CACNB4    | 0 | NA | 0 | NA | 0 | NA | 0 | NA | 0 | NA |
| 2 | 152663465 | 152402386 | -1 | NM_001005746 | CACNB4    | 0 | NA | 0 | NA | 0 | NA | 0 | NA | 0 | NA |
| 2 | 152663790 | 152402386 | -1 | NM_000726    | CACNB4    | 0 | NA | 0 | NA | 0 | NA | 0 | NA | 0 | NA |
| 2 | 152740752 | 152683351 | -1 | NM_005843    | STAM2     | 0 | NA | 0 | NA | 0 | NA | 0 | NA | 0 | NA |
| 2 | 152899996 | 153214594 | 1  | NM_052905    | FMNL2     | 0 | NA | 0 | NA | 0 | NA | 0 | NA | 0 | NA |
| 2 | 153282221 | 153216352 | -1 | NM_017892    | PRPF40A   | 0 | NA | 0 | NA | 0 | NA | 0 | NA | 0 | NA |
| 2 | 153283375 | 153325669 | 1  | NM_152522    | ARL6IP6   | 0 | NA | 0 | NA | 0 | NA | 0 | NA | 0 | NA |
| 2 | 154043568 | 154042097 | -1 | NM_019845    | RPRM      | 0 | NA | 0 | NA | 0 | NA | 0 | NA | 0 | NA |
| 2 | 154436671 | 155018735 | 1  | NM_052917    | GALNT13   | 0 | NA | 0 | NA | 0 | NA | 0 | NA | 0 | NA |
| 2 | 155263338 | 155421260 | 1  | NM_002239    | KCNJ3     | 0 | NA | 0 | NA | 0 | NA | 0 | NA | 0 | NA |
| 2 | 156897446 | 156889194 | -1 | NM_173171    | NR4A2     | 1 | 15 | 0 | NA | 1 | 14 | 0 | NA | 0 | NA |
| 2 | 156897446 | 156889194 | -1 | NM_173172    | NR4A2     | 1 | 15 | 0 | NA | 1 | 14 | 0 | NA | 0 | NA |
| 2 | 156897446 | 156889194 | -1 | NM_173173    | NR4A2     | 1 | 15 | 0 | NA | 1 | 14 | 0 | NA | 0 | NA |
| 2 | 156897533 | 156889189 | -1 | NM_006186    | NR4A2     | 1 | 15 | 0 | NA | 1 | 14 | 0 | NA | 0 | NA |
| 2 | 157000210 | 157151161 | 1  | NM_001083112 | GPD2      | 0 | NA | 0 | NA | 0 | NA | 0 | NA | 0 | NA |
| 2 | 157001145 | 157151161 | 1  | NM_000408    | GPD2      | 0 | NA | 0 | NA | 0 | NA | 0 | NA | 0 | NA |
| 2 | 157822585 | 157876159 | 1  | NM_014568    | GALNT5    | 1 | 13 | 0 | NA | 0 | NA | 0 | NA | 0 | NA |
| 2 | 157890662 | 157883370 | -1 | NM_020711    | ERMN      | 0 | NA | 0 | NA | 0 | NA | 0 | NA | 0 | NA |
| 2 | 157892392 | 157883370 | -1 | NM_001009959 | ERMN      | 0 | NA | 0 | NA | 0 | NA | 0 | NA | 0 | NA |
| 2 | 158008850 | 157979376 | -1 | NM_004288    | PSCDBP    | 0 | NA | 0 | NA | 0 | NA | 0 | NA | 0 | NA |
| 2 | 158162318 | 158091524 | -1 | NM_001111031 | ACVR1C    | 0 | NA | 0 | NA | 0 | NA | 0 | NA | 0 | NA |
| 2 | 158193645 | 158091524 | -1 | NM_001111032 | ACVR1C    | 0 | NA | 0 | NA | 0 | NA | 0 | NA | 0 | NA |
| 2 | 158193645 | 158091524 | -1 | NM_001111033 | ACVR1C    | 0 | NA | 0 | NA | 0 | NA | 0 | NA | 0 | NA |
| 2 | 158193645 | 158091524 | -1 | NM_145259    | ACVR1C    | 0 | NA | 0 | NA | 0 | NA | 0 | NA | 0 | NA |
| 2 | 158439869 | 158301204 | -1 | NM_001105    | ACVR1     | 0 | NA | 0 | NA | 0 | NA | 0 | NA | 0 | NA |
| 2 | 158440620 | 158301204 | -1 | NM_001111067 | ACVR1     | 0 | NA | 0 | NA | 0 | NA | 0 | NA | 0 | NA |
| 2 | 158559936 | 158700724 | 1  | NM_173355    | UPP2      | 0 | NA | 0 | NA | 0 | NA | 0 | NA | 0 | NA |
| 2 | 159021460 | 158736723 | -1 | NM_138803    | CCDC148   | 0 | NA | 0 | NA | 0 | NA | 0 | NA | 0 | NA |
| 2 | 159021721 | 159246186 | 1  | NM_001005476 | PKP4      | 0 | NA | 0 | NA | 0 | NA | 0 | NA | 0 | NA |
| 2 | 159021721 | 159246186 | 1  | NM_003628    | PKP4      | 0 | NA | 0 | NA | 0 | NA | 0 | NA | 0 | NA |
| 2 | 159360086 | 159380742 | 1  | NM_001017920 | DAPL1     | 0 | NA | 0 | NA | 0 | NA | 0 | NA | 0 | NA |
| 2 | 159533391 | 159797416 | 1  | NM_033394    | TANC1     | 0 | NA | 0 | NA | 0 | NA | 1 | 15 | 0 | NA |
| 2 | 159851309 | 159800557 | -1 | NM_152528    | WDSUB1    | 0 | NA | 0 | NA | 0 | NA | 0 | NA | 0 | NA |
| 2 | 160181305 | 159883735 | -1 | NM_013450    | BAZ2B     | 0 | NA | 0 | NA | 1 | 12 | 0 | NA | 0 | NA |
| 2 | 160277255 | 160333330 | 1  | NM_022826    | MARCH7    | 0 | NA | 0 | NA | 0 | NA | 0 | NA | 0 | NA |
| 2 | 160362999 | 160333609 | -1 | NM_014880    | CD302     | 0 | NA | 0 | NA | 0 | NA | 0 | NA | 0 | NA |
| 2 | 160469508 | 160368113 | -1 | NM_002349    | LY75      | 0 | NA | 1 | 12 | 0 | NA | 0 | NA | 0 | NA |
| 2 | 160627367 | 160506257 | -1 | NM_007366    | PLA2R1    | 0 | NA | 0 | NA | 0 | NA | 0 | NA | 1 | 13 |
| 2 | 160627367 | 160510571 | -1 | NM_001007267 | PLA2R1    | 0 | NA | 0 | NA | 0 | NA | 0 | NA | 1 | 13 |
| 2 | 160764836 | 160666478 | -1 | NM_000888    | ITGB6     | 1 | 15 | 0 | NA | 0 | NA | 0 | NA | 0 | NA |
| 2 | 161058551 | 160838758 | -1 | NM_002897    | RBMS1     | 0 | NA | 0 | NA | 0 | NA | 0 | NA | 0 | NA |
| 2 | 161058551 | 160838758 | -1 | NM_016836    | RBMS1     | 0 | NA | 0 | NA | 0 | NA | 0 | NA | 0 | NA |
| 2 | 161058551 | 160838758 | -1 | NM_016839    | RBMS1     | 0 | NA | 0 | NA | 0 | NA | 0 | NA | 0 | NA |
| 2 | 161701711 | 161769736 | 1  | NM_133484    | TANK      | 0 | NA | 0 | NA | 0 | NA | 0 | NA | 0 | NA |
| 2 | 161701711 | 161800928 | 1  | NM_004180    | TANK      | 0 | NA | 0 | NA | 0 | NA | 0 | NA | 0 | NA |
| 2 | 161873185 | 161976172 | 1  | NM_005805    | PSMD14    | 0 | NA | 0 | NA | 0 | NA | 0 | NA | 0 | NA |
| 2 | 161980865 | 161989819 | 1  | NM_006593    | TBR1      | 0 | NA | 1 | 14 | 0 | NA | 0 | NA | 0 | NA |
| 2 | 162189090 | 162550032 | 1  | NM_022058    | SLC4A10   | 0 | NA | 0 | NA | 0 | NA | 0 | NA | 0 | NA |

|   |           |           |    |              |           |   |    |   |    |    |    |    |    |    |    |
|---|-----------|-----------|----|--------------|-----------|---|----|---|----|----|----|----|----|----|----|
| 2 | 162639298 | 162557000 | -1 | NM_001935    | DPP4      | 0 | NA | 0 | NA | 0  | NA | 0  | NA | 0  | NA |
| 2 | 162717003 | 162707633 | -1 | NM_002054    | GCG       | 0 | NA | 0 | NA | 0  | NA | 0  | NA | 0  | NA |
| 2 | 162808291 | 162735445 | -1 | NM_004460    | FAP       | 0 | NA | 0 | NA | 0  | NA | 0  | NA | 0  | NA |
| 2 | 162883285 | 162831834 | -1 | NM_022168    | IFIH1     | 0 | NA | 1 | 12 | 0  | NA | 0  | NA | 0  | NA |
| 2 | 162908895 | 162925875 | 1  | NM_012198    | GCA       | 0 | NA | 0 | NA | 0  | NA | 0  | NA | 0  | NA |
| 2 | 163403486 | 162936162 | -1 | NM_033272    | KCNH7     | 0 | NA | 0 | NA | 0  | NA | 0  | NA | 0  | NA |
| 2 | 163403486 | 162988002 | -1 | NM_173162    | KCNH7     | 0 | NA | 0 | NA | 0  | NA | 0  | NA | 0  | NA |
| 2 | 164300759 | 164172363 | -1 | NM_018086    | FIGN      | 0 | NA | 0 | NA | 0  | NA | 0  | NA | 0  | NA |
| 2 | 165186606 | 165057568 | -1 | NM_004490    | GRB14     | 0 | NA | 0 | NA | 0  | NA | 0  | NA | 0  | NA |
| 2 | 165406174 | 165249503 | -1 | NM_014900    | COBLL1    | 0 | NA | 0 | NA | 0  | NA | 0  | NA | 0  | NA |
| 2 | 165520281 | 165463057 | -1 | NM_173512    | SLC38A11  | 0 | NA | 0 | NA | 0  | NA | 0  | NA | 0  | NA |
| 2 | 165768823 | 165652275 | -1 | NM_001081676 | SCN3A     | 0 | NA | 0 | NA | 0  | NA | 0  | NA | 0  | NA |
| 2 | 165768823 | 165652275 | -1 | NM_001081677 | SCN3A     | 0 | NA | 0 | NA | 0  | NA | 0  | NA | 0  | NA |
| 2 | 165768823 | 165652275 | -1 | NM_006922    | SCN3A     | 0 | NA | 0 | NA | 0  | NA | 0  | NA | 0  | NA |
| 2 | 165804157 | 165957066 | 1  | NM_001040142 | SCN2A     | 0 | NA | 0 | NA | 0  | NA | 0  | NA | 0  | NA |
| 2 | 165858586 | 165957066 | 1  | NM_021007    | SCN2A     | 0 | NA | 0 | NA | 0  | NA | 0  | NA | 0  | NA |
| 2 | 165860528 | 165957066 | 1  | NM_001040143 | SCN2A     | 0 | NA | 0 | NA | 0  | NA | 0  | NA | 0  | NA |
| 2 | 166137135 | 166245451 | 1  | NM_024969    | FAM130A2  | 0 | NA | 0 | NA | 12 | 0  | NA | 0  | NA | 0  |
| 2 | 166359049 | 166312558 | -1 | NM_004482    | GALNT3    | 0 | NA | 0 | NA | 0  | NA | 0  | NA | 0  | NA |
| 2 | 166518594 | 166438698 | -1 | NM_024753    | TTC21B    | 0 | NA | 0 | NA | 0  | NA | 1  | 15 | 0  | NA |
| 2 | 166638395 | 166553915 | -1 | NM_006920    | SCN1A     | 0 | NA | 0 | NA | 0  | NA | 0  | NA | 0  | NA |
| 2 | 166876560 | 166759942 | -1 | NM_002977    | SCN9A     | 0 | NA | 0 | NA | 0  | NA | 0  | NA | 0  | NA |
| 2 | 167051724 | 166969784 | -1 | NM_002976    | SCN7A     | 0 | NA | 0 | NA | 0  | NA | 0  | NA | 0  | NA |
| 2 | 167468220 | 167824507 | 1  | NM_001079810 | XIRP2     | 0 | NA | 0 | NA | 0  | NA | 0  | NA | 0  | NA |
| 2 | 167468220 | 167824507 | 1  | NM_152381    | XIRP2     | 0 | NA | 0 | NA | 0  | NA | 0  | NA | 0  | NA |
| 2 | 168383427 | 168435612 | 1  | NM_020981    | B3GALT1   | 0 | NA | 0 | NA | 0  | NA | 0  | NA | 0  | NA |
| 2 | 168812351 | 168518775 | -1 | NM_013233    | STK39     | 0 | NA | 0 | NA | 0  | NA | 0  | NA | 0  | NA |
| 2 | 169021080 | 169339398 | 1  | NM_203463    | LASS6     | 1 | 13 | 0 | NA | 0  | NA | 0  | NA | 0  | NA |
| 2 | 169367352 | 169429811 | 1  | NM_052946    | NOSTRIN   | 0 | NA | 0 | NA | 0  | NA | 0  | NA | 0  | NA |
| 2 | 169367398 | 169429807 | 1  | NM_001039724 | NOSTRIN   | 0 | NA | 0 | NA | 0  | NA | 0  | NA | 0  | NA |
| 2 | 169455190 | 169435646 | -1 | NM_020675    | SPC25     | 0 | NA | 0 | NA | 0  | NA | 0  | NA | 0  | NA |
| 2 | 169465995 | 169474756 | 1  | NM_001081686 | G6PC2     | 0 | NA | 0 | NA | 0  | NA | 0  | NA | 0  | NA |
| 2 | 169465995 | 169474756 | 1  | NM_021176    | G6PC2     | 0 | NA | 0 | NA | 0  | NA | 0  | NA | 0  | NA |
| 2 | 169596079 | 169487694 | -1 | NM_003742    | ABCB11    | 0 | NA | 0 | NA | 0  | NA | 0  | NA | 0  | NA |
| 2 | 169629544 | 169660923 | 1  | NM_005771    | DHRS9     | 0 | NA | 0 | NA | 0  | NA | 0  | NA | 0  | NA |
| 2 | 169631790 | 169660923 | 1  | NM_199204    | DHRS9     | 0 | NA | 0 | NA | 0  | NA | 0  | NA | 0  | NA |
| 2 | 169927368 | 169691864 | -1 | NM_004525    | LRP2      | 0 | NA | 1 | 13 | 0  | NA | 0  | NA | 0  | NA |
| 2 | 170044251 | 170071411 | 1  | NM_152384    | BBS5      | 0 | NA | 0 | NA | 0  | NA | 0  | NA | 0  | NA |
| 2 | 170074457 | 170091018 | 1  | NM_006063    | KBTD10    | 0 | NA | 0 | NA | 0  | NA | 0  | NA | 0  | NA |
| 2 | 170138568 | 170094512 | -1 | NM_024622    | FASTKD1   | 0 | NA | 0 | NA | 0  | NA | 0  | NA | 0  | NA |
| 2 | 170149095 | 170202500 | 1  | NM_004792    | PPIG      | 1 | 13 | 0 | NA | 0  | NA | 1  | 17 | 0  | NA |
| 2 | 170259177 | 170210180 | -1 | NM_001085447 | LOC129881 | 0 | NA | 0 | NA | 0  | NA | 0  | NA | 0  | NA |
| 2 | 170259220 | 170266465 | 1  | NM_001008489 | PHOSPHO2  | 0 | NA | 0 | NA | 0  | NA | 0  | NA | 0  | NA |
| 2 | 170259246 | 170314684 | 1  | NM_144711    | KLHL23    | 0 | NA | 0 | NA | 0  | NA | 0  | NA | 0  | NA |
| 2 | 170363634 | 170376821 | 1  | NM_003142    | SSB       | 0 | NA | 0 | NA | 0  | NA | 0  | NA | 0  | NA |
| 2 | 170389599 | 170376513 | -1 | NM_014168    | METTL5    | 0 | NA | 0 | NA | 1  | 13 | 0  | NA | 0  | NA |
| 2 | 170392263 | 170648885 | 1  | NM_172070    | UBR3      | 0 | NA | 0 | NA | 1  | 13 | 0  | NA | 0  | NA |
| 2 | 170742900 | 171219231 | 1  | NM_001083615 | MYO3B     | 0 | NA | 0 | NA | 0  | NA | 0  | NA | 0  | NA |
| 2 | 170742900 | 171219231 | 1  | NM_138995    | MYO3B     | 0 | NA | 0 | NA | 0  | NA | 0  | NA | 0  | NA |
| 2 | 171280106 | 171282743 | 1  | NM_001003845 | SP5       | 0 | NA | 1 | 12 | 0  | NA | 0  | NA | 0  | NA |
| 2 | 171381445 | 171407515 | 1  | NM_013445    | GAD1      | 0 | NA | 0 | NA | 0  | NA | 0  | NA | 0  | NA |
| 2 | 171381445 | 171425905 | 1  | NM_000817    | GAD1      | 0 | NA | 0 | NA | 0  | NA | 0  | NA | 0  | NA |
| 2 | 171493956 | 171531886 | 1  | NM_015530    | GORASP2   | 0 | NA | 1 | 12 | 0  | NA | 0  | NA | 1  | 13 |
| 2 | 171725206 | 171556813 | -1 | NM_012290    | TLK1      | 0 | NA | 0 | NA | 0  | NA | 0  | NA | 0  | NA |
| 2 | 171999104 | 172049808 | 1  | NM_025000    | C2orf37   | 0 | NA | 0 | NA | 0  | NA | 1  | 25 | 0  | NA |
| 2 | 171999558 | 171882158 | -1 | NM_024770    | METTL8    | 0 | NA | 0 | NA | 0  | NA | 0  | NA | 0  | NA |
| 2 | 172087232 | 172122885 | 1  | NM_024843    | CYBRD1    | 0 | NA | 0 | NA | 0  | NA | 1  | 12 | 0  | NA |
| 2 | 172252227 | 172313165 | 1  | NM_001378    | DYNC112   | 0 | NA | 0 | NA | 0  | NA | 1  | 15 | 0  | NA |
| 2 | 172458979 | 172349125 | -1 | NM_003705    | SLC25A12  | 1 | 11 | 0 | NA | 0  | NA | 0  | NA | 0  | NA |
| 2 | 172487203 | 172556846 | 1  | NM_001033085 | HAT1      | 0 | NA | 0 | NA | 0  | NA | 0  | NA | 0  | NA |
| 2 | 172487203 | 172556846 | 1  | NM_003642    | HAT1      | 0 | NA | 0 | NA | 0  | NA | 0  | NA | 0  | NA |
| 2 | 172573049 | 172653833 | 1  | NM_199227    | MAP1D     | 0 | NA | 0 | NA | 0  | NA | 0  | NA | 0  | NA |
| 2 | 172658453 | 172662647 | 1  | NM_001038493 | DLX1      | 1 | 14 | 0 | NA | 0  | NA | 1  | 12 | 0  | NA |
| 2 | 172658453 | 172662647 | 1  | NM_178120    | DLX1      | 1 | 14 | 0 | NA | 0  | NA | 1  | 12 | 0  | NA |
| 2 | 172675724 | 172672411 | -1 | NM_004405    | DLX2      | 1 | 14 | 0 | NA | 0  | NA | 1  | 13 | 0  | NA |



|   |           |           |    |              |          |   |    |   |    |   |    |   |    |   |    |
|---|-----------|-----------|----|--------------|----------|---|----|---|----|---|----|---|----|---|----|
| 2 | 173000559 | 173079427 | 1  | NM_000210    | ITGA6    | 0 | NA | 0 | NA | 0 | NA | 0 | NA | 0 | NA |
| 2 | 173000559 | 173079427 | 1  | NM_001079818 | ITGA6    | 0 | NA | 0 | NA | 0 | NA | 0 | NA | 0 | NA |
| 2 | 173129024 | 173172108 | 1  | NM_002610    | PDK1     | 0 | NA | 0 | NA | 0 | NA | 1 | 12 | 0 | NA |
| 2 | 173308770 | 173625866 | 1  | NM_007023    | RAPGEF4  | 0 | NA | 0 | NA | 1 | 12 | 0 | NA | 0 | NA |
| 2 | 173394560 | 173625866 | 1  | NM_001100397 | RAPGEF4  | 0 | NA | 0 | NA | 0 | NA | 0 | NA | 0 | NA |
| 2 | 173648810 | 173800119 | 1  | NM_133646    | ZAK      | 0 | NA | 0 | NA | 0 | NA | 0 | NA | 0 | NA |
| 2 | 173648810 | 173840983 | 1  | NM_016653    | ZAK      | 0 | NA | 0 | NA | 0 | NA | 0 | NA | 0 | NA |
| 2 | 173927806 | 173941964 | 1  | NM_031942    | CDC47    | 0 | NA | 0 | NA | 0 | NA | 1 | 13 | 0 | NA |
| 2 | 173927806 | 173941964 | 1  | NM_145810    | CDC47    | 0 | NA | 0 | NA | 0 | NA | 1 | 13 | 0 | NA |
| 2 | 174537193 | 174481503 | -1 | NM_001017371 | SP3      | 0 | NA | 0 | NA | 0 | NA | 0 | NA | 0 | NA |
| 2 | 174538309 | 174481504 | -1 | NM_003111    | SP3      | 0 | NA | 0 | NA | 0 | NA | 0 | NA | 0 | NA |
| 2 | 174821611 | 174645420 | -1 | NM_001011708 | OLA1     | 0 | NA | 0 | NA | 0 | NA | 0 | NA | 0 | NA |
| 2 | 174821611 | 174645420 | -1 | NM_013341    | OLA1     | 0 | NA | 0 | NA | 0 | NA | 0 | NA | 0 | NA |
| 2 | 174968689 | 174921123 | -1 | NM_004882    | CIR      | 0 | NA | 0 | NA | 0 | NA | 0 | NA | 0 | NA |
| 2 | 174968712 | 175001974 | 1  | NM_024583    | SCRN3    | 0 | NA | 0 | NA | 0 | NA | 0 | NA | 0 | NA |
| 2 | 175060057 | 175004620 | -1 | NM_001033045 | GPR155   | 0 | NA | 0 | NA | 0 | NA | 0 | NA | 0 | NA |
| 2 | 175060057 | 175004620 | -1 | NM_152529    | GPR155   | 0 | NA | 0 | NA | 0 | NA | 0 | NA | 0 | NA |
| 2 | 175207553 | 175132547 | -1 | NM_003387    | WIPF1    | 0 | NA | 0 | NA | 0 | NA | 0 | NA | 0 | NA |
| 2 | 175255873 | 175132547 | -1 | NM_001077269 | WIPF1    | 0 | NA | 0 | NA | 0 | NA | 0 | NA | 1 | 13 |
| 2 | 175337427 | 175320568 | -1 | NM_000079    | CHRNA1   | 0 | NA | 0 | NA | 0 | NA | 0 | NA | 0 | NA |
| 2 | 175337427 | 175320568 | -1 | NM_001039523 | CHRNA1   | 0 | NA | 0 | NA | 0 | NA | 0 | NA | 0 | NA |
| 2 | 175578361 | 175372337 | -1 | NM_001025201 | CHN1     | 0 | NA | 0 | NA | 0 | NA | 0 | NA | 0 | NA |
| 2 | 175578361 | 175372337 | -1 | NM_001822    | CHN1     | 0 | NA | 0 | NA | 0 | NA | 0 | NA | 0 | NA |
| 2 | 175741143 | 175647251 | -1 | NM_001880    | ATF2     | 1 | 11 | 0 | NA | 0 | NA | 0 | NA | 0 | NA |
| 2 | 175754637 | 175749231 | -1 | NM_001002258 | ATP5G3   | 0 | NA | 0 | NA | 0 | NA | 0 | NA | 0 | NA |
| 2 | 175754736 | 175749231 | -1 | NM_001689    | ATP5G3   | 0 | NA | 0 | NA | 0 | NA | 0 | NA | 0 | NA |
| 2 | 176575264 | 176498655 | -1 | NM_030650    | KIAA1715 | 0 | NA | 0 | NA | 0 | NA | 0 | NA | 0 | NA |
| 2 | 176656936 | 176653080 | -1 | NM_001080458 | EVX2     | 0 | NA | 1 | 25 | 0 | NA | 0 | NA | 0 | NA |
| 2 | 176665777 | 176668912 | 1  | NM_000523    | HOXD13   | 0 | NA | 0 | NA | 0 | NA | 0 | NA | 0 | NA |
| 2 | 176672775 | 176673734 | 1  | NM_021193    | HOXD12   | 0 | NA | 0 | NA | 0 | NA | 0 | NA | 0 | NA |
| 2 | 176680329 | 176682562 | 1  | NM_021192    | HOXD11   | 0 | NA | 0 | NA | 0 | NA | 0 | NA | 0 | NA |
| 2 | 176689737 | 176692916 | 1  | NM_002148    | HOXD10   | 0 | NA | 0 | NA | 0 | NA | 0 | NA | 0 | NA |
| 2 | 176695333 | 176697770 | 1  | NM_014213    | HOXD9    | 1 | 15 | 0 | NA | 0 | NA | 0 | NA | 0 | NA |
| 2 | 176702722 | 176704974 | 1  | NM_019558    | HOXD8    | 1 | 15 | 0 | NA | 1 | 12 | 0 | NA | 0 | NA |
| 2 | 176724358 | 176726195 | 1  | NM_014621    | HOXD4    | 0 | NA | 0 | NA | 0 | NA | 0 | NA | 0 | NA |
| 2 | 176737050 | 176746072 | 1  | NM_006898    | HOXD3    | 0 | NA | 0 | NA | 0 | NA | 0 | NA | 0 | NA |
| 2 | 176761552 | 176783881 | 1  | NM_024501    | HOXD1    | 0 | NA | 0 | NA | 0 | NA | 1 | 12 | 0 | NA |
| 2 | 176842382 | 176910999 | 1  | NM_001006635 | MTX2     | 0 | NA | 0 | NA | 1 | 14 | 0 | NA | 0 | NA |
| 2 | 176842382 | 176910999 | 1  | NM_006554    | MTX2     | 0 | NA | 0 | NA | 1 | 14 | 0 | NA | 0 | NA |
| 2 | 177785667 | 177796931 | 1  | NM_194247    | HNRNP3   | 0 | NA | 0 | NA | 0 | NA | 0 | NA | 0 | NA |
| 2 | 177838105 | 177803278 | -1 | NM_006164    | NFE2L2   | 0 | NA | 0 | NA | 0 | NA | 0 | NA | 0 | NA |
| 2 | 177965730 | 178112411 | 1  | NM_003659    | AGPS     | 0 | NA | 0 | NA | 0 | NA | 0 | NA | 0 | NA |
| 2 | 178125770 | 178123126 | -1 | NM_152517    | ITTC30B  | 1 | 11 | 0 | NA | 0 | NA | 0 | NA | 0 | NA |
| 2 | 178191940 | 178187271 | -1 | NM_152275    | ITTC30A  | 0 | NA | 0 | NA | 0 | NA | 0 | NA | 0 | NA |
| 2 | 178461712 | 178196222 | -1 | NM_001077196 | PDE11A   | 0 | NA | 0 | NA | 0 | NA | 0 | NA | 0 | NA |
| 2 | 178495810 | 178202372 | -1 | NM_001077358 | PDE11A   | 0 | NA | 0 | NA | 0 | NA | 0 | NA | 0 | NA |
| 2 | 178645728 | 178196222 | -1 | NM_016953    | PDE11A   | 1 | 11 | 0 | NA | 0 | NA | 0 | NA | 0 | NA |
| 2 | 178681312 | 178196222 | -1 | NM_001077197 | PDE11A   | 0 | NA | 0 | NA | 0 | NA | 0 | NA | 0 | NA |
| 2 | 178685427 | 178702628 | 1  | NM_152945    | RBM45    | 0 | NA | 0 | NA | 0 | NA | 0 | NA | 0 | NA |
| 2 | 178767619 | 178969121 | 1  | NM_032523    | OSBPL6   | 0 | NA | 0 | NA | 0 | NA | 0 | NA | 0 | NA |
| 2 | 178893216 | 178969121 | 1  | NM_145739    | OSBPL6   | 0 | NA | 0 | NA | 0 | NA | 0 | NA | 0 | NA |
| 2 | 179024110 | 179004394 | -1 | NM_003690    | PRKRA    | 0 | NA | 0 | NA | 0 | NA | 1 | 14 | 0 | NA |
| 2 | 179026350 | 179034309 | 1  | NM_001042702 | DFNB59   | 0 | NA | 0 | NA | 0 | NA | 1 | 11 | 0 | NA |
| 2 | 179051568 | 179038268 | -1 | NM_181342    | FKBP7    | 1 | 11 | 0 | NA | 0 | NA | 1 | 11 | 0 | NA |
| 2 | 179053444 | 179078028 | 1  | NM_019091    | PLEKHA3  | 1 | 11 | 0 | NA | 0 | NA | 1 | 11 | 0 | NA |
| 2 | 179380395 | 179098963 | -1 | NM_003319    | TTN      | 0 | NA | 0 | NA | 0 | NA | 0 | NA | 0 | NA |
| 2 | 179380395 | 179098963 | -1 | NM_133378    | TTN      | 0 | NA | 0 | NA | 0 | NA | 0 | NA | 0 | NA |
| 2 | 179380395 | 179098963 | -1 | NM_133432    | TTN      | 0 | NA | 0 | NA | 0 | NA | 0 | NA | 0 | NA |
| 2 | 179380395 | 179098963 | -1 | NM_133437    | TTN      | 0 | NA | 0 | NA | 0 | NA | 0 | NA | 0 | NA |
| 2 | 179380395 | 179318289 | -1 | NM_133379    | TTN      | 0 | NA | 0 | NA | 0 | NA | 0 | NA | 0 | NA |
| 2 | 179457923 | 179408736 | -1 | NM_173648    | CCDC141  | 0 | NA | 0 | NA | 0 | NA | 0 | NA | 0 | NA |
| 2 | 179837491 | 179681775 | -1 | NM_178123    | SESTD1   | 0 | NA | 0 | NA | 1 | 12 | 0 | NA | 0 | NA |
| 2 | 180135560 | 180014955 | -1 | NM_001113398 | ZNF385B  | 0 | NA | 0 | NA | 0 | NA | 0 | NA | 0 | NA |
| 2 | 180319014 | 180014955 | -1 | NM_001113397 | ZNF385B  | 0 | NA | 0 | NA | 0 | NA | 0 | NA | 0 | NA |
| 2 | 180434477 | 180014955 | -1 | NM_152520    | ZNF385B  | 0 | NA | 0 | NA | 0 | NA | 0 | NA | 0 | NA |

|   |           |           |    |              |          |   |    |   |    |   |    |   |    |   |    |
|---|-----------|-----------|----|--------------|----------|---|----|---|----|---|----|---|----|---|----|
| 2 | 180580025 | 180517848 | -1 | NM_020943    | KIAA1604 | 0 | NA | 0 | NA | 0 | NA | 1 | 15 | 0 | NA |
| 2 | 181553356 | 181636395 | 1  | NM_182678    | UBE2E3   | 0 | NA | 0 | NA | 0 | NA | 0 | NA | 0 | NA |
| 2 | 181553586 | 181636395 | 1  | NM_006357    | UBE2E3   | 0 | NA | 0 | NA | 0 | NA | 0 | NA | 0 | NA |
| 2 | 182029863 | 182110713 | 1  | NM_000885    | ITGA4    | 0 | NA | 0 | NA | 0 | NA | 0 | NA | 0 | NA |
| 2 | 182229978 | 182111155 | -1 | NM_001030311 | CERKL    | 0 | NA | 0 | NA | 0 | NA | 0 | NA | 1 | 12 |
| 2 | 182229978 | 182111155 | -1 | NM_001030312 | CERKL    | 0 | NA | 0 | NA | 0 | NA | 0 | NA | 1 | 12 |
| 2 | 182229978 | 182111155 | -1 | NM_001030313 | CERKL    | 0 | NA | 0 | NA | 0 | NA | 0 | NA | 1 | 12 |
| 2 | 182229996 | 182109649 | -1 | NM_201548    | CERKL    | 0 | NA | 0 | NA | 0 | NA | 0 | NA | 1 | 12 |
| 2 | 182253626 | 182249438 | -1 | NM_002500    | NEUROD1  | 0 | NA | 1 | 12 | 0 | NA | 0 | NA | 1 | 16 |
| 2 | 182484926 | 182503706 | 1  | NM_006751    | SSFA2    | 0 | NA | 0 | NA | 0 | NA | 0 | NA | 0 | NA |
| 2 | 182558795 | 182690664 | 1  | NM_001080545 | PPP1R1C  | 0 | NA | 0 | NA | 1 | 12 | 0 | NA | 0 | NA |
| 2 | 183095498 | 182715427 | -1 | NM_005019    | PDE1A    | 0 | NA | 0 | NA | 0 | NA | 0 | NA | 0 | NA |
| 2 | 183095710 | 182740905 | -1 | NM_001003683 | PDE1A    | 0 | NA | 0 | NA | 0 | NA | 0 | NA | 0 | NA |
| 2 | 183289243 | 183351500 | 1  | NM_018981    | DNAJC10  | 0 | NA | 0 | NA | 0 | NA | 0 | NA | 0 | NA |
| 2 | 183439743 | 183406981 | -1 | NM_001463    | FRZB     | 0 | NA | 0 | NA | 0 | NA | 0 | NA | 0 | NA |
| 2 | 183611474 | 183497849 | -1 | NM_013436    | NCKAP1   | 0 | NA | 0 | NA | 0 | NA | 0 | NA | 0 | NA |
| 2 | 183611474 | 183497849 | -1 | NM_205842    | NCKAP1   | 0 | NA | 0 | NA | 0 | NA | 0 | NA | 0 | NA |
| 2 | 183651731 | 183672967 | 1  | NM_080876    | DUSP19   | 0 | NA | 1 | 13 | 0 | NA | 0 | NA | 0 | NA |
| 2 | 183697327 | 183734653 | 1  | NM_138285    | NUP35    | 0 | NA | 0 | NA | 0 | NA | 1 | 18 | 0 | NA |
| 2 | 185171337 | 185512459 | 1  | NM_194250    | ZNF804A  | 0 | NA | 0 | NA | 0 | NA | 0 | NA | 0 | NA |
| 2 | 186378005 | 186406262 | 1  | NM_207482    | FLJ44048 | 0 | NA | 0 | NA | 0 | NA | 0 | NA | 0 | NA |
| 2 | 187059129 | 187082332 | 1  | NM_018471    | ZC3H15   | 0 | NA | 0 | NA | 1 | 12 | 0 | NA | 0 | NA |
| 2 | 187163044 | 187253873 | 1  | NM_002210    | ITGAV    | 0 | NA | 0 | NA | 0 | NA | 0 | NA | 0 | NA |
| 2 | 187267033 | 187336757 | 1  | NM_177454    | KIAA1946 | 0 | NA | 0 | NA | 0 | NA | 0 | NA | 0 | NA |
| 2 | 187422142 | 187400451 | -1 | NM_182521    | ZSWIM2   | 0 | NA | 0 | NA | 0 | NA | 0 | NA | 0 | NA |
| 2 | 188021266 | 187916093 | -1 | NM_005795    | CALCLRL  | 0 | NA | 0 | NA | 0 | NA | 0 | NA | 0 | NA |
| 2 | 188127464 | 188037202 | -1 | NM_006287    | TFPI     | 0 | NA | 0 | NA | 0 | NA | 0 | NA | 0 | NA |
| 2 | 188127464 | 188051550 | -1 | NM_001032281 | TFPI     | 0 | NA | 0 | NA | 0 | NA | 0 | NA | 0 | NA |
| 2 | 188865634 | 189168897 | 1  | NM_016315    | GULP1    | 0 | NA | 0 | NA | 1 | 13 | 0 | NA | 0 | NA |
| 2 | 189363076 | 189306709 | -1 | NM_052952    | DIRC1    | 0 | NA | 0 | NA | 0 | NA | 0 | NA | 0 | NA |
| 2 | 189547343 | 189585717 | 1  | NM_000090    | COL3A1   | 0 | NA | 0 | NA | 0 | NA | 0 | NA | 0 | NA |
| 2 | 189752850 | 189604885 | -1 | NM_000393    | COL5A2   | 0 | NA | 0 | NA | 0 | NA | 0 | NA | 0 | NA |
| 2 | 190014403 | 190048509 | 1  | NM_032168    | WDR75    | 1 | 12 | 0 | NA | 0 | NA | 0 | NA | 0 | NA |
| 2 | 190153782 | 190133560 | -1 | NM_014585    | SLC40A1  | 0 | NA | 0 | NA | 0 | NA | 0 | NA | 0 | NA |
| 2 | 190234390 | 190243800 | 1  | NM_019048    | ASNSD1   | 0 | NA | 0 | NA | 1 | 17 | 0 | NA | 0 | NA |
| 2 | 190249674 | 190319615 | 1  | NM_144708    | ANKAR    | 0 | NA | 0 | NA | 0 | NA | 0 | NA | 0 | NA |
| 2 | 190336169 | 190319630 | -1 | NM_022353    | OSGEPL1  | 0 | NA | 0 | NA | 0 | NA | 0 | NA | 0 | NA |
| 2 | 190355677 | 190343294 | -1 | NM_016467    | ORMDL1   | 0 | NA | 0 | NA | 0 | NA | 0 | NA | 0 | NA |
| 2 | 190357354 | 190450600 | 1  | NM_000534    | PMS1     | 0 | NA | 0 | NA | 0 | NA | 0 | NA | 0 | NA |
| 2 | 190635700 | 190628670 | -1 | NM_005259    | MSTN     | 0 | NA | 0 | NA | 0 | NA | 0 | NA | 0 | NA |
| 2 | 190710730 | 190776455 | 1  | NM_001042521 | MGC13057 | 0 | NA | 0 | NA | 0 | NA | 0 | NA | 0 | NA |
| 2 | 190723216 | 190776455 | 1  | NM_001042520 | MGC13057 | 0 | NA | 0 | NA | 0 | NA | 0 | NA | 0 | NA |
| 2 | 190753833 | 190776455 | 1  | NM_001042519 | MGC13057 | 0 | NA | 0 | NA | 0 | NA | 0 | NA | 0 | NA |
| 2 | 190753925 | 190776455 | 1  | NM_032321    | MGC13057 | 0 | NA | 0 | NA | 0 | NA | 0 | NA | 0 | NA |
| 2 | 190892804 | 190777604 | -1 | NM_014362    | HIBCH    | 1 | 12 | 0 | NA | 0 | NA | 0 | NA | 0 | NA |
| 2 | 190892804 | 190777604 | -1 | NM_198047    | HIBCH    | 1 | 12 | 0 | NA | 0 | NA | 0 | NA | 0 | NA |
| 2 | 190916679 | 190944552 | 1  | NM_002194    | INPP1    | 0 | NA | 0 | NA | 0 | NA | 0 | NA | 0 | NA |
| 2 | 190981325 | 191075286 | 1  | NM_017694    | FLJ20160 | 0 | NA | 0 | NA | 0 | NA | 0 | NA | 0 | NA |
| 2 | 191222092 | 191265737 | 1  | NM_005966    | NAB1     | 0 | NA | 0 | NA | 0 | NA | 0 | NA | 0 | NA |
| 2 | 191453791 | 191538021 | 1  | NM_014905    | GLS      | 1 | 11 | 0 | NA | 0 | NA | 0 | NA | 0 | NA |
| 2 | 191587181 | 191542120 | -1 | NM_007315    | STAT1    | 1 | 11 | 0 | NA | 1 | 15 | 1 | 29 | 0 | NA |
| 2 | 191587181 | 191548508 | -1 | NM_139266    | STAT1    | 1 | 11 | 0 | NA | 1 | 15 | 1 | 29 | 0 | NA |
| 2 | 191724170 | 191602550 | -1 | NM_003151    | STAT4    | 0 | NA | 0 | NA | 0 | NA | 0 | NA | 0 | NA |
| 2 | 191818374 | 191998287 | 1  | NM_012223    | MYO1B    | 0 | NA | 0 | NA | 0 | NA | 0 | NA | 0 | NA |
| 2 | 192251502 | 192259906 | 1  | NM_001031716 | OBFC2A   | 0 | NA | 0 | NA | 1 | 12 | 0 | NA | 0 | NA |
| 2 | 192420226 | 192407280 | -1 | NM_004657    | SDPR     | 0 | NA | 0 | NA | 0 | NA | 0 | NA | 0 | NA |
| 2 | 192767889 | 192522991 | -1 | NM_016192    | TMEFF2   | 0 | NA | 1 | 12 | 0 | NA | 0 | NA | 0 | NA |
| 2 | 196229776 | 196310671 | 1  | NM_001127257 | SLC39A10 | 0 | NA | 0 | NA | 0 | NA | 1 | 11 | 0 | NA |
| 2 | 196230096 | 196310671 | 1  | NM_020342    | SLC39A10 | 0 | NA | 0 | NA | 0 | NA | 1 | 11 | 0 | NA |
| 2 | 196641781 | 196310671 | -1 | NM_018897    | DNAH7    | 0 | NA | 0 | NA | 0 | NA | 0 | NA | 0 | NA |
| 2 | 196744520 | 196710102 | -1 | NM_004226    | STK17B   | 1 | 14 | 0 | NA | 0 | NA | 1 | 11 | 0 | NA |
| 2 | 197165580 | 196772221 | -1 | NM_020760    | HECW2    | 0 | NA | 0 | NA | 0 | NA | 0 | NA | 1 | 14 |
| 2 | 197212600 | 197305775 | 1  | NM_001080539 | CCDC150  | 0 | NA | 0 | NA | 0 | NA | 0 | NA | 0 | NA |
| 2 | 197372670 | 197337344 | -1 | NM_012086    | GTF3C3   | 0 | NA | 0 | NA | 0 | NA | 0 | NA | 0 | NA |
| 2 | 197383245 | 197378253 | -1 | NM_213608    | C2orf66  | 0 | NA | 1 | 14 | 0 | NA | 0 | NA | 0 | NA |

|   |           |           |    |              |            |   |    |   |    |   |    |   |    |   |    |
|---|-----------|-----------|----|--------------|------------|---|----|---|----|---|----|---|----|---|----|
| 2 | 197499699 | 197405972 | -1 | NM_024989    | PGAP1      | 0 | NA | 0 | NA | 0 | NA | 0 | NA | 0 | NA |
| 2 | 197771007 | 197567494 | -1 | NM_153697    | ANKRD44    | 0 | NA | 0 | NA | 0 | NA | 0 | NA | 0 | NA |
| 2 | 198008016 | 197964942 | -1 | NM_012433    | SF3B1      | 0 | NA | 0 | NA | 0 | NA | 1 | 14 | 0 | NA |
| 2 | 198008016 | 197991765 | -1 | NM_001005526 | SF3B1      | 0 | NA | 0 | NA | 0 | NA | 1 | 14 | 0 | NA |
| 2 | 198026475 | 198048096 | 1  | NM_025147    | COQ10B     | 1 | 16 | 0 | NA | 0 | NA | 1 | 15 | 0 | NA |
| 2 | 198072885 | 198059552 | -1 | NM_002156    | HSPD1      | 0 | NA | 0 | NA | 1 | 23 | 0 | NA | 0 | NA |
| 2 | 198073243 | 198059552 | -1 | NM_199440    | HSPD1      | 0 | NA | 0 | NA | 1 | 23 | 0 | NA | 0 | NA |
| 2 | 198073364 | 198076416 | 1  | NM_002157    | HSPE1      | 0 | NA | 0 | NA | 1 | 23 | 0 | NA | 0 | NA |
| 2 | 198088564 | 198125760 | 1  | NM_199482    | MOBK3      | 0 | NA | 0 | NA | 0 | NA | 0 | NA | 0 | NA |
| 2 | 198089015 | 198125760 | 1  | NM_001100819 | MOBK3      | 0 | NA | 0 | NA | 0 | NA | 0 | NA | 0 | NA |
| 2 | 198089015 | 198125760 | 1  | NM_015387    | MOBK3      | 0 | NA | 0 | NA | 0 | NA | 0 | NA | 0 | NA |
| 2 | 198248829 | 198143772 | -1 | NM_144629    | RFTN2      | 0 | NA | 0 | NA | 0 | NA | 0 | NA | 0 | NA |
| 2 | 198278331 | 198281359 | 1  | NM_138395    | MARS2      | 0 | NA | 0 | NA | 0 | NA | 0 | NA | 0 | NA |
| 2 | 198358319 | 198299847 | -1 | NM_033030    | BOLL       | 0 | NA | 0 | NA | 0 | NA | 0 | NA | 0 | NA |
| 2 | 198359183 | 198299847 | -1 | NM_197970    | BOLL       | 0 | NA | 0 | NA | 0 | NA | 0 | NA | 0 | NA |
| 2 | 198377777 | 198721365 | 1  | NM_00114661  | PLCL1      | 0 | NA | 0 | NA | 0 | NA | 0 | NA | 0 | NA |
| 2 | 198539544 | 198721365 | 1  | NM_006226    | PLCL1      | 0 | NA | 0 | NA | 0 | NA | 0 | NA | 0 | NA |
| 2 | 200033500 | 199842468 | -1 | NM_015265    | SATB2      | 0 | NA | 0 | NA | 1 | 12 | 0 | NA | 0 | NA |
| 2 | 200484273 | 200501241 | 1  | NM_153689    | FLJ38973   | 0 | NA | 0 | NA | 0 | NA | 1 | 14 | 0 | NA |
| 2 | 200528284 | 200537085 | 1  | NM_024520    | C2orf47    | 0 | NA | 0 | NA | 0 | NA | 0 | NA | 0 | NA |
| 2 | 200528704 | 200501878 | -1 | NM_001039693 | C2orf60    | 0 | NA | 0 | NA | 0 | NA | 0 | NA | 0 | NA |
| 2 | 200878848 | 201055231 | 1  | NM_015535    | LOC26010   | 0 | NA | 0 | NA | 0 | NA | 1 | 13 | 0 | NA |
| 2 | 200879229 | 201055231 | 1  | NM_001100422 | LOC26010   | 0 | NA | 0 | NA | 0 | NA | 1 | 13 | 0 | NA |
| 2 | 200879229 | 201055231 | 1  | NM_001100424 | LOC26010   | 0 | NA | 0 | NA | 0 | NA | 1 | 13 | 0 | NA |
| 2 | 200879600 | 201055231 | 1  | NM_001100423 | LOC26010   | 0 | NA | 0 | NA | 0 | NA | 1 | 13 | 0 | NA |
| 2 | 201083037 | 201061928 | -1 | NM_152387    | KCTD18     | 0 | NA | 0 | NA | 0 | NA | 0 | NA | 0 | NA |
| 2 | 201099186 | 201156750 | 1  | NM_152524    | SGOL2      | 1 | 15 | 0 | NA | 1 | 15 | 0 | NA | 1 | 14 |
| 2 | 201158975 | 201244462 | 1  | NM_001159    | AOX1       | 0 | NA | 0 | NA | 0 | NA | 0 | NA | 0 | NA |
| 2 | 201384891 | 201396805 | 1  | NM_014670    | BZW1       | 0 | NA | 0 | NA | 0 | NA | 0 | NA | 0 | NA |
| 2 | 201437867 | 201425977 | -1 | NM_004071    | CLK1       | 0 | NA | 0 | NA | 0 | NA | 0 | NA | 0 | NA |
| 2 | 201462029 | 201443923 | -1 | NM_130906    | PPIL3      | 0 | NA | 0 | NA | 0 | NA | 0 | NA | 0 | NA |
| 2 | 201462094 | 201443923 | -1 | NM_032472    | PPIL3      | 0 | NA | 0 | NA | 0 | NA | 0 | NA | 0 | NA |
| 2 | 201462244 | 201443923 | -1 | NM_131916    | PPIL3      | 0 | NA | 0 | NA | 0 | NA | 0 | NA | 0 | NA |
| 2 | 201462390 | 201476898 | 1  | NM_021824    | NIF3L1     | 0 | NA | 0 | NA | 0 | NA | 0 | NA | 0 | NA |
| 2 | 201536655 | 201483138 | -1 | NM_006190    | ORC2L      | 0 | NA | 0 | NA | 0 | NA | 0 | NA | 0 | NA |
| 2 | 201644637 | 201552031 | -1 | NM_173822    | FAM126B    | 0 | NA | 0 | NA | 0 | NA | 0 | NA | 0 | NA |
| 2 | 201644706 | 201658718 | 1  | NM_002491    | NDUFB3     | 0 | NA | 0 | NA | 0 | NA | 0 | NA | 0 | NA |
| 2 | 201689060 | 201714568 | 1  | NM_001127184 | CFLAR      | 0 | NA | 0 | NA | 0 | NA | 0 | NA | 0 | NA |
| 2 | 201689134 | 201737248 | 1  | NM_003879    | CFLAR      | 0 | NA | 0 | NA | 0 | NA | 0 | NA | 0 | NA |
| 2 | 201691631 | 201737086 | 1  | NM_001127183 | CFLAR      | 0 | NA | 0 | NA | 0 | NA | 0 | NA | 0 | NA |
| 2 | 201755865 | 201794628 | 1  | NM_001230    | CASP10     | 0 | NA | 0 | NA | 0 | NA | 1 | 13 | 0 | NA |
| 2 | 201755865 | 201794628 | 1  | NM_032977    | CASP10     | 0 | NA | 0 | NA | 0 | NA | 1 | 13 | 0 | NA |
| 2 | 201755865 | 201802355 | 1  | NM_032974    | CASP10     | 0 | NA | 0 | NA | 0 | NA | 1 | 13 | 0 | NA |
| 2 | 201806410 | 201854883 | 1  | NM_033358    | CASP8      | 1 | 17 | 0 | NA | 0 | NA | 0 | NA | 0 | NA |
| 2 | 201806410 | 201860679 | 1  | NM_001080124 | CASP8      | 1 | 17 | 0 | NA | 0 | NA | 0 | NA | 0 | NA |
| 2 | 201806410 | 201860679 | 1  | NM_001228    | CASP8      | 1 | 17 | 0 | NA | 0 | NA | 0 | NA | 0 | NA |
| 2 | 201806410 | 201860679 | 1  | NM_033355    | CASP8      | 1 | 17 | 0 | NA | 0 | NA | 0 | NA | 0 | NA |
| 2 | 201830998 | 201860679 | 1  | NM_001080125 | CASP8      | 0 | NA | 0 | NA | 0 | NA | 0 | NA | 0 | NA |
| 2 | 201833467 | 201860679 | 1  | NM_033356    | CASP8      | 0 | NA | 0 | NA | 0 | NA | 0 | NA | 0 | NA |
| 2 | 201924421 | 201861238 | -1 | NM_139163    | ALS2CR12   | 0 | NA | 0 | NA | 1 | 13 | 0 | NA | 0 | NA |
| 2 | 202024499 | 201950174 | -1 | NM_015049    | TRAK2      | 1 | 16 | 0 | NA | 0 | NA | 0 | NA | 0 | NA |
| 2 | 202024636 | 202053819 | 1  | NM_018571    | ALS2CR2    | 1 | 16 | 0 | NA | 0 | NA | 0 | NA | 0 | NA |
| 2 | 202192146 | 202060393 | -1 | NM_152525    | ALS2CR11   | 0 | NA | 0 | NA | 0 | NA | 0 | NA | 0 | NA |
| 2 | 202215655 | 202193151 | -1 | NM_152388    | ALS2CR4    | 1 | 12 | 0 | NA | 0 | NA | 0 | NA | 0 | NA |
| 2 | 202216469 | 202193151 | -1 | NM_001044385 | ALS2CR4    | 1 | 12 | 0 | NA | 0 | NA | 0 | NA | 0 | NA |
| 2 | 202271662 | 202217864 | -1 | NM_033066    | MPP4       | 0 | NA | 0 | NA | 0 | NA | 0 | NA | 0 | NA |
| 2 | 202353983 | 202273521 | -1 | NM_020919    | ALS2       | 0 | NA | 0 | NA | 0 | NA | 0 | NA | 0 | NA |
| 2 | 202379442 | 202466508 | 1  | NM_139158    | PFTK2      | 0 | NA | 0 | NA | 0 | NA | 0 | NA | 0 | NA |
| 2 | 202607554 | 202611405 | 1  | NM_003507    | FZD7       | 0 | NA | 1 | 27 | 0 | NA | 0 | NA | 1 | 16 |
| 2 | 202811567 | 202779147 | -1 | NM_001005781 | SUMO1      | 0 | NA | 0 | NA | 0 | NA | 0 | NA | 0 | NA |
| 2 | 202811567 | 202779147 | -1 | NM_001005782 | SUMO1      | 0 | NA | 0 | NA | 0 | NA | 0 | NA | 0 | NA |
| 2 | 202811567 | 202779147 | -1 | NM_003352    | SUMO1      | 0 | NA | 0 | NA | 0 | NA | 0 | NA | 0 | NA |
| 2 | 202838759 | 202876629 | 1  | NM_015934    | NOPS/NOP58 | 0 | NA | 0 | NA | 0 | NA | 1 | 11 | 0 | NA |
| 2 | 202949915 | 203140719 | 1  | NM_001204    | BMP2R      | 0 | NA | 0 | NA | 0 | NA | 0 | NA | 0 | NA |
| 2 | 203208455 | 203342725 | 1  | NM_173511    | ALS2CR13   | 0 | NA | 0 | NA | 0 | NA | 1 | 17 | 0 | NA |

|   |           |           |    |              |           |   |    |   |    |   |    |   |    |   |    |
|---|-----------|-----------|----|--------------|-----------|---|----|---|----|---|----|---|----|---|----|
| 2 | 203444440 | 203398419 | -1 | NM_178231    | ICA1L     | 0 | NA | 0 | NA | 0 | NA | 0 | NA | 0 | NA |
| 2 | 203444616 | 203346117 | -1 | NM_138468    | ICA1L     | 0 | NA | 0 | NA | 0 | NA | 0 | NA | 0 | NA |
| 2 | 203484639 | 203453574 | -1 | NM_018256    | WDR12     | 1 | 14 | 0 | NA | 0 | NA | 0 | NA | 0 | NA |
| 2 | 203485222 | 203559305 | 1  | NM_001104586 | ALS2CR8   | 1 | 14 | 0 | NA | 0 | NA | 0 | NA | 0 | NA |
| 2 | 203485361 | 203559305 | 1  | NM_024744    | ALS2CR8   | 1 | 14 | 0 | NA | 0 | NA | 0 | NA | 0 | NA |
| 2 | 203708717 | 203790962 | 1  | NM_001099273 | NBEAL1    | 0 | NA | 0 | NA | 0 | NA | 0 | NA | 0 | NA |
| 2 | 203708717 | 203790962 | 1  | NM_198945    | NBEAL1    | 0 | NA | 0 | NA | 0 | NA | 0 | NA | 0 | NA |
| 2 | 203811408 | 203878808 | 1  | NM_177538    | CYP20A1   | 1 | 13 | 0 | NA | 0 | NA | 1 | 11 | 0 | NA |
| 2 | 203901247 | 204005137 | 1  | NM_005759    | ABI2      | 0 | NA | 0 | NA | 0 | NA | 0 | NA | 0 | NA |
| 2 | 204108303 | 204006783 | -1 | NM_213589    | RAPH1     | 0 | NA | 0 | NA | 0 | NA | 0 | NA | 0 | NA |
| 2 | 204108303 | 204014436 | -1 | NM_203365    | RAPH1     | 0 | NA | 0 | NA | 0 | NA | 0 | NA | 0 | NA |
| 2 | 204279442 | 204310802 | 1  | NM_006139    | CD28      | 0 | NA | 0 | NA | 0 | NA | 0 | NA | 0 | NA |
| 2 | 204440753 | 204446928 | 1  | NM_001037631 | CTLA4     | 0 | NA | 0 | NA | 0 | NA | 0 | NA | 0 | NA |
| 2 | 204440753 | 204446928 | 1  | NM_005214    | CTLA4     | 0 | NA | 0 | NA | 0 | NA | 0 | NA | 0 | NA |
| 2 | 204509747 | 204534543 | 1  | NM_012092    | ICOS      | 0 | NA | 0 | NA | 0 | NA | 0 | NA | 0 | NA |
| 2 | 205118760 | 206188782 | 1  | NM_057177    | PAR3B     | 0 | NA | 0 | NA | 0 | NA | 0 | NA | 0 | NA |
| 2 | 205118760 | 206188782 | 1  | NM_152526    | PAR3B     | 0 | NA | 0 | NA | 0 | NA | 0 | NA | 0 | NA |
| 2 | 205118760 | 206188782 | 1  | NM_205863    | PAR3B     | 0 | NA | 0 | NA | 0 | NA | 0 | NA | 0 | NA |
| 2 | 206255468 | 206316667 | 1  | NM_201264    | NRP2      | 0 | NA | 0 | NA | 0 | NA | 0 | NA | 0 | NA |
| 2 | 206255468 | 206350125 | 1  | NM_018534    | NRP2      | 0 | NA | 0 | NA | 0 | NA | 0 | NA | 0 | NA |
| 2 | 206255468 | 206350125 | 1  | NM_201267    | NRP2      | 0 | NA | 0 | NA | 0 | NA | 0 | NA | 0 | NA |
| 2 | 206255468 | 206371102 | 1  | NM_003872    | NRP2      | 0 | NA | 0 | NA | 0 | NA | 0 | NA | 0 | NA |
| 2 | 206255468 | 206371102 | 1  | NM_201266    | NRP2      | 0 | NA | 0 | NA | 0 | NA | 0 | NA | 0 | NA |
| 2 | 206255468 | 206371102 | 1  | NM_201279    | NRP2      | 0 | NA | 0 | NA | 0 | NA | 0 | NA | 0 | NA |
| 2 | 206659151 | 206566689 | -1 | NM_017759    | FLJ20309  | 0 | NA | 0 | NA | 0 | NA | 0 | NA | 0 | NA |
| 2 | 206732432 | 206696047 | -1 | NM_005006    | NDUFS1    | 0 | NA | 0 | NA | 0 | NA | 0 | NA | 0 | NA |
| 2 | 206732562 | 206735898 | 1  | NM_001037663 | EEF1B2    | 0 | NA | 0 | NA | 0 | NA | 0 | NA | 0 | NA |
| 2 | 206732562 | 206735898 | 1  | NM_001959    | EEF1B2    | 0 | NA | 0 | NA | 0 | NA | 0 | NA | 0 | NA |
| 2 | 206732562 | 206735898 | 1  | NM_021121    | EEF1B2    | 0 | NA | 0 | NA | 0 | NA | 0 | NA | 0 | NA |
| 2 | 206732907 | 206735897 | 1  | NM_001089876 | LOC644820 | 0 | NA | 0 | NA | 0 | NA | 0 | NA | 0 | NA |
| 2 | 206791016 | 206748284 | -1 | NM_001098199 | GPR1      | 0 | NA | 0 | NA | 0 | NA | 0 | NA | 0 | NA |
| 2 | 206791016 | 206748284 | -1 | NM_005279    | GPR1      | 0 | NA | 0 | NA | 0 | NA | 0 | NA | 0 | NA |
| 2 | 206847767 | 206887393 | 1  | NM_020923    | ZDF2      | 0 | NA | 0 | NA | 0 | NA | 0 | NA | 0 | NA |
| 2 | 207016612 | 207190924 | 1  | NM_003812    | ADAM23    | 0 | NA | 0 | NA | 0 | NA | 0 | NA | 0 | NA |
| 2 | 207215386 | 207222418 | 1  | NM_001102659 | LOC200726 | 0 | NA | 0 | NA | 0 | NA | 0 | NA | 0 | NA |
| 2 | 207291365 | 207224589 | -1 | NM_001093730 | DYTN      | 0 | NA | 0 | NA | 0 | NA | 0 | NA | 0 | NA |
| 2 | 207338295 | 207310733 | -1 | NM_001039845 | MDH1B     | 0 | NA | 0 | NA | 0 | NA | 1 | 21 | 0 | NA |
| 2 | 207339610 | 207365475 | 1  | NM_014929    | FASTKD2   | 0 | NA | 0 | NA | 0 | NA | 1 | 21 | 0 | NA |
| 2 | 207512568 | 207542405 | 1  | NM_173077    | CPO       | 0 | NA | 0 | NA | 0 | NA | 0 | NA | 0 | NA |
| 2 | 207738859 | 207653773 | -1 | NM_003709    | KLF7      | 0 | NA | 0 | NA | 0 | NA | 0 | NA | 0 | NA |
| 2 | 208102930 | 208171815 | 1  | NM_004379    | CREB1     | 0 | NA | 0 | NA | 0 | NA | 0 | NA | 0 | NA |
| 2 | 208102930 | 208171815 | 1  | NM_134442    | CREB1     | 0 | NA | 0 | NA | 0 | NA | 0 | NA | 0 | NA |
| 2 | 208197941 | 208185083 | -1 | NM_145280    | FAM119A   | 1 | 11 | 0 | NA | 0 | NA | 0 | NA | 0 | NA |
| 2 | 208284508 | 208327434 | 1  | NM_152523    | CCNYL1    | 0 | NA | 0 | NA | 0 | NA | 0 | NA | 0 | NA |
| 2 | 208342388 | 208335554 | -1 | NM_003468    | FZD5      | 0 | NA | 0 | NA | 0 | NA | 0 | NA | 0 | NA |
| 2 | 208574637 | 208401287 | -1 | NM_001080475 | PLEKHM3   | 0 | NA | 0 | NA | 0 | NA | 0 | NA | 0 | NA |
| 2 | 208697558 | 208694575 | -1 | NM_006891    | CRYGD     | 0 | NA | 0 | NA | 0 | NA | 0 | NA | 0 | NA |
| 2 | 208702799 | 208701105 | -1 | NM_020989    | CRYGC     | 0 | NA | 0 | NA | 0 | NA | 0 | NA | 0 | NA |
| 2 | 208719122 | 208715541 | -1 | NM_005210    | CRYGB     | 0 | NA | 0 | NA | 0 | NA | 0 | NA | 0 | NA |
| 2 | 208736542 | 208733708 | -1 | NM_014617    | CRYGA     | 0 | NA | 0 | NA | 0 | NA | 0 | NA | 0 | NA |
| 2 | 208763018 | 208738315 | -1 | NM_001099334 | LOC389073 | 0 | NA | 0 | NA | 0 | NA | 0 | NA | 0 | NA |
| 2 | 208828051 | 208809197 | -1 | NM_005896    | IDH1      | 0 | NA | 0 | NA | 0 | NA | 0 | NA | 0 | NA |
| 2 | 208839235 | 208878516 | 1  | NM_152671    | PIP5K3    | 1 | 11 | 0 | NA | 0 | NA | 0 | NA | 0 | NA |
| 2 | 208839235 | 208931720 | 1  | NM_015040    | PIP5K3    | 1 | 11 | 0 | NA | 0 | NA | 0 | NA | 0 | NA |
| 2 | 208979800 | 209067476 | 1  | NM_005048    | PTH2R     | 0 | NA | 0 | NA | 0 | NA | 0 | NA | 0 | NA |
| 2 | 209997015 | 210307079 | 1  | NM_001039538 | MAP2      | 0 | NA | 0 | NA | 0 | NA | 0 | NA | 0 | NA |
| 2 | 210152647 | 210307079 | 1  | NM_002374    | MAP2      | 0 | NA | 0 | NA | 0 | NA | 0 | NA | 0 | NA |
| 2 | 210152647 | 210307079 | 1  | NM_031845    | MAP2      | 0 | NA | 0 | NA | 0 | NA | 0 | NA | 0 | NA |
| 2 | 210152647 | 210307079 | 1  | NM_031847    | MAP2      | 0 | NA | 0 | NA | 0 | NA | 0 | NA | 0 | NA |
| 2 | 210344961 | 210369516 | 1  | NM_182587    | C2orf21   | 0 | NA | 0 | NA | 0 | NA | 0 | NA | 0 | NA |
| 2 | 210575596 | 210594195 | 1  | NM_006916    | RPE       | 0 | NA | 0 | NA | 0 | NA | 0 | NA | 0 | NA |
| 2 | 210575625 | 210594536 | 1  | NM_199229    | RPE       | 0 | NA | 0 | NA | 0 | NA | 0 | NA | 0 | NA |
| 2 | 210744296 | 210593679 | -1 | NM_152519    | C2orf67   | 0 | NA | 0 | NA | 1 | 15 | 0 | NA | 0 | NA |
| 2 | 210798392 | 210760960 | -1 | NM_001608    | ACADL     | 0 | NA | 0 | NA | 0 | NA | 0 | NA | 0 | NA |
| 2 | 210876584 | 210863112 | -1 | NM_079422    | MYL1      | 0 | NA | 0 | NA | 0 | NA | 0 | NA | 0 | NA |

|   |           |           |    |              |           |   |    |    |    |    |    |    |    |   |    |
|---|-----------|-----------|----|--------------|-----------|---|----|----|----|----|----|----|----|---|----|
| 2 | 21088140  | 210863112 | -1 | NM_079420    | MYL1      | 0 | NA | 0  | NA | 0  | NA | 0  | NA | 0 | NA |
| 2 | 211049676 | 211004219 | -1 | NM_006055    | LANCL1    | 0 | NA | 0  | NA | 0  | NA | 0  | NA | 0 | NA |
| 2 | 211050653 | 211252076 | 1  | NM_001122633 | CPS1      | 0 | NA | 0  | NA | 0  | NA | 0  | NA | 0 | NA |
| 2 | 211129570 | 211252076 | 1  | NM_001875    | CPS1      | 0 | NA | 0  | NA | 0  | NA | 0  | NA | 0 | NA |
| 2 | 211166334 | 211252076 | 1  | NM_001122634 | CPS1      | 0 | NA | 0  | NA | 0  | NA | 0  | NA | 0 | NA |
| 2 | 213111597 | 211948686 | -1 | NM_001042599 | ERBB4     | 0 | NA | 0  | NA | 0  | NA | 0  | NA | 0 | NA |
| 2 | 213111597 | 211948686 | -1 | NM_005235    | ERBB4     | 0 | NA | 0  | NA | 0  | NA | 0  | NA | 0 | NA |
| 2 | 213723303 | 213572655 | -1 | NM_016260    | IKZF2     | 0 | NA | 0  | NA | 0  | NA | 0  | NA | 0 | NA |
| 2 | 213724578 | 213572655 | -1 | NM_001079526 | IKZF2     | 0 | NA | 0  | NA | 0  | NA | 0  | NA | 0 | NA |
| 2 | 213857360 | 213890947 | 1  | NM_001025436 | SPAG16    | 1 | 12 | 0  | NA | 1  | 15 | 0  | NA | 0 | NA |
| 2 | 213857360 | 214983470 | 1  | NM_024532    | SPAG16    | 1 | 12 | 0  | NA | 1  | 15 | 0  | NA | 0 | NA |
| 2 | 214984536 | 215149052 | 1  | NM_001080500 | LOC402117 | 0 | NA | 0  | NA | 0  | NA | 0  | NA | 0 | NA |
| 2 | 215382673 | 215301519 | -1 | NM_000465    | BARD1     | 0 | NA | 0  | NA | 0  | NA | 1  | 11 | 0 | NA |
| 2 | 215605055 | 215504510 | -1 | NM_015657    | ABCA12    | 0 | NA | 0  | NA | 0  | NA | 0  | NA | 0 | NA |
| 2 | 215711396 | 215504510 | -1 | NM_173076    | ABCA12    | 0 | NA | 0  | NA | 0  | NA | 0  | NA | 0 | NA |
| 2 | 215884936 | 215922724 | 1  | NM_004044    | ATIC      | 1 | 11 | 0  | NA | 1  | 12 | 0  | NA | 0 | NA |
| 2 | 216009036 | 215933423 | -1 | NM_002026    | FN1       | 1 | 12 | 0  | NA | 0  | NA | 0  | NA | 0 | NA |
| 2 | 216009036 | 215933423 | -1 | NM_212474    | FN1       | 1 | 12 | 0  | NA | 0  | NA | 0  | NA | 0 | NA |
| 2 | 216009036 | 215933423 | -1 | NM_212475    | FN1       | 1 | 12 | 0  | NA | 0  | NA | 0  | NA | 0 | NA |
| 2 | 216009036 | 215933423 | -1 | NM_212476    | FN1       | 1 | 12 | 0  | NA | 0  | NA | 0  | NA | 0 | NA |
| 2 | 216009036 | 215933423 | -1 | NM_212478    | FN1       | 1 | 12 | 0  | NA | 0  | NA | 0  | NA | 0 | NA |
| 2 | 216009036 | 215933423 | -1 | NM_212482    | FN1       | 1 | 12 | 0  | NA | 0  | NA | 0  | NA | 0 | NA |
| 2 | 216009036 | 215987628 | -1 | NM_054034    | FN1       | 1 | 12 | 0  | NA | 0  | NA | 0  | NA | 0 | NA |
| 2 | 216586591 | 216515558 | -1 | NM_018000    | MREG      | 1 | 17 | 0  | NA | 0  | NA | 0  | NA | 0 | NA |
| 2 | 216654777 | 216611377 | -1 | NM_018441    | PECR      | 0 | NA | 0  | NA | 0  | NA | 0  | NA | 0 | NA |
| 2 | 216654886 | 216675739 | 1  | NM_138390    | TMEM169   | 0 | NA | 0  | NA | 0  | NA | 0  | NA | 0 | NA |
| 2 | 216682376 | 216779248 | 1  | NM_021141    | XRCC5     | 0 | NA | 0  | NA | 0  | NA | 0  | NA | 0 | NA |
| 2 | 216944995 | 216830833 | -1 | NM_020814    | MARCH4    | 0 | NA | 0  | NA | 0  | NA | 0  | NA | 0 | NA |
| 2 | 216985381 | 217056019 | 1  | NM_014140    | SMARCAL1  | 0 | NA | 0  | NA | 0  | NA | 0  | NA | 0 | NA |
| 2 | 216985717 | 217056019 | 1  | NM_001127207 | SMARCAL1  | 0 | NA | 0  | NA | 0  | NA | 0  | NA | 0 | NA |
| 2 | 217071764 | 217074433 | 1  | NM_000998    | RPL37A    | 0 | NA | 0  | NA | 0  | NA | 1  | 11 | 0 | NA |
| 2 | 217206371 | 217237403 | 1  | NM_000597    | IGFBP2    | 0 | NA | 0  | NA | 0  | NA | 0  | NA | 0 | NA |
| 2 | 217268517 | 217245072 | -1 | NM_000599    | IGFBP5    | 0 | NA | 0  | NA | 0  | NA | 0  | NA | 0 | NA |
| 2 | 217433027 | 217432426 | -1 | NM_003284    | TNP1      | 0 | NA | 0  | NA | 0  | NA | 0  | NA | 0 | NA |
| 2 | 218517041 | 218372756 | -1 | NM_022648    | TNS1      | 0 | NA | 0  | NA | 0  | NA | 0  | NA | 0 | NA |
| 2 | 218646284 | 218663108 | 1  | NM_198483    | RUFY4     | 0 | NA | 0  | NA | 0  | NA | 0  | NA | 0 | NA |
| 2 | 218698990 | 218710220 | 1  | NM_001557    | IL8RB     | 0 | 1  | 12 | 0  | NA | 0  | NA | 0  | 1 | 13 |
| 2 | 218739961 | 218735812 | -1 | NM_000634    | IL8RA     | 0 | NA | 1  | 12 | 0  | NA | 0  | NA | 1 | 19 |
| 2 | 218790118 | 218827316 | 1  | NM_152862    | ARPC2     | 0 | NA | 0  | NA | 0  | NA | 0  | NA | 0 | NA |
| 2 | 218790364 | 218827316 | 1  | NM_005731    | ARPC2     | 0 | NA | 0  | NA | 0  | NA | 0  | NA | 0 | NA |
| 2 | 218833982 | 218836826 | 1  | NM_001077191 | GPBAR1    | 0 | NA | 0  | NA | 0  | NA | 0  | NA | 0 | NA |
| 2 | 218833982 | 218836826 | 1  | NM_001077194 | GPBAR1    | 0 | NA | 0  | NA | 0  | NA | 0  | NA | 0 | NA |
| 2 | 218833982 | 218836826 | 1  | NM_170699    | GPBAR1    | 0 | NA | 0  | NA | 0  | NA | 0  | NA | 0 | NA |
| 2 | 218843137 | 218837095 | -1 | NM_001087    | AAMP      | 0 | NA | 0  | NA | 0  | NA | 0  | NA | 0 | NA |
| 2 | 218843358 | 218845912 | 1  | NM_001077399 | PNKD      | 0 | NA | 0  | NA | 0  | NA | 0  | NA | 0 | NA |
| 2 | 218843358 | 218919760 | 1  | NM_015488    | PNKD      | 0 | NA | 0  | NA | 0  | NA | 0  | NA | 0 | NA |
| 2 | 218865524 | 218847160 | -1 | NM_022152    | TMBIM1    | 0 | NA | 0  | NA | 0  | NA | 1  | 13 | 0 | NA |
| 2 | 218896161 | 218919760 | 1  | NM_022572    | PNKD      | 0 | NA | 0  | NA | 0  | NA | 0  | NA | 0 | NA |
| 2 | 218929822 | 218941061 | 1  | NM_198559    | C2orf62   | 0 | NA | 0  | NA | 0  | NA | 0  | NA | 0 | NA |
| 2 | 218954995 | 218969861 | 1  | NM_000578    | SLC11A1   | 0 | NA | 0  | NA | 0  | NA | 0  | NA | 0 | NA |
| 2 | 218972721 | 218978908 | 1  | NM_021198    | CTDSP1    | 1 | 25 | 0  | NA | 0  | NA | 0  | NA | 0 | NA |
| 2 | 218973057 | 21897392  | 1  | NM_182642    | CTDSP1    | 1 | 25 | 0  | NA | 0  | NA | 0  | NA | 0 | NA |
| 2 | 218996723 | 219022487 | 1  | NM_007127    | VIL1      | 0 | NA | 0  | NA | 0  | NA | 0  | NA | 0 | NA |
| 2 | 219141293 | 219023217 | -1 | NM_020935    | USP37     | 1 | 17 | 0  | NA | 0  | NA | 1  | 19 | 0 | NA |
| 2 | 219141921 | 219167243 | 1  | NM_005444    | RQCD1     | 1 | 17 | 0  | NA | 0  | NA | 1  | 19 | 0 | NA |
| 2 | 219180875 | 219210148 | 1  | NM_032726    | PLCD4     | 0 | NA | 0  | NA | 0  | NA | 0  | NA | 0 | NA |
| 2 | 219232505 | 219210883 | -1 | NM_001105537 | ZNF142    | 0 | NA | 0  | NA | 0  | NA | 0  | NA | 0 | NA |
| 2 | 219232599 | 219210883 | -1 | NM_005081    | ZNF142    | 0 | NA | 0  | NA | 0  | NA | 0  | NA | 0 | NA |
| 2 | 219232622 | 219236410 | 1  | NM_001079866 | BCS1L     | 0 | NA | 0  | NA | 0  | NA | 0  | NA | 0 | NA |
| 2 | 219232622 | 219236410 | 1  | NM_004328    | BCS1L     | 0 | NA | 0  | NA | 0  | NA | 0  | NA | 0 | NA |
| 2 | 219245025 | 219236830 | -1 | NM_022453    | RNF25     | 1 | 12 | 0  | NA | 0  | NA | 0  | NA | 0 | NA |
| 2 | 219245052 | 219275682 | 1  | NM_015690    | STK36     | 1 | 12 | 0  | NA | 0  | NA | 0  | NA | 0 | NA |
| 2 | 219283886 | 219327652 | 1  | NM_014640    | TLL4      | 0 | NA | 0  | NA | 0  | NA | 0  | NA | 0 | NA |
| 2 | 219354715 | 219388260 | 1  | NM_000784    | CYP27A1   | 0 | NA | 0  | NA | 0  | NA | 0  | NA | 0 | NA |
| 2 | 219404756 | 219395349 | -1 | NM_017431    | PRKAG3    | 0 | NA | 0  | NA | 0  | NA | 0  | NA | 0 | NA |

|   |           |           |    |              |          |   |    |   |    |   |    |   |    |   |    |
|---|-----------|-----------|----|--------------|----------|---|----|---|----|---|----|---|----|---|----|
| 2 | 219432789 | 219447198 | 1  | NM_006522    | WNT6     | 0 | NA | 0 | NA | 1 | 13 | 0 | NA | 0 | NA |
| 2 | 219453498 | 219466895 | 1  | NM_025216    | WNT10A   | 0 | NA | 0 | NA | 0 | NA | 0 | NA | 0 | NA |
| 2 | 219532641 | 219535121 | 1  | NM_003936    | CDK5R2   | 0 | NA | 1 | 14 | 0 | NA | 0 | NA | 1 | 12 |
| 2 | 219558623 | 219554052 | -1 | NM_017521    | FEV      | 0 | NA | 0 | NA | 0 | NA | 0 | NA | 0 | NA |
| 2 | 219566365 | 219563155 | -1 | NM_005209    | CRYBA2   | 0 | NA | 0 | NA | 0 | NA | 0 | NA | 0 | NA |
| 2 | 219566371 | 219563155 | -1 | NM_057093    | CRYBA2   | 0 | NA | 0 | NA | 0 | NA | 0 | NA | 0 | NA |
| 2 | 219566371 | 219563155 | -1 | NM_057094    | CRYBA2   | 0 | NA | 0 | NA | 0 | NA | 0 | NA | 0 | NA |
| 2 | 219614489 | 219575819 | -1 | NM_194302    | CCDC108  | 0 | NA | 0 | NA | 0 | NA | 0 | NA | 0 | NA |
| 2 | 219614489 | 219606657 | -1 | NM_152389    | CCDC108  | 0 | NA | 0 | NA | 0 | NA | 0 | NA | 0 | NA |
| 2 | 219633433 | 219627389 | -1 | NM_002181    | IHH      | 0 | NA | 0 | NA | 0 | NA | 0 | NA | 0 | NA |
| 2 | 219733831 | 219648289 | -1 | NM_024782    | NHEJ1    | 0 | NA | 0 | NA | 0 | NA | 0 | NA | 0 | NA |
| 2 | 219743030 | 219734424 | -1 | NM_144712    | SLC23A3  | 0 | NA | 0 | NA | 0 | NA | 0 | NA | 0 | NA |
| 2 | 219749946 | 219744862 | -1 | NM_015680    | C2orf24  | 0 | NA | 0 | NA | 0 | NA | 0 | NA | 0 | NA |
| 2 | 219751182 | 219758441 | 1  | NM_024293    | FAM134A  | 0 | NA | 0 | NA | 0 | NA | 0 | NA | 0 | NA |
| 2 | 219779781 | 219782614 | 1  | NM_138802    | ZFAND2B  | 1 | 11 | 0 | NA | 0 | NA | 0 | NA | 0 | NA |
| 2 | 219791916 | 219782737 | -1 | NM_005689    | ABCB6    | 1 | 14 | 0 | NA | 0 | NA | 0 | NA | 0 | NA |
| 2 | 219802605 | 219792345 | -1 | NM_001077198 | ATG9A    | 0 | NA | 0 | NA | 0 | NA | 0 | NA | 0 | NA |
| 2 | 219802605 | 219792345 | -1 | NM_024085    | ATG9A    | 0 | NA | 0 | NA | 0 | NA | 0 | NA | 0 | NA |
| 2 | 219802722 | 219809635 | 1  | NM_018089    | ANKZF1   | 0 | NA | 0 | NA | 0 | NA | 0 | NA | 0 | NA |
| 2 | 219802853 | 219809635 | 1  | NM_001042410 | ANKZF1   | 0 | NA | 0 | NA | 0 | NA | 0 | NA | 0 | NA |
| 2 | 219818375 | 219809746 | -1 | NM_024506    | GLB1L    | 1 | 11 | 0 | NA | 0 | NA | 0 | NA | 0 | NA |
| 2 | 219818435 | 219821873 | 1  | NM_001008910 | STK16    | 1 | 11 | 0 | NA | 0 | NA | 0 | NA | 0 | NA |
| 2 | 219818467 | 219821873 | 1  | NM_003691    | STK16    | 1 | 11 | 0 | NA | 0 | NA | 0 | NA | 0 | NA |
| 2 | 219826882 | 219823244 | -1 | NM_006000    | TUBA4A   | 1 | 11 | 0 | NA | 0 | NA | 0 | NA | 0 | NA |
| 2 | 219852283 | 219859866 | 1  | NM_001039550 | DNAJB2   | 0 | NA | 0 | NA | 0 | NA | 0 | NA | 0 | NA |
| 2 | 219852283 | 219859866 | 1  | NM_006736    | DNAJB2   | 0 | NA | 0 | NA | 0 | NA | 0 | NA | 0 | NA |
| 2 | 219882387 | 219862588 | -1 | NM_002846    | PTPRN    | 0 | NA | 1 | 16 | 0 | NA | 0 | NA | 0 | NA |
| 2 | 219960906 | 219946423 | -1 | NM_012100    | DNPEP    | 0 | NA | 0 | NA | 0 | NA | 0 | NA | 0 | NA |
| 2 | 219991342 | 219999705 | 1  | NM_001927    | DES      | 0 | NA | 0 | NA | 0 | NA | 0 | NA | 0 | NA |
| 2 | 220007943 | 220066598 | 1  | NM_005876    | SPEG     | 0 | NA | 0 | NA | 0 | NA | 0 | NA | 0 | NA |
| 2 | 220071856 | 220079955 | 1  | NM_013335    | GMPPA    | 1 | 15 | 0 | NA | 0 | NA | 0 | NA | 0 | NA |
| 2 | 220071872 | 220079955 | 1  | NM_205847    | GMPPA    | 1 | 15 | 0 | NA | 0 | NA | 0 | NA | 0 | NA |
| 2 | 220087295 | 220111738 | 1  | NM_018674    | ACCN4    | 0 | NA | 0 | NA | 0 | NA | 0 | NA | 0 | NA |
| 2 | 220087295 | 220111738 | 1  | NM_182847    | ACCN4    | 0 | NA | 0 | NA | 0 | NA | 0 | NA | 0 | NA |
| 2 | 220116731 | 220111912 | -1 | NM_024536    | CHPF     | 0 | NA | 0 | NA | 1 | 15 | 0 | NA | 0 | NA |
| 2 | 220116988 | 220123561 | 1  | NM_001005209 | TMEM198  | 0 | NA | 0 | NA | 0 | NA | 1 | 15 | 0 | NA |
| 2 | 220144255 | 220123708 | -1 | NM_015311    | OBSL1    | 0 | NA | 0 | NA | 0 | NA | 0 | NA | 0 | NA |
| 2 | 220145197 | 220148671 | 1  | NM_002191    | INHA     | 0 | NA | 0 | NA | 0 | NA | 0 | NA | 0 | NA |
| 2 | 220170839 | 220189417 | 1  | NM_052902    | STK11IP  | 0 | NA | 0 | NA | 0 | NA | 0 | NA | 0 | NA |
| 2 | 220200535 | 220214946 | 1  | NM_005070    | SLC4A3   | 0 | NA | 0 | NA | 0 | NA | 0 | NA | 0 | NA |
| 2 | 220200535 | 220214946 | 1  | NM_201574    | SLC4A3   | 0 | NA | 0 | NA | 0 | NA | 0 | NA | 0 | NA |
| 2 | 222145254 | 221990990 | -1 | NM_004438    | EPHA4    | 0 | NA | 1 | 13 | 0 | NA | 0 | NA | 0 | NA |
| 2 | 222871109 | 222878180 | 1  | NM_153038    | CCDC140  | 1 | 13 | 0 | NA | 0 | NA | 0 | NA | 0 | NA |
| 2 | 222871944 | 222772850 | -1 | NM_181457    | PAX3     | 1 | 13 | 0 | NA | 0 | NA | 0 | NA | 0 | NA |
| 2 | 222871944 | 222772850 | -1 | NM_181458    | PAX3     | 1 | 13 | 0 | NA | 0 | NA | 0 | NA | 0 | NA |
| 2 | 222871944 | 222772850 | -1 | NM_181459    | PAX3     | 1 | 13 | 0 | NA | 0 | NA | 0 | NA | 0 | NA |
| 2 | 222871944 | 222772850 | -1 | NM_181460    | PAX3     | 1 | 13 | 0 | NA | 0 | NA | 0 | NA | 0 | NA |
| 2 | 222871944 | 222774294 | -1 | NM_181461    | PAX3     | 1 | 13 | 0 | NA | 0 | NA | 0 | NA | 0 | NA |
| 2 | 222871944 | 222866592 | -1 | NM_000438    | PAX3     | 1 | 13 | 0 | NA | 0 | NA | 0 | NA | 0 | NA |
| 2 | 222871944 | 222866592 | -1 | NM_013942    | PAX3     | 1 | 13 | 0 | NA | 0 | NA | 0 | NA | 0 | NA |
| 2 | 222997565 | 223131861 | 1  | NM_152386    | SGPP2    | 0 | NA | 0 | NA | 0 | NA | 0 | NA | 0 | NA |
| 2 | 223229071 | 223144405 | -1 | NM_005687    | FARSB    | 1 | 14 | 0 | NA | 0 | NA | 0 | NA | 0 | NA |
| 2 | 223244700 | 223282893 | 1  | NM_058165    | MOGAT1   | 0 | NA | 0 | NA | 0 | NA | 0 | NA | 0 | NA |
| 2 | 223433975 | 223516363 | 1  | NM_004457    | ACSL3    | 0 | NA | 0 | NA | 0 | NA | 0 | NA | 0 | NA |
| 2 | 223433975 | 223516363 | 1  | NM_203372    | ACSL3    | 0 | NA | 0 | NA | 0 | NA | 0 | NA | 0 | NA |
| 2 | 223625105 | 223628599 | 1  | NM_080671    | KCNE4    | 0 | NA | 0 | NA | 0 | NA | 0 | NA | 0 | NA |
| 2 | 224175365 | 224169901 | -1 | NM_003469    | SCG2     | 0 | NA | 0 | NA | 0 | NA | 0 | NA | 0 | NA |
| 2 | 224410563 | 224328290 | -1 | NM_001039569 | API53    | 0 | NA | 0 | NA | 0 | NA | 1 | 11 | 0 | NA |
| 2 | 224518296 | 224448308 | -1 | NM_020830    | WDFY1    | 0 | NA | 0 | NA | 0 | NA | 1 | 14 | 0 | NA |
| 2 | 224530364 | 224540675 | 1  | NM_022915    | MRPL44   | 0 | NA | 0 | NA | 0 | NA | 0 | NA | 0 | NA |
| 2 | 224612237 | 224548120 | -1 | NM_006216    | SERPINE2 | 0 | NA | 0 | NA | 0 | NA | 0 | NA | 0 | NA |
| 2 | 224974955 | 224951658 | -1 | NM_001122779 | FAM124B  | 0 | NA | 1 | 12 | 0 | NA | 0 | NA | 0 | NA |
| 2 | 224974955 | 224951658 | -1 | NM_024785    | FAM124B  | 0 | NA | 1 | 12 | 0 | NA | 0 | NA | 0 | NA |
| 2 | 225158358 | 225043112 | -1 | NM_003590    | CUL3     | 1 | 16 | 0 | NA | 0 | NA | 0 | NA | 0 | NA |
| 2 | 225615574 | 225338050 | -1 | NM_014689    | DOCK10   | 0 | NA | 0 | NA | 0 | NA | 0 | NA | 0 | NA |

|   |           |           |    |              |              |   |    |   |    |   |    |   |    |   |    |
|---|-----------|-----------|----|--------------|--------------|---|----|---|----|---|----|---|----|---|----|
| 2 | 225973845 | 226226978 | 1  | NM_020864    | KIAA1486     | 0 | NA | 0 | NA | 0 | NA | 0 | NA | 0 | NA |
| 2 | 227371750 | 227304276 | -1 | NM_005544    | IRS1         | 1 | 12 | 1 | 14 | 1 | 13 | 1 | 11 | 0 | NA |
| 2 | 227409016 | 227569836 | 1  | NM_032276    | RHBDD1       | 1 | 25 | 1 | 23 | 0 | NA | 0 | NA | 0 | NA |
| 2 | 227737519 | 227575670 | -1 | NM_000092    | COL4A4       | 0 | NA | 0 | NA | 0 | NA | 0 | NA | 0 | NA |
| 2 | 227737524 | 227887751 | 1  | NM_000091    | COL4A3       | 0 | NA | 0 | NA | 0 | NA | 0 | NA | 0 | NA |
| 2 | 227737524 | 227887751 | 1  | NM_031362    | COL4A3       | 0 | NA | 0 | NA | 0 | NA | 0 | NA | 0 | NA |
| 2 | 227737524 | 227887751 | 1  | NM_031365    | COL4A3       | 0 | NA | 0 | NA | 0 | NA | 0 | NA | 0 | NA |
| 2 | 227737524 | 227887751 | 1  | NM_031366    | COL4A3       | 0 | NA | 0 | NA | 0 | NA | 0 | NA | 0 | NA |
| 2 | 227900471 | 227930793 | 1  | NM_020194    | C2orf33      | 0 | NA | 0 | NA | 1 | 17 | 0 | NA | 0 | NA |
| 2 | 227952264 | 227935123 | -1 | NM_024795    | TM4SF20      | 0 | NA | 0 | NA | 0 | NA | 0 | NA | 0 | NA |
| 2 | 228045285 | 228130546 | 1  | NM_004504    | HRB          | 0 | NA | 0 | NA | 1 | 15 | 0 | NA | 0 | NA |
| 2 | 228206132 | 228183049 | -1 | NM_020161    | DKFZp547H025 | 0 | NA | 0 | NA | 0 | NA | 0 | NA | 0 | NA |
| 2 | 228290989 | 228258169 | -1 | NM_025243    | SLC19A3      | 0 | NA | 0 | NA | 0 | NA | 0 | NA | 0 | NA |
| 2 | 228386813 | 228390494 | 1  | NM_004591    | CCL20        | 1 | 11 | 0 | NA | 1 | 13 | 1 | 12 | 0 | NA |
| 2 | 228444570 | 228497270 | 0  | NA           | WDR69        | 0 | NA | 0 | NA | 0 | NA | 0 | NA | 0 | NA |
| 2 | 228754586 | 228552918 | -1 | NM_030623    | SPHKAP       | 0 | NA | 0 | NA | 0 | NA | 0 | NA | 0 | NA |
| 2 | 229844301 | 229596932 | -1 | NM_001100818 | PID1         | 0 | NA | 0 | NA | 0 | NA | 0 | NA | 0 | NA |
| 2 | 229844301 | 229596932 | -1 | NM_017933    | PID1         | 0 | NA | 0 | NA | 0 | NA | 0 | NA | 0 | NA |
| 2 | 230287530 | 229930588 | -1 | NM_139072    | DNER         | 0 | NA | 0 | NA | 0 | NA | 0 | NA | 0 | NA |
| 2 | 230494899 | 230340173 | -1 | NM_004238    | TRIP12       | 0 | NA | 0 | NA | 0 | NA | 0 | NA | 0 | NA |
| 2 | 230495450 | 230586069 | 1  | NM_174899    | FBXO36       | 0 | NA | 0 | NA | 0 | NA | 0 | NA | 0 | NA |
| 2 | 230641863 | 230607941 | -1 | NM_152527    | SLC16A14     | 0 | NA | 0 | NA | 0 | NA | 0 | NA | 0 | NA |
| 2 | 230792932 | 230741895 | -1 | NM_004509    | SP110        | 0 | NA | 0 | NA | 0 | NA | 0 | NA | 0 | NA |
| 2 | 230792932 | 230741895 | -1 | NM_080424    | SP110        | 0 | NA | 0 | NA | 0 | NA | 0 | NA | 0 | NA |
| 2 | 230792932 | 230749432 | -1 | NM_004510    | SP110        | 0 | NA | 0 | NA | 0 | NA | 0 | NA | 0 | NA |
| 2 | 230798689 | 230812035 | 1  | NM_001005176 | SP140        | 0 | NA | 0 | NA | 0 | NA | 0 | NA | 0 | NA |
| 2 | 230798689 | 230886174 | 1  | NM_007237    | SP140        | 0 | NA | 0 | NA | 0 | NA | 0 | NA | 0 | NA |
| 2 | 230900137 | 230976689 | 1  | NM_138402    | LOC93349     | 0 | NA | 0 | NA | 0 | NA | 0 | NA | 0 | NA |
| 2 | 230989114 | 231089486 | 1  | NM_003113    | SP100        | 0 | NA | 0 | NA | 0 | NA | 0 | NA | 0 | NA |
| 2 | 230989114 | 231118561 | 1  | NM_001080391 | SP100        | 0 | NA | 0 | NA | 0 | NA | 0 | NA | 0 | NA |
| 2 | 231285908 | 231394031 | 1  | NM_016289    | CAB39        | 0 | NA | 0 | NA | 0 | NA | 0 | NA | 0 | NA |
| 2 | 231437864 | 231452207 | 1  | NM_001012514 | ITM2C        | 0 | NA | 0 | NA | 0 | NA | 0 | NA | 0 | NA |
| 2 | 231437864 | 231452207 | 1  | NM_001012516 | ITM2C        | 0 | NA | 0 | NA | 0 | NA | 0 | NA | 0 | NA |
| 2 | 231437864 | 231452207 | 1  | NM_030926    | ITM2C        | 0 | NA | 0 | NA | 0 | NA | 0 | NA | 0 | NA |
| 2 | 231498185 | 231480286 | -1 | NM_005683    | GPR55        | 0 | NA | 0 | NA | 0 | NA | 0 | NA | 0 | NA |
| 2 | 231629852 | 231745717 | 1  | NM_002807    | PSMD1        | 0 | NA | 0 | NA | 0 | NA | 1 | 16 | 0 | NA |
| 2 | 231698068 | 231681198 | -1 | NM_000867    | HTR2B        | 0 | NA | 0 | NA | 0 | NA | 0 | NA | 0 | NA |
| 2 | 231771585 | 231918158 | 1  | NM_025139    | ARMC9        | 0 | NA | 0 | NA | 0 | NA | 0 | NA | 0 | NA |
| 2 | 231968578 | 231971928 | 1  | NM_145236    | B3GN17       | 1 | 20 | 0 | NA | 0 | NA | 1 | 31 | 0 | NA |
| 2 | 232037449 | 232027702 | -1 | NM_005381    | NCL          | 0 | NA | 0 | NA | 0 | NA | 0 | NA | 0 | NA |
| 2 | 232087294 | 232081380 | -1 | NM_173513    | C2orf52      | 0 | NA | 0 | NA | 0 | NA | 0 | NA | 0 | NA |
| 2 | 232103447 | 232096114 | -1 | NM_006056    | NMUR1        | 0 | NA | 0 | NA | 0 | NA | 0 | NA | 0 | NA |
| 2 | 232165855 | 232167238 | 1  | NM_152614    | C2orf57      | 0 | NA | 0 | NA | 0 | NA | 0 | NA | 0 | NA |
| 2 | 232281478 | 232286494 | 1  | NM_001099285 | PTMA         | 1 | 24 | 0 | NA | 0 | NA | 1 | 17 | 0 | NA |
| 2 | 232281478 | 232286494 | 1  | NM_002823    | PTMA         | 1 | 24 | 0 | NA | 0 | NA | 1 | 17 | 0 | NA |
| 2 | 232354218 | 232305390 | -1 | NM_002601    | PDE6D        | 0 | NA | 0 | NA | 0 | NA | 0 | NA | 0 | NA |
| 2 | 232359405 | 232381678 | 1  | NM_022730    | COPS7B       | 0 | NA | 0 | NA | 0 | NA | 0 | NA | 0 | NA |
| 2 | 232499203 | 232498378 | -1 | NM_024409    | NPPC         | 0 | NA | 0 | NA | 0 | NA | 1 | 11 | 0 | NA |
| 2 | 232534536 | 232910152 | 1  | NM_152383    | DIS3L2       | 0 | NA | 0 | NA | 0 | NA | 1 | 12 | 0 | NA |
| 2 | 232951591 | 232955843 | 1  | NM_001632    | ALPP         | 0 | NA | 1 | 12 | 0 | NA | 0 | NA | 0 | NA |
| 2 | 232979795 | 232983669 | 1  | NM_031313    | ALPPL2       | 0 | NA | 0 | NA | 0 | NA | 0 | NA | 0 | NA |
| 2 | 233029076 | 233032986 | 1  | NM_001631    | ALPI         | 0 | NA | 0 | NA | 0 | NA | 0 | NA | 0 | NA |
| 2 | 233060776 | 233052780 | -1 | NM_004826    | ECEL1        | 0 | NA | 0 | NA | 0 | NA | 0 | NA | 0 | NA |
| 2 | 233099165 | 233108449 | 1  | NM_000751    | CHRND        | 0 | NA | 0 | NA | 0 | NA | 0 | NA | 0 | NA |
| 2 | 233112680 | 233119282 | 1  | NM_005199    | CHRNA        | 0 | NA | 0 | NA | 0 | NA | 0 | NA | 0 | NA |
| 2 | 233123470 | 233121022 | -1 | NM_145702    | TIGD1        | 0 | NA | 0 | NA | 0 | NA | 0 | NA | 0 | NA |
| 2 | 233123600 | 233142164 | 1  | NM_004846    | EIF4E2       | 0 | NA | 0 | NA | 0 | NA | 0 | NA | 0 | NA |
| 2 | 233206567 | 233255730 | 1  | NM_025202    | EFHD1        | 0 | NA | 0 | NA | 0 | NA | 0 | NA | 0 | NA |
| 2 | 233270258 | 233433531 | 1  | NM_001103146 | GIGYF2       | 0 | NA | 0 | NA | 0 | NA | 0 | NA | 0 | NA |
| 2 | 233270258 | 233433531 | 1  | NM_001103147 | GIGYF2       | 0 | NA | 0 | NA | 0 | NA | 0 | NA | 0 | NA |
| 2 | 233270258 | 233433531 | 1  | NM_001103148 | GIGYF2       | 0 | NA | 0 | NA | 0 | NA | 0 | NA | 0 | NA |
| 2 | 233270258 | 233433531 | 1  | NM_015575    | GIGYF2       | 0 | NA | 0 | NA | 0 | NA | 0 | NA | 0 | NA |
| 2 | 233349519 | 233339103 | -1 | NM_002242    | KCNJ13       | 0 | NA | 0 | NA | 0 | NA | 0 | NA | 0 | NA |
| 2 | 233443237 | 233449351 | 1  | NM_206895    | UNC930       | 1 | 12 | 0 | NA | 0 | NA | 0 | NA | 0 | NA |
| 2 | 233501105 | 233451639 | -1 | NM_001114090 | NGEF         | 0 | NA | 0 | NA | 0 | NA | 0 | NA | 1 | 14 |

|   |           |           |    |              |           |   |    |   |    |   |    |   |    |   |    |
|---|-----------|-----------|----|--------------|-----------|---|----|---|----|---|----|---|----|---|----|
| 2 | 233586195 | 233451639 | -1 | NM_019850    | NGEF      | 0 | NA | 0 | NA | 0 | NA | 0 | NA | 1 | 16 |
| 2 | 233605625 | 233608011 | 1  | NM_005383    | NEU2      | 1 | 12 | 1 | 13 | 0 | NA | 0 | NA | 1 | 12 |
| 2 | 233633279 | 233781288 | 1  | NM_001017915 | INPP5D    | 0 | NA | 0 | NA | 0 | NA | 0 | NA | 0 | NA |
| 2 | 233633279 | 233781288 | 1  | NM_005541    | INPP5D    | 0 | NA | 0 | NA | 0 | NA | 0 | NA | 0 | NA |
| 2 | 233824955 | 233869059 | 1  | NM_017974    | ATG16L1   | 0 | NA | 0 | NA | 0 | NA | 0 | NA | 0 | NA |
| 2 | 233824955 | 233869059 | 1  | NM_030803    | ATG16L1   | 0 | NA | 0 | NA | 0 | NA | 0 | NA | 0 | NA |
| 2 | 233881206 | 233920440 | 1  | NM_000541    | SAG       | 0 | NA | 0 | NA | 0 | NA | 0 | NA | 0 | NA |
| 2 | 233927891 | 234045482 | 1  | NM_152879    | DGKD      | 1 | 12 | 0 | NA | 0 | NA | 0 | NA | 0 | NA |
| 2 | 233961538 | 234045482 | 1  | NM_003648    | DGKD      | 0 | NA | 0 | NA | 0 | NA | 0 | NA | 0 | NA |
| 2 | 234134606 | 234048903 | -1 | NM_018218    | USP40     | 0 | NA | 0 | NA | 0 | NA | 0 | NA | 0 | NA |
| 2 | 234191029 | 234346684 | 1  | NM_019076    | UGT1A8    | 0 | NA | 0 | NA | 0 | NA | 0 | NA | 0 | NA |
| 2 | 234209861 | 234346690 | 1  | NM_019075    | UGT1A10   | 0 | NA | 0 | NA | 0 | NA | 0 | NA | 0 | NA |
| 2 | 234245282 | 234346690 | 1  | NM_021027    | UGT1A9    | 0 | NA | 0 | NA | 0 | NA | 0 | NA | 0 | NA |
| 2 | 234255322 | 234346684 | 1  | NM_019077    | UGT1A7    | 0 | NA | 0 | NA | 0 | NA | 0 | NA | 0 | NA |
| 2 | 234265059 | 234346684 | 1  | NM_205862    | UGT1A6    | 0 | NA | 0 | NA | 0 | NA | 0 | NA | 0 | NA |
| 2 | 234266250 | 234346690 | 1  | NM_001072    | UGT1A6    | 0 | NA | 0 | NA | 0 | NA | 0 | NA | 0 | NA |
| 2 | 234286376 | 234346684 | 1  | NM_019078    | UGT1A5    | 0 | NA | 0 | NA | 0 | NA | 0 | NA | 1 | 12 |
| 2 | 234292176 | 234346684 | 1  | NM_007120    | UGT1A4    | 0 | NA | 0 | NA | 0 | NA | 0 | NA | 1 | 12 |
| 2 | 234302511 | 234346684 | 1  | NM_019093    | UGT1A3    | 0 | NA | 0 | NA | 0 | NA | 0 | NA | 1 | 13 |
| 2 | 234317400 | 234316134 | -1 | NM_001001394 | HGG3      | 0 | NA | 0 | NA | 0 | NA | 0 | NA | 1 | 12 |
| 2 | 234333657 | 234346684 | 1  | NM_000463    | UGT1A1    | 0 | NA | 0 | NA | 0 | NA | 0 | NA | 1 | 15 |
| 2 | 234427951 | 234410224 | -1 | NM_018410    | HJURP     | 0 | NA | 0 | NA | 0 | NA | 0 | NA | 0 | NA |
| 2 | 234490781 | 234592905 | 1  | NM_024080    | TRPM8     | 0 | NA | 0 | NA | 0 | NA | 0 | NA | 0 | NA |
| 2 | 234624084 | 234650515 | 1  | NM_006944    | SPP2      | 0 | NA | 0 | NA | 0 | NA | 0 | NA | 0 | NA |
| 2 | 235070432 | 235066424 | -1 | NM_005737    | ARL4C     | 0 | NA | 0 | NA | 0 | NA | 0 | NA | 1 | 12 |
| 2 | 235525366 | 235629097 | 1  | NM_014521    | SH3BP4    | 0 | NA | 0 | NA | 0 | NA | 0 | NA | 0 | NA |
| 2 | 236067474 | 236698859 | 1  | NM_001037131 | CENTG2    | 0 | NA | 0 | NA | 0 | NA | 0 | NA | 0 | NA |
| 2 | 236067474 | 236698859 | 1  | NM_014914    | CENTG2    | 0 | NA | 0 | NA | 0 | NA | 0 | NA | 0 | NA |
| 2 | 236741391 | 236739045 | -1 | NM_001485    | GBX2      | 0 | NA | 0 | NA | 0 | NA | 0 | NA | 0 | NA |
| 2 | 236837727 | 236788253 | -1 | NM_212556    | ASB18     | 0 | NA | 0 | NA | 0 | NA | 1 | 12 | 1 | 13 |
| 2 | 237080831 | 236897532 | -1 | NM_024726    | IQCA      | 0 | NA | 0 | NA | 0 | NA | 0 | NA | 0 | NA |
| 2 | 237143118 | 237155733 | 1  | NM_020311    | CXCR7     | 0 | NA | 0 | NA | 0 | NA | 0 | NA | 1 | 18 |
| 2 | 237658822 | 237672228 | 1  | NM_006710    | COPS8     | 0 | NA | 0 | NA | 0 | NA | 0 | NA | 0 | NA |
| 2 | 237658822 | 237672228 | 1  | NM_198189    | COPS8     | 0 | NA | 0 | NA | 0 | NA | 0 | NA | 0 | NA |
| 2 | 237987559 | 237897400 | -1 | NM_004369    | COL6A3    | 0 | NA | 0 | NA | 1 | 11 | 1 | 11 | 1 | 14 |
| 2 | 237987559 | 237897400 | -1 | NM_057164    | COL6A3    | 0 | NA | 0 | NA | 0 | NA | 1 | 11 | 1 | 14 |
| 2 | 237987559 | 237897400 | -1 | NM_057165    | COL6A3    | 0 | NA | 0 | NA | 0 | NA | 1 | 11 | 1 | 14 |
| 2 | 237987559 | 237897400 | -1 | NM_057166    | COL6A3    | 0 | NA | 0 | NA | 0 | NA | 1 | 11 | 1 | 14 |
| 2 | 237987559 | 237897400 | -1 | NM_057167    | COL6A3    | 0 | NA | 0 | NA | 0 | NA | 1 | 11 | 1 | 14 |
| 2 | 238060616 | 238128700 | 1  | NM_001042467 | MLPH      | 0 | NA | 1 | 15 | 0 | NA | 1 | 11 | 1 | 26 |
| 2 | 238060616 | 238128700 | 1  | NM_024101    | MLPH      | 0 | NA | 1 | 15 | 0 | NA | 1 | 11 | 1 | 26 |
| 2 | 238139955 | 238140557 | 1  | NM_015893    | PRLH      | 0 | NA | 1 | 12 | 0 | NA | 0 | NA | 0 | NA |
| 2 | 238164475 | 238147703 | -1 | NM_022449    | RAB17     | 0 | NA | 0 | NA | 1 | 12 | 0 | NA | 0 | NA |
| 2 | 238265667 | 238338645 | 1  | NM_004735    | LRRFIP1   | 1 | 14 | 0 | NA | 0 | NA | 1 | 14 | 0 | NA |
| 2 | 238372126 | 238408253 | 1  | NM_001080504 | RBM44     | 0 | NA | 0 | NA | 0 | NA | 0 | NA | 0 | NA |
| 2 | 238432925 | 238485494 | 1  | NM_005855    | RAMP1     | 0 | NA | 0 | NA | 0 | NA | 0 | NA | 0 | NA |
| 2 | 238540438 | 238615421 | 1  | NM_080678    | UBE2F     | 1 | 19 | 1 | 12 | 0 | NA | 1 | 37 | 0 | NA |
| 2 | 238634370 | 238672793 | 1  | NM_016510    | SCLY      | 0 | NA | 0 | NA | 0 | NA | 0 | NA | 0 | NA |
| 2 | 238673689 | 238706667 | 1  | NM_194312    | ESPNL     | 0 | NA | 0 | NA | 0 | NA | 0 | NA | 0 | NA |
| 2 | 238714155 | 238726286 | 1  | NM_198582    | KLHL30    | 0 | NA | 0 | NA | 0 | NA | 0 | NA | 0 | NA |
| 2 | 238777063 | 238743781 | -1 | NM_030768    | ILKAP     | 0 | NA | 0 | NA | 0 | NA | 0 | NA | 0 | NA |
| 2 | 238813409 | 238811646 | -1 | NM_018645    | HES6      | 0 | NA | 0 | NA | 0 | NA | 1 | 13 | 0 | NA |
| 2 | 238861946 | 238817417 | -1 | NM_022817    | PER2      | 0 | NA | 0 | NA | 0 | NA | 0 | NA | 0 | NA |
| 2 | 238893820 | 238972536 | 1  | NM_015650    | TRAF3IP1  | 0 | NA | 0 | NA | 0 | NA | 0 | NA | 0 | NA |
| 2 | 239000364 | 239025630 | 1  | NM_001040445 | ASB1      | 0 | NA | 0 | NA | 1 | 12 | 0 | NA | 0 | NA |
| 2 | 239987580 | 239634800 | -1 | NM_006037    | HDAC4     | 0 | NA | 0 | NA | 0 | NA | 0 | NA | 0 | NA |
| 2 | 240613471 | 240548828 | -1 | NM_004544    | NDUFA10   | 0 | NA | 0 | NA | 0 | NA | 0 | NA | 0 | NA |
| 2 | 240618519 | 240617580 | -1 | NM_001005853 | OR6B2     | 0 | NA | 0 | NA | 0 | NA | 0 | NA | 1 | 12 |
| 2 | 240631072 | 240629902 | -1 | NM_001080835 | LOC643905 | 0 | NA | 0 | NA | 0 | NA | 1 | 12 | 1 | 12 |
| 2 | 240634162 | 240633166 | -1 | NM_173351    | OR6B3     | 0 | NA | 0 | NA | 0 | NA | 1 | 12 | 1 | 12 |
| 2 | 240724437 | 240714652 | -1 | NM_138336    | MYEOV2    | 0 | NA | 0 | NA | 0 | NA | 0 | NA | 0 | NA |
| 2 | 240728746 | 240727118 | -1 | NM_148961    | OTOS      | 0 | NA | 0 | NA | 0 | NA | 0 | NA | 1 | 13 |
| 2 | 241023787 | 241056188 | 1  | NM_002081    | GPC1      | 0 | NA | 1 | 16 | 0 | NA | 1 | 12 | 0 | NA |
| 2 | 241146078 | 241067511 | -1 | NM_016552    | ANKMY1    | 0 | NA | 0 | NA | 0 | NA | 0 | NA | 0 | NA |
| 2 | 241146078 | 241067511 | -1 | NM_017844    | ANKMY1    | 0 | NA | 0 | NA | 0 | NA | 0 | NA | 0 | NA |



|   |           |           |    |              |           |   |    |   |    |   |    |    |    |    |    |
|---|-----------|-----------|----|--------------|-----------|---|----|---|----|---|----|----|----|----|----|
| 2 | 241148143 | 241152104 | 1  | NM_001033575 | DUSP28    | 0 | NA | 0 | NA | 0 | NA | 0  | NA | 0  | NA |
| 2 | 241156776 | 241166816 | 1  | NM_018226    | RNPEPL1   | 0 | NA | 0 | NA | 0 | NA | 0  | NA | 0  | NA |
| 2 | 241174817 | 241187193 | 1  | NM_021251    | CAPN10    | 0 | NA | 0 | NA | 0 | NA | 0  | NA | 0  | NA |
| 2 | 241174817 | 241187193 | 1  | NM_023083    | CAPN10    | 0 | NA | 0 | NA | 0 | NA | 0  | NA | 0  | NA |
| 2 | 241174817 | 241187193 | 1  | NM_023085    | CAPN10    | 0 | NA | 0 | NA | 0 | NA | 0  | NA | 0  | NA |
| 2 | 241174824 | 241205795 | 1  | NM_023089    | CAPN10    | 0 | NA | 0 | NA | 0 | NA | 0  | NA | 0  | NA |
| 2 | 241217467 | 241219342 | 1  | NM_005301    | GPR35     | 0 | NA | 0 | NA | 0 | 1  | 24 | 0  | 0  | NA |
| 2 | 241270990 | 241264507 | -1 | NM_001102467 | AQP12B    | 0 | NA | 0 | NA | 0 | 0  | 0  | 0  | 0  | NA |
| 2 | 241279934 | 241286573 | 1  | NM_198998    | AQP12A    | 0 | NA | 0 | NA | 0 | 0  | 0  | 0  | 0  | NA |
| 2 | 241408297 | 241301856 | -1 | NM_004321    | KIF1A     | 0 | NA | 1 | 13 | 0 | 0  | 0  | 1  | 21 | 0  |
| 2 | 241456834 | 241467209 | 1  | NM_000030    | AGXT      | 0 | NA | 0 | NA | 0 | 0  | 0  | 0  | 0  | NA |
| 2 | 241480125 | 241474137 | -1 | NM_024861    | C2orf54   | 0 | NA | 0 | NA | 0 | 0  | 0  | 0  | 0  | NA |
| 2 | 241484246 | 241474137 | -1 | NM_001085437 | C2orf54   | 0 | NA | 0 | NA | 0 | 0  | 0  | 0  | 0  | NA |
| 2 | 241586927 | 241682316 | 1  | NM_001080437 | SNED1     | 1 | 17 | 1 | 13 | 1 | 13 | 0  | 1  | 14 | 0  |
| 2 | 241690397 | 241675181 | -1 | NM_182501    | MTERFD2   | 1 | 14 | 0 | NA | 0 | 0  | 0  | 0  | 0  | NA |
| 2 | 241737551 | 241694187 | -1 | NM_015148    | PASK      | 0 | NA | 0 | NA | 0 | 0  | 0  | 0  | 0  | NA |
| 2 | 241738574 | 241771112 | 1  | NM_002712    | PPP1R7    | 0 | NA | 0 | NA | 0 | 0  | 0  | 0  | 0  | NA |
| 2 | 241776596 | 241784253 | 1  | NM_001001666 | TMEM16G   | 0 | NA | 0 | NA | 0 | 0  | 0  | 0  | 0  | NA |
| 2 | 241776596 | 241813464 | 1  | NM_001001891 | TMEM16G   | 0 | NA | 0 | NA | 0 | 0  | 0  | 0  | 0  | NA |
| 2 | 241880974 | 241815351 | -1 | NM_203346    | HDLBP     | 0 | NA | 0 | NA | 1 | 12 | 0  | 0  | 0  | NA |
| 2 | 241903395 | 241942114 | 1  | NM_001008491 | SEPT2     | 0 | NA | 0 | NA | 0 | 0  | 0  | 0  | 0  | NA |
| 2 | 241903395 | 241942114 | 1  | NM_006155    | SEPT2     | 0 | NA | 0 | NA | 0 | 0  | 0  | 0  | 0  | NA |
| 2 | 241903927 | 241815351 | -1 | NM_005336    | HDLBP     | 0 | NA | 0 | NA | 0 | 0  | 0  | 0  | 0  | NA |
| 2 | 241903953 | 241942114 | 1  | NM_001008492 | SEPT2     | 0 | NA | 0 | NA | 0 | 0  | 0  | 0  | 0  | NA |
| 2 | 241903953 | 241942114 | 1  | NM_004404    | SEPT2     | 0 | NA | 0 | NA | 0 | 0  | 0  | 0  | 0  | NA |
| 2 | 241944383 | 242082928 | 1  | NM_014808    | FARP2     | 0 | NA | 0 | NA | 0 | 0  | 0  | 0  | 0  | NA |
| 2 | 242096707 | 242083104 | -1 | NM_006374    | STK25     | 0 | NA | 0 | NA | 0 | 0  | 0  | 0  | 0  | NA |
| 2 | 242148684 | 242162226 | 1  | NM_032515    | BOK       | 0 | NA | 0 | NA | 0 | 0  | 0  | 0  | 0  | NA |
| 2 | 242225328 | 242172492 | -1 | NM_015963    | THAP4     | 0 | NA | 0 | NA | 0 | 1  | 12 | 1  | 14 | 0  |
| 2 | 242225699 | 242281944 | 1  | NM_013325    | ATG4B     | 0 | NA | 0 | NA | 0 | 1  | 12 | 1  | 14 | 0  |
| 2 | 242225699 | 242261944 | 1  | NM_178326    | ATG4B     | 0 | NA | 0 | NA | 0 | 1  | 12 | 1  | 14 | 0  |
| 2 | 242274900 | 242263829 | -1 | NM_012145    | DTYMK     | 0 | NA | 0 | NA | 0 | 1  | 12 | 0  | 0  | NA |
| 2 | 242290128 | 242317569 | 1  | NM_032329    | ING5      | 0 | NA | 0 | NA | 0 | 0  | 0  | 0  | 0  | NA |
| 2 | 242322702 | 242356904 | 1  | NM_152783    | DZHGDH    | 0 | NA | 0 | NA | 0 | 0  | 0  | 0  | 0  | NA |
| 2 | 242384912 | 242392375 | 1  | NM_022134    | GAL3ST2   | 0 | NA | 0 | NA | 0 | 0  | 0  | 0  | 0  | NA |
| 2 | 242400745 | 242407407 | 1  | NM_080741    | NEU4      | 0 | NA | 1 | 18 | 0 | 0  | 0  | 0  | 0  | NA |
| 2 | 242449731 | 242440705 | -1 | NM_005018    | PDCD1     | 0 | NA | 1 | 17 | 0 | 0  | 0  | 0  | 1  | 12 |
| 2 | 242460558 | 242464155 | 1  | NM_173821    | FLJ33590  | 0 | NA | 1 | 13 | 0 | 0  | 0  | 0  | 1  | 12 |
| 5 | 193372    | 243087    | 1  | NM_052909    | PLEKHG4B  | 0 | NA | 1 | 14 | 0 | 0  | 0  | 0  | 0  | NA |
| 5 | 244625    | 248468    | 1  | NM_001080478 | LOC389257 | 0 | NA | 0 | NA | 0 | 0  | 0  | 0  | 0  | NA |
| 5 | 271297    | 257874    | -1 | NM_145265    | CCDC127   | 0 | NA | 0 | NA | 0 | 0  | 1  | 12 | 0  | NA |
| 5 | 271355    | 309814    | 1  | NM_004168    | SDHA      | 0 | NA | 0 | NA | 0 | 0  | 1  | 12 | 0  | NA |
| 5 | 324735    | 368089    | 1  | NM_013232    | PDCD6     | 0 | NA | 0 | NA | 0 | 0  | 0  | 0  | 0  | NA |
| 5 | 357290    | 491405    | 1  | NM_020731    | AHRR      | 0 | NA | 0 | NA | 0 | 0  | 0  | 0  | 0  | NA |
| 5 | 496210    | 494842    | -1 | NM_138464    | LOC116349 | 0 | NA | 0 | NA | 0 | 0  | 1  | 11 | 0  | NA |
| 5 | 496333    | 520409    | 1  | NM_007277    | EXOC3     | 0 | NA | 0 | NA | 0 | 0  | 1  | 11 | 0  | NA |
| 5 | 577447    | 526424    | -1 | NM_004174    | SLC9A3    | 0 | NA | 0 | NA | 0 | 0  | 0  | 0  | 0  | NA |
| 5 | 665404    | 706666    | 1  | NM_018140    | CEP72     | 0 | NA | 0 | NA | 0 | 0  | 1  | 20 | 0  | NA |
| 5 | 746510    | 712976    | -1 | NM_007030    | TPPP      | 0 | NA | 0 | NA | 0 | 0  | 0  | 0  | 0  | NA |
| 5 | 904101    | 848721    | -1 | NM_024786    | ZDHHC11   | 0 | NA | 0 | NA | 0 | 0  | 0  | 0  | 0  | NA |
| 5 | 944403    | 916855    | -1 | NM_001009877 | BRD9      | 0 | NA | 0 | NA | 0 | 0  | 0  | 0  | 0  | NA |
| 5 | 945915    | 916855    | -1 | NM_023924    | BRD9      | 0 | NA | 0 | NA | 0 | 0  | 0  | 0  | 0  | NA |
| 5 | 946003    | 971160    | 1  | NM_004237    | TRIP13    | 0 | NA | 0 | NA | 0 | 0  | 0  | 0  | 0  | NA |
| 5 | 1062167   | 1091925   | 1  | NM_033120    | NKD2      | 0 | NA | 0 | NA | 0 | 0  | 0  | 0  | 0  | NA |
| 5 | 1165172   | 1103488   | -1 | NM_006598    | SLC12A7   | 0 | NA | 0 | NA | 0 | 0  | 0  | 0  | 0  | NA |
| 5 | 1254709   | 1278230   | 1  | NM_001003841 | SLC6A19   | 0 | NA | 0 | NA | 0 | 0  | 0  | 0  | 0  | NA |
| 5 | 1278469   | 1299303   | 1  | NM_182632    | SLC6A18   | 0 | NA | 1 | 14 | 0 | 0  | 0  | 0  | 0  | NA |
| 5 | 1348162   | 1306286   | -1 | NM_198253    | TERT      | 0 | NA | 0 | NA | 0 | 0  | 0  | 0  | 0  | NA |
| 5 | 1348162   | 1306286   | -1 | NM_198255    | TERT      | 0 | NA | 0 | NA | 0 | 0  | 0  | 0  | 0  | NA |
| 5 | 1398002   | 1370999   | -1 | NM_030782    | CLPTM1L   | 0 | NA | 0 | NA | 0 | 0  | 0  | 0  | 0  | NA |
| 5 | 1498538   | 1445909   | -1 | NM_001044    | SLC6A3    | 0 | NA | 0 | NA | 0 | 0  | 0  | 0  | 0  | NA |
| 5 | 1577076   | 1514541   | -1 | NM_024830    | LPCAT1    | 1 | 11 | 0 | NA | 0 | 0  | 0  | 0  | 0  | NA |
| 5 | 1852956   | 1851498   | -1 | NM_032479    | MRPL36    | 1 | 15 | 0 | NA | 1 | 15 | 0  | 0  | 0  | NA |
| 5 | 1854508   | 1869167   | 1  | NM_004553    | NDUFS6    | 1 | 15 | 0 | NA | 1 | 15 | 0  | 0  | 0  | NA |
| 5 | 1935880   | 1930548   | -1 | NM_016358    | IRX4      | 0 | NA | 0 | NA | 0 | 0  | 0  | 0  | 0  | NA |

|   |          |          |    |              |           |   |    |   |    |   |    |   |    |   |    |
|---|----------|----------|----|--------------|-----------|---|----|---|----|---|----|---|----|---|----|
| 5 | 2804769  | 2799879  | -1 | NM_033267    | IRX2      | 0 | NA | 0 | NA | 0 | NA | 0 | NA | 0 | NA |
| 5 | 2805261  | 2808511  | 1  | NM_178569    | C5orf38   | 0 | NA | 0 | NA | 0 | NA | 0 | NA | 0 | NA |
| 5 | 3649167  | 3654517  | 1  | NM_024337    | IRX1      | 0 | NA | 1 | 14 | 0 | NA | 0 | NA | 0 | NA |
| 5 | 5193442  | 5373412  | 1  | NM_139056    | ADAMTS16  | 0 | NA | 0 | NA | 0 | NA | 0 | NA | 0 | NA |
| 5 | 5475806  | 5543338  | 1  | NM_015325    | KIAA0947  | 1 | 24 | 0 | NA | 0 | NA | 0 | NA | 0 | NA |
| 5 | 6390405  | 6363553  | -1 | NM_001001702 | FLJ33360  | 0 | NA | 0 | NA | 0 | NA | 0 | NA | 0 | NA |
| 5 | 6431639  | 6425038  | -1 | NM_032286    | MED10     | 0 | NA | 0 | NA | 0 | NA | 0 | NA | 0 | NA |
| 5 | 6686157  | 6652351  | -1 | NM_017755    | NSUN2     | 0 | NA | 0 | NA | 0 | NA | 0 | NA | 0 | NA |
| 5 | 6686499  | 6722675  | 1  | NM_001047    | SRD5A1    | 0 | NA | 0 | NA | 0 | NA | 0 | NA | 0 | NA |
| 5 | 6767717  | 6810161  | 1  | NM_006999    | POLS      | 0 | NA | 0 | NA | 0 | NA | 0 | NA | 0 | NA |
| 5 | 7449342  | 7883194  | 1  | NM_020546    | ADCY2     | 0 | NA | 0 | NA | 0 | NA | 0 | NA | 0 | NA |
| 5 | 7904284  | 7884510  | -1 | NM_001089584 | LOC134121 | 0 | NA | 0 | NA | 0 | NA | 0 | NA | 0 | NA |
| 5 | 7922115  | 7912271  | -1 | NM_024091    | FASTKD3   | 0 | NA | 0 | NA | 0 | NA | 0 | NA | 0 | NA |
| 5 | 7922216  | 7954235  | 1  | NM_002454    | MTRR      | 0 | NA | 0 | NA | 0 | NA | 0 | NA | 0 | NA |
| 5 | 7922216  | 7954235  | 1  | NM_024010    | MTRR      | 0 | NA | 0 | NA | 0 | NA | 0 | NA | 0 | NA |
| 5 | 959233   | 9088137  | -1 | NM_003966    | SEMA5A    | 0 | NA | 0 | NA | 0 | NA | 0 | NA | 0 | NA |
| 5 | 9683463  | 9682108  | -1 | NM_019599    | TAS2R1    | 0 | NA | 0 | NA | 0 | NA | 0 | NA | 0 | NA |
| 5 | 10303014 | 10279437 | -1 | NM_199133    | LOC134145 | 0 | NA | 0 | NA | 1 | 13 | 0 | NA | 0 | NA |
| 5 | 10303281 | 10319501 | 1  | NM_012073    | CCT5      | 0 | NA | 0 | NA | 1 | 13 | 0 | NA | 0 | NA |
| 5 | 10361168 | 10330706 | -1 | NM_138809    | CMBL      | 0 | NA | 0 | NA | 0 | NA | 0 | NA | 0 | NA |
| 5 | 10406827 | 10488491 | 1  | NM_005885    | MARCH6    | 0 | NA | 0 | NA | 0 | NA | 0 | NA | 0 | NA |
| 5 | 10495008 | 10518138 | 1  | NM_031916    | ROPN1L    | 0 | NA | 0 | NA | 0 | NA | 0 | NA | 0 | NA |
| 5 | 10614367 | 10732341 | -1 | NM_004394    | DAP       | 0 | NA | 0 | NA | 0 | NA | 0 | NA | 0 | NA |
| 5 | 11957110 | 11024951 | -1 | NM_001332    | CTNND2    | 0 | NA | 0 | NA | 0 | NA | 0 | NA | 0 | NA |
| 5 | 13997589 | 13743436 | -1 | NM_001369    | DNAH5     | 0 | NA | 0 | NA | 0 | NA | 0 | NA | 0 | NA |
| 5 | 14196828 | 14562458 | 1  | NM_007118    | TRIO      | 0 | NA | 0 | NA | 0 | NA | 0 | NA | 0 | NA |
| 5 | 14634931 | 14664205 | 1  | NM_019018    | FAM105A   | 0 | NA | 0 | NA | 0 | NA | 0 | NA | 1 | 14 |
| 5 | 14717782 | 14752842 | 1  | NM_138348    | FAM105B   | 1 | 16 | 0 | NA | 0 | NA | 0 | NA | 0 | NA |
| 5 | 14924887 | 14757908 | -1 | NM_054027    | ANKH      | 0 | NA | 0 | NA | 0 | NA | 0 | NA | 0 | NA |
| 5 | 15553304 | 15992900 | 1  | NM_012304    | FBXL7     | 0 | NA | 0 | NA | 0 | NA | 0 | NA | 0 | NA |
| 5 | 16232897 | 16120473 | -1 | NM_001102562 | MARCH11   | 0 | NA | 0 | NA | 0 | NA | 0 | NA | 0 | NA |
| 5 | 16518894 | 16504627 | -1 | NM_033414    | ZNF622    | 0 | NA | 0 | NA | 0 | NA | 0 | NA | 0 | NA |
| 5 | 16562031 | 16526146 | -1 | NM_019000    | FAM134B   | 0 | NA | 0 | NA | 0 | NA | 0 | NA | 0 | NA |
| 5 | 16670118 | 16526146 | -1 | NM_001034850 | FAM134B   | 0 | NA | 0 | NA | 0 | NA | 0 | NA | 0 | NA |
| 5 | 16989385 | 16715015 | -1 | NM_012334    | MYO10     | 0 | NA | 1 | 12 | 0 | NA | 0 | NA | 0 | NA |
| 5 | 17270749 | 17329943 | 1  | NM_006317    | BASP1     | 0 | NA | 0 | NA | 0 | NA | 0 | NA | 0 | NA |
| 5 | 20017046 | 19508911 | -1 | NM_004934    | CDH18     | 0 | NA | 0 | NA | 0 | NA | 0 | NA | 0 | NA |
| 5 | 22889488 | 21786910 | -1 | NM_004061    | CDH12     | 0 | NA | 0 | NA | 0 | NA | 0 | NA | 0 | NA |
| 5 | 23543480 | 23564463 | 1  | NM_020227    | PRDM9     | 0 | NA | 0 | NA | 1 | 12 | 0 | NA | 0 | NA |
| 5 | 24680668 | 24522966 | -1 | NM_006727    | CDH10     | 0 | NA | 0 | NA | 0 | NA | 0 | NA | 0 | NA |
| 5 | 27074446 | 26916465 | -1 | NM_016279    | CDH9      | 0 | NA | 0 | NA | 0 | NA | 0 | NA | 0 | NA |
| 5 | 31229552 | 31360994 | 1  | NM_004932    | CDH6      | 0 | NA | 0 | NA | 0 | NA | 0 | NA | 0 | NA |
| 5 | 31568039 | 31436358 | -1 | NM_001100412 | RNASEN    | 0 | NA | 0 | NA | 0 | NA | 0 | NA | 0 | NA |
| 5 | 31568039 | 31436358 | -1 | NM_013235    | RNASEN    | 0 | NA | 0 | NA | 0 | NA | 0 | NA | 0 | NA |
| 5 | 31568129 | 31590922 | 1  | NM_018356    | C5orf22   | 0 | NA | 0 | NA | 0 | NA | 0 | NA | 0 | NA |
| 5 | 31834787 | 32146795 | 1  | NM_178140    | PDZD2     | 0 | NA | 0 | NA | 0 | NA | 0 | NA | 0 | NA |
| 5 | 32210182 | 32160580 | -1 | NM_022130    | GOLPH3    | 0 | NA | 0 | NA | 0 | NA | 0 | NA | 0 | NA |
| 5 | 32348871 | 32262867 | -1 | NM_001040446 | MTMR12    | 0 | NA | 0 | NA | 0 | NA | 0 | NA | 0 | NA |
| 5 | 32480601 | 32390212 | -1 | NM_016107    | ZFR       | 0 | NA | 0 | NA | 0 | NA | 0 | NA | 0 | NA |
| 5 | 32621433 | 32637820 | 1  | NM_006713    | SUB1      | 1 | 14 | 0 | NA | 1 | 12 | 1 | 17 | 0 | NA |
| 5 | 32747421 | 32823011 | 1  | NM_000908    | NPR3      | 0 | NA | 0 | NA | 0 | NA | 0 | NA | 0 | NA |
| 5 | 32824701 | 32827576 | 1  | NM_024563    | C5orf23   | 0 | NA | 1 | 12 | 0 | NA | 0 | NA | 1 | 17 |
| 5 | 33476654 | 33503953 | 1  | NM_152295    | TARS      | 1 | 19 | 0 | NA | 0 | NA | 0 | NA | 0 | NA |
| 5 | 33927881 | 33563043 | -1 | NM_030955    | ADAMTS12  | 0 | NA | 0 | NA | 0 | NA | 0 | NA | 0 | NA |
| 5 | 33972247 | 33974099 | 1  | NM_016568    | RXFP3     | 0 | NA | 0 | NA | 0 | NA | 0 | NA | 0 | NA |
| 5 | 34020537 | 33980477 | -1 | NM_016180    | SLC45A2   | 0 | NA | 0 | NA | 0 | NA | 0 | NA | 0 | NA |
| 5 | 34020537 | 33981728 | -1 | NM_001012509 | SLC45A2   | 0 | NA | 0 | NA | 0 | NA | 0 | NA | 0 | NA |
| 5 | 34043963 | 34023656 | -1 | NM_014324    | AMACR     | 0 | NA | 0 | NA | 0 | NA | 0 | NA | 0 | NA |
| 5 | 34043963 | 34023656 | -1 | NM_203382    | AMACR     | 0 | NA | 0 | NA | 0 | NA | 0 | NA | 0 | NA |
| 5 | 34079074 | 34053719 | -1 | NM_030945    | C1QTNF3   | 0 | NA | 0 | NA | 1 | 12 | 0 | NA | 0 | NA |
| 5 | 34079074 | 34053719 | -1 | NM_181435    | C1QTNF3   | 0 | NA | 0 | NA | 1 | 12 | 0 | NA | 0 | NA |
| 5 | 34692274 | 34868474 | 1  | NM_015577    | RAI14     | 0 | NA | 0 | NA | 0 | NA | 0 | NA | 0 | NA |
| 5 | 34875025 | 34935321 | 1  | NM_144725    | FLJ25439  | 0 | NA | 0 | NA | 0 | NA | 0 | NA | 0 | NA |
| 5 | 34951537 | 34941122 | -1 | NM_002853    | RAD1      | 0 | NA | 0 | NA | 0 | NA | 0 | NA | 0 | NA |
| 5 | 34951576 | 34961545 | 1  | NM_018321    | BXDC2     | 0 | NA | 0 | NA | 0 | NA | 0 | NA | 0 | NA |

|   |          |          |    |              |           |   |    |   |    |   |    |   |    |   |    |
|---|----------|----------|----|--------------|-----------|---|----|---|----|---|----|---|----|---|----|
| 5 | 34954139 | 34941122 | -1 | NM_133377    | RAD1      | 0 | NA | 0 | NA | 0 | NA | 0 | NA | 0 | NA |
| 5 | 34965454 | 34994826 | 1  | NM_001012339 | DNAJC21   | 0 | NA | 0 | NA | 0 | NA | 0 | NA | 0 | NA |
| 5 | 34965454 | 34994826 | 1  | NM_194283    | DNAJC21   | 0 | NA | 0 | NA | 0 | NA | 0 | NA | 0 | NA |
| 5 | 35083756 | 35033962 | -1 | NM_031900    | AGXT2     | 0 | NA | 0 | NA | 0 | NA | 0 | NA | 0 | NA |
| 5 | 35286334 | 35099984 | -1 | NM_000949    | PRLR      | 0 | NA | 0 | NA | 0 | NA | 0 | NA | 0 | NA |
| 5 | 35653745 | 35707433 | 1  | NM_144722    | SPEF2     | 0 | NA | 0 | NA | 0 | NA | 0 | NA | 0 | NA |
| 5 | 35653745 | 35850470 | 1  | NM_024867    | SPEF2     | 0 | NA | 0 | NA | 0 | NA | 0 | NA | 0 | NA |
| 5 | 35892747 | 35912680 | 1  | NM_002185    | IL7R      | 0 | NA | 0 | NA | 0 | NA | 0 | NA | 0 | NA |
| 5 | 35974494 | 35940154 | -1 | NM_001042625 | CAPSL     | 0 | NA | 0 | NA | 0 | NA | 0 | NA | 0 | NA |
| 5 | 35974638 | 35940154 | -1 | NM_144647    | CAPSL     | 0 | NA | 0 | NA | 0 | NA | 0 | NA | 0 | NA |
| 5 | 36027256 | 35989966 | -1 | NM_152404    | UGT3A1    | 0 | NA | 0 | NA | 0 | NA | 0 | NA | 0 | NA |
| 5 | 36102741 | 36070880 | -1 | NM_174914    | UGT3A2    | 0 | NA | 0 | NA | 0 | NA | 0 | NA | 0 | NA |
| 5 | 36187772 | 36139170 | -1 | NM_001007527 | LMBRD2    | 0 | NA | 0 | NA | 0 | NA | 0 | NA | 0 | NA |
| 5 | 36187945 | 36218033 | 1  | NM_005983    | SKP2      | 0 | NA | 0 | NA | 0 | NA | 0 | NA | 0 | NA |
| 5 | 36187945 | 36219904 | 1  | NM_032637    | SKP2      | 0 | NA | 0 | NA | 0 | NA | 0 | NA | 0 | NA |
| 5 | 36277657 | 36228450 | -1 | NM_001085411 | C5orf33   | 1 | 14 | 0 | NA | 0 | NA | 1 | 15 | 0 | NA |
| 5 | 36278015 | 36228450 | -1 | NM_153013    | C5orf33   | 1 | 14 | 0 | NA | 0 | NA | 1 | 15 | 0 | NA |
| 5 | 36337761 | 36284860 | -1 | NM_145000    | RANBP3L   | 0 | NA | 0 | NA | 0 | NA | 0 | NA | 0 | NA |
| 5 | 36642213 | 36724193 | 1  | NM_004172    | SLC1A3    | 0 | NA | 0 | NA | 0 | NA | 0 | NA | 0 | NA |
| 5 | 36912741 | 37100057 | 1  | NM_015384    | NIPBL     | 0 | NA | 0 | NA | 0 | NA | 0 | NA | 0 | NA |
| 5 | 36912741 | 37101678 | 1  | NM_133433    | NIPBL     | 0 | NA | 0 | NA | 0 | NA | 0 | NA | 0 | NA |
| 5 | 37249612 | 37142086 | -1 | NM_023073    | C5orf42   | 0 | NA | 0 | NA | 0 | NA | 0 | NA | 0 | NA |
| 5 | 37406644 | 37327697 | -1 | NM_004298    | NUP155    | 1 | 13 | 0 | NA | 0 | NA | 0 | NA | 0 | NA |
| 5 | 37406954 | 37327697 | -1 | NM_153485    | NUP155    | 1 | 13 | 0 | NA | 0 | NA | 0 | NA | 0 | NA |
| 5 | 37415168 | 37788531 | 1  | NM_018034    | WDR70     | 1 | 13 | 0 | NA | 0 | NA | 0 | NA | 0 | NA |
| 5 | 37870655 | 37851509 | -1 | NM_199234    | GDNF      | 0 | NA | 0 | NA | 0 | NA | 0 | NA | 0 | NA |
| 5 | 37871350 | 37851509 | -1 | NM_199231    | GDNF      | 0 | NA | 0 | NA | 0 | NA | 0 | NA | 0 | NA |
| 5 | 37875539 | 37851509 | -1 | NM_000514    | GDNF      | 0 | NA | 0 | NA | 0 | NA | 0 | NA | 0 | NA |
| 5 | 38294289 | 38500407 | 0  | NM_152403    | EGFLAM    | 0 | NA | 0 | NA | 0 | NA | 0 | NA | 0 | NA |
| 5 | 38439399 | 38501318 | 1  | NM_182798    | EGFLAM    | 0 | NA | 0 | NA | 0 | NA | 0 | NA | 0 | NA |
| 5 | 38439406 | 38501338 | 1  | NM_182799    | EGFLAM    | 0 | NA | 0 | NA | 0 | NA | 0 | NA | 0 | NA |
| 5 | 38481392 | 38501338 | 1  | NM_182801    | EGFLAM    | 0 | NA | 0 | NA | 0 | NA | 0 | NA | 0 | NA |
| 5 | 38631253 | 38510821 | -1 | NM_002310    | LIFR      | 0 | NA | 0 | NA | 0 | NA | 0 | NA | 0 | NA |
| 5 | 38681892 | 38970159 | 1  | NM_003999    | OSMR      | 0 | NA | 0 | NA | 0 | NA | 0 | NA | 0 | NA |
| 5 | 39110258 | 38973779 | -1 | NM_152756    | RICTOR    | 0 | NA | 0 | NA | 0 | NA | 0 | NA | 0 | NA |
| 5 | 39255424 | 39141113 | -1 | NM_001465    | FYB       | 0 | NA | 0 | NA | 0 | NA | 0 | NA | 0 | NA |
| 5 | 39255424 | 39141113 | -1 | NM_199335    | FYB       | 0 | NA | 0 | NA | 0 | NA | 0 | NA | 0 | NA |
| 5 | 39400412 | 39320134 | -1 | NM_001737    | C9        | 0 | NA | 0 | NA | 0 | NA | 0 | NA | 0 | NA |
| 5 | 39461092 | 39407536 | -1 | NM_001343    | DAB2      | 0 | NA | 0 | NA | 0 | NA | 0 | NA | 0 | NA |
| 5 | 40716788 | 40729594 | 1  | NM_000958    | PTGER4    | 1 | 16 | 0 | NA | 0 | NA | 0 | NA | 0 | NA |
| 5 | 40791829 | 40747434 | -1 | NM_012382    | TTC33     | 0 | NA | 0 | NA | 0 | NA | 0 | NA | 0 | NA |
| 5 | 40834054 | 40795237 | -1 | NM_006251    | PRKAA1    | 0 | NA | 0 | NA | 0 | NA | 0 | NA | 0 | NA |
| 5 | 40834054 | 40795237 | -1 | NM_206907    | PRKAA1    | 0 | NA | 0 | NA | 0 | NA | 0 | NA | 0 | NA |
| 5 | 40871144 | 40867186 | -1 | NM_000997    | RPL37     | 0 | NA | 0 | NA | 1 | 13 | 1 | 24 | 0 | NA |
| 5 | 40877166 | 40891213 | 1  | NM_032587    | CARD6     | 0 | NA | 0 | NA | 1 | 13 | 1 | 24 | 0 | NA |
| 5 | 40945355 | 41018798 | 1  | NM_000587    | C7        | 0 | NA | 0 | NA | 0 | NA | 0 | NA | 0 | NA |
| 5 | 41107201 | 41033878 | -1 | NM_173489    | FLJ40243  | 0 | NA | 0 | NA | 0 | NA | 0 | NA | 0 | NA |
| 5 | 41249424 | 41178092 | -1 | NM_000065    | C6        | 0 | NA | 0 | NA | 0 | NA | 0 | NA | 0 | NA |
| 5 | 41297297 | 41178092 | -1 | NM_001115131 | C6        | 0 | NA | 0 | NA | 0 | NA | 0 | NA | 0 | NA |
| 5 | 41546487 | 41342804 | -1 | NM_001005473 | PLCXD3    | 0 | NA | 0 | NA | 0 | NA | 0 | NA | 0 | NA |
| 5 | 41906548 | 41765923 | -1 | NM_000436    | OXCT1     | 0 | NA | 0 | NA | 0 | NA | 0 | NA | 0 | NA |
| 5 | 41940226 | 41957495 | 1  | NM_175921    | LOC285636 | 1 | 14 | 0 | NA | 0 | NA | 0 | NA | 0 | NA |
| 5 | 41961112 | 41970942 | 1  | NM_033484    | FBXO4     | 0 | NA | 0 | NA | 0 | NA | 0 | NA | 0 | NA |
| 5 | 41961112 | 41977429 | 1  | NM_012176    | FBXO4     | 0 | NA | 0 | NA | 0 | NA | 0 | NA | 0 | NA |
| 5 | 42459782 | 42757683 | 1  | NM_000163    | GHR       | 0 | NA | 0 | NA | 0 | NA | 0 | NA | 0 | NA |
| 5 | 42847781 | 42835738 | -1 | NM_001085486 | SEPP1     | 0 | NA | 0 | NA | 0 | NA | 0 | NA | 0 | NA |
| 5 | 42847781 | 42835738 | -1 | NM_001093726 | SEPP1     | 0 | NA | 0 | NA | 0 | NA | 0 | NA | 0 | NA |
| 5 | 42847781 | 42835738 | -1 | NM_005410    | SEPP1     | 0 | NA | 0 | NA | 0 | NA | 0 | NA | 0 | NA |
| 5 | 43076098 | 43074938 | -1 | NM_001014279 | C5orf39   | 0 | NA | 0 | NA | 0 | NA | 1 | 15 | 0 | NA |
| 5 | 43157398 | 43211580 | 1  | NM_003432    | ZNF131    | 0 | NA | 0 | NA | 0 | NA | 0 | NA | 0 | NA |
| 5 | 43228083 | 43316709 | 1  | NM_153361    | MGC42105  | 0 | NA | 0 | NA | 0 | NA | 0 | NA | 0 | NA |
| 5 | 43349352 | 43325249 | -1 | NM_001098272 | HMGCS1    | 0 | NA | 0 | NA | 0 | NA | 0 | NA | 0 | NA |
| 5 | 43349352 | 43325249 | -1 | NM_002130    | HMGCS1    | 0 | NA | 0 | NA | 0 | NA | 0 | NA | 0 | NA |
| 5 | 43448245 | 43417356 | -1 | NM_148672    | CCL28     | 0 | NA | 0 | NA | 0 | NA | 0 | NA | 0 | NA |
| 5 | 43515847 | 43480110 | -1 | NM_022483    | C5orf28   | 0 | NA | 0 | NA | 0 | NA | 0 | NA | 0 | NA |

|   |          |          |    |              |               |          |    |   |    |   |    |   |    |   |    |
|---|----------|----------|----|--------------|---------------|----------|----|---|----|---|----|---|----|---|----|
| 5 | 43550944 | 43522566 | -1 | NM_198566    | C5orf34       | 0        | NA | 0 | NA | 0 | NA | 0 | NA | 0 | NA |
| 5 | 43592947 | 43562126 | -1 | NM_006451    | PAIP1         | 0        | NA | 0 | NA | 0 | NA | 0 | NA | 0 | NA |
| 5 | 43592947 | 43562126 | -1 | NM_182789    | PAIP1         | 0        | NA | 0 | NA | 0 | NA | 0 | NA | 0 | NA |
| 5 | 43593244 | 43562126 | -1 | NM_183323    | PAIP1         | 0        | NA | 0 | NA | 0 | NA | 0 | NA | 0 | NA |
| 5 | 43638547 | 43741425 | 1  | NM_012343    | NNT           | 1        | 13 | 0 | NA | 0 | NA | 1 | 11 | 0 | NA |
| 5 | 43638985 | 43741425 | 1  | NM_182977    | NNT           | 1        | 13 | 0 | NA | 0 | NA | 1 | 11 | 0 | NA |
| 5 | 44424541 | 44340853 | -1 | NM_004465    | FGF10         | 0        | NA | 0 | NA | 0 | NA | 0 | NA | 0 | NA |
| 5 | 44844783 | 44851373 | 1  | NM_016640    | MRPS30        | 0        | NA | 0 | NA | 0 | NA | 0 | NA | 0 | NA |
| 5 | 45731977 | 45295108 | -1 | NM_021072    | HCN1          | 0        | NA | 0 | NA | 0 | NA | 0 | NA | 0 | NA |
| 5 | 49772958 | 49730231 | -1 | NM_198449    | EMB           | 0        | NA | 0 | NA | 0 | NA | 0 | NA | 0 | NA |
| 5 | 49998569 | 50173933 | 1  | NM_024615    | PARP8         | 0        | NA | 0 | NA | 0 | NA | 0 | NA | 0 | NA |
| 5 | 50714714 | 50726320 | 1  | NM_002202    | ISL1          | 0        | NA | 0 | NA | 0 | NA | 0 | NA | 0 | NA |
| 5 | 52119530 | 52134209 | 1  | NM_015946    | PELO          | 1        | 11 | 0 | NA | 0 | NA | 0 | NA | 0 | NA |
| 5 | 52119892 | 52285242 | 1  | NM_181501    | ITGA1         | 1        | 11 | 0 | NA | 0 | NA | 0 | NA | 0 | NA |
| 5 | 52320912 | 52426366 | 1  | NM_002203    | ITGA2         | 0        | NA | 0 | NA | 0 | NA | 0 | NA | 0 | NA |
| 5 | 52441082 | 52429651 | -1 | NM_004531    | MOCS2         | 0        | NA | 0 | NA | 1 | 12 | 0 | NA | 0 | NA |
| 5 | 52441355 | 52429651 | -1 | NM_176806    | MOCS2         | 0        | NA | 0 | NA | 0 | NA | 0 | NA | 0 | NA |
| 5 | 52812351 | 52817661 | 1  | NM_006350    | FST           | 0        | NA | 0 | NA | 0 | NA | 0 | NA | 0 | NA |
| 5 | 52812351 | 52817661 | 1  | NM_013409    | FST           | 0        | NA | 0 | NA | 0 | NA | 0 | NA | 0 | NA |
| 5 | 52892221 | 53014928 | 1  | NM_002495    | NDUFS4        | 0        | NA | 0 | NA | 0 | NA | 0 | NA | 0 | NA |
| 5 | 53642160 | 53216370 | -1 | NM_019087    | ARL15         | 0        | NA | 0 | NA | 0 | NA | 0 | NA | 0 | NA |
| 5 | 53787201 | 53787964 | 1  | NM_006308    | HSPB3         | 0        | NA | 0 | NA | 0 | NA | 0 | NA | 0 | NA |
| 5 | 53849349 | 53852591 | 1  | NM_052870    | SNX18         | 0        | NA | 0 | NA | 0 | NA | 1 | 12 | 0 | NA |
| 5 | 53849349 | 53878173 | 1  | NM_001102575 | SNX18         | 0        | NA | 0 | NA | 0 | NA | 1 | 12 | 0 | NA |
| 5 | 54317167 | 54309899 | -1 | NM_007036    | ESM1          | 54317167 | NA | 0 | NA | 0 | NA | 0 | NA | 0 | NA |
| 5 | 54355863 | 54365717 | 1  | NM_002104    | GZMK          | 0        | NA | 0 | NA | 0 | NA | 0 | NA | 0 | NA |
| 5 | 54434229 | 54441817 | 1  | NM_006144    | GZMA          | 0        | NA | 0 | NA | 0 | NA | 0 | NA | 0 | NA |
| 5 | 54491743 | 54496509 | 1  | NM_001008397 | LOC493869     | 0        | NA | 0 | NA | 0 | NA | 0 | NA | 0 | NA |
| 5 | 54504760 | 54444579 | -1 | NM_152623    | CDC20B        | 0        | NA | 0 | NA | 0 | NA | 0 | NA | 0 | NA |
| 5 | 54565265 | 54562737 | -1 | NM_021147    | CCNO          | 1        | 12 | 0 | NA | 0 | NA | 0 | NA | 0 | NA |
| 5 | 54639278 | 54587829 | -1 | NM_019030    | DHX29         | 0        | NA | 0 | NA | 0 | NA | 0 | NA | 0 | NA |
| 5 | 54639372 | 54756562 | 1  | NM_015360    | SKIV2L2       | 0        | NA | 0 | NA | 0 | NA | 0 | NA | 0 | NA |
| 5 | 54866630 | 54756439 | -1 | NM_003711    | PPAP2A        | 0        | NA | 0 | NA | 0 | NA | 0 | NA | 0 | NA |
| 5 | 54866630 | 54756439 | -1 | NM_176895    | PPAP2A        | 0        | NA | 0 | NA | 0 | NA | 0 | NA | 0 | NA |
| 5 | 55043852 | 54957434 | -1 | NM_173514    | SLC38A9       | 1        | 13 | 0 | NA | 0 | NA | 0 | NA | 0 | NA |
| 5 | 55070532 | 55148362 | 1  | NM_024415    | DDX4          | 0        | NA | 0 | NA | 0 | NA | 0 | NA | 0 | NA |
| 5 | 55183090 | 55248738 | 1  | NM_139017    | IL31RA        | 0        | NA | 0 | NA | 0 | NA | 0 | NA | 0 | NA |
| 5 | 55326520 | 55272450 | -1 | NM_002184    | IL6ST         | 0        | NA | 0 | NA | 0 | NA | 0 | NA | 0 | NA |
| 5 | 55326520 | 55272450 | -1 | NM_175767    | IL6ST         | 0        | NA | 0 | NA | 0 | NA | 0 | NA | 0 | NA |
| 5 | 55448535 | 55431263 | -1 | NM_001039935 | ANKRD55       | 0        | NA | 0 | NA | 0 | NA | 0 | NA | 0 | NA |
| 5 | 55564943 | 55431263 | -1 | NM_024669    | ANKRD55       | 0        | NA | 0 | NA | 0 | NA | 0 | NA | 0 | NA |
| 5 | 56146656 | 56227735 | 1  | NM_005921    | MAP3K1        | 0        | NA | 0 | NA | 0 | NA | 0 | NA | 0 | NA |
| 5 | 56240859 | 56248770 | 1  | NM_153706    | C5orf35       | 0        | NA | 0 | NA | 0 | NA | 0 | NA | 0 | NA |
| 5 | 56283711 | 56251185 | -1 | NM_152622    | MIER3         | 0        | NA | 0 | NA | 0 | NA | 0 | NA | 0 | NA |
| 5 | 56505531 | 56595169 | 1  | NM_001127235 | GPBP1         | 0        | NA | 0 | NA | 0 | NA | 0 | NA | 0 | NA |
| 5 | 56505531 | 56595169 | 1  | NM_022913    | GPBP1         | 0        | NA | 0 | NA | 0 | NA | 0 | NA | 0 | NA |
| 5 | 56545704 | 56595169 | 1  | NM_001127236 | GPBP1         | 0        | NA | 0 | NA | 0 | NA | 0 | NA | 0 | NA |
| 5 | 56814393 | 56811599 | -1 | NM_001017992 | ACTBL2        | 0        | NA | 1 | 17 | 1 | 13 | 0 | NA | 0 | NA |
| 5 | 57791670 | 57785566 | -1 | NM_006622    | PLK2          | 0        | NA | 0 | NA | 0 | NA | 0 | NA | 0 | NA |
| 5 | 57823086 | 57827942 | 1  | NM_152687    | C5orf29       | 0        | NA | 0 | NA | 0 | NA | 0 | NA | 0 | NA |
| 5 | 57914695 | 58183163 | 1  | NM_138453    | RAB3C         | 0        | NA | 0 | NA | 0 | NA | 0 | NA | 0 | NA |
| 5 | 58918081 | 58300622 | -1 | NM_006203    | PDE4D         | 0        | NA | 0 | NA | 0 | NA | 0 | NA | 0 | NA |
| 5 | 59225378 | 58300622 | -1 | NM_001104631 | PDE4D         | 0        | NA | 0 | NA | 0 | NA | 0 | NA | 0 | NA |
| 5 | 60031713 | 59928495 | -1 | NM_018369    | DEPDC1B       | 0        | NA | 0 | NA | 0 | NA | 0 | NA | 0 | NA |
| 5 | 60175858 | 60083372 | -1 | NM_001104558 | ELOVL7        | 0        | NA | 0 | NA | 0 | NA | 0 | NA | 0 | NA |
| 5 | 60175858 | 60083372 | -1 | NM_024930    | ELOVL7        | 0        | NA | 0 | NA | 0 | NA | 0 | NA | 0 | NA |
| 5 | 60276648 | 60205414 | -1 | NM_000082    | ERCC8         | 0        | NA | 0 | NA | 0 | NA | 0 | NA | 0 | NA |
| 5 | 60276648 | 60205414 | -1 | NM_001007233 | ERCC8         | 0        | NA | 0 | NA | 0 | NA | 0 | NA | 0 | NA |
| 5 | 60276648 | 60234941 | -1 | NM_001007234 | ERCC8         | 0        | NA | 0 | NA | 0 | NA | 0 | NA | 0 | NA |
| 5 | 60276797 | 60484610 | 1  | NM_174889    | NDUFAF2       | 0        | NA | 0 | NA | 0 | NA | 0 | NA | 0 | NA |
| 5 | 60494059 | 60489292 | -1 | NM_001048249 | DKFZP686E2158 | 0        | NA | 0 | NA | 0 | NA | 1 | 15 | 0 | NA |
| 5 | 60969392 | 61038119 | 1  | NM_173667    | FLJ37543      | 1        | 11 | 0 | NA | 0 | NA | 0 | NA | 0 | NA |
| 5 | 61637745 | 61717967 | 1  | NM_001098511 | KIF2A         | 1        | 11 | 0 | NA | 0 | NA | 1 | 11 | 0 | NA |
| 5 | 61637745 | 61717967 | 1  | NM_004520    | KIF2A         | 1        | 11 | 0 | NA | 0 | NA | 1 | 11 | 0 | NA |
| 5 | 61735485 | 61720107 | -1 | NM_014473    | DIMT1L        | 0        | NA | 0 | NA | 0 | NA | 0 | NA | 0 | NA |

|   |          |          |    |              |               |   |    |    |    |    |    |    |    |    |    |
|---|----------|----------|----|--------------|---------------|---|----|----|----|----|----|----|----|----|----|
| 5 | 61744350 | 61960165 | 1  | NM_016338    | IPO11         | 0 | NA | 0  | NA | 0  | NA | 0  | NA | 0  | NA |
| 5 | 62108926 | 62106952 | -1 | NM_001080540 | ISCA1L        | 0 | NA | 0  | NA | 0  | NA | 0  | NA | 0  | NA |
| 5 | 63293302 | 63292033 | -1 | NM_000524    | HTR1A         | 0 | NA | 0  | NA | 0  | NA | 0  | NA | 0  | NA |
| 5 | 63497426 | 63549095 | 1  | NM_178532    | RNF180        | 0 | NA | 0  | NA | 0  | NA | 0  | NA | 0  | NA |
| 5 | 63497426 | 63704452 | 1  | NM_001113561 | RNF180        | 0 | NA | 0  | NA | 0  | NA | 0  | NA | 0  | NA |
| 5 | 63838207 | 63943877 | 1  | NM_001029875 | RGS7BP        | 0 | NA | 0  | NA | 0  | NA | 0  | NA | 0  | NA |
| 5 | 64100252 | 64049733 | -1 | NM_173829    | SFRS12IP1     | 0 | NA | 0  | NA | 0  | NA | 0  | NA | 0  | NA |
| 5 | 64100510 | 64350346 | 1  | NM_005869    | SDCCAG10      | 0 | NA | 0  | NA | 0  | NA | 0  | NA | 0  | NA |
| 5 | 64813460 | 64480318 | -1 | NM_197941    | ADAMTS6       | 0 | NA | 0  | NA | 0  | NA | 0  | NA | 0  | NA |
| 5 | 64894751 | 64849348 | -1 | NM_022145    | CENPK         | 1 | 19 | 0  | NA | 0  | NA | 0  | NA | 0  | NA |
| 5 | 64894886 | 64919126 | 1  | NM_015342    | PPWD1         | 1 | 19 | 0  | NA | 0  | NA | 0  | NA | 0  | NA |
| 5 | 64955943 | 64921262 | -1 | NM_001656    | TRIM23        | 0 | NA | 0  | NA | 0  | NA | 0  | NA | 0  | NA |
| 5 | 64955943 | 64921262 | -1 | NM_033227    | TRIM23        | 0 | NA | 0  | NA | 0  | NA | 0  | NA | 0  | NA |
| 5 | 64955943 | 64921262 | -1 | NM_033228    | TRIM23        | 0 | NA | 0  | NA | 0  | NA | 0  | NA | 0  | NA |
| 5 | 64956313 | 64997710 | 1  | NM_001093755 | FLJ13611      | 0 | NA | 0  | NA | 0  | NA | 0  | NA | 0  | NA |
| 5 | 64956313 | 64997710 | 1  | NM_001093756 | FLJ13611      | 0 | NA | 0  | NA | 0  | NA | 0  | NA | 0  | NA |
| 5 | 64956313 | 64997710 | 1  | NM_024941    | FLJ13611      | 0 | NA | 0  | NA | 0  | NA | 0  | NA | 0  | NA |
| 5 | 65053697 | 64997510 | -1 | NM_019072    | SGTB          | 0 | NA | 0  | NA | 0  | NA | 0  | NA | 0  | NA |
| 5 | 65053840 | 65155145 | 1  | NM_020726    | NLN           | 0 | NA | 0  | NA | 0  | NA | 0  | NA | 0  | NA |
| 5 | 65258139 | 65412606 | 1  | NM_001006600 | ERBB2IP       | 0 | NA | 0  | NA | 0  | NA | 0  | NA | 0  | NA |
| 5 | 65258139 | 65412606 | 1  | NM_018695    | ERBB2IP       | 0 | NA | 0  | NA | 0  | NA | 0  | NA | 0  | NA |
| 5 | 65475840 | 65512470 | 1  | NM_001077199 | SFRS12        | 0 | NA | 0  | NA | 0  | NA | 1  | 12 | 0  | NA |
| 5 | 65476418 | 65512470 | 1  | NM_139168    | SFRS12        | 0 | NA | 0  | NA | 0  | NA | 1  | 12 | 0  | NA |
| 5 | 65927931 | 66318107 | 1  | NM_198828    | MAST4         | 0 | NA | 0  | NA | 0  | NA | 0  | NA | 0  | NA |
| 5 | 66160359 | 66498848 | 1  | NM_015183    | MAST4         | 0 | NA | 0  | NA | 0  | NA | 0  | NA | 0  | NA |
| 5 | 66528373 | 66513859 | -1 | NM_005582    | CD180         | 0 | NA | 0  | NA | 0  | NA | 0  | NA | 0  | NA |
| 5 | 67558217 | 67633405 | 1  | NM_181523    | PIK3R1        | 0 | NA | 0  | NA | 0  | NA | 0  | NA | 0  | NA |
| 5 | 67620007 | 67633405 | 1  | NM_181524    | PIK3R1        | 0 | NA | 0  | NA | 0  | NA | 0  | NA | 0  | NA |
| 5 | 67622250 | 67633405 | 1  | NM_181504    | PIK3R1        | 0 | NA | 0  | NA | 0  | NA | 0  | NA | 0  | NA |
| 5 | 68425573 | 68436323 | 1  | NM_024055    | SLC30A5       | 0 | NA | 0  | NA | 0  | NA | 0  | NA | 0  | NA |
| 5 | 68425637 | 68461636 | 1  | NM_022902    | SLC30A5       | 0 | NA | 0  | NA | 0  | NA | 0  | NA | 0  | NA |
| 5 | 68498668 | 68509826 | 1  | NM_031966    | CCNB1         | 0 | NA | 0  | NA | 0  | NA | 0  | NA | 0  | NA |
| 5 | 68521130 | 68541940 | 1  | NM_022909    | CENPH         | 0 | NA | 0  | NA | 0  | NA | 0  | NA | 0  | NA |
| 5 | 68549328 | 68561741 | 1  | NM_033281    | MRPS36        | 0 | NA | 13 | 0  | NA | 0  | NA | 0  | NA | NA |
| 5 | 68566377 | 68609013 | 1  | NM_001799    | CDK7          | 0 | NA | 0  | NA | 0  | NA | 0  | NA | 0  | NA |
| 5 | 68652166 | 68612274 | -1 | NM_176816    | CCDC125       | 0 | NA | 0  | NA | 0  | NA | 0  | NA | 0  | NA |
| 5 | 68700879 | 68746387 | 1  | NM_133343    | RAD17         | 0 | NA | 0  | NA | 0  | NA | 0  | NA | 0  | NA |
| 5 | 68701165 | 68683308 | -1 | NM_016283    | TAF9          | 0 | NA | 0  | NA | 0  | NA | 0  | NA | 0  | NA |
| 5 | 68701165 | 68696325 | -1 | NM_003187    | TAF9          | 0 | NA | 0  | NA | 0  | NA | 0  | NA | 0  | NA |
| 5 | 68701394 | 68746387 | 1  | NM_133338    | RAD17         | 0 | NA | 0  | NA | 0  | NA | 0  | NA | 0  | NA |
| 5 | 68701394 | 68746387 | 1  | NM_133342    | RAD17         | 0 | NA | 0  | NA | 0  | NA | 0  | NA | 0  | NA |
| 5 | 68701394 | 68746387 | 1  | NM_133344    | RAD17         | 0 | NA | 0  | NA | 0  | NA | 0  | NA | 0  | NA |
| 5 | 68701596 | 68683308 | -1 | NM_001015891 | TAF9          | 0 | NA | 0  | NA | 0  | NA | 0  | NA | 0  | NA |
| 5 | 68701596 | 68696325 | -1 | NM_001015892 | TAF9          | 0 | NA | 0  | NA | 0  | NA | 0  | NA | 0  | NA |
| 5 | 68702287 | 68746384 | 1  | NM_002873    | RAD17         | 0 | NA | 0  | NA | 0  | NA | 0  | NA | 0  | NA |
| 5 | 68702617 | 68746387 | 1  | NM_133340    | RAD17         | 0 | NA | 0  | NA | 0  | NA | 0  | NA | 0  | NA |
| 5 | 68702617 | 68746387 | 1  | NM_133341    | RAD17         | 0 | NA | 0  | NA | 0  | NA | 0  | NA | 0  | NA |
| 5 | 68703036 | 68746387 | 1  | NM_133339    | RAD17         | 0 | NA | 0  | NA | 0  | NA | 0  | NA | 0  | NA |
| 5 | 68746698 | 68775592 | 1  | NM_144724    | MARVELD2      | 0 | NA | 0  | NA | 0  | NA | 0  | NA | 0  | NA |
| 5 | 68746709 | 68773646 | 1  | NM_001038603 | MARVELD2      | 0 | NA | 0  | NA | 0  | NA | 0  | NA | 0  | NA |
| 5 | 68823874 | 68885889 | 1  | NM_002538    | OCLN          | 0 | NA | 0  | NA | 0  | NA | 0  | NA | 0  | NA |
| 5 | 68891806 | 68924485 | 1  | NM_001098728 | LOC728340     | 0 | NA | 0  | NA | 0  | NA | 0  | NA | 0  | NA |
| 5 | 68891809 | 68924334 | 1  | NM_001515    | GTF2H2        | 0 | NA | 0  | NA | 0  | NA | 0  | NA | 0  | NA |
| 5 | 68891824 | 68924485 | 1  | NM_001098729 | DKFZP686M0199 | 0 | NA | 0  | NA | 0  | NA | 0  | NA | 0  | NA |
| 5 | 68891829 | 68924108 | 1  | NM_001042490 | LOC730394     | 0 | NA | 0  | NA | 0  | NA | 0  | NA | 0  | NA |
| 5 | 69356851 | 69374696 | 1  | NM_021967    | SERF1A        | 0 | NA | 0  | NA | 0  | NA | 0  | NA | 0  | NA |
| 5 | 69356851 | 69374696 | 1  | NM_022978    | SERF1B        | 0 | NA | 0  | NA | 0  | NA | 0  | NA | 0  | NA |
| 5 | 69381105 | 69409174 | 1  | NM_017411    | SMN2          | 0 | NA | 0  | NA | 0  | NA | 0  | NA | 0  | NA |
| 5 | 69381105 | 69409174 | 1  | NM_022875    | SMN2          | 0 | NA | 0  | NA | 0  | NA | 0  | NA | 0  | NA |
| 5 | 69381105 | 69409174 | 1  | NM_022876    | SMN2          | 0 | NA | 0  | NA | 0  | NA | 0  | NA | 0  | NA |
| 5 | 69381105 | 69409174 | 1  | NM_022877    | SMN2          | 0 | NA | 0  | NA | 0  | NA | 0  | NA | 0  | NA |
| 5 | 69746953 | 69779640 | 1  | NM_001098728 | LOC728340     | 0 | NA | 0  | NA | 0  | NA | 0  | NA | 0  | NA |
| 5 | 69746971 | 69779640 | 1  | NM_001098729 | DKFZP686M0199 | 0 | NA | 0  | NA | 0  | NA | 0  | NA | 0  | NA |
| 5 | 69746976 | 69779263 | 1  | NM_001042490 | LOC730394     | 0 | NA | 0  | NA | 0  | NA | 0  | NA | 0  | NA |
| 5 | 70232269 | 70250113 | 1  | NM_021967    | SERF1A        | 0 | NA | 0  | NA | 0  | NA | 0  | NA | 0  | NA |

|   |          |          |    |              |               |   |    |   |    |   |    |   |    |   |    |
|---|----------|----------|----|--------------|---------------|---|----|---|----|---|----|---|----|---|----|
| 5 | 70232269 | 70250113 | 1  | NM_022978    | SERF1B        | 0 | NA | 0 | NA | 0 | NA | 0 | NA | 0 | NA |
| 5 | 70256523 | 70284593 | 1  | NM_000344    | SMN1          | 0 | NA | 0 | NA | 0 | NA | 0 | NA | 0 | NA |
| 5 | 70256523 | 70284593 | 1  | NM_022874    | SMN1          | 0 | NA | 0 | NA | 0 | NA | 0 | NA | 0 | NA |
| 5 | 70256523 | 70284594 | 1  | NM_017411    | SMN2          | 0 | NA | 0 | NA | 0 | NA | 0 | NA | 0 | NA |
| 5 | 70256523 | 70284594 | 1  | NM_022875    | SMN2          | 0 | NA | 0 | NA | 0 | NA | 0 | NA | 0 | NA |
| 5 | 70256523 | 70284594 | 1  | NM_022876    | SMN2          | 0 | NA | 0 | NA | 0 | NA | 0 | NA | 0 | NA |
| 5 | 70256523 | 70284594 | 1  | NM_022877    | SMN2          | 0 | NA | 0 | NA | 0 | NA | 0 | NA | 0 | NA |
| 5 | 70356697 | 70300065 | -1 | NM_004536    | NAIP          | 0 | NA | 0 | NA | 0 | NA | 0 | NA | 0 | NA |
| 5 | 70356697 | 70300065 | -1 | NM_022892    | NAIP          | 0 | NA | 0 | NA | 0 | NA | 0 | NA | 0 | NA |
| 5 | 70399233 | 70366932 | -1 | NM_001042490 | LOC730394     | 0 | NA | 0 | NA | 0 | NA | 0 | NA | 0 | NA |
| 5 | 70399238 | 70366555 | -1 | NM_001098729 | DKFZP686M0199 | 0 | NA | 0 | NA | 0 | NA | 0 | NA | 0 | NA |
| 5 | 70399253 | 70366706 | -1 | NM_001515    | GTF2H2        | 0 | NA | 0 | NA | 0 | NA | 0 | NA | 0 | NA |
| 5 | 70399256 | 70366555 | -1 | NM_001098728 | LOC728340     | 0 | NA | 0 | NA | 0 | NA | 0 | NA | 0 | NA |
| 5 | 70424776 | 70405174 | -1 | NM_002538    | OCLN          | 0 | NA | 0 | NA | 0 | NA | 0 | NA | 0 | NA |
| 5 | 70460336 | 70432838 | -1 | NM_004536    | NAIP          | 0 | NA | 0 | NA | 0 | NA | 0 | NA | 0 | NA |
| 5 | 70460339 | 70432838 | -1 | NM_022892    | NAIP          | 0 | NA | 0 | NA | 0 | NA | 0 | NA | 0 | NA |
| 5 | 70787197 | 70899405 | 1  | NM_018429    | BDP1          | 0 | NA | 0 | NA | 0 | NA | 0 | NA | 0 | NA |
| 5 | 70918870 | 70990286 | 1  | NM_022132    | MCCC2         | 0 | NA | 0 | NA | 0 | NA | 0 | NA | 0 | NA |
| 5 | 71050749 | 71052628 | 1  | NM_004291    | CARTPT        | 0 | NA | 0 | NA | 0 | NA | 0 | NA | 1 | 14 |
| 5 | 71438873 | 71541153 | 1  | NM_005909    | MAP1B         | 0 | NA | 0 | NA | 0 | NA | 0 | NA | 1 | 13 |
| 5 | 71651840 | 71550991 | -1 | NM_015084    | MRPS27        | 0 | NA | 0 | NA | 0 | NA | 0 | NA | 0 | NA |
| 5 | 71651955 | 71690936 | 1  | NM_024754    | PTCD2         | 0 | NA | 0 | NA | 0 | NA | 0 | NA | 0 | NA |
| 5 | 71639005 | 71774989 | -1 | NM_152625    | ZNF366        | 1 | 16 | 0 | NA | 0 | NA | 0 | NA | 0 | NA |
| 5 | 72148173 | 72245971 | 1  | NM_002270    | TNPO1         | 0 | NA | 0 | NA | 0 | NA | 0 | NA | 0 | NA |
| 5 | 72179685 | 72245971 | 1  | NM_153188    | TNPO1         | 0 | NA | 0 | NA | 0 | NA | 0 | NA | 0 | NA |
| 5 | 72287654 | 72422105 | 1  | NM_138782    | FCHO2         | 0 | NA | 0 | NA | 0 | NA | 0 | NA | 0 | NA |
| 5 | 72452157 | 72463397 | 1  | NM_173490    | TMEM171       | 0 | NA | 0 | NA | 0 | NA | 0 | NA | 0 | NA |
| 5 | 72498929 | 72506295 | 1  | NM_153217    | TMEM174       | 0 | NA | 1 | 13 | 0 | NA | 0 | NA | 0 | NA |
| 5 | 72780108 | 72777840 | -1 | NM_004472    | FOXO1         | 1 | 13 | 0 | NA | 0 | NA | 0 | NA | 0 | NA |
| 5 | 72830005 | 72837204 | 1  | NM_001037637 | BTF3          | 0 | NA | 0 | NA | 0 | NA | 0 | NA | 0 | NA |
| 5 | 72830005 | 72837204 | 1  | NM_001207    | BTF3          | 0 | NA | 0 | NA | 0 | NA | 0 | NA | 0 | NA |
| 5 | 72897254 | 72883918 | -1 | NM_023039    | ANKRA2        | 0 | NA | 0 | NA | 0 | NA | 0 | NA | 0 | NA |
| 5 | 72897353 | 72913550 | 1  | NM_032175    | UTP15         | 0 | NA | 0 | NA | 0 | NA | 0 | NA | 0 | NA |
| 5 | 72957738 | 73243284 | 1  | NM_001080479 | RGNEF         | 0 | NA | 0 | NA | 0 | NA | 0 | NA | 0 | NA |
| 5 | 73972273 | 73958989 | -1 | NM_003633    | ENC1          | 1 | 13 | 0 | NA | 0 | NA | 0 | NA | 0 | NA |
| 5 | 74016766 | 74052869 | 1  | NM_000521    | HEXB          | 0 | NA | 0 | NA | 0 | NA | 0 | NA | 0 | NA |
| 5 | 74098798 | 74052786 | -1 | NM_032380    | GFM2          | 0 | NA | 0 | NA | 0 | NA | 0 | NA | 0 | NA |
| 5 | 74098798 | 74052786 | -1 | NM_170691    | GFM2          | 0 | NA | 0 | NA | 0 | NA | 0 | NA | 0 | NA |
| 5 | 74098798 | 74068249 | -1 | NM_170681    | GFM2          | 0 | NA | 0 | NA | 0 | NA | 0 | NA | 0 | NA |
| 5 | 74098858 | 74108490 | 1  | NM_014886    | TINP1         | 0 | NA | 0 | NA | 0 | NA | 0 | NA | 0 | NA |
| 5 | 74198371 | 74109154 | -1 | NM_015566    | KIAA0888      | 0 | NA | 0 | NA | 0 | NA | 0 | NA | 0 | NA |
| 5 | 74362480 | 74359044 | -1 | NM_016591    | GCNT4         | 0 | NA | 0 | NA | 1 | 12 | 0 | NA | 0 | NA |
| 5 | 74668854 | 74693681 | 1  | NM_000859    | HMGCR         | 0 | NA | 0 | NA | 0 | NA | 0 | NA | 0 | NA |
| 5 | 74843196 | 74710820 | -1 | NM_005713    | COL4A3BP      | 0 | NA | 0 | NA | 0 | NA | 0 | NA | 0 | NA |
| 5 | 74843196 | 74710820 | -1 | NM_031361    | COL4A3BP      | 0 | NA | 0 | NA | 0 | NA | 0 | NA | 0 | NA |
| 5 | 74843336 | 74930889 | 1  | NM_016218    | POLK          | 0 | NA | 0 | NA | 0 | NA | 0 | NA | 0 | NA |
| 5 | 75044036 | 75005779 | -1 | NM_152408    | C5orf37       | 1 | 14 | 0 | NA | 0 | NA | 0 | NA | 0 | NA |
| 5 | 75049069 | 75005779 | -1 | NM_001099271 | C5orf37       | 1 | 14 | 0 | NA | 0 | NA | 0 | NA | 0 | NA |
| 5 | 75415060 | 75657172 | 1  | NM_014979    | SV2C          | 0 | NA | 0 | NA | 0 | NA | 0 | NA | 0 | NA |
| 5 | 75734904 | 76039713 | 1  | NM_006633    | IQGAP2        | 0 | NA | 0 | NA | 0 | NA | 0 | NA | 0 | NA |
| 5 | 75954996 | 75947062 | -1 | NM_004101    | F2RL2         | 0 | NA | 0 | NA | 0 | NA | 0 | NA | 0 | NA |
| 5 | 76047623 | 76067351 | 1  | NM_001992    | F2R           | 0 | NA | 0 | NA | 0 | NA | 0 | NA | 0 | NA |
| 5 | 76150609 | 76166896 | 1  | NM_005242    | F2RL1         | 0 | NA | 0 | NA | 0 | NA | 0 | NA | 0 | NA |
| 5 | 76181581 | 76252812 | 1  | NM_130772    | S100Z         | 0 | NA | 0 | NA | 0 | NA | 0 | NA | 0 | NA |
| 5 | 76284435 | 76301055 | 1  | NM_001882    | CRHBP         | 0 | NA | 1 | 12 | 0 | NA | 0 | NA | 0 | NA |
| 5 | 76361987 | 76396793 | 1  | NM_018046    | AGGF1         | 0 | NA | 0 | NA | 0 | NA | 1 | 14 | 0 | NA |
| 5 | 76418786 | 76408287 | -1 | NM_032367    | ZBED3         | 0 | NA | 0 | NA | 0 | NA | 0 | NA | 0 | NA |
| 5 | 76542461 | 76758984 | 1  | NM_001029851 | PDE8B         | 0 | NA | 0 | NA | 0 | NA | 0 | NA | 0 | NA |
| 5 | 76542461 | 76758984 | 1  | NM_001029852 | PDE8B         | 0 | NA | 0 | NA | 0 | NA | 0 | NA | 0 | NA |
| 5 | 76542461 | 76758984 | 1  | NM_001029853 | PDE8B         | 0 | NA | 0 | NA | 0 | NA | 0 | NA | 0 | NA |
| 5 | 76542461 | 76758984 | 1  | NM_001029854 | PDE8B         | 0 | NA | 0 | NA | 0 | NA | 0 | NA | 0 | NA |
| 5 | 76542461 | 76758984 | 1  | NM_003719    | PDE8B         | 0 | NA | 0 | NA | 0 | NA | 0 | NA | 0 | NA |
| 5 | 76824088 | 76763824 | -1 | NM_018268    | WDR41         | 0 | NA | 0 | NA | 0 | NA | 0 | NA | 0 | NA |
| 5 | 76970278 | 76960292 | -1 | NM_032109    | OTP           | 1 | 11 | 0 | NA | 0 | NA | 0 | NA | 0 | NA |
| 5 | 77107941 | 77022750 | -1 | NM_004607    | TBCA          | 0 | NA | 0 | NA | 0 | NA | 0 | NA | 0 | NA |

|   |          |          |    |              |           |   |    |   |    |   |    |   |    |   |    |
|---|----------|----------|----|--------------|-----------|---|----|---|----|---|----|---|----|---|----|
| 5 | 77626284 | 77333905 | -1 | NM_003664    | AP3B1     | 0 | NA | 0 | NA | 0 | NA | 0 | NA | 0 | NA |
| 5 | 77692094 | 77812318 | 1  | NM_004866    | SCAMP1    | 0 | NA | 0 | NA | 0 | NA | 0 | NA | 0 | NA |
| 5 | 77960404 | 77816793 | -1 | NM_005779    | LHFPL2    | 1 | 14 | 0 | NA | 0 | NA | 0 | NA | 0 | NA |
| 5 | 78317522 | 78147089 | -1 | NM_198709    | ARSB      | 0 | NA | 0 | NA | 0 | NA | 0 | NA | 0 | NA |
| 5 | 78318113 | 78108792 | -1 | NM_000046    | ARSB      | 0 | NA | 0 | NA | 0 | NA | 0 | NA | 0 | NA |
| 5 | 78401205 | 78329184 | -1 | NM_013391    | DMGDH     | 0 | NA | 0 | NA | 0 | NA | 0 | NA | 0 | NA |
| 5 | 78401338 | 78421031 | 1  | NM_017614    | BHMT2     | 0 | NA | 0 | NA | 0 | NA | 0 | NA | 0 | NA |
| 5 | 78443359 | 78463869 | 1  | NM_001713    | BHMT      | 0 | NA | 0 | NA | 0 | NA | 0 | NA | 0 | NA |
| 5 | 78569042 | 78653704 | 1  | NM_152405    | JMY       | 0 | NA | 0 | NA | 0 | NA | 0 | NA | 0 | NA |
| 5 | 78845456 | 78705541 | -1 | NM_004272    | HOMER1    | 0 | NA | 0 | NA | 0 | NA | 0 | NA | 0 | NA |
| 5 | 78943998 | 79018227 | 1  | NM_00114393  | PAPD4     | 0 | NA | 0 | NA | 0 | NA | 1 | 12 | 0 | NA |
| 5 | 78943998 | 79018227 | 1  | NM_00114394  | PAPD4     | 0 | NA | 0 | NA | 0 | NA | 1 | 12 | 0 | NA |
| 5 | 78943998 | 79018227 | 1  | NM_173797    | PAPD4     | 0 | NA | 0 | NA | 0 | NA | 1 | 12 | 0 | NA |
| 5 | 79021414 | 79131805 | 1  | NM_153610    | CMYA5     | 0 | NA | 0 | NA | 0 | NA | 0 | NA | 0 | NA |
| 5 | 79322844 | 79308294 | -1 | NM_001010891 | MTX3      | 1 | 12 | 0 | NA | 0 | NA | 0 | NA | 0 | NA |
| 5 | 79366746 | 79414863 | 1  | NM_003248    | THBS4     | 0 | NA | 0 | NA | 0 | NA | 0 | NA | 0 | NA |
| 5 | 79587626 | 79443229 | -1 | NM_178276    | SERINC5   | 0 | NA | 0 | NA | 1 | 14 | 0 | NA | 0 | NA |
| 5 | 79651598 | 79653416 | 1  | NM_032567    | SPZ1      | 0 | NA | 0 | NA | 0 | NA | 0 | NA | 0 | NA |
| 5 | 79739593 | 79811254 | 1  | NM_001105251 | ZFYVE16   | 0 | NA | 0 | NA | 0 | NA | 1 | 11 | 0 | NA |
| 5 | 79739593 | 79811254 | 1  | NM_014733    | ZFYVE16   | 0 | NA | 0 | NA | 0 | NA | 1 | 11 | 0 | NA |
| 5 | 79819555 | 79873962 | 1  | NM_205548    | FAM151B   | 0 | NA | 0 | NA | 1 | 12 | 0 | NA | 0 | NA |
| 5 | 79901854 | 79888329 | -1 | NM_001004441 | ANKRD34B  | 0 | NA | 0 | NA | 0 | NA | 0 | NA | 0 | NA |
| 5 | 79986049 | 80208390 | 1  | NM_002439    | MSH3      | 1 | 13 | 0 | NA | 0 | NA | 1 | 17 | 0 | NA |
| 5 | 79986556 | 79957800 | -1 | NM_000791    | DHFR      | 1 | 13 | 0 | NA | 0 | NA | 1 | 17 | 0 | NA |
| 5 | 80292313 | 80557709 | 1  | NM_006909    | RASGRF2   | 0 | NA | 0 | NA | 0 | NA | 0 | NA | 0 | NA |
| 5 | 80564894 | 80597973 | 1  | NM_001099735 | CKMT2     | 0 | NA | 0 | NA | 0 | NA | 0 | NA | 0 | NA |
| 5 | 80564894 | 80597973 | 1  | NM_001099736 | CKMT2     | 0 | NA | 0 | NA | 0 | NA | 0 | NA | 0 | NA |
| 5 | 80564894 | 80597973 | 1  | NM_001825    | CKMT2     | 0 | NA | 0 | NA | 0 | NA | 0 | NA | 0 | NA |
| 5 | 80633177 | 80644872 | 1  | NM_032280    | ZCCHC9    | 0 | NA | 0 | NA | 0 | NA | 0 | NA | 0 | NA |
| 5 | 80725744 | 80661702 | -1 | NM_130767    | ACOT12    | 0 | NA | 0 | NA | 0 | NA | 0 | NA | 0 | NA |
| 5 | 81082828 | 80751427 | -1 | NM_012446    | SSBP2     | 0 | NA | 0 | NA | 0 | NA | 0 | NA | 0 | NA |
| 5 | 81303629 | 81586526 | 1  | NM_031482    | ATG10     | 0 | NA | 0 | NA | 0 | NA | 0 | NA | 0 | NA |
| 5 | 81609991 | 81604894 | -1 | NM_001025    | RPS23     | 0 | NA | 0 | NA | 0 | NA | 0 | NA | 0 | NA |
| 5 | 81636921 | 81649903 | 1  | NM_001017971 | LOC92270  | 0 | NA | 0 | NA | 0 | NA | 0 | NA | 0 | NA |
| 5 | 82408935 | 82387741 | -1 | NM_174909    | TMEM167   | 0 | NA | 0 | NA | 1 | 11 | 0 | NA | 0 | NA |
| 5 | 82409072 | 82685335 | 1  | NM_003401    | XRCC4     | 0 | NA | 0 | NA | 0 | NA | 1 | 11 | 0 | NA |
| 5 | 82409072 | 82685335 | 1  | NM_022406    | XRCC4     | 0 | NA | 0 | NA | 0 | NA | 1 | 11 | 0 | NA |
| 5 | 82409072 | 82685335 | 1  | NM_022550    | XRCC4     | 0 | NA | 0 | NA | 0 | NA | 1 | 11 | 0 | NA |
| 5 | 82803285 | 82913556 | 1  | NM_001126336 | VCAN      | 0 | NA | 0 | NA | 0 | NA | 0 | NA | 0 | NA |
| 5 | 82803285 | 82913556 | 1  | NM_004385    | VCAN      | 0 | NA | 0 | NA | 0 | NA | 0 | NA | 0 | NA |
| 5 | 83052454 | 82972499 | -1 | NM_001884    | HAPLN1    | 0 | NA | 0 | NA | 0 | NA | 0 | NA | 0 | NA |
| 5 | 83716367 | 83273881 | -1 | NM_005711    | EDIL3     | 0 | NA | 0 | NA | 0 | NA | 0 | NA | 0 | NA |
| 5 | 85949539 | 85952339 | 1  | NM_001867    | COX7C     | 0 | NA | 0 | NA | 0 | NA | 0 | NA | 0 | NA |
| 5 | 86599906 | 86723489 | 1  | NM_002890    | RASA1     | 1 | 13 | 0 | NA | 0 | NA | 1 | 11 | 0 | NA |
| 5 | 86600521 | 86723489 | 1  | NM_022650    | RASA1     | 1 | 13 | 0 | NA | 0 | NA | 1 | 11 | 0 | NA |
| 5 | 86744592 | 86725837 | -1 | NM_001239    | CCNH      | 0 | NA | 0 | NA | 0 | NA | 0 | NA | 0 | NA |
| 5 | 87600421 | 87526778 | -1 | NM_153354    | TMEM161B  | 1 | 11 | 0 | NA | 0 | NA | 0 | NA | 0 | NA |
| 5 | 88214780 | 88051921 | -1 | NM_002397    | MEF2C     | 0 | NA | 0 | NA | 0 | NA | 0 | NA | 0 | NA |
| 5 | 89741359 | 89725284 | -1 | NM_004365    | CETN3     | 1 | 13 | 0 | NA | 0 | NA | 0 | NA | 0 | NA |
| 5 | 89806341 | 89789775 | -1 | NM_203406    | LOC153364 | 0 | NA | 0 | NA | 0 | NA | 0 | NA | 0 | NA |
| 5 | 89806436 | 89846125 | 1  | NM_006467    | POLR3G    | 0 | NA | 0 | NA | 0 | NA | 0 | NA | 0 | NA |
| 5 | 89861157 | 89847200 | -1 | NM_198273    | LYSMD3    | 0 | NA | 0 | NA | 0 | NA | 0 | NA | 0 | NA |
| 5 | 89890372 | 90495789 | 1  | NM_032119    | GPR98     | 0 | NA | 0 | NA | 0 | NA | 0 | NA | 0 | NA |
| 5 | 90714877 | 90700296 | -1 | NM_020801    | ARRDC3    | 0 | NA | 0 | NA | 0 | NA | 0 | NA | 0 | NA |
| 5 | 92944798 | 92955542 | 1  | NM_005654    | NR2F1     | 0 | NA | 0 | NA | 0 | NA | 0 | NA | 0 | NA |
| 5 | 93103065 | 93101170 | -1 | NM_153216    | POU5F2    | 0 | NA | 0 | NA | 0 | NA | 0 | NA | 0 | NA |
| 5 | 93436221 | 92979530 | -1 | NM_032042    | C5orf21   | 0 | NA | 0 | NA | 0 | NA | 0 | NA | 0 | NA |
| 5 | 93980040 | 93880918 | -1 | NM_173665    | C5orf36   | 0 | NA | 0 | NA | 0 | NA | 0 | NA | 0 | NA |
| 5 | 94040329 | 94057329 | 1  | NM_032290    | ANKRD32   | 0 | NA | 0 | NA | 0 | NA | 0 | NA | 0 | NA |
| 5 | 94442942 | 94068956 | -1 | NM_001002796 | MCTP1     | 0 | NA | 0 | NA | 0 | NA | 0 | NA | 0 | NA |
| 5 | 94646035 | 94068956 | -1 | NM_024717    | MCTP1     | 0 | NA | 0 | NA | 0 | NA | 0 | NA | 0 | NA |
| 5 | 94752803 | 94811900 | 1  | NM_152548    | FAM81B    | 0 | NA | 0 | NA | 0 | NA | 0 | NA | 0 | NA |
| 5 | 94916438 | 94825877 | -1 | NM_014639    | KIAA0372  | 0 | NA | 0 | NA | 0 | NA | 0 | NA | 0 | NA |
| 5 | 94916580 | 94966562 | 1  | NM_198150    | ARSK      | 0 | NA | 0 | NA | 0 | NA | 0 | NA | 0 | NA |
| 5 | 94981735 | 94983040 | 1  | NM_199243    | GPR150    | 0 | NA | 1 | 13 | 0 | NA | 1 | 12 | 0 | NA |

|   |           |           |    |              |          |   |    |   |    |   |    |   |    |   |    |
|---|-----------|-----------|----|--------------|----------|---|----|---|----|---|----|---|----|---|----|
| 5 | 95008341  | 95018600  | 1  | NM_173362    | RFESD    | 0 | NA | 0 | NA | 0 | NA | 0 | NA | 0 | NA |
| 5 | 95044470  | 95019775  | -1 | NM_031952    | SPATA9   | 0 | NA | 0 | NA | 0 | NA | 0 | NA | 0 | NA |
| 5 | 95092605  | 95157827  | 1  | NM_014899    | RHOBTB3  | 0 | NA | 0 | NA | 0 | NA | 0 | NA | 0 | NA |
| 5 | 95184333  | 95175308  | -1 | NM_00118890  | GLRX     | 0 | NA | 0 | NA | 0 | NA | 0 | NA | 0 | NA |
| 5 | 95184333  | 95175308  | -1 | NM_002064    | GLRX     | 0 | NA | 0 | NA | 0 | NA | 0 | NA | 0 | NA |
| 5 | 95323531  | 95246557  | -1 | NM_012081    | ELL2     | 0 | NA | 0 | NA | 0 | NA | 0 | NA | 0 | NA |
| 5 | 95794708  | 95751874  | -1 | NM_000439    | PCSK1    | 0 | NA | 0 | NA | 0 | NA | 0 | NA | 0 | NA |
| 5 | 96023696  | 96136141  | 1  | NM_001042440 | CAST     | 0 | NA | 0 | NA | 0 | NA | 0 | NA | 0 | NA |
| 5 | 96023696  | 96136141  | 1  | NM_001042441 | CAST     | 0 | NA | 0 | NA | 0 | NA | 0 | NA | 0 | NA |
| 5 | 96023696  | 96136141  | 1  | NM_001042442 | CAST     | 0 | NA | 0 | NA | 0 | NA | 0 | NA | 0 | NA |
| 5 | 96023696  | 96136141  | 1  | NM_001750    | CAST     | 0 | NA | 0 | NA | 0 | NA | 0 | NA | 0 | NA |
| 5 | 96023696  | 96136141  | 1  | NM_173063    | CAST     | 0 | NA | 0 | NA | 0 | NA | 0 | NA | 0 | NA |
| 5 | 96064251  | 96136141  | 1  | NM_001042443 | CAST     | 0 | NA | 0 | NA | 0 | NA | 0 | NA | 0 | NA |
| 5 | 96064251  | 96136141  | 1  | NM_001042444 | CAST     | 0 | NA | 0 | NA | 0 | NA | 0 | NA | 0 | NA |
| 5 | 96064251  | 96136141  | 1  | NM_001042445 | CAST     | 0 | NA | 0 | NA | 0 | NA | 0 | NA | 0 | NA |
| 5 | 96064251  | 96136141  | 1  | NM_001042446 | CAST     | 0 | NA | 0 | NA | 0 | NA | 0 | NA | 0 | NA |
| 5 | 96064251  | 96136141  | 1  | NM_173060    | CAST     | 0 | NA | 0 | NA | 0 | NA | 0 | NA | 0 | NA |
| 5 | 96104999  | 96136141  | 1  | NM_173061    | CAST     | 0 | NA | 0 | NA | 0 | NA | 0 | NA | 0 | NA |
| 5 | 96169648  | 96122289  | -1 | NM_016442    | ERAP1    | 1 | 13 | 0 | NA | 0 | NA | 0 | NA | 0 | NA |
| 5 | 96169648  | 96135943  | -1 | NM_001040458 | ERAP1    | 1 | 13 | 0 | NA | 0 | NA | 0 | NA | 0 | NA |
| 5 | 96241023  | 96279367  | 1  | NM_022350    | ERAP2    | 0 | NA | 0 | NA | 0 | NA | 0 | NA | 0 | NA |
| 5 | 96297101  | 96390871  | 1  | NM_005575    | LNPEP    | 0 | NA | 0 | NA | 0 | NA | 0 | NA | 0 | NA |
| 5 | 96319911  | 96390871  | 1  | NM_175920    | LNPEP    | 0 | NA | 0 | NA | 0 | NA | 0 | NA | 0 | NA |
| 5 | 96504276  | 96453329  | -1 | NM_153234    | LIX1     | 0 | NA | 0 | NA | 0 | NA | 0 | NA | 0 | NA |
| 5 | 96544700  | 96524396  | -1 | NM_018343    | RIOK2    | 1 | 16 | 0 | NA | 0 | NA | 1 | 14 | 0 | NA |
| 5 | 98132899  | 98144789  | 1  | NM_173670    | RGMB     | 1 | 23 | 0 | NA | 0 | NA | 0 | NA | 0 | NA |
| 5 | 98132899  | 98160098  | 1  | NM_001012761 | RGMB     | 1 | 23 | 0 | NA | 0 | NA | 0 | NA | 0 | NA |
| 5 | 98290138  | 98218807  | -1 | NM_001270    | CHD1     | 0 | NA | 0 | NA | 0 | NA | 0 | NA | 0 | NA |
| 5 | 99899022  | 99950339  | 1  | NM_198507    | TMEM157  | 0 | NA | 0 | NA | 0 | NA | 0 | NA | 0 | NA |
| 5 | 100266869 | 100170802 | -1 | NM_005668    | ST8SIA4  | 0 | NA | 0 | NA | 0 | NA | 1 | 14 | 0 | NA |
| 5 | 100266869 | 100248913 | -1 | NM_175052    | ST8SIA4  | 0 | NA | 0 | NA | 0 | NA | 1 | 14 | 0 | NA |
| 5 | 101660152 | 101597590 | -1 | NM_180991    | SLC04C1  | 0 | NA | 0 | NA | 0 | NA | 0 | NA | 0 | NA |
| 5 | 101862619 | 101735550 | -1 | NM_173488    | SLC06A1  | 0 | NA | 0 | NA | 0 | NA | 0 | NA | 0 | NA |
| 5 | 102229425 | 102393316 | 1  | NM_000919    | PAM      | 0 | NA | 0 | NA | 0 | NA | 1 | 12 | 0 | NA |
| 5 | 102229425 | 102393316 | 1  | NM_138766    | PAM      | 0 | NA | 0 | NA | 0 | NA | 1 | 12 | 0 | NA |
| 5 | 102229425 | 102393316 | 1  | NM_138821    | PAM      | 0 | NA | 0 | NA | 0 | NA | 1 | 12 | 0 | NA |
| 5 | 102229425 | 102393316 | 1  | NM_138822    | PAM      | 0 | NA | 0 | NA | 0 | NA | 1 | 12 | 0 | NA |
| 5 | 102483741 | 102449602 | -1 | NM_017876    | GIN1     | 0 | NA | 0 | NA | 1 | 14 | 0 | NA | 0 | NA |
| 5 | 102493155 | 102566808 | 1  | NM_015216    | HISPPD1  | 0 | NA | 0 | NA | 1 | 14 | 0 | NA | 0 | NA |
| 5 | 102622340 | 102642260 | 1  | NM_033211    | C5orf30  | 0 | NA | 0 | NA | 0 | NA | 0 | NA | 0 | NA |
| 5 | 102926389 | 102912454 | -1 | NM_031438    | NUDT12   | 0 | NA | 0 | NA | 0 | NA | 0 | NA | 0 | NA |
| 5 | 107034495 | 106744249 | -1 | NM_001962    | EFNA5    | 0 | NA | 0 | NA | 0 | NA | 0 | NA | 0 | NA |
| 5 | 107745010 | 107223347 | -1 | NM_022824    | FBXL17   | 0 | NA | 0 | NA | 0 | NA | 1 | 21 | 0 | NA |
| 5 | 10811421  | 108551272 | 1  | NM_005246    | FER      | 0 | NA | 0 | NA | 0 | NA | 0 | NA | 0 | NA |
| 5 | 108773574 | 108698308 | -1 | NM_014819    | PJA2     | 0 | NA | 0 | NA | 0 | NA | 0 | NA | 0 | NA |
| 5 | 109053054 | 109231328 | 1  | NM_002372    | MAN2A1   | 1 | 15 | 0 | NA | 0 | NA | 0 | NA | 0 | NA |
| 5 | 110102652 | 110126385 | 1  | NM_138773    | SLC25A46 | 0 | NA | 0 | NA | 0 | NA | 0 | NA | 0 | NA |
| 5 | 110435288 | 110441623 | 1  | NM_033035    | TSLP     | 0 | NA | 0 | NA | 0 | NA | 0 | NA | 0 | NA |
| 5 | 110436924 | 110441623 | 1  | NM_138551    | TSLP     | 0 | NA | 0 | NA | 0 | NA | 0 | NA | 0 | NA |
| 5 | 110455768 | 110494099 | 1  | NM_139281    | WDR36    | 1 | 38 | 0 | NA | 0 | NA | 1 | 14 | 0 | NA |
| 5 | 110587980 | 110848647 | 1  | NM_001744    | CAMK4    | 0 | NA | 0 | NA | 0 | NA | 0 | NA | 0 | NA |
| 5 | 110876056 | 110861920 | -1 | NM_139164    | STARD4   | 0 | NA | 0 | NA | 0 | NA | 0 | NA | 0 | NA |
| 5 | 111120854 | 111092891 | -1 | NM_004772    | C5orf13  | 1 | 14 | 0 | NA | 0 | NA | 0 | NA | 0 | NA |
| 5 | 111782909 | 111526213 | -1 | NM_022140    | EPB41L4A | 0 | NA | 0 | NA | 0 | NA | 0 | NA | 0 | NA |
| 5 | 112101482 | 112209835 | 1  | NM_000038    | APC      | 0 | NA | 0 | NA | 0 | NA | 1 | 14 | 0 | NA |
| 5 | 112224891 | 112231503 | 1  | NM_003135    | SRP19    | 0 | NA | 0 | NA | 0 | NA | 1 | 14 | 0 | NA |
| 5 | 112285930 | 112239979 | -1 | NM_005669    | REEP5    | 0 | NA | 0 | NA | 0 | NA | 0 | NA | 0 | NA |
| 5 | 112340331 | 112384566 | 1  | NM_152624    | DGP2     | 1 | 22 | 0 | NA | 0 | NA | 0 | NA | 0 | NA |
| 5 | 112658511 | 112385694 | -1 | NM_002387    | MCC      | 0 | NA | 0 | NA | 0 | NA | 0 | NA | 0 | NA |
| 5 | 112798565 | 112796569 | -1 | NM_032028    | TSSK1B   | 0 | NA | 1 | 20 | 0 | NA | 0 | NA | 0 | NA |
| 5 | 112852426 | 112385694 | -1 | NM_001085377 | MCC      | 0 | NA | 0 | NA | 0 | NA | 0 | NA | 0 | NA |
| 5 | 112877308 | 112958880 | 1  | NM_022828    | YTHDC2   | 0 | NA | 0 | NA | 0 | NA | 0 | NA | 0 | NA |
| 5 | 113725914 | 113860096 | 1  | NM_021614    | KCNN2    | 0 | NA | 0 | NA | 0 | NA | 0 | NA | 0 | NA |
| 5 | 113797125 | 113860096 | 1  | NM_170775    | KCNN2    | 0 | NA | 0 | NA | 0 | NA | 0 | NA | 0 | NA |
| 5 | 114544142 | 114488357 | -1 | NM_018700    | TRIM36   | 0 | NA | 1 | 13 | 0 | NA | 0 | NA | 0 | NA |



|   |           |           |    |              |           |   |    |   |    |   |    |   |    |   |    |
|---|-----------|-----------|----|--------------|-----------|---|----|---|----|---|----|---|----|---|----|
| 5 | 114544142 | 114534698 | -1 | NM_001017397 | TRIM36    | 0 | NA | 1 | 13 | 0 | NA | 0 | NA | 0 | NA |
| 5 | 114544142 | 114541134 | -1 | NM_001017398 | TRIM36    | 0 | NA | 1 | 13 | 0 | NA | 0 | NA | 0 | NA |
| 5 | 114626468 | 114574425 | -1 | NM_005023    | PGGT1B    | 0 | NA | 0 | NA | 0 | NA | 0 | NA | 0 | NA |
| 5 | 114659886 | 114630783 | -1 | NM_152549    | CCDC112   | 0 | NA | 0 | NA | 0 | NA | 0 | NA | 0 | NA |
| 5 | 114660357 | 114630783 | -1 | NM_001040440 | CCDC112   | 0 | NA | 0 | NA | 0 | NA | 0 | NA | 0 | NA |
| 5 | 114908490 | 114884506 | -1 | NM_020177    | FEM1C     | 1 | 17 | 0 | NA | 0 | NA | 1 | 35 | 0 | NA |
| 5 | 114989595 | 114977101 | -1 | NM_181836    | TMED7     | 0 | NA | 0 | NA | 0 | NA | 0 | NA | 0 | NA |
| 5 | 114989610 | 114942246 | -1 | NM_021649    | TICAM2    | 0 | NA | 0 | NA | 0 | NA | 0 | NA | 0 | NA |
| 5 | 115180304 | 115168328 | -1 | NM_001801    | CDO1      | 0 | NA | 0 | NA | 0 | NA | 0 | NA | 0 | NA |
| 5 | 115205398 | 115193714 | -1 | NM_004707    | ATG12     | 0 | NA | 0 | NA | 0 | NA | 0 | NA | 0 | NA |
| 5 | 115205517 | 115277677 | 1  | NM_001284    | AP3S1     | 0 | NA | 0 | NA | 0 | NA | 0 | NA | 0 | NA |
| 5 | 115326169 | 115391199 | 1  | NM_173800    | FLJ90650  | 0 | NA | 0 | NA | 0 | NA | 0 | NA | 0 | NA |
| 5 | 115448625 | 115656877 | 1  | NM_016144    | COMMD10   | 0 | NA | 0 | NA | 0 | NA | 0 | NA | 0 | NA |
| 5 | 115938450 | 115807149 | -1 | NM_020796    | SEMA6A    | 0 | NA | 0 | NA | 1 | 13 | 0 | NA | 0 | NA |
| 5 | 118352139 | 118203134 | -1 | NM_173666    | DTWD2     | 0 | NA | 0 | NA | 0 | NA | 0 | NA | 0 | NA |
| 5 | 118434982 | 118612721 | 1  | NM_005509    | DMXL1     | 0 | NA | 0 | NA | 0 | NA | 0 | NA | 0 | NA |
| 5 | 118632316 | 118758193 | 1  | NM_001077654 | TNFAIP8   | 1 | 13 | 0 | NA | 0 | NA | 1 | 16 | 0 | NA |
| 5 | 118719494 | 118758193 | 1  | NM_014350    | TNFAIP8   | 0 | NA | 0 | NA | 0 | NA | 0 | NA | 0 | NA |
| 5 | 118816046 | 118905926 | 1  | NM_000414    | HSD17B4   | 0 | NA | 0 | NA | 0 | NA | 0 | NA | 0 | NA |
| 5 | 118993191 | 118999416 | 1  | NM_182761    | LOC340069 | 0 | NA | 0 | NA | 0 | NA | 0 | NA | 0 | NA |
| 5 | 119827917 | 120050863 | 1  | NM_016644    | PRR16     | 0 | NA | 0 | NA | 0 | NA | 0 | NA | 0 | NA |
| 5 | 121215548 | 121216422 | 1  | NM_177478    | FTMT      | 0 | NA | 0 | NA | 0 | NA | 0 | NA | 0 | NA |
| 5 | 121325554 | 121392194 | 1  | NM_152546    | SRFBP1    | 1 | 14 | 0 | NA | 0 | NA | 0 | NA | 0 | NA |
| 5 | 121441853 | 121429917 | -1 | NM_002317    | LOX       | 1 | 12 | 0 | NA | 0 | NA | 0 | NA | 0 | NA |
| 5 | 121493113 | 121517165 | 1  | NM_207317    | ZNF474    | 0 | NA | 0 | NA | 0 | NA | 0 | NA | 0 | NA |
| 5 | 121675718 | 121827693 | 1  | NM_005460    | SNCAIP    | 0 | NA | 0 | NA | 0 | NA | 0 | NA | 0 | NA |
| 5 | 122138648 | 122193701 | 1  | NM_003100    | SNX2      | 0 | NA | 0 | NA | 0 | NA | 0 | NA | 0 | NA |
| 5 | 122209169 | 122372798 | 1  | NM_014035    | SNX24     | 0 | NA | 0 | NA | 0 | NA | 0 | NA | 0 | NA |
| 5 | 122400324 | 122386976 | -1 | NM_000943    | PPIC      | 0 | NA | 0 | NA | 0 | NA | 1 | 13 | 0 | NA |
| 5 | 122787151 | 122708477 | -1 | NM_153223    | CCDC100   | 0 | NA | 0 | NA | 0 | NA | 0 | NA | 0 | NA |
| 5 | 122875691 | 122980363 | 1  | NM_001031812 | CSNK1G3   | 1 | 26 | 0 | NA | 1 | 14 | 0 | NA | 0 | NA |
| 5 | 122875691 | 122980363 | 1  | NM_001044722 | CSNK1G3   | 1 | 26 | 0 | NA | 1 | 14 | 0 | NA | 0 | NA |
| 5 | 122875691 | 122980363 | 1  | NM_001044723 | CSNK1G3   | 1 | 26 | 0 | NA | 1 | 14 | 0 | NA | 0 | NA |
| 5 | 122875691 | 122980363 | 1  | NM_004384    | CSNK1G3   | 1 | 26 | 0 | NA | 1 | 14 | 0 | NA | 0 | NA |
| 5 | 124108704 | 124000508 | -1 | NM_020747    | ZNF608    | 1 | 11 | 0 | NA | 1 | 13 | 0 | NA | 0 | NA |
| 5 | 125786999 | 125857947 | 1  | NM_023927    | GRAMD3    | 0 | NA | 0 | NA | 1 | 12 | 0 | NA | 0 | NA |
| 5 | 125958839 | 125908345 | -1 | NM_001182    | ALDH7A1   | 1 | 37 | 0 | NA | 0 | NA | 0 | NA | 0 | NA |
| 5 | 125964531 | 125988979 | 1  | NM_032177    | RNIXA     | 1 | 37 | 0 | NA | 0 | NA | 0 | NA | 0 | NA |
| 5 | 125995312 | 125999873 | 1  | NM_207408    | FLJ27505  | 0 | NA | 0 | NA | 0 | NA | 0 | NA | 0 | NA |
| 5 | 126140731 | 126200608 | 1  | NM_005573    | LMNB1     | 0 | NA | 0 | NA | 1 | 16 | 0 | NA | 0 | NA |
| 5 | 126394145 | 126233449 | -1 | NM_178450    | MARCH3    | 0 | NA | 0 | NA | 0 | NA | 0 | NA | 0 | NA |
| 5 | 126654354 | 126824809 | 1  | NM_032446    | MEGF10    | 0 | NA | 0 | NA | 0 | NA | 0 | NA | 0 | NA |
| 5 | 126881246 | 126918672 | 1  | NM_130809    | PRRC1     | 0 | NA | 0 | NA | 0 | NA | 0 | NA | 0 | NA |
| 5 | 127012634 | 127022221 | 1  | NM_001048252 | CTXN3     | 0 | NA | 0 | NA | 0 | NA | 0 | NA | 0 | NA |
| 5 | 127447381 | 127553279 | 1  | NM_001046    | SLC12A2   | 0 | NA | 0 | NA | 1 | 15 | 0 | NA | 0 | NA |
| 5 | 127901634 | 127621499 | -1 | NM_001999    | FBN2      | 0 | NA | 0 | NA | 0 | NA | 0 | NA | 0 | NA |
| 5 | 128329108 | 128397234 | 1  | NM_014031    | SLC27A6   | 0 | NA | 0 | NA | 0 | NA | 0 | NA | 0 | NA |
| 5 | 128329111 | 128397234 | 1  | NM_001017372 | SLC27A6   | 0 | NA | 0 | NA | 0 | NA | 0 | NA | 0 | NA |
| 5 | 128458340 | 128477618 | 1  | NM_016048    | ISOC1     | 1 | 13 | 0 | NA | 0 | NA | 0 | NA | 0 | NA |
| 5 | 128824001 | 129102275 | 1  | NM_133638    | ADAMTS19  | 0 | NA | 0 | NA | 0 | NA | 0 | NA | 0 | NA |
| 5 | 129268421 | 129550226 | 1  | NM_175856    | CHSY3     | 0 | NA | 0 | NA | 0 | NA | 0 | NA | 0 | NA |
| 5 | 130528935 | 130522775 | -1 | NM_005340    | HINT1     | 0 | NA | 0 | NA | 0 | NA | 0 | NA | 0 | NA |
| 5 | 130534539 | 130569018 | 1  | NM_181705    | LYRM7     | 0 | NA | 0 | NA | 0 | NA | 0 | NA | 0 | NA |
| 5 | 130627600 | 130758281 | 1  | NM_001038702 | CDC42SE2  | 0 | NA | 0 | NA | 0 | NA | 0 | NA | 0 | NA |
| 5 | 130627600 | 130758281 | 1  | NM_020240    | CDC42SE2  | 0 | NA | 0 | NA | 0 | NA | 0 | NA | 0 | NA |
| 5 | 130998828 | 130789502 | -1 | NM_016340    | RAPGEF6   | 1 | 16 | 0 | NA | 1 | 24 | 0 | NA | 0 | NA |
| 5 | 131160655 | 131005305 | -1 | NM_001008738 | FNIP1     | 0 | NA | 0 | NA | 0 | NA | 0 | NA | 0 | NA |
| 5 | 131160655 | 131005305 | -1 | NM_133372    | FNIP1     | 0 | NA | 0 | NA | 0 | NA | 0 | NA | 0 | NA |
| 5 | 131375248 | 131317050 | -1 | NM_001009185 | ACSL6     | 0 | NA | 0 | NA | 0 | NA | 0 | NA | 0 | NA |
| 5 | 131375248 | 131317050 | -1 | NM_015256    | ACSL6     | 0 | NA | 0 | NA | 0 | NA | 0 | NA | 0 | NA |
| 5 | 131424245 | 131426795 | 1  | NM_000588    | IL3       | 0 | NA | 0 | NA | 0 | NA | 0 | NA | 0 | NA |
| 5 | 131437383 | 131439758 | 1  | NM_000758    | CSF2      | 0 | NA | 0 | NA | 0 | NA | 0 | NA | 0 | NA |
| 5 | 131590834 | 131556202 | -1 | NM_001017973 | P4HA2     | 0 | NA | 0 | NA | 0 | NA | 0 | NA | 0 | NA |
| 5 | 131590834 | 131556202 | -1 | NM_004199    | P4HA2     | 0 | NA | 0 | NA | 0 | NA | 0 | NA | 0 | NA |
| 5 | 131591455 | 131556202 | -1 | NM_001017974 | P4HA2     | 0 | NA | 0 | NA | 0 | NA | 0 | NA | 0 | NA |

|   |           |           |    |              |            |   |    |   |    |   |    |   |    |   |    |
|---|-----------|-----------|----|--------------|------------|---|----|---|----|---|----|---|----|---|----|
| 5 | 131621285 | 131637046 | 1  | NM_003687    | PDLIM4     | 0 | NA | 0 | NA | 0 | NA | 1 | 16 | 0 | NA |
| 5 | 131658043 | 131707798 | 1  | NM_003059    | SLC22A4    | 0 | NA | 0 | NA | 0 | NA | 0 | NA | 0 | NA |
| 5 | 131733299 | 131759205 | 1  | NM_003060    | SLC22A5    | 0 | NA | 0 | NA | 0 | NA | 0 | NA | 0 | NA |
| 5 | 131774571 | 131825958 | 1  | NM_001013717 | LOC441108  | 0 | NA | 0 | NA | 0 | NA | 0 | NA | 0 | NA |
| 5 | 131854326 | 131846683 | -1 | NM_002198    | IRF1       | 0 | NA | 0 | NA | 0 | NA | 0 | NA | 0 | NA |
| 5 | 131907113 | 131905034 | -1 | NM_000879    | IL5        | 0 | NA | 0 | NA | 0 | NA | 1 | 11 | 0 | NA |
| 5 | 131920528 | 132007494 | 1  | NM_005732    | RAD50      | 1 | 13 | 0 | NA | 0 | NA | 0 | NA | 0 | NA |
| 5 | 131920528 | 132007494 | 1  | NM_133482    | RAD50      | 1 | 13 | 0 | NA | 0 | NA | 0 | NA | 0 | NA |
| 5 | 132021763 | 132024700 | 1  | NM_002188    | IL13       | 0 | NA | 0 | NA | 0 | NA | 0 | NA | 0 | NA |
| 5 | 132037271 | 132046267 | 1  | NM_000589    | IL4        | 0 | NA | 0 | NA | 0 | NA | 0 | NA | 0 | NA |
| 5 | 132037271 | 132046267 | 1  | NM_172348    | IL4        | 0 | NA | 0 | NA | 0 | NA | 0 | NA | 0 | NA |
| 5 | 132101164 | 132056221 | -1 | NM_007054    | KIF3A      | 0 | NA | 0 | NA | 0 | NA | 0 | NA | 0 | NA |
| 5 | 132111035 | 132117755 | 1  | NM_001039780 | CCNI2      | 0 | NA | 0 | NA | 0 | NA | 0 | NA | 0 | NA |
| 5 | 132140966 | 132114407 | -1 | NM_001098811 | SEPT8      | 0 | NA | 0 | NA | 0 | NA | 0 | NA | 0 | NA |
| 5 | 132140966 | 132119595 | -1 | NM_001098812 | SEPT8      | 0 | NA | 0 | NA | 0 | NA | 0 | NA | 0 | NA |
| 5 | 132140966 | 132119595 | -1 | NM_015146    | SEPT8      | 0 | NA | 0 | NA | 0 | NA | 0 | NA | 0 | NA |
| 5 | 132141460 | 132119595 | -1 | NM_001098813 | SEPT8      | 0 | NA | 0 | NA | 0 | NA | 0 | NA | 0 | NA |
| 5 | 132176931 | 132180388 | 1  | NM_175873    | ANKRD43    | 1 | 14 | 0 | NA | 0 | NA | 1 | 15 | 0 | NA |
| 5 | 132189901 | 132185910 | -1 | NM_133456    | SHROOM1    | 0 | NA | 0 | NA | 0 | NA | 0 | NA | 0 | NA |
| 5 | 132228376 | 132224776 | -1 | NM_005260    | GDF9       | 0 | NA | 0 | NA | 0 | NA | 1 | 13 | 0 | NA |
| 5 | 132230217 | 132232435 | 1  | NM_014402    | UQCRCQ     | 0 | NA | 0 | NA | 0 | NA | 1 | 13 | 0 | NA |
| 5 | 132237256 | 132238481 | 1  | NM_052971    | LEAP2      | 0 | NA | 0 | NA | 0 | NA | 1 | 13 | 0 | NA |
| 5 | 132327253 | 132238969 | -1 | NM_014423    | AFF4       | 0 | NA | 0 | NA | 0 | NA | 0 | NA | 0 | NA |
| 5 | 132390139 | 132360575 | -1 | NM_017665    | ZCCHC10    | 0 | NA | 0 | NA | 0 | NA | 0 | NA | 0 | NA |
| 5 | 132415560 | 132468608 | 1  | NM_002154    | HSPA4      | 0 | NA | 0 | NA | 0 | NA | 0 | NA | 0 | NA |
| 5 | 132976122 | 132560050 | -1 | NM_015082    | FSTL4      | 0 | NA | 0 | NA | 0 | NA | 0 | NA | 0 | NA |
| 5 | 133332377 | 133319099 | -1 | NM_020199    | C5orf15    | 0 | NA | 0 | NA | 0 | NA | 0 | NA | 0 | NA |
| 5 | 133368332 | 133335505 | -1 | NM_003374    | VDAC1      | 0 | NA | 0 | NA | 0 | NA | 0 | NA | 0 | NA |
| 5 | 133478300 | 133511819 | 1  | NM_003202    | TCF7       | 1 | 11 | 0 | NA | 0 | NA | 1 | 20 | 0 | NA |
| 5 | 133479214 | 133509775 | 1  | NM_201633    | TCF7       | 1 | 11 | 0 | NA | 0 | NA | 1 | 20 | 0 | NA |
| 5 | 133479214 | 133511819 | 1  | NM_201632    | TCF7       | 1 | 11 | 0 | NA | 0 | NA | 1 | 20 | 0 | NA |
| 5 | 133479214 | 133511819 | 1  | NM_201634    | TCF7       | 1 | 11 | 0 | NA | 0 | NA | 1 | 20 | 0 | NA |
| 5 | 133479325 | 133511819 | 1  | NM_213648    | TCF7       | 1 | 11 | 0 | NA | 0 | NA | 1 | 20 | 0 | NA |
| 5 | 133540623 | 133519980 | -1 | NM_006930    | SKP1       | 0 | NA | 0 | NA | 0 | NA | 0 | NA | 0 | NA |
| 5 | 133540623 | 133519980 | -1 | NM_170679    | SKP1       | 0 | NA | 0 | NA | 0 | NA | 0 | NA | 0 | NA |
| 5 | 133589849 | 133560046 | -1 | NM_002715    | PPP2CA     | 0 | NA | 0 | NA | 0 | NA | 0 | NA | 0 | NA |
| 5 | 133730664 | 133662013 | -1 | NM_00113575  | CDKL3      | 0 | NA | 0 | NA | 0 | NA | 0 | NA | 0 | NA |
| 5 | 133730664 | 133671590 | -1 | NM_016508    | CDKL3      | 0 | NA | 0 | NA | 0 | NA | 0 | NA | 0 | NA |
| 5 | 133734768 | 133755698 | 1  | NM_003337    | UBE2B      | 0 | NA | 0 | NA | 0 | NA | 0 | NA | 0 | NA |
| 5 | 133775488 | 133444642 | -1 | NM_080656    | CDKN2AIPNL | 0 | NA | 0 | NA | 0 | NA | 0 | NA | 0 | NA |
| 5 | 133889696 | 133946817 | 1  | NM_015288    | PHF15      | 0 | NA | 0 | NA | 0 | NA | 0 | NA | 0 | NA |
| 5 | 133996426 | 133970017 | -1 | NM_001033503 | SAR1B      | 1 | 18 | 0 | NA | 0 | NA | 0 | NA | 0 | NA |
| 5 | 133996426 | 133970017 | -1 | NM_016103    | SAR1B      | 1 | 18 | 0 | NA | 0 | NA | 0 | NA | 0 | NA |
| 5 | 134012377 | 134091500 | 1  | NM_021982    | SEC24A     | 0 | NA | 0 | NA | 0 | NA | 1 | 11 | 0 | NA |
| 5 | 134102104 | 134115742 | 1  | NM_001745    | CAMLG      | 1 | 19 | 0 | NA | 0 | NA | 0 | NA | 0 | NA |
| 5 | 134122359 | 134194710 | 1  | NM_014829    | DDX46      | 0 | NA | 0 | NA | 0 | NA | 0 | NA | 0 | NA |
| 5 | 134209268 | 134222686 | 1  | NM_152409    | C5orf24    | 0 | NA | 0 | NA | 0 | NA | 0 | NA | 0 | NA |
| 5 | 134237358 | 134265222 | 1  | NM_024715    | TXNDC15    | 0 | NA | 0 | NA | 0 | NA | 0 | NA | 0 | NA |
| 5 | 134268708 | 134326235 | 1  | NM_032151    | PCBD2      | 0 | NA | 0 | NA | 0 | NA | 0 | NA | 0 | NA |
| 5 | 134331512 | 134375285 | 1  | NM_178019    | CATSPER3   | 0 | NA | 0 | NA | 0 | NA | 0 | NA | 0 | NA |
| 5 | 134397863 | 134391322 | -1 | NM_002653    | PITX1      | 0 | NA | 1 | 25 | 0 | NA | 0 | NA | 0 | NA |
| 5 | 134762827 | 134697969 | -1 | NM_001040158 | H2AFY      | 0 | NA | 0 | NA | 0 | NA | 0 | NA | 0 | NA |
| 5 | 134762827 | 134697969 | -1 | NM_138609    | H2AFY      | 0 | NA | 0 | NA | 0 | NA | 0 | NA | 0 | NA |
| 5 | 134762827 | 134697969 | -1 | NM_138610    | H2AFY      | 0 | NA | 0 | NA | 0 | NA | 0 | NA | 0 | NA |
| 5 | 134763476 | 134697969 | -1 | NM_004893    | H2AFY      | 0 | NA | 0 | NA | 0 | NA | 0 | NA | 0 | NA |
| 5 | 134810937 | 134807802 | -1 | NM_130848    | C5orf20    | 0 | NA | 0 | NA | 0 | NA | 0 | NA | 0 | NA |
| 5 | 134815988 | 134812456 | -1 | NM_001099221 | TIFAB      | 0 | NA | 0 | NA | 0 | NA | 0 | NA | 0 | NA |
| 5 | 134899538 | 134897870 | -1 | NM_006161    | NEUROG1    | 0 | NA | 0 | NA | 0 | NA | 0 | NA | 0 | NA |
| 5 | 134942868 | 134934273 | -1 | NM_004887    | CXCL14     | 0 | NA | 0 | NA | 0 | NA | 0 | NA | 1 | 13 |
| 5 | 135198263 | 135236335 | 1  | NM_145282    | LOC153328  | 0 | NA | 0 | NA | 0 | NA | 0 | NA | 0 | NA |
| 5 | 135259415 | 135255833 | -1 | NM_000590    | IL9        | 0 | NA | 0 | NA | 0 | NA | 0 | NA | 0 | NA |
| 5 | 135300161 | 135305266 | 1  | NM_012159    | FBXL21     | 0 | NA | 0 | NA | 0 | NA | 0 | NA | 0 | NA |
| 5 | 135318622 | 135310498 | -1 | NM_002302    | LECT2      | 0 | NA | 0 | NA | 0 | NA | 0 | NA | 0 | NA |
| 5 | 135392482 | 135427406 | 1  | NM_000358    | TGFBI      | 0 | NA | 0 | NA | 1 | 13 | 0 | NA | 0 | NA |
| 5 | 135496434 | 135464321 | 1  | NM_001001419 | SMAD5      | 1 | 12 | 0 | NA | 0 | NA | 0 | NA | 0 | NA |

|   |           |           |    |              |                 |   |    |   |    |   |    |   |    |   |    |
|---|-----------|-----------|----|--------------|-----------------|---|----|---|----|---|----|---|----|---|----|
| 5 | 135496434 | 135546321 | 1  | NM_001001420 | SMAD5           | 1 | 12 | 0 | NA | 0 | NA | 0 | NA | 0 | NA |
| 5 | 135496434 | 135546321 | 1  | NM_005903    | SMAD5           | 1 | 12 | 0 | NA | 0 | NA | 0 | NA | 0 | NA |
| 5 | 135720972 | 135577021 | -1 | NM_020389    | TRPC7           | 0 | NA | 0 | NA | 0 | NA | 0 | NA | 0 | NA |
| 5 | 136862917 | 136338885 | -1 | NM_004598    | SPOCK1          | 0 | NA | 0 | NA | 0 | NA | 0 | NA | 0 | NA |
| 5 | 137099678 | 136981087 | -1 | NM_017415    | KLHL3           | 0 | NA | 0 | NA | 0 | NA | 0 | NA | 0 | NA |
| 5 | 137117938 | 137114971 | -1 | NM_006805    | HNRNPA0         | 0 | NA | 0 | NA | 0 | NA | 1 | 11 | 0 | NA |
| 5 | 137231472 | 137251440 | 1  | NM_006790    | MYOT            | 0 | NA | 0 | NA | 0 | NA | 0 | NA | 0 | NA |
| 5 | 137253023 | 137304055 | 1  | NM_014386    | PKD2L2          | 0 | NA | 0 | NA | 0 | NA | 0 | NA | 0 | NA |
| 5 | 137396701 | 137301540 | -1 | NM_001101800 | C5orf5          | 0 | NA | 0 | NA | 0 | NA | 0 | NA | 0 | NA |
| 5 | 137396701 | 137301540 | -1 | NM_001101801 | C5orf5          | 0 | NA | 0 | NA | 0 | NA | 0 | NA | 0 | NA |
| 5 | 137396701 | 137301540 | -1 | NM_016603    | C5orf5          | 0 | NA | 0 | NA | 0 | NA | 0 | NA | 0 | NA |
| 5 | 137447872 | 137455098 | 1  | NM_058244    | WNT8A           | 0 | NA | 0 | NA | 0 | NA | 0 | NA | 0 | NA |
| 5 | 137503031 | 137478759 | -1 | NM_003551    | NME5            | 0 | NA | 0 | NA | 0 | NA | 0 | NA | 0 | NA |
| 5 | 137542257 | 137503357 | -1 | NM_139199    | BRD8            | 0 | NA | 0 | NA | 0 | NA | 1 | 12 | 0 | NA |
| 5 | 137542257 | 137520471 | -1 | NM_006696    | BRD8            | 0 | NA | 0 | NA | 0 | NA | 1 | 12 | 0 | NA |
| 5 | 137542257 | 137520471 | -1 | NM_183359    | BRD8            | 0 | NA | 0 | NA | 0 | NA | 1 | 12 | 0 | NA |
| 5 | 137543247 | 137551261 | 1  | NM_005733    | KIF20A          | 0 | NA | 0 | NA | 0 | NA | 1 | 12 | 0 | NA |
| 5 | 137576931 | 137551235 | -1 | NM_004661    | CDC23           | 0 | NA | 0 | NA | 0 | NA | 0 | NA | 0 | NA |
| 5 | 137638152 | 137615967 | -1 | NM_001496    | GFRA3           | 0 | NA | 0 | NA | 0 | NA | 0 | NA | 0 | NA |
| 5 | 137695415 | 137648857 | -1 | NM_001790    | CDC25C          | 1 | 13 | 0 | NA | 0 | NA | 0 | NA | 0 | NA |
| 5 | 137695415 | 137648857 | -1 | NM_022809    | CDC25C          | 1 | 13 | 0 | NA | 0 | NA | 0 | NA | 0 | NA |
| 5 | 137701866 | 137713317 | 1  | NM_016605    | FAM53C          | 1 | 13 | 0 | NA | 0 | NA | 0 | NA | 0 | NA |
| 5 | 137716183 | 137800615 | 1  | NM_016604    | JMJ1B           | 1 | 37 | 0 | NA | 1 | 33 | 0 | NA | 0 | NA |
| 5 | 137802674 | 137810557 | 1  | NM_016606    | REEP2           | 0 | NA | 0 | NA | 0 | NA | 0 | NA | 0 | NA |
| 5 | 137829079 | 137832903 | 1  | NM_001964    | EGR1            | 1 | 23 | 0 | NA | 0 | NA | 1 | 14 | 0 | NA |
| 5 | 137906831 | 137869682 | -1 | NM_004730    | ETF1            | 0 | NA | 0 | NA | 0 | NA | 0 | NA | 0 | NA |
| 5 | 137939014 | 137918922 | -1 | NM_004134    | HSPA9           | 1 | 23 | 0 | NA | 0 | NA | 0 | NA | 0 | NA |
| 5 | 138117005 | 138298622 | 1  | NM_001903    | CTNNA1          | 0 | NA | 0 | NA | 0 | NA | 0 | NA | 0 | NA |
| 5 | 138238908 | 138232977 | -1 | NM_015564    | LRR12           | 0 | NA | 0 | NA | 0 | NA | 0 | NA | 0 | NA |
| 5 | 138561964 | 138310308 | -1 | NM_001037633 | SIL1            | 0 | NA | 0 | NA | 0 | NA | 0 | NA | 0 | NA |
| 5 | 138561964 | 138310308 | -1 | NM_022464    | SIL1            | 0 | NA | 0 | NA | 0 | NA | 0 | NA | 0 | NA |
| 5 | 138637690 | 138694029 | 1  | NM_199189    | MATR3           | 1 | 24 | 0 | NA | 1 | 15 | 1 | 14 | 0 | NA |
| 5 | 138657253 | 138694029 | 1  | NM_018834    | MATR3           | 0 | NA | 0 | NA | 0 | NA | 0 | NA | 0 | NA |
| 5 | 138705417 | 138733308 | 1  | NM_016480    | PAIP2           | 1 | 17 | 0 | NA | 0 | NA | 0 | NA | 0 | NA |
| 5 | 138706032 | 138733308 | 1  | NM_001033112 | PAIP2           | 1 | 17 | 0 | NA | 0 | NA | 0 | NA | 0 | NA |
| 5 | 138746900 | 138730787 | -1 | NM_005847    | SLC23A1         | 0 | NA | 0 | NA | 0 | NA | 0 | NA | 0 | NA |
| 5 | 138746900 | 138730787 | -1 | NM_152685    | SLC23A1         | 0 | NA | 0 | NA | 0 | NA | 0 | NA | 0 | NA |
| 5 | 138753504 | 138751155 | -1 | NM_016459    | MGC29506        | 0 | NA | 0 | NA | 0 | NA | 0 | NA | 0 | NA |
| 5 | 138803038 | 13875278  | -1 | NM_152686    | DNAJC18         | 0 | NA | 0 | NA | 0 | NA | 0 | NA | 0 | NA |
| 5 | 138822504 | 138812143 | -1 | NM_001077693 | ECSM2           | 0 | NA | 0 | NA | 0 | NA | 0 | NA | 0 | NA |
| 5 | 138842476 | 138835732 | -1 | NM_196282    | TMEM173         | 0 | NA | 0 | NA | 0 | NA | 0 | NA | 0 | NA |
| 5 | 138920934 | 138988202 | 1  | NM_003339    | UBE2D2          | 0 | NA | 0 | NA | 1 | 12 | 0 | NA | 0 | NA |
| 5 | 138920934 | 138988202 | 1  | NM_181838    | UBE2D2          | 0 | NA | 0 | NA | 1 | 12 | 0 | NA | 0 | NA |
| 5 | 139008484 | 139042864 | 1  | NM_016463    | CXXC5           | 0 | NA | 0 | NA | 0 | NA | 0 | NA | 0 | NA |
| 5 | 139155589 | 139204232 | 1  | NM_032289    | PSD2            | 0 | NA | 0 | NA | 0 | NA | 0 | NA | 0 | NA |
| 5 | 139403063 | 139207443 | -1 | NM_004883    | NRG2            | 0 | NA | 0 | NA | 0 | NA | 0 | NA | 0 | NA |
| 5 | 139403063 | 139207443 | -1 | NM_013981    | NRG2            | 0 | NA | 0 | NA | 0 | NA | 0 | NA | 0 | NA |
| 5 | 139403063 | 139207443 | -1 | NM_013982    | NRG2            | 0 | NA | 0 | NA | 0 | NA | 0 | NA | 0 | NA |
| 5 | 139403063 | 139207443 | -1 | NM_013983    | NRG2            | 0 | NA | 0 | NA | 0 | NA | 0 | NA | 0 | NA |
| 5 | 139473891 | 139476505 | 1  | NM_005859    | PURA            | 0 | NA | 0 | NA | 0 | NA | 0 | NA | 0 | NA |
| 5 | 139485704 | 139488575 | 1  | NM_001007189 | LOC492311       | 0 | NA | 0 | NA | 0 | NA | 0 | NA | 0 | NA |
| 5 | 139534836 | 139603558 | 1  | NM_032412    | C5orf32         | 0 | NA | 0 | NA | 0 | NA | 0 | NA | 0 | NA |
| 5 | 139662873 | 139604818 | -1 | NM_002622    | PFN1            | 0 | NA | 0 | NA | 0 | NA | 0 | NA | 0 | NA |
| 5 | 139706358 | 139692611 | -1 | NM_001945    | HBEGF           | 0 | NA | 0 | NA | 0 | NA | 0 | NA | 0 | NA |
| 5 | 139719970 | 139734906 | 1  | NM_031467    | SLC4A9          | 0 | NA | 0 | NA | 0 | NA | 0 | NA | 0 | NA |
| 5 | 139761612 | 139832246 | 1  | NM_017978    | ANKHD1          | 0 | NA | 0 | NA | 0 | NA | 1 | 13 | 0 | NA |
| 5 | 139761612 | 139832246 | 1  | NM_024668    | ANKHD1          | 0 | NA | 0 | NA | 0 | NA | 1 | 13 | 0 | NA |
| 5 | 139761612 | 139899625 | 1  | NM_017747    | ANKHD1          | 0 | NA | 0 | NA | 0 | NA | 1 | 13 | 0 | NA |
| 5 | 139761612 | 139909347 | 1  | NM_020690    | ANKHD1-EIF4EBP3 | 0 | NA | 0 | NA | 0 | NA | 1 | 13 | 0 | NA |
| 5 | 139907434 | 139909347 | 1  | NM_003732    | EIF4EBP3        | 0 | NA | 0 | NA | 0 | NA | 0 | NA | 0 | NA |
| 5 | 139917862 | 139909836 | -1 | NM_001035235 | SRA1            | 1 | 33 | 0 | NA | 0 | NA | 0 | NA | 0 | NA |
| 5 | 139924373 | 139918036 | -1 | NM_006051    | APBB3           | 1 | 33 | 0 | NA | 0 | NA | 0 | NA | 0 | NA |
| 5 | 139924373 | 139918036 | -1 | NM_133172    | APBB3           | 1 | 33 | 0 | NA | 0 | NA | 0 | NA | 0 | NA |
| 5 | 139924373 | 139918036 | -1 | NM_133173    | APBB3           | 1 | 33 | 0 | NA | 0 | NA | 0 | NA | 0 | NA |
| 5 | 139924373 | 139918036 | -1 | NM_133174    | APBB3           | 1 | 33 | 0 | NA | 0 | NA | 0 | NA | 0 | NA |

|   |           |           |    |              |         |   |    |   |    |   |    |   |    |   |    |
|---|-----------|-----------|----|--------------|---------|---|----|---|----|---|----|---|----|---|----|
| 5 | 139924603 | 139928667 | 1  | NM_080670    | SLC35A4 | 1 | 33 | 0 | NA | 0 | NA | 0 | NA | 0 | NA |
| 5 | 139993194 | 139991500 | -1 | NM_000591    | CD14    | 0 | NA | 1 | 16 | 0 | NA | 0 | NA | 0 | NA |
| 5 | 139993439 | 139991500 | -1 | NM_001040021 | CD14    | 0 | NA | 1 | 16 | 0 | NA | 0 | NA | 0 | NA |
| 5 | 139999195 | 140005173 | 1  | NM_018502    | TMCO6   | 1 | 11 | 1 | 16 | 0 | NA | 0 | NA | 0 | NA |
| 5 | 140007424 | 140005141 | -1 | NM_002488    | NDUFA2  | 1 | 11 | 0 | NA | 0 | NA | 0 | NA | 0 | NA |
| 5 | 140007567 | 140022249 | 1  | NM_006083    | IK      | 1 | 11 | 0 | NA | 0 | NA | 0 | NA | 0 | NA |
| 5 | 140024567 | 140030737 | 1  | NM_017706    | WDR55   | 0 | NA | 0 | NA | 0 | NA | 0 | NA | 0 | NA |
| 5 | 140033355 | 140030564 | -1 | NM_194249    | DND1    | 0 | NA | 0 | NA | 0 | NA | 0 | NA | 0 | NA |
| 5 | 140051155 | 140033673 | -1 | NM_002109    | HARS    | 0 | NA | 0 | NA | 0 | NA | 1 | 16 | 0 | NA |
| 5 | 140051201 | 140059074 | 1  | NM_012208    | HARS2   | 0 | NA | 0 | NA | 0 | NA | 1 | 16 | 0 | NA |
| 5 | 140060215 | 140066423 | 1  | NM_144723    | ZMAT2   | 0 | NA | 0 | NA | 0 | NA | 1 | 16 | 0 | NA |
| 5 | 140146059 | 140148629 | 1  | NM_031410    | PCDHA1  | 1 | 11 | 1 | 15 | 0 | NA | 0 | NA | 1 | 14 |
| 5 | 140146059 | 140372113 | 1  | NM_018900    | PCDHA1  | 1 | 11 | 1 | 15 | 0 | NA | 0 | NA | 1 | 14 |
| 5 | 140146059 | 140372113 | 1  | NM_031411    | PCDHA1  | 1 | 11 | 1 | 15 | 0 | NA | 0 | NA | 1 | 14 |
| 5 | 140154627 | 140157246 | 1  | NM_031495    | PCDHA2  | 1 | 11 | 1 | 18 | 0 | NA | 0 | NA | 1 | 14 |
| 5 | 140154627 | 140372113 | 1  | NM_018905    | PCDHA2  | 1 | 11 | 1 | 18 | 0 | NA | 0 | NA | 1 | 14 |
| 5 | 140160966 | 140163441 | 1  | NM_031497    | PCDHA3  | 1 | 11 | 1 | 14 | 0 | NA | 0 | NA | 0 | NA |
| 5 | 140160966 | 140372113 | 1  | NM_018906    | PCDHA3  | 1 | 11 | 1 | 14 | 0 | NA | 0 | NA | 0 | NA |
| 5 | 140166855 | 140169353 | 1  | NM_031500    | PCDHA4  | 0 | NA | 1 | 12 | 0 | NA | 0 | NA | 0 | NA |
| 5 | 140166855 | 140372113 | 1  | NM_018907    | PCDHA4  | 0 | NA | 1 | 12 | 0 | NA | 0 | NA | 0 | NA |
| 5 | 140181544 | 140183995 | 1  | NM_031501    | PCDHA5  | 0 | NA | 0 | NA | 0 | NA | 0 | NA | 0 | NA |
| 5 | 140181544 | 140372113 | 1  | NM_018908    | PCDHA5  | 0 | NA | 0 | NA | 0 | NA | 0 | NA | 0 | NA |
| 5 | 140187833 | 140190272 | 1  | NM_031848    | PCDHA6  | 0 | NA | 0 | NA | 0 | NA | 0 | NA | 0 | NA |
| 5 | 140187833 | 140372113 | 1  | NM_018909    | PCDHA6  | 0 | NA | 0 | NA | 0 | NA | 0 | NA | 0 | NA |
| 5 | 140187833 | 140372113 | 1  | NM_031849    | PCDHA6  | 0 | NA | 0 | NA | 0 | NA | 0 | NA | 0 | NA |
| 5 | 140194152 | 140196522 | 1  | NM_031852    | PCDHA7  | 0 | NA | 0 | NA | 0 | NA | 0 | NA | 0 | NA |
| 5 | 140194152 | 140372113 | 1  | NM_018910    | PCDHA7  | 0 | NA | 0 | NA | 0 | NA | 0 | NA | 0 | NA |
| 5 | 140201090 | 140203535 | 1  | NM_031856    | PCDHA8  | 0 | NA | 0 | NA | 0 | NA | 0 | NA | 1 | 15 |
| 5 | 140201090 | 140372113 | 1  | NM_018911    | PCDHA8  | 0 | NA | 0 | NA | 0 | NA | 0 | NA | 1 | 15 |
| 5 | 140207540 | 140213928 | 1  | NM_014005    | PCDHA9  | 0 | NA | 0 | NA | 0 | NA | 0 | NA | 1 | 15 |
| 5 | 140207540 | 140372113 | 1  | NM_031857    | PCDHA9  | 0 | NA | 0 | NA | 0 | NA | 0 | NA | 1 | 15 |
| 5 | 140215817 | 140218352 | 1  | NM_031859    | PCDHA10 | 0 | NA | 0 | NA | 0 | NA | 0 | NA | 1 | 15 |
| 5 | 140215817 | 140372113 | 1  | NM_018901    | PCDHA10 | 0 | NA | 0 | NA | 0 | NA | 0 | NA | 1 | 15 |
| 5 | 140215817 | 140372113 | 1  | NM_031860    | PCDHA10 | 0 | NA | 0 | NA | 0 | NA | 0 | NA | 1 | 15 |
| 5 | 140228014 | 140231305 | 1  | NM_031861    | PCDHA11 | 0 | NA | 0 | NA | 0 | NA | 0 | NA | 0 | NA |
| 5 | 140228014 | 140372113 | 1  | NM_018902    | PCDHA11 | 0 | NA | 0 | NA | 0 | NA | 0 | NA | 0 | NA |
| 5 | 140235114 | 140237620 | 1  | NM_031864    | PCDHA12 | 0 | NA | 0 | NA | 0 | NA | 0 | NA | 0 | NA |
| 5 | 140235114 | 140372113 | 1  | NM_018903    | PCDHA12 | 0 | NA | 0 | NA | 0 | NA | 0 | NA | 0 | NA |
| 5 | 140242037 | 140244464 | 1  | NM_031865    | PCDHA13 | 0 | NA | 0 | NA | 0 | NA | 0 | NA | 0 | NA |
| 5 | 140242037 | 140372113 | 1  | NM_018904    | PCDHA13 | 0 | NA | 0 | NA | 0 | NA | 0 | NA | 0 | NA |
| 5 | 140286485 | 140289569 | 1  | NM_031882    | PCDHAC1 | 0 | NA | 0 | NA | 0 | NA | 0 | NA | 1 | 12 |
| 5 | 140286485 | 140372113 | 1  | NM_018898    | PCDHAC1 | 0 | NA | 0 | NA | 0 | NA | 0 | NA | 1 | 12 |
| 5 | 140326295 | 140372115 | 1  | NM_018899    | PCDHAC2 | 0 | NA | 0 | NA | 0 | NA | 0 | NA | 0 | NA |
| 5 | 140326535 | 140329190 | 1  | NM_031883    | PCDHAC2 | 0 | NA | 0 | NA | 0 | NA | 0 | NA | 0 | NA |
| 5 | 140411162 | 140413696 | 1  | NM_013340    | PCDHB1  | 0 | NA | 0 | NA | 0 | NA | 0 | NA | 1 | 13 |
| 5 | 140454420 | 140457148 | 1  | NM_018936    | PCDHB2  | 1 | 12 | 0 | NA | 1 | 18 | 0 | NA | 0 | NA |
| 5 | 140460417 | 140463590 | 1  | NM_018937    | PCDHB3  | 1 | 12 | 0 | NA | 0 | NA | 0 | NA | 0 | NA |
| 5 | 140481764 | 140485385 | 1  | NM_018938    | PCDHB4  | 0 | NA | 0 | NA | 0 | NA | 0 | NA | 0 | NA |
| 5 | 140494983 | 140497888 | 1  | NM_015669    | PCDHB5  | 1 | 15 | 0 | NA | 0 | NA | 0 | NA | 0 | NA |
| 5 | 140510022 | 140513052 | 1  | NM_018939    | PCDHB6  | 0 | NA | 0 | NA | 0 | NA | 0 | NA | 0 | NA |
| 5 | 140532426 | 140536141 | 1  | NM_018940    | PCDHB7  | 0 | NA | 1 | 12 | 0 | NA | 0 | NA | 0 | NA |
| 5 | 140537613 | 140540205 | 1  | NM_019120    | PCDHB8  | 0 | NA | 1 | 12 | 0 | NA | 0 | NA | 0 | NA |
| 5 | 140541163 | 140545980 | 1  | NM_020957    | PCDHB16 | 0 | NA | 1 | 14 | 0 | NA | 0 | NA | 0 | NA |
| 5 | 140547076 | 140551295 | 1  | NM_019119    | PCDHB9  | 0 | NA | 1 | 16 | 0 | NA | 0 | NA | 0 | NA |
| 5 | 140552135 | 140555397 | 1  | NM_018930    | PCDHB10 | 0 | NA | 1 | 16 | 0 | NA | 0 | NA | 0 | NA |
| 5 | 140559531 | 140562802 | 1  | NM_018931    | PCDHB11 | 0 | NA | 1 | 16 | 0 | NA | 0 | NA | 0 | NA |
| 5 | 140568474 | 140571882 | 1  | NM_018932    | PCDHB12 | 0 | NA | 0 | NA | 0 | NA | 0 | NA | 0 | NA |
| 5 | 140573692 | 140577177 | 1  | NM_018933    | PCDHB13 | 0 | NA | 0 | NA | 0 | NA | 0 | NA | 0 | NA |
| 5 | 140583261 | 140586045 | 1  | NM_018934    | PCDHB14 | 0 | NA | 0 | NA | 0 | NA | 0 | NA | 0 | NA |
| 5 | 140605330 | 140607985 | 1  | NM_018935    | PCDHB15 | 0 | NA | 1 | 19 | 0 | NA | 0 | NA | 0 | NA |
| 5 | 140663796 | 140662379 | -1 | NM_031947    | SLC25A2 | 0 | NA | 0 | NA | 0 | NA | 0 | NA | 0 | NA |
| 5 | 140680535 | 140678240 | -1 | NM_005642    | TAF7    | 1 | 36 | 1 | 13 | 1 | 28 | 1 | 19 | 1 | 13 |
| 5 | 140690435 | 140692907 | 1  | NM_031993    | PCDHGA1 | 1 | 17 | 1 | 16 | 1 | 12 | 0 | NA | 0 | NA |
| 5 | 140690435 | 140872730 | 1  | NM_018912    | PCDHGA1 | 1 | 17 | 1 | 16 | 1 | 12 | 0 | NA | 0 | NA |
| 5 | 140698537 | 140701194 | 1  | NM_032009    | PCDHGA2 | 1 | 17 | 1 | 43 | 1 | 12 | 0 | NA | 0 | NA |

|   |           |           |    |              |          |   |    |   |    |   |    |   |    |   |    |
|---|-----------|-----------|----|--------------|----------|---|----|---|----|---|----|---|----|---|----|
| 5 | 140698537 | 140872730 | 1  | NM_018915    | PCDHGA2  | 1 | 17 | 1 | 43 | 1 | 12 | 0 | NA | 0 | NA |
| 5 | 140703784 | 140706274 | 1  | NM_032011    | PCDHGA3  | 1 | 17 | 1 | 17 | 0 | NA | 0 | NA | 0 | NA |
| 5 | 140703784 | 140872730 | 1  | NM_018916    | PCDHGA3  | 1 | 17 | 1 | 17 | 0 | NA | 0 | NA | 0 | NA |
| 5 | 140710011 | 140712444 | 1  | NM_032095    | PCDHGB1  | 0 | NA | 1 | 14 | 0 | NA | 0 | NA | 0 | NA |
| 5 | 140710011 | 140872730 | 1  | NM_018922    | PCDHGB1  | 0 | NA | 1 | 14 | 0 | NA | 0 | NA | 0 | NA |
| 5 | 140714951 | 140717480 | 1  | NM_032053    | PCDHGA4  | 0 | NA | 1 | 12 | 0 | NA | 0 | NA | 0 | NA |
| 5 | 140714951 | 140872730 | 1  | NM_018917    | PCDHGA4  | 0 | NA | 1 | 12 | 0 | NA | 0 | NA | 0 | NA |
| 5 | 140719886 | 140722322 | 1  | NM_032096    | PCDHGB2  | 0 | NA | 1 | 21 | 0 | NA | 0 | NA | 0 | NA |
| 5 | 140719886 | 140872730 | 1  | NM_018923    | PCDHGB2  | 0 | NA | 1 | 21 | 0 | NA | 0 | NA | 0 | NA |
| 5 | 140724081 | 140726523 | 1  | NM_032054    | PCDHGA5  | 0 | NA | 1 | 18 | 0 | NA | 0 | NA | 0 | NA |
| 5 | 140724081 | 140872730 | 1  | NM_018918    | PCDHGA5  | 0 | NA | 1 | 18 | 0 | NA | 0 | NA | 0 | NA |
| 5 | 140730145 | 140732590 | 1  | NM_032097    | PCDHGB3  | 0 | NA | 1 | 13 | 0 | NA | 0 | NA | 0 | NA |
| 5 | 140730145 | 140872730 | 1  | NM_018924    | PCDHGB3  | 0 | NA | 1 | 13 | 0 | NA | 0 | NA | 0 | NA |
| 5 | 140733834 | 140736291 | 1  | NM_032086    | PCDHGA6  | 1 | 14 | 1 | 13 | 0 | NA | 0 | NA | 0 | NA |
| 5 | 140733834 | 140872730 | 1  | NM_018919    | PCDHGA6  | 1 | 14 | 1 | 13 | 0 | NA | 0 | NA | 0 | NA |
| 5 | 140742650 | 140745371 | 1  | NM_032087    | PCDHGA7  | 1 | 14 | 1 | 16 | 0 | NA | 0 | NA | 0 | NA |
| 5 | 140742650 | 140872730 | 1  | NM_018920    | PCDHGA7  | 1 | 14 | 1 | 16 | 0 | NA | 0 | NA | 0 | NA |
| 5 | 140747635 | 140750047 | 1  | NM_032098    | PCDHGB4  | 1 | 14 | 1 | 13 | 0 | NA | 0 | NA | 0 | NA |
| 5 | 140747635 | 140872730 | 1  | NM_003736    | PCDHGB4  | 1 | 14 | 1 | 13 | 0 | NA | 0 | NA | 0 | NA |
| 5 | 140751666 | 140755154 | 1  | NM_014004    | PCDHGA8  | 1 | 14 | 1 | 12 | 0 | NA | 0 | NA | 0 | NA |
| 5 | 140751666 | 140872730 | 1  | NM_032088    | PCDHGA8  | 1 | 14 | 1 | 12 | 0 | NA | 0 | NA | 0 | NA |
| 5 | 140757878 | 140760335 | 1  | NM_032099    | PCDHGB5  | 0 | NA | 1 | 16 | 0 | NA | 0 | NA | 0 | NA |
| 5 | 140757878 | 140872730 | 1  | NM_018925    | PCDHGB5  | 0 | NA | 1 | 16 | 0 | NA | 0 | NA | 0 | NA |
| 5 | 140762703 | 140765190 | 1  | NM_032089    | PCDHGA9  | 0 | NA | 1 | 16 | 0 | NA | 0 | NA | 0 | NA |
| 5 | 140762703 | 140872730 | 1  | NM_018921    | PCDHGA9  | 0 | NA | 1 | 16 | 0 | NA | 0 | NA | 0 | NA |
| 5 | 140767953 | 140770416 | 1  | NM_032100    | PCDHGB6  | 0 | NA | 1 | 16 | 0 | NA | 0 | NA | 0 | NA |
| 5 | 140767953 | 140872730 | 1  | NM_018926    | PCDHGB6  | 0 | NA | 1 | 16 | 0 | NA | 0 | NA | 0 | NA |
| 5 | 140772926 | 140775479 | 1  | NM_032090    | PCDHGA10 | 0 | NA | 1 | 18 | 0 | NA | 0 | NA | 0 | NA |
| 5 | 140772926 | 140872730 | 1  | NM_018913    | PCDHGA10 | 0 | NA | 1 | 18 | 0 | NA | 0 | NA | 0 | NA |
| 5 | 140777465 | 140780180 | 1  | NM_032101    | PCDHGB7  | 0 | NA | 1 | 15 | 0 | NA | 0 | NA | 0 | NA |
| 5 | 140777465 | 140872730 | 1  | NM_018927    | PCDHGB7  | 0 | NA | 1 | 15 | 0 | NA | 0 | NA | 0 | NA |
| 5 | 140780720 | 140783837 | 1  | NM_032091    | PCDHGA11 | 0 | NA | 1 | 15 | 0 | NA | 0 | NA | 0 | NA |
| 5 | 140780720 | 140872730 | 1  | NM_018914    | PCDHGA11 | 0 | NA | 1 | 15 | 0 | NA | 0 | NA | 0 | NA |
| 5 | 140780720 | 140872730 | 1  | NM_032092    | PCDHGA11 | 0 | NA | 1 | 15 | 0 | NA | 0 | NA | 0 | NA |
| 5 | 140790341 | 140792973 | 1  | NM_032094    | PCDHGA12 | 0 | NA | 1 | 17 | 0 | NA | 0 | NA | 0 | NA |
| 5 | 140790341 | 140872730 | 1  | NM_003735    | PCDHGA12 | 0 | NA | 1 | 17 | 0 | NA | 0 | NA | 0 | NA |
| 5 | 140835752 | 140838546 | 1  | NM_032402    | PCDHGC3  | 1 | 13 | 1 | 33 | 0 | NA | 0 | NA | 1 | 14 |
| 5 | 140835752 | 140872730 | 1  | NM_002588    | PCDHGC3  | 1 | 13 | 1 | 33 | 0 | NA | 0 | NA | 1 | 14 |
| 5 | 140835752 | 140872730 | 1  | NM_032403    | PCDHGC3  | 1 | 13 | 1 | 33 | 0 | NA | 0 | NA | 1 | 14 |
| 5 | 140844924 | 140847540 | 1  | NM_032406    | PCDHGC4  | 1 | 15 | 1 | 14 | 0 | NA | 1 | 13 | 1 | 14 |
| 5 | 140844924 | 140872730 | 1  | NM_018928    | PCDHGC4  | 1 | 15 | 1 | 14 | 0 | NA | 1 | 13 | 1 | 14 |
| 5 | 140848991 | 140851628 | 1  | NM_032407    | PCDHGC5  | 0 | NA | 0 | NA | 0 | NA | 1 | 13 | 0 | NA |
| 5 | 140848991 | 140872730 | 1  | NM_018929    | PCDHGC5  | 0 | NA | 0 | NA | 0 | NA | 1 | 13 | 0 | NA |
| 5 | 140978747 | 140874771 | -1 | NM_001079812 | DIAPH1   | 0 | NA | 0 | NA | 0 | NA | 0 | NA | 0 | NA |
| 5 | 140978747 | 140874771 | -1 | NM_005219    | DIAPH1   | 0 | NA | 0 | NA | 0 | NA | 0 | NA | 0 | NA |
| 5 | 140996607 | 140980626 | -1 | NM_003883    | HDAC3    | 0 | NA | 0 | NA | 0 | NA | 0 | NA | 0 | NA |
| 5 | 140996776 | 141000815 | 1  | NM_173828    | RELL2    | 0 | NA | 0 | NA | 0 | NA | 0 | NA | 0 | NA |
| 5 | 141011170 | 140999052 | -1 | NM_033449    | FCHSD1   | 0 | NA | 0 | NA | 0 | NA | 0 | NA | 0 | NA |
| 5 | 141041984 | 141013151 | -1 | NM_022481    | CENTD3   | 0 | NA | 0 | NA | 0 | NA | 1 | 13 | 0 | NA |
| 5 | 141238128 | 141212856 | -1 | NM_032420    | PCDH1    | 0 | NA | 0 | NA | 0 | NA | 0 | NA | 0 | NA |
| 5 | 141238128 | 141222400 | -1 | NM_002587    | PCDH1    | 0 | NA | 0 | NA | 0 | NA | 0 | NA | 0 | NA |
| 5 | 141283592 | 141299901 | 1  | NM_014773    | KIAA0141 | 1 | 17 | 0 | NA | 0 | NA | 1 | 11 | 0 | NA |
| 5 | 141318811 | 141304713 | -1 | NM_016580    | PCDH12   | 0 | NA | 0 | NA | 0 | NA | 0 | NA | 0 | NA |
| 5 | 141326620 | 141348938 | 1  | NM_183399    | RNF14    | 0 | NA | 0 | NA | 0 | NA | 0 | NA | 0 | NA |
| 5 | 141328805 | 141348938 | 1  | NM_004290    | RNF14    | 0 | NA | 0 | NA | 0 | NA | 0 | NA | 0 | NA |
| 5 | 141328805 | 141348938 | 1  | NM_183398    | RNF14    | 0 | NA | 0 | NA | 0 | NA | 0 | NA | 0 | NA |
| 5 | 141328805 | 141348938 | 1  | NM_183400    | RNF14    | 0 | NA | 0 | NA | 0 | NA | 0 | NA | 0 | NA |
| 5 | 141328916 | 141348938 | 1  | NM_183401    | RNF14    | 0 | NA | 0 | NA | 0 | NA | 0 | NA | 0 | NA |
| 5 | 141372776 | 141360419 | -1 | NM_005471    | GNPDA1   | 0 | NA | 0 | NA | 0 | NA | 0 | NA | 0 | NA |
| 5 | 141488507 | 141513128 | 1  | NM_030571    | NDIFP1   | 0 | NA | 0 | NA | 0 | NA | 0 | NA | 0 | NA |
| 5 | 141684750 | 141670190 | -1 | NM_030964    | SPRY4    | 1 | 17 | 0 | NA | 1 | 12 | 1 | 16 | 0 | NA |
| 5 | 142045812 | 141953305 | -1 | NM_000800    | FGF1     | 0 | NA | 0 | NA | 0 | NA | 0 | NA | 0 | NA |
| 5 | 142045812 | 141953305 | -1 | NM_033136    | FGF1     | 0 | NA | 0 | NA | 0 | NA | 0 | NA | 0 | NA |
| 5 | 142045812 | 141953305 | -1 | NM_033137    | FGF1     | 0 | NA | 0 | NA | 0 | NA | 0 | NA | 0 | NA |
| 5 | 142130475 | 142588765 | 1  | NM_015071    | ARHGAP26 | 0 | NA | 0 | NA | 0 | NA | 0 | NA | 0 | NA |

|   |           |           |    |              |           |   |    |   |    |   |    |   |    |   |    |
|---|-----------|-----------|----|--------------|-----------|---|----|---|----|---|----|---|----|---|----|
| 5 | 142763447 | 142637688 | -1 | NM_000176    | NR3C1     | 1 | 16 | 0 | NA | 0 | NA | 1 | 16 | 0 | NA |
| 5 | 142763447 | 142637688 | -1 | NM_001020825 | NR3C1     | 1 | 16 | 0 | NA | 0 | NA | 1 | 16 | 0 | NA |
| 5 | 142763447 | 142637688 | -1 | NM_001024094 | NR3C1     | 1 | 16 | 0 | NA | 0 | NA | 1 | 16 | 0 | NA |
| 5 | 142764238 | 142637688 | -1 | NM_001018076 | NR3C1     | 1 | 16 | 0 | NA | 0 | NA | 1 | 16 | 0 | NA |
| 5 | 142795270 | 142637688 | -1 | NM_001018074 | NR3C1     | 0 | NA | 0 | NA | 0 | NA | 0 | NA | 0 | NA |
| 5 | 142795270 | 142637688 | -1 | NM_001018075 | NR3C1     | 0 | NA | 0 | NA | 0 | NA | 0 | NA | 0 | NA |
| 5 | 142795270 | 142637688 | -1 | NM_001018077 | NR3C1     | 0 | NA | 0 | NA | 0 | NA | 0 | NA | 0 | NA |
| 5 | 143171918 | 143180477 | 1  | NM_021182    | HMBH1     | 0 | NA | 0 | NA | 0 | NA | 0 | NA | 0 | NA |
| 5 | 143530387 | 143517919 | -1 | NM_030799    | YIPF5     | 0 | NA | 0 | NA | 0 | NA | 0 | NA | 0 | NA |
| 5 | 143530387 | 143519029 | -1 | NM_001024947 | YIPF5     | 0 | NA | 0 | NA | 0 | NA | 0 | NA | 0 | NA |
| 5 | 143530629 | 143837137 | 1  | NM_020768    | KCTD16    | 0 | NA | 0 | NA | 0 | NA | 0 | NA | 0 | NA |
| 5 | 145195060 | 145118774 | -1 | NM_182960    | PRELID2   | 0 | NA | 0 | NA | 0 | NA | 0 | NA | 0 | NA |
| 5 | 145195060 | 145118774 | -1 | NM_205846    | PRELID2   | 0 | NA | 0 | NA | 0 | NA | 0 | NA | 0 | NA |
| 5 | 145195092 | 145118774 | -1 | NM_138492    | PRELID2   | 0 | NA | 0 | NA | 0 | NA | 0 | NA | 0 | NA |
| 5 | 145232724 | 145219488 | -1 | NM_001080516 | LOC643226 | 0 | NA | 0 | NA | 0 | NA | 0 | NA | 0 | NA |
| 5 | 145296334 | 145423048 | 1  | NM_152550    | SH3RF2    | 0 | NA | 0 | NA | 0 | NA | 0 | NA | 0 | NA |
| 5 | 145464139 | 145444068 | -1 | NM_001029869 | PLAC8L1   | 0 | NA | 0 | NA | 0 | NA | 0 | NA | 0 | NA |
| 5 | 145542487 | 145472781 | -1 | NM_020117    | LARS      | 0 | NA | 0 | NA | 0 | NA | 0 | NA | 0 | NA |
| 5 | 145563355 | 145648977 | 1  | NM_018989    | RBM27     | 0 | NA | 0 | NA | 0 | NA | 0 | NA | 0 | NA |
| 5 | 145698868 | 145700200 | 1  | NM_002700    | POU4F3    | 0 | NA | 0 | NA | 0 | NA | 0 | NA | 0 | NA |
| 5 | 145807065 | 145871262 | 1  | NM_001040006 | TCERG1    | 1 | 25 | 0 | NA | 1 | 20 | 0 | NA | 0 | NA |
| 5 | 145807065 | 145871262 | 1  | NM_006706    | TCERG1    | 1 | 25 | 0 | NA | 1 | 20 | 0 | NA | 0 | NA |
| 5 | 145875869 | 145874609 | -1 | NM_194251    | GPR151    | 0 | NA | 0 | NA | 0 | NA | 0 | NA | 0 | NA |
| 5 | 146238352 | 145949260 | -1 | NM_004576    | PPP2R2B   | 0 | NA | 0 | NA | 0 | NA | 0 | NA | 0 | NA |
| 5 | 146238501 | 145949260 | -1 | NM_181675    | PPP2R2B   | 0 | NA | 0 | NA | 0 | NA | 0 | NA | 0 | NA |
| 5 | 146415671 | 145949260 | -1 | NM_181676    | PPP2R2B   | 0 | NA | 0 | NA | 0 | NA | 0 | NA | 0 | NA |
| 5 | 146415783 | 145949260 | -1 | NM_181674    | PPP2R2B   | 0 | NA | 0 | NA | 0 | NA | 0 | NA | 0 | NA |
| 5 | 146441207 | 145949260 | -1 | NM_181677    | PPP2R2B   | 0 | NA | 0 | NA | 0 | NA | 0 | NA | 0 | NA |
| 5 | 146441207 | 145949260 | -1 | NM_181678    | PPP2R2B   | 0 | NA | 0 | NA | 0 | NA | 0 | NA | 0 | NA |
| 5 | 146594771 | 146708585 | 1  | NM_145001    | STK32A    | 0 | NA | 0 | NA | 0 | NA | 0 | NA | 0 | NA |
| 5 | 146594771 | 146743961 | 1  | NM_001112724 | STK32A    | 0 | NA | 0 | NA | 0 | NA | 0 | NA | 0 | NA |
| 5 | 146813453 | 146750563 | -1 | NM_001387    | DPYSL3    | 0 | NA | 0 | NA | 0 | NA | 0 | NA | 0 | NA |
| 5 | 147142445 | 146950898 | -1 | NM_014790    | JAKMIP2   | 0 | NA | 0 | NA | 0 | NA | 0 | NA | 0 | NA |
| 5 | 147191453 | 147184338 | -1 | NM_003122    | SPINK1    | 0 | NA | 0 | NA | 0 | NA | 0 | NA | 0 | NA |
| 5 | 147238466 | 147241946 | 1  | NM_054023    | SCGB3A2   | 0 | NA | 0 | NA | 0 | NA | 0 | NA | 0 | NA |
| 5 | 147266294 | 147252463 | -1 | NM_206966    | MGC23985  | 0 | NA | 0 | NA | 0 | NA | 0 | NA | 0 | NA |
| 5 | 147423758 | 147497120 | 1  | NM_006846    | SPINK5    | 0 | NA | 0 | NA | 0 | NA | 0 | NA | 0 | NA |
| 5 | 147529488 | 147535154 | 1  | NM_001001325 | SPINK5L2  | 0 | NA | 0 | NA | 0 | NA | 0 | NA | 0 | NA |
| 5 | 147562596 | 147574893 | 1  | NM_205841    | SPINK6    | 0 | NA | 0 | NA | 0 | NA | 0 | NA | 0 | NA |
| 5 | 147628615 | 147645966 | 1  | NM_001040129 | SPINK5L3  | 0 | NA | 0 | NA | 0 | NA | 0 | NA | 0 | NA |
| 5 | 147672182 | 147675674 | 1  | NM_032566    | SPINK7    | 0 | NA | 0 | NA | 0 | NA | 0 | NA | 0 | NA |
| 5 | 147695314 | 147699605 | 1  | NM_001040433 | SPINK9    | 0 | NA | 0 | NA | 0 | NA | 0 | NA | 0 | NA |
| 5 | 147743738 | 147802592 | 1  | NM_030793    | FBXO38    | 0 | NA | 0 | NA | 0 | NA | 0 | NA | 0 | NA |
| 5 | 147743738 | 147802592 | 1  | NM_205836    | FBXO38    | 0 | NA | 0 | NA | 0 | NA | 0 | NA | 0 | NA |
| 5 | 148013934 | 147810787 | -1 | NM_001040169 | HTR4      | 0 | NA | 0 | NA | 0 | NA | 0 | NA | 0 | NA |
| 5 | 148013934 | 147810787 | -1 | NM_199453    | HTR4      | 0 | NA | 0 | NA | 0 | NA | 0 | NA | 0 | NA |
| 5 | 148013934 | 147836391 | -1 | NM_001040171 | HTR4      | 0 | NA | 0 | NA | 0 | NA | 0 | NA | 0 | NA |
| 5 | 148013934 | 147841311 | -1 | NM_000870    | HTR4      | 0 | NA | 0 | NA | 0 | NA | 0 | NA | 0 | NA |
| 5 | 148013934 | 147841311 | -1 | NM_001040172 | HTR4      | 0 | NA | 0 | NA | 0 | NA | 0 | NA | 0 | NA |
| 5 | 148013934 | 147841311 | -1 | NM_001040173 | HTR4      | 0 | NA | 0 | NA | 0 | NA | 0 | NA | 0 | NA |
| 5 | 148013934 | 147869072 | -1 | NM_001040174 | HTR4      | 0 | NA | 0 | NA | 0 | NA | 0 | NA | 0 | NA |
| 5 | 148186348 | 148188381 | 1  | NM_000024    | ADRB2     | 0 | NA | 0 | NA | 0 | NA | 0 | NA | 0 | NA |
| 5 | 148422930 | 148341905 | -1 | NM_024577    | SH3TC2    | 1 | 12 | 0 | NA | 1 | 25 | 0 | NA | 0 | NA |
| 5 | 148501246 | 148620192 | 1  | NM_014945    | ABLIM3    | 0 | NA | 0 | NA | 1 | 12 | 0 | NA | 0 | NA |
| 5 | 148631850 | 148701558 | 1  | NM_152406    | AFAP1L1   | 1 | 11 | 0 | NA | 1 | 20 | 0 | NA | 0 | NA |
| 5 | 148705169 | 148714339 | 1  | NM_152407    | GRPEL2    | 0 | NA | 1 | 13 | 0 | NA | 1 | 17 | 0 | NA |
| 5 | 148717801 | 148729408 | 1  | NM_024028    | PCYOX1L   | 0 | NA | 0 | NA | 1 | 12 | 0 | NA | 0 | NA |
| 5 | 148739031 | 148734022 | -1 | NM_014443    | IL17B     | 0 | NA | 0 | NA | 0 | NA | 0 | NA | 0 | NA |
| 5 | 148911200 | 148855037 | -1 | NM_001025105 | CSNK1A1   | 0 | NA | 0 | NA | 0 | NA | 0 | NA | 0 | NA |
| 5 | 148911200 | 148855037 | -1 | NM_001892    | CSNK1A1   | 0 | NA | 0 | NA | 0 | NA | 0 | NA | 0 | NA |
| 5 | 148941327 | 148994720 | 1  | NM_001001669 | FLJ41603  | 0 | NA | 0 | NA | 0 | NA | 0 | NA | 0 | NA |
| 5 | 149090056 | 149207462 | 1  | NM_133263    | PPARGC1B  | 0 | NA | 0 | NA | 0 | NA | 0 | NA | 0 | NA |
| 5 | 149304549 | 149217711 | -1 | NM_000440    | PDE6A     | 1 | 12 | 0 | NA | 0 | NA | 1 | 13 | 0 | NA |
| 5 | 149320492 | 149347156 | 1  | NM_000112    | SLC26A2   | 0 | NA | 0 | NA | 1 | 12 | 0 | NA | 0 | NA |
| 5 | 149360410 | 149352875 | -1 | NM_030953    | TIGD6     | 1 | 11 | 0 | NA | 0 | NA | 0 | NA | 0 | NA |

|   |           |           |    |              |         |   |    |   |    |   |    |   |    |   |    |
|---|-----------|-----------|----|--------------|---------|---|----|---|----|---|----|---|----|---|----|
| 5 | 149473128 | 149413050 | -1 | NM_005211    | CSF1R   | 0 | NA | 0 | NA | 0 | NA | 0 | NA | 0 | NA |
| 5 | 149515615 | 149473594 | -1 | NM_002609    | PDGFRB  | 0 | NA | 0 | NA | 0 | NA | 0 | NA | 0 | NA |
| 5 | 149526536 | 149544314 | 1  | NM_001804    | CDX1    | 0 | NA | 0 | NA | 0 | NA | 0 | NA | 0 | NA |
| 5 | 149549712 | 149570828 | 1  | NM_014228    | SLC6A7  | 0 | NA | 0 | NA | 0 | NA | 0 | NA | 0 | NA |
| 5 | 149649529 | 149579247 | -1 | NM_015981    | CAMK2A  | 0 | NA | 0 | NA | 0 | NA | 0 | NA | 0 | NA |
| 5 | 149649529 | 149579247 | -1 | NM_171825    | CAMK2A  | 0 | NA | 0 | NA | 0 | NA | 0 | NA | 0 | NA |
| 5 | 149662718 | 149656101 | -1 | NM_001012301 | ARSI    | 0 | NA | 0 | NA | 0 | NA | 0 | NA | 0 | NA |
| 5 | 149717427 | 149744386 | 1  | NM_001008657 | TCOF1   | 0 | NA | 0 | NA | 0 | NA | 0 | NA | 0 | NA |
| 5 | 149717427 | 149760064 | 1  | NM_000356    | TCOF1   | 0 | NA | 0 | NA | 0 | NA | 0 | NA | 0 | NA |
| 5 | 149717427 | 149760064 | 1  | NM_001008656 | TCOF1   | 0 | NA | 0 | NA | 0 | NA | 0 | NA | 0 | NA |
| 5 | 149772516 | 149761394 | -1 | NM_001025159 | CD74    | 0 | NA | 0 | NA | 0 | NA | 0 | NA | 0 | NA |
| 5 | 149772516 | 149761394 | -1 | NM_004355    | CD74    | 0 | NA | 0 | NA | 0 | NA | 0 | NA | 0 | NA |
| 5 | 149772525 | 149761392 | -1 | NM_001025158 | CD74    | 0 | NA | 0 | NA | 0 | NA | 0 | NA | 0 | NA |
| 5 | 149809512 | 149803984 | -1 | NM_001025070 | RPS14   | 1 | 25 | 0 | NA | 1 | 12 | 0 | NA | 0 | NA |
| 5 | 149809512 | 149803984 | -1 | NM_001025071 | RPS14   | 1 | 25 | 0 | NA | 1 | 12 | 0 | NA | 0 | NA |
| 5 | 149809512 | 149803984 | -1 | NM_005617    | RPS14   | 1 | 25 | 0 | NA | 1 | 12 | 0 | NA | 0 | NA |
| 5 | 149880622 | 149917966 | 1  | NM_001543    | NDST1   | 0 | NA | 0 | NA | 0 | NA | 0 | NA | 0 | NA |
| 5 | 150000412 | 150012091 | 1  | NM_001109974 | SYNPO   | 0 | NA | 0 | NA | 0 | NA | 0 | NA | 0 | NA |
| 5 | 150000412 | 150018985 | 1  | NM_007286    | SYNPO   | 0 | NA | 0 | NA | 0 | NA | 0 | NA | 0 | NA |
| 5 | 150020596 | 150039118 | 1  | NM_001122853 | MYO23   | 0 | NA | 0 | NA | 0 | NA | 0 | NA | 0 | NA |
| 5 | 150020596 | 150039118 | 1  | NM_133371    | MYO23   | 0 | NA | 0 | NA | 0 | NA | 0 | NA | 0 | NA |
| 5 | 150060817 | 150050548 | -1 | NM_018047    | RBM22   | 0 | NA | 0 | NA | 0 | NA | 0 | NA | 0 | NA |
| 5 | 150116769 | 150068501 | -1 | NM_016221    | DCTN4   | 1 | 16 | 0 | NA | 0 | NA | 1 | 11 | 0 | NA |
| 5 | 150138059 | 150156491 | 1  | NM_032947    | MST150  | 0 | NA | 0 | NA | 1 | 13 | 0 | NA | 0 | NA |
| 5 | 150264584 | 150254156 | -1 | NM_052860    | ZNF300  | 1 | 11 | 1 | 12 | 1 | 12 | 1 | 13 | 0 | NA |
| 5 | 150380191 | 150388747 | 1  | NM_002084    | GPX3    | 0 | NA | 0 | NA | 0 | NA | 1 | 11 | 0 | NA |
| 5 | 150441190 | 150389698 | -1 | NM_006058    | TNIP1   | 0 | NA | 0 | NA | 0 | NA | 0 | NA | 0 | NA |
| 5 | 150517560 | 150460460 | -1 | NM_001155    | ANXA6   | 0 | NA | 0 | NA | 0 | NA | 0 | NA | 0 | NA |
| 5 | 150517560 | 150460460 | -1 | NM_004033    | ANXA6   | 0 | NA | 0 | NA | 0 | NA | 0 | NA | 0 | NA |
| 5 | 150583847 | 150540805 | -1 | NM_015621    | CCDC69  | 0 | NA | 0 | NA | 0 | NA | 1 | 11 | 0 | NA |
| 5 | 150612836 | 150629000 | 1  | NM_000405    | GM2A    | 0 | NA | 0 | NA | 0 | NA | 0 | NA | 0 | NA |
| 5 | 150663520 | 150636515 | -1 | NM_181774    | SLC36A3 | 0 | NA | 0 | NA | 0 | NA | 0 | NA | 0 | NA |
| 5 | 150707312 | 150674731 | -1 | NM_181776    | SLC36A2 | 0 | NA | 0 | NA | 0 | NA | 0 | NA | 0 | NA |
| 5 | 150807355 | 150852133 | 1  | NM_078483    | SLC36A1 | 0 | NA | 0 | NA | 0 | NA | 0 | NA | 0 | NA |
| 5 | 150928698 | 150863845 | -1 | NM_001447    | FAT2    | 0 | NA | 0 | NA | 0 | NA | 0 | NA | 0 | NA |
| 5 | 151046710 | 151021201 | -1 | NM_003118    | SPARC   | 1 | 11 | 0 | NA | 0 | NA | 0 | NA | 0 | NA |
| 5 | 151118403 | 151102575 | -1 | NM_004045    | ATOX1   | 1 | 11 | 0 | NA | 0 | NA | 0 | NA | 0 | NA |
| 5 | 151131668 | 151165108 | 1  | NM_005754    | G3BP1   | 1 | 22 | 0 | NA | 0 | NA | 0 | NA | 0 | NA |
| 5 | 151131668 | 151165108 | 1  | NM_198395    | G3BP1   | 1 | 22 | 0 | NA | 0 | NA | 0 | NA | 0 | NA |
| 5 | 151284596 | 151182360 | -1 | NM_000171    | GLRA1   | 0 | NA | 0 | NA | 0 | NA | 0 | NA | 0 | NA |
| 5 | 151765033 | 151751294 | -1 | NM_020167    | NMUR2   | 0 | NA | 0 | NA | 0 | NA | 0 | NA | 0 | NA |
| 5 | 152850276 | 153173622 | 1  | NM_000827    | GRIA1   | 0 | NA | 0 | NA | 0 | NA | 0 | NA | 0 | NA |
| 5 | 152850276 | 153173622 | 1  | NM_001114183 | GRIA1   | 0 | NA | 0 | NA | 0 | NA | 0 | NA | 0 | NA |
| 5 | 153398690 | 153351457 | -1 | NM_018691    | C5orf3  | 0 | NA | 0 | NA | 0 | NA | 0 | NA | 0 | NA |
| 5 | 153398751 | 153414786 | 1  | NM_005927    | MFAP3   | 0 | NA | 0 | NA | 0 | NA | 0 | NA | 0 | NA |
| 5 | 153550487 | 153780003 | 1  | NM_198321    | GALNT10 | 0 | NA | 0 | NA | 0 | NA | 0 | NA | 0 | NA |
| 5 | 153763529 | 153780003 | 1  | NM_017540    | GALNT10 | 0 | NA | 0 | NA | 0 | NA | 0 | NA | 0 | NA |
| 5 | 153805775 | 153816066 | 1  | NM_024632    | SAP30L  | 0 | NA | 0 | NA | 0 | NA | 0 | NA | 0 | NA |
| 5 | 153838017 | 153834724 | -1 | NM_004821    | HAND1   | 0 | NA | 0 | NA | 0 | NA | 0 | NA | 0 | NA |
| 5 | 154072654 | 154177356 | 1  | NM_015315    | LARP1   | 0 | NA | 0 | NA | 0 | NA | 0 | NA | 0 | NA |
| 5 | 154115081 | 154177356 | 1  | NM_033551    | LARP1   | 0 | NA | 0 | NA | 0 | NA | 0 | NA | 0 | NA |
| 5 | 154181279 | 154178244 | -1 | NM_016348    | C5orf4  | 0 | NA | 0 | NA | 0 | NA | 0 | NA | 0 | NA |
| 5 | 154210406 | 154178244 | -1 | NM_032385    | C5orf4  | 1 | 12 | 0 | NA | 0 | NA | 1 | 14 | 0 | NA |
| 5 | 154218390 | 154236545 | 1  | NM_004779    | CNOT8   | 1 | 12 | 0 | NA | 0 | NA | 1 | 14 | 0 | NA |
| 5 | 154297964 | 154247188 | -1 | NM_015465    | GEMIN5  | 0 | NA | 0 | NA | 0 | NA | 0 | NA | 0 | NA |
| 5 | 154300825 | 154329164 | 1  | NM_001014990 | MRPL22  | 0 | NA | 0 | NA | 0 | NA | 0 | NA | 0 | NA |
| 5 | 154300825 | 154329164 | 1  | NM_014180    | MRPL22  | 0 | NA | 0 | NA | 0 | NA | 0 | NA | 0 | NA |
| 5 | 154373452 | 154377878 | 1  | NM_001099293 | KIF4B   | 0 | NA | 0 | NA | 0 | NA | 0 | NA | 0 | NA |
| 5 | 155686344 | 156117648 | 1  | NM_172244    | SGCD    | 0 | NA | 0 | NA | 0 | NA | 0 | NA | 0 | NA |
| 5 | 155686344 | 156125625 | 1  | NM_000337    | SGCD    | 0 | NA | 0 | NA | 0 | NA | 0 | NA | 0 | NA |
| 5 | 156322844 | 156278947 | -1 | NM_138379    | TIMD4   | 0 | NA | 0 | NA | 0 | NA | 0 | NA | 0 | NA |
| 5 | 156418065 | 156389108 | -1 | NM_001099414 | HAVCR1  | 0 | NA | 0 | NA | 0 | NA | 0 | NA | 0 | NA |
| 5 | 156418065 | 156389108 | -1 | NM_012206    | HAVCR1  | 0 | NA | 0 | NA | 0 | NA | 0 | NA | 0 | NA |
| 5 | 156468716 | 156445420 | -1 | NM_032782    | HAVCR2  | 0 | NA | 0 | NA | 0 | NA | 0 | NA | 0 | NA |
| 5 | 156502364 | 156498028 | -1 | NM_001100816 | MED7    | 0 | NA | 0 | NA | 0 | NA | 0 | NA | 0 | NA |

|   |           |           |    |              |           |   |    |   |    |   |    |   |    |   |    |
|---|-----------|-----------|----|--------------|-----------|---|----|---|----|---|----|---|----|---|----|
| 5 | 156502499 | 156498028 | -1 | NM_004270    | MED7      | 0 | NA | 0 | NA | 0 | NA | 0 | NA | 0 | NA |
| 5 | 156525853 | 156521921 | -1 | NM_130899    | FAM71B    | 0 | NA | 0 | NA | 0 | NA | 0 | NA | 0 | NA |
| 5 | 156540484 | 156614687 | 1  | NM_005546    | ITK       | 0 | NA | 0 | NA | 0 | NA | 0 | NA | 0 | NA |
| 5 | 156625668 | 156755184 | 1  | NM_001037333 | CYFIP2    | 0 | NA | 0 | NA | 0 | NA | 0 | NA | 0 | NA |
| 5 | 156625764 | 156755184 | 1  | NM_001037332 | CYFIP2    | 0 | NA | 0 | NA | 0 | NA | 0 | NA | 0 | NA |
| 5 | 156628939 | 156755184 | 1  | NM_014376    | CYFIP2    | 0 | NA | 0 | NA | 0 | NA | 0 | NA | 0 | NA |
| 5 | 156705307 | 156701184 | -1 | NM_001001343 | C5orf40   | 0 | NA | 0 | NA | 0 | NA | 0 | NA | 0 | NA |
| 5 | 156819604 | 156834308 | 1  | NM_001099287 | ICHTHYIN  | 0 | NA | 0 | NA | 0 | NA | 0 | NA | 0 | NA |
| 5 | 156935346 | 156836889 | -1 | NM_033274    | ADAM19    | 0 | NA | 0 | NA | 0 | NA | 0 | NA | 0 | NA |
| 5 | 156935346 | 156841019 | -1 | NM_023038    | ADAM19    | 0 | NA | 0 | NA | 0 | NA | 0 | NA | 0 | NA |
| 5 | 157012006 | 156985264 | -1 | NM_007017    | SOX30     | 0 | NA | 0 | NA | 0 | NA | 0 | NA | 0 | NA |
| 5 | 157012006 | 156985264 | -1 | NM_178424    | SOX30     | 0 | NA | 0 | NA | 0 | NA | 0 | NA | 0 | NA |
| 5 | 157090900 | 157099350 | 1  | NM_017872    | THG1L     | 0 | NA | 0 | NA | 0 | NA | 0 | NA | 0 | NA |
| 5 | 157103332 | 157116324 | 1  | NM_173491    | LSM11     | 0 | NA | 0 | NA | 0 | NA | 0 | NA | 0 | NA |
| 5 | 157218746 | 157145874 | -1 | NM_014666    | CLINT1    | 0 | NA | 0 | NA | 0 | NA | 0 | NA | 0 | NA |
| 5 | 158459366 | 158055500 | -1 | NM_024007    | EBF1      | 0 | NA | 0 | NA | 0 | NA | 1 | 11 | 0 | NA |
| 5 | 158567412 | 158516996 | -1 | NM_144726    | RNF145    | 0 | NA | 0 | NA | 1 | 14 | 1 | 11 | 0 | NA |
| 5 | 158622875 | 158645617 | 1  | NM_145049    | UBLCP1    | 0 | NA | 0 | NA | 0 | NA | 0 | NA | 0 | NA |
| 5 | 158690059 | 158674368 | -1 | NM_002187    | IL12B     | 0 | NA | 0 | NA | 0 | NA | 0 | NA | 0 | NA |
| 5 | 159276317 | 159332595 | 1  | NM_000679    | ADRA1B    | 0 | NA | 1 | 17 | 0 | NA | 0 | NA | 0 | NA |
| 5 | 159368757 | 159425128 | 1  | NM_003314    | TTC1      | 0 | NA | 0 | NA | 0 | NA | 0 | NA | 0 | NA |
| 5 | 159479030 | 159435469 | -1 | NM_052927    | PWWP2A    | 0 | NA | 0 | NA | 0 | NA | 0 | NA | 0 | NA |
| 5 | 159558625 | 159598307 | 1  | NM_001040442 | FABP6     | 0 | NA | 0 | NA | 0 | NA | 0 | NA | 0 | NA |
| 5 | 159589014 | 159598307 | 1  | NM_001445    | FABP6     | 0 | NA | 0 | NA | 0 | NA | 0 | NA | 0 | NA |
| 5 | 159672151 | 159611248 | -1 | NM_024565    | CCNJL     | 0 | NA | 0 | NA | 0 | NA | 0 | NA | 0 | NA |
| 5 | 159730226 | 159707352 | -1 | NM_031908    | C1QTNF2   | 0 | NA | 0 | NA | 0 | NA | 0 | NA | 0 | NA |
| 5 | 159759638 | 159752732 | -1 | NM_022090    | LOC63920  | 0 | NA | 0 | NA | 0 | NA | 0 | NA | 0 | NA |
| 5 | 159778746 | 159761225 | -1 | NM_006425    | SLU7      | 0 | NA | 0 | NA | 0 | NA | 0 | NA | 0 | NA |
| 5 | 159781442 | 159788324 | 1  | NM_004219    | PTTG1     | 0 | NA | 0 | NA | 0 | NA | 0 | NA | 0 | NA |
| 5 | 160211797 | 159922704 | -1 | NM_025153    | ATP10B    | 0 | NA | 0 | NA | 0 | NA | 0 | NA | 0 | NA |
| 5 | 160907708 | 160648013 | -1 | NM_000813    | GABRB2    | 0 | NA | 0 | NA | 0 | NA | 0 | NA | 0 | NA |
| 5 | 160907708 | 160648013 | -1 | NM_021911    | GABRB2    | 0 | NA | 0 | NA | 0 | NA | 0 | NA | 0 | NA |
| 5 | 161045235 | 161062176 | 1  | NM_000811    | GABRA6    | 0 | NA | 0 | NA | 0 | NA | 0 | NA | 0 | NA |
| 5 | 161111352 | 161111031 | -1 | NM_001123388 | GLRXL     | 0 | NA | 0 | NA | 0 | NA | 0 | NA | 0 | NA |
| 5 | 161206982 | 161258992 | 1  | NM_000806    | GABRA1    | 0 | NA | 0 | NA | 0 | NA | 0 | NA | 0 | NA |
| 5 | 161427294 | 161513629 | 1  | NM_000816    | GABRG2    | 0 | NA | 0 | NA | 0 | NA | 0 | NA | 0 | NA |
| 5 | 161427294 | 161513629 | 1  | NM_198903    | GABRG2    | 0 | NA | 0 | NA | 0 | NA | 0 | NA | 0 | NA |
| 5 | 161427294 | 161515106 | 1  | NM_198904    | GABRG2    | 0 | NA | 0 | NA | 0 | NA | 0 | NA | 0 | NA |
| 5 | 162797154 | 162804600 | 1  | NM_004060    | CCNG1     | 1 | 12 | 0 | NA | 0 | NA | 0 | NA | 0 | NA |
| 5 | 162797154 | 162804600 | 1  | NM_199246    | CCNG1     | 1 | 12 | 0 | NA | 0 | NA | 0 | NA | 0 | NA |
| 5 | 162819721 | 162813163 | -1 | NM_145266    | NUDCD2    | 0 | NA | 0 | NA | 0 | NA | 0 | NA | 0 | NA |
| 5 | 162820240 | 162851525 | 1  | NM_012484    | HMMR      | 0 | NA | 0 | NA | 0 | NA | 0 | NA | 0 | NA |
| 5 | 162820240 | 162851525 | 1  | NM_012485    | HMMR      | 0 | NA | 0 | NA | 0 | NA | 0 | NA | 0 | NA |
| 5 | 162862808 | 162878906 | 1  | NM_182796    | MAT2B     | 0 | NA | 0 | NA | 0 | NA | 0 | NA | 0 | NA |
| 5 | 162865162 | 162878906 | 1  | NM_013283    | MAT2B     | 0 | NA | 0 | NA | 0 | NA | 0 | NA | 0 | NA |
| 5 | 166644420 | 167623740 | -1 | NM_001122679 | ODZ2      | 0 | NA | 0 | NA | 0 | NA | 0 | NA | 0 | NA |
| 5 | 167651669 | 167829342 | 1  | NM_015238    | WWC1      | 0 | NA | 0 | NA | 0 | NA | 0 | NA | 1 | 14 |
| 5 | 167846040 | 167878887 | 1  | NM_002887    | RARS      | 1 | 20 | 0 | NA | 0 | NA | 0 | NA | 0 | NA |
| 5 | 167939166 | 167915207 | -1 | NM_024594    | PANK3     | 0 | NA | 0 | NA | 0 | NA | 0 | NA | 0 | NA |
| 5 | 168660554 | 168025857 | -1 | NM_003062    | SLIT3     | 0 | NA | 0 | NA | 0 | NA | 0 | NA | 0 | NA |
| 5 | 168943215 | 168964359 | 1  | NM_017785    | CDCO99    | 1 | 11 | 0 | NA | 0 | NA | 0 | NA | 0 | NA |
| 5 | 168996870 | 169442959 | 1  | NM_004946    | DOCK2     | 0 | NA | 0 | NA | 0 | NA | 0 | NA | 0 | NA |
| 5 | 169465494 | 169469307 | 1  | NM_012188    | FOX11     | 0 | NA | 0 | NA | 0 | NA | 0 | NA | 0 | NA |
| 5 | 169465494 | 169469307 | 1  | NM_144769    | FOX11     | 0 | NA | 0 | NA | 0 | NA | 0 | NA | 0 | NA |
| 5 | 169592527 | 169605813 | 1  | NM_001102609 | LOC133874 | 0 | NA | 0 | NA | 0 | NA | 0 | NA | 0 | NA |
| 5 | 169657400 | 169607665 | -1 | NM_005565    | LCP2      | 0 | NA | 0 | NA | 0 | NA | 0 | NA | 0 | NA |
| 5 | 169713458 | 170096214 | 1  | NM_001034838 | KCNIP1    | 0 | NA | 0 | NA | 0 | NA | 0 | NA | 0 | NA |
| 5 | 169749216 | 169737744 | -1 | NM_004137    | KCNMB1    | 0 | NA | 0 | NA | 0 | NA | 0 | NA | 0 | NA |
| 5 | 169863625 | 170096214 | 1  | NM_001034837 | KCNIP1    | 0 | NA | 0 | NA | 0 | NA | 0 | NA | 0 | NA |
| 5 | 169863625 | 170096214 | 1  | NM_014592    | KCNIP1    | 0 | NA | 0 | NA | 0 | NA | 0 | NA | 0 | NA |
| 5 | 170143342 | 170173628 | 1  | NM_014211    | GABRP     | 0 | NA | 0 | NA | 0 | NA | 0 | NA | 0 | NA |
| 5 | 170221599 | 170659624 | 1  | NM_022897    | RANBP17   | 0 | NA | 0 | NA | 0 | NA | 0 | NA | 0 | NA |
| 5 | 170688892 | 170671743 | 1  | NM_021025    | TLX3      | 0 | NA | 0 | NA | 0 | NA | 0 | NA | 0 | NA |
| 5 | 170747402 | 170766338 | 1  | NM_001037738 | NPM1      | 1 | 26 | 0 | NA | 1 | 27 | 1 | 17 | 0 | NA |
| 5 | 170747402 | 170770493 | 1  | NM_002520    | NPM1      | 1 | 26 | 0 | NA | 1 | 27 | 1 | 17 | 0 | NA |



|   |           |           |    |              |           |   |    |   |    |   |    |   |    |   |    |
|---|-----------|-----------|----|--------------|-----------|---|----|---|----|---|----|---|----|---|----|
| 5 | 170747402 | 170770493 | 1  | NM_199185    | NPM1      | 1 | 26 | 0 | NA | 1 | 27 | 1 | 17 | 0 | NA |
| 5 | 170779271 | 170816769 | 1  | NM_003862    | FGF18     | 0 | NA | 0 | NA | 0 | NA | 0 | NA | 0 | NA |
| 5 | 171366482 | 171221160 | -1 | NM_012300    | FBXW11    | 0 | NA | 0 | NA | 0 | NA | 0 | NA | 0 | NA |
| 5 | 171366482 | 171221160 | -1 | NM_033644    | FBXW11    | 0 | NA | 0 | NA | 0 | NA | 0 | NA | 0 | NA |
| 5 | 171366482 | 171221160 | -1 | NM_033645    | FBXW11    | 0 | NA | 0 | NA | 0 | NA | 0 | NA | 0 | NA |
| 5 | 171547951 | 171401678 | -1 | NM_005990    | STK10     | 1 | 18 | 0 | NA | 0 | NA | 0 | NA | 0 | NA |
| 5 | 171643400 | 171569254 | -1 | NM_152277    | UBTD2     | 0 | NA | 0 | NA | 0 | NA | 1 | 14 | 0 | NA |
| 5 | 171814132 | 171693107 | -1 | NM_001017995 | SH3PXD2B  | 0 | NA | 0 | NA | 0 | NA | 0 | NA | 0 | NA |
| 5 | 172130809 | 172127706 | -1 | NM_004417    | DUSP1     | 0 | NA | 0 | NA | 0 | NA | 0 | NA | 0 | NA |
| 5 | 172193828 | 172312294 | 1  | NM_001031711 | ERGIC1    | 0 | NA | 0 | NA | 0 | NA | 0 | NA | 0 | NA |
| 5 | 172319044 | 172329380 | 1  | NM_016093    | RPL26L1   | 1 | 23 | 0 | NA | 1 | 12 | 1 | 11 | 0 | NA |
| 5 | 172319052 | 172329327 | 1  | NM_001093761 | LOC653147 | 1 | 23 | 0 | NA | 1 | 12 | 1 | 11 | 0 | NA |
| 5 | 172343368 | 172394506 | 1  | NM_003945    | ATP6V0E1  | 0 | NA | 0 | NA | 0 | NA | 0 | NA | 0 | NA |
| 5 | 172415975 | 172496569 | 1  | NM_153607    | C5orf41   | 0 | NA | 0 | NA | 0 | NA | 0 | NA | 0 | NA |
| 5 | 172504050 | 172523996 | 1  | NM_001205    | BNIP1     | 0 | NA | 0 | NA | 0 | NA | 0 | NA | 0 | NA |
| 5 | 172504050 | 172523996 | 1  | NM_013978    | BNIP1     | 0 | NA | 0 | NA | 0 | NA | 0 | NA | 0 | NA |
| 5 | 172504050 | 172523996 | 1  | NM_013979    | BNIP1     | 0 | NA | 0 | NA | 0 | NA | 0 | NA | 0 | NA |
| 5 | 172504050 | 172523996 | 1  | NM_013980    | BNIP1     | 0 | NA | 0 | NA | 0 | NA | 0 | NA | 0 | NA |
| 5 | 172594868 | 172591743 | -1 | NM_004387    | NKX2-5    | 1 | 11 | 0 | NA | 0 | NA | 0 | NA | 0 | NA |
| 5 | 172689112 | 172674331 | -1 | NM_003714    | STC2      | 0 | NA | 0 | NA | 0 | NA | 0 | NA | 0 | NA |
| 5 | 172976262 | 172967147 | -1 | NM_138369    | FAM44B    | 1 | 19 | 0 | NA | 0 | NA | 0 | NA | 0 | NA |
| 5 | 173248794 | 173319917 | 1  | NM_030627    | CPEB4     | 0 | NA | 0 | NA | 0 | NA | 1 | 26 | 0 | NA |
| 5 | 173405329 | 173468788 | 1  | NM_015980    | HMP19     | 0 | NA | 0 | NA | 0 | NA | 0 | NA | 0 | NA |
| 5 | 174084180 | 174090508 | 1  | NM_002449    | MSX2      | 0 | NA | 0 | NA | 0 | NA | 0 | NA | 0 | NA |
| 5 | 174803769 | 174800280 | -1 | NM_000794    | DRD1      | 0 | NA | 1 | 12 | 0 | NA | 0 | NA | 0 | NA |
| 5 | 174838188 | 174888218 | 1  | NM_022754    | SFXN1     | 0 | NA | 0 | NA | 0 | NA | 0 | NA | 0 | NA |
| 5 | 175042317 | 175044162 | 1  | NM_022304    | HRH2      | 0 | NA | 0 | NA | 0 | NA | 0 | NA | 0 | NA |
| 5 | 175156215 | 175243629 | 1  | NM_006650    | CPLX2     | 0 | NA | 0 | NA | 0 | NA | 0 | NA | 0 | NA |
| 5 | 175231106 | 175243629 | 1  | NM_001008220 | CPLX2     | 0 | NA | 0 | NA | 0 | NA | 0 | NA | 0 | NA |
| 5 | 175328151 | 175319139 | -1 | NM_032361    | THOC3     | 0 | NA | 0 | NA | 0 | NA | 0 | NA | 0 | NA |
| 5 | 175444514 | 175476063 | 1  | NM_001079529 | FAM153B   | 0 | NA | 0 | NA | 0 | NA | 0 | NA | 0 | NA |
| 5 | 175598008 | 175705596 | 1  | NM_198567    | C5orf25   | 0 | NA | 0 | NA | 0 | NA | 0 | NA | 0 | NA |
| 5 | 175721415 | 175705671 | -1 | NM_001079684 | KIAA1191  | 0 | NA | 0 | NA | 0 | NA | 0 | NA | 0 | NA |
| 5 | 175721415 | 175705671 | -1 | NM_001079685 | KIAA1191  | 0 | NA | 0 | NA | 0 | NA | 0 | NA | 0 | NA |
| 5 | 175721415 | 175705671 | -1 | NM_020444    | KIAA1191  | 0 | NA | 0 | NA | 0 | NA | 0 | NA | 0 | NA |
| 5 | 175725107 | 175733109 | 1  | NM_173664    | ARL10     | 0 | NA | 0 | NA | 0 | NA | 0 | NA | 0 | NA |
| 5 | 175748146 | 175743837 | -1 | NM_016391    | HSPC111   | 0 | NA | 0 | NA | 0 | NA | 0 | NA | 0 | NA |
| 5 | 175748389 | 175749357 | 1  | NM_138820    | HIGD2A    | 0 | NA | 0 | NA | 0 | NA | 0 | NA | 0 | NA |
| 5 | 175776146 | 175752061 | -1 | NM_001834    | CLTB      | 0 | NA | 0 | NA | 0 | NA | 0 | NA | 0 | NA |
| 5 | 175776146 | 175752061 | -1 | NM_007097    | CLTB      | 0 | NA | 0 | NA | 0 | NA | 0 | NA | 0 | NA |
| 5 | 175807961 | 175869681 | 1  | NM_014613    | UBXD8     | 0 | NA | 0 | NA | 0 | NA | 0 | NA | 0 | NA |
| 5 | 175897027 | 175886305 | -1 | NM_014901    | RNF44     | 0 | NA | 0 | NA | 0 | NA | 1 | 12 | 0 | NA |
| 5 | 175908970 | 175955375 | 1  | NM_017675    | PCDH24    | 0 | NA | 0 | NA | 0 | NA | 0 | NA | 0 | NA |
| 5 | 175969737 | 175955408 | -1 | NM_052899    | GPRIN1    | 0 | NA | 1 | 13 | 0 | NA | 0 | NA | 0 | NA |
| 5 | 175990163 | 175979815 | -1 | NM_001001502 | SNCB      | 0 | NA | 1 | 12 | 0 | NA | 0 | NA | 0 | NA |
| 5 | 175990163 | 175979815 | -1 | NM_003085    | SNCB      | 0 | NA | 1 | 12 | 0 | NA | 0 | NA | 0 | NA |
| 5 | 175990288 | 176006248 | 1  | NM_001099408 | EIF4E1B   | 0 | NA | 1 | 12 | 0 | NA | 0 | NA | 0 | NA |
| 5 | 176006993 | 176018665 | 1  | NM_001006616 | TSPAN17   | 0 | NA | 0 | NA | 0 | NA | 0 | NA | 0 | NA |
| 5 | 176006993 | 176018665 | 1  | NM_012171    | TSPAN17   | 0 | NA | 0 | NA | 0 | NA | 0 | NA | 0 | NA |
| 5 | 176006993 | 176018665 | 1  | NM_130465    | TSPAN17   | 0 | NA | 0 | NA | 0 | NA | 0 | NA | 0 | NA |
| 5 | 176170165 | 176240505 | 1  | NM_133369    | UNC5A     | 0 | NA | 0 | NA | 0 | NA | 0 | NA | 0 | NA |
| 5 | 176258921 | 176240475 | -1 | NM_002115    | HK3       | 0 | NA | 0 | NA | 0 | NA | 0 | NA | 0 | NA |
| 5 | 176366049 | 176264611 | -1 | NM_016290    | UIMC1     | 0 | NA | 0 | NA | 0 | NA | 0 | NA | 0 | NA |
| 5 | 176382302 | 176426351 | 1  | NM_012279    | ZNF346    | 0 | NA | 0 | NA | 0 | NA | 0 | NA | 0 | NA |
| 5 | 176446526 | 176457732 | 1  | NM_002011    | FGFR4     | 0 | NA | 0 | NA | 0 | NA | 0 | NA | 0 | NA |
| 5 | 176446526 | 176457732 | 1  | NM_213647    | FGFR4     | 0 | NA | 0 | NA | 0 | NA | 0 | NA | 0 | NA |
| 5 | 176449156 | 176457732 | 1  | NM_022963    | FGFR4     | 0 | NA | 0 | NA | 0 | NA | 0 | NA | 0 | NA |
| 5 | 176492685 | 176659820 | 1  | NM_172349    | NSD1      | 0 | NA | 0 | NA | 0 | NA | 0 | NA | 0 | NA |
| 5 | 176493438 | 176659820 | 1  | NM_022455    | NSD1      | 0 | NA | 0 | NA | 0 | NA | 0 | NA | 0 | NA |
| 5 | 176663350 | 176660804 | -1 | NM_001031677 | RAB24     | 0 | NA | 0 | NA | 0 | NA | 0 | NA | 0 | NA |
| 5 | 176663350 | 176660804 | -1 | NM_130781    | RAB24     | 0 | NA | 0 | NA | 0 | NA | 0 | NA | 0 | NA |
| 5 | 176663440 | 176666556 | 1  | NM_013237    | PRELID1   | 0 | NA | 0 | NA | 0 | NA | 0 | NA | 0 | NA |
| 5 | 176671487 | 176666816 | -1 | NM_031300    | MXD3      | 0 | NA | 0 | NA | 0 | NA | 0 | NA | 0 | NA |
| 5 | 176711254 | 176691356 | -1 | NM_006816    | LMAN2     | 0 | NA | 0 | NA | 0 | NA | 0 | NA | 0 | NA |
| 5 | 176717449 | 176732205 | 1  | NM_006480    | RGS14     | 0 | NA | 0 | NA | 0 | NA | 0 | NA | 0 | NA |

|   |           |           |    |              |           |   |    |   |    |   |    |   |    |   |    |
|---|-----------|-----------|----|--------------|-----------|---|----|---|----|---|----|---|----|---|----|
| 5 | 176744040 | 176758455 | 1  | NM_003052    | SLC34A1   | 0 | NA | 0 | NA | 0 | NA | 0 | NA | 0 | NA |
| 5 | 176760243 | 176759713 | -1 | NM_001029886 | PFN3      | 0 | NA | 0 | NA | 0 | NA | 0 | NA | 0 | NA |
| 5 | 176769183 | 176761744 | -1 | NM_000505    | F12       | 0 | NA | 0 | NA | 0 | NA | 0 | NA | 0 | NA |
| 5 | 176786292 | 176800960 | 1  | NM_001004105 | GRK6      | 0 | NA | 0 | NA | 0 | NA | 0 | NA | 0 | NA |
| 5 | 176786292 | 176802456 | 1  | NM_001004106 | GRK6      | 0 | NA | 0 | NA | 0 | NA | 0 | NA | 0 | NA |
| 5 | 176786292 | 176802456 | 1  | NM_002082    | GRK6      | 0 | NA | 0 | NA | 0 | NA | 0 | NA | 0 | NA |
| 5 | 176806401 | 176815889 | 1  | NM_030567    | PRR7      | 1 | 11 | 0 | NA | 0 | NA | 0 | NA | 0 | NA |
| 5 | 176832477 | 176816219 | -1 | NM_080881    | DBN1      | 0 | NA | 0 | NA | 0 | NA | 0 | NA | 0 | NA |
| 5 | 176833300 | 176816219 | -1 | NM_004395    | DBN1      | 0 | NA | 0 | NA | 0 | NA | 0 | NA | 0 | NA |
| 5 | 176857208 | 176843000 | -1 | NM_005451    | PDLIM7    | 0 | NA | 0 | NA | 0 | NA | 0 | NA | 0 | NA |
| 5 | 176857208 | 176843000 | -1 | NM_203352    | PDLIM7    | 0 | NA | 0 | NA | 0 | NA | 0 | NA | 0 | NA |
| 5 | 176857208 | 176849852 | -1 | NM_213636    | PDLIM7    | 0 | NA | 0 | NA | 0 | NA | 0 | NA | 0 | NA |
| 5 | 176869459 | 176863356 | -1 | NM_024872    | DOK3      | 0 | NA | 0 | NA | 0 | NA | 0 | NA | 0 | NA |
| 5 | 176876573 | 176871183 | -1 | NM_016222    | DDX41     | 0 | NA | 0 | NA | 0 | NA | 0 | NA | 0 | NA |
| 5 | 176914144 | 176879395 | -1 | NM_019057    | FLJ10404  | 1 | 14 | 0 | NA | 1 | 18 | 0 | NA | 0 | NA |
| 5 | 176951818 | 176955705 | 1  | NM_017510    | TMED9     | 0 | NA | 0 | NA | 0 | NA | 0 | NA | 0 | NA |
| 5 | 176959777 | 176969937 | 1  | NM_007255    | B4GALT7   | 0 | NA | 0 | NA | 0 | NA | 0 | NA | 0 | NA |
| 5 | 177140111 | 177082970 | -1 | NM_173663    | FAM153A   | 0 | NA | 0 | NA | 0 | NA | 0 | NA | 0 | NA |
| 5 | 177355849 | 177351841 | -1 | NM_006261    | PROP1     | 0 | NA | 0 | NA | 0 | NA | 0 | NA | 0 | NA |
| 5 | 177368294 | 177407262 | 1  | NM_001079527 | FAM153C   | 0 | NA | 0 | NA | 0 | NA | 0 | NA | 0 | NA |
| 5 | 177414995 | 177415888 | 1  | NM_001080544 | LOC653314 | 0 | NA | 1 | 13 | 0 | NA | 0 | NA | 0 | NA |
| 5 | 177473161 | 177485713 | 1  | NM_015111    | N4BP3     | 0 | NA | 0 | NA | 0 | NA | 0 | NA | 0 | NA |
| 5 | 177490633 | 177508085 | 1  | NM_022762    | RMND5B    | 0 | NA | 0 | NA | 0 | NA | 0 | NA | 0 | NA |
| 5 | 177513567 | 177509071 | -1 | NM_001034833 | NOLA2     | 1 | 11 | 0 | NA | 0 | NA | 0 | NA | 0 | NA |
| 5 | 177513567 | 177509071 | -1 | NM_017838    | NOLA2     | 1 | 11 | 0 | NA | 0 | NA | 0 | NA | 0 | NA |
| 5 | 177564113 | 177570790 | 1  | NM_004499    | HNRNPAB   | 0 | NA | 0 | NA | 0 | NA | 0 | NA | 0 | NA |
| 5 | 177564113 | 177570790 | 1  | NM_031266    | HNRNPAB   | 0 | NA | 0 | NA | 0 | NA | 0 | NA | 0 | NA |
| 5 | 177592392 | 177568195 | -1 | NM_153373    | AGXT2L2   | 0 | NA | 0 | NA | 0 | NA | 0 | NA | 0 | NA |
| 5 | 177950162 | 177597224 | -1 | NM_173465    | COL23A1   | 0 | NA | 1 | 18 | 0 | NA | 0 | NA | 1 | 33 |
| 5 | 177986860 | 177962270 | -1 | NM_020666    | CLK4      | 1 | 11 | 0 | NA | 0 | NA | 1 | 14 | 0 | NA |
| 5 | 178090309 | 178071127 | -1 | NM_005649    | ZNF354A   | 1 | 11 | 0 | NA | 0 | NA | 0 | NA | 0 | NA |
| 5 | 178219606 | 178244021 | 1  | NM_058230    | ZNF354B   | 0 | NA | 0 | NA | 0 | NA | 0 | NA | 0 | NA |
| 5 | 178255521 | 178292816 | 1  | NM_030613    | ZFP2      | 0 | NA | 0 | NA | 0 | NA | 0 | NA | 0 | NA |
| 5 | 178300829 | 178326040 | 1  | NM_182594    | ZNF454    | 1 | 11 | 1 | 18 | 0 | NA | 0 | NA | 0 | NA |
| 5 | 178354730 | 178337935 | -1 | NM_000843    | GRM6      | 0 | NA | 0 | NA | 0 | NA | 0 | NA | 0 | NA |
| 5 | 178420212 | 178440297 | 1  | NM_014594    | ZNF354C   | 0 | NA | 0 | NA | 0 | NA | 0 | NA | 0 | NA |
| 5 | 178704935 | 178473455 | -1 | NM_014244    | ADAMTS2   | 0 | NA | 0 | NA | 0 | NA | 0 | NA | 0 | NA |
| 5 | 178704935 | 178510735 | -1 | NM_021599    | ADAMTS2   | 0 | NA | 0 | NA | 0 | NA | 0 | NA | 0 | NA |
| 5 | 178910176 | 178969625 | 1  | NM_025158    | RUFY1     | 0 | NA | 0 | NA | 0 | NA | 1 | 15 | 0 | NA |
| 5 | 178919337 | 178969625 | 1  | NM_001040451 | RUFY1     | 0 | NA | 0 | NA | 0 | NA | 1 | 15 | 0 | NA |
| 5 | 178919337 | 178969625 | 1  | NM_001040452 | RUFY1     | 0 | NA | 0 | NA | 0 | NA | 1 | 15 | 0 | NA |
| 5 | 178983328 | 178973784 | -1 | NM_005520    | HNRNP1    | 0 | NA | 0 | NA | 0 | NA | 0 | NA | 0 | NA |
| 5 | 179058535 | 179091245 | 1  | NM_001024649 | CANX      | 1 | 14 | 0 | NA | 0 | NA | 1 | 12 | 0 | NA |
| 5 | 179058535 | 179091245 | 1  | NM_001746    | CANX      | 1 | 14 | 0 | NA | 0 | NA | 1 | 12 | 0 | NA |
| 5 | 179092456 | 179136889 | 1  | NM_014757    | MAML1     | 1 | 14 | 0 | NA | 0 | NA | 0 | NA | 0 | NA |
| 5 | 179153591 | 179156119 | 1  | NM_145867    | LTC4S     | 0 | NA | 0 | NA | 0 | NA | 0 | NA | 0 | NA |
| 5 | 179162677 | 179156710 | -1 | NM_054013    | MGAT4B    | 0 | NA | 0 | NA | 0 | NA | 0 | NA | 0 | NA |
| 5 | 179166547 | 179156710 | -1 | NM_014275    | MGAT4B    | 0 | NA | 0 | NA | 0 | NA | 0 | NA | 0 | NA |
| 5 | 179180502 | 179197683 | 1  | NM_003900    | SQSTM1    | 1 | 11 | 0 | NA | 0 | NA | 0 | NA | 0 | NA |
| 5 | 179218446 | 179196871 | -1 | NM_001017987 | LOC51149  | 0 | NA | 0 | NA | 0 | NA | 0 | NA | 0 | NA |
| 5 | 179218446 | 179196871 | -1 | NM_016175    | LOC51149  | 0 | NA | 0 | NA | 0 | NA | 0 | NA | 0 | NA |
| 5 | 179267462 | 179221676 | -1 | NM_015043    | TBC1D9B   | 0 | NA | 0 | NA | 0 | NA | 0 | NA | 0 | NA |
| 5 | 179267462 | 179221676 | -1 | NM_198868    | TBC1D9B   | 0 | NA | 0 | NA | 0 | NA | 0 | NA | 0 | NA |
| 5 | 179431715 | 179315079 | -1 | NM_018434    | RNF130    | 1 | 12 | 1 | 18 | 0 | NA | 0 | NA | 1 | 16 |
| 5 | 179568736 | 179460400 | -1 | NM_175062    | RASGEF1C  | 0 | NA | 0 | NA | 0 | NA | 0 | NA | 0 | NA |
| 5 | 179640216 | 179595389 | -1 | NM_002752    | MAPK9     | 0 | NA | 0 | NA | 0 | NA | 0 | NA | 0 | NA |
| 5 | 179640216 | 179595389 | -1 | NM_139068    | MAPK9     | 0 | NA | 0 | NA | 0 | NA | 0 | NA | 0 | NA |
| 5 | 179640216 | 179595389 | -1 | NM_139069    | MAPK9     | 0 | NA | 0 | NA | 0 | NA | 0 | NA | 0 | NA |
| 5 | 179640216 | 179595389 | -1 | NM_139070    | MAPK9     | 0 | NA | 0 | NA | 0 | NA | 0 | NA | 0 | NA |
| 5 | 179712921 | 179660305 | -1 | NM_005110    | GFPT2     | 0 | NA | 0 | NA | 0 | NA | 0 | NA | 0 | NA |
| 5 | 179854022 | 179937959 | 1  | NM_015455    | CNOT6     | 0 | NA | 0 | NA | 0 | NA | 0 | NA | 0 | NA |
| 5 | 179951093 | 179949710 | -1 | NM_052863    | SCGB3A1   | 0 | NA | 0 | NA | 0 | NA | 0 | NA | 0 | NA |
| 5 | 180009206 | 179961111 | -1 | NM_182925    | FLT4      | 0 | NA | 0 | NA | 0 | NA | 0 | NA | 0 | NA |
| 5 | 180009206 | 179967358 | -1 | NM_002020    | FLT4      | 0 | NA | 0 | NA | 0 | NA | 0 | NA | 0 | NA |
| 5 | 180099664 | 180098728 | -1 | NM_001001657 | OR2Y1     | 0 | NA | 0 | NA | 0 | NA | 0 | NA | 0 | NA |

|   |           |           |    |              |           |   |    |   |    |   |    |   |    |   |    |
|---|-----------|-----------|----|--------------|-----------|---|----|---|----|---|----|---|----|---|----|
| 5 | 180162654 | 180150146 | -1 | NM_002406    | MGAT1     | 1 | 12 | 0 | NA | 0 | NA | 1 | 14 | 0 | NA |
| 5 | 180163508 | 180150146 | -1 | NM_001114619 | MGAT1     | 1 | 12 | 0 | NA | 0 | NA | 1 | 14 | 0 | NA |
| 5 | 180163508 | 180150146 | -1 | NM_001114620 | MGAT1     | 1 | 12 | 0 | NA | 0 | NA | 1 | 14 | 0 | NA |
| 5 | 180169423 | 180150146 | -1 | NM_001114618 | MGAT1     | 1 | 12 | 0 | NA | 0 | NA | 1 | 14 | 0 | NA |
| 5 | 180169743 | 180150146 | -1 | NM_001114617 | MGAT1     | 1 | 12 | 0 | NA | 0 | NA | 1 | 14 | 0 | NA |
| 5 | 180220290 | 180207218 | -1 | NM_152283    | ZFP62     | 0 | NA | 1 | 13 | 0 | NA | 0 | NA | 0 | NA |
| 5 | 180258734 | 180310512 | 1  | NM_001040462 | BTNL8     | 0 | NA | 0 | NA | 0 | NA | 0 | NA | 0 | NA |
| 5 | 180258764 | 180310512 | 1  | NM_024850    | BTNL8     | 0 | NA | 0 | NA | 0 | NA | 0 | NA | 0 | NA |
| 5 | 180341823 | 180345858 | 1  | NM_001101396 | LOC646227 | 0 | NA | 0 | NA | 0 | NA | 0 | NA | 0 | NA |
| 5 | 180348506 | 180366333 | 1  | NM_197975    | BTNL3     | 0 | NA | 0 | NA | 0 | NA | 0 | NA | 0 | NA |
| 5 | 180399856 | 180421121 | 1  | NM_152547    | BTNL9     | 0 | NA | 0 | NA | 0 | NA | 0 | NA | 1 | 12 |
| 5 | 180514548 | 180515496 | 1  | NM_206880    | OR2V2     | 0 | NA | 0 | NA | 0 | NA | 0 | NA | 0 | NA |
| 5 | 180560536 | 180553529 | -1 | NM_203297    | TRIM7     | 0 | NA | 0 | NA | 0 | NA | 0 | NA | 0 | NA |
| 5 | 180563946 | 180553529 | -1 | NM_203294    | TRIM7     | 0 | NA | 0 | NA | 0 | NA | 0 | NA | 0 | NA |
| 5 | 180563946 | 180553529 | -1 | NM_203295    | TRIM7     | 0 | NA | 0 | NA | 0 | NA | 0 | NA | 0 | NA |
| 5 | 180563946 | 180553529 | -1 | NM_203296    | TRIM7     | 0 | NA | 0 | NA | 0 | NA | 0 | NA | 0 | NA |
| 5 | 180564783 | 180553529 | -1 | NM_203293    | TRIM7     | 0 | NA | 0 | NA | 0 | NA | 0 | NA | 0 | NA |
| 5 | 180564783 | 180562728 | -1 | NM_033342    | TRIM7     | 0 | NA | 0 | NA | 0 | NA | 0 | NA | 0 | NA |
| 5 | 180582911 | 180595414 | 1  | NM_033549    | TRIM41    | 0 | NA | 0 | NA | 0 | NA | 0 | NA | 0 | NA |
| 5 | 180582911 | 180595414 | 1  | NM_201627    | TRIM41    | 0 | NA | 0 | NA | 0 | NA | 0 | NA | 0 | NA |
| 5 | 180603512 | 180596533 | -1 | NM_006098    | GNB2L1    | 0 | NA | 0 | NA | 1 | 11 | 0 | NA | 0 | NA |
| 5 | 180620725 | 180615991 | -1 | NM_032765    | TRIM52    | 0 | NA | 0 | NA | 0 | NA | 0 | NA | 0 | NA |
| 5 | 180726893 | 180727832 | 1  | NM_001005221 | OR4F29    | 0 | NA | 0 | NA | 0 | NA | 0 | NA | 0 | NA |
| 5 | 180726893 | 180727832 | 1  | NM_001005224 | OR4F3     | 0 | NA | 0 | NA | 0 | NA | 0 | NA | 0 | NA |
| 5 | 180726893 | 180727832 | 1  | NM_001005277 | OR4F16    | 0 | NA | 0 | NA | 0 | NA | 0 | NA | 0 | NA |
| 4 | 43226     | 78099     | 1  | NM_182524    | ZNF595    | 0 | NA | 1 | 18 | 0 | NA | 0 | NA | 1 | 13 |
| 4 | 43276     | 146490    | 1  | NM_001039127 | ZNF718    | 0 | NA | 1 | 18 | 0 | NA | 0 | NA | 1 | 13 |
| 4 | 321595    | 357691    | 1  | NM_003441    | ZNF141    | 0 | NA | 0 | NA | 0 | NA | 0 | NA | 0 | NA |
| 4 | 482988    | 523320    | 1  | NM_001127178 | PIGG      | 0 | NA | 0 | NA | 0 | NA | 0 | NA | 0 | NA |
| 4 | 482988    | 523320    | 1  | NM_017733    | PIGG      | 0 | NA | 0 | NA | 0 | NA | 0 | NA | 0 | NA |
| 4 | 483442    | 423778    | -1 | NM_133474    | ZNF721    | 0 | NA | 0 | NA | 0 | NA | 0 | NA | 0 | NA |
| 4 | 609372    | 654571    | 1  | NM_000283    | PDE6B     | 0 | NA | 1 | 15 | 0 | NA | 0 | NA | 0 | NA |
| 4 | 658122    | 656224    | -1 | NM_007100    | ATP5J     | 0 | NA | 0 | NA | 0 | NA | 0 | NA | 0 | NA |
| 4 | 661710    | 665817    | 1  | NM_002477    | MYL5      | 0 | NA | 0 | NA | 0 | NA | 0 | NA | 0 | NA |
| 4 | 672973    | 665617    | -1 | NM_032219    | MFS07     | 0 | NA | 1 | 15 | 0 | NA | 0 | NA | 0 | NA |
| 4 | 689572    | 754427    | 1  | NM_006315    | PCGF3     | 0 | NA | 0 | NA | 0 | NA | 0 | NA | 0 | NA |
| 4 | 809945    | 768744    | -1 | NM_006651    | CPLX1     | 0 | NA | 1 | 13 | 0 | NA | 0 | NA | 0 | NA |
| 4 | 916174    | 833064    | -1 | NM_005255    | GAK       | 0 | NA | 0 | NA | 0 | NA | 0 | NA | 0 | NA |
| 4 | 916261    | 942443    | 1  | NM_032326    | TMEM175   | 0 | NA | 0 | NA | 0 | NA | 0 | NA | 0 | NA |
| 4 | 957344    | 942674    | -1 | NM_001347    | DGKQ      | 0 | NA | 0 | NA | 0 | NA | 0 | NA | 0 | NA |
| 4 | 970784    | 988317    | 1  | NM_000203    | IDUA      | 0 | NA | 0 | NA | 0 | NA | 0 | NA | 0 | NA |
| 4 | 977183    | 962862    | -1 | NM_134425    | SLC26A1   | 0 | NA | 0 | NA | 0 | NA | 0 | NA | 0 | NA |
| 4 | 977183    | 971444    | -1 | NM_022042    | SLC26A1   | 0 | NA | 0 | NA | 0 | NA | 0 | NA | 0 | NA |
| 4 | 977224    | 971444    | -1 | NM_213613    | SLC26A1   | 0 | NA | 0 | NA | 0 | NA | 0 | NA | 0 | NA |
| 4 | 995609    | 1010686   | 1  | NM_001004356 | FGFRL1    | 0 | NA | 1 | 13 | 0 | NA | 0 | NA | 0 | NA |
| 4 | 995759    | 1010686   | 1  | NM_001004358 | FGFRL1    | 0 | NA | 1 | 13 | 0 | NA | 0 | NA | 0 | NA |
| 4 | 996251    | 1010686   | 1  | NM_021923    | FGFRL1    | 0 | NA | 1 | 13 | 0 | NA | 0 | NA | 0 | NA |
| 4 | 1097350   | 1055268   | -1 | NM_194439    | RNF212    | 0 | NA | 0 | NA | 0 | NA | 0 | NA | 0 | NA |
| 4 | 1156597   | 1150722   | -1 | NM_012445    | SPON2     | 0 | NA | 1 | 13 | 1 | 12 | 0 | NA | 0 | NA |
| 4 | 1232908   | 1195227   | -1 | NM_001012614 | CTBP1     | 0 | NA | 1 | 16 | 0 | NA | 0 | NA | 0 | NA |
| 4 | 1232908   | 1195227   | -1 | NM_001328    | CTBP1     | 0 | NA | 1 | 16 | 0 | NA | 0 | NA | 0 | NA |
| 4 | 1234176   | 1236616   | 1  | NM_052861    | C4orf42   | 0 | NA | 1 | 16 | 0 | NA | 0 | NA | 0 | NA |
| 4 | 1273671   | 1323925   | 1  | NM_001017405 | MAEA      | 0 | NA | 1 | 17 | 0 | NA | 0 | NA | 0 | NA |
| 4 | 1273671   | 1323925   | 1  | NM_005882    | MAEA      | 0 | NA | 1 | 17 | 0 | NA | 0 | NA | 0 | NA |
| 4 | 1331103   | 1371732   | 1  | NM_020894    | KIAA1530  | 0 | NA | 0 | NA | 0 | NA | 0 | NA | 0 | NA |
| 4 | 1375339   | 1379782   | 1  | NM_175918    | CRIPAK    | 0 | NA | 0 | NA | 0 | NA | 0 | NA | 0 | NA |
| 4 | 1655516   | 1611604   | -1 | NM_001013622 | FAM53A    | 0 | NA | 0 | NA | 0 | NA | 0 | NA | 0 | NA |
| 4 | 1683828   | 1664324   | -1 | NM_006527    | SLBP      | 0 | NA | 0 | NA | 0 | NA | 0 | NA | 0 | NA |
| 4 | 1692882   | 1687476   | -1 | NM_001127266 | TMEM129   | 1 | 12 | 0 | NA | 0 | NA | 0 | NA | 0 | NA |
| 4 | 1692882   | 1687476   | -1 | NM_138385    | TMEM129   | 1 | 12 | 0 | NA | 0 | NA | 0 | NA | 0 | NA |
| 4 | 1693063   | 1716695   | 1  | NM_006342    | TACC3     | 1 | 12 | 0 | NA | 0 | NA | 0 | NA | 0 | NA |
| 4 | 1764836   | 1780396   | 1  | NM_000142    | FGFR3     | 0 | NA | 0 | NA | 0 | NA | 0 | NA | 0 | NA |
| 4 | 1764836   | 1780396   | 1  | NM_022965    | FGFR3     | 0 | NA | 0 | NA | 0 | NA | 0 | NA | 0 | NA |
| 4 | 1827772   | 1784557   | -1 | NM_012318    | LETM1     | 0 | NA | 0 | NA | 0 | NA | 0 | NA | 0 | NA |
| 4 | 1842920   | 1953732   | 1  | NM_001042424 | WHSC1     | 0 | NA | 0 | NA | 0 | NA | 0 | NA | 0 | NA |

|   |         |         |    |              |           |   |    |   |    |   |    |   |    |   |    |
|---|---------|---------|----|--------------|-----------|---|----|---|----|---|----|---|----|---|----|
| 4 | 1864306 | 1914100 | 1  | NM_007331    | WHSC1     | 0 | NA | 0 | NA | 0 | NA | 0 | NA | 0 | NA |
| 4 | 1864306 | 1953728 | 1  | NM_133330    | WHSC1     | 0 | NA | 0 | NA | 0 | NA | 0 | NA | 0 | NA |
| 4 | 1864306 | 1953728 | 1  | NM_133331    | WHSC1     | 0 | NA | 0 | NA | 0 | NA | 0 | NA | 0 | NA |
| 4 | 1864306 | 1953732 | 1  | NM_133335    | WHSC1     | 0 | NA | 0 | NA | 0 | NA | 0 | NA | 0 | NA |
| 4 | 1872150 | 1920343 | 1  | NM_133334    | WHSC1     | 0 | NA | 0 | NA | 0 | NA | 0 | NA | 0 | NA |
| 4 | 1980547 | 1954248 | -1 | NM_005663    | WHSC2     | 0 | NA | 0 | NA | 0 | NA | 0 | NA | 0 | NA |
| 4 | 2031384 | 2037433 | 1  | NM_178557    | NAT8L     | 0 | NA | 0 | NA | 0 | NA | 0 | NA | 0 | NA |
| 4 | 2200756 | 2043442 | -1 | NM_181808    | POLN      | 0 | NA | 0 | NA | 1 | 12 | 0 | NA | 0 | NA |
| 4 | 2213658 | 2199893 | -1 | NM_024511    | C4orf15   | 0 | NA | 0 | NA | 0 | NA | 0 | NA | 0 | NA |
| 4 | 2233537 | 2218957 | -1 | NM_006454    | MXD4      | 0 | NA | 0 | NA | 0 | NA | 0 | NA | 0 | NA |
| 4 | 2390167 | 2241122 | -1 | NM_020972    | ZFYVE28   | 0 | NA | 0 | NA | 0 | NA | 0 | NA | 0 | NA |
| 4 | 2440604 | 2487381 | 1  | NM_002938    | RNF4      | 0 | NA | 0 | NA | 0 | NA | 0 | NA | 0 | NA |
| 4 | 2596956 | 2704100 | 1  | NM_003704    | C4orf8    | 0 | NA | 0 | NA | 0 | NA | 0 | NA | 0 | NA |
| 4 | 2727859 | 2713184 | -1 | NM_024309    | TNIP2     | 0 | NA | 0 | NA | 1 | 15 | 0 | NA | 0 | NA |
| 4 | 2764547 | 2812621 | 1  | NM_001122681 | SH3BP2    | 0 | NA | 0 | NA | 0 | NA | 0 | NA | 0 | NA |
| 4 | 2790338 | 2812621 | 1  | NM_003023    | SH3BP2    | 0 | NA | 0 | NA | 1 | 12 | 0 | NA | 0 | NA |
| 4 | 2815381 | 2901587 | 1  | NM_001119    | ADD1      | 0 | NA | 0 | NA | 0 | NA | 0 | NA | 0 | NA |
| 4 | 2815381 | 2901587 | 1  | NM_014189    | ADD1      | 0 | NA | 0 | NA | 0 | NA | 0 | NA | 0 | NA |
| 4 | 2815381 | 2901587 | 1  | NM_014190    | ADD1      | 0 | NA | 0 | NA | 0 | NA | 0 | NA | 0 | NA |
| 4 | 2815381 | 2901587 | 1  | NM_176801    | ADD1      | 0 | NA | 0 | NA | 0 | NA | 0 | NA | 0 | NA |
| 4 | 2905567 | 2902092 | -1 | NM_001120    | MFS10     | 0 | NA | 0 | NA | 0 | NA | 0 | NA | 0 | NA |
| 4 | 2934916 | 2909461 | -1 | NM_003703    | NOL14     | 0 | NA | 0 | NA | 0 | NA | 0 | NA | 0 | NA |
| 4 | 2935140 | 3012272 | 1  | NM_001004056 | GRK4      | 0 | NA | 0 | NA | 0 | NA | 0 | NA | 0 | NA |
| 4 | 2935140 | 3012272 | 1  | NM_001004057 | GRK4      | 0 | NA | 0 | NA | 0 | NA | 0 | NA | 0 | NA |
| 4 | 2935140 | 3012272 | 1  | NM_182982    | GRK4      | 0 | NA | 0 | NA | 0 | NA | 0 | NA | 0 | NA |
| 4 | 3046205 | 3215485 | 1  | NM_002111    | HTT       | 0 | NA | 0 | NA | 0 | NA | 0 | NA | 0 | NA |
| 4 | 3220564 | 3228140 | 1  | NM_001042690 | LOC345222 | 0 | NA | 0 | NA | 0 | NA | 0 | NA | 0 | NA |
| 4 | 3220564 | 3235638 | 1  | NM_001012982 | LOC345222 | 0 | NA | 0 | NA | 0 | NA | 0 | NA | 0 | NA |
| 4 | 3285671 | 3403702 | 1  | NM_002926    | RGS12     | 0 | NA | 0 | NA | 0 | NA | 0 | NA | 0 | NA |
| 4 | 3285671 | 3411438 | 1  | NM_198229    | RGS12     | 0 | NA | 0 | NA | 0 | NA | 0 | NA | 0 | NA |
| 4 | 3341521 | 3411438 | 1  | NM_198227    | RGS12     | 0 | NA | 0 | NA | 0 | NA | 0 | NA | 0 | NA |
| 4 | 3413523 | 3421011 | 1  | NM_001528    | HGFAC     | 0 | NA | 0 | NA | 0 | NA | 0 | NA | 0 | NA |
| 4 | 3434830 | 3466007 | 1  | NM_173660    | DOK7      | 0 | NA | 1 | 13 | 0 | NA | 0 | NA | 0 | NA |
| 4 | 3503942 | 3484092 | -1 | NM_002337    | LRPAP1    | 0 | NA | 0 | NA | 0 | NA | 0 | NA | 0 | NA |
| 4 | 3738093 | 3740051 | 1  | NM_000683    | ADRA2C    | 0 | NA | 1 | 14 | 0 | NA | 0 | NA | 0 | NA |
| 4 | 4279522 | 4241430 | -1 | NM_177998    | OTOP1     | 0 | NA | 0 | NA | 0 | NA | 0 | NA | 0 | NA |
| 4 | 4300835 | 4288169 | -1 | NM_032927    | TMEM128   | 0 | NA | 0 | NA | 0 | NA | 0 | NA | 0 | NA |
| 4 | 4342744 | 4320337 | -1 | NM_017816    | LYAR      | 0 | NA | 0 | NA | 0 | NA | 0 | NA | 0 | NA |
| 4 | 4342878 | 4374410 | 1  | NM_145291    | ZNF509    | 0 | NA | 0 | NA | 0 | NA | 0 | NA | 0 | NA |
| 4 | 4438883 | 4471685 | 1  | NM_014392    | D4S234E   | 0 | NA | 1 | 13 | 0 | NA | 0 | NA | 0 | NA |
| 4 | 4438883 | 4471686 | 1  | NM_001040101 | D4S234E   | 0 | NA | 1 | 13 | 0 | NA | 0 | NA | 0 | NA |
| 4 | 4594676 | 4471596 | -1 | NM_016930    | STX18     | 0 | NA | 0 | NA | 0 | NA | 0 | NA | 0 | NA |
| 4 | 4912292 | 4916561 | 1  | NM_002448    | MSX1      | 0 | NA | 0 | NA | 0 | NA | 0 | NA | 0 | NA |
| 4 | 5072098 | 5067214 | -1 | NM_018659    | CYTL1     | 0 | NA | 0 | NA | 0 | NA | 0 | NA | 0 | NA |
| 4 | 5104427 | 5553626 | 1  | NM_018401    | STK32B    | 0 | NA | 0 | NA | 0 | NA | 0 | NA | 0 | NA |
| 4 | 5577783 | 5580428 | 1  | NM_005750    | C4orf6    | 0 | NA | 0 | NA | 0 | NA | 0 | NA | 0 | NA |
| 4 | 5761195 | 5615052 | -1 | NM_147127    | EVC2      | 0 | NA | 0 | NA | 1 | 13 | 0 | NA | 0 | NA |
| 4 | 5763824 | 5866932 | 1  | NM_153717    | EVC       | 0 | NA | 0 | NA | 1 | 13 | 0 | NA | 0 | NA |
| 4 | 5941216 | 5873391 | -1 | NM_001313    | CRMP1     | 0 | NA | 0 | NA | 0 | NA | 0 | NA | 0 | NA |
| 4 | 5945686 | 5873391 | -1 | NM_001014809 | CRMP1     | 0 | NA | 0 | NA | 0 | NA | 0 | NA | 0 | NA |
| 4 | 6041067 | 6009745 | -1 | NM_207405    | FLJ46481  | 0 | NA | 0 | NA | 0 | NA | 0 | NA | 0 | NA |
| 4 | 6253219 | 6078826 | -1 | NM_001099433 | JAKMIP1   | 0 | NA | 0 | NA | 0 | NA | 0 | NA | 0 | NA |
| 4 | 6253219 | 6106382 | -1 | NM_144720    | JAKMIP1   | 0 | NA | 0 | NA | 0 | NA | 0 | NA | 0 | NA |
| 4 | 6322477 | 6355893 | 1  | NM_006005    | WFS1      | 0 | NA | 0 | NA | 0 | NA | 0 | NA | 0 | NA |
| 4 | 6434498 | 6373205 | -1 | NM_181876    | PPP2R2C   | 0 | NA | 1 | 12 | 0 | NA | 0 | NA | 0 | NA |
| 4 | 6525227 | 6373205 | -1 | NM_020416    | PPP2R2C   | 0 | NA | 0 | NA | 0 | NA | 0 | NA | 0 | NA |
| 4 | 6627802 | 6675089 | 1  | NM_015274    | MAN2B2    | 0 | NA | 1 | 13 | 0 | NA | 0 | NA | 0 | NA |
| 4 | 6693345 | 6695350 | 1  | NM_033296    | MRFAP1    | 0 | NA | 0 | NA | 0 | NA | 0 | NA | 0 | NA |
| 4 | 6746466 | 6749798 | 1  | NM_005980    | S100P     | 0 | NA | 0 | NA | 0 | NA | 0 | NA | 0 | NA |
| 4 | 6762455 | 6760329 | -1 | NM_152301    | MRFAP1L1  | 1 | 23 | 1 | 12 | 0 | NA | 1 | 17 | 0 | NA |
| 4 | 6762505 | 6760329 | -1 | NM_203462    | MRFAP1L1  | 1 | 23 | 1 | 12 | 0 | NA | 1 | 17 | 0 | NA |
| 4 | 6768742 | 6770288 | 1  | NM_018366    | CNO       | 1 | 23 | 1 | 12 | 0 | NA | 1 | 17 | 0 | NA |
| 4 | 6835359 | 6936800 | 1  | NM_001100590 | KIAA0232  | 0 | NA | 0 | NA | 0 | NA | 0 | NA | 0 | NA |
| 4 | 6835359 | 6936800 | 1  | NM_014743    | KIAA0232  | 0 | NA | 0 | NA | 0 | NA | 0 | NA | 0 | NA |
| 4 | 6962071 | 7085746 | 1  | NM_001113361 | TBC1D14   | 1 | 12 | 0 | NA | 0 | NA | 0 | NA | 0 | NA |

|   |          |          |    |              |           |   |    |   |    |   |    |   |    |   |    |
|---|----------|----------|----|--------------|-----------|---|----|---|----|---|----|---|----|---|----|
| 4 | 6962395  | 7085746  | 1  | NM_020773    | TBC1D14   | 1 | 12 | 0 | NA | 0 | NA | 0 | NA | 0 | NA |
| 4 | 7039789  | 7085746  | 1  | NM_001113363 | TBC1D14   | 0 | NA | 0 | NA | 0 | NA | 0 | NA | 0 | NA |
| 4 | 7095629  | 7093477  | -1 | NM_153376    | CCDC96    | 0 | NA | 0 | NA | 0 | NA | 0 | NA | 0 | NA |
| 4 | 7096056  | 7110578  | 1  | NM_152293    | MGC21874  | 0 | NA | 0 | NA | 0 | NA | 0 | NA | 0 | NA |
| 4 | 7120701  | 7112680  | -1 | NM_025196    | GRPEL1    | 0 | NA | 0 | NA | 0 | NA | 0 | NA | 0 | NA |
| 4 | 7245274  | 7795464  | 1  | NM_020777    | SORCS2    | 0 | NA | 0 | NA | 0 | NA | 0 | NA | 0 | NA |
| 4 | 7487600  | 7482921  | -1 | NM_001085382 | PSAPL1    | 0 | NA | 1 | 13 | 0 | NA | 0 | NA | 0 | NA |
| 4 | 7924923  | 7811339  | -1 | NM_021638    | AFAP1     | 0 | NA | 0 | NA | 0 | NA | 0 | NA | 0 | NA |
| 4 | 7992553  | 7811339  | -1 | NM_198595    | AFAP1     | 0 | NA | 0 | NA | 1 | 13 | 0 | NA | 0 | NA |
| 4 | 8211459  | 8017937  | -1 | NM_032432    | ABLIM2    | 0 | NA | 1 | 19 | 0 | NA | 0 | NA | 0 | NA |
| 4 | 8251959  | 8293730  | 1  | NM_018986    | SH3TC1    | 0 | NA | 0 | NA | 0 | NA | 0 | NA | 0 | NA |
| 4 | 8322391  | 8359734  | 1  | NM_053044    | HTRA3     | 0 | NA | 0 | NA | 0 | NA | 0 | NA | 0 | NA |
| 4 | 8493352  | 8418908  | -1 | NM_001101667 | ACOX3     | 0 | NA | 0 | NA | 0 | NA | 0 | NA | 0 | NA |
| 4 | 8493352  | 8418908  | -1 | NM_003501    | ACOX3     | 0 | NA | 0 | NA | 0 | NA | 0 | NA | 0 | NA |
| 4 | 8507042  | 8529181  | 1  | NM_152544    | C4orf23   | 0 | NA | 0 | NA | 0 | NA | 0 | NA | 0 | NA |
| 4 | 8633190  | 8640420  | 1  | NM_080819    | GPR78     | 0 | NA | 0 | NA | 0 | NA | 0 | NA | 0 | NA |
| 4 | 8645334  | 8672388  | 1  | NM_001014447 | CPZ       | 0 | NA | 0 | NA | 0 | NA | 0 | NA | 0 | NA |
| 4 | 8645334  | 8672388  | 1  | NM_001014448 | CPZ       | 0 | NA | 0 | NA | 0 | NA | 0 | NA | 0 | NA |
| 4 | 8645334  | 8672388  | 1  | NM_003652    | CPZ       | 0 | NA | 0 | NA | 0 | NA | 0 | NA | 0 | NA |
| 4 | 8935988  | 8937581  | 1  | NM_001105662 | USP17     | 0 | NA | 0 | NA | 0 | NA | 0 | NA | 0 | NA |
| 4 | 8940734  | 8942327  | 1  | NM_001105662 | USP17     | 0 | NA | 0 | NA | 0 | NA | 0 | NA | 0 | NA |
| 4 | 8945481  | 8947074  | 1  | NM_001105662 | USP17     | 0 | NA | 0 | NA | 0 | NA | 0 | NA | 0 | NA |
| 4 | 8950226  | 8951819  | 1  | NM_001105662 | USP17     | 0 | NA | 0 | NA | 0 | NA | 0 | NA | 0 | NA |
| 4 | 8954971  | 8956564  | 1  | NM_001105662 | USP17     | 0 | NA | 0 | NA | 0 | NA | 0 | NA | 0 | NA |
| 4 | 8959716  | 8961309  | 1  | NM_001105662 | USP17     | 0 | NA | 0 | NA | 0 | NA | 0 | NA | 0 | NA |
| 4 | 8964461  | 8966054  | 1  | NM_001105662 | USP17     | 0 | NA | 0 | NA | 0 | NA | 0 | NA | 1 | 12 |
| 4 | 8969206  | 8970799  | 1  | NM_001105662 | USP17     | 0 | NA | 0 | NA | 0 | NA | 0 | NA | 1 | 12 |
| 4 | 8973952  | 8975545  | 1  | NM_001105662 | USP17     | 0 | NA | 0 | NA | 0 | NA | 0 | NA | 1 | 12 |
| 4 | 9055357  | 9061338  | 1  | NM_001040448 | DEFB131   | 0 | NA | 0 | NA | 0 | NA | 0 | NA | 0 | NA |
| 4 | 9094611  | 9095260  | 1  | NM_001040071 | LOC650293 | 0 | NA | 0 | NA | 0 | NA | 0 | NA | 0 | NA |
| 4 | 9392355  | 9394731  | 1  | NM_000798    | DRD5      | 0 | NA | 0 | NA | 0 | NA | 0 | NA | 0 | NA |
| 4 | 9632212  | 9436945  | -1 | NM_020041    | SLC2A9    | 0 | NA | 0 | NA | 0 | NA | 0 | NA | 0 | NA |
| 4 | 9650970  | 9436945  | -1 | NM_001001290 | SLC2A9    | 0 | NA | 0 | NA | 0 | NA | 0 | NA | 0 | NA |
| 4 | 9727671  | 9685060  | -1 | NM_005112    | WDR1      | 1 | 14 | 0 | NA | 0 | NA | 0 | NA | 0 | NA |
| 4 | 9727671  | 9685060  | -1 | NM_017491    | WDR1      | 1 | 14 | 0 | NA | 0 | NA | 0 | NA | 0 | NA |
| 4 | 10068130 | 10050601 | -1 | NM_053042    | ZNF518B   | 0 | NA | 1 | 17 | 0 | NA | 0 | NA | 0 | NA |
| 4 | 10295587 | 10100935 | -1 | NM_052964    | MIST      | 0 | NA | 0 | NA | 0 | NA | 0 | NA | 0 | NA |
| 4 | 11039635 | 11009085 | -1 | NM_005114    | HS3ST1    | 0 | NA | 1 | 14 | 0 | NA | 0 | NA | 0 | NA |
| 4 | 13094872 | 12979268 | -1 | NM_004249    | RAB28     | 0 | NA | 0 | NA | 0 | NA | 0 | NA | 0 | NA |
| 4 | 13095054 | 12978479 | -1 | NM_001017979 | RAB28     | 0 | NA | 0 | NA | 0 | NA | 0 | NA | 0 | NA |
| 4 | 13155212 | 13151551 | -1 | NM_001189    | NKX3-2    | 1 | 23 | 1 | 12 | 0 | NA | 0 | NA | 0 | NA |
| 4 | 13238426 | 13179463 | -1 | NM_148894    | FAM44A    | 0 | NA | 0 | NA | 0 | NA | 0 | NA | 0 | NA |
| 4 | 14614619 | 14680872 | 1  | NM_182485    | CPEB2     | 1 | 11 | 0 | NA | 0 | NA | 0 | NA | 0 | NA |
| 4 | 14614619 | 14680872 | 1  | NM_182646    | CPEB2     | 1 | 11 | 0 | NA | 0 | NA | 0 | NA | 0 | NA |
| 4 | 14950709 | 15056364 | 1  | NM_031911    | C1QTNF7   | 0 | NA | 0 | NA | 0 | NA | 0 | NA | 0 | NA |
| 4 | 15080759 | 15212278 | 1  | NM_001080522 | CC2D2A    | 0 | NA | 0 | NA | 0 | NA | 0 | NA | 0 | NA |
| 4 | 15266111 | 15215251 | -1 | NM_012161    | FBXL5     | 0 | NA | 0 | NA | 0 | NA | 0 | NA | 0 | NA |
| 4 | 15266111 | 15215251 | -1 | NM_033535    | FBXL5     | 0 | NA | 0 | NA | 0 | NA | 0 | NA | 0 | NA |
| 4 | 15313670 | 15342894 | 1  | NM_004334    | BST1      | 0 | NA | 0 | NA | 1 | 13 | 0 | NA | 0 | NA |
| 4 | 15389028 | 15459804 | 1  | NM_001775    | CD38      | 0 | NA | 0 | NA | 1 | 13 | 0 | NA | 0 | NA |
| 4 | 15549069 | 15546289 | -1 | NM_005130    | FGFBP1    | 0 | NA | 0 | NA | 0 | NA | 0 | NA | 0 | NA |
| 4 | 15573926 | 15570963 | -1 | NM_031950    | FGFBP2    | 0 | NA | 0 | NA | 0 | NA | 0 | NA | 0 | NA |
| 4 | 15686664 | 15678954 | -1 | NM_006017    | PROM1     | 0 | NA | 1 | 16 | 0 | NA | 0 | NA | 0 | NA |
| 4 | 15837259 | 15771225 | -1 | NM_153365    | TAPT1     | 0 | NA | 0 | NA | 0 | NA | 0 | NA | 0 | NA |
| 4 | 16509425 | 16112281 | -1 | NM_001290    | LDB2      | 0 | NA | 0 | NA | 0 | NA | 0 | NA | 0 | NA |
| 4 | 17122811 | 17097120 | -1 | NM_000320    | QDPR      | 0 | NA | 0 | NA | 0 | NA | 0 | NA | 0 | NA |
| 4 | 17125885 | 17137825 | 1  | NM_001079827 | CLRN2     | 0 | NA | 0 | NA | 0 | NA | 0 | NA | 0 | NA |
| 4 | 17188024 | 17218688 | 1  | NM_015907    | LAP3      | 0 | NA | 0 | NA | 1 | 12 | 0 | NA | 0 | NA |
| 4 | 17225370 | 17235258 | 1  | NM_025205    | MED28     | 0 | NA | 0 | NA | 0 | NA | 0 | NA | 0 | NA |
| 4 | 17421479 | 17411375 | -1 | NM_017741    | C4orf30   | 0 | NA | 0 | NA | 0 | NA | 0 | NA | 0 | NA |
| 4 | 17421622 | 17455585 | 1  | NM_022346    | NCAPG     | 0 | NA | 0 | NA | 0 | NA | 0 | NA | 0 | NA |
| 4 | 17632474 | 17453940 | -1 | NM_153686    | LCORL     | 0 | NA | 0 | NA | 0 | NA | 0 | NA | 0 | NA |
| 4 | 19864332 | 20229886 | 1  | NM_004787    | SLIT2     | 0 | NA | 0 | NA | 0 | NA | 0 | NA | 0 | NA |
| 4 | 20311386 | 20339072 | 1  | NM_145048    | C4orf28   | 1 | 14 | 0 | NA | 0 | NA | 0 | NA | 0 | NA |
| 4 | 20461389 | 20339336 | -1 | NM_147181    | KCNIP4    | 0 | NA | 0 | NA | 0 | NA | 0 | NA | 0 | NA |

|   |          |          |    |              |           |   |    |   |    |   |    |    |    |   |    |
|---|----------|----------|----|--------------|-----------|---|----|---|----|---|----|----|----|---|----|
| 4 | 20493431 | 20339336 | -1 | NM_025221    | KCNIP4    | 0 | NA | 0 | NA | 0 | NA | 0  | NA | 0 | NA |
| 4 | 20914627 | 20339336 | -1 | NM_147183    | KCNIP4    | 0 | NA | 0 | NA | 0 | NA | 0  | NA | 0 | NA |
| 4 | 21155377 | 20339336 | -1 | NM_001035004 | KCNIP4    | 0 | NA | 0 | NA | 0 | NA | 0  | NA | 0 | NA |
| 4 | 21308416 | 20339336 | -1 | NM_001035003 | KCNIP4    | 0 | NA | 0 | NA | 0 | NA | 0  | NA | 0 | NA |
| 4 | 21559472 | 20339336 | -1 | NM_147182    | KCNIP4    | 0 | NA | 0 | NA | 0 | NA | 0  | NA | 0 | NA |
| 4 | 22126770 | 21998096 | -1 | NM_145290    | GPR125    | 0 | NA | 0 | NA | 0 | NA | 0  | NA | 0 | NA |
| 4 | 22303687 | 22430290 | 1  | NM_020973    | GBA3      | 0 | NA | 0 | NA | 0 | NA | 0  | NA | 0 | NA |
| 4 | 22353891 | 22337245 | -1 | NM_001089595 | LOC843751 | 0 | NA | 0 | NA | 0 | NA | 0  | NA | 0 | NA |
| 4 | 23500798 | 23402741 | -1 | NM_013261    | PPARGC1A  | 0 | NA | 0 | NA | 1 | 14 | 0  | NA | 0 | NA |
| 4 | 24195282 | 24138185 | -1 | NM_001358    | DHX15     | 0 | NA | 0 | NA | 0 | 0  | 0  | NA | 0 | NA |
| 4 | 24406182 | 24411565 | 1  | NM_003102    | SOD3      | 0 | NA | 0 | NA | 0 | 0  | 0  | NA | 0 | NA |
| 4 | 24590924 | 24437678 | -1 | NM_173463    | CCDC149   | 0 | NA | 0 | NA | 0 | 0  | 0  | NA | 0 | NA |
| 4 | 24641413 | 24612487 | -1 | NM_018176    | LG12      | 0 | NA | 1 | 12 | 0 | 0  | 0  | NA | 0 | NA |
| 4 | 24771007 | 24734650 | -1 | NM_016955    | SEPSECS   | 0 | NA | 0 | NA | 0 | 0  | 0  | NA | 0 | NA |
| 4 | 24771083 | 24732819 | -1 | NM_153825    | SEPSECS   | 0 | NA | 0 | NA | 0 | 0  | 0  | NA | 0 | NA |
| 4 | 24844772 | 24889808 | 1  | NM_018323    | PI4K2B    | 1 | 33 | 0 | NA | 1 | 13 | 1  | 18 | 0 | NA |
| 4 | 24923493 | 24981103 | 1  | NM_024936    | ZCCHC4    | 0 | NA | 0 | NA | 0 | 0  | 0  | NA | 0 | NA |
| 4 | 24987945 | 25029218 | 1  | NM_013367    | ANAPC4    | 0 | NA | 0 | NA | 0 | 0  | 0  | NA | 0 | NA |
| 4 | 25266532 | 25289466 | 1  | NM_006424    | SLC34A2   | 0 | NA | 0 | NA | 0 | 0  | 0  | NA | 0 | NA |
| 4 | 25473708 | 25388146 | -1 | NM_015187    | KIAA0746  | 0 | NA | 0 | NA | 0 | 0  | 0  | NA | 0 | NA |
| 4 | 25930429 | 26042376 | 1  | NM_005349    | RBPJ      | 1 | 12 | 0 | NA | 0 | 0  | 0  | NA | 0 | NA |
| 4 | 25930429 | 26042376 | 1  | NM_203283    | RBPJ      | 1 | 12 | 0 | NA | 0 | 0  | 0  | NA | 0 | NA |
| 4 | 25931545 | 26042376 | 1  | NM_015874    | RBPJ      | 1 | 12 | 0 | NA | 0 | 0  | 0  | NA | 0 | NA |
| 4 | 25931545 | 26042376 | 1  | NM_203284    | RBPJ      | 1 | 12 | 0 | NA | 0 | 0  | 0  | NA | 0 | NA |
| 4 | 26101140 | 26092115 | -1 | NM_000730    | CKAR      | 0 | NA | 1 | 14 | 0 | 0  | 0  | NA | 0 | NA |
| 4 | 26194643 | 26366015 | 1  | NM_018317    | TBC1D19   | 0 | NA | 0 | NA | 0 | 0  | 0  | NA | 0 | NA |
| 4 | 26471461 | 26634907 | 1  | NM_020860    | STIM2     | 0 | NA | 0 | NA | 0 | 0  | 0  | NA | 0 | NA |
| 4 | 30331134 | 30336055 | 1  | NM_032456    | PCDH7     | 0 | NA | 1 | 15 | 0 | 0  | 0  | NA | 0 | NA |
| 4 | 30331134 | 30341936 | 1  | NM_002589    | PCDH7     | 0 | NA | 1 | 15 | 0 | 0  | 0  | NA | 0 | NA |
| 4 | 30331134 | 30757519 | 1  | NM_032457    | PCDH7     | 0 | NA | 1 | 15 | 0 | 0  | 0  | NA | 0 | NA |
| 4 | 35837758 | 35744016 | -1 | NM_139182    | CENTD1    | 0 | NA | 0 | NA | 0 | 0  | 0  | NA | 0 | NA |
| 4 | 35922374 | 35744016 | -1 | NM_015230    | CENTD1    | 0 | NA | 0 | NA | 0 | 0  | 0  | NA | 0 | NA |
| 4 | 37131946 | 37271527 | 1  | NM_001104629 | C4orf19   | 0 | NA | 1 | 12 | 0 | 0  | 0  | NA | 0 | NA |
| 4 | 37262249 | 37271527 | 1  | NM_018302    | C4orf19   | 0 | NA | 0 | NA | 0 | 0  | 0  | NA | 0 | NA |
| 4 | 37364394 | 37268816 | -1 | NM_001085399 | RELL1     | 0 | NA | 0 | NA | 0 | 0  | 0  | NA | 0 | NA |
| 4 | 37364394 | 37288650 | -1 | NM_001085400 | RELL1     | 0 | NA | 0 | NA | 0 | 0  | 0  | NA | 0 | NA |
| 4 | 37504736 | 37540953 | 1  | NM_018290    | PGM2      | 0 | NA | 0 | NA | 0 | 0  | 0  | NA | 0 | NA |
| 4 | 37569114 | 37817189 | 1  | NM_015173    | TBC1D1    | 0 | NA | 0 | NA | 0 | 0  | 0  | NA | 0 | NA |
| 4 | 37638450 | 37639026 | 1  | NM_006607    | PTTG2     | 0 | NA | 0 | NA | 0 | 0  | 0  | NA | 0 | NA |
| 4 | 38342184 | 38379524 | 1  | NM_016531    | KLFG      | 0 | NA | 1 | 12 | 0 | 0  | 1  | 17 | 0 | NA |
| 4 | 38460984 | 38450646 | -1 | NM_001017388 | TLR10     | 0 | NA | 0 | NA | 0 | 0  | 0  | NA | 0 | NA |
| 4 | 38460984 | 38450646 | -1 | NM_030956    | TLR10     | 0 | NA | 0 | NA | 0 | 0  | 0  | NA | 0 | NA |
| 4 | 38482807 | 38474270 | -1 | NM_003263    | TLR1      | 0 | NA | 0 | NA | 0 | 0  | 0  | NA | 0 | NA |
| 4 | 38507555 | 38504802 | -1 | NM_006068    | TLR6      | 0 | NA | 0 | NA | 0 | 0  | 0  | NA | 0 | NA |
| 4 | 38545831 | 38621821 | 1  | NM_138389    | FAM114A1  | 0 | NA | 0 | NA | 0 | 0  | 0  | NA | 0 | NA |
| 4 | 38710436 | 38644835 | -1 | NM_024943    | TMEM156   | 0 | NA | 0 | NA | 0 | 0  | 0  | NA | 0 | NA |
| 4 | 38723053 | 38800224 | 1  | NM_001007075 | KLHL5     | 0 | NA | 0 | NA | 0 | 0  | 0  | NA | 0 | NA |
| 4 | 38740454 | 38800224 | 1  | NM_015990    | KLHL5     | 0 | NA | 0 | NA | 0 | 0  | 0  | NA | 0 | NA |
| 4 | 38740454 | 38800224 | 1  | NM_199039    | KLHL5     | 0 | NA | 0 | NA | 0 | 0  | 0  | NA | 0 | NA |
| 4 | 38860418 | 38963825 | 1  | NM_025132    | WDR19     | 1 | 12 | 0 | NA | 0 | 0  | 0  | NA | 0 | NA |
| 4 | 39044390 | 38965470 | -1 | NM_002913    | RFC1      | 0 | NA | 0 | NA | 0 | 1  | 21 | 0  | 0 | NA |
| 4 | 39084867 | 39126748 | 1  | NM_175737    | KLB       | 0 | NA | 0 | NA | 0 | 0  | 0  | NA | 0 | NA |
| 4 | 39136602 | 39132139 | -1 | NM_001024921 | RPL9      | 0 | NA | 0 | NA | 0 | 0  | 0  | NA | 0 | NA |
| 4 | 39136963 | 39132139 | -1 | NM_000661    | RPL9      | 0 | NA | 0 | NA | 0 | 0  | 0  | NA | 0 | NA |
| 4 | 39137059 | 39156666 | 1  | NM_006859    | LIAS      | 0 | NA | 0 | NA | 0 | 0  | 0  | NA | 0 | NA |
| 4 | 39137059 | 39156666 | 1  | NM_194451    | LIAS      | 0 | NA | 0 | NA | 0 | 0  | 0  | NA | 0 | NA |
| 4 | 39205606 | 39176769 | -1 | NM_003359    | UGDH      | 0 | NA | 0 | NA | 0 | 0  | 0  | NA | 0 | NA |
| 4 | 39316876 | 39228940 | -1 | NM_174921    | C4orf34   | 0 | NA | 0 | NA | 0 | 0  | 0  | NA | 0 | NA |
| 4 | 39376058 | 39460805 | 1  | NM_001111112 | UBE2K     | 0 | NA | 0 | NA | 0 | 0  | 0  | NA | 0 | NA |
| 4 | 39376058 | 39460805 | 1  | NM_001111113 | UBE2K     | 0 | NA | 0 | NA | 0 | 0  | 0  | NA | 0 | NA |
| 4 | 39376058 | 39460805 | 1  | NM_005339    | UBE2K     | 0 | NA | 0 | NA | 0 | 0  | 0  | NA | 0 | NA |
| 4 | 39655878 | 39500877 | -1 | NM_015200    | PDSSA     | 0 | NA | 0 | NA | 0 | 0  | 0  | NA | 0 | NA |
| 4 | 39655971 | 39500877 | -1 | NM_001100399 | PDSSA     | 0 | NA | 0 | NA | 0 | 0  | 0  | NA | 0 | NA |
| 4 | 39655971 | 39575985 | -1 | NM_001100400 | PDSSA     | 0 | NA | 0 | NA | 0 | 0  | 0  | NA | 0 | NA |
| 4 | 39734918 | 39833414 | 1  | NM_018177    | N4BP2     | 1 | 14 | 0 | NA | 0 | 0  | 0  | NA | 0 | NA |

|   |          |          |    |              |           |           |        |   |    |   |    |   |    |   |    |
|---|----------|----------|----|--------------|-----------|-----------|--------|---|----|---|----|---|----|---|----|
| 4 | 39874921 | 39922676 | 1  | NM_004310    | RHOH      | 0         | NA     | 0 | NA | 1 | 12 | 0 | NA | 0 | NA |
| 4 | 40032225 | 40051730 | 1  | NM_017581    | CHRNA9    | 1         | 17     | 0 | NA | 0 | NA | 0 | NA | 0 | NA |
| 4 | 40212747 | 40120028 | -1 | NM_019027    | RBM47     | 0         | NA     | 0 | NA | 0 | NA | 0 | NA | 0 | NA |
| 4 | 40326640 | 40120028 | -1 | NM_001098634 | RBM47     | 0         | NA     | 0 | NA | 0 | NA | 0 | NA | 0 | NA |
| 4 | 40446670 | 40506759 | 1  | NM_024677    | NSUN7     | 0         | NA     | 0 | NA | 0 | NA | 0 | NA | 0 | NA |
| 4 | 40911245 | 40510995 | -1 | NM_173075    | APBB2     | 0         | NA     | 0 | NA | 0 | NA | 1 | 14 | 0 | NA |
| 4 | 40953685 | 40965203 | 1  | NM_004181    | UCHL1     | 0         | NA     | 0 | NA | 0 | NA | 0 | NA | 0 | NA |
| 4 | 41057560 | 41396818 | 1  | NM_001112717 | LIMCH1    | 0         | NA     | 0 | NA | 0 | NA | 0 | NA | 0 | NA |
| 4 | 41057560 | 41396818 | 1  | NM_001112718 | LIMCH1    | 0         | NA     | 0 | NA | 0 | NA | 0 | NA | 0 | NA |
| 4 | 41057560 | 41396818 | 1  | NM_014988    | LIMCH1    | 0         | NA     | 0 | NA | 0 | NA | 0 | NA | 0 | NA |
| 4 | 41309675 | 41396818 | 1  | NM_001112719 | LIMCH1    | 1         | 13     | 0 | NA | 0 | NA | 0 | NA | 0 | NA |
| 4 | 41309675 | 41396818 | 1  | NM_001112720 | LIMCH1    | 1         | 13     | 0 | NA | 0 | NA | 0 | NA | 0 | NA |
| 4 | 41445744 | 41440855 | -1 | NM_003924    | PHOX2B    | 0         | NA     | 1 | 12 | 0 | NA | 0 | NA | 0 | NA |
| 4 | 41631925 | 41652580 | 1  | NM_018126    | TMEM33    | 1         | 13     | 0 | NA | 0 | NA | 0 | NA | 0 | NA |
| 4 | 41678469 | 41683241 | 1  | NM_001029955 | WDR21B    | 1         | 15     | 0 | NA | 0 | NA | 0 | NA | 0 | NA |
| 4 | 41687279 | 41784308 | 1  | NM_006345    | SLC30A9   | 1         | 15     | 0 | NA | 0 | NA | 0 | NA | 0 | NA |
| 4 | 41849652 | 41807713 | -1 | NM_207406    | CCDC4     | 0         | NA     | 0 | NA | 0 | NA | 0 | NA | 0 | NA |
| 4 | 42094612 | 42099261 | 1  | NM_001080505 | SHISA3    | 0         | NA     | 0 | NA | 0 | NA | 0 | NA | 0 | NA |
| 4 | 42353879 | 42105148 | -1 | NM_001105529 | ATP8A1    | 0         | NA     | 0 | NA | 0 | NA | 0 | NA | 0 | NA |
| 4 | 42353879 | 42105148 | -1 | NM_006095    | ATP8A1    | 0         | NA     | 0 | NA | 0 | NA | 0 | NA | 0 | NA |
| 4 | 42590040 | 42727432 | 1  | NM_001080476 | LOC389207 | 0         | NA     | 0 | NA | 0 | NA | 0 | NA | 0 | NA |
| 4 | 44145581 | 43871029 | -1 | NM_198353    | KCTD8     | 0         | NA     | 0 | NA | 0 | NA | 0 | NA | 0 | NA |
| 4 | 44348415 | 44319110 | -1 | NM_182592    | YIPF7     | 0         | NA     | 0 | NA | 1 | 13 | 1 | 11 | 0 | NA |
| 4 | 44375189 | 44397454 | 1  | NM_021927    | GUF1      | 0         | NA     | 0 | NA | 0 | NA | 0 | NA | 0 | NA |
| 4 | 44423369 | 44398924 | -1 | NM_138335    | GNPDA2    | 1         | 11     | 0 | NA | 0 | NA | 0 | NA | 0 | NA |
| 4 | 45820839 | 45732543 | -1 | NM_173536    | GABRG1    | 0         | NA     | 0 | NA | 0 | NA | 0 | NA | 0 | NA |
| 4 | 46086153 | 45946338 | -1 | NM_001114175 | GABRA2    | 0         | NA     | 1 | 14 | 0 | NA | 0 | NA | 0 | NA |
| 4 | 46086813 | 45946338 | -1 | NM_000807    | GABRA2    | 0         | NA     | 1 | 14 | 0 | NA | 0 | NA | 0 | NA |
| 4 | 46606009 | 46431603 | 0  | NA           | -1        | NM_130902 | COX7B2 | 0 | NA | 0 | NA | 0 | NA | 0 | NA |
| 4 | 46690337 | 46615673 | -1 | NM_000809    | GABRA4    | 0         | NA     | 0 | NA | 0 | NA | 0 | NA | 0 | NA |
| 4 | 46728335 | 47123202 | 1  | NM_000812    | GABRB1    | 0         | NA     | 0 | NA | 0 | NA | 0 | NA | 0 | NA |
| 4 | 47160433 | 47147567 | -1 | NM_017845    | COMMD8    | 0         | NA     | 0 | NA | 0 | NA | 1 | 12 | 0 | NA |
| 4 | 47182166 | 47290260 | 1  | NM_020453    | ATP10D    | 1         | 12     | 0 | NA | 0 | NA | 0 | NA | 0 | NA |
| 4 | 47534816 | 47290774 | -1 | NM_006587    | CORIN     | 1         | 14     | 0 | NA | 0 | NA | 1 | 12 | 0 | NA |
| 4 | 47611390 | 47544013 | -1 | NM_152995    | NFXL1     | 0         | NA     | 0 | NA | 0 | NA | 0 | NA | 0 | NA |
| 4 | 47649483 | 47632750 | -1 | NM_000087    | CNGA1     | 0         | NA     | 0 | NA | 0 | NA | 0 | NA | 0 | NA |
| 4 | 47713547 | 47733837 | 1  | NM_207330    | NPAL1     | 1         | 12     | 0 | NA | 0 | NA | 0 | NA | 0 | NA |
| 4 | 47831030 | 47763166 | -1 | NM_003328    | TXK       | 0         | NA     | 0 | NA | 1 | 12 | 0 | NA | 0 | NA |
| 4 | 47966571 | 47832556 | -1 | NM_003215    | TEC       | 0         | NA     | 0 | NA | 0 | NA | 0 | NA | 0 | NA |
| 4 | 48038369 | 48122972 | 1  | NM_020846    | SLAIN2    | 0         | NA     | 0 | NA | 1 | 12 | 0 | NA | 0 | NA |
| 4 | 48180205 | 48185921 | 1  | NM_152679    | SLC10A4   | 0         | NA     | 1 | 14 | 0 | NA | 0 | NA | 0 | NA |
| 4 | 48187065 | 48191179 | 1  | NM_175619    | ZAR1      | 0         | NA     | 1 | 14 | 0 | NA | 0 | NA | 0 | NA |
| 4 | 48477073 | 48194136 | -1 | NM_015030    | FRYL      | 0         | NA     | 0 | NA | 0 | NA | 0 | NA | 0 | NA |
| 4 | 48527771 | 48558589 | 1  | NM_001079839 | OC1AD1    | 1         | 14     | 0 | NA | 0 | NA | 0 | NA | 0 | NA |
| 4 | 48527771 | 48558589 | 1  | NM_001079840 | OC1AD1    | 1         | 14     | 0 | NA | 0 | NA | 0 | NA | 0 | NA |
| 4 | 48527771 | 48558589 | 1  | NM_001079841 | OC1AD1    | 1         | 14     | 0 | NA | 0 | NA | 0 | NA | 0 | NA |
| 4 | 48527771 | 48558589 | 1  | NM_001079842 | OC1AD1    | 1         | 14     | 0 | NA | 0 | NA | 0 | NA | 0 | NA |
| 4 | 48527771 | 48558589 | 1  | NM_017830    | OC1AD1    | 1         | 14     | 0 | NA | 0 | NA | 0 | NA | 0 | NA |
| 4 | 48603572 | 48582161 | -1 | NM_001014446 | OC1AD2    | 1         | 18     | 0 | NA | 1 | 12 | 0 | NA | 0 | NA |
| 4 | 48603572 | 48582161 | -1 | NM_152398    | OC1AD2    | 1         | 18     | 0 | NA | 1 | 12 | 0 | NA | 0 | NA |
| 4 | 48683021 | 48758852 | 1  | NM_025087    | FLJ21511  | 0         | NA     | 0 | NA | 0 | NA | 0 | NA | 0 | NA |
| 4 | 52404032 | 52477760 | 1  | NM_001040402 | DCUN1D4   | 0         | NA     | 0 | NA | 0 | NA | 1 | 12 | 0 | NA |
| 4 | 52404032 | 52477760 | 1  | NM_015115    | DCUN1D4   | 0         | NA     | 0 | NA | 0 | NA | 1 | 12 | 0 | NA |
| 4 | 52578543 | 52554622 | -1 | NM_001024611 | LOC339977 | 0         | NA     | 0 | NA | 0 | NA | 0 | NA | 0 | NA |
| 4 | 52599203 | 52581628 | -1 | NM_000232    | SGCB      | 0         | NA     | 0 | NA | 1 | 15 | 0 | NA | 0 | NA |
| 4 | 52612349 | 52658215 | 1  | NM_145263    | SPATA18   | 1         | 17     | 0 | NA | 0 | NA | 0 | NA | 0 | NA |
| 4 | 53220197 | 53155964 | -1 | NM_022832    | USP46     | 1         | 13     | 0 | NA | 0 | NA | 0 | NA | 0 | NA |
| 4 | 53423251 | 53427759 | 1  | NM_023940    | RASL11B   | 0         | NA     | 0 | NA | 0 | NA | 0 | NA | 0 | NA |
| 4 | 53926999 | 53433907 | -1 | NM_152540    | SCFD2     | 0         | NA     | 0 | NA | 0 | NA | 0 | NA | 0 | NA |
| 4 | 53938619 | 54020599 | 1  | NM_030917    | FIP1L1    | 0         | NA     | 0 | NA | 0 | NA | 0 | NA | 0 | NA |
| 4 | 54119193 | 54021193 | -1 | NM_032622    | LN1X1     | 0         | NA     | 0 | NA | 0 | NA | 0 | NA | 0 | NA |
| 4 | 54152481 | 54021193 | -1 | NM_001126328 | LN1X1     | 0         | NA     | 0 | NA | 0 | NA | 0 | NA | 0 | NA |
| 4 | 54548202 | 54546422 | -1 | NM_001011538 | LOC402176 | 0         | NA     | 0 | NA | 0 | NA | 0 | NA | 0 | NA |
| 4 | 54625545 | 54570714 | -1 | NM_012110    | CHIC2     | 0         | NA     | 0 | NA | 0 | NA | 0 | NA | 0 | NA |
| 4 | 54660954 | 54662879 | 1  | NM_133267    | GSX2      | 0         | NA     | 1 | 16 | 0 | NA | 0 | NA | 0 | NA |

|   |          |          |    |              |            |   |    |   |    |   |    |   |    |   |    |
|---|----------|----------|----|--------------|------------|---|----|---|----|---|----|---|----|---|----|
| 4 | 54790020 | 54859169 | 1  | NM_006206    | PDGFRA     | 1 | 12 | 0 | NA | 1 | 12 | 0 | NA | 0 | NA |
| 4 | 55218851 | 55301638 | 1  | NM_000222    | KIT        | 0 | NA | 0 | NA | 0 | NA | 1 | 13 | 0 | NA |
| 4 | 55218851 | 55301638 | 1  | NM_00109372  | KIT        | 0 | NA | 0 | NA | 0 | NA | 1 | 13 | 0 | NA |
| 4 | 55686519 | 55639405 | -1 | NM_002253    | KDR        | 0 | NA | 0 | NA | 0 | NA | 0 | NA | 0 | NA |
| 4 | 55907165 | 55932235 | 1  | NM_024592    | SRD5A3     | 0 | NA | 0 | NA | 1 | 16 | 0 | NA | 0 | NA |
| 4 | 55957113 | 55987099 | 1  | NM_018475    | TMEM165    | 0 | NA | 0 | NA | 0 | NA | 0 | NA | 0 | NA |
| 4 | 56107754 | 55993416 | -1 | NM_004898    | CLOCK      | 1 | 13 | 0 | NA | 0 | NA | 0 | NA | 0 | NA |
| 4 | 56153136 | 56117448 | -1 | NM_152401    | PDCL2      | 0 | NA | 1 | 13 | 0 | NA | 0 | NA | 0 | NA |
| 4 | 56197222 | 56156154 | -1 | NM_006681    | NMU        | 0 | NA | 0 | NA | 0 | NA | 0 | NA | 0 | NA |
| 4 | 56414572 | 56466001 | 1  | NM_00102492  | EXOC1      | 0 | NA | 0 | NA | 1 | 12 | 0 | NA | 0 | NA |
| 4 | 56414572 | 56466001 | 1  | NM_018261    | EXOC1      | 0 | NA | 0 | NA | 1 | 12 | 0 | NA | 0 | NA |
| 4 | 56414572 | 56466001 | 1  | NM_178237    | EXOC1      | 0 | NA | 0 | NA | 1 | 12 | 0 | NA | 0 | NA |
| 4 | 56509793 | 56594284 | 1  | NM_025009    | CEP135     | 0 | NA | 0 | NA | 0 | NA | 0 | NA | 0 | NA |
| 4 | 56731117 | 56891647 | 1  | NM_020722    | KIAA1211   | 0 | NA | 0 | NA | 0 | NA | 0 | NA | 0 | NA |
| 4 | 56948395 | 56899213 | -1 | NM_181806    | AASDH      | 0 | NA | 0 | NA | 0 | NA | 0 | NA | 0 | NA |
| 4 | 56996602 | 56954285 | -1 | NM_002703    | PPAT       | 0 | NA | 0 | NA | 0 | NA | 0 | NA | 0 | NA |
| 4 | 56996671 | 57022291 | 1  | NM_006452    | PAICS      | 0 | NA | 0 | NA | 0 | NA | 0 | NA | 0 | NA |
| 4 | 56997025 | 57022291 | 1  | NM_001079524 | PAICS      | 0 | NA | 0 | NA | 0 | NA | 0 | NA | 0 | NA |
| 4 | 56997025 | 57022291 | 1  | NM_001079525 | PAICS      | 0 | NA | 0 | NA | 0 | NA | 0 | NA | 0 | NA |
| 4 | 57028518 | 57064604 | 1  | NM_006947    | SRP72      | 0 | NA | 0 | NA | 1 | 16 | 0 | NA | 0 | NA |
| 4 | 57066131 | 57084815 | 1  | NM_206919    | ARL9       | 0 | NA | 0 | NA | 0 | NA | 0 | NA | 0 | NA |
| 4 | 57217408 | 57208920 | -1 | NM_139211    | HOPX       | 0 | NA | 0 | NA | 0 | NA | 0 | NA | 0 | NA |
| 4 | 57242322 | 57208920 | -1 | NM_032495    | HOPX       | 0 | NA | 0 | NA | 0 | NA | 0 | NA | 0 | NA |
| 4 | 57242322 | 57208920 | -1 | NM_139212    | HOPX       | 0 | NA | 0 | NA | 0 | NA | 0 | NA | 0 | NA |
| 4 | 57382650 | 57370790 | -1 | NM_021114    | SPINK2     | 0 | NA | 0 | NA | 0 | NA | 0 | NA | 0 | NA |
| 4 | 57468798 | 57493097 | 1  | NM_005612    | REST       | 0 | NA | 0 | NA | 0 | NA | 0 | NA | 0 | NA |
| 4 | 57538583 | 57524272 | -1 | NM_032313    | C4orf14    | 0 | NA | 0 | NA | 0 | NA | 0 | NA | 0 | NA |
| 4 | 57539865 | 57592091 | 1  | NM_000938    | POLR2B     | 0 | NA | 0 | NA | 0 | NA | 0 | NA | 0 | NA |
| 4 | 57671296 | 57592000 | -1 | NM_001553    | IGFBP7     | 0 | NA | 0 | NA | 0 | NA | 0 | NA | 0 | NA |
| 4 | 62045433 | 62620763 | 1  | NM_015236    | LPHN3      | 0 | NA | 0 | NA | 0 | NA | 0 | NA | 0 | NA |
| 4 | 64957773 | 64826015 | -1 | NM_001010874 | SRD5A2L2   | 0 | NA | 0 | NA | 0 | NA | 0 | NA | 0 | NA |
| 4 | 66218104 | 65872240 | -1 | NM_004439    | EPHA5      | 0 | NA | 0 | NA | 0 | NA | 0 | NA | 0 | NA |
| 4 | 66218104 | 65872240 | -1 | NM_182472    | EPHA5      | 0 | NA | 0 | NA | 0 | NA | 0 | NA | 0 | NA |
| 4 | 68093851 | 68020583 | -1 | NM_001812    | CENPC1     | 1 | 19 | 0 | NA | 0 | NA | 0 | NA | 0 | NA |
| 4 | 68107040 | 68155211 | 1  | NM_012108    | STAP1      | 0 | NA | 0 | NA | 0 | NA | 0 | NA | 0 | NA |
| 4 | 68249484 | 68164073 | -1 | NM_018227    | UBA6       | 0 | NA | 0 | NA | 0 | NA | 0 | NA | 0 | NA |
| 4 | 68304399 | 68285693 | -1 | NM_000406    | GNRHR      | 0 | NA | 0 | NA | 0 | NA | 0 | NA | 0 | NA |
| 4 | 68304399 | 68285693 | -1 | NM_001012763 | GNRHR      | 0 | NA | 0 | NA | 0 | NA | 0 | NA | 0 | NA |
| 4 | 68432311 | 68369188 | -1 | NM_004262    | TMPRSS11D  | 0 | NA | 0 | NA | 0 | NA | 0 | NA | 0 | NA |
| 4 | 68511827 | 68458613 | -1 | NM_00114387  | TMPRSS11A  | 0 | NA | 0 | NA | 0 | NA | 0 | NA | 0 | NA |
| 4 | 68511827 | 68458613 | -1 | NM_182606    | TMPRSS11A  | 0 | NA | 0 | NA | 0 | NA | 0 | NA | 0 | NA |
| 4 | 68611610 | 68608906 | -1 | NM_001014372 | SYT14L     | 0 | NA | 0 | NA | 0 | NA | 0 | NA | 0 | NA |
| 4 | 68678182 | 68601510 | -1 | NM_207407    | TMPRSS11F  | 0 | NA | 0 | NA | 0 | NA | 0 | NA | 0 | NA |
| 4 | 68794007 | 68774965 | -1 | NM_182502    | TMPRSS11B  | 0 | NA | 0 | NA | 0 | NA | 0 | NA | 0 | NA |
| 4 | 68898419 | 68858699 | -1 | NM_001031732 | YTHDC1     | 0 | NA | 0 | NA | 0 | NA | 1 | 14 | 0 | NA |
| 4 | 68898419 | 68858699 | -1 | NM_133370    | YTHDC1     | 0 | NA | 0 | NA | 0 | NA | 1 | 14 | 0 | NA |
| 4 | 68995761 | 69045917 | 1  | NM_001099662 | TMPRSS11E2 | 0 | NA | 0 | NA | 0 | NA | 0 | NA | 0 | NA |
| 4 | 68995761 | 69045917 | 1  | NM_014058    | TMPRSS11E  | 0 | NA | 0 | NA | 0 | NA | 0 | NA | 0 | NA |
| 4 | 69116840 | 69085497 | -1 | NM_001077    | UGT2B17    | 0 | NA | 0 | NA | 0 | NA | 0 | NA | 0 | NA |
| 4 | 69218969 | 69194909 | -1 | NM_001076    | UGT2B15    | 0 | NA | 0 | NA | 0 | NA | 0 | NA | 0 | NA |
| 4 | 69465107 | 69515259 | 1  | NM_001099662 | TMPRSS11E2 | 0 | NA | 0 | NA | 0 | NA | 0 | NA | 0 | NA |
| 4 | 69465107 | 69515259 | 1  | NM_014058    | TMPRSS11E  | 0 | NA | 0 | NA | 0 | NA | 0 | NA | 0 | NA |
| 4 | 69570979 | 69546931 | -1 | NM_001076    | UGT2B15    | 0 | NA | 0 | NA | 0 | NA | 0 | NA | 0 | NA |
| 4 | 69716317 | 69731209 | 1  | NM_001075    | UGT2B10    | 0 | NA | 0 | NA | 0 | NA | 0 | NA | 0 | NA |
| 4 | 69852093 | 69828755 | -1 | NM_024743    | UGT2A3     | 0 | NA | 0 | NA | 0 | NA | 0 | NA | 0 | NA |
| 4 | 69996813 | 70013293 | 1  | NM_001074    | UGT2B7     | 0 | NA | 0 | NA | 0 | NA | 0 | NA | 0 | NA |
| 4 | 70115038 | 70100635 | -1 | NM_001073    | UGT2B11    | 0 | NA | 0 | NA | 0 | NA | 0 | NA | 0 | NA |
| 4 | 70180805 | 70195357 | 1  | NM_053039    | UGT2B28    | 0 | NA | 0 | NA | 0 | NA | 0 | NA | 0 | NA |
| 4 | 70396215 | 70380471 | -1 | NM_021139    | UGT2B4     | 0 | NA | 0 | NA | 0 | NA | 0 | NA | 0 | NA |
| 4 | 70539923 | 70489678 | -1 | NM_00105677  | UGT2A2     | 0 | NA | 0 | NA | 0 | NA | 0 | NA | 0 | NA |
| 4 | 70548006 | 70488723 | -1 | NM_006798    | UGT2A1     | 0 | NA | 0 | NA | 0 | NA | 0 | NA | 0 | NA |
| 4 | 70681019 | 70627274 | -1 | NM_014465    | SULT1B1    | 0 | NA | 0 | NA | 0 | NA | 0 | NA | 0 | NA |
| 4 | 70760459 | 70741518 | -1 | NM_005420    | SULT1E1    | 0 | NA | 0 | NA | 0 | NA | 0 | NA | 0 | NA |
| 4 | 70831387 | 70846877 | 1  | NM_001025104 | CSN1S1     | 0 | NA | 0 | NA | 0 | NA | 0 | NA | 0 | NA |
| 4 | 70831387 | 70846877 | 1  | NM_001890    | CSN1S1     | 0 | NA | 0 | NA | 0 | NA | 0 | NA | 0 | NA |



|   |          |          |    |              |               |   |    |   |    |   |    |   |    |   |    |
|---|----------|----------|----|--------------|---------------|---|----|---|----|---|----|---|----|---|----|
| 4 | 70861315 | 70855562 | -1 | NM_001891    | CSN2          | 0 | NA | 0 | NA | 0 | NA | 0 | NA | 0 | NA |
| 4 | 70896236 | 70902762 | 1  | NM_001009181 | STATH         | 0 | NA | 0 | NA | 0 | NA | 0 | NA | 0 | NA |
| 4 | 70896236 | 70902762 | 1  | NM_003154    | STATH         | 0 | NA | 0 | NA | 0 | NA | 0 | NA | 0 | NA |
| 4 | 70928764 | 70936836 | 1  | NM_000200    | HTN3          | 0 | NA | 0 | NA | 0 | NA | 0 | NA | 0 | NA |
| 4 | 70950747 | 70959148 | 1  | NM_002159    | HTN1          | 0 | NA | 0 | NA | 0 | NA | 0 | NA | 0 | NA |
| 4 | 71054492 | 71066915 | 1  | NM_214711    | C4orf40       | 0 | NA | 0 | NA | 0 | NA | 0 | NA | 0 | NA |
| 4 | 71096832 | 71104882 | 1  | NM_017855    | ODAM          | 0 | NA | 0 | NA | 0 | NA | 0 | NA | 0 | NA |
| 4 | 71126403 | 71135557 | 1  | NM_152997    | C4orf7        | 0 | NA | 0 | NA | 0 | NA | 0 | NA | 0 | NA |
| 4 | 71142921 | 71151734 | 1  | NM_005212    | CSN3          | 0 | NA | 0 | NA | 0 | NA | 0 | NA | 0 | NA |
| 4 | 71235259 | 71237422 | 1  | NM_033122    | C4orf35       | 0 | NA | 0 | NA | 0 | NA | 0 | NA | 0 | NA |
| 4 | 71261081 | 71267412 | 1  | NM_012390    | SMR3A         | 0 | NA | 0 | NA | 0 | NA | 0 | NA | 0 | NA |
| 4 | 71283383 | 71290550 | 1  | NM_006685    | SMR3B         | 0 | NA | 0 | NA | 0 | NA | 0 | NA | 0 | NA |
| 4 | 71298187 | 71310503 | 1  | NM_021225    | PROL1         | 0 | NA | 0 | NA | 0 | NA | 0 | NA | 0 | NA |
| 4 | 71372524 | 71383303 | 1  | NM_152291    | MUC7          | 0 | NA | 0 | NA | 0 | NA | 0 | NA | 0 | NA |
| 4 | 71418886 | 71433048 | 1  | NM_212557    | AMTN          | 0 | NA | 0 | NA | 0 | NA | 0 | NA | 0 | NA |
| 4 | 71492589 | 71507593 | 1  | NM_016519    | AMBN          | 0 | NA | 0 | NA | 0 | NA | 0 | NA | 0 | NA |
| 4 | 71713324 | 71731400 | 1  | NM_031889    | ENAM          | 0 | NA | 0 | NA | 0 | NA | 0 | NA | 0 | NA |
| 4 | 71751128 | 71740547 | -1 | NM_144646    | IGJ           | 0 | NA | 0 | NA | 0 | NA | 0 | NA | 0 | NA |
| 4 | 71773097 | 71775132 | 1  | NM_020368    | UTP3          | 1 | 16 | 0 | NA | 0 | NA | 0 | NA | 0 | NA |
| 4 | 71806561 | 71878138 | 1  | NM_014961    | RUFY3         | 0 | NA | 0 | NA | 0 | NA | 0 | NA | 0 | NA |
| 4 | 71806575 | 71891787 | 1  | NM_001037442 | RUFY3         | 0 | NA | 0 | NA | 0 | NA | 0 | NA | 0 | NA |
| 4 | 71924084 | 71900362 | -1 | NM_001098477 | GRSF1         | 0 | NA | 0 | NA | 0 | NA | 0 | NA | 0 | NA |
| 4 | 71924491 | 71900362 | -1 | NM_002092    | GRSF1         | 0 | NA | 0 | NA | 0 | NA | 0 | NA | 0 | NA |
| 4 | 71986927 | 72072755 | 1  | NM_173468    | MOBKL1A       | 1 | 13 | 0 | NA | 1 | 15 | 0 | NA | 0 | NA |
| 4 | 72078255 | 72115477 | 1  | NM_000788    | DCK           | 1 | 12 | 0 | NA | 0 | NA | 1 | 19 | 0 | NA |
| 4 | 72271866 | 72656663 | 1  | NM_001098484 | SLC4A4        | 0 | NA | 0 | NA | 0 | NA | 0 | NA | 0 | NA |
| 4 | 72423624 | 72656663 | 1  | NM_003759    | SLC4A4        | 0 | NA | 0 | NA | 0 | NA | 0 | NA | 0 | NA |
| 4 | 72868752 | 72826274 | -1 | NM_000583    | GC            | 0 | NA | 0 | NA | 0 | NA | 0 | NA | 0 | NA |
| 4 | 73116384 | 73232642 | 1  | NM_004885    | NPFPR2        | 1 | 14 | 0 | NA | 0 | NA | 0 | NA | 0 | NA |
| 4 | 73123954 | 73232642 | 1  | NM_053036    | NPFPR2        | 1 | 14 | 0 | NA | 0 | NA | 0 | NA | 0 | NA |
| 4 | 73653380 | 73365550 | -1 | NM_014243    | ADAMTS3       | 0 | NA | 0 | NA | 1 | 12 | 0 | NA | 0 | NA |
| 4 | 74154336 | 74139279 | -1 | NM_173827    | COX18         | 1 | 17 | 0 | NA | 0 | NA | 0 | NA | 0 | NA |
| 4 | 74343366 | 74159365 | -1 | NM_032217    | ANKRD17       | 1 | 13 | 0 | NA | 0 | NA | 0 | NA | 0 | NA |
| 4 | 74343366 | 74159365 | -1 | NM_196889    | ANKRD17       | 1 | 13 | 0 | NA | 0 | NA | 0 | NA | 0 | NA |
| 4 | 74488869 | 74505834 | 1  | NM_000477    | ALB           | 0 | NA | 0 | NA | 0 | NA | 0 | NA | 0 | NA |
| 4 | 74520796 | 74540356 | 1  | NM_001134    | AFP           | 0 | NA | 0 | NA | 0 | NA | 0 | NA | 0 | NA |
| 4 | 74566325 | 74588582 | 1  | NM_001133    | AFM           | 0 | NA | 0 | NA | 0 | NA | 0 | NA | 0 | NA |
| 4 | 74704998 | 74657725 | -1 | NM_177532    | RASSF6        | 0 | NA | 0 | NA | 0 | NA | 0 | NA | 0 | NA |
| 4 | 74705204 | 74657725 | -1 | NM_201431    | RASSF6        | 0 | NA | 0 | NA | 0 | NA | 0 | NA | 0 | NA |
| 4 | 74825138 | 74828297 | 1  | NM_000584    | IL8           | 0 | NA | 0 | NA | 0 | NA | 0 | NA | 0 | NA |
| 4 | 74921276 | 74923341 | 1  | NM_002993    | CXCL6         | 0 | NA | 0 | NA | 0 | NA | 0 | NA | 0 | NA |
| 4 | 74937876 | 74939062 | 1  | NM_002620    | PF4V1         | 0 | NA | 0 | NA | 0 | NA | 0 | NA | 0 | NA |
| 4 | 74953972 | 74955817 | 1  | NM_001511    | CXCL1         | 1 | 14 | 0 | NA | 0 | NA | 0 | NA | 0 | NA |
| 4 | 75066541 | 75065659 | -1 | NM_002619    | PF4           | 0 | NA | 0 | NA | 0 | NA | 0 | NA | 0 | NA |
| 4 | 75072764 | 75071619 | -1 | NM_002704    | PPBP          | 0 | NA | 0 | NA | 0 | NA | 0 | NA | 0 | NA |
| 4 | 75083280 | 75080222 | -1 | NM_002994    | CXCL5         | 0 | NA | 0 | NA | 0 | NA | 0 | NA | 0 | NA |
| 4 | 75123354 | 75121175 | -1 | NM_002090    | CXCL3         | 1 | 14 | 0 | NA | 0 | NA | 0 | NA | 0 | NA |
| 4 | 75183861 | 75181617 | -1 | NM_002089    | CXCL2         | 0 | NA | 0 | NA | 0 | NA | 0 | NA | 0 | NA |
| 4 | 75207854 | 75387678 | 1  | NM_001004346 | MTHFD2L       | 0 | NA | 1 | 12 | 1 | 15 | 0 | NA | 0 | NA |
| 4 | 75393067 | 75398171 | 1  | NM_001013442 | EPGN          | 0 | NA | 0 | NA | 0 | NA | 0 | NA | 0 | NA |
| 4 | 75449723 | 75473341 | 1  | NM_001432    | EREG          | 1 | 19 | 0 | NA | 0 | NA | 0 | NA | 0 | NA |
| 4 | 75529716 | 75539590 | 1  | NM_001657    | AREG          | 0 | NA | 0 | NA | 0 | NA | 0 | NA | 0 | NA |
| 4 | 75699652 | 75709509 | 1  | NM_001657    | AREG          | 0 | NA | 0 | NA | 0 | NA | 0 | NA | 0 | NA |
| 4 | 75938906 | 75890471 | -1 | NM_001729    | BTC           | 0 | NA | 0 | NA | 0 | NA | 0 | NA | 0 | NA |
| 4 | 76077321 | 76194347 | 1  | NM_015393    | DKFZP564O0823 | 0 | NA | 0 | NA | 0 | NA | 0 | NA | 0 | NA |
| 4 | 76658652 | 76623370 | -1 | NM_001008925 | RCHY1         | 0 | NA | 0 | NA | 0 | NA | 0 | NA | 0 | NA |
| 4 | 76658652 | 76623370 | -1 | NM_001009922 | RCHY1         | 0 | NA | 0 | NA | 0 | NA | 0 | NA | 0 | NA |
| 4 | 76658652 | 76623370 | -1 | NM_015436    | RCHY1         | 0 | NA | 0 | NA | 0 | NA | 0 | NA | 0 | NA |
| 4 | 76658677 | 76674260 | 1  | NM_144721    | THAP6         | 0 | NA | 0 | NA | 0 | NA | 0 | NA | 0 | NA |
| 4 | 76700281 | 76708951 | 1  | NM_178497    | C4orf26       | 0 | NA | 0 | NA | 0 | NA | 0 | NA | 0 | NA |
| 4 | 76774745 | 76720727 | -1 | NM_003948    | CDKL2         | 0 | NA | 0 | NA | 0 | NA | 0 | NA | 0 | NA |
| 4 | 76817342 | 76786989 | -1 | NM_012297    | G3BP2         | 1 | 11 | 0 | NA | 1 | 13 | 0 | NA | 0 | NA |
| 4 | 76817629 | 76786989 | -1 | NM_203504    | G3BP2         | 1 | 11 | 0 | NA | 1 | 13 | 0 | NA | 0 | NA |
| 4 | 76817629 | 76786989 | -1 | NM_203505    | G3BP2         | 1 | 11 | 0 | NA | 1 | 13 | 0 | NA | 0 | NA |
| 4 | 76868852 | 76954390 | 1  | NM_003715    | USO1          | 0 | NA | 0 | NA | 0 | NA | 0 | NA | 0 | NA |

|   |          |          |    |              |          |   |    |   |    |   |    |   |    |   |    |
|---|----------|----------|----|--------------|----------|---|----|---|----|---|----|---|----|---|----|
| 4 | 77042705 | 77000049 | -1 | NM_006239    | PPEF2    | 0 | NA | 0 | NA | 0 | NA | 0 | NA | 0 | NA |
| 4 | 77081190 | 77050831 | -1 | NM_001042402 | NAAA     | 0 | NA | 0 | NA | 0 | NA | 0 | NA | 0 | NA |
| 4 | 77081190 | 77053832 | -1 | NM_014435    | NAAA     | 0 | NA | 0 | NA | 0 | NA | 0 | NA | 0 | NA |
| 4 | 77131137 | 77090091 | -1 | NM_018115    | SDAD1    | 1 | 15 | 0 | NA | 0 | NA | 1 | 12 | 0 | NA |
| 4 | 77147665 | 77141646 | -1 | NM_002416    | CXCL9    | 0 | NA | 0 | NA | 0 | NA | 0 | NA | 0 | NA |
| 4 | 77163674 | 77161294 | -1 | NM_001565    | CXCL10   | 0 | NA | 0 | NA | 0 | NA | 0 | NA | 0 | NA |
| 4 | 77176257 | 77173863 | -1 | NM_005409    | CXCL11   | 0 | NA | 0 | NA | 0 | NA | 0 | NA | 0 | NA |
| 4 | 77214886 | 77252962 | 1  | NM_001179    | ART3     | 0 | NA | 0 | NA | 0 | NA | 0 | NA | 0 | NA |
| 4 | 77286679 | 77254840 | -1 | NM_017426    | NUP54    | 1 | 29 | 0 | NA | 0 | NA | 1 | 16 | 0 | NA |
| 4 | 77354059 | 77298917 | -1 | NM_005506    | SCARB2   | 0 | NA | 0 | NA | 1 | 12 | 0 | NA | 0 | NA |
| 4 | 77446832 | 77451307 | 1  | NM_003943    | STBD1    | 0 | NA | 0 | NA | 1 | 13 | 0 | NA | 0 | NA |
| 4 | 77547482 | 77453215 | -1 | NM_001042784 | FLJ25770 | 0 | NA | 0 | NA | 0 | NA | 0 | NA | 0 | NA |
| 4 | 77575276 | 77923429 | 1  | NM_020859    | SHROOM3  | 0 | NA | 0 | NA | 1 | 13 | 0 | NA | 0 | NA |
| 4 | 78038026 | 78035105 | -1 | NM_001029870 | ANKRD56  | 0 | NA | 0 | NA | 0 | NA | 0 | NA | 0 | NA |
| 4 | 78089918 | 78178792 | 1  | NM_018243    | SEPT11   | 0 | NA | 0 | NA | 0 | NA | 0 | NA | 0 | NA |
| 4 | 78216149 | 78188198 | -1 | NM_006835    | CCNI     | 0 | NA | 0 | NA | 1 | 16 | 1 | 15 | 0 | NA |
| 4 | 78297380 | 78310237 | 1  | NM_004354    | CCNG2    | 1 | 19 | 0 | NA | 0 | NA | 0 | NA | 0 | NA |
| 4 | 78651929 | 78752010 | 1  | NM_006419    | CXCL13   | 0 | NA | 0 | NA | 0 | NA | 0 | NA | 0 | NA |
| 4 | 78959568 | 78853564 | -1 | NM_144571    | CNOT6L   | 1 | 16 | 0 | NA | 0 | NA | 0 | NA | 0 | NA |
| 4 | 79002828 | 79092968 | 1  | NM_020236    | MRPL1    | 0 | NA | 0 | NA | 0 | NA | 0 | NA | 0 | NA |
| 4 | 79198119 | 79684447 | 1  | NM_025074    | FRAS1    | 0 | NA | 1 | 13 | 0 | NA | 0 | NA | 0 | NA |
| 4 | 79691765 | 79750629 | 1  | NM_005139    | ANXA3    | 0 | NA | 0 | NA | 0 | NA | 0 | NA | 0 | NA |
| 4 | 79916555 | 80019618 | 1  | NM_017593    | BMP2K    | 0 | NA | 0 | NA | 0 | NA | 0 | NA | 0 | NA |
| 4 | 79916555 | 80052365 | 1  | NM_198892    | BMP2K    | 0 | NA | 0 | NA | 0 | NA | 0 | NA | 0 | NA |
| 4 | 80079606 | 80058117 | -1 | NM_001040202 | PAQR3    | 0 | NA | 0 | NA | 0 | NA | 0 | NA | 0 | NA |
| 4 | 80466195 | 80457295 | -1 | NM_032693    | ARD1B    | 0 | NA | 0 | NA | 0 | NA | 0 | NA | 0 | NA |
| 4 | 80548396 | 80546530 | -1 | NM_033214    | GK2      | 0 | NA | 0 | NA | 0 | NA | 0 | NA | 0 | NA |
| 4 | 81213277 | 81045748 | -1 | NM_058172    | ANTXR2   | 0 | NA | 0 | NA | 0 | NA | 0 | NA | 0 | NA |
| 4 | 81325447 | 81344506 | 1  | NM_020226    | PRDM8    | 0 | NA | 0 | NA | 0 | NA | 0 | NA | 0 | NA |
| 4 | 81337680 | 81344506 | 1  | NM_001099403 | PRDM8    | 0 | NA | 1 | 12 | 0 | NA | 0 | NA | 0 | NA |
| 4 | 81406765 | 81431195 | 1  | NM_004464    | FGF5     | 0 | NA | 0 | NA | 0 | NA | 0 | NA | 0 | NA |
| 4 | 81406765 | 81431195 | 1  | NM_033143    | FGF5     | 0 | NA | 0 | NA | 0 | NA | 0 | NA | 0 | NA |
| 4 | 81475897 | 82103926 | 1  | NM_152770    | C4orf22  | 0 | NA | 0 | NA | 0 | NA | 0 | NA | 0 | NA |
| 4 | 82171142 | 82197709 | 1  | NM_001201    | BMP3     | 0 | NA | 0 | NA | 0 | NA | 0 | NA | 0 | NA |
| 4 | 82345239 | 82228860 | -1 | NM_006259    | PRKG2    | 0 | NA | 0 | NA | 0 | NA | 0 | NA | 0 | NA |
| 4 | 82612085 | 82567242 | -1 | NM_152545    | RASGEF1B | 0 | NA | 0 | NA | 0 | NA | 0 | NA | 0 | NA |
| 4 | 83514173 | 83493490 | -1 | NM_001003810 | HNRNPD   | 0 | NA | 0 | NA | 0 | NA | 1 | 11 | 0 | NA |
| 4 | 83514173 | 83493490 | -1 | NM_002138    | HNRNPD   | 0 | NA | 0 | NA | 0 | NA | 1 | 11 | 0 | NA |
| 4 | 83514173 | 83493490 | -1 | NM_031369    | HNRNPD   | 0 | NA | 0 | NA | 0 | NA | 1 | 11 | 0 | NA |
| 4 | 83514173 | 83493490 | -1 | NM_031370    | HNRNPD   | 0 | NA | 0 | NA | 0 | NA | 1 | 11 | 0 | NA |
| 4 | 83570402 | 83563370 | -1 | NM_031372    | HNRPDL   | 0 | NA | 0 | NA | 0 | NA | 0 | NA | 0 | NA |
| 4 | 83570786 | 83601264 | 1  | NM_021204    | ENOPH1   | 0 | NA | 0 | NA | 0 | NA | 0 | NA | 0 | NA |
| 4 | 83702150 | 83624627 | -1 | NM_001080506 | FLJ12993 | 0 | NA | 0 | NA | 0 | NA | 0 | NA | 0 | NA |
| 4 | 83939034 | 83769713 | -1 | NM_001037582 | SCD5     | 0 | NA | 0 | NA | 0 | NA | 0 | NA | 0 | NA |
| 4 | 83939034 | 83800063 | -1 | NM_024906    | SCD5     | 0 | NA | 0 | NA | 0 | NA | 0 | NA | 0 | NA |
| 4 | 84031424 | 83958837 | -1 | NM_001077206 | SEC31A   | 0 | NA | 0 | NA | 0 | NA | 0 | NA | 0 | NA |
| 4 | 84031424 | 83958837 | -1 | NM_001077207 | SEC31A   | 0 | NA | 0 | NA | 0 | NA | 0 | NA | 0 | NA |
| 4 | 84031424 | 83958837 | -1 | NM_001077208 | SEC31A   | 0 | NA | 0 | NA | 0 | NA | 0 | NA | 0 | NA |
| 4 | 84031424 | 83958837 | -1 | NM_014933    | SEC31A   | 0 | NA | 0 | NA | 0 | NA | 0 | NA | 0 | NA |
| 4 | 84031424 | 83958837 | -1 | NM_016211    | SEC31A   | 0 | NA | 0 | NA | 0 | NA | 0 | NA | 0 | NA |
| 4 | 84040860 | 84060146 | 1  | NM_024672    | THAP9    | 0 | NA | 0 | NA | 0 | NA | 0 | NA | 0 | NA |
| 4 | 84151006 | 84064780 | -1 | NM_001115008 | LIN54    | 0 | NA | 0 | NA | 0 | NA | 0 | NA | 0 | NA |
| 4 | 84151006 | 84064780 | -1 | NM_194282    | LIN54    | 0 | NA | 0 | NA | 0 | NA | 0 | NA | 0 | NA |
| 4 | 84153064 | 84064780 | -1 | NM_001115007 | LIN54    | 0 | NA | 0 | NA | 0 | NA | 0 | NA | 0 | NA |
| 4 | 84175262 | 84215995 | 1  | NM_016129    | COPS4    | 1 | 18 | 0 | NA | 1 | 22 | 0 | NA | 0 | NA |
| 4 | 84254913 | 84230864 | -1 | NM_016619    | PLAC8    | 0 | NA | 0 | NA | 0 | NA | 0 | NA | 0 | NA |
| 4 | 84424988 | 84404000 | -1 | NM_015697    | COQ2     | 0 | NA | 0 | NA | 0 | NA | 0 | NA | 0 | NA |
| 4 | 84475058 | 84435491 | -1 | NM_001098540 | HPSE     | 0 | NA | 0 | NA | 0 | NA | 0 | NA | 0 | NA |
| 4 | 84475330 | 84435496 | -1 | NM_006665    | HPSE     | 0 | NA | 0 | NA | 0 | NA | 0 | NA | 0 | NA |
| 4 | 84596049 | 84547522 | -1 | NM_133636    | HEL308   | 0 | NA | 0 | NA | 0 | NA | 0 | NA | 0 | NA |
| 4 | 84596141 | 84601953 | 1  | NM_016067    | MRPS18C  | 0 | NA | 0 | NA | 0 | NA | 0 | NA | 0 | NA |
| 4 | 84625314 | 84601119 | -1 | NM_139076    | CGDC98   | 0 | NA | 0 | NA | 0 | NA | 0 | NA | 0 | NA |
| 4 | 84676676 | 84748050 | 1  | NM_032717    | AGPAT9   | 0 | NA | 0 | NA | 0 | NA | 0 | NA | 0 | NA |
| 4 | 85638411 | 85633459 | -1 | NM_006168    | NKX6-1   | 0 | NA | 0 | NA | 0 | NA | 0 | NA | 0 | NA |
| 4 | 85723080 | 85789365 | 1  | NM_001263    | CDS1     | 0 | NA | 0 | NA | 0 | NA | 0 | NA | 0 | NA |

|   |          |          |    |              |          |   |    |   |    |   |    |   |    |   |    |
|---|----------|----------|----|--------------|----------|---|----|---|----|---|----|---|----|---|----|
| 4 | 85823116 | 85809718 | -1 | NM_178585    | WDFY3    | 0 | NA | 0 | NA | 0 | NA | 0 | NA | 0 | NA |
| 4 | 86037187 | 85949042 | -1 | NM_178583    | WDFY3    | 0 | NA | 0 | NA | 0 | NA | 0 | NA | 0 | NA |
| 4 | 86106568 | 85809718 | -1 | NM_014991    | WDFY3    | 0 | NA | 0 | NA | 0 | NA | 0 | NA | 0 | NA |
| 4 | 86615307 | 87142847 | 1  | NM_001025616 | ARHGAP24 | 0 | NA | 0 | NA | 0 | NA | 0 | NA | 0 | NA |
| 4 | 86918874 | 87142847 | 1  | NM_001042669 | ARHGAP24 | 0 | NA | 0 | NA | 1 | 12 | 0 | NA | 0 | NA |
| 4 | 87070449 | 87142847 | 1  | NM_031305    | ARHGAP24 | 0 | NA | 0 | NA | 0 | NA | 0 | NA | 0 | NA |
| 4 | 87247830 | 87156655 | -1 | NM_138981    | MAPK10   | 0 | NA | 0 | NA | 0 | NA | 0 | NA | 0 | NA |
| 4 | 87494767 | 87156655 | -1 | NM_138982    | MAPK10   | 0 | NA | 0 | NA | 0 | NA | 0 | NA | 0 | NA |
| 4 | 87500240 | 87156655 | -1 | NM_138980    | MAPK10   | 0 | NA | 0 | NA | 0 | NA | 0 | NA | 0 | NA |
| 4 | 87593307 | 87156655 | -1 | NM_002753    | MAPK10   | 0 | NA | 0 | NA | 0 | NA | 0 | NA | 0 | NA |
| 4 | 87734908 | 87955326 | 1  | NM_006264    | PTPN13   | 0 | NA | 0 | NA | 0 | NA | 0 | NA | 0 | NA |
| 4 | 87734908 | 87955326 | 1  | NM_080683    | PTPN13   | 0 | NA | 0 | NA | 0 | NA | 0 | NA | 0 | NA |
| 4 | 87734908 | 87955326 | 1  | NM_080684    | PTPN13   | 0 | NA | 0 | NA | 0 | NA | 0 | NA | 0 | NA |
| 4 | 87734908 | 87955326 | 1  | NM_080685    | PTPN13   | 0 | NA | 0 | NA | 0 | NA | 0 | NA | 0 | NA |
| 4 | 87989292 | 87963864 | -1 | NM_197965    | SLC10A6  | 0 | NA | 0 | NA | 0 | NA | 0 | NA | 0 | NA |
| 4 | 88032599 | 88016381 | -1 | NM_144645    | C4orf36  | 0 | NA | 0 | NA | 0 | NA | 0 | NA | 0 | NA |
| 4 | 88147176 | 88281215 | 1  | NM_005935    | AFF1     | 0 | NA | 0 | NA | 0 | NA | 0 | NA | 0 | NA |
| 4 | 88360698 | 88301237 | -1 | NM_020803    | KLHL8    | 0 | NA | 0 | NA | 0 | NA | 0 | NA | 0 | NA |
| 4 | 88463062 | 88443964 | -1 | NM_178135    | HSD17B13 | 0 | NA | 0 | NA | 0 | NA | 0 | NA | 0 | NA |
| 4 | 88531479 | 88476714 | -1 | NM_016245    | HSD17B11 | 0 | NA | 0 | NA | 0 | NA | 0 | NA | 0 | NA |
| 4 | 88562758 | 88598523 | 1  | NM_024047    | NUDT9    | 1 | 19 | 0 | NA | 0 | NA | 0 | NA | 0 | NA |
| 4 | 88562758 | 88598523 | 1  | NM_198038    | NUDT9    | 1 | 19 | 0 | NA | 0 | NA | 0 | NA | 0 | NA |
| 4 | 88669530 | 88613511 | -1 | NM_004684    | SPARCL1  | 0 | NA | 0 | NA | 0 | NA | 0 | NA | 0 | NA |
| 4 | 88748704 | 88757049 | 1  | NM_014208    | DSPP     | 0 | NA | 0 | NA | 0 | NA | 0 | NA | 0 | NA |
| 4 | 88790482 | 88804534 | 1  | NM_001079911 | DMP1     | 0 | NA | 0 | NA | 0 | NA | 0 | NA | 0 | NA |
| 4 | 88790482 | 88804534 | 1  | NM_004407    | DMP1     | 0 | NA | 0 | NA | 0 | NA | 0 | NA | 0 | NA |
| 4 | 88939725 | 88952625 | 1  | NM_004967    | IBSP     | 0 | NA | 0 | NA | 0 | NA | 0 | NA | 0 | NA |
| 4 | 88973163 | 88986968 | 1  | NM_020203    | MEPE     | 0 | NA | 0 | NA | 0 | NA | 0 | NA | 0 | NA |
| 4 | 89115825 | 89123587 | 1  | NM_000582    | SPP1     | 0 | NA | 0 | NA | 0 | NA | 0 | NA | 0 | NA |
| 4 | 89115825 | 89123587 | 1  | NM_001040058 | SPP1     | 0 | NA | 0 | NA | 0 | NA | 0 | NA | 0 | NA |
| 4 | 89115825 | 89123587 | 1  | NM_001040060 | SPP1     | 0 | NA | 0 | NA | 0 | NA | 0 | NA | 0 | NA |
| 4 | 89147843 | 89217953 | 1  | NM_000297    | PKD2     | 0 | NA | 0 | NA | 0 | NA | 0 | NA | 0 | NA |
| 4 | 89299035 | 89230439 | -1 | NM_004827    | ABC62    | 0 | NA | 0 | NA | 0 | NA | 0 | NA | 0 | NA |
| 4 | 89424912 | 89400555 | -1 | NM_152542    | PPM1K    | 0 | NA | 0 | NA | 0 | NA | 0 | NA | 0 | NA |
| 4 | 89518914 | 89583272 | 1  | NM_017912    | HERC6    | 0 | NA | 0 | NA | 0 | NA | 0 | NA | 0 | NA |
| 4 | 89597290 | 89646337 | 1  | NM_016323    | HERC5    | 1 | 12 | 0 | NA | 0 | NA | 0 | NA | 0 | NA |
| 4 | 89663978 | 89661157 | -1 | NM_001042616 | PIGY     | 0 | NA | 0 | NA | 0 | NA | 0 | NA | 0 | NA |
| 4 | 89663978 | 89661157 | -1 | NM_032906    | PIGY     | 0 | NA | 0 | NA | 0 | NA | 0 | NA | 0 | NA |
| 4 | 89732669 | 89848709 | 1  | NM_014606    | HERC3    | 0 | NA | 0 | NA | 0 | NA | 0 | NA | 0 | NA |
| 4 | 89838003 | 89836089 | -1 | NM_153757    | NAP1L5   | 0 | NA | 0 | NA | 0 | NA | 0 | NA | 0 | NA |
| 4 | 89963425 | 89866128 | -1 | NM_001015045 | FAM13A1  | 0 | NA | 0 | NA | 0 | NA | 0 | NA | 0 | NA |
| 4 | 90197346 | 89866128 | -1 | NM_014883    | FAM13A1  | 0 | NA | 0 | NA | 0 | NA | 0 | NA | 0 | NA |
| 4 | 90252990 | 90255075 | 1  | NM_145715    | TIGD2    | 0 | NA | 0 | NA | 0 | NA | 0 | NA | 0 | NA |
| 4 | 90448184 | 90384451 | -1 | NM_198281    | GPRIN3   | 0 | NA | 0 | NA | 0 | NA | 0 | NA | 0 | NA |
| 4 | 90975854 | 90868057 | -1 | NM_007308    | SNCA     | 0 | NA | 0 | NA | 0 | NA | 0 | NA | 0 | NA |
| 4 | 90977156 | 90865727 | -1 | NM_000345    | SNCA     | 0 | NA | 0 | NA | 0 | NA | 0 | NA | 0 | NA |
| 4 | 91035074 | 91094803 | 1  | NM_007351    | MMRN1    | 0 | NA | 0 | NA | 0 | NA | 0 | NA | 0 | NA |
| 4 | 91375204 | 91922174 | 1  | NM_207491    | MGC48628 | 0 | NA | 0 | NA | 0 | NA | 0 | NA | 0 | NA |
| 4 | 91979292 | 91978664 | -1 | NM_183049    | TMSL3    | 0 | NA | 0 | NA | 0 | NA | 0 | NA | 0 | NA |
| 4 | 93444572 | 94912672 | 1  | NM_001510    | GRID2    | 0 | NA | 0 | NA | 0 | NA | 0 | NA | 0 | NA |
| 4 | 94969100 | 94970165 | 1  | NM_005172    | ATOH1    | 0 | NA | 0 | NA | 0 | NA | 0 | NA | 0 | NA |
| 4 | 95348220 | 95431466 | 1  | NM_020169    | SMARCD1  | 0 | NA | 0 | NA | 0 | NA | 0 | NA | 0 | NA |
| 4 | 95483050 | 95438729 | -1 | NM_014485    | PGDS     | 0 | NA | 0 | NA | 0 | NA | 0 | NA | 0 | NA |
| 4 | 95592060 | 95728393 | 1  | NM_001011515 | PDLIM5   | 0 | NA | 0 | NA | 1 | 12 | 0 | NA | 0 | NA |
| 4 | 95592060 | 95728393 | 1  | NM_001011516 | PDLIM5   | 0 | NA | 0 | NA | 1 | 12 | 0 | NA | 0 | NA |
| 4 | 95592060 | 95808400 | 1  | NM_001011513 | PDLIM5   | 0 | NA | 0 | NA | 1 | 12 | 0 | NA | 0 | NA |
| 4 | 95592060 | 95808400 | 1  | NM_006457    | PDLIM5   | 0 | NA | 0 | NA | 1 | 12 | 0 | NA | 0 | NA |
| 4 | 95898150 | 96298624 | 1  | NM_001203    | BMPR1B   | 0 | NA | 0 | NA | 0 | NA | 0 | NA | 0 | NA |
| 4 | 96689185 | 96308711 | -1 | NM_003728    | UNC5C    | 0 | NA | 0 | NA | 0 | NA | 0 | NA | 0 | NA |
| 4 | 96980261 | 96981648 | 1  | NM_005390    | PDHA2    | 0 | NA | 0 | NA | 0 | NA | 0 | NA | 0 | NA |
| 4 | 99283414 | 98699056 | -1 | NM_174952    | C4orf37  | 0 | NA | 0 | NA | 0 | NA | 1 | 11 | 0 | NA |
| 4 | 99401549 | 99584035 | 1  | NM_001100426 | RAP1GDS1 | 0 | NA | 0 | NA | 0 | NA | 0 | NA | 0 | NA |
| 4 | 99401549 | 99584035 | 1  | NM_001100427 | RAP1GDS1 | 0 | NA | 0 | NA | 0 | NA | 0 | NA | 0 | NA |
| 4 | 99401549 | 99584035 | 1  | NM_001100428 | RAP1GDS1 | 0 | NA | 0 | NA | 0 | NA | 0 | NA | 0 | NA |
| 4 | 99401549 | 99584035 | 1  | NM_001100429 | RAP1GDS1 | 0 | NA | 0 | NA | 0 | NA | 0 | NA | 0 | NA |

|   |           |           |    |              |           |   |    |   |    |   |    |   |    |   |    |
|---|-----------|-----------|----|--------------|-----------|---|----|---|----|---|----|---|----|---|----|
| 4 | 99401549  | 99584035  | 1  | NM_001100430 | RAP1GDS1  | 0 | NA | 0 | NA | 0 | NA | 0 | NA | 0 | NA |
| 4 | 99401549  | 99584035  | 1  | NM_021159    | RAP1GDS1  | 0 | NA | 0 | NA | 0 | NA | 0 | NA | 0 | NA |
| 4 | 99798750  | 99612425  | -1 | NM_005723    | TSPAN5    | 0 | NA | 0 | NA | 0 | NA | 0 | NA | 0 | NA |
| 4 | 100070139 | 100020234 | -1 | NM_001968    | EIF4E     | 0 | NA | 0 | NA | 0 | NA | 0 | NA | 0 | NA |
| 4 | 100135810 | 100202983 | 1  | NM_015143    | METAP1    | 0 | NA | 0 | NA | 0 | NA | 0 | NA | 0 | NA |
| 4 | 100228954 | 100211152 | -1 | NM_000671    | ADH5      | 0 | NA | 0 | NA | 0 | NA | 0 | NA | 0 | NA |
| 4 | 100284472 | 100263855 | -1 | NM_000670    | ADH4      | 0 | NA | 0 | NA | 0 | NA | 0 | NA | 0 | NA |
| 4 | 100359426 | 100342817 | -1 | NM_001102470 | ADH6      | 0 | NA | 0 | NA | 0 | NA | 0 | NA | 0 | NA |
| 4 | 100359426 | 100344901 | -1 | NM_000672    | ADH6      | 0 | NA | 0 | NA | 0 | NA | 0 | NA | 0 | NA |
| 4 | 100431165 | 100416546 | -1 | NM_000667    | ADH1A     | 0 | NA | 0 | NA | 0 | NA | 0 | NA | 0 | NA |
| 4 | 100461595 | 100446549 | -1 | NM_000668    | ADH1B     | 0 | NA | 0 | NA | 0 | NA | 0 | NA | 0 | NA |
| 4 | 100492940 | 100476671 | -1 | NM_000669    | ADH1C     | 0 | NA | 0 | NA | 0 | NA | 0 | NA | 0 | NA |
| 4 | 100575548 | 100552440 | -1 | NM_000673    | ADH7      | 0 | NA | 0 | NA | 0 | NA | 0 | NA | 0 | NA |
| 4 | 100651222 | 100682483 | 1  | NM_032149    | C4orf17   | 0 | NA | 0 | NA | 0 | NA | 0 | NA | 0 | NA |
| 4 | 100703848 | 100686906 | -1 | NM_152292    | RG9MTD2   | 0 | NA | 0 | NA | 0 | NA | 0 | NA | 0 | NA |
| 4 | 100704262 | 100764177 | 1  | NM_000253    | MTTP      | 0 | NA | 0 | NA | 0 | NA | 0 | NA | 0 | NA |
| 4 | 100957003 | 101010369 | 1  | NM_014395    | DAPP1     | 0 | NA | 0 | NA | 0 | NA | 0 | NA | 0 | NA |
| 4 | 101034726 | 101021386 | -1 | NM_021970    | MAP2K1IP1 | 0 | NA | 0 | NA | 0 | NA | 0 | NA | 0 | NA |
| 4 | 101067271 | 101039587 | -1 | NM_024920    | DNAJB14   | 0 | NA | 0 | NA | 0 | NA | 0 | NA | 0 | NA |
| 4 | 101086775 | 101040700 | -1 | NM_001031723 | DNAJB14   | 0 | NA | 0 | NA | 0 | NA | 0 | NA | 0 | NA |
| 4 | 101090535 | 101088266 | -1 | NM_002106    | H2AFZ     | 0 | NA | 0 | NA | 0 | NA | 0 | NA | 0 | NA |
| 4 | 101330636 | 101326049 | -1 | NM_145244    | DDIT4L    | 0 | NA | 0 | NA | 0 | NA | 0 | NA | 0 | NA |
| 4 | 101658202 | 101538006 | -1 | NM_016242    | EMCN      | 0 | NA | 0 | NA | 0 | NA | 0 | NA | 0 | NA |
| 4 | 102487376 | 102163609 | -1 | NM_000944    | PPP3CA    | 0 | NA | 0 | NA | 0 | NA | 0 | NA | 0 | NA |
| 4 | 102930786 | 103214992 | 1  | NM_017935    | BANK1     | 0 | NA | 0 | NA | 0 | NA | 0 | NA | 0 | NA |
| 4 | 102954005 | 103214992 | 1  | NM_001083907 | BANK1     | 0 | NA | 0 | NA | 0 | NA | 0 | NA | 0 | NA |
| 4 | 103485371 | 103401843 | -1 | NM_022154    | SLC39A8   | 0 | NA | 0 | NA | 0 | NA | 0 | NA | 0 | NA |
| 4 | 103641517 | 103757507 | 1  | NM_003998    | NFKB1     | 0 | NA | 0 | NA | 0 | NA | 0 | NA | 0 | NA |
| 4 | 103901196 | 103771690 | -1 | NM_005908    | MANBA     | 0 | NA | 0 | NA | 0 | NA | 0 | NA | 0 | NA |
| 4 | 103967428 | 103936216 | -1 | NM_181892    | UBE2D3    | 0 | NA | 0 | NA | 0 | NA | 0 | NA | 0 | NA |
| 4 | 103967843 | 103936216 | -1 | NM_181887    | UBE2D3    | 0 | NA | 0 | NA | 0 | NA | 0 | NA | 0 | NA |
| 4 | 103967843 | 103936216 | -1 | NM_181891    | UBE2D3    | 0 | NA | 0 | NA | 0 | NA | 0 | NA | 0 | NA |
| 4 | 103968243 | 103936216 | -1 | NM_003340    | UBE2D3    | 0 | NA | 0 | NA | 0 | NA | 0 | NA | 0 | NA |
| 4 | 103968243 | 103936216 | -1 | NM_181886    | UBE2D3    | 0 | NA | 0 | NA | 0 | NA | 0 | NA | 0 | NA |
| 4 | 103968243 | 103936216 | -1 | NM_181888    | UBE2D3    | 0 | NA | 0 | NA | 0 | NA | 0 | NA | 0 | NA |
| 4 | 103968445 | 103936216 | -1 | NM_181889    | UBE2D3    | 0 | NA | 0 | NA | 0 | NA | 0 | NA | 0 | NA |
| 4 | 104009444 | 103936216 | -1 | NM_181893    | UBE2D3    | 0 | NA | 0 | NA | 0 | NA | 0 | NA | 0 | NA |
| 4 | 104009473 | 103936216 | -1 | NM_181890    | UBE2D3    | 0 | NA | 0 | NA | 0 | NA | 0 | NA | 0 | NA |
| 4 | 104009575 | 104029162 | 1  | NM_001008388 | CISD2     | 0 | NA | 0 | NA | 0 | NA | 0 | NA | 0 | NA |
| 4 | 104160325 | 104025643 | -1 | NM_001100874 | NHEDC1    | 0 | NA | 0 | NA | 0 | NA | 0 | NA | 0 | NA |
| 4 | 104160325 | 104041533 | -1 | NM_139173    | NHEDC1    | 0 | NA | 0 | NA | 0 | NA | 0 | NA | 0 | NA |
| 4 | 104217379 | 104166794 | -1 | NM_178833    | NHEDC2    | 0 | NA | 0 | NA | 0 | NA | 0 | NA | 0 | NA |
| 4 | 104240473 | 104218230 | -1 | NM_020139    | BDH2      | 0 | NA | 0 | NA | 0 | NA | 0 | NA | 0 | NA |
| 4 | 104339015 | 104246411 | -1 | NM_001813    | CENPE     | 0 | NA | 0 | NA | 0 | NA | 0 | NA | 0 | NA |
| 4 | 104860422 | 104730073 | -1 | NM_001059    | TACR3     | 0 | NA | 0 | NA | 0 | NA | 0 | NA | 0 | NA |
| 4 | 105631916 | 105612791 | -1 | NM_025212    | CXXC4     | 0 | NA | 0 | NA | 0 | NA | 0 | NA | 0 | NA |
| 4 | 106287391 | 106383377 | 1  | NM_017628    | TET2      | 0 | NA | 0 | NA | 0 | NA | 0 | NA | 0 | NA |
| 4 | 106287391 | 106420407 | 1  | NM_001127208 | TET2      | 0 | NA | 0 | NA | 0 | NA | 0 | NA | 0 | NA |
| 4 | 106614676 | 106509682 | -1 | NM_001034191 | PPA2      | 0 | NA | 0 | NA | 0 | NA | 0 | NA | 0 | NA |
| 4 | 106614676 | 106509682 | -1 | NM_006903    | PPA2      | 0 | NA | 0 | NA | 0 | NA | 0 | NA | 0 | NA |
| 4 | 106614676 | 106509682 | -1 | NM_176866    | PPA2      | 0 | NA | 0 | NA | 0 | NA | 0 | NA | 0 | NA |
| 4 | 106614676 | 106509682 | -1 | NM_176867    | PPA2      | 0 | NA | 0 | NA | 0 | NA | 0 | NA | 0 | NA |
| 4 | 106614676 | 106509682 | -1 | NM_176869    | PPA2      | 0 | NA | 0 | NA | 0 | NA | 0 | NA | 0 | NA |
| 4 | 106693225 | 106772286 | 1  | NM_017700    | FLJ20184  | 0 | NA | 0 | NA | 0 | NA | 0 | NA | 0 | NA |
| 4 | 106849278 | 106823233 | -1 | NM_020395    | INTS12    | 1 | 16 | 0 | NA | 0 | NA | 1 | 16 | 0 | NA |
| 4 | 106849389 | 106988331 | 1  | NM_024751    | GSTCD     | 1 | 16 | 0 | NA | 0 | NA | 1 | 16 | 0 | NA |
| 4 | 106851418 | 106986359 | 1  | NM_001031720 | GSTCD     | 1 | 16 | 0 | NA | 0 | NA | 1 | 16 | 0 | NA |
| 4 | 107036053 | 107112277 | 1  | NM_001033047 | NPNT      | 0 | NA | 0 | NA | 0 | NA | 0 | NA | 0 | NA |
| 4 | 107456834 | 107186686 | -1 | NM_033115    | MGC16169  | 0 | NA | 0 | NA | 0 | NA | 0 | NA | 0 | NA |
| 4 | 107457123 | 107489021 | 1  | NM_004757    | SCYE1     | 0 | NA | 0 | NA | 0 | NA | 0 | NA | 0 | NA |
| 4 | 108176902 | 108062407 | -1 | NM_014421    | DKK2      | 0 | NA | 0 | NA | 0 | NA | 0 | NA | 0 | NA |
| 4 | 108860868 | 108754270 | -1 | NM_005443    | PAPSS1    | 1 | 12 | 0 | NA | 0 | NA | 1 | 13 | 0 | NA |
| 4 | 109033878 | 109051558 | 1  | NM_152621    | SGMS2     | 0 | NA | 0 | NA | 0 | NA | 0 | NA | 0 | NA |
| 4 | 109072165 | 109094062 | 1  | NM_183075    | CYP2U1    | 0 | NA | 0 | NA | 0 | NA | 0 | NA | 0 | NA |
| 4 | 109130388 | 109175780 | 1  | NM_005327    | HADH      | 0 | NA | 0 | NA | 0 | NA | 0 | NA | 0 | NA |

|   |           |           |    |              |           |   |    |   |    |   |    |    |    |    |    |
|---|-----------|-----------|----|--------------|-----------|---|----|---|----|---|----|----|----|----|----|
| 4 | 109309027 | 109188149 | -1 | NM_016269    | LEF1      | 0 | NA | 0 | NA | 0 | NA | 0  | NA | 0  | NA |
| 4 | 109761170 | 109771088 | 1  | NM_000995    | RPL34     | 0 | NA | 0 | NA | 0 | NA | 0  | NA | 0  | NA |
| 4 | 109761197 | 109771088 | 1  | NM_033625    | RPL34     | 0 | NA | 0 | NA | 0 | NA | 0  | NA | 0  | NA |
| 4 | 109791189 | 109808429 | 1  | NM_021227    | DC2       | 0 | NA | 0 | NA | 0 | NA | 0  | NA | 0  | NA |
| 4 | 109903858 | 109882650 | -1 | NM_031279    | AGXT2L1   | 0 | NA | 0 | NA | 0 | NA | 0  | NA | 0  | NA |
| 4 | 110443248 | 109954420 | -1 | NM_198721    | COL25A1   | 0 | NA | 0 | NA | 0 | NA | 0  | NA | 0  | NA |
| 4 | 110443248 | 109964487 | -1 | NM_032518    | COL25A1   | 0 | NA | 0 | NA | 0 | NA | 0  | NA | 0  | NA |
| 4 | 110574419 | 110681064 | 1  | NM_001042734 | SEC24B    | 0 | NA | 0 | NA | 0 | NA | 0  | NA | 0  | NA |
| 4 | 110574419 | 110681064 | 1  | NM_006323    | SEC24B    | 0 | NA | 0 | NA | 0 | NA | 0  | NA | 0  | NA |
| 4 | 110700865 | 110828321 | 1  | NM_017918    | CCDC109B  | 0 | NA | 0 | NA | 0 | NA | 0  | NA | 0  | NA |
| 4 | 110844078 | 110829233 | -1 | NM_001226    | CASP6     | 0 | NA | 0 | NA | 0 | NA | 0  | NA | 0  | NA |
| 4 | 110844078 | 110829233 | -1 | NM_032992    | CASP6     | 0 | NA | 0 | NA | 0 | NA | 0  | NA | 0  | NA |
| 4 | 110870660 | 110854138 | -1 | NM_030821    | PLA2G12A  | 0 | NA | 0 | NA | 0 | NA | 0  | NA | 0  | NA |
| 4 | 110942784 | 110881296 | -1 | NM_000204    | CFI       | 0 | NA | 0 | NA | 0 | NA | 0  | NA | 0  | NA |
| 4 | 110956114 | 110965342 | 1  | NM_018983    | NOLA1     | 0 | NA | 0 | NA | 0 | NA | 0  | NA | 0  | NA |
| 4 | 110956114 | 110965342 | 1  | NM_032993    | NOLA1     | 0 | NA | 0 | NA | 0 | NA | 0  | NA | 0  | NA |
| 4 | 110968598 | 110985310 | 1  | NM_006583    | RRH       | 0 | NA | 0 | NA | 0 | NA | 0  | NA | 0  | NA |
| 4 | 110991934 | 111012919 | 1  | NM_198506    | LRIT3     | 0 | NA | 0 | NA | 0 | NA | 0  | NA | 0  | NA |
| 4 | 111053488 | 111152870 | 1  | NM_001963    | EGF       | 0 | NA | 0 | NA | 0 | NA | 0  | NA | 0  | NA |
| 4 | 111339220 | 111189991 | -1 | NM_024090    | ELOVL6    | 0 | NA | 0 | NA | 0 | NA | 0  | NA | 0  | NA |
| 4 | 111616677 | 111703942 | 1  | NM_001977    | ENPEP     | 0 | NA | 0 | NA | 0 | NA | 0  | NA | 0  | NA |
| 4 | 111763703 | 111758028 | -1 | NM_000325    | PITX2     | 0 | NA | 0 | NA | 0 | NA | 0  | NA | 0  | NA |
| 4 | 111777957 | 111758028 | -1 | NM_153426    | PITX2     | 0 | NA | 0 | NA | 0 | NA | 0  | NA | 0  | NA |
| 4 | 111777957 | 111758028 | -1 | NM_153427    | PITX2     | 0 | NA | 0 | NA | 0 | NA | 0  | NA | 0  | NA |
| 4 | 113286126 | 113329678 | 1  | NM_152400    | C4orf32   | 0 | NA | 0 | NA | 0 | NA | 0  | NA | 0  | NA |
| 4 | 113372429 | 113410654 | 1  | NM_018569    | C4orf16   | 0 | NA | 0 | NA | 0 | NA | 0  | NA | 0  | NA |
| 4 | 113426508 | 113416230 | -1 | NM_052864    | TIFA      | 1 | 13 | 0 | NA | 0 | NA | 0  | NA | 0  | NA |
| 4 | 113437947 | 113583213 | 1  | NM_001102406 | ALPK1     | 0 | NA | 0 | NA | 0 | NA | 0  | NA | 0  | NA |
| 4 | 113437947 | 113583213 | 1  | NM_025144    | ALPK1     | 0 | NA | 0 | NA | 0 | NA | 0  | NA | 0  | NA |
| 4 | 113656777 | 113654120 | -1 | NM_024019    | NEUROG2   | 0 | NA | 0 | NA | 0 | NA | 0  | NA | 0  | NA |
| 4 | 113728256 | 113679948 | -1 | NM_001099776 | LOC91431  | 0 | NA | 0 | NA | 0 | NA | 0  | NA | 0  | NA |
| 4 | 113777505 | 113730234 | -1 | NM_018392    | C4orf21   | 0 | NA | 0 | NA | 1 | 12 | 0  | NA | 0  | NA |
| 4 | 113777568 | 113798191 | 1  | NM_016648    | LARP7     | 0 | NA | 0 | NA | 0 | 1  | 12 | 0  | NA | 0  |
| 4 | 113778060 | 113798191 | 1  | NM_015454    | LARP7     | 0 | NA | 0 | NA | 0 | 1  | 12 | 0  | NA | 0  |
| 4 | 114190318 | 114524336 | 1  | NM_001148    | ANK2      | 0 | NA | 0 | NA | 0 | NA | 0  | NA | 0  | NA |
| 4 | 114190318 | 114524336 | 1  | NM_020977    | ANK2      | 0 | NA | 0 | NA | 0 | NA | 0  | NA | 0  | NA |
| 4 | 114902177 | 114593020 | -1 | NM_172127    | CAMK2D    | 0 | NA | 0 | NA | 0 | NA | 0  | NA | 0  | NA |
| 4 | 114902177 | 114593020 | -1 | NM_172128    | CAMK2D    | 0 | NA | 0 | NA | 0 | NA | 0  | NA | 0  | NA |
| 4 | 114902177 | 114595013 | -1 | NM_001221    | CAMK2D    | 0 | NA | 0 | NA | 0 | NA | 0  | NA | 0  | NA |
| 4 | 114902177 | 114597792 | -1 | NM_172115    | CAMK2D    | 0 | NA | 0 | NA | 0 | NA | 0  | NA | 0  | NA |
| 4 | 115120327 | 115040888 | -1 | NM_024590    | ARSL      | 0 | NA | 0 | NA | 0 | NA | 0  | NA | 0  | NA |
| 4 | 115762971 | 115817201 | 1  | NM_003360    | UGT8      | 0 | NA | 0 | NA | 0 | NA | 0  | NA | 0  | NA |
| 4 | 116254481 | 115968375 | -1 | NM_022569    | NDST4     | 0 | NA | 0 | NA | 0 | NA | 0  | NA | 0  | NA |
| 4 | 118226184 | 118224157 | -1 | NM_152402    | TRAM1L1   | 0 | NA | 0 | NA | 0 | NA | 0  | NA | 0  | NA |
| 4 | 119174947 | 119396466 | 1  | NM_004784    | NDST3     | 0 | NA | 0 | NA | 0 | NA | 0  | NA | 0  | NA |
| 4 | 119493370 | 119421864 | -1 | NM_003619    | PRSS12    | 0 | NA | 0 | NA | 0 | NA | 0  | NA | 0  | NA |
| 4 | 119826021 | 119851525 | 1  | NM_020961    | KIAA1627  | 0 | NA | 0 | NA | 1 | 12 | 1  | 13 | 0  | NA |
| 4 | 119976702 | 119863426 | -1 | NM_014822    | SEC24D    | 0 | NA | 0 | NA | 0 | NA | 0  | NA | 0  | NA |
| 4 | 120029443 | 120201850 | 1  | NM_133477    | SYNPO2    | 0 | NA | 0 | NA | 0 | NA | 0  | NA | 0  | NA |
| 4 | 120276386 | 120328385 | 1  | NM_016599    | MYO22     | 0 | NA | 0 | NA | 0 | NA | 0  | NA | 0  | NA |
| 4 | 120353229 | 120436121 | 1  | NM_019050    | USP53     | 0 | NA | 0 | NA | 1 | 13 | 0  | NA | 0  | NA |
| 4 | 120441416 | 120437021 | -1 | NM_001001701 | LOC401152 | 0 | NA | 0 | NA | 0 | NA | 0  | NA | 0  | NA |
| 4 | 120462766 | 120457852 | -1 | NM_000134    | FABP2     | 0 | NA | 0 | NA | 0 | NA | 0  | NA | 0  | NA |
| 4 | 120767890 | 120634997 | -1 | NM_033430    | PDE5A     | 0 | NA | 0 | NA | 0 | NA | 0  | NA | 0  | NA |
| 4 | 120768850 | 120634997 | -1 | NM_033437    | PDE5A     | 0 | NA | 0 | NA | 0 | NA | 0  | NA | 0  | NA |
| 4 | 120769429 | 120634997 | -1 | NM_001083    | PDE5A     | 0 | NA | 0 | NA | 0 | NA | 0  | NA | 0  | NA |
| 4 | 121207411 | 121200037 | -1 | NM_002358    | MAD2L1    | 0 | NA | 0 | NA | 0 | NA | 0  | NA | 0  | NA |
| 4 | 122063463 | 121835378 | -1 | NM_018699    | PRDM5     | 0 | NA | 0 | NA | 0 | NA | 0  | NA | 0  | NA |
| 4 | 122213123 | 122176231 | -1 | NM_024574    | C4orf31   | 0 | NA | 0 | NA | 0 | NA | 0  | NA | 0  | NA |
| 4 | 122304926 | 122272016 | -1 | NM_024873    | TNIP3     | 0 | NA | 0 | NA | 0 | NA | 0  | NA | 0  | NA |
| 4 | 122521631 | 122469246 | -1 | NM_198179    | GPR103    | 0 | NA | 0 | NA | 0 | NA | 0  | NA | 1  | 13 |
| 4 | 122837597 | 122808601 | -1 | NM_001154    | ANXA5     | 0 | NA | 0 | NA | 0 | NA | 0  | NA | 0  | NA |
| 4 | 122905790 | 122899534 | -1 | NM_152399    | TMEM195   | 0 | NA | 0 | NA | 0 | NA | 0  | NA | 0  | NA |
| 4 | 122941921 | 122957626 | 1  | NM_001034194 | EXOSC9    | 1 | 15 | 0 | NA | 0 | NA | 0  | NA | 0  | NA |
| 4 | 122941921 | 122957626 | 1  | NM_005033    | EXOSC9    | 1 | 15 | 0 | NA | 0 | NA | 0  | NA | 0  | NA |

|   |           |           |    |              |          |   |    |   |    |   |    |   |    |   |    |
|---|-----------|-----------|----|--------------|----------|---|----|---|----|---|----|---|----|---|----|
| 4 | 122964538 | 122957048 | -1 | NM_001237    | CCNA2    | 0 | NA | 0 | NA | 0 | NA | 0 | NA | 0 | NA |
| 4 | 123011092 | 122965084 | -1 | NM_176824    | BBS7     | 0 | NA | 0 | NA | 0 | NA | 0 | NA | 0 | NA |
| 4 | 123011092 | 122968332 | -1 | NM_018190    | BBS7     | 0 | NA | 0 | NA | 0 | NA | 0 | NA | 0 | NA |
| 4 | 123074061 | 123019881 | -1 | NM_003305    | TRPC3    | 0 | NA | 0 | NA | 0 | NA | 0 | NA | 0 | NA |
| 4 | 123311207 | 123503357 | 1  | NM_015312    | KIAA1109 | 0 | NA | 0 | NA | 0 | NA | 0 | NA | 0 | NA |
| 4 | 123519617 | 123570389 | 1  | NM_139243    | ADAD1    | 0 | NA | 0 | NA | 0 | NA | 0 | NA | 0 | NA |
| 4 | 123597100 | 123592075 | -1 | NM_000586    | IL2      | 0 | NA | 0 | NA | 0 | NA | 0 | NA | 0 | NA |
| 4 | 123761662 | 123753233 | -1 | NM_021803    | IL21     | 0 | NA | 0 | NA | 0 | NA | 0 | NA | 0 | NA |
| 4 | 123873306 | 123885548 | 1  | NM_152618    | BBS12    | 0 | NA | 0 | NA | 0 | NA | 1 | 11 | 0 | NA |
| 4 | 123967312 | 124038840 | 1  | NM_002006    | FGF2     | 0 | NA | 0 | NA | 0 | NA | 0 | NA | 0 | NA |
| 4 | 124063209 | 124033248 | -1 | NM_007083    | NUDT6    | 0 | NA | 0 | NA | 0 | NA | 0 | NA | 0 | NA |
| 4 | 124063573 | 124033248 | -1 | NM_198041    | NUDT6    | 0 | NA | 0 | NA | 0 | NA | 0 | NA | 0 | NA |
| 4 | 124063674 | 124460054 | 1  | NM_145207    | SPATA5   | 0 | NA | 0 | NA | 0 | NA | 0 | NA | 0 | NA |
| 4 | 124537405 | 124544357 | 1  | NM_199327    | SPRY1    | 0 | NA | 0 | NA | 0 | NA | 0 | NA | 0 | NA |
| 4 | 124540132 | 124544359 | 1  | NM_005841    | SPRY1    | 0 | NA | 0 | NA | 0 | NA | 0 | NA | 0 | NA |
| 4 | 125851382 | 125804915 | -1 | NM_020337    | ANKRD50  | 0 | NA | 0 | NA | 0 | NA | 0 | NA | 0 | NA |
| 4 | 126457016 | 126633537 | 1  | NM_024562    | FAT4     | 0 | NA | 0 | NA | 0 | NA | 0 | NA | 0 | NA |
| 4 | 128773569 | 128857380 | 1  | NM_015693    | INTU     | 0 | NA | 0 | NA | 0 | NA | 0 | NA | 0 | NA |
| 4 | 128871023 | 128914897 | 1  | NM_031291    | SLC25A31 | 0 | NA | 0 | NA | 0 | NA | 0 | NA | 0 | NA |
| 4 | 128922902 | 128973976 | 1  | NM_014278    | HSPA4L   | 0 | NA | 0 | NA | 0 | NA | 0 | NA | 0 | NA |
| 4 | 129021494 | 129039802 | 1  | NM_014264    | PLK4     | 0 | NA | 0 | NA | 0 | NA | 0 | NA | 0 | NA |
| 4 | 129105910 | 129171905 | 1  | NM_001039717 | C4orf29  | 0 | NA | 0 | NA | 0 | NA | 0 | NA | 0 | NA |
| 4 | 129106554 | 129061026 | -1 | NM_152778    | MFSDB    | 0 | NA | 0 | NA | 0 | NA | 0 | NA | 0 | NA |
| 4 | 129201952 | 129249506 | 1  | NM_032239    | LARP2    | 0 | NA | 0 | NA | 0 | NA | 0 | NA | 0 | NA |
| 4 | 129201952 | 129262957 | 1  | NM_178043    | LARP2    | 0 | NA | 0 | NA | 0 | NA | 0 | NA | 0 | NA |
| 4 | 129201952 | 129351739 | 1  | NM_018078    | LARP2    | 0 | NA | 0 | NA | 0 | NA | 0 | NA | 0 | NA |
| 4 | 129428398 | 129410746 | -1 | NM_006320    | PGRMC2   | 0 | NA | 0 | NA | 0 | NA | 0 | NA | 0 | NA |
| 4 | 129950228 | 130005237 | 1  | NM_024900    | PHF17    | 0 | NA | 0 | NA | 0 | NA | 0 | NA | 0 | NA |
| 4 | 129950228 | 130015829 | 1  | NM_199320    | PHF17    | 0 | NA | 0 | NA | 0 | NA | 0 | NA | 0 | NA |
| 4 | 130234214 | 130024601 | -1 | NM_144643    | SCLT1    | 0 | NA | 0 | NA | 0 | NA | 0 | NA | 0 | NA |
| 4 | 130234278 | 130253293 | 1  | NM_173487    | C4orf33  | 0 | NA | 0 | NA | 0 | NA | 0 | NA | 0 | NA |
| 4 | 130236731 | 130253293 | 1  | NM_001099783 | C4orf33  | 0 | NA | 0 | NA | 0 | NA | 0 | NA | 0 | NA |
| 4 | 134289919 | 134293854 | 1  | NM_020815    | PCDH10   | 0 | NA | 0 | NA | 0 | NA | 1 | 18 | 1 | 12 |
| 4 | 134289919 | 134332182 | 1  | NM_032961    | PCDH10   | 0 | NA | 0 | NA | 0 | NA | 1 | 18 | 1 | 12 |
| 4 | 135342353 | 135336938 | -1 | NM_001114734 | PABPC4L  | 0 | NA | 0 | NA | 0 | NA | 0 | NA | 0 | NA |
| 4 | 138673079 | 138659521 | -1 | NM_019035    | PCDH18   | 0 | NA | 0 | NA | 0 | NA | 0 | NA | 0 | NA |
| 4 | 139382953 | 139304697 | -1 | NM_014331    | SLC7A11  | 0 | NA | 0 | NA | 0 | NA | 0 | NA | 0 | NA |
| 4 | 140156392 | 140186543 | 1  | NM_012118    | CRN4L    | 0 | NA | 0 | NA | 0 | NA | 0 | NA | 0 | NA |
| 4 | 140225097 | 140198320 | -1 | NM_006874    | ELF2     | 0 | NA | 0 | NA | 0 | NA | 0 | NA | 0 | NA |
| 4 | 140280056 | 140198320 | -1 | NM_201999    | ELF2     | 0 | NA | 0 | NA | 0 | NA | 0 | NA | 0 | NA |
| 4 | 140420942 | 140406766 | -1 | NM_032623    | OSAP     | 0 | NA | 0 | NA | 0 | NA | 0 | NA | 0 | NA |
| 4 | 140436407 | 140430540 | -1 | NM_002494    | NDUFC1   | 0 | NA | 0 | NA | 0 | NA | 0 | NA | 0 | NA |
| 4 | 140442125 | 140531385 | 1  | NM_057175    | NARG1    | 0 | NA | 0 | NA | 0 | NA | 0 | NA | 0 | NA |
| 4 | 140594410 | 140616519 | 1  | NM_031296    | RAB33B   | 0 | NA | 0 | NA | 1 | 12 | 0 | NA | 0 | NA |
| 4 | 140697027 | 140646641 | -1 | NM_030648    | SETD7    | 0 | NA | 0 | NA | 0 | NA | 0 | NA | 0 | NA |
| 4 | 140806371 | 140844856 | 1  | NM_002413    | MGST2    | 0 | NA | 0 | NA | 1 | 12 | 0 | NA | 0 | NA |
| 4 | 141294683 | 140856995 | -1 | NM_018717    | MAML3    | 1 | 14 | 0 | NA | 0 | NA | 1 | 19 | 0 | NA |
| 4 | 141397889 | 141523154 | 1  | NM_032547    | SCOC     | 0 | NA | 0 | NA | 0 | NA | 0 | NA | 0 | NA |
| 4 | 141568232 | 141529056 | -1 | NM_004362    | CLGN     | 0 | NA | 0 | NA | 0 | NA | 0 | NA | 0 | NA |
| 4 | 141664801 | 141691295 | 1  | NM_153702    | ELMOD2   | 0 | NA | 0 | NA | 0 | NA | 0 | NA | 0 | NA |
| 4 | 141709457 | 141700499 | -1 | NM_021833    | UCP1     | 1 | 11 | 1 | 12 | 0 | NA | 0 | NA | 0 | NA |
| 4 | 141896921 | 141761385 | -1 | NM_015130    | TBC1D9   | 0 | NA | 0 | NA | 0 | NA | 0 | NA | 0 | NA |
| 4 | 142274066 | 142006174 | -1 | NM_020724    | RNF150   | 0 | NA | 0 | NA | 0 | NA | 0 | NA | 0 | NA |
| 4 | 142361546 | 142375300 | 1  | NM_014487    | ZNF330   | 0 | NA | 0 | NA | 1 | 13 | 0 | NA | 0 | NA |
| 4 | 142777203 | 142874062 | 1  | NM_000585    | IL15     | 0 | NA | 0 | NA | 0 | NA | 0 | NA | 0 | NA |
| 4 | 142777203 | 142874062 | 1  | NM_172174    | IL15     | 0 | NA | 0 | NA | 0 | NA | 0 | NA | 0 | NA |
| 4 | 143987054 | 143168631 | -1 | NM_001101669 | INPP4B   | 0 | NA | 0 | NA | 0 | NA | 0 | NA | 0 | NA |
| 4 | 143987054 | 143168631 | -1 | NM_003866    | INPP4B   | 0 | NA | 0 | NA | 0 | NA | 0 | NA | 0 | NA |
| 4 | 144325547 | 144362090 | 1  | NM_032557    | USP38    | 0 | NA | 0 | NA | 0 | NA | 0 | NA | 0 | NA |
| 4 | 144477499 | 144610729 | 1  | NM_002039    | GAB1     | 0 | NA | 0 | NA | 0 | NA | 0 | NA | 0 | NA |
| 4 | 144477499 | 144610729 | 1  | NM_207123    | GAB1     | 0 | NA | 0 | NA | 0 | NA | 0 | NA | 0 | NA |
| 4 | 144654065 | 144694017 | 1  | NM_003601    | SMARCA5  | 0 | NA | 0 | NA | 0 | NA | 0 | NA | 0 | NA |
| 4 | 145046166 | 145011468 | -1 | NM_198682    | GYPE     | 0 | NA | 0 | NA | 0 | NA | 0 | NA | 0 | NA |
| 4 | 145046166 | 145015917 | -1 | NM_002102    | GYPE     | 0 | NA | 0 | NA | 0 | NA | 0 | NA | 0 | NA |
| 4 | 145159946 | 145136706 | -1 | NM_002100    | GYPB     | 0 | NA | 0 | NA | 0 | NA | 0 | NA | 0 | NA |

|   |           |           |    |              |           |   |    |   |    |   |    |   |    |   |    |
|---|-----------|-----------|----|--------------|-----------|---|----|---|----|---|----|---|----|---|----|
| 4 | 145281294 | 145249905 | -1 | NM_002099    | GYP A     | 0 | NA | 0 | NA | 0 | NA | 0 | NA | 0 | NA |
| 4 | 145786622 | 145879331 | 1  | NM_022475    | HHIP      | 0 | NA | 0 | NA | 0 | NA | 0 | NA | 0 | NA |
| 4 | 146238605 | 146270126 | 1  | NM_001040876 | ABCE1     | 0 | NA | 0 | NA | 0 | NA | 1 | 12 | 0 | NA |
| 4 | 146238605 | 146270126 | 1  | NM_002940    | ABCE1     | 0 | NA | 0 | NA | 0 | NA | 1 | 12 | 0 | NA |
| 4 | 146238818 | 146135759 | -1 | NM_014885    | ANAPC10   | 0 | NA | 0 | NA | 0 | NA | 1 | 12 | 0 | NA |
| 4 | 146320282 | 146274251 | -1 | NM_001102653 | OTUD4     | 0 | NA | 0 | NA | 0 | NA | 0 | NA | 0 | NA |
| 4 | 146320282 | 146274251 | -1 | NM_199324    | OTUD4     | 0 | NA | 0 | NA | 0 | NA | 0 | NA | 0 | NA |
| 4 | 146320282 | 146299738 | -1 | NM_017493    | OTUD4     | 0 | NA | 0 | NA | 0 | NA | 0 | NA | 0 | NA |
| 4 | 146622400 | 146699775 | 1  | NM_005900    | SMAD1     | 0 | NA | 0 | NA | 0 | NA | 0 | NA | 0 | NA |
| 4 | 146623406 | 146699775 | 1  | NM_001003688 | SMAD1     | 0 | NA | 0 | NA | 0 | NA | 0 | NA | 0 | NA |
| 4 | 146759989 | 146800637 | 1  | NM_172250    | MMAA      | 0 | NA | 0 | NA | 0 | NA | 0 | NA | 0 | NA |
| 4 | 146820805 | 146873398 | 1  | NM_001080531 | LOC646603 | 0 | NA | 0 | NA | 0 | NA | 0 | NA | 0 | NA |
| 4 | 147079057 | 148901337 | -1 | NM_178835    | ZNF827    | 0 | NA | 0 | NA | 0 | NA | 1 | 16 | 0 | NA |
| 4 | 147316284 | 147330663 | 1  | NM_007080    | LSM6      | 0 | NA | 0 | NA | 0 | NA | 0 | NA | 0 | NA |
| 4 | 147662486 | 147582269 | -1 | NM_032128    | SLC10A7   | 0 | NA | 0 | NA | 0 | NA | 0 | NA | 0 | NA |
| 4 | 147662535 | 147395627 | -1 | NM_001029998 | SLC10A7   | 0 | NA | 0 | NA | 0 | NA | 0 | NA | 0 | NA |
| 4 | 147779494 | 147783073 | 1  | NM_004575    | POU4F2    | 0 | NA | 0 | NA | 0 | NA | 0 | NA | 0 | NA |
| 4 | 148086484 | 147847628 | -1 | NM_031956    | TTC29     | 0 | NA | 0 | NA | 0 | NA | 0 | NA | 0 | NA |
| 4 | 148621356 | 148685556 | 1  | NM_001957    | EDNRA     | 0 | NA | 0 | NA | 0 | NA | 0 | NA | 0 | NA |
| 4 | 148758045 | 148776120 | 1  | NM_018241    | TMEM34    | 0 | NA | 0 | NA | 0 | NA | 0 | NA | 0 | NA |
| 4 | 148824730 | 148778982 | -1 | NM_138364    | LOC90826  | 0 | NA | 0 | NA | 0 | NA | 0 | NA | 0 | NA |
| 4 | 148872902 | 149213377 | 1  | NM_024605    | ARHGAP10  | 0 | NA | 0 | NA | 0 | NA | 0 | NA | 0 | NA |
| 4 | 149583093 | 149219364 | -1 | NM_000901    | NR3C2     | 0 | NA | 0 | NA | 0 | NA | 0 | NA | 0 | NA |
| 4 | 151219529 | 151398058 | 1  | NM_001040260 | DCLK2     | 0 | NA | 0 | NA | 0 | NA | 0 | NA | 0 | NA |
| 4 | 151219529 | 151398058 | 1  | NM_001040261 | DCLK2     | 0 | NA | 0 | NA | 0 | NA | 0 | NA | 0 | NA |
| 4 | 151722752 | 151725295 | 1  | NM_006439    | MAB21L2   | 0 | NA | 1 | 12 | 0 | NA | 0 | NA | 0 | NA |
| 4 | 152156329 | 151405045 | -1 | NM_006726    | LRBA      | 0 | NA | 0 | NA | 0 | NA | 0 | NA | 0 | NA |
| 4 | 152240203 | 152245254 | 1  | NM_001006    | RPS3A     | 0 | NA | 0 | NA | 1 | 15 | 0 | NA | 0 | NA |
| 4 | 152367022 | 152260886 | -1 | NM_001009555 | SH3D19    | 0 | NA | 0 | NA | 0 | NA | 0 | NA | 0 | NA |
| 4 | 152417774 | 152432055 | 1  | NM_183375    | ESSPL     | 0 | NA | 0 | NA | 0 | NA | 0 | NA | 0 | NA |
| 4 | 152549847 | 152804234 | 1  | NM_001109977 | LOC729830 | 0 | NA | 0 | NA | 0 | NA | 0 | NA | 0 | NA |
| 4 | 152901596 | 152811450 | -1 | NM_004564    | PET112L   | 0 | NA | 0 | NA | 0 | NA | 1 | 15 | 0 | NA |
| 4 | 153493560 | 153461859 | -1 | NM_018315    | FBXW7     | 0 | NA | 0 | NA | 1 | 22 | 0 | NA | 0 | NA |
| 4 | 153523114 | 153461859 | -1 | NM_001013415 | FBXW7     | 0 | NA | 0 | NA | 0 | NA | 0 | NA | 0 | NA |
| 4 | 153675622 | 153461859 | -1 | NM_036632    | FBXW7     | 0 | NA | 0 | NA | 0 | NA | 0 | NA | 0 | NA |
| 4 | 153820641 | 153766720 | -1 | NM_152680    | TMEM154   | 0 | NA | 0 | NA | 0 | NA | 0 | NA | 0 | NA |
| 4 | 153920327 | 153909955 | -1 | NM_145720    | TIGD4     | 0 | NA | 0 | NA | 0 | NA | 0 | NA | 0 | NA |
| 4 | 153920561 | 154052513 | 1  | NM_001025593 | ARFIP1    | 0 | NA | 0 | NA | 0 | NA | 0 | NA | 0 | NA |
| 4 | 153920561 | 154052513 | 1  | NM_001025595 | ARFIP1    | 0 | NA | 0 | NA | 0 | NA | 0 | NA | 0 | NA |
| 4 | 153920561 | 154052513 | 1  | NM_014447    | ARFIP1    | 0 | NA | 0 | NA | 0 | NA | 0 | NA | 0 | NA |
| 4 | 154083584 | 154120298 | 1  | NM_033393    | FHDC1     | 0 | NA | 0 | NA | 0 | NA | 0 | NA | 0 | NA |
| 4 | 154345067 | 154479918 | 1  | NM_015271    | TRIM2     | 0 | NA | 0 | NA | 0 | NA | 0 | NA | 0 | NA |
| 4 | 154485250 | 154555693 | 1  | NM_032117    | MND1      | 0 | NA | 0 | NA | 0 | NA | 0 | NA | 0 | NA |
| 4 | 154606947 | 15477312  | 1  | NM_015196    | KIAA0922  | 0 | NA | 0 | NA | 0 | NA | 0 | NA | 0 | NA |
| 4 | 154824890 | 154846692 | 1  | NM_003264    | TLR2      | 0 | NA | 0 | NA | 0 | NA | 0 | NA | 0 | NA |
| 4 | 154900837 | 154850761 | -1 | NM_173662    | RNF175    | 0 | NA | 0 | NA | 0 | NA | 0 | NA | 0 | NA |
| 4 | 154929678 | 154921191 | -1 | NM_003013    | SFRP2     | 0 | NA | 0 | NA | 0 | NA | 0 | NA | 0 | NA |
| 4 | 155531899 | 155375137 | -1 | NM_017639    | DCHS2     | 0 | NA | 0 | NA | 0 | NA | 0 | NA | 0 | NA |
| 4 | 155690973 | 155677111 | -1 | NM_002669    | PLRG1     | 0 | NA | 0 | NA | 0 | NA | 0 | NA | 0 | NA |
| 4 | 155703595 | 155711688 | 1  | NM_005141    | FGB       | 0 | NA | 0 | NA | 0 | NA | 0 | NA | 0 | NA |
| 4 | 155731347 | 155723729 | -1 | NM_000508    | FGA       | 0 | NA | 0 | NA | 0 | NA | 0 | NA | 0 | NA |
| 4 | 155731347 | 155725878 | -1 | NM_021871    | FGA       | 0 | NA | 0 | NA | 0 | NA | 0 | NA | 0 | NA |
| 4 | 155753352 | 155744735 | -1 | NM_000509    | FGG       | 0 | NA | 0 | NA | 0 | NA | 0 | NA | 0 | NA |
| 4 | 155753352 | 155745177 | -1 | NM_021870    | FGG       | 0 | NA | 0 | NA | 0 | NA | 0 | NA | 0 | NA |
| 4 | 155884612 | 155893720 | 1  | NM_004744    | LRAT      | 0 | NA | 0 | NA | 0 | NA | 0 | NA | 0 | NA |
| 4 | 155921949 | 155969415 | 1  | NM_144979    | RBM46     | 0 | NA | 0 | NA | 0 | NA | 0 | NA | 0 | NA |
| 4 | 156349230 | 156357678 | 1  | NM_000910    | NPY2R     | 0 | NA | 0 | NA | 0 | NA | 0 | NA | 0 | NA |
| 4 | 156517572 | 156483261 | -1 | NM_001039580 | MAP9      | 0 | NA | 0 | NA | 0 | NA | 0 | NA | 0 | NA |
| 4 | 156807327 | 156871226 | 1  | NM_000856    | GUCY1A3   | 0 | NA | 0 | NA | 0 | NA | 0 | NA | 0 | NA |
| 4 | 156899664 | 156947506 | 1  | NM_000857    | GUCY1B3   | 0 | NA | 0 | NA | 0 | NA | 0 | NA | 0 | NA |
| 4 | 157006875 | 156970330 | -1 | NM_017419    | ACCN5     | 0 | NA | 0 | NA | 0 | NA | 0 | NA | 0 | NA |
| 4 | 157044296 | 157061000 | 1  | NM_005651    | IDO2      | 0 | NA | 0 | NA | 1 | 12 | 0 | NA | 0 | NA |
| 4 | 157094498 | 157064719 | -1 | NM_001334    | CTSO      | 0 | NA | 0 | NA | 0 | NA | 0 | NA | 0 | NA |
| 4 | 158111996 | 157902213 | -1 | NM_016205    | PDGFC     | 0 | NA | 0 | NA | 0 | NA | 0 | NA | 0 | NA |
| 4 | 158216726 | 158312692 | 1  | NM_000824    | GLRB      | 0 | NA | 0 | NA | 0 | NA | 0 | NA | 0 | NA |

|   |           |           |    |              |           |   |    |   |    |   |    |   |    |   |    |
|---|-----------|-----------|----|--------------|-----------|---|----|---|----|---|----|---|----|---|----|
| 4 | 158361185 | 158506676 | 1  | NM_000826    | GRIA2     | 0 | NA | 0 | NA | 0 | NA | 0 | NA | 0 | NA |
| 4 | 158361185 | 158506676 | 1  | NM_001083619 | GRIA2     | 0 | NA | 0 | NA | 0 | NA | 0 | NA | 0 | NA |
| 4 | 158361269 | 158506676 | 1  | NM_001083620 | GRIA2     | 0 | NA | 0 | NA | 0 | NA | 0 | NA | 0 | NA |
| 4 | 159312993 | 159265210 | -1 | NM_016613    | C4orf18   | 1 | 11 | 0 | NA | 0 | NA | 0 | NA | 0 | NA |
| 4 | 159313852 | 159265456 | -1 | NM_001031700 | C4orf18   | 1 | 11 | 0 | NA | 0 | NA | 0 | NA | 0 | NA |
| 4 | 159351125 | 159395886 | 1  | NM_018342    | TMEM144   | 0 | NA | 0 | NA | 0 | NA | 0 | NA | 0 | NA |
| 4 | 159662496 | 159792713 | 1  | NM_021634    | RXFP1     | 0 | NA | 0 | NA | 0 | NA | 0 | NA | 0 | NA |
| 4 | 159812569 | 159807278 | -1 | NM_001008393 | LOC201725 | 0 | NA | 0 | NA | 0 | NA | 0 | NA | 0 | NA |
| 4 | 159812726 | 159849291 | 1  | NM_004453    | ETFDH     | 0 | NA | 0 | NA | 0 | NA | 0 | NA | 0 | NA |
| 4 | 159884002 | 159849728 | -1 | NM_005038    | PPID      | 0 | NA | 0 | NA | 0 | NA | 0 | NA | 0 | NA |
| 4 | 159909631 | 160047404 | 1  | NM_020840    | FNIP2     | 0 | NA | 0 | NA | 0 | NA | 0 | NA | 0 | NA |
| 4 | 160175783 | 160034133 | -1 | NM_152543    | FLJ25371  | 0 | NA | 0 | NA | 0 | NA | 0 | NA | 0 | NA |
| 4 | 160408447 | 160500751 | 1  | NM_014247    | RAPGEF2   | 0 | NA | 0 | NA | 0 | NA | 0 | NA | 0 | NA |
| 4 | 163304636 | 162524498 | -1 | NM_020116    | FSTL5     | 0 | NA | 0 | NA | 0 | NA | 0 | NA | 0 | NA |
| 4 | 164307523 | 164269272 | -1 | NM_138386    | NAF1      | 0 | NA | 0 | NA | 0 | NA | 0 | NA | 0 | NA |
| 4 | 164473198 | 164464566 | -1 | NM_000909    | NPY1R     | 0 | NA | 0 | NA | 0 | NA | 0 | NA | 0 | NA |
| 4 | 164484540 | 164492536 | 1  | NM_006174    | NPY5R     | 0 | NA | 0 | NA | 0 | NA | 0 | NA | 0 | NA |
| 4 | 164614497 | 164611696 | -1 | NM_032136    | TKTL2     | 0 | NA | 0 | NA | 0 | NA | 0 | NA | 0 | NA |
| 4 | 164635122 | 164661141 | 1  | NM_018352    | FLJ11184  | 1 | 17 | 0 | NA | 0 | NA | 0 | NA | 0 | NA |
| 4 | 164754226 | 164668498 | -1 | NM_017923    | MARCH1    | 0 | NA | 0 | NA | 0 | NA | 0 | NA | 0 | NA |
| 4 | 165338313 | 165337608 | -1 | NM_012403    | ANP32C    | 0 | NA | 0 | NA | 0 | NA | 0 | NA | 0 | NA |
| 4 | 166097549 | 166099723 | 1  | NM_153027    | C4orf39   | 1 | 13 | 0 | NA | 0 | NA | 0 | NA | 0 | NA |
| 4 | 166116268 | 166095047 | -1 | NM_001012414 | TRIM61    | 0 | NA | 0 | NA | 0 | NA | 0 | NA | 0 | NA |
| 4 | 166172600 | 166182346 | 1  | NM_152620    | TRIM60    | 0 | NA | 1 | 14 | 0 | NA | 0 | NA | 0 | NA |
| 4 | 166199749 | 166201156 | 1  | NM_001105575 | TRIM75    | 0 | NA | 0 | NA | 0 | NA | 0 | NA | 0 | NA |
| 4 | 166253474 | 166216679 | -1 | NM_001100389 | TMEM192   | 0 | NA | 0 | NA | 0 | NA | 0 | NA | 0 | NA |
| 4 | 166348240 | 166463749 | 1  | NM_007246    | KLHL2     | 0 | NA | 0 | NA | 0 | NA | 0 | NA | 0 | NA |
| 4 | 166468267 | 166483675 | 1  | NM_001017369 | SC4MOL    | 0 | NA | 0 | NA | 0 | NA | 0 | NA | 0 | NA |
| 4 | 166468267 | 166483675 | 1  | NM_006745    | SC4MOL    | 0 | NA | 0 | NA | 0 | NA | 0 | NA | 0 | NA |
| 4 | 166519546 | 166638932 | 1  | NM_001873    | CPE       | 0 | NA | 0 | NA | 0 | NA | 0 | NA | 0 | NA |
| 4 | 167013859 | 167244443 | 1  | NM_012464    | TLL1      | 0 | NA | 0 | NA | 0 | NA | 0 | NA | 0 | NA |
| 4 | 168392316 | 167891110 | -1 | NM_001040159 | SPOCK3    | 0 | NA | 0 | NA | 0 | NA | 0 | NA | 0 | NA |
| 4 | 168392316 | 167891110 | -1 | NM_016950    | SPOCK3    | 0 | NA | 0 | NA | 0 | NA | 0 | NA | 0 | NA |
| 4 | 169250281 | 169345468 | 1  | NM_007193    | ANXA10    | 0 | NA | 0 | NA | 0 | NA | 0 | NA | 0 | NA |
| 4 | 169476473 | 169374021 | -1 | NM_017631    | DDX60     | 0 | NA | 0 | NA | 0 | NA | 0 | NA | 0 | NA |
| 4 | 169638213 | 169514460 | -1 | NM_001012967 | DDX60L    | 0 | NA | 0 | NA | 0 | NA | 0 | NA | 0 | NA |
| 4 | 169654791 | 170086183 | 1  | NM_016081    | PALLD     | 0 | NA | 0 | NA | 0 | NA | 0 | NA | 0 | NA |
| 4 | 170167997 | 170145316 | -1 | NM_032783    | CBR4      | 0 | NA | 0 | NA | 0 | NA | 0 | NA | 0 | NA |
| 4 | 170428824 | 170251981 | -1 | NM_020870    | SH3RF1    | 0 | NA | 0 | NA | 0 | NA | 0 | NA | 0 | NA |
| 4 | 170770189 | 170551003 | -1 | NM_012224    | NEK1      | 0 | NA | 0 | NA | 1 | 14 | 0 | NA | 0 | NA |
| 4 | 170778296 | 170878732 | 1  | NM_001829    | CLCN3     | 0 | NA | 0 | NA | 0 | NA | 1 | 14 | 0 | NA |
| 4 | 170778296 | 170878732 | 1  | NM_173872    | CLCN3     | 0 | NA | 0 | NA | 0 | NA | 1 | 14 | 0 | NA |
| 4 | 170915668 | 170887193 | -1 | NM_017867    | C4orf27   | 0 | NA | 0 | NA | 0 | NA | 0 | NA | 0 | NA |
| 4 | 171161510 | 171144322 | -1 | NM_001009554 | MFAP3L    | 0 | NA | 0 | NA | 0 | NA | 0 | NA | 0 | NA |
| 4 | 171184004 | 171144322 | -1 | NM_021647    | MFAP3L    | 1 | 36 | 1 | 15 | 1 | 18 | 1 | 14 | 0 | NA |
| 4 | 171247758 | 171217947 | -1 | NM_016228    | AADAT     | 0 | NA | 0 | NA | 0 | NA | 0 | NA | 0 | NA |
| 4 | 171247947 | 171217947 | -1 | NM_182662    | AADAT     | 0 | NA | 0 | NA | 0 | NA | 0 | NA | 0 | NA |
| 4 | 172971231 | 174199285 | 1  | NM_001034845 | GALNT17   | 0 | NA | 0 | NA | 0 | NA | 0 | NA | 0 | NA |
| 4 | 174326478 | 174481693 | 1  | NM_017423    | GALNT7    | 0 | NA | 0 | NA | 0 | NA | 0 | NA | 0 | NA |
| 4 | 174492167 | 174489361 | -1 | NM_002129    | HMG2      | 0 | NA | 0 | NA | 0 | NA | 0 | NA | 0 | NA |
| 4 | 174528667 | 174535258 | 1  | NM_003864    | SAP30     | 1 | 15 | 0 | NA | 0 | NA | 1 | 24 | 0 | NA |
| 4 | 174557192 | 174545873 | -1 | NM_007281    | SCRG1     | 0 | NA | 0 | NA | 0 | NA | 0 | NA | 0 | NA |
| 4 | 174687953 | 174684226 | -1 | NM_021973    | HAND2     | 1 | 13 | 0 | NA | 0 | NA | 0 | NA | 0 | NA |
| 4 | 174774369 | 174773661 | -1 | NM_006792    | MORF4     | 0 | NA | 0 | NA | 0 | NA | 0 | NA | 0 | NA |
| 4 | 175441434 | 175478057 | 1  | NM_001040157 | KIAA1712  | 0 | NA | 0 | NA | 0 | NA | 0 | NA | 0 | NA |
| 4 | 175441977 | 175394384 | -1 | NM_012180    | FBX08     | 0 | NA | 0 | NA | 0 | NA | 0 | NA | 0 | NA |
| 4 | 175680186 | 175647954 | -1 | NM_000860    | HPGD      | 0 | NA | 0 | NA | 0 | NA | 0 | NA | 0 | NA |
| 4 | 175987040 | 175799772 | -1 | NM_001042543 | GLRA3     | 0 | NA | 0 | NA | 0 | NA | 0 | NA | 0 | NA |
| 4 | 175987040 | 175799772 | -1 | NM_006529    | GLRA3     | 0 | NA | 0 | NA | 0 | NA | 0 | NA | 0 | NA |
| 4 | 176076133 | 176135906 | 1  | NM_014269    | ADAM29    | 0 | NA | 0 | NA | 0 | NA | 0 | NA | 0 | NA |
| 4 | 176971176 | 176791081 | -1 | NM_201591    | GPMB6A    | 0 | NA | 0 | NA | 0 | NA | 0 | NA | 0 | NA |
| 4 | 177160642 | 176791081 | -1 | NM_005277    | GPMB6A    | 0 | NA | 0 | NA | 0 | NA | 0 | NA | 0 | NA |
| 4 | 177160642 | 176791081 | -1 | NM_201592    | GPMB6A    | 0 | NA | 0 | NA | 0 | NA | 0 | NA | 0 | NA |
| 4 | 177224125 | 177340960 | 1  | NM_170710    | WDR17     | 0 | NA | 0 | NA | 0 | NA | 0 | NA | 0 | NA |
| 4 | 177224125 | 177340960 | 1  | NM_181265    | WDR17     | 0 | NA | 0 | NA | 0 | NA | 0 | NA | 0 | NA |



|    |           |           |       |              |           |       |    |    |    |    |    |    |    |    |    |
|----|-----------|-----------|-------|--------------|-----------|-------|----|----|----|----|----|----|----|----|----|
| 4  | 177353816 | 177342718 | -1    | NM_144644    | SPATA4    | 0     | NA | 0  | NA | 0  | NA | 0  | NA | 0  | NA |
| 4  | 177427269 | 177371821 | -1    | NM_080874    | ASB5      | 0     | NA | 0  | NA | 0  | NA | 0  | NA | 0  | NA |
| 4  | 177478125 | 177486496 | 1     | NM_021928    | SPCS3     | 0     | NA | 0  | NA | 0  | NA | 0  | NA | 0  | NA |
| 4  | 177950889 | 177841684 | -1    | NM_005429    | VEGFC     | 0     | NA | 0  | NA | 0  | NA | 0  | NA | 0  | NA |
| 4  | 178467984 | 178521086 | 1     | NM_018248    | NEIL3     | 0     | NA | 0  | NA | 0  | NA | 0  | NA | 0  | NA |
| 4  | 178600585 | 178588917 | -1    | NM_000027    | AGA       | 1     | 11 | 0  | NA | 1  | 17 | 0  | NA | 0  | NA |
| 4  | 178886900 | 179148663 | -1    | NM_001085490 | LOC285501 | 0     | NA | 0  | NA | 0  | NA | 0  | NA | 0  | NA |
| 4  | 183482130 | 183961171 | 1     | NM_001080477 | ODZ3      | 0     | NA | 0  | NA | 0  | NA | 0  | NA | 0  | NA |
| 4  | 184075624 | 184048237 | -1    | NM_001012732 | DCTD      | 0     | NA | 0  | NA | 1  | 12 | 0  | NA | 0  | NA |
| 4  | 184075624 | 184048237 | -1    | NM_001921    | DCTD      | 0     | NA | 0  | NA | 1  | 12 | 0  | NA | 0  | NA |
| 4  | 184257456 | 184478923 | 1     | NM_024949    | WWC2      | 0     | NA | 0  | NA | 0  | NA | 0  | NA | 0  | NA |
| 4  | 184478921 | 184476213 | -1    | NM_001111319 | CLDN22    | 0     | NA | 0  | NA | 0  | NA | 0  | NA | 0  | NA |
| 4  | 184602782 | 184606043 | 1     | NM_017632    | CDKN2AIP  | 0     | NA | 0  | NA | 0  | NA | 0  | NA | 0  | NA |
| 4  | 184663213 | 184669243 | 1     | NM_001564    | ING2      | 0     | NA | 0  | NA | 0  | NA | 0  | NA | 0  | NA |
| 4  | 184817325 | 184797782 | -1    | NM_152682    | RWDD4A    | 0     | NA | 0  | NA | 0  | NA | 0  | NA | 0  | NA |
| 4  | 184817439 | 184871739 | 1     | NM_021942    | C4orf41   | 0     | NA | 0  | NA | 0  | NA | 0  | NA | 0  | NA |
| 4  | 184817439 | 184871739 | 1     | NM_199053    | C4orf41   | 0     | NA | 0  | NA | 0  | NA | 0  | NA | 0  | NA |
| 4  | 185063502 | 185175869 | 1     | NM_020225    | STOX2     | 0     | NA | 0  | NA | 0  | NA | 0  | NA | 0  | NA |
| 4  | 185376013 | 185246852 | -1    | NM_153343    | ENPP6     | 0     | NA | 0  | NA | 0  | NA | 0  | NA | 0  | NA |
| 4  | 185632720 | 185545869 | -1    | NM_002199    | IRF2      | 0     | NA | 0  | NA | 0  | NA | 0  | NA | 0  | NA |
| 4  | 185807623 | 185785843 | -1    | NM_004346    | CASP3     | 0     | NA | 0  | NA | 0  | NA | 0  | NA | 0  | NA |
| 4  | 185807623 | 185785843 | -1    | NM_032991    | CASP3     | 0     | NA | 0  | NA | 0  | NA | 0  | NA | 0  | NA |
| 4  | 185807895 | 185653106 | 1     | NM_152683    | CCDC111   | 0     | NA | 0  | NA | 0  | NA | 0  | NA | 0  | NA |
| 4  | 185892280 | 185852229 | -1    | NM_024629    | MLF1IP    | 1     | 12 | 0  | NA | 0  | NA | 0  | NA | 0  | NA |
| 4  | 185984209 | 185913742 | -1    | NM_001995    | ACSL1     | 0     | NA | 0  | NA | 0  | NA | 0  | NA | 0  | NA |
| 4  | 186177076 | 186178920 | 1     | NM_001029887 | HELT      | 0     | NA | 0  | NA | 0  | NA | 0  | NA | 0  | NA |
| 4  | 186301391 | 186305419 | 1     | NM_001151    | SLC25A4   | 0     | NA | 0  | NA | 0  | NA | 0  | NA | 0  | NA |
| 4  | 186362176 | 186317812 | -1    | NM_020827    | KIAA1430  | 0     | NA | 0  | NA | 0  | NA | 0  | NA | 0  | NA |
| 4  | 186368277 | 186522114 | 1     | NM_031953    | SNX25     | 0     | NA | 0  | NA | 0  | NA | 0  | NA | 0  | NA |
| 4  | 186537146 | 186522026 | -1    | NM_018409    | LRP2BP    | 0     | NA | 0  | NA | 0  | NA | 0  | NA | 0  | NA |
| 4  | 186554833 | 186558384 | 1     | NM_181726    | ANKRD37   | 0     | NA | 0  | NA | 0  | NA | 0  | NA | 0  | NA |
| 4  | 186584062 | 186558436 | -1    | NM_018359    | UFSP2     | 0     | NA | 0  | NA | 0  | 1  | 15 | 0  | NA | 0  |
| 4  | 186587538 | 186607815 | 1     | NM_001114357 | LOC441054 | 0     | NA | 0  | NA | 0  | 1  | 15 | 0  | NA | 0  |
| 4  | 186629863 | 186603340 | -1    | NM_152775    | CCDC110   | 0     | NA | 0  | NA | 0  | NA | 0  | NA | 0  | NA |
| 4  | 186693706 | 186659844 | -1    | NM_001114107 | PDLIM3    | 0     | NA | 0  | NA | 0  | NA | 0  | NA | 0  | NA |
| 4  | 186693706 | 186659844 | -1    | NM_014476    | PDLIM3    | 0     | NA | 0  | NA | 0  | NA | 0  | NA | 0  | NA |
| 4  | 186970386 | 186743591 | -1    | NM_003603    | SORBS2    | 0     | NA | 0  | NA | 0  | NA | 0  | NA | 0  | NA |
| 4  | 187114516 | 186743591 | -1    | NM_021069    | SORBS2    | 0     | NA | 0  | NA | 0  | NA | 0  | NA | 0  | NA |
| 4  | 187227302 | 187243246 | 1     | NM_003265    | TLR3      | 0     | NA | 0  | NA | 0  | NA | 0  | NA | 0  | NA |
| 4  | 187302988 | 187330811 | 1     | NM_015398    | FAM149A   | 0     | NA | 0  | NA | 1  | 14 | 0  | NA | 0  | NA |
| 4  | 187307320 | 187330811 | 1     | NM_001006655 | FAM149A   | 0     | NA | 0  | NA | 0  | 1  | 14 | 0  | NA | 0  |
| 4  | 187349667 | 187371611 | 1     | NM_207352    | CYP4V2    | 0     | NA | 0  | NA | 0  | NA | 0  | NA | 0  | NA |
| 4  | 187385665 | 187416619 | 1     | NM_000892    | KLKB1     | 0     | NA | 0  | NA | 0  | NA | 0  | NA | 0  | NA |
| 4  | 187424111 | 187447829 | 1     | NM_000128    | F11       | 0     | NA | 0  | NA | 0  | NA | 0  | NA | 0  | NA |
| 4  | 187713531 | 187691802 | -1    | NM_005958    | MTNR1A    | 0     | NA | 0  | NA | 0  | NA | 0  | NA | 0  | NA |
| 4  | 187881981 | 187745930 | -1    | NM_005245    | FAT       | 0     | NA | 0  | NA | 0  | NA | 0  | NA | 0  | NA |
| 4  | 189153918 | 189163193 | 1     | NM_174900    | ZFP42     | 0     | NA | 0  | NA | 0  | NA | 0  | NA | 0  | NA |
| 4  | 189263402 | 189249420 | -1    | NM_173553    | TRIML2    | 0     | NA | 0  | NA | 0  | NA | 0  | NA | 0  | NA |
| 4  | 189297591 | 189305643 | 1     | NM_178556    | TRIML1    | 0     | NA | 0  | NA | 0  | NA | 0  | NA | 0  | NA |
| 4  | 191098967 | 191121353 | 1     | NM_004477    | FRG1      | 1     | 13 | 1  | 50 | 0  | NA | 0  | NA | 1  | 20 |
| 4  | 191143018 | 191140671 | -1    | NM_020040    | TUBB4Q    | 0     | NA | 0  | NA | 0  | NA | 0  | NA | 0  | NA |
| 4  | 191185406 | 191182516 | -1    | NM_001005217 | FRG2      | 0     | NA | 1  | 17 | 0  | NA | 0  | NA | 1  | 20 |
| 4  | 191229360 | 191230977 | 1     | NM_033178    | DUX4      | 0     | NA | 0  | NA | 0  | NA | 0  | NA | 0  | NA |
| 4  | 191232653 | 191234270 | 1     | NM_033178    | DUX4      | 0     | NA | 0  | NA | 0  | NA | 0  | NA | 0  | NA |
| 4  | 191239247 | 191240864 | 1     | NM_033178    | DUX4      | 0     | NA | 0  | NA | 0  | NA | 0  | NA | 0  | NA |
| 4  | 191242540 | 191244157 | 1     | NM_033178    | DUX4      | 0     | NA | 0  | NA | 0  | NA | 0  | NA | 0  | NA |
| 4  | 191245840 | 191247457 | 1     | NM_033178    | DUX4      | 0     | NA | 0  | NA | 0  | NA | 0  | NA | 0  | NA |
| 22 | h2_hap1   | 16485     | 10696 | -1           | NM_005650 | TCF20 | 0  | NA | 0  | NA | 0  | NA | 0  | NA | 0  |
| 22 | h2_hap1   | 16485     | 10696 | -1           | NM_181492 | TCF20 | 0  | NA | 0  | NA | 0  | NA | 0  | NA | 0  |
| 6  | 237100    | 296355    | 1     | NM_020185    | DUSP22    | 0     | NA | 1  | 16 | 1  | 12 | 0  | NA | 0  | NA |
| 6  | 336751    | 356443    | 1     | NM_002460    | IRF4      | 1     | 11 | 1  | 14 | 1  | 12 | 0  | NA | 0  | NA |
| 6  | 601964    | 600938    | -1    | NM_148959    | HUS1B     | 0     | NA | 0  | NA | 0  | NA | 0  | NA | 0  | NA |
| 6  | 638109    | 430137    | -1    | NM_018303    | EXOC2     | 0     | NA | 0  | NA | 0  | NA | 0  | NA | 0  | NA |
| 6  | 1257674   | 1259993   | 1     | NM_033260    | FOXQ1     | 0     | NA | 0  | NA | 0  | NA | 0  | NA | 1  | 14 |
| 6  | 1335067   | 1340831   | 1     | NM_001452    | FOXF2     | 0     | NA | 0  | NA | 0  | NA | 0  | NA | 0  | NA |

|   |          |          |    |              |          |   |    |   |    |   |    |   |    |   |    |
|---|----------|----------|----|--------------|----------|---|----|---|----|---|----|---|----|---|----|
| 6 | 1555679  | 1559128  | 1  | NM_001453    | FOXC1    | 1 | 13 | 1 | 17 | 0 | NA | 0 | NA | 0 | NA |
| 6 | 2190845  | 1569039  | -1 | NM_001500    | GMDS     | 0 | NA | 0 | NA | 0 | NA | 0 | NA | 0 | NA |
| 6 | 2580297  | 2567970  | -1 | NM_152554    | C6orf195 | 1 | 14 | 1 | 12 | 1 | 15 | 0 | NA | 0 | NA |
| 6 | 2696153  | 2608861  | -1 | NM_001012418 | MYLK4    | 0 | NA | 1 | 14 | 1 | 12 | 0 | NA | 0 | NA |
| 6 | 2710664  | 2730978  | 1  | NM_020135    | WRNIP1   | 1 | 11 | 0 | NA | 0 | NA | 0 | NA | 0 | NA |
| 6 | 2710664  | 2730978  | 1  | NM_130395    | WRNIP1   | 1 | 11 | 0 | NA | 0 | NA | 0 | NA | 0 | NA |
| 6 | 2787080  | 2778732  | -1 | NM_030666    | SERPINB1 | 0 | NA | 0 | NA | 0 | NA | 0 | NA | 0 | NA |
| 6 | 2848506  | 2832502  | -1 | NM_004155    | SERPINB9 | 0 | NA | 1 | 16 | 0 | NA | 1 | 12 | 0 | NA |
| 6 | 2917089  | 2893391  | -1 | NM_004568    | SERPINB6 | 0 | NA | 0 | NA | 1 | 12 | 0 | NA | 0 | NA |
| 6 | 2945065  | 2964993  | 1  | NM_000904    | NQO2     | 1 | 21 | 0 | NA | 0 | NA | 0 | NA | 0 | NA |
| 6 | 2990616  | 2991033  | 1  | NM_001012983 | FAM136B  | 1 | 11 | 1 | 13 | 0 | NA | 0 | NA | 0 | NA |
| 6 | 3022056  | 3060420  | 1  | NM_003804    | RIPK1    | 0 | NA | 0 | NA | 0 | NA | 1 | 11 | 0 | NA |
| 6 | 3064040  | 3098281  | 1  | NM_004332    | BPHL     | 0 | NA | 0 | NA | 0 | NA | 0 | NA | 0 | NA |
| 6 | 3102782  | 3098900  | -1 | NM_001069    | TUBB2A   | 0 | NA | 0 | NA | 1 | 18 | 0 | NA | 0 | NA |
| 6 | 3172870  | 3169513  | -1 | NM_178012    | TUBB2B   | 0 | NA | 0 | NA | 0 | NA | 0 | NA | 0 | NA |
| 6 | 3390217  | 3214206  | -1 | NM_021945    | SLC22A23 | 0 | NA | 1 | 12 | 0 | NA | 0 | NA | 0 | NA |
| 6 | 3401792  | 3214206  | -1 | NM_015482    | SLC22A23 | 0 | NA | 1 | 15 | 0 | NA | 0 | NA | 0 | NA |
| 6 | 3696935  | 3667851  | -1 | NM_183373    | C6orf145 | 1 | 12 | 0 | NA | 1 | 14 | 0 | NA | 0 | NA |
| 6 | 3794630  | 3796550  | 1  | NM_012135    | FAM50B   | 1 | 11 | 1 | 16 | 0 | NA | 0 | NA | 0 | NA |
| 6 | 3966567  | 4010216  | 1  | NM_003913    | PRPF4B   | 0 | NA | 0 | NA | 1 | 12 | 0 | NA | 0 | NA |
| 6 | 4024390  | 4013599  | -1 | NM_173563    | C6orf146 | 0 | NA | 0 | NA | 0 | NA | 0 | NA | 0 | NA |
| 6 | 4024438  | 4075998  | 1  | NM_001085401 | C6orf201 | 0 | NA | 0 | NA | 0 | NA | 0 | NA | 0 | NA |
| 6 | 4080830  | 4060925  | -1 | NM_006117    | PECI     | 0 | NA | 0 | NA | 1 | 12 | 0 | NA | 0 | NA |
| 6 | 4080830  | 4060925  | -1 | NM_206836    | PECI     | 0 | NA | 0 | NA | 1 | 12 | 0 | NA | 0 | NA |
| 6 | 4651391  | 4900777  | 1  | NM_004824    | CDYL     | 0 | NA | 0 | NA | 0 | NA | 0 | NA | 0 | NA |
| 6 | 4721681  | 4900777  | 1  | NM_170751    | CDYL     | 1 | 11 | 1 | 15 | 0 | NA | 0 | NA | 0 | NA |
| 6 | 4721681  | 4900777  | 1  | NM_170752    | CDYL     | 1 | 11 | 1 | 15 | 0 | NA | 0 | NA | 0 | NA |
| 6 | 4949270  | 4940278  | -1 | NM_006638    | RPP40    | 1 | 19 | 0 | NA | 1 | 12 | 1 | 28 | 0 | NA |
| 6 | 5206167  | 5053651  | -1 | NM_020408    | LYRM4    | 1 | 14 | 0 | NA | 0 | NA | 1 | 16 | 0 | NA |
| 6 | 5206582  | 5716815  | 1  | NM_006567    | FARS2    | 1 | 14 | 0 | NA | 0 | NA | 1 | 16 | 0 | NA |
| 6 | 5952632  | 5943231  | -1 | NM_016588    | NRN1     | 0 | NA | 0 | NA | 0 | NA | 0 | NA | 0 | NA |
| 6 | 6265923  | 6089309  | -1 | NM_000129    | F13A1    | 0 | NA | 0 | NA | 0 | NA | 0 | NA | 0 | NA |
| 6 | 6533932  | 6600215  | 1  | NM_004271    | LY86     | 0 | NA | 0 | NA | 0 | NA | 0 | NA | 0 | NA |
| 6 | 7053262  | 7196194  | 1  | NM_001003698 | RREB1    | 0 | NA | 0 | NA | 1 | 12 | 0 | NA | 0 | NA |
| 6 | 7053262  | 7196194  | 1  | NM_001003699 | RREB1    | 0 | NA | 0 | NA | 1 | 12 | 0 | NA | 0 | NA |
| 6 | 7084476  | 7196194  | 1  | NM_002955    | RREB1    | 0 | NA | 0 | NA | 1 | 12 | 0 | NA | 0 | NA |
| 6 | 7258540  | 7226286  | -1 | NM_003144    | SSR1     | 0 | NA | 0 | NA | 0 | NA | 0 | NA | 0 | NA |
| 6 | 7334941  | 7271885  | -1 | NM_205864    | CAGE1    | 0 | NA | 0 | NA | 0 | NA | 0 | NA | 0 | NA |
| 6 | 7335060  | 7363269  | 1  | NM_031480    | RIOK1    | 0 | NA | 0 | NA | 0 | NA | 0 | NA | 0 | NA |
| 6 | 7347878  | 7363269  | 1  | NM_153005    | RIOK1    | 0 | NA | 0 | NA | 0 | NA | 0 | NA | 0 | NA |
| 6 | 7486868  | 7531945  | 1  | NM_001008844 | DSP      | 0 | NA | 1 | 15 | 0 | NA | 0 | NA | 0 | NA |
| 6 | 7486868  | 7531945  | 1  | NM_004415    | DSP      | 0 | NA | 1 | 15 | 0 | NA | 0 | NA | 0 | NA |
| 6 | 7535430  | 7557199  | 1  | NM_152551    | C6orf151 | 0 | NA | 0 | NA | 0 | NA | 0 | NA | 0 | NA |
| 6 | 7672009  | 7826960  | 1  | NM_001718    | BMP6     | 1 | 15 | 0 | NA | 1 | 12 | 0 | NA | 0 | NA |
| 6 | 7856040  | 7826750  | -1 | NM_030810    | TXNDC5   | 0 | NA | 0 | NA | 0 | NA | 0 | NA | 0 | NA |
| 6 | 8009596  | 7826750  | -1 | NM_022085    | TXNDC5   | 0 | NA | 0 | NA | 1 | 25 | 1 | 16 | 0 | NA |
| 6 | 8009646  | 7959213  | -1 | NM_201280    | MUTED    | 0 | NA | 0 | NA | 1 | 25 | 1 | 16 | 0 | NA |
| 6 | 8047780  | 8024637  | -1 | NM_004280    | EEF1E1   | 0 | NA | 0 | NA | 1 | 18 | 0 | NA | 0 | NA |
| 6 | 8380624  | 8358305  | -1 | NM_015948    | SLC35B3  | 0 | NA | 0 | NA | 0 | NA | 1 | 11 | 0 | NA |
| 6 | 10168908 | 10004929 | -1 | NM_153003    | OFCC1    | 0 | NA | 0 | NA | 0 | NA | 0 | NA | 0 | NA |
| 6 | 10520593 | 10504901 | -1 | NM_001032280 | TFAP2A   | 1 | 13 | 1 | 15 | 0 | NA | 0 | NA | 0 | NA |
| 6 | 10523456 | 10504901 | -1 | NM_003220    | TFAP2A   | 1 | 12 | 1 | 15 | 0 | NA | 0 | NA | 0 | NA |
| 6 | 10527783 | 10504901 | -1 | NM_001042425 | TFAP2A   | 1 | 12 | 1 | 15 | 0 | NA | 0 | NA | 0 | NA |
| 6 | 10542760 | 10537662 | -1 | NM_152738    | C6orf218 | 1 | 19 | 1 | 16 | 0 | NA | 0 | NA | 0 | NA |
| 6 | 10636696 | 10737587 | 1  | NM_145649    | GCNT2    | 1 | 24 | 0 | NA | 0 | NA | 1 | 14 | 0 | NA |
| 6 | 10663934 | 10737587 | 1  | NM_001491    | GCNT2    | 0 | NA | 0 | NA | 0 | NA | 0 | NA | 0 | NA |
| 6 | 10693978 | 10737587 | 1  | NM_145655    | GCNT2    | 0 | NA | 1 | 14 | 0 | NA | 0 | NA | 0 | NA |
| 6 | 10803173 | 10817956 | 1  | NM_017906    | PAK1IP1  | 1 | 26 | 1 | 12 | 1 | 12 | 1 | 15 | 0 | NA |
| 6 | 10831323 | 10839348 | 1  | NM_016462    | TMEM14C  | 0 | NA | 0 | NA | 0 | NA | 1 | 12 | 0 | NA |
| 6 | 10856035 | 10865200 | 1  | NM_030969    | TMEM14B  | 1 | 16 | 0 | NA | 0 | NA | 0 | NA | 0 | NA |
| 6 | 10939096 | 10870941 | -1 | NM_005906    | MAK      | 0 | NA | 1 | 16 | 0 | NA | 0 | NA | 0 | NA |
| 6 | 10990084 | 10981441 | -1 | NM_004752    | GCM2     | 1 | 16 | 1 | 12 | 0 | NA | 0 | NA | 0 | NA |
| 6 | 10995049 | 11082527 | 1  | NM_001040274 | SYCP2L   | 1 | 16 | 1 | 12 | 0 | NA | 0 | NA | 0 | NA |
| 6 | 11152610 | 11088978 | -1 | NM_017770    | ELOVL2   | 0 | NA | 1 | 15 | 1 | 12 | 0 | NA | 0 | NA |
| 6 | 11219945 | 11210707 | -1 | NM_207582    | HERV-FRD | 0 | NA | 0 | NA | 1 | 12 | 0 | NA | 0 | NA |

|   |          |          |    |              |              |   |    |   |    |   |    |   |    |   |    |
|---|----------|----------|----|--------------|--------------|---|----|---|----|---|----|---|----|---|----|
| 6 | 11340872 | 11308591 | -1 | NM_182966    | NEDD9        | 0 | NA | 0 | NA | 1 | 13 | 0 | NA | 0 | NA |
| 6 | 11340884 | 11291518 | -1 | NM_006403    | NEDD9        | 0 | NA | 0 | NA | 1 | 13 | 0 | NA | 0 | NA |
| 6 | 11646496 | 11691743 | 1  | NM_001100829 | LOC100113407 | 0 | NA | 0 | NA | 0 | NA | 0 | NA | 0 | NA |
| 6 | 11887052 | 11821894 | -1 | NM_032744    | C6orf105     | 0 | NA | 0 | NA | 0 | NA | 0 | NA | 0 | NA |
| 6 | 12120709 | 12273218 | 1  | NM_002114    | HIVEP1       | 0 | NA | 0 | NA | 1 | 12 | 0 | NA | 0 | NA |
| 6 | 12398514 | 12405413 | 1  | NM_001955    | EDN1         | 0 | NA | 0 | NA | 0 | NA | 0 | NA | 0 | NA |
| 6 | 12825818 | 13395507 | 1  | NM_030948    | PHACTR1      | 0 | NA | 0 | NA | 0 | NA | 0 | NA | 0 | NA |
| 6 | 13436593 | 13413162 | -1 | NM_016495    | TBC1D7       | 0 | NA | 0 | NA | 0 | NA | 0 | NA | 0 | NA |
| 6 | 13594394 | 13577487 | -1 | NM_033069    | C6orf114     | 0 | NA | 1 | 13 | 0 | NA | 0 | NA | 0 | NA |
| 6 | 13595766 | 13471797 | -1 | NM_018988    | GFOD1        | 0 | NA | 1 | 13 | 0 | NA | 0 | NA | 0 | NA |
| 6 | 13682811 | 13713949 | 1  | NM_031244    | SIRT5        | 1 | 11 | 0 | NA | 0 | NA | 0 | NA | 0 | NA |
| 6 | 13682853 | 13720500 | 1  | NM_012241    | SIRT5        | 1 | 11 | 0 | NA | 0 | NA | 0 | NA | 0 | NA |
| 6 | 13723537 | 13729106 | 1  | NM_016167    | NOL7         | 1 | 20 | 0 | NA | 0 | NA | 0 | NA | 0 | NA |
| 6 | 13819775 | 13729708 | -1 | NM_005493    | RANBP9       | 0 | NA | 0 | NA | 0 | NA | 0 | NA | 0 | NA |
| 6 | 13922768 | 13898998 | -1 | NM_001031713 | CCDC90A      | 0 | NA | 0 | NA | 0 | NA | 0 | NA | 0 | NA |
| 6 | 14033181 | 14088214 | 1  | NM_152737    | RNF182       | 0 | NA | 0 | NA | 0 | NA | 0 | NA | 0 | NA |
| 6 | 14225843 | 14245127 | 1  | NM_001040280 | CD83         | 0 | NA | 0 | NA | 0 | NA | 0 | NA | 0 | NA |
| 6 | 14225843 | 14245127 | 1  | NM_004233    | CD83         | 0 | NA | 0 | NA | 0 | NA | 0 | NA | 0 | NA |
| 6 | 15354505 | 15630232 | 1  | NM_004973    | JARID2       | 0 | NA | 0 | NA | 1 | 12 | 0 | NA | 0 | NA |
| 6 | 15771250 | 15631017 | -1 | NM_032122    | DTNBP1       | 0 | NA | 0 | NA | 0 | NA | 0 | NA | 0 | NA |
| 6 | 15771250 | 15631017 | -1 | NM_183041    | DTNBP1       | 0 | NA | 0 | NA | 0 | NA | 0 | NA | 0 | NA |
| 6 | 15771250 | 15631784 | -1 | NM_183040    | DTNBP1       | 0 | NA | 0 | NA | 0 | NA | 0 | NA | 0 | NA |
| 6 | 16237295 | 16286457 | 1  | NM_013262    | MYLIP        | 1 | 15 | 0 | NA | 0 | NA | 0 | NA | 0 | NA |
| 6 | 16346789 | 16403759 | 1  | NM_006877    | GMPR         | 0 | NA | 1 | 13 | 1 | 12 | 0 | NA | 0 | NA |
| 6 | 16869700 | 16407321 | -1 | NM_000332    | ATXN1        | 0 | NA | 0 | NA | 1 | 15 | 0 | NA | 0 | NA |
| 6 | 17390910 | 17402052 | 1  | NM_153020    | RBM24        | 0 | NA | 0 | NA | 0 | NA | 0 | NA | 0 | NA |
| 6 | 17501714 | 17666002 | 1  | NM_006366    | CAP2         | 0 | NA | 1 | 12 | 0 | NA | 0 | NA | 0 | NA |
| 6 | 17708564 | 17719929 | 1  | NM_016255    | FAM8A1       | 0 | NA | 0 | NA | 0 | NA | 0 | NA | 0 | NA |
| 6 | 17814797 | 17723247 | -1 | NM_005124    | NUP153       | 1 | 11 | 0 | NA | 0 | NA | 0 | NA | 0 | NA |
| 6 | 18095778 | 17868583 | -1 | NM_001105568 | KIF13A       | 1 | 14 | 0 | NA | 0 | NA | 0 | NA | 0 | NA |
| 6 | 18095778 | 17871902 | -1 | NM_001105566 | KIF13A       | 1 | 14 | 0 | NA | 0 | NA | 0 | NA | 0 | NA |
| 6 | 18095778 | 17871902 | -1 | NM_001105567 | KIF13A       | 1 | 14 | 0 | NA | 0 | NA | 0 | NA | 0 | NA |
| 6 | 18095778 | 17871902 | -1 | NM_022113    | KIF13A       | 1 | 14 | 0 | NA | 0 | NA | 0 | NA | 0 | NA |
| 6 | 18230830 | 18228696 | -1 | NM_198586    | NHLRC1       | 0 | NA | 0 | NA | 0 | NA | 0 | NA | 0 | NA |
| 6 | 18263353 | 18236523 | -1 | NM_000367    | TPMT         | 0 | NA | 0 | NA | 1 | 17 | 0 | NA | 0 | NA |
| 6 | 18263597 | 18332063 | 1  | NM_153042    | AOF1         | 0 | NA | 0 | NA | 1 | 17 | 0 | NA | 0 | NA |
| 6 | 18372778 | 18332378 | -1 | NM_003472    | DEK          | 1 | 11 | 1 | 13 | 0 | NA | 0 | NA | 0 | NA |
| 6 | 18495572 | 18576829 | 1  | NM_182757    | RNF144B      | 0 | NA | 0 | NA | 0 | NA | 0 | NA | 0 | NA |
| 6 | 19945595 | 19948894 | 1  | NM_001546    | ID4          | 0 | NA | 0 | NA | 0 | NA | 0 | NA | 0 | NA |
| 6 | 20320649 | 20208913 | -1 | NM_001080480 | MBOAT1       | 0 | NA | 0 | NA | 0 | NA | 0 | NA | 0 | NA |
| 6 | 20510115 | 20601924 | 1  | NM_001949    | EZF3         | 0 | NA | 0 | NA | 0 | NA | 0 | NA | 0 | NA |
| 6 | 20642666 | 21339743 | 1  | NM_017774    | CDKAL1       | 0 | NA | 0 | NA | 1 | 13 | 0 | NA | 0 | NA |
| 6 | 21701950 | 21706828 | 1  | NM_003107    | SOX4         | 1 | 26 | 0 | NA | 0 | NA | 0 | NA | 0 | NA |
| 6 | 22405709 | 22395458 | -1 | NM_000948    | PRL          | 0 | NA | 0 | NA | 0 | NA | 0 | NA | 0 | NA |
| 6 | 22677666 | 22678729 | 1  | NM_138574    | HDGFL1       | 0 | NA | 1 | 13 | 1 | 14 | 0 | NA | 0 | NA |
| 6 | 24234328 | 24255609 | 1  | NM_080723    | NRSN1        | 0 | NA | 0 | NA | 0 | NA | 0 | NA | 0 | NA |
| 6 | 24465109 | 24466491 | 1  | NM_181337    | KAAG1        | 0 | NA | 0 | NA | 0 | NA | 0 | NA | 0 | NA |
| 6 | 24466259 | 24279961 | -1 | NM_016356    | DCDC2        | 0 | NA | 0 | NA | 0 | NA | 0 | NA | 0 | NA |
| 6 | 24511131 | 24533795 | 1  | NM_020662    | MRS2         | 0 | NA | 0 | NA | 0 | NA | 0 | NA | 0 | NA |
| 6 | 24597778 | 24581304 | -1 | NM_177483    | GPLD1        | 0 | NA | 0 | NA | 0 | NA | 0 | NA | 0 | NA |
| 6 | 24597829 | 24536383 | -1 | NM_001503    | GPLD1        | 0 | NA | 0 | NA | 0 | NA | 0 | NA | 0 | NA |
| 6 | 24603175 | 24645414 | 1  | NM_001080    | ALDH5A1      | 0 | NA | 0 | NA | 0 | NA | 0 | NA | 0 | NA |
| 6 | 24603175 | 24645414 | 1  | NM_170740    | ALDH5A1      | 0 | NA | 0 | NA | 0 | NA | 0 | NA | 0 | NA |
| 6 | 24754362 | 24652310 | -1 | NM_014809    | KIAA0319     | 0 | NA | 0 | NA | 0 | NA | 0 | NA | 0 | NA |
| 6 | 24775094 | 24758183 | -1 | NM_016614    | TTRAP        | 0 | NA | 0 | NA | 0 | NA | 0 | NA | 0 | NA |
| 6 | 24775253 | 24809921 | 1  | NM_018473    | THEM2        | 0 | NA | 0 | NA | 0 | NA | 0 | NA | 0 | NA |
| 6 | 24827382 | 24813143 | -1 | NM_030939    | C6orf62      | 1 | 12 | 0 | NA | 1 | 12 | 1 | 12 | 0 | NA |
| 6 | 24883142 | 24894257 | 1  | NM_015895    | GMNN         | 0 | NA | 0 | NA | 0 | NA | 1 | 14 | 0 | NA |
| 6 | 24985562 | 24947573 | -1 | NM_015864    | C6orf32      | 0 | NA | 1 | 15 | 0 | NA | 0 | NA | 0 | NA |
| 6 | 25019174 | 24912491 | -1 | NM_014722    | C6orf32      | 0 | NA | 0 | NA | 0 | NA | 0 | NA | 0 | NA |
| 6 | 25387626 | 25728737 | 1  | NM_017640    | LRRC16A      | 0 | NA | 0 | NA | 0 | NA | 0 | NA | 0 | NA |
| 6 | 25760407 | 25809987 | 1  | NM_006998    | SCGN         | 0 | NA | 0 | NA | 0 | NA | 0 | NA | 0 | NA |
| 6 | 25834769 | 25834269 | -1 | NM_170745    | HIST1H2AA    | 0 | NA | 1 | 18 | 0 | NA | 0 | NA | 0 | NA |
| 6 | 25835115 | 25835552 | 1  | NM_170610    | HIST1H2BA    | 0 | NA | 1 | 18 | 0 | NA | 0 | NA | 0 | NA |
| 6 | 25862944 | 25888419 | 1  | NM_005495    | SLC17A4      | 0 | NA | 0 | NA | 1 | 14 | 0 | NA | 0 | NA |

|   |          |          |    |              |           |          |    |   |    |   |    |   |    |   |    |
|---|----------|----------|----|--------------|-----------|----------|----|---|----|---|----|---|----|---|----|
| 6 | 25940266 | 25891104 | -1 | NM_005074    | SLC17A1   | 0        | NA | 0 | NA | 0 | NA | 0 | NA | 0 | NA |
| 6 | 25982450 | 25953306 | -1 | NM_001098486 | SLC17A3   | 0        | NA | 0 | NA | 0 | NA | 0 | NA | 0 | NA |
| 6 | 25982450 | 25953306 | -1 | NM_006632    | SLC17A3   | 0        | NA | 0 | NA | 0 | NA | 0 | NA | 0 | NA |
| 6 | 26038818 | 26020962 | -1 | NM_005835    | SLC17A2   | 0        | NA | 0 | NA | 0 | NA | 0 | NA | 0 | NA |
| 6 | 26071049 | 26093331 | 1  | NM_006355    | TRIM38    | 0        | NA | 0 | NA | 0 | NA | 0 | NA | 0 | NA |
| 6 | 26126019 | 26125238 | -1 | NM_005325    | HIST1H1A  | 1        | 14 | 1 | 16 | 1 | 14 | 1 | 12 | 0 | NA |
| 6 | 26128696 | 26129165 | 1  | NM_003529    | HIST1H3A  | 1        | 17 | 1 | 15 | 1 | 16 | 1 | 12 | 0 | NA |
| 6 | 26129885 | 26130257 | 1  | NM_003538    | HIST1H4A  | 1        | 17 | 1 | 15 | 1 | 16 | 1 | 12 | 0 | NA |
| 6 | 26135459 | 26135102 | -1 | NM_003544    | HIST1H4B  | 1        | 14 | 1 | 15 | 1 | 16 | 1 | 12 | 0 | NA |
| 6 | 26140267 | 26139795 | -1 | NM_003537    | HIST1H3B  | 1        | 13 | 0 | NA | 0 | NA | 1 | 12 | 0 | NA |
| 6 | 26141775 | 26141298 | -1 | NM_003513    | HIST1H2AB | 1        | 13 | 0 | NA | 0 | NA | 1 | 12 | 0 | NA |
| 6 | 26151864 | 26151433 | -1 | NM_021062    | HIST1H2BB | 1        | 13 | 1 | 13 | 0 | NA | 0 | NA | 0 | NA |
| 6 | 26153617 | 26154076 | 1  | NM_003531    | HIST1H3C  | 0        | NA | 1 | 13 | 0 | NA | 0 | NA | 0 | NA |
| 6 | 26164678 | 26163946 | -1 | NM_005319    | HIST1H1C  | 1        | 18 | 0 | NA | 0 | NA | 1 | 15 | 0 | NA |
| 6 | 26195487 | 26203448 | 1  | NM_000410    | HFE       | 0        | NA | 0 | NA | 0 | NA | 0 | NA | 0 | NA |
| 6 | 26195487 | 26203448 | 1  | NM_139003    | HFE       | 0        | NA | 0 | NA | 0 | NA | 0 | NA | 0 | NA |
| 6 | 26195487 | 26203448 | 1  | NM_139004    | HFE       | 0        | NA | 0 | NA | 0 | NA | 0 | NA | 0 | NA |
| 6 | 26195487 | 26203448 | 1  | NM_139006    | HFE       | 0        | NA | 0 | NA | 0 | NA | 0 | NA | 0 | NA |
| 6 | 26195487 | 26203448 | 1  | NM_139007    | HFE       | 0        | NA | 0 | NA | 0 | NA | 0 | NA | 0 | NA |
| 6 | 26195487 | 26203448 | 1  | NM_139008    | HFE       | 0        | NA | 0 | NA | 0 | NA | 0 | NA | 0 | NA |
| 6 | 26195487 | 26203448 | 1  | NM_139009    | HFE       | 0        | NA | 0 | NA | 0 | NA | 0 | NA | 0 | NA |
| 6 | 26195487 | 26203448 | 1  | NM_139010    | HFE       | 0        | NA | 0 | NA | 0 | NA | 0 | NA | 0 | NA |
| 6 | 26195487 | 26203448 | 1  | NM_139011    | HFE       | 0        | NA | 0 | NA | 0 | NA | 0 | NA | 0 | NA |
| 6 | 26212154 | 26212544 | 1  | NM_003542    | HIST1H4C  | 1        | 30 | 0 | NA | 1 | 12 | 0 | NA | 0 | NA |
| 6 | 26216343 | 26215618 | -1 | NM_005323    | HIST1H1T  | 1        | 30 | 0 | NA | 1 | 12 | 0 | NA | 0 | NA |
| 6 | 26232111 | 26231673 | -1 | NM_003526    | HIST1H2BC | 1        | 18 | 0 | NA | 1 | 18 | 0 | NA | 0 | NA |
| 6 | 26232351 | 26232897 | 1  | NM_003512    | HIST1H2AC | 1        | 18 | 0 | NA | 1 | 18 | 0 | NA | 0 | NA |
| 6 | 26264537 | 26265322 | 1  | NM_005321    | HIST1H1E  | 1        | 12 | 0 | NA | 0 | NA | 0 | NA | 0 | NA |
| 6 | 26266327 | 26266850 | 1  | NM_021063    | HIST1H2BD | 1        | 12 | 0 | NA | 0 | NA | 0 | NA | 0 | NA |
| 6 | 26266327 | 26279555 | 1  | NM_138720    | HIST1H2BD | 1        | 12 | 0 | NA | 0 | NA | 0 | NA | 0 | NA |
| 6 | 26292002 | 26292437 | 1  | NM_003523    | HIST1H2BE | 1        | 11 | 0 | NA | 1 | 13 | 0 | NA | 0 | NA |
| 6 | 26297283 | 26296916 | -1 | NM_003539    | HIST1H4D  | 1        | 26 | 0 | NA | 1 | 12 | 0 | NA | 0 | NA |
| 6 | 26307443 | 26304990 | -1 | NM_003530    | HIST1H3D  | 1        | 12 | 0 | NA | 1 | 13 | 0 | NA | 0 | NA |
| 6 | 26307450 | 26306990 | -1 | NM_021065    | HIST1H2AD | 1        | 12 | 0 | NA | 1 | 13 | 0 | NA | 0 | NA |
| 6 | 26307765 | 26308195 | 1  | NM_003522    | HIST1H2BF | 1        | 12 | 0 | NA | 1 | 13 | 0 | NA | 0 | NA |
| 6 | 26312851 | 26313228 | 1  | NM_003545    | HIST1H4E  | 1        | 19 | 0 | NA | 1 | 12 | 0 | NA | 0 | NA |
| 6 | 26324851 | 26324407 | -1 | NM_003518    | HIST1H2BG | 1        | 15 | 1 | 16 | 1 | 12 | 0 | NA | 0 | NA |
| 6 | 26325126 | 26325690 | 1  | NM_021052    | HIST1H2AE | 1        | 15 | 1 | 16 | 1 | 12 | 0 | NA | 0 | NA |
| 6 | 26333361 | 26333823 | 1  | NM_003532    | HIST1H3E  | 1        | 11 | 1 | 24 | 1 | 16 | 0 | NA | 0 | NA |
| 6 | 26343195 | 26342418 | -1 | NM_005320    | HIST1H1D  | 1        | 11 | 1 | 14 | 0 | NA | 0 | NA | 0 | NA |
| 6 | 26348632 | 26349000 | 1  | NM_003540    | HIST1H4F  | 0        | NA | 1 | 14 | 1 | 12 | 0 | NA | 0 | NA |
| 6 | 26355184 | 26354817 | -1 | NM_003547    | HIST1H4G  | 0        | NA | 1 | 14 | 1 | 12 | 0 | NA | 0 | NA |
| 6 | 26358814 | 26358348 | -1 | NM_021018    | HIST1H3F  | 0        | NA | 1 | 14 | 1 | 12 | 0 | NA | 0 | NA |
| 6 | 26359857 | 26360282 | 1  | NM_003524    | HIST1H2BH | 0        | NA | 1 | 14 | 1 | 12 | 0 | NA | 0 | NA |
| 6 | 26379591 | 26379124 | -1 | NM_003534    | HIST1H3G  | 0        | NA | 0 | NA | 0 | NA | 0 | NA | 0 | NA |
| 6 | 26381182 | 26381619 | 1  | NM_003525    | HIST1H2BI | 0        | NA | 0 | NA | 0 | NA | 0 | NA | 0 | NA |
| 6 | 26393706 | 26393332 | -1 | NM_003543    | HIST1H4H  | 0        | NA | 0 | NA | 1 | 17 | 0 | NA | 0 | NA |
| 6 | 26473376 | 26486527 | 1  | NM_007047    | BTN3A2    | 0        | NA | 0 | NA | 0 | NA | 0 | NA | 0 | NA |
| 6 | 26491332 | 26503079 | 1  | NM_006995    | BTN2A2    | 0        | NA | 0 | NA | 0 | NA | 0 | NA | 0 | NA |
| 6 | 26491332 | 26503079 | 1  | NM_181531    | BTN2A2    | 0        | NA | 0 | NA | 0 | NA | 0 | NA | 0 | NA |
| 6 | 26510459 | 26523421 | 1  | NM_007048    | BTN3A1    | 0        | NA | 0 | NA | 0 | NA | 0 | NA | 0 | NA |
| 6 | 26530325 | 26539822 | 1  | NM_024018    | BTN2A3    | 0        | NA | 0 | NA | 0 | NA | 1 | 17 | 0 | NA |
| 6 | 26548741 | 26561622 | 1  | NM_006994    | BTN3A3    | 0        | NA | 0 | NA | 0 | NA | 0 | NA | 0 | NA |
| 6 | 26548741 | 26561622 | 1  | NM_197974    | BTN3A3    | 0        | NA | 0 | NA | 0 | NA | 0 | NA | 0 | NA |
| 6 | 26566167 | 26577844 | 1  | NM_007049    | BTN2A1    | 0        | NA | 0 | NA | 0 | NA | 0 | NA | 0 | NA |
| 6 | 26566167 | 26577844 | 1  | NM_078476    | BTN2A1    | 0        | NA | 0 | NA | 0 | NA | 0 | NA | 0 | NA |
| 6 | 26609473 | 26618631 | 1  | NM_001732    | BTN1A1    | 26609473 | NA | 1 | 15 | 0 | NA | 0 | NA | 0 | NA |
| 6 | 26646550 | 26655143 | 1  | NM_006353    | HMGNA4    | 1        | 21 | 0 | NA | 1 | 12 | 0 | NA | 0 | NA |
| 6 | 26705158 | 26708256 | 1  | NM_013375    | ABT1      | 1        | 11 | 0 | NA | 0 | NA | 0 | NA | 0 | NA |
| 6 | 26767942 | 26742589 | -1 | NM_024639    | ZNF322A   | 0        | NA | 0 | NA | 0 | NA | 1 | 13 | 0 | NA |
| 6 | 27208554 | 27208073 | -1 | NM_021058    | HIST1H2BJ | 1        | 30 | 0 | NA | 1 | 34 | 0 | NA | 0 | NA |
| 6 | 27208799 | 27211050 | 1  | NM_021064    | HIST1H2AG | 1        | 30 | 0 | NA | 1 | 34 | 0 | NA | 0 | NA |
| 6 | 27215066 | 27215436 | 1  | NM_003495    | HIST1H4I  | 1        | 30 | 0 | NA | 1 | 34 | 0 | NA | 0 | NA |
| 6 | 27222598 | 27214051 | -1 | NM_080593    | HIST1H2BK | 0        | NA | 0 | NA | 0 | NA | 0 | NA | 0 | NA |
| 6 | 27222886 | 27223325 | 1  | NM_080596    | HIST1H2AH | 0        | NA | 0 | NA | 0 | NA | 0 | NA | 0 | NA |

|   |          |          |    |              |           |   |    |   |    |   |    |   |    |   |    |
|---|----------|----------|----|--------------|-----------|---|----|---|----|---|----|---|----|---|----|
| 6 | 27323486 | 27322229 | 1  | NM_005865    | PRSS16    | 0 | NA | 1 | 15 | 0 | NA | 0 | NA | 0 | NA |
| 6 | 27400556 | 27401720 | 1  | NM_032030    | FKSG83    | 0 | NA | 0 | NA | 0 | NA | 0 | NA | 0 | NA |
| 6 | 27464502 | 27477206 | 1  | NM_001076781 | ZNF391    | 0 | NA | 0 | NA | 0 | NA | 1 | 15 | 0 | NA |
| 6 | 27548858 | 27526505 | -1 | NM_007149    | ZNF184    | 1 | 12 | 0 | NA | 0 | NA | 0 | NA | 0 | NA |
| 6 | 27883688 | 27883235 | -1 | NM_003519    | HIST1H2BL | 1 | 17 | 1 | 29 | 1 | 12 | 0 | NA | 0 | NA |
| 6 | 27883955 | 27884424 | 1  | NM_003509    | HIST1H2AI | 1 | 17 | 1 | 29 | 1 | 12 | 0 | NA | 0 | NA |
| 6 | 27885820 | 27886293 | 1  | NM_003536    | HIST1H3H  | 1 | 17 | 1 | 29 | 1 | 14 | 0 | NA | 0 | NA |
| 6 | 27890497 | 27890058 | -1 | NM_021066    | HIST1H2AJ | 1 | 17 | 1 | 29 | 1 | 17 | 0 | NA | 0 | NA |
| 6 | 27890800 | 27891246 | 1  | NM_003521    | HIST1H2BM | 1 | 17 | 1 | 29 | 1 | 17 | 0 | NA | 0 | NA |
| 6 | 27899881 | 27900237 | 1  | NM_021968    | HIST1H4J  | 1 | 15 | 1 | 29 | 1 | 17 | 0 | NA | 0 | NA |
| 6 | 27907284 | 27906930 | -1 | NM_003541    | HIST1H4K  | 1 | 14 | 0 | NA | 1 | 12 | 0 | NA | 0 | NA |
| 6 | 27914096 | 27913636 | -1 | NM_003510    | HIST1H2AK | 1 | 14 | 0 | NA | 1 | 12 | 0 | NA | 0 | NA |
| 6 | 27914418 | 27914867 | 1  | NM_003520    | HIST1H2BN | 1 | 14 | 0 | NA | 1 | 12 | 0 | NA | 0 | NA |
| 6 | 27941085 | 27941555 | 1  | NM_003511    | HIST1H2AL | 1 | 11 | 1 | 24 | 1 | 19 | 1 | 16 | 0 | NA |
| 6 | 27943338 | 27942548 | -1 | NM_005322    | HIST1H1B  | 1 | 11 | 1 | 24 | 1 | 19 | 1 | 16 | 0 | NA |
| 6 | 27948078 | 27947601 | -1 | NM_003533    | HIST1H3I  | 1 | 11 | 1 | 24 | 1 | 13 | 1 | 16 | 0 | NA |
| 6 | 27949268 | 27948904 | -1 | NM_003546    | HIST1H4L  | 1 | 11 | 1 | 24 | 1 | 12 | 1 | 16 | 0 | NA |
| 6 | 27966549 | 27966071 | -1 | NM_003535    | HIST1H3J  | 1 | 12 | 0 | NA | 0 | NA | 0 | NA | 0 | NA |
| 6 | 27968942 | 27968455 | -1 | NM_003514    | HIST1H2AM | 1 | 17 | 0 | NA | 0 | NA | 0 | NA | 0 | NA |
| 6 | 27969181 | 27969648 | 1  | NM_003527    | HIST1H2BO | 1 | 17 | 0 | NA | 0 | NA | 0 | NA | 0 | NA |
| 6 | 27988076 | 27987002 | -1 | NM_033057    | OR2B2     | 1 | 13 | 1 | 16 | 0 | NA | 0 | NA | 0 | NA |
| 6 | 28032997 | 28033939 | 1  | NM_012367    | OR2B6     | 0 | NA | 1 | 12 | 0 | NA | 0 | NA | 0 | NA |
| 6 | 28154550 | 28165319 | 1  | NM_003447    | ZNF165    | 0 | NA | 0 | NA | 1 | 19 | 0 | NA | 0 | NA |
| 6 | 28200365 | 28205835 | 1  | NM_025231    | ZSCAN16   | 1 | 19 | 0 | NA | 1 | 13 | 0 | NA | 0 | NA |
| 6 | 28217694 | 28233215 | 1  | NM_006298    | ZNF192    | 0 | NA | 0 | NA | 1 | 15 | 0 | NA | 0 | NA |
| 6 | 28301051 | 28309239 | 1  | NM_006299    | ZNF193    | 0 | NA | 0 | NA | 1 | 20 | 0 | NA | 0 | NA |
| 6 | 28327981 | 28320468 | -1 | NM_019110    | ZKSCAN4   | 0 | NA | 1 | 13 | 0 | NA | 0 | NA | 0 | NA |
| 6 | 28335076 | 28336715 | 1  | NM_001007531 | NKAPL     | 0 | NA | 1 | 13 | 0 | NA | 0 | NA | 0 | NA |
| 6 | 28342766 | 28353959 | 1  | NM_001023560 | ZNF187    | 0 | NA | 1 | 13 | 1 | 22 | 0 | NA | 0 | NA |
| 6 | 28342766 | 28353959 | 1  | NM_001111039 | ZNF187    | 0 | NA | 1 | 13 | 1 | 22 | 0 | NA | 0 | NA |
| 6 | 28342766 | 28353959 | 1  | NM_152736    | ZNF187    | 0 | NA | 1 | 13 | 1 | 22 | 0 | NA | 0 | NA |
| 6 | 28357342 | 28378305 | 0  | NM_032507    | PGBD1     | 0 | NA | 0 | NA | 0 | NA | 0 | NA | 0 | NA |
| 6 | 28411904 | 28400708 | -1 | NM_030899    | ZNF323    | 1 | 12 | 1 | 19 | 1 | 14 | 1 | 12 | 0 | NA |
| 6 | 28425669 | 28442503 | 1  | NM_024493    | ZKSCAN3   | 0 | NA | 0 | NA | 0 | NA | 0 | NA | 0 | NA |
| 6 | 28429951 | 28400493 | -1 | NM_145909    | ZNF323    | 0 | NA | 0 | NA | 0 | NA | 0 | NA | 0 | NA |
| 6 | 28591549 | 28579051 | -1 | NM_182701    | GPX6      | 0 | NA | 1 | 12 | 0 | NA | 0 | NA | 0 | NA |
| 6 | 28601767 | 28609923 | 1  | NM_001509    | GPX5      | 0 | NA | 0 | NA | 0 | NA | 0 | NA | 0 | NA |
| 6 | 28601767 | 28609923 | 1  | NM_003996    | GPX5      | 0 | NA | 0 | NA | 0 | NA | 0 | NA | 0 | NA |
| 6 | 28663091 | 28647385 | -1 | NM_052923    | ZNF452    | 0 | NA | 1 | 17 | 0 | NA | 0 | NA | 0 | NA |
| 6 | 2899747  | 28978757 | -1 | NM_006510    | TRIM27    | 0 | NA | 0 | NA | 0 | NA | 0 | NA | 0 | NA |
| 6 | 29081016 | 29070572 | -1 | NM_001010877 | ZNF311    | 1 | 16 | 1 | 12 | 1 | 12 | 0 | NA | 0 | NA |
| 6 | 29120931 | 29119968 | -1 | NM_030903    | OR2W1     | 0 | NA | 0 | NA | 0 | NA | 0 | NA | 0 | NA |
| 6 | 29163004 | 29162062 | -1 | NM_001005226 | OR2B3P    | 0 | NA | 1 | 12 | 0 | NA | 0 | NA | 0 | NA |
| 6 | 29187646 | 29188582 | 1  | NM_001005216 | OR2J3     | 0 | NA | 0 | NA | 0 | NA | 0 | NA | 0 | NA |
| 6 | 29249289 | 29250330 | 1  | NM_030905    | OR2J2     | 0 | NA | 0 | NA | 0 | NA | 0 | NA | 0 | NA |
| 6 | 29339835 | 29338458 | -1 | NM_001080842 | LOC651503 | 0 | NA | 0 | NA | 0 | NA | 0 | NA | 0 | NA |
| 6 | 29382445 | 29383411 | 1  | NM_030946    | OR14J1    | 0 | NA | 0 | NA | 0 | NA | 0 | NA | 0 | NA |
| 6 | 29432033 | 29430985 | -1 | NM_030876    | OR5V1     | 0 | NA | 0 | NA | 0 | NA | 0 | NA | 0 | NA |
| 6 | 29451047 | 29449178 | -1 | NM_030959    | OR12D3    | 0 | NA | 0 | NA | 0 | NA | 0 | NA | 0 | NA |
| 6 | 29472394 | 29473427 | 1  | NM_013936    | OR12D2    | 0 | NA | 0 | NA | 0 | NA | 0 | NA | 0 | NA |
| 6 | 29503488 | 29501259 | -1 | NM_013937    | OR11A1    | 0 | NA | 0 | NA | 0 | NA | 0 | NA | 0 | NA |
| 6 | 29515771 | 29516710 | 1  | NM_013941    | OR10C1    | 0 | NA | 0 | NA | 0 | NA | 0 | NA | 0 | NA |
| 6 | 29534208 | 29540078 | 1  | NM_030883    | OR2H1     | 0 | NA | 0 | NA | 0 | NA | 0 | NA | 0 | NA |
| 6 | 29563658 | 29562521 | -1 | NM_052967    | MAS1L     | 0 | NA | 0 | NA | 0 | NA | 0 | NA | 0 | NA |
| 6 | 29635681 | 29631386 | -1 | NM_006398    | UBD       | 0 | NA | 1 | 23 | 0 | NA | 0 | NA | 0 | NA |
| 6 | 29663661 | 29664724 | 1  | NM_007160    | OR2H2     | 0 | NA | 0 | NA | 0 | NA | 0 | NA | 0 | NA |
| 6 | 29703984 | 29677983 | -1 | NM_021903    | GABBR1    | 0 | NA | 0 | NA | 0 | NA | 0 | NA | 0 | NA |
| 6 | 29708941 | 29677983 | -1 | NM_001470    | GABBR1    | 0 | NA | 0 | NA | 0 | NA | 0 | NA | 0 | NA |
| 6 | 29708941 | 29677983 | -1 | NM_021904    | GABBR1    | 0 | NA | 0 | NA | 0 | NA | 0 | NA | 0 | NA |
| 6 | 29708941 | 29677983 | -1 | NM_021905    | GABBR1    | 0 | NA | 0 | NA | 0 | NA | 0 | NA | 0 | NA |
| 6 | 29732787 | 29748128 | 1  | NM_001008228 | MOG       | 0 | NA | 0 | NA | 0 | NA | 0 | NA | 0 | NA |
| 6 | 29732787 | 29748128 | 1  | NM_001008229 | MOG       | 0 | NA | 0 | NA | 0 | NA | 0 | NA | 0 | NA |
| 6 | 29732787 | 29748128 | 1  | NM_002433    | MOG       | 0 | NA | 0 | NA | 0 | NA | 0 | NA | 0 | NA |
| 6 | 29732787 | 29748128 | 1  | NM_206809    | MOG       | 0 | NA | 0 | NA | 0 | NA | 0 | NA | 0 | NA |
| 6 | 29732787 | 29748128 | 1  | NM_206810    | MOG       | 0 | NA | 0 | NA | 0 | NA | 0 | NA | 0 | NA |

|   |          |          |    |              |           |   |    |   |    |   |    |   |    |   |    |
|---|----------|----------|----|--------------|-----------|---|----|---|----|---|----|---|----|---|----|
| 6 | 29732787 | 29748128 | 1  | NM_206811    | MOG       | 0 | NA | 0 | NA | 0 | NA | 0 | NA | 0 | NA |
| 6 | 29732787 | 29748128 | 1  | NM_206812    | MOG       | 0 | NA | 0 | NA | 0 | NA | 0 | NA | 0 | NA |
| 6 | 29732787 | 29748128 | 1  | NM_206813    | MOG       | 0 | NA | 0 | NA | 0 | NA | 0 | NA | 0 | NA |
| 6 | 29732787 | 29748128 | 1  | NM_206814    | MOG       | 0 | NA | 0 | NA | 0 | NA | 0 | NA | 0 | NA |
| 6 | 29756866 | 29748238 | -1 | NM_001109809 | ZFP57     | 0 | NA | 1 | 13 | 0 | NA | 0 | NA | 0 | NA |
| 6 | 29799095 | 29802282 | 1  | NM_001098478 | HLA-F     | 0 | NA | 1 | 15 | 0 | NA | 0 | NA | 0 | NA |
| 6 | 29799095 | 29802282 | 1  | NM_018950    | HLA-F     | 0 | NA | 1 | 15 | 0 | NA | 0 | NA | 0 | NA |
| 6 | 29799095 | 29803052 | 1  | NM_001098479 | HLA-F     | 0 | NA | 1 | 15 | 0 | NA | 0 | NA | 0 | NA |
| 6 | 29902734 | 29906878 | 1  | NM_002127    | HLA-G     | 0 | NA | 0 | NA | 0 | NA | 0 | NA | 0 | NA |
| 6 | 30018304 | 30085130 | 1  | NM_001080840 | HLA-A29.1 | 0 | NA | 0 | NA | 0 | NA | 0 | NA | 0 | NA |
| 6 | 30018309 | 30021633 | 1  | NM_002116    | HLA-A     | 0 | NA | 0 | NA | 0 | NA | 0 | NA | 0 | NA |
| 6 | 30050870 | 30054156 | 1  | NM_005844    | HCG9      | 1 | 15 | 0 | NA | 0 | NA | 1 | 14 | 0 | NA |
| 6 | 30137014 | 30140665 | 1  | NM_014596    | ZNRD1     | 0 | NA | 0 | NA | 1 | 13 | 0 | NA | 0 | NA |
| 6 | 30137014 | 30140665 | 1  | NM_170783    | ZNRD1     | 0 | NA | 0 | NA | 1 | 13 | 0 | NA | 0 | NA |
| 6 | 30142910 | 30146087 | 1  | NM_021959    | PPP1R11   | 0 | NA | 1 | 12 | 1 | 13 | 0 | NA | 0 | NA |
| 6 | 30151607 | 30146021 | -1 | NM_025236    | RNF39     | 0 | NA | 1 | 12 | 0 | NA | 0 | NA | 0 | NA |
| 6 | 30151607 | 30146021 | -1 | NM_170769    | RNF39     | 0 | NA | 1 | 12 | 0 | NA | 0 | NA | 0 | NA |
| 6 | 30188846 | 30178652 | -1 | NM_007028    | TRIM31    | 0 | NA | 0 | NA | 0 | NA | 0 | NA | 0 | NA |
| 6 | 30212488 | 30224491 | 1  | NM_138700    | TRIM40    | 0 | NA | 0 | NA | 0 | NA | 0 | NA | 0 | NA |
| 6 | 30236690 | 30227702 | -1 | NM_006778    | TRIM10    | 1 | 13 | 1 | 15 | 0 | NA | 0 | NA | 0 | NA |
| 6 | 30236690 | 30227702 | -1 | NM_052828    | TRIM10    | 1 | 13 | 1 | 15 | 0 | NA | 0 | NA | 0 | NA |
| 6 | 30238961 | 30248452 | 1  | NM_033229    | TRIM15    | 1 | 13 | 1 | 15 | 0 | NA | 0 | NA | 0 | NA |
| 6 | 30289132 | 30260210 | -1 | NM_003449    | TRIM26    | 0 | NA | 1 | 18 | 0 | NA | 0 | NA | 0 | NA |
| 6 | 30335352 | 30342707 | 1  | NM_001004349 | FLJ45422  | 1 | 11 | 0 | NA | 0 | NA | 0 | NA | 0 | NA |
| 6 | 30403018 | 30419485 | 1  | NM_021253    | TRIM39    | 0 | NA | 0 | NA | 0 | NA | 0 | NA | 0 | NA |
| 6 | 30403018 | 30419485 | 1  | NM_172016    | TRIM39    | 0 | NA | 0 | NA | 0 | NA | 0 | NA | 0 | NA |
| 6 | 30420915 | 30422611 | 1  | NM_024839    | RPP21     | 0 | NA | 0 | NA | 0 | NA | 0 | NA | 0 | NA |
| 6 | 30565249 | 30569072 | 1  | NM_005516    | HLA-E     | 1 | 16 | 1 | 12 | 0 | NA | 0 | NA | 0 | NA |
| 6 | 30632734 | 30640159 | 1  | NM_001077497 | PRR3      | 0 | NA | 0 | NA | 0 | NA | 0 | NA | 0 | NA |
| 6 | 30632734 | 30640159 | 1  | NM_025263    | PRR3      | 0 | NA | 0 | NA | 0 | NA | 0 | NA | 0 | NA |
| 6 | 30632987 | 30621672 | -1 | NM_005275    | GNL1      | 0 | NA | 0 | NA | 0 | NA | 0 | NA | 0 | NA |
| 6 | 30647148 | 30667288 | 1  | NM_001025091 | ABCF1     | 0 | NA | 0 | NA | 0 | NA | 0 | NA | 0 | NA |
| 6 | 30647148 | 30667288 | 1  | NM_001090    | ABCF1     | 0 | NA | 0 | NA | 0 | NA | 0 | NA | 0 | NA |
| 6 | 30692999 | 30676160 | -1 | NM_002714    | PPP1R10   | 1 | 17 | 0 | NA | 0 | NA | 1 | 19 | 0 | NA |
| 6 | 30693464 | 30702153 | 1  | NM_014046    | MRPS18B   | 1 | 17 | 0 | NA | 0 | NA | 1 | 19 | 0 | NA |
| 6 | 30702591 | 30720427 | 1  | NM_024909    | C6orf134  | 1 | 17 | 0 | NA | 0 | NA | 1 | 19 | 0 | NA |
| 6 | 30722779 | 30728961 | 1  | NM_001109938 | C6orf136  | 0 | NA | 0 | NA | 0 | NA | 0 | NA | 0 | NA |
| 6 | 30723176 | 30728961 | 1  | NM_145029    | C6orf136  | 0 | NA | 0 | NA | 0 | NA | 0 | NA | 0 | NA |
| 6 | 30748736 | 30728885 | -1 | NM_003587    | DHX16     | 0 | NA | 0 | NA | 0 | NA | 0 | NA | 0 | NA |
| 6 | 30761963 | 30752144 | -1 | NM_133471    | KIAA1949  | 0 | NA | 0 | NA | 0 | NA | 1 | 12 | 0 | NA |
| 6 | 30766746 | 30763804 | -1 | NM_007243    | NRM       | 0 | NA | 0 | NA | 0 | NA | 1 | 12 | 0 | NA |
| 6 | 30793437 | 30775562 | -1 | NM_014641    | MDC1      | 1 | 13 | 0 | NA | 1 | 12 | 0 | NA | 0 | NA |
| 6 | 30796135 | 30801174 | 1  | NM_178014    | TUBB      | 1 | 13 | 0 | NA | 1 | 12 | 0 | NA | 0 | NA |
| 6 | 30818432 | 30803489 | -1 | NM_005803    | FLOT1     | 1 | 21 | 1 | 22 | 0 | NA | 1 | 19 | 0 | NA |
| 6 | 30820306 | 30818954 | -1 | NM_003897    | IER3      | 1 | 12 | 1 | 22 | 0 | NA | 1 | 19 | 0 | NA |
| 6 | 30959839 | 30975912 | 1  | NM_001954    | DDR1      | 1 | 22 | 0 | NA | 1 | 16 | 1 | 11 | 0 | NA |
| 6 | 30960305 | 30975912 | 1  | NM_013993    | DDR1      | 1 | 22 | 0 | NA | 1 | 16 | 1 | 11 | 0 | NA |
| 6 | 30964443 | 30975912 | 1  | NM_013994    | DDR1      | 1 | 22 | 0 | NA | 1 | 16 | 1 | 11 | 0 | NA |
| 6 | 30983955 | 30989859 | 1  | NM_001517    | GTF2H4    | 1 | 14 | 0 | NA | 0 | NA | 1 | 14 | 0 | NA |
| 6 | 30989960 | 31002212 | 1  | NM_020442    | VARS2     | 1 | 14 | 0 | NA | 0 | NA | 1 | 14 | 0 | NA |
| 6 | 31007931 | 31007105 | -1 | NM_205854    | SFTPG     | 0 | NA | 1 | 13 | 0 | NA | 0 | NA | 0 | NA |
| 6 | 31027537 | 31029977 | 1  | NM_080870    | DPCR1     | 0 | NA | 1 | 16 | 0 | NA | 0 | NA | 0 | NA |
| 6 | 31059463 | 31065654 | 1  | NM_001010909 | C6orf205  | 0 | NA | 1 | 16 | 0 | NA | 0 | NA | 0 | NA |
| 6 | 31188311 | 31186978 | -1 | NM_014070    | C6orf15   | 0 | NA | 1 | 14 | 1 | 15 | 0 | NA | 0 | NA |
| 6 | 31190601 | 31215816 | 1  | NM_014068    | PSORS1C1  | 0 | NA | 1 | 14 | 1 | 15 | 0 | NA | 0 | NA |
| 6 | 31196202 | 31190848 | -1 | NM_001264    | CDSN      | 0 | NA | 0 | NA | 1 | 15 | 1 | 11 | 0 | NA |
| 6 | 31215106 | 31213289 | -1 | NM_014069    | PSORS1C2  | 0 | NA | 0 | NA | 0 | NA | 1 | 11 | 0 | NA |
| 6 | 31233545 | 31218194 | -1 | NM_001105563 | CCHCR1    | 1 | 14 | 0 | NA | 0 | NA | 0 | NA | 0 | NA |
| 6 | 31233545 | 31218194 | -1 | NM_001105564 | CCHCR1    | 1 | 14 | 0 | NA | 0 | NA | 0 | NA | 0 | NA |
| 6 | 31233994 | 31218194 | -1 | NM_019052    | CCHCR1    | 1 | 14 | 0 | NA | 0 | NA | 0 | NA | 0 | NA |
| 6 | 31234281 | 31239971 | 1  | NM_001077511 | TCF19     | 1 | 14 | 0 | NA | 0 | NA | 0 | NA | 0 | NA |
| 6 | 31234281 | 31239971 | 1  | NM_007109    | TCF19     | 1 | 14 | 0 | NA | 0 | NA | 0 | NA | 0 | NA |
| 6 | 31242006 | 31240092 | -1 | NM_203289    | POU5F1    | 1 | 14 | 0 | NA | 0 | NA | 0 | NA | 0 | NA |
| 6 | 31246430 | 31240092 | -1 | NM_002701    | POU5F1    | 0 | NA | 0 | NA | 0 | NA | 0 | NA | 0 | NA |
| 6 | 31273577 | 31279724 | 1  | NM_181717    | HCG27     | 1 | 14 | 0 | NA | 0 | NA | 0 | NA | 0 | NA |

|   |          |          |    |              |          |   |    |   |    |   |    |   |    |   |    |
|---|----------|----------|----|--------------|----------|---|----|---|----|---|----|---|----|---|----|
| 6 | 31347834 | 31344507 | -1 | NM_002117    | HLA-C    | 0 | NA | 1 | 12 | 0 | NA | 0 | NA | 0 | NA |
| 6 | 31432968 | 31429627 | -1 | NM_005514    | HLA-B    | 0 | NA | 0 | NA | 0 | NA | 0 | NA | 0 | NA |
| 6 | 31479349 | 31491069 | 1  | NM_000247    | MICA     | 0 | NA | 0 | NA | 0 | NA | 0 | NA | 0 | NA |
| 6 | 31538937 | 31541461 | 1  | NM_006674    | HCP5     | 0 | NA | 1 | 13 | 0 | NA | 0 | NA | 0 | NA |
| 6 | 31573833 | 31586880 | 1  | NM_005931    | MICB     | 0 | NA | 0 | NA | 0 | NA | 0 | NA | 0 | NA |
| 6 | 31604717 | 31605987 | 1  | NM_001011700 | MCCD1    | 1 | 11 | 0 | NA | 0 | NA | 0 | NA | 0 | NA |
| 6 | 31618204 | 31605974 | -1 | NM_004640    | BAT1     | 1 | 16 | 0 | NA | 0 | NA | 1 | 14 | 0 | NA |
| 6 | 31618204 | 31605974 | -1 | NM_080598    | BAT1     | 1 | 16 | 0 | NA | 0 | NA | 1 | 14 | 0 | NA |
| 6 | 31622606 | 31620218 | -1 | NM_130463    | ATP6V1G2 | 1 | 16 | 0 | NA | 0 | NA | 1 | 11 | 0 | NA |
| 6 | 31622606 | 31620218 | -1 | NM_138282    | ATP6V1G2 | 1 | 16 | 0 | NA | 0 | NA | 1 | 11 | 0 | NA |
| 6 | 31623350 | 31634585 | 1  | NM_005007    | NFKBIL1  | 1 | 16 | 0 | NA | 0 | NA | 1 | 11 | 0 | NA |
| 6 | 31648071 | 31650077 | 1  | NM_000595    | LTA      | 0 | NA | 1 | 12 | 0 | NA | 0 | NA | 0 | NA |
| 6 | 31651328 | 31654091 | 1  | NM_000594    | TNF      | 0 | NA | 1 | 12 | 0 | NA | 0 | NA | 0 | NA |
| 6 | 31658181 | 31656314 | -1 | NM_002341    | LTB      | 0 | NA | 1 | 12 | 0 | NA | 0 | NA | 0 | NA |
| 6 | 31658181 | 31656314 | -1 | NM_009588    | LTB      | 0 | NA | 1 | 12 | 0 | NA | 0 | NA | 0 | NA |
| 6 | 31661949 | 31664665 | 1  | NM_007161    | LST1     | 0 | NA | 1 | 12 | 0 | NA | 0 | NA | 0 | NA |
| 6 | 31661949 | 31664665 | 1  | NM_205838    | LST1     | 0 | NA | 1 | 12 | 0 | NA | 0 | NA | 0 | NA |
| 6 | 31661949 | 31664665 | 1  | NM_205839    | LST1     | 0 | NA | 1 | 12 | 0 | NA | 0 | NA | 0 | NA |
| 6 | 31661949 | 31664665 | 1  | NM_205840    | LST1     | 0 | NA | 1 | 12 | 0 | NA | 0 | NA | 0 | NA |
| 6 | 31662603 | 31664665 | 1  | NM_205837    | LST1     | 0 | NA | 1 | 12 | 0 | NA | 0 | NA | 0 | NA |
| 6 | 31668741 | 31664650 | -1 | NM_147130    | NCR3     | 0 | NA | 0 | NA | 0 | NA | 0 | NA | 0 | NA |
| 6 | 31691011 | 31692777 | 1  | NM_001623    | AIF1     | 0 | NA | 0 | NA | 0 | NA | 0 | NA | 0 | NA |
| 6 | 31691767 | 31692777 | 1  | NM_032955    | AIF1     | 0 | NA | 0 | NA | 0 | NA | 0 | NA | 0 | NA |
| 6 | 31696428 | 31713533 | 1  | NM_080686    | BAT2     | 0 | NA | 0 | NA | 0 | NA | 0 | NA | 0 | NA |
| 6 | 31728149 | 31714783 | -1 | NM_001098534 | BAT3     | 1 | 21 | 0 | NA | 0 | NA | 1 | 14 | 0 | NA |
| 6 | 31728456 | 31714783 | -1 | NM_004639    | BAT3     | 1 | 21 | 0 | NA | 0 | NA | 1 | 14 | 0 | NA |
| 6 | 31728456 | 31714783 | -1 | NM_080702    | BAT3     | 1 | 21 | 0 | NA | 0 | NA | 1 | 14 | 0 | NA |
| 6 | 31728456 | 31714783 | -1 | NM_080703    | BAT3     | 1 | 21 | 0 | NA | 0 | NA | 1 | 14 | 0 | NA |
| 6 | 31731649 | 31733966 | 1  | NM_019101    | APOM     | 1 | 21 | 0 | NA | 0 | NA | 1 | 14 | 0 | NA |
| 6 | 31736528 | 31734053 | -1 | NM_021184    | C6orf47  | 1 | 11 | 0 | NA | 0 | NA | 1 | 14 | 0 | NA |
| 6 | 31741142 | 31737840 | -1 | NM_033177    | BAT4     | 1 | 11 | 0 | NA | 0 | NA | 0 | NA | 0 | NA |
| 6 | 31741635 | 31745822 | 1  | NM_001320    | CSNK2B   | 1 | 11 | 0 | NA | 0 | NA | 0 | NA | 0 | NA |
| 6 | 31746706 | 31748206 | 1  | NM_021221    | LY6G5B   | 1 | 11 | 0 | NA | 0 | NA | 1 | 12 | 0 | NA |
| 6 | 31756120 | 31752439 | -1 | NM_025262    | LY6G5C   | 0 | NA | 0 | NA | 0 | NA | 1 | 12 | 0 | NA |
| 6 | 31779067 | 31762714 | -1 | NM_021160    | BAT5     | 0 | NA | 0 | NA | 0 | NA | 0 | NA | 0 | NA |
| 6 | 31782662 | 31786351 | 1  | NM_001003693 | C6orf21  | 0 | NA | 0 | NA | 0 | NA | 0 | NA | 0 | NA |
| 6 | 31791111 | 31793560 | 1  | NM_021246    | LY6G6D   | 0 | NA | 0 | NA | 0 | NA | 0 | NA | 0 | NA |
| 6 | 31797489 | 31794403 | -1 | NM_025261    | LY6G6C   | 0 | NA | 0 | NA | 0 | NA | 0 | NA | 0 | NA |
| 6 | 31799139 | 31800830 | 1  | NM_025260    | C6orf25  | 0 | NA | 0 | NA | 0 | NA | 0 | NA | 0 | NA |
| 6 | 31799139 | 31800830 | 1  | NM_138272    | C6orf25  | 0 | NA | 0 | NA | 0 | NA | 0 | NA | 0 | NA |
| 6 | 31799139 | 31800830 | 1  | NM_138273    | C6orf25  | 0 | NA | 0 | NA | 0 | NA | 0 | NA | 0 | NA |
| 6 | 31799139 | 31800830 | 1  | NM_138274    | C6orf25  | 0 | NA | 0 | NA | 0 | NA | 0 | NA | 0 | NA |
| 6 | 31799139 | 31800830 | 1  | NM_138275    | C6orf25  | 0 | NA | 0 | NA | 0 | NA | 0 | NA | 0 | NA |
| 6 | 31799139 | 31800830 | 1  | NM_138277    | C6orf25  | 0 | NA | 0 | NA | 0 | NA | 0 | NA | 0 | NA |
| 6 | 31806018 | 31802795 | -1 | NM_013974    | DDAH2    | 1 | 16 | 0 | NA | 0 | NA | 0 | NA | 0 | NA |
| 6 | 31812320 | 31806336 | -1 | NM_001288    | CLIC1    | 1 | 16 | 0 | NA | 0 | NA | 0 | NA | 0 | NA |
| 6 | 31815752 | 31838431 | 1  | NM_002441    | MSH5     | 1 | 16 | 0 | NA | 0 | NA | 0 | NA | 0 | NA |
| 6 | 31815752 | 31838431 | 1  | NM_025259    | MSH5     | 1 | 16 | 0 | NA | 0 | NA | 0 | NA | 0 | NA |
| 6 | 31815752 | 31838431 | 1  | NM_172165    | MSH5     | 1 | 16 | 0 | NA | 0 | NA | 0 | NA | 0 | NA |
| 6 | 31815752 | 31838431 | 1  | NM_172166    | MSH5     | 1 | 16 | 0 | NA | 0 | NA | 0 | NA | 0 | NA |
| 6 | 31838751 | 31840603 | 1  | NM_001039651 | C6orf26  | 1 | 12 | 0 | NA | 1 | 12 | 0 | NA | 0 | NA |
| 6 | 31853087 | 31841349 | -1 | NM_025258    | C6orf27  | 0 | NA | 0 | NA | 1 | 12 | 0 | NA | 0 | NA |
| 6 | 31871691 | 31853275 | -1 | NM_006295    | VARS     | 0 | NA | 0 | NA | 0 | NA | 0 | NA | 0 | NA |
| 6 | 31882722 | 31873152 | -1 | NM_021177    | LSM2     | 0 | NA | 0 | NA | 0 | NA | 0 | NA | 0 | NA |
| 6 | 31890814 | 31885374 | -1 | NM_005527    | HSPA1L   | 1 | 16 | 0 | NA | 0 | NA | 1 | 14 | 0 | NA |
| 6 | 31891315 | 31893698 | 1  | NM_005345    | HSPA1A   | 1 | 16 | 0 | NA | 0 | NA | 1 | 14 | 0 | NA |
| 6 | 31903490 | 31906010 | 1  | NM_005346    | HSPA1B   | 1 | 16 | 0 | NA | 0 | NA | 1 | 14 | 0 | NA |
| 6 | 31910671 | 31915520 | 1  | NM_001040437 | C6orf48  | 0 | NA | 0 | NA | 0 | NA | 1 | 17 | 0 | NA |
| 6 | 31910671 | 31915520 | 1  | NM_001040438 | C6orf48  | 0 | NA | 0 | NA | 0 | NA | 1 | 17 | 0 | NA |
| 6 | 31938662 | 31934930 | -1 | NM_000434    | NEU1     | 1 | 28 | 0 | NA | 0 | NA | 0 | NA | 0 | NA |
| 6 | 31954802 | 31938948 | -1 | NM_025257    | SLC4A4   | 0 | NA | 0 | NA | 0 | NA | 0 | NA | 0 | NA |
| 6 | 31973443 | 31955515 | -1 | NM_006709    | EHMT2    | 1 | 14 | 0 | NA | 0 | NA | 0 | NA | 0 | NA |
| 6 | 31973443 | 31955515 | -1 | NM_025256    | EHMT2    | 1 | 14 | 0 | NA | 0 | NA | 0 | NA | 0 | NA |
| 6 | 31977748 | 31975372 | -1 | NM_181842    | ZBTB12   | 1 | 14 | 0 | NA | 0 | NA | 0 | NA | 0 | NA |
| 6 | 32003472 | 32021427 | 1  | NM_000063    | C2       | 0 | NA | 0 | NA | 0 | NA | 0 | NA | 0 | NA |

|   |          |          |    |              |          |   |    |   |    |   |    |   |    |   |    |
|---|----------|----------|----|--------------|----------|---|----|---|----|---|----|---|----|---|----|
| 6 | 32021751 | 32027839 | 1  | NM_001710    | CFB      | 0 | NA | 0 | NA | 0 | NA | 0 | NA | 0 | NA |
| 6 | 32034559 | 32045511 | 1  | NM_006929    | SKIV2L   | 0 | NA | 0 | NA | 1 | 12 | 0 | NA | 0 | NA |
| 6 | 32034843 | 32027842 | -1 | NM_002904    | RDBP     | 0 | NA | 0 | NA | 1 | 12 | 0 | NA | 0 | NA |
| 6 | 32047624 | 32057202 | 1  | NM_004197    | STK19    | 1 | 16 | 0 | NA | 0 | NA | 0 | NA | 0 | NA |
| 6 | 32047624 | 32057202 | 1  | NM_032454    | STK19    | 1 | 16 | 0 | NA | 0 | NA | 0 | NA | 0 | NA |
| 6 | 32048011 | 32045566 | -1 | NM_005510    | DOM3Z    | 1 | 16 | 0 | NA | 0 | NA | 0 | NA | 0 | NA |
| 6 | 32057812 | 32078435 | 1  | NM_007293    | C4A      | 1 | 16 | 0 | NA | 0 | NA | 0 | NA | 0 | NA |
| 6 | 32057812 | 32078436 | 1  | NM_001002029 | C4B      | 1 | 16 | 0 | NA | 0 | NA | 0 | NA | 0 | NA |
| 6 | 32089495 | 32089939 | 1  | NM_004197    | STK19    | 0 | NA | 0 | NA | 0 | NA | 0 | NA | 0 | NA |
| 6 | 32089495 | 32089939 | 1  | NM_032454    | STK19    | 0 | NA | 0 | NA | 0 | NA | 0 | NA | 0 | NA |
| 6 | 32090549 | 32111173 | 1  | NM_007293    | C4A      | 0 | NA | 0 | NA | 0 | NA | 0 | NA | 0 | NA |
| 6 | 32090549 | 32111174 | 1  | NM_001002029 | C4B      | 0 | NA | 0 | NA | 0 | NA | 0 | NA | 0 | NA |
| 6 | 32114060 | 32117398 | 1  | NM_000500    | CYP21A2  | 0 | NA | 0 | NA | 0 | NA | 0 | NA | 0 | NA |
| 6 | 32121883 | 32116910 | -1 | NM_032470    | TNXB     | 0 | NA | 0 | NA | 1 | 12 | 0 | NA | 0 | NA |
| 6 | 32185131 | 32116910 | -1 | NM_019105    | TNXB     | 0 | NA | 1 | 12 | 0 | NA | 0 | NA | 0 | NA |
| 6 | 32203995 | 32191022 | -1 | NM_004381    | CREBL1   | 1 | 15 | 0 | NA | 0 | NA | 0 | NA | 0 | NA |
| 6 | 32206045 | 32204461 | -1 | NM_022110    | FKBPL    | 1 | 15 | 0 | NA | 0 | NA | 0 | NA | 0 | NA |
| 6 | 32227698 | 32224117 | -1 | NM_030651    | PRRT1    | 0 | NA | 0 | NA | 0 | NA | 0 | NA | 0 | NA |
| 6 | 32229278 | 32239430 | 1  | NM_138717    | PPT2     | 0 | NA | 0 | NA | 0 | NA | 0 | NA | 0 | NA |
| 6 | 32229599 | 32239430 | 1  | NM_005155    | PPT2     | 0 | NA | 0 | NA | 0 | NA | 0 | NA | 0 | NA |
| 6 | 32240382 | 32244040 | 1  | NM_030652    | EGFL8    | 1 | 14 | 0 | NA | 1 | 13 | 0 | NA | 0 | NA |
| 6 | 32251877 | 32243966 | -1 | NM_006411    | AGPAT1   | 0 | NA | 0 | NA | 1 | 13 | 0 | NA | 0 | NA |
| 6 | 32253820 | 32243966 | -1 | NM_032741    | AGPAT1   | 0 | NA | 0 | NA | 1 | 13 | 0 | NA | 0 | NA |
| 6 | 32254139 | 32256548 | 1  | NM_006913    | RNF5     | 0 | NA | 0 | NA | 0 | NA | 0 | NA | 0 | NA |
| 6 | 32260001 | 32256723 | -1 | NM_001136    | AGER     | 0 | NA | 0 | NA | 0 | NA | 0 | NA | 0 | NA |
| 6 | 32260001 | 32256723 | -1 | NM_172197    | AGER     | 0 | NA | 0 | NA | 0 | NA | 0 | NA | 0 | NA |
| 6 | 32265941 | 32260487 | -1 | NM_002586    | PBX2     | 1 | 28 | 0 | NA | 0 | NA | 0 | NA | 0 | NA |
| 6 | 32271278 | 32266520 | -1 | NM_022107    | GPSM3    | 1 | 28 | 1 | 15 | 0 | NA | 0 | NA | 0 | NA |
| 6 | 32298822 | 32270597 | 0  | NA           | NOTCH4   | 0 | NA | 1 | 13 | 0 | NA | 0 | NA | 0 | NA |
| 6 | 32447634 | 32368452 | -1 | NM_006781    | C6orf10  | 0 | NA | 1 | 13 | 0 | NA | 0 | NA | 0 | NA |
| 6 | 32482878 | 32470490 | -1 | NM_019602    | BTNL2    | 0 | NA | 1 | 15 | 0 | NA | 0 | NA | 0 | NA |
| 6 | 32515624 | 32520802 | 1  | NM_019111    | HLA-DRA  | 0 | NA | 0 | NA | 0 | NA | 0 | NA | 0 | NA |
| 6 | 32605984 | 32593131 | -1 | NM_002125    | HLA-DRB5 | 0 | NA | 0 | NA | 0 | NA | 0 | NA | 0 | NA |
| 6 | 32665540 | 32654524 | -1 | NM_002124    | HLA-DRB1 | 0 | NA | 0 | NA | 0 | NA | 0 | NA | 0 | NA |
| 6 | 32713160 | 32719407 | 1  | NM_002122    | HLA-DQA1 | 0 | NA | 0 | NA | 0 | NA | 0 | NA | 0 | NA |
| 6 | 32742444 | 32735634 | -1 | NM_002123    | HLA-DQB1 | 0 | NA | 0 | NA | 0 | NA | 0 | NA | 0 | NA |
| 6 | 32817140 | 32823199 | 1  | NM_020056    | HLA-DQA2 | 1 | 12 | 0 | NA | 0 | NA | 0 | NA | 0 | NA |
| 6 | 32892803 | 32888517 | -1 | NM_002120    | HLA-DOB  | 0 | NA | 1 | 13 | 0 | NA | 0 | NA | 0 | NA |
| 6 | 32914525 | 32897587 | -1 | NM_018833    | TAP2     | 0 | NA | 0 | NA | 0 | NA | 0 | NA | 0 | NA |
| 6 | 32914525 | 32901164 | -1 | NM_000544    | TAP2     | 0 | NA | 0 | NA | 0 | NA | 0 | NA | 0 | NA |
| 6 | 32919794 | 32916471 | -1 | NM_148919    | PSMB8    | 0 | NA | 0 | NA | 0 | NA | 0 | NA | 0 | NA |
| 6 | 32920690 | 32916471 | -1 | NM_004159    | PSMB8    | 0 | NA | 0 | NA | 0 | NA | 0 | NA | 0 | NA |
| 6 | 32929726 | 32920963 | -1 | NM_000593    | TAP1     | 0 | NA | 0 | NA | 0 | NA | 0 | NA | 0 | NA |
| 6 | 32929915 | 32935606 | 1  | NM_002800    | PSMB9    | 0 | NA | 0 | NA | 0 | NA | 0 | NA | 0 | NA |
| 6 | 32929915 | 32935606 | 1  | NM_148954    | PSMB9    | 0 | NA | 0 | NA | 0 | NA | 0 | NA | 0 | NA |
| 6 | 33016795 | 33010392 | -1 | NM_002118    | HLA-DMB  | 0 | NA | 0 | NA | 0 | NA | 0 | NA | 0 | NA |
| 6 | 33028831 | 33024372 | -1 | NM_006120    | HLA-DMA  | 1 | 14 | 0 | NA | 0 | NA | 0 | NA | 0 | NA |
| 6 | 33044414 | 33057260 | 1  | NM_005104    | BRD2     | 1 | 16 | 0 | NA | 1 | 12 | 1 | 14 | 0 | NA |
| 6 | 33046655 | 33057260 | 1  | NM_00113182  | BRD2     | 1 | 16 | 0 | NA | 1 | 12 | 1 | 11 | 0 | NA |
| 6 | 33085367 | 33079937 | -1 | NM_002119    | HLA-DOA  | 0 | NA | 0 | NA | 0 | NA | 0 | NA | 0 | NA |
| 6 | 33149356 | 33140771 | -1 | NM_033554    | HLA-DPA1 | 1 | 13 | 0 | NA | 0 | NA | 0 | NA | 0 | NA |
| 6 | 33151737 | 33162954 | 1  | NM_002121    | HLA-DPB1 | 1 | 13 | 0 | NA | 0 | NA | 0 | NA | 0 | NA |
| 6 | 33268223 | 33238446 | -1 | NM_080679    | COL11A2  | 0 | NA | 1 | 13 | 0 | NA | 1 | 12 | 0 | NA |
| 6 | 33268223 | 33238446 | -1 | NM_080680    | COL11A2  | 0 | NA | 1 | 13 | 0 | NA | 1 | 12 | 0 | NA |
| 6 | 33268223 | 33238446 | -1 | NM_080681    | COL11A2  | 0 | NA | 1 | 13 | 0 | NA | 1 | 12 | 0 | NA |
| 6 | 33276410 | 33269342 | -1 | NM_021976    | RXRβ     | 1 | 19 | 0 | NA | 1 | 13 | 0 | NA | 0 | NA |
| 6 | 33276580 | 33280192 | 1  | NM_001077516 | SLC39A7  | 1 | 19 | 1 | 13 | 0 | NA | 1 | 12 | 0 | NA |
| 6 | 33276580 | 33280192 | 1  | NM_006979    | SLC39A7  | 1 | 19 | 1 | 13 | 0 | NA | 1 | 12 | 0 | NA |
| 6 | 33280396 | 33282585 | 1  | NM_014234    | HSD17B8  | 1 | 19 | 1 | 13 | 0 | NA | 1 | 12 | 0 | NA |
| 6 | 33284263 | 33288477 | 1  | NM_002931    | RING1    | 1 | 19 | 0 | NA | 1 | 13 | 0 | NA | 0 | NA |
| 6 | 33347640 | 33326026 | -1 | NM_022553    | VPS52    | 1 | 20 | 0 | NA | 0 | NA | 1 | 23 | 0 | NA |
| 6 | 33347829 | 33352259 | 1  | NM_022551    | RPS18    | 1 | 20 | 0 | NA | 0 | NA | 1 | 23 | 0 | NA |
| 6 | 33352894 | 33394580 | 1  | NM_003782    | B3GALT4  | 1 | 11 | 0 | NA | 0 | NA | 1 | 23 | 0 | NA |
| 6 | 33364969 | 33354862 | -1 | NM_005452    | WDR46    | 1 | 12 | 0 | NA | 1 | 12 | 0 | NA | 0 | NA |
| 6 | 33365355 | 33366689 | 1  | NM_014260    | PFDN6    | 1 | 12 | 0 | NA | 1 | 12 | 0 | NA | 0 | NA |



|   |          |          |    |              |           |   |    |   |    |   |    |   |    |   |    |
|---|----------|----------|----|--------------|-----------|---|----|---|----|---|----|---|----|---|----|
| 6 | 33374716 | 33367413 | -1 | NM_004761    | RGL2      | 1 | 12 | 0 | NA | 1 | 12 | 0 | NA | 0 | NA |
| 6 | 33389967 | 33375449 | -1 | NM_003190    | TAPBP     | 0 | NA | 0 | NA | 0 | NA | 0 | NA | 0 | NA |
| 6 | 33389967 | 33379393 | -1 | NM_172208    | TAPBP     | 0 | NA | 0 | NA | 0 | NA | 0 | NA | 0 | NA |
| 6 | 33389967 | 33380022 | -1 | NM_172209    | TAPBP     | 0 | NA | 0 | NA | 0 | NA | 0 | NA | 0 | NA |
| 6 | 33393472 | 33390172 | -1 | NM_005453    | ZBTB22    | 0 | NA | 0 | NA | 0 | NA | 0 | NA | 0 | NA |
| 6 | 33398682 | 33394378 | -1 | NM_001350    | DAXX      | 0 | NA | 0 | NA | 0 | NA | 0 | NA | 0 | NA |
| 6 | 33467290 | 33485677 | 1  | NM_002263    | KIFC1     | 0 | NA | 0 | NA | 0 | NA | 0 | NA | 0 | NA |
| 6 | 33486771 | 33492193 | 1  | NM_024165    | PHF1      | 1 | 14 | 0 | NA | 1 | 13 | 0 | NA | 0 | NA |
| 6 | 33486933 | 33492193 | 1  | NM_002636    | PHF1      | 1 | 14 | 0 | NA | 1 | 13 | 0 | NA | 0 | NA |
| 6 | 33494043 | 33492296 | -1 | NM_001014433 | CUTA      | 1 | 14 | 0 | NA | 1 | 13 | 0 | NA | 0 | NA |
| 6 | 33494043 | 33492296 | -1 | NM_001014837 | CUTA      | 1 | 14 | 0 | NA | 1 | 13 | 0 | NA | 0 | NA |
| 6 | 33494043 | 33492296 | -1 | NM_001014838 | CUTA      | 1 | 14 | 0 | NA | 1 | 13 | 0 | NA | 0 | NA |
| 6 | 33494043 | 33492296 | -1 | NM_001014840 | CUTA      | 1 | 14 | 0 | NA | 1 | 13 | 0 | NA | 0 | NA |
| 6 | 33494043 | 33492296 | -1 | NM_015921    | CUTA      | 1 | 14 | 0 | NA | 1 | 13 | 0 | NA | 0 | NA |
| 6 | 33495824 | 33529444 | 1  | NM_006772    | SYNGAP1   | 1 | 14 | 0 | NA | 1 | 13 | 0 | NA | 0 | NA |
| 6 | 33530333 | 33533298 | 1  | NM_152735    | ZBTB9     | 1 | 16 | 0 | NA | 0 | NA | 0 | NA | 0 | NA |
| 6 | 33656048 | 33648300 | -1 | NM_001188    | BAK1      | 1 | 12 | 0 | NA | 0 | NA | 0 | NA | 0 | NA |
| 6 | 33669093 | 33661860 | -1 | NM_207497    | FLJ43752  | 0 | NA | 0 | NA | 0 | NA | 0 | NA | 0 | NA |
| 6 | 33697138 | 33772326 | 1  | NM_002224    | ITPR3     | 0 | NA | 0 | NA | 0 | NA | 0 | NA | 0 | NA |
| 6 | 33787482 | 33773323 | -1 | NM_032340    | C6orf125  | 1 | 11 | 0 | NA | 0 | NA | 0 | NA | 0 | NA |
| 6 | 33822660 | 33797420 | -1 | NM_054111    | IHPK3     | 0 | NA | 0 | NA | 0 | NA | 0 | NA | 0 | NA |
| 6 | 33864874 | 33846967 | -1 | NM_181336    | LEMD2     | 0 | NA | 0 | NA | 0 | NA | 0 | NA | 0 | NA |
| 6 | 33879771 | 33870426 | -1 | NM_001040109 | MLN       | 0 | NA | 0 | NA | 0 | NA | 0 | NA | 0 | NA |
| 6 | 33879771 | 33870426 | -1 | NM_002418    | MLN       | 0 | NA | 0 | NA | 0 | NA | 0 | NA | 0 | NA |
| 6 | 34209421 | 34097605 | -1 | NM_000841    | GRM4      | 0 | NA | 1 | 12 | 0 | NA | 0 | NA | 0 | NA |
| 6 | 34312627 | 34321986 | 1  | NM_002131    | HMGA1     | 1 | 12 | 0 | NA | 1 | 16 | 0 | NA | 0 | NA |
| 6 | 34312627 | 34321986 | 1  | NM_145899    | HMGA1     | 1 | 12 | 0 | NA | 1 | 16 | 0 | NA | 0 | NA |
| 6 | 34312627 | 34321986 | 1  | NM_145903    | HMGA1     | 1 | 12 | 0 | NA | 1 | 16 | 0 | NA | 0 | NA |
| 6 | 34312906 | 34321986 | 1  | NM_145901    | HMGA1     | 1 | 12 | 0 | NA | 1 | 16 | 0 | NA | 0 | NA |
| 6 | 34312906 | 34321986 | 1  | NM_145902    | HMGA1     | 1 | 12 | 0 | NA | 1 | 16 | 0 | NA | 0 | NA |
| 6 | 34313373 | 34321986 | 1  | NM_145904    | HMGA1     | 1 | 12 | 0 | NA | 1 | 16 | 0 | NA | 0 | NA |
| 6 | 34314545 | 34321986 | 1  | NM_145905    | HMGA1     | 1 | 12 | 0 | NA | 1 | 16 | 0 | NA | 0 | NA |
| 6 | 34324882 | 34322134 | -1 | NM_001008703 | C6orf1    | 1 | 12 | 0 | NA | 1 | 16 | 0 | NA | 0 | NA |
| 6 | 34324882 | 34322134 | -1 | NM_001008704 | C6orf1    | 1 | 12 | 0 | NA | 1 | 16 | 0 | NA | 0 | NA |
| 6 | 34324882 | 34322134 | -1 | NM_178508    | C6orf1    | 1 | 12 | 0 | NA | 1 | 16 | 0 | NA | 0 | NA |
| 6 | 34468419 | 34363974 | -1 | NM_006703    | NUDT3     | 0 | NA | 0 | NA | 0 | NA | 0 | NA | 0 | NA |
| 6 | 34501854 | 34493208 | -1 | NM_001014    | RPS10     | 1 | 13 | 0 | NA | 1 | 12 | 0 | NA | 0 | NA |
| 6 | 34541882 | 34610978 | 1  | NM_020804    | PACIN1    | 0 | NA | 0 | NA | 0 | NA | 0 | NA | 0 | NA |
| 6 | 34632069 | 34613557 | -1 | NM_012391    | SPDEF     | 0 | NA | 0 | NA | 0 | NA | 0 | NA | 0 | NA |
| 6 | 34772603 | 34663047 | -1 | NM_022758    | C6orf106  | 0 | NA | 0 | NA | 0 | NA | 0 | NA | 0 | NA |
| 6 | 34772603 | 34663047 | -1 | NM_024294    | C6orf106  | 0 | NA | 0 | NA | 0 | NA | 0 | NA | 0 | NA |
| 6 | 34833289 | 34849549 | 1  | NM_003093    | SNRPC     | 0 | NA | 0 | NA | 0 | NA | 0 | NA | 0 | NA |
| 6 | 34867771 | 34953269 | 1  | NM_017754    | UHRF1BP1  | 0 | NA | 0 | NA | 1 | 13 | 0 | NA | 0 | NA |
| 6 | 34963797 | 34953532 | -1 | NM_005643    | TAF11     | 0 | NA | 0 | NA | 1 | 17 | 0 | NA | 0 | NA |
| 6 | 34965015 | 35167168 | 1  | NM_015245    | ANKS1A    | 0 | NA | 0 | NA | 1 | 17 | 0 | NA | 0 | NA |
| 6 | 35217165 | 35193826 | -1 | NM_001093728 | TCP11     | 1 | 11 | 0 | NA | 0 | NA | 0 | NA | 0 | NA |
| 6 | 35217165 | 35193826 | -1 | NM_018679    | TCP11     | 1 | 11 | 0 | NA | 0 | NA | 0 | NA | 0 | NA |
| 6 | 35290167 | 35326587 | 1  | NM_152753    | SCUBE3    | 0 | NA | 1 | 12 | 0 | NA | 0 | NA | 0 | NA |
| 6 | 35335487 | 35371738 | 1  | NM_003427    | ZNF76     | 0 | NA | 0 | NA | 1 | 15 | 0 | NA | 0 | NA |
| 6 | 35373572 | 35397526 | 1  | NM_022047    | DEF6      | 0 | NA | 0 | NA | 0 | NA | 0 | NA | 0 | NA |
| 6 | 35418312 | 35503933 | 1  | NM_006238    | PPARD     | 0 | NA | 0 | NA | 0 | NA | 0 | NA | 0 | NA |
| 6 | 35528115 | 35542859 | 1  | NM_021922    | FANCE     | 0 | NA | 0 | NA | 0 | NA | 0 | NA | 0 | NA |
| 6 | 35544155 | 35546536 | 1  | NM_007104    | RPL10A    | 0 | NA | 0 | NA | 0 | NA | 1 | 18 | 0 | NA |
| 6 | 35572839 | 35549351 | -1 | NM_003214    | TEAD3     | 1 | 14 | 0 | NA | 1 | 12 | 0 | NA | 0 | NA |
| 6 | 35588625 | 35573628 | -1 | NM_003322    | TULP1     | 0 | NA | 0 | NA | 0 | NA | 0 | NA | 0 | NA |
| 6 | 35764692 | 35649344 | -1 | NM_004117    | FKBP5     | 0 | NA | 0 | NA | 1 | 13 | 0 | NA | 0 | NA |
| 6 | 35812836 | 35824663 | 1  | NM_145028    | C6orf81   | 0 | NA | 0 | NA | 1 | 13 | 0 | NA | 0 | NA |
| 6 | 35852369 | 35855307 | 1  | NM_207409    | C6orf126  | 0 | NA | 0 | NA | 0 | NA | 0 | NA | 0 | NA |
| 6 | 35856808 | 35863819 | 1  | NM_001010886 | LOC340204 | 1 | 42 | 0 | NA | 1 | 36 | 0 | NA | 0 | NA |
| 6 | 35873080 | 35870737 | -1 | NM_001832    | CLPS      | 1 | 11 | 1 | 12 | 1 | 14 | 0 | NA | 0 | NA |
| 6 | 35881048 | 35899830 | 1  | NM_182548    | LHFPL5    | 1 | 11 | 1 | 12 | 0 | NA | 0 | NA | 0 | NA |
| 6 | 35996934 | 35908788 | -1 | NM_003137    | SRPK1     | 0 | NA | 0 | NA | 0 | NA | 0 | NA | 0 | NA |
| 6 | 36100248 | 36019274 | -1 | NM_138718    | SLC26A8   | 1 | 12 | 0 | NA | 0 | NA | 0 | NA | 0 | NA |
| 6 | 36100355 | 36019270 | -1 | NM_052961    | SLC26A8   | 1 | 12 | 0 | NA | 0 | NA | 0 | NA | 0 | NA |
| 6 | 36103550 | 36178513 | 1  | NM_139013    | MAPK14    | 1 | 37 | 0 | NA | 0 | NA | 0 | NA | 0 | NA |

|   |          |          |    |              |          |   |    |   |    |   |    |   |    |   |    |
|---|----------|----------|----|--------------|----------|---|----|---|----|---|----|---|----|---|----|
| 6 | 36103550 | 36186513 | 1  | NM_001315    | MAPK14   | 1 | 37 | 0 | NA | 0 | NA | 0 | NA | 0 | NA |
| 6 | 36103550 | 36186513 | 1  | NM_139012    | MAPK14   | 1 | 37 | 0 | NA | 0 | NA | 0 | NA | 0 | NA |
| 6 | 36103550 | 36186513 | 1  | NM_139014    | MAPK14   | 1 | 37 | 0 | NA | 0 | NA | 0 | NA | 0 | NA |
| 6 | 36206239 | 36215820 | 1  | NM_002754    | MAPK13   | 0 | NA | 0 | NA | 0 | NA | 0 | NA | 0 | NA |
| 6 | 36272527 | 36308545 | 1  | NM_015695    | BRPF3    | 0 | NA | 0 | NA | 0 | NA | 0 | NA | 0 | NA |
| 6 | 36318922 | 36384350 | 1  | NM_173676    | PNPLA1   | 0 | NA | 0 | NA | 0 | NA | 0 | NA | 0 | NA |
| 6 | 36412640 | 36391512 | -1 | NM_001010903 | C6orf222 | 0 | NA | 0 | NA | 0 | NA | 0 | NA | 0 | NA |
| 6 | 36463445 | 36441948 | -1 | NM_016135    | ETV7     | 0 | NA | 1 | 13 | 0 | NA | 0 | NA | 0 | NA |
| 6 | 36476289 | 36466306 | -1 | NM_152990    | PXT1     | 0 | NA | 0 | NA | 0 | NA | 0 | NA | 0 | NA |
| 6 | 36518521 | 36566293 | 1  | NM_173562    | KCTD20   | 0 | NA | 0 | NA | 0 | NA | 0 | NA | 0 | NA |
| 6 | 36623225 | 36569646 | -1 | NM_007271    | STK38    | 0 | NA | 0 | NA | 0 | NA | 0 | NA | 0 | NA |
| 6 | 36670143 | 36679187 | 1  | NM_003017    | SFRS3    | 1 | 14 | 0 | NA | 0 | NA | 1 | 13 | 0 | NA |
| 6 | 36754436 | 36763087 | 1  | NM_000389    | CDKN1A   | 1 | 16 | 0 | NA | 0 | NA | 0 | NA | 0 | NA |
| 6 | 36754464 | 36763087 | 1  | NM_078467    | CDKN1A   | 1 | 16 | 0 | NA | 0 | NA | 0 | NA | 0 | NA |
| 6 | 36915198 | 36816532 | -1 | NM_020939    | CPNE5    | 0 | NA | 0 | NA | 1 | 12 | 1 | 12 | 0 | NA |
| 6 | 36950747 | 36930583 | -1 | NM_016059    | PPIL1    | 0 | NA | 0 | NA | 0 | NA | 0 | NA | 0 | NA |
| 6 | 36961617 | 37004718 | 1  | NM_152734    | C6orf89  | 0 | NA | 0 | NA | 0 | NA | 0 | NA | 0 | NA |
| 6 | 37030186 | 37040591 | 1  | NM_153370    | PI16     | 0 | NA | 0 | NA | 1 | 16 | 0 | NA | 0 | NA |
| 6 | 37061927 | 37043894 | -1 | NM_014341    | MTCH1    | 1 | 12 | 1 | 13 | 0 | NA | 0 | NA | 0 | NA |
| 6 | 37081400 | 37104822 | 1  | NM_173558    | FGD2     | 0 | NA | 0 | NA | 0 | NA | 0 | NA | 0 | NA |
| 6 | 37245963 | 37251182 | 1  | NM_002648    | PIM1     | 1 | 15 | 0 | NA | 0 | NA | 1 | 17 | 0 | NA |
| 6 | 37333350 | 37287934 | -1 | NM_145316    | C6orf128 | 0 | NA | 0 | NA | 0 | NA | 0 | NA | 0 | NA |
| 6 | 37333525 | 37408724 | 1  | NM_017772    | TBC1D22B | 0 | NA | 0 | NA | 0 | NA | 0 | NA | 0 | NA |
| 6 | 37429725 | 37470492 | 1  | NM_003958    | RNF8     | 0 | NA | 0 | NA | 0 | NA | 0 | NA | 0 | NA |
| 6 | 37429725 | 37470492 | 1  | NM_183078    | RNF8     | 0 | NA | 0 | NA | 0 | NA | 0 | NA | 0 | NA |
| 6 | 37508990 | 37557262 | 1  | NM_015050    | KIAA0082 | 0 | NA | 0 | NA | 0 | NA | 0 | NA | 0 | NA |
| 6 | 37575678 | 37558674 | -1 | NM_138493    | C6orf129 | 0 | NA | 0 | NA | 0 | NA | 0 | NA | 0 | NA |
| 6 | 37773744 | 37708261 | -1 | NM_153487    | MDGA1    | 0 | NA | 1 | 12 | 1 | 13 | 0 | NA | 0 | NA |
| 6 | 37895610 | 38230375 | 1  | NM_021943    | ZFAND3   | 0 | NA | 0 | NA | 0 | NA | 0 | NA | 0 | NA |
| 6 | 38671821 | 38244204 | -1 | NM_152733    | BTBD9    | 0 | NA | 0 | NA | 0 | NA | 0 | NA | 0 | NA |
| 6 | 38715902 | 38244204 | -1 | NM_001099272 | BTBD9    | 0 | NA | 0 | NA | 0 | NA | 1 | 11 | 0 | NA |
| 6 | 38715902 | 38244204 | -1 | NM_052893    | BTBD9    | 0 | NA | 0 | NA | 0 | NA | 1 | 11 | 0 | NA |
| 6 | 38778930 | 38751679 | -1 | NM_006708    | GLO1     | 1 | 12 | 1 | 15 | 1 | 18 | 0 | NA | 0 | NA |
| 6 | 38798529 | 39106545 | 1  | NM_001371    | DNAH8    | 0 | NA | 1 | 17 | 0 | NA | 0 | NA | 0 | NA |
| 6 | 39124534 | 39163498 | 1  | NM_002062    | GLP1R    | 0 | NA | 0 | NA | 0 | NA | 0 | NA | 0 | NA |
| 6 | 39190843 | 39179817 | -1 | NM_018322    | C6orf64  | 1 | 21 | 0 | NA | 0 | NA | 0 | NA | 0 | NA |
| 6 | 39305229 | 39264724 | -1 | NM_003740    | KCNK5    | 0 | NA | 0 | NA | 0 | NA | 0 | NA | 0 | NA |
| 6 | 39390214 | 39374754 | -1 | NM_031460    | KCNK17   | 0 | NA | 0 | NA | 0 | NA | 0 | NA | 0 | NA |
| 6 | 39398294 | 39390459 | -1 | NM_032115    | KCNK16   | 0 | NA | 0 | NA | 0 | NA | 0 | NA | 0 | NA |
| 6 | 39801159 | 39410853 | -1 | NM_145027    | KIF6     | 0 | NA | 0 | NA | 1 | 14 | 0 | NA | 0 | NA |
| 6 | 39868770 | 39980619 | 1  | NM_015345    | DAAM2    | 0 | NA | 0 | NA | 1 | 17 | 0 | NA | 0 | NA |
| 6 | 40003433 | 39981137 | -1 | NM_005943    | MOCS1    | 0 | NA | 0 | NA | 0 | NA | 0 | NA | 0 | NA |
| 6 | 40003433 | 39981276 | -1 | NM_005942    | MOCS1    | 0 | NA | 0 | NA | 0 | NA | 0 | NA | 0 | NA |
| 6 | 40003433 | 39981276 | -1 | NM_138928    | MOCS1    | 0 | NA | 0 | NA | 0 | NA | 0 | NA | 0 | NA |
| 6 | 40010196 | 39981072 | -1 | NM_001075098 | MOCS1    | 0 | NA | 0 | NA | 0 | NA | 0 | NA | 0 | NA |
| 6 | 40663104 | 40467350 | -1 | NM_020737    | LRFN2    | 0 | NA | 0 | NA | 0 | NA | 0 | NA | 0 | NA |
| 6 | 41114906 | 41102748 | -1 | NM_173561    | UNC5CL   | 0 | NA | 0 | NA | 0 | NA | 0 | NA | 0 | NA |
| 6 | 41118270 | 41120054 | 1  | NM_001010873 | BZRPL1   | 0 | NA | 0 | NA | 0 | NA | 0 | NA | 0 | NA |
| 6 | 41128990 | 41140233 | 1  | NM_006789    | APOBEC2  | 0 | NA | 0 | NA | 0 | NA | 0 | NA | 0 | NA |
| 6 | 41148166 | 41142508 | -1 | NM_145063    | C6orf130 | 0 | NA | 0 | NA | 0 | NA | 0 | NA | 0 | NA |
| 6 | 41148687 | 41174714 | 1  | NM_002505    | NFYA     | 0 | NA | 0 | NA | 0 | NA | 0 | NA | 0 | NA |
| 6 | 41148687 | 41174714 | 1  | NM_021705    | NFYA     | 0 | NA | 0 | NA | 0 | NA | 0 | NA | 0 | NA |
| 6 | 41230048 | 41225319 | -1 | NM_178174    | TREML1   | 0 | NA | 1 | 12 | 0 | NA | 0 | NA | 0 | NA |
| 6 | 41238892 | 41234229 | -1 | NM_018965    | TREM2    | 0 | NA | 1 | 12 | 0 | NA | 0 | NA | 0 | NA |
| 6 | 41276903 | 41265529 | -1 | NM_024807    | TREML2   | 0 | NA | 0 | NA | 0 | NA | 0 | NA | 0 | NA |
| 6 | 41304039 | 41314098 | 1  | NM_198153    | TREML4   | 0 | NA | 1 | 13 | 0 | NA | 0 | NA | 0 | NA |
| 6 | 41362435 | 41351689 | -1 | NM_018643    | TREM1    | 0 | NA | 0 | NA | 0 | NA | 0 | NA | 0 | NA |
| 6 | 41411505 | 41426603 | 1  | NM_004828    | NCR2     | 0 | NA | 0 | NA | 0 | NA | 0 | NA | 0 | NA |
| 6 | 41622141 | 41678100 | 1  | NM_001012426 | FOXP4    | 1 | 16 | 0 | NA | 0 | NA | 0 | NA | 0 | NA |
| 6 | 41622141 | 41678100 | 1  | NM_001012427 | FOXP4    | 1 | 16 | 0 | NA | 0 | NA | 0 | NA | 0 | NA |
| 6 | 41622141 | 41678100 | 1  | NM_138457    | FOXP4    | 1 | 16 | 0 | NA | 0 | NA | 0 | NA | 0 | NA |
| 6 | 41714172 | 41729960 | 1  | NM_005586    | MDF1     | 0 | NA | 0 | NA | 0 | NA | 0 | NA | 0 | NA |
| 6 | 41810776 | 41759693 | -1 | NM_007162    | TFEB     | 1 | 12 | 0 | NA | 0 | NA | 0 | NA | 0 | NA |
| 6 | 41823099 | 41812429 | -1 | NM_002630    | PGC      | 0 | NA | 0 | NA | 0 | NA | 0 | NA | 0 | NA |
| 6 | 41855608 | 41845891 | -1 | NM_006653    | FRS3     | 0 | NA | 0 | NA | 0 | NA | 0 | NA | 0 | NA |

|   |          |          |    |              |           |   |    |   |    |   |    |   |    |   |    |
|---|----------|----------|----|--------------|-----------|---|----|---|----|---|----|---|----|---|----|
| 6 | 41856477 | 41865611 | 1  | NM_013397    | PRICKLE4  | 0 | NA | 0 | NA | 0 | NA | 0 | NA | 0 | NA |
| 6 | 41971077 | 41873360 | -1 | NM_018561    | USP49     | 0 | NA | 0 | NA | 0 | NA | 0 | NA | 0 | NA |
| 6 | 41996855 | 41981069 | -1 | NM_004275    | MED20     | 0 | NA | 0 | NA | 1 | 14 | 0 | NA | 0 | NA |
| 6 | 41996942 | 42008762 | 1  | NM_004053    | BYSL      | 0 | NA | 0 | NA | 1 | 14 | 0 | NA | 0 | NA |
| 6 | 42017530 | 42010648 | -1 | NM_001760    | CCND3     | 0 | NA | 0 | NA | 0 | NA | 0 | NA | 0 | NA |
| 6 | 42126228 | 42156622 | 1  | NM_138572    | TAF8      | 0 | NA | 0 | NA | 0 | NA | 0 | NA | 0 | NA |
| 6 | 42231151 | 42255772 | 1  | NM_000409    | GUCA1A    | 0 | NA | 0 | NA | 0 | NA | 0 | NA | 0 | NA |
| 6 | 42270672 | 42258999 | -1 | NM_002098    | GUCA1B    | 0 | NA | 0 | NA | 0 | NA | 0 | NA | 0 | NA |
| 6 | 42293611 | 42282516 | -1 | NM_018141    | MRPS10    | 0 | NA | 0 | NA | 0 | NA | 0 | NA | 0 | NA |
| 6 | 42527761 | 42303841 | -1 | NM_033502    | TRERF1    | 1 | 11 | 0 | NA | 1 | 12 | 0 | NA | 0 | NA |
| 6 | 42640035 | 42766889 | 1  | NM_015255    | UBR2      | 0 | NA | 0 | NA | 0 | NA | 0 | NA | 0 | NA |
| 6 | 42798287 | 42772315 | -1 | NM_000322    | PRPH2     | 0 | NA | 0 | NA | 0 | NA | 0 | NA | 0 | NA |
| 6 | 42821862 | 42820211 | -1 | NM_003192    | TBCC      | 0 | NA | 0 | NA | 1 | 14 | 0 | NA | 0 | NA |
| 6 | 42896771 | 42944274 | 1  | NM_015349    | KIAA0240  | 0 | NA | 0 | NA | 0 | NA | 0 | NA | 0 | NA |
| 6 | 42955648 | 42962709 | 1  | NM_198486    | RPLL1     | 0 | NA | 0 | NA | 0 | NA | 0 | NA | 0 | NA |
| 6 | 42966532 | 42965980 | -1 | NM_001008739 | LOC441150 | 0 | NA | 0 | NA | 0 | NA | 0 | NA | 0 | NA |
| 6 | 42991704 | 43001553 | 1  | NM_138296    | PTCRA     | 0 | NA | 1 | 13 | 0 | NA | 0 | NA | 0 | NA |
| 6 | 43004837 | 43014986 | 1  | NM_006586    | CNPY3     | 0 | NA | 1 | 13 | 0 | NA | 0 | NA | 0 | NA |
| 6 | 43036477 | 43039596 | 1  | NM_018960    | GNMT      | 0 | NA | 0 | NA | 0 | NA | 0 | NA | 0 | NA |
| 6 | 43054866 | 43039723 | -1 | NM_000287    | PEX6      | 0 | NA | 0 | NA | 0 | NA | 0 | NA | 0 | NA |
| 6 | 43060307 | 43088058 | 1  | NM_006245    | PPP2R5D   | 0 | NA | 0 | NA | 0 | NA | 0 | NA | 0 | NA |
| 6 | 43060307 | 43088058 | 1  | NM_180976    | PPP2R5D   | 0 | NA | 0 | NA | 0 | NA | 0 | NA | 0 | NA |
| 6 | 43060307 | 43088058 | 1  | NM_180977    | PPP2R5D   | 0 | NA | 0 | NA | 0 | NA | 0 | NA | 0 | NA |
| 6 | 43089596 | 43087944 | -1 | NM_014623    | MEA1      | 0 | NA | 0 | NA | 0 | NA | 0 | NA | 0 | NA |
| 6 | 43089554 | 43097009 | 1  | NM_057161    | KLHDC3    | 0 | NA | 0 | NA | 0 | NA | 0 | NA | 0 | NA |
| 6 | 43097362 | 43105315 | 1  | NM_033112    | C6orf153  | 0 | NA | 0 | NA | 0 | NA | 0 | NA | 0 | NA |
| 6 | 43129632 | 43113332 | -1 | NM_014780    | CUL7      | 0 | NA | 0 | NA | 1 | 12 | 0 | NA | 0 | NA |
| 6 | 43135220 | 43129744 | -1 | NM_015950    | MRPL2     | 0 | NA | 0 | NA | 1 | 12 | 0 | NA | 0 | NA |
| 6 | 43135349 | 43143111 | 1  | NM_138343    | KLC4      | 0 | NA | 0 | NA | 1 | 12 | 0 | NA | 0 | NA |
| 6 | 43135349 | 43150811 | 1  | NM_201521    | KLC4      | 0 | NA | 0 | NA | 1 | 12 | 0 | NA | 0 | NA |
| 6 | 43135606 | 43150811 | 1  | NM_201523    | KLC4      | 0 | NA | 0 | NA | 1 | 12 | 0 | NA | 0 | NA |
| 6 | 43136159 | 43150811 | 1  | NM_201522    | KLC4      | 0 | NA | 0 | NA | 1 | 12 | 0 | NA | 0 | NA |
| 6 | 43152006 | 43237435 | 1  | NM_002821    | PTK7      | 0 | NA | 0 | NA | 0 | NA | 0 | NA | 0 | NA |
| 6 | 43152006 | 43237435 | 1  | NM_152880    | PTK7      | 0 | NA | 0 | NA | 0 | NA | 0 | NA | 0 | NA |
| 6 | 43152006 | 43237435 | 1  | NM_152881    | PTK7      | 0 | NA | 0 | NA | 0 | NA | 0 | NA | 0 | NA |
| 6 | 43152006 | 43237435 | 1  | NM_152882    | PTK7      | 0 | NA | 0 | NA | 0 | NA | 0 | NA | 0 | NA |
| 6 | 43246897 | 43257222 | 1  | NM_003131    | SRF       | 0 | NA | 0 | NA | 0 | NA | 0 | NA | 0 | NA |
| 6 | 43257899 | 43300303 | 1  | NM_015089    | PARC      | 0 | NA | 0 | NA | 1 | 12 | 0 | NA | 0 | NA |
| 6 | 43305189 | 43301344 | -1 | NM_006443    | C6orf108  | 0 | NA | 1 | 12 | 0 | NA | 0 | NA | 0 | NA |
| 6 | 43305189 | 43301344 | -1 | NM_199184    | C6orf108  | 0 | NA | 1 | 12 | 0 | NA | 0 | NA | 0 | NA |
| 6 | 43319199 | 43363975 | 1  | NM_032538    | TTBK1     | 0 | NA | 1 | 12 | 0 | NA | 0 | NA | 0 | NA |
| 6 | 43373975 | 43381254 | 1  | NM_006672    | SLC22A7   | 0 | NA | 1 | 13 | 0 | NA | 0 | NA | 0 | NA |
| 6 | 43373975 | 43381254 | 1  | NM_153320    | SLC22A7   | 0 | NA | 1 | 13 | 0 | NA | 0 | NA | 0 | NA |
| 6 | 43384508 | 43381188 | -1 | NM_206922    | CRIP3     | 0 | NA | 0 | NA | 0 | NA | 0 | NA | 0 | NA |
| 6 | 43445159 | 43411785 | -1 | NM_014345    | ZNF318    | 0 | NA | 0 | NA | 0 | NA | 0 | NA | 0 | NA |
| 6 | 43507466 | 43526141 | 1  | NM_033450    | ABCC10    | 1 | 24 | 0 | NA | 1 | 13 | 0 | NA | 0 | NA |
| 6 | 43531264 | 43526067 | -1 | NM_023932    | DLK2      | 0 | NA | 1 | 12 | 0 | NA | 0 | NA | 0 | NA |
| 6 | 43531764 | 43526067 | -1 | NM_206539    | DLK2      | 0 | NA | 1 | 12 | 0 | NA | 0 | NA | 0 | NA |
| 6 | 43553288 | 43582269 | 1  | NM_080604    | TJAP1     | 0 | NA | 0 | NA | 0 | NA | 0 | NA | 0 | NA |
| 6 | 43586402 | 43582684 | -1 | NM_001012974 | C6orf154  | 1 | 11 | 0 | NA | 0 | NA | 1 | 11 | 0 | NA |
| 6 | 43592680 | 43587542 | -1 | NM_015388    | YIPF3     | 1 | 11 | 0 | NA | 0 | NA | 1 | 11 | 0 | NA |
| 6 | 43592768 | 43597224 | 1  | NM_203290    | POLR1C    | 1 | 11 | 0 | NA | 0 | NA | 1 | 11 | 0 | NA |
| 6 | 43592768 | 43605092 | 1  | NM_004875    | POLR1C    | 1 | 11 | 0 | NA | 0 | NA | 1 | 11 | 0 | NA |
| 6 | 43651642 | 43598050 | -1 | NM_020750    | XPOS      | 0 | NA | 0 | NA | 0 | NA | 0 | NA | 0 | NA |
| 6 | 43651855 | 43696238 | 1  | NM_006502    | POLH      | 0 | NA | 0 | NA | 0 | NA | 0 | NA | 0 | NA |
| 6 | 43704914 | 43696195 | -1 | NM_019096    | GTPBP2    | 1 | 14 | 0 | NA | 0 | NA | 0 | NA | 0 | NA |
| 6 | 43705256 | 43716666 | 1  | NM_001003690 | MAD2L1BP  | 1 | 14 | 0 | NA | 0 | NA | 0 | NA | 0 | NA |
| 6 | 43711554 | 43716666 | 1  | NM_014628    | MAD2L1BP  | 1 | 16 | 0 | NA | 0 | NA | 0 | NA | 0 | NA |
| 6 | 43720787 | 43746722 | 1  | NM_152732    | C6orf206  | 1 | 17 | 0 | NA | 0 | NA | 0 | NA | 0 | NA |
| 6 | 43763506 | 43747019 | -1 | NM_018135    | MRPS18A   | 0 | NA | 1 | 14 | 0 | NA | 0 | NA | 0 | NA |
| 6 | 43845930 | 43862201 | 1  | NM_001025366 | VEGFA     | 1 | 14 | 0 | NA | 1 | 12 | 0 | NA | 0 | NA |
| 6 | 43845930 | 43862201 | 1  | NM_001025367 | VEGFA     | 1 | 14 | 0 | NA | 1 | 12 | 0 | NA | 0 | NA |
| 6 | 43845930 | 43862201 | 1  | NM_001025368 | VEGFA     | 1 | 14 | 0 | NA | 1 | 12 | 0 | NA | 0 | NA |
| 6 | 43845930 | 43862201 | 1  | NM_001025369 | VEGFA     | 1 | 14 | 0 | NA | 1 | 12 | 0 | NA | 0 | NA |
| 6 | 43845930 | 43862201 | 1  | NM_001025370 | VEGFA     | 1 | 14 | 0 | NA | 1 | 12 | 0 | NA | 0 | NA |

|   |          |          |    |              |          |   |    |   |    |   |    |   |    |   |    |
|---|----------|----------|----|--------------|----------|---|----|---|----|---|----|---|----|---|----|
| 6 | 43845930 | 43862201 | 1  | NM_001033756 | VEGFA    | 1 | 14 | 0 | NA | 1 | 12 | 0 | NA | 0 | NA |
| 6 | 43845930 | 43862201 | 1  | NM_003376    | VEGFA    | 1 | 14 | 0 | NA | 1 | 12 | 0 | NA | 0 | NA |
| 6 | 44076316 | 44080865 | 1  | NM_153246    | C6orf223 | 0 | NA | 0 | NA | 0 | NA | 0 | NA | 0 | NA |
| 6 | 44203169 | 44189349 | -1 | NM_032111    | MRPL14   | 1 | 11 | 0 | NA | 0 | NA | 0 | NA | 0 | NA |
| 6 | 44203353 | 44231234 | 1  | NM_018426    | TMEM63B  | 1 | 11 | 0 | NA | 0 | NA | 0 | NA | 0 | NA |
| 6 | 44234525 | 44280117 | 1  | NM_007058    | CAPN11   | 0 | NA | 0 | NA | 0 | NA | 0 | NA | 0 | NA |
| 6 | 44295219 | 44309866 | 1  | NM_001078174 | SLC29A1  | 0 | NA | 0 | NA | 0 | NA | 0 | NA | 0 | NA |
| 6 | 44295219 | 44309866 | 1  | NM_004955    | SLC29A1  | 0 | NA | 0 | NA | 0 | NA | 0 | NA | 0 | NA |
| 6 | 44299273 | 44309866 | 1  | NM_001078175 | SLC29A1  | 0 | NA | 0 | NA | 0 | NA | 0 | NA | 0 | NA |
| 6 | 44299273 | 44309866 | 1  | NM_001078176 | SLC29A1  | 0 | NA | 0 | NA | 0 | NA | 0 | NA | 0 | NA |
| 6 | 44299340 | 44309866 | 1  | NM_001078177 | SLC29A1  | 0 | NA | 0 | NA | 0 | NA | 0 | NA | 0 | NA |
| 6 | 44322826 | 44329592 | 1  | NM_007355    | HSP90AB1 | 0 | NA | 0 | NA | 0 | NA | 0 | NA | 0 | NA |
| 6 | 44333250 | 44329820 | -1 | NM_178148    | SLC35B2  | 0 | NA | 0 | NA | 0 | NA | 0 | NA | 0 | NA |
| 6 | 44341503 | 44333880 | -1 | NM_004556    | NFKBIE   | 0 | NA | 0 | NA | 0 | NA | 0 | NA | 0 | NA |
| 6 | 44373403 | 44355879 | -1 | NM_182539    | TCTE1    | 0 | NA | 1 | 14 | 0 | NA | 0 | NA | 0 | NA |
| 6 | 44389041 | 44374440 | -1 | NM_020745    | AARS2    | 1 | 24 | 0 | NA | 1 | 13 | 0 | NA | 0 | NA |
| 6 | 44418463 | 44452882 | 1  | NM_145026    | SPATS1   | 0 | NA | 0 | NA | 0 | NA | 0 | NA | 0 | NA |
| 6 | 44463279 | 44522758 | 1  | NM_001253    | CDCSL    | 0 | NA | 0 | NA | 0 | NA | 0 | NA | 0 | NA |
| 6 | 45404031 | 45626797 | 1  | NM_001015051 | RUNX2    | 0 | NA | 0 | NA | 1 | 13 | 0 | NA | 0 | NA |
| 6 | 45404031 | 45626797 | 1  | NM_001024630 | RUNX2    | 0 | NA | 0 | NA | 1 | 13 | 0 | NA | 0 | NA |
| 6 | 45453553 | 44905427 | -1 | NM_003599    | SUPT3H   | 0 | NA | 0 | NA | 0 | NA | 1 | 17 | 0 | NA |
| 6 | 45453648 | 44904447 | -1 | NM_181356    | SUPT3H   | 0 | NA | 0 | NA | 0 | NA | 1 | 17 | 0 | NA |
| 6 | 45497891 | 45626797 | 1  | NM_004348    | RUNX2    | 0 | NA | 0 | NA | 1 | 12 | 0 | NA | 0 | NA |
| 6 | 46091556 | 45974165 | -1 | NM_016929    | CLIC5    | 0 | NA | 1 | 12 | 0 | NA | 0 | NA | 0 | NA |
| 6 | 46156044 | 45974165 | -1 | NM_001114086 | CLIC5    | 0 | NA | 0 | NA | 0 | NA | 0 | NA | 0 | NA |
| 6 | 46205870 | 46222237 | 1  | NM_014936    | ENPP4    | 0 | NA | 0 | NA | 0 | NA | 0 | NA | 0 | NA |
| 6 | 46246676 | 46235720 | -1 | NM_021572    | ENPP5    | 0 | NA | 0 | NA | 0 | NA | 0 | NA | 0 | NA |
| 6 | 46401490 | 46296427 | -1 | NM_005822    | RCAN2    | 0 | NA | 0 | NA | 0 | NA | 0 | NA | 0 | NA |
| 6 | 46728482 | 46625403 | -1 | NM_016593    | CYP39A1  | 0 | NA | 0 | NA | 0 | NA | 0 | NA | 0 | NA |
| 6 | 46728637 | 46753886 | 1  | NM_004277    | SLC25A27 | 0 | NA | 0 | NA | 0 | NA | 0 | NA | 0 | NA |
| 6 | 46763824 | 46778109 | 1  | NM_001010870 | TDRD6    | 0 | NA | 1 | 12 | 0 | NA | 0 | NA | 0 | NA |
| 6 | 46811055 | 46780236 | -1 | NM_005084    | PLA2G7   | 0 | NA | 0 | NA | 1 | 16 | 0 | NA | 0 | NA |
| 6 | 46869052 | 46915478 | 1  | NM_005588    | MEP1A    | 0 | NA | 0 | NA | 0 | NA | 0 | NA | 0 | NA |
| 6 | 46997673 | 46928203 | -1 | NM_001098518 | GPR116   | 0 | NA | 0 | NA | 0 | NA | 0 | NA | 0 | NA |
| 6 | 47030634 | 46928203 | -1 | NM_015234    | GPR116   | 0 | NA | 0 | NA | 0 | NA | 0 | NA | 0 | NA |
| 6 | 47118041 | 47075771 | -1 | NM_153840    | GPR110   | 0 | NA | 0 | NA | 1 | 13 | 0 | NA | 0 | NA |
| 6 | 47118041 | 47095580 | -1 | NM_025048    | GPR110   | 0 | NA | 0 | NA | 1 | 13 | 0 | NA | 0 | NA |
| 6 | 47385639 | 47307226 | -1 | NM_014452    | TNFRSF21 | 0 | NA | 0 | NA | 0 | NA | 0 | NA | 0 | NA |
| 6 | 47553483 | 47702955 | 1  | NM_012120    | CD2AP    | 0 | NA | 0 | NA | 0 | NA | 1 | 12 | 0 | NA |
| 6 | 47732284 | 47766296 | 1  | NM_153839    | GPR111   | 0 | NA | 0 | NA | 0 | NA | 0 | NA | 0 | NA |
| 6 | 47774247 | 47797716 | 1  | NM_153838    | GPR115   | 0 | NA | 0 | NA | 0 | NA | 0 | NA | 0 | NA |
| 6 | 47857756 | 47902075 | 1  | NM_181744    | OPN5     | 0 | NA | 0 | NA | 0 | NA | 0 | NA | 0 | NA |
| 6 | 47862820 | 47902075 | 1  | NM_001030051 | OPN5     | 0 | NA | 0 | NA | 0 | NA | 0 | NA | 0 | NA |
| 6 | 48144384 | 47953997 | -1 | NM_001013732 | C6orf138 | 0 | NA | 1 | 12 | 0 | NA | 0 | NA | 0 | NA |
| 6 | 49538990 | 49506949 | -1 | NM_000255    | MUT      | 0 | NA | 0 | NA | 0 | NA | 0 | NA | 0 | NA |
| 6 | 49539054 | 49568779 | 1  | NM_018132    | CENPQ    | 0 | NA | 0 | NA | 0 | NA | 0 | NA | 0 | NA |
| 6 | 49712546 | 49680848 | -1 | NM_000324    | RHAG     | 0 | NA | 0 | NA | 0 | NA | 0 | NA | 0 | NA |
| 6 | 49789215 | 49768030 | -1 | NM_003296    | CRISP2   | 0 | NA | 0 | NA | 0 | NA | 0 | NA | 0 | NA |
| 6 | 49813070 | 49803053 | -1 | NM_006061    | CRISP3   | 0 | NA | 0 | NA | 0 | NA | 0 | NA | 0 | NA |
| 6 | 49862966 | 49861322 | -1 | NM_138733    | PGK2     | 0 | NA | 0 | NA | 0 | NA | 0 | NA | 0 | NA |
| 6 | 49942177 | 49909940 | -1 | NM_001131    | CRISP1   | 0 | NA | 0 | NA | 0 | NA | 0 | NA | 0 | NA |
| 6 | 49942177 | 49909940 | -1 | NM_170609    | CRISP1   | 0 | NA | 0 | NA | 0 | NA | 0 | NA | 0 | NA |
| 6 | 50039777 | 50035963 | -1 | NM_001037499 | DEFB114  | 0 | NA | 0 | NA | 0 | NA | 0 | NA | 0 | NA |
| 6 | 50045297 | 50044348 | -1 | NM_001037729 | DEFB113  | 0 | NA | 0 | NA | 0 | NA | 0 | NA | 0 | NA |
| 6 | 50097607 | 50084809 | -1 | NM_001037728 | DEFB110  | 0 | NA | 0 | NA | 0 | NA | 0 | NA | 0 | NA |
| 6 | 50097653 | 50094514 | -1 | NM_001037497 | DEFB111  | 0 | NA | 0 | NA | 0 | NA | 0 | NA | 0 | NA |
| 6 | 50124323 | 50119246 | -1 | NM_001037498 | DEFB112  | 0 | NA | 0 | NA | 0 | NA | 0 | NA | 0 | NA |
| 6 | 50789215 | 50848705 | 1  | NM_172238    | TFAP2D   | 0 | NA | 0 | NA | 0 | NA | 0 | NA | 0 | NA |
| 6 | 50894397 | 50923285 | 1  | NM_003221    | TFAP2B   | 0 | NA | 0 | NA | 0 | NA | 0 | NA | 0 | NA |
| 6 | 52060382 | 51588103 | -1 | NM_138694    | PKHD1    | 0 | NA | 0 | NA | 0 | NA | 0 | NA | 0 | NA |
| 6 | 52060382 | 51693605 | -1 | NM_170724    | PKHD1    | 0 | NA | 0 | NA | 0 | NA | 0 | NA | 0 | NA |
| 6 | 52159143 | 52163395 | 1  | NM_002190    | IL17A    | 0 | NA | 0 | NA | 0 | NA | 0 | NA | 0 | NA |
| 6 | 52217257 | 52209442 | -1 | NM_052872    | IL17F    | 0 | NA | 1 | 12 | 0 | NA | 0 | NA | 0 | NA |
| 6 | 52257541 | 52236770 | -1 | NM_002388    | MCM3     | 0 | NA | 0 | NA | 0 | NA | 0 | NA | 0 | NA |
| 6 | 52334884 | 52380534 | 1  | NM_133367    | PAQR8    | 0 | NA | 0 | NA | 0 | NA | 0 | NA | 0 | NA |

|   |          |          |    |              |              |   |    |   |    |   |    |   |    |   |    |
|---|----------|----------|----|--------------|--------------|---|----|---|----|---|----|---|----|---|----|
| 6 | 52392952 | 52468542 | 1  | NM_018100    | EFHC1        | 0 | NA | 0 | NA | 0 | NA | 0 | NA | 0 | NA |
| 6 | 52549821 | 52470158 | -1 | NM_012288    | TRAM2        | 0 | NA | 0 | NA | 1 | 14 | 0 | NA | 0 | NA |
| 6 | 52643842 | 52659344 | 1  | NM_014051    | TMEM14A      | 0 | NA | 0 | NA | 0 | NA | 0 | NA | 0 | NA |
| 6 | 52736283 | 52723139 | -1 | NM_000846    | GSTA2        | 0 | NA | 0 | NA | 0 | NA | 0 | NA | 0 | NA |
| 6 | 52776616 | 52764346 | -1 | NM_145740    | GSTA1        | 0 | NA | 0 | NA | 0 | NA | 0 | NA | 0 | NA |
| 6 | 52818852 | 52804499 | -1 | NM_153699    | GSTA5        | 0 | NA | 0 | NA | 0 | NA | 0 | NA | 0 | NA |
| 6 | 52882455 | 52869402 | -1 | NM_000847    | GSTA3        | 0 | NA | 0 | NA | 0 | NA | 0 | NA | 0 | NA |
| 6 | 52968099 | 52950709 | -1 | NM_001512    | GSTA4        | 0 | NA | 0 | NA | 1 | 12 | 0 | NA | 0 | NA |
| 6 | 53034559 | 52974056 | -1 | NM_014920    | ICK          | 0 | NA | 0 | NA | 0 | NA | 0 | NA | 0 | NA |
| 6 | 53034559 | 52974056 | -1 | NM_016513    | ICK          | 0 | NA | 0 | NA | 0 | NA | 0 | NA | 0 | NA |
| 6 | 53037754 | 53073629 | 1  | NM_033481    | FBXO9        | 0 | NA | 0 | NA | 0 | NA | 0 | NA | 0 | NA |
| 6 | 53038215 | 53073629 | 1  | NM_033480    | FBXO9        | 0 | NA | 0 | NA | 0 | NA | 0 | NA | 0 | NA |
| 6 | 53043729 | 53073629 | 1  | NM_012347    | FBXO9        | 0 | NA | 0 | NA | 0 | NA | 0 | NA | 0 | NA |
| 6 | 53121586 | 53099720 | -1 | NM_003643    | GCM1         | 0 | NA | 0 | NA | 0 | NA | 0 | NA | 0 | NA |
| 6 | 53321901 | 53240154 | -1 | NM_021814    | ELOVL5       | 1 | 11 | 0 | NA | 0 | NA | 1 | 17 | 0 | NA |
| 6 | 53517790 | 53470098 | -1 | NM_001498    | GCLC         | 0 | NA | 0 | NA | 0 | NA | 0 | NA | 0 | NA |
| 6 | 53638465 | 53620657 | -1 | NM_001003760 | KLHL31       | 0 | NA | 0 | NA | 0 | NA | 0 | NA | 0 | NA |
| 6 | 53767736 | 53896878 | 1  | NM_018214    | LRRC1        | 0 | NA | 0 | NA | 0 | NA | 0 | NA | 0 | NA |
| 6 | 53991672 | 54239037 | 1  | NM_138569    | C6orf142     | 0 | NA | 0 | NA | 0 | NA | 0 | NA | 0 | NA |
| 6 | 54281161 | 54362872 | 1  | NM_014464    | TINAG        | 0 | NA | 0 | NA | 1 | 14 | 0 | NA | 0 | NA |
| 6 | 54819527 | 54914778 | 1  | NM_001010872 | FAM83B       | 0 | NA | 0 | NA | 0 | NA | 0 | NA | 0 | NA |
| 6 | 55147029 | 55255377 | 1  | NM_001526    | HCRTR2       | 0 | NA | 0 | NA | 0 | NA | 0 | NA | 0 | NA |
| 6 | 55300225 | 55375250 | 1  | NM_207410    | GFRAL        | 0 | NA | 0 | NA | 0 | NA | 0 | NA | 0 | NA |
| 6 | 55551971 | 55407129 | -1 | NM_001042406 | HMGCLL1      | 0 | NA | 0 | NA | 0 | NA | 0 | NA | 0 | NA |
| 6 | 55551971 | 55407129 | -1 | NM_019036    | HMGCLL1      | 0 | NA | 0 | NA | 0 | NA | 0 | NA | 0 | NA |
| 6 | 55848334 | 55728195 | -1 | NM_021073    | BMP5         | 0 | NA | 0 | NA | 0 | NA | 0 | NA | 0 | NA |
| 6 | 56220337 | 56029346 | -1 | NM_030820    | COL21A1      | 0 | NA | 1 | 12 | 0 | NA | 0 | NA | 0 | NA |
| 6 | 56615653 | 56430743 | -1 | NM_015548    | DST          | 0 | NA | 0 | NA | 0 | NA | 0 | NA | 0 | NA |
| 6 | 56615653 | 56576527 | -1 | NM_020388    | DST          | 0 | NA | 0 | NA | 0 | NA | 0 | NA | 0 | NA |
| 6 | 56615653 | 56587338 | -1 | NM_001723    | DST          | 0 | NA | 0 | NA | 0 | NA | 0 | NA | 0 | NA |
| 6 | 56816422 | 56430743 | -1 | NM_183380    | DST          | 0 | NA | 0 | NA | 0 | NA | 0 | NA | 0 | NA |
| 6 | 56927731 | 57000101 | 1  | NM_152731    | C6orf65      | 1 | 15 | 0 | NA | 0 | NA | 1 | 12 | 0 | NA |
| 6 | 57019342 | 57027953 | 1  | NM_020931    | KIAA1586     | 0 | NA | 0 | NA | 0 | NA | 0 | NA | 0 | NA |
| 6 | 57062786 | 57143057 | 1  | NM_001031623 | ZNF451       | 0 | NA | 0 | NA | 0 | NA | 0 | NA | 0 | NA |
| 6 | 57062786 | 57143057 | 1  | NM_015555    | ZNF451       | 0 | NA | 0 | NA | 0 | NA | 0 | NA | 0 | NA |
| 6 | 57145292 | 57157694 | 1  | NM_004282    | BAG2         | 0 | NA | 0 | NA | 0 | NA | 0 | NA | 0 | NA |
| 6 | 57194216 | 57161540 | -1 | NM_183227    | RAB23        | 0 | NA | 0 | NA | 0 | NA | 0 | NA | 0 | NA |
| 6 | 57195037 | 57161540 | -1 | NM_016277    | RAB23        | 0 | NA | 0 | NA | 0 | NA | 0 | NA | 0 | NA |
| 6 | 57290380 | 57621335 | 1  | NM_000947    | PRIM2        | 0 | NA | 0 | NA | 0 | NA | 1 | 11 | 0 | NA |
| 6 | 63054091 | 62447823 | -1 | NM_152688    | KHDRBS2      | 0 | NA | 0 | NA | 0 | NA | 0 | NA | 0 | NA |
| 6 | 64087841 | 64047518 | -1 | NM_016571    | GLULD1       | 0 | NA | 0 | NA | 0 | NA | 0 | NA | 0 | NA |
| 6 | 64339878 | 64351448 | 1  | NM_003463    | PTP4A1       | 0 | NA | 0 | NA | 0 | NA | 1 | 13 | 0 | NA |
| 6 | 64414389 | 64482364 | 1  | NM_015153    | PHF3         | 0 | NA | 0 | NA | 0 | NA | 0 | NA | 0 | NA |
| 6 | 66346418 | 66101526 | -1 | NM_198283    | EGFL11       | 0 | NA | 0 | NA | 0 | NA | 0 | NA | 0 | NA |
| 6 | 69402352 | 70196124 | 1  | NM_001704    | BAI3         | 0 | NA | 0 | NA | 0 | NA | 0 | NA | 0 | NA |
| 6 | 70563609 | 70442469 | -1 | NM_018368    | LMBRD1       | 0 | NA | 0 | NA | 0 | NA | 0 | NA | 0 | NA |
| 6 | 70633168 | 70978878 | 1  | NM_001858    | COL19A1      | 0 | NA | 0 | NA | 0 | NA | 0 | NA | 0 | NA |
| 6 | 71049632 | 70982528 | -1 | NM_078485    | COL9A1       | 0 | NA | 0 | NA | 0 | NA | 0 | NA | 0 | NA |
| 6 | 71069494 | 70982528 | -1 | NM_001851    | COL9A1       | 0 | NA | 0 | NA | 0 | NA | 0 | NA | 0 | NA |
| 6 | 71179827 | 71327596 | 1  | NM_001105531 | FAM135A      | 1 | 27 | 0 | NA | 0 | NA | 0 | NA | 0 | NA |
| 6 | 71179827 | 71327596 | 1  | NM_020819    | FAM135A      | 1 | 27 | 0 | NA | 0 | NA | 0 | NA | 0 | NA |
| 6 | 71333345 | 71355327 | 1  | NM_145267    | C6orf57      | 0 | NA | 0 | NA | 0 | NA | 0 | NA | 0 | NA |
| 6 | 71434199 | 71628437 | 1  | NM_001044305 | SMAP1        | 0 | NA | 0 | NA | 0 | NA | 0 | NA | 0 | NA |
| 6 | 71434199 | 71628437 | 1  | NM_021940    | SMAP1        | 0 | NA | 0 | NA | 0 | NA | 0 | NA | 0 | NA |
| 6 | 71723509 | 71627789 | -1 | NM_080742    | B3GAT2       | 0 | NA | 1 | 13 | 0 | NA | 0 | NA | 0 | NA |
| 6 | 72055197 | 72068694 | 1  | NM_024576    | OGFRL1       | 0 | NA | 0 | NA | 0 | NA | 0 | NA | 0 | NA |
| 6 | 72653370 | 73169229 | 1  | NM_014989    | RIMS1        | 0 | NA | 0 | NA | 0 | NA | 0 | NA | 0 | NA |
| 6 | 73388555 | 73962301 | 1  | NM_019842    | KCNQ5        | 0 | NA | 1 | 12 | 0 | NA | 0 | NA | 0 | NA |
| 6 | 74029628 | 74007758 | -1 | NM_030568    | KHDC1        | 0 | NA | 0 | NA | 0 | NA | 0 | NA | 0 | NA |
| 6 | 74029640 | 73975313 | -1 | NM_001126063 | LOC100129128 | 0 | NA | 0 | NA | 0 | NA | 0 | NA | 0 | NA |
| 6 | 74120674 | 74119507 | -1 | NM_001025290 | DPPA5        | 0 | NA | 0 | NA | 0 | NA | 0 | NA | 0 | NA |
| 6 | 74129120 | 74130619 | 1  | NM_001017361 | C6orf221     | 0 | NA | 0 | NA | 0 | NA | 0 | NA | 0 | NA |
| 6 | 74136236 | 74135000 | -1 | NM_001080507 | OOEP         | 0 | NA | 0 | NA | 0 | NA | 0 | NA | 0 | NA |
| 6 | 74161191 | 74183791 | 1  | NM_018665    | DDX43        | 0 | NA | 0 | NA | 0 | NA | 0 | NA | 0 | NA |
| 6 | 74218764 | 74191576 | -1 | NM_138441    | C6orf150     | 1 | 13 | 0 | NA | 0 | NA | 0 | NA | 0 | NA |

|   |          |          |    |              |          |   |    |   |    |   |    |   |    |   |    |
|---|----------|----------|----|--------------|----------|---|----|---|----|---|----|---|----|---|----|
| 6 | 74228174 | 74267900 | 1  | NM_001123226 | MTO1     | 0 | NA | 0 | NA | 0 | NA | 0 | NA | 0 | NA |
| 6 | 74228174 | 74267900 | 1  | NM_012123    | MTO1     | 0 | NA | 0 | NA | 0 | NA | 0 | NA | 0 | NA |
| 6 | 74228174 | 74267900 | 1  | NM_133645    | MTO1     | 0 | NA | 0 | NA | 0 | NA | 0 | NA | 0 | NA |
| 6 | 74287476 | 74282193 | -1 | NM_001402    | EEF1A1   | 1 | 19 | 0 | NA | 0 | NA | 0 | NA | 0 | NA |
| 6 | 74420458 | 74359822 | -1 | NM_012434    | SLC17A5  | 0 | NA | 0 | NA | 0 | NA | 1 | 18 | 0 | NA |
| 6 | 74462234 | 74594761 | 1  | NM_133493    | CD109    | 1 | 12 | 0 | NA | 0 | NA | 0 | NA | 0 | NA |
| 6 | 75972343 | 75850761 | -1 | NM_004370    | COL12A1  | 0 | 11 | 0 | NA | 1 | 18 | 0 | NA | 0 | NA |
| 6 | 75972343 | 75850761 | -1 | NM_080645    | COL12A1  | 1 | 11 | 0 | NA | 1 | 18 | 0 | NA | 0 | NA |
| 6 | 76010245 | 76004222 | -1 | NM_001865    | COX7A2   | 0 | NA | 0 | NA | 0 | NA | 0 | NA | 0 | NA |
| 6 | 76051200 | 76019360 | -1 | NM_018247    | TMEM30A  | 0 | NA | 0 | NA | 0 | NA | 0 | NA | 0 | NA |
| 6 | 76260216 | 76074519 | -1 | NM_015687    | FILIP1   | 0 | NA | 0 | NA | 0 | NA | 0 | NA | 0 | NA |
| 6 | 76368341 | 76484714 | 1  | NM_001100409 | SENP6    | 0 | NA | 0 | NA | 0 | NA | 0 | NA | 0 | NA |
| 6 | 76368341 | 76484714 | 1  | NM_015571    | SENP6    | 0 | NA | 0 | NA | 0 | NA | 0 | NA | 0 | NA |
| 6 | 76515628 | 76685974 | 1  | NM_004999    | MYO6     | 0 | NA | 0 | NA | 0 | NA | 0 | NA | 0 | NA |
| 6 | 76839055 | 76687781 | -1 | NM_001563    | IMPG1    | 0 | NA | 0 | NA | 0 | NA | 0 | NA | 0 | NA |
| 6 | 78229839 | 78228666 | -1 | NM_000863    | HTR1B    | 0 | NA | 0 | NA | 0 | NA | 0 | NA | 0 | NA |
| 6 | 79633907 | 79665039 | 1  | NM_001010844 | IRAK1BP1 | 0 | NA | 0 | NA | 0 | NA | 0 | NA | 0 | NA |
| 6 | 79844708 | 79707005 | -1 | NM_017934    | PHIP     | 0 | NA | 0 | NA | 0 | NA | 0 | NA | 0 | NA |
| 6 | 80001174 | 79967680 | -1 | NM_004242    | HMGN3    | 1 | 11 | 0 | NA | 0 | NA | 1 | 21 | 0 | NA |
| 6 | 80001174 | 79967680 | -1 | NM_138730    | HMGN3    | 1 | 11 | 0 | NA | 0 | NA | 1 | 21 | 0 | NA |
| 6 | 80303844 | 80251426 | -1 | NM_001122769 | LCA5     | 0 | NA | 0 | NA | 0 | NA | 1 | 21 | 0 | NA |
| 6 | 80303866 | 80251426 | -1 | NM_181714    | LCA5     | 0 | NA | 0 | NA | 0 | NA | 1 | 21 | 0 | NA |
| 6 | 80397716 | 80470088 | 1  | NM_031469    | SH3BGR2  | 0 | NA | 0 | NA | 0 | NA | 0 | NA | 0 | NA |
| 6 | 80714034 | 80681247 | -1 | NM_022726    | ELOVL4   | 0 | NA | 0 | NA | 0 | NA | 0 | NA | 0 | NA |
| 6 | 80771077 | 8080958  | 1  | NM_003318    | TTK      | 0 | NA | 0 | NA | 0 | NA | 0 | NA | 0 | NA |
| 6 | 80873062 | 81112706 | 1  | NM_000056    | BCKDHB   | 0 | 12 | 0 | NA | 1 | 13 | 0 | NA | 0 | NA |
| 6 | 80873062 | 81112706 | 1  | NM_183050    | BCKDHB   | 1 | 12 | 0 | NA | 1 | 13 | 0 | NA | 0 | NA |
| 6 | 82519147 | 82512165 | -1 | NM_017633    | FAM46A   | 0 | NA | 0 | NA | 0 | NA | 0 | NA | 0 | NA |
| 6 | 83014167 | 82936674 | -1 | NM_015525    | IBTK     | 0 | NA | 0 | NA | 0 | NA | 0 | NA | 0 | NA |
| 6 | 83130257 | 83133335 | 1  | NM_006670    | TPBG     | 0 | NA | 0 | NA | 0 | NA | 0 | NA | 0 | NA |
| 6 | 83832264 | 83658905 | -1 | NM_198920    | UBE2CBP  | 0 | NA | 0 | NA | 0 | NA | 0 | NA | 0 | NA |
| 6 | 83834103 | 83934846 | 1  | NM_015018    | DOPEY1   | 0 | NA | 0 | NA | 0 | NA | 0 | NA | 0 | NA |
| 6 | 83959654 | 83935346 | -1 | NM_015599    | PGM3     | 0 | NA | 0 | NA | 0 | NA | 0 | NA | 0 | NA |
| 6 | 83959750 | 83962975 | 1  | NM_033411    | RWDD2A   | 0 | NA | 0 | NA | 0 | NA | 0 | NA | 0 | NA |
| 6 | 84197498 | 83976828 | -1 | NM_002395    | ME1      | 1 | 16 | 0 | NA | 0 | NA | 0 | NA | 0 | NA |
| 6 | 84278992 | 84292140 | 1  | NM_153362    | PRSS35   | 0 | NA | 0 | NA | 0 | NA | 0 | NA | 0 | NA |
| 6 | 84475495 | 84319331 | -1 | NM_014841    | SNAP91   | 0 | NA | 0 | NA | 0 | NA | 0 | NA | 0 | NA |
| 6 | 84619703 | 84623953 | 1  | NM_001009994 | C6orf165 | 0 | NA | 0 | NA | 0 | NA | 0 | NA | 0 | NA |
| 6 | 84626088 | 84726865 | 1  | NM_016230    | CYB5R4   | 0 | NA | 0 | NA | 0 | NA | 1 | 16 | 0 | NA |
| 6 | 84800138 | 84857324 | 1  | NM_138409    | C6orf117 | 0 | NA | 0 | NA | 0 | NA | 0 | NA | 0 | NA |
| 6 | 84994054 | 84890678 | -1 | NM_014895    | KIAA1009 | 0 | NA | 0 | NA | 0 | NA | 0 | NA | 0 | NA |
| 6 | 85530618 | 85500875 | -1 | NM_001080508 | TBX18    | 0 | NA | 0 | NA | 0 | NA | 0 | NA | 0 | NA |
| 6 | 86216020 | 86262217 | 1  | NM_002526    | NT5E     | 0 | NA | 0 | NA | 0 | NA | 0 | NA | 0 | NA |
| 6 | 86360348 | 86271933 | -1 | NM_020468    | SNX14    | 0 | NA | 0 | NA | 0 | NA | 0 | NA | 0 | NA |
| 6 | 86360348 | 86271933 | -1 | NM_153816    | SNX14    | 0 | NA | 0 | NA | 0 | NA | 0 | NA | 0 | NA |
| 6 | 86409746 | 86380657 | -1 | NM_006372    | SYNCRIP  | 1 | 11 | 0 | NA | 0 | NA | 1 | 13 | 0 | NA |
| 6 | 87704128 | 87783116 | 1  | NM_000865    | HTR1E    | 0 | NA | 0 | NA | 0 | NA | 0 | NA | 0 | NA |
| 6 | 87861543 | 87851940 | -1 | NM_000735    | CGA      | 0 | NA | 0 | NA | 0 | NA | 0 | NA | 0 | NA |
| 6 | 87921987 | 88030125 | 1  | NM_015021    | ZNF292   | 0 | NA | 0 | NA | 0 | NA | 0 | NA | 0 | NA |
| 6 | 88089024 | 88108762 | 1  | NM_001042493 | C6orf162 | 0 | NA | 0 | NA | 1 | 12 | 0 | NA | 0 | NA |
| 6 | 88089024 | 88108762 | 1  | NM_020425    | C6orf162 | 0 | NA | 0 | NA | 1 | 12 | 0 | NA | 0 | NA |
| 6 | 88095715 | 88049418 | -1 | NM_198568    | GJB7     | 0 | NA | 0 | NA | 1 | 12 | 0 | NA | 0 | NA |
| 6 | 88174439 | 88230902 | 1  | NM_001031743 | C6orf165 | 0 | NA | 0 | NA | 0 | NA | 0 | NA | 0 | NA |
| 6 | 88174449 | 88202494 | 1  | NM_178823    | C6orf165 | 0 | NA | 0 | NA | 0 | NA | 0 | NA | 0 | NA |
| 6 | 88239413 | 88278766 | 1  | NM_006416    | SLC35A1  | 0 | NA | 0 | NA | 0 | NA | 0 | NA | 0 | NA |
| 6 | 88356440 | 88280819 | -1 | NM_020320    | RARS2    | 0 | NA | 0 | NA | 0 | NA | 0 | NA | 0 | NA |
| 6 | 88356561 | 88433887 | 1  | NM_012381    | ORC3L    | 0 | NA | 0 | NA | 0 | NA | 0 | NA | 0 | NA |
| 6 | 88356561 | 88433887 | 1  | NM_181837    | ORC3L    | 0 | NA | 0 | NA | 0 | NA | 0 | NA | 0 | NA |
| 6 | 88468645 | 88441692 | -1 | NM_018064    | C6orf166 | 0 | NA | 0 | NA | 0 | NA | 0 | NA | 0 | NA |
| 6 | 88814225 | 88833269 | 1  | NM_030960    | SPACA1   | 0 | NA | 1 | 13 | 0 | NA | 0 | NA | 0 | NA |
| 6 | 88911775 | 88906303 | -1 | NM_016083    | CNR1     | 0 | NA | 0 | NA | 0 | NA | 0 | NA | 1 | 13 |
| 6 | 88911775 | 88906303 | -1 | NM_033181    | CNR1     | 0 | NA | 0 | NA | 0 | NA | 0 | NA | 1 | 13 |
| 6 | 89730067 | 89376707 | -1 | NM_003800    | RNGTT    | 1 | 20 | 0 | NA | 0 | NA | 0 | NA | 0 | NA |
| 6 | 89847215 | 89851598 | 1  | NM_006813    | PNRC1    | 0 | NA | 0 | NA | 1 | 15 | 0 | NA | 0 | NA |
| 6 | 89884519 | 89862396 | -1 | NM_080743    | SRPp35   | 0 | NA | 0 | NA | 0 | NA | 0 | NA | 0 | NA |

|   |           |           |    |              |          |   |    |   |    |   |    |   |    |   |    |
|---|-----------|-----------|----|--------------|----------|---|----|---|----|---|----|---|----|---|----|
| 6 | 89912487  | 89932003  | 1  | NM_001010853 | PM20D2   | 0 | NA | 0 | NA | 0 | NA | 0 | NA | 0 | NA |
| 6 | 89983779  | 89944690  | -1 | NM_002042    | GABRR1   | 0 | NA | 0 | NA | 0 | NA | 0 | NA | 0 | NA |
| 6 | 90081686  | 90023957  | -1 | NM_002043    | GABRR2   | 0 | NA | 0 | NA | 0 | NA | 0 | NA | 0 | NA |
| 6 | 90119338  | 90093062  | -1 | NM_016021    | UBE2J1   | 0 | NA | 0 | NA | 0 | NA | 0 | NA | 0 | NA |
| 6 | 90178484  | 90134312  | -1 | NM_021244    | RRAGD    | 0 | NA | 0 | NA | 0 | NA | 0 | NA | 0 | NA |
| 6 | 90199615  | 90400124  | 1  | NM_014942    | ANKRD6   | 0 | NA | 0 | NA | 0 | NA | 0 | NA | 0 | NA |
| 6 | 90405195  | 90398663  | -1 | NM_020466    | LYRM2    | 1 | 14 | 0 | NA | 0 | NA | 1 | 12 | 0 | NA |
| 6 | 90586163  | 90409951  | -1 | NM_014611    | MDN1     | 0 | NA | 0 | NA | 0 | NA | 0 | NA | 0 | NA |
| 6 | 90596378  | 90640876  | 1  | NM_012115    | CASP8AP2 | 0 | NA | 0 | NA | 0 | NA | 0 | NA | 0 | NA |
| 6 | 90660908  | 90662540  | 1  | NM_032602    | GJA10    | 0 | NA | 1 | 12 | 0 | NA | 0 | NA | 0 | NA |
| 6 | 91063182  | 90692968  | -1 | NM_021813    | BACH2    | 0 | NA | 0 | NA | 0 | NA | 0 | NA | 0 | NA |
| 6 | 91353485  | 91282073  | -1 | NM_145331    | MAP3K7   | 1 | 11 | 0 | NA | 0 | 12 | 0 | NA | 0 | NA |
| 6 | 91353628  | 91282073  | -1 | NM_003188    | MAP3K7   | 1 | 11 | 0 | NA | 1 | 12 | 0 | NA | 0 | NA |
| 6 | 91353628  | 91282073  | -1 | NM_145332    | MAP3K7   | 1 | 11 | 0 | NA | 1 | 12 | 0 | NA | 0 | NA |
| 6 | 91353628  | 91282073  | -1 | NM_145333    | MAP3K7   | 1 | 11 | 0 | NA | 1 | 12 | 0 | NA | 0 | NA |
| 6 | 94185993  | 94007859  | -1 | NM_004440    | EPHA7    | 0 | NA | 0 | NA | 1 | 16 | 0 | NA | 1 | 12 |
| 6 | 96132133  | 96164047  | 1  | NM_024641    | MANEA    | 0 | NA | 0 | NA | 0 | NA | 0 | NA | 0 | NA |
| 6 | 96570565  | 96770209  | 1  | NM_006581    | FUT9     | 0 | NA | 0 | NA | 0 | NA | 0 | NA | 0 | NA |
| 6 | 97076437  | 97109873  | 1  | NM_015323    | KIAA0776 | 0 | NA | 0 | NA | 0 | NA | 0 | NA | 0 | NA |
| 6 | 97117155  | 97171233  | 1  | NM_020482    | FHL5     | 0 | NA | 0 | NA | 0 | NA | 0 | NA | 0 | NA |
| 6 | 97391921  | 97352644  | -1 | NM_030784    | GPR63    | 0 | NA | 0 | NA | 0 | NA | 0 | NA | 0 | NA |
| 6 | 97452476  | 97445608  | -1 | NM_014165    | C6orf66  | 0 | NA | 0 | NA | 0 | NA | 0 | NA | 0 | NA |
| 6 | 97479216  | 97695351  | 1  | NM_052904    | KLHL32   | 0 | NA | 0 | NA | 0 | NA | 0 | NA | 0 | NA |
| 6 | 97837773  | 97696757  | -1 | NM_198468    | C6orf167 | 1 | 17 | 0 | NA | 0 | NA | 1 | 11 | 0 | NA |
| 6 | 99389300  | 99393387  | 1  | NM_005604    | POU3F2   | 0 | NA | 0 | NA | 0 | NA | 0 | NA | 0 | NA |
| 6 | 99502570  | 99428321  | -1 | NM_012160    | FBXL4    | 0 | NA | 0 | NA | 0 | NA | 0 | NA | 0 | NA |
| 6 | 99904252  | 99827513  | -1 | NM_032511    | C6orf168 | 0 | NA | 0 | NA | 0 | NA | 0 | NA | 0 | NA |
| 6 | 99948803  | 99924068  | -1 | NM_017421    | COQ3     | 0 | NA | 0 | NA | 1 | 13 | 0 | NA | 0 | NA |
| 6 | 99979928  | 99954561  | -1 | NM_015491    | SFRS18   | 0 | NA | 0 | NA | 0 | NA | 0 | NA | 0 | NA |
| 6 | 99979928  | 99954561  | -1 | NM_032870    | SFRS18   | 0 | NA | 0 | NA | 0 | NA | 0 | NA | 0 | NA |
| 6 | 10006973  | 99986905  | -1 | NM_001080481 | USP45    | 0 | NA | 0 | NA | 0 | NA | 0 | NA | 0 | NA |
| 6 | 100123411 | 100096983 | -1 | NM_001013399 | CCNC     | 0 | NA | 0 | NA | 1 | 16 | 0 | NA | 0 | NA |
| 6 | 100123411 | 100096983 | -1 | NM_005190    | CCNC     | 0 | NA | 0 | NA | 0 | NA | 1 | 16 | 0 | NA |
| 6 | 100161370 | 100170175 | 1  | NM_021620    | PRDM13   | 0 | NA | 0 | NA | 0 | NA | 1 | 14 | 0 | NA |
| 6 | 100548820 | 100474506 | -1 | NM_001040179 | MCHR2    | 0 | NA | 0 | NA | 0 | NA | 0 | NA | 0 | NA |
| 6 | 100548835 | 100474506 | -1 | NM_032503    | MCHR2    | 0 | NA | 0 | NA | 0 | NA | 0 | NA | 0 | NA |
| 6 | 101018272 | 100943470 | -1 | NM_005068    | SIM1     | 0 | NA | 0 | NA | 0 | NA | 0 | NA | 0 | NA |
| 6 | 101435945 | 101063328 | -1 | NM_006828    | ASCC3    | 0 | NA | 0 | NA | 0 | NA | 0 | NA | 0 | NA |
| 6 | 101435945 | 101410899 | -1 | NM_022091    | ASCC3    | 0 | NA | 0 | NA | 0 | NA | 0 | NA | 0 | NA |
| 6 | 101953625 | 102624651 | 1  | NM_021956    | GRIK2    | 0 | NA | 0 | NA | 0 | NA | 0 | NA | 0 | NA |
| 6 | 101953625 | 102624651 | 1  | NM_175768    | GRIK2    | 0 | NA | 0 | NA | 0 | NA | 0 | NA | 0 | NA |
| 6 | 105414487 | 105282660 | -1 | NM_020771    | HACE1    | 0 | NA | 0 | NA | 0 | NA | 0 | NA | 0 | NA |
| 6 | 105511615 | 105637899 | 1  | NM_001004317 | LIN28B   | 0 | NA | 0 | NA | 0 | NA | 0 | NA | 0 | NA |
| 6 | 105690914 | 105651391 | -1 | NM_147147    | BVES     | 0 | NA | 0 | NA | 0 | NA | 0 | NA | 0 | NA |
| 6 | 105691236 | 105651391 | -1 | NM_007073    | BVES     | 0 | NA | 0 | NA | 0 | NA | 0 | NA | 0 | NA |
| 6 | 105734563 | 105712469 | -1 | NM_022361    | POPDC3   | 0 | NA | 0 | NA | 0 | NA | 0 | NA | 0 | NA |
| 6 | 105957662 | 105832198 | -1 | NM_002726    | PREP     | 0 | NA | 0 | NA | 0 | NA | 0 | NA | 0 | NA |
| 6 | 106640887 | 106664507 | 1  | NM_001198    | PRDM1    | 0 | NA | 0 | NA | 0 | NA | 0 | NA | 0 | NA |
| 6 | 106653507 | 106664504 | 1  | NM_182907    | PRDM1    | 0 | NA | 0 | NA | 0 | NA | 0 | NA | 0 | NA |
| 6 | 106880388 | 106739044 | -1 | NM_004849    | ATG5     | 0 | NA | 0 | NA | 0 | NA | 0 | NA | 0 | NA |
| 6 | 107066422 | 107125027 | 1  | NM_001624    | AIM1     | 1 | 11 | 0 | NA | 0 | NA | 0 | NA | 0 | NA |
| 6 | 107184066 | 107125595 | -1 | NM_032730    | RTN4IP1  | 0 | NA | 0 | NA | 0 | NA | 0 | NA | 0 | NA |
| 6 | 107184145 | 107222103 | 1  | NM_018292    | QRS1     | 0 | NA | 0 | NA | 0 | NA | 0 | NA | 0 | NA |
| 6 | 107456109 | 107479238 | 1  | NM_016487    | C6orf203 | 0 | NA | 0 | NA | 0 | NA | 0 | NA | 0 | NA |
| 6 | 107527182 | 107493077 | -1 | NM_001080450 | KIAA1553 | 0 | NA | 0 | NA | 0 | NA | 0 | NA | 0 | NA |
| 6 | 107887472 | 107580453 | -1 | NM_020381    | PDSS2    | 0 | NA | 0 | NA | 0 | NA | 0 | NA | 0 | NA |
| 6 | 107918009 | 108089206 | 1  | NM_018013    | SOBP     | 0 | NA | 0 | NA | 0 | NA | 0 | NA | 0 | NA |
| 6 | 108252214 | 108130056 | -1 | NM_198081    | SCML4    | 0 | NA | 0 | NA | 0 | NA | 0 | NA | 0 | NA |
| 6 | 108386086 | 108298214 | -1 | NM_007214    | SEC63    | 0 | NA | 0 | NA | 0 | NA | 0 | NA | 0 | NA |
| 6 | 108502634 | 108469305 | -1 | NM_014028    | OSTM1    | 0 | NA | 0 | NA | 0 | NA | 0 | NA | 0 | NA |
| 6 | 108593954 | 108616706 | 1  | NM_003269    | NR2E1    | 0 | NA | 0 | NA | 0 | NA | 0 | NA | 0 | NA |
| 6 | 108689156 | 108639409 | -1 | NM_003795    | SNX3     | 0 | NA | 0 | NA | 0 | NA | 0 | NA | 0 | NA |
| 6 | 108722790 | 108950944 | 1  | NM_145315    | LACE1    | 0 | NA | 0 | NA | 1 | 13 | 1 | 16 | 0 | NA |
| 6 | 108987718 | 109112664 | 1  | NM_201559    | FOXO3    | 0 | NA | 0 | NA | 0 | NA | 0 | NA | 0 | NA |
| 6 | 108988761 | 109112664 | 1  | NM_001455    | FOXO3    | 0 | NA | 0 | NA | 0 | NA | 0 | NA | 0 | NA |

|   |           |           |    |              |           |   |    |   |    |   |    |   |    |   |    |
|---|-----------|-----------|----|--------------|-----------|---|----|---|----|---|----|---|----|---|----|
| 6 | 109276311 | 109402045 | 1  | NM_032131    | ARMC2     | 0 | NA | 0 | NA | 0 | NA | 0 | NA | 0 | NA |
| 6 | 109521970 | 109414337 | -1 | NM_014454    | SESN1     | 0 | NA | 0 | NA | 0 | NA | 0 | NA | 0 | NA |
| 6 | 109523048 | 109591808 | 1  | NM_001083535 | C6orf182  | 0 | NA | 0 | NA | 0 | NA | 0 | NA | 0 | NA |
| 6 | 109557199 | 109591808 | 1  | NM_173830    | C6orf182  | 0 | NA | 0 | NA | 0 | NA | 0 | NA | 0 | NA |
| 6 | 109810340 | 109794413 | -1 | NM_006016    | CD164     | 1 | 14 | 0 | NA | 0 | NA | 1 | 12 | 0 | NA |
| 6 | 109868540 | 109818110 | -1 | NM_001111298 | PPIL6     | 0 | NA | 0 | NA | 0 | NA | 0 | NA | 0 | NA |
| 6 | 109868540 | 109818110 | -1 | NM_173672    | PPIL6     | 0 | NA | 0 | NA | 0 | NA | 0 | NA | 0 | NA |
| 6 | 109868623 | 109871815 | 1  | NM_003080    | SMPD2     | 0 | NA | 0 | NA | 0 | NA | 0 | NA | 0 | NA |
| 6 | 109883883 | 109871958 | -1 | NM_022765    | MICAL1    | 0 | NA | 0 | NA | 0 | NA | 1 | 11 | 0 | NA |
| 6 | 109911133 | 109890411 | -1 | NM_014797    | ZBTB24    | 0 | NA | 0 | NA | 0 | NA | 0 | NA | 0 | NA |
| 6 | 109934386 | 109920756 | -1 | NM_173559    | C6orf224  | 0 | NA | 0 | NA | 0 | NA | 1 | 13 | 0 | NA |
| 6 | 109978433 | 109955524 | -1 | NM_001001706 | FLJ42177  | 0 | NA | 0 | NA | 0 | NA | 0 | NA | 0 | NA |
| 6 | 110119108 | 110059892 | -1 | NM_145025    | C6orf199  | 0 | NA | 0 | NA | 0 | NA | 0 | NA | 0 | NA |
| 6 | 110119160 | 110253327 | 1  | NM_014845    | FIG4      | 0 | NA | 0 | NA | 0 | NA | 0 | NA | 0 | NA |
| 6 | 110406990 | 110408616 | 1  | NM_005284    | GPR6      | 0 | NA | 0 | NA | 0 | NA | 0 | NA | 0 | NA |
| 6 | 110607900 | 110527714 | -1 | NM_001024934 | WASF1     | 0 | NA | 0 | NA | 0 | NA | 0 | NA | 0 | NA |
| 6 | 110607900 | 110527714 | -1 | NM_001024935 | WASF1     | 0 | NA | 0 | NA | 0 | NA | 0 | NA | 0 | NA |
| 6 | 110607900 | 110527714 | -1 | NM_001024936 | WASF1     | 0 | NA | 0 | NA | 0 | NA | 0 | NA | 0 | NA |
| 6 | 110607900 | 110527714 | -1 | NM_003931    | WASF1     | 0 | NA | 0 | NA | 0 | NA | 0 | NA | 0 | NA |
| 6 | 110608316 | 110660115 | 1  | NM_015891    | CDC40     | 0 | NA | 0 | NA | 0 | NA | 0 | NA | 0 | NA |
| 6 | 110786168 | 110673841 | -1 | NM_001123364 | C6orf186  | 0 | NA | 0 | NA | 0 | NA | 0 | NA | 0 | NA |
| 6 | 110843446 | 110820075 | -1 | NM_003649    | DDO       | 0 | NA | 0 | NA | 0 | NA | 0 | NA | 0 | NA |
| 6 | 110843446 | 110820075 | -1 | NM_004032    | DDO       | 0 | NA | 0 | NA | 0 | NA | 0 | NA | 0 | NA |
| 6 | 110904537 | 110852600 | -1 | NM_033125    | SLC22A16  | 0 | NA | 0 | NA | 0 | NA | 0 | NA | 0 | NA |
| 6 | 111243105 | 111037873 | -1 | NM_015076    | CDC2L6    | 0 | NA | 0 | NA | 0 | NA | 0 | NA | 0 | NA |
| 6 | 111302679 | 111323606 | 1  | NM_001634    | AMD1      | 0 | NA | 0 | NA | 0 | NA | 0 | NA | 0 | NA |
| 6 | 111302680 | 111323606 | 1  | NM_001033059 | AMD1      | 0 | NA | 0 | NA | 0 | NA | 0 | NA | 0 | NA |
| 6 | 111386455 | 111395772 | 1  | NM_138408    | GTF3C6    | 0 | NA | 0 | NA | 0 | NA | 0 | NA | 0 | NA |
| 6 | 111409983 | 111453487 | 1  | NM_032194    | BXDC1     | 0 | NA | 0 | NA | 0 | NA | 0 | NA | 0 | NA |
| 6 | 111515501 | 111650907 | 1  | NM_018593    | SLC16A10  | 0 | NA | 0 | NA | 0 | NA | 0 | NA | 0 | NA |
| 6 | 111687174 | 111696954 | 1  | NM_153369    | KIAA1919  | 1 | 16 | 0 | NA | 0 | NA | 0 | NA | 0 | NA |
| 6 | 111911107 | 111726926 | -1 | NM_002912    | REV3L     | 0 | NA | 0 | NA | 0 | NA | 0 | NA | 0 | NA |
| 6 | 112033755 | 111986835 | -1 | NM_147200    | TRAF3IP2  | 0 | NA | 0 | NA | 0 | NA | 0 | NA | 0 | NA |
| 6 | 112034014 | 111986835 | -1 | NM_147686    | TRAF3IP2  | 0 | NA | 0 | NA | 0 | NA | 0 | NA | 0 | NA |
| 6 | 112147958 | 112089177 | -1 | NM_153047    | FYN       | 0 | NA | 0 | NA | 0 | NA | 0 | NA | 0 | NA |
| 6 | 112186978 | 112089177 | -1 | NM_153048    | FYN       | 0 | NA | 0 | NA | 0 | NA | 0 | NA | 0 | NA |
| 6 | 112301320 | 112089177 | -1 | NM_002037    | FYN       | 0 | NA | 0 | NA | 0 | NA | 0 | NA | 0 | NA |
| 6 | 112481970 | 112497577 | 1  | NM_003880    | WISP3     | 0 | NA | 0 | NA | 0 | NA | 0 | NA | 0 | NA |
| 6 | 112482063 | 112497580 | 1  | NM_198239    | WISP3     | 0 | NA | 0 | NA | 0 | NA | 0 | NA | 0 | NA |
| 6 | 112487908 | 112497580 | 1  | NM_130396    | WISP3     | 0 | NA | 0 | NA | 0 | NA | 0 | NA | 0 | NA |
| 6 | 112515349 | 112498672 | -1 | NM_016262    | TUBE1     | 0 | NA | 0 | NA | 0 | NA | 0 | NA | 0 | NA |
| 6 | 112515366 | 112530686 | 1  | NM_001033564 | LOC619208 | 0 | NA | 0 | NA | 0 | NA | 0 | NA | 0 | NA |
| 6 | 112682521 | 112535826 | -1 | NM_001105206 | LAMA4     | 0 | NA | 0 | NA | 0 | NA | 0 | NA | 0 | NA |
| 6 | 112682521 | 112535826 | -1 | NM_001105207 | LAMA4     | 0 | NA | 0 | NA | 0 | NA | 0 | NA | 0 | NA |
| 6 | 112682521 | 112535826 | -1 | NM_002290    | LAMA4     | 0 | NA | 0 | NA | 0 | NA | 0 | NA | 0 | NA |
| 6 | 112682521 | 112681678 | -1 | NM_001105208 | LAMA4     | 0 | NA | 0 | NA | 0 | NA | 0 | NA | 0 | NA |
| 6 | 112682521 | 112681678 | -1 | NM_001105209 | LAMA4     | 0 | NA | 0 | NA | 0 | NA | 0 | NA | 0 | NA |
| 6 | 112775224 | 112779191 | 1  | NM_001013734 | RFPL4B    | 0 | NA | 0 | NA | 0 | NA | 0 | NA | 0 | NA |
| 6 | 114285219 | 114291345 | 1  | NM_002356    | MARCKS    | 0 | NA | 0 | NA | 0 | NA | 0 | NA | 0 | NA |
| 6 | 114399047 | 114364019 | -1 | NM_001527    | HDAC2     | 0 | NA | 0 | NA | 0 | NA | 0 | NA | 0 | NA |
| 6 | 114490734 | 114483442 | -1 | NM_153612    | HS3ST5    | 0 | NA | 0 | NA | 0 | NA | 0 | NA | 0 | NA |
| 6 | 116488614 | 116369385 | -1 | NM_002031    | FRK       | 0 | NA | 0 | NA | 0 | NA | 0 | NA | 0 | NA |
| 6 | 116526691 | 116673546 | 1  | NM_152729    | NT5DC1    | 0 | NA | 0 | NA | 1 | 12 | 0 | NA | 0 | NA |
| 6 | 116553989 | 116546777 | -1 | NM_000493    | COL10A1   | 0 | NA | 0 | NA | 0 | NA | 0 | NA | 0 | NA |
| 6 | 116681954 | 116677823 | -1 | NM_021648    | TSPYL4    | 0 | NA | 0 | NA | 0 | NA | 0 | NA | 0 | NA |
| 6 | 116707973 | 116704438 | -1 | NM_003309    | TSPYL1    | 0 | NA | 0 | NA | 0 | NA | 0 | NA | 0 | NA |
| 6 | 116707975 | 116866135 | 1  | NM_001080976 | DSE       | 0 | NA | 0 | NA | 0 | NA | 0 | NA | 0 | NA |
| 6 | 116798802 | 116866135 | 1  | NM_013352    | DSE       | 0 | NA | 0 | NA | 0 | NA | 0 | NA | 0 | NA |
| 6 | 116889248 | 116891627 | 1  | NM_001010919 | FAM26F    | 0 | NA | 0 | NA | 0 | NA | 0 | NA | 0 | NA |
| 6 | 116939500 | 116946402 | 1  | NM_153711    | FAM26E    | 0 | NA | 0 | NA | 0 | NA | 0 | NA | 0 | NA |
| 6 | 116956887 | 116986724 | 1  | NM_153036    | FAM26D    | 0 | NA | 0 | NA | 0 | NA | 0 | NA | 0 | NA |
| 6 | 116999275 | 117021129 | 1  | NM_001007464 | RWDD1     | 0 | NA | 0 | NA | 0 | NA | 0 | NA | 0 | NA |
| 6 | 116999275 | 117021129 | 1  | NM_015952    | RWDD1     | 0 | NA | 0 | NA | 0 | NA | 0 | NA | 0 | NA |
| 6 | 116999275 | 117021129 | 1  | NM_016104    | RWDD1     | 0 | NA | 0 | NA | 0 | NA | 0 | NA | 0 | NA |
| 6 | 117044342 | 117060834 | 1  | NM_001010892 | RSHL3     | 0 | NA | 0 | NA | 0 | NA | 0 | NA | 0 | NA |



|   |           |           |    |              |          |   |    |    |    |    |    |    |    |    |    |
|---|-----------|-----------|----|--------------|----------|---|----|----|----|----|----|----|----|----|----|
| 6 | 117096650 | 117063473 | -1 | NM_145062    | ZUFSP    | 0 | NA | 0  | NA | 0  | NA | 0  | NA | 0  | NA |
| 6 | 117109059 | 117169723 | 1  | NM_002269    | KPNA5    | 0 | NA | 0  | NA | 0  | NA | 0  | NA | 0  | NA |
| 6 | 117193579 | 117180052 | -1 | NM_001085480 | C6orf189 | 0 | NA | 0  | NA | 0  | NA | 0  | NA | 0  | NA |
| 6 | 117256891 | 117219940 | -1 | NM_148963    | GPRC6A   | 0 | NA | 0  | NA | 0  | NA | 0  | NA | 0  | NA |
| 6 | 117305068 | 117360007 | 1  | NM_173560    | RFXDC1   | 0 | NA | 0  | NA | 0  | NA | 0  | NA | 0  | NA |
| 6 | 117693413 | 117701421 | 1  | NM_153453    | VGLL2    | 0 | NA | 0  | NA | 0  | NA | 0  | NA | 0  | NA |
| 6 | 117693429 | 117701418 | 1  | NM_182645    | VGLL2    | 0 | NA | 0  | NA | 0  | NA | 0  | NA | 0  | NA |
| 6 | 117853711 | 117716222 | -1 | NM_002944    | ROS1     | 0 | NA | 0  | NA | 0  | NA | 0  | NA | 0  | NA |
| 6 | 117910512 | 117997713 | 1  | NM_173674    | DCBLD1   | 0 | NA | 0  | NA | 0  | NA | 0  | NA | 0  | NA |
| 6 | 118030374 | 117988125 | -1 | NM_001017408 | GOPC     | 0 | NA | 0  | NA | 0  | NA | 0  | NA | 0  | NA |
| 6 | 118030374 | 117988125 | -1 | NM_020399    | GOPC     | 0 | NA | 0  | NA | 0  | NA | 0  | NA | 0  | NA |
| 6 | 118103309 | 118138579 | 1  | NM_138459    | NUS1     | 0 | NA | 0  | NA | 0  | NA | 0  | NA | 0  | NA |
| 6 | 118335381 | 118745623 | 1  | NM_001029858 | SLC35F1  | 0 | NA | 0  | NA | 0  | NA | 0  | NA | 0  | NA |
| 6 | 118976164 | 118988280 | 1  | NM_002667    | PLN      | 0 | NA | 0  | NA | 0  | NA | 0  | NA | 0  | NA |
| 6 | 119079713 | 118892931 | -1 | NM_001042475 | C6orf204 | 0 | NA | 0  | NA | 0  | NA | 0  | NA | 0  | NA |
| 6 | 119079713 | 118919287 | -1 | NM_206921    | C6orf204 | 0 | NA | 0  | NA | 0  | NA | 0  | NA | 0  | NA |
| 6 | 119263627 | 119272034 | 1  | NM_014034    | ASF1A    | 0 | NA | 0  | NA | 0  | NA | 0  | NA | 0  | NA |
| 6 | 119298002 | 119273460 | -1 | NM_153255    | MCM9     | 0 | NA | 0  | NA | 0  | NA | 0  | NA | 0  | NA |
| 6 | 119441511 | 119322694 | -1 | NM_024581    | C6orf60  | 0 | NA | 0  | NA | 0  | NA | 0  | NA | 0  | NA |
| 6 | 119512057 | 119322694 | -1 | NM_001100411 | C6orf60  | 0 | NA | 0  | NA | 0  | NA | 0  | NA | 0  | NA |
| 6 | 119712625 | 119540965 | -1 | NM_005907    | MAN1A1   | 0 | NA | 0  | NA | 0  | NA | 0  | NA | 0  | NA |
| 6 | 121697343 | 121442325 | -1 | NM_152730    | C6orf170 | 0 | NA | 0  | NA | 0  | NA | 0  | NA | 0  | NA |
| 6 | 121798443 | 121812572 | 1  | NM_000165    | GJA1     | 0 | NA | 0  | NA | 0  | NA | 0  | NA | 0  | NA |
| 6 | 122762493 | 122795810 | 1  | NM_004506    | HSF2     | 0 | NA | 0  | NA | 0  | NA | 0  | NA | 0  | NA |
| 6 | 122834651 | 122806191 | -1 | NM_020755    | SERINC1  | 0 | NA | 0  | NA | 0  | NA | 0  | NA | 0  | NA |
| 6 | 122834760 | 123089217 | 1  | NM_181794    | PKIB     | 0 | NA | 0  | NA | 0  | NA | 0  | NA | 0  | NA |
| 6 | 122973075 | 123089217 | 1  | NM_032471    | PKIB     | 0 | NA | 0  | NA | 0  | NA | 0  | NA | 0  | NA |
| 6 | 122973075 | 123089217 | 1  | NM_181795    | PKIB     | 0 | NA | 0  | NA | 0  | NA | 0  | NA | 0  | NA |
| 6 | 123142344 | 123146917 | 1  | NM_001446    | FABP7    | 0 | NA | 0  | NA | 0  | NA | 0  | NA | 0  | NA |
| 6 | 123152122 | 123172563 | 1  | NM_006714    | SMPDL3A  | 0 | NA | 0  | NA | 0  | NA | 0  | NA | 0  | NA |
| 6 | 123359280 | 123426762 | 1  | NM_001010852 | RLBP1L2  | 0 | NA | 0  | NA | 0  | NA | 0  | NA | 0  | NA |
| 6 | 123996641 | 123579181 | -1 | NM_006073    | TRDN     | 0 | NA | 0  | NA | 0  | NA | 0  | NA | 0  | NA |
| 6 | 124166767 | 125188485 | 1  | NM_001040214 | NKAIN2   | 0 | NA | 0  | NA | 0  | NA | 0  | NA | 0  | NA |
| 6 | 125346212 | 125446360 | 1  | NM_152553    | RNF217   | 0 | NA | 13 | 0  | NA | 0  | NA | 0  | NA | NA |
| 6 | 125516577 | 125626343 | 1  | NM_001003396 | TPD52L1  | 0 | NA | 0  | NA | 0  | NA | 0  | NA | 0  | NA |
| 6 | 125516577 | 125626343 | 1  | NM_001003397 | TPD52L1  | 0 | NA | 0  | NA | 0  | NA | 0  | NA | 0  | NA |
| 6 | 125516577 | 125626343 | 1  | NM_003287    | TPD52L1  | 0 | NA | 0  | NA | 0  | NA | 0  | NA | 0  | NA |
| 6 | 125517118 | 125626343 | 1  | NM_001003395 | TPD52L1  | 0 | NA | 0  | NA | 0  | NA | 0  | NA | 0  | NA |
| 6 | 125664981 | 125638194 | -1 | NM_016063    | HDDC2    | 0 | NA | 0  | NA | 0  | NA | 0  | NA | 0  | NA |
| 6 | 126112424 | 126124108 | 1  | NM_012259    | HEY2     | 0 | NA | 0  | NA | 0  | NA | 0  | NA | 0  | NA |
| 6 | 126153693 | 126293959 | 1  | NM_001122842 | NCOA7    | 0 | NA | 0  | NA | 0  | NA | 0  | NA | 0  | NA |
| 6 | 126153693 | 126293959 | 1  | NM_181782    | NCOA7    | 0 | NA | 0  | NA | 0  | NA | 0  | NA | 0  | NA |
| 6 | 126319628 | 126341265 | 1  | NM_138571    | HINT3    | 0 | NA | 0  | NA | 0  | NA | 0  | NA | 0  | NA |
| 6 | 126349268 | 126402113 | 1  | NM_001031712 | TRMT11   | 0 | NA | 0  | NA | 0  | NA | 0  | NA | 0  | NA |
| 6 | 126702970 | 126711441 | 1  | NM_001012507 | C6orf173 | 0 | NA | 0  | NA | 0  | NA | 1  | 14 | 0  | NA |
| 6 | 127481740 | 127559877 | 1  | NM_032784    | RSP03    | 0 | NA | 0  | NA | 0  | NA | 0  | NA | 0  | NA |
| 6 | 127629712 | 127651197 | 1  | NM_030963    | RNF146   | 0 | NA | 0  | NA | 0  | NA | 0  | NA | 0  | NA |
| 6 | 127706447 | 127651549 | -1 | NM_001002030 | ECHDC1   | 0 | NA | 0  | NA | 0  | NA | 0  | NA | 0  | NA |
| 6 | 127706447 | 127651549 | -1 | NM_001105544 | ECHDC1   | 0 | NA | 0  | NA | 0  | NA | 0  | NA | 0  | NA |
| 6 | 127706447 | 127651549 | -1 | NM_001105545 | ECHDC1   | 0 | NA | 0  | NA | 0  | NA | 0  | NA | 0  | NA |
| 6 | 127706447 | 127651549 | -1 | NM_018479    | ECHDC1   | 0 | NA | 0  | NA | 0  | NA | 0  | NA | 0  | NA |
| 6 | 127838552 | 127803427 | -1 | NM_014702    | KIAA0408 | 0 | NA | 0  | NA | 0  | NA | 0  | NA | 0  | NA |
| 6 | 127879540 | 127813022 | -1 | NM_001012279 | C6orf174 | 0 | NA | 0  | NA | 0  | NA | 0  | NA | 0  | NA |
| 6 | 127940011 | 127954653 | 1  | NM_001010905 | C6orf58  | 0 | NA | 0  | NA | 0  | NA | 0  | NA | 0  | NA |
| 6 | 128281435 | 128071037 | -1 | NM_001010923 | C6orf190 | 0 | NA | 0  | NA | 0  | NA | 0  | NA | 0  | NA |
| 6 | 128883416 | 128331624 | -1 | NM_002844    | PTPRK    | 0 | NA | 0  | NA | 0  | NA | 0  | NA | 0  | NA |
| 6 | 129245978 | 129879403 | 1  | NM_000426    | LAMA2    | 0 | NA | 0  | NA | 0  | NA | 0  | NA | 0  | NA |
| 6 | 129245978 | 129879403 | 1  | NM_001079823 | LAMA2    | 0 | NA | 0  | NA | 0  | NA | 0  | NA | 0  | NA |
| 6 | 130073063 | 129939932 | -1 | NM_033515    | ARHGAP18 | 0 | NA | 0  | NA | 0  | NA | 0  | NA | 0  | NA |
| 6 | 130224109 | 130194081 | -1 | NM_001010876 | C6orf191 | 0 | NA | 0  | NA | 0  | NA | 0  | NA | 0  | NA |
| 6 | 130381426 | 130504278 | 1  | NM_001007102 | L3MBTL3  | 0 | NA | 0  | NA | 0  | NA | 0  | NA | 0  | NA |
| 6 | 130381426 | 130504278 | 1  | NM_032438    | L3MBTL3  | 0 | NA | 0  | NA | 0  | NA | 0  | NA | 0  | NA |
| 6 | 130578187 | 130545825 | -1 | NM_152552    | SAMD3    | 0 | NA | 0  | NA | 0  | NA | 0  | NA | 0  | NA |
| 6 | 130585792 | 130507153 | -1 | NM_001017373 | SAMD3    | 0 | NA | 0  | NA | 0  | NA | 0  | NA | 0  | NA |
| 6 | 130799954 | 130805903 | 1  | NM_052913    | TMEM200A | 0 | NA | 0  | NA | 0  | NA | 0  | NA | 0  | NA |

|   |           |           |    |              |          |   |    |   |    |   |    |   |    |   |    |
|---|-----------|-----------|----|--------------|----------|---|----|---|----|---|----|---|----|---|----|
| 6 | 131426015 | 131202180 | -1 | NM_001431    | EPB41L2  | 0 | NA | 0 | NA | 0 | NA | 0 | NA | 0 | NA |
| 6 | 131508153 | 131646366 | 1  | NM_016377    | AKAP7    | 0 | NA | 0 | NA | 0 | NA | 0 | NA | 0 | NA |
| 6 | 131613196 | 131646366 | 1  | NM_004842    | AKAP7    | 0 | NA | 0 | NA | 0 | NA | 0 | NA | 0 | NA |
| 6 | 131613196 | 131646366 | 1  | NM_138633    | AKAP7    | 0 | NA | 0 | NA | 0 | NA | 0 | NA | 0 | NA |
| 6 | 131936057 | 131947161 | 1  | NM_000045    | ARG1     | 0 | NA | 0 | NA | 0 | NA | 0 | NA | 0 | NA |
| 6 | 131991056 | 131936798 | -1 | NM_015979    | MED23    | 1 | 25 | 0 | NA | 0 | NA | 1 | 23 | 0 | NA |
| 6 | 131991056 | 131949565 | -1 | NM_004830    | MED23    | 1 | 25 | 0 | NA | 0 | NA | 1 | 23 | 0 | NA |
| 6 | 132000134 | 132110243 | 1  | NM_005021    | ENPP3    | 1 | 25 | 0 | NA | 0 | NA | 1 | 23 | 0 | NA |
| 6 | 132064234 | 132063301 | -1 | NM_030908    | OR2A4    | 0 | NA | 0 | NA | 0 | NA | 0 | NA | 0 | NA |
| 6 | 132170848 | 132257988 | 1  | NM_006208    | ENPP1    | 0 | NA | 0 | NA | 0 | NA | 0 | NA | 0 | NA |
| 6 | 132314211 | 132311009 | -1 | NM_001901    | CTGF     | 0 | NA | 0 | NA | 0 | NA | 0 | NA | 0 | NA |
| 6 | 132764357 | 132658886 | -1 | NM_015529    | MOXD1    | 0 | NA | 0 | NA | 0 | NA | 0 | NA | 0 | NA |
| 6 | 132876030 | 132820355 | -1 | NM_003569    | STX7     | 0 | NA | 0 | NA | 0 | NA | 0 | NA | 0 | NA |
| 6 | 132901119 | 132902168 | 1  | NM_175057    | TAAR9    | 0 | NA | 0 | NA | 0 | NA | 0 | NA | 0 | NA |
| 6 | 132915524 | 132916553 | 1  | NM_053278    | TAAR8    | 0 | NA | 0 | NA | 0 | NA | 0 | NA | 0 | NA |
| 6 | 132933153 | 132934191 | 1  | NM_175067    | TAAR6    | 0 | NA | 0 | NA | 0 | NA | 0 | NA | 0 | NA |
| 6 | 132952518 | 132951504 | -1 | NM_003967    | TAAR5    | 0 | NA | 0 | NA | 0 | NA | 0 | NA | 0 | NA |
| 6 | 132980925 | 132979981 | -1 | NM_014626    | TAAR2    | 0 | NA | 0 | NA | 0 | NA | 0 | NA | 0 | NA |
| 6 | 132987107 | 132979981 | -1 | NM_001033080 | TAAR2    | 0 | NA | 0 | NA | 0 | NA | 0 | NA | 0 | NA |
| 6 | 133008835 | 133007815 | -1 | NM_138327    | TAAR1    | 0 | NA | 0 | NA | 0 | NA | 0 | NA | 0 | NA |
| 6 | 133076881 | 133044421 | -1 | NM_004666    | VNN1     | 0 | NA | 0 | NA | 0 | NA | 0 | NA | 0 | NA |
| 6 | 133097596 | 133085618 | -1 | NM_001024460 | VNN3     | 0 | NA | 0 | NA | 0 | NA | 0 | NA | 0 | NA |
| 6 | 133097596 | 133085618 | -1 | NM_018399    | VNN3     | 0 | NA | 0 | NA | 0 | NA | 0 | NA | 0 | NA |
| 6 | 133097596 | 133085618 | -1 | NM_078625    | VNN3     | 0 | NA | 0 | NA | 0 | NA | 0 | NA | 0 | NA |
| 6 | 133120726 | 133106701 | -1 | NM_004665    | VNN2     | 0 | NA | 0 | NA | 0 | NA | 0 | NA | 0 | NA |
| 6 | 133126291 | 133106701 | -1 | NM_078488    | VNN2     | 0 | NA | 0 | NA | 0 | NA | 0 | NA | 0 | NA |
| 6 | 133161440 | 133132199 | -1 | NM_052831    | Cborf192 | 0 | NA | 0 | NA | 0 | NA | 0 | NA | 0 | NA |
| 6 | 133177400 | 133180396 | 1  | NM_001016    | RPS12    | 0 | NA | 0 | NA | 0 | NA | 0 | NA | 0 | NA |
| 6 | 133604187 | 133894358 | 1  | NM_004100    | EYA4     | 1 | 12 | 0 | NA | 0 | NA | 0 | NA | 0 | NA |
| 6 | 133604187 | 133894358 | 1  | NM_172103    | EYA4     | 1 | 12 | 0 | NA | 0 | NA | 0 | NA | 0 | NA |
| 6 | 133604187 | 133894358 | 1  | NM_172105    | EYA4     | 1 | 12 | 0 | NA | 0 | NA | 0 | NA | 0 | NA |
| 6 | 134251969 | 134255086 | 1  | NM_003206    | TCF21    | 0 | NA | 0 | NA | 0 | NA | 0 | NA | 0 | NA |
| 6 | 134251969 | 134258368 | 1  | NM_198392    | TCF21    | 0 | NA | 0 | NA | 0 | NA | 0 | NA | 0 | NA |
| 6 | 134315993 | 134350322 | 1  | NM_004865    | TBPL1    | 0 | NA | 0 | NA | 0 | NA | 0 | NA | 0 | NA |
| 6 | 134415482 | 134350411 | -1 | NM_145176    | SLC2A12  | 0 | NA | 0 | NA | 0 | NA | 0 | NA | 0 | NA |
| 6 | 134537727 | 134532076 | -1 | NM_005627    | SGK1     | 0 | NA | 0 | NA | 0 | NA | 0 | NA | 0 | NA |
| 6 | 135312937 | 135280220 | -1 | NM_022568    | ALDH8A1  | 0 | NA | 0 | NA | 0 | NA | 0 | NA | 0 | NA |
| 6 | 135312937 | 135280220 | -1 | NM_170771    | ALDH8A1  | 0 | NA | 0 | NA | 0 | NA | 0 | NA | 0 | NA |
| 6 | 135417715 | 135323213 | -1 | NM_006620    | HBS1L    | 0 | NA | 0 | NA | 0 | NA | 0 | NA | 0 | NA |
| 6 | 135544145 | 135582003 | 1  | NM_005375    | MYB      | 0 | NA | 0 | NA | 0 | NA | 0 | NA | 0 | NA |
| 6 | 135860576 | 135646816 | -1 | NM_017851    | AHI1     | 0 | NA | 0 | NA | 0 | NA | 0 | NA | 0 | NA |
| 6 | 136214526 | 136558402 | 1  | NM_018945    | PDE7B    | 0 | NA | 0 | NA | 0 | NA | 0 | NA | 0 | NA |
| 6 | 136613142 | 136593860 | -1 | NM_001099286 | FAM54A   | 0 | NA | 0 | NA | 0 | NA | 0 | NA | 0 | NA |
| 6 | 136613142 | 136593860 | -1 | NM_138419    | FAM54A   | 0 | NA | 0 | NA | 0 | NA | 0 | NA | 0 | NA |
| 6 | 136652682 | 136619693 | -1 | NM_001077440 | BCLAF1   | 0 | NA | 0 | NA | 0 | NA | 1 | 12 | 0 | NA |
| 6 | 136652682 | 136619693 | -1 | NM_001077441 | BCLAF1   | 0 | NA | 0 | NA | 0 | NA | 1 | 12 | 0 | NA |
| 6 | 136652682 | 136619693 | -1 | NM_014739    | BCLAF1   | 0 | NA | 0 | NA | 0 | NA | 1 | 12 | 0 | NA |
| 6 | 136913485 | 136705564 | -1 | NM_003980    | MAP7     | 0 | NA | 0 | NA | 0 | NA | 0 | NA | 0 | NA |
| 6 | 137155349 | 136919879 | -1 | NM_005923    | MAP3K5   | 0 | NA | 0 | NA | 0 | NA | 0 | NA | 0 | NA |
| 6 | 137185415 | 137276752 | 1  | NM_000288    | PEX7     | 0 | NA | 0 | NA | 0 | NA | 1 | 14 | 0 | NA |
| 6 | 137285094 | 137288469 | 1  | NM_001008783 | SLC35D3  | 0 | NA | 0 | NA | 0 | NA | 0 | NA | 0 | NA |
| 6 | 137407991 | 137362800 | -1 | NM_014432    | IL20RA   | 0 | NA | 0 | NA | 0 | NA | 0 | NA | 0 | NA |
| 6 | 137536478 | 137506649 | -1 | NM_052962    | IL22RA2  | 0 | NA | 0 | NA | 0 | NA | 0 | NA | 0 | NA |
| 6 | 137536478 | 137506649 | -1 | NM_181309    | IL22RA2  | 0 | NA | 0 | NA | 0 | NA | 0 | NA | 0 | NA |
| 6 | 137536478 | 137506649 | -1 | NM_181310    | IL22RA2  | 0 | NA | 0 | NA | 0 | NA | 0 | NA | 0 | NA |
| 6 | 137582260 | 137560313 | -1 | NM_000416    | IFNGR1   | 0 | NA | 0 | NA | 0 | NA | 0 | NA | 0 | NA |
| 6 | 137857224 | 137855028 | -1 | NM_175747    | OLIG3    | 0 | NA | 1 | 14 | 0 | NA | 0 | NA | 1 | 15 |
| 6 | 138230273 | 138246142 | 1  | NM_006290    | TNFAIP3  | 1 | 12 | 0 | NA | 0 | NA | 0 | NA | 0 | NA |
| 6 | 138470280 | 138453618 | -1 | NM_022121    | PERP     | 0 | NA | 0 | NA | 0 | NA | 0 | NA | 0 | NA |
| 6 | 138524916 | 138701629 | 1  | NM_020340    | KIAA1244 | 0 | NA | 0 | NA | 0 | NA | 0 | NA | 0 | NA |
| 6 | 138581320 | 138578819 | -1 | NM_021635    | PBOV1    | 0 | NA | 0 | NA | 0 | NA | 0 | NA | 0 | NA |
| 6 | 138767028 | 138776275 | 1  | NM_014320    | HEBP2    | 0 | NA | 0 | NA | 0 | NA | 0 | NA | 0 | NA |
| 6 | 139136349 | 139156149 | 1  | NM_015439    | CCDC28A  | 0 | NA | 0 | NA | 0 | NA | 0 | NA | 0 | NA |
| 6 | 139176001 | 139266900 | 1  | NM_001077706 | Cborf91  | 0 | NA | 0 | NA | 0 | NA | 0 | NA | 0 | NA |
| 6 | 139351091 | 139267312 | -1 | NM_031922    | REPS1    | 0 | NA | 0 | NA | 0 | NA | 0 | NA | 0 | NA |

|   |           |           |    |              |           |   |    |   |    |   |    |   |    |   |    |
|---|-----------|-----------|----|--------------|-----------|---|----|---|----|---|----|---|----|---|----|
| 6 | 139391511 | 139406132 | 1  | NM_021243    | C6orf115  | 0 | NA | 0 | NA | 0 | NA | 0 | NA | 0 | NA |
| 6 | 139497941 | 139543639 | 1  | NM_016217    | HECA      | 0 | NA | 0 | NA | 0 | NA | 0 | NA | 0 | NA |
| 6 | 139654849 | 139602891 | -1 | NM_153235    | TXLNB     | 0 | NA | 0 | NA | 0 | NA | 0 | NA | 0 | NA |
| 6 | 139737478 | 139735089 | -1 | NM_006079    | CITED2    | 0 | NA | 0 | NA | 0 | NA | 1 | 23 | 0 | NA |
| 6 | 142451629 | 142438437 | -1 | NM_002511    | NMBR      | 0 | NA | 0 | NA | 0 | NA | 0 | NA | 0 | NA |
| 6 | 142510102 | 142583778 | 1  | NM_016485    | VTA1      | 0 | NA | 0 | NA | 0 | NA | 0 | NA | 0 | NA |
| 6 | 142664758 | 142609078 | 1  | NM_001032394 | GPR126    | 0 | NA | 0 | NA | 0 | NA | 0 | NA | 0 | NA |
| 6 | 142664758 | 142609078 | 1  | NM_001032395 | GPR126    | 0 | NA | 0 | NA | 0 | NA | 0 | NA | 0 | NA |
| 6 | 142664758 | 142609078 | 1  | NM_020455    | GPR126    | 0 | NA | 0 | NA | 0 | NA | 0 | NA | 0 | NA |
| 6 | 142664758 | 142609078 | 1  | NM_198569    | GPR126    | 0 | NA | 0 | NA | 0 | NA | 0 | NA | 0 | NA |
| 6 | 143308031 | 143114296 | -1 | NM_006734    | HIVEP2    | 0 | NA | 0 | NA | 0 | NA | 0 | NA | 0 | NA |
| 6 | 143423715 | 143703134 | 1  | NM_016108    | AIG1      | 0 | NA | 0 | NA | 0 | NA | 0 | NA | 0 | NA |
| 6 | 143813534 | 143785661 | -1 | NM_182503    | ADAT2     | 0 | NA | 0 | NA | 0 | NA | 1 | 11 | 0 | NA |
| 6 | 143813809 | 143852836 | 1  | NM_003630    | PEX3      | 0 | NA | 0 | NA | 0 | NA | 1 | 11 | 0 | NA |
| 6 | 143874556 | 143857936 | -1 | NM_032020    | FUCA2     | 0 | NA | 0 | NA | 0 | NA | 0 | NA | 0 | NA |
| 6 | 143971009 | 144194015 | 1  | NM_001100166 | PHACTR2   | 0 | NA | 0 | NA | 0 | NA | 0 | NA | 0 | NA |
| 6 | 143971009 | 144194015 | 1  | NM_014721    | PHACTR2   | 0 | NA | 0 | NA | 0 | NA | 0 | NA | 0 | NA |
| 6 | 144040794 | 144194015 | 1  | NM_001100164 | PHACTR2   | 0 | NA | 0 | NA | 0 | NA | 0 | NA | 0 | NA |
| 6 | 144040794 | 144194015 | 1  | NM_001100165 | PHACTR2   | 0 | NA | 0 | NA | 0 | NA | 0 | NA | 0 | NA |
| 6 | 144206200 | 144226636 | 1  | NM_032860    | LTV1      | 0 | NA | 0 | NA | 0 | NA | 1 | 11 | 0 | NA |
| 6 | 144371234 | 144303129 | -1 | NM_001080952 | PLAGL1    | 0 | NA | 0 | NA | 1 | 12 | 0 | NA | 0 | NA |
| 6 | 144371234 | 144303129 | -1 | NM_001080953 | PLAGL1    | 0 | NA | 0 | NA | 1 | 12 | 0 | NA | 0 | NA |
| 6 | 144371234 | 144303129 | -1 | NM_001080954 | PLAGL1    | 0 | NA | 0 | NA | 1 | 12 | 0 | NA | 0 | NA |
| 6 | 144371234 | 144303129 | -1 | NM_001080956 | PLAGL1    | 0 | NA | 0 | NA | 1 | 12 | 0 | NA | 0 | NA |
| 6 | 144371234 | 144303129 | -1 | NM_002656    | PLAGL1    | 0 | NA | 0 | NA | 1 | 12 | 0 | NA | 0 | NA |
| 6 | 144371234 | 144303129 | -1 | NM_006718    | PLAGL1    | 0 | NA | 0 | NA | 1 | 12 | 0 | NA | 0 | NA |
| 6 | 144427428 | 144303129 | -1 | NM_001080951 | PLAGL1    | 0 | NA | 0 | NA | 0 | NA | 0 | NA | 0 | NA |
| 6 | 144427428 | 144303129 | -1 | NM_001080955 | PLAGL1    | 0 | NA | 0 | NA | 0 | NA | 0 | NA | 0 | NA |
| 6 | 144458447 | 144457710 | -1 | NM_031287    | SF3B5     | 0 | NA | 0 | NA | 0 | NA | 0 | NA | 0 | NA |
| 6 | 144513346 | 144554769 | 1  | NM_003764    | STX11     | 0 | NA | 0 | NA | 0 | NA | 0 | NA | 0 | NA |
| 6 | 144654565 | 145215863 | 1  | NM_007124    | UTRN      | 0 | NA | 0 | NA | 0 | NA | 1 | 11 | 0 | NA |
| 6 | 146098684 | 145988132 | -1 | NM_001018041 | EPM2A     | 0 | NA | 0 | NA | 0 | NA | 0 | NA | 0 | NA |
| 6 | 146098684 | 145988132 | -1 | NM_005670    | EPM2A     | 0 | NA | 0 | NA | 0 | NA | 0 | NA | 0 | NA |
| 6 | 146177614 | 146160964 | -1 | NM_032145    | FBXO30    | 1 | 15 | 0 | NA | 0 | NA | 0 | NA | 0 | NA |
| 6 | 146326926 | 146247636 | -1 | NM_001042683 | SHPRH     | 1 | 15 | 0 | NA | 0 | NA | 1 | 13 | 0 | NA |
| 6 | 146326926 | 146247636 | -1 | NM_173082    | SHPRH     | 1 | 15 | 0 | NA | 0 | NA | 1 | 13 | 0 | NA |
| 6 | 146390474 | 146800424 | 1  | NM_000838    | GRM1      | 0 | NA | 0 | NA | 0 | NA | 0 | NA | 0 | NA |
| 6 | 146390474 | 146800424 | 1  | NM_001114329 | GRM1      | 0 | NA | 0 | NA | 0 | NA | 0 | NA | 0 | NA |
| 6 | 146906520 | 146917779 | 1  | NM_006834    | RAB32     | 0 | NA | 0 | NA | 0 | NA | 0 | NA | 0 | NA |
| 6 | 146961828 | 147178290 | 1  | NM_024694    | C6orf103  | 0 | NA | 0 | NA | 0 | NA | 0 | NA | 0 | NA |
| 6 | 147566567 | 147748586 | 1  | NM_139244    | STXBP5    | 0 | NA | 0 | NA | 0 | NA | 0 | NA | 0 | NA |
| 6 | 147871755 | 147932850 | 1  | NM_001030060 | SAMD5     | 0 | NA | 0 | NA | 0 | NA | 0 | NA | 0 | NA |
| 6 | 148705421 | 148914877 | 1  | NM_015278    | SASH1     | 0 | NA | 0 | NA | 0 | NA | 0 | NA | 0 | NA |
| 6 | 149110156 | 149439818 | 1  | NM_005715    | UST       | 0 | NA | 0 | NA | 0 | NA | 0 | NA | 0 | NA |
| 6 | 149680755 | 149774440 | 1  | NM_015093    | MAP3K7IP2 | 0 | NA | 0 | NA | 0 | NA | 0 | NA | 0 | NA |
| 6 | 149763187 | 149763875 | 1  | NM_001002255 | SUMO4     | 0 | NA | 0 | NA | 0 | NA | 0 | NA | 0 | NA |
| 6 | 149847723 | 149812570 | -1 | NM_207360    | ZC3H12D   | 0 | NA | 0 | NA | 0 | NA | 0 | NA | 0 | NA |
| 6 | 149908864 | 149867323 | -1 | NM_139126    | PP1L4     | 0 | NA | 0 | NA | 0 | NA | 0 | NA | 0 | NA |
| 6 | 149929220 | 149953760 | 1  | NM_138785    | C6orf72   | 0 | NA | 0 | NA | 0 | NA | 0 | NA | 0 | NA |
| 6 | 150001421 | 149957864 | -1 | NM_007044    | KATNA1    | 0 | NA | 0 | NA | 0 | NA | 0 | NA | 0 | NA |
| 6 | 150081085 | 150023743 | -1 | NM_004690    | LATS1     | 0 | NA | 0 | NA | 0 | NA | 0 | NA | 0 | NA |
| 6 | 150109381 | 150087149 | -1 | NM_198887    | NUP43     | 0 | NA | 0 | NA | 0 | NA | 0 | NA | 0 | NA |
| 6 | 150112657 | 150174249 | 1  | NM_005389    | PCMT1     | 0 | NA | 0 | NA | 0 | NA | 0 | NA | 0 | NA |
| 6 | 150227173 | 150181624 | -1 | NM_032832    | LRP11     | 0 | NA | 0 | NA | 0 | NA | 0 | NA | 0 | NA |
| 6 | 150253790 | 150251293 | -1 | NM_139165    | RAET1E    | 0 | NA | 0 | NA | 0 | NA | 0 | NA | 0 | NA |
| 6 | 150285907 | 150279706 | -1 | NM_001001788 | RAET1G    | 0 | NA | 0 | NA | 0 | NA | 0 | NA | 0 | NA |
| 6 | 150304828 | 150312061 | 1  | NM_025217    | ULBP2     | 0 | NA | 0 | NA | 0 | NA | 0 | NA | 0 | NA |
| 6 | 150326835 | 150336539 | 1  | NM_025218    | ULBP1     | 0 | NA | 1 | 22 | 0 | NA | 0 | NA | 1 | 18 |
| 6 | 150388361 | 150382958 | -1 | NM_130900    | RAET1L    | 0 | NA | 0 | NA | 0 | NA | 0 | NA | 0 | NA |
| 6 | 150431895 | 150427435 | -1 | NM_024518    | ULBP3     | 0 | NA | 0 | NA | 0 | NA | 0 | NA | 0 | NA |
| 6 | 150505880 | 150613221 | 1  | NM_030949    | PPP1R14C  | 0 | NA | 0 | NA | 0 | NA | 0 | NA | 0 | NA |
| 6 | 150731720 | 150767457 | 1  | NM_203395    | IYD       | 0 | NA | 0 | NA | 0 | NA | 0 | NA | 0 | NA |
| 6 | 150962691 | 151206492 | 1  | NM_001029884 | PLEKHG1   | 0 | NA | 0 | NA | 0 | NA | 0 | NA | 0 | NA |
| 6 | 151228383 | 151464716 | 1  | NM_015440    | MTHFD1L   | 0 | NA | 0 | NA | 0 | NA | 0 | NA | 0 | NA |
| 6 | 151603201 | 151719602 | 1  | NM_005100    | AKAP12    | 0 | NA | 0 | NA | 0 | NA | 0 | NA | 0 | NA |

|   |           |           |    |              |           |   |    |   |    |   |    |   |    |   |    |
|---|-----------|-----------|----|--------------|-----------|---|----|---|----|---|----|---|----|---|----|
| 6 | 151688515 | 151719601 | 1  | NM_144497    | AKAP12    | 0 | NA | 0 | NA | 0 | NA | 0 | NA | 0 | NA |
| 6 | 151754370 | 151726942 | -1 | NM_020861    | ZBTB2     | 0 | NA | 0 | NA | 0 | NA | 0 | NA | 0 | NA |
| 6 | 151815009 | 151767681 | -1 | NM_017909    | RMND1     | 0 | NA | 0 | NA | 0 | NA | 0 | NA | 0 | NA |
| 6 | 151815114 | 151832925 | 1  | NM_024573    | C6orf211  | 0 | NA | 0 | NA | 0 | NA | 0 | NA | 0 | NA |
| 6 | 151856919 | 151984021 | 1  | NM_025059    | C6orf97   | 0 | NA | 0 | NA | 0 | NA | 0 | NA | 1 | 13 |
| 6 | 152053323 | 152466101 | 1  | NM_001122742 | ESR1      | 0 | NA | 0 | NA | 0 | NA | 0 | NA | 0 | NA |
| 6 | 152168500 | 152466101 | 1  | NM_001122741 | ESR1      | 0 | NA | 0 | NA | 0 | NA | 0 | NA | 0 | NA |
| 6 | 152170146 | 152466101 | 1  | NM_001122740 | ESR1      | 0 | NA | 0 | NA | 0 | NA | 0 | NA | 0 | NA |
| 6 | 152170506 | 152466101 | 1  | NM_000125    | ESR1      | 0 | NA | 0 | NA | 0 | NA | 0 | NA | 0 | NA |
| 6 | 152532033 | 152529593 | -1 | NM_001099267 | C6orf98   | 0 | NA | 0 | NA | 0 | NA | 0 | NA | 0 | NA |
| 6 | 152542294 | 152484514 | -1 | NM_133650    | SYNE1     | 0 | NA | 0 | NA | 0 | NA | 0 | NA | 0 | NA |
| 6 | 152681172 | 152484514 | -1 | NM_015293    | SYNE1     | 0 | NA | 0 | NA | 0 | NA | 0 | NA | 0 | NA |
| 6 | 15299679  | 152484514 | -1 | NM_033071    | SYNE1     | 0 | NA | 0 | NA | 0 | NA | 0 | NA | 0 | NA |
| 6 | 153000227 | 152484514 | -1 | NM_182961    | SYNE1     | 0 | NA | 0 | NA | 0 | NA | 0 | NA | 0 | NA |
| 6 | 153060722 | 153087408 | 1  | NM_025107    | MYCT1     | 0 | NA | 0 | NA | 0 | NA | 0 | NA | 0 | NA |
| 6 | 153113625 | 153122593 | 1  | NM_003381    | VIP       | 0 | NA | 0 | NA | 0 | NA | 0 | NA | 0 | NA |
| 6 | 153113625 | 153122593 | 1  | NM_194435    | VIP       | 0 | NA | 0 | NA | 0 | NA | 0 | NA | 0 | NA |
| 6 | 153345867 | 15333350  | -1 | NM_012177    | FBXO5     | 0 | NA | 0 | NA | 0 | NA | 0 | NA | 0 | NA |
| 6 | 153365618 | 153350092 | -1 | NM_001114184 | MTRF1L    | 0 | NA | 0 | NA | 0 | NA | 0 | NA | 0 | NA |
| 6 | 153365618 | 153350092 | -1 | NM_019041    | MTRF1L    | 0 | NA | 0 | NA | 0 | NA | 0 | NA | 0 | NA |
| 6 | 153494082 | 153373724 | -1 | NM_012419    | RGS17     | 0 | NA | 0 | NA | 1 | 13 | 0 | NA | 0 | NA |
| 6 | 153645586 | 153645074 | -1 | NM_001089587 | LOC389435 | 0 | NA | 0 | NA | 0 | NA | 0 | NA | 0 | NA |
| 6 | 154402135 | 154454410 | 1  | NM_001008504 | OPRM1     | 0 | NA | 0 | NA | 0 | NA | 0 | NA | 0 | NA |
| 6 | 154402135 | 154456348 | 1  | NM_001008505 | OPRM1     | 0 | NA | 0 | NA | 0 | NA | 0 | NA | 0 | NA |
| 6 | 154402135 | 154481999 | 1  | NM_000914    | OPRM1     | 0 | NA | 0 | NA | 0 | NA | 0 | NA | 0 | NA |
| 6 | 154402135 | 154609693 | 1  | NM_001008503 | OPRM1     | 0 | NA | 0 | NA | 0 | NA | 0 | NA | 0 | NA |
| 6 | 154719592 | 154517437 | -1 | NM_015553    | PIP3-E    | 0 | NA | 0 | NA | 0 | NA | 0 | NA | 0 | NA |
| 6 | 154873445 | 154768124 | -1 | NM_173515    | CNKSR3    | 0 | NA | 0 | NA | 0 | NA | 1 | 11 | 0 | NA |
| 6 | 155096203 | 155196886 | 1  | NM_014892    | RBM16     | 0 | NA | 0 | NA | 0 | NA | 0 | NA | 0 | NA |
| 6 | 155453114 | 155620549 | 1  | NM_012454    | TIAM2     | 0 | NA | 0 | NA | 0 | NA | 0 | NA | 0 | NA |
| 6 | 155579788 | 155620549 | 1  | NM_001010927 | TIAM2     | 0 | NA | 0 | NA | 0 | NA | 0 | NA | 0 | NA |
| 6 | 155626838 | 155639371 | 1  | NM_001001346 | CLDN20    | 0 | NA | 0 | NA | 0 | NA | 0 | NA | 0 | NA |
| 6 | 155677318 | 155620481 | -1 | NM_016020    | TFB1M     | 0 | NA | 0 | NA | 1 | 14 | 1 | 11 | 0 | NA |
| 6 | 155816729 | 155758195 | -1 | NM_015718    | NOX3      | 0 | NA | 0 | NA | 0 | NA | 0 | NA | 0 | NA |
| 6 | 157140777 | 157572094 | 1  | NM_017519    | ARID1B    | 0 | NA | 0 | NA | 0 | NA | 0 | NA | 0 | NA |
| 6 | 157140777 | 157572094 | 1  | NM_020732    | ARID1B    | 0 | NA | 0 | NA | 0 | NA | 0 | NA | 0 | NA |
| 6 | 157140777 | 157572094 | 1  | NM_175863    | ARID1B    | 0 | NA | 0 | NA | 0 | NA | 0 | NA | 0 | NA |
| 6 | 157722544 | 158014965 | 1  | NM_024630    | ZDHHC14   | 0 | NA | 0 | NA | 0 | NA | 0 | NA | 0 | NA |
| 6 | 157722544 | 158014965 | 1  | NM_153746    | ZDHHC14   | 0 | NA | 0 | NA | 0 | NA | 0 | NA | 0 | NA |
| 6 | 158164281 | 158286097 | 1  | NM_016224    | SNX9      | 0 | NA | 0 | NA | 0 | NA | 0 | NA | 0 | NA |
| 6 | 158322906 | 158439556 | 1  | NM_003898    | SYNJ2     | 0 | NA | 0 | NA | 0 | NA | 0 | NA | 0 | NA |
| 6 | 158509257 | 158450534 | -1 | NM_032861    | SERAC1    | 0 | NA | 0 | NA | 0 | NA | 0 | NA | 0 | NA |
| 6 | 158511488 | 158533364 | 1  | NM_207118    | GTF2H5    | 0 | NA | 0 | NA | 0 | NA | 0 | NA | 0 | NA |
| 6 | 158653679 | 158852844 | 1  | NM_001007466 | TULP4     | 0 | NA | 0 | NA | 0 | NA | 0 | NA | 0 | NA |
| 6 | 158653679 | 158852844 | 1  | NM_020245    | TULP4     | 0 | NA | 0 | NA | 0 | NA | 0 | NA | 0 | NA |
| 6 | 158877455 | 158976455 | 1  | NM_020823    | TMEM181   | 0 | NA | 0 | NA | 0 | NA | 0 | NA | 0 | NA |
| 6 | 158985728 | 158977493 | -1 | NM_006519    | DYNLT1    | 0 | NA | 0 | NA | 0 | NA | 0 | NA | 0 | NA |
| 6 | 158991033 | 159105889 | 1  | NM_001009991 | SYTL3     | 0 | NA | 0 | NA | 0 | NA | 0 | NA | 0 | NA |
| 6 | 159159328 | 159106760 | -1 | NM_003379    | EZR       | 0 | NA | 0 | NA | 0 | NA | 0 | NA | 0 | NA |
| 6 | 159160444 | 159106760 | -1 | NM_001111077 | EZR       | 0 | NA | 0 | NA | 0 | NA | 0 | NA | 0 | NA |
| 6 | 159198652 | 159182145 | -1 | NM_145303    | LOC024459 | 0 | NA | 0 | NA | 0 | NA | 0 | NA | 0 | NA |
| 6 | 159341186 | 159318253 | -1 | NM_031924    | RSPH3     | 0 | NA | 0 | NA | 0 | NA | 0 | NA | 0 | NA |
| 6 | 159386172 | 159376014 | -1 | NM_054114    | TAGAP     | 0 | NA | 0 | NA | 0 | NA | 0 | NA | 0 | NA |
| 6 | 159386172 | 159376014 | -1 | NM_152133    | TAGAP     | 0 | NA | 0 | NA | 0 | NA | 0 | NA | 0 | NA |
| 6 | 159386172 | 159379931 | -1 | NM_138810    | TAGAP     | 0 | NA | 0 | NA | 0 | NA | 0 | NA | 0 | NA |
| 6 | 159510416 | 159613130 | 1  | NM_032532    | FNDC1     | 0 | NA | 0 | NA | 0 | NA | 0 | NA | 0 | NA |
| 6 | 160034343 | 160020138 | -1 | NM_001024465 | SOD2      | 0 | NA | 0 | NA | 0 | NA | 0 | NA | 0 | NA |
| 6 | 160034343 | 160020138 | -1 | NM_001024466 | SOD2      | 0 | NA | 0 | NA | 0 | NA | 0 | NA | 0 | NA |
| 6 | 160034343 | 160022744 | -1 | NM_000636    | SOD2      | 0 | NA | 0 | NA | 0 | NA | 0 | NA | 0 | NA |
| 6 | 160068141 | 160090443 | 1  | NM_152858    | WTAP      | 0 | NA | 0 | NA | 0 | NA | 0 | NA | 0 | NA |
| 6 | 160068141 | 160097341 | 1  | NM_004906    | WTAP      | 0 | NA | 0 | NA | 0 | NA | 0 | NA | 0 | NA |
| 6 | 160068609 | 160090443 | 1  | NM_152857    | WTAP      | 0 | NA | 0 | NA | 0 | NA | 0 | NA | 0 | NA |
| 6 | 160102978 | 160120077 | 1  | NM_005891    | ACAT2     | 0 | NA | 0 | NA | 0 | NA | 0 | NA | 0 | NA |
| 6 | 160130725 | 160119519 | -1 | NM_001008897 | TCP1      | 1 | 11 | 0 | NA | 0 | NA | 0 | NA | 0 | NA |
| 6 | 160130725 | 160119519 | -1 | NM_030752    | TCP1      | 1 | 11 | 0 | NA | 0 | NA | 0 | NA | 0 | NA |

|   |           |           |    |              |          |   |    |   |    |   |    |   |    |   |    |
|---|-----------|-----------|----|--------------|----------|---|----|---|----|---|----|---|----|---|----|
| 6 | 160131481 | 160139451 | 1  | NM_014161    | MRPL18   | 1 | 11 | 0 | NA | 0 | NA | 0 | NA | 0 | NA |
| 6 | 160141290 | 160161725 | 1  | NM_173516    | PNLDC1   | 0 | NA | 0 | NA | 0 | NA | 0 | NA | 0 | NA |
| 6 | 160247963 | 160249097 | 1  | NM_002377    | MAS1     | 0 | NA | 0 | NA | 0 | NA | 0 | NA | 0 | NA |
| 6 | 160310120 | 160447573 | 1  | NM_000876    | IGF2R    | 0 | NA | 0 | NA | 0 | NA | 0 | NA | 0 | NA |
| 6 | 160462852 | 160499740 | 1  | NM_003057    | SLC22A1  | 0 | NA | 0 | NA | 0 | NA | 0 | NA | 0 | NA |
| 6 | 160462852 | 160499740 | 1  | NM_153187    | SLC22A1  | 0 | NA | 0 | NA | 0 | NA | 0 | NA | 0 | NA |
| 6 | 160599949 | 160557781 | -1 | NM_003058    | SLC22A2  | 0 | NA | 0 | NA | 0 | NA | 0 | NA | 0 | NA |
| 6 | 160689414 | 160796004 | 1  | NM_021977    | SLC22A3  | 0 | NA | 0 | NA | 0 | NA | 0 | NA | 0 | NA |
| 6 | 160852146 | 160807576 | -1 | NM_145727    | LPAL2    | 0 | NA | 0 | NA | 0 | NA | 0 | NA | 0 | NA |
| 6 | 160852146 | 160808207 | -1 | NM_024492    | LPAL2    | 0 | NA | 0 | NA | 0 | NA | 0 | NA | 0 | NA |
| 6 | 161007397 | 160872504 | -1 | NM_005577    | LPA      | 0 | NA | 0 | NA | 0 | NA | 0 | NA | 0 | NA |
| 6 | 161043263 | 161094337 | 1  | NM_000301    | PLG      | 0 | NA | 0 | NA | 0 | NA | 0 | NA | 0 | NA |
| 6 | 161332811 | 161458407 | 1  | NM_005922    | MAP3K4   | 0 | NA | 0 | NA | 0 | NA | 1 | 20 | 0 | NA |
| 6 | 161332811 | 161458407 | 1  | NM_006724    | MAP3K4   | 0 | NA | 0 | NA | 0 | NA | 1 | 20 | 0 | NA |
| 6 | 161615097 | 161471046 | -1 | NM_020133    | AGPAT4   | 0 | NA | 0 | NA | 0 | NA | 0 | NA | 0 | NA |
| 6 | 163068153 | 163656514 | 1  | NM_001080378 | PACRG    | 0 | NA | 0 | NA | 0 | NA | 0 | NA | 0 | NA |
| 6 | 163068153 | 163656514 | 1  | NM_152410    | PACRG    | 0 | NA | 0 | NA | 0 | NA | 0 | NA | 0 | NA |
| 6 | 163068824 | 161688579 | -1 | NM_004562    | PARK2    | 0 | NA | 0 | NA | 0 | NA | 0 | NA | 0 | NA |
| 6 | 163068824 | 161688579 | -1 | NM_013987    | PARK2    | 0 | NA | 0 | NA | 0 | NA | 0 | NA | 0 | NA |
| 6 | 163068824 | 161688579 | -1 | NM_013988    | PARK2    | 0 | NA | 0 | NA | 0 | NA | 0 | NA | 0 | NA |
| 6 | 163068824 | 161688579 | -1 | NM_013988    | PARK2    | 0 | NA | 0 | NA | 0 | NA | 0 | NA | 0 | NA |
| 6 | 163068991 | 163656514 | 1  | NM_001080379 | PACRG    | 0 | NA | 0 | NA | 0 | NA | 0 | NA | 0 | NA |
| 6 | 163755664 | 163911166 | 1  | NM_206853    | QKI      | 0 | NA | 0 | NA | 0 | NA | 0 | NA | 0 | NA |
| 6 | 163755664 | 163911166 | 1  | NM_206854    | QKI      | 0 | NA | 0 | NA | 0 | NA | 0 | NA | 0 | NA |
| 6 | 163755664 | 163911166 | 1  | NM_206855    | QKI      | 0 | NA | 0 | NA | 0 | NA | 0 | NA | 0 | NA |
| 6 | 163755664 | 163914884 | 1  | NM_006775    | QKI      | 0 | NA | 0 | NA | 0 | NA | 0 | NA | 0 | NA |
| 6 | 165643101 | 165613142 | -1 | NM_144980    | C6orf118 | 0 | NA | 0 | NA | 0 | NA | 0 | NA | 0 | NA |
| 6 | 165995575 | 165664524 | -1 | NM_006661    | PDE10A   | 0 | NA | 0 | NA | 0 | NA | 0 | NA | 0 | NA |
| 6 | 166502121 | 166491075 | -1 | NM_003181    | T        | 0 | NA | 0 | NA | 0 | NA | 0 | NA | 1 | 13 |
| 6 | 166641861 | 166639157 | -1 | NM_175922    | PRR18    | 0 | NA | 0 | NA | 0 | NA | 0 | NA | 0 | NA |
| 6 | 166675981 | 166653505 | -1 | NM_145169    | SFT2D1   | 0 | NA | 0 | NA | 0 | NA | 0 | NA | 0 | NA |
| 6 | 166716476 | 166698397 | -1 | NM_016098    | BRP44L   | 0 | NA | 0 | NA | 0 | NA | 0 | NA | 0 | NA |
| 6 | 166960716 | 166742843 | -1 | NM_021135    | RPS6KA2  | 0 | NA | 0 | NA | 0 | NA | 0 | NA | 0 | NA |
| 6 | 167195761 | 166742843 | -1 | NM_001006932 | RPS6KA2  | 0 | NA | 0 | NA | 0 | NA | 0 | NA | 0 | NA |
| 6 | 167290067 | 167262993 | -1 | NM_003730    | RNASET2  | 0 | NA | 0 | NA | 0 | NA | 0 | NA | 0 | NA |
| 6 | 167332805 | 167374056 | 1  | NM_007045    | FGFR1OP  | 0 | NA | 0 | NA | 0 | NA | 0 | NA | 0 | NA |
| 6 | 167332805 | 167374056 | 1  | NM_194429    | FGFR1OP  | 0 | NA | 0 | NA | 0 | NA | 0 | NA | 0 | NA |
| 6 | 167445284 | 167472619 | 1  | NM_004367    | CCR6     | 0 | NA | 0 | NA | 0 | NA | 1 | 13 | 0 | NA |
| 6 | 167445230 | 167472619 | 1  | NM_031409    | CCR6     | 0 | NA | 0 | NA | 0 | NA | 1 | 13 | 0 | NA |
| 6 | 167491309 | 167490349 | -1 | NM_005299    | GPR31    | 0 | NA | 0 | NA | 0 | NA | 0 | NA | 0 | NA |
| 6 | 167624890 | 167649491 | 1  | NM_018974    | UNC93A   | 0 | NA | 0 | NA | 0 | NA | 0 | NA | 0 | NA |
| 6 | 167658563 | 167676167 | 1  | NM_031949    | TTL2     | 0 | NA | 0 | NA | 0 | NA | 0 | NA | 0 | NA |
| 6 | 167717988 | 167706566 | -1 | NM_004610    | TCP10    | 0 | NA | 0 | NA | 0 | NA | 0 | NA | 0 | NA |
| 6 | 167970325 | 167967418 | -1 | NM_001042508 | C6orf124 | 0 | NA | 0 | NA | 0 | NA | 0 | NA | 0 | NA |
| 6 | 167970519 | 168095791 | 1  | NM_005936    | MLLT4    | 0 | NA | 0 | NA | 0 | NA | 0 | NA | 0 | NA |
| 6 | 167970519 | 168108864 | 1  | NM_001040000 | MLLT4    | 0 | NA | 0 | NA | 0 | NA | 0 | NA | 0 | NA |
| 6 | 167970519 | 168115552 | 1  | NM_001040001 | MLLT4    | 0 | NA | 0 | NA | 0 | NA | 0 | NA | 0 | NA |
| 6 | 168161401 | 168188618 | 1  | NM_005355    | KIF25    | 0 | NA | 0 | NA | 0 | NA | 0 | NA | 1 | 13 |
| 6 | 168161401 | 168188618 | 1  | NM_030615    | KIF25    | 0 | NA | 0 | NA | 0 | NA | 0 | NA | 1 | 13 |
| 6 | 168219381 | 168199312 | -1 | NM_001122841 | FRMD1    | 0 | NA | 0 | NA | 0 | NA | 0 | NA | 0 | NA |
| 6 | 168222688 | 168199312 | -1 | NM_024919    | FRMD1    | 0 | NA | 0 | NA | 0 | NA | 0 | NA | 0 | NA |
| 6 | 168463251 | 168450432 | -1 | NM_214462    | DACT2    | 0 | NA | 0 | NA | 0 | NA | 0 | NA | 0 | NA |
| 6 | 168584879 | 168810596 | 1  | NM_022138    | SMOC2    | 0 | NA | 0 | NA | 0 | NA | 0 | NA | 0 | NA |
| 6 | 169396062 | 169357799 | -1 | NM_003247    | THBS2    | 0 | NA | 0 | NA | 0 | NA | 0 | NA | 0 | NA |
| 6 | 169844084 | 169599231 | -1 | NM_182552    | WDR27    | 0 | NA | 0 | NA | 0 | NA | 0 | NA | 0 | NA |
| 6 | 169844181 | 169848327 | 1  | NM_001029863 | C6orf120 | 0 | NA | 0 | NA | 0 | NA | 0 | NA | 0 | NA |
| 6 | 169865909 | 169845925 | -1 | NM_133325    | PHF10    | 0 | NA | 0 | NA | 0 | NA | 0 | NA | 0 | NA |
| 6 | 169865909 | 169845928 | -1 | NM_018288    | PHF10    | 0 | NA | 0 | NA | 0 | NA | 0 | NA | 0 | NA |
| 6 | 169893563 | 169882139 | -1 | NM_174910    | TCTE3    | 0 | NA | 0 | NA | 0 | NA | 0 | NA | 0 | NA |
| 6 | 169893645 | 169923542 | 1  | NM_018341    | C6orf70  | 0 | NA | 0 | NA | 0 | NA | 0 | NA | 0 | NA |
| 6 | 170441622 | 170433218 | -1 | NM_005618    | DLL1     | 0 | NA | 0 | NA | 0 | NA | 0 | NA | 0 | NA |
| 6 | 170457768 | 170556162 | 1  | NM_032448    | FAM120B  | 0 | NA | 0 | NA | 0 | NA | 0 | NA | 0 | NA |
| 6 | 170704312 | 170686133 | -1 | NM_002793    | PSMB1    | 0 | NA | 0 | NA | 0 | NA | 0 | NA | 0 | NA |
| 6 | 170705395 | 170723872 | 1  | NM_003194    | TBP      | 0 | NA | 0 | NA | 0 | NA | 0 | NA | 0 | NA |
| 6 | 170735673 | 170728374 | -1 | NM_002598    | PDCD2    | 0 | NA | 0 | NA | 0 | NA | 0 | NA | 0 | NA |
| 6 | 170735673 | 170732759 | -1 | NM_144781    | PDCD2    | 0 | NA | 0 | NA | 0 | NA | 0 | NA | 0 | NA |

|   |          |          |    |              |          |   |    |   |    |   |    |   |    |   |    |
|---|----------|----------|----|--------------|----------|---|----|---|----|---|----|---|----|---|----|
| 9 | 19739    | 4510     | -1 | NM_182905    | WASH1    | 0 | NA | 0 | NA | 0 | NA | 0 | NA | 0 | NA |
| 9 | 108417   | 106233   | -1 | NM_207305    | FOX4     | 0 | NA | 0 | NA | 0 | NA | 0 | NA | 0 | NA |
| 9 | 169075   | 111037   | -1 | NM_018491    | CBWD1    | 0 | NA | 0 | NA | 0 | NA | 0 | NA | 0 | NA |
| 9 | 205741   | 203461   | -1 | NM_152569    | C9orf66  | 0 | NA | 0 | NA | 0 | NA | 0 | NA | 0 | NA |
| 9 | 263047   | 455254   | 1  | NM_203447    | DOCK8    | 0 | NA | 0 | NA | 0 | NA | 0 | NA | 0 | NA |
| 9 | 494702   | 736103   | 1  | NM_015158    | KANK1    | 0 | NA | 0 | NA | 0 | NA | 0 | NA | 0 | NA |
| 9 | 696895   | 736103   | 1  | NM_153186    | KANK1    | 0 | NA | 0 | NA | 0 | NA | 0 | NA | 0 | NA |
| 9 | 831689   | 959090   | 1  | NM_021951    | DMRT1    | 0 | NA | 0 | NA | 0 | NA | 0 | NA | 0 | NA |
| 9 | 966963   | 981732   | 1  | NM_021240    | DMRT3    | 0 | NA | 1 | 21 | 0 | NA | 0 | NA | 0 | NA |
| 9 | 1040600  | 1047552  | 1  | NM_006557    | DMRT2    | 0 | NA | 1 | 12 | 0 | NA | 0 | NA | 0 | NA |
| 9 | 1041613  | 1047552  | 1  | NM_181872    | DMRT2    | 0 | NA | 1 | 12 | 0 | NA | 0 | NA | 0 | NA |
| 9 | 2005341  | 2183623  | 1  | NM_003070    | SMARCA2  | 0 | NA | 0 | NA | 0 | NA | 0 | NA | 0 | NA |
| 9 | 2005341  | 2183623  | 1  | NM_139045    | SMARCA2  | 0 | NA | 0 | NA | 0 | NA | 0 | NA | 0 | NA |
| 9 | 2611792  | 2644485  | 1  | NM_001018056 | VLDLR    | 0 | NA | 1 | 12 | 0 | NA | 0 | NA | 0 | NA |
| 9 | 2611792  | 2644485  | 1  | NM_003383    | VLDLR    | 0 | NA | 1 | 12 | 0 | NA | 0 | NA | 0 | NA |
| 9 | 2707525  | 2719757  | 1  | NM_133497    | KCNV2    | 0 | NA | 1 | 14 | 0 | NA | 0 | NA | 0 | NA |
| 9 | 2834130  | 2794154  | -1 | NM_014878    | KIAA0020 | 1 | 12 | 0 | NA | 0 | NA | 0 | NA | 0 | NA |
| 9 | 3515983  | 3214646  | -1 | NM_134428    | RFX3     | 1 | 14 | 0 | NA | 1 | 15 | 0 | NA | 0 | NA |
| 9 | 3515983  | 3237036  | -1 | NM_002919    | RFX3     | 1 | 14 | 0 | NA | 1 | 15 | 0 | NA | 0 | NA |
| 9 | 4142183  | 3814127  | -1 | NM_152629    | GLIS3    | 0 | NA | 0 | NA | 0 | NA | 0 | NA | 0 | NA |
| 9 | 4290035  | 3814127  | -1 | NM_001042413 | GLIS3    | 0 | NA | 0 | NA | 0 | NA | 0 | NA | 0 | NA |
| 9 | 4480443  | 4577469  | 1  | NM_004170    | SLC1A1   | 0 | NA | 0 | NA | 0 | NA | 0 | NA | 0 | NA |
| 9 | 4652297  | 465258   | 1  | NM_203453    | PPAPDC2  | 0 | NA | 0 | NA | 0 | NA | 0 | NA | 0 | NA |
| 9 | 4656464  | 4588315  | -1 | NM_001039395 | C9orf68  | 0 | NA | 0 | NA | 0 | NA | 0 | NA | 0 | NA |
| 9 | 4669565  | 4696594  | 1  | NM_017913    | CDC37L1  | 1 | 11 | 0 | NA | 0 | NA | 0 | NA | 0 | NA |
| 9 | 4731227  | 4701157  | -1 | NM_016282    | AK3      | 0 | NA | 0 | NA | 0 | NA | 0 | NA | 0 | NA |
| 9 | 4782833  | 4851064  | 1  | NM_005772    | RCL1     | 0 | NA | 0 | NA | 0 | NA | 0 | NA | 0 | NA |
| 9 | 4975244  | 5117995  | 1  | NM_004972    | JAK2     | 0 | NA | 0 | NA | 0 | NA | 0 | NA | 0 | NA |
| 9 | 5175618  | 5153862  | -1 | NM_007179    | INSL6    | 0 | NA | 0 | NA | 0 | NA | 0 | NA | 0 | NA |
| 9 | 5221418  | 5223967  | 1  | NM_002195    | INSL4    | 0 | NA | 0 | NA | 0 | NA | 0 | NA | 0 | NA |
| 9 | 5294580  | 5289867  | -1 | NM_005059    | RLN2     | 0 | NA | 0 | NA | 0 | NA | 0 | NA | 0 | NA |
| 9 | 5294580  | 5289867  | -1 | NM_134441    | RLN2     | 0 | NA | 0 | NA | 0 | NA | 0 | NA | 0 | NA |
| 9 | 5329873  | 5324968  | -1 | NM_006911    | RLN1     | 0 | NA | 0 | NA | 0 | NA | 0 | NA | 0 | NA |
| 9 | 5427860  | 5347970  | -1 | NM_018465    | C9orf46  | 0 | NA | 0 | NA | 0 | NA | 0 | NA | 0 | NA |
| 9 | 5440558  | 5458477  | 1  | NM_014143    | CD274    | 0 | NA | 0 | NA | 0 | NA | 0 | NA | 0 | NA |
| 9 | 5500569  | 5560398  | 1  | NM_025239    | PDCD1LG2 | 0 | NA | 0 | NA | 0 | NA | 0 | NA | 0 | NA |
| 9 | 5646653  | 5764309  | 1  | NM_020829    | KIAA1432 | 0 | NA | 0 | NA | 0 | NA | 0 | NA | 0 | NA |
| 9 | 5823081  | 5774571  | -1 | NM_024896    | ERMP1    | 0 | NA | 0 | NA | 0 | NA | 0 | NA | 0 | NA |
| 9 | 5889098  | 5899822  | 1  | NM_005511    | MLANA    | 0 | NA | 0 | NA | 0 | NA | 0 | NA | 0 | NA |
| 9 | 5998003  | 5909007  | -1 | NM_001017969 | KIAA2026 | 1 | 12 | 0 | NA | 0 | NA | 0 | NA | 0 | NA |
| 9 | 6005618  | 6001018  | -1 | NM_012416    | RANBP6   | 1 | 12 | 0 | NA | 0 | NA | 0 | NA | 0 | NA |
| 9 | 6231677  | 6247982  | 1  | NM_033439    | IL33     | 0 | NA | 0 | NA | 0 | NA | 0 | NA | 0 | NA |
| 9 | 6318374  | 6320670  | 1  | NM_001001875 | TPD52L3  | 0 | NA | 1 | 13 | 0 | NA | 0 | NA | 0 | NA |
| 9 | 6318374  | 6320670  | 1  | NM_033516    | TPD52L3  | 0 | NA | 1 | 13 | 0 | NA | 0 | NA | 0 | NA |
| 9 | 6318374  | 6321900  | 1  | NM_001001874 | TPD52L3  | 0 | NA | 1 | 13 | 0 | NA | 0 | NA | 0 | NA |
| 9 | 6403150  | 6497051  | 1  | NM_152896    | UHRF2    | 0 | NA | 0 | NA | 0 | NA | 0 | NA | 0 | NA |
| 9 | 6635692  | 6522463  | -1 | NM_000170    | GLDC     | 0 | NA | 0 | NA | 0 | NA | 0 | NA | 0 | NA |
| 9 | 6747653  | 7165648  | 1  | NM_015061    | JMJ2C    | 0 | NA | 0 | NA | 0 | NA | 0 | NA | 0 | NA |
| 9 | 7789799  | 7786490  | -1 | NM_033428    | C9orf123 | 0 | NA | 0 | NA | 0 | NA | 0 | NA | 0 | NA |
| 9 | 10602509 | 8304245  | -1 | NM_001040712 | PTPRD    | 0 | NA | 0 | NA | 0 | NA | 0 | NA | 0 | NA |
| 9 | 10602509 | 8304245  | -1 | NM_002839    | PTPRD    | 0 | NA | 0 | NA | 0 | NA | 0 | NA | 0 | NA |
| 9 | 10602509 | 8304245  | -1 | NM_130391    | PTPRD    | 0 | NA | 0 | NA | 0 | NA | 0 | NA | 0 | NA |
| 9 | 10602509 | 8304245  | -1 | NM_130392    | PTPRD    | 0 | NA | 0 | NA | 0 | NA | 0 | NA | 0 | NA |
| 9 | 10602509 | 8304245  | -1 | NM_130393    | PTPRD    | 0 | NA | 0 | NA | 0 | NA | 0 | NA | 0 | NA |
| 9 | 12683385 | 12700266 | 1  | NM_000550    | TYRP1    | 0 | NA | 0 | NA | 0 | NA | 0 | NA | 0 | NA |
| 9 | 12765011 | 12813059 | 1  | NM_203403    | C9orf150 | 1 | 11 | 0 | NA | 0 | NA | 0 | NA | 0 | NA |
| 9 | 13240365 | 13095702 | -1 | NM_003829    | MPDZ     | 0 | NA | 0 | NA | 0 | NA | 0 | NA | 0 | NA |
| 9 | 14303945 | 14071846 | -1 | NM_005596    | NFIB     | 0 | NA | 0 | NA | 0 | NA | 0 | NA | 0 | NA |
| 9 | 14683469 | 14607027 | -1 | NM_178566    | ZDHHC21  | 0 | NA | 0 | NA | 0 | NA | 0 | NA | 0 | NA |
| 9 | 14712715 | 14709731 | -1 | NM_005454    | CER1     | 0 | NA | 0 | NA | 0 | NA | 0 | NA | 0 | NA |
| 9 | 14900234 | 14727150 | -1 | NM_144966    | FREM1    | 0 | NA | 0 | NA | 0 | NA | 0 | NA | 0 | NA |
| 9 | 15297244 | 15161560 | -1 | NM_152574    | C9orf52  | 0 | NA | 0 | NA | 0 | NA | 0 | NA | 0 | NA |
| 9 | 15412781 | 15451627 | 1  | NM_001039697 | SNAPC3   | 0 | NA | 0 | NA | 0 | NA | 0 | NA | 0 | NA |
| 9 | 15500250 | 15460641 | -1 | NM_021144    | PSIP1    | 0 | NA | 0 | NA | 0 | NA | 0 | NA | 0 | NA |
| 9 | 15500982 | 15454064 | -1 | NM_033222    | PSIP1    | 0 | NA | 0 | NA | 0 | NA | 0 | NA | 0 | NA |

|   |          |          |    |              |          |   |    |   |    |   |    |   |    |   |    |
|---|----------|----------|----|--------------|----------|---|----|---|----|---|----|---|----|---|----|
| 9 | 15543096 | 15961897 | 1  | NM_173550    | C9orf93  | 0 | NA | 0 | NA | 0 | NA | 0 | NA | 0 | NA |
| 9 | 16860786 | 16399500 | -1 | NM_017637    | BNC2     | 0 | NA | 0 | NA | 1 | 14 | 0 | NA | 0 | NA |
| 9 | 17125037 | 17292049 | 1  | NM_001114395 | CNTLN    | 0 | NA | 0 | NA | 0 | NA | 0 | NA | 0 | NA |
| 9 | 17125037 | 17493917 | 1  | NM_017738    | CNTLN    | 0 | NA | 0 | NA | 0 | NA | 0 | NA | 0 | NA |
| 9 | 17569193 | 17787122 | 1  | NM_003026    | SH3GL2   | 0 | NA | 0 | NA | 0 | NA | 0 | NA | 0 | NA |
| 9 | 18464103 | 18674952 | 1  | NM_052866    | ADAMTSL1 | 0 | NA | 0 | NA | 0 | NA | 0 | NA | 0 | NA |
| 9 | 18464103 | 18900947 | 1  | NM_001040272 | ADAMTSL1 | 0 | NA | 0 | NA | 0 | NA | 0 | NA | 0 | NA |
| 9 | 19023184 | 18917892 | -1 | NM_153707    | FAM154A  | 0 | NA | 0 | NA | 0 | NA | 0 | NA | 0 | NA |
| 9 | 19039371 | 19041021 | 1  | NM_006570    | RRAGA    | 1 | 18 | 0 | NA | 0 | NA | 0 | NA | 0 | NA |
| 9 | 19092902 | 19043140 | -1 | NM_017645    | FAM29A   | 0 | NA | 0 | NA | 1 | 14 | 0 | NA | 0 | NA |
| 9 | 19117573 | 19105758 | -1 | NM_001122    | ADFP     | 0 | NA | 0 | NA | 0 | NA | 0 | NA | 0 | NA |
| 9 | 19280748 | 19364139 | 1  | NM_017925    | DENND4C  | 0 | NA | 0 | NA | 0 | NA | 0 | NA | 0 | NA |
| 9 | 19370235 | 19366253 | -1 | NM_001010    | RPS6     | 0 | NA | 0 | NA | 0 | NA | 0 | NA | 0 | NA |
| 9 | 19398924 | 19442500 | 1  | NM_001010887 | ASAH3L   | 0 | NA | 0 | NA | 0 | NA | 0 | NA | 0 | NA |
| 9 | 19776926 | 19505977 | -1 | NM_020344    | SLC24A2  | 0 | NA | 0 | NA | 0 | NA | 0 | NA | 0 | NA |
| 9 | 20612514 | 20334967 | -1 | NM_004529    | MLLT3    | 0 | NA | 0 | NA | 0 | NA | 0 | NA | 0 | NA |
| 9 | 20648308 | 20985954 | 1  | NM_017794    | KIAA1797 | 0 | NA | 0 | NA | 0 | NA | 0 | NA | 0 | NA |
| 9 | 21021635 | 20996364 | -1 | NM_001010915 | PTPLAD2  | 0 | NA | 0 | NA | 0 | NA | 0 | NA | 0 | NA |
| 9 | 21067943 | 21067103 | -1 | NM_002176    | IFNB1    | 0 | NA | 0 | NA | 0 | NA | 0 | NA | 0 | NA |
| 9 | 21132144 | 21130630 | -1 | NM_002177    | IFNW1    | 0 | NA | 1 | 12 | 0 | NA | 0 | NA | 0 | NA |
| 9 | 21156659 | 21155635 | -1 | NM_002175    | IFNA21   | 0 | NA | 0 | NA | 0 | NA | 0 | NA | 0 | NA |
| 9 | 21177670 | 21176692 | -1 | NM_021068    | IFNA4    | 0 | NA | 0 | NA | 0 | NA | 0 | NA | 0 | NA |
| 9 | 21192204 | 21191467 | -1 | NM_021057    | IFNA7    | 0 | NA | 0 | NA | 0 | NA | 0 | NA | 0 | NA |
| 9 | 21197142 | 21196179 | -1 | NM_002171    | IFNA10   | 0 | NA | 0 | NA | 0 | NA | 0 | NA | 0 | NA |
| 9 | 21207310 | 21206371 | -1 | NM_002173    | IFNA16   | 0 | NA | 0 | NA | 0 | NA | 0 | NA | 0 | NA |
| 9 | 21218221 | 21217241 | -1 | NM_021268    | IFNA17   | 0 | NA | 0 | NA | 0 | NA | 0 | NA | 0 | NA |
| 9 | 21229978 | 21229200 | -1 | NM_002172    | IFNA14   | 0 | NA | 0 | NA | 0 | NA | 0 | NA | 0 | NA |
| 9 | 21295255 | 21294685 | -1 | NM_002169    | IFNA5    | 0 | NA | 0 | NA | 0 | NA | 0 | NA | 0 | NA |
| 9 | 21325429 | 21321017 | -1 | NM_018847    | KLHL9    | 0 | NA | 0 | NA | 0 | NA | 0 | NA | 0 | NA |
| 9 | 21340886 | 21340316 | -1 | NM_021002    | IFNA6    | 0 | NA | 0 | NA | 0 | NA | 0 | NA | 0 | NA |
| 9 | 21358075 | 21357422 | -1 | NM_006900    | IFNA13   | 0 | NA | 0 | NA | 0 | NA | 0 | NA | 0 | NA |
| 9 | 21375396 | 21374253 | -1 | NM_000605    | IFNA2    | 0 | NA | 1 | 13 | 0 | NA | 0 | NA | 0 | NA |
| 9 | 21399145 | 21400184 | 1  | NM_002170    | IFNA8    | 0 | NA | 0 | NA | 0 | NA | 0 | NA | 0 | NA |
| 9 | 21430439 | 21431315 | 1  | NM_024013    | IFNA1    | 0 | NA | 0 | NA | 1 | 13 | 0 | NA | 0 | NA |
| 9 | 21472312 | 21470838 | -1 | NM_176891    | IFNE1    | 0 | NA | 0 | NA | 0 | NA | 0 | NA | 0 | NA |
| 9 | 21792634 | 21855969 | 1  | NM_002451    | MTAP     | 1 | 12 | 0 | NA | 1 | 12 | 0 | NA | 0 | NA |
| 9 | 21965038 | 21957750 | -1 | NM_000077    | CDKN2A   | 0 | NA | 0 | NA | 0 | NA | 0 | NA | 0 | NA |
| 9 | 21965038 | 21957750 | -1 | NM_058197    | CDKN2A   | 0 | NA | 0 | NA | 0 | NA | 0 | NA | 0 | NA |
| 9 | 21984490 | 21957750 | -1 | NM_058195    | CDKN2A   | 0 | NA | 0 | NA | 1 | 18 | 0 | NA | 0 | NA |
| 9 | 21999312 | 21992901 | -1 | NM_004936    | CDKN2B   | 0 | NA | 0 | NA | 0 | NA | 0 | NA | 0 | NA |
| 9 | 21999312 | 21992901 | -1 | NM_078487    | CDKN2B   | 0 | NA | 0 | NA | 0 | NA | 0 | NA | 0 | NA |
| 9 | 22436839 | 22442472 | 1  | NM_022160    | DMRTA1   | 0 | NA | 0 | NA | 0 | NA | 0 | NA | 0 | NA |
| 9 | 23816063 | 23680102 | -1 | NM_004432    | ELAVL2   | 0 | NA | 0 | NA | 0 | NA | 0 | NA | 0 | NA |
| 9 | 25668856 | 25666386 | -1 | NM_001004125 | TUSC1    | 0 | NA | 0 | NA | 0 | NA | 0 | NA | 0 | NA |
| 9 | 26882725 | 26830682 | -1 | NM_024828    | C9orf82  | 0 | NA | 0 | NA | 1 | 12 | 0 | NA | 0 | NA |
| 9 | 26925207 | 26894517 | -1 | NM_004253    | PLAA     | 0 | NA | 0 | NA | 0 | NA | 0 | NA | 0 | NA |
| 9 | 26937036 | 27052931 | 1  | NM_001099223 | IFT74    | 1 | 14 | 0 | NA | 0 | NA | 0 | NA | 0 | NA |
| 9 | 26937139 | 26895338 | -1 | NM_001031689 | PLAA     | 1 | 14 | 0 | NA | 0 | NA | 0 | NA | 0 | NA |
| 9 | 26937309 | 27052931 | 1  | NM_001099222 | IFT74    | 1 | 14 | 0 | NA | 0 | NA | 0 | NA | 0 | NA |
| 9 | 26946370 | 27026796 | 1  | NM_001099224 | IFT74    | 1 | 14 | 0 | NA | 0 | NA | 0 | NA | 0 | NA |
| 9 | 26946370 | 27052931 | 1  | NM_025103    | IFT74    | 1 | 14 | 0 | NA | 0 | NA | 0 | NA | 0 | NA |
| 9 | 26995670 | 26983585 | -1 | NM_022901    | LRRRC19  | 0 | NA | 0 | NA | 0 | NA | 0 | NA | 0 | NA |
| 9 | 27099146 | 27220172 | 1  | NM_000459    | TEK      | 0 | NA | 0 | NA | 0 | NA | 0 | NA | 0 | NA |
| 9 | 27287137 | 27274666 | -1 | NM_020641    | C9orf11  | 0 | NA | 0 | NA | 0 | NA | 0 | NA | 0 | NA |
| 9 | 27514311 | 27516496 | 1  | NM_020124    | IFNK     | 0 | NA | 0 | NA | 0 | NA | 0 | NA | 0 | NA |
| 9 | 27519850 | 27315206 | -1 | NM_024761    | MOBKLB2B | 0 | NA | 0 | NA | 0 | NA | 0 | NA | 0 | NA |
| 9 | 27563476 | 27536543 | -1 | NM_018325    | C9orf72  | 0 | NA | 0 | NA | 0 | NA | 0 | NA | 0 | NA |
| 9 | 27563842 | 27550498 | -1 | NM_145005    | C9orf72  | 0 | NA | 0 | NA | 0 | NA | 0 | NA | 0 | NA |
| 9 | 28709303 | 27938527 | -1 | NM_152570    | LINGO2   | 0 | NA | 0 | NA | 0 | NA | 0 | NA | 0 | NA |
| 9 | 32374600 | 32440832 | 1  | NM_002197    | ACO1     | 0 | NA | 0 | NA | 0 | NA | 0 | NA | 0 | NA |
| 9 | 32516322 | 32445299 | -1 | NM_014314    | DDX58    | 0 | NA | 0 | NA | 0 | NA | 0 | NA | 0 | NA |
| 9 | 32542601 | 32530541 | -1 | NM_005802    | TOPORS   | 0 | NA | 0 | NA | 1 | 12 | 0 | NA | 0 | NA |
| 9 | 32563182 | 32543522 | -1 | NM_002493    | NDUFB6   | 1 | 20 | 0 | NA | 0 | NA | 0 | NA | 0 | NA |
| 9 | 32563182 | 32543522 | -1 | NM_182739    | NDUFB6   | 1 | 20 | 0 | NA | 0 | NA | 0 | NA | 0 | NA |
| 9 | 32625667 | 32619451 | -1 | NM_153809    | TAF1L    | 0 | NA | 0 | NA | 0 | NA | 0 | NA | 0 | NA |

|   |          |          |    |              |              |   |    |   |    |   |    |   |    |   |    |
|---|----------|----------|----|--------------|--------------|---|----|---|----|---|----|---|----|---|----|
| 9 | 32773496 | 32779199 | 1  | NM_212558    | LOC041498    | 0 | NA | 0 | NA | 0 | NA | 0 | NA | 0 | NA |
| 9 | 32979893 | 32962607 | -1 | NM_175071    | APTX         | 0 | NA | 0 | NA | 0 | NA | 0 | NA | 0 | NA |
| 9 | 32980086 | 32962607 | -1 | NM_017692    | APTX         | 0 | NA | 0 | NA | 0 | NA | 0 | NA | 0 | NA |
| 9 | 32987348 | 32962607 | -1 | NM_175072    | APTX         | 0 | NA | 0 | NA | 0 | NA | 0 | NA | 0 | NA |
| 9 | 32991606 | 32962607 | -1 | NM_175073    | APTX         | 0 | NA | 0 | NA | 0 | NA | 0 | NA | 0 | NA |
| 9 | 32991626 | 32962607 | -1 | NM_175069    | APTX         | 0 | NA | 0 | NA | 0 | NA | 0 | NA | 0 | NA |
| 9 | 33015208 | 33029062 | 1  | NM_001539    | DNAJA1       | 0 | NA | 1 | 12 | 0 | NA | 0 | NA | 0 | NA |
| 9 | 33066714 | 33031849 | -1 | NM_018225    | SMU1         | 0 | NA | 0 | NA | 0 | NA | 0 | NA | 0 | NA |
| 9 | 33157231 | 33100641 | -1 | NM_001497    | B4GALT1      | 0 | NA | 0 | NA | 0 | NA | 0 | NA | 0 | NA |
| 9 | 33230195 | 33238565 | 1  | NM_014471    | SPINK4       | 0 | NA | 0 | NA | 0 | NA | 0 | NA | 0 | NA |
| 9 | 33254761 | 33242469 | -1 | NM_004323    | BAG1         | 0 | NA | 0 | NA | 0 | NA | 0 | NA | 0 | NA |
| 9 | 33254999 | 33271511 | 1  | NM_016410    | CHMP5        | 0 | NA | 0 | NA | 0 | NA | 0 | NA | 0 | NA |
| 9 | 33280509 | 33338721 | 1  | NM_147134    | NFX1         | 0 | NA | 0 | NA | 1 | 12 | 0 | NA | 0 | NA |
| 9 | 33280509 | 33354872 | 1  | NM_147133    | NFX1         | 0 | NA | 0 | NA | 1 | 12 | 0 | NA | 0 | NA |
| 9 | 33280509 | 33361155 | 1  | NM_002504    | NFX1         | 0 | NA | 0 | NA | 1 | 12 | 0 | NA | 0 | NA |
| 9 | 33392517 | 33374947 | -1 | NM_001170    | AQP7         | 0 | NA | 0 | NA | 0 | NA | 0 | NA | 0 | NA |
| 9 | 33437590 | 33431159 | -1 | NM_004925    | AQP3         | 0 | NA | 0 | NA | 0 | NA | 0 | NA | 0 | NA |
| 9 | 33463941 | 33451350 | -1 | NM_022917    | NOL6         | 0 | NA | 0 | NA | 0 | NA | 0 | NA | 0 | NA |
| 9 | 33463941 | 33451350 | -1 | NM_139235    | NOL6         | 0 | NA | 0 | NA | 0 | NA | 0 | NA | 0 | NA |
| 9 | 33740514 | 33789229 | 1  | NM_007343    | PRSS3        | 0 | NA | 0 | NA | 0 | NA | 0 | NA | 0 | NA |
| 9 | 33785558 | 33789229 | 1  | NM_002771    | PRSS3        | 0 | NA | 0 | NA | 0 | NA | 0 | NA | 0 | NA |
| 9 | 33807181 | 33910401 | 1  | NM_017811    | UBE2R2       | 0 | NA | 0 | NA | 0 | NA | 1 | 14 | 0 | NA |
| 9 | 34038947 | 33911690 | -1 | NM_018449    | UBAP2        | 0 | NA | 0 | NA | 0 | NA | 0 | NA | 0 | NA |
| 9 | 34116736 | 34076385 | -1 | NM_015397    | WDR40A       | 0 | NA | 0 | NA | 1 | 17 | 0 | NA | 0 | NA |
| 9 | 34169010 | 34242521 | 1  | NM_016525    | UBAP1        | 0 | NA | 0 | NA | 0 | NA | 0 | NA | 0 | NA |
| 9 | 34319198 | 34242377 | -1 | NM_194313    | KIF24        | 0 | NA | 0 | NA | 0 | NA | 0 | NA | 0 | NA |
| 9 | 34319503 | 34333696 | 1  | NM_001161    | NUDT2        | 0 | NA | 0 | NA | 0 | NA | 0 | NA | 0 | NA |
| 9 | 34319503 | 34333696 | 1  | NM_147172    | NUDT2        | 0 | NA | 0 | NA | 0 | NA | 0 | NA | 0 | NA |
| 9 | 34319503 | 34333696 | 1  | NM_147173    | NUDT2        | 0 | NA | 0 | NA | 0 | NA | 0 | NA | 0 | NA |
| 9 | 34366894 | 34358906 | -1 | NM_020702    | KIAA1161     | 0 | NA | 1 | 15 | 0 | NA | 0 | NA | 0 | NA |
| 9 | 34371598 | 34369016 | -1 | NM_147168    | C9orf24      | 0 | NA | 1 | 12 | 0 | NA | 0 | NA | 0 | NA |
| 9 | 34371598 | 34369016 | -1 | NM_147169    | C9orf24      | 0 | NA | 1 | 12 | 0 | NA | 0 | NA | 0 | NA |
| 9 | 34387849 | 34369016 | -1 | NM_032596    | C9orf24      | 0 | NA | 0 | NA | 0 | NA | 0 | NA | 0 | NA |
| 9 | 34448568 | 34388181 | -1 | NM_147202    | C9orf25      | 0 | NA | 0 | NA | 0 | NA | 1 | 11 | 0 | NA |
| 9 | 34448810 | 34510982 | 1  | NM_012144    | DNAI1        | 0 | NA | 0 | NA | 1 | 11 | 0 | NA | 0 | NA |
| 9 | 34513037 | 34511039 | -1 | NM_198573    | C9orf165     | 0 | NA | 1 | 12 | 0 | NA | 0 | NA | 0 | NA |
| 9 | 34579722 | 34541430 | -1 | NM_001842    | CNTFR        | 1 | 11 | 0 | NA | 1 | 14 | 0 | NA | 0 | NA |
| 9 | 34579722 | 34541430 | -1 | NM_147164    | CNTFR        | 1 | 11 | 0 | NA | 1 | 14 | 0 | NA | 0 | NA |
| 9 | 34602101 | 34600491 | -1 | NM_148178    | C9orf23      | 0 | NA | 0 | NA | 0 | NA | 1 | 12 | 0 | NA |
| 9 | 34602101 | 34600491 | -1 | NM_148179    | C9orf23      | 0 | NA | 0 | NA | 0 | NA | 1 | 12 | 0 | NA |
| 9 | 34610496 | 34603547 | -1 | NM_007234    | DCTN3        | 0 | NA | 1 | 14 | 0 | NA | 1 | 12 | 0 | NA |
| 9 | 34610496 | 34603547 | -1 | NM_024348    | DCTN3        | 0 | NA | 1 | 14 | 0 | NA | 1 | 12 | 0 | NA |
| 9 | 34618011 | 34611454 | -1 | NM_001017363 | ARID3C       | 0 | NA | 1 | 14 | 0 | NA | 0 | NA | 0 | NA |
| 9 | 34627768 | 34624718 | -1 | NM_147157    | OPRS1        | 0 | NA | 1 | 14 | 0 | NA | 0 | NA | 0 | NA |
| 9 | 34627768 | 34624719 | -1 | NM_005866    | OPRS1        | 0 | NA | 1 | 14 | 0 | NA | 0 | NA | 0 | NA |
| 9 | 34636634 | 34640573 | 1  | NM_000155    | GALT         | 0 | NA | 0 | NA | 0 | NA | 0 | NA | 0 | NA |
| 9 | 34643931 | 34650816 | 1  | NM_147162    | IL11RA       | 0 | NA | 0 | NA | 0 | NA | 0 | NA | 0 | NA |
| 9 | 34643931 | 34651884 | 1  | NM_004512    | IL11RA       | 0 | NA | 0 | NA | 0 | NA | 0 | NA | 0 | NA |
| 9 | 34652689 | 34651892 | -1 | NM_006664    | CCL27        | 0 | NA | 0 | NA | 0 | NA | 0 | NA | 0 | NA |
| 9 | 34681274 | 34679566 | -1 | NM_006274    | CCL19        | 0 | NA | 0 | NA | 0 | NA | 0 | NA | 0 | NA |
| 9 | 34700147 | 34699001 | -1 | NM_002989    | CCL21        | 0 | NA | 0 | NA | 0 | NA | 0 | NA | 0 | NA |
| 9 | 34828494 | 34820900 | -1 | NM_001128494 | LOC100129533 | 0 | NA | 0 | NA | 0 | NA | 0 | NA | 0 | NA |
| 9 | 34948191 | 34972541 | 1  | NM_015297    | KIAA1045     | 0 | NA | 0 | NA | 0 | NA | 0 | NA | 0 | NA |
| 9 | 34979784 | 34988428 | 1  | NM_012266    | DNAJB5       | 0 | NA | 0 | NA | 0 | NA | 0 | NA | 0 | NA |
| 9 | 35031101 | 35035988 | 1  | NM_001040411 | C9orf131     | 0 | NA | 0 | NA | 0 | NA | 0 | NA | 0 | NA |
| 9 | 35031101 | 35035988 | 1  | NM_001040412 | C9orf131     | 0 | NA | 0 | NA | 0 | NA | 0 | NA | 0 | NA |
| 9 | 35032222 | 35035988 | 1  | NM_001040410 | C9orf131     | 0 | NA | 0 | NA | 0 | NA | 0 | NA | 0 | NA |
| 9 | 35032222 | 35035988 | 1  | NM_203299    | C9orf131     | 0 | NA | 0 | NA | 0 | NA | 0 | NA | 0 | NA |
| 9 | 35062739 | 35046064 | -1 | NM_007126    | VCP          | 0 | NA | 0 | NA | 0 | NA | 0 | NA | 0 | NA |
| 9 | 35070013 | 35063834 | -1 | NM_004629    | FANCG        | 0 | NA | 0 | NA | 0 | NA | 0 | NA | 0 | NA |
| 9 | 35086546 | 35078687 | -1 | NM_032634    | PIGO         | 0 | NA | 0 | NA | 0 | NA | 0 | NA | 0 | NA |
| 9 | 35086579 | 35078687 | -1 | NM_152850    | PIGO         | 0 | NA | 0 | NA | 0 | NA | 0 | NA | 0 | NA |
| 9 | 35093154 | 35089888 | -1 | NM_013442    | STOML2       | 0 | NA | 0 | NA | 0 | NA | 0 | NA | 0 | NA |
| 9 | 35105893 | 35094117 | -1 | NM_025182    | KIAA1539     | 1 | 11 | 0 | NA | 0 | NA | 0 | NA | 0 | NA |
| 9 | 35151988 | 35395332 | 1  | NM_006377    | UNC13B       | 0 | NA | 0 | NA | 0 | NA | 0 | NA | 0 | NA |



|   |          |          |    |              |           |   |    |   |    |   |    |   |    |   |    |
|---|----------|----------|----|--------------|-----------|---|----|---|----|---|----|---|----|---|----|
| 9 | 35480123 | 35551889 | 1  | NM_014806    | RUSC2     | 0 | NA | 0 | NA | 0 | NA | 0 | NA | 0 | NA |
| 9 | 35553896 | 35551945 | -1 | NM_001099951 | LOC730112 | 0 | NA | 0 | NA | 0 | NA | 0 | NA | 0 | NA |
| 9 | 35595280 | 35600038 | 1  | NM_006285    | TESK1     | 1 | 25 | 0 | NA | 1 | 13 | 1 | 16 | 0 | NA |
| 9 | 35608408 | 35599975 | -1 | NM_001782    | CD72      | 0 | NA | 1 | 13 | 0 | NA | 0 | NA | 0 | NA |
| 9 | 35640947 | 35639296 | -1 | NM_014450    | SIT1      | 0 | NA | 0 | NA | 0 | NA | 1 | 11 | 0 | NA |
| 9 | 35648310 | 35651184 | 1  | NM_174923    | CCDC107   | 0 | NA | 0 | NA | 0 | NA | 1 | 11 | 0 | NA |
| 9 | 35655278 | 35649340 | -1 | NM_032818    | C9orf100  | 0 | NA | 0 | NA | 0 | NA | 1 | 14 | 0 | NA |
| 9 | 35663914 | 35671154 | 1  | NM_001216    | CA9       | 0 | NA | 0 | NA | 1 | 12 | 1 | 14 | 0 | NA |
| 9 | 35680053 | 35671989 | -1 | NM_213674    | TPM2      | 0 | NA | 0 | NA | 0 | NA | 0 | NA | 0 | NA |
| 9 | 35680053 | 35672922 | -1 | NM_003289    | TPM2      | 0 | NA | 0 | NA | 0 | NA | 0 | NA | 0 | NA |
| 9 | 35722128 | 35687333 | -1 | NM_006289    | TLN1      | 1 | 11 | 0 | NA | 0 | NA | 0 | NA | 0 | NA |
| 9 | 35722316 | 35727005 | 1  | NM_006368    | CREB3     | 1 | 11 | 0 | NA | 0 | NA | 0 | NA | 0 | NA |
| 9 | 35739202 | 35742871 | 1  | NM_001080496 | RGP1      | 0 | NA | 0 | NA | 0 | NA | 0 | NA | 0 | NA |
| 9 | 35739225 | 35726862 | -1 | NM_020944    | GBA2      | 0 | NA | 0 | NA | 0 | NA | 0 | NA | 0 | NA |
| 9 | 35744272 | 35742990 | -1 | NM_001044264 | PC-3      | 0 | NA | 0 | NA | 0 | NA | 0 | NA | 0 | NA |
| 9 | 35782405 | 35799728 | 1  | NM_003995    | NPR2      | 0 | NA | 0 | NA | 0 | NA | 0 | NA | 0 | NA |
| 9 | 35802259 | 35797781 | -1 | NM_172312    | SPAG8     | 0 | NA | 0 | NA | 1 | 12 | 0 | NA | 0 | NA |
| 9 | 35802259 | 35799806 | -1 | NM_001039592 | SPAG8     | 0 | NA | 0 | NA | 1 | 12 | 0 | NA | 0 | NA |
| 9 | 35805042 | 35802956 | -1 | NM_032593    | HINT2     | 0 | NA | 0 | NA | 1 | 12 | 0 | NA | 0 | NA |
| 9 | 35818744 | 35808428 | -1 | NM_001012446 | C9orf128  | 0 | NA | 0 | NA | 0 | NA | 0 | NA | 0 | NA |
| 9 | 35819221 | 35837232 | 1  | NM_016446    | C9orf127  | 0 | NA | 0 | NA | 0 | NA | 0 | NA | 0 | NA |
| 9 | 35819228 | 35844844 | 1  | NM_001042589 | C9orf127  | 0 | NA | 0 | NA | 0 | NA | 0 | NA | 0 | NA |
| 9 | 35819512 | 35844844 | 1  | NM_001042590 | C9orf127  | 0 | NA | 0 | NA | 0 | NA | 0 | NA | 0 | NA |
| 9 | 35860398 | 35859459 | -1 | NM_001004487 | QR13J1    | 0 | NA | 0 | NA | 0 | NA | 0 | NA | 0 | NA |
| 9 | 35896188 | 35897138 | 1  | NM_001039792 | LGLL338   | 0 | NA | 0 | NA | 0 | NA | 0 | NA | 0 | NA |
| 9 | 35948151 | 35947104 | -1 | NM_019897    | OR2S2     | 0 | NA | 0 | NA | 0 | NA | 0 | NA | 0 | NA |
| 9 | 36026915 | 36114448 | 1  | NM_021111    | RECK      | 0 | NA | 0 | NA | 0 | NA | 0 | NA | 0 | NA |
| 9 | 36126741 | 36153903 | 1  | NM_022343    | C9orf19   | 0 | NA | 0 | NA | 0 | NA | 0 | NA | 0 | NA |
| 9 | 36159388 | 36161331 | 1  | NM_005893    | CCIN      | 0 | NA | 1 | 16 | 0 | NA | 0 | NA | 0 | NA |
| 9 | 36180891 | 36202056 | 1  | NM_001076677 | CLTA      | 0 | NA | 0 | NA | 0 | NA | 0 | NA | 0 | NA |
| 9 | 36180891 | 36202056 | 1  | NM_001833    | CLTA      | 0 | NA | 0 | NA | 0 | NA | 0 | NA | 0 | NA |
| 9 | 36180891 | 36202056 | 1  | NM_007096    | CLTA      | 0 | NA | 0 | NA | 0 | NA | 0 | NA | 0 | NA |
| 9 | 36248401 | 36204438 | -1 | NM_005476    | GENE      | 1 | 23 | 0 | NA | 0 | NA | 0 | NA | 0 | NA |
| 9 | 36390296 | 36326398 | -1 | NM_022781    | RNF38     | 0 | NA | 0 | NA | 0 | NA | 0 | NA | 0 | NA |
| 9 | 36390296 | 36326398 | -1 | NM_194329    | RNF38     | 0 | NA | 0 | NA | 0 | NA | 0 | NA | 0 | NA |
| 9 | 36390920 | 36326398 | -1 | NM_194328    | RNF38     | 0 | NA | 0 | NA | 0 | NA | 0 | NA | 0 | NA |
| 9 | 36390920 | 36326398 | -1 | NM_194332    | RNF38     | 0 | NA | 0 | NA | 0 | NA | 0 | NA | 0 | NA |
| 9 | 36391195 | 36326398 | -1 | NM_194330    | RNF38     | 0 | NA | 0 | NA | 0 | NA | 0 | NA | 0 | NA |
| 9 | 36562904 | 36667679 | 1  | NM_014791    | MELK      | 0 | NA | 0 | NA | 0 | NA | 0 | NA | 0 | NA |
| 9 | 37024476 | 36828530 | -1 | NM_016734    | PAX5      | 0 | NA | 1 | 12 | 0 | NA | 0 | NA | 1 | 18 |
| 9 | 37110468 | 37348145 | 1  | NM_032226    | ZCCHC7    | 1 | 75 | 1 | 15 | 1 | 24 | 1 | 23 | 0 | NA |
| 9 | 37412706 | 37426986 | 1  | NM_012203    | GRHRP     | 0 | NA | 0 | NA | 0 | NA | 0 | NA | 0 | NA |
| 9 | 37455396 | 37428110 | -1 | NM_014872    | ZBTB5     | 1 | 12 | 0 | NA | 0 | NA | 0 | NA | 0 | NA |
| 9 | 37475944 | 37493693 | 1  | NM_022490    | POLR1E    | 0 | NA | 0 | NA | 0 | NA | 0 | NA | 0 | NA |
| 9 | 37566250 | 37500888 | -1 | NM_012166    | FBXO10    | 0 | NA | 0 | NA | 0 | NA | 0 | NA | 0 | NA |
| 9 | 37582636 | 37578411 | -1 | NM_001001790 | C9orf105  | 0 | NA | 0 | NA | 1 | 12 | 1 | 12 | 0 | NA |
| 9 | 37641051 | 37736901 | 1  | NM_014907    | FRMPD1    | 0 | NA | 1 | 13 | 0 | NA | 0 | NA | 0 | NA |
| 9 | 37743801 | 37768969 | 1  | NM_144964    | RG9MTD3   | 0 | NA | 0 | NA | 0 | NA | 0 | NA | 0 | NA |
| 9 | 37775065 | 37770307 | -1 | NM_016042    | EXOSC3    | 0 | NA | 0 | NA | 0 | NA | 0 | NA | 0 | NA |
| 9 | 37775067 | 37770307 | -1 | NM_001002269 | EXOSC3    | 0 | NA | 0 | NA | 0 | NA | 0 | NA | 0 | NA |
| 9 | 37790789 | 37857665 | 1  | NM_024345    | WDR32     | 0 | NA | 0 | NA | 0 | NA | 0 | NA | 0 | NA |
| 9 | 37894350 | 37877600 | -1 | NM_033412    | MCART1    | 1 | 21 | 0 | NA | 0 | NA | 0 | NA | 0 | NA |
| 9 | 38059210 | 37905894 | -1 | NM_003028    | SHB       | 0 | NA | 0 | NA | 0 | NA | 0 | NA | 0 | NA |
| 9 | 38382701 | 38388657 | 1  | NM_000692    | ALDH1B1   | 0 | NA | 1 | 13 | 0 | NA | 1 | 13 | 0 | NA |
| 9 | 38414444 | 38398990 | -1 | NM_001007563 | IGFBPL1   | 0 | NA | 0 | NA | 0 | NA | 0 | NA | 0 | NA |
| 9 | 39278300 | 39062763 | -1 | NM_033655    | CNTNAP3   | 0 | NA | 0 | NA | 0 | NA | 0 | NA | 0 | NA |
| 9 | 39345698 | 39351956 | 1  | NM_001085452 | FAM75A1   | 0 | NA | 0 | NA | 0 | NA | 0 | NA | 0 | NA |
| 9 | 39345698 | 39351959 | 1  | NM_001040065 | FAM75A2   | 0 | NA | 0 | NA | 0 | NA | 0 | NA | 0 | NA |
| 9 | 39437188 | 39433813 | -1 | NM_001032297 | ZNF658B   | 0 | NA | 0 | NA | 0 | NA | 0 | NA | 0 | NA |
| 9 | 39874974 | 39881207 | 1  | NM_001085452 | FAM75A1   | 0 | NA | 0 | NA | 0 | NA | 0 | NA | 0 | NA |
| 9 | 39874974 | 39881210 | 1  | NM_001040065 | FAM75A2   | 0 | NA | 0 | NA | 0 | NA | 0 | NA | 0 | NA |
| 9 | 40690290 | 40696537 | 1  | NM_001083124 | FAM75A3   | 0 | NA | 0 | NA | 0 | NA | 0 | NA | 0 | NA |
| 9 | 40705661 | 40712679 | 1  | NM_001098718 | FAM74A3   | 0 | NA | 0 | NA | 0 | NA | 0 | NA | 0 | NA |
| 9 | 40782112 | 40761401 | -1 | NM_033160    | ZNF658    | 0 | NA | 0 | NA | 0 | NA | 0 | NA | 0 | NA |
| 9 | 41317364 | 41311106 | -1 | NM_001113541 | FAM75A5   | 0 | NA | 0 | NA | 0 | NA | 0 | NA | 0 | NA |

|   |          |          |    |              |           |   |    |   |    |   |    |   |    |   |    |
|---|----------|----------|----|--------------|-----------|---|----|---|----|---|----|---|----|---|----|
| 9 | 41317364 | 41311109 | -1 | NM_015667    | FAM75A7   | 0 | NA | 0 | NA | 0 | NA | 0 | NA | 0 | NA |
| 9 | 41490678 | 41496922 | 1  | NM_015667    | FAM75A7   | 0 | NA | 0 | NA | 0 | NA | 0 | NA | 0 | NA |
| 9 | 41490678 | 41496925 | 1  | NM_001113541 | FAM75A5   | 0 | NA | 0 | NA | 0 | NA | 0 | NA | 0 | NA |
| 9 | 41582207 | 41578832 | -1 | NM_001032297 | ZNF658B   | 0 | NA | 0 | NA | 0 | NA | 0 | NA | 0 | NA |
| 9 | 42358298 | 42401406 | 1  | NM_001012421 | ANKRD20A2 | 0 | NA | 0 | NA | 0 | NA | 0 | NA | 0 | NA |
| 9 | 42358298 | 42401859 | 1  | NM_001012419 | ANKRD20A3 | 0 | NA | 0 | NA | 0 | NA | 0 | NA | 0 | NA |
| 9 | 42707229 | 42710338 | 1  | NM_001099279 | FOXD4L2   | 0 | NA | 0 | NA | 0 | NA | 0 | NA | 0 | NA |
| 9 | 42707229 | 42710338 | 1  | NM_199244    | FOXD4L4   | 0 | NA | 0 | NA | 0 | NA | 0 | NA | 0 | NA |
| 9 | 43123540 | 43079967 | -1 | NM_001012419 | ANKRD20A3 | 0 | NA | 0 | NA | 0 | NA | 0 | NA | 0 | NA |
| 9 | 43123540 | 43080420 | -1 | NM_001012421 | ANKRD20A2 | 0 | NA | 0 | NA | 0 | NA | 0 | NA | 0 | NA |
| 9 | 65249430 | 65243182 | -1 | NM_001113541 | FAM75A5   | 0 | NA | 0 | NA | 0 | NA | 0 | NA | 0 | NA |
| 9 | 65249430 | 65243185 | -1 | NM_015667    | FAM75A7   | 0 | NA | 0 | NA | 0 | NA | 0 | NA | 0 | NA |
| 9 | 67516580 | 67559660 | 1  | NM_032250    | ANKRD20A1 | 0 | NA | 0 | NA | 0 | NA | 0 | NA | 0 | NA |
| 9 | 67516580 | 67560113 | 1  | NM_001012419 | ANKRD20A3 | 0 | NA | 0 | NA | 0 | NA | 0 | NA | 0 | NA |
| 9 | 68492024 | 68489299 | -1 | NM_001085476 | FOXD4L6   | 0 | NA | 0 | NA | 0 | NA | 0 | NA | 0 | NA |
| 9 | 68552413 | 68494357 | -1 | NM_001085457 | CBWD6     | 0 | NA | 0 | NA | 0 | NA | 0 | NA | 0 | NA |
| 9 | 68671800 | 68714929 | 1  | NM_001098805 | ANKRD20A4 | 0 | NA | 0 | NA | 0 | NA | 0 | NA | 0 | NA |
| 9 | 68715487 | 68738681 | 1  | NM_001098806 | CCDC29    | 0 | NA | 0 | NA | 0 | NA | 0 | NA | 0 | NA |
| 9 | 69486635 | 69465526 | -1 | NM_001126334 | FOXD4L5   | 0 | NA | 0 | NA | 0 | NA | 0 | NA | 0 | NA |
| 9 | 69669551 | 69666442 | -1 | NM_001099279 | FOXD4L2   | 0 | NA | 0 | NA | 0 | NA | 0 | NA | 0 | NA |
| 9 | 69669551 | 69666442 | -1 | NM_199244    | FOXD4L4   | 0 | NA | 0 | NA | 0 | NA | 0 | NA | 0 | NA |
| 9 | 69729991 | 69671823 | -1 | NM_001024916 | CBWD5     | 0 | NA | 0 | NA | 0 | NA | 0 | NA | 0 | NA |
| 9 | 69729997 | 69671819 | -1 | NM_201453    | CBWD3     | 0 | NA | 0 | NA | 0 | NA | 0 | NA | 0 | NA |
| 9 | 70046658 | 70104752 | 1  | NM_201453    | CBWD3     | 0 | NA | 0 | NA | 0 | NA | 0 | NA | 0 | NA |
| 9 | 70107602 | 70109820 | 1  | NM_199135    | FOXD4L3   | 0 | NA | 0 | NA | 0 | NA | 0 | NA | 0 | NA |
| 9 | 70161634 | 70335797 | 1  | NM_021965    | PGM5      | 0 | NA | 0 | NA | 0 | NA | 0 | NA | 0 | NA |
| 9 | 70345603 | 70341317 | -1 | NM_153237    | C9orf71   | 0 | NA | 0 | NA | 0 | NA | 0 | NA | 0 | NA |
| 9 | 70510435 | 70813911 | 1  | NM_003558    | PIP5K1B   | 0 | NA | 0 | NA | 0 | NA | 0 | NA | 0 | NA |
| 9 | 70584783 | 70588429 | 1  | NM_138333    | FAM122A   | 0 | NA | 0 | NA | 0 | NA | 0 | NA | 0 | NA |
| 9 | 70818828 | 70817270 | -1 | NM_002732    | PRKACG    | 0 | NA | 1 | 32 | 0 | NA | 0 | NA | 0 | NA |
| 9 | 70840163 | 70878772 | 1  | NM_000144    | FXN       | 0 | NA | 1 | 13 | 1 | 13 | 0 | NA | 0 | NA |
| 9 | 70840163 | 70878772 | 1  | NM_181425    | FXN       | 0 | NA | 1 | 13 | 1 | 13 | 0 | NA | 0 | NA |
| 9 | 70978908 | 71059940 | 1  | NM_004817    | TJP2      | 0 | NA | 0 | NA | 0 | NA | 0 | NA | 0 | NA |
| 9 | 70978908 | 71059940 | 1  | NM_201629    | TJP2      | 0 | NA | 0 | NA | 0 | NA | 0 | NA | 0 | NA |
| 9 | 71134060 | 71197188 | 1  | NM_004816    | C9orf61   | 0 | NA | 0 | NA | 0 | NA | 0 | NA | 0 | NA |
| 9 | 71477042 | 71235021 | -1 | NM_001163    | APBA1     | 1 | 14 | 0 | NA | 0 | NA | 0 | NA | 0 | NA |
| 9 | 71584696 | 71514257 | -1 | NM_001099666 | PTAR1     | 0 | NA | 0 | NA | 0 | NA | 0 | NA | 0 | NA |
| 9 | 71625550 | 71710968 | 1  | NM_001010940 | C9orf135  | 0 | NA | 0 | NA | 0 | NA | 0 | NA | 0 | NA |
| 9 | 71848339 | 72031708 | 1  | NM_153267    | MAMDC2    | 0 | NA | 0 | NA | 1 | 12 | 0 | NA | 0 | NA |
| 9 | 72063697 | 72159609 | 1  | NM_015110    | SMC5      | 0 | NA | 0 | NA | 0 | NA | 0 | NA | 0 | NA |
| 9 | 72219393 | 72189332 | -1 | NM_001206    | KLF9      | 1 | 12 | 0 | NA | 1 | 12 | 0 | NA | 0 | NA |
| 9 | 72673794 | 72339785 | -1 | NM_020952    | TRPM3     | 0 | NA | 0 | NA | 0 | NA | 0 | NA | 0 | NA |
| 9 | 72673794 | 72339785 | -1 | NM_024971    | TRPM3     | 0 | NA | 0 | NA | 0 | NA | 0 | NA | 0 | NA |
| 9 | 72673794 | 72339785 | -1 | NM_206944    | TRPM3     | 0 | NA | 0 | NA | 0 | NA | 0 | NA | 0 | NA |
| 9 | 72673794 | 72339785 | -1 | NM_206945    | TRPM3     | 0 | NA | 0 | NA | 0 | NA | 0 | NA | 0 | NA |
| 9 | 72673794 | 72339785 | -1 | NM_206946    | TRPM3     | 0 | NA | 0 | NA | 0 | NA | 0 | NA | 0 | NA |
| 9 | 72673794 | 72339785 | -1 | NM_206947    | TRPM3     | 0 | NA | 0 | NA | 0 | NA | 0 | NA | 0 | NA |
| 9 | 72673794 | 72588597 | -1 | NM_001007470 | TRPM3     | 0 | NA | 0 | NA | 0 | NA | 0 | NA | 0 | NA |
| 9 | 72673794 | 72588597 | -1 | NM_206948    | TRPM3     | 0 | NA | 0 | NA | 0 | NA | 0 | NA | 0 | NA |
| 9 | 72926334 | 72339785 | -1 | NM_001007471 | TRPM3     | 0 | NA | 0 | NA | 0 | NA | 0 | NA | 0 | NA |
| 9 | 73573228 | 73488102 | -1 | NM_013390    | TMEM2     | 1 | 12 | 0 | NA | 1 | 13 | 0 | NA | 0 | NA |
| 9 | 73715968 | 73667187 | -1 | NM_016014    | FAM108B1  | 0 | NA | 0 | NA | 1 | 13 | 0 | NA | 0 | NA |
| 9 | 73715968 | 73669887 | -1 | NM_001025780 | FAM108B1  | 0 | NA | 0 | NA | 1 | 13 | 0 | NA | 0 | NA |
| 9 | 73716242 | 73778191 | 1  | NM_182505    | C9orf85   | 0 | NA | 1 | 13 | 1 | 13 | 0 | NA | 0 | NA |
| 9 | 73954112 | 74056960 | 1  | NM_004293    | GDA       | 0 | NA | 0 | NA | 0 | NA | 0 | NA | 0 | NA |
| 9 | 74169983 | 74156160 | -1 | NM_001102420 | ZFAND5    | 1 | 11 | 0 | NA | 0 | NA | 0 | NA | 0 | NA |
| 9 | 74169983 | 74156160 | -1 | NM_001102421 | ZFAND5    | 1 | 11 | 0 | NA | 0 | NA | 0 | NA | 0 | NA |
| 9 | 74169983 | 74156160 | -1 | NM_006007    | ZFAND5    | 1 | 11 | 0 | NA | 0 | NA | 0 | NA | 0 | NA |
| 9 | 74326536 | 74641087 | 1  | NM_138691    | TMC1      | 0 | NA | 0 | NA | 0 | NA | 0 | NA | 0 | NA |
| 9 | 74757789 | 74705406 | -1 | NM_000689    | ALDH1A1   | 0 | NA | 0 | NA | 0 | NA | 0 | NA | 0 | NA |
| 9 | 74956600 | 74975127 | 1  | NM_000700    | ANXA1     | 0 | NA | 0 | NA | 0 | NA | 0 | NA | 0 | NA |
| 9 | 76302071 | 76491937 | 1  | NM_006914    | RORB      | 0 | NA | 0 | NA | 0 | NA | 0 | NA | 0 | NA |
| 9 | 76692830 | 76527230 | -1 | NM_017862    | TRPM6     | 0 | NA | 0 | NA | 0 | NA | 0 | NA | 0 | NA |
| 9 | 76757622 | 76751318 | -1 | NM_017998    | C9orf40   | 0 | NA | 0 | NA | 0 | NA | 0 | NA | 0 | NA |
| 9 | 76833130 | 76787692 | -1 | NM_152420    | C9orf41   | 0 | NA | 0 | NA | 0 | NA | 0 | NA | 0 | NA |

|   |          |          |    |              |           |   |    |   |    |   |    |   |    |   |    |
|---|----------|----------|----|--------------|-----------|---|----|---|----|---|----|---|----|---|----|
| 9 | 76892918 | 76865935 | -1 | NM_017881    | C9orf95   | 0 | NA | 0 | NA | 0 | NA | 0 | NA | 0 | NA |
| 9 | 76893217 | 76951934 | 1  | NM_012383    | OSTF1     | 0 | NA | 0 | NA | 0 | NA | 0 | NA | 0 | NA |
| 9 | 77695440 | 77998155 | 1  | NM_006200    | PCSK5     | 0 | NA | 0 | NA | 0 | NA | 0 | NA | 0 | NA |
| 9 | 78199264 | 78190252 | -1 | NM_018339    | RFK       | 0 | NA | 0 | NA | 0 | NA | 0 | NA | 0 | NA |
| 9 | 78246401 | 78312152 | 1  | NM_001097634 | GCNT1     | 0 | NA | 0 | NA | 0 | NA | 0 | NA | 0 | NA |
| 9 | 78263887 | 78312152 | 1  | NM_001097633 | GCNT1     | 0 | NA | 0 | NA | 0 | NA | 0 | NA | 0 | NA |
| 9 | 78263887 | 78312152 | 1  | NM_001490    | GCNT1     | 0 | NA | 0 | NA | 0 | NA | 0 | NA | 0 | NA |
| 9 | 78283076 | 78312152 | 1  | NM_001097635 | GCNT1     | 0 | NA | 0 | NA | 0 | NA | 0 | NA | 0 | NA |
| 9 | 78305368 | 78312152 | 1  | NM_001097636 | GCNT1     | 0 | NA | 0 | NA | 0 | NA | 0 | NA | 0 | NA |
| 9 | 78710823 | 78416111 | -1 | NM_015225    | PRUNE2    | 0 | NA | 0 | NA | 0 | NA | 0 | NA | 0 | NA |
| 9 | 78710823 | 78628000 | -1 | NM_138818    | PRUNE2    | 0 | NA | 0 | NA | 0 | NA | 0 | NA | 0 | NA |
| 9 | 78824390 | 78825689 | 1  | NM_001013735 | FOXB2     | 0 | NA | 1 | 22 | 0 | NA | 0 | NA | 0 | NA |
| 9 | 78982180 | 79187700 | 1  | NM_001018038 | VPS13A    | 1 | 13 | 1 | 16 | 0 | NA | 0 | NA | 0 | NA |
| 9 | 78982180 | 79189923 | 1  | NM_015186    | VPS13A    | 1 | 13 | 1 | 16 | 0 | NA | 0 | NA | 0 | NA |
| 9 | 78982180 | 79222219 | 1  | NM_001018037 | VPS13A    | 1 | 13 | 1 | 16 | 0 | NA | 0 | NA | 0 | NA |
| 9 | 78982180 | 79222219 | 1  | NM_033305    | VPS13A    | 1 | 13 | 1 | 16 | 0 | NA | 0 | NA | 0 | NA |
| 9 | 79453043 | 79228367 | -1 | NM_004297    | GNA14     | 0 | NA | 0 | NA | 0 | NA | 0 | NA | 0 | NA |
| 9 | 79836012 | 79525010 | -1 | NM_002072    | GNAQ      | 0 | NA | 0 | NA | 0 | NA | 0 | NA | 0 | NA |
| 9 | 80040810 | 80071803 | 1  | NM_001098802 | CEP78     | 0 | NA | 0 | NA | 0 | NA | 0 | NA | 0 | NA |
| 9 | 80040810 | 80071803 | 1  | NM_032171    | CEP78     | 0 | NA | 0 | NA | 0 | NA | 0 | NA | 0 | NA |
| 9 | 80101878 | 80134829 | 1  | NM_021154    | PSAT1     | 0 | NA | 0 | NA | 1 | 12 | 0 | NA | 0 | NA |
| 9 | 80101878 | 80134829 | 1  | NM_058179    | PSAT1     | 0 | NA | 0 | NA | 1 | 12 | 0 | NA | 0 | NA |
| 9 | 81196013 | 81196770 | 1  | NM_001010916 | CHCHD9    | 0 | NA | 0 | NA | 0 | NA | 0 | NA | 0 | NA |
| 9 | 81376697 | 81531476 | 1  | NM_007005    | TLE4      | 0 | NA | 0 | NA | 0 | NA | 0 | NA | 0 | NA |
| 9 | 83493416 | 83388417 | -1 | NM_005077    | TLE1      | 0 | NA | 0 | NA | 0 | NA | 0 | NA | 0 | NA |
| 9 | 83793506 | 83799986 | 1  | NM_001001670 | FLJ46321  | 0 | NA | 0 | NA | 0 | NA | 0 | NA | 0 | NA |
| 9 | 83866824 | 83865479 | -1 | NM_001098807 | FAM75B    | 0 | NA | 0 | NA | 0 | NA | 0 | NA | 0 | NA |
| 9 | 84867863 | 84787136 | -1 | NM_152573    | RAEF      | 0 | NA | 0 | NA | 0 | NA | 0 | NA | 0 | NA |
| 9 | 85343168 | 85052126 | -1 | NM_174938    | FRMD3     | 0 | NA | 0 | NA | 0 | NA | 0 | NA | 0 | NA |
| 9 | 85427785 | 85448858 | 1  | NM_001001551 | C9orf103  | 0 | NA | 0 | NA | 0 | NA | 0 | NA | 0 | NA |
| 9 | 85512688 | 85466166 | -1 | NM_053067    | UBQLN1    | 0 | NA | 0 | NA | 0 | NA | 0 | NA | 0 | NA |
| 9 | 85512773 | 85464698 | -1 | NM_013438    | UBQLN1    | 0 | NA | 0 | NA | 0 | NA | 0 | NA | 0 | NA |
| 9 | 85622477 | 85544155 | -1 | NM_025211    | GKAP1     | 0 | NA | 0 | NA | 0 | NA | 0 | NA | 0 | NA |
| 9 | 85726162 | 85641434 | -1 | NM_017576    | KIF27     | 1 | 11 | 0 | NA | 0 | NA | 0 | NA | 0 | NA |
| 9 | 85761483 | 85743046 | -1 | NM_032307    | C9orf64   | 0 | NA | 0 | NA | 0 | NA | 0 | NA | 0 | NA |
| 9 | 85785004 | 85772817 | -1 | NM_031263    | HNRNPK    | 0 | NA | 0 | NA | 0 | NA | 0 | NA | 0 | NA |
| 9 | 85785389 | 85772817 | -1 | NM_002140    | HNRNPK    | 0 | NA | 0 | NA | 0 | NA | 0 | NA | 0 | NA |
| 9 | 85785389 | 85772817 | -1 | NM_031262    | HNRNPK    | 0 | NA | 0 | NA | 0 | NA | 0 | NA | 0 | NA |
| 9 | 85785456 | 85808807 | 1  | NM_024945    | RMI1      | 0 | NA | 0 | NA | 0 | NA | 0 | NA | 0 | NA |
| 9 | 86173233 | 86082911 | -1 | NM_022127    | SLC28A3   | 0 | NA | 0 | NA | 0 | NA | 0 | NA | 0 | NA |
| 9 | 86473285 | 86682633 | 1  | NM_001018065 | NTRK2     | 0 | NA | 0 | NA | 0 | NA | 0 | NA | 0 | NA |
| 9 | 86473285 | 86682633 | 1  | NM_001018066 | NTRK2     | 0 | NA | 0 | NA | 0 | NA | 0 | NA | 0 | NA |
| 9 | 86473285 | 86828325 | 1  | NM_001018064 | NTRK2     | 0 | NA | 0 | NA | 0 | NA | 0 | NA | 0 | NA |
| 9 | 86473285 | 86828325 | 1  | NM_006180    | NTRK2     | 0 | NA | 0 | NA | 0 | NA | 0 | NA | 0 | NA |
| 9 | 86474445 | 86620441 | 1  | NM_001007097 | NTRK2     | 0 | NA | 0 | NA | 0 | NA | 0 | NA | 0 | NA |
| 9 | 87546764 | 87351273 | -1 | NM_015239    | AGTPBP1   | 0 | NA | 0 | NA | 0 | NA | 1 | 12 | 0 | NA |
| 9 | 87745876 | 87827037 | 1  | NM_024635    | MAK10     | 1 | 22 | 0 | NA | 0 | NA | 0 | NA | 0 | NA |
| 9 | 87904322 | 87830877 | -1 | NM_016548    | GOLM1     | 1 | 17 | 0 | NA | 0 | NA | 0 | NA | 0 | NA |
| 9 | 87904903 | 87830877 | -1 | NM_177937    | GOLM1     | 1 | 17 | 0 | NA | 0 | NA | 0 | NA | 0 | NA |
| 9 | 88064339 | 88032045 | -1 | NM_001010907 | C9orf153  | 0 | NA | 0 | NA | 0 | NA | 0 | NA | 0 | NA |
| 9 | 88087310 | 88069282 | -1 | NM_030940    | ISCA1     | 0 | NA | 0 | NA | 0 | NA | 0 | NA | 0 | NA |
| 9 | 88159189 | 88092467 | -1 | NM_024617    | ZCCHC8    | 1 | 14 | 0 | NA | 1 | 15 | 0 | NA | 0 | NA |
| 9 | 88751924 | 88749096 | -1 | NM_002048    | GAS1      | 0 | NA | 0 | NA | 0 | NA | 0 | NA | 0 | NA |
| 9 | 88953378 | 88964461 | 1  | NM_001001709 | FLJ45537  | 1 | 16 | 0 | NA | 0 | NA | 0 | NA | 0 | NA |
| 9 | 89302575 | 89513369 | 1  | NM_004938    | DAPK1     | 0 | NA | 0 | NA | 0 | NA | 0 | NA | 0 | NA |
| 9 | 89530793 | 89536204 | 1  | NM_001912    | CTSL1     | 0 | NA | 0 | NA | 0 | NA | 0 | NA | 0 | NA |
| 9 | 89530793 | 89536204 | 1  | NM_145918    | CTSL1     | 0 | NA | 0 | NA | 0 | NA | 0 | NA | 0 | NA |
| 9 | 89577649 | 89591619 | 1  | NM_001023564 | CTSL3     | 0 | NA | 0 | NA | 0 | NA | 0 | NA | 0 | NA |
| 9 | 89687591 | 89693634 | 1  | NM_178828    | C9orf79   | 0 | NA | 0 | NA | 0 | NA | 0 | NA | 0 | NA |
| 9 | 89779487 | 89771178 | -1 | NM_001039803 | CCRK      | 0 | NA | 0 | NA | 0 | NA | 0 | NA | 0 | NA |
| 9 | 89779487 | 89771178 | -1 | NM_012119    | CCRK      | 0 | NA | 0 | NA | 0 | NA | 0 | NA | 0 | NA |
| 9 | 89779487 | 89771178 | -1 | NM_178432    | CCRK      | 0 | NA | 0 | NA | 0 | NA | 0 | NA | 0 | NA |
| 9 | 90193116 | 90283442 | 1  | NM_006717    | SPIN1     | 1 | 11 | 0 | NA | 0 | NA | 0 | NA | 0 | NA |
| 9 | 90339839 | 90380521 | 1  | NM_145283    | NXNL2     | 0 | NA | 0 | NA | 0 | NA | 0 | NA | 0 | NA |
| 9 | 90456895 | 90451913 | -1 | NM_001100111 | LOC286238 | 0 | NA | 0 | NA | 0 | NA | 0 | NA | 0 | NA |

|   |          |          |    |              |           |   |    |   |    |   |    |   |    |   |    |
|---|----------|----------|----|--------------|-----------|---|----|---|----|---|----|---|----|---|----|
| 9 | 90795662 | 90800875 | 1  | NM_001001938 | C9orf47   | 0 | NA | 0 | NA | 0 | NA | 0 | NA | 0 | NA |
| 9 | 90796181 | 90809745 | 1  | NM_005226    | S1PR3     | 0 | NA | 0 | NA | 0 | NA | 0 | NA | 0 | NA |
| 9 | 90983502 | 90817888 | -1 | NM_016848    | SHC3      | 1 | 17 | 0 | NA | 0 | NA | 0 | NA | 0 | NA |
| 9 | 91115932 | 91121438 | 1  | NM_001827    | CKS2      | 1 | 11 | 0 | NA | 0 | NA | 1 | 17 | 0 | NA |
| 9 | 91123231 | 91164381 | 1  | NM_024077    | SECISBP2  | 1 | 11 | 0 | NA | 0 | NA | 1 | 17 | 0 | NA |
| 9 | 91169386 | 91166335 | -1 | NM_182635    | C9orf164  | 0 | NA | 0 | NA | 0 | NA | 0 | NA | 0 | NA |
| 9 | 91284431 | 91181971 | -1 | NM_006378    | SEMA4D    | 0 | NA | 0 | NA | 0 | NA | 0 | NA | 0 | NA |
| 9 | 91409747 | 91411289 | 1  | NM_006705    | GADD45G   | 0 | NA | 0 | NA | 0 | NA | 0 | NA | 0 | NA |
| 9 | 92444928 | 92411933 | -1 | NM_017594    | DIRAS2    | 0 | NA | 0 | NA | 0 | NA | 0 | NA | 0 | NA |
| 9 | 92603890 | 92698304 | 1  | NM_003177    | SYK       | 0 | NA | 0 | NA | 0 | NA | 0 | NA | 0 | NA |
| 9 | 93164027 | 93015917 | -1 | NM_001698    | AUH       | 0 | NA | 0 | NA | 0 | NA | 0 | NA | 0 | NA |
| 9 | 93225965 | 93211147 | -1 | NM_005384    | NFIL3     | 1 | 11 | 0 | NA | 0 | NA | 0 | NA | 0 | NA |
| 9 | 93752265 | 93524704 | -1 | NM_004560    | ROR2      | 0 | NA | 1 | 13 | 0 | NA | 0 | NA | 0 | NA |
| 9 | 93917511 | 93833247 | -1 | NM_006415    | SPTLC1    | 0 | NA | 0 | NA | 0 | NA | 0 | NA | 0 | NA |
| 9 | 93917511 | 93881166 | -1 | NM_178324    | SPTLC1    | 0 | NA | 0 | NA | 0 | NA | 0 | NA | 0 | NA |
| 9 | 94095793 | 94012445 | -1 | NM_013417    | IARS      | 1 | 14 | 0 | NA | 0 | NA | 0 | NA | 0 | NA |
| 9 | 94095859 | 94012445 | -1 | NM_002161    | IARS      | 1 | 14 | 0 | NA | 0 | NA | 0 | NA | 0 | NA |
| 9 | 94127561 | 94417258 | 1  | NM_001012267 | CENPP     | 1 | 18 | 0 | NA | 1 | 14 | 1 | 13 | 0 | NA |
| 9 | 94127659 | 94099460 | -1 | NM_017948    | NOL8      | 1 | 18 | 0 | NA | 1 | 14 | 1 | 13 | 0 | NA |
| 9 | 94206758 | 94188069 | -1 | NM_014057    | OGN       | 0 | NA | 0 | NA | 0 | NA | 0 | NA | 0 | NA |
| 9 | 94206758 | 94188069 | -1 | NM_033014    | OGN       | 0 | NA | 0 | NA | 0 | NA | 0 | NA | 0 | NA |
| 9 | 94226657 | 94216347 | -1 | NM_005014    | QMD       | 0 | NA | 0 | NA | 1 | 12 | 0 | NA | 0 | NA |
| 9 | 94284609 | 94288309 | -1 | NM_017680    | ASPN      | 0 | NA | 0 | NA | 0 | NA | 0 | NA | 0 | NA |
| 9 | 94338073 | 94297419 | -1 | NM_001393    | ECM2      | 0 | NA | 0 | NA | 0 | NA | 0 | NA | 0 | NA |
| 9 | 94472368 | 94415286 | -1 | NM_022755    | IPPK      | 1 | 11 | 0 | NA | 0 | NA | 1 | 11 | 0 | NA |
| 9 | 94566904 | 94513465 | -1 | NM_001003800 | BICD2     | 0 | NA | 0 | NA | 0 | NA | 0 | NA | 0 | NA |
| 9 | 94566904 | 94513465 | -1 | NM_015250    | BICD2     | 0 | NA | 0 | NA | 0 | NA | 0 | NA | 0 | NA |
| 9 | 94680091 | 94648175 | -1 | NM_001007101 | ZNF484    | 0 | NA | 0 | NA | 0 | NA | 0 | NA | 0 | NA |
| 9 | 94680111 | 94648171 | -1 | NM_031486    | ZNF484    | 0 | NA | 0 | NA | 0 | NA | 0 | NA | 0 | NA |
| 9 | 94749421 | 94838339 | 1  | NM_001083536 | FGD3      | 0 | NA | 0 | NA | 0 | NA | 0 | NA | 0 | NA |
| 9 | 94776538 | 94838339 | 1  | NM_033086    | FGD3      | 0 | NA | 0 | NA | 1 | 12 | 0 | NA | 0 | NA |
| 9 | 94860809 | 94887236 | 1  | NM_145006    | SUSD3     | 0 | NA | 0 | NA | 0 | NA | 0 | NA | 0 | NA |
| 9 | 94898270 | 94915386 | 1  | NM_032310    | C9orf89   | 1 | 30 | 0 | NA | 1 | 33 | 0 | NA | 0 | NA |
| 9 | 94936391 | 94923591 | -1 | NM_004148    | NINJ1     | 0 | NA | 0 | NA | 1 | 12 | 0 | NA | 0 | NA |
| 9 | 94987032 | 95122675 | 1  | NM_006648    | WNK2      | 0 | NA | 1 | 12 | 0 | NA | 0 | NA | 0 | NA |
| 9 | 95148517 | 95120301 | -1 | NM_001098808 | C9orf129  | 0 | NA | 1 | 15 | 0 | NA | 1 | 11 | 0 | NA |
| 9 | 95253993 | 95368218 | 1  | NM_014612    | FAM120A   | 0 | NA | 0 | NA | 0 | NA | 0 | NA | 0 | NA |
| 9 | 95255695 | 95248602 | -1 | NM_198841    | FAM120AOS | 0 | NA | 0 | NA | 0 | NA | 0 | NA | 0 | NA |
| 9 | 95378729 | 95481690 | 1  | NM_005392    | PHF2      | 0 | NA | 0 | NA | 0 | NA | 0 | NA | 0 | NA |
| 9 | 95757429 | 95753729 | -1 | NM_021570    | BARX1     | 0 | NA | 1 | 12 | 0 | NA | 0 | NA | 0 | NA |
| 9 | 95832896 | 95911957 | 1  | NM_177995    | PTPDC1    | 0 | NA | 0 | NA | 0 | NA | 0 | NA | 0 | NA |
| 9 | 95886566 | 95911957 | 1  | NM_152422    | PTPDC1    | 0 | NA | 0 | NA | 0 | NA | 0 | NA | 0 | NA |
| 9 | 96061398 | 96105112 | 1  | NM_194320    | ZNF169    | 0 | NA | 0 | NA | 0 | NA | 0 | NA | 0 | NA |
| 9 | 96130747 | 96120298 | -1 | NM_017561    | FAM22F    | 0 | NA | 0 | NA | 0 | NA | 0 | NA | 0 | NA |
| 9 | 96176653 | 96263023 | 1  | NM_032558    | HIATL1    | 0 | NA | 0 | NA | 0 | NA | 0 | NA | 0 | NA |
| 9 | 96395896 | 96360823 | -1 | NM_003837    | FBP2      | 0 | NA | 0 | NA | 0 | NA | 0 | NA | 0 | NA |
| 9 | 96441744 | 96405237 | -1 | NM_000507    | FBP1      | 0 | NA | 0 | NA | 1 | 12 | 0 | NA | 0 | NA |
| 9 | 96528814 | 96889262 | 1  | NM_032823    | C9orf3    | 0 | NA | 0 | NA | 0 | NA | 0 | NA | 0 | NA |
| 9 | 97119812 | 96901156 | -1 | NM_000136    | FANCC     | 1 | 15 | 0 | NA | 1 | 13 | 1 | 12 | 0 | NA |
| 9 | 97309302 | 97245084 | -1 | NM_001083607 | PTCH1     | 1 | 12 | 0 | NA | 0 | NA | 1 | 11 | 0 | NA |
| 9 | 97309520 | 97245084 | -1 | NM_001083606 | PTCH1     | 1 | 12 | 0 | NA | 0 | NA | 1 | 11 | 0 | NA |
| 9 | 97310143 | 97245084 | -1 | NM_001083604 | PTCH1     | 1 | 12 | 0 | NA | 0 | NA | 1 | 11 | 0 | NA |
| 9 | 97310143 | 97245084 | -1 | NM_001083605 | PTCH1     | 1 | 12 | 0 | NA | 0 | NA | 1 | 11 | 0 | NA |
| 9 | 97310652 | 97245084 | -1 | NM_000264    | PTCH1     | 1 | 12 | 0 | NA | 0 | NA | 1 | 11 | 0 | NA |
| 9 | 97319068 | 97245084 | -1 | NM_001083602 | PTCH1     | 1 | 12 | 0 | NA | 0 | NA | 1 | 11 | 0 | NA |
| 9 | 97319068 | 97245084 | -1 | NM_001083603 | PTCH1     | 1 | 12 | 0 | NA | 0 | NA | 1 | 11 | 0 | NA |
| 9 | 97677720 | 97770943 | 1  | NM_001010895 | C9orf102  | 1 | 22 | 0 | NA | 0 | NA | 1 | 14 | 0 | NA |
| 9 | 98104255 | 98037409 | -1 | NM_000197    | HSD17B3   | 0 | NA | 0 | NA | 0 | NA | 0 | NA | 0 | NA |
| 9 | 98185758 | 98122808 | -1 | NM_007001    | SLC35D2   | 0 | NA | 0 | NA | 0 | NA | 0 | NA | 0 | NA |
| 9 | 98220490 | 98190056 | -1 | NM_153695    | ZNF367    | 1 | 13 | 0 | NA | 0 | NA | 0 | NA | 0 | NA |
| 9 | 98252234 | 98293439 | 1  | NM_014282    | HABP4     | 0 | NA | 0 | NA | 0 | NA | 0 | NA | 0 | NA |
| 9 | 98369024 | 98302215 | -1 | NM_001077181 | CDC14B    | 0 | NA | 0 | NA | 0 | NA | 0 | NA | 0 | NA |
| 9 | 98421933 | 98302215 | -1 | NM_003671    | CDC14B    | 0 | NA | 0 | NA | 0 | NA | 0 | NA | 0 | NA |
| 9 | 98421933 | 98302215 | -1 | NM_033331    | CDC14B    | 0 | NA | 0 | NA | 0 | NA | 0 | NA | 0 | NA |
| 9 | 98457420 | 98443353 | -1 | NM_153698    | C9orf21   | 0 | NA | 0 | NA | 0 | NA | 0 | NA | 0 | NA |

|   |           |           |    |              |          |   |    |   |    |   |    |   |    |   |    |
|---|-----------|-----------|----|--------------|----------|---|----|---|----|---|----|---|----|---|----|
| 9 | 98580149  | 98557967  | -1 | NM_014930    | ZNF510   | 0 | NA | 0 | NA | 0 | NA | 0 | NA | 0 | NA |
| 9 | 98656210  | 98619093  | -1 | NM_001001662 | ZNF782   | 1 | 11 | 0 | NA | 0 | NA | 0 | NA | 0 | NA |
| 9 | 98730412  | 98744393  | 1  | NM_001045477 | FAM22G   | 0 | NA | 0 | NA | 0 | NA | 0 | NA | 0 | NA |
| 9 | 98841360  | 98834758  | -1 | NM_001333    | CTSL2    | 0 | NA | 1 | 12 | 0 | NA | 0 | NA | 0 | NA |
| 9 | 99001731  | 98999357  | -1 | NM_199005    | ZNF322B  | 0 | NA | 0 | NA | 0 | NA | 0 | NA | 0 | NA |
| 9 | 99040599  | 99179390  | 1  | NM_020893    | KIAA1529 | 1 | 12 | 0 | NA | 0 | NA | 0 | NA | 0 | NA |
| 9 | 99214122  | 99298226  | 1  | NM_014290    | TDRD7    | 0 | NA | 0 | NA | 0 | NA | 0 | NA | 0 | NA |
| 9 | 99326257  | 99403351  | 1  | NM_003275    | TMOD1    | 0 | NA | 0 | NA | 0 | NA | 0 | NA | 0 | NA |
| 9 | 99435525  | 99475850  | 1  | NM_002486    | NCBP1    | 0 | NA | 0 | NA | 0 | NA | 0 | NA | 0 | NA |
| 9 | 99435783  | 99402182  | -1 | NM_139246    | C9orf97  | 0 | NA | 0 | NA | 0 | NA | 0 | NA | 0 | NA |
| 9 | 99499512  | 99477011  | -1 | NM_000380    | XPA      | 0 | NA | 0 | NA | 0 | NA | 0 | NA | 0 | NA |
| 9 | 99655357  | 99658818  | 1  | NM_004473    | FOXE1    | 0 | NA | 1 | 17 | 0 | NA | 0 | NA | 1 | 14 |
| 9 | 99724673  | 99706592  | -1 | NM_016481    | C9orf156 | 0 | NA | 0 | NA | 0 | NA | 0 | NA | 0 | NA |
| 9 | 99740347  | 99728893  | -1 | NM_197978    | HEMGN    | 0 | NA | 0 | NA | 0 | NA | 0 | NA | 0 | NA |
| 9 | 99746955  | 99728893  | -1 | NM_018437    | HEMGN    | 0 | NA | 0 | NA | 0 | NA | 0 | NA | 0 | NA |
| 9 | 99785309  | 99818045  | 1  | NM_006401    | ANP32B   | 0 | NA | 0 | NA | 0 | NA | 0 | NA | 0 | NA |
| 9 | 99858841  | 99885178  | 1  | NM_018946    | NANS     | 0 | NA | 0 | NA | 1 | 12 | 0 | NA | 0 | NA |
| 9 | 99921301  | 99886457  | -1 | NM_014788    | TRIM14   | 0 | NA | 0 | NA | 0 | NA | 0 | NA | 0 | NA |
| 9 | 99921301  | 99886457  | -1 | NM_033219    | TRIM14   | 0 | NA | 0 | NA | 0 | NA | 0 | NA | 0 | NA |
| 9 | 99921301  | 99886457  | -1 | NM_033221    | TRIM14   | 0 | NA | 0 | NA | 0 | NA | 0 | NA | 0 | NA |
| 9 | 99921309  | 99871392  | -1 | NM_033220    | TRIM14   | 0 | NA | 0 | NA | 0 | NA | 0 | NA | 0 | NA |
| 9 | 99974995  | 99926296  | -1 | NM_003389    | CORO2A   | 0 | NA | 0 | NA | 0 | NA | 0 | NA | 0 | NA |
| 9 | 99994743  | 99926296  | -1 | NM_052820    | CORO2A   | 0 | NA | 0 | NA | 0 | NA | 0 | NA | 0 | NA |
| 9 | 100057736 | 100001139 | -1 | NM_018421    | TBC1D2   | 1 | 14 | 0 | NA | 0 | NA | 0 | NA | 0 | NA |
| 9 | 100511300 | 100090186 | -1 | NM_005458    | GABBR2   | 0 | NA | 0 | NA | 0 | NA | 0 | NA | 0 | NA |
| 9 | 100598615 | 100534111 | -1 | NM_173551    | ANKS6    | 0 | NA | 0 | NA | 0 | NA | 0 | NA | 0 | NA |
| 9 | 100609801 | 100652180 | 1  | NM_024642    | GALNT12  | 0 | NA | 0 | NA | 1 | 13 | 0 | NA | 0 | NA |
| 9 | 100745958 | 100872889 | 1  | NM_001855    | COL15A1  | 0 | NA | 0 | NA | 0 | NA | 0 | NA | 0 | NA |
| 9 | 100907232 | 100956294 | 1  | NM_004612    | TGFBR1   | 0 | NA | 0 | NA | 0 | NA | 0 | NA | 0 | NA |
| 9 | 101024067 | 101018527 | -1 | NM_033087    | ALG2     | 0 | NA | 0 | NA | 0 | NA | 0 | NA | 0 | NA |
| 9 | 101024390 | 101032722 | 1  | NM_006808    | SEC61B   | 0 | NA | 0 | NA | 0 | NA | 0 | NA | 0 | NA |
| 9 | 101623957 | 101636162 | 1  | NM_173199    | NR4A3    | 0 | NA | 0 | NA | 1 | 12 | 1 | 12 | 0 | NA |
| 9 | 101623957 | 101668994 | 1  | NM_006981    | NR4A3    | 0 | NA | 0 | NA | 1 | 12 | 1 | 12 | 0 | NA |
| 9 | 101623957 | 101668994 | 1  | NM_173198    | NR4A3    | 0 | NA | 0 | NA | 1 | 12 | 1 | 12 | 0 | NA |
| 9 | 101628829 | 101668994 | 1  | NM_173200    | NR4A3    | 0 | NA | 0 | NA | 1 | 12 | 1 | 12 | 0 | NA |
| 9 | 101708735 | 101776639 | 1  | NM_017919    | STX17    | 0 | NA | 0 | NA | 0 | NA | 0 | NA | 0 | NA |
| 9 | 101901151 | 101781283 | -1 | NM_015051    | TXNDC4   | 0 | NA | 0 | NA | 0 | NA | 0 | NA | 0 | NA |
| 9 | 101901331 | 102103247 | 1  | NM_014425    | INVS     | 0 | NA | 0 | NA | 0 | NA | 0 | NA | 0 | NA |
| 9 | 101901331 | 102103247 | 1  | NM_183245    | INVS     | 0 | NA | 0 | NA | 0 | NA | 0 | NA | 0 | NA |
| 9 | 102154995 | 102104190 | -1 | NM_017746    | TEX10    | 0 | NA | 0 | NA | 0 | NA | 0 | NA | 0 | NA |
| 9 | 102229462 | 102253334 | 1  | NM_080655    | C9orf30  | 1 | 11 | 0 | NA | 0 | NA | 0 | NA | 0 | NA |
| 9 | 102275537 | 102379735 | 1  | NM_003692    | TMEFF1   | 0 | NA | 0 | NA | 0 | NA | 0 | NA | 0 | NA |
| 9 | 102380156 | 102389994 | 1  | NM_001018116 | MURC     | 0 | NA | 0 | NA | 0 | NA | 0 | NA | 0 | NA |
| 9 | 102830851 | 103127238 | 1  | NM_207299    | PRG-3    | 0 | NA | 0 | NA | 0 | NA | 0 | NA | 0 | NA |
| 9 | 102987137 | 103127238 | 1  | NM_017753    | PRG-3    | 0 | NA | 0 | NA | 0 | NA | 0 | NA | 0 | NA |
| 9 | 103187108 | 103162889 | -1 | NM_001701    | BAAT     | 0 | NA | 0 | NA | 0 | NA | 0 | NA | 0 | NA |
| 9 | 103200740 | 103192069 | -1 | NM_019051    | MRPL50   | 0 | NA | 0 | NA | 1 | 12 | 1 | 15 | 0 | NA |
| 9 | 103200983 | 103212763 | 1  | NM_003452    | ZNF189   | 0 | NA | 0 | NA | 1 | 12 | 1 | 15 | 0 | NA |
| 9 | 103200983 | 103212763 | 1  | NM_197977    | ZNF189   | 0 | NA | 0 | NA | 1 | 12 | 1 | 15 | 0 | NA |
| 9 | 103237926 | 103223478 | -1 | NM_000035    | ALDOB    | 0 | NA | 0 | NA | 1 | 12 | 0 | NA | 0 | NA |
| 9 | 103289296 | 103277428 | -1 | NM_032342    | C9orf125 | 0 | NA | 0 | NA | 0 | NA | 0 | NA | 0 | NA |
| 9 | 103335953 | 103365447 | 1  | NM_019592    | RNF20    | 0 | NA | 0 | NA | 0 | NA | 0 | NA | 0 | NA |
| 9 | 103397104 | 103393717 | -1 | NM_147180    | PPP3R2   | 0 | NA | 0 | NA | 0 | NA | 0 | NA | 0 | NA |
| 9 | 103540683 | 103371455 | -1 | NM_133445    | GRIN3A   | 0 | NA | 0 | NA | 0 | NA | 0 | NA | 0 | NA |
| 9 | 104797483 | 104820591 | 1  | NM_001340    | CYLC2    | 0 | NA | 0 | NA | 0 | NA | 0 | NA | 0 | NA |
| 9 | 105896361 | 105943521 | 1  | NM_001042551 | SMC2     | 1 | 13 | 0 | NA | 0 | NA | 0 | NA | 0 | NA |
| 9 | 105896361 | 105943521 | 1  | NM_006444    | SMC2     | 1 | 13 | 0 | NA | 0 | NA | 0 | NA | 0 | NA |
| 9 | 105896651 | 105943521 | 1  | NM_001042550 | SMC2     | 1 | 13 | 0 | NA | 0 | NA | 0 | NA | 0 | NA |
| 9 | 106306364 | 106307324 | 1  | NM_001004485 | OR13F1   | 0 | NA | 0 | NA | 0 | NA | 0 | NA | 0 | NA |
| 9 | 106329311 | 106328354 | -1 | NM_001001919 | OR13C4   | 0 | NA | 0 | NA | 0 | NA | 0 | NA | 0 | NA |
| 9 | 106338915 | 106337871 | -1 | NM_001001961 | OR13C3   | 0 | NA | 0 | NA | 0 | NA | 0 | NA | 0 | NA |
| 9 | 106371269 | 106372232 | 1  | NM_001004483 | OR13C8   | 0 | NA | 0 | NA | 0 | NA | 0 | NA | 0 | NA |
| 9 | 106401515 | 106400558 | -1 | NM_001004482 | OR13C5   | 0 | NA | 0 | NA | 0 | NA | 0 | NA | 0 | NA |
| 9 | 106407729 | 106406772 | -1 | NM_001004481 | OR13C2   | 0 | NA | 0 | NA | 0 | NA | 0 | NA | 0 | NA |
| 9 | 106420306 | 106419349 | -1 | NM_001001956 | OR13C9   | 0 | NA | 0 | NA | 0 | NA | 0 | NA | 0 | NA |

|   |           |           |    |              |             |   |    |    |    |   |    |   |    |   |    |
|---|-----------|-----------|----|--------------|-------------|---|----|----|----|---|----|---|----|---|----|
| 9 | 106496523 | 106497564 | 1  | NM_001004484 | OR13D1      | 0 | NA | 0  | NA | 0 | NA | 0 | NA | 0 | NA |
| 9 | 106549789 | 106562224 | 1  | NM_015469    | NIPSNAP3A   | 0 | NA | 0  | NA | 0 | NA | 0 | NA | 0 | NA |
| 9 | 106566271 | 106576112 | 1  | NM_018376    | NIPSNAP3B   | 0 | NA | 0  | NA | 0 | NA | 0 | NA | 0 | NA |
| 9 | 106730257 | 106583104 | -1 | NM_005502    | ABCA1       | 0 | NA | 0  | NA | 0 | NA | 0 | NA | 0 | NA |
| 9 | 107046749 | 107193503 | 1  | NM_080546    | SLC44A1     | 1 | 19 | 0  | NA | 0 | NA | 0 | NA | 0 | NA |
| 9 | 107250145 | 107274241 | 1  | NM_031919    | FSD1L       | 0 | NA | 1  | 19 | 0 | NA | 0 | NA | 0 | NA |
| 9 | 107250145 | 107351206 | 1  | NM_207647    | FSD1L       | 0 | NA | 1  | 19 | 0 | NA | 0 | NA | 0 | NA |
| 9 | 107360231 | 107443220 | 1  | NM_001079802 | FKTN        | 0 | NA | 0  | NA | 0 | NA | 0 | NA | 0 | NA |
| 9 | 107360231 | 107443220 | 1  | NM_006731    | FKTN        | 0 | NA | 0  | NA | 0 | NA | 0 | NA | 0 | NA |
| 9 | 107464598 | 107464925 | 1  | NM_005421    | TAL2        | 0 | NA | 0  | NA | 0 | NA | 0 | NA | 0 | NA |
| 9 | 107496645 | 107577265 | 1  | NM_018112    | TMEM38B     | 0 | NA | 0  | NA | 0 | NA | 0 | NA | 0 | NA |
| 9 | 108665198 | 108813617 | 1  | NM_021224    | ZNF462      | 0 | NA | 13 | 0  | 0 | NA | 0 | NA | 0 | NA |
| 9 | 109085364 | 109134291 | 1  | NM_002874    | RAD23B      | 1 | 11 | 0  | NA | 0 | NA | 0 | NA | 0 | NA |
| 9 | 109291576 | 109286955 | -1 | NM_004235    | KLF4        | 0 | NA | 0  | NA | 1 | 12 | 0 | NA | 0 | NA |
| 9 | 110658031 | 110656691 | -1 | NM_006686    | ACTL7B      | 0 | NA | 0  | NA | 0 | NA | 0 | NA | 0 | NA |
| 9 | 110664423 | 110665856 | 1  | NM_006687    | ACTL7A      | 0 | NA | 0  | NA | 1 | 12 | 0 | NA | 0 | NA |
| 9 | 110736217 | 110669620 | -1 | NM_003640    | IKBKAP      | 0 | NA | 0  | NA | 0 | NA | 0 | NA | 0 | NA |
| 9 | 110736281 | 110743058 | 1  | NM_017832    | C9orf6      | 0 | NA | 0  | NA | 0 | NA | 0 | NA | 0 | NA |
| 9 | 110815585 | 110744671 | -1 | NM_003798    | CTNNA1      | 1 | 11 | 0  | NA | 0 | NA | 0 | NA | 0 | NA |
| 9 | 110922046 | 110817235 | -1 | NM_001099734 | C9orf5      | 1 | 11 | 0  | NA | 0 | NA | 0 | NA | 0 | NA |
| 9 | 110922046 | 110817235 | -1 | NM_032012    | C9orf5      | 1 | 11 | 0  | NA | 0 | NA | 0 | NA | 0 | NA |
| 9 | 110969392 | 110939401 | -1 | NM_014334    | C9orf4      | 0 | NA | 0  | NA | 0 | NA | 0 | NA | 0 | NA |
| 9 | 111122842 | 110974074 | -1 | NM_019114    | EPB41L4B    | 0 | NA | 0  | NA | 0 | NA | 0 | NA | 0 | NA |
| 9 | 111122842 | 111041832 | -1 | NM_018424    | EPB41L4B    | 0 | NA | 0  | NA | 0 | NA | 0 | NA | 0 | NA |
| 9 | 111265555 | 111180336 | -1 | NM_002829    | PTPN3       | 0 | NA | 0  | NA | 0 | NA | 0 | NA | 0 | NA |
| 9 | 111442892 | 111753577 | 1  | NM_001037293 | PALM2       | 0 | NA | 0  | NA | 0 | NA | 0 | NA | 0 | NA |
| 9 | 111442892 | 111753577 | 1  | NM_053016    | PALM2       | 0 | NA | 0  | NA | 0 | NA | 0 | NA | 0 | NA |
| 9 | 111582397 | 111974612 | 1  | NM_147150    | PALM2-AKAP2 | 0 | NA | 0  | NA | 0 | NA | 0 | NA | 0 | NA |
| 9 | 111582409 | 111974612 | 1  | NM_007203    | PALM2-AKAP2 | 0 | NA | 0  | NA | 0 | NA | 0 | NA | 0 | NA |
| 9 | 111850796 | 111974612 | 1  | NM_001004065 | AKAP2       | 1 | 11 | 0  | NA | 1 | 13 | 0 | NA | 0 | NA |
| 9 | 112010234 | 112001666 | -1 | NM_001012993 | C9orf152    | 0 | NA | 0  | NA | 0 | NA | 0 | NA | 0 | NA |
| 9 | 112058599 | 112046130 | -1 | NM_003329    | TXN         | 0 | NA | 0  | NA | 0 | NA | 0 | NA | 0 | NA |
| 9 | 112139909 | 112105687 | -1 | NM_001003936 | TXNDC8      | 0 | NA | 0  | NA | 0 | NA | 0 | NA | 0 | NA |
| 9 | 112381981 | 112167349 | -1 | NM_153366    | SVEP1       | 0 | NA | 0  | NA | 0 | NA | 0 | NA | 0 | NA |
| 9 | 112470907 | 112603099 | 1  | NM_005592    | MUSK        | 0 | NA | 0  | NA | 0 | NA | 0 | NA | 0 | NA |
| 9 | 112840186 | 112675874 | -1 | NM_001401    | LPAR1       | 0 | NA | 0  | NA | 0 | NA | 0 | NA | 0 | NA |
| 9 | 112840186 | 112675874 | -1 | NM_057159    | LPAR1       | 0 | NA | 0  | NA | 0 | NA | 0 | NA | 0 | NA |
| 9 | 113130534 | 113129583 | -1 | NM_205859    | OR2K2       | 0 | NA | 13 | 0  | 0 | NA | 0 | NA | 0 | NA |
| 9 | 113286846 | 113162793 | -1 | NM_001080398 | KIAA0368    | 0 | NA | 0  | NA | 0 | NA | 0 | NA | 0 | NA |
| 9 | 113327259 | 113379945 | 1  | NM_001007169 | ZNF483      | 0 | NA | 0  | NA | 0 | NA | 0 | NA | 0 | NA |
| 9 | 113327333 | 113346533 | 1  | NM_133464    | ZNF483      | 0 | NA | 0  | NA | 0 | NA | 0 | NA | 0 | NA |
| 9 | 113401532 | 113365072 | -1 | NM_012212    | LTB4DH      | 0 | NA | 0  | NA | 0 | NA | 0 | NA | 0 | NA |
| 9 | 113433452 | 113456452 | 1  | NM_001015882 | ba16L21.2.1 | 0 | NA | 0  | NA | 0 | NA | 0 | NA | 0 | NA |
| 9 | 113433486 | 113472330 | 1  | NM_004125    | LOC552891   | 0 | NA | 0  | NA | 0 | NA | 0 | NA | 0 | NA |
| 9 | 113463681 | 113472347 | 1  | NM_001017998 | GNG10       | 0 | NA | 0  | NA | 0 | NA | 0 | NA | 0 | NA |
| 9 | 113561634 | 113488721 | -1 | NM_001080551 | C9orf84     | 0 | NA | 0  | NA | 0 | NA | 0 | NA | 0 | NA |
| 9 | 113585600 | 113488721 | -1 | NM_173521    | C9orf84     | 0 | NA | 0  | NA | 0 | NA | 0 | NA | 0 | NA |
| 9 | 113699026 | 113735254 | 1  | NM_003358    | UGCG        | 0 | NA | 0  | NA | 0 | NA | 1 | 20 | 0 | NA |
| 9 | 113977377 | 113842881 | -1 | NM_022486    | SUSD1       | 0 | NA | 0  | NA | 0 | NA | 0 | NA | 0 | NA |
| 9 | 114135733 | 114020537 | -1 | NM_005156    | ROD1        | 1 | 11 | 0  | NA | 0 | NA | 0 | NA | 0 | NA |
| 9 | 114182171 | 114274505 | 1  | NM_032303    | HSDL2       | 1 | 21 | 0  | NA | 0 | NA | 0 | NA | 0 | NA |
| 9 | 114289068 | 114462527 | 1  | NM_133465    | KIAA1958    | 0 | NA | 0  | NA | 0 | NA | 0 | NA | 0 | NA |
| 9 | 114520208 | 114488611 | -1 | NM_021218    | C9orf80     | 0 | NA | 0  | NA | 0 | NA | 0 | NA | 0 | NA |
| 9 | 114552954 | 114677088 | 1  | NM_001012994 | SNX30       | 1 | 15 | 0  | NA | 1 | 13 | 0 | NA | 0 | NA |
| 9 | 114692866 | 114681020 | -1 | NM_033051    | SLC46A2     | 1 | 16 | 0  | NA | 0 | NA | 1 | 21 | 0 | NA |
| 9 | 114814293 | 114799220 | -1 | NM_001101338 | LOC169834   | 0 | NA | 0  | NA | 0 | NA | 0 | NA | 0 | NA |
| 9 | 114858817 | 114843994 | -1 | NM_003408    | ZFP37       | 0 | NA | 1  | 16 | 0 | NA | 0 | NA | 1 | 16 |
| 9 | 114953058 | 114966243 | 1  | NM_001860    | SLC31A2     | 0 | NA | 0  | NA | 0 | NA | 0 | NA | 0 | NA |
| 9 | 115023462 | 114967620 | -1 | NM_015258    | FKBP15      | 0 | NA | 0  | NA | 0 | NA | 1 | 11 | 0 | NA |
| 9 | 115023688 | 115066593 | 1  | NM_001859    | SLC31A1     | 0 | NA | 0  | NA | 0 | NA | 1 | 11 | 0 | NA |
| 9 | 115077690 | 115069111 | -1 | NM_139286    | CDC26       | 1 | 19 | 0  | NA | 0 | NA | 0 | NA | 0 | NA |
| 9 | 115077794 | 115094877 | 1  | NM_004697    | PRPF4       | 1 | 19 | 0  | NA | 0 | NA | 0 | NA | 0 | NA |
| 9 | 115101141 | 115099193 | -1 | NM_145051    | RNF183      | 0 | NA | 0  | NA | 0 | NA | 0 | NA | 0 | NA |
| 9 | 115142388 | 115117751 | -1 | NM_001006615 | WDR31       | 1 | 14 | 0  | NA | 1 | 12 | 0 | NA | 0 | NA |
| 9 | 115142388 | 115117751 | -1 | NM_001012361 | WDR31       | 1 | 14 | 0  | NA | 1 | 12 | 0 | NA | 0 | NA |

|   |           |           |    |              |          |   |    |   |    |   |    |   |    |   |    |
|---|-----------|-----------|----|--------------|----------|---|----|---|----|---|----|---|----|---|----|
| 9 | 115142388 | 11517751  | -1 | NM_145241    | WDR31    | 1 | 14 | 0 | NA | 1 | 12 | 0 | NA | 0 | NA |
| 9 | 115151632 | 115173334 | 1  | NM_017688    | BSPRY    | 1 | 14 | 1 | 12 | 1 | 12 | 0 | NA | 0 | NA |
| 9 | 115178162 | 115175618 | -1 | NM_031219    | HDHD3    | 0 | NA | 0 | NA | 0 | NA | 0 | NA | 0 | NA |
| 9 | 115203391 | 115188412 | -1 | NM_000031    | ALAD     | 0 | NA | 0 | NA | 0 | NA | 0 | NA | 0 | NA |
| 9 | 115203391 | 115188412 | -1 | NM_001003945 | ALAD     | 0 | NA | 0 | NA | 0 | NA | 0 | NA | 0 | NA |
| 9 | 115212773 | 115209341 | -1 | NM_017443    | POLE3    | 0 | NA | 0 | NA | 0 | NA | 0 | NA | 0 | NA |
| 9 | 115212842 | 115231700 | 1  | NM_152786    | C9orf43  | 0 | NA | 0 | NA | 0 | NA | 0 | NA | 0 | NA |
| 9 | 115246831 | 115399839 | 1  | NM_144488    | RGS3     | 0 | NA | 0 | NA | 0 | NA | 0 | NA | 0 | NA |
| 9 | 115265829 | 115344192 | 1  | NM_017790    | RGS3     | 0 | NA | 0 | NA | 0 | NA | 0 | NA | 0 | NA |
| 9 | 115303527 | 115399839 | 1  | NM_130795    | RGS3     | 0 | NA | 0 | NA | 0 | NA | 0 | NA | 0 | NA |
| 9 | 115367181 | 115399839 | 1  | NM_134427    | RGS3     | 0 | NA | 0 | NA | 0 | NA | 0 | NA | 0 | NA |
| 9 | 115382760 | 115399839 | 1  | NM_021106    | RGS3     | 0 | NA | 0 | NA | 0 | NA | 0 | NA | 0 | NA |
| 9 | 115396020 | 115399839 | 1  | NM_144489    | RGS3     | 0 | NA | 0 | NA | 0 | NA | 0 | NA | 0 | NA |
| 9 | 115678382 | 115858696 | 1  | NM_133374    | ZNF618   | 0 | NA | 0 | NA | 0 | NA | 0 | NA | 0 | NA |
| 9 | 115880573 | 115862228 | -1 | NM_001633    | AMBP     | 0 | NA | 0 | NA | 0 | NA | 0 | NA | 0 | NA |
| 9 | 115901158 | 115893738 | -1 | NM_138424    | KIF12    | 0 | NA | 0 | NA | 0 | NA | 0 | NA | 0 | NA |
| 9 | 115958051 | 116112796 | 1  | NM_032888    | COL27A1  | 0 | NA | 0 | NA | 0 | NA | 0 | NA | 0 | NA |
| 9 | 116125123 | 116128580 | 1  | NM_000607    | ORM1     | 0 | NA | 0 | NA | 0 | NA | 0 | NA | 0 | NA |
| 9 | 116131889 | 116135357 | 1  | NM_000608    | ORM2     | 0 | NA | 0 | NA | 0 | NA | 0 | NA | 0 | NA |
| 9 | 116196506 | 116136254 | -1 | NM_030767    | AKNA     | 0 | NA | 0 | NA | 0 | NA | 0 | NA | 0 | NA |
| 9 | 116305316 | 116204180 | -1 | NM_001083885 | DFNB31   | 0 | NA | 0 | NA | 0 | NA | 0 | NA | 0 | NA |
| 9 | 116307551 | 116204180 | -1 | NM_015404    | DFNB31   | 0 | NA | 0 | NA | 0 | NA | 0 | NA | 0 | NA |
| 9 | 116389814 | 116400973 | 1  | NM_004888    | ATP6V1G1 | 0 | NA | 0 | NA | 0 | NA | 1 | 12 | 0 | NA |
| 9 | 116413526 | 116448524 | 1  | NM_153045    | C9orf91  | 0 | NA | 0 | NA | 0 | NA | 0 | NA | 0 | NA |
| 9 | 116608229 | 116591431 | -1 | NM_005118    | TNFSF15  | 0 | NA | 0 | NA | 1 | 12 | 0 | NA | 0 | NA |
| 9 | 116732591 | 116704944 | -1 | NM_001244    | TNFSF8   | 0 | NA | 0 | NA | 0 | NA | 0 | NA | 0 | NA |
| 9 | 116920307 | 116822625 | -1 | NM_002160    | TNC      | 0 | NA | 0 | NA | 0 | NA | 0 | NA | 0 | NA |
| 9 | 116943917 | 117204744 | 1  | NM_017418    | DEC1     | 0 | NA | 0 | NA | 0 | NA | 0 | NA | 0 | NA |
| 9 | 117955891 | 118204421 | 1  | NM_002581    | PAPPA    | 0 | NA | 0 | NA | 0 | NA | 0 | NA | 0 | NA |
| 9 | 118489334 | 118227327 | -1 | NM_198188    | ASTN2    | 0 | NA | 0 | NA | 0 | NA | 0 | NA | 0 | NA |
| 9 | 118489401 | 118503400 | 1  | NM_001099679 | TRIM32   | 0 | NA | 0 | NA | 0 | NA | 0 | NA | 0 | NA |
| 9 | 118489401 | 118503400 | 1  | NM_012210    | TRIM32   | 0 | NA | 0 | NA | 0 | NA | 0 | NA | 0 | NA |
| 9 | 119217138 | 118227327 | -1 | NM_014010    | ASTN2    | 0 | NA | 0 | NA | 0 | NA | 0 | NA | 0 | NA |
| 9 | 119217138 | 118227327 | -1 | NM_198188    | ASTN2    | 0 | NA | 0 | NA | 0 | NA | 0 | NA | 0 | NA |
| 9 | 119217138 | 118227327 | -1 | NM_198187    | ASTN2    | 0 | NA | 0 | NA | 0 | NA | 0 | NA | 0 | NA |
| 9 | 119506430 | 119519587 | 1  | NM_138554    | TLR4     | 1 | 14 | 0 | NA | 0 | NA | 0 | NA | 0 | NA |
| 9 | 121171560 | 120968728 | -1 | NM_014618    | DBC1     | 0 | NA | 0 | NA | 0 | NA | 0 | NA | 0 | NA |
| 9 | 122382258 | 122190967 | -1 | NM_001011649 | CDK5RAP2 | 1 | 12 | 0 | NA | 1 | 14 | 1 | 11 | 0 | NA |
| 9 | 122382258 | 122190967 | -1 | NM_018249    | CDK5RAP2 | 1 | 12 | 0 | NA | 1 | 14 | 1 | 11 | 0 | NA |
| 9 | 122516433 | 122402911 | -1 | NM_001080497 | MEGF9    | 0 | NA | 0 | NA | 1 | 12 | 1 | 12 | 0 | NA |
| 9 | 122595561 | 122559074 | -1 | NM_012164    | FBXW2    | 0 | NA | 0 | NA | 0 | NA | 0 | NA | 0 | NA |
| 9 | 122645027 | 122618152 | -1 | NM_005047    | PSMD5    | 1 | 43 | 0 | NA | 0 | NA | 0 | NA | 0 | NA |
| 9 | 122679427 | 122657751 | -1 | NM_015651    | PHF19    | 0 | NA | 0 | NA | 0 | NA | 0 | NA | 0 | NA |
| 9 | 122679427 | 122671673 | -1 | NM_001009936 | PHF19    | 0 | NA | 0 | NA | 0 | NA | 0 | NA | 0 | NA |
| 9 | 122728994 | 122704492 | -1 | NM_005658    | TRAF1    | 0 | NA | 0 | NA | 0 | NA | 0 | NA | 0 | NA |
| 9 | 122852375 | 122754434 | -1 | NM_001735    | C5       | 0 | NA | 0 | NA | 0 | NA | 0 | NA | 0 | NA |
| 9 | 122890394 | 122979707 | 1  | NM_007018    | CEP110   | 0 | NA | 0 | NA | 0 | NA | 0 | NA | 0 | NA |
| 9 | 123003907 | 122980235 | -1 | NM_016322    | RAB14    | 0 | NA | 0 | NA | 1 | 14 | 0 | NA | 0 | NA |
| 9 | 123070200 | 123134941 | 1  | NM_198252    | GSN      | 0 | NA | 0 | NA | 1 | 13 | 0 | NA | 0 | NA |
| 9 | 123101899 | 123134941 | 1  | NM_000177    | GSN      | 0 | NA | 0 | NA | 0 | NA | 0 | NA | 0 | NA |
| 9 | 123172366 | 123141173 | -1 | NM_004099    | STOM     | 0 | NA | 1 | 22 | 0 | NA | 1 | 25 | 0 | NA |
| 9 | 123172366 | 123141175 | -1 | NM_198194    | STOM     | 0 | NA | 1 | 22 | 0 | NA | 1 | 25 | 0 | NA |
| 9 | 123369219 | 123587630 | 1  | NM_032552    | DAB2IP   | 1 | 12 | 0 | NA | 0 | NA | 0 | NA | 0 | NA |
| 9 | 123544884 | 123584753 | 0  | NM_138709    | DAB2IP   | 0 | NA | 1 | 15 | 1 | 14 | 0 | NA | 0 | NA |
| 9 | 123895706 | 123791010 | -1 | NM_194252    | TTLL11   | 0 | NA | 0 | NA | 1 | 12 | 0 | NA | 0 | NA |
| 9 | 123961919 | 123946158 | -1 | NM_014222    | NDUFA8   | 0 | NA | 0 | NA | 1 | 12 | 0 | NA | 0 | NA |
| 9 | 123962010 | 124002182 | 1  | NM_198469    | C9orf18  | 0 | NA | 0 | NA | 1 | 12 | 0 | NA | 0 | NA |
| 9 | 124030840 | 124004678 | -1 | NM_014368    | LHX6     | 0 | NA | 1 | 14 | 0 | NA | 0 | NA | 0 | NA |
| 9 | 124030840 | 124004678 | -1 | NM_199160    | LHX6     | 0 | NA | 1 | 14 | 0 | NA | 0 | NA | 0 | NA |
| 9 | 124066911 | 124043603 | -1 | NM_033117    | RBM18    | 1 | 11 | 0 | NA | 0 | NA | 0 | NA | 0 | NA |
| 9 | 124066967 | 124125563 | 1  | NM_138777    | MRRF     | 1 | 11 | 0 | NA | 0 | NA | 0 | NA | 0 | NA |
| 9 | 124066967 | 124125563 | 1  | NM_199177    | MRRF     | 1 | 11 | 0 | NA | 0 | NA | 0 | NA | 0 | NA |
| 9 | 124173049 | 124197802 | 1  | NM_000962    | PTGS1    | 0 | NA | 0 | NA | 1 | 13 | 0 | NA | 0 | NA |
| 9 | 124173049 | 124197802 | 1  | NM_080591    | PTGS1    | 0 | NA | 0 | NA | 1 | 13 | 0 | NA | 0 | NA |
| 9 | 124280026 | 124279057 | -1 | NM_001004451 | OR1J1    | 0 | NA | 0 | NA | 0 | NA | 0 | NA | 0 | NA |

|   |           |           |    |              |          |   |    |    |    |    |    |    |    |    |    |
|---|-----------|-----------|----|--------------|----------|---|----|----|----|----|----|----|----|----|----|
| 9 | 124312901 | 124313843 | 1  | NM_054107    | OR1J2    | 0 | NA | 0  | NA | 0  | NA | 0  | NA | 0  | NA |
| 9 | 124321240 | 124322182 | 1  | NM_001004452 | OR1J4    | 0 | NA | 0  | NA | 0  | NA | 0  | NA | 0  | NA |
| 9 | 124329393 | 124328457 | -1 | NM_012363    | OR1N1    | 0 | NA | 0  | NA | 0  | NA | 0  | NA | 0  | NA |
| 9 | 124355269 | 124356262 | 1  | NM_001004457 | OR1N2    | 0 | NA | 0  | NA | 0  | NA | 0  | NA | 0  | NA |
| 9 | 124370577 | 124369647 | -1 | NM_001004454 | OR1L8    | 0 | NA | 0  | NA | 0  | NA | 0  | NA | 0  | NA |
| 9 | 124416837 | 124417782 | 1  | NM_012364    | OR1Q1    | 0 | NA | 0  | NA | 0  | NA | 0  | NA | 0  | NA |
| 9 | 124431635 | 124430678 | -1 | NM_001004450 | OR1B1    | 0 | NA | 0  | NA | 0  | NA | 0  | NA | 0  | NA |
| 9 | 124463665 | 124464748 | 1  | NM_001005236 | OR1L1    | 0 | NA | 0  | NA | 0  | NA | 0  | NA | 0  | NA |
| 9 | 124477229 | 124478204 | 1  | NM_001005234 | OR1L3    | 0 | NA | 0  | NA | 0  | NA | 0  | NA | 0  | NA |
| 9 | 124526089 | 124527025 | 1  | NM_001005235 | OR1L4    | 0 | NA | 0  | NA | 0  | NA | 0  | NA | 0  | NA |
| 9 | 124551839 | 124552883 | 1  | NM_001004453 | OR1L6    | 0 | NA | 0  | NA | 0  | NA | 0  | NA | 0  | NA |
| 9 | 124591032 | 124591995 | 1  | NM_001001923 | OR5C1    | 0 | NA | 13 | 0  | NA | 0  | NA | 0  | NA | 0  |
| 9 | 124602222 | 124603173 | 1  | NM_080859    | OR1K1    | 0 | NA | 14 | 0  | NA | 0  | NA | 0  | NA | 0  |
| 9 | 124630661 | 124620443 | -1 | NM_005388    | PDCL     | 0 | NA | 0  | NA | 0  | NA | 0  | NA | 0  | NA |
| 9 | 124707383 | 124651552 | -1 | NM_001100588 | RC3H2    | 0 | NA | 0  | NA | 1  | 14 | 0  | NA | 0  | NA |
| 9 | 124707383 | 124655844 | -1 | NM_018835    | RC3H2    | 0 | NA | 0  | NA | 1  | 14 | 0  | NA | 0  | NA |
| 9 | 124715430 | 124710155 | -1 | NM_006626    | ZBTB6    | 0 | NA | 0  | NA | 1  | 14 | 0  | NA | 0  | NA |
| 9 | 124733600 | 124720198 | -1 | NM_020924    | ZBTB26   | 1 | 13 | 0  | NA | 1  | 19 | 0  | NA | 0  | NA |
| 9 | 124743108 | 124906968 | 1  | NM_012197    | RABGAP1  | 1 | 13 | 0  | NA | 1  | 19 | 0  | NA | 0  | NA |
| 9 | 124836666 | 124837716 | 1  | NM_005294    | GPR21    | 0 | NA | 0  | NA | 0  | NA | 0  | NA | 0  | NA |
| 9 | 125070664 | 124927138 | -1 | NM_018387    | STRBP    | 0 | NA | 0  | NA | 0  | NA | 0  | NA | 0  | NA |
| 9 | 125158268 | 125180853 | 1  | NM_173689    | CRB2     | 0 | NA | 0  | NA | 0  | NA | 0  | NA | 0  | NA |
| 9 | 125732238 | 125181753 | -1 | NM_020946    | DENND1A  | 0 | NA | 0  | NA | 0  | NA | 0  | NA | 0  | NA |
| 9 | 125732238 | 125203690 | -1 | NM_024820    | DENND1A  | 0 | NA | 0  | NA | 0  | NA | 0  | NA | 0  | NA |
| 9 | 125813709 | 125835263 | 1  | NM_004789    | LHX2     | 0 | NA | 0  | NA | 0  | NA | 0  | NA | 0  | NA |
| 9 | 126060069 | 126154540 | 1  | NM_014397    | NEK6     | 0 | NA | 0  | NA | 1  | 13 | 0  | NA | 0  | NA |
| 9 | 126217542 | 126155564 | -1 | NM_002799    | PSMB7    | 1 | 52 | 1  | 22 | 1  | 44 | 0  | NA | 0  | NA |
| 9 | 126309520 | 126283335 | -1 | NM_004959    | NR5A1    | 0 | NA | 1  | 13 | 0  | NA | 0  | NA | 0  | NA |
| 9 | 126573397 | 126324523 | -1 | NM_001489    | NR6A1    | 0 | NA | 0  | NA | 0  | NA | 0  | NA | 0  | NA |
| 9 | 126573397 | 126324523 | -1 | NM_033334    | NR6A1    | 0 | NA | 0  | NA | 0  | NA | 0  | NA | 0  | NA |
| 9 | 126579257 | 126616980 | 1  | NM_182487    | OLFML2A  | 0 | NA | 0  | NA | 0  | NA | 0  | NA | 0  | NA |
| 9 | 126655575 | 126659981 | 1  | NM_001045476 | WDR38    | 1 | 12 | 0  | NA | 0  | NA | 0  | NA | 0  | NA |
| 9 | 126664061 | 126659978 | -1 | NM_007209    | RPL35    | 0 | NA | 0  | NA | 1  | 14 | 0  | NA | 0  | NA |
| 9 | 126671304 | 126679517 | 1  | NM_030978    | ARPC5L   | 0 | NA | 0  | NA | 1  | 14 | 0  | NA | 0  | NA |
| 9 | 126743178 | 126680448 | -1 | NM_002077    | GOLGA1   | 0 | NA | 0  | NA | 0  | NA | 0  | NA | 0  | NA |
| 9 | 126945596 | 126754887 | -1 | NM_173690    | C9orf126 | 0 | NA | 0  | NA | 0  | NA | 0  | NA | 0  | NA |
| 9 | 126992039 | 126948672 | -1 | NM_001123355 | PPP6C    | 1 | 12 | 0  | NA | 0  | NA | 0  | NA | 0  | NA |
| 9 | 126992039 | 126948672 | -1 | NM_001123369 | PPP6C    | 1 | 12 | 0  | NA | 0  | NA | 0  | NA | 0  | NA |
| 9 | 126992039 | 126948672 | -1 | NM_002721    | PPP6C    | 1 | 12 | 0  | NA | 0  | NA | 0  | NA | 0  | NA |
| 9 | 127002877 | 127036259 | 1  | NM_005833    | RABEPK   | 0 | NA | 0  | NA | 0  | NA | 0  | NA | 0  | NA |
| 9 | 127043430 | 127036952 | -1 | NM_005347    | HSPA5    | 1 | 29 | 0  | NA | 0  | NA | 0  | NA | 0  | NA |
| 9 | 127063931 | 127167111 | 1  | NM_015635    | GAPVD1   | 1 | 19 | 0  | NA | 0  | NA | 0  | NA | 0  | NA |
| 9 | 127509334 | 127239493 | -1 | NM_001006617 | MAPKAP1  | 0 | NA | 0  | NA | 0  | NA | 0  | NA | 0  | NA |
| 9 | 127509334 | 127239493 | -1 | NM_001006619 | MAPKAP1  | 0 | NA | 0  | NA | 0  | NA | 0  | NA | 0  | NA |
| 9 | 127509334 | 127239493 | -1 | NM_001006620 | MAPKAP1  | 0 | NA | 0  | NA | 0  | NA | 0  | NA | 0  | NA |
| 9 | 127509334 | 127239493 | -1 | NM_001006621 | MAPKAP1  | 0 | NA | 0  | NA | 0  | NA | 0  | NA | 0  | NA |
| 9 | 127509334 | 127239493 | -1 | NM_024117    | MAPKAP1  | 0 | NA | 0  | NA | 0  | NA | 0  | NA | 0  | NA |
| 9 | 127509334 | 127323569 | -1 | NM_001006618 | MAPKAP1  | 0 | NA | 0  | NA | 0  | NA | 0  | NA | 0  | NA |
| 9 | 127549486 | 127769476 | 1  | NM_006195    | PBX3     | 1 | 47 | 0  | NA | 0  | NA | 1  | 26 | 0  | NA |
| 9 | 128128948 | 128199733 | 1  | NM_001011703 | FAM125B  | 0 | NA | 0  | NA | 0  | NA | 0  | NA | 0  | NA |
| 9 | 128128948 | 128309140 | 1  | NM_033446    | FAM125B  | 0 | NA | 0  | NA | 0  | NA | 0  | NA | 0  | NA |
| 9 | 128416568 | 128503132 | 1  | NM_002316    | LMX1B    | 0 | NA | 1  | 16 | 0  | NA | 0  | NA | 0  | NA |
| 9 | 128607181 | 128637318 | 1  | NM_014007    | ZBTB43   | 0 | NA | 0  | NA | 0  | NA | 0  | NA | 0  | NA |
| 9 | 128662764 | 128687977 | 1  | NM_001099270 | ZBTB34   | 0 | NA | 0  | NA | 0  | NA | 0  | NA | 0  | NA |
| 9 | 128716873 | 129025264 | 1  | NM_014636    | RALGPS1  | 0 | NA | 0  | NA | 0  | NA | 0  | NA | 0  | NA |
| 9 | 128924865 | 128889448 | -1 | NM_012098    | ANGPTL2  | 1 | 11 | 0  | NA | 0  | NA | 0  | NA | 0  | NA |
| 9 | 129066966 | 129195649 | 1  | NM_032293    | GARNL3   | 0 | NA | 0  | NA | 0  | NA | 0  | NA | 0  | NA |
| 9 | 129199285 | 129209986 | 1  | NM_014580    | SLC2A8   | 0 | NA | 0  | NA | 0  | NA | 0  | NA | 0  | NA |
| 9 | 129226481 | 129247471 | 1  | NM_007135    | ZNF79    | 1 | 11 | 0  | NA | 0  | NA | 0  | NA | 0  | NA |
| 9 | 129253505 | 129249775 | -1 | NM_000976    | RPL12    | 1 | 13 | 0  | NA | 1  | 18 | 1  | 14 | 0  | NA |
| 9 | 129253612 | 129305599 | 1  | NM_001005373 | LRSAM1   | 1 | 13 | 0  | NA | 1  | 18 | 1  | 14 | 0  | NA |
| 9 | 129253837 | 129305599 | 1  | NM_138361    | LRSAM1   | 1 | 13 | 0  | NA | 1  | 18 | 1  | 14 | 0  | NA |
| 9 | 129254354 | 129305599 | 1  | NM_001005374 | LRSAM1   | 1 | 13 | 0  | NA | 1  | 18 | 1  | 14 | 0  | NA |
| 9 | 129371176 | 129307438 | -1 | NM_022833    | FAM129B  | 0 | NA | 0  | NA | 0  | NA | 1  | 11 | 0  | NA |
| 9 | 129381089 | 129307438 | -1 | NM_001035534 | FAM129B  | 0 | NA | 0  | NA | 0  | NA | 1  | 11 | 0  | NA |



|   |           |           |    |              |            |   |    |   |    |   |    |   |    |   |    |
|---|-----------|-----------|----|--------------|------------|---|----|---|----|---|----|---|----|---|----|
| 9 | 129414388 | 129494816 | 1  | NM_001032221 | STXBP1     | 0 | NA | 0 | NA | 0 | NA | 0 | NA | 0 | NA |
| 9 | 129414388 | 129494816 | 1  | NM_003165    | STXBP1     | 0 | NA | 0 | NA | 0 | NA | 0 | NA | 0 | NA |
| 9 | 129509091 | 129516124 | 1  | NM_001012502 | C9orf117   | 1 | 11 | 0 | NA | 0 | NA | 0 | NA | 0 | NA |
| 9 | 129517757 | 129516047 | -1 | NM_001002913 | PTRH1      | 1 | 19 | 0 | NA | 0 | NA | 0 | NA | 0 | NA |
| 9 | 129518178 | 129533700 | 1  | NM_144965    | TTC16      | 1 | 19 | 0 | NA | 0 | NA | 0 | NA | 0 | NA |
| 9 | 129537425 | 129533623 | -1 | NM_001085347 | TOR2A      | 0 | NA | 0 | NA | 0 | NA | 0 | NA | 0 | NA |
| 9 | 129537425 | 129533623 | -1 | NM_130459    | TOR2A      | 0 | NA | 0 | NA | 0 | NA | 0 | NA | 0 | NA |
| 9 | 129573372 | 129540845 | -1 | NM_005489    | SH2D3C     | 1 | 12 | 0 | NA | 0 | NA | 0 | NA | 0 | NA |
| 9 | 129580733 | 129540418 | -1 | NM_170600    | SH2D3C     | 1 | 17 | 0 | NA | 1 | 13 | 0 | NA | 0 | NA |
| 9 | 129588125 | 129592873 | 1  | NM_001261    | CDK9       | 1 | 17 | 0 | NA | 1 | 13 | 0 | NA | 0 | NA |
| 9 | 129604974 | 129616377 | 1  | NM_004957    | FPGS       | 0 | NA | 0 | NA | 0 | NA | 0 | NA | 0 | NA |
| 9 | 129605328 | 129616377 | 1  | NM_001018078 | FPGS       | 0 | NA | 0 | NA | 0 | NA | 0 | NA | 0 | NA |
| 9 | 129656868 | 129617111 | -1 | NM_000118    | ENG        | 1 | 13 | 1 | 23 | 0 | NA | 0 | NA | 0 | NA |
| 9 | 129656868 | 129617111 | -1 | NM_001114753 | ENG        | 1 | 13 | 1 | 23 | 0 | NA | 0 | NA | 0 | NA |
| 9 | 129679843 | 129668579 | -1 | NM_000476    | AK1        | 0 | NA | 0 | NA | 0 | NA | 0 | NA | 0 | NA |
| 9 | 129701692 | 129687421 | -1 | NM_013443    | ST6GALNAC6 | 0 | NA | 0 | NA | 0 | NA | 0 | NA | 0 | NA |
| 9 | 129719126 | 129709985 | -1 | NM_175039    | ST6GALNAC4 | 1 | 15 | 0 | NA | 0 | NA | 0 | NA | 0 | NA |
| 9 | 129719126 | 129709985 | -1 | NM_175040    | ST6GALNAC4 | 1 | 15 | 0 | NA | 0 | NA | 0 | NA | 0 | NA |
| 9 | 129729591 | 129723628 | -1 | NM_173492    | PIP5K1     | 1 | 15 | 0 | NA | 0 | NA | 0 | NA | 0 | NA |
| 9 | 129739956 | 129737202 | -1 | NM_003863    | DPM2       | 1 | 11 | 0 | NA | 0 | NA | 0 | NA | 0 | NA |
| 9 | 129752814 | 129742681 | -1 | NM_203305    | FAM102A    | 0 | NA | 0 | NA | 0 | NA | 1 | 11 | 0 | NA |
| 9 | 129782316 | 129742681 | -1 | NM_001035254 | FAM102A    | 0 | NA | 0 | NA | 0 | NA | 0 | NA | 0 | NA |
| 9 | 129869212 | 129863340 | -1 | NM_197956    | NAIF1      | 1 | 15 | 0 | NA | 0 | NA | 0 | NA | 0 | NA |
| 9 | 129870299 | 129911345 | 1  | NM_001006641 | SLC25A25   | 1 | 15 | 0 | NA | 0 | NA | 0 | NA | 0 | NA |
| 9 | 129893948 | 129911345 | 1  | NM_001006642 | SLC25A25   | 0 | NA | 0 | NA | 1 | 12 | 0 | NA | 0 | NA |
| 9 | 129900637 | 129911345 | 1  | NM_052901    | SLC25A25   | 0 | NA | 0 | NA | 1 | 12 | 0 | NA | 0 | NA |
| 9 | 129900656 | 129911345 | 1  | NM_001006643 | SLC25A25   | 0 | NA | 0 | NA | 1 | 12 | 0 | NA | 0 | NA |
| 9 | 129930295 | 129922792 | -1 | NM_025072    | PTGES2     | 1 | 17 | 1 | 12 | 0 | NA | 0 | NA | 0 | NA |
| 9 | 129930533 | 129922792 | -1 | NM_198938    | PTGES2     | 1 | 17 | 1 | 12 | 0 | NA | 0 | NA | 0 | NA |
| 9 | 129930533 | 129922792 | -1 | NM_198940    | PTGES2     | 1 | 17 | 1 | 12 | 0 | NA | 0 | NA | 0 | NA |
| 9 | 129951552 | 129955555 | 1  | NM_005564    | LCN2       | 0 | NA | 0 | NA | 0 | NA | 0 | NA | 0 | NA |
| 9 | 129962359 | 129966028 | 1  | NM_024112    | C9orf16    | 0 | NA | 0 | NA | 0 | NA | 0 | NA | 0 | NA |
| 9 | 130005483 | 130057348 | 1  | NM_001005336 | DNM1       | 1 | 11 | 0 | NA | 0 | NA | 0 | NA | 0 | NA |
| 9 | 130005483 | 130057348 | 1  | NM_004408    | DNM1       | 1 | 11 | 0 | NA | 0 | NA | 0 | NA | 0 | NA |
| 9 | 130006483 | 129968164 | -1 | NM_012127    | CIZ1       | 1 | 11 | 0 | NA | 0 | NA | 0 | NA | 0 | NA |
| 9 | 130078089 | 130057928 | -1 | NM_004486    | GOLGA2     | 0 | NA | 0 | NA | 0 | NA | 0 | NA | 0 | NA |
| 9 | 130078245 | 130091089 | 1  | NM_001040011 | C9orf119   | 0 | NA | 0 | NA | 0 | NA | 0 | NA | 0 | NA |
| 9 | 130124518 | 130111216 | -1 | NM_015679    | TRUB2      | 0 | NA | 0 | NA | 0 | NA | 0 | NA | 0 | NA |
| 9 | 130124611 | 130136172 | 1  | NM_016035    | COQ4       | 0 | NA | 0 | NA | 0 | NA | 0 | NA | 0 | NA |
| 9 | 130142660 | 130163323 | 1  | NM_005094    | SLC27A4    | 0 | NA | 0 | NA | 0 | NA | 1 | 12 | 0 | NA |
| 9 | 130173460 | 130192834 | 1  | NM_030914    | URM1       | 1 | 15 | 0 | NA | 0 | NA | 1 | 13 | 0 | NA |
| 9 | 130222937 | 130239446 | 1  | NM_016174    | CERCAM     | 0 | NA | 0 | NA | 0 | NA | 0 | NA | 0 | NA |
| 9 | 130258252 | 130303060 | -1 | NM_002540    | ODF2       | 0 | NA | 0 | NA | 0 | NA | 0 | NA | 0 | NA |
| 9 | 130259107 | 130296935 | 1  | NM_153437    | ODF2       | 0 | NA | 0 | NA | 0 | NA | 0 | NA | 0 | NA |
| 9 | 130306791 | 130341977 | 1  | NM_001499    | GLE1       | 0 | NA | 0 | NA | 0 | NA | 0 | NA | 0 | NA |
| 9 | 130306791 | 130344401 | 1  | NM_001003722 | GLE1       | 0 | NA | 0 | NA | 0 | NA | 0 | NA | 0 | NA |
| 9 | 130354686 | 130435761 | 1  | NM_003127    | SPTAN1     | 0 | NA | 0 | NA | 0 | NA | 0 | NA | 0 | NA |
| 9 | 130458950 | 130435760 | -1 | NM_052844    | WDR34      | 1 | 16 | 0 | NA | 0 | NA | 1 | 14 | 0 | NA |
| 9 | 130485754 | 130498496 | 1  | NM_001122821 | SET        | 0 | NA | 0 | NA | 0 | NA | 0 | NA | 0 | NA |
| 9 | 130491329 | 130498496 | 1  | NM_003011    | SET        | 0 | NA | 0 | NA | 0 | NA | 0 | NA | 0 | NA |
| 9 | 130504622 | 130523020 | 1  | NM_013355    | PKN3       | 0 | NA | 0 | NA | 0 | NA | 0 | NA | 0 | NA |
| 9 | 130526229 | 130522969 | -1 | NM_032799    | ZDHHC12    | 0 | NA | 0 | NA | 0 | NA | 1 | 16 | 0 | NA |
| 9 | 130574019 | 130531887 | -1 | NM_006336    | ZER1       | 0 | NA | 0 | NA | 0 | NA | 0 | NA | 0 | NA |
| 9 | 130589431 | 130612532 | 1  | NM_018201    | TBC1D13    | 0 | NA | 0 | NA | 0 | NA | 0 | NA | 0 | NA |
| 9 | 130620599 | 130624776 | 1  | NM_004435    | ENDOG      | 0 | NA | 0 | NA | 0 | NA | 0 | NA | 0 | NA |
| 9 | 130631906 | 130624165 | -1 | NM_016390    | C9orf114   | 0 | NA | 0 | NA | 1 | 13 | 0 | NA | 0 | NA |
| 9 | 130684175 | 130635212 | -1 | NM_001122671 | CCBL1      | 1 | 12 | 0 | NA | 0 | NA | 1 | 15 | 0 | NA |
| 9 | 130684175 | 130635212 | -1 | NM_001122672 | CCBL1      | 1 | 12 | 0 | NA | 0 | NA | 1 | 15 | 0 | NA |
| 9 | 130684175 | 130635212 | -1 | NM_004059    | CCBL1      | 1 | 12 | 0 | NA | 0 | NA | 1 | 15 | 0 | NA |
| 9 | 130684211 | 130720138 | 1  | NM_001127245 | LRRCA8A    | 1 | 12 | 0 | NA | 0 | NA | 1 | 15 | 0 | NA |
| 9 | 130684211 | 130720138 | 1  | NM_019594    | LRRCA8A    | 1 | 12 | 0 | NA | 0 | NA | 1 | 15 | 0 | NA |
| 9 | 130684601 | 130720138 | 1  | NM_001127244 | LRRCA8A    | 1 | 12 | 0 | NA | 0 | NA | 1 | 15 | 0 | NA |
| 9 | 130722994 | 130744141 | 1  | NM_001100876 | PHYHD1     | 0 | NA | 0 | NA | 0 | NA | 0 | NA | 0 | NA |
| 9 | 130722994 | 130744141 | 1  | NM_174933    | PHYHD1     | 0 | NA | 0 | NA | 0 | NA | 0 | NA | 0 | NA |
| 9 | 130724382 | 130744141 | 1  | NM_001100877 | PHYHD1     | 0 | NA | 0 | NA | 0 | NA | 0 | NA | 0 | NA |

|   |           |           |    |              |          |   |    |   |    |   |    |   |    |   |    |
|---|-----------|-----------|----|--------------|----------|---|----|---|----|---|----|---|----|---|----|
| 9 | 130749797 | 130809195 | 1  | NM_015354    | NUP188   | 0 | NA | 0 | NA | 0 | NA | 0 | NA | 0 | NA |
| 9 | 130749833 | 130747629 | -1 | NM_014908    | DOLK     | 0 | NA | 0 | NA | 0 | NA | 0 | NA | 0 | NA |
| 9 | 130830400 | 130810133 | -1 | NM_020145    | SH3GLB2  | 1 | 12 | 0 | NA | 0 | NA | 0 | NA | 0 | NA |
| 9 | 130839073 | 130874172 | 1  | NM_032809    | FAM73B   | 0 | NA | 0 | NA | 0 | NA | 0 | NA | 0 | NA |
| 9 | 130883226 | 130892538 | 1  | NM_020438    | DOLPP1   | 0 | NA | 0 | NA | 0 | NA | 0 | NA | 0 | NA |
| 9 | 130911116 | 130896893 | -1 | NM_004003    | CRAT     | 0 | NA | 0 | NA | 0 | NA | 0 | NA | 0 | NA |
| 9 | 130912904 | 130896893 | -1 | NM_000755    | CRAT     | 0 | NA | 0 | NA | 0 | NA | 0 | NA | 0 | NA |
| 9 | 130913064 | 130951044 | 1  | NM_021131    | PPP2R4   | 0 | NA | 0 | NA | 0 | NA | 0 | NA | 0 | NA |
| 9 | 130913433 | 130951044 | 1  | NM_178000    | PPP2R4   | 0 | NA | 0 | NA | 0 | NA | 0 | NA | 0 | NA |
| 9 | 130913433 | 130951044 | 1  | NM_178001    | PPP2R4   | 0 | NA | 0 | NA | 0 | NA | 0 | NA | 0 | NA |
| 9 | 130913433 | 130951044 | 1  | NM_178003    | PPP2R4   | 0 | NA | 0 | NA | 0 | NA | 0 | NA | 0 | NA |
| 9 | 130980361 | 130977651 | -1 | NM_203434    | IER5L    | 0 | 12 | 0 | NA | 0 | NA | 0 | NA | 0 | NA |
| 9 | 131123115 | 131124703 | 1  | NM_001012715 | C9orf106 | 1 | 12 | 0 | NA | 0 | NA | 0 | NA | 0 | NA |
| 9 | 131422876 | 131414324 | -1 | NM_199350    | C9orf50  | 1 | 13 | 0 | NA | 0 | NA | 1 | 12 | 0 | NA |
| 9 | 131428255 | 131437700 | 0  | NM_014064    | C9orf32  | 0 | NA | 0 | NA | 0 | NA | 1 | 12 | 0 | NA |
| 9 | 131444265 | 131436703 | -1 | NM_017873    | ASB6     | 0 | NA | 0 | NA | 0 | NA | 0 | NA | 0 | NA |
| 9 | 131444265 | 131436703 | -1 | NM_177999    | ASB6     | 0 | NA | 0 | NA | 0 | NA | 0 | NA | 0 | NA |
| 9 | 131467740 | 131524772 | 1  | NM_016307    | PRRX2    | 0 | NA | 0 | NA | 0 | NA | 0 | NA | 0 | NA |
| 9 | 131555165 | 131540432 | -1 | NM_004878    | PTGES    | 0 | NA | 0 | NA | 1 | 16 | 0 | NA | 0 | NA |
| 9 | 131605252 | 131613381 | 1  | NM_014506    | TOR1B    | 0 | NA | 0 | NA | 0 | NA | 0 | NA | 0 | NA |
| 9 | 131626262 | 131615041 | -1 | NM_000113    | TOR1A    | 0 | NA | 0 | NA | 1 | 11 | 0 | NA | 0 | NA |
| 9 | 131637393 | 131629384 | -1 | NM_016520    | C9orf78  | 0 | NA | 0 | NA | 0 | NA | 0 | NA | 0 | NA |
| 9 | 131637516 | 131683928 | 1  | NM_00110303  | USP20    | 0 | NA | 0 | NA | 0 | NA | 0 | NA | 0 | NA |
| 9 | 131637516 | 131683928 | 1  | NM_006676    | USP20    | 0 | NA | 0 | NA | 0 | NA | 0 | NA | 0 | NA |
| 9 | 131637577 | 131683928 | 1  | NM_001008563 | USP20    | 0 | NA | 0 | NA | 0 | NA | 0 | NA | 0 | NA |
| 9 | 131845294 | 131689286 | -1 | NM_015033    | FBNP1    | 0 | NA | 0 | NA | 1 | 12 | 0 | NA | 0 | NA |
| 9 | 131855856 | 131942264 | 1  | NM_020960    | GPR107   | 1 | 17 | 0 | NA | 0 | NA | 0 | NA | 0 | NA |
| 9 | 131974677 | 132038726 | 1  | NM_014286    | FREQ     | 0 | NA | 0 | NA | 0 | NA | 0 | NA | 0 | NA |
| 9 | 132309914 | 132366482 | 1  | NM_000050    | ASS1     | 0 | NA | 0 | NA | 0 | NA | 0 | NA | 0 | NA |
| 9 | 132309914 | 132366482 | 1  | NM_054012    | ASS1     | 0 | NA | 0 | NA | 0 | NA | 0 | NA | 0 | NA |
| 9 | 132444780 | 132503560 | 1  | NM_003934    | FUBP3    | 1 | 14 | 0 | NA | 0 | NA | 0 | NA | 0 | NA |
| 9 | 132529801 | 132548205 | 1  | NM_021619    | PRDM12   | 0 | NA | 0 | NA | 0 | NA | 0 | NA | 0 | NA |
| 9 | 132558997 | 132570077 | 1  | NM_014285    | EXOSC2   | 1 | 15 | 0 | NA | 0 | NA | 0 | NA | 0 | NA |
| 9 | 132579088 | 132752883 | 1  | NM_007313    | ABL1     | 0 | NA | 0 | NA | 0 | NA | 0 | NA | 0 | NA |
| 9 | 132700651 | 132752879 | 1  | NM_005157    | ABL1     | 0 | NA | 0 | NA | 0 | NA | 0 | NA | 0 | NA |
| 9 | 132759046 | 132758635 | -1 | NM_198180    | QRFP     | 0 | NA | 0 | NA | 0 | NA | 0 | NA | 0 | NA |
| 9 | 132804058 | 132767721 | -1 | NM_032843    | FIBCD1   | 0 | NA | 0 | NA | 0 | NA | 0 | NA | 0 | NA |
| 9 | 132874324 | 132958267 | 1  | NM_006059    | LAMC3    | 0 | NA | 1 | 12 | 0 | NA | 0 | NA | 0 | NA |
| 9 | 132961732 | 132988360 | 1  | NM_031426    | C9orf58  | 0 | NA | 0 | NA | 0 | NA | 0 | NA | 0 | NA |
| 9 | 132990801 | 133098912 | 1  | NM_005085    | NUP214   | 0 | NA | 0 | NA | 0 | NA | 0 | NA | 0 | NA |
| 9 | 133141727 | 133123285 | -1 | NM_033387    | FAM78A   | 0 | NA | 0 | NA | 0 | NA | 0 | NA | 0 | NA |
| 9 | 133154944 | 133174468 | 1  | NM_032728    | PPAPDC3  | 1 | 14 | 0 | NA | 0 | NA | 0 | NA | 0 | NA |
| 9 | 133295297 | 133365396 | 1  | NM_013318    | KIAA0515 | 0 | NA | 0 | NA | 0 | NA | 0 | NA | 0 | NA |
| 9 | 133368109 | 133389014 | 1  | NM_001077365 | POMT1    | 0 | NA | 0 | NA | 0 | NA | 0 | NA | 0 | NA |
| 9 | 133368109 | 133389014 | 1  | NM_001077366 | POMT1    | 0 | NA | 0 | NA | 0 | NA | 0 | NA | 0 | NA |
| 9 | 133368109 | 133389014 | 1  | NM_007171    | POMT1    | 0 | NA | 0 | NA | 0 | NA | 0 | NA | 0 | NA |
| 9 | 133396476 | 133389011 | -1 | NM_031432    | UCK1     | 0 | NA | 0 | NA | 0 | NA | 0 | NA | 0 | NA |
| 9 | 133575050 | 133441977 | -1 | NM_198679    | RAPGEF1  | 0 | NA | 0 | NA | 0 | NA | 0 | NA | 0 | NA |
| 9 | 133602746 | 133441977 | -1 | NM_005312    | RAPGEF1  | 1 | 12 | 0 | NA | 0 | NA | 0 | NA | 0 | NA |
| 9 | 133945074 | 133725319 | -1 | NM_004269    | MED27    | 0 | NA | 0 | NA | 0 | NA | 1 | 14 | 0 | NA |
| 9 | 134031954 | 134108040 | 1  | NM_032536    | NTNG2    | 0 | NA | 1 | 22 | 0 | NA | 0 | NA | 0 | NA |
| 9 | 134220193 | 134126647 | -1 | NM_015046    | SETX     | 0 | NA | 0 | NA | 0 | NA | 0 | NA | 0 | NA |
| 9 | 134272042 | 134240757 | -1 | NM_007344    | TTF1     | 0 | NA | 0 | NA | 0 | NA | 0 | NA | 0 | NA |
| 9 | 134275431 | 134438496 | 1  | NM_207417    | FLJ46082 | 0 | NA | 0 | NA | 0 | NA | 0 | NA | 0 | NA |
| 9 | 134447813 | 134455461 | 1  | NM_020064    | BARHL1   | 0 | NA | 0 | NA | 0 | NA | 1 | 12 | 0 | NA |
| 9 | 134535548 | 134555291 | 1  | NM_012204    | GTF3C4   | 1 | 13 | 0 | NA | 0 | NA | 0 | NA | 0 | NA |
| 9 | 134535609 | 134459496 | -1 | NM_022779    | DDX31    | 1 | 13 | 0 | NA | 0 | NA | 0 | NA | 0 | NA |
| 9 | 134535609 | 134503070 | -1 | NM_138620    | DDX31    | 1 | 13 | 0 | NA | 0 | NA | 0 | NA | 0 | NA |
| 9 | 134744019 | 134590785 | -1 | NM_152572    | C9orf98  | 0 | NA | 0 | NA | 0 | NA | 0 | NA | 0 | NA |
| 9 | 134744110 | 134755239 | 1  | NM_018956    | C9orf9   | 0 | NA | 0 | NA | 0 | NA | 0 | NA | 0 | NA |
| 9 | 134809841 | 134756556 | -1 | NM_000368    | TSC1     | 0 | NA | 0 | NA | 0 | NA | 0 | NA | 0 | NA |
| 9 | 134809841 | 134776206 | -1 | NM_001008567 | TSC1     | 0 | NA | 0 | NA | 0 | NA | 0 | NA | 0 | NA |
| 9 | 134843918 | 134856903 | 1  | NM_004188    | GFI1B    | 0 | NA | 1 | 12 | 0 | NA | 0 | NA | 0 | NA |
| 9 | 134895882 | 134923711 | 1  | NM_001122823 | GTF3C5   | 0 | NA | 0 | NA | 0 | NA | 0 | NA | 0 | NA |
| 9 | 134895882 | 134923711 | 1  | NM_012087    | GTF3C5   | 0 | NA | 0 | NA | 0 | NA | 0 | NA | 0 | NA |

|   |           |           |    |              |           |   |    |   |    |   |    |   |    |   |    |
|---|-----------|-----------|----|--------------|-----------|---|----|---|----|---|----|---|----|---|----|
| 9 | 134927185 | 134937069 | 1  | NM_001807    | CEL       | 0 | NA | 0 | NA | 0 | NA | 0 | NA | 0 | NA |
| 9 | 134986382 | 134962927 | -1 | NM_006266    | RALGDS    | 0 | NA | 0 | NA | 0 | NA | 0 | NA | 0 | NA |
| 9 | 135014409 | 134962927 | -1 | NM_001042368 | RALGDS    | 0 | NA | 1 | 12 | 0 | NA | 0 | NA | 0 | NA |
| 9 | 135029122 | 135018160 | -1 | NM_021996    | GBGT1     | 0 | NA | 1 | 12 | 0 | NA | 0 | NA | 0 | NA |
| 9 | 135074449 | 135070486 | -1 | NM_014581    | OBP2B     | 0 | NA | 1 | 19 | 0 | NA | 0 | NA | 0 | NA |
| 9 | 135140451 | 135120383 | -1 | NM_020469    | ABO       | 0 | NA | 1 | 18 | 0 | NA | 0 | NA | 0 | NA |
| 9 | 135192868 | 135187372 | -1 | NM_006753    | SURF6     | 0 | NA | 0 | NA | 0 | NA | 0 | NA | 0 | NA |
| 9 | 135204793 | 135197575 | -1 | NM_133640    | MED22     | 0 | NA | 0 | NA | 0 | NA | 0 | NA | 0 | NA |
| 9 | 135204793 | 135197575 | -1 | NM_181491    | MED22     | 0 | NA | 0 | NA | 0 | NA | 0 | NA | 0 | NA |
| 9 | 135204889 | 135208101 | 1  | NM_000972    | RPL7A     | 0 | NA | 0 | NA | 0 | NA | 0 | NA | 0 | NA |
| 9 | 135213182 | 135208486 | -1 | NM_003172    | SURF1     | 0 | NA | 0 | NA | 0 | NA | 1 | 12 | 0 | NA |
| 9 | 135213248 | 135217855 | 1  | NM_017503    | SURF2     | 0 | NA | 0 | NA | 0 | NA | 1 | 12 | 0 | NA |
| 9 | 135232791 | 135218160 | -1 | NM_033161    | SURF4     | 0 | NA | 0 | NA | 0 | NA | 0 | NA | 0 | NA |
| 9 | 135233104 | 135261041 | 1  | NM_153710    | C9orf96   | 0 | NA | 0 | NA | 0 | NA | 0 | NA | 0 | NA |
| 9 | 135272985 | 135261006 | -1 | NM_020385    | REXO4     | 0 | NA | 1 | 17 | 0 | NA | 1 | 18 | 0 | NA |
| 9 | 135276940 | 135314328 | 1  | NM_139025    | ADAMTS13  | 0 | NA | 1 | 17 | 0 | NA | 1 | 18 | 0 | NA |
| 9 | 135276940 | 135314328 | 1  | NM_139026    | ADAMTS13  | 0 | NA | 1 | 17 | 0 | NA | 1 | 18 | 0 | NA |
| 9 | 135276940 | 135314328 | 1  | NM_139027    | ADAMTS13  | 0 | NA | 1 | 17 | 0 | NA | 1 | 18 | 0 | NA |
| 9 | 135314951 | 135325706 | 1  | NM_017586    | C9orf7    | 1 | 25 | 0 | NA | 0 | NA | 0 | NA | 0 | NA |
| 9 | 135334039 | 135326040 | -1 | NM_017585    | SLC2A6    | 0 | NA | 0 | NA | 0 | NA | 0 | NA | 0 | NA |
| 9 | 135379787 | 135369578 | -1 | NM_001080483 | LOC389827 | 0 | NA | 0 | NA | 0 | NA | 0 | NA | 0 | NA |
| 9 | 135389795 | 135430462 | 1  | NM_014694    | ADAMTSL2  | 0 | NA | 1 | 13 | 0 | NA | 0 | NA | 0 | NA |
| 9 | 135435166 | 135433964 | -1 | NM_001080515 | C9orf166  | 0 | NA | 1 | 12 | 0 | NA | 0 | NA | 1 | 20 |
| 9 | 135491305 | 135514287 | 1  | NM_000787    | DBH       | 0 | NA | 0 | NA | 0 | NA | 0 | NA | 0 | NA |
| 9 | 135594863 | 135518504 | -1 | NM_007101    | SARDH     | 0 | NA | 0 | NA | 0 | NA | 0 | NA | 0 | NA |
| 9 | 135847226 | 135616836 | -1 | NM_003371    | VAV2      | 0 | NA | 0 | NA | 0 | NA | 0 | NA | 0 | NA |
| 9 | 135922913 | 135887783 | -1 | NM_007371    | BRD3      | 0 | NA | 0 | NA | 0 | NA | 1 | 14 | 0 | NA |
| 9 | 135991030 | 136014915 | 1  | NM_017588    | WDR5      | 0 | NA | 0 | NA | 0 | NA | 0 | NA | 0 | NA |
| 9 | 135994734 | 136014915 | 1  | NM_052821    | WDR5      | 0 | NA | 0 | NA | 0 | NA | 0 | NA | 0 | NA |
| 9 | 136358230 | 136472252 | 1  | NM_002957    | RXRA      | 0 | NA | 0 | NA | 0 | NA | 0 | NA | 0 | NA |
| 9 | 136673472 | 136876509 | 1  | NM_000093    | COL5A1    | 0 | NA | 0 | NA | 0 | NA | 0 | NA | 0 | NA |
| 9 | 136912478 | 136919187 | 1  | NM_004108    | FCN2      | 0 | NA | 1 | 12 | 1 | 12 | 0 | NA | 0 | NA |
| 9 | 136912478 | 136919187 | 1  | NM_015837    | FCN2      | 0 | NA | 1 | 12 | 1 | 12 | 0 | NA | 0 | NA |
| 9 | 136949630 | 136941254 | -1 | NM_002003    | FCN1      | 0 | NA | 0 | NA | 0 | NA | 0 | NA | 0 | NA |
| 9 | 137106909 | 137152851 | 1  | NM_014279    | OLFM1     | 0 | NA | 0 | NA | 0 | NA | 0 | NA | 0 | NA |
| 9 | 137106923 | 137129773 | 1  | NM_006334    | OLFM1     | 0 | NA | 0 | NA | 0 | NA | 0 | NA | 0 | NA |
| 9 | 137511468 | 137520560 | 1  | NM_014811    | KIAA0649  | 0 | NA | 0 | NA | 0 | NA | 0 | NA | 0 | NA |
| 9 | 137531582 | 137526846 | -1 | NM_001048265 | C9orf116  | 0 | NA | 0 | NA | 0 | NA | 0 | NA | 0 | NA |
| 9 | 137531582 | 137526846 | -1 | NM_144654    | C9orf116  | 0 | NA | 0 | NA | 0 | NA | 0 | NA | 0 | NA |
| 9 | 137532303 | 137536340 | 1  | NM_016034    | MRPS2     | 0 | NA | 0 | NA | 0 | NA | 0 | NA | 0 | NA |
| 9 | 137553106 | 137558199 | 1  | NM_002297    | LCN1      | 0 | NA | 1 | 12 | 0 | NA | 0 | NA | 0 | NA |
| 9 | 137577805 | 137581636 | 1  | NM_014582    | OBP2A     | 0 | NA | 0 | NA | 0 | NA | 0 | NA | 0 | NA |
| 9 | 137593424 | 137598443 | 1  | NM_001018049 | PAEP      | 0 | NA | 0 | NA | 0 | NA | 0 | NA | 0 | NA |
| 9 | 137593424 | 137598443 | 1  | NM_002571    | PAEP      | 0 | NA | 0 | NA | 0 | NA | 0 | NA | 0 | NA |
| 9 | 137671207 | 137655322 | -1 | NM_182974    | GLT1D1    | 0 | NA | 0 | NA | 0 | NA | 1 | 20 | 0 | NA |
| 9 | 137694988 | 137697576 | 1  | NM_001001676 | LCN9      | 0 | NA | 1 | 14 | 0 | NA | 0 | NA | 1 | 12 |
| 9 | 137731195 | 137725075 | -1 | NM_001012415 | SOHLH1    | 0 | NA | 1 | 19 | 0 | NA | 0 | NA | 0 | NA |
| 9 | 137731195 | 137725075 | -1 | NM_00101677  | SOHLH1    | 0 | NA | 1 | 19 | 0 | NA | 0 | NA | 0 | NA |
| 9 | 137733858 | 137824813 | 1  | NM_020822    | KCNT1     | 0 | NA | 0 | NA | 0 | NA | 0 | NA | 0 | NA |
| 9 | 137938826 | 137840153 | -1 | NM_015447    | CAMSAP1   | 0 | NA | 1 | 12 | 0 | NA | 0 | NA | 0 | NA |
| 9 | 137993047 | 137964635 | -1 | NM_016172    | UBAC1     | 0 | NA | 0 | NA | 0 | NA | 0 | NA | 0 | NA |
| 9 | 138126952 | 138043023 | -1 | NM_144653    | BTBD14A   | 0 | NA | 0 | NA | 1 | 12 | 0 | NA | 0 | NA |
| 9 | 138150552 | 138146247 | -1 | NM_152833    | C9orf69   | 0 | NA | 1 | 13 | 0 | NA | 1 | 12 | 0 | NA |
| 9 | 138234825 | 138227916 | -1 | NM_014564    | LHX3      | 0 | NA | 0 | NA | 0 | NA | 0 | NA | 0 | NA |
| 9 | 138236776 | 138227916 | -1 | NM_178138    | LHX3      | 0 | NA | 0 | NA | 0 | NA | 0 | NA | 0 | NA |
| 9 | 138277508 | 138238003 | -1 | NM_181701    | QSOX2     | 0 | NA | 0 | NA | 0 | NA | 0 | NA | 0 | NA |
| 9 | 138348725 | 138372493 | 1  | NM_015597    | GPSM1     | 1 | 11 | 0 | NA | 1 | 14 | 0 | NA | 0 | NA |
| 9 | 138378062 | 138376172 | -1 | NM_001080849 | DNLZ      | 0 | NA | 0 | NA | 0 | NA | 0 | NA | 0 | NA |
| 9 | 138387939 | 138378228 | -1 | NM_052813    | CARD9     | 0 | NA | 0 | NA | 0 | NA | 0 | NA | 0 | NA |
| 9 | 138412710 | 138389849 | -1 | NM_003086    | SNAPC4    | 0 | NA | 0 | NA | 0 | NA | 0 | NA | 0 | NA |
| 9 | 138424875 | 138416194 | -1 | NM_001039707 | SDCCAG3   | 0 | NA | 0 | NA | 0 | NA | 0 | NA | 0 | NA |
| 9 | 138424875 | 138416194 | -1 | NM_001039708 | SDCCAG3   | 0 | NA | 0 | NA | 0 | NA | 0 | NA | 0 | NA |
| 9 | 138424875 | 138416194 | -1 | NM_006643    | SDCCAG3   | 0 | NA | 0 | NA | 0 | NA | 0 | NA | 0 | NA |
| 9 | 138424936 | 138438034 | 1  | NM_015160    | PMPCA     | 0 | NA | 0 | NA | 0 | NA | 0 | NA | 0 | NA |
| 9 | 138454077 | 138442892 | -1 | NM_019892    | INPPE     | 0 | NA | 0 | NA | 0 | NA | 0 | NA | 0 | NA |

|   |           |           |    |              |           |   |    |   |    |   |    |   |    |   |    |
|---|-----------|-----------|----|--------------|-----------|---|----|---|----|---|----|---|----|---|----|
| 9 | 138497328 | 138454368 | -1 | NM_014866    | SEC16A    | 0 | NA | 0 | NA | 1 | 12 | 0 | NA | 0 | NA |
| 9 | 138497767 | 138500340 | 1  | NM_152571    | C9orf163  | 0 | NA | 0 | NA | 1 | 12 | 0 | NA | 0 | NA |
| 9 | 138560059 | 138508716 | -1 | NM_017617    | NOTCH1    | 0 | NA | 0 | NA | 1 | 13 | 0 | NA | 0 | NA |
| 9 | 138677197 | 138686951 | 1  | NM_201446    | EGFL7     | 0 | NA | 0 | NA | 0 | NA | 0 | NA | 0 | NA |
| 9 | 138677202 | 138686951 | 1  | NM_016215    | EGFL7     | 0 | NA | 0 | NA | 0 | NA | 0 | NA | 0 | NA |
| 9 | 138701732 | 138687415 | -1 | NM_001012727 | AGPAT2    | 0 | NA | 0 | NA | 0 | NA | 0 | NA | 0 | NA |
| 9 | 138701732 | 138687415 | -1 | NM_006412    | AGPAT2    | 0 | NA | 0 | NA | 0 | NA | 0 | NA | 0 | NA |
| 9 | 138726850 | 138738310 | 1  | NM_152421    | FAM69B    | 0 | NA | 0 | NA | 0 | NA | 0 | NA | 0 | NA |
| 9 | 13875232  | 138752439 | -1 | NM_001001712 | LCN10     | 0 | NA | 0 | NA | 0 | NA | 0 | NA | 0 | NA |
| 9 | 138762801 | 138758290 | -1 | NM_198946    | LCN6      | 0 | NA | 1 | 17 | 0 | NA | 0 | NA | 0 | NA |
| 9 | 138772552 | 138768660 | -1 | NM_178469    | LCN8      | 0 | NA | 1 | 17 | 0 | NA | 0 | NA | 0 | NA |
| 9 | 138778786 | 138773908 | -1 | NM_203347    | UNQ2541   | 0 | NA | 1 | 17 | 0 | NA | 0 | NA | 0 | NA |
| 9 | 138805997 | 138807590 | 1  | NM_032928    | TMEM141   | 0 | NA | 0 | NA | 0 | NA | 0 | NA | 0 | NA |
| 9 | 138810622 | 138822014 | 1  | NM_001039374 | KIAA1984  | 1 | 11 | 0 | NA | 0 | NA | 0 | NA | 0 | NA |
| 9 | 138822201 | 138855460 | 1  | NM_017995    | C9orf86   | 1 | 11 | 0 | NA | 0 | NA | 0 | NA | 0 | NA |
| 9 | 138822201 | 138855460 | 1  | NM_024718    | C9orf86   | 1 | 11 | 0 | NA | 0 | NA | 0 | NA | 0 | NA |
| 9 | 138858687 | 138861618 | 1  | NM_001080482 | LOC389813 | 1 | 12 | 1 | 13 | 0 | NA | 0 | NA | 0 | NA |
| 9 | 138863366 | 138865311 | 1  | NM_014172    | PHPT1     | 1 | 12 | 1 | 13 | 0 | NA | 0 | NA | 0 | NA |
| 9 | 138866639 | 138875072 | 1  | NM_206920    | MAMDC4    | 1 | 12 | 1 | 13 | 0 | NA | 0 | NA | 0 | NA |
| 9 | 138880559 | 138876391 | -1 | NM_003792    | EDF1      | 1 | 18 | 0 | NA | 0 | NA | 0 | NA | 0 | NA |
| 9 | 138880559 | 138877053 | -1 | NM_153200    | EDF1      | 1 | 18 | 0 | NA | 0 | NA | 0 | NA | 0 | NA |
| 9 | 138900785 | 138940888 | 1  | NM_021138    | TRAF2     | 0 | NA | 0 | NA | 0 | NA | 0 | NA | 0 | NA |
| 9 | 138958994 | 138954707 | -1 | NM_018998    | FBXW5     | 0 | NA | 0 | NA | 0 | NA | 1 | 11 | 0 | NA |
| 9 | 138959518 | 138961247 | 1  | NM_000606    | CSG       | 0 | NA | 0 | NA | 0 | NA | 1 | 11 | 0 | NA |
| 9 | 138966588 | 138969770 | 1  | NM_178536    | LCN12     | 0 | NA | 0 | NA | 0 | NA | 1 | 11 | 0 | NA |
| 9 | 138991776 | 138996015 | 1  | NM_000954    | PTGDS     | 0 | NA | 0 | NA | 0 | NA | 0 | NA | 0 | NA |
| 9 | 138997265 | 139000031 | 1  | NM_207510    | FLJ45224  | 0 | NA | 0 | NA | 0 | NA | 0 | NA | 0 | NA |
| 9 | 139006690 | 139008249 | 1  | NM_183241    | C9orf142  | 0 | NA | 0 | NA | 0 | NA | 0 | NA | 0 | NA |
| 9 | 139010845 | 139008880 | -1 | NM_004669    | CLIC3     | 0 | NA | 0 | NA | 0 | NA | 0 | NA | 0 | NA |
| 9 | 139041736 | 139051055 | 1  | NM_207511    | C9orf139  | 0 | NA | 0 | NA | 0 | NA | 0 | NA | 0 | NA |
| 9 | 139042561 | 139021506 | -1 | NM_001606    | ABCA2     | 0 | NA | 0 | NA | 0 | NA | 0 | NA | 0 | NA |
| 9 | 139043195 | 139021506 | -1 | NM_212533    | ABCA2     | 0 | NA | 0 | NA | 0 | NA | 0 | NA | 0 | NA |
| 9 | 139047113 | 139044446 | -1 | NM_004479    | FUT7      | 0 | NA | 0 | NA | 0 | NA | 0 | NA | 0 | NA |
| 9 | 139060476 | 139053742 | -1 | NM_015392    | NPDC1     | 1 | 20 | 0 | NA | 0 | NA | 0 | NA | 0 | NA |
| 9 | 139068326 | 139062373 | -1 | NM_001246    | ENTPD2    | 1 | 20 | 0 | NA | 0 | NA | 0 | NA | 0 | NA |
| 9 | 139068326 | 139062373 | -1 | NM_203468    | ENTPD2    | 1 | 20 | 0 | NA | 0 | NA | 0 | NA | 0 | NA |
| 9 | 139084849 | 139076594 | -1 | NM_178448    | C9orf140  | 0 | NA | 0 | NA | 0 | NA | 0 | NA | 0 | NA |
| 9 | 139091773 | 139098811 | 1  | NM_207309    | UAP1L1    | 1 | 15 | 0 | NA | 0 | NA | 0 | NA | 0 | NA |
| 9 | 139101199 | 139123460 | 1  | NM_016219    | MAN1B1    | 0 | NA | 0 | NA | 0 | NA | 0 | NA | 0 | NA |
| 9 | 139129016 | 139124812 | -1 | NM_013379    | DPP7      | 0 | NA | 0 | NA | 0 | NA | 0 | NA | 0 | NA |
| 9 | 139153429 | 139183029 | 1  | NM_000832    | GRIN1     | 1 | 13 | 1 | 12 | 0 | NA | 0 | NA | 0 | NA |
| 9 | 139153429 | 139183029 | 1  | NM_007327    | GRIN1     | 1 | 13 | 1 | 12 | 0 | NA | 0 | NA | 0 | NA |
| 9 | 139153429 | 139183029 | 1  | NM_021569    | GRIN1     | 1 | 13 | 1 | 12 | 0 | NA | 0 | NA | 0 | NA |
| 9 | 139184312 | 139183032 | -1 | NM_001013653 | LRRC26    | 0 | NA | 1 | 12 | 0 | NA | 0 | NA | 0 | NA |
| 9 | 139202878 | 139189056 | -1 | NM_013366    | ANAPC2    | 0 | NA | 0 | NA | 0 | NA | 0 | NA | 0 | NA |
| 9 | 139202953 | 139204638 | 1  | NM_003731    | SSNA1     | 0 | NA | 0 | NA | 0 | NA | 0 | NA | 0 | NA |
| 9 | 139214378 | 139205889 | -1 | NM_173691    | C9orf75   | 0 | NA | 0 | NA | 0 | NA | 0 | NA | 0 | NA |
| 9 | 139219911 | 139218355 | -1 | NM_053045    | TMEM203   | 0 | NA | 0 | NA | 0 | NA | 0 | NA | 0 | NA |
| 9 | 139220003 | 139231282 | 1  | NM_014434    | NDOR1     | 0 | NA | 0 | NA | 0 | NA | 0 | NA | 0 | NA |
| 9 | 139235596 | 139234527 | -1 | NM_031297    | RNF208    | 0 | NA | 0 | NA | 0 | NA | 0 | NA | 0 | NA |
| 9 | 139239464 | 139240584 | 1  | NM_199001    | MGC59937  | 0 | NA | 0 | NA | 0 | NA | 0 | NA | 0 | NA |
| 9 | 139245205 | 139250827 | 1  | NM_080877    | SLC34A3   | 0 | NA | 0 | NA | 0 | NA | 0 | NA | 0 | NA |
| 9 | 139255531 | 139257980 | 1  | NM_006088    | TUBB2C    | 0 | NA | 0 | NA | 0 | NA | 0 | NA | 0 | NA |
| 9 | 139262043 | 139257857 | -1 | NM_001001710 | LOC401565 | 0 | NA | 0 | NA | 0 | NA | 0 | NA | 0 | NA |
| 9 | 139265550 | 139267755 | 1  | NM_001004353 | LOC441476 | 0 | NA | 0 | NA | 0 | NA | 0 | NA | 0 | NA |
| 9 | 139269579 | 139287821 | 1  | NM_015456    | COBRA1    | 0 | NA | 0 | NA | 0 | NA | 0 | NA | 0 | NA |
| 9 | 139292100 | 139296914 | 1  | NM_017723    | C9orf167  | 0 | NA | 0 | NA | 0 | NA | 0 | NA | 0 | NA |
| 9 | 139316524 | 139314754 | -1 | NM_001004354 | NRARP     | 0 | NA | 1 | 14 | 0 | NA | 0 | NA | 0 | NA |
| 9 | 139437535 | 139321168 | -1 | NM_017820    | FLJ20433  | 0 | NA | 0 | NA | 0 | NA | 0 | NA | 0 | NA |
| 9 | 139437667 | 139448679 | 1  | NM_006647    | NOXA1     | 0 | NA | 0 | NA | 0 | NA | 0 | NA | 0 | NA |
| 9 | 139455722 | 139448636 | -1 | NM_001033113 | ENTPD8    | 1 | 11 | 0 | NA | 0 | NA | 0 | NA | 0 | NA |
| 9 | 139455722 | 139448636 | -1 | NM_198585    | ENTPD8    | 1 | 11 | 0 | NA | 0 | NA | 0 | NA | 0 | NA |
| 9 | 139473575 | 139462497 | -1 | NM_015537    | NELF      | 0 | NA | 0 | NA | 0 | NA | 0 | NA | 0 | NA |
| 9 | 139564807 | 139474225 | -1 | NM_001098537 | PNPLA7    | 0 | NA | 0 | NA | 0 | NA | 0 | NA | 0 | NA |
| 9 | 139564807 | 139474225 | -1 | NM_152286    | PNPLA7    | 0 | NA | 0 | NA | 0 | NA | 0 | NA | 0 | NA |

|   |           |           |    |              |           |   |    |   |    |   |    |   |    |   |    |
|---|-----------|-----------|----|--------------|-----------|---|----|---|----|---|----|---|----|---|----|
| 9 | 139566129 | 139566828 | 1  | NM_032477    | MRPL41    | 0 | NA | 0 | NA | 0 | NA | 0 | NA | 0 | NA |
| 9 | 139593208 | 139569181 | -1 | NM_138778    | WDR85     | 0 | NA | 0 | NA | 0 | NA | 0 | NA | 0 | NA |
| 9 | 139604758 | 139596351 | -1 | NM_138462    | ZMYND19   | 0 | NA | 0 | NA | 0 | NA | 0 | NA | 0 | NA |
| 9 | 139619916 | 139629633 | 1  | NM_152285    | ARRDC1    | 0 | NA | 0 | NA | 0 | NA | 0 | NA | 0 | NA |
| 9 | 139633070 | 139629609 | -1 | NM_032937    | C9orf37   | 0 | NA | 0 | NA | 0 | NA | 0 | NA | 0 | NA |
| 9 | 139725237 | 139850399 | 1  | NM_024757    | EHMT1     | 0 | NA | 0 | NA | 0 | NA | 1 | 12 | 0 | NA |
| 9 | 139892061 | 140136452 | 1  | NM_000718    | CACNA1B   | 0 | NA | 1 | 14 | 0 | NA | 0 | NA | 0 | NA |
| 8 | 107024    | 106085    | -1 | NM_001005504 | OR4F21    | 0 | NA | 0 | NA | 0 | NA | 0 | NA | 0 | NA |
| 8 | 172199    | 187339    | 1  | NM_173539    | ZNF596    | 0 | NA | 0 | NA | 0 | NA | 0 | NA | 0 | NA |
| 8 | 172383    | 187339    | 1  | NM_001042415 | ZNF596    | 0 | NA | 0 | NA | 0 | NA | 0 | NA | 0 | NA |
| 8 | 172383    | 187339    | 1  | NM_001042416 | ZNF596    | 0 | NA | 0 | NA | 0 | NA | 0 | NA | 0 | NA |
| 8 | 346807    | 409875    | 1  | NM_012173    | FBXQ25    | 0 | NA | 0 | NA | 0 | NA | 0 | NA | 0 | NA |
| 8 | 346807    | 409875    | 1  | NM_183420    | FBXQ25    | 0 | NA | 0 | NA | 0 | NA | 0 | NA | 0 | NA |
| 8 | 346807    | 409875    | 1  | NM_183421    | FBXQ25    | 0 | NA | 0 | NA | 0 | NA | 0 | NA | 0 | NA |
| 8 | 485331    | 431645    | -1 | NM_175075    | C8orf42   | 0 | NA | 1 | 12 | 0 | NA | 0 | NA | 0 | NA |
| 8 | 671226    | 604199    | -1 | NM_207332    | ERICH1    | 0 | NA | 0 | NA | 0 | NA | 0 | NA | 1 | 14 |
| 8 | 1436975   | 1644049   | 1  | NM_004745    | DLGAP2    | 0 | NA | 0 | NA | 0 | NA | 0 | NA | 0 | NA |
| 8 | 1699276   | 1722143   | 1  | NM_018941    | CLN8      | 0 | NA | 0 | NA | 0 | NA | 0 | NA | 0 | NA |
| 8 | 1759555   | 1894214   | 1  | NM_014629    | ARHGEF10  | 1 | 11 | 0 | NA | 0 | NA | 0 | NA | 0 | NA |
| 8 | 1909450   | 1942516   | 1  | NM_014867    | KBTBD11   | 0 | NA | 1 | 12 | 0 | NA | 0 | NA | 1 | 13 |
| 8 | 1980564   | 2080787   | 1  | NM_003970    | MYOM2     | 0 | NA | 1 | 13 | 0 | NA | 0 | NA | 1 | 12 |
| 8 | 4839736   | 2780281   | -1 | NM_033225    | CSMD1     | 0 | NA | 0 | NA | 0 | NA | 0 | NA | 0 | NA |
| 8 | 6251526   | 6493434   | 1  | NM_024596    | MCPH1     | 0 | NA | 0 | NA | 0 | NA | 0 | NA | 0 | NA |
| 8 | 6408192   | 6344580   | -1 | NM_001118887 | ANGPT2    | 0 | NA | 1 | 18 | 0 | NA | 0 | NA | 1 | 15 |
| 8 | 6408192   | 6344580   | -1 | NM_001118888 | ANGPT2    | 0 | NA | 1 | 18 | 0 | NA | 0 | NA | 1 | 15 |
| 8 | 6408192   | 6344580   | -1 | NM_0011147   | ANGPT2    | 0 | NA | 1 | 18 | 0 | NA | 0 | NA | 1 | 15 |
| 8 | 6553285   | 6606429   | 1  | NM_018361    | AGPAT5    | 0 | NA | 0 | NA | 0 | NA | 1 | 15 | 0 | NA |
| 8 | 6680447   | 6653449   | -1 | NM_207411    | XKR5      | 0 | NA | 0 | NA | 0 | NA | 0 | NA | 0 | NA |
| 8 | 6722939   | 6715508   | 0  | NM_005218    | DEFB1     | 0 | NA | 1 | 13 | 0 | NA | 0 | NA | 0 | NA |
| 8 | 6771008   | 6769628   | -1 | NM_001926    | DEFA6     | 0 | NA | 0 | NA | 0 | NA | 0 | NA | 0 | NA |
| 8 | 6783196   | 6780754   | -1 | NM_001925    | DEFA4     | 0 | NA | 0 | NA | 0 | NA | 0 | NA | 0 | NA |
| 8 | 6825012   | 6822580   | -1 | NM_004084    | DEFA1     | 0 | NA | 0 | NA | 0 | NA | 0 | NA | 1 | 12 |
| 8 | 6825024   | 6822580   | -1 | NM_001042500 | LOC728358 | 0 | NA | 0 | NA | 0 | NA | 0 | NA | 1 | 12 |
| 8 | 6844122   | 6841697   | -1 | NM_004084    | DEFA1     | 0 | NA | 0 | NA | 0 | NA | 0 | NA | 0 | NA |
| 8 | 6844134   | 6841697   | -1 | NM_001042500 | LOC728358 | 0 | NA | 0 | NA | 0 | NA | 0 | NA | 0 | NA |
| 8 | 6863221   | 6860800   | -1 | NM_004084    | DEFA1     | 0 | NA | 0 | NA | 0 | NA | 0 | NA | 0 | NA |
| 8 | 6863226   | 6860804   | -1 | NM_005217    | DEFA3     | 0 | NA | 0 | NA | 0 | NA | 0 | NA | 0 | NA |
| 8 | 6863233   | 6860800   | -1 | NM_001042500 | LOC728358 | 0 | NA | 0 | NA | 0 | NA | 0 | NA | 0 | NA |
| 8 | 6901669   | 6900238   | -1 | NM_021010    | DEFA5     | 0 | NA | 0 | NA | 0 | NA | 0 | NA | 0 | NA |
| 8 | 7275092   | 7273825   | -1 | NM_018661    | DEFB103A  | 0 | NA | 0 | NA | 0 | NA | 0 | NA | 0 | NA |
| 8 | 7275280   | 7273900   | -1 | NM_001081551 | DEFB103B  | 0 | NA | 0 | NA | 0 | NA | 0 | NA | 0 | NA |
| 8 | 7297297   | 7295495   | -1 | NM_058206    | SPAG11B   | 0 | NA | 0 | NA | 0 | NA | 0 | NA | 0 | NA |
| 8 | 7297297   | 7295495   | -1 | NM_058207    | SPAG11B   | 0 | NA | 0 | NA | 0 | NA | 0 | NA | 0 | NA |
| 8 | 7308602   | 7292685   | -1 | NM_058200    | SPAG11B   | 0 | NA | 0 | NA | 0 | NA | 0 | NA | 0 | NA |
| 8 | 7308602   | 7292685   | -1 | NM_058202    | SPAG11B   | 0 | NA | 0 | NA | 0 | NA | 0 | NA | 0 | NA |
| 8 | 7308602   | 7295495   | -1 | NM_016512    | SPAG11B   | 0 | NA | 0 | NA | 0 | NA | 0 | NA | 0 | NA |
| 8 | 7308602   | 7295495   | -1 | NM_058201    | SPAG11B   | 0 | NA | 0 | NA | 0 | NA | 0 | NA | 0 | NA |
| 8 | 7308602   | 7306317   | -1 | NM_058203    | SPAG11B   | 0 | NA | 0 | NA | 0 | NA | 0 | NA | 0 | NA |
| 8 | 7320014   | 7315239   | -1 | NM_001040702 | DEFB104B  | 0 | NA | 0 | NA | 0 | NA | 0 | NA | 0 | NA |
| 8 | 7320014   | 7315239   | -1 | NM_080389    | DEFB104A  | 0 | NA | 0 | NA | 0 | NA | 0 | NA | 0 | NA |
| 8 | 7331319   | 7327435   | -1 | NM_001040704 | DEFB106B  | 0 | NA | 0 | NA | 0 | NA | 0 | NA | 0 | NA |
| 8 | 7331319   | 7327435   | -1 | NM_152251    | DEFB106A  | 0 | NA | 0 | NA | 0 | NA | 0 | NA | 0 | NA |
| 8 | 7332652   | 7334483   | 1  | NM_001040703 | DEFB105B  | 0 | NA | 0 | NA | 0 | NA | 0 | NA | 0 | NA |
| 8 | 7332652   | 7334483   | 1  | NM_152250    | DEFB105A  | 0 | NA | 0 | NA | 0 | NA | 0 | NA | 0 | NA |
| 8 | 7340777   | 7354243   | 1  | NM_001037668 | DEFB107A  | 0 | NA | 0 | NA | 0 | NA | 0 | NA | 0 | NA |
| 8 | 7340777   | 7354243   | 1  | NM_001040705 | DEFB107B  | 0 | NA | 0 | NA | 0 | NA | 0 | NA | 0 | NA |
| 8 | 7710648   | 7706651   | -1 | NM_001037668 | DEFB107A  | 0 | NA | 0 | NA | 0 | NA | 0 | NA | 0 | NA |
| 8 | 7710648   | 7706651   | -1 | NM_001040705 | DEFB107B  | 0 | NA | 0 | NA | 0 | NA | 0 | NA | 0 | NA |
| 8 | 7718770   | 7716939   | -1 | NM_001040703 | DEFB105B  | 0 | NA | 0 | NA | 0 | NA | 0 | NA | 0 | NA |
| 8 | 7718770   | 7716939   | -1 | NM_152250    | DEFB105A  | 0 | NA | 0 | NA | 0 | NA | 0 | NA | 0 | NA |
| 8 | 7720103   | 7723985   | 1  | NM_001040704 | DEFB106B  | 0 | NA | 0 | NA | 0 | NA | 0 | NA | 0 | NA |
| 8 | 7720103   | 7723985   | 1  | NM_152251    | DEFB106A  | 0 | NA | 0 | NA | 0 | NA | 0 | NA | 0 | NA |
| 8 | 7731402   | 7736174   | 1  | NM_001040702 | DEFB104B  | 0 | NA | 0 | NA | 0 | NA | 0 | NA | 0 | NA |
| 8 | 7731402   | 7736174   | 1  | NM_080389    | DEFB104A  | 0 | NA | 0 | NA | 0 | NA | 0 | NA | 0 | NA |
| 8 | 7742811   | 7745096   | 1  | NM_058203    | SPAG11B   | 0 | NA | 0 | NA | 0 | NA | 0 | NA | 0 | NA |

|   |          |          |    |              |           |   |    |   |    |   |    |   |    |   |    |
|---|----------|----------|----|--------------|-----------|---|----|---|----|---|----|---|----|---|----|
| 8 | 7742811  | 7758729  | 1  | NM_001081552 | SPAG11A   | 0 | NA | 0 | NA | 0 | NA | 0 | NA | 0 | NA |
| 8 | 7776135  | 7777515  | 1  | NM_001081551 | DEFB103B  | 0 | NA | 0 | NA | 0 | NA | 0 | NA | 0 | NA |
| 8 | 7776323  | 7777590  | 1  | NM_018661    | DEFB103A  | 0 | NA | 0 | NA | 0 | NA | 0 | NA | 0 | NA |
| 8 | 7789608  | 7791647  | 1  | NM_004942    | DEFB4     | 0 | NA | 0 | NA | 0 | NA | 0 | NA | 0 | NA |
| 8 | 8276667  | 8212667  | -1 | NM_001080826 | PRAGMIN   | 0 | NA | 0 | NA | 0 | NA | 0 | NA | 0 | NA |
| 8 | 8597075  | 8599027  | 1  | NM_194284    | CLDN23    | 0 | NA | 1 | 12 | 0 | NA | 0 | NA | 0 | NA |
| 8 | 8788541  | 8679408  | -1 | NM_004225    | MFHAS1    | 0 | NA | 0 | NA | 0 | NA | 0 | NA | 0 | NA |
| 8 | 8897723  | 8928259  | 1  | NM_153332    | THEX1     | 0 | NA | 0 | NA | 0 | NA | 0 | NA | 0 | NA |
| 8 | 9045630  | 9031176  | -1 | NM_024607    | PPP1R3B   | 0 | NA | 0 | NA | 0 | NA | 0 | NA | 0 | NA |
| 8 | 9450854  | 9677266  | 1  | NM_003747    | TNKS      | 0 | NA | 0 | NA | 0 | NA | 0 | NA | 0 | NA |
| 8 | 9949235  | 10323805 | 1  | NM_012331    | MSRA      | 0 | NA | 0 | NA | 0 | NA | 0 | NA | 0 | NA |
| 8 | 10420490 | 10433738 | 1  | NM_198464    | UNQ9391   | 0 | NA | 1 | 13 | 0 | NA | 0 | NA | 0 | NA |
| 8 | 10550027 | 10501269 | -1 | NM_178857    | RP1L1     | 0 | NA | 1 | 12 | 0 | NA | 0 | NA | 0 | NA |
| 8 | 10567556 | 10595513 | 1  | NM_001040032 | C8orf74   | 0 | NA | 0 | NA | 0 | NA | 0 | NA | 0 | NA |
| 8 | 10625432 | 10618687 | -1 | NM_031439    | SOX7      | 0 | NA | 1 | 15 | 0 | NA | 0 | NA | 0 | NA |
| 8 | 10734709 | 10660293 | -1 | NM_017884    | PINX1     | 0 | NA | 0 | NA | 1 | 12 | 0 | NA | 0 | NA |
| 8 | 11096285 | 10791066 | -1 | NM_173683    | XKR6      | 1 | 65 | 1 | 25 | 1 | 16 | 1 | 20 | 0 | NA |
| 8 | 11179409 | 11223064 | 1  | NM_015458    | MTMR9     | 1 | 14 | 0 | NA | 1 | 27 | 0 | NA | 0 | NA |
| 8 | 11225904 | 11227105 | 1  | NM_054028    | AMAC1L2   | 0 | NA | 1 | 12 | 0 | NA | 0 | NA | 0 | NA |
| 8 | 11361686 | 11316382 | -1 | NM_053279    | C8orf13   | 0 | NA | 0 | NA | 0 | NA | 0 | NA | 0 | NA |
| 8 | 11388929 | 11459517 | 1  | NM_001715    | BLK       | 0 | NA | 0 | NA | 0 | NA | 0 | NA | 0 | NA |
| 8 | 11599125 | 11654918 | 1  | NM_002052    | GATA4     | 0 | NA | 0 | NA | 0 | NA | 0 | NA | 0 | NA |
| 8 | 11664665 | 11682263 | 1  | NM_145043    | NEIL2     | 0 | NA | 0 | NA | 0 | NA | 0 | NA | 0 | NA |
| 8 | 11697598 | 11734227 | 1  | NM_004462    | FDFT1     | 1 | 12 | 0 | NA | 0 | NA | 1 | 12 | 0 | NA |
| 8 | 11763055 | 11737442 | -1 | NM_001908    | CTSB      | 1 | 11 | 0 | NA | 1 | 12 | 0 | NA | 0 | NA |
| 8 | 11763055 | 11737442 | -1 | NM_147780    | CTSB      | 1 | 11 | 0 | NA | 1 | 12 | 0 | NA | 0 | NA |
| 8 | 11763055 | 11737442 | -1 | NM_147781    | CTSB      | 1 | 11 | 0 | NA | 1 | 12 | 0 | NA | 0 | NA |
| 8 | 11763055 | 11737442 | -1 | NM_147782    | CTSB      | 1 | 11 | 0 | NA | 1 | 12 | 0 | NA | 0 | NA |
| 8 | 11763055 | 11737442 | -1 | NM_147783    | CTSB      | 1 | 11 | 0 | NA | 1 | 12 | 0 | NA | 0 | NA |
| 8 | 11869517 | 11868854 | -1 | NM_001033018 | DEFB137   | 0 | NA | 1 | 15 | 0 | NA | 0 | NA | 0 | NA |
| 8 | 11877238 | 11879508 | 1  | NM_001033017 | DEFB136   | 0 | NA | 1 | 15 | 0 | NA | 0 | NA | 0 | NA |
| 8 | 11891169 | 11888897 | -1 | NM_001033019 | DEFB134   | 0 | NA | 0 | NA | 0 | NA | 0 | NA | 0 | NA |
| 8 | 11966665 | 11959306 | -1 | NM_001037804 | DEFB130   | 0 | NA | 0 | NA | 0 | NA | 0 | NA | 0 | NA |
| 8 | 11984255 | 12010434 | 1  | NM_001039615 | LOC728957 | 0 | NA | 0 | NA | 0 | NA | 0 | NA | 0 | NA |
| 8 | 12033678 | 12032085 | -1 | NM_201402    | DUB3      | 0 | NA | 1 | 18 | 0 | NA | 0 | NA | 0 | NA |
| 8 | 12089033 | 12077021 | -1 | NM_001083537 | FAM86B1   | 0 | NA | 0 | NA | 0 | NA | 0 | NA | 0 | NA |
| 8 | 12220196 | 12212842 | -1 | NM_001037804 | DEFB130   | 0 | NA | 0 | NA | 0 | NA | 0 | NA | 0 | NA |
| 8 | 12657363 | 12623776 | -1 | NM_152271    | LONRF1    | 0 | NA | 0 | NA | 0 | NA | 0 | NA | 0 | NA |
| 8 | 12847553 | 12931655 | 1  | NM_020844    | C8orf79   | 1 | 11 | 1 | 12 | 0 | NA | 0 | NA | 0 | NA |
| 8 | 12914143 | 12931655 | 1  | NM_001099677 | C8orf79   | 0 | NA | 0 | NA | 0 | NA | 1 | 17 | 0 | NA |
| 8 | 13035180 | 12985242 | -1 | NM_006094    | DLC1      | 1 | 21 | 0 | NA | 0 | NA | 0 | NA | 0 | NA |
| 8 | 13416766 | 12985242 | -1 | NM_182643    | DLC1      | 1 | 16 | 0 | NA | 0 | NA | 0 | NA | 0 | NA |
| 8 | 13416766 | 13116452 | -1 | NM_024767    | DLC1      | 1 | 16 | 0 | NA | 0 | NA | 0 | NA | 0 | NA |
| 8 | 15140163 | 13991743 | -1 | NM_139167    | SGCZ      | 0 | NA | 0 | NA | 0 | NA | 0 | NA | 0 | NA |
| 8 | 15442100 | 15666366 | 1  | NM_006765    | TUSC3     | 0 | NA | 0 | NA | 0 | NA | 1 | 14 | 0 | NA |
| 8 | 15442100 | 15666366 | 1  | NM_178234    | TUSC3     | 0 | NA | 0 | NA | 0 | NA | 1 | 14 | 0 | NA |
| 8 | 16094671 | 16009757 | -1 | NM_138715    | MSR1      | 0 | NA | 0 | NA | 0 | NA | 0 | NA | 0 | NA |
| 8 | 16094671 | 16009757 | -1 | NM_138716    | MSR1      | 0 | NA | 0 | NA | 0 | NA | 0 | NA | 0 | NA |
| 8 | 16094671 | 16041196 | -1 | NM_002445    | MSR1      | 0 | NA | 0 | NA | 0 | NA | 0 | NA | 0 | NA |
| 8 | 16904045 | 16894704 | -1 | NM_019851    | FGF20     | 0 | NA | 0 | NA | 0 | NA | 0 | NA | 0 | NA |
| 8 | 16929118 | 17024518 | 1  | NM_181723    | EFHA2     | 0 | NA | 0 | NA | 0 | NA | 0 | NA | 0 | NA |
| 8 | 17058401 | 17124612 | 1  | NM_016353    | ZDHHC2    | 0 | NA | 0 | NA | 0 | NA | 0 | NA | 0 | NA |
| 8 | 17148758 | 17131110 | -1 | NM_013354    | CNOT7     | 0 | NA | 0 | NA | 0 | NA | 0 | NA | 0 | NA |
| 8 | 17148758 | 17133392 | -1 | NM_054026    | CNOT7     | 0 | NA | 0 | NA | 0 | NA | 0 | NA | 0 | NA |
| 8 | 17148850 | 17197418 | 1  | NM_152415    | VPS37A    | 0 | NA | 0 | NA | 0 | NA | 0 | NA | 0 | NA |
| 8 | 17315207 | 17199910 | -1 | NM_004686    | MTMR7     | 0 | NA | 0 | NA | 0 | NA | 0 | NA | 0 | NA |
| 8 | 17440664 | 17472352 | 1  | NM_003046    | SLC7A2    | 0 | NA | 0 | NA | 0 | NA | 0 | NA | 0 | NA |
| 8 | 17445205 | 17472352 | 1  | NM_001008539 | SLC7A2    | 0 | NA | 0 | NA | 0 | NA | 0 | NA | 0 | NA |
| 8 | 17478985 | 17544903 | 1  | NM_006207    | PDGFRL    | 0 | NA | 1 | 13 | 0 | NA | 0 | NA | 0 | NA |
| 8 | 17599449 | 17545582 | -1 | NM_020749    | MTUS1     | 0 | NA | 0 | NA | 0 | NA | 0 | NA | 0 | NA |
| 8 | 17624010 | 17545582 | -1 | NM_001001931 | MTUS1     | 0 | NA | 0 | NA | 0 | NA | 0 | NA | 0 | NA |
| 8 | 17702666 | 17545582 | -1 | NM_001001924 | MTUS1     | 0 | NA | 0 | NA | 0 | NA | 0 | NA | 0 | NA |
| 8 | 17702666 | 17545582 | -1 | NM_001001925 | MTUS1     | 0 | NA | 0 | NA | 0 | NA | 0 | NA | 0 | NA |
| 8 | 17797193 | 17766179 | -1 | NM_147203    | FGL1      | 0 | NA | 0 | NA | 0 | NA | 0 | NA | 0 | NA |
| 8 | 17797193 | 17766179 | -1 | NM_201553    | FGL1      | 0 | NA | 0 | NA | 0 | NA | 0 | NA | 0 | NA |

|   |          |          |    |              |            |   |    |   |    |   |    |   |    |   |    |
|---|----------|----------|----|--------------|------------|---|----|---|----|---|----|---|----|---|----|
| 8 | 17797327 | 17766179 | -1 | NM_004467    | FGL1       | 0 | NA | 0 | NA | 0 | NA | 0 | NA | 0 | NA |
| 8 | 17797327 | 17766179 | -1 | NM_201552    | FGL1       | 0 | NA | 0 | NA | 0 | NA | 0 | NA | 0 | NA |
| 8 | 17824645 | 17931737 | 1  | NM_006197    | PCM1       | 0 | NA | 0 | NA | 1 | 14 | 0 | NA | 0 | NA |
| 8 | 17986159 | 17958213 | -1 | NM_177924    | ASAH1      | 0 | NA | 0 | NA | 0 | 0  | 0 | NA | 0 | NA |
| 8 | 17986787 | 17958213 | -1 | NM_004315    | ASAH1      | 0 | NA | 0 | NA | 0 | 0  | 0 | NA | 0 | NA |
| 8 | 18111894 | 18125100 | 1  | NM_000662    | NAT1       | 0 | NA | 1 | 12 | 0 | 0  | 0 | NA | 0 | NA |
| 8 | 18293034 | 18303003 | 1  | NM_000015    | NAT2       | 0 | NA | 1 | 20 | 0 | 0  | 0 | NA | 0 | NA |
| 8 | 18710685 | 18429092 | -1 | NM_206909    | PSD3       | 0 | NA | 0 | NA | 0 | 0  | 0 | NA | 0 | NA |
| 8 | 18915476 | 18429092 | -1 | NM_015310    | PSD3       | 0 | NA | 0 | NA | 1 | 13 | 0 | NA | 0 | NA |
| 8 | 19215486 | 19297596 | 1  | NM_022071    | SH2D4A     | 0 | NA | 0 | NA | 0 | 0  | 0 | NA | 0 | NA |
| 8 | 19584374 | 19305951 | -1 | NM_018371    | CSGALNACT1 | 0 | NA | 0 | NA | 0 | 0  | 0 | NA | 0 | NA |
| 8 | 19719197 | 19753866 | 1  | NM_018142    | INTS10     | 1 | 19 | 0 | 0  | 0 | 0  | 1 | 14 | 0 | NA |
| 8 | 19840861 | 19869050 | 1  | NM_000237    | LPL        | 0 | NA | 0 | NA | 0 | 0  | 0 | NA | 0 | NA |
| 8 | 20084997 | 20046651 | -1 | NM_003053    | SLC18A1    | 1 | 12 | 0 | NA | 1 | 14 | 0 | NA | 0 | NA |
| 8 | 20089893 | 20123487 | 1  | NM_001693    | ATP6V1B2   | 1 | 15 | 0 | NA | 1 | 13 | 0 | NA | 0 | NA |
| 8 | 20157083 | 20147955 | -1 | NM_021020    | LZTS1      | 1 | 18 | 0 | NA | 1 | 21 | 1 | 13 | 0 | NA |
| 8 | 21702292 | 21593809 | -1 | NM_001495    | GFRA2      | 0 | NA | 0 | NA | 0 | 0  | 0 | NA | 0 | NA |
| 8 | 21827151 | 21822329 | -1 | NM_003974    | DOK2       | 0 | NA | 0 | NA | 0 | 0  | 0 | NA | 0 | NA |
| 8 | 21833125 | 21920042 | 1  | NM_001100161 | XPO7       | 0 | NA | 0 | NA | 0 | 0  | 0 | NA | 0 | NA |
| 8 | 21833125 | 21920042 | 1  | NM_015024    | XPO7       | 0 | NA | 0 | NA | 0 | 0  | 0 | NA | 0 | NA |
| 8 | 21879694 | 21920042 | 1  | NM_001100162 | XPO7       | 0 | NA | 0 | NA | 0 | 0  | 0 | NA | 0 | NA |
| 8 | 21938299 | 21950354 | 1  | NM_182795    | NPM2       | 0 | NA | 0 | NA | 0 | 0  | 0 | NA | 0 | NA |
| 8 | 21956373 | 21962265 | 1  | NM_003867    | FGF17      | 0 | NA | 0 | NA | 0 | 0  | 0 | NA | 0 | NA |
| 8 | 21967026 | 21995982 | 1  | NM_001114137 | EPB49      | 0 | NA | 0 | NA | 0 | 0  | 0 | NA | 0 | NA |
| 8 | 21968273 | 21995982 | 1  | NM_001114136 | EPB49      | 0 | NA | 0 | NA | 0 | 0  | 0 | NA | 0 | NA |
| 8 | 21968273 | 21995982 | 1  | NM_001114139 | EPB49      | 0 | NA | 0 | NA | 0 | 0  | 0 | NA | 0 | NA |
| 8 | 21971321 | 21995982 | 1  | NM_001114135 | EPB49      | 0 | NA | 0 | NA | 0 | 0  | 0 | NA | 0 | NA |
| 8 | 21972631 | 21995982 | 1  | NM_001114138 | EPB49      | 0 | NA | 0 | NA | 0 | 0  | 0 | NA | 0 | NA |
| 8 | 21972631 | 21995982 | 1  | NM_001978    | EPB49      | 0 | NA | 0 | NA | 0 | 0  | 0 | NA | 0 | NA |
| 8 | 22002659 | 22017836 | 1  | NM_022749    | RAI16      | 1 | 14 | 0 | NA | 0 | 0  | 0 | NA | 0 | NA |
| 8 | 22022877 | 22020327 | -1 | NM_024815    | NUDT18     | 0 | NA | 0 | NA | 0 | 0  | 0 | NA | 0 | NA |
| 8 | 22043975 | 22027876 | -1 | NM_005144    | HR         | 0 | NA | 0 | NA | 0 | 0  | 0 | NA | 0 | NA |
| 8 | 22043975 | 22027876 | -1 | NM_018411    | HR         | 0 | NA | 0 | NA | 0 | 0  | 0 | NA | 0 | NA |
| 8 | 22055393 | 22051477 | -1 | NM_025232    | REEP4      | 0 | NA | 1 | 19 | 0 | 0  | 1 | 12 | 0 | NA |
| 8 | 22070289 | 22060287 | -1 | NM_139278    | LG3        | 0 | NA | 1 | 19 | 0 | 0  | 0 | NA | 0 | NA |
| 8 | 22075128 | 22077936 | 1  | NM_003018    | SFTPC      | 0 | NA | 0 | NA | 0 | 0  | 0 | NA | 0 | NA |
| 8 | 22078834 | 22114926 | 1  | NM_001199    | BMP1       | 0 | NA | 0 | NA | 0 | 0  | 0 | NA | 0 | NA |
| 8 | 22078834 | 22114926 | 1  | NM_006128    | BMP1       | 0 | NA | 0 | NA | 0 | 0  | 0 | NA | 0 | NA |
| 8 | 22078863 | 22125782 | 1  | NM_006129    | BMP1       | 0 | NA | 0 | NA | 0 | 0  | 0 | NA | 0 | NA |
| 8 | 22145796 | 22133160 | -1 | NM_001099335 | PHYHIP     | 0 | NA | 0 | NA | 0 | 0  | 0 | NA | 0 | NA |
| 8 | 22145796 | 22133160 | -1 | NM_014759    | PHYHIP     | 0 | NA | 0 | NA | 0 | 0  | 0 | NA | 0 | NA |
| 8 | 22158563 | 22164625 | 1  | NM_001722    | POLR3D     | 0 | NA | 0 | NA | 0 | 0  | 0 | NA | 0 | NA |
| 8 | 22188800 | 22269531 | 1  | NM_018068    | PIWIL2     | 0 | NA | 0 | NA | 0 | 0  | 0 | NA | 0 | NA |
| 8 | 22280736 | 22336143 | 1  | NM_015359    | SLC39A14   | 0 | NA | 0 | NA | 0 | 0  | 0 | NA | 0 | NA |
| 8 | 22354540 | 22454582 | 1  | NM_005805    | PPP3CC     | 0 | NA | 0 | NA | 0 | 0  | 0 | NA | 0 | NA |
| 8 | 22465195 | 22488953 | 1  | NM_005775    | SORBS3     | 0 | NA | 0 | NA | 1 | 17 | 0 | NA | 0 | NA |
| 8 | 22479123 | 22488953 | 1  | NM_001018003 | SORBS3     | 0 | NA | 0 | NA | 0 | 0  | 0 | NA | 0 | NA |
| 8 | 22492587 | 22507755 | 1  | NM_021630    | PDLIM2     | 0 | NA | 0 | NA | 0 | 0  | 0 | NA | 0 | NA |
| 8 | 22493928 | 22507755 | 1  | NM_198042    | PDLIM2     | 0 | NA | 0 | NA | 0 | 0  | 0 | NA | 0 | NA |
| 8 | 22493928 | 22511483 | 1  | NM_176871    | PDLIM2     | 0 | NA | 0 | NA | 0 | 0  | 0 | NA | 0 | NA |
| 8 | 22513066 | 22517607 | 1  | NM_001013842 | C8orf58    | 1 | 11 | 0 | NA | 0 | 0  | 0 | NA | 0 | NA |
| 8 | 22518201 | 22533928 | 1  | NM_199205    | KIAA1967   | 1 | 28 | 0 | NA | 0 | 0  | 0 | NA | 0 | NA |
| 8 | 22518495 | 22533928 | 1  | NM_021174    | KIAA1967   | 1 | 28 | 0 | NA | 0 | 0  | 0 | NA | 0 | NA |
| 8 | 22582606 | 22533891 | -1 | NM_018688    | BIN3       | 1 | 15 | 1 | 12 | 1 | 14 | 1 | 12 | 0 | NA |
| 8 | 22606760 | 22601118 | -1 | NM_004430    | EGR3       | 1 | 15 | 0 | NA | 1 | 12 | 0 | NA | 0 | NA |
| 8 | 22841366 | 22626709 | -1 | NM_144962    | PEBP4      | 1 | 11 | 0 | NA | 1 | 12 | 0 | NA | 0 | NA |
| 8 | 22913406 | 22933653 | 1  | NM_015178    | RHOBTB2    | 0 | NA | 0 | NA | 0 | 0  | 0 | NA | 0 | NA |
| 8 | 22982637 | 22933592 | -1 | NM_003842    | TNFRSF10B  | 1 | 33 | 0 | NA | 0 | 0  | 0 | NA | 0 | NA |
| 8 | 22982637 | 22933592 | -1 | NM_147187    | TNFRSF10B  | 1 | 33 | 0 | NA | 0 | 0  | 0 | NA | 0 | NA |
| 8 | 23016378 | 23030895 | 1  | NM_003841    | TNFRSF10C  | 0 | NA | 0 | NA | 0 | 0  | 0 | NA | 0 | NA |
| 8 | 23077485 | 23049048 | -1 | NM_003840    | TNFRSF10D  | 1 | 11 | 0 | NA | 0 | 0  | 0 | NA | 0 | NA |
| 8 | 23138584 | 23104914 | -1 | NM_003844    | TNFRSF10A  | 1 | 12 | 0 | NA | 0 | 0  | 0 | NA | 0 | NA |
| 8 | 23157113 | 23175452 | 1  | NM_152272    | CHMP7      | 0 | NA | 0 | NA | 0 | 0  | 0 | NA | 0 | NA |
| 8 | 23317667 | 23210354 | -1 | NM_002318    | LOXL2      | 0 | NA | 0 | NA | 0 | 0  | 0 | NA | 0 | NA |
| 8 | 23371081 | 23346077 | -1 | NM_004901    | ENTPD4     | 0 | NA | 0 | NA | 0 | 0  | 0 | NA | 0 | NA |

|   |          |          |    |              |          |   |    |   |    |   |    |   |    |   |    |
|---|----------|----------|----|--------------|----------|---|----|---|----|---|----|---|----|---|----|
| 8 | 23442307 | 23486008 | 1  | NM_016612    | SLC25A37 | 1 | 14 | 0 | NA | 0 | NA | 0 | NA | 0 | NA |
| 8 | 23596395 | 23592172 | -1 | NM_006167    | NKX3-1   | 0 | NA | 1 | 14 | 1 | 13 | 0 | NA | 0 | NA |
| 8 | 23768265 | 23755378 | -1 | NM_003155    | STC1     | 0 | NA | 0 | NA | 0 | NA | 0 | NA | 0 | NA |
| 8 | 24207524 | 24249557 | 1  | NM_021777    | ADAM28   | 0 | NA | 0 | NA | 0 | NA | 0 | NA | 0 | NA |
| 8 | 24207524 | 24268671 | 1  | NM_014265    | ADAM28   | 0 | NA | 0 | NA | 0 | NA | 0 | NA | 0 | NA |
| 8 | 24297915 | 24319471 | 1  | NM_014479    | ADAMDEC1 | 0 | NA | 0 | NA | 0 | NA | 0 | NA | 0 | NA |
| 8 | 24354453 | 24422165 | 1  | NM_003817    | ADAM7    | 0 | NA | 0 | NA | 0 | NA | 0 | NA | 0 | NA |
| 8 | 24827178 | 24832511 | 1  | NM_005382    | NEFM     | 0 | NA | 1 | 40 | 0 | NA | 0 | NA | 0 | NA |
| 8 | 24828359 | 24832511 | 1  | NM_001105541 | NEFM     | 0 | NA | 1 | 40 | 0 | NA | 0 | NA | 0 | NA |
| 8 | 24870043 | 24864385 | -1 | NM_006158    | NEFL     | 0 | NA | 1 | 22 | 0 | NA | 0 | NA | 1 | 13 |
| 8 | 25098203 | 25326536 | 1  | NM_024940    | DOCK5    | 0 | NA | 0 | NA | 1 | 12 | 0 | NA | 0 | NA |
| 8 | 25338473 | 25332690 | -1 | NM_000825    | GNRH1    | 0 | NA | 0 | NA | 0 | NA | 0 | NA | 0 | NA |
| 8 | 25338473 | 25332690 | -1 | NM_001083111 | GNRH1    | 0 | NA | 0 | NA | 0 | NA | 0 | NA | 0 | NA |
| 8 | 25371837 | 25341280 | -1 | NM_017634    | KCTD9    | 0 | NA | 0 | NA | 0 | NA | 0 | NA | 0 | NA |
| 8 | 25372429 | 25421342 | 1  | NM_152562    | CDC42    | 0 | NA | 0 | NA | 0 | NA | 0 | NA | 0 | NA |
| 8 | 25958309 | 25757489 | -1 | NM_022659    | EBF2     | 1 | 13 | 1 | 16 | 0 | NA | 0 | NA | 1 | 13 |
| 8 | 26204950 | 26284563 | 1  | NM_002717    | PPP2R2A  | 0 | NA | 0 | NA | 0 | NA | 0 | NA | 0 | NA |
| 8 | 26296439 | 26326561 | 1  | NM_004331    | BNIP3L   | 0 | NA | 0 | NA | 1 | 13 | 0 | NA | 0 | NA |
| 8 | 26427400 | 26418112 | -1 | NM_007257    | PNMA2    | 0 | NA | 1 | 18 | 0 | NA | 0 | NA | 0 | NA |
| 8 | 26491337 | 26571610 | 1  | NM_001386    | DPYSL2   | 1 | 17 | 0 | NA | 1 | 18 | 0 | NA | 0 | NA |
| 8 | 26778839 | 26661583 | -1 | NM_033303    | ADRA1A   | 0 | NA | 0 | NA | 0 | NA | 0 | NA | 0 | NA |
| 8 | 26778839 | 26669829 | -1 | NM_033302    | ADRA1A   | 0 | NA | 0 | NA | 0 | NA | 0 | NA | 0 | NA |
| 8 | 26778839 | 26679287 | -1 | NM_033304    | ADRA1A   | 0 | NA | 0 | NA | 0 | NA | 0 | NA | 0 | NA |
| 8 | 26778839 | 26683138 | -1 | NM_000680    | ADRA1A   | 0 | NA | 0 | NA | 0 | NA | 0 | NA | 0 | NA |
| 8 | 27171820 | 27149730 | -1 | NM_030795    | STMN4    | 0 | NA | 1 | 13 | 0 | NA | 0 | NA | 0 | NA |
| 8 | 27224751 | 27198320 | -1 | NM_171982    | TRIM35   | 1 | 16 | 0 | NA | 0 | NA | 0 | NA | 0 | NA |
| 8 | 27224915 | 27372820 | 1  | NM_004103    | PTK2B    | 1 | 16 | 0 | NA | 0 | NA | 0 | NA | 0 | NA |
| 8 | 27224915 | 27372820 | 1  | NM_173174    | PTK2B    | 1 | 16 | 0 | NA | 0 | NA | 0 | NA | 0 | NA |
| 8 | 27238970 | 27372820 | 1  | NM_173176    | PTK2B    | 0 | NA | 0 | NA | 0 | NA | 0 | NA | 0 | NA |
| 8 | 27238970 | 27372820 | 1  | NM_173175    | PTK2B    | 0 | NA | 0 | NA | 0 | NA | 0 | NA | 0 | NA |
| 8 | 27392730 | 27373194 | -1 | NM_000742    | CHRNA2   | 0 | NA | 0 | NA | 0 | NA | 0 | NA | 0 | NA |
| 8 | 27404561 | 27458403 | 1  | NM_001979    | EPHX2    | 0 | NA | 0 | NA | 0 | NA | 0 | NA | 0 | NA |
| 8 | 27524855 | 27510367 | -1 | NM_203339    | CLU      | 0 | NA | 1 | 12 | 0 | NA | 0 | NA | 0 | NA |
| 8 | 27528244 | 27510367 | -1 | NM_001831    | CLU      | 0 | NA | 1 | 12 | 0 | NA | 0 | NA | 0 | NA |
| 8 | 27547495 | 27586456 | 1  | NM_016240    | SCARA3   | 0 | NA | 1 | 13 | 0 | NA | 0 | NA | 0 | NA |
| 8 | 27547495 | 27590205 | 1  | NM_182826    | SCARA3   | 0 | NA | 1 | 13 | 0 | NA | 0 | NA | 0 | NA |
| 8 | 27686089 | 27646751 | -1 | NM_018246    | CCDC25   | 0 | NA | 0 | NA | 0 | NA | 1 | 12 | 0 | NA |
| 8 | 27687976 | 27718343 | 1  | NM_001017420 | ESCO2    | 0 | NA | 0 | NA | 0 | NA | 1 | 12 | 0 | NA |
| 8 | 27751268 | 27723056 | -1 | NM_018492    | PBK      | 0 | NA | 0 | NA | 0 | NA | 0 | NA | 0 | NA |
| 8 | 27906117 | 27783668 | -1 | NM_173833    | SCARA5   | 1 | 11 | 0 | NA | 0 | NA | 0 | NA | 0 | NA |
| 8 | 27997307 | 27935399 | -1 | NM_001010906 | C8orf80  | 0 | NA | 0 | NA | 0 | NA | 0 | NA | 0 | NA |
| 8 | 28006502 | 28104588 | 1  | NM_018091    | ELP3     | 0 | NA | 0 | NA | 0 | NA | 0 | NA | 0 | NA |
| 8 | 28230567 | 28256787 | 1  | NM_006228    | PNOC     | 0 | NA | 1 | 15 | 0 | NA | 0 | NA | 0 | NA |
| 8 | 28299896 | 28259020 | -1 | NM_018660    | ZNF395   | 0 | NA | 0 | NA | 0 | NA | 0 | NA | 0 | NA |
| 8 | 28403703 | 28341847 | -1 | NM_172366    | FBXO16   | 0 | NA | 0 | NA | 0 | NA | 0 | NA | 0 | NA |
| 8 | 28407691 | 28477880 | 1  | NM_017412    | FZD3     | 0 | NA | 0 | NA | 0 | NA | 0 | NA | 0 | NA |
| 8 | 28615071 | 28667121 | 1  | NM_001440    | EXTL3    | 0 | NA | 0 | NA | 0 | NA | 0 | NA | 0 | NA |
| 8 | 28803398 | 28681098 | -1 | NM_018250    | INTS9    | 0 | NA | 0 | NA | 0 | NA | 0 | NA | 0 | NA |
| 8 | 28804143 | 28965336 | 1  | NM_024567    | HMBBOX1  | 0 | NA | 0 | NA | 0 | NA | 0 | NA | 0 | NA |
| 8 | 29176529 | 28980713 | -1 | NM_015254    | KIF13B   | 0 | NA | 0 | NA | 0 | NA | 0 | NA | 0 | NA |
| 8 | 29262241 | 29249536 | -1 | NM_057158    | DUSP4    | 0 | NA | 0 | NA | 0 | NA | 0 | NA | 0 | NA |
| 8 | 29264104 | 29249538 | -1 | NM_001394    | DUSP4    | 0 | NA | 0 | NA | 0 | NA | 0 | NA | 0 | NA |
| 8 | 30060191 | 30040172 | -1 | NM_016127    | TMEM66   | 1 | 16 | 0 | NA | 0 | NA | 0 | NA | 0 | NA |
| 8 | 30072486 | 30085122 | 1  | NM_015344    | LEPROTL1 | 0 | NA | 0 | NA | 0 | NA | 0 | NA | 0 | NA |
| 8 | 30133354 | 30160602 | 1  | NM_006571    | DCTN6    | 1 | 15 | 0 | NA | 0 | NA | 0 | NA | 0 | NA |
| 8 | 30361485 | 30524571 | 1  | NM_001008712 | RBPM5    | 0 | NA | 0 | NA | 0 | NA | 0 | NA | 0 | NA |
| 8 | 30361485 | 30549276 | 1  | NM_001008710 | RBPM5    | 0 | NA | 0 | NA | 0 | NA | 0 | NA | 0 | NA |
| 8 | 30361485 | 30549276 | 1  | NM_001008711 | RBPM5    | 0 | NA | 0 | NA | 0 | NA | 0 | NA | 0 | NA |
| 8 | 30361485 | 30549276 | 1  | NM_006867    | RBPM5    | 0 | NA | 0 | NA | 0 | NA | 0 | NA | 0 | NA |
| 8 | 30635280 | 30555572 | -1 | NM_002095    | GTF2E2   | 0 | NA | 0 | NA | 1 | 12 | 0 | NA | 0 | NA |
| 8 | 30704985 | 30655976 | -1 | NM_000637    | GSR      | 1 | 28 | 0 | NA | 1 | 29 | 1 | 16 | 0 | NA |
| 8 | 30721231 | 30744062 | 1  | NM_005671    | UBXD6    | 1 | 13 | 0 | NA | 1 | 12 | 0 | NA | 0 | NA |
| 8 | 30789894 | 30762667 | -1 | NM_001009552 | PPP2CB   | 0 | NA | 0 | NA | 1 | 19 | 0 | NA | 0 | NA |
| 8 | 30789894 | 30762667 | -1 | NM_004156    | PPP2CB   | 0 | NA | 0 | NA | 1 | 19 | 0 | NA | 0 | NA |
| 8 | 30826075 | 30808601 | -1 | NM_031271    | TEX15    | 0 | NA | 0 | NA | 0 | NA | 0 | NA | 0 | NA |



|   |          |          |    |              |           |   |    |    |    |    |    |   |    |   |    |
|---|----------|----------|----|--------------|-----------|---|----|----|----|----|----|---|----|---|----|
| 8 | 31009859 | 31007898 | -1 | NM_013357    | PURG      | 0 | NA | 0  | NA | 0  | NA | 0 | NA | 0 | NA |
| 8 | 31010319 | 31150819 | 1  | NM_000553    | WRN       | 0 | NA | 0  | NA | 0  | NA | 0 | NA | 0 | NA |
| 8 | 31010773 | 30972862 | -1 | NM_001015508 | PURG      | 0 | NA | 0  | NA | 0  | NA | 0 | NA | 0 | NA |
| 8 | 31616809 | 32720312 | 1  | NM_013962    | NRG1      | 0 | NA | 0  | NA | 0  | NA | 0 | NA | 0 | NA |
| 8 | 32525294 | 32705678 | 1  | NM_004495    | NRG1      | 0 | NA | 0  | NA | 0  | NA | 0 | NA | 0 | NA |
| 8 | 32525294 | 32720312 | 1  | NM_013958    | NRG1      | 0 | NA | 0  | NA | 0  | NA | 0 | NA | 0 | NA |
| 8 | 32525294 | 32720312 | 1  | NM_013961    | NRG1      | 0 | NA | 0  | NA | 0  | NA | 0 | NA | 0 | NA |
| 8 | 32525294 | 32741615 | 1  | NM_013956    | NRG1      | 0 | NA | 0  | NA | 0  | NA | 0 | NA | 0 | NA |
| 8 | 32525294 | 32741615 | 1  | NM_013957    | NRG1      | 0 | NA | 0  | NA | 0  | NA | 0 | NA | 0 | NA |
| 8 | 32525294 | 32741615 | 1  | NM_013960    | NRG1      | 0 | NA | 0  | NA | 0  | NA | 0 | NA | 0 | NA |
| 8 | 32525294 | 32741615 | 1  | NM_013964    | NRG1      | 0 | NA | 0  | NA | 0  | NA | 0 | NA | 0 | NA |
| 8 | 32624070 | 32720312 | 1  | NM_013959    | NRG1      | 0 | NA | 0  | NA | 0  | NA | 0 | NA | 0 | NA |
| 8 | 33450206 | 33347885 | -1 | NM_032664    | FUT10     | 1 | 13 | 0  | NA | 0  | NA | 0 | NA | 0 | NA |
| 8 | 33462258 | 33478318 | 1  | NM_032509    | RBM13     | 1 | 14 | 0  | NA | 0  | NA | 1 | 19 | 0 | NA |
| 8 | 33490198 | 33475777 | -1 | NM_025115    | C8orf41   | 1 | 11 | 0  | NA | 0  | NA | 0 | NA | 0 | NA |
| 8 | 33490245 | 33475777 | -1 | NM_001102401 | C8orf41   | 1 | 11 | 0  | NA | 0  | NA | 0 | NA | 0 | NA |
| 8 | 33544185 | 33524814 | -1 | NM_024787    | RNF122    | 0 | NA | 0  | NA | 0  | NA | 0 | NA | 0 | NA |
| 8 | 33576981 | 33568392 | -1 | NM_024025    | DUSP26    | 0 | NA | 0  | NA | 0  | NA | 0 | NA | 0 | NA |
| 8 | 35521451 | 35771722 | 1  | NM_080872    | UNC5D     | 0 | NA | 0  | NA | 0  | NA | 0 | NA | 0 | NA |
| 8 | 36760999 | 36912801 | 1  | NM_001031836 | KCNU1     | 0 | NA | 0  | NA | 0  | NA | 0 | NA | 0 | NA |
| 8 | 36865154 | 36865986 | 1  | NM_021631    | FKSG2     | 0 | NA | 0  | NA | 0  | NA | 0 | NA | 0 | NA |
| 8 | 37672458 | 37675554 | 1  | NM_025069    | ZNF703    | 1 | 15 | 0  | NA | 0  | NA | 1 | 11 | 0 | NA |
| 8 | 37713254 | 37723229 | 1  | NM_001003791 | ERLIN2    | 1 | 19 | 0  | NA | 1  | 28 | 0 | NA | 0 | NA |
| 8 | 37713254 | 37734477 | 1  | NM_007175    | ERLIN2    | 1 | 19 | 0  | NA | 1  | 28 | 0 | NA | 0 | NA |
| 8 | 37713356 | 37723229 | 1  | NM_001003790 | ERLIN2    | 1 | 19 | 0  | NA | 1  | 28 | 0 | NA | 0 | NA |
| 8 | 37738832 | 37756444 | 1  | NM_007198    | PROSC     | 1 | 12 | 0  | NA | 0  | NA | 0 | NA | 0 | NA |
| 8 | 37773931 | 37820650 | 1  | NM_032777    | GPR124    | 1 | 11 | 0  | NA | 1  | 13 | 1 | 12 | 0 | NA |
| 8 | 37826569 | 37820560 | -1 | NM_018310    | BRF2      | 0 | NA | 0  | NA | 0  | NA | 0 | NA | 0 | NA |
| 8 | 37849954 | 37837342 | -1 | NM_001002233 | RAB11FIP1 | 0 | NA | 0  | NA | 0  | NA | 0 | NA | 0 | NA |
| 8 | 37876161 | 37835627 | -1 | NM_001002814 | RAB11FIP1 | 0 | NA | 0  | NA | 1  | 12 | 0 | NA | 0 | NA |
| 8 | 37876161 | 37837342 | -1 | NM_025151    | RAB11FIP1 | 0 | NA | 0  | NA | 1  | 12 | 0 | NA | 0 | NA |
| 8 | 37916804 | 37910959 | -1 | NM_152413    | GOT1L1    | 0 | NA | 0  | NA | 0  | NA | 0 | NA | 0 | NA |
| 8 | 37943341 | 37939672 | -1 | NM_000025    | ADRB3     | 0 | NA | 13 | 0  | NA | 0  | 0 | NA | 0 | NA |
| 8 | 38007176 | 38037040 | 1  | NM_004095    | EIF4EBP1  | 0 | NA | 0  | NA | 0  | NA | 0 | NA | 0 | NA |
| 8 | 38082167 | 38116385 | 1  | NM_004674    | ASH2L     | 1 | 11 | 0  | NA | 0  | NA | 0 | NA | 0 | NA |
| 8 | 38082505 | 38116385 | 1  | NM_001105214 | ASH2L     | 1 | 11 | 0  | NA | 0  | NA | 0 | NA | 0 | NA |
| 8 | 38127757 | 38119374 | -1 | NM_000349    | STAR      | 0 | NA | 0  | NA | 0  | NA | 0 | NA | 0 | NA |
| 8 | 38127757 | 38119374 | -1 | NM_001007243 | STAR      | 0 | NA | 0  | NA | 0  | NA | 0 | NA | 0 | NA |
| 8 | 38153183 | 38140014 | -1 | NM_014462    | LSM1      | 0 | NA | 0  | NA | 0  | NA | 1 | 13 | 0 | NA |
| 8 | 38153262 | 38187694 | 1  | NM_004874    | BAG4      | 0 | NA | 0  | NA | 0  | NA | 1 | 13 | 0 | NA |
| 8 | 38208263 | 38238143 | 1  | NM_015214    | DDHD2     | 0 | NA | 0  | NA | 0  | NA | 0 | NA | 0 | NA |
| 8 | 38245895 | 38239806 | -1 | NM_001102559 | PPAPDC1B  | 0 | NA | 0  | NA | 0  | NA | 0 | NA | 0 | NA |
| 8 | 38245895 | 38241414 | -1 | NM_032483    | PPAPDC1B  | 0 | NA | 0  | NA | 0  | NA | 0 | NA | 0 | NA |
| 8 | 38245895 | 38243654 | -1 | NM_001102560 | PPAPDC1B  | 0 | NA | 0  | NA | 0  | NA | 0 | NA | 0 | NA |
| 8 | 38358947 | 38251717 | -1 | NM_023034    | WHSC1L1   | 1 | 13 | 0  | NA | 0  | NA | 0 | NA | 0 | NA |
| 8 | 38358947 | 38293091 | -1 | NM_017778    | WHSC1L1   | 1 | 13 | 0  | NA | 0  | NA | 0 | NA | 0 | NA |
| 8 | 38363176 | 38385218 | 1  | NM_144652    | LETM2     | 1 | 13 | 0  | NA | 0  | NA | 0 | NA | 0 | NA |
| 8 | 38445509 | 38387812 | -1 | NM_015850    | FGFR1     | 0 | NA | 0  | NA | 0  | NA | 0 | NA | 0 | NA |
| 8 | 38445509 | 38387812 | -1 | NM_023105    | FGFR1     | 0 | NA | 0  | NA | 0  | NA | 0 | NA | 0 | NA |
| 8 | 38445509 | 38387812 | -1 | NM_023106    | FGFR1     | 0 | NA | 0  | NA | 0  | NA | 0 | NA | 0 | NA |
| 8 | 38445509 | 38387812 | -1 | NM_023110    | FGFR1     | 0 | NA | 0  | NA | 0  | NA | 0 | NA | 0 | NA |
| 8 | 38445509 | 38387812 | -1 | NM_023111    | FGFR1     | 0 | NA | 0  | NA | 0  | NA | 0 | NA | 0 | NA |
| 8 | 38445509 | 38400008 | -1 | NM_023107    | FGFR1     | 0 | NA | 0  | NA | 0  | NA | 0 | NA | 0 | NA |
| 8 | 38445509 | 38400008 | -1 | NM_023108    | FGFR1     | 0 | NA | 0  | NA | 0  | NA | 0 | NA | 0 | NA |
| 8 | 38505337 | 38487508 | -1 | NM_207412    | FLJ43582  | 0 | NA | 0  | NA | 1  | 14 | 0 | NA | 0 | NA |
| 8 | 38763878 | 38829703 | 1  | NM_001122824 | TACC1     | 0 | NA | 0  | NA | 0  | NA | 0 | NA | 0 | NA |
| 8 | 38763878 | 38829703 | 1  | NM_006283    | TACC1     | 0 | NA | 0  | NA | 0  | NA | 0 | NA | 0 | NA |
| 8 | 38877909 | 38950587 | 1  | NM_021623    | PLEKHA2   | 0 | NA | 0  | NA | 0  | NA | 0 | NA | 0 | NA |
| 8 | 38950853 | 38964801 | 1  | NM_153692    | HTRA4     | 0 | NA | 0  | NA | 0  | NA | 0 | NA | 0 | NA |
| 8 | 38973198 | 38965483 | -1 | NM_001024380 | TM2D2     | 1 | 32 | 0  | NA | 0  | NA | 0 | NA | 0 | NA |
| 8 | 38973198 | 38965483 | -1 | NM_001024381 | TM2D2     | 1 | 32 | 0  | NA | 0  | NA | 0 | NA | 0 | NA |
| 8 | 38973198 | 38965483 | -1 | NM_031940    | TM2D2     | 1 | 32 | 0  | NA | 0  | NA | 0 | NA | 0 | NA |
| 8 | 38973198 | 38965483 | -1 | NM_078473    | TM2D2     | 1 | 32 | 0  | NA | 0  | NA | 0 | NA | 0 | NA |
| 8 | 38973661 | 39081936 | 1  | NM_001005845 | ADAM9     | 1 | 22 | 0  | NA | 0  | NA | 0 | NA | 0 | NA |
| 8 | 38973661 | 39081936 | 1  | NM_003816    | ADAM9     | 1 | 22 | 0  | NA | 0  | NA | 0 | NA | 0 | NA |

|   |          |          |    |              |          |   |    |   |    |   |    |   |    |   |    |
|---|----------|----------|----|--------------|----------|---|----|---|----|---|----|---|----|---|----|
| 8 | 39084206 | 39261593 | 1  | NM_145004    | ADAM32   | 0 | NA | 0 | NA | 0 | NA | 0 | NA | 0 | NA |
| 8 | 39561298 | 39706644 | 1  | NM_014237    | ADAM18   | 0 | NA | 0 | NA | 0 | NA | 0 | NA | 0 | NA |
| 8 | 39814936 | 39720411 | -1 | NM_001464    | ADAM2    | 0 | NA | 1 | 16 | 0 | NA | 0 | NA | 1 | 12 |
| 8 | 39890484 | 39905104 | 1  | NM_002164    | INDO     | 0 | NA | 0 | NA | 0 | NA | 0 | NA | 0 | NA |
| 8 | 39911630 | 39993067 | 1  | NM_194294    | INDOL1   | 0 | NA | 0 | NA | 1 | 13 | 0 | NA | 0 | NA |
| 8 | 40130145 | 40131978 | 1  | NM_020130    | C8orf4   | 0 | NA | 0 | NA | 1 | 12 | 0 | NA | 0 | NA |
| 8 | 40874500 | 40507269 | -1 | NM_024645    | ZMAT4    | 0 | NA | 0 | NA | 0 | NA | 0 | NA | 0 | NA |
| 8 | 41286137 | 41238634 | -1 | NM_003012    | SFRP1    | 1 | 15 | 0 | NA | 0 | NA | 0 | NA | 0 | NA |
| 8 | 41467237 | 41487656 | 1  | NM_016099    | GOLGA7   | 0 | NA | 0 | NA | 0 | NA | 0 | NA | 0 | NA |
| 8 | 41467329 | 41487656 | 1  | NM_001002296 | GOLGA7   | 0 | NA | 0 | NA | 0 | NA | 0 | NA | 0 | NA |
| 8 | 41505902 | 41519059 | 1  | NM_032336    | GINS4    | 0 | NA | 0 | NA | 1 | 12 | 0 | NA | 0 | NA |
| 8 | 41554875 | 41597971 | 1  | NM_178819    | AGPAT6   | 0 | NA | 0 | NA | 0 | NA | 0 | NA | 0 | NA |
| 8 | 41624035 | 41622985 | -1 | NM_152568    | NKK6-3   | 0 | NA | 0 | NA | 0 | NA | 0 | NA | 0 | NA |
| 8 | 41642241 | 41629900 | -1 | NM_020478    | ANK1     | 0 | NA | 1 | 12 | 0 | NA | 0 | NA | 0 | NA |
| 8 | 41642241 | 41629900 | -1 | NM_020480    | ANK1     | 0 | NA | 1 | 12 | 0 | NA | 0 | NA | 0 | NA |
| 8 | 41774297 | 41629900 | -1 | NM_000037    | ANK1     | 1 | 12 | 0 | NA | 1 | 14 | 0 | NA | 0 | NA |
| 8 | 41774297 | 41629900 | -1 | NM_020475    | ANK1     | 1 | 12 | 0 | NA | 1 | 14 | 0 | NA | 0 | NA |
| 8 | 41774297 | 41629900 | -1 | NM_020476    | ANK1     | 1 | 12 | 0 | NA | 1 | 14 | 0 | NA | 0 | NA |
| 8 | 41774297 | 41629900 | -1 | NM_020477    | ANK1     | 1 | 12 | 0 | NA | 1 | 14 | 0 | NA | 0 | NA |
| 8 | 42028662 | 41906153 | -1 | NM_001099412 | MYST3    | 1 | 11 | 0 | NA | 0 | NA | 1 | 11 | 0 | NA |
| 8 | 42028662 | 41906153 | -1 | NM_001099413 | MYST3    | 1 | 11 | 0 | NA | 0 | NA | 1 | 11 | 0 | NA |
| 8 | 42028662 | 41906153 | -1 | NM_006766    | MYST3    | 1 | 11 | 0 | NA | 0 | NA | 1 | 11 | 0 | NA |
| 8 | 42129760 | 42147858 | 1  | NM_006803    | AP3M2    | 1 | 36 | 0 | NA | 1 | 20 | 0 | NA | 0 | NA |
| 8 | 42184351 | 42151392 | -1 | NM_000930    | PLAT     | 1 | 26 | 0 | NA | 1 | 12 | 1 | 13 | 0 | NA |
| 8 | 42184351 | 42151392 | -1 | NM_033011    | PLAT     | 1 | 26 | 0 | NA | 1 | 12 | 1 | 13 | 0 | NA |
| 8 | 42247985 | 42309122 | 1  | NM_001556    | IKBKB    | 0 | NA | 0 | NA | 0 | NA | 0 | NA | 0 | NA |
| 8 | 42315186 | 42348470 | 1  | NM_002690    | POLB     | 0 | NA | 0 | NA | 0 | NA | 0 | NA | 0 | NA |
| 8 | 42353831 | 42350742 | -1 | NM_014420    | DKK4     | 0 | NA | 0 | NA | 0 | NA | 0 | NA | 0 | NA |
| 8 | 42368546 | 42382572 | 1  | NM_005662    | VDAC3    | 1 | 11 | 0 | NA | 0 | NA | 0 | NA | 0 | NA |
| 8 | 42515912 | 42527280 | 1  | NM_138436    | C8orf40  | 0 | NA | 0 | NA | 0 | NA | 0 | NA | 0 | NA |
| 8 | 42516225 | 42393149 | -1 | NM_006749    | SLC20A2  | 0 | NA | 0 | NA | 0 | NA | 0 | NA | 0 | NA |
| 8 | 42671718 | 42711366 | 1  | NM_000749    | CHRN3    | 0 | NA | 0 | NA | 0 | NA | 0 | NA | 0 | NA |
| 8 | 42742776 | 42726936 | -1 | NM_004198    | CHRNA6   | 0 | NA | 1 | 15 | 1 | 14 | 0 | NA | 0 | NA |
| 8 | 42817631 | 42810973 | -1 | NM_018105    | THAP1    | 0 | NA | 0 | NA | 0 | NA | 0 | NA | 0 | NA |
| 8 | 42817631 | 42810973 | -1 | NM_199003    | THAP1    | 0 | NA | 0 | NA | 0 | NA | 0 | NA | 0 | NA |
| 8 | 42870939 | 42829547 | -1 | NM_030954    | RNF170   | 0 | NA | 0 | NA | 0 | NA | 0 | NA | 0 | NA |
| 8 | 42871189 | 42994084 | 1  | NM_032410    | HOOK3    | 0 | NA | 0 | NA | 0 | NA | 0 | NA | 0 | NA |
| 8 | 43030598 | 43060088 | 1  | NM_001018676 | FNTA     | 1 | 13 | 0 | NA | 0 | NA | 0 | NA | 0 | NA |
| 8 | 43030598 | 43060088 | 1  | NM_001018677 | FNTA     | 1 | 13 | 0 | NA | 0 | NA | 0 | NA | 0 | NA |
| 8 | 43030598 | 43060088 | 1  | NM_002027    | FNTA     | 1 | 13 | 0 | NA | 0 | NA | 0 | NA | 0 | NA |
| 8 | 43067817 | 43097480 | 1  | NM_032237    | FLJ23356 | 0 | NA | 0 | NA | 1 | 17 | 0 | NA | 0 | NA |
| 8 | 43114748 | 43177127 | 1  | NM_152419    | HGSNAT   | 0 | NA | 0 | NA | 0 | NA | 0 | NA | 0 | NA |
| 8 | 43266741 | 43337485 | 1  | NM_001002920 | A26A1    | 0 | NA | 1 | 14 | 0 | NA | 0 | NA | 0 | NA |
| 8 | 43266741 | 43337485 | 1  | NM_001005365 | A26A1    | 0 | NA | 1 | 14 | 0 | NA | 0 | NA | 0 | NA |
| 8 | 48336094 | 48811028 | 1  | NM_001080394 | KIAA0146 | 0 | NA | 1 | 17 | 0 | NA | 0 | NA | 0 | NA |
| 8 | 48813279 | 48812028 | -1 | NM_005195    | CEBPD    | 0 | NA | 0 | NA | 0 | NA | 0 | NA | 0 | NA |
| 8 | 49035296 | 48848221 | -1 | NM_001081640 | PRKDC    | 0 | NA | 0 | NA | 0 | NA | 0 | NA | 0 | NA |
| 8 | 49035296 | 48848221 | -1 | NM_006904    | PRKDC    | 0 | NA | 0 | NA | 0 | NA | 0 | NA | 0 | NA |
| 8 | 49036046 | 49052621 | 1  | NM_005914    | MCM4     | 0 | NA | 0 | NA | 0 | NA | 0 | NA | 0 | NA |
| 8 | 49036046 | 49052621 | 1  | NM_182746    | MCM4     | 0 | NA | 0 | NA | 0 | NA | 0 | NA | 0 | NA |
| 8 | 49083547 | 49137007 | 1  | NM_003350    | UBE2V2   | 0 | NA | 0 | NA | 0 | NA | 0 | NA | 0 | NA |
| 8 | 49810344 | 49798521 | -1 | NM_024593    | EFCAB1   | 0 | NA | 1 | 17 | 0 | NA | 0 | NA | 1 | 13 |
| 8 | 49996541 | 49992793 | -1 | NM_003068    | SNAI2    | 1 | 28 | 1 | 13 | 0 | NA | 0 | NA | 0 | NA |
| 8 | 50147455 | 50151195 | 1  | NM_001007176 | C8orf22  | 0 | NA | 1 | 13 | 0 | NA | 0 | NA | 0 | NA |
| 8 | 50987149 | 51867980 | 1  | NM_018967    | SNTG1    | 0 | NA | 0 | NA | 0 | NA | 0 | NA | 0 | NA |
| 8 | 52884558 | 52394689 | -1 | NM_144651    | PXDNL    | 0 | NA | 0 | NA | 0 | NA | 0 | NA | 0 | NA |
| 8 | 52936350 | 52892699 | -1 | NM_052937    | PCMTD1   | 0 | NA | 0 | NA | 0 | NA | 0 | NA | 0 | NA |
| 8 | 53484856 | 53185951 | -1 | NM_014682    | ST18     | 0 | NA | 1 | 12 | 1 | 14 | 0 | NA | 1 | 12 |
| 8 | 53640565 | 53609250 | -1 | NM_207413    | FAM150A  | 0 | NA | 0 | NA | 0 | NA | 0 | NA | 0 | NA |
| 8 | 53789579 | 53697570 | -1 | NM_001083617 | RB1CC1   | 0 | NA | 0 | NA | 0 | NA | 0 | NA | 0 | NA |
| 8 | 53789579 | 53697570 | -1 | NM_014781    | RB1CC1   | 0 | NA | 0 | NA | 0 | NA | 0 | NA | 0 | NA |
| 8 | 54015020 | 54016007 | 1  | NM_005285    | NPBWR1   | 0 | NA | 1 | 24 | 0 | NA | 0 | NA | 1 | 15 |
| 8 | 54326747 | 54300828 | -1 | NM_000912    | OPRK1    | 0 | NA | 0 | NA | 0 | NA | 0 | NA | 0 | NA |
| 8 | 54918100 | 54790667 | -1 | NM_213620    | ATP6V1H  | 0 | NA | 0 | NA | 0 | NA | 0 | NA | 0 | NA |
| 8 | 54918403 | 54790667 | -1 | NM_015941    | ATP6V1H  | 0 | NA | 0 | NA | 0 | NA | 0 | NA | 0 | NA |

|   |          |          |    |              |           |   |    |   |    |   |    |   |    |   |    |
|---|----------|----------|----|--------------|-----------|---|----|---|----|---|----|---|----|---|----|
| 8 | 54918403 | 54790667 | -1 | NM_213619    | ATP6V1H   | 0 | NA | 0 | NA | 0 | NA | 0 | NA | 0 | NA |
| 8 | 54926920 | 55034416 | 1  | NM_170587    | RGS20     | 0 | NA | 0 | NA | 0 | NA | 0 | NA | 0 | NA |
| 8 | 54956117 | 55034417 | 1  | NM_003702    | RGS20     | 0 | NA | 1 | 16 | 0 | NA | 1 | 14 | 0 | NA |
| 8 | 55097561 | 55041668 | -1 | NM_006756    | TCEA1     | 0 | NA | 0 | NA | 1 | 14 | 1 | 21 | 0 | NA |
| 8 | 55097561 | 55041668 | -1 | NM_201437    | TCEA1     | 0 | NA | 0 | NA | 1 | 14 | 1 | 21 | 0 | NA |
| 8 | 55177130 | 55121490 | -1 | NM_006330    | LYPLA1    | 0 | NA | 0 | NA | 1 | 12 | 0 | NA | 0 | NA |
| 8 | 55210333 | 55223627 | 1  | NM_014175    | MRPL15    | 0 | NA | 0 | NA | 0 | NA | 0 | NA | 0 | NA |
| 8 | 55533047 | 55536009 | 1  | NM_022454    | SOX17     | 0 | NA | 1 | 14 | 0 | NA | 0 | NA | 0 | NA |
| 8 | 55691179 | 55705947 | 1  | NM_006269    | RP1       | 0 | NA | 1 | 18 | 0 | NA | 0 | NA | 0 | NA |
| 8 | 56177570 | 56601264 | 1  | NM_052898    | XKR4      | 0 | NA | 1 | 17 | 0 | NA | 0 | NA | 1 | 15 |
| 8 | 56848344 | 56900559 | 1  | NM_024831    | TGS1      | 0 | NA | 0 | NA | 0 | NA | 0 | NA | 0 | NA |
| 8 | 56848439 | 56813873 | -1 | NM_152417    | TMEM68    | 0 | NA | 0 | NA | 0 | NA | 0 | NA | 0 | NA |
| 8 | 56954939 | 57086494 | 1  | NM_00111097  | LYN       | 0 | NA | 0 | NA | 0 | NA | 0 | NA | 0 | NA |
| 8 | 56954939 | 57086494 | 1  | NM_002350    | LYN       | 0 | NA | 0 | NA | 0 | NA | 0 | NA | 0 | NA |
| 8 | 57149623 | 57148166 | -1 | NM_001023    | RPS20     | 1 | 35 | 0 | NA | 0 | NA | 1 | 18 | 0 | NA |
| 8 | 57189095 | 57188054 | -1 | NM_005372    | MOS       | 0 | NA | 1 | 12 | 0 | NA | 0 | NA | 0 | NA |
| 8 | 57286413 | 57236021 | -1 | NM_00114634  | PLAG1     | 1 | 15 | 0 | NA | 0 | NA | 0 | NA | 0 | NA |
| 8 | 57286413 | 57236021 | -1 | NM_00114635  | PLAG1     | 1 | 15 | 0 | NA | 0 | NA | 0 | NA | 0 | NA |
| 8 | 57286413 | 57236021 | -1 | NM_002655    | PLAG1     | 1 | 15 | 0 | NA | 0 | NA | 0 | NA | 0 | NA |
| 8 | 57286868 | 57293730 | 1  | NM_001011667 | CHCHD7    | 1 | 15 | 0 | NA | 0 | NA | 0 | NA | 0 | NA |
| 8 | 57286868 | 57293730 | 1  | NM_001011668 | CHCHD7    | 1 | 15 | 0 | NA | 0 | NA | 0 | NA | 0 | NA |
| 8 | 57286868 | 57293730 | 1  | NM_001011669 | CHCHD7    | 1 | 15 | 0 | NA | 0 | NA | 0 | NA | 0 | NA |
| 8 | 57286868 | 57293730 | 1  | NM_001011670 | CHCHD7    | 1 | 15 | 0 | NA | 0 | NA | 0 | NA | 0 | NA |
| 8 | 57286868 | 57293730 | 1  | NM_001011671 | CHCHD7    | 1 | 15 | 0 | NA | 0 | NA | 0 | NA | 0 | NA |
| 8 | 57286868 | 57293730 | 1  | NM_024300    | CHCHD7    | 1 | 15 | 0 | NA | 0 | NA | 0 | NA | 0 | NA |
| 8 | 57395795 | 57375123 | -1 | NM_138969    | RDHE2     | 0 | NA | 0 | NA | 0 | NA | 0 | NA | 0 | NA |
| 8 | 57521143 | 57516069 | -1 | NM_006211    | PENK      | 0 | NA | 0 | NA | 0 | NA | 0 | NA | 0 | NA |
| 8 | 58068981 | 58033041 | -1 | NM_017813    | IMPAD1    | 1 | 12 | 0 | NA | 0 | NA | 0 | NA | 0 | NA |
| 8 | 59069666 | 59224831 | 1  | NM_147189    | FAM110B   | 0 | NA | 0 | NA | 0 | NA | 0 | NA | 0 | NA |
| 8 | 59486376 | 59526614 | 1  | NM_001077619 | LOC137886 | 0 | NA | 0 | NA | 0 | NA | 0 | NA | 0 | NA |
| 8 | 59575274 | 59565290 | -1 | NM_000780    | CYP7A1    | 0 | NA | 1 | 12 | 0 | NA | 0 | NA | 0 | NA |
| 8 | 59628281 | 59657973 | 1  | NM_001007067 | SDCBP     | 0 | NA | 0 | NA | 0 | NA | 0 | NA | 0 | NA |
| 8 | 59628281 | 59657973 | 1  | NM_001007068 | SDCBP     | 0 | NA | 0 | NA | 0 | NA | 0 | NA | 0 | NA |
| 8 | 59628281 | 59657973 | 1  | NM_001007069 | SDCBP     | 0 | NA | 0 | NA | 0 | NA | 0 | NA | 0 | NA |
| 8 | 59628281 | 59657973 | 1  | NM_001007070 | SDCBP     | 0 | NA | 0 | NA | 0 | NA | 0 | NA | 0 | NA |
| 8 | 59628281 | 59657973 | 1  | NM_005625    | SDCBP     | 0 | NA | 0 | NA | 0 | NA | 0 | NA | 0 | NA |
| 8 | 59734940 | 59658617 | -1 | NM_003580    | NSMAF     | 0 | NA | 0 | NA | 0 | NA | 0 | NA | 0 | NA |
| 8 | 60194321 | 59880530 | -1 | NM_014729    | TOX       | 0 | NA | 0 | NA | 0 | NA | 0 | NA | 0 | NA |
| 8 | 61356508 | 61263976 | -1 | NM_004056    | CA8       | 0 | NA | 0 | NA | 0 | NA | 0 | NA | 0 | NA |
| 8 | 61592112 | 61696183 | 1  | NM_002865    | RAB2A     | 0 | NA | 0 | NA | 0 | NA | 0 | NA | 0 | NA |
| 8 | 61753892 | 61942021 | 1  | NM_017780    | CHD7      | 0 | NA | 0 | NA | 0 | NA | 0 | NA | 0 | NA |
| 8 | 62363103 | 62576758 | 1  | NM_173519    | RLBP1L1   | 0 | NA | 0 | NA | 0 | NA | 0 | NA | 0 | NA |
| 8 | 62764840 | 62739837 | -1 | NM_020164    | ASPH      | 0 | NA | 0 | NA | 0 | NA | 0 | NA | 0 | NA |
| 8 | 62764899 | 62739837 | -1 | NM_032467    | ASPH      | 0 | NA | 0 | NA | 0 | NA | 0 | NA | 0 | NA |
| 8 | 62764919 | 62699647 | -1 | NM_032468    | ASPH      | 0 | NA | 0 | NA | 0 | NA | 0 | NA | 0 | NA |
| 8 | 62789495 | 62699657 | -1 | NM_032466    | ASPH      | 1 | 19 | 0 | NA | 1 | 13 | 0 | NA | 0 | NA |
| 8 | 62789556 | 62578373 | -1 | NM_004318    | ASPH      | 1 | 19 | 0 | NA | 1 | 13 | 0 | NA | 0 | NA |
| 8 | 63324054 | 64066182 | 1  | NM_173688    | NKAIN3    | 0 | 11 | 0 | NA | 0 | NA | 0 | NA | 0 | NA |
| 8 | 64113940 | 64090192 | -1 | NM_003878    | GGH       | 0 | NA | 0 | NA | 0 | NA | 1 | 13 | 0 | NA |
| 8 | 64161166 | 64135984 | -1 | NM_000370    | TTPA      | 0 | NA | 0 | NA | 0 | NA | 0 | NA | 0 | NA |
| 8 | 64243674 | 64287900 | 1  | NM_152758    | YTHDF3    | 0 | NA | 0 | NA | 0 | NA | 0 | NA | 0 | NA |
| 8 | 65655367 | 65658740 | 1  | NM_152414    | BHLHB5    | 0 | NA | 1 | 15 | 0 | NA | 0 | NA | 0 | NA |
| 8 | 65873902 | 65671245 | -1 | NM_004820    | CYP7B1    | 0 | NA | 1 | 14 | 0 | NA | 0 | NA | 0 | NA |
| 8 | 66708986 | 66677627 | -1 | NM_018120    | ARMC1     | 1 | 14 | 0 | NA | 1 | 17 | 1 | 14 | 0 | NA |
| 8 | 66719527 | 66785340 | 1  | NM_014637    | MTFR1     | 0 | NA | 0 | NA | 0 | NA | 1 | 14 | 0 | NA |
| 8 | 66863883 | 66793866 | -1 | NM_002603    | PDE7A     | 0 | NA | 0 | NA | 0 | NA | 0 | NA | 0 | NA |
| 8 | 66916297 | 66796605 | -1 | NM_002604    | PDE7A     | 1 | 16 | 0 | NA | 0 | NA | 0 | NA | 0 | NA |
| 8 | 67096344 | 67175309 | 1  | NM_033105    | DNAJC5B   | 0 | NA | 0 | NA | 0 | NA | 0 | NA | 0 | NA |
| 8 | 67201831 | 67250272 | 1  | NM_033058    | TRIM55    | 0 | NA | 0 | NA | 0 | NA | 0 | NA | 0 | NA |
| 8 | 67201831 | 67250272 | 1  | NM_184085    | TRIM55    | 0 | NA | 0 | NA | 0 | NA | 0 | NA | 0 | NA |
| 8 | 67201831 | 67250272 | 1  | NM_184086    | TRIM55    | 0 | NA | 0 | NA | 0 | NA | 0 | NA | 0 | NA |
| 8 | 67201831 | 67250272 | 1  | NM_184087    | TRIM55    | 0 | NA | 0 | NA | 0 | NA | 0 | NA | 0 | NA |
| 8 | 67253252 | 67251172 | -1 | NM_000756    | CRH       | 0 | NA | 1 | 14 | 0 | NA | 0 | NA | 0 | NA |
| 8 | 67503816 | 67505522 | 1  | NM_015169    | RRS1      | 0 | NA | 0 | NA | 1 | 13 | 0 | NA | 0 | NA |
| 8 | 67507271 | 67543598 | 1  | NM_144650    | ADHFE1    | 0 | NA | 0 | NA | 1 | 12 | 0 | NA | 0 | NA |

|   |          |          |    |              |           |   |    |   |    |   |    |   |    |   |    |
|---|----------|----------|----|--------------|-----------|---|----|---|----|---|----|---|----|---|----|
| 8 | 67568320 | 67593294 | 1  | NM_152765    | C8orf46   | 0 | NA | 0 | NA | 0 | NA | 0 | NA | 0 | NA |
| 8 | 67687729 | 67636967 | -1 | NM_001080416 | MYBL1     | 0 | NA | 0 | NA | 0 | NA | 0 | NA | 0 | NA |
| 8 | 67742006 | 67705041 | -1 | NM_025054    | VCPIP1    | 0 | NA | 0 | NA | 0 | NA | 0 | NA | 0 | NA |
| 8 | 67751007 | 67755789 | 1  | NM_019607    | C8orf44   | 0 | NA | 0 | NA | 0 | NA | 0 | NA | 0 | NA |
| 8 | 67787444 | 67936811 | 1  | NM_001033578 | SGK3      | 0 | NA | 0 | NA | 0 | NA | 0 | NA | 0 | NA |
| 8 | 67850015 | 67936811 | 1  | NM_013257    | SGK3      | 0 | NA | 0 | NA | 0 | NA | 0 | NA | 0 | NA |
| 8 | 67850015 | 67936811 | 1  | NM_170709    | SGK3      | 0 | NA | 0 | NA | 0 | NA | 0 | NA | 0 | NA |
| 8 | 67948883 | 67976568 | 1  | NM_173518    | C8orf45   | 0 | NA | 1 | 13 | 0 | NA | 0 | NA | 1 | 12 |
| 8 | 68103340 | 68062920 | -1 | NM_001013626 | LOC286187 | 0 | NA | 0 | NA | 0 | NA | 0 | NA | 0 | NA |
| 8 | 68137116 | 68117868 | -1 | NM_006837    | COPS5     | 0 | NA | 0 | NA | 0 | NA | 0 | NA | 0 | NA |
| 8 | 68139156 | 68271050 | 1  | NM_001077204 | CSPP1     | 0 | NA | 0 | NA | 0 | NA | 0 | NA | 0 | NA |
| 8 | 68139156 | 68271050 | 1  | NM_024790    | CSPP1     | 0 | NA | 0 | NA | 0 | NA | 0 | NA | 0 | NA |
| 8 | 68418466 | 68272450 | -1 | NM_006421    | ARFGEF1   | 0 | NA | 0 | NA | 0 | NA | 0 | NA | 0 | NA |
| 8 | 68821134 | 68496961 | -1 | NM_020361    | CPA6      | 0 | NA | 0 | NA | 0 | NA | 0 | NA | 0 | NA |
| 8 | 69027156 | 69180208 | 1  | NM_025170    | DEPDC2    | 0 | NA | 0 | NA | 0 | NA | 0 | NA | 0 | NA |
| 8 | 69027156 | 69306451 | 1  | NM_024870    | DEPDC2    | 0 | NA | 0 | NA | 0 | NA | 0 | NA | 0 | NA |
| 8 | 69512701 | 69893811 | 1  | NM_052958    | C8orf34   | 0 | NA | 0 | NA | 0 | NA | 0 | NA | 0 | NA |
| 8 | 70541426 | 70735701 | 1  | NM_015170    | SULF1     | 0 | NA | 0 | NA | 0 | NA | 0 | NA | 0 | NA |
| 8 | 70909762 | 70747129 | -1 | NM_030958    | SLC05A1   | 0 | NA | 1 | 13 | 0 | NA | 0 | NA | 0 | NA |
| 8 | 71146116 | 71126576 | -1 | NM_024504    | PRDM14    | 0 | NA | 1 | 12 | 0 | NA | 0 | NA | 0 | NA |
| 8 | 71478574 | 71186820 | -1 | NM_006540    | NCOA2     | 0 | NA | 0 | NA | 1 | 14 | 0 | NA | 0 | NA |
| 8 | 71683158 | 71648226 | -1 | NM_014294    | TRAM1     | 0 | NA | 0 | NA | 0 | NA | 0 | NA | 0 | NA |
| 8 | 71743946 | 71712044 | -1 | NM_016027    | LACTB2    | 1 | 27 | 1 | 14 | 1 | 37 | 1 | 22 | 0 | NA |
| 8 | 71744153 | 71810731 | 1  | NM_001011720 | XKR9      | 1 | 27 | 1 | 14 | 1 | 37 | 1 | 22 | 0 | NA |
| 8 | 72431533 | 72272221 | -1 | NM_172058    | EYA1      | 0 | NA | 0 | NA | 0 | NA | 0 | NA | 0 | NA |
| 8 | 72431533 | 72272221 | -1 | NM_172059    | EYA1      | 0 | NA | 0 | NA | 0 | NA | 0 | NA | 0 | NA |
| 8 | 72431533 | 72272221 | -1 | NM_172060    | EYA1      | 0 | NA | 0 | NA | 0 | NA | 0 | NA | 0 | NA |
| 8 | 72437021 | 72272221 | -1 | NM_000503    | EYA1      | 0 | NA | 0 | NA | 0 | NA | 0 | NA | 0 | NA |
| 8 | 72919285 | 72916330 | -1 | NM_005098    | MSC       | 0 | NA | 1 | 27 | 0 | NA | 0 | NA | 0 | NA |
| 8 | 73150373 | 73096039 | -1 | NM_007332    | TRPA1     | 0 | NA | 0 | NA | 0 | NA | 0 | NA | 0 | NA |
| 8 | 73612179 | 74013138 | 1  | NM_004770    | KCNB2     | 0 | NA | 0 | NA | 0 | NA | 0 | NA | 0 | NA |
| 8 | 74083662 | 74122281 | 1  | NM_003218    | TERF1     | 0 | NA | 0 | NA | 0 | NA | 0 | NA | 0 | NA |
| 8 | 74083662 | 74122281 | 1  | NM_017489    | TERF1     | 0 | NA | 0 | NA | 0 | NA | 0 | NA | 0 | NA |
| 8 | 74168061 | 74141807 | -1 | NM_153225    | RPESP     | 0 | NA | 1 | 12 | 0 | NA | 0 | NA | 0 | NA |
| 8 | 74368423 | 74365427 | -1 | NM_000971    | RPL7      | 1 | 14 | 0 | NA | 0 | NA | 0 | NA | 0 | NA |
| 8 | 74369890 | 74399347 | 1  | NM_172037    | RDH10     | 1 | 14 | 0 | NA | 0 | NA | 0 | NA | 0 | NA |
| 8 | 74821611 | 74624394 | -1 | NM_014393    | STAU2     | 1 | 11 | 0 | NA | 0 | NA | 0 | NA | 0 | NA |
| 8 | 74953664 | 74865393 | -1 | NM_001001481 | UBE2W     | 0 | NA | 0 | NA | 0 | NA | 0 | NA | 0 | NA |
| 8 | 74953664 | 74865393 | -1 | NM_018299    | UBE2W     | 0 | NA | 0 | NA | 0 | NA | 0 | NA | 0 | NA |
| 8 | 75046900 | 75021187 | -1 | NM_005648    | TCEB1     | 1 | 14 | 0 | NA | 0 | NA | 1 | 15 | 0 | NA |
| 8 | 75050983 | 75057567 | 1  | NM_001040613 | TMEM70    | 1 | 17 | 0 | NA | 0 | NA | 1 | 15 | 0 | NA |
| 8 | 75050983 | 75057567 | 1  | NM_017866    | TMEM70    | 1 | 17 | 0 | NA | 0 | NA | 1 | 15 | 0 | NA |
| 8 | 75066143 | 75103859 | 1  | NM_015364    | LY96      | 0 | NA | 0 | NA | 0 | NA | 0 | NA | 0 | NA |
| 8 | 75396117 | 75309492 | -1 | NM_020647    | JPH1      | 0 | NA | 0 | NA | 0 | NA | 0 | NA | 0 | NA |
| 8 | 75425172 | 75441890 | 1  | NM_018972    | GDAP1     | 0 | NA | 0 | NA | 1 | 12 | 0 | NA | 0 | NA |
| 8 | 75425207 | 75441890 | 1  | NM_001040875 | GDAP1     | 0 | NA | 0 | NA | 1 | 12 | 0 | NA | 0 | NA |
| 8 | 75899326 | 75929819 | 1  | NM_015886    | PI15      | 0 | NA | 0 | NA | 0 | NA | 0 | NA | 0 | NA |
| 8 | 76059530 | 76109350 | 1  | NM_031461    | CRISPLD1  | 0 | NA | 0 | NA | 0 | NA | 1 | 13 | 0 | NA |
| 8 | 76614757 | 76641616 | 1  | NM_004133    | HNF4G     | 0 | NA | 0 | NA | 1 | 13 | 0 | NA | 0 | NA |
| 8 | 77756069 | 77942076 | 1  | NM_024721    | ZFXH4     | 0 | NA | 0 | NA | 1 | 12 | 0 | NA | 1 | 12 |
| 8 | 78075079 | 78055048 | -1 | NM_000318    | PXMP3     | 0 | NA | 0 | NA | 0 | NA | 0 | NA | 0 | NA |
| 8 | 78075079 | 78055048 | -1 | NM_001079867 | PXMP3     | 0 | NA | 0 | NA | 0 | NA | 0 | NA | 0 | NA |
| 8 | 79590890 | 79678040 | 1  | NM_006823    | PKIA      | 0 | NA | 0 | NA | 0 | NA | 0 | NA | 0 | NA |
| 8 | 79590890 | 79678040 | 1  | NM_181839    | PKIA      | 0 | NA | 0 | NA | 0 | NA | 0 | NA | 0 | NA |
| 8 | 79740884 | 79792490 | 1  | NM_016010    | C8orf70   | 0 | NA | 0 | NA | 0 | NA | 1 | 12 | 0 | NA |
| 8 | 79880313 | 79807559 | -1 | NM_000880    | IL7       | 0 | NA | 1 | 12 | 0 | NA | 0 | NA | 0 | NA |
| 8 | 80685934 | 80739781 | 1  | NM_007029    | STMN2     | 0 | NA | 0 | NA | 0 | NA | 0 | NA | 0 | NA |
| 8 | 80842653 | 80838799 | -1 | NM_001040708 | HEY1      | 0 | NA | 0 | NA | 0 | NA | 0 | NA | 0 | NA |
| 8 | 80842653 | 80838799 | -1 | NM_012258    | HEY1      | 0 | NA | 0 | NA | 0 | NA | 0 | NA | 0 | NA |
| 8 | 81105061 | 80993649 | -1 | NM_014018    | MRPS28    | 0 | NA | 0 | NA | 1 | 13 | 1 | 11 | 0 | NA |
| 8 | 81155665 | 81109659 | -1 | NM_001025252 | TPD52     | 0 | NA | 0 | NA | 0 | NA | 0 | NA | 0 | NA |
| 8 | 81246391 | 81109659 | -1 | NM_001025253 | TPD52     | 0 | NA | 0 | NA | 0 | NA | 0 | NA | 0 | NA |
| 8 | 81246391 | 81109659 | -1 | NM_005079    | TPD52     | 0 | NA | 0 | NA | 0 | NA | 0 | NA | 0 | NA |
| 8 | 81561002 | 81597165 | 1  | NM_001105539 | ZBTB10    | 1 | 13 | 0 | NA | 0 | NA | 0 | NA | 0 | NA |
| 8 | 81561002 | 81597165 | 1  | NM_023929    | ZBTB10    | 1 | 13 | 0 | NA | 0 | NA | 0 | NA | 0 | NA |

|   |          |          |    |              |           |   |    |   |    |   |    |   |    |   |    |
|---|----------|----------|----|--------------|-----------|---|----|---|----|---|----|---|----|---|----|
| 8 | 81633556 | 81634615 | 1  | NM_001089588 | LOC389672 | 0 | NA | 0 | NA | 0 | NA | 0 | NA | 0 | NA |
| 8 | 81949571 | 81713323 | -1 | NM_001033723 | ZNF704    | 0 | NA | 1 | 13 | 0 | NA | 0 | NA | 0 | NA |
| 8 | 82186858 | 82042600 | -1 | NM_018440    | PAG1      | 0 | NA | 0 | NA | 0 | NA | 0 | NA | 0 | NA |
| 8 | 82355339 | 82359563 | 1  | NM_001444    | FABP5     | 0 | NA | 0 | NA | 0 | NA | 0 | NA | 0 | NA |
| 8 | 82522274 | 82515118 | -1 | NM_002677    | PMP2      | 0 | NA | 0 | NA | 0 | NA | 0 | NA | 0 | NA |
| 8 | 82536313 | 82533172 | -1 | NM_001080526 | FABP9     | 0 | NA | 0 | NA | 0 | NA | 0 | NA | 0 | NA |
| 8 | 82580828 | 82553286 | -1 | NM_001442    | FABP4     | 0 | NA | 0 | NA | 0 | NA | 0 | NA | 0 | NA |
| 8 | 82606105 | 82599835 | -1 | NM_001105281 | LOC846486 | 0 | NA | 0 | NA | 0 | NA | 0 | NA | 0 | NA |
| 8 | 82761115 | 82732750 | -1 | NM_005536    | IMPA1     | 0 | NA | 0 | NA | 1 | 13 | 1 | 12 | 0 | NA |
| 8 | 82769762 | 82768445 | -1 | NM_001010893 | SLC10A5   | 0 | NA | 0 | NA | 1 | 13 | 0 | NA | 0 | NA |
| 8 | 82796085 | 82776512 | -1 | NM_024699    | ZFAND1    | 0 | NA | 1 | 12 | 0 | NA | 0 | NA | 1 | 14 |
| 8 | 82807242 | 82834303 | 1  | NM_152284    | CHMP4C    | 0 | NA | 1 | 12 | 0 | NA | 0 | NA | 1 | 14 |
| 8 | 82915233 | 82874372 | -1 | NM_022133    | SNX16     | 0 | NA | 0 | NA | 1 | 12 | 0 | NA | 0 | NA |
| 8 | 82916990 | 82874372 | -1 | NM_152836    | SNX16     | 0 | NA | 0 | NA | 1 | 12 | 0 | NA | 0 | NA |
| 8 | 82916990 | 82874372 | -1 | NM_152837    | SNX16     | 0 | NA | 0 | NA | 1 | 12 | 0 | NA | 0 | NA |
| 8 | 85258007 | 85996633 | 1  | NM_001100392 | RALYL     | 0 | NA | 0 | NA | 0 | NA | 0 | NA | 0 | NA |
| 8 | 85258007 | 85996633 | 1  | NM_001100393 | RALYL     | 0 | NA | 0 | NA | 0 | NA | 0 | NA | 0 | NA |
| 8 | 85258140 | 85996633 | 1  | NM_173848    | RALYL     | 0 | NA | 0 | NA | 0 | NA | 0 | NA | 0 | NA |
| 8 | 85259654 | 85996633 | 1  | NM_001100391 | RALYL     | 0 | NA | 0 | NA | 0 | NA | 0 | NA | 0 | NA |
| 8 | 86206628 | 86245566 | 1  | NM_001077501 | LRRCC1    | 0 | NA | 0 | NA | 0 | NA | 1 | 11 | 0 | NA |
| 8 | 86206628 | 86245566 | 1  | NM_033402    | LRRCC1    | 0 | NA | 0 | NA | 0 | NA | 1 | 11 | 0 | NA |
| 8 | 86276870 | 86314006 | 1  | NM_001083588 | EZF5      | 0 | NA | 0 | NA | 0 | NA | 0 | NA | 0 | NA |
| 8 | 86276870 | 86314006 | 1  | NM_001951    | EZF5      | 0 | NA | 0 | NA | 0 | NA | 0 | NA | 0 | NA |
| 8 | 86287161 | 86314006 | 1  | NM_001083589 | EZF5      | 0 | NA | 0 | NA | 0 | NA | 0 | NA | 0 | NA |
| 8 | 86319895 | 86313539 | -1 | NM_001099670 | C8orf59   | 0 | NA | 0 | NA | 0 | NA | 0 | NA | 0 | NA |
| 8 | 86319895 | 86313539 | -1 | NM_001099671 | C8orf59   | 0 | NA | 0 | NA | 0 | NA | 0 | NA | 0 | NA |
| 8 | 86319895 | 86313539 | -1 | NM_001099672 | C8orf59   | 0 | NA | 0 | NA | 0 | NA | 0 | NA | 0 | NA |
| 8 | 86319895 | 86313539 | -1 | NM_001099673 | C8orf59   | 0 | NA | 0 | NA | 0 | NA | 0 | NA | 0 | NA |
| 8 | 86344967 | 86383554 | 1  | NM_198584    | CA13      | 0 | NA | 1 | 12 | 0 | NA | 0 | NA | 0 | NA |
| 8 | 86477594 | 86427708 | -1 | NM_001738    | CA1       | 0 | NA | 0 | NA | 0 | NA | 0 | NA | 0 | NA |
| 8 | 86537709 | 86548526 | 1  | NM_005181    | CA3       | 0 | NA | 0 | NA | 0 | NA | 0 | NA | 0 | NA |
| 8 | 86563382 | 86580973 | 1  | NM_000067    | CA2       | 0 | NA | 0 | NA | 0 | NA | 0 | NA | 0 | NA |
| 8 | 86762978 | 86755946 | -1 | NM_172239    | REXO11.1  | 0 | NA | 0 | NA | 0 | NA | 0 | NA | 0 | NA |
| 8 | 87150967 | 87129806 | -1 | NM_033126    | PSKH2     | 0 | NA | 1 | 15 | 0 | NA | 0 | NA | 0 | NA |
| 8 | 87180254 | 87235570 | 1  | NM_152565    | ATP6V0D2  | 0 | NA | 0 | NA | 0 | NA | 1 | 12 | 0 | NA |
| 8 | 87311720 | 87295403 | -1 | NM_138817    | SLC7A13   | 0 | NA | 0 | NA | 0 | NA | 0 | NA | 0 | NA |
| 8 | 87424109 | 87549294 | 1  | NM_007013    | WWP1      | 1 | 26 | 0 | NA | 0 | NA | 1 | 17 | 0 | NA |
| 8 | 87590125 | 87553693 | -1 | NM_016033    | FAM82B    | 1 | 34 | 0 | NA | 0 | NA | 0 | NA | 0 | NA |
| 8 | 87595787 | 87642842 | 1  | NM_003909    | CPNE3     | 1 | 34 | 0 | NA | 0 | NA | 0 | NA | 0 | NA |
| 8 | 87825017 | 87655276 | -1 | NM_019098    | CNGB3     | 0 | NA | 0 | NA | 0 | NA | 0 | NA | 0 | NA |
| 8 | 87947791 | 88464071 | 1  | NM_173538    | CNBD1     | 0 | NA | 0 | NA | 0 | NA | 0 | NA | 0 | NA |
| 8 | 88955412 | 88952095 | -1 | NM_152418    | WDR21C    | 0 | NA | 1 | 15 | 1 | 16 | 0 | NA | 1 | 12 |
| 8 | 89408833 | 89118575 | -1 | NM_005941    | MMP16     | 0 | NA | 0 | NA | 0 | NA | 0 | NA | 0 | NA |
| 8 | 89408833 | 89150576 | -1 | NM_022564    | MMP16     | 0 | NA | 0 | NA | 0 | NA | 0 | NA | 0 | NA |
| 8 | 90839109 | 90872433 | 1  | NM_003821    | RIPK2     | 0 | NA | 0 | NA | 0 | NA | 0 | NA | 0 | NA |
| 8 | 90983268 | 91009270 | 1  | NM_004337    | OSGIN2    | 0 | NA | 0 | NA | 1 | 13 | 0 | NA | 0 | NA |
| 8 | 90983934 | 91009270 | 1  | NM_001126111 | OSGIN2    | 0 | NA | 0 | NA | 1 | 13 | 0 | NA | 0 | NA |
| 8 | 91066075 | 91014739 | -1 | NM_001024688 | NBN       | 1 | 13 | 0 | NA | 0 | NA | 1 | 16 | 0 | NA |
| 8 | 91066075 | 91014739 | -1 | NM_002485    | NBN       | 1 | 13 | 0 | NA | 0 | NA | 1 | 16 | 0 | NA |
| 8 | 91082755 | 91133403 | 1  | NM_001359    | DECR1     | 1 | 11 | 0 | NA | 0 | NA | 0 | NA | 0 | NA |
| 8 | 91164283 | 91140013 | -1 | NM_004929    | CALB1     | 0 | NA | 0 | NA | 0 | NA | 0 | NA | 0 | NA |
| 8 | 91727112 | 91704777 | -1 | NM_001008495 | TMEM64    | 0 | NA | 0 | NA | 0 | NA | 1 | 13 | 0 | NA |
| 8 | 91872953 | 92040806 | 1  | NM_022351    | NECAB1    | 0 | NA | 1 | 13 | 0 | NA | 0 | NA | 0 | NA |
| 8 | 92122224 | 92075674 | -1 | NM_018710    | TMEM55A   | 0 | NA | 0 | NA | 0 | NA | 0 | NA | 0 | NA |
| 8 | 92151599 | 92168499 | 1  | NM_016023    | OTUD6B    | 0 | NA | 0 | NA | 1 | 20 | 0 | NA | 0 | NA |
| 8 | 92330691 | 92476122 | 1  | NM_134266    | SLC26A7   | 0 | NA | 0 | NA | 0 | NA | 0 | NA | 0 | NA |
| 8 | 92330691 | 92479554 | 1  | NM_052832    | SLC26A7   | 0 | NA | 0 | NA | 0 | NA | 0 | NA | 0 | NA |
| 8 | 93099084 | 93040327 | -1 | NM_175636    | RUNX1T1   | 0 | NA | 0 | NA | 0 | NA | 0 | NA | 0 | NA |
| 8 | 93144367 | 93040327 | -1 | NM_004349    | RUNX1T1   | 0 | NA | 0 | NA | 0 | NA | 0 | NA | 0 | NA |
| 8 | 93157540 | 93040327 | -1 | NM_175634    | RUNX1T1   | 0 | NA | 0 | NA | 0 | NA | 0 | NA | 0 | NA |
| 8 | 93176619 | 93040327 | -1 | NM_175635    | RUNX1T1   | 1 | 15 | 0 | NA | 0 | NA | 0 | NA | 0 | NA |
| 8 | 94781948 | 94809847 | 1  | NM_145269    | FAM92A1   | 0 | NA | 0 | NA | 0 | NA | 0 | NA | 0 | NA |
| 8 | 94822400 | 94812903 | -1 | NM_203390    | RBM12B    | 1 | 11 | 0 | NA | 1 | 14 | 0 | NA | 0 | NA |
| 8 | 94836268 | 94899523 | 1  | NM_153704    | TMEM67    | 0 | NA | 0 | NA | 1 | 14 | 0 | NA | 0 | NA |
| 8 | 94998337 | 95007472 | 1  | NM_018444    | PPM2C     | 1 | 18 | 0 | NA | 1 | 12 | 1 | 14 | 0 | NA |

|   |           |           |    |              |          |   |    |   |    |   |    |   |    |   |    |
|---|-----------|-----------|----|--------------|----------|---|----|---|----|---|----|---|----|---|----|
| 8 | 95289986  | 95208567  | -1 | NM_004063    | CDH17    | 0 | NA | 0 | NA | 0 | NA | 0 | NA | 0 | NA |
| 8 | 95343733  | 95330660  | -1 | NM_005261    | GEM      | 0 | NA | 0 | NA | 1 | 16 | 0 | NA | 0 | NA |
| 8 | 95343733  | 95330660  | -1 | NM_181702    | GEM      | 0 | NA | 0 | NA | 1 | 16 | 0 | NA | 0 | NA |
| 8 | 95564866  | 95453363  | -1 | NM_012415    | RAD54B   | 1 | 24 | 0 | NA | 0 | NA | 0 | NA | 0 | NA |
| 8 | 95634864  | 95569775  | -1 | NM_015496    | KIAA1429 | 0 | NA | 0 | NA | 0 | NA | 0 | NA | 0 | NA |
| 8 | 95634864  | 95592381  | -1 | NM_183009    | KIAA1429 | 0 | NA | 0 | NA | 0 | NA | 0 | NA | 0 | NA |
| 8 | 95722539  | 95788870  | 1  | NM_001034915 | RBM35A   | 0 | NA | 0 | NA | 0 | NA | 0 | NA | 0 | NA |
| 8 | 95722539  | 95788870  | 1  | NM_001122825 | RBM35A   | 0 | NA | 0 | NA | 0 | NA | 0 | NA | 0 | NA |
| 8 | 95722539  | 95788870  | 1  | NM_001122826 | RBM35A   | 0 | NA | 0 | NA | 0 | NA | 0 | NA | 0 | NA |
| 8 | 95722539  | 95788870  | 1  | NM_001122827 | RBM35A   | 0 | NA | 0 | NA | 0 | NA | 0 | NA | 0 | NA |
| 8 | 95722539  | 95788870  | 1  | NM_017697    | RBM35A   | 0 | NA | 0 | NA | 0 | NA | 0 | NA | 0 | NA |
| 8 | 95801278  | 95875252  | 1  | NM_181787    | DPY19L4  | 0 | NA | 0 | NA | 0 | NA | 0 | NA | 0 | NA |
| 8 | 95904709  | 95961897  | 1  | NM_017864    | INTS8    | 1 | 13 | 0 | NA | 0 | NA | 0 | NA | 0 | NA |
| 8 | 95976658  | 95961628  | -1 | NM_057749    | CCNE2    | 0 | NA | 0 | NA | 0 | NA | 1 | 11 | 0 | NA |
| 8 | 96030767  | 96007376  | -1 | NM_033285    | TP53INP1 | 0 | NA | 0 | NA | 0 | NA | 0 | NA | 0 | NA |
| 8 | 96106396  | 96140114  | 1  | NM_152416    | C8orf38  | 1 | 27 | 0 | NA | 0 | NA | 0 | NA | 0 | NA |
| 8 | 96215213  | 96238087  | 1  | NM_024613    | PLEKHF2  | 1 | 14 | 0 | NA | 0 | NA | 1 | 12 | 1 | 12 |
| 8 | 96350613  | 96327410  | -1 | NM_177965    | C8orf37  | 0 | NA | 0 | NA | 0 | NA | 0 | NA | 0 | NA |
| 8 | 97242196  | 97223733  | -1 | NM_001001557 | GDF6     | 0 | NA | 1 | 15 | 0 | NA | 0 | NA | 1 | 13 |
| 8 | 97317038  | 97308479  | -1 | NM_006294    | UGCRB    | 0 | NA | 0 | NA | 0 | NA | 0 | NA | 0 | NA |
| 8 | 97342972  | 97320820  | -1 | NM_015942    | MTERFD1  | 0 | NA | 0 | NA | 1 | 13 | 0 | NA | 0 | NA |
| 8 | 97343342  | 97415950  | 1  | NM_014754    | PTDSS1   | 0 | NA | 0 | NA | 1 | 13 | 0 | NA | 0 | NA |
| 8 | 97575057  | 97693213  | 1  | NM_002998    | SDC2     | 0 | NA | 0 | NA | 0 | NA | 0 | NA | 0 | NA |
| 8 | 97726674  | 98224898  | 1  | NM_016134    | PGCP     | 1 | 11 | 0 | NA | 0 | NA | 1 | 19 | 0 | NA |
| 8 | 98359352  | 98354889  | -1 | NM_033512    | TSPYL5   | 0 | NA | 0 | NA | 1 | 23 | 0 | NA | 0 | NA |
| 8 | 98725582  | 98807713  | 1  | NM_178812    | MTDH     | 0 | NA | 0 | NA | 0 | NA | 0 | NA | 0 | NA |
| 8 | 98856984  | 98934006  | 1  | NM_018407    | LAPTM4B  | 1 | 11 | 0 | NA | 1 | 12 | 1 | 14 | 0 | NA |
| 8 | 98950486  | 99118122  | 1  | NM_002380    | MATN2    | 0 | NA | 0 | NA | 1 | 12 | 0 | NA | 0 | NA |
| 8 | 98950486  | 99118122  | 1  | NM_030583    | MATN2    | 0 | NA | 0 | NA | 1 | 12 | 0 | NA | 0 | NA |
| 8 | 99126949  | 99123117  | -1 | NM_000989    | RPL30    | 0 | NA | 0 | NA | 1 | 12 | 0 | NA | 0 | NA |
| 8 | 99145925  | 99175014  | 1  | NM_173549    | C8orf47  | 0 | NA | 0 | NA | 0 | NA | 0 | NA | 0 | NA |
| 8 | 99198594  | 99183742  | -1 | NM_005836    | HRSP12   | 0 | NA | 0 | NA | 0 | NA | 0 | NA | 0 | NA |
| 8 | 99199243  | 99239814  | 1  | NM_015029    | POP1     | 0 | NA | 0 | NA | 0 | NA | 0 | NA | 0 | NA |
| 8 | 99375797  | 99273562  | -1 | NM_024759    | NPAL2    | 1 | 13 | 0 | NA | 0 | NA | 0 | NA | 0 | NA |
| 8 | 99508425  | 99512199  | 1  | NM_020697    | KCNS2    | 0 | NA | 1 | 18 | 0 | NA | 0 | NA | 1 | 12 |
| 8 | 99907085  | 99536036  | -1 | NM_006281    | STK3     | 1 | 15 | 0 | NA | 1 | 13 | 0 | NA | 0 | NA |
| 8 | 100025861 | 100033502 | 1  | NM_053001    | OSR2     | 1 | 12 | 1 | 12 | 0 | NA | 0 | NA | 0 | NA |
| 8 | 100094669 | 100203163 | 1  | NM_181861    | VPS13B   | 0 | NA | 0 | NA | 0 | NA | 0 | NA | 0 | NA |
| 8 | 100094669 | 100291191 | 1  | NM_015243    | VPS13B   | 0 | NA | 0 | NA | 0 | NA | 0 | NA | 0 | NA |
| 8 | 100094669 | 100958984 | 1  | NM_017890    | VPS13B   | 0 | NA | 0 | NA | 0 | NA | 0 | NA | 0 | NA |
| 8 | 100094669 | 100958984 | 1  | NM_152564    | VPS13B   | 0 | NA | 0 | NA | 0 | NA | 0 | NA | 0 | NA |
| 8 | 100975071 | 100959547 | -1 | NM_004374    | COX6C    | 0 | NA | 0 | NA | 0 | NA | 0 | NA | 0 | NA |
| 8 | 101187520 | 101042451 | -1 | NM_015668    | RGS22    | 0 | NA | 1 | 15 | 0 | NA | 0 | NA | 0 | NA |
| 8 | 101227252 | 101214834 | -1 | NM_001029860 | FBXO43   | 0 | NA | 0 | NA | 1 | 15 | 0 | NA | 0 | NA |
| 8 | 101227252 | 101214834 | -1 | NM_001077528 | FBXO43   | 0 | NA | 0 | NA | 1 | 15 | 0 | NA | 0 | NA |
| 8 | 101232014 | 101235406 | 1  | NM_005034    | POLR2K   | 0 | NA | 0 | NA | 1 | 15 | 0 | NA | 0 | NA |
| 8 | 101239438 | 101323306 | 1  | NM_172218    | SPAG1    | 0 | NA | 0 | NA | 0 | NA | 0 | NA | 0 | NA |
| 8 | 101239831 | 101323306 | 1  | NM_003114    | SPAG1    | 0 | NA | 0 | NA | 0 | NA | 0 | NA | 0 | NA |
| 8 | 101384663 | 101338463 | -1 | NM_015435    | RNF19A   | 0 | NA | 0 | NA | 1 | 16 | 0 | NA | 0 | NA |
| 8 | 101391503 | 101338463 | -1 | NM_183419    | RNF19A   | 0 | NA | 0 | NA | 1 | 16 | 0 | NA | 0 | NA |
| 8 | 101641188 | 101602175 | -1 | NM_198401    | ANKRD46  | 1 | 11 | 0 | NA | 0 | NA | 1 | 11 | 0 | NA |
| 8 | 101731069 | 101654298 | -1 | NM_152628    | SNX31    | 0 | NA | 0 | NA | 0 | NA | 0 | NA | 0 | NA |
| 8 | 101803491 | 101784319 | -1 | NM_002568    | PABPC1   | 1 | 12 | 0 | NA | 0 | NA | 0 | NA | 0 | NA |
| 8 | 102033447 | 102000089 | 0  | NM_145690    | YWHAZ    | 0 | NA | 0 | NA | 0 | NA | 0 | NA | 0 | NA |
| 8 | 102034745 | 102000089 | -1 | NM_003406    | YWHAZ    | 0 | NA | 0 | NA | 0 | NA | 0 | NA | 0 | NA |
| 8 | 102287049 | 102278441 | -1 | NM_001042511 | ZNF706   | 0 | NA | 0 | NA | 0 | NA | 0 | NA | 0 | NA |
| 8 | 102287136 | 102278441 | -1 | NM_001042510 | ZNF706   | 0 | NA | 0 | NA | 0 | NA | 0 | NA | 0 | NA |
| 8 | 102287136 | 102278441 | -1 | NM_016096    | ZNF706   | 0 | NA | 0 | NA | 0 | NA | 0 | NA | 0 | NA |
| 8 | 102573843 | 102751128 | 1  | NM_024915    | GRHL2    | 0 | NA | 1 | 15 | 0 | NA | 0 | NA | 0 | NA |
| 8 | 102872615 | 102767945 | -1 | NM_032041    | NCALD    | 0 | NA | 0 | NA | 1 | 12 | 0 | NA | 0 | NA |
| 8 | 103205738 | 102767945 | -1 | NM_001040624 | NCALD    | 0 | NA | 0 | NA | 0 | NA | 0 | NA | 0 | NA |
| 8 | 103205738 | 102767945 | -1 | NM_001040625 | NCALD    | 0 | NA | 0 | NA | 0 | NA | 0 | NA | 0 | NA |
| 8 | 103205738 | 102767945 | -1 | NM_001040626 | NCALD    | 0 | NA | 0 | NA | 0 | NA | 0 | NA | 0 | NA |
| 8 | 103205738 | 102767945 | -1 | NM_001040627 | NCALD    | 0 | NA | 0 | NA | 0 | NA | 0 | NA | 0 | NA |
| 8 | 103205738 | 102767945 | -1 | NM_001040628 | NCALD    | 0 | NA | 0 | NA | 0 | NA | 0 | NA | 0 | NA |

|   |           |           |    |              |           |   |    |   |    |   |    |   |    |   |    |
|---|-----------|-----------|----|--------------|-----------|---|----|---|----|---|----|---|----|---|----|
| 8 | 103205738 | 102767945 | -1 | NM_001040629 | NCALD     | 0 | NA | 0 | NA | 0 | NA | 0 | NA | 0 | NA |
| 8 | 103206311 | 102767945 | -1 | NM_001040630 | NCALD     | 0 | NA | 0 | NA | 0 | NA | 0 | NA | 0 | NA |
| 8 | 103320522 | 103285906 | -1 | NM_015713    | RRM2B     | 0 | NA | 0 | NA | 0 | NA | 0 | NA | 0 | NA |
| 8 | 103493671 | 103334744 | -1 | NM_015902    | UBR5      | 0 | NA | 0 | NA | 0 | NA | 0 | NA | 0 | NA |
| 8 | 103633035 | 103642422 | 1  | NM_024410    | ODF1      | 0 | NA | 1 | 14 | 0 | NA | 0 | NA | 1 | 12 |
| 8 | 103735195 | 103730187 | -1 | NM_001032282 | KLF10     | 0 | NA | 0 | NA | 1 | 18 | 0 | NA | 0 | NA |
| 8 | 103737128 | 103730196 | -1 | NM_005655    | KLF10     | 0 | NA | 0 | NA | 1 | 18 | 0 | NA | 0 | NA |
| 8 | 103945573 | 103907711 | -1 | NM_015878    | AZIN1     | 1 | 11 | 0 | NA | 0 | NA | 0 | NA | 0 | NA |
| 8 | 103945573 | 103907711 | -1 | NM_148174    | AZIN1     | 1 | 11 | 0 | NA | 0 | NA | 0 | NA | 0 | NA |
| 8 | 104102423 | 104154481 | 1  | NM_001695    | ATP6V1C1  | 0 | NA | 0 | NA | 0 | NA | 0 | NA | 0 | NA |
| 8 | 104222096 | 104311709 | 1  | NM_001024372 | BAALC     | 0 | NA | 0 | NA | 1 | 18 | 1 | 12 | 0 | NA |
| 8 | 104222096 | 104311709 | 1  | NM_024812    | BAALC     | 0 | NA | 0 | NA | 1 | 18 | 1 | 12 | 0 | NA |
| 8 | 104380275 | 104414270 | 1  | NM_003506    | FZD6      | 0 | NA | 0 | NA | 0 | NA | 0 | NA | 0 | NA |
| 8 | 104452961 | 104464393 | 1  | NM_138455    | CTHRC1    | 0 | NA | 0 | NA | 0 | NA | 0 | NA | 0 | NA |
| 8 | 104496117 | 104524376 | 1  | NM_015420    | WDSOF1    | 1 | 15 | 0 | NA | 0 | NA | 0 | NA | 0 | NA |
| 8 | 104496447 | 104480041 | -1 | NM_030780    | SLC25A32  | 1 | 15 | 0 | NA | 0 | NA | 0 | NA | 0 | NA |
| 8 | 104582151 | 105334627 | 1  | NM_001100117 | RIMS2     | 0 | NA | 0 | NA | 0 | NA | 0 | NA | 1 | 12 |
| 8 | 104900591 | 105334627 | 1  | NM_014677    | RIMS2     | 0 | NA | 0 | NA | 0 | NA | 0 | NA | 0 | NA |
| 8 | 105421229 | 105438092 | 1  | NM_030788    | TM7SF4    | 0 | NA | 0 | NA | 0 | NA | 1 | 13 | 0 | NA |
| 8 | 105548453 | 105460827 | -1 | NM_001385    | DPYS      | 0 | NA | 0 | NA | 0 | NA | 0 | NA | 0 | NA |
| 8 | 105670344 | 105570640 | -1 | NM_013437    | LRP12     | 0 | NA | 0 | NA | 0 | NA | 0 | NA | 0 | NA |
| 8 | 106400322 | 106885943 | 1  | NM_012082    | ZFPM2     | 0 | NA | 1 | 12 | 0 | NA | 0 | NA | 1 | 14 |
| 8 | 107739269 | 107834097 | 1  | NM_181354    | OXR1      | 1 | 11 | 0 | NA | 1 | 14 | 0 | NA | 0 | NA |
| 8 | 107851649 | 107842320 | -1 | NM_139166    | ABRA      | 0 | NA | 0 | NA | 0 | NA | 0 | NA | 0 | NA |
| 8 | 108579430 | 108330885 | -1 | NM_001146    | ANGPT1    | 0 | NA | 0 | NA | 1 | 12 | 0 | NA | 0 | NA |
| 8 | 109164742 | 108980719 | -1 | NM_178565    | RSP02     | 0 | NA | 0 | NA | 0 | NA | 0 | NA | 0 | NA |
| 8 | 109330135 | 109283147 | -1 | NM_001568    | EIF3E     | 1 | 12 | 0 | NA | 0 | NA | 0 | NA | 0 | NA |
| 8 | 109525028 | 109568312 | 1  | NM_014673    | TTC35     | 1 | 14 | 0 | NA | 0 | NA | 1 | 14 | 0 | NA |
| 8 | 109868946 | 109864521 | -1 | NM_153015    | TMEM74    | 0 | NA | 0 | NA | 0 | NA | 0 | NA | 0 | NA |
| 8 | 110168901 | 110200988 | 1  | NM_003301    | TRHR      | 0 | NA | 0 | NA | 0 | NA | 0 | NA | 0 | NA |
| 8 | 110415491 | 110322323 | -1 | NM_032869    | NUDCD1    | 1 | 17 | 0 | NA | 0 | NA | 1 | 12 | 0 | NA |
| 8 | 110415811 | 110425087 | 1  | NM_020189    | ENY2      | 1 | 17 | 0 | NA | 0 | NA | 1 | 12 | 0 | NA |
| 8 | 110443881 | 110612676 | 1  | NM_177531    | PKHD1L1   | 0 | NA | 0 | NA | 0 | NA | 0 | NA | 1 | 13 |
| 8 | 110621104 | 110646567 | 1  | NM_198120    | EBAG9     | 1 | 14 | 0 | NA | 0 | NA | 1 | 20 | 0 | NA |
| 8 | 110621485 | 110646567 | 1  | NM_004215    | EBAG9     | 1 | 14 | 0 | NA | 0 | NA | 1 | 20 | 0 | NA |
| 8 | 110724595 | 110655580 | -1 | NM_001099756 | GOLSYN    | 0 | NA | 0 | NA | 0 | NA | 0 | NA | 0 | NA |
| 8 | 110726227 | 110655580 | -1 | NM_001099753 | GOLSYN    | 0 | NA | 0 | NA | 0 | NA | 0 | NA | 0 | NA |
| 8 | 110726227 | 110655580 | -1 | NM_001099754 | GOLSYN    | 0 | NA | 0 | NA | 0 | NA | 0 | NA | 0 | NA |
| 8 | 110726227 | 110655580 | -1 | NM_001099755 | GOLSYN    | 0 | NA | 0 | NA | 0 | NA | 0 | NA | 0 | NA |
| 8 | 110726998 | 110655580 | -1 | NM_001099751 | GOLSYN    | 0 | NA | 0 | NA | 0 | NA | 0 | NA | 0 | NA |
| 8 | 110726998 | 110655580 | -1 | NM_001099752 | GOLSYN    | 0 | NA | 0 | NA | 0 | NA | 0 | NA | 0 | NA |
| 8 | 110730308 | 110655580 | -1 | NM_001099747 | GOLSYN    | 0 | NA | 0 | NA | 0 | NA | 0 | NA | 0 | NA |
| 8 | 110730308 | 110655580 | -1 | NM_001099748 | GOLSYN    | 0 | NA | 0 | NA | 0 | NA | 0 | NA | 0 | NA |
| 8 | 110730308 | 110655580 | -1 | NM_001099749 | GOLSYN    | 0 | NA | 0 | NA | 0 | NA | 0 | NA | 0 | NA |
| 8 | 110730308 | 110655580 | -1 | NM_001099750 | GOLSYN    | 0 | NA | 0 | NA | 0 | NA | 0 | NA | 0 | NA |
| 8 | 110730308 | 110655580 | -1 | NM_017786    | GOLSYN    | 0 | NA | 0 | NA | 0 | NA | 0 | NA | 0 | NA |
| 8 | 110762410 | 110655580 | -1 | NM_001099745 | GOLSYN    | 0 | NA | 0 | NA | 0 | NA | 0 | NA | 0 | NA |
| 8 | 110762410 | 110655580 | -1 | NM_001099746 | GOLSYN    | 0 | NA | 0 | NA | 0 | NA | 0 | NA | 0 | NA |
| 8 | 110773196 | 110655580 | -1 | NM_001099743 | GOLSYN    | 0 | NA | 0 | NA | 0 | NA | 0 | NA | 0 | NA |
| 8 | 110773196 | 110655580 | -1 | NM_001099744 | GOLSYN    | 0 | NA | 0 | NA | 0 | NA | 0 | NA | 0 | NA |
| 8 | 111056135 | 111048408 | -1 | NM_014379    | KCNV1     | 0 | NA | 0 | NA | 0 | NA | 0 | NA | 0 | NA |
| 8 | 114458558 | 113304332 | -1 | NM_198124    | CSMD3     | 0 | NA | 0 | NA | 0 | NA | 0 | NA | 0 | NA |
| 8 | 114518418 | 113304332 | -1 | NM_052900    | CSMD3     | 0 | NA | 0 | NA | 0 | NA | 0 | NA | 0 | NA |
| 8 | 114518418 | 113304332 | -1 | NM_198123    | CSMD3     | 0 | NA | 0 | NA | 0 | NA | 0 | NA | 0 | NA |
| 8 | 116750402 | 116489899 | -1 | NM_014112    | TRPS1     | 1 | 13 | 0 | NA | 0 | NA | 0 | NA | 0 | NA |
| 8 | 117837243 | 117726235 | -1 | NM_003756    | EIF3H     | 0 | NA | 0 | NA | 0 | NA | 0 | NA | 0 | NA |
| 8 | 117847922 | 117853378 | 1  | NM_032334    | Cborf53   | 1 | 18 | 0 | NA | 0 | NA | 0 | NA | 0 | NA |
| 8 | 117956182 | 117927354 | -1 | NM_006265    | RAD21     | 1 | 19 | 1 | 12 | 0 | NA | 0 | NA | 0 | NA |
| 8 | 118019663 | 118024403 | 1  | NM_001025357 | LOC441376 | 0 | NA | 1 | 13 | 0 | NA | 0 | NA | 0 | NA |
| 8 | 118216517 | 118258134 | 1  | NM_173851    | SLC30A8   | 0 | NA | 0 | NA | 0 | NA | 0 | NA | 0 | NA |
| 8 | 118602210 | 118621682 | 1  | NM_080651    | MED30     | 0 | NA | 0 | NA | 0 | NA | 0 | NA | 0 | NA |
| 8 | 119193239 | 118880782 | -1 | NM_000127    | EXT1      | 1 | 14 | 0 | NA | 0 | NA | 0 | NA | 0 | NA |
| 8 | 119703365 | 119270875 | -1 | NM_001101676 | SAMD12    | 0 | NA | 0 | NA | 0 | NA | 0 | NA | 0 | NA |
| 8 | 119703365 | 119459407 | -1 | NM_207506    | SAMD12    | 0 | NA | 0 | NA | 0 | NA | 0 | NA | 0 | NA |
| 8 | 120033564 | 120004976 | -1 | NM_002546    | TNFRSF11B | 0 | NA | 0 | NA | 0 | NA | 0 | NA | 0 | NA |

|   |           |           |    |              |          |   |    |   |    |   |    |   |    |   |    |
|---|-----------|-----------|----|--------------|----------|---|----|---|----|---|----|---|----|---|----|
| 8 | 120148626 | 120188383 | 1  | NM_006438    | COLEC10  | 0 | NA | 0 | NA | 0 | NA | 0 | NA | 0 | NA |
| 8 | 120289790 | 120327095 | 1  | NM_052886    | MAL2     | 0 | NA | 0 | NA | 0 | NA | 0 | NA | 0 | NA |
| 8 | 120497732 | 120505859 | 1  | NM_002514    | NOV      | 0 | NA | 0 | NA | 0 | NA | 0 | NA | 0 | NA |
| 8 | 120720287 | 120638499 | -1 | NM_001040092 | ENPP2    | 0 | NA | 0 | NA | 1 | 15 | 0 | NA | 0 | NA |
| 8 | 120720287 | 120638499 | -1 | NM_006209    | ENPP2    | 0 | NA | 0 | NA | 1 | 15 | 0 | NA | 0 | NA |
| 8 | 120914255 | 120812194 | -1 | NM_003184    | TAF2     | 1 | 14 | 0 | NA | 0 | NA | 0 | NA | 0 | NA |
| 8 | 120937330 | 120915396 | -1 | NM_024094    | DSCC1    | 0 | NA | 0 | NA | 0 | NA | 0 | NA | 0 | NA |
| 8 | 120955145 | 121131939 | 1  | NM_022783    | DEPDC6   | 1 | 11 | 0 | NA | 1 | 15 | 0 | NA | 0 | NA |
| 8 | 121206532 | 121453454 | 1  | NM_021110    | COL14A1  | 0 | NA | 0 | NA | 0 | NA | 0 | NA | 0 | NA |
| 8 | 121526828 | 121477263 | -1 | NM_014078    | MRPL13   | 0 | NA | 0 | NA | 0 | NA | 0 | NA | 0 | NA |
| 8 | 121526846 | 121605056 | 1  | NM_022045    | MTBP     | 0 | NA | 0 | NA | 0 | NA | 0 | NA | 0 | NA |
| 8 | 121893910 | 121619225 | -1 | NM_021021    | SNTB1    | 1 | 16 | 0 | NA | 1 | 20 | 0 | NA | 0 | NA |
| 8 | 122722811 | 122694451 | -1 | NM_005328    | HAS2     | 1 | 17 | 0 | NA | 0 | NA | 0 | NA | 0 | NA |
| 8 | 123863081 | 124055936 | 1  | NM_014943    | ZHX2     | 0 | NA | 0 | NA | 0 | NA | 0 | NA | 0 | NA |
| 8 | 124123722 | 124094768 | -1 | NM_024295    | DERL1    | 0 | NA | 0 | NA | 0 | NA | 1 | 18 | 0 | NA |
| 8 | 124154100 | 124233571 | 1  | NM_145647    | WDR67    | 0 | NA | 1 | 12 | 0 | NA | 0 | NA | 0 | NA |
| 8 | 124263932 | 124290388 | 1  | NM_032899    | FAM83A   | 0 | NA | 1 | 13 | 1 | 12 | 0 | NA | 0 | NA |
| 8 | 124263932 | 124291499 | 1  | NM_207006    | FAM83A   | 0 | NA | 1 | 13 | 1 | 12 | 0 | NA | 0 | NA |
| 8 | 124322798 | 124301411 | -1 | NM_032847    | C8orf76  | 0 | NA | 0 | NA | 0 | NA | 0 | NA | 0 | NA |
| 8 | 124335728 | 124329876 | -1 | NM_001017926 | ZHX1     | 0 | NA | 0 | NA | 0 | NA | 0 | NA | 0 | NA |
| 8 | 124335728 | 124329876 | -1 | NM_007222    | ZHX1     | 0 | NA | 0 | NA | 0 | NA | 0 | NA | 0 | NA |
| 8 | 124477886 | 124401271 | -1 | NM_014109    | ATAD2    | 0 | NA | 0 | NA | 0 | NA | 0 | NA | 0 | NA |
| 8 | 124498145 | 124523441 | 1  | NM_018024    | C8orf32  | 0 | NA | 0 | NA | 0 | NA | 0 | NA | 0 | NA |
| 8 | 124613564 | 124584538 | -1 | NM_148177    | FBX032   | 1 | 17 | 0 | NA | 0 | NA | 0 | NA | 0 | NA |
| 8 | 124622627 | 124584538 | -1 | NM_058229    | FBX032   | 1 | 17 | 0 | NA | 0 | NA | 0 | NA | 0 | NA |
| 8 | 124734371 | 124727095 | -1 | NM_001081675 | CBORFK36 | 0 | NA | 0 | NA | 0 | NA | 0 | NA | 0 | NA |
| 8 | 124818828 | 124762214 | -1 | NM_001003954 | ANXA13   | 0 | NA | 0 | NA | 1 | 13 | 0 | NA | 0 | NA |
| 8 | 124818828 | 124762214 | -1 | NM_004306    | ANXA13   | 0 | NA | 0 | NA | 1 | 13 | 0 | NA | 0 | NA |
| 8 | 124850062 | 124896871 | 1  | NM_144963    | FAM91A1  | 0 | NA | 0 | NA | 0 | NA | 0 | NA | 0 | NA |
| 8 | 124933407 | 125201483 | 1  | NM_001039112 | FER1L6   | 0 | NA | 0 | NA | 0 | NA | 0 | NA | 1 | 14 |
| 8 | 125454121 | 125392339 | -1 | NM_194291    | TMEM65   | 0 | NA | 0 | NA | 0 | NA | 0 | NA | 0 | NA |
| 8 | 125532228 | 125534447 | 1  | NM_017956    | TRMT12   | 0 | NA | 0 | NA | 0 | NA | 0 | NA | 0 | NA |
| 8 | 125556188 | 125570040 | 1  | NM_007218    | RNF139   | 0 | NA | 0 | NA | 0 | NA | 0 | NA | 0 | NA |
| 8 | 125620492 | 125569929 | -1 | NM_032026    | TATDN1   | 0 | NA | 0 | NA | 0 | NA | 0 | NA | 0 | NA |
| 8 | 125620523 | 125631408 | 1  | NM_005005    | NDUFB9   | 0 | NA | 0 | NA | 0 | NA | 0 | NA | 0 | NA |
| 8 | 125809911 | 125632208 | -1 | NM_014751    | MTSS1    | 1 | 11 | 0 | NA | 0 | NA | 0 | NA | 0 | NA |
| 8 | 126054732 | 126060809 | 1  | NM_152412    | ZNF572   | 1 | 33 | 0 | NA | 1 | 36 | 1 | 11 | 0 | NA |
| 8 | 126079900 | 126103707 | 1  | NM_003129    | SQLE     | 0 | NA | 0 | NA | 0 | NA | 0 | NA | 0 | NA |
| 8 | 126173243 | 126105684 | -1 | NM_014846    | KIAA0196 | 0 | NA | 0 | NA | 0 | NA | 0 | NA | 0 | NA |
| 8 | 126173276 | 126448544 | 1  | NM_173685    | NSMCE2   | 0 | NA | 0 | NA | 0 | NA | 0 | NA | 0 | NA |
| 8 | 126511744 | 126519826 | 1  | NM_025195    | TRIB1    | 1 | 16 | 0 | NA | 1 | 13 | 1 | 20 | 0 | NA |
| 8 | 127639648 | 127633868 | -1 | NM_174911    | FAM84B   | 1 | 17 | 0 | NA | 1 | 16 | 0 | NA | 0 | NA |
| 8 | 128817497 | 128822855 | 1  | NM_002467    | MYC      | 1 | 20 | 0 | NA | 0 | NA | 0 | NA | 0 | NA |
| 8 | 130868316 | 130829623 | -1 | NM_031415    | MLZE     | 0 | NA | 0 | NA | 0 | NA | 0 | NA | 0 | NA |
| 8 | 131021182 | 130922897 | -1 | NM_016623    | FAM49B   | 0 | NA | 0 | NA | 0 | NA | 0 | NA | 0 | NA |
| 8 | 131483399 | 131133534 | -1 | NM_018482    | DDEF1    | 0 | NA | 0 | NA | 1 | 12 | 0 | NA | 0 | NA |
| 8 | 132122017 | 131861728 | -1 | NM_001115    | ADCY8    | 0 | NA | 1 | 13 | 0 | NA | 0 | NA | 1 | 14 |
| 8 | 132985540 | 133094953 | 1  | NM_015137    | EFR3A    | 0 | NA | 0 | NA | 0 | NA | 0 | NA | 0 | NA |
| 8 | 133131298 | 133105909 | -1 | NM_001080399 | OC90     | 0 | NA | 1 | 14 | 0 | NA | 1 | 12 | 0 | NA |
| 8 | 133562186 | 133210437 | -1 | NM_004519    | KCNQ3    | 0 | NA | 0 | NA | 0 | NA | 0 | NA | 0 | NA |
| 8 | 133756995 | 133653628 | -1 | NM_012472    | LRRC6    | 0 | NA | 0 | NA | 0 | NA | 0 | NA | 0 | NA |
| 8 | 133842010 | 133791375 | -1 | NM_144649    | TMEM71   | 0 | NA | 0 | NA | 0 | NA | 0 | NA | 0 | NA |
| 8 | 133856785 | 133894621 | 1  | NM_198513    | PHF20L1  | 0 | NA | 0 | NA | 1 | 14 | 0 | NA | 0 | NA |
| 8 | 133856785 | 133906769 | 1  | NM_032205    | PHF20L1  | 0 | NA | 0 | NA | 1 | 14 | 0 | NA | 0 | NA |
| 8 | 133856785 | 133930234 | 1  | NM_016018    | PHF20L1  | 0 | NA | 0 | NA | 1 | 14 | 0 | NA | 0 | NA |
| 8 | 133948386 | 134216325 | 1  | NM_003235    | TG       | 0 | NA | 1 | 14 | 0 | NA | 0 | NA | 0 | NA |
| 8 | 134141785 | 134118154 | -1 | NM_006748    | SLA      | 0 | NA | 0 | NA | 0 | NA | 0 | NA | 1 | 12 |
| 8 | 134184479 | 134118154 | -1 | NM_001045556 | SLA      | 0 | NA | 1 | 12 | 0 | NA | 0 | NA | 0 | NA |
| 8 | 134184479 | 134118154 | -1 | NM_001045557 | SLA      | 0 | NA | 1 | 12 | 0 | NA | 0 | NA | 0 | NA |
| 8 | 134272493 | 134309235 | 1  | NM_080838    | WISP1    | 0 | NA | 0 | NA | 0 | NA | 0 | NA | 0 | NA |
| 8 | 134272493 | 134310753 | 1  | NM_003882    | WISP1    | 0 | NA | 0 | NA | 0 | NA | 0 | NA | 0 | NA |
| 8 | 134378680 | 134318595 | -1 | NM_006096    | NDRG1    | 0 | NA | 0 | NA | 0 | NA | 1 | 13 | 0 | NA |
| 8 | 134653344 | 134540324 | -1 | NM_003033    | ST3GAL1  | 1 | 12 | 0 | NA | 1 | 14 | 0 | NA | 0 | NA |
| 8 | 134653344 | 134540324 | -1 | NM_173344    | ST3GAL1  | 1 | 12 | 0 | NA | 1 | 14 | 0 | NA | 0 | NA |
| 8 | 13577976  | 135678968 | -1 | NM_001029939 | ZFAT     | 0 | NA | 0 | NA | 1 | 12 | 0 | NA | 0 | NA |



|   |           |           |    |              |          |   |    |   |    |   |    |   |    |   |    |
|---|-----------|-----------|----|--------------|----------|---|----|---|----|---|----|---|----|---|----|
| 8 | 135794463 | 135559212 | -1 | NM_020863    | ZFAT     | 1 | 12 | 0 | NA | 1 | 15 | 1 | 11 | 0 | NA |
| 8 | 136538897 | 136729030 | 1  | NM_006558    | KHDRBS3  | 0 | NA | 0 | NA | 0 | NA | 0 | NA | 0 | NA |
| 8 | 139578247 | 139211447 | -1 | NM_015912    | FAM135B  | 0 | NA | 1 | 13 | 0 | NA | 0 | NA | 1 | 12 |
| 8 | 139995418 | 139669659 | -1 | NM_152888    | COL22A1  | 1 | 11 | 0 | NA | 0 | NA | 0 | NA | 0 | NA |
| 8 | 140784481 | 140693985 | -1 | NM_016601    | KCNK9    | 0 | NA | 0 | NA | 0 | NA | 0 | NA | 1 | 12 |
| 8 | 141537860 | 140811769 | -1 | NM_031466    | NIBP     | 0 | NA | 0 | NA | 1 | 25 | 1 | 19 | 0 | NA |
| 8 | 141590585 | 141596434 | 1  | NM_017444    | CHRA1    | 0 | NA | 0 | NA | 0 | NA | 1 | 13 | 0 | NA |
| 8 | 141714827 | 141610445 | -1 | NM_012154    | EIF2C2   | 1 | 14 | 0 | NA | 1 | 12 | 0 | NA | 0 | NA |
| 8 | 142080514 | 141737682 | -1 | NM_005607    | PTK2     | 1 | 16 | 0 | NA | 0 | NA | 0 | NA | 0 | NA |
| 8 | 142080514 | 141737682 | -1 | NM_153831    | PTK2     | 1 | 16 | 0 | NA | 0 | NA | 0 | NA | 0 | NA |
| 8 | 142207901 | 142275082 | 1  | NM_014957    | DENND3   | 1 | 14 | 0 | NA | 0 | NA | 0 | NA | 0 | NA |
| 8 | 142307855 | 142290051 | -1 | NM_001080431 | SLC45A4  | 0 | NA | 0 | NA | 0 | NA | 0 | NA | 0 | NA |
| 8 | 142446547 | 142435768 | -1 | NM_005293    | GPR20    | 0 | NA | 1 | 12 | 0 | NA | 0 | NA | 0 | NA |
| 8 | 142501188 | 142510802 | 1  | NM_007079    | PTP4A3   | 0 | NA | 0 | NA | 0 | NA | 0 | NA | 0 | NA |
| 8 | 142501188 | 142510802 | 1  | NM_032611    | PTP4A3   | 0 | NA | 0 | NA | 0 | NA | 0 | NA | 0 | NA |
| 8 | 142586512 | 142513110 | -1 | NM_207414    | FLJ43860 | 0 | NA | 0 | NA | 0 | NA | 0 | NA | 0 | NA |
| 8 | 143482444 | 143291347 | -1 | NM_145003    | TSNARE1  | 0 | NA | 1 | 12 | 0 | NA | 0 | NA | 0 | NA |
| 8 | 143542378 | 143623370 | 1  | NM_001702    | BAI1     | 1 | 11 | 1 | 20 | 0 | NA | 0 | NA | 0 | NA |
| 8 | 143692835 | 143689411 | -1 | NM_015193    | ARC      | 0 | NA | 1 | 27 | 0 | NA | 0 | NA | 0 | NA |
| 8 | 143748403 | 143735875 | -1 | NM_001077527 | JRK      | 1 | 14 | 0 | NA | 1 | 29 | 0 | NA | 1 | 13 |
| 8 | 143748403 | 143735875 | -1 | NM_003724    | JRK      | 1 | 14 | 0 | NA | 1 | 29 | 0 | NA | 1 | 13 |
| 8 | 143758876 | 143761145 | 1  | NM_005672    | PSCA     | 1 | 17 | 0 | NA | 1 | 12 | 0 | NA | 1 | 13 |
| 8 | 143778532 | 143782613 | 1  | NM_017527    | LY6K     | 1 | 42 | 1 | 14 | 0 | NA | 0 | NA | 0 | NA |
| 8 | 143805622 | 143815352 | 1  | NM_016647    | C8orf55  | 1 | 19 | 1 | 24 | 0 | NA | 0 | NA | 0 | NA |
| 8 | 143820831 | 143819363 | -1 | NM_020427    | SLURP1   | 0 | NA | 0 | NA | 0 | NA | 0 | NA | 0 | NA |
| 8 | 143830954 | 143828629 | -1 | NM_205545    | LYPD2    | 0 | NA | 1 | 13 | 0 | NA | 0 | NA | 0 | NA |
| 8 | 143848248 | 143842757 | -1 | NM_177458    | LYNX1    | 0 | NA | 1 | 13 | 1 | 12 | 0 | NA | 0 | NA |
| 8 | 143855439 | 143849616 | -1 | NM_177476    | LYNX1    | 0 | NA | 1 | 13 | 1 | 12 | 0 | NA | 0 | NA |
| 8 | 143855746 | 143849616 | -1 | NM_177477    | LYNX1    | 0 | NA | 1 | 13 | 1 | 12 | 0 | NA | 0 | NA |
| 8 | 143856641 | 143842757 | -1 | NM_023946    | LYNX1    | 0 | NA | 1 | 13 | 1 | 12 | 0 | NA | 0 | NA |
| 8 | 143856642 | 143849616 | -1 | NM_177457    | LYNX1    | 0 | NA | 1 | 13 | 1 | 12 | 0 | NA | 0 | NA |
| 8 | 143865010 | 143863299 | -1 | NM_003695    | LY6D     | 0 | NA | 0 | NA | 1 | 12 | 0 | NA | 0 | NA |
| 8 | 143913218 | 143925264 | 1  | NM_002066    | GML      | 0 | NA | 1 | 13 | 0 | NA | 0 | NA | 0 | NA |
| 8 | 143958238 | 143950774 | -1 | NM_000497    | CYP11B1  | 0 | NA | 1 | 12 | 0 | NA | 0 | NA | 1 | 14 |
| 8 | 143958238 | 143950774 | -1 | NM_001026213 | CYP11B1  | 0 | NA | 1 | 12 | 0 | NA | 0 | NA | 1 | 14 |
| 8 | 143996261 | 143988976 | -1 | NM_000498    | CYP11B2  | 0 | NA | 1 | 14 | 0 | NA | 0 | NA | 1 | 13 |
| 8 | 144171276 | 144175202 | 1  | NM_001127213 | LY6E     | 1 | 11 | 0 | NA | 0 | NA | 1 | 13 | 0 | NA |
| 8 | 144171276 | 144175202 | 1  | NM_002346    | LY6E     | 1 | 11 | 0 | NA | 0 | NA | 1 | 13 | 0 | NA |
| 8 | 144192053 | 144207095 | 1  | NM_173687    | C8orf31  | 0 | NA | 0 | NA | 0 | NA | 0 | NA | 0 | NA |
| 8 | 144313116 | 144310705 | -1 | NM_002347    | LY6H     | 0 | NA | 1 | 12 | 0 | NA | 0 | NA | 1 | 14 |
| 8 | 144366442 | 144370418 | 1  | NM_178172    | GPIHBP1  | 0 | NA | 1 | 13 | 0 | NA | 0 | NA | 0 | NA |
| 8 | 144400483 | 144416250 | 1  | NM_173832    | ZFP41    | 0 | NA | 1 | 22 | 0 | NA | 1 | 12 | 0 | NA |
| 8 | 144420981 | 144430476 | 1  | NM_138465    | GLI4     | 1 | 12 | 1 | 18 | 0 | NA | 0 | NA | 0 | NA |
| 8 | 144444970 | 144451539 | 1  | NM_030895    | ZNF696   | 0 | NA | 0 | NA | 0 | NA | 1 | 15 | 0 | NA |
| 8 | 144488425 | 144462902 | -1 | NM_052963    | TOP1MT   | 0 | NA | 0 | NA | 0 | NA | 0 | NA | 0 | NA |
| 8 | 144522399 | 144537533 | 1  | NM_052924    | RHPN1    | 1 | 14 | 0 | NA | 0 | NA | 1 | 11 | 0 | NA |
| 8 | 144583719 | 144582657 | -1 | NM_201589    | MAFA     | 0 | NA | 1 | 14 | 0 | NA | 0 | NA | 0 | NA |
| 8 | 144694763 | 144590967 | -1 | NM_015117    | ZC3H3    | 0 | NA | 0 | NA | 0 | NA | 0 | NA | 0 | NA |
| 8 | 144711634 | 144716374 | 1  | NM_024736    | GSDMDC1  | 0 | NA | 1 | 13 | 1 | 13 | 0 | NA | 0 | NA |
| 8 | 144726071 | 144719505 | -1 | NM_001100878 | C8orf73  | 0 | NA | 0 | NA | 0 | NA | 0 | NA | 0 | NA |
| 8 | 144731636 | 144728097 | -1 | NM_145201    | NAPRT1   | 0 | NA | 0 | NA | 0 | NA | 0 | NA | 0 | NA |
| 8 | 144750726 | 144733040 | -1 | NM_001960    | EEF1D    | 0 | NA | 0 | NA | 0 | NA | 0 | NA | 0 | NA |
| 8 | 144750726 | 144733040 | -1 | NM_032378    | EEF1D    | 0 | NA | 0 | NA | 0 | NA | 0 | NA | 0 | NA |
| 8 | 144751363 | 144753627 | 1  | NM_032862    | TIGD5    | 0 | NA | 0 | NA | 0 | NA | 0 | NA | 0 | NA |
| 8 | 144762887 | 144757531 | -1 | NM_023078    | PYCR1    | 0 | NA | 1 | 12 | 0 | NA | 0 | NA | 0 | NA |
| 8 | 144770039 | 144765932 | -1 | NM_003313    | TSTA3    | 0 | NA | 1 | 12 | 0 | NA | 0 | NA | 0 | NA |
| 8 | 144789515 | 144807043 | 1  | NM_001082480 | ZNF623   | 1 | 11 | 0 | NA | 1 | 15 | 0 | NA | 0 | NA |
| 8 | 144803096 | 144807043 | 1  | NM_014789    | ZNF623   | 1 | 33 | 1 | 14 | 1 | 17 | 1 | 27 | 1 | 14 |
| 8 | 144838609 | 144849543 | 1  | NM_001100598 | ZNF707   | 0 | NA | 1 | 17 | 0 | NA | 0 | NA | 0 | NA |
| 8 | 144838609 | 144849543 | 1  | NM_001100599 | ZNF707   | 0 | NA | 1 | 17 | 0 | NA | 0 | NA | 0 | NA |
| 8 | 144838609 | 144849543 | 1  | NM_173831    | ZNF707   | 0 | NA | 1 | 17 | 0 | NA | 0 | NA | 0 | NA |
| 8 | 144870494 | 144876621 | 1  | NM_139021    | MAPK15   | 0 | NA | 1 | 15 | 0 | NA | 0 | NA | 0 | NA |
| 8 | 144887902 | 144878090 | -1 | NM_198488    | FAM83H   | 0 | NA | 1 | 14 | 0 | NA | 0 | NA | 0 | NA |
| 8 | 144969537 | 144945077 | -1 | NM_015356    | SCRIB    | 0 | NA | 0 | NA | 0 | NA | 0 | NA | 0 | NA |
| 8 | 144969537 | 144945077 | -1 | NM_182706    | SCRIB    | 0 | NA | 0 | NA | 0 | NA | 0 | NA | 0 | NA |

|   |           |           |    |              |          |   |    |   |    |   |    |   |    |   |    |
|---|-----------|-----------|----|--------------|----------|---|----|---|----|---|----|---|----|---|----|
| 8 | 144983525 | 144970534 | -1 | NM_014281    | PUF60    | 0 | NA | 0 | NA | 0 | NA | 1 | 18 | 0 | NA |
| 8 | 144983525 | 144970534 | -1 | NM_078480    | PUF60    | 0 | NA | 0 | NA | 0 | NA | 1 | 18 | 0 | NA |
| 8 | 144996188 | 144987903 | -1 | NM_178564    | NRBP2    | 1 | 17 | 1 | 14 | 0 | NA | 1 | 18 | 1 | 15 |
| 8 | 145019422 | 145011899 | -1 | NM_031308    | EPPK1    | 0 | NA | 1 | 34 | 0 | NA | 1 | 11 | 0 | NA |
| 8 | 145085746 | 145061308 | -1 | NM_201384    | PLEC1    | 1 | 46 | 1 | 27 | 0 | NA | 1 | 11 | 0 | NA |
| 8 | 145088680 | 145061308 | -1 | NM_201383    | PLEC1    | 1 | 46 | 1 | 27 | 0 | NA | 1 | 11 | 0 | NA |
| 8 | 145090053 | 145061308 | -1 | NM_201382    | PLEC1    | 1 | 14 | 1 | 27 | 0 | NA | 1 | 11 | 0 | NA |
| 8 | 145090893 | 145061308 | -1 | NM_201381    | PLEC1    | 1 | 14 | 1 | 27 | 0 | NA | 1 | 11 | 0 | NA |
| 8 | 145097032 | 145061308 | -1 | NM_201380    | PLEC1    | 1 | 14 | 0 | NA | 0 | NA | 1 | 11 | 0 | NA |
| 8 | 145100076 | 145061308 | -1 | NM_201379    | PLEC1    | 1 | 14 | 0 | NA | 0 | NA | 1 | 11 | 0 | NA |
| 8 | 145119628 | 145061308 | -1 | NM_201378    | PLEC1    | 0 | NA | 0 | NA | 0 | NA | 0 | NA | 0 | NA |
| 8 | 145121531 | 145061308 | -1 | NM_000445    | PLEC1    | 0 | NA | 0 | NA | 0 | NA | 0 | NA | 0 | NA |
| 8 | 145132623 | 145123307 | -1 | NM_032789    | PARP10   | 0 | NA | 0 | NA | 0 | NA | 0 | NA | 0 | NA |
| 8 | 145136213 | 145139571 | 1  | NM_000837    | GRINA    | 0 | NA | 0 | NA | 0 | NA | 0 | NA | 0 | NA |
| 8 | 145136213 | 145139571 | 1  | NM_001009184 | GRINA    | 0 | NA | 0 | NA | 0 | NA | 0 | NA | 0 | NA |
| 8 | 145158594 | 145174003 | 1  | NM_198572    | SPATC1   | 0 | NA | 0 | NA | 0 | NA | 0 | NA | 0 | NA |
| 8 | 145186959 | 145178154 | -1 | NM_017570    | OPLAH    | 0 | NA | 1 | 15 | 0 | NA | 0 | NA | 0 | NA |
| 8 | 145205509 | 145207539 | 1  | NM_019037    | EXOSC4   | 1 | 11 | 0 | NA | 1 | 12 | 1 | 11 | 0 | NA |
| 8 | 145209511 | 145213107 | 1  | NM_003801    | GPAA1    | 1 | 11 | 0 | NA | 1 | 12 | 1 | 11 | 0 | NA |
| 8 | 145221947 | 145224416 | 1  | NM_001916    | CYC1     | 1 | 11 | 0 | NA | 0 | NA | 1 | 13 | 0 | NA |
| 8 | 145231128 | 145225523 | -1 | NM_030974    | SHARPIN  | 1 | 11 | 0 | NA | 0 | NA | 0 | NA | 0 | NA |
| 8 | 145231292 | 145234503 | 1  | NM_032272    | MAF1     | 1 | 11 | 0 | NA | 0 | NA | 0 | NA | 0 | NA |
| 8 | 145264659 | 145267608 | 1  | NM_016458    | C8orf30A | 0 | NA | 0 | NA | 0 | NA | 0 | NA | 0 | NA |
| 8 | 145274906 | 145340356 | 1  | NM_001099280 | KIAA1833 | 0 | NA | 0 | NA | 0 | NA | 0 | NA | 0 | NA |
| 8 | 145274906 | 145340356 | 1  | NM_001099281 | KIAA1833 | 0 | NA | 0 | NA | 0 | NA | 0 | NA | 0 | NA |
| 8 | 145274906 | 145388831 | 1  | NM_032450    | KIAA1833 | 0 | NA | 0 | NA | 0 | NA | 0 | NA | 0 | NA |
| 8 | 145393504 | 145395033 | 1  | NM_001008271 | SCXA     | 0 | NA | 0 | NA | 0 | NA | 0 | NA | 0 | NA |
| 8 | 145393504 | 145395033 | 1  | NM_001080514 | SCXB     | 0 | NA | 0 | NA | 0 | NA | 0 | NA | 0 | NA |
| 8 | 145408687 | 145411636 | 1  | NM_016458    | C8orf30A | 0 | NA | 0 | NA | 0 | NA | 0 | NA | 0 | NA |
| 8 | 145461410 | 145462939 | 1  | NM_001008271 | SCXA     | 0 | NA | 0 | NA | 0 | NA | 0 | NA | 0 | NA |
| 8 | 145461410 | 145462939 | 1  | NM_001080514 | SCXB     | 0 | NA | 0 | NA | 0 | NA | 0 | NA | 0 | NA |
| 8 | 145485928 | 145456863 | -1 | NM_015201    | BOP1     | 0 | NA | 0 | NA | 0 | NA | 0 | NA | 0 | NA |
| 8 | 145486077 | 145509193 | 1  | NM_005526    | HSF1     | 0 | NA | 0 | NA | 0 | NA | 0 | NA | 0 | NA |
| 8 | 145521375 | 145510761 | -1 | NM_012079    | DGAT1    | 0 | NA | 1 | 13 | 0 | NA | 0 | NA | 0 | NA |
| 8 | 145530751 | 145525261 | -1 | NM_031309    | SCRT1    | 0 | NA | 1 | 13 | 0 | NA | 0 | NA | 0 | NA |
| 8 | 145552940 | 145549898 | -1 | NM_012162    | FBXL6    | 0 | NA | 0 | NA | 0 | NA | 0 | NA | 0 | NA |
| 8 | 145552940 | 145549898 | -1 | NM_024555    | FBXL6    | 0 | NA | 0 | NA | 0 | NA | 0 | NA | 0 | NA |
| 8 | 145553032 | 145555754 | 1  | NM_024531    | GPR172A  | 0 | NA | 0 | NA | 0 | NA | 0 | NA | 0 | NA |
| 8 | 145568538 | 145589261 | 1  | NM_174922    | ADCK5    | 0 | NA | 0 | NA | 0 | NA | 0 | NA | 0 | NA |
| 8 | 145605541 | 145589253 | -1 | NM_013291    | CPSF1    | 0 | NA | 0 | NA | 0 | NA | 0 | NA | 0 | NA |
| 8 | 145612725 | 145608605 | -1 | NM_017767    | SLC39A4  | 0 | NA | 0 | NA | 0 | NA | 0 | NA | 0 | NA |
| 8 | 145613081 | 145608605 | -1 | NM_130849    | SLC39A4  | 0 | NA | 0 | NA | 0 | NA | 0 | NA | 0 | NA |
| 8 | 145624735 | 145619807 | -1 | NM_016208    | VPS28    | 0 | NA | 0 | NA | 0 | NA | 0 | NA | 0 | NA |
| 8 | 145624735 | 145619807 | -1 | NM_183057    | VPS28    | 0 | NA | 0 | NA | 0 | NA | 0 | NA | 0 | NA |
| 8 | 145640620 | 145624970 | -1 | NM_013432    | NFKBIL2  | 0 | NA | 0 | NA | 0 | NA | 1 | 12 | 0 | NA |
| 8 | 145661657 | 145660015 | -1 | NM_032687    | CYHR1    | 0 | NA | 0 | NA | 0 | NA | 0 | NA | 0 | NA |
| 8 | 145662545 | 145670307 | 1  | NM_145754    | KIFC2    | 0 | NA | 0 | NA | 1 | 12 | 0 | NA | 0 | NA |
| 8 | 145672526 | 145670316 | -1 | NM_003923    | FOXH1    | 0 | NA | 0 | NA | 1 | 12 | 0 | NA | 0 | NA |
| 8 | 145692916 | 145698312 | 1  | NM_032902    | PPP1R16A | 0 | NA | 0 | NA | 0 | NA | 0 | NA | 0 | NA |
| 8 | 145700272 | 145703363 | 1  | NM_005309    | GPT      | 1 | 11 | 0 | NA | 0 | NA | 0 | NA | 0 | NA |
| 8 | 145705359 | 145707397 | 1  | NM_138431    | MFSO3    | 1 | 11 | 0 | NA | 0 | NA | 0 | NA | 0 | NA |
| 8 | 145714008 | 145707478 | -1 | NM_004260    | RECQL4   | 1 | 23 | 0 | NA | 0 | NA | 0 | NA | 0 | NA |
| 8 | 145714198 | 145721365 | 1  | NM_014665    | LRRC14   | 1 | 23 | 0 | NA | 0 | NA | 0 | NA | 0 | NA |
| 8 | 145723216 | 145718579 | -1 | NM_001024678 | LRRC24   | 1 | 23 | 0 | NA | 0 | NA | 0 | NA | 0 | NA |
| 8 | 145725266 | 145722410 | -1 | NM_001001795 | MGC70857 | 1 | 23 | 0 | NA | 0 | NA | 0 | NA | 0 | NA |
| 8 | 145809696 | 145725370 | -1 | NM_025251    | KIAA1688 | 0 | NA | 1 | 23 | 0 | NA | 0 | NA | 1 | 18 |
| 8 | 145951775 | 145917102 | -1 | NM_138367    | ZNF251   | 0 | NA | 0 | NA | 0 | NA | 0 | NA | 0 | NA |
| 8 | 145983529 | 145969304 | -1 | NM_030580    | ZNF34    | 0 | NA | 0 | NA | 0 | NA | 1 | 16 | 0 | NA |
| 8 | 145988533 | 145985957 | -1 | NM_033301    | RPL8     | 1 | 11 | 0 | NA | 0 | NA | 1 | 16 | 0 | NA |
| 8 | 145988609 | 145985957 | -1 | NM_000973    | RPL8     | 1 | 11 | 0 | NA | 0 | NA | 1 | 16 | 0 | NA |
| 8 | 145995064 | 146005333 | 1  | NM_213605    | ZNF517   | 1 | 11 | 0 | NA | 0 | NA | 1 | 16 | 0 | NA |
| 8 | 146023706 | 146039410 | 1  | NM_003416    | ZNF7     | 0 | NA | 1 | 17 | 1 | 14 | 0 | NA | 1 | 13 |
| 8 | 146049255 | 146046354 | -1 | NM_001081004 | COMMD5   | 1 | 14 | 1 | 14 | 1 | 12 | 1 | 19 | 1 | 14 |
| 8 | 146049256 | 146046354 | -1 | NM_014066    | COMMD5   | 1 | 14 | 1 | 14 | 1 | 12 | 1 | 19 | 1 | 14 |
| 8 | 146049736 | 146046354 | -1 | NM_001081003 | COMMD5   | 1 | 14 | 1 | 14 | 1 | 12 | 1 | 19 | 1 | 14 |

|            |           |           |    |              |           |   |    |   |    |   |    |   |    |   |    |
|------------|-----------|-----------|----|--------------|-----------|---|----|---|----|---|----|---|----|---|----|
| 8          | 146097650 | 146073139 | -1 | NM_001109689 | ZNF250    | 1 | 15 | 1 | 13 | 0 | NA | 0 | NA | 0 | NA |
| 8          | 146097650 | 146073139 | -1 | NM_021061    | ZNF250    | 1 | 15 | 1 | 13 | 0 | NA | 0 | NA | 0 | NA |
| 8          | 146147078 | 146126547 | -1 | NM_001029976 | ZNF16     | 0 | NA | 0 | NA | 0 | NA | 0 | NA | 0 | NA |
| 8          | 146147078 | 146126547 | -1 | NM_006958    | ZNF16     | 0 | NA | 0 | NA | 0 | NA | 0 | NA | 0 | NA |
| 8          | 146248627 | 146252220 | 1  | NM_023080    | C6orf33   | 0 | NA | 0 | NA | 1 | 15 | 1 | 19 | 0 | NA |
| 6_random   | 814192    | 811285    | -1 | NM_001042508 | C6orf124  | 0 | NA | 0 | NA | 0 | NA | 0 | NA | 0 | NA |
| 6_random   | 1544909   | 1510169   | -1 | NM_018452    | C6orf35   | 0 | NA | 0 | NA | 0 | NA | 0 | NA | 0 | NA |
| 6_qbl_hap2 | 149116    | 128126    | -1 | NM_006510    | TRIM27    | 0 | NA | 0 | NA | 0 | NA | 0 | NA | 0 | NA |
| 6_qbl_hap2 | 230381    | 219937    | -1 | NM_001010877 | ZNF311    | 0 | NA | 0 | NA | 0 | NA | 0 | NA | 0 | NA |
| 6_qbl_hap2 | 270296    | 269333    | -1 | NM_030903    | OR2W1     | 0 | NA | 0 | NA | 0 | NA | 0 | NA | 0 | NA |
| 6_qbl_hap2 | 312371    | 311429    | -1 | NM_001005226 | OR2B3P    | 0 | NA | 0 | NA | 0 | NA | 0 | NA | 0 | NA |
| 6_qbl_hap2 | 337018    | 337954    | 1  | NM_001005216 | OR2J3     | 0 | NA | 0 | NA | 0 | NA | 0 | NA | 0 | NA |
| 6_qbl_hap2 | 398666    | 399707    | 1  | NM_030905    | OR2J2     | 0 | NA | 0 | NA | 0 | NA | 0 | NA | 0 | NA |
| 6_qbl_hap2 | 652745    | 650516    | -1 | NM_013937    | OR11A1    | 0 | NA | 0 | NA | 0 | NA | 0 | NA | 0 | NA |
| 6_qbl_hap2 | 665027    | 665966    | 1  | NM_013941    | OR10C1    | 0 | NA | 0 | NA | 0 | NA | 0 | NA | 0 | NA |
| 6_qbl_hap2 | 663460    | 669331    | 1  | NM_030883    | OR2H1     | 0 | NA | 0 | NA | 0 | NA | 0 | NA | 0 | NA |
| 6_qbl_hap2 | 712911    | 711774    | -1 | NM_052967    | MAS1L     | 0 | NA | 0 | NA | 0 | NA | 0 | NA | 0 | NA |
| 6_qbl_hap2 | 784968    | 780672    | -1 | NM_006398    | UBD       | 0 | NA | 0 | NA | 0 | NA | 0 | NA | 0 | NA |
| 6_qbl_hap2 | 812960    | 814023    | 1  | NM_007160    | OR2H2     | 0 | NA | 0 | NA | 0 | NA | 0 | NA | 0 | NA |
| 6_qbl_hap2 | 853284    | 827282    | -1 | NM_021903    | GABBR1    | 0 | NA | 0 | NA | 0 | NA | 0 | NA | 0 | NA |
| 6_qbl_hap2 | 858241    | 827282    | -1 | NM_001470    | GABBR1    | 0 | NA | 0 | NA | 0 | NA | 0 | NA | 0 | NA |
| 6_qbl_hap2 | 858241    | 827282    | -1 | NM_021904    | GABBR1    | 0 | NA | 0 | NA | 0 | NA | 0 | NA | 0 | NA |
| 6_qbl_hap2 | 858241    | 827282    | -1 | NM_021905    | GABBR1    | 0 | NA | 0 | NA | 0 | NA | 0 | NA | 0 | NA |
| 6_qbl_hap2 | 882074    | 897416    | 1  | NM_001008228 | MOG       | 0 | NA | 0 | NA | 0 | NA | 0 | NA | 0 | NA |
| 6_qbl_hap2 | 882074    | 897416    | 1  | NM_001008229 | MOG       | 0 | NA | 0 | NA | 0 | NA | 0 | NA | 0 | NA |
| 6_qbl_hap2 | 882074    | 897416    | 1  | NM_002433    | MOG       | 0 | NA | 0 | NA | 0 | NA | 0 | NA | 0 | NA |
| 6_qbl_hap2 | 882074    | 897416    | 1  | NM_206809    | MOG       | 0 | NA | 0 | NA | 0 | NA | 0 | NA | 0 | NA |
| 6_qbl_hap2 | 882074    | 897416    | 1  | NM_206810    | MOG       | 0 | NA | 0 | NA | 0 | NA | 0 | NA | 0 | NA |
| 6_qbl_hap2 | 882074    | 897416    | 1  | NM_206811    | MOG       | 0 | NA | 0 | NA | 0 | NA | 0 | NA | 0 | NA |
| 6_qbl_hap2 | 882074    | 897416    | 1  | NM_206812    | MOG       | 0 | NA | 0 | NA | 0 | NA | 0 | NA | 0 | NA |
| 6_qbl_hap2 | 882074    | 897416    | 1  | NM_206813    | MOG       | 0 | NA | 0 | NA | 0 | NA | 0 | NA | 0 | NA |
| 6_qbl_hap2 | 882074    | 897416    | 1  | NM_206814    | MOG       | 0 | NA | 0 | NA | 0 | NA | 0 | NA | 0 | NA |
| 6_qbl_hap2 | 906146    | 897526    | -1 | NM_001109809 | ZFP57     | 0 | NA | 0 | NA | 0 | NA | 0 | NA | 0 | NA |
| 6_qbl_hap2 | 945922    | 949109    | 1  | NM_001098478 | HLA-F     | 0 | NA | 0 | NA | 0 | NA | 0 | NA | 0 | NA |
| 6_qbl_hap2 | 945922    | 949109    | 1  | NM_018950    | HLA-F     | 0 | NA | 0 | NA | 0 | NA | 0 | NA | 0 | NA |
| 6_qbl_hap2 | 945922    | 949881    | 1  | NM_001098479 | HLA-F     | 0 | NA | 0 | NA | 0 | NA | 0 | NA | 0 | NA |
| 6_qbl_hap2 | 1049287   | 1053445   | 1  | NM_002127    | HLA-G     | 0 | NA | 0 | NA | 0 | NA | 0 | NA | 0 | NA |
| 6_qbl_hap2 | 1157050   | 1159804   | 1  | NM_001080840 | HLA-A29.1 | 0 | NA | 0 | NA | 0 | NA | 0 | NA | 0 | NA |
| 6_qbl_hap2 | 1157055   | 1160394   | 1  | NM_002116    | HLA-A     | 0 | NA | 0 | NA | 0 | NA | 0 | NA | 0 | NA |
| 6_qbl_hap2 | 1189630   | 1192919   | 1  | NM_005844    | HCG9      | 0 | NA | 0 | NA | 0 | NA | 0 | NA | 0 | NA |
| 6_qbl_hap2 | 1275983   | 1279613   | 1  | NM_014596    | ZNRD1     | 0 | NA | 0 | NA | 0 | NA | 0 | NA | 0 | NA |
| 6_qbl_hap2 | 1275983   | 1279613   | 1  | NM_170763    | ZNRD1     | 0 | NA | 0 | NA | 0 | NA | 0 | NA | 0 | NA |
| 6_qbl_hap2 | 1281857   | 1285034   | 1  | NM_021959    | PPP1R11   | 0 | NA | 0 | NA | 0 | NA | 0 | NA | 0 | NA |
| 6_qbl_hap2 | 1290549   | 1284968   | -1 | NM_025236    | RNF39     | 0 | NA | 0 | NA | 0 | NA | 0 | NA | 0 | NA |
| 6_qbl_hap2 | 1290549   | 1284968   | -1 | NM_170769    | RNF39     | 0 | NA | 0 | NA | 0 | NA | 0 | NA | 0 | NA |
| 6_qbl_hap2 | 1327774   | 1317586   | -1 | NM_007028    | TRIM31    | 0 | NA | 0 | NA | 0 | NA | 0 | NA | 0 | NA |
| 6_qbl_hap2 | 1351403   | 1363407   | 1  | NM_138700    | TRIM40    | 0 | NA | 0 | NA | 0 | NA | 0 | NA | 0 | NA |
| 6_qbl_hap2 | 1375605   | 1366618   | -1 | NM_006778    | TRIM10    | 0 | NA | 0 | NA | 0 | NA | 0 | NA | 0 | NA |
| 6_qbl_hap2 | 1375605   | 1366618   | -1 | NM_052828    | TRIM10    | 0 | NA | 0 | NA | 0 | NA | 0 | NA | 0 | NA |
| 6_qbl_hap2 | 137876    | 1387367   | 1  | NM_033229    | TRIM15    | 0 | NA | 0 | NA | 0 | NA | 0 | NA | 0 | NA |
| 6_qbl_hap2 | 1428021   | 1399093   | -1 | NM_003449    | TRIM26    | 0 | NA | 0 | NA | 0 | NA | 0 | NA | 0 | NA |
| 6_qbl_hap2 | 1474234   | 1481589   | 1  | NM_001004349 | FLJ45422  | 0 | NA | 0 | NA | 0 | NA | 0 | NA | 0 | NA |
| 6_qbl_hap2 | 1541880   | 1558354   | 1  | NM_021253    | TRIM39    | 0 | NA | 0 | NA | 0 | NA | 0 | NA | 0 | NA |
| 6_qbl_hap2 | 1541880   | 1558354   | 1  | NM_172016    | TRIM39    | 0 | NA | 0 | NA | 0 | NA | 0 | NA | 0 | NA |
| 6_qbl_hap2 | 1559784   | 1561480   | 1  | NM_024839    | RPP21     | 0 | NA | 0 | NA | 0 | NA | 0 | NA | 0 | NA |
| 6_qbl_hap2 | 1704132   | 1707955   | 1  | NM_005516    | HLA-E     | 0 | NA | 0 | NA | 0 | NA | 0 | NA | 0 | NA |
| 6_qbl_hap2 | 1771606   | 1779031   | 1  | NM_001077497 | PRR3      | 0 | NA | 0 | NA | 0 | NA | 0 | NA | 0 | NA |
| 6_qbl_hap2 | 1771606   | 1779031   | 1  | NM_025263    | PRR3      | 0 | NA | 0 | NA | 0 | NA | 0 | NA | 0 | NA |
| 6_qbl_hap2 | 1771859   | 1760543   | -1 | NM_005275    | GNL1      | 0 | NA | 0 | NA | 0 | NA | 0 | NA | 0 | NA |
| 6_qbl_hap2 | 1786022   | 1806158   | 1  | NM_001025091 | ABCF1     | 0 | NA | 0 | NA | 0 | NA | 0 | NA | 0 | NA |
| 6_qbl_hap2 | 1786022   | 1806158   | 1  | NM_001090    | ABCF1     | 0 | NA | 0 | NA | 0 | NA | 0 | NA | 0 | NA |
| 6_qbl_hap2 | 1831874   | 1815036   | -1 | NM_002714    | PPP1R10   | 0 | NA | 0 | NA | 0 | NA | 0 | NA | 0 | NA |
| 6_qbl_hap2 | 1832339   | 1841028   | 1  | NM_014046    | MRPS18B   | 0 | NA | 0 | NA | 0 | NA | 0 | NA | 0 | NA |
| 6_qbl_hap2 | 1841466   | 1859302   | 1  | NM_024909    | C6orf134  | 0 | NA | 0 | NA | 0 | NA | 0 | NA | 0 | NA |
| 6_qbl_hap2 | 1861654   | 1867830   | 1  | NM_001109938 | C6orf136  | 0 | NA | 0 | NA | 0 | NA | 0 | NA | 0 | NA |

|            |         |         |    |              |          |   |    |   |    |   |    |   |    |   |    |
|------------|---------|---------|----|--------------|----------|---|----|---|----|---|----|---|----|---|----|
| 6_qbl_hap2 | 1862051 | 1867830 | 1  | NM_145029    | C6orf136 | 0 | NA | 0 | NA | 0 | NA | 0 | NA | 0 | NA |
| 6_qbl_hap2 | 1887636 | 1867754 | -1 | NM_003587    | DHX16    | 0 | NA | 0 | NA | 0 | NA | 0 | NA | 0 | NA |
| 6_qbl_hap2 | 1900864 | 1891045 | -1 | NM_133471    | KIAA1949 | 0 | NA | 0 | NA | 0 | NA | 0 | NA | 0 | NA |
| 6_qbl_hap2 | 1905649 | 1902705 | -1 | NM_007243    | NRM      | 0 | NA | 0 | NA | 0 | NA | 0 | NA | 0 | NA |
| 6_qbl_hap2 | 1932336 | 1914462 | -1 | NM_014641    | MDC1     | 0 | NA | 0 | NA | 0 | NA | 0 | NA | 0 | NA |
| 6_qbl_hap2 | 1935034 | 1940074 | 1  | NM_178014    | TUBB     | 0 | NA | 0 | NA | 0 | NA | 0 | NA | 0 | NA |
| 6_qbl_hap2 | 1957329 | 1942389 | -1 | NM_005803    | FLOT1    | 0 | NA | 0 | NA | 0 | NA | 0 | NA | 0 | NA |
| 6_qbl_hap2 | 1959203 | 1957851 | -1 | NM_003897    | IER3     | 0 | NA | 0 | NA | 0 | NA | 0 | NA | 0 | NA |
| 6_qbl_hap2 | 2098794 | 2114869 | 1  | NM_001954    | DDR1     | 0 | NA | 0 | NA | 0 | NA | 0 | NA | 0 | NA |
| 6_qbl_hap2 | 2099260 | 2114869 | 1  | NM_013993    | DDR1     | 0 | NA | 0 | NA | 0 | NA | 0 | NA | 0 | NA |
| 6_qbl_hap2 | 2103398 | 2114869 | 1  | NM_013994    | DDR1     | 0 | NA | 0 | NA | 0 | NA | 0 | NA | 0 | NA |
| 6_qbl_hap2 | 2122908 | 2128812 | 1  | NM_001517    | GTF2H4   | 0 | NA | 0 | NA | 0 | NA | 0 | NA | 0 | NA |
| 6_qbl_hap2 | 2128913 | 2141176 | 1  | NM_020442    | VARS2    | 0 | NA | 0 | NA | 0 | NA | 0 | NA | 0 | NA |
| 6_qbl_hap2 | 2146870 | 2146044 | -1 | NM_205854    | SFTPG    | 0 | NA | 0 | NA | 0 | NA | 0 | NA | 0 | NA |
| 6_qbl_hap2 | 2166477 | 2168916 | 1  | NM_080870    | DPCR1    | 0 | NA | 0 | NA | 0 | NA | 0 | NA | 0 | NA |
| 6_qbl_hap2 | 2198416 | 2204807 | 1  | NM_001010909 | C6orf205 | 0 | NA | 0 | NA | 0 | NA | 0 | NA | 0 | NA |
| 6_qbl_hap2 | 2330097 | 2328764 | -1 | NM_014070    | C6orf15  | 0 | NA | 0 | NA | 0 | NA | 0 | NA | 0 | NA |
| 6_qbl_hap2 | 2332387 | 2357628 | 1  | NM_014068    | PSORS1C1 | 0 | NA | 0 | NA | 0 | NA | 0 | NA | 0 | NA |
| 6_qbl_hap2 | 2337991 | 2332634 | -1 | NM_001264    | CDSN     | 0 | NA | 0 | NA | 0 | NA | 0 | NA | 0 | NA |
| 6_qbl_hap2 | 2356919 | 2355104 | -1 | NM_014069    | PSORS1C2 | 0 | NA | 0 | NA | 0 | NA | 0 | NA | 0 | NA |
| 6_qbl_hap2 | 2375364 | 2359996 | -1 | NM_001105563 | CCHCR1   | 0 | NA | 0 | NA | 0 | NA | 0 | NA | 0 | NA |
| 6_qbl_hap2 | 2375364 | 2359996 | -1 | NM_001105564 | CCHCR1   | 0 | NA | 0 | NA | 0 | NA | 0 | NA | 0 | NA |
| 6_qbl_hap2 | 2375813 | 2359996 | -1 | NM_019052    | CCHCR1   | 0 | NA | 0 | NA | 0 | NA | 0 | NA | 0 | NA |
| 6_qbl_hap2 | 2376100 | 2381791 | 1  | NM_001077511 | TCF19    | 0 | NA | 0 | NA | 0 | NA | 0 | NA | 0 | NA |
| 6_qbl_hap2 | 2376100 | 2381791 | 1  | NM_007109    | TCF19    | 0 | NA | 0 | NA | 0 | NA | 0 | NA | 0 | NA |
| 6_qbl_hap2 | 2383836 | 2381912 | -1 | NM_203289    | POU5F1   | 0 | NA | 0 | NA | 0 | NA | 0 | NA | 0 | NA |
| 6_qbl_hap2 | 2388267 | 2381912 | -1 | NM_002701    | POU5F1   | 0 | NA | 0 | NA | 0 | NA | 0 | NA | 0 | NA |
| 6_qbl_hap2 | 2415387 | 2421539 | 1  | NM_181717    | HCG27    | 0 | NA | 0 | NA | 0 | NA | 0 | NA | 0 | NA |
| 6_qbl_hap2 | 2487042 | 2483726 | -1 | NM_002117    | HLA-C    | 0 | NA | 0 | NA | 0 | NA | 0 | NA | 0 | NA |
| 6_qbl_hap2 | 2572452 | 2569111 | -1 | NM_005514    | HLA-B    | 0 | NA | 0 | NA | 0 | NA | 0 | NA | 0 | NA |
| 6_qbl_hap2 | 2618763 | 2630581 | 1  | NM_000247    | MICA     | 0 | NA | 0 | NA | 0 | NA | 0 | NA | 0 | NA |
| 6_qbl_hap2 | 2713520 | 2726545 | 1  | NM_005931    | MICB     | 0 | NA | 0 | NA | 0 | NA | 0 | NA | 0 | NA |
| 6_qbl_hap2 | 2744366 | 2745636 | 1  | NM_001011700 | MCCD1    | 0 | NA | 0 | NA | 0 | NA | 0 | NA | 0 | NA |
| 6_qbl_hap2 | 2757847 | 2745623 | -1 | NM_004640    | BAT1     | 0 | NA | 0 | NA | 0 | NA | 0 | NA | 0 | NA |
| 6_qbl_hap2 | 2757847 | 2745623 | -1 | NM_080598    | BAT1     | 0 | NA | 0 | NA | 0 | NA | 0 | NA | 0 | NA |
| 6_qbl_hap2 | 2762245 | 2759861 | -1 | NM_130463    | ATP6V1G2 | 0 | NA | 0 | NA | 0 | NA | 0 | NA | 0 | NA |
| 6_qbl_hap2 | 2762245 | 2759861 | -1 | NM_138282    | ATP6V1G2 | 0 | NA | 0 | NA | 0 | NA | 0 | NA | 0 | NA |
| 6_qbl_hap2 | 2762988 | 2774216 | 1  | NM_005007    | NFKBIL1  | 0 | NA | 0 | NA | 0 | NA | 0 | NA | 0 | NA |
| 6_qbl_hap2 | 2787675 | 2789683 | 1  | NM_000595    | LTA      | 0 | NA | 0 | NA | 0 | NA | 0 | NA | 0 | NA |
| 6_qbl_hap2 | 2790934 | 2793699 | 1  | NM_000594    | TNF      | 0 | NA | 0 | NA | 0 | NA | 0 | NA | 0 | NA |
| 6_qbl_hap2 | 2797789 | 2795922 | -1 | NM_002341    | LTB      | 0 | NA | 0 | NA | 0 | NA | 0 | NA | 0 | NA |
| 6_qbl_hap2 | 2797789 | 2795922 | -1 | NM_009588    | LTB      | 0 | NA | 0 | NA | 0 | NA | 0 | NA | 0 | NA |
| 6_qbl_hap2 | 2801557 | 2804275 | 1  | NM_007161    | LST1     | 0 | NA | 0 | NA | 0 | NA | 0 | NA | 0 | NA |
| 6_qbl_hap2 | 2801557 | 2804275 | 1  | NM_205838    | LST1     | 0 | NA | 0 | NA | 0 | NA | 0 | NA | 0 | NA |
| 6_qbl_hap2 | 2801557 | 2804275 | 1  | NM_205839    | LST1     | 0 | NA | 0 | NA | 0 | NA | 0 | NA | 0 | NA |
| 6_qbl_hap2 | 2801557 | 2804275 | 1  | NM_205840    | LST1     | 0 | NA | 0 | NA | 0 | NA | 0 | NA | 0 | NA |
| 6_qbl_hap2 | 2802211 | 2804275 | 1  | NM_205837    | LST1     | 0 | NA | 0 | NA | 0 | NA | 0 | NA | 0 | NA |
| 6_qbl_hap2 | 2808349 | 2804260 | -1 | NM_147130    | NCR3     | 0 | NA | 0 | NA | 0 | NA | 0 | NA | 0 | NA |
| 6_qbl_hap2 | 2830620 | 2832386 | 1  | NM_001623    | AIF1     | 0 | NA | 0 | NA | 0 | NA | 0 | NA | 0 | NA |
| 6_qbl_hap2 | 2831376 | 2832386 | 1  | NM_032955    | AIF1     | 0 | NA | 0 | NA | 0 | NA | 0 | NA | 0 | NA |
| 6_qbl_hap2 | 2836037 | 2853138 | 1  | NM_080686    | BAT2     | 0 | NA | 0 | NA | 0 | NA | 0 | NA | 0 | NA |
| 6_qbl_hap2 | 2867755 | 2854383 | -1 | NM_001098534 | BAT3     | 0 | NA | 0 | NA | 0 | NA | 0 | NA | 0 | NA |
| 6_qbl_hap2 | 2868062 | 2854383 | -1 | NM_004639    | BAT3     | 0 | NA | 0 | NA | 0 | NA | 0 | NA | 0 | NA |
| 6_qbl_hap2 | 2868062 | 2854383 | -1 | NM_080702    | BAT3     | 0 | NA | 0 | NA | 0 | NA | 0 | NA | 0 | NA |
| 6_qbl_hap2 | 2868062 | 2854383 | -1 | NM_080703    | BAT3     | 0 | NA | 0 | NA | 0 | NA | 0 | NA | 0 | NA |
| 6_qbl_hap2 | 2871254 | 2873571 | 1  | NM_019101    | APOM     | 0 | NA | 0 | NA | 0 | NA | 0 | NA | 0 | NA |
| 6_qbl_hap2 | 2876133 | 2873658 | -1 | NM_021184    | C6orf47  | 0 | NA | 0 | NA | 0 | NA | 0 | NA | 0 | NA |
| 6_qbl_hap2 | 2880753 | 2877450 | -1 | NM_033177    | BAT4     | 0 | NA | 0 | NA | 0 | NA | 0 | NA | 0 | NA |
| 6_qbl_hap2 | 2881246 | 2885433 | 1  | NM_001320    | CSNK2B   | 0 | NA | 0 | NA | 0 | NA | 0 | NA | 0 | NA |
| 6_qbl_hap2 | 2888317 | 2887817 | 1  | NM_021221    | LY6G5B   | 0 | NA | 0 | NA | 0 | NA | 0 | NA | 0 | NA |
| 6_qbl_hap2 | 2895732 | 2892050 | -1 | NM_025262    | LY6G5C   | 0 | NA | 0 | NA | 0 | NA | 0 | NA | 0 | NA |
| 6_qbl_hap2 | 2918686 | 2902325 | -1 | NM_021160    | BAT5     | 0 | NA | 0 | NA | 0 | NA | 0 | NA | 0 | NA |
| 6_qbl_hap2 | 2922266 | 2925986 | 1  | NM_001003693 | C6orf21  | 0 | NA | 0 | NA | 0 | NA | 0 | NA | 0 | NA |
| 6_qbl_hap2 | 2930718 | 2933161 | 1  | NM_021246    | LY6G6D   | 0 | NA | 0 | NA | 0 | NA | 0 | NA | 0 | NA |
| 6_qbl_hap2 | 2937090 | 2934004 | -1 | NM_025261    | LY6G6C   | 0 | NA | 0 | NA | 0 | NA | 0 | NA | 0 | NA |

|            |         |         |    |              |          |   |    |   |    |   |    |   |    |   |    |
|------------|---------|---------|----|--------------|----------|---|----|---|----|---|----|---|----|---|----|
| 6_qbl_hap2 | 2938737 | 2940428 | 1  | NM_025260    | C6orf25  | 0 | NA | 0 | NA | 0 | NA | 0 | NA | 0 | NA |
| 6_qbl_hap2 | 2938737 | 2940428 | 1  | NM_138272    | C6orf25  | 0 | NA | 0 | NA | 0 | NA | 0 | NA | 0 | NA |
| 6_qbl_hap2 | 2938737 | 2940428 | 1  | NM_138273    | C6orf25  | 0 | NA | 0 | NA | 0 | NA | 0 | NA | 0 | NA |
| 6_qbl_hap2 | 2938737 | 2940428 | 1  | NM_138274    | C6orf25  | 0 | NA | 0 | NA | 0 | NA | 0 | NA | 0 | NA |
| 6_qbl_hap2 | 2938737 | 2940428 | 1  | NM_138275    | C6orf25  | 0 | NA | 0 | NA | 0 | NA | 0 | NA | 0 | NA |
| 6_qbl_hap2 | 2938737 | 2940428 | 1  | NM_138277    | C6orf25  | 0 | NA | 0 | NA | 0 | NA | 0 | NA | 0 | NA |
| 6_qbl_hap2 | 2945616 | 2942393 | -1 | NM_013974    | DDAH2    | 0 | NA | 0 | NA | 0 | NA | 0 | NA | 0 | NA |
| 6_qbl_hap2 | 2951926 | 2945934 | -1 | NM_001288    | CLIC1    | 0 | NA | 0 | NA | 0 | NA | 0 | NA | 0 | NA |
| 6_qbl_hap2 | 2955358 | 2976981 | 1  | NM_002441    | MSH5     | 0 | NA | 0 | NA | 0 | NA | 0 | NA | 0 | NA |
| 6_qbl_hap2 | 2955358 | 2976981 | 1  | NM_025259    | MSH5     | 0 | NA | 0 | NA | 0 | NA | 0 | NA | 0 | NA |
| 6_qbl_hap2 | 2955358 | 2976981 | 1  | NM_172165    | MSH5     | 0 | NA | 0 | NA | 0 | NA | 0 | NA | 0 | NA |
| 6_qbl_hap2 | 2955358 | 2976981 | 1  | NM_172166    | MSH5     | 0 | NA | 0 | NA | 0 | NA | 0 | NA | 0 | NA |
| 6_qbl_hap2 | 3011305 | 3006978 | -1 | NM_006295    | VAR5     | 0 | NA | 0 | NA | 0 | NA | 0 | NA | 0 | NA |
| 6_qbl_hap2 | 3022327 | 3012765 | -1 | NM_021177    | LSM2     | 0 | NA | 0 | NA | 0 | NA | 0 | NA | 0 | NA |
| 6_qbl_hap2 | 3030429 | 3024990 | -1 | NM_005527    | HSPA1L   | 0 | NA | 0 | NA | 0 | NA | 0 | NA | 0 | NA |
| 6_qbl_hap2 | 3030930 | 3033313 | 1  | NM_005345    | HSPA1A   | 0 | NA | 0 | NA | 0 | NA | 0 | NA | 0 | NA |
| 6_qbl_hap2 | 3043109 | 3045633 | 1  | NM_005346    | HSPA1B   | 0 | NA | 0 | NA | 0 | NA | 0 | NA | 0 | NA |
| 6_qbl_hap2 | 3050298 | 3055143 | 1  | NM_00104037  | C6orf48  | 0 | NA | 0 | NA | 0 | NA | 0 | NA | 0 | NA |
| 6_qbl_hap2 | 3050298 | 3055143 | 1  | NM_00104038  | C6orf48  | 0 | NA | 0 | NA | 0 | NA | 0 | NA | 0 | NA |
| 6_qbl_hap2 | 3078421 | 3074689 | -1 | NM_000434    | NEU1     | 0 | NA | 0 | NA | 0 | NA | 0 | NA | 0 | NA |
| 6_qbl_hap2 | 3094562 | 3078707 | -1 | NM_025257    | SLC44A4  | 0 | NA | 0 | NA | 0 | NA | 0 | NA | 0 | NA |
| 6_qbl_hap2 | 3113202 | 3095275 | -1 | NM_006709    | EHMT2    | 0 | NA | 0 | NA | 0 | NA | 0 | NA | 0 | NA |
| 6_qbl_hap2 | 3113202 | 3095275 | -1 | NM_025256    | EHMT2    | 0 | NA | 0 | NA | 0 | NA | 0 | NA | 0 | NA |
| 6_qbl_hap2 | 3117510 | 3115132 | -1 | NM_181842    | ZBTB12   | 0 | NA | 0 | NA | 0 | NA | 0 | NA | 0 | NA |
| 6_qbl_hap2 | 3143233 | 3161189 | 1  | NM_000063    | C2       | 0 | NA | 0 | NA | 0 | NA | 0 | NA | 0 | NA |
| 6_qbl_hap2 | 3161513 | 3167601 | 1  | NM_001710    | CFB      | 0 | NA | 0 | NA | 0 | NA | 0 | NA | 0 | NA |
| 6_qbl_hap2 | 3174316 | 3185288 | 1  | NM_006929    | SKIV2L   | 0 | NA | 0 | NA | 0 | NA | 0 | NA | 0 | NA |
| 6_qbl_hap2 | 3174600 | 3167604 | -1 | NM_002904    | RDBP     | 0 | NA | 0 | NA | 0 | NA | 0 | NA | 0 | NA |
| 6_qbl_hap2 | 3187381 | 3196960 | 1  | NM_004197    | STK19    | 0 | NA | 0 | NA | 0 | NA | 0 | NA | 0 | NA |
| 6_qbl_hap2 | 3187381 | 3196960 | 1  | NM_032454    | STK19    | 0 | NA | 0 | NA | 0 | NA | 0 | NA | 0 | NA |
| 6_qbl_hap2 | 3187768 | 3185323 | -1 | NM_005510    | DOM3Z    | 0 | NA | 0 | NA | 0 | NA | 0 | NA | 0 | NA |
| 6_qbl_hap2 | 3197570 | 3218195 | 1  | NM_007293    | C4A      | 0 | NA | 0 | NA | 0 | NA | 0 | NA | 0 | NA |
| 6_qbl_hap2 | 3197570 | 3218196 | 1  | NM_001002029 | C4B      | 0 | NA | 0 | NA | 0 | NA | 0 | NA | 0 | NA |
| 6_qbl_hap2 | 3221082 | 3224420 | 1  | NM_000500    | CYP21A2  | 0 | NA | 0 | NA | 0 | NA | 0 | NA | 0 | NA |
| 6_qbl_hap2 | 3228906 | 3223932 | -1 | NM_032470    | TNXB     | 0 | NA | 0 | NA | 0 | NA | 0 | NA | 0 | NA |
| 6_qbl_hap2 | 3270193 | 3223932 | -1 | NM_019105    | TNXB     | 0 | NA | 0 | NA | 0 | NA | 0 | NA | 0 | NA |
| 6_qbl_hap2 | 3334683 | 3331102 | -1 | NM_030651    | PRRT1    | 0 | NA | 0 | NA | 0 | NA | 0 | NA | 0 | NA |
| 6_qbl_hap2 | 3336260 | 3346419 | 1  | NM_138717    | PPT2     | 0 | NA | 0 | NA | 0 | NA | 0 | NA | 0 | NA |
| 6_qbl_hap2 | 3336581 | 3346419 | 1  | NM_005155    | PPT2     | 0 | NA | 0 | NA | 0 | NA | 0 | NA | 0 | NA |
| 6_qbl_hap2 | 3347371 | 3351029 | 1  | NM_030652    | EGFL8    | 0 | NA | 0 | NA | 0 | NA | 0 | NA | 0 | NA |
| 6_qbl_hap2 | 3358866 | 3350955 | -1 | NM_006411    | AGPAT1   | 0 | NA | 0 | NA | 0 | NA | 0 | NA | 0 | NA |
| 6_qbl_hap2 | 3360809 | 3350955 | -1 | NM_032741    | AGPAT1   | 0 | NA | 0 | NA | 0 | NA | 0 | NA | 0 | NA |
| 6_qbl_hap2 | 3361128 | 3363537 | 1  | NM_006913    | RNF5     | 0 | NA | 0 | NA | 0 | NA | 0 | NA | 0 | NA |
| 6_qbl_hap2 | 3366990 | 3363712 | -1 | NM_001136    | AGER     | 0 | NA | 0 | NA | 0 | NA | 0 | NA | 0 | NA |
| 6_qbl_hap2 | 3366990 | 3363712 | -1 | NM_172197    | AGER     | 0 | NA | 0 | NA | 0 | NA | 0 | NA | 0 | NA |
| 6_qbl_hap2 | 3372928 | 3367476 | -1 | NM_002586    | PBX2     | 0 | NA | 0 | NA | 0 | NA | 0 | NA | 0 | NA |
| 6_qbl_hap2 | 3378265 | 3373507 | -1 | NM_022107    | GPSM3    | 0 | NA | 0 | NA | 0 | NA | 0 | NA | 0 | NA |
| 6_qbl_hap2 | 3406812 | 3377584 | -1 | NM_004557    | NOTCH4   | 0 | NA | 0 | NA | 0 | NA | 0 | NA | 0 | NA |
| 6_qbl_hap2 | 3554471 | 3475640 | -1 | NM_006781    | C6orf10  | 0 | NA | 0 | NA | 0 | NA | 0 | NA | 0 | NA |
| 6_qbl_hap2 | 3589712 | 3577317 | -1 | NM_019602    | BTNL2    | 0 | NA | 0 | NA | 0 | NA | 0 | NA | 0 | NA |
| 6_qbl_hap2 | 3622461 | 3627646 | 1  | NM_019111    | HLA-DRA  | 0 | NA | 0 | NA | 0 | NA | 0 | NA | 0 | NA |
| 6_qbl_hap2 | 3751908 | 3674895 | -1 | NM_002124    | HLA-DRB1 | 0 | NA | 0 | NA | 0 | NA | 0 | NA | 0 | NA |
| 6_qbl_hap2 | 3895192 | 3901275 | 1  | NM_020056    | HLA-DQA2 | 0 | NA | 0 | NA | 0 | NA | 0 | NA | 0 | NA |
| 6_qbl_hap2 | 3992602 | 3975663 | -1 | NM_018833    | TAP2     | 0 | NA | 0 | NA | 0 | NA | 0 | NA | 0 | NA |
| 6_qbl_hap2 | 3992602 | 3979239 | -1 | NM_000544    | TAP2     | 0 | NA | 0 | NA | 0 | NA | 0 | NA | 0 | NA |
| 6_qbl_hap2 | 3997870 | 3994547 | -1 | NM_148919    | PSMB8    | 0 | NA | 0 | NA | 0 | NA | 0 | NA | 0 | NA |
| 6_qbl_hap2 | 3998766 | 3994547 | -1 | NM_004159    | PSMB8    | 0 | NA | 0 | NA | 0 | NA | 0 | NA | 0 | NA |
| 6_qbl_hap2 | 4007802 | 3999039 | -1 | NM_000593    | TAP1     | 0 | NA | 0 | NA | 0 | NA | 0 | NA | 0 | NA |
| 6_qbl_hap2 | 4007991 | 4013683 | 1  | NM_002800    | PSMB9    | 0 | NA | 0 | NA | 0 | NA | 0 | NA | 0 | NA |
| 6_qbl_hap2 | 4007991 | 4013683 | 1  | NM_148954    | PSMB9    | 0 | NA | 0 | NA | 0 | NA | 0 | NA | 0 | NA |
| 6_qbl_hap2 | 4094890 | 4088488 | -1 | NM_002118    | HLA-DMB  | 0 | NA | 0 | NA | 0 | NA | 0 | NA | 0 | NA |
| 6_qbl_hap2 | 4106929 | 4102467 | -1 | NM_006120    | HLA-DMA  | 0 | NA | 0 | NA | 0 | NA | 0 | NA | 0 | NA |
| 6_qbl_hap2 | 4122527 | 4135366 | 1  | NM_005104    | BRD2     | 0 | NA | 0 | NA | 0 | NA | 0 | NA | 0 | NA |
| 6_qbl_hap2 | 4124768 | 4135366 | 1  | NM_001113182 | BRD2     | 0 | NA | 0 | NA | 0 | NA | 0 | NA | 0 | NA |
| 6_qbl_hap2 | 4163429 | 4157999 | -1 | NM_002119    | HLA-DOA  | 0 | NA | 0 | NA | 0 | NA | 0 | NA | 0 | NA |

|            |         |         |    |              |          |   |    |   |    |   |    |   |    |   |    |
|------------|---------|---------|----|--------------|----------|---|----|---|----|---|----|---|----|---|----|
| 6_qbl_hap2 | 4227776 | 4219191 | -1 | NM_033554    | HLA-DPA1 | 0 | NA | 0 | NA | 0 | NA | 0 | NA | 0 | NA |
| 6_qbl_hap2 | 4230157 | 4241376 | 1  | NM_002121    | HLA-DPB1 | 0 | NA | 0 | NA | 0 | NA | 0 | NA | 0 | NA |
| 6_qbl_hap2 | 4346414 | 4316638 | -1 | NM_080679    | COL11A2  | 0 | NA | 0 | NA | 0 | NA | 0 | NA | 0 | NA |
| 6_qbl_hap2 | 4346414 | 4316638 | -1 | NM_080680    | COL11A2  | 0 | NA | 0 | NA | 0 | NA | 0 | NA | 0 | NA |
| 6_qbl_hap2 | 4346414 | 4316638 | -1 | NM_080681    | COL11A2  | 0 | NA | 0 | NA | 0 | NA | 0 | NA | 0 | NA |
| 6_qbl_hap2 | 4354602 | 4347533 | -1 | NM_021976    | RXRB     | 0 | NA | 0 | NA | 0 | NA | 0 | NA | 0 | NA |
| 6_qbl_hap2 | 4354772 | 4358384 | 1  | NM_001077516 | SLC39A7  | 0 | NA | 0 | NA | 0 | NA | 0 | NA | 0 | NA |
| 6_qbl_hap2 | 4354772 | 4358384 | 1  | NM_006979    | SLC39A7  | 0 | NA | 0 | NA | 0 | NA | 0 | NA | 0 | NA |
| 6_qbl_hap2 | 4358588 | 4360781 | 1  | NM_014234    | HSD17B8  | 0 | NA | 0 | NA | 0 | NA | 0 | NA | 0 | NA |
| 6_qbl_hap2 | 4362459 | 4366673 | 1  | NM_002931    | RING1    | 0 | NA | 0 | NA | 0 | NA | 0 | NA | 0 | NA |
| 6_qbl_hap2 | 4425845 | 4404214 | -1 | NM_022553    | VPS52    | 0 | NA | 0 | NA | 0 | NA | 0 | NA | 0 | NA |
| 6_qbl_hap2 | 4426034 | 4430467 | 1  | NM_022551    | RPS18    | 0 | NA | 0 | NA | 0 | NA | 0 | NA | 0 | NA |
| 6_qbl_hap2 | 4431102 | 4432788 | 1  | NM_003782    | B3GALT4  | 0 | NA | 0 | NA | 0 | NA | 0 | NA | 0 | NA |
| 6_qbl_hap2 | 4443181 | 4433070 | -1 | NM_005452    | WDR46    | 0 | NA | 0 | NA | 0 | NA | 0 | NA | 0 | NA |
| 6_qbl_hap2 | 4443567 | 4444901 | 1  | NM_014260    | PFDN6    | 0 | NA | 0 | NA | 0 | NA | 0 | NA | 0 | NA |
| 6_qbl_hap2 | 4452925 | 4445625 | -1 | NM_004761    | RGL2     | 0 | NA | 0 | NA | 0 | NA | 0 | NA | 0 | NA |
| 6_qbl_hap2 | 4468182 | 4453658 | -1 | NM_003190    | TAPBP    | 0 | NA | 0 | NA | 0 | NA | 0 | NA | 0 | NA |
| 6_qbl_hap2 | 4468182 | 4457612 | -1 | NM_172208    | TAPBP    | 0 | NA | 0 | NA | 0 | NA | 0 | NA | 0 | NA |
| 6_qbl_hap2 | 4468182 | 4458241 | -1 | NM_172209    | TAPBP    | 0 | NA | 0 | NA | 0 | NA | 0 | NA | 0 | NA |
| 6_qbl_hap2 | 4471688 | 4468387 | -1 | NM_005453    | ZBTB22   | 0 | NA | 0 | NA | 0 | NA | 0 | NA | 0 | NA |
| 6_qbl_hap2 | 4476900 | 4472596 | -1 | NM_001350    | DAXX     | 0 | NA | 0 | NA | 0 | NA | 0 | NA | 0 | NA |
| 6_qbl_hap2 | 4545486 | 4563851 | 1  | NM_002263    | KIFC1    | 0 | NA | 0 | NA | 0 | NA | 0 | NA | 0 | NA |
| 7          | 288051  | 304059  | 1  | NM_020223    | FAM20C   | 1 | 11 | 1 | 12 | 1 | 14 | 0 | NA | 0 | NA |
| 7          | 526007  | 503422  | -1 | NM_002607    | PDGFA    | 1 | 13 | 1 | 12 | 0 | NA | 0 | NA | 0 | NA |
| 7          | 526007  | 503422  | -1 | NM_033023    | PDGFA    | 1 | 13 | 1 | 12 | 0 | NA | 0 | NA | 0 | NA |
| 7          | 718659  | 555912  | -1 | NM_002735    | PRKAR1B  | 1 | 11 | 1 | 12 | 0 | NA | 0 | NA | 0 | NA |
| 7          | 732863  | 792642  | 1  | NM_017802    | HEATR2   | 0 | NA | 1 | 12 | 0 | NA | 1 | 19 | 1 | 13 |
| 7          | 822777  | 881083  | 1  | NM_025154    | UNC84A   | 1 | 25 | 0 | NA | 1 | 22 | 0 | NA | 0 | NA |
| 7          | 882716  | 902597  | 1  | NM_015949    | C7orf20  | 0 | NA | 0 | NA | 1 | 16 | 0 | NA | 0 | NA |
| 7          | 960815  | 904062  | -1 | NM_006869    | CENTA1   | 0 | NA | 1 | 15 | 0 | NA | 0 | NA | 0 | NA |
| 7          | 981761  | 971011  | -1 | NM_001031617 | COX19    | 1 | 14 | 0 | NA | 0 | NA | 0 | NA | 0 | NA |
| 7          | 989360  | 995802  | 1  | NM_017781    | CYP2W1   | 1 | 14 | 0 | NA | 0 | NA | 0 | NA | 0 | NA |
| 7          | 1063666 | 1065423 | 1  | NM_138445    | GPR146   | 0 | NA | 0 | NA | 0 | NA | 0 | NA | 0 | NA |
| 7          | 1092968 | 1099977 | 1  | NM_001039966 | GPER     | 1 | 14 | 0 | NA | 0 | NA | 0 | NA | 0 | NA |
| 7          | 1092968 | 1099977 | 1  | NM_001505    | GPER     | 1 | 14 | 0 | NA | 0 | NA | 0 | NA | 0 | NA |
| 7          | 1094248 | 1099977 | 1  | NM_001098201 | GPER     | 1 | 14 | 1 | 13 | 0 | NA | 0 | NA | 0 | NA |
| 7          | 1144402 | 1003167 | -1 | NM_032350    | C7orf50  | 0 | NA | 0 | NA | 0 | NA | 0 | NA | 0 | NA |
| 7          | 1166324 | 1159068 | -1 | NM_182491    | ZFAND2A  | 0 | NA | 1 | 15 | 1 | 13 | 0 | NA | 0 | NA |
| 7          | 1239179 | 1243139 | 1  | NM_001080461 | UNCX     | 0 | NA | 1 | 19 | 0 | NA | 0 | NA | 0 | NA |
| 7          | 1465635 | 1440520 | -1 | NM_182924    | MICALL2  | 1 | 12 | 0 | NA | 0 | NA | 1 | 11 | 0 | NA |
| 7          | 1510544 | 1476438 | -1 | NM_001080453 | INTS1    | 0 | NA | 0 | NA | 0 | NA | 1 | 11 | 0 | NA |
| 7          | 1536893 | 1549205 | 1  | NM_002360    | MAFK     | 0 | NA | 1 | 12 | 0 | NA | 0 | NA | 0 | NA |
| 7          | 1562592 | 1548396 | -1 | NM_001097620 | TMEM184A | 0 | NA | 0 | NA | 0 | NA | 0 | NA | 0 | NA |
| 7          | 1576155 | 1573494 | -1 | NM_032302    | PSMG3    | 1 | 17 | 0 | NA | 0 | NA | 0 | NA | 0 | NA |
| 7          | 2239109 | 1821953 | -1 | NM_001013836 | MAD1L1   | 0 | NA | 0 | NA | 1 | 12 | 0 | NA | 0 | NA |
| 7          | 2239109 | 1821953 | -1 | NM_001013837 | MAD1L1   | 0 | NA | 0 | NA | 1 | 12 | 0 | NA | 0 | NA |
| 7          | 2239109 | 1821953 | -1 | NM_003550    | MAD1L1   | 0 | NA | 0 | NA | 1 | 12 | 0 | NA | 0 | NA |
| 7          | 2248359 | 2240451 | -1 | NM_013393    | FTSJ2    | 0 | NA | 0 | NA | 1 | 12 | 0 | NA | 0 | NA |
| 7          | 2248382 | 2257306 | 1  | NM_002452    | NUDT1    | 0 | NA | 0 | NA | 1 | 12 | 0 | NA | 0 | NA |
| 7          | 2248382 | 2257306 | 1  | NM_198948    | NUDT1    | 0 | NA | 0 | NA | 1 | 12 | 0 | NA | 0 | NA |
| 7          | 2248382 | 2257306 | 1  | NM_198949    | NUDT1    | 0 | NA | 0 | NA | 1 | 12 | 0 | NA | 0 | NA |
| 7          | 2248421 | 2257306 | 1  | NM_198950    | NUDT1    | 0 | NA | 0 | NA | 1 | 12 | 0 | NA | 0 | NA |
| 7          | 2248421 | 2257306 | 1  | NM_198952    | NUDT1    | 0 | NA | 0 | NA | 1 | 12 | 0 | NA | 0 | NA |
| 7          | 2249065 | 2257306 | 1  | NM_198953    | NUDT1    | 0 | NA | 0 | NA | 1 | 12 | 0 | NA | 0 | NA |
| 7          | 2249065 | 2257306 | 1  | NM_198954    | NUDT1    | 0 | NA | 0 | NA | 1 | 12 | 0 | NA | 0 | NA |
| 7          | 2320625 | 2261164 | -1 | NM_013321    | SNX8     | 0 | NA | 1 | 15 | 0 | NA | 1 | 12 | 0 | NA |
| 7          | 2360999 | 2386903 | 1  | NM_001037283 | EIF3B    | 1 | 19 | 0 | NA | 1 | 13 | 0 | NA | 0 | NA |
| 7          | 2360999 | 2386903 | 1  | NM_003751    | EIF3B    | 1 | 19 | 0 | NA | 1 | 13 | 0 | NA | 0 | NA |
| 7          | 2409784 | 2440742 | 1  | NM_018641    | CHST12   | 0 | NA | 0 | NA | 1 | 16 | 0 | NA | 0 | NA |
| 7          | 2523910 | 2481297 | -1 | NM_001099942 | GRIFIN   | 0 | NA | 0 | NA | 1 | 12 | 0 | NA | 0 | NA |
| 7          | 2526004 | 2534589 | 1  | NM_001040167 | LFNG     | 1 | 12 | 0 | NA | 1 | 12 | 0 | NA | 0 | NA |
| 7          | 2526004 | 2535336 | 1  | NM_001040168 | LFNG     | 1 | 12 | 0 | NA | 1 | 12 | 0 | NA | 0 | NA |
| 7          | 2561672 | 2544038 | -1 | NM_152743    | C7orf27  | 1 | 12 | 0 | NA | 0 | NA | 0 | NA | 0 | NA |
| 7          | 2565157 | 2620894 | 1  | NM_001100390 | IQCE     | 1 | 12 | 0 | NA | 0 | NA | 0 | NA | 0 | NA |
| 7          | 2565157 | 2620894 | 1  | NM_152558    | IQCE     | 1 | 12 | 0 | NA | 0 | NA | 0 | NA | 0 | NA |

|   |          |          |    |              |           |   |    |   |    |   |    |   |    |   |    |
|---|----------|----------|----|--------------|-----------|---|----|---|----|---|----|---|----|---|----|
| 7 | 2638128  | 2670962  | 1  | NM_025250    | TTYH3     | 1 | 14 | 0 | NA | 1 | 23 | 0 | NA | 0 | NA |
| 7 | 2685688  | 2721595  | 1  | NM_133463    | AMZ1      | 0 | NA | 1 | 17 | 0 | NA | 0 | NA | 0 | NA |
| 7 | 2850485  | 2734266  | -1 | NM_007353    | GNA12     | 1 | 14 | 1 | 16 | 0 | NA | 0 | NA | 0 | NA |
| 7 | 3050105  | 2912294  | -1 | NM_032415    | CARD11    | 0 | NA | 1 | 12 | 0 | NA | 0 | NA | 0 | NA |
| 7 | 3307605  | 4275157  | 1  | NM_152744    | SDK1      | 0 | NA | 1 | 12 | 1 | 12 | 0 | NA | 0 | NA |
| 7 | 4135842  | 4275157  | 1  | NM_001079653 | SDK1      | 0 | NA | 1 | 13 | 0 | NA | 0 | NA | 0 | NA |
| 7 | 4688455  | 4777600  | 1  | NM_001037165 | FOXK1     | 0 | NA | 1 | 29 | 1 | 12 | 0 | NA | 0 | NA |
| 7 | 4781789  | 4797925  | 1  | NM_014855    | KIAA0415  | 0 | NA | 0 | NA | 0 | NA | 0 | NA | 0 | NA |
| 7 | 4868151  | 4863894  | -1 | NM_020144    | PAPOLB    | 0 | NA | 1 | 54 | 0 | NA | 0 | NA | 0 | NA |
| 7 | 4889861  | 4805265  | -1 | NM_018059    | RADIL     | 0 | NA | 1 | 12 | 0 | NA | 0 | NA | 0 | NA |
| 7 | 4965370  | 4912145  | -1 | NM_001100600 | MMD2      | 0 | NA | 1 | 13 | 0 | NA | 0 | NA | 0 | NA |
| 7 | 4965370  | 4912145  | -1 | NM_198403    | MMD2      | 0 | NA | 1 | 13 | 0 | NA | 0 | NA | 0 | NA |
| 7 | 5052078  | 5075645  | 1  | NM_021163    | RBAK      | 0 | NA | 0 | NA | 1 | 12 | 1 | 17 | 0 | NA |
| 7 | 5196360  | 5240012  | 1  | NM_001033518 | WIPI2     | 0 | NA | 1 | 20 | 0 | NA | 0 | NA | 0 | NA |
| 7 | 5196360  | 5240012  | 1  | NM_001033519 | WIPI2     | 0 | NA | 1 | 20 | 0 | NA | 0 | NA | 0 | NA |
| 7 | 5196360  | 5240012  | 1  | NM_015610    | WIPI2     | 0 | NA | 1 | 20 | 0 | NA | 0 | NA | 0 | NA |
| 7 | 5196360  | 5240012  | 1  | NM_016003    | WIPI2     | 0 | NA | 1 | 20 | 0 | NA | 0 | NA | 0 | NA |
| 7 | 5220425  | 5240012  | 1  | NM_001033520 | WIPI2     | 0 | NA | 0 | NA | 0 | NA | 0 | NA | 0 | NA |
| 7 | 5289086  | 5310230  | 1  | NM_001040661 | SLC29A4   | 0 | NA | 0 | NA | 0 | NA | 0 | NA | 0 | NA |
| 7 | 5289086  | 5310230  | 1  | NM_153247    | SLC29A4   | 0 | NA | 0 | NA | 0 | NA | 0 | NA | 0 | NA |
| 7 | 5429703  | 5312948  | -1 | NM_001080495 | TNRC18    | 1 | 16 | 0 | NA | 0 | NA | 0 | NA | 0 | NA |
| 7 | 5519925  | 5481953  | -1 | NM_024963    | FBXL18    | 0 | NA | 1 | 15 | 0 | NA | 0 | NA | 0 | NA |
| 7 | 5536758  | 5533304  | -1 | NM_001101    | ACTB      | 1 | 29 | 1 | 13 | 0 | NA | 1 | 11 | 0 | NA |
| 7 | 5598979  | 5612812  | 1  | NM_003088    | FSCN1     | 0 | NA | 0 | NA | 1 | 13 | 0 | NA | 0 | NA |
| 7 | 5787818  | 5626203  | -1 | NM_207111    | RNF216    | 0 | NA | 0 | NA | 0 | NA | 0 | NA | 0 | NA |
| 7 | 5787818  | 5626203  | -1 | NM_207116    | RNF216    | 0 | NA | 0 | NA | 0 | NA | 0 | NA | 0 | NA |
| 7 | 5886954  | 5892520  | 1  | NM_001097622 | OCM       | 0 | NA | 0 | NA | 0 | NA | 0 | NA | 0 | NA |
| 7 | 5904866  | 5932129  | 1  | NM_015622    | C7orf28A  | 0 | NA | 0 | NA | 0 | NA | 0 | NA | 0 | NA |
| 7 | 5976840  | 5932302  | -1 | NM_001099697 | LQC228194 | 0 | NA | 0 | NA | 0 | NA | 0 | NA | 0 | NA |
| 7 | 5976840  | 5932302  | -1 | NM_173565    | RSPH10B   | 0 | NA | 0 | NA | 0 | NA | 0 | NA | 0 | NA |
| 7 | 6015263  | 5979395  | -1 | NM_000535    | PMS2      | 0 | NA | 0 | NA | 0 | NA | 0 | NA | 0 | NA |
| 7 | 6015407  | 6029991  | 1  | NM_006303    | JTV1      | 0 | NA | 0 | NA | 0 | NA | 0 | NA | 0 | NA |
| 7 | 6065302  | 6029988  | -1 | NM_014413    | EIF2AK1   | 0 | NA | 0 | NA | 0 | NA | 0 | NA | 0 | NA |
| 7 | 6111075  | 6167720  | 1  | NM_032172    | USP42     | 0 | NA | 0 | NA | 1 | 13 | 1 | 11 | 0 | NA |
| 7 | 6278767  | 6167936  | -1 | NM_004227    | PSCD3     | 0 | NA | 1 | 15 | 1 | 14 | 0 | NA | 0 | NA |
| 7 | 6355115  | 6335564  | -1 | NM_001037163 | MGC12966  | 1 | 24 | 0 | NA | 0 | NA | 0 | NA | 0 | NA |
| 7 | 6380650  | 6410123  | 1  | NM_006908    | RAC1      | 1 | 11 | 0 | NA | 0 | NA | 0 | NA | 0 | NA |
| 7 | 6380650  | 6410123  | 1  | NM_018890    | RAC1      | 1 | 11 | 0 | NA | 0 | NA | 0 | NA | 0 | NA |
| 7 | 6380650  | 6410123  | 1  | NM_198829    | RAC1      | 1 | 11 | 0 | NA | 0 | NA | 0 | NA | 0 | NA |
| 7 | 6454110  | 6415284  | -1 | NM_139179    | DAGLB     | 1 | 17 | 0 | NA | 0 | NA | 0 | NA | 0 | NA |
| 7 | 6490374  | 6467236  | -1 | NM_001100603 | KDELR2    | 0 | NA | 1 | 17 | 0 | NA | 0 | NA | 0 | NA |
| 7 | 6490374  | 6467236  | -1 | NM_006854    | KDELR2    | 0 | NA | 1 | 17 | 0 | NA | 0 | NA | 0 | NA |
| 7 | 6584666  | 6595505  | 1  | NM_018106    | ZDHHC4    | 0 | NA | 0 | NA | 0 | NA | 0 | NA | 0 | NA |
| 7 | 6596439  | 6614880  | 1  | NM_024067    | C7orf26   | 0 | NA | 0 | NA | 0 | NA | 0 | NA | 0 | NA |
| 7 | 6713091  | 6694588  | -1 | NM_006956    | ZNF12     | 1 | 12 | 1 | 15 | 1 | 12 | 1 | 17 | 0 | NA |
| 7 | 6713091  | 6694588  | -1 | NM_016265    | ZNF12     | 1 | 12 | 1 | 15 | 1 | 12 | 1 | 17 | 0 | NA |
| 7 | 6760264  | 6804921  | 1  | NM_001099697 | LQC228194 | 0 | NA | 0 | NA | 0 | NA | 0 | NA | 0 | NA |
| 7 | 6760264  | 6804921  | 1  | NM_173565    | RSPH10B   | 0 | NA | 0 | NA | 0 | NA | 0 | NA | 0 | NA |
| 7 | 6832386  | 6805096  | -1 | NM_198097    | C7orf28B  | 1 | 25 | 0 | NA | 0 | NA | 0 | NA | 0 | NA |
| 7 | 7188770  | 7250506  | 1  | NM_020156    | C1GALT1   | 0 | NA | 0 | NA | 0 | NA | 1 | 14 | 0 | NA |
| 7 | 7541985  | 7364768  | -1 | NM_001037763 | COL28A1   | 0 | NA | 0 | NA | 0 | NA | 0 | NA | 0 | NA |
| 7 | 7573140  | 7613635  | 1  | NM_019005    | FLJ20323  | 0 | NA | 0 | NA | 0 | NA | 0 | NA | 0 | NA |
| 7 | 7724763  | 7643099  | -1 | NM_002947    | RPA3      | 0 | NA | 0 | NA | 0 | NA | 0 | NA | 0 | NA |
| 7 | 7974947  | 8095234  | 1  | NM_138426    | GLCC11    | 0 | NA | 0 | NA | 0 | NA | 0 | NA | 0 | NA |
| 7 | 8268207  | 8119339  | -1 | NM_022307    | ICA1      | 0 | NA | 1 | 12 | 0 | NA | 0 | NA | 0 | NA |
| 7 | 8268710  | 8119339  | -1 | NM_004968    | ICA1      | 0 | NA | 1 | 12 | 0 | NA | 0 | NA | 0 | NA |
| 7 | 8440109  | 8759118  | 1  | NM_152745    | NXPH1     | 1 | 16 | 1 | 13 | 0 | NA | 0 | NA | 0 | NA |
| 7 | 10946338 | 10939339 | -1 | NM_002489    | NDUFA4    | 1 | 54 | 0 | NA | 1 | 16 | 1 | 22 | 0 | NA |
| 7 | 10980040 | 11109807 | 1  | NM_014660    | PHF14     | 1 | 24 | 1 | 20 | 1 | 13 | 0 | NA | 0 | NA |
| 7 | 10980040 | 11175769 | 1  | NM_001007157 | PHF14     | 1 | 24 | 1 | 20 | 1 | 13 | 0 | NA | 0 | NA |
| 7 | 11838349 | 11380695 | -1 | NM_015204    | THSD7A    | 0 | NA | 0 | NA | 0 | NA | 0 | NA | 0 | NA |
| 7 | 12217450 | 12243408 | 1  | NM_018374    | TMEM106B  | 0 | NA | 0 | NA | 0 | NA | 0 | NA | 0 | NA |
| 7 | 12576664 | 12659753 | 1  | NM_001112706 | SCIN      | 0 | NA | 0 | NA | 0 | NA | 0 | NA | 0 | NA |
| 7 | 12595672 | 12659752 | 1  | NM_033128    | SCIN      | 0 | NA | 1 | 17 | 0 | NA | 0 | NA | 0 | NA |
| 7 | 12693005 | 12697083 | 1  | NM_001037164 | ARL4A     | 1 | 14 | 0 | NA | 1 | 14 | 0 | NA | 0 | NA |

|   |          |          |    |              |           |   |    |   |    |   |    |   |    |   |    |
|---|----------|----------|----|--------------|-----------|---|----|---|----|---|----|---|----|---|----|
| 7 | 12693005 | 12697083 | 1  | NM_212460    | ARL4A     | 1 | 14 | 0 | NA | 1 | 14 | 0 | NA | 0 | NA |
| 7 | 12693485 | 12697083 | 1  | NM_005738    | ARL4A     | 1 | 14 | 0 | NA | 1 | 14 | 0 | NA | 0 | NA |
| 7 | 13995289 | 13897380 | -1 | NM_004956    | ETV1      | 1 | 13 | 0 | NA | 1 | 12 | 0 | NA | 0 | NA |
| 7 | 14847413 | 14153769 | -1 | NM_004080    | DGKB      | 0 | NA | 0 | NA | 0 | NA | 0 | NA | 0 | NA |
| 7 | 14847413 | 14182130 | -1 | NM_145695    | DGKB      | 0 | NA | 0 | NA | 0 | NA | 0 | NA | 0 | NA |
| 7 | 15568165 | 15206467 | -1 | NM_001004320 | TMEM195   | 0 | NA | 0 | NA | 1 | 12 | 0 | NA | 0 | NA |
| 7 | 15692833 | 15617361 | -1 | NM_005924    | MEOX2     | 1 | 12 | 1 | 33 | 0 | NA | 0 | NA | 0 | NA |
| 7 | 16427472 | 16097682 | -1 | NM_001101417 | LOC729920 | 0 | NA | 0 | NA | 1 | 15 | 0 | NA | 0 | NA |
| 7 | 16427472 | 16097785 | -1 | NM_001101426 | LOC729920 | 0 | NA | 0 | NA | 1 | 15 | 0 | NA | 0 | NA |
| 7 | 16471999 | 16467630 | -1 | NM_015464    | SOSTDC1   | 1 | 11 | 1 | 12 | 1 | 15 | 0 | NA | 0 | NA |
| 7 | 16651923 | 16605936 | -1 | NM_020319    | ANKMY2    | 1 | 37 | 1 | 12 | 1 | 12 | 1 | 11 | 0 | NA |
| 7 | 16652283 | 16712672 | 1  | NM_014038    | BZW2      | 1 | 37 | 1 | 12 | 1 | 12 | 1 | 11 | 0 | NA |
| 7 | 16759875 | 16790686 | 1  | NM_014399    | TSPAN13   | 0 | NA | 0 | NA | 1 | 13 | 0 | NA | 0 | NA |
| 7 | 16811133 | 16797959 | -1 | NM_006408    | AGR2      | 0 | NA | 0 | NA | 1 | 14 | 0 | NA | 0 | NA |
| 7 | 16888138 | 16865554 | -1 | NM_176813    | AGR3      | 0 | NA | 0 | NA | 1 | 12 | 0 | NA | 0 | NA |
| 7 | 17304831 | 17352299 | 1  | NM_001621    | AHR       | 1 | 18 | 1 | 12 | 1 | 15 | 0 | NA | 0 | NA |
| 7 | 17946656 | 17798180 | -1 | NM_015132    | SNX13     | 0 | NA | 0 | NA | 0 | NA | 0 | NA | 0 | NA |
| 7 | 18034011 | 18032924 | -1 | NM_175886    | PRPS1L1   | 0 | NA | 0 | NA | 0 | NA | 0 | NA | 0 | NA |
| 7 | 18501893 | 18674990 | 1  | NM_014707    | HDAC9     | 0 | NA | 0 | NA | 1 | 12 | 0 | NA | 0 | NA |
| 7 | 18501893 | 19003517 | 1  | NM_178423    | HDAC9     | 0 | NA | 0 | NA | 1 | 12 | 0 | NA | 0 | NA |
| 7 | 18502409 | 18841797 | 1  | NM_058177    | HDAC9     | 0 | NA | 0 | NA | 1 | 12 | 0 | NA | 0 | NA |
| 7 | 18502409 | 18960464 | 1  | NM_058176    | HDAC9     | 0 | NA | 0 | NA | 1 | 12 | 0 | NA | 0 | NA |
| 7 | 18502409 | 19003517 | 1  | NM_178425    | HDAC9     | 0 | NA | 0 | NA | 1 | 12 | 0 | NA | 0 | NA |
| 7 | 19123820 | 19121615 | -1 | NM_000474    | TWIST1    | 1 | 11 | 1 | 19 | 1 | 14 | 0 | NA | 0 | NA |
| 7 | 19151569 | 19150929 | -1 | NM_152898    | FERD3L    | 0 | NA | 1 | 22 | 0 | NA | 0 | NA | 0 | NA |
| 7 | 19715185 | 19701609 | -1 | NM_001002926 | TWISTNB   | 1 | 19 | 0 | NA | 1 | 13 | 0 | NA | 0 | NA |
| 7 | 19779541 | 19725462 | -1 | NM_152774    | TMEM196   | 0 | NA | 1 | 13 | 0 | NA | 0 | NA | 0 | NA |
| 7 | 20223538 | 20140803 | -1 | NM_182762    | 7A5       | 2 | 19 | 1 | 19 | 1 | 13 | 0 | NA | 0 | NA |
| 7 | 20337249 | 20421907 | 1  | NM_002214    | ITGB8     | 1 | 11 | 0 | NA | 0 | NA | 1 | 18 | 0 | NA |
| 7 | 20653740 | 20761821 | 1  | NM_178559    | ABCB5     | 0 | NA | 0 | NA | 0 | NA | 0 | NA | 0 | NA |
| 7 | 20793030 | 20788425 | -1 | NM_182700    | SP8       | 0 | NA | 1 | 23 | 1 | 17 | 0 | NA | 0 | NA |
| 7 | 20793030 | 20788425 | -1 | NM_198956    | SP8       | 0 | NA | 1 | 23 | 1 | 17 | 0 | NA | 0 | NA |
| 7 | 21434213 | 21520676 | 1  | NM_003112    | SP4       | 0 | NA | 0 | NA | 0 | NA | 0 | NA | 0 | NA |
| 7 | 21549357 | 21907982 | 1  | NM_003777    | DNAH11    | 0 | NA | 1 | 17 | 0 | NA | 0 | NA | 0 | NA |
| 7 | 21952031 | 21907043 | -1 | NM_018719    | CDC47L    | 0 | NA | 1 | 12 | 1 | 13 | 0 | NA | 0 | NA |
| 7 | 22363058 | 22124432 | -1 | NM_012294    | RAPGEF5   | 0 | NA | 1 | 12 | 0 | NA | 0 | NA | 0 | NA |
| 7 | 22733342 | 22738145 | 1  | NM_000600    | IL6       | 1 | 11 | 0 | NA | 1 | 19 | 0 | NA | 0 | NA |
| 7 | 22828946 | 22818776 | -1 | NM_019059    | TOMM7     | 0 | NA | 0 | NA | 0 | NA | 0 | NA | 0 | NA |
| 7 | 23020273 | 22949782 | -1 | NM_032581    | FAM126A   | 0 | NA | 0 | NA | 1 | 15 | 0 | NA | 0 | NA |
| 7 | 23111877 | 23181563 | 1  | NM_001031710 | KLHL7     | 1 | 12 | 1 | 34 | 1 | 14 | 0 | NA | 0 | NA |
| 7 | 23111877 | 23181563 | 1  | NM_018846    | KLHL7     | 1 | 12 | 1 | 34 | 1 | 14 | 0 | NA | 0 | NA |
| 7 | 23188010 | 23207149 | 1  | NM_007342    | NUPL2     | 0 | NA | 0 | NA | 1 | 12 | 0 | NA | 0 | NA |
| 7 | 23252840 | 23281254 | 1  | NM_001005340 | GPNMB     | 0 | NA | 1 | 13 | 1 | 16 | 0 | NA | 0 | NA |
| 7 | 23252840 | 23281254 | 1  | NM_002510    | GPNMB     | 0 | NA | 1 | 13 | 1 | 16 | 0 | NA | 0 | NA |
| 7 | 23305464 | 23315705 | 1  | NM_138446    | C7orf30   | 1 | 11 | 0 | NA | 0 | NA | 0 | NA | 0 | NA |
| 7 | 23476520 | 23316352 | -1 | NM_006547    | IGF2BP3   | 1 | 12 | 0 | NA | 1 | 12 | 0 | NA | 0 | NA |
| 7 | 23538181 | 23510925 | -1 | NM_013293    | TRA2A     | 0 | NA | 0 | NA | 0 | NA | 0 | NA | 0 | NA |
| 7 | 23603522 | 23650852 | 1  | NM_138771    | CCDC126   | 1 | 69 | 1 | 12 | 0 | NA | 0 | NA | 0 | NA |
| 7 | 23686346 | 23708794 | 1  | NM_199136    | C7orf46   | 1 | 25 | 0 | NA | 0 | NA | 0 | NA | 0 | NA |
| 7 | 23716362 | 23838652 | 1  | NM_001122833 | STK31     | 0 | NA | 0 | NA | 0 | NA | 0 | NA | 0 | NA |
| 7 | 23716362 | 23838652 | 1  | NM_031414    | STK31     | 0 | NA | 0 | NA | 0 | NA | 0 | NA | 0 | NA |
| 7 | 23716521 | 23838652 | 1  | NM_032944    | STK31     | 0 | NA | 0 | NA | 0 | NA | 0 | NA | 0 | NA |
| 7 | 24290333 | 24298002 | 1  | NM_000905    | NPY       | 0 | NA | 1 | 16 | 0 | NA | 0 | NA | 0 | NA |
| 7 | 24579609 | 24694023 | 1  | NM_016447    | MPP6      | 1 | 13 | 0 | NA | 1 | 12 | 0 | NA | 0 | NA |
| 7 | 24784164 | 24704498 | -1 | NM_004403    | DFNA5     | 0 | NA | 0 | NA | 0 | NA | 0 | NA | 0 | NA |
| 7 | 24986285 | 24802688 | -1 | NM_015550    | OSBPL3    | 1 | 12 | 0 | NA | 1 | 12 | 0 | NA | 0 | NA |
| 7 | 24986285 | 24802688 | -1 | NM_145320    | OSBPL3    | 1 | 12 | 0 | NA | 1 | 12 | 0 | NA | 0 | NA |
| 7 | 24986285 | 24802688 | -1 | NM_145321    | OSBPL3    | 1 | 12 | 0 | NA | 1 | 12 | 0 | NA | 0 | NA |
| 7 | 24986285 | 24802688 | -1 | NM_145322    | OSBPL3    | 1 | 12 | 0 | NA | 1 | 12 | 0 | NA | 0 | NA |
| 7 | 25131480 | 25124799 | -1 | NM_018947    | CYCS      | 0 | NA | 0 | NA | 0 | NA | 1 | 12 | 0 | NA |
| 7 | 25186342 | 25140840 | -1 | NM_138811    | C7orf31   | 0 | NA | 1 | 15 | 0 | NA | 1 | 11 | 0 | NA |
| 7 | 25234630 | 25230715 | -1 | NM_022150    | NPVF      | 0 | NA | 1 | 12 | 0 | NA | 0 | NA | 0 | NA |
| 7 | 26158384 | 26192432 | 1  | NM_004289    | NFE2L3    | 1 | 14 | 0 | NA | 1 | 17 | 0 | NA | 0 | NA |
| 7 | 26206938 | 26196080 | -1 | NM_002137    | HNRNPA2B1 | 0 | NA | 0 | NA | 1 | 12 | 0 | NA | 0 | NA |
| 7 | 26206938 | 26196080 | -1 | NM_031243    | HNRNPA2B1 | 0 | NA | 0 | NA | 1 | 12 | 0 | NA | 0 | NA |



|   |          |          |    |              |           |   |    |   |    |   |    |   |    |   |    |
|---|----------|----------|----|--------------|-----------|---|----|---|----|---|----|---|----|---|----|
| 7 | 26207623 | 26219501 | 1  | NM_007276    | CBX3      | 0 | NA | 0 | NA | 1 | 12 | 0 | NA | 0 | NA |
| 7 | 26207848 | 26219501 | 1  | NM_016587    | CBX3      | 0 | NA | 0 | NA | 1 | 12 | 0 | NA | 0 | NA |
| 7 | 26298039 | 26380474 | 1  | NM_013322    | SNX10     | 0 | NA | 0 | NA | 0 | NA | 0 | NA | 0 | NA |
| 7 | 26870866 | 26673212 | -1 | NM_003930    | SKAP2     | 1 | 12 | 0 | NA | 1 | 14 | 0 | NA | 0 | NA |
| 7 | 27102150 | 27099138 | -1 | NM_005522    | HOXA1     | 0 | NA | 0 | NA | 1 | 17 | 0 | NA | 0 | NA |
| 7 | 27102150 | 27099138 | -1 | NM_153620    | HOXA1     | 0 | NA | 0 | NA | 1 | 17 | 0 | NA | 0 | NA |
| 7 | 27108919 | 27106497 | -1 | NM_006735    | HOXA2     | 1 | 14 | 0 | NA | 1 | 17 | 0 | NA | 0 | NA |
| 7 | 27120141 | 27112333 | -1 | NM_153632    | HOXA3     | 1 | 14 | 0 | NA | 1 | 12 | 0 | NA | 0 | NA |
| 7 | 27125739 | 27112333 | -1 | NM_030661    | HOXA3     | 1 | 14 | 0 | NA | 1 | 12 | 0 | NA | 0 | NA |
| 7 | 27133164 | 27112333 | -1 | NM_153631    | HOXA3     | 1 | 15 | 0 | NA | 1 | 12 | 0 | NA | 0 | NA |
| 7 | 27136924 | 27134650 | -1 | NM_002141    | HOXA4     | 1 | 15 | 0 | NA | 1 | 14 | 0 | NA | 0 | NA |
| 7 | 27149812 | 27147520 | -1 | NM_019102    | HOXA5     | 1 | 15 | 1 | 13 | 1 | 13 | 0 | NA | 0 | NA |
| 7 | 27153893 | 27151640 | -1 | NM_024014    | HOXA6     | 1 | 23 | 1 | 13 | 1 | 13 | 0 | NA | 0 | NA |
| 7 | 27162821 | 27159862 | -1 | NM_006896    | HOXA7     | 1 | 23 | 0 | NA | 1 | 14 | 0 | NA | 0 | NA |
| 7 | 27171674 | 27168581 | -1 | NM_152739    | HOXA9     | 1 | 12 | 0 | NA | 1 | 13 | 0 | NA | 0 | NA |
| 7 | 27180480 | 27176734 | -1 | NM_018951    | HOXA10    | 1 | 26 | 0 | NA | 1 | 13 | 0 | NA | 0 | NA |
| 7 | 27186401 | 27176734 | -1 | NM_153715    | HOXA10    | 1 | 19 | 1 | 17 | 1 | 13 | 0 | NA | 0 | NA |
| 7 | 27191360 | 27187300 | -1 | NM_005523    | HOXA11    | 1 | 19 | 1 | 17 | 1 | 12 | 0 | NA | 0 | NA |
| 7 | 27206250 | 27203023 | -1 | NM_000522    | HOXA13    | 0 | NA | 1 | 14 | 0 | NA | 0 | NA | 0 | NA |
| 7 | 27248688 | 27252717 | 1  | NM_001989    | EVX1      | 0 | NA | 1 | 13 | 1 | 12 | 0 | NA | 0 | NA |
| 7 | 27669127 | 27531585 | -1 | NM_152740    | HIBADH    | 0 | NA | 0 | NA | 1 | 13 | 0 | NA | 0 | NA |
| 7 | 27746262 | 27835911 | 1  | NM_001079864 | TAX1BP1   | 1 | 14 | 0 | NA | 1 | 13 | 0 | NA | 0 | NA |
| 7 | 27746262 | 27835911 | 1  | NM_006024    | TAX1BP1   | 1 | 14 | 0 | NA | 1 | 13 | 0 | NA | 0 | NA |
| 7 | 28186962 | 27836717 | -1 | NM_175061    | JAZF1     | 0 | NA | 0 | NA | 0 | NA | 0 | NA | 0 | NA |
| 7 | 28285843 | 28285366 | -1 | NM_001126493 | LOC402644 | 1 | 13 | 1 | 13 | 0 | NA | 0 | NA | 0 | NA |
| 7 | 28304564 | 28832036 | 1  | NM_182899    | CREB5     | 0 | NA | 0 | NA | 0 | NA | 0 | NA | 0 | NA |
| 7 | 28418668 | 28832036 | 1  | NM_182898    | CREB5     | 1 | 12 | 0 | NA | 1 | 14 | 0 | NA | 0 | NA |
| 7 | 28441758 | 28832036 | 1  | NM_004904    | CREB5     | 0 | NA | 0 | NA | 1 | 12 | 0 | NA | 0 | NA |
| 7 | 28692245 | 28832036 | 1  | NM_001011666 | CREB5     | 1 | 11 | 0 | NA | 1 | 12 | 0 | NA | 0 | NA |
| 7 | 28964554 | 28959498 | -1 | NM_014817    | KIAA0644  | 1 | 12 | 1 | 39 | 1 | 18 | 0 | NA | 1 | 18 |
| 7 | 29152678 | 29001771 | -1 | NM_019029    | CPVL      | 0 | NA | 1 | 12 | 0 | NA | 0 | NA | 0 | NA |
| 7 | 29152678 | 29001771 | -1 | NM_031311    | CPVL      | 0 | NA | 1 | 12 | 0 | NA | 0 | NA | 0 | NA |
| 7 | 29200645 | 29520469 | 1  | NM_004067    | CHN2      | 0 | NA | 1 | 14 | 0 | NA | 0 | NA | 0 | NA |
| 7 | 29486010 | 29520469 | 1  | NM_001039936 | CHN2      | 0 | NA | 1 | 12 | 0 | NA | 0 | NA | 0 | NA |
| 7 | 29569951 | 29573436 | 1  | NM_175887    | PRR15     | 0 | NA | 1 | 18 | 1 | 12 | 0 | NA | 0 | NA |
| 7 | 29840865 | 29912316 | 1  | NM_001080529 | WIPF3     | 0 | NA | 1 | 13 | 0 | NA | 0 | NA | 0 | NA |
| 7 | 29995902 | 29926252 | -1 | NM_014766    | SCRN1     | 1 | 11 | 1 | 18 | 1 | 20 | 0 | NA | 0 | NA |
| 7 | 30032793 | 30019408 | -1 | NM_017946    | FKBP14    | 0 | NA | 0 | NA | 1 | 13 | 0 | NA | 0 | NA |
| 7 | 30034812 | 30096884 | 1  | NM_032639    | PLEKHA8   | 0 | NA | 0 | NA | 1 | 13 | 0 | NA | 0 | NA |
| 7 | 30141076 | 30168906 | 1  | NM_152793    | C7orf41   | 0 | NA | 0 | NA | 0 | NA | 0 | NA | 0 | NA |
| 7 | 30290447 | 30373833 | 1  | NM_147128    | ZNRF2     | 0 | NA | 0 | NA | 1 | 12 | 1 | 12 | 0 | NA |
| 7 | 30484790 | 30430674 | -1 | NM_006092    | NOD1      | 0 | NA | 0 | NA | 1 | 12 | 0 | NA | 0 | NA |
| 7 | 30510977 | 30502761 | -1 | NM_024051    | C7orf24   | 1 | 21 | 0 | NA | 0 | NA | 0 | NA | 0 | NA |
| 7 | 30600705 | 30640173 | 1  | NM_002047    | GARS      | 0 | NA | 0 | NA | 1 | 13 | 0 | NA | 0 | NA |
| 7 | 30688665 | 30689387 | -1 | NM_001883    | CRHR2     | 0 | NA | 1 | 12 | 0 | NA | 0 | NA | 0 | NA |
| 7 | 30758275 | 30763743 | 1  | NM_006774    | INMT      | 1 | 12 | 1 | 18 | 1 | 18 | 0 | NA | 0 | NA |
| 7 | 30777557 | 30898527 | 1  | NM_032222    | FLJ22374  | 0 | NA | 0 | NA | 0 | NA | 0 | NA | 0 | NA |
| 7 | 30917992 | 30931656 | 1  | NM_198098    | ACP1      | 1 | 13 | 0 | NA | 0 | NA | 0 | NA | 0 | NA |
| 7 | 30970160 | 30982113 | 1  | NM_001009824 | GHRHR     | 0 | NA | 1 | 17 | 0 | NA | 0 | NA | 0 | NA |
| 7 | 30970160 | 30985668 | 1  | NM_000823    | GHRHR     | 0 | NA | 1 | 17 | 0 | NA | 0 | NA | 0 | NA |
| 7 | 31058666 | 31112836 | 1  | NM_001118    | ADCYAP1R1 | 0 | NA | 1 | 13 | 0 | NA | 0 | NA | 0 | NA |
| 7 | 31347063 | 31343604 | -1 | NM_022728    | NEUROD6   | 0 | NA | 0 | NA | 0 | NA | 0 | NA | 0 | NA |
| 7 | 31523502 | 31659828 | 1  | NM_194300    | CCDC129   | 0 | NA | 0 | NA | 0 | NA | 0 | NA | 0 | NA |
| 7 | 31693371 | 31714594 | 1  | NM_006658    | C7orf16   | 0 | NA | 0 | NA | 0 | NA | 0 | NA | 0 | NA |
| 7 | 32077516 | 31795771 | -1 | NM_005020    | PDE1C     | 0 | NA | 0 | NA | 1 | 14 | 0 | NA | 0 | NA |
| 7 | 32496502 | 32492941 | -1 | NM_012322    | LSM5      | 1 | 15 | 0 | NA | 0 | NA | 0 | NA | 0 | NA |
| 7 | 32501700 | 32590304 | 1  | NM_015060    | KIAA0241  | 1 | 19 | 0 | NA | 0 | NA | 0 | NA | 0 | NA |
| 7 | 32897894 | 32874308 | -1 | NM_015483    | KBTD2     | 0 | NA | 0 | NA | 0 | NA | 1 | 18 | 0 | NA |
| 7 | 32963576 | 33013067 | 1  | NM_007270    | FKBP9     | 1 | 23 | 1 | 33 | 0 | NA | 1 | 13 | 1 | 13 |
| 7 | 33047047 | 33020266 | -1 | NM_016489    | NT5C3     | 0 | NA | 0 | NA | 0 | NA | 0 | NA | 0 | NA |
| 7 | 33068934 | 33020266 | -1 | NM_001002009 | NT5C3     | 1 | 14 | 1 | 18 | 0 | NA | 1 | 11 | 0 | NA |
| 7 | 33068934 | 33020266 | -1 | NM_001002010 | NT5C3     | 1 | 14 | 1 | 18 | 0 | NA | 1 | 11 | 0 | NA |
| 7 | 33115527 | 33100934 | -1 | NM_203288    | RP9       | 0 | NA | 0 | NA | 0 | NA | 0 | NA | 0 | NA |
| 7 | 33135676 | 33612205 | 1  | NM_001033604 | BBS9      | 0 | NA | 0 | NA | 0 | NA | 0 | NA | 0 | NA |
| 7 | 33135676 | 33612205 | 1  | NM_001033605 | BBS9      | 0 | NA | 0 | NA | 0 | NA | 0 | NA | 0 | NA |

|   |          |          |    |              |           |   |    |   |    |   |    |   |    |   |    |
|---|----------|----------|----|--------------|-----------|---|----|---|----|---|----|---|----|---|----|
| 7 | 33135676 | 33612205 | 1  | NM_014451    | BBS9      | 0 | NA | 0 | NA | 0 | NA | 0 | NA | 0 | NA |
| 7 | 33135676 | 33612205 | 1  | NM_198428    | BBS9      | 0 | NA | 0 | NA | 0 | NA | 0 | NA | 0 | NA |
| 7 | 33911047 | 34162009 | 1  | NM_133468    | BMPER     | 0 | NA | 1 | 16 | 0 | NA | 0 | NA | 0 | NA |
| 7 | 34664421 | 3486115  | 1  | NM_207172    | NPSR1     | 0 | NA | 0 | NA | 0 | NA | 0 | NA | 0 | NA |
| 7 | 34664421 | 34884469 | 1  | NM_207173    | NPSR1     | 0 | NA | 0 | NA | 0 | NA | 0 | NA | 0 | NA |
| 7 | 35044178 | 34935017 | -1 | NM_015283    | DPY19L1   | 0 | NA | 0 | NA | 0 | NA | 0 | NA | 0 | NA |
| 7 | 35259767 | 35208566 | -1 | NM_001077653 | TBX20     | 0 | NA | 0 | 18 | 0 | NA | 0 | NA | 0 | NA |
| 7 | 35259767 | 35237636 | -1 | NM_020417    | TBX20     | 0 | NA | 1 | 18 | 0 | NA | 0 | NA | 0 | NA |
| 7 | 35701254 | 35638794 | -1 | NM_022373    | HERPUD2   | 0 | NA | 0 | NA | 1 | 12 | 0 | NA | 0 | NA |
| 7 | 35807151 | 35911442 | 1  | NM_001011553 | SEPT7     | 1 | 24 | 0 | NA | 0 | NA | 0 | NA | 0 | NA |
| 7 | 35807151 | 35911442 | 1  | NM_001788    | SEPT7     | 1 | 24 | 0 | NA | 0 | NA | 0 | NA | 0 | NA |
| 7 | 36159360 | 36307677 | 1  | NM_030636    | EEDP1     | 0 | NA | 1 | 13 | 0 | NA | 0 | NA | 0 | NA |
| 7 | 36373375 | 36330283 | -1 | NM_015314    | KIAA0895  | 0 | NA | 0 | NA | 0 | NA | 0 | NA | 0 | NA |
| 7 | 36395956 | 36459925 | 1  | NM_018685    | ANLN      | 1 | 11 | 0 | NA | 0 | NA | 0 | NA | 0 | NA |
| 7 | 36396259 | 36330283 | -1 | NM_001100425 | KIAA0895  | 1 | 11 | 0 | NA | 0 | NA | 0 | NA | 0 | NA |
| 7 | 36730678 | 36519132 | -1 | NM_001637    | AOAH      | 0 | NA | 0 | NA | 0 | NA | 0 | NA | 0 | NA |
| 7 | 36991190 | 36860485 | -1 | NM_001039459 | ELMO1     | 0 | NA | 0 | NA | 0 | NA | 0 | NA | 0 | NA |
| 7 | 36992246 | 36860485 | -1 | NM_130442    | ELMO1     | 0 | NA | 0 | NA | 0 | NA | 0 | NA | 0 | NA |
| 7 | 37455036 | 36860485 | -1 | NM_014800    | ELMO1     | 1 | 14 | 0 | NA | 0 | NA | 0 | NA | 0 | NA |
| 7 | 37746520 | 37747438 | 1  | NM_181791    | GPR141    | 0 | NA | 0 | NA | 0 | NA | 0 | NA | 0 | NA |
| 7 | 37854723 | 37906527 | 1  | NM_016616    | TXNDC3    | 0 | NA | 0 | NA | 0 | NA | 0 | NA | 0 | NA |
| 7 | 37923050 | 37912059 | -1 | NM_003014    | SFRP4     | 0 | NA | 1 | 23 | 0 | NA | 0 | NA | 0 | NA |
| 7 | 37926687 | 37958067 | 1  | NM_017549    | EPDR1     | 0 | NA | 1 | 23 | 0 | NA | 0 | NA | 0 | NA |
| 7 | 38184457 | 38236795 | 1  | NM_032016    | STARD3NL  | 1 | 11 | 0 | NA | 1 | 15 | 1 | 12 | 0 | NA |
| 7 | 38279773 | 38265768 | -1 | NM_001003799 | TARP      | 0 | NA | 0 | NA | 0 | NA | 0 | NA | 0 | NA |
| 7 | 38279773 | 38265768 | -1 | NM_001003806 | TARP      | 0 | NA | 0 | NA | 0 | NA | 0 | NA | 0 | NA |
| 7 | 38637545 | 38389829 | -1 | NM_001635    | AMPH      | 0 | NA | 0 | NA | 0 | NA | 0 | NA | 0 | NA |
| 7 | 38637545 | 38389829 | -1 | NM_139316    | AMPH      | 0 | NA | 0 | NA | 0 | NA | 0 | NA | 0 | NA |
| 7 | 38693162 | 38691468 | -1 | NM_001105282 | LOC340286 | 0 | NA | 1 | 12 | 0 | NA | 0 | NA | 0 | NA |
| 7 | 38915325 | 38730067 | -1 | NM_014396    | VPS41     | 0 | NA | 0 | NA | 0 | NA | 0 | NA | 0 | NA |
| 7 | 38915325 | 38730067 | -1 | NM_080631    | VPS41     | 0 | NA | 0 | NA | 0 | NA | 0 | NA | 0 | NA |
| 7 | 39012932 | 39470915 | 1  | NM_007252    | POU6F2    | 0 | NA | 0 | NA | 1 | 22 | 0 | NA | 0 | NA |
| 7 | 39572533 | 39578996 | 1  | NM_020192    | C7orf36   | 0 | NA | 0 | NA | 0 | NA | 0 | NA | 0 | NA |
| 7 | 39629686 | 39714242 | 1  | NM_005402    | RALA      | 0 | NA | 0 | NA | 0 | NA | 0 | NA | 0 | NA |
| 7 | 39956483 | 40101672 | 1  | NM_003718    | CDC2L5    | 0 | NA | 0 | NA | 0 | NA | 1 | 19 | 0 | NA |
| 7 | 39956483 | 40101672 | 1  | NM_031267    | CDC2L5    | 0 | NA | 0 | NA | 0 | NA | 1 | 19 | 0 | NA |
| 7 | 40140741 | 40138866 | -1 | NM_138701    | C7orf11   | 0 | NA | 0 | NA | 1 | 14 | 1 | 12 | 0 | NA |
| 7 | 40141099 | 40866882 | 1  | NM_024728    | C7orf10   | 1 | 17 | 0 | NA | 1 | 14 | 1 | 12 | 0 | NA |
| 7 | 41709231 | 41695125 | -1 | NM_002192    | INHBA     | 1 | 27 | 0 | NA | 1 | 25 | 0 | NA | 0 | NA |
| 7 | 42243137 | 41967072 | -1 | NM_000168    | GLI3      | 1 | 23 | 0 | NA | 1 | 14 | 0 | NA | 0 | NA |
| 7 | 42918214 | 42915396 | -1 | NM_001099858 | C7orf25   | 0 | NA | 0 | NA | 0 | NA | 0 | NA | 0 | NA |
| 7 | 42918214 | 42915396 | -1 | NM_024054    | C7orf25   | 0 | NA | 0 | NA | 0 | NA | 0 | NA | 0 | NA |
| 7 | 42938330 | 42922986 | -1 | NM_002787    | PSMA2     | 0 | NA | 0 | NA | 1 | 15 | 0 | NA | 0 | NA |
| 7 | 42938463 | 42943978 | 1  | NM_031903    | MRPL32    | 0 | NA | 0 | NA | 1 | 15 | 0 | NA | 0 | NA |
| 7 | 43118722 | 43569463 | 1  | NM_015052    | HECW1     | 1 | 11 | 0 | NA | 1 | 14 | 0 | NA | 0 | NA |
| 7 | 43589216 | 43633503 | 1  | NM_004760    | STK17A    | 0 | NA | 0 | NA | 0 | NA | 0 | NA | 0 | NA |
| 7 | 43735608 | 43645383 | -1 | NM_018224    | C7orf44   | 1 | 11 | 0 | NA | 0 | NA | 0 | NA | 0 | NA |
| 7 | 43764796 | 43813466 | 1  | NM_000712    | BLVRA     | 0 | NA | 1 | 13 | 0 | NA | 0 | NA | 0 | NA |
| 7 | 43875670 | 43872681 | -1 | NM_032014    | MRPS24    | 1 | 12 | 0 | NA | 0 | NA | 0 | NA | 0 | NA |
| 7 | 43912756 | 43882025 | -1 | NM_001077663 | URG4      | 0 | NA | 0 | NA | 0 | NA | 0 | NA | 0 | NA |
| 7 | 43912756 | 43882025 | -1 | NM_017920    | URG4      | 0 | NA | 0 | NA | 0 | NA | 0 | NA | 0 | NA |
| 7 | 43932521 | 43882025 | -1 | NM_001077664 | URG4      | 0 | NA | 0 | NA | 0 | NA | 0 | NA | 0 | NA |
| 7 | 43932571 | 43959688 | 1  | NM_015983    | UBE2D4    | 0 | NA | 0 | NA | 0 | NA | 0 | NA | 0 | NA |
| 7 | 44007013 | 44016248 | 1  | NM_175064    | WBSCR19   | 0 | NA | 0 | NA | 0 | NA | 0 | NA | 0 | NA |
| 7 | 44050763 | 44067840 | 1  | NM_001014436 | DBNL      | 0 | NA | 0 | NA | 0 | NA | 0 | NA | 0 | NA |
| 7 | 44050763 | 44067840 | 1  | NM_001122956 | DBNL      | 0 | NA | 0 | NA | 0 | NA | 0 | NA | 0 | NA |
| 7 | 44050763 | 44067840 | 1  | NM_014063    | DBNL      | 0 | NA | 0 | NA | 0 | NA | 0 | NA | 0 | NA |
| 7 | 44071688 | 44068850 | -1 | NM_000290    | PGAM2     | 0 | NA | 0 | NA | 0 | NA | 1 | 12 | 0 | NA |
| 7 | 44088607 | 44078371 | -1 | NM_013284    | POLM      | 1 | 11 | 0 | NA | 0 | NA | 0 | NA | 0 | NA |
| 7 | 44110484 | 44120684 | 1  | NM_001129    | AEBP1     | 1 | 12 | 0 | NA | 1 | 12 | 0 | NA | 0 | NA |
| 7 | 44129672 | 44120810 | -1 | NM_001127218 | POLD2     | 0 | NA | 0 | NA | 1 | 13 | 0 | NA | 0 | NA |
| 7 | 44129672 | 44120810 | -1 | NM_006230    | POLD2     | 0 | NA | 0 | NA | 1 | 13 | 0 | NA | 0 | NA |
| 7 | 44147441 | 44144987 | -1 | NM_021223    | MYL7      | 0 | NA | 0 | NA | 0 | NA | 0 | NA | 0 | NA |
| 7 | 44165412 | 44150394 | -1 | NM_033507    | GCK       | 0 | NA | 0 | NA | 0 | NA | 0 | NA | 0 | NA |
| 7 | 44165412 | 44150394 | -1 | NM_033508    | GCK       | 0 | NA | 0 | NA | 0 | NA | 0 | NA | 0 | NA |

|   |          |          |    |              |               |   |    |   |    |   |    |   |    |   |    |
|---|----------|----------|----|--------------|---------------|---|----|---|----|---|----|---|----|---|----|
| 7 | 44195547 | 44150394 | -1 | NM_000162    | GCK           | 0 | NA | 1 | 15 | 0 | NA | 0 | NA | 1 | 12 |
| 7 | 44207102 | 44220418 | 1  | NM_006555    | YKT6          | 0 | NA | 1 | 15 | 0 | NA | 0 | NA | 0 | NA |
| 7 | 44331749 | 44225419 | -1 | NM_001220    | CAMK2B        | 0 | NA | 1 | 12 | 1 | 14 | 0 | NA | 0 | NA |
| 7 | 44331749 | 44225419 | -1 | NM_172078    | CAMK2B        | 0 | NA | 1 | 12 | 1 | 14 | 0 | NA | 0 | NA |
| 7 | 44331749 | 44225419 | -1 | NM_172079    | CAMK2B        | 0 | NA | 1 | 12 | 1 | 14 | 0 | NA | 0 | NA |
| 7 | 44331749 | 44225419 | -1 | NM_172080    | CAMK2B        | 0 | NA | 1 | 12 | 1 | 14 | 0 | NA | 0 | NA |
| 7 | 44331749 | 44225419 | -1 | NM_172081    | CAMK2B        | 0 | NA | 1 | 12 | 1 | 14 | 0 | NA | 0 | NA |
| 7 | 44331749 | 44225419 | -1 | NM_172082    | CAMK2B        | 0 | NA | 1 | 12 | 1 | 14 | 0 | NA | 0 | NA |
| 7 | 44331749 | 44225419 | -1 | NM_172083    | CAMK2B        | 0 | NA | 1 | 12 | 1 | 14 | 0 | NA | 0 | NA |
| 7 | 44331749 | 44225419 | -1 | NM_172084    | CAMK2B        | 0 | NA | 1 | 12 | 1 | 14 | 0 | NA | 0 | NA |
| 7 | 44473966 | 44475105 | 1  | NM_001090027 | LOC644907     | 0 | NA | 0 | NA | 1 | 12 | 0 | NA | 0 | NA |
| 7 | 44496910 | 44388489 | -1 | NM_015332    | NUDCD3        | 1 | 11 | 0 | NA | 0 | NA | 0 | NA | 0 | NA |
| 7 | 44547439 | 44518659 | -1 | NM_001101648 | NPC1L1        | 0 | NA | 0 | NA | 0 | NA | 0 | NA | 0 | NA |
| 7 | 44547439 | 44518659 | -1 | NM_013389    | NPC1L1        | 0 | NA | 0 | NA | 0 | NA | 0 | NA | 0 | NA |
| 7 | 44580662 | 44571927 | 0  | NM_019082    | DDX56         | 0 | NA | 0 | NA | 0 | NA | 0 | NA | 0 | NA |
| 7 | 44588352 | 44585286 | -1 | NM_182547    | TMED4         | 0 | NA | 0 | NA | 0 | NA | 0 | NA | 0 | NA |
| 7 | 44612695 | 44682720 | 1  | NM_001003941 | OGDH          | 0 | NA | 0 | NA | 0 | NA | 0 | NA | 0 | NA |
| 7 | 44612695 | 44715194 | 0  | NM_002541    | OGDH          | 0 | NA | 0 | NA | 0 | NA | 0 | NA | 0 | NA |
| 7 | 44755054 | 44776004 | 1  | NM_031449    | ZMIZ2         | 0 | NA | 0 | NA | 1 | 12 | 0 | NA | 0 | NA |
| 7 | 44762311 | 44776004 | 1  | NM_174929    | ZMIZ2         | 0 | NA | 0 | NA | 0 | NA | 0 | NA | 0 | NA |
| 7 | 44802765 | 44809241 | 1  | NM_021130    | PPIA          | 1 | 11 | 0 | NA | 0 | NA | 0 | NA | 0 | NA |
| 7 | 44854250 | 44833012 | -1 | NM_138635    | H2AFV         | 0 | NA | 0 | NA | 1 | 21 | 0 | NA | 0 | NA |
| 7 | 44854250 | 44839737 | -1 | NM_012412    | H2AFV         | 0 | NA | 0 | NA | 1 | 21 | 0 | NA | 0 | NA |
| 7 | 44854250 | 44839737 | -1 | NM_201436    | H2AFV         | 0 | NA | 0 | NA | 1 | 21 | 0 | NA | 0 | NA |
| 7 | 44854250 | 44839737 | -1 | NM_201516    | H2AFV         | 0 | NA | 0 | NA | 1 | 21 | 0 | NA | 0 | NA |
| 7 | 44854250 | 44839737 | -1 | NM_201517    | H2AFV         | 0 | NA | 0 | NA | 1 | 21 | 0 | NA | 0 | NA |
| 7 | 44891485 | 44882416 | -1 | NM_033224    | PURB          | 0 | NA | 0 | NA | 1 | 12 | 0 | NA | 0 | NA |
| 7 | 44985193 | 44968785 | -1 | NM_033054    | MYO1G         | 1 | 14 | 0 | NA | 0 | NA | 0 | NA | 0 | NA |
| 7 | 45006311 | 45082594 | 0  | NM_031443    | CCM2          | 0 | NA | 0 | NA | 0 | NA | 0 | NA | 0 | NA |
| 7 | 45033509 | 45082594 | 1  | NM_001029835 | CCM2          | 0 | NA | 0 | NA | 0 | NA | 0 | NA | 0 | NA |
| 7 | 45117842 | 45106223 | -1 | NM_004749    | TBRG4         | 0 | NA | 0 | NA | 0 | NA | 0 | NA | 0 | NA |
| 7 | 45117842 | 45106223 | -1 | NM_030900    | TBRG4         | 0 | NA | 0 | NA | 0 | NA | 0 | NA | 0 | NA |
| 7 | 45117842 | 45106223 | -1 | NM_199122    | TBRG4         | 0 | NA | 0 | NA | 0 | NA | 0 | NA | 0 | NA |
| 7 | 45163891 | 45190375 | 1  | NM_005856    | RAMP3         | 0 | NA | 1 | 12 | 0 | NA | 0 | NA | 0 | NA |
| 7 | 45580649 | 45729239 | 1  | NM_021116    | ADCY1         | 0 | NA | 1 | 12 | 0 | NA | 0 | NA | 0 | NA |
| 7 | 45894483 | 45899792 | 1  | NM_000596    | IGFBP1        | 0 | NA | 1 | 16 | 0 | NA | 0 | NA | 0 | NA |
| 7 | 45927396 | 45918368 | -1 | NM_000598    | IGFBP3        | 1 | 12 | 0 | NA | 0 | NA | 0 | NA | 0 | NA |
| 7 | 45927396 | 45918368 | -1 | NM_001013398 | IGFBP3        | 1 | 12 | 0 | NA | 0 | NA | 0 | NA | 0 | NA |
| 7 | 47545724 | 47281276 | -1 | NM_022748    | TNS3          | 0 | NA | 0 | NA | 0 | NA | 0 | NA | 0 | NA |
| 7 | 47661366 | 47667771 | 1  | NM_001123065 | LOC401335     | 0 | NA | 0 | NA | 1 | 12 | 0 | NA | 0 | NA |
| 7 | 47801413 | 47825969 | 1  | NM_025031    | FLJ21075      | 1 | 11 | 0 | NA | 1 | 16 | 0 | NA | 0 | NA |
| 7 | 47954562 | 47780814 | -1 | NM_138295    | PKD1L1        | 1 | 21 | 0 | NA | 0 | NA | 0 | NA | 0 | NA |
| 7 | 47985771 | 47970307 | -1 | NM_004507    | HUS1          | 1 | 25 | 0 | NA | 0 | NA | 0 | NA | 0 | NA |
| 7 | 48035241 | 47993270 | -1 | NM_001030019 | SUNC1         | 0 | NA | 0 | NA | 0 | NA | 0 | NA | 0 | NA |
| 7 | 48035241 | 47993270 | -1 | NM_152782    | SUNC1         | 0 | NA | 0 | NA | 0 | NA | 0 | NA | 0 | NA |
| 7 | 48041641 | 48067419 | 1  | NM_001100159 | C7orf57       | 0 | NA | 0 | NA | 0 | NA | 0 | NA | 0 | NA |
| 7 | 48094879 | 48114855 | 1  | NM_181597    | UPP1          | 1 | 23 | 1 | 13 | 0 | NA | 0 | NA | 0 | NA |
| 7 | 48095270 | 48114855 | 1  | NM_003364    | UPP1          | 1 | 23 | 1 | 13 | 0 | NA | 0 | NA | 0 | NA |
| 7 | 48208388 | 48657637 | 1  | NM_152701    | ABCA13        | 0 | NA | 0 | NA | 0 | NA | 0 | NA | 0 | NA |
| 7 | 49783802 | 49922684 | 1  | NM_198570    | VWC2          | 0 | NA | 0 | NA | 0 | NA | 0 | NA | 0 | NA |
| 7 | 50103372 | 49947584 | -1 | NM_007009    | ZFPB          | 0 | NA | 0 | NA | 0 | NA | 0 | NA | 0 | NA |
| 7 | 50314923 | 50440292 | 1  | NM_006060    | IKZF1         | 0 | NA | 0 | NA | 0 | NA | 0 | NA | 0 | NA |
| 7 | 50485582 | 50479325 | -1 | NM_001042762 | FIGL1         | 0 | NA | 0 | NA | 0 | NA | 0 | NA | 0 | NA |
| 7 | 50485582 | 50479325 | -1 | NM_022116    | FIGL1         | 0 | NA | 0 | NA | 0 | NA | 0 | NA | 0 | NA |
| 7 | 50596262 | 50493627 | -1 | NM_000790    | DDC           | 0 | NA | 1 | 17 | 0 | NA | 0 | NA | 0 | NA |
| 7 | 50600648 | 50493627 | -1 | NM_001082971 | DDC           | 0 | NA | 1 | 12 | 0 | NA | 0 | NA | 0 | NA |
| 7 | 50740492 | 50625258 | -1 | NM_001001550 | GRB10         | 0 | NA | 0 | NA | 1 | 13 | 0 | NA | 0 | NA |
| 7 | 50767544 | 50625258 | -1 | NM_001001549 | GRB10         | 0 | NA | 0 | NA | 1 | 12 | 0 | NA | 0 | NA |
| 7 | 50767544 | 50625258 | -1 | NM_005311    | GRB10         | 0 | NA | 0 | NA | 1 | 12 | 0 | NA | 0 | NA |
| 7 | 50828652 | 50625258 | -1 | NM_001001555 | GRB10         | 1 | 12 | 1 | 20 | 0 | NA | 0 | NA | 1 | 13 |
| 7 | 51352009 | 51051402 | -1 | NM_015198    | COBL          | 0 | NA | 0 | NA | 1 | 13 | 0 | NA | 0 | NA |
| 7 | 53070842 | 53072112 | 1  | NM_182595    | DKFZp564N2472 | 0 | NA | 0 | NA | 0 | NA | 0 | NA | 0 | NA |
| 7 | 54577512 | 54604442 | 1  | NM_182546    | VSTM2A        | 0 | NA | 0 | NA | 0 | NA | 0 | NA | 0 | NA |
| 7 | 54794433 | 54787433 | -1 | NM_001012456 | SEC61G        | 1 | 16 | 0 | NA | 1 | 12 | 0 | NA | 0 | NA |
| 7 | 54794433 | 54787433 | -1 | NM_014302    | SEC61G        | 1 | 16 | 0 | NA | 1 | 12 | 0 | NA | 0 | NA |

|   |          |          |    |              |           |   |    |   |    |   |    |   |    |   |    |
|---|----------|----------|----|--------------|-----------|---|----|---|----|---|----|---|----|---|----|
| 7 | 55054218 | 55192138 | 1  | NM_201283    | EGFR      | 0 | NA | 1 | 18 | 0 | NA | 0 | NA | 0 | NA |
| 7 | 55054218 | 55203822 | 1  | NM_201282    | EGFR      | 0 | NA | 1 | 18 | 0 | NA | 0 | NA | 0 | NA |
| 7 | 55054218 | 55206232 | 1  | NM_201284    | EGFR      | 0 | NA | 1 | 18 | 0 | NA | 0 | NA | 0 | NA |
| 7 | 55054218 | 55242525 | 1  | NM_005228    | EGFR      | 0 | NA | 1 | 18 | 0 | NA | 0 | NA | 0 | NA |
| 7 | 55400634 | 55468929 | 1  | NM_018697    | LANCL2    | 0 | NA | 0 | NA | 0 | NA | 0 | NA | 0 | NA |
| 7 | 55607694 | 55505799 | -1 | NM_030796    | ECOP      | 0 | NA | 0 | NA | 1 | 12 | 0 | NA | 0 | NA |
| 7 | 55897976 | 55828730 | -1 | NM_207366    | SEPT14    | 0 | NA | 1 | 15 | 0 | NA | 0 | NA | 0 | NA |
| 7 | 55947824 | 55975927 | 1  | NM_182633    | ZNF13     | 0 | NA | 0 | NA | 1 | 12 | 0 | NA | 0 | NA |
| 7 | 55987104 | 55990527 | 1  | NM_015969    | MRPS17    | 0 | NA | 0 | NA | 0 | NA | 0 | NA | 0 | NA |
| 7 | 55999789 | 56035365 | 1  | NM_001483    | GBAS      | 0 | NA | 0 | NA | 0 | NA | 0 | NA | 0 | NA |
| 7 | 56086762 | 56046237 | -1 | NM_004577    | PSPH      | 0 | NA | 0 | NA | 0 | NA | 0 | NA | 0 | NA |
| 7 | 56086871 | 56099176 | 1  | NM_001009186 | CCT6A     | 0 | NA | 0 | NA | 0 | NA | 0 | NA | 0 | NA |
| 7 | 56086871 | 56099176 | 1  | NM_001762    | CCT6A     | 0 | NA | 0 | NA | 0 | NA | 0 | NA | 0 | NA |
| 7 | 56099410 | 56115859 | 1  | NM_001042468 | SUMF2     | 0 | NA | 0 | NA | 0 | NA | 0 | NA | 0 | NA |
| 7 | 56099410 | 56115859 | 1  | NM_001042469 | SUMF2     | 0 | NA | 0 | NA | 0 | NA | 0 | NA | 0 | NA |
| 7 | 56099410 | 56115859 | 1  | NM_001042470 | SUMF2     | 0 | NA | 0 | NA | 0 | NA | 0 | NA | 0 | NA |
| 7 | 56099410 | 56115859 | 1  | NM_015411    | SUMF2     | 0 | NA | 0 | NA | 0 | NA | 0 | NA | 0 | NA |
| 7 | 56128183 | 56116168 | -1 | NM_006213    | PHKG1     | 0 | NA | 0 | NA | 0 | NA | 0 | NA | 0 | NA |
| 7 | 56141681 | 56136759 | -1 | NM_016139    | CHCHD2    | 0 | NA | 0 | NA | 0 | NA | 0 | NA | 0 | NA |
| 7 | 57211513 | 57191267 | -1 | NM_033273    | ZNF479    | 0 | NA | 0 | NA | 0 | NA | 0 | NA | 0 | NA |
| 7 | 63660919 | 63617696 | -1 | NM_178558    | ZNF680    | 0 | NA | 1 | 17 | 0 | NA | 0 | NA | 0 | NA |
| 7 | 63763945 | 63808836 | 1  | NM_001013746 | ZNF107    | 0 | NA | 0 | NA | 0 | NA | 0 | NA | 0 | NA |
| 7 | 63763945 | 63808836 | 1  | NM_016220    | ZNF107    | 0 | NA | 0 | NA | 0 | NA | 0 | NA | 0 | NA |
| 7 | 63892240 | 63931140 | 1  | NM_006524    | ZNF138    | 1 | 15 | 0 | NA | 0 | NA | 1 | 11 | 0 | NA |
| 7 | 64001054 | 64029390 | 1  | NM_021148    | ZNF273    | 0 | NA | 0 | NA | 0 | NA | 0 | NA | 0 | NA |
| 7 | 64088849 | 64072264 | -1 | NM_015852    | ZNF117    | 0 | NA | 0 | NA | 0 | NA | 0 | NA | 0 | NA |
| 7 | 64476202 | 64503433 | 1  | NM_007139    | ZNF92     | 0 | NA | 0 | NA | 0 | NA | 0 | NA | 0 | NA |
| 7 | 64476202 | 64503433 | 1  | NM_152626    | ZNF92     | 0 | NA | 0 | NA | 0 | NA | 0 | NA | 0 | NA |
| 7 | 64975691 | 65057235 | 1  | NM_173517    | VKORC1L1  | 0 | NA | 0 | NA | 0 | NA | 0 | NA | 0 | NA |
| 7 | 65084681 | 65063107 | -1 | NM_000181    | GUSB      | 0 | NA | 0 | NA | 0 | NA | 0 | NA | 0 | NA |
| 7 | 65178210 | 65195764 | 1  | NM_000048    | ASL       | 0 | NA | 0 | NA | 0 | NA | 0 | NA | 0 | NA |
| 7 | 65178268 | 65195764 | 1  | NM_001024943 | ASL       | 0 | NA | 0 | NA | 0 | NA | 0 | NA | 0 | NA |
| 7 | 65178268 | 65195764 | 1  | NM_001024944 | ASL       | 0 | NA | 0 | NA | 0 | NA | 0 | NA | 0 | NA |
| 7 | 65178268 | 65195764 | 1  | NM_001024946 | ASL       | 0 | NA | 0 | NA | 0 | NA | 0 | NA | 0 | NA |
| 7 | 65217239 | 65256988 | 1  | NM_001040647 | RCP9      | 0 | NA | 0 | NA | 0 | NA | 0 | NA | 0 | NA |
| 7 | 65217239 | 65256988 | 1  | NM_001040648 | RCP9      | 0 | NA | 0 | NA | 0 | NA | 0 | NA | 0 | NA |
| 7 | 65217239 | 65256988 | 1  | NM_014478    | RCP9      | 0 | NA | 0 | NA | 0 | NA | 0 | NA | 0 | NA |
| 7 | 65307748 | 65462865 | 1  | NM_003596    | TPST1     | 0 | NA | 1 | 12 | 0 | NA | 0 | NA | 0 | NA |
| 7 | 65502830 | 65478478 | -1 | NM_181722    | LOC285908 | 0 | NA | 0 | NA | 0 | NA | 0 | NA | 0 | NA |
| 7 | 65731379 | 65743252 | 1  | NM_153033    | KCTD7     | 1 | 14 | 0 | NA | 0 | NA | 1 | 13 | 0 | NA |
| 7 | 65843077 | 65913883 | 1  | NM_014504    | RABGEF1   | 0 | NA | 0 | NA | 0 | NA | 0 | NA | 0 | NA |
| 7 | 66023637 | 66060973 | 1  | NM_017994    | C7orf42   | 0 | NA | 0 | NA | 0 | NA | 0 | NA | 0 | NA |
| 7 | 66098023 | 66090124 | -1 | NM_016038    | SBDS      | 1 | 12 | 0 | NA | 0 | NA | 0 | NA | 0 | NA |
| 7 | 66099251 | 66341933 | 1  | NM_018264    | TYW1      | 1 | 12 | 0 | NA | 0 | NA | 0 | NA | 0 | NA |
| 7 | 66405050 | 66423948 | 1  | NM_022906    | STAG3L4   | 0 | NA | 0 | NA | 0 | NA | 0 | NA | 0 | NA |
| 7 | 68701840 | 69895411 | 1  | NM_001127231 | AUTS2     | 0 | NA | 0 | NA | 0 | NA | 0 | NA | 0 | NA |
| 7 | 68701841 | 69393543 | 1  | NM_001127232 | AUTS2     | 0 | NA | 0 | NA | 0 | NA | 0 | NA | 0 | NA |
| 7 | 68701841 | 69895821 | 1  | NM_015570    | AUTS2     | 0 | NA | 0 | NA | 0 | NA | 0 | NA | 0 | NA |
| 7 | 70235724 | 70816520 | 1  | NM_022479    | WBSCR17   | 0 | NA | 0 | NA | 0 | NA | 0 | NA | 0 | NA |
| 7 | 71440144 | 70882411 | -1 | NM_001017440 | CALN1     | 0 | NA | 0 | NA | 0 | NA | 0 | NA | 0 | NA |
| 7 | 71515296 | 70882411 | -1 | NM_031468    | CALN1     | 0 | NA | 0 | NA | 0 | NA | 0 | NA | 0 | NA |
| 7 | 71987871 | 72056774 | 1  | NM_172020    | POM121    | 0 | NA | 0 | NA | 0 | NA | 0 | NA | 0 | NA |
| 7 | 72063222 | 72056767 | -1 | NM_001039487 | NSUN5C    | 0 | NA | 0 | NA | 0 | NA | 0 | NA | 0 | NA |
| 7 | 72063222 | 72056767 | -1 | NM_032158    | NSUN5C    | 0 | NA | 0 | NA | 0 | NA | 0 | NA | 0 | NA |
| 7 | 72063222 | 72056767 | -1 | NM_148936    | NSUN5C    | 0 | NA | 0 | NA | 0 | NA | 0 | NA | 0 | NA |
| 7 | 72077933 | 72067951 | -1 | NM_198853    | TRIM74    | 0 | NA | 0 | NA | 0 | NA | 0 | NA | 0 | NA |
| 7 | 72114391 | 72106962 | -1 | NM_001013739 | STAG3L3   | 0 | NA | 0 | NA | 0 | NA | 0 | NA | 0 | NA |
| 7 | 72360759 | 72355161 | -1 | NM_018044    | NSUN5     | 0 | NA | 0 | NA | 1 | 18 | 0 | NA | 0 | NA |
| 7 | 72360759 | 72355161 | -1 | NM_148956    | NSUN5     | 0 | NA | 0 | NA | 1 | 18 | 0 | NA | 0 | NA |
| 7 | 72380021 | 72364470 | -1 | NM_178125    | TRIM50    | 0 | NA | 0 | NA | 0 | NA | 0 | NA | 0 | NA |
| 7 | 72380235 | 72410577 | 1  | NM_003602    | FKBP6     | 0 | NA | 0 | NA | 0 | NA | 0 | NA | 0 | NA |
| 7 | 72486044 | 72488386 | 1  | NM_003508    | FZD9      | 1 | 11 | 1 | 12 | 1 | 13 | 0 | NA | 0 | NA |
| 7 | 72574544 | 72492675 | -1 | NM_032408    | BAZ1B     | 0 | NA | 0 | NA | 0 | NA | 0 | NA | 0 | NA |
| 7 | 72609960 | 72588621 | -1 | NM_001707    | BCL7B     | 0 | NA | 0 | NA | 0 | NA | 0 | NA | 0 | NA |
| 7 | 72630949 | 72621209 | -1 | NM_012453    | TBL2      | 1 | 11 | 0 | NA | 0 | NA | 0 | NA | 0 | NA |

|   |          |          |    |              |           |   |    |   |    |   |    |   |    |   |    |
|---|----------|----------|----|--------------|-----------|---|----|---|----|---|----|---|----|---|----|
| 7 | 72676806 | 72645459 | -1 | NM_032951    | MLXIPL    | 0 | NA | 1 | 15 | 0 | NA | 0 | NA | 0 | NA |
| 7 | 72676806 | 72645459 | -1 | NM_032952    | MLXIPL    | 0 | NA | 1 | 15 | 0 | NA | 0 | NA | 0 | NA |
| 7 | 72676806 | 72645459 | -1 | NM_032953    | MLXIPL    | 0 | NA | 1 | 15 | 0 | NA | 0 | NA | 0 | NA |
| 7 | 72676806 | 72645459 | -1 | NM_032954    | MLXIPL    | 0 | NA | 1 | 15 | 0 | NA | 0 | NA | 0 | NA |
| 7 | 72720109 | 72724376 | 1  | NM_001077621 | VPS37D    | 0 | NA | 1 | 12 | 0 | NA | 0 | NA | 0 | NA |
| 7 | 72735717 | 72733183 | -1 | NM_032317    | WBSCR18   | 0 | NA | 0 | NA | 1 | 12 | 1 | 12 | 0 | NA |
| 7 | 72735833 | 72750478 | 1  | NM_017528    | WBSCR22   | 0 | NA | 0 | NA | 1 | 12 | 1 | 12 | 0 | NA |
| 7 | 72771924 | 72751475 | -1 | NM_004603    | STX1A     | 1 | 11 | 0 | NA | 0 | NA | 0 | NA | 0 | NA |
| 7 | 72791120 | 72788362 | -1 | NM_148912    | ABHD11    | 0 | NA | 0 | NA | 0 | NA | 0 | NA | 0 | NA |
| 7 | 72822536 | 72821262 | -1 | NM_001306    | CLDN3     | 0 | NA | 0 | NA | 1 | 12 | 0 | NA | 0 | NA |
| 7 | 72883128 | 72884951 | 1  | NM_001305    | CLDN4     | 1 | 16 | 0 | NA | 0 | NA | 0 | NA | 0 | NA |
| 7 | 72894791 | 72886857 | -1 | NM_152559    | WBSCR27   | 0 | NA | 0 | NA | 1 | 22 | 0 | NA | 0 | NA |
| 7 | 72913424 | 72918159 | 1  | NM_182504    | WBSCR28   | 0 | NA | 0 | NA | 1 | 13 | 0 | NA | 0 | NA |
| 7 | 73080362 | 73122172 | 1  | NM_000501    | ELN       | 1 | 12 | 0 | NA | 0 | NA | 0 | NA | 0 | NA |
| 7 | 73080362 | 73122172 | 1  | NM_001081752 | ELN       | 1 | 12 | 0 | NA | 0 | NA | 0 | NA | 0 | NA |
| 7 | 73080362 | 73122172 | 1  | NM_001081753 | ELN       | 1 | 12 | 0 | NA | 0 | NA | 0 | NA | 0 | NA |
| 7 | 73080362 | 73122172 | 1  | NM_001081754 | ELN       | 1 | 12 | 0 | NA | 0 | NA | 0 | NA | 0 | NA |
| 7 | 73080362 | 73122172 | 1  | NM_001081755 | ELN       | 1 | 12 | 0 | NA | 0 | NA | 0 | NA | 0 | NA |
| 7 | 73136091 | 73174790 | 1  | NM_002314    | LIMK1     | 0 | NA | 0 | NA | 0 | NA | 1 | 17 | 0 | NA |
| 7 | 73226641 | 73249365 | 1  | NM_022170    | EIF4H     | 0 | NA | 0 | NA | 0 | NA | 0 | NA | 0 | NA |
| 7 | 73226641 | 73249365 | 1  | NM_031992    | EIF4H     | 0 | NA | 0 | NA | 0 | NA | 0 | NA | 0 | NA |
| 7 | 73262022 | 73282100 | 1  | NM_014146    | LAT2      | 0 | NA | 0 | NA | 0 | NA | 0 | NA | 0 | NA |
| 7 | 73262022 | 73282100 | 1  | NM_032463    | LAT2      | 0 | NA | 0 | NA | 0 | NA | 0 | NA | 0 | NA |
| 7 | 73262022 | 73282100 | 1  | NM_032464    | LAT2      | 0 | NA | 0 | NA | 0 | NA | 0 | NA | 0 | NA |
| 7 | 73306674 | 73283767 | -1 | NM_002914    | RFC2      | 0 | NA | 0 | NA | 1 | 12 | 0 | NA | 0 | NA |
| 7 | 73306674 | 73283767 | -1 | NM_181471    | RFC2      | 0 | NA | 0 | NA | 1 | 12 | 0 | NA | 0 | NA |
| 7 | 73341740 | 73458209 | 1  | NM_003388    | CLIP2     | 0 | NA | 0 | NA | 0 | NA | 0 | NA | 0 | NA |
| 7 | 73341740 | 73458209 | 1  | NM_032421    | CLIP2     | 0 | NA | 0 | NA | 0 | NA | 0 | NA | 0 | NA |
| 7 | 73506055 | 73654848 | 1  | NM_016328    | GTF2IRD1  | 1 | 11 | 0 | NA | 0 | NA | 0 | NA | 0 | NA |
| 7 | 73506372 | 73654848 | 1  | NM_005685    | GTF2IRD1  | 1 | 11 | 0 | NA | 0 | NA | 0 | NA | 0 | NA |
| 7 | 73709965 | 73812958 | 1  | NM_001518    | GTF2I     | 0 | NA | 0 | NA | 1 | 15 | 0 | NA | 0 | NA |
| 7 | 73709965 | 73812958 | 1  | NM_032999    | GTF2I     | 0 | NA | 0 | NA | 1 | 15 | 0 | NA | 0 | NA |
| 7 | 73709965 | 73812958 | 1  | NM_033000    | GTF2I     | 0 | NA | 0 | NA | 1 | 15 | 0 | NA | 0 | NA |
| 7 | 73709965 | 73812958 | 1  | NM_033001    | GTF2I     | 0 | NA | 0 | NA | 1 | 15 | 0 | NA | 0 | NA |
| 7 | 73826244 | 73841595 | 1  | NM_000265    | NCF1      | 0 | NA | 0 | NA | 0 | NA | 0 | NA | 0 | NA |
| 7 | 73905777 | 73848419 | -1 | NM_173537    | GTF2IRD2  | 0 | NA | 0 | NA | 0 | NA | 0 | NA | 0 | NA |
| 7 | 73944667 | 73937218 | -1 | NM_001025202 | STAG3L2   | 0 | NA | 0 | NA | 0 | NA | 0 | NA | 0 | NA |
| 7 | 73944836 | 73959790 | 1  | NM_174930    | PMS2L5    | 0 | NA | 0 | NA | 0 | NA | 0 | NA | 0 | NA |
| 7 | 74127635 | 74094218 | -1 | NM_030798    | WBSCR16   | 0 | NA | 0 | NA | 0 | NA | 0 | NA | 0 | NA |
| 7 | 74146282 | 74203559 | 1  | NM_001003795 | GTF2IRD2B | 0 | NA | 0 | NA | 0 | NA | 0 | NA | 0 | NA |
| 7 | 74826382 | 74834926 | 1  | NM_001002840 | STAG3L1   | 0 | NA | 0 | NA | 0 | NA | 0 | NA | 0 | NA |
| 7 | 74826382 | 74834926 | 1  | NM_018991    | STAG3L1   | 0 | NA | 0 | NA | 0 | NA | 0 | NA | 0 | NA |
| 7 | 74862838 | 74872824 | 1  | NM_198924    | TRIM73    | 0 | NA | 0 | NA | 0 | NA | 0 | NA | 0 | NA |
| 7 | 74877581 | 74884001 | 1  | NM_001039575 | NSUN5B    | 0 | NA | 0 | NA | 0 | NA | 0 | NA | 0 | NA |
| 7 | 74877581 | 74884001 | 1  | NM_001039576 | NSUN5B    | 0 | NA | 0 | NA | 0 | NA | 0 | NA | 0 | NA |
| 7 | 74877581 | 74884001 | 1  | NM_145645    | NSUN5B    | 0 | NA | 0 | NA | 0 | NA | 0 | NA | 0 | NA |
| 7 | 74953504 | 74884000 | -1 | NM_001099415 | POM121C   | 0 | NA | 0 | NA | 0 | NA | 0 | NA | 0 | NA |
| 7 | 74962234 | 74971564 | 1  | NM_001099435 | LOC442590 | 0 | NA | 0 | NA | 0 | NA | 0 | NA | 0 | NA |
| 7 | 74995330 | 74975004 | -1 | NM_001003686 | PMS2L3    | 0 | NA | 0 | NA | 0 | NA | 0 | NA | 0 | NA |
| 7 | 74995330 | 74975004 | -1 | NM_005395    | PMS2L3    | 0 | NA | 0 | NA | 0 | NA | 0 | NA | 0 | NA |
| 7 | 75206215 | 75001344 | 0  | NA           | HIP1      | 0 | NA | 0 | NA | 0 | NA | 0 | NA | 0 | NA |
| 7 | 75257000 | 75236777 | -1 | NM_006072    | CCL26     | 0 | NA | 0 | NA | 0 | NA | 0 | NA | 0 | NA |
| 7 | 75280969 | 75279049 | -1 | NM_002991    | CCL24     | 1 | 11 | 1 | 13 | 0 | NA | 1 | 25 | 0 | NA |
| 7 | 75346252 | 75356180 | 0  | NA           | RHBDD2    | 0 | NA | 0 | NA | 0 | NA | 0 | NA | 0 | NA |
| 7 | 75346252 | 75356180 | 1  | NM_001040457 | RHBDD2    | 0 | NA | 0 | NA | 0 | NA | 0 | NA | 0 | NA |
| 7 | 75382355 | 75454109 | 1  | NM_000941    | POR       | 1 | 12 | 0 | NA | 0 | NA | 0 | NA | 0 | NA |
| 7 | 75461889 | 75454242 | -1 | NM_031925    | TMEM120A  | 0 | NA | 0 | NA | 0 | NA | 0 | NA | 0 | NA |
| 7 | 75515257 | 75463590 | -1 | NM_016086    | STYXL1    | 1 | 12 | 0 | NA | 1 | 12 | 0 | NA | 0 | NA |
| 7 | 75515328 | 75533866 | 1  | NM_005918    | MDH2      | 1 | 12 | 0 | NA | 1 | 12 | 0 | NA | 0 | NA |
| 7 | 75669151 | 75754541 | 1  | NM_001110199 | FLJ37078  | 0 | NA | 0 | NA | 0 | NA | 0 | NA | 0 | NA |
| 7 | 75769858 | 75771548 | 1  | NM_001540    | HSPB1     | 1 | 14 | 0 | NA | 0 | NA | 1 | 13 | 0 | NA |
| 7 | 75826252 | 75794051 | -1 | NM_012479    | YWHAG     | 1 | 11 | 0 | NA | 1 | 12 | 0 | NA | 0 | NA |
| 7 | 75864776 | 75909324 | 1  | NM_007155    | ZP3       | 0 | NA | 0 | NA | 1 | 14 | 1 | 12 | 0 | NA |
| 7 | 75876948 | 75856581 | -1 | NM_080744    | SRCRB4D   | 0 | NA | 0 | NA | 0 | NA | 0 | NA | 0 | NA |
| 7 | 75892207 | 75909324 | 1  | NM_001110354 | ZP3       | 0 | NA | 0 | NA | 0 | NA | 0 | NA | 0 | NA |

|   |          |          |    |              |           |   |    |   |    |   |    |   |    |   |    |
|---|----------|----------|----|--------------|-----------|---|----|---|----|---|----|---|----|---|----|
| 7 | 75928907 | 75973248 | 1  | NM_001102594 | DTX2      | 0 | NA | 0 | NA | 0 | NA | 0 | NA | 0 | NA |
| 7 | 75928907 | 75973248 | 1  | NM_001102595 | DTX2      | 0 | NA | 0 | NA | 0 | NA | 0 | NA | 0 | NA |
| 7 | 75928907 | 75973248 | 1  | NM_020892    | DTX2      | 0 | NA | 0 | NA | 0 | NA | 0 | NA | 0 | NA |
| 7 | 75947762 | 75973248 | 1  | NM_001102596 | DTX2      | 0 | NA | 0 | NA | 0 | NA | 0 | NA | 0 | NA |
| 7 | 75977680 | 75995135 | 1  | NM_030570    | UPKB      | 0 | NA | 0 | NA | 0 | NA | 0 | NA | 0 | NA |
| 7 | 75977680 | 75995135 | 1  | NM_182684    | UPKB      | 0 | NA | 0 | NA | 0 | NA | 0 | NA | 0 | NA |
| 7 | 76094556 | 76077238 | -1 | NM_012230    | POMZP3    | 0 | NA | 0 | NA | 0 | NA | 0 | NA | 0 | NA |
| 7 | 76094556 | 76077238 | -1 | NM_152992    | POMZP3    | 0 | NA | 0 | NA | 0 | NA | 0 | NA | 0 | NA |
| 7 | 76589869 | 76762457 | 1  | NM_020879    | CCDC146   | 0 | NA | 0 | NA | 0 | NA | 0 | NA | 0 | NA |
| 7 | 76667086 | 76660623 | -1 | NM_006682    | FGL2      | 0 | NA | 0 | NA | 1 | 34 | 0 | NA | 0 | NA |
| 7 | 76883653 | 76778003 | -1 | NM_017439    | LOC54103  | 0 | NA | 0 | NA | 0 | NA | 0 | NA | 0 | NA |
| 7 | 77004770 | 77107322 | 1  | NM_002835    | PTPN12    | 1 | 12 | 0 | NA | 0 | NA | 0 | NA | 0 | NA |
| 7 | 77163678 | 77247056 | 1  | NM_198467    | RSBN1L    | 0 | NA | 0 | NA | 0 | NA | 0 | NA | 0 | NA |
| 7 | 77265683 | 77260980 | -1 | NM_032936    | TMEM60    | 0 | NA | 0 | NA | 0 | NA | 0 | NA | 0 | NA |
| 7 | 77307432 | 77424475 | 1  | NM_020432    | PHTF2     | 0 | NA | 0 | NA | 0 | NA | 0 | NA | 0 | NA |
| 7 | 78920826 | 77484309 | -1 | NM_012301    | MAGI2     | 1 | 16 | 0 | NA | 0 | NA | 0 | NA | 0 | NA |
| 7 | 79602075 | 79686661 | 1  | NM_002069    | GNA11     | 0 | NA | 0 | NA | 1 | 13 | 0 | NA | 0 | NA |
| 7 | 79979178 | 79925922 | -1 | NM_001102386 | GNAT3     | 0 | NA | 0 | NA | 0 | NA | 0 | NA | 0 | NA |
| 7 | 80069458 | 80141670 | 1  | NM_001001547 | CD36      | 0 | NA | 0 | NA | 0 | NA | 0 | NA | 0 | NA |
| 7 | 80105892 | 80141670 | 1  | NM_000072    | CD36      | 0 | NA | 0 | NA | 0 | NA | 0 | NA | 0 | NA |
| 7 | 80105892 | 80144261 | 1  | NM_001001548 | CD36      | 0 | NA | 0 | NA | 0 | NA | 0 | NA | 0 | NA |
| 7 | 80386603 | 80209789 | -1 | NM_006379    | SEMA3C    | 0 | NA | 0 | NA | 0 | NA | 1 | 16 | 0 | NA |
| 7 | 81237388 | 81169379 | -1 | NM_000601    | HGF       | 0 | NA | 0 | NA | 0 | NA | 0 | NA | 0 | NA |
| 7 | 81237388 | 81169379 | -1 | NM_001010932 | HGF       | 0 | NA | 0 | NA | 0 | NA | 0 | NA | 0 | NA |
| 7 | 81237388 | 81209942 | -1 | NM_001010931 | HGF       | 0 | NA | 0 | NA | 0 | NA | 0 | NA | 0 | NA |
| 7 | 81237388 | 81209942 | -1 | NM_001010933 | HGF       | 0 | NA | 0 | NA | 0 | NA | 0 | NA | 0 | NA |
| 7 | 81237388 | 81218151 | -1 | NM_001010934 | HGF       | 0 | NA | 0 | NA | 0 | NA | 0 | NA | 0 | NA |
| 7 | 81910967 | 81417353 | -1 | NM_000722    | CACNA2D1  | 0 | NA | 1 | 12 | 0 | NA | 0 | NA | 0 | NA |
| 7 | 82630133 | 82221256 | -1 | NM_033026    | PCL0      | 0 | NA | 0 | NA | 0 | NA | 0 | NA | 0 | NA |
| 7 | 82630133 | 82287731 | -1 | NM_014510    | PCL0      | 0 | NA | 0 | NA | 0 | NA | 0 | NA | 0 | NA |
| 7 | 83116260 | 82831157 | -1 | NM_012431    | SEMA3E    | 0 | NA | 0 | NA | 0 | NA | 0 | NA | 0 | NA |
| 7 | 83662153 | 83425594 | -1 | NM_006080    | SEMA3A    | 0 | NA | 0 | NA | 0 | NA | 0 | NA | 0 | NA |
| 7 | 84589183 | 84462807 | -1 | NM_152754    | SEMA3D    | 0 | NA | 0 | NA | 0 | NA | 0 | NA | 0 | NA |
| 7 | 86111165 | 86332128 | 1  | NM_000840    | GRM3      | 0 | NA | 0 | NA | 0 | NA | 0 | NA | 1 | 12 |
| 7 | 86507467 | 86347173 | -1 | NM_152748    | KIAA1324L | 0 | NA | 0 | NA | 0 | NA | 0 | NA | 0 | NA |
| 7 | 86619859 | 86663584 | 1  | NM_021145    | DMTF1     | 1 | 17 | 0 | NA | 0 | NA | 0 | NA | 0 | NA |
| 7 | 86686967 | 86663413 | -1 | NM_024315    | C7orf23   | 0 | NA | 0 | NA | 0 | NA | 0 | NA | 0 | NA |
| 7 | 86812946 | 86867045 | 1  | NM_021151    | CROT      | 1 | 11 | 0 | NA | 1 | 17 | 0 | NA | 0 | NA |
| 7 | 86942955 | 86869296 | -1 | NM_000443    | ABCB4     | 0 | NA | 0 | NA | 0 | NA | 0 | NA | 0 | NA |
| 7 | 86942955 | 86869296 | -1 | NM_018849    | ABCB4     | 0 | NA | 0 | NA | 0 | NA | 0 | NA | 0 | NA |
| 7 | 86942955 | 86869296 | -1 | NM_018850    | ABCB4     | 0 | NA | 0 | NA | 0 | NA | 0 | NA | 0 | NA |
| 7 | 87095664 | 87297691 | 1  | NM_138290    | RUNC3B    | 0 | NA | 0 | NA | 0 | NA | 0 | NA | 0 | NA |
| 7 | 87180500 | 86970883 | -1 | NM_000927    | ABCB1     | 0 | NA | 0 | NA | 0 | NA | 0 | NA | 0 | NA |
| 7 | 87343479 | 87376792 | 1  | NM_006716    | DBF4      | 0 | NA | 1 | 14 | 0 | NA | 0 | NA | 0 | NA |
| 7 | 87343604 | 87303353 | -1 | NM_018843    | SLC25A40  | 0 | NA | 1 | 14 | 0 | NA | 0 | NA | 0 | NA |
| 7 | 87401637 | 87649364 | 1  | NM_004194    | ADAM22    | 0 | NA | 0 | NA | 0 | NA | 0 | NA | 0 | NA |
| 7 | 87401637 | 87649364 | 1  | NM_021721    | ADAM22    | 0 | NA | 0 | NA | 0 | NA | 0 | NA | 0 | NA |
| 7 | 87401637 | 87664385 | 1  | NM_016351    | ADAM22    | 0 | NA | 0 | NA | 0 | NA | 0 | NA | 0 | NA |
| 7 | 87401637 | 87664385 | 1  | NM_021722    | ADAM22    | 0 | NA | 0 | NA | 0 | NA | 0 | NA | 0 | NA |
| 7 | 87401637 | 87664385 | 1  | NM_021723    | ADAM22    | 0 | NA | 0 | NA | 0 | NA | 0 | NA | 0 | NA |
| 7 | 87687329 | 87672367 | -1 | NM_003130    | SRI       | 1 | 12 | 0 | NA | 0 | NA | 0 | NA | 0 | NA |
| 7 | 87694244 | 87672367 | -1 | NM_198901    | SRI       | 1 | 12 | 0 | NA | 0 | NA | 0 | NA | 0 | NA |
| 7 | 87774145 | 87743679 | -1 | NM_024636    | STEAP4    | 0 | NA | 0 | NA | 0 | NA | 0 | NA | 0 | NA |
| 7 | 88226688 | 88804282 | 1  | NM_181646    | ZNF804B   | 0 | NA | 0 | NA | 0 | NA | 0 | NA | 0 | NA |
| 7 | 88262967 | 88261355 | -1 | NM_152706    | MGC26647  | 0 | NA | 0 | NA | 0 | NA | 0 | NA | 0 | NA |
| 7 | 89621624 | 89632077 | 1  | NM_012449    | STEAP1    | 0 | NA | 0 | NA | 0 | NA | 0 | NA | 0 | NA |
| 7 | 89678935 | 89704928 | 1  | NM_152999    | STEAP2    | 0 | NA | 0 | NA | 0 | NA | 0 | NA | 0 | NA |
| 7 | 89679109 | 89704928 | 1  | NM_001040665 | STEAP2    | 0 | NA | 0 | NA | 0 | NA | 0 | NA | 0 | NA |
| 7 | 89681069 | 89704928 | 1  | NM_001040666 | STEAP2    | 0 | NA | 0 | NA | 0 | NA | 0 | NA | 0 | NA |
| 7 | 89712460 | 89777622 | 1  | NM_001039706 | FLJ21062  | 0 | NA | 0 | NA | 0 | NA | 0 | NA | 0 | NA |
| 7 | 89813925 | 89854586 | 1  | NM_001042717 | GTPBP10   | 0 | NA | 0 | NA | 0 | NA | 1 | 20 | 0 | NA |
| 7 | 89813925 | 89854586 | 1  | NM_033107    | GTPBP10   | 0 | NA | 0 | NA | 0 | NA | 1 | 20 | 0 | NA |
| 7 | 89870731 | 89883204 | 1  | NM_012129    | CLDN12    | 1 | 12 | 0 | NA | 1 | 16 | 0 | NA | 0 | NA |
| 7 | 90176647 | 90677840 | 1  | NM_012395    | PFTK1     | 0 | NA | 0 | NA | 0 | NA | 0 | NA | 0 | NA |
| 7 | 90731718 | 90736068 | 1  | NM_003505    | FZD1      | 1 | 12 | 1 | 32 | 0 | NA | 0 | NA | 1 | 14 |

|   |          |          |    |              |               |    |    |   |    |    |    |    |    |    |    |
|---|----------|----------|----|--------------|---------------|----|----|---|----|----|----|----|----|----|----|
| 7 | 91347952 | 91339956 | -1 | NM_006980    | MTERF         | 0  | NA | 0 | NA | 1  | 13 | 0  | NA | 0  | NA |
| 7 | 91408127 | 91509031 | 1  | NM_147166    | AKAP9         | 0  | NA | 0 | NA | 0  | NA | 0  | NA | 0  | NA |
| 7 | 91408127 | 91577925 | 1  | NM_005751    | AKAP9         | 0  | NA | 0 | NA | 0  | NA | 0  | NA | 0  | NA |
| 7 | 91408127 | 91577925 | 1  | NM_147171    | AKAP9         | 0  | NA | 0 | NA | 0  | NA | 0  | NA | 0  | NA |
| 7 | 91408127 | 91577925 | 1  | NM_147185    | AKAP9         | 0  | NA | 0 | NA | 0  | NA | 0  | NA | 0  | NA |
| 7 | 91601776 | 91579398 | -1 | NM_000786    | CYP51A1       | 0  | NA | 0 | NA | 0  | NA | 0  | NA | 0  | NA |
| 7 | 91713148 | 91666218 | -1 | NM_004912    | KRIT1         | 0  | NA | 0 | NA | 0  | NA | 0  | NA | 0  | NA |
| 7 | 91713164 | 91666218 | -1 | NM_001013406 | KRIT1         | 0  | NA | 0 | NA | 0  | NA | 0  | NA | 0  | NA |
| 7 | 91713164 | 91666218 | -1 | NM_194454    | KRIT1         | 0  | NA | 0 | NA | 0  | NA | 0  | NA | 0  | NA |
| 7 | 91713350 | 91666218 | -1 | NM_194455    | KRIT1         | 0  | NA | 0 | NA | 0  | NA | 0  | NA | 0  | NA |
| 7 | 91713350 | 91666218 | -1 | NM_194456    | KRIT1         | 0  | NA | 0 | NA | 0  | NA | 0  | NA | 0  | NA |
| 7 | 91713483 | 91868634 | 1  | NM_019004    | ANKIB1        | 0  | NA | 0 | NA | 0  | NA | 0  | NA | 0  | NA |
| 7 | 91914700 | 91926678 | 1  | NM_021167    | GATAD1        | 0  | NA | 0 | NA | 0  | NA | 0  | NA | 0  | NA |
| 7 | 91995781 | 91954272 | -1 | NM_000466    | PEX1          | 0  | NA | 0 | NA | 1  | 21 | 1  | 15 | 0  | NA |
| 7 | 91996022 | 92004759 | 1  | NM_032120    | DKFZP564O0523 | 0  | NA | 0 | NA | 1  | 21 | 1  | 15 | 0  | NA |
| 7 | 92057642 | 92028007 | -1 | NM_001040057 | FAM133B       | 0  | NA | 0 | NA | 0  | NA | 0  | NA | 0  | NA |
| 7 | 92057642 | 92028007 | -1 | NM_152789    | FAM133B       | 0  | NA | 0 | NA | 0  | NA | 0  | NA | 0  | NA |
| 7 | 92301148 | 92072170 | -1 | NM_001259    | CDK6          | 1  | 15 | 0 | NA | 0  | NA | 0  | NA | 1  | 13 |
| 7 | 92585258 | 92566766 | -1 | NM_017654    | SAMD9         | 0  | NA | 0 | NA | 1  | 14 | 0  | NA | 0  | NA |
| 7 | 92615616 | 92597303 | -1 | NM_152703    | SAMD9L        | 0  | NA | 0 | NA | 0  | NA | 0  | NA | 1  | 12 |
| 7 | 92686806 | 92655834 | -1 | NM_198151    | LOC253012     | 0  | NA | 0 | NA | 0  | NA | 0  | NA | 0  | NA |
| 7 | 92693718 | 92655835 | -1 | NM_001039372 | LOC253012     | 0  | NA | 0 | NA | 0  | NA | 0  | NA | 0  | NA |
| 7 | 92699588 | 92743673 | 1  | NM_024553    | CCDC132       | 0  | NA | 0 | NA | 0  | NA | 0  | NA | 0  | NA |
| 7 | 92699588 | 92826274 | 1  | NM_017667    | CCDC132       | 0  | NA | 0 | NA | 0  | NA | 0  | NA | 0  | NA |
| 7 | 93041686 | 92891734 | -1 | NM_001742    | CALCR         | 0  | NA | 0 | NA | 0  | NA | 0  | NA | 1  | 12 |
| 7 | 93358001 | 93353680 | -1 | NM_006528    | TFPI2         | 0  | NA | 0 | NA | 0  | NA | 0  | NA | 0  | NA |
| 7 | 93373755 | 93378421 | 1  | NM_021955    | GNGT1         | 0  | NA | 0 | NA | 0  | NA | 0  | NA | 0  | NA |
| 7 | 93388951 | 93393762 | 1  | NM_004126    | GNGT1         | 0  | NA | 0 | NA | 0  | NA | 0  | NA | 0  | NA |
| 7 | 93471626 | 93458935 | -1 | NM_005868    | BET1          | 0  | NA | 0 | NA | 0  | NA | 0  | NA | 0  | NA |
| 7 | 93861808 | 93898480 | 1  | NM_000089    | COL1A2        | 0  | NA | 0 | NA | 1  | 14 | 0  | NA | 0  | NA |
| 7 | 93977105 | 94024264 | 1  | NM_022900    | CASD1         | 0  | NA | 0 | NA | 0  | NA | 0  | NA | 0  | NA |
| 7 | 94123457 | 94052471 | -1 | NM_001099400 | SGCE          | 11 | 11 | 1 | NA | 14 | 14 | 1  | 14 | 1  | 12 |
| 7 | 94123457 | 94052471 | -1 | NM_001099401 | SGCE          | 1  | 11 | 1 | NA | 14 | 14 | 1  | 14 | 1  | 12 |
| 7 | 94123457 | 94052471 | -1 | NM_003919    | SGCE          | 1  | 11 | 1 | NA | 14 | 14 | 1  | 14 | 1  | 12 |
| 7 | 94123572 | 94136942 | 1  | NM_001040152 | PEG10         | 1  | 11 | 1 | NA | 14 | 14 | 1  | 14 | 1  | 12 |
| 7 | 94123572 | 94136942 | 1  | NM_015068    | PEG10         | 1  | 11 | 1 | NA | 14 | 14 | 1  | 14 | 1  | 12 |
| 7 | 94374884 | 94763683 | 1  | NM_017650    | PPP1R9A       | 0  | NA | 0 | NA | 1  | 16 | 0  | NA | 0  | NA |
| 7 | 94791780 | 94764923 | -1 | NM_000446    | PON1          | 0  | NA | 0 | NA | 0  | NA | 0  | NA | 0  | NA |
| 7 | 94863623 | 94827119 | -1 | NM_000940    | PON3          | 0  | NA | 0 | NA | 0  | NA | 0  | NA | 0  | NA |
| 7 | 94902320 | 94872109 | -1 | NM_000305    | PON2          | 1  | 13 | 1 | NA | 13 | 0  | NA | 0  | NA | NA |
| 7 | 94902320 | 94872109 | -1 | NM_001018161 | PON2          | 1  | 13 | 1 | NA | 13 | 0  | NA | 0  | NA | NA |
| 7 | 94953219 | 94996049 | 1  | NM_145872    | ASB4          | 0  | NA | 0 | NA | 1  | 12 | 1  | 15 | 0  | NA |
| 7 | 94953219 | 95005007 | 1  | NM_016116    | ASB4          | 0  | NA | 0 | NA | 1  | 12 | 1  | 15 | 0  | NA |
| 7 | 95063861 | 95050744 | -1 | NM_002612    | PDK4          | 1  | 14 | 0 | NA | 0  | NA | 0  | NA | 0  | NA |
| 7 | 95239837 | 95566658 | 1  | NM_004411    | DYNC11H       | 0  | NA | 0 | NA | 0  | NA | 0  | NA | 0  | NA |
| 7 | 95789395 | 95587467 | -1 | NM_014251    | SLC25A13      | 0  | NA | 0 | NA | 0  | NA | 0  | NA | 0  | NA |
| 7 | 96177139 | 96156014 | -1 | NM_006304    | SHFM1         | 1  | 17 | 0 | NA | 0  | NA | 1  | 32 | 0  | NA |
| 7 | 96473225 | 96478288 | 1  | NM_005222    | DLX6          | 0  | NA | 1 | NA | 13 | 0  | NA | 0  | NA | NA |
| 7 | 96492079 | 96487637 | -1 | NM_005221    | DLX5          | 0  | NA | 1 | NA | 14 | 0  | NA | 0  | NA | NA |
| 7 | 96583840 | 96649011 | 1  | NM_020186    | ACN9          | 1  | 18 | 0 | NA | 1  | 17 | 1  | 19 | 0  | NA |
| 7 | 97199206 | 97207720 | 1  | NM_003182    | TAC1          | 0  | NA | 0 | NA | 0  | NA | 0  | NA | 1  | 14 |
| 7 | 97199206 | 97207720 | 1  | NM_013996    | TAC1          | 0  | NA | 0 | NA | 0  | NA | 0  | NA | 1  | 14 |
| 7 | 97199206 | 97207720 | 1  | NM_013997    | TAC1          | 0  | NA | 0 | NA | 0  | NA | 0  | NA | 1  | 14 |
| 7 | 97199206 | 97207720 | 1  | NM_013998    | TAC1          | 0  | NA | 0 | NA | 0  | NA | 0  | NA | 1  | 14 |
| 7 | 97339413 | 97319376 | -1 | NM_133436    | ASNS          | 0  | NA | 0 | NA | 0  | NA | 0  | NA | 0  | NA |
| 7 | 97339790 | 97319376 | -1 | NM_001673    | ASNS          | 0  | NA | 0 | NA | 0  | NA | 0  | NA | 0  | NA |
| 7 | 97339790 | 97319376 | -1 | NM_183356    | ASNS          | 0  | NA | 0 | NA | 0  | NA | 0  | NA | 0  | NA |
| 7 | 97457352 | 97451948 | -1 | NM_006188    | LOC4951       | 0  | NA | 0 | NA | 0  | NA | 0  | NA | 0  | NA |
| 7 | 97574132 | 97673537 | 1  | NM_014916    | LMTK2         | 0  | NA | 0 | NA | 0  | NA | 0  | NA | 0  | NA |
| 7 | 97679501 | 97680207 | 1  | NM_177455    | BHLHB8        | 0  | NA | 0 | NA | 0  | NA | 0  | NA | 0  | NA |
| 7 | 97719404 | 97683982 | -1 | NM_015395    | DKFZP434B0335 | 0  | NA | 0 | NA | 0  | NA | 1  | 12 | 0  | NA |
| 7 | 97748922 | 97758775 | 1  | NM_015379    | BRI3          | 0  | NA | 0 | NA | 0  | NA | 0  | NA | 0  | NA |
| 7 | 97868316 | 97760490 | -1 | NM_018842    | BAIAP2L1      | 0  | NA | 0 | NA | 0  | NA | 0  | NA | 0  | NA |
| 7 | 98084544 | 98097116 | 1  | NM_002523    | NPTX2         | 0  | NA | 0 | NA | 0  | NA | 0  | NA | 1  | 18 |
| 7 | 98305573 | 98282046 | -1 | NM_152913    | TMEM130       | 0  | NA | 1 | NA | 13 | 0  | NA | 0  | NA | 14 |

|   |          |          |    |              |           |   |    |   |    |   |    |   |    |   |    |
|---|----------|----------|----|--------------|-----------|---|----|---|----|---|----|---|----|---|----|
| 7 | 98314048 | 98448775 | 1  | NM_003496    | TRRAP     | 0 | NA | 0 | NA | 0 | NA | 0 | NA | 0 | NA |
| 7 | 98579659 | 98462999 | -1 | NM_020429    | SMURF1    | 0 | NA | 0 | NA | 0 | NA | 0 | NA | 0 | NA |
| 7 | 98579659 | 98462999 | -1 | NM_181349    | SMURF1    | 0 | NA | 0 | NA | 0 | NA | 0 | NA | 0 | NA |
| 7 | 98761445 | 98801821 | 1  | NM_006409    | ARPC1A    | 0 | NA | 0 | NA | 0 | NA | 0 | NA | 0 | NA |
| 7 | 98810264 | 98830340 | 1  | NM_005720    | ARPC1B    | 0 | NA | 0 | NA | 0 | NA | 0 | NA | 0 | NA |
| 7 | 98844228 | 98830524 | -1 | NM_014891    | PDAP1     | 0 | NA | 0 | NA | 0 | NA | 0 | NA | 0 | NA |
| 7 | 98844536 | 98855175 | 1  | NM_003910    | BUD31     | 0 | NA | 0 | NA | 0 | NA | 0 | NA | 0 | NA |
| 7 | 98874355 | 98854681 | -1 | NM_015545    | PTCD1     | 0 | NA | 0 | NA | 0 | NA | 0 | NA | 0 | NA |
| 7 | 98874498 | 98892932 | 1  | NM_001081559 | CPSF4     | 0 | NA | 0 | NA | 0 | NA | 0 | NA | 0 | NA |
| 7 | 98874498 | 98892932 | 1  | NM_006693    | CPSF4     | 0 | NA | 0 | NA | 0 | NA | 0 | NA | 0 | NA |
| 7 | 98901744 | 98893719 | -1 | NM_001003713 | ATP5J2    | 1 | 14 | 0 | NA | 0 | NA | 1 | 15 | 0 | NA |
| 7 | 98901744 | 98893719 | -1 | NM_001003714 | ATP5J2    | 1 | 14 | 0 | NA | 0 | NA | 1 | 15 | 0 | NA |
| 7 | 98901744 | 98893719 | -1 | NM_001039178 | ATP5J2    | 1 | 14 | 0 | NA | 0 | NA | 1 | 15 | 0 | NA |
| 7 | 98901744 | 98893719 | -1 | NM_004889    | ATP5J2    | 1 | 14 | 0 | NA | 0 | NA | 1 | 15 | 0 | NA |
| 7 | 98908450 | 98917884 | 1  | NM_001013258 | ZNF789    | 1 | 14 | 0 | NA | 0 | NA | 1 | 15 | 0 | NA |
| 7 | 98908450 | 98923153 | 1  | NM_213603    | ZNF789    | 1 | 14 | 0 | NA | 0 | NA | 1 | 15 | 0 | NA |
| 7 | 98935813 | 98928789 | -1 | NM_032164    | ZNF394    | 1 | 12 | 0 | NA | 0 | NA | 0 | NA | 0 | NA |
| 7 | 98940208 | 98969381 | 1  | NM_145102    | ZKSCAN5   | 0 | NA | 0 | NA | 0 | NA | 0 | NA | 0 | NA |
| 7 | 98940508 | 98969381 | 1  | NM_014569    | ZKSCAN5   | 0 | NA | 0 | NA | 0 | NA | 0 | NA | 0 | NA |
| 7 | 98987652 | 98981858 | -1 | NM_145111    | C7orf38   | 0 | NA | 0 | NA | 0 | NA | 1 | 14 | 0 | NA |
| 7 | 98993980 | 99000264 | 1  | NM_001085366 | ZNF655    | 0 | NA | 0 | NA | 0 | NA | 1 | 14 | 0 | NA |
| 7 | 98993980 | 99000264 | 1  | NM_024061    | ZNF655    | 0 | NA | 0 | NA | 0 | NA | 1 | 14 | 0 | NA |
| 7 | 98993980 | 99012013 | 1  | NM_001083956 | ZNF655    | 0 | NA | 0 | NA | 0 | NA | 1 | 14 | 0 | NA |
| 7 | 98993980 | 99012013 | 1  | NM_138494    | ZNF655    | 0 | NA | 0 | NA | 0 | NA | 1 | 14 | 0 | NA |
| 7 | 98994383 | 99000264 | 1  | NM_001009958 | ZNF655    | 0 | NA | 0 | NA | 0 | NA | 1 | 14 | 0 | NA |
| 7 | 98994383 | 99000264 | 1  | NM_001085367 | ZNF655    | 0 | NA | 0 | NA | 0 | NA | 1 | 14 | 0 | NA |
| 7 | 98994383 | 99012013 | 1  | NM_001009960 | ZNF655    | 0 | NA | 0 | NA | 0 | NA | 1 | 14 | 0 | NA |
| 7 | 98994383 | 99012013 | 1  | NM_001085368 | ZNF655    | 0 | NA | 0 | NA | 0 | NA | 1 | 14 | 0 | NA |
| 7 | 99052506 | 99067966 | 1  | NM_145115    | ZNF498    | 0 | NA | 1 | 14 | 0 | NA | 0 | NA | 0 | NA |
| 7 | 99115542 | 99083752 | -1 | NM_000777    | CYP3A5    | 0 | NA | 0 | NA | 0 | NA | 0 | NA | 0 | NA |
| 7 | 99170757 | 99140595 | -1 | NM_000765    | CYP3A7    | 0 | NA | 0 | NA | 0 | NA | 0 | NA | 0 | NA |
| 7 | 99219744 | 99192539 | -1 | NM_017460    | CYP3A4    | 0 | NA | 0 | NA | 0 | NA | 0 | NA | 1 | 12 |
| 7 | 99263571 | 99302109 | 1  | NM_022820    | CYP3A43   | 0 | NA | 0 | NA | 0 | NA | 0 | NA | 1 | 16 |
| 7 | 99263571 | 99302109 | 1  | NM_057095    | CYP3A43   | 0 | NA | 0 | NA | 0 | NA | 0 | NA | 1 | 16 |
| 7 | 99263571 | 99302109 | 1  | NM_057096    | CYP3A43   | 0 | NA | 0 | NA | 0 | NA | 0 | NA | 1 | 16 |
| 7 | 99312592 | 99311620 | -1 | NM_001005276 | OR2AE1    | 0 | NA | 1 | 15 | 0 | NA | 0 | NA | 1 | 14 |
| 7 | 99355090 | 99325971 | -1 | NM_033017    | TRIM4     | 1 | 11 | 0 | NA | 1 | 18 | 1 | 13 | 0 | NA |
| 7 | 99355090 | 99325971 | -1 | NM_033091    | TRIM4     | 1 | 11 | 0 | NA | 1 | 18 | 1 | 13 | 0 | NA |
| 7 | 99365179 | 99359103 | -1 | NM_181538    | GJC3      | 0 | NA | 0 | NA | 0 | NA | 1 | 13 | 1 | 14 |
| 7 | 99411623 | 99402285 | -1 | NM_001185    | AZGP1     | 0 | NA | 0 | NA | 0 | NA | 0 | NA | 0 | NA |
| 7 | 99451154 | 99473339 | 1  | NM_003439    | ZKSCAN1   | 0 | NA | 0 | NA | 0 | NA | 1 | 13 | 0 | NA |
| 7 | 99485352 | 99500600 | 1  | NM_145914    | ZSCAN21   | 1 | 29 | 0 | NA | 0 | NA | 0 | NA | 0 | NA |
| 7 | 99517307 | 99499588 | -1 | NM_017715    | ZNF3      | 1 | 26 | 1 | 12 | 1 | 27 | 1 | 16 | 0 | NA |
| 7 | 99517307 | 99505529 | -1 | NM_032924    | ZNF3      | 1 | 26 | 1 | 12 | 1 | 27 | 1 | 16 | 0 | NA |
| 7 | 99524518 | 99527758 | 1  | NM_006833    | COPS6     | 1 | 26 | 0 | NA | 0 | NA | 1 | 16 | 0 | NA |
| 7 | 99536316 | 99528339 | -1 | NM_182776    | MCM7      | 0 | NA | 0 | NA | 0 | NA | 0 | NA | 0 | NA |
| 7 | 99537065 | 99542739 | 1  | NM_004722    | AP4M1     | 0 | NA | 0 | NA | 0 | NA | 0 | NA | 0 | NA |
| 7 | 99537363 | 99528339 | -1 | NM_005916    | MCM7      | 0 | NA | 0 | NA | 0 | NA | 0 | NA | 0 | NA |
| 7 | 99554915 | 99542628 | -1 | NM_139315    | TAF6      | 0 | NA | 0 | NA | 0 | NA | 0 | NA | 0 | NA |
| 7 | 99554915 | 99542637 | -1 | NM_005641    | TAF6      | 0 | NA | 0 | NA | 0 | NA | 0 | NA | 0 | NA |
| 7 | 99554915 | 99542637 | -1 | NM_139122    | TAF6      | 0 | NA | 0 | NA | 0 | NA | 0 | NA | 0 | NA |
| 7 | 99554915 | 99542637 | -1 | NM_139123    | TAF6      | 0 | NA | 0 | NA | 0 | NA | 0 | NA | 0 | NA |
| 7 | 99555200 | 99561064 | 1  | NM_152755    | CNPY4     | 0 | NA | 0 | NA | 0 | NA | 0 | NA | 0 | NA |
| 7 | 99562255 | 99564057 | 1  | NM_203397    | LOC255374 | 0 | NA | 0 | NA | 0 | NA | 0 | NA | 0 | NA |
| 7 | 99584465 | 99589769 | 1  | NM_001008395 | LOC389541 | 0 | NA | 0 | NA | 0 | NA | 0 | NA | 0 | NA |
| 7 | 99594238 | 99589978 | -1 | NM_018275    | C7orf43   | 0 | NA | 0 | NA | 0 | NA | 0 | NA | 0 | NA |
| 7 | 99604309 | 99594800 | -1 | NM_024637    | GAL3ST4   | 1 | 79 | 0 | NA | 1 | 36 | 1 | 14 | 0 | NA |
| 7 | 99612926 | 99605164 | -1 | NM_152742    | GPC2      | 1 | 79 | 0 | NA | 1 | 36 | 1 | 14 | 0 | NA |
| 7 | 99613473 | 99649946 | 1  | NM_012447    | STAG3     | 1 | 79 | 0 | NA | 1 | 36 | 1 | 14 | 0 | NA |
| 7 | 99654806 | 99657047 | 1  | NM_024070    | PVRIG     | 0 | NA | 0 | NA | 0 | NA | 0 | NA | 0 | NA |
| 7 | 99707549 | 99644496 | -1 | NM_178831    | GATS      | 0 | NA | 0 | NA | 0 | NA | 0 | NA | 0 | NA |
| 7 | 99749999 | 99756693 | 1  | NM_001004351 | MGC57359  | 0 | NA | 0 | NA | 0 | NA | 0 | NA | 0 | NA |
| 7 | 99771672 | 99803388 | 1  | NM_013440    | PILRB     | 0 | NA | 0 | NA | 0 | NA | 0 | NA | 0 | NA |
| 7 | 99771672 | 99803388 | 1  | NM_175047    | PILRB     | 0 | NA | 0 | NA | 0 | NA | 0 | NA | 0 | NA |
| 7 | 99793561 | 99803388 | 1  | NM_178238    | PILRB     | 0 | NA | 0 | NA | 0 | NA | 0 | NA | 0 | NA |



|   |           |           |    |              |           |   |    |   |    |   |    |   |    |   |    |
|---|-----------|-----------|----|--------------|-----------|---|----|---|----|---|----|---|----|---|----|
| 7 | 99809003  | 99835658  | 1  | NM_013439    | PILRA     | 0 | NA | 0 | NA | 0 | NA | 0 | NA | 0 | NA |
| 7 | 99809003  | 99835658  | 1  | NM_178272    | PILRA     | 0 | NA | 0 | NA | 0 | NA | 0 | NA | 0 | NA |
| 7 | 99809003  | 99835658  | 1  | NM_178273    | PILRA     | 0 | NA | 0 | NA | 0 | NA | 0 | NA | 0 | NA |
| 7 | 99864238  | 99836430  | -1 | NM_017984    | ZCWPW1    | 1 | 77 | 1 | 27 | 0 | NA | 1 | 24 | 0 | NA |
| 7 | 99865464  | 99869677  | 1  | NM_019606    | MEPCE     | 1 | 77 | 1 | 27 | 0 | NA | 1 | 24 | 0 | NA |
| 7 | 99872030  | 99870847  | -1 | NM_145030    | C7orf47   | 1 | 77 | 1 | 27 | 0 | NA | 1 | 24 | 0 | NA |
| 7 | 99899830  | 99892173  | -1 | NM_001004323 | LOC402573 | 1 | 12 | 0 | NA | 0 | NA | 0 | NA | 0 | NA |
| 7 | 99914838  | 99902077  | -1 | NM_030935    | TSC22D4   | 0 | NA | 0 | NA | 0 | NA | 0 | NA | 0 | NA |
| 7 | 99919485  | 99930358  | 1  | NM_173564    | C7orf51   | 0 | NA | 0 | NA | 0 | NA | 0 | NA | 0 | NA |
| 7 | 99974769  | 100003779 | 1  | NM_006076    | HRBL      | 0 | NA | 0 | NA | 0 | NA | 0 | NA | 0 | NA |
| 7 | 100021712 | 100009569 | -1 | NM_002319    | LRCH4     | 0 | NA | 0 | NA | 0 | NA | 0 | NA | 0 | NA |
| 7 | 100021891 | 100031265 | 1  | NM_012172    | FBXO24    | 0 | NA | 0 | NA | 0 | NA | 0 | NA | 0 | NA |
| 7 | 100021891 | 100036676 | 1  | NM_033506    | FBXO24    | 0 | NA | 0 | NA | 0 | NA | 0 | NA | 0 | NA |
| 7 | 100037817 | 100043734 | 1  | NM_002593    | PCOLCE    | 0 | NA | 0 | NA | 0 | NA | 0 | NA | 0 | NA |
| 7 | 100047660 | 100050936 | 1  | NM_001040097 | MOSPD3    | 0 | NA | 0 | NA | 0 | NA | 0 | NA | 1 | 13 |
| 7 | 100047988 | 100050936 | 1  | NM_001040098 | MOSPD3    | 0 | NA | 0 | NA | 0 | NA | 0 | NA | 1 | 13 |
| 7 | 100048049 | 100050936 | 1  | NM_001040099 | MOSPD3    | 0 | NA | 0 | NA | 0 | NA | 0 | NA | 1 | 13 |
| 7 | 100048049 | 100050936 | 1  | NM_023948    | MOSPD3    | 0 | NA | 0 | NA | 0 | NA | 0 | NA | 1 | 13 |
| 7 | 100077109 | 100055974 | -1 | NM_003227    | TFR2      | 0 | NA | 1 | 17 | 0 | NA | 0 | NA | 0 | NA |
| 7 | 100091986 | 100078663 | -1 | NM_016188    | ACTL6B    | 1 | 12 | 1 | 16 | 0 | NA | 0 | NA | 1 | 14 |
| 7 | 100109310 | 100114728 | 1  | NM_005273    | GNB2      | 0 | NA | 0 | NA | 0 | NA | 0 | NA | 0 | NA |
| 7 | 100124806 | 100115065 | -1 | NM_022574    | GIGYF1    | 0 | NA | 0 | NA | 1 | 12 | 0 | NA | 0 | NA |
| 7 | 100141611 | 100143059 | 1  | NM_005837    | POP7      | 0 | NA | 0 | NA | 0 | NA | 1 | 17 | 0 | NA |
| 7 | 100156358 | 100159259 | 1  | NM_000799    | EPO       | 0 | NA | 1 | 14 | 0 | NA | 0 | NA | 0 | NA |
| 7 | 100169184 | 100233355 | 1  | NM_003386    | ZAN       | 0 | NA | 0 | NA | 0 | NA | 0 | NA | 0 | NA |
| 7 | 100169184 | 100233355 | 1  | NM_173059    | ZAN       | 0 | NA | 0 | NA | 0 | NA | 0 | NA | 0 | NA |
| 7 | 100263079 | 100238122 | -1 | NM_004444    | EPHB4     | 0 | NA | 0 | NA | 0 | NA | 0 | NA | 0 | NA |
| 7 | 100288293 | 100302570 | 1  | NM_020246    | SLC12A9   | 0 | NA | 0 | NA | 0 | NA | 0 | NA | 0 | NA |
| 7 | 100302885 | 100309012 | 1  | NM_003302    | TRIP6     | 1 | 11 | 0 | NA | 0 | NA | 0 | NA | 0 | NA |
| 7 | 100310670 | 100324221 | 1  | NM_015908    | ARS2      | 1 | 11 | 0 | NA | 0 | NA | 0 | NA | 0 | NA |
| 7 | 100310670 | 100324221 | 1  | NM_182800    | ARS2      | 1 | 11 | 0 | NA | 0 | NA | 0 | NA | 0 | NA |
| 7 | 100325275 | 100324279 | -1 | NM_001015072 | UFSP1     | 1 | 18 | 1 | 16 | 0 | NA | 0 | NA | 0 | NA |
| 7 | 100331477 | 100325550 | -1 | NM_000665    | ACHE      | 1 | 12 | 1 | 16 | 0 | NA | 0 | NA | 0 | NA |
| 7 | 100331477 | 100325550 | -1 | NM_015831    | ACHE      | 1 | 12 | 1 | 16 | 0 | NA | 0 | NA | 0 | NA |
| 7 | 100450083 | 100488860 | 1  | NM_001040105 | MUC17     | 0 | NA | 1 | 15 | 0 | NA | 1 | 12 | 0 | NA |
| 7 | 100515505 | 100520609 | 1  | NM_030961    | TRIM56    | 1 | 12 | 0 | NA | 1 | 12 | 0 | NA | 0 | NA |
| 7 | 100557098 | 100569262 | 1  | NM_000602    | SERPINE1  | 0 | NA | 0 | NA | 1 | 16 | 0 | NA | 0 | NA |
| 7 | 100584405 | 100591277 | 1  | NM_001283    | AP1S1     | 1 | 15 | 1 | 17 | 0 | NA | 0 | NA | 0 | NA |
| 7 | 100584405 | 100591277 | 1  | NM_057089    | AP1S1     | 1 | 15 | 1 | 17 | 0 | NA | 0 | NA | 0 | NA |
| 7 | 100595572 | 100592516 | -1 | NM_003378    | VGF       | 0 | NA | 1 | 15 | 0 | NA | 0 | NA | 0 | NA |
| 7 | 100610277 | 100600497 | -1 | NM_198571    | C7orf52   | 0 | NA | 1 | 15 | 1 | 14 | 1 | 11 | 0 | NA |
| 7 | 100631022 | 100625732 | -1 | NM_178176    | MOGAT3    | 0 | NA | 0 | NA | 0 | NA | 0 | NA | 0 | NA |
| 7 | 100647704 | 100654191 | 1  | NM_006349    | ZNHIT1    | 0 | NA | 0 | NA | 1 | 14 | 1 | 51 | 0 | NA |
| 7 | 100647731 | 100635977 | -1 | NM_001084    | FLOD3     | 0 | NA | 0 | NA | 1 | 14 | 1 | 51 | 0 | NA |
| 7 | 100667836 | 100662093 | -1 | NM_014343    | CLDN15    | 1 | 15 | 0 | NA | 0 | NA | 0 | NA | 0 | NA |
| 7 | 100675091 | 100669612 | -1 | NM_016068    | FIS1      | 1 | 15 | 0 | NA | 0 | NA | 0 | NA | 0 | NA |
| 7 | 100751750 | 100743368 | -1 | NM_022777    | RABL5     | 0 | NA | 0 | NA | 0 | NA | 1 | 11 | 0 | NA |
| 7 | 100792841 | 100989024 | 1  | NM_133457    | EMID2     | 0 | NA | 0 | NA | 1 | 12 | 0 | NA | 1 | 12 |
| 7 | 101059118 | 101043474 | -1 | NM_138403    | MYLC2PL   | 1 | 18 | 0 | NA | 1 | 14 | 0 | NA | 0 | NA |
| 7 | 101246011 | 101713970 | 1  | NM_001913    | CUX1      | 0 | NA | 0 | NA | 0 | NA | 0 | NA | 0 | NA |
| 7 | 101246022 | 101713970 | 1  | NM_181500    | CUX1      | 0 | NA | 0 | NA | 0 | NA | 0 | NA | 0 | NA |
| 7 | 101247601 | 101680064 | 1  | NM_181552    | CUX1      | 0 | NA | 0 | NA | 0 | NA | 0 | NA | 0 | NA |
| 7 | 101715165 | 101748898 | 1  | NM_020979    | SH2B2     | 0 | NA | 0 | NA | 0 | NA | 0 | NA | 0 | NA |
| 7 | 101823808 | 101854134 | 1  | NM_024653    | PRKRIP1   | 0 | NA | 0 | NA | 0 | NA | 0 | NA | 0 | NA |
| 7 | 101861000 | 101884273 | 1  | NM_001126340 | ORAI2     | 0 | NA | 0 | NA | 0 | NA | 0 | NA | 0 | NA |
| 7 | 101861000 | 101884273 | 1  | NM_032831    | ORAI2     | 0 | NA | 0 | NA | 0 | NA | 0 | NA | 0 | NA |
| 7 | 101892293 | 101883694 | -1 | NM_017621    | ALKBH4    | 0 | NA | 0 | NA | 0 | NA | 0 | NA | 0 | NA |
| 7 | 101892394 | 101900617 | 1  | NM_152892    | LRWD1     | 0 | NA | 0 | NA | 0 | NA | 0 | NA | 0 | NA |
| 7 | 101906386 | 101900552 | -1 | NM_006234    | POLR2J    | 0 | NA | 0 | NA | 0 | NA | 0 | NA | 0 | NA |
| 7 | 101983351 | 101989853 | 1  | NM_001031618 | MGC119295 | 0 | NA | 0 | NA | 0 | NA | 0 | NA | 0 | NA |
| 7 | 102000173 | 101965370 | -1 | NM_001097615 | POLR2J3   | 0 | NA | 0 | NA | 0 | NA | 0 | NA | 0 | NA |
| 7 | 102044425 | 102007167 | -1 | NM_001079877 | RASA4     | 0 | NA | 0 | NA | 0 | NA | 0 | NA | 0 | NA |
| 7 | 102044425 | 102007167 | -1 | NM_006989    | RASA4     | 0 | NA | 0 | NA | 0 | NA | 0 | NA | 0 | NA |
| 7 | 102070474 | 102064709 | -1 | NM_001114403 | UPLP      | 0 | NA | 0 | NA | 0 | NA | 0 | NA | 0 | NA |
| 7 | 102099418 | 102064709 | -1 | NM_032959    | POLR2J2   | 0 | NA | 0 | NA | 0 | NA | 0 | NA | 0 | NA |

|   |           |           |    |              |           |   |    |   |    |   |    |   |    |   |    |
|---|-----------|-----------|----|--------------|-----------|---|----|---|----|---|----|---|----|---|----|
| 7 | 102340687 | 102372632 | 1  | NM_005824    | LRRC17    | 0 | NA | 0 | NA | 0 | NA | 0 | NA | 0 | NA |
| 7 | 102340701 | 102372626 | 1  | NM_001031692 | LRRC17    | 0 | NA | 0 | NA | 0 | NA | 0 | NA | 0 | NA |
| 7 | 102502251 | 102240543 | -1 | NM_145032    | FBXL13    | 0 | NA | 0 | NA | 1 | 12 | 0 | NA | 0 | NA |
| 7 | 102502524 | 102240543 | -1 | NM_001111038 | FBXL13    | 0 | NA | 0 | NA | 1 | 12 | 0 | NA | 0 | NA |
| 7 | 102502563 | 102527441 | 1  | NM_031905    | ARMC10    | 0 | NA | 0 | NA | 1 | 12 | 0 | NA | 0 | NA |
| 7 | 102576805 | 102527258 | -1 | NM_001122838 | NAPEPLD   | 0 | NA | 0 | NA | 0 | NA | 0 | NA | 0 | NA |
| 7 | 102576805 | 102527258 | -1 | NM_198990    | NAPEPLD   | 0 | NA | 0 | NA | 0 | NA | 0 | NA | 0 | NA |
| 7 | 102725108 | 102742369 | 1  | NM_004279    | PMPCB     | 0 | NA | 0 | NA | 0 | NA | 0 | NA | 0 | NA |
| 7 | 102772556 | 102740156 | -1 | NM_014377    | ZRF1      | 0 | NA | 0 | NA | 0 | NA | 1 | 11 | 0 | NA |
| 7 | 102775324 | 102795892 | 1  | NM_002803    | PSMC2     | 0 | NA | 0 | NA | 0 | NA | 1 | 11 | 0 | NA |
| 7 | 102873834 | 102780412 | -1 | NM_206883    | SLC26A5   | 0 | NA | 1 | 15 | 0 | NA | 0 | NA | 0 | NA |
| 7 | 102873834 | 102780412 | -1 | NM_206884    | SLC26A5   | 0 | NA | 1 | 15 | 0 | NA | 0 | NA | 0 | NA |
| 7 | 102873834 | 102780412 | -1 | NM_206885    | SLC26A5   | 0 | NA | 1 | 15 | 0 | NA | 0 | NA | 0 | NA |
| 7 | 102873834 | 102801890 | -1 | NM_198999    | SLC26A5   | 0 | NA | 1 | 15 | 0 | NA | 0 | NA | 0 | NA |
| 7 | 103417198 | 102899472 | -1 | NM_005045    | RELN      | 0 | NA | 0 | NA | 0 | NA | 0 | NA | 0 | NA |
| 7 | 103417198 | 102899472 | -1 | NM_173054    | RELN      | 0 | NA | 0 | NA | 0 | NA | 0 | NA | 0 | NA |
| 7 | 103635699 | 103554023 | -1 | NM_002553    | ORCSL     | 0 | NA | 0 | NA | 0 | NA | 1 | 13 | 0 | NA |
| 7 | 103635699 | 103595859 | -1 | NM_181747    | ORCSL     | 0 | NA | 0 | NA | 0 | NA | 1 | 13 | 0 | NA |
| 7 | 103756339 | 104336239 | 1  | NM_199000    | LHFPL3    | 0 | NA | 0 | NA | 0 | NA | 0 | NA | 1 | 12 |
| 7 | 104441872 | 104541768 | 1  | NM_018682    | MLL5      | 1 | 17 | 0 | NA | 0 | NA | 1 | 11 | 0 | NA |
| 7 | 104441872 | 104541768 | 1  | NM_182931    | MLL5      | 1 | 17 | 0 | NA | 0 | NA | 1 | 11 | 0 | NA |
| 7 | 104696713 | 104544058 | -1 | NM_182691    | SRPK2     | 0 | NA | 0 | NA | 0 | NA | 0 | NA | 0 | NA |
| 7 | 104816577 | 104544058 | -1 | NM_182692    | SRPK2     | 0 | NA | 0 | NA | 0 | NA | 0 | NA | 0 | NA |
| 7 | 104949921 | 104884195 | -1 | NM_019042    | PUS7      | 1 | 11 | 0 | NA | 0 | NA | 1 | 13 | 0 | NA |
| 7 | 104959767 | 104995360 | 1  | NM_021930    | RINT1     | 0 | NA | 0 | NA | 0 | NA | 1 | 13 | 0 | NA |
| 7 | 105304267 | 105032456 | -1 | NM_020725    | ATXN7L1   | 0 | NA | 0 | NA | 1 | 14 | 0 | NA | 0 | NA |
| 7 | 105304267 | 105187871 | -1 | NM_152749    | ATXN7L1   | 0 | NA | 0 | NA | 1 | 14 | 0 | NA | 0 | NA |
| 7 | 105390920 | 105461454 | 1  | NM_152750    | FLJ23834  | 0 | NA | 0 | NA | 0 | NA | 0 | NA | 1 | 16 |
| 7 | 105539994 | 105518187 | -1 | NM_182715    | SYPL1     | 0 | NA | 0 | NA | 0 | NA | 0 | NA | 0 | NA |
| 7 | 105540293 | 105518187 | -1 | NM_006754    | SYPL1     | 0 | NA | 0 | NA | 1 | 17 | 0 | NA | 0 | NA |
| 7 | 105712874 | 105675967 | -1 | NM_005746    | NAMPT     | 0 | NA | 0 | NA | 0 | NA | 0 | NA | 0 | NA |
| 7 | 106088827 | 106086384 | -1 | NM_175884    | FLJ36031  | 0 | NA | 0 | NA | 1 | 21 | 0 | NA | 0 | NA |
| 7 | 106293159 | 106334828 | 1  | NM_002649    | PIK3CG    | 0 | NA | 0 | NA | 0 | NA | 0 | NA | 0 | NA |
| 7 | 106472413 | 106589492 | 1  | NM_002736    | PRKAR2B   | 0 | NA | 0 | NA | 0 | NA | 0 | NA | 0 | NA |
| 7 | 106596695 | 106630210 | 1  | NM_012257    | HBP1      | 1 | 19 | 0 | NA | 1 | 12 | 0 | NA | 0 | NA |
| 7 | 106897737 | 106903361 | 1  | NM_005295    | GPR2L     | 0 | NA | 0 | NA | 0 | NA | 0 | NA | 0 | NA |
| 7 | 106991667 | 107006204 | 1  | NM_181581    | DUS4L     | 0 | NA | 0 | NA | 0 | NA | 1 | 18 | 0 | NA |
| 7 | 106991721 | 106630226 | -1 | NM_006348    | COG5      | 0 | NA | 0 | NA | 0 | NA | 1 | 18 | 0 | NA |
| 7 | 106991721 | 106630226 | -1 | NM_181733    | COG5      | 0 | NA | 0 | NA | 0 | NA | 1 | 18 | 0 | NA |
| 7 | 107007945 | 107048159 | 1  | NM_001008405 | BCAP29    | 0 | NA | 0 | NA | 0 | NA | 0 | NA | 0 | NA |
| 7 | 107007945 | 107048159 | 1  | NM_018844    | BCAP29    | 0 | NA | 0 | NA | 0 | NA | 0 | NA | 0 | NA |
| 7 | 107007945 | 107050998 | 1  | NM_001008406 | BCAP29    | 0 | NA | 0 | NA | 0 | NA | 0 | NA | 0 | NA |
| 7 | 107007945 | 107058401 | 1  | NM_001008407 | BCAP29    | 0 | NA | 0 | NA | 0 | NA | 0 | NA | 0 | NA |
| 7 | 107088315 | 107145488 | 1  | NM_000441    | SLC26A4   | 0 | NA | 1 | 12 | 0 | NA | 0 | NA | 0 | NA |
| 7 | 107171821 | 107187262 | 1  | NM_024814    | CBLL1     | 0 | NA | 0 | NA | 0 | NA | 0 | NA | 0 | NA |
| 7 | 107230914 | 107193147 | -1 | NM_000111    | SLC26A3   | 0 | NA | 0 | NA | 0 | NA | 0 | NA | 0 | NA |
| 7 | 107318821 | 107348879 | 1  | NM_000108    | DLD       | 0 | NA | 0 | NA | 0 | NA | 0 | NA | 0 | NA |
| 7 | 107431040 | 107351481 | -1 | NM_002291    | LAMB1     | 1 | 11 | 0 | NA | 0 | NA | 1 | 14 | 0 | NA |
| 7 | 107559037 | 107451231 | -1 | NM_007356    | LAMB4     | 0 | NA | 0 | NA | 0 | NA | 1 | 12 | 0 | NA |
| 7 | 107584318 | 107575317 | -1 | NM_001037133 | NRCAM     | 0 | NA | 0 | NA | 0 | NA | 0 | NA | 0 | NA |
| 7 | 107884062 | 107575317 | -1 | NM_001037132 | NRCAM     | 0 | NA | 0 | NA | 0 | NA | 0 | NA | 0 | NA |
| 7 | 107884062 | 107575317 | -1 | NM_005010    | NRCAM     | 0 | NA | 0 | NA | 0 | NA | 0 | NA | 0 | NA |
| 7 | 107953874 | 107899306 | -1 | NM_015723    | PNPLA8    | 0 | NA | 0 | NA | 1 | 12 | 0 | NA | 0 | NA |
| 7 | 107997133 | 107991765 | -1 | NM_182529    | THAP5     | 0 | NA | 0 | NA | 0 | NA | 1 | 12 | 0 | NA |
| 7 | 107997591 | 108002530 | 1  | NM_012328    | DNAJB9    | 0 | NA | 0 | NA | 0 | NA | 1 | 12 | 0 | NA |
| 7 | 108311873 | 108311273 | -1 | NM_001024607 | LOC154907 | 0 | NA | 0 | NA | 0 | NA | 0 | NA | 0 | NA |
| 7 | 110518297 | 110552745 | 1  | NM_001099658 | LRRN3     | 0 | NA | 0 | NA | 0 | NA | 0 | NA | 0 | NA |
| 7 | 110518297 | 110552745 | 1  | NM_001099660 | LRRN3     | 0 | NA | 0 | NA | 0 | NA | 0 | NA | 0 | NA |
| 7 | 110518297 | 110552745 | 1  | NM_018334    | LRRN3     | 0 | NA | 0 | NA | 0 | NA | 0 | NA | 0 | NA |
| 7 | 110989583 | 110090345 | -1 | NM_032549    | IMMP2L    | 0 | NA | 0 | NA | 0 | NA | 0 | NA | 0 | NA |
| 7 | 111633698 | 111153399 | -1 | NM_014705    | DOCK4     | 0 | NA | 0 | NA | 0 | NA | 0 | NA | 0 | NA |
| 7 | 111633878 | 111771225 | 1  | NM_021994    | ZNF277    | 0 | NA | 0 | NA | 0 | NA | 0 | NA | 0 | NA |
| 7 | 111850461 | 111903482 | 1  | NM_001007245 | IFRD1     | 0 | NA | 0 | NA | 0 | NA | 1 | 12 | 0 | NA |
| 7 | 111877750 | 111903482 | 1  | NM_001550    | IFRD1     | 0 | NA | 0 | NA | 0 | NA | 0 | NA | 0 | NA |
| 7 | 111908281 | 111918178 | 1  | NM_182597    | C7orf53   | 0 | NA | 0 | NA | 1 | 12 | 1 | 12 | 0 | NA |

|   |           |           |    |              |           |   |    |   |    |   |    |   |    |   |    |
|---|-----------|-----------|----|--------------|-----------|---|----|---|----|---|----|---|----|---|----|
| 7 | 112217714 | 112193022 | -1 | NM_022484    | TMEM168   | 1 | 21 | 1 | 13 | 0 | NA | 0 | NA | 0 | NA |
| 7 | 112367168 | 112246437 | -1 | NM_152556    | FLJ31818  | 0 | NA | 0 | NA | 1 | 13 | 0 | NA | 0 | NA |
| 7 | 112515069 | 112507703 | -1 | NM_018970    | GPR85     | 0 | NA | 0 | NA | 1 | 12 | 0 | NA | 0 | NA |
| 7 | 113346318 | 113304117 | -1 | NM_002711    | PPP1R3A   | 0 | NA | 0 | NA | 0 | NA | 0 | NA | 0 | NA |
| 7 | 113842287 | 114118328 | 1  | NM_014491    | FOXP2     | 0 | NA | 0 | NA | 0 | NA | 0 | NA | 0 | NA |
| 7 | 113842287 | 114118328 | 1  | NM_148898    | FOXP2     | 0 | NA | 0 | NA | 0 | NA | 0 | NA | 0 | NA |
| 7 | 113842287 | 114118328 | 1  | NM_148899    | FOXP2     | 0 | NA | 0 | NA | 0 | NA | 0 | NA | 0 | NA |
| 7 | 114349444 | 114446501 | 1  | NM_199072    | MDFIC     | 0 | NA | 0 | NA | 0 | NA | 1 | 12 | 0 | NA |
| 7 | 115458034 | 115362437 | -1 | NM_001018058 | TFEC      | 0 | NA | 0 | NA | 0 | NA | 0 | NA | 0 | NA |
| 7 | 115458034 | 115362437 | -1 | NM_012252    | TFEC      | 0 | NA | 0 | NA | 0 | NA | 0 | NA | 0 | NA |
| 7 | 115637816 | 115686073 | 1  | NM_015641    | TES       | 0 | NA | 0 | NA | 0 | NA | 0 | NA | 0 | NA |
| 7 | 115650270 | 115686073 | 1  | NM_152829    | TES       | 0 | NA | 0 | NA | 0 | NA | 0 | NA | 0 | NA |
| 7 | 115926679 | 115935831 | 1  | NM_001233    | CAV2      | 0 | NA | 0 | NA | 0 | NA | 0 | NA | 0 | NA |
| 7 | 115926679 | 115935831 | 1  | NM_198212    | CAV2      | 0 | NA | 0 | NA | 0 | NA | 0 | NA | 0 | NA |
| 7 | 115952074 | 115988466 | 1  | NM_001753    | CAV1      | 1 | 13 | 0 | NA | 1 | 14 | 0 | NA | 0 | NA |
| 7 | 116099694 | 116225676 | 1  | NM_000245    | MET       | 0 | NA | 0 | NA | 1 | 12 | 1 | 11 | 0 | NA |
| 7 | 116289798 | 116346549 | 1  | NM_006136    | CAPZA2    | 0 | NA | 0 | NA | 0 | NA | 0 | NA | 0 | NA |
| 7 | 116380616 | 116651197 | 1  | NM_021908    | ST7       | 1 | 15 | 0 | NA | 0 | NA | 1 | 23 | 0 | NA |
| 7 | 116380616 | 116657311 | 1  | NM_018412    | ST7       | 1 | 15 | 0 | NA | 0 | NA | 1 | 23 | 0 | NA |
| 7 | 116750579 | 116704517 | -1 | NM_003391    | WNT2      | 0 | NA | 1 | 17 | 0 | NA | 0 | NA | 1 | 16 |
| 7 | 116854813 | 116790511 | -1 | NM_130768    | ASZ1      | 0 | NA | 1 | 12 | 0 | NA | 0 | NA | 1 | 12 |
| 7 | 116907262 | 117095954 | 1  | NM_000492    | CFTR      | 0 | NA | 0 | NA | 0 | NA | 0 | NA | 1 | 14 |
| 7 | 117300797 | 117137941 | -1 | NM_033427    | CTTNBP2   | 0 | NA | 0 | NA | 1 | 12 | 0 | NA | 0 | NA |
| 7 | 117611321 | 117620116 | 1  | NM_016200    | LSM8      | 0 | NA | 0 | NA | 0 | NA | 0 | NA | 0 | NA |
| 7 | 117651952 | 117669981 | 1  | NM_001077708 | ANKRD7    | 0 | NA | 0 | NA | 0 | NA | 0 | NA | 0 | NA |
| 7 | 117651952 | 117669981 | 1  | NM_019644    | ANKRD7    | 0 | NA | 0 | NA | 0 | NA | 0 | NA | 0 | NA |
| 7 | 119700957 | 120177623 | 1  | NM_012281    | KCND2     | 0 | NA | 1 | 15 | 0 | NA | 0 | NA | 0 | NA |
| 7 | 120285413 | 120214609 | -1 | NM_012338    | TSPAN12   | 0 | NA | 0 | NA | 0 | NA | 0 | NA | 0 | NA |
| 7 | 120378052 | 120384270 | 1  | NM_198267    | ING3      | 1 | 11 | 0 | NA | 0 | NA | 0 | NA | 0 | NA |
| 7 | 120378052 | 120402947 | 1  | NM_019071    | ING3      | 1 | 11 | 0 | NA | 0 | NA | 0 | NA | 0 | NA |
| 7 | 120415986 | 120724734 | 1  | NM_024913    | C7orf58   | 0 | NA | 0 | NA | 1 | 12 | 1 | 12 | 0 | NA |
| 7 | 120416680 | 120689208 | 1  | NM_001105533 | C7orf58   | 0 | NA | 0 | NA | 1 | 12 | 1 | 12 | 0 | NA |
| 7 | 120752656 | 120768394 | 1  | NM_016087    | WNT16     | 0 | NA | 1 | 12 | 0 | NA | 0 | NA | 1 | 17 |
| 7 | 120756325 | 120768394 | 1  | NM_057168    | WNT16     | 0 | NA | 1 | 12 | 0 | NA | 0 | NA | 1 | 17 |
| 7 | 120823658 | 120776140 | -1 | NM_001040020 | FAM3C     | 0 | NA | 0 | NA | 0 | NA | 0 | NA | 0 | NA |
| 7 | 120823658 | 120776140 | -1 | NM_014888    | FAM3C     | 0 | NA | 0 | NA | 0 | NA | 0 | NA | 0 | NA |
| 7 | 120951744 | 120868123 | -1 | NM_001085391 | LOC392979 | 1 | 19 | 0 | NA | 1 | 12 | 0 | NA | 0 | NA |
| 7 | 121300394 | 121489326 | 1  | NM_002851    | PTPRZ1    | 0 | NA | 0 | NA | 0 | NA | 0 | NA | 0 | NA |
| 7 | 121561112 | 121503422 | -1 | NM_005763    | AASS      | 0 | NA | 0 | NA | 0 | NA | 0 | NA | 0 | NA |
| 7 | 121731835 | 121729286 | -1 | NM_001024613 | FEZF1     | 0 | NA | 0 | NA | 0 | NA | 0 | NA | 0 | NA |
| 7 | 122126444 | 122125001 | -1 | NM_139175    | RNF133    | 0 | NA | 0 | NA | 0 | NA | 0 | NA | 0 | NA |
| 7 | 122130257 | 122128955 | -1 | NM_198085    | RNF148    | 0 | NA | 0 | NA | 0 | NA | 0 | NA | 0 | NA |
| 7 | 122313790 | 121745713 | -1 | NM_001009571 | CADPS2    | 0 | NA | 1 | 12 | 0 | NA | 0 | NA | 0 | NA |
| 7 | 122313790 | 121745713 | -1 | NM_017954    | CADPS2    | 0 | NA | 1 | 12 | 0 | NA | 0 | NA | 0 | NA |
| 7 | 122422990 | 122421994 | -1 | NM_016945    | TAS2R16   | 0 | NA | 0 | NA | 0 | NA | 0 | NA | 0 | NA |
| 7 | 122627261 | 122540823 | -1 | NM_022444    | SLC13A1   | 0 | NA | 0 | NA | 1 | 14 | 0 | NA | 0 | NA |
| 7 | 122961874 | 122879949 | -1 | NM_178827    | IQUB      | 0 | NA | 0 | NA | 0 | NA | 0 | NA | 0 | NA |
| 7 | 122985194 | 122968318 | -1 | NM_005000    | NDUFA5    | 0 | NA | 0 | NA | 0 | NA | 1 | 16 | 0 | NA |
| 7 | 123036347 | 123065168 | 1  | NM_080928    | ASB15     | 0 | NA | 0 | NA | 1 | 12 | 0 | NA | 0 | NA |
| 7 | 123083096 | 123091383 | 1  | NM_207163    | LMOD2     | 0 | NA | 0 | NA | 1 | 13 | 0 | NA | 1 | 15 |
| 7 | 123176352 | 123109232 | -1 | NM_003941    | WASL      | 1 | 12 | 0 | NA | 0 | NA | 1 | 14 | 0 | NA |
| 7 | 123272458 | 123304767 | 1  | NM_012269    | HYAL4     | 0 | NA | 0 | NA | 0 | NA | 0 | NA | 0 | NA |
| 7 | 123352564 | 123387336 | 1  | NM_153189    | SPAM1     | 0 | NA | 0 | NA | 0 | NA | 0 | NA | 0 | NA |
| 7 | 123352564 | 123398697 | 1  | NM_003117    | SPAM1     | 0 | NA | 0 | NA | 0 | NA | 0 | NA | 0 | NA |
| 7 | 123903860 | 123904245 | 1  | NM_001085395 | LOC136157 | 0 | NA | 0 | NA | 0 | NA | 0 | NA | 0 | NA |
| 7 | 124192917 | 124173349 | -1 | NM_005302    | GPR37     | 1 | 13 | 1 | 13 | 0 | NA | 0 | NA | 0 | NA |
| 7 | 124357273 | 124249675 | -1 | NM_001042594 | POT1      | 1 | 29 | 0 | NA | 0 | NA | 0 | NA | 0 | NA |
| 7 | 124357273 | 124249675 | -1 | NM_015450    | POT1      | 1 | 29 | 0 | NA | 0 | NA | 0 | NA | 0 | NA |
| 7 | 126670805 | 125865887 | -1 | NM_000845    | GRM8      | 0 | NA | 0 | NA | 0 | NA | 0 | NA | 1 | 14 |
| 7 | 126670805 | 125865887 | -1 | NM_001127326 | GRM8      | 0 | NA | 0 | NA | 0 | NA | 0 | NA | 1 | 14 |
| 7 | 126679664 | 125865887 | -1 | NM_001127323 | GRM8      | 0 | NA | 0 | NA | 0 | NA | 0 | NA | 1 | 14 |
| 7 | 126820003 | 126797589 | -1 | NM_176814    | ZNF800    | 0 | NA | 0 | NA | 0 | NA | 0 | NA | 0 | NA |
| 7 | 127012890 | 127007917 | -1 | NM_024523    | GCC1      | 1 | 16 | 1 | 13 | 0 | NA | 0 | NA | 1 | 17 |
| 7 | 127015752 | 127018988 | 1  | NM_001662    | ARF5      | 1 | 16 | 1 | 13 | 0 | NA | 0 | NA | 1 | 17 |
| 7 | 127020924 | 127029079 | 1  | NM_020369    | FSCN3     | 1 | 16 | 1 | 13 | 0 | NA | 0 | NA | 1 | 17 |

|   |           |           |    |              |           |   |    |   |    |   |    |   |    |   |    |
|---|-----------|-----------|----|--------------|-----------|---|----|---|----|---|----|---|----|---|----|
| 7 | 127043016 | 127037581 | -1 | NM_006193    | PAX4      | 0 | NA | 1 | 14 | 0 | NA | 0 | NA | 1 | 14 |
| 7 | 127079437 | 127519895 | 1  | NM_014390    | SND1      | 0 | NA | 0 | NA | 1 | 13 | 0 | NA | 0 | NA |
| 7 | 127424797 | 127427366 | 1  | NM_014411    | C7orf54   | 0 | NA | 0 | NA | 0 | NA | 0 | NA | 0 | NA |
| 7 | 127458238 | 127454359 | -1 | NM_022143    | LRRC4     | 0 | NA | 1 | 12 | 0 | NA | 0 | NA | 0 | NA |
| 7 | 127668566 | 127684918 | 1  | NM_000230    | LEP       | 0 | NA | 1 | 23 | 0 | NA | 0 | NA | 0 | NA |
| 7 | 127771198 | 127737671 | -1 | NM_018077    | RBM28     | 0 | NA | 0 | NA | 0 | NA | 0 | NA | 0 | NA |
| 7 | 127788975 | 127777614 | 0  | NM_001114726 | LOC401399 | 0 | NA | 0 | NA | 0 | NA | 0 | NA | 0 | NA |
| 7 | 127837272 | 127819566 | -1 | NM_000883    | IMPDH1    | 1 | 12 | 0 | NA | 0 | NA | 1 | 12 | 0 | NA |
| 7 | 127837272 | 127819566 | -1 | NM_001102605 | IMPDH1    | 1 | 12 | 0 | NA | 0 | NA | 1 | 12 | 0 | NA |
| 7 | 127837272 | 127819566 | -1 | NM_183243    | IMPDH1    | 1 | 12 | 0 | NA | 0 | NA | 1 | 12 | 0 | NA |
| 7 | 127883119 | 127885708 | 1  | NM_001098786 | HIG2      | 0 | NA | 0 | NA | 0 | NA | 0 | NA | 0 | NA |
| 7 | 127883119 | 127885708 | 1  | NM_013332    | HIG2      | 0 | NA | 0 | NA | 0 | NA | 0 | NA | 0 | NA |
| 7 | 127904018 | 127930214 | 1  | NM_018396    | METTL2B   | 0 | NA | 0 | NA | 0 | NA | 0 | NA | 0 | NA |
| 7 | 128099581 | 128110611 | 1  | NM_001012454 | FAM71F2   | 0 | NA | 0 | NA | 0 | NA | 0 | NA | 0 | NA |
| 7 | 128142678 | 128159033 | 1  | NM_032599    | FAM71F1   | 0 | NA | 0 | NA | 0 | NA | 0 | NA | 0 | NA |
| 7 | 128166671 | 128198764 | 1  | NM_001219    | CALU      | 0 | NA | 0 | NA | 0 | NA | 0 | NA | 0 | NA |
| 7 | 128203080 | 128199778 | -1 | NM_001708    | OPN1SW    | 0 | NA | 1 | 13 | 1 | 12 | 0 | NA | 0 | NA |
| 7 | 128219334 | 128249419 | 1  | NM_022742    | CCDC136   | 0 | NA | 0 | NA | 0 | NA | 0 | NA | 0 | NA |
| 7 | 128257718 | 128286572 | 1  | NM_001458    | FLNC      | 0 | NA | 0 | NA | 0 | NA | 0 | NA | 0 | NA |
| 7 | 128290133 | 128293138 | 1  | NM_004231    | ATP6V1F   | 0 | NA | 0 | NA | 0 | NA | 0 | NA | 0 | NA |
| 7 | 128365229 | 128377324 | 1  | NM_001098628 | IRF5      | 0 | NA | 0 | NA | 0 | NA | 0 | NA | 0 | NA |
| 7 | 128365229 | 128377324 | 1  | NM_001098629 | IRF5      | 0 | NA | 0 | NA | 0 | NA | 0 | NA | 0 | NA |
| 7 | 128365229 | 128377324 | 1  | NM_001098630 | IRF5      | 0 | NA | 0 | NA | 0 | NA | 0 | NA | 0 | NA |
| 7 | 128365229 | 128377324 | 1  | NM_002200    | IRF5      | 0 | NA | 0 | NA | 0 | NA | 0 | NA | 0 | NA |
| 7 | 128365506 | 128377324 | 1  | NM_001098631 | IRF5      | 0 | NA | 0 | NA | 0 | NA | 0 | NA | 0 | NA |
| 7 | 128365506 | 128377324 | 1  | NM_032643    | IRF5      | 0 | NA | 0 | NA | 0 | NA | 0 | NA | 0 | NA |
| 7 | 128368007 | 128377324 | 1  | NM_001098627 | IRF5      | 0 | NA | 0 | NA | 0 | NA | 0 | NA | 0 | NA |
| 7 | 128482434 | 128382183 | -1 | NM_012470    | TNPO3     | 1 | 11 | 0 | NA | 0 | NA | 0 | NA | 1 | 12 |
| 7 | 128571947 | 128595907 | 1  | NM_178562    | TSPAN33   | 0 | NA | 0 | NA | 0 | NA | 0 | NA | 0 | NA |
| 7 | 128615948 | 128640621 | 1  | NM_005631    | SMO       | 0 | NA | 0 | NA | 0 | NA | 0 | NA | 0 | NA |
| 7 | 128652099 | 128857288 | 1  | NM_015328    | AHCYL2    | 1 | 22 | 0 | NA | 0 | NA | 0 | NA | 0 | NA |
| 7 | 128861535 | 128915473 | 1  | NM_020704    | FAM40B    | 0 | NA | 0 | NA | 0 | NA | 0 | NA | 0 | NA |
| 7 | 129038790 | 129184158 | 1  | NM_005011    | NRF1      | 0 | NA | 0 | NA | 0 | NA | 0 | NA | 0 | NA |
| 7 | 129057154 | 129184158 | 1  | NM_001040110 | NRF1      | 0 | NA | 0 | NA | 1 | 12 | 0 | NA | 0 | NA |
| 7 | 129380025 | 129260230 | -1 | NM_003344    | UBE2H     | 0 | NA | 0 | NA | 1 | 19 | 0 | NA | 0 | NA |
| 7 | 129380025 | 129260230 | -1 | NM_182697    | UBE2H     | 0 | NA | 0 | NA | 1 | 19 | 0 | NA | 0 | NA |
| 7 | 129478469 | 129445361 | -1 | NM_016478    | ZC3HC1    | 0 | NA | 0 | NA | 0 | NA | 1 | 15 | 0 | NA |
| 7 | 129497584 | 129560829 | 1  | NM_014997    | KIAA0265  | 1 | 30 | 0 | NA | 0 | NA | 0 | NA | 0 | NA |
| 7 | 129632574 | 129591790 | -1 | NM_032842    | TMEM209   | 1 | 16 | 0 | NA | 1 | 14 | 1 | 14 | 0 | NA |
| 7 | 129634953 | 129644733 | 1  | NM_145268    | C7orf45   | 1 | 16 | 0 | NA | 0 | NA | 1 | 14 | 0 | NA |
| 7 | 129693959 | 129716871 | 1  | NM_001869    | CPA2      | 0 | NA | 1 | 12 | 0 | NA | 0 | NA | 1 | 12 |
| 7 | 129720229 | 129751250 | 1  | NM_016352    | CPA4      | 0 | NA | 0 | NA | 0 | NA | 1 | 13 | 1 | 13 |
| 7 | 129771922 | 129795807 | 1  | NM_080385    | CPA5      | 0 | NA | 0 | NA | 1 | 12 | 1 | 11 | 0 | NA |
| 7 | 129807590 | 129815185 | 1  | NM_001868    | CPA1      | 0 | NA | 0 | NA | 0 | NA | 0 | NA | 1 | 14 |
| 7 | 129868090 | 129823610 | -1 | NM_018718    | TSGA14    | 0 | NA | 1 | 14 | 0 | NA | 1 | 23 | 1 | 24 |
| 7 | 129913281 | 129933367 | 1  | NM_177524    | MEST      | 0 | NA | 1 | 14 | 0 | NA | 0 | NA | 0 | NA |
| 7 | 129918408 | 129933367 | 1  | NM_177525    | MEST      | 0 | NA | 1 | 14 | 0 | NA | 0 | NA | 0 | NA |
| 7 | 129919173 | 129933367 | 1  | NM_002402    | MEST      | 0 | NA | 1 | 16 | 0 | NA | 0 | NA | 0 | NA |
| 7 | 130004138 | 129933315 | -1 | NM_012133    | COPG2     | 0 | NA | 0 | NA | 0 | NA | 0 | NA | 0 | NA |
| 7 | 130021946 | 130004025 | -1 | NM_052933    | TSGA13    | 0 | NA | 0 | NA | 0 | NA | 0 | NA | 0 | NA |
| 7 | 130069400 | 130068017 | -1 | NM_138693    | KLF14     | 0 | NA | 1 | 25 | 0 | NA | 0 | NA | 0 | NA |
| 7 | 130663177 | 130831931 | 1  | NM_013255    | MKLN1     | 1 | 11 | 0 | NA | 0 | NA | 1 | 22 | 0 | NA |
| 7 | 130891916 | 130835560 | -1 | NM_001018111 | PODXL     | 0 | NA | 0 | NA | 0 | NA | 0 | NA | 0 | NA |
| 7 | 130891916 | 130835560 | -1 | NM_005397    | PODXL     | 0 | NA | 0 | NA | 0 | NA | 0 | NA | 0 | NA |
| 7 | 131911863 | 131458630 | -1 | NM_020911    | PLXNA4    | 0 | NA | 0 | NA | 0 | NA | 0 | NA | 0 | NA |
| 7 | 131911863 | 131718786 | -1 | NM_001105543 | PLXNA4    | 0 | NA | 0 | NA | 0 | NA | 0 | NA | 0 | NA |
| 7 | 131983987 | 131820060 | -1 | NM_181775    | PLXNA4    | 0 | NA | 0 | NA | 0 | NA | 0 | NA | 0 | NA |
| 7 | 132417368 | 132120162 | -1 | NM_017812    | CHCHD3    | 0 | NA | 0 | NA | 0 | NA | 0 | NA | 0 | NA |
| 7 | 132588362 | 132819486 | 1  | NM_001037126 | EXOC4     | 0 | NA | 0 | NA | 0 | NA | 0 | NA | 0 | NA |
| 7 | 132588362 | 133401053 | 1  | NM_021807    | EXOC4     | 0 | NA | 0 | NA | 0 | NA | 0 | NA | 0 | NA |
| 7 | 133462644 | 133599473 | 1  | NM_144648    | LRGUK     | 0 | NA | 0 | NA | 1 | 13 | 1 | 11 | 0 | NA |
| 7 | 133652343 | 133624629 | -1 | NM_032826    | SLC35B4   | 1 | 12 | 0 | NA | 0 | NA | 0 | NA | 0 | NA |
| 7 | 133794428 | 133777646 | -1 | NM_001628    | AKR1B1    | 0 | NA | 1 | 14 | 1 | 13 | 1 | 13 | 0 | NA |
| 7 | 133862938 | 133876700 | 1  | NM_020299    | AKR1B10   | 0 | NA | 0 | NA | 0 | NA | 0 | NA | 1 | 12 |
| 7 | 133900772 | 133914841 | 1  | NM_001080538 | LOC441282 | 1 | 12 | 1 | 17 | 0 | NA | 0 | NA | 1 | 14 |

|   |           |           |    |              |           |   |    |   |    |   |    |   |    |   |    |
|---|-----------|-----------|----|--------------|-----------|---|----|---|----|---|----|---|----|---|----|
| 7 | 133982094 | 134015107 | 1  | NM_001724    | BPGM      | 0 | NA | 0 | NA | 1 | 12 | 0 | NA | 0 | NA |
| 7 | 133982110 | 134015100 | 1  | NM_199186    | BPGM      | 0 | NA | 0 | NA | 1 | 12 | 0 | NA | 0 | NA |
| 7 | 134114710 | 134306012 | 1  | NM_004342    | CALD1     | 1 | 11 | 0 | NA | 1 | 12 | 0 | NA | 0 | NA |
| 7 | 134114710 | 134306012 | 1  | NM_033138    | CALD1     | 1 | 11 | 0 | NA | 1 | 12 | 0 | NA | 0 | NA |
| 7 | 134114710 | 134306012 | 1  | NM_033157    | CALD1     | 1 | 11 | 0 | NA | 1 | 12 | 0 | NA | 0 | NA |
| 7 | 134226698 | 134306012 | 1  | NM_033139    | CALD1     | 1 | 13 | 1 | 13 | 0 | NA | 1 | 22 | 0 | NA |
| 7 | 134226698 | 134306012 | 1  | NM_033140    | CALD1     | 1 | 13 | 1 | 13 | 0 | NA | 1 | 22 | 0 | NA |
| 7 | 134483363 | 134501190 | 1  | NM_018295    | TMEM140   | 0 | NA | 0 | NA | 0 | NA | 0 | NA | 0 | NA |
| 7 | 134505987 | 134501076 | -1 | NM_024033    | C7orf49   | 1 | 11 | 0 | NA | 0 | NA | 0 | NA | 0 | NA |
| 7 | 134546811 | 134520524 | -1 | NM_014149    | WDR91     | 0 | NA | 0 | NA | 0 | NA | 0 | NA | 0 | NA |
| 7 | 134567270 | 134593784 | 1  | NM_182489    | STRA8     | 0 | NA | 0 | NA | 0 | NA | 0 | NA | 0 | NA |
| 7 | 134845391 | 134697088 | -1 | NM_013316    | CNOT4     | 0 | NA | 0 | NA | 0 | NA | 0 | NA | 0 | NA |
| 7 | 134845391 | 134723303 | -1 | NM_001008225 | CNOT4     | 0 | NA | 0 | NA | 0 | NA | 0 | NA | 0 | NA |
| 7 | 134893227 | 134984037 | 1  | NM_015135    | NUP205    | 1 | 11 | 0 | NA | 0 | NA | 0 | NA | 0 | NA |
| 7 | 134995326 | 134995941 | 1  | NM_001089590 | LOC402694 | 0 | NA | 0 | NA | 1 | 22 | 0 | NA | 0 | NA |
| 7 | 135063473 | 135016526 | -1 | NM_012450    | SLC13A4   | 0 | NA | 0 | NA | 0 | NA | 0 | NA | 0 | NA |
| 7 | 135083987 | 135064894 | -1 | NM_205855    | UNQ1940   | 0 | NA | 1 | 18 | 0 | NA | 0 | NA | 0 | NA |
| 7 | 135312604 | 135262048 | -1 | NM_145808    | MTPN      | 0 | NA | 0 | NA | 0 | NA | 0 | NA | 0 | NA |
| 7 | 136203938 | 136352311 | 1  | NM_001006627 | CHRM2     | 0 | NA | 0 | NA | 0 | NA | 0 | NA | 0 | NA |
| 7 | 136203938 | 136352311 | 1  | NM_001006630 | CHRM2     | 0 | NA | 0 | NA | 0 | NA | 0 | NA | 0 | NA |
| 7 | 136204371 | 136352311 | 1  | NM_000739    | CHRM2     | 0 | NA | 0 | NA | 0 | NA | 0 | NA | 0 | NA |
| 7 | 136204371 | 136352311 | 1  | NM_001006631 | CHRM2     | 0 | NA | 0 | NA | 0 | NA | 0 | NA | 0 | NA |
| 7 | 136204371 | 136352311 | 1  | NM_001006632 | CHRM2     | 0 | NA | 0 | NA | 0 | NA | 0 | NA | 0 | NA |
| 7 | 136204408 | 136352311 | 1  | NM_001006626 | CHRM2     | 0 | NA | 0 | NA | 0 | NA | 0 | NA | 0 | NA |
| 7 | 136204523 | 136352311 | 1  | NM_001006629 | CHRM2     | 0 | NA | 0 | NA | 0 | NA | 0 | NA | 0 | NA |
| 7 | 136204532 | 136352311 | 1  | NM_001006628 | CHRM2     | 0 | NA | 0 | NA | 0 | NA | 0 | NA | 0 | NA |
| 7 | 136679086 | 136562634 | -1 | NM_002825    | PTN       | 1 | 12 | 0 | NA | 0 | NA | 0 | NA | 0 | NA |
| 7 | 137182149 | 136724924 | -1 | NM_004717    | DGKI      | 0 | NA | 0 | NA | 0 | NA | 0 | NA | 0 | NA |
| 7 | 137337386 | 137210264 | -1 | NM_194071    | CREB3L2   | 1 | 16 | 0 | NA | 0 | NA | 0 | NA | 0 | NA |
| 7 | 137411735 | 137453590 | 1  | NM_005989    | AKR1D1    | 0 | NA | 0 | NA | 0 | NA | 0 | NA | 0 | NA |
| 7 | 137633769 | 137633403 | -1 | NM_001126311 | LOC442726 | 0 | NA | 0 | NA | 0 | NA | 0 | NA | 0 | NA |
| 7 | 137795618 | 137920872 | 1  | NM_003852    | TRIM24    | 1 | 15 | 0 | NA | 1 | 18 | 1 | 11 | 0 | NA |
| 7 | 137795618 | 137920872 | 1  | NM_015905    | TRIM24    | 1 | 15 | 0 | NA | 1 | 18 | 1 | 11 | 0 | NA |
| 7 | 137995909 | 137929569 | -1 | NM_174959    | SVOPL     | 0 | NA | 0 | NA | 0 | NA | 0 | NA | 1 | 12 |
| 7 | 138109322 | 138041578 | -1 | NM_130841    | ATP6V0A4  | 0 | NA | 0 | NA | 0 | NA | 0 | NA | 0 | NA |
| 7 | 138133278 | 138141309 | 1  | NM_001085429 | LOC155006 | 0 | NA | 1 | 15 | 0 | NA | 0 | NA | 1 | 13 |
| 7 | 138133481 | 138041578 | -1 | NM_020632    | ATP6V0A4  | 0 | NA | 1 | 15 | 0 | NA | 0 | NA | 1 | 13 |
| 7 | 138133481 | 138041578 | -1 | NM_130840    | ATP6V0A4  | 0 | NA | 1 | 15 | 0 | NA | 0 | NA | 1 | 13 |
| 7 | 138255110 | 138166666 | -1 | NM_020910    | KIAA1549  | 0 | NA | 1 | 14 | 0 | NA | 0 | NA | 1 | 14 |
| 7 | 138371315 | 138360991 | -1 | NM_080660    | ZC3HAV1L  | 0 | NA | 0 | NA | 0 | NA | 0 | NA | 0 | NA |
| 7 | 138445005 | 138378805 | -1 | NM_020119    | ZC3HAV1   | 0 | NA | 0 | NA | 0 | NA | 0 | NA | 0 | NA |
| 7 | 138445005 | 138395623 | -1 | NM_024625    | ZC3HAV1   | 0 | NA | 0 | NA | 0 | NA | 0 | NA | 0 | NA |
| 7 | 138469063 | 138525086 | 1  | NM_024926    | TTC26     | 1 | 21 | 0 | NA | 0 | NA | 0 | NA | 0 | NA |
| 7 | 138566990 | 138643522 | 1  | NM_173569    | FLJ25778  | 0 | NA | 0 | NA | 0 | NA | 0 | NA | 0 | NA |
| 7 | 138676614 | 138681605 | 1  | NM_197964    | C7orf55   | 1 | 49 | 0 | NA | 1 | 19 | 1 | 21 | 0 | NA |
| 7 | 138695173 | 138758740 | 1  | NM_016019    | LUC7L2    | 1 | 24 | 0 | NA | 0 | NA | 1 | 17 | 0 | NA |
| 7 | 138818997 | 138788627 | -1 | NM_198508    | KLRG2     | 0 | NA | 1 | 14 | 0 | NA | 0 | NA | 0 | NA |
| 7 | 138859213 | 138880271 | 1  | NM_001080511 | CLEC2L    | 0 | NA | 1 | 17 | 0 | NA | 0 | NA | 1 | 15 |
| 7 | 139124065 | 138896855 | -1 | NM_001113239 | HIPK2     | 0 | NA | 0 | NA | 0 | NA | 1 | 11 | 0 | NA |
| 7 | 139124065 | 138896855 | -1 | NM_022740    | HIPK2     | 0 | NA | 0 | NA | 0 | NA | 1 | 11 | 0 | NA |
| 7 | 139175420 | 139366471 | 1  | NM_001061    | TBXAS1    | 0 | NA | 1 | 12 | 0 | NA | 0 | NA | 0 | NA |
| 7 | 139175420 | 139366471 | 1  | NM_030984    | TBXAS1    | 0 | NA | 1 | 12 | 0 | NA | 0 | NA | 0 | NA |
| 7 | 139409990 | 139370017 | -1 | NM_022750    | PARP12    | 0 | NA | 0 | NA | 0 | NA | 1 | 13 | 0 | NA |
| 7 | 139523210 | 139431014 | -1 | NM_030647    | JHDM1D    | 0 | NA | 0 | NA | 0 | NA | 0 | NA | 0 | NA |
| 7 | 139744780 | 139680020 | -1 | NM_032295    | SLC37A3   | 0 | NA | 0 | NA | 0 | NA | 1 | 11 | 0 | NA |
| 7 | 139744780 | 139680020 | -1 | NM_207113    | SLC37A3   | 0 | NA | 0 | NA | 0 | NA | 1 | 11 | 0 | NA |
| 7 | 139753915 | 139772419 | 1  | NM_001008749 | RAB19     | 0 | NA | 0 | NA | 0 | NA | 0 | NA | 0 | NA |
| 7 | 139825771 | 139799326 | -1 | NM_013446    | MKRN1     | 0 | NA | 0 | NA | 0 | NA | 0 | NA | 0 | NA |
| 7 | 139948811 | 139864888 | -1 | NM_015689    | DENND2A   | 0 | NA | 0 | NA | 0 | NA | 0 | NA | 0 | NA |
| 7 | 140019421 | 140041377 | 1  | NM_052853    | ADCK2     | 0 | NA | 0 | NA | 1 | 17 | 0 | NA | 0 | NA |
| 7 | 140042949 | 140052915 | 1  | NM_004546    | NDUFB2    | 0 | NA | 0 | NA | 0 | NA | 0 | NA | 0 | NA |
| 7 | 140271033 | 140080281 | -1 | NM_004333    | BRAF      | 0 | NA | 0 | NA | 1 | 14 | 0 | NA | 0 | NA |
| 7 | 140380948 | 140352429 | -1 | NM_016071    | MRPS33    | 0 | NA | 0 | NA | 0 | NA | 0 | NA | 0 | NA |
| 7 | 140361250 | 140352429 | -1 | NM_053035    | MRPS33    | 0 | NA | 0 | NA | 0 | NA | 0 | NA | 0 | NA |
| 7 | 140897546 | 141000678 | 1  | NM_018238    | AGK       | 0 | NA | 0 | NA | 0 | NA | 0 | NA | 0 | NA |

|   |           |           |    |              |           |   |    |   |    |   |    |   |    |   |    |
|---|-----------|-----------|----|--------------|-----------|---|----|---|----|---|----|---|----|---|----|
| 7 | 141048422 | 141002996 | -1 | NM_001080392 | KIAA1147  | 0 | NA | 0 | NA | 0 | NA | 0 | NA | 1 | 12 |
| 7 | 141054621 | 141077540 | 1  | NM_001105558 | WEE2      | 0 | NA | 0 | NA | 0 | NA | 0 | NA | 1 | 12 |
| 7 | 141084644 | 141096726 | 1  | NM_003143    | SSBP1     | 1 | 23 | 0 | NA | 0 | NA | 1 | 18 | 0 | NA |
| 7 | 141110365 | 141111466 | 1  | NM_016943    | TAS2R3    | 0 | NA | 0 | NA | 0 | NA | 0 | NA | 0 | NA |
| 7 | 141124757 | 141125657 | 1  | NM_016944    | TAS2R4    | 0 | NA | 0 | NA | 0 | NA | 0 | NA | 0 | NA |
| 7 | 141136485 | 141137635 | 1  | NM_018980    | TAS2R5    | 0 | NA | 0 | NA | 0 | NA | 0 | NA | 0 | NA |
| 7 | 141187690 | 141182554 | -1 | NM_001008270 | LOC136242 | 0 | NA | 0 | NA | 0 | NA | 0 | NA | 0 | NA |
| 7 | 141265144 | 141266089 | 1  | NM_001001656 | OR9A4     | 0 | NA | 0 | NA | 0 | NA | 0 | NA | 0 | NA |
| 7 | 141293252 | 141273625 | -1 | NM_013252    | CLEC5A    | 0 | NA | 0 | NA | 0 | NA | 0 | NA | 0 | NA |
| 7 | 141320042 | 141318899 | -1 | NM_176817    | TAS2R38   | 0 | NA | 0 | NA | 0 | NA | 0 | NA | 0 | NA |
| 7 | 141342147 | 141453016 | 1  | NM_004668    | MGAM      | 0 | NA | 0 | NA | 0 | NA | 0 | NA | 0 | NA |
| 7 | 141604355 | 141598440 | -1 | NM_001001317 | TRYX3     | 0 | NA | 0 | NA | 0 | NA | 0 | NA | 0 | NA |
| 7 | 142136892 | 142140501 | 1  | NM_002769    | PRSS1     | 0 | NA | 0 | NA | 0 | NA | 0 | NA | 0 | NA |
| 7 | 142178777 | 142182363 | 1  | NM_002770    | PRSS2     | 0 | NA | 0 | NA | 0 | NA | 0 | NA | 0 | NA |
| 7 | 142262913 | 142278969 | 1  | NM_004445    | EPHB6     | 0 | NA | 0 | NA | 0 | NA | 0 | NA | 0 | NA |
| 7 | 142293599 | 142279081 | -1 | NM_018646    | TRPV6     | 0 | NA | 0 | NA | 0 | NA | 0 | NA | 0 | NA |
| 7 | 142340942 | 142315769 | -1 | NM_019841    | TRPV5     | 0 | NA | 0 | NA | 0 | NA | 0 | NA | 0 | NA |
| 7 | 142346724 | 142348079 | 1  | NM_178829    | C7orf34   | 0 | NA | 0 | NA | 0 | NA | 0 | NA | 1 | 12 |
| 7 | 142369625 | 142348322 | -1 | NM_000420    | KEL       | 0 | NA | 0 | NA | 0 | NA | 0 | NA | 1 | 14 |
| 7 | 142434341 | 142433408 | -1 | NM_001001658 | OR9A2     | 0 | NA | 0 | NA | 0 | NA | 0 | NA | 0 | NA |
| 7 | 142459559 | 142460501 | 1  | NM_001001667 | OR6V1     | 0 | NA | 0 | NA | 0 | NA | 0 | NA | 1 | 12 |
| 7 | 142539295 | 142546956 | 1  | NM_002652    | PIP       | 0 | NA | 0 | NA | 0 | NA | 0 | NA | 0 | NA |
| 7 | 142590633 | 142591650 | 1  | NM_176881    | TAS2R39   | 0 | NA | 0 | NA | 0 | NA | 0 | NA | 0 | NA |
| 7 | 142629293 | 142630265 | 1  | NM_176882    | TAS2R40   | 0 | NA | 1 | 15 | 0 | NA | 0 | NA | 0 | NA |
| 7 | 142670685 | 142676326 | 1  | NM_015917    | GSTK1     | 0 | NA | 0 | NA | 0 | NA | 1 | 14 | 0 | NA |
| 7 | 142692184 | 142695263 | 1  | NM_153345    | TMEM139   | 1 | 40 | 1 | 12 | 0 | NA | 0 | NA | 0 | NA |
| 7 | 142695523 | 142714907 | 1  | NM_032982    | CASP2     | 1 | 40 | 1 | 12 | 0 | NA | 0 | NA | 0 | NA |
| 7 | 142695523 | 142714907 | 1  | NM_032983    | CASP2     | 1 | 40 | 1 | 12 | 0 | NA | 0 | NA | 0 | NA |
| 7 | 142720276 | 142719895 | -1 | NM_001122715 | LOC730647 | 0 | NA | 0 | NA | 1 | 12 | 0 | NA | 0 | NA |
| 7 | 142723340 | 142759219 | 1  | NM_000083    | CLCN1     | 0 | NA | 0 | NA | 1 | 12 | 0 | NA | 0 | NA |
| 7 | 142769295 | 142760614 | -1 | NM_014690    | FAM131B   | 0 | NA | 1 | 18 | 1 | 12 | 0 | NA | 1 | 12 |
| 7 | 142769962 | 142760614 | -1 | NM_001031690 | FAM131B   | 1 | 12 | 1 | 18 | 1 | 12 | 0 | NA | 1 | 12 |
| 7 | 142788481 | 142798327 | 1  | NM_001010972 | ZYX       | 1 | 12 | 0 | NA | 1 | 14 | 0 | NA | 0 | NA |
| 7 | 142788481 | 142798327 | 1  | NM_003461    | ZYX       | 1 | 12 | 0 | NA | 1 | 14 | 0 | NA | 0 | NA |
| 7 | 142816107 | 142798326 | -1 | NM_005232    | EPHA1     | 0 | NA | 0 | NA | 0 | NA | 0 | NA | 1 | 12 |
| 7 | 142850667 | 142851624 | 1  | NM_177437    | TAS2R60   | 0 | NA | 0 | NA | 0 | NA | 0 | NA | 0 | NA |
| 7 | 142885087 | 142886011 | 1  | NM_176883    | TAS2R41   | 0 | NA | 0 | NA | 0 | NA | 0 | NA | 0 | NA |
| 7 | 142979011 | 142981366 | 1  | NM_001008747 | LOC441294 | 0 | NA | 0 | NA | 0 | NA | 0 | NA | 0 | NA |
| 7 | 143026666 | 143053107 | 1  | NM_173678    | FAM139A   | 0 | NA | 0 | NA | 0 | NA | 0 | NA | 0 | NA |
| 7 | 143085776 | 143083114 | -1 | NM_178561    | CTAGE6    | 0 | NA | 0 | NA | 0 | NA | 0 | NA | 0 | NA |
| 7 | 143230105 | 143180981 | -1 | NM_014719    | FAM115A   | 1 | 12 | 0 | NA | 0 | NA | 0 | NA | 0 | NA |
| 7 | 143263258 | 143264212 | 1  | NM_001004685 | OR2F2     | 0 | NA | 0 | NA | 0 | NA | 0 | NA | 0 | NA |
| 7 | 143287952 | 143289041 | 1  | NM_012369    | OR2F1     | 0 | NA | 0 | NA | 0 | NA | 0 | NA | 0 | NA |
| 7 | 143332022 | 143332958 | 1  | NM_001005281 | OR6B1     | 0 | NA | 0 | NA | 0 | NA | 0 | NA | 0 | NA |
| 7 | 143378427 | 143379363 | 1  | NM_012365    | OR2A5     | 0 | NA | 0 | NA | 0 | NA | 0 | NA | 0 | NA |
| 7 | 143402245 | 143403178 | 1  | NM_001004488 | OR2A25    | 0 | NA | 0 | NA | 0 | NA | 0 | NA | 0 | NA |
| 7 | 143423133 | 143424066 | 1  | NM_001004135 | OR2A12    | 0 | NA | 0 | NA | 0 | NA | 0 | NA | 0 | NA |
| 7 | 143437608 | 143438565 | 1  | NM_001005480 | OR2A2     | 0 | NA | 0 | NA | 0 | NA | 0 | NA | 0 | NA |
| 7 | 143457138 | 143458071 | 1  | NM_001001659 | OR2A14    | 0 | NA | 0 | NA | 0 | NA | 0 | NA | 0 | NA |
| 7 | 143523669 | 143514609 | -1 | NM_001003702 | FLJ43692  | 0 | NA | 0 | NA | 0 | NA | 0 | NA | 0 | NA |
| 7 | 143560851 | 143559936 | -1 | NM_001001802 | OR2A42    | 0 | NA | 0 | NA | 0 | NA | 0 | NA | 0 | NA |
| 7 | 143560869 | 143559936 | -1 | NM_001005287 | OR2A1     | 0 | NA | 0 | NA | 0 | NA | 0 | NA | 0 | NA |
| 7 | 143587654 | 143586721 | -1 | NM_001005328 | OR2A7     | 0 | NA | 0 | NA | 0 | NA | 0 | NA | 0 | NA |
| 7 | 143646150 | 143647083 | 1  | NM_001005287 | OR2A1     | 0 | NA | 0 | NA | 0 | NA | 0 | NA | 0 | NA |
| 7 | 143646168 | 143647083 | 1  | NM_001001802 | OR2A42    | 0 | NA | 0 | NA | 0 | NA | 0 | NA | 0 | NA |
| 7 | 143683421 | 143708658 | 1  | NM_005435    | ARHGGEF5  | 0 | NA | 0 | NA | 0 | NA | 0 | NA | 0 | NA |
| 7 | 143738253 | 143726971 | -1 | NM_001080413 | NOBOX     | 0 | NA | 0 | NA | 0 | NA | 0 | NA | 0 | NA |
| 7 | 144164079 | 143779966 | -1 | NM_001042482 | TPK1      | 1 | 21 | 0 | NA | 0 | NA | 0 | NA | 0 | NA |
| 7 | 144164079 | 143779966 | -1 | NM_022445    | TPK1      | 1 | 21 | 0 | NA | 0 | NA | 0 | NA | 0 | NA |
| 7 | 145444385 | 147749019 | 1  | NM_014141    | CNTNAP2   | 0 | NA | 1 | 13 | 0 | NA | 1 | 12 | 0 | NA |
| 7 | 147762571 | 147774206 | 1  | NM_001126313 | LOC392145 | 0 | NA | 0 | NA | 0 | NA | 0 | NA | 0 | NA |
| 7 | 147918589 | 147943885 | 1  | NM_145304    | C7orf33   | 0 | NA | 1 | 12 | 0 | NA | 0 | NA | 0 | NA |
| 7 | 148026865 | 148129135 | 1  | NM_003592    | CUL1      | 0 | NA | 0 | NA | 1 | 12 | 0 | NA | 0 | NA |
| 7 | 148212347 | 148135407 | -1 | NM_004456    | EZH2      | 0 | NA | 0 | NA | 0 | NA | 0 | NA | 0 | NA |
| 7 | 148212347 | 148135407 | -1 | NM_152998    | EZH2      | 0 | NA | 0 | NA | 0 | NA | 0 | NA | 0 | NA |

|   |           |           |    |              |           |   |    |   |    |   |    |   |    |   |    |
|---|-----------|-----------|----|--------------|-----------|---|----|---|----|---|----|---|----|---|----|
| 7 | 148356715 | 148331086 | -1 | NM_004911    | PDIA4     | 0 | NA | 0 | NA | 1 | 12 | 1 | 12 | 0 | NA |
| 7 | 148418802 | 148397665 | -1 | NM_152411    | ZNF786    | 0 | NA | 0 | NA | 0 | NA | 1 | 11 | 0 | NA |
| 7 | 148454311 | 148430810 | -1 | NM_001001661 | ZNF425    | 0 | NA | 0 | NA | 0 | NA | 1 | 12 | 0 | NA |
| 7 | 148454440 | 148511051 | 1  | NM_020781    | ZNF398    | 0 | NA | 0 | NA | 0 | NA | 1 | 12 | 0 | NA |
| 7 | 148475750 | 148511051 | 1  | NM_170686    | ZNF398    | 0 | NA | 0 | NA | 0 | NA | 0 | NA | 0 | NA |
| 7 | 148523509 | 14854272  | 1  | NM_003575    | ZNF282    | 1 | 12 | 0 | NA | 0 | NA | 0 | NA | 0 | NA |
| 7 | 148567706 | 148583621 | 1  | NM_012256    | ZNF212    | 0 | NA | 0 | NA | 0 | NA | 0 | NA | 0 | NA |
| 7 | 148590194 | 148613015 | 1  | NM_001004302 | ZNF783    | 0 | NA | 0 | NA | 0 | NA | 0 | NA | 0 | NA |
| 7 | 148788986 | 148759386 | -1 | NM_015694    | ZNF777    | 0 | NA | 0 | NA | 0 | NA | 0 | NA | 0 | NA |
| 7 | 148825727 | 148800817 | -1 | NM_152557    | ZNF746    | 0 | NA | 1 | 12 | 0 | NA | 0 | NA | 0 | NA |
| 7 | 148952751 | 148875177 | -1 | NM_024910    | ZNF767    | 0 | NA | 0 | NA | 0 | NA | 0 | NA | 0 | NA |
| 7 | 149043080 | 149062597 | 1  | NM_032534    | KRBA1     | 1 | 19 | 0 | NA | 1 | 12 | 1 | 20 | 0 | NA |
| 7 | 149101228 | 149092384 | -1 | NM_207336    | ZNF467    | 0 | NA | 0 | NA | 1 | 12 | 0 | NA | 0 | NA |
| 7 | 149104063 | 149161986 | 1  | NM_198455    | SSPO      | 0 | NA | 1 | 12 | 1 | 12 | 0 | NA | 0 | NA |
| 7 | 149166441 | 149195501 | 1  | NM_001099220 | LOC643641 | 0 | NA | 1 | 13 | 0 | NA | 1 | 11 | 0 | NA |
| 7 | 149200989 | 149208671 | 1  | NM_001100592 | ATP6V0E2  | 0 | NA | 0 | NA | 1 | 13 | 0 | NA | 0 | NA |
| 7 | 149200989 | 149208720 | 1  | NM_145230    | ATP6V0E2  | 0 | NA | 0 | NA | 1 | 13 | 0 | NA | 0 | NA |
| 7 | 149651537 | 149666172 | 1  | NM_023942    | LRRC61    | 0 | NA | 0 | NA | 0 | NA | 0 | NA | 0 | NA |
| 7 | 149657870 | 149660743 | 1  | NM_138434    | C7orf29   | 0 | NA | 0 | NA | 0 | NA | 0 | NA | 0 | NA |
| 7 | 149669639 | 149666350 | -1 | NM_002889    | RARRES2   | 0 | NA | 1 | 13 | 0 | NA | 0 | NA | 0 | NA |
| 7 | 149696811 | 149702066 | 1  | NM_001099695 | REPIN1    | 1 | 12 | 0 | NA | 0 | NA | 0 | NA | 0 | NA |
| 7 | 149696811 | 149702066 | 1  | NM_001099696 | REPIN1    | 1 | 12 | 0 | NA | 0 | NA | 0 | NA | 0 | NA |
| 7 | 149696811 | 149702066 | 1  | NM_013400    | REPIN1    | 1 | 12 | 0 | NA | 0 | NA | 0 | NA | 0 | NA |
| 7 | 149699190 | 149702066 | 1  | NM_014374    | REPIN1    | 1 | 12 | 0 | NA | 0 | NA | 0 | NA | 0 | NA |
| 7 | 149707338 | 149726652 | 1  | NM_173680    | ZNF775    | 1 | 12 | 0 | NA | 0 | NA | 1 | 12 | 0 | NA |
| 7 | 149778894 | 149807416 | 1  | NM_175571    | GIMAP8    | 0 | NA | 1 | 12 | 0 | NA | 0 | NA | 0 | NA |
| 7 | 149842877 | 149849094 | 1  | NM_153236    | GIMAP7    | 0 | NA | 0 | NA | 0 | NA | 0 | NA | 1 | 12 |
| 7 | 149895390 | 149901974 | 1  | NM_018326    | GIMAP4    | 0 | NA | 0 | NA | 0 | NA | 0 | NA | 0 | NA |
| 7 | 149960374 | 149953396 | -1 | NM_001007224 | GIMAP6    | 0 | NA | 0 | NA | 0 | NA | 0 | NA | 0 | NA |
| 7 | 149960374 | 149953396 | -1 | NM_024711    | GIMAP6    | 0 | NA | 0 | NA | 0 | NA | 0 | NA | 0 | NA |
| 7 | 150013726 | 150021661 | 1  | NM_015660    | GIMAP2    | 0 | NA | 0 | NA | 1 | 12 | 0 | NA | 0 | NA |
| 7 | 150044630 | 150049186 | 1  | NM_130759    | GIMAP1    | 0 | NA | 0 | NA | 0 | NA | 0 | NA | 1 | 12 |
| 7 | 150065383 | 150071669 | 1  | NM_018384    | GIMAP5    | 0 | NA | 0 | NA | 0 | NA | 0 | NA | 0 | NA |
| 7 | 150126630 | 150119308 | -1 | NM_001101313 | TMEM176B  | 0 | NA | 0 | NA | 0 | NA | 0 | NA | 0 | NA |
| 7 | 150128554 | 150119308 | -1 | NM_001101311 | TMEM176B  | 0 | NA | 0 | NA | 0 | NA | 0 | NA | 0 | NA |
| 7 | 150128554 | 150119308 | -1 | NM_001101312 | TMEM176B  | 0 | NA | 0 | NA | 0 | NA | 0 | NA | 0 | NA |
| 7 | 150128554 | 150119308 | -1 | NM_001101314 | TMEM176B  | 0 | NA | 0 | NA | 0 | NA | 0 | NA | 0 | NA |
| 7 | 150128786 | 150133141 | 1  | NM_018487    | TMEM176A  | 0 | NA | 0 | NA | 0 | NA | 0 | NA | 0 | NA |
| 7 | 150129381 | 150119308 | -1 | NM_014020    | TMEM176B  | 0 | NA | 0 | NA | 0 | NA | 0 | NA | 0 | NA |
| 7 | 150180505 | 150189312 | 1  | NM_001091    | ABP1      | 0 | NA | 0 | NA | 0 | NA | 0 | NA | 1 | 12 |
| 7 | 150283848 | 150272981 | -1 | NM_172057    | KCNH2     | 1 | 13 | 0 | NA | 0 | NA | 0 | NA | 0 | NA |
| 7 | 150305947 | 150272981 | -1 | NM_000238    | KCNH2     | 0 | NA | 0 | NA | 0 | NA | 0 | NA | 0 | NA |
| 7 | 150305947 | 150277447 | -1 | NM_172056    | KCNH2     | 0 | NA | 0 | NA | 0 | NA | 0 | NA | 0 | NA |
| 7 | 150319079 | 150342609 | 1  | NM_000603    | NOS3      | 1 | 12 | 1 | 14 | 0 | NA | 0 | NA | 0 | NA |
| 7 | 150352519 | 150340236 | -1 | NM_173681    | ATG9B     | 0 | NA | 0 | NA | 0 | NA | 0 | NA | 0 | NA |
| 7 | 150356442 | 150375802 | 1  | NM_007188    | ABCB8     | 0 | NA | 0 | NA | 0 | NA | 0 | NA | 0 | NA |
| 7 | 150376537 | 150380776 | 1  | NM_004769    | ACCN3     | 0 | NA | 0 | NA | 0 | NA | 0 | NA | 0 | NA |
| 7 | 150376537 | 150380776 | 1  | NM_020321    | ACCN3     | 0 | NA | 0 | NA | 0 | NA | 0 | NA | 0 | NA |
| 7 | 150376537 | 150380776 | 1  | NM_020322    | ACCN3     | 0 | NA | 0 | NA | 0 | NA | 0 | NA | 0 | NA |
| 7 | 150385929 | 150381831 | -1 | NM_004935    | CDK5      | 0 | NA | 0 | NA | 0 | NA | 0 | NA | 0 | NA |
| 7 | 150387589 | 150404547 | 1  | NM_003040    | SLC4A2    | 0 | NA | 0 | NA | 0 | NA | 0 | NA | 0 | NA |
| 7 | 150408884 | 150404640 | -1 | NM_006712    | FASTK     | 1 | 14 | 0 | NA | 0 | NA | 1 | 16 | 0 | NA |
| 7 | 150408884 | 150404640 | -1 | NM_033015    | FASTK     | 1 | 14 | 0 | NA | 0 | NA | 1 | 16 | 0 | NA |
| 7 | 150411021 | 150409104 | -1 | NM_031434    | TMUB1     | 1 | 14 | 0 | NA | 0 | NA | 1 | 16 | 0 | NA |
| 7 | 150414758 | 150451658 | 1  | NM_001042535 | CENTG3    | 1 | 14 | 0 | NA | 0 | NA | 1 | 16 | 0 | NA |
| 7 | 150414758 | 15042456  | 1  | NM_031946    | CENTG3    | 1 | 14 | 0 | NA | 0 | NA | 1 | 16 | 0 | NA |
| 7 | 150495800 | 150476608 | -1 | NM_001098834 | GBX1      | 0 | NA | 1 | 13 | 1 | 12 | 0 | NA | 0 | NA |
| 7 | 150515411 | 150503717 | -1 | NM_080871    | ASB10     | 0 | NA | 1 | 14 | 0 | NA | 1 | 11 | 0 | NA |
| 7 | 150555250 | 150535855 | -1 | NM_005692    | ABCF2     | 0 | NA | 0 | NA | 0 | NA | 0 | NA | 0 | NA |
| 7 | 150555250 | 150540508 | -1 | NM_007189    | ABCF2     | 0 | NA | 0 | NA | 0 | NA | 0 | NA | 0 | NA |
| 7 | 150560517 | 150566838 | 1  | NM_019015    | CSG1cA-T  | 0 | NA | 0 | NA | 0 | NA | 0 | NA | 0 | NA |
| 7 | 150576682 | 150566991 | -1 | NM_001003801 | SMARCD3   | 0 | NA | 1 | 13 | 0 | NA | 1 | 12 | 0 | NA |
| 7 | 150604753 | 150566991 | -1 | NM_001003802 | SMARCD3   | 0 | NA | 1 | 28 | 0 | NA | 0 | NA | 0 | NA |
| 7 | 150605164 | 150566991 | -1 | NM_003078    | SMARCD3   | 0 | NA | 1 | 28 | 0 | NA | 0 | NA | 0 | NA |
| 7 | 150669790 | 150706465 | 1  | NM_016118    | NUB1      | 0 | NA | 0 | NA | 0 | NA | 0 | NA | 0 | NA |

|           |           |           |    |              |               |   |    |   |    |   |    |   |    |   |    |
|-----------|-----------|-----------|----|--------------|---------------|---|----|---|----|---|----|---|----|---|----|
| 7         | 150738057 | 150709139 | -1 | NM_198285    | WDR86         | 0 | NA | 1 | 15 | 0 | NA | 0 | NA | 1 | 13 |
| 7         | 150768032 | 150757988 | -1 | NM_144727    | CRYGN         | 0 | NA | 0 | NA | 0 | NA | 0 | NA | 0 | NA |
| 7         | 150847943 | 150794030 | -1 | NM_005614    | RHEB          | 1 | 17 | 0 | NA | 1 | 23 | 1 | 22 | 0 | NA |
| 7         | 150960277 | 150884133 | -1 | NM_024429    | PRKAG2        | 0 | NA | 1 | 12 | 0 | NA | 0 | NA | 0 | NA |
| 7         | 151142890 | 150884133 | -1 | NM_001040633 | PRKAG2        | 0 | NA | 1 | 12 | 0 | NA | 0 | NA | 0 | NA |
| 7         | 151205249 | 150884133 | -1 | NM_016203    | PRKAG2        | 0 | NA | 1 | 14 | 0 | NA | 0 | NA | 0 | NA |
| 7         | 151284443 | 151347945 | 1  | NM_145292    | GALNTL5       | 0 | NA | 1 | 22 | 0 | NA | 0 | NA | 1 | 13 |
| 7         | 151353710 | 151450360 | 1  | NM_022087    | GALNT11       | 0 | NA | 0 | NA | 0 | NA | 1 | 14 | 0 | NA |
| 7         | 151764023 | 151462942 | -1 | NM_170606    | MLL3          | 0 | NA | 0 | NA | 0 | NA | 0 | NA | 0 | NA |
| 7         | 151773256 | 151775287 | 1  | NM_001029866 | CCTBL1        | 0 | NA | 0 | NA | 0 | NA | 0 | NA | 0 | NA |
| 7         | 152004183 | 151974519 | -1 | NM_005431    | XRCC2         | 0 | NA | 0 | NA | 0 | NA | 1 | 12 | 0 | NA |
| 7         | 152087783 | 152183396 | 1  | NM_001040135 | ACTR3B        | 0 | NA | 0 | NA | 1 | 14 | 0 | NA | 0 | NA |
| 7         | 152087783 | 152183396 | 1  | NM_020445    | ACTR3B        | 0 | NA | 0 | NA | 1 | 14 | 0 | NA | 0 | NA |
| 7         | 153215351 | 154316928 | 1  | NM_001039350 | DPP6          | 0 | NA | 0 | NA | 0 | NA | 0 | NA | 0 | NA |
| 7         | 153380709 | 154316928 | 1  | NM_130797    | DPP6          | 0 | NA | 0 | NA | 0 | NA | 0 | NA | 0 | NA |
| 7         | 153633279 | 154316928 | 1  | NM_001936    | DPP6          | 0 | NA | 0 | NA | 0 | NA | 0 | NA | 0 | NA |
| 7         | 154425615 | 154366332 | -1 | NM_007349    | PAXIP1        | 0 | NA | 0 | NA | 0 | NA | 0 | NA | 0 | NA |
| 7         | 154493478 | 154508392 | 1  | NM_024012    | HTR5A         | 1 | 12 | 1 | 12 | 0 | NA | 0 | NA | 1 | 13 |
| 7         | 154720475 | 154732879 | 1  | NM_005542    | INSIG1        | 0 | NA | 0 | NA | 0 | NA | 0 | NA | 0 | NA |
| 7         | 154720475 | 154732879 | 1  | NM_198336    | INSIG1        | 0 | NA | 0 | NA | 0 | NA | 0 | NA | 0 | NA |
| 7         | 154720475 | 154732879 | 1  | NM_198337    | INSIG1        | 0 | NA | 0 | NA | 0 | NA | 0 | NA | 0 | NA |
| 7         | 154943584 | 154950287 | 1  | NM_001427    | EN2           | 0 | NA | 1 | 15 | 1 | 17 | 1 | 12 | 0 | NA |
| 7         | 155019300 | 154986713 | -1 | NM_001103176 | CNPY1         | 0 | NA | 1 | 12 | 0 | NA | 0 | NA | 0 | NA |
| 7         | 155129963 | 155266940 | 1  | NM_001008408 | RBM33         | 0 | NA | 0 | NA | 1 | 15 | 0 | NA | 0 | NA |
| 7         | 155129963 | 155266940 | 1  | NM_053043    | RBM33         | 0 | NA | 0 | NA | 1 | 15 | 0 | NA | 0 | NA |
| 7         | 155297728 | 155288318 | -1 | NM_000193    | SHH           | 0 | NA | 1 | 13 | 0 | NA | 0 | NA | 1 | 14 |
| 7         | 156126161 | 156162581 | 1  | NM_030936    | RNF32         | 0 | NA | 1 | 15 | 0 | NA | 0 | NA | 1 | 14 |
| 7         | 156378663 | 156166330 | -1 | NM_022458    | LMBR1         | 0 | NA | 0 | NA | 0 | NA | 0 | NA | 0 | NA |
| 7         | 156435177 | 156458637 | 1  | NM_138400    | NOM1          | 1 | 12 | 1 | 36 | 1 | 13 | 0 | NA | 1 | 12 |
| 7         | 156496108 | 156490307 | -1 | NM_005515    | MXN1          | 1 | 12 | 1 | 14 | 0 | NA | 0 | NA | 0 | NA |
| 7         | 156624415 | 156754827 | 1  | NM_014671    | UBE3C         | 0 | NA | 0 | NA | 0 | NA | 0 | NA | 0 | NA |
| 7         | 156822470 | 156871779 | 1  | NM_005494    | DNAJB6        | 0 | NA | 1 | 13 | 1 | 12 | 1 | 11 | 0 | NA |
| 7         | 156822471 | 156902894 | 1  | NM_058246    | DNAJB6        | 0 | NA | 1 | 13 | 1 | 12 | 1 | 11 | 0 | NA |
| 7         | 158073179 | 157024515 | -1 | NM_002847    | PTPRN2        | 0 | NA | 1 | 21 | 0 | NA | 0 | NA | 0 | NA |
| 7         | 158073179 | 157024515 | -1 | NM_130842    | PTPRN2        | 0 | NA | 1 | 21 | 0 | NA | 0 | NA | 0 | NA |
| 7         | 158073179 | 157024515 | -1 | NM_130843    | PTPRN2        | 0 | NA | 1 | 21 | 0 | NA | 0 | NA | 0 | NA |
| 7         | 158190281 | 158116763 | -1 | NM_017760    | NCAPG2        | 0 | NA | 1 | 12 | 0 | NA | 1 | 13 | 0 | NA |
| 7         | 158315080 | 158216449 | -1 | NM_020728    | FAM62B        | 0 | NA | 0 | NA | 0 | NA | 0 | NA | 0 | NA |
| 7         | 158342029 | 158431844 | 1  | NM_018051    | WDR60         | 0 | NA | 0 | NA | 0 | NA | 1 | 16 | 0 | NA |
| 7         | 158630410 | 158513626 | -1 | NM_003382    | VIPR2         | 0 | NA | 0 | NA | 0 | NA | 0 | NA | 0 | NA |
| 5_h2_hap1 | 281       | 935       | 1  | NM_022909    | CENPH         | 0 | NA | 0 | NA | 0 | NA | 0 | NA | 0 | NA |
| 5_h2_hap1 | 8323      | 20734     | 1  | NM_033281    | MRPS36        | 0 | NA | 0 | NA | 0 | NA | 0 | NA | 0 | NA |
| 5_h2_hap1 | 25370     | 67992     | 1  | NM_001799    | CDK7          | 0 | NA | 0 | NA | 0 | NA | 0 | NA | 0 | NA |
| 5_h2_hap1 | 111099    | 71262     | -1 | NM_176816    | CCDC125       | 0 | NA | 0 | NA | 0 | NA | 0 | NA | 0 | NA |
| 5_h2_hap1 | 159888    | 205623    | 1  | NM_133343    | RAD17         | 0 | NA | 0 | NA | 0 | NA | 0 | NA | 0 | NA |
| 5_h2_hap1 | 160174    | 142314    | -1 | NM_016283    | TAF9          | 0 | NA | 0 | NA | 0 | NA | 0 | NA | 0 | NA |
| 5_h2_hap1 | 160174    | 155333    | -1 | NM_003187    | TAF9          | 0 | NA | 0 | NA | 0 | NA | 0 | NA | 0 | NA |
| 5_h2_hap1 | 160403    | 205623    | 1  | NM_133338    | RAD17         | 0 | NA | 0 | NA | 0 | NA | 0 | NA | 0 | NA |
| 5_h2_hap1 | 160403    | 205623    | 1  | NM_133342    | RAD17         | 0 | NA | 0 | NA | 0 | NA | 0 | NA | 0 | NA |
| 5_h2_hap1 | 160403    | 205623    | 1  | NM_133344    | RAD17         | 0 | NA | 0 | NA | 0 | NA | 0 | NA | 0 | NA |
| 5_h2_hap1 | 160605    | 142314    | -1 | NM_001015891 | TAF9          | 0 | NA | 0 | NA | 0 | NA | 0 | NA | 0 | NA |
| 5_h2_hap1 | 160605    | 155333    | -1 | NM_001015892 | TAF9          | 0 | NA | 0 | NA | 0 | NA | 0 | NA | 0 | NA |
| 5_h2_hap1 | 161296    | 205620    | 1  | NM_002873    | RAD17         | 0 | NA | 0 | NA | 0 | NA | 0 | NA | 0 | NA |
| 5_h2_hap1 | 161626    | 205623    | 1  | NM_133340    | RAD17         | 0 | NA | 0 | NA | 0 | NA | 0 | NA | 0 | NA |
| 5_h2_hap1 | 161626    | 205623    | 1  | NM_133341    | RAD17         | 0 | NA | 0 | NA | 0 | NA | 0 | NA | 0 | NA |
| 5_h2_hap1 | 162042    | 205623    | 1  | NM_133339    | RAD17         | 0 | NA | 0 | NA | 0 | NA | 0 | NA | 0 | NA |
| 5_h2_hap1 | 205934    | 234375    | 1  | NM_144724    | MARVELD2      | 0 | NA | 0 | NA | 0 | NA | 0 | NA | 0 | NA |
| 5_h2_hap1 | 205945    | 232430    | 1  | NM_001038603 | MARVELD2      | 0 | NA | 0 | NA | 0 | NA | 0 | NA | 0 | NA |
| 5_h2_hap1 | 282584    | 344645    | 1  | NM_002538    | OCLN          | 0 | NA | 0 | NA | 0 | NA | 0 | NA | 0 | NA |
| 5_h2_hap1 | 350567    | 383261    | 1  | NM_001098728 | LOC728340     | 0 | NA | 0 | NA | 0 | NA | 0 | NA | 0 | NA |
| 5_h2_hap1 | 350570    | 383110    | 1  | NM_001515    | GTF2H2        | 0 | NA | 0 | NA | 0 | NA | 0 | NA | 0 | NA |
| 5_h2_hap1 | 350585    | 383261    | 1  | NM_001098729 | DKFZP686M0199 | 0 | NA | 0 | NA | 0 | NA | 0 | NA | 0 | NA |
| 5_h2_hap1 | 350590    | 382884    | 1  | NM_001042490 | LOC730394     | 0 | NA | 0 | NA | 0 | NA | 0 | NA | 0 | NA |
| 5_h2_hap1 | 393127    | 449737    | 1  | NM_004536    | NAIP          | 0 | NA | 0 | NA | 0 | NA | 0 | NA | 0 | NA |
| 5_h2_hap1 | 393127    | 449737    | 1  | NM_022892    | NAIP          | 0 | NA | 0 | NA | 0 | NA | 0 | NA | 0 | NA |



|           |         |         |    |              |               |   |    |   |    |   |    |   |    |   |    |
|-----------|---------|---------|----|--------------|---------------|---|----|---|----|---|----|---|----|---|----|
| 5_h2_hap1 | 493242  | 465175  | -1 | NM_017411    | SMN2          | 0 | NA | 0 | NA | 0 | NA | 0 | NA | 0 | NA |
| 5_h2_hap1 | 493242  | 465175  | -1 | NM_022875    | SMN2          | 0 | NA | 0 | NA | 0 | NA | 0 | NA | 0 | NA |
| 5_h2_hap1 | 493242  | 465175  | -1 | NM_022876    | SMN2          | 0 | NA | 0 | NA | 0 | NA | 0 | NA | 0 | NA |
| 5_h2_hap1 | 493242  | 465175  | -1 | NM_022877    | SMN2          | 0 | NA | 0 | NA | 0 | NA | 0 | NA | 0 | NA |
| 5_h2_hap1 | 493242  | 465176  | -1 | NM_000344    | SMN1          | 0 | NA | 0 | NA | 0 | NA | 0 | NA | 0 | NA |
| 5_h2_hap1 | 493242  | 465176  | -1 | NM_022874    | SMN1          | 0 | NA | 0 | NA | 0 | NA | 0 | NA | 0 | NA |
| 5_h2_hap1 | 517517  | 499651  | -1 | NM_021967    | SERF1A        | 0 | NA | 0 | NA | 0 | NA | 0 | NA | 0 | NA |
| 5_h2_hap1 | 517517  | 499651  | -1 | NM_022978    | SERF1B        | 0 | NA | 0 | NA | 0 | NA | 0 | NA | 0 | NA |
| 5_h2_hap1 | 1005292 | 973040  | -1 | NM_001042490 | LOC730394     | 0 | NA | 0 | NA | 0 | NA | 0 | NA | 0 | NA |
| 5_h2_hap1 | 1005297 | 972663  | -1 | NM_001098729 | DKFZP686M0199 | 0 | NA | 0 | NA | 0 | NA | 0 | NA | 0 | NA |
| 5_h2_hap1 | 1005312 | 972814  | -1 | NM_001515    | GTF2H2        | 0 | NA | 0 | NA | 0 | NA | 0 | NA | 0 | NA |
| 5_h2_hap1 | 1005315 | 972663  | -1 | NM_001098728 | LOC728340     | 0 | NA | 0 | NA | 0 | NA | 0 | NA | 0 | NA |
| 5_h2_hap1 | 1030855 | 1011231 | -1 | NM_002538    | OCLN          | 0 | NA | 0 | NA | 0 | NA | 0 | NA | 0 | NA |
| 5_h2_hap1 | 1066400 | 1038915 | -1 | NM_004536    | NAIP          | 0 | NA | 0 | NA | 0 | NA | 0 | NA | 0 | NA |
| 5_h2_hap1 | 1066403 | 1038915 | -1 | NM_022892    | NAIP          | 0 | NA | 0 | NA | 0 | NA | 0 | NA | 0 | NA |
| 5_h2_hap1 | 1412260 | 1524468 | 1  | NM_018429    | BDP1          | 0 | NA | 0 | NA | 0 | NA | 0 | NA | 0 | NA |
| 5_h2_hap1 | 1543933 | 1615349 | 1  | NM_022132    | MCCC2         | 0 | NA | 0 | NA | 0 | NA | 0 | NA | 0 | NA |
| 5_h2_hap1 | 1675812 | 1677691 | 1  | NM_004291    | CARTPT        | 0 | NA | 0 | NA | 0 | NA | 0 | NA | 0 | NA |
| 1_random  | 126731  | 132885  | 1  | NM_020141    | C1orf119      | 0 | NA | 0 | NA | 0 | NA | 0 | NA | 0 | NA |
| 1_random  | 266953  | 270068  | 1  | NM_152228    | TAS1R3        | 0 | NA | 0 | NA | 0 | NA | 0 | NA | 0 | NA |
| 1_random  | 384701  | 386172  | 1  | NM_001127229 | AURKAIP1      | 0 | NA | 0 | NA | 0 | NA | 0 | NA | 0 | NA |
| 1_random  | 384719  | 386171  | 1  | NM_001127230 | AURKAIP1      | 0 | NA | 0 | NA | 0 | NA | 0 | NA | 0 | NA |
| 1_random  | 873196  | 889888  | 1  | NM_207418    | GCUD2         | 0 | NA | 0 | NA | 0 | NA | 0 | NA | 0 | NA |
| 1_random  | 1514478 | 1500603 | -1 | NM_006625    | FUSIP1        | 0 | NA | 0 | NA | 0 | NA | 0 | NA | 0 | NA |
| 1_random  | 1514478 | 1503240 | -1 | NM_054016    | FUSIP1        | 0 | NA | 0 | NA | 0 | NA | 0 | NA | 0 | NA |
| Y         | 132990  | 160020  | 1  | NM_018390    | PLCXD1        | 0 | NA | 0 | NA | 0 | NA | 0 | NA | 0 | NA |
| Y         | 170887  | 161425  | -1 | NM_012227    | GTPBP6        | 0 | NA | 0 | NA | 0 | NA | 0 | NA | 0 | NA |
| Y         | 222590  | 214969  | -1 | NM_199326    | PPP2R3B       | 0 | NA | 0 | NA | 0 | NA | 0 | NA | 0 | NA |
| Y         | 267627  | 214969  | -1 | NM_013239    | PPP2R3B       | 0 | NA | 0 | NA | 0 | NA | 0 | NA | 0 | NA |
| Y         | 505078  | 527558  | 1  | NM_000451    | SHOX          | 0 | NA | 0 | NA | 0 | NA | 0 | NA | 0 | NA |
| Y         | 505078  | 540146  | 1  | NM_006883    | SHOX          | 0 | NA | 0 | NA | 0 | NA | 0 | NA | 0 | NA |
| Y         | 1291527 | 1274886 | -1 | NM_001012288 | CRLF2         | 0 | NA | 0 | NA | 0 | NA | 0 | NA | 0 | NA |
| Y         | 1291530 | 1274893 | -1 | NM_022148    | CRLF2         | 0 | NA | 0 | NA | 0 | NA | 0 | NA | 0 | NA |
| Y         | 1347700 | 1388827 | 1  | NM_006140    | CSF2RA        | 0 | NA | 0 | NA | 0 | NA | 0 | NA | 0 | NA |
| Y         | 1347700 | 1388827 | 1  | NM_172245    | CSF2RA        | 0 | NA | 0 | NA | 0 | NA | 0 | NA | 0 | NA |
| Y         | 1347700 | 1388827 | 1  | NM_172246    | CSF2RA        | 0 | NA | 0 | NA | 0 | NA | 0 | NA | 0 | NA |
| Y         | 1347700 | 1388827 | 1  | NM_172249    | CSF2RA        | 0 | NA | 0 | NA | 0 | NA | 0 | NA | 0 | NA |
| Y         | 1361570 | 1388827 | 1  | NM_172247    | CSF2RA        | 0 | NA | 0 | NA | 0 | NA | 0 | NA | 0 | NA |
| Y         | 1415508 | 1461582 | 1  | NM_002183    | IL3RA         | 0 | NA | 0 | NA | 0 | NA | 0 | NA | 0 | NA |
| Y         | 1470998 | 1465044 | -1 | NM_001636    | SLC25A6       | 0 | NA | 0 | NA | 0 | NA | 0 | NA | 0 | NA |
| Y         | 1531844 | 1482031 | -1 | NM_004192    | ASMTL         | 0 | NA | 0 | NA | 0 | NA | 0 | NA | 0 | NA |
| Y         | 1616000 | 1541465 | -1 | NM_178129    | P2RY8         | 0 | NA | 0 | NA | 0 | NA | 0 | NA | 0 | NA |
| Y         | 1670485 | 1681411 | 1  | NM_005088    | SFRS17A       | 0 | NA | 0 | NA | 0 | NA | 0 | NA | 0 | NA |
| Y         | 1674347 | 1721974 | 1  | NM_004043    | ASMT          | 0 | NA | 0 | NA | 0 | NA | 0 | NA | 0 | NA |
| Y         | 2428975 | 2147552 | -1 | NM_145177    | DHRXS         | 0 | NA | 0 | NA | 0 | NA | 0 | NA | 0 | NA |
| Y         | 2429008 | 2414454 | -1 | NM_004729    | ZBED1         | 0 | NA | 0 | NA | 0 | NA | 0 | NA | 0 | NA |
| Y         | 2619227 | 2669350 | 1  | NM_001122898 | CD99          | 0 | NA | 0 | NA | 0 | NA | 0 | NA | 0 | NA |
| Y         | 2619227 | 2669350 | 1  | NM_002414    | CD99          | 0 | NA | 0 | NA | 0 | NA | 0 | NA | 0 | NA |
| Y         | 2715792 | 2714895 | -1 | NM_003140    | SRY           | 0 | NA | 0 | NA | 0 | NA | 0 | NA | 0 | NA |
| Y         | 2769622 | 2794997 | 1  | NM_001008    | RPS4Y1        | 0 | NA | 0 | NA | 0 | NA | 0 | NA | 0 | NA |
| Y         | 2863545 | 2909891 | 1  | NM_003411    | ZFY           | 0 | NA | 0 | NA | 0 | NA | 0 | NA | 0 | NA |
| Y         | 3507125 | 3508082 | 1  | NM_139214    | TGIF2LY       | 0 | NA | 0 | NA | 0 | NA | 0 | NA | 0 | NA |
| Y         | 4928266 | 5033485 | 1  | NM_032971    | PCDH11Y       | 0 | NA | 0 | NA | 0 | NA | 0 | NA | 0 | NA |
| Y         | 4984130 | 5033485 | 1  | NM_032972    | PCDH11Y       | 0 | NA | 0 | NA | 0 | NA | 0 | NA | 0 | NA |
| Y         | 4984130 | 5670264 | 1  | NM_032973    | PCDH11Y       | 0 | NA | 0 | NA | 0 | NA | 0 | NA | 0 | NA |
| Y         | 6174263 | 6177053 | 1  | NM_022573    | TSPY2         | 0 | NA | 0 | NA | 0 | NA | 0 | NA | 0 | NA |
| Y         | 6802068 | 6793958 | -1 | NM_001143    | AMELY         | 0 | NA | 0 | NA | 0 | NA | 0 | NA | 0 | NA |
| Y         | 6838726 | 7019724 | 1  | NM_033284    | TBL1Y         | 0 | NA | 0 | NA | 0 | NA | 0 | NA | 0 | NA |
| Y         | 6838726 | 7019724 | 1  | NM_134258    | TBL1Y         | 0 | NA | 0 | NA | 0 | NA | 0 | NA | 0 | NA |
| Y         | 6838726 | 7019724 | 1  | NM_134259    | TBL1Y         | 0 | NA | 0 | NA | 0 | NA | 0 | NA | 0 | NA |
| Y         | 7202013 | 7309588 | 1  | NM_002760    | PRKY          | 0 | NA | 0 | NA | 0 | NA | 0 | NA | 0 | NA |
| Y         | 9296048 | 9298663 | 1  | NM_001077697 | LOC728137     | 0 | NA | 0 | NA | 0 | NA | 0 | NA | 0 | NA |
| Y         | 9914563 | 9917398 | 1  | NM_003308    | TSPY1         | 0 | NA | 0 | NA | 0 | NA | 0 | NA | 0 | NA |
| Y         | 9934894 | 9937527 | 1  | NM_001077697 | LOC728137     | 0 | NA | 0 | NA | 0 | NA | 0 | NA | 0 | NA |
| Y         | 9975507 | 9978122 | 1  | NM_001077697 | LOC728137     | 0 | NA | 0 | NA | 0 | NA | 0 | NA | 0 | NA |

|   |          |          |    |              |          |   |    |   |    |   |    |   |    |   |    |
|---|----------|----------|----|--------------|----------|---|----|---|----|---|----|---|----|---|----|
| Y | 13322553 | 13482162 | 1  | NM_004654    | USP9Y    | 0 | NA | 0 | NA | 0 | NA | 0 | NA | 0 | NA |
| Y | 13525412 | 13541784 | 1  | NM_001122865 | DDX3Y    | 0 | NA | 0 | NA | 0 | NA | 0 | NA | 0 | NA |
| Y | 13526092 | 13541784 | 1  | NM_004660    | DDX3Y    | 0 | NA | 0 | NA | 0 | NA | 0 | NA | 0 | NA |
| Y | 14101944 | 13869656 | -1 | NM_007125    | UTY      | 0 | NA | 0 | NA | 0 | NA | 0 | NA | 0 | NA |
| Y | 14101944 | 13918782 | -1 | NM_182659    | UTY      | 0 | NA | 0 | NA | 0 | NA | 0 | NA | 0 | NA |
| Y | 14101944 | 13944307 | -1 | NM_182660    | UTY      | 0 | NA | 0 | NA | 0 | NA | 0 | NA | 0 | NA |
| Y | 14324840 | 14327296 | 1  | NM_004202    | TMSB4Y   | 0 | NA | 0 | NA | 0 | NA | 0 | NA | 0 | NA |
| Y | 14607782 | 14607045 | -1 | NM_181880    | VCY1B    | 0 | NA | 0 | NA | 0 | NA | 0 | NA | 0 | NA |
| Y | 14607786 | 14607045 | -1 | NM_004679    | VCY      | 0 | NA | 0 | NA | 0 | NA | 0 | NA | 0 | NA |
| Y | 14677491 | 14678232 | 1  | NM_004679    | VCY      | 0 | NA | 0 | NA | 0 | NA | 0 | NA | 0 | NA |
| Y | 14677495 | 14678232 | 1  | NM_181880    | VCY1B    | 0 | NA | 0 | NA | 0 | NA | 0 | NA | 0 | NA |
| Y | 15145847 | 15464921 | 1  | NM_014893    | NLGN4Y   | 0 | NA | 0 | NA | 0 | NA | 0 | NA | 0 | NA |
| Y | 18391834 | 18390253 | -1 | NM_001002906 | XKRY2    | 0 | NA | 0 | NA | 0 | NA | 0 | NA | 0 | NA |
| Y | 18391834 | 18390253 | -1 | NM_004677    | XKRY     | 0 | NA | 0 | NA | 0 | NA | 0 | NA | 0 | NA |
| Y | 18501493 | 18499533 | -1 | NM_001001722 | CDY2B    | 0 | NA | 0 | NA | 0 | NA | 0 | NA | 0 | NA |
| Y | 18501494 | 18499534 | -1 | NM_004825    | CDY2A    | 0 | NA | 0 | NA | 0 | NA | 0 | NA | 0 | NA |
| Y | 18647060 | 18649020 | 1  | NM_004825    | CDY2A    | 0 | NA | 0 | NA | 0 | NA | 0 | NA | 0 | NA |
| Y | 18647061 | 18649021 | 1  | NM_001001722 | CDY2B    | 0 | NA | 0 | NA | 0 | NA | 0 | NA | 0 | NA |
| Y | 18756722 | 18758303 | 1  | NM_001002906 | XKRY2    | 0 | NA | 0 | NA | 0 | NA | 0 | NA | 0 | NA |
| Y | 18756722 | 18758303 | 1  | NM_004677    | XKRY     | 0 | NA | 0 | NA | 0 | NA | 0 | NA | 0 | NA |
| Y | 19167944 | 19169865 | 1  | NM_153716    | HSFY2    | 0 | NA | 0 | NA | 0 | NA | 0 | NA | 0 | NA |
| Y | 19167961 | 19169866 | 1  | NM_033108    | HSFY1    | 0 | NA | 0 | NA | 0 | NA | 0 | NA | 0 | NA |
| Y | 19167964 | 19210237 | 1  | NM_001001877 | HSFY2    | 0 | NA | 0 | NA | 0 | NA | 0 | NA | 0 | NA |
| Y | 19167964 | 19210237 | 1  | NM_152584    | HSFY1    | 0 | NA | 0 | NA | 0 | NA | 0 | NA | 0 | NA |
| Y | 19394989 | 19352713 | -1 | NM_001001877 | HSFY2    | 0 | NA | 0 | NA | 0 | NA | 0 | NA | 0 | NA |
| Y | 19394989 | 19352713 | -1 | NM_152584    | HSFY1    | 0 | NA | 0 | NA | 0 | NA | 0 | NA | 0 | NA |
| Y | 19394992 | 19393087 | -1 | NM_033108    | HSFY1    | 0 | NA | 0 | NA | 0 | NA | 0 | NA | 0 | NA |
| Y | 19395009 | 19393088 | -1 | NM_153716    | HSFY2    | 0 | NA | 0 | NA | 0 | NA | 0 | NA | 0 | NA |
| Y | 19614093 | 19611913 | -1 | NM_013230    | CD24     | 0 | NA | 0 | NA | 0 | NA | 0 | NA | 0 | NA |
| Y | 20188622 | 20211697 | 1  | NM_001005852 | CYor115A | 0 | NA | 0 | NA | 0 | NA | 0 | NA | 0 | NA |
| Y | 20213723 | 20225769 | 1  | NM_032576    | CYor115B | 0 | NA | 0 | NA | 0 | NA | 0 | NA | 0 | NA |
| Y | 20366212 | 20326688 | -1 | NM_004653    | JARID1D  | 0 | NA | 0 | NA | 0 | NA | 0 | NA | 0 | NA |
| Y | 21146598 | 21164428 | 1  | NM_004681    | EIF1AY   | 0 | NA | 0 | NA | 0 | NA | 0 | NA | 0 | NA |
| Y | 21327341 | 21352306 | 1  | NM_001039567 | RPS4Y2   | 0 | NA | 0 | NA | 0 | NA | 0 | NA | 0 | NA |
| Y | 22082645 | 22097060 | 1  | NM_001006121 | RBM1B    | 0 | NA | 0 | NA | 0 | NA | 0 | NA | 0 | NA |
| Y | 22082645 | 22097060 | 1  | NM_005058    | RBM1A1   | 0 | NA | 0 | NA | 0 | NA | 0 | NA | 0 | NA |
| Y | 22082651 | 22097060 | 1  | NM_001006118 | RBM1E    | 0 | NA | 0 | NA | 0 | NA | 0 | NA | 0 | NA |
| Y | 22082651 | 22097060 | 1  | NM_001006120 | RBM1D    | 0 | NA | 0 | NA | 0 | NA | 0 | NA | 0 | NA |
| Y | 22106186 | 22120600 | 1  | NM_001006121 | RBM1B    | 0 | NA | 0 | NA | 0 | NA | 0 | NA | 0 | NA |
| Y | 22106186 | 22120600 | 1  | NM_005058    | RBM1A1   | 0 | NA | 0 | NA | 0 | NA | 0 | NA | 0 | NA |
| Y | 22106192 | 22120600 | 1  | NM_001006120 | RBM1D    | 0 | NA | 0 | NA | 0 | NA | 0 | NA | 0 | NA |
| Y | 22450021 | 22435610 | -1 | NM_001006118 | RBM1E    | 0 | NA | 0 | NA | 0 | NA | 0 | NA | 0 | NA |
| Y | 22450021 | 22435610 | -1 | NM_001006120 | RBM1D    | 0 | NA | 0 | NA | 0 | NA | 0 | NA | 0 | NA |
| Y | 22450027 | 22435610 | -1 | NM_001006121 | RBM1B    | 0 | NA | 0 | NA | 0 | NA | 0 | NA | 0 | NA |
| Y | 22450027 | 22435610 | -1 | NM_005058    | RBM1A1   | 0 | NA | 0 | NA | 0 | NA | 0 | NA | 0 | NA |
| Y | 22473562 | 22459152 | -1 | NM_001006118 | RBM1E    | 0 | NA | 0 | NA | 0 | NA | 0 | NA | 0 | NA |
| Y | 22473562 | 22459152 | -1 | NM_001006120 | RBM1D    | 0 | NA | 0 | NA | 0 | NA | 0 | NA | 0 | NA |
| Y | 22473568 | 22459152 | -1 | NM_001006121 | RBM1B    | 0 | NA | 0 | NA | 0 | NA | 0 | NA | 0 | NA |
| Y | 22651542 | 22627290 | -1 | NM_001002758 | PRY2     | 0 | NA | 0 | NA | 0 | NA | 0 | NA | 0 | NA |
| Y | 22651542 | 22627290 | -1 | NM_004676    | PRY      | 0 | NA | 0 | NA | 0 | NA | 0 | NA | 0 | NA |
| Y | 22738477 | 22724076 | -1 | NM_001006117 | RBM1J    | 0 | NA | 0 | NA | 0 | NA | 0 | NA | 0 | NA |
| Y | 22738477 | 22724076 | -1 | NM_152585    | RBM1F    | 0 | NA | 0 | NA | 0 | NA | 0 | NA | 0 | NA |
| Y | 22864397 | 22973416 | 1  | NM_152585    | RBM1F    | 0 | NA | 0 | NA | 0 | NA | 0 | NA | 0 | NA |
| Y | 22959010 | 22973416 | 1  | NM_001006117 | RBM1J    | 0 | NA | 0 | NA | 0 | NA | 0 | NA | 0 | NA |
| Y | 23045931 | 23070172 | 1  | NM_001002758 | PRY2     | 0 | NA | 0 | NA | 0 | NA | 0 | NA | 0 | NA |
| Y | 23045931 | 23070172 | 1  | NM_004676    | PRY      | 0 | NA | 0 | NA | 0 | NA | 0 | NA | 0 | NA |
| Y | 23539797 | 23560998 | 1  | NM_001002760 | BPY2B    | 0 | NA | 0 | NA | 0 | NA | 0 | NA | 0 | NA |
| Y | 23539797 | 23560998 | 1  | NM_001002761 | BPY2C    | 0 | NA | 0 | NA | 0 | NA | 0 | NA | 0 | NA |
| Y | 23539797 | 23560998 | 1  | NM_004678    | BPY2     | 0 | NA | 0 | NA | 0 | NA | 0 | NA | 0 | NA |
| Y | 23754528 | 23684894 | -1 | NM_001005375 | DAZ4     | 0 | NA | 0 | NA | 0 | NA | 0 | NA | 0 | NA |
| Y | 23754545 | 23684894 | -1 | NM_020420    | DAZ4     | 0 | NA | 0 | NA | 0 | NA | 0 | NA | 0 | NA |
| Y | 23754545 | 23684895 | -1 | NM_004081    | DAZ1     | 0 | NA | 0 | NA | 0 | NA | 0 | NA | 0 | NA |
| Y | 23775009 | 23846884 | 1  | NM_001005785 | DAZ2     | 0 | NA | 0 | NA | 0 | NA | 0 | NA | 0 | NA |
| Y | 23775065 | 23846886 | 1  | NM_020420    | DAZ4     | 0 | NA | 0 | NA | 0 | NA | 0 | NA | 0 | NA |
| Y | 23775067 | 23846885 | 1  | NM_001005786 | DAZ2     | 0 | NA | 0 | NA | 0 | NA | 0 | NA | 0 | NA |

|   |          |          |    |              |         |   |    |    |    |    |    |    |    |    |    |
|---|----------|----------|----|--------------|---------|---|----|----|----|----|----|----|----|----|----|
| Y | 23775082 | 23846885 | 1  | NM_020363    | DAZ2    | 0 | NA | 0  | NA | 0  | NA | 0  | NA | 0  | NA |
| Y | 23775090 | 23846885 | 1  | NM_020364    | DAZ3    | 0 | NA | 0  | NA | 0  | NA | 0  | NA | 0  | NA |
| Y | 24603549 | 24600763 | -1 | NM_001003895 | CDY1B   | 0 | NA | 0  | NA | 0  | NA | 0  | NA | 0  | NA |
| Y | 24603549 | 24600763 | -1 | NM_004680    | CDY1    | 0 | NA | 0  | NA | 0  | NA | 0  | NA | 0  | NA |
| Y | 24603549 | 24601327 | -1 | NM_001003894 | CDY1B   | 0 | NA | 0  | NA | 0  | NA | 0  | NA | 0  | NA |
| Y | 24603549 | 24601327 | -1 | NM_170723    | CDY1    | 0 | NA | 0  | NA | 0  | NA | 0  | NA | 0  | NA |
| Y | 25173538 | 25194740 | 1  | NM_001002760 | BPY2B   | 0 | NA | 0  | NA | 0  | NA | 0  | NA | 0  | NA |
| Y | 25173538 | 25194740 | 1  | NM_001002761 | BPY2C   | 0 | NA | 0  | NA | 0  | NA | 0  | NA | 0  | NA |
| Y | 25173538 | 25194740 | 1  | NM_004678    | BPY2    | 0 | NA | 0  | NA | 0  | NA | 0  | NA | 0  | NA |
| Y | 25368905 | 25318609 | -1 | NM_020364    | DAZ3    | 0 | NA | 0  | NA | 0  | NA | 0  | NA | 0  | NA |
| Y | 25389395 | 25462568 | 1  | NM_001005785 | DAZ2    | 0 | NA | 0  | NA | 0  | NA | 0  | NA | 0  | NA |
| Y | 25389451 | 25462569 | 1  | NM_004081    | DAZ1    | 0 | NA | 0  | NA | 0  | NA | 0  | NA | 0  | NA |
| Y | 25389451 | 25462570 | 1  | NM_020420    | DAZ4    | 0 | NA | 0  | NA | 0  | NA | 0  | NA | 0  | NA |
| Y | 25389453 | 25462569 | 1  | NM_001005786 | DAZ2    | 0 | NA | 0  | NA | 0  | NA | 0  | NA | 0  | NA |
| Y | 25389468 | 25462570 | 1  | NM_001005375 | DAZ4    | 0 | NA | 0  | NA | 0  | NA | 0  | NA | 0  | NA |
| Y | 25389476 | 25462569 | 1  | NM_020364    | DAZ3    | 0 | NA | 0  | NA | 0  | NA | 0  | NA | 0  | NA |
| Y | 25607639 | 25586437 | -1 | NM_001002760 | BPY2B   | 0 | NA | 0  | NA | 0  | NA | 0  | NA | 0  | NA |
| Y | 25607639 | 25586437 | -1 | NM_001002761 | BPY2C   | 0 | NA | 0  | NA | 0  | NA | 0  | NA | 0  | NA |
| Y | 25607639 | 25586437 | -1 | NM_004678    | BPY2    | 0 | NA | 0  | NA | 0  | NA | 0  | NA | 0  | NA |
| Y | 26177651 | 26179873 | 1  | NM_001003894 | CDY1B   | 0 | NA | 0  | NA | 0  | NA | 0  | NA | 0  | NA |
| Y | 26177651 | 26179873 | 1  | NM_170723    | CDY1    | 0 | NA | 0  | NA | 0  | NA | 0  | NA | 0  | NA |
| Y | 26177651 | 26180436 | 1  | NM_001003895 | CDY1B   | 0 | NA | 0  | NA | 0  | NA | 0  | NA | 0  | NA |
| Y | 26177651 | 26180436 | 1  | NM_004680    | CDY1    | 0 | NA | 0  | NA | 0  | NA | 0  | NA | 0  | NA |
| Y | 57509844 | 57524511 | 1  | NM_005840    | SPRY3   | 0 | NA | 0  | NA | 0  | NA | 0  | NA | 0  | NA |
| Y | 57623412 | 57685814 | 1  | NM_005638    | VAMP7   | 0 | NA | 0  | NA | 0  | NA | 0  | NA | 0  | NA |
| Y | 57739639 | 57752876 | 1  | NM_002186    | IL9R    | 0 | NA | 0  | NA | 0  | NA | 0  | NA | 0  | NA |
| Y | 57739639 | 57752876 | 1  | NM_176786    | IL9R    | 0 | NA | 0  | NA | 0  | NA | 0  | NA | 0  | NA |
| X | 132990   | 160020   | 1  | NM_018390    | PLCXD1  | 0 | NA | 0  | NA | 0  | NA | 0  | NA | 0  | NA |
| X | 170887   | 161425   | -1 | NM_012227    | GTPBP6  | 0 | NA | 0  | NA | 0  | NA | 0  | NA | 0  | NA |
| X | 222590   | 214969   | -1 | NM_199326    | PPP2R3B | 0 | NA | 0  | NA | 0  | NA | 0  | NA | 0  | NA |
| X | 267627   | 214969   | -1 | NM_013239    | PPP2R3B | 1 | 11 | 0  | NA | 0  | NA | 0  | NA | 0  | NA |
| X | 505078   | 527558   | 1  | NM_000451    | SHOX    | 0 | NA | 0  | NA | 0  | NA | 0  | NA | 0  | NA |
| X | 505078   | 540146   | 1  | NM_006883    | SHOX    | 0 | NA | 0  | NA | 0  | NA | 0  | NA | 0  | NA |
| X | 1291527  | 1274886  | -1 | NM_001012288 | CRLF2   | 0 | NA | 0  | NA | 0  | NA | 0  | NA | 0  | NA |
| X | 1291530  | 1274893  | -1 | NM_022148    | CRLF2   | 0 | NA | 0  | NA | 0  | NA | 0  | NA | 0  | NA |
| X | 1347700  | 1388827  | 1  | NM_006140    | CSF2RA  | 0 | NA | 0  | NA | 0  | NA | 0  | NA | 0  | NA |
| X | 1347700  | 1388827  | 1  | NM_172245    | CSF2RA  | 0 | NA | 0  | NA | 0  | NA | 0  | NA | 0  | NA |
| X | 1347700  | 1388827  | 1  | NM_172246    | CSF2RA  | 0 | NA | 0  | NA | 0  | NA | 0  | NA | 0  | NA |
| X | 1347700  | 1388827  | 1  | NM_172249    | CSF2RA  | 0 | NA | 0  | NA | 0  | NA | 0  | NA | 0  | NA |
| X | 1361570  | 1388827  | 1  | NM_172247    | CSF2RA  | 0 | NA | 0  | NA | 0  | NA | 0  | NA | 0  | NA |
| X | 1415508  | 1461582  | 1  | NM_002183    | IL3RA   | 0 | NA | 12 | 0  | NA | 0  | NA | 0  | NA | 0  |
| X | 1470998  | 1465044  | -1 | NM_001636    | SLC25A6 | 0 | NA | 0  | NA | 0  | NA | 0  | NA | 0  | NA |
| X | 1531844  | 1482031  | -1 | NM_004192    | ASMTL   | 0 | NA | 0  | NA | 0  | NA | 0  | NA | 0  | NA |
| X | 1616000  | 1541465  | -1 | NM_178129    | P2RY8   | 0 | NA | 0  | NA | 0  | NA | 0  | NA | 0  | NA |
| X | 1670485  | 1681411  | 1  | NM_005088    | SFRS17A | 0 | NA | 0  | NA | 0  | NA | 0  | NA | 0  | NA |
| X | 1674347  | 1721974  | 1  | NM_004043    | ASMT    | 0 | NA | 0  | NA | 0  | NA | 0  | NA | 0  | NA |
| X | 2428975  | 2147552  | -1 | NM_145177    | DHRXS   | 0 | NA | 0  | NA | 0  | NA | 0  | NA | 0  | NA |
| X | 2429008  | 2414454  | -1 | NM_004729    | ZBED1   | 0 | NA | 0  | NA | 0  | NA | 0  | NA | 0  | NA |
| X | 2619227  | 2669350  | 1  | NM_001122898 | CD99    | 0 | NA | 0  | NA | 0  | NA | 0  | NA | 0  | NA |
| X | 2619227  | 2669350  | 1  | NM_002414    | CD99    | 0 | NA | 0  | NA | 0  | NA | 0  | NA | 0  | NA |
| X | 2680114  | 2743968  | 1  | NM_175569    | XG      | 0 | NA | 0  | NA | 0  | NA | 0  | NA | 0  | NA |
| X | 2756862  | 2810861  | 1  | NM_001079855 | GYG2    | 0 | NA | 12 | 0  | NA | 0  | NA | 0  | NA | 0  |
| X | 2756862  | 2810861  | 1  | NM_003918    | GYG2    | 0 | NA | 12 | 0  | NA | 0  | NA | 0  | NA | 0  |
| X | 2857392  | 2832010  | -1 | NM_001669    | ARSD    | 0 | NA | 0  | NA | 0  | NA | 0  | NA | 0  | NA |
| X | 2857392  | 2841654  | -1 | NM_009589    | ARSD    | 0 | NA | 0  | NA | 0  | NA | 0  | NA | 0  | NA |
| X | 2892494  | 2862672  | -1 | NM_000047    | ARSE    | 0 | NA | 0  | NA | 0  | NA | 0  | NA | 0  | NA |
| X | 2934653  | 2961426  | 1  | NM_001011719 | ARSH    | 0 | NA | 0  | NA | 0  | NA | 0  | NA | 0  | NA |
| X | 2994852  | 3040747  | 1  | NM_004042    | ARSF    | 0 | NA | 0  | NA | 0  | NA | 0  | NA | 0  | NA |
| X | 3274681  | 3236607  | -1 | NM_015419    | MXRA5   | 0 | NA | 0  | NA | 0  | NA | 0  | NA | 0  | NA |
| X | 3641661  | 3532410  | -1 | NM_005044    | PRKX    | 0 | NA | 0  | NA | 0  | NA | 0  | NA | 0  | NA |
| X | 6155888  | 5818082  | -1 | NM_020742    | NLGN4X  | 0 | NA | 0  | NA | 0  | NA | 0  | NA | 0  | NA |
| X | 6156706  | 5818082  | -1 | NM_181332    | NLGN4X  | 0 | NA | 0  | NA | 0  | NA | 0  | NA | 0  | NA |
| X | 6463159  | 6461688  | -1 | NM_016379    | VCX3A   | 0 | NA | 0  | NA | 0  | NA | 0  | NA | 0  | NA |
| X | 7076189  | 6976960  | -1 | NM_012080    | HDHD1A  | 0 | NA | 0  | NA | 0  | NA | 0  | NA | 0  | NA |
| X | 7147471  | 7282682  | 1  | NM_000351    | STS     | 0 | NA | 0  | NA | 0  | NA | 0  | NA | 0  | NA |

|   |          |          |    |              |           |   |    |   |    |   |    |   |    |   |    |
|---|----------|----------|----|--------------|-----------|---|----|---|----|---|----|---|----|---|----|
| X | 7770302  | 7772184  | 1  | NM_013452    | VCX       | 0 | NA | 0 | NA | 0 | NA | 0 | NA | 0 | NA |
| X | 7855443  | 7826803  | -1 | NM_004650    | PNPLA4    | 1 | 16 | 0 | NA | 0 | NA | 0 | NA | 0 | NA |
| X | 8099308  | 8097984  | -1 | NM_016378    | VCX2      | 0 | NA | 0 | NA | 0 | NA | 0 | NA | 0 | NA |
| X | 8392870  | 8394551  | 1  | NM_001001888 | VCX3B     | 0 | NA | 0 | NA | 0 | NA | 0 | NA | 0 | NA |
| X | 8660227  | 8456914  | -1 | NM_000216    | KAL1      | 0 | NA | 0 | NA | 0 | NA | 0 | NA | 0 | NA |
| X | 8729424  | 8718836  | -1 | NM_174951    | FAM9A     | 0 | NA | 0 | NA | 0 | NA | 0 | NA | 0 | NA |
| X | 8962168  | 8953036  | -1 | NM_205849    | FAM9B     | 0 | NA | 0 | NA | 0 | NA | 0 | NA | 0 | NA |
| X | 9393038  | 9647778  | 1  | NM_005647    | TBL1X     | 0 | NA | 0 | NA | 0 | NA | 0 | NA | 0 | NA |
| X | 9693917  | 9653453  | -1 | NM_000273    | GPR143    | 0 | NA | 0 | NA | 0 | NA | 0 | NA | 0 | NA |
| X | 9714495  | 9877481  | 1  | NM_001649    | SHROOM2   | 0 | NA | 0 | NA | 0 | NA | 0 | NA | 0 | NA |
| X | 9943794  | 10072518 | 1  | NM_015691    | WWC3      | 0 | NA | 0 | NA | 0 | NA | 0 | NA | 0 | NA |
| X | 10084984 | 10165699 | 1  | NM_001830    | CLCN4     | 0 | NA | 0 | NA | 0 | NA | 0 | NA | 0 | NA |
| X | 10548674 | 10373595 | -1 | NM_000381    | MID1      | 1 | 11 | 0 | NA | 0 | NA | 0 | NA | 0 | NA |
| X | 10605779 | 10373595 | -1 | NM_001098624 | MID1      | 0 | NA | 0 | NA | 0 | NA | 0 | NA | 0 | NA |
| X | 10761730 | 10373595 | -1 | NM_033290    | MID1      | 0 | NA | 0 | NA | 0 | NA | 0 | NA | 0 | NA |
| X | 11039335 | 11051122 | 1  | NM_001122608 | HCCS      | 0 | NA | 0 | NA | 0 | NA | 0 | NA | 0 | NA |
| X | 11039335 | 11051122 | 1  | NM_005333    | HCCS      | 0 | NA | 0 | NA | 0 | NA | 0 | NA | 0 | NA |
| X | 11194016 | 11065583 | -1 | NM_013423    | ARHGAP6   | 0 | NA | 0 | NA | 0 | NA | 0 | NA | 0 | NA |
| X | 11221453 | 11228802 | 1  | NM_001142    | AMELX     | 0 | NA | 0 | NA | 0 | NA | 0 | NA | 0 | NA |
| X | 11221453 | 11228802 | 1  | NM_182680    | AMELX     | 0 | NA | 0 | NA | 0 | NA | 0 | NA | 0 | NA |
| X | 11221453 | 11228802 | 1  | NM_182681    | AMELX     | 0 | NA | 0 | NA | 0 | NA | 0 | NA | 0 | NA |
| X | 11593742 | 11065583 | -1 | NM_013427    | ARHGAP6   | 0 | NA | 0 | NA | 0 | NA | 0 | NA | 0 | NA |
| X | 11593742 | 11071437 | -1 | NM_006125    | ARHGAP6   | 0 | NA | 0 | NA | 0 | NA | 0 | NA | 0 | NA |
| X | 11686198 | 11696017 | 1  | NM_078628    | MSL3L1    | 0 | NA | 0 | NA | 0 | NA | 0 | NA | 0 | NA |
| X | 11686198 | 11703791 | 1  | NM_078629    | MSL3L1    | 0 | NA | 0 | NA | 0 | NA | 0 | NA | 0 | NA |
| X | 11686198 | 11703791 | 1  | NM_078630    | MSL3L1    | 0 | NA | 0 | NA | 0 | NA | 0 | NA | 0 | NA |
| X | 11687681 | 11703793 | 1  | NM_006800    | MSL3L1    | 0 | NA | 0 | NA | 0 | NA | 0 | NA | 0 | NA |
| X | 12066505 | 12650450 | 1  | NM_014728    | FRMPD4    | 0 | NA | 0 | NA | 0 | NA | 0 | NA | 0 | NA |
| X | 12719413 | 12752264 | 1  | NM_001039091 | PRPS2     | 0 | NA | 0 | NA | 0 | NA | 0 | NA | 0 | NA |
| X | 12719413 | 12752264 | 1  | NM_002765    | PRPS2     | 0 | NA | 0 | NA | 0 | NA | 0 | NA | 0 | NA |
| X | 12795122 | 12818401 | 1  | NM_016562    | TLR7      | 0 | NA | 0 | NA | 0 | NA | 0 | NA | 0 | NA |
| X | 12834678 | 12851209 | 1  | NM_138636    | TLR8      | 0 | NA | 0 | NA | 0 | NA | 0 | NA | 0 | NA |
| X | 12903145 | 12905267 | 1  | NM_183049    | TMSL3     | 0 | NA | 0 | NA | 0 | NA | 0 | NA | 0 | NA |
| X | 12903146 | 12905267 | 1  | NM_021109    | TMSB4X    | 0 | NA | 0 | NA | 0 | NA | 0 | NA | 0 | NA |
| X | 12972721 | 12963657 | -1 | NM_174901    | FAM9C     | 0 | NA | 0 | NA | 0 | NA | 0 | NA | 0 | NA |
| X | 13497661 | 13561615 | 1  | NM_015507    | EGFL6     | 0 | NA | 0 | NA | 0 | NA | 0 | NA | 0 | NA |
| X | 13581227 | 13592168 | 1  | NM_152634    | LOC170082 | 0 | NA | 0 | NA | 0 | NA | 0 | NA | 0 | NA |
| X | 13617261 | 13637685 | 1  | NM_004251    | RAB9A     | 0 | NA | 0 | NA | 1 | 12 | 0 | NA | 0 | NA |
| X | 13662648 | 13640281 | -1 | NM_001011658 | TRAPPC2   | 0 | NA | 0 | NA | 0 | NA | 0 | NA | 0 | NA |
| X | 13662648 | 13640281 | -1 | NM_014563    | TRAPPC2   | 0 | NA | 0 | NA | 0 | NA | 0 | NA | 0 | NA |
| X | 13662752 | 13697401 | 1  | NM_003611    | OFD1      | 0 | NA | 0 | NA | 0 | NA | 0 | NA | 0 | NA |
| X | 13745235 | 13698982 | -1 | NM_001001995 | GPM6B     | 0 | NA | 0 | NA | 0 | NA | 0 | NA | 0 | NA |
| X | 13745235 | 13702017 | -1 | NM_001001996 | GPM6B     | 0 | NA | 0 | NA | 0 | NA | 0 | NA | 0 | NA |
| X | 13745235 | 13702017 | -1 | NM_005278    | GPM6B     | 0 | NA | 0 | NA | 0 | NA | 0 | NA | 0 | NA |
| X | 13866752 | 13702017 | -1 | NM_001001994 | GPM6B     | 0 | NA | 0 | NA | 0 | NA | 0 | NA | 0 | NA |
| X | 13957956 | 13934765 | -1 | NM_001042479 | GEMIN8    | 0 | NA | 0 | NA | 0 | NA | 0 | NA | 0 | NA |
| X | 13957956 | 13934765 | -1 | NM_001042480 | GEMIN8    | 0 | NA | 0 | NA | 0 | NA | 0 | NA | 0 | NA |
| X | 13957956 | 13934765 | -1 | NM_017856    | GEMIN8    | 0 | NA | 0 | NA | 0 | NA | 0 | NA | 0 | NA |
| X | 14457340 | 14659854 | 1  | NM_001118885 | GLRA2     | 0 | NA | 0 | NA | 0 | NA | 0 | NA | 0 | NA |
| X | 14457340 | 14659854 | 1  | NM_001118886 | GLRA2     | 0 | NA | 0 | NA | 0 | NA | 0 | NA | 0 | NA |
| X | 14457340 | 14659854 | 1  | NM_002063    | GLRA2     | 0 | NA | 0 | NA | 0 | NA | 0 | NA | 0 | NA |
| X | 14801105 | 14771449 | -1 | NM_001018113 | FANCB     | 0 | NA | 0 | NA | 0 | NA | 0 | NA | 0 | NA |
| X | 14801105 | 14771449 | -1 | NM_152633    | FANCB     | 0 | NA | 0 | NA | 0 | NA | 0 | NA | 0 | NA |
| X | 14801483 | 14849378 | 1  | NM_152581    | MOSPD2    | 0 | NA | 0 | NA | 0 | NA | 0 | NA | 0 | NA |
| X | 15198104 | 15172029 | -1 | NM_024087    | ASB9      | 0 | NA | 0 | NA | 0 | NA | 0 | NA | 0 | NA |
| X | 15198154 | 15172029 | -1 | NM_001031739 | ASB9      | 0 | NA | 0 | NA | 0 | NA | 0 | NA | 0 | NA |
| X | 15242590 | 15211547 | -1 | NM_001012428 | ASB11     | 0 | NA | 0 | NA | 0 | NA | 0 | NA | 0 | NA |
| X | 15243648 | 15211547 | -1 | NM_080873    | ASB11     | 0 | NA | 0 | NA | 0 | NA | 0 | NA | 0 | NA |
| X | 15263581 | 15247498 | -1 | NM_002641    | PIGA      | 0 | NA | 0 | NA | 0 | NA | 0 | NA | 0 | NA |
| X | 15263581 | 15247498 | -1 | NM_020473    | PIGA      | 0 | NA | 0 | NA | 0 | NA | 0 | NA | 0 | NA |
| X | 15312498 | 15273638 | -1 | NM_004469    | FICF      | 0 | NA | 0 | NA | 0 | NA | 0 | NA | 0 | NA |
| X | 15421385 | 15312844 | -1 | NM_001018109 | PIR       | 0 | NA | 0 | NA | 0 | NA | 0 | NA | 0 | NA |
| X | 15421385 | 15312844 | -1 | NM_003662    | PIR       | 0 | NA | 0 | NA | 0 | NA | 0 | NA | 0 | NA |
| X | 15428820 | 15484573 | 1  | NM_203281    | BMX       | 0 | NA | 0 | NA | 0 | NA | 0 | NA | 0 | NA |
| X | 15435351 | 15484573 | 1  | NM_001721    | BMX       | 0 | NA | 0 | NA | 0 | NA | 0 | NA | 0 | NA |

|   |          |          |    |              |           |   |    |   |    |   |    |   |    |   |    |
|---|----------|----------|----|--------------|-----------|---|----|---|----|---|----|---|----|---|----|
| X | 15529058 | 15489076 | -1 | NM_021804    | ACE2      | 0 | NA | 0 | NA | 0 | NA | 0 | NA | 0 | NA |
| X | 15593075 | 15555371 | -1 | NM_020665    | TMEM27    | 0 | NA | 0 | NA | 0 | NA | 0 | NA | 0 | NA |
| X | 15666332 | 15715669 | 1  | NM_007220    | CASB      | 0 | NA | 0 | NA | 0 | NA | 0 | NA | 0 | NA |
| X | 15718494 | 15751303 | 1  | NM_005089    | ZRSR2     | 0 | NA | 0 | NA | 0 | NA | 0 | NA | 0 | NA |
| X | 15783021 | 15753849 | -1 | NM_003916    | AP1S2     | 0 | NA | 0 | NA | 1 | 13 | 0 | NA | 0 | NA |
| X | 16051344 | 16081562 | 1  | NM_005314    | GRPR      | 0 | NA | 0 | NA | 0 | NA | 0 | NA | 0 | NA |
| X | 16578201 | 16582712 | 1  | NM_004057    | S100G     | 0 | NA | 0 | NA | 0 | NA | 0 | NA | 0 | NA |
| X | 16640696 | 16516042 | -1 | NM_175859    | CTPS2     | 0 | NA | 0 | NA | 0 | NA | 0 | NA | 0 | NA |
| X | 16640980 | 16516042 | -1 | NM_019857    | CTPS2     | 0 | NA | 0 | NA | 0 | NA | 0 | NA | 0 | NA |
| X | 16647675 | 16689256 | 1  | NM_032796    | SYAP1     | 0 | NA | 0 | NA | 0 | NA | 0 | NA | 0 | NA |
| X | 16714480 | 16770217 | 1  | NM_018360    | CXorf15   | 0 | NA | 0 | NA | 0 | NA | 0 | NA | 0 | NA |
| X | 16798378 | 16772697 | -1 | NM_002893    | RBBP7     | 0 | NA | 0 | NA | 0 | NA | 0 | NA | 0 | NA |
| X | 16874734 | 17081324 | 1  | NM_001080975 | REPS2     | 0 | NA | 0 | NA | 0 | NA | 0 | NA | 0 | NA |
| X | 16874734 | 17081324 | 1  | NM_004726    | REPS2     | 0 | NA | 0 | NA | 0 | NA | 0 | NA | 0 | NA |
| X | 17303463 | 17664034 | 1  | NM_198270    | NHS       | 0 | NA | 0 | NA | 0 | NA | 0 | NA | 0 | NA |
| X | 17665512 | 17683026 | 1  | NM_001037535 | SCML1     | 0 | NA | 0 | NA | 0 | NA | 0 | NA | 0 | NA |
| X | 17665512 | 17683026 | 1  | NM_001037536 | SCML1     | 0 | NA | 0 | NA | 0 | NA | 0 | NA | 0 | NA |
| X | 17665512 | 17683026 | 1  | NM_001037540 | SCML1     | 0 | NA | 0 | NA | 0 | NA | 0 | NA | 0 | NA |
| X | 17665512 | 17683026 | 1  | NM_006746    | SCML1     | 0 | NA | 0 | NA | 0 | NA | 0 | NA | 0 | NA |
| X | 17730428 | 17728091 | -1 | NM_021785    | RAI2      | 0 | NA | 0 | NA | 0 | NA | 0 | NA | 0 | NA |
| X | 18148924 | 18090971 | -1 | NM_153346    | CXorf20   | 0 | NA | 0 | NA | 0 | NA | 0 | NA | 0 | NA |
| X | 18282699 | 18167354 | -1 | NM_006089    | SCML2     | 0 | NA | 0 | NA | 0 | NA | 0 | NA | 0 | NA |
| X | 18353645 | 18581670 | 1  | NM_003159    | CDKL5     | 1 | 12 | 0 | NA | 0 | NA | 0 | NA | 0 | NA |
| X | 18370264 | 18581670 | 1  | NM_001037343 | CDKL5     | 0 | NA | 0 | NA | 0 | NA | 0 | NA | 0 | NA |
| X | 18600150 | 18567728 | -1 | NM_000330    | RS1       | 0 | NA | 0 | NA | 1 | 17 | 0 | NA | 0 | NA |
| X | 18618965 | 18755955 | 1  | NM_006240    | PPEF1     | 0 | NA | 0 | NA | 0 | NA | 0 | NA | 0 | NA |
| X | 18618965 | 18755955 | 1  | NM_152224    | PPEF1     | 0 | NA | 0 | NA | 0 | NA | 0 | NA | 0 | NA |
| X | 18618965 | 18755955 | 1  | NM_152226    | PPEF1     | 0 | NA | 0 | NA | 0 | NA | 0 | NA | 0 | NA |
| X | 18912401 | 18820336 | -1 | NM_000292    | PHKA2     | 0 | NA | 0 | NA | 0 | NA | 0 | NA | 0 | NA |
| X | 19050598 | 18917345 | -1 | NM_001079859 | GPR64     | 0 | NA | 0 | NA | 0 | NA | 0 | NA | 0 | NA |
| X | 19050598 | 18917345 | -1 | NM_005756    | GPR64     | 0 | NA | 0 | NA | 0 | NA | 0 | NA | 0 | NA |
| X | 19050598 | 18917352 | -1 | NM_001079858 | GPR64     | 0 | NA | 0 | NA | 0 | NA | 0 | NA | 0 | NA |
| X | 19050598 | 18917352 | -1 | NM_001079860 | GPR64     | 0 | NA | 0 | NA | 0 | NA | 0 | NA | 0 | NA |
| X | 19271931 | 19289723 | 1  | NM_000284    | PDHA1     | 0 | NA | 0 | NA | 0 | NA | 0 | NA | 0 | NA |
| X | 19410315 | 19288094 | -1 | NM_001001671 | MAP3K15   | 0 | NA | 0 | NA | 0 | NA | 0 | NA | 0 | NA |
| X | 19727790 | 19463741 | -1 | NM_001024666 | SH3KBP1   | 0 | NA | 0 | NA | 0 | NA | 0 | NA | 0 | NA |
| X | 19815640 | 19463440 | -1 | NM_031892    | SH3KBP1   | 0 | NA | 0 | NA | 0 | NA | 0 | NA | 0 | NA |
| X | 19898303 | 19844038 | -1 | NM_198279    | CXorf23   | 0 | NA | 0 | NA | 0 | NA | 0 | NA | 0 | NA |
| X | 20044937 | 19935149 | -1 | NM_152780    | MAP7D2    | 0 | NA | 0 | NA | 0 | NA | 0 | NA | 0 | NA |
| X | 20069887 | 20052556 | -1 | NM_001412    | EIF1AX    | 0 | NA | 0 | NA | 0 | NA | 0 | NA | 0 | NA |
| X | 20194671 | 20077949 | -1 | NM_004586    | RPS6KA3   | 0 | NA | 0 | NA | 0 | NA | 0 | NA | 0 | NA |
| X | 21302900 | 21580700 | 1  | NM_014927    | CNKSR2    | 0 | NA | 0 | NA | 0 | NA | 0 | NA | 0 | NA |
| X | 21586369 | 21583529 | -1 | NM_153270    | KLHL34    | 0 | NA | 0 | NA | 0 | NA | 0 | NA | 0 | NA |
| X | 21686151 | 21634011 | -1 | NM_014332    | SMPX      | 0 | NA | 0 | NA | 0 | NA | 0 | NA | 0 | NA |
| X | 21767674 | 21810794 | 1  | NM_015884    | MBTPS2    | 0 | NA | 0 | NA | 0 | NA | 0 | NA | 0 | NA |
| X | 21784523 | 21785642 | 1  | NM_206923    | YY2       | 0 | NA | 0 | NA | 0 | NA | 0 | NA | 0 | NA |
| X | 21868762 | 21922876 | 1  | NM_004595    | SMS       | 0 | NA | 0 | NA | 1 | 21 | 0 | NA | 0 | NA |
| X | 21960841 | 22176399 | 1  | NM_000444    | PHEX      | 0 | NA | 0 | NA | 0 | NA | 0 | NA | 0 | NA |
| X | 22200980 | 22202495 | 1  | NM_152577    | ZNF645    | 0 | NA | 0 | NA | 0 | NA | 0 | NA | 0 | NA |
| X | 22928007 | 22930127 | 1  | NM_182699    | DDX53     | 0 | NA | 0 | NA | 0 | NA | 0 | NA | 0 | NA |
| X | 23262905 | 23324839 | 1  | NM_173495    | PTCHD1    | 0 | NA | 0 | NA | 0 | NA | 0 | NA | 0 | NA |
| X | 23595565 | 23614435 | 1  | NM_006406    | PRDX4     | 0 | NA | 0 | NA | 0 | NA | 0 | NA | 0 | NA |
| X | 23671328 | 23631697 | -1 | NM_001033583 | ACOT9     | 0 | NA | 0 | NA | 0 | NA | 0 | NA | 0 | NA |
| X | 23671328 | 23631697 | -1 | NM_001037171 | ACOT9     | 0 | NA | 0 | NA | 0 | NA | 0 | NA | 0 | NA |
| X | 23711224 | 23714248 | 1  | NM_002970    | SAT1      | 1 | 19 | 0 | NA | 1 | 12 | 1 | 13 | 0 | NA |
| X | 23835955 | 23761397 | -1 | NM_024122    | APOO      | 0 | NA | 0 | NA | 1 | 16 | 0 | NA | 0 | NA |
| X | 23836043 | 23867545 | 1  | NM_152761    | CXorf58   | 0 | NA | 0 | NA | 1 | 16 | 0 | NA | 0 | NA |
| X | 23955224 | 23915883 | -1 | NM_030624    | KLHL15    | 0 | NA | 0 | NA | 0 | NA | 0 | NA | 0 | NA |
| X | 23982985 | 24006851 | 1  | NM_001415    | EIF2S3    | 0 | NA | 0 | NA | 0 | NA | 0 | NA | 0 | NA |
| X | 24079728 | 24142549 | 1  | NM_003410    | ZFX       | 0 | NA | 0 | NA | 0 | NA | 0 | NA | 0 | NA |
| X | 24393474 | 24462463 | 1  | NM_005391    | PDK3      | 0 | NA | 0 | NA | 0 | NA | 0 | NA | 0 | NA |
| X | 24575274 | 24486124 | -1 | NM_004845    | PCYT1B    | 0 | NA | 0 | NA | 0 | NA | 0 | NA | 0 | NA |
| X | 24621976 | 24925023 | 1  | NM_016937    | POLA1     | 0 | NA | 0 | NA | 0 | NA | 0 | NA | 0 | NA |
| X | 24717149 | 24716383 | -1 | NM_001089876 | LOC644820 | 0 | NA | 0 | NA | 0 | NA | 0 | NA | 0 | NA |
| X | 24943986 | 24931731 | -1 | NM_139058    | ARX       | 0 | NA | 1 | 12 | 0 | NA | 0 | NA | 0 | NA |

|   |          |          |    |              |           |   |    |   |    |   |    |   |    |   |    |
|---|----------|----------|----|--------------|-----------|---|----|---|----|---|----|---|----|---|----|
| X | 26066383 | 26068773 | 1  | NM_173699    | MAGEB18   | 0 | NA | 0 | NA | 0 | NA | 0 | NA | 0 | NA |
| X | 26120477 | 26123684 | 1  | NM_173523    | MAGEB6    | 0 | NA | 0 | NA | 0 | NA | 0 | NA | 0 | NA |
| X | 27736045 | 27750684 | 1  | NM_182506    | MAGEB10   | 0 | NA | 0 | NA | 0 | NA | 0 | NA | 0 | NA |
| X | 27909487 | 27906030 | -1 | NM_001017930 | WDR42B    | 0 | NA | 0 | NA | 0 | NA | 0 | NA | 0 | NA |
| X | 28515601 | 29883938 | 1  | NM_014271    | IL1RAPL1  | 0 | NA | 0 | NA | 0 | NA | 0 | NA | 0 | NA |
| X | 30143600 | 30148127 | 1  | NM_002364    | MAGEB2    | 0 | NA | 0 | NA | 0 | NA | 0 | NA | 0 | NA |
| X | 30158473 | 30165528 | 1  | NM_002365    | MAGEB3    | 0 | NA | 0 | NA | 0 | NA | 0 | NA | 0 | NA |
| X | 30170089 | 30172229 | 1  | NM_002367    | MAGEB4    | 0 | NA | 0 | NA | 0 | NA | 0 | NA | 0 | NA |
| X | 30171768 | 30180076 | 1  | NM_002363    | MAGEB1    | 0 | NA | 0 | NA | 0 | NA | 0 | NA | 0 | NA |
| X | 30171768 | 30180076 | 1  | NM_177415    | MAGEB1    | 0 | NA | 0 | NA | 0 | NA | 0 | NA | 0 | NA |
| X | 30175191 | 30180076 | 1  | NM_177404    | MAGEB1    | 0 | NA | 0 | NA | 0 | NA | 0 | NA | 0 | NA |
| X | 30237413 | 30232505 | -1 | NM_000475    | NR0B1     | 0 | NA | 0 | NA | 0 | NA | 0 | NA | 0 | NA |
| X | 30505835 | 30488861 | -1 | NM_025159    | CXorf21   | 0 | NA | 0 | NA | 0 | NA | 0 | NA | 0 | NA |
| X | 30581460 | 30658646 | 1  | NM_000167    | GK        | 0 | NA | 0 | NA | 0 | NA | 0 | NA | 0 | NA |
| X | 30581460 | 30658646 | 1  | NM_203391    | GK        | 0 | NA | 0 | NA | 0 | NA | 0 | NA | 0 | NA |
| X | 30617432 | 30755479 | -1 | NM_152787    | MAP3K7IP3 | 1 | 12 | 0 | NA | 0 | NA | 0 | NA | 0 | NA |
| X | 31000091 | 30999278 | -1 | NM_031894    | FTHL17    | 0 | NA | 1 | 16 | 0 | NA | 0 | NA | 0 | NA |
| X | 31194945 | 31047265 | -1 | NM_004015    | DMD       | 0 | NA | 0 | NA | 0 | NA | 0 | NA | 0 | NA |
| X | 31194945 | 31047265 | -1 | NM_004016    | DMD       | 0 | NA | 0 | NA | 0 | NA | 0 | NA | 0 | NA |
| X | 31194945 | 31047265 | -1 | NM_004017    | DMD       | 0 | NA | 0 | NA | 0 | NA | 0 | NA | 0 | NA |
| X | 31194945 | 31047265 | -1 | NM_004018    | DMD       | 0 | NA | 0 | NA | 0 | NA | 0 | NA | 0 | NA |
| X | 31194945 | 31106232 | -1 | NM_004019    | DMD       | 0 | NA | 0 | NA | 0 | NA | 0 | NA | 0 | NA |
| X | 31436336 | 31047265 | -1 | NM_004014    | DMD       | 0 | NA | 0 | NA | 0 | NA | 0 | NA | 0 | NA |
| X | 32083507 | 31047265 | -1 | NM_004013    | DMD       | 0 | NA | 0 | NA | 0 | NA | 0 | NA | 0 | NA |
| X | 32083507 | 31047265 | -1 | NM_004020    | DMD       | 0 | NA | 0 | NA | 0 | NA | 0 | NA | 0 | NA |
| X | 32083507 | 31047265 | -1 | NM_004021    | DMD       | 0 | NA | 0 | NA | 0 | NA | 0 | NA | 0 | NA |
| X | 32083507 | 31047265 | -1 | NM_004022    | DMD       | 0 | NA | 0 | NA | 0 | NA | 0 | NA | 0 | NA |
| X | 32083507 | 31047265 | -1 | NM_004023    | DMD       | 0 | NA | 0 | NA | 0 | NA | 0 | NA | 0 | NA |
| X | 32340292 | 31047265 | -1 | NM_004011    | DMD       | 0 | NA | 0 | NA | 0 | NA | 0 | NA | 0 | NA |
| X | 32340292 | 31047265 | -1 | NM_004012    | DMD       | 0 | NA | 0 | NA | 0 | NA | 0 | NA | 0 | NA |
| X | 32948238 | 31047265 | -1 | NM_004007    | DMD       | 0 | NA | 0 | NA | 0 | NA | 0 | NA | 0 | NA |
| X | 33056465 | 31047265 | -1 | NM_004010    | DMD       | 0 | NA | 0 | NA | 0 | NA | 0 | NA | 0 | NA |
| X | 33056466 | 31047265 | -1 | NM_004009    | DMD       | 0 | NA | 0 | NA | 0 | NA | 0 | NA | 0 | NA |
| X | 33139594 | 31047265 | -1 | NM_004006    | DMD       | 1 | 11 | 0 | NA | 0 | NA | 0 | NA | 0 | NA |
| X | 33267647 | 31047265 | -1 | NM_000109    | DMD       | 0 | NA | 0 | NA | 0 | NA | 0 | NA | 0 | NA |
| X | 34060349 | 34057793 | -1 | NM_203408    | FAM47A    | 0 | NA | 0 | NA | 0 | NA | 0 | NA | 0 | NA |
| X | 34585326 | 34555101 | -1 | NM_031442    | TMEM47    | 0 | NA | 0 | NA | 0 | NA | 0 | NA | 0 | NA |
| X | 34870851 | 34872955 | 1  | NM_152631    | FAM47B    | 0 | NA | 1 | 13 | 0 | NA | 0 | NA | 0 | NA |
| X | 35726379 | 35731773 | 1  | NM_001099921 | MAGEB16   | 0 | NA | 0 | NA | 0 | NA | 0 | NA | 0 | NA |
| X | 35847778 | 35918190 | 1  | NM_152632    | CXorf22   | 0 | NA | 0 | NA | 0 | NA | 0 | NA | 0 | NA |
| X | 35974973 | 36073108 | 1  | NM_173695    | CXorf59   | 0 | NA | 0 | NA | 0 | NA | 0 | NA | 0 | NA |
| X | 36164854 | 36313432 | 1  | NM_001098843 | CXorf30   | 0 | NA | 0 | NA | 0 | NA | 0 | NA | 0 | NA |
| X | 36936390 | 36939660 | 1  | NM_001013736 | FAM47C    | 0 | NA | 0 | NA | 0 | NA | 0 | NA | 0 | NA |
| X | 37093545 | 37201463 | 1  | NM_000950    | PRRG1     | 0 | NA | 0 | NA | 0 | NA | 0 | NA | 0 | NA |
| X | 37315740 | 37421668 | 1  | NM_198511    | LANCL3    | 0 | NA | 0 | NA | 0 | NA | 0 | NA | 0 | NA |
| X | 37430051 | 37476322 | 1  | NM_021083    | XK        | 0 | NA | 0 | NA | 0 | NA | 0 | NA | 0 | NA |
| X | 37524213 | 37557658 | 1  | NM_000397    | CYBB      | 0 | NA | 0 | NA | 1 | 14 | 0 | NA | 0 | NA |
| X | 37591775 | 37583032 | -1 | NM_006520    | DYNLT3    | 0 | NA | 0 | NA | 0 | NA | 0 | NA | 0 | NA |
| X | 37735013 | 37735514 | 1  | NM_012274    | CXorf27   | 0 | NA | 0 | NA | 0 | NA | 0 | NA | 0 | NA |
| X | 37778086 | 37870927 | 1  | NM_138780    | SYTL5     | 0 | NA | 0 | NA | 0 | NA | 0 | NA | 0 | NA |
| X | 37965075 | 37893536 | -1 | NM_006307    | SRPX      | 1 | 11 | 0 | NA | 0 | NA | 0 | NA | 0 | NA |
| X | 38071732 | 38013366 | -1 | NM_000328    | RPGR      | 0 | NA | 0 | NA | 0 | NA | 0 | NA | 0 | NA |
| X | 38071732 | 38028645 | -1 | NM_001034853 | RPGR      | 0 | NA | 0 | NA | 0 | NA | 0 | NA | 0 | NA |
| X | 38096679 | 38165647 | 1  | NM_000531    | OTC       | 0 | NA | 0 | NA | 0 | NA | 0 | NA | 0 | NA |
| X | 38305674 | 38433116 | 1  | NM_004615    | TSPAN7    | 0 | NA | 0 | NA | 0 | NA | 0 | NA | 0 | NA |
| X | 38545628 | 38550727 | 1  | NM_001098790 | MID1IP1   | 1 | 13 | 0 | NA | 0 | NA | 0 | NA | 0 | NA |
| X | 38545628 | 38550727 | 1  | NM_001098791 | MID1IP1   | 1 | 13 | 0 | NA | 0 | NA | 0 | NA | 0 | NA |
| X | 38548016 | 38550727 | 1  | NM_021242    | MID1IP1   | 1 | 13 | 0 | NA | 0 | NA | 0 | NA | 0 | NA |
| X | 39841663 | 39795442 | -1 | NM_001123385 | BCOR      | 0 | NA | 0 | NA | 0 | NA | 0 | NA | 0 | NA |
| X | 39841663 | 39795442 | -1 | NM_017745    | BCOR      | 0 | NA | 0 | NA | 0 | NA | 0 | NA | 0 | NA |
| X | 39921526 | 39795442 | -1 | NM_001123383 | BCOR      | 1 | 13 | 0 | NA | 0 | NA | 0 | NA | 0 | NA |
| X | 39921526 | 39795442 | -1 | NM_001123384 | BCOR      | 1 | 13 | 0 | NA | 0 | NA | 0 | NA | 0 | NA |
| X | 40325159 | 40390832 | 1  | NM_005765    | ATP6AP2   | 0 | NA | 0 | NA | 0 | NA | 0 | NA | 0 | NA |
| X | 40391721 | 40373990 | -1 | NM_144970    | CXorf38   | 0 | NA | 0 | NA | 0 | NA | 0 | NA | 0 | NA |
| X | 40479748 | 40393738 | -1 | NM_004229    | MED14     | 0 | NA | 0 | NA | 0 | NA | 0 | NA | 0 | NA |

|   |          |          |    |              |         |   |    |   |    |   |    |   |    |   |    |   |    |
|---|----------|----------|----|--------------|---------|---|----|---|----|---|----|---|----|---|----|---|----|
| X | 40829831 | 40980776 | 1  | NM_001039590 | USP9X   | 1 | 12 | 0 | NA | 0 | NA | 0 | NA | 0 | NA | 0 | NA |
| X | 40829831 | 40980776 | 1  | NM_001039591 | USP9X   | 1 | 12 | 0 | NA | 0 | NA | 0 | NA | 0 | NA | 0 | NA |
| X | 41077594 | 41094468 | 1  | NM_001356    | DDX3X   | 0 | NA | 0 | NA | 0 | NA | 0 | NA | 0 | NA | 0 | NA |
| X | 41191630 | 41219907 | 1  | NM_022567    | NYX     | 0 | NA | 0 | NA | 0 | NA | 0 | NA | 0 | NA | 0 | NA |
| X | 41433169 | 41441474 | 1  | NM_001097579 | GPR34   | 0 | NA | 0 | NA | 0 | NA | 0 | NA | 0 | NA | 0 | NA |
| X | 41433169 | 41441474 | 1  | NM_005300    | GPR34   | 0 | NA | 0 | NA | 0 | NA | 0 | NA | 0 | NA | 0 | NA |
| X | 41468351 | 41472393 | 1  | NM_080817    | GPR82   | 0 | NA | 0 | NA | 0 | NA | 0 | NA | 0 | NA | 0 | NA |
| X | 41667231 | 41263405 | -1 | NM_001126054 | CASK    | 0 | NA | 0 | NA | 0 | NA | 0 | NA | 0 | NA | 0 | NA |
| X | 41667231 | 41263405 | -1 | NM_001126055 | CASK    | 0 | NA | 0 | NA | 0 | NA | 0 | NA | 0 | NA | 0 | NA |
| X | 41667231 | 41263405 | -1 | NM_003688    | CASK    | 0 | NA | 0 | NA | 0 | NA | 0 | NA | 0 | NA | 0 | NA |
| X | 43400352 | 43491012 | 1  | NM_000240    | MAOA    | 0 | NA | 0 | NA | 0 | NA | 0 | NA | 0 | NA | 0 | NA |
| X | 43626665 | 43510800 | -1 | NM_000898    | MAOB    | 0 | NA | 0 | NA | 0 | NA | 0 | NA | 0 | NA | 0 | NA |
| X | 43717788 | 43692967 | -1 | NM_000266    | NDP     | 0 | NA | 0 | NA | 0 | NA | 0 | NA | 0 | NA | 0 | NA |
| X | 44087867 | 43892071 | -1 | NM_025184    | EFHC2   | 0 | NA | 0 | NA | 0 | NA | 0 | NA | 0 | NA | 0 | NA |
| X | 44287160 | 44267848 | -1 | NM_173794    | FUNDC1  | 0 | NA | 0 | NA | 0 | NA | 0 | NA | 0 | NA | 0 | NA |
| X | 44588193 | 44589078 | 1  | NM_022076    | DUSP21  | 0 | NA | 0 | NA | 0 | NA | 0 | NA | 0 | NA | 0 | NA |
| X | 44617724 | 44856789 | 1  | NM_021140    | UTX     | 0 | NA | 0 | NA | 0 | NA | 0 | NA | 0 | NA | 0 | NA |
| X | 44945090 | 44906510 | -1 | NM_024689    | CXorf36 | 0 | NA | 0 | NA | 0 | NA | 0 | NA | 0 | NA | 0 | NA |
| X | 46191704 | 46219018 | 1  | NM_017776    | ZNF673  | 0 | NA | 0 | NA | 0 | NA | 0 | NA | 0 | NA | 0 | NA |
| X | 46289820 | 46243489 | -1 | NM_001039891 | ZNF674  | 0 | NA | 0 | NA | 0 | NA | 1 | 12 | 0 | NA | 0 | NA |
| X | 46318135 | 46342782 | 1  | NM_019886    | CHST7   | 0 | NA | 1 | 12 | 0 | NA | 0 | NA | 0 | NA | 0 | NA |
| X | 46503416 | 46351316 | -1 | NM_032591    | SLC9A7  | 0 | NA | 0 | NA | 0 | NA | 0 | NA | 0 | NA | 0 | NA |
| X | 46581290 | 46626735 | 1  | NM_006915    | RP2     | 0 | NA | 0 | NA | 0 | NA | 0 | NA | 0 | NA | 0 | NA |
| X | 46656679 | 46805585 | 1  | NM_001077445 | PHF16   | 0 | NA | 0 | NA | 0 | NA | 0 | NA | 0 | NA | 0 | NA |
| X | 46656811 | 46805585 | 1  | NM_014735    | PHF16   | 0 | NA | 0 | NA | 0 | NA | 0 | NA | 0 | NA | 0 | NA |
| X | 46822718 | 46837656 | 1  | NM_004683    | RGN     | 0 | NA | 0 | NA | 0 | NA | 0 | NA | 0 | NA | 0 | NA |
| X | 46822718 | 46837656 | 1  | NM_152869    | RGN     | 0 | NA | 0 | NA | 0 | NA | 0 | NA | 0 | NA | 0 | NA |
| X | 46889381 | 46886562 | -1 | NM_019056    | NDUFB11 | 0 | NA | 0 | NA | 0 | NA | 0 | NA | 0 | NA | 0 | NA |
| X | 46889574 | 46931154 | 1  | NM_005676    | RBM10   | 0 | NA | 0 | NA | 0 | NA | 0 | NA | 0 | NA | 0 | NA |
| X | 46889574 | 46931156 | 1  | NM_152856    | RBM10   | 0 | NA | 0 | NA | 0 | NA | 0 | NA | 0 | NA | 0 | NA |
| X | 46935142 | 46959471 | 1  | NM_153280    | UBA1    | 0 | NA | 0 | NA | 0 | NA | 0 | NA | 0 | NA | 0 | NA |
| X | 46938144 | 46959471 | 1  | NM_003334    | UBA1    | 0 | NA | 0 | NA | 0 | NA | 0 | NA | 0 | NA | 0 | NA |
| X | 46962575 | 46974338 | 1  | NM_033018    | PCTK1   | 1 | 12 | 0 | NA | 0 | NA | 0 | NA | 0 | NA | 0 | NA |
| X | 46963058 | 46974338 | 1  | NM_006201    | PCTK1   | 1 | 12 | 0 | NA | 0 | NA | 0 | NA | 0 | NA | 0 | NA |
| X | 46977257 | 46992671 | 1  | NM_004651    | USP11   | 0 | NA | 0 | NA | 0 | NA | 0 | NA | 0 | NA | 0 | NA |
| X | 47114942 | 47158042 | 1  | NM_003446    | ZNF157  | 0 | NA | 0 | NA | 1 | 12 | 0 | NA | 0 | NA | 0 | NA |
| X | 47227289 | 47190504 | -1 | NM_007130    | ZNF41   | 0 | NA | 0 | NA | 0 | NA | 0 | NA | 0 | NA | 0 | NA |
| X | 47227289 | 47190504 | -1 | NM_153380    | ZNF41   | 0 | NA | 0 | NA | 0 | NA | 0 | NA | 0 | NA | 0 | NA |
| X | 47305521 | 47316264 | 1  | NM_001654    | ARAF    | 0 | NA | 0 | NA | 0 | NA | 0 | NA | 0 | NA | 0 | NA |
| X | 47326633 | 47331134 | 1  | NM_003254    | TIMP1   | 0 | NA | 0 | NA | 1 | 15 | 0 | NA | 0 | NA | 0 | NA |
| X | 47364200 | 47316243 | -1 | NM_006950    | SYN1    | 0 | NA | 0 | NA | 0 | NA | 0 | NA | 0 | NA | 0 | NA |
| X | 47364200 | 47316243 | -1 | NM_133499    | SYN1    | 0 | NA | 0 | NA | 0 | NA | 0 | NA | 0 | NA | 0 | NA |
| X | 47374648 | 47368569 | -1 | NM_002621    | CFP     | 0 | NA | 0 | NA | 0 | NA | 0 | NA | 0 | NA | 0 | NA |
| X | 47394947 | 47379863 | -1 | NM_001114123 | ELK1    | 1 | 15 | 0 | NA | 0 | NA | 1 | 11 | 0 | NA | 0 | NA |
| X | 47394947 | 47379863 | -1 | NM_005229    | ELK1    | 1 | 15 | 0 | NA | 0 | NA | 1 | 11 | 0 | NA | 0 | NA |
| X | 47403460 | 47396138 | -1 | NM_153477    | UXT     | 1 | 13 | 0 | NA | 0 | NA | 1 | 11 | 0 | NA | 0 | NA |
| X | 47403504 | 47396139 | -1 | NM_004182    | UXT     | 1 | 13 | 0 | NA | 0 | NA | 1 | 11 | 0 | NA | 0 | NA |
| X | 47541296 | 47549521 | 1  | NM_001102604 | WASF4   | 0 | NA | 0 | NA | 0 | NA | 0 | NA | 0 | NA | 0 | NA |
| X | 47581244 | 47666554 | 1  | NM_007137    | ZNF81   | 0 | NA | 0 | NA | 0 | NA | 0 | NA | 0 | NA | 0 | NA |
| X | 47748321 | 47719193 | -1 | NM_001007088 | ZNF182  | 1 | 12 | 0 | NA | 0 | NA | 0 | NA | 0 | NA | 0 | NA |
| X | 47748321 | 47719193 | -1 | NM_006962    | ZNF182  | 1 | 12 | 0 | NA | 0 | NA | 0 | NA | 0 | NA | 0 | NA |
| X | 47748677 | 47754072 | 1  | NM_205856    | SPACA5  | 1 | 12 | 0 | NA | 0 | NA | 0 | NA | 0 | NA | 0 | NA |
| X | 47752113 | 47754070 | 1  | NM_001079900 | SPACA5B | 1 | 12 | 0 | NA | 0 | NA | 0 | NA | 0 | NA | 0 | NA |
| X | 47815452 | 47802510 | -1 | NM_001037735 | ZNF630  | 0 | NA | 0 | NA | 0 | NA | 0 | NA | 0 | NA | 0 | NA |
| X | 47852031 | 47865013 | 1  | NM_173357    | SSX6    | 0 | NA | 0 | NA | 0 | NA | 0 | NA | 0 | NA | 0 | NA |
| X | 47871546 | 47876941 | 1  | NM_205856    | SPACA5  | 0 | NA | 0 | NA | 0 | NA | 0 | NA | 0 | NA | 0 | NA |
| X | 47874982 | 47876939 | 1  | NM_001079900 | SPACA5B | 0 | NA | 0 | NA | 0 | NA | 0 | NA | 0 | NA | 0 | NA |
| X | 47941143 | 47930599 | -1 | NM_021015    | SSX5    | 0 | NA | 0 | NA | 0 | NA | 0 | NA | 0 | NA | 0 | NA |
| X | 47941143 | 47930599 | -1 | NM_175723    | SSX5    | 0 | NA | 0 | NA | 0 | NA | 0 | NA | 0 | NA | 0 | NA |
| X | 47999740 | 48011823 | 1  | NM_005635    | SSX1    | 0 | NA | 0 | NA | 0 | NA | 0 | NA | 0 | NA | 0 | NA |
| X | 48050558 | 48039828 | -1 | NM_174962    | SSX9    | 0 | NA | 0 | NA | 0 | NA | 0 | NA | 0 | NA | 0 | NA |
| X | 48101086 | 48090806 | -1 | NM_021014    | SSX3    | 0 | NA | 0 | NA | 0 | NA | 0 | NA | 0 | NA | 0 | NA |
| X | 48101086 | 48092637 | -1 | NM_175711    | SSX3    | 0 | NA | 0 | NA | 0 | NA | 0 | NA | 0 | NA | 0 | NA |
| X | 48127911 | 48137725 | 1  | NM_001034832 | SSX4B   | 0 | NA | 0 | NA | 0 | NA | 0 | NA | 0 | NA | 0 | NA |
| X | 48127911 | 48137725 | 1  | NM_001040612 | SSX4B   | 0 | NA | 0 | NA | 0 | NA | 0 | NA | 0 | NA | 0 | NA |

|   |          |          |    |              |          |   |    |   |    |   |    |   |    |   |    |
|---|----------|----------|----|--------------|----------|---|----|---|----|---|----|---|----|---|----|
| X | 48127911 | 48137729 | 1  | NM_005636    | SSX4     | 0 | NA | 0 | NA | 0 | NA | 0 | NA | 0 | NA |
| X | 48127911 | 48137729 | 1  | NM_175729    | SSX4     | 0 | NA | 0 | NA | 0 | NA | 0 | NA | 0 | NA |
| X | 48156288 | 48146467 | -1 | NM_005636    | SSX4     | 0 | NA | 0 | NA | 0 | NA | 0 | NA | 0 | NA |
| X | 48156288 | 48146467 | -1 | NM_175729    | SSX4     | 0 | NA | 0 | NA | 0 | NA | 0 | NA | 0 | NA |
| X | 48156288 | 48146471 | -1 | NM_001034832 | SSX4B    | 0 | NA | 0 | NA | 0 | NA | 0 | NA | 0 | NA |
| X | 48156288 | 48146471 | -1 | NM_001040612 | SSX4B    | 0 | NA | 0 | NA | 0 | NA | 0 | NA | 0 | NA |
| X | 48213509 | 48201870 | -1 | NM_033518    | SLC38A5  | 1 | 11 | 0 | NA | 0 | NA | 0 | NA | 0 | NA |
| X | 48219492 | 48229696 | 1  | NM_012280    | FTSJ1    | 1 | 16 | 0 | NA | 0 | NA | 0 | NA | 0 | NA |
| X | 48219492 | 48229696 | 1  | NM_177439    | FTSJ1    | 1 | 16 | 0 | NA | 0 | NA | 0 | NA | 0 | NA |
| X | 48221323 | 48229696 | 1  | NM_177434    | FTSJ1    | 1 | 16 | 0 | NA | 0 | NA | 0 | NA | 0 | NA |
| X | 48252314 | 48264146 | 1  | NM_022825    | PORCN    | 0 | NA | 0 | NA | 0 | NA | 0 | NA | 0 | NA |
| X | 48252314 | 48264146 | 1  | NM_203473    | PORCN    | 0 | NA | 0 | NA | 0 | NA | 0 | NA | 0 | NA |
| X | 48252314 | 48264146 | 1  | NM_203476    | PORCN    | 0 | NA | 0 | NA | 0 | NA | 0 | NA | 0 | NA |
| X | 48253115 | 48264146 | 1  | NM_203474    | PORCN    | 0 | NA | 0 | NA | 0 | NA | 0 | NA | 0 | NA |
| X | 48253115 | 48264146 | 1  | NM_203475    | PORCN    | 0 | NA | 0 | NA | 0 | NA | 0 | NA | 0 | NA |
| X | 48265107 | 48272048 | 1  | NM_006579    | EBP      | 0 | NA | 0 | NA | 0 | NA | 0 | NA | 0 | NA |
| X | 48283018 | 48305941 | 1  | NM_002536    | TBC1D25  | 0 | NA | 0 | NA | 0 | NA | 0 | NA | 0 | NA |
| X | 48317779 | 48321748 | 1  | NM_006743    | RBM3     | 0 | NA | 0 | NA | 0 | NA | 0 | NA | 0 | NA |
| X | 48340844 | 48348518 | 1  | NM_017883    | WDR13    | 0 | NA | 0 | NA | 1 | 12 | 0 | NA | 0 | NA |
| X | 48427129 | 48434761 | 1  | NM_000377    | WAS      | 0 | NA | 0 | NA | 0 | NA | 0 | NA | 0 | NA |
| X | 48440074 | 48452350 | 1  | NM_003173    | SUV39H1  | 0 | NA | 0 | NA | 1 | 12 | 0 | NA | 0 | NA |
| X | 48508984 | 48516795 | 1  | NM_001080489 | GLOD5    | 0 | NA | 0 | NA | 0 | NA | 0 | NA | 0 | NA |
| X | 48529925 | 48537661 | 1  | NM_002049    | GATA1    | 0 | NA | 0 | NA | 0 | NA | 0 | NA | 0 | NA |
| X | 48545430 | 48568324 | 1  | NM_006044    | HDAC6    | 0 | NA | 0 | NA | 0 | NA | 0 | NA | 0 | NA |
| X | 48572226 | 48573492 | 1  | NM_181532    | ERAS     | 0 | NA | 0 | NA | 0 | NA | 0 | NA | 0 | NA |
| X | 48578904 | 48574449 | -1 | NM_013271    | PCSK1N   | 0 | NA | 0 | NA | 0 | NA | 0 | NA | 0 | NA |
| X | 48640138 | 48645364 | 1  | NM_001032381 | PQBP1    | 0 | NA | 0 | NA | 0 | NA | 0 | NA | 0 | NA |
| X | 48640138 | 48645364 | 1  | NM_001032382 | PQBP1    | 0 | NA | 0 | NA | 0 | NA | 0 | NA | 0 | NA |
| X | 48640138 | 48645364 | 1  | NM_001032383 | PQBP1    | 0 | NA | 0 | NA | 0 | NA | 0 | NA | 0 | NA |
| X | 48640370 | 48635675 | -1 | NM_005834    | TIMM17B  | 0 | NA | 0 | NA | 0 | NA | 0 | NA | 0 | NA |
| X | 48640482 | 48645364 | 1  | NM_001032384 | PQBP1    | 0 | NA | 0 | NA | 0 | NA | 0 | NA | 0 | NA |
| X | 48640482 | 48645364 | 1  | NM_005710    | PQBP1    | 0 | NA | 0 | NA | 0 | NA | 0 | NA | 0 | NA |
| X | 48653961 | 48645402 | -1 | NM_005660    | SLC35A2  | 1 | 11 | 0 | NA | 0 | NA | 0 | NA | 0 | NA |
| X | 48653877 | 48645833 | -1 | NM_001032289 | SLC35A2  | 1 | 11 | 0 | NA | 0 | NA | 0 | NA | 0 | NA |
| X | 48654179 | 48645832 | -1 | NM_001042498 | SLC35A2  | 1 | 11 | 0 | NA | 0 | NA | 0 | NA | 0 | NA |
| X | 48661228 | 48655402 | -1 | NM_006875    | PIM2     | 1 | 11 | 0 | NA | 0 | NA | 0 | NA | 0 | NA |
| X | 48699837 | 48664431 | -1 | NM_017602    | OTUD5    | 0 | NA | 0 | NA | 0 | NA | 0 | NA | 0 | NA |
| X | 48713195 | 48703582 | -1 | NM_004979    | KCND1    | 0 | NA | 0 | NA | 0 | NA | 0 | NA | 0 | NA |
| X | 48743619 | 48715077 | -1 | NM_020137    | GRIPAP1  | 1 | 21 | 0 | NA | 0 | NA | 0 | NA | 0 | NA |
| X | 48743619 | 48718276 | -1 | NM_207672    | GRIPAP1  | 1 | 21 | 0 | NA | 0 | NA | 0 | NA | 0 | NA |
| X | 48787934 | 48771185 | -1 | NM_006521    | TFE3     | 0 | NA | 0 | NA | 0 | NA | 0 | NA | 0 | NA |
| X | 48803459 | 48814454 | 1  | NM_033626    | CCDC120  | 0 | NA | 0 | NA | 0 | NA | 0 | NA | 0 | NA |
| X | 48818606 | 48815761 | -1 | NM_007213    | PRAF2    | 0 | NA | 0 | NA | 0 | NA | 0 | NA | 0 | NA |
| X | 48824508 | 48819035 | -1 | NM_001029896 | WDR45    | 0 | NA | 0 | NA | 0 | NA | 0 | NA | 0 | NA |
| X | 48845003 | 48819035 | -1 | NM_007075    | WDR45    | 0 | NA | 0 | NA | 0 | NA | 0 | NA | 0 | NA |
| X | 48867023 | 48857288 | -1 | NM_015698    | GPKOW    | 0 | NA | 0 | NA | 0 | NA | 0 | NA | 0 | NA |
| X | 48906124 | 48910780 | 1  | NM_001099681 | MAGIX    | 1 | 11 | 0 | NA | 0 | NA | 1 | 13 | 0 | NA |
| X | 48906124 | 48910780 | 1  | NM_001099682 | MAGIX    | 1 | 11 | 0 | NA | 0 | NA | 1 | 13 | 0 | NA |
| X | 48906124 | 48910780 | 1  | NM_024859    | MAGIX    | 1 | 11 | 0 | NA | 0 | NA | 1 | 13 | 0 | NA |
| X | 48907213 | 48910780 | 1  | NM_001099680 | MAGIX    | 1 | 11 | 0 | NA | 0 | NA | 1 | 13 | 0 | NA |
| X | 48915216 | 48918382 | 1  | NM_002668    | PLP2     | 0 | NA | 0 | NA | 0 | NA | 1 | 13 | 0 | NA |
| X | 48929720 | 48918849 | -1 | NM_006160    | PRICKLE3 | 0 | NA | 0 | NA | 0 | NA | 0 | NA | 0 | NA |
| X | 48943605 | 48931208 | -1 | NM_003179    | SYP      | 0 | NA | 0 | NA | 0 | NA | 0 | NA | 0 | NA |
| X | 48976777 | 48949466 | -1 | NM_005183    | CACNA1F  | 0 | NA | 0 | NA | 0 | NA | 0 | NA | 0 | NA |
| X | 48978884 | 48994341 | 1  | NM_014008    | CCDC22   | 0 | NA | 0 | NA | 0 | NA | 0 | NA | 0 | NA |
| X | 49008232 | 48993840 | -1 | NM_001114377 | FOXP3    | 0 | NA | 0 | NA | 0 | NA | 0 | NA | 0 | NA |
| X | 49008232 | 48993840 | -1 | NM_014009    | FOXP3    | 0 | NA | 0 | NA | 0 | NA | 0 | NA | 0 | NA |
| X | 49013260 | 49031021 | 1  | NM_033215    | PPP1R3F  | 0 | NA | 0 | NA | 0 | NA | 0 | NA | 0 | NA |
| X | 49047068 | 49063255 | 1  | NM_001098413 | GAGE10   | 0 | NA | 0 | NA | 0 | NA | 0 | NA | 0 | NA |
| X | 49065459 | 49072810 | 1  | NM_001098406 | GAGE12J  | 0 | NA | 0 | NA | 0 | NA | 0 | NA | 0 | NA |
| X | 49075037 | 49082309 | 1  | NM_001098412 | GAGE13   | 0 | NA | 0 | NA | 0 | NA | 0 | NA | 0 | NA |
| X | 49075047 | 49082313 | 1  | NM_001127200 | GAGE2E   | 0 | NA | 0 | NA | 0 | NA | 0 | NA | 0 | NA |
| X | 49075047 | 49200644 | 1  | NM_012196    | GAGE8    | 0 | NA | 0 | NA | 0 | NA | 0 | NA | 0 | NA |
| X | 49084506 | 49110887 | 1  | NM_001098407 | GAGE2D   | 0 | NA | 0 | NA | 0 | NA | 0 | NA | 0 | NA |
| X | 49084525 | 49200644 | 1  | NM_001127212 | GAGE2A   | 0 | NA | 0 | NA | 0 | NA | 0 | NA | 0 | NA |



|   |          |          |    |              |         |   |    |   |    |   |    |   |    |   |    |
|---|----------|----------|----|--------------|---------|---|----|---|----|---|----|---|----|---|----|
| X | 49084539 | 49101374 | 1  | NM_001472    | GAGE2C  | 0 | NA | 0 | NA | 0 | NA | 0 | NA | 0 | NA |
| X | 49084550 | 49091867 | 1  | NM_001127200 | GAGE2E  | 0 | NA | 0 | NA | 0 | NA | 0 | NA | 0 | NA |
| X | 49084550 | 49181532 | 1  | NM_012196    | GAGE8   | 0 | NA | 0 | NA | 0 | NA | 0 | NA | 0 | NA |
| X | 49094059 | 49101364 | 1  | NM_001098407 | GAGE2D  | 0 | NA | 0 | NA | 0 | NA | 0 | NA | 0 | NA |
| X | 49094078 | 49191088 | 1  | NM_001127212 | GAGE2A  | 0 | NA | 0 | NA | 0 | NA | 0 | NA | 0 | NA |
| X | 49094092 | 49110897 | 1  | NM_001472    | GAGE2C  | 0 | NA | 0 | NA | 0 | NA | 0 | NA | 0 | NA |
| X | 49094103 | 49101364 | 1  | NM_001127200 | GAGE2E  | 0 | NA | 0 | NA | 0 | NA | 0 | NA | 0 | NA |
| X | 49094103 | 49101364 | 1  | NM_012196    | GAGE8   | 0 | NA | 0 | NA | 0 | NA | 0 | NA | 0 | NA |
| X | 49103577 | 49181532 | 1  | NM_001127212 | GAGE2A  | 0 | NA | 0 | NA | 0 | NA | 0 | NA | 0 | NA |
| X | 49103591 | 49181542 | 1  | NM_001472    | GAGE2C  | 0 | NA | 0 | NA | 0 | NA | 0 | NA | 0 | NA |
| X | 49103592 | 49110883 | 1  | NM_001474    | GAGE4   | 0 | NA | 0 | NA | 0 | NA | 0 | NA | 0 | NA |
| X | 49103600 | 49110887 | 1  | NM_001475    | GAGE5   | 0 | NA | 0 | NA | 0 | NA | 0 | NA | 0 | NA |
| X | 49103602 | 49181532 | 1  | NM_001127200 | GAGE2E  | 0 | NA | 0 | NA | 0 | NA | 0 | NA | 0 | NA |
| X | 49103602 | 49191088 | 1  | NM_012196    | GAGE8   | 0 | NA | 0 | NA | 0 | NA | 0 | NA | 0 | NA |
| X | 49103620 | 49110887 | 1  | NM_001477    | GAGE12I | 0 | NA | 0 | NA | 0 | NA | 0 | NA | 0 | NA |
| X | 49103621 | 49110883 | 1  | NM_021123    | GAGE7   | 0 | NA | 0 | NA | 0 | NA | 0 | NA | 0 | NA |
| X | 49104714 | 49110793 | 1  | NM_001098405 | GAGE12F | 0 | NA | 0 | NA | 0 | NA | 0 | NA | 0 | NA |
| X | 49113081 | 49120425 | 1  | NM_001098407 | GAGE2D  | 0 | NA | 0 | NA | 0 | NA | 0 | NA | 0 | NA |
| X | 49113114 | 49120435 | 1  | NM_001472    | GAGE2C  | 0 | NA | 0 | NA | 0 | NA | 0 | NA | 0 | NA |
| X | 49122651 | 49129941 | 1  | NM_001098411 | GAGE2B  | 0 | NA | 0 | NA | 0 | NA | 0 | NA | 0 | NA |
| X | 49183712 | 49191098 | 1  | NM_001127199 | GAGE12D | 0 | NA | 0 | NA | 0 | NA | 0 | NA | 0 | NA |
| X | 49183723 | 49191088 | 1  | NM_001098408 | GAGE12C | 0 | NA | 0 | NA | 0 | NA | 0 | NA | 0 | NA |
| X | 49183723 | 49191088 | 1  | NM_001098409 | GAGE12G | 0 | NA | 0 | NA | 0 | NA | 0 | NA | 0 | NA |
| X | 49183723 | 49191088 | 1  | NM_001098410 | GAGE12H | 0 | NA | 0 | NA | 0 | NA | 0 | NA | 0 | NA |
| X | 49183723 | 49191088 | 1  | NM_001098418 | GAGE12E | 0 | NA | 0 | NA | 0 | NA | 0 | NA | 0 | NA |
| X | 49183758 | 49191088 | 1  | NM_001085441 | GAGE12D | 0 | NA | 0 | NA | 0 | NA | 0 | NA | 0 | NA |
| X | 49193268 | 49200654 | 1  | NM_001127199 | GAGE12D | 0 | NA | 0 | NA | 0 | NA | 0 | NA | 0 | NA |
| X | 49193279 | 49200644 | 1  | NM_001098408 | GAGE12C | 0 | NA | 0 | NA | 0 | NA | 0 | NA | 0 | NA |
| X | 49193279 | 49200644 | 1  | NM_001098409 | GAGE12G | 0 | NA | 0 | NA | 0 | NA | 0 | NA | 0 | NA |
| X | 49193279 | 49200644 | 1  | NM_001098410 | GAGE12H | 0 | NA | 0 | NA | 0 | NA | 0 | NA | 0 | NA |
| X | 49193279 | 49200644 | 1  | NM_001098418 | GAGE12E | 0 | NA | 0 | NA | 0 | NA | 0 | NA | 0 | NA |
| X | 49193314 | 49200644 | 1  | NM_001085441 | GAGE12D | 0 | NA | 0 | NA | 0 | NA | 0 | NA | 0 | NA |
| X | 49202824 | 49210206 | 1  | NM_001127199 | GAGE12D | 0 | NA | 0 | NA | 0 | NA | 0 | NA | 0 | NA |
| X | 49202835 | 49210196 | 1  | NM_001098408 | GAGE12C | 0 | NA | 0 | NA | 0 | NA | 0 | NA | 0 | NA |
| X | 49202835 | 49210196 | 1  | NM_001098409 | GAGE12G | 0 | NA | 0 | NA | 0 | NA | 0 | NA | 0 | NA |
| X | 49202835 | 49210196 | 1  | NM_001098410 | GAGE12H | 0 | NA | 0 | NA | 0 | NA | 0 | NA | 0 | NA |
| X | 49202835 | 49210196 | 1  | NM_001098418 | GAGE12E | 0 | NA | 0 | NA | 0 | NA | 0 | NA | 0 | NA |
| X | 49202870 | 49210196 | 1  | NM_001085441 | GAGE12D | 0 | NA | 0 | NA | 0 | NA | 0 | NA | 0 | NA |
| X | 49212377 | 49219765 | 1  | NM_001127199 | GAGE12D | 0 | NA | 0 | NA | 0 | NA | 0 | NA | 0 | NA |
| X | 49212388 | 49219755 | 1  | NM_001098408 | GAGE12C | 0 | NA | 0 | NA | 0 | NA | 0 | NA | 0 | NA |
| X | 49212388 | 49219755 | 1  | NM_001098409 | GAGE12G | 0 | NA | 0 | NA | 0 | NA | 0 | NA | 0 | NA |
| X | 49212388 | 49219755 | 1  | NM_001098418 | GAGE12E | 0 | NA | 0 | NA | 0 | NA | 0 | NA | 0 | NA |
| X | 49212423 | 49219751 | 1  | NM_001476    | GAGE6   | 0 | NA | 0 | NA | 0 | NA | 0 | NA | 0 | NA |
| X | 49212423 | 49219755 | 1  | NM_001085441 | GAGE12D | 0 | NA | 0 | NA | 0 | NA | 0 | NA | 0 | NA |
| X | 49212450 | 49219755 | 1  | NM_001477    | GAGE12I | 0 | NA | 0 | NA | 0 | NA | 0 | NA | 0 | NA |
| X | 49213543 | 49219661 | 1  | NM_001098405 | GAGE12F | 0 | NA | 0 | NA | 0 | NA | 0 | NA | 0 | NA |
| X | 49221935 | 49229314 | 1  | NM_001127199 | GAGE12D | 0 | NA | 0 | NA | 0 | NA | 0 | NA | 0 | NA |
| X | 49221946 | 49229304 | 1  | NM_001098408 | GAGE12C | 0 | NA | 0 | NA | 0 | NA | 0 | NA | 0 | NA |
| X | 49221946 | 49229304 | 1  | NM_001098409 | GAGE12G | 0 | NA | 0 | NA | 0 | NA | 0 | NA | 0 | NA |
| X | 49221946 | 49229304 | 1  | NM_001098418 | GAGE12E | 0 | NA | 0 | NA | 0 | NA | 0 | NA | 0 | NA |
| X | 49221981 | 49229300 | 1  | NM_001476    | GAGE6   | 0 | NA | 0 | NA | 0 | NA | 0 | NA | 0 | NA |
| X | 49221981 | 49229304 | 1  | NM_001085441 | GAGE12D | 0 | NA | 0 | NA | 0 | NA | 0 | NA | 0 | NA |
| X | 49222008 | 49229304 | 1  | NM_001477    | GAGE12I | 0 | NA | 0 | NA | 0 | NA | 0 | NA | 0 | NA |
| X | 49223101 | 49229210 | 1  | NM_001098405 | GAGE12F | 0 | NA | 0 | NA | 0 | NA | 0 | NA | 0 | NA |
| X | 49231484 | 49238861 | 1  | NM_001127199 | GAGE12D | 0 | NA | 0 | NA | 0 | NA | 0 | NA | 0 | NA |
| X | 49231495 | 49238861 | 1  | NM_001098408 | GAGE12C | 0 | NA | 0 | NA | 0 | NA | 0 | NA | 0 | NA |
| X | 49231495 | 49238861 | 1  | NM_001098410 | GAGE12H | 0 | NA | 0 | NA | 0 | NA | 0 | NA | 0 | NA |
| X | 49231495 | 49238861 | 1  | NM_001098418 | GAGE12E | 0 | NA | 0 | NA | 0 | NA | 0 | NA | 0 | NA |
| X | 49231530 | 49238861 | 1  | NM_001085441 | GAGE12D | 0 | NA | 0 | NA | 0 | NA | 0 | NA | 0 | NA |
| X | 49241061 | 49248374 | 1  | NM_001127212 | GAGE2A  | 0 | NA | 0 | NA | 0 | NA | 0 | NA | 0 | NA |
| X | 49250566 | 49257905 | 1  | NM_001040663 | GAGE1   | 0 | NA | 0 | NA | 0 | NA | 0 | NA | 0 | NA |
| X | 49250566 | 49257905 | 1  | NM_001468    | GAGE1   | 0 | NA | 0 | NA | 0 | NA | 0 | NA | 0 | NA |
| X | 49347307 | 49339007 | -1 | NM_003785    | PAGE1   | 0 | NA | 0 | NA | 0 | NA | 0 | NA | 0 | NA |
| X | 49480643 | 49485308 | 1  | NM_007003    | PAGE4   | 0 | NA | 0 | NA | 0 | NA | 0 | NA | 0 | NA |
| X | 49718954 | 49750632 | 1  | NM_000084    | CLCN5   | 0 | NA | 0 | NA | 0 | NA | 0 | NA | 0 | NA |

|   |          |          |    |              |           |   |    |   |    |   |    |   |    |   |    |
|---|----------|----------|----|--------------|-----------|---|----|---|----|---|----|---|----|---|----|
| X | 49807453 | 49807987 | 1  | NM_001109810 | PYY3      | 0 | NA | 0 | NA | 0 | NA | 0 | NA | 0 | NA |
| X | 49851744 | 49842159 | -1 | NM_139289    | AKAP4     | 0 | NA | 0 | NA | 0 | NA | 0 | NA | 0 | NA |
| X | 49852404 | 49842150 | -1 | NM_003886    | AKAP4     | 0 | NA | 0 | NA | 0 | NA | 0 | NA | 0 | NA |
| X | 50044279 | 50111651 | 1  | NM_033031    | CCNB3     | 0 | NA | 0 | NA | 0 | NA | 0 | NA | 0 | NA |
| X | 50044279 | 50111651 | 1  | NM_033670    | CCNB3     | 0 | NA | 0 | NA | 0 | NA | 0 | NA | 0 | NA |
| X | 50230477 | 50128636 | -1 | NM_001013742 | DGKK      | 0 | NA | 0 | NA | 0 | NA | 0 | NA | 0 | NA |
| X | 50573784 | 50351386 | -1 | NM_020717    | SHROOM4   | 0 | NA | 0 | NA | 0 | NA | 0 | NA | 0 | NA |
| X | 50670523 | 50676347 | 1  | NM_005448    | BMP15     | 0 | NA | 0 | NA | 0 | NA | 0 | NA | 0 | NA |
| X | 51091822 | 51097117 | 1  | NM_153183    | NUDT10    | 0 | NA | 0 | NA | 0 | NA | 0 | NA | 0 | NA |
| X | 51166506 | 51168429 | 1  | NM_203407    | LOC340602 | 0 | NA | 0 | NA | 0 | NA | 0 | NA | 0 | NA |
| X | 51256199 | 51249602 | -1 | NM_018159    | NUDT11    | 0 | NA | 0 | NA | 0 | NA | 0 | NA | 0 | NA |
| X | 51503266 | 51505769 | 1  | NM_018094    | GSPT2     | 0 | NA | 0 | NA | 0 | NA | 0 | NA | 0 | NA |
| X | 51562894 | 51662190 | 1  | NM_001005332 | MAGED1    | 0 | NA | 0 | NA | 1 | 29 | 0 | NA | 0 | NA |
| X | 51653437 | 51662190 | 1  | NM_001005333 | MAGED1    | 1 | 11 | 0 | NA | 0 | NA | 0 | NA | 0 | NA |
| X | 51653437 | 51662190 | 1  | NM_006986    | MAGED1    | 1 | 11 | 0 | NA | 0 | NA | 0 | NA | 0 | NA |
| X | 51944658 | 51952104 | 1  | NM_030801    | MAGED4B   | 0 | NA | 0 | NA | 0 | NA | 0 | NA | 0 | NA |
| X | 51944658 | 51952104 | 1  | NM_177535    | MAGED4B   | 0 | NA | 0 | NA | 0 | NA | 0 | NA | 0 | NA |
| X | 51944658 | 51952104 | 1  | NM_177537    | MAGED4B   | 0 | NA | 0 | NA | 0 | NA | 0 | NA | 0 | NA |
| X | 51944747 | 51952104 | 1  | NM_001098800 | MAGED4    | 0 | NA | 0 | NA | 0 | NA | 0 | NA | 0 | NA |
| X | 52128792 | 52135537 | 1  | NM_130777    | XAGE2     | 0 | NA | 0 | NA | 0 | NA | 0 | NA | 0 | NA |
| X | 52129872 | 52135449 | 1  | NM_001079538 | LOC728242 | 0 | NA | 0 | NA | 0 | NA | 0 | NA | 0 | NA |
| X | 52255542 | 52260678 | 1  | NM_001097592 | XAGE1     | 0 | NA | 0 | NA | 0 | NA | 0 | NA | 0 | NA |
| X | 52255542 | 52260678 | 1  | NM_001097594 | XAGE1B    | 0 | NA | 0 | NA | 0 | NA | 0 | NA | 0 | NA |
| X | 52255542 | 52260678 | 1  | NM_001097597 | XAGE1C    | 0 | NA | 0 | NA | 0 | NA | 0 | NA | 0 | NA |
| X | 52255542 | 52260678 | 1  | NM_001097604 | XAGE1E    | 0 | NA | 0 | NA | 0 | NA | 0 | NA | 0 | NA |
| X | 52255542 | 52260678 | 1  | NM_020411    | XAGE1D    | 0 | NA | 0 | NA | 0 | NA | 0 | NA | 0 | NA |
| X | 52255698 | 52260678 | 1  | NM_001097591 | XAGE1     | 0 | NA | 0 | NA | 0 | NA | 0 | NA | 0 | NA |
| X | 52255698 | 52260678 | 1  | NM_001097595 | XAGE1B    | 0 | NA | 0 | NA | 0 | NA | 0 | NA | 0 | NA |
| X | 52255698 | 52260678 | 1  | NM_001097602 | XAGE1C    | 0 | NA | 0 | NA | 0 | NA | 0 | NA | 0 | NA |
| X | 52255698 | 52260678 | 1  | NM_001097603 | XAGE1E    | 0 | NA | 0 | NA | 0 | NA | 0 | NA | 0 | NA |
| X | 52255698 | 52260678 | 1  | NM_133430    | XAGE1D    | 0 | NA | 0 | NA | 0 | NA | 0 | NA | 0 | NA |
| X | 52255698 | 52260678 | 1  | NM_133431    | XAGE1D    | 0 | NA | 0 | NA | 0 | NA | 0 | NA | 0 | NA |
| X | 52257182 | 52260678 | 1  | NM_001097593 | XAGE1     | 0 | NA | 0 | NA | 0 | NA | 0 | NA | 0 | NA |
| X | 52257182 | 52260678 | 1  | NM_001097596 | XAGE1B    | 0 | NA | 0 | NA | 0 | NA | 0 | NA | 0 | NA |
| X | 52257182 | 52260678 | 1  | NM_001097598 | XAGE1C    | 0 | NA | 0 | NA | 0 | NA | 0 | NA | 0 | NA |
| X | 52257182 | 52260678 | 1  | NM_001097605 | XAGE1E    | 0 | NA | 0 | NA | 0 | NA | 0 | NA | 0 | NA |
| X | 52275440 | 52271944 | -1 | NM_001097593 | XAGE1     | 0 | NA | 0 | NA | 0 | NA | 0 | NA | 0 | NA |
| X | 52275440 | 52271944 | -1 | NM_001097596 | XAGE1B    | 0 | NA | 0 | NA | 0 | NA | 0 | NA | 0 | NA |
| X | 52275440 | 52271944 | -1 | NM_001097598 | XAGE1C    | 0 | NA | 0 | NA | 0 | NA | 0 | NA | 0 | NA |
| X | 52275440 | 52271944 | -1 | NM_001097605 | XAGE1E    | 0 | NA | 0 | NA | 0 | NA | 0 | NA | 0 | NA |
| X | 52276924 | 52271944 | -1 | NM_001097591 | XAGE1     | 0 | NA | 0 | NA | 0 | NA | 0 | NA | 0 | NA |
| X | 52276924 | 52271944 | -1 | NM_001097595 | XAGE1B    | 0 | NA | 0 | NA | 0 | NA | 0 | NA | 0 | NA |
| X | 52276924 | 52271944 | -1 | NM_001097602 | XAGE1C    | 0 | NA | 0 | NA | 0 | NA | 0 | NA | 0 | NA |
| X | 52276924 | 52271944 | -1 | NM_001097603 | XAGE1E    | 0 | NA | 0 | NA | 0 | NA | 0 | NA | 0 | NA |
| X | 52276924 | 52271944 | -1 | NM_133430    | XAGE1D    | 0 | NA | 0 | NA | 0 | NA | 0 | NA | 0 | NA |
| X | 52276924 | 52271944 | -1 | NM_133431    | XAGE1D    | 0 | NA | 0 | NA | 0 | NA | 0 | NA | 0 | NA |
| X | 52277080 | 52271944 | -1 | NM_001097592 | XAGE1     | 0 | NA | 0 | NA | 0 | NA | 0 | NA | 0 | NA |
| X | 52277080 | 52271944 | -1 | NM_001097594 | XAGE1B    | 0 | NA | 0 | NA | 0 | NA | 0 | NA | 0 | NA |
| X | 52277080 | 52271944 | -1 | NM_001097597 | XAGE1C    | 0 | NA | 0 | NA | 0 | NA | 0 | NA | 0 | NA |
| X | 52277080 | 52271944 | -1 | NM_001097604 | XAGE1E    | 0 | NA | 0 | NA | 0 | NA | 0 | NA | 0 | NA |
| X | 52277080 | 52271944 | -1 | NM_020411    | XAGE1D    | 0 | NA | 0 | NA | 0 | NA | 0 | NA | 0 | NA |
| X | 52402741 | 52397164 | -1 | NM_001079538 | LOC728242 | 0 | NA | 0 | NA | 0 | NA | 0 | NA | 0 | NA |
| X | 52403821 | 52397076 | -1 | NM_130777    | XAGE2     | 0 | NA | 0 | NA | 0 | NA | 0 | NA | 0 | NA |
| X | 52528493 | 52533629 | 1  | NM_001097592 | XAGE1     | 0 | NA | 0 | NA | 0 | NA | 0 | NA | 0 | NA |
| X | 52528493 | 52533629 | 1  | NM_001097594 | XAGE1B    | 0 | NA | 0 | NA | 0 | NA | 0 | NA | 0 | NA |
| X | 52528493 | 52533629 | 1  | NM_001097597 | XAGE1C    | 0 | NA | 0 | NA | 0 | NA | 0 | NA | 0 | NA |
| X | 52528493 | 52533629 | 1  | NM_001097604 | XAGE1E    | 0 | NA | 0 | NA | 0 | NA | 0 | NA | 0 | NA |
| X | 52528493 | 52533629 | 1  | NM_020411    | XAGE1D    | 0 | NA | 0 | NA | 0 | NA | 0 | NA | 0 | NA |
| X | 52528649 | 52533629 | 1  | NM_001097591 | XAGE1     | 0 | NA | 0 | NA | 0 | NA | 0 | NA | 0 | NA |
| X | 52528649 | 52533629 | 1  | NM_001097595 | XAGE1B    | 0 | NA | 0 | NA | 0 | NA | 0 | NA | 0 | NA |
| X | 52528649 | 52533629 | 1  | NM_001097602 | XAGE1C    | 0 | NA | 0 | NA | 0 | NA | 0 | NA | 0 | NA |
| X | 52528649 | 52533629 | 1  | NM_001097603 | XAGE1E    | 0 | NA | 0 | NA | 0 | NA | 0 | NA | 0 | NA |
| X | 52528649 | 52533629 | 1  | NM_133430    | XAGE1D    | 0 | NA | 0 | NA | 0 | NA | 0 | NA | 0 | NA |
| X | 52528649 | 52533629 | 1  | NM_133431    | XAGE1D    | 0 | NA | 0 | NA | 0 | NA | 0 | NA | 0 | NA |
| X | 52530133 | 52533629 | 1  | NM_001097593 | XAGE1     | 0 | NA | 0 | NA | 0 | NA | 0 | NA | 0 | NA |

|   |          |          |    |              |          |   |    |   |    |   |    |   |    |   |    |
|---|----------|----------|----|--------------|----------|---|----|---|----|---|----|---|----|---|----|
| X | 52530133 | 52533629 | 1  | NM_001097596 | XAGE1B   | 0 | NA | 0 | NA | 0 | NA | 0 | NA | 0 | NA |
| X | 52530133 | 52533629 | 1  | NM_001097598 | XAGE1C   | 0 | NA | 0 | NA | 0 | NA | 0 | NA | 0 | NA |
| X | 52530133 | 52533629 | 1  | NM_001097605 | XAGE1E   | 0 | NA | 0 | NA | 0 | NA | 0 | NA | 0 | NA |
| X | 52548380 | 52544884 | -1 | NM_001097593 | XAGE1    | 0 | NA | 0 | NA | 0 | NA | 0 | NA | 0 | NA |
| X | 52548380 | 52544884 | -1 | NM_001097596 | XAGE1B   | 0 | NA | 0 | NA | 0 | NA | 0 | NA | 0 | NA |
| X | 52548380 | 52544884 | -1 | NM_001097598 | XAGE1C   | 0 | NA | 0 | NA | 0 | NA | 0 | NA | 0 | NA |
| X | 52548380 | 52544884 | -1 | NM_001097605 | XAGE1E   | 0 | NA | 0 | NA | 0 | NA | 0 | NA | 0 | NA |
| X | 52549864 | 52544884 | -1 | NM_001097591 | XAGE1    | 0 | NA | 0 | NA | 0 | NA | 0 | NA | 0 | NA |
| X | 52549864 | 52544884 | -1 | NM_001097595 | XAGE1B   | 0 | NA | 0 | NA | 0 | NA | 0 | NA | 0 | NA |
| X | 52549864 | 52544884 | -1 | NM_001097602 | XAGE1C   | 0 | NA | 0 | NA | 0 | NA | 0 | NA | 0 | NA |
| X | 52549864 | 52544884 | -1 | NM_001097603 | XAGE1E   | 0 | NA | 0 | NA | 0 | NA | 0 | NA | 0 | NA |
| X | 52549864 | 52544884 | -1 | NM_133430    | XAGE1D   | 0 | NA | 0 | NA | 0 | NA | 0 | NA | 0 | NA |
| X | 52549864 | 52544884 | -1 | NM_133431    | XAGE1D   | 0 | NA | 0 | NA | 0 | NA | 0 | NA | 0 | NA |
| X | 52550020 | 52544884 | -1 | NM_001097592 | XAGE1    | 0 | NA | 0 | NA | 0 | NA | 0 | NA | 0 | NA |
| X | 52550020 | 52544884 | -1 | NM_001097594 | XAGE1B   | 0 | NA | 0 | NA | 0 | NA | 0 | NA | 0 | NA |
| X | 52550020 | 52544884 | -1 | NM_001097597 | XAGE1C   | 0 | NA | 0 | NA | 0 | NA | 0 | NA | 0 | NA |
| X | 52550020 | 52544884 | -1 | NM_001097604 | XAGE1E   | 0 | NA | 0 | NA | 0 | NA | 0 | NA | 0 | NA |
| X | 52550020 | 52544884 | -1 | NM_020411    | XAGE1D   | 0 | NA | 0 | NA | 0 | NA | 0 | NA | 0 | NA |
| X | 52561274 | 52557778 | -1 | NM_001097593 | XAGE1    | 0 | NA | 0 | NA | 0 | NA | 0 | NA | 0 | NA |
| X | 52561274 | 52557778 | -1 | NM_001097596 | XAGE1B   | 0 | NA | 0 | NA | 0 | NA | 0 | NA | 0 | NA |
| X | 52561274 | 52557778 | -1 | NM_001097598 | XAGE1C   | 0 | NA | 0 | NA | 0 | NA | 0 | NA | 0 | NA |
| X | 52561274 | 52557778 | -1 | NM_001097605 | XAGE1E   | 0 | NA | 0 | NA | 0 | NA | 0 | NA | 0 | NA |
| X | 52562758 | 52557778 | -1 | NM_001097591 | XAGE1    | 0 | NA | 0 | NA | 0 | NA | 0 | NA | 0 | NA |
| X | 52562758 | 52557778 | -1 | NM_001097595 | XAGE1B   | 0 | NA | 0 | NA | 0 | NA | 0 | NA | 0 | NA |
| X | 52562758 | 52557778 | -1 | NM_001097602 | XAGE1C   | 0 | NA | 0 | NA | 0 | NA | 0 | NA | 0 | NA |
| X | 52562758 | 52557778 | -1 | NM_001097603 | XAGE1E   | 0 | NA | 0 | NA | 0 | NA | 0 | NA | 0 | NA |
| X | 52562758 | 52557778 | -1 | NM_133430    | XAGE1D   | 0 | NA | 0 | NA | 0 | NA | 0 | NA | 0 | NA |
| X | 52562758 | 52557778 | -1 | NM_133431    | XAGE1D   | 0 | NA | 0 | NA | 0 | NA | 0 | NA | 0 | NA |
| X | 52562914 | 52557778 | -1 | NM_001097592 | XAGE1    | 0 | NA | 0 | NA | 0 | NA | 0 | NA | 0 | NA |
| X | 52562914 | 52557778 | -1 | NM_001097594 | XAGE1B   | 0 | NA | 0 | NA | 0 | NA | 0 | NA | 0 | NA |
| X | 52562914 | 52557778 | -1 | NM_001097597 | XAGE1C   | 0 | NA | 0 | NA | 0 | NA | 0 | NA | 0 | NA |
| X | 52562914 | 52557778 | -1 | NM_001097604 | XAGE1E   | 0 | NA | 0 | NA | 0 | NA | 0 | NA | 0 | NA |
| X | 52562914 | 52557778 | -1 | NM_020411    | XAGE1D   | 0 | NA | 0 | NA | 0 | NA | 0 | NA | 0 | NA |
| X | 52700675 | 52689635 | -1 | NM_173358    | SSX7     | 0 | NA | 0 | NA | 0 | NA | 0 | NA | 0 | NA |
| X | 52752974 | 52742670 | -1 | NM_003147    | SSX2     | 0 | NA | 0 | NA | 0 | NA | 0 | NA | 0 | NA |
| X | 52752974 | 52742670 | -1 | NM_175698    | SSX2     | 0 | NA | 0 | NA | 0 | NA | 0 | NA | 0 | NA |
| X | 52797032 | 52807342 | 1  | NM_003147    | SSX2     | 0 | NA | 0 | NA | 0 | NA | 0 | NA | 0 | NA |
| X | 52797032 | 52807342 | 1  | NM_175698    | SSX2     | 0 | NA | 0 | NA | 0 | NA | 0 | NA | 0 | NA |
| X | 52843113 | 52841910 | -1 | NM_001009616 | SPANXN5  | 0 | NA | 0 | NA | 0 | NA | 0 | NA | 0 | NA |
| X | 52857952 | 52864047 | 1  | NM_130775    | XAGE5    | 0 | NA | 0 | NA | 0 | NA | 0 | NA | 0 | NA |
| X | 52913057 | 52908282 | -1 | NM_130776    | XAGE3    | 0 | NA | 0 | NA | 0 | NA | 0 | NA | 0 | NA |
| X | 52913824 | 52908282 | -1 | NM_133179    | XAGE3    | 0 | NA | 0 | NA | 0 | NA | 0 | NA | 0 | NA |
| X | 52944586 | 52954310 | 1  | NM_014138    | FAM156A  | 0 | NA | 0 | NA | 0 | NA | 0 | NA | 0 | NA |
| X | 52945133 | 52954310 | 1  | NM_001099684 | FAM156B  | 0 | NA | 0 | NA | 0 | NA | 0 | NA | 0 | NA |
| X | 53002354 | 52993188 | -1 | NM_001099684 | FAM156B  | 0 | NA | 0 | NA | 0 | NA | 0 | NA | 0 | NA |
| X | 53002901 | 52993188 | -1 | NM_014138    | FAM156A  | 0 | NA | 0 | NA | 0 | NA | 0 | NA | 0 | NA |
| X | 53095230 | 53123968 | 1  | NM_018969    | GPR173   | 0 | NA | 0 | NA | 0 | NA | 0 | NA | 0 | NA |
| X | 53128286 | 53134447 | 1  | NM_022117    | TSPYL2   | 0 | NA | 0 | NA | 0 | NA | 0 | NA | 0 | NA |
| X | 53271329 | 53237377 | -1 | NM_004187    | JARID1C  | 0 | NA | 0 | NA | 0 | NA | 0 | NA | 0 | NA |
| X | 53327521 | 53278782 | -1 | NM_015075    | IQSEC2   | 0 | NA | 0 | NA | 0 | NA | 0 | NA | 0 | NA |
| X | 53367247 | 53278789 | -1 | NM_00111125  | IQSEC2   | 0 | NA | 0 | NA | 0 | NA | 0 | NA | 0 | NA |
| X | 53466343 | 53417794 | -1 | NM_006306    | SMC1A    | 0 | NA | 0 | NA | 0 | NA | 0 | NA | 0 | NA |
| X | 53466563 | 53473501 | 1  | NM_144968    | RIBC1    | 0 | NA | 0 | NA | 0 | NA | 0 | NA | 0 | NA |
| X | 53466614 | 53474782 | 1  | NM_001031745 | RIBC1    | 0 | NA | 0 | NA | 0 | NA | 0 | NA | 0 | NA |
| X | 53478048 | 53474930 | -1 | NM_001037811 | HSD17B10 | 0 | NA | 0 | NA | 0 | NA | 0 | NA | 0 | NA |
| X | 53478048 | 53474930 | -1 | NM_004493    | HSD17B10 | 0 | NA | 0 | NA | 0 | NA | 0 | NA | 0 | NA |
| X | 53697776 | 53576475 | -1 | NM_031407    | HUWE1    | 0 | NA | 0 | NA | 0 | NA | 0 | NA | 0 | NA |
| X | 54087036 | 53979837 | -1 | NM_015107    | PHF8     | 0 | NA | 0 | NA | 0 | NA | 0 | NA | 0 | NA |
| X | 54226439 | 54111481 | -1 | NM_017848    | FAM120C  | 0 | NA | 0 | NA | 0 | NA | 0 | NA | 0 | NA |
| X | 54401163 | 54239579 | -1 | NM_001002838 | WNK3     | 1 | 24 | 1 | 14 | 0 | NA | 1 | 15 | 0 | NA |
| X | 54401163 | 54239579 | -1 | NM_020922    | WNK3     | 1 | 24 | 1 | 14 | 0 | NA | 1 | 15 | 0 | NA |
| X | 54483577 | 54488456 | 1  | NM_058163    | TSR2     | 0 | NA | 0 | NA | 0 | NA | 0 | NA | 0 | NA |
| X | 54539324 | 54488611 | -1 | NM_004463    | FGD1     | 0 | NA | 0 | NA | 0 | NA | 0 | NA | 0 | NA |
| X | 54573368 | 54608698 | 1  | NM_019067    | GNL3L    | 0 | NA | 0 | NA | 0 | NA | 0 | NA | 0 | NA |
| X | 54841398 | 54792340 | -1 | NM_198510    | ITIH5L   | 0 | NA | 0 | NA | 0 | NA | 0 | NA | 0 | NA |

|   |          |          |    |              |          |   |    |   |    |   |    |   |    |   |    |
|---|----------|----------|----|--------------|----------|---|----|---|----|---|----|---|----|---|----|
| X | 54850895 | 54859170 | 1  | NM_177433    | MAGED2   | 0 | NA | 0 | NA | 0 | NA | 0 | NA | 0 | NA |
| X | 54851521 | 54859170 | 1  | NM_014599    | MAGED2   | 0 | NA | 0 | NA | 0 | NA | 0 | NA | 0 | NA |
| X | 54852217 | 54859170 | 1  | NM_201222    | MAGED2   | 0 | NA | 0 | NA | 0 | NA | 0 | NA | 0 | NA |
| X | 54963973 | 54974589 | 1  | NM_016157    | TRO      | 0 | NA | 0 | NA | 0 | NA | 0 | NA | 0 | NA |
| X | 54963973 | 54974590 | 1  | NM_001039705 | TRO      | 0 | NA | 0 | NA | 0 | NA | 0 | NA | 0 | NA |
| X | 54963973 | 54974590 | 1  | NM_177556    | TRO      | 0 | NA | 0 | NA | 0 | NA | 0 | NA | 0 | NA |
| X | 55037236 | 54976314 | -1 | NM_002625    | PFKFB1   | 1 | 19 | 0 | NA | 0 | NA | 0 | NA | 0 | NA |
| X | 55043504 | 55050937 | 1  | NM_014481    | APEX2    | 1 | 19 | 0 | NA | 0 | NA | 0 | NA | 0 | NA |
| X | 55074136 | 55052212 | -1 | NM_000032    | ALAS2    | 0 | NA | 0 | NA | 0 | NA | 0 | NA | 0 | NA |
| X | 55074136 | 55052212 | -1 | NM_001037967 | ALAS2    | 0 | NA | 0 | NA | 0 | NA | 0 | NA | 0 | NA |
| X | 55074136 | 55052212 | -1 | NM_001037968 | ALAS2    | 0 | NA | 0 | NA | 0 | NA | 0 | NA | 0 | NA |
| X | 55074136 | 55052212 | -1 | NM_001037969 | ALAS2    | 0 | NA | 0 | NA | 0 | NA | 0 | NA | 0 | NA |
| X | 55118228 | 55122061 | 1  | NM_001015038 | PAGE2B   | 1 | 18 | 1 | 15 | 0 | NA | 0 | NA | 0 | NA |
| X | 55132221 | 55135985 | 1  | NM_207339    | PAGE2    | 0 | NA | 0 | NA | 0 | NA | 0 | NA | 0 | NA |
| X | 55204334 | 55186259 | -1 | NM_138362    | FAM104B  | 1 | 12 | 0 | NA | 0 | NA | 0 | NA | 0 | NA |
| X | 55263515 | 55267266 | 1  | NM_130467    | PAGE5    | 0 | NA | 0 | NA | 0 | NA | 0 | NA | 0 | NA |
| X | 55263516 | 55267266 | 1  | NM_001013435 | PAGE5    | 0 | NA | 0 | NA | 0 | NA | 0 | NA | 0 | NA |
| X | 55308004 | 55301573 | -1 | NM_001017931 | PAGE3    | 0 | NA | 0 | NA | 0 | NA | 0 | NA | 0 | NA |
| X | 55495262 | 55496724 | 1  | NM_014061    | MAGEH1   | 1 | 13 | 0 | NA | 0 | NA | 0 | NA | 0 | NA |
| X | 55532356 | 55529686 | -1 | NM_201286    | USP51    | 0 | NA | 0 | NA | 0 | NA | 0 | NA | 0 | NA |
| X | 55666557 | 55668483 | 1  | NM_198451    | FOXR2    | 0 | NA | 0 | NA | 0 | NA | 0 | NA | 0 | NA |
| X | 55760903 | 55801932 | 1  | NM_006064    | RRAGB    | 0 | NA | 0 | NA | 0 | NA | 0 | NA | 0 | NA |
| X | 55760903 | 55801932 | 1  | NM_016656    | RRAGB    | 0 | NA | 0 | NA | 0 | NA | 0 | NA | 0 | NA |
| X | 56275631 | 56328254 | 1  | NM_007250    | KLF8     | 0 | NA | 0 | NA | 0 | NA | 0 | NA | 0 | NA |
| X | 56606796 | 56610102 | 1  | NM_013444    | UBQLN2   | 0 | NA | 0 | NA | 0 | NA | 0 | NA | 0 | NA |
| X | 57038713 | 57033988 | -1 | NM_001010862 | SPIN3    | 1 | 11 | 0 | NA | 1 | 13 | 0 | NA | 0 | NA |
| X | 57164704 | 57162839 | -1 | NM_001006681 | SPIN2B   | 0 | NA | 0 | NA | 1 | 14 | 0 | NA | 0 | NA |
| X | 57164704 | 57162839 | -1 | NM_001006682 | SPIN2B   | 0 | NA | 0 | NA | 1 | 14 | 0 | NA | 0 | NA |
| X | 57164704 | 57162839 | -1 | NM_001006683 | SPIN2B   | 0 | NA | 0 | NA | 1 | 14 | 0 | NA | 0 | NA |
| X | 57180783 | 57178807 | -1 | NM_019003    | SPIN2A   | 0 | NA | 0 | NA | 0 | NA | 0 | NA | 0 | NA |
| X | 57329863 | 57532351 | 1  | NM_174912    | FAAH2    | 0 | NA | 0 | NA | 0 | NA | 0 | NA | 0 | NA |
| X | 57634993 | 57640635 | 1  | NM_007157    | ZXDB     | 0 | NA | 0 | NA | 0 | NA | 0 | NA | 0 | NA |
| X | 57953792 | 57950921 | -1 | NM_007156    | ZXDA     | 0 | NA | 0 | NA | 0 | NA | 0 | NA | 0 | NA |
| X | 62487943 | 62483831 | -1 | NM_001012968 | SPIN4    | 0 | NA | 0 | NA | 0 | NA | 0 | NA | 0 | NA |
| X | 62891756 | 62771572 | -1 | NM_015185    | ARHGFE9  | 0 | NA | 0 | NA | 0 | NA | 0 | NA | 0 | NA |
| X | 63342349 | 63321721 | -1 | NM_152424    | FAM123B  | 0 | NA | 0 | NA | 0 | NA | 0 | NA | 0 | NA |
| X | 63362228 | 63360800 | -1 | NM_130388    | ASB12    | 0 | NA | 0 | NA | 0 | NA | 0 | NA | 0 | NA |
| X | 63532036 | 63404685 | -1 | NM_017677    | MTMR8    | 0 | NA | 0 | NA | 0 | NA | 0 | NA | 0 | NA |
| X | 64113061 | 64052985 | -1 | NM_018684    | KIAA1166 | 0 | NA | 0 | NA | 0 | NA | 0 | NA | 0 | NA |
| X | 64625430 | 64644492 | 1  | NM_001010888 | ZC3H12B  | 0 | NA | 0 | NA | 0 | NA | 0 | NA | 0 | NA |
| X | 64671392 | 64649192 | -1 | NM_031206    | LAS1L    | 0 | NA | 0 | NA | 0 | NA | 0 | NA | 0 | NA |
| X | 64804235 | 64878518 | 1  | NM_002444    | MSN      | 0 | NA | 0 | NA | 0 | NA | 0 | NA | 0 | NA |
| X | 65176692 | 65158304 | -1 | NM_001100431 | VSIG4    | 0 | NA | 0 | NA | 0 | NA | 0 | NA | 0 | NA |
| X | 65176692 | 65158304 | -1 | NM_007268    | VSIG4    | 0 | NA | 0 | NA | 0 | NA | 0 | NA | 0 | NA |
| X | 65299387 | 65403955 | 1  | NM_138737    | HEPH     | 0 | NA | 0 | NA | 0 | NA | 0 | NA | 0 | NA |
| X | 65300833 | 65403955 | 1  | NM_014799    | HEPH     | 0 | NA | 0 | NA | 0 | NA | 0 | NA | 0 | NA |
| X | 65752598 | 65732206 | -1 | NM_021783    | EDA2R    | 0 | NA | 0 | NA | 0 | NA | 0 | NA | 0 | NA |
| X | 66680598 | 66860844 | 1  | NM_000044    | AR       | 0 | NA | 0 | NA | 0 | NA | 0 | NA | 0 | NA |
| X | 66705407 | 66860844 | 1  | NM_001011645 | AR       | 0 | NA | 0 | NA | 0 | NA | 0 | NA | 0 | NA |
| X | 67570024 | 67178910 | -1 | NM_002547    | OPHN1    | 0 | NA | 0 | NA | 0 | NA | 0 | NA | 0 | NA |
| X | 67635610 | 67669026 | 1  | NM_173834    | YIPF6    | 0 | NA | 0 | NA | 0 | NA | 0 | NA | 0 | NA |
| X | 67784235 | 67862403 | 1  | NM_014725    | STARD8   | 0 | NA | 0 | NA | 0 | NA | 0 | NA | 0 | NA |
| X | 67965564 | 67978731 | 1  | NM_004429    | EFNB1    | 0 | NA | 0 | NA | 0 | NA | 0 | NA | 0 | NA |
| X | 68301997 | 68297428 | -1 | NM_001032396 | PJA1     | 0 | NA | 0 | NA | 0 | NA | 0 | NA | 0 | NA |
| X | 68301997 | 68297428 | -1 | NM_145119    | PJA1     | 0 | NA | 0 | NA | 0 | NA | 0 | NA | 0 | NA |
| X | 68302065 | 68297421 | -1 | NM_022368    | PJA1     | 0 | NA | 0 | NA | 0 | NA | 0 | NA | 0 | NA |
| X | 68641802 | 68669076 | 1  | NM_015686    | FAM155B  | 0 | NA | 0 | NA | 0 | NA | 0 | NA | 0 | NA |
| X | 68752635 | 68753868 | 1  | NM_001005611 | EDA      | 0 | NA | 0 | NA | 0 | NA | 0 | NA | 0 | NA |
| X | 68752635 | 68997614 | 1  | NM_001005615 | EDA      | 0 | NA | 0 | NA | 0 | NA | 0 | NA | 0 | NA |
| X | 68752635 | 69094052 | 1  | NM_001005610 | EDA      | 0 | NA | 0 | NA | 0 | NA | 0 | NA | 0 | NA |
| X | 68752635 | 69094052 | 1  | NM_001005612 | EDA      | 0 | NA | 0 | NA | 0 | NA | 0 | NA | 0 | NA |
| X | 68752635 | 69176046 | 1  | NM_001005609 | EDA      | 0 | NA | 0 | NA | 0 | NA | 0 | NA | 0 | NA |
| X | 68752635 | 69176046 | 1  | NM_001399    | EDA      | 0 | NA | 0 | NA | 0 | NA | 0 | NA | 0 | NA |
| X | 69186513 | 69177116 | -1 | NM_001002254 | DGAT2L4  | 0 | NA | 0 | NA | 0 | NA | 0 | NA | 0 | NA |
| X | 69199065 | 69200754 | 1  | NM_207320    | OTUD6A   | 0 | NA | 1 | 12 | 0 | NA | 0 | NA | 0 | NA |

|   |          |          |    |              |           |   |    |   |    |   |    |   |    |   |    |
|---|----------|----------|----|--------------|-----------|---|----|---|----|---|----|---|----|---|----|
| X | 69270042 | 69302898 | 1  | NM_001551    | IGBP1     | 0 | NA | 0 | NA | 0 | NA | 0 | NA | 0 | NA |
| X | 69314060 | 69342278 | 1  | NM_198512    | DGAT2L6   | 0 | NA | 0 | NA | 0 | NA | 0 | NA | 0 | NA |
| X | 69371270 | 69376865 | 1  | NM_001013579 | DGAT2L3   | 0 | NA | 0 | NA | 0 | NA | 0 | NA | 0 | NA |
| X | 69396379 | 69394740 | -1 | NM_002565    | P2RY4     | 0 | NA | 0 | NA | 0 | NA | 0 | NA | 0 | NA |
| X | 69404909 | 69418415 | 1  | NM_004312    | ARR3      | 0 | NA | 0 | NA | 0 | NA | 0 | NA | 0 | NA |
| X | 69418792 | 69421577 | 1  | NM_001032726 | RAB41     | 0 | NA | 0 | NA | 0 | NA | 0 | NA | 0 | NA |
| X | 69426523 | 69422935 | -1 | NM_016484    | PDZD11    | 0 | NA | 0 | NA | 0 | NA | 0 | NA | 0 | NA |
| X | 69426619 | 69557461 | 1  | NM_012310    | KIF4A     | 0 | NA | 0 | NA | 0 | NA | 0 | NA | 0 | NA |
| X | 69559715 | 69569956 | 1  | NM_017711    | GDPD2     | 0 | NA | 0 | NA | 0 | NA | 0 | NA | 0 | NA |
| X | 69581448 | 69642062 | 1  | NM_021120    | DLG3      | 0 | NA | 0 | NA | 0 | NA | 0 | NA | 0 | NA |
| X | 69588885 | 69642062 | 1  | NM_020730    | DLG3      | 0 | NA | 0 | NA | 0 | NA | 0 | NA | 0 | NA |
| X | 70045292 | 69665514 | -1 | NM_001003811 | TEX11     | 0 | NA | 0 | NA | 0 | NA | 0 | NA | 0 | NA |
| X | 70045292 | 69665514 | -1 | NM_031276    | TEX11     | 0 | NA | 0 | NA | 0 | NA | 0 | NA | 0 | NA |
| X | 70067684 | 70062154 | -1 | NM_001048164 | SLC7A3    | 0 | NA | 0 | NA | 0 | NA | 0 | NA | 0 | NA |
| X | 70067684 | 70062154 | -1 | NM_032803    | SLC7A3    | 0 | NA | 0 | NA | 0 | NA | 0 | NA | 0 | NA |
| X | 70204956 | 70197512 | -1 | NM_013346    | SNX12     | 1 | 13 | 0 | NA | 0 | NA | 0 | NA | 0 | NA |
| X | 70232750 | 70240109 | 1  | NM_005938    | FOXO4     | 0 | NA | 0 | NA | 0 | NA | 0 | NA | 0 | NA |
| X | 70243145 | 70240561 | -1 | NM_001025265 | LOC158830 | 0 | NA | 0 | NA | 0 | NA | 0 | NA | 0 | NA |
| X | 70248128 | 70243983 | -1 | NM_000206    | IL2RG     | 0 | NA | 0 | NA | 0 | NA | 0 | NA | 0 | NA |
| X | 70255130 | 70279029 | 1  | NM_005120    | MED12     | 0 | NA | 0 | NA | 0 | NA | 0 | NA | 0 | NA |
| X | 70281435 | 70307776 | 1  | NM_018977    | NLGN3     | 0 | NA | 0 | NA | 0 | NA | 0 | NA | 0 | NA |
| X | 70351786 | 70361777 | 1  | NM_001097642 | GJB1      | 0 | NA | 0 | NA | 0 | NA | 0 | NA | 0 | NA |
| X | 70359780 | 70361777 | 1  | NM_000166    | GJB1      | 0 | NA | 0 | NA | 0 | NA | 0 | NA | 0 | NA |
| X | 70390671 | 70376198 | -1 | NM_201599    | ZMYM3     | 0 | NA | 0 | NA | 0 | NA | 0 | NA | 0 | NA |
| X | 70391148 | 70376198 | -1 | NM_005096    | ZMYM3     | 0 | NA | 0 | NA | 0 | NA | 0 | NA | 0 | NA |
| X | 70420191 | 70437743 | 1  | NM_007363    | NONO      | 0 | NA | 0 | NA | 0 | NA | 0 | NA | 0 | NA |
| X | 70438352 | 70441929 | 1  | NM_012278    | ITGB1BP2  | 0 | NA | 0 | NA | 0 | NA | 0 | NA | 0 | NA |
| X | 70502838 | 70602580 | 1  | NM_004606    | TAF1      | 0 | NA | 0 | NA | 0 | NA | 0 | NA | 0 | NA |
| X | 70502838 | 70602580 | 1  | NM_138923    | TAF1      | 0 | NA | 0 | NA | 0 | NA | 0 | NA | 0 | NA |
| X | 70669657 | 70712465 | 1  | NM_181672    | OGT       | 0 | NA | 0 | NA | 0 | NA | 0 | NA | 0 | NA |
| X | 70669657 | 70712465 | 1  | NM_181673    | OGT       | 0 | NA | 0 | NA | 0 | NA | 0 | NA | 0 | NA |
| X | 70714985 | 70750158 | 1  | NM_052957    | ACRC      | 0 | NA | 0 | NA | 0 | NA | 0 | NA | 0 | NA |
| X | 70755092 | 70752490 | -1 | NM_001504    | CXCR3     | 0 | NA | 0 | NA | 0 | NA | 0 | NA | 0 | NA |
| X | 71268476 | 71263687 | -1 | NM_001024455 | RGAG4     | 0 | NA | 0 | NA | 0 | NA | 0 | NA | 0 | NA |
| X | 71270223 | 71277937 | 1  | NM_001013627 | NHSL2     | 0 | NA | 0 | NA | 0 | NA | 0 | NA | 0 | NA |
| X | 71280758 | 71298324 | 1  | NM_207422    | FLJ44635  | 0 | NA | 0 | NA | 0 | NA | 0 | NA | 0 | NA |
| X | 71318250 | 71334666 | 1  | NM_006223    | PIN4      | 1 | 21 | 0 | NA | 0 | NA | 0 | NA | 0 | NA |
| X | 71375583 | 71341231 | -1 | NM_017869    | ERCC6L    | 0 | NA | 0 | NA | 0 | NA | 0 | NA | 0 | NA |
| X | 71413866 | 71409177 | -1 | NM_001007    | RPS4X     | 0 | NA | 0 | NA | 0 | NA | 0 | NA | 0 | NA |
| X | 71443515 | 71438225 | -1 | NM_004143    | CITED1    | 0 | NA | 0 | NA | 0 | NA | 0 | NA | 0 | NA |
| X | 71709378 | 71466090 | -1 | NM_018486    | HDAC8     | 0 | NA | 0 | NA | 1 | 13 | 0 | NA | 0 | NA |
| X | 71850754 | 71715388 | -1 | NM_001122670 | PHKA1     | 0 | NA | 0 | NA | 0 | NA | 0 | NA | 0 | NA |
| X | 71850754 | 71715388 | -1 | NM_002637    | PHKA1     | 0 | NA | 0 | NA | 0 | NA | 0 | NA | 0 | NA |
| X | 71981600 | 71985361 | 1  | NM_001080851 | LOC728656 | 0 | NA | 0 | NA | 0 | NA | 0 | NA | 0 | NA |
| X | 71981600 | 71985361 | 1  | NM_033053    | DMRTC1    | 0 | NA | 0 | NA | 0 | NA | 0 | NA | 0 | NA |
| X | 72012347 | 72008583 | -1 | NM_001080851 | LOC728656 | 0 | NA | 0 | NA | 0 | NA | 0 | NA | 0 | NA |
| X | 72012347 | 72008583 | -1 | NM_033053    | DMRTC1    | 0 | NA | 0 | NA | 0 | NA | 0 | NA | 0 | NA |
| X | 72140076 | 72142276 | 1  | NM_001042506 | PABPC1L2B | 0 | NA | 0 | NA | 0 | NA | 0 | NA | 0 | NA |
| X | 72216076 | 72213901 | -1 | NM_001012977 | PABPC1L2A | 0 | NA | 0 | NA | 0 | NA | 0 | NA | 0 | NA |
| X | 72351409 | 72348878 | -1 | NM_021963    | NAP1L2    | 0 | NA | 0 | NA | 0 | NA | 0 | NA | 0 | NA |
| X | 72583814 | 72591146 | 1  | NM_005193    | CDX4      | 0 | NA | 0 | NA | 0 | NA | 0 | NA | 0 | NA |
| X | 72699708 | 72823662 | 1  | NM_001039840 | CHIC1     | 0 | NA | 0 | NA | 0 | NA | 0 | NA | 0 | NA |
| X | 73011597 | 73013522 | 1  | NM_001099278 | FXYP8     | 0 | NA | 0 | NA | 0 | NA | 0 | NA | 0 | NA |
| X | 73440749 | 73441594 | 1  | NM_203303    | ZCCHC13   | 0 | NA | 0 | NA | 0 | NA | 0 | NA | 0 | NA |
| X | 73557809 | 73670477 | 1  | NM_006517    | SLC16A2   | 0 | NA | 0 | NA | 0 | NA | 0 | NA | 0 | NA |
| X | 73751168 | 73726768 | -1 | NM_183353    | RNF12     | 0 | NA | 0 | NA | 0 | NA | 0 | NA | 0 | NA |
| X | 73751168 | 73726769 | -1 | NM_016120    | RNF12     | 0 | NA | 0 | NA | 0 | NA | 0 | NA | 0 | NA |
| X | 74061709 | 73870136 | -1 | NM_001008537 | KIAA2022  | 0 | NA | 0 | NA | 0 | NA | 0 | NA | 0 | NA |
| X | 74292857 | 74189829 | -1 | NM_004299    | ABC87     | 1 | 13 | 0 | NA | 0 | NA | 0 | NA | 0 | NA |
| X | 74410685 | 74441157 | 1  | NM_145052    | UPRT      | 0 | NA | 0 | NA | 0 | NA | 0 | NA | 0 | NA |
| X | 74659600 | 74508785 | -1 | NM_144969    | ZDHHC15   | 0 | NA | 0 | NA | 0 | NA | 0 | NA | 0 | NA |
| X | 74921796 | 74919547 | -1 | NM_138703    | MAGEE2    | 0 | NA | 0 | NA | 0 | NA | 0 | NA | 0 | NA |
| X | 75309172 | 75314436 | 1  | NM_016500    | CXorf26   | 0 | NA | 0 | NA | 0 | NA | 0 | NA | 0 | NA |
| X | 75564520 | 75568148 | 1  | NM_020932    | MAGEE1    | 0 | NA | 0 | NA | 0 | NA | 0 | NA | 0 | NA |
| X | 76596302 | 76598669 | 1  | NM_003868    | FGF16     | 0 | NA | 0 | NA | 0 | NA | 0 | NA | 0 | NA |

|   |           |           |    |              |         |   |    |   |    |   |    |   |    |   |    |
|---|-----------|-----------|----|--------------|---------|---|----|---|----|---|----|---|----|---|----|
| X | 76928375  | 76647011  | -1 | NM_000489    | ATRX    | 0 | NA | 0 | NA | 0 | NA | 0 | NA | 0 | NA |
| X | 76928375  | 76647011  | -1 | NM_138270    | ATRX    | 0 | NA | 0 | NA | 0 | NA | 0 | NA | 0 | NA |
| X | 77037583  | 76968517  | -1 | NM_032121    | MAGT1   | 0 | NA | 0 | NA | 0 | NA | 0 | NA | 0 | NA |
| X | 77041616  | 77047537  | 1  | NM_001866    | COX7B   | 0 | NA | 0 | NA | 0 | NA | 0 | NA | 0 | NA |
| X | 77052875  | 77192208  | 1  | NM_000052    | ATP7A   | 1 | 24 | 0 | NA | 0 | NA | 0 | NA | 0 | NA |
| X | 77111791  | 77110113  | -1 | NM_001029891 | PGAM4   | 0 | NA | 0 | NA | 0 | NA | 0 | NA | 0 | NA |
| X | 77246321  | 77268980  | 1  | NM_000291    | PGK1    | 0 | NA | 0 | NA | 0 | NA | 0 | NA | 0 | NA |
| X | 77281835  | 77271900  | -1 | NM_015975    | TAF9B   | 0 | NA | 0 | NA | 0 | NA | 0 | NA | 0 | NA |
| X | 77469743  | 77414785  | -1 | NM_006639    | CYSLTR1 | 0 | NA | 0 | NA | 0 | NA | 0 | NA | 0 | NA |
| X | 77801481  | 77798221  | -1 | NM_152694    | ZCCHC5  | 0 | NA | 0 | NA | 0 | NA | 0 | NA | 0 | NA |
| X | 77896956  | 77899244  | 1  | NM_005296    | LPAR4   | 0 | NA | 0 | NA | 0 | NA | 0 | NA | 0 | NA |
| X | 78087484  | 78104094  | 1  | NM_014499    | PZRY10  | 0 | NA | 0 | NA | 0 | NA | 0 | NA | 0 | NA |
| X | 78087484  | 78104094  | 1  | NM_198333    | PZRY10  | 0 | NA | 0 | NA | 0 | NA | 0 | NA | 0 | NA |
| X | 78313124  | 78314382  | 1  | NM_032553    | GPR174  | 0 | NA | 0 | NA | 0 | NA | 0 | NA | 0 | NA |
| X | 78509703  | 78502536  | -1 | NM_004867    | ITM2A   | 0 | NA | 0 | NA | 0 | NA | 0 | NA | 0 | NA |
| X | 79156910  | 79173924  | 1  | NM_001109878 | TBX22   | 0 | NA | 0 | NA | 0 | NA | 0 | NA | 0 | NA |
| X | 79156910  | 79173924  | 1  | NM_001109879 | TBX22   | 0 | NA | 0 | NA | 0 | NA | 0 | NA | 0 | NA |
| X | 79164397  | 79173924  | 1  | NM_016954    | TBX22   | 0 | NA | 0 | NA | 0 | NA | 0 | NA | 0 | NA |
| X | 79562620  | 79587466  | 1  | NM_152630    | FAM46D  | 0 | NA | 0 | NA | 1 | 13 | 0 | NA | 0 | NA |
| X | 79951889  | 79818338  | -1 | NM_153252    | BRWD3   | 0 | NA | 0 | NA | 0 | NA | 0 | NA | 0 | NA |
| X | 80263772  | 80255855  | -1 | NM_030763    | NSBP1   | 0 | NA | 0 | NA | 0 | NA | 0 | NA | 0 | NA |
| X | 80344277  | 80440702  | 1  | NM_003022    | SH3BGRL | 0 | NA | 0 | NA | 0 | NA | 0 | NA | 0 | NA |
| X | 82649940  | 82651431  | 1  | NM_000307    | POU3F4  | 0 | NA | 1 | 13 | 0 | NA | 0 | NA | 0 | NA |
| X | 83002825  | 83028282  | 1  | NM_021118    | CYLC1   | 0 | NA | 0 | NA | 0 | NA | 0 | NA | 0 | NA |
| X | 83334609  | 83205639  | -1 | NM_014496    | RPS6KA6 | 0 | NA | 0 | NA | 0 | NA | 0 | NA | 0 | NA |
| X | 83644114  | 83462864  | -1 | NM_144657    | HDX     | 1 | 12 | 0 | NA | 0 | NA | 0 | NA | 0 | NA |
| X | 84145560  | 84231630  | 1  | NM_198450    | APOOL   | 0 | NA | 0 | NA | 0 | NA | 0 | NA | 0 | NA |
| X | 84250102  | 84233955  | -1 | NM_001012980 | SATL1   | 0 | NA | 0 | NA | 0 | NA | 0 | NA | 0 | NA |
| X | 84385652  | 84415025  | 1  | NM_021998    | ZNF111  | 0 | NA | 0 | NA | 0 | NA | 0 | NA | 0 | NA |
| X | 84521404  | 84419057  | -1 | NM_024921    | POF1B   | 0 | NA | 0 | NA | 0 | NA | 0 | NA | 0 | NA |
| X | 85189222  | 85002840  | -1 | NM_000390    | CHM     | 0 | NA | 0 | NA | 0 | NA | 0 | NA | 0 | NA |
| X | 85290280  | 85974245  | 1  | NM_053281    | DACH2   | 0 | NA | 0 | NA | 0 | NA | 0 | NA | 0 | NA |
| X | 86659472  | 86811252  | 1  | NM_057162    | KLHL4   | 0 | NA | 0 | NA | 0 | NA | 0 | NA | 0 | NA |
| X | 86659472  | 86811706  | 1  | NM_019117    | KLHL4   | 0 | NA | 0 | NA | 0 | NA | 0 | NA | 0 | NA |
| X | 87888881  | 87896441  | 1  | NM_033048    | CPXCR1  | 0 | NA | 0 | NA | 0 | NA | 0 | NA | 0 | NA |
| X | 89063595  | 89064538  | 1  | NM_138960    | TGIF2LX | 0 | NA | 0 | NA | 0 | NA | 0 | NA | 0 | NA |
| X | 90576252  | 90580239  | 1  | NM_080832    | PABPC5  | 0 | NA | 0 | NA | 0 | NA | 0 | NA | 0 | NA |
| X | 90920959  | 91025662  | 1  | NM_032967    | PCDH11X | 0 | NA | 0 | NA | 0 | NA | 0 | NA | 0 | NA |
| X | 90976314  | 91021653  | 1  | NM_014522    | PCDH11X | 0 | NA | 0 | NA | 0 | NA | 0 | NA | 0 | NA |
| X | 90976314  | 91764882  | 1  | NM_032968    | PCDH11X | 0 | NA | 0 | NA | 0 | NA | 0 | NA | 0 | NA |
| X | 90976314  | 91764882  | 1  | NM_032969    | PCDH11X | 0 | NA | 0 | NA | 0 | NA | 0 | NA | 0 | NA |
| X | 92815264  | 92812587  | -1 | NM_004538    | NAP1L3  | 0 | NA | 0 | NA | 0 | NA | 0 | NA | 0 | NA |
| X | 92815860  | 92853917  | 1  | NM_173698    | FAM133A | 0 | NA | 0 | NA | 0 | NA | 0 | NA | 0 | NA |
| X | 95826364  | 96611491  | 1  | NM_007309    | DIAPH2  | 0 | NA | 0 | NA | 0 | NA | 0 | NA | 0 | NA |
| X | 95826364  | 96748651  | 1  | NM_006729    | DIAPH2  | 0 | NA | 0 | NA | 0 | NA | 0 | NA | 0 | NA |
| X | 96025562  | 96027106  | 1  | NM_013347    | RPA4    | 0 | NA | 0 | NA | 0 | NA | 0 | NA | 0 | NA |
| X | 99551927  | 99433297  | -1 | NM_001105243 | PCDH19  | 0 | NA | 1 | 14 | 0 | NA | 0 | NA | 0 | NA |
| X | 99551927  | 99433297  | -1 | NM_020766    | PCDH19  | 0 | NA | 1 | 14 | 0 | NA | 0 | NA | 0 | NA |
| X | 99726445  | 99741538  | 1  | NM_022144    | TNMD    | 0 | NA | 0 | NA | 0 | NA | 0 | NA | 0 | NA |
| X | 99778450  | 99770450  | -1 | NM_003270    | TSPAN6  | 0 | NA | 0 | NA | 0 | NA | 0 | NA | 0 | NA |
| X | 99785818  | 99812952  | 1  | NM_014467    | SRPX2   | 0 | NA | 0 | NA | 0 | NA | 0 | NA | 0 | NA |
| X | 99873154  | 99816144  | -1 | NM_080737    | SYTL4   | 0 | NA | 0 | NA | 0 | NA | 0 | NA | 0 | NA |
| X | 99962003  | 99982579  | 1  | NM_001325    | CSTF2   | 0 | NA | 0 | NA | 0 | NA | 0 | NA | 0 | NA |
| X | 100015990 | 99984968  | -1 | NM_007052    | NOX1    | 0 | NA | 0 | NA | 0 | NA | 0 | NA | 0 | NA |
| X | 100015990 | 99984968  | -1 | NM_013955    | NOX1    | 0 | NA | 0 | NA | 0 | NA | 0 | NA | 0 | NA |
| X | 100070554 | 100055091 | -1 | NM_212559    | XKRX    | 0 | NA | 0 | NA | 0 | NA | 0 | NA | 0 | NA |
| X | 100111355 | 100132476 | 1  | NM_001012990 | ARL13A  | 0 | NA | 0 | NA | 0 | NA | 0 | NA | 0 | NA |
| X | 100193726 | 100151201 | -1 | NM_024917    | CXorf34 | 0 | NA | 0 | NA | 0 | NA | 0 | NA | 0 | NA |
| X | 100220518 | 100238009 | 1  | NM_021637    | TMEM35  | 0 | NA | 0 | NA | 0 | NA | 0 | NA | 0 | NA |
| X | 100241453 | 100304634 | 1  | NM_006733    | CENPI   | 0 | NA | 0 | NA | 0 | NA | 0 | NA | 0 | NA |
| X | 100361588 | 100406141 | 1  | NM_001939    | DRP2    | 0 | NA | 0 | NA | 0 | NA | 0 | NA | 0 | NA |
| X | 100434701 | 100409896 | -1 | NM_024885    | TAF7L   | 0 | NA | 0 | NA | 0 | NA | 0 | NA | 0 | NA |
| X | 100490343 | 100487305 | -1 | NM_004085    | TIMM8A  | 1 | 12 | 0 | NA | 0 | NA | 0 | NA | 0 | NA |
| X | 100527838 | 100491097 | -1 | NM_000061    | BTK     | 1 | 15 | 0 | NA | 0 | NA | 0 | NA | 0 | NA |
| X | 100532603 | 100537439 | 1  | NM_021029    | RPL36A  | 1 | 15 | 0 | NA | 0 | NA | 0 | NA | 0 | NA |

|   |           |           |    |              |          |   |    |   |    |   |    |   |    |   |    |
|---|-----------|-----------|----|--------------|----------|---|----|---|----|---|----|---|----|---|----|
| X | 100549657 | 100539434 | -1 | NM_000169    | GLA      | 0 | NA | 0 | NA | 0 | NA | 0 | NA | 0 | NA |
| X | 100549846 | 100555773 | 1  | NM_001032393 | HNRNPH2  | 0 | NA | 0 | NA | 0 | NA | 0 | NA | 0 | NA |
| X | 100549846 | 100555773 | 1  | NM_019597    | HNRNPH2  | 0 | NA | 0 | NA | 0 | NA | 0 | NA | 0 | NA |
| X | 100692169 | 100696331 | 1  | NM_016608    | ARMCX1   | 0 | NA | 0 | NA | 0 | NA | 0 | NA | 0 | NA |
| X | 100759647 | 100756763 | -1 | NM_001009584 | ARMCX6   | 0 | NA | 0 | NA | 0 | NA | 0 | NA | 0 | NA |
| X | 100759647 | 100756763 | -1 | NM_019007    | ARMCX6   | 0 | NA | 0 | NA | 0 | NA | 0 | NA | 0 | NA |
| X | 100764775 | 100769487 | 1  | NM_016607    | ARMCX3   | 0 | NA | 0 | NA | 0 | NA | 0 | NA | 0 | NA |
| X | 100764775 | 100769487 | 1  | NM_177947    | ARMCX3   | 0 | NA | 0 | NA | 0 | NA | 0 | NA | 0 | NA |
| X | 100765006 | 100769487 | 1  | NM_177948    | ARMCX3   | 0 | NA | 0 | NA | 0 | NA | 0 | NA | 0 | NA |
| X | 100801519 | 100796925 | -1 | NM_014782    | ARMCX2   | 0 | NA | 0 | NA | 0 | NA | 0 | NA | 0 | NA |
| X | 100801519 | 100796925 | -1 | NM_177949    | ARMCX2   | 0 | NA | 0 | NA | 0 | NA | 0 | NA | 0 | NA |
| X | 100999205 | 100973740 | -1 | NM_032946    | NXF5     | 0 | NA | 0 | NA | 0 | NA | 0 | NA | 0 | NA |
| X | 101031849 | 101023917 | -1 | NM_032441    | ZMAT1    | 0 | NA | 0 | NA | 0 | NA | 0 | NA | 0 | NA |
| X | 101073656 | 101023917 | -1 | NM_001011657 | ZMAT1    | 0 | NA | 0 | NA | 0 | NA | 0 | NA | 0 | NA |
| X | 101267315 | 101269340 | 1  | NM_080390    | TCEAL2   | 0 | NA | 0 | NA | 0 | NA | 0 | NA | 0 | NA |
| X | 101284044 | 101281588 | -1 | NM_001006938 | TCEAL6   | 0 | NA | 0 | NA | 0 | NA | 0 | NA | 0 | NA |
| X | 101297685 | 101295339 | -1 | NM_001012978 | BEX5     | 0 | NA | 0 | NA | 0 | NA | 0 | NA | 0 | NA |
| X | 101356935 | 101468287 | 1  | NM_017809    | NXF2     | 0 | NA | 0 | NA | 0 | NA | 0 | NA | 0 | NA |
| X | 101356935 | 101468290 | 1  | NM_001099686 | NXF2B    | 0 | NA | 0 | NA | 0 | NA | 0 | NA | 0 | NA |
| X | 101388825 | 101468287 | 1  | NM_022053    | NXF2     | 0 | NA | 0 | NA | 0 | NA | 0 | NA | 0 | NA |
| X | 101581509 | 101501974 | -1 | NM_022053    | NXF2     | 0 | NA | 0 | NA | 0 | NA | 0 | NA | 0 | NA |
| X | 101613388 | 101501971 | -1 | NM_001099686 | NXF2B    | 0 | NA | 0 | NA | 0 | NA | 0 | NA | 0 | NA |
| X | 101613388 | 101501974 | -1 | NM_017809    | NXF2     | 0 | NA | 0 | NA | 0 | NA | 0 | NA | 0 | NA |
| X | 101658355 | 101655265 | -1 | NM_021992    | TMSL8    | 0 | NA | 0 | NA | 1 | 11 | 0 | NA | 0 | NA |
| X | 101740813 | 101745741 | 1  | NM_022838    | ARMCX5   | 0 | NA | 0 | NA | 0 | NA | 0 | NA | 0 | NA |
| X | 101792949 | 101800666 | 1  | NM_001099410 | GPRASP1  | 0 | NA | 0 | NA | 0 | NA | 0 | NA | 0 | NA |
| X | 101792949 | 101800666 | 1  | NM_001099411 | GPRASP1  | 0 | NA | 0 | NA | 0 | NA | 0 | NA | 0 | NA |
| X | 101792949 | 101800666 | 1  | NM_014710    | GPRASP1  | 0 | NA | 0 | NA | 0 | NA | 0 | NA | 0 | NA |
| X | 101853995 | 101859317 | 1  | NM_001004051 | GPRASP2  | 0 | NA | 0 | NA | 0 | NA | 0 | NA | 0 | NA |
| X | 101853995 | 101859317 | 1  | NM_138437    | GPRASP2  | 0 | NA | 0 | NA | 0 | NA | 0 | NA | 0 | NA |
| X | 101862309 | 101894025 | 1  | NM_030639    | BHLHB9   | 0 | NA | 0 | NA | 0 | NA | 0 | NA | 0 | NA |
| X | 102078855 | 102079884 | 1  | NM_001031834 | RAB40AL  | 0 | NA | 0 | NA | 0 | NA | 0 | NA | 0 | NA |
| X | 102205824 | 102204236 | -1 | NM_018476    | BEX1     | 0 | NA | 0 | NA | 0 | NA | 0 | NA | 0 | NA |
| X | 102234678 | 102217405 | -1 | NM_022052    | NXF3     | 0 | NA | 0 | NA | 0 | NA | 0 | NA | 0 | NA |
| X | 102356707 | 102358778 | 1  | NM_001080425 | BEX4     | 0 | NA | 0 | NA | 0 | NA | 0 | NA | 0 | NA |
| X | 102396777 | 102394578 | -1 | NM_001006684 | TCEAL8   | 0 | NA | 0 | NA | 0 | NA | 0 | NA | 0 | NA |
| X | 102396777 | 102394578 | -1 | NM_153333    | TCEAL8   | 0 | NA | 0 | NA | 0 | NA | 0 | NA | 0 | NA |
| X | 102418456 | 102415274 | -1 | NM_001012979 | TCEAL5   | 0 | NA | 0 | NA | 0 | NA | 0 | NA | 0 | NA |
| X | 102452601 | 102450929 | -1 | NM_032621    | BEX2     | 0 | NA | 0 | NA | 0 | NA | 0 | NA | 0 | NA |
| X | 102471820 | 102473907 | 1  | NM_152278    | TCEAL7   | 0 | NA | 0 | NA | 0 | NA | 0 | NA | 0 | NA |
| X | 102498035 | 102500053 | 1  | NM_001006612 | WBP5     | 0 | NA | 0 | NA | 0 | NA | 0 | NA | 0 | NA |
| X | 102498035 | 102500053 | 1  | NM_001006613 | WBP5     | 0 | NA | 0 | NA | 0 | NA | 0 | NA | 0 | NA |
| X | 102498035 | 102500053 | 1  | NM_001006614 | WBP5     | 0 | NA | 0 | NA | 0 | NA | 0 | NA | 0 | NA |
| X | 102498035 | 102500053 | 1  | NM_016303    | WBP5     | 0 | NA | 0 | NA | 0 | NA | 0 | NA | 0 | NA |
| X | 102517923 | 102519657 | 1  | NM_206915    | NGFRAP1  | 0 | NA | 0 | NA | 1 | 12 | 0 | NA | 0 | NA |
| X | 102517923 | 102519657 | 1  | NM_206917    | NGFRAP1  | 0 | NA | 0 | NA | 1 | 12 | 0 | NA | 0 | NA |
| X | 102518764 | 102519655 | 1  | NM_014380    | NGFRAP1  | 0 | NA | 0 | NA | 1 | 12 | 0 | NA | 0 | NA |
| X | 102661073 | 102641336 | -1 | NM_080879    | RAB40A   | 0 | NA | 0 | NA | 0 | NA | 0 | NA | 0 | NA |
| X | 102727074 | 102729311 | 1  | NM_001006935 | TCEAL4   | 0 | NA | 0 | NA | 0 | NA | 0 | NA | 0 | NA |
| X | 102727074 | 102729311 | 1  | NM_001006936 | TCEAL4   | 0 | NA | 0 | NA | 0 | NA | 0 | NA | 0 | NA |
| X | 102727074 | 102729311 | 1  | NM_001006937 | TCEAL4   | 0 | NA | 0 | NA | 0 | NA | 0 | NA | 0 | NA |
| X | 102727074 | 102729311 | 1  | NM_024863    | TCEAL4   | 0 | NA | 0 | NA | 0 | NA | 0 | NA | 0 | NA |
| X | 102749489 | 102751511 | 1  | NM_001006933 | TCEAL3   | 0 | NA | 0 | NA | 0 | NA | 0 | NA | 0 | NA |
| X | 102749489 | 102751511 | 1  | NM_032926    | TCEAL3   | 0 | NA | 0 | NA | 0 | NA | 0 | NA | 0 | NA |
| X | 102770303 | 102772532 | 1  | NM_001006640 | TCEAL1   | 0 | NA | 0 | NA | 0 | NA | 0 | NA | 0 | NA |
| X | 102770547 | 102772532 | 1  | NM_001006639 | TCEAL1   | 0 | NA | 0 | NA | 0 | NA | 0 | NA | 0 | NA |
| X | 102770547 | 102772532 | 1  | NM_004780    | TCEAL1   | 0 | NA | 0 | NA | 0 | NA | 0 | NA | 0 | NA |
| X | 102828252 | 102817088 | -1 | NM_012286    | MORF4L2  | 0 | NA | 0 | NA | 0 | NA | 0 | NA | 0 | NA |
| X | 102852492 | 102855616 | 1  | NM_182541    | TMEM31   | 0 | NA | 0 | NA | 0 | NA | 0 | NA | 0 | NA |
| X | 102866560 | 102848927 | -1 | NM_001024452 | GLRA4    | 0 | NA | 0 | NA | 0 | NA | 0 | NA | 0 | NA |
| X | 102918409 | 102934203 | 1  | NM_000533    | PLP1     | 0 | NA | 0 | NA | 0 | NA | 0 | NA | 0 | NA |
| X | 102918409 | 102934203 | 1  | NM_199478    | PLP1     | 0 | NA | 0 | NA | 0 | NA | 0 | NA | 0 | NA |
| X | 102973814 | 102966606 | -1 | NM_016370    | RAB9B    | 0 | NA | 0 | NA | 0 | NA | 0 | NA | 0 | NA |
| X | 103103855 | 103107219 | 1  | NM_194324    | MGC39900 | 0 | NA | 0 | NA | 0 | NA | 0 | NA | 0 | NA |
| X | 103154912 | 103152374 | -1 | NM_001002916 | H2BFWT   | 0 | NA | 0 | NA | 0 | NA | 0 | NA | 0 | NA |

|   |           |           |    |              |          |   |    |   |    |   |    |   |    |   |    |
|---|-----------|-----------|----|--------------|----------|---|----|---|----|---|----|---|----|---|----|
| X | 103288364 | 103230553 | -1 | NM_001012755 | MCART6   | 0 | NA | 0 | NA | 0 | NA | 0 | NA | 0 | NA |
| X | 103297956 | 103322783 | 1  | NM_207318    | CXorf39  | 0 | NA | 0 | NA | 0 | NA | 0 | NA | 0 | NA |
| X | 103386244 | 103381374 | -1 | NM_153448    | ESX1     | 0 | NA | 0 | NA | 0 | NA | 0 | NA | 0 | NA |
| X | 103697651 | 104898478 | 1  | NM_017416    | IL1RAPL2 | 0 | NA | 0 | NA | 0 | NA | 0 | NA | 0 | NA |
| X | 104352014 | 104350266 | -1 | NM_031274    | TEX13A   | 0 | NA | 0 | NA | 0 | NA | 0 | NA | 0 | NA |
| X | 104953191 | 105089258 | 1  | NM_198465    | NRK      | 0 | NA | 0 | NA | 0 | NA | 0 | NA | 0 | NA |
| X | 105167722 | 105163852 | -1 | NM_000354    | SERPINA7 | 0 | NA | 0 | NA | 0 | NA | 0 | NA | 0 | NA |
| X | 105307974 | 105339604 | 1  | NM_152423    | MUM1L1   | 0 | NA | 0 | NA | 0 | NA | 0 | NA | 0 | NA |
| X | 105741914 | 105809328 | 1  | NM_018015    | CXorf57  | 0 | NA | 0 | NA | 0 | NA | 0 | NA | 0 | NA |
| X | 105823723 | 105926902 | 1  | NM_024539    | RNF128   | 0 | NA | 0 | NA | 0 | NA | 0 | NA | 0 | NA |
| X | 105856549 | 105926902 | 1  | NM_194463    | RNF128   | 0 | NA | 0 | NA | 0 | NA | 0 | NA | 0 | NA |
| X | 105932574 | 105979722 | 1  | NM_198881    | TBC1D8B  | 0 | NA | 0 | NA | 0 | NA | 0 | NA | 0 | NA |
| X | 105932574 | 106006033 | 1  | NM_017752    | TBC1D8B  | 0 | NA | 0 | NA | 0 | NA | 0 | NA | 0 | NA |
| X | 106033217 | 106030103 | -1 | NM_138382    | RIPPLY1  | 0 | NA | 0 | NA | 0 | NA | 0 | NA | 0 | NA |
| X | 106050289 | 106060747 | 1  | NM_020384    | CLDN2    | 0 | NA | 0 | NA | 0 | NA | 0 | NA | 0 | NA |
| X | 106130098 | 106070619 | -1 | NM_001085354 | MORC4    | 0 | NA | 0 | NA | 0 | NA | 0 | NA | 0 | NA |
| X | 106130098 | 106070619 | -1 | NM_024657    | MORC4    | 0 | NA | 0 | NA | 0 | NA | 0 | NA | 0 | NA |
| X | 106248690 | 106197024 | -1 | NM_018301    | RBM41    | 0 | NA | 0 | NA | 0 | NA | 0 | NA | 0 | NA |
| X | 106336200 | 106253358 | -1 | NM_017681    | NUP62CL  | 0 | NA | 0 | NA | 0 | NA | 0 | NA | 0 | NA |
| X | 106336517 | 106374129 | 1  | NM_173494    | CXorf41  | 0 | NA | 0 | NA | 0 | NA | 0 | NA | 0 | NA |
| X | 106758309 | 106780912 | 1  | NM_002764    | PRPS1    | 0 | NA | 0 | NA | 0 | NA | 0 | NA | 0 | NA |
| X | 106846367 | 106843107 | -1 | NM_001015881 | TSC22D3  | 0 | NA | 0 | NA | 0 | NA | 0 | NA | 0 | NA |
| X | 106846947 | 106843107 | -1 | NM_004089    | TSC22D3  | 0 | NA | 0 | NA | 0 | NA | 0 | NA | 0 | NA |
| X | 106905673 | 106843107 | -1 | NM_198057    | TSC22D3  | 0 | NA | 0 | NA | 0 | NA | 0 | NA | 0 | NA |
| X | 106956115 | 107057077 | 1  | NM_012216    | MID2     | 0 | NA | 0 | NA | 0 | NA | 0 | NA | 0 | NA |
| X | 106956115 | 107057077 | 1  | NM_052817    | MID2     | 0 | NA | 0 | NA | 0 | NA | 0 | NA | 0 | NA |
| X | 107112256 | 107110749 | -1 | NM_031273    | TEX13B   | 0 | NA | 0 | NA | 0 | NA | 0 | NA | 0 | NA |
| X | 107174855 | 107209070 | 1  | NM_182607    | VSIG1    | 0 | NA | 0 | NA | 0 | NA | 0 | NA | 0 | NA |
| X | 107221504 | 107214092 | -1 | NM_002814    | PSMD10   | 0 | NA | 0 | NA | 0 | NA | 0 | NA | 0 | NA |
| X | 107221504 | 107214092 | -1 | NM_170750    | PSMD10   | 0 | NA | 0 | NA | 0 | NA | 0 | NA | 0 | NA |
| X | 107221589 | 107284552 | 1  | NM_052936    | ATG4A    | 0 | NA | 0 | NA | 0 | NA | 0 | NA | 0 | NA |
| X | 107221589 | 107284552 | 1  | NM_178270    | ATG4A    | 0 | NA | 0 | NA | 0 | NA | 0 | NA | 0 | NA |
| X | 107568314 | 107285492 | -1 | NM_033641    | COL4A6   | 0 | NA | 0 | NA | 0 | NA | 0 | NA | 0 | NA |
| X | 107569360 | 107285492 | -1 | NM_001847    | COL4A6   | 0 | NA | 0 | NA | 0 | NA | 0 | NA | 0 | NA |
| X | 107569809 | 107827431 | 1  | NM_000495    | COL4A5   | 0 | NA | 0 | NA | 0 | NA | 0 | NA | 0 | NA |
| X | 107569809 | 107827431 | 1  | NM_033380    | COL4A5   | 0 | NA | 0 | NA | 0 | NA | 0 | NA | 0 | NA |
| X | 107569809 | 107827431 | 1  | NM_033381    | COL4A5   | 0 | NA | 0 | NA | 0 | NA | 0 | NA | 0 | NA |
| X | 107866295 | 107862367 | -1 | NM_003604    | IRS4     | 0 | NA | 0 | NA | 0 | NA | 0 | NA | 0 | NA |
| X | 108611941 | 108502790 | -1 | NM_001522    | GUCY2F   | 0 | NA | 0 | NA | 0 | NA | 0 | NA | 0 | NA |
| X | 108665665 | 108674569 | 1  | NM_018698    | NXT2     | 0 | NA | 0 | NA | 0 | NA | 0 | NA | 0 | NA |
| X | 108755049 | 108753584 | -1 | NM_012282    | KCNE1L   | 0 | NA | 0 | NA | 0 | NA | 0 | NA | 0 | NA |
| X | 108863277 | 108771219 | -1 | NM_004458    | ACSL4    | 0 | NA | 0 | NA | 0 | NA | 0 | NA | 0 | NA |
| X | 108863277 | 108771219 | -1 | NM_022977    | ACSL4    | 0 | NA | 0 | NA | 0 | NA | 0 | NA | 0 | NA |
| X | 109133017 | 109303430 | 1  | NM_032227    | TMEM164  | 0 | NA | 0 | NA | 0 | NA | 0 | NA | 0 | NA |
| X | 109448036 | 109324069 | -1 | NM_001025580 | AMMECR1  | 0 | NA | 0 | NA | 0 | NA | 0 | NA | 0 | NA |
| X | 109448036 | 109324069 | -1 | NM_015365    | AMMECR1  | 0 | NA | 0 | NA | 0 | NA | 0 | NA | 0 | NA |
| X | 109548940 | 109586217 | 1  | NM_020769    | RGAG1    | 0 | NA | 0 | NA | 0 | NA | 0 | NA | 0 | NA |
| X | 109925649 | 109805128 | -1 | NM_145234    | CHRD1    | 1 | 12 | 0 | NA | 0 | NA | 0 | NA | 0 | NA |
| X | 110226255 | 110350816 | 1  | NM_002578    | PAK3     | 0 | NA | 0 | NA | 0 | NA | 0 | NA | 0 | NA |
| X | 110400407 | 110374986 | -1 | NM_014289    | CAPN6    | 0 | NA | 0 | NA | 0 | NA | 0 | NA | 0 | NA |
| X | 110541030 | 110423662 | -1 | NM_000555    | DCX      | 0 | NA | 0 | NA | 0 | NA | 0 | NA | 0 | NA |
| X | 110541962 | 110423662 | -1 | NM_178151    | DCX      | 0 | NA | 0 | NA | 0 | NA | 0 | NA | 0 | NA |
| X | 110542062 | 110423662 | -1 | NM_178152    | DCX      | 0 | NA | 0 | NA | 0 | NA | 0 | NA | 0 | NA |
| X | 110542062 | 110423662 | -1 | NM_178153    | DCX      | 0 | NA | 0 | NA | 0 | NA | 0 | NA | 0 | NA |
| X | 110811068 | 110818680 | 1  | NM_018466    | ALG13    | 1 | 15 | 0 | NA | 0 | NA | 0 | NA | 0 | NA |
| X | 111212660 | 110904197 | -1 | NM_012471    | TRPC5    | 0 | NA | 0 | NA | 0 | NA | 0 | NA | 0 | NA |
| X | 111212908 | 111587129 | 1  | NM_001004308 | ZCCHC16  | 0 | NA | 0 | NA | 0 | NA | 0 | NA | 0 | NA |
| X | 111810031 | 111760534 | -1 | NM_178175    | LHFPL1   | 0 | NA | 0 | NA | 0 | NA | 0 | NA | 0 | NA |
| X | 111953010 | 111904760 | -1 | NM_001113490 | AMOT     | 0 | NA | 0 | NA | 0 | NA | 0 | NA | 0 | NA |
| X | 111970699 | 111904760 | -1 | NM_133265    | AMOT     | 0 | NA | 0 | NA | 0 | NA | 0 | NA | 0 | NA |
| X | 113724806 | 114050880 | 1  | NM_000868    | HTR2C    | 0 | NA | 1 | 14 | 0 | NA | 0 | NA | 0 | NA |
| X | 114158463 | 114144793 | -1 | NM_000640    | IL13RA2  | 0 | NA | 0 | NA | 0 | NA | 0 | NA | 0 | NA |
| X | 114374891 | 114251438 | -1 | NM_020871    | LRCH2    | 0 | NA | 0 | NA | 0 | NA | 0 | NA | 0 | NA |
| X | 114430547 | 114448377 | 1  | NM_016383    | LUZP4    | 0 | NA | 0 | NA | 0 | NA | 0 | NA | 0 | NA |
| X | 114701764 | 114781246 | 1  | NM_005032    | PLS3     | 0 | NA | 0 | NA | 0 | NA | 0 | NA | 0 | NA |



|   |           |           |    |              |           |   |    |   |    |   |    |   |    |   |    |
|---|-----------|-----------|----|--------------|-----------|---|----|---|----|---|----|---|----|---|----|
| X | 115215985 | 115220253 | 1  | NM_000686    | AGTR2     | 0 | NA | 0 | NA | 0 | NA | 0 | NA | 0 | NA |
| X | 115481817 | 115506851 | 1  | NM_007231    | SLC6A14   | 0 | NA | 0 | NA | 0 | NA | 0 | NA | 0 | NA |
| X | 115508165 | 115506879 | -1 | NM_001017978 | CXorf61   | 0 | NA | 0 | NA | 0 | NA | 0 | NA | 0 | NA |
| X | 116990881 | 116915803 | -1 | NM_033495    | KLHL13    | 0 | NA | 0 | NA | 0 | NA | 0 | NA | 0 | NA |
| X | 117364069 | 117467951 | 1  | NM_019045    | WDR44     | 0 | NA | 0 | NA | 0 | NA | 0 | NA | 0 | NA |
| X | 117513899 | 117704151 | 1  | NM_144658    | DOCK11    | 0 | NA | 0 | NA | 0 | NA | 0 | NA | 0 | NA |
| X | 117745586 | 117812524 | 1  | NM_001560    | IL13RA1   | 0 | NA | 0 | NA | 0 | NA | 0 | NA | 0 | NA |
| X | 117841814 | 117844959 | 1  | NM_173798    | ZCCHC12   | 0 | NA | 0 | NA | 0 | NA | 0 | NA | 0 | NA |
| X | 117992740 | 118035977 | 1  | NM_001031855 | LONRF3    | 0 | NA | 1 | 13 | 0 | NA | 0 | NA | 0 | NA |
| X | 117992740 | 118035977 | 1  | NM_024778    | LONRF3    | 0 | NA | 1 | 13 | 0 | NA | 0 | NA | 0 | NA |
| X | 118168570 | 118096625 | -1 | NM_020721    | KIAA1210  | 0 | NA | 0 | NA | 0 | NA | 0 | NA | 0 | NA |
| X | 118254290 | 118262457 | 1  | NM_006667    | PGRMC1    | 0 | NA | 0 | NA | 0 | NA | 0 | NA | 0 | NA |
| X | 118417050 | 118472461 | 1  | NM_145305    | SLC25A43  | 0 | NA | 0 | NA | 0 | NA | 0 | NA | 0 | NA |
| X | 118486432 | 118489320 | 1  | NM_001152    | SLC25A5   | 0 | NA | 0 | NA | 0 | NA | 0 | NA | 0 | NA |
| X | 118583392 | 118557528 | -1 | NM_022101    | CXorf56   | 0 | NA | 0 | NA | 0 | NA | 0 | NA | 0 | NA |
| X | 118592526 | 118602407 | 1  | NM_003336    | UBE2A     | 0 | NA | 0 | NA | 0 | NA | 0 | NA | 0 | NA |
| X | 118592526 | 118602407 | 1  | NM_181762    | UBE2A     | 0 | NA | 0 | NA | 0 | NA | 0 | NA | 0 | NA |
| X | 118598325 | 118602407 | 1  | NM_181777    | UBE2A     | 0 | NA | 0 | NA | 0 | NA | 0 | NA | 0 | NA |
| X | 118623841 | 118606333 | -1 | NM_017544    | NKRF      | 0 | NA | 0 | NA | 0 | NA | 0 | NA | 0 | NA |
| X | 118711361 | 118633715 | -1 | NM_145800    | SEPT6     | 0 | NA | 0 | NA | 0 | NA | 0 | NA | 0 | NA |
| X | 118711361 | 118633715 | -1 | NM_145802    | SEPT6     | 0 | NA | 0 | NA | 0 | NA | 0 | NA | 0 | NA |
| X | 118711361 | 118634936 | -1 | NM_015129    | SEPT6     | 0 | NA | 0 | NA | 0 | NA | 0 | NA | 0 | NA |
| X | 118711361 | 118634936 | -1 | NM_145799    | SEPT6     | 0 | NA | 0 | NA | 0 | NA | 0 | NA | 0 | NA |
| X | 118776603 | 118778155 | 1  | NM_001105576 | ANKRD58   | 0 | NA | 0 | NA | 0 | NA | 0 | NA | 0 | NA |
| X | 118809634 | 118804496 | -1 | NM_001000    | RPL39     | 0 | NA | 0 | NA | 0 | NA | 0 | NA | 0 | NA |
| X | 118870996 | 118852016 | -1 | NM_023010    | UPF3B     | 0 | NA | 0 | NA | 0 | NA | 0 | NA | 0 | NA |
| X | 118870996 | 118852016 | -1 | NM_080632    | UPF3B     | 0 | NA | 0 | NA | 0 | NA | 0 | NA | 0 | NA |
| X | 118889761 | 118894657 | 1  | NM_004541    | NDUFA1    | 1 | 14 | 0 | NA | 0 | NA | 1 | 14 | 0 | NA |
| X | 118889818 | 118888465 | -1 | NM_006978    | RNF113A   | 1 | 14 | 0 | NA | 0 | NA | 1 | 14 | 0 | NA |
| X | 118913963 | 118921648 | 1  | NM_001008535 | AKAP14    | 0 | NA | 0 | NA | 0 | NA | 0 | NA | 0 | NA |
| X | 118913963 | 118938707 | 1  | NM_001008534 | AKAP14    | 0 | NA | 0 | NA | 0 | NA | 0 | NA | 0 | NA |
| X | 118913963 | 118938707 | 1  | NM_178813    | AKAP14    | 0 | NA | 0 | NA | 0 | NA | 0 | NA | 0 | NA |
| X | 118961763 | 118943050 | -1 | NM_024528    | NKAP      | 0 | NA | 0 | NA | 0 | NA | 0 | NA | 0 | NA |
| X | 119095735 | 119090256 | -1 | NM_001099685 | RHOXF2B   | 0 | NA | 0 | NA | 0 | NA | 0 | NA | 0 | NA |
| X | 119095735 | 119090268 | -1 | NM_032498    | RHOXF2    | 0 | NA | 0 | NA | 0 | NA | 0 | NA | 0 | NA |
| X | 119133875 | 119127052 | -1 | NM_139282    | RHOXF1    | 0 | NA | 0 | NA | 0 | NA | 0 | NA | 0 | NA |
| X | 119176494 | 119181961 | 1  | NM_032498    | RHOXF2    | 0 | NA | 0 | NA | 0 | NA | 0 | NA | 0 | NA |
| X | 119176494 | 119181973 | 1  | NM_001099685 | RHOXF2B   | 0 | NA | 0 | NA | 0 | NA | 0 | NA | 0 | NA |
| X | 119268634 | 119276279 | 1  | NM_006777    | ZBTB33    | 0 | NA | 0 | NA | 0 | NA | 0 | NA | 0 | NA |
| X | 119329419 | 119276532 | -1 | NM_001104544 | FAM70A    | 0 | NA | 1 | 12 | 0 | NA | 0 | NA | 0 | NA |
| X | 119329419 | 119276532 | -1 | NM_001104545 | FAM70A    | 0 | NA | 1 | 12 | 0 | NA | 0 | NA | 0 | NA |
| X | 119329419 | 119276532 | -1 | NM_017938    | FAM70A    | 0 | NA | 1 | 12 | 0 | NA | 0 | NA | 0 | NA |
| X | 119379994 | 119400252 | 1  | NM_012069    | ATP1B4    | 0 | NA | 0 | NA | 0 | NA | 0 | NA | 0 | NA |
| X | 119487232 | 119444030 | -1 | NM_001122606 | LAMP2     | 0 | NA | 0 | NA | 0 | NA | 0 | NA | 0 | NA |
| X | 119487232 | 119444030 | -1 | NM_002294    | LAMP2     | 0 | NA | 0 | NA | 0 | NA | 0 | NA | 0 | NA |
| X | 119487232 | 119454376 | -1 | NM_013995    | LAMP2     | 0 | NA | 0 | NA | 0 | NA | 0 | NA | 0 | NA |
| X | 119578845 | 119542473 | -1 | NM_001079872 | CUL4B     | 0 | NA | 0 | NA | 0 | NA | 0 | NA | 0 | NA |
| X | 119593712 | 119542473 | -1 | NM_003588    | CUL4B     | 0 | NA | 0 | NA | 0 | NA | 0 | NA | 0 | NA |
| X | 119621862 | 119630268 | 1  | NM_014060    | MCTS1     | 0 | NA | 0 | NA | 1 | 15 | 0 | NA | 0 | NA |
| X | 119647969 | 119643561 | -1 | NM_001011551 | C1GALT1C1 | 0 | NA | 0 | NA | 0 | NA | 0 | NA | 0 | NA |
| X | 119647969 | 119643561 | -1 | NM_152692    | C1GALT1C1 | 0 | NA | 0 | NA | 0 | NA | 0 | NA | 0 | NA |
| X | 119898693 | 119895375 | -1 | NM_001080137 | CT47.10   | 0 | NA | 0 | NA | 0 | NA | 0 | NA | 0 | NA |
| X | 119898693 | 119895375 | -1 | NM_001080138 | CT47.9    | 0 | NA | 0 | NA | 0 | NA | 0 | NA | 0 | NA |
| X | 119898693 | 119895375 | -1 | NM_001080139 | CT47.8    | 0 | NA | 0 | NA | 0 | NA | 0 | NA | 0 | NA |
| X | 119898693 | 119895375 | -1 | NM_001080141 | CT47.6    | 0 | NA | 0 | NA | 0 | NA | 0 | NA | 0 | NA |
| X | 119898693 | 119895375 | -1 | NM_001080142 | CT47.5    | 0 | NA | 0 | NA | 0 | NA | 0 | NA | 0 | NA |
| X | 119898693 | 119895375 | -1 | NM_001080143 | CT47.4    | 0 | NA | 0 | NA | 0 | NA | 0 | NA | 0 | NA |
| X | 119898693 | 119895375 | -1 | NM_001080144 | CT47.3    | 0 | NA | 0 | NA | 0 | NA | 0 | NA | 0 | NA |
| X | 119898693 | 119895375 | -1 | NM_001080145 | CT47.2    | 0 | NA | 0 | NA | 0 | NA | 0 | NA | 0 | NA |
| X | 119898693 | 119895375 | -1 | NM_001080146 | CT47.1    | 0 | NA | 0 | NA | 0 | NA | 0 | NA | 0 | NA |
| X | 119898693 | 119895375 | -1 | NM_173571    | CT47.11   | 0 | NA | 0 | NA | 0 | NA | 0 | NA | 0 | NA |
| X | 119903554 | 119900236 | -1 | NM_001080137 | CT47.10   | 0 | NA | 0 | NA | 0 | NA | 0 | NA | 0 | NA |
| X | 119903554 | 119900236 | -1 | NM_001080138 | CT47.9    | 0 | NA | 0 | NA | 0 | NA | 0 | NA | 0 | NA |
| X | 119903554 | 119900236 | -1 | NM_001080139 | CT47.8    | 0 | NA | 0 | NA | 0 | NA | 0 | NA | 0 | NA |
| X | 119903554 | 119900236 | -1 | NM_001080141 | CT47.6    | 0 | NA | 0 | NA | 0 | NA | 0 | NA | 0 | NA |



|   |           |           |    |              |              |   |    |   |    |   |    |   |    |   |    |
|---|-----------|-----------|----|--------------|--------------|---|----|---|----|---|----|---|----|---|----|
| X | 119942459 | 119939140 | -1 | NM_001080144 | CT47.3       | 0 | NA | 0 | NA | 0 | NA | 0 | NA | 0 | NA |
| X | 119942459 | 119939140 | -1 | NM_001080145 | CT47.2       | 0 | NA | 0 | NA | 0 | NA | 0 | NA | 0 | NA |
| X | 119942459 | 119939140 | -1 | NM_001080146 | CT47.1       | 0 | NA | 0 | NA | 0 | NA | 0 | NA | 0 | NA |
| X | 119942459 | 119939140 | -1 | NM_173571    | CT47.11      | 0 | NA | 0 | NA | 0 | NA | 0 | NA | 0 | NA |
| X | 119947319 | 119914817 | -1 | NM_001080137 | CT47.10      | 0 | NA | 0 | NA | 0 | NA | 0 | NA | 0 | NA |
| X | 119947319 | 119914817 | -1 | NM_001080138 | CT47.9       | 0 | NA | 0 | NA | 0 | NA | 0 | NA | 0 | NA |
| X | 119947319 | 119914817 | -1 | NM_001080139 | CT47.8       | 0 | NA | 0 | NA | 0 | NA | 0 | NA | 0 | NA |
| X | 119947319 | 119914817 | -1 | NM_001080142 | CT47.5       | 0 | NA | 0 | NA | 0 | NA | 0 | NA | 0 | NA |
| X | 119947319 | 119914817 | -1 | NM_001080143 | CT47.4       | 0 | NA | 0 | NA | 0 | NA | 0 | NA | 0 | NA |
| X | 119947319 | 119914817 | -1 | NM_001080144 | CT47.3       | 0 | NA | 0 | NA | 0 | NA | 0 | NA | 0 | NA |
| X | 119947319 | 119914817 | -1 | NM_001080145 | CT47.2       | 0 | NA | 0 | NA | 0 | NA | 0 | NA | 0 | NA |
| X | 119947319 | 119914817 | -1 | NM_173571    | CT47.11      | 0 | NA | 0 | NA | 0 | NA | 0 | NA | 0 | NA |
| X | 119947319 | 119944001 | -1 | NM_001080141 | CT47.6       | 0 | NA | 0 | NA | 0 | NA | 0 | NA | 0 | NA |
| X | 119947319 | 119944001 | -1 | NM_001080146 | CT47.1       | 0 | NA | 0 | NA | 0 | NA | 0 | NA | 0 | NA |
| X | 120009142 | 120011477 | 1  | NM_012084    | GLUD2        | 0 | NA | 0 | NA | 0 | NA | 0 | NA | 0 | NA |
| X | 122145776 | 122452447 | 1  | NM_000828    | GRIA3        | 0 | NA | 0 | NA | 0 | NA | 0 | NA | 0 | NA |
| X | 122145776 | 122452447 | 1  | NM_007325    | GRIA3        | 0 | NA | 0 | NA | 0 | NA | 0 | NA | 0 | NA |
| X | 122694585 | 122562092 | -1 | NM_001081550 | THOC2        | 0 | NA | 0 | NA | 0 | NA | 0 | NA | 0 | NA |
| X | 122694585 | 122562092 | -1 | NM_020449    | THOC2        | 0 | NA | 0 | NA | 0 | NA | 0 | NA | 0 | NA |
| X | 122821728 | 122875503 | 1  | NM_001167    | XIAP         | 0 | NA | 0 | NA | 0 | NA | 0 | NA | 0 | NA |
| X | 122922155 | 123064186 | 1  | NM_001042749 | STAG2        | 0 | NA | 0 | NA | 0 | NA | 0 | NA | 0 | NA |
| X | 122923236 | 123064186 | 1  | NM_001042750 | STAG2        | 0 | NA | 0 | NA | 0 | NA | 0 | NA | 0 | NA |
| X | 122923236 | 123064186 | 1  | NM_001042751 | STAG2        | 0 | NA | 0 | NA | 0 | NA | 0 | NA | 0 | NA |
| X | 122923236 | 123064186 | 1  | NM_006603    | STAG2        | 0 | NA | 0 | NA | 0 | NA | 0 | NA | 0 | NA |
| X | 123307828 | 123334691 | 1  | NM_001114937 | SH2D1A       | 0 | NA | 0 | NA | 0 | NA | 0 | NA | 0 | NA |
| X | 123307828 | 123334691 | 1  | NM_002351    | SH2D1A       | 0 | NA | 0 | NA | 0 | NA | 0 | NA | 0 | NA |
| X | 123925347 | 123339503 | -1 | NM_014253    | ODZ1         | 0 | NA | 0 | NA | 0 | NA | 0 | NA | 0 | NA |
| X | 125127615 | 125126194 | -1 | NM_001013628 | WDR40C       | 0 | NA | 0 | NA | 0 | NA | 0 | NA | 0 | NA |
| X | 125514515 | 125511050 | -1 | NM_178470    | WDR40B       | 0 | NA | 0 | NA | 0 | NA | 0 | NA | 0 | NA |
| X | 125781427 | 125783449 | 1  | NM_001122716 | LOC100130613 | 0 | NA | 0 | NA | 0 | NA | 0 | NA | 0 | NA |
| X | 127014058 | 127012621 | -1 | NM_138289    | ACTRT1       | 0 | NA | 0 | NA | 0 | NA | 0 | NA | 0 | NA |
| X | 128485141 | 128408158 | -1 | NM_003069    | SMARCA1      | 0 | NA | 0 | NA | 0 | NA | 0 | NA | 0 | NA |
| X | 128485141 | 128408158 | -1 | NM_139035    | SMARCA1      | 0 | NA | 0 | NA | 0 | NA | 0 | NA | 0 | NA |
| X | 128501932 | 128554211 | 1  | NM_000276    | OCRL         | 0 | NA | 0 | NA | 0 | NA | 0 | NA | 0 | NA |
| X | 128501932 | 128554211 | 1  | NM_001587    | OCRL         | 0 | NA | 0 | NA | 0 | NA | 0 | NA | 0 | NA |
| X | 128616595 | 128607005 | -1 | NM_017413    | APLN         | 0 | NA | 0 | NA | 0 | NA | 0 | NA | 0 | NA |
| X | 128700626 | 128731206 | 1  | NM_003399    | XPNPEP2      | 0 | NA | 0 | NA | 0 | NA | 0 | NA | 0 | NA |
| X | 128741640 | 128756857 | 1  | NM_018990    | SASH3        | 0 | NA | 0 | NA | 0 | NA | 0 | NA | 0 | NA |
| X | 128805149 | 128766593 | -1 | NM_001008222 | ZDHHC9       | 0 | NA | 0 | NA | 0 | NA | 0 | NA | 0 | NA |
| X | 128805554 | 128766593 | -1 | NM_016032    | ZDHHC9       | 0 | NA | 0 | NA | 0 | NA | 0 | NA | 0 | NA |
| X | 128867839 | 128891409 | 1  | NM_006649    | UTP14A       | 0 | NA | 0 | NA | 0 | NA | 0 | NA | 0 | NA |
| X | 128944349 | 129019282 | 1  | NM_021946    | BCORL1       | 0 | NA | 0 | NA | 0 | NA | 0 | NA | 0 | NA |
| X | 129072156 | 129026575 | -1 | NM_001421    | ELF4         | 0 | NA | 0 | NA | 0 | NA | 0 | NA | 0 | NA |
| X | 129072369 | 129026575 | -1 | NM_001127197 | ELF4         | 0 | NA | 0 | NA | 0 | NA | 0 | NA | 0 | NA |
| X | 129127489 | 129091018 | -1 | NM_004208    | AIFM1        | 1 | 11 | 0 | NA | 0 | NA | 0 | NA | 0 | NA |
| X | 129127489 | 129091018 | -1 | NM_145812    | AIFM1        | 1 | 11 | 0 | NA | 0 | NA | 0 | NA | 0 | NA |
| X | 129127489 | 129091018 | -1 | NM_145813    | AIFM1        | 1 | 11 | 0 | NA | 0 | NA | 0 | NA | 0 | NA |
| X | 129133453 | 129146525 | 1  | NM_004794    | RAB33A       | 1 | 11 | 0 | NA | 0 | NA | 0 | NA | 0 | NA |
| X | 129230554 | 129164367 | -1 | NM_017666    | ZNF280C      | 1 | 29 | 0 | NA | 1 | 34 | 0 | NA | 0 | NA |
| X | 129301727 | 129335016 | 1  | NM_003951    | SLC25A14     | 0 | NA | 0 | NA | 0 | NA | 0 | NA | 0 | NA |
| X | 129301727 | 129335016 | 1  | NM_022810    | SLC25A14     | 0 | NA | 0 | NA | 0 | NA | 0 | NA | 0 | NA |
| X | 129347102 | 129346094 | -1 | NM_178471    | GPR119       | 0 | NA | 0 | NA | 0 | NA | 0 | NA | 0 | NA |
| X | 129363623 | 129374998 | 1  | NM_016024    | RBMX2        | 0 | NA | 0 | NA | 0 | NA | 0 | NA | 0 | NA |
| X | 129864889 | 129585037 | -1 | NM_006375    | ENOX2        | 0 | NA | 0 | NA | 0 | NA | 0 | NA | 0 | NA |
| X | 129864889 | 129585037 | -1 | NM_182314    | ENOX2        | 0 | NA | 0 | NA | 0 | NA | 0 | NA | 0 | NA |
| X | 130019896 | 130051534 | 1  | NM_144967    | FLJ30058     | 0 | NA | 0 | NA | 0 | NA | 0 | NA | 0 | NA |
| X | 130250936 | 130235162 | -1 | NM_001555    | IGSF1        | 0 | NA | 0 | NA | 0 | NA | 0 | NA | 0 | NA |
| X | 130250936 | 130245822 | -1 | NM_205833    | IGSF1        | 0 | NA | 0 | NA | 0 | NA | 0 | NA | 0 | NA |
| X | 130505728 | 130506655 | 1  | NM_001004486 | OR13H1       | 0 | NA | 0 | NA | 0 | NA | 0 | NA | 0 | NA |
| X | 130984925 | 131037652 | 1  | NM_001042453 | MST4         | 0 | NA | 0 | NA | 0 | NA | 0 | NA | 0 | NA |
| X | 130984925 | 131037652 | 1  | NM_016542    | MST4         | 0 | NA | 0 | NA | 0 | NA | 0 | NA | 0 | NA |
| X | 130985316 | 131037652 | 1  | NM_001042452 | MST4         | 0 | NA | 0 | NA | 0 | NA | 0 | NA | 0 | NA |
| X | 131089729 | 131038703 | -1 | NM_194277    | FRMD7        | 0 | NA | 0 | NA | 0 | NA | 0 | NA | 0 | NA |
| X | 131179870 | 131164733 | -1 | NM_021183    | RAP2C        | 0 | NA | 0 | NA | 0 | NA | 0 | NA | 0 | NA |
| X | 131401399 | 131339857 | -1 | NM_018388    | MBNL3        | 0 | NA | 0 | NA | 0 | NA | 0 | NA | 0 | NA |

|   |           |           |    |              |             |   |    |   |    |   |    |   |    |   |    |
|---|-----------|-----------|----|--------------|-------------|---|----|---|----|---|----|---|----|---|----|
| X | 131401399 | 131340912 | -1 | NM_133486    | MBNL3       | 0 | NA | 0 | NA | 0 | NA | 0 | NA | 0 | NA |
| X | 131923093 | 131587718 | -1 | NM_001077188 | HS6ST2      | 0 | NA | 0 | NA | 0 | NA | 0 | NA | 0 | NA |
| X | 131923093 | 131587718 | -1 | NM_147175    | HS6ST2      | 0 | NA | 0 | NA | 0 | NA | 0 | NA | 0 | NA |
| X | 131989966 | 131987172 | -1 | NM_031907    | USP26       | 0 | NA | 0 | NA | 0 | NA | 0 | NA | 0 | NA |
| X | 132180042 | 132178362 | -1 | NM_016521    | TFDP3       | 0 | NA | 0 | NA | 0 | NA | 0 | NA | 0 | NA |
| X | 132376871 | 132262729 | -1 | NM_001448    | GPC4        | 0 | NA | 0 | NA | 0 | NA | 0 | NA | 0 | NA |
| X | 132947332 | 132497441 | -1 | NM_004484    | GPC3        | 0 | NA | 0 | NA | 0 | NA | 0 | NA | 0 | NA |
| X | 133198742 | 133207474 | 1  | NM_001101357 | LOC347475   | 0 | NA | 0 | NA | 0 | NA | 0 | NA | 0 | NA |
| X | 133335007 | 133376987 | 1  | NM_032335    | PHF6        | 1 | 22 | 0 | NA | 0 | NA | 0 | NA | 0 | NA |
| X | 133335007 | 133390488 | 1  | NM_001015877 | PHF6        | 1 | 22 | 0 | NA | 0 | NA | 0 | NA | 0 | NA |
| X | 133335007 | 133390488 | 1  | NM_032458    | PHF6        | 1 | 22 | 0 | NA | 0 | NA | 0 | NA | 0 | NA |
| X | 133421840 | 133462364 | 1  | NM_000194    | HPRT1       | 0 | NA | 0 | NA | 0 | NA | 0 | NA | 0 | NA |
| X | 133620179 | 133527538 | -1 | NM_021796    | PLAC1       | 0 | NA | 0 | NA | 0 | NA | 0 | NA | 0 | NA |
| X | 133758376 | 133731261 | -1 | NM_145284    | FAM122B     | 0 | NA | 0 | NA | 0 | NA | 0 | NA | 0 | NA |
| X | 133768889 | 133816282 | 1  | NM_138819    | FAM122C     | 0 | NA | 0 | NA | 0 | NA | 0 | NA | 0 | NA |
| X | 133876963 | 133849327 | -1 | NM_019556    | MOSPD1      | 0 | NA | 0 | NA | 0 | NA | 0 | NA | 0 | NA |
| X | 133984232 | 133982199 | -1 | NM_001078173 | FAM127C     | 0 | NA | 0 | NA | 0 | NA | 0 | NA | 0 | NA |
| X | 133993998 | 133995241 | 1  | NM_001078171 | FAM127A     | 0 | NA | 0 | NA | 0 | NA | 0 | NA | 0 | NA |
| X | 134013887 | 134012628 | -1 | NM_001078172 | FAM127B     | 0 | NA | 0 | NA | 1 | 12 | 0 | NA | 0 | NA |
| X | 134132826 | 134118126 | -1 | NM_001031705 | CXorf48     | 0 | NA | 0 | NA | 0 | NA | 0 | NA | 0 | NA |
| X | 134133417 | 134118126 | -1 | NM_017863    | CXorf48     | 0 | NA | 0 | NA | 0 | NA | 0 | NA | 0 | NA |
| X | 134305623 | 134247384 | -1 | NM_007131    | ZNF75       | 0 | NA | 0 | NA | 0 | NA | 0 | NA | 0 | NA |
| X | 134306386 | 134325004 | 1  | NM_152695    | ZNF49       | 0 | NA | 0 | NA | 0 | NA | 0 | NA | 0 | NA |
| X | 134482220 | 134544126 | 1  | NM_182540    | DDX26B      | 0 | NA | 0 | NA | 0 | NA | 0 | NA | 0 | NA |
| X | 134674850 | 134684654 | 1  | NM_001017417 | CT45-1      | 0 | NA | 0 | NA | 0 | NA | 0 | NA | 0 | NA |
| X | 134693879 | 134701914 | 1  | NM_152582    | CT45-2      | 0 | NA | 0 | NA | 0 | NA | 0 | NA | 0 | NA |
| X | 134693879 | 134719185 | 1  | NM_001017436 | CT45-4      | 0 | NA | 0 | NA | 0 | NA | 0 | NA | 0 | NA |
| X | 134711153 | 134719185 | 1  | NM_001017435 | CT45-3      | 0 | NA | 0 | NA | 0 | NA | 0 | NA | 0 | NA |
| X | 134764401 | 134756362 | -1 | NM_001017436 | CT45-4      | 0 | NA | 0 | NA | 0 | NA | 0 | NA | 0 | NA |
| X | 134781860 | 134773629 | -1 | NM_001007551 | CT45-5      | 0 | NA | 0 | NA | 0 | NA | 0 | NA | 0 | NA |
| X | 134798910 | 134790880 | -1 | NM_001017438 | CT45-6      | 0 | NA | 0 | NA | 0 | NA | 0 | NA | 0 | NA |
| X | 134803450 | 134822886 | 1  | NM_018666    | SAGE1       | 0 | NA | 0 | NA | 0 | NA | 0 | NA | 0 | NA |
| X | 134883800 | 134871896 | -1 | NM_173470    | TMEM32      | 0 | NA | 0 | NA | 0 | NA | 0 | NA | 0 | NA |
| X | 134895251 | 134957094 | 1  | NM_001042537 | SLC9A6      | 0 | NA | 0 | NA | 0 | NA | 0 | NA | 0 | NA |
| X | 134895251 | 134957094 | 1  | NM_006359    | SLC9A6      | 0 | NA | 0 | NA | 0 | NA | 0 | NA | 0 | NA |
| X | 135057345 | 135121176 | 1  | NM_001449    | FHL1        | 0 | NA | 0 | NA | 0 | NA | 0 | NA | 0 | NA |
| X | 135161274 | 135128045 | -1 | NM_024597    | MAP7D3      | 0 | NA | 0 | NA | 0 | NA | 0 | NA | 0 | NA |
| X | 135210787 | 135326713 | 1  | NM_153834    | GPR112      | 0 | NA | 0 | NA | 0 | NA | 0 | NA | 0 | NA |
| X | 135397790 | 135402264 | 1  | NM_001727    | BRS3        | 1 | 14 | 0 | NA | 0 | NA | 0 | NA | 0 | NA |
| X | 135407336 | 135422156 | 1  | NM_014500    | HTATSF1     | 1 | 14 | 0 | NA | 0 | NA | 0 | NA | 0 | NA |
| X | 135441976 | 135466629 | 1  | NM_016267    | VGLL1       | 0 | NA | 0 | NA | 0 | NA | 0 | NA | 0 | NA |
| X | 135558001 | 135570215 | 1  | NM_000074    | CD40LG      | 0 | NA | 0 | NA | 0 | NA | 0 | NA | 0 | NA |
| X | 135691169 | 135575376 | -1 | NM_004840    | ARHGEF6     | 0 | NA | 0 | NA | 0 | NA | 0 | NA | 0 | NA |
| X | 135790605 | 135783284 | -1 | NM_002139    | RBMX        | 0 | NA | 0 | NA | 1 | 15 | 1 | 14 | 0 | NA |
| X | 135941499 | 135939972 | -1 | NM_054021    | GPR101      | 0 | NA | 0 | NA | 0 | NA | 0 | NA | 0 | NA |
| X | 136476011 | 136481925 | 1  | NM_003413    | ZIC3        | 0 | NA | 0 | NA | 0 | NA | 0 | NA | 0 | NA |
| X | 137621493 | 137541400 | -1 | NM_004114    | FGF13       | 0 | NA | 0 | NA | 0 | NA | 0 | NA | 0 | NA |
| X | 137649181 | 137541400 | -1 | NM_033642    | FGF13       | 0 | NA | 0 | NA | 0 | NA | 0 | NA | 0 | NA |
| X | 138440560 | 138473283 | 1  | NM_000133    | F9          | 0 | NA | 0 | NA | 0 | NA | 0 | NA | 0 | NA |
| X | 138552637 | 138491595 | -1 | NM_005369    | MCF2        | 0 | NA | 0 | NA | 0 | NA | 0 | NA | 0 | NA |
| X | 138618047 | 138491595 | -1 | NM_001099855 | MCF2        | 0 | NA | 0 | NA | 0 | NA | 0 | NA | 0 | NA |
| X | 138742113 | 138636170 | -1 | NM_001010986 | ATP11C      | 0 | NA | 0 | NA | 0 | NA | 0 | NA | 0 | NA |
| X | 138742113 | 138636170 | -1 | NM_173694    | ATP11C      | 0 | NA | 0 | NA | 0 | NA | 0 | NA | 0 | NA |
| X | 138875345 | 138865549 | -1 | NM_001013403 | LOC347487   | 0 | NA | 0 | NA | 0 | NA | 0 | NA | 0 | NA |
| X | 139414891 | 139412817 | -1 | NM_005634    | SOX3        | 0 | NA | 0 | NA | 0 | NA | 0 | NA | 0 | NA |
| X | 139619597 | 139624653 | 1  | NM_001128492 | RP1-177G6.2 | 0 | NA | 0 | NA | 0 | NA | 0 | NA | 0 | NA |
| X | 139694389 | 139693090 | -1 | NM_004065    | CDR1        | 0 | NA | 0 | NA | 0 | NA | 0 | NA | 0 | NA |
| X | 139912421 | 139913537 | 1  | NM_032461    | SPANXB1     | 0 | NA | 0 | NA | 0 | NA | 0 | NA | 0 | NA |
| X | 139912421 | 139913537 | 1  | NM_145664    | SPANXB1     | 0 | NA | 0 | NA | 0 | NA | 0 | NA | 0 | NA |
| X | 139924426 | 139925542 | 1  | NM_032461    | SPANXB2     | 0 | NA | 0 | NA | 0 | NA | 0 | NA | 0 | NA |
| X | 139924426 | 139925542 | 1  | NM_145664    | SPANXB2     | 0 | NA | 0 | NA | 0 | NA | 0 | NA | 0 | NA |
| X | 140089976 | 140097596 | -1 | NM_012317    | LDOC1       | 0 | NA | 0 | NA | 0 | NA | 0 | NA | 0 | NA |
| X | 140164312 | 140163261 | -1 | NM_022661    | SPANXC      | 0 | NA | 0 | NA | 0 | NA | 0 | NA | 0 | NA |
| X | 140500502 | 140499471 | -1 | NM_013453    | SPANXA1     | 0 | NA | 0 | NA | 0 | NA | 0 | NA | 0 | NA |
| X | 140500526 | 140499461 | -1 | NM_145662    | SPANXA2     | 0 | NA | 0 | NA | 0 | NA | 0 | NA | 0 | NA |

|   |           |           |    |              |           |   |    |   |    |   |    |   |    |   |    |
|---|-----------|-----------|----|--------------|-----------|---|----|---|----|---|----|---|----|---|----|
| X | 140505500 | 140506665 | 1  | NM_145662    | SPANXA2   | 0 | NA | 0 | NA | 0 | NA | 0 | NA | 0 | NA |
| X | 140505524 | 140506555 | 1  | NM_013453    | SPANXA1   | 0 | NA | 0 | NA | 0 | NA | 0 | NA | 0 | NA |
| X | 140614264 | 140613233 | -1 | NM_032417    | SPANXD    | 0 | NA | 0 | NA | 0 | NA | 0 | NA | 0 | NA |
| X | 140614321 | 140613233 | -1 | NM_145665    | SPANXE    | 0 | NA | 0 | NA | 0 | NA | 0 | NA | 0 | NA |
| X | 140753767 | 140813284 | 1  | NM_138702    | MAGEC3    | 0 | NA | 0 | NA | 0 | NA | 0 | NA | 0 | NA |
| X | 140810117 | 140813284 | 1  | NM_177456    | MAGEC3    | 0 | NA | 0 | NA | 0 | NA | 0 | NA | 0 | NA |
| X | 140819345 | 140824849 | 1  | NM_005462    | MAGEC1    | 0 | NA | 0 | NA | 0 | NA | 0 | NA | 0 | NA |
| X | 141120742 | 141117795 | -1 | NM_016249    | MAGEC2    | 0 | NA | 0 | NA | 0 | NA | 0 | NA | 0 | NA |
| X | 141941369 | 141949732 | 1  | NM_001009613 | SPANXN4   | 0 | NA | 0 | NA | 0 | NA | 0 | NA | 0 | NA |
| X | 142432973 | 142424229 | -1 | NM_001009609 | SPANXN3   | 0 | NA | 0 | NA | 0 | NA | 0 | NA | 0 | NA |
| X | 142550685 | 142543607 | -1 | NM_173078    | SLITRK4   | 0 | NA | 0 | NA | 0 | NA | 0 | NA | 0 | NA |
| X | 142632182 | 142622720 | -1 | NM_001009615 | SPANXN2   | 0 | NA | 0 | NA | 0 | NA | 0 | NA | 0 | NA |
| X | 142794838 | 142796023 | 1  | NM_001012989 | UBE2NL    | 0 | NA | 0 | NA | 0 | NA | 0 | NA | 0 | NA |
| X | 144136798 | 144145420 | 1  | NM_001009614 | SPANXN1   | 0 | NA | 0 | NA | 0 | NA | 0 | NA | 0 | NA |
| X | 144707041 | 144715052 | 1  | NM_032539    | SLITRK2   | 0 | NA | 0 | NA | 0 | NA | 0 | NA | 0 | NA |
| X | 144716619 | 144719062 | 1  | NM_004709    | CXorf1    | 0 | NA | 0 | NA | 0 | NA | 0 | NA | 0 | NA |
| X | 146801200 | 146840333 | 1  | NM_002024    | FMR1      | 0 | NA | 0 | NA | 0 | NA | 0 | NA | 0 | NA |
| X | 146870540 | 146915876 | 1  | NM_152578    | FMR1NB    | 0 | NA | 0 | NA | 0 | NA | 0 | NA | 0 | NA |
| X | 147389830 | 147898999 | 1  | NM_002025    | AFF2      | 0 | NA | 0 | NA | 0 | NA | 0 | NA | 0 | NA |
| X | 148394698 | 148368205 | -1 | NM_000202    | IDS       | 0 | NA | 0 | NA | 0 | NA | 0 | NA | 0 | NA |
| X | 148394698 | 148376568 | -1 | NM_006123    | IDS       | 0 | NA | 0 | NA | 0 | NA | 0 | NA | 0 | NA |
| X | 148430462 | 148436760 | 1  | NM_178124    | CXorf40A  | 0 | NA | 0 | NA | 0 | NA | 0 | NA | 0 | NA |
| X | 148476904 | 148471104 | -1 | NM_005365    | MAGEA9    | 0 | NA | 0 | NA | 0 | NA | 0 | NA | 0 | NA |
| X | 148476911 | 148471104 | -1 | NM_001080790 | LOC728269 | 0 | NA | 0 | NA | 0 | NA | 0 | NA | 0 | NA |
| X | 148484725 | 148666329 | 1  | NM_016153    | HSFX1     | 0 | NA | 0 | NA | 0 | NA | 0 | NA | 0 | NA |
| X | 148521375 | 148486014 | -1 | NM_032508    | TMEM185A  | 0 | NA | 0 | NA | 0 | NA | 0 | NA | 0 | NA |
| X | 148580667 | 148575476 | -1 | NM_005366    | MAGEA11   | 0 | NA | 0 | NA | 0 | NA | 0 | NA | 0 | NA |
| X | 148604507 | 148575476 | -1 | NM_001011544 | MAGEA11   | 0 | NA | 0 | NA | 0 | NA | 0 | NA | 0 | NA |
| X | 148663581 | 148481977 | -1 | NM_016153    | HSFX1     | 0 | NA | 0 | NA | 0 | NA | 0 | NA | 0 | NA |
| X | 148671394 | 148677206 | 1  | NM_001080790 | LOC728269 | 0 | NA | 0 | NA | 0 | NA | 0 | NA | 0 | NA |
| X | 148671401 | 148677206 | 1  | NM_005365    | MAGEA9    | 0 | NA | 0 | NA | 0 | NA | 0 | NA | 0 | NA |
| X | 148770653 | 148775266 | 1  | NM_005364    | MAGEA8    | 0 | NA | 0 | NA | 0 | NA | 0 | NA | 0 | NA |
| X | 148857374 | 148851072 | -1 | NM_001013845 | CXorf40B  | 0 | NA | 0 | NA | 0 | NA | 0 | NA | 0 | NA |
| X | 149364377 | 149433104 | 1  | NM_005491    | MAMLD1    | 0 | NA | 0 | NA | 0 | NA | 0 | NA | 0 | NA |
| X | 149487704 | 149592274 | 1  | NM_000252    | MTM1      | 0 | NA | 0 | NA | 0 | NA | 0 | NA | 0 | NA |
| X | 149612526 | 149684233 | 1  | NM_003828    | MTMR1     | 1 | 34 | 0 | NA | 1 | 17 | 0 | NA | 0 | NA |
| X | 149817837 | 149685466 | -1 | NM_031462    | CD99L2    | 0 | NA | 0 | NA | 0 | NA | 1 | 17 | 0 | NA |
| X | 149817837 | 149685466 | -1 | NM_134445    | CD99L2    | 0 | NA | 0 | NA | 0 | NA | 1 | 17 | 0 | NA |
| X | 149817837 | 149685466 | -1 | NM_134446    | CD99L2    | 0 | NA | 0 | NA | 0 | NA | 1 | 17 | 0 | NA |
| X | 149902420 | 149909906 | 1  | NM_005342    | HMGB3     | 0 | NA | 0 | NA | 0 | NA | 0 | NA | 0 | NA |
| X | 150095716 | 150100588 | 1  | NM_004224    | GPR50     | 0 | NA | 0 | NA | 0 | NA | 0 | NA | 0 | NA |
| X | 150316362 | 150328494 | 1  | NM_001017980 | LOC203547 | 0 | NA | 0 | NA | 0 | NA | 1 | 11 | 0 | NA |
| X | 150482662 | 150595867 | 1  | NM_173493    | PASD1     | 0 | NA | 0 | NA | 0 | NA | 0 | NA | 0 | NA |
| X | 150617434 | 150620669 | 1  | NM_024082    | PRRG3     | 0 | NA | 0 | NA | 0 | NA | 0 | NA | 0 | NA |
| X | 150635163 | 150642320 | 1  | NM_033085    | FATE1     | 0 | NA | 0 | NA | 0 | NA | 0 | NA | 0 | NA |
| X | 150653873 | 150664692 | 1  | NM_005140    | CNGA2     | 0 | NA | 0 | NA | 0 | NA | 0 | NA | 0 | NA |
| X | 150832016 | 150844298 | 1  | NM_001011548 | MAGEA4    | 0 | NA | 0 | NA | 0 | NA | 0 | NA | 0 | NA |
| X | 150835364 | 150844298 | 1  | NM_002362    | MAGEA4    | 0 | NA | 0 | NA | 0 | NA | 0 | NA | 0 | NA |
| X | 150836052 | 150844298 | 1  | NM_001011549 | MAGEA4    | 0 | NA | 0 | NA | 0 | NA | 0 | NA | 0 | NA |
| X | 150837415 | 150844298 | 1  | NM_001011550 | MAGEA4    | 0 | NA | 0 | NA | 0 | NA | 0 | NA | 0 | NA |
| X | 150893807 | 150872251 | -1 | NM_004961    | GABRE     | 0 | NA | 0 | NA | 0 | NA | 0 | NA | 0 | NA |
| X | 150893807 | 150872251 | -1 | NM_021984    | GABRE     | 0 | NA | 0 | NA | 0 | NA | 0 | NA | 0 | NA |
| X | 150893807 | 150872251 | -1 | NM_021987    | GABRE     | 0 | NA | 0 | NA | 0 | NA | 0 | NA | 0 | NA |
| X | 150893807 | 150872251 | -1 | NM_021990    | GABRE     | 0 | NA | 0 | NA | 0 | NA | 0 | NA | 0 | NA |
| X | 151037100 | 151033181 | -1 | NM_021049    | MAGEA5    | 0 | NA | 0 | NA | 0 | NA | 0 | NA | 0 | NA |
| X | 151057681 | 151053563 | -1 | NM_001011543 | MAGEA10   | 0 | NA | 0 | NA | 0 | NA | 0 | NA | 0 | NA |
| X | 151057681 | 151053563 | -1 | NM_021048    | MAGEA10   | 0 | NA | 0 | NA | 0 | NA | 0 | NA | 0 | NA |
| X | 151370487 | 151086289 | -1 | NM_000808    | GABRA3    | 0 | NA | 0 | NA | 0 | NA | 0 | NA | 0 | NA |
| X | 151557292 | 151572481 | 1  | NM_018558    | GABRQ     | 0 | NA | 0 | NA | 0 | NA | 0 | NA | 0 | NA |
| X | 151617900 | 151621470 | 1  | NM_005363    | MAGEA6    | 0 | NA | 0 | NA | 0 | NA | 0 | NA | 0 | NA |
| X | 151617900 | 151621470 | 1  | NM_175868    | MAGEA6    | 0 | NA | 0 | NA | 0 | NA | 0 | NA | 0 | NA |
| X | 151628403 | 151627398 | -1 | NM_001080848 | CSAG2     | 0 | NA | 0 | NA | 0 | NA | 0 | NA | 0 | NA |
| X | 151628403 | 151627398 | -1 | NM_004909    | CSAG2     | 0 | NA | 0 | NA | 0 | NA | 0 | NA | 0 | NA |
| X | 151633774 | 151637751 | 1  | NM_005361    | MAGEA2    | 0 | NA | 0 | NA | 0 | NA | 0 | NA | 0 | NA |
| X | 151633774 | 151637751 | 1  | NM_175742    | MAGEA2    | 0 | NA | 0 | NA | 0 | NA | 0 | NA | 0 | NA |

|   |           |           |    |              |         |   |    |    |    |   |    |   |    |   |    |
|---|-----------|-----------|----|--------------|---------|---|----|----|----|---|----|---|----|---|----|
| X | 151633774 | 151637751 | 1  | NM_175743    | MAGEA2  | 0 | NA | 0  | NA | 0 | NA | 0 | NA | 0 | NA |
| X | 151636039 | 151637735 | 1  | NM_153488    | MAGEA2B | 0 | NA | 0  | NA | 0 | NA | 0 | NA | 0 | NA |
| X | 151653828 | 151649948 | -1 | NM_005367    | MAGEA12 | 0 | NA | 0  | NA | 0 | NA | 0 | NA | 0 | NA |
| X | 151653883 | 151660174 | 1  | NM_001102576 | CSAG1   | 0 | NA | 0  | NA | 0 | NA | 0 | NA | 0 | NA |
| X | 151653883 | 151660174 | 1  | NM_153478    | CSAG1   | 0 | NA | 0  | NA | 0 | NA | 0 | NA | 0 | NA |
| X | 151670755 | 151669058 | -1 | NM_153488    | MAGEA2B | 0 | NA | 0  | NA | 0 | NA | 0 | NA | 0 | NA |
| X | 151673020 | 151669043 | -1 | NM_005361    | MAGEA2  | 0 | NA | 0  | NA | 0 | NA | 0 | NA | 0 | NA |
| X | 151673020 | 151669043 | -1 | NM_175742    | MAGEA2  | 0 | NA | 0  | NA | 0 | NA | 0 | NA | 0 | NA |
| X | 151673020 | 151669043 | -1 | NM_175743    | MAGEA2  | 0 | NA | 0  | NA | 0 | NA | 0 | NA | 0 | NA |
| X | 151678389 | 151679394 | 1  | NM_001080848 | CSAG2   | 0 | NA | 0  | NA | 0 | NA | 0 | NA | 0 | NA |
| X | 151678389 | 151679394 | 1  | NM_004909    | CSAG2   | 0 | NA | 0  | NA | 0 | NA | 0 | NA | 0 | NA |
| X | 151688896 | 151685307 | -1 | NM_005362    | MAGEA3  | 0 | NA | 0  | NA | 0 | NA | 0 | NA | 0 | NA |
| X | 151749957 | 151746526 | -1 | NM_004344    | CETN2   | 0 | NA | 0  | NA | 0 | NA | 0 | NA | 0 | NA |
| X | 151750166 | 151788563 | 1  | NM_015922    | NSDHL   | 0 | NA | 0  | NA | 0 | NA | 0 | NA | 0 | NA |
| X | 151833652 | 151892678 | 1  | NM_007150    | ZNF185  | 0 | NA | 0  | NA | 0 | NA | 0 | NA | 0 | NA |
| X | 151911417 | 151908023 | -1 | NM_001103150 | PNMA5   | 0 | NA | 0  | NA | 0 | NA | 0 | NA | 0 | NA |
| X | 151911417 | 151908023 | -1 | NM_001103151 | PNMA5   | 0 | NA | 0  | NA | 0 | NA | 0 | NA | 0 | NA |
| X | 151911417 | 151908023 | -1 | NM_052926    | PNMA5   | 0 | NA | 0  | NA | 0 | NA | 0 | NA | 0 | NA |
| X | 151975421 | 151979483 | 1  | NM_013364    | PNMA3   | 0 | NA | 0  | NA | 0 | NA | 0 | NA | 0 | NA |
| X | 151991457 | 151994058 | 1  | NM_032882    | PNMA6A  | 0 | NA | 0  | NA | 0 | NA | 0 | NA | 0 | NA |
| X | 152139310 | 152134715 | -1 | NM_004988    | MAGEA1  | 0 | NA | 0  | NA | 0 | NA | 0 | NA | 0 | NA |
| X | 152262059 | 152270239 | 1  | NM_001080485 | ZNF275  | 0 | NA | 0  | NA | 0 | NA | 0 | NA | 0 | NA |
| X | 152365139 | 152363371 | -1 | NM_080701    | TREX2   | 0 | NA | 0  | NA | 0 | NA | 0 | NA | 0 | NA |
| X | 152389283 | 152366317 | -1 | NM_017518    | UCHL5IP | 0 | NA | 0  | NA | 0 | NA | 0 | NA | 0 | NA |
| X | 152389283 | 152366317 | -1 | NM_207107    | UCHL5IP | 0 | NA | 0  | NA | 0 | NA | 0 | NA | 0 | NA |
| X | 152413604 | 152428198 | 1  | NM_001711    | BGN     | 0 | NA | 0  | NA | 0 | NA | 0 | NA | 0 | NA |
| X | 152454773 | 152501581 | 1  | NM_001001344 | ATP2B3  | 0 | NA | 0  | NA | 0 | NA | 0 | NA | 0 | NA |
| X | 152454773 | 152501581 | 1  | NM_021949    | ATP2B3  | 0 | NA | 0  | NA | 0 | NA | 0 | NA | 0 | NA |
| X | 152517775 | 152506576 | -1 | NM_152274    | FAM58A  | 0 | NA | 0  | NA | 0 | NA | 0 | NA | 0 | NA |
| X | 152561090 | 152569975 | 1  | NM_001395    | DUSP9   | 0 | NA | 0  | NA | 0 | NA | 0 | NA | 0 | NA |
| X | 152592974 | 152588416 | -1 | NM_001039582 | PNCK    | 0 | NA | 0  | NA | 0 | NA | 0 | NA | 0 | NA |
| X | 152606945 | 152615240 | 1  | NM_005629    | SLC6A8  | 0 | NA | 13 | NA | 0 | NA | 0 | NA | 0 | NA |
| X | 152643081 | 152619145 | -1 | NM_005745    | BCAP31  | 1 | 12 | 0  | NA | 0 | NA | 0 | NA | 0 | NA |
| X | 152643529 | 152663374 | 1  | NM_000033    | ABCD1   | 1 | 12 | 0  | NA | 0 | NA | 0 | NA | 0 | NA |
| X | 152682904 | 152697989 | 1  | NM_005393    | PLXNB3  | 0 | NA | 0  | NA | 0 | NA | 0 | NA | 0 | NA |
| X | 152699703 | 152704381 | 1  | NM_014370    | SRPK3   | 0 | NA | 0  | NA | 0 | NA | 0 | NA | 0 | NA |
| X | 152713161 | 152704414 | -1 | NM_004135    | IDH3G   | 0 | NA | 0  | NA | 0 | NA | 1 | 11 | 0 | NA |
| X | 152713161 | 152704414 | -1 | NM_174869    | IDH3G   | 0 | NA | 0  | NA | 0 | NA | 1 | 11 | 0 | NA |
| X | 152713287 | 152717148 | 1  | NM_006280    | SSR4    | 0 | NA | 0  | NA | 0 | NA | 1 | 11 | 0 | NA |
| X | 152749197 | 152720816 | -1 | NM_032512    | PDZD4   | 0 | NA | 0  | NA | 0 | NA | 0 | NA | 0 | NA |
| X | 152794505 | 152780580 | -1 | NM_000425    | L1CAM   | 0 | NA | 0  | NA | 0 | NA | 0 | NA | 0 | NA |
| X | 152794505 | 152780580 | -1 | NM_024003    | L1CAM   | 0 | NA | 0  | NA | 0 | NA | 0 | NA | 0 | NA |
| X | 152799320 | 152807621 | 1  | NM_001039768 | LCAP    | 0 | NA | 0  | NA | 0 | NA | 0 | NA | 0 | NA |
| X | 152823621 | 152825814 | 1  | NM_000054    | AVPR2   | 0 | NA | 0  | NA | 0 | NA | 0 | NA | 0 | NA |
| X | 152844892 | 152826024 | -1 | NM_001866    | ARHGAP4 | 0 | NA | 0  | NA | 0 | NA | 0 | NA | 0 | NA |
| X | 152853662 | 152848570 | -1 | NM_003491    | ARD1A   | 0 | NA | 0  | NA | 0 | NA | 0 | NA | 0 | NA |
| X | 152863426 | 152853916 | -1 | NM_002910    | REBP    | 0 | NA | 0  | NA | 0 | NA | 0 | NA | 0 | NA |
| X | 152890013 | 152866201 | -1 | NM_005334    | HCFC1   | 0 | NA | 0  | NA | 0 | NA | 0 | NA | 0 | NA |
| X | 152891184 | 152901840 | 1  | NM_003492    | TMEM187 | 0 | NA | 0  | NA | 0 | NA | 0 | NA | 0 | NA |
| X | 152938536 | 152929150 | -1 | NM_001025242 | IRAK1   | 0 | NA | 0  | NA | 0 | NA | 0 | NA | 0 | NA |
| X | 152938536 | 152929150 | -1 | NM_001025243 | IRAK1   | 0 | NA | 0  | NA | 0 | NA | 0 | NA | 0 | NA |
| X | 152938536 | 152929150 | -1 | NM_001569    | IRAK1   | 0 | NA | 0  | NA | 0 | NA | 0 | NA | 0 | NA |
| X | 153016382 | 152940457 | -1 | NM_004992    | MECP2   | 0 | NA | 0  | NA | 0 | NA | 0 | NA | 0 | NA |
| X | 153016382 | 152948879 | -1 | NM_001110792 | MECP2   | 0 | NA | 0  | NA | 0 | NA | 0 | NA | 0 | NA |
| X | 153062918 | 153077701 | 1  | NM_020061    | OPN1LW  | 0 | NA | 0  | NA | 0 | NA | 0 | NA | 0 | NA |
| X | 153101342 | 153114834 | 1  | NM_001048181 | OPN1MW2 | 0 | NA | 0  | NA | 0 | NA | 0 | NA | 0 | NA |
| X | 153101360 | 153114725 | 1  | NM_000513    | OPN1MW  | 0 | NA | 0  | NA | 0 | NA | 0 | NA | 0 | NA |
| X | 153138460 | 153151952 | 1  | NM_001048181 | OPN1MW2 | 0 | NA | 0  | NA | 0 | NA | 0 | NA | 0 | NA |
| X | 153138478 | 153151843 | 1  | NM_000513    | OPN1MW  | 0 | NA | 0  | NA | 0 | NA | 0 | NA | 0 | NA |
| X | 153176632 | 153152125 | -1 | NM_001586    | TEX28   | 0 | NA | 0  | NA | 0 | NA | 0 | NA | 0 | NA |
| X | 153177344 | 153211894 | 1  | NM_012253    | TKTL1   | 0 | NA | 0  | NA | 0 | NA | 0 | NA | 0 | NA |
| X | 153256200 | 153230093 | -1 | NM_001110556 | FLNA    | 0 | NA | 0  | NA | 1 | 12 | 0 | NA | 0 | NA |
| X | 153256200 | 153230093 | -1 | NM_001456    | FLNA    | 0 | NA | 0  | NA | 1 | 12 | 0 | NA | 0 | NA |
| X | 153260980 | 153263075 | 1  | NM_000117    | EMD     | 0 | NA | 0  | NA | 1 | 12 | 0 | NA | 0 | NA |
| X | 153279911 | 153283874 | 1  | NM_006013    | RPL10   | 0 | NA | 0  | NA | 0 | NA | 1 | 13 | 0 | NA |

|          |           |           |    |              |          |   |    |   |    |   |    |   |    |   |    |
|----------|-----------|-----------|----|--------------|----------|---|----|---|----|---|----|---|----|---|----|
| X        | 153290769 | 153282772 | -1 | NM_006730    | DNASE1L1 | 0 | NA | 0 | NA | 0 | NA | 1 | 13 | 0 | NA |
| X        | 153293070 | 153303257 | 1  | NM_000116    | TAZ      | 0 | NA | 0 | NA | 0 | NA | 0 | NA | 0 | NA |
| X        | 153293070 | 153303257 | 1  | NM_181311    | TAZ      | 0 | NA | 0 | NA | 0 | NA | 0 | NA | 0 | NA |
| X        | 153293070 | 153303257 | 1  | NM_181312    | TAZ      | 0 | NA | 0 | NA | 0 | NA | 0 | NA | 0 | NA |
| X        | 153293070 | 153303257 | 1  | NM_181313    | TAZ      | 0 | NA | 0 | NA | 0 | NA | 0 | NA | 0 | NA |
| X        | 153293621 | 153282772 | -1 | NM_001009932 | DNASE1L1 | 0 | NA | 0 | NA | 0 | NA | 0 | NA | 0 | NA |
| X        | 153293621 | 153282772 | -1 | NM_001009933 | DNASE1L1 | 0 | NA | 0 | NA | 0 | NA | 0 | NA | 0 | NA |
| X        | 153293621 | 153282772 | -1 | NM_001009934 | DNASE1L1 | 0 | NA | 0 | NA | 0 | NA | 0 | NA | 0 | NA |
| X        | 153310171 | 153318056 | 1  | NM_001183    | ATP6AP1  | 0 | NA | 0 | NA | 0 | NA | 0 | NA | 0 | NA |
| X        | 153318452 | 153325009 | 1  | NM_001493    | GDI1     | 0 | NA | 0 | NA | 0 | NA | 0 | NA | 0 | NA |
| X        | 153325701 | 153332190 | 1  | NM_004699    | FAM50A   | 0 | NA | 0 | NA | 0 | NA | 0 | NA | 0 | NA |
| X        | 153339816 | 153355179 | 1  | NM_017514    | PLXNA3   | 0 | NA | 0 | NA | 0 | NA | 0 | NA | 0 | NA |
| X        | 153360790 | 153358434 | -1 | NM_006014    | LAGE3    | 0 | NA | 0 | NA | 0 | NA | 0 | NA | 0 | NA |
| X        | 153368126 | 153365249 | -1 | NM_014235    | UBL4A    | 0 | NA | 0 | NA | 0 | NA | 1 | 12 | 0 | NA |
| X        | 153372189 | 153368841 | -1 | NM_019848    | SLC10A3  | 0 | NA | 0 | NA | 0 | NA | 1 | 12 | 0 | NA |
| X        | 153397567 | 153387699 | -1 | NM_021806    | FAM3A    | 0 | NA | 0 | NA | 0 | NA | 0 | NA | 0 | NA |
| X        | 153423652 | 153446455 | 1  | NM_001099856 | IKBK     | 1 | 15 | 0 | NA | 0 | NA | 0 | NA | 0 | NA |
| X        | 153428427 | 153412799 | -1 | NM_000402    | G6PD     | 1 | 15 | 0 | NA | 0 | NA | 0 | NA | 0 | NA |
| X        | 153428755 | 153446455 | 1  | NM_001099857 | IKBK     | 1 | 15 | 0 | NA | 0 | NA | 0 | NA | 0 | NA |
| X        | 153428981 | 153412799 | -1 | NM_001042351 | G6PD     | 1 | 15 | 0 | NA | 0 | NA | 0 | NA | 0 | NA |
| X        | 153429255 | 153446455 | 1  | NM_003639    | IKBK     | 1 | 15 | 0 | NA | 0 | NA | 0 | NA | 0 | NA |
| X        | 153466611 | 153468269 | 1  | NM_139250    | CTAG1A   | 0 | NA | 0 | NA | 0 | NA | 0 | NA | 0 | NA |
| X        | 153466613 | 153468269 | 1  | NM_001327    | CTAG1B   | 0 | NA | 0 | NA | 0 | NA | 0 | NA | 0 | NA |
| X        | 153500714 | 153499058 | -1 | NM_001327    | CTAG1B   | 0 | NA | 0 | NA | 0 | NA | 0 | NA | 0 | NA |
| X        | 153500716 | 153499058 | -1 | NM_139250    | CTAG1A   | 0 | NA | 0 | NA | 0 | NA | 0 | NA | 0 | NA |
| X        | 153535035 | 153533444 | -1 | NM_172377    | CTAG2    | 0 | NA | 0 | NA | 0 | NA | 0 | NA | 0 | NA |
| X        | 153535036 | 153533444 | -1 | NM_020994    | CTAG2    | 0 | NA | 0 | NA | 0 | NA | 0 | NA | 0 | NA |
| X        | 153632542 | 153556720 | -1 | NM_001081573 | GAB3     | 0 | NA | 0 | NA | 1 | 13 | 0 | NA | 0 | NA |
| X        | 153632542 | 153556720 | -1 | NM_080612    | GAB3     | 0 | NA | 0 | NA | 1 | 13 | 0 | NA | 0 | NA |
| X        | 153644343 | 153659154 | 1  | NM_001363    | DKC1     | 0 | NA | 0 | NA | 1 | 12 | 0 | NA | 0 | NA |
| X        | 153686957 | 153680161 | -1 | NM_002436    | MPP1     | 0 | NA | 0 | NA | 0 | NA | 0 | NA | 0 | NA |
| X        | 153766510 | 153767027 | 1  | NM_001017990 | H2AFB1   | 0 | NA | 0 | NA | 0 | NA | 0 | NA | 0 | NA |
| X        | 153766510 | 153767027 | 1  | NM_080720    | H2AFB3   | 0 | NA | 0 | NA | 0 | NA | 0 | NA | 0 | NA |
| X        | 153767771 | 153717257 | -1 | NM_019863    | F8       | 0 | NA | 0 | NA | 0 | NA | 0 | NA | 0 | NA |
| X        | 153767828 | 153769530 | 1  | NM_012151    | F8A1     | 0 | NA | 0 | NA | 0 | NA | 0 | NA | 0 | NA |
| X        | 153767843 | 153768959 | 1  | NM_001007523 | F8A2     | 0 | NA | 0 | NA | 0 | NA | 0 | NA | 0 | NA |
| X        | 153767843 | 153768959 | 1  | NM_001007524 | F8A3     | 0 | NA | 0 | NA | 0 | NA | 0 | NA | 0 | NA |
| X        | 153904192 | 153717262 | -1 | NM_000132    | F8       | 0 | NA | 0 | NA | 0 | NA | 0 | NA | 0 | NA |
| X        | 153908257 | 153938385 | 1  | NM_023934    | FUND2    | 0 | NA | 0 | NA | 0 | NA | 0 | NA | 0 | NA |
| X        | 153952829 | 153943093 | -1 | NM_001018025 | MTCP1    | 0 | NA | 0 | NA | 0 | NA | 0 | NA | 0 | NA |
| X        | 153952829 | 153943093 | -1 | NM_014221    | MTCP1    | 0 | NA | 0 | NA | 0 | NA | 0 | NA | 0 | NA |
| X        | 153952830 | 153943093 | -1 | NM_001018024 | MTCP1    | 0 | NA | 0 | NA | 0 | NA | 0 | NA | 0 | NA |
| X        | 153952903 | 154004543 | 1  | NM_001018055 | BRCC3    | 0 | NA | 0 | NA | 0 | NA | 0 | NA | 0 | NA |
| X        | 153952903 | 154004543 | 1  | NM_024332    | BRCC3    | 0 | NA | 0 | NA | 0 | NA | 0 | NA | 0 | NA |
| X        | 154097743 | 154121292 | 1  | NM_003372    | VBP1     | 0 | NA | 0 | NA | 0 | NA | 0 | NA | 0 | NA |
| X        | 154147046 | 154140719 | -1 | NM_171998    | RAB39B   | 0 | NA | 0 | NA | 0 | NA | 0 | NA | 0 | NA |
| X        | 154217180 | 154158693 | -1 | NM_001289    | CLIC2    | 0 | NA | 0 | NA | 0 | NA | 0 | NA | 0 | NA |
| X        | 154263621 | 154264138 | 1  | NM_001017990 | H2AFB1   | 0 | NA | 0 | NA | 0 | NA | 0 | NA | 0 | NA |
| X        | 154263621 | 154264138 | 1  | NM_080720    | H2AFB3   | 0 | NA | 0 | NA | 0 | NA | 0 | NA | 0 | NA |
| X        | 154263629 | 154263977 | 1  | NM_001017991 | H2AFB2   | 0 | NA | 0 | NA | 0 | NA | 0 | NA | 0 | NA |
| X        | 154264942 | 154266644 | 1  | NM_012151    | F8A1     | 0 | NA | 0 | NA | 0 | NA | 0 | NA | 0 | NA |
| X        | 154264957 | 154266073 | 1  | NM_001007523 | F8A2     | 0 | NA | 0 | NA | 0 | NA | 0 | NA | 0 | NA |
| X        | 154264957 | 154266073 | 1  | NM_001007524 | F8A3     | 0 | NA | 0 | NA | 0 | NA | 0 | NA | 0 | NA |
| X        | 154341455 | 154340339 | -1 | NM_001007523 | F8A2     | 0 | NA | 0 | NA | 0 | NA | 0 | NA | 0 | NA |
| X        | 154341455 | 154340339 | -1 | NM_001007524 | F8A3     | 0 | NA | 0 | NA | 0 | NA | 0 | NA | 0 | NA |
| X        | 154341470 | 154339768 | -1 | NM_012151    | F8A1     | 0 | NA | 0 | NA | 0 | NA | 0 | NA | 0 | NA |
| X        | 154342782 | 154342434 | -1 | NM_001017991 | H2AFB2   | 0 | NA | 0 | NA | 0 | NA | 0 | NA | 0 | NA |
| X        | 154342790 | 154342273 | -1 | NM_001017990 | H2AFB1   | 0 | NA | 0 | NA | 0 | NA | 0 | NA | 0 | NA |
| X        | 154342790 | 154342273 | -1 | NM_080720    | H2AFB3   | 0 | NA | 0 | NA | 0 | NA | 0 | NA | 0 | NA |
| X        | 154495791 | 154372966 | -1 | NM_018196    | TMLHE    | 0 | NA | 0 | NA | 0 | NA | 0 | NA | 0 | NA |
| X        | 154650644 | 154665311 | 1  | NM_005840    | SPRY3    | 0 | NA | 0 | NA | 0 | NA | 0 | NA | 0 | NA |
| X        | 154764212 | 154826614 | 1  | NM_005638    | VAMP7    | 0 | NA | 0 | NA | 0 | NA | 1 | 11 | 0 | NA |
| X        | 154880439 | 154893676 | 1  | NM_002186    | IL9R     | 0 | NA | 0 | NA | 0 | NA | 0 | NA | 0 | NA |
| X        | 154880439 | 154893676 | 1  | NM_176786    | IL9R     | 0 | NA | 0 | NA | 0 | NA | 0 | NA | 0 | NA |
| 4_random | 283964    | 279193    | -1 | NM_018942    | HMX1     | 0 | NA | 0 | NA | 0 | NA | 0 | NA | 0 | NA |

|           |         |         |    |              |           |   |    |   |    |   |    |   |    |   |    |
|-----------|---------|---------|----|--------------|-----------|---|----|---|----|---|----|---|----|---|----|
| 4_random  | 555087  | 493625  | -1 | NM_001033515 | LOC389833 | 0 | NA | 0 | NA | 0 | NA | 0 | NA | 0 | NA |
| 4_random  | 736550  | 732467  | -1 | NM_001013655 | LOC389834 | 0 | NA | 0 | NA | 0 | NA | 0 | NA | 0 | NA |
| X_random  | 1326617 | 1324939 | -1 | NM_001029891 | PGAM4     | 0 | NA | 0 | NA | 0 | NA | 0 | NA | 0 | NA |
| X_random  | 1383006 | 1393033 | 1  | NM_015975    | TAF9B     | 0 | NA | 0 | NA | 0 | NA | 0 | NA | 0 | NA |
| X_random  | 1672109 | 1687558 | 1  | NM_022148    | CRLF2     | 0 | NA | 0 | NA | 0 | NA | 0 | NA | 0 | NA |
| X_random  | 1672112 | 1687565 | 1  | NM_001012288 | CRLF2     | 0 | NA | 0 | NA | 0 | NA | 0 | NA | 0 | NA |
| 19_random | 164599  | 179138  | 1  | NM_014219    | KIR2DL2   | 0 | NA | 0 | NA | 0 | NA | 0 | NA | 0 | NA |
| 19_random | 181167  | 194571  | 1  | NM_001015070 | KIR3DP1   | 0 | NA | 0 | NA | 0 | NA | 0 | NA | 0 | NA |
| 19_random | 199897  | 210812  | 1  | NM_001080770 | KIR2DL4   | 0 | NA | 0 | NA | 0 | NA | 0 | NA | 0 | NA |
| 19_random | 199897  | 210812  | 1  | NM_001080772 | KIR2DL4   | 0 | NA | 0 | NA | 0 | NA | 0 | NA | 0 | NA |
| 19_random | 199897  | 210812  | 1  | NM_002255    | KIR2DL4   | 0 | NA | 0 | NA | 0 | NA | 0 | NA | 0 | NA |
| 19_random | 212785  | 227347  | 1  | NM_001083539 | KIR3DS1   | 0 | NA | 0 | NA | 0 | NA | 0 | NA | 0 | NA |
| 19_random | 229379  | 238844  | 1  | NM_020535    | KIR2DL5A  | 0 | NA | 0 | NA | 0 | NA | 0 | NA | 0 | NA |
| 19_random | 229434  | 238935  | 1  | NM_001018081 | KIR2DL5B  | 0 | NA | 0 | NA | 0 | NA | 0 | NA | 0 | NA |
| 19_random | 240800  | 255821  | 1  | NM_014513    | KIR2DS5   | 0 | NA | 0 | NA | 0 | NA | 0 | NA | 0 | NA |
| 19_random | 240823  | 255356  | 1  | NM_012313    | KIR2DS3   | 0 | NA | 0 | NA | 0 | NA | 0 | NA | 0 | NA |
| 19_random | 257787  | 271802  | 1  | NM_014512    | KIR2DS1   | 0 | NA | 0 | NA | 0 | NA | 0 | NA | 0 | NA |
| 19_random | 274137  | 288434  | 1  | NM_012312    | KIR2DS2   | 0 | NA | 0 | NA | 0 | NA | 0 | NA | 0 | NA |
| 11        | 183079  | 184573  | 1  | NM_145651    | SCGB1C1   | 0 | NA | 0 | NA | 0 | NA | 1 | 29 | 1 | 12 |
| 11        | 186760  | 190258  | 1  | NM_053280    | ODF3      | 0 | NA | 0 | NA | 0 | NA | 1 | 29 | 1 | 12 |
| 11        | 197422  | 192923  | -1 | NM_001098787 | BET1L     | 1 | 12 | 0 | NA | 0 | NA | 0 | NA | 0 | NA |
| 11        | 197422  | 192923  | -1 | NM_016526    | BET1L     | 1 | 12 | 0 | NA | 0 | NA | 0 | NA | 0 | NA |
| 11        | 198529  | 205110  | 1  | NM_021932    | RIC8A     | 1 | 12 | 0 | NA | 0 | NA | 0 | NA | 0 | NA |
| 11        | 226362  | 205029  | -1 | NM_001017524 | SIRT3     | 0 | NA | 0 | NA | 0 | NA | 0 | NA | 0 | NA |
| 11        | 226362  | 205029  | -1 | NM_012239    | SIRT3     | 0 | NA | 0 | NA | 0 | NA | 0 | NA | 0 | NA |
| 11        | 226807  | 242984  | 1  | NM_002817    | PSMD13    | 0 | NA | 0 | NA | 0 | NA | 0 | NA | 0 | NA |
| 11        | 226807  | 242984  | 1  | NM_175932    | PSMD13    | 0 | NA | 0 | NA | 0 | NA | 0 | NA | 0 | NA |
| 11        | 268569  | 275304  | 1  | NM_138329    | NLRP6     | 0 | NA | 0 | NA | 0 | NA | 0 | NA | 0 | NA |
| 11        | 279137  | 285688  | 1  | NM_025092    | ATHL1     | 0 | NA | 0 | NA | 0 | NA | 0 | NA | 0 | NA |
| 11        | 289526  | 288202  | -1 | NM_001025295 | IFITM5    | 0 | NA | 0 | NA | 0 | NA | 0 | NA | 0 | NA |
| 11        | 298106  | 299410  | 1  | NM_006435    | IFITM2    | 0 | NA | 0 | NA | 0 | NA | 0 | NA | 0 | NA |
| 11        | 303990  | 305272  | 1  | NM_003641    | IFITM1    | 0 | NA | 0 | NA | 0 | NA | 0 | NA | 0 | NA |
| 11        | 310914  | 309672  | -1 | NM_021034    | IFITM3    | 0 | NA | 0 | NA | 0 | NA | 0 | NA | 0 | NA |
| 11        | 359803  | 371792  | 1  | NM_178537    | B4GALNT4  | 1 | 14 | 0 | NA | 0 | NA | 1 | 11 | 0 | NA |
| 11        | 384216  | 394908  | 1  | NM_007183    | PKP3      | 0 | NA | 0 | NA | 0 | NA | 0 | NA | 0 | NA |
| 11        | 407397  | 395715  | -1 | NM_021805    | SIGIRR    | 1 | 13 | 0 | NA | 0 | NA | 0 | NA | 0 | NA |
| 11        | 432011  | 407929  | -1 | NM_001012302 | TMEM16J   | 1 | 11 | 0 | NA | 0 | NA | 0 | NA | 0 | NA |
| 11        | 440279  | 481387  | 1  | NM_030783    | PTDSS2    | 1 | 11 | 0 | NA | 0 | NA | 0 | NA | 0 | NA |
| 11        | 496821  | 484511  | -1 | NM_002939    | RNH1      | 0 | NA | 1 | 13 | 0 | NA | 0 | NA | 0 | NA |
| 11        | 496821  | 484511  | -1 | NM_203383    | RNH1      | 0 | NA | 1 | 13 | 0 | NA | 0 | NA | 0 | NA |
| 11        | 496821  | 484511  | -1 | NM_203384    | RNH1      | 0 | NA | 1 | 13 | 0 | NA | 0 | NA | 0 | NA |
| 11        | 496821  | 484511  | -1 | NM_203385    | RNH1      | 0 | NA | 1 | 13 | 0 | NA | 0 | NA | 0 | NA |
| 11        | 497273  | 484511  | -1 | NM_203386    | RNH1      | 0 | NA | 0 | NA | 0 | NA | 0 | NA | 0 | NA |
| 11        | 497273  | 484511  | -1 | NM_203387    | RNH1      | 0 | NA | 0 | NA | 0 | NA | 0 | NA | 0 | NA |
| 11        | 497273  | 484511  | -1 | NM_203388    | RNH1      | 0 | NA | 0 | NA | 0 | NA | 0 | NA | 0 | NA |
| 11        | 497273  | 484511  | -1 | NM_203389    | RNH1      | 0 | NA | 0 | NA | 0 | NA | 0 | NA | 0 | NA |
| 11        | 525550  | 522241  | -1 | NM_005343    | HRAS      | 0 | NA | 0 | NA | 0 | NA | 0 | NA | 0 | NA |
| 11        | 525550  | 522241  | -1 | NM_176795    | HRAS      | 0 | NA | 0 | NA | 0 | NA | 0 | NA | 0 | NA |
| 11        | 527526  | 544914  | 1  | NM_198075    | LRRC56    | 0 | NA | 0 | NA | 0 | NA | 0 | NA | 0 | NA |
| 11        | 550779  | 544856  | -1 | NM_173573    | C11orf35  | 0 | NA | 0 | NA | 0 | NA | 0 | NA | 0 | NA |
| 11        | 551449  | 554018  | 1  | NM_003475    | RASSF7    | 0 | NA | 0 | NA | 0 | NA | 0 | NA | 0 | NA |
| 11        | 566485  | 602220  | 1  | NM_020901    | KIAA1542  | 0 | NA | 0 | NA | 0 | NA | 0 | NA | 0 | NA |
| 11        | 605728  | 602554  | -1 | NM_004031    | IRF7      | 0 | NA | 0 | NA | 0 | NA | 1 | 11 | 0 | NA |
| 11        | 605999  | 602554  | -1 | NM_001572    | IRF7      | 0 | NA | 0 | NA | 0 | NA | 1 | 11 | 0 | NA |
| 11        | 605999  | 602554  | -1 | NM_004029    | IRF7      | 0 | NA | 0 | NA | 0 | NA | 1 | 11 | 0 | NA |
| 11        | 615007  | 606574  | -1 | NM_021924    | MUPCDH    | 0 | NA | 0 | NA | 0 | NA | 1 | 11 | 0 | NA |
| 11        | 615007  | 606574  | -1 | NM_031264    | MUPCDH    | 0 | NA | 0 | NA | 0 | NA | 1 | 11 | 0 | NA |
| 11        | 617173  | 616312  | -1 | NM_021920    | SCT       | 0 | NA | 0 | NA | 0 | NA | 0 | NA | 0 | NA |
| 11        | 627304  | 630703  | 1  | NM_000797    | DRD4      | 0 | NA | 1 | 12 | 0 | NA | 0 | NA | 0 | NA |
| 11        | 685615  | 694129  | 1  | NM_001042463 | TMEM80    | 0 | NA | 0 | NA | 0 | NA | 1 | 11 | 0 | NA |
| 11        | 685615  | 694129  | 1  | NM_174940    | TMEM80    | 0 | NA | 0 | NA | 0 | NA | 1 | 11 | 0 | NA |
| 11        | 685740  | 634224  | -1 | NM_021008    | DEAF1     | 0 | NA | 0 | NA | 0 | NA | 1 | 11 | 0 | NA |
| 11        | 696122  | 717727  | 1  | NM_022772    | EPS8L2    | 0 | NA | 0 | NA | 0 | NA | 1 | 12 | 0 | NA |
| 11        | 737431  | 755024  | 1  | NM_006755    | TALDO1    | 0 | NA | 0 | NA | 0 | NA | 0 | NA | 0 | NA |
| 11        | 767487  | 757222  | -1 | NM_182612    | PDDC1     | 0 | NA | 0 | NA | 0 | NA | 0 | NA | 0 | NA |



|    |         |         |    |              |          |   |    |   |    |   |    |   |    |   |    |
|----|---------|---------|----|--------------|----------|---|----|---|----|---|----|---|----|---|----|
| 11 | 780126  | 777109  | -1 | NM_016564    | CEND1    | 0 | NA | 0 | NA | 0 | NA | 0 | NA | 0 | NA |
| 11 | 786221  | 780474  | -1 | NM_024698    | SLC25A22 | 0 | NA | 0 | NA | 0 | NA | 0 | NA | 0 | NA |
| 11 | 794464  | 789178  | -1 | NM_145887    | LRDD     | 0 | NA | 0 | NA | 0 | NA | 1 | 12 | 0 | NA |
| 11 | 795245  | 789178  | -1 | NM_018494    | LRDD     | 0 | NA | 0 | NA | 0 | NA | 1 | 12 | 0 | NA |
| 11 | 795245  | 789178  | -1 | NM_145886    | LRDD     | 0 | NA | 0 | NA | 0 | NA | 1 | 12 | 0 | NA |
| 11 | 799935  | 802876  | 1  | NM_001004    | RPLP2    | 0 | NA | 0 | NA | 0 | NA | 1 | 12 | 0 | NA |
| 11 | 808901  | 815217  | 1  | NM_020376    | PNPLA2   | 0 | NA | 0 | NA | 0 | NA | 1 | 12 | 0 | NA |
| 11 | 817584  | 821991  | 1  | NM_173584    | EFCAB4A  | 0 | NA | 0 | NA | 0 | NA | 0 | NA | 0 | NA |
| 11 | 822951  | 828835  | 1  | NM_001039490 | CD151    | 0 | NA | 0 | NA | 0 | NA | 1 | 14 | 0 | NA |
| 11 | 822951  | 828835  | 1  | NM_004357    | CD151    | 0 | NA | 0 | NA | 0 | NA | 1 | 14 | 0 | NA |
| 11 | 822951  | 828835  | 1  | NM_139029    | CD151    | 0 | NA | 0 | NA | 0 | NA | 1 | 14 | 0 | NA |
| 11 | 822951  | 828835  | 1  | NM_139030    | CD151    | 0 | NA | 0 | NA | 0 | NA | 1 | 14 | 0 | NA |
| 11 | 832529  | 829720  | -1 | NM_021128    | POLR2L   | 1 | 14 | 0 | NA | 0 | NA | 1 | 14 | 0 | NA |
| 11 | 832823  | 857116  | 1  | NM_001025238 | TSPAN4   | 1 | 14 | 0 | NA | 0 | NA | 1 | 14 | 0 | NA |
| 11 | 832823  | 857116  | 1  | NM_001025239 | TSPAN4   | 1 | 14 | 0 | NA | 0 | NA | 1 | 14 | 0 | NA |
| 11 | 832823  | 857116  | 1  | NM_003271    | TSPAN4   | 1 | 14 | 0 | NA | 0 | NA | 1 | 14 | 0 | NA |
| 11 | 832940  | 857116  | 1  | NM_001025235 | TSPAN4   | 1 | 14 | 0 | NA | 0 | NA | 1 | 14 | 0 | NA |
| 11 | 832940  | 857116  | 1  | NM_001025236 | TSPAN4   | 1 | 14 | 0 | NA | 0 | NA | 1 | 14 | 0 | NA |
| 11 | 834080  | 857116  | 1  | NM_001025234 | TSPAN4   | 1 | 14 | 0 | NA | 0 | NA | 1 | 14 | 0 | NA |
| 11 | 834445  | 857116  | 1  | NM_001025237 | TSPAN4   | 1 | 14 | 0 | NA | 0 | NA | 1 | 14 | 0 | NA |
| 11 | 900823  | 858395  | -1 | NM_023947    | CHID1    | 0 | NA | 0 | NA | 0 | NA | 0 | NA | 0 | NA |
| 11 | 915840  | 1002240 | 1  | NM_012305    | AP2A2    | 0 | NA | 0 | NA | 0 | NA | 0 | NA | 0 | NA |
| 11 | 1026706 | 1002823 | -1 | NM_005961    | MUC6     | 0 | NA | 0 | NA | 0 | NA | 0 | NA | 0 | NA |
| 11 | 1064874 | 1094417 | 1  | NM_002457    | MUC2     | 0 | NA | 0 | NA | 0 | NA | 0 | NA | 0 | NA |
| 11 | 1132473 | 1245302 | 1  | NM_017511    | MUC5AC   | 0 | NA | 1 | 20 | 0 | NA | 0 | NA | 0 | NA |
| 11 | 1200871 | 1239982 | 1  | NM_002458    | MUC5B    | 0 | NA | 0 | NA | 0 | NA | 0 | NA | 0 | NA |
| 11 | 1287415 | 1252176 | -1 | NM_019009    | TOLLIP   | 0 | NA | 0 | NA | 0 | NA | 1 | 12 | 0 | NA |
| 11 | 1367704 | 1439904 | 1  | NM_003957    | BRSK2    | 0 | NA | 0 | NA | 0 | NA | 0 | NA | 0 | NA |
| 11 | 1549726 | 1531856 | -1 | NM_004420    | DUSP8    | 0 | NA | 1 | 12 | 0 | NA | 0 | NA | 0 | NA |
| 11 | 1563089 | 1562147 | -1 | NM_001005922 | KRTAP5-1 | 0 | NA | 1 | 12 | 0 | NA | 0 | NA | 0 | NA |
| 11 | 1576100 | 1574982 | -1 | NM_001004325 | KRTAP5-2 | 0 | NA | 0 | NA | 0 | NA | 0 | NA | 0 | NA |
| 11 | 1586269 | 1585370 | -1 | NM_001012708 | KRTAP5-3 | 0 | NA | 0 | NA | 0 | NA | 0 | NA | 0 | NA |
| 11 | 1599944 | 1598763 | -1 | NM_001012709 | KRTAP5-4 | 0 | NA | 0 | NA | 0 | NA | 0 | NA | 0 | NA |
| 11 | 1607608 | 1608735 | 1  | NM_001001480 | KRTAP5-5 | 0 | NA | 0 | NA | 0 | NA | 0 | NA | 0 | NA |
| 11 | 1675000 | 1675561 | 1  | NM_001012416 | KRTAP5-6 | 0 | NA | 1 | 12 | 0 | NA | 1 | 13 | 0 | NA |
| 11 | 1741798 | 1730560 | -1 | NM_001909    | CTSD     | 0 | NA | 0 | NA | 0 | NA | 1 | 15 | 0 | NA |
| 11 | 1742077 | 1447268 | -1 | NM_053005    | HCCA2    | 0 | NA | 0 | NA | 0 | NA | 1 | 15 | 0 | NA |
| 11 | 1812249 | 1815326 | 1  | NM_138567    | SYT8     | 0 | NA | 0 | NA | 0 | NA | 0 | NA | 0 | NA |
| 11 | 1817478 | 1819484 | 1  | NM_003282    | TNNI2    | 0 | NA | 0 | NA | 0 | NA | 0 | NA | 0 | NA |
| 11 | 1830775 | 1870069 | 1  | NM_002339    | LSP1     | 0 | NA | 0 | NA | 0 | NA | 0 | NA | 0 | NA |
| 11 | 1846478 | 1870069 | 1  | NM_001013253 | LSP1     | 0 | NA | 0 | NA | 0 | NA | 0 | NA | 0 | NA |
| 11 | 1848674 | 1870069 | 1  | NM_001013254 | LSP1     | 0 | NA | 0 | NA | 0 | NA | 0 | NA | 0 | NA |
| 11 | 1848729 | 1870069 | 1  | NM_001013255 | LSP1     | 0 | NA | 0 | NA | 0 | NA | 0 | NA | 0 | NA |
| 11 | 1897374 | 1916512 | 1  | NM_001042780 | TNNT3    | 0 | NA | 0 | NA | 0 | NA | 0 | NA | 0 | NA |
| 11 | 1897374 | 1916512 | 1  | NM_001042781 | TNNT3    | 0 | NA | 0 | NA | 0 | NA | 0 | NA | 0 | NA |
| 11 | 1897374 | 1916512 | 1  | NM_001042782 | TNNT3    | 0 | NA | 0 | NA | 0 | NA | 0 | NA | 0 | NA |
| 11 | 1897374 | 1916512 | 1  | NM_006757    | TNNT3    | 0 | NA | 0 | NA | 0 | NA | 0 | NA | 0 | NA |
| 11 | 1925113 | 1934408 | 1  | NM_021134    | MRPL23   | 1 | 15 | 0 | NA | 0 | NA | 1 | 13 | 0 | NA |
| 11 | 2116780 | 2106922 | -1 | NM_000612    | IGF2     | 0 | NA | 1 | 27 | 0 | NA | 0 | NA | 0 | NA |
| 11 | 2118312 | 2126470 | 1  | NM_016412    | IGF2AS   | 0 | NA | 1 | 27 | 0 | NA | 0 | NA | 0 | NA |
| 11 | 2127409 | 2106922 | -1 | NM_001007139 | IGF2     | 0 | NA | 0 | NA | 0 | NA | 0 | NA | 0 | NA |
| 11 | 2139015 | 2124431 | -1 | NM_001042376 | INS-IGF2 | 0 | NA | 0 | NA | 0 | NA | 0 | NA | 0 | NA |
| 11 | 2139015 | 2137584 | -1 | NM_000207    | INS      | 0 | NA | 0 | NA | 0 | NA | 0 | NA | 0 | NA |
| 11 | 2149611 | 2141734 | -1 | NM_000360    | TH       | 0 | NA | 0 | NA | 0 | NA | 0 | NA | 0 | NA |
| 11 | 2149611 | 2141734 | -1 | NM_199292    | TH       | 0 | NA | 0 | NA | 0 | NA | 0 | NA | 0 | NA |
| 11 | 2149611 | 2141734 | -1 | NM_199293    | TH       | 0 | NA | 0 | NA | 0 | NA | 0 | NA | 0 | NA |
| 11 | 2248758 | 2246303 | -1 | NM_005170    | ASCL2    | 0 | NA | 1 | 12 | 0 | NA | 0 | NA | 0 | NA |
| 11 | 2279818 | 2296006 | 1  | NM_139022    | TSPAN32  | 0 | NA | 0 | NA | 0 | NA | 0 | NA | 0 | NA |
| 11 | 2355122 | 2375225 | 1  | NM_004356    | CD81     | 0 | NA | 0 | NA | 0 | NA | 0 | NA | 0 | NA |
| 11 | 2380098 | 2381682 | 1  | NM_005706    | TSSC4    | 1 | 22 | 0 | NA | 0 | NA | 0 | NA | 0 | NA |
| 11 | 2400851 | 2382335 | -1 | NM_014555    | TRPM5    | 0 | NA | 1 | 14 | 0 | NA | 0 | NA | 0 | NA |
| 11 | 2422796 | 2826916 | 1  | NM_000218    | KCNQ1    | 0 | NA | 1 | 13 | 0 | NA | 0 | NA | 0 | NA |
| 11 | 2439259 | 2826916 | 1  | NM_181798    | KCNQ1    | 0 | NA | 1 | 13 | 0 | NA | 0 | NA | 0 | NA |
| 11 | 2863571 | 2861023 | -1 | NM_000076    | CDKN1C   | 0 | NA | 1 | 15 | 0 | NA | 0 | NA | 0 | NA |
| 11 | 2863571 | 2861023 | -1 | NM_001122630 | CDKN1C   | 0 | NA | 1 | 15 | 0 | NA | 0 | NA | 0 | NA |

|    |         |         |    |              |          |   |    |   |    |   |    |   |    |   |    |
|----|---------|---------|----|--------------|----------|---|----|---|----|---|----|---|----|---|----|
| 11 | 2863571 | 2861023 | -1 | NM_001122631 | CDKN1C   | 0 | NA | 1 | 15 | 0 | NA | 0 | NA | 0 | NA |
| 11 | 2877526 | 2903052 | 1  | NM_183233    | SLC22A18 | 1 | 23 | 1 | 14 | 1 | 18 | 0 | NA | 0 | NA |
| 11 | 2880099 | 2903052 | 1  | NM_002555    | SLC22A18 | 1 | 23 | 1 | 14 | 1 | 18 | 0 | NA | 0 | NA |
| 11 | 2907226 | 2906078 | -1 | NM_003311    | PHLDA2   | 0 | NA | 0 | NA | 0 | NA | 1 | 11 | 1 | 12 |
| 11 | 2970183 | 2922235 | -1 | NM_005969    | NAP1L4   | 0 | NA | 0 | NA | 0 | NA | 0 | NA | 0 | NA |
| 11 | 3035247 | 2978734 | -1 | NM_001014437 | CARS     | 0 | NA | 0 | NA | 0 | NA | 0 | NA | 0 | NA |
| 11 | 3035247 | 2978734 | -1 | NM_001014438 | CARS     | 0 | NA | 0 | NA | 0 | NA | 0 | NA | 0 | NA |
| 11 | 3035247 | 2978734 | -1 | NM_001751    | CARS     | 0 | NA | 0 | NA | 0 | NA | 0 | NA | 0 | NA |
| 11 | 3035247 | 2978734 | -1 | NM_139273    | CARS     | 0 | NA | 0 | NA | 0 | NA | 0 | NA | 0 | NA |
| 11 | 3143116 | 3064921 | -1 | NM_020896    | OSBPL5   | 0 | NA | 1 | 12 | 0 | NA | 1 | 18 | 0 | NA |
| 11 | 3143116 | 3064921 | -1 | NM_145638    | OSBPL5   | 0 | NA | 1 | 12 | 0 | NA | 1 | 18 | 0 | NA |
| 11 | 3210192 | 3205616 | -1 | NM_001039165 | MIRGPRE  | 0 | NA | 1 | 12 | 0 | NA | 0 | NA | 0 | NA |
| 11 | 3396991 | 3336574 | -1 | NM_007152    | ZNF195   | 1 | 11 | 1 | 14 | 0 | NA | 0 | NA | 0 | NA |
| 11 | 3620061 | 3616311 | -1 | NM_053017    | ART5     | 0 | NA | 0 | NA | 0 | NA | 0 | NA | 0 | NA |
| 11 | 3620122 | 3616311 | -1 | NM_001079536 | ART5     | 0 | NA | 0 | NA | 0 | NA | 0 | NA | 0 | NA |
| 11 | 3622936 | 3642222 | 1  | NM_004314    | ART1     | 0 | NA | 0 | NA | 0 | NA | 0 | NA | 0 | NA |
| 11 | 3649190 | 3643392 | -1 | NM_020402    | CHRNA10  | 0 | NA | 0 | NA | 0 | NA | 0 | NA | 0 | NA |
| 11 | 3775468 | 3652815 | -1 | NM_016320    | NUP98    | 1 | 14 | 0 | NA | 0 | NA | 0 | NA | 0 | NA |
| 11 | 3775468 | 3652815 | -1 | NM_139132    | NUP98    | 1 | 14 | 0 | NA | 0 | NA | 0 | NA | 0 | NA |
| 11 | 3775468 | 3689634 | -1 | NM_005387    | NUP98    | 1 | 14 | 0 | NA | 0 | NA | 0 | NA | 0 | NA |
| 11 | 3775468 | 3689634 | -1 | NM_139131    | NUP98    | 1 | 14 | 0 | NA | 0 | NA | 0 | NA | 0 | NA |
| 11 | 3786359 | 3804160 | 1  | NM_014489    | FRAG1    | 0 | NA | 0 | NA | 0 | NA | 0 | NA | 0 | NA |
| 11 | 3818789 | 3804783 | -1 | NM_001665    | RHOG     | 0 | NA | 0 | NA | 0 | NA | 0 | NA | 0 | NA |
| 11 | 3833508 | 4071015 | 1  | NM_003156    | STIM1    | 0 | NA | 0 | NA | 0 | NA | 0 | NA | 0 | NA |
| 11 | 4072499 | 4116682 | 1  | NM_001033    | RRM1     | 1 | 21 | 0 | NA | 0 | NA | 0 | NA | 0 | NA |
| 11 | 4346101 | 4345156 | -1 | NM_001005161 | OR52B4   | 0 | NA | 0 | NA | 0 | NA | 0 | NA | 0 | NA |
| 11 | 4371502 | 4362702 | -1 | NM_003141    | TRIM21   | 0 | NA | 0 | NA | 0 | NA | 0 | NA | 0 | NA |
| 11 | 4427145 | 4428090 | 1  | NM_001005172 | OR52K2   | 0 | NA | 0 | NA | 0 | NA | 0 | NA | 0 | NA |
| 11 | 4466706 | 4467651 | 1  | NM_001005171 | OR52K1   | 0 | NA | 0 | NA | 0 | NA | 0 | NA | 0 | NA |
| 11 | 4522996 | 4523950 | 1  | NM_001004137 | OR52M1   | 0 | NA | 0 | NA | 0 | NA | 0 | NA | 0 | NA |
| 11 | 4555626 | 4549228 | -1 | NM_144663    | C11orf40 | 0 | NA | 0 | NA | 0 | NA | 0 | NA | 0 | NA |
| 11 | 4564618 | 4565671 | 1  | NM_001005170 | OR52I2   | 0 | NA | 0 | NA | 0 | NA | 0 | NA | 0 | NA |
| 11 | 4571844 | 4572819 | 1  | NM_001005169 | OR52I1   | 0 | NA | 0 | NA | 0 | NA | 0 | NA | 0 | NA |
| 11 | 4586013 | 4576477 | -1 | NM_018073    | TRIM68   | 1 | 13 | 0 | NA | 0 | NA | 0 | NA | 0 | NA |
| 11 | 4617596 | 4618571 | 1  | NM_001004751 | OR51D1   | 0 | NA | 0 | NA | 0 | NA | 0 | NA | 0 | NA |
| 11 | 4630135 | 4631485 | 1  | NM_152430    | OR51E1   | 0 | NA | 0 | NA | 0 | NA | 0 | NA | 0 | NA |
| 11 | 4675645 | 4657976 | -1 | NM_030774    | OR51E2   | 0 | NA | 0 | NA | 0 | NA | 0 | NA | 0 | NA |
| 11 | 4747723 | 4746784 | -1 | NM_001004752 | OR51F1   | 0 | NA | 0 | NA | 0 | NA | 0 | NA | 0 | NA |
| 11 | 4782423 | 4781238 | -1 | NM_001005177 | OR52R1   | 0 | NA | 0 | NA | 0 | NA | 0 | NA | 0 | NA |
| 11 | 4799191 | 4800220 | 1  | NM_001004753 | OR51F2   | 0 | NA | 0 | NA | 0 | NA | 0 | NA | 0 | NA |
| 11 | 4827014 | 4826042 | -1 | NM_001004758 | OR51S1   | 0 | NA | 0 | NA | 0 | NA | 0 | NA | 0 | NA |
| 11 | 4859624 | 4860689 | 1  | NM_001004759 | OR51T1   | 0 | NA | 0 | NA | 0 | NA | 0 | NA | 0 | NA |
| 11 | 4885175 | 4886114 | 1  | NM_001004749 | OR51A7   | 0 | NA | 0 | NA | 0 | NA | 0 | NA | 0 | NA |
| 11 | 4893469 | 4892524 | -1 | NM_001005238 | OR51G2   | 0 | NA | 0 | NA | 0 | NA | 0 | NA | 0 | NA |
| 11 | 4902145 | 4901179 | -1 | NM_001005237 | OR51G1   | 0 | NA | 0 | NA | 0 | NA | 0 | NA | 0 | NA |
| 11 | 4924906 | 4923964 | -1 | NM_001005329 | OR51A4   | 0 | NA | 0 | NA | 0 | NA | 0 | NA | 0 | NA |
| 11 | 4933519 | 4932577 | -1 | NM_001004748 | OR51A2   | 0 | NA | 0 | NA | 0 | NA | 0 | NA | 0 | NA |
| 11 | 4965999 | 4970235 | 1  | NM_021801    | MMP26    | 0 | NA | 0 | NA | 0 | NA | 0 | NA | 0 | NA |
| 11 | 4976788 | 4977736 | 1  | NM_001004755 | OR51L1   | 0 | NA | 0 | NA | 0 | NA | 0 | NA | 0 | NA |
| 11 | 5024331 | 5025267 | 1  | NM_001001916 | OR52J3   | 0 | NA | 0 | NA | 0 | NA | 0 | NA | 0 | NA |
| 11 | 5037433 | 5036455 | -1 | NM_001005164 | OR52E2   | 0 | NA | 0 | NA | 0 | NA | 0 | NA | 0 | NA |
| 11 | 5099384 | 5098469 | -1 | NM_001005222 | OR52A4   | 0 | NA | 0 | NA | 0 | NA | 0 | NA | 0 | NA |
| 11 | 5110448 | 5109497 | -1 | NM_001005160 | OR52A5   | 0 | NA | 0 | NA | 0 | NA | 0 | NA | 0 | NA |
| 11 | 5130175 | 5129236 | -1 | NM_012375    | OR52A1   | 0 | NA | 0 | NA | 0 | NA | 0 | NA | 0 | NA |
| 11 | 5178506 | 5177540 | -1 | NM_001004760 | OR51V1   | 0 | NA | 0 | NA | 0 | NA | 0 | NA | 0 | NA |
| 11 | 5204877 | 5203271 | -1 | NM_000518    | HBB      | 0 | NA | 0 | NA | 0 | NA | 0 | NA | 0 | NA |
| 11 | 5212434 | 5210634 | -1 | NM_000519    | HBD      | 0 | NA | 0 | NA | 0 | NA | 0 | NA | 0 | NA |
| 11 | 5227663 | 5226077 | -1 | NM_000559    | HBG1     | 0 | NA | 0 | NA | 0 | NA | 0 | NA | 0 | NA |
| 11 | 5232587 | 5230996 | -1 | NM_000184    | HBG2     | 0 | NA | 0 | NA | 0 | NA | 0 | NA | 0 | NA |
| 11 | 5247949 | 5246155 | -1 | NM_005330    | HBE1     | 0 | NA | 0 | NA | 0 | NA | 0 | NA | 0 | NA |
| 11 | 5279752 | 5278819 | -1 | NM_033179    | OR51B4   | 0 | NA | 0 | NA | 0 | NA | 0 | NA | 0 | NA |
| 11 | 5302158 | 5301103 | -1 | NM_033180    | OR51B2   | 0 | NA | 0 | NA | 0 | NA | 0 | NA | 0 | NA |
| 11 | 5321330 | 5320391 | -1 | NM_001005567 | OR51B5   | 0 | NA | 0 | NA | 0 | NA | 0 | NA | 0 | NA |
| 11 | 5329313 | 5330252 | 1  | NM_001004750 | OR51B6   | 0 | NA | 0 | NA | 0 | NA | 0 | NA | 0 | NA |
| 11 | 5367204 | 5368185 | 1  | NM_001004756 | OR51M1   | 0 | NA | 0 | NA | 0 | NA | 0 | NA | 0 | NA |

|    |         |         |    |              |              |   |    |   |    |   |    |   |    |   |    |
|----|---------|---------|----|--------------|--------------|---|----|---|----|---|----|---|----|---|----|
| 11 | 540006  | 540096  | 1  | NM_001004757 | OR51Q1       | 0 | NA | 0 | NA | 0 | NA | 0 | NA | 0 | NA |
| 11 | 5419320 | 5418375 | -1 | NM_001005288 | OR51I1       | 0 | NA | 0 | NA | 0 | NA | 0 | NA | 0 | NA |
| 11 | 5431294 | 5432233 | 1  | NM_001004754 | OR51I2       | 0 | NA | 0 | NA | 0 | NA | 0 | NA | 0 | NA |
| 11 | 5466512 | 5467469 | 1  | NM_001005163 | OR52D1       | 0 | NA | 0 | NA | 0 | NA | 0 | NA | 0 | NA |
| 11 | 5487729 | 5485105 | -1 | NM_017481    | UBQLN3       | 0 | NA | 0 | NA | 0 | NA | 0 | NA | 0 | NA |
| 11 | 5494532 | 5492198 | -1 | NM_145053    | UBQLNL       | 0 | NA | 0 | NA | 0 | NA | 0 | NA | 0 | NA |
| 11 | 5523329 | 5522366 | -1 | NM_001005289 | OR52H1       | 0 | NA | 0 | NA | 0 | NA | 0 | NA | 0 | NA |
| 11 | 5558682 | 5559690 | 1  | NM_001005162 | OR52B6       | 0 | NA | 0 | NA | 0 | NA | 0 | NA | 0 | NA |
| 11 | 5573922 | 5590764 | 1  | NM_058166    | TRIM6        | 0 | NA | 0 | NA | 0 | NA | 0 | NA | 0 | NA |
| 11 | 5574461 | 5590764 | 1  | NM_001003818 | TRIM6        | 0 | NA | 0 | NA | 0 | NA | 0 | NA | 0 | NA |
| 11 | 5574461 | 5622201 | 1  | NM_001003819 | TRIM6-TRIM34 | 0 | NA | 0 | NA | 0 | NA | 0 | NA | 0 | NA |
| 11 | 5597749 | 5622201 | 1  | NM_001003827 | TRIM34       | 0 | NA | 0 | NA | 0 | NA | 0 | NA | 0 | NA |
| 11 | 5602810 | 5622201 | 1  | NM_021616    | TRIM34       | 0 | NA | 0 | NA | 0 | NA | 0 | NA | 0 | NA |
| 11 | 5602810 | 5622201 | 1  | NM_130389    | TRIM34       | 0 | NA | 0 | NA | 0 | NA | 0 | NA | 0 | NA |
| 11 | 5610060 | 5619102 | 1  | NM_130390    | TRIM34       | 0 | NA | 0 | NA | 0 | NA | 0 | NA | 0 | NA |
| 11 | 5662869 | 5641363 | -1 | NM_033034    | TRIM5        | 1 | 11 | 0 | NA | 0 | NA | 0 | NA | 0 | NA |
| 11 | 5662869 | 5641368 | -1 | NM_033093    | TRIM5        | 1 | 11 | 0 | NA | 0 | NA | 0 | NA | 0 | NA |
| 11 | 5662869 | 5642928 | -1 | NM_033092    | TRIM5        | 1 | 11 | 0 | NA | 0 | NA | 0 | NA | 0 | NA |
| 11 | 5667494 | 5688669 | 1  | NM_006074    | TRIM22       | 1 | 11 | 0 | NA | 0 | NA | 0 | NA | 0 | NA |
| 11 | 5714322 | 5715297 | 1  | NM_001005180 | OR56B1       | 0 | NA | 0 | NA | 0 | NA | 0 | NA | 0 | NA |
| 11 | 5732546 | 5733512 | 1  | NM_001005175 | OR52N4       | 0 | NA | 0 | NA | 0 | NA | 0 | NA | 0 | NA |
| 11 | 5756440 | 5755465 | -1 | NM_001001922 | OR52N5       | 0 | NA | 0 | NA | 1 | 12 | 0 | NA | 0 | NA |
| 11 | 5766622 | 5765659 | -1 | NM_001001913 | OR52N1       | 0 | NA | 0 | NA | 1 | 12 | 0 | NA | 0 | NA |
| 11 | 5798141 | 5799107 | 1  | NM_001005174 | OR52N2       | 0 | NA | 0 | NA | 0 | NA | 0 | NA | 0 | NA |
| 11 | 5819703 | 5818761 | -1 | NM_001005167 | OR52E6       | 0 | NA | 0 | NA | 0 | NA | 0 | NA | 0 | NA |
| 11 | 5835508 | 5834554 | -1 | NM_001005168 | OR52E8       | 0 | NA | 0 | NA | 0 | NA | 0 | NA | 0 | NA |
| 11 | 5862098 | 5863037 | 1  | NM_001005165 | OR52E4       | 0 | NA | 0 | NA | 0 | NA | 0 | NA | 0 | NA |
| 11 | 5925152 | 5926100 | 1  | NM_001003443 | OR56A3       | 0 | NA | 0 | NA | 0 | NA | 0 | NA | 0 | NA |
| 11 | 5964736 | 5963746 | -1 | NM_001005173 | OR52L1       | 0 | NA | 0 | NA | 0 | NA | 0 | NA | 1 | 12 |
| 11 | 5980954 | 5979856 | -1 | NM_001005179 | OR56A4       | 0 | NA | 0 | NA | 0 | NA | 0 | NA | 0 | NA |
| 11 | 6005510 | 6004553 | -1 | NM_001001917 | OR56A1       | 0 | NA | 0 | NA | 0 | NA | 0 | NA | 0 | NA |
| 11 | 6085584 | 6086544 | 1  | NM_001005181 | OR56B4       | 0 | NA | 0 | NA | 0 | NA | 0 | NA | 0 | NA |
| 11 | 6148132 | 6147160 | -1 | NM_001004052 | OR52B2       | 0 | NA | 0 | NA | 0 | NA | 0 | NA | 0 | NA |
| 11 | 6177029 | 6177992 | 1  | NM_001005178 | OR52W1       | 0 | NA | 0 | NA | 0 | NA | 0 | NA | 0 | NA |
| 11 | 6183373 | 6188937 | 1  | NM_173525    | C11orf42     | 0 | NA | 0 | NA | 0 | NA | 0 | NA | 0 | NA |
| 11 | 6212517 | 6189139 | -1 | NM_001098794 | C11orf56     | 0 | NA | 0 | NA | 0 | NA | 0 | NA | 0 | NA |
| 11 | 6212517 | 6189139 | -1 | NM_032127    | C11orf56     | 0 | NA | 0 | NA | 0 | NA | 0 | NA | 0 | NA |
| 11 | 6216905 | 6222283 | 1  | NM_001037329 | CNGA4        | 0 | NA | 0 | NA | 0 | NA | 0 | NA | 0 | NA |
| 11 | 6237541 | 6249932 | 1  | NM_176875    | CKCBR        | 0 | NA | 0 | NA | 0 | NA | 0 | NA | 0 | NA |
| 11 | 6298316 | 6296751 | -1 | NM_145040    | PRKCDBP      | 1 | 11 | 0 | NA | 0 | NA | 0 | NA | 0 | NA |
| 11 | 6368230 | 6372802 | 1  | NM_000543    | SMPD1        | 0 | NA | 0 | NA | 0 | NA | 0 | NA | 0 | NA |
| 11 | 6368230 | 6372802 | 1  | NM_001007593 | SMPD1        | 0 | NA | 0 | NA | 0 | NA | 0 | NA | 0 | NA |
| 11 | 6396876 | 6372930 | -1 | NM_001164    | APBB1        | 0 | NA | 0 | NA | 0 | NA | 0 | NA | 0 | NA |
| 11 | 6397220 | 6372930 | -1 | NM_145689    | APBB1        | 0 | NA | 0 | NA | 0 | NA | 0 | NA | 0 | NA |
| 11 | 6418769 | 6409016 | -1 | NM_000613    | HPX          | 0 | NA | 0 | NA | 0 | NA | 0 | NA | 0 | NA |
| 11 | 6451781 | 6426418 | -1 | NM_006458    | TRIM3        | 0 | NA | 0 | NA | 0 | NA | 0 | NA | 0 | NA |
| 11 | 6451781 | 6426418 | -1 | NM_033278    | TRIM3        | 0 | NA | 0 | NA | 0 | NA | 0 | NA | 0 | NA |
| 11 | 6459171 | 6453501 | -1 | NM_012402    | ARFIP2       | 0 | NA | 0 | NA | 0 | NA | 0 | NA | 0 | NA |
| 11 | 6459252 | 6462487 | 1  | NM_012192    | FXC1         | 0 | NA | 0 | NA | 0 | NA | 0 | NA | 0 | NA |
| 11 | 6475106 | 6498666 | 1  | NM_173589    | C11orf47     | 0 | NA | 0 | NA | 0 | NA | 0 | NA | 0 | NA |
| 11 | 6543910 | 6549825 | 1  | NM_144666    | DNH01        | 0 | NA | 0 | NA | 0 | NA | 0 | NA | 0 | NA |
| 11 | 6581387 | 6577727 | -1 | NM_015324    | KIAA0409     | 0 | NA | 0 | NA | 0 | NA | 0 | NA | 0 | NA |
| 11 | 6581539 | 6588675 | 1  | NM_001014794 | ILK          | 0 | NA | 0 | NA | 0 | NA | 0 | NA | 0 | NA |
| 11 | 6581539 | 6588675 | 1  | NM_004517    | ILK          | 0 | NA | 0 | NA | 0 | NA | 0 | NA | 0 | NA |
| 11 | 6581782 | 6588675 | 1  | NM_001014795 | ILK          | 0 | NA | 0 | NA | 0 | NA | 0 | NA | 0 | NA |
| 11 | 6590021 | 6588648 | -1 | NM_006284    | TAF10        | 0 | NA | 0 | NA | 0 | NA | 0 | NA | 0 | NA |
| 11 | 6597268 | 6590572 | -1 | NM_000391    | TPP1         | 0 | NA | 0 | NA | 0 | NA | 0 | NA | 0 | NA |
| 11 | 6633650 | 6599133 | -1 | NM_003737    | DCHS1        | 1 | 12 | 0 | NA | 0 | NA | 0 | NA | 0 | NA |
| 11 | 6661208 | 6658191 | -1 | NM_022061    | MRPL17       | 0 | NA | 0 | NA | 0 | NA | 1 | 15 | 0 | NA |
| 11 | 6746764 | 6745813 | -1 | NM_001004490 | OR2AG2       | 0 | NA | 0 | NA | 0 | NA | 0 | NA | 0 | NA |
| 11 | 6762844 | 6763795 | 1  | NM_001004489 | OR2AG1       | 0 | NA | 0 | NA | 0 | NA | 0 | NA | 0 | NA |
| 11 | 6773715 | 6772331 | -1 | NM_003696    | OR6A2        | 0 | NA | 0 | NA | 0 | NA | 0 | NA | 0 | NA |
| 11 | 6823489 | 6824443 | 1  | NM_178168    | OR10A5       | 0 | NA | 0 | NA | 0 | NA | 0 | NA | 0 | NA |
| 11 | 6847561 | 6848473 | 1  | NM_001004460 | OR10A2       | 0 | NA | 0 | NA | 0 | NA | 0 | NA | 0 | NA |
| 11 | 6854454 | 6855402 | 1  | NM_207186    | OR10A4       | 0 | NA | 0 | NA | 0 | NA | 0 | NA | 0 | NA |

|    |          |          |    |              |          |   |    |   |    |    |    |    |    |    |    |
|----|----------|----------|----|--------------|----------|---|----|---|----|----|----|----|----|----|----|
| 11 | 6870307  | 6869380  | -1 | NM_003700    | OR2D2    | 0 | NA | 0 | NA | 0  | NA | 0  | NA | 0  | NA |
| 11 | 6898808  | 6899801  | 1  | NM_001004684 | OR2D3    | 0 | NA | 0 | NA | 0  | NA | 0  | NA | 0  | NA |
| 11 | 6904229  | 6935654  | 1  | NM_013250    | ZNF215   | 0 | NA | 0 | NA | 0  | NA | 0  | NA | 0  | NA |
| 11 | 6998162  | 6971124  | -1 | NM_013249    | ZNF214   | 0 | NA | 0 | NA | 0  | NA | 0  | NA | 0  | NA |
| 11 | 6998275  | 7049333  | 1  | NM_176822    | NLRP14   | 0 | NA | 0 | NA | 0  | NA | 0  | NA | 0  | NA |
| 11 | 7066740  | 7068955  | 1  | NM_014469    | RBMXL2   | 0 | NA | 0 | NA | 0  | NA | 0  | NA | 0  | NA |
| 11 | 7229756  | 7446846  | 1  | NM_175733    | SYT9     | 0 | NA | 0 | NA | 0  | NA | 0  | NA | 0  | NA |
| 11 | 7463330  | 7489139  | 1  | NM_198474    | OLFML1   | 0 | NA | 0 | NA | 0  | NA | 0  | NA | 0  | NA |
| 11 | 7491576  | 7631567  | 1  | NM_003621    | PPFIBP2  | 0 | NA | 0 | NA | 0  | NA | 0  | NA | 0  | NA |
| 11 | 7651397  | 7642901  | -1 | NM_016229    | CYB5R2   | 0 | NA | 0 | NA | 0  | NA | 0  | NA | 0  | NA |
| 11 | 7684517  | 7669019  | -1 | NM_198185    | OVCH2    | 0 | NA | 0 | NA | 0  | NA | 0  | NA | 0  | NA |
| 11 | 7775065  | 7774096  | -1 | NM_153444    | OR5P2    | 0 | NA | 0 | NA | 0  | NA | 0  | NA | 0  | NA |
| 11 | 7804095  | 7803159  | -1 | NM_153445    | OR5P3    | 0 | NA | 0 | NA | 0  | NA | 0  | NA | 0  | NA |
| 11 | 7906785  | 7905840  | -1 | NM_001004461 | OR10A6   | 0 | NA | 0 | NA | 0  | NA | 0  | NA | 0  | NA |
| 11 | 7917643  | 7916698  | -1 | NM_001003745 | OR10A3   | 0 | NA | 0 | NA | 0  | NA | 0  | NA | 0  | NA |
| 11 | 7941635  | 7937731  | -1 | NM_176821    | NLRP10   | 0 | NA | 0 | NA | 0  | NA | 0  | NA | 0  | NA |
| 11 | 7965442  | 7974294  | 1  | NM_003754    | EIF3F    | 0 | NA | 0 | NA | 0  | NA | 0  | NA | 0  | NA |
| 11 | 8016755  | 8084228  | 1  | NM_003320    | TUB      | 0 | NA | 0 | NA | 0  | NA | 0  | NA | 0  | NA |
| 11 | 8059484  | 8084228  | 1  | NM_177972    | TUB      | 0 | NA | 0 | NA | 0  | NA | 0  | NA | 0  | NA |
| 11 | 8147144  | 8087070  | -1 | NM_024557    | RIC3     | 0 | NA | 1 | 16 | 0  | NA | 0  | NA | 0  | NA |
| 11 | 8241982  | 8202432  | -1 | NM_002315    | LMO1     | 0 | NA | 0 | NA | 0  | NA | 0  | NA | 0  | NA |
| 11 | 8572079  | 8369993  | -1 | NM_030906    | STK33    | 0 | NA | 0 | NA | 0  | NA | 0  | NA | 0  | NA |
| 11 | 8660570  | 8667995  | 1  | NM_000990    | RPL27A   | 0 | NA | 0 | NA | 0  | NA | 0  | NA | 0  | NA |
| 11 | 8788800  | 8671474  | -1 | NM_213618    | ST5      | 0 | NA | 0 | NA | 0  | NA | 0  | NA | 0  | NA |
| 11 | 8789458  | 8671474  | -1 | NM_139157    | ST5      | 0 | NA | 0 | NA | 0  | NA | 0  | NA | 0  | NA |
| 11 | 8889074  | 8671474  | -1 | NM_005418    | ST5      | 0 | NA | 0 | NA | 0  | NA | 0  | NA | 0  | NA |
| 11 | 8889276  | 8896202  | 1  | NM_020642    | C11orf17 | 0 | NA | 0 | NA | 0  | NA | 0  | NA | 0  | NA |
| 11 | 8889377  | 8896202  | 1  | NM_182901    | C11orf17 | 0 | NA | 0 | NA | 0  | NA | 0  | NA | 0  | NA |
| 11 | 8911129  | 8998198  | -1 | NM_020643    | C11orf16 | 0 | NA | 0 | NA | 0  | NA | 0  | NA | 0  | NA |
| 11 | 8921156  | 8915694  | -1 | NM_020646    | ASCL3    | 0 | NA | 0 | NA | 0  | NA | 0  | NA | 0  | NA |
| 11 | 8942565  | 8925415  | -1 | NM_020644    | TMEM9B   | 0 | NA | 0 | NA | 0  | NA | 0  | NA | 0  | NA |
| 11 | 8982124  | 8960967  | -1 | NM_020645    | NRIP3    | 0 | NA | 0 | NA | 0  | NA | 0  | NA | 0  | NA |
| 11 | 9069731  | 8998510  | -1 | NM_020974    | SCUBE2   | 0 | NA | 0 | NA | 0  | NA | 0  | NA | 0  | NA |
| 11 | 9243447  | 9116948  | -1 | NM_015213    | RAB6IP1  | 0 | NA | 0 | NA | 0  | NA | 0  | NA | 0  | NA |
| 11 | 9292872  | 9258777  | -1 | NM_015012    | TMEM41B  | 0 | NA | 0 | NA | 0  | NA | 0  | NA | 0  | NA |
| 11 | 9362779  | 9423651  | 1  | NM_006391    | IPO7     | 0 | NA | 0 | NA | 0  | NA | 0  | NA | 0  | NA |
| 11 | 9439088  | 9506647  | 1  | NM_003442    | ZNF143   | 0 | NA | 0 | NA | 0  | NA | 0  | NA | 0  | NA |
| 11 | 9550915  | 9567874  | 1  | NM_003390    | WEE1     | 0 | NA | 0 | NA | 0  | NA | 0  | NA | 0  | NA |
| 11 | 9642203  | 9731083  | 1  | NM_015055    | SWAP70   | 1 | 12 | 0 | NA | 0  | NA | 0  | NA | 0  | NA |
| 11 | 10272312 | 9756904  | -1 | NM_030962    | SBF2     | 0 | NA | 0 | 1  | 12 | 0  | NA | 0  | NA | 0  |
| 11 | 10283217 | 10285499 | 1  | NM_001124    | ADM      | 1 | 11 | 0 | NA | 1  | 12 | 0  | NA | 0  | NA |
| 11 | 10428799 | 10485702 | 1  | NM_000480    | AMPD3    | 0 | NA | 0 | NA | 0  | NA | 0  | NA | 0  | NA |
| 11 | 10433241 | 10485702 | 1  | NM_001025389 | AMPD3    | 0 | NA | 0 | NA | 0  | NA | 0  | NA | 0  | NA |
| 11 | 10434056 | 10485702 | 1  | NM_001025390 | AMPD3    | 0 | NA | 0 | NA | 0  | NA | 0  | NA | 0  | NA |
| 11 | 10519350 | 10489800 | -1 | NM_016422    | RNF141   | 0 | NA | 0 | NA | 0  | NA | 0  | NA | 0  | NA |
| 11 | 10546941 | 10535988 | -1 | NM_006691    | LYVE1    | 0 | NA | 0 | NA | 0  | NA | 0  | NA | 0  | NA |
| 11 | 10630424 | 10551213 | -1 | NM_001098579 | MRV11    | 0 | NA | 0 | NA | 0  | NA | 0  | NA | 0  | NA |
| 11 | 10671681 | 10551213 | -1 | NM_001100167 | MRV11    | 0 | NA | 0 | NA | 0  | NA | 0  | NA | 0  | NA |
| 11 | 10672111 | 10551213 | -1 | NM_001100163 | MRV11    | 0 | NA | 0 | NA | 0  | NA | 0  | NA | 0  | NA |
| 11 | 10672111 | 10551213 | -1 | NM_130385    | MRV11    | 0 | NA | 0 | NA | 0  | NA | 0  | NA | 0  | NA |
| 11 | 10729386 | 10757866 | 1  | NM_014633    | CTR9     | 0 | NA | 0 | NA | 0  | NA | 0  | NA | 0  | NA |
| 11 | 10787158 | 10775168 | -1 | NM_001042559 | EIF4G2   | 0 | NA | 0 | NA | 0  | NA | 0  | NA | 0  | NA |
| 11 | 10787158 | 10775168 | -1 | NM_001418    | EIF4G2   | 0 | NA | 0 | NA | 0  | NA | 0  | NA | 0  | NA |
| 11 | 11600128 | 11248998 | -1 | NM_198516    | GALNTL4  | 0 | NA | 0 | NA | 0  | NA | 0  | NA | 0  | NA |
| 11 | 11819545 | 11937448 | 1  | NM_017944    | USP47    | 1 | 20 | 0 | NA | 0  | NA | 0  | NA | 0  | NA |
| 11 | 11986762 | 11941118 | -1 | NM_001018057 | DKK3     | 1 | 11 | 0 | NA | 1  | 20 | 0  | NA | 0  | NA |
| 11 | 11987205 | 11941118 | -1 | NM_015881    | DKK3     | 1 | 11 | 0 | NA | 1  | 20 | 0  | NA | 0  | NA |
| 11 | 11987493 | 11941118 | -1 | NM_013253    | DKK3     | 1 | 11 | 0 | NA | 1  | 20 | 0  | NA | 0  | NA |
| 11 | 12088713 | 12241907 | 1  | NM_014632    | MICAL2   | 0 | NA | 0 | NA | 0  | NA | 1  | 12 | 0  | NA |
| 11 | 12265022 | 12337267 | 1  | NM_032867    | MICALCL  | 0 | NA | 0 | NA | 0  | NA | 0  | NA | 0  | NA |
| 11 | 12355721 | 12507986 | 1  | NM_018222    | PARVA    | 1 | 14 | 0 | NA | 0  | NA | 0  | NA | 0  | NA |
| 11 | 12652544 | 12922875 | 1  | NM_021961    | TEAD1    | 1 | 23 | 0 | NA | 0  | NA | 0  | NA | 0  | NA |
| 11 | 12987271 | 12989223 | 1  | NM_001080521 | RASSF10  | 0 | NA | 1 | 18 | 0  | NA | 0  | NA | 0  | NA |
| 11 | 13255900 | 13365388 | 1  | NM_001030272 | ARNTL    | 0 | NA | 0 | NA | 0  | NA | 0  | NA | 0  | NA |
| 11 | 13255900 | 13365388 | 1  | NM_001030273 | ARNTL    | 0 | NA | 0 | NA | 0  | NA | 0  | NA | 0  | NA |

|    |          |          |    |              |          |   |    |   |    |   |    |   |    |   |    |
|----|----------|----------|----|--------------|----------|---|----|---|----|---|----|---|----|---|----|
| 11 | 1325900  | 13365388 | 1  | NM_001178    | ARNTL    | 0 | NA | 0 | NA | 0 | NA | 0 | NA | 0 | NA |
| 11 | 13441414 | 13366131 | -1 | NM_032320    | BTBD10   | 1 | 17 | 0 | NA | 1 | 17 | 0 | NA | 0 | NA |
| 11 | 13474143 | 13470176 | -1 | NM_000315    | PTH      | 0 | NA | 0 | NA | 0 | NA | 0 | NA | 0 | NA |
| 11 | 13646846 | 13710469 | 1  | NM_032228    | MLSTD2   | 0 | NA | 0 | NA | 0 | NA | 0 | NA | 0 | NA |
| 11 | 13940489 | 14246231 | 1  | NM_006108    | SPON1    | 0 | NA | 0 | NA | 0 | NA | 0 | NA | 0 | NA |
| 11 | 14336607 | 14256041 | -1 | NM_001102669 | RRAS2    | 0 | NA | 0 | NA | 0 | NA | 0 | NA | 0 | NA |
| 11 | 14337305 | 14256041 | -1 | NM_012250    | RRAS2    | 0 | NA | 0 | NA | 0 | NA | 0 | NA | 0 | NA |
| 11 | 14477974 | 14435627 | -1 | NM_016451    | COPB1    | 0 | NA | 0 | NA | 0 | NA | 0 | NA | 0 | NA |
| 11 | 14498524 | 14482997 | -1 | NM_002786    | PSMA1    | 1 | 26 | 0 | NA | 0 | NA | 0 | NA | 0 | NA |
| 11 | 14621739 | 14482997 | -1 | NM_148976    | PSMA1    | 1 | 11 | 0 | NA | 0 | NA | 1 | 14 | 0 | NA |
| 11 | 14621906 | 14848926 | 1  | NM_000922    | PDE3B    | 1 | 11 | 0 | NA | 0 | NA | 1 | 14 | 0 | NA |
| 11 | 14870327 | 14856131 | -1 | NM_024514    | CYP2R1   | 1 | 30 | 0 | NA | 0 | NA | 1 | 13 | 0 | NA |
| 11 | 14950408 | 14944791 | -1 | NM_001033953 | CALCA    | 0 | NA | 0 | NA | 0 | NA | 0 | NA | 0 | NA |
| 11 | 14950408 | 14946623 | -1 | NM_001033952 | CALCA    | 0 | NA | 0 | NA | 0 | NA | 0 | NA | 0 | NA |
| 11 | 14950408 | 14946623 | -1 | NM_001741    | CALCA    | 0 | NA | 0 | NA | 0 | NA | 0 | NA | 0 | NA |
| 11 | 15051721 | 15056753 | 1  | NM_000728    | CALCB    | 0 | NA | 0 | NA | 0 | NA | 0 | NA | 0 | NA |
| 11 | 15090545 | 15225330 | 1  | NM_001031853 | INSC     | 0 | NA | 0 | NA | 0 | NA | 0 | NA | 1 | 14 |
| 11 | 15093059 | 15225330 | 1  | NM_001042536 | INSC     | 0 | NA | 0 | NA | 0 | NA | 0 | NA | 1 | 14 |
| 11 | 16380968 | 15948370 | -1 | NM_017508    | SOX6     | 0 | NA | 0 | NA | 0 | NA | 0 | NA | 0 | NA |
| 11 | 16454494 | 15948370 | -1 | NM_033326    | SOX6     | 0 | NA | 0 | NA | 0 | NA | 0 | NA | 0 | NA |
| 11 | 16716769 | 16734149 | 1  | NM_014267    | C11orf58 | 1 | 20 | 0 | NA | 0 | NA | 0 | NA | 0 | NA |
| 11 | 16992535 | 16765785 | -1 | NM_175058    | PLEKHA7  | 0 | NA | 0 | NA | 0 | NA | 0 | NA | 0 | NA |
| 11 | 17055796 | 17052514 | -1 | NM_001017    | RPS13    | 0 | NA | 1 | 14 | 0 | NA | 0 | NA | 0 | NA |
| 11 | 17147930 | 17064699 | -1 | NM_002645    | PIK3C2A  | 0 | NA | 0 | NA | 0 | NA | 0 | NA | 0 | NA |
| 11 | 17254861 | 17309646 | 1  | NM_005013    | NUCB2    | 0 | NA | 0 | NA | 0 | NA | 0 | NA | 0 | NA |
| 11 | 17366782 | 17363371 | -1 | NM_000525    | KCNJ11   | 0 | NA | 0 | NA | 0 | NA | 0 | NA | 0 | NA |
| 11 | 17455025 | 17371007 | -1 | NM_000352    | ABCC8    | 0 | NA | 0 | NA | 0 | NA | 0 | NA | 0 | NA |
| 11 | 17522539 | 17472017 | -1 | NM_005709    | USH1C    | 0 | NA | 0 | NA | 0 | NA | 0 | NA | 0 | NA |
| 11 | 17522539 | 17472017 | -1 | NM_153676    | USH1C    | 0 | NA | 0 | NA | 0 | NA | 0 | NA | 0 | NA |
| 11 | 17697685 | 17700254 | 1  | NM_002478    | MYOD1    | 0 | NA | 0 | NA | 0 | NA | 0 | NA | 0 | NA |
| 11 | 17714070 | 17755953 | 1  | NM_004976    | KCNC1    | 0 | NA | 1 | 13 | 0 | NA | 0 | NA | 0 | NA |
| 11 | 17714070 | 17761178 | 1  | NM_00112741  | KCNC1    | 0 | NA | 1 | 13 | 0 | NA | 0 | NA | 0 | NA |
| 11 | 17991213 | 17766171 | -1 | NM_012139    | SERGEF   | 0 | NA | 0 | NA | 0 | NA | 0 | NA | 0 | NA |
| 11 | 18018885 | 17999113 | -1 | NM_004179    | TPH1     | 0 | NA | 0 | NA | 0 | NA | 0 | NA | 0 | NA |
| 11 | 18084214 | 18058465 | -1 | NM_138421    | SAAL1    | 1 | 11 | 0 | NA | 0 | NA | 0 | NA | 0 | NA |
| 11 | 18099077 | 18116603 | 1  | NM_054031    | MRGPRX3  | 0 | NA | 0 | NA | 0 | NA | 1 | 12 | 0 | NA |
| 11 | 18150959 | 18152403 | 1  | NM_054032    | MRGPRX4  | 0 | NA | 1 | 19 | 0 | NA | 0 | NA | 0 | NA |
| 11 | 18214910 | 18209478 | -1 | NM_006512    | SAA4     | 0 | NA | 0 | NA | 0 | NA | 0 | NA | 0 | NA |
| 11 | 18226744 | 18223364 | -1 | NM_030754    | SAA2     | 0 | NA | 0 | NA | 0 | NA | 0 | NA | 0 | NA |
| 11 | 18244347 | 18248102 | 1  | NM_000331    | SAA1     | 0 | NA | 0 | NA | 0 | NA | 0 | NA | 0 | NA |
| 11 | 18244347 | 18248102 | 1  | NM_199161    | SAA1     | 0 | NA | 0 | NA | 0 | NA | 0 | NA | 0 | NA |
| 11 | 18300297 | 18256792 | -1 | NM_007216    | HPSS     | 0 | NA | 0 | NA | 0 | NA | 0 | NA | 0 | NA |
| 11 | 18300297 | 18256792 | -1 | NM_181507    | HPSS     | 0 | NA | 0 | NA | 0 | NA | 0 | NA | 0 | NA |
| 11 | 18300297 | 18256792 | -1 | NM_181508    | HPSS     | 0 | NA | 0 | NA | 0 | NA | 0 | NA | 0 | NA |
| 11 | 18300718 | 18345153 | 1  | NM_005316    | GTF2H1   | 0 | NA | 0 | NA | 0 | NA | 0 | NA | 0 | NA |
| 11 | 18372557 | 18385974 | 1  | NM_005566    | LDHA     | 0 | NA | 0 | NA | 0 | NA | 0 | NA | 0 | NA |
| 11 | 18390433 | 18429369 | 1  | NM_002301    | LDHC     | 0 | NA | 0 | NA | 0 | NA | 0 | NA | 0 | NA |
| 11 | 18390433 | 18429369 | 1  | NM_017448    | LDHC     | 0 | NA | 0 | NA | 0 | NA | 0 | NA | 0 | NA |
| 11 | 18434006 | 18457723 | 1  | NM_144972    | LDHAL6A  | 0 | NA | 0 | NA | 0 | NA | 0 | NA | 0 | NA |
| 11 | 18505065 | 18458433 | -1 | NM_006292    | TSG101   | 0 | NA | 0 | NA | 0 | NA | 0 | NA | 0 | NA |
| 11 | 18566857 | 18509819 | -1 | NM_001040697 | UEVLD    | 0 | NA | 0 | NA | 0 | NA | 0 | NA | 0 | NA |
| 11 | 18566857 | 18509819 | -1 | NM_018314    | UEVLD    | 0 | NA | 0 | NA | 0 | NA | 0 | NA | 0 | NA |
| 11 | 18612596 | 18584523 | -1 | NM_194285    | SPTY2D1  | 0 | NA | 0 | NA | 1 | 12 | 0 | NA | 0 | NA |
| 11 | 18676926 | 18682908 | 1  | NM_153347    | TMEM86A  | 0 | NA | 1 | 18 | 0 | NA | 0 | NA | 0 | NA |
| 11 | 18704353 | 18682427 | -1 | NM_173588    | IGSF22   | 0 | NA | 1 | 15 | 0 | NA | 0 | NA | 0 | NA |
| 11 | 18769965 | 18706050 | -1 | NM_001039970 | PTPN5    | 0 | NA | 0 | NA | 0 | NA | 0 | NA | 0 | NA |
| 11 | 18769965 | 18706050 | -1 | NM_006906    | PTPN5    | 0 | NA | 0 | NA | 0 | NA | 0 | NA | 0 | NA |
| 11 | 18769965 | 18706050 | -1 | NM_032781    | PTPN5    | 0 | NA | 0 | NA | 0 | NA | 0 | NA | 0 | NA |
| 11 | 18913125 | 18911935 | -1 | NM_147199    | MRGPRX1  | 0 | NA | 1 | 13 | 0 | NA | 0 | NA | 1 | 13 |
| 11 | 19038804 | 19032578 | -1 | NM_054030    | MRGPRX2  | 0 | NA | 0 | NA | 0 | NA | 0 | NA | 0 | NA |
| 11 | 19095267 | 19154543 | 1  | NM_001001483 | ZDHHC13  | 0 | NA | 0 | NA | 0 | NA | 0 | NA | 0 | NA |
| 11 | 19095267 | 19154543 | 1  | NM_019028    | ZDHHC13  | 0 | NA | 0 | NA | 0 | NA | 0 | NA | 0 | NA |
| 11 | 19180177 | 19160153 | -1 | NM_003476    | CSRP3    | 0 | NA | 0 | NA | 0 | NA | 0 | NA | 0 | NA |
| 11 | 19219083 | 19202185 | -1 | NM_024680    | EZF8     | 0 | NA | 0 | NA | 0 | NA | 0 | NA | 0 | NA |
| 11 | 19328846 | 20099723 | 1  | NM_001111018 | NAV2     | 0 | NA | 1 | 15 | 0 | NA | 0 | NA | 0 | NA |

|    |          |          |    |              |          |   |    |   |    |   |    |   |    |   |    |
|----|----------|----------|----|--------------|----------|---|----|---|----|---|----|---|----|---|----|
| 11 | 19691456 | 20099723 | 1  | NM_145117    | NAV2     | 1 | 12 | 0 | NA | 1 | 12 | 1 | 11 | 0 | NA |
| 11 | 19691456 | 20099723 | 1  | NM_182964    | NAV2     | 1 | 12 | 0 | NA | 1 | 12 | 1 | 11 | 0 | NA |
| 11 | 20001211 | 20099723 | 1  | NM_001111019 | NAV2     | 0 | NA | 0 | NA | 0 | NA | 0 | NA | 0 | NA |
| 11 | 20138446 | 20134335 | -1 | NM_001029865 | DBX1     | 0 | NA | 1 | 16 | 0 | NA | 0 | NA | 0 | NA |
| 11 | 20341806 | 20361905 | 1  | NM_006410    | HTATIP2  | 0 | NA | 0 | NA | 0 | NA | 0 | NA | 0 | NA |
| 11 | 20341822 | 20361905 | 1  | NM_001098521 | HTATIP2  | 0 | NA | 0 | NA | 0 | NA | 0 | NA | 0 | NA |
| 11 | 20341864 | 20361905 | 1  | NM_001098520 | HTATIP2  | 0 | NA | 0 | NA | 0 | NA | 0 | NA | 0 | NA |
| 11 | 20341978 | 20361905 | 1  | NM_001098522 | HTATIP2  | 0 | NA | 0 | NA | 0 | NA | 0 | NA | 0 | NA |
| 11 | 20342262 | 20345776 | 1  | NM_001098523 | HTATIP2  | 0 | NA | 0 | NA | 0 | NA | 0 | NA | 0 | NA |
| 11 | 20365678 | 20487349 | 1  | NM_005788    | PRMT3    | 1 | 24 | 0 | NA | 0 | NA | 0 | NA | 0 | NA |
| 11 | 20577521 | 20633186 | 1  | NM_004211    | SLC6A5   | 0 | NA | 0 | NA | 0 | NA | 0 | NA | 0 | NA |
| 11 | 20647711 | 21553577 | 1  | NM_006157    | NELL1    | 0 | NA | 0 | NA | 0 | NA | 0 | NA | 0 | NA |
| 11 | 22171297 | 22257975 | 1  | NM_213599    | TMEM16E  | 0 | NA | 0 | NA | 0 | NA | 0 | NA | 0 | NA |
| 11 | 22316242 | 22357619 | 1  | NM_020346    | SLC17A6  | 0 | NA | 1 | 14 | 0 | NA | 0 | NA | 0 | NA |
| 11 | 22603963 | 22600654 | -1 | NM_022725    | FANCF    | 1 | 12 | 0 | NA | 1 | 14 | 0 | NA | 0 | NA |
| 11 | 22646229 | 22791123 | 1  | NM_177553    | GAS2     | 0 | NA | 0 | NA | 0 | NA | 0 | NA | 0 | NA |
| 11 | 22652930 | 22791123 | 1  | NM_005256    | GAS2     | 0 | NA | 0 | NA | 0 | NA | 0 | NA | 0 | NA |
| 11 | 22807958 | 22800173 | -1 | NM_148893    | SVIP     | 0 | NA | 0 | NA | 0 | NA | 0 | NA | 0 | NA |
| 11 | 24475131 | 25060762 | 1  | NM_001009909 | LUZP2    | 0 | NA | 0 | NA | 0 | NA | 0 | NA | 0 | NA |
| 11 | 26310253 | 26641412 | 1  | NM_031418    | TMEM16C  | 0 | NA | 0 | NA | 0 | NA | 0 | NA | 0 | NA |
| 11 | 26550356 | 26538427 | -1 | NM_145650    | MUC15    | 0 | NA | 0 | NA | 0 | NA | 0 | NA | 0 | NA |
| 11 | 26700150 | 26645141 | -1 | NM_178498    | SLC5A12  | 0 | NA | 0 | NA | 0 | NA | 0 | NA | 0 | NA |
| 11 | 26972203 | 26975208 | 1  | NM_203371    | FIBIN    | 0 | NA | 0 | NA | 0 | NA | 0 | NA | 0 | NA |
| 11 | 27019084 | 27105930 | 1  | NM_003986    | BBOX1    | 0 | NA | 0 | NA | 0 | NA | 0 | NA | 0 | NA |
| 11 | 27341371 | 27316636 | -1 | NM_030771    | CCDC34   | 0 | NA | 0 | NA | 0 | NA | 1 | 12 | 0 | NA |
| 11 | 27341371 | 27326994 | -1 | NM_080654    | CCDC34   | 0 | NA | 0 | NA | 0 | NA | 1 | 12 | 0 | NA |
| 11 | 27450910 | 27344083 | -1 | NM_018490    | LGR4     | 0 | NA | 0 | NA | 0 | NA | 0 | NA | 0 | NA |
| 11 | 27484879 | 27472698 | -1 | NM_018362    | LIN7C    | 1 | 24 | 0 | NA | 0 | NA | 0 | NA | 0 | NA |
| 11 | 27637249 | 27633017 | -1 | NM_170735    | BDNF     | 0 | NA | 0 | NA | 0 | NA | 0 | NA | 0 | NA |
| 11 | 27677756 | 27633017 | -1 | NM_170734    | BDNF     | 0 | NA | 0 | NA | 0 | NA | 0 | NA | 0 | NA |
| 11 | 27678552 | 27633017 | -1 | NM_001709    | BDNF     | 0 | NA | 0 | NA | 0 | NA | 0 | NA | 0 | NA |
| 11 | 27679729 | 27633017 | -1 | NM_170733    | BDNF     | 0 | NA | 0 | NA | 0 | NA | 0 | NA | 0 | NA |
| 11 | 27698846 | 27633017 | -1 | NM_170732    | BDNF     | 0 | NA | 0 | NA | 0 | NA | 0 | NA | 0 | NA |
| 11 | 27699872 | 27633017 | -1 | NM_170731    | BDNF     | 0 | NA | 0 | NA | 0 | NA | 0 | NA | 0 | NA |
| 11 | 28086322 | 27998738 | -1 | NM_031217    | KIF18A   | 0 | NA | 0 | NA | 1 | 21 | 0 | NA | 0 | NA |
| 11 | 28086373 | 28311630 | 1  | NM_001113528 | METT5D1  | 0 | NA | 0 | NA | 1 | 21 | 0 | NA | 0 | NA |
| 11 | 28086373 | 28311630 | 1  | NM_152636    | METT5D1  | 0 | NA | 0 | NA | 1 | 21 | 0 | NA | 0 | NA |
| 11 | 29995064 | 29988340 | -1 | NM_002233    | KCNA4    | 0 | NA | 0 | NA | 0 | NA | 0 | NA | 0 | NA |
| 11 | 30209138 | 30213400 | 1  | NM_000510    | FSHB     | 0 | NA | 0 | NA | 0 | NA | 0 | NA | 0 | NA |
| 11 | 30209138 | 30213400 | 1  | NM_001018080 | FSHB     | 0 | NA | 0 | NA | 0 | NA | 0 | NA | 0 | NA |
| 11 | 30301224 | 30315741 | 1  | NM_152316    | C11orf46 | 0 | NA | 0 | NA | 0 | NA | 0 | NA | 0 | NA |
| 11 | 30558616 | 30388347 | -1 | NM_001584    | MPPED2   | 0 | NA | 1 | 19 | 0 | NA | 0 | NA | 0 | NA |
| 11 | 31347897 | 31240746 | -1 | NM_181807    | DCDC1    | 0 | NA | 0 | NA | 0 | NA | 0 | NA | 0 | NA |
| 11 | 31347952 | 31410958 | 1  | NM_181706    | DPH4     | 0 | NA | 0 | NA | 0 | NA | 0 | NA | 0 | NA |
| 11 | 31487745 | 31410524 | -1 | NM_144981    | IMMP1L   | 0 | NA | 0 | NA | 0 | NA | 0 | NA | 0 | NA |
| 11 | 31487872 | 31761905 | 1  | NM_019040    | ELP4     | 0 | NA | 0 | NA | 0 | NA | 0 | NA | 0 | NA |
| 11 | 31789434 | 31767033 | -1 | NM_000280    | PAX6     | 0 | NA | 1 | 12 | 0 | NA | 0 | NA | 0 | NA |
| 11 | 31789455 | 31767033 | -1 | NM_001604    | PAX6     | 0 | NA | 1 | 12 | 0 | NA | 0 | NA | 0 | NA |
| 11 | 32069266 | 32083653 | 1  | NM_002901    | RCN1     | 0 | NA | 0 | NA | 0 | NA | 0 | NA | 0 | NA |
| 11 | 32413663 | 32365900 | -1 | NM_000378    | WT1      | 0 | NA | 1 | 13 | 0 | NA | 0 | NA | 0 | NA |
| 11 | 32413663 | 32365900 | -1 | NM_024424    | WT1      | 0 | NA | 1 | 13 | 0 | NA | 0 | NA | 0 | NA |
| 11 | 32413663 | 32365900 | -1 | NM_024425    | WT1      | 0 | NA | 1 | 13 | 0 | NA | 0 | NA | 0 | NA |
| 11 | 32413663 | 32365900 | -1 | NM_024426    | WT1      | 0 | NA | 1 | 13 | 0 | NA | 0 | NA | 0 | NA |
| 11 | 32416250 | 32418196 | 1  | NM_015855    | WIT1     | 0 | NA | 1 | 13 | 0 | NA | 0 | NA | 0 | NA |
| 11 | 32581966 | 32580590 | 1  | NM_006360    | EIF3M    | 0 | NA | 0 | NA | 0 | NA | 0 | NA | 0 | NA |
| 11 | 32772763 | 32580201 | -1 | NM_001008391 | CCDC73   | 0 | NA | 0 | NA | 0 | NA | 0 | NA | 0 | NA |
| 11 | 32808064 | 32832681 | 1  | NM_024081    | PRRG4    | 0 | NA | 0 | NA | 0 | NA | 0 | NA | 0 | NA |
| 11 | 32871367 | 32958390 | 1  | NM_001076786 | QSER1    | 0 | NA | 0 | NA | 0 | NA | 0 | NA | 0 | NA |
| 11 | 32993985 | 33011704 | 1  | NM_001077242 | DEPDC7   | 0 | NA | 0 | NA | 0 | NA | 0 | NA | 0 | NA |
| 11 | 32994303 | 33011704 | 1  | NM_139160    | DEPDC7   | 0 | NA | 0 | NA | 0 | NA | 0 | NA | 0 | NA |
| 11 | 33017719 | 33051451 | 1  | NM_018393    | TCP11L1  | 1 | 15 | 0 | NA | 0 | NA | 0 | NA | 0 | NA |
| 11 | 33139613 | 33062705 | -1 | NM_001326    | CSTF3    | 1 | 25 | 0 | NA | 0 | NA | 0 | NA | 0 | NA |
| 11 | 33139613 | 33119552 | -1 | NM_001033505 | CSTF3    | 1 | 25 | 0 | NA | 0 | NA | 0 | NA | 0 | NA |
| 11 | 33139613 | 33119552 | -1 | NM_001033506 | CSTF3    | 1 | 25 | 0 | NA | 0 | NA | 0 | NA | 0 | NA |
| 11 | 33235743 | 33332515 | 1  | NM_001048200 | HIPK3    | 1 | 13 | 0 | NA | 0 | NA | 0 | NA | 0 | NA |

|    |          |          |    |              |               |   |    |   |    |   |    |   |    |   |    |
|----|----------|----------|----|--------------|---------------|---|----|---|----|---|----|---|----|---|----|
| 11 | 33235743 | 33392515 | 1  | NM_005734    | HIPK3         | 1 | 13 | 0 | NA | 0 | NA | 0 | NA | 0 | NA |
| 11 | 33520452 | 33652222 | 1  | NM_012194    | C11orf41      | 0 | NA | 0 | NA | 1 | 16 | 0 | NA | 0 | NA |
| 11 | 33700849 | 33681131 | -1 | NM_001127223 | CD59          | 0 | NA | 0 | NA | 1 | 13 | 0 | NA | 0 | NA |
| 11 | 33700849 | 33681131 | -1 | NM_001127225 | CD59          | 0 | NA | 0 | NA | 1 | 13 | 0 | NA | 0 | NA |
| 11 | 33700849 | 33681131 | -1 | NM_001127226 | CD59          | 0 | NA | 0 | NA | 1 | 13 | 0 | NA | 0 | NA |
| 11 | 33701074 | 33681131 | -1 | NM_001127227 | CD59          | 0 | NA | 0 | NA | 1 | 13 | 0 | NA | 0 | NA |
| 11 | 33714601 | 33681131 | -1 | NM_000611    | CD59          | 0 | NA | 0 | NA | 0 | NA | 0 | NA | 0 | NA |
| 11 | 33714601 | 33681131 | -1 | NM_203329    | CD59          | 0 | NA | 0 | NA | 0 | NA | 0 | NA | 0 | NA |
| 11 | 33714601 | 33681131 | -1 | NM_203330    | CD59          | 0 | NA | 0 | NA | 0 | NA | 0 | NA | 0 | NA |
| 11 | 33714601 | 33681131 | -1 | NM_203331    | CD59          | 0 | NA | 0 | NA | 0 | NA | 0 | NA | 0 | NA |
| 11 | 33752647 | 33719065 | -1 | NM_012175    | FBXO3         | 0 | NA | 0 | NA | 0 | NA | 0 | NA | 0 | NA |
| 11 | 33752647 | 33724866 | -1 | NM_033406    | FBXO3         | 0 | NA | 0 | NA | 0 | NA | 0 | NA | 0 | NA |
| 11 | 33870412 | 33836698 | -1 | NM_005574    | LMO2          | 0 | NA | 0 | NA | 0 | NA | 0 | NA | 0 | NA |
| 11 | 34029805 | 34077183 | 1  | NM_203364    | CAPRIN1       | 0 | NA | 0 | NA | 0 | NA | 0 | NA | 0 | NA |
| 11 | 34029805 | 34080733 | 1  | NM_005898    | CAPRIN1       | 0 | NA | 0 | NA | 0 | NA | 0 | NA | 0 | NA |
| 11 | 34083724 | 34125033 | 1  | NM_024662    | NAT10         | 0 | NA | 0 | NA | 0 | NA | 1 | 11 | 0 | NA |
| 11 | 34335378 | 34129110 | -1 | NM_145804    | ABTB2         | 0 | NA | 0 | NA | 1 | 14 | 0 | NA | 0 | NA |
| 11 | 34417053 | 34450183 | 1  | NM_001752    | CAT           | 0 | NA | 0 | NA | 0 | NA | 0 | NA | 0 | NA |
| 11 | 34489922 | 34456917 | -1 | NM_198381    | ELF5          | 0 | NA | 0 | NA | 0 | NA | 0 | NA | 0 | NA |
| 11 | 34491906 | 34456917 | -1 | NM_001422    | ELF5          | 0 | NA | 0 | NA | 0 | NA | 0 | NA | 0 | NA |
| 11 | 34599243 | 34639657 | 1  | NM_012153    | EHF           | 0 | NA | 0 | NA | 0 | NA | 0 | NA | 0 | NA |
| 11 | 34894515 | 34860418 | -1 | NM_015957    | APIP          | 1 | 11 | 0 | NA | 0 | NA | 0 | NA | 0 | NA |
| 11 | 34894740 | 34974094 | 1  | NM_003477    | PDHX          | 1 | 11 | 0 | NA | 0 | NA | 0 | NA | 0 | NA |
| 11 | 35116992 | 35210525 | 1  | NM_000610    | CD44          | 0 | NA | 0 | NA | 1 | 13 | 0 | NA | 0 | NA |
| 11 | 35116992 | 35210525 | 1  | NM_001001389 | CD44          | 0 | NA | 0 | NA | 1 | 13 | 0 | NA | 0 | NA |
| 11 | 35116992 | 35210525 | 1  | NM_001001390 | CD44          | 0 | NA | 0 | NA | 1 | 13 | 0 | NA | 0 | NA |
| 11 | 35116992 | 35210525 | 1  | NM_001001391 | CD44          | 0 | NA | 0 | NA | 1 | 13 | 0 | NA | 0 | NA |
| 11 | 35116992 | 35210525 | 1  | NM_001001392 | CD44          | 0 | NA | 0 | NA | 1 | 13 | 0 | NA | 0 | NA |
| 11 | 35397681 | 35229327 | -1 | NM_004171    | SLC1A2        | 0 | NA | 1 | 15 | 0 | NA | 0 | NA | 0 | NA |
| 11 | 35503752 | 35409951 | -1 | NM_001001991 | DKFZP586H2123 | 0 | NA | 0 | NA | 0 | NA | 1 | 11 | 0 | NA |
| 11 | 35503752 | 35409951 | -1 | NM_015430    | DKFZP586H2123 | 0 | NA | 0 | NA | 0 | NA | 1 | 11 | 0 | NA |
| 11 | 35596630 | 35598989 | 1  | NM_014344    | FJX1          | 0 | NA | 0 | NA | 0 | NA | 0 | NA | 0 | NA |
| 11 | 35640928 | 35786335 | 1  | NM_017583    | TRIM44        | 1 | 34 | 1 | 23 | 1 | 15 | 1 | 15 | 0 | NA |
| 11 | 35922187 | 36209417 | 1  | NM_174902    | LDLRAD3       | 1 | 15 | 0 | NA | 0 | NA | 0 | NA | 0 | NA |
| 11 | 36267575 | 36250417 | -1 | NM_001101653 | COMMD9        | 0 | NA | 0 | NA | 0 | NA | 0 | NA | 0 | NA |
| 11 | 36267575 | 36250417 | -1 | NM_014186    | COMMD9        | 0 | NA | 0 | NA | 0 | NA | 0 | NA | 0 | NA |
| 11 | 36354130 | 36443330 | 1  | NM_024841    | FLJ14213      | 0 | NA | 0 | NA | 0 | NA | 0 | NA | 0 | NA |
| 11 | 36488398 | 36467298 | -1 | NM_004620    | TRAF6         | 0 | NA | 1 | 13 | 0 | NA | 0 | NA | 0 | NA |
| 11 | 36488398 | 36467298 | -1 | NM_145803    | TRAF6         | 0 | NA | 1 | 13 | 0 | NA | 0 | NA | 0 | NA |
| 11 | 36546138 | 36557886 | 1  | NM_000448    | RAG1          | 0 | NA | 1 | 13 | 0 | NA | 0 | NA | 0 | NA |
| 11 | 36572668 | 36637393 | 1  | NM_138787    | C11orf74      | 1 | 11 | 0 | NA | 0 | NA | 0 | NA | 0 | NA |
| 11 | 36576388 | 36570068 | -1 | NM_000536    | RAG2          | 1 | 11 | 0 | NA | 0 | NA | 0 | NA | 0 | NA |
| 11 | 40272240 | 40092328 | -1 | NM_020929    | LRRC4C        | 0 | NA | 0 | NA | 0 | NA | 0 | NA | 0 | NA |
| 11 | 43290108 | 43322655 | 1  | NM_006595    | API5          | 0 | NA | 0 | NA | 0 | NA | 0 | NA | 0 | NA |
| 11 | 43337066 | 43472071 | 1  | NM_018259    | TTC17         | 0 | NA | 0 | NA | 0 | NA | 0 | NA | 0 | NA |
| 11 | 43658718 | 43834745 | 1  | NM_016142    | HSD17B12      | 1 | 13 | 0 | NA | 0 | NA | 0 | NA | 0 | NA |
| 11 | 43858972 | 43898389 | 1  | NM_139178    | ALKBH3        | 1 | 60 | 1 | 14 | 0 | NA | 1 | 11 | 0 | NA |
| 11 | 44026106 | 44038103 | 1  | NM_001031854 | LOC390110     | 0 | NA | 0 | NA | 0 | NA | 0 | NA | 0 | NA |
| 11 | 44044304 | 44062145 | 1  | NM_001127219 | ACCS          | 0 | NA | 0 | NA | 0 | NA | 1 | 12 | 0 | NA |
| 11 | 44044387 | 44062145 | 1  | NM_032592    | ACCS          | 0 | NA | 0 | NA | 0 | NA | 1 | 12 | 0 | NA |
| 11 | 44073674 | 44223556 | 1  | NM_000401    | EXT2          | 0 | NA | 0 | NA | 0 | NA | 1 | 14 | 0 | NA |
| 11 | 44073674 | 44223556 | 1  | NM_207122    | EXT2          | 0 | NA | 0 | NA | 0 | NA | 1 | 14 | 0 | NA |
| 11 | 44288292 | 44242733 | -1 | NM_021926    | ALX4          | 0 | NA | 0 | NA | 0 | NA | 0 | NA | 0 | NA |
| 11 | 44543716 | 44597891 | 1  | NM_001024844 | CD82          | 1 | 12 | 0 | NA | 0 | NA | 0 | NA | 0 | NA |
| 11 | 44543716 | 44597891 | 1  | NM_002231    | CD82          | 1 | 12 | 0 | NA | 0 | NA | 0 | NA | 0 | NA |
| 11 | 44838454 | 44909459 | 1  | NM_130783    | TSPAN18       | 0 | NA | 0 | NA | 0 | NA | 0 | NA | 0 | NA |
| 11 | 44884532 | 44909460 | 1  | NM_001031730 | TSPAN18       | 0 | NA | 0 | NA | 0 | NA | 0 | NA | 0 | NA |
| 11 | 44929184 | 44910474 | -1 | NM_001076787 | TP53I11       | 0 | NA | 0 | NA | 0 | NA | 0 | NA | 0 | NA |
| 11 | 44929184 | 44910474 | -1 | NM_006034    | TP53I11       | 0 | NA | 0 | NA | 0 | NA | 0 | NA | 0 | NA |
| 11 | 45072139 | 45203479 | 1  | NM_020229    | PRDM11        | 0 | NA | 0 | NA | 0 | NA | 0 | NA | 0 | NA |
| 11 | 45264460 | 45218428 | -1 | NM_020826    | SYT13         | 0 | NA | 0 | NA | 0 | NA | 0 | NA | 0 | NA |
| 11 | 45643748 | 45627002 | -1 | NM_003654    | CHST1         | 0 | NA | 0 | NA | 0 | NA | 0 | NA | 0 | NA |
| 11 | 45783911 | 45791143 | 1  | NM_018389    | SLC35C1       | 1 | 11 | 0 | NA | 0 | NA | 0 | NA | 0 | NA |
| 11 | 45825604 | 45861372 | 1  | NM_021117    | CRY2          | 0 | NA | 0 | NA | 0 | NA | 0 | NA | 0 | NA |
| 11 | 45863777 | 45884592 | 1  | NM_005456    | MAPK8IP1      | 0 | NA | 0 | NA | 1 | 14 | 0 | NA | 0 | NA |

|    |          |          |    |              |           |   |    |   |    |   |    |   |    |   |    |
|----|----------|----------|----|--------------|-----------|---|----|---|----|---|----|---|----|---|----|
| 11 | 45885409 | 45884661 | -1 | NM_001080446 | LOC143678 | 0 | NA | 0 | NA | 0 | NA | 0 | NA | 0 | NA |
| 11 | 45896182 | 45887795 | -1 | NM_057174    | PEX16     | 0 | NA | 0 | NA | 0 | NA | 0 | NA | 0 | NA |
| 11 | 45896182 | 4588300  | -1 | NM_004813    | PEX16     | 0 | NA | 0 | NA | 0 | NA | 0 | NA | 0 | NA |
| 11 | 45899771 | 45907223 | 1  | NM_152312    | GYLTL1B   | 0 | NA | 0 | NA | 0 | NA | 0 | NA | 0 | NA |
| 11 | 46099561 | 45907445 | -1 | NM_001101802 | PHF21A    | 0 | NA | 0 | NA | 0 | NA | 0 | NA | 0 | NA |
| 11 | 46099561 | 45907445 | -1 | NM_016621    | PHF21A    | 0 | NA | 0 | NA | 0 | NA | 0 | NA | 0 | NA |
| 11 | 46255803 | 46299548 | 1  | NM_052854    | CREB3L1   | 0 | NA | 0 | NA | 0 | NA | 0 | NA | 0 | NA |
| 11 | 46311314 | 46358680 | 1  | NM_201532    | DGKZ      | 0 | NA | 0 | NA | 0 | NA | 0 | NA | 0 | NA |
| 11 | 46323562 | 46358680 | 1  | NM_201533    | DGKZ      | 0 | NA | 0 | NA | 0 | NA | 0 | NA | 0 | NA |
| 11 | 46325531 | 46358680 | 1  | NM_003646    | DGKZ      | 0 | NA | 0 | NA | 0 | NA | 0 | NA | 0 | NA |
| 11 | 46339720 | 46358680 | 1  | NM_001105540 | DGKZ      | 1 | 16 | 0 | NA | 0 | NA | 0 | NA | 0 | NA |
| 11 | 46359193 | 46361951 | 1  | NM_001012334 | MDK       | 1 | 12 | 0 | NA | 0 | NA | 0 | NA | 0 | NA |
| 11 | 46359794 | 46361951 | 1  | NM_002391    | MDK       | 1 | 12 | 0 | NA | 0 | NA | 0 | NA | 0 | NA |
| 11 | 46359878 | 46361951 | 1  | NM_001012333 | MDK       | 1 | 12 | 0 | NA | 0 | NA | 0 | NA | 0 | NA |
| 11 | 46364683 | 46363215 | -1 | NM_000741    | CHRM4     | 1 | 12 | 0 | NA | 0 | NA | 0 | NA | 0 | NA |
| 11 | 46569490 | 46374539 | -1 | NM_017749    | AMBRA1    | 0 | NA | 0 | NA | 0 | NA | 0 | NA | 0 | NA |
| 11 | 46595353 | 46580986 | -1 | NM_173811    | C11orf77  | 1 | 12 | 0 | NA | 0 | NA | 0 | NA | 0 | NA |
| 11 | 46595702 | 46652644 | 1  | NM_014741    | HARB1     | 1 | 12 | 0 | NA | 0 | NA | 0 | NA | 0 | NA |
| 11 | 46678696 | 46655207 | -1 | NM_004308    | ARHGAP1   | 1 | 19 | 0 | NA | 0 | NA | 0 | NA | 0 | NA |
| 11 | 46678943 | 46684037 | 1  | NM_024741    | ZNF408    | 1 | 19 | 0 | NA | 0 | NA | 0 | NA | 0 | NA |
| 11 | 46697318 | 46717632 | 1  | NM_000506    | F2        | 0 | NA | 0 | NA | 0 | NA | 0 | NA | 0 | NA |
| 11 | 46824419 | 46721659 | -1 | NM_001008938 | CKAP5     | 0 | NA | 0 | NA | 0 | NA | 0 | NA | 0 | NA |
| 11 | 46824419 | 46721659 | -1 | NM_014756    | CKAP5     | 0 | NA | 0 | NA | 0 | NA | 0 | NA | 0 | NA |
| 11 | 46896652 | 46834993 | -1 | NM_002334    | LRP4      | 0 | NA | 0 | NA | 1 | 12 | 0 | NA | 0 | NA |
| 11 | 46914826 | 47140374 | 1  | NM_001003676 | C11orf49  | 0 | NA | 0 | NA | 0 | NA | 0 | NA | 0 | NA |
| 11 | 46914826 | 47140374 | 1  | NM_001003677 | C11orf49  | 0 | NA | 0 | NA | 0 | NA | 0 | NA | 0 | NA |
| 11 | 46914826 | 47140374 | 1  | NM_024113    | C11orf49  | 0 | NA | 0 | NA | 0 | NA | 0 | NA | 0 | NA |
| 11 | 46914826 | 47142507 | 1  | NM_001003678 | C11orf49  | 0 | NA | 0 | NA | 0 | NA | 0 | NA | 0 | NA |
| 11 | 47154995 | 47142427 | -1 | NM_032389    | ARFGAP2   | 1 | 17 | 0 | NA | 0 | NA | 0 | NA | 0 | NA |
| 11 | 47164534 | 47156656 | -1 | NM_016223    | PAC3IN3   | 1 | 17 | 0 | NA | 0 | NA | 0 | NA | 0 | NA |
| 11 | 47193068 | 47217345 | 1  | NM_000107    | DDB2      | 1 | 15 | 0 | NA | 1 | 15 | 0 | NA | 0 | NA |
| 11 | 47226939 | 47217428 | -1 | NM_001610    | ACP2      | 1 | 11 | 0 | NA | 0 | NA | 0 | NA | 0 | NA |
| 11 | 47237308 | 47246972 | 1  | NM_005693    | NR1H3     | 1 | 11 | 0 | NA | 0 | NA | 0 | NA | 0 | NA |
| 11 | 47247534 | 47308158 | 1  | NM_130470    | MADD      | 1 | 17 | 0 | NA | 0 | NA | 0 | NA | 0 | NA |
| 11 | 47247774 | 47308158 | 1  | NM_003682    | MADD      | 1 | 17 | 0 | NA | 0 | NA | 0 | NA | 0 | NA |
| 11 | 47247774 | 47308158 | 1  | NM_130471    | MADD      | 1 | 17 | 0 | NA | 0 | NA | 0 | NA | 0 | NA |
| 11 | 47247774 | 47308158 | 1  | NM_130472    | MADD      | 1 | 17 | 0 | NA | 0 | NA | 0 | NA | 0 | NA |
| 11 | 47247774 | 47308158 | 1  | NM_130473    | MADD      | 1 | 17 | 0 | NA | 0 | NA | 0 | NA | 0 | NA |
| 11 | 47247774 | 47308158 | 1  | NM_130474    | MADD      | 1 | 17 | 0 | NA | 0 | NA | 0 | NA | 0 | NA |
| 11 | 47248259 | 47308157 | 1  | NM_130476    | MADD      | 1 | 17 | 0 | NA | 0 | NA | 0 | NA | 0 | NA |
| 11 | 47248259 | 47308158 | 1  | NM_130475    | MADD      | 1 | 17 | 0 | NA | 0 | NA | 0 | NA | 0 | NA |
| 11 | 47330829 | 47309532 | -1 | NM_000256    | MYBPC3    | 0 | NA | 1 | 15 | 0 | NA | 0 | NA | 0 | NA |
| 11 | 47356703 | 47332984 | -1 | NM_001080547 | SPI1      | 0 | NA | 0 | NA | 0 | NA | 0 | NA | 0 | NA |
| 11 | 47356703 | 47332984 | -1 | NM_003120    | SPI1      | 0 | NA | 0 | NA | 0 | NA | 0 | NA | 0 | NA |
| 11 | 47386757 | 47394623 | 1  | NM_152264    | SLC39A13  | 0 | NA | 0 | NA | 0 | NA | 0 | NA | 0 | NA |
| 11 | 47404600 | 47396895 | -1 | NM_002804    | PSMC3     | 0 | NA | 0 | NA | 0 | NA | 0 | NA | 0 | NA |
| 11 | 47427306 | 47415890 | -1 | NM_005055    | RAPSN     | 0 | NA | 0 | NA | 0 | NA | 0 | NA | 0 | NA |
| 11 | 47427306 | 47415890 | -1 | NM_032645    | RAPSN     | 0 | NA | 0 | NA | 0 | NA | 0 | NA | 0 | NA |
| 11 | 47467152 | 47446520 | -1 | NM_001025596 | CUGBP1    | 0 | NA | 0 | NA | 0 | NA | 0 | NA | 0 | NA |
| 11 | 47472649 | 47446520 | -1 | NM_198700    | CUGBP1    | 0 | NA | 0 | NA | 0 | NA | 0 | NA | 0 | NA |
| 11 | 47531264 | 47446520 | -1 | NM_006560    | CUGBP1    | 0 | NA | 0 | NA | 0 | NA | 0 | NA | 0 | NA |
| 11 | 47543704 | 47549944 | 1  | NM_175732    | PTPMT1    | 0 | NA | 0 | NA | 0 | NA | 0 | NA | 0 | NA |
| 11 | 47557078 | 47550325 | -1 | NM_016506    | KBTD4     | 0 | NA | 0 | NA | 0 | NA | 0 | NA | 0 | NA |
| 11 | 47557101 | 47550325 | -1 | NM_018095    | KBTD4     | 0 | NA | 0 | NA | 0 | NA | 0 | NA | 0 | NA |
| 11 | 47557207 | 47562690 | 1  | NM_004551    | NDUFS3    | 0 | NA | 0 | NA | 0 | NA | 0 | NA | 0 | NA |
| 11 | 47572537 | 47567791 | -1 | NM_031909    | C1QTNF4   | 0 | NA | 0 | NA | 0 | NA | 0 | NA | 0 | NA |
| 11 | 47620640 | 47595443 | -1 | NM_014342    | MTCH2     | 0 | NA | 0 | NA | 0 | NA | 0 | NA | 0 | NA |
| 11 | 47692878 | 47637718 | -1 | NM_024783    | AGBL2     | 0 | NA | 0 | NA | 0 | NA | 0 | NA | 0 | NA |
| 11 | 47745569 | 47694644 | -1 | NM_015308    | FNBP4     | 0 | NA | 0 | NA | 0 | NA | 0 | NA | 0 | NA |
| 11 | 47826633 | 47756245 | -1 | NM_015231    | NUP160    | 0 | NA | 0 | NA | 0 | NA | 0 | NA | 0 | NA |
| 11 | 47958685 | 48110842 | 1  | NM_001098503 | PTPRJ     | 0 | NA | 0 | NA | 0 | NA | 1 | 14 | 0 | NA |
| 11 | 47958685 | 48148970 | 1  | NM_002843    | PTPRJ     | 0 | NA | 0 | NA | 0 | NA | 1 | 14 | 0 | NA |
| 11 | 48194937 | 48195867 | 1  | NM_001005470 | OR4B1     | 0 | NA | 0 | NA | 0 | NA | 0 | NA | 0 | NA |
| 11 | 48223231 | 48224143 | 1  | NM_001004727 | OR4X2     | 0 | NA | 0 | NA | 0 | NA | 0 | NA | 0 | NA |
| 11 | 48241988 | 48242906 | 1  | NM_001004726 | OR4X1     | 0 | NA | 0 | NA | 0 | NA | 0 | NA | 0 | NA |



|    |          |          |    |              |          |   |    |   |    |   |    |   |    |   |    |
|----|----------|----------|----|--------------|----------|---|----|---|----|---|----|---|----|---|----|
| 11 | 48284350 | 48285280 | 1  | NM_001004725 | OR4S1    | 0 | NA | 0 | NA | 0 | NA | 0 | NA | 0 | NA |
| 11 | 48303068 | 48304058 | 1  | NM_001004702 | OR4C3    | 0 | NA | 0 | NA | 0 | NA | 0 | NA | 0 | NA |
| 11 | 48330575 | 48323475 | -1 | NM_001005513 | OR4C45   | 0 | NA | 0 | NA | 0 | NA | 0 | NA | 0 | NA |
| 11 | 48466920 | 48467850 | 1  | NM_001005512 | OR4A47   | 0 | NA | 0 | NA | 0 | NA | 0 | NA | 0 | NA |
| 11 | 49186798 | 49124762 | -1 | NM_001014986 | FOLH1    | 0 | NA | 0 | NA | 0 | NA | 0 | NA | 0 | NA |
| 11 | 49186798 | 49124762 | -1 | NM_004476    | FOLH1    | 0 | NA | 0 | NA | 0 | NA | 0 | NA | 0 | NA |
| 11 | 49930550 | 49931480 | 1  | NM_001001955 | OR4C13   | 0 | NA | 0 | NA | 0 | NA | 0 | NA | 0 | NA |
| 11 | 49960613 | 49959683 | -1 | NM_001005270 | OR4C12   | 0 | NA | 0 | NA | 0 | NA | 0 | NA | 0 | NA |
| 11 | 51268971 | 51268023 | -1 | NM_001005272 | OR4A5    | 0 | NA | 0 | NA | 0 | NA | 0 | NA | 0 | NA |
| 11 | 51371857 | 51372787 | 1  | NM_001004703 | OR4C46   | 0 | NA | 0 | NA | 0 | NA | 0 | NA | 0 | NA |
| 11 | 54786233 | 54795171 | 1  | NM_024114    | TRIM48   | 0 | NA | 0 | NA | 0 | NA | 0 | NA | 0 | NA |
| 11 | 54867252 | 54868239 | 1  | NM_001005274 | OR4A16   | 0 | NA | 0 | NA | 0 | NA | 0 | NA | 0 | NA |
| 11 | 54891935 | 54892970 | 1  | NM_001005275 | OR4A15   | 0 | NA | 0 | NA | 0 | NA | 0 | NA | 0 | NA |
| 11 | 55078358 | 55079471 | 1  | NM_001001920 | OR4C15   | 0 | NA | 0 | NA | 0 | NA | 0 | NA | 0 | NA |
| 11 | 55096179 | 55097112 | 1  | NM_001004701 | OR4C16   | 0 | NA | 0 | NA | 0 | NA | 0 | NA | 0 | NA |
| 11 | 55128425 | 55127492 | -1 | NM_001004700 | OR4C11   | 0 | NA | 0 | NA | 0 | NA | 0 | NA | 0 | NA |
| 11 | 55162409 | 55163348 | 1  | NM_001004124 | OR4P4    | 0 | NA | 0 | NA | 0 | NA | 0 | NA | 0 | NA |
| 11 | 55174955 | 55175891 | 1  | NM_001004059 | OR4S2    | 0 | NA | 0 | NA | 0 | NA | 0 | NA | 0 | NA |
| 11 | 55189218 | 55190148 | 1  | NM_001004704 | OR4C6    | 0 | NA | 0 | NA | 0 | NA | 0 | NA | 0 | NA |
| 11 | 55297489 | 55298434 | 1  | NM_001001967 | OR5D13   | 0 | NA | 0 | NA | 0 | NA | 0 | NA | 0 | NA |
| 11 | 55319607 | 55320552 | 1  | NM_001004735 | OR5D14   | 0 | NA | 0 | NA | 0 | NA | 0 | NA | 0 | NA |
| 11 | 55335518 | 55336454 | 1  | NM_001004738 | OR5L1    | 0 | NA | 0 | NA | 0 | NA | 0 | NA | 0 | NA |
| 11 | 55343681 | 55344623 | 1  | NM_001001952 | OR5D18   | 0 | NA | 0 | NA | 0 | NA | 0 | NA | 0 | NA |
| 11 | 55351270 | 55352206 | 1  | NM_001004739 | OR5L2    | 0 | NA | 0 | NA | 1 | 12 | 0 | NA | 0 | NA |
| 11 | 55362803 | 55363790 | 1  | NM_001005496 | OR5D16   | 0 | NA | 0 | NA | 1 | 12 | 0 | NA | 0 | NA |
| 11 | 55410031 | 55415860 | 1  | NM_032681    | SPRYD5   | 0 | NA | 0 | NA | 0 | NA | 0 | NA | 0 | NA |
| 11 | 55438634 | 55437701 | -1 | NM_001001960 | OR5W2    | 0 | NA | 0 | NA | 0 | NA | 0 | NA | 0 | NA |
| 11 | 55460452 | 55459507 | -1 | NM_006637    | OR5I1    | 0 | NA | 0 | NA | 1 | 13 | 0 | NA | 0 | NA |
| 11 | 55492515 | 55491609 | -1 | NM_001005491 | OR10AG1  | 0 | NA | 0 | NA | 0 | NA | 0 | NA | 0 | NA |
| 11 | 55518677 | 55517732 | -1 | NM_003697    | OR5F1    | 0 | NA | 0 | NA | 0 | NA | 0 | NA | 0 | NA |
| 11 | 55554470 | 55555445 | 1  | NM_001001921 | OR5AS1   | 0 | NA | 0 | NA | 0 | NA | 0 | NA | 0 | NA |
| 11 | 55617359 | 55618292 | 1  | NM_001003750 | OR8I2    | 0 | NA | 0 | NA | 0 | NA | 0 | NA | 0 | NA |
| 11 | 55629094 | 55630033 | 1  | NM_001005200 | OR8H2    | 0 | NA | 0 | NA | 0 | NA | 0 | NA | 0 | NA |
| 11 | 55646424 | 55647363 | 1  | NM_001005201 | OR8H3    | 0 | NA | 0 | NA | 0 | NA | 0 | NA | 0 | NA |
| 11 | 55661770 | 55660822 | -1 | NM_001004064 | OR8J3    | 0 | NA | 0 | NA | 0 | NA | 0 | NA | 0 | NA |
| 11 | 55684369 | 55683445 | -1 | NM_001004058 | OR8K5    | 0 | NA | 0 | NA | 0 | NA | 0 | NA | 0 | NA |
| 11 | 55700669 | 55701608 | 1  | NM_001005492 | OR5J2    | 0 | NA | 0 | NA | 0 | NA | 0 | NA | 0 | NA |
| 11 | 55757237 | 55756157 | -1 | NM_001004746 | OR5T2    | 0 | NA | 0 | NA | 0 | NA | 0 | NA | 0 | NA |
| 11 | 55776251 | 55777274 | 1  | NM_001004747 | OR5T3    | 0 | NA | 0 | NA | 0 | NA | 0 | NA | 0 | NA |
| 11 | 55799690 | 55800671 | 1  | NM_001004745 | OR5T1    | 0 | NA | 0 | NA | 0 | NA | 0 | NA | 0 | NA |
| 11 | 55815114 | 55814178 | -1 | NM_001005199 | OR8H1    | 0 | NA | 0 | NA | 0 | NA | 0 | NA | 0 | NA |
| 11 | 55842358 | 55843297 | 1  | NM_001005202 | OR8K3    | 0 | NA | 0 | NA | 0 | NA | 0 | NA | 0 | NA |
| 11 | 55870090 | 55871050 | 1  | NM_001002907 | OR8K1    | 0 | NA | 0 | NA | 0 | NA | 0 | NA | 0 | NA |
| 11 | 55884298 | 55885249 | 1  | NM_001005205 | OR8J1    | 0 | NA | 0 | NA | 0 | NA | 0 | NA | 0 | NA |
| 11 | 55899675 | 55900605 | 1  | NM_001005204 | OR8U1    | 0 | NA | 0 | NA | 0 | NA | 0 | NA | 0 | NA |
| 11 | 55899675 | 56265136 | 1  | NM_001013356 | OR8U8    | 0 | NA | 0 | NA | 0 | NA | 0 | NA | 0 | NA |
| 11 | 55942284 | 55941309 | -1 | NM_001004744 | OR5R1    | 0 | NA | 0 | NA | 0 | NA | 0 | NA | 0 | NA |
| 11 | 55987453 | 55986520 | -1 | NM_001004743 | OR5M9    | 0 | NA | 0 | NA | 0 | NA | 0 | NA | 0 | NA |
| 11 | 55994549 | 55993625 | -1 | NM_001004742 | OR5M3    | 0 | NA | 0 | NA | 0 | NA | 0 | NA | 0 | NA |
| 11 | 56015422 | 56014486 | -1 | NM_001005282 | OR5M8    | 0 | NA | 0 | NA | 0 | NA | 0 | NA | 0 | NA |
| 11 | 56067309 | 56066391 | -1 | NM_001005245 | OR5M11   | 0 | NA | 0 | NA | 0 | NA | 0 | NA | 0 | NA |
| 11 | 56101773 | 56100825 | -1 | NM_001004741 | OR5M10   | 0 | NA | 0 | NA | 0 | NA | 0 | NA | 0 | NA |
| 11 | 56137554 | 56136606 | -1 | NM_001004740 | OR5M1    | 0 | NA | 0 | NA | 0 | NA | 0 | NA | 0 | NA |
| 11 | 56166491 | 56165540 | -1 | NM_001002925 | OR5AP2   | 0 | NA | 0 | NA | 0 | NA | 0 | NA | 0 | NA |
| 11 | 56187737 | 56188670 | 1  | NM_001004730 | OR5AR1   | 0 | NA | 0 | NA | 0 | NA | 0 | NA | 0 | NA |
| 11 | 56224439 | 56225357 | 1  | NM_001005213 | OR9G1    | 0 | NA | 0 | NA | 1 | 12 | 0 | NA | 0 | NA |
| 11 | 56224439 | 56225357 | 1  | NM_001013358 | OR9G9    | 0 | NA | 0 | NA | 1 | 12 | 0 | NA | 0 | NA |
| 11 | 56267863 | 56266879 | -1 | NM_001005284 | OR9G4    | 0 | NA | 0 | NA | 0 | NA | 0 | NA | 0 | NA |
| 11 | 56512964 | 56513894 | 1  | NM_001005323 | OR5AK2   | 0 | NA | 0 | NA | 0 | NA | 0 | NA | 0 | NA |
| 11 | 56705796 | 56714154 | 1  | NM_001005210 | LRRC55   | 0 | NA | 0 | NA | 0 | NA | 0 | NA | 0 | NA |
| 11 | 56761489 | 56757642 | -1 | NM_005161    | AGTRL1   | 0 | NA | 1 | 15 | 0 | NA | 0 | NA | 0 | NA |
| 11 | 56848989 | 56823678 | -1 | NM_033396    | TNKS1BP1 | 1 | 18 | 0 | NA | 0 | NA | 0 | NA | 0 | NA |
| 11 | 56859927 | 56850034 | -1 | NM_003146    | SSRP1    | 0 | NA | 0 | NA | 0 | NA | 0 | NA | 0 | NA |
| 11 | 56862524 | 56894125 | 1  | NM_002559    | P2RX3    | 0 | NA | 0 | NA | 0 | NA | 0 | NA | 0 | NA |
| 11 | 56905199 | 56900818 | -1 | NM_006093    | PRG3     | 0 | NA | 0 | NA | 0 | NA | 0 | NA | 0 | NA |

|    |          |          |    |              |            |   |    |   |    |   |    |   |    |   |    |
|----|----------|----------|----|--------------|------------|---|----|---|----|---|----|---|----|---|----|
| 11 | 56914706 | 56911409 | -1 | NM_002728    | PRG2       | 0 | NA | 0 | NA | 0 | NA | 0 | NA | 0 | NA |
| 11 | 56951099 | 56931002 | -1 | NM_014096    | SLC43A3    | 0 | NA | 0 | NA | 1 | 12 | 0 | NA | 0 | NA |
| 11 | 56951170 | 56931002 | -1 | NM_199329    | SLC43A3    | 0 | NA | 0 | NA | 1 | 12 | 0 | NA | 0 | NA |
| 11 | 56951629 | 56931002 | -1 | NM_017611    | SLC43A3    | 0 | NA | 0 | NA | 1 | 12 | 0 | NA | 0 | NA |
| 11 | 56984914 | 57000960 | 1  | NM_178570    | RTN4RL2    | 0 | NA | 0 | NA | 0 | NA | 0 | NA | 0 | NA |
| 11 | 57039735 | 57008582 | -1 | NM_003627    | SLC43A1    | 0 | NA | 0 | NA | 0 | NA | 0 | NA | 0 | NA |
| 11 | 57054808 | 57052511 | -1 | NM_012456    | TIMM10     | 0 | NA | 0 | NA | 0 | NA | 0 | NA | 0 | NA |
| 11 | 57065554 | 57074684 | 1  | NM_001105565 | SMTNL1     | 0 | NA | 0 | NA | 0 | NA | 0 | NA | 0 | NA |
| 11 | 57091756 | 57075704 | -1 | NM_004223    | UBE2L6     | 0 | NA | 1 | 13 | 1 | 12 | 0 | NA | 0 | NA |
| 11 | 57092029 | 57075704 | -1 | NM_198183    | UBE2L6     | 0 | NA | 1 | 13 | 1 | 12 | 0 | NA | 0 | NA |
| 11 | 57121602 | 57138902 | 1  | NM_000062    | SERPING1   | 0 | NA | 0 | NA | 0 | NA | 0 | NA | 0 | NA |
| 11 | 57122280 | 57138902 | 1  | NM_001032295 | SERPING1   | 0 | NA | 0 | NA | 0 | NA | 0 | NA | 0 | NA |
| 11 | 57173993 | 57169136 | -1 | NM_145008    | YPEL4      | 0 | NA | 0 | NA | 1 | 12 | 0 | NA | 0 | NA |
| 11 | 57181205 | 57185913 | 1  | NM_006831    | CLP1       | 1 | 17 | 0 | NA | 1 | 12 | 0 | NA | 0 | NA |
| 11 | 57192049 | 57225235 | 1  | NM_015457    | ZDHC5      | 1 | 17 | 0 | NA | 0 | NA | 1 | 15 | 0 | NA |
| 11 | 57236249 | 57227762 | -1 | NM_153450    | MED19      | 0 | NA | 0 | NA | 0 | NA | 0 | NA | 0 | NA |
| 11 | 57236617 | 57265020 | 1  | NM_015959    | TXNDC14    | 0 | NA | 0 | NA | 0 | NA | 0 | NA | 0 | NA |
| 11 | 57265297 | 57267459 | 1  | NM_170746    | C11orf31   | 0 | NA | 0 | NA | 0 | NA | 0 | NA | 0 | NA |
| 11 | 57285809 | 57343228 | 1  | NM_001085458 | CTNND1     | 0 | NA | 0 | NA | 0 | NA | 0 | NA | 0 | NA |
| 11 | 57285809 | 57343228 | 1  | NM_001085459 | CTNND1     | 0 | NA | 0 | NA | 0 | NA | 0 | NA | 0 | NA |
| 11 | 57285809 | 57343228 | 1  | NM_001085460 | CTNND1     | 0 | NA | 0 | NA | 0 | NA | 0 | NA | 0 | NA |
| 11 | 57285809 | 57343228 | 1  | NM_001085461 | CTNND1     | 0 | NA | 0 | NA | 0 | NA | 0 | NA | 0 | NA |
| 11 | 57285809 | 57343228 | 1  | NM_001085462 | CTNND1     | 0 | NA | 0 | NA | 0 | NA | 0 | NA | 0 | NA |
| 11 | 57285809 | 57343228 | 1  | NM_001085463 | CTNND1     | 0 | NA | 0 | NA | 0 | NA | 0 | NA | 0 | NA |
| 11 | 57285809 | 57343228 | 1  | NM_001085464 | CTNND1     | 0 | NA | 0 | NA | 0 | NA | 0 | NA | 0 | NA |
| 11 | 57285809 | 57343228 | 1  | NM_001085465 | CTNND1     | 0 | NA | 0 | NA | 0 | NA | 0 | NA | 0 | NA |
| 11 | 57285809 | 57343228 | 1  | NM_001085466 | CTNND1     | 0 | NA | 0 | NA | 0 | NA | 0 | NA | 0 | NA |
| 11 | 57285809 | 57343228 | 1  | NM_001085467 | CTNND1     | 0 | NA | 0 | NA | 0 | NA | 0 | NA | 0 | NA |
| 11 | 57285809 | 57343228 | 1  | NM_001085468 | CTNND1     | 0 | NA | 0 | NA | 0 | NA | 0 | NA | 0 | NA |
| 11 | 57285809 | 57343228 | 1  | NM_001085469 | CTNND1     | 0 | NA | 0 | NA | 0 | NA | 0 | NA | 0 | NA |
| 11 | 57285809 | 57343228 | 1  | NM_0011331   | CTNND1     | 0 | NA | 0 | NA | 0 | NA | 0 | NA | 0 | NA |
| 11 | 57547928 | 57705614 | 1  | NM_001005212 | OR9Q1      | 0 | NA | 0 | NA | 0 | NA | 0 | NA | 0 | NA |
| 11 | 57555000 | 57555954 | 1  | NM_001005186 | OR6Q1      | 0 | NA | 0 | NA | 0 | NA | 0 | NA | 0 | NA |
| 11 | 57643492 | 57642547 | -1 | NM_001005211 | OR9H1      | 0 | NA | 0 | NA | 0 | NA | 0 | NA | 0 | NA |
| 11 | 57714538 | 57715483 | 1  | NM_001005283 | OR9Q2      | 0 | NA | 0 | NA | 0 | NA | 0 | NA | 0 | NA |
| 11 | 57728229 | 57727251 | -1 | NM_001004459 | OR1S2      | 0 | NA | 0 | NA | 0 | NA | 0 | NA | 0 | NA |
| 11 | 57738792 | 57739770 | 1  | NM_001004458 | OR1S1      | 0 | NA | 0 | NA | 0 | NA | 0 | NA | 0 | NA |
| 11 | 57752923 | 57751963 | -1 | NM_001004471 | OR10Q1     | 0 | NA | 1 | 13 | 0 | NA | 0 | NA | 0 | NA |
| 11 | 57792308 | 57790839 | -1 | NM_207374    | OR10W1     | 0 | NA | 0 | NA | 0 | NA | 0 | NA | 0 | NA |
| 11 | 57883118 | 57882173 | -1 | NM_001005489 | OR5B17     | 0 | NA | 0 | NA | 0 | NA | 0 | NA | 0 | NA |
| 11 | 57927458 | 57926513 | -1 | NM_001005469 | OR5B3      | 0 | NA | 0 | NA | 0 | NA | 0 | NA | 0 | NA |
| 11 | 57947310 | 57946380 | -1 | NM_001005566 | OR5B2      | 0 | NA | 0 | NA | 0 | NA | 0 | NA | 0 | NA |
| 11 | 57964200 | 57963255 | -1 | NM_001004733 | OR5B12     | 0 | NA | 0 | NA | 0 | NA | 0 | NA | 0 | NA |
| 11 | 58032154 | 58031224 | -1 | NM_001005218 | OR5B21     | 0 | NA | 0 | NA | 0 | NA | 0 | NA | 0 | NA |
| 11 | 58099910 | 58050919 | -1 | NM_004811    | LPXN       | 1 | 13 | 0 | NA | 0 | NA | 0 | NA | 0 | NA |
| 11 | 58103162 | 58145091 | 1  | NM_053023    | ZFP91      | 1 | 13 | 0 | NA | 0 | NA | 0 | NA | 0 | NA |
| 11 | 58103162 | 58149781 | 1  | NM_170768    | ZFP91-CNTF | 1 | 13 | 0 | NA | 0 | NA | 0 | NA | 0 | NA |
| 11 | 58146720 | 58149778 | 1  | NM_000614    | CNTF       | 0 | NA | 0 | NA | 0 | NA | 0 | NA | 0 | NA |
| 11 | 58256023 | 58232805 | -1 | NM_201648    | GLYAT      | 0 | NA | 0 | NA | 0 | NA | 0 | NA | 0 | NA |
| 11 | 58256023 | 58234136 | -1 | NM_005838    | GLYAT      | 0 | NA | 0 | NA | 0 | NA | 0 | NA | 0 | NA |
| 11 | 58368573 | 58358115 | -1 | NM_145016    | GLYATL2    | 0 | NA | 0 | NA | 0 | NA | 0 | NA | 0 | NA |
| 11 | 58467297 | 58481092 | 1  | NM_080661    | GLYATL1    | 0 | NA | 0 | NA | 0 | NA | 0 | NA | 0 | NA |
| 11 | 58631285 | 58651443 | 1  | NM_198947    | FAM111B    | 0 | NA | 0 | NA | 0 | NA | 0 | NA | 0 | NA |
| 11 | 58668827 | 58679087 | 1  | NM_022074    | FAM111A    | 0 | NA | 1 | 12 | 1 | 20 | 0 | NA | 0 | NA |
| 11 | 58668827 | 58679087 | 1  | NM_198847    | FAM111A    | 0 | NA | 0 | NA | 1 | 12 | 1 | 20 | 0 | NA |
| 11 | 58696387 | 58732636 | 1  | NM_015177    | DTX4       | 0 | NA | 0 | NA | 0 | NA | 0 | NA | 0 | NA |
| 11 | 58737070 | 58732558 | -1 | NM_001039396 | MPEG1      | 0 | NA | 0 | NA | 0 | NA | 0 | NA | 0 | NA |
| 11 | 58888507 | 58889443 | 1  | NM_001004729 | OR5AN1     | 0 | NA | 0 | NA | 0 | NA | 0 | NA | 0 | NA |
| 11 | 58947002 | 58946027 | -1 | NM_001001954 | OR5A2      | 0 | NA | 0 | NA | 0 | NA | 0 | NA | 0 | NA |
| 11 | 58967217 | 58968165 | 1  | NM_001004728 | OR5A1      | 0 | NA | 0 | NA | 0 | NA | 0 | NA | 0 | NA |
| 11 | 58981009 | 58981954 | 1  | NM_001004708 | OR4D6      | 0 | NA | 0 | NA | 0 | NA | 0 | NA | 0 | NA |
| 11 | 59001478 | 59002414 | 1  | NM_001004705 | OR4D10     | 0 | NA | 0 | NA | 0 | NA | 0 | NA | 0 | NA |
| 11 | 59027624 | 59028560 | 1  | NM_001004706 | OR4D11     | 0 | NA | 0 | NA | 0 | NA | 0 | NA | 0 | NA |
| 11 | 59038961 | 59039906 | 1  | NM_001004711 | OR4D9      | 0 | NA | 0 | NA | 0 | NA | 0 | NA | 0 | NA |
| 11 | 59140193 | 59098446 | -1 | NM_002556    | OSBP       | 0 | NA | 0 | NA | 0 | NA | 0 | NA | 0 | NA |

|    |          |          |    |              |          |   |    |   |    |   |    |   |    |   |    |   |    |
|----|----------|----------|----|--------------|----------|---|----|---|----|---|----|---|----|---|----|---|----|
| 11 | 59182994 | 59160769 | -1 | NM_152716    | PATL1    | 1 | 13 | 0 | NA | 0 | NA | 0 | NA | 0 | NA | 0 | NA |
| 11 | 59237894 | 59236964 | -1 | NM_001005324 | OR10V1   | 0 | NA | 0 | NA | 0 | NA | 0 | NA | 0 | NA | 0 | NA |
| 11 | 59279464 | 59326754 | 1  | NM_004177    | STX3     | 0 | NA | 1 | 12 | 0 | NA | 0 | NA | 0 | NA | 0 | NA |
| 11 | 59334921 | 59330183 | -1 | NM_017840    | MRPL16   | 1 | 28 | 0 | NA | 0 | NA | 0 | NA | 0 | NA | 0 | NA |
| 11 | 59369550 | 59353321 | -1 | NM_005142    | GIF      | 0 | NA | 0 | NA | 0 | NA | 0 | NA | 0 | NA | 0 | NA |
| 11 | 59390617 | 59376856 | -1 | NM_001062    | TGN1     | 0 | NA | 0 | NA | 0 | NA | 0 | NA | 0 | NA | 0 | NA |
| 11 | 59564323 | 59572092 | 1  | NM_173801    | PLAC1L   | 0 | NA | 0 | NA | 0 | NA | 0 | NA | 0 | NA | 0 | NA |
| 11 | 59580676 | 59595164 | 1  | NM_001031666 | MS4A3    | 0 | NA | 0 | NA | 0 | NA | 0 | NA | 0 | NA | 0 | NA |
| 11 | 59580676 | 59595164 | 1  | NM_001031809 | MS4A3    | 0 | NA | 0 | NA | 0 | NA | 0 | NA | 0 | NA | 0 | NA |
| 11 | 59580676 | 59595164 | 1  | NM_006138    | MS4A3    | 0 | NA | 0 | NA | 0 | NA | 0 | NA | 0 | NA | 0 | NA |
| 11 | 59612712 | 59622592 | 1  | NM_000139    | MS4A2    | 0 | NA | 0 | NA | 0 | NA | 0 | NA | 0 | NA | 0 | NA |
| 11 | 59707250 | 59695655 | -1 | NM_152851    | MS4A6A   | 0 | NA | 0 | NA | 0 | NA | 0 | NA | 0 | NA | 0 | NA |
| 11 | 59707250 | 59695655 | -1 | NM_152852    | MS4A6A   | 0 | NA | 0 | NA | 0 | NA | 0 | NA | 0 | NA | 0 | NA |
| 11 | 59707250 | 59695646 | -1 | NM_022349    | MS4A6A   | 0 | NA | 0 | NA | 0 | NA | 0 | NA | 0 | NA | 0 | NA |
| 11 | 59804714 | 59833021 | 1  | NM_148975    | MS4A4A   | 0 | NA | 0 | NA | 0 | NA | 0 | NA | 0 | NA | 0 | NA |
| 11 | 59806661 | 59833021 | 1  | NM_024021    | MS4A4A   | 0 | NA | 0 | NA | 0 | NA | 0 | NA | 0 | NA | 0 | NA |
| 11 | 59858930 | 59865017 | 1  | NM_139249    | MS4A6E   | 0 | NA | 0 | NA | 0 | NA | 0 | NA | 0 | NA | 0 | NA |
| 11 | 59902533 | 59920002 | 1  | NM_021201    | MS4A7    | 0 | NA | 0 | NA | 0 | NA | 0 | NA | 0 | NA | 0 | NA |
| 11 | 59902533 | 59920002 | 1  | NM_206938    | MS4A7    | 0 | NA | 0 | NA | 0 | NA | 0 | NA | 0 | NA | 0 | NA |
| 11 | 59902533 | 59920002 | 1  | NM_206939    | MS4A7    | 0 | NA | 0 | NA | 0 | NA | 0 | NA | 0 | NA | 0 | NA |
| 11 | 59902533 | 59920002 | 1  | NM_206940    | MS4A7    | 0 | NA | 0 | NA | 0 | NA | 0 | NA | 0 | NA | 0 | NA |
| 11 | 59920062 | 59941804 | 1  | NM_001079692 | MS4A14   | 0 | NA | 0 | NA | 0 | NA | 0 | NA | 0 | NA | 0 | NA |
| 11 | 59920062 | 59941804 | 1  | NM_032597    | MS4A14   | 0 | NA | 0 | NA | 0 | NA | 0 | NA | 0 | NA | 0 | NA |
| 11 | 59953637 | 59971841 | 1  | NM_023945    | MS4A5    | 0 | NA | 0 | NA | 0 | NA | 0 | NA | 0 | NA | 0 | NA |
| 11 | 59979857 | 59994801 | 1  | NM_021950    | MS4A1    | 0 | NA | 0 | NA | 0 | NA | 0 | NA | 0 | NA | 0 | NA |
| 11 | 59979857 | 59994801 | 1  | NM_152866    | MS4A1    | 0 | NA | 0 | NA | 0 | NA | 0 | NA | 0 | NA | 0 | NA |
| 11 | 60016826 | 60031477 | 1  | NM_017716    | MS4A12   | 0 | NA | 0 | NA | 0 | NA | 0 | NA | 0 | NA | 0 | NA |
| 11 | 60039461 | 60066767 | 1  | NM_001012417 | MS4A13   | 0 | NA | 1 | 12 | 0 | NA | 0 | NA | 0 | NA | 0 | NA |
| 11 | 60039461 | 60066767 | 1  | NM_001100909 | MS4A13   | 0 | NA | 1 | 12 | 0 | NA | 0 | NA | 0 | NA | 0 | NA |
| 11 | 60223622 | 60239861 | 1  | NM_031457    | MS4A8B   | 0 | NA | 0 | NA | 0 | NA | 0 | NA | 0 | NA | 0 | NA |
| 11 | 60280915 | 60300780 | 1  | NM_001098835 | MS4A15   | 0 | NA | 0 | NA | 0 | NA | 0 | NA | 0 | NA | 0 | NA |
| 11 | 60280915 | 60300780 | 1  | NM_152717    | MS4A15   | 0 | NA | 0 | NA | 0 | NA | 0 | NA | 0 | NA | 0 | NA |
| 11 | 60309396 | 60325354 | 1  | NM_206893    | MS4A10   | 0 | NA | 1 | 12 | 0 | NA | 0 | NA | 0 | NA | 0 | NA |
| 11 | 60366004 | 60375137 | 1  | NM_024098    | CCDC8E   | 0 | NA | 0 | NA | 0 | NA | 0 | NA | 0 | NA | 0 | NA |
| 11 | 60380020 | 60374973 | -1 | NM_004778    | GPR44    | 1 | 11 | 0 | NA | 0 | NA | 0 | NA | 0 | NA | 0 | NA |
| 11 | 60391590 | 60399740 | 1  | NM_207341    | ZP1      | 1 | 12 | 0 | NA | 0 | NA | 0 | NA | 0 | NA | 0 | NA |
| 11 | 60430632 | 60414777 | -1 | NM_014502    | PRPF19   | 1 | 19 | 0 | NA | 0 | NA | 0 | NA | 0 | NA | 0 | NA |
| 11 | 60438252 | 60447491 | 1  | NM_024092    | TMEM109  | 1 | 19 | 0 | NA | 0 | NA | 0 | NA | 0 | NA | 0 | NA |
| 11 | 60448488 | 60461207 | 1  | NM_017870    | TMEM132A | 0 | NA | 0 | NA | 0 | NA | 0 | NA | 0 | NA | 0 | NA |
| 11 | 60448488 | 60461207 | 1  | NM_178031    | TMEM132A | 0 | NA | 0 | NA | 0 | NA | 0 | NA | 0 | NA | 0 | NA |
| 11 | 60475833 | 60461135 | -1 | NM_016582    | SLC15A3  | 0 | NA | 0 | NA | 0 | NA | 0 | NA | 0 | NA | 0 | NA |
| 11 | 60495749 | 60544424 | 1  | NM_006725    | CD6      | 0 | NA | 0 | NA | 0 | NA | 0 | NA | 0 | NA | 0 | NA |
| 11 | 60626505 | 60651899 | 1  | NM_014207    | CD5      | 0 | NA | 1 | 15 | 0 | NA | 0 | NA | 0 | NA | 0 | NA |
| 11 | 60685492 | 60654303 | -1 | NM_017966    | VPS37C   | 0 | NA | 1 | 16 | 0 | NA | 0 | NA | 0 | NA | 0 | NA |
| 11 | 60727559 | 60736926 | 1  | NM_001079807 | PGA3     | 0 | NA | 0 | NA | 0 | NA | 0 | NA | 0 | NA | 0 | NA |
| 11 | 60746396 | 60755755 | 1  | NM_001079808 | PGA4     | 0 | NA | 0 | NA | 0 | NA | 0 | NA | 0 | NA | 0 | NA |
| 11 | 60765244 | 60775491 | 1  | NM_014224    | PGA5     | 0 | NA | 0 | NA | 0 | NA | 0 | NA | 0 | NA | 0 | NA |
| 11 | 60819364 | 60782333 | -1 | NM_152718    | VWCE     | 0 | NA | 0 | NA | 0 | NA | 0 | NA | 0 | NA | 0 | NA |
| 11 | 60857229 | 60872807 | 1  | NM_015533    | DAK      | 0 | NA | 0 | NA | 0 | NA | 0 | NA | 0 | NA | 0 | NA |
| 11 | 60857242 | 60823494 | -1 | NM_001923    | DBD1     | 0 | NA | 0 | NA | 0 | NA | 0 | NA | 0 | NA | 0 | NA |
| 11 | 60886305 | 60872853 | -1 | NM_153611    | CYBASC3  | 0 | NA | 0 | NA | 0 | NA | 1 | 13 | 0 | NA | 0 | NA |
| 11 | 60886431 | 60893254 | 1  | NM_016464    | TMEM138  | 0 | NA | 0 | NA | 0 | NA | 1 | 13 | 0 | NA | 0 | NA |
| 11 | 60916440 | 60922899 | 1  | NM_016499    | MGC13379 | 0 | NA | 0 | NA | 0 | NA | 1 | 12 | 0 | NA | 0 | NA |
| 11 | 60953849 | 60926776 | -1 | NM_024811    | FLJ12529 | 0 | NA | 0 | NA | 0 | NA | 0 | NA | 0 | NA | 0 | NA |
| 11 | 60954172 | 60970805 | 1  | NM_017841    | C11orf79 | 0 | NA | 0 | NA | 0 | NA | 0 | NA | 0 | NA | 0 | NA |
| 11 | 61005167 | 61014975 | 1  | NM_145017    | C11orf66 | 0 | NA | 0 | NA | 0 | NA | 0 | NA | 0 | NA | 0 | NA |
| 11 | 61104874 | 61039360 | -1 | NM_004200    | SYT7     | 1 | 16 | 0 | NA | 0 | NA | 0 | NA | 0 | NA | 0 | NA |
| 11 | 61204485 | 61271049 | 1  | NM_006133    | DAGLA    | 0 | NA | 0 | NA | 0 | NA | 0 | NA | 0 | NA | 0 | NA |
| 11 | 61279436 | 61312565 | 1  | NM_013279    | C11orf9  | 1 | 15 | 0 | NA | 0 | NA | 0 | NA | 0 | NA | 0 | NA |
| 11 | 61316661 | 61313180 | -1 | NM_014206    | C11orf10 | 1 | 20 | 0 | NA | 0 | NA | 0 | NA | 0 | NA | 0 | NA |
| 11 | 61316725 | 61321286 | 1  | NM_004111    | FEN1     | 1 | 20 | 0 | NA | 0 | NA | 0 | NA | 0 | NA | 0 | NA |
| 11 | 61340886 | 61323676 | -1 | NM_013402    | FADS1    | 0 | NA | 0 | NA | 0 | NA | 0 | NA | 0 | NA | 0 | NA |
| 11 | 61352288 | 61391401 | 1  | NM_004265    | FADS2    | 0 | NA | 0 | NA | 0 | NA | 0 | NA | 0 | NA | 0 | NA |
| 11 | 61415582 | 61397573 | -1 | NM_021727    | FADS3    | 0 | NA | 0 | NA | 1 | 12 | 1 | 14 | 0 | NA | 0 | NA |
| 11 | 61441573 | 61421348 | -1 | NM_013401    | RAB31L1  | 0 | NA | 0 | NA | 0 | NA | 0 | NA | 0 | NA | 0 | NA |

|    |          |          |    |              |           |   |    |   |    |   |    |   |    |   |    |
|----|----------|----------|----|--------------|-----------|---|----|---|----|---|----|---|----|---|----|
| 11 | 61474407 | 61488981 | 1  | NM_004183    | BEST1     | 0 | NA | 0 | NA | 0 | NA | 0 | NA | 0 | NA |
| 11 | 61491708 | 61488332 | -1 | NM_002032    | FTH1      | 0 | NA | 0 | NA | 0 | NA | 0 | NA | 0 | NA |
| 11 | 61648020 | 61677211 | 1  | NM_001040694 | INCENP    | 0 | NA | 0 | NA | 0 | NA | 1 | 14 | 0 | NA |
| 11 | 61648020 | 61677211 | 1  | NM_020238    | INCENP    | 0 | NA | 0 | NA | 0 | NA | 1 | 14 | 0 | NA |
| 11 | 61714285 | 61717585 | 1  | NM_006552    | SCGB1D1   | 0 | NA | 0 | NA | 0 | NA | 0 | NA | 0 | NA |
| 11 | 61732715 | 61737984 | 1  | NM_002407    | SCGB2A1   | 0 | NA | 0 | NA | 0 | NA | 0 | NA | 0 | NA |
| 11 | 61766299 | 61768856 | 1  | NM_006551    | SCGB1D2   | 0 | NA | 0 | NA | 0 | NA | 0 | NA | 0 | NA |
| 11 | 61794205 | 61797204 | 1  | NM_002411    | SCGB2A2   | 0 | NA | 0 | NA | 0 | NA | 0 | NA | 0 | NA |
| 11 | 61823112 | 61820329 | -1 | NM_206998    | SCGB1D4   | 0 | NA | 0 | NA | 0 | NA | 0 | NA | 0 | NA |
| 11 | 61861349 | 61917463 | 1  | NM_001083926 | ASRGL1    | 0 | NA | 0 | NA | 0 | NA | 0 | NA | 0 | NA |
| 11 | 61861349 | 61917463 | 1  | NM_025080    | ASRGL1    | 0 | NA | 0 | NA | 0 | NA | 0 | NA | 0 | NA |
| 11 | 61943098 | 61947243 | 1  | NM_003357    | SCGB1A1   | 0 | NA | 0 | NA | 0 | NA | 0 | NA | 0 | NA |
| 11 | 62070908 | 61957591 | -1 | NM_024060    | AHNAK     | 0 | NA | 0 | NA | 1 | 12 | 1 | 12 | 0 | NA |
| 11 | 62070908 | 62039949 | -1 | NM_001620    | AHNAK     | 0 | NA | 0 | NA | 1 | 12 | 1 | 12 | 0 | NA |
| 11 | 62098036 | 62083648 | -1 | NM_001404    | EEF1G     | 1 | 11 | 0 | NA | 0 | NA | 0 | NA | 0 | NA |
| 11 | 62115592 | 62099095 | -1 | NM_022830    | TUT1      | 0 | NA | 0 | NA | 1 | 12 | 1 | 16 | 0 | NA |
| 11 | 62125879 | 62117250 | -1 | NM_004739    | MTA2      | 0 | NA | 0 | NA | 1 | 12 | 0 | NA | 0 | NA |
| 11 | 62136813 | 62126266 | -1 | NM_153265    | EML3      | 0 | NA | 0 | NA | 0 | NA | 0 | NA | 0 | NA |
| 11 | 62137198 | 62139164 | 1  | NM_000327    | ROM1      | 0 | NA | 0 | NA | 0 | NA | 0 | NA | 0 | NA |
| 11 | 62146024 | 62139343 | -1 | NM_012200    | B3GAT3    | 0 | NA | 0 | NA | 0 | NA | 0 | NA | 0 | NA |
| 11 | 62170680 | 62148873 | -1 | NM_198334    | GANAB     | 0 | NA | 0 | NA | 0 | NA | 0 | NA | 0 | NA |
| 11 | 62170680 | 62148875 | -1 | NM_198335    | GANAB     | 0 | NA | 0 | NA | 0 | NA | 0 | NA | 0 | NA |
| 11 | 62177350 | 62170895 | -1 | NM_030628    | INTS5     | 0 | NA | 0 | NA | 0 | NA | 0 | NA | 0 | NA |
| 11 | 62189354 | 62191499 | 1  | NM_001043229 | LOC751071 | 0 | NA | 0 | NA | 1 | 12 | 0 | NA | 0 | NA |
| 11 | 62195701 | 62196428 | 1  | NM_001085372 | LOC790955 | 0 | NA | 0 | NA | 1 | 14 | 0 | NA | 0 | NA |
| 11 | 62195817 | 62186864 | -1 | NM_024099    | C11orf48  | 0 | NA | 0 | NA | 1 | 14 | 0 | NA | 0 | NA |
| 11 | 62203103 | 62200547 | -1 | NM_015853    | LOC51035  | 0 | NA | 0 | NA | 0 | NA | 0 | NA | 0 | NA |
| 11 | 62213776 | 62210449 | -1 | NM_203422    | LOC221091 | 0 | NA | 0 | NA | 0 | NA | 0 | NA | 0 | NA |
| 11 | 62230363 | 62214322 | -1 | NM_032667    | BSCL2     | 0 | NA | 0 | NA | 0 | NA | 0 | NA | 0 | NA |
| 11 | 62231446 | 62214322 | -1 | NM_001122955 | BSCL2     | 0 | NA | 0 | NA | 0 | NA | 0 | NA | 0 | NA |
| 11 | 62231708 | 62233246 | 1  | NM_012202    | GNG3      | 0 | NA | 0 | NA | 0 | NA | 0 | NA | 0 | NA |
| 11 | 62251397 | 62238795 | -1 | NM_001079559 | HNRNPUL2  | 0 | NA | 0 | NA | 1 | 14 | 0 | NA | 0 | NA |
| 11 | 62252527 | 62262684 | 1  | NM_173810    | ITIC9C    | 0 | NA | 0 | NA | 1 | 16 | 0 | NA | 0 | NA |
| 11 | 62278190 | 62275010 | -1 | NM_024784    | ZBTB3     | 1 | 11 | 0 | NA | 0 | NA | 0 | NA | 0 | NA |
| 11 | 62285590 | 62290757 | 1  | NM_002696    | POLR2G    | 1 | 11 | 0 | NA | 0 | NA | 0 | NA | 0 | NA |
| 11 | 62295450 | 62311389 | 1  | NM_006473    | TAF6L     | 0 | NA | 0 | NA | 0 | NA | 0 | NA | 0 | NA |
| 11 | 62311449 | 62314448 | 1  | NM_199337    | TMEM179B  | 0 | NA | 0 | NA | 0 | NA | 0 | NA | 0 | NA |
| 11 | 62316062 | 62314362 | -1 | NM_001080501 | MGC3196   | 0 | NA | 0 | NA | 0 | NA | 0 | NA | 0 | NA |
| 11 | 62329540 | 62316173 | -1 | NM_001081491 | NXF1      | 0 | NA | 0 | NA | 0 | NA | 1 | 13 | 0 | NA |
| 11 | 62329540 | 62316173 | -1 | NM_006362    | NXF1      | 0 | NA | 0 | NA | 0 | NA | 1 | 13 | 0 | NA |
| 11 | 62356136 | 62330944 | -1 | NM_003164    | STX5      | 1 | 32 | 0 | NA | 0 | NA | 1 | 17 | 0 | NA |
| 11 | 62364204 | 62356959 | -1 | NM_018093    | WDR74     | 1 | 32 | 0 | NA | 0 | NA | 1 | 17 | 0 | NA |
| 11 | 62380093 | 62412929 | 1  | NM_001012661 | SLC3A2    | 0 | NA | 0 | NA | 0 | NA | 0 | NA | 0 | NA |
| 11 | 62380093 | 62412929 | 1  | NM_001012662 | SLC3A2    | 0 | NA | 0 | NA | 0 | NA | 0 | NA | 0 | NA |
| 11 | 62380093 | 62412929 | 1  | NM_001012663 | SLC3A2    | 0 | NA | 0 | NA | 0 | NA | 0 | NA | 0 | NA |
| 11 | 62380093 | 62412929 | 1  | NM_001012664 | SLC3A2    | 0 | NA | 0 | NA | 0 | NA | 0 | NA | 0 | NA |
| 11 | 62380093 | 62412929 | 1  | NM_002394    | SLC3A2    | 0 | NA | 0 | NA | 0 | NA | 0 | NA | 0 | NA |
| 11 | 62404862 | 62412929 | 1  | NM_001013251 | SLC3A2    | 0 | NA | 0 | NA | 0 | NA | 0 | NA | 0 | NA |
| 11 | 62445588 | 62432726 | -1 | NM_000738    | CHRM1     | 0 | NA | 0 | NA | 0 | NA | 0 | NA | 0 | NA |
| 11 | 62509045 | 62500644 | -1 | NM_004790    | SLC22A6   | 0 | NA | 0 | NA | 0 | NA | 0 | NA | 0 | NA |
| 11 | 62509045 | 62500644 | -1 | NM_153276    | SLC22A6   | 0 | NA | 0 | NA | 0 | NA | 0 | NA | 0 | NA |
| 11 | 62509045 | 62500644 | -1 | NM_153277    | SLC22A6   | 0 | NA | 0 | NA | 0 | NA | 0 | NA | 0 | NA |
| 11 | 62509045 | 62500644 | -1 | NM_153278    | SLC22A6   | 0 | NA | 0 | NA | 0 | NA | 0 | NA | 0 | NA |
| 11 | 62539687 | 62516871 | -1 | NM_004254    | SLC22A8   | 0 | NA | 0 | NA | 0 | NA | 0 | NA | 0 | NA |
| 11 | 62753700 | 62687871 | -1 | NM_199352    | SLC22A25  | 0 | NA | 0 | NA | 0 | NA | 0 | NA | 0 | NA |
| 11 | 62814005 | 62835822 | 1  | NM_001039752 | SLC22A10  | 0 | NA | 0 | NA | 0 | NA | 0 | NA | 0 | NA |
| 11 | 62893836 | 62934288 | 1  | NM_080866    | SLC22A9   | 0 | NA | 0 | NA | 0 | NA | 0 | NA | 0 | NA |
| 11 | 63015242 | 62987384 | -1 | NM_054108    | HRASLS5   | 0 | NA | 0 | NA | 0 | NA | 0 | NA | 0 | NA |
| 11 | 63030131 | 63040815 | 1  | NM_033101    | LGALS12   | 0 | NA | 0 | NA | 0 | NA | 0 | NA | 0 | NA |
| 11 | 63060848 | 63070506 | 1  | NM_004585    | RARRES3   | 0 | NA | 0 | NA | 0 | NA | 0 | NA | 0 | NA |
| 11 | 63087431 | 63076817 | -1 | NM_017878    | HRASLS2   | 0 | NA | 0 | NA | 0 | NA | 0 | NA | 0 | NA |
| 11 | 63138469 | 63098824 | -1 | NM_007069    | HRASLS3   | 0 | NA | 0 | NA | 0 | NA | 0 | NA | 0 | NA |
| 11 | 63195659 | 63153012 | -1 | NM_015459    | ATL3      | 0 | NA | 0 | NA | 0 | NA | 1 | 13 | 0 | NA |
| 11 | 63205497 | 63283918 | 1  | NM_006054    | RTN3      | 0 | NA | 0 | NA | 0 | NA | 1 | 13 | 0 | NA |
| 11 | 63205497 | 63283939 | 1  | NM_201428    | RTN3      | 0 | NA | 0 | NA | 0 | NA | 1 | 13 | 0 | NA |

|    |          |          |    |              |              |   |    |   |    |   |    |   |    |   |    |
|----|----------|----------|----|--------------|--------------|---|----|---|----|---|----|---|----|---|----|
| 11 | 63205497 | 63283939 | 1  | NM_201429    | RTN3         | 0 | NA | 0 | NA | 0 | NA | 1 | 13 | 0 | NA |
| 11 | 63205497 | 63283939 | 1  | NM_201430    | RTN3         | 0 | NA | 0 | NA | 0 | NA | 1 | 13 | 0 | NA |
| 11 | 63337498 | 63351766 | 1  | NM_138471    | LOC144097    | 0 | NA | 0 | NA | 0 | NA | 1 | 14 | 0 | NA |
| 11 | 63363470 | 63433629 | 1  | NM_001039468 | MARK2        | 0 | NA | 0 | NA | 0 | NA | 0 | NA | 0 | NA |
| 11 | 63412650 | 63433629 | 1  | NM_004954    | MARK2        | 0 | NA | 0 | NA | 0 | NA | 0 | NA | 0 | NA |
| 11 | 63412650 | 63433629 | 1  | NM_017490    | MARK2        | 0 | NA | 0 | NA | 0 | NA | 0 | NA | 0 | NA |
| 11 | 63419206 | 63433623 | 1  | NM_001039469 | MARK2        | 0 | NA | 0 | NA | 0 | NA | 0 | NA | 0 | NA |
| 11 | 63440892 | 63435277 | -1 | NM_173587    | RCOR2        | 0 | NA | 0 | NA | 0 | NA | 0 | NA | 0 | NA |
| 11 | 63463043 | 63481020 | 1  | NM_024771    | NAT11        | 0 | NA | 0 | NA | 0 | NA | 0 | NA | 0 | NA |
| 11 | 63498654 | 63500591 | 1  | NM_004074    | COX8A        | 0 | NA | 0 | NA | 0 | NA | 0 | NA | 0 | NA |
| 11 | 63509900 | 63522468 | 1  | NM_017670    | OTUB1        | 0 | NA | 0 | NA | 0 | NA | 0 | NA | 0 | NA |
| 11 | 63627937 | 63643221 | 1  | NM_013280    | FLRT1        | 1 | 11 | 0 | NA | 0 | NA | 0 | NA | 0 | NA |
| 11 | 63690094 | 63522605 | -1 | NM_014067    | MACROD1      | 0 | NA | 0 | NA | 0 | NA | 0 | NA | 0 | NA |
| 11 | 63710162 | 63728596 | 1  | NM_006819    | STIP1        | 1 | 12 | 0 | NA | 1 | 13 | 0 | NA | 0 | NA |
| 11 | 63730781 | 63747930 | 1  | NM_178443    | FERMT3       | 0 | NA | 0 | NA | 0 | NA | 0 | NA | 0 | NA |
| 11 | 63730788 | 63747939 | 1  | NM_031471    | FERMT3       | 0 | NA | 0 | NA | 0 | NA | 0 | NA | 0 | NA |
| 11 | 63750198 | 63747846 | -1 | NM_031472    | TRPT1        | 0 | NA | 0 | NA | 0 | NA | 0 | NA | 0 | NA |
| 11 | 63750257 | 63747894 | -1 | NM_001033678 | TRPT1        | 0 | NA | 0 | NA | 0 | NA | 0 | NA | 0 | NA |
| 11 | 63750337 | 63754064 | 1  | NM_032344    | NUDT22       | 0 | NA | 0 | NA | 0 | NA | 0 | NA | 0 | NA |
| 11 | 63754511 | 63758329 | 1  | NM_005528    | DNAJC4       | 0 | NA | 0 | NA | 0 | NA | 0 | NA | 0 | NA |
| 11 | 63758841 | 63762835 | 1  | NM_003377    | VEGFB        | 0 | NA | 0 | NA | 0 | NA | 0 | NA | 0 | NA |
| 11 | 63764988 | 63768262 | 1  | NM_004470    | FKBP2        | 1 | 16 | 0 | NA | 0 | NA | 0 | NA | 0 | NA |
| 11 | 63766163 | 63768262 | 1  | NM_057092    | FKBP2        | 1 | 16 | 0 | NA | 0 | NA | 0 | NA | 0 | NA |
| 11 | 63770989 | 63768526 | -1 | NM_138689    | PPP1R14B     | 1 | 16 | 0 | NA | 0 | NA | 0 | NA | 0 | NA |
| 11 | 63775697 | 63791604 | 1  | NM_000932    | PLCB3        | 1 | 16 | 0 | NA | 0 | NA | 0 | NA | 0 | NA |
| 11 | 63808657 | 63793877 | -1 | NM_004322    | BAD          | 0 | NA | 0 | NA | 0 | NA | 0 | NA | 0 | NA |
| 11 | 63808740 | 63793877 | -1 | NM_032989    | BAD          | 0 | NA | 0 | NA | 0 | NA | 0 | NA | 0 | NA |
| 11 | 63809906 | 63813539 | 1  | NM_020155    | GPR137       | 0 | NA | 0 | NA | 0 | NA | 0 | NA | 0 | NA |
| 11 | 63815368 | 63824079 | 1  | NM_033310    | KCNK4        | 0 | NA | 0 | NA | 0 | NA | 0 | NA | 0 | NA |
| 11 | 63824438 | 63828815 | 1  | NM_001039496 | DKFZP566E164 | 0 | NA | 0 | NA | 0 | NA | 0 | NA | 0 | NA |
| 11 | 63829619 | 63840786 | 1  | NM_004451    | ESRRA        | 0 | NA | 0 | NA | 0 | NA | 0 | NA | 0 | NA |
| 11 | 63841609 | 63840740 | -1 | NM_016404    | HSPC152      | 1 | 15 | 0 | NA | 0 | NA | 0 | NA | 0 | NA |
| 11 | 63842144 | 63845859 | 1  | NM_012094    | PRDX5        | 1 | 11 | 0 | NA | 0 | NA | 0 | NA | 0 | NA |
| 11 | 63842144 | 63845859 | 1  | NM_181651    | PRDX5        | 1 | 11 | 0 | NA | 0 | NA | 0 | NA | 0 | NA |
| 11 | 63842144 | 63845859 | 1  | NM_181652    | PRDX5        | 1 | 11 | 0 | NA | 0 | NA | 0 | NA | 0 | NA |
| 11 | 63864270 | 63881582 | 1  | NM_032251    | CCDC88B      | 0 | NA | 0 | NA | 0 | NA | 0 | NA | 0 | NA |
| 11 | 63883200 | 63896263 | 1  | NM_001006944 | RPS6KA4      | 0 | NA | 0 | NA | 0 | NA | 0 | NA | 0 | NA |
| 11 | 63883200 | 63896263 | 1  | NM_003942    | RPS6KA4      | 0 | NA | 0 | NA | 0 | NA | 0 | NA | 0 | NA |
| 11 | 64079673 | 64095575 | 1  | NM_018484    | SLC22A11     | 0 | NA | 0 | NA | 0 | NA | 0 | NA | 0 | NA |
| 11 | 64114857 | 64126396 | 1  | NM_144585    | SLC22A12     | 0 | NA | 1 | 16 | 0 | NA | 0 | NA | 0 | NA |
| 11 | 64114857 | 64126396 | 1  | NM_153378    | SLC22A12     | 0 | NA | 1 | 16 | 0 | NA | 0 | NA | 0 | NA |
| 11 | 64167363 | 64130221 | -1 | NM_138734    | NRXN2        | 0 | NA | 0 | NA | 0 | NA | 0 | NA | 0 | NA |
| 11 | 64247236 | 64130221 | -1 | NM_015080    | NRXN2        | 0 | NA | 0 | NA | 0 | NA | 0 | NA | 0 | NA |
| 11 | 64247236 | 64130221 | -1 | NM_138732    | NRXN2        | 0 | NA | 0 | NA | 0 | NA | 0 | NA | 0 | NA |
| 11 | 64268206 | 64250958 | -1 | NM_001098671 | RASGRP2      | 0 | NA | 1 | 16 | 0 | NA | 0 | NA | 0 | NA |
| 11 | 64268905 | 64250958 | -1 | NM_001098670 | RASGRP2      | 0 | NA | 1 | 16 | 0 | NA | 0 | NA | 0 | NA |
| 11 | 64269504 | 64250958 | -1 | NM_153819    | RASGRP2      | 0 | NA | 1 | 16 | 0 | NA | 0 | NA | 0 | NA |
| 11 | 64284763 | 64270436 | -1 | NM_005609    | PYGM         | 0 | NA | 0 | NA | 1 | 12 | 0 | NA | 0 | NA |
| 11 | 64302817 | 64288653 | -1 | NM_004630    | SF1          | 0 | NA | 0 | NA | 1 | 13 | 0 | NA | 0 | NA |
| 11 | 64302817 | 64288653 | -1 | NM_201995    | SF1          | 0 | NA | 0 | NA | 1 | 13 | 0 | NA | 0 | NA |
| 11 | 64302817 | 64288653 | -1 | NM_201998    | SF1          | 0 | NA | 0 | NA | 1 | 13 | 0 | NA | 0 | NA |
| 11 | 64302817 | 64300091 | -1 | NM_201997    | SF1          | 0 | NA | 0 | NA | 1 | 13 | 0 | NA | 0 | NA |
| 11 | 64327289 | 64313184 | -1 | NM_004579    | MAP4K2       | 0 | NA | 0 | NA | 0 | NA | 0 | NA | 0 | NA |
| 11 | 64334611 | 64327569 | -1 | NM_130800    | MEN1         | 0 | NA | 0 | NA | 0 | NA | 0 | NA | 0 | NA |
| 11 | 64334611 | 64327569 | -1 | NM_130801    | MEN1         | 0 | NA | 0 | NA | 0 | NA | 0 | NA | 0 | NA |
| 11 | 64334764 | 64327569 | -1 | NM_000244    | MEN1         | 0 | NA | 0 | NA | 0 | NA | 0 | NA | 0 | NA |
| 11 | 64334764 | 64327569 | -1 | NM_130799    | MEN1         | 0 | NA | 0 | NA | 0 | NA | 0 | NA | 0 | NA |
| 11 | 64334789 | 64327569 | -1 | NM_130802    | MEN1         | 0 | NA | 0 | NA | 0 | NA | 0 | NA | 0 | NA |
| 11 | 64335342 | 64327569 | -1 | NM_130803    | MEN1         | 0 | NA | 0 | NA | 0 | NA | 0 | NA | 0 | NA |
| 11 | 64335342 | 64327569 | -1 | NM_130804    | MEN1         | 0 | NA | 0 | NA | 0 | NA | 0 | NA | 0 | NA |
| 11 | 64368617 | 64348237 | -1 | NM_017525    | CDC42BPG     | 0 | NA | 0 | NA | 0 | NA | 0 | NA | 0 | NA |
| 11 | 64402767 | 64376783 | -1 | NM_006795    | EHD1         | 1 | 12 | 0 | NA | 0 | NA | 0 | NA | 0 | NA |
| 11 | 64441239 | 64418594 | -1 | NM_015104    | ATG2A        | 1 | 14 | 0 | NA | 0 | NA | 0 | NA | 0 | NA |
| 11 | 64448755 | 64458523 | 1  | NM_006244    | PPP2R5B      | 1 | 14 | 0 | NA | 0 | NA | 0 | NA | 0 | NA |
| 11 | 64459936 | 64458518 | -1 | NM_130769    | GPHA2        | 0 | NA | 0 | NA | 0 | NA | 0 | NA | 0 | NA |

|    |          |          |    |              |              |   |    |   |    |   |    |   |    |   |    |
|----|----------|----------|----|--------------|--------------|---|----|---|----|---|----|---|----|---|----|
| 11 | 64484185 | 64462504 | -1 | NM_001037225 | LOC283129    | 0 | NA | 0 | NA | 0 | NA | 0 | NA | 0 | NA |
| 11 | 64521093 | 64511992 | -1 | NM_138456    | BATF2        | 0 | NA | 0 | NA | 0 | NA | 0 | NA | 0 | NA |
| 11 | 64538161 | 64546232 | 1  | NM_001667    | ARL2         | 0 | NA | 0 | NA | 0 | NA | 0 | NA | 0 | NA |
| 11 | 64551485 | 64564620 | 1  | NM_013306    | SNX15        | 0 | NA | 0 | NA | 0 | NA | 0 | NA | 0 | NA |
| 11 | 64551485 | 64564620 | 1  | NM_147777    | SNX15        | 0 | NA | 0 | NA | 0 | NA | 0 | NA | 0 | NA |
| 11 | 64564951 | 64568876 | 1  | NM_013299    | SAC3D1       | 0 | NA | 0 | NA | 0 | NA | 0 | NA | 0 | NA |
| 11 | 64582585 | 64568870 | -1 | NM_005468    | NAALADL1     | 0 | NA | 0 | NA | 0 | NA | 0 | NA | 0 | NA |
| 11 | 64608100 | 64601502 | -1 | NM_080668    | CDCA5        | 1 | 13 | 0 | NA | 0 | NA | 0 | NA | 0 | NA |
| 11 | 64608269 | 64612450 | 1  | NM_006782    | ZFPL1        | 1 | 13 | 0 | NA | 0 | NA | 0 | NA | 0 | NA |
| 11 | 64620258 | 64635756 | 1  | NM_013265    | C11orf2      | 1 | 11 | 0 | NA | 0 | NA | 0 | NA | 0 | NA |
| 11 | 64635916 | 64640283 | 1  | NM_003273    | TM7SF2       | 1 | 11 | 0 | NA | 0 | NA | 1 | 12 | 0 | NA |
| 11 | 64641746 | 64640450 | -1 | NM_014205    | ZNHIT2       | 0 | NA | 0 | NA | 0 | NA | 1 | 12 | 0 | NA |
| 11 | 64646236 | 64644677 | -1 | NM_001997    | FAU          | 0 | NA | 0 | NA | 0 | NA | 0 | NA | 0 | NA |
| 11 | 64646303 | 64651417 | 1  | NM_004927    | MRPL49       | 0 | NA | 0 | NA | 0 | NA | 0 | NA | 0 | NA |
| 11 | 64658579 | 64651326 | -1 | NM_032431    | SYVN1        | 0 | NA | 0 | NA | 0 | NA | 0 | NA | 0 | NA |
| 11 | 64658579 | 64651326 | -1 | NM_172230    | SYVN1        | 0 | NA | 0 | NA | 0 | NA | 0 | NA | 0 | NA |
| 11 | 64694282 | 64697264 | 1  | NM_001008778 | SPDYC        | 0 | NA | 0 | NA | 0 | NA | 0 | NA | 0 | NA |
| 11 | 64705918 | 64736052 | 1  | NM_005186    | CAPN1        | 0 | NA | 0 | NA | 0 | NA | 0 | NA | 0 | NA |
| 11 | 64737884 | 64766133 | 1  | NM_001004326 | SLC22A20     | 0 | NA | 0 | NA | 0 | NA | 0 | NA | 0 | NA |
| 11 | 64786007 | 64821664 | 1  | NM_002689    | POLA2        | 0 | NA | 0 | NA | 0 | NA | 0 | NA | 0 | NA |
| 11 | 64838906 | 64846476 | 1  | NM_006779    | CDC42EP2     | 0 | NA | 0 | NA | 0 | NA | 0 | NA | 0 | NA |
| 11 | 64857921 | 64877027 | 1  | NM_006268    | DPF2         | 1 | 14 | 0 | NA | 0 | NA | 0 | NA | 0 | NA |
| 11 | 64878857 | 64881658 | 1  | NM_145719    | TIGD3        | 0 | NA | 0 | NA | 0 | NA | 0 | NA | 0 | NA |
| 11 | 64906718 | 64899238 | -1 | NM_001077241 | SLC25A45     | 0 | NA | 0 | NA | 1 | 12 | 1 | 11 | 0 | NA |
| 11 | 64906718 | 64899238 | -1 | NM_182556    | SLC25A45     | 0 | NA | 0 | NA | 1 | 12 | 1 | 11 | 0 | NA |
| 11 | 64910616 | 64937571 | 1  | NM_031904    | FRMD8        | 0 | NA | 0 | NA | 1 | 12 | 1 | 11 | 0 | NA |
| 11 | 65049123 | 65062758 | 1  | NM_001048218 | SCYL1        | 0 | NA | 0 | NA | 0 | NA | 0 | NA | 0 | NA |
| 11 | 65049123 | 65062758 | 1  | NM_020680    | SCYL1        | 0 | NA | 0 | NA | 0 | NA | 0 | NA | 0 | NA |
| 11 | 65082006 | 65062849 | -1 | NM_021070    | LTBP3        | 0 | NA | 0 | NA | 0 | NA | 0 | NA | 0 | NA |
| 11 | 65094518 | 65095815 | 1  | NM_006396    | SSSCA1       | 0 | NA | 0 | NA | 0 | NA | 0 | NA | 0 | NA |
| 11 | 65096395 | 65098245 | 1  | NM_001098784 | FAM89B       | 0 | NA | 0 | NA | 0 | NA | 0 | NA | 0 | NA |
| 11 | 65096395 | 65098245 | 1  | NM_001098785 | FAM89B       | 0 | NA | 0 | NA | 0 | NA | 0 | NA | 0 | NA |
| 11 | 65096395 | 65098245 | 1  | NM_152832    | FAM89B       | 0 | NA | 0 | NA | 0 | NA | 0 | NA | 0 | NA |
| 11 | 65100084 | 65116692 | 1  | NM_001099409 | EHPF1L1      | 0 | NA | 0 | NA | 0 | NA | 0 | NA | 0 | NA |
| 11 | 65120043 | 65116901 | -1 | NM_005714    | KCNK7        | 0 | NA | 0 | NA | 0 | NA | 0 | NA | 0 | NA |
| 11 | 65120043 | 65116901 | -1 | NM_033347    | KCNK7        | 0 | NA | 0 | NA | 0 | NA | 0 | NA | 0 | NA |
| 11 | 65120043 | 65116901 | -1 | NM_033348    | KCNK7        | 0 | NA | 0 | NA | 0 | NA | 0 | NA | 0 | NA |
| 11 | 65120043 | 65116901 | -1 | NM_033455    | KCNK7        | 0 | NA | 0 | NA | 0 | NA | 0 | NA | 0 | NA |
| 11 | 65138296 | 65121801 | -1 | NM_002419    | MAP3K11      | 1 | 16 | 0 | NA | 0 | NA | 0 | NA | 0 | NA |
| 11 | 65140358 | 65161486 | 1  | NM_032223    | PCNXL3       | 1 | 16 | 0 | NA | 0 | NA | 0 | NA | 0 | NA |
| 11 | 65162170 | 65174965 | 1  | NM_006747    | SIPA1        | 0 | NA | 0 | NA | 0 | NA | 0 | NA | 0 | NA |
| 11 | 65164167 | 65174965 | 1  | NM_153253    | SIPA1        | 0 | NA | 0 | NA | 0 | NA | 0 | NA | 0 | NA |
| 11 | 65186951 | 65178392 | -1 | NM_021975    | RELA         | 0 | NA | 0 | NA | 0 | NA | 1 | 12 | 0 | NA |
| 11 | 65236064 | 65243651 | 1  | NM_006388    | HTATIP       | 0 | NA | 0 | NA | 0 | NA | 0 | NA | 0 | NA |
| 11 | 65236064 | 65243651 | 1  | NM_182709    | HTATIP       | 0 | NA | 0 | NA | 0 | NA | 0 | NA | 0 | NA |
| 11 | 65236064 | 65243651 | 1  | NM_182710    | HTATIP       | 0 | NA | 0 | NA | 0 | NA | 0 | NA | 0 | NA |
| 11 | 65244985 | 65241719 | -1 | NM_032193    | RNASEH2C     | 0 | NA | 1 | 12 | 0 | NA | 0 | NA | 0 | NA |
| 11 | 65304398 | 65299953 | -1 | NM_138368    | DKFZp761E198 | 0 | NA | 1 | 15 | 0 | NA | 0 | NA | 0 | NA |
| 11 | 65311104 | 65321261 | 1  | NM_004561    | OVOL1        | 0 | NA | 1 | 15 | 0 | NA | 0 | NA | 0 | NA |
| 11 | 65357985 | 65377748 | 1  | NM_152760    | SNX32        | 0 | NA | 0 | NA | 0 | NA | 0 | NA | 0 | NA |
| 11 | 65382380 | 65378860 | -1 | NM_005507    | CFL1         | 0 | NA | 0 | NA | 0 | NA | 0 | NA | 0 | NA |
| 11 | 65384447 | 65390490 | 1  | NM_025128    | MUS81        | 0 | NA | 0 | NA | 0 | NA | 0 | NA | 0 | NA |
| 11 | 65396852 | 65390487 | -1 | NM_016938    | EFEMP2       | 0 | NA | 0 | NA | 0 | NA | 0 | NA | 0 | NA |
| 11 | 65403859 | 65407788 | 1  | NM_001335    | CTSW         | 0 | NA | 0 | NA | 0 | NA | 0 | NA | 0 | NA |
| 11 | 65412586 | 65407786 | -1 | NM_004214    | FIBP         | 0 | NA | 0 | NA | 0 | NA | 0 | NA | 0 | NA |
| 11 | 65412586 | 65407786 | -1 | NM_198897    | FIBP         | 0 | NA | 0 | NA | 0 | NA | 0 | NA | 0 | NA |
| 11 | 65414450 | 65415682 | 1  | NM_006848    | CCDC85B      | 0 | NA | 0 | NA | 0 | NA | 0 | NA | 0 | NA |
| 11 | 65424573 | 65416267 | -1 | NM_005438    | FOSL1        | 0 | NA | 0 | NA | 0 | NA | 0 | NA | 0 | NA |
| 11 | 65443107 | 65440858 | -1 | NM_031450    | C11orf68     | 1 | 14 | 0 | NA | 0 | NA | 1 | 16 | 0 | NA |
| 11 | 65443303 | 65445607 | 1  | NM_006442    | DRAP1        | 1 | 14 | 0 | NA | 0 | NA | 1 | 16 | 0 | NA |
| 11 | 65469690 | 65484010 | 1  | NM_152762    | TSGA10IP     | 0 | NA | 0 | NA | 0 | NA | 0 | NA | 0 | NA |
| 11 | 65485735 | 65504183 | 1  | NM_005146    | SART1        | 0 | NA | 0 | NA | 0 | NA | 0 | NA | 0 | NA |
| 11 | 65526125 | 65528193 | 1  | NM_003860    | BANF1        | 1 | 16 | 0 | NA | 0 | NA | 0 | NA | 0 | NA |
| 11 | 65526154 | 65520592 | -1 | NM_032325    | EIF1AD       | 1 | 16 | 0 | NA | 0 | NA | 0 | NA | 0 | NA |
| 11 | 65536037 | 65537552 | 1  | NM_001323    | CST6         | 1 | 16 | 0 | NA | 0 | NA | 0 | NA | 0 | NA |

|    |          |          |    |              |          |   |    |   |    |   |    |   |    |   |    |
|----|----------|----------|----|--------------|----------|---|----|---|----|---|----|---|----|---|----|
| 11 | 6550560  | 65540798 | -1 | NM_053054    | CATSPER1 | 0 | NA | 0 | NA | 0 | NA | 0 | NA | 0 | NA |
| 11 | 65573227 | 65564811 | -1 | NM_033036    | GAL3ST3  | 0 | NA | 0 | NA | 0 | NA | 0 | NA | 0 | NA |
| 11 | 65576391 | 65592958 | 1  | NM_006842    | SF3B2    | 0 | NA | 0 | NA | 0 | NA | 0 | NA | 0 | NA |
| 11 | 65594399 | 65768789 | 1  | NM_018026    | PACS1    | 0 | NA | 0 | NA | 0 | NA | 0 | NA | 0 | NA |
| 11 | 65781823 | 65791907 | 1  | NM_022822    | KLC2     | 0 | NA | 0 | NA | 0 | NA | 0 | NA | 0 | NA |
| 11 | 65792631 | 65801539 | 1  | NM_030981    | RAB1B    | 0 | NA | 0 | NA | 0 | NA | 0 | NA | 0 | NA |
| 11 | 65802271 | 65808259 | 1  | NM_182553    | CNIH2    | 0 | NA | 0 | NA | 0 | NA | 0 | NA | 0 | NA |
| 11 | 65813214 | 65808626 | -1 | NM_020470    | YIF1A    | 1 | 11 | 0 | NA | 0 | NA | 0 | NA | 0 | NA |
| 11 | 65815916 | 65820711 | 1  | NM_153266    | TMEM151A | 1 | 11 | 0 | NA | 0 | NA | 0 | NA | 0 | NA |
| 11 | 65841091 | 65838533 | -1 | NM_020404    | CD248    | 1 | 16 | 0 | NA | 1 | 22 | 0 | NA | 0 | NA |
| 11 | 65860576 | 65866117 | -1 | NM_004292    | RIN1     | 1 | 19 | 0 | NA | 0 | NA | 0 | NA | 0 | NA |
| 11 | 65869158 | 65861379 | -1 | NM_001024957 | BRMS1    | 1 | 19 | 0 | NA | 1 | 12 | 0 | NA | 0 | NA |
| 11 | 65869158 | 65861379 | -1 | NM_015399    | BRMS1    | 1 | 19 | 0 | NA | 1 | 12 | 0 | NA | 0 | NA |
| 11 | 65871737 | 65869418 | -1 | NM_006876    | B3GNT1   | 0 | NA | 0 | NA | 1 | 12 | 0 | NA | 0 | NA |
| 11 | 65895867 | 65886567 | -1 | NM_001532    | SLC29A2  | 0 | NA | 0 | NA | 0 | NA | 0 | NA | 0 | NA |
| 11 | 65945050 | 65950753 | 1  | NM_178864    | NPAS4    | 1 | 21 | 0 | NA | 0 | NA | 0 | NA | 0 | NA |
| 11 | 65962886 | 65959125 | -1 | NM_016050    | MRPL11   | 0 | NA | 0 | NA | 0 | NA | 0 | NA | 0 | NA |
| 11 | 65962886 | 65959125 | -1 | NM_170738    | MRPL11   | 0 | NA | 0 | NA | 0 | NA | 0 | NA | 0 | NA |
| 11 | 65962886 | 65959125 | -1 | NM_170739    | MRPL11   | 0 | NA | 0 | NA | 0 | NA | 0 | NA | 0 | NA |
| 11 | 65990911 | 66001384 | 1  | NM_001098510 | PELI3    | 0 | NA | 0 | NA | 0 | NA | 0 | NA | 0 | NA |
| 11 | 65990911 | 66001384 | 1  | NM_145065    | PELI3    | 0 | NA | 0 | NA | 0 | NA | 0 | NA | 0 | NA |
| 11 | 66004455 | 66033706 | 1  | NM_005700    | DPP3     | 0 | NA | 0 | NA | 1 | 12 | 0 | NA | 0 | NA |
| 11 | 66004455 | 66033706 | 1  | NM_130443    | DPP3     | 0 | NA | 0 | NA | 1 | 12 | 0 | NA | 0 | NA |
| 11 | 66034694 | 66057660 | 1  | NM_024649    | BBS1     | 1 | 11 | 0 | NA | 1 | 14 | 0 | NA | 0 | NA |
| 11 | 66070247 | 66063310 | -1 | NM_207340    | ZDHHC24  | 0 | NA | 0 | NA | 0 | NA | 0 | NA | 0 | NA |
| 11 | 66070966 | 66087373 | 1  | NM_001104    | ACTN3    | 0 | NA | 0 | NA | 0 | NA | 0 | NA | 0 | NA |
| 11 | 66092623 | 66087510 | -1 | NM_003793    | CTSF     | 0 | NA | 0 | NA | 0 | NA | 0 | NA | 0 | NA |
| 11 | 66117130 | 66114215 | -1 | NM_018219    | CCDC87   | 1 | 15 | 1 | 12 | 0 | NA | 0 | NA | 0 | NA |
| 11 | 66117265 | 66130066 | 1  | NM_005125    | CCS      | 1 | 15 | 1 | 12 | 0 | NA | 0 | NA | 0 | NA |
| 11 | 66140672 | 66151389 | 1  | NM_006328    | RBM14    | 1 | 24 | 0 | NA | 0 | NA | 1 | 19 | 0 | NA |
| 11 | 66162713 | 66170516 | 1  | NM_002896    | RBM4     | 0 | NA | 0 | NA | 1 | 15 | 0 | NA | 0 | NA |
| 11 | 66201851 | 66189045 | -1 | NM_031492    | RBM4B    | 0 | NA | 0 | NA | 0 | NA | 0 | NA | 0 | NA |
| 11 | 66245446 | 66209298 | -1 | NM_006946    | SPTBN2   | 1 | 11 | 0 | NA | 1 | 13 | 0 | NA | 0 | NA |
| 11 | 66268782 | 66367563 | 1  | NM_024650    | C11orf80 | 0 | NA | 0 | NA | 0 | NA | 1 | 14 | 0 | NA |
| 11 | 66367458 | 66370579 | 1  | NM_001032279 | RCE1     | 0 | NA | 0 | NA | 0 | NA | 0 | NA | 0 | NA |
| 11 | 66367458 | 66370579 | 1  | NM_005133    | RCE1     | 0 | NA | 0 | NA | 0 | NA | 0 | NA | 0 | NA |
| 11 | 66381548 | 66384522 | 1  | NM_024036    | LRFN4    | 1 | 12 | 0 | NA | 0 | NA | 0 | NA | 0 | NA |
| 11 | 66431916 | 66372572 | -1 | NM_022172    | PC       | 0 | NA | 0 | NA | 0 | NA | 0 | NA | 0 | NA |
| 11 | 66482423 | 66372572 | -1 | NM_000920    | PC       | 1 | 55 | 0 | NA | 0 | NA | 0 | NA | 0 | NA |
| 11 | 66482423 | 66372572 | -1 | NM_001040716 | PC       | 1 | 55 | 0 | NA | 0 | NA | 0 | NA | 0 | NA |
| 11 | 66547466 | 66574906 | 1  | NM_177963    | SYT12    | 1 | 14 | 0 | NA | 0 | NA | 0 | NA | 0 | NA |
| 11 | 66580896 | 66596060 | 1  | NM_014578    | RHOD     | 0 | NA | 0 | NA | 0 | NA | 0 | NA | 0 | NA |
| 11 | 66644073 | 66781717 | 1  | NM_012308    | FBXL11   | 0 | NA | 0 | NA | 0 | NA | 0 | NA | 0 | NA |
| 11 | 66790480 | 66810605 | 1  | NM_001619    | ADRBK1   | 0 | NA | 0 | NA | 0 | NA | 0 | NA | 0 | NA |
| 11 | 66813394 | 66826530 | 1  | NM_207354    | ANKRD13D | 0 | NA | 0 | NA | 0 | NA | 1 | 11 | 0 | NA |
| 11 | 66827576 | 66836647 | 1  | NM_017857    | SSH3     | 0 | NA | 0 | NA | 0 | NA | 0 | NA | 0 | NA |
| 11 | 66877593 | 66875594 | -1 | NM_021173    | POLD4    | 0 | NA | 0 | NA | 0 | NA | 0 | NA | 0 | NA |
| 11 | 66897782 | 66888214 | -1 | NM_013246    | CLCF1    | 0 | NA | 0 | NA | 0 | NA | 0 | NA | 0 | NA |
| 11 | 66915998 | 66922459 | 1  | NM_004584    | RAD9A    | 0 | NA | 0 | NA | 0 | NA | 0 | NA | 0 | NA |
| 11 | 66925952 | 66922227 | -1 | NM_001008709 | PPP1CA   | 0 | NA | 0 | NA | 0 | NA | 0 | NA | 0 | NA |
| 11 | 66925952 | 66922227 | -1 | NM_002708    | PPP1CA   | 0 | NA | 0 | NA | 0 | NA | 0 | NA | 0 | NA |
| 11 | 66925952 | 66922227 | -1 | NM_206873    | PPP1CA   | 0 | NA | 0 | NA | 0 | NA | 0 | NA | 0 | NA |
| 11 | 66927987 | 66934136 | 1  | NM_198517    | TBC1D10C | 0 | NA | 0 | NA | 0 | NA | 0 | NA | 0 | NA |
| 11 | 66939724 | 66949654 | 1  | NM_020811    | KIAA1394 | 0 | NA | 0 | NA | 0 | NA | 0 | NA | 0 | NA |
| 11 | 66952510 | 66959455 | 1  | NM_003952    | RPS6KB2  | 1 | 12 | 0 | NA | 0 | NA | 0 | NA | 0 | NA |
| 11 | 66961729 | 66959556 | -1 | NM_005608    | PTPRCAP  | 1 | 12 | 0 | NA | 0 | NA | 0 | NA | 0 | NA |
| 11 | 66967559 | 66962093 | -1 | NM_020441    | CORO1B   | 0 | NA | 0 | NA | 0 | NA | 0 | NA | 0 | NA |
| 11 | 66967839 | 66962093 | -1 | NM_001018070 | CORO1B   | 0 | NA | 0 | NA | 0 | NA | 0 | NA | 0 | NA |
| 11 | 66976776 | 66975347 | -1 | NM_206997    | GPR152   | 0 | NA | 0 | NA | 0 | NA | 0 | NA | 0 | NA |
| 11 | 66979393 | 66983263 | 1  | NM_145200    | CABP4    | 1 | 12 | 0 | NA | 0 | NA | 0 | NA | 0 | NA |
| 11 | 66993307 | 66988394 | -1 | NM_001078650 | TMEM134  | 1 | 12 | 0 | NA | 0 | NA | 0 | NA | 0 | NA |
| 11 | 66993307 | 66988394 | -1 | NM_001078651 | TMEM134  | 1 | 12 | 0 | NA | 0 | NA | 0 | NA | 0 | NA |
| 11 | 66993307 | 66988394 | -1 | NM_025124    | TMEM134  | 1 | 12 | 0 | NA | 0 | NA | 0 | NA | 0 | NA |
| 11 | 67007096 | 67015150 | 1  | NM_003977    | AIP      | 1 | 53 | 0 | NA | 1 | 14 | 0 | NA | 0 | NA |
| 11 | 67028416 | 67015814 | -1 | NM_004910    | PITPNM1  | 0 | NA | 0 | NA | 1 | 12 | 0 | NA | 0 | NA |

|    |          |          |    |              |           |   |    |   |    |   |    |   |    |   |    |
|----|----------|----------|----|--------------|-----------|---|----|---|----|---|----|---|----|---|----|
| 11 | 67032678 | 67030543 | -1 | NM_005851    | CDK2AP2   | 0 | NA | 0 | NA | 1 | 12 | 0 | NA | 0 | NA |
| 11 | 67047475 | 67042993 | -1 | NM_016366    | CABP2     | 0 | NA | 1 | 16 | 0 | NA | 0 | NA | 0 | NA |
| 11 | 67047475 | 67042993 | -1 | NM_031204    | CABP2     | 0 | NA | 1 | 16 | 0 | NA | 0 | NA | 0 | NA |
| 11 | 67107861 | 67110699 | 1  | NM_000852    | GSTP1     | 0 | NA | 1 | 13 | 0 | NA | 0 | NA | 0 | NA |
| 11 | 67130898 | 67136588 | 1  | NM_007103    | NDUFV1    | 0 | NA | 0 | NA | 0 | NA | 0 | NA | 0 | NA |
| 11 | 67153977 | 67151984 | -1 | NM_181843    | NUDT8     | 0 | NA | 0 | NA | 0 | NA | 0 | NA | 0 | NA |
| 11 | 67163607 | 67155349 | -1 | NM_005995    | TBX10     | 0 | NA | 0 | NA | 0 | NA | 0 | NA | 0 | NA |
| 11 | 67174706 | 67166601 | -1 | NM_080658    | ACY3      | 0 | NA | 0 | NA | 0 | NA | 0 | NA | 0 | NA |
| 11 | 67198678 | 67186208 | -1 | NM_000695    | ALDH3B2   | 0 | NA | 0 | NA | 0 | NA | 0 | NA | 0 | NA |
| 11 | 67205261 | 67186208 | -1 | NM_001031615 | ALDH3B2   | 0 | NA | 0 | NA | 0 | NA | 0 | NA | 0 | NA |
| 11 | 67528169 | 67515150 | -1 | NM_030930    | UNC93B1   | 0 | NA | 0 | NA | 0 | NA | 0 | NA | 0 | NA |
| 11 | 67534365 | 67553319 | 1  | NM_000694    | ALDH3B1   | 0 | NA | 0 | NA | 0 | NA | 0 | NA | 0 | NA |
| 11 | 67534365 | 67553319 | 1  | NM_001030010 | ALDH3B1   | 0 | NA | 0 | NA | 0 | NA | 0 | NA | 0 | NA |
| 11 | 67554669 | 67560690 | 1  | NM_002496    | NDUFS8    | 0 | NA | 0 | NA | 0 | NA | 0 | NA | 0 | NA |
| 11 | 67563058 | 67574942 | 1  | NM_006019    | TCIRG1    | 0 | NA | 0 | NA | 0 | NA | 0 | NA | 0 | NA |
| 11 | 67567022 | 67574942 | 1  | NM_006053    | TCIRG1    | 0 | NA | 0 | NA | 0 | NA | 0 | NA | 0 | NA |
| 11 | 67645434 | 67576901 | -1 | NM_001277    | CHKA      | 0 | NA | 0 | NA | 0 | NA | 0 | NA | 0 | NA |
| 11 | 67645434 | 67576901 | -1 | NM_212469    | CHKA      | 0 | NA | 0 | NA | 0 | NA | 0 | NA | 0 | NA |
| 11 | 67737360 | 67680082 | -1 | NM_017635    | SUV420H1  | 0 | NA | 0 | NA | 0 | NA | 0 | NA | 0 | NA |
| 11 | 67737360 | 67689761 | -1 | NM_016028    | SUV420H1  | 0 | NA | 0 | NA | 0 | NA | 0 | NA | 0 | NA |
| 11 | 67795997 | 67785382 | -1 | NM_022338    | C11orf24  | 0 | NA | 0 | NA | 1 | 12 | 1 | 13 | 0 | NA |
| 11 | 67836683 | 67973319 | 1  | NM_002335    | LRP5      | 0 | NA | 0 | NA | 0 | NA | 0 | NA | 0 | NA |
| 11 | 67984774 | 68139377 | 1  | NM_018312    | SAPS3     | 0 | NA | 0 | NA | 0 | NA | 1 | 12 | 0 | NA |
| 11 | 68208558 | 68215219 | 1  | NM_015973    | GAL       | 0 | NA | 1 | 14 | 0 | NA | 0 | NA | 0 | NA |
| 11 | 68275564 | 68231483 | -1 | NM_004923    | MTL5      | 0 | NA | 0 | NA | 0 | NA | 0 | NA | 0 | NA |
| 11 | 68275564 | 68260175 | -1 | NM_001039656 | MTL5      | 0 | NA | 0 | NA | 0 | NA | 0 | NA | 0 | NA |
| 11 | 68365850 | 68278663 | -1 | NM_001031847 | CPT1A     | 1 | 13 | 0 | NA | 0 | NA | 0 | NA | 0 | NA |
| 11 | 68365881 | 68281144 | -1 | NM_001876    | CPT1A     | 1 | 13 | 0 | NA | 0 | NA | 0 | NA | 0 | NA |
| 11 | 68427879 | 68415321 | -1 | NM_181514    | MRPL21    | 0 | NA | 0 | NA | 0 | NA | 0 | NA | 0 | NA |
| 11 | 68427879 | 68415321 | -1 | NM_181515    | MRPL21    | 0 | NA | 0 | NA | 0 | NA | 0 | NA | 0 | NA |
| 11 | 68427894 | 68464645 | 1  | NM_002180    | IGHMBP2   | 0 | NA | 0 | NA | 0 | NA | 0 | NA | 0 | NA |
| 11 | 68505031 | 68504065 | -1 | NM_198923    | MRGPRD    | 0 | NA | 1 | 15 | 0 | NA | 0 | NA | 0 | NA |
| 11 | 68537426 | 68528437 | -1 | NM_001098515 | MRGPRF    | 0 | NA | 0 | NA | 0 | NA | 0 | NA | 0 | NA |
| 11 | 68537426 | 68528437 | -1 | NM_145015    | MRGPRF    | 0 | NA | 0 | NA | 0 | NA | 0 | NA | 0 | NA |
| 11 | 68572925 | 68614648 | 1  | NM_139075    | TPCN2     | 0 | NA | 0 | NA | 0 | NA | 1 | 13 | 0 | NA |
| 11 | 68818197 | 68821330 | 1  | NM_138768    | MYEOV     | 1 | 12 | 0 | NA | 1 | 16 | 0 | NA | 0 | NA |
| 11 | 69185053 | 69178423 | 1  | NM_053056    | CCND1     | 0 | NA | 0 | NA | 0 | NA | 1 | 12 | 0 | NA |
| 11 | 69199346 | 69189512 | -1 | NM_153451    | ORAOV1    | 0 | NA | 0 | NA | 1 | 12 | 0 | NA | 0 | NA |
| 11 | 69228287 | 69222186 | -1 | NM_005117    | FGF19     | 0 | NA | 0 | NA | 0 | NA | 0 | NA | 1 | 12 |
| 11 | 69299352 | 69296977 | -1 | NM_002007    | FGF4      | 0 | NA | 1 | 18 | 0 | NA | 0 | NA | 1 | 13 |
| 11 | 69343129 | 69333916 | -1 | NM_005247    | FGF3      | 0 | NA | 0 | NA | 0 | NA | 0 | NA | 1 | 14 |
| 11 | 69602293 | 69713282 | 1  | NM_018043    | TMEM16A   | 0 | NA | 0 | NA | 0 | NA | 0 | NA | 1 | 12 |
| 11 | 69726916 | 69731134 | 1  | NM_003824    | FADD      | 0 | NA | 0 | NA | 0 | NA | 1 | 12 | 0 | NA |
| 11 | 69794470 | 69902146 | 1  | NM_177423    | PPFIA1    | 0 | NA | 0 | NA | 0 | NA | 0 | NA | 0 | NA |
| 11 | 69794470 | 69908150 | 1  | NM_003626    | PPFIA1    | 0 | NA | 0 | NA | 0 | NA | 0 | NA | 0 | NA |
| 11 | 69922259 | 69960338 | 1  | NM_005231    | CTTN      | 0 | NA | 0 | NA | 0 | NA | 0 | NA | 0 | NA |
| 11 | 69922291 | 69960338 | 1  | NM_138565    | CTTN      | 0 | NA | 0 | NA | 0 | NA | 0 | NA | 0 | NA |
| 11 | 70185520 | 69991608 | -1 | NM_012309    | SHANK2    | 0 | NA | 0 | NA | 0 | NA | 0 | NA | 1 | 14 |
| 11 | 70185520 | 70012765 | -1 | NM_133266    | SHANK2    | 0 | NA | 0 | NA | 0 | NA | 0 | NA | 1 | 14 |
| 11 | 70837125 | 70823104 | -1 | NM_001360    | DHCR7     | 0 | NA | 0 | NA | 0 | NA | 0 | NA | 1 | 14 |
| 11 | 70841864 | 70890229 | 1  | NM_018161    | NADSYN1   | 0 | NA | 0 | NA | 0 | NA | 0 | NA | 1 | 14 |
| 11 | 70915960 | 70916858 | 1  | NM_001012503 | KRTAP5-7  | 0 | NA | 1 | 12 | 0 | NA | 0 | NA | 1 | 17 |
| 11 | 70926718 | 70927901 | 1  | NM_021046    | KRTAP5-8  | 0 | NA | 1 | 12 | 0 | NA | 0 | NA | 1 | 27 |
| 11 | 70937113 | 70938301 | 1  | NM_005553    | KRTAP5-9  | 0 | NA | 0 | NA | 0 | NA | 0 | NA | 1 | 16 |
| 11 | 70954256 | 70955314 | 1  | NM_001012710 | KRTAP5-10 | 0 | NA | 0 | NA | 0 | NA | 0 | NA | 1 | 12 |
| 11 | 70971569 | 70970548 | -1 | NM_001005405 | KRTAP5-11 | 0 | NA | 0 | NA | 0 | NA | 0 | NA | 0 | NA |
| 11 | 71176204 | 71189928 | 1  | NM_001099653 | FAM86C    | 0 | NA | 0 | NA | 0 | NA | 0 | NA | 0 | NA |
| 11 | 71176204 | 71189928 | 1  | NM_018172    | FAM86C    | 0 | NA | 0 | NA | 0 | NA | 0 | NA | 0 | NA |
| 11 | 71176204 | 71189928 | 1  | NM_152563    | FAM86C    | 0 | NA | 0 | NA | 0 | NA | 0 | NA | 0 | NA |
| 11 | 71221893 | 71226256 | 1  | NM_001002035 | DEFB108B  | 0 | NA | 0 | NA | 0 | NA | 0 | NA | 0 | NA |
| 11 | 71317730 | 71386291 | 1  | NM_018320    | RNF121    | 0 | NA | 0 | NA | 0 | NA | 0 | NA | 0 | NA |
| 11 | 71317730 | 71386291 | 1  | NM_194452    | RNF121    | 0 | NA | 0 | NA | 0 | NA | 0 | NA | 0 | NA |
| 11 | 71317730 | 71386291 | 1  | NM_194453    | RNF121    | 0 | NA | 0 | NA | 0 | NA | 0 | NA | 0 | NA |
| 11 | 71387605 | 71391222 | 1  | NM_001039659 | IL18BP    | 0 | NA | 0 | NA | 0 | NA | 1 | 15 | 1 | 12 |
| 11 | 71387605 | 71391222 | 1  | NM_001039660 | IL18BP    | 0 | NA | 0 | NA | 0 | NA | 1 | 15 | 1 | 12 |



|    |          |          |    |              |          |   |    |   |    |   |    |   |    |   |    |
|----|----------|----------|----|--------------|----------|---|----|---|----|---|----|---|----|---|----|
| 11 | 71387756 | 71391222 | 1  | NM_173042    | IL18BP   | 0 | NA | 0 | NA | 0 | NA | 1 | 15 | 1 | 12 |
| 11 | 71469221 | 71391558 | -1 | NM_006185    | NUMA1    | 1 | 14 | 0 | NA | 0 | NA | 0 | NA | 0 | NA |
| 11 | 71469552 | 71485586 | 1  | NM_145309    | LRRCS1   | 1 | 14 | 0 | NA | 0 | NA | 0 | NA | 0 | NA |
| 11 | 71491970 | 71485985 | -1 | NM_017907    | C11orf59 | 1 | 23 | 0 | NA | 1 | 19 | 1 | 15 | 0 | NA |
| 11 | 71501470 | 71498280 | -1 | NM_014042    | C11orf51 | 1 | 23 | 0 | NA | 1 | 19 | 1 | 15 | 1 | 16 |
| 11 | 71524418 | 71528582 | 1  | NM_000804    | FOLR3    | 0 | NA | 0 | NA | 0 | NA | 0 | NA | 1 | 17 |
| 11 | 71578249 | 71584989 | 1  | NM_016725    | FOLR1    | 0 | NA | 0 | NA | 0 | NA | 0 | NA | 0 | NA |
| 11 | 71578387 | 71584989 | 1  | NM_016724    | FOLR1    | 0 | NA | 0 | NA | 0 | NA | 0 | NA | 0 | NA |
| 11 | 71578606 | 71585014 | 1  | NM_000802    | FOLR1    | 0 | NA | 0 | NA | 0 | NA | 0 | NA | 0 | NA |
| 11 | 71578905 | 71584990 | 1  | NM_016730    | FOLR1    | 0 | NA | 0 | NA | 0 | NA | 0 | NA | 0 | NA |
| 11 | 71580820 | 71584989 | 1  | NM_016729    | FOLR1    | 0 | NA | 0 | NA | 0 | NA | 0 | NA | 0 | NA |
| 11 | 71580855 | 71585014 | 1  | NM_016731    | FOLR1    | 0 | NA | 0 | NA | 0 | NA | 0 | NA | 0 | NA |
| 11 | 71605466 | 71610642 | 1  | NM_000803    | FOLR2    | 0 | NA | 0 | NA | 0 | NA | 1 | 12 | 1 | 12 |
| 11 | 71605466 | 71610642 | 1  | NM_001113534 | FOLR2    | 0 | NA | 0 | NA | 0 | NA | 1 | 12 | 1 | 12 |
| 11 | 71605466 | 71610642 | 1  | NM_001113535 | FOLR2    | 0 | NA | 0 | NA | 0 | NA | 1 | 12 | 1 | 12 |
| 11 | 71605466 | 71610642 | 1  | NM_001113536 | FOLR2    | 0 | NA | 0 | NA | 0 | NA | 1 | 12 | 1 | 12 |
| 11 | 71613472 | 71627797 | 1  | NM_001567    | INPL1    | 0 | NA | 0 | NA | 0 | NA | 1 | 11 | 1 | 12 |
| 11 | 71632852 | 71627768 | -1 | NM_005169    | PHOX2A   | 0 | NA | 0 | NA | 0 | NA | 1 | 14 | 1 | 16 |
| 11 | 71823216 | 71681117 | -1 | NM_030813    | CLPB     | 1 | 17 | 0 | NA | 0 | NA | 1 | 14 | 0 | NA |
| 11 | 72063060 | 71964832 | -1 | NM_002599    | PDE2A    | 0 | NA | 0 | NA | 0 | NA | 1 | 16 | 1 | 17 |
| 11 | 72101844 | 72073761 | -1 | NM_015242    | CENTD2   | 0 | NA | 0 | NA | 1 | 12 | 0 | NA | 0 | NA |
| 11 | 72111028 | 72073761 | -1 | NM_139181    | CENTD2   | 0 | NA | 0 | NA | 0 | NA | 0 | NA | 1 | 12 |
| 11 | 72115821 | 72073761 | -1 | NM_001040118 | CENTD2   | 0 | NA | 0 | NA | 0 | NA | 1 | 12 | 1 | 12 |
| 11 | 72182398 | 72143421 | -1 | NM_006645    | STARD10  | 0 | NA | 0 | NA | 0 | NA | 1 | 11 | 0 | NA |
| 11 | 72203098 | 72218328 | 1  | NM_033388    | ATG16L2  | 0 | NA | 0 | NA | 1 | 12 | 0 | NA | 0 | NA |
| 11 | 72530791 | 72225437 | -1 | NM_014824    | FCHSD2   | 0 | NA | 0 | NA | 0 | NA | 1 | 13 | 0 | NA |
| 11 | 72606991 | 72625043 | 1  | NM_002564    | P2RY2    | 0 | NA | 1 | 12 | 1 | 12 | 0 | NA | 1 | 16 |
| 11 | 72606991 | 72625043 | 1  | NM_176072    | P2RY2    | 0 | NA | 1 | 12 | 1 | 12 | 0 | NA | 1 | 16 |
| 11 | 72607149 | 72625043 | 1  | NM_176071    | P2RY2    | 0 | NA | 1 | 12 | 1 | 12 | 0 | NA | 1 | 16 |
| 11 | 72653217 | 72686498 | 1  | NM_176796    | P2RY6    | 0 | NA | 0 | NA | 0 | NA | 0 | NA | 0 | NA |
| 11 | 72653217 | 72686498 | 1  | NM_176797    | P2RY6    | 0 | NA | 0 | NA | 0 | NA | 0 | NA | 0 | NA |
| 11 | 72658586 | 72686498 | 1  | NM_176798    | P2RY6    | 0 | NA | 0 | NA | 0 | NA | 0 | NA | 0 | NA |
| 11 | 72660894 | 72687312 | 1  | NM_004154    | P2RY6    | 0 | NA | 0 | NA | 0 | NA | 0 | NA | 0 | NA |
| 11 | 72697316 | 72757784 | 1  | NM_014786    | ARHGEF17 | 1 | 11 | 0 | NA | 0 | NA | 1 | 20 | 0 | NA |
| 11 | 72765052 | 72786167 | 1  | NM_152222    | RELT     | 0 | NA | 0 | NA | 0 | NA | 1 | 14 | 0 | NA |
| 11 | 72765360 | 72786167 | 1  | NM_032871    | RELT     | 0 | NA | 0 | NA | 0 | NA | 1 | 14 | 0 | NA |
| 11 | 72986876 | 72794675 | -1 | NM_015159    | KIAA0280 | 0 | NA | 0 | NA | 0 | NA | 1 | 16 | 0 | NA |
| 11 | 73034870 | 73051512 | 1  | NM_021200    | PLEKHB1  | 0 | NA | 0 | NA | 0 | NA | 0 | NA | 0 | NA |
| 11 | 73149849 | 73064330 | -1 | NM_002869    | RAB6A    | 0 | NA | 0 | NA | 0 | NA | 1 | 17 | 0 | NA |
| 11 | 73149849 | 73064330 | -1 | NM_198896    | RAB6A    | 0 | NA | 0 | NA | 0 | NA | 1 | 17 | 0 | NA |
| 11 | 73176564 | 73253304 | 1  | NM_016055    | MRPL48   | 1 | 14 | 0 | NA | 1 | 13 | 0 | NA | 0 | NA |
| 11 | 73265538 | 73261360 | -1 | NM_016565    | CHCHD8   | 0 | NA | 0 | NA | 0 | NA | 1 | 12 | 0 | NA |
| 11 | 73265680 | 73316427 | 1  | NM_025155    | PAAF1    | 0 | NA | 0 | NA | 0 | NA | 1 | 12 | 0 | NA |
| 11 | 73339011 | 73358980 | 1  | NM_153614    | DNAJB13  | 0 | NA | 0 | NA | 0 | NA | 0 | NA | 1 | 13 |
| 11 | 73371537 | 73363363 | -1 | NM_003355    | UCP2     | 0 | NA | 0 | NA | 0 | NA | 0 | NA | 1 | 12 |
| 11 | 73397778 | 73388984 | -1 | NM_003356    | UCP3     | 0 | NA | 0 | NA | 0 | NA | 0 | NA | 1 | 12 |
| 11 | 73397778 | 73392372 | -1 | NM_022803    | UCP3     | 0 | NA | 0 | NA | 0 | NA | 0 | NA | 1 | 12 |
| 11 | 73559712 | 73423127 | -1 | NM_015531    | C2CD3    | 0 | NA | 0 | NA | 1 | 12 | 0 | NA | 0 | NA |
| 11 | 73560015 | 73643396 | 1  | NM_016147    | PPME1    | 0 | NA | 0 | NA | 1 | 12 | 0 | NA | 0 | NA |
| 11 | 73700347 | 73655349 | -1 | NM_182904    | P4HA3    | 0 | NA | 0 | NA | 1 | 16 | 1 | 11 | 1 | 14 |
| 11 | 73787150 | 73719008 | -1 | NM_173582    | PGM2L1   | 0 | NA | 0 | NA | 0 | NA | 0 | NA | 0 | NA |
| 11 | 73856248 | 73843533 | -1 | NM_005472    | KCNE3    | 0 | NA | 0 | NA | 0 | NA | 0 | NA | 0 | NA |
| 11 | 73981276 | 74031413 | 1  | NM_006591    | POLD3    | 0 | NA | 0 | NA | 0 | NA | 0 | NA | 0 | NA |
| 11 | 74119834 | 74085121 | -1 | NM_015424    | CHRDL2   | 0 | NA | 0 | NA | 0 | NA | 0 | NA | 1 | 12 |
| 11 | 74137560 | 74231106 | 1  | NM_001098638 | RNF169   | 0 | NA | 0 | NA | 0 | NA | 1 | 12 | 0 | NA |
| 11 | 74337880 | 74229602 | -1 | NM_182969    | XRRR1    | 0 | NA | 0 | NA | 1 | 12 | 0 | NA | 0 | NA |
| 11 | 74337939 | 74367724 | 1  | NM_014752    | SPCS2    | 0 | NA | 0 | NA | 1 | 12 | 0 | NA | 0 | NA |
| 11 | 74377597 | 74396391 | 1  | NM_006656    | NEU3     | 0 | NA | 0 | NA | 0 | NA | 0 | NA | 0 | NA |
| 11 | 74478406 | 74477443 | -1 | NM_001005285 | OR2AT4   | 0 | NA | 0 | NA | 0 | NA | 0 | NA | 0 | NA |
| 11 | 74539810 | 74594947 | 1  | NM_007256    | SLCO2B1  | 0 | NA | 0 | NA | 0 | NA | 0 | NA | 0 | NA |
| 11 | 74740521 | 74654129 | -1 | NM_004041    | ARRB1    | 0 | NA | 0 | NA | 0 | NA | 0 | NA | 0 | NA |
| 11 | 74740521 | 74654129 | -1 | NM_020251    | ARRB1    | 0 | NA | 0 | NA | 0 | NA | 0 | NA | 0 | NA |
| 11 | 74788209 | 74794381 | 1  | NM_001005    | RPS3     | 1 | 13 | 0 | NA | 0 | NA | 1 | 11 | 0 | NA |
| 11 | 74818881 | 74811085 | -1 | NM_001039548 | FLJ33790 | 0 | NA | 1 | 14 | 0 | NA | 0 | NA | 0 | NA |
| 11 | 74914515 | 74823333 | -1 | NM_030792    | GDPD5    | 0 | NA | 0 | NA | 0 | NA | 0 | NA | 0 | NA |

|    |          |          |    |              |          |   |    |   |    |   |    |   |    |   |    |
|----|----------|----------|----|--------------|----------|---|----|---|----|---|----|---|----|---|----|
| 11 | 74950817 | 74961494 | 1  | NM_001235    | SERPINH1 | 1 | 15 | 0 | NA | 1 | 27 | 1 | 12 | 0 | NA |
| 11 | 75057127 | 74975610 | -1 | NM_033063    | MAP6     | 0 | NA | 1 | 12 | 0 | NA | 0 | NA | 0 | NA |
| 11 | 75057127 | 74991552 | -1 | NM_207577    | MAP6     | 0 | NA | 1 | 12 | 0 | NA | 0 | NA | 0 | NA |
| 11 | 75106581 | 75119979 | 1  | NM_025098    | MOGAT2   | 0 | NA | 0 | NA | 0 | NA | 0 | NA | 0 | NA |
| 11 | 75157455 | 75190225 | 1  | NM_032564    | DGAT2    | 0 | NA | 0 | NA | 0 | NA | 1 | 11 | 1 | 18 |
| 11 | 75203859 | 75532930 | 1  | NM_003369    | UVRAG    | 0 | NA | 0 | NA | 0 | NA | 0 | NA | 0 | NA |
| 11 | 75595222 | 75575017 | -1 | NM_004626    | WNT11    | 0 | NA | 0 | NA | 0 | NA | 0 | NA | 0 | NA |
| 11 | 75769528 | 75738651 | -1 | NM_004705    | PRKRIR   | 0 | NA | 0 | NA | 0 | NA | 0 | NA | 0 | NA |
| 11 | 75833716 | 75940237 | 1  | NM_020193    | C11orf30 | 0 | NA | 0 | NA | 1 | 13 | 0 | NA | 0 | NA |
| 11 | 76058543 | 76046221 | -1 | NM_005512    | LRRC32   | 0 | NA | 0 | NA | 0 | NA | 0 | NA | 0 | NA |
| 11 | 76171932 | 76186846 | 1  | NM_015516    | TSKU     | 0 | NA | 0 | NA | 0 | NA | 0 | NA | 0 | NA |
| 11 | 76249564 | 76412498 | 1  | NM_018367    | PHCA     | 0 | NA | 0 | NA | 0 | NA | 0 | NA | 0 | NA |
| 11 | 76423082 | 76430653 | 1  | NM_138706    | B3GNT6   | 0 | NA | 0 | NA | 0 | NA | 0 | NA | 0 | NA |
| 11 | 76455639 | 76514846 | 1  | NM_004055    | CAPN5    | 0 | NA | 0 | NA | 0 | NA | 1 | 29 | 0 | NA |
| 11 | 76491533 | 76492025 | 1  | NM_006189    | OMP      | 0 | NA | 0 | NA | 0 | NA | 0 | NA | 0 | NA |
| 11 | 76516963 | 76603932 | 1  | NM_000260    | MYO7A    | 0 | NA | 0 | NA | 0 | NA | 0 | NA | 0 | NA |
| 11 | 76676111 | 76605250 | -1 | NM_182833    | GDPD4    | 0 | NA | 0 | NA | 0 | NA | 0 | NA | 1 | 12 |
| 11 | 76862581 | 76710707 | -1 | NM_002576    | PAK1     | 0 | NA | 0 | NA | 0 | NA | 0 | NA | 0 | NA |
| 11 | 76978327 | 76998341 | 1  | NM_173039    | AQP11    | 0 | NA | 0 | NA | 1 | 13 | 0 | NA | 0 | NA |
| 11 | 77026495 | 77004846 | -1 | NM_001293    | CLNS1A   | 0 | NA | 0 | NA | 0 | NA | 0 | NA | 0 | NA |
| 11 | 77209528 | 77054921 | -1 | NM_016578    | RSF1     | 0 | NA | 0 | NA | 0 | NA | 1 | 11 | 0 | NA |
| 11 | 77209855 | 77261046 | 1  | NM_024684    | C11orf67 | 0 | NA | 0 | NA | 0 | NA | 1 | 11 | 0 | NA |
| 11 | 77383365 | 77267413 | -1 | NM_033547    | INTS4    | 1 | 14 | 0 | NA | 1 | 19 | 0 | NA | 0 | NA |
| 11 | 77411968 | 77404408 | -1 | NM_023930    | KCTD14   | 0 | NA | 0 | NA | 0 | NA | 0 | NA | 0 | NA |
| 11 | 77452554 | 77457045 | 1  | NM_003251    | THRSP    | 0 | NA | 0 | NA | 0 | NA | 0 | NA | 0 | NA |
| 11 | 77468913 | 77457043 | -1 | NM_004549    | NDUFC2   | 0 | NA | 0 | NA | 0 | NA | 1 | 14 | 0 | NA |
| 11 | 77528347 | 77489635 | -1 | NM_001007027 | ALG8     | 1 | 25 | 0 | NA | 1 | 13 | 1 | 16 | 0 | NA |
| 11 | 77528347 | 77489635 | -1 | NM_024079    | ALG8     | 1 | 25 | 0 | NA | 1 | 13 | 1 | 16 | 0 | NA |
| 11 | 77577312 | 77559945 | -1 | NM_001029859 | KCTD21   | 0 | NA | 0 | NA | 0 | NA | 1 | 11 | 0 | NA |
| 11 | 77577605 | 77603401 | 1  | NM_020798    | USP35    | 0 | NA | 0 | NA | 0 | NA | 1 | 11 | 0 | NA |
| 11 | 77730574 | 77603989 | -1 | NM_012296    | GAB2     | 1 | 20 | 0 | NA | 1 | 15 | 0 | NA | 0 | NA |
| 11 | 77806414 | 77603989 | -1 | NM_080491    | GAB2     | 0 | NA | 0 | NA | 0 | NA | 1 | 12 | 0 | NA |
| 11 | 77963367 | 77824890 | -1 | NM_024678    | NARS2    | 0 | NA | 0 | NA | 0 | NA | 0 | NA | 0 | NA |
| 11 | 78629343 | 78041975 | -1 | NM_001098816 | ODZ4     | 0 | NA | 0 | NA | 0 | NA | 0 | NA | 0 | NA |
| 11 | 82122554 | 82120693 | -1 | NM_175885    | MGC33846 | 0 | NA | 1 | 23 | 0 | NA | 0 | NA | 0 | NA |
| 11 | 82289205 | 82213056 | -1 | NM_005040    | PRCP     | 0 | NA | 0 | NA | 0 | NA | 0 | NA | 0 | NA |
| 11 | 82289205 | 82213056 | -1 | NM_199418    | PRCP     | 0 | NA | 0 | NA | 0 | NA | 0 | NA | 0 | NA |
| 11 | 82290416 | 82323347 | 1  | NM_145018    | C11orf82 | 0 | NA | 0 | NA | 0 | NA | 0 | NA | 0 | NA |
| 11 | 82460532 | 82370125 | -1 | NM_014488    | RAB30    | 0 | NA | 0 | NA | 0 | NA | 0 | NA | 0 | NA |
| 11 | 82545784 | 82574483 | 1  | NM_015885    | PCF11    | 1 | 11 | 0 | NA | 0 | NA | 1 | 11 | 0 | NA |
| 11 | 82582938 | 82637661 | 1  | NM_182603    | ANKRD42  | 0 | NA | 0 | NA | 0 | NA | 0 | NA | 0 | NA |
| 11 | 82675025 | 82650149 | -1 | NM_021825    | CCDC90B  | 0 | NA | 0 | NA | 0 | NA | 0 | NA | 0 | NA |
| 11 | 84312113 | 82843700 | -1 | NM_001364    | DLG2     | 0 | NA | 0 | NA | 0 | NA | 0 | NA | 0 | NA |
| 11 | 85017309 | 85025185 | 1  | NM_018480    | TMEM126B | 1 | 13 | 0 | NA | 0 | NA | 0 | NA | 0 | NA |
| 11 | 85036692 | 85045235 | 1  | NM_032273    | TMEM126A | 0 | NA | 0 | NA | 0 | NA | 0 | NA | 0 | NA |
| 11 | 85053821 | 85046517 | -1 | NM_001039618 | CREBZF   | 1 | 12 | 0 | NA | 0 | NA | 0 | NA | 0 | NA |
| 11 | 85074968 | 85072540 | -1 | NM_152723    | CCDC89   | 0 | NA | 0 | NA | 0 | NA | 0 | NA | 0 | NA |
| 11 | 85103439 | 85082912 | -1 | NM_032379    | SYTL2    | 0 | NA | 0 | NA | 0 | NA | 0 | NA | 0 | NA |
| 11 | 85107859 | 85082912 | -1 | NM_206929    | SYTL2    | 0 | NA | 0 | NA | 0 | NA | 0 | NA | 0 | NA |
| 11 | 85107859 | 85082912 | -1 | NM_206930    | SYTL2    | 0 | NA | 0 | NA | 0 | NA | 0 | NA | 0 | NA |
| 11 | 85115159 | 85082912 | -1 | NM_206927    | SYTL2    | 0 | NA | 0 | NA | 0 | NA | 0 | NA | 0 | NA |
| 11 | 85115159 | 85082912 | -1 | NM_206928    | SYTL2    | 0 | NA | 0 | NA | 0 | NA | 0 | NA | 0 | NA |
| 11 | 85146692 | 85082912 | -1 | NM_032943    | SYTL2    | 0 | NA | 0 | NA | 1 | 12 | 0 | NA | 0 | NA |
| 11 | 85243791 | 85308699 | 1  | NM_173556    | CCDC83   | 1 | 16 | 0 | NA | 0 | NA | 1 | 14 | 0 | NA |
| 11 | 85457756 | 85346132 | -1 | NM_001008660 | PICALM   | 1 | 11 | 0 | NA | 0 | NA | 1 | 12 | 0 | NA |
| 11 | 85457756 | 85346132 | -1 | NM_007166    | PICALM   | 1 | 11 | 0 | NA | 0 | NA | 1 | 12 | 0 | NA |
| 11 | 85633462 | 85667428 | 1  | NM_003797    | EED      | 1 | 12 | 0 | NA | 0 | NA | 0 | NA | 0 | NA |
| 11 | 85633462 | 85667428 | 1  | NM_152991    | EED      | 1 | 12 | 0 | NA | 0 | NA | 0 | NA | 0 | NA |
| 11 | 85690935 | 85734633 | 1  | NM_016401    | C11orf73 | 1 | 16 | 0 | NA | 0 | NA | 0 | NA | 0 | NA |
| 11 | 85763425 | 85811798 | 1  | NM_021827    | CCDC81   | 0 | NA | 0 | NA | 0 | NA | 0 | NA | 0 | NA |
| 11 | 86060888 | 85829797 | -1 | NM_001014811 | ME3      | 0 | NA | 0 | NA | 0 | NA | 0 | NA | 0 | NA |
| 11 | 86061075 | 85829797 | -1 | NM_006680    | ME3      | 0 | NA | 0 | NA | 0 | NA | 0 | NA | 0 | NA |
| 11 | 86189138 | 86199921 | 1  | NM_007173    | PRSS23   | 0 | NA | 0 | NA | 1 | 15 | 0 | NA | 0 | NA |
| 11 | 86344081 | 86334368 | -1 | NM_012193    | FZD4     | 0 | NA | 0 | NA | 0 | NA | 0 | NA | 0 | NA |
| 11 | 86426712 | 86712218 | 1  | NM_022918    | TMEM135  | 1 | 20 | 0 | NA | 0 | NA | 0 | NA | 0 | NA |

|    |           |           |    |              |           |   |    |   |    |   |    |   |    |   |    |
|----|-----------|-----------|----|--------------|-----------|---|----|---|----|---|----|---|----|---|----|
| 11 | 87548247  | 87486078  | -1 | NM_022337    | RAB38     | 0 | NA | 0 | NA | 0 | NA | 0 | NA | 0 | NA |
| 11 | 87710589  | 87666407  | -1 | NM_001814    | CTSC      | 1 | 22 | 0 | NA | 0 | NA | 1 | 13 | 0 | NA |
| 11 | 87710589  | 87693628  | -1 | NM_001114173 | CTSC      | 1 | 22 | 0 | NA | 0 | NA | 1 | 13 | 0 | NA |
| 11 | 87710589  | 87693628  | -1 | NM_148170    | CTSC      | 1 | 22 | 0 | NA | 0 | NA | 1 | 13 | 0 | NA |
| 11 | 88420838  | 87880625  | -1 | NM_000842    | GRM5      | 0 | NA | 0 | NA | 0 | NA | 0 | NA | 0 | NA |
| 11 | 88550687  | 88668575  | 1  | NM_000372    | TYR       | 0 | NA | 0 | NA | 0 | NA | 0 | NA | 0 | NA |
| 11 | 88864301  | 88699160  | -1 | NM_016931    | NOX4      | 0 | NA | 0 | NA | 0 | NA | 0 | NA | 0 | NA |
| 11 | 89032112  | 89071534  | 1  | NM_153696    | PSMAL     | 0 | NA | 0 | NA | 0 | NA | 0 | NA | 0 | NA |
| 11 | 89126791  | 89125600  | -1 | NM_001101321 | LOC120126 | 0 | NA | 0 | NA | 0 | NA | 0 | NA | 0 | NA |
| 11 | 89181391  | 89170470  | -1 | NM_020358    | TRIM49    | 0 | NA | 0 | NA | 0 | NA | 0 | NA | 0 | NA |
| 11 | 89293224  | 89284226  | -1 | NM_001105522 | LOC729384 | 0 | NA | 0 | NA | 0 | NA | 0 | NA | 0 | NA |
| 11 | 89296879  | 89305877  | 1  | NM_001105522 | LOC729384 | 0 | NA | 0 | NA | 0 | NA | 0 | NA | 0 | NA |
| 11 | 89507465  | 89565427  | 1  | NM_005467    | NAALAD2   | 0 | NA | 0 | NA | 0 | NA | 0 | NA | 0 | NA |
| 11 | 89595854  | 89574264  | -1 | NM_012124    | CHORDC1   | 0 | NA | 0 | NA | 0 | NA | 0 | NA | 0 | NA |
| 11 | 91724909  | 92269283  | 1  | NM_001008781 | FAT3      | 0 | NA | 0 | NA | 0 | NA | 0 | NA | 0 | NA |
| 11 | 92342436  | 92355596  | 1  | NM_005959    | MTNR1B    | 0 | NA | 1 | 14 | 0 | NA | 0 | NA | 0 | NA |
| 11 | 92570743  | 92520497  | -1 | NM_152313    | SLC36A4   | 0 | NA | 0 | NA | 0 | NA | 1 | 13 | 0 | NA |
| 11 | 92703530  | 92811284  | 1  | NM_181645    | CCDC67    | 0 | NA | 0 | NA | 0 | NA | 0 | NA | 0 | NA |
| 11 | 92916194  | 92851286  | -1 | NM_020179    | C11orf75  | 0 | NA | 0 | NA | 0 | NA | 0 | NA | 0 | NA |
| 11 | 93034463  | 93103170  | 1  | NM_033395    | KIAA1731  | 0 | NA | 0 | NA | 0 | NA | 1 | 17 | 0 | NA |
| 11 | 93114310  | 93108745  | -1 | NM_024116    | JOSD3     | 1 | 18 | 0 | NA | 0 | NA | 0 | NA | 0 | NA |
| 11 | 93114440  | 93135895  | 1  | NM_014039    | C11orf54  | 1 | 18 | 0 | NA | 0 | NA | 0 | NA | 0 | NA |
| 11 | 93157052  | 93186144  | 1  | NM_004268    | MED17     | 1 | 12 | 0 | NA | 0 | NA | 0 | NA | 0 | NA |
| 11 | 93394025  | 93487022  | 1  | NM_001098672 | HEPPL1    | 0 | NA | 0 | NA | 0 | NA | 0 | NA | 0 | NA |
| 11 | 93501741  | 93554785  | 1  | NM_015368    | PANX1     | 0 | NA | 0 | NA | 0 | NA | 0 | NA | 0 | NA |
| 11 | 93678450  | 93680506  | 1  | NM_001080486 | LOC90243  | 0 | NA | 0 | NA | 0 | NA | 0 | NA | 0 | NA |
| 11 | 93774066  | 93750130  | -1 | NM_016540    | GPR83     | 0 | NA | 0 | NA | 0 | NA | 0 | NA | 0 | NA |
| 11 | 93866688  | 93790114  | -1 | NM_005590    | MRE11A    | 1 | 16 | 0 | NA | 0 | NA | 0 | NA | 0 | NA |
| 11 | 93866688  | 93790114  | -1 | NM_005591    | MRE11A    | 1 | 16 | 0 | NA | 0 | NA | 0 | NA | 0 | NA |
| 11 | 93866800  | 93872392  | 1  | NM_017704    | ANKRD49   | 1 | 16 | 0 | NA | 0 | NA | 0 | NA | 0 | NA |
| 11 | 93916774  | 93922712  | 1  | NM_002033    | FUT4      | 1 | 12 | 0 | NA | 0 | NA | 0 | NA | 0 | NA |
| 11 | 93940181  | 93994234  | 1  | NM_152431    | PIWIL4    | 0 | NA | 0 | NA | 1 | 12 | 0 | NA | 0 | NA |
| 11 | 94141155  | 94249566  | 1  | NM_130847    | AMOTL1    | 0 | NA | 0 | NA | 0 | NA | 0 | NA | 0 | NA |
| 11 | 94346424  | 94335434  | -1 | NM_016403    | CWC15     | 0 | NA | 0 | NA | 0 | NA | 0 | NA | 0 | NA |
| 11 | 94346492  | 94372324  | 1  | NM_018039    | JMJD2D    | 0 | NA | 0 | NA | 0 | NA | 0 | NA | 0 | NA |
| 11 | 94439703  | 94444036  | 1  | NM_032102    | SFRS2B    | 0 | NA | 0 | NA | 0 | NA | 0 | NA | 0 | NA |
| 11 | 94462664  | 94505483  | 1  | NM_015036    | ENDOD1    | 0 | NA | 0 | NA | 0 | NA | 0 | NA | 0 | NA |
| 11 | 94603894  | 94545780  | -1 | NM_144665    | SESN3     | 0 | NA | 0 | NA | 1 | 22 | 0 | NA | 0 | NA |
| 11 | 95162602  | 95141753  | -1 | NM_144664    | FAM76B    | 0 | NA | 0 | NA | 0 | NA | 1 | 16 | 0 | NA |
| 11 | 95163289  | 95205502  | 1  | NM_014679    | CEP57     | 0 | NA | 0 | NA | 0 | NA | 1 | 16 | 0 | NA |
| 11 | 95296919  | 95205693  | -1 | NM_016156    | MTMR2     | 0 | NA | 0 | NA | 0 | NA | 0 | NA | 0 | NA |
| 11 | 95296920  | 95205693  | -1 | NM_201278    | MTMR2     | 0 | NA | 0 | NA | 0 | NA | 0 | NA | 0 | NA |
| 11 | 95296920  | 95205693  | -1 | NM_201281    | MTMR2     | 0 | NA | 0 | NA | 0 | NA | 0 | NA | 0 | NA |
| 11 | 95715992  | 95351087  | -1 | NM_032427    | MAML2     | 1 | 35 | 0 | NA | 1 | 12 | 1 | 18 | 0 | NA |
| 11 | 95762731  | 95725576  | -1 | NM_024725    | CCDC82    | 0 | NA | 0 | NA | 0 | NA | 0 | NA | 0 | NA |
| 11 | 95763461  | 95766375  | 1  | NM_003772    | JRKL      | 0 | NA | 0 | NA | 0 | NA | 0 | NA | 0 | NA |
| 11 | 98397080  | 99732683  | 1  | NM_014361    | CNTN5     | 0 | NA | 0 | NA | 0 | NA | 0 | NA | 0 | NA |
| 11 | 98397080  | 99732683  | 1  | NM_175566    | CNTN5     | 0 | NA | 0 | NA | 0 | NA | 0 | NA | 0 | NA |
| 11 | 100368020 | 100369876 | 1  | NM_032021    | TMEM133   | 0 | NA | 0 | NA | 0 | NA | 0 | NA | 0 | NA |
| 11 | 100505754 | 100405564 | -1 | NM_000926    | PGR       | 0 | NA | 0 | NA | 0 | NA | 0 | NA | 0 | NA |
| 11 | 100959869 | 100827504 | -1 | NM_004621    | TRPC6     | 0 | NA | 0 | NA | 0 | NA | 0 | NA | 0 | NA |
| 11 | 101290955 | 101377003 | 1  | NM_020802    | KIAA1377  | 1 | 11 | 0 | NA | 0 | NA | 0 | NA | 0 | NA |
| 11 | 101292463 | 101266614 | -1 | NM_178127    | ANGPTL5   | 1 | 11 | 0 | NA | 0 | NA | 0 | NA | 0 | NA |
| 11 | 101423408 | 101459356 | 1  | NM_032930    | C11orf70  | 0 | NA | 0 | NA | 0 | NA | 0 | NA | 0 | NA |
| 11 | 101486540 | 101609358 | 1  | NM_006106    | YAP1      | 0 | NA | 0 | NA | 0 | NA | 0 | NA | 0 | NA |
| 11 | 101693403 | 101713675 | 1  | NM_001165    | BIRC3     | 0 | NA | 0 | NA | 0 | NA | 0 | NA | 0 | NA |
| 11 | 101693403 | 101713675 | 1  | NM_182962    | BIRC3     | 0 | NA | 0 | NA | 0 | NA | 0 | NA | 0 | NA |
| 11 | 101723175 | 101754611 | 1  | NM_001166    | BIRC2     | 0 | NA | 0 | NA | 1 | 13 | 0 | NA | 0 | NA |
| 11 | 101828985 | 101772265 | -1 | NM_052932    | TMEM123   | 0 | NA | 0 | NA | 0 | NA | 0 | NA | 0 | NA |
| 11 | 101906688 | 101896448 | -1 | NM_002423    | MMP7      | 0 | NA | 0 | NA | 0 | NA | 0 | NA | 0 | NA |
| 11 | 102001273 | 101952775 | -1 | NM_004771    | MMP20     | 0 | NA | 0 | NA | 0 | NA | 0 | NA | 0 | NA |
| 11 | 102081878 | 102067624 | -1 | NM_022122    | MMP27     | 0 | NA | 0 | NA | 0 | NA | 0 | NA | 0 | NA |
| 11 | 102100868 | 102088539 | -1 | NM_002424    | MMP8      | 0 | NA | 0 | NA | 1 | 12 | 0 | NA | 0 | NA |
| 11 | 102156554 | 102146443 | -1 | NM_002425    | MMP10     | 0 | NA | 0 | NA | 0 | NA | 0 | NA | 0 | NA |
| 11 | 102174104 | 102165860 | -1 | NM_002421    | MMP1      | 0 | NA | 0 | NA | 0 | NA | 0 | NA | 0 | NA |

|    |           |           |    |              |           |   |    |   |    |   |    |   |    |   |    |
|----|-----------|-----------|----|--------------|-----------|---|----|---|----|---|----|---|----|---|----|
| 11 | 102219552 | 102211737 | -1 | NM_002422    | MMP3      | 0 | NA | 0 | NA | 0 | NA | 0 | NA | 0 | NA |
| 11 | 102250922 | 102238673 | -1 | NM_002426    | MMP12     | 0 | NA | 0 | NA | 0 | NA | 0 | NA | 0 | NA |
| 11 | 102331672 | 102318933 | -1 | NM_002427    | MMP13     | 0 | NA | 0 | NA | 0 | NA | 0 | NA | 0 | NA |
| 11 | 102468079 | 102438030 | -1 | NM_032299    | DCUN1D5   | 0 | NA | 0 | NA | 0 | NA | 0 | NA | 0 | NA |
| 11 | 102485369 | 102855801 | 1  | NM_001080463 | DYNC2H1   | 1 | 15 | 0 | NA | 0 | NA | 0 | NA | 0 | NA |
| 11 | 103412517 | 103415132 | 1  | NM_001001711 | DDI1      | 0 | NA | 0 | NA | 0 | NA | 0 | NA | 0 | NA |
| 11 | 103540237 | 103283123 | -1 | NM_025208    | PDGFD     | 0 | NA | 0 | NA | 0 | NA | 0 | NA | 0 | NA |
| 11 | 103540237 | 103283123 | -1 | NM_033135    | PDGFD     | 0 | NA | 0 | NA | 0 | NA | 0 | NA | 0 | NA |
| 11 | 104332632 | 104318803 | -1 | NM_033306    | CASP4     | 0 | NA | 0 | NA | 0 | NA | 0 | NA | 0 | NA |
| 11 | 104344535 | 104318803 | -1 | NM_001225    | CASP4     | 0 | NA | 0 | NA | 0 | NA | 0 | NA | 0 | NA |
| 11 | 104384956 | 104370171 | -1 | NM_004347    | CASP5     | 0 | NA | 0 | NA | 0 | NA | 0 | NA | 0 | NA |
| 11 | 104411067 | 104401446 | -1 | NM_001223    | CASP1     | 0 | NA | 0 | NA | 0 | NA | 0 | NA | 0 | NA |
| 11 | 104411067 | 104401446 | -1 | NM_033292    | CASP1     | 0 | NA | 0 | NA | 0 | NA | 0 | NA | 0 | NA |
| 11 | 104411067 | 104401446 | -1 | NM_033293    | CASP1     | 0 | NA | 0 | NA | 0 | NA | 0 | NA | 0 | NA |
| 11 | 104411067 | 104401446 | -1 | NM_033294    | CASP1     | 0 | NA | 0 | NA | 0 | NA | 0 | NA | 0 | NA |
| 11 | 104411067 | 104401446 | -1 | NM_033295    | CASP1     | 0 | NA | 0 | NA | 0 | NA | 0 | NA | 0 | NA |
| 11 | 104421261 | 104417262 | -1 | NM_001017534 | COP1      | 0 | NA | 0 | NA | 0 | NA | 0 | NA | 0 | NA |
| 11 | 104421261 | 104417262 | -1 | NM_052889    | COP1      | 0 | NA | 0 | NA | 0 | NA | 0 | NA | 0 | NA |
| 11 | 104477368 | 104468405 | -1 | NM_001007232 | INCA      | 0 | NA | 0 | NA | 1 | 14 | 0 | NA | 0 | NA |
| 11 | 104515016 | 104513878 | -1 | NM_021571    | ICEBERG   | 0 | NA | 0 | NA | 0 | NA | 0 | NA | 0 | NA |
| 11 | 104986009 | 105289441 | 1  | NM_001077244 | GRIA4     | 0 | NA | 1 | 12 | 0 | NA | 0 | NA | 0 | NA |
| 11 | 104986009 | 105358029 | 1  | NM_000829    | GRIA4     | 0 | NA | 1 | 12 | 0 | NA | 0 | NA | 0 | NA |
| 11 | 104986009 | 105358029 | 1  | NM_001077243 | GRIA4     | 0 | NA | 1 | 12 | 0 | NA | 0 | NA | 0 | NA |
| 11 | 104986620 | 105289441 | 1  | NM_001112812 | GRIA4     | 0 | NA | 1 | 12 | 0 | NA | 0 | NA | 0 | NA |
| 11 | 105398164 | 105383838 | -1 | NM_032424    | KIAA1826  | 1 | 34 | 0 | NA | 0 | NA | 1 | 15 | 0 | NA |
| 11 | 105453396 | 105427034 | -1 | NM_152433    | KBTBD3    | 0 | NA | 0 | NA | 0 | NA | 1 | 14 | 0 | NA |
| 11 | 105453396 | 105427034 | -1 | NM_198439    | KBTBD3    | 0 | NA | 0 | NA | 0 | NA | 1 | 14 | 0 | NA |
| 11 | 105453501 | 105474629 | 1  | NM_015423    | AADHPPT   | 0 | NA | 0 | NA | 0 | NA | 1 | 14 | 0 | NA |
| 11 | 106394381 | 106063119 | -1 | NM_000855    | GUCY1A2   | 0 | NA | 1 | 12 | 0 | NA | 0 | NA | 0 | NA |
| 11 | 106833782 | 106702281 | -1 | NM_152434    | CWF19L2   | 0 | NA | 1 | 12 | 0 | NA | 0 | NA | 0 | NA |
| 11 | 106941637 | 106880543 | -1 | NM_138775    | ALKBH8    | 0 | NA | 0 | NA | 0 | NA | 0 | NA | 0 | NA |
| 11 | 106967286 | 107042715 | 1  | NM_018712    | ELMOD1    | 0 | NA | 0 | NA | 0 | NA | 0 | NA | 0 | NA |
| 11 | 106967680 | 106969159 | 1  | NM_001039772 | LOC843923 | 0 | NA | 0 | NA | 0 | NA | 0 | NA | 0 | NA |
| 11 | 107087997 | 107083310 | -1 | NM_003063    | SLN       | 0 | NA | 0 | NA | 0 | NA | 0 | NA | 0 | NA |
| 11 | 107234864 | 107166926 | -1 | NM_017515    | SLC35F2   | 0 | NA | 0 | NA | 0 | NA | 0 | NA | 0 | NA |
| 11 | 107304486 | 107339418 | 1  | NM_017516    | RAB39     | 0 | NA | 0 | NA | 0 | NA | 0 | NA | 0 | NA |
| 11 | 107384617 | 107483698 | 1  | NM_003478    | CUL5      | 0 | NA | 0 | NA | 0 | NA | 0 | NA | 0 | NA |
| 11 | 107497467 | 107523485 | 1  | NM_000019    | ACAT1     | 0 | NA | 0 | NA | 0 | NA | 0 | NA | 0 | NA |
| 11 | 107598575 | 107533327 | -1 | NM_002519    | NPAT      | 0 | NA | 0 | NA | 0 | NA | 1 | 13 | 0 | NA |
| 11 | 107598768 | 107745036 | 1  | NM_000051    | ATM       | 0 | NA | 0 | NA | 0 | NA | 1 | 13 | 0 | NA |
| 11 | 107663328 | 107745036 | 1  | NM_138292    | ATM       | 0 | NA | 0 | NA | 0 | NA | 0 | NA | 0 | NA |
| 11 | 107843468 | 107758936 | -1 | NM_152587    | C11orf65  | 0 | NA | 0 | NA | 0 | NA | 0 | NA | 0 | NA |
| 11 | 107874369 | 107848042 | -1 | NM_153705    | KDELC2    | 1 | 11 | 0 | NA | 0 | NA | 1 | 14 | 0 | NA |
| 11 | 107969570 | 107884885 | -1 | NM_015065    | EXPH5     | 0 | NA | 0 | NA | 0 | NA | 0 | NA | 0 | NA |
| 11 | 108041025 | 108316858 | 1  | NM_004398    | DDX10     | 0 | NA | 0 | NA | 0 | NA | 0 | NA | 0 | NA |
| 11 | 108798084 | 108801533 | 1  | NM_207645    | LOC399947 | 0 | NA | 0 | NA | 0 | NA | 0 | NA | 0 | NA |
| 11 | 109469296 | 109547776 | 1  | NM_033390    | ZC3H12C   | 0 | NA | 0 | NA | 0 | NA | 0 | NA | 0 | NA |
| 11 | 109672647 | 109605375 | -1 | NM_002906    | RDX       | 0 | NA | 0 | NA | 0 | NA | 0 | NA | 0 | NA |
| 11 | 109805803 | 109840815 | 1  | NM_004109    | FDX1      | 0 | NA | 0 | NA | 0 | NA | 0 | NA | 0 | NA |
| 11 | 110088661 | 109952975 | -1 | NM_020809    | ARHGAP20  | 0 | NA | 0 | NA | 0 | NA | 0 | NA | 0 | NA |
| 11 | 110631916 | 110662182 | 1  | NM_198498    | C11orf53  | 0 | NA | 0 | NA | 0 | NA | 0 | NA | 0 | NA |
| 11 | 110675749 | 110669379 | -1 | NM_207429    | FLJ45803  | 0 | NA | 0 | NA | 0 | NA | 0 | NA | 0 | NA |
| 11 | 110755367 | 110728189 | -1 | NM_006235    | POU2AF1   | 0 | NA | 0 | NA | 0 | NA | 0 | NA | 0 | NA |
| 11 | 110888274 | 110843465 | -1 | NM_017589    | BTG4      | 0 | NA | 0 | NA | 0 | NA | 0 | NA | 0 | NA |
| 11 | 110890719 | 110912966 | 1  | NM_001100388 | FLJ46266  | 0 | NA | 0 | NA | 0 | NA | 0 | NA | 0 | NA |
| 11 | 110890719 | 110912966 | 1  | NM_207430    | FLJ46266  | 0 | NA | 0 | NA | 0 | NA | 0 | NA | 0 | NA |
| 11 | 110916442 | 110936998 | 1  | NM_178834    | LAYN      | 0 | NA | 0 | NA | 0 | NA | 0 | NA | 0 | NA |
| 11 | 110978379 | 111102842 | 1  | NM_015191    | SNF1LK2   | 0 | NA | 0 | NA | 0 | NA | 0 | NA | 0 | NA |
| 11 | 111142379 | 111102841 | -1 | NM_181699    | PPP2R1B   | 0 | NA | 0 | NA | 0 | NA | 0 | NA | 0 | NA |
| 11 | 111142379 | 111113814 | -1 | NM_002716    | PPP2R1B   | 0 | NA | 0 | NA | 0 | NA | 0 | NA | 0 | NA |
| 11 | 111247214 | 111158128 | -1 | NM_001077691 | ALG9      | 0 | NA | 0 | NA | 0 | NA | 0 | NA | 0 | NA |
| 11 | 111247214 | 111158128 | -1 | NM_001077692 | ALG9      | 0 | NA | 0 | NA | 0 | NA | 0 | NA | 0 | NA |
| 11 | 111247515 | 111158128 | -1 | NM_001077690 | ALG9      | 0 | NA | 0 | NA | 0 | NA | 0 | NA | 0 | NA |
| 11 | 111247515 | 111158128 | -1 | NM_024740    | ALG9      | 0 | NA | 0 | NA | 0 | NA | 0 | NA | 0 | NA |
| 11 | 111255157 | 111260007 | 1  | NM_022761    | C11orf1   | 0 | NA | 0 | NA | 0 | NA | 0 | NA | 0 | NA |

|    |           |           |    |              |           |   |    |   |    |   |    |   |    |   |    |
|----|-----------|-----------|----|--------------|-----------|---|----|---|----|---|----|---|----|---|----|
| 11 | 111255363 | 111249989 | -1 | NM_138378    | LOC91893  | 0 | NA | 0 | NA | 0 | NA | 0 | NA | 0 | NA |
| 11 | 111287683 | 111284659 | -1 | NM_001885    | CRYAB     | 1 | 16 | 0 | NA | 0 | NA | 0 | NA | 0 | NA |
| 11 | 111288708 | 111290027 | 1  | NM_001541    | HSPB2     | 1 | 16 | 0 | NA | 0 | NA | 0 | NA | 0 | NA |
| 11 | 111294810 | 111302805 | 1  | NM_080659    | C11orf52  | 1 | 16 | 0 | NA | 0 | NA | 0 | NA | 0 | NA |
| 11 | 111313136 | 111398517 | 1  | NM_001037954 | DIXDC1    | 1 | 11 | 0 | NA | 0 | NA | 0 | NA | 0 | NA |
| 11 | 111353242 | 111398517 | 1  | NM_033425    | DIXDC1    | 0 | NA | 0 | NA | 0 | NA | 0 | NA | 0 | NA |
| 11 | 111401387 | 111439799 | 1  | NM_001931    | DLAT      | 1 | 11 | 0 | NA | 0 | NA | 1 | 18 | 0 | NA |
| 11 | 111450105 | 111439943 | -1 | NM_001082619 | PIH1D2    | 1 | 18 | 0 | NA | 0 | NA | 0 | NA | 0 | NA |
| 11 | 111450105 | 111443732 | -1 | NM_138789    | PIH1D2    | 1 | 18 | 0 | NA | 0 | NA | 0 | NA | 0 | NA |
| 11 | 111450177 | 111461084 | 1  | NM_001082969 | C11orf57  | 1 | 18 | 0 | NA | 0 | NA | 0 | NA | 0 | NA |
| 11 | 111450177 | 111461084 | 1  | NM_001082970 | C11orf57  | 1 | 18 | 0 | NA | 0 | NA | 0 | NA | 0 | NA |
| 11 | 111450177 | 111461084 | 1  | NM_018195    | C11orf57  | 1 | 18 | 0 | NA | 0 | NA | 0 | NA | 0 | NA |
| 11 | 111462669 | 111461079 | -1 | NM_012459    | TIMM8B    | 0 | NA | 0 | NA | 0 | NA | 0 | NA | 0 | NA |
| 11 | 111462831 | 111471727 | 1  | NM_003002    | SDHD      | 0 | NA | 0 | NA | 0 | NA | 0 | NA | 0 | NA |
| 11 | 111540050 | 111519185 | -1 | NM_001562    | IL18      | 0 | NA | 0 | NA | 0 | NA | 0 | NA | 0 | NA |
| 11 | 111543304 | 111548489 | 1  | NM_031275    | TEX12     | 0 | NA | 0 | NA | 1 | 12 | 0 | NA | 0 | NA |
| 11 | 111551417 | 111594859 | 1  | NM_031938    | BCO2      | 0 | NA | 0 | NA | 1 | 12 | 0 | NA | 0 | NA |
| 11 | 111552298 | 111594859 | 1  | NM_001037290 | BCO2      | 0 | NA | 0 | NA | 1 | 12 | 0 | NA | 0 | NA |
| 11 | 111602297 | 111609905 | 1  | NM_000317    | PTS       | 0 | NA | 0 | NA | 0 | NA | 0 | NA | 0 | NA |
| 11 | 112337204 | 112641129 | 1  | NM_001076682 | NCAM1     | 0 | NA | 0 | NA | 0 | NA | 0 | NA | 0 | NA |
| 11 | 112337204 | 112654368 | 1  | NM_000615    | NCAM1     | 0 | NA | 0 | NA | 0 | NA | 0 | NA | 0 | NA |
| 11 | 112337204 | 112654368 | 1  | NM_181351    | NCAM1     | 0 | NA | 0 | NA | 0 | NA | 0 | NA | 0 | NA |
| 11 | 112690460 | 112742324 | 1  | NM_017868    | TTC12     | 0 | NA | 0 | NA | 0 | NA | 0 | NA | 0 | NA |
| 11 | 112763722 | 112776350 | 1  | NM_178510    | ANKK1     | 0 | NA | 0 | NA | 0 | NA | 0 | NA | 0 | NA |
| 11 | 112851211 | 112785526 | -1 | NM_000795    | DRD2      | 0 | NA | 0 | NA | 0 | NA | 0 | NA | 0 | NA |
| 11 | 112851211 | 112785526 | -1 | NM_016574    | DRD2      | 0 | NA | 0 | NA | 0 | NA | 0 | NA | 0 | NA |
| 11 | 113082278 | 113063477 | -1 | NM_030770    | TMPRSS5   | 0 | NA | 0 | NA | 0 | NA | 0 | NA | 0 | NA |
| 11 | 113149635 | 113109118 | -1 | NM_004724    | ZW10      | 0 | NA | 0 | NA | 0 | NA | 0 | NA | 0 | NA |
| 11 | 113155727 | 113156417 | 1  | NM_001101389 | LOC644672 | 0 | NA | 0 | NA | 0 | NA | 0 | NA | 0 | NA |
| 11 | 113251466 | 113173806 | -1 | NM_020886    | USP28     | 1 | 17 | 0 | NA | 0 | NA | 0 | NA | 0 | NA |
| 11 | 113280798 | 113322493 | 1  | NM_006028    | HTR3B     | 0 | NA | 0 | NA | 0 | NA | 0 | NA | 0 | NA |
| 11 | 113351119 | 113366244 | 1  | NM_000869    | HTR3A     | 0 | NA | 0 | NA | 0 | NA | 0 | NA | 0 | NA |
| 11 | 113351119 | 113366244 | 1  | NM_213621    | HTR3A     | 0 | NA | 0 | NA | 0 | NA | 0 | NA | 0 | NA |
| 11 | 113435640 | 113626607 | 1  | NM_006006    | ZBTB16    | 0 | NA | 1 | 16 | 0 | NA | 0 | NA | 0 | NA |
| 11 | 113436497 | 113626607 | 1  | NM_001018011 | ZBTB16    | 0 | NA | 1 | 16 | 0 | NA | 0 | NA | 0 | NA |
| 11 | 113671744 | 113688448 | 1  | NM_006169    | NNMT      | 1 | 11 | 1 | 19 | 1 | 15 | 0 | NA | 0 | NA |
| 11 | 113776349 | 113787379 | -1 | NM_019021    | C11orf71  | 1 | 14 | 0 | NA | 0 | NA | 0 | NA | 0 | NA |
| 11 | 113776593 | 113784845 | 1  | NM_016090    | RBM7      | 1 | 14 | 0 | NA | 0 | NA | 0 | NA | 0 | NA |
| 11 | 113815386 | 113826210 | 1  | NM_015523    | REXO2     | 0 | NA | 0 | NA | 1 | 12 | 0 | NA | 0 | NA |
| 11 | 113935790 | 113897646 | -1 | NM_152315    | FAM55A    | 0 | NA | 0 | NA | 0 | NA | 0 | NA | 0 | NA |
| 11 | 113971694 | 113946522 | -1 | NM_001077639 | FAM55D    | 0 | NA | 0 | NA | 0 | NA | 0 | NA | 0 | NA |
| 11 | 113971694 | 113946522 | -1 | NM_017678    | FAM55D    | 0 | NA | 0 | NA | 0 | NA | 0 | NA | 0 | NA |
| 11 | 114880451 | 114549554 | -1 | NM_001098517 | CADM1     | 0 | NA | 0 | NA | 0 | NA | 0 | NA | 0 | NA |
| 11 | 114880451 | 114549554 | -1 | NM_014333    | CADM1     | 0 | NA | 0 | NA | 0 | NA | 0 | NA | 0 | NA |
| 11 | 116148914 | 116124100 | -1 | NM_032725    | BUD13     | 0 | NA | 0 | NA | 0 | NA | 0 | NA | 0 | NA |
| 11 | 116163949 | 116154485 | -1 | NM_003904    | ZNF259    | 0 | NA | 0 | NA | 0 | NA | 0 | NA | 0 | NA |
| 11 | 116167794 | 116165295 | -1 | NM_052968    | APOA5     | 0 | NA | 0 | NA | 0 | NA | 0 | NA | 0 | NA |
| 11 | 116199221 | 116196627 | -1 | NM_000482    | APOA4     | 0 | NA | 0 | NA | 0 | NA | 0 | NA | 0 | NA |
| 11 | 116205833 | 116208997 | 1  | NM_000040    | APOC3     | 0 | NA | 0 | NA | 0 | NA | 0 | NA | 0 | NA |
| 11 | 116213548 | 116211678 | -1 | NM_000039    | APOA1     | 0 | NA | 0 | NA | 0 | NA | 0 | NA | 0 | NA |
| 11 | 116474203 | 116219327 | -1 | NM_025164    | KIAA0999  | 0 | NA | 0 | NA | 1 | 12 | 0 | NA | 0 | NA |
| 11 | 116520249 | 116544024 | 1  | NM_002572    | PAFAH1B2  | 0 | NA | 0 | NA | 0 | NA | 0 | NA | 0 | NA |
| 11 | 116555148 | 116573371 | 1  | NM_001040455 | SIDT2     | 0 | NA | 0 | NA | 0 | NA | 0 | NA | 0 | NA |
| 11 | 116575249 | 116580718 | 1  | NM_001001522 | TAGLN     | 0 | NA | 0 | NA | 0 | NA | 0 | NA | 0 | NA |
| 11 | 116575249 | 116580718 | 1  | NM_003186    | TAGLN     | 0 | NA | 0 | NA | 0 | NA | 0 | NA | 0 | NA |
| 11 | 116608021 | 116580997 | -1 | NM_004716    | PCSK7     | 0 | NA | 0 | NA | 0 | NA | 0 | NA | 0 | NA |
| 11 | 116608613 | 116661614 | 1  | NM_207343    | RNF214    | 0 | NA | 0 | NA | 0 | NA | 0 | NA | 0 | NA |
| 11 | 116608661 | 116661614 | 1  | NM_001077239 | RNF214    | 0 | NA | 0 | NA | 0 | NA | 0 | NA | 0 | NA |
| 11 | 116692182 | 116661624 | -1 | NM_012104    | BACE1     | 0 | NA | 0 | NA | 0 | NA | 0 | NA | 0 | NA |
| 11 | 116692182 | 116661624 | -1 | NM_138971    | BACE1     | 0 | NA | 0 | NA | 0 | NA | 0 | NA | 0 | NA |
| 11 | 116692182 | 116661624 | -1 | NM_138972    | BACE1     | 0 | NA | 0 | NA | 0 | NA | 0 | NA | 0 | NA |
| 11 | 116692182 | 116661624 | -1 | NM_138973    | BACE1     | 0 | NA | 0 | NA | 0 | NA | 0 | NA | 0 | NA |
| 11 | 116703780 | 116789192 | 1  | NM_014956    | CEP164    | 0 | NA | 0 | NA | 0 | NA | 0 | NA | 0 | NA |
| 11 | 117173186 | 116803698 | -1 | NM_020693    | DSCAML1   | 0 | NA | 0 | NA | 0 | NA | 0 | NA | 0 | NA |
| 11 | 117200644 | 117195999 | -1 | NM_001680    | FXD2      | 0 | NA | 0 | NA | 0 | NA | 0 | NA | 0 | NA |

|    |           |           |    |              |           |   |    |   |    |   |    |   |    |   |    |
|----|-----------|-----------|----|--------------|-----------|---|----|---|----|---|----|---|----|---|----|
| 11 | 117204017 | 117195999 | -1 | NM_021603    | FXVD2     | 0 | NA | 0 | NA | 0 | NA | 0 | NA | 0 | NA |
| 11 | 117252577 | 117212902 | -1 | NM_022003    | FXVD6     | 0 | NA | 0 | NA | 0 | NA | 0 | NA | 0 | NA |
| 11 | 117305325 | 117276569 | -1 | NM_001077263 | TMPRSS13  | 0 | NA | 0 | NA | 0 | NA | 0 | NA | 0 | NA |
| 11 | 117362318 | 117377404 | 1  | NM_001558    | IL10RA    | 0 | NA | 0 | NA | 0 | NA | 0 | NA | 0 | NA |
| 11 | 117452936 | 117495766 | 1  | NM_001083947 | TMPRSS4   | 0 | NA | 1 | 14 | 0 | NA | 0 | NA | 0 | NA |
| 11 | 117452936 | 117495766 | 1  | NM_019894    | TMPRSS4   | 0 | NA | 1 | 14 | 0 | NA | 0 | NA | 0 | NA |
| 11 | 117528745 | 117509301 | -1 | NM_174934    | SCN4B     | 0 | NA | 0 | NA | 0 | NA | 0 | NA | 0 | NA |
| 11 | 117552546 | 117538728 | -1 | NM_004588    | SCN2B     | 0 | NA | 0 | NA | 0 | NA | 0 | NA | 0 | NA |
| 11 | 117589284 | 117569651 | -1 | NM_153206    | AMICA1    | 0 | NA | 0 | NA | 0 | NA | 0 | NA | 0 | NA |
| 11 | 117601019 | 117569651 | -1 | NM_001098526 | AMICA1    | 0 | NA | 0 | NA | 0 | NA | 0 | NA | 0 | NA |
| 11 | 117628221 | 117605545 | -1 | NM_198275    | MPZL3     | 1 | 15 | 1 | 25 | 0 | NA | 0 | NA | 0 | NA |
| 11 | 117640219 | 117629343 | -1 | NM_005797    | MPZL2     | 0 | NA | 0 | NA | 0 | NA | 1 | 13 | 0 | NA |
| 11 | 117640219 | 117632837 | -1 | NM_144765    | MPZL2     | 0 | NA | 0 | NA | 0 | NA | 1 | 13 | 0 | NA |
| 11 | 117680504 | 117692100 | 1  | NM_000733    | CD3E      | 0 | NA | 0 | NA | 0 | NA | 0 | NA | 0 | NA |
| 11 | 117718669 | 117714998 | -1 | NM_000732    | CD3D      | 0 | NA | 0 | NA | 0 | NA | 0 | NA | 0 | NA |
| 11 | 117718669 | 117714998 | -1 | NM_001040651 | CD3D      | 0 | NA | 0 | NA | 0 | NA | 0 | NA | 0 | NA |
| 11 | 117720268 | 117729707 | 1  | NM_000073    | CD3G      | 0 | NA | 0 | NA | 0 | NA | 0 | NA | 0 | NA |
| 11 | 117735511 | 117775136 | 1  | NM_004788    | UBE4A     | 1 | 19 | 1 | 15 | 0 | NA | 0 | NA | 0 | NA |
| 11 | 117777313 | 117785772 | 1  | NM_006476    | ATP5L     | 0 | NA | 0 | NA | 0 | NA | 1 | 16 | 0 | NA |
| 11 | 117812414 | 117901146 | 1  | NM_005933    | MLL       | 0 | NA | 0 | NA | 0 | NA | 1 | 11 | 0 | NA |
| 11 | 117903419 | 117906950 | 1  | NM_001080441 | TTC36     | 0 | NA | 0 | NA | 0 | NA | 0 | NA | 0 | NA |
| 11 | 117907133 | 117911760 | 1  | NM_032780    | TMEM25    | 0 | NA | 0 | NA | 0 | NA | 0 | NA | 0 | NA |
| 11 | 117941960 | 117920468 | -1 | NM_020153    | C11orf60  | 0 | NA | 0 | NA | 0 | NA | 0 | NA | 0 | NA |
| 11 | 117948320 | 117978855 | 1  | NM_001655    | ARCN1     | 0 | NA | 0 | NA | 0 | NA | 0 | NA | 0 | NA |
| 11 | 117982422 | 118033951 | 1  | NM_015157    | PHLDB1    | 1 | 12 | 0 | NA | 0 | NA | 0 | NA | 0 | NA |
| 11 | 118055591 | 118034151 | -1 | NM_007180    | TREH      | 0 | NA | 0 | NA | 0 | NA | 0 | NA | 0 | NA |
| 11 | 118167182 | 118123682 | -1 | NM_004397    | DDX6      | 1 | 12 | 0 | NA | 0 | NA | 0 | NA | 0 | NA |
| 11 | 118259750 | 118272181 | 1  | NM_001716    | CXCR5     | 0 | NA | 0 | NA | 0 | NA | 0 | NA | 0 | NA |
| 11 | 118269310 | 118272181 | 1  | NM_032966    | CXCR5     | 0 | NA | 0 | NA | 0 | NA | 0 | NA | 0 | NA |
| 11 | 118286823 | 118272060 | -1 | NM_182557    | BCL9L     | 1 | 14 | 0 | NA | 1 | 14 | 1 | 11 | 0 | NA |
| 11 | 118332235 | 118334479 | 1  | NM_006760    | UPK2      | 0 | NA | 0 | NA | 0 | NA | 0 | NA | 0 | NA |
| 11 | 118347626 | 118357205 | 1  | NM_181721    | FOXR1     | 0 | NA | 0 | NA | 0 | NA | 0 | NA | 0 | NA |
| 11 | 118374061 | 118391665 | 1  | NM_198489    | CCDC84    | 0 | NA | 0 | NA | 0 | NA | 0 | NA | 0 | NA |
| 11 | 118394267 | 118391632 | -1 | NM_001028    | RPS25     | 0 | NA | 0 | NA | 0 | NA | 0 | NA | 0 | NA |
| 11 | 118394450 | 118399592 | 1  | NM_016146    | TRAPPC4   | 0 | NA | 0 | NA | 0 | NA | 0 | NA | 0 | NA |
| 11 | 118406800 | 118400273 | -1 | NM_001467    | SLC37A4   | 0 | NA | 0 | NA | 0 | NA | 1 | 12 | 0 | NA |
| 11 | 118433126 | 118420105 | -1 | NM_006389    | HYOU1     | 0 | NA | 0 | NA | 0 | NA | 0 | NA | 0 | NA |
| 11 | 118443702 | 118457898 | 1  | NM_021729    | VPS11     | 0 | NA | 0 | NA | 0 | NA | 0 | NA | 0 | NA |
| 11 | 118460796 | 118469469 | 1  | NM_000190    | HMBS      | 0 | NA | 0 | NA | 0 | NA | 0 | NA | 0 | NA |
| 11 | 118463906 | 118469469 | 1  | NM_001024382 | HMBS      | 1 | 21 | 0 | NA | 0 | NA | 0 | NA | 0 | NA |
| 11 | 118471387 | 118469794 | -1 | NM_002105    | H2AFX     | 1 | 21 | 0 | NA | 0 | NA | 0 | NA | 0 | NA |
| 11 | 118477995 | 118472422 | -1 | NM_001382    | DPAGT1    | 1 | 19 | 0 | NA | 0 | NA | 0 | NA | 0 | NA |
| 11 | 118477995 | 118472422 | -1 | NM_203316    | DPAGT1    | 1 | 19 | 0 | NA | 0 | NA | 0 | NA | 0 | NA |
| 11 | 118483302 | 118493037 | 1  | NM_014807    | C2CD2L    | 1 | 19 | 0 | NA | 0 | NA | 0 | NA | 0 | NA |
| 11 | 118497497 | 118510975 | 1  | NM_015517    | MIZF      | 0 | NA | 0 | NA | 0 | NA | 0 | NA | 0 | NA |
| 11 | 118497497 | 118510975 | 1  | NM_198971    | MIZF      | 0 | NA | 0 | NA | 0 | NA | 0 | NA | 0 | NA |
| 11 | 118524959 | 118538584 | 1  | NM_022169    | ABCG4     | 0 | NA | 0 | NA | 0 | NA | 0 | NA | 0 | NA |
| 11 | 118544649 | 118559936 | 1  | NM_024618    | NLRX1     | 0 | NA | 0 | NA | 0 | NA | 0 | NA | 0 | NA |
| 11 | 118544649 | 118559936 | 1  | NM_170722    | NLRX1     | 0 | NA | 0 | NA | 0 | NA | 0 | NA | 0 | NA |
| 11 | 118561404 | 118566130 | 1  | NM_024791    | PDZD3     | 0 | NA | 0 | NA | 0 | NA | 0 | NA | 0 | NA |
| 11 | 118569381 | 118566188 | -1 | NM_001033658 | LOC283152 | 0 | NA | 0 | NA | 0 | NA | 0 | NA | 0 | NA |
| 11 | 118582199 | 118684069 | 1  | NM_005188    | CBL       | 0 | NA | 0 | NA | 0 | NA | 0 | NA | 0 | NA |
| 11 | 118693050 | 118684443 | -1 | NM_006500    | MCAM      | 1 | 14 | 0 | NA | 0 | NA | 0 | NA | 0 | NA |
| 11 | 118710446 | 118713232 | 1  | NM_032015    | RNF26     | 1 | 12 | 0 | NA | 0 | NA | 0 | NA | 0 | NA |
| 11 | 118716791 | 118714861 | -1 | NM_015645    | C1QTNF5   | 1 | 12 | 0 | NA | 0 | NA | 0 | NA | 0 | NA |
| 11 | 118722580 | 118716835 | -1 | NM_031433    | MFRP      | 0 | NA | 0 | NA | 0 | NA | 0 | NA | 0 | NA |
| 11 | 118740102 | 118732754 | -1 | NM_171997    | USP2      | 0 | NA | 0 | NA | 0 | NA | 0 | NA | 0 | NA |
| 11 | 118757575 | 118732162 | -1 | NM_004205    | USP2      | 0 | NA | 0 | NA | 0 | NA | 0 | NA | 0 | NA |
| 11 | 118799064 | 118794097 | -1 | NM_006288    | THY1      | 0 | NA | 0 | NA | 0 | NA | 0 | NA | 0 | NA |
| 11 | 119104645 | 119014017 | -1 | NM_203285    | PVRL1     | 0 | NA | 0 | NA | 0 | NA | 0 | NA | 0 | NA |
| 11 | 119104645 | 119036912 | -1 | NM_002855    | PVRL1     | 0 | NA | 0 | NA | 0 | NA | 0 | NA | 0 | NA |
| 11 | 119104645 | 119050308 | -1 | NM_203286    | PVRL1     | 0 | NA | 0 | NA | 0 | NA | 0 | NA | 0 | NA |
| 11 | 119514073 | 119487203 | -1 | NM_012101    | TRIM29    | 0 | NA | 1 | 12 | 0 | NA | 0 | NA | 0 | NA |
| 11 | 119586956 | 119605860 | 1  | NM_178507    | OAF       | 1 | 17 | 0 | NA | 1 | 14 | 0 | NA | 0 | NA |
| 11 | 119616160 | 119685863 | 1  | NM_014352    | POU2F3    | 0 | NA | 0 | NA | 0 | NA | 0 | NA | 0 | NA |

|    |           |           |    |              |           |   |    |   |    |   |    |   |    |   |    |
|----|-----------|-----------|----|--------------|-----------|---|----|---|----|---|----|---|----|---|----|
| 11 | 119701225 | 119706557 | 1  | NM_174926    | TMEM136   | 0 | NA | 0 | NA | 0 | NA | 0 | NA | 0 | NA |
| 11 | 119713155 | 119865855 | 1  | NM_015313    | ARHGEF12  | 0 | NA | 0 | NA | 0 | NA | 0 | NA | 0 | NA |
| 11 | 120036237 | 120362179 | 1  | NM_014619    | GRIK4     | 0 | NA | 0 | NA | 0 | NA | 0 | NA | 0 | NA |
| 11 | 120400039 | 120463333 | 1  | NM_152715    | TBCEL     | 0 | NA | 0 | NA | 0 | NA | 0 | NA | 0 | NA |
| 11 | 120478584 | 120566725 | 1  | NM_005422    | TECTA     | 0 | NA | 0 | NA | 0 | NA | 0 | NA | 0 | NA |
| 11 | 120668597 | 120689329 | 1  | NM_006918    | SC5DL     | 0 | NA | 0 | NA | 0 | NA | 0 | NA | 0 | NA |
| 11 | 120668786 | 120689329 | 1  | NM_001024956 | SC5DL     | 0 | NA | 0 | NA | 0 | NA | 0 | NA | 0 | NA |
| 11 | 120828170 | 121009681 | 1  | NM_003105    | SORL1     | 0 | NA | 0 | NA | 0 | NA | 0 | NA | 0 | NA |
| 11 | 121492133 | 121491271 | -1 | NM_001001786 | BLID      | 0 | NA | 0 | NA | 1 | 12 | 0 | NA | 0 | NA |
| 11 | 122031607 | 122190397 | 1  | NM_032873    | UBASH3B   | 1 | 12 | 0 | NA | 0 | NA | 0 | NA | 0 | NA |
| 11 | 122214464 | 122248557 | 1  | NM_019604    | CRTAM     | 0 | NA | 0 | NA | 0 | NA | 0 | NA | 0 | NA |
| 11 | 122258682 | 122281793 | 1  | NM_199124    | C11orf63  | 0 | NA | 0 | NA | 0 | NA | 0 | NA | 0 | NA |
| 11 | 122258682 | 122335640 | 1  | NM_024806    | C11orf63  | 0 | NA | 0 | NA | 0 | NA | 0 | NA | 0 | NA |
| 11 | 122357589 | 122353566 | -1 | NM_001098169 | BSX       | 0 | NA | 0 | NA | 0 | NA | 0 | NA | 0 | NA |
| 11 | 122438054 | 122433409 | -1 | NM_006597    | HSPA8     | 1 | 14 | 0 | NA | 1 | 16 | 0 | NA | 0 | NA |
| 11 | 122438054 | 122433409 | -1 | NM_153201    | HSPA8     | 1 | 14 | 0 | NA | 1 | 16 | 0 | NA | 0 | NA |
| 11 | 122571217 | 122448242 | -1 | NM_024769    | ASAM      | 1 | 12 | 0 | NA | 0 | NA | 0 | NA | 0 | NA |
| 11 | 122901737 | 122998728 | 1  | NM_020716    | GRAMD1B   | 0 | NA | 0 | NA | 0 | NA | 0 | NA | 0 | NA |
| 11 | 123030525 | 123005104 | -1 | NM_001040151 | SCN3B     | 0 | NA | 0 | NA | 0 | NA | 0 | NA | 0 | NA |
| 11 | 123030525 | 123005104 | -1 | NM_018400    | SCN3B     | 0 | NA | 0 | NA | 0 | NA | 0 | NA | 0 | NA |
| 11 | 123117573 | 123100206 | -1 | NM_003455    | ZNF202    | 0 | NA | 0 | NA | 0 | NA | 0 | NA | 0 | NA |
| 11 | 123130436 | 123129497 | -1 | NM_001005188 | OR6X1     | 0 | NA | 0 | NA | 0 | NA | 0 | NA | 0 | NA |
| 11 | 123182267 | 123181325 | -1 | NM_001005325 | OR6M1     | 0 | NA | 0 | NA | 0 | NA | 0 | NA | 0 | NA |
| 11 | 123261550 | 123258842 | -1 | NM_001013743 | PMP22CD   | 0 | NA | 0 | NA | 0 | NA | 0 | NA | 0 | NA |
| 11 | 123282348 | 123283293 | 1  | NM_001005197 | OR8D4     | 0 | NA | 0 | NA | 0 | NA | 0 | NA | 0 | NA |
| 11 | 123315533 | 123316490 | 1  | NM_001001965 | OR4D5     | 0 | NA | 0 | NA | 0 | NA | 0 | NA | 0 | NA |
| 11 | 123319755 | 123318783 | -1 | NM_001005187 | OR6T1     | 0 | NA | 0 | NA | 0 | NA | 0 | NA | 0 | NA |
| 11 | 123353608 | 123352612 | -1 | NM_001004474 | OR10S1    | 0 | NA | 0 | NA | 0 | NA | 0 | NA | 0 | NA |
| 11 | 123391491 | 123392427 | 1  | NM_001004462 | OR10G4    | 0 | NA | 0 | NA | 0 | NA | 0 | NA | 0 | NA |
| 11 | 123398929 | 123398965 | 1  | NM_001001953 | OR10G9    | 0 | NA | 0 | NA | 0 | NA | 0 | NA | 0 | NA |
| 11 | 123405539 | 123406475 | 1  | NM_001004464 | OR10G8    | 0 | NA | 0 | NA | 0 | NA | 0 | NA | 0 | NA |
| 11 | 123414918 | 123413982 | -1 | NM_001004463 | OR10G7    | 0 | NA | 0 | NA | 0 | NA | 0 | NA | 0 | NA |
| 11 | 123491320 | 123500753 | 1  | NM_198315    | LOH11CR2A | 1 | 22 | 0 | NA | 0 | NA | 0 | NA | 0 | NA |
| 11 | 123491320 | 123522828 | 1  | NM_014622    | LOH11CR2A | 1 | 22 | 0 | NA | 0 | NA | 0 | NA | 0 | NA |
| 11 | 123600607 | 123601522 | 1  | NM_001007249 | OR8G2     | 0 | NA | 0 | NA | 0 | NA | 0 | NA | 0 | NA |
| 11 | 123625632 | 123640966 | 1  | NM_001002905 | OR8G1     | 0 | NA | 0 | NA | 0 | NA | 0 | NA | 0 | NA |
| 11 | 123639932 | 123640973 | 1  | NM_001005198 | OR8G5     | 0 | NA | 0 | NA | 0 | NA | 0 | NA | 0 | NA |
| 11 | 123685872 | 123684945 | -1 | NM_001002917 | OR8D1     | 0 | NA | 0 | NA | 0 | NA | 0 | NA | 0 | NA |
| 11 | 123695303 | 123694367 | -1 | NM_001002918 | OR8D2     | 0 | NA | 0 | NA | 0 | NA | 0 | NA | 0 | NA |
| 11 | 123758449 | 123757507 | -1 | NM_001005468 | OR8B2     | 0 | NA | 0 | NA | 0 | NA | 0 | NA | 0 | NA |
| 11 | 123772457 | 123771515 | -1 | NM_001005467 | OR8B3     | 0 | NA | 0 | NA | 0 | NA | 0 | NA | 0 | NA |
| 11 | 123799977 | 123799047 | -1 | NM_001005196 | OR8B4     | 0 | NA | 0 | NA | 0 | NA | 0 | NA | 0 | NA |
| 11 | 123816191 | 123815255 | -1 | NM_012378    | OR8B8     | 0 | NA | 0 | NA | 0 | NA | 0 | NA | 0 | NA |
| 11 | 123918760 | 123917827 | -1 | NM_001005195 | OR8B12    | 0 | NA | 0 | NA | 0 | NA | 0 | NA | 0 | NA |
| 11 | 123945174 | 123946155 | 1  | NM_001005194 | OR8A1     | 0 | NA | 0 | NA | 0 | NA | 0 | NA | 0 | NA |
| 11 | 123986662 | 123995461 | 1  | NM_052959    | PANX3     | 0 | NA | 1 | 14 | 0 | NA | 0 | NA | 0 | NA |
| 11 | 123997951 | 124011032 | 1  | NM_032811    | TBRG1     | 0 | NA | 1 | 14 | 0 | NA | 0 | NA | 0 | NA |
| 11 | 124048927 | 124010902 | -1 | NM_170601    | SIAE      | 1 | 11 | 0 | NA | 0 | NA | 0 | NA | 0 | NA |
| 11 | 124048949 | 124069897 | 1  | NM_017425    | SPA17     | 1 | 11 | 0 | NA | 0 | NA | 0 | NA | 0 | NA |
| 11 | 124115038 | 124122312 | 1  | NM_001126181 | NRGN      | 0 | NA | 0 | NA | 0 | NA | 0 | NA | 0 | NA |
| 11 | 124115038 | 124122312 | 1  | NM_006176    | NRGN      | 0 | NA | 0 | NA | 0 | NA | 0 | NA | 0 | NA |
| 11 | 124127319 | 124122579 | -1 | NM_014312    | VSIG2     | 0 | NA | 0 | NA | 1 | 12 | 0 | NA | 0 | NA |
| 11 | 124137433 | 124126228 | -1 | NM_138961    | ESAM      | 0 | NA | 0 | NA | 1 | 12 | 0 | NA | 0 | NA |
| 11 | 124175509 | 124141603 | -1 | NM_024631    | C11orf61  | 0 | NA | 1 | 14 | 0 | NA | 0 | NA | 0 | NA |
| 11 | 124240491 | 124256572 | 1  | NM_022370    | ROBO3     | 0 | NA | 1 | 12 | 0 | NA | 0 | NA | 0 | NA |
| 11 | 124272951 | 124259323 | -1 | NM_019055    | ROBO4     | 0 | NA | 0 | NA | 0 | NA | 0 | NA | 0 | NA |
| 11 | 124294355 | 124295783 | 1  | NM_001037558 | HEPN1     | 0 | NA | 1 | 15 | 0 | NA | 0 | NA | 0 | NA |
| 11 | 124311518 | 124294355 | -1 | NM_152722    | HEPACAM   | 0 | NA | 0 | NA | 0 | NA | 0 | NA | 0 | NA |
| 11 | 124329226 | 124416595 | 1  | NM_025004    | CCDC15    | 0 | NA | 0 | NA | 0 | NA | 0 | NA | 0 | NA |
| 11 | 124438441 | 124464341 | 1  | NM_198277    | SLC37A2   | 0 | NA | 0 | NA | 0 | NA | 0 | NA | 0 | NA |
| 11 | 124478415 | 124471608 | -1 | NM_001080546 | LOC219854 | 0 | NA | 0 | NA | 0 | NA | 0 | NA | 0 | NA |
| 11 | 124539768 | 124808495 | 1  | NM_022062    | PKNOX2    | 0 | NA | 0 | NA | 0 | NA | 0 | NA | 1 | 12 |
| 11 | 124871333 | 124820857 | -1 | NM_005103    | FEZ1      | 0 | NA | 0 | NA | 0 | NA | 0 | NA | 0 | NA |
| 11 | 124871333 | 124863305 | -1 | NM_022549    | FEZ1      | 0 | NA | 0 | NA | 0 | NA | 0 | NA | 0 | NA |
| 11 | 124944507 | 124959785 | 1  | NM_001007277 | EI24      | 0 | NA | 0 | NA | 0 | NA | 0 | NA | 0 | NA |

|    |           |           |    |              |          |   |    |   |    |   |    |   |    |   |    |
|----|-----------|-----------|----|--------------|----------|---|----|---|----|---|----|---|----|---|----|
| 11 | 124944507 | 124959785 | 1  | NM_004879    | EI24     | 0 | NA | 0 | NA | 0 | NA | 0 | NA | 0 | NA |
| 11 | 124967966 | 124996164 | 1  | NM_152713    | STT3A    | 1 | 11 | 0 | NA | 0 | NA | 0 | NA | 0 | NA |
| 11 | 125000245 | 125030850 | 1  | NM_001114122 | CHEK1    | 0 | NA | 0 | NA | 0 | NA | 1 | 18 | 0 | NA |
| 11 | 125000245 | 125051360 | 1  | NM_001114121 | CHEK1    | 0 | NA | 0 | NA | 0 | NA | 1 | 18 | 0 | NA |
| 11 | 125001521 | 125030850 | 1  | NM_001274    | CHEK1    | 0 | NA | 0 | NA | 0 | NA | 1 | 18 | 0 | NA |
| 11 | 125056152 | 125047438 | -1 | NM_001612    | ACRV1    | 0 | NA | 0 | NA | 0 | NA | 0 | NA | 0 | NA |
| 11 | 125056152 | 125047438 | -1 | NM_020069    | ACRV1    | 0 | NA | 0 | NA | 0 | NA | 0 | NA | 0 | NA |
| 11 | 125056152 | 125047438 | -1 | NM_020107    | ACRV1    | 0 | NA | 0 | NA | 0 | NA | 0 | NA | 0 | NA |
| 11 | 125056152 | 125047438 | -1 | NM_020108    | ACRV1    | 0 | NA | 0 | NA | 0 | NA | 0 | NA | 0 | NA |
| 11 | 125056152 | 125047438 | -1 | NM_020109    | ACRV1    | 0 | NA | 0 | NA | 0 | NA | 0 | NA | 0 | NA |
| 11 | 125056152 | 125047438 | -1 | NM_020110    | ACRV1    | 0 | NA | 0 | NA | 0 | NA | 0 | NA | 0 | NA |
| 11 | 125056152 | 125047438 | -1 | NM_020111    | ACRV1    | 0 | NA | 0 | NA | 0 | NA | 0 | NA | 0 | NA |
| 11 | 125056152 | 125047438 | -1 | NM_020113    | ACRV1    | 0 | NA | 0 | NA | 0 | NA | 0 | NA | 0 | NA |
| 11 | 125056152 | 125047438 | -1 | NM_020115    | ACRV1    | 0 | NA | 0 | NA | 0 | NA | 0 | NA | 0 | NA |
| 11 | 125121397 | 125124953 | 1  | NM_138294    | PATE     | 0 | NA | 0 | NA | 0 | NA | 0 | NA | 0 | NA |
| 11 | 125153924 | 125151235 | -1 | NM_212555    | C11orf38 | 0 | NA | 0 | NA | 0 | NA | 0 | NA | 0 | NA |
| 11 | 125258718 | 125275749 | 1  | NM_145014    | HYLS1    | 1 | 11 | 0 | NA | 0 | NA | 0 | NA | 0 | NA |
| 11 | 125278315 | 125268589 | -1 | NM_031307    | PUS3     | 0 | NA | 1 | 17 | 0 | NA | 0 | NA | 0 | NA |
| 11 | 125279481 | 125298215 | 1  | NM_013264    | DDX25    | 0 | NA | 1 | 17 | 0 | NA | 0 | NA | 0 | NA |
| 11 | 125438397 | 125331922 | -1 | NM_016952    | CDON     | 0 | NA | 0 | NA | 0 | NA | 0 | NA | 0 | NA |
| 11 | 125586751 | 125577518 | -1 | NM_032795    | RPUSD4   | 0 | NA | 0 | NA | 0 | NA | 0 | NA | 0 | NA |
| 11 | 125586828 | 125637751 | 1  | NM_024556    | FAM118B  | 0 | NA | 0 | NA | 0 | NA | 0 | NA | 0 | NA |
| 11 | 125643960 | 125638043 | -1 | NM_003139    | SRPR     | 0 | NA | 0 | NA | 0 | NA | 0 | NA | 0 | NA |
| 11 | 125644264 | 125653237 | 1  | NM_017547    | FOXRED1  | 0 | NA | 0 | NA | 0 | NA | 0 | NA | 0 | NA |
| 11 | 125658191 | 125668281 | 1  | NM_148910    | TIRAP    | 0 | NA | 0 | NA | 0 | NA | 0 | NA | 0 | NA |
| 11 | 125658191 | 125670038 | 1  | NM_001039661 | TIRAP    | 0 | NA | 0 | NA | 0 | NA | 0 | NA | 0 | NA |
| 11 | 125678856 | 125720854 | 1  | NM_014026    | DCPS     | 1 | 11 | 0 | NA | 1 | 17 | 0 | NA | 0 | NA |
| 11 | 125731305 | 125789743 | 1  | NM_006278    | ST3GAL4  | 0 | NA | 0 | NA | 1 | 12 | 1 | 13 | 0 | NA |
| 11 | 126375701 | 125799612 | -1 | NM_032531    | KIRREL3  | 0 | NA | 1 | 12 | 0 | NA | 0 | NA | 0 | NA |
| 11 | 127897371 | 127833869 | -1 | NM_005238    | ETS1     | 0 | NA | 0 | NA | 0 | NA | 1 | 12 | 0 | NA |
| 11 | 128069198 | 128187521 | 1  | NM_002017    | FLI1     | 0 | NA | 1 | 14 | 0 | NA | 0 | NA | 1 | 13 |
| 11 | 128217573 | 128213124 | -1 | NM_000220    | KCNJ1    | 0 | NA | 0 | NA | 0 | NA | 0 | NA | 0 | NA |
| 11 | 128242478 | 128213124 | -1 | NM_153764    | KCNJ1    | 0 | NA | 0 | NA | 0 | NA | 0 | NA | 0 | NA |
| 11 | 128242478 | 128213124 | -1 | NM_153765    | KCNJ1    | 0 | NA | 0 | NA | 0 | NA | 0 | NA | 0 | NA |
| 11 | 128242478 | 128213124 | -1 | NM_153766    | KCNJ1    | 0 | NA | 0 | NA | 0 | NA | 0 | NA | 0 | NA |
| 11 | 128242478 | 128213124 | -1 | NM_153767    | KCNJ1    | 0 | NA | 0 | NA | 0 | NA | 0 | NA | 0 | NA |
| 11 | 128266522 | 128293161 | 1  | NM_000890    | KCNJ5    | 0 | NA | 0 | NA | 0 | NA | 0 | NA | 0 | NA |
| 11 | 128280802 | 128274669 | -1 | NM_145013    | C11orf45 | 0 | NA | 1 | 13 | 0 | NA | 0 | NA | 0 | NA |
| 11 | 128318032 | 128310479 | -1 | NM_022112    | P53AIP1  | 0 | NA | 0 | NA | 0 | NA | 0 | NA | 0 | NA |
| 11 | 128399222 | 128343051 | -1 | NM_014715    | RICS     | 0 | NA | 0 | NA | 0 | NA | 0 | NA | 0 | NA |
| 11 | 128751090 | 128827384 | 1  | NM_003658    | BARX2    | 1 | 11 | 1 | 15 | 0 | NA | 0 | NA | 0 | NA |
| 11 | 129190950 | 129235108 | 1  | NM_138788    | TMEM45B  | 0 | NA | 1 | 16 | 0 | NA | 0 | NA | 0 | NA |
| 11 | 129268114 | 129239574 | -1 | NM_006165    | NFRKB    | 0 | NA | 0 | NA | 0 | NA | 0 | NA | 0 | NA |
| 11 | 129322727 | 129274810 | -1 | NM_199438    | PRDM10   | 0 | NA | 0 | NA | 0 | NA | 0 | NA | 0 | NA |
| 11 | 129322727 | 129274810 | -1 | NM_199439    | PRDM10   | 0 | NA | 0 | NA | 0 | NA | 0 | NA | 0 | NA |
| 11 | 129377940 | 129274810 | -1 | NM_020228    | PRDM10   | 1 | 11 | 0 | NA | 1 | 15 | 0 | NA | 0 | NA |
| 11 | 129377940 | 129274810 | -1 | NM_199437    | PRDM10   | 1 | 11 | 0 | NA | 1 | 15 | 0 | NA | 0 | NA |
| 11 | 129445010 | 129519910 | 1  | NM_001642    | APLP2    | 0 | NA | 0 | NA | 0 | NA | 0 | NA | 0 | NA |
| 11 | 129534891 | 129585467 | 1  | NM_021978    | ST14     | 0 | NA | 0 | NA | 0 | NA | 0 | NA | 0 | NA |
| 11 | 129689817 | 129601783 | -1 | NM_014155    | ZBTB44   | 0 | NA | 0 | NA | 1 | 13 | 0 | NA | 0 | NA |
| 11 | 129803749 | 129780027 | -1 | NM_007037    | ADAMTS8  | 0 | NA | 1 | 15 | 1 | 12 | 0 | NA | 0 | NA |
| 11 | 129824078 | 129848926 | 1  | NM_139055    | ADAMTS15 | 0 | NA | 0 | NA | 0 | NA | 0 | NA | 0 | NA |
| 11 | 130291592 | 130250975 | -1 | NM_014758    | SNX19    | 0 | NA | 0 | NA | 0 | NA | 1 | 18 | 0 | NA |
| 11 | 130745580 | 131711926 | 1  | NM_001048209 | HNT      | 0 | NA | 0 | NA | 0 | NA | 0 | NA | 0 | NA |
| 11 | 131285921 | 131711926 | 1  | NM_016522    | HNT      | 0 | NA | 0 | NA | 0 | NA | 0 | NA | 0 | NA |
| 11 | 132318247 | 131790084 | -1 | NM_002545    | OPCML    | 0 | NA | 0 | NA | 0 | NA | 0 | NA | 0 | NA |
| 11 | 132907613 | 131790084 | -1 | NM_001012393 | OPCML    | 0 | NA | 0 | NA | 0 | NA | 0 | NA | 0 | NA |
| 11 | 133220602 | 133215726 | -1 | NM_174927    | SPATA19  | 0 | NA | 0 | NA | 0 | NA | 0 | NA | 0 | NA |
| 11 | 133332090 | 133290394 | -1 | NM_014987    | IGSF9B   | 0 | NA | 0 | NA | 0 | NA | 0 | NA | 0 | NA |
| 11 | 133444029 | 133526859 | 1  | NM_032801    | JAM3     | 0 | NA | 0 | NA | 0 | NA | 0 | NA | 0 | NA |
| 11 | 133599636 | 133527546 | -1 | NM_015261    | NCAPD3   | 0 | NA | 0 | NA | 0 | NA | 1 | 12 | 0 | NA |
| 11 | 133599770 | 133622896 | 1  | NM_052875    | VPS26B   | 0 | NA | 0 | NA | 0 | NA | 1 | 12 | 0 | NA |
| 11 | 133628470 | 133623382 | -1 | NM_001037304 | THYN1    | 0 | NA | 0 | NA | 0 | NA | 0 | NA | 0 | NA |
| 11 | 133628470 | 133623382 | -1 | NM_001037305 | THYN1    | 0 | NA | 0 | NA | 0 | NA | 0 | NA | 0 | NA |
| 11 | 133628470 | 133623382 | -1 | NM_014174    | THYN1    | 0 | NA | 0 | NA | 0 | NA | 0 | NA | 0 | NA |



|    |           |           |    |              |           |   |    |   |    |   |    |   |    |   |    |
|----|-----------|-----------|----|--------------|-----------|---|----|---|----|---|----|---|----|---|----|
| 11 | 133628470 | 133623382 | -1 | NM_199297    | THYN1     | 0 | NA | 0 | NA | 0 | NA | 0 | NA | 0 | NA |
| 11 | 133628470 | 133623382 | -1 | NM_199298    | THYN1     | 0 | NA | 0 | NA | 0 | NA | 0 | NA | 0 | NA |
| 11 | 133628643 | 133640966 | 1  | NM_014384    | ACAD8     | 0 | NA | 0 | NA | 0 | NA | 0 | NA | 0 | NA |
| 11 | 133651484 | 133694668 | 1  | NM_001080407 | GLB1L3    | 0 | NA | 0 | NA | 0 | NA | 0 | NA | 1 | 12 |
| 11 | 133707018 | 133751428 | 1  | NM_138342    | GLB1L2    | 0 | NA | 1 | 16 | 0 | NA | 0 | NA | 0 | NA |
| 11 | 133787022 | 133753607 | -1 | NM_018644    | B3GAT1    | 0 | NA | 0 | NA | 0 | NA | 0 | NA | 0 | NA |
| 11 | 133787022 | 133753607 | -1 | NM_054025    | B3GAT1    | 0 | NA | 0 | NA | 0 | NA | 0 | NA | 0 | NA |
| 10 | 85178     | 82996     | -1 | NM_177987    | TUBB8     | 0 | NA | 0 | NA | 0 | NA | 0 | NA | 0 | NA |
| 10 | 170642    | 285201    | 1  | NM_212479    | ZMYND11   | 0 | NA | 0 | NA | 0 | NA | 0 | NA | 0 | NA |
| 10 | 170642    | 290577    | 1  | NM_006624    | ZMYND11   | 0 | NA | 0 | NA | 0 | NA | 0 | NA | 0 | NA |
| 10 | 725606    | 311431    | -1 | NM_014974    | DIP2C     | 0 | NA | 0 | NA | 0 | NA | 0 | NA | 0 | NA |
| 10 | 921702    | 845483    | -1 | NM_015155    | LARP5     | 0 | NA | 0 | NA | 0 | NA | 0 | NA | 0 | NA |
| 10 | 1024348   | 1053708   | 1  | NM_012341    | GTPBP4    | 0 | NA | 0 | NA | 0 | NA | 0 | NA | 0 | NA |
| 10 | 1061799   | 1054846   | -1 | NM_033261    | IDI2      | 1 | 12 | 0 | NA | 0 | NA | 0 | NA | 0 | NA |
| 10 | 1085061   | 1075963   | -1 | NM_004508    | IDI1      | 1 | 14 | 0 | NA | 0 | NA | 1 | 15 | 0 | NA |
| 10 | 1092775   | 1168237   | 1  | NM_014023    | WDR37     | 1 | 14 | 0 | NA | 0 | NA | 1 | 15 | 0 | NA |
| 10 | 1558824   | 1589184   | 1  | NM_001098830 | C10orf109 | 0 | NA | 0 | NA | 0 | NA | 0 | NA | 0 | NA |
| 10 | 1769718   | 1218072   | -1 | NM_018702    | ADARB2    | 0 | NA | 0 | NA | 0 | NA | 0 | NA | 1 | 12 |
| 10 | 3099751   | 3168996   | 1  | NM_002627    | PFKP      | 0 | NA | 0 | NA | 0 | NA | 0 | NA | 0 | NA |
| 10 | 3205003   | 3169919   | -1 | NM_014889    | PITRM1    | 0 | NA | 0 | NA | 0 | NA | 0 | NA | 0 | NA |
| 10 | 3817455   | 3811238   | -1 | NM_001300    | KLF6      | 0 | NA | 0 | NA | 0 | NA | 0 | NA | 0 | NA |
| 10 | 4858401   | 4880251   | 1  | NM_001040177 | AKR1CL2   | 0 | NA | 0 | NA | 0 | NA | 1 | 26 | 0 | NA |
| 10 | 4995453   | 5010158   | 1  | NM_001353    | AKR1C1    | 0 | NA | 0 | NA | 0 | NA | 0 | NA | 0 | NA |
| 10 | 5050207   | 5021964   | -1 | NM_001354    | AKR1C2    | 0 | NA | 0 | NA | 0 | NA | 0 | NA | 0 | NA |
| 10 | 5050207   | 5021964   | -1 | NM_205845    | AKR1C2    | 0 | NA | 0 | NA | 0 | NA | 0 | NA | 0 | NA |
| 10 | 5126567   | 5139878   | 1  | NM_003739    | AKR1C3    | 0 | NA | 0 | NA | 0 | NA | 0 | NA | 0 | NA |
| 10 | 5217144   | 5193693   | -1 | NM_001007536 | AKR1CL1   | 0 | NA | 0 | NA | 0 | NA | 0 | NA | 0 | NA |
| 10 | 5228797   | 5250912   | 1  | NM_001818    | AKR1C4    | 0 | NA | 0 | NA | 0 | NA | 0 | NA | 0 | NA |
| 10 | 5396975   | 5406169   | 1  | NM_053049    | UCN3      | 0 | NA | 0 | NA | 0 | NA | 0 | NA | 0 | NA |
| 10 | 5436793   | 5425060   | -1 | NM_024803    | TUBAL3    | 0 | NA | 1 | 12 | 0 | NA | 0 | NA | 0 | NA |
| 10 | 5444517   | 5490426   | 1  | NM_001047160 | NET1      | 0 | NA | 0 | NA | 0 | NA | 0 | NA | 0 | NA |
| 10 | 5478545   | 5490426   | 1  | NM_005863    | NET1      | 0 | NA | 0 | NA | 0 | NA | 0 | NA | 0 | NA |
| 10 | 5531510   | 5530659   | -1 | NM_017422    | CALML5    | 0 | NA | 0 | NA | 0 | NA | 0 | NA | 0 | NA |
| 10 | 5556923   | 5558225   | 1  | NM_005185    | CALML3    | 0 | NA | 0 | NA | 0 | NA | 0 | NA | 0 | NA |
| 10 | 5748547   | 5720836   | -1 | NM_024701    | ASB13     | 0 | NA | 0 | NA | 0 | NA | 0 | NA | 0 | NA |
| 10 | 5766806   | 5846949   | 1  | NM_017782    | C10orf18  | 1 | 27 | 0 | NA | 0 | NA | 1 | 18 | 0 | NA |
| 10 | 5895518   | 5847191   | -1 | NM_00115156  | GDI2      | 0 | NA | 0 | NA | 0 | NA | 0 | NA | 0 | NA |
| 10 | 5895518   | 5847191   | -1 | NM_001494    | GDI2      | 0 | NA | 0 | NA | 0 | NA | 0 | NA | 0 | NA |
| 10 | 5971352   | 5943694   | -1 | NM_019046    | ANKRD16   | 0 | NA | 0 | NA | 0 | NA | 0 | NA | 0 | NA |
| 10 | 5971352   | 5960057   | -1 | NM_001009941 | ANKRD16   | 0 | NA | 0 | NA | 0 | NA | 0 | NA | 0 | NA |
| 10 | 5971352   | 5960057   | -1 | NM_001009942 | ANKRD16   | 0 | NA | 0 | NA | 0 | NA | 0 | NA | 0 | NA |
| 10 | 5971352   | 5960057   | -1 | NM_001009943 | ANKRD16   | 0 | NA | 0 | NA | 0 | NA | 0 | NA | 0 | NA |
| 10 | 5972219   | 6019562   | 1  | NM_178150    | FBXO18    | 0 | NA | 0 | NA | 0 | NA | 0 | NA | 0 | NA |
| 10 | 5976354   | 6019562   | 1  | NM_032807    | FBXO18    | 0 | NA | 0 | NA | 0 | NA | 0 | NA | 0 | NA |
| 10 | 6059543   | 6034339   | -1 | NM_002189    | IL15RA    | 0 | NA | 0 | NA | 0 | NA | 0 | NA | 0 | NA |
| 10 | 6060148   | 6034339   | -1 | NM_172200    | IL15RA    | 0 | NA | 0 | NA | 0 | NA | 0 | NA | 0 | NA |
| 10 | 6144278   | 6093511   | -1 | NM_000417    | IL2RA     | 0 | NA | 0 | NA | 0 | NA | 0 | NA | 0 | NA |
| 10 | 6171012   | 6198847   | 1  | NM_032905    | RBM17     | 0 | NA | 0 | NA | 0 | NA | 0 | NA | 0 | NA |
| 10 | 6284900   | 6317501   | 1  | NM_004566    | PFKFB3    | 0 | NA | 0 | NA | 0 | NA | 0 | NA | 0 | NA |
| 10 | 6662244   | 6509110   | -1 | NM_006257    | PRKCC     | 0 | NA | 0 | NA | 0 | NA | 0 | NA | 0 | NA |
| 10 | 7493456   | 7244254   | -1 | NM_001029880 | SFMBT2    | 0 | NA | 0 | NA | 0 | NA | 0 | NA | 0 | NA |
| 10 | 7701620   | 7641640   | -1 | NM_032817    | ITIH5     | 0 | NA | 0 | NA | 0 | NA | 0 | NA | 0 | NA |
| 10 | 7748940   | 7641640   | -1 | NM_030569    | ITIH5     | 0 | NA | 0 | NA | 0 | NA | 0 | NA | 0 | NA |
| 10 | 7748940   | 7653373   | -1 | NM_001001851 | ITIH5     | 0 | NA | 0 | NA | 0 | NA | 0 | NA | 0 | NA |
| 10 | 7785241   | 7831489   | 1  | NM_002216    | ITIH2     | 0 | NA | 0 | NA | 0 | NA | 0 | NA | 0 | NA |
| 10 | 7869950   | 7837372   | -1 | NM_012311    | KIN       | 1 | 13 | 0 | NA | 0 | NA | 0 | NA | 0 | NA |
| 10 | 7870098   | 7889768   | 1  | NM_001001973 | ATP5C1    | 1 | 13 | 0 | NA | 0 | NA | 0 | NA | 0 | NA |
| 10 | 7870098   | 7889768   | 1  | NM_005174    | ATP5C1    | 1 | 13 | 0 | NA | 0 | NA | 0 | NA | 0 | NA |
| 10 | 7900678   | 8096720   | 1  | NM_031923    | TAF3      | 0 | NA | 0 | NA | 0 | NA | 1 | 11 | 0 | NA |
| 10 | 8135453   | 8132418   | -1 | NM_207423    | FLJ45983  | 0 | NA | 0 | NA | 0 | NA | 0 | NA | 0 | NA |
| 10 | 8136672   | 8157170   | 1  | NM_001002295 | GATA3     | 0 | NA | 0 | NA | 0 | NA | 0 | NA | 0 | NA |
| 10 | 8136672   | 8157170   | 1  | NM_002051    | GATA3     | 0 | NA | 0 | NA | 0 | NA | 0 | NA | 0 | NA |
| 10 | 11087264  | 11418678  | 1  | NM_001025077 | CUGBP2    | 0 | NA | 0 | NA | 0 | NA | 0 | NA | 0 | NA |
| 10 | 11099898  | 11418678  | 1  | NM_006561    | CUGBP2    | 0 | NA | 0 | NA | 0 | NA | 0 | NA | 0 | NA |
| 10 | 11246998  | 11418678  | 1  | NM_001025076 | CUGBP2    | 0 | NA | 0 | NA | 0 | NA | 0 | NA | 0 | NA |

|    |          |          |    |              |           |   |    |   |    |   |    |   |    |   |    |
|----|----------|----------|----|--------------|-----------|---|----|---|----|---|----|---|----|---|----|
| 10 | 11246998 | 11418678 | 1  | NM_001083591 | CUGBP2    | 0 | NA | 0 | NA | 0 | NA | 0 | NA | 0 | NA |
| 10 | 11614280 | 11542514 | -1 | NM_001080491 | USP6NL    | 0 | NA | 0 | NA | 0 | NA | 0 | NA | 0 | NA |
| 10 | 11824361 | 11846071 | 1  | NM_024693    | ECHDC3    | 0 | NA | 0 | NA | 0 | NA | 0 | NA | 0 | NA |
| 10 | 11905402 | 11954282 | 1  | NM_153256    | C10orf47  | 0 | NA | 0 | NA | 0 | NA | 0 | NA | 0 | NA |
| 10 | 12124814 | 12002026 | -1 | NM_015542    | UPF2      | 0 | NA | 0 | NA | 0 | NA | 0 | NA | 0 | NA |
| 10 | 12125029 | 12002027 | -1 | NM_080599    | UPF2      | 0 | NA | 0 | NA | 0 | NA | 0 | NA | 0 | NA |
| 10 | 12150939 | 12205230 | 1  | NM_018706    | DHTKD1    | 0 | NA | 0 | NA | 0 | NA | 0 | NA | 0 | NA |
| 10 | 12211703 | 12246832 | 1  | NM_018144    | SEC81A2   | 0 | NA | 0 | NA | 0 | NA | 0 | NA | 0 | NA |
| 10 | 12277970 | 12332593 | 1  | NM_006023    | CDC123    | 1 | 11 | 0 | NA | 0 | NA | 0 | NA | 0 | NA |
| 10 | 12278149 | 12249578 | -1 | NM_014142    | NUDT5     | 1 | 11 | 0 | NA | 0 | NA | 0 | NA | 0 | NA |
| 10 | 12431588 | 12908143 | 1  | NM_020397    | CAMK1D    | 0 | NA | 0 | NA | 0 | NA | 0 | NA | 0 | NA |
| 10 | 12431588 | 12911739 | 1  | NM_153498    | CAMK1D    | 0 | NA | 0 | NA | 0 | NA | 0 | NA | 0 | NA |
| 10 | 13083710 | 12978630 | -1 | NM_031455    | CCDC3     | 0 | NA | 0 | NA | 0 | NA | 0 | NA | 0 | NA |
| 10 | 13182087 | 13220282 | 1  | NM_001008211 | OPTN      | 1 | 11 | 0 | NA | 0 | NA | 0 | NA | 0 | NA |
| 10 | 13182087 | 13220282 | 1  | NM_001008212 | OPTN      | 1 | 11 | 0 | NA | 0 | NA | 0 | NA | 0 | NA |
| 10 | 13182087 | 13220282 | 1  | NM_001008213 | OPTN      | 1 | 11 | 0 | NA | 0 | NA | 0 | NA | 0 | NA |
| 10 | 13182087 | 13220282 | 1  | NM_021980    | OPTN      | 1 | 11 | 0 | NA | 0 | NA | 0 | NA | 0 | NA |
| 10 | 13243586 | 13293110 | 1  | NM_018518    | MCM10     | 1 | 14 | 0 | NA | 0 | NA | 0 | NA | 0 | NA |
| 10 | 13243586 | 13293110 | 1  | NM_182751    | MCM10     | 1 | 14 | 0 | NA | 0 | NA | 0 | NA | 0 | NA |
| 10 | 13316334 | 13303772 | -1 | NM_145314    | C10orf49  | 0 | NA | 0 | NA | 0 | NA | 0 | NA | 0 | NA |
| 10 | 13381752 | 13359801 | -1 | NM_001037537 | PHYH      | 0 | NA | 0 | NA | 0 | NA | 0 | NA | 0 | NA |
| 10 | 13382136 | 13359801 | -1 | NM_006214    | PHYH      | 0 | NA | 0 | NA | 0 | NA | 0 | NA | 0 | NA |
| 10 | 13430286 | 13400086 | -1 | NM_012247    | SEPHS1    | 0 | NA | 0 | NA | 0 | NA | 0 | NA | 0 | NA |
| 10 | 13584982 | 13520489 | -1 | NM_152751    | C10orf30  | 0 | NA | 0 | NA | 0 | NA | 0 | NA | 0 | NA |
| 10 | 13584982 | 13523093 | -1 | NM_001100912 | C10orf30  | 0 | NA | 0 | NA | 0 | NA | 0 | NA | 0 | NA |
| 10 | 13668944 | 13712874 | 1  | NM_003675    | PRPF18    | 0 | NA | 0 | NA | 0 | NA | 0 | NA | 0 | NA |
| 10 | 14412872 | 13725711 | -1 | NM_018027    | FRMD4A    | 0 | NA | 0 | NA | 0 | NA | 0 | NA | 0 | NA |
| 10 | 14856902 | 14600564 | -1 | NM_031453    | FAM107B   | 0 | NA | 0 | NA | 0 | NA | 0 | NA | 0 | NA |
| 10 | 14919989 | 14901256 | -1 | NM_001029954 | ARMETL1   | 0 | NA | 0 | NA | 0 | NA | 0 | NA | 0 | NA |
| 10 | 14920266 | 14953746 | 1  | NM_016299    | HSPA14    | 0 | NA | 0 | NA | 0 | NA | 0 | NA | 0 | NA |
| 10 | 14960904 | 14986310 | 1  | NM_024670    | SUV39H2   | 0 | NA | 0 | NA | 0 | NA | 1 | 13 | 0 | NA |
| 10 | 15036100 | 14988876 | -1 | NM_001033855 | DCLRE1C   | 1 | 11 | 0 | NA | 0 | NA | 0 | NA | 0 | NA |
| 10 | 15036100 | 14988876 | -1 | NM_001033857 | DCLRE1C   | 1 | 11 | 0 | NA | 0 | NA | 0 | NA | 0 | NA |
| 10 | 15036100 | 14988876 | -1 | NM_001033858 | DCLRE1C   | 1 | 11 | 0 | NA | 0 | NA | 0 | NA | 0 | NA |
| 10 | 15036100 | 14988876 | -1 | NM_022487    | DCLRE1C   | 1 | 11 | 0 | NA | 0 | NA | 0 | NA | 0 | NA |
| 10 | 15041443 | 15054856 | 1  | NM_001080836 | MEIG1     | 1 | 11 | 0 | NA | 0 | NA | 0 | NA | 0 | NA |
| 10 | 15125950 | 15155664 | 1  | NM_001039702 | OLAH      | 0 | NA | 0 | NA | 0 | NA | 0 | NA | 0 | NA |
| 10 | 15125967 | 15155857 | 1  | NM_018324    | OLAH      | 0 | NA | 0 | NA | 0 | NA | 0 | NA | 0 | NA |
| 10 | 15170781 | 15157479 | -1 | NM_001039844 | ACBD7     | 0 | NA | 1 | 12 | 0 | NA | 0 | NA | 0 | NA |
| 10 | 15179187 | 15186262 | 1  | NM_001097590 | RPP38     | 0 | NA | 1 | 12 | 0 | NA | 0 | NA | 0 | NA |
| 10 | 15179187 | 15186262 | 1  | NM_006414    | RPP38     | 0 | NA | 1 | 12 | 0 | NA | 0 | NA | 0 | NA |
| 10 | 15179187 | 15186262 | 1  | NM_183005    | RPP38     | 0 | NA | 1 | 12 | 0 | NA | 0 | NA | 0 | NA |
| 10 | 15179324 | 15177389 | -1 | NM_153244    | C10orf111 | 0 | NA | 1 | 12 | 0 | NA | 0 | NA | 0 | NA |
| 10 | 15250701 | 15187776 | -1 | NM_004808    | NMT2      | 0 | NA | 0 | NA | 0 | NA | 0 | NA | 0 | NA |
| 10 | 15453064 | 15293649 | -1 | NM_001010924 | C10orf38  | 0 | NA | 0 | NA | 0 | NA | 0 | NA | 0 | NA |
| 10 | 15801776 | 15599093 | -1 | NM_003638    | ITGA8     | 0 | NA | 0 | NA | 0 | NA | 0 | NA | 0 | NA |
| 10 | 15942525 | 15860180 | -1 | NM_024948    | C10orf97  | 1 | 20 | 0 | NA | 0 | NA | 0 | NA | 0 | NA |
| 10 | 16518972 | 16595742 | 1  | NM_001001484 | PTER      | 1 | 12 | 0 | NA | 0 | NA | 0 | NA | 0 | NA |
| 10 | 16518972 | 16595742 | 1  | NM_030664    | PTER      | 1 | 12 | 0 | NA | 0 | NA | 0 | NA | 0 | NA |
| 10 | 16604010 | 16595747 | -1 | NM_001010908 | C1QL3     | 0 | NA | 0 | NA | 0 | NA | 0 | NA | 0 | NA |
| 10 | 16899459 | 16672622 | -1 | NM_012425    | RSU1      | 1 | 13 | 0 | NA | 0 | NA | 0 | NA | 0 | NA |
| 10 | 16899459 | 16672622 | -1 | NM_152724    | RSU1      | 1 | 13 | 0 | NA | 0 | NA | 0 | NA | 0 | NA |
| 10 | 17211822 | 16905970 | -1 | NM_001081    | CUBN      | 0 | NA | 0 | NA | 0 | NA | 0 | NA | 0 | NA |
| 10 | 17283687 | 17224987 | -1 | NM_004412    | TRDMT1    | 0 | NA | 0 | NA | 0 | NA | 0 | NA | 0 | NA |
| 10 | 17283687 | 17224987 | -1 | NM_176081    | TRDMT1    | 0 | NA | 0 | NA | 0 | NA | 0 | NA | 0 | NA |
| 10 | 17283687 | 17224987 | -1 | NM_176083    | TRDMT1    | 0 | NA | 0 | NA | 0 | NA | 0 | NA | 0 | NA |
| 10 | 17311303 | 17319598 | 1  | NM_003380    | VIM       | 0 | NA | 0 | NA | 0 | NA | 0 | NA | 0 | NA |
| 10 | 17536260 | 17402681 | -1 | NM_001004470 | STRSIA6   | 0 | NA | 1 | 20 | 0 | NA | 1 | 13 | 0 | NA |
| 10 | 17699379 | 17671963 | -1 | NM_014241    | PTPLA     | 0 | NA | 0 | NA | 0 | NA | 0 | NA | 0 | NA |
| 10 | 17726129 | 17797913 | 1  | NM_003473    | STAM      | 0 | NA | 0 | NA | 0 | NA | 0 | NA | 0 | NA |
| 10 | 17834256 | 17882872 | 1  | NM_001098844 | FAM23A    | 0 | NA | 0 | NA | 0 | NA | 0 | NA | 0 | NA |
| 10 | 17891367 | 17993184 | 1  | NM_001009567 | MRC1L1    | 0 | NA | 0 | NA | 0 | NA | 0 | NA | 0 | NA |
| 10 | 17891367 | 17993184 | 1  | NM_002438    | MRC1      | 0 | NA | 0 | NA | 0 | NA | 0 | NA | 0 | NA |
| 10 | 18081223 | 18129860 | 1  | NM_001013629 | FAM23B    | 0 | NA | 0 | NA | 0 | NA | 0 | NA | 0 | NA |
| 10 | 18081223 | 18129860 | 1  | NM_001098844 | FAM23A    | 0 | NA | 0 | NA | 0 | NA | 0 | NA | 0 | NA |

|    |          |          |    |              |           |   |    |   |    |   |    |   |    |   |    |
|----|----------|----------|----|--------------|-----------|---|----|---|----|---|----|---|----|---|----|
| 10 | 18138357 | 18240097 | 1  | NM_001009567 | MRC1L1    | 0 | NA | 0 | NA | 0 | NA | 0 | NA | 0 | NA |
| 10 | 18138357 | 18240097 | 1  | NM_002438    | MRC1      | 0 | NA | 0 | NA | 0 | NA | 0 | NA | 0 | NA |
| 10 | 18208026 | 18372218 | 1  | NM_152725    | SLC39A12  | 0 | NA | 0 | NA | 0 | NA | 0 | NA | 0 | NA |
| 10 | 18469611 | 18870694 | 1  | NM_201593    | CACNB2    | 0 | NA | 0 | NA | 0 | NA | 0 | NA | 0 | NA |
| 10 | 18469611 | 18870694 | 1  | NM_201596    | CACNB2    | 0 | NA | 0 | NA | 0 | NA | 0 | NA | 0 | NA |
| 10 | 18469611 | 18870694 | 1  | NM_201597    | CACNB2    | 0 | NA | 0 | NA | 0 | NA | 0 | NA | 0 | NA |
| 10 | 18469815 | 18870694 | 1  | NM_201571    | CACNB2    | 0 | NA | 0 | NA | 0 | NA | 0 | NA | 0 | NA |
| 10 | 18469815 | 18870694 | 1  | NM_201572    | CACNB2    | 0 | NA | 0 | NA | 0 | NA | 0 | NA | 0 | NA |
| 10 | 18589589 | 18870694 | 1  | NM_000724    | CACNB2    | 0 | NA | 0 | NA | 0 | NA | 0 | NA | 0 | NA |
| 10 | 18669619 | 18870694 | 1  | NM_201590    | CACNB2    | 0 | NA | 0 | NA | 0 | NA | 0 | NA | 0 | NA |
| 10 | 18729518 | 18870694 | 1  | NM_201570    | CACNB2    | 0 | NA | 0 | NA | 0 | NA | 0 | NA | 0 | NA |
| 10 | 18980556 | 18874495 | -1 | NM_182543    | NSUN6     | 1 | 25 | 0 | NA | 0 | NA | 1 | 12 | 0 | NA |
| 10 | 18988318 | 19006946 | 1  | NM_178815    | ARL5B     | 1 | 25 | 0 | NA | 0 | NA | 1 | 12 | 0 | NA |
| 10 | 20145377 | 20609121 | 1  | NM_032812    | PLXD2     | 0 | NA | 0 | NA | 0 | NA | 0 | NA | 0 | NA |
| 10 | 21226537 | 21110093 | -1 | NM_006393    | NEBL      | 0 | NA | 0 | NA | 0 | NA | 0 | NA | 0 | NA |
| 10 | 21475433 | 21454697 | -1 | NM_001010896 | C10orf113 | 0 | NA | 0 | NA | 0 | NA | 0 | NA | 0 | NA |
| 10 | 21503122 | 21114603 | -1 | NM_213569    | NEBL      | 0 | NA | 0 | NA | 0 | NA | 0 | NA | 0 | NA |
| 10 | 21826219 | 21823426 | -1 | NM_001010911 | C10orf114 | 0 | NA | 0 | NA | 0 | NA | 0 | NA | 0 | NA |
| 10 | 21854617 | 21842414 | -1 | NM_207371    | C10orf140 | 0 | NA | 0 | NA | 0 | NA | 1 | 17 | 0 | NA |
| 10 | 21863107 | 22072560 | 1  | NM_004841    | MLLT10    | 0 | NA | 0 | NA | 0 | NA | 1 | 17 | 0 | NA |
| 10 | 21863579 | 22072560 | 1  | NM_001009569 | MLLT10    | 0 | NA | 0 | NA | 0 | NA | 1 | 17 | 0 | NA |
| 10 | 22332656 | 22085482 | -1 | NM_022365    | DNAJC1    | 0 | NA | 0 | NA | 0 | NA | 0 | NA | 0 | NA |
| 10 | 22645304 | 22649243 | 1  | NM_012071    | COMMD3    | 0 | NA | 1 | 13 | 0 | NA | 0 | NA | 0 | NA |
| 10 | 22650145 | 22660192 | 1  | NM_005180    | BMI1      | 0 | NA | 1 | 13 | 0 | NA | 0 | NA | 0 | NA |
| 10 | 22674404 | 22746545 | 1  | NM_012443    | SPAG6     | 0 | NA | 1 | 13 | 0 | NA | 0 | NA | 0 | NA |
| 10 | 22674404 | 22746545 | 1  | NM_172242    | SPAG6     | 0 | NA | 1 | 13 | 0 | NA | 0 | NA | 0 | NA |
| 10 | 23043509 | 22863771 | -1 | NM_005028    | PIP4K2A   | 0 | NA | 0 | NA | 0 | NA | 0 | NA | 0 | NA |
| 10 | 23256965 | 23366520 | 1  | NM_173081    | ARMC3     | 0 | NA | 0 | NA | 0 | NA | 0 | NA | 0 | NA |
| 10 | 23424432 | 23450948 | 1  | NM_012228    | MSRB2     | 0 | NA | 0 | NA | 0 | NA | 0 | NA | 0 | NA |
| 10 | 23521465 | 23523187 | 1  | NM_178161    | PTF1A     | 0 | NA | 0 | NA | 0 | NA | 0 | NA | 0 | NA |
| 10 | 23673778 | 23645525 | -1 | NM_153714    | C10orf67  | 0 | NA | 0 | NA | 0 | NA | 0 | NA | 0 | NA |
| 10 | 24023680 | 24876778 | 1  | NM_001098500 | KIAA1217  | 0 | NA | 0 | NA | 0 | NA | 0 | NA | 0 | NA |
| 10 | 24537725 | 24876778 | 1  | NM_001098501 | KIAA1217  | 1 | 12 | 0 | NA | 1 | 13 | 0 | NA | 0 | NA |
| 10 | 24537725 | 24876778 | 1  | NM_019590    | KIAA1217  | 1 | 12 | 0 | NA | 1 | 13 | 0 | NA | 0 | NA |
| 10 | 25052550 | 24912548 | -1 | NM_020824    | ARHGAP21  | 0 | NA | 0 | NA | 0 | NA | 0 | NA | 0 | NA |
| 10 | 25281539 | 25177559 | -1 | NM_020200    | PRTFDC1   | 1 | 12 | 0 | NA | 0 | NA | 0 | NA | 0 | NA |
| 10 | 25345036 | 25310922 | -1 | NM_145010    | C10orf63  | 0 | NA | 0 | NA | 0 | NA | 0 | NA | 0 | NA |
| 10 | 25345513 | 25385599 | 1  | NM_024838    | THNSL1    | 0 | NA | 0 | NA | 0 | NA | 0 | NA | 0 | NA |
| 10 | 25504295 | 25931163 | 1  | NM_020752    | GPR158    | 0 | NA | 0 | NA | 0 | NA | 0 | NA | 0 | NA |
| 10 | 26263007 | 26541471 | 1  | NM_017433    | MYO3A     | 0 | NA | 0 | NA | 0 | NA | 0 | NA | 0 | NA |
| 10 | 26545599 | 26633493 | 1  | NM_000818    | GAD2      | 0 | NA | 0 | NA | 0 | NA | 0 | NA | 0 | NA |
| 10 | 26767271 | 26896738 | 1  | NM_019043    | APBB1IP   | 0 | NA | 0 | NA | 0 | NA | 0 | NA | 0 | NA |
| 10 | 27026600 | 27075732 | 1  | NM_014317    | PDSS1     | 0 | NA | 0 | NA | 0 | NA | 0 | NA | 0 | NA |
| 10 | 27189965 | 27075530 | -1 | NM_001012750 | ABI1      | 0 | NA | 0 | NA | 0 | NA | 0 | NA | 0 | NA |
| 10 | 27189965 | 27075530 | -1 | NM_001012751 | ABI1      | 0 | NA | 0 | NA | 0 | NA | 0 | NA | 0 | NA |
| 10 | 27189965 | 27075530 | -1 | NM_001012752 | ABI1      | 0 | NA | 0 | NA | 0 | NA | 0 | NA | 0 | NA |
| 10 | 27189965 | 27075530 | -1 | NM_005470    | ABI1      | 0 | NA | 0 | NA | 0 | NA | 0 | NA | 0 | NA |
| 10 | 27429433 | 27333050 | -1 | NM_014915    | ANKRD26   | 0 | NA | 0 | NA | 0 | NA | 0 | NA | 0 | NA |
| 10 | 27483327 | 27439388 | -1 | NM_014263    | YME1L1    | 0 | NA | 0 | NA | 0 | NA | 0 | NA | 0 | NA |
| 10 | 27483327 | 27439388 | -1 | NM_139312    | YME1L1    | 0 | NA | 0 | NA | 0 | NA | 0 | NA | 0 | NA |
| 10 | 27483722 | 27515854 | 1  | NM_032844    | MASTL     | 0 | NA | 0 | NA | 0 | NA | 0 | NA | 0 | NA |
| 10 | 27569767 | 27524148 | -1 | NM_145698    | ACBD5     | 1 | 13 | 0 | NA | 0 | NA | 0 | NA | 0 | NA |
| 10 | 27571065 | 27524148 | -1 | NM_001042473 | ACBD5     | 1 | 13 | 0 | NA | 0 | NA | 0 | NA | 0 | NA |
| 10 | 27743227 | 27727205 | -1 | NM_001034842 | PTCHD3    | 0 | NA | 1 | 17 | 0 | NA | 0 | NA | 0 | NA |
| 10 | 27833254 | 27869105 | 1  | NM_021252    | RAB18     | 0 | NA | 0 | NA | 0 | NA | 1 | 12 | 0 | NA |
| 10 | 28074784 | 28001808 | -1 | NM_173576    | MKX       | 0 | NA | 0 | NA | 0 | NA | 0 | NA | 0 | NA |
| 10 | 28327983 | 28141102 | -1 | NM_018076    | ARMC4     | 0 | NA | 0 | NA | 0 | NA | 0 | NA | 0 | NA |
| 10 | 28611073 | 28379928 | -1 | NM_173496    | MPP7      | 0 | NA | 0 | NA | 0 | NA | 0 | NA | 0 | NA |
| 10 | 28861705 | 28949475 | 1  | NM_100264    | WAC       | 0 | NA | 0 | NA | 0 | NA | 0 | NA | 0 | NA |
| 10 | 28862439 | 28949471 | 1  | NM_100486    | WAC       | 0 | NA | 0 | NA | 0 | NA | 0 | NA | 0 | NA |
| 10 | 28862439 | 28949475 | 1  | NM_016628    | WAC       | 0 | NA | 0 | NA | 0 | NA | 0 | NA | 0 | NA |
| 10 | 29006429 | 29011874 | 1  | NM_012342    | BAMBI     | 0 | NA | 0 | NA | 0 | NA | 0 | NA | 0 | NA |
| 10 | 29617995 | 29640164 | 1  | NM_032517    | LYZL1     | 0 | NA | 0 | NA | 0 | NA | 0 | NA | 0 | NA |
| 10 | 29963907 | 29786282 | -1 | NM_021738    | SVIL      | 0 | NA | 0 | NA | 1 | 12 | 0 | NA | 0 | NA |
| 10 | 30064736 | 29786282 | -1 | NM_003174    | SVIL      | 0 | NA | 0 | NA | 0 | NA | 0 | NA | 0 | NA |

|    |          |          |    |              |            |   |    |   |    |   |    |   |    |   |    |
|----|----------|----------|----|--------------|------------|---|----|---|----|---|----|---|----|---|----|
| 10 | 30376806 | 30343389 | -1 | NM_020848    | KIAA1462   | 0 | NA | 0 | NA | 0 | NA | 0 | NA | 0 | NA |
| 10 | 30678254 | 30641764 | -1 | NM_018109    | PAPD1      | 0 | NA | 0 | NA | 0 | NA | 0 | NA | 0 | NA |
| 10 | 30762871 | 30790767 | 1  | NM_005204    | MAP3K8     | 0 | NA | 0 | NA | 0 | NA | 0 | NA | 0 | NA |
| 10 | 30958653 | 30940713 | -1 | NM_183058    | LYZL2      | 0 | NA | 0 | NA | 0 | NA | 0 | NA | 0 | NA |
| 10 | 31313361 | 31173570 | -1 | NM_182755    | ZNF438     | 0 | NA | 0 | NA | 0 | NA | 0 | NA | 0 | NA |
| 10 | 31648147 | 31856740 | 1  | NM_030751    | ZEB1       | 0 | NA | 0 | NA | 0 | NA | 0 | NA | 0 | NA |
| 10 | 32257776 | 32135230 | -1 | NM_018287    | ARHGAP12   | 0 | NA | 0 | NA | 0 | NA | 0 | NA | 0 | NA |
| 10 | 32385377 | 32337943 | -1 | NM_004521    | KIF5B      | 0 | NA | 0 | NA | 0 | NA | 1 | 13 | 0 | NA |
| 10 | 32676119 | 32597864 | -1 | NM_025209    | EPC1       | 0 | NA | 0 | NA | 0 | NA | 0 | NA | 0 | NA |
| 10 | 32775046 | 32903498 | 1  | NM_001026383 | CCDC7      | 0 | NA | 0 | NA | 0 | NA | 0 | NA | 0 | NA |
| 10 | 32775046 | 32903498 | 1  | NM_145023    | CCDC7      | 0 | NA | 0 | NA | 0 | NA | 0 | NA | 0 | NA |
| 10 | 32896656 | 33211798 | 1  | NM_024688    | C10orf68   | 0 | NA | 0 | NA | 0 | NA | 0 | NA | 0 | NA |
| 10 | 33264492 | 33229251 | -1 | NM_033667    | ITGB1      | 0 | NA | 0 | NA | 0 | NA | 0 | NA | 0 | NA |
| 10 | 33264492 | 33229251 | -1 | NM_033668    | ITGB1      | 0 | NA | 0 | NA | 0 | NA | 0 | NA | 0 | NA |
| 10 | 33264492 | 33229251 | -1 | NM_033669    | ITGB1      | 0 | NA | 0 | NA | 0 | NA | 0 | NA | 0 | NA |
| 10 | 33264492 | 33236244 | -1 | NM_033666    | ITGB1      | 0 | NA | 0 | NA | 0 | NA | 0 | NA | 0 | NA |
| 10 | 33286828 | 33229251 | -1 | NM_133376    | ITGB1      | 0 | NA | 0 | NA | 0 | NA | 0 | NA | 0 | NA |
| 10 | 33287299 | 33229251 | -1 | NM_002211    | ITGB1      | 0 | NA | 0 | NA | 0 | NA | 0 | NA | 0 | NA |
| 10 | 33663839 | 33506424 | -1 | NM_003873    | NRP1       | 0 | NA | 0 | NA | 0 | NA | 0 | NA | 0 | NA |
| 10 | 33663839 | 33526552 | -1 | NM_001024628 | NRP1       | 0 | NA | 0 | NA | 0 | NA | 0 | NA | 0 | NA |
| 10 | 33663839 | 33526552 | -1 | NM_001024629 | NRP1       | 0 | NA | 0 | NA | 0 | NA | 0 | NA | 0 | NA |
| 10 | 35143929 | 34440102 | -1 | NM_019619    | PARD3      | 0 | NA | 0 | NA | 0 | NA | 0 | NA | 0 | NA |
| 10 | 35419300 | 35338811 | -1 | NM_003591    | CUL2       | 0 | NA | 0 | NA | 0 | NA | 0 | NA | 0 | NA |
| 10 | 35455806 | 35508781 | 1  | NM_001881    | CREM       | 0 | NA | 0 | NA | 0 | NA | 0 | NA | 0 | NA |
| 10 | 35455806 | 35541892 | 1  | NM_182850    | CREM       | 0 | NA | 0 | NA | 0 | NA | 0 | NA | 0 | NA |
| 10 | 35455806 | 35541892 | 1  | NM_182853    | CREM       | 0 | NA | 0 | NA | 0 | NA | 0 | NA | 0 | NA |
| 10 | 35455806 | 35541892 | 1  | NM_183013    | CREM       | 0 | NA | 0 | NA | 0 | NA | 0 | NA | 0 | NA |
| 10 | 35456393 | 35541892 | 1  | NM_181571    | CREM       | 0 | NA | 0 | NA | 0 | NA | 0 | NA | 0 | NA |
| 10 | 35456393 | 35541892 | 1  | NM_183060    | CREM       | 0 | NA | 0 | NA | 0 | NA | 0 | NA | 0 | NA |
| 10 | 35466715 | 35541892 | 1  | NM_183011    | CREM       | 0 | NA | 0 | NA | 0 | NA | 0 | NA | 0 | NA |
| 10 | 35466715 | 35541892 | 1  | NM_183012    | CREM       | 0 | NA | 0 | NA | 0 | NA | 0 | NA | 0 | NA |
| 10 | 35496472 | 35541892 | 1  | NM_182771    | CREM       | 0 | NA | 0 | NA | 0 | NA | 0 | NA | 0 | NA |
| 10 | 35496472 | 35541892 | 1  | NM_182772    | CREM       | 0 | NA | 0 | NA | 0 | NA | 0 | NA | 0 | NA |
| 10 | 35504529 | 35541892 | 1  | NM_182769    | CREM       | 0 | NA | 0 | NA | 0 | NA | 0 | NA | 0 | NA |
| 10 | 35504529 | 35541892 | 1  | NM_182770    | CREM       | 0 | NA | 0 | NA | 0 | NA | 0 | NA | 0 | NA |
| 10 | 35524060 | 35541892 | 1  | NM_182717    | CREM       | 0 | NA | 0 | NA | 0 | NA | 0 | NA | 0 | NA |
| 10 | 35524060 | 35541892 | 1  | NM_182718    | CREM       | 0 | NA | 0 | NA | 0 | NA | 0 | NA | 0 | NA |
| 10 | 35524060 | 35541892 | 1  | NM_182719    | CREM       | 0 | NA | 0 | NA | 0 | NA | 0 | NA | 0 | NA |
| 10 | 35524060 | 35541892 | 1  | NM_182720    | CREM       | 0 | NA | 0 | NA | 0 | NA | 0 | NA | 0 | NA |
| 10 | 35524835 | 35541892 | 1  | NM_182721    | CREM       | 0 | NA | 0 | NA | 0 | NA | 0 | NA | 0 | NA |
| 10 | 35524835 | 35541892 | 1  | NM_182722    | CREM       | 0 | NA | 0 | NA | 0 | NA | 0 | NA | 0 | NA |
| 10 | 35524835 | 35541892 | 1  | NM_182723    | CREM       | 0 | NA | 0 | NA | 0 | NA | 0 | NA | 0 | NA |
| 10 | 35524835 | 35541892 | 1  | NM_182724    | CREM       | 0 | NA | 0 | NA | 0 | NA | 0 | NA | 0 | NA |
| 10 | 35524835 | 35541892 | 1  | NM_182725    | CREM       | 0 | NA | 0 | NA | 0 | NA | 0 | NA | 0 | NA |
| 10 | 35575958 | 35898672 | 1  | NM_181898    | CCNY       | 0 | NA | 0 | NA | 0 | NA | 0 | NA | 0 | NA |
| 10 | 35665960 | 35899161 | -1 | NM_145012    | CCNY       | 0 | NA | 0 | NA | 0 | NA | 0 | NA | 0 | NA |
| 10 | 35934343 | 35937869 | 1  | NM_153368    | GJD4       | 0 | NA | 0 | NA | 0 | NA | 0 | NA | 0 | NA |
| 10 | 35970368 | 35967182 | -1 | NM_031866    | FZD8       | 0 | NA | 0 | NA | 0 | NA | 0 | NA | 0 | NA |
| 10 | 37454790 | 37561501 | 1  | NM_052997    | ANKRD30A   | 0 | NA | 0 | NA | 0 | NA | 0 | NA | 0 | NA |
| 10 | 38186492 | 38157904 | -1 | NM_021045    | ZNF248     | 0 | NA | 0 | NA | 0 | NA | 0 | NA | 0 | NA |
| 10 | 38305459 | 38278800 | -1 | NM_145011    | ZNF25      | 0 | NA | 0 | NA | 0 | NA | 0 | NA | 0 | NA |
| 10 | 38339583 | 38389001 | 1  | NM_006954    | ZNF33A     | 0 | NA | 0 | NA | 0 | NA | 0 | NA | 0 | NA |
| 10 | 38339583 | 38389001 | 1  | NM_006974    | ZNF33A     | 0 | NA | 0 | NA | 0 | NA | 0 | NA | 0 | NA |
| 10 | 38423280 | 38452284 | 1  | NM_001007094 | ZNF37A     | 1 | 14 | 0 | NA | 0 | NA | 0 | NA | 0 | NA |
| 10 | 38423280 | 38452284 | 1  | NM_003421    | ZNF37A     | 1 | 14 | 0 | NA | 0 | NA | 0 | NA | 0 | NA |
| 10 | 42453998 | 42404560 | -1 | NM_006955    | ZNF33B     | 0 | NA | 0 | NA | 0 | NA | 0 | NA | 0 | NA |
| 10 | 42598264 | 42646856 | 1  | NM_014753    | BMS1       | 0 | NA | 0 | NA | 1 | 14 | 0 | NA | 0 | NA |
| 10 | 42892522 | 42942958 | 1  | NM_020630    | RET        | 0 | NA | 0 | NA | 0 | NA | 0 | NA | 0 | NA |
| 10 | 42892522 | 42945803 | 1  | NM_020975    | RET        | 0 | NA | 0 | NA | 0 | NA | 0 | NA | 0 | NA |
| 10 | 42953939 | 43000755 | 1  | NM_018590    | CSGALNACT2 | 0 | NA | 0 | NA | 0 | NA | 0 | NA | 0 | NA |
| 10 | 43082373 | 43009989 | -1 | NM_145313    | RASGEF1A   | 0 | NA | 0 | NA | 0 | NA | 0 | NA | 0 | NA |
| 10 | 43187097 | 43191789 | 1  | NM_173160    | FXYP4      | 0 | NA | 0 | NA | 0 | NA | 0 | NA | 0 | NA |
| 10 | 43212285 | 43201070 | -1 | NM_001098208 | HNRNPF     | 0 | NA | 0 | NA | 0 | NA | 0 | NA | 0 | NA |
| 10 | 43212800 | 43201070 | -1 | NM_001098207 | HNRNPF     | 0 | NA | 0 | NA | 0 | NA | 0 | NA | 0 | NA |
| 10 | 43223305 | 43201070 | -1 | NM_001098206 | HNRNPF     | 1 | 12 | 0 | NA | 0 | NA | 1 | 14 | 0 | NA |

|    |          |          |    |              |          |   |    |   |    |   |    |   |    |   |    |
|----|----------|----------|----|--------------|----------|---|----|---|----|---|----|---|----|---|----|
| 10 | 43224338 | 43201070 | -1 | NM_001098205 | HNRNPF   | 1 | 12 | 0 | NA | 0 | NA | 1 | 14 | 0 | NA |
| 10 | 43224662 | 43201070 | -1 | NM_004966    | HNRNPF   | 1 | 12 | 0 | NA | 0 | NA | 1 | 14 | 0 | NA |
| 10 | 43224702 | 43201070 | -1 | NM_001098204 | HNRNPF   | 1 | 12 | 0 | NA | 0 | NA | 1 | 14 | 0 | NA |
| 10 | 43383913 | 43371798 | -1 | NM_005674    | ZNF239   | 1 | 13 | 1 | 23 | 0 | NA | 0 | NA | 0 | NA |
| 10 | 43390071 | 43371798 | -1 | NM_001099282 | ZNF239   | 1 | 13 | 1 | 23 | 0 | NA | 0 | NA | 0 | NA |
| 10 | 43390072 | 43371798 | -1 | NM_001099283 | ZNF239   | 1 | 13 | 1 | 23 | 0 | NA | 0 | NA | 0 | NA |
| 10 | 43390072 | 43371798 | -1 | NM_001099284 | ZNF239   | 1 | 13 | 1 | 23 | 0 | NA | 0 | NA | 0 | NA |
| 10 | 43421880 | 43433358 | 1  | NM_145312    | ZNF485   | 1 | 13 | 1 | 17 | 0 | NA | 0 | NA | 0 | NA |
| 10 | 43464158 | 43459312 | -1 | NM_001005368 | ZNF32    | 0 | NA | 1 | 14 | 0 | NA | 0 | NA | 0 | NA |
| 10 | 43464332 | 43459312 | -1 | NM_006973    | ZNF32    | 0 | NA | 1 | 14 | 0 | NA | 0 | NA | 0 | NA |
| 10 | 44200548 | 44185610 | -1 | NM_000609    | CXCL12   | 0 | NA | 0 | NA | 0 | NA | 0 | NA | 0 | NA |
| 10 | 44200548 | 44191370 | -1 | NM_001033886 | CXCL12   | 0 | NA | 0 | NA | 0 | NA | 0 | NA | 0 | NA |
| 10 | 44200548 | 44192515 | -1 | NM_199168    | CXCL12   | 0 | NA | 0 | NA | 0 | NA | 0 | NA | 0 | NA |
| 10 | 44726769 | 44750648 | 1  | NM_001123376 | KSP37    | 1 | 14 | 0 | NA | 1 | 14 | 0 | NA | 0 | NA |
| 10 | 44775224 | 44810178 | 1  | NM_032023    | RASSF4   | 0 | NA | 0 | NA | 0 | NA | 1 | 13 | 0 | NA |
| 10 | 44794336 | 44791714 | -1 | NM_007021    | C10orf10 | 0 | NA | 0 | NA | 0 | NA | 0 | NA | 0 | NA |
| 10 | 44815927 | 44820780 | 1  | NM_006963    | ZNF22    | 0 | NA | 0 | NA | 0 | NA | 0 | NA | 0 | NA |
| 10 | 44816342 | 44813151 | -1 | NM_001039380 | C10orf25 | 0 | NA | 0 | NA | 0 | NA | 0 | NA | 0 | NA |
| 10 | 45131062 | 45118107 | -1 | NM_001004297 | OR13A1   | 0 | NA | 0 | NA | 0 | NA | 0 | NA | 0 | NA |
| 10 | 45189634 | 45261569 | 1  | NM_000698    | ALOX5    | 0 | NA | 0 | NA | 0 | NA | 0 | NA | 0 | NA |
| 10 | 45350825 | 45272822 | -1 | NM_001002266 | MARCH8   | 0 | NA | 0 | NA | 0 | NA | 0 | NA | 0 | NA |
| 10 | 45410360 | 45272822 | -1 | NM_001002265 | MARCH8   | 0 | NA | 0 | NA | 0 | NA | 0 | NA | 0 | NA |
| 10 | 45410360 | 45272822 | -1 | NM_145021    | MARCH8   | 0 | NA | 0 | NA | 0 | NA | 0 | NA | 0 | NA |
| 10 | 45487802 | 45431048 | -1 | NM_174890    | ANUBL1   | 1 | 11 | 0 | NA | 0 | NA | 0 | NA | 0 | NA |
| 10 | 45542672 | 4560418  | 1  | NM_015262    | FAM21C   | 0 | NA | 0 | NA | 0 | NA | 0 | NA | 0 | NA |
| 10 | 45662927 | 45641055 | -1 | NM_133446    | CTGLF1   | 0 | NA | 0 | NA | 0 | NA | 0 | NA | 0 | NA |
| 10 | 46040064 | 45970128 | -1 | NM_001042357 | PTPN20B  | 0 | NA | 0 | NA | 0 | NA | 0 | NA | 0 | NA |
| 10 | 46040064 | 45970128 | -1 | NM_001042389 | PTPN20A  | 0 | NA | 0 | NA | 0 | NA | 0 | NA | 0 | NA |
| 10 | 46060666 | 45970128 | -1 | NM_001042358 | PTPN20B  | 0 | NA | 0 | NA | 0 | NA | 0 | NA | 0 | NA |
| 10 | 46060666 | 45970128 | -1 | NM_001042359 | PTPN20B  | 0 | NA | 0 | NA | 0 | NA | 0 | NA | 0 | NA |
| 10 | 46060666 | 45970128 | -1 | NM_001042360 | PTPN20B  | 0 | NA | 0 | NA | 0 | NA | 0 | NA | 0 | NA |
| 10 | 46060666 | 45970128 | -1 | NM_001042361 | PTPN20B  | 0 | NA | 0 | NA | 0 | NA | 0 | NA | 0 | NA |
| 10 | 46060666 | 45970128 | -1 | NM_001042362 | PTPN20B  | 0 | NA | 0 | NA | 0 | NA | 0 | NA | 0 | NA |
| 10 | 46060666 | 45970128 | -1 | NM_001042390 | PTPN20A  | 0 | NA | 0 | NA | 0 | NA | 0 | NA | 0 | NA |
| 10 | 46060666 | 45970128 | -1 | NM_001042391 | PTPN20A  | 0 | NA | 0 | NA | 0 | NA | 0 | NA | 0 | NA |
| 10 | 46060666 | 45970128 | -1 | NM_001042392 | PTPN20A  | 0 | NA | 0 | NA | 0 | NA | 0 | NA | 0 | NA |
| 10 | 46060666 | 45970128 | -1 | NM_001042393 | PTPN20A  | 0 | NA | 0 | NA | 0 | NA | 0 | NA | 0 | NA |
| 10 | 46060666 | 45970128 | -1 | NM_001042394 | PTPN20A  | 0 | NA | 0 | NA | 0 | NA | 0 | NA | 0 | NA |
| 10 | 46061009 | 45970128 | -1 | NM_001042363 | PTPN20B  | 0 | NA | 0 | NA | 0 | NA | 0 | NA | 0 | NA |
| 10 | 46061009 | 45970128 | -1 | NM_001042364 | PTPN20B  | 0 | NA | 0 | NA | 0 | NA | 0 | NA | 0 | NA |
| 10 | 46061009 | 45970128 | -1 | NM_001042365 | PTPN20B  | 0 | NA | 0 | NA | 0 | NA | 0 | NA | 0 | NA |
| 10 | 46061009 | 45970128 | -1 | NM_001042387 | PTPN20A  | 0 | NA | 0 | NA | 0 | NA | 0 | NA | 0 | NA |
| 10 | 46061009 | 45970128 | -1 | NM_001042395 | PTPN20A  | 0 | NA | 0 | NA | 0 | NA | 0 | NA | 0 | NA |
| 10 | 46061009 | 45970128 | -1 | NM_001042396 | PTPN20A  | 0 | NA | 0 | NA | 0 | NA | 0 | NA | 0 | NA |
| 10 | 46061009 | 45970128 | -1 | NM_001042397 | PTPN20A  | 0 | NA | 0 | NA | 0 | NA | 0 | NA | 0 | NA |
| 10 | 46061009 | 45970128 | -1 | NM_015605    | PTPN20B  | 0 | NA | 0 | NA | 0 | NA | 0 | NA | 0 | NA |
| 10 | 46095721 | 46077145 | -1 | NM_001042516 | FRMPD2L2 | 0 | NA | 0 | NA | 0 | NA | 0 | NA | 0 | NA |
| 10 | 46095721 | 46077145 | -1 | NM_001042525 | FRMPD2L1 | 0 | NA | 0 | NA | 0 | NA | 0 | NA | 0 | NA |
| 10 | 46096738 | 46077145 | -1 | NM_001042515 | FRMPD2L2 | 0 | NA | 0 | NA | 0 | NA | 0 | NA | 0 | NA |
| 10 | 46096738 | 46077145 | -1 | NM_001042524 | FRMPD2L1 | 0 | NA | 0 | NA | 0 | NA | 0 | NA | 0 | NA |
| 10 | 46390607 | 46375450 | -1 | NM_181519    | SYT15    | 0 | NA | 0 | NA | 0 | NA | 0 | NA | 1 | 19 |
| 10 | 46390607 | 46378532 | -1 | NM_031912    | SYT15    | 0 | NA | 0 | NA | 0 | NA | 0 | NA | 1 | 19 |
| 10 | 46413551 | 46420574 | 1  | NM_014696    | GPRIN2   | 0 | NA | 0 | NA | 0 | NA | 0 | NA | 0 | NA |
| 10 | 46503539 | 46508326 | 1  | NM_005972    | PPYR1    | 0 | NA | 1 | 12 | 0 | NA | 0 | NA | 0 | NA |
| 10 | 46594046 | 46577994 | -1 | NM_001098845 | ANXA8L1  | 0 | NA | 0 | NA | 0 | NA | 0 | NA | 0 | NA |
| 10 | 46594128 | 46577989 | -1 | NM_001040084 | ANXA8    | 0 | NA | 0 | NA | 0 | NA | 0 | NA | 0 | NA |
| 10 | 47216925 | 47233046 | 1  | NM_001630    | ANXA8L2  | 0 | NA | 0 | NA | 0 | NA | 0 | NA | 0 | NA |
| 10 | 47414028 | 47469423 | 1  | NM_018232    | FAM21B   | 0 | NA | 0 | NA | 0 | NA | 0 | NA | 0 | NA |
| 10 | 47875230 | 47891374 | 1  | NM_001040084 | ANXA8    | 0 | NA | 0 | NA | 0 | NA | 0 | NA | 0 | NA |
| 10 | 47875312 | 47891369 | 1  | NM_001098845 | ANXA8L1  | 0 | NA | 0 | NA | 0 | NA | 0 | NA | 0 | NA |
| 10 | 47975094 | 47983874 | 1  | NM_153034    | ZNF488   | 0 | NA | 0 | NA | 0 | NA | 0 | NA | 0 | NA |
| 10 | 48010997 | 48001492 | -1 | NM_002900    | RBP3     | 0 | NA | 0 | NA | 0 | NA | 0 | NA | 0 | NA |
| 10 | 48036859 | 48033097 | -1 | NM_016204    | GDF2     | 0 | NA | 0 | NA | 0 | NA | 0 | NA | 0 | NA |
| 10 | 48059172 | 48045794 | -1 | NM_004962    | GDF10    | 0 | NA | 0 | NA | 0 | NA | 0 | NA | 0 | NA |
| 10 | 48426991 | 48357047 | -1 | NM_001042357 | PTPN20B  | 0 | NA | 0 | NA | 0 | NA | 0 | NA | 0 | NA |

|    |          |          |    |              |           |   |    |   |    |   |    |   |    |   |    |
|----|----------|----------|----|--------------|-----------|---|----|---|----|---|----|---|----|---|----|
| 10 | 48426991 | 48357047 | -1 | NM_001042389 | PTPN20A   | 0 | NA | 0 | NA | 0 | NA | 0 | NA | 0 | NA |
| 10 | 48447587 | 48357047 | -1 | NM_001042358 | PTPN20B   | 0 | NA | 0 | NA | 0 | NA | 0 | NA | 0 | NA |
| 10 | 48447587 | 48357047 | -1 | NM_001042369 | PTPN20B   | 0 | NA | 0 | NA | 0 | NA | 0 | NA | 0 | NA |
| 10 | 48447587 | 48357047 | -1 | NM_001042360 | PTPN20B   | 0 | NA | 0 | NA | 0 | NA | 0 | NA | 0 | NA |
| 10 | 48447587 | 48357047 | -1 | NM_001042361 | PTPN20B   | 0 | NA | 0 | NA | 0 | NA | 0 | NA | 0 | NA |
| 10 | 48447587 | 48357047 | -1 | NM_001042362 | PTPN20B   | 0 | NA | 0 | NA | 0 | NA | 0 | NA | 0 | NA |
| 10 | 48447587 | 48357047 | -1 | NM_001042390 | PTPN20A   | 0 | NA | 0 | NA | 0 | NA | 0 | NA | 0 | NA |
| 10 | 48447587 | 48357047 | -1 | NM_001042391 | PTPN20A   | 0 | NA | 0 | NA | 0 | NA | 0 | NA | 0 | NA |
| 10 | 48447587 | 48357047 | -1 | NM_001042392 | PTPN20A   | 0 | NA | 0 | NA | 0 | NA | 0 | NA | 0 | NA |
| 10 | 48447587 | 48357047 | -1 | NM_001042393 | PTPN20A   | 0 | NA | 0 | NA | 0 | NA | 0 | NA | 0 | NA |
| 10 | 48447587 | 48357047 | -1 | NM_001042394 | PTPN20A   | 0 | NA | 0 | NA | 0 | NA | 0 | NA | 0 | NA |
| 10 | 48447930 | 48357047 | -1 | NM_001042363 | PTPN20B   | 0 | NA | 0 | NA | 0 | NA | 0 | NA | 0 | NA |
| 10 | 48447930 | 48357047 | -1 | NM_001042364 | PTPN20B   | 0 | NA | 0 | NA | 0 | NA | 0 | NA | 0 | NA |
| 10 | 48447930 | 48357047 | -1 | NM_001042365 | PTPN20B   | 0 | NA | 0 | NA | 0 | NA | 0 | NA | 0 | NA |
| 10 | 48447930 | 48357047 | -1 | NM_001042387 | PTPN20A   | 0 | NA | 0 | NA | 0 | NA | 0 | NA | 0 | NA |
| 10 | 48447930 | 48357047 | -1 | NM_001042395 | PTPN20A   | 0 | NA | 0 | NA | 0 | NA | 0 | NA | 0 | NA |
| 10 | 48447930 | 48357047 | -1 | NM_001042396 | PTPN20A   | 0 | NA | 0 | NA | 0 | NA | 0 | NA | 0 | NA |
| 10 | 48447930 | 48357047 | -1 | NM_001042397 | PTPN20A   | 0 | NA | 0 | NA | 0 | NA | 0 | NA | 0 | NA |
| 10 | 48447930 | 48357047 | -1 | NM_015605    | PTPN20B   | 0 | NA | 0 | NA | 0 | NA | 0 | NA | 0 | NA |
| 10 | 49053173 | 49034611 | -1 | NM_001042512 | FRMPD2    | 0 | NA | 0 | NA | 0 | NA | 0 | NA | 0 | NA |
| 10 | 49054190 | 49034611 | -1 | NM_001017929 | FRMPD2    | 0 | NA | 0 | NA | 0 | NA | 0 | NA | 0 | NA |
| 10 | 49152723 | 49034611 | -1 | NM_001018071 | FRMPD2    | 0 | NA | 0 | NA | 0 | NA | 0 | NA | 0 | NA |
| 10 | 49152723 | 49034611 | -1 | NM_152428    | FRMPD2    | 0 | NA | 0 | NA | 0 | NA | 0 | NA | 0 | NA |
| 10 | 49279692 | 49313189 | 1  | NM_002750    | MAPK8     | 0 | NA | 0 | NA | 0 | NA | 0 | NA | 0 | NA |
| 10 | 49279692 | 49313189 | 1  | NM_139046    | MAPK8     | 0 | NA | 0 | NA | 0 | NA | 0 | NA | 0 | NA |
| 10 | 49279692 | 49313189 | 1  | NM_139047    | MAPK8     | 0 | NA | 0 | NA | 0 | NA | 0 | NA | 0 | NA |
| 10 | 49279692 | 49313189 | 1  | NM_139049    | MAPK8     | 0 | NA | 0 | NA | 0 | NA | 0 | NA | 0 | NA |
| 10 | 49483144 | 49324084 | -1 | NM_021226    | ARHGAP22  | 0 | NA | 0 | NA | 0 | NA | 0 | NA | 0 | NA |
| 10 | 49792286 | 49787534 | -1 | NM_001006939 | LRRC18    | 0 | NA | 0 | NA | 0 | NA | 0 | NA | 0 | NA |
| 10 | 49993557 | 49896257 | -1 | NM_001031746 | C10orf72  | 0 | NA | 0 | NA | 0 | NA | 0 | NA | 0 | NA |
| 10 | 49993560 | 49980222 | -1 | NM_144984    | C10orf72  | 0 | NA | 0 | NA | 0 | NA | 0 | NA | 0 | NA |
| 10 | 50066413 | 50033896 | -1 | NM_001010863 | C10orf128 | 0 | NA | 0 | NA | 0 | NA | 0 | NA | 0 | NA |
| 10 | 50177192 | 50205538 | 1  | NM_199459    | C10orf71  | 0 | NA | 0 | NA | 0 | NA | 0 | NA | 0 | NA |
| 10 | 50269913 | 50244166 | -1 | NM_001080520 | DRGX      | 0 | NA | 0 | NA | 0 | NA | 0 | NA | 0 | NA |
| 10 | 50402332 | 50393249 | -1 | NM_170753    | PGBD3     | 0 | NA | 0 | NA | 0 | NA | 0 | NA | 0 | NA |
| 10 | 50417153 | 50334496 | -1 | NM_000124    | ERCC6     | 0 | NA | 0 | NA | 0 | NA | 0 | NA | 0 | NA |
| 10 | 50487146 | 50543156 | 1  | NM_020984    | CHAT      | 0 | NA | 0 | NA | 0 | NA | 0 | NA | 0 | NA |
| 10 | 50488352 | 50490772 | 1  | NM_003055    | SLC18A3   | 0 | NA | 0 | NA | 0 | NA | 0 | NA | 0 | NA |
| 10 | 50491159 | 50543156 | 1  | NM_020985    | CHAT      | 0 | NA | 0 | NA | 0 | NA | 0 | NA | 0 | NA |
| 10 | 50491170 | 50543156 | 1  | NM_020986    | CHAT      | 0 | NA | 0 | NA | 0 | NA | 0 | NA | 0 | NA |
| 10 | 50492061 | 50543156 | 1  | NM_020549    | CHAT      | 0 | NA | 0 | NA | 0 | NA | 0 | NA | 0 | NA |
| 10 | 50557689 | 50572954 | 1  | NM_001042427 | C10orf53  | 0 | NA | 0 | NA | 0 | NA | 0 | NA | 0 | NA |
| 10 | 50557689 | 50586962 | 1  | NM_182554    | C10orf53  | 0 | NA | 0 | NA | 0 | NA | 0 | NA | 0 | NA |
| 10 | 50640375 | 50612716 | -1 | NM_018245    | OGDHL     | 0 | NA | 0 | NA | 0 | NA | 0 | NA | 0 | NA |
| 10 | 50916541 | 50894693 | -1 | NM_001077686 | CTGLF5    | 0 | NA | 0 | NA | 0 | NA | 0 | NA | 0 | NA |
| 10 | 51041337 | 50696330 | -1 | NM_003631    | PARG      | 0 | NA | 0 | NA | 0 | NA | 0 | NA | 0 | NA |
| 10 | 51156333 | 51134167 | -1 | NM_001077685 | CTGLF4    | 0 | NA | 0 | NA | 0 | NA | 0 | NA | 0 | NA |
| 10 | 51219558 | 51232598 | 1  | NM_002443    | MSMB      | 0 | NA | 0 | NA | 0 | NA | 0 | NA | 0 | NA |
| 10 | 51219558 | 51232598 | 1  | NM_138634    | MSMB      | 0 | NA | 0 | NA | 0 | NA | 0 | NA | 0 | NA |
| 10 | 51242372 | 51260738 | 1  | NM_005437    | NCOA4     | 0 | NA | 0 | NA | 0 | NA | 0 | NA | 0 | NA |
| 10 | 51293342 | 51262093 | -1 | NM_006327    | TIMM23    | 0 | NA | 0 | NA | 0 | NA | 0 | NA | 0 | NA |
| 10 | 51418083 | 51440265 | 1  | NM_001077665 | CTGLF3    | 0 | NA | 0 | NA | 0 | NA | 0 | NA | 0 | NA |
| 10 | 51497689 | 51563275 | 1  | NM_001005751 | FAM21A    | 0 | NA | 0 | NA | 0 | NA | 0 | NA | 0 | NA |
| 10 | 51507891 | 51563275 | 1  | NM_018232    | FAM21B    | 0 | NA | 0 | NA | 0 | NA | 0 | NA | 0 | NA |
| 10 | 51678319 | 51617077 | -1 | NM_019893    | ASAH2     | 0 | NA | 0 | NA | 0 | NA | 0 | NA | 0 | NA |
| 10 | 52053743 | 51735350 | -1 | NM_147156    | SGS1      | 1 | 12 | 0 | NA | 0 | NA | 0 | NA | 0 | NA |
| 10 | 52169713 | 52184575 | 1  | NM_001079516 | ASAH2B    | 0 | NA | 0 | NA | 0 | NA | 0 | NA | 0 | NA |
| 10 | 52315441 | 52236330 | -1 | NM_014576    | A1CF      | 0 | NA | 0 | NA | 0 | NA | 0 | NA | 0 | NA |
| 10 | 52315441 | 52236330 | -1 | NM_138932    | A1CF      | 0 | NA | 0 | NA | 0 | NA | 0 | NA | 0 | NA |
| 10 | 52315441 | 52236330 | -1 | NM_138933    | A1CF      | 0 | NA | 0 | NA | 0 | NA | 0 | NA | 0 | NA |
| 10 | 52420950 | 53725280 | 1  | NM_001098512 | PRKG1     | 0 | NA | 0 | NA | 0 | NA | 0 | NA | 0 | NA |
| 10 | 52504239 | 53725280 | 1  | NM_006258    | PRKG1     | 0 | NA | 0 | NA | 0 | NA | 0 | NA | 0 | NA |
| 10 | 53129361 | 53125251 | -1 | NM_015235    | CSTF2T    | 0 | NA | 0 | NA | 0 | NA | 0 | NA | 0 | NA |
| 10 | 53744046 | 53747423 | 1  | NM_012242    | DKK1      | 0 | NA | 0 | NA | 0 | NA | 0 | NA | 0 | NA |
| 10 | 54201466 | 54195145 | -1 | NM_000242    | MBL2      | 0 | NA | 0 | NA | 1 | 13 | 0 | NA | 0 | NA |

|    |          |          |    |              |           |   |    |   |    |   |    |   |    |   |    |
|----|----------|----------|----|--------------|-----------|---|----|---|----|---|----|---|----|---|----|
| 10 | 56231057 | 55250865 | -1 | NM_033056    | PCDH15    | 0 | NA | 0 | NA | 0 | NA | 0 | NA | 0 | NA |
| 10 | 57791040 | 57787204 | -1 | NM_001005413 | ZWINT     | 1 | 11 | 0 | NA | 0 | NA | 0 | NA | 0 | NA |
| 10 | 57791040 | 57787204 | -1 | NM_007057    | ZWINT     | 1 | 11 | 0 | NA | 0 | NA | 0 | NA | 0 | NA |
| 10 | 57791040 | 57787204 | -1 | NM_032997    | ZWINT     | 1 | 11 | 0 | NA | 0 | NA | 0 | NA | 0 | NA |
| 10 | 59697700 | 59625619 | -1 | NM_152230    | IPMK      | 1 | 14 | 0 | NA | 0 | NA | 0 | NA | 0 | NA |
| 10 | 59698900 | 59719025 | 1  | NM_018464    | CISD1     | 1 | 14 | 0 | NA | 0 | NA | 0 | NA | 0 | NA |
| 10 | 59764744 | 59800515 | 1  | NM_003338    | UBE2D1    | 0 | NA | 0 | NA | 0 | NA | 0 | NA | 0 | NA |
| 10 | 59815181 | 59825903 | 1  | NM_003201    | TFAM      | 0 | NA | 0 | NA | 0 | NA | 1 | 18 | 0 | NA |
| 10 | 59942909 | 60258851 | 1  | NM_001080512 | BICC1     | 0 | NA | 0 | NA | 0 | NA | 0 | NA | 0 | NA |
| 10 | 60606352 | 60677062 | 1  | NM_032439    | PHYHIPL   | 0 | NA | 0 | NA | 0 | NA | 0 | NA | 0 | NA |
| 10 | 60792358 | 60675898 | -1 | NM_198215    | FAM13C1   | 0 | NA | 0 | NA | 0 | NA | 0 | NA | 0 | NA |
| 10 | 60792358 | 60675951 | -1 | NM_001001971 | FAM13C1   | 0 | NA | 0 | NA | 0 | NA | 0 | NA | 0 | NA |
| 10 | 61165766 | 61080528 | -1 | NM_194298    | SLC16A9   | 0 | NA | 0 | NA | 0 | NA | 0 | NA | 0 | NA |
| 10 | 61336824 | 61218526 | -1 | NM_005436    | CCDC6     | 0 | NA | 0 | NA | 0 | NA | 0 | NA | 0 | NA |
| 10 | 61570752 | 61458164 | -1 | NM_001149    | ANK3      | 0 | NA | 0 | NA | 0 | NA | 0 | NA | 0 | NA |
| 10 | 61619494 | 61458164 | -1 | NM_020987    | ANK3      | 0 | NA | 0 | NA | 0 | NA | 0 | NA | 0 | NA |
| 10 | 62208241 | 62223930 | 1  | NM_001786    | CDC2      | 0 | NA | 0 | NA | 0 | NA | 0 | NA | 0 | NA |
| 10 | 62209916 | 62223930 | 1  | NM_033379    | CDC2      | 0 | NA | 0 | NA | 0 | NA | 0 | NA | 0 | NA |
| 10 | 62373995 | 62299203 | -1 | NM_014836    | RHOBTB1   | 0 | NA | 0 | NA | 0 | NA | 0 | NA | 0 | NA |
| 10 | 62430735 | 62299203 | -1 | NM_198225    | RHOBTB1   | 0 | NA | 0 | NA | 0 | NA | 1 | 12 | 0 | NA |
| 10 | 62431204 | 62299203 | -1 | NM_001032380 | RHOBTB1   | 0 | NA | 0 | NA | 0 | NA | 1 | 12 | 0 | NA |
| 10 | 62883214 | 62836413 | -1 | NM_178505    | TMEM26    | 0 | NA | 0 | NA | 0 | NA | 0 | NA | 0 | NA |
| 10 | 63092724 | 63196097 | 1  | NM_173554    | C10orf107 | 0 | NA | 0 | NA | 0 | NA | 0 | NA | 0 | NA |
| 10 | 63331448 | 63526709 | 1  | NM_032199    | ARID5B    | 0 | NA | 0 | NA | 0 | NA | 0 | NA | 0 | NA |
| 10 | 63698472 | 63622958 | -1 | NM_145307    | RTKN2     | 0 | NA | 0 | NA | 1 | 12 | 0 | NA | 0 | NA |
| 10 | 63803921 | 63832223 | 1  | NM_014951    | ZNF365    | 0 | NA | 0 | NA | 0 | NA | 0 | NA | 0 | NA |
| 10 | 63803921 | 63910054 | 1  | NM_199450    | ZNF365    | 0 | NA | 0 | NA | 0 | NA | 0 | NA | 0 | NA |
| 10 | 63803921 | 64101777 | 1  | NM_199451    | ZNF365    | 0 | NA | 0 | NA | 0 | NA | 0 | NA | 0 | NA |
| 10 | 63950212 | 64101777 | 1  | NM_199452    | ZNF365    | 0 | NA | 0 | NA | 0 | NA | 0 | NA | 0 | NA |
| 10 | 64234521 | 64238245 | 1  | NM_032804    | ADO       | 0 | NA | 0 | NA | 0 | NA | 0 | NA | 0 | NA |
| 10 | 64246133 | 64241762 | -1 | NM_000399    | EGR2      | 1 | 14 | 0 | NA | 0 | NA | 0 | NA | 0 | NA |
| 10 | 64563012 | 64584792 | 1  | NM_030759    | NRBF2     | 1 | 12 | 0 | NA | 1 | 23 | 0 | NA | 0 | NA |
| 10 | 64698988 | 64596993 | -1 | NM_004241    | JMJD1C    | 0 | NA | 0 | NA | 1 | 16 | 0 | NA | 0 | NA |
| 10 | 64695728 | 64596993 | -1 | NM_032776    | JMJD1C    | 0 | NA | 0 | NA | 0 | NA | 0 | NA | 0 | NA |
| 10 | 64951128 | 65051978 | 1  | NM_001001330 | REEP3     | 1 | 16 | 0 | NA | 1 | 12 | 1 | 16 | 0 | NA |
| 10 | 68355797 | 68530873 | 1  | NM_178011    | LRRTM3    | 0 | NA | 0 | NA | 0 | NA | 0 | NA | 0 | NA |
| 10 | 69125933 | 67349936 | -1 | NM_013266    | CTNNA3    | 0 | NA | 0 | NA | 0 | NA | 0 | NA | 0 | NA |
| 10 | 69267943 | 69226432 | -1 | NM_021800    | DNAJC12   | 0 | NA | 0 | NA | 0 | NA | 0 | NA | 0 | NA |
| 10 | 69267943 | 69240971 | -1 | NM_201262    | DNAJC12   | 0 | NA | 0 | NA | 0 | NA | 0 | NA | 0 | NA |
| 10 | 69314432 | 69348149 | 1  | NM_012238    | SIRT1     | 0 | NA | 0 | NA | 0 | NA | 0 | NA | 0 | NA |
| 10 | 69505109 | 69351661 | -1 | NM_015601    | HERC4     | 0 | NA | 0 | NA | 0 | NA | 0 | NA | 0 | NA |
| 10 | 69505109 | 69351661 | -1 | NM_022079    | HERC4     | 0 | NA | 0 | NA | 0 | NA | 0 | NA | 0 | NA |
| 10 | 69539255 | 69641779 | 1  | NM_032578    | MYPN      | 0 | NA | 0 | NA | 0 | NA | 0 | NA | 0 | NA |
| 10 | 69661861 | 69660387 | -1 | NM_145178    | ATOH7     | 0 | NA | 0 | NA | 0 | NA | 0 | NA | 0 | NA |
| 10 | 69761773 | 69772959 | 1  | NM_012207    | HNRNPH3   | 0 | NA | 0 | NA | 0 | NA | 0 | NA | 0 | NA |
| 10 | 69761773 | 69772959 | 1  | NM_021644    | HNRNPH3   | 0 | NA | 0 | NA | 0 | NA | 0 | NA | 0 | NA |
| 10 | 69762690 | 69712422 | -1 | NM_022129    | PBLD      | 0 | NA | 0 | NA | 0 | NA | 0 | NA | 0 | NA |
| 10 | 69762690 | 69714843 | -1 | NM_001033083 | PBLD      | 0 | NA | 0 | NA | 0 | NA | 0 | NA | 0 | NA |
| 10 | 69836952 | 69773280 | -1 | NM_017987    | RUFY2     | 0 | NA | 0 | NA | 0 | NA | 0 | NA | 0 | NA |
| 10 | 69837057 | 69806955 | -1 | NM_001042417 | RUFY2     | 0 | NA | 0 | NA | 0 | NA | 0 | NA | 0 | NA |
| 10 | 69901885 | 69843826 | -1 | NM_001080449 | DNA2      | 0 | NA | 0 | NA | 0 | NA | 0 | NA | 0 | NA |
| 10 | 69957590 | 69912102 | -1 | NM_152707    | SLC25A16  | 0 | NA | 0 | NA | 0 | NA | 0 | NA | 0 | NA |
| 10 | 69990122 | 70124245 | 1  | NM_030625    | TET1      | 0 | NA | 0 | NA | 0 | NA | 0 | NA | 0 | NA |
| 10 | 70150976 | 70221315 | 1  | NM_018237    | CCAR1     | 0 | NA | 0 | NA | 0 | NA | 0 | NA | 0 | NA |
| 10 | 70257386 | 70322821 | 1  | NM_152709    | STOX1     | 0 | NA | 0 | NA | 0 | NA | 0 | NA | 0 | NA |
| 10 | 70331039 | 70376609 | 1  | NM_024045    | DDX50     | 1 | 18 | 0 | NA | 0 | NA | 0 | NA | 0 | NA |
| 10 | 70385897 | 70414285 | 1  | NM_004728    | DDX21     | 0 | NA | 0 | NA | 0 | NA | 0 | NA | 0 | NA |
| 10 | 70418498 | 70446742 | 1  | NM_015634    | KIAA1279  | 0 | NA | 0 | NA | 0 | NA | 0 | NA | 0 | NA |
| 10 | 70517833 | 70534573 | 1  | NM_002727    | SRGN      | 0 | NA | 0 | NA | 0 | NA | 0 | NA | 0 | NA |
| 10 | 70553913 | 70602622 | 1  | NM_001035260 | VPS26A    | 0 | NA | 0 | NA | 0 | NA | 0 | NA | 0 | NA |
| 10 | 70553913 | 70602622 | 1  | NM_004896    | VPS26A    | 0 | NA | 0 | NA | 0 | NA | 0 | NA | 0 | NA |
| 10 | 70609998 | 70638855 | 1  | NM_003171    | SUPV3L1   | 0 | NA | 0 | NA | 0 | NA | 0 | NA | 0 | NA |
| 10 | 70650064 | 70697321 | 1  | NM_025130    | HKDC1     | 1 | 14 | 0 | NA | 1 | 16 | 0 | NA | 0 | NA |
| 10 | 70699761 | 70831641 | 1  | NM_033497    | HK1       | 0 | NA | 0 | NA | 0 | NA | 0 | NA | 0 | NA |
| 10 | 70699761 | 70831641 | 1  | NM_033498    | HK1       | 0 | NA | 0 | NA | 0 | NA | 0 | NA | 0 | NA |

|    |          |          |    |              |           |   |    |   |    |   |    |   |    |   |    |
|----|----------|----------|----|--------------|-----------|---|----|---|----|---|----|---|----|---|----|
| 10 | 70699761 | 70831641 | 1  | NM_033500    | HK1       | 0 | NA | 0 | NA | 0 | NA | 0 | NA | 0 | NA |
| 10 | 70745575 | 70831641 | 1  | NM_033496    | HK1       | 0 | NA | 0 | NA | 0 | NA | 0 | NA | 0 | NA |
| 10 | 70748628 | 70831641 | 1  | NM_000188    | HK1       | 0 | NA | 0 | NA | 0 | NA | 0 | NA | 0 | NA |
| 10 | 70846680 | 70833963 | -1 | NM_001057    | TACR2     | 0 | NA | 0 | NA | 0 | NA | 0 | NA | 0 | NA |
| 10 | 70881231 | 70937429 | 1  | NM_012339    | TSPAN15   | 0 | NA | 0 | NA | 0 | NA | 0 | NA | 0 | NA |
| 10 | 71003128 | 71001796 | -1 | NM_020999    | NEUROG3   | 0 | NA | 0 | NA | 0 | NA | 0 | NA | 1 | 12 |
| 10 | 71060008 | 71063361 | 1  | NM_145306    | C10orf35  | 0 | NA | 0 | NA | 0 | NA | 0 | NA | 0 | NA |
| 10 | 71231649 | 71388909 | 1  | NM_005203    | COL13A1   | 0 | NA | 0 | NA | 0 | NA | 0 | NA | 0 | NA |
| 10 | 71231649 | 71388909 | 1  | NM_080798    | COL13A1   | 0 | NA | 0 | NA | 0 | NA | 0 | NA | 0 | NA |
| 10 | 71231649 | 71388909 | 1  | NM_080799    | COL13A1   | 0 | NA | 0 | NA | 0 | NA | 0 | NA | 0 | NA |
| 10 | 71231649 | 71388909 | 1  | NM_080800    | COL13A1   | 0 | NA | 0 | NA | 0 | NA | 0 | NA | 0 | NA |
| 10 | 71231649 | 71388909 | 1  | NM_080801    | COL13A1   | 0 | NA | 0 | NA | 0 | NA | 0 | NA | 0 | NA |
| 10 | 71231649 | 71388909 | 1  | NM_080802    | COL13A1   | 0 | NA | 0 | NA | 0 | NA | 0 | NA | 0 | NA |
| 10 | 71231649 | 71388909 | 1  | NM_080803    | COL13A1   | 0 | NA | 0 | NA | 0 | NA | 0 | NA | 0 | NA |
| 10 | 71231649 | 71388909 | 1  | NM_080804    | COL13A1   | 0 | NA | 0 | NA | 0 | NA | 0 | NA | 0 | NA |
| 10 | 71231649 | 71388909 | 1  | NM_080805    | COL13A1   | 0 | NA | 0 | NA | 0 | NA | 0 | NA | 0 | NA |
| 10 | 71231649 | 71388909 | 1  | NM_080806    | COL13A1   | 0 | NA | 0 | NA | 0 | NA | 0 | NA | 0 | NA |
| 10 | 71231649 | 71388909 | 1  | NM_080807    | COL13A1   | 0 | NA | 0 | NA | 0 | NA | 0 | NA | 0 | NA |
| 10 | 71231649 | 71388909 | 1  | NM_080808    | COL13A1   | 0 | NA | 0 | NA | 0 | NA | 0 | NA | 0 | NA |
| 10 | 71231649 | 71388909 | 1  | NM_080809    | COL13A1   | 0 | NA | 0 | NA | 0 | NA | 0 | NA | 0 | NA |
| 10 | 71231649 | 71388909 | 1  | NM_080810    | COL13A1   | 0 | NA | 0 | NA | 0 | NA | 0 | NA | 0 | NA |
| 10 | 71231649 | 71388909 | 1  | NM_080811    | COL13A1   | 0 | NA | 0 | NA | 0 | NA | 0 | NA | 0 | NA |
| 10 | 71231649 | 71388909 | 1  | NM_080812    | COL13A1   | 0 | NA | 0 | NA | 0 | NA | 0 | NA | 0 | NA |
| 10 | 71231649 | 71388909 | 1  | NM_080813    | COL13A1   | 0 | NA | 0 | NA | 0 | NA | 0 | NA | 0 | NA |
| 10 | 71231649 | 71388909 | 1  | NM_080814    | COL13A1   | 0 | NA | 0 | NA | 0 | NA | 0 | NA | 0 | NA |
| 10 | 71231649 | 71388909 | 1  | NM_080815    | COL13A1   | 0 | NA | 0 | NA | 0 | NA | 0 | NA | 0 | NA |
| 10 | 71482362 | 71542046 | 1  | NM_018649    | HZAFY2    | 0 | NA | 0 | NA | 0 | NA | 0 | NA | 0 | NA |
| 10 | 71562696 | 71542035 | -1 | NM_032797    | AIFM2     | 0 | NA | 0 | NA | 0 | NA | 0 | NA | 0 | NA |
| 10 | 71576502 | 71567738 | -1 | NM_001040273 | TYSND1    | 0 | NA | 0 | NA | 0 | NA | 0 | NA | 0 | NA |
| 10 | 71576502 | 71567738 | -1 | NM_173555    | TYSND1    | 0 | NA | 0 | NA | 0 | NA | 0 | NA | 0 | NA |
| 10 | 71600272 | 71579966 | -1 | NM_020150    | SAR1A     | 0 | NA | 0 | NA | 0 | NA | 0 | NA | 0 | NA |
| 10 | 71663196 | 71632591 | -1 | NM_021129    | PPA1      | 0 | NA | 0 | NA | 0 | NA | 0 | NA | 0 | NA |
| 10 | 71696154 | 71684718 | -1 | NM_022146    | NPFFR1    | 0 | NA | 0 | NA | 0 | NA | 0 | NA | 0 | NA |
| 10 | 71811420 | 71728734 | -1 | NM_207119    | LRRC20    | 0 | NA | 0 | NA | 0 | NA | 0 | NA | 0 | NA |
| 10 | 71812388 | 71728734 | -1 | NM_018205    | LRRC20    | 0 | NA | 0 | NA | 0 | NA | 0 | NA | 0 | NA |
| 10 | 71812388 | 71728734 | -1 | NM_018239    | LRRC20    | 0 | NA | 0 | NA | 0 | NA | 0 | NA | 0 | NA |
| 10 | 71833927 | 71853676 | 1  | NM_004096    | EIF4EBP2  | 0 | NA | 0 | NA | 0 | NA | 0 | NA | 0 | NA |
| 10 | 71871429 | 71862076 | -1 | NM_018055    | NODAL     | 0 | NA | 0 | NA | 0 | NA | 0 | NA | 0 | NA |
| 10 | 71908569 | 71998212 | 1  | NM_014431    | KIAA1274  | 0 | NA | 0 | NA | 0 | NA | 0 | NA | 0 | NA |
| 10 | 72032537 | 72027109 | -1 | NM_001083116 | PRF1      | 0 | NA | 0 | NA | 0 | NA | 0 | NA | 0 | NA |
| 10 | 72032537 | 72027109 | -1 | NM_005041    | PRF1      | 0 | NA | 0 | NA | 0 | NA | 0 | NA | 0 | NA |
| 10 | 72102564 | 72192201 | 1  | NM_080722    | ADAMTS14  | 0 | NA | 0 | NA | 0 | NA | 0 | NA | 0 | NA |
| 10 | 72102564 | 72192201 | 1  | NM_139155    | ADAMTS14  | 0 | NA | 0 | NA | 0 | NA | 0 | NA | 0 | NA |
| 10 | 72215163 | 72201000 | -1 | NM_152710    | C10orf27  | 0 | NA | 0 | NA | 0 | NA | 0 | NA | 0 | NA |
| 10 | 72245721 | 72309873 | 1  | NM_003901    | SGPL1     | 0 | NA | 0 | NA | 0 | NA | 0 | NA | 0 | NA |
| 10 | 72318547 | 72313272 | -1 | NM_000281    | PCBD1     | 0 | NA | 0 | NA | 0 | NA | 0 | NA | 0 | NA |
| 10 | 72642354 | 72729716 | 1  | NM_170744    | UNC5B     | 0 | NA | 0 | NA | 0 | NA | 0 | NA | 0 | NA |
| 10 | 72749015 | 72793153 | 1  | NM_018344    | SLC29A3   | 0 | NA | 0 | NA | 0 | NA | 0 | NA | 0 | NA |
| 10 | 72826696 | 73076543 | 1  | NM_052836    | CDH23     | 0 | NA | 0 | NA | 0 | NA | 0 | NA | 0 | NA |
| 10 | 72826696 | 73245710 | 1  | NM_022124    | CDH23     | 0 | NA | 0 | NA | 0 | NA | 0 | NA | 0 | NA |
| 10 | 73203343 | 73177318 | -1 | NM_022153    | C10orf54  | 0 | NA | 0 | NA | 0 | NA | 0 | NA | 0 | NA |
| 10 | 73281088 | 73246060 | -1 | NM_001042465 | PSAP      | 1 | 13 | 0 | NA | 0 | NA | 1 | 16 | 0 | NA |
| 10 | 73281088 | 73246060 | -1 | NM_001042466 | PSAP      | 1 | 13 | 0 | NA | 0 | NA | 1 | 16 | 0 | NA |
| 10 | 73281088 | 73246060 | -1 | NM_002778    | PSAP      | 1 | 13 | 0 | NA | 0 | NA | 1 | 16 | 0 | NA |
| 10 | 73394125 | 73443318 | 1  | NM_004273    | CHST3     | 0 | NA | 0 | NA | 0 | NA | 0 | NA | 0 | NA |
| 10 | 73518773 | 73488798 | -1 | NM_014767    | SPOCK2    | 0 | NA | 0 | NA | 0 | NA | 0 | NA | 0 | NA |
| 10 | 73645700 | 73526283 | -1 | NM_015947    | ASCC1     | 0 | NA | 0 | NA | 0 | NA | 0 | NA | 0 | NA |
| 10 | 73645911 | 73665624 | 1  | NM_173473    | C10orf104 | 0 | NA | 0 | NA | 0 | NA | 0 | NA | 0 | NA |
| 10 | 73703682 | 73705803 | 1  | NM_019058    | DDIT4     | 0 | NA | 0 | NA | 0 | NA | 0 | NA | 0 | NA |
| 10 | 73784875 | 73762593 | -1 | NM_001002762 | DNAJB12   | 0 | NA | 0 | NA | 0 | NA | 0 | NA | 0 | NA |
| 10 | 73784875 | 73762593 | -1 | NM_017626    | DNAJB12   | 0 | NA | 0 | NA | 0 | NA | 0 | NA | 0 | NA |
| 10 | 74055905 | 73797103 | -1 | NM_006077    | CBARA1    | 0 | NA | 0 | NA | 0 | NA | 0 | NA | 0 | NA |
| 10 | 74121894 | 74317458 | 1  | NM_138357    | CCDC109A  | 0 | NA | 0 | NA | 0 | NA | 0 | NA | 0 | NA |
| 10 | 74323344 | 74362793 | 1  | NM_152635    | OIT3      | 0 | NA | 0 | NA | 0 | NA | 0 | NA | 0 | NA |
| 10 | 74384516 | 74364943 | -1 | NM_032562    | PLA2G12B  | 0 | NA | 0 | NA | 0 | NA | 0 | NA | 0 | NA |



|    |          |          |    |              |          |   |    |   |    |   |    |   |    |   |    |
|----|----------|----------|----|--------------|----------|---|----|---|----|---|----|---|----|---|----|
| 10 | 74526630 | 74436985 | -1 | NM_000917    | P4HA1    | 0 | NA | 0 | NA | 0 | NA | 0 | NA | 0 | NA |
| 10 | 74526630 | 74436985 | -1 | NM_001017962 | P4HA1    | 0 | NA | 0 | NA | 0 | NA | 0 | NA | 0 | NA |
| 10 | 74540215 | 74561587 | 1  | NM_015901    | NUDT13   | 0 | NA | 0 | NA | 0 | NA | 0 | NA | 0 | NA |
| 10 | 74597823 | 74564288 | -1 | NM_007265    | ECD      | 0 | NA | 0 | NA | 0 | NA | 0 | NA | 0 | NA |
| 10 | 74677031 | 74672587 | -1 | NM_015190    | DNAJC9   | 0 | NA | 0 | NA | 0 | NA | 0 | NA | 0 | NA |
| 10 | 74682457 | 74678606 | -1 | NM_016065    | MRPS16   | 0 | NA | 0 | NA | 0 | NA | 0 | NA | 0 | NA |
| 10 | 74788618 | 74683526 | -1 | NM_145170    | TTC18    | 1 | 20 | 0 | NA | 0 | NA | 0 | NA | 0 | NA |
| 10 | 74843847 | 74805194 | -1 | NM_001156    | ANXA7    | 0 | NA | 0 | NA | 0 | NA | 0 | NA | 0 | NA |
| 10 | 74843847 | 74805194 | -1 | NM_004034    | ANXA7    | 0 | NA | 0 | NA | 0 | NA | 0 | NA | 0 | NA |
| 10 | 74863325 | 74853342 | -1 | NM_001024593 | ZMYND17  | 0 | NA | 0 | NA | 0 | NA | 0 | NA | 0 | NA |
| 10 | 74925760 | 74866617 | -1 | NM_021132    | PPP3CB   | 0 | NA | 0 | NA | 1 | 13 | 0 | NA | 0 | NA |
| 10 | 75005439 | 74927301 | -1 | NM_152586    | USP54    | 0 | NA | 0 | NA | 0 | NA | 0 | NA | 0 | NA |
| 10 | 75071521 | 75061417 | -1 | NM_021245    | MYO21    | 0 | NA | 0 | NA | 0 | NA | 0 | NA | 0 | NA |
| 10 | 75080793 | 75074649 | -1 | NM_024875    | SYNPO2L  | 0 | NA | 0 | NA | 0 | NA | 0 | NA | 0 | NA |
| 10 | 75085838 | 75074649 | -1 | NM_001114133 | SYNPO2L  | 0 | NA | 0 | NA | 0 | NA | 0 | NA | 0 | NA |
| 10 | 75174137 | 75201925 | 1  | NM_004922    | SEC24C   | 0 | NA | 0 | NA | 0 | NA | 0 | NA | 0 | NA |
| 10 | 75174137 | 75201925 | 1  | NM_198597    | SEC24C   | 0 | NA | 0 | NA | 0 | NA | 0 | NA | 0 | NA |
| 10 | 75202054 | 75205982 | 1  | NM_173540    | FUT11    | 0 | NA | 0 | NA | 1 | 12 | 0 | NA | 0 | NA |
| 10 | 75211813 | 75213412 | 1  | NM_203298    | CHCHD1   | 0 | NA | 0 | NA | 1 | 12 | 1 | 13 | 0 | NA |
| 10 | 75215610 | 75231557 | 1  | NM_015037    | KIAA0913 | 0 | NA | 0 | NA | 0 | NA | 1 | 13 | 0 | NA |
| 10 | 75241348 | 75231674 | -1 | NM_003635    | NDST2    | 0 | NA | 0 | NA | 0 | NA | 0 | NA | 0 | NA |
| 10 | 75304344 | 75242264 | -1 | NM_001222    | CAMK2G   | 0 | NA | 0 | NA | 0 | NA | 0 | NA | 0 | NA |
| 10 | 75304344 | 75242264 | -1 | NM_172169    | CAMK2G   | 0 | NA | 0 | NA | 0 | NA | 0 | NA | 0 | NA |
| 10 | 75304344 | 75242264 | -1 | NM_172171    | CAMK2G   | 0 | NA | 0 | NA | 0 | NA | 0 | NA | 0 | NA |
| 10 | 75304344 | 75242264 | -1 | NM_172173    | CAMK2G   | 0 | NA | 0 | NA | 0 | NA | 0 | NA | 0 | NA |
| 10 | 75304349 | 75242264 | -1 | NM_172170    | CAMK2G   | 0 | NA | 0 | NA | 0 | NA | 0 | NA | 0 | NA |
| 10 | 75340895 | 75347261 | 1  | NM_002658    | PLAU     | 1 | 20 | 0 | NA | 1 | 12 | 0 | NA | 1 | 12 |
| 10 | 75341994 | 75339739 | -1 | NM_001001791 | C10orf55 | 1 | 20 | 0 | NA | 1 | 12 | 0 | NA | 1 | 12 |
| 10 | 75427877 | 75549920 | 1  | NM_003373    | VCL      | 0 | NA | 0 | NA | 0 | NA | 0 | NA | 0 | NA |
| 10 | 75427877 | 75549920 | 1  | NM_014000    | VCL      | 0 | NA | 0 | NA | 0 | NA | 0 | NA | 0 | NA |
| 10 | 75580832 | 75550020 | -1 | NM_012095    | AP3M1    | 0 | NA | 0 | NA | 0 | NA | 0 | NA | 0 | NA |
| 10 | 75580832 | 75550020 | -1 | NM_207012    | AP3M1    | 0 | NA | 0 | NA | 0 | NA | 0 | NA | 0 | NA |
| 10 | 75580970 | 76139066 | 1  | NM_006721    | ADK      | 0 | NA | 0 | NA | 0 | NA | 0 | NA | 0 | NA |
| 10 | 75606449 | 76139066 | 1  | NM_001123    | ADK      | 0 | NA | 0 | NA | 0 | NA | 0 | NA | 0 | NA |
| 10 | 76256384 | 76462645 | 1  | NM_012330    | MYST4    | 0 | NA | 0 | NA | 0 | NA | 0 | NA | 0 | NA |
| 10 | 76488278 | 76467599 | -1 | NM_001003892 | DUPD1    | 0 | NA | 0 | NA | 0 | NA | 0 | NA | 0 | NA |
| 10 | 76529254 | 76524197 | -1 | NM_016364    | DUSP13   | 0 | NA | 0 | NA | 0 | NA | 0 | NA | 0 | NA |
| 10 | 76538976 | 76524195 | -1 | NM_001007271 | DUSP13   | 0 | NA | 0 | NA | 0 | NA | 0 | NA | 0 | NA |
| 10 | 76538976 | 76524195 | -1 | NM_001007272 | DUSP13   | 0 | NA | 0 | NA | 0 | NA | 0 | NA | 0 | NA |
| 10 | 76538976 | 76524195 | -1 | NM_001007273 | DUSP13   | 0 | NA | 0 | NA | 0 | NA | 0 | NA | 0 | NA |
| 10 | 76541472 | 76606455 | 1  | NM_144860    | SAMD8    | 0 | NA | 0 | NA | 0 | NA | 0 | NA | 0 | NA |
| 10 | 76640568 | 76661212 | 1  | NM_003375    | VDAC2    | 0 | NA | 0 | NA | 0 | NA | 0 | NA | 0 | NA |
| 10 | 76665776 | 76663734 | -1 | NM_144589    | COMTD1   | 0 | NA | 0 | NA | 0 | NA | 0 | NA | 0 | NA |
| 10 | 76831431 | 76827920 | -1 | NM_032772    | ZNF503   | 0 | NA | 0 | NA | 0 | NA | 0 | NA | 0 | NA |
| 10 | 77212524 | 77987132 | 1  | NM_032024    | C10orf11 | 1 | 12 | 0 | NA | 1 | 12 | 1 | 11 | 0 | NA |
| 10 | 79067583 | 78299367 | -1 | NM_001014797 | KCNMA1   | 1 | 11 | 0 | NA | 0 | NA | 1 | 11 | 0 | NA |
| 10 | 79067583 | 78314640 | -1 | NM_002247    | KCNMA1   | 1 | 11 | 0 | NA | 0 | NA | 1 | 11 | 0 | NA |
| 10 | 79356354 | 79220554 | -1 | NM_004747    | DLG5     | 0 | NA | 0 | NA | 0 | NA | 0 | NA | 0 | NA |
| 10 | 79459265 | 79405909 | -1 | NM_007055    | POLR3A   | 0 | NA | 0 | NA | 0 | NA | 0 | NA | 0 | NA |
| 10 | 79463579 | 79470479 | 1  | NM_001026    | RPS24    | 0 | NA | 0 | NA | 0 | NA | 0 | NA | 0 | NA |
| 10 | 79463579 | 79470479 | 1  | NM_033022    | RPS24    | 0 | NA | 0 | NA | 0 | NA | 0 | NA | 0 | NA |
| 10 | 80591875 | 80746279 | 1  | NM_020338    | ZMIZ1    | 0 | NA | 0 | NA | 0 | NA | 0 | NA | 0 | NA |
| 10 | 80777225 | 80785095 | 1  | NM_005729    | PPIF     | 0 | NA | 0 | NA | 0 | NA | 0 | NA | 0 | NA |
| 10 | 80875386 | 80812088 | -1 | NM_153367    | C10orf56 | 0 | NA | 0 | NA | 0 | NA | 0 | NA | 0 | NA |
| 10 | 80942362 | 80946198 | 1  | NM_001099692 | EIF5A1   | 0 | NA | 0 | NA | 0 | NA | 0 | NA | 0 | NA |
| 10 | 80990157 | 80985613 | -1 | NM_001098668 | SFTPA2   | 0 | NA | 0 | NA | 0 | NA | 0 | NA | 0 | NA |
| 10 | 80990169 | 80985627 | -1 | NM_006926    | SFTPA2B  | 0 | NA | 0 | NA | 0 | NA | 0 | NA | 0 | NA |
| 10 | 81040717 | 81043975 | 1  | NM_005411    | SFTPA1B  | 0 | NA | 0 | NA | 0 | NA | 0 | NA | 0 | NA |
| 10 | 81040721 | 81045208 | 1  | NM_001093770 | SFTPA1   | 0 | NA | 0 | NA | 0 | NA | 0 | NA | 0 | NA |
| 10 | 81310102 | 81305558 | -1 | NM_001098668 | SFTPA2   | 0 | NA | 0 | NA | 0 | NA | 0 | NA | 0 | NA |
| 10 | 81310114 | 81305572 | -1 | NM_006926    | SFTPA2B  | 0 | NA | 0 | NA | 0 | NA | 0 | NA | 0 | NA |
| 10 | 81360663 | 81363921 | 1  | NM_005411    | SFTPA1B  | 0 | NA | 0 | NA | 0 | NA | 0 | NA | 0 | NA |
| 10 | 81360667 | 81365154 | 1  | NM_001093770 | SFTPA1   | 0 | NA | 0 | NA | 0 | NA | 0 | NA | 0 | NA |
| 10 | 81698841 | 81687475 | -1 | NM_003019    | SFTPD    | 0 | NA | 0 | NA | 0 | NA | 0 | NA | 0 | NA |
| 10 | 81828405 | 81842287 | 1  | NM_025125    | C10orf57 | 0 | NA | 0 | NA | 0 | NA | 0 | NA | 0 | NA |

|    |          |          |    |              |           |   |    |   |    |   |    |   |    |   |    |
|----|----------|----------|----|--------------|-----------|---|----|---|----|---|----|---|----|---|----|
| 10 | 81882237 | 81894764 | 1  | NM_001012973 | PLAC9     | 0 | NA | 0 | NA | 0 | NA | 0 | NA | 0 | NA |
| 10 | 81955308 | 81904859 | -1 | NM_001157    | ANXA11    | 0 | NA | 0 | NA | 0 | NA | 0 | NA | 0 | NA |
| 10 | 81955308 | 81904859 | -1 | NM_145868    | ANXA11    | 0 | NA | 0 | NA | 0 | NA | 0 | NA | 0 | NA |
| 10 | 81955308 | 81904859 | -1 | NM_145869    | ANXA11    | 0 | NA | 0 | NA | 0 | NA | 0 | NA | 0 | NA |
| 10 | 82039414 | 82021555 | -1 | NM_000429    | MAT1A     | 0 | NA | 0 | NA | 0 | NA | 0 | NA | 0 | NA |
| 10 | 82106480 | 82085841 | -1 | NM_138812    | DYDC1     | 0 | NA | 0 | NA | 0 | NA | 0 | NA | 0 | NA |
| 10 | 82106537 | 82117809 | 1  | NM_032372    | DYDC2     | 0 | NA | 0 | NA | 0 | NA | 0 | NA | 0 | NA |
| 10 | 82158221 | 82182733 | 1  | NM_032333    | C10orf58  | 0 | NA | 0 | NA | 0 | NA | 0 | NA | 0 | NA |
| 10 | 82204046 | 82269366 | 1  | NM_030927    | TSPAN14   | 0 | NA | 0 | NA | 0 | NA | 1 | 11 | 0 | NA |
| 10 | 82287637 | 82396296 | 1  | NM_207372    | SH2D4B    | 0 | NA | 0 | NA | 0 | NA | 1 | 14 | 0 | NA |
| 10 | 83625076 | 84735341 | 1  | NM_001010848 | NRG3      | 0 | NA | 0 | NA | 0 | NA | 0 | NA | 0 | NA |
| 10 | 85889164 | 85903291 | 1  | NM_014394    | GHITM     | 1 | 20 | 0 | NA | 0 | NA | 0 | NA | 0 | NA |
| 10 | 85923533 | 85935030 | 1  | NM_207373    | C10orf99  | 0 | NA | 0 | NA | 0 | NA | 0 | NA | 0 | NA |
| 10 | 85944496 | 85967101 | 1  | NM_033100    | PCDH21    | 0 | NA | 0 | NA | 0 | NA | 0 | NA | 0 | NA |
| 10 | 85975264 | 85970228 | -1 | NM_001017924 | LRIT2     | 0 | NA | 0 | NA | 0 | NA | 0 | NA | 0 | NA |
| 10 | 85991197 | 85981255 | -1 | NM_015613    | LRIT1     | 0 | NA | 0 | NA | 0 | NA | 0 | NA | 0 | NA |
| 10 | 85994788 | 86008924 | 1  | NM_001012720 | RGR       | 0 | NA | 0 | NA | 0 | NA | 0 | NA | 0 | NA |
| 10 | 85994788 | 86008924 | 1  | NM_001012722 | RGR       | 0 | NA | 0 | NA | 0 | NA | 0 | NA | 0 | NA |
| 10 | 85994788 | 86008924 | 1  | NM_002921    | RGR       | 0 | NA | 0 | NA | 0 | NA | 0 | NA | 0 | NA |
| 10 | 86078389 | 86268256 | 1  | NM_018999    | KIAA1128  | 0 | NA | 0 | NA | 0 | NA | 0 | NA | 0 | NA |
| 10 | 88116230 | 87349291 | -1 | NM_017551    | GRID1     | 0 | NA | 0 | NA | 0 | NA | 0 | NA | 0 | NA |
| 10 | 88271521 | 88184992 | -1 | NM_015045    | WAPAL     | 0 | NA | 0 | NA | 0 | NA | 0 | NA | 0 | NA |
| 10 | 88404293 | 88416196 | 1  | NM_001030015 | OPN4      | 0 | NA | 0 | NA | 0 | NA | 0 | NA | 0 | NA |
| 10 | 88404293 | 88416196 | 1  | NM_033282    | OPN4      | 0 | NA | 0 | NA | 0 | NA | 0 | NA | 0 | NA |
| 10 | 88418300 | 88449790 | 1  | NM_001080116 | LDB3      | 0 | NA | 0 | NA | 0 | NA | 0 | NA | 0 | NA |
| 10 | 88418405 | 88449790 | 1  | NM_001080115 | LDB3      | 0 | NA | 0 | NA | 0 | NA | 0 | NA | 0 | NA |
| 10 | 88418405 | 88485804 | 1  | NM_001080114 | LDB3      | 0 | NA | 0 | NA | 0 | NA | 0 | NA | 0 | NA |
| 10 | 88418405 | 88485804 | 1  | NM_007078    | LDB3      | 0 | NA | 0 | NA | 0 | NA | 0 | NA | 0 | NA |
| 10 | 88506375 | 88674925 | 1  | NM_004329    | BMPR1A    | 0 | NA | 0 | NA | 0 | NA | 0 | NA | 0 | NA |
| 10 | 88707352 | 88685575 | -1 | NM_024756    | MMRN2     | 1 | 11 | 0 | NA | 1 | 12 | 0 | NA | 0 | NA |
| 10 | 88708392 | 88712995 | 1  | NM_003087    | SNCG      | 1 | 11 | 0 | NA | 1 | 12 | 0 | NA | 0 | NA |
| 10 | 88718167 | 88720646 | 1  | NM_006829    | C10orf116 | 0 | NA | 0 | NA | 1 | 12 | 0 | NA | 0 | NA |
| 10 | 88720477 | 88759940 | 1  | NM_133447    | KIAA1975  | 0 | NA | 0 | NA | 1 | 12 | 0 | NA | 0 | NA |
| 10 | 88844603 | 88800222 | -1 | NM_005271    | GLUD1     | 0 | NA | 0 | NA | 0 | NA | 0 | NA | 0 | NA |
| 10 | 88844932 | 88941202 | 1  | NM_019054    | FAM35A    | 0 | NA | 0 | NA | 0 | NA | 0 | NA | 0 | NA |
| 10 | 88975184 | 88984713 | 1  | NM_001099338 | FAM22A    | 0 | NA | 0 | NA | 0 | NA | 0 | NA | 0 | NA |
| 10 | 89107456 | 89120432 | 1  | NM_001009610 | FAM22D    | 0 | NA | 0 | NA | 0 | NA | 0 | NA | 0 | NA |
| 10 | 89254202 | 89303148 | 1  | NM_004897    | MINPP1    | 0 | NA | 0 | NA | 0 | NA | 0 | NA | 0 | NA |
| 10 | 89409455 | 89497442 | 1  | NM_001015880 | PAPSS2    | 0 | NA | 0 | NA | 0 | NA | 0 | NA | 0 | NA |
| 10 | 89409455 | 89497442 | 1  | NM_004670    | PAPSS2    | 0 | NA | 0 | NA | 0 | NA | 0 | NA | 0 | NA |
| 10 | 89567897 | 89502854 | -1 | NM_032810    | ATAD1     | 0 | NA | 0 | NA | 0 | NA | 0 | NA | 0 | NA |
| 10 | 89613174 | 89608897 | -1 | NM_001126049 | KILLIN    | 0 | NA | 0 | NA | 0 | NA | 0 | NA | 0 | NA |
| 10 | 89613174 | 89718512 | 1  | NM_000314    | PTEN      | 0 | NA | 0 | NA | 0 | NA | 0 | NA | 0 | NA |
| 10 | 90332950 | 90034695 | -1 | NM_001031709 | C10orf59  | 0 | NA | 1 | 16 | 0 | NA | 0 | NA | 0 | NA |
| 10 | 90332988 | 90023600 | -1 | NM_018363    | C10orf59  | 0 | NA | 1 | 16 | 0 | NA | 0 | NA | 0 | NA |
| 10 | 90336498 | 90356713 | 1  | NM_001010939 | LIPJ      | 0 | NA | 1 | 16 | 0 | NA | 0 | NA | 0 | NA |
| 10 | 90414073 | 90428552 | 1  | NM_004190    | LIPF      | 0 | NA | 0 | NA | 0 | NA | 0 | NA | 0 | NA |
| 10 | 90474280 | 90502493 | 1  | NM_001080518 | LIPK      | 0 | NA | 0 | NA | 0 | NA | 0 | NA | 1 | 13 |
| 10 | 90511142 | 90527979 | 1  | NM_001102469 | LIPN      | 0 | NA | 0 | NA | 0 | NA | 0 | NA | 0 | NA |
| 10 | 90601712 | 90569638 | -1 | NM_144590    | ANKRD22   | 0 | NA | 0 | NA | 0 | NA | 0 | NA | 0 | NA |
| 10 | 90630005 | 90673224 | 1  | NM_020799    | STAMBPL1  | 0 | NA | 0 | NA | 0 | NA | 0 | NA | 0 | NA |
| 10 | 90702491 | 90684810 | -1 | NM_001613    | ACTA2     | 0 | NA | 0 | NA | 0 | NA | 0 | NA | 0 | NA |
| 10 | 90740267 | 90765522 | 1  | NM_000043    | FAS       | 0 | NA | 0 | NA | 0 | NA | 1 | 14 | 0 | NA |
| 10 | 90740267 | 90765522 | 1  | NM_152871    | FAS       | 0 | NA | 0 | NA | 0 | NA | 1 | 14 | 0 | NA |
| 10 | 90740267 | 90765522 | 1  | NM_152872    | FAS       | 0 | NA | 0 | NA | 0 | NA | 1 | 14 | 0 | NA |
| 10 | 90740267 | 90765522 | 1  | NM_152873    | FAS       | 0 | NA | 0 | NA | 0 | NA | 1 | 14 | 0 | NA |
| 10 | 90740267 | 90765522 | 1  | NM_152874    | FAS       | 0 | NA | 0 | NA | 0 | NA | 1 | 14 | 0 | NA |
| 10 | 90740267 | 90765522 | 1  | NM_152875    | FAS       | 0 | NA | 0 | NA | 0 | NA | 1 | 14 | 0 | NA |
| 10 | 90740267 | 90765522 | 1  | NM_152876    | FAS       | 0 | NA | 0 | NA | 0 | NA | 1 | 14 | 0 | NA |
| 10 | 90740267 | 90765522 | 1  | NM_152877    | FAS       | 0 | NA | 0 | NA | 0 | NA | 1 | 14 | 0 | NA |
| 10 | 90957051 | 90955673 | -1 | NM_003956    | CH25H     | 0 | NA | 0 | NA | 1 | 13 | 0 | NA | 0 | NA |
| 10 | 91001640 | 90963309 | -1 | NM_000235    | LIPA      | 1 | 12 | 0 | NA | 0 | NA | 0 | NA | 0 | NA |
| 10 | 91051685 | 91059013 | 1  | NM_001547    | IFIT2     | 0 | NA | 0 | NA | 0 | NA | 0 | NA | 0 | NA |
| 10 | 91077732 | 91090288 | 1  | NM_001549    | IFIT3     | 0 | NA | 0 | NA | 0 | NA | 0 | NA | 0 | NA |
| 10 | 91082282 | 91090296 | 1  | NM_001031683 | IFIT3     | 0 | NA | 0 | NA | 0 | NA | 0 | NA | 0 | NA |

|    |          |          |    |              |           |   |    |   |    |   |    |   |    |   |    |
|----|----------|----------|----|--------------|-----------|---|----|---|----|---|----|---|----|---|----|
| 10 | 91127792 | 91134942 | 1  | NM_001010987 | IFIT1L    | 0 | NA | 0 | NA | 0 | NA | 0 | NA | 0 | NA |
| 10 | 91142301 | 91153724 | 1  | NM_001548    | IFIT1     | 1 | 11 | 0 | NA | 0 | NA | 0 | NA | 0 | NA |
| 10 | 91164418 | 91170733 | 1  | NM_012420    | IFIT5     | 0 | NA | 0 | NA | 0 | NA | 0 | NA | 0 | NA |
| 10 | 91285293 | 91180035 | -1 | NM_213606    | SLC16A12  | 0 | NA | 0 | NA | 0 | NA | 0 | NA | 0 | NA |
| 10 | 91393627 | 91332728 | -1 | NM_138316    | PANK1     | 0 | NA | 0 | NA | 0 | NA | 0 | NA | 0 | NA |
| 10 | 91393627 | 91332728 | -1 | NM_148978    | PANK1     | 0 | NA | 0 | NA | 0 | NA | 0 | NA | 0 | NA |
| 10 | 91395195 | 91332728 | -1 | NM_148977    | PANK1     | 0 | NA | 0 | NA | 0 | NA | 0 | NA | 0 | NA |
| 10 | 91451346 | 91524680 | 1  | NM_016195    | MPHOSPH1  | 1 | 16 | 0 | NA | 0 | NA | 0 | NA | 0 | NA |
| 10 | 92607651 | 92490555 | -1 | NM_000872    | HTR7      | 0 | NA | 0 | NA | 0 | NA | 0 | NA | 0 | NA |
| 10 | 92607651 | 92490555 | -1 | NM_019859    | HTR7      | 0 | NA | 0 | NA | 0 | NA | 0 | NA | 0 | NA |
| 10 | 92607651 | 92490555 | -1 | NM_019860    | HTR7      | 0 | NA | 0 | NA | 0 | NA | 0 | NA | 0 | NA |
| 10 | 92621688 | 92651927 | 1  | NM_006413    | RPP30     | 0 | NA | 0 | NA | 0 | NA | 0 | NA | 0 | NA |
| 10 | 92621688 | 92658292 | 1  | NM_001104546 | RPP30     | 0 | NA | 0 | NA | 0 | NA | 0 | NA | 0 | NA |
| 10 | 92671012 | 92661836 | -1 | NM_014391    | ANKRD1    | 0 | NA | 0 | NA | 0 | NA | 0 | NA | 0 | NA |
| 10 | 92970348 | 93034001 | 1  | NM_032373    | PCGF5     | 0 | NA | 0 | NA | 0 | NA | 0 | NA | 0 | NA |
| 10 | 93160080 | 93213401 | 1  | NM_173497    | HECTD2    | 0 | NA | 0 | NA | 0 | NA | 0 | NA | 0 | NA |
| 10 | 93160081 | 93264500 | 1  | NM_182765    | HECTD2    | 0 | NA | 0 | NA | 0 | NA | 0 | NA | 0 | NA |
| 10 | 93382838 | 93378178 | -1 | NM_005398    | PPP1R3C   | 0 | NA | 0 | NA | 0 | NA | 0 | NA | 0 | NA |
| 10 | 93548048 | 93615012 | 1  | NM_025235    | TNKS2     | 0 | NA | 0 | NA | 0 | NA | 0 | NA | 0 | NA |
| 10 | 93659220 | 93656325 | -1 | NM_152429    | FGFBP3    | 0 | NA | 0 | NA | 0 | NA | 0 | NA | 0 | NA |
| 10 | 93673715 | 93780060 | 1  | NM_003972    | BTAF1     | 0 | NA | 0 | NA | 0 | NA | 0 | NA | 0 | NA |
| 10 | 94040824 | 93798378 | -1 | NM_014912    | CPEB3     | 1 | 12 | 0 | NA | 0 | NA | 0 | NA | 0 | NA |
| 10 | 94040899 | 94103701 | 1  | NM_017824    | MARCH5    | 1 | 12 | 0 | NA | 0 | NA | 0 | NA | 0 | NA |
| 10 | 94323832 | 94203579 | -1 | NM_004969    | IDE       | 0 | NA | 0 | NA | 0 | NA | 1 | 15 | 0 | NA |
| 10 | 94342970 | 94405130 | 1  | NM_004523    | KIF11     | 0 | NA | 0 | NA | 0 | NA | 0 | NA | 0 | NA |
| 10 | 94439660 | 94445388 | 1  | NM_002729    | HHEX      | 1 | 15 | 0 | NA | 0 | NA | 0 | NA | 0 | NA |
| 10 | 94584449 | 94809241 | 1  | NM_001013848 | EXOC6     | 0 | NA | 0 | NA | 0 | NA | 0 | NA | 0 | NA |
| 10 | 94598221 | 94809241 | 1  | NM_019053    | EXOC6     | 0 | NA | 0 | NA | 0 | NA | 0 | NA | 0 | NA |
| 10 | 94811010 | 94818444 | 1  | NM_183374    | CYP26C1   | 0 | NA | 0 | NA | 0 | NA | 0 | NA | 0 | NA |
| 10 | 94823221 | 94827631 | 1  | NM_057157    | CYP26A1   | 0 | NA | 0 | NA | 0 | NA | 0 | NA | 0 | NA |
| 10 | 94823656 | 94827631 | 1  | NM_000783    | CYP26A1   | 0 | NA | 0 | NA | 0 | NA | 0 | NA | 0 | NA |
| 10 | 95232029 | 95056175 | -1 | NM_013451    | FER1L3    | 0 | NA | 0 | NA | 0 | NA | 0 | NA | 0 | NA |
| 10 | 95232029 | 95056175 | -1 | NM_133337    | FER1L3    | 0 | NA | 0 | NA | 0 | NA | 0 | NA | 0 | NA |
| 10 | 95246356 | 95278839 | 1  | NM_001127182 | CEP55     | 0 | NA | 0 | NA | 0 | NA | 0 | NA | 0 | NA |
| 10 | 95246378 | 95278839 | 1  | NM_018131    | CEP55     | 0 | NA | 0 | NA | 0 | NA | 0 | NA | 0 | NA |
| 10 | 95316411 | 95337356 | 1  | NM_181745    | GPR120    | 0 | NA | 0 | NA | 0 | NA | 0 | NA | 0 | NA |
| 10 | 95350983 | 95341582 | -1 | NM_006744    | RBP4      | 0 | NA | 0 | NA | 0 | NA | 0 | NA | 0 | NA |
| 10 | 95362334 | 95415419 | 1  | NM_006204    | PDEEC     | 0 | NA | 0 | NA | 0 | NA | 0 | NA | 0 | NA |
| 10 | 95452319 | 95418318 | -1 | NM_145246    | C10orf4   | 1 | 19 | 0 | NA | 0 | NA | 0 | NA | 0 | NA |
| 10 | 95507555 | 95547906 | 1  | NM_005097    | LG11      | 0 | NA | 0 | NA | 0 | NA | 0 | NA | 0 | NA |
| 10 | 95643719 | 95652480 | 1  | NM_153226    | TMEM20    | 0 | NA | 0 | NA | 0 | NA | 0 | NA | 0 | NA |
| 10 | 95743735 | 96078138 | 1  | NM_016341    | PLCE1     | 0 | NA | 0 | NA | 0 | NA | 0 | NA | 0 | NA |
| 10 | 96112673 | 96082978 | -1 | NM_022451    | NOC3L     | 0 | NA | 0 | NA | 0 | NA | 0 | NA | 0 | NA |
| 10 | 96152175 | 96286079 | 1  | NM_015188    | TBC1D12   | 0 | NA | 0 | NA | 0 | NA | 0 | NA | 0 | NA |
| 10 | 96295563 | 96351846 | 1  | NM_018063    | HELLS     | 0 | NA | 0 | NA | 0 | NA | 0 | NA | 0 | NA |
| 10 | 96433367 | 96485514 | 1  | NM_000772    | CYP2C18   | 0 | NA | 0 | NA | 0 | NA | 0 | NA | 0 | NA |
| 10 | 96512452 | 96602661 | 1  | NM_000769    | CYP2C19   | 0 | NA | 0 | NA | 0 | NA | 0 | NA | 0 | NA |
| 10 | 96688429 | 96739137 | 1  | NM_000771    | CYP2C9    | 0 | NA | 0 | NA | 0 | NA | 0 | NA | 0 | NA |
| 10 | 96819244 | 96786518 | -1 | NM_000770    | CYP2C8    | 0 | NA | 0 | NA | 0 | NA | 0 | NA | 0 | NA |
| 10 | 96943946 | 96976152 | 1  | NM_207321    | C10orf129 | 0 | NA | 0 | NA | 0 | NA | 0 | NA | 0 | NA |
| 10 | 97040771 | 96987319 | -1 | NM_020992    | PDLIM1    | 0 | NA | 0 | NA | 0 | NA | 0 | NA | 0 | NA |
| 10 | 97190927 | 97061519 | -1 | NM_001034954 | SORBS1    | 0 | NA | 0 | NA | 0 | NA | 0 | NA | 0 | NA |
| 10 | 97190927 | 97061519 | -1 | NM_001034955 | SORBS1    | 0 | NA | 0 | NA | 0 | NA | 0 | NA | 0 | NA |
| 10 | 97190927 | 97061519 | -1 | NM_001034956 | SORBS1    | 0 | NA | 0 | NA | 0 | NA | 0 | NA | 0 | NA |
| 10 | 97190927 | 97061519 | -1 | NM_001034957 | SORBS1    | 0 | NA | 0 | NA | 0 | NA | 0 | NA | 0 | NA |
| 10 | 97190927 | 97061519 | -1 | NM_006434    | SORBS1    | 0 | NA | 0 | NA | 0 | NA | 0 | NA | 0 | NA |
| 10 | 97311161 | 97061519 | -1 | NM_015385    | SORBS1    | 0 | NA | 0 | NA | 0 | NA | 0 | NA | 0 | NA |
| 10 | 97311161 | 97061519 | -1 | NM_024991    | SORBS1    | 0 | NA | 0 | NA | 0 | NA | 0 | NA | 0 | NA |
| 10 | 97406557 | 97355675 | -1 | NM_001017423 | ALDH18A1  | 0 | NA | 0 | NA | 0 | NA | 0 | NA | 0 | NA |
| 10 | 97406557 | 97355675 | -1 | NM_002860    | ALDH18A1  | 0 | NA | 0 | NA | 0 | NA | 0 | NA | 0 | NA |
| 10 | 97443890 | 97413147 | -1 | NM_015631    | TCTN3     | 0 | NA | 0 | NA | 0 | NA | 0 | NA | 0 | NA |
| 10 | 97461525 | 97627013 | 1  | NM_001098175 | ENTPD1    | 0 | NA | 0 | NA | 0 | NA | 0 | NA | 0 | NA |
| 10 | 97505515 | 97627013 | 1  | NM_001776    | ENTPD1    | 0 | NA | 0 | NA | 0 | NA | 0 | NA | 0 | NA |
| 10 | 97749872 | 97782431 | 1  | NM_001001732 | CC2D2B    | 0 | NA | 0 | NA | 0 | NA | 0 | NA | 0 | NA |
| 10 | 97793143 | 97810612 | 1  | NM_019084    | CCNJ      | 0 | NA | 0 | NA | 0 | NA | 0 | NA | 0 | NA |

|    |           |           |    |              |           |   |    |   |    |   |    |   |    |   |    |
|----|-----------|-----------|----|--------------|-----------|---|----|---|----|---|----|---|----|---|----|
| 10 | 97879461  | 97913507  | 1  | NM_014803    | ZNF518A   | 1 | 32 | 1 | 16 | 0 | NA | 0 | NA | 0 | NA |
| 10 | 98021323  | 97941444  | -1 | NM_001114094 | BLNK      | 0 | NA | 0 | NA | 0 | NA | 0 | NA | 0 | NA |
| 10 | 98021323  | 97941444  | -1 | NM_013314    | BLNK      | 0 | NA | 0 | NA | 0 | NA | 0 | NA | 0 | NA |
| 10 | 98054074  | 98088311  | 1  | NM_001017520 | DN1T      | 0 | NA | 0 | NA | 0 | NA | 0 | NA | 0 | NA |
| 10 | 98054074  | 98088311  | 1  | NM_004088    | DN1T      | 0 | NA | 0 | NA | 0 | NA | 0 | NA | 0 | NA |
| 10 | 98109082  | 98092964  | -1 | NM_001040102 | OPALIN    | 0 | NA | 1 | 12 | 0 | NA | 0 | NA | 0 | NA |
| 10 | 98109082  | 98092964  | -1 | NM_001040103 | OPALIN    | 0 | NA | 1 | 12 | 0 | NA | 0 | NA | 0 | NA |
| 10 | 98109082  | 98092964  | -1 | NM_033207    | OPALIN    | 0 | NA | 1 | 12 | 0 | NA | 0 | NA | 0 | NA |
| 10 | 98263658  | 98114355  | -1 | NM_012465    | TLL2      | 0 | NA | 0 | NA | 0 | NA | 0 | NA | 0 | NA |
| 10 | 98336799  | 98270419  | -1 | NM_020123    | TM9SF3    | 0 | NA | 0 | NA | 0 | NA | 0 | NA | 0 | NA |
| 10 | 98470269  | 98343058  | -1 | NM_152309    | PIK3AP1   | 0 | NA | 0 | NA | 0 | NA | 0 | NA | 0 | NA |
| 10 | 98582726  | 98708655  | 1  | NM_032440    | LCOR      | 0 | NA | 0 | NA | 0 | NA | 0 | NA | 0 | NA |
| 10 | 98731030  | 98735575  | 1  | NM_015652    | C10orf12  | 0 | NA | 0 | NA | 0 | NA | 0 | NA | 0 | NA |
| 10 | 98935653  | 98750600  | -1 | NM_003061    | SLIT1     | 0 | NA | 0 | NA | 0 | NA | 0 | NA | 0 | NA |
| 10 | 99042403  | 98971919  | -1 | NM_032900    | ARHGAP19  | 0 | NA | 0 | NA | 1 | 13 | 0 | NA | 0 | NA |
| 10 | 99069011  | 99071662  | 1  | NM_005479    | FRAT1     | 0 | NA | 0 | NA | 0 | NA | 0 | NA | 0 | NA |
| 10 | 99084448  | 99082243  | -1 | NM_012083    | FRAT2     | 0 | NA | 0 | NA | 0 | NA | 0 | NA | 0 | NA |
| 10 | 99151055  | 99106447  | -1 | NM_015179    | RRP12     | 0 | NA | 0 | NA | 0 | NA | 0 | NA | 0 | NA |
| 10 | 99176016  | 99183188  | 1  | NM_002629    | PGAM1     | 0 | NA | 0 | NA | 0 | NA | 0 | NA | 0 | NA |
| 10 | 99195758  | 99185655  | -1 | NM_016046    | EXOSC1    | 0 | NA | 0 | NA | 0 | NA | 0 | NA | 0 | NA |
| 10 | 99195919  | 99207117  | 1  | NM_032327    | ZDHHC16   | 0 | NA | 0 | NA | 0 | NA | 0 | NA | 0 | NA |
| 10 | 99195919  | 99207117  | 1  | NM_198043    | ZDHHC16   | 0 | NA | 0 | NA | 0 | NA | 0 | NA | 0 | NA |
| 10 | 99195919  | 99207117  | 1  | NM_198044    | ZDHHC16   | 0 | NA | 0 | NA | 0 | NA | 0 | NA | 0 | NA |
| 10 | 99195919  | 99207117  | 1  | NM_198045    | ZDHHC16   | 0 | NA | 0 | NA | 0 | NA | 0 | NA | 0 | NA |
| 10 | 99195936  | 99207117  | 1  | NM_198046    | ZDHHC16   | 0 | NA | 0 | NA | 0 | NA | 0 | NA | 0 | NA |
| 10 | 99248356  | 99208070  | -1 | NM_022362    | MMS19     | 0 | NA | 0 | NA | 0 | NA | 0 | NA | 0 | NA |
| 10 | 99248757  | 99320950  | 1  | NM_024954    | UBTD1     | 0 | NA | 0 | NA | 0 | NA | 0 | NA | 0 | NA |
| 10 | 99322245  | 99333631  | 1  | NM_020349    | ANKRD2    | 0 | NA | 0 | NA | 0 | NA | 0 | NA | 0 | NA |
| 10 | 99334110  | 99362545  | 1  | NM_138413    | C10orf65  | 0 | NA | 0 | NA | 0 | NA | 0 | NA | 0 | NA |
| 10 | 99339473  | 99340681  | 1  | NM_001009997 | C10orf62  | 0 | NA | 0 | NA | 0 | NA | 0 | NA | 0 | NA |
| 10 | 99383334  | 99364299  | -1 | NM_178832    | C10orf83  | 0 | NA | 0 | NA | 0 | NA | 0 | NA | 0 | NA |
| 10 | 99383903  | 99364299  | -1 | NM_001098831 | C10orf83  | 0 | NA | 0 | NA | 0 | NA | 0 | NA | 0 | NA |
| 10 | 99390432  | 99426177  | 1  | NM_018425    | PI4K2A    | 0 | NA | 0 | NA | 1 | 13 | 0 | NA | 0 | NA |
| 10 | 99436960  | 99427170  | -1 | NM_021732    | AVP1      | 0 | NA | 0 | NA | 0 | NA | 0 | NA | 0 | NA |
| 10 | 99486869  | 99510642  | 1  | NM_001002261 | ZFYVE27   | 1 | 40 | 0 | NA | 1 | 12 | 0 | NA | 0 | NA |
| 10 | 99486869  | 99510642  | 1  | NM_001002262 | ZFYVE27   | 1 | 40 | 0 | NA | 1 | 12 | 0 | NA | 0 | NA |
| 10 | 99486869  | 99510642  | 1  | NM_144588    | ZFYVE27   | 1 | 40 | 0 | NA | 1 | 12 | 0 | NA | 0 | NA |
| 10 | 99521760  | 99516507  | -1 | NM_003015    | SFRP5     | 0 | NA | 0 | NA | 0 | NA | 0 | NA | 0 | NA |
| 10 | 99599985  | 99617772  | 1  | NM_001010917 | C10orf132 | 0 | NA | 0 | NA | 0 | NA | 0 | NA | 0 | NA |
| 10 | 99780575  | 99614747  | -1 | NM_018058    | CRTAC1    | 0 | NA | 0 | NA | 0 | NA | 0 | NA | 0 | NA |
| 10 | 99884370  | 99994644  | 1  | NM_014472    | C10orf28  | 0 | NA | 0 | NA | 0 | NA | 0 | NA | 0 | NA |
| 10 | 100017997 | 99997432  | -1 | NM_032211    | LOXL4     | 0 | NA | 0 | NA | 0 | NA | 0 | NA | 0 | NA |
| 10 | 100164931 | 100133313 | -1 | NM_032709    | C10orf33  | 1 | 12 | 0 | NA | 0 | NA | 0 | NA | 0 | NA |
| 10 | 100196694 | 100165945 | -1 | NM_000195    | HPS1      | 0 | NA | 0 | NA | 0 | NA | 0 | NA | 0 | NA |
| 10 | 100196694 | 100178892 | -1 | NM_182639    | HPS1      | 0 | NA | 0 | NA | 0 | NA | 0 | NA | 0 | NA |
| 10 | 100985609 | 100208866 | -1 | NM_021828    | HPSE2     | 0 | NA | 1 | 17 | 0 | NA | 0 | NA | 0 | NA |
| 10 | 101078845 | 101144077 | 1  | NM_020348    | CNNM1     | 0 | NA | 0 | NA | 0 | NA | 0 | NA | 0 | NA |
| 10 | 101180336 | 101146617 | -1 | NM_002079    | GOT1      | 0 | NA | 0 | NA | 0 | NA | 0 | NA | 0 | NA |
| 10 | 101282679 | 101286270 | 1  | NM_145285    | NKX2-3    | 0 | NA | 0 | NA | 0 | NA | 0 | NA | 0 | NA |
| 10 | 101370211 | 101360264 | -1 | NM_031212    | SLC25A28  | 1 | 15 | 0 | NA | 0 | NA | 1 | 14 | 0 | NA |
| 10 | 101409252 | 101455453 | 1  | NM_020354    | ENTPD7    | 0 | NA | 0 | NA | 0 | NA | 0 | NA | 0 | NA |
| 10 | 101481890 | 101461593 | -1 | NM_004376    | COX15     | 0 | NA | 0 | NA | 0 | NA | 1 | 34 | 0 | NA |
| 10 | 101481890 | 101461593 | -1 | NM_078470    | COX15     | 0 | NA | 0 | NA | 0 | NA | 1 | 34 | 0 | NA |
| 10 | 101481947 | 101505884 | 1  | NM_015960    | CUTC      | 0 | NA | 0 | NA | 0 | NA | 1 | 34 | 0 | NA |
| 10 | 101532492 | 101601571 | 1  | NM_000392    | ABCC2     | 0 | NA | 0 | NA | 0 | NA | 0 | NA | 0 | NA |
| 10 | 101759666 | 101625323 | -1 | NM_015221    | DNMBP     | 0 | NA | 0 | NA | 0 | NA | 0 | NA | 0 | NA |
| 10 | 101831632 | 101792054 | -1 | NM_001308    | CPN1      | 0 | NA | 0 | NA | 0 | NA | 0 | NA | 0 | NA |
| 10 | 101935724 | 101899836 | -1 | NM_006459    | ERLIN1    | 0 | NA | 0 | NA | 0 | NA | 0 | NA | 0 | NA |
| 10 | 101935804 | 101899836 | -1 | NM_001100626 | ERLIN1    | 0 | NA | 0 | NA | 0 | NA | 0 | NA | 0 | NA |
| 10 | 101979334 | 101938113 | -1 | NM_001278    | CHUK      | 0 | NA | 0 | NA | 0 | NA | 0 | NA | 0 | NA |
| 10 | 102017427 | 101982044 | -1 | NM_018294    | CWF19L1   | 0 | NA | 0 | NA | 0 | NA | 0 | NA | 0 | NA |
| 10 | 102036104 | 102023702 | -1 | NM_001001342 | BLOC1S2   | 0 | NA | 0 | NA | 0 | NA | 1 | 11 | 0 | NA |
| 10 | 102036429 | 102023702 | -1 | NM_173809    | BLOC1S2   | 0 | NA | 0 | NA | 0 | NA | 1 | 11 | 0 | NA |
| 10 | 102080233 | 102037892 | -1 | NM_016112    | PKD2L1    | 0 | NA | 0 | NA | 0 | NA | 0 | NA | 0 | NA |
| 10 | 102096761 | 102114578 | 1  | NM_005063    | SCD       | 0 | NA | 0 | NA | 1 | 12 | 1 | 11 | 0 | NA |

|    |           |           |    |              |               |   |    |   |    |   |    |   |    |   |    |
|----|-----------|-----------|----|--------------|---------------|---|----|---|----|---|----|---|----|---|----|
| 10 | 102212801 | 102233989 | 1  | NM_003393    | WNT8B         | 0 | NA | 0 | NA | 0 | NA | 0 | NA | 0 | NA |
| 10 | 102269585 | 102236392 | -1 | NM_015490    | SEC31B        | 0 | NA | 0 | NA | 0 | NA | 0 | NA | 0 | NA |
| 10 | 102279626 | 102273486 | -1 | NM_005004    | NDUF8         | 0 | NA | 0 | NA | 0 | NA | 0 | NA | 0 | NA |
| 10 | 102285630 | 102303671 | 1  | NM_017902    | HIF1AN        | 0 | NA | 0 | NA | 0 | NA | 0 | NA | 0 | NA |
| 10 | 102495457 | 102579688 | 1  | NM_000278    | PAX2          | 0 | NA | 0 | NA | 0 | NA | 0 | NA | 0 | NA |
| 10 | 102495457 | 102579688 | 1  | NM_003987    | PAX2          | 0 | NA | 0 | NA | 0 | NA | 0 | NA | 0 | NA |
| 10 | 102495457 | 102579688 | 1  | NM_003988    | PAX2          | 0 | NA | 0 | NA | 0 | NA | 0 | NA | 0 | NA |
| 10 | 102495457 | 102579688 | 1  | NM_003989    | PAX2          | 0 | NA | 0 | NA | 0 | NA | 0 | NA | 0 | NA |
| 10 | 102495457 | 102579688 | 1  | NM_003990    | PAX2          | 0 | NA | 0 | NA | 0 | NA | 0 | NA | 0 | NA |
| 10 | 102662315 | 102714881 | 1  | NM_018121    | C10orf6       | 1 | 17 | 0 | NA | 1 | 14 | 0 | NA | 0 | NA |
| 10 | 102722275 | 102735362 | 1  | NM_017893    | SEMA4G        | 0 | NA | 0 | NA | 0 | NA | 0 | NA | 0 | NA |
| 10 | 102737262 | 102727568 | -1 | NM_176792    | MRPL43        | 1 | 11 | 0 | NA | 0 | NA | 0 | NA | 0 | NA |
| 10 | 102737262 | 102731123 | -1 | NM_176793    | MRPL43        | 1 | 11 | 0 | NA | 0 | NA | 0 | NA | 0 | NA |
| 10 | 102737262 | 102731123 | -1 | NM_176794    | MRPL43        | 1 | 11 | 0 | NA | 0 | NA | 0 | NA | 0 | NA |
| 10 | 102737262 | 102736016 | -1 | NM_032112    | MRPL43        | 1 | 11 | 0 | NA | 0 | NA | 0 | NA | 0 | NA |
| 10 | 102737301 | 102744148 | 1  | NM_021830    | C10orf2       | 1 | 11 | 0 | NA | 0 | NA | 0 | NA | 0 | NA |
| 10 | 102746954 | 102757577 | 1  | NM_032429    | LZTS2         | 1 | 11 | 0 | NA | 0 | NA | 0 | NA | 0 | NA |
| 10 | 102780869 | 102767078 | -1 | NM_024895    | PDZD7         | 0 | NA | 0 | NA | 0 | NA | 0 | NA | 0 | NA |
| 10 | 102780985 | 102790988 | 1  | NM_030971    | SFXN3         | 0 | NA | 0 | NA | 0 | NA | 0 | NA | 0 | NA |
| 10 | 102811587 | 102815339 | 1  | NM_030929    | KAZALD1       | 1 | 11 | 0 | NA | 0 | NA | 0 | NA | 0 | NA |
| 10 | 102880251 | 102887526 | 1  | NM_005521    | TLX1          | 0 | NA | 0 | NA | 0 | NA | 0 | NA | 0 | NA |
| 10 | 102880893 | 102839067 | -1 | NM_001085398 | TD1           | 0 | NA | 0 | NA | 0 | NA | 0 | NA | 0 | NA |
| 10 | 102978707 | 102976722 | -1 | NM_006562    | LBX1          | 0 | NA | 0 | NA | 0 | NA | 0 | NA | 0 | NA |
| 10 | 103103814 | 103307060 | 1  | NM_003939    | BTRC          | 0 | NA | 0 | NA | 0 | NA | 0 | NA | 0 | NA |
| 10 | 103103814 | 103307060 | 1  | NM_033637    | BTRC          | 0 | NA | 0 | NA | 0 | NA | 0 | NA | 0 | NA |
| 10 | 103337963 | 103328628 | -1 | NM_013274    | POLL          | 0 | NA | 0 | NA | 0 | NA | 0 | NA | 0 | NA |
| 10 | 103338078 | 103359400 | 1  | NM_015448    | RP11-529H10.4 | 0 | NA | 0 | NA | 0 | NA | 0 | NA | 0 | NA |
| 10 | 103444733 | 103360410 | -1 | NM_022039    | FBXW4         | 0 | NA | 0 | NA | 0 | NA | 0 | NA | 0 | NA |
| 10 | 103525817 | 103519876 | -1 | NM_006119    | FGF8          | 0 | NA | 0 | NA | 1 | 13 | 0 | NA | 0 | NA |
| 10 | 103525817 | 103519876 | -1 | NM_033163    | FGF8          | 0 | NA | 0 | NA | 1 | 13 | 0 | NA | 0 | NA |
| 10 | 103525817 | 103519876 | -1 | NM_033164    | FGF8          | 0 | NA | 0 | NA | 1 | 13 | 0 | NA | 0 | NA |
| 10 | 103525817 | 103519876 | -1 | NM_033165    | FGF8          | 0 | NA | 0 | NA | 1 | 13 | 0 | NA | 0 | NA |
| 10 | 103533148 | 103531071 | -1 | NM_006993    | NPM3          | 0 | NA | 0 | NA | 1 | 13 | 0 | NA | 0 | NA |
| 10 | 103568165 | 103534198 | -1 | NM_012215    | MGEA5         | 0 | NA | 0 | NA | 0 | NA | 0 | NA | 0 | NA |
| 10 | 103589601 | 103575720 | -1 | NM_173194    | KCNIP2        | 0 | NA | 0 | NA | 0 | NA | 0 | NA | 0 | NA |
| 10 | 103593667 | 103575720 | -1 | NM_014591    | KCNIP2        | 0 | NA | 0 | NA | 0 | NA | 0 | NA | 0 | NA |
| 10 | 103593667 | 103575720 | -1 | NM_173191    | KCNIP2        | 0 | NA | 0 | NA | 0 | NA | 0 | NA | 0 | NA |
| 10 | 103593667 | 103575720 | -1 | NM_173192    | KCNIP2        | 0 | NA | 0 | NA | 0 | NA | 0 | NA | 0 | NA |
| 10 | 103593667 | 103575720 | -1 | NM_173193    | KCNIP2        | 0 | NA | 0 | NA | 0 | NA | 0 | NA | 0 | NA |
| 10 | 103593667 | 103575720 | -1 | NM_173195    | KCNIP2        | 0 | NA | 0 | NA | 0 | NA | 0 | NA | 0 | NA |
| 10 | 103593667 | 103577387 | -1 | NM_173197    | KCNIP2        | 0 | NA | 0 | NA | 0 | NA | 0 | NA | 0 | NA |
| 10 | 103805922 | 103595345 | -1 | NM_024541    | C10orf76      | 1 | 12 | 0 | NA | 0 | NA | 0 | NA | 0 | NA |
| 10 | 103815136 | 103817783 | 1  | NM_024747    | HPS6          | 1 | 12 | 0 | NA | 0 | NA | 0 | NA | 0 | NA |
| 10 | 103864713 | 103857314 | -1 | NM_003893    | LDB1          | 0 | NA | 0 | NA | 0 | NA | 0 | NA | 0 | NA |
| 10 | 103870200 | 103857314 | -1 | NM_001113407 | LDB1          | 0 | NA | 0 | NA | 0 | NA | 0 | NA | 0 | NA |
| 10 | 103882776 | 103900080 | 1  | NM_015062    | PPRC1         | 0 | NA | 0 | NA | 0 | NA | 0 | NA | 0 | NA |
| 10 | 103901922 | 103913617 | 1  | NM_004741    | NOLC1         | 1 | 14 | 0 | NA | 0 | NA | 0 | NA | 0 | NA |
| 10 | 103976132 | 103979334 | 1  | NM_152310    | ELOVL3        | 1 | 27 | 0 | NA | 1 | 15 | 0 | NA | 0 | NA |
| 10 | 103991221 | 103979935 | -1 | NM_005029    | PITX3         | 0 | NA | 0 | NA | 0 | NA | 0 | NA | 0 | NA |
| 10 | 103995298 | 104132639 | 1  | NM_004193    | GBF1          | 0 | NA | 0 | NA | 0 | NA | 0 | NA | 0 | NA |
| 10 | 104144218 | 104152271 | 1  | NM_001077493 | NFKB2         | 0 | NA | 0 | NA | 0 | NA | 0 | NA | 0 | NA |
| 10 | 104144328 | 104152271 | 1  | NM_001077494 | NFKB2         | 0 | NA | 0 | NA | 0 | NA | 0 | NA | 0 | NA |
| 10 | 104145421 | 104152271 | 1  | NM_002502    | NFKB2         | 0 | NA | 0 | NA | 0 | NA | 0 | NA | 0 | NA |
| 10 | 104168891 | 104152365 | -1 | NM_002779    | PSD           | 0 | NA | 0 | NA | 1 | 18 | 0 | NA | 0 | NA |
| 10 | 104169578 | 104172883 | 1  | NM_024326    | FBXL15        | 0 | NA | 0 | NA | 1 | 18 | 0 | NA | 0 | NA |
| 10 | 104182413 | 104172991 | -1 | NM_024040    | CUEDC2        | 0 | NA | 0 | NA | 0 | NA | 0 | NA | 0 | NA |
| 10 | 104201290 | 104199583 | -1 | NM_024886    | C10orf95      | 0 | NA | 0 | NA | 1 | 15 | 0 | NA | 0 | NA |
| 10 | 104211159 | 104226792 | 1  | NM_024789    | TMEM180       | 0 | NA | 0 | NA | 0 | NA | 0 | NA | 0 | NA |
| 10 | 104252452 | 104228975 | -1 | NM_005736    | ACTR1A        | 0 | NA | 0 | NA | 0 | NA | 0 | NA | 0 | NA |
| 10 | 104253753 | 104383199 | 1  | NM_016169    | SUFU          | 0 | NA | 0 | NA | 0 | NA | 0 | NA | 0 | NA |
| 10 | 104394241 | 104408066 | 1  | NM_030912    | TRIM8         | 0 | NA | 0 | NA | 1 | 15 | 0 | NA | 0 | NA |
| 10 | 104464180 | 104423477 | -1 | NM_004311    | ARL3          | 0 | NA | 0 | NA | 0 | NA | 0 | NA | 0 | NA |
| 10 | 104464287 | 104489933 | 1  | NM_178858    | SFXN2         | 0 | NA | 0 | NA | 0 | NA | 0 | NA | 0 | NA |
| 10 | 104493716 | 104566011 | 1  | NM_001083913 | C10orf26      | 0 | NA | 0 | NA | 0 | NA | 0 | NA | 0 | NA |
| 10 | 104525877 | 104566011 | 1  | NM_017787    | C10orf26      | 0 | NA | 0 | NA | 0 | NA | 0 | NA | 0 | NA |

|    |           |           |    |              |           |   |    |   |    |   |    |   |    |   |    |
|----|-----------|-----------|----|--------------|-----------|---|----|---|----|---|----|---|----|---|----|
| 10 | 104587280 | 104580277 | -1 | NM_000102    | CYP17A1   | 0 | NA | 0 | NA | 0 | NA | 0 | NA | 0 | NA |
| 10 | 104604008 | 104613960 | 1  | NM_144591    | C10orf32  | 0 | NA | 0 | NA | 0 | NA | 0 | NA | 0 | NA |
| 10 | 104619199 | 104651645 | 1  | NM_020682    | AS3MT     | 0 | NA | 0 | NA | 0 | NA | 0 | NA | 0 | NA |
| 10 | 104668103 | 104677365 | 1  | NM_199077    | CNNM2     | 0 | NA | 0 | NA | 0 | NA | 0 | NA | 0 | NA |
| 10 | 104668103 | 104828230 | 1  | NM_017649    | CNNM2     | 0 | NA | 0 | NA | 0 | NA | 0 | NA | 0 | NA |
| 10 | 104668103 | 104828230 | 1  | NM_199076    | CNNM2     | 0 | NA | 0 | NA | 0 | NA | 0 | NA | 0 | NA |
| 10 | 104943006 | 104837901 | -1 | NM_012229    | NT5C2     | 0 | NA | 0 | NA | 0 | NA | 0 | NA | 0 | NA |
| 10 | 105026909 | 105040093 | 1  | NM_032727    | INA       | 0 | NA | 1 | 22 | 0 | NA | 0 | NA | 0 | NA |
| 10 | 105100881 | 105052542 | -1 | NM_001011863 | PCGF6     | 0 | NA | 0 | NA | 0 | NA | 0 | NA | 0 | NA |
| 10 | 105100881 | 105052542 | -1 | NM_032154    | PCGF6     | 0 | NA | 0 | NA | 0 | NA | 0 | NA | 0 | NA |
| 10 | 105117713 | 105138812 | 1  | NM_006951    | TAF5      | 0 | NA | 0 | NA | 0 | NA | 0 | NA | 0 | NA |
| 10 | 105146213 | 105138803 | -1 | NM_032747    | USMG5     | 0 | NA | 0 | NA | 1 | 12 | 0 | NA | 0 | NA |
| 10 | 105146401 | 105196009 | 1  | NM_014976    | PDCD11    | 0 | NA | 0 | NA | 1 | 12 | 0 | NA | 0 | NA |
| 10 | 105202065 | 105196536 | -1 | NM_015916    | FAM26B    | 0 | NA | 0 | NA | 0 | NA | 0 | NA | 0 | NA |
| 10 | 105208635 | 105203133 | -1 | NM_001001412 | FAM26C    | 0 | NA | 1 | 16 | 0 | NA | 0 | NA | 0 | NA |
| 10 | 105244037 | 105342293 | 1  | NM_004210    | NEURL     | 0 | NA | 0 | NA | 0 | NA | 0 | NA | 0 | NA |
| 10 | 105605154 | 105343773 | -1 | NM_014631    | SH3PXD2A  | 1 | 14 | 0 | NA | 1 | 12 | 0 | NA | 0 | NA |
| 10 | 105667956 | 105632289 | -1 | NM_024928    | OBFC1     | 0 | NA | 0 | NA | 1 | 14 | 0 | NA | 0 | NA |
| 10 | 105717459 | 105777332 | 1  | NM_014720    | SLK       | 0 | NA | 0 | NA | 0 | NA | 1 | 12 | 0 | NA |
| 10 | 105835628 | 105781035 | -1 | NM_000494    | COL17A1   | 0 | NA | 0 | NA | 0 | NA | 0 | NA | 0 | NA |
| 10 | 105871805 | 105876133 | 1  | NM_145247    | C10orf78  | 0 | NA | 0 | NA | 0 | NA | 1 | 11 | 0 | NA |
| 10 | 105871918 | 105876133 | 1  | NM_001002759 | C10orf78  | 0 | NA | 0 | NA | 0 | NA | 1 | 11 | 0 | NA |
| 10 | 105982110 | 105879635 | -1 | NM_025145    | C10orf79  | 0 | NA | 0 | NA | 0 | NA | 0 | NA | 0 | NA |
| 10 | 106004667 | 106017203 | 1  | NM_004832    | GSTO1     | 0 | NA | 0 | NA | 0 | NA | 1 | 12 | 0 | NA |
| 10 | 106018620 | 106049166 | 1  | NM_183239    | GSTO2     | 0 | NA | 0 | NA | 0 | NA | 0 | NA | 0 | NA |
| 10 | 106083653 | 106061888 | -1 | NM_033397    | KIAA1754  | 0 | NA | 0 | NA | 0 | NA | 0 | NA | 0 | NA |
| 10 | 106103511 | 106204838 | 1  | NM_001008723 | CCDC147   | 0 | NA | 0 | NA | 0 | NA | 0 | NA | 0 | NA |
| 10 | 106390848 | 107014983 | 1  | NM_014978    | SORCS3    | 0 | NA | 0 | NA | 0 | NA | 0 | NA | 0 | NA |
| 10 | 108914282 | 108323410 | -1 | NM_001013031 | SORCS1    | 0 | NA | 0 | NA | 0 | NA | 0 | NA | 0 | NA |
| 10 | 108914282 | 108323410 | -1 | NM_052918    | SORCS1    | 0 | NA | 0 | NA | 0 | NA | 0 | NA | 0 | NA |
| 10 | 111673192 | 111614513 | -1 | NM_020383    | XPNPEP1   | 0 | NA | 0 | NA | 0 | NA | 0 | NA | 0 | NA |
| 10 | 111755715 | 111885313 | 1  | NM_019903    | ADD3      | 0 | NA | 0 | NA | 0 | NA | 0 | NA | 0 | NA |
| 10 | 111757700 | 111885313 | 1  | NM_001121    | ADD3      | 0 | NA | 0 | NA | 0 | NA | 0 | NA | 0 | NA |
| 10 | 111757700 | 111885313 | 1  | NM_016824    | ADD3      | 0 | NA | 0 | NA | 0 | NA | 0 | NA | 0 | NA |
| 10 | 111957352 | 112037113 | 1  | NM_130439    | MX1       | 0 | NA | 0 | NA | 0 | NA | 0 | NA | 0 | NA |
| 10 | 111959978 | 112037113 | 1  | NM_001008541 | MX1       | 0 | NA | 0 | NA | 0 | NA | 0 | NA | 0 | NA |
| 10 | 111975751 | 112037113 | 1  | NM_005962    | MX1       | 1 | 23 | 0 | NA | 0 | NA | 1 | 27 | 0 | NA |
| 10 | 112054687 | 112042787 | -1 | NM_005871    | SMNDC1    | 1 | 16 | 0 | NA | 0 | NA | 0 | NA | 0 | NA |
| 10 | 112247614 | 112261292 | 1  | NM_004419    | DUSP5     | 0 | NA | 0 | NA | 0 | NA | 0 | NA | 0 | NA |
| 10 | 112317438 | 112354382 | 1  | NM_005445    | SMC3      | 1 | 11 | 0 | NA | 0 | NA | 0 | NA | 0 | NA |
| 10 | 112621585 | 112649754 | 1  | NM_014456    | PDCD4     | 0 | NA | 0 | NA | 0 | NA | 0 | NA | 0 | NA |
| 10 | 112621585 | 112649754 | 1  | NM_145341    | PDCD4     | 0 | NA | 0 | NA | 0 | NA | 0 | NA | 0 | NA |
| 10 | 112713902 | 112763413 | 1  | NM_007373    | SHOC2     | 0 | NA | 0 | NA | 0 | NA | 0 | NA | 0 | NA |
| 10 | 112826910 | 112830560 | 1  | NM_000681    | ADRA2A    | 0 | NA | 1 | 18 | 0 | NA | 0 | NA | 0 | NA |
| 10 | 113933508 | 113899611 | -1 | NM_020918    | GPAM      | 0 | NA | 0 | NA | 0 | NA | 0 | NA | 0 | NA |
| 10 | 114033482 | 114053060 | 1  | NM_058222    | TECTB     | 0 | NA | 0 | NA | 0 | NA | 0 | NA | 0 | NA |
| 10 | 114123905 | 114178128 | 1  | NM_203379    | ACSL5     | 0 | NA | 0 | NA | 0 | NA | 0 | NA | 0 | NA |
| 10 | 114125012 | 114178128 | 1  | NM_203380    | ACSL5     | 0 | NA | 0 | NA | 0 | NA | 0 | NA | 0 | NA |
| 10 | 114125945 | 114178128 | 1  | NM_016234    | ACSL5     | 0 | NA | 0 | NA | 0 | NA | 0 | NA | 0 | NA |
| 10 | 114196662 | 114180047 | -1 | NM_022494    | ZDHHC6    | 0 | NA | 0 | NA | 0 | NA | 0 | NA | 0 | NA |
| 10 | 114196745 | 114568493 | 1  | NM_145206    | VTI1A     | 0 | NA | 0 | NA | 0 | NA | 0 | NA | 0 | NA |
| 10 | 114699998 | 114916060 | 1  | NM_030756    | TCF7L2    | 0 | NA | 0 | NA | 0 | NA | 0 | NA | 0 | NA |
| 10 | 115302767 | 115339350 | 1  | NM_004132    | HABP2     | 0 | NA | 0 | NA | 0 | NA | 0 | NA | 0 | NA |
| 10 | 115413795 | 115338572 | -1 | NM_006175    | NRAP      | 0 | NA | 0 | NA | 0 | NA | 0 | NA | 0 | NA |
| 10 | 115413795 | 115338572 | -1 | NM_198060    | NRAP      | 0 | NA | 0 | NA | 0 | NA | 0 | NA | 0 | NA |
| 10 | 115428924 | 115480654 | 1  | NM_033340    | CASP7     | 0 | NA | 0 | NA | 0 | NA | 0 | NA | 0 | NA |
| 10 | 115429415 | 115480654 | 1  | NM_001227    | CASP7     | 0 | NA | 0 | NA | 0 | NA | 0 | NA | 0 | NA |
| 10 | 115429415 | 115480654 | 1  | NM_033338    | CASP7     | 0 | NA | 0 | NA | 0 | NA | 0 | NA | 0 | NA |
| 10 | 115429415 | 115480654 | 1  | NM_033339    | CASP7     | 0 | NA | 0 | NA | 0 | NA | 0 | NA | 0 | NA |
| 10 | 115501202 | 115532181 | 1  | NM_024889    | C10orf81  | 0 | NA | 0 | NA | 0 | NA | 0 | NA | 0 | NA |
| 10 | 115603597 | 115584473 | -1 | NM_014881    | DCLRE1A   | 0 | NA | 0 | NA | 0 | NA | 1 | 11 | 0 | NA |
| 10 | 115604409 | 115658442 | 1  | NM_198514    | NHLRC2    | 0 | NA | 0 | NA | 0 | NA | 1 | 11 | 0 | NA |
| 10 | 115793795 | 115796657 | 1  | NM_000684    | ADRB1     | 0 | NA | 1 | 24 | 0 | NA | 0 | NA | 0 | NA |
| 10 | 115924354 | 115871963 | -1 | NM_018017    | C10orf118 | 0 | NA | 0 | NA | 0 | NA | 0 | NA | 0 | NA |
| 10 | 115929018 | 115982053 | 1  | NM_198795    | TDRD1     | 0 | NA | 0 | NA | 0 | NA | 0 | NA | 0 | NA |

|    |           |           |    |              |           |   |    |   |    |   |    |   |    |   |    |
|----|-----------|-----------|----|--------------|-----------|---|----|---|----|---|----|---|----|---|----|
| 10 | 115989007 | 116039741 | 1  | NM_198496    | VWA2      | 0 | NA | 0 | NA | 0 | NA | 0 | NA | 0 | NA |
| 10 | 116154505 | 116044572 | -1 | NM_001001936 | AFAP1L2   | 0 | NA | 0 | NA | 0 | NA | 0 | NA | 0 | NA |
| 10 | 116154505 | 116044572 | -1 | NM_032550    | AFAP1L2   | 0 | NA | 0 | NA | 0 | NA | 0 | NA | 0 | NA |
| 10 | 116276675 | 116180858 | -1 | NM_006720    | ABLIM1    | 0 | NA | 0 | NA | 0 | NA | 0 | NA | 0 | NA |
| 10 | 116408048 | 116180858 | -1 | NM_002313    | ABLIM1    | 0 | NA | 0 | NA | 0 | NA | 0 | NA | 0 | NA |
| 10 | 116434404 | 116180858 | -1 | NM_001003407 | ABLIM1    | 0 | NA | 0 | NA | 0 | NA | 0 | NA | 0 | NA |
| 10 | 116434404 | 116180858 | -1 | NM_001003408 | ABLIM1    | 0 | NA | 0 | NA | 0 | NA | 0 | NA | 0 | NA |
| 10 | 116571772 | 116614256 | 1  | NM_020940    | KIAA1600  | 1 | 11 | 0 | NA | 0 | NA | 0 | NA | 0 | NA |
| 10 | 116687941 | 116727429 | 1  | NM_139169    | TRUB1     | 0 | NA | 0 | NA | 0 | NA | 0 | NA | 0 | NA |
| 10 | 116843113 | 117698486 | 1  | NM_207303    | ATRN1     | 1 | 16 | 0 | NA | 0 | NA | 0 | NA | 0 | NA |
| 10 | 118021784 | 117812942 | -1 | NM_145793    | GFRA1     | 0 | NA | 0 | NA | 0 | NA | 0 | NA | 0 | NA |
| 10 | 118022966 | 117812942 | -1 | NM_005264    | GFRA1     | 0 | NA | 0 | NA | 0 | NA | 0 | NA | 0 | NA |
| 10 | 118073929 | 118129531 | 1  | NM_198515    | C10orf96  | 0 | NA | 0 | NA | 0 | NA | 0 | NA | 0 | NA |
| 10 | 118177371 | 118227458 | 1  | NM_001011709 | PNLIPRP3  | 0 | NA | 0 | NA | 0 | NA | 0 | NA | 0 | NA |
| 10 | 118295417 | 118317357 | 1  | NM_000936    | PNLIP     | 0 | NA | 0 | NA | 0 | NA | 0 | NA | 0 | NA |
| 10 | 118340479 | 118358676 | 1  | NM_006229    | PNLIPRP1  | 0 | NA | 0 | NA | 0 | NA | 0 | NA | 0 | NA |
| 10 | 118370454 | 118394644 | 1  | NM_005396    | PNLIPRP2  | 0 | NA | 0 | NA | 0 | NA | 0 | NA | 0 | NA |
| 10 | 118419471 | 118413196 | -1 | NM_144661    | C10orf82  | 0 | NA | 0 | NA | 0 | NA | 0 | NA | 0 | NA |
| 10 | 118492075 | 118420692 | -1 | NM_025015    | HSPA12A   | 0 | NA | 0 | NA | 0 | NA | 0 | NA | 0 | NA |
| 10 | 118755078 | 118634295 | -1 | NM_001127211 | KIAA1598  | 1 | 12 | 0 | NA | 0 | NA | 0 | NA | 0 | NA |
| 10 | 118755078 | 118634295 | -1 | NM_018330    | KIAA1598  | 1 | 12 | 0 | NA | 0 | NA | 0 | NA | 0 | NA |
| 10 | 118887802 | 118878021 | -1 | NM_199131    | VAX1      | 0 | NA | 0 | NA | 0 | NA | 0 | NA | 0 | NA |
| 10 | 118887802 | 118882790 | -1 | NM_001112704 | VAX1      | 0 | NA | 0 | NA | 0 | NA | 0 | NA | 0 | NA |
| 10 | 118946989 | 118959800 | 1  | NM_181840    | KCNK18    | 0 | NA | 0 | NA | 0 | NA | 0 | NA | 0 | NA |
| 10 | 118990705 | 119027085 | 1  | NM_003054    | SLC18A2   | 0 | NA | 0 | NA | 0 | NA | 0 | NA | 0 | NA |
| 10 | 119124927 | 119032595 | -1 | NM_173791    | PDZD8     | 0 | NA | 0 | NA | 0 | NA | 1 | 12 | 0 | NA |
| 10 | 119291945 | 119299047 | 1  | NM_004098    | EMX2      | 0 | NA | 1 | 12 | 0 | NA | 0 | NA | 0 | NA |
| 10 | 119796104 | 119754418 | -1 | NM_014904    | RAB11FIP2 | 0 | NA | 0 | NA | 0 | NA | 0 | NA | 0 | NA |
| 10 | 120091808 | 120058561 | -1 | NM_022063    | C10orf84  | 0 | NA | 0 | NA | 0 | NA | 0 | NA | 0 | NA |
| 10 | 120345150 | 120342905 | -1 | NM_004248    | PRLHR     | 0 | NA | 0 | NA | 0 | NA | 0 | NA | 0 | NA |
| 10 | 120504748 | 120430483 | -1 | NM_153810    | C10orf46  | 0 | NA | 0 | NA | 1 | 15 | 0 | NA | 0 | NA |
| 10 | 120779217 | 120783844 | 1  | NM_199461    | NANOS1    | 1 | 12 | 0 | NA | 0 | NA | 0 | NA | 0 | NA |
| 10 | 120830324 | 120784530 | -1 | NM_003750    | EIF3A     | 0 | NA | 0 | NA | 0 | NA | 0 | NA | 0 | NA |
| 10 | 120853600 | 120887213 | 1  | NM_207009    | FAM45A    | 0 | NA | 0 | NA | 0 | NA | 0 | NA | 0 | NA |
| 10 | 120853618 | 120886505 | 1  | NM_018472    | FAM45B    | 0 | NA | 0 | NA | 0 | NA | 0 | NA | 0 | NA |
| 10 | 120915194 | 120890414 | -1 | NM_213649    | SFXN4     | 0 | NA | 0 | NA | 0 | NA | 1 | 11 | 0 | NA |
| 10 | 120928335 | 120917204 | -1 | NM_006793    | PRDX3     | 0 | NA | 0 | NA | 0 | NA | 0 | NA | 0 | NA |
| 10 | 120928335 | 120917204 | -1 | NM_014098    | PRDX3     | 0 | NA | 0 | NA | 0 | NA | 0 | NA | 0 | NA |
| 10 | 120957186 | 121205121 | 1  | NM_005308    | GRK5      | 0 | NA | 0 | NA | 0 | NA | 0 | NA | 0 | NA |
| 10 | 121286035 | 121249328 | -1 | NM_002925    | RGS10     | 0 | NA | 0 | NA | 0 | NA | 0 | NA | 0 | NA |
| 10 | 121292212 | 121249328 | -1 | NM_001005339 | RGS10     | 0 | NA | 0 | NA | 0 | NA | 0 | NA | 0 | NA |
| 10 | 121346531 | 121322967 | -1 | NM_001033925 | TIAL1     | 0 | NA | 0 | NA | 0 | NA | 0 | NA | 0 | NA |
| 10 | 121346531 | 121322967 | -1 | NM_003252    | TIAL1     | 0 | NA | 0 | NA | 0 | NA | 0 | NA | 0 | NA |
| 10 | 121400871 | 121427319 | 1  | NM_004281    | BAG3      | 1 | 14 | 0 | NA | 0 | NA | 1 | 11 | 0 | NA |
| 10 | 121475598 | 121578649 | 1  | NM_014937    | INPP5F    | 1 | 15 | 0 | NA | 0 | NA | 0 | NA | 0 | NA |
| 10 | 121622384 | 121578961 | -1 | NM_024834    | C10orf119 | 0 | NA | 0 | NA | 0 | NA | 1 | 12 | 0 | NA |
| 10 | 121642212 | 121691235 | 1  | NM_007190    | SEC23P    | 0 | NA | 0 | NA | 0 | NA | 0 | NA | 0 | NA |
| 10 | 122206455 | 122339357 | 1  | NM_001030059 | PPAPDC1A  | 0 | NA | 0 | NA | 0 | NA | 0 | NA | 0 | NA |
| 10 | 122600684 | 122659026 | 1  | NM_018117    | BRWD2     | 0 | NA | 0 | NA | 0 | NA | 1 | 12 | 0 | NA |
| 10 | 123347962 | 123227844 | -1 | NM_000141    | FGFR2     | 0 | NA | 0 | NA | 0 | NA | 0 | NA | 0 | NA |
| 10 | 123347962 | 123227844 | -1 | NM_022970    | FGFR2     | 0 | NA | 0 | NA | 0 | NA | 0 | NA | 0 | NA |
| 10 | 123677536 | 123492614 | -1 | NM_001001976 | ATE1      | 0 | NA | 0 | NA | 0 | NA | 0 | NA | 0 | NA |
| 10 | 123677536 | 123492614 | -1 | NM_007041    | ATE1      | 0 | NA | 0 | NA | 0 | NA | 0 | NA | 0 | NA |
| 10 | 123724700 | 123706592 | -1 | NM_017615    | NSMCE4A   | 0 | NA | 0 | NA | 0 | NA | 0 | NA | 0 | NA |
| 10 | 123738678 | 124004047 | 1  | NM_206861    | TACC2     | 0 | NA | 0 | NA | 0 | NA | 0 | NA | 0 | NA |
| 10 | 123738678 | 124004047 | 1  | NM_206862    | TACC2     | 0 | NA | 0 | NA | 0 | NA | 0 | NA | 0 | NA |
| 10 | 123913094 | 124004047 | 1  | NM_006997    | TACC2     | 0 | NA | 0 | NA | 0 | NA | 0 | NA | 0 | NA |
| 10 | 123913094 | 124004047 | 1  | NM_206860    | TACC2     | 0 | NA | 0 | NA | 0 | NA | 0 | NA | 0 | NA |
| 10 | 124020810 | 124087666 | 1  | NM_144587    | BTBD16    | 0 | NA | 0 | NA | 0 | NA | 0 | NA | 0 | NA |
| 10 | 124124209 | 124181856 | 1  | NM_001001974 | PLEKHA1   | 0 | NA | 0 | NA | 0 | NA | 0 | NA | 0 | NA |
| 10 | 124141832 | 124181856 | 1  | NM_021622    | PLEKHA1   | 0 | NA | 0 | NA | 0 | NA | 0 | NA | 0 | NA |
| 10 | 124204168 | 124206858 | 1  | NM_001099667 | ARMS2     | 0 | NA | 0 | NA | 0 | NA | 0 | NA | 0 | NA |
| 10 | 124211046 | 124264413 | 1  | NM_002775    | HTRA1     | 0 | NA | 0 | NA | 0 | NA | 0 | NA | 0 | NA |
| 10 | 124310170 | 124393242 | 1  | NM_004406    | DMBT1     | 0 | NA | 0 | NA | 0 | NA | 0 | NA | 0 | NA |
| 10 | 124310170 | 124393242 | 1  | NM_007329    | DMBT1     | 0 | NA | 0 | NA | 0 | NA | 0 | NA | 0 | NA |

|    |           |           |    |              |              |   |    |   |    |   |    |   |    |   |    |
|----|-----------|-----------|----|--------------|--------------|---|----|---|----|---|----|---|----|---|----|
| 10 | 124310170 | 124393242 | 1  | NM_017579    | DMBT1        | 0 | NA | 0 | NA | 0 | NA | 0 | NA | 0 | NA |
| 10 | 124449328 | 124447214 | -1 | NM_001010912 | C10orf120    | 0 | NA | 0 | NA | 0 | NA | 0 | NA | 0 | NA |
| 10 | 124595681 | 124581663 | -1 | NM_022034    | CUZD1        | 0 | NA | 0 | NA | 0 | NA | 0 | NA | 0 | NA |
| 10 | 124629147 | 124598599 | -1 | NM_152644    | FAM24B       | 0 | NA | 0 | NA | 0 | NA | 1 | 18 | 0 | NA |
| 10 | 124660206 | 124662617 | 1  | NM_001029888 | FAM24A       | 0 | NA | 0 | NA | 0 | NA | 0 | NA | 0 | NA |
| 10 | 124703909 | 124680408 | -1 | NM_024942    | C10orf88     | 1 | 30 | 1 | 30 | 0 | NA | 0 | NA | 0 | NA |
| 10 | 124729545 | 124739896 | 1  | NM_153336    | PSTK         | 0 | NA | 0 | NA | 0 | NA | 0 | NA | 0 | NA |
| 10 | 124758301 | 124743186 | -1 | NM_022466    | IKZF5        | 1 | 15 | 0 | NA | 0 | NA | 0 | NA | 0 | NA |
| 10 | 124758418 | 124807796 | 1  | NM_001609    | ACADSB       | 1 | 15 | 0 | NA | 0 | NA | 0 | NA | 0 | NA |
| 10 | 124885556 | 124887237 | 1  | NM_001105574 | HMX3         | 0 | NA | 1 | 13 | 0 | NA | 0 | NA | 0 | NA |
| 10 | 124897627 | 124900178 | 1  | NM_005519    | HMX2         | 0 | NA | 1 | 13 | 0 | NA | 0 | NA | 0 | NA |
| 10 | 124903859 | 124914872 | 1  | NM_001007793 | BUB3         | 0 | NA | 1 | 13 | 0 | NA | 0 | NA | 0 | NA |
| 10 | 124903859 | 124914872 | 1  | NM_004725    | BUB3         | 0 | NA | 1 | 13 | 0 | NA | 0 | NA | 0 | NA |
| 10 | 125415860 | 125444113 | 1  | NM_153442    | GPR26        | 0 | NA | 0 | NA | 0 | NA | 0 | NA | 0 | NA |
| 10 | 125641490 | 125495141 | -1 | NM_198148    | CPXM2        | 0 | NA | 0 | NA | 0 | NA | 0 | NA | 0 | NA |
| 10 | 125796231 | 125757173 | -1 | NM_015892    | GALNAC4S-6ST | 0 | NA | 0 | NA | 0 | NA | 0 | NA | 0 | NA |
| 10 | 126097509 | 126075861 | -1 | NM_000274    | OAT          | 0 | NA | 0 | NA | 0 | NA | 1 | 14 | 0 | NA |
| 10 | 126140401 | 126292699 | 1  | NM_022126    | LHPP         | 0 | NA | 0 | NA | 0 | NA | 0 | NA | 0 | NA |
| 10 | 126422920 | 126297852 | -1 | NM_014661    | FAM53B       | 0 | NA | 0 | NA | 0 | NA | 0 | NA | 0 | NA |
| 10 | 126470429 | 126437395 | -1 | NM_212554    | METTL10      | 0 | NA | 0 | NA | 0 | NA | 0 | NA | 0 | NA |
| 10 | 126480343 | 126515229 | 1  | NM_032182    | KIAA0157     | 0 | NA | 0 | NA | 0 | NA | 0 | NA | 0 | NA |
| 10 | 126620681 | 126665995 | 1  | NM_017580    | ZRANB1       | 0 | NA | 0 | NA | 0 | NA | 0 | NA | 0 | NA |
| 10 | 126706443 | 126666407 | -1 | NM_022802    | CTBP2        | 0 | NA | 0 | NA | 0 | NA | 0 | NA | 0 | NA |
| 10 | 126839093 | 126666407 | -1 | NM_001329    | CTBP2        | 0 | NA | 0 | NA | 0 | NA | 0 | NA | 0 | NA |
| 10 | 126839614 | 126666407 | -1 | NM_001083914 | CTBP2        | 0 | NA | 0 | NA | 0 | NA | 0 | NA | 0 | NA |
| 10 | 127398073 | 127442702 | 1  | NM_015608    | C10orf137    | 1 | 30 | 1 | 14 | 0 | NA | 1 | 27 | 0 | NA |
| 10 | 127454380 | 127445015 | -1 | NM_147191    | MMP21        | 0 | NA | 0 | NA | 0 | NA | 0 | NA | 0 | NA |
| 10 | 127501827 | 127467136 | -1 | NM_000375    | UROS         | 0 | NA | 0 | NA | 0 | NA | 0 | NA | 0 | NA |
| 10 | 127502093 | 127515114 | 1  | NM_078468    | BCCIP        | 0 | NA | 0 | NA | 0 | NA | 0 | NA | 0 | NA |
| 10 | 127502093 | 127521366 | 1  | NM_078469    | BCCIP        | 0 | NA | 0 | NA | 0 | NA | 0 | NA | 0 | NA |
| 10 | 127502093 | 127532254 | 1  | NM_016567    | BCCIP        | 0 | NA | 0 | NA | 0 | NA | 0 | NA | 0 | NA |
| 10 | 127559874 | 127514898 | -1 | NM_018180    | DHX32        | 0 | NA | 1 | 12 | 0 | NA | 0 | NA | 1 | 12 |
| 10 | 127575097 | 127688151 | 1  | NM_145235    | FANK1        | 0 | NA | 1 | 26 | 1 | 13 | 0 | NA | 1 | 12 |
| 10 | 128067055 | 127693414 | -1 | NM_003474    | ADAM12       | 0 | 14 | 1 | 13 | 1 | 15 | 0 | NA | 0 | NA |
| 10 | 128067055 | 127719903 | -1 | NM_021641    | ADAM12       | 1 | 14 | 1 | 13 | 1 | 15 | 0 | NA | 0 | NA |
| 10 | 128200000 | 128103563 | -1 | NM_001004298 | C10orf90     | 0 | NA | 0 | NA | 0 | NA | 0 | NA | 0 | NA |
| 10 | 128584012 | 129140770 | 1  | NM_001380    | DOCK1        | 0 | NA | 0 | NA | 0 | NA | 0 | NA | 0 | NA |
| 10 | 128884412 | 128823679 | -1 | NM_001039762 | C10orf141    | 0 | NA | 0 | NA | 0 | NA | 0 | NA | 0 | NA |
| 10 | 129237602 | 129240925 | 1  | NM_001030013 | NPS          | 0 | NA | 0 | NA | 0 | NA | 0 | NA | 0 | NA |
| 10 | 129425944 | 129429440 | 1  | NM_207426    | FOXI2        | 0 | NA | 0 | NA | 0 | NA | 0 | NA | 0 | NA |
| 10 | 129581201 | 129566103 | -1 | NM_152311    | CLRN3        | 0 | NA | 0 | NA | 0 | NA | 0 | NA | 0 | NA |
| 10 | 129595314 | 129774154 | 1  | NM_006504    | PTPRE        | 0 | NA | 0 | NA | 0 | NA | 0 | NA | 0 | NA |
| 10 | 129735823 | 129774154 | 1  | NM_130435    | PTPRE        | 0 | NA | 0 | NA | 0 | NA | 0 | NA | 0 | NA |
| 10 | 129814645 | 129784913 | -1 | NM_002417    | MKI67        | 0 | NA | 0 | NA | 0 | NA | 0 | NA | 0 | NA |
| 10 | 131155455 | 131455358 | 1  | NM_002412    | MGMT         | 0 | NA | 0 | NA | 0 | NA | 0 | NA | 0 | NA |
| 10 | 131652081 | 131523536 | -1 | NM_001005463 | EBF3         | 0 | NA | 0 | NA | 0 | NA | 0 | NA | 0 | NA |
| 10 | 131824652 | 131867860 | 1  | NM_006541    | GLRX3        | 0 | NA | 0 | NA | 0 | NA | 0 | NA | 0 | NA |
| 10 | 132999974 | 132780644 | -1 | NM_174937    | TCERG1L      | 0 | NA | 0 | NA | 0 | NA | 0 | NA | 0 | NA |
| 10 | 133597949 | 133620043 | 1  | NM_001003656 | PPP2R2D      | 0 | NA | 0 | NA | 0 | NA | 0 | NA | 0 | NA |
| 10 | 133597949 | 133620043 | 1  | NM_018461    | PPP2R2D      | 0 | NA | 0 | NA | 0 | NA | 0 | NA | 0 | NA |
| 10 | 133645425 | 133631193 | -1 | NM_004052    | BNIP3        | 0 | NA | 0 | NA | 0 | NA | 0 | NA | 0 | NA |
| 10 | 133768302 | 133830527 | 1  | NM_001105521 | JAKMIP3      | 0 | NA | 0 | NA | 0 | NA | 0 | NA | 0 | NA |
| 10 | 133850393 | 133869256 | 1  | NM_006426    | DPYSL4       | 0 | NA | 0 | NA | 0 | NA | 0 | NA | 0 | NA |
| 10 | 133971467 | 133870985 | -1 | NM_173575    | STK32C       | 0 | NA | 0 | NA | 0 | NA | 0 | NA | 1 | 14 |
| 10 | 133995693 | 134043412 | 1  | NM_030626    | LRRC27       | 0 | NA | 0 | NA | 0 | NA | 0 | NA | 0 | NA |
| 10 | 134060691 | 134081348 | 1  | NM_001098637 | PWWP2B       | 0 | NA | 0 | NA | 0 | NA | 0 | NA | 0 | NA |
| 10 | 134060691 | 134081348 | 1  | NM_138499    | PWWP2B       | 0 | NA | 0 | NA | 0 | NA | 0 | NA | 0 | NA |
| 10 | 134108703 | 134111815 | 1  | NM_173541    | C10orf91     | 0 | NA | 1 | 12 | 0 | NA | 0 | NA | 0 | NA |
| 10 | 134201342 | 134446974 | 1  | NM_005539    | INPP5A       | 0 | NA | 0 | NA | 0 | NA | 0 | NA | 0 | NA |
| 10 | 134449527 | 134448309 | -1 | NM_177400    | NCK6-2       | 0 | NA | 0 | NA | 0 | NA | 0 | NA | 0 | NA |
| 10 | 134521226 | 134471885 | -1 | NM_017609    | C10orf92     | 0 | NA | 0 | NA | 0 | NA | 0 | NA | 0 | NA |
| 10 | 134606054 | 134592680 | -1 | NM_173572    | C10orf93     | 0 | NA | 1 | 17 | 0 | NA | 0 | NA | 1 | 12 |
| 10 | 134751398 | 134795169 | 1  | NM_001083909 | GPR123       | 0 | NA | 0 | NA | 0 | NA | 0 | NA | 0 | NA |
| 10 | 134823960 | 134889906 | 1  | NM_152643    | KNDC1        | 0 | NA | 0 | NA | 0 | NA | 0 | NA | 0 | NA |
| 10 | 134893767 | 134895052 | 1  | NM_003577    | UTF1         | 0 | NA | 0 | NA | 0 | NA | 0 | NA | 0 | NA |



|    |           |           |    |              |              |   |    |   |    |   |    |   |    |   |    |
|----|-----------|-----------|----|--------------|--------------|---|----|---|----|---|----|---|----|---|----|
| 10 | 134901397 | 134905423 | 1  | NM_014468    | VENTX        | 0 | NA | 0 | NA | 0 | NA | 0 | NA | 0 | NA |
| 10 | 134940362 | 134925910 | -1 | NM_001109    | ADAM8        | 0 | NA | 0 | NA | 0 | NA | 1 | 11 | 0 | NA |
| 10 | 134972412 | 134976656 | 1  | NM_145806    | ZNF511       | 0 | NA | 0 | NA | 0 | NA | 0 | NA | 0 | NA |
| 10 | 134972634 | 134943127 | -1 | NM_006659    | TUBGCP2      | 0 | NA | 0 | NA | 0 | NA | 0 | NA | 0 | NA |
| 10 | 135000465 | 134988917 | -1 | NM_015722    | CALY         | 0 | NA | 1 | 13 | 0 | NA | 0 | NA | 0 | NA |
| 10 | 135010900 | 135016177 | 1  | NM_145202    | PRAP1        | 0 | NA | 1 | 13 | 0 | NA | 0 | NA | 0 | NA |
| 10 | 135021519 | 135018647 | -1 | NM_198472    | C10orf125    | 0 | NA | 0 | NA | 0 | NA | 0 | NA | 0 | NA |
| 10 | 135021519 | 135018784 | -1 | NM_001098483 | C10orf125    | 0 | NA | 0 | NA | 0 | NA | 0 | NA | 0 | NA |
| 10 | 135036898 | 135025979 | -1 | NM_004092    | ECHS1        | 0 | NA | 0 | NA | 0 | NA | 0 | NA | 0 | NA |
| 10 | 135042730 | 135055188 | 1  | NM_152911    | PAOX         | 0 | NA | 0 | NA | 0 | NA | 0 | NA | 0 | NA |
| 10 | 135042730 | 135055188 | 1  | NM_207127    | PAOX         | 0 | NA | 0 | NA | 0 | NA | 0 | NA | 0 | NA |
| 10 | 135042730 | 135055188 | 1  | NM_207128    | PAOX         | 0 | NA | 0 | NA | 0 | NA | 0 | NA | 0 | NA |
| 10 | 135057610 | 135084164 | 1  | NM_138384    | MTG1         | 0 | NA | 0 | NA | 0 | NA | 0 | NA | 0 | NA |
| 10 | 135088111 | 135084159 | -1 | NM_001012508 | SPRN         | 0 | NA | 0 | NA | 0 | NA | 0 | NA | 0 | NA |
| 10 | 135190856 | 135202610 | 1  | NM_000773    | CYP2E1       | 0 | NA | 0 | NA | 0 | NA | 1 | 12 | 0 | NA |
| 10 | 135223588 | 135217394 | -1 | NM_201564    | SYCE1        | 0 | NA | 0 | NA | 0 | NA | 0 | NA | 0 | NA |
| 10 | 135232866 | 135217394 | -1 | NM_130784    | SYCE1        | 0 | NA | 0 | NA | 0 | NA | 0 | NA | 0 | NA |
| 10 | 135290289 | 135288592 | -1 | NM_001080998 | FRG2B        | 0 | NA | 0 | NA | 0 | NA | 0 | NA | 0 | NA |
| 10 | 135330357 | 135335265 | 1  | NM_033178    | DUX4         | 0 | NA | 0 | NA | 0 | NA | 0 | NA | 0 | NA |
| 10 | 135333668 | 135338574 | 1  | NM_033178    | DUX4         | 0 | NA | 0 | NA | 0 | NA | 0 | NA | 0 | NA |
| 13 | 18653936  | 18645917  | -1 | NM_006001    | TUBA3C       | 0 | NA | 1 | 16 | 0 | NA | 0 | NA | 0 | NA |
| 13 | 19008903  | 18895018  | -1 | NM_130785    | TPTE2        | 0 | NA | 0 | NA | 0 | NA | 0 | NA | 0 | NA |
| 13 | 19008903  | 18895018  | -1 | NM_199254    | TPTE2        | 0 | NA | 0 | NA | 0 | NA | 0 | NA | 0 | NA |
| 13 | 19105879  | 19144640  | 1  | NM_017520    | MPHOSPH8     | 0 | NA | 0 | NA | 0 | NA | 0 | NA | 0 | NA |
| 13 | 19255083  | 19175008  | -1 | NM_001042414 | PSPC1        | 0 | NA | 0 | NA | 0 | NA | 0 | NA | 0 | NA |
| 13 | 19335773  | 19309592  | -1 | NM_001039649 | ZMYM5        | 1 | 14 | 0 | NA | 0 | NA | 0 | NA | 0 | NA |
| 13 | 19335773  | 19309592  | -1 | NM_001039650 | ZMYM5        | 1 | 14 | 0 | NA | 0 | NA | 0 | NA | 0 | NA |
| 13 | 19430809  | 19558939  | 1  | NM_003453    | ZMYM2        | 0 | NA | 0 | NA | 0 | NA | 0 | NA | 0 | NA |
| 13 | 19430809  | 19558939  | 1  | NM_197968    | ZMYM2        | 0 | NA | 0 | NA | 0 | NA | 0 | NA | 0 | NA |
| 13 | 19633183  | 19610394  | -1 | NM_021954    | GJA3         | 0 | NA | 0 | NA | 0 | NA | 0 | NA | 0 | NA |
| 13 | 19665114  | 19659604  | -1 | NM_004004    | GJB2         | 0 | NA | 1 | 16 | 0 | NA | 0 | NA | 0 | NA |
| 13 | 19703120  | 19694100  | -1 | NM_006783    | GJB6         | 0 | NA | 0 | NA | 0 | NA | 0 | NA | 0 | NA |
| 13 | 19704456  | 19694100  | -1 | NM_001110219 | GJB6         | 0 | NA | 0 | NA | 0 | NA | 0 | NA | 0 | NA |
| 13 | 19704456  | 19694100  | -1 | NM_001110220 | GJB6         | 0 | NA | 0 | NA | 0 | NA | 0 | NA | 0 | NA |
| 13 | 19704456  | 19694100  | -1 | NM_001110221 | GJB6         | 0 | NA | 0 | NA | 0 | NA | 0 | NA | 0 | NA |
| 13 | 19998012  | 19875805  | -1 | NM_015974    | CRYL1        | 0 | NA | 0 | NA | 0 | NA | 0 | NA | 0 | NA |
| 13 | 20039207  | 20163576  | 1  | NM_006531    | IFT88        | 1 | 20 | 0 | NA | 0 | NA | 1 | 25 | 0 | NA |
| 13 | 20039207  | 20163576  | 1  | NM_175605    | IFT88        | 1 | 20 | 0 | NA | 0 | NA | 1 | 25 | 0 | NA |
| 13 | 20175481  | 20195237  | 1  | NM_138284    | IL17D        | 0 | NA | 0 | NA | 0 | NA | 0 | NA | 0 | NA |
| 13 | 20246057  | 20201072  | -1 | NM_174928    | NGAMT2       | 0 | NA | 0 | NA | 0 | NA | 0 | NA | 0 | NA |
| 13 | 20374913  | 20249467  | -1 | NM_022459    | XPO4         | 0 | NA | 0 | NA | 0 | NA | 0 | NA | 0 | NA |
| 13 | 20533722  | 20445175  | -1 | NM_014572    | LATS2        | 0 | NA | 0 | NA | 0 | NA | 0 | NA | 0 | NA |
| 13 | 20612684  | 20620976  | 1  | NM_005870    | SAP18        | 0 | NA | 0 | NA | 0 | NA | 0 | NA | 0 | NA |
| 13 | 20648371  | 20651220  | 1  | NM_024026    | MRP63        | 0 | NA | 0 | NA | 0 | NA | 0 | NA | 0 | NA |
| 13 | 20648710  | 20625733  | -1 | NM_145061    | C13orf3      | 0 | NA | 0 | NA | 0 | NA | 0 | NA | 0 | NA |
| 13 | 20931423  | 20848507  | -1 | NM_153251    | ZDHHC20      | 0 | NA | 0 | NA | 0 | NA | 0 | NA | 0 | NA |
| 13 | 21076307  | 20964838  | -1 | NM_152726    | EFHA1        | 0 | NA | 0 | NA | 0 | NA | 0 | NA | 0 | NA |
| 13 | 21143874  | 21174186  | 1  | NM_002010    | FGF9         | 0 | NA | 0 | NA | 0 | NA | 0 | NA | 1 | 12 |
| 13 | 22653090  | 22797304  | 1  | NM_000231    | SGCG         | 0 | NA | 0 | NA | 0 | NA | 0 | NA | 0 | NA |
| 13 | 22905841  | 22800964  | -1 | NM_014363    | SACS         | 0 | NA | 0 | NA | 0 | NA | 0 | NA | 0 | NA |
| 13 | 23042722  | 23148232  | 1  | NM_148957    | TNFRSF19     | 0 | NA | 0 | NA | 1 | 12 | 0 | NA | 0 | NA |
| 13 | 23051638  | 23141412  | 1  | NM_018647    | TNFRSF19     | 0 | NA | 0 | NA | 1 | 12 | 0 | NA | 0 | NA |
| 13 | 23361027  | 23364242  | 1  | NM_001014442 | PCOTH        | 0 | NA | 0 | NA | 0 | NA | 0 | NA | 0 | NA |
| 13 | 23361559  | 23202327  | -1 | NM_005932    | MIPEP        | 0 | NA | 0 | NA | 0 | NA | 0 | NA | 0 | NA |
| 13 | 23369125  | 23363427  | -1 | NM_001007537 | RP11-45B20.2 | 0 | NA | 0 | NA | 0 | NA | 0 | NA | 0 | NA |
| 13 | 23632886  | 23776048  | 1  | NM_153023    | SPATA13      | 0 | NA | 0 | NA | 0 | NA | 0 | NA | 0 | NA |
| 13 | 23781715  | 23794669  | 1  | NM_178540    | C1QTNF9      | 0 | NA | 0 | NA | 0 | NA | 0 | NA | 0 | NA |
| 13 | 23984948  | 23893068  | -1 | NM_006437    | PARP4        | 0 | NA | 0 | NA | 1 | 13 | 0 | NA | 0 | NA |
| 13 | 24152694  | 24183918  | 1  | NM_001676    | ATP12A       | 0 | NA | 0 | NA | 0 | NA | 0 | NA | 0 | NA |
| 13 | 24236300  | 24352058  | 1  | NM_031277    | RNF17        | 0 | NA | 0 | NA | 0 | NA | 0 | NA | 0 | NA |
| 13 | 24395085  | 24354411  | -1 | NM_018451    | CENPJ        | 0 | NA | 0 | NA | 0 | NA | 0 | NA | 0 | NA |
| 13 | 24440415  | 24396814  | -1 | NM_001126062 | LOC646405    | 0 | NA | 0 | NA | 0 | NA | 0 | NA | 0 | NA |
| 13 | 24568275  | 24570704  | 1  | NM_030979    | PABPC3       | 0 | NA | 0 | NA | 0 | NA | 0 | NA | 0 | NA |
| 13 | 24643857  | 24640671  | -1 | NM_152704    | FAM123A      | 0 | NA | 1 | 15 | 0 | NA | 0 | NA | 1 | 12 |
| 13 | 24643857  | 24640671  | -1 | NM_199138    | FAM123A      | 0 | NA | 1 | 15 | 0 | NA | 0 | NA | 1 | 12 |

|    |          |          |    |              |          |   |    |   |    |   |    |   |    |   |    |
|----|----------|----------|----|--------------|----------|---|----|---|----|---|----|---|----|---|----|
| 13 | 24759704 | 24718340 | -1 | NM_004685    | MTMR6    | 0 | NA | 0 | NA | 0 | NA | 1 | 13 | 0 | NA |
| 13 | 24773665 | 24808480 | 1  | NM_001008565 | NUPL1    | 0 | NA | 0 | NA | 0 | NA | 0 | NA | 0 | NA |
| 13 | 24773665 | 24814561 | 1  | NM_001008564 | NUPL1    | 0 | NA | 0 | NA | 0 | NA | 0 | NA | 0 | NA |
| 13 | 24773665 | 24814561 | 1  | NM_014089    | NUPL1    | 0 | NA | 0 | NA | 0 | NA | 0 | NA | 0 | NA |
| 13 | 24844208 | 25493420 | 1  | NM_016529    | ATP8A2   | 0 | NA | 1 | 13 | 0 | NA | 0 | NA | 0 | NA |
| 13 | 25523198 | 25516734 | -1 | NM_001007538 | SHISA2   | 0 | NA | 0 | NA | 0 | NA | 0 | NA | 0 | NA |
| 13 | 25693840 | 25684904 | -1 | NM_183044    | RNF6     | 0 | NA | 0 | NA | 0 | NA | 0 | NA | 0 | NA |
| 13 | 25693978 | 25684904 | -1 | NM_183043    | RNF6     | 0 | NA | 0 | NA | 0 | NA | 0 | NA | 0 | NA |
| 13 | 25694508 | 25684904 | -1 | NM_005977    | RNF6     | 0 | NA | 0 | NA | 0 | NA | 0 | NA | 0 | NA |
| 13 | 25726755 | 25876569 | 1  | NM_001260    | CDK8     | 0 | NA | 0 | NA | 0 | NA | 0 | NA | 0 | NA |
| 13 | 26029839 | 26161082 | 1  | NM_006646    | WASF3    | 0 | NA | 0 | NA | 0 | NA | 0 | NA | 0 | NA |
| 13 | 26231964 | 26230959 | -1 | NM_005288    | GPR12    | 0 | NA | 0 | NA | 0 | NA | 0 | NA | 0 | NA |
| 13 | 26644029 | 26540435 | -1 | NM_182488    | USP12    | 0 | NA | 0 | NA | 0 | NA | 0 | NA | 0 | NA |
| 13 | 26723691 | 26728702 | 1  | NM_000982    | RPL21    | 0 | NA | 0 | NA | 0 | NA | 1 | 16 | 0 | NA |
| 13 | 26742463 | 26745827 | 1  | NM_206827    | RASL11A  | 0 | NA | 0 | NA | 0 | NA | 0 | NA | 0 | NA |
| 13 | 26896680 | 26907846 | 1  | NM_002097    | GTF3A    | 0 | NA | 0 | NA | 0 | NA | 1 | 17 | 0 | NA |
| 13 | 26922711 | 26907780 | -1 | NM_152912    | MTIF3    | 0 | NA | 0 | NA | 0 | NA | 1 | 19 | 0 | NA |
| 13 | 27092720 | 27018049 | -1 | NM_153371    | LNK2     | 0 | NA | 0 | NA | 0 | NA | 0 | NA | 0 | NA |
| 13 | 27094002 | 27139548 | 1  | NM_152705    | POLR1D   | 0 | NA | 0 | NA | 0 | NA | 0 | NA | 0 | NA |
| 13 | 27094028 | 27095585 | 1  | NM_015972    | POLR1D   | 0 | NA | 0 | NA | 0 | NA | 0 | NA | 0 | NA |
| 13 | 27264779 | 27266089 | 1  | NM_145657    | GSX1     | 0 | NA | 0 | NA | 0 | NA | 0 | NA | 1 | 12 |
| 13 | 27392156 | 27397394 | 1  | NM_000209    | PDX1     | 0 | NA | 0 | NA | 0 | NA | 0 | NA | 0 | NA |
| 13 | 27441317 | 27434277 | -1 | NM_001265    | CDX2     | 0 | NA | 0 | NA | 0 | NA | 0 | NA | 0 | NA |
| 13 | 27460774 | 27450242 | -1 | NM_001105577 | PRHOXNB  | 0 | NA | 0 | NA | 0 | NA | 0 | NA | 0 | NA |
| 13 | 27572729 | 27475410 | -1 | NM_004119    | FLT3     | 0 | NA | 0 | NA | 0 | NA | 0 | NA | 0 | NA |
| 13 | 27646416 | 27767471 | 1  | NM_175854    | PAN3     | 0 | NA | 0 | NA | 0 | NA | 0 | NA | 0 | NA |
| 13 | 27967265 | 27774388 | -1 | NM_002019    | FLT1     | 0 | NA | 0 | NA | 1 | 13 | 0 | NA | 0 | NA |
| 13 | 28131250 | 28151059 | 1  | NM_015932    | POMP     | 0 | NA | 0 | NA | 0 | NA | 0 | NA | 0 | NA |
| 13 | 28190962 | 28172217 | -1 | NM_181785    | SLC46A3  | 0 | NA | 0 | NA | 0 | NA | 0 | NA | 0 | NA |
| 13 | 28496747 | 28978084 | 1  | NM_001033602 | KIAA0774 | 0 | NA | 0 | NA | 0 | NA | 0 | NA | 0 | NA |
| 13 | 28900776 | 28978084 | 1  | NM_015233    | KIAA0774 | 0 | NA | 0 | NA | 0 | NA | 0 | NA | 0 | NA |
| 13 | 29067721 | 28981550 | -1 | NM_003045    | SLC7A1   | 0 | NA | 0 | NA | 0 | NA | 0 | NA | 0 | NA |
| 13 | 29322160 | 29236541 | -1 | NM_007106    | UBL3     | 0 | NA | 0 | NA | 0 | NA | 0 | NA | 0 | NA |
| 13 | 29779163 | 29674766 | -1 | NM_001014380 | KATNAL1  | 0 | NA | 0 | NA | 0 | NA | 0 | NA | 0 | NA |
| 13 | 29779584 | 29674766 | -1 | NM_032116    | KATNAL1  | 0 | NA | 0 | NA | 0 | NA | 0 | NA | 0 | NA |
| 13 | 29938081 | 29930878 | -1 | NM_002128    | HMGB1    | 0 | NA | 0 | NA | 0 | NA | 0 | NA | 0 | NA |
| 13 | 30089829 | 30131686 | 1  | NM_005800    | USPL1    | 1 | 13 | 0 | NA | 1 | 21 | 0 | NA | 0 | NA |
| 13 | 30207668 | 30236556 | 1  | NM_001629    | ALOX5AP  | 0 | NA | 0 | NA | 0 | NA | 0 | NA | 0 | NA |
| 13 | 30378327 | 30397678 | 1  | NM_032849    | C13orf33 | 0 | NA | 0 | NA | 0 | NA | 0 | NA | 0 | NA |
| 13 | 30404833 | 30447153 | 1  | NM_152325    | C13orf26 | 0 | NA | 0 | NA | 0 | NA | 0 | NA | 0 | NA |
| 13 | 30634117 | 30608762 | -1 | NM_006644    | HSPH1    | 0 | NA | 0 | NA | 0 | NA | 1 | 12 | 0 | NA |
| 13 | 30672111 | 30804411 | 1  | NM_194318    | B3GALTL  | 0 | NA | 0 | NA | 0 | NA | 0 | NA | 0 | NA |
| 13 | 31211678 | 31275009 | 1  | NM_130806    | RXFP2    | 0 | NA | 0 | NA | 0 | NA | 0 | NA | 0 | NA |
| 13 | 31503436 | 31768776 | 1  | NM_023037    | FRY      | 0 | NA | 0 | NA | 0 | NA | 0 | NA | 0 | NA |
| 13 | 31787616 | 31871809 | 1  | NM_000059    | BRCA2    | 0 | NA | 0 | NA | 0 | NA | 0 | NA | 0 | NA |
| 13 | 31900315 | 31872859 | -1 | NM_001079691 | N4BP2L1  | 0 | NA | 0 | NA | 0 | NA | 0 | NA | 0 | NA |
| 13 | 31900315 | 31872859 | -1 | NM_052818    | N4BP2L1  | 0 | NA | 0 | NA | 0 | NA | 0 | NA | 0 | NA |
| 13 | 32010932 | 31989029 | -1 | NM_014887    | N4BP2L2  | 1 | 23 | 0 | NA | 0 | NA | 1 | 17 | 0 | NA |
| 13 | 32010936 | 31904929 | -1 | NM_033111    | N4BP2L2  | 1 | 23 | 0 | NA | 0 | NA | 1 | 17 | 0 | NA |
| 13 | 32058591 | 32250157 | 1  | NM_015032    | PDS5B    | 0 | NA | 0 | NA | 0 | NA | 1 | 14 | 0 | NA |
| 13 | 32488570 | 32538279 | 1  | NM_004795    | KL       | 0 | NA | 0 | NA | 0 | NA | 0 | NA | 0 | NA |
| 13 | 32658216 | 32575306 | -1 | NM_178007    | STARD13  | 0 | NA | 0 | NA | 0 | NA | 0 | NA | 0 | NA |
| 13 | 32678143 | 32575306 | -1 | NM_052851    | STARD13  | 0 | NA | 0 | NA | 0 | NA | 0 | NA | 0 | NA |
| 13 | 32757878 | 32575306 | -1 | NM_178006    | STARD13  | 0 | NA | 0 | NA | 0 | NA | 0 | NA | 0 | NA |
| 13 | 33290205 | 33309644 | 1  | NM_002915    | RFC3     | 1 | 15 | 0 | NA | 0 | NA | 1 | 13 | 0 | NA |
| 13 | 33290205 | 33438695 | 1  | NM_181558    | RFC3     | 1 | 15 | 0 | NA | 0 | NA | 1 | 13 | 0 | NA |
| 13 | 34414455 | 35144873 | 1  | NM_015678    | NBEA     | 0 | NA | 0 | NA | 0 | NA | 0 | NA | 0 | NA |
| 13 | 34948788 | 34946341 | -1 | NM_005584    | MAB2L1L1 | 0 | NA | 0 | NA | 0 | NA | 0 | NA | 0 | NA |
| 13 | 35603443 | 35243477 | -1 | NM_004734    | DCLK1    | 0 | NA | 0 | NA | 0 | NA | 0 | NA | 0 | NA |
| 13 | 35686676 | 35640353 | -1 | NM_017826    | SOHLH2   | 0 | NA | 0 | NA | 0 | NA | 0 | NA | 0 | NA |
| 13 | 35818453 | 35773774 | -1 | NM_015087    | SPG20    | 0 | NA | 0 | NA | 0 | NA | 0 | NA | 0 | NA |
| 13 | 35903966 | 35915019 | 1  | NM_001111046 | CCNA1    | 0 | NA | 0 | NA | 0 | NA | 0 | NA | 0 | NA |
| 13 | 35903966 | 35915019 | 1  | NM_001111047 | CCNA1    | 0 | NA | 0 | NA | 0 | NA | 0 | NA | 0 | NA |
| 13 | 35904408 | 35915019 | 1  | NM_001111045 | CCNA1    | 0 | NA | 0 | NA | 0 | NA | 0 | NA | 0 | NA |
| 13 | 35904408 | 35915019 | 1  | NM_003914    | CCNA1    | 0 | NA | 0 | NA | 0 | NA | 0 | NA | 0 | NA |

|    |          |          |    |              |           |   |    |   |    |   |    |   |    |   |    |
|----|----------|----------|----|--------------|-----------|---|----|---|----|---|----|---|----|---|----|
| 13 | 36146048 | 36169975 | 1  | NM_203451    | LOC400120 | 0 | NA | 0 | NA | 0 | NA | 0 | NA | 0 | NA |
| 13 | 36291338 | 36301740 | 1  | NM_000538    | RFXAP     | 0 | NA | 0 | NA | 0 | NA | 0 | NA | 0 | NA |
| 13 | 36392409 | 36320206 | -1 | NM_001127217 | SMAD9     | 0 | NA | 0 | NA | 0 | NA | 0 | NA | 0 | NA |
| 13 | 36392409 | 36320206 | -1 | NM_005905    | SMAD9     | 0 | NA | 0 | NA | 0 | NA | 0 | NA | 0 | NA |
| 13 | 36471477 | 36421966 | -1 | NM_013338    | ALG5      | 1 | 11 | 0 | NA | 0 | NA | 0 | NA | 0 | NA |
| 13 | 36472916 | 36481537 | 1  | NM_181503    | EXOSC8    | 1 | 11 | 0 | NA | 0 | NA | 0 | NA | 0 | NA |
| 13 | 36531850 | 36481450 | -1 | NM_001014286 | FAM48A    | 0 | NA | 0 | NA | 0 | NA | 0 | NA | 0 | NA |
| 13 | 36531850 | 36481450 | -1 | NM_017569    | FAM48A    | 0 | NA | 0 | NA | 0 | NA | 0 | NA | 0 | NA |
| 13 | 36577801 | 36575396 | -1 | NM_145203    | CSNK1A1L  | 0 | NA | 0 | NA | 0 | NA | 0 | NA | 0 | NA |
| 13 | 37070874 | 37034778 | -1 | NM_006475    | POSTN     | 0 | NA | 0 | NA | 0 | NA | 0 | NA | 0 | NA |
| 13 | 37341935 | 37108794 | -1 | NM_016179    | TRPC4     | 0 | NA | 0 | NA | 0 | NA | 0 | NA | 0 | NA |
| 13 | 37822017 | 37835139 | 1  | NM_016617    | UFM1      | 0 | NA | 0 | NA | 0 | NA | 0 | NA | 0 | NA |
| 13 | 38159172 | 38399267 | 1  | NM_207361    | FREM2     | 0 | NA | 1 | 24 | 1 | 13 | 0 | NA | 0 | NA |
| 13 | 38462983 | 38438061 | -1 | NM_145286    | STOML3    | 0 | NA | 0 | NA | 0 | NA | 0 | NA | 0 | NA |
| 13 | 38510252 | 38482001 | -1 | NM_025138    | C13orf23  | 1 | 15 | 0 | NA | 0 | NA | 0 | NA | 0 | NA |
| 13 | 38510252 | 38482001 | -1 | NM_170719    | C13orf23  | 1 | 15 | 0 | NA | 0 | NA | 0 | NA | 0 | NA |
| 13 | 38510454 | 38522246 | 1  | NM_001012754 | NHLRC3    | 1 | 15 | 0 | NA | 0 | NA | 0 | NA | 0 | NA |
| 13 | 38510454 | 38522246 | 1  | NM_001017370 | NHLRC3    | 1 | 15 | 0 | NA | 0 | NA | 0 | NA | 0 | NA |
| 13 | 39075356 | 38815028 | -1 | NM_005780    | LHFP      | 0 | NA | 0 | NA | 0 | NA | 0 | NA | 0 | NA |
| 13 | 39127813 | 39224633 | 1  | NM_020751    | COG6      | 0 | NA | 0 | NA | 0 | NA | 0 | NA | 0 | NA |
| 13 | 40138734 | 40027800 | -1 | NM_002015    | FOXO1     | 0 | NA | 0 | NA | 0 | NA | 0 | NA | 0 | NA |
| 13 | 40243347 | 40201431 | -1 | NM_005830    | MRPS31    | 0 | NA | 0 | NA | 0 | NA | 0 | NA | 0 | NA |
| 13 | 40261596 | 40282246 | 1  | NM_014252    | SLC25A15  | 1 | 15 | 0 | NA | 0 | NA | 0 | NA | 0 | NA |
| 13 | 40454418 | 40404163 | -1 | NM_172373    | ELF1      | 0 | NA | 0 | NA | 0 | NA | 0 | NA | 0 | NA |
| 13 | 40533696 | 4056139  | 1  | NM_007187    | WBP4      | 1 | 13 | 0 | NA | 0 | NA | 1 | 14 | 0 | NA |
| 13 | 40604936 | 40599708 | -1 | NM_152903    | KBTBD6    | 0 | NA | 0 | NA | 0 | NA | 1 | 11 | 0 | NA |
| 13 | 40666702 | 40663710 | -1 | NM_032138    | KBTBD7    | 0 | NA | 1 | 22 | 0 | NA | 0 | NA | 0 | NA |
| 13 | 40735713 | 40688515 | -1 | NM_004294    | MTRF1     | 0 | NA | 0 | NA | 0 | NA | 0 | NA | 0 | NA |
| 13 | 40783340 | 40830854 | 0  | NM_001110798 | NARG1L    | 0 | NA | 0 | NA | 0 | NA | 0 | NA | 0 | NA |
| 13 | 40783340 | 40849166 | 1  | NM_024561    | NARG1L    | 0 | NA | 0 | NA | 0 | NA | 0 | NA | 0 | NA |
| 13 | 40783417 | 40830854 | 1  | NM_018527    | NARG1L    | 0 | NA | 0 | NA | 0 | NA | 0 | NA | 0 | NA |
| 13 | 40929541 | 40943013 | 1  | NM_014059    | C13orf15  | 0 | NA | 1 | 13 | 0 | NA | 0 | NA | 0 | NA |
| 13 | 41433221 | 41038960 | -1 | NM_015058    | KIAA0564  | 0 | NA | 0 | NA | 0 | NA | 0 | NA | 0 | NA |
| 13 | 41433221 | 41191472 | -1 | NM_001009814 | KIAA0564  | 0 | NA | 0 | NA | 0 | NA | 0 | NA | 0 | NA |
| 13 | 41520888 | 41701888 | 1  | NM_152910    | DGKH      | 1 | 11 | 0 | NA | 0 | NA | 0 | NA | 0 | NA |
| 13 | 41520888 | 41701888 | 1  | NM_178009    | DGKH      | 1 | 11 | 0 | NA | 0 | NA | 0 | NA | 0 | NA |
| 13 | 41744288 | 41795402 | 1  | NM_016248    | AKAP11    | 0 | NA | 1 | 22 | 1 | 16 | 0 | NA | 0 | NA |
| 13 | 42043794 | 42080148 | 1  | NM_033012    | TNFSF11   | 0 | NA | 0 | NA | 0 | NA | 0 | NA | 0 | NA |
| 13 | 42046297 | 42080148 | 1  | NM_003701    | TNFSF11   | 0 | NA | 0 | NA | 0 | NA | 0 | NA | 0 | NA |
| 13 | 42253750 | 42263683 | 1  | NM_182508    | C13orf30  | 0 | NA | 0 | NA | 0 | NA | 0 | NA | 0 | NA |
| 13 | 42464377 | 42360121 | -1 | NM_001002264 | EPST11    | 0 | NA | 0 | NA | 0 | NA | 0 | NA | 0 | NA |
| 13 | 42464377 | 42360121 | -1 | NM_033255    | EPST11    | 0 | NA | 0 | NA | 0 | NA | 0 | NA | 0 | NA |
| 13 | 42495361 | 42581306 | 1  | NM_013238    | DNAJC15   | 1 | 14 | 0 | NA | 0 | NA | 1 | 17 | 0 | NA |
| 13 | 43139655 | 42685703 | -1 | NM_017993    | ENOX1     | 0 | NA | 0 | NA | 0 | NA | 0 | NA | 0 | NA |
| 13 | 43351826 | 43308488 | -1 | NM_144974    | CCDC122   | 0 | NA | 0 | NA | 0 | NA | 0 | NA | 0 | NA |
| 13 | 43351968 | 43364438 | 1  | NM_153218    | C13orf31  | 0 | NA | 0 | NA | 0 | NA | 0 | NA | 0 | NA |
| 13 | 43845977 | 43869850 | 1  | NM_001010897 | SERP2     | 0 | NA | 0 | NA | 0 | NA | 0 | NA | 0 | NA |
| 13 | 43908979 | 43905658 | -1 | NM_006022    | TSC22D1   | 1 | 16 | 0 | NA | 1 | 14 | 0 | NA | 0 | NA |
| 13 | 44048701 | 43905654 | -1 | NM_183422    | TSC22D1   | 0 | NA | 0 | NA | 0 | NA | 0 | NA | 0 | NA |
| 13 | 44461613 | 44411383 | -1 | NM_012345    | NUFIP1    | 0 | NA | 0 | NA | 0 | NA | 1 | 11 | 0 | NA |
| 13 | 44461686 | 44500404 | 1  | NM_018559    | KIAA1704  | 0 | NA | 0 | NA | 0 | NA | 1 | 11 | 0 | NA |
| 13 | 44592671 | 44756237 | 1  | NM_004128    | GTF2F2    | 1 | 13 | 0 | NA | 0 | NA | 0 | NA | 0 | NA |
| 13 | 44673175 | 44664987 | -1 | NM_198404    | KCTD4     | 0 | NA | 0 | NA | 0 | NA | 0 | NA | 0 | NA |
| 13 | 44813297 | 44809303 | -1 | NM_003295    | TPT1      | 0 | NA | 0 | NA | 1 | 16 | 0 | NA | 0 | NA |
| 13 | 44890515 | 44868043 | -1 | NM_001010875 | SLC25A30  | 0 | NA | 0 | NA | 0 | NA | 0 | NA | 0 | NA |
| 13 | 44937071 | 45008761 | 1  | NM_031431    | COG3      | 1 | 11 | 0 | NA | 0 | NA | 0 | NA | 0 | NA |
| 13 | 45174446 | 45186694 | 1  | NM_152719    | SPERT     | 0 | NA | 0 | NA | 0 | NA | 0 | NA | 0 | NA |
| 13 | 45323847 | 45252416 | -1 | NM_198849    | LOC283514 | 0 | NA | 0 | NA | 0 | NA | 0 | NA | 0 | NA |
| 13 | 45524895 | 45434314 | -1 | NM_015070    | ZC3H13    | 0 | NA | 0 | NA | 0 | NA | 0 | NA | 0 | NA |
| 13 | 45577212 | 45525322 | -1 | NM_001872    | CPB2      | 0 | NA | 0 | NA | 0 | NA | 0 | NA | 0 | NA |
| 13 | 45577212 | 45525322 | -1 | NM_016413    | CPB2      | 0 | NA | 0 | NA | 0 | NA | 0 | NA | 0 | NA |
| 13 | 45654395 | 45598058 | -1 | NM_002298    | LCP1      | 0 | NA | 0 | NA | 0 | NA | 0 | NA | 0 | NA |
| 13 | 45859636 | 45814137 | -1 | NM_025113    | C13orf18  | 0 | NA | 0 | NA | 0 | NA | 0 | NA | 0 | NA |
| 13 | 46025303 | 46215731 | 1  | NM_015116    | LRCH1     | 0 | NA | 0 | NA | 0 | NA | 0 | NA | 0 | NA |
| 13 | 46269368 | 46243391 | -1 | NM_001984    | ESD       | 1 | 14 | 0 | NA | 0 | NA | 1 | 12 | 0 | NA |

|    |          |          |    |              |           |   |    |   |    |   |    |   |    |   |    |
|----|----------|----------|----|--------------|-----------|---|----|---|----|---|----|---|----|---|----|
| 13 | 46368176 | 46305513 | -1 | NM_000621    | HTR2A     | 0 | NA | 0 | NA | 1 | 13 | 0 | NA | 0 | NA |
| 13 | 47473463 | 47414791 | -1 | NM_003850    | SUCLA2    | 1 | 14 | 0 | NA | 0 | NA | 0 | NA | 0 | NA |
| 13 | 47509703 | 47519283 | 1  | NM_018283    | NUDT15    | 1 | 19 | 0 | NA | 0 | NA | 0 | NA | 0 | NA |
| 13 | 47567241 | 47548092 | -1 | NM_014166    | MED4      | 0 | NA | 0 | NA | 0 | NA | 0 | NA | 0 | NA |
| 13 | 47705308 | 47734228 | 1  | NM_021999    | ITM2B     | 0 | NA | 0 | NA | 0 | NA | 0 | NA | 0 | NA |
| 13 | 47775883 | 47954027 | 1  | NM_000321    | RB1       | 0 | NA | 0 | NA | 1 | 13 | 0 | NA | 0 | NA |
| 13 | 47887947 | 47883182 | -1 | NM_005767    | P2RY5     | 0 | NA | 0 | NA | 0 | NA | 0 | NA | 0 | NA |
| 13 | 48005317 | 47961099 | -1 | NM_001268    | RCBTB2    | 0 | NA | 0 | NA | 0 | NA | 0 | NA | 0 | NA |
| 13 | 48178951 | 48181499 | 1  | NM_020377    | CYSLTR2   | 0 | NA | 0 | NA | 0 | NA | 0 | NA | 0 | NA |
| 13 | 48448048 | 48681916 | 1  | NM_001079673 | FNDC3A    | 0 | NA | 0 | NA | 0 | NA | 0 | NA | 0 | NA |
| 13 | 48582449 | 48681916 | 1  | NM_014923    | FNDC3A    | 0 | NA | 0 | NA | 0 | NA | 0 | NA | 0 | NA |
| 13 | 48692474 | 48694514 | 1  | NM_001507    | MLNR      | 0 | NA | 1 | 13 | 0 | NA | 0 | NA | 0 | NA |
| 13 | 48720103 | 48766619 | 1  | NM_030911    | CDADC1    | 0 | NA | 0 | NA | 0 | NA | 0 | NA | 0 | NA |
| 13 | 48873736 | 48780786 | -1 | NM_030925    | CAB39L    | 0 | NA | 0 | NA | 0 | NA | 0 | NA | 0 | NA |
| 13 | 48916222 | 48780786 | -1 | NM_001079670 | CAB39L    | 0 | NA | 0 | NA | 0 | NA | 0 | NA | 0 | NA |
| 13 | 48916510 | 48964299 | 1  | NM_031915    | SETDB2    | 0 | NA | 0 | NA | 0 | NA | 0 | NA | 0 | NA |
| 13 | 48967801 | 49001118 | 1  | NM_001040443 | PHF11     | 0 | NA | 0 | NA | 0 | NA | 0 | NA | 0 | NA |
| 13 | 48968528 | 49001118 | 1  | NM_001040444 | PHF11     | 0 | NA | 0 | NA | 0 | NA | 0 | NA | 0 | NA |
| 13 | 49057720 | 49004082 | -1 | NM_018191    | RCBTB1    | 0 | NA | 0 | NA | 0 | NA | 0 | NA | 0 | NA |
| 13 | 49100624 | 49105732 | 1  | NM_138450    | ARL11     | 0 | NA | 0 | NA | 0 | NA | 1 | 12 | 0 | NA |
| 13 | 49163612 | 49132862 | -1 | NM_032565    | EBPL      | 0 | NA | 0 | NA | 0 | NA | 0 | NA | 0 | NA |
| 13 | 49265058 | 49171461 | -1 | NM_002267    | KPNA3     | 0 | NA | 0 | NA | 0 | NA | 0 | NA | 0 | NA |
| 13 | 49408477 | 49384842 | -1 | NM_020456    | C13orf1   | 0 | NA | 0 | NA | 0 | NA | 0 | NA | 0 | NA |
| 13 | 49469143 | 49490604 | 1  | NM_001007278 | TRIM13    | 0 | NA | 0 | NA | 0 | NA | 0 | NA | 0 | NA |
| 13 | 49469143 | 49490604 | 1  | NM_005798    | TRIM13    | 0 | NA | 0 | NA | 0 | NA | 0 | NA | 0 | NA |
| 13 | 49469143 | 49490604 | 1  | NM_052811    | TRIM13    | 0 | NA | 0 | NA | 0 | NA | 0 | NA | 0 | NA |
| 13 | 49469143 | 49490604 | 1  | NM_213590    | TRIM13    | 0 | NA | 0 | NA | 0 | NA | 0 | NA | 0 | NA |
| 13 | 49487390 | 49493059 | 1  | NM_173605    | KCNRG     | 0 | NA | 0 | NA | 0 | NA | 0 | NA | 0 | NA |
| 13 | 49487390 | 49493059 | 1  | NM_199464    | KCNRG     | 0 | NA | 0 | NA | 0 | NA | 0 | NA | 0 | NA |
| 13 | 50315886 | 50184759 | -1 | NM_198989    | DLEU7     | 0 | NA | 0 | NA | 0 | NA | 0 | NA | 0 | NA |
| 13 | 50381892 | 50428902 | 1  | NM_024570    | RNASEH2B  | 0 | NA | 0 | NA | 0 | NA | 0 | NA | 0 | NA |
| 13 | 50694507 | 50753617 | 1  | NM_145019    | FAM124A   | 0 | NA | 1 | 16 | 0 | NA | 0 | NA | 0 | NA |
| 13 | 50813168 | 50834240 | 1  | NM_001101320 | LOC647174 | 0 | NA | 0 | NA | 0 | NA | 0 | NA | 0 | NA |
| 13 | 50925276 | 50833701 | -1 | NM_001039937 | INTS6     | 0 | NA | 0 | NA | 0 | NA | 0 | NA | 0 | NA |
| 13 | 50925276 | 50833701 | -1 | NM_012141    | INTS6     | 0 | NA | 0 | NA | 0 | NA | 0 | NA | 0 | NA |
| 13 | 50925276 | 50921621 | -1 | NM_001039938 | INTS6     | 0 | NA | 0 | NA | 0 | NA | 0 | NA | 0 | NA |
| 13 | 51056484 | 51234172 | 1  | NM_052950    | WDFY2     | 0 | NA | 0 | NA | 0 | NA | 0 | NA | 0 | NA |
| 13 | 51276235 | 51242920 | -1 | NM_001031719 | DHRS12    | 0 | NA | 0 | NA | 1 | 13 | 0 | NA | 0 | NA |
| 13 | 51276294 | 51240131 | -1 | NM_024705    | DHRS12    | 0 | NA | 0 | NA | 1 | 13 | 0 | NA | 0 | NA |
| 13 | 51334117 | 51338373 | 1  | NM_031290    | CCDC70    | 0 | NA | 0 | NA | 0 | NA | 1 | 11 | 0 | NA |
| 13 | 51483631 | 51404805 | -1 | NM_000053    | ATP7B     | 0 | NA | 0 | NA | 0 | NA | 0 | NA | 0 | NA |
| 13 | 51483631 | 51404805 | -1 | NM_001005918 | ATP7B     | 0 | NA | 0 | NA | 0 | NA | 0 | NA | 0 | NA |
| 13 | 51484550 | 51501781 | 1  | NM_001004127 | ALG11     | 0 | NA | 0 | NA | 0 | NA | 0 | NA | 0 | NA |
| 13 | 51496827 | 51505702 | 1  | NM_021645    | UTP14C    | 0 | NA | 0 | NA | 0 | NA | 1 | 11 | 0 | NA |
| 13 | 51601215 | 51536900 | -1 | NM_199289    | NEK5      | 0 | NA | 0 | NA | 0 | NA | 0 | NA | 0 | NA |
| 13 | 51631511 | 51604779 | -1 | NM_152720    | NEK3      | 0 | NA | 0 | NA | 0 | NA | 0 | NA | 0 | NA |
| 13 | 51631997 | 51604779 | -1 | NM_002498    | NEK3      | 0 | NA | 0 | NA | 0 | NA | 0 | NA | 0 | NA |
| 13 | 51878321 | 51849303 | -1 | NM_018676    | THSD1     | 0 | NA | 0 | NA | 0 | NA | 0 | NA | 0 | NA |
| 13 | 51878321 | 51849303 | -1 | NM_199263    | THSD1     | 0 | NA | 0 | NA | 0 | NA | 0 | NA | 0 | NA |
| 13 | 51922764 | 51884737 | -1 | NM_016075    | VPS36     | 1 | 14 | 0 | NA | 0 | NA | 0 | NA | 0 | NA |
| 13 | 51927495 | 51948764 | 1  | NM_001098525 | CKAP2     | 1 | 14 | 0 | NA | 0 | NA | 0 | NA | 0 | NA |
| 13 | 51927495 | 51948764 | 1  | NM_018204    | CKAP2     | 1 | 14 | 0 | NA | 0 | NA | 0 | NA | 0 | NA |
| 13 | 52089605 | 52115920 | 1  | NM_001011724 | LOC144983 | 0 | NA | 0 | NA | 0 | NA | 0 | NA | 0 | NA |
| 13 | 52089605 | 52115920 | 1  | NM_001011725 | LOC144983 | 0 | NA | 0 | NA | 0 | NA | 0 | NA | 0 | NA |
| 13 | 52125001 | 52160434 | 1  | NM_006704    | SUGT1     | 1 | 11 | 0 | NA | 0 | NA | 0 | NA | 0 | NA |
| 13 | 52211948 | 52175399 | -1 | NM_001011705 | LECT1     | 0 | NA | 0 | NA | 0 | NA | 0 | NA | 0 | NA |
| 13 | 52211948 | 52175399 | -1 | NM_007015    | LECT1     | 0 | NA | 0 | NA | 0 | NA | 0 | NA | 0 | NA |
| 13 | 52320775 | 52316109 | -1 | NM_002590    | PCDH8     | 0 | NA | 0 | NA | 0 | NA | 0 | NA | 0 | NA |
| 13 | 52320775 | 52316109 | -1 | NM_032949    | PCDH8     | 0 | NA | 0 | NA | 0 | NA | 0 | NA | 0 | NA |
| 13 | 52500972 | 52524189 | 1  | NM_006418    | OLFM4     | 0 | NA | 0 | NA | 0 | NA | 0 | NA | 0 | NA |
| 13 | 56613052 | 56616074 | 1  | NM_198441    | FLJ40296  | 0 | NA | 0 | NA | 0 | NA | 0 | NA | 0 | NA |
| 13 | 56619622 | 56622644 | 1  | NM_198441    | FLJ40296  | 0 | NA | 0 | NA | 0 | NA | 0 | NA | 0 | NA |
| 13 | 56626195 | 56629217 | 1  | NM_198441    | FLJ40296  | 0 | NA | 0 | NA | 0 | NA | 0 | NA | 0 | NA |
| 13 | 56632766 | 56635788 | 1  | NM_198441    | FLJ40296  | 0 | NA | 0 | NA | 0 | NA | 0 | NA | 0 | NA |
| 13 | 56639331 | 56642353 | 1  | NM_198441    | FLJ40296  | 0 | NA | 0 | NA | 0 | NA | 0 | NA | 0 | NA |

|    |          |          |    |              |           |   |    |   |    |   |    |   |    |   |    |
|----|----------|----------|----|--------------|-----------|---|----|---|----|---|----|---|----|---|----|
| 13 | 57103789 | 57201066 | 1  | NM_001040429 | PCDH17    | 0 | NA | 1 | 17 | 0 | NA | 0 | NA | 1 | 12 |
| 13 | 59485344 | 59246297 | -1 | NM_030932    | DIAPH3    | 0 | NA | 0 | NA | 0 | NA | 0 | NA | 0 | NA |
| 13 | 59636120 | 59137723 | -1 | NM_001042517 | DIAPH3    | 0 | NA | 0 | NA | 0 | NA | 0 | NA | 0 | NA |
| 13 | 59869122 | 60046012 | 1  | NM_030794    | TDRD3     | 0 | NA | 0 | NA | 0 | NA | 0 | NA | 0 | NA |
| 13 | 60887282 | 60881819 | -1 | NM_022843    | PCDH20    | 0 | NA | 0 | NA | 0 | NA | 0 | NA | 0 | NA |
| 13 | 66702464 | 65774966 | -1 | NM_020403    | PCDH9     | 1 | 12 | 0 | NA | 1 | 12 | 0 | NA | 0 | NA |
| 13 | 66702464 | 65774966 | -1 | NM_203487    | PCDH9     | 1 | 12 | 0 | NA | 1 | 12 | 0 | NA | 0 | NA |
| 13 | 69580460 | 69172725 | -1 | NM_020866    | KLHL1     | 0 | NA | 0 | NA | 0 | NA | 0 | NA | 0 | NA |
| 13 | 71339331 | 70910098 | -1 | NM_004392    | DACH1     | 0 | NA | 0 | NA | 0 | NA | 0 | NA | 1 | 12 |
| 13 | 71339331 | 70910098 | -1 | NM_080759    | DACH1     | 0 | NA | 0 | NA | 0 | NA | 0 | NA | 1 | 12 |
| 13 | 71339331 | 70910098 | -1 | NM_080760    | DACH1     | 0 | NA | 0 | NA | 0 | NA | 0 | NA | 1 | 12 |
| 13 | 72199939 | 72180495 | -1 | NM_001071775 | LOC440145 | 1 | 18 | 0 | NA | 0 | NA | 0 | NA | 0 | NA |
| 13 | 72200042 | 72228329 | 1  | NM_024808    | C13orf34  | 1 | 18 | 0 | NA | 0 | NA | 0 | NA | 0 | NA |
| 13 | 72254007 | 72227540 | -1 | NM_014953    | DIS3      | 0 | NA | 0 | NA | 0 | NA | 0 | NA | 0 | NA |
| 13 | 72254230 | 72488592 | 1  | NM_006346    | PIBF1     | 0 | NA | 0 | NA | 0 | NA | 0 | NA | 0 | NA |
| 13 | 72531142 | 72549677 | 1  | NM_001730    | KLF5      | 0 | NA | 0 | NA | 0 | NA | 0 | NA | 0 | NA |
| 13 | 73606067 | 73158149 | -1 | NM_007249    | KLF12     | 0 | NA | 0 | NA | 1 | 15 | 0 | NA | 0 | NA |
| 13 | 74954251 | 74756809 | -1 | NM_014832    | TBC1D4    | 0 | NA | 0 | NA | 0 | NA | 0 | NA | 0 | NA |
| 13 | 75009992 | 74997350 | -1 | NM_203495    | COMMD6    | 0 | NA | 0 | NA | 0 | NA | 1 | 17 | 0 | NA |
| 13 | 75009992 | 74997350 | -1 | NM_203497    | COMMD6    | 0 | NA | 0 | NA | 0 | NA | 1 | 17 | 0 | NA |
| 13 | 75021927 | 75078069 | 1  | NM_006002    | UCHL3     | 0 | NA | 0 | NA | 0 | NA | 0 | NA | 0 | NA |
| 13 | 75092570 | 75332003 | 1  | NM_005358    | LMO7      | 0 | NA | 0 | NA | 0 | NA | 0 | NA | 0 | NA |
| 13 | 76356541 | 76352304 | -1 | NM_138444    | KCTD12    | 0 | NA | 0 | NA | 0 | NA | 0 | NA | 0 | NA |
| 13 | 76462795 | 76474653 | 1  | NM_006493    | CLN5      | 0 | NA | 0 | NA | 0 | NA | 0 | NA | 0 | NA |
| 13 | 76499258 | 76477396 | -1 | NM_012158    | FBXL3     | 0 | NA | 0 | NA | 0 | NA | 0 | NA | 0 | NA |
| 13 | 76799178 | 76516792 | -1 | NM_015057    | MYCBP2    | 0 | NA | 0 | NA | 1 | 12 | 1 | 11 | 0 | NA |
| 13 | 77007859 | 77116645 | 1  | NM_003843    | SCEL      | 0 | NA | 0 | NA | 0 | NA | 0 | NA | 0 | NA |
| 13 | 77007859 | 77116645 | 1  | NM_144777    | SCEL      | 0 | NA | 0 | NA | 0 | NA | 0 | NA | 0 | NA |
| 13 | 77170470 | 77236378 | 1  | NM_001040153 | SLAIN1    | 0 | NA | 0 | NA | 0 | NA | 0 | NA | 0 | NA |
| 13 | 77213295 | 77236378 | 1  | NM_144595    | SLAIN1    | 0 | NA | 0 | NA | 0 | NA | 0 | NA | 0 | NA |
| 13 | 77390967 | 77367616 | -1 | NM_001122659 | EDNRB     | 1 | 23 | 0 | NA | 0 | NA | 0 | NA | 0 | NA |
| 13 | 77390967 | 77367616 | -1 | NM_003991    | EDNRB     | 1 | 23 | 0 | NA | 0 | NA | 0 | NA | 0 | NA |
| 13 | 77447665 | 77367616 | -1 | NM_000115    | EDNRB     | 0 | NA | 0 | NA | 0 | NA | 0 | NA | 0 | NA |
| 13 | 78075696 | 78071230 | -1 | NM_006237    | POU4F1    | 0 | NA | 1 | 18 | 0 | NA | 0 | NA | 0 | NA |
| 13 | 78131315 | 78086421 | -1 | NM_024546    | RNF219    | 0 | NA | 0 | NA | 0 | NA | 0 | NA | 0 | NA |
| 13 | 78877924 | 78792099 | -1 | NM_022118    | RBM26     | 0 | NA | 0 | NA | 0 | NA | 0 | NA | 0 | NA |
| 13 | 78953287 | 79026222 | 1  | NM_019080    | NDPIP2    | 0 | NA | 0 | NA | 0 | NA | 0 | NA | 0 | NA |
| 13 | 79813087 | 79808112 | -1 | NM_005842    | SPRY2     | 1 | 13 | 0 | NA | 0 | NA | 0 | NA | 0 | NA |
| 13 | 83354529 | 83349343 | -1 | NM_052910    | SLITRK1   | 0 | NA | 0 | NA | 0 | NA | 0 | NA | 0 | NA |
| 13 | 85271484 | 85264922 | -1 | NM_032229    | SLITRK6   | 0 | NA | 0 | NA | 0 | NA | 0 | NA | 0 | NA |
| 13 | 87122870 | 87129871 | 1  | NM_015567    | SLITRK5   | 0 | NA | 0 | NA | 0 | NA | 0 | NA | 0 | NA |
| 13 | 90848887 | 92317488 | 1  | NM_004466    | GPC5      | 0 | NA | 0 | NA | 0 | NA | 0 | NA | 0 | NA |
| 13 | 92677095 | 93853948 | 1  | NM_005708    | GPC6      | 0 | NA | 0 | NA | 1 | 16 | 0 | NA | 0 | NA |
| 13 | 93929924 | 93889841 | -1 | NM_001922    | DCT       | 0 | NA | 0 | NA | 1 | 16 | 0 | NA | 0 | NA |
| 13 | 94046512 | 94024308 | -1 | NM_014305    | TGDS      | 1 | 19 | 0 | NA | 0 | NA | 1 | 11 | 0 | NA |
| 13 | 94052104 | 94079947 | 1  | NM_180989    | GPR180    | 1 | 13 | 0 | NA | 0 | NA | 1 | 11 | 0 | NA |
| 13 | 94162390 | 94159879 | -1 | NM_007084    | SOX21     | 0 | NA | 0 | NA | 0 | NA | 0 | NA | 0 | NA |
| 13 | 94751688 | 94470083 | -1 | NM_005845    | ABCC4     | 0 | NA | 0 | NA | 1 | 14 | 0 | NA | 0 | NA |
| 13 | 94751688 | 94546025 | -1 | NM_001105515 | ABCC4     | 0 | NA | 0 | NA | 1 | 14 | 0 | NA | 0 | NA |
| 13 | 94883858 | 95029907 | 1  | NM_182848    | CLDN10    | 0 | NA | 0 | NA | 0 | NA | 0 | NA | 0 | NA |
| 13 | 95002960 | 95029907 | 1  | NM_006984    | CLDN10    | 0 | NA | 1 | 13 | 0 | NA | 0 | NA | 0 | NA |
| 13 | 95094958 | 95028456 | -1 | NM_014934    | DZIP1     | 0 | NA | 0 | NA | 0 | NA | 0 | NA | 0 | NA |
| 13 | 95094958 | 95028456 | -1 | NM_198968    | DZIP1     | 0 | NA | 0 | NA | 0 | NA | 0 | NA | 0 | NA |
| 13 | 95127483 | 95241285 | 1  | NM_006260    | DNAJC3    | 0 | NA | 0 | NA | 0 | NA | 0 | NA | 0 | NA |
| 13 | 95503638 | 95251836 | -1 | NM_020121    | UGCG2     | 0 | NA | 0 | NA | 0 | NA | 0 | NA | 0 | NA |
| 13 | 95541093 | 96289813 | 1  | NM_153456    | HS6ST3    | 0 | NA | 0 | NA | 0 | NA | 0 | NA | 0 | NA |
| 13 | 96444605 | 96435973 | -1 | NM_080818    | OXGR1     | 0 | NA | 0 | NA | 0 | NA | 0 | NA | 0 | NA |
| 13 | 96672574 | 96844375 | 1  | NM_144778    | MBNL2     | 0 | NA | 0 | NA | 0 | NA | 0 | NA | 0 | NA |
| 13 | 96672574 | 96844375 | 1  | NM_207304    | MBNL2     | 0 | NA | 0 | NA | 0 | NA | 0 | NA | 0 | NA |
| 13 | 98884476 | 96918245 | 1  | NM_021033    | RAP2A     | 1 | 36 | 0 | NA | 0 | NA | 0 | NA | 0 | NA |
| 13 | 97403929 | 97474551 | 1  | NM_002271    | IPO5      | 0 | NA | 0 | NA | 0 | NA | 0 | NA | 0 | NA |
| 13 | 97593434 | 97695559 | 1  | NM_001001715 | FARP1     | 0 | NA | 0 | NA | 0 | NA | 0 | NA | 0 | NA |
| 13 | 97593434 | 97900024 | 1  | NM_005766    | FARP1     | 0 | NA | 0 | NA | 0 | NA | 0 | NA | 0 | NA |
| 13 | 97627522 | 97626039 | -1 | NM_178861    | RNF113B   | 0 | NA | 0 | NA | 0 | NA | 0 | NA | 0 | NA |
| 13 | 97972342 | 97900455 | -1 | NM_003576    | STK24     | 0 | NA | 0 | NA | 0 | NA | 0 | NA | 0 | NA |

|    |           |           |    |              |           |   |    |   |    |   |    |   |    |   |    |
|----|-----------|-----------|----|--------------|-----------|---|----|---|----|---|----|---|----|---|----|
| 13 | 98027397  | 97900455  | -1 | NM_001032296 | STK24     | 0 | NA | 0 | NA | 0 | NA | 0 | NA | 0 | NA |
| 13 | 98202909  | 98134056  | -1 | NM_005073    | SLC15A1   | 0 | NA | 1 | 12 | 0 | NA | 0 | NA | 0 | NA |
| 13 | 98536661  | 98243744  | -1 | NM_015296    | DOCK9     | 0 | NA | 0 | NA | 0 | NA | 0 | NA | 0 | NA |
| 13 | 98651163  | 98836682  | 1  | NM_177967    | UBAC2     | 0 | NA | 0 | NA | 0 | NA | 0 | NA | 0 | NA |
| 13 | 98708683  | 98704967  | -1 | NM_001098200 | GPR18     | 0 | NA | 0 | NA | 0 | NA | 0 | NA | 0 | NA |
| 13 | 98708683  | 98704967  | -1 | NM_005292    | GPR18     | 0 | NA | 0 | NA | 0 | NA | 0 | NA | 0 | NA |
| 13 | 98757695  | 98744789  | -1 | NM_004951    | EBI2      | 0 | NA | 0 | NA | 0 | NA | 0 | NA | 0 | NA |
| 13 | 98951728  | 99013277  | 1  | NM_004800    | TM9SF2    | 1 | 14 | 0 | NA | 0 | NA | 1 | 14 | 0 | NA |
| 13 | 99056936  | 99342825  | 1  | NM_206808    | CLYBL     | 0 | NA | 0 | NA | 0 | NA | 0 | NA | 0 | NA |
| 13 | 99422179  | 99413275  | -1 | NM_033132    | ZIC5      | 0 | NA | 1 | 13 | 0 | NA | 0 | NA | 0 | NA |
| 13 | 99432319  | 99437020  | 1  | NM_007129    | ZIC2      | 0 | NA | 1 | 30 | 0 | NA | 0 | NA | 0 | NA |
| 13 | 99539337  | 99980689  | 1  | NM_000282    | PCCA      | 1 | 16 | 0 | NA | 0 | NA | 0 | NA | 0 | NA |
| 13 | 100125104 | 100054090 | -1 | NM_001079669 | TMTC4     | 0 | NA | 0 | NA | 0 | NA | 0 | NA | 0 | NA |
| 13 | 100125104 | 100054090 | -1 | NM_032813    | TMTC4     | 0 | NA | 0 | NA | 0 | NA | 0 | NA | 0 | NA |
| 13 | 100866814 | 100504130 | -1 | NM_052867    | NALCN     | 0 | NA | 0 | NA | 0 | NA | 0 | NA | 0 | NA |
| 13 | 100902966 | 101166795 | 1  | NM_004791    | ITGBL1    | 0 | NA | 0 | NA | 0 | NA | 0 | NA | 0 | NA |
| 13 | 101366966 | 101171205 | -1 | NM_004115    | FGF14     | 0 | NA | 0 | NA | 0 | NA | 0 | NA | 0 | NA |
| 13 | 101852125 | 101171205 | -1 | NM_175929    | FGF14     | 0 | NA | 0 | NA | 0 | NA | 0 | NA | 0 | NA |
| 13 | 102047286 | 102129524 | 1  | NM_003291    | TPP2      | 0 | NA | 0 | NA | 0 | NA | 0 | NA | 0 | NA |
| 13 | 102144855 | 102136097 | -1 | NM_001010977 | LOC196541 | 0 | NA | 0 | NA | 0 | NA | 0 | NA | 0 | NA |
| 13 | 102224143 | 102216466 | -1 | NM_138779    | C13orf27  | 1 | 11 | 1 | 13 | 0 | NA | 0 | NA | 0 | NA |
| 13 | 102249399 | 102291882 | 1  | NM_017693    | BIVM      | 0 | NA | 0 | NA | 0 | NA | 0 | NA | 0 | NA |
| 13 | 102249405 | 102234631 | -1 | NM_024089    | KDELC1    | 0 | NA | 0 | NA | 0 | NA | 0 | NA | 0 | NA |
| 13 | 102296174 | 102326346 | 1  | NM_000123    | ERCC5     | 1 | 23 | 0 | NA | 0 | NA | 0 | NA | 0 | NA |
| 13 | 102517197 | 102494350 | -1 | NM_000452    | SLC10A2   | 0 | NA | 0 | NA | 0 | NA | 0 | NA | 0 | NA |
| 13 | 104916364 | 104941384 | 1  | NM_172370    | DAOA      | 0 | NA | 0 | NA | 0 | NA | 0 | NA | 0 | NA |
| 13 | 105985338 | 105940096 | -1 | NM_004093    | EFNB2     | 0 | NA | 0 | NA | 0 | NA | 0 | NA | 0 | NA |
| 13 | 106018515 | 105993662 | -1 | NM_018011    | ARGLU1    | 0 | NA | 0 | NA | 0 | NA | 1 | 14 | 0 | NA |
| 13 | 107317084 | 106618879 | -1 | NM_001080396 | FAM155A   | 0 | NA | 0 | NA | 0 | NA | 0 | NA | 0 | NA |
| 13 | 107665131 | 107657792 | -1 | NM_002312    | LIG4      | 0 | NA | 0 | NA | 0 | NA | 1 | 12 | 0 | NA |
| 13 | 107665883 | 107657792 | -1 | NM_206937    | LIG4      | 0 | NA | 0 | NA | 0 | NA | 1 | 12 | 0 | NA |
| 13 | 107668717 | 107657792 | -1 | NM_001098268 | LIG4      | 0 | NA | 0 | NA | 0 | NA | 1 | 12 | 0 | NA |
| 13 | 107668763 | 107684604 | 1  | NM_032859    | ABHD13    | 0 | NA | 0 | NA | 0 | NA | 1 | 12 | 0 | NA |
| 13 | 107719977 | 107757366 | 1  | NM_006573    | TNFSF13B  | 0 | NA | 0 | NA | 0 | NA | 0 | NA | 0 | NA |
| 13 | 108046500 | 108658356 | 1  | NM_015011    | MYO16     | 0 | NA | 0 | NA | 0 | NA | 0 | NA | 0 | NA |
| 13 | 109236915 | 109204184 | -1 | NM_003749    | IRS2      | 0 | NA | 0 | NA | 0 | NA | 0 | NA | 0 | NA |
| 13 | 109757497 | 109599310 | -1 | NM_001845    | COL4A1    | 0 | NA | 0 | NA | 0 | NA | 0 | NA | 1 | 15 |
| 13 | 109757631 | 109963374 | 1  | NM_001846    | COL4A2    | 0 | NA | 0 | NA | 0 | NA | 0 | NA | 1 | 15 |
| 13 | 110012072 | 109973413 | -1 | NM_017817    | RAB20     | 0 | NA | 0 | NA | 0 | NA | 0 | NA | 0 | NA |
| 13 | 110066008 | 110090343 | 1  | NM_018210    | FLJ10769  | 0 | NA | 0 | NA | 0 | NA | 0 | NA | 0 | NA |
| 13 | 110156464 | 110091759 | -1 | NM_024537    | CARS2     | 1 | 14 | 0 | NA | 0 | NA | 0 | NA | 0 | NA |
| 13 | 110163083 | 110171422 | 1  | NM_198217    | ING1      | 1 | 14 | 0 | NA | 0 | NA | 0 | NA | 0 | NA |
| 13 | 110163610 | 110171422 | 1  | NM_198218    | ING1      | 1 | 14 | 0 | NA | 0 | NA | 0 | NA | 0 | NA |
| 13 | 110163625 | 110171422 | 1  | NM_198219    | ING1      | 1 | 14 | 0 | NA | 0 | NA | 0 | NA | 0 | NA |
| 13 | 110165359 | 110171422 | 1  | NM_005537    | ING1      | 1 | 14 | 0 | NA | 0 | NA | 0 | NA | 0 | NA |
| 13 | 110365417 | 110328887 | -1 | NM_017664    | ANKRD10   | 0 | NA | 0 | NA | 0 | NA | 0 | NA | 0 | NA |
| 13 | 110565624 | 110745543 | 1  | NM_001113511 | ARHGEF7   | 0 | NA | 1 | 12 | 0 | NA | 0 | NA | 0 | NA |
| 13 | 110565624 | 110745543 | 1  | NM_001113512 | ARHGEF7   | 0 | NA | 1 | 12 | 0 | NA | 0 | NA | 0 | NA |
| 13 | 110565624 | 110745543 | 1  | NM_145735    | ARHGEF7   | 0 | NA | 1 | 12 | 0 | NA | 0 | NA | 0 | NA |
| 13 | 110604061 | 110756082 | 1  | NM_003899    | ARHGEF7   | 0 | NA | 0 | NA | 0 | NA | 0 | NA | 0 | NA |
| 13 | 110637173 | 110756082 | 1  | NM_001113513 | ARHGEF7   | 0 | NA | 0 | NA | 0 | NA | 0 | NA | 0 | NA |
| 13 | 110771015 | 110794595 | 1  | NM_152324    | C13orf16  | 0 | NA | 0 | NA | 0 | NA | 0 | NA | 0 | NA |
| 13 | 111769913 | 111774021 | 1  | NM_005986    | SOX1      | 0 | NA | 0 | NA | 0 | NA | 0 | NA | 0 | NA |
| 13 | 112078669 | 112137002 | 1  | NM_145248    | C13orf28  | 0 | NA | 0 | NA | 0 | NA | 0 | NA | 0 | NA |
| 13 | 112290482 | 112187328 | -1 | NM_006322    | TUBGCP3   | 0 | NA | 0 | NA | 1 | 15 | 0 | NA | 0 | NA |
| 13 | 112349358 | 112386812 | 1  | NM_207440    | C13orf35  | 0 | NA | 1 | 13 | 0 | NA | 0 | NA | 0 | NA |
| 13 | 112392643 | 112589483 | 1  | NM_015205    | ATP11A    | 0 | NA | 0 | NA | 0 | NA | 0 | NA | 0 | NA |
| 13 | 112392643 | 112589483 | 1  | NM_032189    | ATP11A    | 0 | NA | 0 | NA | 0 | NA | 0 | NA | 0 | NA |
| 13 | 112670757 | 112800863 | 1  | NM_001112732 | MCF2L     | 0 | NA | 1 | 12 | 0 | NA | 0 | NA | 0 | NA |
| 13 | 112681655 | 112800863 | 1  | NM_024979    | MCF2L     | 0 | NA | 1 | 12 | 0 | NA | 0 | NA | 0 | NA |
| 13 | 112808105 | 112822996 | 1  | NM_000131    | F7        | 0 | NA | 0 | NA | 0 | NA | 0 | NA | 0 | NA |
| 13 | 112808105 | 112822996 | 1  | NM_019616    | F7        | 0 | NA | 0 | NA | 0 | NA | 0 | NA | 0 | NA |
| 13 | 112825113 | 112851844 | 1  | NM_000504    | F10       | 0 | NA | 1 | 21 | 0 | NA | 0 | NA | 1 | 13 |
| 13 | 112860968 | 112874695 | 1  | NM_003891    | PROZ      | 0 | NA | 0 | NA | 0 | NA | 1 | 12 | 0 | NA |
| 13 | 112910984 | 112879926 | -1 | NM_018386    | PCID2     | 0 | NA | 0 | NA | 0 | NA | 0 | NA | 0 | NA |

|    |           |           |    |              |          |   |    |   |    |   |    |   |    |   |    |
|----|-----------|-----------|----|--------------|----------|---|----|---|----|---|----|---|----|---|----|
| 13 | 112911086 | 112967393 | 1  | NM_003589    | CUL4A    | 0 | NA | 0 | NA | 0 | NA | 0 | NA | 0 | NA |
| 13 | 112911931 | 112967393 | 1  | NM_001008895 | CUL4A    | 0 | NA | 0 | NA | 0 | NA | 0 | NA | 0 | NA |
| 13 | 112999469 | 113025742 | 1  | NM_005561    | LAMP1    | 0 | NA | 0 | NA | 1 | 16 | 0 | NA | 0 | NA |
| 13 | 113066464 | 113026505 | -1 | NM_024719    | GRTP1    | 0 | NA | 0 | NA | 0 | NA | 0 | NA | 0 | NA |
| 13 | 113151458 | 113124260 | -1 | NM_199162    | ADPRHL1  | 0 | NA | 0 | NA | 0 | NA | 0 | NA | 0 | NA |
| 13 | 113155840 | 113124584 | -1 | NM_138430    | ADPRHL1  | 0 | NA | 0 | NA | 0 | NA | 0 | NA | 0 | NA |
| 13 | 113193024 | 113158134 | -1 | NM_001014283 | DCUN1D2  | 0 | NA | 0 | NA | 0 | NA | 0 | NA | 0 | NA |
| 13 | 113193308 | 113252545 | 1  | NM_017905    | TMC03    | 0 | NA | 0 | NA | 0 | NA | 0 | NA | 0 | NA |
| 13 | 113287056 | 113343506 | 1  | NM_007111    | TFDP1    | 0 | NA | 0 | NA | 0 | NA | 0 | NA | 0 | NA |
| 13 | 113360502 | 113351122 | -1 | NM_000705    | ATP4B    | 0 | NA | 0 | NA | 0 | NA | 0 | NA | 0 | NA |
| 13 | 113369597 | 113373973 | 1  | NM_002929    | GRK1     | 0 | NA | 0 | NA | 0 | NA | 0 | NA | 0 | NA |
| 13 | 113546912 | 113590396 | 1  | NM_000820    | GAS6     | 0 | NA | 0 | NA | 0 | NA | 1 | 11 | 0 | NA |
| 13 | 113651873 | 113599043 | -1 | NM_182614    | FAM70B   | 0 | NA | 0 | NA | 0 | NA | 0 | NA | 0 | NA |
| 13 | 113916197 | 113765295 | -1 | NM_007368    | RASA3    | 0 | NA | 1 | 12 | 1 | 12 | 0 | NA | 0 | NA |
| 13 | 114018463 | 114056252 | 1  | NM_001078645 | CDC16    | 1 | 27 | 0 | NA | 1 | 16 | 0 | NA | 0 | NA |
| 13 | 114018463 | 114056252 | 1  | NM_003903    | CDC16    | 1 | 27 | 0 | NA | 1 | 16 | 0 | NA | 0 | NA |
| 13 | 114065179 | 114089385 | 1  | NM_023011    | UPF3A    | 0 | NA | 0 | NA | 0 | NA | 0 | NA | 0 | NA |
| 13 | 114065179 | 114089385 | 1  | NM_080687    | UPF3A    | 0 | NA | 0 | NA | 0 | NA | 0 | NA | 0 | NA |
| 13 | 114098116 | 114110899 | 1  | NM_032436    | ZNF828   | 1 | 13 | 0 | NA | 0 | NA | 0 | NA | 0 | NA |
| 12 | 56802     | 150755    | 1  | NM_015232    | IQSEC3   | 0 | NA | 0 | NA | 0 | NA | 0 | NA | 0 | NA |
| 12 | 192753    | 169512    | -1 | NM_003044    | SLC6A12  | 0 | NA | 0 | NA | 0 | NA | 0 | NA | 0 | NA |
| 12 | 193095    | 169510    | -1 | NM_001122847 | SLC6A12  | 0 | NA | 0 | NA | 0 | NA | 0 | NA | 0 | NA |
| 12 | 193632    | 169510    | -1 | NM_001122848 | SLC6A12  | 0 | NA | 1 | 12 | 0 | NA | 0 | NA | 0 | NA |
| 12 | 242263    | 200051    | -1 | NM_016615    | SLC6A13  | 0 | NA | 0 | NA | 0 | NA | 0 | NA | 1 | 12 |
| 12 | 368881    | 259483    | -1 | NM_001042603 | JARID1A  | 0 | NA | 0 | NA | 0 | NA | 0 | NA | 0 | NA |
| 12 | 368881    | 259483    | -1 | NM_005056    | JARID1A  | 0 | NA | 0 | NA | 0 | NA | 0 | NA | 0 | NA |
| 12 | 384938    | 422067    | 1  | NM_032358    | CCDC77   | 1 | 11 | 0 | NA | 0 | NA | 0 | NA | 0 | NA |
| 12 | 439803    | 541319    | 1  | NM_173593    | B4GALNT3 | 0 | NA | 0 | NA | 1 | 19 | 1 | 11 | 0 | NA |
| 12 | 643016    | 543722    | -1 | NM_016533    | NINJ2    | 0 | NA | 0 | NA | 0 | NA | 0 | NA | 0 | NA |
| 12 | 732485    | 890879    | 1  | NM_018979    | WNK1     | 0 | NA | 0 | NA | 0 | NA | 0 | NA | 0 | NA |
| 12 | 847256    | 848561    | 1  | NM_213655    | HSN2     | 0 | NA | 0 | NA | 0 | NA | 0 | NA | 0 | NA |
| 12 | 929124    | 891515    | -1 | NM_134424    | RAD52    | 0 | NA | 0 | NA | 0 | NA | 1 | 14 | 0 | NA |
| 12 | 970664    | 1472958   | 1  | NM_015064    | ERC1     | 0 | NA | 0 | NA | 0 | NA | 0 | NA | 0 | NA |
| 12 | 970664    | 1472958   | 1  | NM_178037    | ERC1     | 0 | NA | 0 | NA | 0 | NA | 0 | NA | 0 | NA |
| 12 | 970664    | 1472958   | 1  | NM_178038    | ERC1     | 0 | NA | 0 | NA | 0 | NA | 0 | NA | 0 | NA |
| 12 | 970664    | 1472958   | 1  | NM_178039    | ERC1     | 0 | NA | 0 | NA | 0 | NA | 0 | NA | 0 | NA |
| 12 | 970664    | 1472958   | 1  | NM_178040    | ERC1     | 0 | NA | 0 | NA | 0 | NA | 0 | NA | 0 | NA |
| 12 | 1573592   | 1545419   | -1 | NM_152441    | FBXL14   | 0 | NA | 0 | NA | 0 | NA | 1 | 12 | 0 | NA |
| 12 | 1596482   | 1626638   | 1  | NM_030775    | WNT5B    | 0 | NA | 0 | NA | 0 | NA | 0 | NA | 0 | NA |
| 12 | 1608672   | 1626639   | 1  | NM_032642    | WNT5B    | 0 | NA | 0 | NA | 0 | NA | 0 | NA | 0 | NA |
| 12 | 1670507   | 1768106   | 1  | NM_024551    | ADIPOR2  | 1 | 21 | 0 | NA | 0 | NA | 0 | NA | 0 | NA |
| 12 | 1799955   | 1816179   | 1  | NM_001039029 | LRTM2    | 1 | 20 | 0 | NA | 0 | NA | 0 | NA | 1 | 14 |
| 12 | 1898131   | 1771383   | -1 | NM_172364    | CACNA2D4 | 1 | 12 | 0 | NA | 0 | NA | 0 | NA | 0 | NA |
| 12 | 1983938   | 1925474   | -1 | NM_152640    | DCP1B    | 1 | 28 | 0 | NA | 1 | 27 | 1 | 14 | 0 | NA |
| 12 | 2032724   | 2677376   | 1  | NM_000719    | CACNA1C  | 0 | NA | 0 | NA | 0 | NA | 0 | NA | 0 | NA |
| 12 | 2774413   | 2783385   | 1  | NM_002014    | FKBP4    | 0 | NA | 0 | NA | 0 | NA | 0 | NA | 0 | NA |
| 12 | 2792123   | 2804367   | 1  | NM_018463    | ITFG2    | 1 | 20 | 0 | NA | 0 | NA | 0 | NA | 0 | NA |
| 12 | 2814450   | 2804774   | -1 | NM_031474    | NRIP2    | 0 | NA | 0 | NA | 0 | NA | 0 | NA | 0 | NA |
| 12 | 2856564   | 2837109   | -1 | NM_021953    | FOXM1    | 0 | NA | 0 | NA | 0 | NA | 0 | NA | 0 | NA |
| 12 | 2856564   | 2837109   | -1 | NM_202002    | FOXM1    | 0 | NA | 0 | NA | 0 | NA | 0 | NA | 0 | NA |
| 12 | 2856564   | 2837109   | -1 | NM_202003    | FOXM1    | 0 | NA | 0 | NA | 0 | NA | 0 | NA | 0 | NA |
| 12 | 2856649   | 2868887   | 1  | NM_031465    | C12orf32 | 0 | NA | 0 | NA | 0 | NA | 0 | NA | 0 | NA |
| 12 | 2870293   | 2920562   | 1  | NM_003324    | TULP3    | 0 | NA | 0 | NA | 1 | 13 | 0 | NA | 0 | NA |
| 12 | 2938756   | 3020103   | 1  | NM_003213    | TEAD4    | 1 | 14 | 0 | NA | 0 | NA | 1 | 13 | 0 | NA |
| 12 | 2938756   | 3020103   | 1  | NM_201441    | TEAD4    | 1 | 14 | 0 | NA | 0 | NA | 1 | 13 | 0 | NA |
| 12 | 2939222   | 3020103   | 1  | NM_201443    | TEAD4    | 1 | 14 | 0 | NA | 0 | NA | 1 | 13 | 0 | NA |
| 12 | 3056817   | 3265991   | 1  | NM_006675    | TSPAN9   | 0 | NA | 0 | NA | 0 | NA | 0 | NA | 0 | NA |
| 12 | 3470685   | 3573399   | 1  | NM_019854    | PRMT8    | 0 | NA | 0 | NA | 1 | 12 | 0 | NA | 0 | NA |
| 12 | 3732524   | 3627369   | -1 | NM_032680    | EFCAB4B  | 0 | NA | 0 | NA | 0 | NA | 0 | NA | 0 | NA |
| 12 | 3852863   | 3788287   | -1 | NM_020367    | PARP11   | 0 | NA | 0 | NA | 0 | NA | 0 | NA | 0 | NA |
| 12 | 4253198   | 4284777   | 1  | NM_001759    | CCND2    | 0 | NA | 1 | 21 | 0 | NA | 0 | NA | 0 | NA |
| 12 | 4300619   | 4339451   | 1  | NM_020375    | C12orf5  | 0 | NA | 0 | NA | 0 | NA | 0 | NA | 0 | NA |
| 12 | 4359155   | 4347653   | -1 | NM_020638    | FGF23    | 0 | NA | 0 | NA | 0 | NA | 0 | NA | 0 | NA |
| 12 | 4425041   | 4413568   | -1 | NM_020996    | FGF6     | 0 | NA | 0 | NA | 0 | NA | 0 | NA | 1 | 12 |
| 12 | 4517898   | 4467161   | -1 | NM_020374    | C12orf4  | 0 | NA | 0 | NA | 0 | NA | 1 | 14 | 0 | NA |

|    |         |         |    |              |          |   |    |   |    |   |    |   |    |   |    |
|----|---------|---------|----|--------------|----------|---|----|---|----|---|----|---|----|---|----|
| 12 | 4518316 | 4539475 | 1  | NM_006479    | RAD51AP1 | 0 | NA | 0 | NA | 0 | NA | 1 | 14 | 0 | NA |
| 12 | 4569504 | 4593302 | 1  | NM_003845    | DYRK4    | 0 | NA | 0 | NA | 0 | NA | 0 | NA | 0 | NA |
| 12 | 4624604 | 4594936 | -1 | NM_006422    | AKAP3    | 1 | 19 | 0 | NA | 1 | 14 | 0 | NA | 0 | NA |
| 12 | 4628543 | 4666660 | 1  | NM_005002    | NDUFA9   | 1 | 19 | 0 | NA | 1 | 14 | 0 | NA | 0 | NA |
| 12 | 4700012 | 4752153 | 1  | NM_017417    | GALNT8   | 0 | NA | 0 | NA | 0 | NA | 0 | NA | 0 | NA |
| 12 | 4788602 | 4792839 | 1  | NM_002235    | KCNA6    | 0 | NA | 0 | NA | 0 | NA | 0 | NA | 0 | NA |
| 12 | 4889333 | 4897683 | 1  | NM_000217    | KCNA1    | 0 | NA | 0 | NA | 0 | NA | 0 | NA | 0 | NA |
| 12 | 5023345 | 5026210 | 1  | NM_002234    | KCNA5    | 0 | NA | 0 | NA | 0 | NA | 0 | NA | 0 | NA |
| 12 | 5411540 | 5474726 | 1  | NM_001102654 | NTF3     | 0 | NA | 0 | NA | 0 | NA | 0 | NA | 0 | NA |
| 12 | 5473558 | 5474726 | 1  | NM_002527    | NTF3     | 0 | NA | 0 | NA | 0 | NA | 0 | NA | 0 | NA |
| 12 | 5925659 | 5542080 | -1 | NM_020373    | TMEM16B  | 0 | NA | 0 | NA | 0 | NA | 0 | NA | 0 | NA |
| 12 | 6104097 | 5928300 | -1 | NM_000552    | VWF      | 0 | NA | 0 | NA | 0 | NA | 0 | NA | 1 | 14 |
| 12 | 6179815 | 6217688 | 1  | NM_001769    | CD9      | 1 | 11 | 0 | NA | 0 | NA | 0 | NA | 0 | NA |
| 12 | 6289862 | 6307932 | 1  | NM_018173    | PLEKHG6  | 0 | NA | 0 | NA | 0 | NA | 0 | NA | 0 | NA |
| 12 | 6321522 | 6308183 | -1 | NM_001065    | TNFRSF1A | 1 | 12 | 0 | NA | 1 | 16 | 1 | 15 | 0 | NA |
| 12 | 6354976 | 6326273 | -1 | NM_001038    | SCNN1A   | 0 | NA | 0 | NA | 1 | 17 | 1 | 11 | 0 | NA |
| 12 | 6363617 | 6370993 | 1  | NM_002342    | LTBR     | 0 | NA | 0 | NA | 1 | 17 | 0 | NA | 0 | NA |
| 12 | 6424311 | 6431145 | 1  | NM_001242    | CD27     | 0 | NA | 0 | NA | 0 | NA | 0 | NA | 0 | NA |
| 12 | 6431437 | 6441749 | 1  | NM_018009    | TAPBP1   | 0 | NA | 0 | NA | 0 | NA | 1 | 11 | 0 | NA |
| 12 | 6450104 | 6441664 | -1 | NM_014231    | VAMP1    | 0 | NA | 0 | NA | 1 | 12 | 1 | 11 | 0 | NA |
| 12 | 6450104 | 6441664 | -1 | NM_016830    | VAMP1    | 0 | NA | 0 | NA | 1 | 12 | 1 | 11 | 0 | NA |
| 12 | 6450104 | 6441664 | -1 | NM_199245    | VAMP1    | 0 | NA | 0 | NA | 1 | 12 | 1 | 11 | 0 | NA |
| 12 | 6472732 | 6471576 | -1 | NM_016497    | MRPL51   | 1 | 14 | 0 | NA | 0 | NA | 0 | NA | 0 | NA |
| 12 | 6473558 | 6511393 | 1  | NM_014865    | NCAPD2   | 1 | 14 | 0 | NA | 0 | NA | 0 | NA | 0 | NA |
| 12 | 6513917 | 6517797 | 1  | NM_002046    | GAPDH    | 1 | 11 | 0 | NA | 1 | 14 | 1 | 12 | 0 | NA |
| 12 | 6528535 | 6518954 | -1 | NM_080731    | IFFO     | 0 | NA | 0 | NA | 0 | NA | 1 | 13 | 0 | NA |
| 12 | 6535490 | 6518954 | -1 | NM_001039670 | IFFO     | 0 | NA | 0 | NA | 0 | NA | 1 | 13 | 0 | NA |
| 12 | 6535490 | 6518954 | -1 | NM_080730    | IFFO     | 0 | NA | 0 | NA | 0 | NA | 1 | 13 | 0 | NA |
| 12 | 6547741 | 6536297 | -1 | NM_001033714 | NOL1     | 0 | NA | 0 | NA | 0 | NA | 0 | NA | 0 | NA |
| 12 | 6547741 | 6536297 | -1 | NM_006170    | NOL1     | 0 | NA | 0 | NA | 0 | NA | 0 | NA | 0 | NA |
| 12 | 6586812 | 6549508 | -1 | NM_001273    | CHD4     | 1 | 13 | 0 | NA | 0 | NA | 0 | NA | 0 | NA |
| 12 | 6615548 | 6598261 | -1 | NM_020400    | LPAR5    | 0 | NA | 1 | 13 | 0 | NA | 0 | NA | 1 | 12 |
| 12 | 6626841 | 6617502 | -1 | NM_032489    | ACRBP    | 0 | NA | 1 | 17 | 0 | NA | 0 | NA | 1 | 12 |
| 12 | 6642565 | 6629706 | -1 | NM_016162    | ING4     | 1 | 16 | 0 | NA | 0 | NA | 0 | NA | 0 | NA |
| 12 | 6668086 | 6645903 | -1 | NM_001039916 | ZNF384   | 0 | NA | 0 | NA | 0 | NA | 0 | NA | 0 | NA |
| 12 | 6668788 | 6645903 | -1 | NM_001039918 | ZNF384   | 0 | NA | 0 | NA | 0 | NA | 0 | NA | 0 | NA |
| 12 | 6668788 | 6645903 | -1 | NM_133476    | ZNF384   | 0 | NA | 0 | NA | 0 | NA | 0 | NA | 0 | NA |
| 12 | 6668930 | 6645903 | -1 | NM_001039917 | ZNF384   | 0 | NA | 0 | NA | 0 | NA | 0 | NA | 0 | NA |
| 12 | 6668930 | 6645903 | -1 | NM_001039919 | ZNF384   | 0 | NA | 0 | NA | 0 | NA | 0 | NA | 0 | NA |
| 12 | 6668930 | 6645903 | -1 | NM_001039920 | ZNF384   | 0 | NA | 0 | NA | 0 | NA | 0 | NA | 0 | NA |
| 12 | 6680073 | 6673217 | -1 | NM_153685    | C12orf53 | 0 | NA | 0 | NA | 0 | NA | 0 | NA | 0 | NA |
| 12 | 6703481 | 6711291 | 1  | NM_016319    | COP57A   | 1 | 11 | 0 | NA | 1 | 21 | 1 | 22 | 0 | NA |
| 12 | 6732530 | 6727422 | -1 | NM_005439    | MLF2     | 0 | NA | 0 | NA | 0 | NA | 0 | NA | 0 | NA |
| 12 | 6745801 | 6750379 | 1  | NM_002824    | PTMS     | 1 | 12 | 0 | NA | 0 | NA | 1 | 12 | 0 | NA |
| 12 | 6751930 | 6757882 | 1  | NM_002286    | LAG3     | 1 | 12 | 0 | NA | 0 | NA | 1 | 12 | 0 | NA |
| 12 | 6768911 | 6800237 | 1  | NM_000616    | CD4      | 0 | NA | 0 | NA | 0 | NA | 0 | NA | 0 | NA |
| 12 | 6801223 | 6806844 | 1  | NM_014449    | GPR162   | 0 | NA | 0 | NA | 0 | NA | 0 | NA | 0 | NA |
| 12 | 6801223 | 6806844 | 1  | NM_019858    | GPR162   | 0 | NA | 0 | NA | 0 | NA | 0 | NA | 0 | NA |
| 12 | 6807832 | 6819279 | 1  | NM_014262    | LEPREL2  | 0 | NA | 0 | NA | 0 | NA | 0 | NA | 0 | NA |
| 12 | 6819635 | 6826818 | 1  | NM_002075    | GNB3     | 0 | NA | 0 | NA | 0 | NA | 0 | NA | 0 | NA |
| 12 | 6830686 | 6828252 | -1 | NM_031299    | CDC43    | 0 | NA | 0 | NA | 0 | NA | 0 | NA | 0 | NA |
| 12 | 6831545 | 6846056 | 1  | NM_001098536 | USP5     | 0 | NA | 0 | NA | 0 | NA | 0 | NA | 0 | NA |
| 12 | 6831551 | 6846056 | 1  | NM_003481    | USP5     | 0 | NA | 0 | NA | 0 | NA | 0 | NA | 0 | NA |
| 12 | 6846966 | 6850253 | 1  | NM_000365    | TPI1     | 1 | 11 | 0 | NA | 0 | NA | 1 | 11 | 0 | NA |
| 12 | 6852713 | 6850360 | -1 | NM_032641    | SPSB2    | 1 | 11 | 0 | NA | 0 | NA | 1 | 11 | 0 | NA |
| 12 | 6884212 | 6893667 | 1  | NM_006992    | LRRC23   | 0 | NA | 0 | NA | 0 | NA | 0 | NA | 0 | NA |
| 12 | 6884212 | 6893667 | 1  | NM_201650    | LRRC23   | 0 | NA | 0 | NA | 0 | NA | 0 | NA | 0 | NA |
| 12 | 6893874 | 6903120 | 1  | NM_001975    | ENO2     | 0 | NA | 0 | NA | 0 | NA | 0 | NA | 0 | NA |
| 12 | 6903886 | 6921745 | 1  | NM_001007026 | ATN1     | 0 | NA | 0 | NA | 0 | NA | 0 | NA | 0 | NA |
| 12 | 6907740 | 6921745 | 1  | NM_001940    | ATN1     | 0 | NA | 0 | NA | 0 | NA | 1 | 26 | 0 | NA |
| 12 | 6923463 | 6925426 | 1  | NM_138425    | C12orf57 | 1 | 15 | 0 | NA | 0 | NA | 1 | 26 | 0 | NA |
| 12 | 6926000 | 6940740 | 1  | NM_080548    | PTPN6    | 1 | 15 | 0 | NA | 0 | NA | 1 | 26 | 0 | NA |
| 12 | 6930694 | 6940740 | 1  | NM_002831    | PTPN6    | 1 | 15 | 0 | NA | 1 | 12 | 0 | NA | 0 | NA |
| 12 | 6930694 | 6940740 | 1  | NM_080549    | PTPN6    | 1 | 15 | 0 | NA | 1 | 12 | 0 | NA | 0 | NA |
| 12 | 6950152 | 6944777 | -1 | NM_007273    | PHB2     | 1 | 17 | 0 | NA | 1 | 13 | 1 | 12 | 0 | NA |



|    |          |          |    |              |           |   |    |   |    |   |    |   |    |   |    |
|----|----------|----------|----|--------------|-----------|---|----|---|----|---|----|---|----|---|----|
| 12 | 6950254  | 6955404  | 1  | NM_006331    | EMG1      | 1 | 17 | 0 | NA | 1 | 13 | 1 | 12 | 0 | NA |
| 12 | 6996103  | 6955607  | -1 | NM_005768    | MBOAT5    | 0 | NA | 0 | NA | 0 | NA | 1 | 14 | 0 | NA |
| 12 | 7038277  | 7048596  | 1  | NM_201442    | C1S       | 0 | NA | 1 | 14 | 0 | NA | 0 | NA | 0 | NA |
| 12 | 7038281  | 7048596  | 1  | NM_001734    | C1S       | 0 | NA | 1 | 14 | 0 | NA | 0 | NA | 0 | NA |
| 12 | 7136184  | 7057769  | -1 | NM_001733    | C1R       | 0 | NA | 0 | NA | 0 | NA | 0 | NA | 0 | NA |
| 12 | 7153069  | 7138290  | -1 | NM_016546    | C1RL      | 0 | NA | 0 | NA | 0 | NA | 0 | NA | 0 | NA |
| 12 | 7172733  | 7167553  | -1 | NM_031491    | RBP5      | 0 | NA | 0 | NA | 0 | NA | 0 | NA | 0 | NA |
| 12 | 7174233  | 7202797  | 1  | NM_014718    | CLSTN3    | 0 | NA | 0 | NA | 0 | NA | 0 | NA | 0 | NA |
| 12 | 7234223  | 7255343  | 1  | NM_000319    | PEX5      | 0 | NA | 0 | NA | 0 | NA | 0 | NA | 0 | NA |
| 12 | 7348194  | 7372236  | 1  | NM_001080454 | ACSM4     | 0 | NA | 0 | NA | 0 | NA | 0 | NA | 0 | NA |
| 12 | 7488016  | 7398823  | -1 | NM_174941    | CD163L1   | 0 | NA | 1 | 12 | 0 | NA | 0 | NA | 0 | NA |
| 12 | 7547681  | 7514676  | -1 | NM_004244    | CD163     | 0 | NA | 0 | NA | 0 | NA | 0 | NA | 0 | NA |
| 12 | 7547681  | 7514676  | -1 | NM_203416    | CD163     | 0 | NA | 0 | NA | 0 | NA | 0 | NA | 0 | NA |
| 12 | 7709769  | 7693262  | -1 | NM_001644    | APOBEC1   | 0 | NA | 0 | NA | 0 | NA | 0 | NA | 0 | NA |
| 12 | 7739627  | 7733647  | -1 | NM_020634    | GDF3      | 0 | NA | 0 | NA | 0 | NA | 0 | NA | 0 | NA |
| 12 | 7755355  | 7761419  | 1  | NM_199286    | DPPA3     | 0 | NA | 0 | NA | 0 | NA | 0 | NA | 0 | NA |
| 12 | 7793336  | 7773277  | -1 | NM_130441    | CLEC4C    | 0 | NA | 0 | NA | 0 | NA | 0 | NA | 0 | NA |
| 12 | 7793336  | 7773277  | -1 | NM_203503    | CLEC4C    | 0 | NA | 0 | NA | 0 | NA | 0 | NA | 0 | NA |
| 12 | 7833261  | 7839922  | 1  | NM_024865    | NANOG     | 0 | NA | 0 | NA | 0 | NA | 0 | NA | 0 | NA |
| 12 | 7916762  | 7857663  | -1 | NM_153449    | SLC2A14   | 0 | NA | 0 | NA | 0 | NA | 0 | NA | 0 | NA |
| 12 | 7980138  | 7963093  | -1 | NM_006931    | SLC2A3    | 0 | NA | 0 | NA | 0 | NA | 0 | NA | 0 | NA |
| 12 | 8076625  | 8099385  | 1  | NM_018416    | FOXJ2     | 1 | 16 | 0 | NA | 0 | NA | 0 | NA | 0 | NA |
| 12 | 8110222  | 8102185  | -1 | NM_004054    | C3AR1     | 0 | NA | 0 | NA | 0 | NA | 0 | NA | 0 | NA |
| 12 | 8126150  | 8141634  | 1  | NM_015509    | NECAP1    | 0 | NA | 0 | NA | 0 | NA | 0 | NA | 0 | NA |
| 12 | 8167494  | 8182470  | 1  | NM_016184    | CLEC4A    | 0 | NA | 0 | NA | 0 | NA | 0 | NA | 0 | NA |
| 12 | 8167494  | 8182470  | 1  | NM_194447    | CLEC4A    | 0 | NA | 0 | NA | 0 | NA | 0 | NA | 0 | NA |
| 12 | 8167494  | 8182470  | 1  | NM_194448    | CLEC4A    | 0 | NA | 0 | NA | 0 | NA | 0 | NA | 0 | NA |
| 12 | 8167494  | 8182470  | 1  | NM_194450    | CLEC4A    | 0 | NA | 0 | NA | 0 | NA | 0 | NA | 0 | NA |
| 12 | 8216416  | 8223909  | 1  | NM_001004328 | ZNF705A   | 0 | NA | 0 | NA | 0 | NA | 0 | NA | 0 | NA |
| 12 | 8271481  | 8265122  | -1 | NM_018088    | FAM90A1   | 0 | NA | 0 | NA | 0 | NA | 0 | NA | 0 | NA |
| 12 | 8499857  | 8522193  | 1  | NM_001007033 | CLEC6A    | 0 | NA | 0 | NA | 0 | NA | 0 | NA | 0 | NA |
| 12 | 8557402  | 8566227  | 1  | NM_080387    | CLEC4D    | 0 | NA | 1 | 12 | 0 | NA | 0 | NA | 0 | NA |
| 12 | 8584825  | 8577167  | -1 | NM_014358    | CLEC4E    | 0 | NA | 0 | NA | 0 | NA | 0 | NA | 0 | NA |
| 12 | 8656706  | 8646028  | -1 | NM_020661    | AICDA     | 0 | NA | 1 | 14 | 0 | NA | 1 | 13 | 0 | NA |
| 12 | 8706700  | 8689806  | -1 | NM_003480    | MFAP5     | 0 | NA | 0 | NA | 0 | NA | 0 | NA | 0 | NA |
| 12 | 8741784  | 8821054  | 1  | NM_020734    | FAM80B    | 0 | NA | 0 | NA | 0 | NA | 0 | NA | 0 | NA |
| 12 | 8866416  | 8920644  | 1  | NM_144670    | AZML1     | 0 | NA | 0 | NA | 0 | NA | 0 | NA | 0 | NA |
| 12 | 8988582  | 8985327  | 1  | NM_004426    | PHC1      | 0 | NA | 0 | NA | 0 | NA | 0 | NA | 0 | NA |
| 12 | 8993519  | 8984230  | -1 | NM_002355    | M6PR      | 0 | NA | 0 | NA | 0 | NA | 1 | 23 | 0 | NA |
| 12 | 9033487  | 9054607  | 1  | NM_005810    | KLRG1     | 0 | NA | 0 | NA | 0 | NA | 0 | NA | 0 | NA |
| 12 | 9159825  | 9111570  | -1 | NM_000014    | A2M       | 0 | NA | 0 | NA | 1 | 12 | 0 | NA | 1 | 12 |
| 12 | 9252233  | 9192702  | -1 | NM_002864    | PZP       | 0 | NA | 0 | NA | 0 | NA | 0 | NA | 0 | NA |
| 12 | 9651764  | 9639136  | -1 | NM_002258    | KLRB1     | 0 | NA | 0 | NA | 0 | NA | 0 | NA | 0 | NA |
| 12 | 9713575  | 9743306  | 1  | NM_001004419 | CLEC2D    | 0 | NA | 0 | NA | 0 | NA | 1 | 14 | 0 | NA |
| 12 | 9713575  | 9743306  | 1  | NM_013269    | CLEC2D    | 0 | NA | 0 | NA | 0 | NA | 1 | 14 | 0 | NA |
| 12 | 9777127  | 9766357  | -1 | NM_172004    | CLECL1    | 0 | NA | 0 | NA | 0 | NA | 0 | NA | 0 | NA |
| 12 | 9804764  | 9796348  | -1 | NM_001781    | CD69      | 0 | NA | 0 | NA | 0 | NA | 0 | NA | 0 | NA |
| 12 | 9871343  | 9888870  | 1  | NM_016523    | KLRF1     | 0 | NA | 0 | NA | 0 | NA | 0 | NA | 0 | NA |
| 12 | 9913725  | 9896234  | -1 | NM_005127    | CLEC2B    | 0 | NA | 0 | NA | 1 | 12 | 0 | NA | 0 | NA |
| 12 | 10015280 | 10029461 | 1  | NM_138337    | CLEC12A   | 0 | NA | 0 | NA | 0 | NA | 0 | NA | 0 | NA |
| 12 | 10015280 | 10029461 | 1  | NM_201623    | CLEC12A   | 0 | NA | 0 | NA | 0 | NA | 0 | NA | 0 | NA |
| 12 | 10043166 | 10036928 | -1 | NM_001099431 | CLEC1B    | 0 | NA | 0 | NA | 0 | NA | 0 | NA | 0 | NA |
| 12 | 10043166 | 10036928 | -1 | NM_016509    | CLEC1B    | 0 | NA | 0 | NA | 0 | NA | 0 | NA | 0 | NA |
| 12 | 10054497 | 10061814 | 1  | NM_205852    | CLEC12B   | 0 | NA | 0 | NA | 0 | NA | 0 | NA | 0 | NA |
| 12 | 10074542 | 10109832 | 1  | NM_207345    | CLEC9A    | 0 | NA | 0 | NA | 0 | NA | 0 | NA | 0 | NA |
| 12 | 10142872 | 10114346 | -1 | NM_016511    | CLEC1A    | 0 | NA | 0 | NA | 1 | 16 | 0 | NA | 0 | NA |
| 12 | 10174135 | 10160646 | -1 | NM_022570    | CLEC7A    | 0 | NA | 0 | NA | 0 | NA | 0 | NA | 0 | NA |
| 12 | 10174135 | 10160646 | -1 | NM_197947    | CLEC7A    | 0 | NA | 0 | NA | 0 | NA | 0 | NA | 0 | NA |
| 12 | 10174135 | 10160646 | -1 | NM_197948    | CLEC7A    | 0 | NA | 0 | NA | 0 | NA | 0 | NA | 0 | NA |
| 12 | 10174135 | 10160646 | -1 | NM_197949    | CLEC7A    | 0 | NA | 0 | NA | 0 | NA | 0 | NA | 0 | NA |
| 12 | 10174135 | 10160646 | -1 | NM_197950    | CLEC7A    | 0 | NA | 0 | NA | 0 | NA | 0 | NA | 0 | NA |
| 12 | 10174135 | 10171188 | -1 | NM_197954    | CLEC7A    | 0 | NA | 0 | NA | 0 | NA | 0 | NA | 0 | NA |
| 12 | 10216057 | 10202165 | -1 | NM_002543    | OLR1      | 0 | NA | 0 | NA | 0 | NA | 0 | NA | 0 | NA |
| 12 | 10222823 | 10235670 | 1  | NM_153022    | C12orf59  | 0 | NA | 0 | NA | 0 | NA | 0 | NA | 0 | NA |
| 12 | 10256755 | 10266991 | 1  | NM_031412    | GABARAPL1 | 1 | 14 | 0 | NA | 1 | 13 | 0 | NA | 0 | NA |

|    |          |          |    |              |          |   |    |   |    |   |    |   |    |   |    |
|----|----------|----------|----|--------------|----------|---|----|---|----|---|----|---|----|---|----|
| 12 | 10348316 | 10361117 | 1  | NM_001114396 | KLRD1    | 0 | NA | 0 | NA | 0 | NA | 0 | NA | 0 | NA |
| 12 | 10351683 | 10361117 | 1  | NM_002262    | KLRD1    | 0 | NA | 0 | NA | 0 | NA | 0 | NA | 0 | NA |
| 12 | 10351683 | 10361117 | 1  | NM_007334    | KLRD1    | 0 | NA | 0 | NA | 0 | NA | 0 | NA | 0 | NA |
| 12 | 10433907 | 10416218 | -1 | NM_007360    | KLRK1    | 0 | NA | 0 | NA | 0 | NA | 0 | NA | 0 | NA |
| 12 | 10453623 | 10451249 | -1 | NM_013431    | KLRC4    | 0 | NA | 0 | NA | 0 | NA | 0 | NA | 0 | NA |
| 12 | 10464461 | 10456180 | -1 | NM_002261    | KLRC3    | 0 | NA | 0 | NA | 0 | NA | 0 | NA | 0 | NA |
| 12 | 10464461 | 10459449 | -1 | NM_007333    | KLRC3    | 0 | NA | 0 | NA | 0 | NA | 0 | NA | 0 | NA |
| 12 | 10479859 | 10474470 | -1 | NM_002260    | KLRC2    | 0 | NA | 0 | NA | 0 | NA | 0 | NA | 0 | NA |
| 12 | 10497196 | 10489903 | -1 | NM_002259    | KLRC1    | 0 | NA | 0 | NA | 0 | NA | 0 | NA | 0 | NA |
| 12 | 10497196 | 10489903 | -1 | NM_007328    | KLRC1    | 0 | NA | 0 | NA | 0 | NA | 0 | NA | 0 | NA |
| 12 | 10498251 | 10489903 | -1 | NM_213657    | KLRC1    | 0 | NA | 0 | NA | 0 | NA | 0 | NA | 0 | NA |
| 12 | 10498251 | 10489903 | -1 | NM_213658    | KLRC1    | 0 | NA | 0 | NA | 0 | NA | 0 | NA | 0 | NA |
| 12 | 10643701 | 10632343 | -1 | NM_006611    | KLRA1    | 0 | NA | 0 | NA | 0 | NA | 0 | NA | 0 | NA |
| 12 | 10657450 | 10648060 | -1 | NM_018048    | MAGOHB   | 0 | NA | 0 | NA | 0 | NA | 0 | NA | 0 | NA |
| 12 | 10717906 | 10662804 | -1 | NM_018423    | STYK1    | 0 | NA | 0 | NA | 0 | NA | 0 | NA | 0 | NA |
| 12 | 10767171 | 10742954 | -1 | NM_003651    | CSDA     | 0 | NA | 0 | NA | 0 | NA | 0 | NA | 0 | NA |
| 12 | 10846493 | 10845397 | -1 | NM_023919    | TAS2R7   | 0 | NA | 0 | NA | 0 | NA | 0 | NA | 0 | NA |
| 12 | 10850846 | 10849916 | -1 | NM_023918    | TAS2R8   | 0 | NA | 0 | NA | 0 | NA | 0 | NA | 0 | NA |
| 12 | 10854034 | 10852959 | -1 | NM_023917    | TAS2R9   | 0 | NA | 0 | NA | 0 | NA | 0 | NA | 0 | NA |
| 12 | 10870135 | 10869211 | -1 | NM_023921    | TAS2R10  | 0 | NA | 0 | NA | 0 | NA | 0 | NA | 0 | NA |
| 12 | 10893342 | 10889714 | -1 | NM_007244    | PRR4     | 0 | NA | 1 | 12 | 0 | NA | 0 | NA | 0 | NA |
| 12 | 10953428 | 10951791 | -1 | NM_023920    | TAS2R13  | 0 | NA | 0 | NA | 0 | NA | 0 | NA | 0 | NA |
| 12 | 10973100 | 10978711 | 1  | NM_005042    | PRH2     | 0 | NA | 0 | NA | 0 | NA | 0 | NA | 0 | NA |
| 12 | 10973101 | 10978711 | 1  | NM_001110213 | PRH2     | 0 | NA | 0 | NA | 0 | NA | 0 | NA | 0 | NA |
| 12 | 10983073 | 10982119 | -1 | NM_023922    | TAS2R14  | 0 | NA | 0 | NA | 0 | NA | 0 | NA | 0 | NA |
| 12 | 11030778 | 11029778 | -1 | NM_176890    | TAS2R50  | 0 | NA | 0 | NA | 0 | NA | 0 | NA | 0 | NA |
| 12 | 11041741 | 11039827 | -1 | NM_176889    | TAS2R49  | 0 | NA | 0 | NA | 0 | NA | 0 | NA | 0 | NA |
| 12 | 11066437 | 11065537 | -1 | NM_176888    | TAS2R48  | 0 | NA | 0 | NA | 0 | NA | 0 | NA | 0 | NA |
| 12 | 11075273 | 11074252 | -1 | NM_176885    | TAS2R44  | 0 | NA | 0 | NA | 0 | NA | 0 | NA | 0 | NA |
| 12 | 11106160 | 11105230 | -1 | NM_176887    | TAS2R46  | 0 | NA | 0 | NA | 0 | NA | 0 | NA | 0 | NA |
| 12 | 11136179 | 11135152 | -1 | NM_176884    | TAS2R43  | 0 | NA | 0 | NA | 0 | NA | 0 | NA | 0 | NA |
| 12 | 11178110 | 11177150 | -1 | NM_001097643 | TAS2R47  | 0 | NA | 0 | NA | 0 | NA | 0 | NA | 0 | NA |
| 12 | 11215477 | 10924826 | -1 | NM_006250    | PRH1     | 1 | 21 | 0 | NA | 0 | NA | 1 | 23 | 0 | NA |
| 12 | 11215480 | 10889714 | -1 | NM_001098538 | PRR4     | 1 | 21 | 0 | NA | 0 | NA | 1 | 23 | 0 | NA |
| 12 | 11230810 | 11229865 | -1 | NM_181429    | TAS2R42  | 0 | NA | 0 | NA | 0 | NA | 0 | NA | 0 | NA |
| 12 | 11313908 | 11310123 | -1 | NM_006249    | PRB3     | 0 | NA | 0 | NA | 0 | NA | 0 | NA | 0 | NA |
| 12 | 11354633 | 11351281 | -1 | NM_002723    | PRB4     | 0 | NA | 0 | NA | 0 | NA | 0 | NA | 0 | NA |
| 12 | 11399791 | 11396023 | -1 | NM_005039    | PRB1     | 0 | NA | 0 | NA | 0 | NA | 0 | NA | 0 | NA |
| 12 | 11399791 | 11396023 | -1 | NM_199353    | PRB1     | 0 | NA | 0 | NA | 0 | NA | 0 | NA | 0 | NA |
| 12 | 11399791 | 11396023 | -1 | NM_199354    | PRB1     | 0 | NA | 0 | NA | 0 | NA | 0 | NA | 0 | NA |
| 12 | 11439768 | 11435740 | -1 | NM_006248    | PRB2     | 0 | NA | 0 | NA | 0 | NA | 0 | NA | 0 | NA |
| 12 | 11694054 | 11939592 | 1  | NM_001987    | ETV6     | 0 | NA | 0 | NA | 1 | 16 | 0 | NA | 0 | NA |
| 12 | 12115144 | 12143894 | 1  | NM_138723    | BCL2L14  | 0 | NA | 0 | NA | 0 | NA | 0 | NA | 0 | NA |
| 12 | 12115668 | 12143894 | 1  | NM_030766    | BCL2L14  | 0 | NA | 0 | NA | 0 | NA | 0 | NA | 0 | NA |
| 12 | 12115668 | 12143894 | 1  | NM_138722    | BCL2L14  | 0 | NA | 0 | NA | 0 | NA | 0 | NA | 0 | NA |
| 12 | 12123499 | 12255214 | 1  | NM_138724    | BCL2L14  | 0 | NA | 0 | NA | 0 | NA | 0 | NA | 0 | NA |
| 12 | 12311078 | 12160227 | -1 | NM_002336    | LRP6     | 0 | NA | 0 | NA | 0 | NA | 0 | NA | 0 | NA |
| 12 | 12394436 | 12373484 | -1 | NM_018050    | MANSC1   | 0 | NA | 0 | NA | 0 | NA | 1 | 14 | 0 | NA |
| 12 | 12401321 | 12511105 | 1  | NM_058169    | LOH12CR1 | 0 | NA | 0 | NA | 0 | NA | 1 | 14 | 0 | NA |
| 12 | 12606584 | 12520097 | -1 | NM_030640    | DUSP16   | 0 | NA | 0 | NA | 0 | NA | 1 | 12 | 0 | NA |
| 12 | 12656097 | 12689308 | 1  | NM_001310    | CREBL2   | 0 | NA | 0 | NA | 0 | NA | 0 | NA | 0 | NA |
| 12 | 12706671 | 12705262 | -1 | NM_006143    | GPR19    | 0 | NA | 0 | NA | 0 | NA | 0 | NA | 0 | NA |
| 12 | 12761575 | 12766570 | 1  | NM_004064    | CDKN1B   | 1 | 19 | 0 | NA | 0 | NA | 0 | NA | 0 | NA |
| 12 | 12829881 | 12835664 | 1  | NM_030817    | APOLD1   | 0 | NA | 0 | NA | 0 | NA | 1 | 12 | 0 | NA |
| 12 | 12857546 | 12874182 | 1  | NM_016355    | DDX47    | 0 | NA | 0 | NA | 0 | NA | 0 | NA | 0 | NA |
| 12 | 12857546 | 12874182 | 1  | NM_201224    | DDX47    | 0 | NA | 0 | NA | 0 | NA | 0 | NA | 0 | NA |
| 12 | 12935222 | 12957867 | 1  | NM_003979    | GPRC5A   | 1 | 11 | 0 | NA | 1 | 12 | 1 | 15 | 0 | NA |
| 12 | 12994585 | 12984975 | -1 | NM_018654    | GPRC5D   | 0 | NA | 1 | 12 | 0 | NA | 0 | NA | 0 | NA |
| 12 | 13044488 | 13019065 | -1 | NM_015987    | HEBP1    | 0 | NA | 0 | NA | 0 | NA | 0 | NA | 0 | NA |
| 12 | 13088581 | 13127650 | 1  | NM_020853    | KIAA1467 | 0 | NA | 0 | NA | 0 | NA | 0 | NA | 0 | NA |
| 12 | 13139976 | 13128308 | -1 | NM_031289    | SGS1     | 0 | NA | 0 | NA | 0 | NA | 0 | NA | 0 | NA |
| 12 | 13139976 | 13128308 | -1 | NM_153823    | SGS1     | 0 | NA | 0 | NA | 0 | NA | 0 | NA | 0 | NA |
| 12 | 13147886 | 13128308 | -1 | NM_001080554 | SGS1     | 0 | NA | 0 | NA | 0 | NA | 0 | NA | 0 | NA |
| 12 | 13147886 | 13128308 | -1 | NM_001080555 | SGS1     | 0 | NA | 0 | NA | 0 | NA | 0 | NA | 0 | NA |
| 12 | 13240923 | 13260975 | 1  | NM_001423    | EMP1     | 1 | 12 | 0 | NA | 0 | NA | 1 | 12 | 0 | NA |

|    |          |          |    |              |           |   |    |   |    |   |    |   |    |   |    |
|----|----------|----------|----|--------------|-----------|---|----|---|----|---|----|---|----|---|----|
| 12 | 13420912 | 13415289 | -1 | NM_182558    | C12orf36  | 0 | NA | 0 | NA | 0 | NA | 0 | NA | 1 | 12 |
| 12 | 14024289 | 13605676 | -1 | NM_000834    | GRIN2B    | 0 | NA | 1 | 12 | 0 | NA | 0 | NA | 1 | 14 |
| 12 | 14409877 | 14542964 | 1  | NM_018179    | ATF7IP    | 1 | 26 | 0 | NA | 1 | 12 | 1 | 14 | 0 | NA |
| 12 | 14612058 | 14547863 | -1 | NM_024829    | FLJ22662  | 0 | NA | 0 | NA | 0 | NA | 0 | NA | 0 | NA |
| 12 | 14740696 | 14656842 | -1 | NM_004963    | GUCY2C    | 0 | NA | 0 | NA | 0 | NA | 0 | NA | 0 | NA |
| 12 | 14815332 | 14814920 | -1 | NM_175054    | HIST4H4   | 1 | 16 | 0 | NA | 0 | NA | 0 | NA | 0 | NA |
| 12 | 14818536 | 14822203 | 1  | NM_177925    | H2AFJ     | 1 | 16 | 0 | NA | 0 | NA | 0 | NA | 0 | NA |
| 12 | 14847668 | 14830678 | -1 | NM_016312    | WBP11     | 0 | NA | 0 | NA | 0 | NA | 0 | NA | 0 | NA |
| 12 | 14847772 | 14868058 | 1  | NM_175874    | C12orf60  | 0 | NA | 0 | NA | 0 | NA | 0 | NA | 0 | NA |
| 12 | 14858383 | 14848850 | -1 | NM_001013698 | LOC440087 | 0 | NA | 0 | NA | 0 | NA | 1 | 12 | 0 | NA |
| 12 | 14887680 | 14873511 | -1 | NM_021071    | ART4      | 0 | NA | 0 | NA | 1 | 13 | 0 | NA | 0 | NA |
| 12 | 14930095 | 14926093 | -1 | NM_000900    | MGP       | 0 | NA | 0 | NA | 0 | NA | 0 | NA | 0 | NA |
| 12 | 14982722 | 14988244 | -1 | NM_152321    | ERP27     | 0 | NA | 0 | NA | 0 | NA | 0 | NA | 0 | NA |
| 12 | 15005829 | 14986216 | -1 | NM_001175    | ARHGDIB   | 0 | NA | 0 | NA | 0 | NA | 0 | NA | 0 | NA |
| 12 | 15017244 | 15026066 | 1  | NM_006205    | PDE6H     | 0 | NA | 0 | NA | 0 | NA | 0 | NA | 0 | NA |
| 12 | 15265571 | 15151983 | -1 | NM_032918    | RERG      | 0 | NA | 0 | NA | 0 | NA | 0 | NA | 0 | NA |
| 12 | 15366753 | 15641602 | 1  | NM_002848    | PTPRO     | 0 | NA | 0 | NA | 0 | NA | 0 | NA | 0 | NA |
| 12 | 15366753 | 15641602 | 1  | NM_030667    | PTPRO     | 0 | NA | 0 | NA | 0 | NA | 0 | NA | 0 | NA |
| 12 | 15590552 | 15641602 | 1  | NM_030668    | PTPRO     | 0 | NA | 0 | NA | 0 | NA | 0 | NA | 0 | NA |
| 12 | 15590552 | 15641602 | 1  | NM_030669    | PTPRO     | 0 | NA | 0 | NA | 0 | NA | 0 | NA | 0 | NA |
| 12 | 15590552 | 15641602 | 1  | NM_030670    | PTPRO     | 0 | NA | 0 | NA | 0 | NA | 0 | NA | 0 | NA |
| 12 | 15590552 | 15641602 | 1  | NM_030671    | PTPRO     | 0 | NA | 0 | NA | 0 | NA | 0 | NA | 0 | NA |
| 12 | 15833601 | 15664341 | -1 | NM_004447    | EPS8      | 0 | NA | 0 | NA | 0 | NA | 1 | 21 | 0 | NA |
| 12 | 15926554 | 15947677 | 1  | NM_007178    | STRAP     | 0 | NA | 0 | NA | 0 | NA | 0 | NA | 0 | NA |
| 12 | 15955452 | 16081582 | 1  | NM_015954    | DERA      | 0 | NA | 0 | NA | 0 | NA | 0 | NA | 0 | NA |
| 12 | 16391342 | 16408611 | 1  | NM_145792    | MGST1     | 0 | NA | 0 | NA | 0 | NA | 0 | NA | 0 | NA |
| 12 | 16391845 | 16408609 | 1  | NM_020300    | MGST1     | 0 | NA | 0 | NA | 0 | NA | 0 | NA | 0 | NA |
| 12 | 16391978 | 16408611 | 1  | NM_145791    | MGST1     | 0 | NA | 0 | NA | 0 | NA | 0 | NA | 0 | NA |
| 12 | 16397617 | 16408611 | 1  | NM_145764    | MGST1     | 0 | NA | 0 | NA | 0 | NA | 0 | NA | 0 | NA |
| 12 | 16650698 | 16592573 | -1 | NM_018640    | LMO3      | 0 | NA | 0 | NA | 0 | NA | 0 | NA | 0 | NA |
| 12 | 16652291 | 16592573 | -1 | NM_001001395 | LMO3      | 0 | NA | 0 | NA | 0 | NA | 0 | NA | 0 | NA |
| 12 | 18134381 | 18125069 | -1 | NM_024730    | RERGL     | 0 | NA | 0 | NA | 0 | NA | 0 | NA | 0 | NA |
| 12 | 18305740 | 18692617 | 1  | NM_004570    | PIK3C2G   | 0 | NA | 0 | NA | 0 | NA | 0 | NA | 0 | NA |
| 12 | 18782185 | 18727382 | -1 | NM_033123    | PLCZ1     | 0 | NA | 0 | NA | 0 | NA | 0 | NA | 0 | NA |
| 12 | 18782311 | 18783389 | 1  | NM_033328    | CAPZA3    | 0 | NA | 0 | NA | 0 | NA | 0 | NA | 0 | NA |
| 12 | 19173994 | 19420600 | 1  | NM_019012    | PLEKHA5   | 0 | NA | 0 | NA | 0 | NA | 0 | NA | 0 | NA |
| 12 | 19483874 | 19566440 | 1  | NM_001114176 | AEBP2     | 1 | 17 | 0 | NA | 1 | 21 | 1 | 18 | 0 | NA |
| 12 | 19483874 | 19566440 | 1  | NM_153207    | AEBP2     | 1 | 17 | 0 | NA | 1 | 21 | 1 | 18 | 0 | NA |
| 12 | 20413463 | 20725148 | 1  | NM_000921    | PDE3A     | 0 | NA | 0 | NA | 0 | NA | 0 | NA | 0 | NA |
| 12 | 20739665 | 20797587 | 1  | NM_017435    | SLCO1C1   | 0 | NA | 0 | NA | 0 | NA | 0 | NA | 0 | NA |
| 12 | 20854904 | 20960925 | 1  | NM_019844    | SLCO1B3   | 0 | NA | 0 | NA | 0 | NA | 0 | NA | 0 | NA |
| 12 | 21059896 | 21134307 | 1  | NM_001009562 | LST-3TM12 | 0 | NA | 0 | NA | 0 | NA | 0 | NA | 0 | NA |
| 12 | 21175403 | 21283997 | 1  | NM_006446    | SLCO1B1   | 0 | NA | 0 | NA | 0 | NA | 0 | NA | 0 | NA |
| 12 | 21368856 | 21319110 | -1 | NM_005075    | SLCO1A2   | 0 | NA | 0 | NA | 0 | NA | 0 | NA | 0 | NA |
| 12 | 21379099 | 21313093 | -1 | NM_021094    | SLCO1A2   | 0 | NA | 0 | NA | 0 | NA | 0 | NA | 0 | NA |
| 12 | 21417084 | 21423683 | 1  | NM_000415    | IAPP      | 0 | NA | 0 | NA | 0 | NA | 0 | NA | 0 | NA |
| 12 | 21439638 | 21311650 | -1 | NM_134431    | SLCO1A2   | 0 | NA | 0 | NA | 0 | NA | 0 | NA | 0 | NA |
| 12 | 21481877 | 21514553 | 1  | NM_024854    | PYROXD1   | 0 | NA | 0 | NA | 0 | NA | 1 | 11 | 0 | NA |
| 12 | 21545796 | 21513964 | -1 | NM_002907    | RECQL     | 1 | 12 | 0 | NA | 0 | NA | 0 | NA | 0 | NA |
| 12 | 21545796 | 21514352 | -1 | NM_032941    | RECQL     | 1 | 12 | 0 | NA | 0 | NA | 0 | NA | 0 | NA |
| 12 | 21546066 | 21562357 | 1  | NM_016072    | GOLT1B    | 1 | 12 | 0 | NA | 0 | NA | 0 | NA | 0 | NA |
| 12 | 21570522 | 21575477 | 1  | NM_030572    | C12orf39  | 0 | NA | 1 | 13 | 0 | NA | 0 | NA | 0 | NA |
| 12 | 21649048 | 21580389 | -1 | NM_021957    | GYS2      | 0 | NA | 0 | NA | 0 | NA | 0 | NA | 0 | NA |
| 12 | 21702043 | 21679542 | -1 | NM_002300    | LDHB      | 1 | 12 | 0 | NA | 0 | NA | 1 | 14 | 0 | NA |
| 12 | 21819014 | 21809155 | -1 | NM_004982    | KCNJ8     | 0 | NA | 0 | NA | 0 | NA | 0 | NA | 0 | NA |
| 12 | 21980895 | 21841590 | -1 | NM_020297    | ABCC9     | 0 | NA | 0 | NA | 0 | NA | 0 | NA | 1 | 14 |
| 12 | 21980895 | 21849374 | -1 | NM_005691    | ABCC9     | 0 | NA | 0 | NA | 0 | NA | 0 | NA | 1 | 14 |
| 12 | 21980895 | 21849374 | -1 | NM_020298    | ABCC9     | 0 | NA | 0 | NA | 0 | NA | 0 | NA | 1 | 14 |
| 12 | 22090425 | 22109869 | 1  | NM_018686    | CMAS      | 0 | NA | 0 | NA | 0 | NA | 0 | NA | 0 | NA |
| 12 | 22378915 | 22237591 | -1 | NM_003034    | ST8SIA1   | 0 | NA | 1 | 12 | 0 | NA | 0 | NA | 0 | NA |
| 12 | 22588719 | 22492784 | -1 | NM_014802    | KIAA0528  | 1 | 46 | 0 | NA | 0 | NA | 0 | NA | 0 | NA |
| 12 | 22669342 | 22688616 | 1  | NM_001039481 | ETNK1     | 0 | NA | 0 | NA | 0 | NA | 0 | NA | 0 | NA |
| 12 | 22669342 | 22734875 | 1  | NM_018638    | ETNK1     | 0 | NA | 0 | NA | 0 | NA | 0 | NA | 0 | NA |
| 12 | 23628775 | 23576497 | -1 | NM_178010    | SOX5      | 0 | NA | 0 | NA | 0 | NA | 0 | NA | 0 | NA |
| 12 | 23993904 | 23576497 | -1 | NM_006940    | SOX5      | 0 | NA | 0 | NA | 0 | NA | 1 | 14 | 0 | NA |

|    |          |          |    |              |           |   |    |   |    |   |    |   |    |   |    |
|----|----------|----------|----|--------------|-----------|---|----|---|----|---|----|---|----|---|----|
| 12 | 24606647 | 23576497 | -1 | NM_152989    | SOX5      | 0 | NA | 0 | NA | 1 | 15 | 0 | NA | 0 | NA |
| 12 | 24628369 | 24611164 | -1 | NM_144667    | FLJ32894  | 0 | NA | 0 | NA | 0 | NA | 0 | NA | 0 | NA |
| 12 | 24993499 | 24855545 | -1 | NM_005504    | BCAT1     | 0 | NA | 0 | NA | 1 | 13 | 0 | NA | 0 | NA |
| 12 | 25041640 | 25037631 | -1 | NM_001101339 | LOC196415 | 0 | NA | 0 | NA | 0 | NA | 0 | NA | 0 | NA |
| 12 | 25096507 | 25152536 | 1  | NM_006152    | LRMP      | 0 | NA | 0 | NA | 0 | NA | 0 | NA | 0 | NA |
| 12 | 25239361 | 25152489 | -1 | NM_001082972 | CASC1     | 0 | NA | 0 | NA | 0 | NA | 0 | NA | 0 | NA |
| 12 | 25239361 | 25152489 | -1 | NM_001082973 | CASC1     | 0 | NA | 0 | NA | 0 | NA | 0 | NA | 0 | NA |
| 12 | 25239361 | 25152489 | -1 | NM_018272    | CASC1     | 0 | NA | 0 | NA | 0 | NA | 0 | NA | 0 | NA |
| 12 | 25239416 | 25249216 | 1  | NM_001001660 | LYRM5     | 0 | NA | 0 | NA | 0 | NA | 0 | NA | 0 | NA |
| 12 | 25295121 | 25249446 | -1 | NM_004985    | KRAS      | 0 | NA | 0 | NA | 1 | 13 | 0 | NA | 0 | NA |
| 12 | 25295121 | 25249446 | -1 | NM_033360    | KRAS      | 0 | NA | 0 | NA | 1 | 13 | 0 | NA | 0 | NA |
| 12 | 25597445 | 25520282 | -1 | NM_152590    | IFITD1    | 0 | NA | 0 | NA | 0 | NA | 0 | NA | 0 | NA |
| 12 | 26003235 | 26124092 | 1  | NM_007211    | RASSF8    | 0 | NA | 0 | NA | 0 | NA | 0 | NA | 0 | NA |
| 12 | 26169113 | 26184225 | -1 | NM_030762    | BHLHB3    | 0 | NA | 0 | NA | 0 | NA | 0 | NA | 0 | NA |
| 12 | 26239788 | 26277136 | 1  | NM_005086    | SSPN      | 0 | NA | 0 | NA | 0 | NA | 0 | NA | 0 | NA |
| 12 | 26877398 | 26379551 | -1 | NM_002223    | ITPR2     | 1 | 12 | 0 | NA | 0 | NA | 0 | NA | 0 | NA |
| 12 | 26982521 | 26949378 | -1 | NM_018164    | C12orf11  | 1 | 39 | 0 | NA | 0 | NA | 0 | NA | 0 | NA |
| 12 | 26982582 | 27010126 | 1  | NM_015633    | FGFR1OP2  | 1 | 39 | 0 | NA | 0 | NA | 0 | NA | 0 | NA |
| 12 | 27058405 | 27017389 | -1 | NM_016551    | TM7SF3    | 0 | NA | 0 | NA | 0 | NA | 0 | NA | 0 | NA |
| 12 | 27066749 | 27073949 | 1  | NM_004264    | MED21     | 0 | NA | 0 | NA | 0 | NA | 0 | NA | 0 | NA |
| 12 | 27126722 | 27125256 | -1 | NM_001080406 | LOC728858 | 0 | NA | 0 | NA | 0 | NA | 0 | NA | 0 | NA |
| 12 | 27288374 | 27369795 | 1  | NM_015000    | STK38L    | 1 | 27 | 1 | 38 | 0 | NA | 0 | NA | 0 | NA |
| 12 | 27377254 | 27464733 | 1  | NM_020183    | ARNTL2    | 0 | NA | 0 | NA | 1 | 13 | 0 | NA | 0 | NA |
| 12 | 27568311 | 27692165 | 1  | NM_177444    | PPFBP1    | 1 | 16 | 0 | NA | 0 | NA | 0 | NA | 0 | NA |
| 12 | 27568311 | 27739763 | 1  | NM_003622    | PPFBP1    | 1 | 16 | 0 | NA | 0 | NA | 0 | NA | 0 | NA |
| 12 | 27740694 | 27741833 | 0  | NM_001029874 | REP15     | 0 | NA | 0 | NA | 0 | NA | 0 | NA | 0 | NA |
| 12 | 27754995 | 27800495 | 1  | NM_021821    | MRPS35    | 0 | NA | 0 | NA | 0 | NA | 1 | 15 | 0 | NA |
| 12 | 27824453 | 27847240 | 1  | NM_020782    | KLHDC5    | 0 | NA | 0 | NA | 0 | NA | 0 | NA | 0 | NA |
| 12 | 28014161 | 28002283 | -1 | NM_198966    | PTHLH     | 0 | NA | 0 | NA | 0 | NA | 0 | NA | 0 | NA |
| 12 | 28014161 | 28006520 | -1 | NM_198964    | PTHLH     | 0 | NA | 0 | NA | 0 | NA | 0 | NA | 0 | NA |
| 12 | 28016183 | 28002283 | -1 | NM_198965    | PTHLH     | 0 | NA | 0 | NA | 0 | NA | 0 | NA | 0 | NA |
| 12 | 28016183 | 28006520 | -1 | NM_002820    | PTHLH     | 0 | NA | 0 | NA | 0 | NA | 0 | NA | 0 | NA |
| 12 | 28301399 | 28594366 | 1  | NM_018318    | CCDC91    | 0 | NA | 0 | NA | 0 | NA | 0 | NA | 0 | NA |
| 12 | 29267864 | 29378273 | 1  | NM_018099    | MLSTD1    | 0 | NA | 0 | NA | 0 | NA | 0 | NA | 0 | NA |
| 12 | 29425410 | 29384845 | -1 | NM_016570    | ERGIC2    | 0 | NA | 0 | NA | 0 | NA | 0 | NA | 0 | NA |
| 12 | 29541886 | 29471755 | -1 | NM_183378    | OVCH1     | 0 | NA | 0 | NA | 0 | NA | 0 | NA | 0 | NA |
| 12 | 29828959 | 29545023 | -1 | NM_175861    | TMTC1     | 0 | NA | 1 | 12 | 0 | NA | 0 | NA | 1 | 13 |
| 12 | 30740018 | 30673188 | -1 | NM_006390    | IPO8      | 0 | NA | 0 | NA | 0 | NA | 0 | NA | 0 | NA |
| 12 | 30798715 | 30753752 | -1 | NM_001002259 | CAPRIN2   | 0 | NA | 0 | NA | 1 | 12 | 0 | NA | 0 | NA |
| 12 | 30798715 | 30753752 | -1 | NM_023925    | CAPRIN2   | 0 | NA | 0 | NA | 1 | 12 | 0 | NA | 0 | NA |
| 12 | 30798715 | 30753752 | -1 | NM_032156    | CAPRIN2   | 0 | NA | 0 | NA | 1 | 12 | 0 | NA | 0 | NA |
| 12 | 30971104 | 31036722 | 1  | NM_001080509 | TSPAN11   | 0 | NA | 0 | NA | 0 | NA | 0 | NA | 0 | NA |
| 12 | 31118045 | 31148992 | 1  | NM_004399    | DDX11     | 1 | 17 | 0 | NA | 0 | NA | 0 | NA | 0 | NA |
| 12 | 31118045 | 31148992 | 1  | NM_030653    | DDX11     | 1 | 17 | 0 | NA | 0 | NA | 0 | NA | 0 | NA |
| 12 | 31118045 | 31148992 | 1  | NM_152438    | DDX11     | 1 | 17 | 0 | NA | 0 | NA | 0 | NA | 0 | NA |
| 12 | 31250355 | 31158726 | -1 | NM_001080502 | OVOS2     | 0 | NA | 0 | NA | 0 | NA | 0 | NA | 0 | NA |
| 12 | 31370340 | 31324791 | -1 | NM_021238    | FAM60A    | 1 | 11 | 0 | NA | 0 | NA | 1 | 17 | 0 | NA |
| 12 | 31635219 | 31426423 | -1 | NM_144973    | MGC24039  | 0 | NA | 0 | NA | 1 | 12 | 0 | NA | 0 | NA |
| 12 | 31703387 | 31713168 | 1  | NM_173802    | MGC50559  | 0 | NA | 0 | NA | 0 | NA | 1 | 13 | 0 | NA |
| 12 | 31773375 | 31715337 | -1 | NM_001113402 | AMN1      | 1 | 41 | 0 | NA | 0 | NA | 1 | 11 | 0 | NA |
| 12 | 31836442 | 31835385 | -1 | NM_001013699 | LOC440093 | 0 | NA | 0 | NA | 0 | NA | 0 | NA | 0 | NA |
| 12 | 32003619 | 32037308 | 1  | NM_018169    | C12orf35  | 0 | NA | 0 | NA | 1 | 14 | 1 | 13 | 0 | NA |
| 12 | 32151451 | 32422408 | 1  | NM_001003398 | BICD1     | 1 | 12 | 0 | NA | 1 | 17 | 0 | NA | 0 | NA |
| 12 | 32151451 | 32422408 | 1  | NM_001714    | BICD1     | 1 | 12 | 0 | NA | 1 | 17 | 0 | NA | 0 | NA |
| 12 | 32546360 | 32684940 | 1  | NM_139241    | FGD4      | 0 | NA | 0 | NA | 0 | NA | 1 | 11 | 0 | NA |
| 12 | 32723403 | 32789851 | 1  | NM_005690    | DNM1L     | 0 | NA | 0 | NA | 0 | NA | 1 | 12 | 0 | NA |
| 12 | 32723403 | 32789851 | 1  | NM_012062    | DNM1L     | 0 | NA | 0 | NA | 0 | NA | 1 | 12 | 0 | NA |
| 12 | 32723403 | 32789851 | 1  | NM_012063    | DNM1L     | 0 | NA | 0 | NA | 0 | NA | 1 | 12 | 0 | NA |
| 12 | 32800141 | 32790743 | -1 | NM_001040436 | YARS2     | 0 | NA | 0 | NA | 1 | 15 | 1 | 16 | 0 | NA |
| 12 | 32941047 | 32834946 | -1 | NM_001005242 | PKP2      | 0 | NA | 0 | NA | 0 | NA | 0 | NA | 0 | NA |
| 12 | 32941047 | 32834946 | -1 | NM_004572    | PKP2      | 0 | NA | 0 | NA | 0 | NA | 0 | NA | 0 | NA |
| 12 | 33484021 | 33419614 | -1 | NM_198992    | SYT10     | 0 | NA | 0 | NA | 0 | NA | 0 | NA | 0 | NA |
| 12 | 34066482 | 34072503 | 1  | NM_032834    | ALG10     | 1 | 17 | 0 | NA | 1 | 26 | 1 | 11 | 0 | NA |
| 12 | 36998823 | 37009795 | 1  | NM_001013620 | ALG10B    | 1 | 28 | 0 | NA | 0 | NA | 0 | NA | 0 | NA |
| 12 | 37585687 | 37332268 | -1 | NM_153634    | CPNE8     | 0 | NA | 0 | NA | 0 | NA | 0 | NA | 0 | NA |

|    |          |          |    |              |           |   |    |   |    |   |    |   |    |   |    |
|----|----------|----------|----|--------------|-----------|---|----|---|----|---|----|---|----|---|----|
| 12 | 38123185 | 37973296 | -1 | NM_017641    | KIF21A    | 1 | 11 | 0 | NA | 0 | NA | 0 | NA | 0 | NA |
| 12 | 38300110 | 38231288 | -1 | NM_005164    | ABCD2     | 0 | NA | 0 | NA | 0 | NA | 0 | NA | 0 | NA |
| 12 | 38306238 | 38401985 | 1  | NM_001031748 | C12orf40  | 0 | NA | 0 | NA | 0 | NA | 0 | NA | 0 | NA |
| 12 | 38785928 | 38435089 | -1 | NM_052885    | SLC2A13   | 0 | NA | 0 | NA | 0 | NA | 0 | NA | 0 | NA |
| 12 | 38905079 | 39049353 | 1  | NM_198578    | LRRK2     | 0 | NA | 0 | NA | 0 | NA | 0 | NA | 0 | NA |
| 12 | 39372624 | 39750361 | 1  | NM_001843    | CNTN1     | 0 | NA | 0 | NA | 0 | NA | 0 | NA | 0 | NA |
| 12 | 39372624 | 39750361 | 1  | NM_175038    | CNTN1     | 0 | NA | 0 | NA | 0 | NA | 0 | NA | 0 | NA |
| 12 | 40117807 | 40254659 | 1  | NM_013377    | PDZRN4    | 0 | NA | 0 | NA | 0 | NA | 0 | NA | 0 | NA |
| 12 | 40824940 | 40761914 | -1 | NM_001099650 | GLT8D3    | 0 | NA | 0 | NA | 0 | NA | 0 | NA | 0 | NA |
| 12 | 40824940 | 40761914 | -1 | NM_173601    | GLT8D3    | 0 | NA | 0 | NA | 0 | NA | 0 | NA | 0 | NA |
| 12 | 40918317 | 40837173 | -1 | NM_005748    | YAF2      | 0 | NA | 0 | NA | 0 | NA | 0 | NA | 0 | NA |
| 12 | 41006199 | 40992154 | -1 | NM_033114    | ZCRB1     | 1 | 12 | 0 | NA | 0 | NA | 0 | NA | 0 | NA |
| 12 | 41006213 | 41079494 | 1  | NM_201438    | PPHLN1    | 1 | 12 | 0 | NA | 0 | NA | 0 | NA | 0 | NA |
| 12 | 41006213 | 41122032 | 1  | NM_201439    | PPHLN1    | 1 | 12 | 0 | NA | 0 | NA | 0 | NA | 0 | NA |
| 12 | 41006213 | 41122032 | 1  | NM_201440    | PPHLN1    | 1 | 12 | 0 | NA | 0 | NA | 0 | NA | 0 | NA |
| 12 | 41006213 | 41122032 | 1  | NM_201515    | PPHLN1    | 1 | 12 | 0 | NA | 0 | NA | 0 | NA | 0 | NA |
| 12 | 41006213 | 41128689 | 1  | NM_016488    | PPHLN1    | 1 | 12 | 0 | NA | 0 | NA | 0 | NA | 0 | NA |
| 12 | 41269745 | 41139340 | -1 | NM_153026    | PRICKLE1  | 1 | 15 | 0 | NA | 0 | NA | 0 | NA | 0 | NA |
| 12 | 42231991 | 42034278 | -1 | NM_025003    | ADAMTS20  | 0 | NA | 1 | 17 | 0 | NA | 0 | NA | 0 | NA |
| 12 | 42438828 | 42408678 | -1 | NM_001098615 | PUS7L     | 0 | NA | 0 | NA | 0 | NA | 0 | NA | 0 | NA |
| 12 | 42438829 | 42408678 | -1 | NM_001098614 | PUS7L     | 0 | NA | 0 | NA | 0 | NA | 0 | NA | 0 | NA |
| 12 | 42438863 | 42408678 | -1 | NM_031292    | PUS7L     | 0 | NA | 0 | NA | 0 | NA | 0 | NA | 0 | NA |
| 12 | 42439019 | 42468166 | 1  | NM_001114182 | IRAK4     | 0 | NA | 0 | NA | 0 | NA | 0 | NA | 0 | NA |
| 12 | 42439019 | 42468166 | 1  | NM_016123    | IRAK4     | 0 | NA | 0 | NA | 0 | NA | 0 | NA | 0 | NA |
| 12 | 42486445 | 42473792 | -1 | NM_002822    | TWF1      | 0 | NA | 0 | NA | 0 | NA | 0 | NA | 0 | NA |
| 12 | 42516228 | 43069808 | 1  | NM_032256    | TMEM117   | 0 | NA | 0 | NA | 0 | NA | 0 | NA | 0 | NA |
| 12 | 43556405 | 43188331 | -1 | NM_006159    | NELL2     | 0 | NA | 0 | NA | 0 | NA | 0 | NA | 0 | NA |
| 12 | 43731149 | 43694805 | -1 | NM_001004329 | DBX2      | 0 | NA | 0 | NA | 0 | NA | 0 | NA | 0 | NA |
| 12 | 43896056 | 43853113 | -1 | NM_015899    | PLEKHA9   | 0 | NA | 0 | NA | 1 | 16 | 0 | NA | 0 | NA |
| 12 | 43896169 | 44112399 | 1  | NM_001025356 | TMEM16F   | 0 | NA | 0 | NA | 1 | 16 | 0 | NA | 0 | NA |
| 12 | 44409886 | 44588086 | 1  | NM_152641    | ARID2     | 0 | NA | 0 | NA | 0 | NA | 1 | 13 | 0 | NA |
| 12 | 44670668 | 44599180 | -1 | NM_004719    | SFRS2IP   | 0 | NA | 0 | NA | 0 | NA | 1 | 12 | 0 | NA |
| 12 | 44949475 | 44863107 | -1 | NM_001077484 | SLC38A1   | 0 | NA | 0 | NA | 0 | NA | 0 | NA | 1 | 19 |
| 12 | 44949475 | 44863107 | -1 | NM_030674    | SLC38A1   | 0 | NA | 0 | NA | 0 | NA | 0 | NA | 1 | 19 |
| 12 | 45052814 | 45038237 | -1 | NM_018976    | SLC38A2   | 1 | 11 | 0 | NA | 0 | NA | 0 | NA | 0 | NA |
| 12 | 45506002 | 45444810 | -1 | NM_018018    | SLC38A4   | 0 | NA | 1 | 15 | 0 | NA | 0 | NA | 0 | NA |
| 12 | 45759915 | 45755756 | -1 | NM_181847    | AMIGO2    | 0 | NA | 0 | NA | 1 | 12 | 0 | NA | 0 | NA |
| 12 | 45896318 | 45916710 | 1  | NM_138371    | FAM113B   | 0 | NA | 0 | NA | 0 | NA | 0 | NA | 0 | NA |
| 12 | 46386041 | 46343340 | -1 | NM_024604    | RPAP3     | 0 | NA | 0 | NA | 0 | NA | 0 | NA | 0 | NA |
| 12 | 46405617 | 46389794 | -1 | NM_006025    | P11       | 1 | 13 | 0 | NA | 1 | 12 | 0 | NA | 0 | NA |
| 12 | 46438448 | 46417292 | -1 | NM_001098532 | RAPGEF3   | 0 | NA | 0 | NA | 0 | NA | 0 | NA | 0 | NA |
| 12 | 46438511 | 46417292 | -1 | NM_006105    | RAPGEF3   | 0 | NA | 0 | NA | 0 | NA | 0 | NA | 0 | NA |
| 12 | 46438952 | 46417292 | -1 | NM_001098531 | RAPGEF3   | 0 | NA | 0 | NA | 0 | NA | 0 | NA | 0 | NA |
| 12 | 46453257 | 46461720 | 1  | NM_017842    | FLJ20489  | 0 | NA | 0 | NA | 0 | NA | 1 | 17 | 0 | NA |
| 12 | 46500030 | 46462773 | -1 | NM_001098416 | HDAC7     | 0 | NA | 0 | NA | 0 | NA | 0 | NA | 0 | NA |
| 12 | 46500030 | 46462773 | -1 | NM_015401    | HDAC7     | 0 | NA | 0 | NA | 0 | NA | 0 | NA | 0 | NA |
| 12 | 46585081 | 46521586 | -1 | NM_000376    | VDR       | 0 | NA | 0 | NA | 0 | NA | 0 | NA | 0 | NA |
| 12 | 46585081 | 46521586 | -1 | NM_001017535 | VDR       | 0 | NA | 0 | NA | 0 | NA | 0 | NA | 0 | NA |
| 12 | 46644258 | 46648928 | 1  | NM_024056    | TMEM106C  | 0 | NA | 0 | NA | 0 | NA | 1 | 11 | 0 | NA |
| 12 | 46684552 | 46653014 | -1 | NM_001844    | COL2A1    | 1 | 11 | 0 | NA | 1 | 21 | 1 | 11 | 0 | NA |
| 12 | 46684552 | 46653014 | -1 | NM_033150    | COL2A1    | 1 | 11 | 0 | NA | 1 | 21 | 1 | 11 | 0 | NA |
| 12 | 46785908 | 46723023 | -1 | NM_014554    | SENP1     | 0 | NA | 0 | NA | 0 | NA | 0 | NA | 0 | NA |
| 12 | 46799294 | 46626154 | 1  | NM_000289    | PFKM      | 1 | 12 | 0 | NA | 0 | NA | 0 | NA | 0 | NA |
| 12 | 46837644 | 46827838 | -1 | NM_024095    | ASB8      | 0 | NA | 0 | NA | 1 | 16 | 0 | NA | 0 | NA |
| 12 | 46883665 | 46865976 | 1  | NM_001013635 | LOC387856 | 0 | NA | 1 | 16 | 0 | NA | 0 | NA | 0 | NA |
| 12 | 46883342 | 46882388 | -1 | NM_001004134 | OR10AD1   | 0 | NA | 0 | NA | 0 | NA | 0 | NA | 0 | NA |
| 12 | 47009029 | 47010329 | 1  | NM_181788    | H1FNT     | 0 | NA | 1 | 12 | 0 | NA | 0 | NA | 0 | NA |
| 12 | 47030268 | 47022178 | -1 | NM_152320    | ZNF641    | 0 | NA | 0 | NA | 0 | NA | 0 | NA | 0 | NA |
| 12 | 47152714 | 47153110 | 1  | NM_012404    | ANP32D    | 0 | NA | 0 | NA | 0 | NA | 0 | NA | 0 | NA |
| 12 | 47163289 | 47176434 | 1  | NM_152319    | C12orf54  | 0 | NA | 0 | NA | 0 | NA | 0 | NA | 0 | NA |
| 12 | 47205681 | 47208153 | 1  | NM_001005203 | OR8S1     | 0 | NA | 0 | NA | 0 | NA | 0 | NA | 0 | NA |
| 12 | 47250096 | 47247733 | -1 | NM_002289    | LALBA     | 0 | NA | 0 | NA | 0 | NA | 0 | NA | 0 | NA |
| 12 | 47362302 | 47333261 | -1 | NM_017822    | C12orf41  | 0 | NA | 0 | NA | 0 | NA | 0 | NA | 0 | NA |
| 12 | 47397048 | 47373018 | -1 | NM_001240    | CCNT1     | 1 | 22 | 0 | NA | 0 | NA | 0 | NA | 0 | NA |
| 12 | 47464144 | 47446241 | -1 | NM_015270    | ADCY6     | 1 | 15 | 0 | NA | 0 | NA | 0 | NA | 0 | NA |

|    |          |          |    |              |           |   |    |   |    |   |    |   |    |   |    |
|----|----------|----------|----|--------------|-----------|---|----|---|----|---|----|---|----|---|----|
| 12 | 47469087 | 47446247 | -1 | NM_020983    | ADCY6     | 1 | 15 | 0 | NA | 0 | NA | 0 | NA | 0 | NA |
| 12 | 47498778 | 47508991 | 1  | NM_000725    | CACNB3    | 0 | NA | 0 | NA | 0 | NA | 0 | NA | 0 | NA |
| 12 | 47532224 | 47509805 | -1 | NM_004818    | DDX23     | 0 | NA | 0 | NA | 0 | NA | 0 | NA | 0 | NA |
| 12 | 47545920 | 47537194 | -1 | NM_014470    | RND1      | 0 | NA | 0 | NA | 0 | NA | 0 | NA | 0 | NA |
| 12 | 47584198 | 47601625 | 1  | NM_033124    | CCDC65    | 0 | NA | 0 | NA | 0 | NA | 0 | NA | 0 | NA |
| 12 | 47605542 | 47602008 | -1 | NM_016594    | FKBP11    | 0 | NA | 0 | NA | 0 | NA | 0 | NA | 0 | NA |
| 12 | 47637519 | 47616258 | -1 | NM_001659    | ARF3      | 1 | 17 | 0 | NA | 0 | NA | 0 | NA | 0 | NA |
| 12 | 47651810 | 47645389 | -1 | NM_003394    | WNT10B    | 0 | NA | 1 | 15 | 0 | NA | 0 | NA | 0 | NA |
| 12 | 47658502 | 47662746 | 1  | NM_005430    | WNT1      | 0 | NA | 1 | 15 | 0 | NA | 0 | NA | 0 | NA |
| 12 | 47679355 | 47675199 | -1 | NM_015086    | DDN       | 0 | NA | 0 | NA | 0 | NA | 0 | NA | 0 | NA |
| 12 | 47698859 | 47682321 | -1 | NM_002733    | PRKAG1    | 0 | NA | 0 | NA | 0 | NA | 0 | NA | 0 | NA |
| 12 | 47698859 | 47682321 | -1 | NM_212461    | PRKAG1    | 0 | NA | 0 | NA | 0 | NA | 0 | NA | 0 | NA |
| 12 | 47735374 | 47699024 | -1 | NM_003482    | MLL2      | 0 | NA | 0 | NA | 0 | NA | 0 | NA | 0 | NA |
| 12 | 47750042 | 47744734 | -1 | NM_144593    | RHEBL1    | 0 | NA | 0 | NA | 0 | NA | 0 | NA | 0 | NA |
| 12 | 47774869 | 47769472 | -1 | NM_021044    | DHH       | 0 | NA | 0 | NA | 0 | NA | 0 | NA | 0 | NA |
| 12 | 47790947 | 47777189 | -1 | NM_018113    | LMBR1L    | 0 | NA | 0 | NA | 0 | NA | 0 | NA | 0 | NA |
| 12 | 47811571 | 47807832 | -1 | NM_006082    | TUBA1B    | 1 | 17 | 0 | NA | 1 | 15 | 0 | NA | 0 | NA |
| 12 | 47869128 | 47864849 | -1 | NM_006009    | TUBA1A    | 0 | NA | 0 | NA | 1 | 13 | 0 | NA | 0 | NA |
| 12 | 47945131 | 47953380 | 1  | NM_032704    | TUBA1C    | 0 | NA | 0 | NA | 0 | NA | 0 | NA | 0 | NA |
| 12 | 47975175 | 47978748 | 1  | NM_006262    | PRPH      | 0 | NA | 0 | NA | 0 | NA | 0 | NA | 0 | NA |
| 12 | 48003237 | 48004438 | 1  | NM_001100620 | TROAP     | 0 | NA | 0 | NA | 1 | 12 | 0 | NA | 0 | NA |
| 12 | 48003237 | 48011781 | 1  | NM_005480    | TROAP     | 0 | NA | 0 | NA | 1 | 12 | 0 | NA | 0 | NA |
| 12 | 48017238 | 48012466 | -1 | NM_001008223 | C1QL4     | 0 | NA | 0 | NA | 1 | 12 | 0 | NA | 0 | NA |
| 12 | 48027307 | 48031952 | 1  | NM_024902    | FLJ13236  | 0 | NA | 0 | NA | 0 | NA | 0 | NA | 0 | NA |
| 12 | 48046954 | 48207474 | 1  | NM_023071    | SPATS2    | 0 | NA | 0 | NA | 0 | NA | 0 | NA | 0 | NA |
| 12 | 48219206 | 48238344 | 1  | NM_012284    | KCNH3     | 0 | NA | 0 | NA | 0 | NA | 0 | NA | 0 | NA |
| 12 | 48246489 | 48238352 | -1 | NM_001012300 | MCRS1     | 1 | 16 | 0 | NA | 0 | NA | 0 | NA | 0 | NA |
| 12 | 48248178 | 48238352 | -1 | NM_006337    | MCRS1     | 1 | 16 | 0 | NA | 0 | NA | 0 | NA | 0 | NA |
| 12 | 48285621 | 48267554 | -1 | NM_032130    | C12orf25  | 0 | NA | 0 | NA | 0 | NA | 0 | NA | 0 | NA |
| 12 | 48303669 | 48324716 | 1  | NM_012272    | PRPF40B   | 1 | 13 | 0 | NA | 0 | NA | 1 | 11 | 0 | NA |
| 12 | 48310593 | 48324716 | 1  | NM_001031698 | PRPF40B   | 1 | 11 | 0 | NA | 0 | NA | 1 | 11 | 0 | NA |
| 12 | 48387464 | 48317990 | -1 | NM_175736    | FMNL3     | 1 | 11 | 0 | NA | 0 | NA | 0 | NA | 0 | NA |
| 12 | 48387464 | 48317990 | -1 | NM_198900    | FMNL3     | 1 | 11 | 0 | NA | 0 | NA | 0 | NA | 0 | NA |
| 12 | 48421559 | 48444984 | 1  | NM_003217    | TEGT      | 0 | NA | 0 | NA | 0 | NA | 0 | NA | 0 | NA |
| 12 | 48421858 | 48444984 | 1  | NM_001098576 | TEGT      | 0 | NA | 0 | NA | 0 | NA | 0 | NA | 0 | NA |
| 12 | 48485440 | 48482773 | -1 | NM_001037806 | LOC283331 | 0 | NA | 0 | NA | 0 | NA | 0 | NA | 0 | NA |
| 12 | 48508475 | 48471201 | -1 | NM_020941    | KIAA1602  | 0 | NA | 0 | NA | 0 | NA | 1 | 13 | 0 | NA |
| 12 | 48523142 | 48517824 | -1 | NM_181708    | BCDIN3D   | 0 | NA | 0 | NA | 0 | NA | 0 | NA | 0 | NA |
| 12 | 48583987 | 48546946 | -1 | NM_012306    | FAIM2     | 0 | NA | 0 | NA | 0 | NA | 0 | NA | 0 | NA |
| 12 | 48630795 | 48638931 | 1  | NM_000486    | AQP2      | 1 | 11 | 0 | NA | 0 | NA | 0 | NA | 0 | NA |
| 12 | 48641545 | 48645728 | 1  | NM_001651    | AQP5      | 1 | 11 | 0 | NA | 0 | NA | 0 | NA | 0 | NA |
| 12 | 48652886 | 48657189 | 1  | NM_001652    | AQP6      | 0 | NA | 0 | NA | 0 | NA | 0 | NA | 0 | NA |
| 12 | 48705574 | 48669211 | -1 | NM_001126103 | RACGAP1   | 0 | NA | 0 | NA | 1 | 17 | 1 | 16 | 0 | NA |
| 12 | 48705574 | 48669211 | -1 | NM_001126104 | RACGAP1   | 0 | NA | 0 | NA | 1 | 17 | 1 | 16 | 0 | NA |
| 12 | 48705574 | 48669211 | -1 | NM_013277    | RACGAP1   | 0 | NA | 0 | NA | 1 | 17 | 1 | 16 | 0 | NA |
| 12 | 48737753 | 48763661 | 1  | NM_001095    | ACCN2     | 0 | NA | 0 | NA | 0 | NA | 0 | NA | 0 | NA |
| 12 | 48737753 | 48763661 | 1  | NM_020039    | ACCN2     | 0 | NA | 0 | NA | 0 | NA | 0 | NA | 0 | NA |
| 12 | 48765249 | 48780761 | 1  | NM_003076    | SMARCD1   | 0 | NA | 0 | NA | 0 | NA | 0 | NA | 0 | NA |
| 12 | 48765249 | 48780761 | 1  | NM_139071    | SMARCD1   | 0 | NA | 0 | NA | 0 | NA | 0 | NA | 0 | NA |
| 12 | 48784067 | 48791362 | 1  | NM_005276    | GPD1      | 1 | 11 | 0 | NA | 0 | NA | 0 | NA | 0 | NA |
| 12 | 48792166 | 48800501 | 1  | NM_032901    | C12orf62  | 0 | NA | 0 | NA | 0 | NA | 0 | NA | 0 | NA |
| 12 | 48847364 | 48809847 | -1 | NM_147190    | LASS5     | 1 | 12 | 0 | NA | 0 | NA | 0 | NA | 0 | NA |
| 12 | 48902755 | 48855829 | -1 | NM_001113547 | LIMA1     | 0 | NA | 0 | NA | 1 | 15 | 0 | NA | 0 | NA |
| 12 | 48963620 | 48855829 | -1 | NM_001113546 | LIMA1     | 0 | NA | 0 | NA | 0 | NA | 0 | NA | 0 | NA |
| 12 | 48963620 | 48855829 | -1 | NM_016357    | LIMA1     | 0 | NA | 0 | NA | 0 | NA | 0 | NA | 0 | NA |
| 12 | 49080916 | 49160055 | 1  | NM_052879    | LARP4     | 0 | NA | 0 | NA | 1 | 13 | 0 | NA | 0 | NA |
| 12 | 49080916 | 49160055 | 1  | NM_199188    | LARP4     | 0 | NA | 0 | NA | 1 | 13 | 0 | NA | 0 | NA |
| 12 | 49080916 | 49160055 | 1  | NM_199190    | LARP4     | 0 | NA | 0 | NA | 1 | 13 | 0 | NA | 0 | NA |
| 12 | 49185034 | 49428717 | 1  | NM_173602    | DIP2B     | 1 | 12 | 0 | NA | 0 | NA | 1 | 15 | 0 | NA |
| 12 | 49444085 | 49501174 | 1  | NM_005171    | ATF1      | 0 | NA | 0 | NA | 0 | NA | 0 | NA | 0 | NA |
| 12 | 49522967 | 49567930 | 1  | NM_182559    | TMPRSS12  | 0 | NA | 1 | 13 | 0 | NA | 0 | NA | 0 | NA |
| 12 | 49604800 | 49612567 | 1  | NM_014033    | METTL7A   | 0 | NA | 1 | 12 | 1 | 16 | 0 | NA | 0 | NA |
| 12 | 49634048 | 49690556 | 1  | NM_001109619 | HIGD1C    | 0 | NA | 0 | NA | 0 | NA | 0 | NA | 0 | NA |
| 12 | 49706409 | 49666043 | -1 | NM_000617    | SLC11A2   | 0 | NA | 0 | NA | 0 | NA | 1 | 11 | 0 | NA |
| 12 | 49728350 | 49740474 | 1  | NM_001024668 | LETMD1    | 0 | NA | 0 | NA | 0 | NA | 0 | NA | 0 | NA |

|    |          |          |    |              |          |   |    |    |    |    |    |    |    |    |    |
|----|----------|----------|----|--------------|----------|---|----|----|----|----|----|----|----|----|----|
| 12 | 49728350 | 49740474 | 1  | NM_015416    | LETMD1   | 0 | NA | 0  | NA | 0  | NA | 0  | NA | 0  | NA |
| 12 | 49763600 | 49741256 | -1 | NM_030809    | FAM130A1 | 0 | NA | 0  | NA | 0  | NA | 0  | NA | 0  | NA |
| 12 | 49852931 | 49774886 | -1 | NM_005653    | TFCP2    | 0 | NA | 0  | NA | 0  | NA | 0  | NA | 0  | NA |
| 12 | 49897744 | 49869231 | -1 | NM_002702    | POU6F1   | 0 | NA | 0  | NA | 0  | NA | 0  | NA | 0  | NA |
| 12 | 49918892 | 49923834 | 1  | NM_014764    | DAZAP2   | 1 | 13 | 0  | NA | 0  | NA | 1  | 18 | 0  | NA |
| 12 | 49950249 | 49925405 | -1 | NM_020467    | LOC57228 | 0 | NA | 0  | NA | 0  | NA | 0  | NA | 0  | NA |
| 12 | 49950261 | 49925399 | -1 | NM_001033873 | LOC57228 | 0 | NA | 0  | NA | 0  | NA | 0  | NA | 0  | NA |
| 12 | 49950469 | 49925399 | -1 | NM_001031628 | LOC57228 | 0 | NA | 0  | NA | 0  | NA | 0  | NA | 0  | NA |
| 12 | 50004205 | 49961088 | -1 | NM_016293    | BIN2     | 0 | NA | 0  | NA | 0  | NA | 0  | NA | 0  | NA |
| 12 | 50026730 | 50008493 | -1 | NM_001971    | ELA1     | 0 | NA | 0  | NA | 0  | NA | 0  | NA | 0  | NA |
| 12 | 50071467 | 50032099 | -1 | NM_007210    | GALNT6   | 0 | NA | 0  | NA | 0  | NA | 0  | NA | 0  | NA |
| 12 | 50104860 | 50177917 | 1  | NM_004858    | SLC4A8   | 0 | NA | 0  | NA | 0  | NA | 0  | NA | 0  | NA |
| 12 | 50104860 | 50189247 | 1  | NM_001039960 | SLC4A8   | 0 | NA | 0  | NA | 0  | NA | 0  | NA | 0  | NA |
| 12 | 50271286 | 50488566 | 1  | NM_014191    | SCN8A    | 0 | NA | 0  | NA | 0  | NA | 0  | NA | 0  | NA |
| 12 | 50502475 | 50497942 | -1 | NM_001013690 | FIGLN2   | 0 | NA | 0  | NA | 0  | NA | 0  | NA | 0  | NA |
| 12 | 50568010 | 50571705 | 1  | NM_182608    | ANKRD33  | 0 | NA | 0  | NA | 0  | NA | 0  | NA | 0  | NA |
| 12 | 50587468 | 50603412 | 1  | NM_000020    | ACVRL1   | 0 | NA | 0  | NA | 0  | NA | 0  | NA | 0  | NA |
| 12 | 50592379 | 50603412 | 1  | NM_001077401 | ACVRL1   | 0 | NA | 0  | NA | 0  | NA | 0  | NA | 0  | NA |
| 12 | 50631752 | 50667398 | 1  | NM_020328    | ACVR1B   | 1 | 12 | 0  | NA | 0  | NA | 0  | NA | 0  | NA |
| 12 | 50631752 | 50672393 | 1  | NM_020327    | ACVR1B   | 1 | 12 | 0  | NA | 0  | NA | 0  | NA | 0  | NA |
| 12 | 50631752 | 50677127 | 1  | NM_004302    | ACVR1B   | 1 | 12 | 0  | NA | 0  | NA | 0  | NA | 0  | NA |
| 12 | 50687014 | 50695938 | 1  | NM_181711    | GRASP    | 0 | NA | 0  | NA | 0  | NA | 0  | NA | 0  | NA |
| 12 | 50731457 | 50739554 | 1  | NM_002135    | NR4A1    | 0 | NA | 0  | NA | 0  | NA | 0  | NA | 0  | NA |
| 12 | 50731457 | 50739554 | 1  | NM_173157    | NR4A1    | 0 | NA | 0  | NA | 0  | NA | 0  | NA | 0  | NA |
| 12 | 50750024 | 50757546 | 1  | NM_001098673 | C12orf44 | 1 | 11 | 0  | NA | 1  | 16 | 0  | NA | 0  | NA |
| 12 | 50750024 | 50757546 | 1  | NM_021934    | C12orf44 | 1 | 11 | 0  | NA | 1  | 16 | 0  | NA | 0  | NA |
| 12 | 50872051 | 50849046 | -1 | NM_001081492 | KRT80    | 1 | 11 | 0  | NA | 0  | NA | 0  | NA | 0  | NA |
| 12 | 50872051 | 50849046 | -1 | NM_182507    | KRT80    | 1 | 11 | 0  | NA | 0  | NA | 0  | NA | 0  | NA |
| 12 | 50913220 | 50928976 | 1  | NM_005556    | KRT17    | 0 | NA | 0  | NA | 0  | NA | 0  | NA | 0  | NA |
| 12 | 50971566 | 50965963 | -1 | NM_002281    | KRT81    | 0 | NA | 0  | NA | 0  | NA | 0  | NA | 0  | NA |
| 12 | 50981915 | 50989214 | 1  | NM_002284    | KRT86    | 0 | NA | 0  | NA | 0  | NA | 0  | NA | 0  | NA |
| 12 | 51001449 | 50994351 | -1 | NM_002282    | KRT83    | 0 | NA | 0  | NA | 0  | NA | 0  | NA | 0  | NA |
| 12 | 51047576 | 51040056 | -1 | NM_002283    | KRT85    | 0 | NA | 0  | NA | 0  | NA | 0  | NA | 0  | NA |
| 12 | 51065684 | 51057862 | -1 | NM_033045    | KRT84    | 0 | NA | 0  | NA | 0  | NA | 0  | NA | 0  | NA |
| 12 | 51086443 | 51074001 | -1 | NM_033033    | KRT82    | 0 | NA | 0  | NA | 0  | NA | 0  | NA | 0  | NA |
| 12 | 51114377 | 51104120 | -1 | NM_004693    | KRT75    | 0 | NA | 17 | 0  | NA | 0  | NA | 0  | NA | NA |
| 12 | 51132177 | 51126701 | -1 | NM_005555    | KRT6B    | 0 | NA | 13 | 0  | NA | 0  | NA | 0  | NA | NA |
| 12 | 51153836 | 51148566 | -1 | NM_173086    | KRT6C    | 0 | NA | 17 | 0  | NA | 0  | NA | 0  | NA | NA |
| 12 | 51173448 | 51167224 | -1 | NM_005554    | KRT6A    | 0 | NA | 0  | NA | 0  | NA | 0  | NA | 0  | NA |
| 12 | 51200510 | 51194625 | -1 | NM_000424    | KRT5     | 0 | NA | 0  | NA | 0  | NA | 0  | NA | 0  | NA |
| 12 | 51233170 | 51223959 | -1 | NM_033448    | KRT71    | 0 | NA | 0  | NA | 0  | NA | 0  | NA | 0  | NA |
| 12 | 51253876 | 51245869 | -1 | NM_175053    | KRT74    | 0 | NA | 0  | NA | 0  | NA | 0  | NA | 0  | NA |
| 12 | 51281559 | 51265639 | -1 | NM_080747    | KRT72    | 0 | NA | 0  | NA | 0  | NA | 0  | NA | 0  | NA |
| 12 | 51298610 | 51287620 | -1 | NM_175068    | KRT73    | 0 | NA | 0  | NA | 0  | NA | 0  | NA | 0  | NA |
| 12 | 51332226 | 51324608 | -1 | NM_000423    | KRT2     | 0 | NA | 0  | NA | 0  | NA | 0  | NA | 0  | NA |
| 12 | 51360458 | 51354786 | -1 | NM_006121    | KRT1     | 0 | NA | 0  | NA | 0  | NA | 0  | NA | 0  | NA |
| 12 | 51383514 | 51369909 | -1 | NM_175078    | KRT77    | 0 | NA | 0  | NA | 0  | NA | 0  | NA | 0  | NA |
| 12 | 51457372 | 51448205 | -1 | NM_015848    | KRT76    | 0 | NA | 0  | NA | 0  | NA | 0  | NA | 0  | NA |
| 12 | 51476159 | 51469735 | -1 | NM_057088    | KRT3     | 0 | NA | 0  | NA | 0  | NA | 0  | NA | 0  | NA |
| 12 | 51494602 | 51486599 | -1 | NM_002272    | KRT4     | 0 | NA | 0  | NA | 0  | NA | 0  | NA | 0  | NA |
| 12 | 51514344 | 51501497 | -1 | NM_175834    | KRT79    | 0 | NA | 13 | 0  | NA | 0  | NA | 0  | NA | NA |
| 12 | 51529045 | 51519012 | -1 | NM_173352    | KRT78    | 0 | NA | 15 | 0  | NA | 0  | NA | 0  | NA | NA |
| 12 | 51585127 | 51577237 | -1 | NM_002273    | KRT8     | 0 | NA | 0  | NA | 0  | NA | 0  | NA | 0  | NA |
| 12 | 51628921 | 51632952 | 1  | NM_199187    | KRT18    | 0 | NA | 0  | NA | 0  | NA | 0  | NA | 0  | NA |
| 12 | 51629109 | 51632952 | 1  | NM_000224    | KRT18    | 0 | NA | 0  | NA | 0  | NA | 0  | NA | 0  | NA |
| 12 | 51686328 | 51722260 | 1  | NM_001417    | EIF4B    | 1 | 21 | 0  | NA | 0  | NA | 0  | NA | 0  | NA |
| 12 | 51727076 | 51744429 | 1  | NM_198316    | TENC1    | 0 | NA | 0  | NA | 0  | NA | 0  | NA | 0  | NA |
| 12 | 51728999 | 51744429 | 1  | NM_015319    | TENC1    | 0 | NA | 0  | NA | 0  | NA | 0  | NA | 0  | NA |
| 12 | 51730101 | 51744429 | 1  | NM_170754    | TENC1    | 0 | NA | 0  | NA | 0  | NA | 0  | NA | 0  | NA |
| 12 | 51759405 | 51744664 | -1 | NM_032840    | SPRYD3   | 1 | 13 | 0  | NA | 0  | NA | 0  | NA | 0  | NA |
| 12 | 51777702 | 51782395 | 1  | NM_002178    | IGFBP6   | 0 | NA | 0  | NA | 0  | NA | 1  | 13 | 0  | NA |
| 12 | 51783540 | 51804590 | 1  | NM_003578    | SOAT2    | 0 | NA | 0  | NA | 0  | NA | 1  | 13 | 0  | NA |
| 12 | 51860647 | 51837713 | -1 | NM_015989    | CSAD     | 0 | NA | 0  | NA | 0  | NA | 0  | NA | 0  | NA |
| 12 | 51860801 | 51870921 | 1  | NM_001004304 | ZNF740   | 0 | NA | 0  | NA | 0  | NA | 0  | NA | 0  | NA |
| 12 | 51887267 | 51871373 | -1 | NM_000889    | ITGB7    | 0 | NA | 0  | NA | 0  | NA | 0  | NA | 0  | NA |

|    |          |          |    |              |          |   |    |   |    |   |    |   |    |   |    |
|----|----------|----------|----|--------------|----------|---|----|---|----|---|----|---|----|---|----|
| 12 | 51900417 | 51890619 | -1 | NM_001042728 | RARG     | 0 | NA | 0 | NA | 0 | NA | 0 | NA | 0 | NA |
| 12 | 51912303 | 51890619 | -1 | NM_000966    | RARG     | 0 | NA | 0 | NA | 0 | NA | 0 | NA | 0 | NA |
| 12 | 51932146 | 51934455 | 1  | NM_032889    | MFSD5    | 0 | NA | 0 | NA | 0 | NA | 0 | NA | 0 | NA |
| 12 | 51948349 | 51973694 | 1  | NM_012291    | ESPL1    | 0 | NA | 0 | NA | 0 | NA | 0 | NA | 0 | NA |
| 12 | 51975501 | 51979501 | 1  | NM_002624    | PFDN5    | 0 | NA | 0 | NA | 1 | 13 | 0 | NA | 0 | NA |
| 12 | 51975501 | 51979501 | 1  | NM_145897    | PFDN5    | 0 | NA | 0 | NA | 1 | 13 | 0 | NA | 0 | NA |
| 12 | 51979736 | 51987232 | 1  | NM_021640    | C12orf10 | 0 | NA | 0 | NA | 1 | 13 | 0 | NA | 0 | NA |
| 12 | 52001679 | 51987506 | -1 | NM_015665    | AAAS     | 1 | 15 | 0 | NA | 0 | NA | 0 | NA | 0 | NA |
| 12 | 52015804 | 52006626 | -1 | NM_152860    | SP7      | 0 | NA | 0 | NA | 0 | NA | 0 | NA | 0 | NA |
| 12 | 52060245 | 52096493 | 1  | NM_138473    | SP1      | 0 | NA | 0 | NA | 0 | NA | 0 | NA | 0 | NA |
| 12 | 52103907 | 52111579 | 1  | NM_020547    | AMHR2    | 0 | NA | 0 | NA | 0 | NA | 0 | NA | 0 | NA |
| 12 | 52121699 | 52126694 | 1  | NM_001005354 | PRR13    | 0 | NA | 0 | NA | 0 | NA | 0 | NA | 0 | NA |
| 12 | 52121699 | 52126694 | 1  | NM_018457    | PRR13    | 0 | NA | 0 | NA | 0 | NA | 0 | NA | 0 | NA |
| 12 | 52132160 | 52159872 | 1  | NM_001098620 | PCBP2    | 0 | NA | 0 | NA | 0 | NA | 0 | NA | 0 | NA |
| 12 | 52132160 | 52159872 | 1  | NM_005016    | PCBP2    | 0 | NA | 0 | NA | 0 | NA | 0 | NA | 0 | NA |
| 12 | 52132160 | 52159872 | 1  | NM_031989    | PCBP2    | 0 | NA | 0 | NA | 0 | NA | 0 | NA | 0 | NA |
| 12 | 52179538 | 52160546 | -1 | NM_006301    | MAP3K12  | 0 | NA | 0 | NA | 0 | NA | 0 | NA | 0 | NA |
| 12 | 52180971 | 52186482 | 1  | NM_004178    | TARBP2   | 0 | NA | 0 | NA | 0 | NA | 0 | NA | 0 | NA |
| 12 | 52180971 | 52186482 | 1  | NM_134323    | TARBP2   | 0 | NA | 0 | NA | 0 | NA | 0 | NA | 0 | NA |
| 12 | 52181643 | 52186482 | 1  | NM_134324    | TARBP2   | 0 | NA | 0 | NA | 0 | NA | 0 | NA | 0 | NA |
| 12 | 52187689 | 52186740 | -1 | NM_003717    | NPFF     | 0 | NA | 0 | NA | 0 | NA | 0 | NA | 0 | NA |
| 12 | 52306405 | 52196027 | -1 | NM_006856    | ATF7     | 0 | NA | 0 | NA | 0 | NA | 0 | NA | 0 | NA |
| 12 | 52356376 | 52345210 | -1 | NM_005176    | ATP5G2   | 0 | NA | 0 | NA | 1 | 13 | 0 | NA | 0 | NA |
| 12 | 52356779 | 52345210 | -1 | NM_001002031 | ATP5G2   | 0 | NA | 0 | NA | 1 | 13 | 0 | NA | 0 | NA |
| 12 | 52407486 | 52391168 | -1 | NM_020898    | CALCOCO1 | 0 | NA | 0 | NA | 0 | NA | 0 | NA | 0 | NA |
| 12 | 52618842 | 52626595 | 1  | NM_017410    | HOXC13   | 1 | 20 | 0 | NA | 0 | NA | 0 | NA | 0 | NA |
| 12 | 52634980 | 52636617 | 1  | NM_173860    | HOXC12   | 0 | NA | 1 | 15 | 0 | NA | 0 | NA | 0 | NA |
| 12 | 52653176 | 52656470 | 1  | NM_014212    | HOXC11   | 0 | NA | 0 | NA | 0 | NA | 0 | NA | 0 | NA |
| 12 | 52665212 | 52670329 | 1  | NM_017409    | HOXC10   | 0 | NA | 0 | NA | 0 | NA | 1 | 13 | 0 | NA |
| 12 | 52680143 | 52683387 | 1  | NM_006897    | HOXC9    | 0 | NA | 0 | NA | 1 | 16 | 0 | NA | 0 | NA |
| 12 | 52689156 | 52692812 | 1  | NM_022658    | HOXC8    | 0 | NA | 0 | NA | 1 | 16 | 0 | NA | 0 | NA |
| 12 | 52696908 | 52710874 | 1  | NM_153693    | HOXC6    | 0 | NA | 0 | NA | 0 | NA | 0 | NA | 0 | NA |
| 12 | 52696908 | 52736081 | 1  | NM_014620    | HOXC4    | 0 | NA | 0 | NA | 0 | NA | 0 | NA | 0 | NA |
| 12 | 52708460 | 52710874 | 1  | NM_004503    | HOXC6    | 0 | NA | 0 | NA | 0 | NA | 1 | 14 | 0 | NA |
| 12 | 52713098 | 52715411 | 1  | NM_018953    | HOXC5    | 0 | NA | 0 | NA | 0 | NA | 1 | 14 | 0 | NA |
| 12 | 52733927 | 52736081 | 1  | NM_153633    | HOXC4    | 0 | NA | 0 | NA | 0 | NA | 0 | NA | 0 | NA |
| 12 | 52869024 | 52861518 | -1 | NM_014311    | SMUG1    | 1 | 11 | 0 | NA | 0 | NA | 0 | NA | 0 | NA |
| 12 | 52960151 | 52921676 | -1 | NM_012117    | CBX5     | 1 | 20 | 0 | NA | 0 | NA | 1 | 14 | 0 | NA |
| 12 | 52960754 | 52965297 | 1  | NM_002136    | HNRNPA1  | 1 | 20 | 0 | NA | 0 | NA | 1 | 14 | 0 | NA |
| 12 | 52960754 | 52965297 | 1  | NM_031157    | HNRNPA1  | 1 | 20 | 0 | NA | 0 | NA | 1 | 14 | 0 | NA |
| 12 | 52975811 | 52972162 | -1 | NM_006163    | NFE2     | 0 | NA | 0 | NA | 0 | NA | 0 | NA | 0 | NA |
| 12 | 53005177 | 53031900 | 1  | NM_016057    | COP21    | 1 | 12 | 0 | NA | 0 | NA | 0 | NA | 0 | NA |
| 12 | 53044525 | 53042496 | -1 | NM_020370    | GPR84    | 1 | 12 | 0 | NA | 0 | NA | 0 | NA | 0 | NA |
| 12 | 53064748 | 53049186 | -1 | NM_015481    | ZNF385A  | 0 | NA | 0 | NA | 0 | NA | 0 | NA | 0 | NA |
| 12 | 53099317 | 53075311 | -1 | NM_002205    | ITGA5    | 1 | 12 | 0 | NA | 0 | NA | 0 | NA | 0 | NA |
| 12 | 53153614 | 53136010 | -1 | NM_144594    | GTSF1    | 0 | NA | 0 | NA | 0 | NA | 0 | NA | 0 | NA |
| 12 | 53177761 | 53223166 | 1  | NM_005337    | NCKAP1L  | 0 | NA | 0 | NA | 0 | NA | 0 | NA | 0 | NA |
| 12 | 53229670 | 53259290 | 1  | NM_000924    | PDE1B    | 0 | NA | 0 | NA | 0 | NA | 0 | NA | 0 | NA |
| 12 | 53268710 | 53259290 | -1 | NM_006741    | PPP1R1A  | 0 | NA | 0 | NA | 0 | NA | 0 | NA | 0 | NA |
| 12 | 53314930 | 53310889 | -1 | NM_033277    | LACRT    | 0 | NA | 0 | NA | 0 | NA | 0 | NA | 0 | NA |
| 12 | 53328416 | 53324641 | -1 | NM_053283    | DCD      | 0 | NA | 0 | NA | 0 | NA | 0 | NA | 0 | NA |
| 12 | 53534565 | 53538441 | 1  | NM_058173    | MUCL1    | 0 | NA | 0 | NA | 0 | NA | 0 | NA | 0 | NA |
| 12 | 53661889 | 53630195 | -1 | NM_001098815 | KIAA0748 | 0 | NA | 0 | NA | 0 | NA | 0 | NA | 0 | NA |
| 12 | 53699995 | 53710068 | 1  | NM_021191    | NEUROD4  | 0 | NA | 0 | NA | 0 | NA | 0 | NA | 0 | NA |
| 12 | 53809819 | 53810827 | 1  | NM_001005243 | OR9K2    | 0 | NA | 0 | NA | 0 | NA | 0 | NA | 0 | NA |
| 12 | 53901075 | 53902026 | 1  | NM_001005280 | OR10A7   | 0 | NA | 0 | NA | 0 | NA | 0 | NA | 0 | NA |
| 12 | 53927338 | 53928277 | 1  | NM_001005490 | OR6C74   | 0 | NA | 0 | NA | 0 | NA | 0 | NA | 0 | NA |
| 12 | 53975283 | 53974338 | -1 | NM_001005493 | OR6C6    | 0 | NA | 0 | NA | 0 | NA | 0 | NA | 0 | NA |
| 12 | 54000650 | 54001589 | 1  | NM_001005182 | OR6C1    | 0 | NA | 0 | NA | 0 | NA | 0 | NA | 0 | NA |
| 12 | 54011751 | 54012687 | 1  | NM_054104    | OR6C3    | 0 | NA | 0 | NA | 0 | NA | 0 | NA | 0 | NA |
| 12 | 54045161 | 54046100 | 1  | NM_001005497 | OR6C75   | 0 | NA | 0 | NA | 0 | NA | 0 | NA | 0 | NA |
| 12 | 54080579 | 54081518 | 1  | NM_001005518 | OR6C65   | 0 | NA | 0 | NA | 0 | NA | 0 | NA | 0 | NA |
| 12 | 54106304 | 54107243 | 1  | NM_001005183 | OR6C76   | 0 | NA | 0 | NA | 0 | NA | 0 | NA | 0 | NA |
| 12 | 54132264 | 54133203 | 1  | NM_054105    | OR6C2    | 0 | NA | 0 | NA | 0 | NA | 0 | NA | 0 | NA |
| 12 | 54150189 | 54149250 | -1 | NM_001005499 | OR6C70   | 0 | NA | 0 | NA | 0 | NA | 0 | NA | 0 | NA |



|    |          |          |    |              |           |   |    |   |    |   |    |   |    |   |    |
|----|----------|----------|----|--------------|-----------|---|----|---|----|---|----|---|----|---|----|
| 12 | 54172413 | 54173367 | 1  | NM_001005519 | OR6C68    | 0 | NA | 0 | NA | 0 | NA | 0 | NA | 0 | NA |
| 12 | 54231277 | 54232207 | 1  | NM_001005494 | OR6C4     | 0 | NA | 0 | NA | 0 | NA | 0 | NA | 0 | NA |
| 12 | 54316942 | 54317884 | 1  | NM_206899    | OR10P1    | 0 | NA | 0 | NA | 0 | NA | 0 | NA | 0 | NA |
| 12 | 54361596 | 54364661 | 1  | NM_152637    | METTL7B   | 0 | NA | 0 | NA | 0 | NA | 0 | NA | 0 | NA |
| 12 | 54387894 | 54364620 | -1 | NM_002206    | ITGA7     | 0 | NA | 1 | 12 | 0 | NA | 0 | NA | 0 | NA |
| 12 | 54396086 | 54399754 | 1  | NM_001487    | BLOC1S1   | 0 | NA | 1 | 12 | 0 | NA | 1 | 12 | 0 | NA |
| 12 | 54400487 | 54404756 | 1  | NM_002905    | RDH5      | 0 | NA | 0 | NA | 0 | NA | 1 | 12 | 0 | NA |
| 12 | 54409177 | 54405496 | -1 | NM_001040034 | CD63      | 0 | NA | 0 | NA | 0 | NA | 0 | NA | 0 | NA |
| 12 | 54409177 | 54405496 | -1 | NM_001780    | CD63      | 0 | NA | 0 | NA | 0 | NA | 0 | NA | 0 | NA |
| 12 | 54423333 | 54430332 | 1  | NM_005811    | GDF11     | 0 | NA | 0 | NA | 0 | NA | 0 | NA | 0 | NA |
| 12 | 54497773 | 54437324 | -1 | NM_033082    | CIP29     | 0 | NA | 0 | NA | 0 | NA | 0 | NA | 0 | NA |
| 12 | 54498072 | 54501226 | 1  | NM_014182    | ORMDL2    | 0 | NA | 0 | NA | 0 | NA | 0 | NA | 0 | NA |
| 12 | 54509687 | 54501010 | -1 | NM_032364    | DNAJC14   | 1 | 13 | 0 | NA | 0 | NA | 0 | NA | 0 | NA |
| 12 | 54523002 | 54515480 | -1 | NM_002429    | MMP19     | 0 | NA | 0 | NA | 0 | NA | 0 | NA | 0 | NA |
| 12 | 54607964 | 54581463 | -1 | NM_032345    | WIBG      | 0 | NA | 0 | NA | 0 | NA | 0 | NA | 0 | NA |
| 12 | 54611212 | 54634074 | 1  | NM_001345    | DGKA      | 0 | NA | 0 | NA | 0 | NA | 0 | NA | 0 | NA |
| 12 | 54612078 | 54634074 | 1  | NM_201444    | DGKA      | 0 | NA | 0 | NA | 0 | NA | 0 | NA | 0 | NA |
| 12 | 54612078 | 54634074 | 1  | NM_201445    | DGKA      | 0 | NA | 0 | NA | 0 | NA | 0 | NA | 0 | NA |
| 12 | 54612078 | 54634074 | 1  | NM_201554    | DGKA      | 0 | NA | 0 | NA | 0 | NA | 0 | NA | 0 | NA |
| 12 | 54646093 | 54634155 | -1 | NM_006928    | SILV      | 0 | NA | 0 | NA | 0 | NA | 0 | NA | 0 | NA |
| 12 | 54646822 | 54652835 | 1  | NM_001798    | CDK2      | 0 | NA | 0 | NA | 0 | NA | 0 | NA | 0 | NA |
| 12 | 54646822 | 54652835 | 1  | NM_052827    | CDK2      | 0 | NA | 0 | NA | 0 | NA | 0 | NA | 0 | NA |
| 12 | 54654128 | 54674755 | 1  | NM_002868    | RAB5B     | 0 | NA | 0 | NA | 0 | NA | 0 | NA | 0 | NA |
| 12 | 54677309 | 54685576 | 1  | NM_000456    | SUOX      | 0 | NA | 0 | NA | 0 | NA | 0 | NA | 0 | NA |
| 12 | 54677309 | 54685576 | 1  | NM_001032386 | SUOX      | 0 | NA | 0 | NA | 0 | NA | 0 | NA | 0 | NA |
| 12 | 54677309 | 54685576 | 1  | NM_001032387 | SUOX      | 0 | NA | 0 | NA | 0 | NA | 0 | NA | 0 | NA |
| 12 | 54700955 | 54718486 | 1  | NM_022465    | IKZF4     | 0 | NA | 0 | NA | 0 | NA | 0 | NA | 0 | NA |
| 12 | 54721952 | 54724274 | 1  | NM_001029    | RPS26     | 1 | 19 | 0 | NA | 0 | NA | 0 | NA | 0 | NA |
| 12 | 54722190 | 54724271 | 1  | NM_001093731 | LQC728937 | 1 | 19 | 0 | NA | 0 | NA | 0 | NA | 0 | NA |
| 12 | 54760158 | 54765668 | 1  | NM_001005915 | ERBB3     | 1 | 14 | 0 | NA | 0 | NA | 0 | NA | 0 | NA |
| 12 | 54760158 | 54783395 | 1  | NM_001982    | ERBB3     | 1 | 14 | 0 | NA | 0 | NA | 0 | NA | 0 | NA |
| 12 | 54784369 | 54793961 | 1  | NM_006191    | PA2G4     | 1 | 32 | 0 | NA | 0 | NA | 0 | NA | 0 | NA |
| 12 | 54796640 | 54797883 | 1  | NM_001035267 | RPL41     | 1 | 17 | 0 | NA | 1 | 12 | 1 | 13 | 0 | NA |
| 12 | 54796640 | 54797883 | 1  | NM_021104    | RPL41     | 1 | 17 | 0 | NA | 1 | 12 | 1 | 13 | 0 | NA |
| 12 | 54798296 | 54802545 | 1  | NM_032786    | ZC3H10    | 1 | 17 | 0 | NA | 1 | 12 | 1 | 13 | 0 | NA |
| 12 | 54808320 | 54824721 | 1  | NM_015292    | FAM62A    | 0 | NA | 0 | NA | 0 | NA | 0 | NA | 0 | NA |
| 12 | 54832601 | 54838038 | 1  | NM_002475    | MYL6B     | 0 | NA | 0 | NA | 0 | NA | 1 | 13 | 0 | NA |
| 12 | 54838366 | 54841633 | 1  | NM_021019    | MYL6      | 0 | NA | 0 | NA | 0 | NA | 1 | 13 | 0 | NA |
| 12 | 54838366 | 54841633 | 1  | NM_079423    | MYL6      | 0 | NA | 0 | NA | 0 | NA | 1 | 13 | 0 | NA |
| 12 | 54869544 | 54843393 | -1 | NM_003075    | SMARCC2   | 0 | NA | 0 | NA | 1 | 13 | 0 | NA | 0 | NA |
| 12 | 54869544 | 54843393 | -1 | NM_139067    | SMARCC2   | 0 | NA | 0 | NA | 1 | 13 | 0 | NA | 0 | NA |
| 12 | 54901971 | 54884552 | -1 | NM_005785    | RNF41     | 0 | NA | 0 | NA | 0 | NA | 0 | NA | 0 | NA |
| 12 | 54901971 | 54884552 | -1 | NM_194358    | RNF41     | 0 | NA | 0 | NA | 0 | NA | 0 | NA | 0 | NA |
| 12 | 54902002 | 54884552 | -1 | NM_194359    | RNF41     | 0 | NA | 0 | NA | 0 | NA | 0 | NA | 0 | NA |
| 12 | 54904773 | 54909787 | 1  | NM_024068    | OBFC2B    | 0 | NA | 0 | NA | 0 | NA | 0 | NA | 0 | NA |
| 12 | 54910893 | 54917896 | 1  | NM_173596    | SLC39A5   | 0 | NA | 0 | NA | 0 | NA | 0 | NA | 0 | NA |
| 12 | 54938410 | 54917857 | -1 | NM_173595    | ANKRD52   | 0 | NA | 0 | NA | 0 | NA | 1 | 12 | 0 | NA |
| 12 | 54946908 | 54951017 | 1  | NM_144576    | COQ10A    | 0 | NA | 0 | NA | 0 | NA | 1 | 12 | 0 | NA |
| 12 | 54947333 | 54951017 | 1  | NM_001099337 | COQ10A    | 0 | NA | 0 | NA | 0 | NA | 1 | 12 | 0 | NA |
| 12 | 54980442 | 54951749 | -1 | NM_004077    | CS        | 0 | NA | 0 | NA | 0 | NA | 0 | NA | 0 | NA |
| 12 | 54980442 | 54951749 | -1 | NM_198324    | CS        | 0 | NA | 0 | NA | 0 | NA | 0 | NA | 0 | NA |
| 12 | 54996387 | 54990483 | -1 | NM_014255    | CNPY2     | 1 | 13 | 0 | NA | 0 | NA | 0 | NA | 0 | NA |
| 12 | 55014017 | 54996986 | -1 | NM_014871    | PAN2      | 0 | NA | 0 | NA | 0 | NA | 0 | NA | 0 | NA |
| 12 | 55018929 | 55020461 | 1  | NM_016584    | IL23A     | 0 | NA | 0 | NA | 0 | NA | 0 | NA | 0 | NA |
| 12 | 55040176 | 55021648 | -1 | NM_005419    | STAT2     | 1 | 24 | 0 | NA | 0 | NA | 0 | NA | 0 | NA |
| 12 | 55042850 | 55040621 | -1 | NM_001638    | APOF      | 1 | 24 | 0 | NA | 0 | NA | 0 | NA | 0 | NA |
| 12 | 55129433 | 55097173 | -1 | NM_003920    | TIMELESS  | 1 | 24 | 0 | NA | 0 | NA | 1 | 12 | 0 | NA |
| 12 | 55134696 | 55130150 | -1 | NM_012064    | MIP       | 0 | NA | 0 | NA | 0 | NA | 1 | 12 | 0 | NA |
| 12 | 55148567 | 55151034 | 1  | NM_207344    | SPRYD4    | 0 | NA | 0 | NA | 0 | NA | 0 | NA | 0 | NA |
| 12 | 55168448 | 55151002 | -1 | NM_013267    | GLS2      | 0 | NA | 1 | 30 | 0 | NA | 0 | NA | 0 | NA |
| 12 | 55201992 | 55269875 | 1  | NM_002898    | RBMS2     | 0 | NA | 0 | NA | 1 | 17 | 0 | NA | 0 | NA |
| 12 | 55316430 | 55275646 | -1 | NM_013449    | BAZZA     | 1 | 11 | 0 | NA | 1 | 22 | 0 | NA | 0 | NA |
| 12 | 55326119 | 55318225 | -1 | NM_001686    | ATP5B     | 1 | 11 | 0 | NA | 1 | 22 | 0 | NA | 0 | NA |
| 12 | 55368345 | 55343391 | -1 | NM_006601    | PTGES3    | 1 | 17 | 0 | NA | 0 | NA | 0 | NA | 0 | NA |
| 12 | 55405333 | 55392477 | -1 | NM_001113201 | NACA      | 0 | NA | 0 | NA | 0 | NA | 0 | NA | 0 | NA |

|    |          |          |    |              |          |   |    |   |    |   |    |   |    |   |    |
|----|----------|----------|----|--------------|----------|---|----|---|----|---|----|---|----|---|----|
| 12 | 55405333 | 55392477 | -1 | NM_005594    | NACA     | 0 | NA | 0 | NA | 0 | NA | 0 | NA | 0 | NA |
| 12 | 55405593 | 55392477 | -1 | NM_001113202 | NACA     | 0 | NA | 0 | NA | 0 | NA | 0 | NA | 0 | NA |
| 12 | 55405593 | 55392477 | -1 | NM_001113203 | NACA     | 0 | NA | 0 | NA | 0 | NA | 0 | NA | 0 | NA |
| 12 | 55432413 | 55411630 | -1 | NM_000946    | PRIM1    | 0 | NA | 0 | NA | 0 | NA | 0 | NA | 0 | NA |
| 12 | 55443374 | 55467841 | 1  | NM_003725    | HSD17B6  | 0 | NA | 0 | NA | 0 | NA | 0 | NA | 0 | NA |
| 12 | 55614312 | 55603883 | -1 | NM_148897    | SDR-O    | 0 | NA | 0 | NA | 0 | NA | 0 | NA | 0 | NA |
| 12 | 55637685 | 55631482 | -1 | NM_003708    | RDH16    | 0 | NA | 1 | 13 | 0 | NA | 0 | NA | 0 | NA |
| 12 | 55674621 | 55676736 | 1  | NM_007264    | GPR182   | 0 | NA | 0 | NA | 0 | NA | 0 | NA | 0 | NA |
| 12 | 55686497 | 55678884 | -1 | NM_014830    | ZBTB39   | 0 | NA | 0 | NA | 0 | NA | 0 | NA | 0 | NA |
| 12 | 55696592 | 55690050 | -1 | NM_001006667 | TAC3     | 0 | NA | 0 | NA | 0 | NA | 0 | NA | 0 | NA |
| 12 | 55696592 | 55690050 | -1 | NM_013251    | TAC3     | 0 | NA | 0 | NA | 0 | NA | 0 | NA | 0 | NA |
| 12 | 55730160 | 55708567 | -1 | NM_005379    | MYO1A    | 0 | NA | 0 | NA | 0 | NA | 0 | NA | 0 | NA |
| 12 | 55758810 | 55736692 | -1 | NM_015257    | TMEM194  | 0 | NA | 0 | NA | 0 | NA | 1 | 17 | 0 | NA |
| 12 | 55768943 | 55775526 | 1  | NM_005967    | NAB2     | 0 | NA | 0 | NA | 0 | NA | 1 | 17 | 0 | NA |
| 12 | 55791428 | 55775459 | -1 | NM_003153    | STAT6    | 1 | 14 | 0 | NA | 1 | 15 | 1 | 12 | 0 | NA |
| 12 | 55808548 | 55893392 | 1  | NM_002332    | LRP1     | 0 | NA | 0 | NA | 1 | 13 | 0 | NA | 0 | NA |
| 12 | 55896844 | 55906493 | 1  | NM_007224    | NXP4     | 0 | NA | 1 | 12 | 1 | 12 | 0 | NA | 0 | NA |
| 12 | 55909818 | 55914981 | 1  | NM_005412    | SHMT2    | 0 | NA | 0 | NA | 1 | 12 | 0 | NA | 0 | NA |
| 12 | 55920742 | 55914952 | -1 | NM_020142    | NDUFA4L2 | 0 | NA | 0 | NA | 0 | NA | 0 | NA | 0 | NA |
| 12 | 55931236 | 55923508 | -1 | NM_145064    | STAC3    | 0 | NA | 0 | NA | 0 | NA | 0 | NA | 0 | NA |
| 12 | 55990513 | 55933814 | -1 | NM_014925    | R3HDM2   | 0 | NA | 0 | NA | 0 | NA | 0 | NA | 0 | NA |
| 12 | 56114809 | 56130876 | 1  | NM_005538    | INHBC    | 0 | NA | 0 | NA | 0 | NA | 0 | NA | 0 | NA |
| 12 | 56135362 | 56138058 | 1  | NM_031479    | INHBE    | 0 | NA | 0 | NA | 0 | NA | 1 | 12 | 0 | NA |
| 12 | 56140200 | 56152312 | 1  | NM_005269    | GLI1     | 0 | NA | 1 | 17 | 0 | NA | 1 | 12 | 0 | NA |
| 12 | 56157995 | 56152304 | -1 | NM_001080156 | ARHGAP9  | 0 | NA | 0 | NA | 0 | NA | 0 | NA | 0 | NA |
| 12 | 56159691 | 56152304 | -1 | NM_001080157 | ARHGAP9  | 0 | NA | 0 | NA | 0 | NA | 0 | NA | 0 | NA |
| 12 | 56159900 | 56152304 | -1 | NM_032496    | ARHGAP9  | 0 | NA | 0 | NA | 0 | NA | 0 | NA | 0 | NA |
| 12 | 56168117 | 56196700 | 1  | NM_004990    | MARS     | 0 | NA | 0 | NA | 0 | NA | 0 | NA | 0 | NA |
| 12 | 56200567 | 56196637 | -1 | NM_004083    | DDIT3    | 1 | 15 | 0 | NA | 0 | NA | 0 | NA | 0 | NA |
| 12 | 56202925 | 56210198 | 1  | NM_052897    | MBD6     | 1 | 15 | 0 | NA | 0 | NA | 0 | NA | 0 | NA |
| 12 | 56227245 | 56210360 | -1 | NM_006400    | DCTN2    | 0 | NA | 0 | NA | 0 | NA | 0 | NA | 0 | NA |
| 12 | 56230113 | 56264821 | 1  | NM_004984    | KIF5A    | 0 | NA | 0 | NA | 0 | NA | 0 | NA | 0 | NA |
| 12 | 56271323 | 56283298 | 1  | NM_024779    | PIP4K2C  | 0 | NA | 0 | NA | 0 | NA | 0 | NA | 0 | NA |
| 12 | 56284870 | 56289650 | 1  | NM_178502    | DTX3     | 0 | NA | 0 | NA | 0 | NA | 0 | NA | 0 | NA |
| 12 | 56290229 | 56297293 | 1  | NM_001111270 | GEFT     | 0 | NA | 0 | NA | 0 | NA | 0 | NA | 0 | NA |
| 12 | 56291484 | 56297293 | 1  | NM_182947    | GEFT     | 0 | NA | 1 | 14 | 0 | NA | 0 | NA | 0 | NA |
| 12 | 56299959 | 56306201 | 1  | NM_133489    | SLC26A10 | 0 | NA | 1 | 14 | 0 | NA | 1 | 19 | 0 | NA |
| 12 | 56313252 | 56305817 | -1 | NM_001478    | B4GALNT1 | 0 | NA | 0 | NA | 0 | NA | 0 | NA | 0 | NA |
| 12 | 56374152 | 56401607 | 1  | NM_001017956 | OS9      | 0 | NA | 0 | NA | 0 | NA | 0 | NA | 0 | NA |
| 12 | 56374152 | 56401607 | 1  | NM_001017957 | OS9      | 0 | NA | 0 | NA | 0 | NA | 0 | NA | 0 | NA |
| 12 | 56374152 | 56401607 | 1  | NM_001017958 | OS9      | 0 | NA | 0 | NA | 0 | NA | 0 | NA | 0 | NA |
| 12 | 56374152 | 56401607 | 1  | NM_006812    | OS9      | 0 | NA | 0 | NA | 0 | NA | 0 | NA | 0 | NA |
| 12 | 56418296 | 56405260 | -1 | NM_001122772 | CENTG1   | 0 | NA | 0 | NA | 1 | 12 | 0 | NA | 0 | NA |
| 12 | 56422207 | 56405260 | -1 | NM_014770    | CENTG1   | 0 | NA | 0 | NA | 1 | 12 | 0 | NA | 0 | NA |
| 12 | 56425050 | 56428293 | 1  | NM_005981    | TSPAN31  | 0 | NA | 0 | NA | 1 | 12 | 0 | NA | 0 | NA |
| 12 | 56432431 | 56428269 | -1 | NM_000075    | CDK4     | 0 | NA | 0 | NA | 1 | 12 | 0 | NA | 0 | NA |
| 12 | 56435166 | 56439956 | 1  | NM_138396    | MARCH9   | 0 | NA | 0 | NA | 1 | 12 | 0 | NA | 0 | NA |
| 12 | 56447243 | 56442383 | -1 | NM_000785    | CYP27B1  | 0 | NA | 0 | NA | 0 | NA | 0 | NA | 0 | NA |
| 12 | 56452181 | 56448617 | -1 | NM_005371    | METTL1   | 0 | NA | 0 | NA | 0 | NA | 0 | NA | 0 | NA |
| 12 | 56452181 | 56448617 | -1 | NM_023033    | METTL1   | 0 | NA | 0 | NA | 0 | NA | 0 | NA | 0 | NA |
| 12 | 56452649 | 56462591 | 1  | NM_015433    | FAM119B  | 0 | NA | 0 | NA | 0 | NA | 0 | NA | 0 | NA |
| 12 | 56452649 | 56462591 | 1  | NM_206914    | FAM119B  | 0 | NA | 0 | NA | 0 | NA | 0 | NA | 0 | NA |
| 12 | 56462802 | 56477634 | 1  | NM_005726    | TSFM     | 0 | NA | 0 | NA | 0 | NA | 0 | NA | 0 | NA |
| 12 | 56496119 | 56477709 | -1 | NM_006576    | AVIL     | 0 | NA | 0 | NA | 0 | NA | 0 | NA | 0 | NA |
| 12 | 56527014 | 56499976 | -1 | NM_005730    | CTDSP2   | 0 | NA | 0 | NA | 0 | NA | 0 | NA | 0 | NA |
| 12 | 56621711 | 56637319 | 1  | NM_033276    | XRCC6BP1 | 0 | NA | 0 | NA | 0 | NA | 0 | NA | 0 | NA |
| 12 | 57600529 | 57552203 | -1 | NM_153377    | LRIG3    | 0 | NA | 0 | NA | 0 | NA | 0 | NA | 0 | NA |
| 12 | 58369392 | 58461675 | 1  | NM_004731    | SLC16A7  | 0 | NA | 0 | NA | 0 | NA | 0 | NA | 0 | NA |
| 12 | 60872818 | 60388307 | -1 | NM_178539    | FAM19A2  | 0 | NA | 1 | 27 | 0 | NA | 0 | NA | 0 | NA |
| 12 | 60940453 | 61086165 | 1  | NM_006313    | USP15    | 1 | 27 | 0 | NA | 0 | NA | 1 | 16 | 0 | NA |
| 12 | 61146863 | 61277630 | 1  | NM_015026    | MON2     | 0 | NA | 0 | NA | 0 | NA | 0 | NA | 0 | NA |
| 12 | 61283481 | 61281797 | -1 | NM_175895    | C12orf61 | 1 | 14 | 0 | NA | 0 | NA | 0 | NA | 0 | NA |
| 12 | 61614932 | 61324030 | -1 | NM_020700    | PPM1H    | 0 | NA | 0 | NA | 0 | NA | 0 | NA | 0 | NA |
| 12 | 61832857 | 61826482 | -1 | NM_000706    | AVPR1A   | 0 | NA | 1 | 19 | 0 | NA | 0 | NA | 0 | NA |
| 12 | 62348621 | 62238959 | -1 | NM_173812    | DPY19L2  | 1 | 16 | 0 | NA | 0 | NA | 0 | NA | 0 | NA |

|    |          |          |    |              |           |   |    |   |    |   |    |   |    |   |    |
|----|----------|----------|----|--------------|-----------|---|----|---|----|---|----|---|----|---|----|
| 12 | 62459903 | 62489154 | 1  | NM_014254    | TMEM5     | 0 | NA | 0 | NA | 0 | NA | 0 | NA | 0 | NA |
| 12 | 62524807 | 62823829 | 1  | NM_020762    | SRGAP1    | 0 | NA | 0 | NA | 0 | NA | 0 | NA | 0 | NA |
| 12 | 62902343 | 62872685 | -1 | NM_152440    | FLJ32549  | 1 | 13 | 0 | NA | 0 | NA | 0 | NA | 0 | NA |
| 12 | 63070612 | 62947029 | -1 | NM_001099676 | C12orf56  | 0 | NA | 0 | NA | 0 | NA | 0 | NA | 0 | NA |
| 12 | 63084499 | 63128730 | 1  | NM_007235    | XPOT      | 0 | NA | 0 | NA | 0 | NA | 0 | NA | 0 | NA |
| 12 | 63132203 | 63182158 | 1  | NM_013254    | TBK1      | 0 | NA | 0 | NA | 0 | NA | 0 | NA | 0 | NA |
| 12 | 63290559 | 63375459 | 1  | NM_178169    | RASSF3    | 0 | NA | 0 | NA | 0 | NA | 0 | NA | 0 | NA |
| 12 | 63439479 | 63393488 | -1 | NM_002076    | GNS       | 0 | NA | 0 | NA | 0 | NA | 0 | NA | 0 | NA |
| 12 | 63801383 | 63730672 | -1 | NM_007191    | WIF1      | 0 | NA | 1 | 13 | 0 | NA | 0 | NA | 0 | NA |
| 12 | 63849637 | 63928374 | 1  | NM_014319    | LEMD3     | 0 | NA | 0 | NA | 0 | NA | 1 | 11 | 0 | NA |
| 12 | 63958754 | 64146954 | 1  | NM_001031679 | MSRB3     | 0 | NA | 0 | NA | 0 | NA | 0 | NA | 0 | NA |
| 12 | 63958754 | 64146954 | 1  | NM_198080    | MSRB3     | 0 | NA | 0 | NA | 0 | NA | 0 | NA | 0 | NA |
| 12 | 64504506 | 64595574 | 1  | NM_003484    | HMG2      | 0 | NA | 0 | NA | 0 | NA | 1 | 12 | 0 | NA |
| 12 | 64504506 | 64646338 | 1  | NM_003483    | HMG2      | 0 | NA | 0 | NA | 0 | NA | 1 | 12 | 0 | NA |
| 12 | 64810800 | 64803108 | 0  | NM_032338    | C12orf31  | 0 | NA | 0 | NA | 0 | NA | 0 | NA | 0 | NA |
| 12 | 64850074 | 64816983 | -1 | NM_016056    | TMBIM4    | 1 | 24 | 0 | NA | 1 | 19 | 0 | NA | 0 | NA |
| 12 | 64869283 | 64928652 | 1  | NM_007199    | IRAK3     | 0 | NA | 0 | NA | 0 | NA | 0 | NA | 0 | NA |
| 12 | 64982622 | 65018225 | 1  | NM_033647    | HELB      | 0 | NA | 0 | NA | 0 | NA | 0 | NA | 0 | NA |
| 12 | 65359020 | 65029065 | -1 | NM_021150    | GRIP1     | 0 | NA | 0 | NA | 0 | NA | 0 | NA | 0 | NA |
| 12 | 65949327 | 65994655 | 1  | NM_018448    | CAND1     | 1 | 12 | 0 | NA | 0 | NA | 0 | NA | 0 | NA |
| 12 | 66328778 | 66342711 | 1  | NM_003583    | DYRK2     | 0 | NA | 0 | NA | 0 | NA | 0 | NA | 0 | NA |
| 12 | 66328778 | 66342711 | 1  | NM_006482    | DYRK2     | 0 | NA | 0 | NA | 0 | NA | 0 | NA | 0 | NA |
| 12 | 66839788 | 66834816 | -1 | NM_000619    | IFNG      | 0 | NA | 0 | NA | 0 | NA | 0 | NA | 0 | NA |
| 12 | 66905838 | 66881395 | -1 | NM_018402    | IL26      | 0 | NA | 0 | NA | 0 | NA | 0 | NA | 0 | NA |
| 12 | 66933548 | 66928291 | -1 | NM_020525    | IL22      | 0 | NA | 0 | NA | 0 | NA | 0 | NA | 0 | NA |
| 12 | 67012428 | 66974612 | 0  | NM_017440    | MDM1      | 0 | NA | 0 | NA | 0 | NA | 1 | 14 | 0 | NA |
| 12 | 67012428 | 67005051 | -1 | NM_020128    | MDM1      | 0 | NA | 0 | NA | 0 | NA | 1 | 14 | 0 | NA |
| 12 | 67290918 | 67340641 | 1  | NM_001010942 | RAP1B     | 0 | NA | 0 | NA | 1 | 12 | 0 | NA | 0 | NA |
| 12 | 67290918 | 67340641 | 1  | NM_015646    | RAP1B     | 0 | NA | 0 | NA | 1 | 12 | 0 | NA | 0 | NA |
| 12 | 67290954 | 67340518 | 1  | NM_001089704 | LOC643752 | 0 | NA | 0 | NA | 1 | 12 | 0 | NA | 0 | NA |
| 12 | 67366997 | 67422740 | 1  | NM_020401    | NUP107    | 1 | 11 | 0 | NA | 0 | NA | 0 | NA | 0 | NA |
| 12 | 67426202 | 67446120 | 1  | NM_018656    | SLC35E3   | 0 | NA | 0 | NA | 0 | NA | 0 | NA | 0 | NA |
| 12 | 67488246 | 67520481 | 1  | NM_002392    | MDM2      | 0 | NA | 0 | NA | 1 | 14 | 0 | NA | 0 | NA |
| 12 | 67488246 | 67520481 | 1  | NM_006878    | MDM2      | 0 | NA | 0 | NA | 1 | 14 | 0 | NA | 0 | NA |
| 12 | 67488246 | 67520481 | 1  | NM_006879    | MDM2      | 0 | NA | 0 | NA | 1 | 14 | 0 | NA | 0 | NA |
| 12 | 67488246 | 67520481 | 1  | NM_006881    | MDM2      | 0 | NA | 0 | NA | 1 | 14 | 0 | NA | 0 | NA |
| 12 | 67488246 | 67520481 | 1  | NM_006882    | MDM2      | 0 | NA | 0 | NA | 1 | 14 | 0 | NA | 0 | NA |
| 12 | 67613246 | 67531222 | -1 | NM_001005502 | CPM       | 0 | NA | 0 | NA | 0 | NA | 0 | NA | 0 | NA |
| 12 | 67613246 | 67531222 | -1 | NM_198320    | CPM       | 0 | NA | 0 | NA | 0 | NA | 0 | NA | 0 | NA |
| 12 | 67643287 | 67531222 | 0  | NM_001874    | CPM       | 0 | NA | 1 | 15 | 0 | NA | 0 | NA | 0 | NA |
| 12 | 67919583 | 67954405 | 1  | NM_007007    | CPSF6     | 0 | NA | 0 | NA | 0 | NA | 0 | NA | 0 | NA |
| 12 | 68028400 | 68034280 | 1  | NM_000239    | LYZ       | 0 | NA | 0 | NA | 0 | NA | 1 | 12 | 0 | NA |
| 12 | 68039798 | 68070843 | 1  | NM_006530    | YEATS4    | 0 | NA | 0 | NA | 1 | 14 | 1 | 12 | 0 | NA |
| 12 | 68150395 | 68259829 | 1  | NM_001042555 | FRS2      | 1 | 12 | 0 | NA | 0 | NA | 0 | NA | 0 | NA |
| 12 | 68150395 | 68259829 | 1  | NM_006854    | FRS2      | 1 | 12 | 0 | NA | 0 | NA | 0 | NA | 0 | NA |
| 12 | 68265474 | 68281624 | 1  | NM_006431    | CCT2      | 0 | NA | 0 | NA | 0 | NA | 0 | NA | 0 | NA |
| 12 | 68291209 | 68288611 | -1 | NM_201550    | LRRC10    | 0 | NA | 0 | NA | 0 | NA | 0 | NA | 0 | NA |
| 12 | 68369323 | 68333655 | -1 | NM_152439    | BEST3     | 0 | NA | 0 | NA | 0 | NA | 0 | NA | 0 | NA |
| 12 | 68379463 | 68333655 | -1 | NM_032735    | BEST3     | 0 | NA | 0 | NA | 0 | NA | 0 | NA | 0 | NA |
| 12 | 68418897 | 68503251 | 1  | NM_022456    | RAB3IP    | 0 | NA | 1 | 13 | 0 | NA | 0 | NA | 0 | NA |
| 12 | 68418897 | 68503251 | 1  | NM_175624    | RAB3IP    | 0 | NA | 1 | 13 | 0 | NA | 0 | NA | 0 | NA |
| 12 | 68419446 | 68503251 | 1  | NM_175623    | RAB3IP    | 0 | NA | 1 | 13 | 0 | NA | 0 | NA | 0 | NA |
| 12 | 68419446 | 68503251 | 1  | NM_175625    | RAB3IP    | 0 | NA | 1 | 13 | 0 | NA | 0 | NA | 0 | NA |
| 12 | 68459020 | 68503251 | 1  | NM_001024647 | RAB3IP    | 0 | NA | 0 | NA | 0 | NA | 0 | NA | 0 | NA |
| 12 | 68923043 | 69035040 | 1  | NM_014515    | CNOT2     | 0 | NA | 0 | NA | 0 | NA | 0 | NA | 0 | NA |
| 12 | 69046328 | 69111245 | 1  | NM_014505    | KCNMB4    | 0 | NA | 0 | NA | 0 | NA | 0 | NA | 0 | NA |
| 12 | 69289891 | 69196898 | -1 | NM_002837    | PTPRB     | 0 | NA | 0 | NA | 0 | NA | 0 | NA | 0 | NA |
| 12 | 69317486 | 69196898 | -1 | NM_001109754 | PTPRB     | 0 | NA | 0 | NA | 0 | NA | 0 | NA | 0 | NA |
| 12 | 69434632 | 69318128 | -1 | NM_130846    | PTPRR     | 0 | NA | 0 | NA | 0 | NA | 0 | NA | 0 | NA |
| 12 | 69600851 | 69318128 | -1 | NM_002849    | PTPRR     | 0 | NA | 0 | NA | 0 | NA | 0 | NA | 0 | NA |
| 12 | 69838046 | 69805143 | -1 | NM_004616    | TSPAN8    | 1 | 11 | 0 | NA | 0 | NA | 0 | NA | 0 | NA |
| 12 | 70120079 | 70264888 | 1  | NM_003667    | LGR5      | 1 | 12 | 1 | 15 | 0 | NA | 1 | 18 | 0 | NA |
| 12 | 70344016 | 70289648 | -1 | NM_144982    | CCDC131   | 0 | NA | 0 | NA | 1 | 14 | 0 | NA | 0 | NA |
| 12 | 70344050 | 70360686 | 1  | NM_031435    | THAP2     | 0 | NA | 0 | NA | 1 | 14 | 0 | NA | 0 | NA |
| 12 | 70366144 | 70384106 | 1  | NM_018279    | TMEM19    | 0 | NA | 0 | NA | 0 | NA | 0 | NA | 0 | NA |

|    |          |          |    |              |          |   |    |   |    |   |    |   |    |   |    |
|----|----------|----------|----|--------------|----------|---|----|---|----|---|----|---|----|---|----|
| 12 | 70434924 | 70467417 | 1  | NM_014999    | RAB21    | 0 | NA | 0 | NA | 0 | NA | 0 | NA | 0 | NA |
| 12 | 70519805 | 70604362 | 1  | NM_022771    | TBC1D15  | 1 | 23 | 0 | NA | 1 | 15 | 0 | NA | 0 | NA |
| 12 | 70618892 | 70712488 | 1  | NM_173353    | TPH2     | 0 | NA | 0 | NA | 0 | NA | 0 | NA | 0 | NA |
| 12 | 70952729 | 71345689 | 1  | NM_013381    | TRHDE    | 1 | 15 | 1 | 13 | 0 | NA | 0 | NA | 0 | NA |
| 12 | 73889778 | 73720162 | -1 | NM_139136    | KCNC2    | 0 | NA | 1 | 16 | 0 | NA | 0 | NA | 0 | NA |
| 12 | 73889778 | 73720162 | -1 | NM_153748    | KCNC2    | 0 | NA | 1 | 16 | 0 | NA | 0 | NA | 0 | NA |
| 12 | 73889778 | 73723144 | -1 | NM_139137    | KCNC2    | 0 | NA | 1 | 16 | 0 | NA | 0 | NA | 0 | NA |
| 12 | 74010103 | 73956025 | -1 | NM_032606    | CAPS2    | 0 | NA | 0 | NA | 0 | NA | 0 | NA | 0 | NA |
| 12 | 74014729 | 74050436 | 1  | NM_152779    | GLIPR1L1 | 0 | NA | 0 | NA | 0 | NA | 0 | NA | 0 | NA |
| 12 | 74071155 | 74104087 | 1  | NM_152436    | GLIPR1L2 | 0 | NA | 0 | NA | 1 | 14 | 0 | NA | 0 | NA |
| 12 | 74160779 | 74181983 | 1  | NM_006851    | GLIPR1   | 0 | NA | 0 | NA | 0 | NA | 0 | NA | 0 | NA |
| 12 | 74191685 | 74177685 | -1 | NM_007043    | KRR1     | 1 | 11 | 0 | NA | 1 | 12 | 0 | NA | 0 | NA |
| 12 | 74711823 | 74705493 | -1 | NM_007350    | PHLDA1   | 1 | 11 | 0 | NA | 1 | 14 | 1 | 11 | 0 | NA |
| 12 | 74764717 | 74726222 | -1 | NM_004537    | NAP1L1   | 0 | NA | 0 | NA | 0 | NA | 0 | NA | 0 | NA |
| 12 | 74764717 | 74726222 | -1 | NM_139207    | NAP1L1   | 0 | NA | 0 | NA | 0 | NA | 0 | NA | 0 | NA |
| 12 | 75266353 | 75262396 | -1 | NM_024685    | BBS10    | 1 | 15 | 0 | NA | 0 | NA | 1 | 11 | 0 | NA |
| 12 | 75477720 | 75269708 | -1 | NM_001003712 | OSBPL8   | 0 | NA | 0 | NA | 1 | 12 | 0 | NA | 0 | NA |
| 12 | 75477720 | 75269708 | -1 | NM_020841    | OSBPL8   | 0 | NA | 0 | NA | 1 | 12 | 0 | NA | 0 | NA |
| 12 | 75681984 | 75771605 | 1  | NM_015336    | ZDHHC17  | 0 | NA | 0 | NA | 0 | NA | 0 | NA | 0 | NA |
| 12 | 75796930 | 75776626 | -1 | NM_001321    | CSRFP2   | 0 | NA | 0 | NA | 1 | 14 | 1 | 11 | 0 | NA |
| 12 | 75983491 | 75939156 | -1 | NM_203394    | EZF7     | 0 | NA | 0 | NA | 0 | NA | 0 | NA | 0 | NA |
| 12 | 76749199 | 77130921 | 1  | NM_014903    | NAV3     | 0 | NA | 0 | NA | 0 | NA | 0 | NA | 0 | NA |
| 12 | 78135413 | 78368973 | 1  | NM_005639    | SYT1     | 0 | NA | 0 | NA | 0 | NA | 0 | NA | 0 | NA |
| 12 | 78608921 | 78509875 | -1 | NM_002583    | PAWR     | 0 | NA | 0 | NA | 0 | NA | 0 | NA | 0 | NA |
| 12 | 78852842 | 78692316 | -1 | NM_002480    | PPP1R12A | 1 | 14 | 0 | NA | 1 | 12 | 0 | NA | 0 | NA |
| 12 | 79625576 | 79627382 | 1  | NM_002469    | MYF6     | 0 | NA | 0 | NA | 0 | NA | 0 | NA | 0 | NA |
| 12 | 79634838 | 79637578 | 1  | NM_005593    | MYF5     | 0 | NA | 0 | NA | 0 | NA | 0 | NA | 0 | NA |
| 12 | 79855825 | 79715301 | -1 | NM_004664    | LIN7A    | 0 | NA | 0 | NA | 0 | NA | 0 | NA | 0 | NA |
| 12 | 79995939 | 80173713 | 1  | NM_024560    | ACSS3    | 0 | NA | 0 | NA | 0 | NA | 0 | NA | 0 | NA |
| 12 | 80677240 | 80177486 | -1 | NM_003625    | PPFIA2   | 0 | NA | 0 | NA | 0 | NA | 0 | NA | 0 | NA |
| 12 | 81276330 | 81270219 | -1 | NM_014167    | CGDC59   | 1 | 49 | 0 | NA | 0 | NA | 1 | 16 | 0 | NA |
| 12 | 81276454 | 81397076 | 1  | NM_032230    | C12orf26 | 1 | 49 | 0 | NA | 0 | NA | 1 | 23 | 0 | NA |
| 12 | 81605064 | 82052196 | 1  | NM_152588    | TMTC2    | 0 | NA | 0 | NA | 0 | NA | 0 | NA | 0 | NA |
| 12 | 83630705 | 83777397 | -1 | NM_182767    | SLC6A15  | 1 | 25 | 0 | NA | 0 | NA | 0 | NA | 0 | NA |
| 12 | 83830705 | 83798759 | -1 | NM_018057    | SLC6A15  | 1 | 25 | 0 | NA | 0 | NA | 0 | NA | 0 | NA |
| 12 | 83954186 | 83932224 | -1 | NM_001100917 | TSPAN19  | 0 | NA | 0 | NA | 0 | NA | 0 | NA | 0 | NA |
| 12 | 83954229 | 84042767 | 1  | NM_032165    | LRRIQ1   | 0 | NA | 0 | NA | 0 | NA | 0 | NA | 0 | NA |
| 12 | 83954229 | 84163014 | 1  | NM_001079910 | LRRIQ1   | 0 | NA | 0 | NA | 0 | NA | 0 | NA | 0 | NA |
| 12 | 84198166 | 84219692 | 1  | NM_006982    | ALX1     | 0 | NA | 0 | NA | 0 | NA | 0 | NA | 0 | NA |
| 12 | 84754449 | 84722461 | -1 | NM_005447    | RASSF9   | 0 | NA | 0 | NA | 0 | NA | 0 | NA | 0 | NA |
| 12 | 84792205 | 84800896 | 1  | NM_006183    | NTS      | 0 | NA | 0 | NA | 0 | NA | 0 | NA | 0 | NA |
| 12 | 85756812 | 84897167 | -1 | NM_013244    | MGAT4C   | 0 | NA | 0 | NA | 0 | NA | 0 | NA | 0 | NA |
| 12 | 86947307 | 86897946 | -1 | NM_152589    | C12orf50 | 0 | NA | 0 | NA | 0 | NA | 0 | NA | 0 | NA |
| 12 | 86953398 | 86968068 | 1  | NM_001009894 | C12orf29 | 0 | NA | 0 | NA | 0 | NA | 0 | NA | 0 | NA |
| 12 | 87060124 | 86966920 | -1 | NM_025114    | CEP290   | 1 | 12 | 0 | NA | 0 | NA | 0 | NA | 0 | NA |
| 12 | 87060231 | 87115591 | 1  | NM_181783    | TMTC3    | 1 | 12 | 0 | NA | 0 | NA | 0 | NA | 0 | NA |
| 12 | 87498369 | 87410697 | -1 | NM_000899    | KITLG    | 0 | NA | 0 | NA | 0 | NA | 0 | NA | 0 | NA |
| 12 | 87498369 | 87410697 | -1 | NM_003994    | KITLG    | 0 | NA | 0 | NA | 0 | NA | 0 | NA | 0 | NA |
| 12 | 88270427 | 88265967 | -1 | NM_001946    | DUSP6    | 1 | 16 | 0 | NA | 0 | NA | 1 | 14 | 0 | NA |
| 12 | 88270427 | 88265967 | -1 | NM_022652    | DUSP6    | 1 | 16 | 0 | NA | 0 | NA | 1 | 14 | 0 | NA |
| 12 | 88442666 | 88437320 | -1 | NM_003774    | GALNT4   | 1 | 30 | 0 | NA | 1 | 14 | 1 | 37 | 0 | NA |
| 12 | 88443908 | 88337633 | -1 | NM_172240    | WDR51B   | 1 | 30 | 0 | NA | 1 | 14 | 1 | 37 | 0 | NA |
| 12 | 88573975 | 88505956 | -1 | NM_001001323 | ATP2B1   | 0 | NA | 0 | NA | 0 | NA | 0 | NA | 0 | NA |
| 12 | 88573975 | 88505956 | -1 | NM_001682    | ATP2B1   | 0 | NA | 0 | NA | 0 | NA | 0 | NA | 0 | NA |
| 12 | 89873084 | 89870122 | -1 | NM_152638    | C12orf12 | 0 | NA | 0 | NA | 0 | NA | 0 | NA | 0 | NA |
| 12 | 89922934 | 89881589 | -1 | NM_004950    | EPYC     | 0 | NA | 0 | NA | 0 | NA | 0 | NA | 0 | NA |
| 12 | 89976262 | 89968401 | -1 | NM_007035    | KERA     | 0 | NA | 0 | NA | 0 | NA | 0 | NA | 0 | NA |
| 12 | 90029673 | 90021362 | -1 | NM_002345    | LUM      | 0 | NA | 0 | NA | 0 | NA | 0 | NA | 0 | NA |
| 12 | 90096460 | 90063165 | -1 | NM_133504    | DCN      | 0 | NA | 0 | NA | 0 | NA | 0 | NA | 0 | NA |
| 12 | 90096460 | 90063165 | -1 | NM_133505    | DCN      | 0 | NA | 0 | NA | 0 | NA | 0 | NA | 0 | NA |
| 12 | 90096460 | 90063165 | -1 | NM_133506    | DCN      | 0 | NA | 0 | NA | 0 | NA | 0 | NA | 0 | NA |
| 12 | 90096460 | 90063165 | -1 | NM_133507    | DCN      | 0 | NA | 0 | NA | 0 | NA | 0 | NA | 0 | NA |
| 12 | 90097490 | 90063165 | -1 | NM_133503    | DCN      | 0 | NA | 0 | NA | 0 | NA | 0 | NA | 0 | NA |
| 12 | 90100937 | 90063165 | -1 | NM_001920    | DCN      | 0 | NA | 0 | NA | 0 | NA | 0 | NA | 0 | NA |
| 12 | 91063751 | 91061033 | -1 | NM_001731    | BTG1     | 0 | NA | 0 | NA | 1 | 12 | 0 | NA | 0 | NA |

|    |           |           |    |              |           |   |    |   |    |   |    |   |    |   |    |
|----|-----------|-----------|----|--------------|-----------|---|----|---|----|---|----|---|----|---|----|
| 12 | 91341865  | 91348861  | 1  | NM_001025233 | CELLU1    | 0 | NA | 0 | NA | 0 | NA | 0 | NA | 0 | NA |
| 12 | 91346055  | 91338000  | -1 | NM_001025232 | CELLU1OS  | 0 | NA | 0 | NA | 0 | NA | 0 | NA | 0 | NA |
| 12 | 91620970  | 91626196  | 1  | NM_001037671 | LOC338809 | 0 | NA | 0 | NA | 0 | NA | 0 | NA | 0 | NA |
| 12 | 91654441  | 91689999  | 1  | NM_001004330 | PLEKHG7   | 0 | NA | 0 | NA | 0 | NA | 0 | NA | 0 | NA |
| 12 | 91847238  | 91690415  | -1 | NM_003566    | EEA1      | 0 | NA | 0 | NA | 0 | NA | 1 | 11 | 0 | NA |
| 12 | 92295831  | 92321155  | 1  | NM_019094    | NUDT4     | 0 | NA | 0 | NA | 0 | NA | 0 | NA | 0 | NA |
| 12 | 92295831  | 92321155  | 1  | NM_199040    | NUDT4     | 0 | NA | 0 | NA | 0 | NA | 0 | NA | 0 | NA |
| 12 | 92360157  | 92326218  | -1 | NM_003348    | UBE2N     | 0 | NA | 0 | NA | 0 | NA | 0 | NA | 0 | NA |
| 12 | 92385400  | 92420563  | 1  | NM_014050    | MRPL42    | 0 | NA | 0 | NA | 0 | NA | 0 | NA | 0 | NA |
| 12 | 92385400  | 92420563  | 1  | NM_172177    | MRPL42    | 0 | NA | 0 | NA | 0 | NA | 0 | NA | 0 | NA |
| 12 | 92385400  | 92420563  | 1  | NM_172178    | MRPL42    | 0 | NA | 0 | NA | 0 | NA | 0 | NA | 0 | NA |
| 12 | 92487728  | 92494109  | 1  | NM_003877    | SOC52     | 0 | NA | 0 | NA | 0 | NA | 0 | NA | 0 | NA |
| 12 | 92595281  | 92768662  | 1  | NM_003805    | CRADD     | 0 | NA | 0 | NA | 0 | NA | 0 | NA | 0 | NA |
| 12 | 93066629  | 93223356  | 1  | NM_005761    | PLXNC1    | 0 | NA | 0 | NA | 0 | NA | 0 | NA | 1 | 13 |
| 12 | 93377895  | 93226186  | -1 | NM_001042399 | CCDC41    | 1 | 12 | 0 | NA | 0 | NA | 0 | NA | 0 | NA |
| 12 | 93377895  | 93226186  | -1 | NM_016122    | CCDC41    | 1 | 12 | 0 | NA | 0 | NA | 0 | NA | 0 | NA |
| 12 | 93568455  | 93486179  | -1 | NM_020698    | TMCC3     | 0 | NA | 0 | NA | 0 | NA | 0 | NA | 0 | NA |
| 12 | 93921642  | 93889240  | -1 | NM_018838    | NDUFA12   | 0 | NA | 0 | NA | 0 | NA | 0 | NA | 0 | NA |
| 12 | 93991339  | 93939801  | -1 | NM_003297    | NR2C1     | 1 | 14 | 0 | NA | 0 | NA | 0 | NA | 0 | NA |
| 12 | 93991487  | 93948315  | -1 | NM_001032287 | NR2C1     | 1 | 14 | 0 | NA | 0 | NA | 0 | NA | 0 | NA |
| 12 | 94135371  | 93994655  | -1 | NM_018351    | FGD6      | 0 | NA | 0 | NA | 0 | NA | 0 | NA | 0 | NA |
| 12 | 94135652  | 94220697  | 1  | NM_017599    | VEZT      | 0 | NA | 0 | NA | 0 | NA | 0 | NA | 0 | NA |
| 12 | 94391952  | 94433744  | 1  | NM_006838    | METAP2    | 1 | 24 | 0 | NA | 0 | NA | 0 | NA | 0 | NA |
| 12 | 94466751  | 94435017  | -1 | NM_001042403 | USP44     | 0 | NA | 1 | 13 | 0 | NA | 0 | NA | 0 | NA |
| 12 | 94469394  | 94435017  | -1 | NM_032147    | USP44     | 0 | NA | 1 | 13 | 0 | NA | 0 | NA | 0 | NA |
| 12 | 94708667  | 94575713  | -1 | NM_021229    | NTN4      | 1 | 14 | 0 | NA | 0 | NA | 0 | NA | 0 | NA |
| 12 | 94776839  | 94784369  | 1  | NM_003095    | SNRPF     | 0 | NA | 0 | NA | 0 | NA | 0 | NA | 0 | NA |
| 12 | 94860559  | 94784957  | -1 | NM_182496    | CCDC38    | 0 | NA | 0 | NA | 0 | NA | 0 | NA | 0 | NA |
| 12 | 94861201  | 94886500  | 1  | NM_152435    | AMDHD1    | 0 | NA | 0 | NA | 0 | NA | 0 | NA | 0 | NA |
| 12 | 94914202  | 94891272  | -1 | NM_002108    | HAL       | 0 | NA | 1 | 12 | 0 | NA | 0 | NA | 0 | NA |
| 12 | 94953496  | 94918741  | -1 | NM_000895    | LTA4H     | 0 | NA | 0 | NA | 0 | NA | 0 | NA | 0 | NA |
| 12 | 95112337  | 95185737  | 1  | NM_005230    | ELK3      | 0 | NA | 0 | NA | 0 | NA | 0 | NA | 0 | NA |
| 12 | 95318354  | 95196170  | -1 | NM_002595    | PCTK2     | 0 | NA | 0 | NA | 0 | NA | 0 | NA | 0 | NA |
| 12 | 95565883  | 95683179  | 1  | NM_196520    | C12orf63  | 0 | NA | 0 | NA | 0 | NA | 0 | NA | 0 | NA |
| 12 | 95825374  | 95870172  | 1  | NM_152905    | NEDD1     | 0 | NA | 0 | NA | 0 | NA | 0 | NA | 0 | NA |
| 12 | 97433539  | 97466866  | 1  | NM_001032283 | TMPO      | 0 | NA | 0 | NA | 0 | NA | 0 | NA | 0 | NA |
| 12 | 97433539  | 97466866  | 1  | NM_001032284 | TMPO      | 0 | NA | 0 | NA | 0 | NA | 0 | NA | 0 | NA |
| 12 | 97433572  | 97452452  | 1  | NM_003276    | TMPO      | 0 | NA | 0 | NA | 0 | NA | 0 | NA | 0 | NA |
| 12 | 97511533  | 97519909  | 1  | NM_002635    | SLC25A3   | 0 | NA | 0 | NA | 0 | NA | 0 | NA | 0 | NA |
| 12 | 97511533  | 97519909  | 1  | NM_005888    | SLC25A3   | 0 | NA | 0 | NA | 0 | NA | 0 | NA | 0 | NA |
| 12 | 97511533  | 97519909  | 1  | NM_213611    | SLC25A3   | 0 | NA | 0 | NA | 0 | NA | 0 | NA | 0 | NA |
| 12 | 97562720  | 97531312  | -1 | NM_201612    | IKIP      | 0 | NA | 0 | NA | 0 | NA | 0 | NA | 0 | NA |
| 12 | 97562720  | 97531312  | -1 | NM_201613    | IKIP      | 0 | NA | 0 | NA | 0 | NA | 0 | NA | 0 | NA |
| 12 | 97562720  | 97542160  | -1 | NM_153687    | IKIP      | 0 | NA | 0 | NA | 0 | NA | 0 | NA | 0 | NA |
| 12 | 97563208  | 97653342  | 1  | NM_001160    | APAF1     | 0 | NA | 0 | NA | 0 | NA | 0 | NA | 0 | NA |
| 12 | 97563208  | 97653342  | 1  | NM_013229    | APAF1     | 0 | NA | 0 | NA | 0 | NA | 0 | NA | 0 | NA |
| 12 | 97563208  | 97653342  | 1  | NM_181861    | APAF1     | 0 | NA | 0 | NA | 0 | NA | 0 | NA | 0 | NA |
| 12 | 97563208  | 97653342  | 1  | NM_181868    | APAF1     | 0 | NA | 0 | NA | 0 | NA | 0 | NA | 0 | NA |
| 12 | 97563208  | 97653342  | 1  | NM_181869    | APAF1     | 0 | NA | 0 | NA | 0 | NA | 0 | NA | 0 | NA |
| 12 | 98072603  | 97653201  | -1 | NM_020140    | ANKS1B    | 0 | NA | 0 | NA | 0 | NA | 0 | NA | 0 | NA |
| 12 | 98072603  | 97662124  | -1 | NM_181670    | ANKS1B    | 0 | NA | 0 | NA | 0 | NA | 0 | NA | 0 | NA |
| 12 | 98565665  | 98567957  | 1  | NM_153364    | FAM71C    | 0 | NA | 0 | NA | 0 | NA | 0 | NA | 0 | NA |
| 12 | 98902563  | 97653201  | -1 | NM_152788    | ANKS1B    | 0 | NA | 0 | NA | 0 | NA | 0 | NA | 0 | NA |
| 12 | 99060773  | 98954993  | -1 | NM_015054    | UHRF1BP1L | 0 | NA | 0 | NA | 0 | NA | 0 | NA | 0 | NA |
| 12 | 99060773  | 98987816  | -1 | NM_001006947 | UHRF1BP1L | 0 | NA | 0 | NA | 0 | NA | 0 | NA | 0 | NA |
| 12 | 99091202  | 99074323  | -1 | NM_017600    | GOLGA2L1  | 0 | NA | 0 | NA | 0 | NA | 0 | NA | 0 | NA |
| 12 | 99118704  | 99142332  | 1  | NM_022496    | ACTR6     | 0 | NA | 0 | NA | 0 | NA | 0 | NA | 0 | NA |
| 12 | 99184988  | 99170172  | -1 | NM_152317    | DEPDC4    | 1 | 23 | 0 | NA | 0 | NA | 0 | NA | 0 | NA |
| 12 | 99185679  | 99258045  | 1  | NM_017988    | SCYL2     | 1 | 23 | 0 | NA | 0 | NA | 0 | NA | 0 | NA |
| 12 | 99275124  | 99339968  | 1  | NM_139319    | SLC17A8   | 0 | NA | 0 | NA | 0 | NA | 0 | NA | 0 | NA |
| 12 | 99391809  | 99481774  | 1  | NM_005123    | NR1H4     | 0 | NA | 0 | NA | 0 | NA | 0 | NA | 0 | NA |
| 12 | 99491619  | 99542816  | 1  | NM_174942    | GAS2L3    | 0 | NA | 0 | NA | 0 | NA | 0 | NA | 0 | NA |
| 12 | 99712715  | 100046539 | 1  | NM_178826    | TMEM16D   | 0 | NA | 0 | NA | 0 | NA | 0 | NA | 0 | NA |
| 12 | 100128147 | 100074124 | -1 | NM_145913    | SLC5A8    | 0 | NA | 0 | NA | 0 | NA | 0 | NA | 1 | 12 |
| 12 | 100198035 | 100304528 | 1  | NM_014503    | UTP20     | 0 | NA | 0 | NA | 0 | NA | 0 | NA | 0 | NA |

|    |           |           |    |              |          |   |    |   |    |   |    |   |    |   |    |
|----|-----------|-----------|----|--------------|----------|---|----|---|----|---|----|---|----|---|----|
| 12 | 100325703 | 100311045 | -1 | NM_001177    | ARL1     | 1 | 15 | 0 | NA | 0 | NA | 0 | NA | 0 | NA |
| 12 | 100394787 | 100404906 | 1  | NM_152323    | SPIC     | 0 | NA | 0 | NA | 0 | NA | 0 | NA | 0 | NA |
| 12 | 100512877 | 100603789 | 1  | NM_002465    | MYBPC1   | 0 | NA | 0 | NA | 0 | NA | 0 | NA | 0 | NA |
| 12 | 100512877 | 100603789 | 1  | NM_206819    | MYBPC1   | 0 | NA | 0 | NA | 0 | NA | 0 | NA | 0 | NA |
| 12 | 100512877 | 100603789 | 1  | NM_206820    | MYBPC1   | 0 | NA | 0 | NA | 0 | NA | 0 | NA | 0 | NA |
| 12 | 100512877 | 100603789 | 1  | NM_206821    | MYBPC1   | 0 | NA | 0 | NA | 0 | NA | 0 | NA | 0 | NA |
| 12 | 100615547 | 100646977 | 1  | NM_020244    | CHPT1    | 0 | NA | 0 | NA | 0 | NA | 0 | NA | 0 | NA |
| 12 | 100657378 | 100646556 | -1 | NM_153694    | SYCP3    | 0 | NA | 0 | NA | 0 | NA | 0 | NA | 0 | NA |
| 12 | 100748763 | 100663407 | -1 | NM_024312    | GNPTAB   | 0 | NA | 0 | NA | 0 | NA | 1 | 15 | 0 | NA |
| 12 | 100795235 | 100841532 | 1  | NM_018370    | DRAM     | 0 | NA | 0 | NA | 0 | NA | 0 | NA | 0 | NA |
| 12 | 100980029 | 100930847 | -1 | NM_016053    | CCDC53   | 0 | NA | 0 | NA | 0 | NA | 0 | NA | 0 | NA |
| 12 | 101036491 | 100992102 | -1 | NM_024057    | NUP37    | 0 | NA | 0 | NA | 0 | NA | 0 | NA | 0 | NA |
| 12 | 101038085 | 101115428 | 1  | NM_017915    | C12orf48 | 0 | NA | 0 | NA | 0 | NA | 0 | NA | 0 | NA |
| 12 | 101115744 | 101114366 | -1 | NM_002674    | PMCH     | 0 | NA | 0 | NA | 0 | NA | 0 | NA | 0 | NA |
| 12 | 101396559 | 101313774 | -1 | NM_00111284  | IGF1     | 0 | NA | 0 | NA | 0 | NA | 0 | NA | 0 | NA |
| 12 | 101396508 | 101313774 | -1 | NM_000618    | IGF1     | 0 | NA | 0 | NA | 0 | NA | 0 | NA | 0 | NA |
| 12 | 101398508 | 101313774 | -1 | NM_00111283  | IGF1     | 0 | NA | 0 | NA | 0 | NA | 0 | NA | 0 | NA |
| 12 | 101398508 | 101335583 | -1 | NM_00111285  | IGF1     | 0 | NA | 0 | NA | 0 | NA | 0 | NA | 0 | NA |
| 12 | 101835511 | 101756233 | -1 | NM_000277    | PAH      | 0 | NA | 0 | NA | 0 | NA | 0 | NA | 0 | NA |
| 12 | 101875593 | 101878419 | 1  | NM_004316    | ASCL1    | 0 | NA | 0 | NA | 0 | NA | 0 | NA | 0 | NA |
| 12 | 102413876 | 102219862 | -1 | NM_198521    | C12orf42 | 0 | NA | 0 | NA | 0 | NA | 0 | NA | 0 | NA |
| 12 | 102413879 | 102219862 | -1 | NM_001099336 | C12orf42 | 0 | NA | 0 | NA | 0 | NA | 0 | NA | 0 | NA |
| 12 | 102505198 | 102684632 | 1  | NM_017564    | STAB2    | 0 | NA | 0 | NA | 0 | NA | 0 | NA | 0 | NA |
| 12 | 102758914 | 102690217 | -1 | NM_016575    | NT5DC3   | 0 | NA | 0 | NA | 0 | NA | 0 | NA | 0 | NA |
| 12 | 102759105 | 102695618 | -1 | NM_001031701 | NT5DC3   | 0 | NA | 0 | NA | 0 | NA | 0 | NA | 0 | NA |
| 12 | 102848318 | 102865833 | 1  | NM_003299    | HSP90B1  | 0 | NA | 0 | NA | 0 | NA | 0 | NA | 0 | NA |
| 12 | 102883746 | 102906786 | 1  | NM_003211    | TDG      | 1 | 38 | 0 | NA | 0 | NA | 0 | NA | 0 | NA |
| 12 | 102968045 | 102906894 | -1 | NM_031302    | GLT8D2   | 1 | 11 | 0 | NA | 0 | NA | 0 | NA | 0 | NA |
| 12 | 102982365 | 103024433 | 1  | NM_013320    | HCF2     | 1 | 15 | 0 | NA | 0 | NA | 0 | NA | 0 | NA |
| 12 | 103056170 | 103034987 | -1 | NM_006166    | NFYB     | 0 | NA | 0 | NA | 0 | NA | 0 | NA | 0 | NA |
| 12 | 103133688 | 103268192 | 1  | NM_001093771 | TXNRD1   | 1 | 13 | 0 | NA | 0 | NA | 0 | NA | 0 | NA |
| 12 | 103204856 | 103268192 | 1  | NM_003330    | TXNRD1   | 0 | NA | 0 | NA | 0 | NA | 0 | NA | 0 | NA |
| 12 | 103204856 | 103268192 | 1  | NM_182729    | TXNRD1   | 0 | NA | 0 | NA | 0 | NA | 0 | NA | 0 | NA |
| 12 | 103204856 | 103268192 | 1  | NM_182742    | TXNRD1   | 0 | NA | 0 | NA | 0 | NA | 0 | NA | 0 | NA |
| 12 | 103204856 | 103268192 | 1  | NM_182743    | TXNRD1   | 0 | NA | 0 | NA | 0 | NA | 0 | NA | 0 | NA |
| 12 | 103221678 | 103223112 | 1  | NM_001008394 | EID3     | 0 | NA | 0 | NA | 0 | NA | 0 | NA | 0 | NA |
| 12 | 103374907 | 103676013 | 1  | NM_018413    | CHST11   | 0 | NA | 0 | NA | 1 | 17 | 1 | 14 | 0 | NA |
| 12 | 103846563 | 103722492 | -1 | NM_032148    | SLC41A2  | 0 | NA | 0 | NA | 0 | NA | 0 | NA | 0 | NA |
| 12 | 103904227 | 103912635 | 1  | NM_152318    | C12orf45 | 0 | NA | 0 | NA | 0 | NA | 0 | NA | 0 | NA |
| 12 | 104002366 | 103942331 | -1 | NM_001034173 | ALDH1L2  | 0 | NA | 0 | NA | 0 | NA | 0 | NA | 0 | NA |
| 12 | 104025621 | 104087036 | 1  | NM_015275    | KIAA1033 | 0 | NA | 0 | NA | 0 | NA | 0 | NA | 0 | NA |
| 12 | 104154138 | 104091204 | -1 | NM_018171    | APPL2    | 0 | NA | 0 | NA | 0 | NA | 0 | NA | 0 | NA |
| 12 | 105057941 | 104981254 | -1 | NM_014840    | NUAK1    | 0 | NA | 0 | NA | 0 | NA | 0 | NA | 0 | NA |
| 12 | 105165843 | 105155919 | -1 | NM_006825    | CKAP4    | 0 | NA | 0 | NA | 0 | NA | 0 | NA | 0 | NA |
| 12 | 105220710 | 105264922 | 1  | NM_152772    | TGP11L2  | 0 | NA | 0 | NA | 0 | NA | 0 | NA | 0 | NA |
| 12 | 105275618 | 105428105 | 1  | NM_018082    | POLR3B   | 0 | NA | 0 | NA | 0 | NA | 0 | NA | 0 | NA |
| 12 | 105501162 | 105680711 | 1  | NM_213594    | RFX4     | 0 | NA | 0 | NA | 0 | NA | 0 | NA | 0 | NA |
| 12 | 105519079 | 105651416 | 1  | NM_002920    | RFX4     | 0 | NA | 0 | NA | 0 | NA | 0 | NA | 0 | NA |
| 12 | 105602615 | 105680711 | 1  | NM_032491    | RFX4     | 0 | NA | 0 | NA | 0 | NA | 0 | NA | 0 | NA |
| 12 | 105692528 | 105807224 | 1  | NM_018157    | RIC8B    | 0 | NA | 0 | NA | 1 | 15 | 1 | 12 | 0 | NA |
| 12 | 105873834 | 105891891 | 1  | NM_152261    | C12orf23 | 0 | NA | 0 | NA | 1 | 13 | 0 | NA | 0 | NA |
| 12 | 105905059 | 105895198 | -1 | NM_001033050 | MTERFD3  | 0 | NA | 0 | NA | 0 | NA | 0 | NA | 0 | NA |
| 12 | 105905059 | 105895198 | -1 | NM_025198    | MTERFD3  | 0 | NA | 0 | NA | 0 | NA | 0 | NA | 0 | NA |
| 12 | 106011455 | 105909271 | -1 | NM_004075    | CRY1     | 0 | NA | 0 | NA | 0 | NA | 0 | NA | 0 | NA |
| 12 | 106236326 | 106577549 | 1  | NM_001018072 | BTBD11   | 0 | NA | 0 | NA | 0 | NA | 0 | NA | 0 | NA |
| 12 | 106498763 | 106577549 | 1  | NM_001017523 | BTBD11   | 0 | NA | 0 | NA | 0 | NA | 0 | NA | 0 | NA |
| 12 | 106603719 | 106630387 | 1  | NM_007062    | PWP1     | 0 | NA | 0 | NA | 0 | NA | 0 | NA | 0 | NA |
| 12 | 106679044 | 106650772 | -1 | NM_012406    | PRDM4    | 0 | NA | 0 | NA | 0 | NA | 0 | NA | 0 | NA |
| 12 | 106692291 | 106694545 | 1  | NM_203436    | ASCL4    | 0 | NA | 0 | NA | 0 | NA | 0 | NA | 0 | NA |
| 12 | 107047640 | 107168443 | 1  | NM_014653    | WSCD2    | 0 | NA | 0 | NA | 0 | NA | 0 | NA | 0 | NA |
| 12 | 107257216 | 107209476 | -1 | NM_004072    | CMKLR1   | 0 | NA | 0 | NA | 0 | NA | 0 | NA | 0 | NA |
| 12 | 107433180 | 107437510 | 1  | NM_007076    | FICD     | 0 | NA | 0 | NA | 0 | NA | 0 | NA | 0 | NA |
| 12 | 107479295 | 107440120 | -1 | NM_014706    | SART3    | 0 | NA | 0 | NA | 0 | NA | 0 | NA | 0 | NA |
| 12 | 107480511 | 107487273 | 1  | NM_014301    | ISCU     | 0 | NA | 0 | NA | 0 | NA | 0 | NA | 0 | NA |
| 12 | 107480511 | 107487273 | 1  | NM_213595    | ISCU     | 0 | NA | 0 | NA | 0 | NA | 0 | NA | 0 | NA |

|    |           |           |    |              |          |   |    |   |    |   |    |   |    |   |    |
|----|-----------|-----------|----|--------------|----------|---|----|---|----|---|----|---|----|---|----|
| 12 | 107515913 | 107507755 | -1 | NM_181724    | TMEM119  | 0 | NA | 0 | NA | 1 | 12 | 0 | NA | 0 | NA |
| 12 | 107551799 | 107539808 | -1 | NM_003006    | SELPLG   | 0 | NA | 0 | NA | 0 | NA | 0 | NA | 0 | NA |
| 12 | 107649424 | 107563015 | -1 | NM_014325    | COR01C   | 1 | 20 | 0 | NA | 1 | 14 | 1 | 12 | 0 | NA |
| 12 | 107775480 | 107705098 | -1 | NM_018984    | SSH1     | 0 | NA | 0 | NA | 0 | NA | 0 | NA | 0 | NA |
| 12 | 107797985 | 107818839 | 1  | NM_001917    | DAO      | 0 | NA | 0 | NA | 0 | NA | 0 | NA | 0 | NA |
| 12 | 107943228 | 107828786 | -1 | NM_018711    | SVOP     | 0 | NA | 0 | NA | 0 | NA | 0 | NA | 0 | NA |
| 12 | 107974762 | 108010214 | 1  | NM_032663    | USP30    | 1 | 12 | 0 | NA | 0 | NA | 0 | NA | 0 | NA |
| 12 | 108015628 | 108010378 | -1 | NM_001001655 | ALKBH2   | 1 | 12 | 0 | NA | 0 | NA | 0 | NA | 0 | NA |
| 12 | 108019797 | 108033181 | 1  | NM_080911    | UNG      | 1 | 12 | 0 | NA | 0 | NA | 0 | NA | 0 | NA |
| 12 | 108020389 | 108033181 | 1  | NM_003362    | UNG      | 1 | 12 | 0 | NA | 0 | NA | 0 | NA | 0 | NA |
| 12 | 108061584 | 108190413 | 1  | NM_001093    | ACACB    | 0 | NA | 0 | NA | 0 | NA | 0 | NA | 0 | NA |
| 12 | 108231408 | 108200165 | -1 | NM_213596    | FOXN4    | 0 | NA | 0 | NA | 0 | NA | 0 | NA | 0 | NA |
| 12 | 108310870 | 108370961 | 1  | NM_001101421 | MYO1H    | 0 | NA | 0 | NA | 0 | NA | 0 | NA | 0 | NA |
| 12 | 108399538 | 108370842 | -1 | NM_031954    | KCTD10   | 1 | 14 | 0 | NA | 0 | NA | 0 | NA | 0 | NA |
| 12 | 108399821 | 108458890 | 1  | NM_130466    | UBE3B    | 1 | 14 | 0 | NA | 0 | NA | 0 | NA | 0 | NA |
| 12 | 108399821 | 108458890 | 1  | NM_183415    | UBE3B    | 1 | 14 | 0 | NA | 0 | NA | 0 | NA | 0 | NA |
| 12 | 108495741 | 108475903 | -1 | NM_052845    | MMAB     | 1 | 15 | 0 | NA | 0 | NA | 1 | 11 | 0 | NA |
| 12 | 108495882 | 108519454 | 1  | NM_000431    | MVK      | 1 | 15 | 0 | NA | 0 | NA | 1 | 11 | 0 | NA |
| 12 | 108495882 | 108519454 | 1  | NM_001114185 | MVK      | 1 | 15 | 0 | NA | 0 | NA | 1 | 11 | 0 | NA |
| 12 | 108656954 | 108692682 | 1  | NM_032829    | C12orf34 | 1 | 11 | 0 | NA | 0 | NA | 0 | NA | 0 | NA |
| 12 | 108755595 | 108705276 | -1 | NM_021625    | TRPV4    | 0 | NA | 0 | NA | 0 | NA | 0 | NA | 0 | NA |
| 12 | 108755595 | 108705276 | -1 | NM_147204    | TRPV4    | 0 | NA | 0 | NA | 0 | NA | 0 | NA | 0 | NA |
| 12 | 108802676 | 108773130 | -1 | NM_016433    | GLTP     | 0 | NA | 0 | NA | 0 | NA | 0 | NA | 0 | NA |
| 12 | 108822705 | 108840251 | 1  | NM_032300    | TCHP     | 0 | NA | 0 | NA | 0 | NA | 1 | 12 | 0 | NA |
| 12 | 108918483 | 108851991 | -1 | NM_014776    | GIT2     | 1 | 14 | 0 | NA | 0 | NA | 1 | 16 | 0 | NA |
| 12 | 108918483 | 108851991 | -1 | NM_057169    | GIT2     | 1 | 14 | 0 | NA | 0 | NA | 1 | 16 | 0 | NA |
| 12 | 108918483 | 108851991 | -1 | NM_057170    | GIT2     | 1 | 14 | 0 | NA | 0 | NA | 1 | 16 | 0 | NA |
| 12 | 108918483 | 108870249 | -1 | NM_139201    | GIT2     | 1 | 14 | 0 | NA | 0 | NA | 1 | 16 | 0 | NA |
| 12 | 108921617 | 108961618 | 1  | NM_033121    | ANKRD13A | 1 | 14 | 0 | NA | 0 | NA | 1 | 16 | 0 | NA |
| 12 | 108989883 | 108963365 | -1 | NM_207435    | FLJ40142 | 0 | NA | 0 | NA | 0 | NA | 0 | NA | 0 | NA |
| 12 | 109046564 | 109140983 | 1  | NM_014055    | IFT81    | 0 | NA | 0 | NA | 0 | NA | 0 | NA | 0 | NA |
| 12 | 109046686 | 109091370 | 1  | NM_031473    | IFT81    | 0 | NA | 0 | NA | 0 | NA | 0 | NA | 0 | NA |
| 12 | 109203414 | 109273280 | 1  | NM_001681    | ATP2A2   | 0 | NA | 0 | NA | 0 | NA | 0 | NA | 0 | NA |
| 12 | 109203414 | 109273280 | 1  | NM_170665    | ATP2A2   | 0 | NA | 0 | NA | 0 | NA | 0 | NA | 0 | NA |
| 12 | 109325815 | 109296331 | -1 | NM_016238    | ANAPC7   | 0 | NA | 0 | NA | 0 | NA | 1 | 12 | 0 | NA |
| 12 | 109372541 | 109357088 | -1 | NM_005719    | ARPC3    | 0 | NA | 0 | NA | 0 | NA | 0 | NA | 0 | NA |
| 12 | 109390447 | 109374673 | -1 | NM_016301    | GPN3     | 0 | NA | 0 | NA | 0 | NA | 0 | NA | 0 | NA |
| 12 | 109390614 | 109412575 | 1  | NM_013300    | C12orf24 | 0 | NA | 0 | NA | 0 | NA | 0 | NA | 0 | NA |
| 12 | 109424299 | 109413712 | -1 | NM_016226    | VPS29    | 1 | 28 | 0 | NA | 1 | 13 | 1 | 31 | 0 | NA |
| 12 | 109424299 | 109413712 | -1 | NM_057180    | VPS29    | 1 | 28 | 0 | NA | 1 | 13 | 1 | 31 | 0 | NA |
| 12 | 109424387 | 109454274 | 1  | NM_152442    | RAD9B    | 1 | 28 | 0 | NA | 1 | 13 | 1 | 31 | 0 | NA |
| 12 | 109505447 | 109456619 | -1 | NM_139283    | PPTC7    | 0 | NA | 0 | NA | 0 | NA | 0 | NA | 0 | NA |
| 12 | 109536262 | 109571318 | 1  | NM_001082537 | TCTN1    | 0 | NA | 0 | NA | 0 | NA | 0 | NA | 0 | NA |
| 12 | 109536262 | 109571318 | 1  | NM_001082538 | TCTN1    | 0 | NA | 0 | NA | 0 | NA | 0 | NA | 0 | NA |
| 12 | 109536262 | 109571318 | 1  | NM_024549    | TCTN1    | 0 | NA | 0 | NA | 0 | NA | 0 | NA | 0 | NA |
| 12 | 109611329 | 109570873 | -1 | NM_032369    | HVCN1    | 0 | NA | 1 | 12 | 0 | NA | 0 | NA | 0 | NA |
| 12 | 109612000 | 109570873 | -1 | NM_001040107 | HVCN1    | 0 | NA | 1 | 12 | 0 | NA | 0 | NA | 0 | NA |
| 12 | 109665050 | 109642126 | -1 | NM_002710    | PPP1CC   | 0 | NA | 0 | NA | 0 | NA | 0 | NA | 0 | NA |
| 12 | 109769193 | 109829721 | 1  | NM_152591    | CCDC63   | 0 | NA | 0 | NA | 0 | NA | 0 | NA | 0 | NA |
| 12 | 109842764 | 109833031 | -1 | NM_000432    | MYL2     | 0 | NA | 0 | NA | 0 | NA | 0 | NA | 0 | NA |
| 12 | 109956211 | 110272739 | 1  | NM_015267    | CUX2     | 0 | NA | 0 | NA | 0 | NA | 0 | NA | 0 | NA |
| 12 | 110291308 | 110282865 | -1 | NM_144671    | FAM109A  | 1 | 13 | 0 | NA | 0 | NA | 0 | NA | 0 | NA |
| 12 | 110328134 | 110373810 | 1  | NM_005475    | SH2B3    | 1 | 17 | 0 | NA | 0 | NA | 1 | 12 | 0 | NA |
| 12 | 110521863 | 110374400 | -1 | NM_002973    | ATXN2    | 0 | NA | 0 | NA | 0 | NA | 0 | NA | 0 | NA |
| 12 | 110608122 | 110586278 | -1 | NM_006768    | BRAP     | 0 | NA | 0 | NA | 0 | NA | 0 | NA | 0 | NA |
| 12 | 110608284 | 110679284 | 1  | NM_025247    | ACAD10   | 0 | NA | 0 | NA | 0 | NA | 0 | NA | 0 | NA |
| 12 | 110688728 | 110732167 | 1  | NM_000690    | ALDH2    | 0 | NA | 0 | NA | 0 | NA | 0 | NA | 0 | NA |
| 12 | 110764661 | 110815611 | 1  | NM_003668    | MAPKAPK5 | 0 | NA | 0 | NA | 0 | NA | 0 | NA | 0 | NA |
| 12 | 110764661 | 110815611 | 1  | NM_139078    | MAPKAPK5 | 0 | NA | 0 | NA | 0 | NA | 0 | NA | 0 | NA |
| 12 | 110935318 | 110853485 | -1 | NM_138341    | TMEM116  | 1 | 13 | 0 | NA | 1 | 12 | 1 | 14 | 0 | NA |
| 12 | 110935534 | 110945407 | 1  | NM_001034025 | ERP29    | 1 | 13 | 0 | NA | 1 | 12 | 1 | 14 | 0 | NA |
| 12 | 110935534 | 110945407 | 1  | NM_006817    | ERP29    | 1 | 13 | 0 | NA | 1 | 12 | 1 | 14 | 0 | NA |
| 12 | 111030980 | 110948875 | -1 | NM_024953    | C12orf30 | 0 | NA | 0 | NA | 0 | NA | 1 | 13 | 0 | NA |
| 12 | 111047763 | 111075795 | 1  | NM_006700    | TRAFD1   | 0 | NA | 0 | NA | 0 | NA | 0 | NA | 0 | NA |
| 12 | 111228421 | 111082493 | -1 | NM_001109662 | C12orf51 | 0 | NA | 0 | NA | 0 | NA | 0 | NA | 0 | NA |

|    |           |           |    |              |           |   |    |   |    |   |    |   |    |   |    |
|----|-----------|-----------|----|--------------|-----------|---|----|---|----|---|----|---|----|---|----|
| 12 | 111331826 | 111327376 | -1 | NM_000970    | RPL6      | 0 | NA | 0 | NA | 0 | NA | 0 | NA | 0 | NA |
| 12 | 111331826 | 111327376 | -1 | NM_001024662 | RPL6      | 0 | NA | 0 | NA | 0 | NA | 0 | NA | 0 | NA |
| 12 | 111340918 | 111432100 | 1  | NM_002834    | PTPN11    | 0 | NA | 0 | NA | 0 | NA | 0 | NA | 0 | NA |
| 12 | 111714124 | 111819629 | 1  | NM_014954    | RPH3A     | 0 | NA | 0 | NA | 0 | NA | 0 | NA | 0 | NA |
| 12 | 111829121 | 111840214 | 1  | NM_002534    | OAS1      | 0 | NA | 0 | NA | 0 | NA | 0 | NA | 0 | NA |
| 12 | 111829121 | 111842095 | 1  | NM_001032409 | OAS1      | 0 | NA | 0 | NA | 0 | NA | 0 | NA | 0 | NA |
| 12 | 111829121 | 111842095 | 1  | NM_016816    | OAS1      | 0 | NA | 0 | NA | 0 | NA | 0 | NA | 0 | NA |
| 12 | 111860631 | 111895438 | 1  | NM_006187    | OAS3      | 0 | NA | 0 | NA | 0 | NA | 0 | NA | 0 | NA |
| 12 | 111900656 | 111910993 | 1  | NM_001032731 | OAS2      | 0 | NA | 0 | NA | 0 | NA | 0 | NA | 0 | NA |
| 12 | 111900656 | 111932886 | 1  | NM_002535    | OAS2      | 0 | NA | 0 | NA | 0 | NA | 0 | NA | 0 | NA |
| 12 | 111900656 | 111933911 | 1  | NM_016817    | OAS2      | 0 | NA | 0 | NA | 0 | NA | 0 | NA | 0 | NA |
| 12 | 111980044 | 112020216 | 1  | NM_004416    | DTX1      | 0 | NA | 0 | NA | 0 | NA | 0 | NA | 0 | NA |
| 12 | 112058404 | 112021700 | -1 | NM_004658    | RASAL1    | 0 | NA | 0 | NA | 1 | 12 | 0 | NA | 0 | NA |
| 12 | 112107667 | 112079360 | -1 | NM_001111322 | DDX54     | 0 | NA | 0 | NA | 0 | NA | 0 | NA | 0 | NA |
| 12 | 112107667 | 112079360 | -1 | NM_024072    | DDX54     | 0 | NA | 0 | NA | 0 | NA | 0 | NA | 0 | NA |
| 12 | 112107937 | 112114502 | 1  | NM_032848    | C12orf52  | 0 | NA | 0 | NA | 0 | NA | 0 | NA | 0 | NA |
| 12 | 112143263 | 112117628 | -1 | NM_138451    | IQCD      | 0 | NA | 0 | NA | 0 | NA | 0 | NA | 0 | NA |
| 12 | 112143651 | 112218317 | 1  | NM_017901    | TPCN1     | 0 | NA | 0 | NA | 0 | NA | 0 | NA | 0 | NA |
| 12 | 112257308 | 112220953 | -1 | NM_024959    | SLC24A6   | 0 | NA | 0 | NA | 0 | NA | 1 | 14 | 0 | NA |
| 12 | 112280760 | 112311584 | 1  | NM_173542    | P76       | 0 | NA | 0 | NA | 0 | NA | 0 | NA | 0 | NA |
| 12 | 112326075 | 112314633 | -1 | NM_006843    | SDS       | 0 | NA | 1 | 17 | 0 | NA | 0 | NA | 0 | NA |
| 12 | 112344598 | 112360464 | 1  | NM_138432    | SDSL      | 0 | NA | 0 | NA | 0 | NA | 0 | NA | 0 | NA |
| 12 | 112394260 | 112385076 | -1 | NM_022363    | LHX5      | 0 | NA | 1 | 12 | 0 | NA | 0 | NA | 0 | NA |
| 12 | 112888499 | 112744244 | -1 | NM_016196    | RBM19     | 0 | NA | 0 | NA | 0 | NA | 0 | NA | 0 | NA |
| 12 | 113326086 | 113288284 | -1 | NM_080718    | TBX5      | 0 | NA | 0 | NA | 0 | NA | 0 | NA | 0 | NA |
| 12 | 113328272 | 113276117 | -1 | NM_181486    | TBX5      | 0 | NA | 0 | NA | 0 | NA | 0 | NA | 0 | NA |
| 12 | 113330630 | 113276117 | -1 | NM_000192    | TBX5      | 0 | NA | 0 | NA | 0 | NA | 0 | NA | 0 | NA |
| 12 | 113330630 | 113276117 | -1 | NM_080717    | TBX5      | 0 | NA | 0 | NA | 0 | NA | 0 | NA | 0 | NA |
| 12 | 113606352 | 113592441 | -1 | NM_005996    | TBX3      | 1 | 23 | 0 | NA | 0 | NA | 0 | NA | 0 | NA |
| 12 | 113606352 | 113592441 | -1 | NM_016569    | TBX3      | 1 | 23 | 0 | NA | 0 | NA | 0 | NA | 0 | NA |
| 12 | 115199526 | 114880763 | -1 | NM_015335    | MED13L    | 0 | NA | 0 | NA | 0 | NA | 0 | NA | 0 | NA |
| 12 | 115455609 | 115457709 | 1  | NM_207436    | FLJ42957  | 0 | NA | 0 | NA | 0 | NA | 0 | NA | 0 | NA |
| 12 | 115481568 | 115498808 | 1  | NM_001085481 | LOC643246 | 0 | NA | 0 | NA | 1 | 14 | 0 | NA | 0 | NA |
| 12 | 115660226 | 115637978 | -1 | NM_024738    | C12orf49  | 1 | 11 | 0 | NA | 0 | NA | 1 | 13 | 0 | NA |
| 12 | 115660478 | 115775819 | 1  | NM_00109903  | RNF2      | 1 | 11 | 0 | NA | 0 | NA | 1 | 13 | 0 | NA |
| 12 | 115660478 | 115775819 | 1  | NM_032814    | RNF2      | 1 | 11 | 0 | NA | 0 | NA | 1 | 13 | 0 | NA |
| 12 | 115803615 | 115783409 | -1 | NM_003806    | HRK       | 0 | NA | 0 | NA | 0 | NA | 0 | NA | 0 | NA |
| 12 | 115833143 | 115953336 | 1  | NM_012174    | FBXW8     | 0 | NA | 0 | NA | 0 | NA | 0 | NA | 0 | NA |
| 12 | 115833143 | 115953336 | 1  | NM_153348    | FBXW8     | 0 | NA | 0 | NA | 0 | NA | 0 | NA | 0 | NA |
| 12 | 116021634 | 115961110 | -1 | NM_017899    | TESC      | 1 | 12 | 1 | 14 | 0 | NA | 0 | NA | 0 | NA |
| 12 | 116112683 | 116065967 | -1 | NM_015002    | FBXO21    | 0 | NA | 0 | NA | 0 | NA | 0 | NA | 0 | NA |
| 12 | 116112683 | 116065967 | -1 | NM_033624    | FBXO21    | 0 | NA | 0 | NA | 0 | NA | 0 | NA | 0 | NA |
| 12 | 116283965 | 116135361 | -1 | NM_000620    | NOS1      | 0 | NA | 0 | NA | 0 | NA | 0 | NA | 0 | NA |
| 12 | 116890411 | 116375199 | -1 | NM_173598    | KSR2      | 0 | NA | 0 | NA | 0 | NA | 0 | NA | 0 | NA |
| 12 | 116938892 | 116954422 | 1  | NM_007370    | RFC5      | 0 | NA | 0 | NA | 0 | NA | 0 | NA | 0 | NA |
| 12 | 116938892 | 116954422 | 1  | NM_181578    | RFC5      | 0 | NA | 0 | NA | 0 | NA | 0 | NA | 0 | NA |
| 12 | 116983334 | 116954879 | -1 | NM_018639    | WSB2      | 0 | NA | 0 | NA | 0 | NA | 0 | NA | 0 | NA |
| 12 | 117026132 | 116987863 | -1 | NM_019086    | FLJ20674  | 0 | NA | 0 | NA | 0 | NA | 0 | NA | 0 | NA |
| 12 | 117058252 | 117067773 | 1  | NM_002567    | PEBP1     | 0 | NA | 0 | NA | 0 | NA | 0 | NA | 0 | NA |
| 12 | 117295133 | 117071988 | -1 | NM_016281    | TAOK3     | 1 | 20 | 0 | NA | 0 | NA | 0 | NA | 0 | NA |
| 12 | 117298740 | 117340223 | 1  | NM_022491    | SUDS3     | 1 | 20 | 0 | NA | 0 | NA | 0 | NA | 0 | NA |
| 12 | 117903778 | 118085240 | 1  | NM_194286    | KIAA1853  | 0 | NA | 0 | NA | 0 | NA | 0 | NA | 0 | NA |
| 12 | 118100977 | 118116934 | 1  | NM_014365    | HSPB8     | 0 | NA | 0 | NA | 0 | NA | 0 | NA | 0 | NA |
| 12 | 118256899 | 118463235 | 1  | NM_178499    | CCDC60    | 0 | NA | 0 | NA | 0 | NA | 0 | NA | 0 | NA |
| 12 | 118590143 | 118603812 | 1  | NM_006253    | PRKAB1    | 0 | NA | 0 | NA | 0 | NA | 0 | NA | 0 | NA |
| 12 | 118799475 | 118607980 | -1 | NM_007174    | CIT       | 0 | NA | 0 | NA | 0 | NA | 1 | 11 | 0 | NA |
| 12 | 118912030 | 119016682 | 1  | NM_207311    | CCDC64    | 0 | NA | 0 | NA | 0 | NA | 0 | NA | 0 | NA |
| 12 | 119038982 | 119017286 | -1 | NM_006861    | RAB35     | 0 | NA | 0 | NA | 0 | NA | 0 | NA | 0 | NA |
| 12 | 119116896 | 119049396 | -1 | NM_006836    | GCN1L1    | 0 | NA | 0 | NA | 0 | NA | 0 | NA | 0 | NA |
| 12 | 119123397 | 119118885 | -1 | NM_001002    | RPLP0     | 0 | NA | 0 | NA | 0 | NA | 0 | NA | 0 | NA |
| 12 | 119123397 | 119118885 | -1 | NM_053275    | RPLP0     | 0 | NA | 0 | NA | 0 | NA | 0 | NA | 0 | NA |
| 12 | 119172340 | 119132632 | -1 | NM_025157    | PXN       | 0 | NA | 0 | NA | 0 | NA | 0 | NA | 0 | NA |
| 12 | 119187946 | 119132632 | -1 | NM_001080855 | PXN       | 1 | 18 | 0 | NA | 0 | NA | 0 | NA | 0 | NA |
| 12 | 119187946 | 119132632 | -1 | NM_002859    | PXN       | 1 | 18 | 0 | NA | 0 | NA | 0 | NA | 0 | NA |
| 12 | 119224545 | 119235428 | 1  | NM_012240    | SIRT4     | 0 | NA | 0 | NA | 0 | NA | 0 | NA | 0 | NA |



|    |           |           |    |              |          |   |    |   |    |   |    |   |    |   |    |
|----|-----------|-----------|----|--------------|----------|---|----|---|----|---|----|---|----|---|----|
| 12 | 119249975 | 119244296 | -1 | NM_000928    | PLA2G1B  | 0 | NA | 0 | NA | 0 | NA | 1 | 16 | 0 | NA |
| 12 | 119291341 | 119263515 | -1 | NM_002442    | MSI1     | 0 | NA | 0 | NA | 0 | NA | 0 | NA | 0 | NA |
| 12 | 119360286 | 119362912 | 1  | NM_004373    | COX6A1   | 1 | 12 | 0 | NA | 1 | 13 | 1 | 16 | 0 | NA |
| 12 | 119368698 | 119366146 | -1 | NM_016399    | TRIAP1   | 0 | NA | 0 | NA | 0 | NA | 0 | NA | 0 | NA |
| 12 | 119368666 | 119382145 | 1  | NM_176818    | GATC     | 0 | NA | 0 | NA | 0 | NA | 0 | NA | 0 | NA |
| 12 | 119391941 | 119383853 | -1 | NM_003769    | SFRS9    | 0 | NA | 0 | NA | 0 | NA | 0 | NA | 0 | NA |
| 12 | 119392042 | 119420681 | 1  | NM_001037494 | DYNLL1   | 0 | NA | 0 | NA | 0 | NA | 0 | NA | 0 | NA |
| 12 | 119418241 | 119420681 | 1  | NM_001037495 | DYNLL1   | 0 | NA | 0 | NA | 0 | NA | 0 | NA | 0 | NA |
| 12 | 119418241 | 119420681 | 1  | NM_003746    | DYNLL1   | 0 | NA | 0 | NA | 0 | NA | 0 | NA | 0 | NA |
| 12 | 119451347 | 119425464 | -1 | NM_032314    | COQ5     | 0 | NA | 0 | NA | 0 | NA | 0 | NA | 0 | NA |
| 12 | 119456514 | 119499780 | 1  | NM_014868    | RNF10    | 0 | NA | 0 | NA | 0 | NA | 0 | NA | 0 | NA |
| 12 | 119503580 | 119501230 | -1 | NM_015918    | POP5     | 0 | NA | 0 | NA | 0 | NA | 0 | NA | 0 | NA |
| 12 | 119503584 | 119501230 | -1 | NM_198202    | POP5     | 0 | NA | 0 | NA | 0 | NA | 0 | NA | 0 | NA |
| 12 | 119562804 | 119589510 | 1  | NM_001033677 | CABP1    | 0 | NA | 1 | 13 | 0 | NA | 1 | 14 | 0 | NA |
| 12 | 119572753 | 119589510 | 1  | NM_004276    | CABP1    | 0 | NA | 1 | 13 | 0 | NA | 1 | 14 | 0 | NA |
| 12 | 119572753 | 119589510 | 1  | NM_031205    | CABP1    | 0 | NA | 1 | 13 | 0 | NA | 1 | 14 | 0 | NA |
| 12 | 119609331 | 119624050 | 1  | NM_014730    | KIAA0152 | 0 | NA | 0 | NA | 0 | NA | 1 | 13 | 0 | NA |
| 12 | 119632213 | 119645826 | 1  | NM_001080533 | UNC119B  | 0 | NA | 0 | NA | 0 | NA | 0 | NA | 0 | NA |
| 12 | 119647953 | 119662194 | 1  | NM_000017    | ACADS    | 0 | NA | 0 | NA | 0 | NA | 0 | NA | 0 | NA |
| 12 | 119826534 | 119685417 | -1 | NM_139015    | SPPL3    | 0 | NA | 0 | NA | 0 | NA | 0 | NA | 0 | NA |
| 12 | 119900931 | 119924697 | 1  | NM_000545    | HNF1A    | 0 | NA | 0 | NA | 0 | NA | 0 | NA | 0 | NA |
| 12 | 119938683 | 119925230 | -1 | NM_022895    | C12orf43 | 0 | NA | 0 | NA | 0 | NA | 0 | NA | 0 | NA |
| 12 | 119961163 | 119942477 | -1 | NM_003733    | OASL     | 0 | NA | 0 | NA | 0 | NA | 0 | NA | 0 | NA |
| 12 | 119961163 | 119942477 | -1 | NM_198213    | OASL     | 0 | NA | 0 | NA | 0 | NA | 0 | NA | 0 | NA |
| 12 | 120055060 | 120108241 | 1  | NM_002562    | P2RX7    | 0 | NA | 0 | NA | 0 | NA | 1 | 12 | 0 | NA |
| 12 | 120132046 | 120156292 | 1  | NM_002560    | P2RX4    | 0 | NA | 0 | NA | 0 | NA | 0 | NA | 0 | NA |
| 12 | 120218888 | 120159877 | -1 | NM_172226    | CAMKK2   | 0 | NA | 0 | NA | 0 | NA | 0 | NA | 0 | NA |
| 12 | 120220494 | 120159877 | -1 | NM_006549    | CAMKK2   | 0 | NA | 0 | NA | 0 | NA | 0 | NA | 0 | NA |
| 12 | 120220494 | 120159877 | -1 | NM_153499    | CAMKK2   | 0 | NA | 0 | NA | 0 | NA | 0 | NA | 0 | NA |
| 12 | 120220494 | 120159877 | -1 | NM_153500    | CAMKK2   | 0 | NA | 0 | NA | 0 | NA | 0 | NA | 0 | NA |
| 12 | 120220494 | 120159877 | -1 | NM_172216    | CAMKK2   | 0 | NA | 0 | NA | 0 | NA | 0 | NA | 0 | NA |
| 12 | 120220494 | 120165773 | -1 | NM_172214    | CAMKK2   | 0 | NA | 0 | NA | 0 | NA | 0 | NA | 0 | NA |
| 12 | 120220494 | 120165773 | -1 | NM_172215    | CAMKK2   | 0 | NA | 0 | NA | 0 | NA | 0 | NA | 0 | NA |
| 12 | 120274585 | 120230542 | -1 | NM_016237    | ANAPC5   | 0 | NA | 0 | NA | 0 | NA | 0 | NA | 0 | NA |
| 12 | 120322284 | 120346538 | 1  | NM_025126    | RNF34    | 0 | NA | 0 | NA | 0 | NA | 0 | NA | 0 | NA |
| 12 | 120322284 | 120346538 | 1  | NM_194271    | RNF34    | 0 | NA | 0 | NA | 0 | NA | 0 | NA | 0 | NA |
| 12 | 120502747 | 120351281 | -1 | NM_001005366 | FBXL10   | 0 | NA | 0 | NA | 1 | 12 | 0 | NA | 0 | NA |
| 12 | 120503272 | 120351281 | -1 | NM_032590    | FBXL10   | 0 | NA | 0 | NA | 1 | 12 | 0 | NA | 0 | NA |
| 12 | 120548837 | 120564329 | 1  | NM_032790    | ORAI1    | 0 | NA | 0 | NA | 1 | 12 | 0 | NA | 0 | NA |
| 12 | 120591943 | 120573675 | -1 | NM_173855    | MORN3    | 0 | NA | 0 | NA | 0 | NA | 0 | NA | 0 | NA |
| 12 | 120635162 | 120698088 | 1  | NM_001080825 | TMEM120B | 0 | NA | 0 | NA | 0 | NA | 0 | NA | 0 | NA |
| 12 | 120715977 | 120700042 | -1 | NM_019034    | RHOF     | 0 | NA | 0 | NA | 0 | NA | 0 | NA | 0 | NA |
| 12 | 120781152 | 120761815 | -1 | NM_002150    | HPD      | 0 | NA | 0 | NA | 0 | NA | 0 | NA | 0 | NA |
| 12 | 120811028 | 120840154 | 1  | NM_002813    | PSMD9    | 1 | 31 | 0 | NA | 0 | NA | 0 | NA | 0 | NA |
| 12 | 120840862 | 120926215 | 1  | NM_144868    | WDR66    | 0 | NA | 0 | NA | 0 | NA | 0 | NA | 0 | NA |
| 12 | 120944243 | 120984333 | 1  | NM_001024808 | BCL7A    | 0 | NA | 0 | NA | 0 | NA | 0 | NA | 0 | NA |
| 12 | 120944243 | 120984333 | 1  | NM_020993    | BCL7A    | 0 | NA | 0 | NA | 0 | NA | 0 | NA | 0 | NA |
| 12 | 121001142 | 121194920 | 1  | NM_014938    | MLXIP    | 0 | NA | 0 | NA | 0 | NA | 0 | NA | 0 | NA |
| 12 | 121218218 | 121253971 | 1  | NM_152759    | LRRC43   | 0 | NA | 0 | NA | 0 | NA | 0 | NA | 0 | NA |
| 12 | 121224699 | 121222529 | -1 | NM_001014336 | IL31     | 0 | NA | 0 | NA | 0 | NA | 0 | NA | 0 | NA |
| 12 | 121233619 | 121253971 | 1  | NM_001098519 | LRRC43   | 0 | NA | 0 | NA | 0 | NA | 0 | NA | 0 | NA |
| 12 | 121254180 | 121258037 | 1  | NM_030765    | B3GNT4   | 0 | NA | 0 | NA | 0 | NA | 0 | NA | 0 | NA |
| 12 | 121276552 | 121258161 | -1 | NM_019887    | DIABLO   | 0 | NA | 0 | NA | 1 | 12 | 0 | NA | 0 | NA |
| 12 | 121276552 | 121258161 | -1 | NM_138929    | DIABLO   | 0 | NA | 0 | NA | 1 | 12 | 0 | NA | 0 | NA |
| 12 | 121276552 | 121258161 | -1 | NM_138930    | DIABLO   | 0 | NA | 0 | NA | 1 | 12 | 0 | NA | 0 | NA |
| 12 | 121317021 | 121282046 | -1 | NM_022916    | VPS33A   | 1 | 22 | 0 | NA | 0 | NA | 0 | NA | 0 | NA |
| 12 | 121473069 | 121321933 | -1 | NM_002956    | CLIP1    | 0 | NA | 0 | NA | 0 | NA | 1 | 12 | 0 | NA |
| 12 | 121473069 | 121321933 | -1 | NM_198240    | CLIP1    | 0 | NA | 0 | NA | 0 | NA | 1 | 12 | 0 | NA |
| 12 | 121551471 | 121523387 | -1 | NM_017612    | ZCCHC8   | 0 | NA | 0 | NA | 0 | NA | 0 | NA | 0 | NA |
| 12 | 121577499 | 121555225 | -1 | NM_023012    | RSRC2    | 0 | NA | 0 | NA | 0 | NA | 0 | NA | 0 | NA |
| 12 | 121577499 | 121555225 | -1 | NM_198261    | RSRC2    | 0 | NA | 0 | NA | 0 | NA | 0 | NA | 0 | NA |
| 12 | 121577500 | 121555225 | -1 | NM_198262    | RSRC2    | 0 | NA | 0 | NA | 0 | NA | 0 | NA | 0 | NA |
| 12 | 121577761 | 121676900 | 1  | NM_014708    | KNTC1    | 0 | NA | 0 | NA | 0 | NA | 0 | NA | 0 | NA |
| 12 | 121753857 | 121751792 | -1 | NM_177551    | GPR109A  | 0 | NA | 0 | NA | 0 | NA | 0 | NA | 0 | NA |
| 12 | 121767392 | 121765255 | -1 | NM_006018    | GPR109B  | 0 | NA | 0 | NA | 0 | NA | 0 | NA | 0 | NA |

|    |           |           |    |              |           |   |    |   |    |   |    |   |    |   |    |
|----|-----------|-----------|----|--------------|-----------|---|----|---|----|---|----|---|----|---|----|
| 12 | 121781082 | 121778105 | -1 | NM_032554    | GPR81     | 1 | 11 | 0 | NA | 0 | NA | 0 | NA | 0 | NA |
| 12 | 121803323 | 121821906 | 1  | NM_003677    | DENR      | 1 | 14 | 0 | NA | 0 | NA | 0 | NA | 0 | NA |
| 12 | 121825025 | 121877710 | 1  | NM_201435    | CCDC62    | 0 | NA | 0 | NA | 0 | NA | 0 | NA | 0 | NA |
| 12 | 121825025 | 121877894 | 1  | NM_032573    | CCDC62    | 0 | NA | 0 | NA | 0 | NA | 0 | NA | 0 | NA |
| 12 | 121885991 | 121913460 | 1  | NM_003959    | HIP1R     | 0 | NA | 0 | NA | 0 | NA | 0 | NA | 0 | NA |
| 12 | 121946665 | 121915834 | -1 | NM_024667    | VPS37B    | 0 | NA | 1 | 13 | 0 | NA | 0 | NA | 0 | NA |
| 12 | 122017009 | 121979491 | -1 | NM_019624    | ABCB9     | 0 | NA | 0 | NA | 0 | NA | 0 | NA | 0 | NA |
| 12 | 122017009 | 121979491 | -1 | NM_019625    | ABCB9     | 0 | NA | 0 | NA | 0 | NA | 0 | NA | 0 | NA |
| 12 | 122025306 | 122030541 | 1  | NM_024623    | OGFOD2    | 0 | NA | 0 | NA | 0 | NA | 0 | NA | 0 | NA |
| 12 | 122025705 | 121979491 | -1 | NM_203444    | ABCB9     | 0 | NA | 0 | NA | 0 | NA | 0 | NA | 0 | NA |
| 12 | 122030832 | 122033413 | 1  | NM_001002251 | ARL6IP4   | 0 | NA | 0 | NA | 0 | NA | 0 | NA | 0 | NA |
| 12 | 122030832 | 122033413 | 1  | NM_001002252 | ARL6IP4   | 0 | NA | 0 | NA | 0 | NA | 0 | NA | 0 | NA |
| 12 | 122030832 | 122033413 | 1  | NM_016638    | ARL6IP4   | 0 | NA | 0 | NA | 0 | NA | 0 | NA | 0 | NA |
| 12 | 122030832 | 122033413 | 1  | NM_018694    | ARL6IP4   | 0 | NA | 0 | NA | 0 | NA | 0 | NA | 0 | NA |
| 12 | 122160928 | 122033979 | -1 | NM_020845    | PITPNM2   | 0 | NA | 0 | NA | 0 | NA | 0 | NA | 0 | NA |
| 12 | 122272394 | 122206896 | -1 | NM_022782    | MPHOSPH9  | 0 | NA | 0 | NA | 0 | NA | 0 | NA | 0 | NA |
| 12 | 122283415 | 122308459 | 1  | NM_152269    | C12orf65  | 0 | NA | 0 | NA | 0 | NA | 0 | NA | 0 | NA |
| 12 | 122322640 | 122311492 | -1 | NM_004642    | CDK2AP1   | 1 | 11 | 0 | NA | 0 | NA | 0 | NA | 0 | NA |
| 12 | 122400941 | 122346407 | -1 | NM_018183    | SBNO1     | 0 | NA | 0 | NA | 0 | NA | 0 | NA | 0 | NA |
| 12 | 122434656 | 122459853 | 1  | NM_020382    | SETD8     | 0 | NA | 0 | NA | 0 | NA | 1 | 12 | 0 | NA |
| 12 | 122487217 | 122465888 | -1 | NM_145058    | RILPL2    | 0 | NA | 0 | NA | 0 | NA | 0 | NA | 0 | NA |
| 12 | 122508603 | 122516890 | 1  | NM_022717    | U1SNRNPBP | 1 | 11 | 0 | NA | 0 | NA | 0 | NA | 0 | NA |
| 12 | 122508603 | 122516890 | 1  | NM_180699    | U1SNRNPBP | 1 | 11 | 0 | NA | 0 | NA | 0 | NA | 0 | NA |
| 12 | 122508603 | 122516894 | 1  | NM_180703    | U1SNRNPBP | 1 | 11 | 0 | NA | 0 | NA | 0 | NA | 0 | NA |
| 12 | 122584453 | 122522315 | -1 | NM_178314    | RILPL1    | 0 | NA | 0 | NA | 0 | NA | 0 | NA | 0 | NA |
| 12 | 122635028 | 122648641 | 1  | NM_006815    | TMED2     | 0 | NA | 0 | NA | 1 | 13 | 0 | NA | 0 | NA |
| 12 | 122652624 | 122671435 | 1  | NM_020936    | DDX55     | 0 | NA | 0 | NA | 0 | NA | 0 | NA | 0 | NA |
| 12 | 122684200 | 122671522 | -1 | NM_001414    | EIF2B1    | 1 | 22 | 0 | NA | 0 | NA | 0 | NA | 0 | NA |
| 12 | 122684333 | 122711287 | 1  | NM_001516    | GTF2H3    | 1 | 22 | 0 | NA | 0 | NA | 0 | NA | 0 | NA |
| 12 | 122721643 | 122758901 | 1  | NM_024809    | TCTN2     | 0 | NA | 0 | NA | 0 | NA | 0 | NA | 0 | NA |
| 12 | 122762817 | 122810393 | 1  | NM_012463    | ATP6V0A2  | 0 | NA | 0 | NA | 0 | NA | 0 | NA | 0 | NA |
| 12 | 122812994 | 122986220 | 1  | NM_001083900 | DNAH10    | 0 | NA | 0 | NA | 0 | NA | 0 | NA | 0 | NA |
| 12 | 122831603 | 122864757 | 1  | NM_207437    | DNAH10    | 0 | NA | 1 | 12 | 0 | NA | 0 | NA | 0 | NA |
| 12 | 123023116 | 122986907 | -1 | NM_025140    | CCDC92    | 0 | NA | 0 | NA | 0 | NA | 0 | NA | 0 | NA |
| 12 | 123023622 | 123065922 | 1  | NM_152437    | ZNF664    | 0 | NA | 0 | NA | 0 | NA | 0 | NA | 0 | NA |
| 12 | 123339662 | 123366521 | 1  | NM_181709    | FAM101A   | 1 | 14 | 1 | 14 | 0 | NA | 0 | NA | 1 | 14 |
| 12 | 123586102 | 123374913 | -1 | NM_001077261 | NCOR2     | 1 | 14 | 0 | NA | 0 | NA | 0 | NA | 0 | NA |
| 12 | 123586102 | 123374913 | -1 | NM_006312    | NCOR2     | 1 | 14 | 0 | NA | 0 | NA | 0 | NA | 0 | NA |
| 12 | 123914472 | 123828126 | -1 | NM_001082959 | SCARB1    | 0 | NA | 0 | NA | 1 | 12 | 0 | NA | 0 | NA |
| 12 | 123914472 | 123828126 | -1 | NM_005505    | SCARB1    | 0 | NA | 0 | NA | 1 | 12 | 0 | NA | 0 | NA |
| 12 | 123965530 | 123962144 | -1 | NM_021009    | UBC       | 1 | 24 | 0 | NA | 1 | 13 | 1 | 11 | 0 | NA |
| 12 | 124039620 | 123997324 | -1 | NM_032656    | DHX37     | 0 | NA | 0 | NA | 0 | NA | 0 | NA | 0 | NA |
| 12 | 124044146 | 124076302 | 1  | NM_080626    | BRI3BP    | 0 | NA | 0 | NA | 0 | NA | 0 | NA | 0 | NA |
| 12 | 124115877 | 124193824 | 1  | NM_023928    | AACS      | 0 | NA | 0 | NA | 0 | NA | 0 | NA | 0 | NA |
| 12 | 124377114 | 124709542 | 1  | NM_052907    | TMEM132B  | 0 | NA | 0 | NA | 0 | NA | 0 | NA | 0 | NA |
| 12 | 127874494 | 127843715 | -1 | NM_145648    | SLC15A4   | 0 | NA | 0 | NA | 0 | NA | 0 | NA | 0 | NA |
| 12 | 127904033 | 128035462 | 1  | NM_144669    | GLT1D1    | 0 | NA | 1 | 14 | 0 | NA | 0 | NA | 0 | NA |
| 12 | 128954165 | 128122223 | -1 | NM_133448    | TMEM132D  | 0 | NA | 0 | NA | 0 | NA | 0 | NA | 0 | NA |
| 12 | 129212984 | 129216238 | 1  | NM_007197    | FZD10     | 0 | NA | 0 | NA | 0 | NA | 0 | NA | 0 | NA |
| 12 | 129388566 | 129422826 | 1  | NM_004764    | PIWIL1    | 0 | NA | 0 | NA | 0 | NA | 0 | NA | 0 | NA |
| 12 | 129568363 | 129446633 | -1 | NM_015347    | RIMBP2    | 0 | NA | 0 | NA | 0 | NA | 0 | NA | 0 | NA |
| 12 | 129889764 | 129840099 | -1 | NM_001980    | STX2      | 0 | NA | 0 | NA | 1 | 13 | 0 | NA | 0 | NA |
| 12 | 129889764 | 129840099 | -1 | NM_194356    | STX2      | 0 | NA | 0 | NA | 1 | 13 | 0 | NA | 0 | NA |
| 12 | 129922520 | 129927316 | 1  | NM_006325    | RAN       | 0 | NA | 0 | NA | 0 | NA | 0 | NA | 0 | NA |
| 12 | 130004789 | 130189786 | 1  | NM_198827    | GPR133    | 0 | NA | 1 | 12 | 0 | NA | 0 | NA | 1 | 12 |
| 12 | 130761587 | 130850235 | 1  | NM_004592    | SFRS8     | 0 | NA | 0 | NA | 0 | NA | 0 | NA | 1 | 13 |
| 12 | 130878893 | 130902269 | 1  | NM_016155    | MMP17     | 0 | NA | 0 | NA | 0 | NA | 0 | NA | 0 | NA |
| 12 | 130945231 | 130973649 | 1  | NM_003565    | ULK1      | 0 | NA | 0 | NA | 0 | NA | 0 | NA | 0 | NA |
| 12 | 130979741 | 130994357 | 1  | NM_001002019 | PUS1      | 0 | NA | 0 | NA | 0 | NA | 0 | NA | 0 | NA |
| 12 | 130979741 | 130994357 | 1  | NM_001002020 | PUS1      | 0 | NA | 0 | NA | 0 | NA | 0 | NA | 0 | NA |
| 12 | 130979741 | 130994357 | 1  | NM_025215    | PUS1      | 0 | NA | 0 | NA | 0 | NA | 0 | NA | 0 | NA |
| 12 | 131000460 | 131130958 | 1  | NM_015409    | EP400     | 0 | NA | 0 | NA | 0 | NA | 0 | NA | 0 | NA |
| 12 | 131194833 | 131187092 | -1 | NM_175066    | DDX51     | 0 | NA | 0 | NA | 0 | NA | 0 | NA | 0 | NA |
| 12 | 131194945 | 131202939 | 1  | NM_024078    | NOCL4     | 0 | NA | 0 | NA | 0 | NA | 0 | NA | 0 | NA |
| 12 | 131256526 | 131246869 | -1 | NM_021808    | GALNT9    | 0 | NA | 1 | 12 | 0 | NA | 0 | NA | 0 | NA |

|    |           |           |    |              |           |   |    |   |    |   |    |   |    |   |    |
|----|-----------|-----------|----|--------------|-----------|---|----|---|----|---|----|---|----|---|----|
| 12 | 131415978 | 131246869 | -1 | NM_001122636 | GALNT9    | 0 | NA | 1 | 14 | 0 | NA | 0 | NA | 1 | 14 |
| 12 | 131705475 | 131709045 | 1  | NM_012226    | P2RX2     | 0 | NA | 1 | 14 | 0 | NA | 0 | NA | 1 | 13 |
| 12 | 131705475 | 131709045 | 1  | NM_016318    | P2RX2     | 0 | NA | 1 | 14 | 0 | NA | 0 | NA | 1 | 13 |
| 12 | 131705475 | 131709045 | 1  | NM_170682    | P2RX2     | 0 | NA | 1 | 14 | 0 | NA | 0 | NA | 1 | 13 |
| 12 | 131705475 | 131709045 | 1  | NM_170683    | P2RX2     | 0 | NA | 1 | 14 | 0 | NA | 0 | NA | 1 | 13 |
| 12 | 131705475 | 131709045 | 1  | NM_174872    | P2RX2     | 0 | NA | 1 | 14 | 0 | NA | 0 | NA | 1 | 13 |
| 12 | 131705475 | 131709045 | 1  | NM_174873    | P2RX2     | 0 | NA | 1 | 14 | 0 | NA | 0 | NA | 1 | 13 |
| 12 | 131774018 | 131710420 | -1 | NM_006231    | POLE      | 0 | NA | 0 | NA | 0 | NA | 0 | NA | 0 | NA |
| 12 | 131774264 | 131791650 | 1  | NM_018663    | PXMP2     | 0 | NA | 0 | NA | 0 | NA | 0 | NA | 0 | NA |
| 12 | 131797508 | 131805825 | 1  | NM_138575    | PGAM5     | 0 | NA | 0 | NA | 0 | NA | 0 | NA | 0 | NA |
| 12 | 131848524 | 131812326 | -1 | NM_015114    | ANKLE2    | 0 | NA | 0 | NA | 0 | NA | 0 | NA | 0 | NA |
| 12 | 131915361 | 131855567 | -1 | NM_005895    | GOLGA3    | 1 | 35 | 0 | NA | 0 | NA | 0 | NA | 0 | NA |
| 12 | 131974257 | 131927010 | -1 | NM_018223    | CHFR      | 0 | NA | 0 | NA | 1 | 14 | 0 | NA | 0 | NA |
| 12 | 132042941 | 132008119 | -1 | NM_183238    | ZNF605    | 1 | 12 | 1 | 14 | 0 | NA | 0 | NA | 0 | NA |
| 12 | 132073128 | 132099226 | 0  | NM_019591    | ZNF26     | 0 | NA | 0 | NA | 0 | NA | 0 | NA | 0 | NA |
| 12 | 132124240 | 132146261 | 1  | NM_003428    | ZNF84     | 1 | 15 | 0 | NA | 0 | NA | 0 | NA | 0 | NA |
| 12 | 132167109 | 132194331 | 1  | NM_003440    | ZNF140    | 1 | 14 | 1 | 14 | 0 | NA | 0 | NA | 0 | NA |
| 12 | 132217286 | 132246122 | 1  | NM_015394    | ZNF10     | 1 | 17 | 0 | NA | 0 | NA | 0 | NA | 0 | NA |
| 12 | 132268067 | 132289534 | 1  | NM_003415    | ZNF268    | 1 | 24 | 0 | NA | 0 | NA | 0 | NA | 0 | NA |
| 15 | 18971443  | 18848557  | -1 | NM_001024682 | LOC283755 | 0 | NA | 0 | NA | 0 | NA | 0 | NA | 0 | NA |
| 15 | 19336667  | 19305252  | -1 | NM_207355    | A26B1     | 0 | NA | 0 | NA | 0 | NA | 0 | NA | 0 | NA |
| 15 | 19869939  | 19870881  | 1  | NM_001004719 | OR4M2     | 0 | NA | 0 | NA | 0 | NA | 0 | NA | 0 | NA |
| 15 | 19883836  | 19884787  | 1  | NM_001005241 | OR4N4     | 0 | NA | 0 | NA | 0 | NA | 0 | NA | 0 | NA |
| 15 | 19915065  | 19915749  | 1  | NM_001080841 | LOC650137 | 0 | NA | 0 | NA | 0 | NA | 0 | NA | 0 | NA |
| 15 | 20287609  | 20296164  | 1  | NM_001001413 | LOC283767 | 0 | NA | 0 | NA | 0 | NA | 0 | NA | 0 | NA |
| 15 | 20384835  | 20424224  | 1  | NM_001102610 | TUBGCP5   | 0 | NA | 0 | NA | 0 | NA | 0 | NA | 0 | NA |
| 15 | 20384835  | 20425332  | 1  | NM_052903    | TUBGCP5   | 0 | NA | 0 | NA | 0 | NA | 0 | NA | 0 | NA |
| 15 | 20444124  | 20555044  | 1  | NM_014608    | CYFIP1    | 0 | NA | 0 | NA | 1 | 14 | 0 | NA | 0 | NA |
| 15 | 20507195  | 20555044  | 1  | NM_001033028 | CYFIP1    | 0 | NA | 0 | NA | 0 | NA | 0 | NA | 0 | NA |
| 15 | 20585849  | 20556787  | -1 | NM_001008860 | NIPA2     | 0 | NA | 0 | NA | 0 | NA | 0 | NA | 0 | NA |
| 15 | 20585849  | 20556787  | -1 | NM_001008892 | NIPA2     | 0 | NA | 0 | NA | 0 | NA | 0 | NA | 0 | NA |
| 15 | 20585849  | 20556787  | -1 | NM_001008894 | NIPA2     | 0 | NA | 0 | NA | 0 | NA | 0 | NA | 0 | NA |
| 15 | 20585849  | 20556787  | -1 | NM_030922    | NIPA2     | 0 | NA | 0 | NA | 0 | NA | 0 | NA | 0 | NA |
| 15 | 20637877  | 20594719  | -1 | NM_144599    | NIPA1     | 0 | NA | 0 | NA | 0 | NA | 0 | NA | 0 | NA |
| 15 | 20986536  | 20999860  | 1  | NM_001012423 | GOLGA8E   | 0 | NA | 0 | NA | 0 | NA | 0 | NA | 0 | NA |
| 15 | 21361546  | 21364653  | 1  | NM_005664    | MKRN3     | 0 | NA | 0 | NA | 0 | NA | 0 | NA | 0 | NA |
| 15 | 21442268  | 21439788  | -1 | NM_019066    | MAGEL2    | 0 | NA | 0 | NA | 0 | NA | 1 | 11 | 0 | NA |
| 15 | 21483543  | 21481646  | -1 | NM_002487    | NDN       | 0 | NA | 0 | NA | 0 | NA | 0 | NA | 0 | NA |
| 15 | 22471633  | 22479686  | 1  | NM_018958    | C15orf2   | 0 | NA | 0 | NA | 0 | NA | 0 | NA | 0 | NA |
| 15 | 22619886  | 22774822  | 1  | NM_022806    | SNRPN     | 0 | NA | 0 | NA | 0 | NA | 0 | NA | 0 | NA |
| 15 | 22619886  | 22774822  | 1  | NM_022807    | SNRPN     | 0 | NA | 0 | NA | 0 | NA | 0 | NA | 0 | NA |
| 15 | 22619886  | 22774822  | 1  | NM_022808    | SNRPN     | 0 | NA | 0 | NA | 0 | NA | 0 | NA | 0 | NA |
| 15 | 22652790  | 22774822  | 1  | NM_022805    | SNRPN     | 0 | NA | 0 | NA | 0 | NA | 0 | NA | 0 | NA |
| 15 | 22751162  | 22765069  | 1  | NM_022804    | SNURF     | 0 | NA | 0 | NA | 0 | NA | 0 | NA | 0 | NA |
| 15 | 22751227  | 22774822  | 1  | NM_003097    | SNRPN     | 0 | NA | 0 | NA | 0 | NA | 0 | NA | 0 | NA |
| 15 | 22751227  | 22774822  | 1  | NM_005678    | SNURF     | 0 | NA | 0 | NA | 0 | NA | 0 | NA | 0 | NA |
| 15 | 23201746  | 23133488  | -1 | NM_130838    | UBE3A     | 0 | NA | 0 | NA | 0 | NA | 0 | NA | 0 | NA |
| 15 | 23204888  | 23133488  | -1 | NM_000462    | UBE3A     | 0 | NA | 0 | NA | 0 | NA | 0 | NA | 0 | NA |
| 15 | 23235221  | 23133488  | -1 | NM_130839    | UBE3A     | 0 | NA | 0 | NA | 0 | NA | 0 | NA | 0 | NA |
| 15 | 23659442  | 23474952  | -1 | NM_024490    | ATP10A    | 0 | NA | 0 | NA | 0 | NA | 0 | NA | 0 | NA |
| 15 | 24569344  | 24339786  | -1 | NM_000814    | GABRB3    | 0 | NA | 0 | NA | 0 | NA | 0 | NA | 0 | NA |
| 15 | 24570020  | 24339786  | -1 | NM_021912    | GABRB3    | 0 | NA | 0 | NA | 0 | NA | 0 | NA | 0 | NA |
| 15 | 24663150  | 24776749  | 1  | NM_000810    | GABRA5    | 0 | NA | 0 | NA | 0 | NA | 0 | NA | 0 | NA |
| 15 | 24799262  | 25451729  | 1  | NM_033223    | GABRG3    | 0 | NA | 0 | NA | 0 | NA | 0 | NA | 0 | NA |
| 15 | 26018053  | 25673615  | -1 | NM_000275    | OCA2      | 1 | 12 | 1 | 13 | 1 | 15 | 0 | NA | 0 | NA |
| 15 | 26240890  | 26029782  | -1 | NM_004667    | HERC2     | 0 | NA | 0 | NA | 0 | NA | 0 | NA | 0 | NA |
| 15 | 26297404  | 26310766  | 1  | NM_001012420 | GOLGA8G   | 0 | NA | 0 | NA | 0 | NA | 0 | NA | 0 | NA |
| 15 | 26297459  | 26308821  | 1  | NM_001012452 | FLJ32679  | 0 | NA | 0 | NA | 0 | NA | 0 | NA | 0 | NA |
| 15 | 26577103  | 26565742  | -1 | NM_001012452 | FLJ32679  | 0 | NA | 0 | NA | 0 | NA | 0 | NA | 0 | NA |
| 15 | 26577158  | 26563797  | -1 | NM_001012420 | GOLGA8G   | 0 | NA | 0 | NA | 0 | NA | 0 | NA | 0 | NA |
| 15 | 27001144  | 27197807  | 1  | NM_005503    | APBA2     | 0 | NA | 0 | NA | 0 | NA | 0 | NA | 0 | NA |
| 15 | 27349309  | 27347649  | -1 | NM_138704    | NDNL2     | 0 | NA | 0 | NA | 0 | NA | 0 | NA | 0 | NA |
| 15 | 27650219  | 27199746  | -1 | NM_015307    | KIAA0574  | 0 | NA | 0 | NA | 0 | NA | 0 | NA | 0 | NA |
| 15 | 27901998  | 27779648  | -1 | NM_003257    | TJP1      | 0 | NA | 0 | NA | 0 | NA | 0 | NA | 0 | NA |
| 15 | 27901998  | 27779648  | -1 | NM_175610    | TJP1      | 0 | NA | 0 | NA | 0 | NA | 0 | NA | 0 | NA |

|    |          |          |    |              |           |   |    |   |    |   |    |   |    |   |    |
|----|----------|----------|----|--------------|-----------|---|----|---|----|---|----|---|----|---|----|
| 15 | 28473156 | 28440734 | -1 | NM_139320    | CHRFAM7A  | 0 | NA | 0 | NA | 0 | NA | 0 | NA | 0 | NA |
| 15 | 28473156 | 28440734 | -1 | NM_148911    | CHRFAM7A  | 0 | NA | 0 | NA | 0 | NA | 0 | NA | 0 | NA |
| 15 | 28706170 | 28718305 | 1  | NM_001039841 | ARHGAP11B | 0 | NA | 0 | NA | 0 | NA | 0 | NA | 0 | NA |
| 15 | 28983420 | 29022600 | 1  | NM_014967    | MTMR15    | 1 | 17 | 0 | NA | 1 | 14 | 0 | NA | 0 | NA |
| 15 | 29071099 | 29018435 | -1 | NM_017762    | MTMR10    | 0 | NA | 0 | NA | 0 | NA | 0 | NA | 0 | NA |
| 15 | 29181216 | 29080842 | -1 | NM_002420    | TRPM1     | 0 | NA | 0 | NA | 0 | NA | 0 | NA | 0 | NA |
| 15 | 29406374 | 29457394 | 1  | NM_015995    | KLF13     | 0 | NA | 0 | NA | 0 | NA | 0 | NA | 1 | 12 |
| 15 | 29734834 | 29562620 | -1 | NM_130901    | OTUD7A    | 0 | NA | 0 | NA | 0 | NA | 0 | NA | 0 | NA |
| 15 | 30110017 | 30248527 | 1  | NM_000746    | CHRNA7    | 0 | NA | 0 | NA | 0 | NA | 0 | NA | 0 | NA |
| 15 | 30694982 | 30715674 | 1  | NM_199357    | ARHGAP11A | 0 | NA | 0 | NA | 0 | NA | 0 | NA | 0 | NA |
| 15 | 30694982 | 30719160 | 1  | NM_014783    | ARHGAP11A | 0 | NA | 0 | NA | 0 | NA | 0 | NA | 0 | NA |
| 15 | 30721251 | 30776590 | 1  | NM_003020    | SCG5      | 0 | NA | 0 | NA | 0 | NA | 0 | NA | 0 | NA |
| 15 | 30797496 | 30814158 | 1  | NM_013372    | GREM1     | 0 | NA | 1 | 13 | 0 | NA | 0 | NA | 0 | NA |
| 15 | 31147377 | 30853636 | -1 | NM_001103184 | FMN1      | 0 | NA | 0 | NA | 0 | NA | 0 | NA | 0 | NA |
| 15 | 31390468 | 31945595 | 1  | NM_001036    | RYR3      | 0 | NA | 0 | NA | 0 | NA | 0 | NA | 0 | NA |
| 15 | 32097719 | 32144579 | 1  | NM_012125    | CHRM5     | 0 | NA | 0 | NA | 0 | NA | 0 | NA | 0 | NA |
| 15 | 32118595 | 31945719 | -1 | NM_020371    | AVEN      | 1 | 19 | 0 | NA | 0 | NA | 1 | 15 | 0 | NA |
| 15 | 32181345 | 32163515 | -1 | NM_020154    | C15orf24  | 0 | NA | 0 | NA | 1 | 12 | 1 | 17 | 0 | NA |
| 15 | 32181565 | 32183883 | 1  | NM_152595    | PGBD4     | 0 | NA | 0 | NA | 1 | 12 | 1 | 17 | 0 | NA |
| 15 | 32289515 | 32220166 | -1 | NM_024713    | C15orf29  | 1 | 12 | 0 | NA | 0 | NA | 0 | NA | 0 | NA |
| 15 | 32304536 | 32309644 | 1  | NM_016454    | TMEM85    | 1 | 14 | 0 | NA | 0 | NA | 0 | NA | 0 | NA |
| 15 | 32398313 | 32309488 | -1 | NM_005135    | SLC12A6   | 0 | NA | 0 | NA | 0 | NA | 0 | NA | 0 | NA |
| 15 | 32416337 | 32309488 | -1 | NM_001042497 | SLC12A6   | 0 | NA | 0 | NA | 0 | NA | 0 | NA | 0 | NA |
| 15 | 32416337 | 32309488 | -1 | NM_133647    | SLC12A6   | 0 | NA | 0 | NA | 0 | NA | 0 | NA | 0 | NA |
| 15 | 32417253 | 32309488 | -1 | NM_001042494 | SLC12A6   | 0 | NA | 0 | NA | 0 | NA | 0 | NA | 0 | NA |
| 15 | 32417253 | 32309488 | -1 | NM_001042496 | SLC12A6   | 0 | NA | 0 | NA | 0 | NA | 0 | NA | 0 | NA |
| 15 | 32417557 | 32309488 | -1 | NM_001042495 | SLC12A6   | 0 | NA | 0 | NA | 0 | NA | 0 | NA | 0 | NA |
| 15 | 32422654 | 32421208 | -1 | NM_018648    | NOLA3     | 0 | NA | 0 | NA | 0 | NA | 0 | NA | 0 | NA |
| 15 | 32425357 | 32437223 | 1  | NM_175741    | C15orf55  | 0 | NA | 0 | NA | 0 | NA | 0 | NA | 0 | NA |
| 15 | 32446687 | 32438380 | -1 | NM_153613    | AGPAT7    | 0 | NA | 0 | NA | 0 | NA | 0 | NA | 0 | NA |
| 15 | 32487180 | 32458561 | -1 | NM_181077    | GOLGA8A   | 0 | NA | 0 | NA | 0 | NA | 0 | NA | 0 | NA |
| 15 | 32613203 | 32604591 | -1 | NM_001023567 | GOLGA8B   | 0 | NA | 0 | NA | 0 | NA | 0 | NA | 0 | NA |
| 15 | 32833981 | 32831970 | -1 | NM_020660    | GJD2      | 0 | NA | 0 | NA | 0 | NA | 0 | NA | 0 | NA |
| 15 | 32875219 | 32867588 | -1 | NM_005159    | ACTC1     | 0 | NA | 0 | NA | 0 | NA | 0 | NA | 0 | NA |
| 15 | 33022541 | 33022953 | 1  | NM_001101383 | LOC643007 | 0 | NA | 0 | NA | 0 | NA | 0 | NA | 0 | NA |
| 15 | 33049287 | 32955843 | -1 | NM_014691    | AQR       | 0 | NA | 0 | NA | 0 | NA | 0 | NA | 0 | NA |
| 15 | 33067746 | 33057835 | -1 | NM_014106    | ZNF770    | 0 | NA | 0 | NA | 0 | NA | 0 | NA | 0 | NA |
| 15 | 33625656 | 33450374 | -1 | NM_080650    | ATPBD4    | 0 | NA | 0 | NA | 0 | NA | 0 | NA | 0 | NA |
| 15 | 34674386 | 34889739 | 1  | NM_032499    | C15orf41  | 0 | NA | 0 | NA | 0 | NA | 0 | NA | 0 | NA |
| 15 | 35177795 | 34970523 | -1 | NM_172315    | MEIS2     | 1 | 12 | 0 | NA | 0 | NA | 1 | 13 | 0 | NA |
| 15 | 35178889 | 34970523 | -1 | NM_172316    | MEIS2     | 1 | 12 | 0 | NA | 0 | NA | 1 | 13 | 0 | NA |
| 15 | 35179996 | 34970523 | -1 | NM_170674    | MEIS2     | 1 | 12 | 0 | NA | 0 | NA | 1 | 13 | 0 | NA |
| 15 | 35179996 | 34970523 | -1 | NM_170675    | MEIS2     | 1 | 12 | 0 | NA | 0 | NA | 1 | 13 | 0 | NA |
| 15 | 35179996 | 34970523 | -1 | NM_170676    | MEIS2     | 1 | 12 | 0 | NA | 0 | NA | 1 | 13 | 0 | NA |
| 15 | 35179996 | 34970523 | -1 | NM_170677    | MEIS2     | 1 | 12 | 0 | NA | 0 | NA | 1 | 13 | 0 | NA |
| 15 | 35180792 | 34970523 | -1 | NM_002399    | MEIS2     | 1 | 12 | 0 | NA | 0 | NA | 1 | 13 | 0 | NA |
| 15 | 36014748 | 36030915 | 1  | NM_152453    | TMCO5     | 0 | NA | 0 | NA | 0 | NA | 0 | NA | 0 | NA |
| 15 | 36332343 | 36436742 | 1  | NM_152594    | SPRED1    | 0 | NA | 0 | NA | 1 | 17 | 0 | NA | 0 | NA |
| 15 | 36533619 | 36561121 | 1  | NM_001042429 | FAM98B    | 0 | NA | 0 | NA | 0 | NA | 0 | NA | 0 | NA |
| 15 | 36533619 | 36564355 | 1  | NM_173611    | FAM98B    | 0 | NA | 0 | NA | 0 | NA | 0 | NA | 0 | NA |
| 15 | 36644224 | 36567595 | -1 | NM_005739    | RASGRP1   | 0 | NA | 0 | NA | 0 | NA | 0 | NA | 0 | NA |
| 15 | 36776090 | 36779531 | 1  | NM_207444    | C15orf53  | 0 | NA | 0 | NA | 0 | NA | 0 | NA | 0 | NA |
| 15 | 37330210 | 37334340 | 1  | NM_207445    | C15orf54  | 0 | NA | 0 | NA | 0 | NA | 0 | NA | 0 | NA |
| 15 | 37660571 | 37676960 | 1  | NM_003246    | THBS1     | 0 | NA | 0 | NA | 0 | NA | 0 | NA | 0 | NA |
| 15 | 37862331 | 37679523 | -1 | NM_152597    | FSIP1     | 1 | 14 | 0 | NA | 0 | NA | 0 | NA | 0 | NA |
| 15 | 38000385 | 37880222 | -1 | NM_007223    | GPR176    | 1 | 14 | 0 | NA | 0 | NA | 0 | NA | 0 | NA |
| 15 | 38013638 | 38115089 | 1  | NM_001013703 | E1F2AK4   | 1 | 14 | 0 | NA | 0 | NA | 0 | NA | 0 | NA |
| 15 | 38118681 | 38115182 | -1 | NM_003134    | SRP14     | 0 | NA | 0 | NA | 0 | NA | 0 | NA | 0 | NA |
| 15 | 38185579 | 38167382 | -1 | NM_001003942 | BMF       | 1 | 11 | 0 | NA | 0 | NA | 1 | 15 | 0 | NA |
| 15 | 38185579 | 38167382 | -1 | NM_001003943 | BMF       | 1 | 11 | 0 | NA | 0 | NA | 1 | 15 | 0 | NA |
| 15 | 38185931 | 38167382 | -1 | NM_033503    | BMF       | 1 | 11 | 0 | NA | 0 | NA | 1 | 15 | 0 | NA |
| 15 | 38188367 | 38167382 | -1 | NM_001003940 | BMF       | 1 | 11 | 0 | NA | 0 | NA | 1 | 15 | 0 | NA |
| 15 | 38240501 | 38300629 | 1  | NM_001211    | BUB1B     | 0 | NA | 0 | NA | 0 | NA | 0 | NA | 0 | NA |
| 15 | 38319367 | 38356979 | 1  | NM_020168    | PAK6      | 0 | NA | 0 | NA | 0 | NA | 0 | NA | 0 | NA |
| 15 | 38332402 | 38330159 | -1 | NM_001039905 | C15orf56  | 0 | NA | 0 | NA | 0 | NA | 0 | NA | 0 | NA |

|    |          |          |    |              |                      |   |    |   |    |   |    |   |    |   |    |
|----|----------|----------|----|--------------|----------------------|---|----|---|----|---|----|---|----|---|----|
| 15 | 38387466 | 38367389 | -1 | NM_004573    | PLCB2                | 0 | NA | 0 | NA | 0 | NA | 0 | NA | 0 | NA |
| 15 | 38420460 | 38410944 | -1 | NM_207380    | C15orf52             | 0 | NA | 0 | NA | 0 | NA | 0 | NA | 0 | NA |
| 15 | 38437725 | 38450548 | 1  | NM_033510    | DISP2                | 0 | NA | 0 | NA | 0 | NA | 0 | NA | 0 | NA |
| 15 | 38462284 | 38473299 | 1  | NM_033286    | C15orf23             | 0 | NA | 0 | NA | 0 | NA | 0 | NA | 0 | NA |
| 15 | 38484977 | 38498355 | 1  | NM_002225    | IVD                  | 0 | NA | 0 | NA | 0 | NA | 0 | NA | 0 | NA |
| 15 | 38520702 | 38547733 | 1  | NM_014952    | BAHD1                | 0 | NA | 0 | NA | 0 | NA | 0 | NA | 0 | NA |
| 15 | 38550504 | 38552646 | 1  | NM_130468    | CHST14               | 0 | NA | 0 | NA | 0 | NA | 0 | NA | 0 | NA |
| 15 | 38644544 | 38632589 | -1 | NM_001080791 | CCDC32               | 1 | 12 | 0 | NA | 0 | NA | 0 | NA | 0 | NA |
| 15 | 38644544 | 38632589 | -1 | NM_001080792 | CCDC32               | 1 | 12 | 0 | NA | 0 | NA | 0 | NA | 0 | NA |
| 15 | 38644544 | 38632589 | -1 | NM_052849    | CCDC32               | 1 | 12 | 0 | NA | 0 | NA | 0 | NA | 0 | NA |
| 15 | 38648828 | 38653953 | 1  | NM_152260    | RPUSD2               | 1 | 12 | 0 | NA | 0 | NA | 0 | NA | 0 | NA |
| 15 | 38673738 | 38742173 | 1  | NM_144508    | CASC5                | 0 | NA | 0 | NA | 0 | NA | 0 | NA | 0 | NA |
| 15 | 38673738 | 38742173 | 1  | NM_170589    | CASC5                | 0 | NA | 0 | NA | 0 | NA | 0 | NA | 0 | NA |
| 15 | 38774650 | 38811648 | 1  | NM_002875    | RAD51                | 0 | NA | 0 | NA | 0 | NA | 0 | NA | 0 | NA |
| 15 | 38774650 | 38811648 | 1  | NM_133487    | RAD51                | 0 | NA | 0 | NA | 0 | NA | 0 | NA | 0 | NA |
| 15 | 38834750 | 38815377 | -1 | NM_018145    | FAM82C               | 0 | NA | 0 | NA | 0 | NA | 0 | NA | 0 | NA |
| 15 | 38843576 | 38847203 | 1  | NM_005258    | GCHFR                | 0 | NA | 0 | NA | 0 | NA | 0 | NA | 0 | NA |
| 15 | 38886565 | 38894059 | 1  | NM_001077268 | ZFYVE19              | 0 | NA | 0 | NA | 1 | 12 | 0 | NA | 0 | NA |
| 15 | 38886947 | 38847362 | -1 | NM_018163    | DNAJC17              | 0 | NA | 0 | NA | 1 | 12 | 0 | NA | 0 | NA |
| 15 | 38908199 | 38894942 | -1 | NM_017726    | PPP1R14D             | 0 | NA | 0 | NA | 0 | NA | 0 | NA | 0 | NA |
| 15 | 38923537 | 38937145 | 1  | NM_003710    | SPINT1               | 0 | NA | 0 | NA | 0 | NA | 0 | NA | 0 | NA |
| 15 | 38923537 | 38937145 | 1  | NM_181642    | SPINT1               | 0 | NA | 0 | NA | 0 | NA | 0 | NA | 0 | NA |
| 15 | 38923934 | 38937145 | 1  | NM_001032367 | SPINT1               | 0 | NA | 0 | NA | 0 | NA | 0 | NA | 0 | NA |
| 15 | 38953731 | 38952193 | -1 | NM_133639    | RHOV                 | 0 | NA | 0 | NA | 0 | NA | 0 | NA | 0 | NA |
| 15 | 38973919 | 38983465 | 1  | NM_020857    | VPS18                | 0 | NA | 0 | NA | 0 | NA | 0 | NA | 0 | NA |
| 15 | 39008838 | 39018529 | 1  | NM_019074    | DLL4                 | 0 | NA | 0 | NA | 0 | NA | 0 | NA | 0 | NA |
| 15 | 39032982 | 39036002 | 1  | NM_024111    | CHAC1                | 0 | NA | 0 | NA | 0 | NA | 0 | NA | 0 | NA |
| 15 | 39195632 | 39058370 | -1 | NM_017553    | INOC1                | 0 | NA | 0 | NA | 0 | NA | 0 | NA | 0 | NA |
| 15 | 39310187 | 39262222 | -1 | NM_152596    | EXDL1                | 1 | 12 | 0 | NA | 0 | NA | 1 | 20 | 0 | NA |
| 15 | 39310728 | 39361375 | 1  | NM_007236    | CHP                  | 1 | 12 | 0 | NA | 0 | NA | 1 | 20 | 0 | NA |
| 15 | 39412111 | 39388757 | -1 | NM_007280    | OIP5                 | 0 | NA | 0 | NA | 0 | NA | 1 | 14 | 0 | NA |
| 15 | 39412360 | 39460538 | 1  | NM_016359    | NUSAP1               | 0 | NA | 0 | NA | 0 | NA | 1 | 14 | 0 | NA |
| 15 | 39412360 | 39460538 | 1  | NM_018454    | NUSAP1               | 0 | NA | 0 | NA | 0 | NA | 1 | 14 | 0 | NA |
| 15 | 39481934 | 39466842 | -1 | NM_016013    | NDUFAP1              | 0 | NA | 0 | NA | 0 | NA | 0 | NA | 0 | NA |
| 15 | 39496607 | 39563048 | 1  | NM_015138    | RTF1                 | 0 | NA | 0 | NA | 0 | NA | 0 | NA | 0 | NA |
| 15 | 39573413 | 39583039 | 1  | NM_002220    | ITPKA                | 0 | NA | 0 | NA | 0 | NA | 0 | NA | 0 | NA |
| 15 | 39593791 | 39583131 | -1 | NM_002344    | LTK                  | 0 | NA | 0 | NA | 0 | NA | 0 | NA | 0 | NA |
| 15 | 39593791 | 39583131 | -1 | NM_206961    | LTK                  | 0 | NA | 0 | NA | 0 | NA | 0 | NA | 0 | NA |
| 15 | 39623756 | 39596666 | -1 | NM_015540    | RPAP1                | 0 | NA | 0 | NA | 1 | 14 | 0 | NA | 0 | NA |
| 15 | 39638523 | 39658818 | 1  | NM_006293    | TYRO3                | 0 | NA | 0 | NA | 0 | NA | 0 | NA | 0 | NA |
| 15 | 39739901 | 39849433 | 1  | NM_001080541 | MGA                  | 1 | 12 | 0 | NA | 1 | 14 | 0 | NA | 0 | NA |
| 15 | 39854003 | 39907345 | 1  | NM_014994    | MAPKBP1              | 0 | NA | 0 | NA | 0 | NA | 0 | NA | 0 | NA |
| 15 | 39907574 | 39917077 | 1  | NM_001114632 | LOC100137047         | 0 | NA | 0 | NA | 0 | NA | 0 | NA | 0 | NA |
| 15 | 39907574 | 39927638 | 1  | NM_005090    | LOC100137047-PLA2G4B | 0 | NA | 0 | NA | 0 | NA | 0 | NA | 0 | NA |
| 15 | 39918302 | 39927638 | 1  | NM_001114633 | PLA2G4B              | 0 | NA | 0 | NA | 0 | NA | 0 | NA | 0 | NA |
| 15 | 39973567 | 39927635 | -1 | NM_016642    | SPTBN5               | 0 | NA | 0 | NA | 0 | NA | 0 | NA | 0 | NA |
| 15 | 40052034 | 39978930 | -1 | NM_139265    | EHD4                 | 0 | NA | 0 | NA | 0 | NA | 0 | NA | 0 | NA |
| 15 | 40089737 | 40063243 | -1 | NM_001080490 | PLA2G4E              | 0 | NA | 0 | NA | 0 | NA | 0 | NA | 0 | NA |
| 15 | 40174044 | 40147172 | -1 | NM_178034    | PLA2G4D              | 0 | NA | 0 | NA | 0 | NA | 0 | NA | 0 | NA |
| 15 | 40236102 | 40220688 | -1 | NM_213600    | PLA2G4F              | 0 | NA | 0 | NA | 0 | NA | 0 | NA | 0 | NA |
| 15 | 40287794 | 40238190 | -1 | NM_015289    | VPS39                | 0 | NA | 0 | NA | 0 | NA | 0 | NA | 0 | NA |
| 15 | 40353047 | 40290017 | -1 | NM_015497    | TMEM87A              | 1 | 22 | 0 | NA | 1 | 14 | 0 | NA | 0 | NA |
| 15 | 40353047 | 40337427 | -1 | NM_001110503 | TMEM87A              | 1 | 22 | 0 | NA | 1 | 14 | 0 | NA | 0 | NA |
| 15 | 40353657 | 40433156 | 1  | NM_198141    | GANC                 | 1 | 22 | 0 | NA | 1 | 14 | 0 | NA | 0 | NA |
| 15 | 40427592 | 40491807 | 1  | NM_212464    | CAPN3                | 0 | NA | 0 | NA | 0 | NA | 0 | NA | 0 | NA |
| 15 | 40427592 | 40491807 | 1  | NM_212465    | CAPN3                | 0 | NA | 0 | NA | 0 | NA | 0 | NA | 0 | NA |
| 15 | 40427592 | 40491807 | 1  | NM_212467    | CAPN3                | 0 | NA | 0 | NA | 0 | NA | 0 | NA | 0 | NA |
| 15 | 40438989 | 40491807 | 1  | NM_000070    | CAPN3                | 0 | NA | 0 | NA | 0 | NA | 0 | NA | 0 | NA |
| 15 | 40438989 | 40491807 | 1  | NM_024344    | CAPN3                | 0 | NA | 0 | NA | 0 | NA | 0 | NA | 0 | NA |
| 15 | 40438989 | 40491807 | 1  | NM_173087    | CAPN3                | 0 | NA | 0 | NA | 0 | NA | 0 | NA | 0 | NA |
| 15 | 40481879 | 40491807 | 1  | NM_173088    | CAPN3                | 0 | NA | 0 | NA | 0 | NA | 0 | NA | 0 | NA |
| 15 | 40484268 | 40491807 | 1  | NM_173089    | CAPN3                | 0 | NA | 0 | NA | 0 | NA | 0 | NA | 0 | NA |
| 15 | 40484268 | 40491807 | 1  | NM_173090    | CAPN3                | 0 | NA | 0 | NA | 0 | NA | 0 | NA | 0 | NA |
| 15 | 40537022 | 40492312 | -1 | NM_022473    | ZFP106               | 0 | NA | 0 | NA | 0 | NA | 0 | NA | 0 | NA |
| 15 | 40575126 | 40612548 | 1  | NM_003825    | SNAP23               | 0 | NA | 0 | NA | 0 | NA | 0 | NA | 0 | NA |

|    |          |          |    |              |          |   |    |   |    |   |    |   |    |   |    |
|----|----------|----------|----|--------------|----------|---|----|---|----|---|----|---|----|---|----|
| 15 | 40575126 | 40612548 | 1  | NM_130798    | SNAP23   | 0 | NA | 0 | NA | 0 | NA | 0 | NA | 0 | NA |
| 15 | 40628292 | 40622013 | -1 | NM_153260    | LRRCS7   | 0 | NA | 0 | NA | 0 | NA | 1 | 12 | 0 | NA |
| 15 | 40628344 | 40647334 | 1  | NM_018097    | CEP27    | 0 | NA | 0 | NA | 0 | NA | 1 | 12 | 0 | NA |
| 15 | 40816709 | 40803051 | -1 | NM_138477    | CDAN1    | 0 | NA | 0 | NA | 0 | NA | 0 | NA | 0 | NA |
| 15 | 41000299 | 40823835 | -1 | NM_173500    | TTBK2    | 0 | NA | 0 | NA | 0 | NA | 0 | NA | 0 | NA |
| 15 | 41185578 | 41022389 | -1 | NM_174916    | UBR1     | 0 | NA | 0 | NA | 0 | NA | 0 | NA | 0 | NA |
| 15 | 41213013 | 41264633 | 1  | NM_024956    | TMEM62   | 0 | NA | 0 | NA | 0 | NA | 0 | NA | 0 | NA |
| 15 | 41264831 | 41274687 | 1  | NM_012142    | CCNDBP1  | 0 | NA | 0 | NA | 0 | NA | 1 | 12 | 0 | NA |
| 15 | 41265441 | 41274687 | 1  | NM_037370    | CCNDBP1  | 0 | NA | 0 | NA | 0 | NA | 1 | 12 | 0 | NA |
| 15 | 41300615 | 41276717 | -1 | NM_000119    | EPB42    | 0 | NA | 0 | NA | 0 | NA | 0 | NA | 0 | NA |
| 15 | 41300615 | 41276717 | -1 | NM_001114134 | EPB42    | 0 | NA | 0 | NA | 0 | NA | 0 | NA | 0 | NA |
| 15 | 41346347 | 41312666 | -1 | NM_004245    | TGM5     | 0 | NA | 0 | NA | 0 | NA | 0 | NA | 0 | NA |
| 15 | 41346347 | 41312666 | -1 | NM_201631    | TGM5     | 0 | NA | 0 | NA | 0 | NA | 0 | NA | 0 | NA |
| 15 | 41381745 | 41359770 | -1 | NM_052955    | TGM7     | 0 | NA | 0 | NA | 0 | NA | 0 | NA | 0 | NA |
| 15 | 41410183 | 41407265 | -1 | NM_014793    | LCMT2    | 1 | 13 | 0 | NA | 0 | NA | 0 | NA | 0 | NA |
| 15 | 41410216 | 41428902 | 1  | NM_001012969 | ADAL     | 1 | 13 | 0 | NA | 0 | NA | 0 | NA | 0 | NA |
| 15 | 41449550 | 41437661 | -1 | NM_152455    | ZSCAN29  | 1 | 11 | 0 | NA | 1 | 17 | 1 | 12 | 0 | NA |
| 15 | 41450604 | 41485532 | 1  | NM_014444    | TUBGCP4  | 1 | 11 | 0 | NA | 1 | 17 | 1 | 12 | 0 | NA |
| 15 | 41590028 | 41486698 | -1 | NM_005657    | TP53BP1  | 1 | 12 | 0 | NA | 0 | NA | 0 | NA | 0 | NA |
| 15 | 41597097 | 41611110 | 1  | NM_002373    | MAP1A    | 1 | 12 | 0 | NA | 0 | NA | 0 | NA | 0 | NA |
| 15 | 41664383 | 41612951 | -1 | NM_001024463 | HISPPD2A | 0 | NA | 0 | NA | 0 | NA | 0 | NA | 0 | NA |
| 15 | 41664383 | 41612951 | -1 | NM_014659    | HISPPD2A | 0 | NA | 0 | NA | 0 | NA | 0 | NA | 0 | NA |
| 15 | 41672543 | 41678896 | 1  | NM_020990    | CKMT1B   | 0 | NA | 0 | NA | 0 | NA | 0 | NA | 0 | NA |
| 15 | 41698290 | 41679052 | -1 | NM_153700    | STRC     | 0 | NA | 0 | NA | 0 | NA | 0 | NA | 0 | NA |
| 15 | 41728331 | 41710063 | -1 | NM_054020    | CATSPER2 | 0 | NA | 0 | NA | 0 | NA | 0 | NA | 0 | NA |
| 15 | 41728331 | 41710063 | -1 | NM_172095    | CATSPER2 | 0 | NA | 0 | NA | 0 | NA | 0 | NA | 0 | NA |
| 15 | 41728331 | 41718925 | -1 | NM_172097    | CATSPER2 | 0 | NA | 0 | NA | 0 | NA | 0 | NA | 0 | NA |
| 15 | 41772375 | 41778712 | 1  | NM_001015001 | CKMT1A   | 0 | NA | 0 | NA | 0 | NA | 0 | NA | 0 | NA |
| 15 | 41825881 | 41852096 | 1  | NM_005313    | PDIA3    | 0 | NA | 0 | NA | 0 | NA | 0 | NA | 0 | NA |
| 15 | 41856794 | 41852089 | -1 | NM_025165    | ELL3     | 0 | NA | 0 | NA | 0 | NA | 1 | 14 | 0 | NA |
| 15 | 41871768 | 41875579 | 1  | NM_001018108 | SERF2    | 0 | NA | 0 | NA | 0 | NA | 0 | NA | 0 | NA |
| 15 | 41879547 | 41874456 | -1 | NM_001033517 | SERINC4  | 0 | NA | 0 | NA | 0 | NA | 0 | NA | 0 | NA |
| 15 | 41879912 | 41882061 | 1  | NM_016400    | HYPK     | 0 | NA | 0 | NA | 0 | NA | 0 | NA | 0 | NA |
| 15 | 41904243 | 41884024 | -1 | NM_005926    | MFAP1    | 1 | 12 | 0 | NA | 0 | NA | 1 | 12 | 0 | NA |
| 15 | 41906499 | 41946502 | 1  | NM_024908    | WDR76    | 1 | 12 | 0 | NA | 0 | NA | 1 | 12 | 0 | NA |
| 15 | 42274721 | 41953021 | -1 | NM_032892    | FRMD5    | 0 | NA | 0 | NA | 0 | NA | 0 | NA | 0 | NA |
| 15 | 42368220 | 42495247 | 1  | NM_138423    | CASC4    | 0 | NA | 0 | NA | 0 | NA | 0 | NA | 0 | NA |
| 15 | 42368220 | 42495247 | 1  | NM_177974    | CASC4    | 0 | NA | 0 | NA | 0 | NA | 0 | NA | 0 | NA |
| 15 | 42506870 | 42606721 | 1  | NM_016396    | CTDSPL2  | 0 | NA | 0 | NA | 0 | NA | 0 | NA | 0 | NA |
| 15 | 42616557 | 42642293 | 1  | NM_003758    | EIF3J    | 0 | NA | 0 | NA | 1 | 13 | 0 | NA | 0 | NA |
| 15 | 42743168 | 42642185 | -1 | NM_025137    | SPG11    | 0 | NA | 0 | NA | 0 | NA | 0 | NA | 0 | NA |
| 15 | 42790976 | 42797649 | 1  | NM_004048    | B2M      | 0 | NA | 0 | NA | 0 | NA | 0 | NA | 0 | NA |
| 15 | 42815851 | 42847317 | 1  | NM_080745    | TRIM69   | 0 | NA | 0 | NA | 0 | NA | 0 | NA | 0 | NA |
| 15 | 42815851 | 42847317 | 1  | NM_182985    | TRIM69   | 0 | NA | 0 | NA | 0 | NA | 0 | NA | 0 | NA |
| 15 | 43036194 | 43058713 | 1  | NM_152448    | C15orf43 | 0 | NA | 0 | NA | 0 | NA | 0 | NA | 0 | NA |
| 15 | 43102632 | 43154331 | 1  | NM_003104    | SORD     | 0 | NA | 0 | NA | 0 | NA | 1 | 13 | 0 | NA |
| 15 | 43193651 | 43172143 | -1 | NM_014080    | DUOX2    | 0 | NA | 0 | NA | 0 | NA | 0 | NA | 0 | NA |
| 15 | 43193815 | 43197593 | 1  | NM_207581    | DUOX2A   | 0 | NA | 0 | NA | 0 | NA | 0 | NA | 0 | NA |
| 15 | 43209349 | 43196977 | -1 | NM_144565    | DUOX1    | 0 | NA | 0 | NA | 0 | NA | 0 | NA | 0 | NA |
| 15 | 43209483 | 43245066 | 1  | NM_017434    | DUOX1    | 0 | NA | 0 | NA | 0 | NA | 0 | NA | 0 | NA |
| 15 | 43209483 | 43245066 | 1  | NM_175940    | DUOX1    | 0 | NA | 0 | NA | 0 | NA | 0 | NA | 0 | NA |
| 15 | 43280665 | 43246703 | -1 | NM_138356    | SHF      | 0 | NA | 0 | NA | 1 | 17 | 0 | NA | 0 | NA |
| 15 | 43331725 | 43355425 | 1  | NM_004212    | SLC28A2  | 0 | NA | 0 | NA | 0 | NA | 1 | 23 | 0 | NA |
| 15 | 43458272 | 43440613 | -1 | NM_001482    | GATM     | 0 | NA | 0 | NA | 0 | NA | 0 | NA | 0 | NA |
| 15 | 43481877 | 43500905 | 1  | NM_024063    | SPATA5L1 | 0 | NA | 0 | NA | 0 | NA | 0 | NA | 0 | NA |
| 15 | 43510054 | 43512939 | 1  | NM_032413    | C15orf48 | 0 | NA | 0 | NA | 0 | NA | 0 | NA | 0 | NA |
| 15 | 43510054 | 43512939 | 1  | NM_197955    | C15orf48 | 0 | NA | 0 | NA | 0 | NA | 0 | NA | 0 | NA |
| 15 | 43602294 | 43561969 | -1 | NM_013309    | SLC30A4  | 0 | NA | 0 | NA | 0 | NA | 0 | NA | 0 | NA |
| 15 | 43666708 | 43689201 | 1  | NM_012388    | PLDN     | 0 | NA | 0 | NA | 0 | NA | 0 | NA | 0 | NA |
| 15 | 43714547 | 43770771 | 1  | NM_021199    | SQRDL    | 0 | NA | 0 | NA | 0 | NA | 0 | NA | 0 | NA |
| 15 | 45797977 | 45844969 | 1  | NM_024966    | SEMA6D   | 0 | NA | 0 | NA | 0 | NA | 0 | NA | 0 | NA |
| 15 | 45797977 | 45853712 | 1  | NM_020858    | SEMA6D   | 0 | NA | 0 | NA | 0 | NA | 0 | NA | 0 | NA |
| 15 | 45797977 | 45853712 | 1  | NM_153616    | SEMA6D   | 0 | NA | 0 | NA | 0 | NA | 0 | NA | 0 | NA |
| 15 | 45797977 | 45853712 | 1  | NM_153617    | SEMA6D   | 0 | NA | 0 | NA | 0 | NA | 0 | NA | 0 | NA |
| 15 | 45797977 | 45853712 | 1  | NM_153618    | SEMA6D   | 0 | NA | 0 | NA | 0 | NA | 0 | NA | 0 | NA |

|    |          |          |    |              |           |   |    |   |    |   |    |   |    |   |    |
|----|----------|----------|----|--------------|-----------|---|----|---|----|---|----|---|----|---|----|
| 15 | 45797977 | 45853712 | 1  | NM_153619    | SEMA6D    | 0 | NA | 0 | NA | 0 | NA | 0 | NA | 0 | NA |
| 15 | 46200460 | 46221881 | 1  | NM_205850    | SLC24A5   | 0 | NA | 0 | NA | 0 | NA | 0 | NA | 0 | NA |
| 15 | 46257850 | 46218920 | -1 | NM_016132    | MYEF2     | 0 | NA | 0 | NA | 0 | NA | 0 | NA | 0 | NA |
| 15 | 46285789 | 46383568 | 1  | NM_000338    | SLC12A1   | 0 | NA | 0 | NA | 0 | NA | 0 | NA | 0 | NA |
| 15 | 46410912 | 46422862 | 1  | NM_001025248 | DUT       | 0 | NA | 0 | NA | 0 | NA | 0 | NA | 0 | NA |
| 15 | 46410912 | 46422862 | 1  | NM_001025249 | DUT       | 0 | NA | 0 | NA | 0 | NA | 0 | NA | 0 | NA |
| 15 | 46411656 | 46422862 | 1  | NM_001948    | DUT       | 0 | NA | 0 | NA | 0 | NA | 0 | NA | 0 | NA |
| 15 | 46725210 | 46487796 | -1 | NM_000138    | FBN1      | 1 | 12 | 0 | NA | 0 | NA | 0 | NA | 0 | NA |
| 15 | 46890476 | 46817639 | -1 | NM_014985    | CEP152    | 0 | NA | 0 | NA | 0 | NA | 0 | NA | 0 | NA |
| 15 | 46957581 | 46959672 | 1  | NM_014335    | EID1      | 0 | NA | 0 | NA | 0 | NA | 0 | NA | 0 | NA |
| 15 | 47042933 | 46903225 | -1 | NM_203349    | SHC4      | 1 | 12 | 0 | NA | 0 | NA | 1 | 11 | 0 | NA |
| 15 | 47125922 | 47068258 | -1 | NM_014701    | KIAA0256  | 0 | NA | 0 | NA | 0 | NA | 0 | NA | 0 | NA |
| 15 | 47235073 | 47206833 | -1 | NM_004236    | COPS2     | 1 | 11 | 0 | NA | 0 | NA | 0 | NA | 0 | NA |
| 15 | 47235267 | 47409294 | 1  | NM_001001556 | GALK2     | 1 | 11 | 0 | NA | 0 | NA | 0 | NA | 0 | NA |
| 15 | 47249713 | 47409294 | 1  | NM_002044    | GALK2     | 0 | NA | 0 | NA | 0 | NA | 0 | NA | 0 | NA |
| 15 | 47502750 | 47566815 | 1  | NM_002009    | FGF7      | 0 | NA | 0 | NA | 0 | NA | 0 | NA | 0 | NA |
| 15 | 47700410 | 47407883 | -1 | NM_152647    | C15orf33  | 0 | NA | 0 | NA | 0 | NA | 1 | 16 | 0 | NA |
| 15 | 47700587 | 47723154 | 1  | NM_020234    | DTWD1     | 0 | NA | 0 | NA | 0 | NA | 1 | 16 | 0 | NA |
| 15 | 48198711 | 47937726 | -1 | NM_024837    | ATP8B4    | 0 | NA | 0 | NA | 0 | NA | 0 | NA | 0 | NA |
| 15 | 48261713 | 48315862 | 1  | NM_003645    | SLC27A2   | 0 | NA | 0 | NA | 0 | NA | 0 | NA | 0 | NA |
| 15 | 48345218 | 48321437 | -1 | NM_002112    | HDC       | 0 | NA | 0 | NA | 0 | NA | 0 | NA | 0 | NA |
| 15 | 48434687 | 48356680 | -1 | NM_005254    | GABPB2    | 0 | NA | 0 | NA | 1 | 13 | 0 | NA | 0 | NA |
| 15 | 48434687 | 48356680 | -1 | NM_016654    | GABPB2    | 0 | NA | 0 | NA | 1 | 13 | 0 | NA | 0 | NA |
| 15 | 48434687 | 48365368 | -1 | NM_002041    | GABPB2    | 0 | NA | 0 | NA | 1 | 13 | 0 | NA | 0 | NA |
| 15 | 48434687 | 48365368 | -1 | NM_016655    | GABPB2    | 0 | NA | 0 | NA | 1 | 13 | 0 | NA | 0 | NA |
| 15 | 48434687 | 48365368 | -1 | NM_181427    | GABPB2    | 0 | NA | 0 | NA | 1 | 13 | 0 | NA | 0 | NA |
| 15 | 48503870 | 48579265 | 1  | NM_005154    | USP8      | 0 | NA | 0 | NA | 0 | NA | 0 | NA | 0 | NA |
| 15 | 48626194 | 48580050 | -1 | NM_203494    | USP50     | 0 | NA | 0 | NA | 0 | NA | 0 | NA | 0 | NA |
| 15 | 48766286 | 48639781 | -1 | NM_017672    | TRPM7     | 0 | NA | 0 | NA | 0 | NA | 0 | NA | 0 | NA |
| 15 | 48845202 | 48787028 | -1 | NM_032802    | SPPL2A    | 0 | NA | 0 | NA | 0 | NA | 0 | NA | 0 | NA |
| 15 | 48988237 | 49085389 | 1  | NM_007347    | AP4E1     | 0 | NA | 0 | NA | 0 | NA | 0 | NA | 0 | NA |
| 15 | 49184765 | 49136090 | -1 | NM_207381    | TNFAIP8L3 | 0 | NA | 0 | NA | 0 | NA | 0 | NA | 0 | NA |
| 15 | 49418086 | 49288961 | -1 | NM_000103    | CYP19A1   | 0 | NA | 0 | NA | 0 | NA | 0 | NA | 0 | NA |
| 15 | 49418086 | 49288961 | -1 | NM_031226    | CYP19A1   | 0 | NA | 0 | NA | 0 | NA | 0 | NA | 0 | NA |
| 15 | 49421004 | 49487501 | 1  | NM_181789    | GLDN      | 0 | NA | 0 | NA | 0 | NA | 0 | NA | 0 | NA |
| 15 | 49702259 | 49527230 | -1 | NM_015263    | DMXL2     | 0 | NA | 0 | NA | 0 | NA | 0 | NA | 0 | NA |
| 15 | 49760841 | 49800515 | 1  | NM_013243    | SCG3      | 0 | NA | 0 | NA | 0 | NA | 0 | NA | 0 | NA |
| 15 | 49817608 | 49802552 | -1 | NM_153374    | LYSMD2    | 0 | NA | 0 | NA | 0 | NA | 0 | NA | 0 | NA |
| 15 | 49831101 | 49889635 | 1  | NM_014548    | TMOD2     | 0 | NA | 0 | NA | 0 | NA | 0 | NA | 0 | NA |
| 15 | 49909180 | 49989138 | 1  | NM_014547    | TMOD3     | 0 | NA | 0 | NA | 0 | NA | 0 | NA | 0 | NA |
| 15 | 50051250 | 50017513 | -1 | NM_138792    | LEO1      | 0 | NA | 0 | NA | 0 | NA | 0 | NA | 0 | NA |
| 15 | 50098738 | 50145754 | 1  | NM_002748    | MAPK6     | 0 | NA | 0 | NA | 1 | 13 | 0 | NA | 0 | NA |
| 15 | 50192264 | 50189113 | -1 | NM_020396    | BCL2L10   | 0 | NA | 0 | NA | 0 | NA | 0 | NA | 0 | NA |
| 15 | 50259454 | 50200414 | -1 | NM_006578    | GNB5      | 0 | NA | 0 | NA | 0 | NA | 0 | NA | 0 | NA |
| 15 | 50270857 | 50200414 | -1 | NM_016194    | GNB5      | 0 | NA | 0 | NA | 0 | NA | 0 | NA | 0 | NA |
| 15 | 50375262 | 50271811 | -1 | NM_018728    | MYOSC     | 0 | NA | 0 | NA | 0 | NA | 0 | NA | 0 | NA |
| 15 | 50608539 | 50386769 | -1 | NM_000259    | MYOSA     | 0 | NA | 0 | NA | 0 | NA | 0 | NA | 0 | NA |
| 15 | 50648505 | 50626723 | -1 | NM_006628    | ARPP-19   | 0 | NA | 0 | NA | 0 | NA | 0 | NA | 0 | NA |
| 15 | 50758112 | 50660809 | -1 | NM_019600    | KIAA1370  | 0 | NA | 0 | NA | 0 | NA | 0 | NA | 0 | NA |
| 15 | 50869501 | 50836644 | -1 | NM_004498    | ONECUT1   | 0 | NA | 0 | NA | 0 | NA | 0 | NA | 0 | NA |
| 15 | 51839151 | 51593229 | -1 | NM_182758    | WDR72     | 0 | NA | 0 | NA | 0 | NA | 0 | NA | 0 | NA |
| 15 | 52092392 | 52708098 | 1  | NM_001080534 | UNC13C    | 0 | NA | 0 | NA | 0 | NA | 0 | NA | 0 | NA |
| 15 | 53276523 | 53260803 | -1 | NM_016304    | C15orf15  | 0 | NA | 0 | NA | 0 | NA | 0 | NA | 0 | NA |
| 15 | 53349776 | 53283091 | -1 | NM_183234    | RAB27A    | 0 | NA | 0 | NA | 0 | NA | 1 | 11 | 0 | NA |
| 15 | 53349877 | 53283091 | -1 | NM_004580    | RAB27A    | 0 | NA | 0 | NA | 0 | NA | 1 | 11 | 0 | NA |
| 15 | 53350399 | 53283091 | -1 | NM_183236    | RAB27A    | 0 | NA | 0 | NA | 0 | NA | 1 | 11 | 0 | NA |
| 15 | 53369293 | 53283091 | -1 | NM_183235    | RAB27A    | 0 | NA | 0 | NA | 0 | NA | 0 | NA | 0 | NA |
| 15 | 53398424 | 53435138 | 1  | NM_004855    | PIGB      | 0 | NA | 0 | NA | 0 | NA | 1 | 11 | 0 | NA |
| 15 | 53487834 | 53434729 | -1 | NM_004748    | CCPG1     | 0 | NA | 0 | NA | 0 | NA | 0 | NA | 0 | NA |
| 15 | 53487866 | 53434729 | -1 | NM_020739    | CCPG1     | 0 | NA | 0 | NA | 0 | NA | 0 | NA | 0 | NA |
| 15 | 53587724 | 53497245 | -1 | NM_001033560 | DYX1C1    | 0 | NA | 0 | NA | 0 | NA | 0 | NA | 0 | NA |
| 15 | 53587724 | 53509797 | -1 | NM_001033559 | DYX1C1    | 0 | NA | 0 | NA | 0 | NA | 0 | NA | 0 | NA |
| 15 | 53587724 | 53509797 | -1 | NM_130810    | DYX1C1    | 0 | NA | 0 | NA | 0 | NA | 0 | NA | 0 | NA |
| 15 | 53668342 | 53625512 | -1 | NM_015617    | PYG01     | 0 | NA | 0 | NA | 0 | NA | 0 | NA | 0 | NA |
| 15 | 53822469 | 53698892 | -1 | NM_173814    | PRTG      | 0 | NA | 0 | NA | 0 | NA | 0 | NA | 0 | NA |

|    |          |          |    |              |         |   |    |   |    |   |    |   |    |   |    |
|----|----------|----------|----|--------------|---------|---|----|---|----|---|----|---|----|---|----|
| 15 | 53996621 | 53906413 | -1 | NM_198400    | NEDD4   | 0 | NA | 0 | NA | 0 | NA | 0 | NA | 0 | NA |
| 15 | 54073127 | 53906413 | -1 | NM_006154    | NEDD4   | 0 | NA | 0 | NA | 0 | NA | 0 | NA | 0 | NA |
| 15 | 54322775 | 54170022 | -1 | NM_022841    | RFXDC2  | 0 | NA | 0 | NA | 1 | 13 | 0 | NA | 0 | NA |
| 15 | 54444935 | 54525364 | 1  | NM_198524    | TEX9    | 0 | NA | 0 | NA | 0 | NA | 1 | 15 | 0 | NA |
| 15 | 54544627 | 54508298 | -1 | NM_018365    | MNS1    | 0 | NA | 0 | NA | 0 | NA | 1 | 19 | 0 | NA |
| 15 | 54813079 | 54709665 | -1 | NM_001002843 | ZNF280D | 0 | NA | 0 | NA | 0 | NA | 0 | NA | 0 | NA |
| 15 | 54813079 | 54709665 | -1 | NM_017661    | ZNF280D | 0 | NA | 0 | NA | 0 | NA | 0 | NA | 0 | NA |
| 15 | 54813079 | 54778849 | -1 | NM_001002844 | ZNF280D | 0 | NA | 0 | NA | 0 | NA | 0 | NA | 0 | NA |
| 15 | 54998124 | 55368006 | 1  | NM_003205    | TCF12   | 1 | 18 | 0 | NA | 0 | NA | 0 | NA | 0 | NA |
| 15 | 54998124 | 55368006 | 1  | NM_207036    | TCF12   | 1 | 18 | 0 | NA | 0 | NA | 0 | NA | 0 | NA |
| 15 | 54998124 | 55368006 | 1  | NM_207037    | TCF12   | 1 | 18 | 0 | NA | 0 | NA | 0 | NA | 0 | NA |
| 15 | 54998124 | 55368006 | 1  | NM_207038    | TCF12   | 1 | 18 | 0 | NA | 0 | NA | 0 | NA | 0 | NA |
| 15 | 55298946 | 55368006 | 1  | NM_207040    | TCF12   | 0 | NA | 0 | NA | 0 | NA | 0 | NA | 0 | NA |
| 15 | 55455996 | 55630213 | 1  | NM_032866    | CGNL1   | 0 | NA | 0 | NA | 0 | NA | 0 | NA | 0 | NA |
| 15 | 55671405 | 55764854 | 1  | NM_001018100 | Gcom1   | 0 | NA | 0 | NA | 0 | NA | 0 | NA | 0 | NA |
| 15 | 55671405 | 55764854 | 1  | NM_152451    | Gcom1   | 0 | NA | 0 | NA | 0 | NA | 0 | NA | 0 | NA |
| 15 | 55671405 | 55797045 | 1  | NM_001018090 | Gcom1   | 0 | NA | 0 | NA | 0 | NA | 0 | NA | 0 | NA |
| 15 | 55671405 | 55797045 | 1  | NM_001018091 | Gcom1   | 0 | NA | 0 | NA | 0 | NA | 0 | NA | 0 | NA |
| 15 | 55786192 | 55788674 | 1  | NM_001018103 | GRINL1A | 0 | NA | 0 | NA | 1 | 12 | 1 | 11 | 0 | NA |
| 15 | 55786192 | 55797045 | 1  | NM_001018102 | GRINL1A | 0 | NA | 0 | NA | 1 | 12 | 1 | 11 | 0 | NA |
| 15 | 55786192 | 55797045 | 1  | NM_015532    | GRINL1A | 0 | NA | 0 | NA | 1 | 12 | 1 | 11 | 0 | NA |
| 15 | 56093527 | 56032918 | -1 | NM_170697    | ALDH1A2 | 0 | NA | 0 | NA | 0 | NA | 0 | NA | 0 | NA |
| 15 | 56145198 | 56032918 | -1 | NM_003888    | ALDH1A2 | 0 | NA | 1 | 19 | 0 | NA | 0 | NA | 0 | NA |
| 15 | 56145198 | 56032918 | -1 | NM_170696    | ALDH1A2 | 0 | NA | 1 | 19 | 0 | NA | 0 | NA | 0 | NA |
| 15 | 56217699 | 56265402 | 1  | NM_020980    | AQP9    | 0 | NA | 0 | NA | 0 | NA | 0 | NA | 0 | NA |
| 15 | 56511466 | 56648364 | 1  | NM_000236    | LIPC    | 0 | NA | 0 | NA | 0 | NA | 0 | NA | 0 | NA |
| 15 | 56829469 | 56675801 | -1 | NM_001110    | ADAM10  | 0 | NA | 0 | NA | 0 | NA | 0 | NA | 0 | NA |
| 15 | 56850684 | 56937026 | 1  | NM_001040450 | FAM63B  | 0 | NA | 0 | NA | 0 | NA | 1 | 19 | 0 | NA |
| 15 | 56850684 | 56937026 | 1  | NM_001040453 | FAM63B  | 0 | NA | 0 | NA | 0 | NA | 1 | 19 | 0 | NA |
| 15 | 57013144 | 56958535 | -1 | NM_001013843 | SLTM    | 0 | NA | 0 | NA | 0 | NA | 0 | NA | 0 | NA |
| 15 | 57013144 | 56958535 | -1 | NM_024755    | SLTM    | 0 | NA | 0 | NA | 0 | NA | 0 | NA | 0 | NA |
| 15 | 57067156 | 57176545 | 1  | NM_017610    | RNF111  | 0 | NA | 0 | NA | 0 | NA | 0 | NA | 0 | NA |
| 15 | 57184611 | 57204536 | 1  | NM_004701    | CCNB2   | 0 | NA | 0 | NA | 0 | NA | 0 | NA | 0 | NA |
| 15 | 57286333 | 57288001 | 1  | NM_033195    | LDHAL6B | 0 | NA | 0 | NA | 0 | NA | 0 | NA | 0 | NA |
| 15 | 57452363 | 57215854 | -1 | NM_004998    | MYO1E   | 0 | NA | 0 | NA | 0 | NA | 0 | NA | 0 | NA |
| 15 | 57517663 | 57603043 | 1  | NM_152450    | FAM81A  | 0 | NA | 0 | NA | 0 | NA | 0 | NA | 0 | NA |
| 15 | 57696079 | 57699494 | 1  | NM_004751    | GCNT3   | 0 | NA | 0 | NA | 0 | NA | 0 | NA | 0 | NA |
| 15 | 57736985 | 57718357 | -1 | NM_004492    | GTF2A2  | 0 | NA | 0 | NA | 0 | NA | 0 | NA | 0 | NA |
| 15 | 57768934 | 57742353 | -1 | NM_004330    | BNIP2   | 0 | NA | 0 | NA | 0 | NA | 0 | NA | 0 | NA |
| 15 | 58083712 | 58085434 | 1  | NM_012182    | FOXB1   | 0 | NA | 0 | NA | 0 | NA | 0 | NA | 1 | 17 |
| 15 | 58477477 | 58426641 | -1 | NM_001002857 | ANXA2   | 1 | 11 | 0 | NA | 0 | NA | 0 | NA | 0 | NA |
| 15 | 58477477 | 58426641 | -1 | NM_001002858 | ANXA2   | 1 | 11 | 0 | NA | 0 | NA | 0 | NA | 0 | NA |
| 15 | 58477477 | 58426641 | -1 | NM_004039    | ANXA2   | 1 | 11 | 0 | NA | 0 | NA | 0 | NA | 0 | NA |
| 15 | 58558636 | 58499099 | -1 | NM_001018089 | NARG2   | 0 | NA | 0 | NA | 0 | NA | 0 | NA | 0 | NA |
| 15 | 58558636 | 58499099 | -1 | NM_024611    | NARG2   | 0 | NA | 0 | NA | 0 | NA | 0 | NA | 0 | NA |
| 15 | 58671999 | 58576754 | -1 | NM_134262    | RORA    | 0 | NA | 0 | NA | 0 | NA | 0 | NA | 0 | NA |
| 15 | 58707024 | 58576754 | -1 | NM_002943    | RORA    | 0 | NA | 0 | NA | 0 | NA | 0 | NA | 0 | NA |
| 15 | 58707024 | 58576754 | -1 | NM_134260    | RORA    | 0 | NA | 0 | NA | 0 | NA | 0 | NA | 0 | NA |
| 15 | 59308794 | 58576754 | -1 | NM_134261    | RORA    | 0 | NA | 0 | NA | 0 | NA | 0 | NA | 0 | NA |
| 15 | 60139939 | 59931881 | -1 | NM_017684    | VPS13C  | 0 | NA | 0 | NA | 0 | NA | 0 | NA | 0 | NA |
| 15 | 60139939 | 59931883 | -1 | NM_020821    | VPS13C  | 0 | NA | 0 | NA | 0 | NA | 0 | NA | 0 | NA |
| 15 | 60139939 | 59947234 | -1 | NM_001018088 | VPS13C  | 0 | NA | 0 | NA | 0 | NA | 0 | NA | 0 | NA |
| 15 | 60139939 | 59947234 | -1 | NM_018080    | VPS13C  | 0 | NA | 0 | NA | 0 | NA | 0 | NA | 0 | NA |
| 15 | 60146467 | 60150408 | 1  | NM_207322    | FAM148A | 0 | NA | 0 | NA | 0 | NA | 0 | NA | 0 | NA |
| 15 | 60244774 | 60243028 | -1 | NM_001007595 | FAM148B | 0 | NA | 0 | NA | 0 | NA | 0 | NA | 0 | NA |
| 15 | 60726801 | 60923882 | 1  | NM_015059    | TLN2    | 0 | NA | 0 | NA | 0 | NA | 0 | NA | 0 | NA |
| 15 | 61121890 | 61145345 | 1  | NM_000366    | TPM1    | 0 | NA | 0 | NA | 0 | NA | 0 | NA | 0 | NA |
| 15 | 61121890 | 61145345 | 1  | NM_001018005 | TPM1    | 0 | NA | 0 | NA | 0 | NA | 0 | NA | 0 | NA |
| 15 | 61121890 | 61151166 | 1  | NM_001018004 | TPM1    | 0 | NA | 0 | NA | 0 | NA | 0 | NA | 0 | NA |
| 15 | 61121890 | 61151166 | 1  | NM_001018006 | TPM1    | 0 | NA | 0 | NA | 0 | NA | 0 | NA | 0 | NA |
| 15 | 61121890 | 61151166 | 1  | NM_001018007 | TPM1    | 0 | NA | 0 | NA | 0 | NA | 0 | NA | 0 | NA |
| 15 | 61121890 | 61151166 | 1  | NM_001018020 | TPM1    | 0 | NA | 0 | NA | 0 | NA | 0 | NA | 0 | NA |
| 15 | 61127688 | 61149884 | 1  | NM_001018008 | TPM1    | 0 | NA | 0 | NA | 0 | NA | 0 | NA | 0 | NA |
| 15 | 61201084 | 61209079 | 1  | NM_171846    | LACTB   | 0 | NA | 0 | NA | 0 | NA | 0 | NA | 0 | NA |
| 15 | 61201084 | 61221313 | 1  | NM_032857    | LACTB   | 0 | NA | 0 | NA | 0 | NA | 0 | NA | 0 | NA |



|    |          |          |    |              |           |   |    |   |    |   |    |   |    |   |    |
|----|----------|----------|----|--------------|-----------|---|----|---|----|---|----|---|----|---|----|
| 15 | 61236794 | 61232591 | -1 | NM_015920    | RPS27L    | 0 | NA | 0 | NA | 0 | NA | 0 | NA | 0 | NA |
| 15 | 61268780 | 61347026 | 1  | NM_016530    | RAB8B     | 0 | NA | 0 | NA | 0 | NA | 0 | NA | 0 | NA |
| 15 | 61356843 | 61385166 | 1  | NM_031301    | APH1B     | 0 | NA | 0 | NA | 0 | NA | 0 | NA | 0 | NA |
| 15 | 61461128 | 61402782 | -1 | NM_001218    | CA12      | 0 | NA | 0 | NA | 0 | NA | 0 | NA | 0 | NA |
| 15 | 61461128 | 61402782 | -1 | NM_206925    | CA12      | 0 | NA | 0 | NA | 0 | NA | 0 | NA | 0 | NA |
| 15 | 61583862 | 61670716 | 1  | NM_006537    | USP3      | 0 | NA | 0 | NA | 0 | NA | 1 | 13 | 0 | NA |
| 15 | 61676648 | 61681673 | 1  | NM_203373    | FBXL22    | 0 | NA | 0 | NA | 0 | NA | 0 | NA | 0 | NA |
| 15 | 61913200 | 61687869 | -1 | NM_003922    | HERC1     | 0 | NA | 0 | NA | 0 | NA | 0 | NA | 0 | NA |
| 15 | 62125574 | 61986287 | -1 | NM_014326    | DAPK2     | 0 | NA | 0 | NA | 0 | NA | 0 | NA | 0 | NA |
| 15 | 62173260 | 62151813 | -1 | NM_001014812 | FAM96A    | 0 | NA | 0 | NA | 0 | NA | 0 | NA | 0 | NA |
| 15 | 62173260 | 62151813 | -1 | NM_032231    | FAM96A    | 0 | NA | 0 | NA | 0 | NA | 0 | NA | 0 | NA |
| 15 | 62175229 | 62223486 | 1  | NM_003099    | SNX1      | 0 | NA | 0 | NA | 0 | NA | 0 | NA | 0 | NA |
| 15 | 62175229 | 62223486 | 1  | NM_148955    | SNX1      | 0 | NA | 0 | NA | 0 | NA | 0 | NA | 0 | NA |
| 15 | 62175229 | 62223486 | 1  | NM_152826    | SNX1      | 0 | NA | 0 | NA | 0 | NA | 0 | NA | 0 | NA |
| 15 | 62230968 | 62236733 | 1  | NM_024798    | SNX22     | 1 | 21 | 0 | NA | 1 | 12 | 0 | NA | 0 | NA |
| 15 | 62242407 | 62235066 | -1 | NM_000942    | PPIB      | 0 | NA | 0 | NA | 0 | NA | 0 | NA | 0 | NA |
| 15 | 62435495 | 62244768 | -1 | NM_022048    | CSNK1G1   | 0 | NA | 0 | NA | 0 | NA | 0 | NA | 0 | NA |
| 15 | 62460755 | 62444263 | -1 | NM_001029989 | KIAA0101  | 1 | 46 | 0 | NA | 0 | NA | 0 | NA | 0 | NA |
| 15 | 62460755 | 62444263 | -1 | NM_014736    | KIAA0101  | 1 | 46 | 0 | NA | 0 | NA | 0 | NA | 0 | NA |
| 15 | 62467072 | 62534555 | 1  | NM_016213    | TRIP4     | 1 | 46 | 0 | NA | 0 | NA | 0 | NA | 0 | NA |
| 15 | 62578671 | 62765319 | 1  | NM_015042    | ZNF609    | 0 | NA | 0 | NA | 0 | NA | 0 | NA | 0 | NA |
| 15 | 62782515 | 62768825 | -1 | NM_002537    | OAZ2      | 0 | NA | 0 | NA | 0 | NA | 0 | NA | 0 | NA |
| 15 | 62854823 | 62819147 | -1 | NM_194272    | RBPMS2    | 0 | NA | 0 | NA | 0 | NA | 0 | NA | 0 | NA |
| 15 | 62904891 | 62894886 | -1 | NM_025049    | PIF1      | 0 | NA | 0 | NA | 0 | NA | 0 | NA | 0 | NA |
| 15 | 62921187 | 62947254 | 1  | NM_025201    | PLEKHO2   | 0 | NA | 0 | NA | 0 | NA | 0 | NA | 0 | NA |
| 15 | 62991153 | 63038094 | 1  | NM_182703    | ANKDD1A   | 0 | NA | 0 | NA | 0 | NA | 0 | NA | 0 | NA |
| 15 | 63069304 | 63042415 | -1 | NM_016630    | SPG21     | 0 | NA | 0 | NA | 0 | NA | 0 | NA | 0 | NA |
| 15 | 63109030 | 63080902 | -1 | NM_139242    | MTFMT     | 0 | NA | 0 | NA | 0 | NA | 0 | NA | 0 | NA |
| 15 | 63129365 | 63132592 | 1  | NM_178859    | OSTbeta   | 0 | NA | 0 | NA | 0 | NA | 0 | NA | 0 | NA |
| 15 | 63147441 | 63132727 | -1 | NM_016563    | RASL12    | 0 | NA | 0 | NA | 0 | NA | 0 | NA | 0 | NA |
| 15 | 63156206 | 63157583 | 1  | NM_001101362 | LOC390594 | 0 | NA | 0 | NA | 0 | NA | 0 | NA | 0 | NA |
| 15 | 63213227 | 63196769 | -1 | NM_005707    | PDCD7     | 0 | NA | 0 | NA | 0 | NA | 0 | NA | 0 | NA |
| 15 | 63264616 | 63229836 | -1 | NM_006660    | CLPX      | 0 | NA | 0 | NA | 0 | NA | 0 | NA | 0 | NA |
| 15 | 63290864 | 63275396 | -1 | NM_003613    | CILP      | 0 | NA | 0 | NA | 0 | NA | 0 | NA | 0 | NA |
| 15 | 63366071 | 63337489 | -1 | NM_017851    | PARP16    | 0 | NA | 0 | NA | 0 | NA | 0 | NA | 0 | NA |
| 15 | 63457431 | 63406517 | -1 | NM_004884    | PUNC      | 1 | 11 | 0 | NA | 0 | NA | 0 | NA | 0 | NA |
| 15 | 63502463 | 63460877 | -1 | NM_020962    | NOPE      | 0 | NA | 0 | NA | 0 | NA | 0 | NA | 0 | NA |
| 15 | 63596662 | 63525050 | -1 | NM_197960    | DPP8      | 1 | 11 | 0 | NA | 0 | NA | 0 | NA | 0 | NA |
| 15 | 63597088 | 63525050 | -1 | NM_017743    | DPP8      | 1 | 11 | 0 | NA | 0 | NA | 0 | NA | 0 | NA |
| 15 | 63597088 | 63525050 | -1 | NM_130434    | DPP8      | 1 | 11 | 0 | NA | 0 | NA | 0 | NA | 0 | NA |
| 15 | 63597088 | 63525050 | -1 | NM_197961    | DPP8      | 1 | 11 | 0 | NA | 0 | NA | 0 | NA | 0 | NA |
| 15 | 63609879 | 63657746 | 1  | NM_016395    | PTPLAD1   | 0 | NA | 0 | NA | 0 | NA | 0 | NA | 0 | NA |
| 15 | 63690460 | 63658170 | -1 | NM_030800    | C15orf44  | 0 | NA | 0 | NA | 0 | NA | 0 | NA | 0 | NA |
| 15 | 63701322 | 63735652 | 1  | NM_004727    | SLC24A1   | 0 | NA | 0 | NA | 0 | NA | 0 | NA | 0 | NA |
| 15 | 63871516 | 63741169 | -1 | NM_005848    | DENND4A   | 0 | NA | 0 | NA | 0 | NA | 0 | NA | 0 | NA |
| 15 | 63948849 | 63968846 | 1  | NM_004663    | RAB11A    | 0 | NA | 0 | NA | 0 | NA | 0 | NA | 0 | NA |
| 15 | 64333129 | 63974687 | -1 | NM_032445    | MEGF11    | 0 | NA | 0 | NA | 0 | NA | 0 | NA | 0 | NA |
| 15 | 64372713 | 64413290 | 1  | NM_133375    | DIS3L     | 0 | NA | 0 | NA | 0 | NA | 0 | NA | 0 | NA |
| 15 | 64436108 | 64416061 | -1 | NM_017858    | TIPIN     | 0 | NA | 0 | NA | 0 | NA | 1 | 11 | 0 | NA |
| 15 | 64466264 | 64570936 | 1  | NM_002755    | MAP2K1    | 0 | NA | 0 | NA | 0 | NA | 0 | NA | 0 | NA |
| 15 | 64577200 | 64569719 | -1 | NM_006049    | SNAPC5    | 0 | NA | 0 | NA | 0 | NA | 0 | NA | 0 | NA |
| 15 | 64584238 | 64578706 | -1 | NM_000968    | RPL4      | 0 | NA | 0 | NA | 0 | NA | 0 | NA | 0 | NA |
| 15 | 64584484 | 64628876 | 1  | NM_017975    | ZWILCH    | 0 | NA | 0 | NA | 0 | NA | 0 | NA | 0 | NA |
| 15 | 64644889 | 64627590 | -1 | NM_207338    | LCTL      | 0 | NA | 0 | NA | 0 | NA | 0 | NA | 0 | NA |
| 15 | 64781687 | 64861380 | 1  | NM_005585    | SMAD6     | 0 | NA | 0 | NA | 0 | NA | 0 | NA | 0 | NA |
| 15 | 65145248 | 65274587 | 1  | NM_005902    | SMAD3     | 0 | NA | 0 | NA | 0 | NA | 0 | NA | 0 | NA |
| 15 | 65334128 | 65280420 | -1 | NM_024666    | FLJ11506  | 0 | NA | 0 | NA | 0 | NA | 0 | NA | 0 | NA |
| 15 | 65334241 | 65580349 | 1  | NM_001031715 | IQCH      | 0 | NA | 0 | NA | 0 | NA | 0 | NA | 0 | NA |
| 15 | 65334247 | 65581193 | 1  | NM_022784    | IQCH      | 0 | NA | 0 | NA | 0 | NA | 0 | NA | 0 | NA |
| 15 | 65622074 | 65886506 | 1  | NM_002757    | MAP2K5    | 0 | NA | 0 | NA | 0 | NA | 0 | NA | 0 | NA |
| 15 | 65622074 | 65886506 | 1  | NM_145160    | MAP2K5    | 0 | NA | 0 | NA | 0 | NA | 0 | NA | 0 | NA |
| 15 | 65904994 | 65913228 | 1  | NM_001031807 | LBXCOR1   | 0 | NA | 0 | NA | 0 | NA | 0 | NA | 0 | NA |
| 15 | 66133625 | 66267458 | 1  | NM_016166    | PIAS1     | 0 | NA | 1 | 12 | 0 | NA | 0 | NA | 0 | NA |
| 15 | 66285502 | 66270096 | -1 | NM_001031733 | CALML4    | 0 | NA | 0 | NA | 0 | NA | 0 | NA | 0 | NA |
| 15 | 66285502 | 66270096 | -1 | NM_033429    | CALML4    | 0 | NA | 0 | NA | 0 | NA | 0 | NA | 0 | NA |

|    |          |          |    |              |           |   |    |    |    |    |    |    |    |    |    |    |    |
|----|----------|----------|----|--------------|-----------|---|----|----|----|----|----|----|----|----|----|----|----|
| 15 | 66309079 | 66286383 | -1 | NM_017882    | CLN6      | 0 | NA | 0  | NA | 0  | NA | 0  | NA | 0  | NA |    |    |
| 15 | 66357194 | 66370694 | 1  | NM_015322    | FEM1B     | 0 | NA | 0  | NA | 0  | NA | 1  | NA | 14 | 0  | NA |    |
| 15 | 66511546 | 66381095 | -1 | NM_001004439 | ITGA11    | 0 | NA | 0  | NA | 0  | NA | 0  | NA | 0  | 0  | NA |    |
| 15 | 66658626 | 66807198 | 1  | NM_006091    | CORO2B    | 0 | NA | 0  | NA | 0  | NA | 0  | NA | 0  | 0  | NA |    |
| 15 | 66900277 | 66859258 | -1 | NM_006305    | ANP32A    | 0 | NA | 0  | NA | 0  | NA | 0  | NA | 0  | 0  | NA |    |
| 15 | 67009917 | 67136127 | 1  | NM_024505    | NOX5      | 0 | NA | 1  | NA | 12 | 0  | NA | 0  | NA | 0  | NA |    |
| 15 | 67009918 | 67026202 | 1  | NM_145658    | SPESP1    | 0 | NA | 1  | NA | 12 | 0  | NA | 0  | NA | 0  | NA |    |
| 15 | 67240026 | 67351598 | 1  | NM_015554    | GLCE      | 0 | NA | 0  | NA | 0  | 0  | NA | 0  | NA | 0  | NA |    |
| 15 | 67378347 | 67487030 | 1  | NM_017705    | PAQR5     | 0 | NA | 0  | NA | 0  | 0  | NA | 0  | NA | 0  | NA |    |
| 15 | 67393795 | 67487030 | 1  | NM_001104554 | PAQR5     | 0 | NA | 0  | NA | 0  | 0  | NA | 0  | NA | 0  | NA |    |
| 15 | 67493741 | 67527818 | 1  | NM_004856    | KIF23     | 0 | NA | 0  | NA | 0  | 0  | NA | 0  | NA | 0  | NA |    |
| 15 | 67493741 | 67527818 | 1  | NM_138555    | KIF23     | 0 | NA | 0  | NA | 0  | 0  | NA | 0  | NA | 0  | NA |    |
| 15 | 67532212 | 67534938 | 1  | NM_001003    | RPLP1     | 0 | NA | 0  | NA | 0  | 0  | NA | 0  | NA | 0  | NA |    |
| 15 | 67532212 | 67534938 | 1  | NM_213725    | RPLP1     | 0 | NA | 0  | NA | 0  | 0  | NA | 0  | NA | 0  | NA |    |
| 15 | 68177310 | 68127596 | -1 | NM_001105192 | TLE3      | 1 | NA | 12 | 0  | NA | 0  | NA | 0  | NA | 0  | NA |    |
| 15 | 68177310 | 68127596 | -1 | NM_005078    | TLE3      | 1 | NA | 12 | 0  | NA | 0  | NA | 0  | NA | 0  | NA |    |
| 15 | 68177310 | 68127596 | -1 | NM_020908    | TLE3      | 1 | NA | 12 | 0  | NA | 0  | NA | 0  | NA | 0  | NA |    |
| 15 | 68781674 | 68733946 | -1 | NM_001008224 | UACA      | 0 | NA | 0  | NA | 0  | 0  | NA | 0  | NA | 0  | NA |    |
| 15 | 68842904 | 68733946 | -1 | NM_018003    | UACA      | 0 | NA | 0  | NA | 0  | 0  | NA | 0  | NA | 0  | NA |    |
| 15 | 68933552 | 68910942 | -1 | NM_018357    | LARP6     | 1 | NA | 14 | 0  | NA | 0  | NA | 0  | NA | 0  | NA |    |
| 15 | 68933552 | 68930821 | -1 | NM_197958    | LARP6     | 1 | NA | 14 | 0  | NA | 0  | NA | 0  | NA | 0  | NA |    |
| 15 | 68971807 | 68960734 | -1 | NM_020147    | THAP10    | 0 | NA | 0  | NA | 0  | 0  | NA | 0  | NA | 0  | NA |    |
| 15 | 68972040 | 69129490 | 1  | NM_017691    | LRRC49    | 0 | NA | 0  | NA | 0  | 0  | NA | 0  | NA | 0  | NA |    |
| 15 | 69194893 | 69189636 | -1 | NM_001102658 | LOC196993 | 0 | NA | 0  | NA | 0  | 0  | NA | 0  | NA | 0  | NA |    |
| 15 | 69220841 | 69862776 | 1  | NM_024817    | THSD4     | 0 | NA | 0  | NA | 0  | 0  | NA | 0  | NA | 0  | NA |    |
| 15 | 69421140 | 69420517 | -1 | NM_001093733 | LOC845296 | 0 | NA | 0  | NA | 0  | 0  | NA | 0  | NA | 0  | NA |    |
| 15 | 69889947 | 69894324 | 1  | NM_016346    | NR2E3     | 0 | NA | 0  | NA | 0  | 0  | NA | 1  | NA | 17 | 0  | NA |
| 15 | 69889947 | 69897651 | 1  | NM_014249    | NR2E3     | 0 | NA | 0  | NA | 0  | 0  | NA | 1  | NA | 17 | 0  | NA |
| 15 | 70197476 | 69905414 | -1 | NM_006901    | MYO9A     | 0 | NA | 0  | NA | 0  | 0  | NA | 0  | NA | 0  | 0  | NA |
| 15 | 70197807 | 70220358 | 1  | NM_145204    | SENP8     | 0 | NA | 0  | NA | 0  | 0  | NA | 0  | NA | 0  | 0  | NA |
| 15 | 70277180 | 70239201 | -1 | NM_001012642 | GRAMD2    | 0 | NA | 0  | NA | 0  | 0  | NA | 0  | NA | 0  | 0  | NA |
| 15 | 70310738 | 70278423 | -1 | NM_002654    | PKM2      | 0 | NA | 0  | NA | 0  | 0  | NA | 0  | NA | 0  | 0  | NA |
| 15 | 70310738 | 70278423 | -1 | NM_182470    | PKM2      | 0 | NA | 0  | NA | 0  | 0  | NA | 0  | NA | 0  | 0  | NA |
| 15 | 70310738 | 70278423 | -1 | NM_182471    | PKM2      | 0 | NA | 0  | NA | 0  | 0  | NA | 0  | NA | 0  | 0  | NA |
| 15 | 70350682 | 70320575 | -1 | NM_020214    | PARP6     | 0 | NA | 0  | NA | 0  | 0  | NA | 0  | NA | 0  | 0  | NA |
| 15 | 70399579 | 70364122 | -1 | NM_052840    | BRUNOL6   | 0 | NA | 0  | NA | 0  | 0  | NA | 0  | NA | 0  | 0  | NA |
| 15 | 70455457 | 70422831 | -1 | NM_000520    | HEXA      | 0 | NA | 0  | NA | 0  | 0  | NA | 0  | NA | 0  | 0  | NA |
| 15 | 70477721 | 70487762 | 1  | NM_001080462 | TMEM202   | 0 | NA | 0  | NA | 0  | 0  | NA | 0  | NA | 0  | 0  | NA |
| 15 | 70553720 | 70665950 | 1  | NM_005744    | ARIH1     | 0 | NA | 0  | NA | 0  | 0  | NA | 0  | NA | 0  | 0  | NA |
| 15 | 70734091 | 70746791 | 1  | NM_018652    | GOLGA6B   | 0 | NA | 0  | NA | 0  | 0  | NA | 0  | NA | 0  | 0  | NA |
| 15 | 70765587 | 70817869 | 1  | NM_033028    | BBS4      | 1 | NA | 15 | 0  | NA | 0  | NA | 0  | NA | 0  | 0  | NA |
| 15 | 70863179 | 70830760 | -1 | NM_031284    | ADPGK     | 0 | NA | 0  | NA | 0  | 0  | NA | 0  | NA | 0  | 0  | NA |
| 15 | 71131927 | 71384598 | 1  | NM_002499    | NEO1      | 0 | NA | 0  | NA | 0  | 0  | NA | 0  | NA | 0  | 0  | NA |
| 15 | 71448230 | 71400987 | -1 | NM_005477    | HCN4      | 0 | NA | 0  | NA | 0  | 0  | NA | 0  | NA | 0  | 0  | NA |
| 15 | 71522551 | 71639406 | 1  | NM_001042367 | LOC283677 | 0 | NA | 1  | NA | 14 | 0  | NA | 0  | NA | 0  | 0  | NA |
| 15 | 71712806 | 71639409 | -1 | NM_012428    | NPTN      | 0 | NA | 0  | NA | 0  | 0  | NA | 0  | NA | 0  | 0  | NA |
| 15 | 71712806 | 71639409 | -1 | NM_017455    | NPTN      | 0 | NA | 0  | NA | 0  | 0  | NA | 0  | NA | 0  | 0  | NA |
| 15 | 71763674 | 71793912 | 1  | NM_001024736 | CD276     | 0 | NA | 0  | NA | 0  | 1  | NA | 0  | NA | 0  | 0  | NA |
| 15 | 71763674 | 71793912 | 1  | NM_025240    | CD276     | 0 | NA | 0  | NA | 0  | 1  | NA | 0  | NA | 0  | 0  | NA |
| 15 | 71830869 | 71819193 | -1 | NM_001039614 | LOC388135 | 0 | NA | 0  | NA | 0  | 0  | NA | 0  | NA | 0  | 0  | NA |
| 15 | 71953020 | 71968608 | 1  | NM_153356    | TBC1D21   | 0 | NA | 0  | NA | 0  | 0  | NA | 0  | NA | 0  | 0  | NA |
| 15 | 72005841 | 72031531 | 1  | NM_005576    | LOXL1     | 0 | NA | 0  | NA | 0  | 0  | NA | 0  | NA | 0  | 0  | NA |
| 15 | 72071688 | 72062612 | -1 | NM_004809    | STOML1    | 0 | NA | 0  | NA | 0  | 0  | NA | 0  | NA | 0  | 0  | NA |
| 15 | 72074066 | 72115788 | 1  | NM_033239    | PML       | 0 | NA | 0  | NA | 0  | 0  | NA | 0  | NA | 0  | 0  | NA |
| 15 | 72074066 | 72115788 | 1  | NM_033240    | PML       | 0 | NA | 0  | NA | 0  | 0  | NA | 0  | NA | 0  | 0  | NA |
| 15 | 72074066 | 72115788 | 1  | NM_033244    | PML       | 0 | NA | 0  | NA | 0  | 0  | NA | 0  | NA | 0  | 0  | NA |
| 15 | 72074066 | 72115788 | 1  | NM_033247    | PML       | 0 | NA | 0  | NA | 0  | 0  | NA | 0  | NA | 0  | 0  | NA |
| 15 | 72074066 | 72115788 | 1  | NM_033250    | PML       | 0 | NA | 0  | NA | 0  | 0  | NA | 0  | NA | 0  | 0  | NA |
| 15 | 72074066 | 72122770 | 1  | NM_002675    | PML       | 0 | NA | 0  | NA | 0  | 0  | NA | 0  | NA | 0  | 0  | NA |
| 15 | 72074066 | 72122770 | 1  | NM_033246    | PML       | 0 | NA | 0  | NA | 0  | 0  | NA | 0  | NA | 0  | 0  | NA |
| 15 | 72074066 | 72122770 | 1  | NM_033249    | PML       | 0 | NA | 0  | NA | 0  | 0  | NA | 0  | NA | 0  | 0  | NA |
| 15 | 72074066 | 72127208 | 1  | NM_033238    | PML       | 0 | NA | 0  | NA | 0  | 0  | NA | 0  | NA | 0  | 0  | NA |
| 15 | 72161944 | 72149250 | -1 | NM_001038640 | GOLGA6    | 0 | NA | 0  | NA | 0  | 0  | NA | 0  | NA | 0  | 0  | NA |
| 15 | 72209997 | 72216196 | 1  | NM_020851    | ISLR2     | 0 | NA | 1  | NA | 12 | 0  | NA | 0  | NA | 0  | 0  | NA |
| 15 | 72253139 | 72256265 | 1  | NM_005545    | ISLR      | 0 | NA | 0  | NA | 0  | 0  | NA | 0  | NA | 0  | 0  | NA |

|    |          |          |    |              |           |   |    |   |    |   |    |   |    |   |    |
|----|----------|----------|----|--------------|-----------|---|----|---|----|---|----|---|----|---|----|
| 15 | 72253957 | 72256265 | 1  | NM_201526    | ISLR      | 0 | NA | 0 | NA | 0 | NA | 0 | NA | 0 | NA |
| 15 | 72282245 | 72258860 | -1 | NM_022369    | STRAG     | 1 | 11 | 0 | NA | 0 | NA | 0 | NA | 0 | NA |
| 15 | 72315719 | 72415535 | 1  | NM_025055    | CCDC33    | 1 | 11 | 0 | NA | 0 | NA | 0 | NA | 0 | NA |
| 15 | 72397952 | 72415535 | 1  | NM_182791    | CCDC33    | 0 | NA | 0 | NA | 0 | NA | 0 | NA | 0 | NA |
| 15 | 72445606 | 72417155 | -1 | NM_001099773 | CYP11A1   | 0 | NA | 0 | NA | 0 | NA | 0 | NA | 0 | NA |
| 15 | 72447134 | 72417155 | -1 | NM_000781    | CYP11A1   | 0 | NA | 0 | NA | 0 | NA | 0 | NA | 0 | NA |
| 15 | 72513329 | 72489375 | -1 | NM_003612    | SEMA7A    | 0 | NA | 0 | NA | 0 | NA | 0 | NA | 0 | NA |
| 15 | 72540563 | 72525370 | -1 | NM_032907    | UBL7      | 0 | NA | 0 | NA | 0 | NA | 0 | NA | 0 | NA |
| 15 | 72540582 | 72525370 | -1 | NM_201265    | UBL7      | 0 | NA | 0 | NA | 0 | NA | 0 | NA | 0 | NA |
| 15 | 72620600 | 72677525 | 1  | NM_006465    | ARID3B    | 0 | NA | 0 | NA | 0 | NA | 0 | NA | 0 | NA |
| 15 | 72694893 | 72709595 | 1  | NM_003992    | CLK3      | 0 | NA | 0 | NA | 0 | NA | 0 | NA | 0 | NA |
| 15 | 72775413 | 72709951 | -1 | NM_025083    | EDC3      | 0 | NA | 0 | NA | 0 | NA | 0 | NA | 0 | NA |
| 15 | 72804930 | 72798942 | -1 | NM_000499    | CYP1A1    | 0 | NA | 0 | NA | 0 | NA | 0 | NA | 0 | NA |
| 15 | 72828236 | 72835994 | 1  | NM_000761    | CYP1A2    | 0 | NA | 1 | 16 | 0 | NA | 0 | NA | 1 | 17 |
| 15 | 72861477 | 72882592 | 1  | NM_001127190 | CSK       | 0 | NA | 0 | NA | 0 | NA | 1 | 11 | 0 | NA |
| 15 | 72861477 | 72882592 | 1  | NM_004383    | CSK       | 0 | NA | 0 | NA | 0 | NA | 1 | 11 | 0 | NA |
| 15 | 72892246 | 72905152 | 1  | NM_021819    | LMAN1L    | 1 | 13 | 0 | NA | 0 | NA | 0 | NA | 0 | NA |
| 15 | 72906003 | 72911189 | 1  | NM_001030005 | CPLX3     | 1 | 13 | 0 | NA | 0 | NA | 0 | NA | 0 | NA |
| 15 | 72922605 | 72915511 | -1 | NM_001099436 | ULK3      | 0 | NA | 0 | NA | 0 | NA | 0 | NA | 0 | NA |
| 15 | 72952723 | 72924249 | -1 | NM_005697    | SCAMP2    | 0 | NA | 0 | NA | 0 | NA | 1 | 14 | 0 | NA |
| 15 | 72969462 | 72977618 | 1  | NM_002435    | MPI       | 0 | NA | 0 | NA | 0 | NA | 1 | 14 | 0 | NA |
| 15 | 72986515 | 72979380 | -1 | NM_020447    | C15orf17  | 0 | NA | 0 | NA | 0 | NA | 1 | 12 | 0 | NA |
| 15 | 73017425 | 72999671 | -1 | NM_004255    | COX5A     | 0 | NA | 0 | NA | 0 | NA | 0 | NA | 0 | NA |
| 15 | 73036828 | 73034495 | -1 | NM_017793    | RPP25     | 1 | 11 | 0 | NA | 1 | 13 | 0 | NA | 0 | NA |
| 15 | 73074953 | 73100889 | 1  | NM_138967    | SCAMP5    | 1 | 11 | 0 | NA | 0 | NA | 0 | NA | 0 | NA |
| 15 | 73102979 | 73130120 | 1  | NM_021823    | PPDC      | 1 | 11 | 0 | NA | 0 | NA | 0 | NA | 0 | NA |
| 15 | 73281273 | 73291563 | 1  | NM_015492    | C15orf39  | 0 | NA | 0 | NA | 0 | NA | 0 | NA | 0 | NA |
| 15 | 73415426 | 73419667 | 1  | NM_017828    | COMMD4    | 0 | NA | 0 | NA | 0 | NA | 0 | NA | 0 | NA |
| 15 | 73426462 | 73434641 | 1  | NM_024608    | NEIL1     | 0 | NA | 0 | NA | 0 | NA | 0 | NA | 0 | NA |
| 15 | 73447994 | 73435185 | -1 | NM_006715    | MAN2C1    | 0 | NA | 0 | NA | 0 | NA | 0 | NA | 0 | NA |
| 15 | 73530979 | 73450327 | -1 | NM_015477    | SIN3A     | 1 | 11 | 0 | NA | 0 | NA | 0 | NA | 0 | NA |
| 15 | 73658680 | 73546514 | -1 | NM_002833    | PTPN9     | 0 | NA | 0 | NA | 0 | NA | 0 | NA | 0 | NA |
| 15 | 73705501 | 73677478 | -1 | NM_001042581 | SNUPN     | 0 | NA | 0 | NA | 0 | NA | 0 | NA | 0 | NA |
| 15 | 73705501 | 73677478 | -1 | NM_005701    | SNUPN     | 0 | NA | 0 | NA | 0 | NA | 0 | NA | 0 | NA |
| 15 | 73705774 | 73677478 | -1 | NM_001042588 | SNUPN     | 0 | NA | 0 | NA | 0 | NA | 0 | NA | 0 | NA |
| 15 | 73719650 | 73718490 | -1 | NM_018285    | IMP3      | 0 | NA | 0 | NA | 0 | NA | 1 | 11 | 0 | NA |
| 15 | 73728402 | 73738023 | 1  | NM_153271    | SNX33     | 0 | NA | 0 | NA | 0 | NA | 1 | 11 | 0 | NA |
| 15 | 73792244 | 73753717 | -1 | NM_001897    | CSPG4     | 0 | NA | 0 | NA | 0 | NA | 0 | NA | 0 | NA |
| 15 | 73803373 | 73807082 | 1  | NM_175881    | ODF3L1    | 0 | NA | 0 | NA | 0 | NA | 0 | NA | 0 | NA |
| 15 | 73922854 | 73980437 | 1  | NM_173469    | UBE2Q2    | 1 | 12 | 0 | NA | 0 | NA | 0 | NA | 0 | NA |
| 15 | 73983254 | 74010368 | 1  | NM_012170    | FBXO22    | 0 | NA | 0 | NA | 0 | NA | 0 | NA | 0 | NA |
| 15 | 73983254 | 74013999 | 1  | NM_147188    | FBXO22    | 0 | NA | 0 | NA | 0 | NA | 0 | NA | 0 | NA |
| 15 | 74091840 | 74022898 | -1 | NM_138573    | NRG4      | 0 | NA | 0 | NA | 0 | NA | 0 | NA | 0 | NA |
| 15 | 74139353 | 74284359 | 1  | NM_152335    | C15orf27  | 0 | NA | 0 | NA | 0 | NA | 0 | NA | 0 | NA |
| 15 | 74390865 | 74296635 | -1 | NM_000126    | ETFA      | 0 | NA | 0 | NA | 0 | NA | 1 | 15 | 0 | NA |
| 15 | 74416201 | 74421871 | 1  | NM_145805    | ISL2      | 1 | 17 | 0 | NA | 0 | NA | 0 | NA | 0 | NA |
| 15 | 74963247 | 74427591 | -1 | NM_020843    | SCAPER    | 0 | NA | 0 | NA | 0 | NA | 0 | NA | 0 | NA |
| 15 | 75011170 | 75029300 | 1  | NM_002902    | RCN2      | 0 | NA | 0 | NA | 0 | NA | 0 | NA | 0 | NA |
| 15 | 75074519 | 75116726 | 1  | NM_003978    | PSTPIP1   | 0 | NA | 0 | NA | 0 | NA | 0 | NA | 0 | NA |
| 15 | 75150568 | 75125385 | -1 | NM_005724    | TSPAN3    | 0 | NA | 0 | NA | 0 | NA | 0 | NA | 0 | NA |
| 15 | 75150568 | 75125385 | -1 | NM_198902    | TSPAN3    | 0 | NA | 0 | NA | 0 | NA | 0 | NA | 0 | NA |
| 15 | 75364388 | 75187525 | -1 | NM_024776    | SGK269    | 0 | NA | 0 | NA | 0 | NA | 0 | NA | 0 | NA |
| 15 | 75500297 | 75565000 | 1  | NM_018200    | HMG20A    | 1 | 12 | 0 | NA | 0 | NA | 1 | 12 | 0 | NA |
| 15 | 75711764 | 75692423 | -1 | NM_032808    | LINGO1    | 0 | NA | 0 | NA | 0 | NA | 0 | NA | 0 | NA |
| 15 | 76157049 | 76074381 | -1 | NM_015079    | TBC1D2B   | 0 | NA | 0 | NA | 0 | NA | 0 | NA | 0 | NA |
| 15 | 76171981 | 76183448 | 1  | NM_001101404 | LOC646892 | 0 | NA | 0 | NA | 0 | NA | 0 | NA | 0 | NA |
| 15 | 76210933 | 76184045 | -1 | NM_006383    | CIB2      | 0 | NA | 0 | NA | 0 | NA | 0 | NA | 0 | NA |
| 15 | 76228773 | 76249939 | 1  | NM_005530    | IDH3A     | 0 | NA | 0 | NA | 0 | NA | 0 | NA | 0 | NA |
| 15 | 76313954 | 76250241 | -1 | NM_015162    | ACSBG1    | 0 | NA | 0 | NA | 0 | NA | 0 | NA | 0 | NA |
| 15 | 76343550 | 76361591 | 1  | NM_018602    | DNAJA4    | 0 | NA | 0 | NA | 0 | NA | 0 | NA | 0 | NA |
| 15 | 76378995 | 76362632 | -1 | NM_025234    | WDR61     | 0 | NA | 0 | NA | 0 | NA | 0 | NA | 0 | NA |
| 15 | 76419757 | 76427622 | 1  | NM_004378    | CRABP1    | 0 | NA | 0 | NA | 0 | NA | 0 | NA | 0 | NA |
| 15 | 76517572 | 76580853 | 1  | NM_004136    | IREB2     | 0 | NA | 0 | NA | 0 | NA | 0 | NA | 0 | NA |
| 15 | 76586960 | 76613067 | 1  | NM_001013619 | LOC123688 | 0 | NA | 0 | NA | 0 | NA | 0 | NA | 0 | NA |
| 15 | 76586960 | 76616770 | 1  | NM_001083612 | LOC123688 | 0 | NA | 0 | NA | 0 | NA | 0 | NA | 0 | NA |

|    |          |          |    |              |           |   |    |   |    |   |    |   |    |   |    |
|----|----------|----------|----|--------------|-----------|---|----|---|----|---|----|---|----|---|----|
| 15 | 76619801 | 76628618 | 1  | NM_001102667 | PSMA4     | 0 | NA | 0 | NA | 0 | NA | 0 | NA | 0 | NA |
| 15 | 76619801 | 76628618 | 1  | NM_001102668 | PSMA4     | 0 | NA | 0 | NA | 0 | NA | 0 | NA | 0 | NA |
| 15 | 76619801 | 76628618 | 1  | NM_002789    | PSMA4     | 0 | NA | 0 | NA | 0 | NA | 0 | NA | 0 | NA |
| 15 | 76644960 | 76673515 | 1  | NM_000745    | CHRNA5    | 0 | NA | 0 | NA | 0 | NA | 0 | NA | 0 | NA |
| 15 | 76700377 | 76674705 | -1 | NM_000743    | CHRNA3    | 0 | NA | 1 | 16 | 0 | NA | 0 | NA | 0 | NA |
| 15 | 76720642 | 76703690 | -1 | NM_000750    | CHRNA4    | 0 | NA | 0 | NA | 0 | NA | 0 | NA | 0 | NA |
| 15 | 76890828 | 76838599 | -1 | NM_014272    | ADAMTS7   | 0 | NA | 0 | NA | 0 | NA | 0 | NA | 0 | NA |
| 15 | 76952226 | 76977129 | 1  | NM_006791    | MORF4L1   | 0 | NA | 0 | NA | 0 | NA | 0 | NA | 0 | NA |
| 15 | 76952226 | 76977129 | 1  | NM_206839    | MORF4L1   | 0 | NA | 0 | NA | 0 | NA | 0 | NA | 0 | NA |
| 15 | 77024475 | 77001146 | -1 | NM_004390    | CTSH      | 0 | NA | 0 | NA | 0 | NA | 0 | NA | 0 | NA |
| 15 | 77024475 | 77001146 | -1 | NM_148979    | CTSH      | 0 | NA | 0 | NA | 0 | NA | 0 | NA | 0 | NA |
| 15 | 77085057 | 77041340 | -1 | NM_153815    | RASGRF1   | 0 | NA | 0 | NA | 0 | NA | 0 | NA | 0 | NA |
| 15 | 77169895 | 77041340 | -1 | NM_002891    | RASGRF1   | 0 | NA | 0 | NA | 0 | NA | 0 | NA | 0 | NA |
| 15 | 77390545 | 77402244 | 1  | NM_007364    | TMED3     | 0 | NA | 0 | NA | 1 | 13 | 0 | NA | 0 | NA |
| 15 | 77511912 | 77551697 | 1  | NM_015206    | KIAA1024  | 0 | NA | 0 | NA | 0 | NA | 0 | NA | 0 | NA |
| 15 | 77976425 | 77924372 | -1 | NM_006441    | MTHFS     | 0 | NA | 0 | NA | 0 | NA | 0 | NA | 0 | NA |
| 15 | 77994653 | 77978236 | -1 | NM_001100879 | ST20      | 1 | 18 | 0 | NA | 1 | 14 | 1 | 27 | 1 | 12 |
| 15 | 78002167 | 78004249 | 1  | NM_175898    | C15orf37  | 1 | 28 | 0 | NA | 1 | 12 | 1 | 15 | 1 | 12 |
| 15 | 78003132 | 77978236 | -1 | NM_001100880 | ST20      | 1 | 28 | 0 | NA | 1 | 12 | 1 | 15 | 1 | 12 |
| 15 | 78050698 | 78040286 | -1 | NM_001114735 | BCL2A1    | 0 | NA | 0 | NA | 0 | NA | 0 | NA | 0 | NA |
| 15 | 78050698 | 78040286 | -1 | NM_004049    | BCL2A1    | 0 | NA | 0 | NA | 0 | NA | 0 | NA | 0 | NA |
| 15 | 78139075 | 78217765 | 1  | NM_019006    | ZFAND6    | 0 | NA | 0 | NA | 0 | NA | 0 | NA | 0 | NA |
| 15 | 78232395 | 78265737 | 1  | NM_000137    | FAH       | 0 | NA | 0 | NA | 0 | NA | 0 | NA | 0 | NA |
| 15 | 78483746 | 78677332 | 1  | NM_014862    | ARNT2     | 0 | NA | 0 | NA | 0 | NA | 0 | NA | 0 | NA |
| 15 | 78774706 | 78835017 | 1  | NM_021214    | FAM108C1  | 0 | NA | 0 | NA | 0 | NA | 0 | NA | 0 | NA |
| 15 | 78858766 | 79031054 | 1  | NM_018689    | KIAA1199  | 0 | NA | 0 | NA | 0 | NA | 0 | NA | 0 | NA |
| 15 | 79069260 | 79055149 | -1 | NM_015154    | MESDC2    | 0 | NA | 0 | NA | 0 | NA | 0 | NA | 0 | NA |
| 15 | 79081027 | 79083400 | 1  | NM_022566    | MESDC1    | 0 | NA | 0 | NA | 0 | NA | 0 | NA | 0 | NA |
| 15 | 79213698 | 79228571 | 1  | NM_173528    | C15orf26  | 0 | NA | 0 | NA | 0 | NA | 0 | NA | 0 | NA |
| 15 | 79276273 | 79392157 | 1  | NM_172217    | IL16      | 0 | NA | 0 | NA | 0 | NA | 0 | NA | 0 | NA |
| 15 | 79374521 | 79392157 | 1  | NM_004513    | IL16      | 0 | NA | 0 | NA | 0 | NA | 0 | NA | 0 | NA |
| 15 | 79403579 | 79392061 | -1 | NM_181900    | STARD5    | 0 | NA | 0 | NA | 0 | NA | 0 | NA | 0 | NA |
| 15 | 79453473 | 79411814 | -1 | NM_001080532 | TMC3      | 0 | NA | 0 | NA | 0 | NA | 0 | NA | 0 | NA |
| 15 | 80125416 | 80121182 | -1 | NM_032246    | MEX3B     | 0 | NA | 0 | NA | 1 | 12 | 0 | NA | 1 | 15 |
| 15 | 80342159 | 80209615 | -1 | NM_001040610 | EFTUD1    | 0 | NA | 0 | NA | 0 | NA | 0 | NA | 0 | NA |
| 15 | 80342159 | 80209615 | -1 | NM_024580    | EFTUD1    | 0 | NA | 0 | NA | 0 | NA | 0 | NA | 0 | NA |
| 15 | 80342206 | 80364322 | 1  | NM_001008226 | FAM154B   | 0 | NA | 0 | NA | 0 | NA | 0 | NA | 0 | NA |
| 15 | 80509239 | 80518641 | 1  | NM_198181    | LOC440295 | 0 | NA | 0 | NA | 0 | NA | 0 | NA | 0 | NA |
| 15 | 80611920 | 80608215 | -1 | NM_001021    | RPS17     | 0 | NA | 0 | NA | 0 | NA | 0 | NA | 0 | NA |
| 15 | 80895764 | 80905166 | 1  | NM_198181    | LOC440295 | 0 | NA | 0 | NA | 0 | NA | 0 | NA | 0 | NA |
| 15 | 81006263 | 81002558 | -1 | NM_001021    | RPS17     | 0 | NA | 0 | NA | 0 | NA | 0 | NA | 0 | NA |
| 15 | 81037628 | 81009005 | -1 | NM_001079533 | CPEB1     | 0 | NA | 0 | NA | 0 | NA | 0 | NA | 0 | NA |
| 15 | 81037628 | 81009005 | -1 | NM_001079534 | CPEB1     | 0 | NA | 0 | NA | 0 | NA | 0 | NA | 0 | NA |
| 15 | 81037628 | 81009005 | -1 | NM_001079535 | CPEB1     | 0 | NA | 0 | NA | 0 | NA | 0 | NA | 0 | NA |
| 15 | 81113783 | 81009005 | -1 | NM_030594    | CPEB1     | 0 | NA | 0 | NA | 0 | NA | 0 | NA | 0 | NA |
| 15 | 81175689 | 81125087 | -1 | NM_004644    | AP3B2     | 0 | NA | 0 | NA | 0 | NA | 0 | NA | 0 | NA |
| 15 | 81271860 | 81225077 | -1 | NM_001007122 | FSD2      | 0 | NA | 0 | NA | 0 | NA | 0 | NA | 0 | NA |
| 15 | 81275026 | 81300667 | 1  | NM_001080435 | WHDC1     | 0 | NA | 0 | NA | 0 | NA | 0 | NA | 0 | NA |
| 15 | 81412477 | 81314789 | -1 | NM_004839    | HOMER2    | 0 | NA | 0 | NA | 0 | NA | 0 | NA | 0 | NA |
| 15 | 81412477 | 81314789 | -1 | NM_199330    | HOMER2    | 0 | NA | 0 | NA | 0 | NA | 0 | NA | 0 | NA |
| 15 | 81412477 | 81314789 | -1 | NM_199331    | HOMER2    | 0 | NA | 0 | NA | 0 | NA | 0 | NA | 0 | NA |
| 15 | 81412477 | 81314789 | -1 | NM_199332    | HOMER2    | 0 | NA | 0 | NA | 0 | NA | 0 | NA | 0 | NA |
| 15 | 81445998 | 81450427 | 1  | NM_031452    | FAM103A1  | 1 | 13 | 0 | NA | 1 | 23 | 1 | 37 | 0 | NA |
| 15 | 81471362 | 81464407 | -1 | NM_144597    | C15orf40  | 0 | NA | 0 | NA | 0 | NA | 0 | NA | 0 | NA |
| 15 | 81527110 | 81476184 | -1 | NM_001011885 | BTBD1     | 0 | NA | 0 | NA | 0 | NA | 0 | NA | 0 | NA |
| 15 | 81527110 | 81476184 | -1 | NM_025238    | BTBD1     | 0 | NA | 0 | NA | 0 | NA | 0 | NA | 0 | NA |
| 15 | 81567383 | 81596680 | 1  | NM_023003    | TM6SF1    | 0 | NA | 0 | NA | 0 | NA | 0 | NA | 0 | NA |
| 15 | 81667325 | 81597819 | -1 | NM_016073    | HDFFRP3   | 0 | NA | 0 | NA | 0 | NA | 0 | NA | 0 | NA |
| 15 | 81744472 | 81715658 | -1 | NM_001717    | BNC1      | 0 | NA | 1 | 12 | 0 | NA | 0 | NA | 0 | NA |
| 15 | 81907286 | 82078495 | 1  | NM_003027    | SH3GL3    | 0 | NA | 0 | NA | 0 | NA | 0 | NA | 0 | NA |
| 15 | 82113841 | 82499597 | 1  | NM_207517    | ADAMTSL3  | 0 | NA | 0 | NA | 0 | NA | 0 | NA | 0 | NA |
| 15 | 82945252 | 82951120 | 1  | NM_017894    | ZSCAN2    | 1 | 32 | 0 | NA | 1 | 13 | 0 | NA | 0 | NA |
| 15 | 82945252 | 82960845 | 1  | NM_001007072 | ZSCAN2    | 1 | 32 | 0 | NA | 1 | 13 | 0 | NA | 0 | NA |
| 15 | 82945252 | 82967951 | 1  | NM_181877    | ZSCAN2    | 1 | 32 | 0 | NA | 1 | 13 | 0 | NA | 0 | NA |
| 15 | 82998525 | 82987014 | -1 | NM_032856    | WDR73     | 0 | NA | 0 | NA | 0 | NA | 1 | 11 | 0 | NA |

|    |          |          |    |              |           |   |    |   |    |   |    |   |    |   |    |
|----|----------|----------|----|--------------|-----------|---|----|---|----|---|----|---|----|---|----|
| 15 | 83002806 | 82999363 | -1 | NM_021077    | NMB       | 0 | NA | 0 | NA | 0 | NA | 1 | 11 | 0 | NA |
| 15 | 83002806 | 82999363 | -1 | NM_205858    | NMB       | 0 | NA | 0 | NA | 0 | NA | 1 | 11 | 0 | NA |
| 15 | 83060678 | 83013778 | -1 | NM_014300    | SEC11A    | 0 | NA | 0 | NA | 0 | NA | 0 | NA | 0 | NA |
| 15 | 83092821 | 83150667 | 1  | NM_014630    | ZNF592    | 0 | NA | 0 | NA | 0 | NA | 0 | NA | 0 | NA |
| 15 | 83160914 | 83217712 | 1  | NM_020778    | ALPK3     | 0 | NA | 0 | NA | 0 | NA | 0 | NA | 0 | NA |
| 15 | 83228916 | 83240272 | 1  | NM_201651    | SLC28A1   | 0 | NA | 0 | NA | 0 | NA | 0 | NA | 0 | NA |
| 15 | 83228916 | 83290031 | 1  | NM_004213    | SLC28A1   | 0 | NA | 0 | NA | 0 | NA | 0 | NA | 0 | NA |
| 15 | 83326208 | 83483376 | 1  | NM_002605    | PDE8A     | 0 | NA | 0 | NA | 0 | NA | 0 | NA | 0 | NA |
| 15 | 83326208 | 83483376 | 1  | NM_173454    | PDE8A     | 0 | NA | 0 | NA | 0 | NA | 0 | NA | 0 | NA |
| 15 | 83724874 | 84093590 | 1  | NM_006738    | AKAP13    | 0 | NA | 0 | NA | 0 | NA | 0 | NA | 0 | NA |
| 15 | 83724874 | 84093590 | 1  | NM_007200    | AKAP13    | 0 | NA | 0 | NA | 0 | NA | 0 | NA | 0 | NA |
| 15 | 84021271 | 84093590 | 1  | NM_144767    | AKAP13    | 0 | NA | 0 | NA | 0 | NA | 0 | NA | 0 | NA |
| 15 | 84139193 | 84103562 | -1 | NM_022480    | KLHL25    | 0 | NA | 0 | NA | 0 | NA | 0 | NA | 0 | NA |
| 15 | 84486245 | 85373287 | 1  | NM_152336    | AGBL1     | 0 | NA | 0 | NA | 0 | NA | 0 | NA | 0 | NA |
| 15 | 86600665 | 86220991 | -1 | NM_001012338 | NTRK3     | 0 | NA | 0 | NA | 0 | NA | 0 | NA | 0 | NA |
| 15 | 86600665 | 86220991 | -1 | NM_002530    | NTRK3     | 0 | NA | 0 | NA | 0 | NA | 0 | NA | 0 | NA |
| 15 | 86600665 | 86321598 | -1 | NM_001007156 | NTRK3     | 0 | NA | 0 | NA | 0 | NA | 0 | NA | 0 | NA |
| 15 | 86811637 | 86803712 | -1 | NM_022163    | MRPL46    | 1 | 17 | 0 | NA | 0 | NA | 0 | NA | 0 | NA |
| 15 | 86811687 | 86822494 | 1  | NM_176805    | MRPS11    | 1 | 17 | 0 | NA | 0 | NA | 0 | NA | 0 | NA |
| 15 | 86811687 | 86822499 | 1  | NM_022839    | MRPS11    | 1 | 17 | 0 | NA | 0 | NA | 0 | NA | 0 | NA |
| 15 | 86890888 | 86856717 | -1 | NM_017996    | DET1      | 0 | NA | 0 | NA | 0 | NA | 0 | NA | 0 | NA |
| 15 | 86965592 | 86976516 | 1  | NM_022767    | ISG20L1   | 0 | NA | 0 | NA | 0 | NA | 0 | NA | 0 | NA |
| 15 | 86983042 | 86999883 | 1  | NM_002201    | ISG20     | 0 | NA | 0 | NA | 0 | NA | 0 | NA | 0 | NA |
| 15 | 87147677 | 87219589 | 1  | NM_001135    | ACAN      | 0 | NA | 0 | NA | 0 | NA | 0 | NA | 0 | NA |
| 15 | 87147677 | 87219589 | 1  | NM_013227    | ACAN      | 0 | NA | 0 | NA | 0 | NA | 0 | NA | 0 | NA |
| 15 | 87239774 | 87221522 | -1 | NM_178232    | HAPLN3    | 0 | NA | 0 | NA | 0 | NA | 0 | NA | 0 | NA |
| 15 | 87257667 | 87242917 | -1 | NM_001114614 | MFGE8     | 0 | NA | 0 | NA | 1 | 12 | 0 | NA | 0 | NA |
| 15 | 87257667 | 87242917 | -1 | NM_005928    | MFGE8     | 0 | NA | 0 | NA | 1 | 12 | 0 | NA | 0 | NA |
| 15 | 87432428 | 87546591 | 1  | NM_007011    | ABHD2     | 1 | 14 | 0 | NA | 1 | 19 | 0 | NA | 0 | NA |
| 15 | 87432428 | 87546591 | 1  | NM_152924    | ABHD2     | 1 | 14 | 0 | NA | 1 | 19 | 0 | NA | 0 | NA |
| 15 | 87565926 | 87554101 | -1 | NM_000326    | RLBP1     | 0 | NA | 0 | NA | 0 | NA | 0 | NA | 0 | NA |
| 15 | 87588197 | 87661366 | 1  | NM_001113378 | FANCI     | 0 | NA | 0 | NA | 0 | NA | 0 | NA | 0 | NA |
| 15 | 87588197 | 87661366 | 1  | NM_018193    | FANCI     | 0 | NA | 0 | NA | 0 | NA | 0 | NA | 0 | NA |
| 15 | 87679030 | 87660539 | -1 | NM_001126131 | POLG      | 0 | NA | 0 | NA | 0 | NA | 0 | NA | 0 | NA |
| 15 | 87679030 | 87660539 | -1 | NM_002693    | POLG      | 0 | NA | 0 | NA | 0 | NA | 0 | NA | 0 | NA |
| 15 | 87840803 | 87815643 | -1 | NM_016321    | RHCG      | 0 | NA | 0 | NA | 0 | NA | 0 | NA | 0 | NA |
| 15 | 87919821 | 87972257 | 1  | NM_152259    | C15orf42  | 0 | NA | 0 | NA | 0 | NA | 0 | NA | 0 | NA |
| 15 | 87992578 | 87972210 | -1 | NM_198525    | KIF7      | 0 | NA | 0 | NA | 0 | NA | 0 | NA | 0 | NA |
| 15 | 88023595 | 88008602 | -1 | NM_002666    | PLIN      | 0 | NA | 0 | NA | 0 | NA | 0 | NA | 0 | NA |
| 15 | 88034962 | 88027290 | -1 | NM_003847    | PEX11A    | 0 | NA | 0 | NA | 0 | NA | 0 | NA | 0 | NA |
| 15 | 88035031 | 88087873 | 1  | NM_020212    | WDR93     | 0 | NA | 0 | NA | 0 | NA | 0 | NA | 0 | NA |
| 15 | 88095545 | 88094109 | -1 | NM_018670    | MESP1     | 0 | NA | 0 | NA | 0 | NA | 0 | NA | 0 | NA |
| 15 | 88120592 | 88122986 | 1  | NM_001039958 | MESP2     | 0 | NA | 0 | NA | 0 | NA | 0 | NA | 0 | NA |
| 15 | 88159076 | 88129129 | -1 | NM_001150    | ANPEP     | 0 | NA | 0 | NA | 0 | NA | 0 | NA | 0 | NA |
| 15 | 88238206 | 88177791 | -1 | NM_005829    | AP3S2     | 0 | NA | 0 | NA | 0 | NA | 0 | NA | 0 | NA |
| 15 | 88257163 | 88244835 | -1 | NM_182616    | C15orf38  | 0 | NA | 0 | NA | 0 | NA | 0 | NA | 0 | NA |
| 15 | 88345755 | 88425029 | 1  | NM_198526    | ZNF710    | 0 | NA | 0 | NA | 0 | NA | 0 | NA | 0 | NA |
| 15 | 88446712 | 88428215 | -1 | NM_002168    | IDH2      | 1 | 15 | 0 | NA | 0 | NA | 0 | NA | 0 | NA |
| 15 | 88529155 | 88573896 | 1  | NM_020210    | SEMA4B    | 0 | NA | 0 | NA | 0 | NA | 1 | 13 | 0 | NA |
| 15 | 88545565 | 88573896 | 1  | NM_198925    | SEMA4B    | 0 | NA | 0 | NA | 0 | NA | 0 | NA | 0 | NA |
| 15 | 88578283 | 88574480 | -1 | NM_006384    | CIB1      | 0 | NA | 0 | NA | 0 | NA | 0 | NA | 0 | NA |
| 15 | 88578490 | 88586316 | 1  | NM_001013657 | LOC390637 | 0 | NA | 0 | NA | 0 | NA | 0 | NA | 0 | NA |
| 15 | 88593767 | 88603316 | 1  | NM_001029964 | TTL13     | 0 | NA | 0 | NA | 0 | NA | 0 | NA | 0 | NA |
| 15 | 88609898 | 88616447 | 1  | NM_001033088 | NGRN      | 1 | 11 | 0 | NA | 0 | NA | 0 | NA | 0 | NA |
| 15 | 88609898 | 88616447 | 1  | NM_016645    | NGRN      | 1 | 11 | 0 | NA | 0 | NA | 0 | NA | 0 | NA |
| 15 | 88696480 | 88705719 | 1  | NM_001004309 | ZNF774    | 0 | NA | 0 | NA | 0 | NA | 0 | NA | 0 | NA |
| 15 | 88732476 | 88846479 | 1  | NM_003870    | IQGAP1    | 0 | NA | 0 | NA | 0 | NA | 1 | 18 | 0 | NA |
| 15 | 88874201 | 88989581 | 1  | NM_001042574 | CRTC3     | 0 | NA | 0 | NA | 0 | NA | 0 | NA | 0 | NA |
| 15 | 88874201 | 88989581 | 1  | NM_022769    | CRTC3     | 0 | NA | 0 | NA | 0 | NA | 0 | NA | 0 | NA |
| 15 | 89061582 | 89159690 | 1  | NM_000057    | BLM       | 0 | NA | 0 | NA | 0 | NA | 1 | 12 | 0 | NA |
| 15 | 89212888 | 89227691 | 1  | NM_002569    | FURIN     | 0 | NA | 0 | NA | 0 | NA | 0 | NA | 0 | NA |
| 15 | 89228712 | 89240010 | 1  | NM_002005    | FES       | 0 | NA | 0 | NA | 0 | NA | 0 | NA | 0 | NA |
| 15 | 89248423 | 89266819 | 1  | NM_006122    | MAN2A2    | 0 | NA | 0 | NA | 0 | NA | 0 | NA | 0 | NA |
| 15 | 89274413 | 89298327 | 1  | NM_001039675 | UNC45A    | 0 | NA | 0 | NA | 0 | NA | 0 | NA | 0 | NA |
| 15 | 89276778 | 89275158 | -1 | NM_198527    | HDDC3     | 0 | NA | 0 | NA | 0 | NA | 0 | NA | 0 | NA |

|    |           |           |    |              |           |   |    |   |    |   |    |   |    |   |    |
|----|-----------|-----------|----|--------------|-----------|---|----|---|----|---|----|---|----|---|----|
| 15 | 89279218  | 89298327  | 1  | NM_018671    | UNC45A    | 0 | NA | 0 | NA | 0 | NA | 0 | NA | 0 | NA |
| 15 | 89299109  | 89307359  | 1  | NM_001017919 | RCCD1     | 0 | NA | 0 | NA | 0 | NA | 0 | NA | 0 | NA |
| 15 | 89299109  | 89307359  | 1  | NM_033544    | RCCD1     | 0 | NA | 0 | NA | 0 | NA | 0 | NA | 0 | NA |
| 15 | 89338808  | 89310271  | -1 | NM_003981    | PRC1      | 0 | NA | 0 | NA | 0 | NA | 1 | 12 | 0 | NA |
| 15 | 89338808  | 89310271  | -1 | NM_199413    | PRC1      | 0 | NA | 0 | NA | 0 | NA | 1 | 12 | 0 | NA |
| 15 | 89338808  | 89310271  | -1 | NM_199414    | PRC1      | 0 | NA | 0 | NA | 0 | NA | 1 | 12 | 0 | NA |
| 15 | 89366837  | 89342777  | -1 | NM_018668    | VPS33B    | 0 | NA | 0 | NA | 0 | NA | 0 | NA | 0 | NA |
| 15 | 89570106  | 89639654  | 1  | NM_014848    | SV2B      | 0 | NA | 0 | NA | 0 | NA | 0 | NA | 0 | NA |
| 15 | 90197949  | 90507782  | 1  | NM_013272    | SLCO3A1   | 0 | NA | 0 | NA | 0 | NA | 0 | NA | 0 | NA |
| 15 | 90738143  | 90812962  | 1  | NM_006011    | ST8SIA2   | 0 | NA | 0 | NA | 0 | NA | 0 | NA | 1 | 13 |
| 15 | 90815910  | 90845351  | 1  | NM_153040    | C15orf32  | 0 | NA | 0 | NA | 0 | NA | 0 | NA | 0 | NA |
| 15 | 91000035  | 90961682  | -1 | NM_207446    | LOC400451 | 0 | NA | 0 | NA | 0 | NA | 0 | NA | 0 | NA |
| 15 | 91244554  | 91293467  | 1  | NM_001042572 | CHD2      | 0 | NA | 0 | NA | 1 | 12 | 0 | NA | 0 | NA |
| 15 | 91244554  | 91372241  | 1  | NM_001271    | CHD2      | 0 | NA | 0 | NA | 1 | 12 | 0 | NA | 0 | NA |
| 15 | 91433437  | 91387640  | -1 | NM_020211    | RGMA      | 0 | NA | 1 | 12 | 0 | NA | 0 | NA | 0 | NA |
| 15 | 92642498  | 92823267  | 1  | NM_018349    | MCTP2     | 0 | NA | 0 | NA | 0 | NA | 0 | NA | 0 | NA |
| 15 | 94674949  | 94683047  | 1  | NM_021005    | NR2F2     | 0 | NA | 0 | NA | 0 | NA | 0 | NA | 0 | NA |
| 15 | 95127682  | 95129849  | 1  | NM_173499    | SPATA8    | 0 | NA | 0 | NA | 0 | NA | 0 | NA | 0 | NA |
| 15 | 96304951  | 96318064  | 1  | NM_183376    | ARRDC4    | 0 | NA | 0 | NA | 0 | NA | 0 | NA | 0 | NA |
| 15 | 96875134  | 96797913  | -1 | NM_182562    | FLJ39743  | 1 | 11 | 0 | NA | 0 | NA | 0 | NA | 0 | NA |
| 15 | 97010283  | 97325282  | 1  | NM_000875    | IGF1R     | 0 | NA | 0 | NA | 0 | NA | 0 | NA | 0 | NA |
| 15 | 97366314  | 97329031  | -1 | NM_001102612 | LOC145814 | 0 | NA | 0 | NA | 0 | NA | 0 | NA | 0 | NA |
| 15 | 97462808  | 97493323  | 1  | NM_015286    | DMN       | 0 | NA | 0 | NA | 0 | NA | 0 | NA | 0 | NA |
| 15 | 97462808  | 97493323  | 1  | NM_145728    | DMN       | 0 | NA | 0 | NA | 0 | NA | 0 | NA | 0 | NA |
| 15 | 97607338  | 97494050  | -1 | NM_001040655 | TTC23     | 0 | NA | 0 | NA | 1 | 20 | 0 | NA | 0 | NA |
| 15 | 97607338  | 97494050  | -1 | NM_001040656 | TTC23     | 0 | NA | 0 | NA | 1 | 20 | 0 | NA | 0 | NA |
| 15 | 97607338  | 97494050  | -1 | NM_001040657 | TTC23     | 0 | NA | 0 | NA | 1 | 20 | 0 | NA | 0 | NA |
| 15 | 97607338  | 97494050  | -1 | NM_001040658 | TTC23     | 0 | NA | 0 | NA | 1 | 20 | 0 | NA | 0 | NA |
| 15 | 97607338  | 97494050  | -1 | NM_001040659 | TTC23     | 0 | NA | 0 | NA | 1 | 20 | 0 | NA | 0 | NA |
| 15 | 97607338  | 97494050  | -1 | NM_001040660 | TTC23     | 0 | NA | 0 | NA | 1 | 20 | 0 | NA | 0 | NA |
| 15 | 97607338  | 97494050  | -1 | NM_022905    | TTC23     | 0 | NA | 0 | NA | 1 | 20 | 0 | NA | 0 | NA |
| 15 | 97609174  | 97744021  | 1  | NM_144598    | LRRC28    | 0 | NA | 0 | NA | 1 | 20 | 0 | NA | 0 | NA |
| 15 | 97956184  | 98071524  | 1  | NM_005587    | MEF2A     | 0 | NA | 0 | NA | 0 | NA | 0 | NA | 0 | NA |
| 15 | 98091149  | 98085134  | -1 | NM_152449    | LYSMD4    | 1 | 16 | 0 | NA | 0 | NA | 0 | NA | 0 | NA |
| 15 | 98699706  | 98329165  | -1 | NM_139057    | ADAMTS17  | 0 | NA | 0 | NA | 0 | NA | 0 | NA | 0 | NA |
| 15 | 98902448  | 98758122  | -1 | NM_178842    | LASS3     | 0 | NA | 0 | NA | 0 | NA | 0 | NA | 0 | NA |
| 15 | 98959927  | 98926957  | -1 | NM_001040614 | LINS1     | 0 | NA | 0 | NA | 0 | NA | 0 | NA | 0 | NA |
| 15 | 98959927  | 98926957  | -1 | NM_001040615 | LINS1     | 0 | NA | 0 | NA | 0 | NA | 0 | NA | 0 | NA |
| 15 | 98959927  | 98926957  | -1 | NM_001040616 | LINS1     | 0 | NA | 0 | NA | 0 | NA | 0 | NA | 0 | NA |
| 15 | 98959927  | 98926957  | -1 | NM_018148    | LINS1     | 0 | NA | 0 | NA | 0 | NA | 0 | NA | 0 | NA |
| 15 | 98960357  | 98987937  | 1  | NM_024708    | ASB7      | 0 | NA | 0 | NA | 0 | NA | 0 | NA | 0 | NA |
| 15 | 98960357  | 99007174  | 1  | NM_198243    | ASB7      | 0 | NA | 0 | NA | 0 | NA | 0 | NA | 0 | NA |
| 15 | 99237531  | 99274353  | 1  | NM_000693    | ALDH1A3   | 0 | NA | 0 | NA | 0 | NA | 0 | NA | 0 | NA |
| 15 | 99276982  | 99427840  | 1  | NM_024652    | LRRK1     | 0 | NA | 0 | NA | 0 | NA | 0 | NA | 0 | NA |
| 15 | 99609649  | 99533454  | -1 | NM_014918    | CHSY1     | 0 | NA | 0 | NA | 0 | NA | 0 | NA | 0 | NA |
| 15 | 99635223  | 99628736  | -1 | NM_203472    | SELS      | 0 | NA | 0 | NA | 0 | NA | 0 | NA | 0 | NA |
| 15 | 99635223  | 99629912  | -1 | NM_018445    | SELS      | 0 | NA | 0 | NA | 0 | NA | 0 | NA | 0 | NA |
| 15 | 99652983  | 99639237  | -1 | NM_003090    | SNRPA1    | 0 | NA | 0 | NA | 0 | NA | 0 | NA | 0 | NA |
| 15 | 99847710  | 99661655  | -1 | NM_002570    | PCSK6     | 0 | NA | 0 | NA | 0 | NA | 0 | NA | 0 | NA |
| 15 | 99847710  | 99661655  | -1 | NM_138319    | PCSK6     | 0 | NA | 0 | NA | 0 | NA | 0 | NA | 0 | NA |
| 15 | 99847710  | 99670747  | -1 | NM_138320    | PCSK6     | 0 | NA | 0 | NA | 0 | NA | 0 | NA | 0 | NA |
| 15 | 99847710  | 99670747  | -1 | NM_138321    | PCSK6     | 0 | NA | 0 | NA | 0 | NA | 0 | NA | 0 | NA |
| 15 | 99847710  | 99704469  | -1 | NM_138323    | PCSK6     | 0 | NA | 0 | NA | 0 | NA | 0 | NA | 0 | NA |
| 15 | 99847710  | 99704469  | -1 | NM_138324    | PCSK6     | 0 | NA | 0 | NA | 0 | NA | 0 | NA | 0 | NA |
| 15 | 99847710  | 99722601  | -1 | NM_138325    | PCSK6     | 0 | NA | 0 | NA | 0 | NA | 0 | NA | 0 | NA |
| 15 | 99847710  | 99741475  | -1 | NM_138322    | PCSK6     | 0 | NA | 0 | NA | 0 | NA | 0 | NA | 0 | NA |
| 15 | 100010117 | 99999571  | -1 | NM_025141    | TM2D3     | 0 | NA | 0 | NA | 0 | NA | 0 | NA | 0 | NA |
| 15 | 100010117 | 99999571  | -1 | NM_078474    | TM2D3     | 0 | NA | 0 | NA | 0 | NA | 0 | NA | 0 | NA |
| 15 | 100082168 | 100011477 | -1 | NM_152334    | TARSL2    | 0 | NA | 0 | NA | 0 | NA | 0 | NA | 0 | NA |
| 15 | 100163445 | 100164384 | 1  | NM_001005326 | OR4F6     | 1 | 11 | 0 | NA | 0 | NA | 1 | 11 | 0 | NA |
| 15 | 100175912 | 100176851 | 1  | NM_001001674 | OR4F15    | 0 | NA | 0 | NA | 0 | NA | 0 | NA | 0 | NA |
| 15 | 100280785 | 100279867 | -1 | NM_001004195 | OR4F4     | 0 | NA | 0 | NA | 0 | NA | 0 | NA | 0 | NA |
| 14 | 18447593  | 18448574  | 1  | NM_001013354 | OR11H12   | 0 | NA | 0 | NA | 0 | NA | 0 | NA | 0 | NA |
| 14 | 18623364  | 18654942  | 1  | NM_001005356 | A26C2     | 0 | NA | 0 | NA | 0 | NA | 0 | NA | 0 | NA |
| 14 | 19285426  | 19286368  | 1  | NM_172194    | OR4Q3     | 0 | NA | 0 | NA | 0 | NA | 0 | NA | 0 | NA |

|    |          |          |    |              |          |   |    |   |    |   |    |   |    |   |    |
|----|----------|----------|----|--------------|----------|---|----|---|----|---|----|---|----|---|----|
| 14 | 19318321 | 19319263 | 1  | NM_001005500 | OR4M1    | 0 | NA | 1 | 12 | 0 | NA | 0 | NA | 0 | NA |
| 14 | 19365447 | 19366371 | 1  | NM_001004723 | OR4N2    | 0 | NA | 0 | NA | 0 | NA | 0 | NA | 0 | NA |
| 14 | 19414266 | 19415211 | 1  | NM_001005501 | OR4K2    | 0 | NA | 0 | NA | 0 | NA | 0 | NA | 0 | NA |
| 14 | 19458605 | 19459577 | 1  | NM_001005483 | OR4K5    | 0 | NA | 0 | NA | 0 | NA | 0 | NA | 0 | NA |
| 14 | 19473665 | 19474601 | 1  | NM_001004063 | OR4K1    | 0 | NA | 0 | NA | 0 | NA | 0 | NA | 0 | NA |
| 14 | 19513517 | 19514564 | 1  | NM_001005486 | OR4K15   | 0 | NA | 0 | NA | 0 | NA | 0 | NA | 0 | NA |
| 14 | 19553192 | 19552259 | -1 | NM_001004712 | OR4K14   | 0 | NA | 0 | NA | 0 | NA | 0 | NA | 0 | NA |
| 14 | 19572757 | 19571842 | -1 | NM_001004714 | OR4K13   | 0 | NA | 0 | NA | 0 | NA | 0 | NA | 0 | NA |
| 14 | 19598043 | 19598982 | 1  | NM_001004717 | OR4L1    | 0 | NA | 0 | NA | 0 | NA | 0 | NA | 0 | NA |
| 14 | 19655405 | 19656437 | 1  | NM_001004715 | OR4K17   | 0 | NA | 0 | NA | 0 | NA | 0 | NA | 0 | NA |
| 14 | 19681734 | 19682661 | 1  | NM_001004724 | OR4N5    | 0 | NA | 0 | NA | 0 | NA | 0 | NA | 0 | NA |
| 14 | 19735334 | 19736372 | 1  | NM_001005503 | OR11G2   | 0 | NA | 0 | NA | 0 | NA | 0 | NA | 0 | NA |
| 14 | 19761708 | 19762701 | 1  | NM_001004480 | OR11H6   | 0 | NA | 0 | NA | 0 | NA | 0 | NA | 0 | NA |
| 14 | 19780790 | 19781765 | 1  | NM_001004479 | OR11H4   | 0 | NA | 0 | NA | 0 | NA | 0 | NA | 0 | NA |
| 14 | 19843976 | 19827143 | -1 | NM_138376    | TTCS     | 0 | NA | 0 | NA | 0 | NA | 0 | NA | 0 | NA |
| 14 | 19867376 | 19849368 | -1 | NM_182851    | CCNB1IP1 | 0 | NA | 0 | NA | 0 | NA | 0 | NA | 0 | NA |
| 14 | 19867379 | 19849368 | -1 | NM_182852    | CCNB1IP1 | 0 | NA | 0 | NA | 0 | NA | 0 | NA | 0 | NA |
| 14 | 19871297 | 19849368 | -1 | NM_021178    | CCNB1IP1 | 1 | 12 | 0 | NA | 0 | NA | 0 | NA | 0 | NA |
| 14 | 19871297 | 19849368 | -1 | NM_182849    | CCNB1IP1 | 1 | 12 | 0 | NA | 0 | NA | 0 | NA | 0 | NA |
| 14 | 19881612 | 19895903 | 1  | NM_001042618 | PARP2    | 1 | 12 | 0 | NA | 0 | NA | 0 | NA | 0 | NA |
| 14 | 19881612 | 19895903 | 1  | NM_005484    | PARP2    | 1 | 12 | 0 | NA | 0 | NA | 0 | NA | 0 | NA |
| 14 | 19951420 | 19905765 | -1 | NM_007110    | TEP1     | 0 | NA | 0 | NA | 0 | NA | 0 | NA | 0 | NA |
| 14 | 19966434 | 19966847 | -1 | NM_001109997 | KLHL33   | 0 | NA | 0 | NA | 0 | NA | 0 | NA | 0 | NA |
| 14 | 19993038 | 19985055 | -1 | NM_017807    | OSGEP    | 1 | 19 | 0 | NA | 0 | NA | 0 | NA | 0 | NA |
| 14 | 19993129 | 19995766 | 1  | NM_001641    | APEX1    | 1 | 19 | 0 | NA | 0 | NA | 0 | NA | 0 | NA |
| 14 | 19993129 | 19995766 | 1  | NM_080648    | APEX1    | 1 | 19 | 0 | NA | 0 | NA | 0 | NA | 0 | NA |
| 14 | 19993129 | 19995766 | 1  | NM_080649    | APEX1    | 1 | 19 | 0 | NA | 0 | NA | 0 | NA | 0 | NA |
| 14 | 19999477 | 19995851 | -1 | NM_001100814 | TMEM55B  | 1 | 19 | 0 | NA | 0 | NA | 0 | NA | 0 | NA |
| 14 | 19999477 | 19995851 | -1 | NM_144568    | TMEM55B  | 1 | 19 | 0 | NA | 0 | NA | 0 | NA | 0 | NA |
| 14 | 20007381 | 20015088 | 1  | NM_000270    | NP       | 1 | 19 | 0 | NA | 0 | NA | 0 | NA | 0 | NA |
| 14 | 20048470 | 20049121 | 1  | NM_001012975 | RNASE10  | 0 | NA | 0 | NA | 0 | NA | 0 | NA | 0 | NA |
| 14 | 20098930 | 20094091 | -1 | NM_001001673 | RNASE9   | 0 | NA | 0 | NA | 0 | NA | 0 | NA | 0 | NA |
| 14 | 20098930 | 20094091 | -1 | NM_001110356 | RNASE9   | 0 | NA | 0 | NA | 0 | NA | 0 | NA | 0 | NA |
| 14 | 20098930 | 20094091 | -1 | NM_001110357 | RNASE9   | 0 | NA | 0 | NA | 0 | NA | 0 | NA | 0 | NA |
| 14 | 20098930 | 20094091 | -1 | NM_001110358 | RNASE9   | 0 | NA | 0 | NA | 0 | NA | 0 | NA | 0 | NA |
| 14 | 20098930 | 20094091 | -1 | NM_001110359 | RNASE9   | 0 | NA | 0 | NA | 0 | NA | 0 | NA | 0 | NA |
| 14 | 20098930 | 20094091 | -1 | NM_001110360 | RNASE9   | 0 | NA | 0 | NA | 0 | NA | 0 | NA | 0 | NA |
| 14 | 20098930 | 20094091 | -1 | NM_001110361 | RNASE9   | 0 | NA | 0 | NA | 0 | NA | 0 | NA | 0 | NA |
| 14 | 20128257 | 20120891 | -1 | NM_145250    | RNASE11  | 0 | NA | 0 | NA | 0 | NA | 0 | NA | 0 | NA |
| 14 | 20128722 | 20128278 | -1 | NM_001024822 | RNASE12  | 0 | NA | 0 | NA | 0 | NA | 0 | NA | 0 | NA |
| 14 | 20179690 | 20178694 | -1 | NM_001001968 | OR6S1    | 0 | NA | 0 | NA | 0 | NA | 0 | NA | 0 | NA |
| 14 | 20222175 | 20232185 | 1  | NM_001145    | ANG      | 1 | 11 | 0 | NA | 1 | 15 | 0 | NA | 0 | NA |
| 14 | 20222211 | 20238598 | 1  | NM_002937    | RNASE4   | 1 | 11 | 0 | NA | 1 | 15 | 0 | NA | 0 | NA |
| 14 | 20226771 | 20232185 | 1  | NM_001097577 | ANG      | 1 | 11 | 0 | NA | 1 | 15 | 0 | NA | 0 | NA |
| 14 | 20226771 | 20238598 | 1  | NM_194431    | RNASE4   | 1 | 11 | 0 | NA | 1 | 15 | 0 | NA | 0 | NA |
| 14 | 20283938 | 20286379 | 1  | NM_006683    | FAM12A   | 0 | NA | 1 | 14 | 0 | NA | 1 | 18 | 0 | NA |
| 14 | 20306425 | 20308947 | 1  | NM_022360    | FAM12B   | 0 | NA | 0 | NA | 0 | NA | 0 | NA | 0 | NA |
| 14 | 20319049 | 20320466 | 1  | NM_005615    | RNASE6   | 0 | NA | 0 | NA | 0 | NA | 0 | NA | 0 | NA |
| 14 | 20340398 | 20339354 | -1 | NM_198232    | RNASE1   | 0 | NA | 0 | NA | 0 | NA | 0 | NA | 0 | NA |
| 14 | 20340876 | 20339354 | -1 | NM_002933    | RNASE1   | 0 | NA | 0 | NA | 0 | NA | 0 | NA | 0 | NA |
| 14 | 20340876 | 20339354 | -1 | NM_198234    | RNASE1   | 0 | NA | 0 | NA | 0 | NA | 0 | NA | 0 | NA |
| 14 | 20340876 | 20339354 | -1 | NM_198235    | RNASE1   | 0 | NA | 0 | NA | 0 | NA | 0 | NA | 0 | NA |
| 14 | 20429401 | 20430347 | 1  | NM_002935    | RNASE3   | 0 | NA | 0 | NA | 0 | NA | 0 | NA | 0 | NA |
| 14 | 20493469 | 20494434 | 1  | NM_002934    | RNASE2   | 0 | NA | 0 | NA | 1 | 13 | 0 | NA | 0 | NA |
| 14 | 20527804 | 20535034 | 1  | NM_001029991 | METT11D1 | 0 | NA | 0 | NA | 0 | NA | 0 | NA | 0 | NA |
| 14 | 20527804 | 20535034 | 1  | NM_022734    | METT11D1 | 0 | NA | 0 | NA | 0 | NA | 0 | NA | 0 | NA |
| 14 | 20537258 | 20539870 | 1  | NM_014579    | SLC39A2  | 0 | NA | 0 | NA | 0 | NA | 0 | NA | 0 | NA |
| 14 | 20563104 | 20554761 | -1 | NM_201538    | NDRG2    | 0 | NA | 0 | NA | 0 | NA | 0 | NA | 0 | NA |
| 14 | 20563104 | 20554761 | -1 | NM_201539    | NDRG2    | 0 | NA | 0 | NA | 0 | NA | 0 | NA | 0 | NA |
| 14 | 20563104 | 20554761 | -1 | NM_201540    | NDRG2    | 0 | NA | 0 | NA | 0 | NA | 0 | NA | 0 | NA |
| 14 | 20563104 | 20554761 | -1 | NM_201541    | NDRG2    | 0 | NA | 0 | NA | 0 | NA | 0 | NA | 0 | NA |
| 14 | 20563775 | 20554761 | -1 | NM_016250    | NDRG2    | 0 | NA | 0 | NA | 0 | NA | 0 | NA | 0 | NA |
| 14 | 20563775 | 20554761 | -1 | NM_201535    | NDRG2    | 0 | NA | 0 | NA | 0 | NA | 0 | NA | 0 | NA |
| 14 | 20563775 | 20554761 | -1 | NM_201536    | NDRG2    | 0 | NA | 0 | NA | 0 | NA | 0 | NA | 0 | NA |
| 14 | 20563775 | 20554761 | -1 | NM_201537    | NDRG2    | 0 | NA | 0 | NA | 0 | NA | 0 | NA | 0 | NA |

|    |          |          |    |              |           |   |    |   |    |   |    |   |    |   |    |
|----|----------|----------|----|--------------|-----------|---|----|---|----|---|----|---|----|---|----|
| 14 | 20568511 | 20570167 | 1  | NM_173846    | TPPP2     | 0 | NA | 0 | NA | 0 | NA | 0 | NA | 0 | NA |
| 14 | 20572784 | 20570818 | -1 | NM_001012264 | RNASE13   | 0 | NA | 0 | NA | 0 | NA | 0 | NA | 0 | NA |
| 14 | 20580224 | 20582232 | 1  | NM_032572    | RNASE7    | 0 | NA | 0 | NA | 0 | NA | 0 | NA | 0 | NA |
| 14 | 20595891 | 20596356 | 1  | NM_138331    | RNASE8    | 0 | NA | 0 | NA | 0 | NA | 0 | NA | 0 | NA |
| 14 | 20608366 | 20627876 | 1  | NM_018071    | FLJ10357  | 0 | NA | 0 | NA | 0 | NA | 1 | 12 | 0 | NA |
| 14 | 20636648 | 20628044 | -1 | NM_016423    | ZNF219    | 0 | NA | 0 | NA | 1 | 14 | 1 | 13 | 0 | NA |
| 14 | 20637013 | 20628044 | -1 | NM_001101672 | ZNF219    | 0 | NA | 0 | NA | 1 | 14 | 1 | 13 | 0 | NA |
| 14 | 20642703 | 20628044 | -1 | NM_001102454 | ZNF219    | 0 | NA | 0 | NA | 0 | NA | 0 | NA | 0 | NA |
| 14 | 20694024 | 20692935 | -1 | NM_001004731 | OR5AU1    | 0 | NA | 1 | 12 | 0 | NA | 0 | NA | 0 | NA |
| 14 | 20807478 | 20747135 | -1 | NM_001077442 | HNRNPC    | 0 | NA | 0 | NA | 0 | NA | 0 | NA | 0 | NA |
| 14 | 20807478 | 20747135 | -1 | NM_001077443 | HNRNPC    | 0 | NA | 0 | NA | 0 | NA | 0 | NA | 0 | NA |
| 14 | 20807478 | 20747135 | -1 | NM_004500    | HNRNPC    | 0 | NA | 0 | NA | 0 | NA | 0 | NA | 0 | NA |
| 14 | 20807478 | 20747135 | -1 | NM_031314    | HNRNPC    | 0 | NA | 0 | NA | 0 | NA | 0 | NA | 0 | NA |
| 14 | 20825975 | 20889300 | 1  | NM_020366    | RPGRIP1   | 0 | NA | 0 | NA | 0 | NA | 0 | NA | 0 | NA |
| 14 | 20922265 | 20889475 | -1 | NM_007192    | SUPT16H   | 1 | 22 | 0 | NA | 0 | NA | 0 | NA | 0 | NA |
| 14 | 20975244 | 20923197 | -1 | NM_020920    | CHD8      | 0 | NA | 0 | NA | 0 | NA | 0 | NA | 0 | NA |
| 14 | 21014961 | 20997023 | -1 | NM_032846    | RAB2B     | 0 | NA | 0 | NA | 1 | 15 | 0 | NA | 0 | NA |
| 14 | 21015174 | 21037159 | 1  | NM_014828    | TOX4      | 0 | NA | 0 | NA | 1 | 15 | 0 | NA | 0 | NA |
| 14 | 21049297 | 21036121 | -1 | NM_019852    | METTL3    | 1 | 16 | 0 | NA | 0 | NA | 0 | NA | 0 | NA |
| 14 | 21075177 | 21059071 | -1 | NM_005407    | SALL2     | 0 | NA | 0 | NA | 0 | NA | 0 | NA | 0 | NA |
| 14 | 21108715 | 21107773 | -1 | NM_001005465 | OR10G3    | 0 | NA | 0 | NA | 0 | NA | 0 | NA | 0 | NA |
| 14 | 21172838 | 21171905 | -1 | NM_001005466 | OR10G2    | 0 | NA | 0 | NA | 0 | NA | 0 | NA | 0 | NA |
| 14 | 21203136 | 21204078 | 1  | NM_001001912 | OR4E2     | 0 | NA | 0 | NA | 0 | NA | 0 | NA | 0 | NA |
| 14 | 22127983 | 22103646 | -1 | NM_001344    | DAD1      | 1 | 11 | 0 | NA | 0 | NA | 0 | NA | 0 | NA |
| 14 | 22136986 | 22151105 | 1  | NM_022060    | ABHD4     | 1 | 11 | 0 | NA | 0 | NA | 0 | NA | 0 | NA |
| 14 | 22305570 | 22310607 | 1  | NM_005015    | OXA1L     | 1 | 11 | 0 | NA | 0 | NA | 0 | NA | 0 | NA |
| 14 | 22354912 | 22312271 | -1 | NM_001126105 | SLC7A7    | 0 | NA | 0 | NA | 0 | NA | 0 | NA | 0 | NA |
| 14 | 22354912 | 22312271 | -1 | NM_003982    | SLC7A7    | 0 | NA | 0 | NA | 0 | NA | 0 | NA | 0 | NA |
| 14 | 22358854 | 22312271 | -1 | NM_001126106 | SLC7A7    | 0 | NA | 0 | NA | 0 | NA | 0 | NA | 0 | NA |
| 14 | 22368931 | 22374086 | 1  | NM_178336    | MRPL52    | 1 | 11 | 0 | NA | 0 | NA | 0 | NA | 0 | NA |
| 14 | 22368931 | 22374086 | 1  | NM_180982    | MRPL52    | 1 | 11 | 0 | NA | 0 | NA | 0 | NA | 0 | NA |
| 14 | 22368931 | 22374086 | 1  | NM_181304    | MRPL52    | 1 | 11 | 0 | NA | 0 | NA | 0 | NA | 0 | NA |
| 14 | 22368931 | 22374086 | 1  | NM_181305    | MRPL52    | 1 | 11 | 0 | NA | 0 | NA | 0 | NA | 0 | NA |
| 14 | 22368931 | 22374086 | 1  | NM_181306    | MRPL52    | 1 | 11 | 0 | NA | 0 | NA | 0 | NA | 0 | NA |
| 14 | 22368931 | 22374086 | 1  | NM_181307    | MRPL52    | 1 | 11 | 0 | NA | 0 | NA | 0 | NA | 0 | NA |
| 14 | 22375632 | 22386643 | 1  | NM_004995    | MMP14     | 1 | 11 | 0 | NA | 0 | NA | 0 | NA | 0 | NA |
| 14 | 22410799 | 22417131 | 1  | NM_014045    | LRP10     | 1 | 18 | 0 | NA | 0 | NA | 0 | NA | 0 | NA |
| 14 | 22422271 | 22426729 | 1  | NM_173527    | REM2      | 0 | NA | 0 | NA | 0 | NA | 0 | NA | 0 | NA |
| 14 | 22458236 | 22439693 | -1 | NM_001077351 | RBM23     | 0 | NA | 0 | NA | 0 | NA | 0 | NA | 0 | NA |
| 14 | 22458236 | 22439693 | -1 | NM_001077352 | RBM23     | 0 | NA | 0 | NA | 0 | NA | 0 | NA | 0 | NA |
| 14 | 22458236 | 22439693 | -1 | NM_018107    | RBM23     | 0 | NA | 0 | NA | 0 | NA | 0 | NA | 0 | NA |
| 14 | 22468501 | 22459572 | -1 | NM_001039619 | PRMT5     | 0 | NA | 0 | NA | 0 | NA | 0 | NA | 0 | NA |
| 14 | 22468501 | 22459572 | -1 | NM_006109    | PRMT5     | 0 | NA | 0 | NA | 0 | NA | 0 | NA | 0 | NA |
| 14 | 22496160 | 22485276 | -1 | NM_017815    | C14orf94  | 0 | NA | 0 | NA | 0 | NA | 0 | NA | 0 | NA |
| 14 | 22516272 | 22510249 | -1 | NM_198086    | JUB       | 0 | NA | 0 | NA | 0 | NA | 0 | NA | 0 | NA |
| 14 | 22521688 | 22510249 | -1 | NM_032876    | JUB       | 0 | NA | 0 | NA | 0 | NA | 0 | NA | 0 | NA |
| 14 | 22549192 | 22525950 | -1 | NM_021944    | C14orf93  | 1 | 12 | 0 | NA | 0 | NA | 0 | NA | 0 | NA |
| 14 | 22573949 | 22564899 | -1 | NM_002797    | PSMB5     | 1 | 11 | 0 | NA | 0 | NA | 0 | NA | 0 | NA |
| 14 | 22581215 | 22583109 | 1  | NM_001099780 | PSMB11    | 1 | 11 | 0 | NA | 0 | NA | 0 | NA | 0 | NA |
| 14 | 22594875 | 22586708 | -1 | NM_022478    | CDH24     | 0 | NA | 0 | NA | 0 | NA | 1 | 12 | 0 | NA |
| 14 | 22594875 | 22586708 | -1 | NM_144985    | CDH24     | 0 | NA | 0 | NA | 0 | NA | 1 | 12 | 0 | NA |
| 14 | 22634627 | 22639505 | 1  | NM_017924    | C14orf119 | 0 | NA | 0 | NA | 0 | NA | 0 | NA | 0 | NA |
| 14 | 22634663 | 22597615 | -1 | NM_014977    | ACIN1     | 0 | NA | 0 | NA | 0 | NA | 0 | NA | 0 | NA |
| 14 | 22658314 | 22656354 | -1 | NM_001805    | CEBPE     | 0 | NA | 0 | NA | 0 | NA | 0 | NA | 0 | NA |
| 14 | 22693450 | 22664343 | -1 | NM_182728    | SLC7A8    | 0 | NA | 0 | NA | 0 | NA | 0 | NA | 0 | NA |
| 14 | 22722689 | 22664343 | -1 | NM_012244    | SLC7A8    | 0 | NA | 0 | NA | 0 | NA | 0 | NA | 0 | NA |
| 14 | 22825149 | 22812683 | -1 | NM_020834    | HOMEZ     | 0 | NA | 0 | NA | 0 | NA | 0 | NA | 0 | NA |
| 14 | 22845951 | 22850808 | 1  | NM_004050    | BCL2L2    | 1 | 15 | 0 | NA | 0 | NA | 0 | NA | 0 | NA |
| 14 | 22859236 | 22865209 | 1  | NM_004643    | PABPN1    | 0 | NA | 0 | NA | 0 | NA | 0 | NA | 0 | NA |
| 14 | 22891319 | 22885366 | -1 | NM_020372    | SLC22A17  | 0 | NA | 0 | NA | 1 | 13 | 0 | NA | 0 | NA |
| 14 | 22891920 | 22885378 | -1 | NM_016609    | SLC22A17  | 0 | NA | 0 | NA | 1 | 13 | 0 | NA | 0 | NA |
| 14 | 22904682 | 22895450 | -1 | NM_005864    | EFS       | 0 | NA | 0 | NA | 0 | NA | 0 | NA | 0 | NA |
| 14 | 22904682 | 22895450 | -1 | NM_032459    | EFS       | 0 | NA | 0 | NA | 0 | NA | 0 | NA | 0 | NA |
| 14 | 22911857 | 22915452 | 1  | NM_022789    | IL25      | 0 | NA | 0 | NA | 0 | NA | 0 | NA | 0 | NA |
| 14 | 22911857 | 22915452 | 1  | NM_172314    | IL25      | 0 | NA | 0 | NA | 0 | NA | 0 | NA | 0 | NA |



|    |          |          |    |              |           |   |    |   |    |   |    |   |    |   |    |
|----|----------|----------|----|--------------|-----------|---|----|---|----|---|----|---|----|---|----|
| 14 | 22915856 | 22918821 | 1  | NM_001037288 | CMTM5     | 0 | NA | 0 | NA | 0 | NA | 0 | NA | 0 | NA |
| 14 | 22915856 | 22918821 | 1  | NM_138460    | CMTM5     | 0 | NA | 0 | NA | 0 | NA | 0 | NA | 0 | NA |
| 14 | 22947322 | 22921038 | -1 | NM_002471    | MYH6      | 0 | NA | 1 | 14 | 0 | NA | 0 | NA | 1 | 12 |
| 14 | 22974710 | 22951786 | -1 | NM_000257    | MYH7      | 0 | NA | 0 | NA | 0 | NA | 0 | NA | 0 | NA |
| 14 | 23008737 | 23017242 | 1  | NM_001042635 | NGDN      | 1 | 17 | 0 | NA | 1 | 14 | 0 | NA | 0 | NA |
| 14 | 23008737 | 23017242 | 1  | NM_015514    | NGDN      | 1 | 17 | 0 | NA | 1 | 14 | 0 | NA | 0 | NA |
| 14 | 23095037 | 23098623 | 1  | NM_001126339 | THTPA     | 0 | NA | 0 | NA | 0 | NA | 0 | NA | 0 | NA |
| 14 | 23095037 | 23098627 | 1  | NM_024328    | THTPA     | 0 | NA | 0 | NA | 0 | NA | 0 | NA | 0 | NA |
| 14 | 23107119 | 23098615 | -1 | NM_080545    | AP1G2     | 0 | NA | 0 | NA | 0 | NA | 0 | NA | 0 | NA |
| 14 | 23107119 | 23098616 | -1 | NM_003917    | AP1G2     | 0 | NA | 0 | NA | 0 | NA | 0 | NA | 0 | NA |
| 14 | 23117834 | 23107087 | -1 | NM_032452    | JPH4      | 0 | NA | 0 | NA | 0 | NA | 0 | NA | 0 | NA |
| 14 | 23175412 | 23184688 | 1  | NM_005794    | DHRS2     | 0 | NA | 0 | NA | 0 | NA | 1 | 11 | 0 | NA |
| 14 | 23175412 | 23184688 | 1  | NM_182908    | DHRS2     | 0 | NA | 0 | NA | 0 | NA | 1 | 11 | 0 | NA |
| 14 | 23492804 | 23508328 | 1  | NM_021004    | DHRS4     | 0 | NA | 0 | NA | 0 | NA | 0 | NA | 0 | NA |
| 14 | 23527866 | 23545459 | 1  | NM_198083    | DHRS4L2   | 0 | NA | 0 | NA | 0 | NA | 0 | NA | 0 | NA |
| 14 | 23575549 | 23590420 | 1  | NM_001082488 | LOC728635 | 1 | 11 | 0 | NA | 0 | NA | 1 | 12 | 0 | NA |
| 14 | 23591045 | 23608777 | 1  | NM_138360    | LRRC16B   | 0 | NA | 0 | NA | 0 | NA | 0 | NA | 0 | NA |
| 14 | 23610595 | 23617136 | 1  | NM_006032    | CPNE6     | 0 | NA | 0 | NA | 0 | NA | 0 | NA | 0 | NA |
| 14 | 23623672 | 23619155 | -1 | NM_006177    | NRL       | 0 | NA | 0 | NA | 0 | NA | 1 | 11 | 0 | NA |
| 14 | 23633322 | 23639610 | 1  | NM_001018073 | PCK2      | 0 | NA | 0 | NA | 1 | 17 | 1 | 11 | 0 | NA |
| 14 | 23633322 | 23643179 | 1  | NM_004563    | PCK2      | 0 | NA | 0 | NA | 1 | 17 | 1 | 11 | 0 | NA |
| 14 | 23653860 | 23664291 | 1  | NM_025230    | WDR23     | 1 | 18 | 0 | NA | 0 | NA | 0 | NA | 0 | NA |
| 14 | 23653860 | 23664291 | 1  | NM_181357    | WDR23     | 1 | 18 | 0 | NA | 0 | NA | 0 | NA | 0 | NA |
| 14 | 23670607 | 23671898 | 1  | NM_203402    | FIT1      | 0 | NA | 0 | NA | 0 | NA | 0 | NA | 0 | NA |
| 14 | 23675217 | 23678016 | 1  | NM_006263    | PSME1     | 0 | NA | 0 | NA | 0 | NA | 0 | NA | 0 | NA |
| 14 | 23675217 | 23678016 | 1  | NM_176783    | PSME1     | 0 | NA | 0 | NA | 0 | NA | 0 | NA | 0 | NA |
| 14 | 23680637 | 23678013 | -1 | NM_016049    | C14orf122 | 1 | 11 | 0 | NA | 0 | NA | 0 | NA | 0 | NA |
| 14 | 23685695 | 23682413 | -1 | NM_002818    | PSME2     | 1 | 11 | 0 | NA | 0 | NA | 0 | NA | 0 | NA |
| 14 | 23686498 | 23699710 | 1  | NM_017999    | RNF31     | 1 | 11 | 0 | NA | 0 | NA | 0 | NA | 0 | NA |
| 14 | 23700261 | 23705614 | 1  | NM_006084    | IRF9      | 0 | NA | 0 | NA | 0 | NA | 0 | NA | 0 | NA |
| 14 | 23711073 | 23719303 | 1  | NM_001048205 | REC8      | 0 | NA | 0 | NA | 0 | NA | 0 | NA | 0 | NA |
| 14 | 23711073 | 23719303 | 1  | NM_005132    | REC8      | 0 | NA | 0 | NA | 0 | NA | 0 | NA | 0 | NA |
| 14 | 23727964 | 23719264 | -1 | NM_024658    | IPO4      | 1 | 17 | 0 | NA | 0 | NA | 0 | NA | 0 | NA |
| 14 | 23734722 | 23728192 | -1 | NM_006405    | TM9SF1    | 1 | 17 | 0 | NA | 0 | NA | 0 | NA | 0 | NA |
| 14 | 23734722 | 23729083 | -1 | NM_001014842 | TM9SF1    | 1 | 17 | 0 | NA | 0 | NA | 0 | NA | 0 | NA |
| 14 | 23744801 | 23747294 | 1  | NM_174944    | TSSK4     | 0 | NA | 0 | NA | 0 | NA | 0 | NA | 0 | NA |
| 14 | 23753025 | 23748626 | -1 | NM_014169    | CHMP4A    | 0 | NA | 0 | NA | 0 | NA | 0 | NA | 0 | NA |
| 14 | 23755081 | 23752997 | -1 | NM_138476    | MDP-1     | 0 | NA | 0 | NA | 0 | NA | 0 | NA | 0 | NA |
| 14 | 23771416 | 23755896 | -1 | NM_006156    | NEDD8     | 0 | NA | 0 | NA | 0 | NA | 0 | NA | 0 | NA |
| 14 | 23771487 | 23778287 | 1  | NM_001002000 | GMPR2     | 0 | NA | 0 | NA | 0 | NA | 0 | NA | 0 | NA |
| 14 | 23771487 | 23778287 | 1  | NM_001002001 | GMPR2     | 0 | NA | 0 | NA | 0 | NA | 0 | NA | 0 | NA |
| 14 | 23771942 | 23778287 | 1  | NM_001002002 | GMPR2     | 1 | 17 | 0 | NA | 0 | NA | 0 | NA | 0 | NA |
| 14 | 23771942 | 23778287 | 1  | NM_016576    | GMPR2     | 1 | 17 | 0 | NA | 0 | NA | 0 | NA | 0 | NA |
| 14 | 23781720 | 23778690 | -1 | NM_001099274 | TINF2     | 1 | 17 | 0 | NA | 0 | NA | 0 | NA | 0 | NA |
| 14 | 23781720 | 23778690 | -1 | NM_012461    | TINF2     | 1 | 17 | 0 | NA | 0 | NA | 0 | NA | 0 | NA |
| 14 | 23802256 | 23788159 | -1 | NM_000359    | TGM1      | 0 | NA | 0 | NA | 0 | NA | 0 | NA | 0 | NA |
| 14 | 23810583 | 23804583 | -1 | NM_004581    | RABGGTA   | 0 | NA | 0 | NA | 0 | NA | 0 | NA | 0 | NA |
| 14 | 23810643 | 23804583 | -1 | NM_182836    | RABGGTA   | 0 | NA | 0 | NA | 0 | NA | 0 | NA | 0 | NA |
| 14 | 23838506 | 23829645 | -1 | NM_138452    | DHRS1     | 1 | 12 | 0 | NA | 0 | NA | 0 | NA | 0 | NA |
| 14 | 23838937 | 23844214 | 1  | NM_174913    | C14orf21  | 1 | 12 | 0 | NA | 0 | NA | 0 | NA | 0 | NA |
| 14 | 23848000 | 23850798 | 1  | NM_019839    | LTBR2     | 0 | NA | 0 | NA | 0 | NA | 0 | NA | 0 | NA |
| 14 | 23850416 | 23844232 | -1 | NM_014430    | CIDEB     | 0 | NA | 0 | NA | 0 | NA | 0 | NA | 0 | NA |
| 14 | 23852356 | 23856992 | 1  | NM_181657    | LTBR4     | 0 | NA | 0 | NA | 0 | NA | 0 | NA | 0 | NA |
| 14 | 23873704 | 23857409 | -1 | NM_139247    | ADCY4     | 0 | NA | 0 | NA | 0 | NA | 0 | NA | 0 | NA |
| 14 | 23879082 | 23875066 | -1 | NM_006871    | RIPK3     | 0 | NA | 0 | NA | 0 | NA | 0 | NA | 0 | NA |
| 14 | 23907093 | 23918650 | 1  | NM_004554    | NFATC4    | 0 | NA | 0 | NA | 0 | NA | 0 | NA | 0 | NA |
| 14 | 23937831 | 23958334 | 1  | NM_025081    | KIAA1305  | 0 | NA | 0 | NA | 0 | NA | 0 | NA | 0 | NA |
| 14 | 23968571 | 23965579 | -1 | NM_001039771 | CBLN3     | 0 | NA | 0 | NA | 0 | NA | 0 | NA | 0 | NA |
| 14 | 23968980 | 23980387 | 1  | NM_015299    | KIAA0323  | 0 | NA | 0 | NA | 0 | NA | 0 | NA | 0 | NA |
| 14 | 23981847 | 23978811 | -1 | NM_020195    | C14orf124 | 0 | NA | 0 | NA | 0 | NA | 0 | NA | 0 | NA |
| 14 | 24047311 | 24044551 | -1 | NM_001836    | CMA1      | 0 | NA | 0 | NA | 0 | NA | 0 | NA | 0 | NA |
| 14 | 24115306 | 24112583 | -1 | NM_001911    | CTSG      | 0 | NA | 0 | NA | 0 | NA | 0 | NA | 0 | NA |
| 14 | 24148704 | 24148532 | -1 | NM_033423    | GZMH      | 0 | NA | 0 | NA | 0 | NA | 0 | NA | 0 | NA |
| 14 | 24173272 | 24170001 | -1 | NM_004131    | GZMB      | 0 | NA | 0 | NA | 0 | NA | 0 | NA | 0 | NA |
| 14 | 24588935 | 24351143 | -1 | NM_014178    | STXBP6    | 0 | NA | 0 | NA | 1 | 13 | 0 | NA | 0 | NA |

|    |          |          |    |              |           |   |    |   |    |   |    |   |    |   |    |
|----|----------|----------|----|--------------|-----------|---|----|---|----|---|----|---|----|---|----|
| 14 | 26136800 | 25984928 | -1 | NM_002515    | NOVA1     | 0 | NA | 0 | NA | 0 | NA | 0 | NA | 0 | NA |
| 14 | 26136800 | 25984928 | -1 | NM_006489    | NOVA1     | 0 | NA | 0 | NA | 0 | NA | 0 | NA | 0 | NA |
| 14 | 26136800 | 26009163 | -1 | NM_006491    | NOVA1     | 0 | NA | 0 | NA | 0 | NA | 0 | NA | 0 | NA |
| 14 | 28306037 | 28308622 | 1  | NM_005249    | FOXG1     | 0 | NA | 1 | 14 | 0 | NA | 0 | NA | 0 | NA |
| 14 | 29466650 | 29115437 | -1 | NM_002742    | PRKD1     | 1 | 12 | 0 | NA | 0 | NA | 0 | NA | 0 | NA |
| 14 | 30098127 | 30158797 | 1  | NM_017769    | KIAA1333  | 0 | NA | 0 | NA | 0 | NA | 0 | NA | 0 | NA |
| 14 | 30161271 | 30274769 | 1  | NM_016106    | SCFD1     | 1 | 11 | 0 | NA | 0 | NA | 0 | NA | 0 | NA |
| 14 | 30161271 | 30274769 | 1  | NM_182835    | SCFD1     | 1 | 11 | 0 | NA | 0 | NA | 0 | NA | 0 | NA |
| 14 | 30413515 | 30429573 | 1  | NM_004086    | COCH      | 0 | NA | 0 | NA | 0 | NA | 0 | NA | 0 | NA |
| 14 | 30564643 | 30624759 | 1  | NM_007077    | AP4S1     | 0 | NA | 0 | NA | 0 | NA | 0 | NA | 0 | NA |
| 14 | 30565358 | 30432755 | -1 | NM_001083893 | STRN3     | 0 | NA | 0 | NA | 0 | NA | 0 | NA | 0 | NA |
| 14 | 30565358 | 30432755 | -1 | NM_014574    | STRN3     | 0 | NA | 0 | NA | 0 | NA | 0 | NA | 0 | NA |
| 14 | 30746440 | 30639074 | -1 | NM_015382    | HECTD1    | 0 | NA | 0 | NA | 0 | NA | 0 | NA | 0 | NA |
| 14 | 30927932 | 30830744 | -1 | NM_015473    | HEATR5A   | 0 | NA | 0 | NA | 0 | NA | 0 | NA | 0 | NA |
| 14 | 30996431 | 30984993 | -1 | NM_080664    | C14orf126 | 0 | NA | 0 | NA | 0 | NA | 0 | NA | 0 | NA |
| 14 | 31100341 | 31400180 | 1  | NM_025152    | NUBPL     | 0 | NA | 0 | NA | 0 | NA | 0 | NA | 0 | NA |
| 14 | 31616245 | 31698685 | 1  | NM_001030055 | ARHGAP5   | 0 | NA | 0 | NA | 0 | NA | 0 | NA | 0 | NA |
| 14 | 31616245 | 31698685 | 1  | NM_001173    | ARHGAP5   | 0 | NA | 0 | NA | 0 | NA | 0 | NA | 0 | NA |
| 14 | 31868273 | 32372018 | 1  | NM_004274    | AKAP6     | 0 | NA | 0 | NA | 0 | NA | 0 | NA | 0 | NA |
| 14 | 32478209 | 33340702 | 1  | NM_022123    | NPAS3     | 0 | NA | 0 | NA | 0 | NA | 0 | NA | 0 | NA |
| 14 | 32478273 | 33340066 | 1  | NM_173159    | NPAS3     | 0 | NA | 0 | NA | 0 | NA | 0 | NA | 0 | NA |
| 14 | 33490035 | 33463171 | -1 | NM_022073    | EGLN3     | 0 | NA | 1 | 13 | 0 | NA | 0 | NA | 0 | NA |
| 14 | 34001219 | 33971894 | -1 | NM_138288    | C14orf147 | 0 | NA | 0 | NA | 0 | NA | 0 | NA | 0 | NA |
| 14 | 34078694 | 34054885 | -1 | NM_018453    | EAPP      | 0 | NA | 0 | NA | 0 | NA | 0 | NA | 0 | NA |
| 14 | 34169066 | 34100368 | -1 | NM_021249    | SNX6      | 0 | NA | 0 | NA | 0 | NA | 0 | NA | 0 | NA |
| 14 | 34169117 | 34100368 | -1 | NM_152233    | SNX6      | 0 | NA | 0 | NA | 0 | NA | 0 | NA | 0 | NA |
| 14 | 34252696 | 34249342 | -1 | NM_021914    | CFL2      | 0 | NA | 0 | NA | 0 | NA | 0 | NA | 0 | NA |
| 14 | 34253657 | 34249342 | -1 | NM_138638    | CFL2      | 0 | NA | 0 | NA | 0 | NA | 0 | NA | 0 | NA |
| 14 | 34414604 | 34291687 | -1 | NM_013448    | BAZ1A     | 0 | NA | 0 | NA | 0 | NA | 0 | NA | 0 | NA |
| 14 | 34414604 | 34291687 | -1 | NM_182648    | BAZ1A     | 0 | NA | 0 | NA | 0 | NA | 0 | NA | 0 | NA |
| 14 | 34521981 | 34568519 | 1  | NM_003136    | SRP54     | 0 | NA | 0 | NA | 0 | NA | 1 | 13 | 0 | NA |
| 14 | 34583863 | 34622340 | 1  | NM_001079519 | C14orf24  | 0 | NA | 0 | NA | 0 | NA | 0 | NA | 0 | NA |
| 14 | 34585360 | 34622340 | 1  | NM_173607    | C14orf24  | 0 | NA | 0 | NA | 0 | NA | 0 | NA | 0 | NA |
| 14 | 34661270 | 34624428 | -1 | NM_017917    | PPP2R3C   | 0 | NA | 0 | NA | 0 | NA | 0 | NA | 0 | NA |
| 14 | 34661526 | 34813021 | 1  | NM_014672    | KIAA0391  | 0 | NA | 0 | NA | 0 | NA | 0 | NA | 0 | NA |
| 14 | 34831324 | 34856431 | 1  | NM_002791    | PSMA6     | 0 | NA | 0 | NA | 0 | NA | 0 | NA | 0 | NA |
| 14 | 34943711 | 34940466 | -1 | NM_020529    | NFKBIA    | 0 | NA | 0 | NA | 0 | NA | 0 | NA | 0 | NA |
| 14 | 35072998 | 35076011 | 1  | NM_032594    | INSM2     | 0 | NA | 0 | NA | 0 | NA | 0 | NA | 0 | NA |
| 14 | 35348183 | 35077308 | -1 | NM_014990    | GARNL1    | 1 | 17 | 0 | NA | 0 | NA | 0 | NA | 0 | NA |
| 14 | 35348183 | 35077308 | -1 | NM_194301    | GARNL1    | 1 | 17 | 0 | NA | 0 | NA | 0 | NA | 0 | NA |
| 14 | 35365347 | 35410920 | 1  | NM_032352    | BRMS1L    | 0 | NA | 0 | NA | 0 | NA | 0 | NA | 0 | NA |
| 14 | 35859596 | 35837520 | -1 | NM_016586    | MBIP      | 0 | NA | 0 | NA | 1 | 13 | 0 | NA | 0 | NA |
| 14 | 36052741 | 36012243 | -1 | NM_001101341 | SFTPH     | 0 | NA | 1 | 13 | 0 | NA | 0 | NA | 0 | NA |
| 14 | 36058654 | 36055352 | -1 | NM_003317    | NKX2-1    | 0 | NA | 0 | NA | 0 | NA | 0 | NA | 0 | NA |
| 14 | 36059167 | 36055352 | -1 | NM_001079668 | NKX2-1    | 0 | NA | 0 | NA | 0 | NA | 0 | NA | 0 | NA |
| 14 | 36121537 | 36118966 | -1 | NM_014360    | NKX2-8    | 0 | NA | 0 | NA | 0 | NA | 0 | NA | 0 | NA |
| 14 | 36196532 | 36216762 | 1  | NM_006194    | PAX9      | 0 | NA | 1 | 12 | 0 | NA | 0 | NA | 0 | NA |
| 14 | 36711616 | 36218828 | -1 | NM_030631    | SLC25A21  | 0 | NA | 0 | NA | 0 | NA | 0 | NA | 0 | NA |
| 14 | 36736906 | 37090215 | 1  | NM_138731    | MIPOL1    | 1 | 14 | 0 | NA | 0 | NA | 1 | 12 | 0 | NA |
| 14 | 37134240 | 37128941 | -1 | NM_004496    | FOXA1     | 0 | NA | 0 | NA | 0 | NA | 0 | NA | 0 | NA |
| 14 | 37334264 | 37381247 | 1  | NM_001007795 | ITTC6     | 0 | NA | 0 | NA | 0 | NA | 0 | NA | 0 | NA |
| 14 | 37746954 | 37752019 | 1  | NM_001049    | SSTR1     | 0 | NA | 0 | NA | 0 | NA | 0 | NA | 0 | NA |
| 14 | 37795325 | 37793069 | -1 | NM_175060    | CLEC14A   | 0 | NA | 0 | NA | 0 | NA | 0 | NA | 0 | NA |
| 14 | 38642188 | 38570873 | -1 | NM_006364    | SEC23A    | 0 | NA | 0 | NA | 0 | NA | 0 | NA | 0 | NA |
| 14 | 38653238 | 38675928 | 1  | NM_001009182 | SIP1      | 0 | NA | 0 | NA | 0 | NA | 0 | NA | 0 | NA |
| 14 | 38653238 | 38675928 | 1  | NM_001009183 | SIP1      | 0 | NA | 0 | NA | 0 | NA | 0 | NA | 0 | NA |
| 14 | 38653238 | 38675928 | 1  | NM_003616    | SIP1      | 0 | NA | 0 | NA | 0 | NA | 0 | NA | 0 | NA |
| 14 | 38709385 | 38686765 | -1 | NM_001079537 | TRAPPC6B  | 0 | NA | 0 | NA | 0 | NA | 0 | NA | 0 | NA |
| 14 | 38709385 | 38686765 | -1 | NM_177452    | TRAPPC6B  | 0 | NA | 0 | NA | 0 | NA | 0 | NA | 0 | NA |
| 14 | 38714137 | 38722173 | 1  | NM_002687    | PNN       | 0 | NA | 0 | NA | 0 | NA | 0 | NA | 0 | NA |
| 14 | 38772875 | 38792326 | 1  | NM_054024    | MIA2      | 0 | NA | 0 | NA | 0 | NA | 0 | NA | 0 | NA |
| 14 | 38804226 | 38890148 | 1  | NM_203354    | CTAGE5    | 0 | NA | 0 | NA | 0 | NA | 0 | NA | 0 | NA |
| 14 | 38805252 | 38890148 | 1  | NM_203356    | CTAGE5    | 0 | NA | 0 | NA | 0 | NA | 0 | NA | 0 | NA |
| 14 | 38806078 | 38890148 | 1  | NM_005930    | CTAGE5    | 0 | NA | 0 | NA | 0 | NA | 0 | NA | 0 | NA |
| 14 | 38806078 | 38890148 | 1  | NM_203355    | CTAGE5    | 0 | NA | 0 | NA | 0 | NA | 0 | NA | 0 | NA |

|    |          |          |    |              |           |   |    |   |    |   |    |   |    |   |    |
|----|----------|----------|----|--------------|-----------|---|----|---|----|---|----|---|----|---|----|
| 14 | 38971371 | 38936709 | -1 | NM_203301    | FBX033    | 1 | 12 | 0 | NA | 0 | NA | 0 | NA | 0 | NA |
| 14 | 41147093 | 41443499 | 1  | NM_152447    | LRFN5     | 0 | NA | 0 | NA | 0 | NA | 0 | NA | 0 | NA |
| 14 | 44046208 | 44043295 | -1 | NM_032135    | FSCB      | 0 | NA | 0 | NA | 0 | NA | 0 | NA | 0 | NA |
| 14 | 44436256 | 44446210 | 1  | NM_001017923 | C14orf28  | 1 | 13 | 0 | NA | 0 | NA | 0 | NA | 0 | NA |
| 14 | 44500929 | 44463276 | -1 | NM_017658    | KLHL28    | 0 | NA | 0 | NA | 0 | NA | 0 | NA | 0 | NA |
| 14 | 44501165 | 44613384 | 1  | NM_015091    | KIAA0423  | 0 | NA | 0 | NA | 0 | NA | 0 | NA | 0 | NA |
| 14 | 44623051 | 44654554 | 1  | NM_017922    | PRPF39    | 0 | NA | 0 | NA | 0 | NA | 0 | NA | 0 | NA |
| 14 | 44674272 | 44654858 | -1 | NM_002013    | FKBP3     | 0 | NA | 0 | NA | 0 | NA | 0 | NA | 0 | NA |
| 14 | 44674885 | 44739843 | 1  | NM_020937    | FANCM     | 0 | NA | 0 | NA | 0 | NA | 0 | NA | 0 | NA |
| 14 | 44792146 | 44742142 | -1 | NM_018353    | C14orf106 | 0 | NA | 1 | 12 | 0 | NA | 1 | 22 | 0 | NA |
| 14 | 46190778 | 46189969 | -1 | NM_080746    | RPL10L    | 0 | NA | 0 | NA | 0 | NA | 0 | NA | 0 | NA |
| 14 | 46882188 | 46378577 | -1 | NM_182830    | MDGA2     | 0 | NA | 0 | NA | 0 | NA | 0 | NA | 0 | NA |
| 14 | 47213738 | 46378577 | -1 | NM_001113498 | MDGA2     | 0 | NA | 0 | NA | 0 | NA | 0 | NA | 0 | NA |
| 14 | 49122844 | 49113791 | -1 | NM_001030001 | RPS29     | 1 | 11 | 0 | NA | 0 | NA | 0 | NA | 0 | NA |
| 14 | 49122844 | 49120039 | -1 | NM_001032    | RPS29     | 1 | 11 | 0 | NA | 0 | NA | 0 | NA | 0 | NA |
| 14 | 49135164 | 49151140 | 1  | NM_152329    | PPIL5     | 1 | 12 | 0 | NA | 0 | NA | 0 | NA | 0 | NA |
| 14 | 49135164 | 49151140 | 1  | NM_203467    | PPIL5     | 1 | 12 | 0 | NA | 0 | NA | 0 | NA | 0 | NA |
| 14 | 49157099 | 49155156 | -1 | NM_001001    | RPL36AL   | 0 | NA | 0 | NA | 0 | NA | 0 | NA | 0 | NA |
| 14 | 49157238 | 49159949 | 1  | NM_002408    | MGAT2     | 0 | NA | 0 | NA | 0 | NA | 0 | NA | 0 | NA |
| 14 | 49171698 | 49161641 | -1 | NM_001083908 | C14orf104 | 0 | NA | 0 | NA | 0 | NA | 0 | NA | 0 | NA |
| 14 | 49171698 | 49161641 | -1 | NM_018139    | C14orf104 | 0 | NA | 0 | NA | 0 | NA | 0 | NA | 0 | NA |
| 14 | 49224685 | 49180028 | -1 | NM_002692    | POLE2     | 0 | NA | 0 | NA | 0 | NA | 0 | NA | 0 | NA |
| 14 | 49229634 | 49289614 | 1  | NM_172193    | KLHDC1    | 0 | NA | 0 | NA | 0 | NA | 0 | NA | 0 | NA |
| 14 | 49304536 | 49319606 | 1  | NM_014315    | KLHDC2    | 0 | NA | 0 | NA | 0 | NA | 0 | NA | 0 | NA |
| 14 | 49389289 | 49320281 | -1 | NM_004713    | SDCCAG1   | 1 | 15 | 0 | NA | 0 | NA | 1 | 14 | 0 | NA |
| 14 | 49429485 | 49433522 | 1  | NM_001663    | ARF6      | 0 | NA | 0 | NA | 0 | NA | 0 | NA | 0 | NA |
| 14 | 49543988 | 49518179 | -1 | NM_001012706 | LOC283551 | 0 | NA | 0 | NA | 0 | NA | 0 | NA | 0 | NA |
| 14 | 49629111 | 49620118 | -1 | NM_001014830 | LOC196913 | 0 | NA | 0 | NA | 0 | NA | 0 | NA | 0 | NA |
| 14 | 49653047 | 49645099 | -1 | NM_001040662 | C14orf138 | 0 | NA | 0 | NA | 0 | NA | 0 | NA | 0 | NA |
| 14 | 49653047 | 49645099 | -1 | NM_024558    | C14orf138 | 0 | NA | 0 | NA | 0 | NA | 0 | NA | 0 | NA |
| 14 | 49767849 | 49653595 | -1 | NM_006939    | SOS2      | 0 | NA | 0 | NA | 0 | NA | 0 | NA | 0 | NA |
| 14 | 49848697 | 49778901 | -1 | NM_024884    | L2HGDH    | 0 | NA | 0 | NA | 0 | NA | 0 | NA | 0 | NA |
| 14 | 49848796 | 49859493 | 1  | NM_015684    | ATP5S     | 0 | NA | 0 | NA | 0 | NA | 0 | NA | 0 | NA |
| 14 | 49848796 | 49862418 | 1  | NM_001003803 | ATP5S     | 0 | NA | 0 | NA | 0 | NA | 0 | NA | 0 | NA |
| 14 | 49848796 | 49862418 | 1  | NM_001003805 | ATP5S     | 0 | NA | 0 | NA | 0 | NA | 0 | NA | 0 | NA |
| 14 | 49932367 | 49866469 | -1 | NM_004196    | CDKL1     | 0 | NA | 0 | NA | 0 | NA | 0 | NA | 0 | NA |
| 14 | 50069126 | 49954992 | -1 | NM_006575    | MAP4K5    | 0 | NA | 0 | NA | 0 | NA | 0 | NA | 0 | NA |
| 14 | 50069126 | 49954992 | -1 | NM_198794    | MAP4K5    | 0 | NA | 0 | NA | 0 | NA | 0 | NA | 0 | NA |
| 14 | 50096499 | 50169141 | 1  | NM_015915    | SPG3A     | 0 | NA | 0 | NA | 0 | NA | 0 | NA | 0 | NA |
| 14 | 50096499 | 50169141 | 1  | NM_181598    | SPG3A     | 0 | NA | 0 | NA | 0 | NA | 0 | NA | 0 | NA |
| 14 | 50204773 | 50170109 | -1 | NM_021818    | SAV1      | 0 | NA | 0 | NA | 0 | NA | 0 | NA | 0 | NA |
| 14 | 50360106 | 50262296 | -1 | NM_016350    | NIN       | 0 | NA | 0 | NA | 0 | NA | 0 | NA | 0 | NA |
| 14 | 50367589 | 50256230 | -1 | NM_020921    | NIN       | 0 | NA | 0 | NA | 0 | NA | 0 | NA | 0 | NA |
| 14 | 50367589 | 50262296 | -1 | NM_182946    | NIN       | 0 | NA | 0 | NA | 0 | NA | 0 | NA | 0 | NA |
| 14 | 50367589 | 50263700 | -1 | NM_182944    | NIN       | 0 | NA | 0 | NA | 0 | NA | 0 | NA | 0 | NA |
| 14 | 50408627 | 50441438 | 1  | NM_181533    | ABHD12B   | 0 | NA | 0 | NA | 0 | NA | 0 | NA | 0 | NA |
| 14 | 50408627 | 50441438 | 1  | NM_181814    | ABHD12B   | 0 | NA | 0 | NA | 0 | NA | 0 | NA | 0 | NA |
| 14 | 50480984 | 50441686 | -1 | NM_002863    | PYGL      | 0 | NA | 0 | NA | 0 | NA | 0 | NA | 0 | NA |
| 14 | 50631797 | 50511730 | -1 | NM_015163    | TRIM9     | 0 | NA | 0 | NA | 0 | NA | 0 | NA | 0 | NA |
| 14 | 50631797 | 50532534 | -1 | NM_052978    | TRIM9     | 0 | NA | 0 | NA | 0 | NA | 0 | NA | 0 | NA |
| 14 | 50776635 | 50794122 | 1  | NM_030755    | TXNDC1    | 0 | NA | 0 | NA | 0 | NA | 0 | NA | 0 | NA |
| 14 | 51025604 | 51267194 | 1  | NM_001042481 | FRMD6     | 0 | NA | 0 | NA | 0 | NA | 0 | NA | 0 | NA |
| 14 | 51188325 | 51267194 | 1  | NM_152330    | FRMD6     | 0 | NA | 0 | NA | 0 | NA | 0 | NA | 0 | NA |
| 14 | 51396799 | 51506268 | 1  | NM_053064    | GNG2      | 0 | NA | 0 | NA | 1 | 14 | 0 | NA | 0 | NA |
| 14 | 51525977 | 51541170 | 1  | NM_016039    | C14orf166 | 0 | NA | 0 | NA | 0 | NA | 0 | NA | 0 | NA |
| 14 | 51605696 | 51541269 | -1 | NM_007361    | NID2      | 0 | NA | 0 | NA | 0 | NA | 0 | NA | 1 | 13 |
| 14 | 51804180 | 51813192 | 1  | NM_000953    | PTGDR     | 0 | NA | 0 | NA | 0 | NA | 0 | NA | 0 | NA |
| 14 | 51850862 | 51865072 | 1  | NM_000956    | PTGER2    | 0 | NA | 1 | 13 | 0 | NA | 0 | NA | 0 | NA |
| 14 | 52088963 | 51967058 | -1 | NM_020784    | TXNDC16   | 0 | NA | 0 | NA | 0 | NA | 0 | NA | 0 | NA |
| 14 | 52089615 | 52174181 | 1  | NM_001099652 | GPR137C   | 0 | NA | 0 | NA | 0 | NA | 0 | NA | 0 | NA |
| 14 | 52232169 | 52178354 | -1 | NM_014584    | ERO1L     | 0 | NA | 0 | NA | 0 | NA | 0 | NA | 0 | NA |
| 14 | 52243667 | 52264466 | 1  | NM_002806    | PSMC6     | 0 | NA | 0 | NA | 0 | NA | 0 | NA | 0 | NA |
| 14 | 52266681 | 52309232 | 1  | NM_145251    | STYX      | 0 | NA | 0 | NA | 0 | NA | 0 | NA | 0 | NA |
| 14 | 52328133 | 52311660 | -1 | NM_198066    | GPNPAT1   | 0 | NA | 0 | NA | 0 | NA | 0 | NA | 0 | NA |
| 14 | 52487460 | 52393742 | -1 | NM_006832    | FERMT2    | 0 | NA | 0 | NA | 1 | 13 | 0 | NA | 0 | NA |

|    |          |          |    |              |           |   |    |   |    |   |    |   |    |   |    |
|----|----------|----------|----|--------------|-----------|---|----|---|----|---|----|---|----|---|----|
| 14 | 52689750 | 52582490 | -1 | NM_030637    | DDHD1     | 0 | NA | 0 | NA | 0 | NA | 0 | NA | 0 | NA |
| 14 | 53491020 | 53486204 | -1 | NM_130851    | BMP4      | 0 | NA | 1 | 12 | 0 | NA | 0 | NA | 0 | NA |
| 14 | 53493304 | 53486204 | -1 | NM_001202    | BMP4      | 0 | NA | 1 | 12 | 0 | NA | 0 | NA | 0 | NA |
| 14 | 53493304 | 53486204 | -1 | NM_130850    | BMP4      | 0 | NA | 1 | 12 | 0 | NA | 0 | NA | 0 | NA |
| 14 | 53933475 | 53956682 | 1  | NM_005192    | CDKN3     | 0 | NA | 0 | NA | 0 | NA | 1 | 11 | 0 | NA |
| 14 | 53977898 | 53963396 | -1 | NM_005776    | CNIH      | 0 | NA | 0 | NA | 0 | NA | 0 | NA | 0 | NA |
| 14 | 54025494 | 54010958 | -1 | NM_004124    | GMFB      | 0 | NA | 0 | NA | 0 | NA | 0 | NA | 0 | NA |
| 14 | 54046336 | 54075084 | 1  | NM_006568    | CGRRF1    | 0 | NA | 0 | NA | 0 | NA | 0 | NA | 0 | NA |
| 14 | 54104386 | 54325595 | 1  | NM_015589    | SAMD4A    | 0 | NA | 0 | NA | 0 | NA | 0 | NA | 0 | NA |
| 14 | 54439292 | 54378473 | -1 | NM_000161    | GCH1      | 0 | NA | 0 | NA | 0 | NA | 0 | NA | 0 | NA |
| 14 | 54439292 | 54378473 | -1 | NM_001024024 | GCH1      | 0 | NA | 0 | NA | 0 | NA | 0 | NA | 0 | NA |
| 14 | 54439292 | 54378473 | -1 | NM_001024070 | GCH1      | 0 | NA | 0 | NA | 0 | NA | 0 | NA | 0 | NA |
| 14 | 54439292 | 54378473 | -1 | NM_001024071 | GCH1      | 0 | NA | 0 | NA | 0 | NA | 0 | NA | 0 | NA |
| 14 | 54563557 | 54476691 | -1 | NM_001008396 | WDHD1     | 0 | NA | 0 | NA | 0 | NA | 0 | NA | 0 | NA |
| 14 | 54563557 | 54476691 | -1 | NM_007086    | WDHD1     | 0 | NA | 0 | NA | 0 | NA | 0 | NA | 0 | NA |
| 14 | 54563593 | 54585959 | 1  | NM_080867    | SOCS4     | 0 | NA | 0 | NA | 0 | NA | 0 | NA | 0 | NA |
| 14 | 54563593 | 54585959 | 1  | NM_199421    | SOCS4     | 0 | NA | 0 | NA | 0 | NA | 0 | NA | 0 | NA |
| 14 | 54588114 | 54606665 | 1  | NM_144578    | MAPK1IP1L | 0 | NA | 0 | NA | 0 | NA | 0 | NA | 0 | NA |
| 14 | 54665624 | 54681901 | 1  | NM_002306    | LGALS3    | 0 | NA | 0 | NA | 0 | NA | 0 | NA | 0 | NA |
| 14 | 54728149 | 54684600 | -1 | NM_014750    | DLG7      | 0 | NA | 0 | NA | 0 | NA | 0 | NA | 0 | NA |
| 14 | 54807831 | 54890082 | 1  | NM_017943    | FBXO34    | 0 | NA | 0 | NA | 0 | NA | 1 | 12 | 0 | NA |
| 14 | 54948329 | 54902862 | -1 | NM_014924    | KIAA0831  | 0 | NA | 0 | NA | 0 | NA | 0 | NA | 0 | NA |
| 14 | 54977016 | 54950682 | -1 | NM_199047    | TBPL2     | 0 | NA | 0 | NA | 1 | 12 | 0 | NA | 0 | NA |
| 14 | 55116677 | 55221049 | 1  | NM_004986    | KTN1      | 0 | NA | 0 | NA | 0 | NA | 0 | NA | 0 | NA |
| 14 | 55116677 | 55221055 | 1  | NM_001079521 | KTN1      | 0 | NA | 0 | NA | 0 | NA | 0 | NA | 0 | NA |
| 14 | 55116677 | 55221055 | 1  | NM_001079522 | KTN1      | 0 | NA | 0 | NA | 0 | NA | 0 | NA | 0 | NA |
| 14 | 55116677 | 55221055 | 1  | NM_182926    | KTN1      | 0 | NA | 0 | NA | 0 | NA | 0 | NA | 0 | NA |
| 14 | 55654845 | 55837784 | 1  | NM_021255    | PELI2     | 0 | NA | 0 | NA | 0 | NA | 0 | NA | 0 | NA |
| 14 | 56116263 | 56185985 | 1  | NM_017799    | C14orf101 | 0 | NA | 0 | NA | 0 | NA | 0 | NA | 0 | NA |
| 14 | 56342098 | 56337177 | -1 | NM_172337    | OTX2      | 0 | NA | 0 | NA | 0 | NA | 0 | NA | 0 | NA |
| 14 | 56346937 | 56337177 | -1 | NM_021728    | OTX2      | 0 | NA | 0 | NA | 0 | NA | 0 | NA | 0 | NA |
| 14 | 56805370 | 56738946 | -1 | NM_006544    | EXOC5     | 1 | 12 | 0 | NA | 0 | NA | 0 | NA | 0 | NA |
| 14 | 56805379 | 56826545 | 1  | NM_018229    | C14orf108 | 1 | 12 | 0 | NA | 0 | NA | 0 | NA | 0 | NA |
| 14 | 56927023 | 56947636 | 1  | NM_001011713 | NAT12     | 0 | NA | 0 | NA | 0 | NA | 0 | NA | 0 | NA |
| 14 | 57030323 | 57006347 | -1 | NM_018168    | C14orf105 | 0 | NA | 0 | NA | 0 | NA | 0 | NA | 0 | NA |
| 14 | 57133368 | 57100392 | -1 | NM_001080455 | SLC35F4   | 0 | NA | 0 | NA | 0 | NA | 0 | NA | 0 | NA |
| 14 | 57688600 | 57540560 | -1 | NM_001001872 | C14orf37  | 0 | NA | 0 | NA | 0 | NA | 0 | NA | 0 | NA |
| 14 | 57736585 | 57772106 | 1  | NM_018477    | ACTR10    | 0 | NA | 0 | NA | 0 | NA | 0 | NA | 0 | NA |
| 14 | 57781345 | 57808479 | 1  | NM_002788    | PSMA3     | 0 | NA | 0 | NA | 0 | NA | 0 | NA | 0 | NA |
| 14 | 57781345 | 57808479 | 1  | NM_152132    | PSMA3     | 0 | NA | 0 | NA | 0 | NA | 0 | NA | 0 | NA |
| 14 | 57834974 | 57910204 | 1  | NM_002892    | ARID4A    | 1 | 20 | 0 | NA | 0 | NA | 0 | NA | 0 | NA |
| 14 | 57834974 | 57910204 | 1  | NM_023000    | ARID4A    | 1 | 20 | 0 | NA | 0 | NA | 0 | NA | 0 | NA |
| 14 | 57834974 | 57910204 | 1  | NM_023001    | ARID4A    | 1 | 20 | 0 | NA | 0 | NA | 0 | NA | 0 | NA |
| 14 | 57932396 | 57945172 | 1  | NM_207377    | UNQ9438   | 0 | NA | 0 | NA | 0 | NA | 0 | NA | 0 | NA |
| 14 | 57963985 | 57945122 | -1 | NM_012460    | TIMM9     | 1 | 12 | 0 | NA | 1 | 14 | 0 | NA | 0 | NA |
| 14 | 57964462 | 58085302 | 1  | NM_014749    | KIAA0586  | 1 | 12 | 0 | NA | 1 | 14 | 0 | NA | 0 | NA |
| 14 | 58174509 | 58184791 | 1  | NM_001079520 | DACT1     | 0 | NA | 0 | NA | 0 | NA | 0 | NA | 0 | NA |
| 14 | 58174509 | 58184791 | 1  | NM_016651    | DACT1     | 0 | NA | 0 | NA | 0 | NA | 0 | NA | 0 | NA |
| 14 | 58725151 | 58906224 | 1  | NM_014992    | DAAM1     | 0 | NA | 0 | NA | 0 | NA | 0 | NA | 0 | NA |
| 14 | 59001812 | 58999992 | -1 | NM_022571    | GPR135    | 0 | NA | 0 | NA | 0 | NA | 0 | NA | 0 | NA |
| 14 | 59020826 | 59009158 | -1 | NM_144581    | C14orf149 | 0 | NA | 0 | NA | 0 | NA | 0 | NA | 0 | NA |
| 14 | 59020913 | 59041834 | 1  | NM_001098625 | C14orf100 | 0 | NA | 0 | NA | 0 | NA | 0 | NA | 0 | NA |
| 14 | 59020913 | 59041834 | 1  | NM_016475    | C14orf100 | 0 | NA | 0 | NA | 0 | NA | 0 | NA | 0 | NA |
| 14 | 59167273 | 59132446 | -1 | NM_206852    | RTN1      | 0 | NA | 0 | NA | 0 | NA | 0 | NA | 0 | NA |
| 14 | 59284184 | 59132446 | -1 | NM_206857    | RTN1      | 0 | NA | 0 | NA | 0 | NA | 0 | NA | 0 | NA |
| 14 | 59407310 | 59132446 | -1 | NM_021136    | RTN1      | 0 | NA | 0 | NA | 0 | NA | 0 | NA | 0 | NA |
| 14 | 59628381 | 59671285 | 1  | NM_022495    | C14orf135 | 1 | 12 | 0 | NA | 0 | NA | 0 | NA | 0 | NA |
| 14 | 59701857 | 59681251 | -1 | NM_016029    | DHRS7     | 0 | NA | 0 | NA | 0 | NA | 0 | NA | 0 | NA |
| 14 | 59782222 | 59829825 | 1  | NM_177952    | PPM1A     | 0 | NA | 0 | NA | 0 | NA | 0 | NA | 0 | NA |
| 14 | 59785817 | 59823180 | 1  | NM_177951    | PPM1A     | 0 | NA | 0 | NA | 0 | NA | 0 | NA | 0 | NA |
| 14 | 59785817 | 59829825 | 1  | NM_021003    | PPM1A     | 0 | NA | 0 | NA | 0 | NA | 0 | NA | 0 | NA |
| 14 | 60022502 | 59972427 | -1 | NM_174978    | C14orf39  | 1 | 16 | 1 | 15 | 0 | NA | 0 | NA | 0 | NA |
| 14 | 60045690 | 60048278 | 1  | NM_007374    | SIX6      | 0 | NA | 1 | 13 | 0 | NA | 0 | NA | 0 | NA |
| 14 | 60185908 | 60181169 | -1 | NM_005982    | SIX1      | 0 | NA | 0 | NA | 0 | NA | 0 | NA | 0 | NA |
| 14 | 60260545 | 60246008 | -1 | NM_017420    | SIX4      | 0 | NA | 0 | NA | 0 | NA | 0 | NA | 0 | NA |

|    |          |          |    |              |          |   |    |   |    |   |    |   |    |   |    |
|----|----------|----------|----|--------------|----------|---|----|---|----|---|----|---|----|---|----|
| 14 | 60271222 | 60505151 | 1  | NM_002431    | MNAT1    | 0 | NA | 0 | NA | 0 | NA | 0 | NA | 0 | NA |
| 14 | 60517535 | 60507919 | -1 | NM_020810    | TRMT5    | 0 | NA | 0 | NA | 0 | NA | 0 | NA | 0 | NA |
| 14 | 60517632 | 60588929 | 1  | NM_153811    | SLC38A6  | 0 | NA | 0 | NA | 0 | NA | 0 | NA | 0 | NA |
| 14 | 60818283 | 60813841 | -1 | NM_001017970 | TMEM30B  | 0 | NA | 0 | NA | 0 | NA | 0 | NA | 0 | NA |
| 14 | 60858267 | 61087451 | 1  | NM_006255    | PRKCH    | 0 | NA | 1 | 13 | 0 | NA | 0 | NA | 0 | NA |
| 14 | 61231991 | 61284729 | 1  | NM_001530    | HIF1A    | 1 | 17 | 0 | NA | 1 | 13 | 0 | NA | 0 | NA |
| 14 | 61231991 | 61284729 | 1  | NM_181054    | HIF1A    | 1 | 17 | 0 | NA | 1 | 13 | 0 | NA | 0 | NA |
| 14 | 61298919 | 61332899 | 1  | NM_003082    | SNAPC1   | 0 | NA | 0 | NA | 0 | NA | 0 | NA | 0 | NA |
| 14 | 61532293 | 61638180 | 1  | NM_031914    | SYT16    | 0 | NA | 0 | NA | 0 | NA | 0 | NA | 0 | NA |
| 14 | 62581708 | 62243697 | -1 | NM_139318    | KCNH5    | 0 | NA | 0 | NA | 0 | NA | 0 | NA | 0 | NA |
| 14 | 62581708 | 62243697 | -1 | NM_172375    | KCNH5    | 0 | NA | 0 | NA | 0 | NA | 0 | NA | 0 | NA |
| 14 | 62638337 | 62248710 | -1 | NM_172376    | KCNH5    | 0 | NA | 0 | NA | 0 | NA | 0 | NA | 0 | NA |
| 14 | 62740897 | 62828312 | 1  | NM_020663    | RHOJ     | 1 | 22 | 0 | NA | 1 | 12 | 0 | NA | 0 | NA |
| 14 | 62854316 | 62849394 | -1 | NM_145171    | GPHB5    | 0 | NA | 0 | NA | 0 | NA | 0 | NA | 0 | NA |
| 14 | 63079832 | 62911107 | -1 | NM_006246    | PPP2R5E  | 0 | NA | 0 | NA | 1 | 12 | 0 | NA | 0 | NA |
| 14 | 63177878 | 63133509 | -1 | NM_001008726 | WDR89    | 1 | 24 | 0 | NA | 0 | NA | 1 | 16 | 0 | NA |
| 14 | 63178344 | 63133509 | -1 | NM_080666    | WDR89    | 1 | 24 | 0 | NA | 0 | NA | 1 | 16 | 0 | NA |
| 14 | 63264509 | 63220687 | -1 | NM_030791    | SGPP1    | 0 | NA | 0 | NA | 0 | NA | 0 | NA | 0 | NA |
| 14 | 63389435 | 63762922 | 1  | NM_015180    | SYNE2    | 0 | NA | 0 | NA | 0 | NA | 0 | NA | 0 | NA |
| 14 | 63389435 | 63762922 | 1  | NM_182914    | SYNE2    | 0 | NA | 0 | NA | 0 | NA | 0 | NA | 0 | NA |
| 14 | 63750611 | 63762922 | 1  | NM_182913    | SYNE2    | 0 | NA | 0 | NA | 0 | NA | 0 | NA | 0 | NA |
| 14 | 63752424 | 63762922 | 1  | NM_182910    | SYNE2    | 0 | NA | 0 | NA | 0 | NA | 0 | NA | 0 | NA |
| 14 | 63830881 | 63763503 | -1 | NM_001040275 | ESR2     | 0 | NA | 0 | NA | 0 | NA | 0 | NA | 0 | NA |
| 14 | 63830881 | 63769499 | -1 | NM_001437    | ESR2     | 0 | NA | 0 | NA | 0 | NA | 0 | NA | 0 | NA |
| 14 | 63875021 | 63763503 | -1 | NM_001040276 | ESR2     | 1 | 12 | 0 | NA | 0 | NA | 1 | 13 | 0 | NA |
| 14 | 63924845 | 63996474 | 1  | NM_005956    | MTHFD1   | 0 | NA | 0 | NA | 0 | NA | 1 | 12 | 0 | NA |
| 14 | 64001969 | 64010974 | 1  | NM_004857    | AKAP5    | 0 | NA | 0 | NA | 0 | NA | 0 | NA | 0 | NA |
| 14 | 64043037 | 64023307 | -1 | NM_006977    | ZBTB25   | 1 | 11 | 0 | NA | 0 | NA | 0 | NA | 0 | NA |
| 14 | 64041044 | 64061422 | 1  | NM_001123329 | ZBTB1    | 1 | 11 | 0 | NA | 0 | NA | 0 | NA | 0 | NA |
| 14 | 64041044 | 64070161 | 1  | NM_014950    | ZBTB1    | 1 | 11 | 0 | NA | 0 | NA | 0 | NA | 0 | NA |
| 14 | 64076938 | 64079707 | 1  | NM_021979    | HSPA2    | 1 | 14 | 1 | 17 | 0 | NA | 0 | NA | 0 | NA |
| 14 | 64086372 | 64125849 | 1  | NM_172365    | C14orf50 | 1 | 16 | 1 | 17 | 0 | NA | 0 | NA | 0 | NA |
| 14 | 64240945 | 64280813 | 1  | NM_015549    | PLEKHG3  | 0 | NA | 0 | NA | 0 | NA | 0 | NA | 0 | NA |
| 14 | 64359619 | 64282753 | -1 | NM_001024858 | SPTB     | 0 | NA | 0 | NA | 0 | NA | 0 | NA | 0 | NA |
| 14 | 64359619 | 64302901 | -1 | NM_000347    | SPTB     | 0 | NA | 0 | NA | 0 | NA | 0 | NA | 0 | NA |
| 14 | 64450892 | 64471666 | 1  | NM_145165    | CHURC1   | 1 | 23 | 0 | NA | 0 | NA | 0 | NA | 0 | NA |
| 14 | 64479284 | 64475624 | -1 | NM_002083    | GPX2     | 0 | NA | 0 | NA | 0 | NA | 0 | NA | 0 | NA |
| 14 | 64508551 | 64482286 | -1 | NM_198686    | RAB15    | 0 | NA | 0 | NA | 0 | NA | 1 | 13 | 0 | NA |
| 14 | 64523259 | 64599123 | 1  | NM_002028    | FNTB     | 0 | NA | 0 | NA | 0 | NA | 1 | 11 | 0 | NA |
| 14 | 64638980 | 64542644 | -1 | NM_197957    | MAX      | 0 | NA | 0 | NA | 1 | 17 | 0 | NA | 0 | NA |
| 14 | 64638980 | 64611597 | -1 | NM_002382    | MAX      | 0 | NA | 0 | NA | 1 | 17 | 0 | NA | 0 | NA |
| 14 | 64638980 | 64611597 | -1 | NM_145112    | MAX      | 0 | NA | 0 | NA | 1 | 17 | 0 | NA | 0 | NA |
| 14 | 64638980 | 64611597 | -1 | NM_145113    | MAX      | 0 | NA | 0 | NA | 1 | 17 | 0 | NA | 0 | NA |
| 14 | 64638980 | 64614273 | -1 | NM_145116    | MAX      | 0 | NA | 0 | NA | 1 | 17 | 0 | NA | 0 | NA |
| 14 | 64638980 | 64620214 | -1 | NM_145114    | MAX      | 0 | NA | 0 | NA | 1 | 17 | 0 | NA | 0 | NA |
| 14 | 64947592 | 65279715 | 1  | NM_178155    | FUT8     | 0 | NA | 0 | NA | 0 | NA | 0 | NA | 0 | NA |
| 14 | 64947592 | 65279715 | 1  | NM_178156    | FUT8     | 0 | NA | 0 | NA | 0 | NA | 0 | NA | 0 | NA |
| 14 | 64949287 | 65279715 | 1  | NM_004480    | FUT8     | 0 | NA | 0 | NA | 0 | NA | 0 | NA | 0 | NA |
| 14 | 64949287 | 65279715 | 1  | NM_178154    | FUT8     | 0 | NA | 0 | NA | 0 | NA | 0 | NA | 0 | NA |
| 14 | 65205885 | 65279715 | 1  | NM_178157    | FUT8     | 0 | NA | 0 | NA | 0 | NA | 0 | NA | 0 | NA |
| 14 | 66043877 | 66718278 | 1  | NM_001024218 | GPHN     | 0 | NA | 0 | NA | 0 | NA | 0 | NA | 0 | NA |
| 14 | 66043877 | 66718278 | 1  | NM_020806    | GPHN     | 0 | NA | 0 | NA | 0 | NA | 0 | NA | 0 | NA |
| 14 | 66725898 | 66765020 | 1  | NM_173526    | FAM71D   | 0 | NA | 0 | NA | 0 | NA | 0 | NA | 0 | NA |
| 14 | 66777773 | 66872289 | 1  | NM_022474    | MPP5     | 0 | NA | 0 | NA | 0 | NA | 1 | 12 | 0 | NA |
| 14 | 66896344 | 66874341 | -1 | NM_015994    | ATP6V1D  | 1 | 15 | 0 | NA | 0 | NA | 0 | NA | 0 | NA |
| 14 | 66896786 | 66922986 | 1  | NM_004094    | E1F2S1   | 1 | 15 | 0 | NA | 0 | NA | 0 | NA | 0 | NA |
| 14 | 66948581 | 66923452 | -1 | NM_016445    | PLEK2    | 0 | NA | 0 | NA | 0 | NA | 0 | NA | 0 | NA |
| 14 | 67051774 | 67006735 | -1 | NM_182526    | C14orf83 | 0 | NA | 0 | NA | 0 | NA | 0 | NA | 0 | NA |
| 14 | 67069780 | 67126008 | 1  | NM_020715    | PLEKHH1  | 0 | NA | 0 | NA | 0 | NA | 0 | NA | 0 | NA |
| 14 | 67136770 | 67125775 | -1 | NM_004569    | PIGH     | 0 | NA | 0 | NA | 0 | NA | 0 | NA | 0 | NA |
| 14 | 67156331 | 67188189 | 1  | NM_001172    | ARG2     | 0 | NA | 0 | NA | 0 | NA | 0 | NA | 0 | NA |
| 14 | 67211301 | 67187618 | -1 | NM_006370    | VTI1B    | 0 | NA | 0 | NA | 0 | NA | 0 | NA | 0 | NA |
| 14 | 67232263 | 67213270 | -1 | NM_016026    | RDH11    | 0 | NA | 0 | NA | 0 | NA | 0 | NA | 0 | NA |
| 14 | 67238355 | 67270921 | 1  | NM_152443    | RDH12    | 0 | NA | 0 | NA | 0 | NA | 0 | NA | 0 | NA |
| 14 | 67353055 | 67282991 | -1 | NM_015346    | ZFYVE26  | 0 | NA | 0 | NA | 0 | NA | 0 | NA | 0 | NA |

|    |          |          |    |              |           |   |    |   |    |   |    |   |    |   |    |
|----|----------|----------|----|--------------|-----------|---|----|---|----|---|----|---|----|---|----|
| 14 | 67356261 | 68014563 | 1  | NM_133510    | RAD51L1   | 0 | NA | 0 | NA | 0 | NA | 0 | NA | 0 | NA |
| 14 | 67356261 | 68034351 | 1  | NM_002877    | RAD51L1   | 0 | NA | 0 | NA | 0 | NA | 0 | NA | 0 | NA |
| 14 | 67356261 | 68132367 | 1  | NM_133509    | RAD51L1   | 0 | NA | 0 | NA | 0 | NA | 0 | NA | 0 | NA |
| 14 | 68329538 | 68324127 | -1 | NM_004926    | ZFP36L1   | 0 | NA | 1 | 14 | 0 | NA | 0 | NA | 0 | NA |
| 14 | 68332943 | 68331216 | -1 | NM_207442    | C14orf181 | 0 | NA | 1 | 14 | 0 | NA | 0 | NA | 0 | NA |
| 14 | 68515709 | 68410792 | -1 | NM_001102    | ACTN1     | 0 | NA | 0 | NA | 1 | 14 | 0 | NA | 0 | NA |
| 14 | 68689502 | 68587394 | -1 | NM_003861    | WDR22     | 0 | NA | 0 | NA | 0 | NA | 0 | NA | 0 | NA |
| 14 | 68746230 | 68778825 | 1  | NM_018199    | EXDL2     | 0 | NA | 0 | NA | 0 | NA | 0 | NA | 0 | NA |
| 14 | 68796667 | 68890936 | 1  | NM_020692    | GALNTL1   | 0 | NA | 0 | NA | 0 | NA | 0 | NA | 0 | NA |
| 14 | 68934774 | 68916597 | -1 | NM_004450    | ERH       | 0 | NA | 0 | NA | 0 | NA | 0 | NA | 0 | NA |
| 14 | 68935703 | 68997021 | 1  | NM_018375    | SLC39A9   | 0 | NA | 0 | NA | 0 | NA | 0 | NA | 0 | NA |
| 14 | 69148065 | 69251614 | 1  | NM_014734    | KIAA0247  | 0 | NA | 0 | NA | 0 | NA | 0 | NA | 0 | NA |
| 14 | 69303581 | 69308475 | 1  | NM_001039465 | SFRS5     | 1 | 14 | 0 | NA | 0 | NA | 0 | NA | 0 | NA |
| 14 | 69303586 | 69308475 | 1  | NM_006925    | SFRS5     | 1 | 14 | 0 | NA | 0 | NA | 0 | NA | 0 | NA |
| 14 | 69333707 | 69312304 | -1 | NM_003049    | SLC10A1   | 0 | NA | 0 | NA | 0 | NA | 0 | NA | 0 | NA |
| 14 | 69415895 | 69568836 | 1  | NM_001034852 | SMOC1     | 0 | NA | 0 | NA | 0 | NA | 0 | NA | 0 | NA |
| 14 | 69415895 | 69568836 | 1  | NM_022137    | SMOC1     | 0 | NA | 0 | NA | 0 | NA | 0 | NA | 0 | NA |
| 14 | 69616671 | 69580686 | -1 | NM_182936    | SLC8A3    | 0 | NA | 0 | NA | 0 | NA | 0 | NA | 0 | NA |
| 14 | 69725540 | 69580686 | -1 | NM_033262    | SLC8A3    | 0 | NA | 0 | NA | 0 | NA | 0 | NA | 0 | NA |
| 14 | 69725540 | 69580686 | -1 | NM_058240    | SLC8A3    | 0 | NA | 0 | NA | 0 | NA | 0 | NA | 0 | NA |
| 14 | 69725540 | 69580686 | -1 | NM_182932    | SLC8A3    | 0 | NA | 0 | NA | 0 | NA | 0 | NA | 0 | NA |
| 14 | 69725540 | 69580686 | -1 | NM_183002    | SLC8A3    | 0 | NA | 0 | NA | 0 | NA | 0 | NA | 0 | NA |
| 14 | 69896147 | 69862537 | -1 | NM_016468    | C14orf112 | 0 | NA | 0 | NA | 0 | NA | 1 | 11 | 0 | NA |
| 14 | 69953560 | 69902965 | -1 | NM_018373    | SYNJ2BP   | 0 | NA | 0 | NA | 1 | 12 | 0 | NA | 0 | NA |
| 14 | 69993969 | 69996375 | 1  | NM_003813    | ADAM21    | 0 | NA | 0 | NA | 0 | NA | 0 | NA | 0 | NA |
| 14 | 70071485 | 70058830 | -1 | NM_003814    | ADAM20    | 0 | NA | 0 | NA | 0 | NA | 0 | NA | 0 | NA |
| 14 | 70137137 | 70120709 | -1 | NM_005466    | MED6      | 0 | NA | 0 | NA | 0 | NA | 0 | NA | 0 | NA |
| 14 | 70178256 | 70211830 | 1  | NM_015351    | TTC9      | 0 | NA | 0 | NA | 0 | NA | 0 | NA | 1 | 14 |
| 14 | 70345641 | 70264606 | -1 | NM_033141    | MAP3K9    | 0 | NA | 0 | NA | 0 | NA | 0 | NA | 0 | NA |
| 14 | 70443874 | 70651852 | 1  | NM_014982    | PCNX      | 0 | NA | 0 | NA | 0 | NA | 0 | NA | 0 | NA |
| 14 | 71065794 | 71275873 | 1  | NM_015556    | SIPA1L1   | 0 | NA | 0 | NA | 0 | NA | 0 | NA | 0 | NA |
| 14 | 71469538 | 72102991 | 1  | NM_004296    | RGS6      | 0 | NA | 0 | NA | 0 | NA | 0 | NA | 0 | NA |
| 14 | 72430562 | 72206412 | -1 | NM_012074    | DPF3      | 0 | NA | 0 | NA | 0 | NA | 0 | NA | 0 | NA |
| 14 | 72462837 | 72496110 | 1  | NM_015604    | WDR21A    | 0 | NA | 0 | NA | 0 | NA | 0 | NA | 0 | NA |
| 14 | 72462837 | 72496110 | 1  | NM_181340    | WDR21A    | 0 | NA | 0 | NA | 0 | NA | 0 | NA | 0 | NA |
| 14 | 72462837 | 72496110 | 1  | NM_181341    | WDR21A    | 0 | NA | 0 | NA | 0 | NA | 0 | NA | 0 | NA |
| 14 | 72523417 | 72505911 | -1 | NM_178441    | ZFYVE1    | 0 | NA | 0 | NA | 0 | NA | 0 | NA | 0 | NA |
| 14 | 72563592 | 72505911 | -1 | NM_021260    | ZFYVE1    | 0 | NA | 0 | NA | 0 | NA | 0 | NA | 0 | NA |
| 14 | 72595020 | 72657745 | 1  | NM_021239    | RBM25     | 0 | NA | 0 | NA | 0 | NA | 0 | NA | 0 | NA |
| 14 | 72672931 | 72756862 | 1  | NM_000021    | PSEN1     | 0 | NA | 0 | NA | 0 | NA | 0 | NA | 0 | NA |
| 14 | 72773957 | 72811100 | 1  | NM_173462    | PAPLN     | 0 | NA | 0 | NA | 0 | NA | 0 | NA | 0 | NA |
| 14 | 72995039 | 72811670 | -1 | NM_001005743 | NUMB      | 0 | NA | 0 | NA | 0 | NA | 0 | NA | 0 | NA |
| 14 | 72995039 | 72811670 | -1 | NM_001005744 | NUMB      | 0 | NA | 0 | NA | 0 | NA | 0 | NA | 0 | NA |
| 14 | 72995039 | 72811670 | -1 | NM_001005745 | NUMB      | 0 | NA | 0 | NA | 0 | NA | 0 | NA | 0 | NA |
| 14 | 72995039 | 72811670 | -1 | NM_003744    | NUMB      | 0 | NA | 0 | NA | 0 | NA | 0 | NA | 0 | NA |
| 14 | 73027396 | 73029858 | 1  | NM_024644    | C14orf169 | 0 | NA | 0 | NA | 0 | NA | 0 | NA | 0 | NA |
| 14 | 73073680 | 73080251 | 1  | NM_001037161 | ACOT1     | 0 | NA | 0 | NA | 0 | NA | 0 | NA | 0 | NA |
| 14 | 73095404 | 73014944 | -1 | NM_203309    | HEATR4    | 0 | NA | 0 | NA | 0 | NA | 0 | NA | 0 | NA |
| 14 | 73105524 | 73112112 | 1  | NM_006821    | ACOT2     | 0 | NA | 0 | NA | 1 | 16 | 0 | NA | 0 | NA |
| 14 | 73128162 | 73132223 | 1  | NM_152331    | ACOT4     | 0 | NA | 0 | NA | 0 | NA | 0 | NA | 0 | NA |
| 14 | 73153300 | 73156345 | 1  | NM_001037162 | ACOT6     | 0 | NA | 0 | NA | 0 | NA | 0 | NA | 0 | NA |
| 14 | 73181330 | 73238402 | 1  | NM_031427    | DNAL1     | 0 | NA | 0 | NA | 0 | NA | 0 | NA | 0 | NA |
| 14 | 73250881 | 73248238 | -1 | NM_006029    | PNMA1     | 0 | NA | 0 | NA | 1 | 12 | 0 | NA | 0 | NA |
| 14 | 73296754 | 73251577 | -1 | NM_194278    | C14orf43  | 1 | 14 | 0 | NA | 0 | NA | 0 | NA | 0 | NA |
| 14 | 73323649 | 73251577 | -1 | NM_001043318 | C14orf43  | 0 | NA | 0 | NA | 0 | NA | 0 | NA | 0 | NA |
| 14 | 73388426 | 73421915 | 1  | NM_152444    | ZADH1     | 1 | 14 | 0 | NA | 1 | 13 | 0 | NA | 0 | NA |
| 14 | 73423338 | 73468556 | 1  | NM_021188    | ZNF410    | 1 | 11 | 0 | NA | 0 | NA | 0 | NA | 0 | NA |
| 14 | 73486395 | 73499566 | 1  | NM_182480    | COQ6      | 0 | NA | 0 | NA | 1 | 13 | 0 | NA | 0 | NA |
| 14 | 73486588 | 73470457 | -1 | NM_152445    | C14orf44  | 0 | NA | 0 | NA | 1 | 13 | 0 | NA | 0 | NA |
| 14 | 73486708 | 73499566 | 1  | NM_182476    | COQ6      | 0 | NA | 0 | NA | 1 | 13 | 0 | NA | 0 | NA |
| 14 | 73552386 | 73502933 | -1 | NM_001249    | ENTPD5    | 0 | NA | 0 | NA | 0 | NA | 0 | NA | 0 | NA |
| 14 | 73555811 | 73602548 | 1  | NM_025057    | C14orf45  | 0 | NA | 0 | NA | 0 | NA | 0 | NA | 0 | NA |
| 14 | 73620949 | 73596624 | -1 | NM_005589    | ALDH6A1   | 0 | NA | 0 | NA | 0 | NA | 0 | NA | 0 | NA |
| 14 | 73621251 | 73735491 | 1  | NM_001024674 | LIN52     | 0 | NA | 0 | NA | 0 | NA | 0 | NA | 0 | NA |
| 14 | 73775927 | 73799194 | 1  | NM_182894    | V5X2      | 0 | NA | 1 | 13 | 0 | NA | 0 | NA | 0 | NA |

|    |          |          |    |              |            |   |    |   |    |   |    |   |    |   |    |
|----|----------|----------|----|--------------|------------|---|----|---|----|---|----|---|----|---|----|
| 14 | 73839512 | 73821732 | -1 | NM_005050    | ABCD4      | 0 | NA | 0 | NA | 0 | NA | 0 | NA | 0 | NA |
| 14 | 73884918 | 73896464 | 1  | NM_018228    | C14orf115  | 0 | NA | 1 | 16 | 0 | NA | 0 | NA | 0 | NA |
| 14 | 73962558 | 73942348 | -1 | NM_001105579 | TMEM90A    | 0 | NA | 0 | NA | 0 | NA | 0 | NA | 0 | NA |
| 14 | 74029837 | 74016395 | -1 | NM_006432    | NPC2       | 0 | NA | 0 | NA | 0 | NA | 1 | 11 | 0 | NA |
| 14 | 74030202 | 74032024 | 1  | NM_194279    | ISCA2      | 0 | NA | 0 | NA | 0 | NA | 1 | 11 | 0 | NA |
| 14 | 74148787 | 74034638 | -1 | NM_000428    | LTBP2      | 0 | NA | 0 | NA | 0 | NA | 0 | NA | 0 | NA |
| 14 | 74249560 | 74197707 | 0  | NM_001039479 | KIAA0317   | 0 | NA | 0 | NA | 1 | 13 | 0 | NA | 0 | NA |
| 14 | 74249602 | 74273143 | 1  | NM_015962    | FCF1       | 0 | NA | 0 | NA | 1 | 13 | 0 | NA | 0 | NA |
| 14 | 74299821 | 74373766 | 1  | NM_019589    | YLPM1      | 1 | 12 | 0 | NA | 0 | NA | 0 | NA | 0 | NA |
| 14 | 74400290 | 74391587 | -1 | NM_001080408 | PROX2      | 0 | NA | 0 | NA | 0 | NA | 0 | NA | 0 | NA |
| 14 | 74418371 | 74440198 | 1  | NM_001933    | DLST       | 0 | NA | 0 | NA | 0 | NA | 0 | NA | 0 | NA |
| 14 | 74458898 | 74442098 | -1 | NM_031464    | RPS6KL1    | 0 | NA | 0 | NA | 0 | NA | 0 | NA | 0 | NA |
| 14 | 74492044 | 74478290 | -1 | NM_002632    | PGF        | 0 | NA | 0 | NA | 0 | NA | 0 | NA | 0 | NA |
| 14 | 74539364 | 74546045 | 1  | NM_014239    | EIF2B2     | 0 | NA | 0 | NA | 0 | NA | 0 | NA | 0 | NA |
| 14 | 74587988 | 74550219 | -1 | NM_001040108 | MLH3       | 0 | NA | 0 | NA | 0 | NA | 1 | 15 | 0 | NA |
| 14 | 74587988 | 74550219 | -1 | NM_014381    | MLH3       | 0 | NA | 0 | NA | 0 | NA | 1 | 15 | 0 | NA |
| 14 | 74600489 | 74589680 | -1 | NM_001107    | ACYP1      | 0 | NA | 0 | NA | 0 | NA | 0 | NA | 0 | NA |
| 14 | 74600489 | 74589680 | -1 | NM_203488    | ACYP1      | 0 | NA | 0 | NA | 0 | NA | 0 | NA | 0 | NA |
| 14 | 74606051 | 74614552 | 1  | NM_001042430 | C14orf140  | 0 | NA | 0 | NA | 0 | NA | 0 | NA | 0 | NA |
| 14 | 74606051 | 74614552 | 1  | NM_024643    | C14orf140  | 0 | NA | 0 | NA | 0 | NA | 0 | NA | 0 | NA |
| 14 | 74663389 | 74620727 | -1 | NM_033116    | NEK9       | 0 | NA | 0 | NA | 0 | NA | 0 | NA | 0 | NA |
| 14 | 74713102 | 74667923 | -1 | NM_006827    | TMED10     | 0 | NA | 0 | NA | 0 | NA | 0 | NA | 0 | NA |
| 14 | 74815283 | 74818665 | 1  | NM_005252    | FOS        | 0 | NA | 0 | NA | 0 | NA | 0 | NA | 0 | NA |
| 14 | 74968589 | 75006909 | 1  | NM_130469    | JDP2       | 0 | NA | 0 | NA | 0 | NA | 0 | NA | 0 | NA |
| 14 | 75058536 | 75083086 | 1  | NM_006399    | BATF       | 0 | NA | 0 | NA | 0 | NA | 0 | NA | 0 | NA |
| 14 | 75114744 | 75184262 | 1  | NM_017791    | FLVCR2     | 0 | NA | 0 | NA | 0 | NA | 0 | NA | 0 | NA |
| 14 | 75196912 | 75185883 | -1 | NM_007176    | C14orf1    | 0 | NA | 0 | NA | 0 | NA | 0 | NA | 0 | NA |
| 14 | 75197373 | 75491175 | 1  | NM_015072    | TLL5       | 0 | NA | 0 | NA | 0 | NA | 0 | NA | 0 | NA |
| 14 | 75517845 | 75494194 | -1 | NM_003239    | TGFB3      | 0 | NA | 0 | NA | 0 | NA | 0 | NA | 0 | NA |
| 14 | 75521848 | 75619845 | 1  | NM_001102564 | C14orf179  | 0 | NA | 0 | NA | 0 | NA | 0 | NA | 0 | NA |
| 14 | 75521848 | 75619845 | 1  | NM_052873    | C14orf179  | 0 | NA | 0 | NA | 0 | NA | 0 | NA | 0 | NA |
| 14 | 75688011 | 75738887 | 1  | NM_017926    | C14orf118  | 0 | NA | 0 | NA | 1 | 12 | 0 | NA | 0 | NA |
| 14 | 75688011 | 75738887 | 1  | NM_017972    | C14orf118  | 0 | NA | 0 | NA | 0 | NA | 1 | 12 | 0 | NA |
| 14 | 75907478 | 76036961 | 1  | NM_004452    | ESRRB      | 0 | NA | 0 | NA | 0 | NA | 0 | NA | 0 | NA |
| 14 | 76297987 | 76319116 | 1  | NM_014909    | VASH1      | 0 | NA | 0 | NA | 0 | NA | 0 | NA | 0 | NA |
| 14 | 76348983 | 76323338 | -1 | NM_015305    | ANGEL1     | 0 | NA | 0 | NA | 0 | NA | 0 | NA | 0 | NA |
| 14 | 76362477 | 76406398 | 1  | NM_194287    | C14orf166B | 0 | NA | 0 | NA | 0 | NA | 0 | NA | 0 | NA |
| 14 | 76564787 | 76560638 | -1 | NM_024496    | C14orf4    | 1 | 16 | 0 | NA | 1 | 12 | 0 | NA | 0 | NA |
| 14 | 76634330 | 76653383 | 1  | NM_033426    | KIAA1737   | 0 | NA | 0 | NA | 0 | NA | 1 | 14 | 0 | NA |
| 14 | 76677887 | 76667365 | -1 | NM_174976    | ZDHHC22    | 0 | NA | 0 | NA | 0 | NA | 0 | NA | 0 | NA |
| 14 | 76717922 | 76795591 | 1  | NM_020431    | TMEM63C    | 0 | NA | 0 | NA | 0 | NA | 0 | NA | 0 | NA |
| 14 | 76807408 | 76801586 | -1 | NM_021257    | NGB        | 0 | NA | 0 | NA | 0 | NA | 0 | NA | 0 | NA |
| 14 | 76856970 | 76811051 | -1 | NM_013382    | POMT2      | 0 | NA | 0 | NA | 0 | NA | 0 | NA | 0 | NA |
| 14 | 76857106 | 76867693 | 1  | NM_145870    | GSTZ1      | 0 | NA | 0 | NA | 0 | NA | 0 | NA | 0 | NA |
| 14 | 76857106 | 76867693 | 1  | NM_145871    | GSTZ1      | 0 | NA | 0 | NA | 0 | NA | 0 | NA | 0 | NA |
| 14 | 76857458 | 76867693 | 1  | NM_001513    | GSTZ1      | 0 | NA | 0 | NA | 0 | NA | 0 | NA | 0 | NA |
| 14 | 76913149 | 76877866 | -1 | NM_213601    | TMED8      | 0 | NA | 0 | NA | 0 | NA | 0 | NA | 0 | NA |
| 14 | 76913514 | 76927340 | 1  | NM_001010860 | C14orf174  | 0 | NA | 0 | NA | 0 | NA | 0 | NA | 0 | NA |
| 14 | 76958985 | 76942748 | -1 | NM_138791    | C14orf148  | 0 | NA | 0 | NA | 0 | NA | 0 | NA | 0 | NA |
| 14 | 76959132 | 76930176 | -1 | NM_001113475 | C14orf148  | 0 | NA | 0 | NA | 0 | NA | 0 | NA | 0 | NA |
| 14 | 76993657 | 76962770 | -1 | NM_022067    | C14orf133  | 0 | NA | 0 | NA | 0 | NA | 0 | NA | 0 | NA |
| 14 | 76994154 | 77005568 | 1  | NM_012111    | AHSA1      | 0 | NA | 0 | NA | 0 | NA | 0 | NA | 0 | NA |
| 14 | 77034912 | 77010490 | -1 | NM_182509    | THSD3      | 0 | NA | 0 | NA | 0 | NA | 0 | NA | 0 | NA |
| 14 | 77034912 | 77010490 | -1 | NM_199265    | THSD3      | 0 | NA | 0 | NA | 0 | NA | 0 | NA | 0 | NA |
| 14 | 77034912 | 77010490 | -1 | NM_199296    | THSD3      | 0 | NA | 0 | NA | 0 | NA | 0 | NA | 0 | NA |
| 14 | 77152863 | 77043022 | -1 | NM_004863    | SPTLC2     | 0 | NA | 0 | NA | 0 | NA | 0 | NA | 0 | NA |
| 14 | 77244109 | 77208501 | -1 | NM_006020    | ALKBH1     | 1 | 11 | 0 | NA | 0 | NA | 0 | NA | 0 | NA |
| 14 | 77244187 | 77253696 | 1  | NM_031210    | C14orf156  | 1 | 11 | 0 | NA | 0 | NA | 0 | NA | 0 | NA |
| 14 | 77296645 | 77305838 | 1  | NM_174943    | C14orf178  | 0 | NA | 0 | NA | 0 | NA | 0 | NA | 0 | NA |
| 14 | 77297250 | 77253696 | -1 | NM_012245    | SNW1       | 0 | NA | 0 | NA | 0 | NA | 0 | NA | 0 | NA |
| 14 | 77336226 | 77470047 | 1  | NM_020421    | ADCK1      | 0 | NA | 0 | NA | 0 | NA | 0 | NA | 0 | NA |
| 14 | 77939845 | 79400513 | 1  | NM_004796    | NRXN3      | 0 | NA | 0 | NA | 0 | NA | 0 | NA | 0 | NA |
| 14 | 78815406 | 79400513 | 1  | NM_001105250 | NRXN3      | 0 | NA | 0 | NA | 0 | NA | 0 | NA | 0 | NA |
| 14 | 78815406 | 79400513 | 1  | NM_138970    | NRXN3      | 0 | NA | 0 | NA | 0 | NA | 0 | NA | 0 | NA |
| 14 | 79747596 | 79733621 | -1 | NM_001007023 | DIO2       | 0 | NA | 1 | 12 | 0 | NA | 0 | NA | 0 | NA |

|    |          |          |    |              |           |   |    |   |    |   |    |   |    |   |    |
|----|----------|----------|----|--------------|-----------|---|----|---|----|---|----|---|----|---|----|
| 14 | 79748278 | 79733621 | -1 | NM_000793    | DIO2      | 0 | NA | 1 | 12 | 0 | NA | 0 | NA | 0 | NA |
| 14 | 79748278 | 79733621 | -1 | NM_013989    | DIO2      | 0 | NA | 1 | 12 | 0 | NA | 0 | NA | 0 | NA |
| 14 | 80475637 | 80032576 | -1 | NM_152446    | C14orf145 | 0 | NA | 0 | NA | 0 | NA | 0 | NA | 0 | NA |
| 14 | 80491621 | 80645041 | 1  | NM_001018036 | TSHR      | 0 | NA | 0 | NA | 0 | NA | 0 | NA | 0 | NA |
| 14 | 80491621 | 80682399 | 1  | NM_000369    | TSHR      | 0 | NA | 0 | NA | 0 | NA | 0 | NA | 0 | NA |
| 14 | 80757047 | 80716146 | -1 | NM_015859    | GTF2A1    | 0 | NA | 0 | NA | 1 | 15 | 1 | 16 | 0 | NA |
| 14 | 80757328 | 80716146 | -1 | NM_201595    | GTF2A1    | 0 | NA | 0 | NA | 1 | 15 | 1 | 16 | 0 | NA |
| 14 | 80934680 | 80806661 | -1 | NM_033104    | STON2     | 0 | NA | 0 | NA | 0 | NA | 0 | NA | 0 | NA |
| 14 | 81069886 | 81007645 | -1 | NM_005065    | SEL1L     | 0 | NA | 0 | NA | 0 | NA | 0 | NA | 0 | NA |
| 14 | 85066240 | 85164023 | 1  | NM_013231    | FLRT2     | 0 | NA | 0 | NA | 0 | NA | 0 | NA | 0 | NA |
| 14 | 87529660 | 87469110 | -1 | NM_000153    | GALC      | 0 | NA | 0 | NA | 0 | NA | 0 | NA | 0 | NA |
| 14 | 87529660 | 87499410 | -1 | NM_001037525 | GALC      | 0 | NA | 0 | NA | 0 | NA | 0 | NA | 0 | NA |
| 14 | 87541248 | 87548168 | 1  | NM_003608    | GPR65     | 0 | NA | 0 | NA | 0 | NA | 0 | NA | 0 | NA |
| 14 | 87807008 | 87720998 | -1 | NM_138318    | KCNK10    | 0 | NA | 0 | NA | 0 | NA | 0 | NA | 0 | NA |
| 14 | 87859100 | 87720998 | -1 | NM_138317    | KCNK10    | 0 | NA | 0 | NA | 0 | NA | 0 | NA | 0 | NA |
| 14 | 87863004 | 87720998 | -1 | NM_021161    | KCNK10    | 0 | NA | 0 | NA | 0 | NA | 0 | NA | 0 | NA |
| 14 | 87921764 | 87974557 | 1  | NM_001040428 | SPATA7    | 0 | NA | 0 | NA | 0 | NA | 0 | NA | 0 | NA |
| 14 | 87921764 | 87974557 | 1  | NM_018418    | SPATA7    | 0 | NA | 0 | NA | 0 | NA | 0 | NA | 0 | NA |
| 14 | 88090876 | 88001874 | -1 | NM_007039    | PTPN21    | 0 | NA | 0 | NA | 0 | NA | 0 | NA | 0 | NA |
| 14 | 88099066 | 88149606 | 1  | NM_207860    | ZC3H14    | 0 | NA | 0 | NA | 0 | NA | 0 | NA | 0 | NA |
| 14 | 88099074 | 88149606 | 1  | NM_024824    | ZC3H14    | 0 | NA | 0 | NA | 0 | NA | 0 | NA | 0 | NA |
| 14 | 88099443 | 88149606 | 1  | NM_207661    | ZC3H14    | 0 | NA | 0 | NA | 0 | NA | 0 | NA | 0 | NA |
| 14 | 88130498 | 88149606 | 1  | NM_207662    | ZC3H14    | 0 | NA | 0 | NA | 0 | NA | 0 | NA | 0 | NA |
| 14 | 88328910 | 88150955 | -1 | NM_183387    | EML5      | 0 | NA | 1 | 12 | 0 | NA | 0 | NA | 0 | NA |
| 14 | 88360730 | 88414088 | 1  | NM_144596    | TTC8      | 1 | 16 | 0 | NA | 0 | NA | 0 | NA | 0 | NA |
| 14 | 88360730 | 88414088 | 1  | NM_198309    | TTC8      | 1 | 16 | 0 | NA | 0 | NA | 0 | NA | 0 | NA |
| 14 | 88360730 | 88414088 | 1  | NM_198310    | TTC8      | 1 | 16 | 0 | NA | 0 | NA | 0 | NA | 0 | NA |
| 14 | 88953207 | 88692268 | -1 | NM_005197    | FOXN3     | 0 | NA | 0 | NA | 0 | NA | 1 | 13 | 0 | NA |
| 14 | 89155247 | 88692268 | -1 | NM_001085471 | FOXN3     | 0 | NA | 0 | NA | 0 | NA | 0 | NA | 0 | NA |
| 14 | 89490842 | 89333221 | -1 | NM_145231    | C14orf143 | 0 | NA | 0 | NA | 0 | NA | 0 | NA | 0 | NA |
| 14 | 89491998 | 89580861 | 1  | NM_001008744 | TDP1      | 0 | NA | 0 | NA | 0 | NA | 0 | NA | 0 | NA |
| 14 | 89491998 | 89580861 | 1  | NM_018319    | TDP1      | 0 | NA | 0 | NA | 0 | NA | 0 | NA | 0 | NA |
| 14 | 89597860 | 89721948 | 1  | NM_022054    | KCNK13    | 0 | NA | 0 | NA | 0 | NA | 0 | NA | 0 | NA |
| 14 | 89792646 | 89808719 | 1  | NM_002802    | PSMC1     | 1 | 14 | 0 | NA | 0 | NA | 0 | NA | 0 | NA |
| 14 | 89868032 | 89814150 | -1 | NM_017970    | C14orf102 | 0 | NA | 0 | NA | 1 | 13 | 0 | NA | 0 | NA |
| 14 | 89868032 | 89814150 | -1 | NM_199043    | C14orf102 | 0 | NA | 0 | NA | 1 | 13 | 0 | NA | 0 | NA |
| 14 | 89933125 | 89944363 | 1  | NM_006888    | CALM1     | 0 | NA | 0 | NA | 0 | NA | 0 | NA | 0 | NA |
| 14 | 90352514 | 90076684 | -1 | NM_001010854 | TTC7B     | 0 | NA | 0 | NA | 0 | NA | 0 | NA | 0 | NA |
| 14 | 90596746 | 90406922 | -1 | NM_004755    | RPS6KA5   | 1 | 12 | 0 | NA | 0 | NA | 0 | NA | 0 | NA |
| 14 | 90596746 | 90430071 | -1 | NM_182398    | RPS6KA5   | 1 | 12 | 0 | NA | 0 | NA | 0 | NA | 0 | NA |
| 14 | 90650109 | 90761456 | 1  | NM_001102366 | C14orf159 | 0 | NA | 0 | NA | 0 | NA | 0 | NA | 0 | NA |
| 14 | 90650109 | 90761456 | 1  | NM_001102368 | C14orf159 | 0 | NA | 0 | NA | 0 | NA | 0 | NA | 0 | NA |
| 14 | 90650109 | 90761456 | 1  | NM_001102369 | C14orf159 | 0 | NA | 0 | NA | 0 | NA | 0 | NA | 0 | NA |
| 14 | 90650109 | 90761456 | 1  | NM_024952    | C14orf159 | 0 | NA | 0 | NA | 0 | NA | 0 | NA | 0 | NA |
| 14 | 90650731 | 90761456 | 1  | NM_001102367 | C14orf159 | 0 | NA | 0 | NA | 0 | NA | 0 | NA | 0 | NA |
| 14 | 90789977 | 90768628 | -1 | NM_003485    | GPR68     | 0 | NA | 0 | NA | 0 | NA | 0 | NA | 0 | NA |
| 14 | 90953886 | 90807419 | -1 | NM_001080414 | CCDC88C   | 0 | NA | 0 | NA | 0 | NA | 0 | NA | 0 | NA |
| 14 | 91046397 | 90993708 | -1 | NM_032560    | SMEK1     | 1 | 12 | 0 | NA | 0 | NA | 0 | NA | 0 | NA |
| 14 | 91111136 | 91108540 | -1 | NM_001080113 | PP8961    | 0 | NA | 0 | NA | 0 | NA | 0 | NA | 0 | NA |
| 14 | 91268166 | 91116870 | -1 | NM_024764    | CATSPERB  | 0 | NA | 0 | NA | 0 | NA | 0 | NA | 0 | NA |
| 14 | 91372436 | 91316278 | -1 | NM_152332    | TC2N      | 0 | NA | 0 | NA | 0 | NA | 0 | NA | 0 | NA |
| 14 | 91483799 | 91405507 | -1 | NM_006329    | FBLN5     | 0 | NA | 0 | NA | 0 | NA | 0 | NA | 0 | NA |
| 14 | 91576139 | 91505613 | -1 | NM_004239    | TRIP11    | 0 | NA | 0 | NA | 0 | NA | 0 | NA | 0 | NA |
| 14 | 91642707 | 91598884 | -1 | NM_004993    | ATXN3     | 0 | NA | 0 | NA | 0 | NA | 0 | NA | 0 | NA |
| 14 | 91642707 | 91598884 | -1 | NM_030660    | ATXN3     | 0 | NA | 0 | NA | 0 | NA | 0 | NA | 0 | NA |
| 14 | 91657906 | 91652220 | -1 | NM_004545    | NDUFB1    | 0 | NA | 0 | NA | 0 | NA | 0 | NA | 0 | NA |
| 14 | 91658081 | 91700296 | 1  | NM_017437    | CPSF2     | 0 | NA | 0 | NA | 0 | NA | 0 | NA | 0 | NA |
| 14 | 91858677 | 92032349 | 1  | NM_153648    | SLC24A4   | 0 | NA | 0 | NA | 0 | NA | 0 | NA | 0 | NA |
| 14 | 91859954 | 92032349 | 1  | NM_153646    | SLC24A4   | 0 | NA | 0 | NA | 0 | NA | 0 | NA | 0 | NA |
| 14 | 91859954 | 92032349 | 1  | NM_153647    | SLC24A4   | 0 | NA | 0 | NA | 0 | NA | 0 | NA | 0 | NA |
| 14 | 92049877 | 92225087 | 1  | NM_024832    | RIN3      | 0 | NA | 0 | NA | 0 | NA | 0 | NA | 0 | NA |
| 14 | 92284765 | 92239907 | -1 | NM_001008530 | LGMN      | 0 | NA | 0 | NA | 0 | NA | 0 | NA | 0 | NA |
| 14 | 92284765 | 92239907 | -1 | NM_005606    | LGMN      | 0 | NA | 0 | NA | 0 | NA | 0 | NA | 0 | NA |
| 14 | 92330402 | 92376057 | 1  | NM_005113    | GOLGA5    | 0 | NA | 0 | NA | 0 | NA | 1 | 11 | 0 | NA |
| 14 | 92459197 | 92471393 | 1  | NM_001275    | CHGA      | 0 | NA | 0 | NA | 0 | NA | 0 | NA | 0 | NA |



|    |          |          |    |              |           |   |    |   |    |   |    |   |    |   |    |
|----|----------|----------|----|--------------|-----------|---|----|---|----|---|----|---|----|---|----|
| 14 | 92651980 | 92475959 | -1 | NM_014216    | ITPK1     | 0 | NA | 0 | NA | 0 | NA | 0 | NA | 0 | NA |
| 14 | 92721002 | 92718293 | -1 | NM_022151    | MOAP1     | 0 | NA | 0 | NA | 0 | NA | 0 | NA | 0 | NA |
| 14 | 92721048 | 92723184 | 1  | NM_015676    | C14orf109 | 0 | NA | 0 | NA | 0 | NA | 0 | NA | 0 | NA |
| 14 | 92721127 | 92723178 | 1  | NM_001098621 | C14orf109 | 0 | NA | 0 | NA | 0 | NA | 0 | NA | 0 | NA |
| 14 | 92743153 | 92765314 | 1  | NM_001100417 | C14orf130 | 1 | 16 | 0 | NA | 0 | NA | 0 | NA | 0 | NA |
| 14 | 92743153 | 92765314 | 1  | NM_175748    | C14orf130 | 1 | 16 | 0 | NA | 0 | NA | 0 | NA | 0 | NA |
| 14 | 92743212 | 92738989 | -1 | NM_032490    | C14orf142 | 1 | 16 | 0 | NA | 0 | NA | 0 | NA | 0 | NA |
| 14 | 92869138 | 92773648 | -1 | NM_001002860 | BTBD7     | 0 | NA | 0 | NA | 0 | NA | 0 | NA | 0 | NA |
| 14 | 92869138 | 92823726 | -1 | NM_018167    | BTBD7     | 0 | NA | 0 | NA | 0 | NA | 0 | NA | 0 | NA |
| 14 | 92869317 | 93243442 | 1  | NM_020818    | KIAA1409  | 0 | NA | 0 | NA | 0 | NA | 0 | NA | 0 | NA |
| 14 | 92883289 | 92884453 | 1  | NM_182971    | COX8C     | 0 | NA | 0 | NA | 0 | NA | 0 | NA | 0 | NA |
| 14 | 93324519 | 93254396 | -1 | NM_178013    | PRIMA1    | 0 | NA | 0 | NA | 0 | NA | 0 | NA | 0 | NA |
| 14 | 93455010 | 93466697 | 1  | NM_138344    | C14orf162 | 0 | NA | 0 | NA | 0 | NA | 0 | NA | 0 | NA |
| 14 | 93493520 | 93470265 | -1 | NM_016150    | ASB2      | 0 | NA | 0 | NA | 0 | NA | 0 | NA | 0 | NA |
| 14 | 93533394 | 93544962 | 1  | NM_152777    | C14orf48  | 0 | NA | 0 | NA | 0 | NA | 0 | NA | 0 | NA |
| 14 | 93562476 | 93585029 | 1  | NM_023112    | OTUB2     | 0 | NA | 0 | NA | 0 | NA | 0 | NA | 0 | NA |
| 14 | 93617311 | 93587020 | -1 | NM_020414    | DDX24     | 0 | NA | 0 | NA | 0 | NA | 0 | NA | 0 | NA |
| 14 | 93617391 | 93638808 | 1  | NM_206949    | FAM14B    | 0 | NA | 0 | NA | 0 | NA | 0 | NA | 0 | NA |
| 14 | 93617427 | 93638808 | 1  | NM_145249    | FAM14B    | 0 | NA | 0 | NA | 0 | NA | 0 | NA | 0 | NA |
| 14 | 93646831 | 93652786 | 1  | NM_005532    | IFI27     | 0 | NA | 0 | NA | 0 | NA | 0 | NA | 0 | NA |
| 14 | 93665710 | 93663870 | -1 | NM_032036    | FAM14A    | 0 | NA | 0 | NA | 0 | NA | 0 | NA | 0 | NA |
| 14 | 93710401 | 93763935 | 1  | NM_020958    | KIAA1622  | 0 | NA | 0 | NA | 0 | NA | 0 | NA | 0 | NA |
| 14 | 93710401 | 93815825 | 1  | NM_058237    | KIAA1622  | 0 | NA | 0 | NA | 0 | NA | 0 | NA | 0 | NA |
| 14 | 93829114 | 93819402 | -1 | NM_016186    | SERPINA10 | 0 | NA | 0 | NA | 0 | NA | 0 | NA | 0 | NA |
| 14 | 93829349 | 93819402 | -1 | NM_001100607 | SERPINA10 | 0 | NA | 0 | NA | 0 | NA | 0 | NA | 0 | NA |
| 14 | 93859441 | 93840337 | -1 | NM_001756    | SERPINA6  | 0 | NA | 0 | NA | 0 | NA | 0 | NA | 0 | NA |
| 14 | 93924904 | 93914450 | -1 | NM_000295    | SERPINA1  | 0 | NA | 0 | NA | 0 | NA | 0 | NA | 0 | NA |
| 14 | 93926782 | 93914450 | -1 | NM_001002235 | SERPINA1  | 0 | NA | 0 | NA | 0 | NA | 0 | NA | 0 | NA |
| 14 | 93926782 | 93914450 | -1 | NM_001002236 | SERPINA1  | 0 | NA | 0 | NA | 0 | NA | 0 | NA | 0 | NA |
| 14 | 93988875 | 93978553 | -1 | NM_001080451 | SERPINA11 | 0 | NA | 0 | NA | 0 | NA | 0 | NA | 0 | NA |
| 14 | 94012423 | 93998810 | -1 | NM_001042518 | SERPINA9  | 0 | NA | 0 | NA | 0 | NA | 0 | NA | 0 | NA |
| 14 | 94012423 | 93998810 | -1 | NM_175739    | SERPINA9  | 0 | NA | 0 | NA | 0 | NA | 0 | NA | 0 | NA |
| 14 | 94053934 | 94023372 | -1 | NM_173850    | SERPINA12 | 0 | NA | 0 | NA | 0 | NA | 0 | NA | 1 | 12 |
| 14 | 94097535 | 94105996 | 1  | NM_006215    | SERPINA4  | 0 | NA | 0 | NA | 0 | NA | 0 | NA | 0 | NA |
| 14 | 94117563 | 94129205 | 1  | NM_000624    | SERPINA5  | 0 | NA | 0 | NA | 0 | NA | 0 | NA | 0 | NA |
| 14 | 94148466 | 94160143 | 1  | NM_001085    | SERPINA3  | 1 | 14 | 1 | 14 | 1 | 15 | 0 | NA | 0 | NA |
| 14 | 94306252 | 94304312 | -1 | NM_173849    | GSC       | 0 | NA | 0 | NA | 0 | NA | 0 | NA | 0 | NA |
| 14 | 94677808 | 94622317 | -1 | NM_030621    | DICER1    | 0 | NA | 0 | NA | 0 | NA | 0 | NA | 0 | NA |
| 14 | 94693512 | 94622317 | -1 | NM_177438    | DICER1    | 0 | NA | 0 | NA | 0 | NA | 0 | NA | 0 | NA |
| 14 | 94855955 | 94727617 | -1 | NM_024734    | CLMN      | 0 | NA | 0 | NA | 0 | NA | 0 | NA | 0 | NA |
| 14 | 95011926 | 94953583 | -1 | NM_152592    | C14orf49  | 0 | NA | 0 | NA | 1 | 14 | 0 | NA | 0 | NA |
| 14 | 95071075 | 95080808 | 1  | NM_016417    | GLRX5     | 0 | NA | 0 | NA | 0 | NA | 0 | NA | 0 | NA |
| 14 | 95187267 | 95207940 | 1  | NM_020554    | TCL6      | 0 | NA | 0 | NA | 0 | NA | 0 | NA | 0 | NA |
| 14 | 95187267 | 95209542 | 1  | NM_020553    | TCL6      | 0 | NA | 0 | NA | 0 | NA | 0 | NA | 0 | NA |
| 14 | 95199345 | 95207940 | 1  | NM_012468    | TCL6      | 0 | NA | 0 | NA | 0 | NA | 0 | NA | 0 | NA |
| 14 | 95199345 | 95209542 | 1  | NM_020552    | TCL6      | 0 | NA | 0 | NA | 0 | NA | 0 | NA | 0 | NA |
| 14 | 95199345 | 95215923 | 1  | NM_014418    | TCL6      | 0 | NA | 0 | NA | 0 | NA | 0 | NA | 0 | NA |
| 14 | 95199345 | 95215923 | 1  | NM_020550    | TCL6      | 0 | NA | 0 | NA | 0 | NA | 0 | NA | 0 | NA |
| 14 | 95222515 | 95228720 | 1  | NM_004918    | TCL1B     | 0 | NA | 0 | NA | 0 | NA | 0 | NA | 0 | NA |
| 14 | 95222515 | 95228720 | 1  | NM_199206    | TCL1B     | 0 | NA | 0 | NA | 0 | NA | 0 | NA | 0 | NA |
| 14 | 95250286 | 95246056 | -1 | NM_001098725 | TCL1A     | 0 | NA | 0 | NA | 0 | NA | 0 | NA | 0 | NA |
| 14 | 95250286 | 95246056 | -1 | NM_021966    | TCL1A     | 0 | NA | 0 | NA | 0 | NA | 0 | NA | 0 | NA |
| 14 | 95740887 | 95780419 | 1  | NM_000623    | BDKRB2    | 0 | NA | 0 | NA | 0 | NA | 0 | NA | 0 | NA |
| 14 | 95792311 | 95800853 | 1  | NM_000710    | BDKRB1    | 0 | NA | 0 | NA | 1 | 15 | 0 | NA | 0 | NA |
| 14 | 95899431 | 95817347 | -1 | NM_018036    | ATG2B     | 0 | NA | 0 | NA | 0 | NA | 0 | NA | 0 | NA |
| 14 | 95915774 | 95923316 | 1  | NM_016472    | C14orf129 | 0 | NA | 0 | NA | 0 | NA | 0 | NA | 0 | NA |
| 14 | 95928200 | 96024865 | 1  | NM_152327    | AK7       | 0 | NA | 0 | NA | 0 | NA | 0 | NA | 0 | NA |
| 14 | 96038472 | 96103201 | 1  | NM_032632    | PAPOLA    | 0 | NA | 0 | NA | 0 | NA | 0 | NA | 0 | NA |
| 14 | 96333436 | 96417704 | 1  | NM_003384    | VRK1      | 0 | NA | 0 | NA | 0 | NA | 1 | 13 | 0 | NA |
| 14 | 98247702 | 98253850 | 1  | NM_182560    | C14orf177 | 0 | NA | 0 | NA | 0 | NA | 0 | NA | 0 | NA |
| 14 | 98807575 | 98705377 | -1 | NM_022898    | BCL11B    | 0 | NA | 0 | NA | 0 | NA | 0 | NA | 0 | NA |
| 14 | 98807575 | 98705377 | -1 | NM_138576    | BCL11B    | 0 | NA | 0 | NA | 0 | NA | 0 | NA | 0 | NA |
| 14 | 99016979 | 98933835 | -1 | NM_032233    | SETD3     | 0 | NA | 0 | NA | 0 | NA | 0 | NA | 0 | NA |
| 14 | 99016979 | 98945893 | -1 | NM_199123    | SETD3     | 0 | NA | 0 | NA | 0 | NA | 0 | NA | 0 | NA |
| 14 | 99017491 | 99047605 | 1  | NM_001099402 | CCNK      | 0 | NA | 0 | NA | 0 | NA | 0 | NA | 0 | NA |

|    |           |           |    |              |           |   |    |   |    |   |    |   |    |   |    |
|----|-----------|-----------|----|--------------|-----------|---|----|---|----|---|----|---|----|---|----|
| 14 | 99017491  | 99047605  | 1  | NM_003858    | CCNK      | 0 | NA | 0 | NA | 0 | NA | 0 | NA | 0 | NA |
| 14 | 99181232  | 99205364  | 1  | NM_032425    | HHIPL1    | 0 | NA | 0 | NA | 0 | NA | 0 | NA | 0 | NA |
| 14 | 99181232  | 99212764  | 1  | NM_001127258 | HHIPL1    | 0 | NA | 0 | NA | 0 | NA | 0 | NA | 0 | NA |
| 14 | 99220507  | 99263391  | 1  | NM_006668    | CYP46A1   | 0 | NA | 1 | 17 | 0 | NA | 0 | NA | 0 | NA |
| 14 | 99329497  | 99478148  | 1  | NM_001008707 | EML1      | 0 | NA | 0 | NA | 0 | NA | 0 | NA | 0 | NA |
| 14 | 99329497  | 99478148  | 1  | NM_004434    | EML1      | 0 | NA | 0 | NA | 0 | NA | 0 | NA | 0 | NA |
| 14 | 99601503  | 99680326  | 1  | NM_016337    | EVL       | 0 | NA | 0 | NA | 0 | NA | 0 | NA | 0 | NA |
| 14 | 99695712  | 99682508  | -1 | NM_206918    | DEGS2     | 0 | NA | 0 | NA | 1 | 12 | 0 | NA | 0 | NA |
| 14 | 99774854  | 99814557  | 1  | NM_003403    | YY1       | 0 | NA | 0 | NA | 0 | NA | 0 | NA | 0 | NA |
| 14 | 99842613  | 99827205  | -1 | NM_001039355 | SLC25A29  | 0 | NA | 0 | NA | 0 | NA | 0 | NA | 0 | NA |
| 14 | 99859431  | 99866468  | 1  | NM_207117    | C14orf68  | 0 | NA | 0 | NA | 0 | NA | 0 | NA | 0 | NA |
| 14 | 99911680  | 99869877  | -1 | NM_004184    | WARS      | 0 | NA | 0 | NA | 0 | NA | 1 | 12 | 0 | NA |
| 14 | 99911680  | 99869877  | -1 | NM_213646    | WARS      | 0 | NA | 0 | NA | 0 | NA | 1 | 12 | 0 | NA |
| 14 | 99912433  | 99869877  | -1 | NM_173701    | WARS      | 0 | NA | 0 | NA | 0 | NA | 1 | 12 | 0 | NA |
| 14 | 99912433  | 99869877  | -1 | NM_213645    | WARS      | 0 | NA | 0 | NA | 0 | NA | 1 | 12 | 0 | NA |
| 14 | 99912702  | 100066393 | 1  | NM_024515    | WDR25     | 0 | NA | 0 | NA | 0 | NA | 1 | 12 | 0 | NA |
| 14 | 100105884 | 100073240 | -1 | NM_020836    | BEGAIN    | 0 | NA | 0 | NA | 0 | NA | 0 | NA | 0 | NA |
| 14 | 100263005 | 100271212 | 1  | NM_003836    | DLK1      | 0 | NA | 0 | NA | 0 | NA | 0 | NA | 0 | NA |
| 14 | 101097440 | 101099542 | 1  | NM_001362    | DIO3      | 0 | NA | 1 | 15 | 0 | NA | 0 | NA | 0 | NA |
| 14 | 101345924 | 101442737 | 1  | NM_178588    | PPP2R5C   | 0 | NA | 0 | NA | 0 | NA | 0 | NA | 0 | NA |
| 14 | 101345924 | 101448715 | 1  | NM_178587    | PPP2R5C   | 0 | NA | 0 | NA | 0 | NA | 0 | NA | 0 | NA |
| 14 | 101345924 | 101463830 | 1  | NM_002719    | PPP2R5C   | 0 | NA | 0 | NA | 0 | NA | 0 | NA | 0 | NA |
| 14 | 101345924 | 101463830 | 1  | NM_178586    | PPP2R5C   | 0 | NA | 0 | NA | 0 | NA | 0 | NA | 0 | NA |
| 14 | 101500733 | 101586888 | 1  | NM_001376    | DYNC1H1   | 0 | NA | 0 | NA | 0 | NA | 0 | NA | 0 | NA |
| 14 | 101623265 | 101616827 | -1 | NM_005348    | HSP90AA1  | 0 | NA | 0 | NA | 0 | NA | 0 | NA | 0 | NA |
| 14 | 101675839 | 101616827 | -1 | NM_00117963  | HSP90AA1  | 0 | NA | 0 | NA | 0 | NA | 0 | NA | 0 | NA |
| 14 | 101675964 | 101746616 | 1  | NM_181302    | WDR20     | 0 | NA | 0 | NA | 0 | NA | 0 | NA | 0 | NA |
| 14 | 101675964 | 101746620 | 1  | NM_144574    | WDR20     | 0 | NA | 0 | NA | 0 | NA | 0 | NA | 0 | NA |
| 14 | 101675964 | 101746620 | 1  | NM_181308    | WDR20     | 0 | NA | 0 | NA | 0 | NA | 0 | NA | 0 | NA |
| 14 | 101675964 | 101759763 | 1  | NM_181291    | WDR20     | 0 | NA | 0 | NA | 0 | NA | 0 | NA | 0 | NA |
| 14 | 101841284 | 101764930 | -1 | NM_014226    | RAGE      | 0 | NA | 0 | NA | 0 | NA | 0 | NA | 0 | NA |
| 14 | 101855848 | 101878797 | 1  | NM_018335    | C14orf131 | 0 | NA | 0 | NA | 0 | NA | 0 | NA | 0 | NA |
| 14 | 101899006 | 101884371 | -1 | NM_032630    | CINP      | 0 | NA | 0 | NA | 0 | NA | 0 | NA | 0 | NA |
| 14 | 101899130 | 102038570 | 1  | NM_014844    | KIAA0329  | 0 | NA | 0 | NA | 0 | NA | 0 | NA | 0 | NA |
| 14 | 102045881 | 102042950 | -1 | NM_152326    | ANKRD9    | 0 | NA | 0 | NA | 0 | NA | 0 | NA | 0 | NA |
| 14 | 102128985 | 102266666 | 1  | NM_015156    | RCOR1     | 0 | NA | 0 | NA | 0 | NA | 0 | NA | 0 | NA |
| 14 | 102313568 | 102442381 | 1  | NM_003300    | TRAF3     | 0 | NA | 0 | NA | 0 | NA | 0 | NA | 0 | NA |
| 14 | 102313568 | 102442381 | 1  | NM_145725    | TRAF3     | 0 | NA | 0 | NA | 0 | NA | 0 | NA | 0 | NA |
| 14 | 102313568 | 102442381 | 1  | NM_145726    | TRAF3     | 0 | NA | 0 | NA | 0 | NA | 0 | NA | 0 | NA |
| 14 | 102458746 | 102467282 | 1  | NM_030943    | AMN       | 0 | NA | 0 | NA | 0 | NA | 0 | NA | 0 | NA |
| 14 | 102593495 | 102468468 | -1 | NM_006035    | CDC42BPB  | 0 | NA | 0 | NA | 0 | NA | 0 | NA | 0 | NA |
| 14 | 102636233 | 102646647 | 1  | NM_001077594 | C14orf73  | 0 | NA | 0 | NA | 0 | NA | 1 | 11 | 0 | NA |
| 14 | 102662416 | 102673529 | 1  | NM_006291    | TNFAIP2   | 0 | NA | 0 | NA | 0 | NA | 0 | NA | 0 | NA |
| 14 | 102870245 | 102881114 | 1  | NM_001969    | EIF5      | 0 | NA | 0 | NA | 0 | NA | 0 | NA | 0 | NA |
| 14 | 102870988 | 102881114 | 1  | NM_183004    | EIF5      | 0 | NA | 0 | NA | 0 | NA | 0 | NA | 0 | NA |
| 14 | 102921523 | 103039919 | 1  | NM_002376    | MARK3     | 0 | NA | 0 | NA | 0 | NA | 1 | 12 | 0 | NA |
| 14 | 103058923 | 103055748 | -1 | NM_001823    | CKB       | 0 | NA | 0 | NA | 0 | NA | 0 | NA | 0 | NA |
| 14 | 103065261 | 103073163 | 1  | NM_152307    | C14orf172 | 0 | NA | 0 | NA | 0 | NA | 1 | 11 | 0 | NA |
| 14 | 103098367 | 103092641 | -1 | NM_001015049 | BAG5      | 0 | NA | 0 | NA | 0 | NA | 0 | NA | 0 | NA |
| 14 | 103098395 | 103092641 | -1 | NM_004873    | BAG5      | 0 | NA | 0 | NA | 0 | NA | 0 | NA | 0 | NA |
| 14 | 103098904 | 103092641 | -1 | NM_001015048 | BAG5      | 0 | NA | 0 | NA | 0 | NA | 0 | NA | 0 | NA |
| 14 | 103099083 | 103128263 | 1  | NM_032374    | C14orf153 | 0 | NA | 0 | NA | 0 | NA | 0 | NA | 0 | NA |
| 14 | 103165277 | 103222321 | 1  | NM_005652    | KLC1      | 0 | NA | 0 | NA | 0 | NA | 1 | 12 | 0 | NA |
| 14 | 103165277 | 103237641 | 1  | NM_182923    | KLC1      | 0 | NA | 0 | NA | 0 | NA | 1 | 12 | 0 | NA |
| 14 | 103251576 | 103233706 | -1 | NM_001100118 | XRCC3     | 0 | NA | 0 | NA | 0 | NA | 0 | NA | 0 | NA |
| 14 | 103251576 | 103233706 | -1 | NM_001100119 | XRCC3     | 0 | NA | 0 | NA | 0 | NA | 0 | NA | 0 | NA |
| 14 | 103251576 | 103233706 | -1 | NM_005432    | XRCC3     | 0 | NA | 0 | NA | 0 | NA | 0 | NA | 0 | NA |
| 14 | 103251897 | 103269752 | 1  | NM_024071    | ZFYVE21   | 0 | NA | 0 | NA | 0 | NA | 0 | NA | 0 | NA |
| 14 | 103383680 | 103269840 | -1 | NM_015316    | PPP1R13B  | 0 | NA | 0 | NA | 0 | NA | 0 | NA | 0 | NA |
| 14 | 103457619 | 103448379 | -1 | NM_004894    | C14orf2   | 0 | NA | 0 | NA | 0 | NA | 0 | NA | 0 | NA |
| 14 | 103464569 | 103588757 | 1  | NM_153046    | TDRD9     | 0 | NA | 0 | NA | 0 | NA | 0 | NA | 0 | NA |
| 14 | 103621800 | 103648678 | 1  | NM_001080464 | LOC374569 | 0 | NA | 0 | NA | 0 | NA | 1 | 12 | 0 | NA |
| 14 | 103674812 | 103716988 | 1  | NM_015656    | KIF26A    | 0 | NA | 0 | NA | 0 | NA | 0 | NA | 0 | NA |
| 14 | 104117100 | 104127228 | 1  | NM_001008404 | C14orf180 | 0 | NA | 0 | NA | 0 | NA | 0 | NA | 0 | NA |
| 14 | 104142142 | 104131464 | -1 | NM_207379    | TMEM179   | 0 | NA | 0 | NA | 0 | NA | 0 | NA | 0 | NA |

|    |           |           |    |              |           |   |    |   |    |   |    |   |    |   |    |
|----|-----------|-----------|----|--------------|-----------|---|----|---|----|---|----|---|----|---|----|
| 14 | 104226987 | 104256992 | 1  | NM_001031714 | INF2      | 0 | NA | 0 | NA | 0 | NA | 0 | NA | 0 | NA |
| 14 | 104226987 | 104256992 | 1  | NM_022489    | INF2      | 0 | NA | 0 | NA | 0 | NA | 0 | NA | 0 | NA |
| 14 | 104227002 | 104242190 | 1  | NM_032714    | C14orf151 | 0 | NA | 0 | NA | 0 | NA | 0 | NA | 0 | NA |
| 14 | 104261578 | 104284692 | 1  | NM_152328    | ADSSL1    | 0 | NA | 0 | NA | 0 | NA | 0 | NA | 0 | NA |
| 14 | 104267272 | 104284692 | 1  | NM_199165    | ADSSL1    | 0 | NA | 0 | NA | 0 | NA | 0 | NA | 0 | NA |
| 14 | 104290514 | 104297041 | 1  | NM_006427    | SIVA1     | 0 | NA | 0 | NA | 0 | NA | 0 | NA | 0 | NA |
| 14 | 104290514 | 104297041 | 1  | NM_021709    | SIVA1     | 0 | NA | 0 | NA | 0 | NA | 0 | NA | 0 | NA |
| 14 | 104330983 | 104306731 | -1 | NM_005163    | AKT1      | 0 | NA | 0 | NA | 0 | NA | 0 | NA | 0 | NA |
| 14 | 104333125 | 104306731 | -1 | NM_001014431 | AKT1      | 0 | NA | 0 | NA | 0 | NA | 0 | NA | 0 | NA |
| 14 | 104333125 | 104306731 | -1 | NM_001014432 | AKT1      | 0 | NA | 0 | NA | 0 | NA | 0 | NA | 0 | NA |
| 14 | 104402698 | 104434132 | 1  | NM_001112726 | KIAA0284  | 0 | NA | 0 | NA | 0 | NA | 0 | NA | 0 | NA |
| 14 | 104402698 | 104434132 | 1  | NM_015005    | KIAA0284  | 0 | NA | 0 | NA | 0 | NA | 0 | NA | 0 | NA |
| 14 | 104462231 | 104470618 | 1  | NM_138790    | PLD4      | 0 | NA | 0 | NA | 0 | NA | 0 | NA | 0 | NA |
| 14 | 104515739 | 104474635 | -1 | NM_138420    | AHNAK2    | 0 | NA | 0 | NA | 0 | NA | 1 | 12 | 0 | NA |
| 14 | 104523660 | 104532900 | 1  | NM_174891    | C14orf79  | 0 | NA | 0 | NA | 0 | NA | 1 | 12 | 0 | NA |
| 14 | 104558538 | 104547319 | -1 | NM_017955    | CDCA4     | 0 | NA | 0 | NA | 0 | NA | 1 | 15 | 0 | NA |
| 14 | 104558538 | 104547319 | -1 | NM_145701    | CDCA4     | 0 | NA | 0 | NA | 0 | NA | 1 | 15 | 0 | NA |
| 14 | 104602799 | 104586781 | -1 | NM_013345    | GPR132    | 0 | NA | 0 | NA | 0 | NA | 0 | NA | 0 | NA |
| 14 | 104706206 | 104679120 | -1 | NM_002226    | JAG2      | 0 | NA | 0 | NA | 0 | NA | 0 | NA | 0 | NA |
| 14 | 104706206 | 104679120 | -1 | NM_145159    | JAG2      | 0 | NA | 0 | NA | 0 | NA | 0 | NA | 0 | NA |
| 14 | 104718685 | 104710320 | -1 | NM_177533    | NUDT14    | 0 | NA | 0 | NA | 0 | NA | 0 | NA | 1 | 13 |
| 14 | 104785267 | 104746667 | -1 | NM_145685    | BRF1      | 0 | NA | 0 | NA | 0 | NA | 0 | NA | 0 | NA |
| 14 | 104786052 | 104788474 | 1  | NM_033271    | BTBD6     | 0 | NA | 0 | NA | 0 | NA | 0 | NA | 0 | NA |
| 14 | 104838374 | 104746669 | -1 | NM_001519    | BRF1      | 0 | NA | 0 | NA | 0 | NA | 1 | 11 | 0 | NA |
| 14 | 104852125 | 104935529 | 1  | NM_001100913 | PACS2     | 0 | NA | 0 | NA | 0 | NA | 0 | NA | 0 | NA |
| 14 | 104852125 | 104935529 | 1  | NM_015197    | PACS2     | 0 | NA | 0 | NA | 0 | NA | 0 | NA | 0 | NA |
| 14 | 104957230 | 105008102 | 1  | NM_004689    | MTA1      | 0 | NA | 0 | NA | 0 | NA | 0 | NA | 0 | NA |
| 14 | 105012175 | 105017545 | 1  | NM_001312    | CRIP2     | 1 | 14 | 0 | NA | 0 | NA | 0 | NA | 0 | NA |
| 14 | 105024593 | 105026169 | 1  | NM_001311    | CRIP1     | 1 | 14 | 0 | NA | 0 | NA | 0 | NA | 0 | NA |
| 14 | 105028748 | 105036610 | 1  | NM_173608    | C14orf80  | 0 | NA | 0 | NA | 0 | NA | 0 | NA | 0 | NA |
| 14 | 105063997 | 105067584 | 1  | NM_025268    | TMEM121   | 0 | NA | 0 | NA | 0 | NA | 0 | NA | 0 | NA |
| 17 | 202576    | 62293     | -1 | NM_006987    | RPH3AL    | 0 | NA | 1 | 16 | 0 | NA | 0 | NA | 0 | NA |
| 17 | 260433    | 264713    | 1  | NM_001013672 | LOC400566 | 0 | NA | 0 | NA | 0 | NA | 0 | NA | 0 | NA |
| 17 | 295959    | 289998    | -1 | NM_182705    | FAM101B   | 0 | NA | 0 | NA | 0 | NA | 0 | NA | 0 | NA |
| 17 | 564758    | 382697    | -1 | NM_018289    | VPS53     | 0 | NA | 0 | NA | 0 | NA | 0 | NA | 0 | NA |
| 17 | 582596    | 592825    | 1  | NM_024792    | FAM57A    | 0 | NA | 0 | NA | 0 | NA | 0 | NA | 0 | NA |
| 17 | 602251    | 594410    | -1 | NM_015721    | GEMIN4    | 0 | NA | 1 | 12 | 0 | NA | 0 | NA | 0 | NA |
| 17 | 632262    | 642491    | 1  | NM_018146    | RNMTL1    | 1 | 13 | 0 | NA | 0 | NA | 0 | NA | 0 | NA |
| 17 | 632297    | 609319    | -1 | NM_016080    | GLOD4     | 1 | 13 | 0 | NA | 0 | NA | 0 | NA | 0 | NA |
| 17 | 829760    | 649334    | -1 | NM_022463    | NXN       | 0 | NA | 0 | NA | 0 | NA | 0 | NA | 0 | NA |
| 17 | 847106    | 852140    | 1  | NM_013337    | TIMM22    | 0 | NA | 0 | NA | 0 | NA | 1 | 21 | 0 | NA |
| 17 | 959074    | 853508    | -1 | NM_001092    | ABR       | 1 | 15 | 0 | NA | 0 | NA | 0 | NA | 0 | NA |
| 17 | 1029881   | 853508    | -1 | NM_021962    | ABR       | 0 | NA | 0 | NA | 0 | NA | 0 | NA | 0 | NA |
| 17 | 1129706   | 1151031   | 1  | NM_172367    | TUSC5     | 0 | NA | 0 | NA | 0 | NA | 0 | NA | 0 | NA |
| 17 | 1250267   | 1194592   | -1 | NM_006761    | YWHAE     | 0 | NA | 0 | NA | 0 | NA | 0 | NA | 0 | NA |
| 17 | 1306294   | 1272207   | -1 | NM_005206    | CRK       | 1 | 12 | 0 | NA | 0 | NA | 0 | NA | 0 | NA |
| 17 | 1306294   | 1272207   | -1 | NM_016823    | CRK       | 1 | 12 | 0 | NA | 0 | NA | 0 | NA | 0 | NA |
| 17 | 1335801   | 1314229   | -1 | NM_001080950 | MYO1C     | 0 | NA | 0 | NA | 0 | NA | 0 | NA | 0 | NA |
| 17 | 1341722   | 1314229   | -1 | NM_033375    | MYO1C     | 0 | NA | 0 | NA | 0 | NA | 0 | NA | 0 | NA |
| 17 | 1342751   | 1314229   | -1 | NM_001080779 | MYO1C     | 0 | NA | 0 | NA | 0 | NA | 0 | NA | 0 | NA |
| 17 | 1366704   | 1344620   | -1 | NM_016532    | SKIP      | 0 | NA | 0 | NA | 0 | NA | 1 | 14 | 0 | NA |
| 17 | 1366704   | 1344620   | -1 | NM_130766    | SKIP      | 0 | NA | 0 | NA | 0 | NA | 1 | 14 | 0 | NA |
| 17 | 1412860   | 1368032   | -1 | NM_006224    | PITPNA    | 0 | NA | 0 | NA | 0 | NA | 0 | NA | 0 | NA |
| 17 | 1478880   | 1424445   | -1 | NM_152346    | SLC43A2   | 0 | NA | 0 | NA | 0 | NA | 0 | NA | 0 | NA |
| 17 | 1495791   | 1483901   | -1 | NM_003693    | SCARF1    | 0 | NA | 0 | NA | 0 | NA | 0 | NA | 0 | NA |
| 17 | 1495791   | 1483901   | -1 | NM_145349    | SCARF1    | 0 | NA | 0 | NA | 0 | NA | 0 | NA | 0 | NA |
| 17 | 1495791   | 1483901   | -1 | NM_145350    | SCARF1    | 0 | NA | 0 | NA | 0 | NA | 0 | NA | 0 | NA |
| 17 | 1495791   | 1483901   | -1 | NM_145351    | SCARF1    | 0 | NA | 0 | NA | 0 | NA | 0 | NA | 0 | NA |
| 17 | 1495791   | 1483901   | -1 | NM_145352    | SCARF1    | 0 | NA | 0 | NA | 0 | NA | 0 | NA | 0 | NA |
| 17 | 1500142   | 1496194   | -1 | NM_031430    | RILP      | 0 | NA | 0 | NA | 0 | NA | 0 | NA | 0 | NA |
| 17 | 1534926   | 1500672   | -1 | NM_006445    | PRPF8     | 0 | NA | 0 | NA | 0 | NA | 0 | NA | 0 | NA |
| 17 | 1566254   | 1561552   | -1 | NM_032895    | C17orf91  | 0 | NA | 0 | NA | 0 | NA | 1 | 13 | 0 | NA |
| 17 | 1566255   | 1561552   | -1 | NM_001001870 | C17orf91  | 0 | NA | 0 | NA | 0 | NA | 1 | 13 | 0 | NA |
| 17 | 1566579   | 1588629   | 1  | NM_152348    | WDR81     | 0 | NA | 0 | NA | 0 | NA | 1 | 13 | 0 | NA |
| 17 | 1592879   | 1605309   | 1  | NM_000934    | SERPINF2  | 0 | NA | 0 | NA | 0 | NA | 0 | NA | 0 | NA |

|    |         |         |    |              |           |   |    |   |    |   |    |   |    |   |    |
|----|---------|---------|----|--------------|-----------|---|----|---|----|---|----|---|----|---|----|
| 17 | 1612008 | 1627618 | 1  | NM_002615    | SERPINF1  | 1 | 11 | 0 | NA | 0 | NA | 0 | NA | 0 | NA |
| 17 | 1679925 | 1629578 | -1 | NM_052928    | SMYD4     | 0 | NA | 0 | NA | 0 | NA | 1 | 13 | 0 | NA |
| 17 | 1680022 | 1749598 | 1  | NM_002945    | RPA1      | 0 | NA | 0 | NA | 0 | NA | 1 | 13 | 0 | NA |
| 17 | 1874928 | 1784720 | -1 | NM_178568    | RTN4RL1   | 0 | NA | 0 | NA | 1 | 13 | 0 | NA | 0 | NA |
| 17 | 1880180 | 1893475 | 1  | NM_001383    | DPH1      | 0 | NA | 0 | NA | 1 | 13 | 0 | NA | 0 | NA |
| 17 | 1892026 | 1893475 | 1  | NM_080822    | OVCA2     | 1 | 11 | 0 | NA | 0 | NA | 0 | NA | 0 | NA |
| 17 | 1905142 | 1909731 | 1  | NM_006497    | HIC1      | 0 | NA | 0 | NA | 0 | NA | 0 | NA | 0 | NA |
| 17 | 1906353 | 1909731 | 1  | NM_001098202 | HIC1      | 0 | NA | 0 | NA | 0 | NA | 0 | NA | 0 | NA |
| 17 | 2153819 | 1909882 | -1 | NM_017575    | SMG6      | 0 | NA | 0 | NA | 1 | 12 | 0 | NA | 0 | NA |
| 17 | 2153997 | 2175303 | 1  | NM_021947    | SRR       | 0 | NA | 0 | NA | 1 | 12 | 0 | NA | 0 | NA |
| 17 | 2187428 | 2172731 | -1 | NM_018128    | TSR1      | 1 | 15 | 0 | NA | 0 | NA | 0 | NA | 0 | NA |
| 17 | 2187555 | 2231098 | 1  | NM_014853    | SGSM2     | 1 | 15 | 0 | NA | 0 | NA | 0 | NA | 0 | NA |
| 17 | 2187557 | 2231098 | 1  | NM_001098509 | SGSM2     | 1 | 15 | 0 | NA | 0 | NA | 0 | NA | 0 | NA |
| 17 | 2251008 | 2234103 | -1 | NM_020310    | MNT       | 1 | 12 | 0 | NA | 0 | NA | 1 | 16 | 0 | NA |
| 17 | 2265480 | 2257024 | -1 | NM_001025459 | LOC284009 | 0 | NA | 0 | NA | 0 | NA | 0 | NA | 0 | NA |
| 17 | 2361950 | 2266097 | -1 | NM_024086    | METT10D   | 0 | NA | 0 | NA | 0 | NA | 0 | NA | 0 | NA |
| 17 | 2443672 | 2535659 | 1  | NM_000430    | PAFAH1B1  | 0 | NA | 0 | NA | 0 | NA | 0 | NA | 0 | NA |
| 17 | 2561677 | 2539429 | -1 | NM_015229    | KIAA0664  | 0 | NA | 0 | NA | 0 | NA | 0 | NA | 0 | NA |
| 17 | 2646481 | 2887785 | 1  | NM_001100398 | GARNL4    | 0 | NA | 0 | NA | 0 | NA | 0 | NA | 0 | NA |
| 17 | 2646481 | 2887785 | 1  | NM_015085    | GARNL4    | 0 | NA | 0 | NA | 0 | NA | 0 | NA | 0 | NA |
| 17 | 2913651 | 2912712 | -1 | NM_014566    | OR1D5     | 0 | NA | 0 | NA | 0 | NA | 0 | NA | 0 | NA |
| 17 | 2913705 | 2912712 | -1 | NM_003552    | OR1D4     | 0 | NA | 0 | NA | 0 | NA | 0 | NA | 0 | NA |
| 17 | 2943040 | 2942101 | -1 | NM_002548    | OR1D2     | 0 | NA | 0 | NA | 0 | NA | 0 | NA | 0 | NA |
| 17 | 2977595 | 2976653 | -1 | NM_003555    | OR1G1     | 0 | NA | 0 | NA | 0 | NA | 0 | NA | 0 | NA |
| 17 | 3047562 | 3048492 | 1  | NM_012352    | OR1A2     | 0 | NA | 0 | NA | 0 | NA | 0 | NA | 0 | NA |
| 17 | 3065664 | 3066594 | 1  | NM_014565    | OR1A1     | 0 | NA | 0 | NA | 0 | NA | 0 | NA | 0 | NA |
| 17 | 3129018 | 3127933 | -1 | NM_002551    | OR3A2     | 0 | NA | 0 | NA | 0 | NA | 0 | NA | 0 | NA |
| 17 | 3142626 | 3141678 | -1 | NM_002550    | OR3A1     | 0 | NA | 0 | NA | 0 | NA | 0 | NA | 0 | NA |
| 17 | 3160354 | 3161401 | 1  | NM_001005334 | OR3A4     | 0 | NA | 0 | NA | 0 | NA | 0 | NA | 0 | NA |
| 17 | 3248454 | 3247509 | -1 | NM_003553    | OR1E1     | 0 | NA | 0 | NA | 0 | NA | 0 | NA | 0 | NA |
| 17 | 3270611 | 3271577 | 1  | NM_012373    | OR3A3     | 0 | NA | 0 | NA | 0 | NA | 0 | NA | 0 | NA |
| 17 | 3283885 | 3282913 | -1 | NM_003554    | OR1E2     | 0 | NA | 0 | NA | 0 | NA | 0 | NA | 0 | NA |
| 17 | 3321787 | 3290063 | -1 | NM_032598    | SPATA22   | 0 | NA | 0 | NA | 1 | 13 | 0 | NA | 0 | NA |
| 17 | 3326045 | 3349450 | 1  | NM_000049    | ASPA      | 0 | NA | 0 | NA | 1 | 13 | 0 | NA | 0 | NA |
| 17 | 3408039 | 3363235 | -1 | NM_145068    | TRPV3     | 0 | NA | 0 | NA | 0 | NA | 0 | NA | 1 | 12 |
| 17 | 3442920 | 3415489 | -1 | NM_080706    | TRPV1     | 0 | NA | 0 | NA | 0 | NA | 0 | NA | 0 | NA |
| 17 | 3445874 | 3415489 | -1 | NM_080705    | TRPV1     | 0 | NA | 0 | NA | 0 | NA | 0 | NA | 0 | NA |
| 17 | 3447085 | 3415489 | -1 | NM_018727    | TRPV1     | 0 | NA | 0 | NA | 0 | NA | 0 | NA | 0 | NA |
| 17 | 3459454 | 3415489 | -1 | NM_080704    | TRPV1     | 0 | NA | 0 | NA | 0 | NA | 0 | NA | 0 | NA |
| 17 | 3486365 | 3458304 | -1 | NM_013276    | SHPK      | 0 | NA | 0 | NA | 0 | NA | 0 | NA | 0 | NA |
| 17 | 3486510 | 3513146 | 1  | NM_001031681 | CTNS      | 0 | NA | 0 | NA | 0 | NA | 0 | NA | 0 | NA |
| 17 | 3486510 | 3513146 | 1  | NM_004937    | CTNS      | 0 | NA | 0 | NA | 0 | NA | 0 | NA | 0 | NA |
| 17 | 3518722 | 3512937 | -1 | NM_014604    | TAX1BP3   | 0 | NA | 0 | NA | 0 | NA | 0 | NA | 0 | NA |
| 17 | 3518838 | 3519711 | 1  | NM_001014764 | TMEM93    | 0 | NA | 0 | NA | 0 | NA | 0 | NA | 0 | NA |
| 17 | 3518838 | 3519711 | 1  | NM_031298    | TMEM93    | 0 | NA | 0 | NA | 0 | NA | 0 | NA | 0 | NA |
| 17 | 3546332 | 3523270 | -1 | NM_002561    | P2RX5     | 0 | NA | 0 | NA | 0 | NA | 0 | NA | 1 | 13 |
| 17 | 3546332 | 3523270 | -1 | NM_175080    | P2RX5     | 0 | NA | 0 | NA | 0 | NA | 0 | NA | 1 | 13 |
| 17 | 3546332 | 3540328 | -1 | NM_175081    | P2RX5     | 0 | NA | 0 | NA | 0 | NA | 0 | NA | 1 | 13 |
| 17 | 3573945 | 3576741 | 1  | NM_031965    | GSG2      | 0 | NA | 0 | NA | 1 | 12 | 0 | NA | 0 | NA |
| 17 | 3651286 | 3564667 | -1 | NM_002208    | ITGAE     | 0 | NA | 0 | NA | 0 | NA | 0 | NA | 0 | NA |
| 17 | 3696289 | 3661208 | -1 | NM_001114118 | C17orf85  | 0 | NA | 0 | NA | 0 | NA | 0 | NA | 0 | NA |
| 17 | 3696289 | 3661208 | -1 | NM_018553    | C17orf85  | 0 | NA | 0 | NA | 0 | NA | 0 | NA | 0 | NA |
| 17 | 3740786 | 3710365 | -1 | NM_172206    | CAMKK1    | 0 | NA | 0 | NA | 0 | NA | 0 | NA | 0 | NA |
| 17 | 3743086 | 3710365 | -1 | NM_032294    | CAMKK1    | 0 | NA | 0 | NA | 0 | NA | 0 | NA | 0 | NA |
| 17 | 3743086 | 3715199 | -1 | NM_172207    | CAMKK1    | 0 | NA | 0 | NA | 0 | NA | 0 | NA | 0 | NA |
| 17 | 3766709 | 3746633 | -1 | NM_002558    | P2RX1     | 0 | NA | 0 | NA | 0 | NA | 0 | NA | 0 | NA |
| 17 | 3814485 | 3773917 | -1 | NM_005173    | ATP2A3    | 0 | NA | 0 | NA | 0 | NA | 0 | NA | 0 | NA |
| 17 | 3814485 | 3773917 | -1 | NM_174953    | ATP2A3    | 0 | NA | 0 | NA | 0 | NA | 0 | NA | 0 | NA |
| 17 | 3814485 | 3773917 | -1 | NM_174954    | ATP2A3    | 0 | NA | 0 | NA | 0 | NA | 0 | NA | 0 | NA |
| 17 | 3814485 | 3773917 | -1 | NM_174955    | ATP2A3    | 0 | NA | 0 | NA | 0 | NA | 0 | NA | 0 | NA |
| 17 | 3814485 | 3773917 | -1 | NM_174956    | ATP2A3    | 0 | NA | 0 | NA | 0 | NA | 0 | NA | 0 | NA |
| 17 | 3814485 | 3773917 | -1 | NM_174957    | ATP2A3    | 0 | NA | 0 | NA | 0 | NA | 0 | NA | 0 | NA |
| 17 | 3814485 | 3773917 | -1 | NM_174958    | ATP2A3    | 0 | NA | 0 | NA | 0 | NA | 0 | NA | 0 | NA |
| 17 | 3993002 | 3854487 | -1 | NM_015113    | ZZEF1     | 0 | NA | 0 | NA | 0 | NA | 0 | NA | 0 | NA |
| 17 | 3993298 | 4007740 | 1  | NM_144611    | CYB5D2    | 0 | NA | 0 | NA | 0 | NA | 0 | NA | 0 | NA |

|    |         |         |    |              |          |   |    |   |    |   |    |   |    |   |    |
|----|---------|---------|----|--------------|----------|---|----|---|----|---|----|---|----|---|----|
| 17 | 4114023 | 4013413 | -1 | NM_016376    | ANKFY1   | 0 | NA | 0 | NA | 0 | NA | 1 | 17 | 0 | NA |
| 17 | 4114023 | 4044521 | -1 | NM_020740    | ANKFY1   | 0 | NA | 0 | NA | 0 | NA | 1 | 17 | 0 | NA |
| 17 | 4216718 | 4119260 | -1 | NM_003342    | UBE2G1   | 0 | NA | 0 | NA | 0 | NA | 0 | NA | 0 | NA |
| 17 | 4283967 | 4338248 | 1  | NM_182538    | SPNS3    | 0 | NA | 0 | NA | 0 | NA | 0 | NA | 0 | NA |
| 17 | 4348877 | 4389977 | 1  | NM_001124758 | SPNS2    | 0 | NA | 0 | NA | 0 | NA | 0 | NA | 0 | NA |
| 17 | 4405430 | 4388939 | -1 | NM_001105538 | MYBBP1A  | 1 | 11 | 0 | NA | 0 | NA | 0 | NA | 0 | NA |
| 17 | 4405430 | 4388939 | -1 | NM_014520    | MYBBP1A  | 1 | 11 | 0 | NA | 0 | NA | 0 | NA | 0 | NA |
| 17 | 4410625 | 4406970 | -1 | NM_001122890 | GGT6     | 1 | 11 | 0 | NA | 0 | NA | 1 | 22 | 0 | NA |
| 17 | 4410625 | 4406970 | -1 | NM_153338    | GGT6     | 1 | 11 | 0 | NA | 0 | NA | 1 | 22 | 0 | NA |
| 17 | 4434024 | 4458363 | 1  | NM_198501    | SMTNL2   | 0 | NA | 0 | NA | 0 | NA | 0 | NA | 0 | NA |
| 17 | 4434582 | 4458363 | 1  | NM_001114974 | SMTNL2   | 0 | NA | 0 | NA | 0 | NA | 0 | NA | 0 | NA |
| 17 | 4491709 | 4480962 | -1 | NM_001140    | ALOX15   | 0 | NA | 0 | NA | 0 | NA | 0 | NA | 0 | NA |
| 17 | 4554381 | 4521427 | -1 | NM_014389    | PELP1    | 0 | NA | 0 | NA | 0 | NA | 0 | NA | 0 | NA |
| 17 | 4560537 | 4571544 | 1  | NM_004313    | ARRB2    | 0 | NA | 0 | NA | 0 | NA | 0 | NA | 0 | NA |
| 17 | 4560537 | 4571544 | 1  | NM_199004    | ARRB2    | 0 | NA | 0 | NA | 0 | NA | 0 | NA | 0 | NA |
| 17 | 4581471 | 4583645 | 1  | NM_001001683 | MED11    | 1 | 14 | 0 | NA | 0 | NA | 0 | NA | 0 | NA |
| 17 | 4589972 | 4583576 | -1 | NM_022059    | CXCL16   | 1 | 14 | 0 | NA | 0 | NA | 0 | NA | 0 | NA |
| 17 | 4589972 | 4584552 | -1 | NM_001100812 | CXCL16   | 1 | 14 | 0 | NA | 0 | NA | 0 | NA | 0 | NA |
| 17 | 4590085 | 4596156 | 1  | NM_032265    | ZMYND15  | 1 | 14 | 0 | NA | 0 | NA | 0 | NA | 0 | NA |
| 17 | 4621935 | 4633253 | 1  | NM_003963    | TM4SF5   | 0 | NA | 0 | NA | 0 | NA | 0 | NA | 0 | NA |
| 17 | 4636467 | 4635319 | -1 | NM_182566    | VMO1     | 1 | 14 | 1 | 15 | 0 | NA | 0 | NA | 0 | NA |
| 17 | 4638993 | 4640425 | 1  | NM_001014985 | GLTPD2   | 1 | 14 | 1 | 15 | 0 | NA | 0 | NA | 0 | NA |
| 17 | 4646414 | 4648748 | 1  | NM_002798    | PSMB6    | 1 | 14 | 0 | NA | 0 | NA | 0 | NA | 0 | NA |
| 17 | 4657377 | 4673694 | 1  | NM_002663    | PLD2     | 0 | NA | 0 | NA | 0 | NA | 0 | NA | 0 | NA |
| 17 | 4683350 | 4742135 | 1  | NM_001024937 | MINK1    | 0 | NA | 0 | NA | 1 | 12 | 0 | NA | 0 | NA |
| 17 | 4683350 | 4742135 | 1  | NM_015716    | MINK1    | 0 | NA | 0 | NA | 1 | 12 | 0 | NA | 0 | NA |
| 17 | 4683350 | 4742135 | 1  | NM_153827    | MINK1    | 0 | NA | 0 | NA | 1 | 12 | 0 | NA | 0 | NA |
| 17 | 4683350 | 4742135 | 1  | NM_170663    | MINK1    | 0 | NA | 0 | NA | 1 | 12 | 0 | NA | 0 | NA |
| 17 | 4747148 | 4741839 | -1 | NM_000080    | CHRNE    | 0 | NA | 0 | NA | 0 | NA | 1 | 11 | 0 | NA |
| 17 | 4776371 | 4779067 | 1  | NM_000173    | GP1BA    | 1 | 15 | 0 | NA | 0 | NA | 1 | 13 | 0 | NA |
| 17 | 4784063 | 4781348 | -1 | NM_003562    | SLC25A11 | 1 | 15 | 0 | NA | 0 | NA | 1 | 13 | 0 | NA |
| 17 | 4784374 | 4789262 | 1  | NM_015528    | RNF167   | 1 | 15 | 0 | NA | 0 | NA | 1 | 13 | 0 | NA |
| 17 | 4792570 | 4789691 | -1 | NM_005022    | PFN1     | 1 | 15 | 0 | NA | 0 | NA | 1 | 13 | 0 | NA |
| 17 | 4795130 | 4801148 | 1  | NM_001976    | ENO3     | 0 | NA | 0 | NA | 0 | NA | 0 | NA | 0 | NA |
| 17 | 4795130 | 4801148 | 1  | NM_053013    | ENO3     | 0 | NA | 0 | NA | 0 | NA | 0 | NA | 0 | NA |
| 17 | 4811856 | 4803243 | -1 | NM_004890    | SPAG7    | 1 | 14 | 0 | NA | 0 | NA | 1 | 15 | 0 | NA |
| 17 | 4831655 | 4812016 | -1 | NM_015099    | CAMTA2   | 0 | NA | 0 | NA | 0 | NA | 1 | 11 | 0 | NA |
| 17 | 4841629 | 4832148 | -1 | NM_213726    | INCA1    | 0 | NA | 0 | NA | 0 | NA | 1 | 11 | 0 | NA |
| 17 | 4841999 | 4868720 | 1  | NM_006612    | KIF1C    | 0 | NA | 0 | NA | 0 | NA | 1 | 11 | 0 | NA |
| 17 | 4879451 | 4876620 | -1 | NM_001104577 | GPR172B  | 0 | NA | 0 | NA | 0 | NA | 0 | NA | 0 | NA |
| 17 | 4879451 | 4876620 | -1 | NM_017986    | GPR172B  | 0 | NA | 0 | NA | 0 | NA | 0 | NA | 0 | NA |
| 17 | 4922477 | 4940393 | 1  | NM_153018    | ZFP3     | 0 | NA | 1 | 13 | 1 | 20 | 0 | NA | 1 | 13 |
| 17 | 4967121 | 4949754 | -1 | NM_014519    | ZNF232   | 0 | NA | 0 | NA | 0 | NA | 0 | NA | 0 | NA |
| 17 | 4972410 | 5019048 | 1  | NM_004505    | USP6     | 0 | NA | 0 | NA | 0 | NA | 0 | NA | 1 | 12 |
| 17 | 5039902 | 5023554 | -1 | NM_032530    | ZNF594   | 1 | 21 | 1 | 12 | 1 | 28 | 1 | 11 | 0 | NA |
| 17 | 5078807 | 5054624 | -1 | NM_207103    | C17orf87 | 0 | NA | 0 | NA | 0 | NA | 0 | NA | 0 | NA |
| 17 | 5126281 | 5229856 | 1  | NM_001083585 | RABEP1   | 0 | NA | 0 | NA | 0 | NA | 0 | NA | 0 | NA |
| 17 | 5126281 | 5229856 | 1  | NM_004703    | RABEP1   | 0 | NA | 0 | NA | 0 | NA | 0 | NA | 0 | NA |
| 17 | 5263684 | 5276920 | 1  | NM_001033002 | RPAIN    | 0 | NA | 0 | NA | 0 | NA | 1 | 12 | 0 | NA |
| 17 | 5263720 | 5230143 | -1 | NM_002532    | NUP88    | 0 | NA | 0 | NA | 0 | NA | 1 | 12 | 0 | NA |
| 17 | 5283195 | 5276822 | -1 | NM_001212    | C1QBP    | 0 | NA | 0 | NA | 0 | NA | 0 | NA | 0 | NA |
| 17 | 5312905 | 5286314 | -1 | NM_020162    | DHX33    | 1 | 26 | 0 | NA | 0 | NA | 0 | NA | 0 | NA |
| 17 | 5330218 | 5318336 | -1 | NM_016041    | DERL2    | 0 | NA | 0 | NA | 0 | NA | 1 | 14 | 0 | NA |
| 17 | 5330970 | 5334854 | 1  | NM_024039    | MIS12    | 0 | NA | 0 | NA | 0 | NA | 1 | 14 | 0 | NA |
| 17 | 5428556 | 5345442 | -1 | NM_001033053 | NLRP1    | 0 | NA | 0 | NA | 0 | NA | 0 | NA | 0 | NA |
| 17 | 5428556 | 5358161 | -1 | NM_014922    | NLRP1    | 0 | NA | 0 | NA | 0 | NA | 0 | NA | 0 | NA |
| 17 | 5428556 | 5358161 | -1 | NM_033004    | NLRP1    | 0 | NA | 0 | NA | 0 | NA | 0 | NA | 0 | NA |
| 17 | 5428556 | 5358161 | -1 | NM_033006    | NLRP1    | 0 | NA | 0 | NA | 0 | NA | 0 | NA | 0 | NA |
| 17 | 5428556 | 5358161 | -1 | NM_033007    | NLRP1    | 0 | NA | 0 | NA | 0 | NA | 0 | NA | 0 | NA |
| 17 | 5914657 | 5968471 | 1  | NM_015253    | WSCD1    | 0 | NA | 0 | NA | 0 | NA | 0 | NA | 0 | NA |
| 17 | 6279243 | 6267782 | -1 | NM_001033054 | AIPL1    | 0 | NA | 0 | NA | 0 | NA | 0 | NA | 0 | NA |
| 17 | 6279243 | 6267782 | -1 | NM_001033055 | AIPL1    | 0 | NA | 0 | NA | 0 | NA | 0 | NA | 0 | NA |
| 17 | 6279243 | 6267782 | -1 | NM_014336    | AIPL1    | 0 | NA | 0 | NA | 0 | NA | 0 | NA | 0 | NA |
| 17 | 6288518 | 6295108 | 1  | NM_019013    | FAM64A   | 0 | NA | 0 | NA | 0 | NA | 0 | NA | 0 | NA |
| 17 | 6400601 | 6299348 | -1 | NM_031220    | PITPNM3  | 0 | NA | 1 | 14 | 0 | NA | 0 | NA | 0 | NA |

|    |         |         |    |              |                 |   |    |   |    |   |    |   |    |   |    |
|----|---------|---------|----|--------------|-----------------|---|----|---|----|---|----|---|----|---|----|
| 17 | 6484945 | 6488585 | 1  | NM_032731    | TXNDC17         | 1 | 15 | 0 | NA | 0 | NA | 0 | NA | 0 | NA |
| 17 | 6484971 | 6422388 | -1 | NM_014804    | KIAA0753        | 1 | 15 | 0 | NA | 0 | NA | 0 | NA | 0 | NA |
| 17 | 6495678 | 6487356 | -1 | NM_016060    | MED31           | 1 | 22 | 1 | 26 | 0 | NA | 0 | NA | 1 | 13 |
| 17 | 6495782 | 6497341 | 1  | NM_001105520 | LOC388327       | 1 | 22 | 1 | 26 | 0 | NA | 0 | NA | 1 | 13 |
| 17 | 6557388 | 6528762 | -1 | NM_177550    | SLC13A5         | 0 | NA | 0 | NA | 0 | NA | 0 | NA | 1 | 12 |
| 17 | 6599879 | 6619688 | 1  | NM_017523    | XAF1            | 0 | NA | 0 | NA | 0 | NA | 0 | NA | 0 | NA |
| 17 | 6599879 | 6619688 | 1  | NM_199139    | XAF1            | 0 | NA | 0 | NA | 0 | NA | 0 | NA | 0 | NA |
| 17 | 6620295 | 6631689 | 1  | NM_153230    | FBXO39          | 0 | NA | 0 | NA | 0 | NA | 0 | NA | 0 | NA |
| 17 | 6675784 | 6644023 | -1 | NM_053285    | TEKT1           | 0 | NA | 1 | 19 | 0 | NA | 0 | NA | 1 | 18 |
| 17 | 6840107 | 6854779 | 1  | NM_000697    | ALOX12          | 0 | NA | 0 | NA | 0 | NA | 0 | NA | 0 | NA |
| 17 | 6856521 | 6858575 | 1  | NM_001004333 | RNASEK          | 0 | NA | 0 | NA | 0 | NA | 1 | 11 | 0 | NA |
| 17 | 6858847 | 6861563 | 1  | NM_174893    | C17orf49        | 0 | NA | 0 | NA | 0 | NA | 1 | 11 | 0 | NA |
| 17 | 6867092 | 6873685 | 1  | NM_181844    | BCL6B           | 0 | NA | 0 | NA | 0 | NA | 1 | 11 | 0 | NA |
| 17 | 6880425 | 6884005 | 1  | NM_201566    | SLC16A13        | 0 | NA | 0 | NA | 0 | NA | 0 | NA | 0 | NA |
| 17 | 6887966 | 6885672 | -1 | NM_153357    | SLC16A11        | 0 | NA | 0 | NA | 0 | NA | 0 | NA | 0 | NA |
| 17 | 6924324 | 6918579 | -1 | NM_006344    | CLEC10A         | 0 | NA | 0 | NA | 0 | NA | 0 | NA | 0 | NA |
| 17 | 6924324 | 6918579 | -1 | NM_182906    | CLEC10A         | 0 | NA | 0 | NA | 0 | NA | 0 | NA | 0 | NA |
| 17 | 6958353 | 6945364 | -1 | NM_080914    | ASGR2           | 0 | NA | 1 | 12 | 0 | NA | 0 | NA | 0 | NA |
| 17 | 6958852 | 6945364 | -1 | NM_001181    | ASGR2           | 0 | NA | 1 | 12 | 0 | NA | 0 | NA | 0 | NA |
| 17 | 6958852 | 6945364 | -1 | NM_080912    | ASGR2           | 0 | NA | 1 | 12 | 0 | NA | 0 | NA | 0 | NA |
| 17 | 6958852 | 6945364 | -1 | NM_080913    | ASGR2           | 0 | NA | 1 | 12 | 0 | NA | 0 | NA | 0 | NA |
| 17 | 7023607 | 7017474 | -1 | NM_001671    | ASGR1           | 0 | NA | 0 | NA | 0 | NA | 0 | NA | 0 | NA |
| 17 | 7063781 | 7033933 | -1 | NM_001365    | DLG4            | 0 | NA | 0 | NA | 0 | NA | 0 | NA | 0 | NA |
| 17 | 7063876 | 7069309 | 1  | NM_000018    | ACADVL          | 0 | NA | 0 | NA | 0 | NA | 0 | NA | 0 | NA |
| 17 | 7063876 | 7069309 | 1  | NM_001033859 | ACADVL          | 0 | NA | 0 | NA | 0 | NA | 0 | NA | 0 | NA |
| 17 | 7078587 | 7069384 | -1 | NM_004422    | DVL2            | 0 | NA | 0 | NA | 0 | NA | 0 | NA | 0 | NA |
| 17 | 7083549 | 7079070 | -1 | NM_024297    | PHF23           | 1 | 11 | 0 | NA | 0 | NA | 0 | NA | 0 | NA |
| 17 | 7086477 | 7084461 | -1 | NM_007278    | GABARAP         | 1 | 11 | 0 | NA | 0 | NA | 0 | NA | 0 | NA |
| 17 | 7095983 | 7087881 | -1 | NM_015343    | DULLARD         | 1 | 11 | 0 | NA | 0 | NA | 0 | NA | 0 | NA |
| 17 | 7096095 | 7103983 | 1  | NM_203415    | C17orf81        | 1 | 11 | 0 | NA | 0 | NA | 0 | NA | 0 | NA |
| 17 | 7096274 | 7103983 | 1  | NM_015362    | C17orf81        | 1 | 11 | 0 | NA | 0 | NA | 0 | NA | 0 | NA |
| 17 | 7096274 | 7103983 | 1  | NM_203413    | C17orf81        | 1 | 11 | 0 | NA | 0 | NA | 0 | NA | 0 | NA |
| 17 | 7096274 | 7103983 | 1  | NM_203414    | C17orf81        | 1 | 11 | 0 | NA | 0 | NA | 0 | NA | 0 | NA |
| 17 | 7106519 | 7103945 | -1 | NM_001307    | CLDN7           | 0 | NA | 0 | NA | 0 | NA | 0 | NA | 0 | NA |
| 17 | 7125777 | 7132091 | 1  | NM_001042    | SLC2A4          | 0 | NA | 0 | NA | 0 | NA | 1 | 24 | 0 | NA |
| 17 | 7138600 | 7132294 | -1 | NM_015982    | YBX2            | 0 | NA | 0 | NA | 0 | NA | 0 | NA | 0 | NA |
| 17 | 7151692 | 7156498 | 1  | NM_001970    | EIF5A           | 1 | 15 | 0 | NA | 0 | NA | 0 | NA | 0 | NA |
| 17 | 7159382 | 7156701 | -1 | NM_004489    | GPS2            | 1 | 15 | 0 | NA | 0 | NA | 0 | NA | 0 | NA |
| 17 | 7173362 | 7159674 | -1 | NM_001005408 | KIAA1787        | 0 | NA | 0 | NA | 0 | NA | 0 | NA | 0 | NA |
| 17 | 7173362 | 7159674 | -1 | NM_032442    | KIAA1787        | 0 | NA | 0 | NA | 0 | NA | 0 | NA | 0 | NA |
| 17 | 7180596 | 7195517 | 1  | NM_014716    | CENTB1          | 0 | NA | 0 | NA | 0 | NA | 0 | NA | 0 | NA |
| 17 | 7195931 | 7198986 | 1  | NM_001002914 | KCTD11          | 0 | NA | 0 | NA | 0 | NA | 0 | NA | 0 | NA |
| 17 | 7199220 | 7201262 | 1  | NM_198154    | TMEM95          | 0 | NA | 0 | NA | 0 | NA | 0 | NA | 0 | NA |
| 17 | 7225088 | 7233816 | 1  | NM_003985    | TNK1            | 0 | NA | 0 | NA | 0 | NA | 0 | NA | 0 | NA |
| 17 | 7238567 | 7233778 | -1 | NM_020360    | PLSCR3          | 1 | 15 | 0 | NA | 0 | NA | 0 | NA | 0 | NA |
| 17 | 7248142 | 7247018 | -1 | NM_152766    | C17orf61        | 1 | 15 | 0 | NA | 0 | NA | 0 | NA | 0 | NA |
| 17 | 7252225 | 7263903 | 1  | NM_020795    | NLGN2           | 1 | 15 | 0 | NA | 0 | NA | 0 | NA | 0 | NA |
| 17 | 7264402 | 7265675 | 1  | NM_199339    | SPEM1           | 0 | NA | 0 | NA | 0 | NA | 0 | NA | 0 | NA |
| 17 | 7269658 | 7271610 | 1  | NM_175734    | C17orf74        | 0 | NA | 0 | NA | 0 | NA | 0 | NA | 0 | NA |
| 17 | 7279485 | 7281722 | 1  | NM_178518    | TMEM102         | 0 | NA | 0 | NA | 1 | 13 | 0 | NA | 0 | NA |
| 17 | 7283412 | 7288975 | 1  | NM_004112    | FGF11           | 0 | NA | 0 | NA | 1 | 13 | 0 | NA | 0 | NA |
| 17 | 7289129 | 7301656 | 1  | NM_000747    | CHRN1           | 0 | NA | 0 | NA | 1 | 13 | 0 | NA | 0 | NA |
| 17 | 7325444 | 7327107 | 1  | NM_001102614 | AMAC1L3         | 1 | 16 | 0 | NA | 0 | NA | 0 | NA | 0 | NA |
| 17 | 7328241 | 7303420 | -1 | NM_020899    | ZBTB4           | 1 | 16 | 0 | NA | 0 | NA | 0 | NA | 0 | NA |
| 17 | 7328573 | 7358655 | 1  | NM_000937    | POLR2A          | 1 | 16 | 0 | NA | 0 | NA | 0 | NA | 0 | NA |
| 17 | 7393098 | 7401931 | 1  | NM_003809    | TNFSF12         | 0 | NA | 0 | NA | 0 | NA | 0 | NA | 0 | NA |
| 17 | 7393139 | 7405649 | 1  | NM_172089    | TNFSF12-TNFSF13 | 0 | NA | 0 | NA | 0 | NA | 0 | NA | 0 | NA |
| 17 | 7402339 | 7405642 | 1  | NM_003808    | TNFSF13         | 0 | NA | 0 | NA | 0 | NA | 0 | NA | 0 | NA |
| 17 | 7402339 | 7405642 | 1  | NM_172087    | TNFSF13         | 0 | NA | 0 | NA | 0 | NA | 0 | NA | 0 | NA |
| 17 | 7402339 | 7405642 | 1  | NM_172088    | TNFSF13         | 0 | NA | 0 | NA | 0 | NA | 0 | NA | 0 | NA |
| 17 | 7406042 | 7416011 | 1  | NM_015670    | SENP3           | 0 | NA | 0 | NA | 0 | NA | 0 | NA | 0 | NA |
| 17 | 7416780 | 7423048 | 1  | NM_001416    | EIF4A1          | 0 | NA | 0 | NA | 1 | 13 | 0 | NA | 0 | NA |
| 17 | 7423528 | 7426153 | 1  | NM_001251    | CD68            | 1 | 11 | 0 | NA | 1 | 13 | 1 | 24 | 0 | NA |
| 17 | 7423529 | 7426153 | 1  | NM_001040059 | CD68            | 1 | 11 | 0 | NA | 1 | 13 | 1 | 24 | 0 | NA |
| 17 | 7427853 | 7432247 | 1  | NM_004870    | MPDU1           | 1 | 11 | 0 | NA | 1 | 13 | 1 | 24 | 0 | NA |

|    |          |         |    |              |          |   |    |   |    |   |    |   |    |   |    |
|----|----------|---------|----|--------------|----------|---|----|---|----|---|----|---|----|---|----|
| 17 | 7434212  | 7432221 | -1 | NM_006942    | SOX15    | 1 | 11 | 0 | NA | 0 | NA | 1 | 24 | 0 | NA |
| 17 | 7458796  | 7435271 | -1 | NM_004860    | FXR2     | 1 | 13 | 0 | NA | 0 | NA | 0 | NA | 0 | NA |
| 17 | 7471889  | 7470280 | -1 | NM_133491    | SAT2     | 0 | NA | 0 | NA | 0 | NA | 0 | NA | 0 | NA |
| 17 | 7474215  | 7477395 | 1  | NM_001040    | SHBG     | 0 | NA | 0 | NA | 0 | NA | 0 | NA | 0 | NA |
| 17 | 7494978  | 7501814 | 1  | NM_001678    | ATP1B2   | 0 | NA | 0 | NA | 0 | NA | 0 | NA | 0 | NA |
| 17 | 7519536  | 7512444 | -1 | NM_001126115 | TP53     | 0 | NA | 1 | 12 | 0 | NA | 0 | NA | 0 | NA |
| 17 | 7519536  | 7512444 | -1 | NM_001126116 | TP53     | 0 | NA | 0 | 12 | 0 | NA | 0 | NA | 0 | NA |
| 17 | 7519536  | 7512444 | -1 | NM_001126117 | TP53     | 0 | NA | 1 | 12 | 0 | NA | 0 | NA | 0 | NA |
| 17 | 7531588  | 7512444 | -1 | NM_000546    | TP53     | 1 | 15 | 0 | NA | 0 | NA | 1 | 14 | 0 | NA |
| 17 | 7531588  | 7512444 | -1 | NM_001126112 | TP53     | 1 | 15 | 0 | NA | 0 | NA | 1 | 14 | 0 | NA |
| 17 | 7531588  | 7512444 | -1 | NM_001126113 | TP53     | 1 | 15 | 0 | NA | 0 | NA | 1 | 14 | 0 | NA |
| 17 | 7531588  | 7512444 | -1 | NM_001126114 | TP53     | 1 | 15 | 0 | NA | 0 | NA | 1 | 14 | 0 | NA |
| 17 | 7532519  | 7547544 | 1  | NM_018081    | WDR79    | 1 | 15 | 0 | NA | 0 | NA | 1 | 14 | 0 | NA |
| 17 | 7549244  | 7555418 | 1  | NM_001406    | EFNB3    | 0 | NA | 0 | NA | 0 | NA | 0 | NA | 0 | NA |
| 17 | 7563763  | 7677783 | 1  | NM_020877    | DNAH2    | 0 | NA | 0 | NA | 0 | NA | 0 | NA | 0 | NA |
| 17 | 7683959  | 7698843 | 1  | NM_001080424 | JMJ3     | 0 | NA | 0 | NA | 0 | NA | 0 | NA | 0 | NA |
| 17 | 7699108  | 7700142 | 1  | NM_203411    | TMEM88   | 1 | 12 | 0 | NA | 0 | NA | 1 | 11 | 0 | NA |
| 17 | 7701897  | 7700727 | -1 | NM_032356    | LSMD1    | 1 | 12 | 0 | NA | 0 | NA | 1 | 11 | 0 | NA |
| 17 | 7702037  | 7706325 | 1  | NM_144607    | CYB5D1   | 1 | 12 | 0 | NA | 0 | NA | 1 | 11 | 0 | NA |
| 17 | 7728847  | 7756800 | 1  | NM_001005271 | CHD3     | 0 | NA | 0 | NA | 0 | NA | 0 | NA | 0 | NA |
| 17 | 7732893  | 7756800 | 1  | NM_001005273 | CHD3     | 0 | NA | 0 | NA | 0 | NA | 0 | NA | 0 | NA |
| 17 | 7732893  | 7756800 | 1  | NM_005852    | CHD3     | 0 | NA | 0 | NA | 0 | NA | 0 | NA | 0 | NA |
| 17 | 7773478  | 7766751 | -1 | NM_004732    | KCNAB3   | 1 | 13 | 0 | NA | 1 | 12 | 0 | NA | 0 | NA |
| 17 | 7775983  | 7774391 | -1 | NM_021210    | TRAPPC1  | 1 | 13 | 0 | NA | 1 | 12 | 0 | NA | 0 | NA |
| 17 | 7776197  | 7793619 | 1  | NM_001037144 | CNTROB   | 1 | 13 | 0 | NA | 1 | 12 | 0 | NA | 0 | NA |
| 17 | 7776261  | 7793621 | 1  | NM_053051    | CNTROB   | 1 | 13 | 0 | NA | 1 | 12 | 0 | NA | 0 | NA |
| 17 | 7846712  | 7864383 | 1  | NM_000180    | GUCY2D   | 0 | NA | 1 | 12 | 0 | NA | 0 | NA | 0 | NA |
| 17 | 7883082  | 7893176 | 1  | NM_001039130 | ALOX15B  | 0 | NA | 0 | NA | 0 | NA | 0 | NA | 0 | NA |
| 17 | 7883082  | 7893176 | 1  | NM_001039131 | ALOX15B  | 0 | NA | 0 | NA | 0 | NA | 0 | NA | 0 | NA |
| 17 | 7883082  | 7893176 | 1  | NM_001141    | ALOX15B  | 0 | NA | 0 | NA | 0 | NA | 0 | NA | 0 | NA |
| 17 | 7931746  | 7916678 | -1 | NM_001139    | ALOX12B  | 0 | NA | 0 | NA | 0 | NA | 0 | NA | 0 | NA |
| 17 | 7962585  | 7939942 | -1 | NM_021628    | ALOXE3   | 0 | NA | 1 | 16 | 0 | NA | 0 | NA | 0 | NA |
| 17 | 7968127  | 7965023 | -1 | NM_032580    | HES7     | 0 | NA | 1 | 12 | 0 | NA | 0 | NA | 0 | NA |
| 17 | 7996427  | 7984514 | -1 | NM_002616    | PER1     | 0 | NA | 0 | NA | 0 | NA | 1 | 11 | 0 | NA |
| 17 | 8007018  | 8003189 | -1 | NM_014232    | VAMP2    | 0 | NA | 0 | NA | 0 | NA | 1 | 11 | 0 | NA |
| 17 | 8020439  | 8017020 | -1 | NM_032354    | TMEM107  | 0 | NA | 0 | NA | 1 | 13 | 0 | NA | 0 | NA |
| 17 | 8020439  | 8017020 | -1 | NM_183065    | TMEM107  | 0 | NA | 0 | NA | 1 | 13 | 0 | NA | 0 | NA |
| 17 | 8034115  | 8032375 | -1 | NM_017622    | C17orf59 | 0 | NA | 0 | NA | 0 | NA | 1 | 11 | 0 | NA |
| 17 | 8054608  | 8048773 | -1 | NM_004217    | AURKB    | 0 | NA | 0 | NA | 0 | NA | 1 | 19 | 0 | NA |
| 17 | 8092138  | 8070917 | -1 | NM_025099    | C17orf68 | 0 | NA | 0 | NA | 0 | NA | 0 | NA | 0 | NA |
| 17 | 8093361  | 8114528 | 1  | NM_012393    | PFAS     | 0 | NA | 0 | NA | 0 | NA | 0 | NA | 0 | NA |
| 17 | 8132713  | 8134130 | 1  | NM_016492    | RANGRF   | 1 | 15 | 0 | NA | 0 | NA | 1 | 11 | 0 | NA |
| 17 | 8138895  | 8131806 | -1 | NM_201520    | SLC25A35 | 1 | 15 | 0 | NA | 0 | NA | 1 | 11 | 0 | NA |
| 17 | 8154314  | 8166554 | 1  | NM_173728    | ARHGEF15 | 0 | NA | 0 | NA | 0 | NA | 0 | NA | 0 | NA |
| 17 | 8183912  | 8190088 | 1  | NM_153007    | ODF4     | 0 | NA | 0 | NA | 0 | NA | 0 | NA | 0 | NA |
| 17 | 8215583  | 8212697 | -1 | NM_213597    | KRBA2    | 0 | NA | 0 | NA | 0 | NA | 0 | NA | 0 | NA |
| 17 | 8227290  | 8221558 | -1 | NM_000987    | RPL26    | 0 | NA | 0 | NA | 0 | NA | 1 | 12 | 0 | NA |
| 17 | 8279903  | 8312206 | 1  | NM_001025579 | NDEL1    | 0 | NA | 0 | NA | 0 | NA | 0 | NA | 0 | NA |
| 17 | 8279903  | 8312206 | 1  | NM_030808    | NDEL1    | 0 | NA | 0 | NA | 0 | NA | 0 | NA | 0 | NA |
| 17 | 8474761  | 8318254 | -1 | NM_005964    | MYH10    | 0 | NA | 0 | NA | 0 | NA | 0 | NA | 0 | NA |
| 17 | 8588879  | 8573976 | -1 | NM_144681    | CCDC42   | 0 | NA | 1 | 12 | 0 | NA | 0 | NA | 0 | NA |
| 17 | 8643308  | 8641205 | -1 | NM_152599    | FLJ35773 | 0 | NA | 1 | 12 | 0 | NA | 1 | 18 | 0 | NA |
| 17 | 8711719  | 8646779 | -1 | NM_001010855 | PIK3R6   | 0 | NA | 0 | NA | 0 | NA | 1 | 16 | 0 | NA |
| 17 | 8756559  | 8724137 | -1 | NM_014308    | PIK3R5   | 0 | NA | 0 | NA | 1 | 15 | 0 | NA | 0 | NA |
| 17 | 8865583  | 9088042 | 1  | NM_004822    | NTN1     | 0 | NA | 1 | 13 | 0 | NA | 0 | NA | 0 | NA |
| 17 | 9420000  | 9094512 | -1 | NM_004853    | STX8     | 0 | NA | 0 | NA | 0 | NA | 0 | NA | 0 | NA |
| 17 | 9420668  | 9487501 | 1  | NM_001080556 | WDR16    | 0 | NA | 0 | NA | 0 | NA | 0 | NA | 0 | NA |
| 17 | 9420668  | 9487501 | 1  | NM_145054    | WDR16    | 0 | NA | 0 | NA | 0 | NA | 0 | NA | 0 | NA |
| 17 | 9489674  | 9573728 | 1  | NM_153210    | USP43    | 0 | NA | 1 | 12 | 0 | NA | 0 | NA | 0 | NA |
| 17 | 9635326  | 9615479 | -1 | NM_001105571 | DHRS7C   | 0 | NA | 0 | NA | 0 | NA | 0 | NA | 0 | NA |
| 17 | 9670105  | 9733747 | 1  | NM_004246    | GLP2R    | 0 | NA | 1 | 12 | 0 | NA | 0 | NA | 0 | NA |
| 17 | 9749409  | 9741751 | -1 | NM_002903    | RCVRN    | 0 | NA | 0 | NA | 0 | NA | 0 | NA | 1 | 12 |
| 17 | 9803491  | 9754650 | -1 | NM_003644    | GAS7     | 0 | NA | 0 | NA | 0 | NA | 0 | NA | 0 | NA |
| 17 | 9880789  | 9754650 | -1 | NM_201432    | GAS7     | 1 | 13 | 0 | NA | 1 | 23 | 0 | NA | 0 | NA |
| 17 | 10042593 | 9754650 | -1 | NM_201433    | GAS7     | 0 | NA | 1 | 14 | 0 | NA | 0 | NA | 0 | NA |

|    |          |          |    |              |           |   |    |   |    |   |    |   |    |   |    |
|----|----------|----------|----|--------------|-----------|---|----|---|----|---|----|---|----|---|----|
| 17 | 10217047 | 10144907 | -1 | NM_003802    | MYH13     | 0 | NA | 0 | NA | 0 | NA | 0 | NA | 0 | NA |
| 17 | 10265992 | 10234366 | -1 | NM_002472    | MYH8      | 0 | NA | 0 | NA | 0 | NA | 0 | NA | 0 | NA |
| 17 | 10313601 | 10287332 | -1 | NM_017533    | MYH4      | 0 | NA | 0 | NA | 0 | NA | 0 | NA | 0 | NA |
| 17 | 10362584 | 10366348 | -1 | NM_005963    | MYH1      | 0 | NA | 0 | NA | 0 | NA | 0 | NA | 0 | NA |
| 17 | 10393665 | 10365189 | -1 | NM_001100112 | MYH2      | 0 | NA | 0 | NA | 0 | NA | 0 | NA | 0 | NA |
| 17 | 10393742 | 10365189 | -1 | NM_017534    | MYH2      | 0 | NA | 0 | NA | 0 | NA | 0 | NA | 0 | NA |
| 17 | 10500190 | 10472567 | -1 | NM_002470    | MYH3      | 0 | NA | 0 | NA | 0 | NA | 0 | NA | 0 | NA |
| 17 | 10541610 | 10524373 | -1 | NM_004589    | SCO1      | 1 | 14 | 0 | NA | 0 | NA | 0 | NA | 0 | NA |
| 17 | 10541651 | 10555600 | 1  | NM_020233    | C17orf48  | 1 | 14 | 0 | NA | 0 | NA | 0 | NA | 0 | NA |
| 17 | 10574371 | 10557363 | -1 | NM_001004313 | LOC388335 | 0 | NA | 0 | NA | 0 | NA | 0 | NA | 0 | NA |
| 17 | 10682143 | 10666516 | -1 | NM_001101387 | LOC644139 | 0 | NA | 0 | NA | 0 | NA | 0 | NA | 0 | NA |
| 17 | 11442472 | 11813790 | 1  | NM_001372    | DNAH9     | 0 | NA | 0 | NA | 0 | NA | 0 | NA | 0 | NA |
| 17 | 11726943 | 11813790 | 1  | NM_004662    | DNAH9     | 0 | NA | 0 | NA | 0 | NA | 0 | NA | 0 | NA |
| 17 | 11841414 | 11821486 | -1 | NM_144680    | ZNF18     | 0 | NA | 0 | NA | 0 | NA | 0 | NA | 0 | NA |
| 17 | 11864859 | 11987776 | 1  | NM_003010    | MAP2K4    | 0 | NA | 0 | NA | 0 | NA | 0 | NA | 0 | NA |
| 17 | 12510230 | 12607686 | 1  | NM_153604    | MYOCD     | 0 | NA | 0 | NA | 0 | NA | 0 | NA | 0 | NA |
| 17 | 12633553 | 12835685 | 1  | NM_014859    | RICH2     | 0 | NA | 0 | NA | 0 | NA | 0 | NA | 0 | NA |
| 17 | 12862084 | 12836426 | -1 | NM_018127    | ELAC2     | 1 | 15 | 0 | NA | 0 | NA | 0 | NA | 0 | NA |
| 17 | 13445969 | 13339730 | -1 | NM_006042    | HS3ST3A1  | 0 | NA | 0 | NA | 0 | NA | 0 | NA | 1 | 14 |
| 17 | 13913443 | 14052721 | 1  | NM_001303    | COX10     | 1 | 16 | 0 | NA | 0 | NA | 0 | NA | 0 | NA |
| 17 | 14080875 | 14079897 | -1 | NM_001007530 | CDRT15    | 0 | NA | 0 | NA | 0 | NA | 0 | NA | 0 | NA |
| 17 | 14145230 | 14190217 | 1  | NM_006041    | HS3ST3B1  | 1 | 12 | 1 | 20 | 0 | NA | 1 | 13 | 1 | 13 |
| 17 | 14624245 | 14611624 | -1 | NM_001001684 | FLJ45831  | 0 | NA | 0 | NA | 0 | NA | 0 | NA | 0 | NA |
| 17 | 15104818 | 15073821 | -1 | NM_153322    | PMP22     | 1 | 12 | 0 | NA | 1 | 14 | 0 | NA | 0 | NA |
| 17 | 15106614 | 15073820 | -1 | NM_153321    | PMP22     | 1 | 12 | 0 | NA | 1 | 14 | 0 | NA | 0 | NA |
| 17 | 15109369 | 15073821 | -1 | NM_000304    | PMP22     | 1 | 12 | 0 | NA | 1 | 14 | 0 | NA | 0 | NA |
| 17 | 15185624 | 15147853 | -1 | NM_031898    | TEKT3     | 0 | NA | 0 | NA | 1 | 12 | 0 | NA | 0 | NA |
| 17 | 15311650 | 15280062 | -1 | NM_173622    | CDRT4     | 1 | 12 | 0 | NA | 0 | NA | 1 | 14 | 0 | NA |
| 17 | 15407570 | 15346303 | -1 | NM_145301    | FAM18B2   | 0 | NA | 0 | NA | 0 | NA | 0 | NA | 0 | NA |
| 17 | 15463743 | 15432701 | -1 | NM_006382    | CDRT1     | 0 | NA | 0 | NA | 0 | NA | 0 | NA | 0 | NA |
| 17 | 15526918 | 15472004 | -1 | NM_006470    | TRIM16    | 0 | NA | 0 | NA | 0 | NA | 0 | NA | 0 | NA |
| 17 | 15544053 | 15561963 | 1  | NM_020652    | ZNF286A   | 0 | NA | 0 | NA | 0 | NA | 0 | NA | 0 | NA |
| 17 | 15576315 | 15588823 | 1  | NM_178571    | TBC1D26   | 0 | NA | 0 | NA | 0 | NA | 0 | NA | 0 | NA |
| 17 | 15788955 | 15819935 | 1  | NM_000676    | ADORA2B   | 0 | NA | 0 | NA | 0 | NA | 0 | NA | 1 | 13 |
| 17 | 15843506 | 15872821 | 1  | NM_017775    | TTC19     | 0 | NA | 0 | NA | 0 | NA | 0 | NA | 0 | NA |
| 17 | 15843731 | 15820599 | -1 | NM_001042697 | ZSWIM7    | 0 | NA | 0 | NA | 0 | NA | 0 | NA | 0 | NA |
| 17 | 15843731 | 15820599 | -1 | NM_001042698 | ZSWIM7    | 0 | NA | 0 | NA | 0 | NA | 0 | NA | 0 | NA |
| 17 | 16059570 | 15875982 | -1 | NM_006311    | NGOR1     | 0 | NA | 0 | NA | 1 | 14 | 0 | NA | 0 | NA |
| 17 | 16061233 | 16170298 | 1  | NM_004278    | PIGL      | 0 | NA | 0 | NA | 1 | 14 | 0 | NA | 0 | NA |
| 17 | 16197537 | 16186572 | -1 | NM_181716    | PRRG      | 0 | NA | 0 | NA | 0 | NA | 0 | NA | 0 | NA |
| 17 | 16225091 | 16226779 | 1  | NM_018955    | UBB       | 1 | 28 | 0 | NA | 1 | 21 | 1 | 11 | 0 | NA |
| 17 | 16259612 | 16281042 | 1  | NM_016113    | TRPV2     | 1 | 13 | 0 | NA | 1 | 18 | 1 | 25 | 0 | NA |
| 17 | 16283086 | 16286065 | 1  | NM_152350    | C17orf45  | 0 | NA | 0 | NA | 0 | NA | 1 | 14 | 0 | NA |
| 17 | 16336205 | 16286052 | -1 | NM_001113567 | C17orf76  | 0 | NA | 1 | 13 | 0 | NA | 0 | NA | 0 | NA |
| 17 | 16336205 | 16286052 | -1 | NM_207387    | C17orf76  | 0 | NA | 1 | 13 | 0 | NA | 0 | NA | 0 | NA |
| 17 | 16413189 | 16395433 | -1 | NM_020653    | ZNF287    | 0 | NA | 0 | NA | 0 | NA | 1 | 11 | 1 | 25 |
| 17 | 16497883 | 16464772 | -1 | NM_020787    | ZNF624    | 0 | NA | 0 | NA | 0 | NA | 0 | NA | 0 | NA |
| 17 | 16534363 | 16619036 | 1  | NM_014695    | CCDC144A  | 0 | NA | 0 | NA | 0 | NA | 0 | NA | 0 | NA |
| 17 | 16816127 | 16783122 | -1 | NM_012452    | TNFRSF13B | 0 | NA | 1 | 12 | 0 | NA | 0 | NA | 0 | NA |
| 17 | 16886831 | 17029597 | 1  | NM_015134    | M-RIP     | 0 | NA | 0 | NA | 0 | NA | 0 | NA | 0 | NA |
| 17 | 16886831 | 17029598 | 1  | NM_201274    | M-RIP     | 0 | NA | 0 | NA | 0 | NA | 0 | NA | 0 | NA |
| 17 | 17050357 | 17045033 | -1 | NM_178836    | LOC201164 | 0 | NA | 0 | NA | 0 | NA | 0 | NA | 0 | NA |
| 17 | 17081227 | 17056251 | -1 | NM_144997    | FLCN      | 0 | NA | 0 | NA | 0 | NA | 1 | 12 | 0 | NA |
| 17 | 17081227 | 17065209 | -1 | NM_144606    | FLCN      | 0 | NA | 0 | NA | 0 | NA | 1 | 12 | 0 | NA |
| 17 | 17125316 | 17090863 | -1 | NM_003653    | COPS3     | 0 | NA | 0 | NA | 0 | NA | 1 | 11 | 0 | NA |
| 17 | 17147404 | 17191702 | 1  | NM_020201    | NTSM      | 0 | NA | 0 | NA | 0 | NA | 0 | NA | 0 | NA |
| 17 | 17321024 | 17337259 | 1  | NM_018019    | MED9      | 0 | NA | 0 | NA | 0 | NA | 0 | NA | 0 | NA |
| 17 | 17340432 | 17338477 | -1 | NM_016084    | RASD1     | 0 | NA | 1 | 16 | 0 | NA | 0 | NA | 0 | NA |
| 17 | 17421504 | 17349601 | -1 | NM_148173    | PEMT      | 0 | NA | 0 | NA | 0 | NA | 0 | NA | 0 | NA |
| 17 | 17426470 | 17349601 | -1 | NM_007169    | PEMT      | 1 | 33 | 0 | NA | 0 | NA | 1 | 14 | 0 | NA |
| 17 | 17435719 | 17349601 | -1 | NM_148172    | PEMT      | 1 | 33 | 0 | NA | 0 | NA | 1 | 14 | 0 | NA |
| 17 | 17525511 | 17655490 | 1  | NM_030665    | RAI1      | 0 | NA | 0 | NA | 0 | NA | 1 | 12 | 0 | NA |
| 17 | 17681050 | 17696110 | -1 | NM_001005291 | SREBF1    | 0 | NA | 0 | NA | 1 | 12 | 1 | 14 | 0 | NA |
| 17 | 17681050 | 17656110 | -1 | NM_004176    | SREBF1    | 0 | NA | 0 | NA | 1 | 12 | 1 | 14 | 0 | NA |
| 17 | 17816509 | 17687546 | -1 | NM_001033551 | TOM1L2    | 0 | NA | 0 | NA | 0 | NA | 1 | 11 | 0 | NA |



|    |          |          |    |              |           |   |    |   |    |   |    |   |    |   |    |
|----|----------|----------|----|--------------|-----------|---|----|---|----|---|----|---|----|---|----|
| 17 | 17816509 | 17687546 | -1 | NM_001082968 | TOM1L2    | 0 | NA | 0 | NA | 0 | NA | 1 | 11 | 0 | NA |
| 17 | 17816923 | 17860898 | 1  | NM_031294    | LRRC48    | 0 | NA | 0 | NA | 0 | NA | 1 | 11 | 0 | NA |
| 17 | 17883205 | 17862058 | -1 | NM_145691    | ATPAF2    | 0 | NA | 0 | NA | 0 | NA | 0 | NA | 0 | NA |
| 17 | 17883335 | 17912443 | 1  | NM_024052    | C17orf39  | 0 | NA | 0 | NA | 0 | NA | 0 | NA | 0 | NA |
| 17 | 17932007 | 17952017 | 1  | NM_001388    | DRG2      | 1 | 11 | 0 | NA | 0 | NA | 0 | NA | 0 | NA |
| 17 | 17952744 | 18023841 | 1  | NM_016239    | MYO15A    | 0 | NA | 0 | NA | 0 | NA | 0 | NA | 0 | NA |
| 17 | 18027591 | 18053992 | 1  | NM_017758    | ALKBH5    | 0 | NA | 0 | NA | 0 | NA | 1 | 13 | 0 | NA |
| 17 | 18069660 | 18088913 | 1  | NM_004140    | LLGL1     | 0 | NA | 0 | NA | 0 | NA | 0 | NA | 0 | NA |
| 17 | 18102780 | 18088877 | -1 | NM_002018    | FLJ1      | 0 | NA | 0 | NA | 0 | NA | 0 | NA | 0 | NA |
| 17 | 18104593 | 18109818 | 1  | NM_139162    | SMCR7     | 0 | NA | 0 | NA | 0 | NA | 0 | NA | 0 | NA |
| 17 | 18105148 | 18109820 | 1  | NM_148886    | SMCR7     | 0 | NA | 0 | NA | 0 | NA | 0 | NA | 0 | NA |
| 17 | 18159046 | 18117959 | -1 | NM_004618    | TOP3A     | 0 | NA | 0 | NA | 0 | NA | 1 | 27 | 1 | 19 |
| 17 | 18159318 | 18172095 | 1  | NM_144775    | SMCR8     | 0 | NA | 0 | NA | 0 | NA | 1 | 27 | 1 | 19 |
| 17 | 18207581 | 18171911 | -1 | NM_004169    | SHMT1     | 0 | NA | 0 | NA | 0 | NA | 0 | NA | 0 | NA |
| 17 | 18207581 | 18171911 | -1 | NM_148918    | SHMT1     | 0 | NA | 0 | NA | 0 | NA | 0 | NA | 0 | NA |
| 17 | 18320823 | 18338984 | 1  | NM_001040078 | LOC654346 | 0 | NA | 0 | NA | 0 | NA | 0 | NA | 0 | NA |
| 17 | 18469570 | 18427446 | -1 | NM_182568    | CCDC144B  | 0 | NA | 0 | NA | 0 | NA | 0 | NA | 0 | NA |
| 17 | 18488465 | 18479566 | -1 | NM_001039397 | TBC1D28   | 0 | NA | 0 | NA | 0 | NA | 0 | NA | 0 | NA |
| 17 | 18566126 | 18580156 | 1  | NM_001037330 | TRIM16L   | 0 | NA | 0 | NA | 0 | NA | 0 | NA | 0 | NA |
| 17 | 18588050 | 18623387 | 1  | NM_031456    | FBXW10    | 0 | NA | 0 | NA | 0 | NA | 0 | NA | 0 | NA |
| 17 | 18625306 | 18650751 | 1  | NM_016078    | FAM18B    | 0 | NA | 0 | NA | 0 | NA | 0 | NA | 0 | NA |
| 17 | 18702216 | 18775305 | 1  | NM_002767    | PRPSAP2   | 0 | NA | 0 | NA | 0 | NA | 0 | NA | 0 | NA |
| 17 | 18796202 | 18864728 | 1  | NM_001042450 | SLC5A10   | 0 | NA | 0 | NA | 0 | NA | 0 | NA | 0 | NA |
| 17 | 18796202 | 18864728 | 1  | NM_152351    | SLC5A10   | 0 | NA | 0 | NA | 0 | NA | 0 | NA | 0 | NA |
| 17 | 18848785 | 18815105 | -1 | NM_001039999 | FAM83G    | 0 | NA | 0 | NA | 0 | NA | 0 | NA | 0 | NA |
| 17 | 18891061 | 18864714 | -1 | NM_006613    | GRAP      | 0 | NA | 0 | NA | 0 | NA | 0 | NA | 0 | NA |
| 17 | 19081282 | 19180621 | 1  | NM_001102864 | EPN2      | 0 | NA | 0 | NA | 0 | NA | 0 | NA | 0 | NA |
| 17 | 19081282 | 19180621 | 1  | NM_014964    | EPN2      | 0 | NA | 0 | NA | 0 | NA | 0 | NA | 0 | NA |
| 17 | 19081282 | 19180621 | 1  | NM_148921    | EPN2      | 0 | NA | 0 | NA | 0 | NA | 0 | NA | 0 | NA |
| 17 | 19206639 | 19187075 | -1 | NM_015681    | BSD1      | 0 | NA | 0 | NA | 0 | NA | 0 | NA | 0 | NA |
| 17 | 19221658 | 19227445 | 1  | NM_139032    | MAPK7     | 0 | NA | 0 | NA | 0 | NA | 0 | NA | 0 | NA |
| 17 | 19221658 | 19227445 | 1  | NM_139033    | MAPK7     | 0 | NA | 0 | NA | 0 | NA | 0 | NA | 0 | NA |
| 17 | 19222399 | 19227445 | 1  | NM_002749    | MAPK7     | 0 | NA | 0 | NA | 0 | NA | 0 | NA | 0 | NA |
| 17 | 19222399 | 19227445 | 1  | NM_139034    | MAPK7     | 0 | NA | 0 | NA | 0 | NA | 0 | NA | 0 | NA |
| 17 | 19231086 | 19227347 | -1 | NM_002404    | MFAP4     | 0 | NA | 0 | NA | 0 | NA | 0 | NA | 0 | NA |
| 17 | 19255115 | 19261181 | 1  | NM_007148    | ZNF179    | 0 | NA | 0 | NA | 0 | NA | 0 | NA | 0 | NA |
| 17 | 19377758 | 19422938 | 1  | NM_018242    | SLC47A1   | 0 | NA | 0 | NA | 0 | NA | 0 | NA | 0 | NA |
| 17 | 19492655 | 19521496 | 1  | NM_001031806 | ALDH3A2   | 1 | 11 | 0 | NA | 0 | NA | 1 | 16 | 0 | NA |
| 17 | 19492655 | 19521500 | 1  | NM_000382    | ALDH3A2   | 1 | 11 | 0 | NA | 0 | NA | 1 | 16 | 0 | NA |
| 17 | 19560635 | 19522219 | -1 | NM_001099646 | SLC47A2   | 0 | NA | 0 | NA | 0 | NA | 0 | NA | 0 | NA |
| 17 | 19560635 | 19522219 | -1 | NM_152908    | SLC47A2   | 0 | NA | 0 | NA | 0 | NA | 0 | NA | 0 | NA |
| 17 | 19592200 | 19581889 | -1 | NM_000691    | ALDH3A1   | 1 | 11 | 0 | NA | 0 | NA | 0 | NA | 1 | 12 |
| 17 | 19711822 | 19618057 | -1 | NM_014683    | ULK2      | 0 | NA | 0 | NA | 0 | NA | 0 | NA | 1 | 16 |
| 17 | 19821721 | 19749341 | -1 | NM_007202    | AKAP10    | 1 | 11 | 1 | 13 | 0 | NA | 1 | 16 | 1 | 12 |
| 17 | 19930926 | 20081075 | 1  | NM_152904    | SPECC1    | 0 | NA | 0 | NA | 0 | NA | 0 | NA | 0 | NA |
| 17 | 19930926 | 20158659 | 1  | NM_001033553 | SPECC1    | 0 | NA | 0 | NA | 0 | NA | 0 | NA | 0 | NA |
| 17 | 19999993 | 20081083 | 1  | NM_001033554 | SPECC1    | 0 | NA | 0 | NA | 0 | NA | 0 | NA | 0 | NA |
| 17 | 19999993 | 20158659 | 1  | NM_001033555 | SPECC1    | 0 | NA | 0 | NA | 0 | NA | 0 | NA | 0 | NA |
| 17 | 20311440 | 20293767 | -1 | NM_001042685 | LOC284194 | 0 | NA | 0 | NA | 0 | NA | 0 | NA | 0 | NA |
| 17 | 20740045 | 20707299 | -1 | NM_001004306 | MGC87631  | 0 | NA | 0 | NA | 0 | NA | 0 | NA | 0 | NA |
| 17 | 20886944 | 20843497 | -1 | NM_015276    | USP22     | 0 | NA | 0 | NA | 0 | NA | 0 | NA | 0 | NA |
| 17 | 20970849 | 21035428 | 1  | NM_015510    | DHRS7B    | 0 | NA | 0 | NA | 0 | NA | 0 | NA | 0 | NA |
| 17 | 21058299 | 21041854 | -1 | NM_003876    | TMEM11    | 0 | NA | 0 | NA | 0 | NA | 1 | 12 | 0 | NA |
| 17 | 21097171 | 21082775 | -1 | NM_152914    | MGC33894  | 0 | NA | 0 | NA | 0 | NA | 0 | NA | 0 | NA |
| 17 | 21128560 | 21159144 | 1  | NM_145109    | MAP2K3    | 0 | NA | 0 | NA | 0 | NA | 1 | 13 | 0 | NA |
| 17 | 21135373 | 21159144 | 1  | NM_002756    | MAP2K3    | 0 | NA | 0 | NA | 0 | NA | 1 | 13 | 0 | NA |
| 17 | 21220291 | 21263772 | 1  | NM_021012    | KCNJ12    | 0 | NA | 0 | NA | 0 | NA | 0 | NA | 0 | NA |
| 17 | 21395508 | 21375773 | -1 | NM_001113434 | C17orf51  | 0 | NA | 0 | NA | 0 | NA | 0 | NA | 0 | NA |
| 17 | 21749496 | 21750630 | 1  | NM_203392    | FAM27L    | 0 | NA | 1 | 13 | 0 | NA | 0 | NA | 0 | NA |
| 17 | 22645232 | 22664772 | 1  | NM_015626    | WSB1      | 0 | NA | 0 | NA | 0 | NA | 0 | NA | 0 | NA |
| 17 | 22645232 | 22664772 | 1  | NM_134265    | WSB1      | 0 | NA | 0 | NA | 0 | NA | 0 | NA | 0 | NA |
| 17 | 22823162 | 22974845 | 1  | NM_014238    | KSR1      | 0 | NA | 0 | NA | 0 | NA | 0 | NA | 0 | NA |
| 17 | 22982300 | 23000713 | 1  | NM_002308    | LGALS9    | 0 | NA | 0 | NA | 0 | NA | 0 | NA | 0 | NA |
| 17 | 22982300 | 23000713 | 1  | NM_009587    | LGALS9    | 0 | NA | 0 | NA | 0 | NA | 0 | NA | 0 | NA |
| 17 | 23151682 | 23107918 | -1 | NM_000625    | NOS2A     | 1 | 11 | 0 | NA | 0 | NA | 0 | NA | 0 | NA |

|    |          |          |    |              |           |   |    |   |    |   |    |   |    |   |    |
|----|----------|----------|----|--------------|-----------|---|----|---|----|---|----|---|----|---|----|
| 17 | 23244536 | 23229466 | -1 | NM_001076680 | LOC201229 | 0 | NA | 0 | NA | 0 | NA | 0 | NA | 0 | NA |
| 17 | 23393814 | 23547531 | 1  | NM_016231    | NLK       | 1 | 18 | 0 | NA | 1 | 14 | 0 | NA | 0 | NA |
| 17 | 23658144 | 23627734 | -1 | NM_173624    | FLJ40504  | 0 | NA | 0 | NA | 0 | NA | 0 | NA | 0 | NA |
| 17 | 23670247 | 23679838 | 1  | NM_014573    | TMEM97    | 0 | NA | 0 | NA | 0 | NA | 1 | 11 | 0 | NA |
| 17 | 23686622 | 23679479 | -1 | NM_174887    | IFT20     | 1 | 16 | 0 | NA | 1 | 12 | 0 | NA | 0 | NA |
| 17 | 23686912 | 23698160 | 1  | NM_021137    | TNFAIP1   | 1 | 16 | 0 | NA | 1 | 12 | 0 | NA | 0 | NA |
| 17 | 23708730 | 23697785 | -1 | NM_015584    | POLDIP2   | 1 | 11 | 0 | NA | 0 | NA | 0 | NA | 0 | NA |
| 17 | 23708813 | 23713216 | 1  | NM_152464    | TMEM199   | 1 | 11 | 0 | NA | 0 | NA | 0 | NA | 0 | NA |
| 17 | 23716392 | 23715416 | -1 | NM_001080837 | SEBOX     | 1 | 11 | 0 | NA | 0 | NA | 0 | NA | 0 | NA |
| 17 | 23719114 | 23715416 | -1 | NM_001083896 | SEBOX     | 0 | NA | 0 | NA | 0 | NA | 0 | NA | 0 | NA |
| 17 | 23721500 | 23718425 | -1 | NM_000638    | VTN       | 0 | NA | 0 | NA | 0 | NA | 0 | NA | 0 | NA |
| 17 | 23723113 | 23752192 | 1  | NM_015077    | SARM1     | 0 | NA | 0 | NA | 0 | NA | 0 | NA | 0 | NA |
| 17 | 23757355 | 23745787 | -1 | NM_080669    | SLC46A1   | 0 | NA | 0 | NA | 0 | NA | 0 | NA | 0 | NA |
| 17 | 23824790 | 23848514 | 1  | NM_003984    | SLC13A2   | 0 | NA | 0 | NA | 1 | 12 | 0 | NA | 0 | NA |
| 17 | 23875085 | 23889302 | 1  | NM_003593    | FOXN1     | 0 | NA | 0 | NA | 0 | NA | 0 | NA | 0 | NA |
| 17 | 23903770 | 23897851 | -1 | NM_005148    | UNC119    | 0 | NA | 0 | NA | 0 | NA | 0 | NA | 0 | NA |
| 17 | 23903770 | 23897852 | -1 | NM_054035    | UNC119    | 0 | NA | 0 | NA | 0 | NA | 0 | NA | 0 | NA |
| 17 | 23922655 | 23904531 | -1 | NM_033198    | PIGS      | 0 | NA | 0 | NA | 0 | NA | 0 | NA | 0 | NA |
| 17 | 23928078 | 23924259 | -1 | NM_005165    | ALDOC     | 0 | NA | 0 | NA | 0 | NA | 0 | NA | 0 | NA |
| 17 | 23950183 | 23928709 | -1 | NM_006461    | SPAG5     | 0 | NA | 0 | NA | 0 | NA | 0 | NA | 0 | NA |
| 17 | 23965338 | 23959108 | -1 | NM_144610    | FLJ25006  | 0 | NA | 0 | NA | 0 | NA | 0 | NA | 0 | NA |
| 17 | 23963600 | 23965584 | -1 | NM_014680    | KIAA0100  | 0 | NA | 0 | NA | 0 | NA | 0 | NA | 0 | NA |
| 17 | 24013060 | 23999733 | -1 | NM_006923    | SDF2      | 1 | 11 | 0 | NA | 0 | NA | 0 | NA | 0 | NA |
| 17 | 24013428 | 24053376 | 1  | NM_003170    | SUPT6H    | 1 | 11 | 0 | NA | 0 | NA | 0 | NA | 0 | NA |
| 17 | 24062999 | 24054660 | -1 | NM_152465    | PROCA1    | 1 | 18 | 0 | NA | 0 | NA | 0 | NA | 0 | NA |
| 17 | 24069013 | 24065429 | -1 | NM_031934    | RAB34     | 1 | 18 | 0 | NA | 0 | NA | 0 | NA | 0 | NA |
| 17 | 24071126 | 24075501 | 1  | NM_000984    | RPL23A    | 1 | 18 | 0 | NA | 0 | NA | 0 | NA | 0 | NA |
| 17 | 24071135 | 24075081 | 1  | NM_001093758 | LOC647099 | 1 | 18 | 0 | NA | 0 | NA | 0 | NA | 0 | NA |
| 17 | 24077353 | 24075502 | -1 | NM_138463    | TLCD1     | 1 | 13 | 0 | NA | 0 | NA | 0 | NA | 0 | NA |
| 17 | 24079958 | 24093911 | 1  | NM_178170    | NEK8      | 1 | 13 | 0 | NA | 0 | NA | 0 | NA | 0 | NA |
| 17 | 24095149 | 24102103 | 1  | NM_004295    | TRAF4     | 0 | NA | 0 | NA | 0 | NA | 0 | NA | 0 | NA |
| 17 | 24193967 | 24107122 | -1 | NM_001077498 | C17orf63  | 0 | NA | 0 | NA | 0 | NA | 0 | NA | 0 | NA |
| 17 | 24193967 | 24107122 | -1 | NM_018182    | C17orf63  | 0 | NA | 0 | NA | 0 | NA | 0 | NA | 0 | NA |
| 17 | 24206168 | 24212198 | 1  | NM_005702    | ERAL1     | 0 | NA | 0 | NA | 0 | NA | 0 | NA | 0 | NA |
| 17 | 24248841 | 24230482 | -1 | NM_004475    | FLOT2     | 1 | 11 | 0 | NA | 0 | NA | 0 | NA | 0 | NA |
| 17 | 24254215 | 24248924 | -1 | NM_144683    | DHRS13    | 1 | 11 | 0 | NA | 0 | NA | 0 | NA | 0 | NA |
| 17 | 24302634 | 24256396 | -1 | NM_001033561 | PHF12     | 0 | NA | 0 | NA | 0 | NA | 1 | 14 | 0 | NA |
| 17 | 24302634 | 24263287 | -1 | NM_020889    | PHF12     | 0 | NA | 0 | NA | 0 | NA | 1 | 14 | 0 | NA |
| 17 | 24357207 | 24306072 | -1 | NM_001098635 | SEZ6      | 0 | NA | 0 | NA | 0 | NA | 0 | NA | 0 | NA |
| 17 | 24357207 | 24306072 | -1 | NM_178860    | SEZ6      | 0 | NA | 0 | NA | 0 | NA | 0 | NA | 0 | NA |
| 17 | 24394043 | 24408362 | 1  | NM_016518    | PIPOX     | 0 | NA | 0 | NA | 0 | NA | 0 | NA | 0 | NA |
| 17 | 24426753 | 24424664 | -1 | NM_004740    | TIAF1     | 0 | NA | 0 | NA | 0 | NA | 0 | NA | 0 | NA |
| 17 | 24531533 | 24424653 | -1 | NM_078471    | MYO18A    | 0 | NA | 0 | NA | 0 | NA | 0 | NA | 0 | NA |
| 17 | 24531533 | 24424653 | -1 | NM_203318    | MYO18A    | 0 | NA | 0 | NA | 0 | NA | 0 | NA | 0 | NA |
| 17 | 24598000 | 24606628 | 1  | NM_005208    | CRYBA1    | 0 | NA | 0 | NA | 0 | NA | 0 | NA | 0 | NA |
| 17 | 24645292 | 24606979 | -1 | NM_020772    | NUFIP2    | 0 | NA | 0 | NA | 0 | NA | 0 | NA | 0 | NA |
| 17 | 24742068 | 24895628 | 1  | NM_020791    | TAOK1     | 1 | 34 | 0 | NA | 0 | NA | 0 | NA | 0 | NA |
| 17 | 24918174 | 24912436 | -1 | NM_198147    | LOC116236 | 0 | NA | 0 | NA | 0 | NA | 0 | NA | 0 | NA |
| 17 | 24919864 | 24924301 | 1  | NM_138349    | TP53113   | 0 | NA | 0 | NA | 0 | NA | 0 | NA | 0 | NA |
| 17 | 24940736 | 24924612 | -1 | NM_001085454 | GIT1      | 0 | NA | 0 | NA | 0 | NA | 0 | NA | 0 | NA |
| 17 | 24940736 | 24924612 | -1 | NM_014030    | GIT1      | 0 | NA | 0 | NA | 0 | NA | 0 | NA | 0 | NA |
| 17 | 24944652 | 24965905 | 1  | NM_152345    | ANKRD13B  | 0 | NA | 0 | NA | 0 | NA | 0 | NA | 0 | NA |
| 17 | 24972620 | 24965899 | -1 | NM_032854    | CORO6     | 0 | NA | 0 | NA | 0 | NA | 0 | NA | 0 | NA |
| 17 | 25281144 | 24977090 | -1 | NM_033389    | SSH2      | 0 | NA | 0 | NA | 0 | NA | 1 | 18 | 0 | NA |
| 17 | 25292811 | 25459596 | 1  | NM_198529    | EFCAB5    | 0 | NA | 0 | NA | 0 | NA | 0 | NA | 0 | NA |
| 17 | 25467959 | 25537612 | 1  | NM_032141    | CCDC55    | 0 | NA | 0 | NA | 0 | NA | 0 | NA | 0 | NA |
| 17 | 25586841 | 25549031 | -1 | NM_001045    | SLC6A4    | 0 | NA | 0 | NA | 0 | NA | 0 | NA | 0 | NA |
| 17 | 25643200 | 25599348 | -1 | NM_000386    | BLMH      | 0 | NA | 0 | NA | 0 | NA | 0 | NA | 0 | NA |
| 17 | 25685191 | 25667491 | -1 | NM_206832    | TMIGD1    | 0 | NA | 0 | NA | 0 | NA | 0 | NA | 0 | NA |
| 17 | 25730109 | 25819825 | 1  | NM_001304    | CPD       | 0 | NA | 0 | NA | 0 | NA | 0 | NA | 0 | NA |
| 17 | 25828551 | 25877958 | 1  | NM_001007024 | GOSR1     | 0 | NA | 0 | NA | 0 | NA | 0 | NA | 0 | NA |
| 17 | 25828551 | 25877958 | 1  | NM_001007025 | GOSR1     | 0 | NA | 0 | NA | 0 | NA | 0 | NA | 0 | NA |
| 17 | 25828551 | 25877958 | 1  | NM_004871    | GOSR1     | 0 | NA | 0 | NA | 0 | NA | 0 | NA | 0 | NA |
| 17 | 25910709 | 25914635 | 1  | NM_015594    | TBC1D29   | 0 | NA | 0 | NA | 0 | NA | 0 | NA | 0 | NA |
| 17 | 26175904 | 26133827 | -1 | NM_015986    | CRLF3     | 0 | NA | 0 | NA | 0 | NA | 0 | NA | 0 | NA |

|    |          |          |    |              |           |   |    |   |    |   |    |   |    |   |    |
|----|----------|----------|----|--------------|-----------|---|----|---|----|---|----|---|----|---|----|
| 17 | 26183148 | 26246421 | 1  | NM_024857    | ATAD5     | 0 | NA | 0 | NA | 0 | NA | 0 | NA | 0 | NA |
| 17 | 26257412 | 26250126 | -1 | NM_024683    | C17orf42  | 0 | NA | 0 | NA | 0 | NA | 0 | NA | 0 | NA |
| 17 | 26272879 | 26310337 | 1  | NM_018404    | CENTA2    | 0 | NA | 0 | NA | 0 | NA | 0 | NA | 0 | NA |
| 17 | 26322081 | 26351053 | 1  | NM_032322    | RNF135    | 0 | NA | 0 | NA | 0 | NA | 0 | NA | 0 | NA |
| 17 | 26322081 | 26351053 | 1  | NM_197939    | RNF135    | 0 | NA | 0 | NA | 0 | NA | 0 | NA | 0 | NA |
| 17 | 26446120 | 26728821 | 1  | NM_000267    | NF1       | 0 | NA | 0 | NA | 0 | NA | 0 | NA | 0 | NA |
| 17 | 26446120 | 26728821 | 1  | NM_001042492 | NF1       | 0 | NA | 0 | NA | 0 | NA | 0 | NA | 0 | NA |
| 17 | 26648481 | 26645793 | -1 | NM_002544    | OMG       | 0 | NA | 0 | NA | 0 | NA | 0 | NA | 0 | NA |
| 17 | 26665256 | 26654913 | -1 | NM_006495    | EV12B     | 0 | NA | 0 | NA | 0 | NA | 0 | NA | 0 | NA |
| 17 | 26672843 | 26668800 | -1 | NM_001003927 | EV12A     | 0 | NA | 0 | NA | 0 | NA | 0 | NA | 0 | NA |
| 17 | 26672843 | 26668800 | -1 | NM_014210    | EV12A     | 0 | NA | 0 | NA | 0 | NA | 0 | NA | 0 | NA |
| 17 | 26742767 | 26889352 | 1  | NM_032932    | RAB11FIP4 | 0 | NA | 0 | NA | 0 | NA | 0 | NA | 0 | NA |
| 17 | 27210369 | 27203011 | -1 | NM_018405    | C17orf79  | 0 | NA | 0 | NA | 0 | NA | 0 | NA | 0 | NA |
| 17 | 27252842 | 27214302 | -1 | NM_018428    | UTP6      | 0 | NA | 0 | NA | 0 | NA | 0 | NA | 0 | NA |
| 17 | 27288184 | 27352162 | 1  | NM_015355    | SUZ12     | 0 | NA | 0 | NA | 0 | NA | 0 | NA | 0 | NA |
| 17 | 27372267 | 27404632 | 1  | NM_052888    | LRRC37B   | 0 | NA | 0 | NA | 0 | NA | 0 | NA | 0 | NA |
| 17 | 27493585 | 27576858 | 1  | NM_018307    | RHOT1     | 0 | NA | 0 | NA | 0 | NA | 0 | NA | 0 | NA |
| 17 | 27493585 | 27576859 | 1  | NM_001033566 | RHOT1     | 0 | NA | 0 | NA | 0 | NA | 0 | NA | 0 | NA |
| 17 | 27493585 | 27576859 | 1  | NM_001033568 | RHOT1     | 0 | NA | 0 | NA | 0 | NA | 0 | NA | 0 | NA |
| 17 | 27617307 | 27675793 | 1  | NM_138328    | RHBDL3    | 0 | NA | 0 | NA | 0 | NA | 0 | NA | 0 | NA |
| 17 | 27693302 | 27682501 | -1 | NM_022344    | C17orf75  | 0 | NA | 0 | NA | 1 | 14 | 0 | NA | 0 | NA |
| 17 | 27701269 | 27721581 | 1  | NM_001032293 | ZNF207    | 0 | NA | 0 | NA | 0 | NA | 1 | 14 | 0 | NA |
| 17 | 27701269 | 27721581 | 1  | NM_001098507 | ZNF207    | 0 | NA | 0 | NA | 0 | NA | 1 | 14 | 0 | NA |
| 17 | 27701269 | 27721581 | 1  | NM_003457    | ZNF207    | 0 | NA | 0 | NA | 0 | NA | 1 | 14 | 0 | NA |
| 17 | 27795614 | 27832155 | 1  | NM_002815    | PSMD11    | 0 | NA | 0 | NA | 0 | NA | 0 | NA | 0 | NA |
| 17 | 27838217 | 27842384 | 1  | NM_003885    | CDK5R1    | 0 | NA | 0 | NA | 0 | NA | 1 | 12 | 0 | NA |
| 17 | 28228015 | 27843740 | -1 | NM_015194    | MYO1D     | 0 | NA | 0 | NA | 0 | NA | 0 | NA | 0 | NA |
| 17 | 28279040 | 28292780 | 1  | NM_001033504 | TMEM98    | 0 | NA | 0 | NA | 0 | NA | 0 | NA | 0 | NA |
| 17 | 28279040 | 28292780 | 1  | NM_015544    | TMEM98    | 0 | NA | 0 | NA | 0 | NA | 0 | NA | 0 | NA |
| 17 | 28342994 | 28349005 | 1  | NM_173847    | SPACA3    | 0 | NA | 0 | NA | 0 | NA | 0 | NA | 0 | NA |
| 17 | 28644119 | 28364218 | -1 | NM_183377    | ACCN1     | 0 | NA | 0 | NA | 0 | NA | 0 | NA | 0 | NA |
| 17 | 29507938 | 28364218 | -1 | NM_001094    | ACCN1     | 0 | NA | 0 | NA | 0 | NA | 0 | NA | 0 | NA |
| 17 | 29606408 | 29608333 | 1  | NM_002982    | CCL2      | 0 | NA | 0 | NA | 0 | NA | 0 | NA | 0 | NA |
| 17 | 29621352 | 29623369 | 1  | NM_006273    | CCL7      | 0 | NA | 0 | NA | 0 | NA | 0 | NA | 0 | NA |
| 17 | 29636799 | 29639312 | 1  | NM_002986    | CCL11     | 0 | NA | 0 | NA | 0 | NA | 0 | NA | 0 | NA |
| 17 | 29670178 | 29672534 | 1  | NM_005623    | CCL8      | 0 | NA | 0 | NA | 0 | NA | 0 | NA | 0 | NA |
| 17 | 29707583 | 29709742 | 1  | NM_005408    | CCL13     | 0 | NA | 0 | NA | 0 | NA | 0 | NA | 0 | NA |
| 17 | 29714365 | 29711511 | -1 | NM_002981    | CCL1      | 0 | NA | 0 | NA | 0 | NA | 0 | NA | 0 | NA |
| 17 | 29930501 | 29925254 | -1 | NM_207454    | FLJ44815  | 0 | NA | 0 | NA | 0 | NA | 0 | NA | 0 | NA |
| 17 | 29931880 | 29990450 | 1  | NM_207313    | TMEM132E  | 0 | NA | 0 | NA | 0 | NA | 0 | NA | 0 | NA |
| 17 | 30312619 | 30279050 | -1 | NM_006584    | CCT6B     | 0 | NA | 0 | NA | 0 | NA | 0 | NA | 0 | NA |
| 17 | 30312661 | 30314318 | 1  | NM_052857    | ZNF830    | 0 | NA | 0 | NA | 0 | NA | 0 | NA | 0 | NA |
| 17 | 30331650 | 30354281 | 1  | NM_002311    | LIG3      | 0 | NA | 0 | NA | 0 | NA | 0 | NA | 0 | NA |
| 17 | 30331650 | 30356201 | 1  | NM_013975    | LIG3      | 0 | NA | 0 | NA | 0 | NA | 0 | NA | 0 | NA |
| 17 | 30414872 | 30360243 | -1 | NM_001017368 | RFFL      | 0 | NA | 0 | NA | 0 | NA | 0 | NA | 0 | NA |
| 17 | 30440407 | 30360243 | -1 | NM_057178    | RFFL      | 0 | NA | 0 | NA | 0 | NA | 0 | NA | 0 | NA |
| 17 | 30471001 | 30451513 | -1 | NM_002878    | RAD51L3   | 0 | NA | 0 | NA | 0 | NA | 0 | NA | 0 | NA |
| 17 | 30471001 | 30451514 | -1 | NM_133629    | RAD51L3   | 0 | NA | 0 | NA | 0 | NA | 0 | NA | 0 | NA |
| 17 | 30472743 | 30481864 | 1  | NM_017559    | FNDC8     | 0 | NA | 0 | NA | 0 | NA | 0 | NA | 0 | NA |
| 17 | 30493435 | 30482480 | -1 | NM_001014445 | NLE1      | 0 | NA | 0 | NA | 1 | 15 | 1 | 19 | 0 | NA |
| 17 | 30493435 | 30482480 | -1 | NM_018096    | NLE1      | 0 | NA | 0 | NA | 1 | 15 | 1 | 19 | 0 | NA |
| 17 | 30498948 | 30540477 | 1  | NM_001033576 | UNC45B    | 0 | NA | 0 | NA | 1 | 15 | 1 | 19 | 0 | NA |
| 17 | 30498948 | 30540477 | 1  | NM_173167    | UNC45B    | 0 | NA | 0 | NA | 1 | 15 | 1 | 19 | 0 | NA |
| 17 | 30545490 | 30543651 | -1 | NM_152462    | AMAC1     | 0 | NA | 0 | NA | 0 | NA | 0 | NA | 0 | NA |
| 17 | 30594198 | 30618874 | 1  | NM_144975    | SLFN5     | 0 | NA | 0 | NA | 0 | NA | 0 | NA | 0 | NA |
| 17 | 30724833 | 30701440 | -1 | NM_001104587 | SLFN11    | 0 | NA | 0 | NA | 0 | NA | 0 | NA | 0 | NA |
| 17 | 30724833 | 30701440 | -1 | NM_001104588 | SLFN11    | 0 | NA | 0 | NA | 0 | NA | 0 | NA | 0 | NA |
| 17 | 30724833 | 30701440 | -1 | NM_001104589 | SLFN11    | 0 | NA | 0 | NA | 0 | NA | 0 | NA | 0 | NA |
| 17 | 30724833 | 30701440 | -1 | NM_001104590 | SLFN11    | 0 | NA | 0 | NA | 0 | NA | 0 | NA | 0 | NA |
| 17 | 30724833 | 30701440 | -1 | NM_152270    | SLFN11    | 0 | NA | 0 | NA | 0 | NA | 0 | NA | 0 | NA |
| 17 | 30783656 | 30762193 | -1 | NM_018042    | SLFN12    | 0 | NA | 0 | NA | 1 | 16 | 0 | NA | 0 | NA |
| 17 | 30799855 | 30786227 | -1 | NM_144682    | SLFN13    | 0 | NA | 1 | 16 | 0 | NA | 0 | NA | 0 | NA |
| 17 | 30929687 | 30925927 | -1 | NM_000286    | PEX12     | 1 | 17 | 0 | NA | 0 | NA | 0 | NA | 0 | NA |
| 17 | 30938394 | 31077549 | 1  | NM_001030006 | AP2B1     | 1 | 11 | 0 | NA | 0 | NA | 0 | NA | 0 | NA |
| 17 | 30938394 | 31077549 | 1  | NM_001282    | AP2B1     | 1 | 11 | 0 | NA | 0 | NA | 0 | NA | 0 | NA |

|    |          |          |    |              |          |   |    |   |    |   |    |   |    |   |    |
|----|----------|----------|----|--------------|----------|---|----|---|----|---|----|---|----|---|----|
| 17 | 31082870 | 31094653 | 1  | NM_033315    | RASL10B  | 0 | NA | 0 | NA | 0 | NA | 0 | NA | 1 | 13 |
| 17 | 31104010 | 31095649 | -1 | NM_139285    | GAS2L2   | 0 | NA | 0 | NA | 0 | NA | 0 | NA | 0 | NA |
| 17 | 31112028 | 31116211 | 1  | NM_145272    | C17orf50 | 0 | NA | 0 | NA | 0 | NA | 0 | NA | 0 | NA |
| 17 | 31146753 | 31116988 | -1 | NM_024302    | MMP28    | 0 | NA | 0 | NA | 0 | NA | 0 | NA | 0 | NA |
| 17 | 31146753 | 31129621 | -1 | NM_001032278 | MMP28    | 0 | NA | 0 | NA | 0 | NA | 0 | NA | 0 | NA |
| 17 | 31160600 | 31198350 | 1  | NM_139215    | TAF15    | 0 | NA | 0 | NA | 0 | NA | 0 | NA | 0 | NA |
| 17 | 31160600 | 31198351 | 1  | NM_003487    | TAF15    | 0 | NA | 0 | NA | 0 | NA | 0 | NA | 0 | NA |
| 17 | 31220008 | 31206072 | -1 | NM_152781    | C17orf66 | 0 | NA | 0 | NA | 0 | NA | 0 | NA | 0 | NA |
| 17 | 31231490 | 31222608 | -1 | NM_002985    | CCL5     | 0 | NA | 0 | NA | 0 | NA | 0 | NA | 0 | NA |
| 17 | 31281893 | 31269197 | -1 | NM_145654    | RDM1     | 0 | NA | 0 | NA | 0 | NA | 0 | NA | 0 | NA |
| 17 | 31281893 | 31273594 | -1 | NM_001034836 | RDM1     | 0 | NA | 0 | NA | 0 | NA | 0 | NA | 0 | NA |
| 17 | 31290623 | 31285637 | -1 | NM_020426    | LYZL6    | 0 | NA | 0 | NA | 0 | NA | 0 | NA | 0 | NA |
| 17 | 31332636 | 31327647 | -1 | NM_004590    | CCL16    | 0 | NA | 0 | NA | 0 | NA | 0 | NA | 0 | NA |
| 17 | 31337852 | 31334804 | -1 | NM_032963    | CCL14    | 0 | NA | 0 | NA | 0 | NA | 0 | NA | 0 | NA |
| 17 | 31353125 | 31334804 | -1 | NM_004166    | CCL14    | 0 | NA | 0 | NA | 0 | NA | 0 | NA | 0 | NA |
| 17 | 31353125 | 31334804 | -1 | NM_004167    | CCL15    | 0 | NA | 0 | NA | 0 | NA | 0 | NA | 0 | NA |
| 17 | 31353125 | 31334804 | -1 | NM_032962    | CCL14    | 0 | NA | 0 | NA | 0 | NA | 0 | NA | 0 | NA |
| 17 | 31353125 | 31334804 | -1 | NM_032964    | CCL15    | 0 | NA | 0 | NA | 0 | NA | 0 | NA | 0 | NA |
| 17 | 31353125 | 31348776 | -1 | NM_032965    | CCL15    | 0 | NA | 0 | NA | 0 | NA | 0 | NA | 0 | NA |
| 17 | 31369118 | 31364209 | -1 | NM_005064    | CCL23    | 0 | NA | 0 | NA | 0 | NA | 0 | NA | 0 | NA |
| 17 | 31369118 | 31364209 | -1 | NM_145898    | CCL23    | 0 | NA | 0 | NA | 0 | NA | 0 | NA | 0 | NA |
| 17 | 31416755 | 31422954 | 1  | NM_002988    | CCL18    | 0 | NA | 0 | NA | 0 | NA | 0 | NA | 0 | NA |
| 17 | 31441619 | 31439715 | -1 | NM_002983    | CCL3     | 0 | NA | 0 | NA | 0 | NA | 0 | NA | 0 | NA |
| 17 | 31455332 | 31457127 | 1  | NM_002984    | CCL4     | 0 | NA | 0 | NA | 0 | NA | 0 | NA | 0 | NA |
| 17 | 31528101 | 31517173 | -1 | NM_001001417 | TBC1D3B  | 0 | NA | 0 | NA | 0 | NA | 0 | NA | 0 | NA |
| 17 | 31548260 | 31546381 | -1 | NM_001001437 | CCL3L3   | 0 | NA | 0 | NA | 0 | NA | 0 | NA | 0 | NA |
| 17 | 31548269 | 31546381 | -1 | NM_021006    | CCL3L1   | 0 | NA | 0 | NA | 0 | NA | 0 | NA | 0 | NA |
| 17 | 31562580 | 31564387 | 1  | NM_001001435 | CCL4L1   | 0 | NA | 0 | NA | 0 | NA | 0 | NA | 0 | NA |
| 17 | 31562580 | 31564387 | 1  | NM_207007    | CCL4L2   | 0 | NA | 0 | NA | 0 | NA | 0 | NA | 0 | NA |
| 17 | 31616140 | 31605197 | -1 | NM_001001418 | TBC1D3C  | 0 | NA | 0 | NA | 0 | NA | 0 | NA | 0 | NA |
| 17 | 31649834 | 31647955 | -1 | NM_001001437 | CCL3L3   | 0 | NA | 0 | NA | 0 | NA | 0 | NA | 0 | NA |
| 17 | 31649843 | 31647955 | -1 | NM_021006    | CCL3L1   | 0 | NA | 0 | NA | 0 | NA | 0 | NA | 0 | NA |
| 17 | 31664146 | 31665953 | 1  | NM_001001435 | CCL4L1   | 0 | NA | 0 | NA | 0 | NA | 0 | NA | 0 | NA |
| 17 | 31664146 | 31665953 | 1  | NM_207007    | CCL4L2   | 0 | NA | 0 | NA | 0 | NA | 0 | NA | 0 | NA |
| 17 | 31882204 | 31820231 | -1 | NM_001001418 | TBC1D3C  | 0 | NA | 0 | NA | 0 | NA | 0 | NA | 0 | NA |
| 17 | 31882216 | 31871287 | -1 | NM_001040282 | TBC1D3G  | 0 | NA | 0 | NA | 0 | NA | 0 | NA | 0 | NA |
| 17 | 31916585 | 31925775 | 1  | NM_004773    | ZNHIT3   | 0 | NA | 0 | NA | 0 | NA | 0 | NA | 0 | NA |
| 17 | 31964837 | 31925711 | -1 | NM_025109    | MYO19    | 1 | 23 | 0 | NA | 0 | NA | 0 | NA | 0 | NA |
| 17 | 31964838 | 31943041 | -1 | NM_001033580 | MYO19    | 1 | 23 | 0 | NA | 0 | NA | 0 | NA | 0 | NA |
| 17 | 31965515 | 31969263 | 1  | NM_178517    | PIGW     | 1 | 23 | 0 | NA | 0 | NA | 0 | NA | 0 | NA |
| 17 | 31974916 | 32020389 | 1  | NM_024835    | GGNBP2   | 1 | 23 | 0 | NA | 0 | NA | 0 | NA | 0 | NA |
| 17 | 32022338 | 32031346 | 1  | NM_024308    | MGC4172  | 0 | NA | 0 | NA | 0 | NA | 0 | NA | 0 | NA |
| 17 | 32032137 | 32039520 | 1  | NM_024864    | MRM1     | 0 | NA | 0 | NA | 0 | NA | 1 | 14 | 0 | NA |
| 17 | 32368611 | 32374607 | 1  | NM_005568    | LHX1     | 0 | NA | 0 | NA | 0 | NA | 0 | NA | 0 | NA |
| 17 | 32380287 | 32488284 | 1  | NM_012138    | AATF     | 0 | NA | 0 | NA | 0 | NA | 0 | NA | 0 | NA |
| 17 | 32730805 | 32516039 | -1 | NM_198837    | ACACA    | 0 | NA | 0 | NA | 0 | NA | 0 | NA | 0 | NA |
| 17 | 32730805 | 32516039 | -1 | NM_198838    | ACACA    | 0 | NA | 0 | NA | 0 | NA | 0 | NA | 0 | NA |
| 17 | 32790172 | 32516039 | -1 | NM_198836    | ACACA    | 0 | NA | 0 | NA | 0 | NA | 0 | NA | 0 | NA |
| 17 | 32807097 | 32823775 | 1  | NM_173625    | C17orf78 | 0 | NA | 0 | NA | 0 | NA | 0 | NA | 0 | NA |
| 17 | 32841015 | 32516039 | -1 | NM_198834    | ACACA    | 0 | NA | 0 | NA | 0 | NA | 0 | NA | 0 | NA |
| 17 | 32841015 | 32516039 | -1 | NM_198839    | ACACA    | 0 | NA | 0 | NA | 0 | NA | 0 | NA | 0 | NA |
| 17 | 32841424 | 32899870 | 1  | NM_133439    | TADA2L   | 0 | NA | 0 | NA | 0 | NA | 0 | NA | 0 | NA |
| 17 | 32841424 | 32911339 | 1  | NM_001488    | TADA2L   | 0 | NA | 0 | NA | 0 | NA | 0 | NA | 0 | NA |
| 17 | 32924063 | 32947701 | 1  | NM_007026    | DUSP14   | 0 | NA | 0 | NA | 0 | NA | 0 | NA | 0 | NA |
| 17 | 33043559 | 32952045 | -1 | NM_007247    | AP1GBP1  | 0 | NA | 0 | NA | 0 | NA | 0 | NA | 0 | NA |
| 17 | 33043559 | 32952045 | -1 | NM_080550    | AP1GBP1  | 0 | NA | 0 | NA | 0 | NA | 0 | NA | 0 | NA |
| 17 | 33077600 | 33046525 | -1 | NM_007010    | DDX52    | 0 | NA | 0 | NA | 0 | NA | 0 | NA | 0 | NA |
| 17 | 33077600 | 33046525 | -1 | NM_152300    | DDX52    | 0 | NA | 0 | NA | 0 | NA | 0 | NA | 0 | NA |
| 17 | 33179209 | 33120546 | -1 | NM_000458    | HNF1B    | 0 | NA | 1 | 14 | 0 | NA | 0 | NA | 0 | NA |
| 17 | 33358341 | 33369482 | 1  | NM_001123391 | TBC1D3F  | 0 | NA | 0 | NA | 0 | NA | 0 | NA | 0 | NA |
| 17 | 33358341 | 33369482 | 1  | NM_001123392 | TBC1D3E  | 0 | NA | 0 | NA | 0 | NA | 0 | NA | 0 | NA |
| 17 | 33358400 | 33369299 | 1  | NM_032258    | TBC1D3   | 0 | NA | 0 | NA | 0 | NA | 0 | NA | 0 | NA |
| 17 | 33423036 | 33411895 | -1 | NM_001123392 | TBC1D3E  | 0 | NA | 0 | NA | 0 | NA | 0 | NA | 0 | NA |
| 17 | 33552188 | 33541290 | -1 | NM_032258    | TBC1D3   | 0 | NA | 0 | NA | 0 | NA | 0 | NA | 0 | NA |
| 17 | 33552247 | 33411895 | -1 | NM_001123391 | TBC1D3F  | 0 | NA | 0 | NA | 0 | NA | 0 | NA | 0 | NA |

|    |          |          |    |              |           |   |    |   |    |   |    |   |    |   |    |
|----|----------|----------|----|--------------|-----------|---|----|---|----|---|----|---|----|---|----|
| 17 | 33552247 | 33541107 | -1 | NM_001123390 | TBC1D3H   | 0 | NA | 0 | NA | 0 | NA | 0 | NA | 0 | NA |
| 17 | 33552247 | 33541107 | -1 | NM_001123392 | TBC1D3E   | 0 | NA | 0 | NA | 0 | NA | 0 | NA | 0 | NA |
| 17 | 33602396 | 33591516 | -1 | NM_032258    | TBC1D3    | 0 | NA | 0 | NA | 0 | NA | 0 | NA | 0 | NA |
| 17 | 33602455 | 33591333 | -1 | NM_001123391 | TBC1D3F   | 0 | NA | 0 | NA | 0 | NA | 0 | NA | 0 | NA |
| 17 | 33602455 | 33591333 | -1 | NM_001123392 | TBC1D3E   | 0 | NA | 0 | NA | 0 | NA | 0 | NA | 0 | NA |
| 17 | 33706516 | 33732628 | 1  | NM_032351    | MRPL45    | 0 | NA | 0 | NA | 0 | NA | 0 | NA | 0 | NA |
| 17 | 33753219 | 33735018 | -1 | NM_001004334 | GPR179    | 0 | NA | 0 | NA | 0 | NA | 0 | NA | 0 | NA |
| 17 | 33761530 | 33809545 | 1  | NM_014598    | SOC57     | 0 | NA | 0 | NA | 0 | NA | 0 | NA | 0 | NA |
| 17 | 34015709 | 33939784 | -1 | NM_025248    | SNIP      | 0 | NA | 1 | 12 | 0 | NA | 0 | NA | 0 | NA |
| 17 | 34115398 | 34139582 | 1  | NM_005937    | MLLT6     | 0 | NA | 0 | NA | 0 | NA | 0 | NA | 0 | NA |
| 17 | 34158084 | 34143675 | -1 | NM_007144    | PCGF2     | 1 | 11 | 0 | NA | 0 | NA | 0 | NA | 0 | NA |
| 17 | 34162527 | 34174004 | 1  | NM_002795    | PSMB3     | 1 | 13 | 0 | NA | 0 | NA | 0 | NA | 0 | NA |
| 17 | 34209684 | 34175469 | -1 | NM_003559    | PIP4K2B   | 0 | NA | 0 | NA | 0 | NA | 0 | NA | 0 | NA |
| 17 | 34235115 | 34210971 | -1 | NM_017748    | CCDC49    | 1 | 19 | 0 | NA | 0 | NA | 0 | NA | 0 | NA |
| 17 | 34251168 | 34244866 | -1 | NM_001080465 | LOC388381 | 0 | NA | 0 | NA | 0 | NA | 0 | NA | 0 | NA |
| 17 | 34263579 | 34259846 | -1 | NM_000978    | RPL23     | 0 | NA | 1 | 12 | 0 | NA | 0 | NA | 0 | NA |
| 17 | 34279893 | 34331541 | 1  | NM_006148    | LASP1     | 1 | 11 | 0 | NA | 0 | NA | 0 | NA | 0 | NA |
| 17 | 34377182 | 34346243 | -1 | NM_001008777 | FBXO47    | 0 | NA | 0 | NA | 0 | NA | 0 | NA | 0 | NA |
| 17 | 34561298 | 34473081 | -1 | NM_020405    | PLXDC1    | 0 | NA | 0 | NA | 0 | NA | 0 | NA | 0 | NA |
| 17 | 34607427 | 34583234 | -1 | NM_000723    | CACNB1    | 1 | 12 | 0 | NA | 0 | NA | 0 | NA | 0 | NA |
| 17 | 34607427 | 34586914 | -1 | NM_199247    | CACNB1    | 1 | 12 | 0 | NA | 0 | NA | 0 | NA | 0 | NA |
| 17 | 34607427 | 34586914 | -1 | NM_199248    | CACNB1    | 1 | 12 | 0 | NA | 0 | NA | 0 | NA | 0 | NA |
| 17 | 34610061 | 34614506 | 1  | NM_000981    | RPL19     | 1 | 12 | 0 | NA | 0 | NA | 0 | NA | 0 | NA |
| 17 | 34635500 | 34620314 | -1 | NM_198993    | STAC2     | 0 | NA | 0 | NA | 0 | NA | 0 | NA | 0 | NA |
| 17 | 34811402 | 34670365 | -1 | NM_032875    | FBXL20    | 0 | NA | 0 | NA | 0 | NA | 0 | NA | 0 | NA |
| 17 | 34861053 | 34814063 | -1 | NM_004774    | MED1      | 1 | 22 | 0 | NA | 1 | 13 | 0 | NA | 0 | NA |
| 17 | 34871264 | 34944326 | 1  | NM_015083    | CRKRS     | 1 | 22 | 0 | NA | 1 | 14 | 0 | NA | 0 | NA |
| 17 | 34871264 | 34944326 | 1  | NM_016507    | CRKRS     | 1 | 22 | 0 | NA | 1 | 14 | 0 | NA | 0 | NA |
| 17 | 35017701 | 35013546 | -1 | NM_006160    | NEUROD2   | 0 | NA | 0 | NA | 0 | NA | 0 | NA | 0 | NA |
| 17 | 35036704 | 35046403 | 1  | NM_032192    | PPP1R1B   | 0 | NA | 0 | NA | 0 | NA | 0 | NA | 0 | NA |
| 17 | 35038278 | 35046404 | 1  | NM_181505    | PPP1R1B   | 0 | NA | 0 | NA | 0 | NA | 0 | NA | 0 | NA |
| 17 | 35046937 | 35073250 | 1  | NM_006804    | STARD3    | 0 | NA | 0 | NA | 0 | NA | 0 | NA | 0 | NA |
| 17 | 35075124 | 35076333 | 1  | NM_003673    | TCAP      | 0 | NA | 0 | NA | 0 | NA | 0 | NA | 0 | NA |
| 17 | 35078032 | 35080254 | 1  | NM_002686    | PNMT      | 0 | NA | 0 | NA | 0 | NA | 0 | NA | 0 | NA |
| 17 | 35097836 | 35080900 | -1 | NM_033419    | PERLD1    | 0 | NA | 0 | NA | 0 | NA | 0 | NA | 0 | NA |
| 17 | 35097918 | 35138441 | 1  | NM_001005862 | ERBB2     | 0 | NA | 0 | NA | 0 | NA | 0 | NA | 0 | NA |
| 17 | 35109779 | 35138441 | 1  | NM_004448    | ERBB2     | 0 | NA | 0 | NA | 0 | NA | 0 | NA | 0 | NA |
| 17 | 35140314 | 35138934 | -1 | NM_032339    | C17orf37  | 0 | NA | 0 | NA | 0 | NA | 0 | NA | 0 | NA |
| 17 | 35147712 | 35157064 | 1  | NM_005310    | GRB7      | 0 | NA | 0 | NA | 0 | NA | 0 | NA | 0 | NA |
| 17 | 35148115 | 35157064 | 1  | NM_001030002 | GRB7      | 0 | NA | 0 | NA | 0 | NA | 0 | NA | 0 | NA |
| 17 | 35273967 | 35174724 | -1 | NM_012481    | IKZF3     | 0 | NA | 1 | 22 | 0 | NA | 0 | NA | 0 | NA |
| 17 | 35273967 | 35174724 | -1 | NM_183228    | IKZF3     | 0 | NA | 1 | 22 | 0 | NA | 0 | NA | 0 | NA |
| 17 | 35273967 | 35174724 | -1 | NM_183229    | IKZF3     | 0 | NA | 1 | 22 | 0 | NA | 0 | NA | 0 | NA |
| 17 | 35273967 | 35174724 | -1 | NM_183230    | IKZF3     | 0 | NA | 1 | 22 | 0 | NA | 0 | NA | 0 | NA |
| 17 | 35273967 | 35174724 | -1 | NM_183231    | IKZF3     | 0 | NA | 1 | 22 | 0 | NA | 0 | NA | 0 | NA |
| 17 | 35273967 | 35174724 | -1 | NM_183232    | IKZF3     | 0 | NA | 1 | 22 | 0 | NA | 0 | NA | 0 | NA |
| 17 | 35277980 | 35287675 | 1  | NM_198844    | ZBPB2     | 0 | NA | 1 | 22 | 0 | NA | 0 | NA | 0 | NA |
| 17 | 35277980 | 35287675 | 1  | NM_199321    | ZBPB2     | 0 | NA | 1 | 22 | 0 | NA | 0 | NA | 0 | NA |
| 17 | 35327319 | 35314373 | -1 | NM_018530    | GSDML     | 0 | NA | 0 | NA | 0 | NA | 0 | NA | 0 | NA |
| 17 | 35328429 | 35314373 | -1 | NM_001042471 | GSDML     | 1 | 18 | 0 | NA | 0 | NA | 0 | NA | 0 | NA |
| 17 | 35337380 | 35330821 | -1 | NM_139280    | ORMDL3    | 1 | 18 | 0 | NA | 0 | NA | 0 | NA | 0 | NA |
| 17 | 35372751 | 35387545 | 1  | NM_178171    | GSDM1     | 0 | NA | 0 | NA | 0 | NA | 0 | NA | 0 | NA |
| 17 | 35390585 | 35407738 | 1  | NM_002809    | PSMD3     | 0 | NA | 0 | NA | 0 | NA | 0 | NA | 0 | NA |
| 17 | 35425213 | 35427592 | 1  | NM_000759    | CSF3      | 0 | NA | 0 | NA | 0 | NA | 0 | NA | 0 | NA |
| 17 | 35425213 | 35427592 | 1  | NM_172219    | CSF3      | 0 | NA | 0 | NA | 0 | NA | 0 | NA | 0 | NA |
| 17 | 35425213 | 35427592 | 1  | NM_172220    | CSF3      | 0 | NA | 0 | NA | 0 | NA | 0 | NA | 0 | NA |
| 17 | 35464415 | 35428875 | -1 | NM_001079518 | MED24     | 0 | NA | 0 | NA | 0 | NA | 0 | NA | 0 | NA |
| 17 | 35464415 | 35428875 | -1 | NM_014815    | MED24     | 0 | NA | 0 | NA | 0 | NA | 0 | NA | 0 | NA |
| 17 | 35472588 | 35499816 | 1  | NM_199334    | THRA      | 0 | NA | 0 | NA | 0 | NA | 0 | NA | 0 | NA |
| 17 | 35472685 | 35503646 | 1  | NM_003250    | THRA      | 0 | NA | 0 | NA | 0 | NA | 0 | NA | 0 | NA |
| 17 | 35510499 | 35502566 | -1 | NM_021724    | NR1D1     | 0 | NA | 0 | NA | 0 | NA | 0 | NA | 0 | NA |
| 17 | 35532315 | 35546568 | 1  | NM_001012241 | MSL-1     | 1 | 11 | 0 | NA | 0 | NA | 0 | NA | 0 | NA |
| 17 | 35550032 | 35581957 | 1  | NM_007359    | CASC3     | 1 | 12 | 0 | NA | 0 | NA | 0 | NA | 0 | NA |
| 17 | 35587767 | 35605432 | 1  | NM_016339    | RAPGEFL1  | 0 | NA | 0 | NA | 0 | NA | 0 | NA | 0 | NA |
| 17 | 35629099 | 35691965 | 1  | NM_133264    | WIPF2     | 0 | NA | 0 | NA | 0 | NA | 0 | NA | 0 | NA |

|    |          |          |    |              |           |   |    |   |    |   |    |   |    |   |    |
|----|----------|----------|----|--------------|-----------|---|----|---|----|---|----|---|----|---|----|
| 17 | 35697671 | 35712939 | 1  | NM_001254    | CDC6      | 1 | 17 | 0 | NA | 0 | NA | 0 | NA | 0 | NA |
| 17 | 35718971 | 35767420 | 1  | NM_000964    | RARA      | 0 | NA | 0 | NA | 0 | NA | 0 | NA | 0 | NA |
| 17 | 35751867 | 35767420 | 1  | NM_001024809 | RARA      | 1 | 11 | 0 | NA | 0 | NA | 0 | NA | 0 | NA |
| 17 | 35774471 | 35770430 | -1 | NM_152219    | GJD3      | 0 | NA | 0 | NA | 0 | NA | 0 | NA | 0 | NA |
| 17 | 35827695 | 35798321 | -1 | NM_001067    | TOP2A     | 1 | 13 | 0 | NA | 0 | NA | 0 | NA | 0 | NA |
| 17 | 35853201 | 35867508 | 1  | NM_001552    | IGFBP4    | 0 | NA | 0 | NA | 0 | NA | 0 | NA | 0 | NA |
| 17 | 35911380 | 35885605 | -1 | NM_032865    | TNS4      | 0 | NA | 0 | NA | 0 | NA | 0 | NA | 0 | NA |
| 17 | 35975250 | 35963547 | -1 | NM_001838    | CCR7      | 0 | NA | 0 | NA | 0 | NA | 0 | NA | 0 | NA |
| 17 | 36057629 | 36037505 | -1 | NM_003079    | SMARCE1   | 1 | 14 | 0 | NA | 0 | NA | 0 | NA | 0 | NA |
| 17 | 36074942 | 36065397 | -1 | NM_152349    | KRT222P   | 0 | NA | 0 | NA | 1 | 13 | 0 | NA | 0 | NA |
| 17 | 36113528 | 36107768 | -1 | NM_019016    | KRT24     | 0 | NA | 0 | NA | 0 | NA | 0 | NA | 0 | NA |
| 17 | 36185091 | 36157798 | -1 | NM_181534    | KRT25     | 0 | NA | 0 | NA | 0 | NA | 0 | NA | 0 | NA |
| 17 | 36181937 | 36176015 | -1 | NM_181539    | KRT26     | 0 | NA | 0 | NA | 0 | NA | 0 | NA | 0 | NA |
| 17 | 36192312 | 36186585 | -1 | NM_181537    | KRT27     | 0 | NA | 0 | NA | 0 | NA | 0 | NA | 0 | NA |
| 17 | 36209737 | 36201973 | -1 | NM_181535    | KRT28     | 0 | NA | 0 | NA | 0 | NA | 0 | NA | 0 | NA |
| 17 | 36228899 | 36246052 | 1  | NM_145274    | TMEM99    | 0 | NA | 0 | NA | 0 | NA | 0 | NA | 0 | NA |
| 17 | 36232373 | 36227894 | -1 | NM_000421    | KRT10     | 0 | NA | 0 | NA | 0 | NA | 0 | NA | 0 | NA |
| 17 | 36276988 | 36270955 | -1 | NM_000223    | KRT12     | 0 | NA | 0 | NA | 0 | NA | 0 | NA | 0 | NA |
| 17 | 36295005 | 36285718 | -1 | NM_019010    | KRT20     | 0 | NA | 0 | NA | 0 | NA | 0 | NA | 0 | NA |
| 17 | 36347362 | 36332477 | -1 | NM_015515    | KRT23     | 0 | NA | 0 | NA | 0 | NA | 0 | NA | 0 | NA |
| 17 | 36376670 | 36368194 | -1 | NM_213656    | KRT39     | 0 | NA | 0 | NA | 0 | NA | 0 | NA | 0 | NA |
| 17 | 36396116 | 36387493 | -1 | NM_182497    | KRT40     | 0 | NA | 0 | NA | 0 | NA | 0 | NA | 0 | NA |
| 17 | 36403911 | 36403207 | -1 | NM_033185    | KRTAP3-3  | 0 | NA | 0 | NA | 0 | NA | 0 | NA | 0 | NA |
| 17 | 36409664 | 36408970 | -1 | NM_031959    | KRTAP3-2  | 0 | NA | 0 | NA | 0 | NA | 0 | NA | 0 | NA |
| 17 | 36418892 | 36418299 | -1 | NM_031958    | KRTAP3-1  | 0 | NA | 0 | NA | 0 | NA | 0 | NA | 0 | NA |
| 17 | 36436980 | 36435804 | -1 | NM_031957    | KRTAP1-5  | 0 | NA | 0 | NA | 0 | NA | 0 | NA | 0 | NA |
| 17 | 36444633 | 36443662 | -1 | NM_030966    | KRTAP1-3  | 0 | NA | 0 | NA | 0 | NA | 0 | NA | 0 | NA |
| 17 | 36451239 | 36450336 | -1 | NM_030967    | KRTAP1-1  | 0 | NA | 0 | NA | 1 | 13 | 0 | NA | 0 | NA |
| 17 | 36457094 | 36456321 | -1 | NM_001123387 | KRTAP2-1  | 0 | NA | 0 | NA | 1 | 13 | 0 | NA | 0 | NA |
| 17 | 36475657 | 36474893 | -1 | NM_033184    | KRTAP2-4  | 0 | NA | 0 | NA | 0 | NA | 0 | NA | 0 | NA |
| 17 | 36528138 | 36526959 | -1 | NM_033059    | KRTAP4-11 | 0 | NA | 0 | NA | 0 | NA | 0 | NA | 0 | NA |
| 17 | 36533945 | 36532870 | -1 | NM_031854    | KRTAP4-12 | 0 | NA | 0 | NA | 0 | NA | 0 | NA | 0 | NA |
| 17 | 36559580 | 36558701 | -1 | NM_033188    | KRTAP4-5  | 0 | NA | 1 | 13 | 0 | NA | 0 | NA | 0 | NA |
| 17 | 36570509 | 36569431 | -1 | NM_032524    | KRTAP4-4  | 0 | NA | 0 | NA | 0 | NA | 0 | NA | 0 | NA |
| 17 | 36577950 | 36577008 | -1 | NM_033187    | KRTAP4-3  | 0 | NA | 0 | NA | 0 | NA | 0 | NA | 0 | NA |
| 17 | 36587986 | 36587223 | -1 | NM_033062    | KRTAP4-2  | 0 | NA | 0 | NA | 0 | NA | 0 | NA | 0 | NA |
| 17 | 36594673 | 36593877 | -1 | NM_033060    | KRTAP4-1  | 0 | NA | 0 | NA | 0 | NA | 0 | NA | 0 | NA |
| 17 | 36636425 | 36637430 | 1  | NM_031961    | KRTAP9-2  | 0 | NA | 0 | NA | 0 | NA | 0 | NA | 0 | NA |
| 17 | 36642240 | 36643232 | 1  | NM_031962    | KRTAP9-3  | 0 | NA | 0 | NA | 0 | NA | 0 | NA | 0 | NA |
| 17 | 36642277 | 36666142 | 1  | NM_030975    | KRTAP9-9  | 0 | NA | 0 | NA | 0 | NA | 0 | NA | 0 | NA |
| 17 | 36647795 | 36648782 | 1  | NM_031963    | KRTAP9-8  | 0 | NA | 0 | NA | 0 | NA | 0 | NA | 0 | NA |
| 17 | 36659464 | 36660431 | 1  | NM_033191    | KRTAP9-4  | 0 | NA | 0 | NA | 0 | NA | 0 | NA | 0 | NA |
| 17 | 36725473 | 36724694 | -1 | NM_031964    | KRTAP17-1 | 0 | NA | 0 | NA | 0 | NA | 0 | NA | 0 | NA |
| 17 | 36760582 | 36755896 | -1 | NM_004138    | KRT33A    | 0 | NA | 0 | NA | 0 | NA | 0 | NA | 0 | NA |
| 17 | 36779573 | 36773271 | -1 | NM_002279    | KRT33B    | 0 | NA | 0 | NA | 0 | NA | 0 | NA | 0 | NA |
| 17 | 36792162 | 36787446 | -1 | NM_021013    | KRT34     | 0 | NA | 0 | NA | 0 | NA | 0 | NA | 0 | NA |
| 17 | 36807370 | 36803502 | -1 | NM_002277    | KRT31     | 0 | NA | 0 | NA | 0 | NA | 0 | NA | 1 | 13 |
| 17 | 36834348 | 36830334 | -1 | NM_003770    | KRT37     | 0 | NA | 1 | 12 | 0 | NA | 0 | NA | 1 | 13 |
| 17 | 36851122 | 36846146 | -1 | NM_006771    | KRT38     | 0 | NA | 1 | 14 | 0 | NA | 0 | NA | 0 | NA |
| 17 | 36877164 | 36869290 | -1 | NM_002278    | KRT32     | 0 | NA | 1 | 12 | 1 | 13 | 0 | NA | 0 | NA |
| 17 | 36890918 | 36886466 | -1 | NM_002280    | KRT35     | 0 | NA | 0 | NA | 1 | 13 | 0 | NA | 0 | NA |
| 17 | 36899642 | 36895913 | -1 | NM_003771    | KRT36     | 0 | NA | 0 | NA | 0 | NA | 0 | NA | 0 | NA |
| 17 | 36915391 | 36910758 | -1 | NM_002274    | KRT13     | 0 | NA | 1 | 12 | 0 | NA | 0 | NA | 0 | NA |
| 17 | 36915391 | 36910758 | -1 | NM_153490    | KRT13     | 0 | NA | 1 | 12 | 0 | NA | 0 | NA | 0 | NA |
| 17 | 36928666 | 36923523 | -1 | NM_002275    | KRT15     | 1 | 11 | 1 | 12 | 0 | NA | 0 | NA | 0 | NA |
| 17 | 36938167 | 36933394 | -1 | NM_002276    | KRT19     | 1 | 11 | 0 | NA | 0 | NA | 0 | NA | 0 | NA |
| 17 | 36981836 | 36975621 | -1 | NM_000226    | KRT9      | 0 | NA | 1 | 12 | 0 | NA | 0 | NA | 0 | NA |
| 17 | 36996673 | 36992058 | -1 | NM_000526    | KRT14     | 0 | NA | 0 | NA | 0 | NA | 0 | NA | 0 | NA |
| 17 | 37022605 | 37019556 | -1 | NM_005557    | KRT16     | 0 | NA | 0 | NA | 0 | NA | 0 | NA | 0 | NA |
| 17 | 37034335 | 37029219 | -1 | NM_000422    | KRT17     | 0 | NA | 0 | NA | 0 | NA | 0 | NA | 0 | NA |
| 17 | 37098652 | 37101424 | 1  | NM_005801    | EIF1      | 0 | NA | 0 | NA | 0 | NA | 0 | NA | 0 | NA |
| 17 | 37122138 | 37125747 | 1  | NM_000805    | GAST      | 0 | NA | 0 | NA | 0 | NA | 0 | NA | 0 | NA |
| 17 | 37144424 | 37132416 | -1 | NM_001079870 | HAP1      | 0 | NA | 0 | NA | 0 | NA | 0 | NA | 0 | NA |
| 17 | 37144424 | 37132416 | -1 | NM_001079871 | HAP1      | 0 | NA | 0 | NA | 0 | NA | 0 | NA | 0 | NA |
| 17 | 37144424 | 37132416 | -1 | NM_003949    | HAP1      | 0 | NA | 0 | NA | 0 | NA | 0 | NA | 0 | NA |

|    |          |          |    |              |          |   |    |   |    |   |    |   |    |   |    |
|----|----------|----------|----|--------------|----------|---|----|---|----|---|----|---|----|---|----|
| 17 | 37144424 | 37132416 | -1 | NM_177977    | HAP1     | 0 | NA | 0 | NA | 0 | NA | 0 | NA | 0 | NA |
| 17 | 37196475 | 37164389 | -1 | NM_002230    | JUP      | 0 | NA | 0 | NA | 0 | NA | 0 | NA | 0 | NA |
| 17 | 37196475 | 37164389 | -1 | NM_021991    | JUP      | 0 | NA | 0 | NA | 0 | NA | 0 | NA | 0 | NA |
| 17 | 37221977 | 37211730 | -1 | NM_006455    | SC65     | 1 | 11 | 0 | NA | 0 | NA | 0 | NA | 0 | NA |
| 17 | 37222726 | 37232995 | 1  | NM_021939    | FKBP10   | 1 | 11 | 0 | NA | 0 | NA | 0 | NA | 0 | NA |
| 17 | 37246017 | 37234948 | -1 | NM_052935    | NT5C3L   | 0 | NA | 0 | NA | 1 | 14 | 0 | NA | 0 | NA |
| 17 | 37247568 | 37258125 | 1  | NM_152467    | KLHL10   | 0 | NA | 0 | NA | 1 | 14 | 0 | NA | 0 | NA |
| 17 | 37275155 | 37263324 | -1 | NM_018143    | KLHL11   | 0 | NA | 0 | NA | 0 | NA | 0 | NA | 0 | NA |
| 17 | 37328798 | 37276704 | -1 | NM_001096    | ACLY     | 0 | NA | 0 | NA | 0 | NA | 0 | NA | 0 | NA |
| 17 | 37328798 | 37276704 | -1 | NM_198830    | ACLY     | 0 | NA | 0 | NA | 0 | NA | 0 | NA | 0 | NA |
| 17 | 37340413 | 37371194 | 1  | NM_031421    | TTC25    | 0 | NA | 0 | NA | 0 | NA | 0 | NA | 0 | NA |
| 17 | 37372284 | 37383280 | 1  | NM_033133    | CNP      | 0 | NA | 0 | NA | 0 | NA | 0 | NA | 0 | NA |
| 17 | 37422963 | 37431182 | 1  | NM_001001349 | NKIRAS2  | 0 | NA | 0 | NA | 0 | NA | 0 | NA | 0 | NA |
| 17 | 37422956 | 37382013 | -1 | NM_003315    | DNAJC7   | 0 | NA | 0 | NA | 0 | NA | 0 | NA | 0 | NA |
| 17 | 37425617 | 37431182 | 1  | NM_017595    | NKIRAS2  | 0 | NA | 0 | NA | 0 | NA | 0 | NA | 0 | NA |
| 17 | 37434233 | 37431119 | -1 | NM_001013624 | ZNF385C  | 0 | NA | 0 | NA | 0 | NA | 0 | NA | 0 | NA |
| 17 | 37518277 | 37506949 | -1 | NM_024119    | DHX58    | 0 | NA | 0 | NA | 0 | NA | 0 | NA | 0 | NA |
| 17 | 37526908 | 37518654 | -1 | NM_021078    | GCN5L2   | 0 | NA | 0 | NA | 0 | NA | 0 | NA | 0 | NA |
| 17 | 37528394 | 37528874 | 1  | NM_033194    | HSPB9    | 0 | NA | 0 | NA | 0 | NA | 0 | NA | 0 | NA |
| 17 | 37560548 | 37530522 | -1 | NM_004583    | RAB5C    | 0 | NA | 0 | NA | 0 | NA | 0 | NA | 0 | NA |
| 17 | 37560548 | 37530522 | -1 | NM_201434    | RAB5C    | 0 | NA | 0 | NA | 0 | NA | 0 | NA | 0 | NA |
| 17 | 37586822 | 37562438 | -1 | NM_012285    | KCNH4    | 1 | 11 | 0 | NA | 0 | NA | 0 | NA | 0 | NA |
| 17 | 37590996 | 37589603 | -1 | NM_001524    | HCRT     | 1 | 11 | 0 | NA | 0 | NA | 0 | NA | 0 | NA |
| 17 | 37599739 | 37594631 | -1 | NM_032484    | GHDC     | 0 | NA | 0 | NA | 0 | NA | 0 | NA | 0 | NA |
| 17 | 37681950 | 37604720 | -1 | NM_012448    | STAT5B   | 1 | 18 | 0 | NA | 0 | NA | 0 | NA | 0 | NA |
| 17 | 37693090 | 37717484 | 1  | NM_003152    | STAT5A   | 0 | NA | 0 | NA | 0 | NA | 0 | NA | 0 | NA |
| 17 | 37793931 | 37718868 | -1 | NM_213662    | STAT3    | 1 | 14 | 0 | NA | 0 | NA | 0 | NA | 0 | NA |
| 17 | 37794039 | 37718868 | -1 | NM_003150    | STAT3    | 1 | 14 | 0 | NA | 0 | NA | 0 | NA | 0 | NA |
| 17 | 37794039 | 37718868 | -1 | NM_139276    | STAT3    | 1 | 14 | 0 | NA | 0 | NA | 0 | NA | 0 | NA |
| 17 | 37828800 | 37808000 | -1 | NM_012232    | PTRF     | 0 | NA | 0 | NA | 0 | NA | 0 | NA | 0 | NA |
| 17 | 37864387 | 37928123 | 1  | NM_005177    | ATP6V0A1 | 0 | NA | 0 | NA | 0 | NA | 0 | NA | 0 | NA |
| 17 | 37941476 | 37949992 | 1  | NM_000263    | NAGLU    | 1 | 15 | 0 | NA | 0 | NA | 0 | NA | 0 | NA |
| 17 | 37957509 | 37960757 | 1  | NM_000413    | HSD17B1  | 0 | NA | 0 | NA | 0 | NA | 0 | NA | 0 | NA |
| 17 | 37967617 | 37971821 | 1  | NM_001042529 | COASY    | 0 | NA | 0 | NA | 0 | NA | 0 | NA | 0 | NA |
| 17 | 37967617 | 37971821 | 1  | NM_001042530 | COASY    | 0 | NA | 0 | NA | 0 | NA | 0 | NA | 0 | NA |
| 17 | 37967617 | 37971821 | 1  | NM_001042531 | COASY    | 0 | NA | 0 | NA | 0 | NA | 0 | NA | 0 | NA |
| 17 | 37967617 | 37971821 | 1  | NM_001042532 | COASY    | 0 | NA | 0 | NA | 0 | NA | 0 | NA | 0 | NA |
| 17 | 37967617 | 37971821 | 1  | NM_025233    | COASY    | 0 | NA | 0 | NA | 0 | NA | 0 | NA | 0 | NA |
| 17 | 37972603 | 37978747 | 1  | NM_170607    | MLX      | 0 | NA | 0 | NA | 0 | NA | 0 | NA | 0 | NA |
| 17 | 37972603 | 37978747 | 1  | NM_198204    | MLX      | 0 | NA | 0 | NA | 0 | NA | 0 | NA | 0 | NA |
| 17 | 37972603 | 37978747 | 1  | NM_198205    | MLX      | 0 | NA | 0 | NA | 0 | NA | 0 | NA | 0 | NA |
| 17 | 37983273 | 37977858 | -1 | NM_016556    | PSMC3IP  | 0 | NA | 0 | NA | 0 | NA | 0 | NA | 0 | NA |
| 17 | 37983375 | 37977876 | -1 | NM_013290    | PSMC3IP  | 0 | NA | 0 | NA | 0 | NA | 0 | NA | 0 | NA |
| 17 | 38014928 | 37985058 | -1 | NM_178126    | FAM134C  | 0 | NA | 0 | NA | 0 | NA | 0 | NA | 0 | NA |
| 17 | 38015219 | 38020777 | 1  | NM_001070    | TUBG1    | 0 | NA | 0 | NA | 0 | NA | 0 | NA | 0 | NA |
| 17 | 38064836 | 38072550 | 1  | NM_016437    | TUBG2    | 1 | 12 | 0 | NA | 0 | NA | 0 | NA | 0 | NA |
| 17 | 38082495 | 38073458 | -1 | NM_024927    | PLEKHH3  | 0 | NA | 0 | NA | 0 | NA | 0 | NA | 0 | NA |
| 17 | 38087371 | 38084945 | -1 | NM_016602    | CCR10    | 0 | NA | 0 | NA | 0 | NA | 0 | NA | 0 | NA |
| 17 | 38088157 | 38105358 | 1  | NM_003632    | CNTNAP1  | 0 | NA | 0 | NA | 0 | NA | 0 | NA | 0 | NA |
| 17 | 38150574 | 38105818 | -1 | NM_001991    | EZH1     | 0 | NA | 0 | NA | 0 | NA | 0 | NA | 0 | NA |
| 17 | 38166737 | 38168585 | 1  | NM_005854    | RAMP2    | 0 | NA | 0 | NA | 0 | NA | 0 | NA | 0 | NA |
| 17 | 38178979 | 38185143 | 1  | NM_032353    | VPS25    | 1 | 15 | 0 | NA | 1 | 12 | 0 | NA | 0 | NA |
| 17 | 38186221 | 38202610 | 1  | NM_032387    | WNK4     | 1 | 15 | 0 | NA | 1 | 12 | 0 | NA | 0 | NA |
| 17 | 38204230 | 38203177 | -1 | NM_001040431 | CCDC56   | 0 | NA | 0 | NA | 0 | NA | 0 | NA | 0 | NA |
| 17 | 38204379 | 38217131 | 1  | NM_173478    | CNTD1    | 0 | NA | 0 | NA | 0 | NA | 0 | NA | 0 | NA |
| 17 | 38229836 | 38215675 | -1 | NM_003766    | BECN1    | 0 | NA | 0 | NA | 1 | 13 | 0 | NA | 0 | NA |
| 17 | 38238948 | 38249303 | 1  | NM_005789    | PSME3    | 0 | NA | 0 | NA | 0 | NA | 0 | NA | 0 | NA |
| 17 | 38238948 | 38249303 | 1  | NM_176863    | PSME3    | 0 | NA | 0 | NA | 0 | NA | 0 | NA | 0 | NA |
| 17 | 38250134 | 38256251 | 1  | NM_001158    | AOC2     | 0 | NA | 0 | NA | 0 | NA | 0 | NA | 0 | NA |
| 17 | 38250134 | 38256251 | 1  | NM_009590    | AOC2     | 0 | NA | 0 | NA | 0 | NA | 0 | NA | 0 | NA |
| 17 | 38256726 | 38263666 | 1  | NM_003734    | AOC3     | 0 | NA | 0 | NA | 0 | NA | 0 | NA | 0 | NA |
| 17 | 38306340 | 38318912 | 1  | NM_000151    | G6PC     | 0 | NA | 0 | NA | 0 | NA | 0 | NA | 0 | NA |
| 17 | 38385546 | 38396068 | -1 | NM_025267    | AARSD1   | 1 | 13 | 0 | NA | 0 | NA | 0 | NA | 0 | NA |
| 17 | 38386107 | 38399233 | 1  | NM_173079    | RUNDC1   | 1 | 13 | 0 | NA | 0 | NA | 0 | NA | 0 | NA |
| 17 | 38403971 | 38408497 | 1  | NM_000988    | RPL27    | 1 | 17 | 0 | NA | 0 | NA | 0 | NA | 0 | NA |

|    |          |          |    |              |          |   |    |   |    |   |    |   |    |   |    |
|----|----------|----------|----|--------------|----------|---|----|---|----|---|----|---|----|---|----|
| 17 | 38412350 | 38419999 | 1  | NM_005533    | IFI35    | 1 | 17 | 0 | NA | 1 | 12 | 0 | NA | 0 | NA |
| 17 | 38427985 | 38420147 | -1 | NM_006373    | VAT1     | 0 | NA | 0 | NA | 0 | NA | 0 | NA | 0 | NA |
| 17 | 38430783 | 38437584 | 1  | NM_005440    | RND2     | 0 | NA | 0 | NA | 0 | NA | 0 | NA | 0 | NA |
| 17 | 38530657 | 38449839 | -1 | NM_007295    | BRCA1    | 1 | 14 | 0 | NA | 0 | NA | 0 | NA | 0 | NA |
| 17 | 38530994 | 38449839 | -1 | NM_007294    | BRCA1    | 1 | 14 | 0 | NA | 0 | NA | 0 | NA | 0 | NA |
| 17 | 38530994 | 38449839 | -1 | NM_007296    | BRCA1    | 1 | 14 | 0 | NA | 0 | NA | 0 | NA | 0 | NA |
| 17 | 38530994 | 38449839 | -1 | NM_007297    | BRCA1    | 1 | 14 | 0 | NA | 0 | NA | 0 | NA | 0 | NA |
| 17 | 38530994 | 38449839 | -1 | NM_007298    | BRCA1    | 1 | 14 | 0 | NA | 0 | NA | 0 | NA | 0 | NA |
| 17 | 38530994 | 38449839 | -1 | NM_007299    | BRCA1    | 1 | 14 | 0 | NA | 0 | NA | 0 | NA | 0 | NA |
| 17 | 38530994 | 38449839 | -1 | NM_007300    | BRCA1    | 1 | 14 | 0 | NA | 0 | NA | 0 | NA | 0 | NA |
| 17 | 38530994 | 38449839 | -1 | NM_007302    | BRCA1    | 1 | 14 | 0 | NA | 0 | NA | 0 | NA | 0 | NA |
| 17 | 38530994 | 38449839 | -1 | NM_007303    | BRCA1    | 1 | 14 | 0 | NA | 0 | NA | 0 | NA | 0 | NA |
| 17 | 38530994 | 38449839 | -1 | NM_007304    | BRCA1    | 1 | 14 | 0 | NA | 0 | NA | 0 | NA | 0 | NA |
| 17 | 38530994 | 38449839 | -1 | NM_007305    | BRCA1    | 1 | 14 | 0 | NA | 0 | NA | 0 | NA | 0 | NA |
| 17 | 38576023 | 38719233 | 1  | NM_031862    | NBR1     | 0 | NA | 0 | NA | 0 | NA | 0 | NA | 0 | NA |
| 17 | 38576036 | 38719233 | 1  | NM_031858    | NBR1     | 0 | NA | 0 | NA | 0 | NA | 0 | NA | 0 | NA |
| 17 | 38576771 | 38719233 | 1  | NM_005899    | NBR1     | 0 | NA | 0 | NA | 0 | NA | 0 | NA | 0 | NA |
| 17 | 38719419 | 38727115 | 1  | NM_145041    | TMEM106A | 0 | NA | 0 | NA | 0 | NA | 0 | NA | 0 | NA |
| 17 | 38831878 | 38834030 | 1  | NM_001661    | ARLAD    | 0 | NA | 0 | NA | 1 | 12 | 0 | NA | 0 | NA |
| 17 | 38916859 | 38957206 | 1  | NM_004941    | DHX8     | 1 | 14 | 0 | NA | 0 | NA | 1 | 18 | 0 | NA |
| 17 | 38978831 | 38960736 | -1 | NM_001986    | ETV4     | 1 | 11 | 0 | NA | 0 | NA | 0 | NA | 0 | NA |
| 17 | 38979288 | 38960736 | -1 | NM_001079675 | ETV4     | 1 | 11 | 0 | NA | 0 | NA | 0 | NA | 0 | NA |
| 17 | 39094457 | 39073283 | -1 | NM_004527    | MEOX1    | 0 | NA | 0 | NA | 0 | NA | 0 | NA | 0 | NA |
| 17 | 39094457 | 39073283 | -1 | NM_013999    | MEOX1    | 0 | NA | 0 | NA | 0 | NA | 0 | NA | 0 | NA |
| 17 | 39094788 | 39073283 | -1 | NM_001040002 | MEOX1    | 0 | NA | 0 | NA | 0 | NA | 0 | NA | 0 | NA |
| 17 | 39191682 | 39186624 | -1 | NM_025237    | SOST     | 0 | NA | 0 | NA | 0 | NA | 0 | NA | 0 | NA |
| 17 | 39211894 | 39199014 | -1 | NM_004090    | DUSP3    | 0 | NA | 0 | NA | 0 | NA | 0 | NA | 0 | NA |
| 17 | 39266064 | 39233692 | -1 | NM_001932    | MPP3     | 0 | NA | 0 | NA | 0 | NA | 0 | NA | 0 | NA |
| 17 | 39280072 | 39296521 | -1 | NM_145273    | CD300LG  | 0 | NA | 0 | NA | 0 | NA | 0 | NA | 0 | NA |
| 17 | 39340639 | 39308252 | -1 | NM_005374    | MPP2     | 0 | NA | 0 | NA | 0 | NA | 0 | NA | 0 | NA |
| 17 | 39375359 | 39373697 | -1 | NM_002722    | PPY      | 0 | NA | 0 | NA | 0 | NA | 1 | 15 | 0 | NA |
| 17 | 39437363 | 39385632 | -1 | NM_004160    | PYY      | 0 | NA | 1 | 13 | 0 | NA | 0 | NA | 0 | NA |
| 17 | 39437557 | 39441962 | 1  | NM_153006    | NAGS     | 0 | NA | 1 | 13 | 0 | NA | 0 | NA | 0 | NA |
| 17 | 39447871 | 39444081 | -1 | NM_032376    | TMEM101  | 1 | 21 | 1 | 13 | 0 | NA | 1 | 18 | 0 | NA |
| 17 | 39499531 | 39467529 | -1 | NM_152344    | LSM12    | 0 | NA | 0 | NA | 0 | NA | 0 | NA | 0 | NA |
| 17 | 39503643 | 39509238 | 1  | NM_138387    | G6PC3    | 0 | NA | 0 | NA | 0 | NA | 0 | NA | 0 | NA |
| 17 | 39556540 | 39509646 | -1 | NM_001015053 | HDAC5    | 0 | NA | 0 | NA | 0 | NA | 0 | NA | 0 | NA |
| 17 | 39556540 | 39509646 | -1 | NM_005474    | HDAC5    | 0 | NA | 0 | NA | 0 | NA | 0 | NA | 0 | NA |
| 17 | 39574851 | 39595370 | 1  | NM_024032    | C17orf53 | 0 | NA | 0 | NA | 0 | NA | 0 | NA | 0 | NA |
| 17 | 39603599 | 39611977 | 1  | NM_080863    | ASB16    | 0 | NA | 0 | NA | 0 | NA | 0 | NA | 0 | NA |
| 17 | 39619608 | 39608877 | -1 | NM_178542    | C17orf65 | 1 | 21 | 0 | NA | 0 | NA | 0 | NA | 0 | NA |
| 17 | 39619879 | 39624625 | 1  | NM_001076674 | TMUB2    | 1 | 21 | 0 | NA | 0 | NA | 0 | NA | 0 | NA |
| 17 | 39619879 | 39624625 | 1  | NM_024107    | TMUB2    | 1 | 21 | 0 | NA | 0 | NA | 0 | NA | 0 | NA |
| 17 | 39620099 | 39624625 | 1  | NM_177441    | TMUB2    | 1 | 21 | 0 | NA | 0 | NA | 0 | NA | 0 | NA |
| 17 | 39631055 | 39624698 | -1 | NM_001098833 | ATXN7L3  | 0 | NA | 0 | NA | 0 | NA | 0 | NA | 0 | NA |
| 17 | 39631055 | 39624698 | -1 | NM_020218    | ATXN7L3  | 0 | NA | 0 | NA | 0 | NA | 0 | NA | 0 | NA |
| 17 | 39651190 | 39637926 | -1 | NM_014233    | UBTF     | 0 | NA | 0 | NA | 0 | NA | 0 | NA | 0 | NA |
| 17 | 39652450 | 39637926 | -1 | NM_001076684 | UBTF     | 0 | NA | 0 | NA | 0 | NA | 0 | NA | 0 | NA |
| 17 | 39653776 | 39637926 | -1 | NM_001076683 | UBTF     | 0 | NA | 0 | NA | 0 | NA | 0 | NA | 0 | NA |
| 17 | 39701028 | 39681283 | -1 | NM_000342    | SLC4A1   | 0 | NA | 0 | NA | 0 | NA | 0 | NA | 0 | NA |
| 17 | 39741489 | 39750764 | 1  | NM_006695    | RUNDC3A  | 0 | NA | 0 | NA | 0 | NA | 0 | NA | 0 | NA |
| 17 | 39757658 | 39752521 | -1 | NM_016016    | SLC25A39 | 1 | 11 | 0 | NA | 1 | 12 | 0 | NA | 0 | NA |
| 17 | 39778016 | 39785996 | 1  | NM_002087    | GRN      | 0 | NA | 0 | NA | 0 | NA | 0 | NA | 0 | NA |
| 17 | 39822399 | 39805075 | -1 | NM_000419    | ITGA2B   | 1 | 11 | 0 | NA | 0 | NA | 0 | NA | 0 | NA |
| 17 | 39936328 | 39828175 | -1 | NM_001002909 | GPATCH8  | 0 | NA | 0 | NA | 0 | NA | 1 | 13 | 0 | NA |
| 17 | 39990450 | 39992433 | 1  | NM_001466    | FZD2     | 1 | 25 | 1 | 18 | 0 | NA | 0 | NA | 0 | NA |
| 17 | 40122691 | 40110330 | -1 | NM_001099225 | CCDC43   | 0 | NA | 0 | NA | 0 | NA | 0 | NA | 0 | NA |
| 17 | 40122691 | 40110330 | -1 | NM_144609    | CCDC43   | 0 | NA | 0 | NA | 0 | NA | 0 | NA | 0 | NA |
| 17 | 40141501 | 40165771 | 1  | NM_025104    | DBF4B    | 0 | NA | 0 | NA | 0 | NA | 0 | NA | 0 | NA |
| 17 | 40141501 | 40185158 | 1  | NM_145663    | DBF4B    | 0 | NA | 0 | NA | 0 | NA | 0 | NA | 0 | NA |
| 17 | 40192093 | 40214740 | 1  | NM_002390    | ADAM11   | 0 | NA | 0 | NA | 1 | 12 | 0 | NA | 0 | NA |
| 17 | 40263133 | 40231341 | -1 | NM_005497    | GJC1     | 1 | 15 | 0 | NA | 0 | NA | 0 | NA | 0 | NA |
| 17 | 40263705 | 40231341 | -1 | NM_001080383 | GJC1     | 1 | 15 | 0 | NA | 0 | NA | 0 | NA | 0 | NA |
| 17 | 40280804 | 40283374 | 1  | NM_016438    | HIGD1B   | 0 | NA | 0 | NA | 0 | NA | 0 | NA | 0 | NA |
| 17 | 40332289 | 40283804 | -1 | NM_004247    | EFTUD2   | 0 | NA | 0 | NA | 1 | 12 | 0 | NA | 0 | NA |



|    |          |          |    |              |           |   |    |   |    |   |    |   |    |   |    |
|----|----------|----------|----|--------------|-----------|---|----|---|----|---|----|---|----|---|----|
| 17 | 40332679 | 40336155 | 1  | NM_213607    | CCDC103   | 0 | NA | 0 | NA | 1 | 12 | 0 | NA | 0 | NA |
| 17 | 40348394 | 40338518 | -1 | NM_002055    | GFAP      | 0 | NA | 0 | NA | 0 | NA | 1 | 13 | 0 | NA |
| 17 | 40380608 | 40358973 | -1 | NM_001080443 | KIF18B    | 0 | NA | 0 | NA | 0 | NA | 0 | NA | 0 | NA |
| 17 | 40401170 | 40392586 | -1 | NM_006688    | C1QL1     | 0 | NA | 0 | NA | 0 | NA | 0 | NA | 1 | 15 |
| 17 | 40493912 | 40456237 | -1 | NM_024819    | DCAKD     | 0 | NA | 0 | NA | 0 | NA | 0 | NA | 0 | NA |
| 17 | 40494205 | 40541908 | 1  | NM_021079    | NMT1      | 0 | NA | 0 | NA | 0 | NA | 0 | NA | 0 | NA |
| 17 | 40565417 | 40544533 | -1 | NM_133373    | PLCD3     | 1 | 17 | 0 | NA | 1 | 16 | 0 | NA | 0 | NA |
| 17 | 40568579 | 40577324 | 1  | NM_024722    | ACBD4     | 1 | 17 | 0 | NA | 1 | 16 | 0 | NA | 0 | NA |
| 17 | 40580466 | 40585251 | 1  | NM_006460    | HEXIM1    | 1 | 12 | 0 | NA | 1 | 13 | 0 | NA | 0 | NA |
| 17 | 40594046 | 40603189 | 1  | NM_144608    | HEXIM2    | 0 | NA | 0 | NA | 0 | NA | 0 | NA | 0 | NA |
| 17 | 40655074 | 40680466 | 1  | NM_005892    | FMNL1     | 0 | NA | 0 | NA | 0 | NA | 0 | NA | 0 | NA |
| 17 | 40695262 | 40687542 | -1 | NM_152343    | C17orf46  | 0 | NA | 0 | NA | 0 | NA | 0 | NA | 0 | NA |
| 17 | 40750197 | 40696270 | -1 | NM_003954    | MAP3K14   | 0 | NA | 0 | NA | 0 | NA | 1 | 23 | 0 | NA |
| 17 | 40858780 | 40827057 | -1 | NM_199282    | ARHGAP27  | 0 | NA | 0 | NA | 0 | NA | 0 | NA | 0 | NA |
| 17 | 40867570 | 40862500 | -1 | NM_174919    | LOC201175 | 0 | NA | 0 | NA | 0 | NA | 0 | NA | 0 | NA |
| 17 | 40923893 | 40869048 | -1 | NM_014798    | PLEKHM1   | 0 | NA | 0 | NA | 0 | NA | 0 | NA | 0 | NA |
| 17 | 41217448 | 41268973 | 1  | NM_004382    | CRHR1     | 0 | NA | 0 | NA | 0 | NA | 0 | NA | 0 | NA |
| 17 | 41278052 | 41280107 | 1  | NM_175882    | IMP5      | 0 | NA | 0 | NA | 0 | NA | 0 | NA | 0 | NA |
| 17 | 41327616 | 41461546 | 1  | NM_001123066 | MAPT      | 0 | NA | 0 | NA | 0 | NA | 0 | NA | 0 | NA |
| 17 | 41327616 | 41461546 | 1  | NM_001123067 | MAPT      | 0 | NA | 0 | NA | 0 | NA | 0 | NA | 0 | NA |
| 17 | 41327623 | 41461546 | 1  | NM_005910    | MAPT      | 0 | NA | 0 | NA | 0 | NA | 0 | NA | 0 | NA |
| 17 | 41327623 | 41461546 | 1  | NM_016834    | MAPT      | 0 | NA | 0 | NA | 0 | NA | 0 | NA | 0 | NA |
| 17 | 41327623 | 41461546 | 1  | NM_016835    | MAPT      | 0 | NA | 0 | NA | 0 | NA | 0 | NA | 0 | NA |
| 17 | 41327623 | 41461546 | 1  | NM_016841    | MAPT      | 0 | NA | 0 | NA | 0 | NA | 0 | NA | 0 | NA |
| 17 | 41432452 | 41432897 | 1  | NM_001007532 | STH       | 0 | NA | 0 | NA | 0 | NA | 0 | NA | 0 | NA |
| 17 | 41605371 | 41463128 | -1 | NM_015443    | KIAA1267  | 0 | NA | 0 | NA | 1 | 12 | 0 | NA | 0 | NA |
| 17 | 41728273 | 41770918 | 1  | NM_014834    | LRRC37A   | 0 | NA | 0 | NA | 0 | NA | 0 | NA | 0 | NA |
| 17 | 41794876 | 41732689 | -1 | NM_001103154 | ARL17     | 0 | NA | 0 | NA | 0 | NA | 0 | NA | 0 | NA |
| 17 | 41794876 | 41772521 | -1 | NM_001039083 | ARL17     | 0 | NA | 0 | NA | 0 | NA | 0 | NA | 0 | NA |
| 17 | 41945391 | 41988330 | 1  | NM_001006607 | LRRC37A2  | 0 | NA | 0 | NA | 0 | NA | 0 | NA | 0 | NA |
| 17 | 42012375 | 41989935 | -1 | NM_001039083 | ARL17     | 0 | NA | 0 | NA | 0 | NA | 0 | NA | 0 | NA |
| 17 | 42012404 | 41949383 | -1 | NM_016632    | ARL17P1   | 0 | NA | 0 | NA | 0 | NA | 0 | NA | 0 | NA |
| 17 | 42012404 | 41985437 | -1 | NM_001113738 | ARL17P1   | 0 | NA | 0 | NA | 0 | NA | 0 | NA | 0 | NA |
| 17 | 42023353 | 42190000 | 1  | NM_006178    | NSF       | 0 | NA | 0 | NA | 0 | NA | 0 | NA | 0 | NA |
| 17 | 42251081 | 42196856 | -1 | NM_030753    | WNT3      | 0 | NA | 0 | NA | 0 | NA | 0 | NA | 0 | NA |
| 17 | 42283966 | 42309436 | 1  | NM_003396    | WNT9B     | 0 | NA | 1 | 13 | 0 | NA | 0 | NA | 1 | 12 |
| 17 | 42355484 | 42369204 | 1  | NM_001012511 | GOSR2     | 0 | NA | 0 | NA | 0 | NA | 1 | 19 | 0 | NA |
| 17 | 42355484 | 42373732 | 1  | NM_004287    | GOSR2     | 0 | NA | 0 | NA | 0 | NA | 1 | 19 | 0 | NA |
| 17 | 42355484 | 42373732 | 1  | NM_054022    | GOSR2     | 0 | NA | 0 | NA | 0 | NA | 1 | 19 | 0 | NA |
| 17 | 42411613 | 42410520 | -1 | NM_203400    | RPRML     | 0 | NA | 0 | NA | 0 | NA | 0 | NA | 0 | NA |
| 17 | 42621664 | 42550309 | -1 | NM_001114091 | CDC27     | 0 | NA | 0 | NA | 0 | NA | 1 | 11 | 0 | NA |
| 17 | 42621664 | 42550309 | -1 | NM_001256    | CDC27     | 0 | NA | 0 | NA | 0 | NA | 1 | 11 | 0 | NA |
| 17 | 42641426 | 42656044 | -1 | NM_001002841 | MYL4      | 0 | NA | 0 | NA | 0 | NA | 0 | NA | 0 | NA |
| 17 | 42641712 | 42656044 | 1  | NM_002476    | MYL4      | 0 | NA | 0 | NA | 0 | NA | 0 | NA | 0 | NA |
| 17 | 42686206 | 42745076 | 1  | NM_000212    | ITGB3     | 1 | 12 | 0 | NA | 0 | NA | 1 | 15 | 0 | NA |
| 17 | 42756348 | 42873676 | 1  | NM_152347    | C17orf57  | 0 | NA | 0 | NA | 0 | NA | 1 | 13 | 0 | NA |
| 17 | 42963442 | 43055641 | 1  | NM_006310    | NPEPPS    | 0 | NA | 0 | NA | 0 | NA | 0 | NA | 0 | NA |
| 17 | 43082273 | 43116003 | 1  | NM_002265    | KPNB1     | 1 | 14 | 0 | NA | 0 | NA | 0 | NA | 0 | NA |
| 17 | 43127628 | 43144415 | 1  | NM_014726    | TBKBP1    | 0 | NA | 0 | NA | 0 | NA | 1 | 11 | 0 | NA |
| 17 | 43165608 | 43178484 | 1  | NM_013351    | TBX21     | 0 | NA | 0 | NA | 0 | NA | 0 | NA | 0 | NA |
| 17 | 43254146 | 43239731 | -1 | NM_145798    | OSBPL7    | 0 | NA | 0 | NA | 0 | NA | 1 | 11 | 0 | NA |
| 17 | 43263902 | 43255636 | -1 | NM_145255    | MRPL10    | 0 | NA | 0 | NA | 0 | NA | 1 | 13 | 0 | NA |
| 17 | 43264098 | 43269691 | 1  | NM_033413    | LRRC46    | 0 | NA | 0 | NA | 0 | NA | 1 | 13 | 0 | NA |
| 17 | 43273611 | 43270056 | -1 | NM_138355    | SCRN2     | 0 | NA | 0 | NA | 0 | NA | 1 | 16 | 0 | NA |
| 17 | 43288239 | 43277278 | -1 | NM_199262    | SP6       | 0 | NA | 0 | NA | 0 | NA | 0 | NA | 1 | 12 |
| 17 | 43328514 | 43361322 | 1  | NM_003110    | SP2       | 1 | 12 | 0 | NA | 0 | NA | 0 | NA | 0 | NA |
| 17 | 43373915 | 43381673 | 1  | NM_018129    | PNPO      | 1 | 35 | 0 | NA | 1 | 15 | 0 | NA | 0 | NA |
| 17 | 43390109 | 43384332 | -1 | NM_024320    | ATAD4     | 0 | NA | 0 | NA | 0 | NA | 0 | NA | 0 | NA |
| 17 | 43403427 | 43414146 | 1  | NM_176096    | CDK5RAP3  | 1 | 12 | 0 | NA | 0 | NA | 1 | 21 | 0 | NA |
| 17 | 43470151 | 43458531 | -1 | NM_016429    | COP22     | 0 | NA | 0 | NA | 0 | NA | 1 | 16 | 0 | NA |
| 17 | 43480744 | 43493841 | 1  | NM_003204    | NFE2L1    | 1 | 21 | 0 | NA | 0 | NA | 0 | NA | 0 | NA |
| 17 | 43533559 | 43502412 | -1 | NM_006807    | CBX1      | 0 | NA | 0 | NA | 0 | NA | 1 | 11 | 0 | NA |
| 17 | 43533882 | 43502412 | -1 | NM_001127228 | CBX1      | 0 | NA | 0 | NA | 0 | NA | 1 | 11 | 0 | NA |
| 17 | 43539918 | 43555104 | 1  | NM_152244    | SNX11     | 0 | NA | 0 | NA | 0 | NA | 1 | 11 | 0 | NA |
| 17 | 43539945 | 43555104 | 1  | NM_013323    | SNX11     | 0 | NA | 0 | NA | 0 | NA | 1 | 11 | 0 | NA |

|    |          |          |    |              |          |   |    |   |    |   |    |   |    |   |    |
|----|----------|----------|----|--------------|----------|---|----|---|----|---|----|---|----|---|----|
| 17 | 43862593 | 43565800 | -1 | NM_001075099 | SKAP1    | 0 | NA | 0 | NA | 0 | NA | 0 | NA | 0 | NA |
| 17 | 43862593 | 43565800 | -1 | NM_003726    | SKAP1    | 0 | NA | 0 | NA | 0 | NA | 0 | NA | 0 | NA |
| 17 | 43963271 | 43961805 | -1 | NM_002144    | HOXB1    | 0 | NA | 0 | NA | 0 | NA | 0 | NA | 0 | NA |
| 17 | 43977392 | 43975017 | -1 | NM_002145    | HOXB2    | 0 | NA | 0 | NA | 0 | NA | 1 | 15 | 0 | NA |
| 17 | 44006809 | 43981230 | -1 | NM_002146    | HOXB3    | 0 | NA | 0 | NA | 0 | NA | 0 | NA | 0 | NA |
| 17 | 44010742 | 44007867 | -1 | NM_024015    | HOXB4    | 0 | NA | 0 | NA | 1 | 12 | 0 | NA | 0 | NA |
| 17 | 44026102 | 44023617 | -1 | NM_002147    | HOXB5    | 0 | NA | 0 | NA | 1 | 12 | 0 | NA | 0 | NA |
| 17 | 44037333 | 44028097 | -1 | NM_018952    | HOXB6    | 0 | NA | 0 | NA | 0 | NA | 1 | 11 | 0 | NA |
| 17 | 44043382 | 44039593 | -1 | NM_004502    | HOXB7    | 0 | NA | 0 | NA | 0 | NA | 1 | 11 | 0 | NA |
| 17 | 44047300 | 44044706 | -1 | NM_024016    | HOXB8    | 0 | NA | 0 | NA | 0 | NA | 1 | 11 | 0 | NA |
| 17 | 44058834 | 44053517 | -1 | NM_024017    | HOXB9    | 0 | NA | 0 | NA | 0 | NA | 0 | NA | 0 | NA |
| 17 | 44154881 | 44154080 | -1 | NM_032391    | C17orf92 | 0 | NA | 1 | 12 | 0 | NA | 0 | NA | 0 | NA |
| 17 | 44161110 | 44157124 | -1 | NM_006361    | HOXB13   | 0 | NA | 1 | 12 | 0 | NA | 0 | NA | 0 | NA |
| 17 | 44226685 | 44194600 | -1 | NM_173623    | TLL6     | 0 | NA | 0 | NA | 0 | NA | 1 | 11 | 0 | NA |
| 17 | 44263370 | 44297228 | 1  | NM_005831    | CALCOCO2 | 0 | NA | 0 | NA | 0 | NA | 0 | NA | 0 | NA |
| 17 | 44325146 | 44328231 | 1  | NM_001002027 | ATP5G1   | 1 | 17 | 0 | NA | 0 | NA | 0 | NA | 0 | NA |
| 17 | 44325146 | 44328231 | 1  | NM_005175    | ATP5G1   | 1 | 17 | 0 | NA | 0 | NA | 0 | NA | 0 | NA |
| 17 | 44340765 | 44361421 | 1  | NM_023079    | UBE2Z    | 0 | NA | 0 | NA | 0 | NA | 0 | NA | 0 | NA |
| 17 | 44377153 | 44362457 | -1 | NM_007241    | SNF8     | 0 | NA | 0 | NA | 0 | NA | 1 | 12 | 0 | NA |
| 17 | 44400954 | 44390916 | -1 | NM_004123    | GIP      | 1 | 11 | 0 | NA | 0 | NA | 0 | NA | 0 | NA |
| 17 | 44429772 | 44488506 | 1  | NM_006546    | IGF2BP1  | 0 | NA | 0 | NA | 0 | NA | 0 | NA | 0 | NA |
| 17 | 44565327 | 44602121 | 1  | NM_153446    | B4GALNT2 | 0 | NA | 1 | 16 | 0 | NA | 0 | NA | 1 | 14 |
| 17 | 44641742 | 44638595 | -1 | NM_031498    | GNGT2    | 0 | NA | 0 | NA | 0 | NA | 0 | NA | 1 | 16 |
| 17 | 44642587 | 44655586 | 1  | NM_016428    | ABI3     | 0 | NA | 0 | NA | 0 | NA | 0 | NA | 1 | 16 |
| 17 | 44663127 | 44655730 | -1 | NM_178500    | PHOSPHO1 | 0 | NA | 0 | NA | 0 | NA | 0 | NA | 0 | NA |
| 17 | 44794834 | 44727484 | -1 | NM_014897    | ZNF652   | 0 | NA | 0 | NA | 0 | NA | 0 | NA | 0 | NA |
| 17 | 44847241 | 44836418 | -1 | NM_002634    | PHB      | 0 | NA | 0 | NA | 0 | NA | 0 | NA | 0 | NA |
| 17 | 44927653 | 44947371 | 1  | NM_002507    | NGFR     | 0 | NA | 0 | NA | 0 | NA | 0 | NA | 1 | 12 |
| 17 | 45008477 | 45012717 | 1  | NM_007225    | NXPH3    | 0 | NA | 0 | NA | 0 | NA | 1 | 11 | 0 | NA |
| 17 | 45110524 | 45031244 | -1 | NM_001007226 | SPOP     | 1 | 71 | 0 | NA | 0 | NA | 1 | 11 | 0 | NA |
| 17 | 45110524 | 45031244 | -1 | NM_001007227 | SPOP     | 1 | 71 | 0 | NA | 0 | NA | 1 | 11 | 0 | NA |
| 17 | 45110524 | 45031244 | -1 | NM_001007228 | SPOP     | 1 | 71 | 0 | NA | 0 | NA | 1 | 11 | 0 | NA |
| 17 | 45110524 | 45031244 | -1 | NM_001007229 | SPOP     | 1 | 71 | 0 | NA | 0 | NA | 1 | 11 | 0 | NA |
| 17 | 45110524 | 45031244 | -1 | NM_001007230 | SPOP     | 1 | 71 | 0 | NA | 0 | NA | 1 | 11 | 0 | NA |
| 17 | 45110524 | 45031244 | -1 | NM_003563    | SPOP     | 1 | 71 | 0 | NA | 0 | NA | 1 | 11 | 0 | NA |
| 17 | 45140281 | 45133688 | -1 | NM_005827    | SLC35B1  | 0 | NA | 0 | NA | 0 | NA | 0 | NA | 0 | NA |
| 17 | 45196518 | 45142685 | -1 | NM_030802    | FAM117A  | 1 | 13 | 0 | NA | 0 | NA | 0 | NA | 0 | NA |
| 17 | 45221069 | 45261457 | 1  | NM_007067    | MYST2    | 1 | 14 | 0 | NA | 0 | NA | 1 | 11 | 0 | NA |
| 17 | 45280378 | 45270669 | -1 | NM_001077503 | TAC4     | 0 | NA | 0 | NA | 0 | NA | 0 | NA | 0 | NA |
| 17 | 45280378 | 45270669 | -1 | NM_001077504 | TAC4     | 0 | NA | 0 | NA | 0 | NA | 0 | NA | 0 | NA |
| 17 | 45280378 | 45270669 | -1 | NM_001077505 | TAC4     | 0 | NA | 0 | NA | 0 | NA | 0 | NA | 0 | NA |
| 17 | 45280378 | 45270669 | -1 | NM_001077506 | TAC4     | 0 | NA | 0 | NA | 0 | NA | 0 | NA | 0 | NA |
| 17 | 45280378 | 45270669 | -1 | NM_170685    | TAC4     | 0 | NA | 0 | NA | 0 | NA | 0 | NA | 0 | NA |
| 17 | 45401562 | 45406950 | 1  | NM_138281    | DLX4     | 0 | NA | 1 | 13 | 0 | NA | 0 | NA | 0 | NA |
| 17 | 45405128 | 45406950 | 1  | NM_001934    | DLX4     | 0 | NA | 1 | 15 | 0 | NA | 0 | NA | 0 | NA |
| 17 | 45427587 | 45422367 | -1 | NM_005220    | DLX3     | 0 | NA | 1 | 24 | 0 | NA | 1 | 14 | 0 | NA |
| 17 | 45488338 | 45522848 | 1  | NM_002204    | ITGA3    | 0 | NA | 0 | NA | 0 | NA | 0 | NA | 0 | NA |
| 17 | 45488338 | 45522848 | 1  | NM_005501    | ITGA3    | 0 | NA | 0 | NA | 0 | NA | 0 | NA | 0 | NA |
| 17 | 45527694 | 45543422 | 1  | NM_002611    | PDK2     | 1 | 21 | 0 | NA | 0 | NA | 0 | NA | 0 | NA |
| 17 | 45562166 | 45545033 | -1 | NM_174920    | SAMD14   | 0 | NA | 0 | NA | 0 | NA | 1 | 11 | 0 | NA |
| 17 | 45582876 | 45566099 | -1 | NM_032595    | PPP1R9B  | 1 | 14 | 0 | NA | 0 | NA | 1 | 11 | 0 | NA |
| 17 | 45598389 | 45608288 | 1  | NM_000023    | SGCA     | 0 | NA | 0 | NA | 0 | NA | 0 | NA | 0 | NA |
| 17 | 45633999 | 45616455 | -1 | NM_000088    | COL1A1   | 0 | NA | 0 | NA | 1 | 15 | 1 | 20 | 0 | NA |
| 17 | 45706831 | 45713843 | 1  | NM_153229    | TMEM92   | 1 | 11 | 0 | NA | 0 | NA | 1 | 12 | 0 | NA |
| 17 | 45778391 | 45793511 | 1  | NM_022167    | XYLT2    | 0 | NA | 0 | NA | 0 | NA | 0 | NA | 0 | NA |
| 17 | 45805561 | 45800226 | -1 | NM_016504    | MRPL27   | 0 | NA | 0 | NA | 0 | NA | 1 | 15 | 0 | NA |
| 17 | 45805588 | 45813817 | 1  | NM_152463    | EME1     | 0 | NA | 0 | NA | 0 | NA | 1 | 15 | 0 | NA |
| 17 | 45829831 | 45813597 | -1 | NM_018509    | LRRC59   | 0 | NA | 0 | NA | 0 | NA | 0 | NA | 0 | NA |
| 17 | 45858517 | 45907199 | 1  | NM_025149    | ACSF2    | 0 | NA | 0 | NA | 0 | NA | 0 | NA | 0 | NA |
| 17 | 45901226 | 45896851 | -1 | NM_001267    | CHAD     | 0 | NA | 0 | NA | 0 | NA | 0 | NA | 0 | NA |
| 17 | 45911188 | 45918335 | 1  | NM_018346    | RSAD1    | 0 | NA | 0 | NA | 0 | NA | 0 | NA | 0 | NA |
| 17 | 45940810 | 45963861 | 1  | NM_032133    | MYCBPAP  | 0 | NA | 0 | NA | 0 | NA | 0 | NA | 0 | NA |
| 17 | 45965046 | 45976110 | 1  | NM_017957    | EPN3     | 1 | 14 | 0 | NA | 0 | NA | 0 | NA | 0 | NA |
| 17 | 45979560 | 45988212 | 1  | NM_022827    | SPATA20  | 1 | 14 | 0 | NA | 0 | NA | 0 | NA | 0 | NA |
| 17 | 45993447 | 46038832 | 1  | NM_198397    | CACNA1G  | 0 | NA | 0 | NA | 0 | NA | 0 | NA | 0 | NA |

|    |          |          |    |              |           |   |    |   |    |   |    |    |    |    |    |
|----|----------|----------|----|--------------|-----------|---|----|---|----|---|----|----|----|----|----|
| 17 | 45993447 | 46059430 | 1  | NM_018896    | CACNA1G   | 0 | NA | 0 | NA | 0 | NA | 0  | NA | 0  | NA |
| 17 | 45993447 | 46059430 | 1  | NM_198376    | CACNA1G   | 0 | NA | 0 | NA | 0 | NA | 0  | NA | 0  | NA |
| 17 | 45993447 | 46059430 | 1  | NM_198377    | CACNA1G   | 0 | NA | 0 | NA | 0 | NA | 0  | NA | 0  | NA |
| 17 | 45993447 | 46059430 | 1  | NM_198378    | CACNA1G   | 0 | NA | 0 | NA | 0 | NA | 0  | NA | 0  | NA |
| 17 | 45993447 | 46059430 | 1  | NM_198379    | CACNA1G   | 0 | NA | 0 | NA | 0 | NA | 0  | NA | 0  | NA |
| 17 | 45993447 | 46059430 | 1  | NM_198380    | CACNA1G   | 0 | NA | 0 | NA | 0 | NA | 0  | NA | 0  | NA |
| 17 | 45993447 | 46059430 | 1  | NM_198382    | CACNA1G   | 0 | NA | 0 | NA | 0 | NA | 0  | NA | 0  | NA |
| 17 | 45993447 | 46059430 | 1  | NM_198383    | CACNA1G   | 0 | NA | 0 | NA | 0 | NA | 0  | NA | 0  | NA |
| 17 | 45993447 | 46059430 | 1  | NM_198384    | CACNA1G   | 0 | NA | 0 | NA | 0 | NA | 0  | NA | 0  | NA |
| 17 | 45993447 | 46059430 | 1  | NM_198385    | CACNA1G   | 0 | NA | 0 | NA | 0 | NA | 0  | NA | 0  | NA |
| 17 | 45993447 | 46059430 | 1  | NM_198386    | CACNA1G   | 0 | NA | 0 | NA | 0 | NA | 0  | NA | 0  | NA |
| 17 | 45993447 | 46059430 | 1  | NM_198387    | CACNA1G   | 0 | NA | 0 | NA | 0 | NA | 0  | NA | 0  | NA |
| 17 | 45993447 | 46059430 | 1  | NM_198388    | CACNA1G   | 0 | NA | 0 | NA | 0 | NA | 0  | NA | 0  | NA |
| 17 | 45993447 | 46059541 | 1  | NM_198396    | CACNA1G   | 0 | NA | 0 | NA | 0 | NA | 0  | NA | 0  | NA |
| 17 | 46067226 | 46124062 | 1  | NM_003786    | ABCC3     | 0 | NA | 0 | NA | 0 | NA | 0  | NA | 0  | NA |
| 17 | 46140262 | 46127681 | -1 | NM_052855    | ANKRD40   | 0 | NA | 0 | NA | 0 | NA | 0  | NA | 0  | NA |
| 17 | 46151975 | 46185071 | 1  | NM_006107    | CROP      | 1 | 11 | 0 | NA | 0 | NA | 0  | NA | 0  | NA |
| 17 | 46151975 | 46185071 | 1  | NM_016424    | CROP      | 1 | 11 | 0 | NA | 0 | NA | 0  | NA | 0  | NA |
| 17 | 46267603 | 46274708 | 1  | NM_175575    | WFIKKN2   | 0 | NA | 0 | NA | 0 | NA | 0  | NA | 0  | NA |
| 17 | 46296412 | 46294585 | -1 | NM_005749    | TOB1      | 1 | 11 | 0 | NA | 0 | NA | 0  | NA | 0  | NA |
| 17 | 46553094 | 46397986 | -1 | NM_003971    | SPAG9     | 1 | 11 | 0 | NA | 0 | NA | 0  | NA | 0  | NA |
| 17 | 46585918 | 46594449 | 1  | NM_000269    | NME1      | 0 | NA | 0 | NA | 0 | NA | 0  | NA | 0  | NA |
| 17 | 46585918 | 46594449 | 1  | NM_198175    | NME1      | 0 | NA | 0 | NA | 0 | NA | 0  | NA | 0  | NA |
| 17 | 46585918 | 46604104 | 1  | NM_001018136 | NME1-NME2 | 0 | NA | 0 | NA | 0 | NA | 0  | NA | 0  | NA |
| 17 | 46597889 | 46604104 | 1  | NM_001018137 | NME2      | 0 | NA | 0 | NA | 0 | NA | 0  | NA | 0  | NA |
| 17 | 46598637 | 46604103 | 1  | NM_002512    | NME2      | 0 | NA | 0 | NA | 0 | NA | 0  | NA | 0  | NA |
| 17 | 46598879 | 46604104 | 1  | NM_001018139 | NME2      | 0 | NA | 0 | NA | 0 | NA | 0  | NA | 0  | NA |
| 17 | 46599081 | 46604104 | 1  | NM_001018138 | NME2      | 0 | NA | 0 | NA | 0 | NA | 0  | NA | 0  | NA |
| 17 | 46692426 | 46609784 | -1 | NM_017643    | MBTD1     | 0 | NA | 0 | NA | 0 | NA | 0  | NA | 0  | NA |
| 17 | 46692895 | 46730291 | 1  | NM_016001    | UTP18     | 0 | NA | 0 | NA | 0 | NA | 0  | NA | 0  | NA |
| 17 | 47591131 | 47062672 | -1 | NM_020178    | CA10      | 0 | NA | 0 | NA | 0 | NA | 0  | NA | 0  | NA |
| 17 | 47592160 | 47062672 | -1 | NM_001082533 | CA10      | 0 | NA | 0 | NA | 0 | NA | 0  | NA | 0  | NA |
| 17 | 47592376 | 47062672 | -1 | NM_001082534 | CA10      | 0 | NA | 0 | NA | 0 | NA | 0  | NA | 0  | NA |
| 17 | 49255237 | 49257572 | 1  | NM_032559    | KIF2B     | 0 | NA | 0 | NA | 0 | NA | 0  | NA | 1  | 13 |
| 17 | 50333202 | 50394309 | 1  | NM_005486    | TOM1L1    | 0 | NA | 0 | NA | 0 | NA | 0  | NA | 0  | NA |
| 17 | 50401053 | 50384263 | -1 | NM_004375    | COX11     | 0 | NA | 0 | NA | 0 | NA | 0  | NA | 0  | NA |
| 17 | 50401124 | 50596448 | 1  | NM_178509    | STXBP4    | 0 | NA | 0 | NA | 0 | NA | 0  | NA | 0  | NA |
| 17 | 50697319 | 50757425 | 1  | NM_002126    | HLF       | 0 | NA | 0 | NA | 0 | NA | 0  | NA | 0  | NA |
| 17 | 50854340 | 50824972 | -1 | NM_012329    | MMD       | 1 | 12 | 0 | NA | 0 | NA | 0  | NA | 0  | NA |
| 17 | 51155224 | 51151986 | -1 | NM_018286    | TMEM100   | 0 | NA | 0 | NA | 0 | NA | 0  | NA | 0  | NA |
| 17 | 51164481 | 51151986 | -1 | NM_001099640 | TMEM100   | 0 | NA | 0 | NA | 0 | NA | 0  | NA | 0  | NA |
| 17 | 51183354 | 51209747 | 1  | NM_001102402 | PCTP      | 0 | NA | 0 | NA | 0 | NA | 1  | 18 | 0  | NA |
| 17 | 51183354 | 51209747 | 1  | NM_021213    | PCTP      | 0 | NA | 0 | NA | 0 | NA | 1  | 18 | 0  | NA |
| 17 | 51585834 | 51915006 | 1  | NM_153228    | ANKFN1    | 0 | NA | 0 | NA | 0 | NA | 0  | NA | 0  | NA |
| 17 | 52026272 | 52027950 | 1  | NM_005450    | NOG       | 0 | NA | 0 | NA | 0 | NA | 0  | NA | 0  | NA |
| 17 | 52248249 | 52224272 | -1 | NM_001085430 | C17orf67  | 0 | NA | 0 | NA | 0 | NA | 1  | 57 | 0  | NA |
| 17 | 52266551 | 52295922 | 1  | NM_003647    | DGKE      | 0 | NA | 0 | NA | 0 | NA | 1  | 57 | 0  | NA |
| 17 | 52346408 | 52320268 | -1 | NM_005082    | TRIM25    | 0 | NA | 0 | NA | 0 | NA | 0  | NA | 0  | NA |
| 17 | 52393410 | 52370559 | -1 | NM_004645    | COIL      | 0 | NA | 0 | NA | 0 | NA | 0  | NA | 0  | NA |
| 17 | 52410466 | 52439128 | 1  | NM_021626    | SCPEP1    | 0 | NA | 0 | NA | 0 | NA | 0  | NA | 0  | NA |
| 17 | 52517551 | 52553709 | 1  | NM_003488    | AKAP1     | 0 | NA | 0 | NA | 0 | NA | 0  | NA | 0  | NA |
| 17 | 52688929 | 53112298 | 1  | NM_138962    | MSI2      | 0 | NA | 0 | NA | 0 | NA | 0  | NA | 0  | NA |
| 17 | 52689372 | 53065543 | 1  | NM_170721    | MSI2      | 0 | NA | 0 | NA | 0 | NA | 0  | NA | 0  | NA |
| 17 | 53282398 | 53271840 | -1 | NM_016070    | MRPS23    | 1 | 38 | 0 | NA | 0 | NA | 13 | 0  | NA | NA |
| 17 | 53335749 | 53295335 | -1 | NM_017949    | CUEDC1    | 1 | 17 | 0 | NA | 0 | NA | 17 | 0  | NA | NA |
| 17 | 53420614 | 53403908 | -1 | NM_007146    | VEZF1     | 0 | NA | 0 | NA | 0 | NA | 1  | 11 | 0  | NA |
| 17 | 53439706 | 53433278 | -1 | NM_001078166 | SFRS1     | 1 | 28 | 0 | NA | 0 | NA | 1  | 15 | 0  | NA |
| 17 | 53439706 | 53433278 | -1 | NM_006924    | SFRS1     | 1 | 28 | 0 | NA | 0 | NA | 1  | 15 | 0  | NA |
| 17 | 53515797 | 53521810 | 1  | NM_080677    | DYNLL2    | 0 | NA | 0 | NA | 0 | NA | 0  | NA | 0  | NA |
| 17 | 53587513 | 53588446 | 1  | NM_012374    | OR4D1     | 0 | NA | 0 | NA | 0 | NA | 0  | NA | 0  | NA |
| 17 | 53602015 | 53602939 | 1  | NM_001004707 | OR4D2     | 0 | NA | 0 | NA | 0 | NA | 0  | NA | 0  | NA |
| 17 | 53625087 | 53636783 | 1  | NM_000502    | EPX       | 0 | NA | 0 | NA | 0 | NA | 0  | NA | 0  | NA |
| 17 | 53651665 | 53637796 | -1 | NM_017777    | MKS1      | 0 | NA | 0 | NA | 0 | NA | 1  | 12 | 0  | NA |
| 17 | 53670846 | 53700878 | 1  | NM_006151    | LPO       | 0 | NA | 1 | 12 | 0 | NA | 0  | NA | 1  | 13 |
| 17 | 53713295 | 53702215 | -1 | NM_000250    | MPO       | 0 | NA | 0 | NA | 0 | NA | 0  | NA | 0  | NA |

|    |          |          |    |              |           |   |    |   |    |   |    |   |    |   |    |
|----|----------|----------|----|--------------|-----------|---|----|---|----|---|----|---|----|---|----|
| 17 | 53761151 | 53733592 | -1 | NM_004758    | BZRAP1    | 0 | NA | 0 | NA | 0 | NA | 0 | NA | 0 | NA |
| 17 | 53761151 | 53733592 | -1 | NM_024418    | BZRAP1    | 0 | NA | 0 | NA | 0 | NA | 0 | NA | 0 | NA |
| 17 | 53784562 | 53777537 | -1 | NM_003168    | SUPT4H1   | 0 | NA | 0 | NA | 0 | NA | 0 | NA | 0 | NA |
| 17 | 53849930 | 53786036 | -1 | NM_017763    | RNF43     | 0 | NA | 0 | NA | 0 | NA | 1 | 16 | 0 | NA |
| 17 | 53920758 | 53852527 | -1 | NM_001080439 | HSF5      | 0 | NA | 0 | NA | 0 | NA | 0 | NA | 0 | NA |
| 17 | 53950211 | 53921896 | -1 | NM_004687    | MTMR4     | 1 | 11 | 0 | NA | 0 | NA | 0 | NA | 0 | NA |
| 17 | 53961662 | 53952614 | -1 | NM_004574    | SEPT4     | 1 | 11 | 0 | NA | 0 | NA | 0 | NA | 0 | NA |
| 17 | 53964410 | 53952614 | -1 | NM_080415    | SEPT4     | 1 | 11 | 0 | NA | 0 | NA | 0 | NA | 0 | NA |
| 17 | 53964410 | 53952614 | -1 | NM_080416    | SEPT4     | 1 | 11 | 0 | NA | 0 | NA | 0 | NA | 0 | NA |
| 17 | 53976682 | 53973946 | -1 | NM_001038704 | C17orf47  | 0 | NA | 1 | 13 | 0 | NA | 0 | NA | 0 | NA |
| 17 | 54124391 | 54092936 | -1 | NM_001101392 | LOC645545 | 1 | 11 | 0 | NA | 0 | NA | 1 | 14 | 0 | NA |
| 17 | 54124415 | 53989037 | -1 | NM_031272    | TEX14     | 1 | 11 | 0 | NA | 0 | NA | 1 | 14 | 0 | NA |
| 17 | 54124415 | 53989037 | -1 | NM_198393    | TEX14     | 1 | 11 | 0 | NA | 0 | NA | 1 | 14 | 0 | NA |
| 17 | 54124961 | 54127694 | 1  | NM_002876    | RAD51C    | 1 | 11 | 0 | NA | 0 | NA | 1 | 14 | 0 | NA |
| 17 | 54124961 | 54166691 | 1  | NM_058216    | RAD51C    | 1 | 11 | 0 | NA | 0 | NA | 1 | 14 | 0 | NA |
| 17 | 54188230 | 54417316 | 1  | NM_014906    | PPM1E     | 0 | NA | 0 | NA | 0 | NA | 0 | NA | 1 | 12 |
| 17 | 54539011 | 54414791 | -1 | NM_001005207 | TRIM37    | 0 | NA | 0 | NA | 0 | NA | 0 | NA | 0 | NA |
| 17 | 54539011 | 54430346 | -1 | NM_015294    | TRIM37    | 0 | NA | 0 | NA | 0 | NA | 0 | NA | 0 | NA |
| 17 | 54587582 | 54542089 | -1 | NM_001100595 | FAM33A    | 1 | 27 | 0 | NA | 0 | NA | 1 | 11 | 0 | NA |
| 17 | 54587582 | 54542089 | -1 | NM_182620    | FAM33A    | 1 | 27 | 0 | NA | 0 | NA | 1 | 11 | 0 | NA |
| 17 | 54587874 | 54633929 | 1  | NM_018304    | PRR1      | 1 | 27 | 0 | NA | 0 | NA | 1 | 11 | 0 | NA |
| 17 | 54642152 | 54647393 | 1  | NM_018149    | C17orf71  | 0 | NA | 0 | NA | 0 | NA | 1 | 11 | 0 | NA |
| 17 | 54652615 | 54706655 | 1  | NM_182569    | GDPD1     | 0 | NA | 0 | NA | 0 | NA | 0 | NA | 0 | NA |
| 17 | 54763834 | 54833877 | 1  | NM_001005404 | YPEL2     | 0 | NA | 0 | NA | 0 | NA | 0 | NA | 0 | NA |
| 17 | 54997667 | 55040484 | 1  | NM_024612    | DHX40     | 1 | 55 | 1 | 26 | 0 | NA | 1 | 48 | 1 | 13 |
| 17 | 55051831 | 55129099 | 1  | NM_004859    | CLTC      | 1 | 15 | 0 | NA | 0 | NA | 1 | 16 | 0 | NA |
| 17 | 55139638 | 55129448 | -1 | NM_016077    | PTRH2     | 0 | NA | 0 | NA | 0 | NA | 1 | 24 | 0 | NA |
| 17 | 55139644 | 55272734 | 1  | NM_030938    | TMEM49    | 0 | NA | 0 | NA | 0 | NA | 1 | 24 | 0 | NA |
| 17 | 55325078 | 55291632 | -1 | NM_016261    | TUBD1     | 0 | NA | 0 | NA | 0 | NA | 0 | NA | 0 | NA |
| 17 | 55325224 | 55382568 | 1  | NM_003161    | RPS6KB1   | 0 | NA | 0 | NA | 0 | NA | 0 | NA | 0 | NA |
| 17 | 55396899 | 55384504 | -1 | NM_016125    | RNFT1     | 0 | NA | 0 | NA | 0 | NA | 0 | NA | 0 | NA |
| 17 | 55511074 | 55475333 | -1 | NM_022070    | HEATR6    | 0 | NA | 0 | NA | 0 | NA | 0 | NA | 0 | NA |
| 17 | 55582083 | 55591688 | 1  | NM_000717    | CA4       | 0 | NA | 0 | NA | 0 | NA | 0 | NA | 0 | NA |
| 17 | 55824368 | 55609472 | -1 | NM_032582    | USP32     | 1 | 13 | 0 | NA | 0 | NA | 0 | NA | 0 | NA |
| 17 | 55854654 | 55863544 | 1  | NM_181707    | C17orf64  | 0 | NA | 0 | NA | 0 | NA | 0 | NA | 1 | 13 |
| 17 | 55958362 | 55875301 | -1 | NM_006380    | APBP2     | 0 | NA | 0 | NA | 0 | NA | 0 | NA | 0 | NA |
| 17 | 56032335 | 56096818 | 1  | NM_003620    | PPM1D     | 0 | NA | 0 | NA | 0 | NA | 0 | NA | 0 | NA |
| 17 | 56109953 | 56824981 | 1  | NM_001099432 | BCAS3     | 0 | NA | 0 | NA | 0 | NA | 0 | NA | 0 | NA |
| 17 | 56109953 | 56824981 | 1  | NM_017679    | BCAS3     | 0 | NA | 0 | NA | 0 | NA | 0 | NA | 0 | NA |
| 17 | 56501992 | 56502554 | 1  | NM_001101668 | LOC729617 | 0 | NA | 0 | NA | 0 | NA | 0 | NA | 0 | NA |
| 17 | 56632038 | 56841609 | 1  | NM_005994    | TBX2      | 1 | 11 | 0 | NA | 0 | NA | 0 | NA | 0 | NA |
| 17 | 56843893 | 56845423 | 1  | NM_203425    | C17orf82  | 0 | NA | 0 | NA | 0 | NA | 0 | NA | 0 | NA |
| 17 | 56888588 | 56916446 | 1  | NM_018488    | TBX4      | 0 | NA | 0 | NA | 0 | NA | 0 | NA | 1 | 12 |
| 17 | 57023345 | 57022571 | -1 | NM_199290    | NACA2     | 0 | NA | 1 | 12 | 0 | NA | 0 | NA | 1 | 16 |
| 17 | 57295537 | 57114766 | -1 | NM_032043    | BRIP1     | 0 | NA | 0 | NA | 0 | NA | 0 | NA | 0 | NA |
| 17 | 57360159 | 57297512 | -1 | NM_020748    | INTS2     | 0 | NA | 0 | NA | 0 | NA | 0 | NA | 0 | NA |
| 17 | 57497425 | 57374747 | -1 | NM_005121    | MED13     | 0 | NA | 0 | NA | 0 | NA | 0 | NA | 0 | NA |
| 17 | 57811645 | 57847569 | 1  | NM_173503    | EFCAB3    | 0 | NA | 0 | NA | 0 | NA | 0 | NA | 0 | NA |
| 17 | 57854977 | 57881186 | 1  | NM_181725    | METTL2A   | 0 | NA | 0 | NA | 0 | NA | 0 | NA | 0 | NA |
| 17 | 57910117 | 58046573 | 1  | NM_001112707 | TLK2      | 0 | NA | 0 | NA | 0 | NA | 0 | NA | 0 | NA |
| 17 | 57910117 | 58046573 | 1  | NM_006852    | TLK2      | 0 | NA | 0 | NA | 0 | NA | 0 | NA | 0 | NA |
| 17 | 58058493 | 58124684 | 1  | NM_006039    | MRC2      | 0 | NA | 0 | NA | 0 | NA | 0 | NA | 0 | NA |
| 17 | 58237743 | 58132406 | -1 | NM_001100875 | MARCH10   | 0 | NA | 0 | NA | 0 | NA | 0 | NA | 0 | NA |
| 17 | 58239437 | 58132406 | -1 | NM_152598    | MARCH10   | 0 | NA | 0 | NA | 0 | NA | 0 | NA | 0 | NA |
| 17 | 58440629 | 58858799 | 1  | NM_025185    | TANC2     | 0 | NA | 0 | NA | 0 | NA | 0 | NA | 0 | NA |
| 17 | 58871939 | 58863396 | -1 | NM_001017917 | CYB5E1    | 1 | 12 | 0 | NA | 0 | NA | 0 | NA | 0 | NA |
| 17 | 58877277 | 58863396 | -1 | NM_001017916 | CYB5E1    | 0 | NA | 0 | NA | 0 | NA | 0 | NA | 0 | NA |
| 17 | 58877454 | 58863396 | -1 | NM_001915    | CYB5E1    | 0 | NA | 0 | NA | 0 | NA | 0 | NA | 0 | NA |
| 17 | 58908165 | 58928711 | 1  | NM_000789    | ACE       | 0 | NA | 0 | NA | 0 | NA | 0 | NA | 0 | NA |
| 17 | 58915908 | 58928711 | 1  | NM_152830    | ACE       | 0 | NA | 0 | NA | 0 | NA | 0 | NA | 0 | NA |
| 17 | 58954426 | 58977334 | 1  | NM_030779    | KCNH6     | 0 | NA | 0 | NA | 0 | NA | 0 | NA | 0 | NA |
| 17 | 58954426 | 58980070 | 1  | NM_173092    | KCNH6     | 0 | NA | 0 | NA | 0 | NA | 0 | NA | 0 | NA |
| 17 | 58981553 | 59025373 | 1  | NM_005828    | WDR68     | 0 | NA | 0 | NA | 0 | NA | 0 | NA | 0 | NA |
| 17 | 59031974 | 59039457 | 1  | NM_016360    | CCDC44    | 1 | 17 | 0 | NA | 0 | NA | 0 | NA | 0 | NA |
| 17 | 59053532 | 59127402 | 1  | NM_002401    | MAP3K3    | 0 | NA | 0 | NA | 0 | NA | 0 | NA | 0 | NA |

|    |          |          |    |              |           |   |    |   |    |   |    |   |    |   |    |
|----|----------|----------|----|--------------|-----------|---|----|---|----|---|----|---|----|---|----|
| 17 | 59053532 | 59127402 | 1  | NM_203351    | MAP3K3    | 0 | NA | 0 | NA | 0 | NA | 0 | NA | 0 | NA |
| 17 | 59131251 | 59126980 | -1 | NM_030576    | LIMD2     | 0 | NA | 0 | NA | 0 | NA | 0 | NA | 0 | NA |
| 17 | 59172947 | 59133926 | -1 | NM_001003786 | LYK5      | 0 | NA | 0 | NA | 0 | NA | 0 | NA | 0 | NA |
| 17 | 59172947 | 59133926 | -1 | NM_001003787 | LYK5      | 0 | NA | 0 | NA | 0 | NA | 0 | NA | 0 | NA |
| 17 | 59172947 | 59133926 | -1 | NM_001003788 | LYK5      | 0 | NA | 0 | NA | 0 | NA | 0 | NA | 0 | NA |
| 17 | 59172947 | 59133926 | -1 | NM_153335    | LYK5      | 0 | NA | 0 | NA | 0 | NA | 0 | NA | 0 | NA |
| 17 | 59204820 | 59176341 | -1 | NM_020198    | CCDC47    | 0 | NA | 0 | NA | 1 | 12 | 1 | 13 | 0 | NA |
| 17 | 59205298 | 59250409 | 1  | NM_007372    | DDX42     | 0 | NA | 0 | NA | 1 | 12 | 1 | 13 | 0 | NA |
| 17 | 59205298 | 59250409 | 1  | NM_203499    | DDX42     | 0 | NA | 0 | NA | 1 | 12 | 1 | 13 | 0 | NA |
| 17 | 59258188 | 59250524 | -1 | NM_017647    | FTSJ3     | 1 | 20 | 0 | NA | 1 | 13 | 0 | NA | 0 | NA |
| 17 | 59258541 | 59263119 | 1  | NM_002805    | PSMC5     | 1 | 20 | 0 | NA | 1 | 13 | 0 | NA | 0 | NA |
| 17 | 59274083 | 59263172 | -1 | NM_001098426 | SMARCD2   | 1 | 34 | 0 | NA | 1 | 15 | 1 | 12 | 0 | NA |
| 17 | 59274083 | 59263172 | -1 | NM_003077    | SMARCD2   | 1 | 34 | 0 | NA | 1 | 15 | 1 | 12 | 0 | NA |
| 17 | 59304821 | 59303103 | -1 | NM_020991    | CSH2      | 0 | NA | 0 | NA | 0 | NA | 0 | NA | 0 | NA |
| 17 | 59304821 | 59303103 | -1 | NM_022644    | CSH2      | 0 | NA | 0 | NA | 0 | NA | 0 | NA | 0 | NA |
| 17 | 59304821 | 59303103 | -1 | NM_022645    | CSH2      | 0 | NA | 0 | NA | 0 | NA | 0 | NA | 0 | NA |
| 17 | 59312955 | 59311303 | -1 | NM_022557    | GH2       | 0 | NA | 0 | NA | 0 | NA | 0 | NA | 0 | NA |
| 17 | 59312955 | 59311305 | -1 | NM_022558    | GH2       | 0 | NA | 0 | NA | 0 | NA | 0 | NA | 0 | NA |
| 17 | 59312955 | 59311307 | -1 | NM_002059    | GH2       | 0 | NA | 0 | NA | 0 | NA | 0 | NA | 0 | NA |
| 17 | 59312955 | 59311307 | -1 | NM_022556    | GH2       | 0 | NA | 0 | NA | 0 | NA | 0 | NA | 0 | NA |
| 17 | 59327719 | 59326004 | -1 | NM_001317    | CSH1      | 0 | NA | 0 | NA | 0 | NA | 0 | NA | 0 | NA |
| 17 | 59327719 | 59326004 | -1 | NM_022640    | CSH1      | 0 | NA | 0 | NA | 0 | NA | 0 | NA | 0 | NA |
| 17 | 59327719 | 59326004 | -1 | NM_022641    | CSH1      | 0 | NA | 0 | NA | 0 | NA | 0 | NA | 0 | NA |
| 17 | 59342350 | 59340696 | -1 | NM_001318    | CSHL1     | 0 | NA | 0 | NA | 0 | NA | 0 | NA | 0 | NA |
| 17 | 59342350 | 59340696 | -1 | NM_022579    | CSHL1     | 0 | NA | 0 | NA | 0 | NA | 0 | NA | 0 | NA |
| 17 | 59342350 | 59340696 | -1 | NM_022580    | CSHL1     | 0 | NA | 0 | NA | 0 | NA | 0 | NA | 0 | NA |
| 17 | 59342350 | 59340696 | -1 | NM_022581    | CSHL1     | 0 | NA | 0 | NA | 0 | NA | 0 | NA | 0 | NA |
| 17 | 59349930 | 59348294 | -1 | NM_000515    | GH1       | 0 | NA | 0 | NA | 0 | NA | 0 | NA | 0 | NA |
| 17 | 59349930 | 59348294 | -1 | NM_022559    | GH1       | 0 | NA | 0 | NA | 0 | NA | 0 | NA | 0 | NA |
| 17 | 59349930 | 59348294 | -1 | NM_022560    | GH1       | 0 | NA | 0 | NA | 0 | NA | 0 | NA | 0 | NA |
| 17 | 59349930 | 59348294 | -1 | NM_022561    | GH1       | 0 | NA | 0 | NA | 0 | NA | 0 | NA | 0 | NA |
| 17 | 59349930 | 59348294 | -1 | NM_022562    | GH1       | 0 | NA | 0 | NA | 0 | NA | 0 | NA | 0 | NA |
| 17 | 59363436 | 59359829 | -1 | NM_000626    | CD79B     | 0 | NA | 1 | 12 | 0 | NA | 0 | NA | 0 | NA |
| 17 | 59363436 | 59359829 | -1 | NM_001039933 | CD79B     | 0 | NA | 1 | 12 | 0 | NA | 0 | NA | 0 | NA |
| 17 | 59363436 | 59359829 | -1 | NM_021602    | CD79B     | 0 | NA | 1 | 12 | 0 | NA | 0 | NA | 0 | NA |
| 17 | 59404010 | 59369645 | -1 | NM_000334    | SCN4A     | 0 | NA | 0 | NA | 0 | NA | 0 | NA | 0 | NA |
| 17 | 59438015 | 59433686 | -1 | NM_000873    | ICAM2     | 0 | NA | 1 | 14 | 0 | NA | 0 | NA | 0 | NA |
| 17 | 59451726 | 59433686 | -1 | NM_001099786 | ICAM2     | 0 | NA | 0 | NA | 0 | NA | 0 | NA | 0 | NA |
| 17 | 59451726 | 59433686 | -1 | NM_001099787 | ICAM2     | 0 | NA | 0 | NA | 0 | NA | 0 | NA | 0 | NA |
| 17 | 59451726 | 59433686 | -1 | NM_001099788 | ICAM2     | 0 | NA | 0 | NA | 0 | NA | 0 | NA | 0 | NA |
| 17 | 59451726 | 59433686 | -1 | NM_001099789 | ICAM2     | 0 | NA | 0 | NA | 0 | NA | 0 | NA | 0 | NA |
| 17 | 59561234 | 59474121 | -1 | NM_001433    | ERN1      | 1 | 11 | 0 | NA | 0 | NA | 1 | 12 | 0 | NA |
| 17 | 59694385 | 59578526 | -1 | NM_018469    | TEX2      | 0 | NA | 0 | NA | 0 | NA | 1 | 18 | 1 | 14 |
| 17 | 59739782 | 59739367 | -1 | NM_001101393 | LOC645993 | 0 | NA | 0 | NA | 1 | 15 | 0 | NA | 0 | NA |
| 17 | 59817743 | 59753594 | -1 | NM_000442    | PECAM1    | 0 | NA | 0 | NA | 1 | 14 | 0 | NA | 0 | NA |
| 17 | 59875701 | 59895222 | 1  | NM_001085423 | C17orf60  | 0 | NA | 0 | NA | 0 | NA | 0 | NA | 0 | NA |
| 17 | 59923631 | 59904363 | -1 | NM_007215    | POLG2     | 1 | 15 | 0 | NA | 0 | NA | 1 | 15 | 0 | NA |
| 17 | 59932869 | 59926199 | -1 | NM_004396    | DDX5      | 1 | 15 | 0 | NA | 0 | NA | 1 | 15 | 0 | NA |
| 17 | 59933619 | 59964524 | 1  | NM_138363    | CCDC45    | 1 | 27 | 0 | NA | 0 | NA | 1 | 15 | 0 | NA |
| 17 | 60088848 | 59971196 | -1 | NM_022739    | SMURF2    | 0 | NA | 0 | NA | 0 | NA | 0 | NA | 0 | NA |
| 17 | 60345365 | 60280949 | -1 | NM_199340    | LRRC37A3  | 0 | NA | 0 | NA | 0 | NA | 0 | NA | 0 | NA |
| 17 | 60483216 | 60437294 | -1 | NM_006572    | GNA13     | 0 | NA | 0 | NA | 1 | 12 | 0 | NA | 0 | NA |
| 17 | 60564010 | 60654283 | 1  | NM_001081955 | RGS9      | 0 | NA | 0 | NA | 0 | NA | 0 | NA | 0 | NA |
| 17 | 60564010 | 60654283 | 1  | NM_003835    | RGS9      | 0 | NA | 0 | NA | 0 | NA | 0 | NA | 0 | NA |
| 17 | 60988227 | 60955144 | -1 | NM_004655    | AXIN2     | 0 | NA | 0 | NA | 0 | NA | 0 | NA | 0 | NA |
| 17 | 61253063 | 61062119 | -1 | NM_001037325 | CCDC46    | 0 | NA | 0 | NA | 0 | NA | 0 | NA | 0 | NA |
| 17 | 61618435 | 61062119 | -1 | NM_145036    | CCDC46    | 1 | 12 | 0 | NA | 0 | NA | 0 | NA | 0 | NA |
| 17 | 61656018 | 61638608 | -1 | NM_000042    | APQH      | 0 | NA | 0 | NA | 0 | NA | 0 | NA | 0 | NA |
| 17 | 61729387 | 62237324 | 1  | NM_002737    | PRKCA     | 0 | NA | 0 | NA | 0 | NA | 0 | NA | 0 | NA |
| 17 | 62303912 | 62311561 | 1  | NM_014404    | CACNG5    | 0 | NA | 1 | 15 | 0 | NA | 0 | NA | 0 | NA |
| 17 | 62303912 | 62311819 | 1  | NM_145811    | CACNG5    | 0 | NA | 1 | 15 | 0 | NA | 0 | NA | 0 | NA |
| 17 | 62391474 | 62459980 | 1  | NM_014405    | CACNG4    | 0 | NA | 0 | NA | 0 | NA | 0 | NA | 0 | NA |
| 17 | 62471167 | 62483373 | 1  | NM_000727    | CACNG1    | 0 | NA | 1 | 15 | 0 | NA | 0 | NA | 1 | 16 |
| 17 | 62671781 | 62497015 | -1 | NM_014877    | HELZ      | 0 | NA | 0 | NA | 0 | NA | 0 | NA | 0 | NA |
| 17 | 62793183 | 62767080 | -1 | NM_002816    | PSMD12    | 0 | NA | 0 | NA | 0 | NA | 1 | 14 | 0 | NA |

|    |          |          |    |              |              |   |    |   |    |   |    |   |    |   |    |
|----|----------|----------|----|--------------|--------------|---|----|---|----|---|----|---|----|---|----|
| 17 | 62804385 | 63120109 | 1  | NM_012417    | PITPNC1      | 0 | NA | 0 | NA | 0 | NA | 0 | NA | 0 | NA |
| 17 | 62804385 | 63120109 | 1  | NM_181671    | PITPNC1      | 0 | NA | 0 | NA | 0 | NA | 0 | NA | 0 | NA |
| 17 | 63144522 | 63170728 | 1  | NM_015462    | NOL11        | 0 | NA | 0 | NA | 0 | NA | 1 | 13 | 0 | NA |
| 17 | 63252241 | 63410956 | 1  | NM_004459    | BPTF         | 0 | NA | 0 | NA | 0 | NA | 0 | NA | 0 | NA |
| 17 | 63252241 | 63410956 | 1  | NM_182641    | BPTF         | 0 | NA | 0 | NA | 0 | NA | 0 | NA | 0 | NA |
| 17 | 63420227 | 63417678 | -1 | NM_181655    | C17orf58     | 0 | NA | 0 | NA | 0 | NA | 0 | NA | 0 | NA |
| 17 | 63420227 | 63417678 | -1 | NM_181656    | C17orf58     | 0 | NA | 0 | NA | 0 | NA | 0 | NA | 0 | NA |
| 17 | 63462309 | 63473432 | 1  | NM_002266    | KPNA2        | 0 | NA | 0 | NA | 0 | NA | 0 | NA | 0 | NA |
| 17 | 63755739 | 63764900 | 1  | NM_001033569 | AMZ2         | 0 | NA | 0 | NA | 0 | NA | 0 | NA | 0 | NA |
| 17 | 63755739 | 63764900 | 1  | NM_001033570 | AMZ2         | 0 | NA | 0 | NA | 0 | NA | 0 | NA | 0 | NA |
| 17 | 63755739 | 63764900 | 1  | NM_001033571 | AMZ2         | 0 | NA | 0 | NA | 0 | NA | 0 | NA | 0 | NA |
| 17 | 63755739 | 63764900 | 1  | NM_001033572 | AMZ2         | 0 | NA | 0 | NA | 0 | NA | 0 | NA | 0 | NA |
| 17 | 63755739 | 63764900 | 1  | NM_001033574 | AMZ2         | 0 | NA | 0 | NA | 0 | NA | 0 | NA | 0 | NA |
| 17 | 63755739 | 63764900 | 1  | NM_016627    | AMZ2         | 0 | NA | 0 | NA | 0 | NA | 0 | NA | 0 | NA |
| 17 | 63799000 | 63775932 | -1 | NM_004694    | SLC16A6      | 0 | NA | 0 | NA | 0 | NA | 1 | 12 | 0 | NA |
| 17 | 63815190 | 63928595 | 1  | NM_014960    | ARSG         | 0 | NA | 0 | NA | 0 | NA | 0 | NA | 0 | NA |
| 17 | 63965248 | 63929016 | -1 | NM_017983    | WIPI1        | 0 | NA | 0 | NA | 0 | NA | 0 | NA | 0 | NA |
| 17 | 64019704 | 64040505 | 1  | NM_212471    | PRKAR1A      | 1 | 21 | 0 | NA | 1 | 18 | 0 | NA | 0 | NA |
| 17 | 64020137 | 64040505 | 1  | NM_002734    | PRKAR1A      | 1 | 21 | 0 | NA | 1 | 18 | 0 | NA | 0 | NA |
| 17 | 64020137 | 64040505 | 1  | NM_212472    | PRKAR1A      | 1 | 21 | 0 | NA | 1 | 18 | 0 | NA | 0 | NA |
| 17 | 64108690 | 64044859 | -1 | NM_017565    | FAM20A       | 0 | NA | 0 | NA | 0 | NA | 1 | 14 | 0 | NA |
| 17 | 64463128 | 64375025 | -1 | NM_007168    | ABCA8        | 0 | NA | 0 | NA | 0 | NA | 0 | NA | 0 | NA |
| 17 | 64566731 | 64482367 | -1 | NM_080283    | ABCA9        | 0 | NA | 0 | NA | 0 | NA | 0 | NA | 0 | NA |
| 17 | 64649610 | 64586441 | -1 | NM_080284    | ABCA6        | 0 | NA | 0 | NA | 0 | NA | 0 | NA | 0 | NA |
| 17 | 64752551 | 64655742 | -1 | NM_080282    | ABCA10       | 0 | NA | 0 | NA | 0 | NA | 1 | 13 | 0 | NA |
| 17 | 64823369 | 64754385 | -1 | NM_018672    | ABCA5        | 0 | NA | 0 | NA | 0 | NA | 0 | NA | 0 | NA |
| 17 | 64834885 | 64754385 | -1 | NM_172232    | ABCA5        | 1 | 24 | 0 | NA | 0 | NA | 0 | NA | 0 | NA |
| 17 | 64922432 | 65050065 | 1  | NM_002758    | MAP2K6       | 0 | NA | 0 | NA | 0 | NA | 0 | NA | 0 | NA |
| 17 | 65583020 | 65643341 | 1  | NM_018658    | KCNJ16       | 0 | NA | 0 | NA | 1 | 13 | 0 | NA | 0 | NA |
| 17 | 65583020 | 65643341 | 1  | NM_170741    | KCNJ16       | 0 | NA | 0 | NA | 1 | 13 | 0 | NA | 0 | NA |
| 17 | 65612589 | 65643341 | 1  | NM_170742    | KCNJ16       | 0 | NA | 0 | NA | 0 | NA | 0 | NA | 0 | NA |
| 17 | 65677270 | 65687778 | 1  | NM_000891    | KCNJ2        | 0 | NA | 0 | NA | 0 | NA | 0 | NA | 1 | 13 |
| 17 | 67628755 | 67634155 | 1  | NM_000346    | SOX9         | 0 | NA | 0 | NA | 0 | NA | 0 | NA | 1 | 12 |
| 17 | 68600427 | 68153682 | -1 | NM_139177    | SLC39A11     | 0 | NA | 0 | NA | 0 | NA | 0 | NA | 0 | NA |
| 17 | 68672754 | 68679657 | 1  | NM_001050    | SSTR2        | 0 | NA | 0 | NA | 0 | NA | 0 | NA | 1 | 12 |
| 17 | 68700767 | 68716240 | 1  | NM_018714    | COG1         | 0 | NA | 0 | NA | 1 | 15 | 0 | NA | 0 | NA |
| 17 | 68740128 | 68715086 | -1 | NM_001098832 | FAM104A      | 1 | 11 | 0 | NA | 0 | NA | 1 | 19 | 0 | NA |
| 17 | 68740128 | 68715086 | -1 | NM_032837    | FAM104A      | 1 | 11 | 0 | NA | 0 | NA | 1 | 19 | 0 | NA |
| 17 | 68740370 | 68753078 | 1  | NM_001100622 | C17orf80     | 1 | 11 | 0 | NA | 0 | NA | 1 | 19 | 0 | NA |
| 17 | 68740370 | 68756690 | 1  | NM_001100621 | C17orf80     | 1 | 11 | 0 | NA | 0 | NA | 1 | 19 | 0 | NA |
| 17 | 68740370 | 68756690 | 1  | NM_017941    | C17orf80     | 1 | 11 | 0 | NA | 0 | NA | 1 | 19 | 0 | NA |
| 17 | 68819738 | 68791357 | -1 | NM_012121    | CDC42EP4     | 0 | NA | 0 | NA | 0 | NA | 0 | NA | 0 | NA |
| 17 | 69711389 | 69717614 | 1  | NM_000999    | RPL38        | 0 | NA | 0 | NA | 0 | NA | 1 | 17 | 0 | NA |
| 17 | 69711389 | 69717614 | 1  | NM_001035258 | RPL38        | 0 | NA | 0 | NA | 0 | NA | 1 | 17 | 0 | NA |
| 17 | 69721290 | 69769752 | 1  | NM_032646    | TTYH2        | 0 | NA | 0 | NA | 0 | NA | 1 | 13 | 0 | NA |
| 17 | 69756099 | 69769752 | 1  | NM_052869    | TTYH2        | 0 | NA | 0 | NA | 0 | NA | 0 | NA | 0 | NA |
| 17 | 69782006 | 69822618 | 1  | NM_023036    | DNAI2        | 0 | NA | 1 | 14 | 0 | NA | 0 | NA | 0 | NA |
| 17 | 69833945 | 69863554 | 1  | NM_153209    | KIF19        | 0 | NA | 1 | 14 | 0 | NA | 0 | NA | 1 | 19 |
| 17 | 69869553 | 69864150 | -1 | NM_001080466 | LOC388419    | 0 | NA | 0 | NA | 0 | NA | 0 | NA | 0 | NA |
| 17 | 69875239 | 69880334 | 1  | NM_181790    | GPR142       | 0 | NA | 0 | NA | 0 | NA | 0 | NA | 0 | NA |
| 17 | 69939261 | 69955163 | 1  | NM_022036    | GPRC5C       | 0 | NA | 0 | NA | 0 | NA | 1 | 28 | 1 | 16 |
| 17 | 69941430 | 69955163 | 1  | NM_018653    | GPRC5C       | 0 | NA | 0 | NA | 0 | NA | 1 | 28 | 1 | 16 |
| 17 | 69974116 | 69992528 | 1  | NM_007261    | CD300A       | 0 | NA | 1 | 13 | 0 | NA | 0 | NA | 0 | NA |
| 17 | 70039208 | 70028907 | -1 | NM_174892    | CD300LB      | 0 | NA | 0 | NA | 0 | NA | 0 | NA | 1 | 12 |
| 17 | 70053877 | 70048841 | -1 | NM_006678    | CD300C       | 0 | NA | 0 | NA | 0 | NA | 0 | NA | 0 | NA |
| 17 | 70092651 | 70101943 | 1  | NM_152460    | C17orf77     | 0 | NA | 1 | 12 | 0 | NA | 0 | NA | 0 | NA |
| 17 | 70099965 | 70087705 | -1 | NM_001115152 | LOC100131439 | 0 | NA | 0 | NA | 0 | NA | 0 | NA | 0 | NA |
| 17 | 70131396 | 70120306 | -1 | NM_181449    | CD300E       | 0 | NA | 0 | NA | 0 | NA | 0 | NA | 1 | 15 |
| 17 | 70178864 | 70255069 | 1  | NM_175738    | RAB37        | 0 | NA | 1 | 17 | 0 | NA | 1 | 11 | 1 | 12 |
| 17 | 70220703 | 70202046 | -1 | NM_139018    | CD300LF      | 0 | NA | 0 | NA | 0 | NA | 0 | NA | 0 | NA |
| 17 | 70244955 | 70254394 | 1  | NM_001006638 | RAB37        | 0 | NA | 1 | 12 | 0 | NA | 0 | NA | 1 | 16 |
| 17 | 70256378 | 70277089 | 1  | NM_004252    | SLC9A3R1     | 0 | NA | 1 | 12 | 0 | NA | 0 | NA | 0 | NA |
| 17 | 70284065 | 70278280 | -1 | NM_015654    | NAT9         | 0 | NA | 0 | NA | 0 | NA | 0 | NA | 0 | NA |
| 17 | 70284216 | 70347517 | 1  | NM_017728    | TMEM104      | 0 | NA | 0 | NA | 0 | NA | 0 | NA | 0 | NA |
| 17 | 70367602 | 70349762 | -1 | NM_000835    | GRIN2C       | 0 | NA | 0 | NA | 0 | NA | 0 | NA | 0 | NA |

|    |          |          |    |              |              |   |    |   |    |   |    |   |    |   |    |
|----|----------|----------|----|--------------|--------------|---|----|---|----|---|----|---|----|---|----|
| 17 | 70380751 | 70370213 | -1 | NM_004110    | FDXR         | 0 | NA | 0 | NA | 0 | NA | 0 | NA | 0 | NA |
| 17 | 70380751 | 70370213 | -1 | NM_024417    | FDXR         | 0 | NA | 0 | NA | 0 | NA | 0 | NA | 0 | NA |
| 17 | 70401300 | 70380607 | -1 | NM_178128    | FADS6        | 0 | NA | 0 | NA | 0 | NA | 0 | NA | 0 | NA |
| 17 | 70430946 | 70423770 | -1 | NM_173477    | USH1G        | 0 | NA | 0 | NA | 0 | NA | 0 | NA | 0 | NA |
| 17 | 70431964 | 70441235 | 1  | NM_178160    | OTOP2        | 0 | NA | 0 | NA | 0 | NA | 0 | NA | 0 | NA |
| 17 | 70443491 | 70457106 | 1  | NM_178233    | OTOP3        | 0 | NA | 0 | NA | 0 | NA | 0 | NA | 1 | 18 |
| 17 | 70480411 | 70458433 | -1 | NM_030630    | C17orf28     | 0 | NA | 1 | 14 | 0 | NA | 0 | NA | 0 | NA |
| 17 | 70495321 | 70513487 | 1  | NM_014603    | CDR2L        | 0 | NA | 1 | 14 | 0 | NA | 1 | 12 | 0 | NA |
| 17 | 70520374 | 70528951 | 1  | NM_001545    | ICT1         | 0 | NA | 0 | NA | 0 | NA | 0 | NA | 0 | NA |
| 17 | 70554669 | 70546549 | -1 | NM_001003785 | ATP5H        | 0 | NA | 0 | NA | 0 | NA | 0 | NA | 0 | NA |
| 17 | 70554669 | 70546549 | -1 | NM_006356    | ATP5H        | 0 | NA | 0 | NA | 0 | NA | 0 | NA | 0 | NA |
| 17 | 70554673 | 70573576 | 1  | NM_015353    | KCTD2        | 0 | NA | 0 | NA | 0 | NA | 0 | NA | 0 | NA |
| 17 | 70595649 | 70613843 | 1  | NM_004695    | SLC16A5      | 0 | NA | 0 | NA | 0 | NA | 0 | NA | 0 | NA |
| 17 | 70617676 | 70637955 | 1  | NM_024585    | ARMC7        | 0 | NA | 0 | NA | 0 | NA | 0 | NA | 0 | NA |
| 17 | 70639472 | 70637917 | -1 | NM_014595    | NT5C         | 0 | NA | 0 | NA | 0 | NA | 0 | NA | 0 | NA |
| 17 | 70662369 | 70642938 | -1 | NM_001002032 | HN1          | 1 | 29 | 0 | NA | 0 | NA | 1 | 12 | 0 | NA |
| 17 | 70662369 | 70642938 | -1 | NM_001002033 | HN1          | 1 | 29 | 0 | NA | 0 | NA | 1 | 12 | 0 | NA |
| 17 | 70662370 | 70642938 | -1 | NM_016185    | HN1          | 1 | 29 | 0 | NA | 0 | NA | 1 | 12 | 0 | NA |
| 17 | 70690693 | 70675419 | -1 | NM_001005849 | SUMO2        | 1 | 29 | 0 | NA | 0 | NA | 1 | 32 | 0 | NA |
| 17 | 70690693 | 70675419 | -1 | NM_006937    | SUMO2        | 1 | 29 | 0 | NA | 0 | NA | 1 | 32 | 0 | NA |
| 17 | 70713191 | 70743449 | 1  | NM_024844    | NUP85        | 0 | NA | 0 | NA | 0 | NA | 1 | 38 | 0 | NA |
| 17 | 70769272 | 70744289 | -1 | NM_014001    | GGA3         | 0 | NA | 0 | NA | 0 | NA | 1 | 18 | 0 | NA |
| 17 | 70769272 | 70744289 | -1 | NM_138619    | GGA3         | 0 | NA | 0 | NA | 0 | NA | 1 | 18 | 0 | NA |
| 17 | 70769343 | 70774052 | 1  | NM_015971    | MRPS7        | 0 | NA | 0 | NA | 0 | NA | 1 | 18 | 0 | NA |
| 17 | 70778898 | 70773905 | -1 | NM_020679    | MIF4GD       | 0 | NA | 0 | NA | 0 | NA | 1 | 16 | 0 | NA |
| 17 | 70797125 | 70780655 | -1 | NM_001126121 | SLC25A19     | 0 | NA | 0 | NA | 0 | NA | 0 | NA | 0 | NA |
| 17 | 70797125 | 70780655 | -1 | NM_001126122 | SLC25A19     | 0 | NA | 0 | NA | 0 | NA | 0 | NA | 0 | NA |
| 17 | 70797125 | 70780655 | -1 | NM_021734    | SLC25A19     | 0 | NA | 0 | NA | 0 | NA | 0 | NA | 0 | NA |
| 17 | 70913384 | 70825751 | -1 | NM_002086    | GRB2         | 1 | 13 | 0 | NA | 0 | NA | 0 | NA | 0 | NA |
| 17 | 70913385 | 70825751 | -1 | NM_203506    | GRB2         | 1 | 13 | 0 | NA | 0 | NA | 0 | NA | 0 | NA |
| 17 | 70964258 | 71008128 | 1  | NM_014738    | KIAA0195     | 1 | 11 | 0 | NA | 0 | NA | 0 | NA | 0 | NA |
| 17 | 71023222 | 71007936 | -1 | NM_020753    | CASKIN2      | 0 | NA | 0 | NA | 0 | NA | 0 | NA | 0 | NA |
| 17 | 71024203 | 71032415 | 1  | NM_207346    | TSEN54       | 0 | NA | 0 | NA | 0 | NA | 0 | NA | 0 | NA |
| 17 | 71033377 | 71072399 | 1  | NM_001015002 | LLGL2        | 0 | NA | 0 | NA | 0 | NA | 0 | NA | 0 | NA |
| 17 | 71033377 | 71082885 | 1  | NM_001031803 | LLGL2        | 0 | NA | 0 | NA | 0 | NA | 0 | NA | 0 | NA |
| 17 | 71033377 | 71082885 | 1  | NM_004524    | LLGL2        | 0 | NA | 0 | NA | 0 | NA | 0 | NA | 0 | NA |
| 17 | 71174860 | 71134544 | -1 | NM_004259    | RECQL5       | 0 | NA | 0 | NA | 0 | NA | 0 | NA | 0 | NA |
| 17 | 71174864 | 71156539 | -1 | NM_001003716 | RECQL5       | 0 | NA | 0 | NA | 0 | NA | 0 | NA | 0 | NA |
| 17 | 71174864 | 71158037 | -1 | NM_001003715 | RECQL5       | 0 | NA | 0 | NA | 0 | NA | 0 | NA | 0 | NA |
| 17 | 71174993 | 71215734 | 1  | NM_013260    | SAP30BP      | 0 | NA | 0 | NA | 0 | NA | 0 | NA | 0 | NA |
| 17 | 71229110 | 71265494 | 1  | NM_000213    | ITGB4        | 0 | NA | 0 | NA | 0 | NA | 0 | NA | 0 | NA |
| 17 | 71229110 | 71265494 | 1  | NM_001005731 | ITGB4        | 0 | NA | 0 | NA | 0 | NA | 0 | NA | 0 | NA |
| 17 | 71232370 | 71265494 | 1  | NM_001005619 | ITGB4        | 0 | NA | 0 | NA | 0 | NA | 0 | NA | 0 | NA |
| 17 | 71272875 | 71265612 | -1 | NM_000154    | GALK1        | 0 | NA | 0 | NA | 0 | NA | 0 | NA | 0 | NA |
| 17 | 71287455 | 71284109 | -1 | NM_005324    | H3F3B        | 1 | 12 | 0 | NA | 1 | 13 | 1 | 11 | 0 | NA |
| 17 | 71292275 | 71333481 | 1  | NM_001080419 | UNK          | 1 | 12 | 0 | NA | 1 | 13 | 1 | 11 | 0 | NA |
| 17 | 71352393 | 71334901 | -1 | NM_199242    | UNC13D       | 0 | NA | 0 | NA | 0 | NA | 0 | NA | 0 | NA |
| 17 | 71363096 | 71353374 | -1 | NM_012478    | WBP2         | 0 | NA | 0 | NA | 0 | NA | 0 | NA | 0 | NA |
| 17 | 71386251 | 71381839 | -1 | NM_033452    | TRIM47       | 0 | NA | 0 | NA | 0 | NA | 0 | NA | 0 | NA |
| 17 | 71404649 | 71396635 | -1 | NM_173547    | TRIM65       | 0 | NA | 0 | NA | 0 | NA | 1 | 11 | 0 | NA |
| 17 | 71413069 | 71406318 | -1 | NM_032478    | MRPL38       | 0 | NA | 0 | NA | 0 | NA | 1 | 11 | 0 | NA |
| 17 | 71448714 | 71418212 | -1 | NM_001080542 | FBF1         | 0 | NA | 0 | NA | 0 | NA | 0 | NA | 0 | NA |
| 17 | 71486895 | 71508262 | 1  | NM_001113324 | LOC100134934 | 0 | NA | 0 | NA | 0 | NA | 0 | NA | 0 | NA |
| 17 | 71487039 | 71449186 | -1 | NM_004035    | ACOX1        | 0 | NA | 0 | NA | 0 | NA | 0 | NA | 0 | NA |
| 17 | 71487039 | 71449186 | -1 | NM_007292    | ACOX1        | 0 | NA | 0 | NA | 0 | NA | 0 | NA | 0 | NA |
| 17 | 71508581 | 71513675 | 1  | NM_001258    | CDK3         | 0 | NA | 1 | 14 | 0 | NA | 0 | NA | 0 | NA |
| 17 | 71535102 | 71514521 | -1 | NM_001988    | EVPL         | 0 | NA | 0 | NA | 0 | NA | 1 | 12 | 1 | 14 |
| 17 | 71580202 | 71546785 | -1 | NM_014230    | SRP68        | 0 | NA | 0 | NA | 0 | NA | 0 | NA | 0 | NA |
| 17 | 71582486 | 71585168 | 1  | NM_003857    | GALR2        | 0 | NA | 0 | NA | 0 | NA | 0 | NA | 0 | NA |
| 17 | 71586903 | 71590342 | 1  | NM_180990    | ZACN         | 0 | NA | 0 | NA | 0 | NA | 0 | NA | 0 | NA |
| 17 | 71611451 | 71586861 | -1 | NM_001013839 | EXOC7        | 1 | 16 | 0 | NA | 0 | NA | 1 | 12 | 0 | NA |
| 17 | 71611451 | 71586861 | -1 | NM_015219    | EXOC7        | 1 | 16 | 0 | NA | 0 | NA | 1 | 12 | 0 | NA |
| 17 | 71648161 | 71644009 | -1 | NM_001454    | FOXJ1        | 0 | NA | 0 | NA | 0 | NA | 0 | NA | 0 | NA |
| 17 | 71747985 | 71651450 | -1 | NM_052916    | RNF157       | 0 | NA | 0 | NA | 0 | NA | 0 | NA | 1 | 13 |
| 17 | 71773042 | 71778970 | 1  | NM_182565    | FAM100B      | 0 | NA | 0 | NA | 0 | NA | 0 | NA | 0 | NA |

|    |          |          |    |              |            |   |    |    |    |    |    |    |    |    |    |
|----|----------|----------|----|--------------|------------|---|----|----|----|----|----|----|----|----|----|
| 17 | 71815356 | 71781724 | -1 | NM_032134    | QRICH2     | 0 | NA | 0  | NA | 0  | NA | 0  | NA | 0  | NA |
| 17 | 71861526 | 71818609 | -1 | NM_002766    | PRPSAP1    | 0 | NA | 0  | NA | 0  | NA | 1  | 12 | 0  | NA |
| 17 | 71892296 | 71895536 | 1  | NM_021972    | SPHK1      | 1 | 15 | 0  | NA | 0  | NA | 1  | 16 | 0  | NA |
| 17 | 71892325 | 71895531 | 1  | NM_182965    | SPHK1      | 1 | 15 | 0  | NA | 0  | NA | 1  | 16 | 0  | NA |
| 17 | 71960883 | 71897490 | -1 | NM_022066    | UBE2O      | 0 | NA | 0  | NA | 0  | NA | 0  | NA | 0  | NA |
| 17 | 71975245 | 71977794 | 1  | NM_001088    | AANAT      | 0 | NA | 0  | NA | 0  | NA | 0  | NA | 0  | NA |
| 17 | 72009103 | 71978569 | -1 | NM_001005498 | RHBDP2     | 0 | NA | 0  | NA | 0  | NA | 0  | NA | 0  | NA |
| 17 | 72009103 | 71978569 | -1 | NM_024599    | RHBDP2     | 0 | NA | 0  | NA | 0  | NA | 0  | NA | 0  | NA |
| 17 | 72045377 | 72035034 | -1 | NM_134268    | CYGB       | 1 | 11 | 0  | NA | 0  | NA | 1  | 21 | 0  | NA |
| 17 | 72047766 | 72052047 | 1  | NM_001077620 | PRCD       | 1 | 11 | 0  | NA | 0  | NA | 0  | NA | 0  | NA |
| 17 | 72093524 | 72073076 | -1 | NM_006456    | ST6GALNAC2 | 0 | NA | 0  | NA | 0  | NA | 0  | NA | 0  | NA |
| 17 | 72151489 | 72132439 | -1 | NM_018414    | ST6GALNAC1 | 0 | 1  | 12 | 0  | NA | 0  | NA | 1  | 12 | 0  |
| 17 | 72218651 | 72183403 | -1 | NM_001008528 | MXRA7      | 0 | NA | 0  | NA | 0  | NA | 0  | NA | 0  | NA |
| 17 | 72218651 | 72187245 | -1 | NM_001008529 | MXRA7      | 0 | NA | 0  | NA | 0  | NA | 0  | NA | 0  | NA |
| 17 | 72218651 | 72187245 | -1 | NM_198530    | MXRA7      | 0 | NA | 0  | NA | 0  | NA | 0  | NA | 0  | NA |
| 17 | 72234476 | 72220508 | -1 | NM_001081461 | JMJD6      | 0 | NA | 0  | NA | 0  | NA | 0  | NA | 0  | NA |
| 17 | 72234476 | 72226119 | -1 | NM_015167    | JMJD6      | 0 | NA | 0  | NA | 0  | NA | 0  | NA | 0  | NA |
| 17 | 72234544 | 72241557 | 1  | NM_001080510 | LOC124512  | 0 | NA | 0  | NA | 0  | NA | 0  | NA | 0  | NA |
| 17 | 72245007 | 72241791 | -1 | NM_003016    | SFRS2      | 1 | 11 | 0  | NA | 0  | NA | 0  | NA | 0  | NA |
| 17 | 72245377 | 72286933 | 1  | NM_024311    | MFS011     | 1 | 11 | 0  | NA | 0  | NA | 0  | NA | 0  | NA |
| 17 | 72376392 | 72458066 | 1  | NM_144677    | MGAT5B     | 1 | 11 | 12 | 0  | NA | 0  | NA | 0  | NA | 0  |
| 17 | 72380323 | 72458066 | 1  | NM_198955    | MGAT5B     | 1 | 11 | 0  | NA | 0  | NA | 0  | NA | 0  | NA |
| 17 | 72648646 | 72722009 | 1  | NM_003003    | SEC14L1    | 1 | 11 | 0  | NA | 0  | NA | 0  | NA | 0  | NA |
| 17 | 72648646 | 72724776 | 1  | NM_001039573 | SEC14L1    | 1 | 11 | 0  | NA | 0  | NA | 0  | NA | 0  | NA |
| 17 | 72789086 | 73008273 | 1  | NM_001113491 | SEPT9      | 0 | NA | 0  | NA | 0  | NA | 1  | 11 | 1  | 12 |
| 17 | 72795567 | 73008273 | 1  | NM_001113492 | SEPT9      | 0 | NA | 0  | NA | 0  | NA | 1  | 11 | 0  | NA |
| 17 | 72827191 | 73008273 | 1  | NM_006640    | SEPT9      | 0 | NA | 0  | NA | 0  | NA | 1  | 11 | 1  | 12 |
| 17 | 72880866 | 73008273 | 1  | NM_001113493 | SEPT9      | 1 | 14 | 0  | NA | 1  | 12 | 0  | NA | 0  | NA |
| 17 | 72883759 | 73008273 | 1  | NM_001113494 | SEPT9      | 1 | 14 | 0  | NA | 0  | NA | 0  | NA | 0  | NA |
| 17 | 72958207 | 73008273 | 1  | NM_001113496 | SEPT9      | 1 | 16 | 0  | NA | 0  | NA | 1  | 14 | 0  | NA |
| 17 | 72982919 | 73008273 | 1  | NM_001113495 | SEPT9      | 1 | 15 | 0  | NA | 0  | NA | 1  | 15 | 0  | NA |
| 17 | 73391764 | 73386703 | -1 | NM_001001685 | FLJ45079   | 0 | NA | 1  | 20 | 0  | NA | 1  | 11 | 1  | 12 |
| 17 | 73556588 | 73612616 | 1  | NM_018996    | TNRC6C     | 0 | NA | 0  | NA | 0  | NA | 0  | NA | 0  | NA |
| 17 | 73636456 | 73620593 | -1 | NM_001127198 | TMC6       | 0 | NA | 0  | NA | 0  | NA | 1  | 15 | 0  | NA |
| 17 | 73638453 | 73650644 | 1  | NM_152468    | TMC8       | 0 | NA | 0  | NA | 0  | NA | 1  | 15 | 0  | NA |
| 17 | 73640083 | 73620593 | -1 | NM_007267    | TMC6       | 0 | NA | 0  | NA | 0  | NA | 1  | 15 | 0  | NA |
| 17 | 73676265 | 73680604 | 1  | NM_004710    | SYNGR2     | 0 | NA | 0  | NA | 0  | NA | 0  | NA | 0  | NA |
| 17 | 73694880 | 73681754 | -1 | NM_003258    | TK1        | 0 | NA | 0  | NA | 0  | NA | 0  | NA | 0  | NA |
| 17 | 73695037 | 73715377 | 1  | NM_001010982 | AFMID      | 0 | NA | 0  | NA | 0  | NA | 0  | NA | 0  | NA |
| 17 | 73721871 | 73733311 | 1  | NM_001012270 | BIRC5      | 1 | 11 | 0  | NA | 0  | NA | 1  | 13 | 0  | NA |
| 17 | 73721871 | 73733311 | 1  | NM_001012271 | BIRC5      | 1 | 11 | 0  | NA | 0  | NA | 1  | 13 | 0  | NA |
| 17 | 73721871 | 73733311 | 1  | NM_001168    | BIRC5      | 1 | 11 | 0  | NA | 0  | NA | 1  | 13 | 0  | NA |
| 17 | 73867753 | 73864456 | -1 | NM_003955    | SOCS3      | 0 | NA | 0  | NA | 0  | NA | 1  | 11 | 0  | NA |
| 17 | 73886329 | 73932234 | 1  | NM_024419    | PGS1       | 0 | NA | 0  | NA | 0  | NA | 0  | NA | 0  | NA |
| 17 | 74289971 | 74181724 | -1 | NM_004762    | PSCD1      | 0 | NA | 0  | NA | 0  | NA | 0  | NA | 0  | NA |
| 17 | 74289971 | 74181724 | -1 | NM_017456    | PSCD1      | 0 | NA | 0  | NA | 0  | NA | 0  | NA | 0  | NA |
| 17 | 74348564 | 74304559 | -1 | NM_025090    | USP36      | 0 | NA | 0  | NA | 1  | 12 | 0  | NA | 0  | NA |
| 17 | 74433067 | 74360653 | -1 | NM_003255    | TIMP2      | 0 | NA | 0  | NA | 0  | NA | 0  | NA | 0  | NA |
| 17 | 74487656 | 74478931 | -1 | NM_005567    | LGALS3BP   | 0 | NA | 0  | NA | 0  | NA | 1  | 11 | 0  | NA |
| 17 | 74517433 | 74499393 | -1 | NM_138793    | CANT1      | 0 | NA | 0  | NA | 0  | NA | 0  | NA | 0  | NA |
| 17 | 74531845 | 74557465 | 1  | NM_030968    | C1QTNF1    | 0 | NA | 0  | NA | 1  | 12 | 0  | NA | 0  | NA |
| 17 | 74531845 | 74557465 | 1  | NM_198594    | C1QTNF1    | 0 | NA | 0  | NA | 1  | 12 | 0  | NA | 0  | NA |
| 17 | 74542066 | 74557465 | 1  | NM_198593    | C1QTNF1    | 0 | NA | 0  | NA | 1  | 12 | 0  | NA | 0  | NA |
| 17 | 74582613 | 74596276 | 1  | NM_001042573 | FLJ21865   | 0 | NA | 0  | NA | 0  | NA | 0  | NA | 0  | NA |
| 17 | 74990158 | 74597021 | -1 | NM_001082575 | HRNBP3     | 0 | NA | 0  | NA | 0  | NA | 1  | 11 | 1  | 12 |
| 17 | 75319476 | 75330616 | 1  | NM_178543    | ENPP7      | 0 | NA | 0  | NA | 0  | NA | 0  | NA | 1  | 13 |
| 17 | 75366587 | 75370926 | 1  | NM_032647    | CBX2       | 0 | NA | 0  | NA | 0  | NA | 0  | NA | 0  | NA |
| 17 | 75366587 | 75375974 | 1  | NM_005189    | CBX2       | 0 | NA | 0  | NA | 0  | NA | 0  | NA | 0  | NA |
| 17 | 75385485 | 75382770 | -1 | NM_020649    | CBX8       | 0 | NA | 1  | 20 | 0  | NA | 0  | NA | 0  | NA |
| 17 | 75427808 | 75421549 | -1 | NM_003655    | CBX4       | 1 | 11 | 14 | 0  | NA | 1  | 11 | 0  | NA | 0  |
| 17 | 75624242 | 75528413 | -1 | NM_019020    | TBC1D16    | 0 | NA | 0  | NA | 0  | NA | 1  | 11 | 0  | NA |
| 17 | 75625029 | 75689007 | 1  | NM_017950    | CCDC40     | 0 | NA | 0  | NA | 0  | NA | 1  | 11 | 0  | NA |
| 17 | 75689949 | 75708274 | 1  | NM_000152    | GAA        | 0 | NA | 0  | NA | 0  | NA | 0  | NA | 0  | NA |
| 17 | 75689949 | 75708274 | 1  | NM_001079803 | GAA        | 0 | NA | 0  | NA | 0  | NA | 0  | NA | 0  | NA |
| 17 | 75689949 | 75708274 | 1  | NM_001079804 | GAA        | 0 | NA | 0  | NA | 0  | NA | 0  | NA | 0  | NA |



|    |          |          |    |              |          |   |    |   |    |   |    |   |    |   |    |
|----|----------|----------|----|--------------|----------|---|----|---|----|---|----|---|----|---|----|
| 17 | 75735533 | 75723611 | -1 | NM_014740    | EIF4A3   | 0 | NA | 0 | NA | 0 | NA | 1 | 14 | 1 | 12 |
| 17 | 75766875 | 75797446 | 1  | NM_024110    | CARD14   | 0 | NA | 0 | NA | 0 | NA | 0 | NA | 0 | NA |
| 17 | 75776193 | 75787318 | 1  | NM_052819    | CARD14   | 0 | NA | 0 | NA | 0 | NA | 0 | NA | 0 | NA |
| 17 | 75808794 | 75797673 | -1 | NM_000199    | SGSH     | 1 | 13 | 0 | NA | 0 | NA | 0 | NA | 0 | NA |
| 17 | 75808831 | 75841892 | 1  | NM_173626    | SLC26A11 | 1 | 13 | 0 | NA | 0 | NA | 0 | NA | 0 | NA |
| 17 | 75849261 | 75909857 | 1  | NM_020954    | KIAA1618 | 0 | NA | 0 | NA | 0 | NA | 0 | NA | 0 | NA |
| 17 | 75928320 | 75984673 | 1  | NM_020914    | RNF213   | 0 | NA | 0 | NA | 0 | NA | 0 | NA | 0 | NA |
| 17 | 76003561 | 76026476 | 1  | NM_173627    | FLJ35220 | 0 | NA | 0 | NA | 0 | NA | 1 | 12 | 0 | NA |
| 17 | 76064999 | 76055227 | -1 | NM_002522    | NPTX1    | 0 | NA | 0 | NA | 0 | NA | 1 | 13 | 1 | 14 |
| 17 | 76133219 | 76554768 | 1  | NM_020761    | KIAA1303 | 1 | 12 | 0 | NA | 0 | NA | 0 | NA | 0 | NA |
| 17 | 76580289 | 76585528 | 1  | NM_024591    | CHMP6    | 0 | NA | 0 | NA | 0 | NA | 0 | NA | 0 | NA |
| 17 | 76623556 | 76698907 | 1  | NM_017450    | BAIAP2   | 1 | 23 | 0 | NA | 0 | NA | 0 | NA | 0 | NA |
| 17 | 76623556 | 76704619 | 1  | NM_006340    | BAIAP2   | 1 | 23 | 0 | NA | 0 | NA | 0 | NA | 0 | NA |
| 17 | 76623556 | 76705827 | 1  | NM_017451    | BAIAP2   | 1 | 23 | 0 | NA | 0 | NA | 0 | NA | 0 | NA |
| 17 | 76754467 | 76705690 | -1 | NM_001080395 | AATK     | 0 | NA | 0 | NA | 0 | NA | 0 | NA | 1 | 18 |
| 17 | 76811346 | 76777987 | -1 | NM_001009811 | AZI1     | 1 | 12 | 0 | NA | 0 | NA | 0 | NA | 0 | NA |
| 17 | 76811346 | 76777987 | -1 | NM_014984    | AZI1     | 1 | 12 | 0 | NA | 0 | NA | 0 | NA | 0 | NA |
| 17 | 76827450 | 76816673 | -1 | NM_144679    | C17orf56 | 1 | 13 | 0 | NA | 0 | NA | 0 | NA | 1 | 13 |
| 17 | 76827705 | 76829693 | 1  | NM_001086521 | C17orf89 | 1 | 13 | 0 | NA | 0 | NA | 0 | NA | 1 | 13 |
| 17 | 76883691 | 76833393 | -1 | NM_001037984 | SLC38A10 | 1 | 11 | 0 | NA | 0 | NA | 0 | NA | 0 | NA |
| 17 | 76883691 | 76839265 | -1 | NM_138570    | SLC38A10 | 1 | 11 | 0 | NA | 0 | NA | 0 | NA | 0 | NA |
| 17 | 76897643 | 76891218 | -1 | NM_178519    | C17orf55 | 0 | NA | 0 | NA | 0 | NA | 0 | NA | 0 | NA |
| 17 | 76919069 | 76899668 | -1 | NM_178520    | TMEM105  | 0 | NA | 0 | NA | 0 | NA | 0 | NA | 0 | NA |
| 17 | 76988134 | 77047953 | 1  | NM_001080519 | BAHCC1   | 1 | 12 | 0 | NA | 0 | NA | 1 | 12 | 0 | NA |
| 17 | 77094422 | 77091593 | -1 | NM_001614    | ACTG1    | 0 | NA | 0 | NA | 0 | NA | 0 | NA | 1 | 15 |
| 17 | 77110011 | 77114632 | 1  | NM_001077182 | FSCN2    | 0 | NA | 1 | 15 | 0 | NA | 0 | NA | 0 | NA |
| 17 | 77110011 | 77114632 | 1  | NM_012418    | FSCN2    | 0 | NA | 1 | 15 | 0 | NA | 0 | NA | 0 | NA |
| 17 | 77129848 | 77117386 | -1 | NM_001109760 | C17orf70 | 0 | NA | 0 | NA | 0 | NA | 1 | 20 | 0 | NA |
| 17 | 77129868 | 77117386 | -1 | NM_025161    | C17orf70 | 0 | NA | 0 | NA | 0 | NA | 1 | 20 | 0 | NA |
| 17 | 77214543 | 77134356 | -1 | NM_017921    | NPLOC4   | 0 | NA | 0 | NA | 0 | NA | 0 | NA | 1 | 17 |
| 17 | 77219753 | 77226184 | 1  | NM_031945    | TSPAN10  | 0 | NA | 0 | NA | 0 | NA | 1 | 11 | 1 | 17 |
| 17 | 77234038 | 77227893 | -1 | NM_002602    | PDE6G    | 0 | NA | 0 | NA | 0 | NA | 1 | 11 | 1 | 12 |
| 17 | 77244023 | 77242470 | -1 | NM_001039842 | C17orf90 | 0 | NA | 0 | NA | 0 | NA | 0 | NA | 0 | NA |
| 17 | 77244165 | 77251341 | 1  | NM_199287    | CCDC137  | 0 | NA | 0 | NA | 0 | NA | 0 | NA | 0 | NA |
| 17 | 77261359 | 77258628 | -1 | NM_001040025 | ARL16    | 0 | NA | 0 | NA | 0 | NA | 1 | 11 | 0 | NA |
| 17 | 77261424 | 77279552 | 1  | NM_004712    | HGS      | 0 | NA | 0 | NA | 0 | NA | 1 | 11 | 0 | NA |
| 17 | 77280811 | 77284953 | 1  | NM_002949    | MRPL12   | 1 | 14 | 0 | NA | 0 | NA | 0 | NA | 0 | NA |
| 17 | 77289775 | 77298447 | 1  | NM_012140    | SLC25A10 | 1 | 14 | 0 | NA | 0 | NA | 0 | NA | 0 | NA |
| 17 | 77386215 | 77384656 | -1 | NM_001007533 | DYSFIP1  | 0 | NA | 0 | NA | 0 | NA | 0 | NA | 0 | NA |
| 17 | 77411833 | 77394322 | -1 | NM_000918    | P4HB     | 0 | NA | 0 | NA | 0 | NA | 1 | 21 | 0 | NA |
| 17 | 77422527 | 77418885 | -1 | NM_004309    | ARHGDI4  | 0 | NA | 0 | NA | 0 | NA | 1 | 16 | 0 | NA |
| 17 | 77442758 | 77439015 | -1 | NM_005762    | THOC4    | 0 | NA | 0 | NA | 0 | NA | 1 | 12 | 0 | NA |
| 17 | 77442894 | 77451655 | 1  | NM_001002244 | ANAPC11  | 0 | NA | 0 | NA | 0 | NA | 1 | 12 | 0 | NA |
| 17 | 77442894 | 77451655 | 1  | NM_001002245 | ANAPC11  | 0 | NA | 0 | NA | 0 | NA | 1 | 12 | 0 | NA |
| 17 | 77442894 | 77451655 | 1  | NM_001002246 | ANAPC11  | 0 | NA | 0 | NA | 0 | NA | 1 | 12 | 0 | NA |
| 17 | 77442894 | 77451655 | 1  | NM_001002247 | ANAPC11  | 0 | NA | 0 | NA | 0 | NA | 1 | 12 | 0 | NA |
| 17 | 77442894 | 77451655 | 1  | NM_001002248 | ANAPC11  | 0 | NA | 0 | NA | 0 | NA | 1 | 12 | 0 | NA |
| 17 | 77442894 | 77451655 | 1  | NM_016476    | ANAPC11  | 0 | NA | 0 | NA | 0 | NA | 1 | 12 | 0 | NA |
| 17 | 77443113 | 77451655 | 1  | NM_001002249 | ANAPC11  | 0 | NA | 0 | NA | 0 | NA | 1 | 12 | 0 | NA |
| 17 | 77453445 | 77453916 | 1  | NM_148896    | NPB      | 0 | NA | 0 | NA | 0 | NA | 0 | NA | 0 | NA |
| 17 | 77462586 | 77455383 | -1 | NM_002861    | PCYT2    | 0 | NA | 0 | NA | 0 | NA | 0 | NA | 0 | NA |
| 17 | 77469332 | 77463106 | -1 | NM_016538    | SIRT7    | 0 | NA | 0 | NA | 0 | NA | 0 | NA | 0 | NA |
| 17 | 77474701 | 77469437 | -1 | NM_032711    | MAFG     | 0 | NA | 0 | NA | 0 | NA | 1 | 16 | 0 | NA |
| 17 | 77478879 | 77469437 | -1 | NM_002359    | MAFG     | 0 | NA | 0 | NA | 0 | NA | 1 | 16 | 0 | NA |
| 17 | 77488259 | 77483557 | -1 | NM_153824    | PYCR1    | 0 | NA | 0 | NA | 0 | NA | 1 | 12 | 0 | NA |
| 17 | 77488259 | 77483559 | -1 | NM_006907    | PYCR1    | 0 | NA | 0 | NA | 0 | NA | 1 | 12 | 0 | NA |
| 17 | 77512353 | 77503677 | -1 | NM_178493    | NOTUM    | 0 | NA | 0 | NA | 0 | NA | 1 | 11 | 0 | NA |
| 17 | 77528714 | 77568571 | 1  | NM_024083    | ASPSR1   | 1 | 11 | 0 | NA | 0 | NA | 1 | 16 | 0 | NA |
| 17 | 77574062 | 77569867 | -1 | NM_144998    | STRA13   | 0 | NA | 0 | NA | 0 | NA | 0 | NA | 0 | NA |
| 17 | 77574568 | 77582316 | 1  | NM_144999    | LRRC45   | 0 | NA | 0 | NA | 0 | NA | 0 | NA | 0 | NA |
| 17 | 77582820 | 77585369 | 1  | NM_005052    | RAC3     | 0 | NA | 0 | NA | 0 | NA | 0 | NA | 0 | NA |
| 17 | 77588862 | 77587045 | -1 | NM_016286    | DCXR     | 0 | NA | 0 | NA | 0 | NA | 0 | NA | 0 | NA |
| 17 | 77602939 | 77599066 | -1 | NM_002917    | RFNG     | 0 | NA | 0 | NA | 0 | NA | 0 | NA | 0 | NA |
| 17 | 77603051 | 77608635 | 1  | NM_004127    | GPS1     | 0 | NA | 0 | NA | 0 | NA | 0 | NA | 0 | NA |
| 17 | 77603051 | 77608635 | 1  | NM_212492    | GPS1     | 0 | NA | 0 | NA | 0 | NA | 0 | NA | 0 | NA |

|    |          |          |    |              |           |   |    |   |    |   |    |   |    |   |    |
|----|----------|----------|----|--------------|-----------|---|----|---|----|---|----|---|----|---|----|
| 17 | 77616969 | 77609039 | -1 | NM_022156    | DUS1L     | 0 | NA | 0 | NA | 0 | NA | 0 | NA | 0 | NA |
| 17 | 77649395 | 77629502 | -1 | NM_004104    | FASN      | 0 | NA | 0 | NA | 0 | NA | 0 | NA | 0 | NA |
| 17 | 77763978 | 77652634 | -1 | NM_198082    | CCDC57    | 0 | NA | 0 | NA | 0 | NA | 1 | 19 | 0 | NA |
| 17 | 77779581 | 77790658 | 1  | NM_001042422 | SLC16A3   | 0 | NA | 0 | NA | 0 | NA | 1 | 11 | 0 | NA |
| 17 | 77780177 | 77790658 | 1  | NM_004207    | SLC16A3   | 0 | NA | 0 | NA | 0 | NA | 1 | 11 | 0 | NA |
| 17 | 77783432 | 77790658 | 1  | NM_001042423 | SLC16A3   | 0 | NA | 0 | NA | 0 | NA | 1 | 11 | 0 | NA |
| 17 | 77824862 | 77795528 | -1 | NM_001893    | CSNK1D    | 0 | NA | 0 | NA | 0 | NA | 0 | NA | 1 | 18 |
| 17 | 77824862 | 77795528 | -1 | NM_139062    | CSNK1D    | 0 | NA | 0 | NA | 0 | NA | 0 | NA | 1 | 18 |
| 17 | 77868769 | 77866034 | -1 | NM_006137    | CD7       | 0 | NA | 1 | 12 | 0 | NA | 0 | NA | 1 | 14 |
| 17 | 77885210 | 77872188 | -1 | NM_003004    | SECTM1    | 1 | 11 | 0 | NA | 0 | NA | 0 | NA | 0 | NA |
| 17 | 77910412 | 77914909 | 1  | NM_207459    | FLJ35767  | 0 | NA | 0 | NA | 0 | NA | 1 | 13 | 0 | NA |
| 17 | 77925489 | 77926659 | 1  | NM_018949    | UTS2R     | 0 | NA | 1 | 12 | 1 | 12 | 1 | 15 | 0 | NA |
| 17 | 77969540 | 77993805 | 1  | NM_173620    | HEXDC     | 0 | NA | 0 | NA | 0 | NA | 0 | NA | 0 | NA |
| 17 | 77969741 | 77943388 | -1 | NM_175902    | FLJ22222  | 0 | NA | 0 | NA | 0 | NA | 0 | NA | 0 | NA |
| 17 | 77969751 | 77943388 | -1 | NM_024648    | FLJ22222  | 0 | NA | 0 | NA | 0 | NA | 0 | NA | 0 | NA |
| 17 | 78001983 | 77993807 | -1 | NM_001033046 | C17orf62  | 0 | NA | 0 | NA | 0 | NA | 0 | NA | 0 | NA |
| 17 | 78001983 | 77993807 | -1 | NM_001100407 | C17orf62  | 0 | NA | 0 | NA | 0 | NA | 0 | NA | 0 | NA |
| 17 | 78001983 | 77993807 | -1 | NM_001100408 | C17orf62  | 0 | NA | 0 | NA | 0 | NA | 0 | NA | 0 | NA |
| 17 | 78009348 | 78039432 | 1  | NM_001038618 | NARF      | 0 | NA | 0 | NA | 0 | NA | 0 | NA | 0 | NA |
| 17 | 78009828 | 78039432 | 1  | NM_001083608 | NARF      | 0 | NA | 0 | NA | 0 | NA | 0 | NA | 0 | NA |
| 17 | 78009828 | 78039432 | 1  | NM_012336    | NARF      | 0 | NA | 0 | NA | 0 | NA | 0 | NA | 0 | NA |
| 17 | 78009828 | 78039432 | 1  | NM_031968    | NARF      | 0 | NA | 0 | NA | 0 | NA | 0 | NA | 0 | NA |
| 17 | 78070882 | 78155772 | 1  | NM_004514    | FOXK2     | 0 | NA | 0 | NA | 1 | 18 | 0 | NA | 0 | NA |
| 17 | 78199700 | 78165726 | -1 | NM_019613    | WDR45L    | 0 | NA | 0 | NA | 0 | NA | 0 | NA | 0 | NA |
| 17 | 78249802 | 78208237 | -1 | NM_006822    | RAB40B    | 0 | NA | 1 | 14 | 0 | NA | 1 | 15 | 0 | NA |
| 17 | 78267894 | 78279146 | 1  | NM_024619    | FN3KRP    | 0 | NA | 0 | NA | 0 | NA | 0 | NA | 1 | 12 |
| 17 | 78286796 | 78302362 | 1  | NM_022158    | FN3K      | 0 | NA | 0 | NA | 0 | NA | 1 | 18 | 1 | 21 |
| 17 | 78303228 | 78494351 | 1  | NM_005993    | TBCD      | 0 | NA | 0 | NA | 0 | NA | 0 | NA | 0 | NA |
| 17 | 78391220 | 78380598 | -1 | NM_024702    | ZNF750    | 0 | NA | 0 | NA | 0 | NA | 0 | NA | 0 | NA |
| 17 | 78602975 | 78494955 | -1 | NM_001009905 | B3GNTL1   | 0 | NA | 0 | NA | 0 | NA | 1 | 11 | 0 | NA |
| 17 | 78630855 | 78646011 | 1  | NM_001004431 | METRNL    | 0 | NA | 0 | NA | 0 | NA | 1 | 13 | 0 | NA |
| 16 | 43625    | 36999    | -1 | NM_016310    | POLR3K    | 0 | NA | 0 | NA | 0 | NA | 0 | NA | 0 | NA |
| 16 | 43828    | 47669    | 1  | NM_024571    | C16orf33  | 0 | NA | 0 | NA | 0 | NA | 0 | NA | 0 | NA |
| 16 | 62591    | 48057    | -1 | NM_022450    | RHBDF1    | 0 | 12 | 0 | NA | 0 | NA | 0 | NA | 0 | NA |
| 16 | 67017    | 75843    | 1  | NM_001015054 | MPG       | 1 | 12 | 0 | NA | 0 | NA | 0 | NA | 0 | NA |
| 16 | 68168    | 75843    | 1  | NM_001015052 | MPG       | 1 | 12 | 0 | NA | 0 | NA | 0 | NA | 0 | NA |
| 16 | 68168    | 75843    | 1  | NM_002434    | MPG       | 1 | 12 | 0 | NA | 0 | NA | 0 | NA | 0 | NA |
| 16 | 128610   | 75803    | -1 | NM_001039476 | C16orf35  | 0 | NA | 0 | NA | 0 | NA | 0 | NA | 0 | NA |
| 16 | 128672   | 75803    | -1 | NM_001077350 | C16orf35  | 0 | NA | 0 | NA | 0 | NA | 0 | NA | 0 | NA |
| 16 | 142853   | 144504   | 1  | NM_005332    | HBZ       | 0 | NA | 0 | NA | 0 | NA | 0 | NA | 0 | NA |
| 16 | 155972   | 156767   | 1  | NM_001003938 | HBM       | 0 | NA | 0 | NA | 0 | NA | 0 | NA | 0 | NA |
| 16 | 162845   | 163709   | 1  | NM_000517    | HBA2      | 0 | NA | 0 | NA | 0 | NA | 0 | NA | 0 | NA |
| 16 | 166678   | 167520   | 1  | NM_000558    | HBA1      | 0 | NA | 0 | NA | 0 | NA | 0 | NA | 0 | NA |
| 16 | 170334   | 171178   | 1  | NM_005331    | HBQ1      | 0 | NA | 0 | NA | 0 | NA | 0 | NA | 0 | NA |
| 16 | 219450   | 178970   | -1 | NM_018032    | LUC7L     | 0 | NA | 0 | NA | 0 | NA | 0 | NA | 0 | NA |
| 16 | 219450   | 178974   | -1 | NM_201412    | LUC7L     | 0 | NA | 0 | NA | 0 | NA | 0 | NA | 0 | NA |
| 16 | 224834   | 256120   | 1  | NM_032039    | ITFG3     | 0 | NA | 0 | NA | 0 | NA | 0 | NA | 0 | NA |
| 16 | 265915   | 258310   | -1 | NM_003834    | RGS11     | 0 | NA | 0 | NA | 0 | NA | 0 | NA | 0 | NA |
| 16 | 265915   | 258310   | -1 | NM_183337    | RGS11     | 0 | NA | 0 | NA | 0 | NA | 0 | NA | 0 | NA |
| 16 | 270606   | 273004   | 1  | NM_001176    | ARHGDI3   | 0 | NA | 0 | NA | 0 | NA | 0 | NA | 0 | NA |
| 16 | 273118   | 277210   | 1  | NM_006849    | PDIA2     | 0 | NA | 0 | NA | 0 | NA | 0 | NA | 0 | NA |
| 16 | 342465   | 277440   | -1 | NM_003502    | AXIN1     | 0 | NA | 0 | NA | 0 | NA | 0 | NA | 0 | NA |
| 16 | 342465   | 277440   | -1 | NM_181050    | AXIN1     | 0 | NA | 0 | NA | 0 | NA | 0 | NA | 0 | NA |
| 16 | 360541   | 357396   | -1 | NM_006428    | MRPL28    | 0 | NA | 0 | NA | 0 | NA | 0 | NA | 0 | NA |
| 16 | 371951   | 360776   | -1 | NM_021259    | TMEM8     | 0 | NA | 0 | NA | 0 | NA | 1 | 11 | 0 | NA |
| 16 | 387192   | 390755   | 1  | NM_005009    | NME4      | 0 | NA | 0 | NA | 0 | NA | 0 | NA | 0 | NA |
| 16 | 391858   | 402488   | 1  | NM_020664    | DECR2     | 0 | NA | 0 | NA | 0 | NA | 0 | NA | 0 | NA |
| 16 | 415668   | 512482   | 1  | NM_014700    | RAB11FIP3 | 0 | NA | 0 | NA | 0 | NA | 0 | NA | 0 | NA |
| 16 | 517856   | 544637   | 1  | NM_005632    | SOLH      | 0 | NA | 0 | NA | 0 | NA | 0 | NA | 0 | NA |
| 16 | 550422   | 555530   | 1  | NM_145270    | LOC146325 | 1 | 11 | 0 | NA | 0 | NA | 0 | NA | 0 | NA |
| 16 | 557032   | 559496   | 1  | NM_176677    | FLJ36208  | 1 | 11 | 0 | NA | 0 | NA | 0 | NA | 0 | NA |
| 16 | 560004   | 574109   | 1  | NM_004204    | PIGQ      | 1 | 11 | 0 | NA | 0 | NA | 0 | NA | 0 | NA |
| 16 | 560004   | 574110   | 1  | NM_148920    | PIGQ      | 1 | 11 | 0 | NA | 0 | NA | 0 | NA | 0 | NA |
| 16 | 580179   | 619273   | 1  | NM_021168    | RAB40C    | 0 | NA | 0 | NA | 0 | NA | 0 | NA | 0 | NA |
| 16 | 621012   | 624117   | 1  | NM_053284    | WFIKK1    | 1 | 16 | 0 | NA | 0 | NA | 1 | 12 | 0 | NA |

|    |         |         |    |              |           |   |    |   |    |   |    |   |    |   |    |
|----|---------|---------|----|--------------|-----------|---|----|---|----|---|----|---|----|---|----|
| 16 | 626348  | 624429  | -1 | NM_001040160 | C16orf13  | 1 | 16 | 0 | NA | 0 | NA | 1 | 12 | 0 | NA |
| 16 | 626348  | 624429  | -1 | NM_001040161 | C16orf13  | 1 | 16 | 0 | NA | 0 | NA | 1 | 12 | 0 | NA |
| 16 | 626348  | 624429  | -1 | NM_001040162 | C16orf13  | 1 | 16 | 0 | NA | 0 | NA | 1 | 12 | 0 | NA |
| 16 | 626348  | 624429  | -1 | NM_001040165 | C16orf13  | 1 | 16 | 0 | NA | 0 | NA | 1 | 12 | 0 | NA |
| 16 | 626348  | 624429  | -1 | NM_032366    | C16orf13  | 1 | 16 | 0 | NA | 0 | NA | 1 | 12 | 0 | NA |
| 16 | 631849  | 638475  | 1  | NM_138418    | C16orf14  | 1 | 16 | 0 | NA | 1 | 13 | 1 | 12 | 0 | NA |
| 16 | 639363  | 657830  | 1  | NM_145294    | WDR90     | 1 | NA | 0 | NA | 1 | 13 | 0 | NA | 0 | NA |
| 16 | 658133  | 664172  | 1  | NM_138769    | RHOT2     | 0 | NA | 0 | NA | 1 | 14 | 0 | NA | 0 | NA |
| 16 | 666075  | 668268  | 1  | NM_003961    | RHBDL1    | 0 | NA | 0 | NA | 0 | NA | 0 | NA | 0 | NA |
| 16 | 670115  | 672769  | 1  | NM_005861    | STUB1     | 0 | NA | 0 | NA | 0 | NA | 0 | NA | 0 | NA |
| 16 | 674440  | 671667  | -1 | NM_001005920 | LOC339123 | 0 | NA | 0 | NA | 0 | NA | 0 | NA | 0 | NA |
| 16 | 680401  | 674702  | -1 | NM_032259    | WDR24     | 0 | NA | 0 | NA | 0 | NA | 0 | NA | 0 | NA |
| 16 | 695809  | 682505  | -1 | NM_153350    | FBXL16    | 0 | NA | 0 | NA | 0 | NA | 0 | NA | 0 | NA |
| 16 | 705173  | 707481  | 1  | NM_024042    | METRNL    | 0 | NA | 0 | NA | 0 | NA | 0 | NA | 0 | NA |
| 16 | 711158  | 712591  | 1  | NM_023933    | C16orf24  | 0 | NA | 0 | NA | 0 | NA | 0 | NA | 0 | NA |
| 16 | 716460  | 712582  | -1 | NM_001031737 | CCDC78    | 0 | NA | 0 | NA | 0 | NA | 0 | NA | 0 | NA |
| 16 | 716958  | 719716  | 1  | NM_207112    | HAGHL     | 0 | NA | 0 | NA | 0 | NA | 0 | NA | 0 | NA |
| 16 | 717266  | 719716  | 1  | NM_032304    | HAGHL     | 0 | NA | 0 | NA | 0 | NA | 0 | NA | 0 | NA |
| 16 | 730998  | 719769  | -1 | NM_022493    | NARFL     | 0 | NA | 0 | NA | 0 | NA | 0 | NA | 0 | NA |
| 16 | 751133  | 758866  | 1  | NM_005823    | MSLN      | 0 | NA | 0 | NA | 0 | NA | 0 | NA | 0 | NA |
| 16 | 751133  | 758866  | 1  | NM_013404    | MSLN      | 0 | NA | 0 | NA | 0 | NA | 0 | NA | 0 | NA |
| 16 | 772927  | 759428  | -1 | NM_001025190 | MPFL      | 0 | NA | 0 | NA | 0 | NA | 0 | NA | 0 | NA |
| 16 | 778384  | 774974  | -1 | NM_058192    | RPUSD1    | 0 | NA | 0 | NA | 0 | NA | 0 | NA | 0 | NA |
| 16 | 778622  | 788075  | 1  | NM_022092    | CHTF18    | 0 | NA | 0 | NA | 0 | NA | 0 | NA | 0 | NA |
| 16 | 790734  | 788041  | -1 | NM_016541    | GNG13     | 1 | 11 | 0 | NA | 0 | NA | 0 | NA | 0 | NA |
| 16 | 795443  | 803862  | 1  | NM_001013638 | LOC388199 | 1 | 15 | 1 | 14 | 0 | NA | 0 | NA | 0 | NA |
| 16 | 960985  | 843634  | -1 | NM_022773    | LMF1      | 0 | NA | 1 | 13 | 0 | NA | 0 | NA | 0 | NA |
| 16 | 971808  | 976980  | 1  | NM_014587    | SOX8      | 0 | NA | 1 | 13 | 0 | NA | 0 | NA | 0 | NA |
| 16 | 1068869 | 1069964 | 1  | NM_001053    | SSTR5     | 0 | NA | 1 | 12 | 0 | NA | 0 | NA | 0 | NA |
| 16 | 1086245 | 1078226 | -1 | NM_207419    | C1QTNF8   | 0 | NA | 0 | NA | 0 | NA | 0 | NA | 0 | NA |
| 16 | 1143241 | 1211773 | 1  | NM_001005407 | CACNA1H   | 0 | NA | 1 | 12 | 0 | NA | 0 | NA | 0 | NA |
| 16 | 1143241 | 1211773 | 1  | NM_021098    | CACNA1H   | 0 | NA | 1 | 12 | 0 | NA | 0 | NA | 0 | NA |
| 16 | 1215255 | 1211652 | -1 | NM_012467    | TPSG1     | 0 | NA | 0 | NA | 0 | NA | 0 | NA | 0 | NA |
| 16 | 1220186 | 1218336 | -1 | NM_024164    | TPSB2     | 0 | NA | 0 | NA | 0 | NA | 0 | NA | 0 | NA |
| 16 | 1230678 | 1232556 | 1  | NM_003294    | TPSAB1    | 0 | NA | 0 | NA | 0 | NA | 0 | NA | 0 | NA |
| 16 | 1246273 | 1248495 | 1  | NM_012217    | TPSD1     | 0 | NA | 1 | 13 | 0 | NA | 0 | NA | 0 | NA |
| 16 | 1299180 | 1315391 | 1  | NM_194261    | UBE2I     | 0 | NA | 1 | 12 | 0 | NA | 0 | NA | 0 | NA |
| 16 | 1299361 | 1315391 | 1  | NM_194260    | UBE2I     | 0 | NA | 0 | NA | 0 | NA | 0 | NA | 0 | NA |
| 16 | 1299638 | 1315391 | 1  | NM_003345    | UBE2I     | 0 | NA | 0 | NA | 0 | NA | 0 | NA | 0 | NA |
| 16 | 1299638 | 1315391 | 1  | NM_194259    | UBE2I     | 0 | NA | 0 | NA | 0 | NA | 0 | NA | 0 | NA |
| 16 | 1324663 | 1339443 | 1  | NM_003933    | BAIAP3    | 0 | NA | 0 | NA | 0 | NA | 0 | NA | 0 | NA |
| 16 | 1341874 | 1339241 | -1 | NM_001001410 | C16orf42  | 0 | NA | 0 | NA | 0 | NA | 0 | NA | 0 | NA |
| 16 | 1341932 | 1353353 | 1  | NM_032520    | GNPTG     | 0 | NA | 0 | NA | 0 | NA | 0 | NA | 0 | NA |
| 16 | 1369682 | 1353206 | -1 | NM_023076    | UNKL      | 0 | NA | 0 | NA | 0 | NA | 0 | NA | 0 | NA |
| 16 | 1404701 | 1388306 | -1 | NM_001037125 | UNKL      | 0 | NA | 0 | NA | 0 | NA | 0 | NA | 0 | NA |
| 16 | 1419346 | 1409944 | -1 | NM_001010878 | LOC283951 | 0 | NA | 0 | NA | 0 | NA | 0 | NA | 0 | NA |
| 16 | 1465086 | 1434935 | -1 | NM_00114331  | CLCN7     | 1 | 12 | 0 | NA | 1 | 12 | 1 | 14 | 0 | NA |
| 16 | 1465086 | 1434935 | -1 | NM_001287    | CLCN7     | 1 | 12 | 0 | NA | 1 | 12 | 1 | 14 | 0 | NA |
| 16 | 1478469 | 1475940 | -1 | NM_001013658 | LOC390667 | 1 | 12 | 0 | NA | 0 | NA | 0 | NA | 0 | NA |
| 16 | 1483422 | 1500456 | 1  | NM_016111    | TELO2     | 1 | 12 | 0 | NA | 0 | NA | 0 | NA | 0 | NA |
| 16 | 1524231 | 1545244 | 1  | NM_024600    | TMEM204   | 0 | NA | 0 | NA | 0 | NA | 0 | NA | 0 | NA |
| 16 | 1597301 | 1500430 | -1 | NM_014714    | IFT140    | 1 | 20 | 0 | NA | 0 | NA | 1 | 13 | 0 | NA |
| 16 | 1604901 | 1667910 | 1  | NM_020825    | CRAMP1L   | 1 | 20 | 0 | NA | 0 | NA | 1 | 13 | 0 | NA |
| 16 | 1668278 | 1692074 | 1  | NM_144570    | HN1L      | 0 | NA | 0 | NA | 1 | 12 | 0 | NA | 0 | NA |
| 16 | 1696221 | 1760319 | 1  | NM_001040439 | MAPK8IP3  | 1 | 11 | 0 | NA | 0 | NA | 0 | NA | 0 | NA |
| 16 | 1696221 | 1760319 | 1  | NM_015133    | MAPK8IP3  | 1 | 11 | 0 | NA | 0 | NA | 0 | NA | 0 | NA |
| 16 | 1761711 | 1760321 | -1 | NM_002513    | NME3      | 0 | NA | 0 | NA | 0 | NA | 0 | NA | 0 | NA |
| 16 | 1763141 | 1761896 | -1 | NM_023936    | MRPS34    | 0 | NA | 0 | NA | 0 | NA | 0 | NA | 0 | NA |
| 16 | 1763229 | 1766240 | 1  | NM_001010865 | EME2      | 0 | NA | 0 | NA | 0 | NA | 0 | NA | 0 | NA |
| 16 | 1772582 | 1766713 | -1 | NM_080861    | SPSB3     | 0 | NA | 0 | NA | 0 | NA | 1 | 11 | 0 | NA |
| 16 | 1772959 | 1779187 | 1  | NM_012225    | NUBP2     | 0 | NA | 0 | NA | 0 | NA | 1 | 11 | 0 | NA |
| 16 | 1783710 | 1780419 | -1 | NM_004970    | IGFALS    | 0 | NA | 0 | NA | 0 | NA | 0 | NA | 0 | NA |
| 16 | 1817196 | 1799104 | -1 | NM_001040427 | HAGH      | 0 | NA | 0 | NA | 0 | NA | 0 | NA | 0 | NA |
| 16 | 1817196 | 1799104 | -1 | NM_005326    | HAGH      | 0 | NA | 0 | NA | 0 | NA | 0 | NA | 0 | NA |
| 16 | 1817225 | 1818909 | 1  | NM_031208    | FAHD1     | 0 | NA | 0 | NA | 0 | NA | 0 | NA | 0 | NA |

|    |         |         |    |              |           |   |    |   |    |   |    |   |    |   |    |
|----|---------|---------|----|--------------|-----------|---|----|---|----|---|----|---|----|---|----|
| 16 | 1817230 | 1830173 | 1  | NM_001018104 | FAHD1     | 0 | NA | 0 | NA | 0 | NA | 0 | NA | 0 | NA |
| 16 | 1850456 | 1823989 | -1 | NM_152764    | C16orf73  | 0 | NA | 0 | NA | 0 | NA | 0 | NA | 0 | NA |
| 16 | 1908232 | 1901465 | -1 | NM_001009606 | HS3ST6    | 0 | NA | 0 | NA | 0 | NA | 0 | NA | 0 | NA |
| 16 | 1933295 | 1928234 | -1 | NM_016332    | SEPX1     | 0 | NA | 0 | NA | 0 | NA | 0 | NA | 0 | NA |
| 16 | 1944680 | 1934580 | -1 | NM_005061    | RPL3L     | 1 | 11 | 0 | NA | 0 | NA | 0 | NA | 0 | NA |
| 16 | 1949517 | 1951977 | 1  | NM_004548    | NDUFB10   | 1 | 11 | 0 | NA | 0 | NA | 0 | NA | 0 | NA |
| 16 | 1954828 | 1952062 | -1 | NM_002952    | RPS2      | 1 | 11 | 0 | NA | 0 | NA | 0 | NA | 0 | NA |
| 16 | 1956875 | 1958977 | 1  | NM_174903    | RNF151    | 1 | 11 | 0 | NA | 0 | NA | 0 | NA | 0 | NA |
| 16 | 1962064 | 1968752 | 1  | NM_006453    | TBL3      | 1 | 11 | 0 | NA | 0 | NA | 0 | NA | 0 | NA |
| 16 | 1971185 | 1969041 | -1 | NM_172167    | NOXO1     | 0 | NA | 0 | NA | 0 | NA | 0 | NA | 0 | NA |
| 16 | 1971185 | 1969041 | -1 | NM_172168    | NOXO1     | 0 | NA | 0 | NA | 0 | NA | 0 | NA | 0 | NA |
| 16 | 1971441 | 1968918 | -1 | NM_144603    | NOXO1     | 0 | NA | 0 | NA | 0 | NA | 0 | NA | 0 | NA |
| 16 | 1974150 | 1977751 | 1  | NM_005262    | GFER      | 0 | NA | 0 | NA | 0 | NA | 0 | NA | 0 | NA |
| 16 | 1979968 | 1984277 | 1  | NM_004209    | SYNGR3    | 0 | NA | 0 | NA | 0 | NA | 0 | NA | 0 | NA |
| 16 | 1999764 | 1987768 | -1 | NM_178167    | ZNF598    | 0 | NA | 0 | NA | 1 | 12 | 0 | NA | 0 | NA |
| 16 | 2009521 | 2010757 | 1  | NM_001099456 | NPW       | 0 | NA | 0 | NA | 1 | 12 | 0 | NA | 0 | NA |
| 16 | 2016929 | 2028484 | 1  | NM_004785    | SLC9A3R2  | 0 | NA | 0 | NA | 0 | NA | 0 | NA | 0 | NA |
| 16 | 2037868 | 2029816 | -1 | NM_002528    | NTHL1     | 0 | NA | 0 | NA | 0 | NA | 0 | NA | 0 | NA |
| 16 | 2037990 | 2078714 | 1  | NM_000548    | TSC2      | 0 | NA | 0 | NA | 0 | NA | 0 | NA | 0 | NA |
| 16 | 2037990 | 2078714 | 1  | NM_001077183 | TSC2      | 0 | NA | 0 | NA | 0 | NA | 0 | NA | 0 | NA |
| 16 | 2037990 | 2078714 | 1  | NM_001114382 | TSC2      | 0 | NA | 0 | NA | 0 | NA | 0 | NA | 0 | NA |
| 16 | 2125900 | 2078711 | -1 | NM_000296    | PKD1      | 0 | NA | 0 | NA | 0 | NA | 0 | NA | 0 | NA |
| 16 | 2125900 | 2078711 | -1 | NM_001009944 | PKD1      | 0 | NA | 0 | NA | 0 | NA | 0 | NA | 0 | NA |
| 16 | 2138651 | 2144142 | 1  | NM_014353    | RAB26     | 1 | 12 | 0 | NA | 0 | NA | 1 | 12 | 0 | NA |
| 16 | 2145799 | 2168131 | 1  | NM_032271    | TRAF7     | 1 | 12 | 0 | NA | 0 | NA | 1 | 12 | 0 | NA |
| 16 | 2186466 | 2167184 | -1 | NM_020764    | CASKIN1   | 0 | NA | 0 | NA | 0 | NA | 0 | NA | 0 | NA |
| 16 | 2195450 | 2199419 | 1  | NM_022372    | GBL       | 0 | NA | 0 | NA | 0 | NA | 0 | NA | 0 | NA |
| 16 | 2201012 | 2199254 | -1 | NM_182563    | C16orf79  | 0 | NA | 0 | NA | 0 | NA | 0 | NA | 0 | NA |
| 16 | 2204823 | 2201603 | -1 | NM_001042371 | LQC283871 | 0 | NA | 0 | NA | 0 | NA | 0 | NA | 0 | NA |
| 16 | 2213587 | 2225744 | 1  | NM_004424    | E4F1      | 0 | NA | 0 | NA | 0 | NA | 0 | NA | 0 | NA |
| 16 | 2226468 | 2228713 | 1  | NM_001374    | DNASE1L2  | 0 | NA | 0 | NA | 0 | NA | 0 | NA | 0 | NA |
| 16 | 2241604 | 2229898 | -1 | NM_001919    | DCI       | 0 | NA | 0 | NA | 0 | NA | 0 | NA | 0 | NA |
| 16 | 2257798 | 2243122 | -1 | NM_006711    | RNPS1     | 0 | NA | 0 | NA | 0 | NA | 0 | NA | 0 | NA |
| 16 | 2258115 | 2243122 | -1 | NM_080594    | RNPS1     | 0 | NA | 0 | NA | 0 | NA | 0 | NA | 0 | NA |
| 16 | 2330748 | 2265879 | -1 | NM_001089    | ABCA3     | 0 | NA | 0 | NA | 0 | NA | 0 | NA | 0 | NA |
| 16 | 2419395 | 2448860 | 1  | NM_001761    | CCNF      | 0 | NA | 0 | NA | 0 | NA | 0 | NA | 0 | NA |
| 16 | 2450115 | 2454965 | 1  | NM_025108    | C16orf59  | 0 | NA | 0 | NA | 0 | NA | 0 | NA | 0 | NA |
| 16 | 2461500 | 2464147 | 1  | NM_006181    | NTN2L     | 0 | NA | 0 | NA | 0 | NA | 0 | NA | 0 | NA |
| 16 | 2465147 | 2493489 | 1  | NM_020705    | TBC1D24   | 0 | NA | 0 | NA | 0 | NA | 0 | NA | 0 | NA |
| 16 | 2503953 | 2510220 | 1  | NM_001694    | ATP6V0C   | 0 | NA | 0 | NA | 1 | 12 | 0 | NA | 0 | NA |
| 16 | 2510427 | 2519733 | 1  | NM_015944    | AMDHD2    | 0 | NA | 0 | NA | 1 | 12 | 0 | NA | 0 | NA |
| 16 | 2521420 | 2520036 | -1 | NM_001048212 | CEMP1     | 0 | NA | 0 | NA | 0 | NA | 0 | NA | 0 | NA |
| 16 | 2527970 | 2593190 | 1  | NM_002613    | PDPK1     | 0 | NA | 0 | NA | 0 | NA | 0 | NA | 0 | NA |
| 16 | 2527970 | 2593190 | 1  | NM_031268    | PDPK1     | 0 | NA | 0 | NA | 0 | NA | 0 | NA | 0 | NA |
| 16 | 2672498 | 2699032 | 1  | NM_018992    | KCTD5     | 0 | NA | 0 | NA | 0 | NA | 0 | NA | 0 | NA |
| 16 | 2710553 | 2702423 | -1 | NM_031948    | PRSS27    | 0 | NA | 0 | NA | 0 | NA | 0 | NA | 0 | NA |
| 16 | 2742330 | 2761414 | 1  | NM_016333    | SRRM2     | 1 | 22 | 0 | NA | 0 | NA | 0 | NA | 0 | NA |
| 16 | 2767298 | 2761415 | -1 | NM_007108    | TCEB2     | 0 | NA | 0 | NA | 0 | NA | 0 | NA | 0 | NA |
| 16 | 2767298 | 2761415 | -1 | NM_207013    | TCEB2     | 0 | NA | 0 | NA | 0 | NA | 0 | NA | 0 | NA |
| 16 | 2776709 | 2773954 | -1 | NM_152891    | PRSS33    | 0 | NA | 0 | NA | 0 | NA | 0 | NA | 0 | NA |
| 16 | 2807164 | 2811719 | 1  | NM_006799    | PRSS21    | 0 | NA | 1 | 12 | 0 | NA | 0 | NA | 0 | NA |
| 16 | 2807164 | 2811719 | 1  | NM_144956    | PRSS21    | 0 | NA | 1 | 12 | 0 | NA | 0 | NA | 0 | NA |
| 16 | 2807164 | 2811719 | 1  | NM_144957    | PRSS21    | 0 | NA | 1 | 12 | 0 | NA | 0 | NA | 0 | NA |
| 16 | 2820173 | 2822286 | 1  | NM_145252    | LOC124220 | 0 | NA | 0 | NA | 0 | NA | 1 | 14 | 0 | NA |
| 16 | 2848172 | 2842728 | -1 | NM_022119    | PRSS22    | 0 | NA | 0 | NA | 0 | NA | 0 | NA | 0 | NA |
| 16 | 2873318 | 2889357 | 1  | NM_138439    | FLYWCH2   | 0 | NA | 0 | NA | 0 | NA | 1 | 11 | 0 | NA |
| 16 | 2901980 | 2930159 | 1  | NM_020912    | FLYWCH1   | 1 | 14 | 0 | NA | 0 | NA | 1 | 14 | 0 | NA |
| 16 | 2901980 | 2941210 | 1  | NM_032296    | FLYWCH1   | 1 | 14 | 0 | NA | 0 | NA | 1 | 14 | 0 | NA |
| 16 | 2954217 | 2958382 | 1  | NM_024507    | KREMEN2   | 0 | NA | 0 | NA | 0 | NA | 1 | 11 | 0 | NA |
| 16 | 2954217 | 2958382 | 1  | NM_172229    | KREMEN2   | 0 | NA | 0 | NA | 0 | NA | 1 | 11 | 0 | NA |
| 16 | 2959342 | 2963486 | 1  | NM_152341    | PAQR4     | 0 | NA | 0 | NA | 0 | NA | 1 | 11 | 0 | NA |
| 16 | 2970475 | 2962792 | -1 | NM_004203    | PKMYT1    | 0 | NA | 0 | NA | 0 | NA | 0 | NA | 0 | NA |
| 16 | 2970475 | 2962792 | -1 | NM_182687    | PKMYT1    | 0 | NA | 0 | NA | 0 | NA | 0 | NA | 0 | NA |
| 16 | 3002206 | 3004507 | 1  | NM_020982    | CLDN9     | 0 | NA | 0 | NA | 0 | NA | 0 | NA | 0 | NA |
| 16 | 3008189 | 3004713 | -1 | NM_021195    | CLDN6     | 0 | NA | 0 | NA | 0 | NA | 0 | NA | 0 | NA |

|    |         |         |    |              |           |   |    |   |    |   |    |   |    |   |    |
|----|---------|---------|----|--------------|-----------|---|----|---|----|---|----|---|----|---|----|
| 16 | 3010313 | 3012384 | 1  | NM_016639    | TNFRSF12A | 0 | NA | 0 | NA | 0 | NA | 0 | NA | 0 | NA |
| 16 | 3014093 | 3017752 | 1  | NM_024339    | THOC6     | 0 | NA | 0 | NA | 0 | NA | 0 | NA | 0 | NA |
| 16 | 3014288 | 3012626 | -1 | NM_001002017 | HCFC1R1   | 0 | NA | 0 | NA | 0 | NA | 0 | NA | 0 | NA |
| 16 | 3014288 | 3012626 | -1 | NM_001002018 | HCFC1R1   | 0 | NA | 0 | NA | 0 | NA | 0 | NA | 0 | NA |
| 16 | 3014288 | 3012626 | -1 | NM_017885    | HCFC1R1   | 0 | NA | 0 | NA | 0 | NA | 0 | NA | 0 | NA |
| 16 | 3025543 | 3017868 | -1 | NM_001103175 | CCDC64B   | 0 | NA | 0 | NA | 0 | NA | 0 | NA | 0 | NA |
| 16 | 3036682 | 3050725 | 1  | NM_022468    | MMP25     | 0 | NA | 0 | NA | 0 | NA | 0 | NA | 0 | NA |
| 16 | 3055313 | 3059669 | 1  | NM_001012631 | IL32      | 0 | NA | 0 | NA | 0 | NA | 0 | NA | 0 | NA |
| 16 | 3055313 | 3059669 | 1  | NM_001012633 | IL32      | 0 | NA | 0 | NA | 0 | NA | 0 | NA | 0 | NA |
| 16 | 3055313 | 3059669 | 1  | NM_001012718 | IL32      | 0 | NA | 0 | NA | 0 | NA | 0 | NA | 0 | NA |
| 16 | 3055313 | 3059669 | 1  | NM_004221    | IL32      | 0 | NA | 0 | NA | 0 | NA | 0 | NA | 0 | NA |
| 16 | 3055612 | 3059669 | 1  | NM_001012635 | IL32      | 0 | NA | 0 | NA | 0 | NA | 0 | NA | 0 | NA |
| 16 | 3055639 | 3059669 | 1  | NM_001012634 | IL32      | 0 | NA | 0 | NA | 0 | NA | 0 | NA | 0 | NA |
| 16 | 3055663 | 3059669 | 1  | NM_001012632 | IL32      | 0 | NA | 0 | NA | 0 | NA | 0 | NA | 0 | NA |
| 16 | 3055785 | 3059669 | 1  | NM_001012636 | IL32      | 0 | NA | 0 | NA | 0 | NA | 0 | NA | 0 | NA |
| 16 | 3082862 | 3078895 | -1 | NM_032805    | ZSCAN10   | 0 | NA | 0 | NA | 0 | NA | 0 | NA | 0 | NA |
| 16 | 3102563 | 3110519 | 1  | NM_001042428 | ZNF205    | 0 | NA | 0 | NA | 0 | NA | 0 | NA | 0 | NA |
| 16 | 3102563 | 3110519 | 1  | NM_003456    | ZNF205    | 0 | NA | 0 | NA | 0 | NA | 0 | NA | 0 | NA |
| 16 | 3125139 | 3132806 | 1  | NM_004220    | ZNF213    | 1 | 19 | 0 | NA | 0 | NA | 0 | NA | 0 | NA |
| 16 | 3194247 | 3195186 | 1  | NM_012360    | OR1F1     | 0 | NA | 1 | 13 | 0 | NA | 0 | NA | 0 | NA |
| 16 | 3225410 | 3212342 | -1 | NM_003454    | ZNF200    | 0 | NA | 0 | NA | 0 | NA | 0 | NA | 0 | NA |
| 16 | 3225410 | 3212342 | -1 | NM_198087    | ZNF200    | 0 | NA | 0 | NA | 0 | NA | 0 | NA | 0 | NA |
| 16 | 3225410 | 3212342 | -1 | NM_198088    | ZNF200    | 0 | NA | 0 | NA | 0 | NA | 0 | NA | 0 | NA |
| 16 | 3246628 | 3232028 | -1 | NM_000243    | MEFV      | 1 | 25 | 0 | NA | 0 | NA | 1 | 18 | 0 | NA |
| 16 | 3273487 | 3281460 | 1  | NM_005741    | ZNF263    | 1 | 15 | 1 | 13 | 0 | NA | 1 | 11 | 0 | NA |
| 16 | 3291401 | 3288832 | -1 | NM_033208    | TIGD7     | 1 | 18 | 0 | NA | 0 | NA | 1 | 20 | 0 | NA |
| 16 | 3295486 | 3308575 | 1  | NM_153028    | ZNF75A    | 1 | 18 | 0 | NA | 0 | NA | 1 | 20 | 0 | NA |
| 16 | 3345889 | 3346925 | 1  | NM_012368    | OR2C1     | 1 | 29 | 1 | 16 | 0 | NA | 0 | NA | 1 | 12 |
| 16 | 3391026 | 3372085 | -1 | NM_017810    | ZNF434    | 1 | 61 | 1 | 14 | 1 | 24 | 1 | 48 | 1 | 12 |
| 16 | 3391244 | 3395044 | 1  | NM_001032292 | ZNF174    | 1 | 61 | 1 | 14 | 1 | 24 | 1 | 48 | 1 | 12 |
| 16 | 3391420 | 3399365 | 1  | NM_003450    | ZNF174    | 1 | 61 | 1 | 14 | 1 | 24 | 1 | 48 | 1 | 12 |
| 16 | 3433491 | 3426110 | -1 | NM_152457    | ZNF597    | 0 | NA | 0 | NA | 0 | NA | 0 | NA | 0 | NA |
| 16 | 3433668 | 3476964 | 1  | NM_001083601 | FLJ14154  | 0 | NA | 0 | NA | 0 | NA | 0 | NA | 0 | NA |
| 16 | 3447992 | 3476964 | 1  | NM_001083600 | FLJ14154  | 0 | NA | 0 | NA | 1 | 12 | 0 | NA | 0 | NA |
| 16 | 3447992 | 3476964 | 1  | NM_024845    | FLJ14154  | 0 | NA | 0 | NA | 1 | 12 | 0 | NA | 0 | NA |
| 16 | 3485422 | 3483484 | -1 | NM_001080524 | LOC646174 | 1 | 20 | 0 | NA | 0 | NA | 0 | NA | 0 | NA |
| 16 | 3490963 | 3526586 | 1  | NM_015041    | CLUAP1    | 1 | 20 | 0 | NA | 0 | NA | 0 | NA | 0 | NA |
| 16 | 3499894 | 3527670 | 1  | NM_024793    | CLUAP1    | 1 | 20 | 0 | NA | 0 | NA | 0 | NA | 0 | NA |
| 16 | 3567393 | 3529036 | -1 | NM_178844    | NLR3      | 0 | NA | 0 | NA | 0 | NA | 0 | NA | 0 | NA |
| 16 | 3601586 | 3571183 | -1 | NM_032444    | BTBD12    | 0 | NA | 0 | NA | 0 | NA | 0 | NA | 0 | NA |
| 16 | 3642940 | 3648097 | 1  | NM_005223    | DNASE1    | 0 | NA | 0 | NA | 0 | NA | 0 | NA | 0 | NA |
| 16 | 3707599 | 3648038 | -1 | NM_016292    | TRAP1     | 0 | NA | 0 | NA | 0 | NA | 0 | NA | 0 | NA |
| 16 | 3870122 | 3715056 | -1 | NM_001079846 | CREBBP    | 0 | NA | 0 | NA | 0 | NA | 1 | 16 | 0 | NA |
| 16 | 3870122 | 3715056 | -1 | NM_004380    | CREBBP    | 0 | NA | 0 | NA | 0 | NA | 1 | 16 | 0 | NA |
| 16 | 4106187 | 3952652 | -1 | NM_001116    | ADCY9     | 0 | NA | 0 | NA | 0 | NA | 0 | NA | 0 | NA |
| 16 | 4232082 | 4179375 | -1 | NM_001098814 | SRL       | 0 | NA | 0 | NA | 0 | NA | 0 | NA | 0 | NA |
| 16 | 4263011 | 4247187 | -1 | NM_003223    | TFAP4     | 1 | 11 | 0 | NA | 0 | NA | 1 | 11 | 0 | NA |
| 16 | 4322225 | 4329599 | 1  | NM_032575    | GLIS2     | 0 | NA | 0 | NA | 0 | NA | 0 | NA | 0 | NA |
| 16 | 4341301 | 4330252 | -1 | NM_016069    | Magmas    | 0 | NA | 0 | NA | 0 | NA | 0 | NA | 0 | NA |
| 16 | 4361849 | 4373530 | 1  | NM_138440    | VASN      | 0 | NA | 0 | NA | 0 | NA | 0 | NA | 0 | NA |
| 16 | 4406640 | 4344543 | -1 | NM_024535    | CORO7     | 0 | NA | 0 | NA | 0 | NA | 0 | NA | 0 | NA |
| 16 | 4415882 | 4446776 | 1  | NM_005147    | DNAJA3    | 0 | NA | 0 | NA | 0 | NA | 0 | NA | 0 | NA |
| 16 | 4464719 | 4500349 | 1  | NM_001127206 | HMOX2     | 0 | NA | 0 | NA | 0 | NA | 0 | NA | 0 | NA |
| 16 | 4464897 | 4451695 | -1 | NM_020677    | NMRAL1    | 0 | NA | 0 | NA | 0 | NA | 0 | NA | 0 | NA |
| 16 | 4466341 | 4500349 | 1  | NM_001127204 | HMOX2     | 0 | NA | 0 | NA | 0 | NA | 0 | NA | 0 | NA |
| 16 | 4466341 | 4500349 | 1  | NM_002134    | HMOX2     | 0 | NA | 0 | NA | 0 | NA | 0 | NA | 0 | NA |
| 16 | 4485859 | 4500349 | 1  | NM_001127205 | HMOX2     | 0 | NA | 0 | NA | 0 | NA | 0 | NA | 0 | NA |
| 16 | 4528817 | 4500677 | -1 | NM_013399    | C16orf5   | 1 | 42 | 1 | 14 | 0 | NA | 1 | 28 | 0 | NA |
| 16 | 4604928 | 4598884 | -1 | NM_145253    | FAM100A   | 0 | NA | 0 | NA | 0 | NA | 0 | NA | 0 | NA |
| 16 | 4614853 | 4680974 | 1  | NM_015246    | MGRN1     | 0 | NA | 0 | NA | 0 | NA | 0 | NA | 0 | NA |
| 16 | 4683716 | 4685846 | 1  | NM_032349    | NUDT16L1  | 0 | NA | 0 | NA | 0 | NA | 0 | NA | 0 | NA |
| 16 | 4724164 | 4688513 | -1 | NM_133450    | ANKS3     | 0 | NA | 0 | NA | 0 | NA | 0 | NA | 0 | NA |
| 16 | 4724289 | 4739398 | 1  | NM_139170    | C16orf71  | 0 | NA | 0 | NA | 0 | NA | 0 | NA | 0 | NA |
| 16 | 4757167 | 4740815 | -1 | NM_021646    | ZNF500    | 0 | NA | 0 | NA | 0 | NA | 0 | NA | 0 | NA |
| 16 | 4778348 | 4767674 | -1 | NM_144605    | SEPT12    | 0 | NA | 0 | NA | 0 | NA | 0 | NA | 0 | NA |

|    |          |          |    |              |          |   |    |   |    |   |    |   |    |   |    |   |    |
|----|----------|----------|----|--------------|----------|---|----|---|----|---|----|---|----|---|----|---|----|
| 16 | 4792675  | 4786969  | -1 | NM_024589    | ROGDI    | 1 | 17 | 0 | NA | 0 | NA | 0 | NA | 0 | NA | 0 | NA |
| 16 | 4837285  | 4793204  | -1 | NM_032569    | N-PAC    | 0 | NA | 0 | NA | 0 | NA | 0 | NA | 0 | NA | 0 | NA |
| 16 | 4837912  | 4872364  | 1  | NM_001079514 | UBN1     | 0 | NA | 0 | NA | 0 | NA | 0 | NA | 0 | NA | 0 | NA |
| 16 | 4842077  | 4872364  | 1  | NM_016936    | UBN1     | 0 | NA | 0 | NA | 0 | NA | 0 | NA | 0 | NA | 0 | NA |
| 16 | 4927137  | 4872508  | -1 | NM_002705    | PPL      | 1 | 11 | 0 | NA | 0 | NA | 0 | NA | 0 | NA | 0 | NA |
| 16 | 4948318  | 5009157  | 1  | NM_014692    | SEC14L5  | 0 | NA | 0 | NA | 0 | NA | 0 | NA | 0 | NA | 0 | NA |
| 16 | 5023937  | 5014845  | -1 | NM_016256    | NAGPA    | 0 | NA | 0 | NA | 0 | NA | 0 | NA | 0 | NA | 0 | NA |
| 16 | 5056112  | 5034123  | -1 | NM_001098514 | MGC45438 | 0 | NA | 0 | NA | 0 | NA | 0 | NA | 0 | NA | 0 | NA |
| 16 | 5056112  | 5034123  | -1 | NM_152459    | MGC45438 | 0 | NA | 0 | NA | 0 | NA | 0 | NA | 0 | NA | 0 | NA |
| 16 | 5061820  | 5075589  | 1  | NM_019109    | ALG1     | 0 | NA | 0 | NA | 0 | NA | 0 | NA | 0 | NA | 0 | NA |
| 16 | 5087782  | 5075235  | -1 | NM_201400    | FAM86A   | 0 | NA | 0 | NA | 0 | NA | 0 | NA | 0 | NA | 0 | NA |
| 16 | 5087782  | 5075235  | -1 | NM_201598    | FAM86A   | 0 | NA | 0 | NA | 0 | NA | 0 | NA | 0 | NA | 0 | NA |
| 16 | 6009132  | 7700847  | 1  | NM_018723    | A2BP1    | 0 | NA | 0 | NA | 0 | NA | 0 | NA | 0 | NA | 0 | NA |
| 16 | 7322751  | 7702500  | 1  | NM_145891    | A2BP1    | 0 | NA | 0 | NA | 0 | NA | 0 | NA | 0 | NA | 0 | NA |
| 16 | 7322751  | 7702500  | 1  | NM_145892    | A2BP1    | 0 | NA | 0 | NA | 0 | NA | 0 | NA | 0 | NA | 0 | NA |
| 16 | 7322751  | 7702500  | 1  | NM_145893    | A2BP1    | 0 | NA | 0 | NA | 0 | NA | 0 | NA | 0 | NA | 0 | NA |
| 16 | 8623027  | 8647580  | 1  | NM_024109    | C16orf68 | 0 | NA | 0 | NA | 0 | NA | 0 | NA | 0 | NA | 0 | NA |
| 16 | 8675927  | 8785933  | 1  | NM_020686    | ABAT     | 0 | NA | 0 | NA | 0 | NA | 0 | NA | 0 | NA | 0 | NA |
| 16 | 8714449  | 8785933  | 1  | NM_000663    | ABAT     | 0 | NA | 0 | NA | 0 | NA | 0 | NA | 0 | NA | 0 | NA |
| 16 | 8798991  | 8796821  | -1 | NM_015421    | TMEM186  | 0 | NA | 0 | NA | 0 | NA | 0 | NA | 0 | NA | 0 | NA |
| 16 | 8799192  | 8850684  | 1  | NM_000303    | PMM2     | 0 | NA | 0 | NA | 0 | NA | 0 | NA | 0 | NA | 0 | NA |
| 16 | 8869749  | 8854302  | -1 | NM_001042476 | CARHSP1  | 1 | 13 | 0 | NA | 0 | NA | 0 | NA | 0 | NA | 0 | NA |
| 16 | 8870364  | 8854302  | -1 | NM_014316    | CARHSP1  | 1 | 13 | 0 | NA | 0 | NA | 0 | NA | 0 | NA | 0 | NA |
| 16 | 8964842  | 8893451  | -1 | NM_003470    | USP7     | 0 | NA | 0 | NA | 0 | NA | 0 | NA | 0 | NA | 0 | NA |
| 16 | 9093037  | 9121056  | 1  | NM_014117    | C16orf72 | 0 | NA | 0 | NA | 0 | NA | 0 | NA | 0 | NA | 0 | NA |
| 16 | 10184112 | 9762922  | -1 | NM_000833    | GRIN2A   | 0 | NA | 0 | NA | 0 | NA | 0 | NA | 0 | NA | 0 | NA |
| 16 | 10430225 | 10484996 | 1  | NM_024997    | ATF7IP2  | 0 | NA | 0 | NA | 0 | NA | 0 | NA | 0 | NA | 0 | NA |
| 16 | 10582040 | 10533475 | -1 | NM_001424    | EMP2     | 0 | NA | 0 | NA | 0 | NA | 0 | NA | 0 | NA | 0 | NA |
| 16 | 10696303 | 10628861 | -1 | NM_144674    | TEKT5    | 0 | NA | 1 | 13 | 0 | NA | 0 | NA | 0 | NA | 0 | NA |
| 16 | 10745198 | 10770709 | 1  | NM_002484    | NUBP1    | 0 | NA | 0 | NA | 1 | 12 | 0 | NA | 0 | NA | 0 | NA |
| 16 | 10820122 | 10768033 | -1 | NM_001079512 | FAM18A   | 0 | NA | 0 | NA | 0 | NA | 0 | NA | 0 | NA | 0 | NA |
| 16 | 10878555 | 10926341 | 1  | NM_000246    | CIITA    | 1 | 11 | 0 | NA | 0 | NA | 0 | NA | 0 | NA | 0 | NA |
| 16 | 10943758 | 10930248 | -1 | NM_014015    | DEXI     | 0 | NA | 0 | NA | 0 | NA | 0 | NA | 0 | NA | 0 | NA |
| 16 | 10945942 | 11183539 | 1  | NM_015226    | CLEC16A  | 0 | NA | 0 | NA | 0 | NA | 0 | NA | 0 | NA | 0 | NA |
| 16 | 11257540 | 11255774 | -1 | NM_003745    | SOCS1    | 0 | NA | 0 | NA | 0 | NA | 0 | NA | 0 | NA | 0 | NA |
| 16 | 11270661 | 11269214 | -1 | NM_005425    | TNP2     | 0 | NA | 0 | NA | 0 | NA | 0 | NA | 0 | NA | 0 | NA |
| 16 | 11274953 | 11274644 | -1 | NM_021247    | PRM3     | 0 | NA | 0 | NA | 0 | NA | 0 | NA | 0 | NA | 0 | NA |
| 16 | 11277838 | 11276993 | -1 | NM_002762    | PRM2     | 0 | NA | 0 | NA | 0 | NA | 0 | NA | 0 | NA | 0 | NA |
| 16 | 11282693 | 11282193 | -1 | NM_002761    | PRM1     | 0 | NA | 0 | NA | 0 | NA | 0 | NA | 0 | NA | 0 | NA |
| 16 | 11346811 | 11353118 | 1  | NM_152308    | C16orf75 | 0 | NA | 0 | NA | 1 | 13 | 1 | 11 | 0 | NA | 0 | NA |
| 16 | 11587730 | 11549356 | -1 | NM_004862    | LITAF    | 0 | NA | 0 | NA | 0 | NA | 0 | NA | 0 | NA | 0 | NA |
| 16 | 11669801 | 11680509 | 1  | NM_003498    | SNN      | 0 | NA | 0 | NA | 1 | 13 | 0 | NA | 0 | NA | 0 | NA |
| 16 | 11744149 | 11680443 | -1 | NM_015914    | TXNDC11  | 0 | NA | 0 | NA | 0 | NA | 0 | NA | 0 | NA | 0 | NA |
| 16 | 11783909 | 11751942 | -1 | NM_014153    | ZC3H7A   | 1 | 19 | 0 | NA | 0 | NA | 0 | NA | 0 | NA | 0 | NA |
| 16 | 11852943 | 11835555 | -1 | NM_015659    | RSL1D1   | 0 | NA | 0 | NA | 0 | NA | 0 | NA | 0 | NA | 0 | NA |
| 16 | 11917309 | 11874039 | -1 | NM_002094    | GSPT1    | 0 | NA | 0 | NA | 0 | NA | 0 | NA | 0 | NA | 0 | NA |
| 16 | 11966464 | 11969426 | 1  | NM_001192    | TNFRSF17 | 1 | 12 | 0 | NA | 0 | NA | 0 | NA | 0 | NA | 0 | NA |
| 16 | 11978102 | 12054642 | 1  | NM_032167    | RUNDC2A  | 0 | NA | 0 | NA | 0 | NA | 0 | NA | 0 | NA | 0 | NA |
| 16 | 12053555 | 12575647 | 1  | NM_001080530 | SNX29    | 0 | NA | 0 | NA | 0 | NA | 0 | NA | 0 | NA | 0 | NA |
| 16 | 12805245 | 12661156 | -1 | NM_001099455 | FLJ11151 | 1 | 32 | 0 | NA | 1 | 12 | 0 | NA | 0 | NA | 0 | NA |
| 16 | 12805245 | 12661156 | -1 | NM_018340    | FLJ11151 | 1 | 32 | 0 | NA | 1 | 12 | 0 | NA | 0 | NA | 0 | NA |
| 16 | 13921514 | 13953706 | 1  | NM_005236    | ERCC4    | 0 | NA | 0 | NA | 0 | NA | 0 | NA | 0 | NA | 0 | NA |
| 16 | 14072696 | 14268131 | 1  | NM_014048    | MKL2     | 0 | NA | 0 | NA | 0 | NA | 0 | NA | 0 | NA | 0 | NA |
| 16 | 14631540 | 14437059 | -1 | NM_002582    | PARN     | 0 | NA | 0 | NA | 0 | NA | 0 | NA | 0 | NA | 0 | NA |
| 16 | 14634296 | 14670195 | 1  | NM_016561    | BFAR     | 0 | NA | 0 | NA | 0 | NA | 0 | NA | 0 | NA | 0 | NA |
| 16 | 14696027 | 14673905 | -1 | NM_003561    | PLA2G10  | 0 | NA | 0 | NA | 0 | NA | 0 | NA | 0 | NA | 0 | NA |
| 16 | 14835143 | 14897515 | 1  | NM_014287    | NOMO1    | 0 | NA | 0 | NA | 0 | NA | 0 | NA | 0 | NA | 0 | NA |
| 16 | 14938800 | 14953432 | 1  | NM_006985    | NPIP     | 0 | NA | 0 | NA | 0 | NA | 0 | NA | 0 | NA | 0 | NA |
| 16 | 14976486 | 15039687 | 1  | NM_015027    | PDXDC1   | 0 | NA | 0 | NA | 0 | NA | 0 | NA | 0 | NA | 0 | NA |
| 16 | 15057334 | 15039215 | -1 | NM_173474    | NTAN1    | 0 | NA | 0 | NA | 0 | NA | 0 | NA | 0 | NA | 0 | NA |
| 16 | 15095659 | 15061379 | -1 | NM_018427    | RRN3     | 0 | NA | 0 | NA | 0 | NA | 0 | NA | 0 | NA | 0 | NA |
| 16 | 15397136 | 15411044 | 1  | NM_173803    | MPV17L   | 0 | NA | 0 | NA | 0 | NA | 0 | NA | 0 | NA | 0 | NA |
| 16 | 15435825 | 15589418 | 1  | NM_033201    | C16orf45 | 0 | NA | 0 | NA | 0 | NA | 0 | NA | 0 | NA | 0 | NA |
| 16 | 15644510 | 15595744 | -1 | NM_014647    | KIAA0430 | 0 | NA | 0 | NA | 0 | NA | 0 | NA | 0 | NA | 0 | NA |
| 16 | 15651604 | 15726491 | 1  | NM_017668    | NDE1     | 0 | NA | 0 | NA | 0 | NA | 0 | NA | 0 | NA | 0 | NA |

|    |          |          |    |              |           |   |    |   |    |   |    |   |    |   |    |
|----|----------|----------|----|--------------|-----------|---|----|---|----|---|----|---|----|---|----|
| 16 | 15858388 | 15704492 | -1 | NM_001040113 | MYH11     | 0 | NA | 0 | NA | 0 | NA | 0 | NA | 0 | NA |
| 16 | 15858388 | 15704492 | -1 | NM_001040114 | MYH11     | 0 | NA | 0 | NA | 0 | NA | 0 | NA | 0 | NA |
| 16 | 15858388 | 15704492 | -1 | NM_002474    | MYH11     | 0 | NA | 0 | NA | 0 | NA | 0 | NA | 0 | NA |
| 16 | 15858388 | 15704492 | -1 | NM_022844    | MYH11     | 0 | NA | 0 | NA | 0 | NA | 0 | NA | 0 | NA |
| 16 | 15889948 | 15867077 | -1 | NM_144600    | C16orf63  | 0 | NA | 0 | NA | 0 | NA | 0 | NA | 0 | NA |
| 16 | 15950934 | 16144431 | 1  | NM_004996    | ABCC1     | 0 | NA | 0 | NA | 0 | NA | 0 | NA | 0 | NA |
| 16 | 15950934 | 16144431 | 1  | NM_019862    | ABCC1     | 0 | NA | 0 | NA | 0 | NA | 0 | NA | 0 | NA |
| 16 | 15950934 | 16144431 | 1  | NM_019898    | ABCC1     | 0 | NA | 0 | NA | 0 | NA | 0 | NA | 0 | NA |
| 16 | 15950934 | 16144431 | 1  | NM_019899    | ABCC1     | 0 | NA | 0 | NA | 0 | NA | 0 | NA | 0 | NA |
| 16 | 15950934 | 16144431 | 1  | NM_019900    | ABCC1     | 0 | NA | 0 | NA | 0 | NA | 0 | NA | 0 | NA |
| 16 | 16224852 | 16150922 | -1 | NM_001171    | ABCC6     | 0 | NA | 0 | NA | 0 | NA | 0 | NA | 0 | NA |
| 16 | 16224852 | 16222544 | -1 | NM_001079528 | ABCC6     | 0 | NA | 0 | NA | 0 | NA | 0 | NA | 0 | NA |
| 16 | 16233889 | 16296168 | 1  | NM_001004067 | NOMO3     | 0 | NA | 0 | NA | 0 | NA | 0 | NA | 0 | NA |
| 16 | 17472239 | 17103681 | -1 | NM_022166    | XYLT1     | 0 | NA | 1 | 12 | 0 | NA | 0 | NA | 0 | NA |
| 16 | 18480935 | 18418682 | -1 | NM_001004060 | NOMO2     | 0 | NA | 0 | NA | 0 | NA | 0 | NA | 0 | NA |
| 16 | 18480935 | 18418682 | -1 | NM_173614    | NOMO2     | 0 | NA | 0 | NA | 0 | NA | 0 | NA | 0 | NA |
| 16 | 18709157 | 18701777 | -1 | NM_001019    | RPS15A    | 0 | NA | 0 | NA | 0 | NA | 0 | NA | 0 | NA |
| 16 | 18709157 | 18701777 | -1 | NM_001030009 | RPS15A    | 0 | NA | 0 | NA | 0 | NA | 0 | NA | 0 | NA |
| 16 | 18720358 | 18710491 | -1 | NM_015161    | ARL6IP1   | 0 | NA | 0 | NA | 0 | NA | 1 | 16 | 0 | NA |
| 16 | 18844887 | 18723675 | -1 | NM_015092    | SMG1      | 0 | NA | 0 | NA | 0 | NA | 0 | NA | 0 | NA |
| 16 | 18902830 | 18982002 | 1  | NM_024847    | TMC7      | 0 | NA | 0 | NA | 1 | 13 | 0 | NA | 0 | NA |
| 16 | 18986427 | 18998853 | 1  | NM_016138    | COQ7      | 0 | NA | 0 | NA | 0 | NA | 0 | NA | 0 | NA |
| 16 | 19032782 | 19040453 | 1  | NM_001034841 | LOC162073 | 0 | NA | 0 | NA | 0 | NA | 0 | NA | 0 | NA |
| 16 | 19087138 | 19186055 | 1  | NM_016524    | SYT17     | 0 | NA | 0 | NA | 0 | NA | 0 | NA | 0 | NA |
| 16 | 19329557 | 19417935 | 1  | NM_001105248 | TMC5      | 0 | NA | 1 | 13 | 0 | NA | 0 | NA | 0 | NA |
| 16 | 19329557 | 19417935 | 1  | NM_001105249 | TMC5      | 0 | NA | 1 | 13 | 0 | NA | 0 | NA | 0 | NA |
| 16 | 19375272 | 19417935 | 1  | NM_024780    | TMC5      | 0 | NA | 0 | NA | 0 | NA | 0 | NA | 0 | NA |
| 16 | 19440951 | 19420515 | -1 | NM_016641    | GDE1      | 0 | NA | 0 | NA | 0 | NA | 0 | NA | 0 | NA |
| 16 | 19442708 | 19472229 | 1  | NM_014711    | CP110     | 0 | NA | 0 | NA | 0 | NA | 0 | NA | 0 | NA |
| 16 | 19474540 | 19619945 | 1  | NM_020314    | C16orf62  | 0 | NA | 0 | NA | 0 | NA | 0 | NA | 0 | NA |
| 16 | 19635278 | 19776360 | 1  | NM_153208    | IQQC      | 0 | NA | 0 | NA | 0 | NA | 0 | NA | 0 | NA |
| 16 | 19636993 | 19625174 | -1 | NM_001012991 | LOC400506 | 0 | NA | 0 | NA | 0 | NA | 0 | NA | 0 | NA |
| 16 | 19803652 | 19777793 | -1 | NM_016235    | GPRC5B    | 0 | NA | 1 | 12 | 0 | NA | 0 | NA | 0 | NA |
| 16 | 19992601 | 19950543 | -1 | NM_001002911 | GPR139    | 0 | NA | 0 | NA | 0 | NA | 0 | NA | 0 | NA |
| 16 | 20246336 | 20229311 | -1 | NM_001007240 | GP2       | 0 | NA | 0 | NA | 0 | NA | 0 | NA | 0 | NA |
| 16 | 20246336 | 20229311 | -1 | NM_001007241 | GP2       | 0 | NA | 0 | NA | 0 | NA | 0 | NA | 0 | NA |
| 16 | 20246336 | 20229311 | -1 | NM_001007242 | GP2       | 0 | NA | 0 | NA | 0 | NA | 0 | NA | 0 | NA |
| 16 | 20246336 | 20229311 | -1 | NM_001502    | GP2       | 0 | NA | 0 | NA | 0 | NA | 0 | NA | 0 | NA |
| 16 | 20271538 | 20251873 | -1 | NM_001008389 | UMOD      | 0 | NA | 0 | NA | 0 | NA | 0 | NA | 0 | NA |
| 16 | 20271538 | 20251873 | -1 | NM_003361    | UMOD      | 0 | NA | 0 | NA | 0 | NA | 0 | NA | 0 | NA |
| 16 | 20323534 | 20277992 | -1 | NM_174924    | PDILT     | 0 | NA | 0 | NA | 0 | NA | 0 | NA | 0 | NA |
| 16 | 20328356 | 20359782 | 1  | NM_017888    | ACSM5     | 0 | NA | 0 | NA | 0 | NA | 0 | NA | 0 | NA |
| 16 | 20370359 | 20406492 | 1  | NM_001010845 | ACSM2A    | 0 | NA | 0 | NA | 0 | NA | 0 | NA | 0 | NA |
| 16 | 20495196 | 20455583 | -1 | NM_001105069 | ACSM2B    | 0 | NA | 0 | NA | 0 | NA | 0 | NA | 0 | NA |
| 16 | 20495196 | 20455583 | -1 | NM_182617    | ACSM2B    | 0 | NA | 0 | NA | 0 | NA | 0 | NA | 0 | NA |
| 16 | 20610079 | 20542059 | -1 | NM_052956    | ACSM1     | 0 | NA | 0 | NA | 0 | NA | 0 | NA | 0 | NA |
| 16 | 20660700 | 20652489 | -1 | NM_017736    | THUMPD1   | 0 | NA | 0 | NA | 0 | NA | 1 | 11 | 0 | NA |
| 16 | 20682812 | 20705139 | 1  | NM_202000    | ACSM3     | 0 | NA | 0 | NA | 0 | NA | 0 | NA | 0 | NA |
| 16 | 20682812 | 20715980 | 1  | NM_005622    | ACSM3     | 0 | NA | 0 | NA | 0 | NA | 0 | NA | 0 | NA |
| 16 | 20725296 | 20699015 | -1 | NM_080663    | EXOD1     | 1 | 12 | 0 | NA | 0 | NA | 0 | NA | 0 | NA |
| 16 | 20725333 | 20768488 | 1  | NM_030941    | LOC81691  | 1 | 12 | 0 | NA | 0 | NA | 0 | NA | 0 | NA |
| 16 | 20819161 | 20776896 | -1 | NM_173475    | DCUN1D3   | 0 | NA | 0 | NA | 0 | NA | 0 | NA | 0 | NA |
| 16 | 20819926 | 20843834 | 1  | NM_020424    | LYRM1     | 0 | NA | 0 | NA | 0 | NA | 0 | NA | 0 | NA |
| 16 | 21077500 | 21099431 | 1  | NM_020422    | TMEM159   | 0 | NA | 0 | NA | 0 | NA | 0 | NA | 0 | NA |
| 16 | 21078263 | 20851976 | -1 | NM_017539    | DNAH3     | 0 | NA | 0 | NA | 0 | NA | 0 | NA | 0 | NA |
| 16 | 21130369 | 21116273 | -1 | NM_003460    | ZP2       | 0 | NA | 0 | NA | 0 | NA | 0 | NA | 0 | NA |
| 16 | 21152516 | 21171251 | 1  | NM_145865    | ANKS4B    | 0 | NA | 0 | NA | 0 | NA | 0 | NA | 0 | NA |
| 16 | 21197158 | 21177342 | -1 | NM_001888    | CRYM      | 0 | NA | 0 | NA | 0 | NA | 0 | NA | 0 | NA |
| 16 | 21219670 | 21237413 | 1  | NM_001101368 | FLJ41766  | 0 | NA | 0 | NA | 0 | NA | 0 | NA | 0 | NA |
| 16 | 21221918 | 21177342 | -1 | NM_001014444 | CRYM      | 0 | NA | 0 | NA | 0 | NA | 0 | NA | 0 | NA |
| 16 | 21298813 | 21310915 | 1  | NM_001012391 | RUNDC2B   | 0 | NA | 0 | NA | 0 | NA | 0 | NA | 0 | NA |
| 16 | 21344159 | 21320950 | -1 | NM_130464    | LOC23117  | 0 | NA | 0 | NA | 0 | NA | 0 | NA | 0 | NA |
| 16 | 21518356 | 21576293 | 1  | NM_001077180 | METTL9    | 1 | 13 | 0 | NA | 0 | NA | 0 | NA | 0 | NA |
| 16 | 21518356 | 21576293 | 1  | NM_016025    | METTL9    | 1 | 13 | 0 | NA | 0 | NA | 0 | NA | 0 | NA |
| 16 | 21571473 | 21560106 | -1 | NM_005849    | IGSF6     | 0 | NA | 0 | NA | 0 | NA | 0 | NA | 0 | NA |

|    |          |          |    |              |           |   |    |   |    |   |    |   |    |   |    |
|----|----------|----------|----|--------------|-----------|---|----|---|----|---|----|---|----|---|----|
| 16 | 21597335 | 21679551 | 1  | NM_144672    | OTOA      | 0 | NA | 0 | NA | 0 | NA | 0 | NA | 0 | NA |
| 16 | 21623784 | 21679550 | 1  | NM_170664    | OTOA      | 0 | NA | 0 | NA | 0 | NA | 0 | NA | 0 | NA |
| 16 | 21872109 | 21902169 | 1  | NM_003366    | UQCRC2    | 0 | NA | 0 | NA | 0 | NA | 0 | NA | 0 | NA |
| 16 | 21919929 | 21902986 | -1 | NM_173806    | C16orf65  | 0 | NA | 0 | NA | 0 | NA | 0 | NA | 0 | NA |
| 16 | 22011362 | 22075788 | 1  | NM_173615    | VWA3A     | 0 | NA | 0 | NA | 0 | NA | 0 | NA | 0 | NA |
| 16 | 22125092 | 22207567 | 1  | NM_013302    | EEF2K     | 0 | NA | 0 | NA | 0 | NA | 0 | NA | 0 | NA |
| 16 | 22216241 | 22252844 | 1  | NM_018119    | POLR3E    | 0 | NA | 0 | NA | 0 | NA | 0 | NA | 0 | NA |
| 16 | 22293439 | 22264757 | -1 | NM_001802    | CDR2      | 1 | 12 | 0 | NA | 0 | NA | 0 | NA | 0 | NA |
| 16 | 22432384 | 22455362 | 1  | NM_130464    | LOC23117  | 0 | NA | 0 | NA | 0 | NA | 0 | NA | 0 | NA |
| 16 | 22733360 | 22835160 | 1  | NM_006043    | HS3ST2    | 0 | NA | 0 | NA | 0 | NA | 0 | NA | 0 | NA |
| 16 | 23068092 | 22980228 | -1 | NM_020718    | USP31     | 0 | NA | 0 | NA | 0 | NA | 0 | NA | 0 | NA |
| 16 | 23101540 | 23135701 | 1  | NM_001039    | SCNN1G    | 0 | NA | 0 | NA | 0 | NA | 0 | NA | 0 | NA |
| 16 | 23221091 | 23300121 | 1  | NM_000336    | SCNN1B    | 0 | NA | 1 | 12 | 0 | NA | 0 | NA | 0 | NA |
| 16 | 23372004 | 23307316 | -1 | NM_153603    | COG7      | 0 | NA | 0 | NA | 0 | NA | 0 | NA | 0 | NA |
| 16 | 23429309 | 23383143 | -1 | NM_015044    | GGA2      | 0 | NA | 0 | NA | 0 | NA | 0 | NA | 0 | NA |
| 16 | 23476197 | 23440834 | -1 | NM_001083614 | EARS2     | 0 | NA | 0 | NA | 0 | NA | 0 | NA | 0 | NA |
| 16 | 23476362 | 23493211 | 1  | NM_019116    | UBFD1     | 0 | NA | 0 | NA | 0 | NA | 0 | NA | 0 | NA |
| 16 | 23515140 | 23499835 | -1 | NM_005003    | NDUFB1    | 0 | NA | 0 | NA | 0 | NA | 0 | NA | 0 | NA |
| 16 | 23560179 | 23521983 | -1 | NM_024675    | PALB2     | 0 | NA | 0 | NA | 1 | 13 | 0 | NA | 0 | NA |
| 16 | 23560307 | 23588683 | 1  | NM_032486    | DCTN5     | 0 | NA | 0 | NA | 1 | 13 | 0 | NA | 0 | NA |
| 16 | 23597701 | 23609189 | 1  | NM_005030    | PLK1      | 1 | 20 | 0 | NA | 0 | NA | 0 | NA | 0 | NA |
| 16 | 23632322 | 23609126 | -1 | NM_033266    | ERN2      | 0 | NA | 0 | NA | 0 | NA | 0 | NA | 0 | NA |
| 16 | 23673448 | 23677757 | 1  | NM_022097    | CHP2      | 0 | NA | 0 | NA | 0 | NA | 0 | NA | 0 | NA |
| 16 | 23754822 | 24134810 | 1  | NM_002738    | PRKCB1    | 0 | NA | 0 | NA | 0 | NA | 0 | NA | 0 | NA |
| 16 | 23754822 | 24139063 | 1  | NM_212535    | PRKCB1    | 0 | NA | 0 | NA | 0 | NA | 0 | NA | 0 | NA |
| 16 | 24174376 | 24281238 | 1  | NM_006539    | CACNG3    | 0 | NA | 0 | NA | 0 | NA | 0 | NA | 0 | NA |
| 16 | 24458408 | 24468223 | 1  | NM_032626    | RBBP6     | 0 | NA | 0 | NA | 0 | NA | 1 | 13 | 0 | NA |
| 16 | 24458408 | 24491684 | 1  | NM_006910    | RBBP6     | 0 | NA | 0 | NA | 0 | NA | 1 | 13 | 0 | NA |
| 16 | 24458408 | 24491684 | 1  | NM_018703    | RBBP6     | 0 | NA | 0 | NA | 0 | NA | 1 | 13 | 0 | NA |
| 16 | 24648549 | 24745048 | 1  | NM_014494    | TNRC6A    | 0 | NA | 0 | NA | 0 | NA | 0 | NA | 0 | NA |
| 16 | 24765052 | 24830445 | 1  | NM_052944    | SLC5A11   | 0 | NA | 0 | NA | 0 | NA | 0 | NA | 0 | NA |
| 16 | 24934176 | 24838212 | -1 | NM_001006634 | ARHGAP17  | 0 | NA | 0 | NA | 0 | NA | 0 | NA | 0 | NA |
| 16 | 24934176 | 24838212 | -1 | NM_018054    | ARHGAP17  | 0 | NA | 0 | NA | 0 | NA | 0 | NA | 0 | NA |
| 16 | 25030547 | 25097052 | 1  | NM_001032391 | LCMT1     | 0 | NA | 0 | NA | 0 | NA | 1 | 18 | 0 | NA |
| 16 | 25030547 | 25097052 | 1  | NM_016309    | LCMT1     | 0 | NA | 0 | NA | 0 | NA | 1 | 18 | 0 | NA |
| 16 | 25135785 | 25147754 | 1  | NM_001169    | AQP8      | 0 | NA | 0 | NA | 0 | NA | 0 | NA | 0 | NA |
| 16 | 25176356 | 25154822 | -1 | NM_001012981 | ZKSCAN2   | 0 | NA | 0 | NA | 0 | NA | 0 | NA | 0 | NA |
| 16 | 25610847 | 26096510 | 1  | NM_006040    | HS3ST4    | 0 | NA | 0 | NA | 0 | NA | 0 | NA | 0 | NA |
| 16 | 27122316 | 27140544 | 1  | NM_024773    | JMJD5     | 1 | 26 | 0 | NA | 0 | NA | 1 | 17 | 0 | NA |
| 16 | 27187614 | 27143815 | -1 | NM_145080    | NSMCE1    | 0 | NA | 0 | NA | 0 | NA | 0 | NA | 0 | NA |
| 16 | 27232751 | 27274033 | 1  | NM_001008699 | IL4R      | 0 | NA | 0 | NA | 0 | NA | 0 | NA | 0 | NA |
| 16 | 27232751 | 27283600 | 1  | NM_000418    | IL4R      | 0 | NA | 0 | NA | 0 | NA | 0 | NA | 0 | NA |
| 16 | 27321223 | 27369616 | 1  | NM_181078    | IL21R     | 0 | NA | 0 | NA | 0 | NA | 0 | NA | 0 | NA |
| 16 | 27321923 | 27369616 | 1  | NM_181079    | IL21R     | 0 | NA | 0 | NA | 0 | NA | 0 | NA | 0 | NA |
| 16 | 27346079 | 27369616 | 1  | NM_021798    | IL21R     | 0 | NA | 0 | NA | 0 | NA | 0 | NA | 0 | NA |
| 16 | 27468752 | 27379435 | -1 | NM_001520    | GTF3C1    | 0 | NA | 0 | NA | 0 | NA | 0 | NA | 0 | NA |
| 16 | 27468970 | 27699190 | 1  | NM_015202    | KIAA0556  | 0 | NA | 0 | NA | 0 | NA | 0 | NA | 0 | NA |
| 16 | 27806979 | 27706350 | -1 | NM_144675    | GSG1L     | 0 | NA | 1 | 12 | 0 | NA | 0 | NA | 0 | NA |
| 16 | 27982331 | 27706350 | -1 | NM_001109763 | GSG1L     | 0 | NA | 0 | NA | 0 | NA | 0 | NA | 0 | NA |
| 16 | 28130691 | 28016816 | -1 | NM_015171    | XP06      | 0 | NA | 0 | NA | 0 | NA | 0 | NA | 0 | NA |
| 16 | 28211340 | 28242671 | 1  | NM_001024401 | SBK1      | 0 | NA | 0 | NA | 0 | NA | 0 | NA | 0 | NA |
| 16 | 28275423 | 28262354 | -1 | NM_001018122 | LOC440350 | 0 | NA | 0 | NA | 0 | NA | 0 | NA | 0 | NA |
| 16 | 28322663 | 28298400 | -1 | NM_001099661 | EIF3CL    | 0 | NA | 0 | NA | 0 | NA | 0 | NA | 0 | NA |
| 16 | 28322666 | 28298403 | -1 | NM_001037808 | EIF3C     | 0 | NA | 0 | NA | 0 | NA | 0 | NA | 0 | NA |
| 16 | 28322666 | 28298403 | -1 | NM_003752    | EIF3C     | 0 | NA | 0 | NA | 0 | NA | 0 | NA | 0 | NA |
| 16 | 28332524 | 28333958 | 1  | NM_001080829 | LOC390688 | 0 | NA | 0 | NA | 0 | NA | 0 | NA | 0 | NA |
| 16 | 28389260 | 28376192 | -1 | NM_001018122 | LOC440350 | 0 | NA | 0 | NA | 0 | NA | 0 | NA | 0 | NA |
| 16 | 28410904 | 28396100 | -1 | NM_000086    | CLN3      | 1 | 17 | 0 | NA | 0 | NA | 0 | NA | 0 | NA |
| 16 | 28411124 | 28396100 | -1 | NM_001042432 | CLN3      | 1 | 17 | 0 | NA | 0 | NA | 0 | NA | 0 | NA |
| 16 | 28413493 | 28417783 | 1  | NM_018690    | APOB48R   | 1 | 17 | 0 | NA | 0 | NA | 0 | NA | 0 | NA |
| 16 | 28425656 | 28418183 | -1 | NM_145659    | IL27      | 0 | NA | 0 | NA | 0 | NA | 0 | NA | 0 | NA |
| 16 | 28457996 | 28456162 | -1 | NM_001042483 | NUPR1     | 0 | NA | 0 | NA | 0 | NA | 0 | NA | 0 | NA |
| 16 | 28457996 | 28456162 | -1 | NM_012385    | NUPR1     | 0 | NA | 0 | NA | 0 | NA | 0 | NA | 0 | NA |
| 16 | 28472757 | 28510610 | 1  | NM_138414    | CCDC101   | 1 | 11 | 0 | NA | 0 | NA | 0 | NA | 0 | NA |
| 16 | 28515302 | 28510766 | -1 | NM_177528    | SULT1A2   | 0 | NA | 1 | 13 | 0 | NA | 0 | NA | 0 | NA |



|    |          |          |    |              |           |   |    |   |    |   |    |   |    |   |    |
|----|----------|----------|----|--------------|-----------|---|----|---|----|---|----|---|----|---|----|
| 16 | 28515892 | 28510766 | -1 | NM_001054    | SULT1A2   | 0 | NA | 1 | 13 | 0 | NA | 0 | NA | 0 | NA |
| 16 | 28528150 | 28524416 | -1 | NM_177530    | SULT1A1   | 0 | NA | 1 | 13 | 0 | NA | 0 | NA | 0 | NA |
| 16 | 28528150 | 28524416 | -1 | NM_177534    | SULT1A1   | 0 | NA | 1 | 13 | 0 | NA | 0 | NA | 0 | NA |
| 16 | 28528858 | 28524418 | -1 | NM_001055    | SULT1A1   | 0 | NA | 1 | 13 | 0 | NA | 0 | NA | 0 | NA |
| 16 | 28528858 | 28524418 | -1 | NM_177529    | SULT1A1   | 0 | NA | 1 | 13 | 0 | NA | 0 | NA | 0 | NA |
| 16 | 28542367 | 28524416 | -1 | NM_177536    | SULT1A1   | 0 | NA | 0 | NA | 0 | NA | 0 | NA | 0 | NA |
| 16 | 28563411 | 28576505 | 1  | NM_001018122 | LOC440350 | 0 | NA | 0 | NA | 0 | NA | 0 | NA | 0 | NA |
| 16 | 28620433 | 28618997 | -1 | NM_001080829 | LOC390688 | 0 | NA | 0 | NA | 0 | NA | 0 | NA | 0 | NA |
| 16 | 28630282 | 28654551 | 1  | NM_001037808 | EIF3C     | 0 | NA | 0 | NA | 0 | NA | 0 | NA | 0 | NA |
| 16 | 28630282 | 28654551 | 1  | NM_003752    | EIF3C     | 0 | NA | 0 | NA | 0 | NA | 0 | NA | 0 | NA |
| 16 | 28630285 | 28654554 | 1  | NM_001099661 | EIF3CL    | 0 | NA | 0 | NA | 0 | NA | 0 | NA | 0 | NA |
| 16 | 28677525 | 28690630 | 1  | NM_001018122 | LOC440350 | 0 | NA | 0 | NA | 0 | NA | 0 | NA | 0 | NA |
| 16 | 28741914 | 28796054 | 1  | NM_145714    | ATXN2L    | 0 | NA | 0 | NA | 0 | NA | 0 | NA | 0 | NA |
| 16 | 28741914 | 28756059 | 1  | NM_007245    | ATXN2L    | 0 | NA | 0 | NA | 0 | NA | 0 | NA | 0 | NA |
| 16 | 28741914 | 28756059 | 1  | NM_148414    | ATXN2L    | 0 | NA | 0 | NA | 0 | NA | 0 | NA | 0 | NA |
| 16 | 28741914 | 28756059 | 1  | NM_148415    | ATXN2L    | 0 | NA | 0 | NA | 0 | NA | 0 | NA | 0 | NA |
| 16 | 28741914 | 28756059 | 1  | NM_148416    | ATXN2L    | 0 | NA | 0 | NA | 0 | NA | 0 | NA | 0 | NA |
| 16 | 28765230 | 28761232 | -1 | NM_003321    | TUFM      | 0 | NA | 0 | NA | 0 | NA | 1 | 11 | 0 | NA |
| 16 | 28782814 | 28793027 | 1  | NM_015503    | SH2B1     | 0 | NA | 0 | NA | 0 | NA | 0 | NA | 0 | NA |
| 16 | 28797309 | 28823331 | 1  | NM_004320    | ATP2A1    | 0 | NA | 0 | NA | 0 | NA | 0 | NA | 0 | NA |
| 16 | 28797309 | 28823331 | 1  | NM_173201    | ATP2A1    | 0 | NA | 0 | NA | 0 | NA | 0 | NA | 0 | NA |
| 16 | 28844033 | 28823242 | -1 | NM_024816    | RABEP2    | 0 | NA | 0 | NA | 0 | NA | 0 | NA | 0 | NA |
| 16 | 28850760 | 28858164 | 1  | NM_001770    | CD19      | 0 | NA | 0 | NA | 0 | NA | 0 | NA | 0 | NA |
| 16 | 28869818 | 28885268 | 1  | NM_032815    | NFATC2IP  | 0 | NA | 0 | NA | 0 | NA | 0 | NA | 0 | NA |
| 16 | 28893649 | 28903358 | 1  | NM_032038    | SPNS1     | 0 | NA | 0 | NA | 0 | NA | 0 | NA | 0 | NA |
| 16 | 28903647 | 28909605 | 1  | NM_001014989 | LAT       | 0 | NA | 0 | NA | 0 | NA | 0 | NA | 0 | NA |
| 16 | 28903887 | 28909605 | 1  | NM_001014987 | LAT       | 0 | NA | 0 | NA | 0 | NA | 0 | NA | 0 | NA |
| 16 | 28903887 | 28909605 | 1  | NM_001014988 | LAT       | 0 | NA | 0 | NA | 0 | NA | 0 | NA | 0 | NA |
| 16 | 28903887 | 28909605 | 1  | NM_014387    | LAT       | 0 | NA | 0 | NA | 0 | NA | 0 | NA | 0 | NA |
| 16 | 29373375 | 29377041 | 1  | NM_001014999 | GIYD1     | 0 | NA | 0 | NA | 0 | NA | 0 | NA | 0 | NA |
| 16 | 29373375 | 29377041 | 1  | NM_001015000 | GIYD1     | 0 | NA | 0 | NA | 0 | NA | 0 | NA | 0 | NA |
| 16 | 29373375 | 29377041 | 1  | NM_024044    | GIYD2     | 0 | NA | 0 | NA | 0 | NA | 0 | NA | 0 | NA |
| 16 | 29373375 | 29377041 | 1  | NM_178044    | GIYD2     | 0 | NA | 0 | NA | 0 | NA | 0 | NA | 0 | NA |
| 16 | 29373786 | 29372414 | -1 | NM_001031827 | BOLA2     | 0 | NA | 0 | NA | 0 | NA | 0 | NA | 0 | NA |
| 16 | 29373786 | 29372414 | -1 | NM_001039182 | BOLA2B    | 0 | NA | 0 | NA | 0 | NA | 0 | NA | 0 | NA |
| 16 | 29373901 | 29383781 | 1  | NM_001017391 | SULT1A4   | 0 | NA | 0 | NA | 0 | NA | 0 | NA | 0 | NA |
| 16 | 29373901 | 29383802 | 1  | NM_001017387 | SULT1A3   | 0 | NA | 0 | NA | 0 | NA | 0 | NA | 0 | NA |
| 16 | 29374627 | 29383781 | 1  | NM_001017389 | SULT1A4   | 0 | NA | 0 | NA | 0 | NA | 0 | NA | 0 | NA |
| 16 | 29374627 | 29383802 | 1  | NM_003166    | SULT1A3   | 0 | NA | 0 | NA | 0 | NA | 0 | NA | 0 | NA |
| 16 | 29378694 | 29383781 | 1  | NM_001017390 | SULT1A4   | 0 | NA | 0 | NA | 0 | NA | 0 | NA | 0 | NA |
| 16 | 29378694 | 29383802 | 1  | NM_177552    | SULT1A3   | 0 | NA | 0 | NA | 0 | NA | 0 | NA | 0 | NA |
| 16 | 29581800 | 29589324 | 1  | NM_001030288 | SPN       | 0 | NA | 0 | NA | 0 | NA | 0 | NA | 0 | NA |
| 16 | 29582080 | 29589324 | 1  | NM_003123    | SPN       | 0 | NA | 0 | NA | 0 | NA | 0 | NA | 0 | NA |
| 16 | 29597941 | 29616815 | 1  | NM_014298    | QPR1      | 0 | NA | 0 | NA | 0 | NA | 0 | NA | 0 | NA |
| 16 | 29664841 | 29661286 | -1 | NM_175900    | C16orf54  | 0 | NA | 0 | NA | 0 | NA | 0 | NA | 0 | NA |
| 16 | 29725355 | 29730005 | 1  | NM_001042539 | MAZ       | 1 | 12 | 0 | NA | 0 | NA | 1 | 11 | 0 | NA |
| 16 | 29725355 | 29730005 | 1  | NM_002383    | MAZ       | 1 | 12 | 0 | NA | 0 | NA | 1 | 11 | 0 | NA |
| 16 | 29730909 | 29734703 | 1  | NM_145239    | PRRT2     | 1 | 11 | 0 | NA | 0 | NA | 1 | 11 | 0 | NA |
| 16 | 29735028 | 29741317 | 1  | NM_024516    | C16orf53  | 1 | 11 | 0 | NA | 0 | NA | 0 | NA | 0 | NA |
| 16 | 29739287 | 29766842 | 1  | NM_005115    | MVP       | 1 | 14 | 0 | NA | 0 | NA | 0 | NA | 0 | NA |
| 16 | 29739288 | 29766842 | 1  | NM_017458    | MVP       | 1 | 14 | 0 | NA | 0 | NA | 0 | NA | 0 | NA |
| 16 | 29782079 | 29777178 | -1 | NM_006319    | CDIPT     | 1 | 23 | 0 | NA | 0 | NA | 0 | NA | 0 | NA |
| 16 | 29818081 | 29789980 | -1 | NM_001114099 | SEZ6L2    | 0 | NA | 0 | NA | 0 | NA | 0 | NA | 0 | NA |
| 16 | 29818081 | 29789980 | -1 | NM_001114100 | SEZ6L2    | 0 | NA | 0 | NA | 0 | NA | 0 | NA | 0 | NA |
| 16 | 29818081 | 29789980 | -1 | NM_012410    | SEZ6L2    | 0 | NA | 0 | NA | 0 | NA | 0 | NA | 0 | NA |
| 16 | 29818081 | 29789980 | -1 | NM_201575    | SEZ6L2    | 0 | NA | 0 | NA | 0 | NA | 0 | NA | 0 | NA |
| 16 | 29819647 | 29824878 | 1  | NM_181718    | ASPHD1    | 0 | NA | 0 | NA | 0 | NA | 0 | NA | 0 | NA |
| 16 | 29845046 | 29825161 | -1 | NM_178863    | KCTD13    | 0 | NA | 0 | NA | 0 | NA | 0 | NA | 0 | NA |
| 16 | 29880851 | 29891874 | 1  | NM_001083613 | LOC124446 | 0 | NA | 0 | NA | 0 | NA | 0 | NA | 0 | NA |
| 16 | 29880851 | 29891874 | 1  | NM_194280    | LOC124446 | 0 | NA | 0 | NA | 0 | NA | 0 | NA | 0 | NA |
| 16 | 29892722 | 29907220 | 1  | NM_016151    | TAOK2     | 0 | NA | 0 | NA | 0 | NA | 1 | 17 | 0 | NA |
| 16 | 29892722 | 29911082 | 1  | NM_004783    | TAOK2     | 0 | NA | 0 | NA | 0 | NA | 1 | 17 | 0 | NA |
| 16 | 29914888 | 29911816 | -1 | NM_003609    | HIRIP3    | 1 | 12 | 0 | NA | 0 | NA | 0 | NA | 0 | NA |
| 16 | 29915031 | 29924613 | 1  | NM_173618    | CCDC95    | 1 | 12 | 0 | NA | 0 | NA | 0 | NA | 0 | NA |
| 16 | 29929902 | 29924335 | -1 | NM_003586    | DOC2A     | 0 | NA | 0 | NA | 0 | NA | 0 | NA | 0 | NA |

|    |          |          |    |              |          |   |    |   |    |   |    |   |    |   |    |
|----|----------|----------|----|--------------|----------|---|----|---|----|---|----|---|----|---|----|
| 16 | 29942155 | 29943524 | 1  | NM_001109659 | FLJ25404 | 0 | NA | 0 | NA | 0 | NA | 1 | 12 | 0 | NA |
| 16 | 29942155 | 29943524 | 1  | NM_001109660 | FLJ25404 | 0 | NA | 0 | NA | 0 | NA | 1 | 12 | 0 | NA |
| 16 | 29949687 | 29943248 | -1 | NM_031478    | FAM57B   | 0 | NA | 1 | 17 | 0 | NA | 1 | 12 | 0 | NA |
| 16 | 29971991 | 29989236 | 1  | NM_000034    | ALDOA    | 0 | NA | 0 | NA | 0 | NA | 0 | NA | 0 | NA |
| 16 | 29983100 | 29989236 | 1  | NM_184043    | ALDOA    | 1 | 11 | 0 | NA | 0 | NA | 1 | 18 | 0 | NA |
| 16 | 29984544 | 29989236 | 1  | NM_184041    | ALDOA    | 1 | 11 | 0 | NA | 0 | NA | 1 | 18 | 0 | NA |
| 16 | 29994884 | 30004196 | 0  | NM_002720    | PPP4C    | 0 | NA | 0 | NA | 0 | NA | 1 | 18 | 0 | NA |
| 16 | 30010709 | 30004582 | -1 | NM_004608    | TBX6     | 1 | 50 | 1 | 17 | 0 | NA | 1 | 42 | 0 | NA |
| 16 | 30010709 | 30006737 | -1 | NM_080758    | TBX6     | 1 | 50 | 1 | 17 | 0 | NA | 1 | 42 | 0 | NA |
| 16 | 30015022 | 30011135 | -1 | NM_031477    | YPCL3    | 1 | 50 | 1 | 17 | 0 | NA | 1 | 42 | 0 | NA |
| 16 | 30032379 | 30023631 | -1 | NM_024307    | GDPD3    | 0 | NA | 0 | NA | 0 | NA | 0 | NA | 0 | NA |
| 16 | 30042131 | 30032926 | -1 | NM_001040056 | MAPK3    | 0 | NA | 0 | NA | 0 | NA | 0 | NA | 0 | NA |
| 16 | 30042131 | 30032926 | -1 | NM_001109891 | MAPK3    | 0 | NA | 0 | NA | 0 | NA | 0 | NA | 0 | NA |
| 16 | 30042131 | 30032926 | -1 | NM_002746    | MAPK3    | 0 | NA | 0 | NA | 0 | NA | 0 | NA | 0 | NA |
| 16 | 30102426 | 30107898 | 1  | NM_007074    | CORO1A   | 0 | NA | 0 | NA | 0 | NA | 0 | NA | 0 | NA |
| 16 | 30112717 | 30116383 | 1  | NM_001014999 | GIYD1    | 0 | NA | 0 | NA | 0 | NA | 0 | NA | 0 | NA |
| 16 | 30112717 | 30116383 | 1  | NM_001015000 | GIYD1    | 0 | NA | 0 | NA | 0 | NA | 0 | NA | 0 | NA |
| 16 | 30112717 | 30116383 | 1  | NM_024044    | GIYD2    | 0 | NA | 0 | NA | 0 | NA | 0 | NA | 0 | NA |
| 16 | 30112717 | 30116383 | 1  | NM_178044    | GIYD2    | 0 | NA | 0 | NA | 0 | NA | 0 | NA | 0 | NA |
| 16 | 30113128 | 30111756 | -1 | NM_001031827 | BOLA2    | 0 | NA | 0 | NA | 0 | NA | 0 | NA | 0 | NA |
| 16 | 30113128 | 30111756 | -1 | NM_001039182 | BOLA2B   | 0 | NA | 0 | NA | 0 | NA | 0 | NA | 0 | NA |
| 16 | 30113243 | 30123121 | 1  | NM_001017391 | SULT1A4  | 0 | NA | 0 | NA | 0 | NA | 0 | NA | 0 | NA |
| 16 | 30113243 | 30123151 | 1  | NM_001017387 | SULT1A3  | 0 | NA | 0 | NA | 0 | NA | 0 | NA | 0 | NA |
| 16 | 30113969 | 30123121 | 1  | NM_001017389 | SULT1A4  | 0 | NA | 0 | NA | 0 | NA | 0 | NA | 0 | NA |
| 16 | 30113969 | 30123151 | 1  | NM_003166    | SULT1A3  | 0 | NA | 0 | NA | 0 | NA | 0 | NA | 0 | NA |
| 16 | 30118036 | 30123121 | 1  | NM_001017390 | SULT1A4  | 0 | NA | 0 | NA | 0 | NA | 0 | NA | 0 | NA |
| 16 | 30118036 | 30123151 | 1  | NM_177552    | SULT1A3  | 0 | NA | 0 | NA | 0 | NA | 0 | NA | 0 | NA |
| 16 | 30274128 | 30271668 | -1 | NM_006110    | CD2BP2   | 0 | NA | 0 | NA | 0 | NA | 0 | NA | 0 | NA |
| 16 | 30289023 | 30275922 | -1 | NM_015527    | TBC1D10B | 1 | 11 | 0 | NA | 0 | NA | 0 | NA | 0 | NA |
| 16 | 30293623 | 30296811 | 1  | NM_013292    | MYLPP    | 1 | 11 | 0 | NA | 0 | NA | 0 | NA | 0 | NA |
| 16 | 30301672 | 30296956 | -1 | NM_052838    | SEPT1    | 0 | NA | 0 | NA | 0 | NA | 0 | NA | 0 | NA |
| 16 | 30314557 | 30318216 | 1  | NM_152652    | ZNF553   | 1 | 21 | 0 | NA | 0 | NA | 1 | 11 | 0 | NA |
| 16 | 30326977 | 30338231 | 1  | NM_016643    | ZNF771   | 1 | 21 | 0 | NA | 0 | NA | 1 | 11 | 0 | NA |
| 16 | 30348874 | 30342519 | -1 | NM_024096    | XTP3TPA  | 0 | NA | 0 | NA | 0 | NA | 0 | NA | 0 | NA |
| 16 | 30364725 | 30362452 | -1 | NM_012248    | SEPHS2   | 1 | 16 | 0 | NA | 0 | NA | 1 | 16 | 0 | NA |
| 16 | 30391483 | 30442007 | 1  | NM_001114380 | ITGAL    | 0 | NA | 0 | NA | 0 | NA | 0 | NA | 0 | NA |
| 16 | 30391483 | 30442007 | 1  | NM_002209    | ITGAL    | 0 | NA | 0 | NA | 0 | NA | 0 | NA | 0 | NA |
| 16 | 30445411 | 30442822 | -1 | NM_024671    | ZNF768   | 0 | NA | 0 | NA | 0 | NA | 0 | NA | 0 | NA |
| 16 | 30453695 | 30450279 | -1 | NM_023931    | ZNF747   | 0 | NA | 0 | NA | 0 | NA | 0 | NA | 0 | NA |
| 16 | 30477085 | 30472585 | -1 | NM_033410    | ZNF764   | 0 | NA | 0 | NA | 0 | NA | 1 | 12 | 0 | NA |
| 16 | 30491229 | 30488523 | -1 | NM_001024683 | ZNF688   | 0 | NA | 0 | NA | 0 | NA | 0 | NA | 0 | NA |
| 16 | 30491229 | 30488523 | -1 | NM_145271    | ZNF688   | 0 | NA | 0 | NA | 0 | NA | 0 | NA | 0 | NA |
| 16 | 30504511 | 30499494 | -1 | NM_152458    | ZNF785   | 0 | NA | 0 | NA | 0 | NA | 0 | NA | 0 | NA |
| 16 | 30529183 | 30522200 | -1 | NM_138447    | ZNF689   | 0 | NA | 0 | NA | 0 | NA | 0 | NA | 0 | NA |
| 16 | 30569741 | 30575235 | 1  | NM_024031    | PRR14    | 1 | 14 | 0 | NA | 0 | NA | 1 | 19 | 0 | NA |
| 16 | 30583278 | 30589632 | 1  | NM_001105079 | FBR3     | 1 | 14 | 0 | NA | 0 | NA | 0 | NA | 0 | NA |
| 16 | 30617962 | 30658951 | 1  | NM_006662    | SRCAP    | 1 | 12 | 0 | NA | 0 | NA | 0 | NA | 0 | NA |
| 16 | 30667237 | 30676183 | 1  | NM_000294    | PHKG2    | 0 | NA | 0 | NA | 0 | NA | 0 | NA | 0 | NA |
| 16 | 30681043 | 30676252 | -1 | NM_001014979 | LOC90835 | 0 | NA | 0 | NA | 0 | NA | 0 | NA | 0 | NA |
| 16 | 30681130 | 30694039 | 1  | NM_014771    | RNF40    | 0 | NA | 0 | NA | 0 | NA | 0 | NA | 0 | NA |
| 16 | 30706024 | 30697270 | -1 | NM_001080417 | ZNF629   | 1 | 16 | 0 | NA | 0 | NA | 0 | NA | 0 | NA |
| 16 | 30812900 | 30806616 | -1 | NM_004765    | BCL7C    | 0 | NA | 0 | NA | 0 | NA | 0 | NA | 0 | NA |
| 16 | 30815428 | 30822382 | 1  | NM_0011330   | CTF1     | 0 | NA | 0 | NA | 0 | NA | 0 | NA | 0 | NA |
| 16 | 30843396 | 30867605 | 1  | NM_001099784 | FBXL19   | 0 | NA | 0 | NA | 0 | NA | 0 | NA | 0 | NA |
| 16 | 30867915 | 30873760 | 1  | NM_152288    | ORAI3    | 0 | NA | 0 | NA | 0 | NA | 1 | 14 | 0 | NA |
| 16 | 30876115 | 30903482 | 1  | NM_014712    | SETD1A   | 0 | NA | 0 | NA | 0 | NA | 1 | 14 | 0 | NA |
| 16 | 30904032 | 30907972 | 1  | NM_025193    | HSD3B7   | 1 | 11 | 0 | NA | 1 | 12 | 0 | NA | 0 | NA |
| 16 | 30929330 | 30910868 | -1 | NM_052874    | STX1B    | 0 | NA | 0 | NA | 0 | NA | 0 | NA | 0 | NA |
| 16 | 30952403 | 30958986 | 1  | NM_004604    | STX4     | 0 | NA | 0 | NA | 0 | NA | 1 | 11 | 0 | NA |
| 16 | 30993005 | 30979671 | -1 | NM_024706    | ZNF668   | 0 | NA | 0 | NA | 0 | NA | 0 | NA | 0 | NA |
| 16 | 30993268 | 31002334 | 1  | NM_014699    | ZNF646   | 0 | NA | 0 | NA | 0 | NA | 0 | NA | 0 | NA |
| 16 | 31007631 | 31002245 | -1 | NM_001039503 | POL3S    | 0 | NA | 0 | NA | 0 | NA | 0 | NA | 0 | NA |
| 16 | 31013777 | 31009675 | -1 | NM_024006    | VKORC1   | 0 | NA | 0 | NA | 0 | NA | 0 | NA | 0 | NA |
| 16 | 31013777 | 31009675 | -1 | NM_206824    | VKORC1   | 0 | NA | 0 | NA | 0 | NA | 0 | NA | 0 | NA |
| 16 | 31027162 | 31031613 | 1  | NM_001122957 | BCKDK    | 0 | NA | 0 | NA | 0 | NA | 0 | NA | 0 | NA |

|    |          |          |    |              |           |   |    |   |    |   |    |   |    |   |    |
|----|----------|----------|----|--------------|-----------|---|----|---|----|---|----|---|----|---|----|
| 16 | 31027162 | 31031613 | 1  | NM_005881    | BCKDK     | 0 | NA | 0 | NA | 0 | NA | 0 | NA | 0 | NA |
| 16 | 31036487 | 31050181 | 1  | NM_182958    | MYST1     | 0 | NA | 0 | NA | 0 | NA | 0 | NA | 0 | NA |
| 16 | 31036487 | 31050206 | 1  | NM_032188    | MYST1     | 0 | NA | 0 | NA | 0 | NA | 0 | NA | 0 | NA |
| 16 | 31054652 | 31050254 | -1 | NM_002773    | PRSS8     | 0 | NA | 0 | NA | 0 | NA | 0 | NA | 0 | NA |
| 16 | 31088888 | 31057749 | -1 | NM_173502    | PRSS36    | 0 | NA | 0 | NA | 0 | NA | 0 | NA | 0 | NA |
| 16 | 31098953 | 31110600 | 1  | NM_004960    | FUS       | 0 | NA | 0 | NA | 0 | NA | 0 | NA | 0 | NA |
| 16 | 31121752 | 31120307 | -1 | NM_013258    | PYCARD    | 0 | NA | 0 | NA | 0 | NA | 0 | NA | 0 | NA |
| 16 | 31121752 | 31120307 | -1 | NM_145182    | PYCARD    | 0 | NA | 0 | NA | 0 | NA | 0 | NA | 0 | NA |
| 16 | 31132915 | 31144011 | 1  | NM_001008274 | TRIM72    | 0 | NA | 0 | NA | 0 | NA | 0 | NA | 0 | NA |
| 16 | 31135896 | 31134783 | -1 | NM_152901    | PYDC1     | 0 | NA | 0 | NA | 0 | NA | 0 | NA | 0 | NA |
| 16 | 31178788 | 31251714 | 1  | NM_000632    | ITGAM     | 0 | NA | 0 | NA | 0 | NA | 0 | NA | 0 | NA |
| 16 | 31274009 | 31301819 | 1  | NM_000887    | ITGAX     | 0 | NA | 0 | NA | 0 | NA | 0 | NA | 0 | NA |
| 16 | 31312133 | 31345327 | 1  | NM_005353    | ITGAD     | 0 | NA | 0 | NA | 0 | NA | 0 | NA | 0 | NA |
| 16 | 31347222 | 31346555 | -1 | NM_005205    | COX6A2    | 1 | 12 | 1 | 16 | 0 | NA | 0 | NA | 0 | NA |
| 16 | 31377817 | 31385989 | 1  | NM_001105247 | ARMC5     | 0 | NA | 0 | NA | 0 | NA | 0 | NA | 0 | NA |
| 16 | 31377817 | 31385989 | 1  | NM_024742    | ARMC5     | 0 | NA | 0 | NA | 0 | NA | 0 | NA | 0 | NA |
| 16 | 31390984 | 31396780 | 1  | NM_001042454 | TGFB111   | 0 | NA | 0 | NA | 1 | 12 | 0 | NA | 0 | NA |
| 16 | 31392026 | 31396781 | 1  | NM_015927    | TGFB111   | 0 | NA | 0 | NA | 1 | 12 | 0 | NA | 0 | NA |
| 16 | 31401939 | 31409592 | 1  | NM_003041    | SLC5A2    | 0 | NA | 1 | 12 | 1 | 15 | 0 | NA | 0 | NA |
| 16 | 31427207 | 31408315 | -1 | NM_022744    | C16orf58  | 0 | NA | 0 | NA | 0 | NA | 0 | NA | 0 | NA |
| 16 | 31446703 | 31447625 | 1  | NM_016633    | ERAF      | 0 | NA | 0 | NA | 0 | NA | 0 | NA | 0 | NA |
| 16 | 31792660 | 31836128 | 1  | NM_003414    | ZNF267    | 1 | 13 | 0 | NA | 0 | NA | 0 | NA | 0 | NA |
| 16 | 32595554 | 32592349 | -1 | NM_016212    | TP53TG3   | 0 | NA | 0 | NA | 0 | NA | 0 | NA | 0 | NA |
| 16 | 32596379 | 32592341 | -1 | NM_001099687 | LOC729355 | 0 | NA | 0 | NA | 0 | NA | 0 | NA | 0 | NA |
| 16 | 33111656 | 33115688 | 1  | NM_001099687 | LOC729355 | 0 | NA | 0 | NA | 0 | NA | 0 | NA | 0 | NA |
| 16 | 33112480 | 33115680 | 1  | NM_016212    | TP53TG3   | 0 | NA | 0 | NA | 0 | NA | 0 | NA | 0 | NA |
| 16 | 33168191 | 33172228 | 1  | NM_001099687 | LOC729355 | 0 | NA | 0 | NA | 0 | NA | 0 | NA | 0 | NA |
| 16 | 33169015 | 33172220 | 1  | NM_016212    | TP53TG3   | 0 | NA | 0 | NA | 0 | NA | 0 | NA | 0 | NA |
| 16 | 45212785 | 45171967 | -1 | NM_024745    | SHCBP1    | 0 | NA | 0 | NA | 0 | NA | 0 | NA | 0 | NA |
| 16 | 45280645 | 45251089 | -1 | NM_018206    | VPS35     | 0 | NA | 0 | NA | 0 | NA | 0 | NA | 0 | NA |
| 16 | 45281058 | 45289807 | 1  | NM_014321    | ORC6L     | 0 | NA | 0 | NA | 0 | NA | 0 | NA | 0 | NA |
| 16 | 45339722 | 45293694 | -1 | NM_182493    | MYLK3     | 0 | NA | 0 | NA | 0 | NA | 0 | NA | 0 | NA |
| 16 | 45422575 | 45393459 | -1 | NM_001001436 | LOC388272 | 0 | NA | 0 | NA | 0 | NA | 0 | NA | 0 | NA |
| 16 | 45475808 | 45522699 | 1  | NM_133443    | GPT2      | 0 | NA | 0 | NA | 0 | NA | 0 | NA | 0 | NA |
| 16 | 45565126 | 45546774 | -1 | NM_005880    | DNAJA2    | 1 | 12 | 0 | NA | 0 | NA | 0 | NA | 0 | NA |
| 16 | 45735409 | 45672942 | -1 | NM_018092    | NETO2     | 0 | NA | 0 | NA | 1 | 12 | 0 | NA | 0 | NA |
| 16 | 46052516 | 45746798 | -1 | NM_030790    | ITFG1     | 0 | NA | 0 | NA | 0 | NA | 0 | NA | 0 | NA |
| 16 | 46052710 | 46292935 | 1  | NM_000293    | PHKB      | 0 | NA | 0 | NA | 0 | NA | 0 | NA | 0 | NA |
| 16 | 46052710 | 46292935 | 1  | NM_001031835 | PHKB      | 0 | NA | 0 | NA | 0 | NA | 0 | NA | 0 | NA |
| 16 | 46738182 | 46674384 | -1 | NM_033226    | ABCC12    | 0 | NA | 0 | NA | 0 | NA | 0 | NA | 0 | NA |
| 16 | 46823683 | 46758322 | -1 | NM_033151    | ABCC11    | 0 | NA | 0 | NA | 0 | NA | 0 | NA | 0 | NA |
| 16 | 46826589 | 46758322 | -1 | NM_032583    | ABCC11    | 0 | NA | 0 | NA | 0 | NA | 0 | NA | 0 | NA |
| 16 | 46826589 | 46758322 | -1 | NM_145186    | ABCC11    | 0 | NA | 0 | NA | 0 | NA | 0 | NA | 0 | NA |
| 16 | 46835711 | 46944908 | 1  | NM_031490    | LONP2     | 0 | NA | 0 | NA | 0 | NA | 0 | NA | 0 | NA |
| 16 | 46957285 | 46951946 | -1 | NM_001006610 | SIAH1     | 0 | NA | 0 | NA | 1 | 14 | 0 | NA | 0 | NA |
| 16 | 46976730 | 46951954 | -1 | NM_003031    | SIAH1     | 0 | NA | 0 | NA | 0 | NA | 0 | NA | 0 | NA |
| 16 | 47201621 | 47130137 | -1 | NM_153029    | N4BP1     | 1 | 15 | 0 | NA | 0 | NA | 0 | NA | 0 | NA |
| 16 | 47873184 | 47870199 | -1 | NM_004352    | CBLN1     | 0 | NA | 0 | NA | 0 | NA | 0 | NA | 0 | NA |
| 16 | 47965308 | 47990820 | 1  | NM_144602    | C16orf78  | 0 | NA | 0 | NA | 0 | NA | 0 | NA | 0 | NA |
| 16 | 48418419 | 48082021 | -1 | NM_015069    | ZNF423    | 0 | NA | 1 | 12 | 0 | NA | 0 | NA | 0 | NA |
| 16 | 48616689 | 48628500 | 1  | NM_153261    | TMEM188   | 1 | 18 | 0 | NA | 1 | 14 | 0 | NA | 0 | NA |
| 16 | 48657381 | 48696876 | 1  | NM_182922    | HEATR3    | 0 | NA | 1 | 12 | 0 | NA | 0 | NA | 0 | NA |
| 16 | 48745568 | 48826720 | 1  | NM_001040284 | PAPD5     | 1 | 14 | 0 | NA | 0 | NA | 0 | NA | 0 | NA |
| 16 | 48745568 | 48826720 | 1  | NM_001040285 | PAPD5     | 1 | 14 | 0 | NA | 0 | NA | 0 | NA | 0 | NA |
| 16 | 48879323 | 48909544 | 1  | NM_001114    | ADCY7     | 0 | NA | 0 | NA | 0 | NA | 0 | NA | 0 | NA |
| 16 | 48960330 | 48910441 | -1 | NM_013263    | BRD7      | 0 | NA | 0 | NA | 1 | 15 | 0 | NA | 0 | NA |
| 16 | 49139741 | 49226142 | 1  | NM_033119    | NKD1      | 0 | NA | 0 | NA | 0 | NA | 0 | NA | 0 | NA |
| 16 | 49272667 | 49264386 | -1 | NM_182854    | SNX20     | 1 | 11 | 0 | NA | 1 | 13 | 1 | 31 | 0 | NA |
| 16 | 49288550 | 49324488 | 1  | NM_022162    | NOD2      | 0 | NA | 0 | NA | 0 | NA | 0 | NA | 0 | NA |
| 16 | 49333461 | 49393347 | 1  | NM_001042355 | CYLD      | 0 | NA | 0 | NA | 0 | NA | 0 | NA | 0 | NA |
| 16 | 49333461 | 49393347 | 1  | NM_015247    | CYLD      | 0 | NA | 0 | NA | 0 | NA | 0 | NA | 0 | NA |
| 16 | 49333529 | 49393347 | 1  | NM_001042412 | CYLD      | 0 | NA | 0 | NA | 0 | NA | 0 | NA | 0 | NA |
| 16 | 49742684 | 49727386 | -1 | NM_002968    | SALL1     | 0 | NA | 0 | NA | 1 | 14 | 0 | NA | 0 | NA |
| 16 | 51138307 | 51029417 | -1 | NM_001080430 | TOX3      | 0 | NA | 0 | NA | 0 | NA | 0 | NA | 0 | NA |
| 16 | 51646445 | 51918915 | 1  | NM_025134    | CHD9      | 0 | NA | 0 | NA | 0 | NA | 0 | NA | 0 | NA |

|    |          |          |    |              |          |   |    |   |    |   |    |   |    |   |    |
|----|----------|----------|----|--------------|----------|---|----|---|----|---|----|---|----|---|----|
| 16 | 52025851 | 52083061 | 1  | NM_005611    | RBL2     | 0 | NA | 0 | NA | 0 | NA | 0 | NA | 0 | NA |
| 16 | 52094671 | 52082692 | -1 | NM_001012398 | AKTIP    | 0 | NA | 0 | NA | 0 | NA | 0 | NA | 0 | NA |
| 16 | 52094671 | 52082692 | -1 | NM_022476    | AKTIP    | 0 | NA | 0 | NA | 0 | NA | 0 | NA | 0 | NA |
| 16 | 52295272 | 52191318 | -1 | NM_015272    | RPGRIP1L | 0 | NA | 0 | NA | 0 | NA | 0 | NA | 0 | NA |
| 16 | 52295375 | 52705882 | 1  | NM_001080432 | FTO      | 0 | NA | 0 | NA | 0 | NA | 0 | NA | 0 | NA |
| 16 | 52877879 | 52874712 | -1 | NM_024336    | IRX3     | 0 | NA | 0 | NA | 0 | NA | 0 | NA | 0 | NA |
| 16 | 53522611 | 53525896 | 1  | NM_005853    | IRX5     | 1 | 14 | 0 | NA | 1 | 22 | 0 | NA | 0 | NA |
| 16 | 53915971 | 53922173 | 1  | NM_024335    | IRX6     | 0 | NA | 0 | NA | 0 | NA | 0 | NA | 0 | NA |
| 16 | 54070588 | 54098104 | 1  | NM_004530    | MMP2     | 1 | 11 | 0 | NA | 0 | NA | 0 | NA | 0 | NA |
| 16 | 54100454 | 54174652 | 1  | NM_017839    | LPCAT2   | 0 | NA | 0 | NA | 0 | NA | 0 | NA | 0 | NA |
| 16 | 54158084 | 54159093 | 1  | NM_032330    | CAPNS2   | 0 | NA | 0 | NA | 0 | NA | 0 | NA | 0 | NA |
| 16 | 54248056 | 54295201 | 1  | NM_001043    | SLC6A2   | 0 | NA | 1 | 17 | 0 | NA | 0 | NA | 0 | NA |
| 16 | 54424576 | 54394264 | -1 | NM_001025194 | CES1     | 0 | NA | 0 | NA | 0 | NA | 0 | NA | 0 | NA |
| 16 | 54424576 | 54394264 | -1 | NM_001025195 | CES1     | 0 | NA | 0 | NA | 0 | NA | 0 | NA | 0 | NA |
| 16 | 54424576 | 54394264 | -1 | NM_001266    | CES1     | 0 | NA | 0 | NA | 0 | NA | 0 | NA | 0 | NA |
| 16 | 54466783 | 54437628 | -1 | NM_145024    | CES7     | 0 | NA | 0 | NA | 0 | NA | 0 | NA | 0 | NA |
| 16 | 54782751 | 54939612 | 1  | NM_138736    | GNAO1    | 0 | NA | 0 | NA | 0 | NA | 0 | NA | 0 | NA |
| 16 | 54782751 | 54948857 | 1  | NM_020988    | GNAO1    | 0 | NA | 0 | NA | 0 | NA | 0 | NA | 0 | NA |
| 16 | 55016945 | 54952864 | -1 | NM_001144    | AMFR     | 0 | NA | 0 | NA | 0 | NA | 0 | NA | 0 | NA |
| 16 | 55042762 | 55020548 | -1 | NM_007006    | NUDT21   | 0 | NA | 0 | NA | 0 | NA | 0 | NA | 0 | NA |
| 16 | 55042924 | 55068908 | 1  | NM_018233    | OGFOD1   | 0 | NA | 0 | NA | 0 | NA | 0 | NA | 0 | NA |
| 16 | 55111696 | 55075798 | -1 | NM_031885    | BBS2     | 0 | NA | 0 | NA | 0 | NA | 0 | NA | 0 | NA |
| 16 | 55156461 | 55160370 | 1  | NM_032935    | MT4      | 0 | NA | 0 | NA | 0 | NA | 0 | NA | 0 | NA |
| 16 | 55180767 | 55182501 | 1  | NM_005954    | MT3      | 0 | NA | 0 | NA | 0 | NA | 0 | NA | 0 | NA |
| 16 | 55200011 | 55200894 | 1  | NM_005953    | MT2A     | 1 | 14 | 0 | NA | 1 | 12 | 0 | NA | 0 | NA |
| 16 | 55217085 | 55218525 | 1  | NM_175617    | MT1E     | 0 | NA | 0 | NA | 0 | NA | 0 | NA | 0 | NA |
| 16 | 55224034 | 55225399 | 1  | NM_176870    | MT1M     | 0 | NA | 0 | NA | 0 | NA | 0 | NA | 0 | NA |
| 16 | 55230078 | 55231500 | 1  | NM_005946    | MT1A     | 0 | NA | 0 | NA | 0 | NA | 0 | NA | 0 | NA |
| 16 | 55243311 | 55244617 | 1  | NM_005947    | MT1B     | 0 | NA | 0 | NA | 0 | NA | 0 | NA | 0 | NA |
| 16 | 55249355 | 55250713 | 1  | NM_005949    | MT1F     | 0 | NA | 0 | NA | 0 | NA | 0 | NA | 0 | NA |
| 16 | 55259478 | 55258153 | -1 | NM_005950    | MT1G     | 0 | NA | 0 | NA | 0 | NA | 0 | NA | 0 | NA |
| 16 | 55261226 | 55262542 | 1  | NM_005951    | MT1H     | 0 | NA | 0 | NA | 0 | NA | 0 | NA | 0 | NA |
| 16 | 55273895 | 55275609 | 1  | NM_005952    | MT1X     | 0 | NA | 0 | NA | 0 | NA | 0 | NA | 0 | NA |
| 16 | 55321607 | 55436178 | 1  | NM_014669    | NUP93    | 0 | NA | 0 | NA | 0 | NA | 0 | NA | 0 | NA |
| 16 | 55456619 | 55507263 | 1  | NM_000339    | SLC12A3  | 0 | NA | 0 | NA | 0 | NA | 0 | NA | 0 | NA |
| 16 | 55456619 | 55507263 | 1  | NM_001126107 | SLC12A3  | 0 | NA | 0 | NA | 0 | NA | 0 | NA | 0 | NA |
| 16 | 55456619 | 55507263 | 1  | NM_001126108 | SLC12A3  | 0 | NA | 0 | NA | 0 | NA | 0 | NA | 0 | NA |
| 16 | 55523248 | 55535294 | 1  | NM_001010989 | HERPUD1  | 0 | NA | 0 | NA | 0 | NA | 0 | NA | 0 | NA |
| 16 | 55523248 | 55535294 | 1  | NM_001010990 | HERPUD1  | 0 | NA | 0 | NA | 0 | NA | 0 | NA | 0 | NA |
| 16 | 55523248 | 55535294 | 1  | NM_014685    | HERPUD1  | 0 | NA | 0 | NA | 0 | NA | 0 | NA | 0 | NA |
| 16 | 55553335 | 55575257 | 1  | NM_000078    | CETP     | 0 | NA | 0 | NA | 0 | NA | 0 | NA | 0 | NA |
| 16 | 55580910 | 55674937 | 1  | NM_032206    | NLR5     | 0 | NA | 0 | NA | 0 | NA | 0 | NA | 0 | NA |
| 16 | 55684010 | 55739377 | 1  | NM_152727    | CPNE2    | 0 | NA | 0 | NA | 0 | NA | 0 | NA | 0 | NA |
| 16 | 55777477 | 55743878 | -1 | NM_024946    | NIP30    | 0 | NA | 0 | NA | 0 | NA | 0 | NA | 0 | NA |
| 16 | 55777471 | 55830448 | 1  | NM_133368    | RSPRY1   | 0 | NA | 0 | NA | 0 | NA | 0 | NA | 0 | NA |
| 16 | 55836538 | 55845046 | 1  | NM_012106    | ARL2BP   | 0 | NA | 0 | NA | 0 | NA | 0 | NA | 0 | NA |
| 16 | 55876072 | 55847509 | -1 | NM_015993    | PLL      | 0 | NA | 0 | NA | 0 | NA | 0 | NA | 0 | NA |
| 16 | 55950218 | 55957602 | 1  | NM_002990    | CCL22    | 0 | NA | 0 | NA | 0 | NA | 0 | NA | 0 | NA |
| 16 | 55963914 | 55976457 | 1  | NM_002996    | CX3CL1   | 0 | NA | 0 | NA | 0 | NA | 0 | NA | 0 | NA |
| 16 | 55996179 | 56007475 | 1  | NM_002987    | CCL17    | 0 | NA | 0 | NA | 0 | NA | 0 | NA | 0 | NA |
| 16 | 56038870 | 56019587 | -1 | NM_020313    | CIAPIN1  | 0 | NA | 0 | NA | 0 | NA | 0 | NA | 0 | NA |
| 16 | 56038902 | 56052680 | 1  | NM_020312    | COQ9     | 0 | NA | 0 | NA | 0 | NA | 0 | NA | 0 | NA |
| 16 | 56054051 | 56063422 | 1  | NM_032940    | POLR2C   | 0 | NA | 0 | NA | 0 | NA | 0 | NA | 0 | NA |
| 16 | 56077828 | 56063373 | -1 | NM_018110    | DOK4     | 0 | NA | 0 | NA | 0 | NA | 0 | NA | 0 | NA |
| 16 | 56127978 | 56103590 | -1 | NM_033212    | CCDC102A | 0 | NA | 0 | NA | 0 | NA | 0 | NA | 0 | NA |
| 16 | 56134101 | 56168601 | 1  | NM_153837    | GPR114   | 0 | NA | 0 | NA | 0 | NA | 0 | NA | 0 | NA |
| 16 | 56211458 | 56256445 | 1  | NM_005682    | GPR56    | 0 | NA | 0 | NA | 0 | NA | 0 | NA | 0 | NA |
| 16 | 56220022 | 56256440 | 1  | NM_201525    | GPR56    | 1 | 16 | 0 | NA | 0 | NA | 1 | 12 | 0 | NA |
| 16 | 56220041 | 56256445 | 1  | NM_201524    | GPR56    | 1 | 16 | 0 | NA | 0 | NA | 1 | 12 | 0 | NA |
| 16 | 56259671 | 56280791 | 1  | NM_170776    | GPR97    | 0 | NA | 0 | NA | 0 | NA | 0 | NA | 0 | NA |
| 16 | 56286226 | 56322868 | 1  | NM_032269    | CCDC135  | 0 | NA | 0 | NA | 0 | NA | 0 | NA | 0 | NA |
| 16 | 56327160 | 56348683 | 1  | NM_005886    | KATNB1   | 0 | NA | 0 | NA | 0 | NA | 0 | NA | 0 | NA |
| 16 | 56393940 | 56349629 | -1 | NM_005550    | KIFC3    | 0 | NA | 0 | NA | 0 | NA | 0 | NA | 0 | NA |
| 16 | 56562513 | 56475205 | -1 | NM_001297    | CNGB1    | 0 | NA | 0 | NA | 0 | NA | 0 | NA | 0 | NA |
| 16 | 56567839 | 56579518 | 1  | NM_199046    | TEPP     | 0 | NA | 0 | NA | 0 | NA | 0 | NA | 0 | NA |

|    |          |          |    |              |           |   |    |   |    |   |    |   |    |   |    |
|----|----------|----------|----|--------------|-----------|---|----|---|----|---|----|---|----|---|----|
| 16 | 56567839 | 56579518 | 1  | NM_199456    | TEPP      | 0 | NA | 0 | NA | 0 | NA | 0 | NA | 0 | NA |
| 16 | 56591263 | 56586073 | -1 | NM_020807    | ZNF319    | 0 | NA | 0 | NA | 0 | NA | 0 | NA | 0 | NA |
| 16 | 56592805 | 56613023 | 1  | NM_024598    | C16orf57  | 0 | NA | 0 | NA | 0 | NA | 0 | NA | 0 | NA |
| 16 | 56616782 | 56638305 | 1  | NM_002428    | MMP15     | 0 | NA | 0 | NA | 0 | NA | 0 | NA | 0 | NA |
| 16 | 56720797 | 56704997 | -1 | NM_013242    | C16orf80  | 0 | NA | 0 | NA | 0 | NA | 0 | NA | 0 | NA |
| 16 | 56789283 | 56749312 | -1 | NM_001896    | CSNK2A2   | 0 | NA | 0 | NA | 0 | NA | 0 | NA | 0 | NA |
| 16 | 56841363 | 56875235 | 1  | NM_014157    | CCDC113   | 0 | NA | 0 | NA | 0 | NA | 0 | NA | 0 | NA |
| 16 | 56886452 | 56871401 | -1 | NM_001080492 | Kikbl4    | 0 | NA | 0 | NA | 0 | NA | 0 | NA | 0 | NA |
| 16 | 56983798 | 56997549 | 1  | NM_001126129 | GINS3     | 1 | 24 | 0 | NA | 0 | NA | 1 | 17 | 0 | NA |
| 16 | 56983798 | 56997549 | 1  | NM_001126130 | GINS3     | 1 | 24 | 0 | NA | 0 | NA | 1 | 17 | 0 | NA |
| 16 | 56983798 | 56997549 | 1  | NM_022770    | GINS3     | 1 | 24 | 0 | NA | 0 | NA | 1 | 17 | 0 | NA |
| 16 | 57055117 | 57105024 | 1  | NM_020465    | NDRG4     | 0 | NA | 0 | NA | 0 | NA | 0 | NA | 0 | NA |
| 16 | 57079160 | 57105023 | 1  | NM_022910    | NDRG4     | 0 | NA | 0 | NA | 0 | NA | 0 | NA | 0 | NA |
| 16 | 57106927 | 57111053 | 1  | NM_024860    | SETD6     | 1 | 11 | 0 | NA | 0 | NA | 0 | NA | 0 | NA |
| 16 | 57221251 | 57111355 | -1 | NM_016284    | CNOT1     | 0 | NA | 0 | NA | 0 | NA | 0 | NA | 0 | NA |
| 16 | 57221251 | 57134732 | -1 | NM_206999    | CNOT1     | 0 | NA | 0 | NA | 0 | NA | 0 | NA | 0 | NA |
| 16 | 57276175 | 57257798 | -1 | NM_018231    | SLC38A7   | 0 | NA | 0 | NA | 0 | NA | 0 | NA | 0 | NA |
| 16 | 57325747 | 57298535 | -1 | NM_002080    | GOT2      | 0 | NA | 0 | NA | 0 | NA | 0 | NA | 0 | NA |
| 16 | 60627537 | 60244735 | -1 | NM_001796    | CDH8      | 0 | NA | 0 | NA | 0 | NA | 0 | NA | 0 | NA |
| 16 | 63713420 | 63538183 | -1 | NM_001797    | CDH11     | 0 | NA | 0 | NA | 0 | NA | 0 | NA | 0 | NA |
| 16 | 64167704 | 63875902 | -1 | NM_001101346 | LOC283867 | 0 | NA | 0 | NA | 0 | NA | 0 | NA | 0 | NA |
| 16 | 64958025 | 64996190 | 1  | NM_001795    | CDH5      | 0 | NA | 0 | NA | 0 | NA | 0 | NA | 0 | NA |
| 16 | 65141816 | 65100845 | -1 | NM_004614    | TK2       | 1 | 14 | 0 | NA | 0 | NA | 1 | 18 | 0 | NA |
| 16 | 65143966 | 65157655 | 1  | NM_001040138 | CKLF      | 1 | 14 | 0 | NA | 0 | NA | 1 | 18 | 0 | NA |
| 16 | 65143972 | 65157472 | 1  | NM_016326    | CKLF      | 1 | 14 | 0 | NA | 0 | NA | 1 | 18 | 0 | NA |
| 16 | 65143972 | 65157472 | 1  | NM_016951    | CKLF      | 1 | 14 | 0 | NA | 0 | NA | 1 | 18 | 0 | NA |
| 16 | 65143972 | 65157472 | 1  | NM_181640    | CKLF      | 1 | 14 | 0 | NA | 0 | NA | 1 | 18 | 0 | NA |
| 16 | 65143972 | 65157472 | 1  | NM_181641    | CKLF      | 1 | 14 | 0 | NA | 0 | NA | 1 | 18 | 0 | NA |
| 16 | 65157794 | 65170539 | 1  | NM_181269    | CMTM1     | 0 | NA | 0 | NA | 0 | NA | 0 | NA | 0 | NA |
| 16 | 65157794 | 65170539 | 1  | NM_181270    | CMTM1     | 0 | NA | 0 | NA | 0 | NA | 0 | NA | 0 | NA |
| 16 | 65157794 | 65170539 | 1  | NM_181271    | CMTM1     | 0 | NA | 0 | NA | 0 | NA | 0 | NA | 0 | NA |
| 16 | 65157794 | 65170539 | 1  | NM_181272    | CMTM1     | 0 | NA | 0 | NA | 0 | NA | 0 | NA | 0 | NA |
| 16 | 65157794 | 65170539 | 1  | NM_181283    | CMTM1     | 0 | NA | 0 | NA | 0 | NA | 0 | NA | 0 | NA |
| 16 | 65157794 | 65170539 | 1  | NM_181296    | CMTM1     | 0 | NA | 0 | NA | 0 | NA | 0 | NA | 0 | NA |
| 16 | 65157850 | 65170539 | 1  | NM_052999    | CMTM1     | 0 | NA | 0 | NA | 0 | NA | 0 | NA | 0 | NA |
| 16 | 65157850 | 65170539 | 1  | NM_181268    | CMTM1     | 0 | NA | 0 | NA | 0 | NA | 0 | NA | 0 | NA |
| 16 | 65170851 | 65179678 | 1  | NM_144673    | CMTM2     | 0 | NA | 0 | NA | 0 | NA | 0 | NA | 0 | NA |
| 16 | 65195702 | 65205296 | 1  | NM_001048251 | CMTM3     | 0 | NA | 0 | NA | 0 | NA | 0 | NA | 0 | NA |
| 16 | 65195713 | 65205296 | 1  | NM_144601    | CMTM3     | 0 | NA | 0 | NA | 0 | NA | 0 | NA | 0 | NA |
| 16 | 65195713 | 65205296 | 1  | NM_181554    | CMTM3     | 0 | NA | 0 | NA | 0 | NA | 0 | NA | 0 | NA |
| 16 | 65196067 | 65205296 | 1  | NM_181553    | CMTM3     | 0 | NA | 0 | NA | 0 | NA | 0 | NA | 0 | NA |
| 16 | 65288111 | 65206153 | -1 | NM_178818    | CMTM4     | 0 | NA | 0 | NA | 0 | NA | 0 | NA | 0 | NA |
| 16 | 65288111 | 65206153 | -1 | NM_181521    | CMTM4     | 0 | NA | 0 | NA | 0 | NA | 0 | NA | 0 | NA |
| 16 | 65343026 | 65312299 | -1 | NM_006141    | DYNC1L12  | 0 | NA | 0 | NA | 0 | NA | 0 | NA | 0 | NA |
| 16 | 65422380 | 65394281 | -1 | NM_001018159 | NAE1      | 0 | NA | 0 | NA | 0 | NA | 0 | NA | 0 | NA |
| 16 | 65422380 | 65394281 | -1 | NM_001018160 | NAE1      | 0 | NA | 0 | NA | 0 | NA | 0 | NA | 0 | NA |
| 16 | 65422380 | 65394281 | -1 | NM_003905    | NAE1      | 0 | NA | 0 | NA | 0 | NA | 0 | NA | 0 | NA |
| 16 | 65435782 | 65445550 | 1  | NM_005182    | CA7       | 0 | NA | 0 | NA | 0 | NA | 0 | NA | 0 | NA |
| 16 | 65436341 | 65445550 | 1  | NM_001014435 | CA7       | 0 | NA | 0 | NA | 0 | NA | 0 | NA | 0 | NA |
| 16 | 65471936 | 65479356 | 1  | NM_020786    | PDP2      | 0 | NA | 0 | NA | 0 | NA | 0 | NA | 0 | NA |
| 16 | 65510267 | 65499525 | -1 | NM_004062    | CDH16     | 0 | NA | 0 | NA | 0 | NA | 0 | NA | 0 | NA |
| 16 | 65516920 | 65513088 | -1 | NM_004165    | RRAD      | 0 | NA | 0 | NA | 0 | NA | 0 | NA | 0 | NA |
| 16 | 65525804 | 65523466 | -1 | NM_016062    | FAM96B    | 0 | NA | 0 | NA | 0 | NA | 0 | NA | 0 | NA |
| 16 | 65525847 | 65536495 | 1  | NM_003869    | CES2      | 0 | NA | 0 | NA | 0 | NA | 0 | NA | 0 | NA |
| 16 | 65525847 | 65536495 | 1  | NM_198061    | CES2      | 0 | NA | 0 | NA | 0 | NA | 0 | NA | 0 | NA |
| 16 | 65552638 | 65566553 | 1  | NM_024922    | CES3      | 0 | NA | 0 | NA | 0 | NA | 0 | NA | 0 | NA |
| 16 | 65580133 | 65601160 | 1  | NM_173815    | FLJ37464  | 1 | 11 | 0 | NA | 0 | NA | 0 | NA | 0 | NA |
| 16 | 65620550 | 65692459 | 1  | NM_001755    | CBFB      | 0 | NA | 0 | NA | 0 | NA | 0 | NA | 0 | NA |
| 16 | 65620550 | 65692459 | 1  | NM_022845    | CBFB      | 0 | NA | 0 | NA | 0 | NA | 0 | NA | 0 | NA |
| 16 | 65701415 | 65739943 | 1  | NM_025187    | C16orf70  | 0 | NA | 0 | NA | 0 | NA | 1 | 11 | 0 | NA |
| 16 | 65742403 | 65739505 | -1 | NM_033309    | MGC4655   | 0 | NA | 0 | NA | 0 | NA | 0 | NA | 0 | NA |
| 16 | 65751313 | 65745589 | -1 | NM_003789    | TRADD     | 1 | 14 | 0 | NA | 0 | NA | 0 | NA | 0 | NA |
| 16 | 65751391 | 65755578 | 1  | NM_018378    | FBXL8     | 1 | 14 | 0 | NA | 0 | NA | 0 | NA | 0 | NA |
| 16 | 65754857 | 65761349 | 1  | NM_001040667 | HSF4      | 1 | 14 | 0 | NA | 0 | NA | 0 | NA | 0 | NA |
| 16 | 65754857 | 65761349 | 1  | NM_001538    | HSF4      | 1 | 14 | 0 | NA | 0 | NA | 0 | NA | 0 | NA |

|    |          |          |    |              |           |   |    |   |    |   |    |   |    |   |    |
|----|----------|----------|----|--------------|-----------|---|----|---|----|---|----|---|----|---|----|
| 16 | 65765370 | 65767127 | 1  | NM_003946    | NOL3      | 0 | NA | 0 | NA | 0 | NA | 0 | NA | 0 | NA |
| 16 | 65775384 | 65767005 | -1 | NM_001040715 | LOC653319 | 0 | NA | 0 | NA | 0 | NA | 0 | NA | 0 | NA |
| 16 | 65781608 | 65775782 | -1 | NM_178516    | EXOC3L    | 0 | NA | 0 | NA | 0 | NA | 0 | NA | 0 | NA |
| 16 | 65783568 | 65790322 | 1  | NM_001950    | E2F4      | 0 | NA | 0 | NA | 0 | NA | 0 | NA | 0 | NA |
| 16 | 65790528 | 65795428 | 1  | NM_024712    | ELMO3     | 0 | NA | 0 | NA | 0 | NA | 0 | NA | 0 | NA |
| 16 | 65818222 | 65798542 | -1 | NM_012163    | LRRC29    | 0 | NA | 0 | NA | 0 | NA | 0 | NA | 0 | NA |
| 16 | 65818402 | 65798542 | -1 | NM_001004055 | LRRC29    | 0 | NA | 0 | NA | 0 | NA | 0 | NA | 0 | NA |
| 16 | 65818516 | 65820683 | 1  | NM_014187    | TMEM208   | 0 | NA | 0 | NA | 0 | NA | 0 | NA | 0 | NA |
| 16 | 65838926 | 65820792 | -1 | NM_013241    | FHOD1     | 0 | NA | 0 | NA | 0 | NA | 0 | NA | 0 | NA |
| 16 | 65840355 | 65863595 | 1  | NM_004594    | SLC9A5    | 0 | NA | 0 | NA | 0 | NA | 0 | NA | 0 | NA |
| 16 | 65868913 | 65880884 | 1  | NM_015432    | PLEKHG4   | 0 | NA | 0 | NA | 0 | NA | 0 | NA | 0 | NA |
| 16 | 65918162 | 65880893 | -1 | NM_001100915 | KCTD19    | 0 | NA | 0 | NA | 0 | NA | 0 | NA | 0 | NA |
| 16 | 65918247 | 65976602 | 1  | NM_018296    | LRRC36    | 0 | NA | 0 | NA | 0 | NA | 0 | NA | 0 | NA |
| 16 | 65984922 | 65981212 | -1 | NM_015964    | TPPP3     | 0 | NA | 0 | NA | 0 | NA | 0 | NA | 0 | NA |
| 16 | 65984922 | 65981212 | -1 | NM_016140    | TPPP3     | 0 | NA | 0 | NA | 0 | NA | 0 | NA | 0 | NA |
| 16 | 66007878 | 65985828 | -1 | NM_013304    | ZDHHC1    | 0 | NA | 0 | NA | 0 | NA | 0 | NA | 0 | NA |
| 16 | 66022536 | 66028955 | 1  | NM_000196    | HSD11B2   | 0 | NA | 0 | NA | 0 | NA | 0 | NA | 0 | NA |
| 16 | 66072590 | 66029417 | -1 | NM_004691    | ATP6V0D1  | 0 | NA | 0 | NA | 0 | NA | 0 | NA | 0 | NA |
| 16 | 66074805 | 66073974 | -1 | NM_007316    | AGRP      | 0 | NA | 0 | NA | 0 | NA | 0 | NA | 0 | NA |
| 16 | 66075217 | 66073974 | -1 | NM_001138    | AGRP      | 0 | NA | 0 | NA | 0 | NA | 0 | NA | 0 | NA |
| 16 | 66120254 | 66138190 | 1  | NM_024519    | FAM65A    | 0 | NA | 0 | NA | 1 | 17 | 0 | NA | 0 | NA |
| 16 | 66153964 | 66230589 | 1  | NM_006565    | CTCF      | 0 | NA | 0 | NA | 0 | NA | 0 | NA | 0 | NA |
| 16 | 66236530 | 66248973 | 1  | NM_001013838 | RLTPR     | 0 | NA | 0 | NA | 0 | NA | 0 | NA | 0 | NA |
| 16 | 66252219 | 66248915 | -1 | NM_001082486 | ACD       | 0 | NA | 0 | NA | 0 | NA | 0 | NA | 0 | NA |
| 16 | 66252219 | 66248915 | -1 | NM_001082487 | ACD       | 0 | NA | 0 | NA | 0 | NA | 0 | NA | 0 | NA |
| 16 | 66252219 | 66248915 | -1 | NM_022914    | ACD       | 0 | NA | 0 | NA | 0 | NA | 0 | NA | 0 | NA |
| 16 | 66252351 | 66254182 | 1  | NM_001037281 | PARDA6A   | 0 | NA | 0 | NA | 0 | NA | 0 | NA | 0 | NA |
| 16 | 66252351 | 66254182 | 1  | NM_016948    | PARDA6A   | 0 | NA | 0 | NA | 0 | NA | 0 | NA | 0 | NA |
| 16 | 66258129 | 66254350 | -1 | NM_032140    | C16orf48  | 0 | NA | 0 | NA | 0 | NA | 0 | NA | 0 | NA |
| 16 | 66258217 | 66260182 | 1  | NM_001012984 | C16orf86  | 0 | NA | 0 | NA | 0 | NA | 0 | NA | 0 | NA |
| 16 | 66310720 | 66265939 | -1 | NM_030819    | GFOD2     | 0 | NA | 0 | NA | 0 | NA | 0 | NA | 0 | NA |
| 16 | 66398056 | 66314505 | -1 | NM_020850    | RANBP10   | 0 | NA | 0 | NA | 0 | NA | 0 | NA | 0 | NA |
| 16 | 66398510 | 66419472 | 1  | NM_018430    | TSNAXIP1  | 0 | NA | 0 | NA | 0 | NA | 0 | NA | 0 | NA |
| 16 | 66433713 | 66435599 | 1  | NM_020457    | THAP11    | 0 | NA | 0 | NA | 0 | NA | 0 | NA | 0 | NA |
| 16 | 66438319 | 66462720 | 1  | NM_005796    | NUTF2     | 0 | NA | 0 | NA | 0 | NA | 0 | NA | 0 | NA |
| 16 | 66438862 | 66419560 | -1 | NM_025082    | CENPT     | 0 | NA | 0 | NA | 0 | NA | 0 | NA | 0 | NA |
| 16 | 66464499 | 66475907 | 1  | NM_014329    | EDC4      | 0 | NA | 0 | NA | 0 | NA | 0 | NA | 0 | NA |
| 16 | 66476281 | 66477772 | 1  | NM_198443    | NRN1L     | 1 | 12 | 0 | NA | 0 | NA | 0 | NA | 0 | NA |
| 16 | 66484715 | 66521082 | 1  | NM_006742    | PSKH1     | 1 | 12 | 0 | NA | 0 | NA | 0 | NA | 0 | NA |
| 16 | 66523266 | 66520973 | -1 | NM_001907    | CTRL      | 0 | NA | 0 | NA | 0 | NA | 0 | NA | 0 | NA |
| 16 | 66528254 | 66525907 | -1 | NM_002801    | PSMB10    | 0 | NA | 0 | NA | 0 | NA | 0 | NA | 0 | NA |
| 16 | 66535516 | 66531287 | -1 | NM_000229    | LCAT      | 0 | NA | 0 | NA | 0 | NA | 0 | NA | 0 | NA |
| 16 | 66560026 | 66535730 | -1 | NM_005072    | SLC12A4   | 0 | NA | 0 | NA | 0 | NA | 0 | NA | 0 | NA |
| 16 | 66571914 | 66567066 | -1 | NM_022357    | DPEP3     | 0 | NA | 0 | NA | 0 | NA | 0 | NA | 0 | NA |
| 16 | 66590857 | 66578798 | -1 | NM_022355    | DPEP2     | 0 | NA | 0 | NA | 0 | NA | 0 | NA | 0 | NA |
| 16 | 66614704 | 66670685 | 1  | NM_017803    | DUS2L     | 0 | NA | 0 | NA | 0 | NA | 0 | NA | 0 | NA |
| 16 | 66615460 | 66612674 | -1 | NM_018380    | DDX28     | 0 | NA | 0 | NA | 0 | NA | 0 | NA | 0 | NA |
| 16 | 66676875 | 66783616 | 1  | NM_173164    | NFATC3    | 0 | NA | 0 | NA | 0 | NA | 0 | NA | 0 | NA |
| 16 | 66676875 | 66818338 | 1  | NM_004555    | NFATC3    | 0 | NA | 0 | NA | 0 | NA | 0 | NA | 0 | NA |
| 16 | 66676875 | 66818338 | 1  | NM_173163    | NFATC3    | 0 | NA | 0 | NA | 0 | NA | 0 | NA | 0 | NA |
| 16 | 66676875 | 66818338 | 1  | NM_173165    | NFATC3    | 0 | NA | 0 | NA | 0 | NA | 0 | NA | 0 | NA |
| 16 | 66827637 | 66819950 | -1 | NM_024939    | RBM35B    | 0 | NA | 0 | NA | 0 | NA | 0 | NA | 0 | NA |
| 16 | 66836747 | 66852462 | 1  | NM_012320    | LYPLA3    | 0 | NA | 0 | NA | 0 | NA | 0 | NA | 0 | NA |
| 16 | 66855923 | 66893223 | 1  | NM_001076785 | SLC7A6    | 0 | NA | 0 | NA | 0 | NA | 0 | NA | 0 | NA |
| 16 | 66855923 | 66893223 | 1  | NM_003983    | SLC7A6    | 0 | NA | 0 | NA | 0 | NA | 0 | NA | 0 | NA |
| 16 | 66902349 | 66892020 | -1 | NM_032178    | SLC7A6OS  | 0 | NA | 0 | NA | 0 | NA | 1 | 14 | 0 | NA |
| 16 | 66902445 | 66948663 | 1  | NM_019023    | PRMT7     | 0 | NA | 0 | NA | 0 | NA | 1 | 14 | 0 | NA |
| 16 | 67039905 | 66949730 | -1 | NM_018667    | SMPD3     | 0 | NA | 0 | NA | 0 | NA | 0 | NA | 0 | NA |
| 16 | 67131161 | 67158540 | 1  | NM_133458    | ZFP90     | 1 | 11 | 0 | NA | 0 | NA | 0 | NA | 0 | NA |
| 16 | 67236276 | 67290443 | 1  | NM_001793    | CDH3      | 0 | NA | 0 | NA | 0 | NA | 0 | NA | 0 | NA |
| 16 | 67328695 | 67426945 | 1  | NM_004360    | CDH1      | 0 | NA | 0 | NA | 0 | NA | 0 | NA | 0 | NA |
| 16 | 67435009 | 67676586 | 1  | NM_024562    | TMC07     | 0 | NA | 0 | NA | 0 | NA | 0 | NA | 0 | NA |
| 16 | 67697660 | 67710120 | 1  | NM_138612    | HAS3      | 0 | NA | 0 | NA | 0 | NA | 0 | NA | 0 | NA |
| 16 | 67698943 | 67709071 | 1  | NM_005329    | HAS3      | 0 | NA | 0 | NA | 0 | NA | 0 | NA | 0 | NA |
| 16 | 67723558 | 67709413 | -1 | NM_001040146 | CTF8      | 0 | NA | 0 | NA | 0 | NA | 0 | NA | 0 | NA |

|    |          |          |    |              |           |   |    |   |    |   |    |   |    |   |    |
|----|----------|----------|----|--------------|-----------|---|----|---|----|---|----|---|----|---|----|
| 16 | 67723985 | 67709413 | -1 | NM_001039690 | CTF8      | 0 | NA | 0 | NA | 0 | NA | 0 | NA | 0 | NA |
| 16 | 67723985 | 67709413 | -1 | NM_001040144 | CTF8      | 0 | NA | 0 | NA | 0 | NA | 0 | NA | 0 | NA |
| 16 | 67723999 | 67760438 | 1  | NM_032830    | CIRH1A    | 0 | NA | 0 | NA | 0 | NA | 0 | NA | 0 | NA |
| 16 | 67778550 | 67900456 | 1  | NM_006750    | SNTB2     | 0 | NA | 0 | NA | 0 | NA | 1 | 11 | 0 | NA |
| 16 | 67902787 | 67916447 | 1  | NM_013245    | VPS4A     | 0 | NA | 0 | NA | 0 | NA | 0 | NA | 0 | NA |
| 16 | 67921999 | 67920024 | -1 | NM_022341    | PDF       | 1 | 26 | 0 | NA | 1 | 12 | 0 | NA | 0 | NA |
| 16 | 67931027 | 67920024 | -1 | NM_032382    | COG8      | 1 | 26 | 0 | NA | 1 | 12 | 0 | NA | 0 | NA |
| 16 | 67931046 | 67934510 | 1  | NM_016101    | NIP7      | 1 | 26 | 0 | NA | 1 | 12 | 0 | NA | 0 | NA |
| 16 | 67943190 | 67934660 | -1 | NM_144676    | TMED6     | 0 | NA | 0 | NA | 0 | NA | 0 | NA | 0 | NA |
| 16 | 67977374 | 67947033 | -1 | NM_005652    | TERF2     | 0 | NA | 0 | NA | 0 | NA | 0 | NA | 0 | NA |
| 16 | 68015998 | 68057668 | 1  | NM_030579    | CYBSB     | 0 | NA | 0 | NA | 0 | NA | 0 | NA | 0 | NA |
| 16 | 68156497 | 68296054 | 1  | NM_00113178  | NFAT5     | 0 | NA | 0 | NA | 0 | NA | 0 | NA | 0 | NA |
| 16 | 68156497 | 68296054 | 1  | NM_006599    | NFAT5     | 0 | NA | 0 | NA | 0 | NA | 0 | NA | 0 | NA |
| 16 | 68156497 | 68296054 | 1  | NM_138713    | NFAT5     | 0 | NA | 0 | NA | 0 | NA | 0 | NA | 0 | NA |
| 16 | 68156497 | 68296054 | 1  | NM_138714    | NFAT5     | 0 | NA | 0 | NA | 0 | NA | 0 | NA | 0 | NA |
| 16 | 68156497 | 68296054 | 1  | NM_173214    | NFAT5     | 0 | NA | 0 | NA | 0 | NA | 0 | NA | 0 | NA |
| 16 | 68318034 | 68300804 | -1 | NM_000903    | NQO1      | 1 | 27 | 0 | NA | 0 | NA | 1 | 12 | 0 | NA |
| 16 | 68318034 | 68300804 | -1 | NM_001025433 | NQO1      | 1 | 27 | 0 | NA | 0 | NA | 1 | 12 | 0 | NA |
| 16 | 68318034 | 68300804 | -1 | NM_001025434 | NQO1      | 1 | 27 | 0 | NA | 0 | NA | 1 | 12 | 0 | NA |
| 16 | 68346330 | 68333274 | -1 | NM_014062    | NOB1      | 1 | 20 | 0 | NA | 1 | 12 | 0 | NA | 0 | NA |
| 16 | 68353774 | 68501812 | 1  | NM_199423    | WWP2      | 1 | 20 | 0 | NA | 1 | 12 | 0 | NA | 0 | NA |
| 16 | 68353774 | 68533144 | 1  | NM_007014    | WWP2      | 1 | 20 | 0 | NA | 1 | 12 | 0 | NA | 0 | NA |
| 16 | 68516401 | 68533144 | 1  | NM_199424    | WWP2      | 0 | NA | 0 | NA | 0 | NA | 0 | NA | 0 | NA |
| 16 | 68542310 | 68555390 | 1  | NM_182619    | LOC348174 | 0 | NA | 0 | NA | 0 | NA | 0 | NA | 0 | NA |
| 16 | 68705029 | 68752685 | 1  | NM_017990    | PDPR      | 0 | NA | 0 | NA | 0 | NA | 0 | NA | 0 | NA |
| 16 | 68765428 | 68778299 | 1  | NM_173619    | MGC34761  | 0 | NA | 0 | NA | 0 | NA | 0 | NA | 0 | NA |
| 16 | 68843334 | 68841634 | -1 | NM_058219    | EXOSC6    | 0 | NA | 0 | NA | 0 | NA | 0 | NA | 0 | NA |
| 16 | 68880913 | 68843797 | -1 | NM_001605    | AARS      | 0 | NA | 0 | NA | 0 | NA | 0 | NA | 0 | NA |
| 16 | 68890572 | 68925232 | 1  | NM_001014449 | DDX19B    | 0 | NA | 0 | NA | 0 | NA | 0 | NA | 0 | NA |
| 16 | 68890572 | 68925232 | 1  | NM_001014451 | DDX19B    | 0 | NA | 0 | NA | 0 | NA | 0 | NA | 0 | NA |
| 16 | 68890572 | 68925232 | 1  | NM_007242    | DDX19B    | 0 | NA | 0 | NA | 0 | NA | 0 | NA | 0 | NA |
| 16 | 68938324 | 68964782 | 1  | NM_018332    | DDX19A    | 0 | NA | 0 | NA | 0 | NA | 0 | NA | 0 | NA |
| 16 | 69030492 | 68970838 | -1 | NM_006927    | ST3GAL2   | 0 | NA | 0 | NA | 0 | NA | 0 | NA | 0 | NA |
| 16 | 69045996 | 69071678 | 1  | NM_145059    | FUK       | 0 | NA | 0 | NA | 0 | NA | 0 | NA | 0 | NA |
| 16 | 69114958 | 69071972 | -1 | NM_015386    | COG4      | 0 | NA | 0 | NA | 0 | NA | 0 | NA | 0 | NA |
| 16 | 69115201 | 69163702 | 1  | NM_012426    | SF3B3     | 0 | NA | 0 | NA | 0 | NA | 0 | NA | 0 | NA |
| 16 | 69237968 | 69252085 | 1  | NM_152456    | C16orf77  | 0 | NA | 0 | NA | 0 | NA | 0 | NA | 0 | NA |
| 16 | 69277455 | 69252607 | -1 | NM_138383    | ABBA-1    | 0 | NA | 0 | NA | 1 | 15 | 0 | NA | 0 | NA |
| 16 | 69392562 | 69278842 | -1 | NM_018052    | VAC14     | 0 | NA | 0 | NA | 0 | NA | 1 | 27 | 0 | NA |
| 16 | 69822070 | 69398789 | -1 | NM_032821    | HYDIN     | 0 | NA | 0 | NA | 0 | NA | 0 | NA | 0 | NA |
| 16 | 69822070 | 69618511 | -1 | NM_017558    | HYDIN     | 0 | NA | 0 | NA | 0 | NA | 0 | NA | 0 | NA |
| 16 | 69880816 | 69873703 | -1 | NM_001099642 | FLJ11171  | 0 | NA | 0 | NA | 0 | NA | 1 | 13 | 0 | NA |
| 16 | 69881010 | 69873703 | -1 | NM_018348    | FLJ11171  | 0 | NA | 0 | NA | 0 | NA | 1 | 13 | 0 | NA |
| 16 | 69950126 | 69981843 | 1  | NM_001740    | CALB2     | 0 | NA | 0 | NA | 0 | NA | 0 | NA | 0 | NA |
| 16 | 69950126 | 69981843 | 1  | NM_007087    | CALB2     | 0 | NA | 0 | NA | 0 | NA | 0 | NA | 0 | NA |
| 16 | 69950126 | 69981843 | 1  | NM_007088    | CALB2     | 0 | NA | 0 | NA | 0 | NA | 0 | NA | 0 | NA |
| 16 | 70053618 | 70039003 | -1 | NM_145911    | ZNF23     | 0 | NA | 0 | NA | 0 | NA | 0 | NA | 0 | NA |
| 16 | 70080755 | 70065476 | -1 | NM_006961    | ZNF19     | 0 | NA | 0 | NA | 0 | NA | 0 | NA | 0 | NA |
| 16 | 70117561 | 70129917 | 1  | NM_005769    | CHST4     | 0 | NA | 0 | NA | 0 | NA | 0 | NA | 0 | NA |
| 16 | 70168499 | 70158254 | -1 | NM_000353    | TAT       | 0 | NA | 0 | NA | 0 | NA | 0 | NA | 0 | NA |
| 16 | 70217570 | 70226734 | 1  | NM_052858    | MARVELD3  | 0 | NA | 0 | NA | 0 | NA | 0 | NA | 0 | NA |
| 16 | 70217570 | 70233369 | 1  | NM_001017967 | MARVELD3  | 0 | NA | 0 | NA | 0 | NA | 0 | NA | 0 | NA |
| 16 | 70306205 | 70236352 | -1 | NM_015020    | PHLPL     | 0 | NA | 0 | NA | 0 | NA | 0 | NA | 0 | NA |
| 16 | 70400477 | 70320405 | -1 | NM_001030007 | AP1G1     | 1 | 15 | 0 | NA | 0 | NA | 0 | NA | 0 | NA |
| 16 | 70400477 | 70320405 | -1 | NM_001128    | AP1G1     | 1 | 15 | 0 | NA | 0 | NA | 0 | NA | 0 | NA |
| 16 | 70474913 | 70451088 | -1 | NM_017530    | ZNF821    | 0 | NA | 0 | NA | 0 | NA | 0 | NA | 0 | NA |
| 16 | 70486946 | 70520407 | 1  | NM_014761    | KIAA0174  | 0 | NA | 0 | NA | 0 | NA | 0 | NA | 0 | NA |
| 16 | 70600143 | 70616456 | 1  | NM_001361    | DHODH     | 1 | 12 | 0 | NA | 0 | NA | 0 | NA | 0 | NA |
| 16 | 70646008 | 70652456 | 1  | NM_001126102 | HP        | 0 | NA | 0 | NA | 0 | NA | 0 | NA | 0 | NA |
| 16 | 70646008 | 70652456 | 1  | NM_005143    | HP        | 0 | NA | 0 | NA | 0 | NA | 0 | NA | 0 | NA |
| 16 | 70654625 | 70668646 | 1  | NM_020995    | HPR       | 0 | NA | 0 | NA | 0 | NA | 0 | NA | 0 | NA |
| 16 | 70685015 | 70676256 | -1 | NM_017853    | TXNL4B    | 0 | NA | 0 | NA | 0 | NA | 0 | NA | 0 | NA |
| 16 | 70685115 | 70704312 | 1  | NM_014003    | DHX38     | 0 | NA | 0 | NA | 0 | NA | 0 | NA | 0 | NA |
| 16 | 70763525 | 70710498 | -1 | NM_031293    | PMFBP1    | 0 | NA | 0 | NA | 0 | NA | 0 | NA | 0 | NA |
| 16 | 71639775 | 71374286 | -1 | NM_006885    | ZFHX3     | 0 | NA | 0 | NA | 0 | NA | 0 | NA | 0 | NA |

|    |          |          |    |              |           |   |    |   |    |   |    |   |    |   |    |
|----|----------|----------|----|--------------|-----------|---|----|---|----|---|----|---|----|---|----|
| 16 | 71684024 | 71685173 | 1  | NM_001101347 | LOC283902 | 0 | NA | 0 | NA | 0 | NA | 0 | NA | 0 | NA |
| 16 | 72888181 | 72897687 | 1  | NM_002811    | PSMD7     | 1 | 14 | 0 | NA | 0 | NA | 0 | NA | 0 | NA |
| 16 | 72969372 | 72983513 | 1  | NM_001018059 | LOC440348 | 0 | NA | 0 | NA | 0 | NA | 0 | NA | 0 | NA |
| 16 | 73012791 | 73000029 | -1 | NM_001011880 | LOC497190 | 0 | NA | 0 | NA | 0 | NA | 0 | NA | 0 | NA |
| 16 | 73013150 | 73000029 | -1 | NM_182619    | LOC348174 | 0 | NA | 0 | NA | 0 | NA | 0 | NA | 0 | NA |
| 16 | 73198518 | 73043356 | -1 | NM_012201    | GLG1      | 0 | NA | 0 | NA | 0 | NA | 0 | NA | 0 | NA |
| 16 | 73258280 | 73212797 | -1 | NM_018124    | RFWD3     | 0 | NA | 0 | NA | 0 | NA | 0 | NA | 0 | NA |
| 16 | 73292290 | 73263261 | -1 | NM_152649    | MLKL      | 0 | NA | 0 | NA | 0 | NA | 0 | NA | 0 | NA |
| 16 | 73366222 | 73304358 | -1 | NM_024306    | FA2H      | 0 | NA | 0 | NA | 0 | NA | 0 | NA | 0 | NA |
| 16 | 73576518 | 73464971 | -1 | NM_030581    | WDR59     | 0 | NA | 0 | NA | 0 | NA | 0 | NA | 0 | NA |
| 16 | 73590415 | 73702393 | 1  | NM_032268    | ZNRF1     | 0 | NA | 0 | NA | 0 | NA | 0 | NA | 0 | NA |
| 16 | 73708166 | 73703258 | -1 | NM_153486    | LDHD      | 1 | 13 | 0 | NA | 0 | NA | 1 | 16 | 0 | NA |
| 16 | 73708166 | 73703258 | -1 | NM_194436    | LDHD      | 1 | 13 | 0 | NA | 0 | NA | 1 | 16 | 0 | NA |
| 16 | 73739921 | 73763633 | 1  | NM_153688    | ZFP1      | 0 | NA | 0 | NA | 0 | NA | 0 | NA | 0 | NA |
| 16 | 73798573 | 73795494 | -1 | NM_001025200 | CTRB2     | 0 | NA | 0 | NA | 0 | NA | 0 | NA | 0 | NA |
| 16 | 73810384 | 73816323 | 1  | NM_001906    | CTRB1     | 0 | NA | 0 | NA | 0 | NA | 0 | NA | 0 | NA |
| 16 | 73843004 | 73820428 | -1 | NM_014567    | BCAR1     | 0 | NA | 0 | NA | 0 | NA | 1 | 14 | 0 | NA |
| 16 | 74024888 | 73885108 | -1 | NM_006324    | CFDP1     | 1 | 16 | 0 | NA | 0 | NA | 1 | 12 | 0 | NA |
| 16 | 74056085 | 74038423 | -1 | NM_145254    | TMEM170   | 0 | NA | 0 | NA | 1 | 12 | 0 | NA | 0 | NA |
| 16 | 74086427 | 74064522 | -1 | NM_021615    | CHST6     | 0 | NA | 0 | NA | 0 | NA | 0 | NA | 0 | NA |
| 16 | 74126569 | 74119928 | -1 | NM_024533    | CHST5     | 0 | NA | 0 | NA | 0 | NA | 0 | NA | 0 | NA |
| 16 | 74147637 | 74129515 | -1 | NM_001077416 | FLJ22167  | 1 | 13 | 0 | NA | 0 | NA | 0 | NA | 0 | NA |
| 16 | 74147671 | 74129515 | -1 | NM_001077418 | FLJ22167  | 1 | 13 | 0 | NA | 0 | NA | 0 | NA | 0 | NA |
| 16 | 74147671 | 74129515 | -1 | NM_001077419 | FLJ22167  | 1 | 13 | 0 | NA | 0 | NA | 0 | NA | 0 | NA |
| 16 | 74157749 | 74169280 | 1  | NM_007285    | GABARAPL2 | 0 | NA | 0 | NA | 0 | NA | 0 | NA | 0 | NA |
| 16 | 74214655 | 74190498 | -1 | NM_012091    | ADAT1     | 1 | 18 | 0 | NA | 0 | NA | 0 | NA | 0 | NA |
| 16 | 74239078 | 74219130 | -1 | NM_005548    | KARS      | 0 | NA | 0 | NA | 0 | NA | 0 | NA | 0 | NA |
| 16 | 74239184 | 74248829 | 1  | NM_018975    | TERF2IP   | 0 | NA | 0 | NA | 0 | NA | 0 | NA | 0 | NA |
| 16 | 74868676 | 75150636 | 1  | NM_033401    | CNTNAP4   | 0 | NA | 0 | NA | 0 | NA | 0 | NA | 0 | NA |
| 16 | 74901235 | 75150636 | 1  | NM_138994    | CNTNAP4   | 0 | NA | 0 | NA | 0 | NA | 0 | NA | 0 | NA |
| 16 | 75782336 | 75791044 | 1  | NM_014940    | MON1B     | 0 | NA | 0 | NA | 0 | NA | 0 | NA | 0 | NA |
| 16 | 76026512 | 75873525 | -1 | NM_199355    | ADAMTS18  | 0 | NA | 0 | NA | 0 | NA | 0 | NA | 0 | NA |
| 16 | 76313911 | 76333655 | 1  | NM_001105663 | NUDT7     | 0 | NA | 0 | NA | 0 | NA | 0 | NA | 0 | NA |
| 16 | 76379983 | 76571502 | 1  | NM_020927    | KIAA1576  | 0 | NA | 0 | NA | 0 | NA | 0 | NA | 0 | NA |
| 16 | 76613943 | 76623499 | 1  | NM_005752    | CLEC3A    | 0 | NA | 0 | NA | 0 | NA | 0 | NA | 0 | NA |
| 16 | 76691051 | 76691596 | 1  | NM_130844    | WVOX      | 1 | 12 | 0 | NA | 0 | NA | 0 | NA | 0 | NA |
| 16 | 76691051 | 76870094 | 1  | NM_130791    | WVOX      | 1 | 12 | 0 | NA | 0 | NA | 0 | NA | 0 | NA |
| 16 | 76691051 | 77804065 | 1  | NM_016373    | WVOX      | 1 | 12 | 0 | NA | 0 | NA | 0 | NA | 0 | NA |
| 16 | 78192112 | 78185731 | -1 | NM_001031804 | MAF       | 1 | 11 | 0 | NA | 1 | 12 | 0 | NA | 0 | NA |
| 16 | 78192112 | 78185731 | -1 | NM_005360    | MAF       | 1 | 11 | 0 | NA | 1 | 12 | 0 | NA | 0 | NA |
| 16 | 79132354 | 79142042 | 1  | NM_130897    | DYNLRB2   | 1 | 26 | 0 | NA | 0 | NA | 0 | NA | 0 | NA |
| 16 | 79395676 | 79195176 | -1 | NM_152342    | CDYL2     | 0 | NA | 0 | NA | 0 | NA | 0 | NA | 0 | NA |
| 16 | 79597603 | 79613988 | 1  | NM_018455    | CENPN     | 0 | NA | 0 | NA | 0 | NA | 0 | NA | 0 | NA |
| 16 | 79597603 | 79622591 | 1  | NM_001100624 | CENPN     | 0 | NA | 0 | NA | 0 | NA | 0 | NA | 0 | NA |
| 16 | 79597603 | 79624210 | 1  | NM_001100625 | CENPN     | 0 | NA | 0 | NA | 0 | NA | 0 | NA | 0 | NA |
| 16 | 79597997 | 79567199 | -1 | NM_020188    | C16orf61  | 0 | NA | 0 | NA | 0 | NA | 0 | NA | 0 | NA |
| 16 | 79626958 | 79638452 | 1  | NM_015251    | ATMIN     | 0 | NA | 0 | NA | 0 | NA | 0 | NA | 0 | NA |
| 16 | 79668373 | 79644602 | -1 | NM_001100873 | C16orf46  | 0 | NA | 0 | NA | 0 | NA | 0 | NA | 0 | NA |
| 16 | 79668373 | 79652085 | -1 | NM_152337    | C16orf46  | 0 | NA | 0 | NA | 0 | NA | 0 | NA | 0 | NA |
| 16 | 79687481 | 79673429 | -1 | NM_004483    | GCSH      | 0 | NA | 0 | NA | 0 | NA | 0 | NA | 0 | NA |
| 16 | 79811476 | 79691984 | -1 | NM_052892    | PKD1L2    | 0 | NA | 0 | NA | 0 | NA | 0 | NA | 0 | NA |
| 16 | 79811476 | 79761395 | -1 | NM_001076780 | PKD1L2    | 0 | NA | 0 | NA | 0 | NA | 0 | NA | 0 | NA |
| 16 | 79829796 | 79882248 | 1  | NM_017429    | BCMO1     | 0 | NA | 1 | 16 | 0 | NA | 0 | NA | 0 | NA |
| 16 | 79906075 | 79971441 | 1  | NM_022041    | GAN       | 0 | NA | 0 | NA | 0 | NA | 0 | NA | 0 | NA |
| 16 | 80036394 | 80302866 | 1  | NM_198390    | CMIP      | 0 | NA | 0 | NA | 0 | NA | 0 | NA | 0 | NA |
| 16 | 80086454 | 80302866 | 1  | NM_030629    | CMIP      | 0 | NA | 0 | NA | 0 | NA | 0 | NA | 0 | NA |
| 16 | 80370430 | 80549400 | 1  | NM_002661    | PLCG2     | 0 | NA | 0 | NA | 0 | NA | 0 | NA | 0 | NA |
| 16 | 80602594 | 80588751 | -1 | NM_145168    | HSPC105   | 0 | NA | 0 | NA | 0 | NA | 0 | NA | 0 | NA |
| 16 | 80626363 | 80689638 | 1  | NM_002153    | HSD17B2   | 0 | NA | 0 | NA | 0 | NA | 0 | NA | 0 | NA |
| 16 | 80761330 | 80739267 | -1 | NM_005792    | MPHOSPH6  | 1 | 18 | 0 | NA | 0 | NA | 0 | NA | 0 | NA |
| 16 | 81218078 | 82387700 | 1  | NM_001257    | CDH13     | 1 | 12 | 0 | NA | 1 | 13 | 0 | NA | 0 | NA |
| 16 | 82399093 | 82404095 | 1  | NM_001537    | HSBP1     | 0 | NA | 0 | NA | 0 | NA | 0 | NA | 0 | NA |
| 16 | 82490230 | 82507288 | 1  | NM_012213    | MLYCD     | 0 | NA | 0 | NA | 0 | NA | 1 | 12 | 0 | NA |
| 16 | 82540172 | 82557438 | 1  | NM_013370    | OSGIN1    | 0 | NA | 0 | NA | 0 | NA | 0 | NA | 0 | NA |
| 16 | 82540172 | 82557438 | 1  | NM_182980    | OSGIN1    | 0 | NA | 0 | NA | 0 | NA | 0 | NA | 0 | NA |



|    |          |          |    |              |           |   |    |   |    |   |    |   |    |   |    |
|----|----------|----------|----|--------------|-----------|---|----|---|----|---|----|---|----|---|----|
| 16 | 82544327 | 82557438 | 1  | NM_182981    | OSGIN1    | 0 | NA | 0 | NA | 0 | NA | 0 | NA | 0 | NA |
| 16 | 82559737 | 82593880 | 1  | NM_019065    | NECAB2    | 0 | NA | 1 | 14 | 0 | NA | 0 | NA | 0 | NA |
| 16 | 82633263 | 82600889 | -1 | NM_00108042  | SLC38A8   | 0 | NA | 1 | 12 | 0 | NA | 1 | 13 | 0 | NA |
| 16 | 82708018 | 82644869 | -1 | NM_003791    | MBTPS1    | 0 | NA | 0 | NA | 0 | NA | 0 | NA | 0 | NA |
| 16 | 82736265 | 82713388 | -1 | NM_031463    | HSDL1     | 0 | NA | 0 | NA | 0 | NA | 0 | NA | 0 | NA |
| 16 | 82736365 | 82769025 | 1  | NM_178452    | LRRCS0    | 0 | NA | 0 | NA | 0 | NA | 0 | NA | 0 | NA |
| 16 | 82778163 | 82768961 | -1 | NM_005679    | TAF1C     | 0 | NA | 0 | NA | 0 | NA | 0 | NA | 0 | NA |
| 16 | 82778163 | 82768961 | -1 | NM_139353    | TAF1C     | 0 | NA | 0 | NA | 0 | NA | 0 | NA | 0 | NA |
| 16 | 82782244 | 82788273 | 1  | NM_139174    | ADAD2     | 0 | NA | 0 | NA | 0 | NA | 0 | NA | 0 | NA |
| 16 | 82830857 | 82813323 | -1 | NM_172347    | KCNG4     | 0 | NA | 0 | NA | 0 | NA | 0 | NA | 0 | NA |
| 16 | 82885901 | 82920951 | 1  | NM_021197    | WFDC1     | 0 | NA | 0 | NA | 0 | NA | 0 | NA | 0 | NA |
| 16 | 82959633 | 83055294 | 1  | NM_014861    | ATP2C2    | 0 | NA | 0 | NA | 0 | NA | 0 | NA | 0 | NA |
| 16 | 83095794 | 83068609 | -1 | NM_020947    | KIAA1609  | 0 | NA | 0 | NA | 0 | NA | 0 | NA | 0 | NA |
| 16 | 83209170 | 83156704 | -1 | NM_021149    | COTL1     | 1 | 12 | 0 | NA | 0 | NA | 0 | NA | 0 | NA |
| 16 | 83239631 | 83253417 | 1  | NM_024731    | C16orf44  | 0 | NA | 0 | NA | 1 | 12 | 1 | 11 | 0 | NA |
| 16 | 83291055 | 83371028 | 1  | NM_005153    | USP10     | 0 | NA | 0 | NA | 0 | NA | 0 | NA | 0 | NA |
| 16 | 83411112 | 83500615 | 1  | NM_031476    | CRISPLD2  | 0 | NA | 1 | 14 | 0 | NA | 0 | NA | 1 | 14 |
| 16 | 83602642 | 83565572 | -1 | NM_017740    | ZDHHC7    | 0 | NA | 0 | NA | 0 | NA | 0 | NA | 0 | NA |
| 16 | 83618910 | 83685329 | 1  | NM_014732    | KIAA0513  | 0 | NA | 0 | NA | 0 | NA | 0 | NA | 0 | NA |
| 16 | 83703615 | 83689465 | -1 | NM_198491    | FAM92B    | 0 | NA | 0 | NA | 0 | NA | 0 | NA | 0 | NA |
| 16 | 84204424 | 84267313 | 1  | NM_014615    | KIAA0182  | 0 | NA | 0 | NA | 0 | NA | 0 | NA | 0 | NA |
| 16 | 84280081 | 84268780 | -1 | NM_016095    | GINS2     | 0 | NA | 0 | NA | 0 | NA | 0 | NA | 0 | NA |
| 16 | 84342190 | 84298624 | -1 | NM_206967    | C16orf74  | 0 | NA | 0 | NA | 0 | NA | 0 | NA | 0 | NA |
| 16 | 84390601 | 84369735 | -1 | NM_006067    | COX4NB    | 0 | NA | 0 | NA | 0 | NA | 0 | NA | 0 | NA |
| 16 | 84390696 | 84398108 | 1  | NM_001861    | COX4I1    | 0 | NA | 0 | NA | 0 | NA | 0 | NA | 0 | NA |
| 16 | 84490274 | 84513712 | 1  | NM_002163    | IRF8      | 0 | NA | 0 | NA | 0 | NA | 0 | NA | 0 | NA |
| 16 | 85101633 | 85105571 | 1  | NM_001451    | FOXF1     | 0 | NA | 0 | NA | 0 | NA | 0 | NA | 0 | NA |
| 16 | 85146342 | 85121282 | -1 | NM_022764    | MTHFSD    | 0 | NA | 0 | NA | 1 | 15 | 0 | NA | 0 | NA |
| 16 | 85158442 | 85159948 | 1  | NM_005251    | FOXG2     | 0 | NA | 0 | NA | 0 | NA | 0 | NA | 0 | NA |
| 16 | 85169615 | 85172805 | 1  | NM_005250    | FOXL1     | 0 | NA | 0 | NA | 0 | NA | 0 | NA | 0 | NA |
| 16 | 85974864 | 85920442 | -1 | NM_024735    | FBXO31    | 0 | NA | 0 | NA | 0 | NA | 1 | 11 | 0 | NA |
| 16 | 85983319 | 85959881 | 1  | NM_022818    | MAP1LC3B  | 0 | NA | 0 | NA | 0 | NA | 1 | 11 | 0 | NA |
| 16 | 86082961 | 85997352 | -1 | NM_015144    | ZCCHC14   | 0 | NA | 0 | NA | 0 | NA | 0 | NA | 0 | NA |
| 16 | 86193999 | 86289262 | 1  | NM_020655    | JPH3      | 0 | NA | 0 | NA | 0 | NA | 0 | NA | 0 | NA |
| 16 | 86357043 | 86298918 | -1 | NM_017566    | KLHDC4    | 0 | NA | 0 | NA | 0 | NA | 0 | NA | 0 | NA |
| 16 | 86460601 | 86421129 | -1 | NM_003486    | SLC7A5    | 0 | NA | 0 | NA | 1 | 12 | 0 | NA | 1 | 17 |
| 16 | 86527613 | 86479125 | -1 | NM_001739    | CASA      | 0 | NA | 0 | NA | 1 | 13 | 0 | NA | 0 | NA |
| 16 | 86542538 | 86668425 | 1  | NM_017869    | BANP      | 1 | 25 | 0 | NA | 0 | NA | 0 | NA | 0 | NA |
| 16 | 86542538 | 86668425 | 1  | NM_079837    | BANP      | 1 | 25 | 0 | NA | 0 | NA | 0 | NA | 0 | NA |
| 16 | 87047514 | 87129075 | 1  | NM_153813    | ZFPM1     | 0 | NA | 0 | NA | 0 | NA | 1 | 19 | 0 | NA |
| 16 | 87164049 | 87147612 | -1 | NM_001001682 | C16orf85  | 0 | NA | 0 | NA | 0 | NA | 0 | NA | 0 | NA |
| 16 | 87164344 | 87225758 | 1  | NM_144604    | ZC3H18    | 0 | NA | 0 | NA | 0 | NA | 0 | NA | 0 | NA |
| 16 | 87232501 | 87234383 | 1  | NM_013278    | IL17C     | 0 | NA | 0 | NA | 0 | NA | 0 | NA | 0 | NA |
| 16 | 87244958 | 87237197 | -1 | NM_000101    | CYBA      | 0 | NA | 0 | NA | 0 | NA | 0 | NA | 0 | NA |
| 16 | 87256996 | 87245848 | -1 | NM_002461    | MVD       | 0 | NA | 0 | NA | 0 | NA | 0 | NA | 0 | NA |
| 16 | 87280383 | 87271590 | -1 | NM_178310    | SNAI3     | 0 | NA | 0 | NA | 0 | NA | 0 | NA | 0 | NA |
| 16 | 87300301 | 87290409 | -1 | NM_178841    | RNF166    | 0 | NA | 0 | NA | 0 | NA | 0 | NA | 0 | NA |
| 16 | 87300391 | 87309287 | 1  | NM_001012759 | C16orf84  | 0 | NA | 0 | NA | 0 | NA | 0 | NA | 0 | NA |
| 16 | 87300391 | 87309287 | 1  | NM_001012762 | C16orf84  | 0 | NA | 0 | NA | 0 | NA | 0 | NA | 0 | NA |
| 16 | 87397686 | 87403167 | 1  | NM_030928    | CDT1      | 0 | NA | 0 | NA | 0 | NA | 0 | NA | 0 | NA |
| 16 | 87405843 | 87403377 | -1 | NM_000485    | APRT      | 0 | NA | 0 | NA | 0 | NA | 0 | NA | 0 | NA |
| 16 | 87405843 | 87403377 | -1 | NM_001030018 | APRT      | 0 | NA | 0 | NA | 0 | NA | 0 | NA | 0 | NA |
| 16 | 87450885 | 87407642 | -1 | NM_000512    | GALNS     | 0 | NA | 0 | NA | 0 | NA | 0 | NA | 0 | NA |
| 16 | 87451008 | 87455021 | 1  | NM_016209    | TRAPPC2L  | 0 | NA | 0 | NA | 0 | NA | 0 | NA | 0 | NA |
| 16 | 87460515 | 87455534 | -1 | NM_001080487 | LOC390748 | 0 | NA | 0 | NA | 0 | NA | 0 | NA | 0 | NA |
| 16 | 87535109 | 87468767 | -1 | NM_175931    | CBFA2T3   | 0 | NA | 0 | NA | 0 | NA | 0 | NA | 0 | NA |
| 16 | 87570902 | 87468767 | -1 | NM_005187    | CBFA2T3   | 0 | NA | 0 | NA | 0 | NA | 0 | NA | 0 | NA |
| 16 | 87687754 | 87748498 | 1  | NM_001127214 | ACSF3     | 0 | NA | 0 | NA | 0 | NA | 0 | NA | 0 | NA |
| 16 | 87687754 | 87749670 | 1  | NM_174917    | ACSF3     | 0 | NA | 0 | NA | 0 | NA | 0 | NA | 0 | NA |
| 16 | 87765663 | 87789401 | 1  | NM_004933    | CDH15     | 0 | NA | 0 | NA | 0 | NA | 0 | NA | 0 | NA |
| 16 | 87811611 | 87822864 | 1  | NM_182531    | ZNF778    | 0 | NA | 0 | NA | 0 | NA | 0 | NA | 0 | NA |
| 16 | 88084470 | 87861535 | -1 | NM_013275    | ANKRD11   | 0 | NA | 0 | NA | 0 | NA | 0 | NA | 0 | NA |
| 16 | 88102305 | 88131630 | 1  | NM_199367    | SPG7      | 0 | NA | 0 | NA | 0 | NA | 0 | NA | 0 | NA |
| 16 | 88102305 | 88151675 | 1  | NM_003119    | SPG7      | 0 | NA | 0 | NA | 0 | NA | 0 | NA | 0 | NA |
| 16 | 88154590 | 88157349 | 1  | NM_000977    | RPL13     | 0 | NA | 0 | NA | 0 | NA | 0 | NA | 0 | NA |

|    |          |          |    |              |          |   |    |   |    |   |    |   |    |   |    |
|----|----------|----------|----|--------------|----------|---|----|---|----|---|----|---|----|---|----|
| 16 | 88154631 | 88157349 | 1  | NM_033251    | RPL13    | 0 | NA | 0 | NA | 0 | NA | 0 | NA | 0 | NA |
| 16 | 88169676 | 88191155 | 1  | NM_014427    | CPNE7    | 0 | NA | 1 | 12 | 0 | NA | 0 | NA | 0 | NA |
| 16 | 88169676 | 88191155 | 1  | NM_153636    | CPNE7    | 0 | NA | 1 | 12 | 0 | NA | 0 | NA | 0 | NA |
| 16 | 88214500 | 88232338 | 1  | NM_004413    | DPEP1    | 0 | NA | 0 | NA | 0 | NA | 0 | NA | 0 | NA |
| 16 | 88251630 | 88238344 | -1 | NM_001083314 | CHMP1A   | 0 | NA | 0 | NA | 0 | NA | 0 | NA | 0 | NA |
| 16 | 88251630 | 88238344 | -1 | NM_002768    | CHMP1A   | 0 | NA | 0 | NA | 0 | NA | 0 | NA | 0 | NA |
| 16 | 88251710 | 88265176 | 1  | NM_153025    | C16orf55 | 0 | NA | 0 | NA | 0 | NA | 0 | NA | 0 | NA |
| 16 | 88280576 | 88290263 | 1  | NM_052988    | CDK10    | 0 | NA | 0 | NA | 0 | NA | 0 | NA | 0 | NA |
| 16 | 88280578 | 88290263 | 1  | NM_001098533 | CDK10    | 0 | NA | 0 | NA | 0 | NA | 0 | NA | 0 | NA |
| 16 | 88280578 | 88290263 | 1  | NM_052987    | CDK10    | 0 | NA | 0 | NA | 0 | NA | 0 | NA | 0 | NA |
| 16 | 88295600 | 88290265 | -1 | NM_152339    | SPATA2L  | 0 | NA | 0 | NA | 0 | NA | 0 | NA | 0 | NA |
| 16 | 88314893 | 88334833 | 1  | NM_152287    | ZNF276   | 0 | NA | 0 | NA | 0 | NA | 0 | NA | 0 | NA |
| 16 | 88314895 | 88301041 | -1 | NM_004913    | C16orf7  | 0 | NA | 0 | NA | 0 | NA | 0 | NA | 0 | NA |
| 16 | 88315452 | 88334833 | 1  | NM_001113525 | ZNF276   | 0 | NA | 0 | NA | 0 | NA | 0 | NA | 0 | NA |
| 16 | 88410566 | 88331459 | -1 | NM_000135    | FANCA    | 0 | NA | 0 | NA | 1 | 12 | 0 | NA | 0 | NA |
| 16 | 88410566 | 88392287 | -1 | NM_001018112 | FANCA    | 0 | NA | 0 | NA | 1 | 12 | 0 | NA | 0 | NA |
| 16 | 88422407 | 88465228 | 1  | NM_032451    | SPIRE2   | 0 | NA | 0 | NA | 0 | NA | 0 | NA | 0 | NA |
| 16 | 88467526 | 88505287 | 1  | NM_014972    | TCF25    | 0 | NA | 0 | NA | 1 | 14 | 0 | NA | 0 | NA |
| 16 | 88512526 | 88514886 | 1  | NM_002386    | MC1R     | 1 | 11 | 0 | NA | 1 | 14 | 0 | NA | 0 | NA |
| 16 | 88517245 | 88530006 | 1  | NM_006086    | TUBB3    | 1 | 12 | 0 | NA | 1 | 14 | 0 | NA | 0 | NA |
| 16 | 88542651 | 88553275 | 1  | NM_017702    | DEF8     | 0 | NA | 0 | NA | 0 | NA | 0 | NA | 0 | NA |
| 16 | 88542683 | 88561968 | 1  | NM_207514    | DEF8     | 0 | NA | 0 | NA | 0 | NA | 0 | NA | 0 | NA |
| 16 | 88566443 | 88563701 | -1 | NM_145039    | MGC16385 | 1 | 27 | 1 | 18 | 0 | NA | 1 | 20 | 0 | NA |
| 16 | 88604030 | 88598779 | -1 | NM_024043    | DBNDD1   | 0 | NA | 0 | NA | 0 | NA | 0 | NA | 0 | NA |
| 16 | 88613438 | 88598779 | -1 | NM_001042610 | DBNDD1   | 1 | 20 | 0 | NA | 0 | NA | 0 | NA | 0 | NA |
| 16 | 88616508 | 88638880 | 1  | NM_001481    | GAS8     | 1 | 20 | 1 | 22 | 1 | 16 | 0 | NA | 0 | NA |
| 16 | 88623810 | 88622816 | -1 | NM_001214    | C16orf3  | 1 | 20 | 1 | 22 | 1 | 16 | 1 | 13 | 0 | NA |
| 16 | 88656234 | 88650474 | -1 | NM_052996    | PRDM7    | 0 | NA | 0 | NA | 0 | NA | 0 | NA | 1 | 12 |
| 16 | 88669839 | 88650474 | -1 | NM_001098173 | PRDM7    | 0 | NA | 0 | NA | 0 | NA | 0 | NA | 0 | NA |
| 19 | 61678    | 62596    | 1  | NM_001005240 | OR4F17   | 0 | NA | 0 | NA | 0 | NA | 0 | NA | 0 | NA |
| 19 | 242169   | 232043   | -1 | NM_177543    | PPAP2C   | 0 | NA | 0 | NA | 0 | NA | 0 | NA | 0 | NA |
| 19 | 242435   | 232043   | -1 | NM_003712    | PPAP2C   | 0 | NA | 0 | NA | 0 | NA | 0 | NA | 0 | NA |
| 19 | 242435   | 232043   | -1 | NM_177526    | PPAP2C   | 0 | NA | 0 | NA | 0 | NA | 0 | NA | 0 | NA |
| 19 | 295791   | 256574   | -1 | NM_017550    | MIER2    | 0 | NA | 1 | 12 | 0 | NA | 0 | NA | 0 | NA |
| 19 | 327009   | 313056   | -1 | NM_016585    | THEG     | 0 | NA | 1 | 13 | 0 | NA | 0 | NA | 0 | NA |
| 19 | 327009   | 313056   | -1 | NM_199202    | THEG     | 0 | NA | 1 | 13 | 0 | NA | 0 | NA | 0 | NA |
| 19 | 411996   | 367582   | -1 | NM_012435    | SHC2     | 0 | NA | 1 | 12 | 0 | NA | 0 | NA | 0 | NA |
| 19 | 425983   | 414359   | -1 | NM_182577    | C19orf19 | 0 | NA | 1 | 13 | 1 | 13 | 0 | NA | 0 | NA |
| 19 | 447489   | 456343   | 1  | NM_130760    | MADCAM1  | 0 | NA | 0 | NA | 0 | NA | 0 | NA | 0 | NA |
| 19 | 447489   | 456343   | 1  | NM_130762    | MADCAM1  | 0 | NA | 0 | NA | 0 | NA | 0 | NA | 0 | NA |
| 19 | 458496   | 470654   | 1  | NM_033513    | C19orf20 | 1 | 23 | 0 | NA | 0 | NA | 0 | NA | 0 | NA |
| 19 | 482732   | 493087   | 1  | NM_004359    | CDC34    | 0 | NA | 0 | NA | 0 | NA | 1 | 13 | 0 | NA |
| 19 | 495026   | 500919   | 1  | NM_005317    | GZMM     | 0 | NA | 0 | NA | 0 | NA | 1 | 13 | 0 | NA |
| 19 | 522324   | 534493   | 1  | NM_198591    | BSG      | 0 | NA | 0 | NA | 0 | NA | 0 | NA | 0 | NA |
| 19 | 523536   | 534493   | 1  | NM_001728    | BSG      | 0 | NA | 0 | NA | 0 | NA | 0 | NA | 0 | NA |
| 19 | 523536   | 534493   | 1  | NM_198589    | BSG      | 0 | NA | 0 | NA | 0 | NA | 0 | NA | 0 | NA |
| 19 | 540892   | 568159   | 1  | NM_001194    | HCN2     | 0 | NA | 0 | NA | 0 | NA | 0 | NA | 0 | NA |
| 19 | 584568   | 568222   | -1 | NM_005035    | POLRMT   | 0 | NA | 0 | NA | 0 | NA | 0 | NA | 0 | NA |
| 19 | 590925   | 594604   | 1  | NM_020637    | FGF22    | 0 | NA | 0 | NA | 0 | NA | 0 | NA | 0 | NA |
| 19 | 614227   | 598525   | -1 | NM_194460    | RNF126   | 0 | NA | 0 | NA | 0 | NA | 0 | NA | 0 | NA |
| 19 | 627388   | 634392   | 1  | NM_005860    | FSTL3    | 0 | NA | 0 | NA | 0 | NA | 0 | NA | 0 | NA |
| 19 | 646461   | 636545   | -1 | NM_214710    | PRSSL1   | 0 | NA | 0 | NA | 0 | NA | 0 | NA | 0 | NA |
| 19 | 659952   | 699330   | 1  | NM_001040134 | PALM     | 0 | NA | 1 | 12 | 0 | NA | 0 | NA | 0 | NA |
| 19 | 659952   | 699330   | 1  | NM_002579    | PALM     | 0 | NA | 1 | 12 | 0 | NA | 0 | NA | 0 | NA |
| 19 | 702145   | 715318   | 1  | NM_173481    | C19orf21 | 0 | NA | 1 | 20 | 0 | NA | 0 | NA | 0 | NA |
| 19 | 748410   | 763327   | 1  | NM_002819    | PTBP1    | 0 | NA | 0 | NA | 0 | NA | 0 | NA | 0 | NA |
| 19 | 748410   | 763327   | 1  | NM_031990    | PTBP1    | 0 | NA | 0 | NA | 0 | NA | 0 | NA | 0 | NA |
| 19 | 748410   | 763327   | 1  | NM_031991    | PTBP1    | 0 | NA | 0 | NA | 0 | NA | 0 | NA | 0 | NA |
| 19 | 748410   | 763327   | 1  | NM_175847    | PTBP1    | 0 | NA | 0 | NA | 0 | NA | 0 | NA | 0 | NA |
| 19 | 772952   | 763517   | -1 | NM_024888    | PRG2     | 0 | NA | 0 | NA | 0 | NA | 0 | NA | 0 | NA |
| 19 | 778830   | 783017   | 1  | NM_001700    | AZU1     | 0 | NA | 0 | NA | 0 | NA | 0 | NA | 0 | NA |
| 19 | 791984   | 799175   | 1  | NM_002777    | PRTN3    | 0 | NA | 0 | NA | 0 | NA | 0 | NA | 0 | NA |
| 19 | 803290   | 807246   | 1  | NM_001972    | ELA2     | 0 | NA | 0 | NA | 0 | NA | 0 | NA | 0 | NA |
| 19 | 810664   | 814610   | 1  | NM_001928    | CFD      | 0 | NA | 0 | NA | 0 | NA | 0 | NA | 0 | NA |
| 19 | 844218   | 818961   | -1 | NM_005481    | MED16    | 0 | NA | 0 | NA | 0 | NA | 0 | NA | 0 | NA |

|    |         |         |    |              |          |   |    |   |    |   |    |   |    |   |    |
|----|---------|---------|----|--------------|----------|---|----|---|----|---|----|---|----|---|----|
| 19 | 864200  | 847502  | -1 | NM_138774    | C19orf22 | 0 | NA | 0 | NA | 0 | NA | 0 | NA | 0 | NA |
| 19 | 868357  | 872013  | 1  | NM_032551    | KISS1R   | 0 | NA | 0 | NA | 0 | NA | 0 | NA | 0 | NA |
| 19 | 877036  | 923803  | 1  | NM_005224    | ARID3A   | 0 | NA | 0 | NA | 0 | NA | 0 | NA | 0 | NA |
| 19 | 935327  | 945569  | 1  | NM_024100    | WDR18    | 0 | NA | 0 | NA | 0 | NA | 0 | NA | 0 | NA |
| 19 | 951436  | 960723  | 1  | NM_138690    | GRIN3B   | 0 | NA | 1 | 12 | 0 | NA | 0 | NA | 0 | NA |
| 19 | 972141  | 960649  | -1 | NM_001033026 | C19orf6  | 1 | 15 | 0 | NA | 0 | NA | 0 | NA | 0 | NA |
| 19 | 972141  | 960649  | -1 | NM_033420    | C19orf6  | 1 | 15 | 0 | NA | 0 | NA | 0 | NA | 0 | NA |
| 19 | 977297  | 990064  | 1  | NM_004368    | CNN2     | 1 | 15 | 0 | NA | 0 | NA | 0 | NA | 0 | NA |
| 19 | 977297  | 990064  | 1  | NM_201277    | CNN2     | 1 | 15 | 0 | NA | 0 | NA | 0 | NA | 0 | NA |
| 19 | 991101  | 1016570 | 1  | NM_019112    | ABCA7    | 0 | NA | 0 | NA | 0 | NA | 0 | NA | 0 | NA |
| 19 | 1018173 | 1037627 | 1  | NM_012292    | HMHA1    | 1 | 30 | 1 | 12 | 1 | 16 | 0 | NA | 0 | NA |
| 19 | 1046391 | 1037577 | -1 | NM_002695    | POLR2E   | 1 | 12 | 0 | NA | 0 | NA | 0 | NA | 0 | NA |
| 19 | 1054935 | 1057787 | 1  | NM_001039847 | GPX4     | 1 | 12 | 0 | NA | 0 | NA | 0 | NA | 0 | NA |
| 19 | 1054935 | 1057787 | 1  | NM_002085    | GPX4     | 1 | 12 | 0 | NA | 0 | NA | 0 | NA | 0 | NA |
| 19 | 1055648 | 1057787 | 1  | NM_001039848 | GPX4     | 1 | 12 | 0 | NA | 0 | NA | 0 | NA | 0 | NA |
| 19 | 1083273 | 1058632 | -1 | NM_001100122 | SBNO2    | 1 | 11 | 0 | NA | 0 | NA | 0 | NA | 0 | NA |
| 19 | 1125282 | 1058632 | -1 | NM_014963    | SBNO2    | 0 | NA | 0 | NA | 0 | NA | 1 | 11 | 0 | NA |
| 19 | 1156797 | 1179434 | 1  | NM_000455    | STK11    | 0 | NA | 0 | NA | 0 | NA | 0 | NA | 0 | NA |
| 19 | 1188990 | 1180946 | -1 | NM_152769    | C19orf26 | 0 | NA | 0 | NA | 0 | NA | 0 | NA | 0 | NA |
| 19 | 1192748 | 1195824 | 1  | NM_001001975 | ATP5D    | 0 | NA | 0 | NA | 0 | NA | 0 | NA | 0 | NA |
| 19 | 1192748 | 1195824 | 1  | NM_001687    | ATP5D    | 0 | NA | 0 | NA | 0 | NA | 0 | NA | 0 | NA |
| 19 | 1199551 | 1210142 | 1  | NM_177401    | MIDN     | 1 | 12 | 0 | NA | 0 | NA | 1 | 17 | 0 | NA |
| 19 | 1220266 | 1224171 | 1  | NM_001280    | CIRBP    | 1 | 11 | 0 | NA | 1 | 12 | 1 | 16 | 0 | NA |
| 19 | 1221259 | 1218469 | -1 | NM_152480    | C19orf23 | 1 | 11 | 0 | NA | 1 | 12 | 1 | 16 | 0 | NA |
| 19 | 1226550 | 1230227 | 1  | NM_017914    | C19orf24 | 0 | NA | 0 | NA | 1 | 12 | 1 | 16 | 0 | NA |
| 19 | 1237167 | 1250944 | 1  | NM_001405    | EFNA2    | 1 | NA | 0 | NA | 0 | NA | 0 | NA | 0 | NA |
| 19 | 1306009 | 1329427 | 1  | NM_032853    | MUM1     | 0 | NA | 0 | NA | 0 | NA | 1 | 12 | 0 | NA |
| 19 | 1334882 | 1346588 | 1  | NM_024407    | NDUFS7   | 1 | 17 | 0 | NA | 0 | NA | 1 | 15 | 0 | NA |
| 19 | 1352552 | 1348087 | -1 | NM_000156    | GAMT     | 0 | NA | 0 | NA | 0 | NA | 1 | 11 | 0 | NA |
| 19 | 1352552 | 1349605 | -1 | NM_138924    | GAMT     | 0 | NA | 0 | NA | 0 | NA | 1 | 11 | 0 | NA |
| 19 | 1358583 | 1386682 | 1  | NM_018959    | DAZAP1   | 0 | NA | 0 | NA | 0 | NA | 1 | 11 | 0 | NA |
| 19 | 1358583 | 1386682 | 1  | NM_170711    | DAZAP1   | 0 | NA | 0 | NA | 0 | NA | 1 | 11 | 0 | NA |
| 19 | 1389362 | 1391492 | 1  | NM_001018    | RPS15    | 1 | 11 | 0 | NA | 0 | NA | 0 | NA | 0 | NA |
| 19 | 1401147 | 1424243 | 1  | NM_005883    | APC2     | 1 | 13 | 1 | 17 | 0 | NA | 1 | 12 | 0 | NA |
| 19 | 1430228 | 1424199 | -1 | NM_152482    | C19orf25 | 0 | NA | 0 | NA | 0 | NA | 0 | NA | 0 | NA |
| 19 | 1441407 | 1432426 | -1 | NM_017573    | PCSK4    | 0 | NA | 0 | NA | 0 | NA | 0 | NA | 0 | NA |
| 19 | 1442164 | 1448924 | 1  | NM_138393    | REEP6    | 0 | NA | 0 | NA | 0 | NA | 0 | NA | 0 | NA |
| 19 | 1464019 | 1456022 | -1 | NM_213604    | ADAMTSL5 | 1 | 15 | 1 | 12 | 1 | 18 | 1 | 12 | 1 | 12 |
| 19 | 1519057 | 1505667 | -1 | NM_203304    | MEX3D    | 1 | 11 | 0 | NA | 0 | NA | 0 | NA | 0 | NA |
| 19 | 1543652 | 1527677 | 0  | NA           | MBD3     | 0 | NA | 0 | NA | 0 | NA | 0 | NA | 0 | NA |
| 19 | 1556431 | 1548170 | -1 | NM_006830    | UQCR     | 0 | NA | 0 | NA | 0 | NA | 0 | NA | 0 | NA |
| 19 | 1601277 | 1560294 | -1 | NM_003200    | TCF3     | 0 | NA | 0 | NA | 0 | NA | 1 | 13 | 0 | NA |
| 19 | 1704661 | 1726444 | 1  | NM_001080488 | ONECUT3  | 0 | NA | 0 | NA | 0 | NA | 0 | NA | 0 | NA |
| 19 | 1763270 | 1733073 | -1 | NM_138813    | ATP8B3   | 0 | NA | 0 | NA | 0 | NA | 0 | NA | 0 | NA |
| 19 | 1799452 | 1766244 | -1 | NM_020695    | REXO1    | 0 | NA | 0 | NA | 0 | NA | 0 | NA | 0 | NA |
| 19 | 1814564 | 1803397 | -1 | NM_031918    | KLF16    | 0 | NA | 0 | NA | 0 | NA | 0 | NA | 0 | NA |
| 19 | 1836432 | 1827974 | -1 | NM_031213    | FAM108A1 | 1 | 11 | 0 | NA | 0 | NA | 0 | NA | 0 | NA |
| 19 | 1856372 | 1877012 | 1  | NM_079834    | SCAMP4   | 1 | 12 | 0 | NA | 1 | 12 | 1 | 12 | 0 | NA |
| 19 | 1856416 | 1864446 | 1  | NM_138422    | ADAT3    | 1 | 12 | 0 | NA | 1 | 12 | 1 | 12 | 0 | NA |
| 19 | 1892160 | 1932336 | 1  | NM_001319    | CSNK1G2  | 0 | NA | 1 | 12 | 0 | NA | 0 | NA | 0 | NA |
| 19 | 1905548 | 1903525 | -1 | NM_152771    | C19orf34 | 0 | NA | 0 | NA | 0 | NA | 0 | NA | 0 | NA |
| 19 | 1966702 | 1936446 | -1 | NM_017797    | BTBD2    | 1 | 11 | 0 | NA | 0 | NA | 0 | NA | 0 | NA |
| 19 | 2002243 | 1988469 | -1 | NM_017572    | MKNK2    | 0 | NA | 0 | NA | 0 | NA | 0 | NA | 0 | NA |
| 19 | 2002243 | 1988469 | -1 | NM_199054    | MKNK2    | 0 | NA | 0 | NA | 0 | NA | 0 | NA | 0 | NA |
| 19 | 2047269 | 2022034 | -1 | NM_130807    | MOBK12A  | 0 | NA | 0 | NA | 0 | NA | 0 | NA | 0 | NA |
| 19 | 2047867 | 2050583 | 1  | NM_001031735 | C19orf36 | 0 | NA | 0 | NA | 0 | NA | 0 | NA | 0 | NA |
| 19 | 2047867 | 2050583 | 1  | NM_001039846 | C19orf36 | 0 | NA | 0 | NA | 0 | NA | 0 | NA | 0 | NA |
| 19 | 2102556 | 2051992 | -1 | NM_001077523 | AP3D1    | 0 | NA | 0 | NA | 0 | NA | 1 | 12 | 0 | NA |
| 19 | 2102556 | 2051993 | -1 | NM_003938    | AP3D1    | 0 | NA | 0 | NA | 0 | NA | 1 | 12 | 0 | NA |
| 19 | 2115147 | 2183577 | 1  | NM_032482    | DOT1L    | 1 | 14 | 0 | NA | 0 | NA | 0 | NA | 0 | NA |
| 19 | 2187328 | 2184154 | -1 | NM_018049    | PLEKHJ1  | 0 | NA | 0 | NA | 0 | NA | 1 | 11 | 0 | NA |
| 19 | 2187815 | 2199678 | 1  | NM_007165    | SF3A2    | 0 | NA | 0 | NA | 0 | NA | 1 | 11 | 0 | NA |
| 19 | 2200112 | 2203072 | 1  | NM_000479    | AMH      | 0 | NA | 0 | NA | 0 | NA | 0 | NA | 0 | NA |
| 19 | 2206344 | 2203251 | -1 | NM_144616    | JSRP1    | 0 | NA | 0 | NA | 0 | NA | 0 | NA | 0 | NA |
| 19 | 2220519 | 2224487 | 1  | NM_004152    | OAZ1     | 1 | 11 | 0 | NA | 0 | NA | 1 | 13 | 0 | NA |

|    |         |         |    |              |           |   |    |   |    |   |    |   |    |   |    |
|----|---------|---------|----|--------------|-----------|---|----|---|----|---|----|---|----|---|----|
| 19 | 2233175 | 2225630 | -1 | NM_198532    | C19orf35  | 0 | NA | 1 | 15 | 0 | NA | 0 | NA | 0 | NA |
| 19 | 2259156 | 2240773 | -1 | NM_001101391 | LOC645191 | 0 | NA | 0 | NA | 0 | NA | 0 | NA | 0 | NA |
| 19 | 2279614 | 2272519 | -1 | NM_016199    | LSM7      | 0 | NA | 0 | NA | 0 | NA | 0 | NA | 0 | NA |
| 19 | 2279628 | 2306100 | 1  | NM_001077238 | SPPL2B    | 0 | NA | 0 | NA | 0 | NA | 0 | NA | 0 | NA |
| 19 | 2279628 | 2306100 | 1  | NM_152988    | SPPL2B    | 0 | NA | 0 | NA | 0 | NA | 0 | NA | 0 | NA |
| 19 | 2340783 | 2377086 | 1  | NM_182973    | TMPRSS9   | 1 | 11 | 0 | NA | 1 | 14 | 1 | 11 | 0 | NA |
| 19 | 2378875 | 2376621 | -1 | NM_012458    | TIMM13    | 0 | NA | 0 | NA | 0 | NA | 1 | 11 | 0 | NA |
| 19 | 2407958 | 2379163 | -1 | NM_032737    | LMNB2     | 1 | 20 | 0 | NA | 0 | NA | 0 | NA | 0 | NA |
| 19 | 2427134 | 2429257 | 1  | NM_015675    | GADD45B   | 0 | NA | 0 | NA | 0 | NA | 0 | NA | 0 | NA |
| 19 | 2653746 | 2462217 | -1 | NM_052847    | GNG7      | 0 | NA | 0 | NA | 0 | NA | 0 | NA | 0 | NA |
| 19 | 2672369 | 2665564 | -1 | NM_145173    | DIRAS1    | 1 | 11 | 1 | 12 | 0 | NA | 0 | NA | 1 | 13 |
| 19 | 2691074 | 2683522 | -1 | NM_144564    | SLC39A3   | 0 | NA | 0 | NA | 0 | NA | 0 | NA | 0 | NA |
| 19 | 2691074 | 2685523 | -1 | NM_213568    | SLC39A3   | 0 | NA | 0 | NA | 0 | NA | 0 | NA | 0 | NA |
| 19 | 2734354 | 2705711 | -1 | NM_003021    | SGTA      | 0 | NA | 0 | NA | 0 | NA | 0 | NA | 0 | NA |
| 19 | 2736505 | 2764599 | 1  | NM_003249    | THOP1     | 0 | NA | 0 | NA | 0 | NA | 0 | NA | 0 | NA |
| 19 | 2770871 | 2787733 | 1  | NM_001102651 | ZNF554    | 0 | NA | 0 | NA | 0 | NA | 1 | 14 | 0 | NA |
| 19 | 2792481 | 2805035 | 1  | NM_152791    | ZNF555    | 1 | 15 | 1 | 12 | 0 | NA | 1 | 20 | 0 | NA |
| 19 | 2818332 | 2829501 | 1  | NM_024967    | ZNF556    | 0 | NA | 0 | NA | 0 | NA | 0 | NA | 0 | NA |
| 19 | 2851963 | 2869474 | 1  | NM_173480    | ZNF57     | 0 | NA | 1 | 13 | 0 | NA | 0 | NA | 0 | NA |
| 19 | 2895930 | 2884215 | -1 | NM_021217    | ZNF77     | 1 | 15 | 0 | NA | 0 | NA | 1 | 11 | 0 | NA |
| 19 | 2928561 | 2946176 | 1  | NM_024760    | TLE6      | 1 | 21 | 0 | NA | 0 | NA | 0 | NA | 0 | NA |
| 19 | 2980022 | 2948635 | -1 | NM_003260    | TLE2      | 0 | NA | 0 | NA | 0 | NA | 0 | NA | 0 | NA |
| 19 | 3013371 | 3003907 | -1 | NM_001130    | AES       | 0 | NA | 0 | NA | 0 | NA | 0 | NA | 0 | NA |
| 19 | 3013371 | 3003907 | -1 | NM_198970    | AES       | 0 | NA | 0 | NA | 0 | NA | 0 | NA | 0 | NA |
| 19 | 3013964 | 3003907 | -1 | NM_198969    | AES       | 0 | NA | 0 | NA | 0 | NA | 0 | NA | 0 | NA |
| 19 | 3045407 | 3072454 | 1  | NM_002067    | GNA11     | 0 | NA | 0 | NA | 0 | NA | 0 | NA | 0 | NA |
| 19 | 3087190 | 3114766 | 1  | NM_002068    | GNA15     | 1 | 11 | 0 | NA | 0 | NA | 0 | NA | 0 | NA |
| 19 | 3129765 | 3131330 | 1  | NM_003775    | S1PR4     | 0 | NA | 0 | NA | 0 | NA | 0 | NA | 0 | NA |
| 19 | 3136874 | 3160573 | 1  | NM_020170    | NCLN      | 0 | NA | 0 | NA | 0 | NA | 0 | NA | 0 | NA |
| 19 | 3175700 | 3248073 | 1  | NM_021938    | BRUNOL5   | 0 | NA | 0 | NA | 0 | NA | 0 | NA | 0 | NA |
| 19 | 3310615 | 3414603 | 1  | NM_205843    | NFIC      | 0 | NA | 0 | NA | 0 | NA | 0 | NA | 0 | NA |
| 19 | 3317572 | 3414603 | 1  | NM_005597    | NFIC      | 0 | NA | 0 | NA | 0 | NA | 0 | NA | 0 | NA |
| 19 | 3451621 | 3441821 | -1 | NM_031304    | DOHH      | 0 | NA | 0 | NA | 1 | 14 | 0 | NA | 0 | NA |
| 19 | 3473953 | 3489325 | 1  | NM_016263    | FZR1      | 0 | NA | 0 | NA | 0 | NA | 0 | NA | 0 | NA |
| 19 | 3508571 | 3489262 | -1 | NM_001042680 | C19orf28  | 1 | 11 | 0 | NA | 1 | 12 | 0 | NA | 0 | NA |
| 19 | 3508571 | 3489262 | -1 | NM_021731    | C19orf28  | 1 | 11 | 0 | NA | 1 | 12 | 0 | NA | 0 | NA |
| 19 | 3508571 | 3495196 | -1 | NM_174983    | C19orf28  | 1 | 11 | 0 | NA | 1 | 12 | 0 | NA | 0 | NA |
| 19 | 3523942 | 3530081 | 1  | NM_006339    | HMG20B    | 1 | 12 | 0 | NA | 1 | 18 | 0 | NA | 0 | NA |
| 19 | 3536568 | 3541434 | 1  | NM_133261    | GIPC3     | 0 | NA | 0 | NA | 1 | 18 | 0 | NA | 0 | NA |
| 19 | 3557658 | 3545503 | -1 | NM_001060    | TBXA2R    | 0 | NA | 0 | NA | 0 | NA | 0 | NA | 0 | NA |
| 19 | 3557658 | 3545503 | -1 | NM_201636    | TBXA2R    | 0 | NA | 0 | NA | 0 | NA | 0 | NA | 0 | NA |
| 19 | 3577813 | 3561626 | -1 | NM_001080543 | C19orf29  | 1 | 14 | 0 | NA | 0 | NA | 0 | NA | 0 | NA |
| 19 | 3577813 | 3561642 | -1 | NM_021231    | C19orf29  | 1 | 14 | 0 | NA | 0 | NA | 0 | NA | 0 | NA |
| 19 | 3651445 | 3581181 | -1 | NM_012398    | PIP5K1C   | 0 | NA | 0 | NA | 0 | NA | 0 | NA | 0 | NA |
| 19 | 3679373 | 3701682 | 1  | NM_014428    | TJP3      | 1 | 12 | 1 | 14 | 0 | NA | 0 | NA | 0 | NA |
| 19 | 3712673 | 3701770 | -1 | NM_004886    | APBA3     | 0 | NA | 0 | NA | 0 | NA | 0 | NA | 0 | NA |
| 19 | 3713664 | 3718563 | 1  | NM_172251    | MRPL54    | 0 | NA | 0 | NA | 0 | NA | 0 | NA | 0 | NA |
| 19 | 3723219 | 3720088 | -1 | NM_032753    | RAX2      | 0 | NA | 1 | 14 | 0 | NA | 0 | NA | 0 | NA |
| 19 | 3737415 | 3728966 | -1 | NM_139354    | MATK      | 0 | NA | 1 | 12 | 0 | NA | 0 | NA | 0 | NA |
| 19 | 3737415 | 3728966 | -1 | NM_139355    | MATK      | 0 | NA | 1 | 12 | 0 | NA | 0 | NA | 0 | NA |
| 19 | 3752810 | 3728966 | -1 | NM_002378    | MATK      | 0 | NA | 1 | 14 | 0 | NA | 0 | NA | 0 | NA |
| 19 | 3820027 | 3755021 | -1 | NM_015174    | ZFR2      | 0 | NA | 1 | 16 | 0 | NA | 0 | NA | 0 | NA |
| 19 | 3831638 | 3879080 | 1  | NM_033064    | ATCAY     | 0 | NA | 0 | NA | 0 | NA | 0 | NA | 0 | NA |
| 19 | 3884100 | 3893414 | 1  | NM_170678    | ITGB1BP3  | 0 | NA | 0 | NA | 0 | NA | 0 | NA | 0 | NA |
| 19 | 3920826 | 3909451 | -1 | NM_001348    | DAPK3     | 0 | NA | 0 | NA | 0 | NA | 0 | NA | 0 | NA |
| 19 | 3936461 | 3927053 | -1 | NM_001961    | EEF2      | 0 | NA | 0 | NA | 1 | 17 | 0 | NA | 0 | NA |
| 19 | 3958748 | 3989067 | 1  | NM_015897    | PIAS4     | 0 | NA | 0 | NA | 0 | NA | 0 | NA | 0 | NA |
| 19 | 4017816 | 3996215 | -1 | NM_015898    | ZBTB7A    | 1 | 12 | 0 | NA | 0 | NA | 0 | NA | 0 | NA |
| 19 | 4075126 | 4041319 | -1 | NM_030662    | MAP2K2    | 0 | NA | 0 | NA | 0 | NA | 0 | NA | 0 | NA |
| 19 | 4104628 | 4124048 | 1  | NM_032607    | CREB3L3   | 0 | NA | 0 | NA | 0 | NA | 0 | NA | 0 | NA |
| 19 | 4133596 | 4125105 | -1 | NM_016539    | SIRT6     | 1 | 14 | 0 | NA | 0 | NA | 0 | NA | 0 | NA |
| 19 | 4134350 | 4175811 | 1  | NM_133475    | ANKRD24   | 1 | 14 | 0 | NA | 0 | NA | 0 | NA | 0 | NA |
| 19 | 4180539 | 4186524 | 1  | NM_005755    | EBI3      | 0 | NA | 0 | NA | 0 | NA | 0 | NA | 0 | NA |
| 19 | 4198110 | 4220085 | 1  | NM_018074    | CCDC94    | 1 | 15 | 0 | NA | 0 | NA | 1 | 18 | 0 | NA |
| 19 | 4230658 | 4241720 | 1  | NM_020209    | SHD       | 0 | NA | 1 | 14 | 0 | NA | 0 | NA | 0 | NA |

|    |         |         |    |              |           |   |    |   |    |   |    |   |    |   |    |
|----|---------|---------|----|--------------|-----------|---|----|---|----|---|----|---|----|---|----|
| 19 | 4253428 | 4243228 | -1 | NM_144615    | TMIGD2    | 0 | NA | 0 | NA | 0 | NA | 0 | NA | 0 | NA |
| 19 | 4255690 | 4274838 | 1  | NM_024333    | FSD1      | 0 | NA | 0 | NA | 0 | NA | 0 | NA | 0 | NA |
| 19 | 4289847 | 4275039 | -1 | NM_001013841 | STAP2     | 1 | 13 | 0 | NA | 0 | NA | 0 | NA | 0 | NA |
| 19 | 4289847 | 4275039 | -1 | NM_017720    | STAP2     | 1 | 13 | 0 | NA | 0 | NA | 0 | NA | 0 | NA |
| 19 | 4294575 | 4311075 | 1  | NM_032868    | MPND      | 1 | 13 | 0 | NA | 0 | NA | 0 | NA | 0 | NA |
| 19 | 4351471 | 4311366 | -1 | NM_003025    | SH3GL1    | 1 | 11 | 0 | NA | 0 | NA | 1 | 20 | 0 | NA |
| 19 | 4353659 | 4394394 | 1  | NM_005483    | CHAF1A    | 1 | 11 | 0 | NA | 0 | NA | 1 | 20 | 0 | NA |
| 19 | 4408790 | 4396260 | -1 | NM_025241    | UBXD1     | 0 | NA | 0 | NA | 0 | NA | 0 | NA | 0 | NA |
| 19 | 4423254 | 4453222 | 1  | NM_001001520 | HDFG2     | 0 | NA | 0 | NA | 0 | NA | 0 | NA | 0 | NA |
| 19 | 4423254 | 4453222 | 1  | NM_032631    | HDFG2     | 0 | NA | 0 | NA | 0 | NA | 0 | NA | 0 | NA |
| 19 | 4468716 | 4453191 | -1 | NM_001080400 | KIAA1881  | 0 | NA | 0 | NA | 0 | NA | 0 | NA | 0 | NA |
| 19 | 4486208 | 4473543 | -1 | NM_001013706 | LSDP5     | 0 | NA | 0 | NA | 0 | NA | 0 | NA | 0 | NA |
| 19 | 4491036 | 4486226 | -1 | NM_052972    | LRG1      | 0 | NA | 0 | NA | 0 | NA | 0 | NA | 0 | NA |
| 19 | 4509503 | 4493599 | -1 | NM_032108    | SEMA6B    | 0 | NA | 0 | NA | 0 | NA | 0 | NA | 0 | NA |
| 19 | 4590529 | 4604953 | 1  | NM_152362    | TNFAIP8L1 | 1 | 11 | 0 | NA | 0 | NA | 1 | 14 | 0 | NA |
| 19 | 4621415 | 4608556 | -1 | NM_019107    | C19orf10  | 0 | NA | 0 | NA | 0 | NA | 0 | NA | 0 | NA |
| 19 | 4674875 | 4626235 | -1 | NM_139159    | DPP9      | 0 | NA | 0 | NA | 0 | NA | 0 | NA | 0 | NA |
| 19 | 4742727 | 4746571 | 1  | NM_018708    | FEM1A     | 0 | NA | 0 | NA | 0 | NA | 0 | NA | 0 | NA |
| 19 | 4769451 | 4768991 | -1 | NM_182919    | TICAM1    | 1 | 13 | 0 | NA | 0 | NA | 0 | NA | 0 | NA |
| 19 | 4818676 | 4789345 | -1 | NM_005817    | M6PRBP1   | 1 | 16 | 0 | NA | 1 | 24 | 0 | NA | 0 | NA |
| 19 | 4853879 | 4841448 | -1 | NM_001080523 | ARRDC5    | 0 | NA | 0 | NA | 0 | NA | 0 | NA | 0 | NA |
| 19 | 4860509 | 4913165 | 1  | NM_001048201 | UHRF1     | 1 | 11 | 0 | NA | 0 | NA | 0 | NA | 0 | NA |
| 19 | 4861565 | 4913165 | 1  | NM_013282    | UHRF1     | 1 | 11 | 0 | NA | 0 | NA | 0 | NA | 0 | NA |
| 19 | 4920131 | 5104606 | 1  | NM_015015    | JMJD2B    | 0 | NA | 0 | NA | 1 | 16 | 0 | NA | 0 | NA |
| 19 | 5291814 | 5156518 | -1 | NM_002850    | PTPRS     | 1 | 11 | 0 | NA | 0 | NA | 0 | NA | 0 | NA |
| 19 | 5291814 | 5156518 | -1 | NM_130853    | PTPRS     | 1 | 11 | 0 | NA | 0 | NA | 0 | NA | 0 | NA |
| 19 | 5291814 | 5156518 | -1 | NM_130854    | PTPRS     | 1 | 11 | 0 | NA | 0 | NA | 0 | NA | 0 | NA |
| 19 | 5291814 | 5156518 | -1 | NM_130855    | PTPRS     | 1 | 11 | 0 | NA | 0 | NA | 0 | NA | 0 | NA |
| 19 | 5406425 | 5407867 | 1  | NM_181710    | ZNRF4     | 0 | NA | 1 | 13 | 0 | NA | 0 | NA | 0 | NA |
| 19 | 5573938 | 5538009 | -1 | NM_014649    | SAFB2     | 0 | NA | 0 | NA | 0 | NA | 0 | NA | 0 | NA |
| 19 | 5574163 | 5619489 | 1  | NM_002967    | SAFB      | 0 | NA | 0 | NA | 0 | NA | 0 | NA | 0 | NA |
| 19 | 5631911 | 5629432 | -1 | NM_205767    | P117      | 0 | NA | 0 | NA | 0 | NA | 0 | NA | 0 | NA |
| 19 | 5632034 | 5639533 | 1  | NM_198704    | HSD11B1L  | 0 | NA | 0 | NA | 0 | NA | 0 | NA | 0 | NA |
| 19 | 5632034 | 5639533 | 1  | NM_198705    | HSD11B1L  | 0 | NA | 0 | NA | 0 | NA | 0 | NA | 0 | NA |
| 19 | 5632046 | 5639533 | 1  | NM_198533    | HSD11B1L  | 0 | NA | 0 | NA | 0 | NA | 0 | NA | 0 | NA |
| 19 | 5632051 | 5639533 | 1  | NM_198707    | HSD11B1L  | 0 | NA | 0 | NA | 0 | NA | 0 | NA | 0 | NA |
| 19 | 5632074 | 5639533 | 1  | NM_198706    | HSD11B1L  | 0 | NA | 0 | NA | 0 | NA | 0 | NA | 0 | NA |
| 19 | 5632074 | 5639533 | 1  | NM_198708    | HSD11B1L  | 0 | NA | 0 | NA | 0 | NA | 0 | NA | 0 | NA |
| 19 | 5641271 | 5642678 | 1  | NM_033643    | RPL36     | 0 | NA | 0 | NA | 0 | NA | 0 | NA | 0 | NA |
| 19 | 5641345 | 5642678 | 1  | NM_015414    | RPL36     | 0 | NA | 0 | NA | 0 | NA | 0 | NA | 0 | NA |
| 19 | 5671176 | 5642844 | -1 | NM_004793    | LONP1     | 0 | NA | 0 | NA | 0 | NA | 0 | NA | 0 | NA |
| 19 | 5671687 | 5729742 | 1  | NM_152784    | TMEM146   | 0 | NA | 0 | NA | 0 | NA | 0 | NA | 0 | NA |
| 19 | 5735610 | 5733970 | -1 | NM_153359    | MGC24975  | 0 | NA | 1 | 13 | 0 | NA | 1 | 11 | 0 | NA |
| 19 | 5742190 | 5736152 | -1 | NM_020175    | DUS3L     | 0 | NA | 0 | NA | 0 | NA | 1 | 11 | 0 | NA |
| 19 | 5774817 | 5779335 | 1  | NM_004558    | NRTN      | 0 | NA | 0 | NA | 0 | NA | 0 | NA | 0 | NA |
| 19 | 5790742 | 5781636 | -1 | NM_000150    | FUT6      | 0 | NA | 0 | NA | 0 | NA | 0 | NA | 0 | NA |
| 19 | 5790742 | 5781636 | -1 | NM_001040701 | FUT6      | 0 | NA | 0 | NA | 0 | NA | 0 | NA | 0 | NA |
| 19 | 5802485 | 5793898 | -1 | NM_000149    | FUT3      | 0 | NA | 0 | NA | 0 | NA | 0 | NA | 0 | NA |
| 19 | 5802485 | 5793898 | -1 | NM_001097639 | FUT3      | 0 | NA | 0 | NA | 0 | NA | 0 | NA | 0 | NA |
| 19 | 5802485 | 5793898 | -1 | NM_001097640 | FUT3      | 0 | NA | 0 | NA | 0 | NA | 0 | NA | 0 | NA |
| 19 | 5802485 | 5793898 | -1 | NM_001097641 | FUT3      | 0 | NA | 0 | NA | 0 | NA | 0 | NA | 0 | NA |
| 19 | 5821551 | 5816836 | -1 | NM_002034    | FUT5      | 0 | NA | 0 | NA | 0 | NA | 0 | NA | 0 | NA |
| 19 | 5855025 | 5845685 | -1 | NM_175614    | NDUFA11   | 1 | 16 | 0 | NA | 1 | 12 | 0 | NA | 0 | NA |
| 19 | 5855896 | 5861263 | 1  | NM_001017921 | VMAC      | 1 | 16 | 0 | NA | 1 | 12 | 0 | NA | 0 | NA |
| 19 | 5865218 | 5866886 | 1  | NM_004058    | CAPS      | 1 | 11 | 0 | NA | 1 | 12 | 0 | NA | 0 | NA |
| 19 | 5865218 | 5866886 | 1  | NM_080590    | CAPS      | 1 | 11 | 0 | NA | 1 | 12 | 0 | NA | 0 | NA |
| 19 | 5929103 | 5868014 | -1 | NM_007322    | RANBP3    | 0 | NA | 0 | NA | 0 | NA | 0 | NA | 0 | NA |
| 19 | 5929113 | 5867151 | -1 | NM_003624    | RANBP3    | 0 | NA | 0 | NA | 0 | NA | 0 | NA | 0 | NA |
| 19 | 5929113 | 5868281 | -1 | NM_007320    | RANBP3    | 0 | NA | 0 | NA | 0 | NA | 0 | NA | 0 | NA |
| 19 | 6061554 | 5944174 | -1 | NM_000635    | RFX2      | 0 | NA | 0 | NA | 0 | NA | 0 | NA | 0 | NA |
| 19 | 6061554 | 5944174 | -1 | NM_134433    | RFX2      | 0 | NA | 0 | NA | 0 | NA | 0 | NA | 0 | NA |
| 19 | 6086709 | 6144112 | 1  | NM_030924    | ACSBG2    | 0 | NA | 1 | 12 | 1 | 14 | 0 | NA | 0 | NA |
| 19 | 6230959 | 6161391 | -1 | NM_005934    | MLL1      | 0 | NA | 1 | 15 | 0 | NA | 1 | 12 | 0 | NA |
| 19 | 6284562 | 6257724 | -1 | NM_133492    | ASAH3     | 0 | NA | 0 | NA | 0 | NA | 0 | NA | 0 | NA |
| 19 | 6312462 | 6319915 | 1  | NM_006012    | CLPP      | 0 | NA | 0 | NA | 0 | NA | 0 | NA | 0 | NA |

|    |         |         |    |              |          |   |    |   |    |   |    |   |    |   |    |
|----|---------|---------|----|--------------|----------|---|----|---|----|---|----|---|----|---|----|
| 19 | 6323443 | 6326040 | 1  | NM_032306    | ALKBH7   | 0 | NA | 0 | NA | 0 | NA | 0 | NA | 0 | NA |
| 19 | 6326860 | 6326304 | -1 | NM_004158    | PSPN     | 0 | NA | 0 | NA | 0 | NA | 0 | NA | 0 | NA |
| 19 | 6344291 | 6330579 | -1 | NM_002096    | GT2F1    | 0 | NA | 0 | NA | 0 | NA | 0 | NA | 0 | NA |
| 19 | 6375822 | 6364118 | -1 | NM_003685    | KHSRP    | 1 | 26 | 1 | 24 | 0 | NA | 1 | 23 | 0 | NA |
| 19 | 6384790 | 6377047 | -1 | NM_173637    | SLC25A41 | 1 | 26 | 1 | 24 | 0 | NA | 1 | 23 | 0 | NA |
| 19 | 6410781 | 6391074 | -1 | NM_024103    | SLC25A23 | 0 | NA | 0 | NA | 0 | NA | 0 | NA | 0 | NA |
| 19 | 6415259 | 6418230 | 1  | NM_139161    | CRB3     | 0 | NA | 0 | NA | 0 | NA | 0 | NA | 0 | NA |
| 19 | 6415259 | 6418230 | 1  | NM_174881    | CRB3     | 0 | NA | 0 | NA | 0 | NA | 0 | NA | 0 | NA |
| 19 | 6432798 | 6418217 | -1 | NM_024898    | DENND1C  | 0 | NA | 1 | 13 | 0 | NA | 0 | NA | 0 | NA |
| 19 | 6453330 | 6445329 | -1 | NM_006087    | TUBB4    | 0 | NA | 0 | NA | 0 | NA | 0 | NA | 0 | NA |
| 19 | 6482036 | 6486933 | 1  | NM_003811    | TNFSF9   | 0 | NA | 0 | NA | 0 | NA | 0 | NA | 0 | NA |
| 19 | 6542163 | 6538849 | -1 | NM_001252    | CD70     | 0 | NA | 0 | NA | 0 | NA | 0 | NA | 0 | NA |
| 19 | 6621599 | 6615565 | -1 | NM_003807    | TNFSF14  | 0 | NA | 0 | NA | 0 | NA | 0 | NA | 0 | NA |
| 19 | 6621599 | 6615565 | -1 | NM_172014    | TNFSF14  | 0 | NA | 0 | NA | 0 | NA | 0 | NA | 0 | NA |
| 19 | 6671662 | 6628845 | -1 | NM_000064    | C3       | 1 | 11 | 1 | 18 | 0 | NA | 0 | NA | 0 | NA |
| 19 | 6688304 | 6680924 | -1 | NM_020171    | GPR108   | 1 | 12 | 0 | NA | 0 | NA | 0 | NA | 0 | NA |
| 19 | 6688633 | 6680924 | -1 | NM_001080452 | GPR108   | 1 | 12 | 0 | NA | 0 | NA | 0 | NA | 0 | NA |
| 19 | 6690706 | 6702529 | 1  | NM_004240    | TRIP10   | 1 | 12 | 0 | NA | 0 | NA | 0 | NA | 0 | NA |
| 19 | 6718480 | 6703172 | -1 | NM_005490    | SH2D3A   | 0 | NA | 1 | 17 | 0 | NA | 0 | NA | 0 | NA |
| 19 | 6723721 | 6808371 | 1  | NM_005428    | VAV1     | 0 | NA | 1 | 17 | 0 | NA | 0 | NA | 0 | NA |
| 19 | 6838581 | 6891464 | 1  | NM_001974    | EMR1     | 0 | NA | 0 | NA | 0 | NA | 0 | NA | 0 | NA |
| 19 | 6941857 | 6903510 | -1 | NM_001080498 | EMR4     | 0 | NA | 1 | 13 | 0 | NA | 0 | NA | 0 | NA |
| 19 | 7000350 | 7002746 | 1  | NM_144614    | MBD3L2   | 0 | NA | 0 | NA | 0 | NA | 0 | NA | 0 | NA |
| 19 | 7020470 | 7038978 | 1  | NM_001044387 | ZNF557   | 0 | NA | 0 | NA | 0 | NA | 1 | 15 | 0 | NA |
| 19 | 7020470 | 7038978 | 1  | NM_001044388 | ZNF557   | 0 | NA | 0 | NA | 0 | NA | 1 | 15 | 0 | NA |
| 19 | 7020470 | 7038978 | 1  | NM_024341    | ZNF557   | 0 | NA | 0 | NA | 0 | NA | 1 | 15 | 0 | NA |
| 19 | 7245011 | 7063285 | -1 | NM_000208    | INSR     | 0 | NA | 0 | NA | 0 | NA | 0 | NA | 0 | NA |
| 19 | 7245011 | 7063285 | -1 | NM_001079817 | INSR     | 0 | NA | 0 | NA | 0 | NA | 0 | NA | 0 | NA |
| 19 | 7351865 | 7443371 | 1  | NM_015318    | ARHGEF18 | 0 | NA | 0 | NA | 0 | NA | 0 | NA | 0 | NA |
| 19 | 7459905 | 7447760 | -1 | NM_080662    | PEX11G   | 0 | NA | 0 | NA | 1 | 12 | 0 | NA | 0 | NA |
| 19 | 7468484 | 7479336 | 1  | NM_198534    | C19orf45 | 0 | NA | 0 | NA | 1 | 12 | 0 | NA | 0 | NA |
| 19 | 7487003 | 7491911 | 1  | NM_018083    | ZNF358   | 0 | NA | 0 | NA | 0 | NA | 0 | NA | 0 | NA |
| 19 | 7493511 | 7504863 | 1  | NM_020533    | MCOLN1   | 0 | NA | 0 | NA | 0 | NA | 0 | NA | 0 | NA |
| 19 | 7505042 | 7532652 | 1  | NM_006702    | PNPLA6   | 0 | NA | 0 | NA | 0 | NA | 1 | 12 | 0 | NA |
| 19 | 7566787 | 7589196 | 1  | NM_001080429 | KIAA1543 | 0 | NA | 0 | NA | 0 | NA | 0 | NA | 0 | NA |
| 19 | 7566787 | 7589196 | 1  | NM_020902    | KIAA1543 | 0 | NA | 0 | NA | 0 | NA | 0 | NA | 0 | NA |
| 19 | 7600439 | 7590410 | -1 | NM_020196    | XAB2     | 0 | NA | 0 | NA | 0 | NA | 0 | NA | 0 | NA |
| 19 | 7604570 | 7602506 | -1 | NM_174895    | PCP2     | 0 | NA | 0 | NA | 0 | NA | 0 | NA | 0 | NA |
| 19 | 7608020 | 7618697 | 1  | NM_006949    | STXBP2   | 0 | NA | 0 | NA | 0 | NA | 0 | NA | 0 | NA |
| 19 | 7639971 | 7641340 | 1  | NM_020415    | RETN     | 0 | NA | 1 | 14 | 0 | NA | 0 | NA | 0 | NA |
| 19 | 7647942 | 7650719 | 1  | NM_174918    | C19orf59 | 0 | NA | 1 | 14 | 0 | NA | 0 | NA | 0 | NA |
| 19 | 7651706 | 7653748 | 1  | NM_001042462 | TRAPPC5  | 0 | NA | 1 | 14 | 0 | NA | 0 | NA | 0 | NA |
| 19 | 7651760 | 7653748 | 1  | NM_174894    | TRAPPC5  | 0 | NA | 1 | 14 | 0 | NA | 0 | NA | 0 | NA |
| 19 | 7651763 | 7653748 | 1  | NM_001042461 | TRAPPC5  | 0 | NA | 1 | 14 | 0 | NA | 0 | NA | 0 | NA |
| 19 | 7672997 | 7659661 | -1 | NM_002002    | FCER2    | 0 | NA | 0 | NA | 0 | NA | 0 | NA | 0 | NA |
| 19 | 7703005 | 7699849 | -1 | NM_198492    | CLEC4G   | 0 | NA | 1 | 12 | 0 | NA | 0 | NA | 0 | NA |
| 19 | 7718406 | 7710881 | -1 | NM_021155    | CD209    | 0 | NA | 1 | 12 | 0 | NA | 0 | NA | 0 | NA |
| 19 | 7734080 | 7740491 | 1  | NM_014257    | CLEC4M   | 0 | NA | 0 | NA | 0 | NA | 0 | NA | 0 | NA |
| 19 | 7734080 | 7740491 | 1  | NM_214675    | CLEC4M   | 0 | NA | 0 | NA | 0 | NA | 0 | NA | 0 | NA |
| 19 | 7734080 | 7740491 | 1  | NM_214676    | CLEC4M   | 0 | NA | 0 | NA | 0 | NA | 0 | NA | 0 | NA |
| 19 | 7734080 | 7740491 | 1  | NM_214677    | CLEC4M   | 0 | NA | 0 | NA | 0 | NA | 0 | NA | 0 | NA |
| 19 | 7734080 | 7740491 | 1  | NM_214678    | CLEC4M   | 0 | NA | 0 | NA | 0 | NA | 0 | NA | 0 | NA |
| 19 | 7734080 | 7740491 | 1  | NM_214679    | CLEC4M   | 0 | NA | 0 | NA | 0 | NA | 0 | NA | 0 | NA |
| 19 | 7801242 | 7835862 | 1  | NM_145245    | EVIL5L   | 0 | NA | 0 | NA | 0 | NA | 0 | NA | 0 | NA |
| 19 | 7859389 | 7872908 | 1  | NM_025061    | LRRC8E   | 0 | NA | 1 | 12 | 0 | NA | 0 | NA | 0 | NA |
| 19 | 7874764 | 7885363 | 1  | NM_145185    | MAP2K7   | 0 | NA | 0 | NA | 0 | NA | 0 | NA | 0 | NA |
| 19 | 7891228 | 7894134 | 1  | NM_003083    | SNAPC2   | 0 | NA | 0 | NA | 0 | NA | 0 | NA | 0 | NA |
| 19 | 7897029 | 7895383 | -1 | NM_206833    | CTXN1    | 0 | NA | 0 | NA | 0 | NA | 0 | NA | 0 | NA |
| 19 | 7914538 | 7897602 | -1 | NM_006351    | TIMM44   | 1 | 12 | 0 | NA | 1 | 17 | 0 | NA | 0 | NA |
| 19 | 7976529 | 7929456 | -1 | NM_001419    | ELAVL1   | 0 | NA | 0 | NA | 0 | NA | 0 | NA | 0 | NA |
| 19 | 8023933 | 8033547 | 1  | NM_005624    | CCL25    | 1 | 12 | 0 | NA | 0 | NA | 0 | NA | 0 | NA |
| 19 | 8118385 | 8036286 | -1 | NM_032447    | FBN3     | 1 | 11 | 0 | NA | 0 | NA | 0 | NA | 0 | NA |
| 19 | 8180256 | 8233302 | 1  | NM_024552    | LASS4    | 0 | NA | 0 | NA | 0 | NA | 0 | NA | 0 | NA |
| 19 | 8279239 | 8273010 | -1 | NM_016579    | CD320    | 0 | NA | 0 | NA | 0 | NA | 0 | NA | 0 | NA |
| 19 | 8292280 | 8282233 | -1 | NM_005001    | NDUFA7   | 0 | NA | 0 | NA | 0 | NA | 0 | NA | 0 | NA |

|    |          |          |    |              |             |   |    |   |    |   |    |   |    |   |    |
|----|----------|----------|----|--------------|-------------|---|----|---|----|---|----|---|----|---|----|
| 19 | 8292383  | 8293280  | 1  | NM_001031    | RPS28       | 0 | NA | 0 | NA | 0 | NA | 0 | NA | 0 | NA |
| 19 | 8314146  | 8293467  | -1 | NM_198471    | KANK3       | 0 | NA | 0 | NA | 0 | NA | 0 | NA | 0 | NA |
| 19 | 8335010  | 8345257  | 1  | NM_001039667 | ANGPTL4     | 0 | NA | 0 | NA | 0 | NA | 0 | NA | 0 | NA |
| 19 | 8335010  | 8345257  | 1  | NM_139314    | ANGPTL4     | 0 | NA | 0 | NA | 0 | NA | 0 | NA | 0 | NA |
| 19 | 8361295  | 8374479  | 1  | NM_004218    | RAB11B      | 1 | 31 | 0 | NA | 0 | NA | 0 | NA | 0 | NA |
| 19 | 8384186  | 8409899  | 1  | NM_001005415 | MARCH2      | 0 | NA | 0 | NA | 0 | NA | 0 | NA | 0 | NA |
| 19 | 8384186  | 8409899  | 1  | NM_001005416 | MARCH2      | 0 | NA | 0 | NA | 0 | NA | 0 | NA | 0 | NA |
| 19 | 8384186  | 8409899  | 1  | NM_016496    | MARCH2      | 0 | NA | 0 | NA | 0 | NA | 0 | NA | 0 | NA |
| 19 | 8415802  | 8459996  | 1  | NM_005968    | HNRNPM      | 0 | NA | 0 | NA | 0 | NA | 0 | NA | 0 | NA |
| 19 | 8415802  | 8459996  | 1  | NM_031203    | HNRNPM      | 0 | NA | 0 | NA | 0 | NA | 0 | NA | 0 | NA |
| 19 | 8473495  | 8460939  | -1 | NM_032152    | PRAM1       | 0 | NA | 0 | NA | 0 | NA | 0 | NA | 0 | NA |
| 19 | 8485032  | 8482221  | -1 | NM_032370    | ZNF414      | 0 | NA | 0 | NA | 1 | 13 | 0 | NA | 0 | NA |
| 19 | 8548307  | 8491996  | -1 | NM_012335    | MYO1F       | 0 | NA | 0 | NA | 0 | NA | 0 | NA | 0 | NA |
| 19 | 8581588  | 8551125  | -1 | NM_030957    | ADAMTS10    | 0 | NA | 1 | 20 | 0 | NA | 0 | NA | 0 | NA |
| 19 | 8670172  | 8668752  | -1 | NM_178525    | MGC33407    | 0 | NA | 0 | NA | 0 | NA | 0 | NA | 0 | NA |
| 19 | 8702390  | 8703335  | 1  | NM_001004699 | ORZ21       | 0 | NA | 0 | NA | 0 | NA | 0 | NA | 0 | NA |
| 19 | 8794565  | 8781381  | -1 | NM_144693    | ZNF558      | 0 | NA | 0 | NA | 1 | 12 | 0 | NA | 0 | NA |
| 19 | 8814331  | 8814995  | 1  | NM_145208    | MBD3L1      | 0 | NA | 0 | NA | 1 | 12 | 0 | NA | 0 | NA |
| 19 | 8953018  | 8820519  | -1 | NM_024690    | MUC16       | 0 | NA | 0 | NA | 0 | NA | 0 | NA | 0 | NA |
| 19 | 9064920  | 9065862  | 1  | NM_001004456 | OR1M1       | 0 | NA | 0 | NA | 0 | NA | 0 | NA | 0 | NA |
| 19 | 9074982  | 9073944  | -1 | NM_001005193 | OR7G2       | 0 | NA | 0 | NA | 0 | NA | 0 | NA | 0 | NA |
| 19 | 9087439  | 9086273  | -1 | NM_001005192 | OR7G1       | 0 | NA | 0 | NA | 0 | NA | 0 | NA | 0 | NA |
| 19 | 9098626  | 9097687  | -1 | NM_001001958 | OR7G3       | 0 | NA | 0 | NA | 0 | NA | 0 | NA | 0 | NA |
| 19 | 9112072  | 9135084  | 1  | NM_020933    | ZNF317      | 0 | NA | 0 | NA | 0 | NA | 0 | NA | 0 | NA |
| 19 | 9157269  | 9160493  | 1  | NM_175883    | OR7D2       | 0 | NA | 0 | NA | 0 | NA | 0 | NA | 0 | NA |
| 19 | 9186513  | 9185574  | -1 | NM_001005191 | OR7D4       | 0 | NA | 0 | NA | 0 | NA | 0 | NA | 0 | NA |
| 19 | 9222719  | 9223739  | 1  | NM_001079935 | OR7E24      | 0 | NA | 0 | NA | 0 | NA | 0 | NA | 0 | NA |
| 19 | 9276795  | 9266985  | -1 | NM_198535    | ZNF699      | 0 | NA | 0 | NA | 0 | NA | 1 | 12 | 0 | NA |
| 19 | 9295927  | 9315521  | 1  | NM_032497    | ZNF559      | 1 | 19 | 0 | NA | 0 | NA | 0 | NA | 0 | NA |
| 19 | 9334695  | 9353866  | 1  | NM_003451    | ZNF177      | 0 | NA | 0 | NA | 0 | NA | 0 | NA | 0 | NA |
| 19 | 9407234  | 9384270  | -1 | NM_006631    | ZNF266      | 1 | 17 | 0 | NA | 1 | 13 | 0 | NA | 0 | NA |
| 19 | 9407234  | 9384270  | -1 | NM_198058    | ZNF266      | 1 | 17 | 0 | NA | 1 | 13 | 0 | NA | 0 | NA |
| 19 | 9470279  | 9438030  | -1 | NM_152476    | ZNF560      | 1 | 26 | 0 | NA | 0 | NA | 0 | NA | 0 | NA |
| 19 | 9510303  | 9499680  | -1 | NM_024106    | ZNF426      | 1 | 11 | 1 | 17 | 1 | 27 | 1 | 18 | 0 | NA |
| 19 | 9556209  | 9537291  | -1 | NM_001008727 | ZNF121      | 0 | NA | 1 | 12 | 0 | NA | 0 | NA | 0 | NA |
| 19 | 9592899  | 9580131  | -1 | NM_152289    | ZNF561      | 1 | 20 | 0 | NA | 0 | NA | 1 | 22 | 0 | NA |
| 19 | 9646734  | 9620352  | -1 | NM_017656    | ZNF562      | 1 | 14 | 0 | NA | 1 | 20 | 1 | 15 | 0 | NA |
| 19 | 9740410  | 9729150  | -1 | NM_001077624 | LOC162993   | 1 | 29 | 0 | NA | 0 | NA | 0 | NA | 0 | NA |
| 19 | 9790731  | 9781942  | -1 | NM_017703    | FBXL12      | 1 | 19 | 0 | NA | 0 | NA | 0 | NA | 0 | NA |
| 19 | 9799567  | 9801797  | 1  | NM_001048241 | UBL5        | 1 | 19 | 0 | NA | 0 | NA | 0 | NA | 0 | NA |
| 19 | 9799567  | 9801797  | 1  | NM_024292    | UBL5        | 1 | 19 | 0 | NA | 0 | NA | 0 | NA | 0 | NA |
| 19 | 9806996  | 9821358  | 1  | NM_006221    | PIN1        | 0 | NA | 0 | NA | 0 | NA | 0 | NA | 0 | NA |
| 19 | 9908070  | 9825393  | -1 | NM_058164    | OLFM2       | 0 | NA | 0 | NA | 0 | NA | 0 | NA | 0 | NA |
| 19 | 9982147  | 9931236  | -1 | NM_015719    | COL5A3      | 0 | NA | 0 | NA | 0 | NA | 0 | NA | 0 | NA |
| 19 | 9984924  | 9993954  | 1  | NM_015725    | RDH8        | 0 | NA | 0 | NA | 0 | NA | 0 | NA | 0 | NA |
| 19 | 10013031 | 10045811 | 1  | NM_001013640 | LOC388503   | 1 | 22 | 1 | 13 | 1 | 12 | 0 | NA | 0 | NA |
| 19 | 10057805 | 10064928 | 1  | NM_018381    | FLJ11286    | 0 | NA | 0 | NA | 0 | NA | 0 | NA | 0 | NA |
| 19 | 10074425 | 10064012 | -1 | NM_031917    | ANGPTL6     | 0 | NA | 0 | NA | 0 | NA | 0 | NA | 0 | NA |
| 19 | 10077964 | 10082975 | 1  | NM_020230    | PPAN        | 0 | NA | 0 | NA | 1 | 14 | 0 | NA | 0 | NA |
| 19 | 10078070 | 10086414 | 1  | NM_001040664 | PPAN-P2RY11 | 0 | NA | 0 | NA | 1 | 14 | 0 | NA | 0 | NA |
| 19 | 10083196 | 10087064 | 1  | NM_002566    | P2RY11      | 0 | 12 | 0 | NA | 1 | 14 | 0 | NA | 0 | NA |
| 19 | 10091599 | 10086689 | -1 | NM_003755    | EIF3G       | 1 | 12 | 0 | NA | 1 | 14 | 0 | NA | 0 | NA |
| 19 | 10166811 | 10105021 | -1 | NM_001379    | DNMT1       | 1 | 13 | 0 | NA | 0 | NA | 0 | NA | 0 | NA |
| 19 | 10202948 | 10193108 | -1 | NM_004230    | S1PR2       | 1 | 11 | 0 | NA | 0 | NA | 0 | NA | 0 | NA |
| 19 | 10223639 | 10231721 | 1  | NM_015956    | MRPL4       | 0 | NA | 0 | NA | 0 | NA | 0 | NA | 0 | NA |
| 19 | 10223639 | 10231721 | 1  | NM_146387    | MRPL4       | 0 | NA | 0 | NA | 0 | NA | 0 | NA | 0 | NA |
| 19 | 10223639 | 10231736 | 1  | NM_146388    | MRPL4       | 0 | NA | 0 | NA | 0 | NA | 0 | NA | 0 | NA |
| 19 | 10242516 | 10258291 | 1  | NM_000201    | ICAM1       | 0 | NA | 0 | NA | 0 | NA | 1 | 11 | 0 | NA |
| 19 | 10258649 | 10260198 | 1  | NM_001039132 | ICAM4       | 1 | 11 | 1 | 12 | 0 | NA | 0 | NA | 0 | NA |
| 19 | 10258649 | 10260198 | 1  | NM_001544    | ICAM4       | 1 | 11 | 1 | 12 | 0 | NA | 0 | NA | 0 | NA |
| 19 | 10258649 | 10260198 | 1  | NM_022377    | ICAM4       | 1 | 11 | 1 | 12 | 0 | NA | 0 | NA | 0 | NA |
| 19 | 10261654 | 10268453 | 1  | NM_003259    | ICAM5       | 1 | 11 | 1 | 12 | 0 | NA | 0 | NA | 0 | NA |
| 19 | 10281233 | 10276478 | -1 | NM_001103167 | GLP-1       | 0 | NA | 0 | NA | 0 | NA | 0 | NA | 0 | NA |
| 19 | 10287691 | 10281890 | -1 | NM_001031734 | FDX1L       | 0 | NA | 0 | NA | 0 | NA | 0 | NA | 0 | NA |
| 19 | 10305314 | 10287888 | -1 | NM_133452    | RAVER1      | 0 | NA | 0 | NA | 0 | NA | 0 | NA | 0 | NA |

|    |          |          |    |              |           |   |    |   |    |   |    |   |    |   |    |
|----|----------|----------|----|--------------|-----------|---|----|---|----|---|----|---|----|---|----|
| 19 | 10311345 | 10305451 | -1 | NM_002162    | ICAM3     | 0 | NA | 0 | NA | 0 | NA | 0 | NA | 0 | NA |
| 19 | 10352248 | 10322203 | -1 | NM_003331    | TYK2      | 0 | NA | 0 | NA | 0 | NA | 0 | NA | 0 | NA |
| 19 | 10375271 | 10362808 | -1 | NM_007065    | CDC37     | 0 | NA | 0 | NA | 0 | NA | 0 | NA | 0 | NA |
| 19 | 10392332 | 10441307 | 1  | NM_00111307  | PDE4A     | 1 | 12 | 0 | NA | 0 | NA | 0 | NA | 0 | NA |
| 19 | 10402520 | 10441307 | 1  | NM_00111308  | PDE4A     | 0 | NA | 0 | NA | 0 | NA | 0 | NA | 0 | NA |
| 19 | 10404110 | 10441307 | 1  | NM_00111309  | PDE4A     | 0 | NA | 0 | NA | 0 | NA | 0 | NA | 0 | NA |
| 19 | 10424632 | 10441307 | 1  | NM_006202    | PDE4A     | 0 | NA | 0 | NA | 0 | NA | 0 | NA | 0 | NA |
| 19 | 10474481 | 10457795 | -1 | NM_012289    | KEAP1     | 0 | NA | 0 | NA | 0 | NA | 0 | NA | 0 | NA |
| 19 | 10475054 | 10457795 | -1 | NM_203500    | KEAP1     | 0 | NA | 0 | NA | 0 | NA | 0 | NA | 0 | NA |
| 19 | 10489112 | 10484622 | -1 | NM_030760    | S1PR5     | 0 | NA | 0 | NA | 0 | NA | 0 | NA | 0 | NA |
| 19 | 10515646 | 10525094 | 1  | NM_032885    | ATG4D     | 0 | NA | 0 | NA | 0 | NA | 0 | NA | 0 | NA |
| 19 | 10537702 | 10524760 | -1 | NM_023008    | KRI1      | 0 | NA | 0 | NA | 1 | 14 | 0 | NA | 0 | NA |
| 19 | 10540631 | 10538137 | -1 | NM_001800    | CDKN2D    | 0 | NA | 0 | NA | 1 | 14 | 0 | NA | 0 | NA |
| 19 | 10540655 | 10538137 | -1 | NM_079421    | CDKN2D    | 0 | NA | 0 | NA | 1 | 14 | 0 | NA | 0 | NA |
| 19 | 10558991 | 10544346 | -1 | NM_005498    | AP1M2     | 1 | 17 | 0 | NA | 0 | NA | 0 | NA | 0 | NA |
| 19 | 10597228 | 10616232 | 1  | NM_020428    | SLC44A2   | 0 | NA | 0 | NA | 0 | NA | 0 | NA | 0 | NA |
| 19 | 10625987 | 10657443 | 1  | NM_004516    | ILF3      | 1 | 14 | 0 | NA | 0 | NA | 0 | NA | 0 | NA |
| 19 | 10625987 | 10657443 | 1  | NM_153464    | ILF3      | 1 | 14 | 0 | NA | 0 | NA | 0 | NA | 0 | NA |
| 19 | 10625987 | 10664095 | 1  | NM_012218    | ILF3      | 1 | 14 | 0 | NA | 0 | NA | 0 | NA | 0 | NA |
| 19 | 10673130 | 10685040 | 1  | NM_031209    | QTRT1     | 0 | NA | 0 | NA | 0 | NA | 1 | 15 | 0 | NA |
| 19 | 10689754 | 10803579 | 1  | NM_001005360 | DNM2      | 0 | NA | 0 | NA | 0 | NA | 1 | 14 | 0 | NA |
| 19 | 10689754 | 10803579 | 1  | NM_001005361 | DNM2      | 0 | NA | 0 | NA | 0 | NA | 1 | 14 | 0 | NA |
| 19 | 10689754 | 10803579 | 1  | NM_001005362 | DNM2      | 0 | NA | 0 | NA | 0 | NA | 1 | 14 | 0 | NA |
| 19 | 10689754 | 10803579 | 1  | NM_004945    | DNM2      | 0 | NA | 0 | NA | 0 | NA | 1 | 14 | 0 | NA |
| 19 | 10807983 | 10804113 | -1 | NM_006858    | TMED1     | 1 | 35 | 1 | 21 | 1 | 16 | 1 | 15 | 0 | NA |
| 19 | 10843252 | 10894448 | 1  | NM_199141    | CARM1     | 0 | NA | 0 | NA | 0 | NA | 1 | 12 | 0 | NA |
| 19 | 10900357 | 10894443 | -1 | NM_024029    | YIPF2     | 0 | NA | 0 | NA | 0 | NA | 0 | NA | 0 | NA |
| 19 | 10900423 | 10901916 | 1  | NM_138358    | C19orf52  | 0 | NA | 0 | NA | 0 | NA | 0 | NA | 0 | NA |
| 19 | 10932605 | 11033953 | 1  | NM_003072    | SMARCA4   | 0 | NA | 0 | NA | 0 | NA | 0 | NA | 0 | NA |
| 19 | 11081056 | 11105505 | 1  | NM_000527    | LDLR      | 1 | 11 | 0 | NA | 0 | NA | 0 | NA | 0 | NA |
| 19 | 11127484 | 11118830 | -1 | NM_182513    | SFC24     | 0 | NA | 0 | NA | 0 | NA | 0 | NA | 0 | NA |
| 19 | 11167496 | 11135945 | -1 | NM_015493    | KANK2     | 0 | NA | 0 | NA | 0 | NA | 0 | NA | 0 | NA |
| 19 | 11209816 | 11213619 | 1  | NM_018687    | LOC55908  | 0 | NA | 0 | NA | 0 | NA | 0 | NA | 0 | NA |
| 19 | 11234157 | 11170970 | -1 | NM_020812    | DOCK6     | 0 | NA | 0 | NA | 0 | NA | 0 | NA | 0 | NA |
| 19 | 11267823 | 11298672 | 1  | NM_012466    | TSPAN16   | 0 | NA | 0 | NA | 0 | NA | 0 | NA | 0 | NA |
| 19 | 11311321 | 11296092 | -1 | NM_004283    | RAB3D     | 1 | 13 | 0 | NA | 0 | NA | 0 | NA | 0 | NA |
| 19 | 11317722 | 11314457 | -1 | NM_198536    | TMEM205   | 0 | NA | 0 | NA | 0 | NA | 0 | NA | 0 | NA |
| 19 | 11318333 | 11327053 | 1  | NM_001080503 | LOC126075 | 1 | 13 | 0 | NA | 0 | NA | 0 | NA | 0 | NA |
| 19 | 11327106 | 11337372 | 1  | NM_022737    | LPPR2     | 0 | NA | 0 | NA | 0 | NA | 0 | NA | 0 | NA |
| 19 | 11346382 | 11348627 | 1  | NM_175871    | C19orf39  | 1 | 12 | 0 | NA | 0 | NA | 0 | NA | 0 | NA |
| 19 | 11356019 | 11349474 | -1 | NM_000121    | EPOR      | 1 | 12 | 0 | NA | 0 | NA | 0 | NA | 0 | NA |
| 19 | 11391004 | 11368000 | -1 | NM_001035223 | RGL3      | 0 | NA | 1 | 12 | 0 | NA | 0 | NA | 0 | NA |
| 19 | 11406980 | 11392271 | -1 | NM_145045    | CCDC151   | 0 | NA | 0 | NA | 0 | NA | 0 | NA | 0 | NA |
| 19 | 11407268 | 11422782 | 1  | NM_001001329 | PRKCSH    | 0 | NA | 0 | NA | 0 | NA | 0 | NA | 0 | NA |
| 19 | 11407268 | 11422782 | 1  | NM_002743    | PRKCSH    | 0 | NA | 0 | NA | 0 | NA | 0 | NA | 0 | NA |
| 19 | 11452803 | 11423142 | -1 | NM_001420    | ELAVL3    | 0 | NA | 0 | NA | 0 | NA | 0 | NA | 0 | NA |
| 19 | 11452803 | 11423142 | -1 | NM_032281    | ELAVL3    | 0 | NA | 0 | NA | 0 | NA | 0 | NA | 0 | NA |
| 19 | 11477654 | 11455245 | -1 | NM_138783    | ZNF653    | 0 | NA | 0 | NA | 0 | NA | 0 | NA | 0 | NA |
| 19 | 11500930 | 11477743 | -1 | NM_016581    | ECSIT     | 0 | NA | 0 | NA | 0 | NA | 0 | NA | 0 | NA |
| 19 | 11510578 | 11522138 | 1  | NM_001299    | CNN1      | 0 | NA | 0 | NA | 0 | NA | 0 | NA | 0 | NA |
| 19 | 11531051 | 11524857 | -1 | NM_032377    | ELOF1     | 0 | NA | 0 | NA | 0 | NA | 0 | NA | 0 | NA |
| 19 | 11549553 | 11546474 | -1 | NM_001611    | ACPS5     | 0 | NA | 0 | NA | 0 | NA | 0 | NA | 0 | NA |
| 19 | 11550592 | 11546474 | -1 | NM_001111034 | ACPS5     | 0 | NA | 0 | NA | 0 | NA | 0 | NA | 0 | NA |
| 19 | 11550801 | 11546474 | -1 | NM_001111035 | ACPS5     | 0 | NA | 0 | NA | 0 | NA | 0 | NA | 0 | NA |
| 19 | 11550801 | 11546474 | -1 | NM_001111036 | ACPS5     | 0 | NA | 0 | NA | 0 | NA | 0 | NA | 0 | NA |
| 19 | 11569326 | 11590974 | 1  | NM_145295    | ZNF627    | 0 | NA | 0 | NA | 0 | NA | 1 | 13 | 0 | NA |
| 19 | 11645807 | 11658384 | 1  | NM_001013691 | LOC401898 | 0 | NA | 0 | NA | 0 | NA | 0 | NA | 0 | NA |
| 19 | 11710760 | 11693079 | -1 | NM_001080493 | ZNF823    | 0 | NA | 0 | NA | 0 | NA | 0 | NA | 0 | NA |
| 19 | 11738906 | 11754301 | 1  | NM_152355    | ZNF441    | 0 | NA | 1 | 14 | 0 | NA | 0 | NA | 0 | NA |
| 19 | 11770390 | 11780306 | 1  | NM_152356    | ZNF491    | 1 | 14 | 0 | NA | 0 | NA | 0 | NA | 0 | NA |
| 19 | 11786106 | 11807016 | 1  | NM_152357    | ZNF440    | 1 | 16 | 0 | NA | 0 | NA | 0 | NA | 0 | NA |
| 19 | 11837843 | 11841306 | 1  | NM_152262    | ZNF439    | 1 | 18 | 0 | NA | 1 | 12 | 0 | NA | 0 | NA |
| 19 | 11859669 | 11886365 | 1  | NM_021915    | ZNF69     | 0 | NA | 1 | 14 | 0 | NA | 1 | 13 | 0 | NA |
| 19 | 11896899 | 11922578 | 1  | NM_144566    | ZNF700    | 0 | NA | 0 | NA | 0 | NA | 1 | 12 | 0 | NA |
| 19 | 11936868 | 11952198 | 1  | NM_001012753 | ZNF763    | 0 | NA | 0 | NA | 0 | NA | 0 | NA | 0 | NA |



|    |          |          |    |              |            |   |    |   |    |   |    |   |    |   |    |
|----|----------|----------|----|--------------|------------|---|----|---|----|---|----|---|----|---|----|
| 19 | 12007525 | 11986531 | -1 | NM_001080411 | ZNF433     | 1 | 11 | 0 | NA | 1 | 13 | 0 | NA | 0 | NA |
| 19 | 12028127 | 12015619 | -1 | NM_001080404 | LOC729747  | 0 | NA | 0 | NA | 0 | NA | 0 | NA | 0 | NA |
| 19 | 12112140 | 12103802 | -1 | NM_021143    | ZNF20      | 0 | NA | 0 | NA | 0 | NA | 1 | 13 | 0 | NA |
| 19 | 12128529 | 12116708 | -1 | NM_145233    | ZNF625     | 0 | NA | 0 | NA | 0 | NA | 1 | 12 | 0 | NA |
| 19 | 12134918 | 12161064 | 1  | NM_003437    | ZNF136     | 0 | NA | 0 | NA | 0 | NA | 1 | 12 | 0 | NA |
| 19 | 12266714 | 12243624 | -1 | NM_016264    | ZNF44      | 0 | NA | 0 | NA | 0 | NA | 0 | NA | 0 | NA |
| 19 | 12305502 | 12289303 | -1 | NM_145276    | ZNF563     | 1 | 14 | 0 | NA | 0 | NA | 0 | NA | 0 | NA |
| 19 | 12337475 | 12321184 | -1 | NM_030824    | ZNF442     | 0 | NA | 0 | NA | 0 | NA | 0 | NA | 0 | NA |
| 19 | 12373034 | 12361829 | -1 | NM_001080821 | ZNF799     | 1 | 11 | 0 | NA | 0 | NA | 0 | NA | 0 | NA |
| 19 | 12412819 | 12401519 | -1 | NM_005815    | ZNF443     | 0 | NA | 0 | NA | 0 | NA | 0 | NA | 0 | NA |
| 19 | 12456632 | 12432997 | -1 | NM_152601    | ZNF709     | 0 | NA | 0 | NA | 0 | NA | 0 | NA | 0 | NA |
| 19 | 12523317 | 12497539 | -1 | NM_144976    | ZNF564     | 0 | NA | 0 | NA | 0 | NA | 0 | NA | 0 | NA |
| 19 | 12582595 | 12547644 | -1 | NM_020714    | ZNF490     | 0 | NA | 0 | NA | 0 | NA | 0 | NA | 0 | NA |
| 19 | 12582752 | 12601676 | 1  | NM_153358    | ZNF791     | 0 | NA | 0 | NA | 0 | NA | 0 | NA | 0 | NA |
| 19 | 12638591 | 12618321 | -1 | NM_000528    | MAN2B1     | 1 | 11 | 0 | NA | 0 | NA | 0 | NA | 0 | NA |
| 19 | 12638627 | 12647646 | 1  | NM_001099737 | MORG1      | 1 | 11 | 0 | NA | 0 | NA | 0 | NA | 0 | NA |
| 19 | 12641449 | 12639886 | -1 | NM_016145    | C19orf56   | 1 | 11 | 0 | NA | 0 | NA | 0 | NA | 0 | NA |
| 19 | 12641516 | 12647646 | 1  | NM_032332    | MORG1      | 1 | 11 | 0 | NA | 0 | NA | 0 | NA | 0 | NA |
| 19 | 12653677 | 12647533 | -1 | NM_001930    | DHPS       | 0 | NA | 0 | NA | 0 | NA | 1 | 16 | 0 | NA |
| 19 | 12653677 | 12647533 | -1 | NM_013406    | DHPS       | 0 | NA | 0 | NA | 0 | NA | 1 | 16 | 0 | NA |
| 19 | 12653677 | 12647533 | -1 | NM_013407    | DHPS       | 0 | NA | 0 | NA | 0 | NA | 1 | 16 | 0 | NA |
| 19 | 12668455 | 12660729 | -1 | NM_032301    | FBXW9      | 0 | NA | 0 | NA | 0 | NA | 0 | NA | 0 | NA |
| 19 | 12694078 | 12671014 | -1 | NM_013433    | TNPO2      | 0 | NA | 0 | NA | 0 | NA | 1 | 13 | 0 | NA |
| 19 | 12706529 | 12702453 | -1 | NM_024038    | C19orf43   | 0 | NA | 0 | NA | 0 | NA | 0 | NA | 0 | NA |
| 19 | 12709305 | 12720137 | 1  | NM_004317    | ASNA1      | 0 | NA | 0 | NA | 0 | NA | 0 | NA | 0 | NA |
| 19 | 12724406 | 12730271 | 1  | NM_017682    | BEST2      | 0 | NA | 0 | NA | 0 | NA | 1 | 12 | 0 | NA |
| 19 | 12747434 | 12734816 | -1 | NM_001100176 | HOOK2      | 0 | NA | 0 | NA | 0 | NA | 1 | 14 | 0 | NA |
| 19 | 12747434 | 12734816 | -1 | NM_013312    | HOOK2      | 0 | NA | 0 | NA | 0 | NA | 1 | 14 | 0 | NA |
| 19 | 12763309 | 12765125 | 1  | NM_002229    | JUNB       | 0 | NA | 0 | NA | 1 | 12 | 0 | NA | 0 | NA |
| 19 | 12773694 | 12768633 | -1 | NM_005809    | PRDX2      | 1 | 15 | 0 | NA | 0 | NA | 0 | NA | 0 | NA |
| 19 | 12773694 | 12772426 | -1 | NM_181738    | PRDX2      | 1 | 15 | 0 | NA | 0 | NA | 0 | NA | 0 | NA |
| 19 | 12778427 | 12785462 | 1  | NM_006397    | RNASEH2A   | 1 | 15 | 0 | NA | 0 | NA | 0 | NA | 0 | NA |
| 19 | 12802207 | 12797296 | -1 | NM_001080997 | RTBDN      | 1 | 11 | 1 | 13 | 0 | NA | 0 | NA | 0 | NA |
| 19 | 12807230 | 12797295 | -1 | NM_031429    | RTBDN      | 1 | 11 | 1 | 15 | 0 | NA | 0 | NA | 0 | NA |
| 19 | 12810347 | 12846765 | 1  | NM_014975    | MAST1      | 1 | 11 | 1 | 15 | 0 | NA | 0 | NA | 0 | NA |
| 19 | 12853335 | 12847024 | -1 | NM_001375    | DNASE2     | 1 | 11 | 1 | 13 | 0 | NA | 1 | 18 | 0 | NA |
| 19 | 12859017 | 12856236 | -1 | NM_006563    | KLF1       | 1 | 11 | 1 | 13 | 0 | NA | 1 | 18 | 0 | NA |
| 19 | 12862973 | 12871783 | 1  | NM_000159    | GCDH       | 1 | 11 | 1 | 13 | 0 | NA | 1 | 18 | 0 | NA |
| 19 | 12862973 | 12871783 | 1  | NM_013976    | GCDH       | 1 | 11 | 1 | 13 | 0 | NA | 1 | 18 | 0 | NA |
| 19 | 12891086 | 12870893 | -1 | NM_001105578 | SYCE2      | 0 | NA | 0 | NA | 0 | NA | 1 | 15 | 0 | NA |
| 19 | 12905558 | 12894283 | -1 | NM_004461    | FARSA      | 1 | 11 | 0 | NA | 0 | NA | 0 | NA | 0 | NA |
| 19 | 12910422 | 12916303 | 1  | NM_004343    | CALR       | 1 | 11 | 0 | NA | 0 | NA | 1 | 23 | 0 | NA |
| 19 | 12917653 | 12925455 | 1  | NM_005053    | RAD23A     | 1 | 11 | 0 | NA | 0 | NA | 1 | 23 | 0 | NA |
| 19 | 12929050 | 12925971 | -1 | NM_052850    | GADD45GIP1 | 0 | NA | 0 | NA | 0 | NA | 0 | NA | 0 | NA |
| 19 | 12941431 | 12946567 | 1  | NM_152654    | DAND5      | 0 | NA | 0 | NA | 0 | NA | 0 | NA | 0 | NA |
| 19 | 12967583 | 13070610 | 1  | NM_002501    | NFIX       | 0 | NA | 0 | NA | 1 | 14 | 0 | NA | 0 | NA |
| 19 | 13074681 | 13070846 | -1 | NM_005583    | LYL1       | 0 | NA | 0 | NA | 0 | NA | 0 | NA | 0 | NA |
| 19 | 13088332 | 13076714 | -1 | NM_017722    | TRMT1      | 1 | 11 | 0 | NA | 0 | NA | 0 | NA | 0 | NA |
| 19 | 13090108 | 13112959 | 1  | NM_052876    | BTBD14B    | 1 | 11 | 0 | NA | 0 | NA | 0 | NA | 0 | NA |
| 19 | 13121987 | 13116223 | -1 | NM_003765    | STX10      | 1 | 15 | 0 | NA | 0 | NA | 0 | NA | 0 | NA |
| 19 | 13122281 | 13126718 | 1  | NM_004907    | IER2       | 1 | 15 | 0 | NA | 0 | NA | 0 | NA | 0 | NA |
| 19 | 13478274 | 13178256 | -1 | NM_000068    | CACNA1A    | 0 | NA | 0 | NA | 0 | NA | 0 | NA | 0 | NA |
| 19 | 13478274 | 13178256 | -1 | NM_001127221 | CACNA1A    | 0 | NA | 0 | NA | 0 | NA | 0 | NA | 0 | NA |
| 19 | 13478274 | 13178256 | -1 | NM_001127222 | CACNA1A    | 0 | NA | 0 | NA | 0 | NA | 0 | NA | 0 | NA |
| 19 | 13478274 | 13178256 | -1 | NM_023035    | CACNA1A    | 0 | NA | 0 | NA | 0 | NA | 0 | NA | 0 | NA |
| 19 | 13719752 | 13735106 | 1  | NM_030818    | CCDC130    | 1 | 16 | 1 | 13 | 0 | NA | 1 | 11 | 0 | NA |
| 19 | 13736336 | 13746096 | 1  | NM_001031727 | MGC3207    | 0 | NA | 0 | NA | 0 | NA | 0 | NA | 0 | NA |
| 19 | 13736336 | 13746096 | 1  | NM_032285    | MGC3207    | 0 | NA | 0 | NA | 0 | NA | 0 | NA | 0 | NA |
| 19 | 13746256 | 13750586 | 1  | NM_014047    | C19orf53   | 1 | 15 | 0 | NA | 0 | NA | 0 | NA | 0 | NA |
| 19 | 13767273 | 13804044 | 1  | NM_023072    | ZSWIM4     | 0 | NA | 0 | NA | 0 | NA | 0 | NA | 0 | NA |
| 19 | 13848949 | 13852571 | 1  | NM_001098622 | NANOS3     | 0 | NA | 0 | NA | 0 | NA | 0 | NA | 0 | NA |
| 19 | 13877909 | 13854167 | -1 | NM_024323    | C19orf57   | 1 | 12 | 0 | NA | 0 | NA | 0 | NA | 0 | NA |
| 19 | 13878051 | 13902692 | 1  | NM_017721    | CC2D1A     | 1 | 12 | 0 | NA | 0 | NA | 0 | NA | 0 | NA |
| 19 | 13910289 | 13904165 | -1 | NM_024825    | PODNL1     | 0 | NA | 0 | NA | 0 | NA | 0 | NA | 0 | NA |
| 19 | 13924318 | 13933256 | 1  | NM_138353    | LOC90379   | 0 | NA | 0 | NA | 0 | NA | 0 | NA | 0 | NA |

|    |          |          |    |              |          |   |    |   |    |   |    |   |    |   |    |
|----|----------|----------|----|--------------|----------|---|----|---|----|---|----|---|----|---|----|
| 19 | 13978097 | 13933351 | -1 | NM_002918    | RFX1     | 0 | NA | 0 | NA | 0 | NA | 0 | NA | 0 | NA |
| 19 | 14000016 | 14002783 | 1  | NM_080864    | RLN3     | 0 | NA | 0 | NA | 0 | NA | 0 | NA | 0 | NA |
| 19 | 14003261 | 14025026 | 1  | NM_004843    | IL27RA   | 0 | NA | 0 | NA | 0 | NA | 0 | NA | 0 | NA |
| 19 | 14062232 | 14060228 | -1 | NM_138352    | SAMD1    | 1 | 13 | 0 | NA | 0 | NA | 0 | NA | 0 | NA |
| 19 | 14085992 | 14063506 | -1 | NM_207518    | PRKACA   | 1 | 12 | 0 | NA | 0 | NA | 1 | 11 | 0 | NA |
| 19 | 14089559 | 14063506 | -1 | NM_002730    | PRKACA   | 1 | 12 | 0 | NA | 0 | NA | 1 | 11 | 0 | NA |
| 19 | 14108440 | 14091320 | -1 | NM_018154    | ASF1B    | 0 | NA | 0 | NA | 0 | NA | 0 | NA | 0 | NA |
| 19 | 14177997 | 14119548 | -1 | NM_001008701 | LPHN1    | 1 | 11 | 0 | NA | 1 | 12 | 0 | NA | 0 | NA |
| 19 | 14177997 | 14119548 | -1 | NM_014921    | LPHN1    | 1 | 11 | 0 | NA | 1 | 12 | 0 | NA | 0 | NA |
| 19 | 14353212 | 14380535 | 1  | NM_001025160 | CD97     | 0 | NA | 0 | NA | 0 | NA | 0 | NA | 0 | NA |
| 19 | 14353212 | 14380535 | 1  | NM_001784    | CD97     | 0 | NA | 0 | NA | 0 | NA | 0 | NA | 0 | NA |
| 19 | 14353212 | 14380535 | 1  | NM_078481    | CD97     | 0 | NA | 0 | NA | 0 | NA | 0 | NA | 0 | NA |
| 19 | 14391171 | 14380630 | -1 | NM_005804    | DDX39    | 0 | NA | 0 | NA | 0 | NA | 0 | NA | 0 | NA |
| 19 | 14405165 | 14443679 | 1  | NM_002741    | PKN1     | 0 | NA | 0 | NA | 0 | NA | 0 | NA | 0 | NA |
| 19 | 14412085 | 14443679 | 1  | NM_213560    | PKN1     | 0 | NA | 0 | NA | 0 | NA | 0 | NA | 0 | NA |
| 19 | 14447174 | 14444277 | -1 | NM_000955    | PTGER1   | 0 | NA | 0 | NA | 0 | NA | 0 | NA | 0 | NA |
| 19 | 14467944 | 14449570 | -1 | NM_005716    | GIPC1    | 1 | 18 | 0 | NA | 0 | NA | 0 | NA | 0 | NA |
| 19 | 14467944 | 14449570 | -1 | NM_202467    | GIPC1    | 1 | 18 | 0 | NA | 0 | NA | 0 | NA | 0 | NA |
| 19 | 14467944 | 14449570 | -1 | NM_202468    | GIPC1    | 1 | 18 | 0 | NA | 0 | NA | 0 | NA | 0 | NA |
| 19 | 14467944 | 14449570 | -1 | NM_202469    | GIPC1    | 1 | 18 | 0 | NA | 0 | NA | 0 | NA | 0 | NA |
| 19 | 14467944 | 14449570 | -1 | NM_202470    | GIPC1    | 1 | 18 | 0 | NA | 0 | NA | 0 | NA | 0 | NA |
| 19 | 14467944 | 14449570 | -1 | NM_202494    | GIPC1    | 1 | 18 | 0 | NA | 0 | NA | 0 | NA | 0 | NA |
| 19 | 14490201 | 14486581 | -1 | NM_006145    | DNAJB1   | 1 | 17 | 0 | NA | 0 | NA | 0 | NA | 0 | NA |
| 19 | 14501381 | 14537792 | 1  | NM_138501    | GPSN2    | 1 | 14 | 0 | NA | 0 | NA | 0 | NA | 0 | NA |
| 19 | 14543886 | 14537889 | -1 | NM_004146    | NDUFB7   | 1 | 13 | 0 | NA | 0 | NA | 0 | NA | 0 | NA |
| 19 | 14554895 | 14582951 | 1  | NM_207390    | FLJ45910 | 0 | NA | 0 | NA | 0 | NA | 0 | NA | 0 | NA |
| 19 | 14646730 | 14591050 | -1 | NM_032571    | EMR3     | 0 | NA | 1 | 13 | 0 | NA | 0 | NA | 0 | NA |
| 19 | 14661869 | 14692772 | 1  | NM_032433    | ZNF333   | 0 | NA | 0 | NA | 0 | NA | 0 | NA | 0 | NA |
| 19 | 14750353 | 14704204 | -1 | NM_013447    | EMR2     | 0 | NA | 0 | NA | 0 | NA | 0 | NA | 0 | NA |
| 19 | 14750353 | 14704204 | -1 | NM_152916    | EMR2     | 0 | NA | 0 | NA | 0 | NA | 0 | NA | 0 | NA |
| 19 | 14750353 | 14704204 | -1 | NM_152917    | EMR2     | 0 | NA | 0 | NA | 0 | NA | 0 | NA | 0 | NA |
| 19 | 14750353 | 14704204 | -1 | NM_152918    | EMR2     | 0 | NA | 0 | NA | 0 | NA | 0 | NA | 0 | NA |
| 19 | 14750353 | 14704204 | -1 | NM_152919    | EMR2     | 0 | NA | 0 | NA | 0 | NA | 0 | NA | 0 | NA |
| 19 | 14750353 | 14704204 | -1 | NM_152920    | EMR2     | 0 | NA | 0 | NA | 0 | NA | 0 | NA | 0 | NA |
| 19 | 14750353 | 14704204 | -1 | NM_152921    | EMR2     | 0 | NA | 0 | NA | 0 | NA | 0 | NA | 0 | NA |
| 19 | 14771948 | 14770985 | -1 | NM_198944    | OR7C1    | 0 | NA | 0 | NA | 0 | NA | 0 | NA | 0 | NA |
| 19 | 14800276 | 14798138 | -1 | NM_017506    | ORTA5    | 0 | NA | 0 | NA | 0 | NA | 0 | NA | 0 | NA |
| 19 | 14813689 | 14812759 | -1 | NM_001005190 | ORTA10   | 0 | NA | 0 | NA | 0 | NA | 0 | NA | 0 | NA |
| 19 | 14853167 | 14852237 | -1 | NM_030901    | ORTA17   | 0 | NA | 0 | NA | 0 | NA | 0 | NA | 0 | NA |
| 19 | 14913300 | 14914260 | 1  | NM_012377    | OR7C2    | 0 | NA | 0 | NA | 0 | NA | 0 | NA | 0 | NA |
| 19 | 14944730 | 14921990 | -1 | NM_005071    | SLC1A6   | 0 | NA | 0 | NA | 0 | NA | 0 | NA | 0 | NA |
| 19 | 14982555 | 14995081 | 1  | NM_173482    | CCDC105  | 0 | NA | 0 | NA | 0 | NA | 0 | NA | 0 | NA |
| 19 | 15024014 | 15027900 | 1  | NM_012114    | CASP14   | 0 | NA | 0 | NA | 0 | NA | 0 | NA | 0 | NA |
| 19 | 15058876 | 15059944 | 1  | NM_001004713 | OR111    | 0 | NA | 0 | NA | 0 | NA | 0 | NA | 0 | NA |
| 19 | 15079213 | 15086789 | 1  | NM_033025    | SYDE1    | 0 | NA | 0 | NA | 0 | NA | 0 | NA | 0 | NA |
| 19 | 15097577 | 15086784 | -1 | NM_006844    | ILVBL    | 0 | NA | 0 | NA | 0 | NA | 1 | 15 | 0 | NA |
| 19 | 15172792 | 15131443 | -1 | NM_000435    | NOTCH3   | 0 | NA | 1 | 13 | 0 | NA | 0 | NA | 0 | NA |
| 19 | 15204231 | 15198729 | -1 | NM_024794    | ABHD9    | 0 | NA | 0 | NA | 0 | NA | 0 | NA | 0 | NA |
| 19 | 15252262 | 15209300 | -1 | NM_058243    | BRD4     | 0 | NA | 0 | NA | 0 | NA | 0 | NA | 0 | NA |
| 19 | 15252262 | 15218846 | -1 | NM_014299    | BRD4     | 0 | NA | 0 | NA | 0 | NA | 0 | NA | 0 | NA |
| 19 | 15351603 | 15325334 | -1 | NM_005858    | AKAP8    | 0 | NA | 0 | NA | 0 | NA | 0 | NA | 0 | NA |
| 19 | 15390833 | 15351858 | -1 | NM_014371    | AKAP8L   | 0 | NA | 0 | NA | 0 | NA | 0 | NA | 0 | NA |
| 19 | 15421762 | 15393317 | -1 | NM_021241    | WIZ      | 0 | NA | 1 | 16 | 0 | NA | 0 | NA | 0 | NA |
| 19 | 15436382 | 15423437 | -1 | NM_022904    | FLJ21438 | 0 | NA | 1 | 12 | 0 | NA | 0 | NA | 0 | NA |
| 19 | 15451315 | 15440456 | -1 | NM_052890    | PGLYRP2  | 0 | NA | 1 | 12 | 0 | NA | 0 | NA | 0 | NA |
| 19 | 15480335 | 15524128 | 1  | NM_173483    | CYP4F22  | 0 | NA | 1 | 12 | 0 | NA | 0 | NA | 0 | NA |
| 19 | 15587028 | 15601447 | 1  | NM_007253    | CYP4F8   | 0 | NA | 0 | NA | 0 | NA | 0 | NA | 0 | NA |
| 19 | 15612706 | 15632570 | 1  | NM_000896    | CYP4F3   | 0 | NA | 0 | NA | 0 | NA | 0 | NA | 0 | NA |
| 19 | 15644885 | 15668984 | 1  | NM_023944    | CYP4F12  | 0 | NA | 0 | NA | 0 | NA | 0 | NA | 0 | NA |
| 19 | 15699833 | 15700862 | 1  | NM_013939    | OR10H2   | 0 | NA | 0 | NA | 0 | NA | 0 | NA | 0 | NA |
| 19 | 15713202 | 15714153 | 1  | NM_013938    | OR10H3   | 0 | NA | 0 | NA | 0 | NA | 0 | NA | 0 | NA |
| 19 | 15785858 | 15766806 | 1  | NM_001004466 | OR10H5   | 0 | NA | 0 | NA | 0 | NA | 0 | NA | 0 | NA |
| 19 | 15779936 | 15778816 | -1 | NM_013940    | OR10H1   | 0 | NA | 0 | NA | 0 | NA | 0 | NA | 0 | NA |
| 19 | 15869884 | 15849833 | -1 | NM_001082    | CYP4F2   | 0 | NA | 0 | NA | 0 | NA | 0 | NA | 0 | NA |
| 19 | 15906326 | 15884180 | -1 | NM_021187    | CYP4F11  | 0 | NA | 0 | NA | 0 | NA | 0 | NA | 0 | NA |

|    |          |          |    |              |           |   |    |   |    |   |    |   |    |   |    |
|----|----------|----------|----|--------------|-----------|---|----|---|----|---|----|---|----|---|----|
| 19 | 15920817 | 15921768 | 1  | NM_001004465 | OR10H4    | 0 | NA | 0 | NA | 0 | NA | 0 | NA | 0 | NA |
| 19 | 16048324 | 16074408 | 1  | NM_003290    | TPM4      | 0 | NA | 0 | NA | 1 | 14 | 0 | NA | 0 | NA |
| 19 | 16083489 | 16105445 | 1  | NM_005370    | RAB8A     | 0 | NA | 0 | NA | 0 | NA | 0 | NA | 0 | NA |
| 19 | 16105837 | 16130377 | 1  | NM_032855    | HSH2D     | 0 | NA | 0 | NA | 0 | NA | 0 | NA | 0 | NA |
| 19 | 16145286 | 16133178 | -1 | NM_054113    | CIB3      | 0 | NA | 0 | NA | 0 | NA | 0 | NA | 0 | NA |
| 19 | 16157234 | 16163857 | 1  | NM_014077    | FAM32A    | 0 | NA | 0 | NA | 0 | NA | 0 | NA | 0 | NA |
| 19 | 16169730 | 16207151 | 1  | NM_032493    | AP1M1     | 1 | 11 | 0 | NA | 0 | NA | 0 | NA | 0 | NA |
| 19 | 16296650 | 16299339 | 1  | NM_016270    | KLF2      | 0 | NA | 0 | NA | 0 | NA | 0 | NA | 0 | NA |
| 19 | 16443762 | 16333407 | -1 | NM_021235    | EPS15L1   | 0 | NA | 0 | NA | 0 | NA | 0 | NA | 0 | NA |
| 19 | 16468003 | 16450874 | -1 | NM_145046    | CALR3     | 0 | NA | 0 | NA | 0 | NA | 0 | NA | 0 | NA |
| 19 | 16468204 | 16493163 | 1  | NM_032207    | C19orf44  | 0 | NA | 0 | NA | 0 | NA | 0 | NA | 0 | NA |
| 19 | 16514263 | 16489699 | -1 | NM_006387    | CHERP     | 0 | NA | 0 | NA | 0 | NA | 0 | NA | 0 | NA |
| 19 | 16544193 | 16521647 | -1 | NM_024881    | SLC35E1   | 0 | NA | 0 | NA | 0 | NA | 0 | NA | 0 | NA |
| 19 | 16600015 | 16546717 | -1 | NM_004831    | MED26     | 0 | NA | 0 | NA | 0 | NA | 0 | NA | 0 | NA |
| 19 | 16631968 | 16617958 | -1 | NM_024104    | C19orf42  | 1 | 15 | 0 | NA | 0 | NA | 0 | NA | 0 | NA |
| 19 | 16632937 | 16660816 | 1  | NM_024074    | TMEM38A   | 1 | 15 | 0 | NA | 0 | NA | 0 | NA | 0 | NA |
| 19 | 16691786 | 16789774 | 1  | NM_001007525 | NWD1      | 0 | NA | 1 | 15 | 0 | NA | 0 | NA | 0 | NA |
| 19 | 16801217 | 16852164 | 1  | NM_015260    | SIN3B     | 0 | NA | 0 | NA | 0 | NA | 0 | NA | 0 | NA |
| 19 | 16860825 | 16863830 | 1  | NM_003950    | F2RL3     | 1 | 11 | 1 | 12 | 0 | NA | 1 | 31 | 0 | NA |
| 19 | 16998625 | 16864761 | -1 | NM_015692    | CPAMD8    | 0 | NA | 0 | NA | 0 | NA | 0 | NA | 0 | NA |
| 19 | 17047343 | 17021570 | -1 | NM_001011699 | NY-SAR-48 | 1 | 12 | 0 | NA | 0 | NA | 1 | 13 | 0 | NA |
| 19 | 17047343 | 17021570 | -1 | NM_033417    | NY-SAR-48 | 1 | 12 | 0 | NA | 0 | NA | 1 | 13 | 0 | NA |
| 19 | 17073527 | 17185104 | 1  | NM_004145    | MYO9B     | 1 | 16 | 0 | NA | 1 | 13 | 1 | 14 | 0 | NA |
| 19 | 17187154 | 17191638 | 1  | NM_018467    | USE1      | 0 | NA | 0 | NA | 0 | NA | 0 | NA | 0 | NA |
| 19 | 17198054 | 17201028 | 1  | NM_024578    | OCEL1     | 0 | NA | 0 | NA | 0 | NA | 0 | NA | 0 | NA |
| 19 | 17217151 | 17203693 | -1 | NM_005234    | NR2F6     | 0 | NA | 0 | NA | 0 | NA | 0 | NA | 0 | NA |
| 19 | 17236544 | 17221848 | -1 | NM_031941    | USHBP1    | 0 | NA | 1 | 16 | 0 | NA | 0 | NA | 0 | NA |
| 19 | 17239231 | 17251162 | 1  | NM_001033549 | C19orf62  | 0 | NA | 1 | 16 | 0 | NA | 0 | NA | 0 | NA |
| 19 | 17239231 | 17251162 | 1  | NM_014173    | C19orf62  | 0 | NA | 1 | 16 | 0 | NA | 0 | NA | 0 | NA |
| 19 | 17253453 | 17259454 | 1  | NM_152363    | ANKLE1    | 0 | NA | 0 | NA | 0 | NA | 1 | 12 | 0 | NA |
| 19 | 17275282 | 17263939 | -1 | NM_024527    | ABHD8     | 0 | NA | 0 | NA | 0 | NA | 0 | NA | 0 | NA |
| 19 | 17277476 | 17278652 | 1  | NM_023937    | MRPL34    | 0 | NA | 0 | NA | 0 | NA | 0 | NA | 0 | NA |
| 19 | 17281353 | 17292099 | 1  | NM_024050    | DDA1      | 0 | NA | 0 | NA | 0 | NA | 0 | NA | 0 | NA |
| 19 | 17306636 | 17295033 | -1 | NM_020959    | TMEM16H   | 1 | 16 | 0 | NA | 0 | NA | 0 | NA | 0 | NA |
| 19 | 17309363 | 17313825 | 1  | NM_133644    | GTPBP3    | 1 | 13 | 0 | NA | 0 | NA | 0 | NA | 0 | NA |
| 19 | 17309378 | 17314530 | 1  | NM_032620    | GTPBP3    | 1 | 13 | 0 | NA | 0 | NA | 0 | NA | 0 | NA |
| 19 | 17349137 | 17323263 | -1 | NM_031310    | PLVAP     | 0 | NA | 0 | NA | 0 | NA | 0 | NA | 0 | NA |
| 19 | 17377384 | 17374754 | -1 | NM_004335    | BST2      | 0 | NA | 0 | NA | 1 | 13 | 0 | NA | 0 | NA |
| 19 | 17391911 | 17397140 | 1  | NM_138401    | FAM125A   | 1 | 19 | 0 | NA | 0 | NA | 0 | NA | 0 | NA |
| 19 | 17432725 | 17427233 | -1 | NM_138454    | NXNL1     | 0 | NA | 0 | NA | 0 | NA | 0 | NA | 0 | NA |
| 19 | 17442299 | 17477977 | 1  | NM_196580    | SLC27A1   | 1 | 11 | 0 | NA | 0 | NA | 0 | NA | 0 | NA |
| 19 | 17483431 | 17493097 | 1  | NM_012088    | PGLS      | 1 | 13 | 0 | NA | 0 | NA | 0 | NA | 0 | NA |
| 19 | 17495109 | 17523835 | 1  | NM_001098524 | FAM129C   | 0 | NA | 1 | 13 | 0 | NA | 0 | NA | 0 | NA |
| 19 | 17495109 | 17525648 | 1  | NM_173544    | FAM129C   | 0 | NA | 1 | 13 | 0 | NA | 0 | NA | 0 | NA |
| 19 | 17527510 | 17554965 | 1  | NM_024656    | GLT25D1   | 0 | NA | 0 | NA | 0 | NA | 0 | NA | 0 | NA |
| 19 | 17660401 | 17573136 | -1 | NM_001080421 | UNC13A    | 0 | NA | 0 | NA | 0 | NA | 0 | NA | 0 | NA |
| 19 | 17691302 | 17706324 | 1  | NM_018174    | MAP1S     | 0 | NA | 0 | NA | 0 | NA | 0 | NA | 0 | NA |
| 19 | 17723335 | 17760365 | 1  | NM_015122    | FCHO1     | 0 | NA | 0 | NA | 0 | NA | 0 | NA | 0 | NA |
| 19 | 17766918 | 17785385 | 1  | NM_014256    | B3GNT3    | 0 | NA | 0 | NA | 0 | NA | 0 | NA | 0 | NA |
| 19 | 17793320 | 17788321 | -1 | NM_005543    | INSL3     | 0 | NA | 1 | 12 | 0 | NA | 0 | NA | 0 | NA |
| 19 | 17819800 | 17797960 | -1 | NM_000215    | JAK3      | 0 | NA | 0 | NA | 0 | NA | 0 | NA | 0 | NA |
| 19 | 17831730 | 17835124 | 1  | NM_000980    | RPL18A    | 0 | NA | 0 | NA | 0 | NA | 1 | 12 | 0 | NA |
| 19 | 17843781 | 17866983 | 1  | NM_000453    | SLC5A5    | 0 | NA | 0 | NA | 0 | NA | 1 | 12 | 0 | NA |
| 19 | 17906904 | 17915783 | 1  | NM_138442    | CCDC124   | 0 | NA | 0 | NA | 1 | 13 | 0 | NA | 0 | NA |
| 19 | 17923110 | 17970930 | 1  | NM_002248    | KCNN1     | 0 | NA | 1 | 12 | 0 | NA | 0 | NA | 0 | NA |
| 19 | 17972943 | 17985911 | 1  | NM_001025604 | ARRDC2    | 1 | 15 | 0 | NA | 0 | NA | 0 | NA | 0 | NA |
| 19 | 17979976 | 17985911 | 1  | NM_015683    | ARRDC2    | 1 | 15 | 0 | NA | 0 | NA | 0 | NA | 0 | NA |
| 19 | 18058697 | 18031370 | -1 | NM_005535    | IL12RB1   | 0 | NA | 0 | NA | 0 | NA | 0 | NA | 0 | NA |
| 19 | 18058697 | 18042371 | -1 | NM_153701    | IL12RB1   | 0 | NA | 0 | NA | 0 | NA | 0 | NA | 0 | NA |
| 19 | 18069602 | 18123499 | 1  | NM_015016    | MAST3     | 0 | NA | 0 | NA | 0 | NA | 0 | NA | 0 | NA |
| 19 | 18125015 | 18142343 | 1  | NM_005027    | PIK3R2    | 0 | NA | 0 | NA | 1 | 18 | 0 | NA | 0 | NA |
| 19 | 18145578 | 18149927 | 1  | NM_006332    | IFI30     | 0 | NA | 0 | NA | 0 | NA | 0 | NA | 0 | NA |
| 19 | 18165039 | 18168550 | 1  | NM_032683    | FKSG24    | 0 | NA | 0 | NA | 0 | NA | 0 | NA | 0 | NA |
| 19 | 18175839 | 18168610 | -1 | NM_002866    | RAB3A     | 1 | 17 | 0 | NA | 0 | NA | 0 | NA | 0 | NA |
| 19 | 18196303 | 18179770 | -1 | NM_001098819 | PDE4C     | 0 | NA | 0 | NA | 0 | NA | 0 | NA | 0 | NA |

|    |          |          |    |              |          |   |    |   |    |   |    |   |    |   |    |
|----|----------|----------|----|--------------|----------|---|----|---|----|---|----|---|----|---|----|
| 19 | 18198248 | 18179770 | -1 | NM_001098818 | PDE4C    | 0 | NA | 0 | NA | 0 | NA | 0 | NA | 0 | NA |
| 19 | 18220010 | 18179770 | -1 | NM_000923    | PDE4C    | 0 | NA | 0 | NA | 0 | NA | 1 | 11 | 0 | NA |
| 19 | 18246235 | 18228907 | -1 | NM_025249    | KIAA1683 | 1 | 18 | 0 | NA | 1 | 12 | 0 | NA | 0 | NA |
| 19 | 18253432 | 18251562 | -1 | NM_005354    | JUND     | 1 | 18 | 0 | NA | 1 | 12 | 0 | NA | 0 | NA |
| 19 | 18294958 | 18278716 | -1 | NM_012321    | LSM4     | 1 | 13 | 0 | NA | 0 | NA | 0 | NA | 0 | NA |
| 19 | 18312407 | 18341763 | 1  | NM_017712    | PGPEP1   | 0 | NA | 0 | NA | 0 | NA | 0 | NA | 0 | NA |
| 19 | 18357967 | 18360986 | 1  | NM_004864    | GDF15    | 1 | 13 | 0 | NA | 1 | 14 | 0 | NA | 0 | NA |
| 19 | 18369415 | 18362953 | -1 | NM_145256    | LRRC25   | 0 | NA | 0 | NA | 0 | NA | 0 | NA | 0 | NA |
| 19 | 18391135 | 18406459 | 1  | NM_001009998 | SSBP4    | 1 | 11 | 0 | NA | 0 | NA | 0 | NA | 0 | NA |
| 19 | 18391135 | 18406459 | 1  | NM_032627    | SSBP4    | 1 | 11 | 0 | NA | 0 | NA | 0 | NA | 0 | NA |
| 19 | 18409943 | 18406624 | -1 | NM_016368    | ISYNA1   | 0 | NA | 0 | NA | 0 | NA | 1 | 13 | 0 | NA |
| 19 | 18493918 | 18414472 | -1 | NM_006532    | ELL      | 0 | NA | 0 | NA | 0 | NA | 0 | NA | 0 | NA |
| 19 | 18515383 | 18503567 | -1 | NM_012181    | FKBP8    | 1 | 11 | 0 | NA | 0 | NA | 0 | NA | 0 | NA |
| 19 | 18529603 | 18541186 | 1  | NM_024069    | C19orf50 | 0 | NA | 0 | NA | 1 | 13 | 0 | NA | 0 | NA |
| 19 | 18543613 | 18549270 | 1  | NM_001033930 | UBA52    | 0 | NA | 0 | NA | 0 | NA | 0 | NA | 0 | NA |
| 19 | 18543613 | 18549270 | 1  | NM_003333    | UBA52    | 0 | NA | 0 | NA | 0 | NA | 0 | NA | 0 | NA |
| 19 | 18560494 | 18564147 | 1  | NM_001100418 | C19orf60 | 1 | 14 | 0 | NA | 0 | NA | 1 | 14 | 0 | NA |
| 19 | 18560494 | 18564147 | 1  | NM_001100419 | C19orf60 | 1 | 14 | 0 | NA | 1 | 14 | 0 | NA | 0 | NA |
| 19 | 18578660 | 18565046 | -1 | NM_004750    | CRLF1    | 0 | NA | 0 | NA | 0 | NA | 0 | NA | 0 | NA |
| 19 | 18584681 | 18592849 | 1  | NM_012109    | TMEM59L  | 0 | NA | 0 | NA | 0 | NA | 0 | NA | 0 | NA |
| 19 | 18608837 | 18642302 | 1  | NM_018316    | KLHL26   | 1 | NA | 0 | NA | 0 | NA | 0 | NA | 0 | NA |
| 19 | 18655424 | 18754143 | 1  | NM_001098482 | CRT1     | 1 | 15 | 0 | NA | 0 | NA | 1 | 16 | 0 | NA |
| 19 | 18655424 | 18754143 | 1  | NM_015321    | CRT1     | 1 | 15 | 0 | NA | 0 | NA | 1 | 16 | 0 | NA |
| 19 | 18763114 | 18754582 | -1 | NM_000095    | COMP     | 1 | 15 | 0 | NA | 0 | NA | 0 | NA | 0 | NA |
| 19 | 18803743 | 18840039 | 1  | NM_002911    | UPF1     | 0 | NA | 0 | NA | 0 | NA | 0 | NA | 0 | NA |
| 19 | 18867953 | 18840360 | -1 | NM_001492    | GDF1     | 0 | NA | 0 | NA | 0 | NA | 0 | NA | 0 | NA |
| 19 | 18867953 | 18840360 | -1 | NM_021267    | LASS1    | 0 | NA | 0 | NA | 0 | NA | 0 | NA | 0 | NA |
| 19 | 18867953 | 18849717 | -1 | NM_198207    | LASS1    | 0 | NA | 0 | NA | 0 | NA | 0 | NA | 0 | NA |
| 19 | 18891199 | 18871322 | -1 | NM_007263    | COPE     | 0 | NA | 0 | NA | 0 | NA | 0 | NA | 0 | NA |
| 19 | 18891199 | 18871322 | -1 | NM_199442    | COPE     | 0 | NA | 0 | NA | 0 | NA | 0 | NA | 0 | NA |
| 19 | 18891199 | 18871322 | -1 | NM_199444    | COPE     | 0 | NA | 0 | NA | 0 | NA | 0 | NA | 0 | NA |
| 19 | 18891493 | 18900436 | 1  | NM_019070    | DDX49    | 0 | NA | 0 | NA | 0 | NA | 0 | NA | 0 | NA |
| 19 | 18912983 | 18901011 | -1 | NM_004838    | HOMER3   | 0 | NA | 0 | NA | 0 | NA | 0 | NA | 0 | NA |
| 19 | 19005308 | 18964176 | -1 | NM_001017392 | SFRS14   | 0 | NA | 0 | NA | 0 | NA | 0 | NA | 0 | NA |
| 19 | 19005368 | 18962701 | -1 | NM_014884    | SFRS14   | 0 | NA | 0 | NA | 0 | NA | 0 | NA | 0 | NA |
| 19 | 19005470 | 19029980 | 1  | NM_033415    | ARMC6    | 0 | NA | 0 | NA | 0 | NA | 0 | NA | 0 | NA |
| 19 | 19035807 | 19084697 | 1  | NM_178526    | SLC25A42 | 0 | NA | 0 | NA | 0 | NA | 0 | NA | 0 | NA |
| 19 | 19110267 | 19091429 | -1 | NM_017814    | TMEM161A | 1 | 16 | 0 | NA | 0 | NA | 0 | NA | 0 | NA |
| 19 | 19163933 | 19117377 | -1 | NM_005919    | MEF2B    | 1 | 15 | 0 | NA | 0 | NA | 0 | NA | 0 | NA |
| 19 | 19164007 | 19173678 | 1  | NM_003721    | RFXANK   | 1 | 15 | 0 | NA | 0 | NA | 0 | NA | 0 | NA |
| 19 | 19164007 | 19173678 | 1  | NM_134440    | RFXANK   | 1 | 15 | 0 | NA | 0 | NA | 0 | NA | 0 | NA |
| 19 | 19175238 | 19173223 | -1 | NM_176880    | NR2C2AP  | 1 | 14 | 0 | NA | 0 | NA | 0 | NA | 0 | NA |
| 19 | 19183781 | 19224061 | 1  | NM_004386    | NCAN     | 1 | 14 | 0 | NA | 0 | NA | 0 | NA | 0 | NA |
| 19 | 19234560 | 19227470 | -1 | NM_023002    | HAPLN4   | 0 | NA | 0 | NA | 0 | NA | 0 | NA | 0 | NA |
| 19 | 19245074 | 19236173 | -1 | NM_001001524 | TM6SF2   | 0 | NA | 0 | NA | 0 | NA | 0 | NA | 0 | NA |
| 19 | 19292307 | 19248321 | -1 | NM_172231    | SF4      | 1 | 14 | 0 | NA | 0 | NA | 1 | 12 | 0 | NA |
| 19 | 19292629 | 19330563 | 1  | NM_015329    | KIAA0892 | 1 | 14 | 0 | NA | 0 | NA | 1 | 12 | 0 | NA |
| 19 | 19357641 | 19480741 | 1  | NM_017660    | GATAD2A  | 0 | NA | 0 | NA | 0 | NA | 0 | NA | 0 | NA |
| 19 | 19487469 | 19486027 | -1 | NM_032037    | TSSK6    | 1 | 25 | 1 | 14 | 0 | NA | 1 | 12 | 0 | NA |
| 19 | 19487539 | 19500073 | 1  | NM_015965    | NDUFA13  | 1 | 25 | 1 | 14 | 0 | NA | 1 | 12 | 0 | NA |
| 19 | 19500719 | 19509393 | 1  | NM_198537    | FLJ44968 | 0 | NA | 0 | NA | 0 | NA | 0 | NA | 0 | NA |
| 19 | 19510073 | 19518468 | 1  | NM_153221    | CILP2    | 0 | NA | 0 | NA | 0 | NA | 0 | NA | 0 | NA |
| 19 | 19590439 | 19533521 | -1 | NM_025245    | PBX4     | 0 | NA | 0 | NA | 0 | NA | 0 | NA | 0 | NA |
| 19 | 19600039 | 19595465 | -1 | NM_004720    | LPAR2    | 0 | NA | 0 | NA | 0 | NA | 0 | NA | 0 | NA |
| 19 | 19615455 | 19601284 | -1 | NM_016573    | GMIP     | 0 | NA | 0 | NA | 0 | NA | 0 | NA | 0 | NA |
| 19 | 19635503 | 19617009 | -1 | NM_020410    | ATP13A1  | 1 | 14 | 0 | NA | 0 | NA | 0 | NA | 0 | NA |
| 19 | 19640662 | 19652138 | 1  | NM_033204    | ZNF101   | 1 | 15 | 0 | NA | 0 | NA | 0 | NA | 0 | NA |
| 19 | 19704921 | 19682280 | -1 | NM_021030    | ZNF14    | 0 | NA | 1 | 15 | 0 | NA | 1 | 15 | 0 | NA |
| 19 | 19793560 | 19765642 | -1 | NM_001099269 | ZNF506   | 1 | 22 | 0 | NA | 1 | 17 | 0 | NA | 0 | NA |
| 19 | 19837713 | 19865293 | 1  | NM_021047    | ZNF253   | 1 | 17 | 1 | 13 | 0 | NA | 0 | NA | 0 | NA |
| 19 | 19872786 | 19906766 | 1  | NM_031218    | ZNF93    | 0 | NA | 0 | NA | 0 | NA | 0 | NA | 0 | NA |
| 19 | 20011064 | 19976226 | -1 | NM_001077349 | ZNF682   | 1 | 11 | 0 | NA | 0 | NA | 0 | NA | 0 | NA |
| 19 | 20011277 | 19976226 | -1 | NM_033196    | ZNF682   | 1 | 11 | 0 | NA | 0 | NA | 0 | NA | 0 | NA |
| 19 | 20139082 | 20169984 | 1  | NM_052852    | ZNF486   | 0 | NA | 0 | NA | 0 | NA | 0 | NA | 0 | NA |
| 19 | 20399602 | 20367762 | -1 | NM_001039884 | ZNF826   | 0 | NA | 0 | NA | 0 | NA | 0 | NA | 0 | NA |

|    |          |          |    |              |           |   |    |   |    |   |    |   |    |   |    |
|----|----------|----------|----|--------------|-----------|---|----|---|----|---|----|---|----|---|----|
| 19 | 20636242 | 20594584 | -1 | NM_001076675 | ZNF626    | 1 | 15 | 0 | NA | 0 | NA | 0 | NA | 0 | NA |
| 19 | 20636242 | 20619348 | -1 | NM_145297    | ZNF626    | 1 | 15 | 0 | NA | 0 | NA | 0 | NA | 0 | NA |
| 19 | 20897919 | 20925343 | 1  | NM_003429    | ZNF85     | 0 | NA | 0 | NA | 0 | NA | 0 | NA | 0 | NA |
| 19 | 20995336 | 21033493 | 1  | NM_025189    | ZNF430    | 0 | NA | 0 | NA | 0 | NA | 0 | NA | 0 | NA |
| 19 | 21056810 | 21099723 | 1  | NM_182515    | ZNF714    | 0 | NA | 0 | NA | 0 | NA | 0 | NA | 0 | NA |
| 19 | 21116727 | 21160645 | 1  | NM_133473    | ZNF431    | 0 | NA | 0 | NA | 0 | NA | 0 | NA | 0 | NA |
| 19 | 21304052 | 21265802 | -1 | NM_021269    | ZNF708    | 0 | NA | 0 | NA | 1 | 14 | 0 | NA | 0 | NA |
| 19 | 21371770 | 21402136 | 1  | NM_001076678 | ZNF493    | 0 | NA | 0 | NA | 1 | 16 | 0 | NA | 0 | NA |
| 19 | 21371770 | 21402136 | 1  | NM_175910    | ZNF493    | 0 | NA | 0 | NA | 1 | 16 | 0 | NA | 0 | NA |
| 19 | 21480276 | 21512919 | 1  | NM_001001415 | ZNF429    | 0 | NA | 0 | NA | 0 | 0  | 0 | NA | 0 | NA |
| 19 | 21742163 | 21697407 | -1 | NM_173531    | ZNF100    | 1 | 12 | 0 | NA | 0 | NA | 0 | NA | 0 | NA |
| 19 | 21810810 | 21779591 | -1 | NM_003423    | ZNF43     | 0 | NA | 0 | NA | 0 | NA | 0 | NA | 0 | NA |
| 19 | 21985585 | 21940736 | -1 | NM_007153    | ZNF208    | 0 | NA | 0 | NA | 0 | NA | 0 | NA | 0 | NA |
| 19 | 22027105 | 22065743 | 1  | NM_033468    | ZNF257    | 0 | NA | 0 | NA | 0 | NA | 0 | NA | 0 | NA |
| 19 | 22171593 | 22153742 | -1 | NM_001001411 | ZNF676    | 0 | NA | 0 | NA | 0 | NA | 0 | NA | 0 | NA |
| 19 | 22343640 | 22343225 | -1 | NM_00111266  | LOC342994 | 0 | NA | 0 | NA | 0 | NA | 0 | NA | 0 | NA |
| 19 | 22396988 | 22365738 | -1 | NM_001098626 | ZNF98     | 0 | NA | 0 | NA | 0 | NA | 0 | NA | 0 | NA |
| 19 | 22609078 | 22642266 | 1  | NM_020855    | ZNF492    | 1 | 12 | 1 | 13 | 0 | NA | 0 | NA | 0 | NA |
| 19 | 22744624 | 22730846 | -1 | NM_001080409 | ZNF99     | 0 | NA | 0 | NA | 0 | NA | 0 | NA | 0 | NA |
| 19 | 23370109 | 23332337 | -1 | NM_003430    | ZNF91     | 0 | NA | 0 | NA | 0 | NA | 0 | NA | 0 | NA |
| 19 | 23661857 | 23627547 | -1 | NM_138330    | ZNF675    | 0 | NA | 0 | NA | 0 | NA | 0 | NA | 0 | NA |
| 19 | 23733533 | 23713836 | -1 | NM_138286    | ZNF681    | 0 | NA | 0 | NA | 1 | 12 | 0 | NA | 0 | NA |
| 19 | 24061815 | 24104494 | 1  | NM_203282    | ZNF254    | 1 | 15 | 0 | NA | 0 | NA | 0 | NA | 0 | NA |
| 19 | 34395976 | 34390006 | -1 | NM_006003    | UQCRRFS1  | 0 | NA | 0 | NA | 0 | NA | 0 | NA | 0 | NA |
| 19 | 34789040 | 34798547 | 1  | NM_006627    | POP4      | 0 | NA | 0 | NA | 0 | NA | 0 | NA | 0 | NA |
| 19 | 34848166 | 34858223 | 1  | NM_024310    | PLEKHF1   | 1 | 11 | 1 | 12 | 1 | 14 | 0 | NA | 0 | NA |
| 19 | 34897803 | 34881632 | -1 | NM_001031726 | C19orf12  | 0 | NA | 0 | NA | 0 | NA | 0 | NA | 0 | NA |
| 19 | 34898292 | 34881632 | -1 | NM_031448    | C19orf12  | 0 | NA | 0 | NA | 0 | NA | 0 | NA | 0 | NA |
| 19 | 34994740 | 35007059 | 1  | NM_001238    | CCNE1     | 0 | NA | 0 | NA | 0 | NA | 0 | NA | 0 | NA |
| 19 | 34995400 | 35007059 | 1  | NM_057182    | CCNE1     | 0 | NA | 0 | NA | 0 | NA | 0 | NA | 0 | NA |
| 19 | 35125264 | 35198453 | 1  | NM_003796    | C19orf2   | 0 | NA | 0 | NA | 0 | NA | 0 | NA | 0 | NA |
| 19 | 35125264 | 35198453 | 1  | NM_134447    | C19orf2   | 0 | NA | 0 | NA | 0 | NA | 0 | NA | 0 | NA |
| 19 | 35555167 | 35740805 | 1  | NM_014717    | ZNF536    | 0 | NA | 1 | 16 | 0 | NA | 0 | NA | 0 | NA |
| 19 | 36532030 | 36457690 | -1 | NM_020856    | TSHZ3     | 0 | NA | 0 | NA | 0 | NA | 0 | NA | 0 | NA |
| 19 | 37528392 | 37570411 | 1  | NM_014910    | ZNF507    | 1 | 13 | 0 | NA | 0 | NA | 0 | NA | 0 | NA |
| 19 | 37588870 | 37667076 | 1  | NM_207325    | DPY19L3   | 0 | NA | 0 | NA | 0 | NA | 0 | NA | 0 | NA |
| 19 | 37763943 | 37770169 | 1  | NM_004708    | PDCD5     | 0 | NA | 0 | NA | 0 | NA | 0 | NA | 0 | NA |
| 19 | 37857942 | 37779746 | -1 | NM_032139    | ANKRD27   | 0 | NA | 0 | NA | 0 | NA | 0 | NA | 0 | NA |
| 19 | 37858152 | 37861046 | 1  | NM_207391    | RGS9BP    | 0 | NA | 0 | NA | 0 | NA | 0 | NA | 0 | NA |
| 19 | 37874706 | 37896542 | 1  | NM_001105570 | NUDT19    | 0 | NA | 0 | NA | 0 | NA | 0 | NA | 0 | NA |
| 19 | 37902516 | 37973554 | 1  | NM_001110822 | TDRD12    | 0 | NA | 0 | NA | 0 | NA | 0 | NA | 0 | NA |
| 19 | 38052523 | 38013258 | -1 | NM_001126335 | SLC7A9    | 0 | NA | 0 | NA | 0 | NA | 0 | NA | 0 | NA |
| 19 | 38052523 | 38013258 | -1 | NM_014270    | SLC7A9    | 0 | NA | 0 | NA | 0 | NA | 0 | NA | 0 | NA |
| 19 | 38154709 | 38061743 | -1 | NM_032816    | CCDC123   | 0 | NA | 0 | NA | 0 | NA | 0 | NA | 0 | NA |
| 19 | 38155017 | 38159800 | 1  | NM_152266    | C19orf40  | 0 | NA | 0 | NA | 0 | NA | 0 | NA | 0 | NA |
| 19 | 38247634 | 38161337 | -1 | NM_033103    | RHPN2     | 1 | 11 | 0 | NA | 0 | NA | 0 | NA | 0 | NA |
| 19 | 38263625 | 38313158 | 1  | NM_018025    | GPATCH1   | 0 | NA | 0 | NA | 1 | 12 | 0 | NA | 0 | NA |
| 19 | 38314837 | 38358543 | 1  | NM_173479    | WDR88     | 0 | NA | 0 | NA | 0 | NA | 0 | NA | 0 | NA |
| 19 | 38377438 | 38391613 | 1  | NM_002333    | LRP3      | 1 | 12 | 0 | NA | 0 | NA | 0 | NA | 0 | NA |
| 19 | 38408548 | 38391410 | -1 | NM_019849    | SLC7A10   | 0 | NA | 1 | 22 | 0 | NA | 1 | 14 | 1 | 13 |
| 19 | 38485160 | 38482775 | -1 | NM_004364    | CEBPA     | 0 | NA | 0 | NA | 0 | NA | 0 | NA | 0 | NA |
| 19 | 38556448 | 38565432 | 1  | NM_001806    | CEBPG     | 0 | NA | 0 | NA | 0 | NA | 0 | NA | 0 | NA |
| 19 | 38704641 | 38569702 | -1 | NM_000285    | PEPD      | 0 | NA | 0 | NA | 0 | NA | 0 | NA | 0 | NA |
| 19 | 38867273 | 38956254 | 1  | NM_022467    | CHST8     | 0 | NA | 0 | NA | 0 | NA | 0 | NA | 0 | NA |
| 19 | 38979606 | 38996986 | 1  | NM_024076    | KCTD15    | 0 | NA | 0 | NA | 0 | NA | 0 | NA | 0 | NA |
| 19 | 39355191 | 39412260 | 1  | NM_001114093 | LSM14A    | 0 | NA | 0 | NA | 0 | NA | 0 | NA | 0 | NA |
| 19 | 39355191 | 39412260 | 1  | NM_015578    | LSM14A    | 0 | NA | 0 | NA | 0 | NA | 0 | NA | 0 | NA |
| 19 | 39437295 | 39538311 | 1  | NM_014686    | KIAA0355  | 0 | NA | 0 | NA | 0 | NA | 0 | NA | 0 | NA |
| 19 | 39547908 | 39583076 | 1  | NM_000175    | GPI       | 1 | 12 | 0 | NA | 0 | NA | 0 | NA | 0 | NA |
| 19 | 39587142 | 39608912 | 1  | NM_032346    | PDCD2L    | 0 | NA | 0 | NA | 0 | NA | 0 | NA | 0 | NA |
| 19 | 39611107 | 39652638 | 1  | NM_005499    | UBA2      | 0 | NA | 0 | NA | 0 | NA | 0 | NA | 0 | NA |
| 19 | 39664719 | 39683925 | 1  | NM_001080436 | WTIP      | 0 | NA | 0 | NA | 0 | NA | 0 | NA | 0 | NA |
| 19 | 39777330 | 39776185 | -1 | NM_001025591 | LOC284402 | 0 | NA | 0 | NA | 0 | NA | 0 | NA | 0 | NA |
| 19 | 39860406 | 39869142 | 1  | NM_001012320 | ZNF302    | 1 | 13 | 0 | NA | 0 | NA | 1 | 18 | 0 | NA |
| 19 | 39860406 | 39869142 | 1  | NM_018443    | ZNF302    | 1 | 13 | 0 | NA | 0 | NA | 1 | 18 | 0 | NA |

|    |          |          |    |              |          |   |    |    |    |   |    |   |    |   |    |
|----|----------|----------|----|--------------|----------|---|----|----|----|---|----|---|----|---|----|
| 19 | 39916932 | 39925613 | 1  | NM_001029997 | ZNF181   | 0 | NA | 0  | NA | 0 | NA | 0 | NA | 0 | NA |
| 19 | 39955974 | 39940818 | -1 | NM_001007248 | ZNF599   | 0 | NA | 0  | NA | 0 | NA | 0 | NA | 0 | NA |
| 19 | 40109646 | 40127916 | 1  | NM_001099437 | ZNF30    | 0 | NA | 0  | NA | 0 | NA | 1 | 11 | 0 | NA |
| 19 | 40109646 | 40127916 | 1  | NM_001099438 | ZNF30    | 0 | NA | 0  | NA | 0 | NA | 1 | 11 | 0 | NA |
| 19 | 40109646 | 40127916 | 1  | NM_194325    | ZNF30    | 0 | NA | 0  | NA | 0 | NA | 1 | 11 | 0 | NA |
| 19 | 40146793 | 40139097 | -1 | NM_175872    | ZNF792   | 1 | 16 | 1  | 13 | 1 | 12 | 0 | NA | 0 | NA |
| 19 | 40183085 | 40209213 | 1  | NM_020895    | GRAMD1A  | 0 | NA | 0  | NA | 0 | NA | 0 | NA | 0 | NA |
| 19 | 40213373 | 40217014 | 1  | NM_199037    | SCN1B    | 0 | NA | 0  | NA | 0 | NA | 0 | NA | 0 | NA |
| 19 | 40213373 | 40223193 | 1  | NM_001037    | SCN1B    | 0 | NA | 0  | NA | 0 | NA | 0 | NA | 0 | NA |
| 19 | 40223249 | 40249315 | 1  | NM_002151    | HPN      | 0 | NA | 0  | NA | 0 | NA | 0 | NA | 0 | NA |
| 19 | 40223249 | 40249315 | 1  | NM_182983    | HPN      | 0 | NA | 0  | NA | 0 | NA | 0 | NA | 0 | NA |
| 19 | 40298638 | 40307067 | 1  | NM_005971    | FXVD3    | 1 | 13 | 0  | NA | 1 | 15 | 1 | 12 | 0 | NA |
| 19 | 40298638 | 40307067 | 1  | NM_021910    | FXVD3    | 1 | 13 | 0  | NA | 1 | 15 | 1 | 12 | 0 | NA |
| 19 | 40317944 | 40307256 | -1 | NM_139284    | LG14     | 0 | NA | 0  | NA | 0 | NA | 1 | 12 | 0 | NA |
| 19 | 40321571 | 40325794 | 1  | NM_021902    | FXVD1    | 0 | NA | 0  | NA | 0 | NA | 1 | 12 | 0 | NA |
| 19 | 40322231 | 40325794 | 1  | NM_005031    | FXVD1    | 0 | NA | 0  | NA | 0 | NA | 1 | 12 | 0 | NA |
| 19 | 40325993 | 40337045 | 1  | NM_022006    | FXVD7    | 0 | NA | 0  | NA | 0 | NA | 1 | 12 | 0 | NA |
| 19 | 40337466 | 40352625 | 1  | NM_014164    | FXVD5    | 1 | 22 | 1  | 12 | 0 | NA | 1 | 13 | 0 | NA |
| 19 | 40337466 | 40352625 | 1  | NM_144779    | FXVD5    | 1 | 22 | 1  | 12 | 0 | NA | 1 | 13 | 0 | NA |
| 19 | 40411468 | 40407543 | -1 | NM_152481    | TMEM162  | 0 | NA | 1  | 15 | 0 | NA | 0 | NA | 0 | NA |
| 19 | 40431398 | 40450707 | 1  | NM_015925    | LSR      | 0 | NA | 1  | 15 | 0 | NA | 0 | NA | 0 | NA |
| 19 | 40431398 | 40450707 | 1  | NM_205834    | LSR      | 0 | NA | 1  | 15 | 0 | NA | 0 | NA | 0 | NA |
| 19 | 40431398 | 40450707 | 1  | NM_205835    | LSR      | 0 | NA | 1  | 15 | 0 | NA | 0 | NA | 0 | NA |
| 19 | 40451735 | 40462558 | 1  | NM_003367    | USF2     | 0 | NA | 0  | NA | 0 | NA | 0 | NA | 0 | NA |
| 19 | 40451735 | 40462558 | 1  | NM_207291    | USF2     | 0 | NA | 0  | NA | 0 | NA | 0 | NA | 0 | NA |
| 19 | 40465249 | 40467885 | 1  | NM_021175    | HAMP     | 0 | NA | 0  | NA | 0 | NA | 0 | NA | 0 | NA |
| 19 | 40474877 | 40496547 | 1  | NM_002361    | MAG      | 0 | NA | 0  | NA | 0 | NA | 0 | NA | 0 | NA |
| 19 | 40474877 | 40496547 | 1  | NM_080600    | MAG      | 0 | NA | 0  | NA | 0 | NA | 0 | NA | 0 | NA |
| 19 | 40511918 | 40530104 | 1  | NM_001771    | CD22     | 0 | NA | 0  | NA | 0 | NA | 0 | NA | 0 | NA |
| 19 | 40534294 | 40535197 | 1  | NM_005303    | FFAR1    | 0 | NA | 0  | NA | 0 | NA | 0 | NA | 0 | NA |
| 19 | 40541341 | 40543229 | 1  | NM_005304    | FFAR3    | 0 | NA | 0  | NA | 0 | NA | 0 | NA | 0 | NA |
| 19 | 40554101 | 40555142 | 1  | NM_005305    | GPR42    | 0 | NA | 0  | NA | 0 | NA | 0 | NA | 0 | NA |
| 19 | 40632456 | 40633449 | 1  | NM_005306    | FFAR2    | 0 | NA | 1  | 15 | 0 | NA | 0 | NA | 0 | NA |
| 19 | 40673196 | 40670067 | -1 | NM_207392    | KRTDAP   | 1 | 11 | 1  | 12 | 0 | NA | 0 | NA | 0 | NA |
| 19 | 40684653 | 40679961 | 1  | NM_001035516 | DMKN     | 1 | 11 | -1 | 13 | 0 | NA | 0 | NA | 0 | NA |
| 19 | 40693252 | 40679961 | -1 | NM_001126059 | DMKN     | 0 | NA | 1  | 13 | 0 | NA | 0 | NA | 0 | NA |
| 19 | 40693252 | 40679961 | -1 | NM_001126061 | DMKN     | 0 | NA | 1  | 13 | 0 | NA | 0 | NA | 0 | NA |
| 19 | 40696400 | 40679961 | -1 | NM_033317    | DMKN     | 0 | NA | 1  | 13 | 0 | NA | 0 | NA | 0 | NA |
| 19 | 40696400 | 40686045 | -1 | NM_001126056 | DMKN     | 0 | NA | 1  | 13 | 0 | NA | 0 | NA | 0 | NA |
| 19 | 40696400 | 40686045 | -1 | NM_001126057 | DMKN     | 0 | NA | 1  | 13 | 0 | NA | 0 | NA | 0 | NA |
| 19 | 40696400 | 40686045 | -1 | NM_001126058 | DMKN     | 0 | NA | 1  | 13 | 0 | NA | 0 | NA | 0 | NA |
| 19 | 40711093 | 40706110 | -1 | NM_198538    | SBSN     | 0 | NA | 0  | 19 | 0 | NA | 0 | NA | 0 | NA |
| 19 | 40716153 | 40728061 | 1  | NM_014364    | GAPDHS   | 0 | NA | 1  | 19 | 0 | NA | 0 | NA | 0 | NA |
| 19 | 40728384 | 40730268 | 1  | NM_032635    | TMEM147  | 0 | NA | 0  | NA | 0 | NA | 1 | 11 | 0 | NA |
| 19 | 40746400 | 40732934 | -1 | NM_000704    | ATP4A    | 0 | NA | 1  | 14 | 0 | NA | 1 | 11 | 0 | NA |
| 19 | 40795485 | 40808091 | 1  | NM_015302    | KIAA0841 | 1 | 14 | 0  | NA | 0 | NA | 0 | NA | 0 | NA |
| 19 | 40811819 | 40820427 | 1  | NM_024321    | RBM42    | 0 | NA | 0  | NA | 0 | NA | 0 | NA | 0 | NA |
| 19 | 40824486 | 40827613 | 1  | NM_014209    | ETV2     | 0 | NA | 0  | NA | 0 | NA | 0 | NA | 0 | NA |
| 19 | 40830994 | 40841524 | 1  | NM_001863    | COX6B1   | 0 | NA | 0  | NA | 0 | NA | 0 | NA | 0 | NA |
| 19 | 40849554 | 40861207 | 1  | NM_007000    | UPK1A    | 0 | NA | 0  | NA | 0 | NA | 0 | NA | 0 | NA |
| 19 | 40895669 | 40899780 | 1  | NM_014383    | ZBTB32   | 0 | NA | 0  | NA | 0 | NA | 0 | NA | 0 | NA |
| 19 | 40900760 | 40921619 | 1  | NM_014727    | MLL4     | 0 | NA | 0  | NA | 0 | NA | 0 | NA | 0 | NA |
| 19 | 40925191 | 40921990 | -1 | NM_024660    | TMEM149  | 1 | 14 | 0  | NA | 0 | NA | 0 | NA | 0 | NA |
| 19 | 40928176 | 40925267 | -1 | NM_001040425 | UZAF1L4  | 1 | 14 | 0  | NA | 0 | NA | 0 | NA | 0 | NA |
| 19 | 40928176 | 40925267 | -1 | NM_144987    | UZAF1L4  | 1 | 14 | 0  | NA | 0 | NA | 0 | NA | 0 | NA |
| 19 | 40928333 | 40929743 | 1  | NM_172341    | PSENEN   | 1 | 14 | 0  | NA | 0 | NA | 0 | NA | 0 | NA |
| 19 | 40931351 | 40937260 | 1  | NM_019104    | LIN37    | 1 | 14 | 0  | NA | 0 | NA | 1 | 11 | 0 | NA |
| 19 | 40939770 | 40937309 | -1 | NM_144617    | HSPB6    | 0 | NA | 0  | NA | 0 | NA | 1 | 11 | 0 | NA |
| 19 | 40940883 | 40951917 | 1  | NM_001039887 | C19orf55 | 0 | NA | 0  | NA | 0 | NA | 1 | 11 | 0 | NA |
| 19 | 40958315 | 40971564 | 1  | NM_052948    | SNX26    | 0 | NA | 0  | NA | 0 | NA | 0 | NA | 0 | NA |
| 19 | 40996041 | 40982731 | -1 | NM_021232    | PRODH2   | 0 | NA | 0  | NA | 0 | NA | 0 | NA | 0 | NA |
| 19 | 41034579 | 41008113 | -1 | NM_004646    | NPHS1    | 0 | NA | 0  | NA | 0 | NA | 0 | NA | 0 | NA |
| 19 | 41039649 | 41049888 | 1  | NM_032123    | KIRREL2  | 0 | NA | 0  | NA | 0 | NA | 0 | NA | 0 | NA |
| 19 | 41039649 | 41049888 | 1  | NM_199179    | KIRREL2  | 0 | NA | 0  | NA | 0 | NA | 0 | NA | 0 | NA |
| 19 | 41039649 | 41049888 | 1  | NM_199180    | KIRREL2  | 0 | NA | 0  | NA | 0 | NA | 0 | NA | 0 | NA |

|    |          |          |    |              |           |   |    |   |    |   |    |   |    |   |    |
|----|----------|----------|----|--------------|-----------|---|----|---|----|---|----|---|----|---|----|
| 19 | 41051240 | 41062539 | 1  | NM_001024807 | APLP1     | 0 | NA | 0 | NA | 0 | NA | 0 | NA | 0 | NA |
| 19 | 41051240 | 41062539 | 1  | NM_005166    | APLP1     | 0 | NA | 0 | NA | 0 | NA | 0 | NA | 0 | NA |
| 19 | 41083392 | 41070982 | -1 | NM_139239    | NFKBID    | 0 | NA | 0 | NA | 0 | NA | 0 | NA | 0 | NA |
| 19 | 41085221 | 41087013 | 1  | NM_001007469 | HCST      | 0 | NA | 0 | NA | 0 | NA | 0 | NA | 0 | NA |
| 19 | 41085221 | 41087013 | 1  | NM_014266    | HCST      | 0 | NA | 0 | NA | 0 | NA | 0 | NA | 0 | NA |
| 19 | 41091026 | 41087142 | -1 | NM_003332    | TYROBP    | 0 | NA | 0 | NA | 0 | NA | 0 | NA | 0 | NA |
| 19 | 41091026 | 41087142 | -1 | NM_198125    | TYROBP    | 0 | NA | 0 | NA | 0 | NA | 0 | NA | 0 | NA |
| 19 | 41119861 | 41127937 | 1  | NM_024509    | LRFN3     | 1 | 12 | 0 | NA | 0 | NA | 0 | NA | 0 | NA |
| 19 | 41177940 | 41179054 | 1  | NM_001042631 | LOC644096 | 0 | NA | 0 | NA | 0 | NA | 0 | NA | 0 | NA |
| 19 | 41191512 | 41185841 | -1 | NM_001039876 | C19orf46  | 0 | NA | 0 | NA | 0 | NA | 0 | NA | 0 | NA |
| 19 | 41196981 | 41191861 | -1 | NM_032878    | ALKBH6    | 0 | NA | 0 | NA | 0 | NA | 0 | NA | 0 | NA |
| 19 | 41196981 | 41191862 | -1 | NM_198867    | ALKBH6    | 0 | NA | 0 | NA | 0 | NA | 0 | NA | 0 | NA |
| 19 | 41215615 | 41197402 | -1 | NM_015526    | CLIP3     | 0 | NA | 0 | NA | 0 | NA | 0 | NA | 0 | NA |
| 19 | 41237504 | 41217726 | -1 | NM_152658    | THAP8     | 0 | NA | 0 | NA | 0 | NA | 0 | NA | 0 | NA |
| 19 | 41237622 | 41287852 | 1  | NM_001083961 | WDR62     | 0 | NA | 0 | NA | 0 | NA | 0 | NA | 0 | NA |
| 19 | 41237622 | 41287852 | 1  | NM_173636    | WDR62     | 0 | NA | 0 | NA | 0 | NA | 0 | NA | 0 | NA |
| 19 | 41297727 | 41308689 | 1  | NM_001281    | TBCB      | 0 | NA | 0 | NA | 0 | NA | 0 | NA | 0 | NA |
| 19 | 41298046 | 41296450 | -1 | NM_006233    | POLR2I    | 0 | NA | 0 | NA | 0 | NA | 0 | NA | 0 | NA |
| 19 | 41322757 | 41333095 | 1  | NM_001003962 | CAPNS1    | 0 | NA | 0 | NA | 0 | NA | 1 | 11 | 0 | NA |
| 19 | 41322757 | 41333095 | 1  | NM_001749    | CAPNS1    | 0 | NA | 0 | NA | 0 | NA | 1 | 11 | 0 | NA |
| 19 | 41335611 | 41333663 | -1 | NM_001864    | COX7A1    | 0 | NA | 0 | NA | 0 | NA | 0 | NA | 0 | NA |
| 19 | 41397343 | 41421515 | 1  | NM_001099638 | ZNF146    | 1 | 11 | 0 | NA | 0 | NA | 0 | NA | 0 | NA |
| 19 | 41397343 | 41421515 | 1  | NM_001099639 | ZNF146    | 1 | 11 | 0 | NA | 0 | NA | 0 | NA | 0 | NA |
| 19 | 41397343 | 41421515 | 1  | NM_007145    | ZNF146    | 1 | 11 | 0 | NA | 0 | NA | 0 | NA | 0 | NA |
| 19 | 41397406 | 41365026 | -1 | NM_152477    | ZNF565    | 1 | 11 | 0 | NA | 0 | NA | 0 | NA | 0 | NA |
| 19 | 41397826 | 41365026 | -1 | NM_001042474 | ZNF565    | 1 | 15 | 0 | NA | 0 | NA | 0 | NA | 0 | NA |
| 19 | 41550713 | 41519001 | -1 | NM_020917    | ZFP14     | 0 | NA | 0 | NA | 0 | NA | 0 | NA | 0 | NA |
| 19 | 41601390 | 41574700 | -1 | NM_133466    | ZNF545    | 0 | NA | 0 | NA | 0 | NA | 0 | NA | 0 | NA |
| 19 | 41672177 | 41630421 | -1 | NM_032838    | ZNF566    | 0 | NA | 1 | 12 | 0 | NA | 0 | NA | 0 | NA |
| 19 | 41711010 | 41693433 | -1 | NM_001012756 | ZNF260    | 1 | 11 | 0 | NA | 0 | NA | 0 | NA | 1 | 13 |
| 19 | 41756037 | 41726362 | -1 | NM_020951    | ZNF529    | 0 | NA | 0 | NA | 0 | NA | 0 | NA | 0 | NA |
| 19 | 41788060 | 41811339 | 1  | NM_032825    | ZNF382    | 0 | NA | 0 | NA | 0 | NA | 0 | NA | 0 | NA |
| 19 | 41849579 | 41820122 | -1 | NM_153257    | ZNF461    | 1 | 15 | 0 | NA | 0 | NA | 0 | NA | 0 | NA |
| 19 | 41872141 | 41904065 | 1  | NM_152603    | ZNF567    | 0 | NA | 0 | NA | 0 | NA | 0 | NA | 0 | NA |
| 19 | 42021124 | 42000170 | -1 | NM_206894    | ZNF790    | 0 | NA | 0 | NA | 0 | NA | 0 | NA | 0 | NA |
| 19 | 42033106 | 42062310 | 1  | NM_003419    | ZNF345    | 0 | NA | 0 | NA | 0 | NA | 0 | NA | 0 | NA |
| 19 | 42099030 | 42074092 | -1 | NM_001037232 | ZNF829    | 0 | NA | 0 | NA | 0 | NA | 0 | NA | 0 | NA |
| 19 | 42099073 | 42134290 | 1  | NM_198539    | ZNF568    | 0 | NA | 0 | NA | 0 | NA | 0 | NA | 0 | NA |
| 19 | 42261221 | 42312491 | 1  | NM_144689    | ZNF420    | 0 | NA | 0 | NA | 0 | NA | 0 | NA | 0 | NA |
| 19 | 42355173 | 42332840 | -1 | NM_199126    | ZNF585A   | 0 | NA | 1 | 13 | 0 | NA | 0 | NA | 0 | NA |
| 19 | 42355455 | 42332840 | -1 | NM_152655    | ZNF585A   | 0 | NA | 1 | 12 | 1 | 13 | 0 | NA | 0 | NA |
| 19 | 42393291 | 42367561 | -1 | NM_152279    | ZNF585B   | 0 | NA | 0 | NA | 0 | NA | 0 | NA | 0 | NA |
| 19 | 42409205 | 42426414 | 1  | NM_152604    | ZNF383    | 0 | NA | 0 | NA | 0 | NA | 0 | NA | 0 | NA |
| 19 | 42517419 | 42547197 | 1  | NM_181786    | HKR1      | 0 | NA | 0 | NA | 0 | NA | 0 | NA | 0 | NA |
| 19 | 42553898 | 42575806 | 1  | NM_032453    | ZNF527    | 0 | NA | 0 | NA | 0 | NA | 0 | NA | 0 | NA |
| 19 | 42650179 | 42593899 | -1 | NM_152484    | ZNF569    | 1 | 26 | 0 | NA | 0 | NA | 0 | NA | 0 | NA |
| 19 | 42651821 | 42668082 | 1  | NM_144694    | ZNF570    | 1 | 26 | 0 | NA | 0 | NA | 0 | NA | 0 | NA |
| 19 | 42689680 | 42726079 | 1  | NM_001013659 | ZNF793    | 0 | NA | 0 | NA | 0 | NA | 0 | NA | 0 | NA |
| 19 | 42734147 | 42796836 | 1  | NM_152606    | ZNF540    | 1 | 17 | 1 | 21 | 1 | 12 | 0 | NA | 0 | NA |
| 19 | 42777513 | 42746994 | -1 | NM_016536    | ZNF571    | 0 | NA | 0 | NA | 0 | NA | 0 | NA | 0 | NA |
| 19 | 42838153 | 42815228 | -1 | NM_014898    | ZFP30     | 1 | 14 | 0 | NA | 0 | NA | 0 | NA | 0 | NA |
| 19 | 42874992 | 42850489 | -1 | NM_152605    | ZNF781    | 1 | 19 | 0 | NA | 0 | NA | 0 | NA | 0 | NA |
| 19 | 42902531 | 42879115 | -1 | NM_032689    | ZNF607    | 1 | 11 | 0 | NA | 0 | NA | 0 | NA | 0 | NA |
| 19 | 42962040 | 42921040 | -1 | NM_152360    | ZNF573    | 1 | 11 | 0 | NA | 0 | NA | 0 | NA | 0 | NA |
| 19 | 43089707 | 43390848 | 1  | NM_015073    | SIPA1L3   | 1 | 15 | 0 | NA | 0 | NA | 0 | NA | 0 | NA |
| 19 | 43406628 | 43394194 | -1 | NM_004647    | DPP1      | 0 | NA | 0 | NA | 0 | NA | 0 | NA | 0 | NA |
| 19 | 43439012 | 43433716 | -1 | NM_033256    | PPP1R14A  | 0 | NA | 0 | NA | 0 | NA | 0 | NA | 0 | NA |
| 19 | 43447041 | 43474948 | 1  | NM_021102    | SPINT2    | 0 | NA | 0 | NA | 0 | NA | 0 | NA | 0 | NA |
| 19 | 43486643 | 43487486 | 1  | NM_033520    | C19orf33  | 0 | NA | 0 | NA | 0 | NA | 0 | NA | 0 | NA |
| 19 | 43492349 | 43487583 | -1 | NM_033557    | Y1F1B     | 0 | NA | 0 | NA | 0 | NA | 0 | NA | 0 | NA |
| 19 | 43498254 | 43487583 | -1 | NM_001039671 | Y1F1B     | 0 | NA | 0 | NA | 0 | NA | 0 | NA | 0 | NA |
| 19 | 43498446 | 43487583 | -1 | NM_001039672 | Y1F1B     | 0 | NA | 0 | NA | 0 | NA | 0 | NA | 0 | NA |
| 19 | 43498446 | 43487583 | -1 | NM_001039673 | Y1F1B     | 0 | NA | 0 | NA | 0 | NA | 0 | NA | 0 | NA |
| 19 | 43502323 | 43511489 | 1  | NM_004823    | KCNK6     | 0 | NA | 0 | NA | 0 | NA | 0 | NA | 0 | NA |
| 19 | 43518282 | 43553429 | 1  | NM_021185    | C19orf15  | 0 | NA | 0 | NA | 0 | NA | 0 | NA | 0 | NA |

|    |          |          |    |              |           |   |    |   |    |   |    |   |    |   |    |
|----|----------|----------|----|--------------|-----------|---|----|---|----|---|----|---|----|---|----|
| 19 | 43557029 | 43566304 | 1  | NM_002812    | PSMD8     | 0 | NA | 0 | NA | 0 | NA | 0 | NA | 0 | NA |
| 19 | 43570508 | 43566831 | -1 | NM_152657    | GGN       | 0 | NA | 0 | NA | 0 | NA | 0 | NA | 0 | NA |
| 19 | 43572778 | 43576956 | 1  | NM_001039616 | SPRED3    | 0 | NA | 0 | NA | 0 | NA | 0 | NA | 0 | NA |
| 19 | 43572778 | 43578711 | 1  | NM_001042522 | SPRED3    | 0 | NA | 0 | NA | 0 | NA | 0 | NA | 0 | NA |
| 19 | 43585614 | 43591588 | 1  | NM_174905    | FAM98C    | 0 | NA | 0 | NA | 0 | NA | 0 | NA | 0 | NA |
| 19 | 43608785 | 43591537 | -1 | NM_170604    | RASGRP4   | 0 | NA | 0 | NA | 0 | NA | 0 | NA | 0 | NA |
| 19 | 43616179 | 43770044 | 1  | NM_000540    | RYSR1     | 0 | NA | 0 | NA | 0 | NA | 0 | NA | 0 | NA |
| 19 | 43616179 | 43770044 | 1  | NM_001042723 | RYSR1     | 0 | NA | 0 | NA | 0 | NA | 0 | NA | 0 | NA |
| 19 | 43800483 | 43770120 | -1 | NM_001042600 | MAP4K1    | 1 | 12 | 0 | NA | 0 | NA | 0 | NA | 0 | NA |
| 19 | 43800483 | 43770120 | -1 | NM_007181    | MAP4K1    | 1 | 12 | 0 | NA | 0 | NA | 0 | NA | 0 | NA |
| 19 | 43801561 | 43819435 | 1  | NM_013234    | EIF3K     | 1 | 12 | 0 | NA | 0 | NA | 0 | NA | 0 | NA |
| 19 | 43830166 | 43913010 | 1  | NM_004924    | ACTN4     | 0 | NA | 0 | NA | 1 | 12 | 0 | NA | 0 | NA |
| 19 | 43926954 | 43912671 | -1 | NM_144691    | CAPN12    | 0 | NA | 0 | NA | 0 | NA | 0 | NA | 0 | NA |
| 19 | 43955987 | 43953447 | -1 | NM_002307    | LGALS7    | 0 | NA | 0 | NA | 0 | NA | 0 | NA | 0 | NA |
| 19 | 43971681 | 43974234 | 1  | NM_001042507 | GAL7      | 0 | NA | 0 | NA | 1 | 13 | 0 | NA | 0 | NA |
| 19 | 43995422 | 43984154 | -1 | NM_006149    | LGALS4    | 0 | NA | 0 | NA | 0 | NA | 0 | NA | 0 | NA |
| 19 | 44014337 | 43997901 | -1 | NM_001398    | ECH1      | 1 | 16 | 0 | NA | 0 | NA | 0 | NA | 0 | NA |
| 19 | 44032457 | 44018867 | -1 | NM_001533    | HNRNPL    | 0 | NA | 0 | NA | 1 | 11 | 0 | NA | 0 | NA |
| 19 | 44034819 | 44018867 | -1 | NM_001005335 | HNRNPL    | 0 | NA | 0 | NA | 0 | 11 | 0 | NA | 0 | NA |
| 19 | 44060734 | 44050311 | -1 | NM_198445    | FLJ45909  | 0 | NA | 0 | NA | 0 | NA | 0 | NA | 0 | NA |
| 19 | 44082193 | 44061039 | -1 | NM_030593    | SIRT2     | 0 | NA | 0 | NA | 0 | NA | 0 | NA | 0 | NA |
| 19 | 44082201 | 44061041 | -1 | NM_012237    | SIRT2     | 0 | NA | 0 | NA | 0 | NA | 0 | NA | 0 | NA |
| 19 | 44082454 | 44091374 | 1  | NM_001001716 | NFKBIB    | 0 | NA | 0 | NA | 0 | NA | 0 | NA | 0 | NA |
| 19 | 44082454 | 44091374 | 1  | NM_002503    | NFKBIB    | 0 | NA | 0 | NA | 0 | NA | 0 | NA | 0 | NA |
| 19 | 44113187 | 44115499 | 1  | NM_033362    | MRPS12    | 0 | NA | 0 | NA | 0 | NA | 0 | NA | 0 | NA |
| 19 | 44113376 | 44097746 | -1 | NM_017827    | SARS2     | 0 | NA | 0 | NA | 0 | NA | 0 | NA | 0 | NA |
| 19 | 44113433 | 44115499 | 1  | NM_021107    | MRPS12    | 0 | NA | 0 | NA | 0 | NA | 0 | NA | 0 | NA |
| 19 | 44113433 | 44115499 | 1  | NM_033363    | MRPS12    | 0 | NA | 0 | NA | 0 | NA | 0 | NA | 0 | NA |
| 19 | 44135167 | 44123881 | -1 | NM_148169    | FBXO17    | 0 | NA | 0 | NA | 0 | NA | 0 | NA | 0 | NA |
| 19 | 44158220 | 44123881 | -1 | NM_024907    | FBXO17    | 0 | NA | 1 | 15 | 0 | NA | 0 | NA | 0 | NA |
| 19 | 44215038 | 44206502 | -1 | NM_178820    | FBXO27    | 0 | NA | 0 | NA | 0 | NA | 0 | NA | 0 | NA |
| 19 | 44266784 | 44293318 | 1  | NM_001004318 | FLJ16165  | 0 | NA | 0 | NA | 1 | 21 | 0 | NA | 0 | NA |
| 19 | 44308259 | 44361886 | 1  | NM_001014831 | PAK4      | 0 | NA | 0 | NA | 0 | NA | 0 | NA | 0 | NA |
| 19 | 44308259 | 44361886 | 1  | NM_001014832 | PAK4      | 0 | NA | 0 | NA | 0 | NA | 0 | NA | 0 | NA |
| 19 | 44308259 | 44361886 | 1  | NM_001014834 | PAK4      | 0 | NA | 0 | NA | 0 | NA | 0 | NA | 0 | NA |
| 19 | 44308259 | 44361886 | 1  | NM_001014835 | PAK4      | 0 | NA | 0 | NA | 0 | NA | 0 | NA | 0 | NA |
| 19 | 44308259 | 44361886 | 1  | NM_005884    | PAK4      | 0 | NA | 0 | NA | 0 | NA | 0 | NA | 0 | NA |
| 19 | 44379443 | 44384362 | 1  | NM_001001414 | LOC342897 | 0 | NA | 0 | NA | 0 | NA | 0 | NA | 0 | NA |
| 19 | 44386746 | 44385401 | -1 | NM_001080468 | SYCN      | 0 | NA | 0 | NA | 0 | NA | 0 | NA | 0 | NA |
| 19 | 44427451 | 44426111 | -1 | NM_172139    | IL28B     | 0 | NA | 1 | 24 | 0 | NA | 0 | NA | 0 | NA |
| 19 | 44450996 | 44452572 | 1  | NM_172138    | IL28A     | 0 | NA | 1 | 12 | 0 | NA | 0 | NA | 0 | NA |
| 19 | 44478804 | 44481152 | 1  | NM_172140    | IL29      | 0 | NA | 0 | NA | 0 | NA | 0 | NA | 0 | NA |
| 19 | 44497816 | 44489296 | -1 | NM_020862    | LRFN1     | 0 | NA | 0 | NA | 0 | NA | 0 | NA | 0 | NA |
| 19 | 44518011 | 44510841 | -1 | NM_004877    | GMFG      | 1 | 37 | 0 | NA | 0 | NA | 0 | NA | 0 | NA |
| 19 | 44524947 | 44567377 | 1  | NM_018028    | SAMD4B    | 1 | 37 | 0 | NA | 0 | NA | 0 | NA | 0 | NA |
| 19 | 44573519 | 44568109 | -1 | NM_019088    | PAF1      | 1 | 14 | 0 | NA | 0 | NA | 0 | NA | 0 | NA |
| 19 | 44573802 | 44583043 | 1  | NM_017592    | MED29     | 1 | 14 | 0 | NA | 0 | NA | 0 | NA | 0 | NA |
| 19 | 44589326 | 44591885 | 1  | NM_003407    | ZFP36     | 1 | 11 | 0 | NA | 0 | NA | 1 | 11 | 0 | NA |
| 19 | 44595589 | 44610895 | 1  | NM_022835    | PLEKHG2   | 1 | 15 | 0 | NA | 0 | NA | 1 | 11 | 0 | NA |
| 19 | 44618458 | 44615686 | -1 | NM_001020    | RPS16     | 0 | NA | 0 | NA | 0 | NA | 0 | NA | 0 | NA |
| 19 | 44628055 | 44659148 | 1  | NM_001111020 | SUPT5H    | 0 | NA | 0 | NA | 0 | NA | 0 | NA | 0 | NA |
| 19 | 44628127 | 44659148 | 1  | NM_003169    | SUPT5H    | 0 | NA | 0 | NA | 0 | NA | 0 | NA | 0 | NA |
| 19 | 44662891 | 44673368 | 1  | NM_001001563 | TIMM50    | 0 | NA | 0 | NA | 0 | NA | 0 | NA | 0 | NA |
| 19 | 44681426 | 44690949 | 1  | NM_016941    | DLL3      | 0 | NA | 0 | NA | 0 | NA | 1 | 11 | 0 | NA |
| 19 | 44681426 | 44690949 | 1  | NM_203486    | DLL3      | 0 | NA | 0 | NA | 0 | NA | 1 | 11 | 0 | NA |
| 19 | 44697592 | 44703166 | 1  | NM_182704    | SELV      | 0 | NA | 1 | 12 | 0 | NA | 0 | NA | 1 | 12 |
| 19 | 44715334 | 44713469 | -1 | NM_152361    | EID2B     | 0 | NA | 0 | NA | 0 | NA | 0 | NA | 0 | NA |
| 19 | 44722678 | 44721286 | -1 | NM_153232    | EID2      | 0 | NA | 0 | NA | 0 | NA | 0 | NA | 0 | NA |
| 19 | 44785008 | 44789954 | 1  | NM_013268    | LGALS13   | 0 | NA | 0 | NA | 0 | NA | 0 | NA | 0 | NA |
| 19 | 44886785 | 44891928 | 1  | NM_020129    | LGALS14   | 0 | NA | 0 | NA | 0 | NA | 0 | NA | 0 | NA |
| 19 | 44886785 | 44891928 | 1  | NM_203471    | LGALS14   | 0 | NA | 0 | NA | 0 | NA | 0 | NA | 0 | NA |
| 19 | 44920508 | 44913734 | -1 | NM_001828    | CLC       | 0 | NA | 0 | NA | 0 | NA | 0 | NA | 0 | NA |
| 19 | 45016681 | 45007829 | -1 | NM_004714    | DYRK1B    | 0 | NA | 0 | NA | 0 | NA | 0 | NA | 0 | NA |
| 19 | 45016681 | 45007829 | -1 | NM_006483    | DYRK1B    | 0 | NA | 0 | NA | 0 | NA | 0 | NA | 0 | NA |
| 19 | 45016681 | 45007829 | -1 | NM_006484    | DYRK1B    | 0 | NA | 0 | NA | 0 | NA | 0 | NA | 0 | NA |



|    |          |          |    |              |          |   |    |   |    |   |    |   |    |   |    |
|----|----------|----------|----|--------------|----------|---|----|---|----|---|----|---|----|---|----|
| 19 | 45028813 | 45016937 | -1 | NM_001436    | FBL      | 0 | NA | 0 | NA | 0 | NA | 0 | NA | 0 | NA |
| 19 | 45132373 | 45045802 | -1 | NM_003890    | FCGBP    | 0 | NA | 0 | NA | 0 | NA | 0 | NA | 0 | NA |
| 19 | 45168912 | 45179193 | 1  | NM_006503    | PSMC4    | 0 | NA | 0 | NA | 0 | NA | 0 | NA | 0 | NA |
| 19 | 45168912 | 45179193 | 1  | NM_153001    | PSMC4    | 0 | NA | 0 | NA | 0 | NA | 0 | NA | 0 | NA |
| 19 | 45194868 | 45215354 | 1  | NM_178544    | ZNF546   | 0 | NA | 0 | NA | 0 | NA | 0 | NA | 0 | NA |
| 19 | 45246543 | 45232103 | -1 | NM_001005851 | ZNF780B  | 1 | 12 | 0 | NA | 0 | NA | 0 | NA | 0 | NA |
| 19 | 45280891 | 45272262 | -1 | NM_001010880 | ZNF780A  | 0 | NA | 0 | NA | 0 | NA | 0 | NA | 0 | NA |
| 19 | 45389490 | 45413314 | 1  | NM_002446    | MAP3K10  | 1 | 19 | 0 | NA | 0 | NA | 0 | NA | 0 | NA |
| 19 | 45416138 | 45413804 | -1 | NM_152479    | TTC9B    | 0 | NA | 0 | NA | 0 | NA | 0 | NA | 0 | NA |
| 19 | 45424404 | 45419961 | -1 | NM_024877    | CNTD2    | 0 | NA | 0 | NA | 0 | NA | 0 | NA | 0 | NA |
| 19 | 45483105 | 45428063 | -1 | NM_001626    | AKT2     | 0 | NA | 0 | NA | 0 | NA | 0 | NA | 0 | NA |
| 19 | 45546133 | 45518810 | -1 | NM_178830    | C19orf47 | 0 | NA | 0 | NA | 0 | NA | 0 | NA | 0 | NA |
| 19 | 45546171 | 45576230 | 1  | NM_001031696 | PLD3     | 0 | NA | 0 | NA | 0 | NA | 0 | NA | 0 | NA |
| 19 | 45546171 | 45576230 | 1  | NM_012268    | PLD3     | 0 | NA | 0 | NA | 0 | NA | 0 | NA | 0 | NA |
| 19 | 45587934 | 45577017 | -1 | NM_144685    | HIPK4    | 0 | NA | 0 | NA | 1 | 12 | 0 | NA | 0 | NA |
| 19 | 45611111 | 45591510 | -1 | NM_020956    | PRX      | 0 | NA | 0 | NA | 0 | NA | 1 | 18 | 0 | NA |
| 19 | 45611111 | 45591510 | -1 | NM_181882    | PRX      | 0 | NA | 0 | NA | 0 | NA | 1 | 18 | 0 | NA |
| 19 | 45623772 | 45620248 | -1 | NM_013376    | SERTAD1  | 1 | 13 | 0 | NA | 0 | NA | 1 | 18 | 0 | NA |
| 19 | 45640345 | 45638590 | -1 | NM_013368    | SERTAD3  | 0 | NA | 0 | NA | 0 | NA | 1 | 13 | 0 | NA |
| 19 | 45642122 | 45638590 | -1 | NM_203344    | SERTAD3  | 0 | NA | 0 | NA | 0 | NA | 1 | 13 | 0 | NA |
| 19 | 45663565 | 45645530 | -1 | NM_000713    | BLVRB    | 0 | NA | 1 | 12 | 0 | NA | 0 | NA | 0 | NA |
| 19 | 45664965 | 45774205 | 1  | NM_020971    | SPTBN4   | 0 | NA | 1 | 12 | 0 | NA | 0 | NA | 0 | NA |
| 19 | 45728234 | 45758498 | 1  | NM_025213    | SPTBN4   | 0 | NA | 0 | NA | 0 | NA | 0 | NA | 0 | NA |
| 19 | 45774629 | 45789141 | 1  | NM_138392    | SHKBP1   | 0 | NA | 0 | NA | 0 | NA | 1 | 11 | 0 | NA |
| 19 | 45790911 | 45827565 | 1  | NM_003573    | LTBP4    | 0 | NA | 0 | NA | 0 | NA | 0 | NA | 0 | NA |
| 19 | 45794980 | 45827565 | 1  | NM_001042544 | LTBP4    | 0 | NA | 0 | NA | 0 | NA | 1 | 11 | 0 | NA |
| 19 | 45799116 | 45827565 | 1  | NM_001042545 | LTBP4    | 0 | NA | 0 | NA | 0 | NA | 1 | 11 | 0 | NA |
| 19 | 45888396 | 45863651 | -1 | NM_004756    | NUMBL    | 0 | NA | 0 | NA | 0 | NA | 0 | NA | 0 | NA |
| 19 | 45914440 | 45889273 | -1 | NM_024876    | ADCK4    | 0 | NA | 0 | NA | 0 | NA | 0 | NA | 0 | NA |
| 19 | 45914847 | 45938605 | 1  | NM_025194    | ITPKC    | 0 | NA | 0 | NA | 0 | NA | 0 | NA | 0 | NA |
| 19 | 45947668 | 45938600 | -1 | NM_198476    | C19orf54 | 0 | NA | 0 | NA | 0 | NA | 0 | NA | 0 | NA |
| 19 | 45948618 | 45963134 | 1  | NM_004596    | SNRPA    | 0 | NA | 0 | NA | 0 | NA | 0 | NA | 0 | NA |
| 19 | 45973139 | 45975234 | 1  | NM_006533    | MIA      | 0 | NA | 0 | NA | 0 | NA | 0 | NA | 0 | NA |
| 19 | 45976010 | 45994687 | 1  | NM_016154    | RAB4B    | 0 | NA | 0 | NA | 0 | NA | 0 | NA | 0 | NA |
| 19 | 45996887 | 46006177 | 1  | NM_080732    | EGLN2    | 0 | NA | 0 | NA | 0 | NA | 0 | NA | 0 | NA |
| 19 | 45998020 | 46006177 | 1  | NM_053046    | EGLN2    | 0 | NA | 0 | NA | 0 | NA | 0 | NA | 0 | NA |
| 19 | 46048180 | 46041283 | -1 | NM_000762    | CYP2A6   | 0 | NA | 0 | NA | 0 | NA | 0 | NA | 0 | NA |
| 19 | 46080497 | 46073183 | -1 | NM_000764    | CYP2A7   | 0 | NA | 0 | NA | 0 | NA | 0 | NA | 0 | NA |
| 19 | 46080497 | 46073183 | -1 | NM_030589    | CYP2A7   | 0 | NA | 0 | NA | 0 | NA | 0 | NA | 0 | NA |
| 19 | 46189043 | 46216141 | 1  | NM_000767    | CYP2B6   | 0 | NA | 0 | NA | 0 | NA | 0 | NA | 0 | NA |
| 19 | 46286207 | 46293939 | 1  | NM_000766    | CYP2A13  | 0 | NA | 0 | NA | 0 | NA | 0 | NA | 0 | NA |
| 19 | 46312192 | 46326121 | 1  | NM_000774    | CYP2F1   | 0 | NA | 0 | NA | 0 | NA | 0 | NA | 0 | NA |
| 19 | 46390954 | 46405284 | 1  | NM_030622    | CYP2S1   | 0 | NA | 0 | NA | 0 | NA | 0 | NA | 0 | NA |
| 19 | 46416947 | 46459511 | 1  | NM_001699    | AXL      | 0 | NA | 0 | NA | 0 | NA | 0 | NA | 0 | NA |
| 19 | 46416947 | 46459511 | 1  | NM_021913    | AXL      | 0 | NA | 0 | NA | 0 | NA | 0 | NA | 0 | NA |
| 19 | 46460230 | 46505651 | 1  | NM_144732    | HNRNPUL1 | 1 | 11 | 0 | NA | 0 | NA | 0 | NA | 0 | NA |
| 19 | 46461959 | 46505651 | 1  | NM_007040    | HNRNPUL1 | 1 | 11 | 0 | NA | 0 | NA | 0 | NA | 0 | NA |
| 19 | 46507933 | 46522628 | 1  | NM_052848    | CCDC97   | 1 | 12 | 0 | NA | 0 | NA | 0 | NA | 0 | NA |
| 19 | 46551656 | 46528490 | -1 | NM_000660    | TGFB1    | 0 | NA | 0 | NA | 0 | NA | 0 | NA | 0 | NA |
| 19 | 46561710 | 46581827 | 1  | NM_001098825 | TMEM91   | 0 | NA | 0 | NA | 0 | NA | 0 | NA | 0 | NA |
| 19 | 46561877 | 46552165 | -1 | NM_030578    | BSD2     | 0 | NA | 0 | NA | 0 | NA | 0 | NA | 0 | NA |
| 19 | 46574277 | 46581827 | 1  | NM_001098821 | TMEM91   | 0 | NA | 0 | NA | 0 | NA | 0 | NA | 0 | NA |
| 19 | 46574277 | 46581827 | 1  | NM_001098822 | TMEM91   | 0 | NA | 0 | NA | 0 | NA | 0 | NA | 0 | NA |
| 19 | 46574277 | 46581827 | 1  | NM_001098823 | TMEM91   | 0 | NA | 0 | NA | 0 | NA | 0 | NA | 0 | NA |
| 19 | 46574277 | 46581827 | 1  | NM_001098824 | TMEM91   | 0 | NA | 0 | NA | 0 | NA | 0 | NA | 0 | NA |
| 19 | 46575008 | 46581827 | 1  | NM_001042595 | TMEM91   | 0 | NA | 0 | NA | 0 | NA | 0 | NA | 0 | NA |
| 19 | 46595096 | 46584115 | -1 | NM_020158    | EXOSC5   | 0 | NA | 0 | NA | 0 | NA | 1 | 12 | 0 | NA |
| 19 | 46595543 | 46622750 | 1  | NM_000709    | BCKDHA   | 0 | NA | 0 | NA | 0 | NA | 1 | 12 | 0 | NA |
| 19 | 46626475 | 46623103 | -1 | NM_198540    | B3GNT8   | 0 | NA | 0 | NA | 0 | NA | 0 | NA | 0 | NA |
| 19 | 46637650 | 46629063 | -1 | NM_018035    | ATP5SL   | 0 | NA | 1 | 15 | 0 | NA | 0 | NA | 0 | NA |
| 19 | 46774370 | 46785037 | 1  | NM_001098506 | CEACAM21 | 0 | NA | 0 | NA | 0 | NA | 0 | NA | 0 | NA |
| 19 | 46774370 | 46785037 | 1  | NM_033543    | CEACAM21 | 0 | NA | 0 | NA | 0 | NA | 0 | NA | 0 | NA |
| 19 | 46825282 | 46817183 | -1 | NM_001817    | CEACAM4  | 0 | NA | 0 | NA | 0 | NA | 0 | NA | 0 | NA |
| 19 | 46883936 | 46869074 | -1 | NM_006890    | CEACAM7  | 0 | NA | 0 | NA | 0 | NA | 0 | NA | 0 | NA |
| 19 | 46904369 | 46926277 | 1  | NM_004363    | CEACAM5  | 0 | NA | 0 | NA | 0 | NA | 0 | NA | 0 | NA |

|    |          |          |    |              |          |   |    |   |    |   |    |   |    |   |    |
|----|----------|----------|----|--------------|----------|---|----|---|----|---|----|---|----|---|----|
| 19 | 46951340 | 46967953 | 1  | NM_002483    | CEACAM6  | 0 | NA | 0 | NA | 0 | NA | 0 | NA | 0 | NA |
| 19 | 46992373 | 47007431 | 1  | NM_001815    | CEACAM3  | 0 | NA | 0 | NA | 0 | NA | 0 | NA | 0 | NA |
| 19 | 47040348 | 47032989 | -1 | NM_173506    | LYPD4    | 0 | NA | 1 | 17 | 0 | NA | 0 | NA | 0 | NA |
| 19 | 47040925 | 47048237 | 1  | NM_001040283 | DMRTC2   | 0 | NA | 1 | 17 | 0 | NA | 0 | NA | 0 | NA |
| 19 | 47055827 | 47067324 | 1  | NM_001022    | RPS19    | 1 | 17 | 0 | NA | 0 | NA | 0 | NA | 0 | NA |
| 19 | 47073029 | 47077279 | 1  | NM_001783    | CD79A    | 0 | NA | 0 | NA | 0 | NA | 0 | NA | 0 | NA |
| 19 | 47073029 | 47077279 | 1  | NM_021601    | CD79A    | 0 | NA | 0 | NA | 0 | NA | 0 | NA | 0 | NA |
| 19 | 47079106 | 47103444 | 1  | NM_004706    | ARHGEF1  | 0 | NA | 0 | NA | 0 | NA | 0 | NA | 0 | NA |
| 19 | 47079106 | 47103444 | 1  | NM_198977    | ARHGEF1  | 0 | NA | 0 | NA | 0 | NA | 0 | NA | 0 | NA |
| 19 | 47080285 | 47103444 | 1  | NM_199002    | ARHGEF1  | 0 | NA | 0 | NA | 0 | NA | 0 | NA | 0 | NA |
| 19 | 47155311 | 47152675 | -1 | NM_006423    | RABAC1   | 0 | NA | 0 | NA | 0 | NA | 0 | NA | 0 | NA |
| 19 | 47190222 | 47162573 | -1 | NM_152296    | ATP1A3   | 0 | NA | 0 | NA | 0 | NA | 0 | NA | 0 | NA |
| 19 | 47261797 | 47194312 | -1 | NM_002088    | GRIK5    | 1 | 11 | 0 | NA | 0 | NA | 0 | NA | 0 | NA |
| 19 | 47272129 | 47277560 | 1  | NM_022752    | ZNF574   | 1 | 11 | 0 | NA | 0 | NA | 0 | NA | 0 | NA |
| 19 | 47328470 | 47284505 | -1 | NM_002698    | POU2F2   | 0 | NA | 0 | NA | 0 | NA | 0 | NA | 0 | NA |
| 19 | 47413653 | 47394591 | -1 | NM_133328    | DEDD2    | 0 | NA | 0 | NA | 0 | NA | 0 | NA | 0 | NA |
| 19 | 47416331 | 47424193 | 1  | NM_133444    | ZNF526   | 0 | NA | 0 | NA | 0 | NA | 0 | NA | 0 | NA |
| 19 | 47438576 | 47426177 | -1 | NM_019884    | GSK3A    | 1 | 11 | 0 | NA | 0 | NA | 0 | NA | 0 | NA |
| 19 | 47451149 | 47443556 | -1 | NM_006494    | ERF      | 1 | 11 | 0 | NA | 0 | NA | 0 | NA | 0 | NA |
| 19 | 47480656 | 47491789 | 1  | NM_015125    | CIC      | 1 | 11 | 0 | NA | 1 | 12 | 0 | NA | 0 | NA |
| 19 | 47498123 | 47506813 | 1  | NM_199285    | PRR19    | 0 | NA | 0 | NA | 1 | 13 | 0 | NA | 0 | NA |
| 19 | 47498563 | 47493024 | -1 | NM_002573    | PAFAH1B3 | 0 | NA | 0 | NA | 1 | 13 | 0 | NA | 0 | NA |
| 19 | 47509316 | 47521054 | 1  | NM_173633    | TMEM145  | 0 | NA | 0 | NA | 0 | NA | 0 | NA | 0 | NA |
| 19 | 47521600 | 47574761 | 1  | NM_001410    | MEGF8    | 1 | 17 | 0 | NA | 0 | NA | 1 | 12 | 0 | NA |
| 19 | 47586284 | 47583010 | -1 | NM_032488    | CNFN     | 0 | NA | 1 | 15 | 1 | 15 | 0 | NA | 0 | NA |
| 19 | 47623418 | 47597505 | -1 | NM_005357    | LIPE     | 1 | 13 | 0 | NA | 0 | NA | 0 | NA | 0 | NA |
| 19 | 47638976 | 47624534 | -1 | NM_198477    | CXCL17   | 1 | 11 | 0 | NA | 0 | NA | 0 | NA | 0 | NA |
| 19 | 47724479 | 47703297 | -1 | NM_001024912 | CEACAM1  | 0 | NA | 0 | NA | 0 | NA | 0 | NA | 0 | NA |
| 19 | 47724479 | 47703297 | -1 | NM_001712    | CEACAM1  | 0 | NA | 0 | NA | 0 | NA | 0 | NA | 0 | NA |
| 19 | 47790890 | 47776234 | -1 | NM_001816    | CEACAM8  | 0 | NA | 0 | NA | 0 | NA | 0 | NA | 0 | NA |
| 19 | 47936508 | 47917633 | -1 | NM_021016    | PSG3     | 0 | NA | 0 | NA | 0 | NA | 0 | NA | 0 | NA |
| 19 | 47961573 | 47950286 | -1 | NM_182707    | PSG8     | 0 | NA | 0 | NA | 0 | NA | 0 | NA | 0 | NA |
| 19 | 48075711 | 48063197 | -1 | NM_006905    | PSG1     | 0 | NA | 0 | NA | 0 | NA | 0 | NA | 0 | NA |
| 19 | 48113829 | 48099607 | -1 | NM_002782    | PSG6     | 0 | NA | 0 | NA | 0 | NA | 0 | NA | 0 | NA |
| 19 | 48113883 | 48098079 | -1 | NM_001031850 | PSG6     | 0 | NA | 0 | NA | 0 | NA | 0 | NA | 0 | NA |
| 19 | 48133170 | 48120123 | -1 | NM_002783    | PSG7     | 0 | NA | 0 | NA | 0 | NA | 0 | NA | 0 | NA |
| 19 | 48222471 | 48203648 | -1 | NM_00113410  | PSG11    | 0 | NA | 0 | NA | 0 | NA | 0 | NA | 0 | NA |
| 19 | 48222471 | 48203648 | -1 | NM_002785    | PSG11    | 0 | NA | 0 | NA | 0 | NA | 0 | NA | 0 | NA |
| 19 | 48222471 | 48203648 | -1 | NM_203287    | PSG11    | 0 | NA | 0 | NA | 0 | NA | 0 | NA | 0 | NA |
| 19 | 48278654 | 48260201 | -1 | NM_031246    | PSG2     | 0 | NA | 0 | NA | 0 | NA | 0 | NA | 0 | NA |
| 19 | 48382492 | 48363734 | -1 | NM_002781    | PSG5     | 0 | NA | 0 | NA | 0 | NA | 0 | NA | 0 | NA |
| 19 | 48401630 | 48388693 | -1 | NM_002780    | PSG4     | 0 | NA | 0 | NA | 0 | NA | 0 | NA | 0 | NA |
| 19 | 48401630 | 48388693 | -1 | NM_213633    | PSG4     | 0 | NA | 0 | NA | 0 | NA | 0 | NA | 0 | NA |
| 19 | 48465522 | 48449274 | -1 | NM_002784    | PSG9     | 0 | NA | 0 | NA | 0 | NA | 0 | NA | 0 | NA |
| 19 | 48549664 | 48559320 | 1  | NM_020406    | CD177    | 0 | NA | 0 | NA | 0 | NA | 0 | NA | 0 | NA |
| 19 | 48584602 | 48614589 | 1  | NM_031451    | TEX101   | 0 | NA | 0 | NA | 0 | NA | 0 | NA | 0 | NA |
| 19 | 48661671 | 48656785 | -1 | NM_014400    | LYPD3    | 1 | 15 | 0 | NA | 0 | NA | 0 | NA | 0 | NA |
| 19 | 48700825 | 48671094 | -1 | NM_198850    | PHLDB3   | 0 | NA | 0 | NA | 0 | NA | 0 | NA | 0 | NA |
| 19 | 48723236 | 48702710 | -1 | NM_014297    | ETHE1    | 1 | 21 | 0 | NA | 0 | NA | 1 | 15 | 0 | NA |
| 19 | 48729168 | 48732124 | 1  | NM_174945    | ZNF575   | 1 | 21 | 0 | NA | 0 | NA | 1 | 15 | 0 | NA |
| 19 | 48771555 | 48739303 | -1 | NM_006297    | XRCC1    | 0 | NA | 0 | NA | 0 | NA | 0 | NA | 0 | NA |
| 19 | 48791516 | 48787865 | -1 | NM_001007561 | IRGQ     | 0 | NA | 0 | NA | 0 | NA | 0 | NA | 0 | NA |
| 19 | 48792383 | 48795996 | 1  | NM_024327    | ZNF576   | 0 | NA | 0 | NA | 0 | NA | 0 | NA | 0 | NA |
| 19 | 48815846 | 48803215 | -1 | NM_182498    | ZNF428   | 1 | 20 | 0 | NA | 0 | NA | 0 | NA | 0 | NA |
| 19 | 48835831 | 48818361 | -1 | NM_145296    | CADM4    | 0 | NA | 0 | NA | 0 | NA | 0 | NA | 0 | NA |
| 19 | 48866342 | 48842087 | -1 | NM_001005376 | PLAUR    | 0 | NA | 0 | NA | 0 | NA | 0 | NA | 0 | NA |
| 19 | 48866342 | 48844571 | -1 | NM_001005377 | PLAUR    | 0 | NA | 0 | NA | 0 | NA | 0 | NA | 0 | NA |
| 19 | 48866342 | 48844571 | -1 | NM_002659    | PLAUR    | 0 | NA | 0 | NA | 0 | NA | 0 | NA | 0 | NA |
| 19 | 48912077 | 48916009 | 1  | NM_019612    | IRGC     | 0 | NA | 0 | NA | 0 | NA | 0 | NA | 0 | NA |
| 19 | 48950982 | 48927140 | -1 | NM_019108    | C19orf61 | 1 | 16 | 0 | NA | 0 | NA | 0 | NA | 0 | NA |
| 19 | 48977249 | 48962524 | -1 | NM_002250    | KCNN4    | 0 | NA | 0 | NA | 1 | 13 | 0 | NA | 0 | NA |
| 19 | 48998453 | 48991918 | -1 | NM_001031749 | LYPD5    | 1 | 11 | 0 | NA | 1 | 12 | 0 | NA | 0 | NA |
| 19 | 49016648 | 48991918 | -1 | NM_182573    | LYPD5    | 0 | NA | 1 | 19 | 0 | NA | 0 | NA | 1 | 12 |
| 19 | 49023312 | 49044890 | 1  | NM_181845    | ZNF283   | 0 | NA | 1 | 13 | 0 | NA | 0 | NA | 1 | 12 |
| 19 | 49076128 | 49068354 | -1 | NM_001033719 | ZNF404   | 0 | NA | 0 | NA | 0 | NA | 0 | NA | 0 | NA |

|    |          |          |    |              |          |   |    |   |    |   |    |   |    |   |    |
|----|----------|----------|----|--------------|----------|---|----|---|----|---|----|---|----|---|----|
| 19 | 49121398 | 49108620 | -1 | NM_003425    | ZNF45    | 1 | 14 | 0 | NA | 0 | NA | 0 | NA | 0 | NA |
| 19 | 49147236 | 49163592 | 1  | NM_013359    | ZNF221   | 1 | 21 | 0 | NA | 0 | NA | 1 | 18 | 0 | NA |
| 19 | 49180194 | 49194317 | 1  | NM_003445    | ZNF155   | 1 | 15 | 0 | NA | 1 | 13 | 0 | NA | 0 | NA |
| 19 | 49180194 | 49194317 | 1  | NM_198089    | ZNF155   | 1 | 15 | 0 | NA | 1 | 13 | 0 | NA | 0 | NA |
| 19 | 49198916 | 49209912 | 1  | NM_006300    | ZNF230   | 1 | 19 | 0 | NA | 1 | 13 | 1 | 14 | 0 | NA |
| 19 | 49221355 | 49229100 | 1  | NM_013360    | ZNF222   | 1 | 25 | 0 | NA | 1 | 15 | 0 | NA | 0 | NA |
| 19 | 49248003 | 49263982 | 1  | NM_013361    | ZNF223   | 0 | NA | 0 | NA | 0 | NA | 0 | NA | 0 | NA |
| 19 | 49268136 | 49283463 | 1  | NM_001037813 | ZNF284   | 1 | 11 | 0 | NA | 1 | 15 | 0 | NA | 0 | NA |
| 19 | 49290336 | 49304317 | 1  | NM_013398    | ZNF224   | 0 | NA | 0 | NA | 0 | NA | 0 | NA | 0 | NA |
| 19 | 49309387 | 49329095 | 1  | NM_013362    | ZNF225   | 1 | 11 | 0 | NA | 1 | 13 | 0 | NA | 0 | NA |
| 19 | 49337617 | 49354116 | 1  | NM_006630    | ZNF234   | 0 | NA | 0 | NA | 0 | NA | 1 | 15 | 0 | NA |
| 19 | 49361088 | 49371422 | 1  | NM_001032374 | ZNF226   | 1 | 17 | 0 | NA | 1 | 17 | 1 | 14 | 0 | NA |
| 19 | 49361088 | 49371422 | 1  | NM_015919    | ZNF226   | 1 | 17 | 0 | NA | 1 | 17 | 1 | 14 | 0 | NA |
| 19 | 49361088 | 49373678 | 1  | NM_001032373 | ZNF226   | 1 | 17 | 0 | NA | 1 | 17 | 1 | 14 | 0 | NA |
| 19 | 49361156 | 49373678 | 1  | NM_001032372 | ZNF226   | 0 | NA | 1 | 17 | 1 | 17 | 1 | 14 | 0 | NA |
| 19 | 49361578 | 49371422 | 1  | NM_001032375 | ZNF226   | 1 | 17 | 0 | NA | 1 | 17 | 1 | 14 | 0 | NA |
| 19 | 49408530 | 49433261 | 1  | NM_182490    | ZNF227   | 1 | 11 | 1 | 12 | 1 | 24 | 0 | NA | 0 | NA |
| 19 | 49455915 | 49471308 | 1  | NM_181756    | ZNF233   | 0 | NA | 0 | NA | 0 | NA | 0 | NA | 0 | NA |
| 19 | 49501010 | 49482439 | -1 | NM_004234    | ZNF235   | 1 | 22 | 0 | NA | 0 | NA | 0 | NA | 0 | NA |
| 19 | 49552696 | 49522545 | -1 | NM_001083335 | ZNF228   | 0 | NA | 0 | NA | 0 | NA | 0 | NA | 0 | NA |
| 19 | 49552696 | 49522545 | -1 | NM_013380    | ZNF228   | 0 | NA | 0 | NA | 0 | NA | 0 | NA | 0 | NA |
| 19 | 49597617 | 49581647 | -1 | NM_152354    | ZNF285A  | 1 | 26 | 1 | 13 | 0 | NA | 0 | NA | 0 | NA |
| 19 | 49644505 | 49622265 | -1 | NM_014518    | ZNF229   | 0 | NA | 1 | 30 | 0 | NA | 0 | NA | 0 | NA |
| 19 | 49696395 | 49671700 | -1 | NM_013256    | ZNF180   | 0 | NA | 1 | 21 | 0 | NA | 0 | NA | 1 | 13 |
| 19 | 49725388 | 49702050 | -1 | NM_001102597 | CEACAM20 | 0 | NA | 1 | 12 | 0 | NA | 0 | NA | 0 | NA |
| 19 | 49725388 | 49702050 | -1 | NM_001102598 | CEACAM20 | 0 | NA | 1 | 12 | 0 | NA | 0 | NA | 0 | NA |
| 19 | 49725388 | 49702050 | -1 | NM_001102599 | CEACAM20 | 0 | NA | 1 | 12 | 0 | NA | 0 | NA | 0 | NA |
| 19 | 49725388 | 49702050 | -1 | NM_001102600 | CEACAM20 | 0 | NA | 1 | 12 | 0 | NA | 0 | NA | 0 | NA |
| 19 | 49839065 | 49858690 | 1  | NM_006505    | PVR      | 0 | NA | 0 | NA | 0 | NA | 0 | NA | 0 | NA |
| 19 | 49866833 | 49879350 | 1  | NM_020219    | CEACAM19 | 0 | NA | 0 | NA | 0 | NA | 0 | NA | 0 | NA |
| 19 | 49894197 | 49905826 | 1  | NM_001039213 | CEACAM16 | 0 | NA | 1 | 12 | 0 | NA | 0 | NA | 0 | NA |
| 19 | 49943817 | 49955141 | 1  | NM_005178    | BCL3     | 1 | 14 | 0 | NA | 1 | 20 | 0 | NA | 0 | NA |
| 19 | 49972987 | 49995731 | 1  | NM_012116    | CBLC     | 0 | NA | 0 | NA | 0 | NA | 0 | NA | 0 | NA |
| 19 | 50004177 | 50015450 | 1  | NM_001013257 | BCAM     | 0 | NA | 0 | NA | 0 | NA | 0 | NA | 0 | NA |
| 19 | 50004177 | 50016518 | 1  | NM_005581    | BCAM     | 0 | NA | 0 | NA | 0 | NA | 0 | NA | 0 | NA |
| 19 | 50041232 | 50074038 | 1  | NM_002856    | PVRL2    | 0 | NA | 0 | NA | 0 | NA | 0 | NA | 0 | NA |
| 19 | 50041232 | 50084325 | 1  | NM_001042724 | PVRL2    | 0 | NA | 0 | NA | 0 | NA | 0 | NA | 0 | NA |
| 19 | 50086333 | 50098777 | 1  | NM_006114    | TOMM40   | 0 | NA | 0 | NA | 0 | NA | 1 | 17 | 0 | NA |
| 19 | 50100878 | 50104490 | 1  | NM_000041    | APOE     | 0 | NA | 0 | NA | 0 | NA | 0 | NA | 0 | NA |
| 19 | 50109760 | 50114446 | 1  | NM_001645    | APOC1    | 0 | NA | 0 | NA | 0 | NA | 0 | NA | 0 | NA |
| 19 | 50137334 | 50140591 | 1  | NM_001646    | APOC4    | 0 | NA | 0 | NA | 0 | NA | 0 | NA | 0 | NA |
| 19 | 50141082 | 50144658 | 1  | NM_000483    | APOC2    | 0 | NA | 0 | NA | 0 | NA | 0 | NA | 0 | NA |
| 19 | 50150477 | 50188439 | 1  | NM_001294    | CLPTM1   | 0 | NA | 0 | NA | 0 | NA | 0 | NA | 0 | NA |
| 19 | 50196551 | 50233292 | 1  | NM_006509    | RELB     | 0 | NA | 0 | NA | 0 | NA | 0 | NA | 0 | NA |
| 19 | 50234137 | 50266054 | 1  | NM_007056    | SFRS16   | 0 | NA | 0 | NA | 0 | NA | 0 | NA | 0 | NA |
| 19 | 50271528 | 50266597 | -1 | NM_145288    | ZNF342   | 1 | 12 | 0 | NA | 0 | NA | 0 | NA | 0 | NA |
| 19 | 50274357 | 50286622 | 1  | NM_001007270 | GEMIN7   | 1 | 12 | 0 | NA | 0 | NA | 0 | NA | 0 | NA |
| 19 | 50274369 | 50286622 | 1  | NM_001007269 | GEMIN7   | 1 | 12 | 0 | NA | 0 | NA | 0 | NA | 0 | NA |
| 19 | 50274369 | 50286622 | 1  | NM_024707    | GEMIN7   | 1 | 12 | 0 | NA | 0 | NA | 0 | NA | 0 | NA |
| 19 | 50348950 | 50347000 | -1 | NM_198478    | NKPD1    | 0 | NA | 1 | 33 | 0 | NA | 0 | NA | 0 | NA |
| 19 | 50373325 | 50358025 | -1 | NM_024108    | TRAPPC6A | 0 | NA | 0 | NA | 0 | NA | 0 | NA | 0 | NA |
| 19 | 50373842 | 50376898 | 1  | NM_212550    | BLOC1S3  | 0 | NA | 0 | NA | 0 | NA | 0 | NA | 0 | NA |
| 19 | 50429309 | 50407718 | -1 | NM_138568    | EXOC3L2  | 0 | NA | 0 | NA | 0 | NA | 0 | NA | 0 | NA |
| 19 | 50446681 | 50500381 | 1  | NM_031417    | MARK4    | 0 | NA | 0 | NA | 0 | NA | 0 | NA | 0 | NA |
| 19 | 50517974 | 50501510 | -1 | NM_001824    | CKM      | 0 | NA | 0 | NA | 0 | NA | 0 | NA | 0 | NA |
| 19 | 50535837 | 50546618 | 1  | NM_177417    | KLC3     | 0 | NA | 0 | NA | 0 | NA | 0 | NA | 0 | NA |
| 19 | 50565669 | 50546685 | -1 | NM_000400    | ERCC2    | 0 | NA | 0 | NA | 0 | NA | 0 | NA | 0 | NA |
| 19 | 50600129 | 50574736 | -1 | NM_006663    | PPP1R13L | 1 | 13 | 0 | NA | 0 | NA | 1 | 12 | 0 | NA |
| 19 | 50601306 | 50605984 | 1  | NM_012099    | CD3EAP   | 1 | 13 | 0 | NA | 0 | NA | 1 | 12 | 0 | NA |
| 19 | 50618642 | 50608531 | -1 | NM_202001    | ERCC1    | 1 | 17 | 0 | NA | 1 | 24 | 0 | NA | 0 | NA |
| 19 | 50619017 | 50604711 | -1 | NM_001983    | ERCC1    | 1 | 17 | 0 | NA | 1 | 24 | 0 | NA | 0 | NA |
| 19 | 50663092 | 50670277 | 1  | NM_001114171 | FOSB     | 0 | NA | 0 | NA | 0 | NA | 1 | 12 | 0 | NA |
| 19 | 50663092 | 50670277 | 1  | NM_006732    | FOSB     | 0 | NA | 0 | NA | 0 | NA | 1 | 12 | 0 | NA |
| 19 | 50688314 | 50680389 | -1 | NM_206901    | RTN2     | 0 | NA | 0 | NA | 0 | NA | 0 | NA | 0 | NA |
| 19 | 50692151 | 50680389 | -1 | NM_005619    | RTN2     | 0 | NA | 0 | NA | 0 | NA | 0 | NA | 0 | NA |

|    |          |          |    |              |           |   |    |   |    |   |    |   |    |   |    |
|----|----------|----------|----|--------------|-----------|---|----|---|----|---|----|---|----|---|----|
| 19 | 50692153 | 50680389 | -1 | NM_206900    | RTN2      | 0 | NA | 0 | NA | 0 | NA | 0 | NA | 0 | NA |
| 19 | 50693570 | 50697604 | 1  | NM_001080401 | FLJ40125  | 0 | NA | 0 | NA | 0 | NA | 0 | NA | 0 | NA |
| 19 | 50702527 | 50722080 | 1  | NM_003370    | VASP      | 0 | NA | 0 | NA | 0 | NA | 0 | NA | 0 | NA |
| 19 | 50779962 | 50722864 | -1 | NM_001017989 | OPA3      | 1 | 13 | 0 | NA | 1 | 16 | 0 | NA | 0 | NA |
| 19 | 50779962 | 50744250 | -1 | NM_025136    | OPA3      | 1 | 13 | 0 | NA | 1 | 16 | 0 | NA | 0 | NA |
| 19 | 50787557 | 50784864 | -1 | NM_005282    | GPR4      | 1 | 13 | 0 | NA | 0 | NA | 0 | NA | 0 | NA |
| 19 | 50834509 | 50804497 | -1 | NM_012155    | EML2      | 1 | 18 | 0 | NA | 0 | NA | 0 | NA | 0 | NA |
| 19 | 50863341 | 50877557 | 1  | NM_000164    | GIPR      | 0 | NA | 0 | NA | 0 | NA | 0 | NA | 0 | NA |
| 19 | 50887282 | 50882557 | -1 | NM_004597    | SNRPD2    | 0 | NA | 0 | NA | 0 | NA | 0 | NA | 0 | NA |
| 19 | 50887282 | 50882557 | -1 | NM_177542    | SNRPD2    | 0 | NA | 0 | NA | 0 | NA | 0 | NA | 0 | NA |
| 19 | 50887771 | 50935848 | 1  | NM_017659    | QPCTL     | 0 | NA | 0 | NA | 0 | NA | 0 | NA | 0 | NA |
| 19 | 50925991 | 50905726 | -1 | NM_001080469 | FBXO46    | 0 | NA | 0 | NA | 0 | NA | 0 | NA | 0 | NA |
| 19 | 50964152 | 50969883 | -1 | NM_175875    | SIX5      | 1 | 13 | 0 | NA | 0 | NA | 0 | NA | 0 | NA |
| 19 | 50975701 | 50964815 | -1 | NM_001081563 | DMPK      | 0 | NA | 0 | NA | 0 | NA | 0 | NA | 0 | NA |
| 19 | 50977655 | 50964815 | -1 | NM_001081560 | DMPK      | 0 | NA | 0 | NA | 0 | NA | 0 | NA | 0 | NA |
| 19 | 50977655 | 50964815 | -1 | NM_001081562 | DMPK      | 0 | NA | 0 | NA | 0 | NA | 0 | NA | 0 | NA |
| 19 | 50977655 | 50964815 | -1 | NM_004409    | DMPK      | 0 | NA | 0 | NA | 0 | NA | 0 | NA | 0 | NA |
| 19 | 50987900 | 50978103 | -1 | NM_004943    | DMWD      | 0 | NA | 0 | NA | 0 | NA | 0 | NA | 0 | NA |
| 19 | 51010417 | 50990807 | -1 | NM_030785    | RSHL1     | 0 | NA | 0 | NA | 0 | NA | 0 | NA | 0 | NA |
| 19 | 51058388 | 51010539 | -1 | NM_004819    | SYMPK     | 1 | 13 | 0 | NA | 0 | NA | 1 | 14 | 0 | NA |
| 19 | 51059357 | 51068895 | 1  | NM_004497    | FOXA3     | 1 | 13 | 0 | NA | 0 | NA | 1 | 14 | 0 | NA |
| 19 | 51081216 | 51078705 | -1 | NM_015649    | IRF2BP1   | 1 | 14 | 0 | NA | 0 | NA | 1 | 13 | 0 | NA |
| 19 | 51097702 | 51085120 | -1 | NM_001012643 | LOC339344 | 0 | NA | 0 | NA | 0 | NA | 0 | NA | 0 | NA |
| 19 | 51109876 | 51108312 | -1 | NM_001029861 | NANOS2    | 0 | NA | 0 | NA | 0 | NA | 0 | NA | 0 | NA |
| 19 | 51168497 | 51134630 | -1 | NM_002516    | NOVA2     | 0 | NA | 1 | 12 | 0 | NA | 0 | NA | 0 | NA |
| 19 | 51190178 | 51213714 | 1  | NM_001080402 | CCDC61    | 0 | NA | 0 | NA | 0 | NA | 0 | NA | 0 | NA |
| 19 | 51218163 | 51214280 | -1 | NM_005091    | PGLYRP1   | 0 | NA | 0 | NA | 0 | NA | 0 | NA | 0 | NA |
| 19 | 51236114 | 51234845 | -1 | NM_001002923 | IGFL4     | 0 | NA | 1 | 16 | 0 | NA | 0 | NA | 1 | 12 |
| 19 | 51319771 | 51315167 | -1 | NM_207393    | IGFL3     | 0 | NA | 1 | 15 | 0 | NA | 0 | NA | 0 | NA |
| 19 | 51342878 | 51356386 | 1  | NM_001002915 | IGFL2     | 0 | NA | 0 | NA | 0 | NA | 0 | NA | 0 | NA |
| 19 | 51424848 | 51426340 | 1  | NM_198541    | IGFL1     | 0 | NA | 0 | NA | 0 | NA | 0 | NA | 0 | NA |
| 19 | 51492144 | 51538530 | 1  | NM_152795    | HIF3A     | 0 | NA | 0 | NA | 0 | NA | 1 | 13 | 0 | NA |
| 19 | 51493498 | 51538530 | 1  | NM_022462    | HIF3A     | 0 | NA | 0 | NA | 0 | NA | 1 | 13 | 0 | NA |
| 19 | 51498715 | 51538530 | 1  | NM_152794    | HIF3A     | 0 | NA | 0 | NA | 0 | NA | 0 | NA | 0 | NA |
| 19 | 51542133 | 51585945 | 1  | NM_006247    | PPP5C     | 0 | NA | 0 | NA | 0 | NA | 0 | NA | 0 | NA |
| 19 | 51608681 | 51605928 | -1 | NM_032040    | CCDC8     | 0 | NA | 0 | NA | 0 | NA | 0 | NA | 0 | NA |
| 19 | 51666660 | 51661587 | -1 | NM_00103149  | PNMAL1    | 0 | NA | 0 | NA | 0 | NA | 0 | NA | 0 | NA |
| 19 | 51666660 | 51661587 | -1 | NM_018215    | PNMAL1    | 0 | NA | 0 | NA | 0 | NA | 0 | NA | 0 | NA |
| 19 | 51691009 | 51686287 | -1 | NM_020709    | PNMAL2    | 0 | NA | 0 | NA | 0 | NA | 0 | NA | 0 | NA |
| 19 | 51796351 | 51805879 | 1  | NM_005184    | CALM3     | 0 | NA | 0 | NA | 1 | 12 | 0 | NA | 0 | NA |
| 19 | 51820194 | 51815564 | -1 | NM_000960    | PTGIR     | 0 | NA | 0 | NA | 0 | NA | 0 | NA | 0 | NA |
| 19 | 51829779 | 51829172 | -1 | NM_033258    | GNG8      | 0 | NA | 0 | NA | 0 | NA | 0 | NA | 0 | NA |
| 19 | 51856235 | 51842708 | -1 | NM_145056    | DACT3     | 0 | NA | 0 | NA | 0 | NA | 1 | 13 | 0 | NA |
| 19 | 51909417 | 51869412 | -1 | NM_001079882 | PRKD2     | 1 | 12 | 0 | NA | 0 | NA | 0 | NA | 0 | NA |
| 19 | 51912224 | 51869412 | -1 | NM_001079880 | PRKD2     | 1 | 12 | 0 | NA | 0 | NA | 0 | NA | 0 | NA |
| 19 | 51912224 | 51869412 | -1 | NM_001079881 | PRKD2     | 1 | 12 | 0 | NA | 0 | NA | 0 | NA | 0 | NA |
| 19 | 51912224 | 51869412 | -1 | NM_016457    | PRKD2     | 1 | 12 | 0 | NA | 0 | NA | 0 | NA | 0 | NA |
| 19 | 51941142 | 51953582 | 1  | NM_001039885 | FKRP      | 0 | NA | 0 | NA | 0 | NA | 0 | NA | 0 | NA |
| 19 | 51941142 | 51953582 | 1  | NM_024301    | FKRP      | 0 | NA | 0 | NA | 0 | NA | 0 | NA | 0 | NA |
| 19 | 51941560 | 51914607 | -1 | NM_001039877 | STRN4     | 0 | NA | 0 | NA | 0 | NA | 0 | NA | 0 | NA |
| 19 | 51941560 | 51914607 | -1 | NM_013403    | STRN4     | 0 | NA | 0 | NA | 0 | NA | 0 | NA | 0 | NA |
| 19 | 51983653 | 51969979 | -1 | NM_005628    | SLC1A5    | 0 | NA | 0 | NA | 0 | NA | 0 | NA | 0 | NA |
| 19 | 52046043 | 52033262 | -1 | NM_004069    | AP2S1     | 1 | 11 | 0 | NA | 1 | 25 | 1 | 17 | 0 | NA |
| 19 | 52046043 | 52033262 | -1 | NM_021575    | AP2S1     | 1 | 11 | 0 | NA | 1 | 25 | 1 | 17 | 0 | NA |
| 19 | 52113772 | 52200173 | 1  | NM_004491    | GRLF1     | 0 | NA | 0 | NA | 1 | 12 | 0 | NA | 0 | NA |
| 19 | 52215982 | 52240857 | 1  | NM_002517    | NPAS1     | 0 | NA | 0 | NA | 0 | NA | 0 | NA | 0 | NA |
| 19 | 52243722 | 52241006 | -1 | NM_017854    | TMEM160   | 0 | NA | 0 | NA | 0 | NA | 1 | 11 | 0 | NA |
| 19 | 52308849 | 52259286 | -1 | NM_015168    | ZC3H4     | 0 | NA | 0 | NA | 0 | NA | 0 | NA | 0 | NA |
| 19 | 52325983 | 52405372 | 1  | NM_005500    | SAE1      | 1 | 12 | 0 | NA | 0 | NA | 0 | NA | 0 | NA |
| 19 | 52426291 | 52415918 | -1 | NM_014417    | BBC3      | 0 | NA | 0 | NA | 0 | NA | 0 | NA | 0 | NA |
| 19 | 52427863 | 52415920 | -1 | NM_001127240 | BBC3      | 0 | NA | 0 | NA | 1 | 12 | 0 | NA | 0 | NA |
| 19 | 52427863 | 52415920 | -1 | NM_001127241 | BBC3      | 0 | NA | 0 | NA | 1 | 12 | 0 | NA | 0 | NA |
| 19 | 52427863 | 52415920 | -1 | NM_001127242 | BBC3      | 0 | NA | 0 | NA | 1 | 12 | 0 | NA | 0 | NA |
| 19 | 52451631 | 52467050 | 1  | NM_015603    | CCDC9     | 1 | 16 | 0 | NA | 0 | NA | 0 | NA | 0 | NA |
| 19 | 52504943 | 52517167 | 1  | NM_001736    | C5AR1     | 0 | NA | 0 | NA | 0 | NA | 0 | NA | 0 | NA |

|    |          |          |    |              |           |   |    |   |    |   |    |   |    |   |    |
|----|----------|----------|----|--------------|-----------|---|----|---|----|---|----|---|----|---|----|
| 19 | 52532210 | 52537112 | 1  | NM_018485    | GPR77     | 0 | NA | 0 | NA | 0 | NA | 0 | NA | 0 | NA |
| 19 | 52544385 | 52577795 | 1  | NM_014681    | DHX34     | 1 | 15 | 0 | NA | 0 | NA | 0 | NA | 0 | NA |
| 19 | 52614597 | 52598192 | -1 | NM_001009813 | MEIS3     | 0 | NA | 0 | NA | 0 | NA | 0 | NA | 0 | NA |
| 19 | 52614597 | 52598194 | -1 | NM_020160    | MEIS3     | 0 | NA | 0 | NA | 0 | NA | 0 | NA | 0 | NA |
| 19 | 52666934 | 52623734 | -1 | NM_015063    | SLC8A2    | 0 | NA | 0 | NA | 0 | NA | 0 | NA | 0 | NA |
| 19 | 52679333 | 52670211 | -1 | NM_007059    | KPTN      | 0 | NA | 0 | NA | 0 | NA | 0 | NA | 0 | NA |
| 19 | 52710309 | 52682702 | -1 | NM_003827    | NAPA      | 0 | NA | 0 | NA | 0 | NA | 0 | NA | 0 | NA |
| 19 | 52803264 | 52898346 | 1  | NM_015711    | GLTSCR1   | 1 | 13 | 0 | NA | 0 | NA | 0 | NA | 0 | NA |
| 19 | 52908412 | 52938203 | 1  | NM_014601    | EHD2      | 0 | NA | 0 | NA | 0 | NA | 0 | NA | 0 | NA |
| 19 | 52940619 | 52952127 | 1  | NM_015710    | GLTSCR2   | 1 | 11 | 0 | NA | 0 | NA | 0 | NA | 0 | NA |
| 19 | 52973653 | 52979755 | 1  | NM_003009    | SEPW1     | 0 | NA | 0 | NA | 0 | NA | 0 | NA | 0 | NA |
| 19 | 52998673 | 52996311 | -1 | NM_198479    | TPRX1     | 0 | NA | 0 | NA | 0 | NA | 0 | NA | 0 | NA |
| 19 | 53016910 | 53038393 | 1  | NM_000554    | CRX       | 0 | NA | 0 | NA | 0 | NA | 0 | NA | 0 | NA |
| 19 | 53081405 | 53065681 | -1 | NM_003167    | SULT2A1   | 0 | NA | 0 | NA | 0 | NA | 0 | NA | 0 | NA |
| 19 | 53189742 | 53220217 | 1  | NM_022142    | ELSPBP1   | 0 | NA | 0 | NA | 0 | NA | 0 | NA | 0 | NA |
| 19 | 53239116 | 53225021 | -1 | NM_019855    | CABP5     | 0 | NA | 1 | 12 | 0 | NA | 0 | NA | 0 | NA |
| 19 | 53305826 | 53242916 | -1 | NM_003706    | PLA2G4C   | 0 | NA | 0 | NA | 0 | NA | 0 | NA | 0 | NA |
| 19 | 53365372 | 53310514 | -1 | NM_000234    | LIG1      | 0 | NA | 0 | NA | 0 | NA | 0 | NA | 0 | NA |
| 19 | 53444734 | 53403324 | -1 | NM_014959    | CARD8     | 0 | NA | 0 | NA | 0 | NA | 0 | NA | 0 | NA |
| 19 | 53466465 | 53482675 | 1  | NM_153808    | ZNF114    | 0 | NA | 0 | NA | 0 | NA | 0 | NA | 0 | NA |
| 19 | 53499144 | 53491531 | -1 | NM_144577    | CCDC114   | 0 | NA | 0 | NA | 0 | NA | 0 | NA | 0 | NA |
| 19 | 53520440 | 53525622 | 1  | NM_001425    | EMP3      | 0 | NA | 0 | NA | 0 | NA | 1 | 11 | 0 | NA |
| 19 | 53558998 | 53527427 | -1 | NM_018273    | TMEM143   | 1 | 16 | 0 | NA | 0 | NA | 0 | NA | 0 | NA |
| 19 | 53559468 | 53571446 | 1  | NM_012451    | SYNGR4    | 1 | 16 | 0 | NA | 0 | NA | 0 | NA | 0 | NA |
| 19 | 53586622 | 53577638 | -1 | NM_006801    | KDLR1     | 0 | NA | 0 | NA | 0 | NA | 0 | NA | 0 | NA |
| 19 | 53589943 | 53640000 | 1  | NM_000836    | GRIN2D    | 0 | NA | 0 | NA | 0 | NA | 0 | NA | 0 | NA |
| 19 | 53640873 | 53648966 | 1  | NM_031485    | GRWD1     | 1 | 14 | 0 | NA | 0 | NA | 0 | NA | 0 | NA |
| 19 | 53650577 | 53661179 | 1  | NM_013348    | KCNJ14    | 1 | 14 | 0 | NA | 0 | NA | 0 | NA | 0 | NA |
| 19 | 53656317 | 53661179 | 1  | NM_170720    | KCNJ14    | 0 | NA | 0 | NA | 0 | NA | 0 | NA | 0 | NA |
| 19 | 53664423 | 53674457 | 1  | NM_004228    | PSCD2     | 0 | NA | 0 | NA | 0 | NA | 0 | NA | 0 | NA |
| 19 | 53664423 | 53674457 | 1  | NM_017457    | PSCD2     | 0 | NA | 0 | NA | 0 | NA | 0 | NA | 0 | NA |
| 19 | 53708258 | 53680339 | -1 | NM_001080434 | LMTK3     | 1 | 12 | 1 | 12 | 0 | NA | 0 | NA | 0 | NA |
| 19 | 53747240 | 53794496 | 1  | NM_177973    | SULT2B1   | 0 | NA | 0 | NA | 0 | NA | 0 | NA | 0 | NA |
| 19 | 53770804 | 53794496 | 1  | NM_004605    | SULT2B1   | 0 | NA | 0 | NA | 0 | NA | 0 | NA | 0 | NA |
| 19 | 53801811 | 53802783 | 1  | NM_133498    | SPACA4    | 0 | NA | 0 | NA | 0 | NA | 0 | NA | 0 | NA |
| 19 | 53808506 | 53795668 | -1 | NM_017708    | FAM83E    | 1 | 11 | 0 | NA | 0 | NA | 0 | NA | 0 | NA |
| 19 | 53814245 | 53810399 | -1 | NM_000979    | RPL18     | 1 | 11 | 0 | NA | 0 | NA | 0 | NA | 0 | NA |
| 19 | 53814359 | 53825474 | 1  | NM_020126    | SPHK2     | 1 | 11 | 0 | NA | 0 | NA | 0 | NA | 0 | NA |
| 19 | 53832451 | 53825628 | -1 | NM_001352    | DBP       | 0 | NA | 0 | NA | 1 | 12 | 1 | 12 | 0 | NA |
| 19 | 53841263 | 53833083 | -1 | NM_001217    | CA11      | 0 | NA | 0 | NA | 0 | NA | 0 | NA | 0 | NA |
| 19 | 53868076 | 53856475 | -1 | NM_145807    | LOC126147 | 0 | NA | 0 | NA | 1 | 12 | 0 | NA | 0 | NA |
| 19 | 53891039 | 53901003 | 1  | NM_000511    | FUT2      | 0 | NA | 0 | NA | 0 | NA | 0 | NA | 0 | NA |
| 19 | 53891039 | 53901003 | 1  | NM_001097638 | FUT2      | 0 | NA | 0 | NA | 0 | NA | 0 | NA | 0 | NA |
| 19 | 53912026 | 53908064 | -1 | NM_182574    | FLJ36070  | 1 | 11 | 1 | 12 | 0 | NA | 0 | NA | 0 | NA |
| 19 | 53935782 | 53915653 | -1 | NM_017805    | RASIP1    | 0 | NA | 0 | NA | 0 | NA | 0 | NA | 0 | NA |
| 19 | 53941978 | 53935956 | -1 | NM_182575    | IZUMO1    | 0 | NA | 0 | NA | 0 | NA | 0 | NA | 0 | NA |
| 19 | 53950459 | 53943079 | -1 | NM_000148    | FUT1      | 0 | NA | 0 | NA | 0 | NA | 0 | NA | 0 | NA |
| 19 | 53951155 | 53953394 | 1  | NM_019113    | FGF21     | 0 | NA | 0 | NA | 0 | NA | 0 | NA | 0 | NA |
| 19 | 54006113 | 53990130 | -1 | NM_001190    | BCAT2     | 0 | NA | 0 | NA | 0 | NA | 0 | NA | 0 | NA |
| 19 | 54031746 | 54008085 | -1 | NM_016246    | HSD17B14  | 0 | NA | 0 | NA | 0 | NA | 0 | NA | 0 | NA |
| 19 | 54063670 | 54032166 | -1 | NM_020904    | PLEKHA4   | 0 | NA | 0 | NA | 0 | NA | 0 | NA | 0 | NA |
| 19 | 54067460 | 54071131 | 1  | NM_014330    | PPP1R15A  | 0 | NA | 0 | NA | 0 | NA | 0 | NA | 0 | NA |
| 19 | 54093750 | 54076033 | -1 | NM_003323    | TULP2     | 0 | NA | 0 | NA | 0 | NA | 0 | NA | 0 | NA |
| 19 | 54095852 | 54118339 | 1  | NM_006184    | NUCB1     | 0 | NA | 0 | NA | 0 | NA | 0 | NA | 0 | NA |
| 19 | 54128750 | 54140038 | 1  | NM_014475    | DHDH      | 1 | 12 | 0 | NA | 0 | NA | 0 | NA | 0 | NA |
| 19 | 54149928 | 54156331 | 1  | NM_004324    | BAX       | 0 | NA | 0 | NA | 0 | NA | 0 | NA | 0 | NA |
| 19 | 54149928 | 54156867 | 1  | NM_138761    | BAX       | 0 | NA | 0 | NA | 0 | NA | 0 | NA | 0 | NA |
| 19 | 54149928 | 54156867 | 1  | NM_138763    | BAX       | 0 | NA | 0 | NA | 0 | NA | 0 | NA | 0 | NA |
| 19 | 54149928 | 54156867 | 1  | NM_138764    | BAX       | 0 | NA | 0 | NA | 0 | NA | 0 | NA | 0 | NA |
| 19 | 54149928 | 54156867 | 1  | NM_138765    | BAX       | 0 | NA | 0 | NA | 0 | NA | 0 | NA | 0 | NA |
| 19 | 54160377 | 54161948 | 1  | NM_000146    | FTL       | 0 | NA | 0 | NA | 0 | NA | 0 | NA | 0 | NA |
| 19 | 54188361 | 54163193 | -1 | NM_002103    | GYS1      | 0 | NA | 0 | NA | 0 | NA | 0 | NA | 0 | NA |
| 19 | 54188967 | 54210994 | 1  | NM_006666    | RUVBL2    | 0 | NA | 0 | NA | 0 | NA | 0 | NA | 0 | NA |
| 19 | 54212159 | 54211048 | -1 | NM_000894    | LHB       | 0 | NA | 0 | NA | 0 | NA | 0 | NA | 0 | NA |
| 19 | 54219405 | 54217938 | -1 | NM_000737    | CGB       | 0 | NA | 0 | NA | 0 | NA | 0 | NA | 0 | NA |

|    |          |          |    |              |           |   |    |   |    |   |    |   |    |   |    |
|----|----------|----------|----|--------------|-----------|---|----|---|----|---|----|---|----|---|----|
| 19 | 54226941 | 54228307 | 1  | NM_033378    | CGB2      | 0 | NA | 0 | NA | 0 | NA | 0 | NA | 0 | NA |
| 19 | 54232003 | 54230637 | -1 | NM_033377    | CGB1      | 0 | NA | 0 | NA | 0 | NA | 0 | NA | 0 | NA |
| 19 | 54238913 | 54240380 | 1  | NM_033043    | CGB5      | 0 | NA | 0 | NA | 0 | NA | 0 | NA | 0 | NA |
| 19 | 54244180 | 54242706 | -1 | NM_033183    | CGB8      | 0 | NA | 0 | NA | 0 | NA | 0 | NA | 0 | NA |
| 19 | 54250809 | 54249342 | -1 | NM_033142    | CGB7      | 0 | NA | 0 | NA | 0 | NA | 0 | NA | 0 | NA |
| 19 | 54258936 | 54256208 | -1 | NM_006179    | NTF4      | 0 | NA | 1 | 15 | 0 | NA | 0 | NA | 0 | NA |
| 19 | 54268010 | 54262486 | -1 | NM_031886    | KCNA7     | 0 | NA | 1 | 15 | 0 | NA | 0 | NA | 0 | NA |
| 19 | 54280276 | 54303682 | 1  | NM_003089    | SNRP70    | 0 | NA | 0 | NA | 0 | NA | 1 | 12 | 0 | NA |
| 19 | 54309429 | 54313529 | 1  | NM_022165    | LIN7B     | 1 | 15 | 0 | NA | 1 | 12 | 0 | NA | 0 | NA |
| 19 | 54314209 | 54313465 | -1 | NM_018111    | FLJ10490  | 1 | 15 | 0 | NA | 1 | 16 | 0 | NA | 0 | NA |
| 19 | 54314474 | 54346092 | 1  | NM_003660    | PPFIA3    | 1 | 15 | 0 | NA | 1 | 16 | 0 | NA | 0 | NA |
| 19 | 54350493 | 54346287 | -1 | NM_002152    | HRC       | 1 | 11 | 0 | NA | 0 | NA | 1 | 11 | 0 | NA |
| 19 | 54352863 | 54406905 | 1  | NM_017636    | TRPM4     | 1 | 11 | 0 | NA | 0 | NA | 1 | 11 | 0 | NA |
| 19 | 54520286 | 54484703 | -1 | NM_014037    | SLC6A16   | 0 | NA | 0 | NA | 0 | NA | 0 | NA | 0 | NA |
| 19 | 54530488 | 54535673 | 1  | NM_001040031 | CD37      | 0 | NA | 0 | NA | 0 | NA | 0 | NA | 0 | NA |
| 19 | 54530488 | 54535673 | 1  | NM_001774    | CD37      | 0 | NA | 0 | NA | 0 | NA | 0 | NA | 0 | NA |
| 19 | 54557526 | 54535666 | -1 | NM_003598    | TEAD2     | 1 | 11 | 1 | 20 | 0 | NA | 1 | 17 | 0 | NA |
| 19 | 54558853 | 54570185 | 1  | NM_014419    | DKKL1     | 1 | 11 | 1 | 20 | 0 | NA | 1 | 17 | 0 | NA |
| 19 | 54583317 | 54613058 | 1  | NM_144688    | FLJ32658  | 0 | NA | 0 | NA | 0 | NA | 0 | NA | 0 | NA |
| 19 | 54618510 | 54617482 | -1 | NM_178449    | PTH2      | 0 | NA | 1 | 13 | 0 | NA | 0 | NA | 0 | NA |
| 19 | 54636596 | 54624469 | -1 | NM_020309    | SLC17A7   | 0 | NA | 1 | 17 | 0 | NA | 0 | NA | 0 | NA |
| 19 | 54646879 | 54641367 | -1 | NM_017916    | PIH1D1    | 1 | 12 | 0 | NA | 0 | NA | 0 | NA | 0 | NA |
| 19 | 54648324 | 54665658 | 1  | NM_153329    | ALDH16A1  | 1 | 12 | 0 | NA | 0 | NA | 0 | NA | 0 | NA |
| 19 | 54669297 | 54681300 | 1  | NM_001459    | FLT3LG    | 0 | NA | 0 | NA | 0 | NA | 1 | 12 | 0 | NA |
| 19 | 54682676 | 54687376 | 1  | NM_012423    | RPL13A    | 0 | NA | 0 | NA | 0 | NA | 1 | 12 | 0 | NA |
| 19 | 54691445 | 54694756 | 1  | NM_001015    | RPS11     | 0 | NA | 0 | NA | 0 | NA | 0 | NA | 0 | NA |
| 19 | 54708303 | 54721403 | 1  | NM_004107    | FCGRT     | 0 | NA | 0 | NA | 0 | NA | 0 | NA | 0 | NA |
| 19 | 54722686 | 54738702 | 1  | NM_020650    | RCN3      | 0 | NA | 0 | NA | 0 | NA | 0 | NA | 0 | NA |
| 19 | 54775615 | 54750779 | -1 | NM_015953    | NOSIP     | 1 | 14 | 0 | NA | 0 | NA | 1 | 17 | 0 | NA |
| 19 | 54778279 | 54786005 | 1  | NM_000951    | PRRG2     | 1 | 14 | 0 | NA | 0 | NA | 1 | 17 | 0 | NA |
| 19 | 54786723 | 54821508 | 1  | NM_020719    | PRR12     | 0 | NA | 0 | NA | 0 | NA | 1 | 12 | 0 | NA |
| 19 | 54835212 | 54830363 | -1 | NM_006270    | RRAS      | 0 | NA | 0 | NA | 0 | NA | 1 | 11 | 0 | NA |
| 19 | 54840088 | 54853711 | 1  | NM_021228    | SCAF1     | 0 | NA | 0 | NA | 0 | NA | 1 | 11 | 0 | NA |
| 19 | 54860210 | 54868985 | 1  | NM_001040668 | BCL2L12   | 1 | 27 | 0 | NA | 0 | NA | 1 | 11 | 0 | NA |
| 19 | 54860210 | 54868985 | 1  | NM_138639    | BCL2L12   | 1 | 27 | 0 | NA | 0 | NA | 1 | 11 | 0 | NA |
| 19 | 54860944 | 54854640 | -1 | NM_001571    | IRF3      | 1 | 27 | 0 | NA | 0 | NA | 1 | 11 | 0 | NA |
| 19 | 54872307 | 54883516 | 1  | NM_001536    | PRMT1     | 1 | 21 | 0 | NA | 0 | NA | 0 | NA | 0 | NA |
| 19 | 54872307 | 54883516 | 1  | NM_198318    | PRMT1     | 1 | 21 | 0 | NA | 0 | NA | 0 | NA | 0 | NA |
| 19 | 54872307 | 54883516 | 1  | NM_198319    | PRMT1     | 1 | 21 | 0 | NA | 0 | NA | 0 | NA | 0 | NA |
| 19 | 54883753 | 54886059 | 1  | NM_001101340 | LOC199800 | 0 | NA | 0 | NA | 0 | NA | 0 | NA | 0 | NA |
| 19 | 54886216 | 54908800 | 1  | NM_152359    | CPT1C     | 0 | NA | 0 | NA | 0 | NA | 0 | NA | 0 | NA |
| 19 | 54958327 | 54934822 | -1 | NM_021733    | TSKS      | 0 | NA | 0 | NA | 0 | NA | 0 | NA | 0 | NA |
| 19 | 54961991 | 55002181 | 1  | NM_014203    | AP2A1     | 0 | NA | 0 | NA | 0 | NA | 0 | NA | 0 | NA |
| 19 | 54961991 | 55002181 | 1  | NM_130787    | AP2A1     | 0 | NA | 0 | NA | 0 | NA | 0 | NA | 0 | NA |
| 19 | 55008280 | 55001960 | -1 | NM_025129    | FUZ       | 0 | NA | 0 | NA | 0 | NA | 0 | NA | 0 | NA |
| 19 | 55013357 | 55032049 | 1  | NM_030973    | MED25     | 0 | NA | 0 | NA | 0 | NA | 0 | NA | 0 | NA |
| 19 | 55046227 | 55055811 | 1  | NM_017432    | PTOV1     | 0 | NA | 0 | NA | 0 | NA | 0 | NA | 0 | NA |
| 19 | 55062630 | 55056272 | -1 | NM_007254    | PNKP      | 0 | NA | 0 | NA | 1 | 13 | 1 | 13 | 0 | NA |
| 19 | 55072390 | 55064108 | -1 | NM_032375    | AKT1S1    | 0 | NA | 0 | NA | 1 | 13 | 1 | 13 | 0 | NA |
| 19 | 55072424 | 55064108 | -1 | NM_001098633 | AKT1S1    | 0 | NA | 0 | NA | 1 | 13 | 1 | 13 | 0 | NA |
| 19 | 55072456 | 55064108 | -1 | NM_001098632 | AKT1S1    | 0 | NA | 0 | NA | 1 | 13 | 1 | 13 | 0 | NA |
| 19 | 55072640 | 55083813 | 1  | NM_024682    | TBC1D17   | 0 | NA | 0 | NA | 1 | 13 | 1 | 13 | 0 | NA |
| 19 | 55091959 | 55084722 | -1 | NM_152899    | IL41      | 0 | NA | 0 | NA | 0 | NA | 0 | NA | 0 | NA |
| 19 | 55124271 | 55129003 | 1  | NM_012068    | ATF5      | 1 | 20 | 0 | NA | 1 | 15 | 0 | NA | 0 | NA |
| 19 | 55124574 | 55084722 | -1 | NM_172374    | IL41      | 1 | 20 | 0 | NA | 1 | 15 | 0 | NA | 0 | NA |
| 19 | 55124598 | 55101893 | -1 | NM_012346    | NUP62     | 1 | 20 | 0 | NA | 1 | 15 | 0 | NA | 0 | NA |
| 19 | 55124598 | 55101893 | -1 | NM_016553    | NUP62     | 1 | 20 | 0 | NA | 1 | 15 | 0 | NA | 0 | NA |
| 19 | 55124598 | 55101893 | -1 | NM_153718    | NUP62     | 1 | 20 | 0 | NA | 1 | 15 | 0 | NA | 0 | NA |
| 19 | 55124598 | 55101893 | -1 | NM_153719    | NUP62     | 1 | 20 | 0 | NA | 1 | 15 | 0 | NA | 0 | NA |
| 19 | 55156241 | 55144061 | -1 | NM_052884    | SIGLEC11  | 0 | NA | 0 | NA | 0 | NA | 0 | NA | 0 | NA |
| 19 | 55220617 | 55171535 | -1 | NM_001025778 | VRK3      | 1 | 35 | 0 | NA | 0 | NA | 1 | 16 | 0 | NA |
| 19 | 55220617 | 55171535 | -1 | NM_016440    | VRK3      | 1 | 35 | 0 | NA | 0 | NA | 1 | 16 | 0 | NA |
| 19 | 55221023 | 55243843 | 1  | NM_001006656 | ZNF473    | 1 | 35 | 0 | NA | 0 | NA | 1 | 16 | 0 | NA |
| 19 | 55221023 | 55243843 | 1  | NM_015428    | ZNF473    | 1 | 35 | 0 | NA | 0 | NA | 1 | 16 | 0 | NA |
| 19 | 55358350 | 55347616 | -1 | NM_152358    | C19orf41  | 0 | NA | 0 | NA | 0 | NA | 0 | NA | 0 | NA |

|    |          |          |    |              |           |   |    |   |    |   |    |   |    |   |    |
|----|----------|----------|----|--------------|-----------|---|----|---|----|---|----|---|----|---|----|
| 19 | 55398696 | 55505613 | 1  | NM_001077186 | MYH14     | 0 | NA | 1 | 18 | 0 | NA | 0 | NA | 0 | NA |
| 19 | 55398696 | 55505613 | 1  | NM_024729    | MYH14     | 0 | NA | 1 | 18 | 0 | NA | 0 | NA | 0 | NA |
| 19 | 55524446 | 55510576 | -1 | NM_004977    | KCN3      | 1 | 42 | 0 | NA | 0 | NA | 0 | NA | 0 | NA |
| 19 | 55560743 | 55553545 | -1 | NM_004851    | NAPSA     | 0 | NA | 0 | NA | 0 | NA | 0 | NA | 0 | NA |
| 19 | 55571496 | 55578079 | 1  | NM_007121    | NR1H2     | 0 | NA | 0 | NA | 0 | NA | 0 | NA | 0 | NA |
| 19 | 55579404 | 55613083 | 1  | NM_002691    | POLD1     | 0 | NA | 0 | NA | 0 | NA | 0 | NA | 0 | NA |
| 19 | 55614027 | 55624060 | 1  | NM_003121    | SPIB      | 0 | NA | 0 | NA | 0 | NA | 0 | NA | 0 | NA |
| 19 | 55627971 | 55661395 | 1  | NM_004533    | MYBPC2    | 0 | NA | 0 | NA | 0 | NA | 0 | NA | 0 | NA |
| 19 | 55671547 | 55678420 | 1  | NM_175063    | C19orf63  | 0 | NA | 0 | NA | 0 | NA | 0 | NA | 0 | NA |
| 19 | 55671547 | 55678420 | 1  | NM_206538    | C19orf63  | 0 | NA | 0 | NA | 0 | NA | 0 | NA | 0 | NA |
| 19 | 55671815 | 55661856 | -1 | NM_138411    | FAM71E1   | 0 | NA | 0 | NA | 0 | NA | 0 | NA | 0 | NA |
| 19 | 55706157 | 55701070 | -1 | NM_138334    | JOSD2     | 0 | NA | 0 | NA | 0 | NA | 0 | NA | 0 | NA |
| 19 | 55708954 | 55706668 | -1 | NM_001114598 | LOC554235 | 0 | NA | 0 | NA | 0 | NA | 0 | NA | 0 | NA |
| 19 | 55709759 | 55706668 | -1 | NM_001024656 | LOC554235 | 0 | NA | 0 | NA | 0 | NA | 0 | NA | 0 | NA |
| 19 | 55763114 | 55711961 | -1 | NM_001080457 | LRRC4B    | 0 | NA | 0 | NA | 0 | NA | 0 | NA | 0 | NA |
| 19 | 55833114 | 55817045 | -1 | NM_032298    | SYT3      | 0 | NA | 0 | NA | 0 | NA | 0 | NA | 0 | NA |
| 19 | 55912007 | 55856895 | -1 | NM_016148    | SHANK1    | 0 | NA | 0 | NA | 0 | NA | 0 | NA | 0 | NA |
| 19 | 55918416 | 55920793 | 1  | NM_002975    | CLEC11A   | 0 | NA | 0 | NA | 0 | NA | 0 | NA | 0 | NA |
| 19 | 55965669 | 55966740 | 1  | NM_001506    | GPR32     | 0 | NA | 0 | NA | 0 | NA | 0 | NA | 0 | NA |
| 19 | 55985483 | 55990293 | 1  | NM_033068    | ACPT      | 0 | NA | 0 | NA | 0 | NA | 1 | 19 | 0 | NA |
| 19 | 55999784 | 55992772 | -1 | NM_199250    | C19orf48  | 1 | 24 | 1 | 18 | 0 | NA | 1 | 11 | 0 | NA |
| 19 | 55999786 | 55992772 | -1 | NM_199249    | C19orf48  | 1 | 24 | 1 | 18 | 0 | NA | 1 | 11 | 0 | NA |
| 19 | 56018855 | 56014215 | -1 | NM_002257    | KLK1      | 0 | NA | 1 | 12 | 0 | NA | 0 | NA | 0 | NA |
| 19 | 56026591 | 56020356 | -1 | NM_017509    | KLK15     | 0 | NA | 0 | NA | 0 | NA | 0 | NA | 0 | NA |
| 19 | 56026591 | 56020356 | -1 | NM_138563    | KLK15     | 0 | NA | 0 | NA | 0 | NA | 0 | NA | 0 | NA |
| 19 | 56026591 | 56020356 | -1 | NM_138564    | KLK15     | 0 | NA | 0 | NA | 0 | NA | 0 | NA | 0 | NA |
| 19 | 56049982 | 56051775 | 1  | NM_001030050 | KLK3      | 0 | NA | 0 | NA | 0 | NA | 0 | NA | 0 | NA |
| 19 | 56049982 | 56055832 | 1  | NM_001030047 | KLK3      | 0 | NA | 0 | NA | 0 | NA | 0 | NA | 0 | NA |
| 19 | 56049982 | 56055832 | 1  | NM_001030048 | KLK3      | 0 | NA | 0 | NA | 0 | NA | 0 | NA | 0 | NA |
| 19 | 56049982 | 56055832 | 1  | NM_001030049 | KLK3      | 0 | NA | 0 | NA | 0 | NA | 0 | NA | 0 | NA |
| 19 | 56049982 | 56055832 | 1  | NM_001648    | KLK3      | 0 | NA | 0 | NA | 0 | NA | 0 | NA | 0 | NA |
| 19 | 56068500 | 56075635 | 1  | NM_001002231 | KLK2      | 0 | NA | 1 | 12 | 0 | NA | 0 | NA | 1 | 15 |
| 19 | 56068500 | 56075635 | 1  | NM_005551    | KLK2      | 0 | NA | 1 | 12 | 0 | NA | 0 | NA | 1 | 15 |
| 19 | 56105806 | 56101419 | -1 | NM_004917    | KLK4      | 0 | NA | 0 | NA | 0 | NA | 0 | NA | 0 | NA |
| 19 | 56148156 | 56138370 | -1 | NM_001077491 | KLK5      | 0 | NA | 0 | NA | 0 | NA | 0 | NA | 0 | NA |
| 19 | 56148156 | 56138370 | -1 | NM_001077492 | KLK5      | 0 | NA | 0 | NA | 0 | NA | 0 | NA | 0 | NA |
| 19 | 56148156 | 56138370 | -1 | NM_012427    | KLK5      | 0 | NA | 0 | NA | 0 | NA | 0 | NA | 0 | NA |
| 19 | 56163859 | 56153698 | -1 | NM_001012965 | KLK6      | 0 | NA | 0 | NA | 0 | NA | 0 | NA | 0 | NA |
| 19 | 56163859 | 56153699 | -1 | NM_001012964 | KLK6      | 0 | NA | 0 | NA | 0 | NA | 0 | NA | 0 | NA |
| 19 | 56164741 | 56153698 | -1 | NM_002774    | KLK6      | 0 | NA | 0 | NA | 0 | NA | 0 | NA | 0 | NA |
| 19 | 56178883 | 56171540 | -1 | NM_139277    | KLK7      | 0 | NA | 0 | NA | 0 | NA | 0 | NA | 0 | NA |
| 19 | 56178962 | 56171540 | -1 | NM_005046    | KLK7      | 0 | NA | 0 | NA | 0 | NA | 0 | NA | 0 | NA |
| 19 | 56196770 | 56191075 | -1 | NM_007196    | KLK8      | 0 | NA | 0 | NA | 0 | NA | 0 | NA | 0 | NA |
| 19 | 56196770 | 56191075 | -1 | NM_144505    | KLK8      | 0 | NA | 0 | NA | 0 | NA | 0 | NA | 0 | NA |
| 19 | 56196770 | 56191075 | -1 | NM_144506    | KLK8      | 0 | NA | 0 | NA | 0 | NA | 0 | NA | 0 | NA |
| 19 | 56196770 | 56191075 | -1 | NM_144507    | KLK8      | 0 | NA | 0 | NA | 0 | NA | 0 | NA | 0 | NA |
| 19 | 56204702 | 56197580 | -1 | NM_012315    | KLK9      | 0 | NA | 0 | NA | 0 | NA | 0 | NA | 0 | NA |
| 19 | 56214766 | 56207811 | -1 | NM_145888    | KLK10     | 0 | NA | 0 | NA | 0 | NA | 0 | NA | 0 | NA |
| 19 | 56215094 | 56207811 | -1 | NM_002776    | KLK10     | 0 | NA | 0 | NA | 0 | NA | 0 | NA | 0 | NA |
| 19 | 56215243 | 56207811 | -1 | NM_001077500 | KLK10     | 0 | NA | 0 | NA | 0 | NA | 0 | NA | 0 | NA |
| 19 | 56222697 | 56217298 | -1 | NM_144947    | KLK11     | 0 | NA | 0 | NA | 0 | NA | 0 | NA | 0 | NA |
| 19 | 56223102 | 56217298 | -1 | NM_006853    | KLK11     | 0 | NA | 0 | NA | 0 | NA | 0 | NA | 0 | NA |
| 19 | 56229960 | 56224159 | -1 | NM_019598    | KLK12     | 0 | NA | 0 | NA | 0 | NA | 0 | NA | 0 | NA |
| 19 | 56229960 | 56224159 | -1 | NM_145894    | KLK12     | 0 | NA | 0 | NA | 0 | NA | 0 | NA | 0 | NA |
| 19 | 56229960 | 56224159 | -1 | NM_145895    | KLK12     | 0 | NA | 0 | NA | 0 | NA | 0 | NA | 0 | NA |
| 19 | 56260179 | 56251274 | -1 | NM_015596    | KLK13     | 0 | NA | 0 | NA | 0 | NA | 0 | NA | 0 | NA |
| 19 | 56279314 | 56272965 | -1 | NM_022046    | KLK14     | 0 | NA | 0 | NA | 0 | NA | 0 | NA | 0 | NA |
| 19 | 56299659 | 56293586 | -1 | NM_145232    | ATPBD3    | 0 | NA | 0 | NA | 0 | NA | 0 | NA | 0 | NA |
| 19 | 56319976 | 56325379 | 1  | NM_014441    | SIGLEC9   | 0 | NA | 0 | NA | 0 | NA | 0 | NA | 0 | NA |
| 19 | 56337369 | 56348595 | 1  | NM_014385    | SIGLEC7   | 0 | NA | 0 | NA | 0 | NA | 0 | NA | 0 | NA |
| 19 | 56337369 | 56348595 | 1  | NM_016543    | SIGLEC7   | 0 | NA | 0 | NA | 0 | NA | 0 | NA | 0 | NA |
| 19 | 56420146 | 56435086 | 1  | NM_001082618 | CD33      | 0 | NA | 0 | NA | 0 | NA | 0 | NA | 0 | NA |
| 19 | 56420146 | 56435086 | 1  | NM_0011772   | CD33      | 0 | NA | 0 | NA | 0 | NA | 0 | NA | 0 | NA |
| 19 | 56452775 | 56464394 | 1  | NM_173635    | FLJ40235  | 0 | NA | 1 | 13 | 0 | NA | 0 | NA | 0 | NA |
| 19 | 56506913 | 56525914 | 1  | NM_001101372 | LOC402865 | 0 | NA | 0 | NA | 0 | NA | 0 | NA | 0 | NA |

|    |          |          |    |              |          |   |    |   |    |   |    |   |    |   |    |
|----|----------|----------|----|--------------|----------|---|----|---|----|---|----|---|----|---|----|
| 19 | 56549908 | 56540220 | -1 | NM_001014763 | ETFB     | 0 | NA | 0 | NA | 0 | NA | 0 | NA | 0 | NA |
| 19 | 56561484 | 56540220 | -1 | NM_001985    | ETFB     | 0 | NA | 0 | NA | 1 | 17 | 0 | NA | 0 | NA |
| 19 | 56564069 | 56562163 | -1 | NM_152353    | CLDND2   | 0 | NA | 0 | NA | 1 | 17 | 0 | NA | 0 | NA |
| 19 | 56567772 | 56566685 | -1 | NM_005601    | NKG7     | 0 | NA | 0 | NA | 1 | 17 | 0 | NA | 0 | NA |
| 19 | 56583009 | 56574975 | -1 | NM_030657    | LIM2     | 1 | 30 | 0 | NA | 0 | NA | 1 | 15 | 0 | NA |
| 19 | 56613263 | 56605086 | -1 | NM_033130    | SIGLEC10 | 0 | NA | 0 | NA | 0 | NA | 0 | NA | 0 | NA |
| 19 | 56653520 | 56646062 | -1 | NM_014442    | SIGLEC8  | 0 | NA | 1 | 12 | 0 | NA | 0 | NA | 0 | NA |
| 19 | 56671649 | 56678423 | 1  | NM_001080405 | CEACAM18 | 0 | NA | 0 | NA | 0 | NA | 0 | NA | 0 | NA |
| 19 | 56695459 | 56686424 | -1 | NM_033329    | SIGLEC12 | 0 | NA | 0 | NA | 0 | NA | 0 | NA | 0 | NA |
| 19 | 56696855 | 56686424 | -1 | NM_053003    | SIGLEC12 | 0 | NA | 0 | NA | 0 | NA | 0 | NA | 0 | NA |
| 19 | 56726876 | 56714794 | -1 | NM_001245    | SIGLEC6  | 0 | NA | 0 | NA | 0 | NA | 0 | NA | 0 | NA |
| 19 | 56726876 | 56714794 | -1 | NM_198845    | SIGLEC6  | 0 | NA | 0 | NA | 0 | NA | 0 | NA | 0 | NA |
| 19 | 56726876 | 56714794 | -1 | NM_198846    | SIGLEC6  | 0 | NA | 0 | NA | 0 | NA | 0 | NA | 0 | NA |
| 19 | 56766342 | 56784803 | 1  | NM_007147    | ZNF175   | 0 | NA | 0 | NA | 0 | NA | 1 | 11 | 0 | NA |
| 19 | 56825530 | 56806995 | -1 | NM_003830    | SIGLEC5  | 0 | NA | 0 | NA | 0 | NA | 0 | NA | 0 | NA |
| 19 | 56841944 | 56837617 | -1 | NM_001098612 | SIGLEC14 | 0 | NA | 0 | NA | 0 | NA | 0 | NA | 0 | NA |
| 19 | 56919033 | 56908176 | -1 | NM_001523    | HAS1     | 0 | NA | 0 | NA | 0 | NA | 0 | NA | 0 | NA |
| 19 | 56946962 | 56940837 | -1 | NM_002029    | FPR1     | 0 | NA | 0 | NA | 0 | NA | 0 | NA | 0 | NA |
| 19 | 56956264 | 56965591 | 1  | NM_001005738 | FPR2     | 0 | NA | 0 | NA | 0 | NA | 0 | NA | 0 | NA |
| 19 | 56958453 | 56965591 | 1  | NM_001462    | FPR2     | 0 | NA | 0 | NA | 0 | NA | 0 | NA | 0 | NA |
| 19 | 56990222 | 57021146 | 1  | NM_002030    | FPR3     | 0 | NA | 0 | NA | 0 | NA | 0 | NA | 0 | NA |
| 19 | 57083009 | 57066361 | -1 | NM_032679    | ZNF577   | 1 | 17 | 0 | NA | 1 | 21 | 0 | NA | 0 | NA |
| 19 | 57100059 | 57084299 | -1 | NM_023074    | ZNF649   | 0 | NA | 0 | NA | 0 | NA | 0 | NA | 0 | NA |
| 19 | 57122499 | 57140817 | 1  | NM_024840    | ZNF613   | 0 | NA | 0 | NA | 0 | NA | 0 | NA | 0 | NA |
| 19 | 57122540 | 57140817 | 1  | NM_001031721 | ZNF613   | 0 | NA | 0 | NA | 0 | NA | 0 | NA | 0 | NA |
| 19 | 57181891 | 57159404 | -1 | NM_021632    | ZNF350   | 1 | 13 | 0 | NA | 1 | 13 | 1 | 13 | 0 | NA |
| 19 | 57203270 | 57186399 | -1 | NM_198480    | ZNF615   | 0 | NA | 0 | NA | 0 | NA | 1 | 14 | 0 | NA |
| 19 | 57223429 | 57208388 | -1 | NM_025040    | ZNF614   | 1 | 19 | 0 | NA | 1 | 19 | 1 | 16 | 0 | NA |
| 19 | 57243885 | 57228488 | -1 | NM_014650    | ZNF432   | 0 | NA | 0 | NA | 0 | NA | 0 | NA | 0 | NA |
| 19 | 57335003 | 57309464 | -1 | NM_178523    | ZNF616   | 1 | 12 | 0 | NA | 1 | 26 | 1 | 12 | 0 | NA |
| 19 | 57366708 | 57349936 | -1 | NM_001102657 | FLJ16287 | 0 | NA | 0 | NA | 0 | NA | 0 | NA | 0 | NA |
| 19 | 57385045 | 57421483 | 1  | NM_014225    | PPP2R1A  | 1 | 11 | 0 | NA | 0 | NA | 0 | NA | 0 | NA |
| 19 | 57464635 | 57487788 | 1  | NM_001010851 | ZNF766   | 0 | NA | 0 | NA | 0 | NA | 1 | 15 | 0 | NA |
| 19 | 57492262 | 57520986 | 1  | NM_144684    | ZNF480   | 0 | NA | 0 | NA | 0 | NA | 0 | NA | 0 | NA |
| 19 | 57540493 | 57561923 | 1  | NM_173530    | ZNF610   | 0 | NA | 0 | NA | 0 | NA | 0 | NA | 0 | NA |
| 19 | 57592932 | 57613469 | 1  | NM_032423    | ZNF528   | 1 | 18 | 0 | NA | 0 | NA | 0 | NA | 0 | NA |
| 19 | 57648640 | 57711943 | 1  | NM_001099694 | ZNF578   | 1 | 11 | 1 | 20 | 0 | NA | 0 | NA | 0 | NA |
| 19 | 57722720 | 57751115 | 1  | NM_001039886 | ZNF808   | 0 | NA | 0 | NA | 0 | NA | 0 | NA | 0 | NA |
| 19 | 57765339 | 57779861 | 1  | NM_018260    | ZNF701   | 1 | 11 | 0 | NA | 0 | NA | 0 | NA | 0 | NA |
| 19 | 57833456 | 57807429 | -1 | NM_001105549 | ZNF83    | 0 | NA | 0 | NA | 0 | NA | 0 | NA | 0 | NA |
| 19 | 57833456 | 57807429 | -1 | NM_001105550 | ZNF83    | 0 | NA | 0 | NA | 0 | NA | 0 | NA | 0 | NA |
| 19 | 57833456 | 57807429 | -1 | NM_001105551 | ZNF83    | 0 | NA | 0 | NA | 0 | NA | 0 | NA | 0 | NA |
| 19 | 57833456 | 57807429 | -1 | NM_001105552 | ZNF83    | 0 | NA | 0 | NA | 0 | NA | 0 | NA | 0 | NA |
| 19 | 57833456 | 57807429 | -1 | NM_001105553 | ZNF83    | 0 | NA | 0 | NA | 0 | NA | 0 | NA | 0 | NA |
| 19 | 57833456 | 57807429 | -1 | NM_001105554 | ZNF83    | 0 | NA | 0 | NA | 0 | NA | 0 | NA | 0 | NA |
| 19 | 57833456 | 57807429 | -1 | NM_018300    | ZNF83    | 0 | NA | 0 | NA | 0 | NA | 0 | NA | 0 | NA |
| 19 | 57924947 | 57899283 | -1 | NM_030972    | ZNF611   | 0 | NA | 0 | NA | 0 | NA | 0 | NA | 0 | NA |
| 19 | 57981846 | 57960559 | -1 | NM_198457    | ZNF600   | 0 | NA | 0 | NA | 0 | NA | 0 | NA | 0 | NA |
| 19 | 58016697 | 57992472 | -1 | NM_006969    | ZNF28    | 0 | NA | 0 | NA | 0 | NA | 0 | NA | 0 | NA |
| 19 | 58052714 | 58033596 | -1 | NM_001008801 | ZNF468   | 0 | NA | 0 | NA | 0 | NA | 0 | NA | 0 | NA |
| 19 | 58052714 | 58033596 | -1 | NM_199132    | ZNF468   | 0 | NA | 0 | NA | 0 | NA | 0 | NA | 0 | NA |
| 19 | 58086411 | 58071236 | -1 | NM_207333    | ZNF320   | 0 | NA | 0 | NA | 0 | NA | 0 | NA | 0 | NA |
| 19 | 58137659 | 58122199 | -1 | NM_203307    | ZNF321   | 1 | 16 | 0 | NA | 0 | NA | 0 | NA | 0 | NA |
| 19 | 58157926 | 58144443 | -1 | NM_001031665 | ZNF816A  | 0 | NA | 0 | NA | 0 | NA | 0 | NA | 0 | NA |
| 19 | 58298499 | 58261678 | -1 | NM_001102603 | ZNF160   | 0 | NA | 0 | NA | 0 | NA | 0 | NA | 0 | NA |
| 19 | 58298499 | 58261678 | -1 | NM_033288    | ZNF160   | 0 | NA | 0 | NA | 0 | NA | 0 | NA | 0 | NA |
| 19 | 58298499 | 58261678 | -1 | NM_198893    | ZNF160   | 0 | NA | 0 | NA | 0 | NA | 0 | NA | 0 | NA |
| 19 | 58327957 | 58302943 | -1 | NM_018355    | ZNF415   | 0 | NA | 1 | 13 | 0 | NA | 0 | NA | 0 | NA |
| 19 | 58354096 | 58334459 | -1 | NM_032584    | ZNF347   | 0 | NA | 0 | NA | 1 | 15 | 0 | NA | 0 | NA |
| 19 | 58388431 | 58358363 | -1 | NM_024733    | ZNF665   | 1 | 11 | 0 | NA | 0 | NA | 0 | NA | 0 | NA |
| 19 | 58449923 | 58430449 | -1 | NM_182609    | ZNF677   | 1 | 27 | 0 | NA | 0 | NA | 0 | NA | 0 | NA |
| 19 | 58453356 | 58454687 | 1  | NM_173856    | VN1R2    | 1 | 27 | 0 | NA | 0 | NA | 0 | NA | 0 | NA |
| 19 | 58462730 | 58461824 | -1 | NM_173857    | VN1R4    | 0 | NA | 0 | NA | 0 | NA | 0 | NA | 0 | NA |
| 19 | 58486687 | 58484665 | -1 | NM_033341    | BIRC8    | 1 | 13 | 0 | NA | 0 | NA | 0 | NA | 0 | NA |
| 19 | 58590208 | 58607074 | 1  | NM_001040185 | ZNF765   | 1 | 16 | 0 | NA | 0 | NA | 0 | NA | 0 | NA |



|    |          |          |    |              |          |   |    |   |    |   |    |   |    |   |    |
|----|----------|----------|----|--------------|----------|---|----|---|----|---|----|---|----|---|----|
| 19 | 58644961 | 58653326 | 1  | NM_001008401 | ZNF761   | 0 | NA | 0 | NA | 0 | NA | 0 | NA | 0 | NA |
| 19 | 58662800 | 58689358 | 1  | NM_001004301 | ZNF813   | 0 | NA | 0 | NA | 0 | NA | 0 | NA | 0 | NA |
| 19 | 58715988 | 58775335 | 1  | NM_018555    | ZNF331   | 1 | 24 | 0 | NA | 1 | 16 | 0 | NA | 0 | NA |
| 19 | 58733144 | 58775335 | 1  | NM_001079906 | ZNF331   | 0 | NA | 0 | NA | 0 | NA | 0 | NA | 0 | NA |
| 19 | 58750372 | 58775335 | 1  | NM_001079907 | ZNF331   | 0 | NA | 0 | NA | 0 | NA | 0 | NA | 0 | NA |
| 19 | 58827121 | 58832075 | 1  | NM_001012728 | DPRX     | 0 | NA | 0 | NA | 0 | NA | 0 | NA | 0 | NA |
| 19 | 59003771 | 58988808 | -1 | NM_033297    | NLRP12   | 0 | NA | 0 | NA | 0 | NA | 0 | NA | 0 | NA |
| 19 | 59019405 | 58988666 | -1 | NM_144687    | NLRP12   | 0 | NA | 0 | NA | 0 | NA | 0 | NA | 0 | NA |
| 19 | 59061422 | 59071501 | 1  | NM_001020820 | MYADM    | 1 | 11 | 0 | NA | 0 | NA | 0 | NA | 0 | NA |
| 19 | 59062948 | 59071501 | 1  | NM_001020819 | MYADM    | 1 | 11 | 0 | NA | 0 | NA | 0 | NA | 0 | NA |
| 19 | 59062948 | 59071501 | 1  | NM_138373    | MYADM    | 1 | 11 | 0 | NA | 0 | NA | 0 | NA | 0 | NA |
| 19 | 59064471 | 59071501 | 1  | NM_001020821 | MYADM    | 1 | 11 | 0 | NA | 0 | NA | 0 | NA | 0 | NA |
| 19 | 59064592 | 59071501 | 1  | NM_001020818 | MYADM    | 1 | 11 | 0 | NA | 0 | NA | 0 | NA | 0 | NA |
| 19 | 59077278 | 59102713 | 1  | NM_002739    | PRKCG    | 0 | NA | 0 | NA | 1 | 12 | 0 | NA | 0 | NA |
| 19 | 59107882 | 59138080 | 1  | NM_031896    | CACNG7   | 0 | NA | 0 | NA | 0 | NA | 0 | NA | 0 | NA |
| 19 | 59158105 | 59177951 | 1  | NM_031895    | CACNG8   | 0 | NA | 0 | NA | 0 | NA | 0 | NA | 0 | NA |
| 19 | 59187353 | 59207732 | 1  | NM_031897    | CACNG6   | 0 | NA | 1 | 12 | 0 | NA | 0 | NA | 0 | NA |
| 19 | 59187353 | 59207732 | 1  | NM_145814    | CACNG6   | 0 | NA | 1 | 12 | 0 | NA | 0 | NA | 0 | NA |
| 19 | 59187353 | 59207732 | 1  | NM_145815    | CACNG6   | 0 | NA | 1 | 12 | 0 | NA | 0 | NA | 0 | NA |
| 19 | 59259019 | 59235891 | -1 | NM_198481    | VSTM1    | 0 | NA | 1 | 19 | 0 | NA | 0 | NA | 0 | NA |
| 19 | 59295960 | 59289744 | -1 | NM_130771    | OSCAR    | 1 | 13 | 0 | NA | 0 | NA | 0 | NA | 0 | NA |
| 19 | 59295960 | 59289744 | -1 | NM_133168    | OSCAR    | 1 | 13 | 0 | NA | 0 | NA | 0 | NA | 0 | NA |
| 19 | 59295960 | 59289744 | -1 | NM_133169    | OSCAR    | 1 | 13 | 0 | NA | 0 | NA | 0 | NA | 0 | NA |
| 19 | 59295960 | 59289744 | -1 | NM_206818    | OSCAR    | 1 | 13 | 0 | NA | 0 | NA | 0 | NA | 0 | NA |
| 19 | 59297971 | 59302080 | 1  | NM_004542    | NDUFA3   | 1 | 13 | 0 | NA | 0 | NA | 0 | NA | 0 | NA |
| 19 | 59310648 | 59326954 | 1  | NM_015629    | PRPF31   | 1 | 15 | 0 | NA | 0 | NA | 0 | NA | 0 | NA |
| 19 | 59310848 | 59302141 | -1 | NM_013342    | TFPT     | 1 | 15 | 0 | NA | 0 | NA | 0 | NA | 0 | NA |
| 19 | 59333260 | 59351239 | 1  | NM_014516    | CNOT3    | 0 | NA | 0 | NA | 0 | NA | 0 | NA | 0 | NA |
| 19 | 59355258 | 59351190 | -1 | NM_024316    | LENG1    | 0 | NA | 0 | NA | 0 | NA | 0 | NA | 0 | NA |
| 19 | 59386864 | 59355657 | -1 | NM_144686    | TMC4     | 0 | NA | 0 | NA | 0 | NA | 0 | NA | 0 | NA |
| 19 | 59385478 | 59368920 | -1 | NM_024298    | MBOAT7   | 0 | NA | 0 | NA | 0 | NA | 0 | NA | 0 | NA |
| 19 | 59386008 | 59389338 | 1  | NM_024075    | TSEN34   | 0 | NA | 0 | NA | 0 | NA | 0 | NA | 0 | NA |
| 19 | 59386915 | 59389338 | 1  | NM_001077446 | TSEN34   | 0 | NA | 0 | NA | 0 | NA | 0 | NA | 0 | NA |
| 19 | 59396537 | 59403327 | 1  | NM_001013    | RPS9     | 0 | NA | 0 | NA | 0 | NA | 0 | NA | 0 | NA |
| 19 | 59418771 | 59411958 | -1 | NM_001081450 | LILRB3   | 0 | NA | 0 | NA | 0 | NA | 0 | NA | 0 | NA |
| 19 | 59418771 | 59411958 | -1 | NM_006864    | LILRB3   | 0 | NA | 0 | NA | 0 | NA | 0 | NA | 0 | NA |
| 19 | 59438536 | 59432280 | -1 | NM_024318    | LILRA6   | 0 | NA | 0 | NA | 0 | NA | 0 | NA | 0 | NA |
| 19 | 59452979 | 59446081 | -1 | NM_001081442 | LILRB5   | 0 | NA | 0 | NA | 0 | NA | 0 | NA | 0 | NA |
| 19 | 59452979 | 59446081 | -1 | NM_001081443 | LILRB5   | 0 | NA | 0 | NA | 0 | NA | 0 | NA | 0 | NA |
| 19 | 59452979 | 59446081 | -1 | NM_006840    | LILRB5   | 0 | NA | 0 | NA | 0 | NA | 0 | NA | 0 | NA |
| 19 | 59476818 | 59469486 | -1 | NM_001080978 | LILRB2   | 0 | NA | 0 | NA | 0 | NA | 0 | NA | 0 | NA |
| 19 | 59476818 | 59469486 | -1 | NM_005874    | LILRB2   | 0 | NA | 0 | NA | 0 | NA | 0 | NA | 0 | NA |
| 19 | 59496050 | 59491666 | -1 | NM_006865    | LILRA3   | 0 | NA | 0 | NA | 0 | NA | 0 | NA | 0 | NA |
| 19 | 59516180 | 59510348 | -1 | NM_181985    | LILRA5   | 0 | NA | 0 | NA | 0 | NA | 0 | NA | 0 | NA |
| 19 | 59516180 | 59514246 | -1 | NM_181986    | LILRA5   | 0 | NA | 0 | NA | 0 | NA | 0 | NA | 0 | NA |
| 19 | 59516180 | 59514364 | -1 | NM_181879    | LILRA5   | 0 | NA | 0 | NA | 0 | NA | 0 | NA | 0 | NA |
| 19 | 59516221 | 59510164 | -1 | NM_021250    | LILRA5   | 0 | NA | 0 | NA | 0 | NA | 0 | NA | 0 | NA |
| 19 | 59542233 | 59536503 | -1 | NM_012276    | LILRA4   | 0 | NA | 0 | NA | 0 | NA | 0 | NA | 0 | NA |
| 19 | 59568533 | 59557046 | -1 | NM_002287    | LAIR1    | 0 | NA | 0 | NA | 0 | NA | 0 | NA | 0 | NA |
| 19 | 59568533 | 59557046 | -1 | NM_021706    | LAIR1    | 0 | NA | 0 | NA | 0 | NA | 0 | NA | 0 | NA |
| 19 | 59618446 | 59639866 | 1  | NM_001005367 | TTYH1    | 1 | 11 | 1 | 14 | 0 | NA | 0 | NA | 0 | NA |
| 19 | 59618446 | 59639866 | 1  | NM_020659    | TTYH1    | 1 | 11 | 1 | 14 | 0 | NA | 0 | NA | 0 | NA |
| 19 | 59652211 | 59665008 | 1  | NM_052925    | LENG8    | 0 | NA | 0 | NA | 0 | NA | 0 | NA | 0 | NA |
| 19 | 59666706 | 59664790 | -1 | NM_198988    | LENG9    | 1 | 16 | 0 | NA | 0 | NA | 1 | 12 | 0 | NA |
| 19 | 59676234 | 59668021 | -1 | NM_145057    | CDC42EP5 | 1 | 16 | 0 | NA | 0 | NA | 1 | 12 | 0 | NA |
| 19 | 59705824 | 59713709 | 1  | NM_002288    | LAIR2    | 0 | NA | 1 | 12 | 0 | NA | 0 | NA | 0 | NA |
| 19 | 59705824 | 59713709 | 1  | NM_021270    | LAIR2    | 0 | NA | 1 | 12 | 0 | NA | 0 | NA | 0 | NA |
| 19 | 59735819 | 59748836 | 1  | NM_001047605 | KIR3DX1  | 0 | NA | 0 | NA | 0 | NA | 0 | NA | 0 | NA |
| 19 | 59777070 | 59790833 | 1  | NM_006866    | LILRA2   | 0 | NA | 0 | NA | 0 | NA | 0 | NA | 0 | NA |
| 19 | 59796924 | 59804352 | 1  | NM_006863    | LILRA1   | 0 | NA | 0 | NA | 0 | NA | 0 | NA | 0 | NA |
| 19 | 59820440 | 59840816 | 1  | NM_006669    | LILRB1   | 0 | NA | 0 | NA | 0 | NA | 0 | NA | 0 | NA |
| 19 | 59833719 | 59840816 | 1  | NM_001081638 | LILRB1   | 0 | NA | 0 | NA | 0 | NA | 0 | NA | 0 | NA |
| 19 | 59833719 | 59840816 | 1  | NM_001081639 | LILRB1   | 0 | NA | 0 | NA | 0 | NA | 0 | NA | 0 | NA |
| 19 | 59833779 | 59840816 | 1  | NM_001081637 | LILRB1   | 0 | NA | 0 | NA | 0 | NA | 0 | NA | 0 | NA |
| 19 | 59865935 | 59871658 | 1  | NM_001081438 | LILRB4   | 0 | NA | 0 | NA | 0 | NA | 0 | NA | 0 | NA |

|    |          |          |    |              |           |   |    |   |    |   |    |   |    |   |    |
|----|----------|----------|----|--------------|-----------|---|----|---|----|---|----|---|----|---|----|
| 19 | 59865935 | 59871658 | 1  | NM_006847    | LILRB4    | 0 | NA | 0 | NA | 0 | NA | 0 | NA | 0 | NA |
| 19 | 59927795 | 59939815 | 1  | NM_153443    | KIR3DL3   | 0 | NA | 0 | NA | 0 | NA | 0 | NA | 0 | NA |
| 19 | 59927812 | 60001550 | 1  | NM_001015070 | KIR3DP1   | 0 | NA | 0 | NA | 0 | NA | 0 | NA | 0 | NA |
| 19 | 59941785 | 59956316 | 1  | NM_014511    | KIR2DL3   | 0 | NA | 0 | NA | 0 | NA | 0 | NA | 0 | NA |
| 19 | 59941785 | 59956316 | 1  | NM_015868    | KIR2DL3   | 0 | NA | 0 | NA | 0 | NA | 0 | NA | 0 | NA |
| 19 | 59973076 | 59987590 | 1  | NM_014218    | KIR2DL1   | 0 | NA | 0 | NA | 0 | NA | 0 | NA | 0 | NA |
| 19 | 60006878 | 60017784 | 1  | NM_001080770 | KIR2DL4   | 0 | NA | 0 | NA | 0 | NA | 0 | NA | 0 | NA |
| 19 | 60006878 | 60017784 | 1  | NM_001080772 | KIR2DL4   | 0 | NA | 0 | NA | 0 | NA | 0 | NA | 0 | NA |
| 19 | 60006878 | 60017784 | 1  | NM_002255    | KIR2DL4   | 0 | NA | 0 | NA | 0 | NA | 0 | NA | 0 | NA |
| 19 | 60019704 | 60034045 | 1  | NM_013289    | KIR3DL1   | 0 | NA | 0 | NA | 0 | NA | 0 | NA | 0 | NA |
| 19 | 60035985 | 60051835 | 1  | NM_012314    | KIR2DS4   | 0 | NA | 0 | NA | 0 | NA | 0 | NA | 0 | NA |
| 19 | 60053709 | 60070474 | 1  | NM_006737    | KIR3DL2   | 0 | NA | 0 | NA | 0 | NA | 0 | NA | 0 | NA |
| 19 | 60077360 | 60092251 | 1  | NM_133279    | FCAR      | 0 | NA | 0 | NA | 0 | NA | 0 | NA | 0 | NA |
| 19 | 60077360 | 60093651 | 1  | NM_002000    | FCAR      | 0 | NA | 0 | NA | 0 | NA | 0 | NA | 0 | NA |
| 19 | 60077360 | 60093651 | 1  | NM_133269    | FCAR      | 0 | NA | 0 | NA | 0 | NA | 0 | NA | 0 | NA |
| 19 | 60077360 | 60093651 | 1  | NM_133271    | FCAR      | 0 | NA | 0 | NA | 0 | NA | 0 | NA | 0 | NA |
| 19 | 60077360 | 60093651 | 1  | NM_133272    | FCAR      | 0 | NA | 0 | NA | 0 | NA | 0 | NA | 0 | NA |
| 19 | 60077360 | 60093651 | 1  | NM_133273    | FCAR      | 0 | NA | 0 | NA | 0 | NA | 0 | NA | 0 | NA |
| 19 | 60077360 | 60093651 | 1  | NM_133274    | FCAR      | 0 | NA | 0 | NA | 0 | NA | 0 | NA | 0 | NA |
| 19 | 60077360 | 60093651 | 1  | NM_133277    | FCAR      | 0 | NA | 0 | NA | 0 | NA | 0 | NA | 0 | NA |
| 19 | 60077360 | 60093651 | 1  | NM_133278    | FCAR      | 0 | NA | 0 | NA | 0 | NA | 0 | NA | 0 | NA |
| 19 | 60109337 | 60116251 | 1  | NM_004829    | NCR1      | 0 | NA | 0 | NA | 0 | NA | 0 | NA | 0 | NA |
| 19 | 60150685 | 60126688 | -1 | NM_001127255 | NLRP7     | 0 | NA | 0 | NA | 0 | NA | 0 | NA | 0 | NA |
| 19 | 60150685 | 60126688 | -1 | NM_139176    | NLRP7     | 0 | NA | 0 | NA | 0 | NA | 0 | NA | 0 | NA |
| 19 | 60150685 | 60126688 | -1 | NM_206828    | NLRP7     | 0 | NA | 0 | NA | 0 | NA | 0 | NA | 0 | NA |
| 19 | 60169582 | 60204317 | 1  | NM_017852    | NLRP2     | 0 | NA | 0 | NA | 0 | NA | 0 | NA | 0 | NA |
| 19 | 60241444 | 60216886 | -1 | NM_001083899 | GP6       | 0 | NA | 1 | 12 | 0 | NA | 0 | NA | 0 | NA |
| 19 | 60241444 | 60216886 | -1 | NM_016363    | GP6       | 0 | NA | 1 | 12 | 0 | NA | 0 | NA | 0 | NA |
| 19 | 60272709 | 60247520 | -1 | NM_138412    | RDH13     | 0 | NA | 0 | NA | 0 | NA | 0 | NA | 0 | NA |
| 19 | 60279032 | 60291103 | 1  | NM_133180    | EPS8L1    | 0 | NA | 0 | NA | 0 | NA | 0 | NA | 0 | NA |
| 19 | 60283571 | 60291103 | 1  | NM_017729    | EPS8L1    | 0 | NA | 0 | NA | 0 | NA | 0 | NA | 0 | NA |
| 19 | 60320739 | 60294092 | -1 | NM_017607    | PPP1R12C  | 1 | 12 | 0 | NA | 0 | NA | 0 | NA | 0 | NA |
| 19 | 60352418 | 60335972 | -1 | NM_001126132 | TNNT1     | 1 | 11 | 0 | NA | 0 | NA | 1 | 11 | 0 | NA |
| 19 | 60352418 | 60335972 | -1 | NM_001126133 | TNNT1     | 1 | 11 | 0 | NA | 0 | NA | 1 | 11 | 0 | NA |
| 19 | 60352418 | 60335972 | -1 | NM_003283    | TNNT1     | 1 | 11 | 0 | NA | 0 | NA | 1 | 11 | 0 | NA |
| 19 | 60360912 | 60354947 | -1 | NM_000363    | TNNI3     | 1 | 11 | 0 | NA | 0 | NA | 1 | 11 | 0 | NA |
| 19 | 60369830 | 60361842 | -1 | NM_178837    | C19orf51  | 1 | 11 | 1 | 12 | 0 | NA | 0 | NA | 0 | NA |
| 19 | 60383532 | 60376280 | -1 | NM_003180    | SYT5      | 0 | NA | 1 | 14 | 0 | NA | 0 | NA | 0 | NA |
| 19 | 60412654 | 60384427 | -1 | NM_002842    | PTPRH     | 1 | 23 | 0 | NA | 0 | NA | 1 | 18 | 0 | NA |
| 19 | 60432444 | 60429923 | -1 | NM_173804    | TMEM86B   | 0 | NA | 0 | NA | 0 | NA | 0 | NA | 0 | NA |
| 19 | 60461850 | 60432958 | -1 | NM_014931    | SAPS1     | 0 | NA | 0 | NA | 0 | NA | 0 | NA | 0 | NA |
| 19 | 60483285 | 60465518 | -1 | NM_012267    | HSPBP1    | 0 | NA | 0 | NA | 0 | NA | 0 | NA | 0 | NA |
| 19 | 60487345 | 60515715 | 1  | NM_032430    | BRSK1     | 0 | NA | 0 | NA | 0 | NA | 0 | NA | 0 | NA |
| 19 | 60528520 | 60516038 | -1 | NM_001085488 | LOC284417 | 0 | NA | 0 | NA | 0 | NA | 0 | NA | 0 | NA |
| 19 | 60543075 | 60551301 | 1  | NM_032701    | SUV420H2  | 0 | NA | 0 | NA | 0 | NA | 0 | NA | 0 | NA |
| 19 | 60557994 | 60552881 | -1 | NM_144613    | COX6B2    | 1 | 13 | 0 | NA | 0 | NA | 0 | NA | 0 | NA |
| 19 | 60573626 | 60567568 | -1 | NM_000641    | IL11      | 0 | NA | 0 | NA | 0 | NA | 0 | NA | 0 | NA |
| 19 | 60580015 | 60581424 | 1  | NM_139172    | TMEM190   | 0 | NA | 0 | NA | 0 | NA | 1 | 16 | 0 | NA |
| 19 | 60589111 | 60595263 | 1  | NM_000991    | RPL28     | 0 | NA | 0 | NA | 0 | NA | 1 | 12 | 0 | NA |
| 19 | 60611137 | 60604461 | -1 | NM_014501    | UBE2S     | 1 | 17 | 0 | NA | 0 | NA | 1 | 23 | 0 | NA |
| 19 | 60664824 | 60656167 | -1 | NM_024710    | ISOC2     | 0 | NA | 0 | NA | 0 | NA | 1 | 11 | 0 | NA |
| 19 | 60679510 | 60687666 | 1  | NM_033113    | ZNF628    | 1 | 23 | 0 | NA | 0 | NA | 1 | 13 | 0 | NA |
| 19 | 60688405 | 60690747 | 1  | NM_020378    | NAT14     | 1 | 23 | 0 | NA | 0 | NA | 1 | 13 | 0 | NA |
| 19 | 60739473 | 60732911 | -1 | NM_001101401 | LOC646643 | 0 | NA | 0 | NA | 0 | NA | 0 | NA | 0 | NA |
| 19 | 60784023 | 60780702 | -1 | NM_152600    | ZNF579    | 0 | NA | 0 | NA | 0 | NA | 0 | NA | 0 | NA |
| 19 | 60802705 | 60794548 | -1 | NM_032836    | FIZ1      | 0 | NA | 0 | NA | 0 | NA | 1 | 19 | 0 | NA |
| 19 | 60803541 | 60806316 | 1  | NM_153219    | ZNF524    | 0 | NA | 0 | NA | 0 | NA | 1 | 19 | 0 | NA |
| 19 | 60827753 | 60823918 | -1 | NM_203374    | ZNF784    | 0 | NA | 0 | NA | 0 | NA | 0 | NA | 0 | NA |
| 19 | 60844203 | 60846648 | 1  | NM_207115    | ZNF580    | 0 | NA | 0 | NA | 0 | NA | 0 | NA | 0 | NA |
| 19 | 60845229 | 60846648 | 1  | NM_016202    | ZNF580    | 0 | NA | 0 | NA | 0 | NA | 0 | NA | 0 | NA |
| 19 | 60846797 | 60848801 | 1  | NM_016535    | ZNF581    | 0 | NA | 0 | NA | 0 | NA | 0 | NA | 0 | NA |
| 19 | 60850765 | 60856338 | 1  | NM_013301    | CDC106    | 0 | NA | 0 | NA | 0 | NA | 0 | NA | 0 | NA |
| 19 | 60857227 | 60877894 | 1  | NM_001012478 | UZAF2     | 0 | NA | 0 | NA | 0 | NA | 0 | NA | 0 | NA |
| 19 | 60857227 | 60877894 | 1  | NM_007279    | UZAF2     | 0 | NA | 0 | NA | 0 | NA | 0 | NA | 0 | NA |
| 19 | 60878403 | 60898945 | 1  | NM_013333    | EPN1      | 0 | NA | 0 | NA | 0 | NA | 0 | NA | 0 | NA |

|    |          |          |    |              |           |   |    |   |    |   |    |   |    |   |    |
|----|----------|----------|----|--------------|-----------|---|----|---|----|---|----|---|----|---|----|
| 19 | 60941580 | 60911609 | -1 | NM_176820    | NLRP9     | 0 | NA | 0 | NA | 0 | NA | 0 | NA | 0 | NA |
| 19 | 61035166 | 60988576 | -1 | NM_145007    | NLRP11    | 0 | NA | 0 | NA | 0 | NA | 0 | NA | 0 | NA |
| 19 | 61055198 | 61085032 | 1  | NM_134444    | NLRP4     | 0 | NA | 0 | NA | 0 | NA | 0 | NA | 0 | NA |
| 19 | 61135514 | 61099122 | -1 | NM_176810    | NLRP13    | 0 | NA | 0 | NA | 0 | NA | 0 | NA | 0 | NA |
| 19 | 61151009 | 61191807 | 1  | NM_176811    | NLRP8     | 0 | NA | 0 | NA | 0 | NA | 0 | NA | 0 | NA |
| 19 | 61202903 | 61264986 | 1  | NM_153447    | NLRP5     | 0 | NA | 0 | NA | 0 | NA | 0 | NA | 0 | NA |
| 19 | 61324461 | 61290543 | -1 | NM_001002836 | ZNF787    | 0 | NA | 0 | NA | 0 | NA | 1 | 14 | 0 | NA |
| 19 | 61344367 | 61364074 | 1  | NM_018337    | ZNF444    | 0 | NA | 0 | NA | 0 | NA | 0 | NA | 0 | NA |
| 19 | 61379200 | 61388956 | 1  | NM_033106    | GALP      | 0 | NA | 0 | NA | 0 | NA | 0 | NA | 0 | NA |
| 19 | 61396157 | 61392869 | -1 | NM_001080456 | LOC342933 | 0 | NA | 0 | NA | 0 | NA | 0 | NA | 0 | NA |
| 19 | 61431471 | 61424490 | -1 | NM_024303    | ZSCAN5    | 0 | NA | 0 | NA | 0 | NA | 0 | NA | 0 | NA |
| 19 | 61596701 | 61598459 | -1 | NM_144690    | ZNF582    | 1 | 33 | 0 | NA | 0 | NA | 0 | NA | 0 | NA |
| 19 | 61607529 | 61628212 | 1  | NM_152478    | ZNF583    | 1 | 14 | 1 | 14 | 0 | NA | 0 | NA | 1 | 15 |
| 19 | 61680555 | 61643017 | -1 | NM_022103    | ZNF667    | 1 | 16 | 0 | NA | 0 | NA | 0 | NA | 0 | NA |
| 19 | 61711023 | 61732081 | 1  | NM_020813    | ZNF471    | 0 | NA | 0 | NA | 0 | NA | 0 | NA | 0 | NA |
| 19 | 61742128 | 61759982 | 1  | NM_020828    | ZFP28     | 0 | NA | 0 | NA | 0 | NA | 0 | NA | 0 | NA |
| 19 | 61770701 | 61786074 | 1  | NM_001001668 | ZNF470    | 1 | 14 | 1 | 12 | 1 | 13 | 0 | NA | 0 | NA |
| 19 | 61798503 | 61827356 | 1  | NM_021216    | ZNF71     | 0 | NA | 0 | NA | 0 | NA | 0 | NA | 0 | NA |
| 19 | 61876058 | 61866764 | -1 | NM_001005850 | BC37295_3 | 0 | NA | 1 | 12 | 0 | NA | 0 | NA | 0 | NA |
| 19 | 62043876 | 62015614 | -1 | NM_006210    | PEG3      | 1 | 12 | 0 | NA | 0 | NA | 0 | NA | 0 | NA |
| 19 | 62043887 | 61977739 | -1 | NM_015363    | ZIM2      | 1 | 12 | 0 | NA | 0 | NA | 0 | NA | 0 | NA |
| 19 | 62323320 | 62335105 | 1  | NM_020903    | USP29     | 0 | NA | 0 | NA | 0 | NA | 0 | NA | 0 | NA |
| 19 | 62348382 | 62337275 | -1 | NM_052882    | ZIM3      | 0 | NA | 0 | NA | 0 | NA | 0 | NA | 0 | NA |
| 19 | 62370668 | 62354905 | -1 | NM_001012729 | DUXA      | 0 | NA | 0 | NA | 0 | NA | 0 | NA | 0 | NA |
| 19 | 62394680 | 62426026 | 1  | NM_003417    | ZNF264    | 0 | NA | 1 | 28 | 0 | NA | 0 | NA | 1 | 15 |
| 19 | 62434188 | 62438728 | 1  | NM_001015879 | AURKC     | 0 | NA | 0 | NA | 0 | NA | 0 | NA | 0 | NA |
| 19 | 62434188 | 62438728 | 1  | NM_003160    | AURKC     | 0 | NA | 0 | NA | 0 | NA | 0 | NA | 0 | NA |
| 19 | 62434239 | 62438728 | 1  | NM_001015878 | AURKC     | 0 | NA | 0 | NA | 0 | NA | 0 | NA | 0 | NA |
| 19 | 62483664 | 62497248 | 1  | NM_006635    | ZNF460    | 0 | NA | 0 | NA | 0 | NA | 1 | 15 | 0 | NA |
| 19 | 62523688 | 62533956 | 1  | NM_213598    | ZNF543    | 0 | NA | 0 | NA | 0 | NA | 0 | NA | 0 | NA |
| 19 | 62554486 | 62563077 | 1  | NM_020657    | ZNF304    | 0 | NA | 0 | NA | 0 | NA | 1 | 19 | 0 | NA |
| 19 | 62566702 | 62582737 | 1  | NM_173631    | ZNF547    | 0 | NA | 0 | NA | 0 | NA | 0 | NA | 0 | NA |
| 19 | 62593029 | 62604598 | 1  | NM_152909    | ZNF548    | 0 | NA | 0 | NA | 0 | NA | 0 | NA | 0 | NA |
| 19 | 62614340 | 62625119 | 1  | NM_006959    | ZNF17     | 0 | NA | 0 | NA | 0 | NA | 0 | NA | 0 | NA |
| 19 | 62638504 | 62649003 | 1  | NM_001023561 | ZNF749    | 0 | NA | 0 | NA | 0 | NA | 1 | 14 | 0 | NA |
| 19 | 62659666 | 62658353 | -1 | NM_020633    | VN1R1     | 0 | NA | 0 | NA | 0 | NA | 0 | NA | 0 | NA |
| 19 | 62680750 | 62672765 | -1 | NM_001024596 | ZNF772    | 1 | 11 | 1 | 21 | 1 | 18 | 1 | 11 | 0 | NA |
| 19 | 62690890 | 62697860 | 1  | NM_001098491 | ZNF419    | 0 | NA | 0 | NA | 0 | NA | 0 | NA | 0 | NA |
| 19 | 62690890 | 62697860 | 1  | NM_001098492 | ZNF419    | 0 | NA | 0 | NA | 0 | NA | 0 | NA | 0 | NA |
| 19 | 62690890 | 62697860 | 1  | NM_001098493 | ZNF419    | 0 | NA | 0 | NA | 0 | NA | 0 | NA | 0 | NA |
| 19 | 62690890 | 62697860 | 1  | NM_001098494 | ZNF419    | 0 | NA | 0 | NA | 0 | NA | 0 | NA | 0 | NA |
| 19 | 62690890 | 62697860 | 1  | NM_001098495 | ZNF419    | 0 | NA | 0 | NA | 0 | NA | 0 | NA | 0 | NA |
| 19 | 62690890 | 62697860 | 1  | NM_001098496 | ZNF419    | 0 | NA | 0 | NA | 0 | NA | 0 | NA | 0 | NA |
| 19 | 62690890 | 62697860 | 1  | NM_024691    | ZNF419    | 0 | NA | 0 | NA | 0 | NA | 0 | NA | 0 | NA |
| 19 | 62703120 | 62711322 | 1  | NM_198542    | ZNF773    | 0 | NA | 0 | NA | 0 | NA | 1 | 17 | 0 | NA |
| 19 | 62730504 | 62743943 | 1  | NM_153263    | ZNF549    | 0 | NA | 1 | 12 | 0 | NA | 0 | NA | 0 | NA |
| 19 | 62759537 | 62750154 | -1 | NM_001039654 | ZNF550    | 0 | NA | 1 | 15 | 0 | NA | 1 | 36 | 0 | NA |
| 19 | 62782055 | 62774745 | -1 | NM_017879    | ZNF416    | 1 | 12 | 1 | 13 | 1 | 12 | 1 | 14 | 0 | NA |
| 19 | 62787439 | 62795570 | 1  | NM_001010879 | ZIK1      | 1 | 14 | 1 | 29 | 1 | 12 | 0 | NA | 0 | NA |
| 19 | 62803064 | 62811449 | 1  | NM_020880    | ZNF530    | 0 | NA | 0 | NA | 0 | NA | 1 | 15 | 0 | NA |
| 19 | 62817641 | 62825448 | 1  | NM_003435    | ZNF134    | 1 | 22 | 1 | 16 | 1 | 22 | 1 | 26 | 1 | 13 |
| 19 | 62836395 | 62845948 | 1  | NM_006385    | ZNF211    | 0 | NA | 0 | NA | 0 | NA | 0 | NA | 0 | NA |
| 19 | 62836395 | 62845948 | 1  | NM_198855    | ZNF211    | 0 | NA | 0 | NA | 0 | NA | 0 | NA | 0 | NA |
| 19 | 62872114 | 62882317 | 1  | NM_152677    | ZSCAN4    | 0 | NA | 0 | NA | 0 | NA | 0 | NA | 0 | NA |
| 19 | 62885216 | 62892981 | 1  | NM_138347    | ZNF551    | 1 | 13 | 1 | 22 | 0 | NA | 1 | 15 | 0 | NA |
| 19 | 62912391 | 62903621 | -1 | NM_001085384 | ZNF154    | 0 | NA | 0 | NA | 0 | NA | 0 | NA | 0 | NA |
| 19 | 62930795 | 62922930 | -1 | NM_024833    | ZNF671    | 0 | NA | 1 | 12 | 0 | NA | 0 | NA | 0 | NA |
| 19 | 62954022 | 62961337 | 1  | NM_173632    | ZNF776    | 0 | NA | 0 | NA | 0 | NA | 1 | 20 | 0 | NA |
| 19 | 62972836 | 62983796 | 1  | NM_017652    | ZNF586    | 0 | NA | 0 | NA | 0 | NA | 1 | 18 | 0 | NA |
| 19 | 63018093 | 63010261 | -1 | NM_024762    | ZNF552    | 0 | NA | 0 | NA | 0 | NA | 0 | NA | 0 | NA |
| 19 | 63053080 | 63068299 | 1  | NM_032828    | ZNF587    | 0 | NA | 0 | NA | 0 | NA | 0 | NA | 0 | NA |
| 19 | 63119790 | 63108953 | -1 | NM_152475    | ZNF417    | 0 | NA | 0 | NA | 0 | NA | 0 | NA | 0 | NA |
| 19 | 63138552 | 63125063 | -1 | NM_133460    | ZNF418    | 1 | 16 | 0 | NA | 0 | NA | 0 | NA | 0 | NA |
| 19 | 63150889 | 63144012 | -1 | NM_005773    | ZNF256    | 0 | NA | 1 | 13 | 0 | NA | 0 | NA | 0 | NA |
| 19 | 63177714 | 63161616 | -1 | NM_152474    | C19orf18  | 0 | NA | 1 | 12 | 1 | 12 | 1 | 16 | 0 | NA |

|    |          |          |    |              |          |   |    |   |    |   |    |   |    |   |    |
|----|----------|----------|----|--------------|----------|---|----|---|----|---|----|---|----|---|----|
| 19 | 63206526 | 63180252 | -1 | NM_025027    | ZNF606   | 1 | 11 | 1 | 30 | 0 | NA | 0 | NA | 0 | NA |
| 19 | 63237245 | 63257811 | 1  | NM_182572    | ZSCAN1   | 1 | 13 | 1 | 14 | 0 | NA | 0 | NA | 0 | NA |
| 19 | 63262423 | 63272587 | 1  | NM_003436    | ZNF135   | 1 | 14 | 1 | 12 | 1 | 12 | 0 | NA | 0 | NA |
| 19 | 63301389 | 63287017 | -1 | NM_023926    | ZSCAN18  | 0 | NA | 1 | 13 | 0 | NA | 0 | NA | 0 | NA |
| 19 | 63353960 | 63329506 | -1 | NM_024620    | ZNF329   | 0 | NA | 0 | NA | 0 | NA | 0 | NA | 0 | NA |
| 19 | 63386207 | 63416739 | 1  | NM_016324    | ZNF274   | 1 | 19 | 1 | 12 | 0 | NA | 0 | NA | 1 | 13 |
| 19 | 63386207 | 63416739 | 1  | NM_016325    | ZNF274   | 1 | 19 | 1 | 12 | 0 | NA | 0 | NA | 1 | 13 |
| 19 | 63386207 | 63416739 | 1  | NM_133502    | ZNF274   | 1 | 19 | 1 | 12 | 0 | NA | 0 | NA | 1 | 13 |
| 19 | 63431881 | 63466820 | 1  | NM_014480    | ZNF544   | 0 | NA | 0 | NA | 0 | NA | 0 | NA | 1 | 13 |
| 19 | 63482129 | 63499066 | 1  | NM_021089    | ZNF8     | 0 | NA | 0 | NA | 0 | NA | 0 | NA | 0 | NA |
| 19 | 63530196 | 63545509 | 1  | NM_181846    | ZSCAN22  | 0 | NA | 0 | NA | 0 | NA | 0 | NA | 0 | NA |
| 19 | 63556677 | 63549983 | -1 | NM_130786    | A1BG     | 1 | 16 | 0 | NA | 0 | NA | 0 | NA | 0 | NA |
| 19 | 63565932 | 63557536 | -1 | NM_198458    | ZNF497   | 1 | 16 | 0 | NA | 0 | NA | 0 | NA | 0 | NA |
| 19 | 63590447 | 63597983 | 1  | NM_001009    | RPS5     | 0 | NA | 0 | NA | 0 | NA | 1 | 15 | 0 | NA |
| 19 | 63611874 | 63621504 | 1  | NM_173548    | ZNF584   | 0 | NA | 0 | NA | 0 | NA | 0 | NA | 0 | NA |
| 19 | 63643401 | 63635992 | -1 | NM_003433    | ZNF132   | 1 | 38 | 1 | 25 | 1 | 16 | 0 | NA | 0 | NA |
| 19 | 63654782 | 63661011 | 1  | NM_207395    | ZNF324B  | 0 | NA | 0 | NA | 0 | NA | 0 | NA | 0 | NA |
| 19 | 63670274 | 63676577 | 1  | NM_014347    | ZNF324   | 0 | NA | 0 | NA | 0 | NA | 0 | NA | 0 | NA |
| 19 | 63679606 | 63684409 | 1  | NM_017908    | ZNF446   | 0 | NA | 0 | NA | 0 | NA | 0 | NA | 0 | NA |
| 19 | 63715157 | 63701516 | -1 | NM_012254    | SLC27A5  | 0 | NA | 0 | NA | 0 | NA | 0 | NA | 0 | NA |
| 19 | 63722733 | 63716708 | -1 | NM_032792    | ZBTB45   | 0 | NA | 0 | NA | 0 | NA | 0 | NA | 0 | NA |
| 19 | 63747647 | 63753894 | 1  | NM_005762    | TRIM28   | 1 | 14 | 0 | NA | 0 | NA | 0 | NA | 0 | NA |
| 19 | 63758167 | 63754744 | -1 | NM_198426    | CHMP2A   | 1 | 11 | 0 | NA | 0 | NA | 0 | NA | 0 | NA |
| 19 | 63758298 | 63754744 | -1 | NM_014453    | CHMP2A   | 1 | 11 | 0 | NA | 0 | NA | 0 | NA | 0 | NA |
| 19 | 63762155 | 63758890 | -1 | NM_003969    | UBE2M    | 1 | 11 | 0 | NA | 0 | NA | 0 | NA | 0 | NA |
| 19 | 63776754 | 63765095 | -1 | NM_003422    | MZF1     | 0 | NA | 0 | NA | 0 | NA | 0 | NA | 0 | NA |
| 19 | 63776754 | 63765095 | -1 | NM_198055    | MZF1     | 0 | NA | 0 | NA | 0 | NA | 0 | NA | 0 | NA |
| 18 | 148482   | 203739   | 1  | NM_001037334 | USP14    | 0 | NA | 0 | NA | 0 | NA | 0 | NA | 0 | NA |
| 18 | 148482   | 203739   | 1  | NM_005151    | USP14    | 0 | NA | 0 | NA | 0 | NA | 0 | NA | 0 | NA |
| 18 | 258059   | 204519   | -1 | NM_005131    | THOC1    | 0 | NA | 0 | NA | 0 | NA | 0 | NA | 0 | NA |
| 18 | 490685   | 309355   | -1 | NM_130386    | COLEC12  | 0 | NA | 0 | NA | 0 | NA | 0 | NA | 0 | NA |
| 18 | 570368   | 571524   | 1  | NM_004066    | CETN1    | 0 | NA | 0 | NA | 0 | NA | 0 | NA | 0 | NA |
| 18 | 586997   | 640293   | 1  | NM_014410    | CLUL1    | 0 | NA | 0 | NA | 0 | NA | 0 | NA | 0 | NA |
| 18 | 606699   | 640293   | 1  | NM_199167    | CLUL1    | 0 | NA | 0 | NA | 0 | NA | 0 | NA | 0 | NA |
| 18 | 647603   | 663499   | 1  | NM_001071    | TYMS     | 0 | NA | 0 | NA | 0 | NA | 0 | NA | 0 | NA |
| 18 | 648340   | 639619   | -1 | NM_001012716 | C18orf56 | 0 | NA | 0 | NA | 0 | NA | 0 | NA | 0 | NA |
| 18 | 702676   | 662556   | -1 | NM_001126123 | ENOSF1   | 0 | NA | 0 | NA | 1 | 12 | 0 | NA | 0 | NA |
| 18 | 702676   | 664000   | -1 | NM_017512    | ENOSF1   | 0 | NA | 0 | NA | 1 | 12 | 0 | NA | 0 | NA |
| 18 | 802327   | 711591   | -1 | NM_005433    | YES1     | 1 | 14 | 0 | NA | 0 | NA | 0 | NA | 0 | NA |
| 18 | 894943   | 902173   | 1  | NM_001099733 | ADCYAP1  | 0 | NA | 0 | NA | 0 | NA | 0 | NA | 0 | NA |
| 18 | 895296   | 902173   | 1  | NM_001117    | ADCYAP1  | 0 | NA | 0 | NA | 0 | NA | 0 | NA | 0 | NA |
| 18 | 2561489  | 2527523  | -1 | NM_022840    | METTL4   | 0 | NA | 0 | NA | 0 | NA | 0 | NA | 0 | NA |
| 18 | 2561604  | 2606628  | 1  | NM_006101    | NDC80    | 0 | NA | 0 | NA | 0 | NA | 0 | NA | 0 | NA |
| 18 | 2645885  | 2795015  | 1  | NM_015295    | SMCHD1   | 0 | NA | 0 | NA | 0 | NA | 0 | NA | 0 | NA |
| 18 | 2837027  | 2904090  | 1  | NM_032048    | EMILIN2  | 0 | NA | 0 | NA | 0 | NA | 0 | NA | 0 | NA |
| 18 | 3001945  | 2906991  | -1 | NM_014646    | LPIN2    | 1 | 16 | 0 | NA | 0 | NA | 0 | NA | 0 | NA |
| 18 | 3210106  | 3056804  | -1 | NM_003803    | MYOM1    | 0 | NA | 0 | NA | 0 | NA | 0 | NA | 0 | NA |
| 18 | 3210106  | 3056804  | -1 | NM_019856    | MYOM1    | 0 | NA | 0 | NA | 0 | NA | 0 | NA | 0 | NA |
| 18 | 3237527  | 3246234  | 1  | NM_006471    | MRCL3    | 1 | 21 | 0 | NA | 0 | NA | 0 | NA | 0 | NA |
| 18 | 3252134  | 3268179  | 1  | NM_033546    | MRLC2    | 0 | NA | 0 | NA | 0 | NA | 0 | NA | 0 | NA |
| 18 | 3402071  | 3448406  | 1  | NM_174886    | TGIF1    | 0 | NA | 0 | NA | 0 | NA | 0 | NA | 0 | NA |
| 18 | 3437607  | 3448406  | 1  | NM_173207    | TGIF1    | 0 | NA | 0 | NA | 0 | NA | 0 | NA | 0 | NA |
| 18 | 3439972  | 3448406  | 1  | NM_173209    | TGIF1    | 0 | NA | 0 | NA | 0 | NA | 0 | NA | 0 | NA |
| 18 | 3440030  | 3448406  | 1  | NM_173208    | TGIF1    | 0 | NA | 0 | NA | 0 | NA | 0 | NA | 0 | NA |
| 18 | 3440171  | 3448406  | 1  | NM_003244    | TGIF1    | 0 | NA | 0 | NA | 0 | NA | 0 | NA | 0 | NA |
| 18 | 3441590  | 3448406  | 1  | NM_170695    | TGIF1    | 0 | NA | 0 | NA | 0 | NA | 0 | NA | 0 | NA |
| 18 | 3441590  | 3448406  | 1  | NM_173210    | TGIF1    | 0 | NA | 0 | NA | 0 | NA | 0 | NA | 0 | NA |
| 18 | 3443771  | 3448406  | 1  | NM_173211    | TGIF1    | 0 | NA | 0 | NA | 0 | NA | 0 | NA | 0 | NA |
| 18 | 3584111  | 3588350  | 1  | NM_001039796 | FLJ35776 | 1 | 11 | 0 | NA | 1 | 12 | 1 | 12 | 0 | NA |
| 18 | 3835296  | 3488836  | -1 | NM_001003809 | DLGAP1   | 0 | NA | 0 | NA | 0 | NA | 0 | NA | 0 | NA |
| 18 | 3870135  | 3488836  | -1 | NM_004746    | DLGAP1   | 0 | NA | 0 | NA | 0 | NA | 0 | NA | 0 | NA |
| 18 | 5283313  | 5279378  | -1 | NM_003409    | ZFP181   | 1 | 16 | 0 | NA | 0 | NA | 0 | NA | 0 | NA |
| 18 | 5533986  | 5382387  | -1 | NM_012307    | EPB41L3  | 0 | NA | 0 | NA | 0 | NA | 0 | NA | 0 | NA |
| 18 | 5882103  | 5880183  | -1 | NM_001080209 | TTMA     | 0 | NA | 0 | NA | 0 | NA | 0 | NA | 0 | NA |
| 18 | 6404910  | 5944704  | -1 | NM_173464    | L3MBTL4  | 0 | NA | 0 | NA | 0 | NA | 0 | NA | 0 | NA |

|    |          |          |    |              |          |   |    |   |    |   |    |   |    |   |    |
|----|----------|----------|----|--------------|----------|---|----|---|----|---|----|---|----|---|----|
| 18 | 6824483  | 6888720  | 1  | NM_030672    | ARHGAP28 | 0 | NA | 0 | NA | 0 | NA | 0 | NA | 0 | NA |
| 18 | 6824483  | 6905712  | 1  | NM_001010000 | ARHGAP28 | 0 | NA | 0 | NA | 0 | NA | 0 | NA | 0 | NA |
| 18 | 7107813  | 6931885  | -1 | NM_005559    | LAMA1    | 0 | NA | 0 | NA | 0 | NA | 0 | NA | 0 | NA |
| 18 | 7221136  | 7222042  | 1  | NM_001105581 | LRRC30   | 0 | NA | 0 | NA | 0 | NA | 0 | NA | 0 | NA |
| 18 | 7557313  | 8396859  | 1  | NM_001105244 | PTPRM    | 0 | NA | 0 | NA | 0 | NA | 0 | NA | 0 | NA |
| 18 | 7557313  | 8396859  | 1  | NM_002845    | PTPRM    | 0 | NA | 0 | NA | 0 | NA | 0 | NA | 0 | NA |
| 18 | 8599442  | 8629380  | 1  | NM_001025300 | RAB12    | 0 | NA | 0 | NA | 0 | NA | 0 | NA | 0 | NA |
| 18 | 8707368  | 8822775  | 1  | NM_015210    | KIAA0802 | 0 | NA | 0 | NA | 0 | NA | 0 | NA | 0 | NA |
| 18 | 9092724  | 9124336  | 1  | NM_021074    | NDUFV2   | 1 | 12 | 0 | NA | 0 | NA | 0 | NA | 0 | NA |
| 18 | 9126757  | 9275206  | 1  | NM_001083625 | ANKRD12  | 0 | NA | 0 | NA | 0 | NA | 0 | NA | 0 | NA |
| 18 | 9126757  | 9275206  | 1  | NM_015208    | ANKRD12  | 0 | NA | 0 | NA | 0 | NA | 0 | NA | 0 | NA |
| 18 | 9324850  | 9392418  | 1  | NM_020648    | TWSG1    | 1 | 15 | 0 | NA | 0 | NA | 0 | NA | 0 | NA |
| 18 | 9466529  | 9528106  | 1  | NM_006788    | RALBP1   | 1 | 12 | 0 | NA | 0 | NA | 0 | NA | 0 | NA |
| 18 | 9604600  | 9536791  | -1 | NM_001042388 | PPP4R1   | 0 | NA | 0 | NA | 0 | NA | 0 | NA | 0 | NA |
| 18 | 9604600  | 9536791  | -1 | NM_005134    | PPP4R1   | 0 | NA | 0 | NA | 0 | NA | 0 | NA | 0 | NA |
| 18 | 9698227  | 9852553  | 1  | NM_006868    | RAB31    | 0 | NA | 0 | NA | 0 | NA | 0 | NA | 0 | NA |
| 18 | 9875722  | 9878156  | 1  | NM_001098529 | TXNDC2   | 0 | NA | 0 | NA | 0 | NA | 0 | NA | 0 | NA |
| 18 | 9875722  | 9878156  | 1  | NM_032243    | TXNDC2   | 0 | NA | 0 | NA | 0 | NA | 0 | NA | 0 | NA |
| 18 | 9875988  | 9878156  | 1  | NM_001098530 | TXNDC2   | 0 | NA | 0 | NA | 0 | NA | 0 | NA | 0 | NA |
| 18 | 9903954  | 9950018  | 1  | NM_003574    | VAPA     | 0 | NA | 0 | NA | 0 | NA | 0 | NA | 0 | NA |
| 18 | 9903954  | 9950018  | 1  | NM_194434    | VAPA     | 0 | NA | 0 | NA | 0 | NA | 0 | NA | 0 | NA |
| 18 | 10444624 | 10478694 | 1  | NM_153000    | APCDD1   | 0 | NA | 0 | NA | 0 | NA | 0 | NA | 0 | NA |
| 18 | 10516030 | 10540372 | 1  | NM_003826    | NAPG     | 0 | NA | 0 | NA | 0 | NA | 0 | NA | 0 | NA |
| 18 | 10687814 | 10660859 | -1 | NM_022068    | FAM38B   | 0 | NA | 0 | NA | 0 | NA | 0 | NA | 0 | NA |
| 18 | 11679264 | 11871919 | 1  | NM_182978    | GNAL     | 0 | NA | 0 | NA | 0 | NA | 0 | NA | 0 | NA |
| 18 | 11742185 | 11871825 | 1  | NM_002071    | GNAL     | 0 | NA | 0 | NA | 0 | NA | 0 | NA | 0 | NA |
| 18 | 11841425 | 11842697 | 1  | NM_020412    | CHMP1B   | 0 | NA | 0 | NA | 0 | NA | 0 | NA | 0 | NA |
| 18 | 11898641 | 11873471 | -1 | NM_023075    | MPPE1    | 0 | NA | 0 | NA | 0 | NA | 0 | NA | 0 | NA |
| 18 | 11971454 | 12020876 | 1  | NM_014214    | IMPA2    | 0 | NA | 0 | NA | 0 | NA | 0 | NA | 0 | NA |
| 18 | 12244317 | 12267594 | 1  | NM_001279    | CIDEA    | 0 | NA | 1 | 14 | 0 | NA | 0 | NA | 0 | NA |
| 18 | 12244627 | 12267594 | 1  | NM_198289    | CIDEA    | 0 | NA | 1 | 14 | 0 | NA | 0 | NA | 0 | NA |
| 18 | 12298256 | 12316568 | 1  | NM_032525    | TUBB6    | 0 | NA | 0 | NA | 0 | NA | 0 | NA | 0 | NA |
| 18 | 12367194 | 12319107 | -1 | NM_006796    | AFG3L2   | 0 | NA | 0 | NA | 0 | NA | 1 | 11 | 0 | NA |
| 18 | 12397927 | 12422234 | 1  | NM_006553    | SLMO1    | 0 | NA | 0 | NA | 0 | NA | 0 | NA | 0 | NA |
| 18 | 12647912 | 12436510 | -1 | NM_020148    | SPIRE1   | 0 | NA | 0 | NA | 0 | NA | 0 | NA | 0 | NA |
| 18 | 12692703 | 12662630 | -1 | NM_024899    | CEP76    | 0 | NA | 0 | NA | 0 | NA | 0 | NA | 0 | NA |
| 18 | 12693063 | 12715739 | 1  | NM_020232    | PSMG2    | 0 | NA | 0 | NA | 0 | NA | 0 | NA | 0 | NA |
| 18 | 12874334 | 12775479 | -1 | NM_080422    | PTPN2    | 0 | NA | 0 | NA | 0 | NA | 0 | NA | 0 | NA |
| 18 | 12874334 | 12775482 | -1 | NM_080423    | PTPN2    | 0 | NA | 0 | NA | 0 | NA | 0 | NA | 0 | NA |
| 18 | 12874334 | 12783246 | -1 | NM_002828    | PTPN2    | 0 | NA | 0 | NA | 0 | NA | 0 | NA | 0 | NA |
| 18 | 12937982 | 12977536 | 1  | NM_001013437 | SEH1L    | 1 | 18 | 1 | 13 | 0 | NA | 0 | NA | 0 | NA |
| 18 | 12937982 | 12977536 | 1  | NM_031216    | SEH1L    | 1 | 18 | 1 | 13 | 0 | NA | 0 | NA | 0 | NA |
| 18 | 12998498 | 13115051 | 1  | NM_032142    | CEP192   | 0 | NA | 0 | NA | 0 | NA | 0 | NA | 0 | NA |
| 18 | 13208794 | 13642748 | 1  | NM_181482    | C18orf1  | 0 | NA | 0 | NA | 0 | NA | 0 | NA | 0 | NA |
| 18 | 13208794 | 13642753 | 1  | NM_181481    | C18orf1  | 0 | NA | 0 | NA | 0 | NA | 0 | NA | 0 | NA |
| 18 | 13601665 | 13642753 | 1  | NM_001003674 | C18orf1  | 0 | NA | 0 | NA | 0 | NA | 0 | NA | 0 | NA |
| 18 | 13601665 | 13642753 | 1  | NM_001003675 | C18orf1  | 0 | NA | 0 | NA | 0 | NA | 0 | NA | 0 | NA |
| 18 | 13610866 | 13642753 | 1  | NM_004338    | C18orf1  | 0 | NA | 0 | NA | 0 | NA | 0 | NA | 0 | NA |
| 18 | 13610866 | 13642753 | 1  | NM_181483    | C18orf1  | 0 | NA | 0 | NA | 0 | NA | 0 | NA | 0 | NA |
| 18 | 13716591 | 13653345 | -1 | NM_001098801 | C18orf19 | 0 | NA | 0 | NA | 0 | NA | 0 | NA | 0 | NA |
| 18 | 13716591 | 13653345 | -1 | NM_152352    | C18orf19 | 0 | NA | 0 | NA | 0 | NA | 0 | NA | 0 | NA |
| 18 | 13716703 | 13754554 | 1  | NM_003799    | RNMT     | 0 | NA | 0 | NA | 0 | NA | 0 | NA | 0 | NA |
| 18 | 13815764 | 13816742 | 1  | NM_005913    | MC5R     | 0 | NA | 1 | 12 | 0 | NA | 0 | NA | 0 | NA |
| 18 | 13905535 | 13872042 | -1 | NM_000529    | MC2R     | 0 | NA | 0 | NA | 0 | NA | 0 | NA | 0 | NA |
| 18 | 14122429 | 14094723 | -1 | NM_145287    | ZNF519   | 0 | NA | 0 | NA | 0 | NA | 0 | NA | 0 | NA |
| 18 | 14169095 | 14175386 | 1  | NM_001029999 | MGC26718 | 0 | NA | 0 | NA | 0 | NA | 0 | NA | 0 | NA |
| 18 | 16945810 | 16783700 | -1 | NM_005406    | ROCK1    | 0 | NA | 0 | NA | 0 | NA | 0 | NA | 0 | NA |
| 18 | 17434691 | 17363259 | -1 | NM_052911    | ESCO1    | 0 | NA | 0 | NA | 0 | NA | 0 | NA | 0 | NA |
| 18 | 17446257 | 17464206 | 1  | NM_006938    | SNRPD1   | 1 | 13 | 0 | NA | 0 | NA | 0 | NA | 0 | NA |
| 18 | 17538724 | 17484855 | -1 | NM_138340    | ABHD3    | 0 | NA | 0 | NA | 0 | NA | 0 | NA | 0 | NA |
| 18 | 17575542 | 17704910 | 1  | NM_020774    | MIB1     | 0 | NA | 0 | NA | 0 | NA | 0 | NA | 0 | NA |
| 18 | 18003413 | 18036225 | 1  | NM_005257    | GATA6    | 0 | NA | 0 | NA | 0 | NA | 0 | NA | 0 | NA |
| 18 | 18251876 | 18247561 | -1 | NM_172241    | CTAGE1   | 0 | NA | 1 | 15 | 0 | NA | 0 | NA | 0 | NA |
| 18 | 18767292 | 18860447 | 1  | NM_002894    | RBBP8    | 0 | NA | 0 | NA | 0 | NA | 0 | NA | 0 | NA |
| 18 | 18767836 | 18860447 | 1  | NM_203291    | RBBP8    | 0 | NA | 0 | NA | 0 | NA | 0 | NA | 0 | NA |

|    |          |          |    |              |          |   |    |   |    |   |    |   |    |   |    |
|----|----------|----------|----|--------------|----------|---|----|---|----|---|----|---|----|---|----|
| 18 | 18767836 | 18860447 | 1  | NM_203292    | RBBP8    | 0 | NA | 0 | NA | 0 | NA | 0 | NA | 0 | NA |
| 18 | 18969724 | 19091329 | 1  | NM_001100619 | CABLES1  | 0 | NA | 0 | NA | 1 | 13 | 1 | 11 | 0 | NA |
| 18 | 18989786 | 19092615 | 1  | NM_138375    | CABLES1  | 1 | 11 | 0 | NA | 0 | NA | 0 | NA | 0 | NA |
| 18 | 19271923 | 19129976 | -1 | NM_032933    | C18orf45 | 0 | NA | 0 | NA | 0 | NA | 0 | NA | 0 | NA |
| 18 | 19286784 | 19317097 | 1  | NM_003831    | RIOK3    | 0 | NA | 0 | NA | 0 | NA | 0 | NA | 0 | NA |
| 18 | 19337459 | 19365742 | 1  | NM_013326    | C18orf8  | 0 | NA | 0 | NA | 0 | NA | 0 | NA | 0 | NA |
| 18 | 19420468 | 19365460 | -1 | NM_000271    | NPC1     | 0 | NA | 0 | NA | 0 | NA | 0 | NA | 0 | NA |
| 18 | 19496847 | 19433975 | -1 | NM_173505    | ANKRD29  | 1 | 11 | 0 | NA | 0 | NA | 0 | NA | 0 | NA |
| 18 | 19523559 | 19789027 | 1  | NM_198129    | LAMA3    | 0 | NA | 0 | NA | 0 | NA | 0 | NA | 0 | NA |
| 18 | 19707003 | 19789027 | 1  | NM_000227    | LAMA3    | 0 | NA | 0 | NA | 0 | NA | 1 | 12 | 0 | NA |
| 18 | 19826734 | 19969699 | 1  | NM_153211    | C18orf17 | 0 | NA | 0 | NA | 0 | NA | 0 | NA | 0 | NA |
| 18 | 19972952 | 19995562 | 1  | NM_012189    | CABYR    | 0 | NA | 0 | NA | 0 | NA | 0 | NA | 0 | NA |
| 18 | 19972952 | 19995562 | 1  | NM_138643    | CABYR    | 0 | NA | 0 | NA | 0 | NA | 0 | NA | 0 | NA |
| 18 | 19972952 | 19995562 | 1  | NM_153768    | CABYR    | 0 | NA | 0 | NA | 0 | NA | 0 | NA | 0 | NA |
| 18 | 19972952 | 19995562 | 1  | NM_153769    | CABYR    | 0 | NA | 0 | NA | 0 | NA | 0 | NA | 0 | NA |
| 18 | 19972952 | 19995562 | 1  | NM_153770    | CABYR    | 0 | NA | 0 | NA | 0 | NA | 0 | NA | 0 | NA |
| 18 | 19973445 | 19995562 | 1  | NM_138644    | CABYR    | 0 | NA | 0 | NA | 0 | NA | 0 | NA | 0 | NA |
| 18 | 20106194 | 19996008 | -1 | NM_018030    | OSBPL1A  | 0 | NA | 0 | NA | 0 | NA | 0 | NA | 0 | NA |
| 18 | 20231788 | 19996008 | -1 | NM_080597    | OSBPL1A  | 0 | NA | 0 | NA | 1 | 13 | 0 | NA | 0 | NA |
| 18 | 20260679 | 20287480 | 1  | NM_018439    | IMPACT   | 0 | NA | 0 | NA | 0 | NA | 0 | NA | 0 | NA |
| 18 | 20294590 | 20313919 | 1  | NM_021624    | HRH4     | 0 | NA | 0 | NA | 0 | NA | 0 | NA | 0 | NA |
| 18 | 21186114 | 20895888 | -1 | NM_015461    | ZNF521   | 0 | NA | 0 | NA | 0 | NA | 0 | NA | 0 | NA |
| 18 | 21924609 | 21850214 | -1 | NM_001007559 | SS18     | 1 | 11 | 0 | NA | 0 | NA | 1 | 13 | 0 | NA |
| 18 | 21924609 | 21850214 | -1 | NM_005637    | SS18     | 1 | 11 | 0 | NA | 0 | NA | 1 | 13 | 0 | NA |
| 18 | 21967813 | 22027317 | 1  | NM_001025096 | PSMA8    | 0 | NA | 0 | NA | 0 | NA | 0 | NA | 0 | NA |
| 18 | 21967813 | 22027317 | 1  | NM_001025097 | PSMA8    | 0 | NA | 0 | NA | 0 | NA | 0 | NA | 0 | NA |
| 18 | 21967813 | 22027317 | 1  | NM_144662    | PSMA8    | 0 | NA | 0 | NA | 0 | NA | 0 | NA | 0 | NA |
| 18 | 22064006 | 22225647 | 1  | NM_005640    | TAF4B    | 0 | NA | 0 | NA | 0 | NA | 1 | 15 | 0 | NA |
| 18 | 22474306 | 22288871 | -1 | NM_198991    | KCTD1    | 0 | NA | 0 | NA | 0 | NA | 0 | NA | 0 | NA |
| 18 | 22696573 | 22686004 | -1 | NM_004028    | AQP4     | 0 | NA | 0 | NA | 0 | NA | 0 | NA | 0 | NA |
| 18 | 22699714 | 22686004 | -1 | NM_001650    | AQP4     | 0 | NA | 0 | NA | 0 | NA | 0 | NA | 0 | NA |
| 18 | 23019279 | 22749611 | -1 | NM_031422    | CHST9    | 0 | NA | 0 | NA | 0 | NA | 0 | NA | 0 | NA |
| 18 | 24011189 | 23784932 | -1 | NM_001792    | CDH2     | 0 | NA | 0 | NA | 0 | NA | 0 | NA | 0 | NA |
| 18 | 26876779 | 26824049 | -1 | NM_001941    | DSC3     | 0 | NA | 0 | NA | 0 | NA | 0 | NA | 0 | NA |
| 18 | 26876779 | 26824049 | -1 | NM_024423    | DSC3     | 0 | NA | 0 | NA | 0 | NA | 0 | NA | 0 | NA |
| 18 | 26936375 | 26900003 | -1 | NM_004949    | DSC2     | 0 | NA | 0 | NA | 0 | NA | 0 | NA | 0 | NA |
| 18 | 26936375 | 26900003 | -1 | NM_024422    | DSC2     | 0 | NA | 0 | NA | 0 | NA | 0 | NA | 0 | NA |
| 18 | 26996817 | 26963211 | -1 | NM_004948    | DSC1     | 0 | NA | 0 | NA | 0 | NA | 0 | NA | 0 | NA |
| 18 | 26996817 | 26963211 | -1 | NM_024421    | DSC1     | 0 | NA | 0 | NA | 0 | NA | 0 | NA | 0 | NA |
| 18 | 27152049 | 27191391 | 1  | NM_001942    | DSG1     | 0 | NA | 0 | NA | 0 | NA | 0 | NA | 0 | NA |
| 18 | 27210737 | 27247877 | 1  | NM_177986    | DSG4     | 0 | NA | 0 | NA | 0 | NA | 0 | NA | 0 | NA |
| 18 | 27281729 | 27312663 | 1  | NM_001944    | DSG3     | 0 | NA | 0 | NA | 0 | NA | 0 | NA | 0 | NA |
| 18 | 27332169 | 27380754 | 1  | NM_001943    | DSG2     | 0 | NA | 0 | NA | 0 | NA | 0 | NA | 0 | NA |
| 18 | 27425837 | 27432794 | 1  | NM_000371    | TTR      | 0 | NA | 0 | NA | 0 | NA | 0 | NA | 0 | NA |
| 18 | 27518626 | 27457130 | -1 | NM_004775    | B4GALT6  | 1 | 11 | 0 | NA | 0 | NA | 0 | NA | 0 | NA |
| 18 | 27594841 | 27593656 | -1 | NM_001034172 | MCART2   | 0 | NA | 0 | NA | 0 | NA | 0 | NA | 0 | NA |
| 18 | 27777089 | 27663133 | -1 | NM_014939    | KIAA1012 | 0 | NA | 0 | NA | 0 | NA | 0 | NA | 0 | NA |
| 18 | 27852442 | 27907152 | 1  | NM_017831    | RNF125   | 0 | NA | 0 | NA | 0 | NA | 0 | NA | 0 | NA |
| 18 | 27925834 | 27965522 | 1  | NM_016271    | RNF138   | 0 | NA | 0 | NA | 0 | NA | 0 | NA | 0 | NA |
| 18 | 27926644 | 27965522 | 1  | NM_198128    | RNF138   | 0 | NA | 0 | NA | 0 | NA | 0 | NA | 0 | NA |
| 18 | 28023984 | 28054364 | 1  | NM_005925    | MEP1B    | 0 | NA | 0 | NA | 0 | NA | 0 | NA | 0 | NA |
| 18 | 28304445 | 28101474 | -1 | NM_022751    | FAM59A   | 0 | NA | 0 | NA | 0 | NA | 0 | NA | 0 | NA |
| 18 | 28606972 | 28506631 | -1 | NM_020805    | KLHL14   | 0 | NA | 1 | 12 | 0 | NA | 0 | NA | 0 | NA |
| 18 | 29274043 | 28771363 | -1 | NM_001105528 | C18orf34 | 0 | NA | 0 | NA | 0 | NA | 0 | NA | 0 | NA |
| 18 | 29274683 | 28771363 | -1 | NM_198995    | C18orf34 | 0 | NA | 0 | NA | 0 | NA | 0 | NA | 0 | NA |
| 18 | 29412538 | 29581397 | 1  | NM_030632    | ASXL3    | 0 | NA | 0 | NA | 0 | NA | 0 | NA | 0 | NA |
| 18 | 30057444 | 29685061 | -1 | NM_003787    | NOL4     | 0 | NA | 0 | NA | 0 | NA | 0 | NA | 0 | NA |
| 18 | 30327278 | 30663290 | 1  | NM_001392    | DTNA     | 0 | NA | 0 | NA | 0 | NA | 0 | NA | 0 | NA |
| 18 | 30327278 | 30701367 | 1  | NM_032979    | DTNA     | 0 | NA | 0 | NA | 0 | NA | 0 | NA | 0 | NA |
| 18 | 30327278 | 30725364 | 1  | NM_032975    | DTNA     | 0 | NA | 0 | NA | 0 | NA | 0 | NA | 0 | NA |
| 18 | 30544233 | 30701367 | 1  | NM_032978    | DTNA     | 0 | NA | 0 | NA | 0 | NA | 0 | NA | 0 | NA |
| 18 | 30544245 | 30701367 | 1  | NM_001391    | DTNA     | 0 | NA | 0 | NA | 0 | NA | 0 | NA | 0 | NA |
| 18 | 30544245 | 30725364 | 1  | NM_001390    | DTNA     | 0 | NA | 0 | NA | 0 | NA | 0 | NA | 0 | NA |
| 18 | 30652329 | 30701367 | 1  | NM_032981    | DTNA     | 0 | NA | 0 | NA | 0 | NA | 0 | NA | 0 | NA |
| 18 | 30652329 | 30725364 | 1  | NM_032980    | DTNA     | 0 | NA | 0 | NA | 0 | NA | 0 | NA | 0 | NA |

|    |          |          |    |              |          |   |    |   |    |   |    |   |    |   |    |
|----|----------|----------|----|--------------|----------|---|----|---|----|---|----|---|----|---|----|
| 18 | 30875388 | 30975813 | 1  | NM_014268    | MAPRE2   | 0 | NA | 0 | NA | 0 | NA | 1 | 11 | 0 | NA |
| 18 | 31075016 | 31092357 | 1  | NM_032347    | ZNF397   | 0 | NA | 0 | NA | 0 | NA | 0 | NA | 0 | NA |
| 18 | 31124170 | 31086816 | -1 | NM_001112734 | ZNF397OS | 0 | NA | 0 | NA | 0 | NA | 0 | NA | 0 | NA |
| 18 | 31124264 | 31144728 | 1  | NM_006629    | ZNF271   | 0 | NA | 0 | NA | 0 | NA | 0 | NA | 0 | NA |
| 18 | 31124266 | 31144728 | 1  | NM_001112663 | ZNF271   | 0 | NA | 0 | NA | 0 | NA | 0 | NA | 0 | NA |
| 18 | 31178403 | 31169956 | -1 | NM_006965    | ZNF24    | 0 | NA | 0 | NA | 0 | NA | 1 | 12 | 0 | NA |
| 18 | 31211299 | 31200658 | -1 | NM_145756    | ZNF396   | 0 | NA | 0 | NA | 0 | NA | 0 | NA | 0 | NA |
| 18 | 31331953 | 31302288 | -1 | NM_001098817 | C18orf37 | 1 | 19 | 0 | NA | 0 | NA | 1 | 11 | 0 | NA |
| 18 | 31331953 | 31302288 | -1 | NM_194281    | C18orf37 | 1 | 19 | 0 | NA | 0 | NA | 1 | 11 | 0 | NA |
| 18 | 31488593 | 31545792 | 1  | NM_020474    | GALNT1   | 0 | NA | 0 | NA | 0 | NA | 0 | NA | 0 | NA |
| 18 | 31806585 | 31813239 | 1  | NM_031446    | C18orf21 | 0 | NA | 0 | NA | 0 | NA | 0 | NA | 0 | NA |
| 18 | 31901371 | 31823789 | -1 | NM_018170    | P15RS    | 0 | NA | 0 | NA | 0 | NA | 0 | NA | 0 | NA |
| 18 | 31963355 | 31942491 | -1 | NM_012319    | SLC39A6  | 0 | NA | 0 | NA | 1 | 15 | 0 | NA | 0 | NA |
| 18 | 31963355 | 31944960 | -1 | NM_001099406 | SLC39A6  | 0 | NA | 0 | NA | 1 | 15 | 0 | NA | 0 | NA |
| 18 | 31963884 | 32008605 | 1  | NM_018255    | ELP2     | 0 | NA | 0 | NA | 1 | 15 | 0 | NA | 0 | NA |
| 18 | 32021477 | 32102683 | 1  | NM_017947    | MOCOS    | 0 | NA | 0 | NA | 0 | NA | 0 | NA | 0 | NA |
| 18 | 32131699 | 32614016 | 1  | NM_025135    | FHOD3    | 0 | NA | 0 | NA | 0 | NA | 0 | NA | 0 | NA |
| 18 | 32663077 | 33059286 | 1  | NM_020776    | KIAA1328 | 0 | NA | 0 | NA | 0 | NA | 0 | NA | 0 | NA |
| 18 | 32663156 | 32630031 | -1 | NM_015476    | C18orf10 | 0 | NA | 0 | NA | 0 | NA | 0 | NA | 0 | NA |
| 18 | 33399998 | 33077005 | -1 | NM_001025087 | BRUNOL4  | 0 | NA | 0 | NA | 0 | NA | 0 | NA | 0 | NA |
| 18 | 33399998 | 33077005 | -1 | NM_001025088 | BRUNOL4  | 0 | NA | 0 | NA | 0 | NA | 0 | NA | 0 | NA |
| 18 | 33399998 | 33077005 | -1 | NM_001025089 | BRUNOL4  | 0 | NA | 0 | NA | 0 | NA | 0 | NA | 0 | NA |
| 18 | 33399998 | 33077005 | -1 | NM_020180    | BRUNOL4  | 0 | NA | 0 | NA | 0 | NA | 0 | NA | 0 | NA |
| 18 | 37789196 | 37915444 | 1  | NM_002647    | PIK3C3   | 0 | NA | 0 | NA | 0 | NA | 0 | NA | 0 | NA |
| 18 | 38949655 | 38571189 | -1 | NM_002930    | RIT2     | 0 | NA | 0 | NA | 0 | NA | 0 | NA | 0 | NA |
| 18 | 39111342 | 39101854 | -1 | NM_020783    | SYT4     | 0 | NA | 0 | NA | 0 | NA | 0 | NA | 0 | NA |
| 18 | 40535466 | 40898771 | 1  | NM_015559    | SETBP1   | 1 | 13 | 0 | NA | 0 | NA | 0 | NA | 0 | NA |
| 18 | 41448763 | 41517058 | 1  | NM_007163    | SLC14A2  | 0 | NA | 0 | NA | 0 | NA | 0 | NA | 0 | NA |
| 18 | 41558156 | 41585297 | 1  | NM_015865    | SLC14A1  | 0 | NA | 0 | NA | 0 | NA | 0 | NA | 0 | NA |
| 18 | 41659542 | 41676519 | 1  | NM_213602    | SIGLEC15 | 0 | NA | 0 | NA | 0 | NA | 0 | NA | 0 | NA |
| 18 | 41801303 | 41681571 | -1 | NM_020964    | KIAA1632 | 0 | NA | 0 | NA | 0 | NA | 0 | NA | 0 | NA |
| 18 | 41906248 | 41817499 | -1 | NM_024430    | PSTPIP2  | 0 | NA | 0 | NA | 0 | NA | 0 | NA | 0 | NA |
| 18 | 41932285 | 41918107 | -1 | NM_004046    | ATP5A1   | 0 | NA | 0 | NA | 0 | NA | 0 | NA | 0 | NA |
| 18 | 41938197 | 41918107 | -1 | NM_001001937 | ATP5A1   | 0 | NA | 0 | NA | 0 | NA | 0 | NA | 0 | NA |
| 18 | 41938322 | 41962297 | 1  | NM_138443    | CCDC5    | 0 | NA | 0 | NA | 0 | NA | 0 | NA | 0 | NA |
| 18 | 42007985 | 42100953 | 1  | NM_001008239 | C18orf25 | 0 | NA | 0 | NA | 0 | NA | 0 | NA | 0 | NA |
| 18 | 42007985 | 42100953 | 1  | NM_145055    | C18orf25 | 0 | NA | 0 | NA | 0 | NA | 0 | NA | 0 | NA |
| 18 | 42168184 | 42294781 | 1  | NM_152470    | RNF165   | 0 | NA | 0 | NA | 0 | NA | 0 | NA | 0 | NA |
| 18 | 42591037 | 42513078 | -1 | NM_013305    | ST8SIA5  | 0 | NA | 0 | NA | 0 | NA | 0 | NA | 0 | NA |
| 18 | 42751464 | 42646057 | -1 | NM_004671    | PIAS2    | 0 | NA | 0 | NA | 0 | NA | 0 | NA | 0 | NA |
| 18 | 42751464 | 42652311 | -1 | NM_173206    | PIAS2    | 0 | NA | 0 | NA | 0 | NA | 0 | NA | 0 | NA |
| 18 | 42780784 | 42881663 | 1  | NM_031303    | KATNAL2  | 0 | NA | 0 | NA | 0 | NA | 0 | NA | 0 | NA |
| 18 | 42798369 | 42796728 | -1 | NM_001100817 | TCEB3CL  | 0 | NA | 0 | NA | 0 | NA | 0 | NA | 0 | NA |
| 18 | 42804296 | 42802655 | -1 | NM_001100817 | TCEB3CL  | 0 | NA | 1 | 12 | 0 | NA | 0 | NA | 0 | NA |
| 18 | 42804532 | 42802655 | -1 | NM_145653    | TCEB3C   | 0 | NA | 1 | 12 | 0 | NA | 0 | NA | 0 | NA |
| 18 | 42810211 | 42808570 | -1 | NM_001100817 | TCEB3CL  | 0 | NA | 1 | 12 | 0 | NA | 0 | NA | 0 | NA |
| 18 | 42810447 | 42808570 | -1 | NM_145653    | TCEB3C   | 0 | NA | 1 | 12 | 0 | NA | 0 | NA | 0 | NA |
| 18 | 42815986 | 42812940 | -1 | NM_016427    | TCEB3B   | 0 | NA | 1 | 12 | 0 | NA | 0 | NA | 0 | NA |
| 18 | 42930869 | 42887778 | -1 | NM_032124    | HDHD2    | 0 | NA | 0 | NA | 0 | NA | 0 | NA | 0 | NA |
| 18 | 42956743 | 42935410 | -1 | NM_016097    | IER3IP1  | 0 | NA | 0 | NA | 0 | NA | 1 | 12 | 0 | NA |
| 18 | 43710924 | 43613463 | -1 | NM_005901    | SMAD2    | 0 | NA | 0 | NA | 0 | NA | 0 | NA | 0 | NA |
| 18 | 43711510 | 43613463 | -1 | NM_001003652 | SMAD2    | 0 | NA | 0 | NA | 0 | NA | 0 | NA | 0 | NA |
| 18 | 43821492 | 43807742 | -1 | NM_001039360 | ZBTB7C   | 0 | NA | 0 | NA | 0 | NA | 0 | NA | 0 | NA |
| 18 | 44319424 | 44643582 | 1  | NM_014772    | KIAA0427 | 1 | 11 | 0 | NA | 0 | NA | 0 | NA | 0 | NA |
| 18 | 44731079 | 44700220 | -1 | NM_005904    | SMAD7    | 0 | NA | 0 | NA | 0 | NA | 0 | NA | 0 | NA |
| 18 | 45241077 | 44824169 | -1 | NM_017653    | DYM      | 0 | NA | 0 | NA | 0 | NA | 0 | NA | 0 | NA |
| 18 | 45267599 | 45262027 | -1 | NM_001035005 | C18orf32 | 0 | NA | 0 | NA | 0 | NA | 0 | NA | 0 | NA |
| 18 | 45271954 | 45268853 | -1 | NM_001089592 | LOC42250 | 0 | NA | 0 | NA | 0 | NA | 0 | NA | 0 | NA |
| 18 | 45272904 | 45268853 | -1 | NM_000985    | RPL17    | 0 | NA | 0 | NA | 0 | NA | 0 | NA | 0 | NA |
| 18 | 45272904 | 45268853 | -1 | NM_001035006 | RPL17    | 0 | NA | 0 | NA | 0 | NA | 0 | NA | 0 | NA |
| 18 | 45342424 | 45373276 | 1  | NM_006033    | LIPG     | 0 | NA | 0 | NA | 0 | NA | 0 | NA | 0 | NA |
| 18 | 45594249 | 45563871 | -1 | NM_006111    | ACAA2    | 0 | NA | 0 | NA | 0 | NA | 0 | NA | 0 | NA |
| 18 | 45975382 | 45603098 | -1 | NM_001080467 | MYO5B    | 0 | NA | 0 | NA | 0 | NA | 0 | NA | 0 | NA |
| 18 | 46046863 | 46007561 | -1 | NM_145020    | CCDC11   | 1 | 13 | 0 | NA | 0 | NA | 0 | NA | 0 | NA |
| 18 | 46062142 | 46049213 | -1 | NM_002384    | MBD1     | 1 | 11 | 0 | NA | 0 | NA | 0 | NA | 0 | NA |

|    |          |          |    |              |           |   |    |   |    |   |    |   |    |   |    |
|----|----------|----------|----|--------------|-----------|---|----|---|----|---|----|---|----|---|----|
| 18 | 46062142 | 46049213 | -1 | NM_015844    | MBD1      | 1 | 11 | 0 | NA | 0 | NA | 0 | NA | 0 | NA |
| 18 | 46062142 | 46049213 | -1 | NM_015845    | MBD1      | 1 | 11 | 0 | NA | 0 | NA | 0 | NA | 0 | NA |
| 18 | 46062142 | 46049213 | -1 | NM_015846    | MBD1      | 1 | 11 | 0 | NA | 0 | NA | 0 | NA | 0 | NA |
| 18 | 46062142 | 46049213 | -1 | NM_015847    | MBD1      | 1 | 11 | 0 | NA | 0 | NA | 0 | NA | 0 | NA |
| 18 | 46068690 | 46062710 | -1 | NM_001101654 | CXXC1     | 1 | 11 | 0 | NA | 0 | NA | 0 | NA | 0 | NA |
| 18 | 46068690 | 46062710 | -1 | NM_014593    | CXXC1     | 1 | 11 | 0 | NA | 0 | NA | 0 | NA | 0 | NA |
| 18 | 46155389 | 46174536 | 1  | NM_001039535 | C18orf24  | 0 | NA | 0 | NA | 1 | 12 | 0 | NA | 0 | NA |
| 18 | 46155389 | 46174536 | 1  | NM_145060    | C18orf24  | 0 | NA | 0 | NA | 1 | 12 | 0 | NA | 0 | NA |
| 18 | 46340481 | 46512194 | 1  | NM_002747    | MAPK4     | 0 | NA | 0 | NA | 0 | NA | 0 | NA | 0 | NA |
| 18 | 46600432 | 46575487 | -1 | NM_001127175 | MRO       | 0 | NA | 0 | NA | 0 | NA | 0 | NA | 0 | NA |
| 18 | 46600432 | 46575487 | -1 | NM_001127176 | MRO       | 0 | NA | 0 | NA | 0 | NA | 0 | NA | 0 | NA |
| 18 | 46600432 | 46575487 | -1 | NM_031939    | MRO       | 0 | NA | 0 | NA | 0 | NA | 0 | NA | 0 | NA |
| 18 | 46605752 | 46575487 | -1 | NM_001127174 | MRO       | 0 | NA | 0 | NA | 0 | NA | 0 | NA | 0 | NA |
| 18 | 46659432 | 46728258 | 1  | NM_002396    | ME2       | 0 | NA | 0 | NA | 0 | NA | 0 | NA | 0 | NA |
| 18 | 46748384 | 46768488 | 1  | NM_018696    | ELAC1     | 0 | NA | 0 | NA | 0 | NA | 1 | 20 | 0 | NA |
| 18 | 46810580 | 46865409 | 1  | NM_005359    | SMAD4     | 0 | NA | 0 | NA | 0 | NA | 0 | NA | 0 | NA |
| 18 | 46977688 | 46954917 | -1 | NM_016626    | MEX3C     | 1 | 24 | 0 | NA | 1 | 13 | 1 | 11 | 0 | NA |
| 18 | 48120568 | 49311780 | 0  | NM_005215    | DCC       | 0 | NA | 0 | NA | 0 | NA | 0 | NA | 0 | NA |
| 18 | 50005156 | 49934572 | -1 | NM_003927    | MBD2      | 0 | NA | 0 | NA | 0 | NA | 0 | NA | 0 | NA |
| 18 | 50005156 | 49983044 | -1 | NM_015832    | MBD2      | 0 | NA | 0 | NA | 0 | NA | 0 | NA | 0 | NA |
| 18 | 50049846 | 50078602 | 1  | NM_007195    | POLI      | 1 | 17 | 0 | NA | 0 | NA | 0 | NA | 0 | NA |
| 18 | 50134941 | 50105059 | -1 | NM_139171    | STAR6     | 0 | NA | 0 | NA | 0 | NA | 0 | NA | 0 | NA |
| 18 | 50139168 | 50162381 | 1  | NM_173529    | C18orf54  | 0 | NA | 0 | NA | 0 | NA | 0 | NA | 0 | NA |
| 18 | 50409387 | 50417722 | 1  | NM_173629    | C18orf26  | 0 | NA | 0 | NA | 0 | NA | 0 | NA | 0 | NA |
| 18 | 50646837 | 50708209 | 1  | NM_004163    | RAB27B    | 0 | NA | 0 | NA | 0 | NA | 0 | NA | 0 | NA |
| 18 | 50777635 | 50719790 | -1 | NM_025214    | CCDC68    | 0 | NA | 0 | NA | 0 | NA | 0 | NA | 0 | NA |
| 18 | 51406858 | 51040559 | -1 | NM_001083962 | TCF4      | 0 | NA | 0 | NA | 0 | NA | 0 | NA | 0 | NA |
| 18 | 51406858 | 51040559 | -1 | NM_003199    | TCF4      | 0 | NA | 0 | NA | 0 | NA | 0 | NA | 0 | NA |
| 18 | 52456874 | 52421050 | -1 | NM_004786    | TXNL1     | 0 | NA | 0 | NA | 0 | NA | 0 | NA | 0 | NA |
| 18 | 52469613 | 52848034 | 1  | NM_015285    | WDR7      | 0 | NA | 0 | NA | 0 | NA | 0 | NA | 0 | NA |
| 18 | 52469613 | 52848034 | 1  | NM_052834    | WDR7      | 0 | NA | 0 | NA | 0 | NA | 0 | NA | 0 | NA |
| 18 | 53170718 | 53187159 | 1  | NM_015879    | ST8SIA3   | 0 | NA | 0 | NA | 0 | NA | 0 | NA | 1 | 12 |
| 18 | 53253914 | 53309528 | 1  | NM_004852    | QNECUT2   | 0 | NA | 0 | NA | 0 | NA | 0 | NA | 0 | NA |
| 18 | 53404988 | 53366534 | -1 | NM_000140    | FECH      | 0 | NA | 0 | NA | 0 | NA | 0 | NA | 0 | NA |
| 18 | 53404988 | 53366534 | -1 | NM_001012515 | FECH      | 0 | NA | 0 | NA | 0 | NA | 0 | NA | 0 | NA |
| 18 | 53440175 | 53418891 | -1 | NM_004539    | NARS      | 0 | NA | 0 | NA | 0 | NA | 0 | NA | 0 | NA |
| 18 | 53550037 | 53464656 | -1 | NM_005603    | ATP8B1    | 0 | NA | 0 | NA | 0 | NA | 0 | NA | 0 | NA |
| 18 | 53862777 | 54216369 | 1  | NM_015277    | NEDD4L    | 0 | NA | 0 | NA | 0 | NA | 0 | NA | 0 | NA |
| 18 | 54447169 | 54299461 | -1 | NM_052947    | ALPK2     | 0 | NA | 0 | NA | 0 | NA | 0 | NA | 0 | NA |
| 18 | 54489597 | 54568350 | 1  | NM_006785    | MALT1     | 0 | NA | 0 | NA | 0 | NA | 0 | NA | 0 | NA |
| 18 | 54489597 | 54568350 | 1  | NM_173844    | MALT1     | 0 | NA | 0 | NA | 0 | NA | 0 | NA | 0 | NA |
| 18 | 54681040 | 54804689 | 1  | NM_018181    | ZNF532    | 0 | NA | 0 | NA | 0 | NA | 0 | NA | 0 | NA |
| 18 | 54958104 | 54977043 | 1  | NM_033280    | SEC11C    | 0 | NA | 0 | NA | 0 | NA | 0 | NA | 0 | NA |
| 18 | 55038379 | 55048982 | 1  | NM_001012512 | GRP       | 0 | NA | 0 | NA | 0 | NA | 0 | NA | 0 | NA |
| 18 | 55038379 | 55048982 | 1  | NM_001012513 | GRP       | 0 | NA | 0 | NA | 0 | NA | 0 | NA | 0 | NA |
| 18 | 55038379 | 55048982 | 1  | NM_002091    | GRP       | 0 | NA | 0 | NA | 0 | NA | 0 | NA | 0 | NA |
| 18 | 55091605 | 55085246 | -1 | NM_013435    | RAX       | 0 | NA | 0 | NA | 0 | NA | 0 | NA | 0 | NA |
| 18 | 55136861 | 55113633 | -1 | NM_181654    | CPLX4     | 0 | NA | 0 | NA | 0 | NA | 0 | NA | 0 | NA |
| 18 | 55177461 | 55148087 | -1 | NM_005570    | LMAN1     | 0 | NA | 0 | NA | 0 | NA | 0 | NA | 0 | NA |
| 18 | 55515570 | 55252126 | -1 | NM_133459    | CCBE1     | 0 | NA | 0 | NA | 0 | NA | 0 | NA | 0 | NA |
| 18 | 55718171 | 55722518 | 1  | NM_021127    | PMAIP1    | 0 | NA | 0 | NA | 0 | NA | 1 | 16 | 0 | NA |
| 18 | 56190981 | 56189543 | -1 | NM_005912    | MC4R      | 0 | NA | 0 | NA | 0 | NA | 0 | NA | 0 | NA |
| 18 | 57308754 | 57373345 | 1  | NM_031891    | CDH20     | 0 | NA | 0 | NA | 0 | NA | 0 | NA | 0 | NA |
| 18 | 57711284 | 57633283 | -1 | NM_173557    | RNF152    | 0 | NA | 0 | NA | 0 | NA | 0 | NA | 0 | NA |
| 18 | 58005269 | 57862437 | -1 | NM_012327    | PIGN      | 0 | NA | 0 | NA | 0 | NA | 0 | NA | 0 | NA |
| 18 | 58005269 | 57862437 | -1 | NM_176787    | PIGN      | 0 | NA | 0 | NA | 0 | NA | 0 | NA | 0 | NA |
| 18 | 58005503 | 58125335 | 1  | NM_020854    | KIAA1468  | 0 | NA | 0 | NA | 0 | NA | 0 | NA | 0 | NA |
| 18 | 58143527 | 58204484 | 1  | NM_003839    | TNFRSF11A | 0 | NA | 0 | NA | 0 | NA | 0 | NA | 0 | NA |
| 18 | 58341637 | 58396798 | 1  | NM_017742    | ZCCHC2    | 0 | NA | 0 | NA | 0 | NA | 0 | NA | 0 | NA |
| 18 | 58533713 | 58798646 | 1  | NM_194449    | PHLPP     | 0 | NA | 0 | NA | 0 | NA | 0 | NA | 0 | NA |
| 18 | 59137593 | 58941558 | -1 | NM_000633    | BCL2      | 0 | NA | 0 | NA | 0 | NA | 0 | NA | 0 | NA |
| 18 | 59137593 | 59136166 | -1 | NM_000657    | BCL2      | 0 | NA | 0 | NA | 0 | NA | 0 | NA | 0 | NA |
| 18 | 59185486 | 59145950 | -1 | NM_002035    | KDSR      | 0 | NA | 0 | NA | 0 | NA | 0 | NA | 0 | NA |
| 18 | 59240732 | 59207404 | -1 | NM_004869    | VPS4B     | 0 | NA | 0 | NA | 0 | NA | 0 | NA | 0 | NA |
| 18 | 59295123 | 59323298 | 1  | NM_002639    | SERPIN5   | 0 | NA | 0 | NA | 0 | NA | 0 | NA | 0 | NA |



|           |          |          |    |              |           |   |    |   |    |   |    |   |    |   |    |
|-----------|----------|----------|----|--------------|-----------|---|----|---|----|---|----|---|----|---|----|
| 18        | 59374372 | 59385224 | 1  | NM_080474    | SERPINB12 | 0 | NA | 0 | NA | 0 | NA | 0 | NA | 0 | NA |
| 18        | 59405579 | 59417413 | 1  | NM_012397    | SERPINB13 | 0 | NA | 0 | NA | 0 | NA | 0 | NA | 0 | NA |
| 18        | 59462482 | 59455472 | -1 | NM_002974    | SERPINB4  | 0 | NA | 0 | NA | 0 | NA | 0 | NA | 0 | NA |
| 18        | 59480094 | 59473410 | -1 | NM_006919    | SERPINB3  | 0 | NA | 0 | NA | 0 | NA | 0 | NA | 0 | NA |
| 18        | 59521173 | 59542102 | 1  | NM_080475    | SERPINB11 | 0 | NA | 0 | NA | 0 | NA | 0 | NA | 0 | NA |
| 18        | 59571256 | 59623583 | 1  | NM_001040147 | SERPINB7  | 0 | NA | 0 | NA | 0 | NA | 0 | NA | 0 | NA |
| 18        | 59593591 | 59623584 | 1  | NM_003784    | SERPINB7  | 0 | NA | 0 | NA | 0 | NA | 0 | NA | 0 | NA |
| 18        | 59705921 | 59722100 | 1  | NM_002575    | SERPINB2  | 0 | NA | 0 | NA | 0 | NA | 0 | NA | 0 | NA |
| 18        | 59733724 | 59753456 | 1  | NM_005024    | SERPINB10 | 0 | NA | 0 | NA | 0 | NA | 0 | NA | 0 | NA |
| 18        | 59767567 | 59778625 | 1  | NM_001123366 | HMSD      | 0 | NA | 0 | NA | 0 | NA | 0 | NA | 0 | NA |
| 18        | 59788242 | 59804867 | 1  | NM_001031848 | SERPINB8  | 0 | NA | 0 | NA | 0 | NA | 0 | NA | 0 | NA |
| 18        | 59788242 | 59807588 | 1  | NM_002640    | SERPINB8  | 0 | NA | 0 | NA | 0 | NA | 0 | NA | 0 | NA |
| 18        | 59788242 | 59807588 | 1  | NM_198833    | SERPINB8  | 0 | NA | 0 | NA | 0 | NA | 0 | NA | 0 | NA |
| 18        | 61568467 | 61699155 | 1  | NM_033646    | CDH7      | 0 | NA | 0 | NA | 0 | NA | 0 | NA | 0 | NA |
| 18        | 61569136 | 61699154 | 1  | NM_004361    | CDH7      | 0 | NA | 0 | NA | 0 | NA | 0 | NA | 0 | NA |
| 18        | 62422196 | 62322300 | -1 | NM_021153    | CDH19     | 0 | NA | 0 | NA | 0 | NA | 0 | NA | 0 | NA |
| 18        | 63334947 | 63324798 | -1 | NM_032160    | DSEL      | 0 | NA | 0 | NA | 0 | NA | 0 | NA | 0 | NA |
| 18        | 64533333 | 64491904 | -1 | NM_019022    | TXNDC10   | 0 | NA | 0 | NA | 0 | NA | 0 | NA | 0 | NA |
| 18        | 64533470 | 64873406 | 1  | NM_001093729 | CCDC102B  | 0 | NA | 0 | NA | 0 | NA | 0 | NA | 0 | NA |
| 18        | 64616296 | 64873406 | 1  | NM_024781    | CCDC102B  | 0 | NA | 0 | NA | 0 | NA | 0 | NA | 0 | NA |
| 18        | 65219270 | 65660359 | 1  | NM_152721    | DOK6      | 0 | NA | 0 | NA | 0 | NA | 0 | NA | 0 | NA |
| 18        | 65775212 | 65681172 | -1 | NM_006566    | CD226     | 0 | NA | 0 | NA | 0 | NA | 0 | NA | 0 | NA |
| 18        | 66023942 | 65822020 | -1 | NM_173630    | RTTN      | 0 | NA | 0 | NA | 0 | NA | 1 | 11 | 0 | NA |
| 18        | 66107116 | 66148414 | 1  | NM_004232    | SOC56     | 0 | NA | 0 | NA | 0 | NA | 0 | NA | 0 | NA |
| 18        | 68362703 | 68354894 | -1 | NM_182511    | CBLN2     | 0 | NA | 0 | NA | 0 | NA | 0 | NA | 0 | NA |
| 18        | 68683914 | 68565766 | -1 | NM_153181    | NETO1     | 0 | NA | 0 | NA | 0 | NA | 0 | NA | 0 | NA |
| 18        | 68683914 | 68652254 | -1 | NM_138999    | NETO1     | 0 | NA | 0 | NA | 0 | NA | 0 | NA | 0 | NA |
| 18        | 68685790 | 68565766 | -1 | NM_138966    | NETO1     | 0 | NA | 0 | NA | 0 | NA | 0 | NA | 0 | NA |
| 18        | 69965929 | 69891584 | -1 | NM_152676    | FBX015    | 0 | NA | 0 | NA | 0 | NA | 0 | NA | 0 | NA |
| 18        | 69966725 | 69977184 | 1  | NM_014177    | C18orf55  | 0 | NA | 0 | NA | 0 | NA | 0 | NA | 0 | NA |
| 18        | 70110201 | 70071506 | -1 | NM_001914    | CYB5A     | 0 | NA | 0 | NA | 0 | NA | 0 | NA | 0 | NA |
| 18        | 70110201 | 70071506 | -1 | NM_148923    | CYB5A     | 0 | NA | 0 | NA | 0 | NA | 0 | NA | 0 | NA |
| 18        | 70276159 | 70253942 | -1 | NM_001044369 | C18orf51  | 0 | NA | 0 | NA | 0 | NA | 1 | 14 | 0 | NA |
| 18        | 70314576 | 70339336 | 1  | NM_018235    | CNDP2     | 0 | NA | 0 | NA | 0 | NA | 0 | NA | 0 | NA |
| 18        | 70352671 | 70403241 | 1  | NM_032649    | CNDP1     | 0 | NA | 0 | NA | 0 | NA | 0 | NA | 0 | NA |
| 18        | 70471906 | 70906616 | 1  | NM_017757    | ZNF407    | 0 | NA | 0 | NA | 0 | NA | 0 | NA | 0 | NA |
| 18        | 71050105 | 71039474 | -1 | NM_175907    | ZADH2     | 0 | NA | 0 | NA | 0 | NA | 0 | NA | 0 | NA |
| 18        | 71051718 | 71130889 | 1  | NM_005786    | TSHZ1     | 0 | NA | 0 | NA | 0 | NA | 0 | NA | 0 | NA |
| 18        | 71268577 | 71250814 | -1 | NM_001037331 | C18orf62  | 0 | NA | 0 | NA | 0 | NA | 0 | NA | 0 | NA |
| 18        | 72304043 | 72200606 | -1 | NM_014643    | ZNF516    | 0 | NA | 0 | NA | 0 | NA | 0 | NA | 0 | NA |
| 18        | 72665103 | 72811670 | 1  | NM_007345    | ZNF236    | 0 | NA | 0 | NA | 0 | NA | 0 | NA | 0 | NA |
| 18        | 72858043 | 72819776 | -1 | NM_001025081 | MBP       | 0 | NA | 0 | NA | 0 | NA | 1 | 14 | 0 | NA |
| 18        | 72858043 | 72819776 | -1 | NM_001025090 | MBP       | 0 | NA | 0 | NA | 0 | NA | 1 | 14 | 0 | NA |
| 18        | 72858043 | 72819776 | -1 | NM_001025092 | MBP       | 0 | NA | 0 | NA | 0 | NA | 1 | 14 | 0 | NA |
| 18        | 72858043 | 72819776 | -1 | NM_002385    | MBP       | 0 | NA | 0 | NA | 0 | NA | 1 | 14 | 0 | NA |
| 18        | 72973762 | 72819776 | -1 | NM_001025101 | MBP       | 0 | NA | 0 | NA | 0 | NA | 0 | NA | 0 | NA |
| 18        | 72973762 | 72853726 | -1 | NM_001025100 | MBP       | 0 | NA | 0 | NA | 0 | NA | 0 | NA | 0 | NA |
| 18        | 73090995 | 73111084 | 1  | NM_001480    | GALR1     | 0 | NA | 0 | NA | 0 | NA | 0 | NA | 0 | NA |
| 18        | 74841262 | 74859181 | 1  | NM_171999    | SALL3     | 0 | NA | 0 | NA | 0 | NA | 0 | NA | 0 | NA |
| 18        | 74930384 | 75239270 | 1  | NM_198531    | ATP9B     | 0 | NA | 1 | 13 | 0 | NA | 0 | NA | 0 | NA |
| 18        | 75256759 | 75329165 | 1  | NM_172390    | NFATC1    | 0 | NA | 0 | NA | 0 | NA | 0 | NA | 0 | NA |
| 18        | 75256759 | 75390311 | 1  | NM_006162    | NFATC1    | 0 | NA | 0 | NA | 0 | NA | 0 | NA | 0 | NA |
| 18        | 75256759 | 75390311 | 1  | NM_172388    | NFATC1    | 0 | NA | 0 | NA | 0 | NA | 0 | NA | 0 | NA |
| 18        | 75261313 | 75390311 | 1  | NM_172387    | NFATC1    | 0 | NA | 0 | NA | 0 | NA | 0 | NA | 0 | NA |
| 18        | 75261313 | 75390311 | 1  | NM_172389    | NFATC1    | 0 | NA | 0 | NA | 0 | NA | 0 | NA | 0 | NA |
| 18        | 75540788 | 75615495 | 1  | NM_004715    | CTDP1     | 0 | NA | 0 | NA | 0 | NA | 0 | NA | 0 | NA |
| 18        | 75540788 | 75615495 | 1  | NM_048368    | CTDP1     | 0 | NA | 0 | NA | 0 | NA | 0 | NA | 0 | NA |
| 18        | 75724655 | 75760804 | 1  | NM_012283    | KCNG2     | 0 | NA | 1 | 12 | 0 | NA | 0 | NA | 0 | NA |
| 18        | 75812605 | 75763474 | -1 | NM_025078    | PQLC1     | 0 | NA | 0 | NA | 0 | NA | 0 | NA | 0 | NA |
| 18        | 75849520 | 75833854 | -1 | NM_006701    | TXNL4A    | 0 | NA | 0 | NA | 0 | NA | 0 | NA | 0 | NA |
| 18        | 75895345 | 75907377 | 1  | NM_024805    | C18orf22  | 0 | NA | 0 | NA | 0 | NA | 1 | 14 | 0 | NA |
| 18        | 75967902 | 75999219 | 1  | NM_014913    | ADNP2     | 0 | NA | 0 | NA | 0 | NA | 0 | NA | 0 | NA |
| 18        | 76106388 | 76016105 | -1 | NM_032510    | PAIRDEG   | 0 | NA | 0 | NA | 0 | NA | 0 | NA | 0 | NA |
| 17_random | 228816   | 229891   | 1  | NM_031854    | KRTAP4-12 | 0 | NA | 0 | NA | 0 | NA | 0 | NA | 0 | NA |
| 17_random | 234609   | 235788   | 1  | NM_033059    | KRTAP4-11 | 0 | NA | 0 | NA | 0 | NA | 0 | NA | 0 | NA |

|           |         |         |    |              |           |   |    |   |    |   |    |   |    |   |    |
|-----------|---------|---------|----|--------------|-----------|---|----|---|----|---|----|---|----|---|----|
| 17_random | 269055  | 267906  | -1 | NM_033061    | KRTAP4-7  | 0 | NA | 0 | NA | 0 | NA | 0 | NA | 0 | NA |
| 17_random | 287342  | 288106  | 1  | NM_033184    | KRTAP2-4  | 0 | NA | 0 | NA | 0 | NA | 0 | NA | 0 | NA |
| 17_random | 306010  | 306783  | 1  | NM_001123387 | KRTAP2-1  | 0 | NA | 0 | NA | 0 | NA | 0 | NA | 0 | NA |
| 17_random | 311865  | 312768  | 1  | NM_030967    | KRTAP1-1  | 0 | NA | 0 | NA | 0 | NA | 0 | NA | 0 | NA |
| 17_random | 318469  | 319440  | 1  | NM_030966    | KRTAP1-3  | 0 | NA | 0 | NA | 0 | NA | 0 | NA | 0 | NA |
| 17_random | 326122  | 327298  | 1  | NM_031957    | KRTAP1-5  | 0 | NA | 0 | NA | 0 | NA | 0 | NA | 0 | NA |
| 17_random | 344210  | 344803  | 1  | NM_031958    | KRTAP3-1  | 0 | NA | 0 | NA | 0 | NA | 0 | NA | 0 | NA |
| 17_random | 353438  | 354132  | 1  | NM_031959    | KRTAP3-2  | 0 | NA | 0 | NA | 0 | NA | 0 | NA | 0 | NA |
| 17_random | 359191  | 359895  | 1  | NM_033185    | KRTAP3-3  | 0 | NA | 0 | NA | 0 | NA | 0 | NA | 0 | NA |
| 17_random | 366986  | 375609  | 1  | NM_182497    | KRT40     | 0 | NA | 0 | NA | 0 | NA | 0 | NA | 0 | NA |
| 17_random | 386432  | 394908  | 1  | NM_213656    | KRT39     | 0 | NA | 0 | NA | 0 | NA | 0 | NA | 0 | NA |
| 17_random | 481039  | 488735  | 1  | NM_145041    | TMEM106A  | 0 | NA | 0 | NA | 0 | NA | 0 | NA | 0 | NA |
| 17_random | 633000  | 666689  | 1  | NM_003585    | DOC2B     | 0 | NA | 0 | NA | 0 | NA | 0 | NA | 0 | NA |
| 17_random | 675630  | 674106  | -1 | NM_001097610 | LOC653486 | 0 | NA | 0 | NA | 0 | NA | 0 | NA | 0 | NA |
| 17_random | 1004820 | 993947  | -1 | NM_032258    | TBC1D3    | 0 | NA | 0 | NA | 0 | NA | 0 | NA | 0 | NA |
| 17_random | 1004867 | 993947  | -1 | NM_001001418 | TBC1D3C   | 0 | NA | 0 | NA | 0 | NA | 0 | NA | 0 | NA |
| 17_random | 1227808 | 1225928 | -1 | NM_001001437 | CCL3L3    | 0 | NA | 0 | NA | 0 | NA | 0 | NA | 0 | NA |
| 17_random | 1227817 | 1225928 | -1 | NM_021006    | CCL3L1    | 0 | NA | 0 | NA | 0 | NA | 0 | NA | 0 | NA |
| 17_random | 1242109 | 1243916 | 1  | NM_001001435 | CCL4L1    | 0 | NA | 0 | NA | 0 | NA | 0 | NA | 0 | NA |
| 17_random | 1242109 | 1243916 | 1  | NM_207007    | CCL4L2    | 0 | NA | 0 | NA | 0 | NA | 0 | NA | 0 | NA |
| 17_random | 1292788 | 1366384 | 1  | NM_001001417 | TBC1D3B   | 0 | NA | 0 | NA | 0 | NA | 0 | NA | 0 | NA |
| 17_random | 1724231 | 1713110 | -1 | NM_002266    | KPNA2     | 0 | NA | 0 | NA | 0 | NA | 0 | NA | 0 | NA |
| 17_random | 2181393 | 2175509 | -1 | NM_001039904 | FLJ44838  | 0 | NA | 0 | NA | 0 | NA | 0 | NA | 0 | NA |
| 17_random | 2312779 | 2308040 | -1 | NM_153824    | PYCR1     | 0 | NA | 0 | NA | 0 | NA | 0 | NA | 0 | NA |
| 17_random | 2312779 | 2308042 | -1 | NM_006907    | PYCR1     | 0 | NA | 0 | NA | 0 | NA | 0 | NA | 0 | NA |
| 17_random | 2320462 | 2330382 | 1  | NM_000160    | GCGR      | 0 | NA | 0 | NA | 0 | NA | 0 | NA | 0 | NA |
| 17_random | 2340800 | 2338651 | -1 | NM_001093767 | LOC348262 | 0 | NA | 0 | NA | 0 | NA | 0 | NA | 0 | NA |
| 17_random | 2340800 | 2338651 | -1 | NM_207368    | LOC348262 | 0 | NA | 0 | NA | 0 | NA | 0 | NA | 0 | NA |
| 17_random | 2377942 | 2360337 | -1 | NM_000918    | P4HB      | 0 | NA | 0 | NA | 0 | NA | 0 | NA | 0 | NA |
| 17_random | 2409125 | 2417940 | 1  | NM_001002244 | ANAPC11   | 0 | NA | 0 | NA | 0 | NA | 0 | NA | 0 | NA |
| 17_random | 2419735 | 2420207 | 1  | NM_148896    | NPB       | 0 | NA | 0 | NA | 0 | NA | 0 | NA | 0 | NA |
| 17_random | 2428927 | 2421678 | -1 | NM_002861    | PCYT2     | 0 | NA | 0 | NA | 0 | NA | 0 | NA | 0 | NA |
| 17_random | 2435703 | 2429447 | -1 | NM_016538    | SIRT7     | 0 | NA | 0 | NA | 0 | NA | 0 | NA | 0 | NA |
| 17_random | 2441103 | 2435809 | -1 | NM_032711    | MAFG      | 0 | NA | 0 | NA | 0 | NA | 0 | NA | 0 | NA |
| 3_random  | 18987   | 73308   | 1  | NM_000187    | HGD       | 0 | NA | 0 | NA | 0 | NA | 0 | NA | 0 | NA |
| 3_random  | 105257  | 99209   | -1 | NM_004547    | NDUFB4    | 0 | NA | 0 | NA | 0 | NA | 0 | NA | 0 | NA |
| 3_random  | 648510  | 654143  | 1  | NM_001123396 | FLJ78302  | 0 | NA | 0 | NA | 0 | NA | 0 | NA | 0 | NA |
| 3_random  | 648510  | 655688  | 1  | NM_001123041 | FLJ78302  | 0 | NA | 0 | NA | 0 | NA | 0 | NA | 0 | NA |
| 3_random  | 648635  | 654425  | 1  | NM_000648    | CCR2      | 0 | NA | 0 | NA | 0 | NA | 0 | NA | 0 | NA |
| 3_random  | 648635  | 655700  | 1  | NM_000647    | CCR2      | 0 | NA | 0 | NA | 0 | NA | 0 | NA | 0 | NA |
| 3_random  | 664914  | 670974  | 1  | NM_000579    | CCR5      | 0 | NA | 0 | NA | 0 | NA | 0 | NA | 0 | NA |
| 3_random  | 664914  | 670974  | 1  | NM_001100168 | CCR5      | 0 | NA | 0 | NA | 0 | NA | 0 | NA | 0 | NA |
| 3_random  | 665718  | 670973  | 1  | NM_001105536 | LOC727797 | 0 | NA | 0 | NA | 0 | NA | 0 | NA | 0 | NA |
| 3_random  | 701912  | 704273  | 1  | NM_001097632 | LOC727811 | 0 | NA | 0 | NA | 0 | NA | 0 | NA | 0 | NA |
| 3_random  | 701979  | 704273  | 1  | NM_003965    | CCR2L2    | 0 | NA | 0 | NA | 0 | NA | 0 | NA | 0 | NA |
| 8_random  | 399386  | 404876  | 1  | NM_031309    | SCRT1     | 0 | NA | 0 | NA | 0 | NA | 0 | NA | 0 | NA |
| 8_random  | 408762  | 419376  | 1  | NM_012079    | DGAT1     | 0 | NA | 0 | NA | 0 | NA | 0 | NA | 0 | NA |

**Table S2 - Summary of bound regions**

**H3K9me3 (10E-9) in WM262**

| CHROM | START    | END      | LENGTH | PEAK POS | PEAK HEIGHT | TOTAL TARGET COUNTS | TOTAL BACKGROUND COUNTS |
|-------|----------|----------|--------|----------|-------------|---------------------|-------------------------|
| 20    | 188450   | 188525   | 75     | 188462   | 12          | 36                  | 4.3                     |
| 20    | 270525   | 270725   | 200    | 270612   | 18          | 135                 | 0                       |
| 20    | 473025   | 473100   | 75     | 473062   | 17          | 46                  | 2.2                     |
| 20    | 479650   | 479675   | 25     | 479662   | 12          | 12                  | 0                       |
| 20    | 630650   | 630675   | 25     | 630662   | 12          | 12                  | 2.2                     |
| 20    | 689275   | 689325   | 50     | 689287   | 13          | 25                  | 4.3                     |
| 20    | 694325   | 694350   | 25     | 694337   | 12          | 12                  | 2.2                     |
| 20    | 699425   | 699625   | 200    | 699562   | 16          | 109                 | 0                       |
| 20    | 1127500  | 1127625  | 125    | 1127512  | 14          | 61                  | 6.5                     |
| 20    | 1155050  | 1155100  | 50     | 1155062  | 12          | 24                  | 4.3                     |
| 20    | 1206325  | 1206525  | 200    | 1206412  | 18          | 122                 | 0                       |
| 20    | 1379875  | 1380000  | 125    | 1379987  | 14          | 66                  | 0                       |
| 20    | 1380600  | 1380650  | 50     | 1380637  | 14          | 27                  | 0                       |
| 20    | 1419925  | 1420000  | 75     | 1419987  | 16          | 45                  | 6.5                     |
| 20    | 1421625  | 1421725  | 100    | 1421687  | 14          | 52                  | 0                       |
| 20    | 1752200  | 1752225  | 25     | 1752212  | 17          | 17                  | 2.2                     |
| 20    | 1896575  | 1896700  | 125    | 1896662  | 15          | 70                  | 0                       |
| 20    | 1955125  | 1955175  | 50     | 1955137  | 14          | 26                  | 2.2                     |
| 20    | 2008325  | 2008350  | 25     | 2008337  | 14          | 14                  | 2.2                     |
| 20    | 2135550  | 2135950  | 400    | 2135862  | 19          | 249                 | 17.3                    |
| 20    | 2246175  | 2246200  | 25     | 2246187  | 12          | 12                  | 2.2                     |
| 20    | 2256825  | 2256850  | 25     | 2256837  | 14          | 14                  | 2.2                     |
| 20    | 2269150  | 2269225  | 75     | 2269187  | 13          | 37                  | 4.3                     |
| 20    | 2269525  | 2269550  | 25     | 2269537  | 12          | 12                  | 0                       |
| 20    | 2298725  | 2298800  | 75     | 2298787  | 15          | 40                  | 2.2                     |
| 20    | 2301075  | 2301100  | 25     | 2301087  | 12          | 12                  | 0                       |
| 20    | 2317825  | 2317950  | 125    | 2317837  | 14          | 69                  | 0                       |
| 20    | 2326500  | 2326725  | 225    | 2326587  | 19          | 143                 | 0                       |
| 20    | 2346025  | 2346050  | 25     | 2346037  | 12          | 12                  | 0                       |
| 20    | 2359450  | 2359500  | 50     | 2359487  | 15          | 29                  | 4.3                     |
| 20    | 2497425  | 2497625  | 200    | 2497487  | 15          | 108                 | 0                       |
| 20    | 2500975  | 2501000  | 25     | 2500987  | 12          | 12                  | 0                       |
| 20    | 2523475  | 2523525  | 50     | 2523487  | 12          | 24                  | 4.3                     |
| 20    | 2545850  | 2545900  | 50     | 2545887  | 13          | 25                  | 2.2                     |
| 20    | 2660200  | 2660250  | 50     | 2660237  | 13          | 25                  | 4.3                     |
| 20    | 2728975  | 2729000  | 25     | 2728987  | 14          | 14                  | 2.2                     |
| 20    | 3648825  | 3649025  | 200    | 3648912  | 17          | 115                 | 0                       |
| 20    | 3674525  | 3674600  | 75     | 3674587  | 13          | 37                  | 0                       |
| 20    | 4158900  | 4158975  | 75     | 4158962  | 13          | 37                  | 0                       |
| 20    | 4161450  | 4161475  | 25     | 4161462  | 13          | 13                  | 0                       |
| 20    | 4451125  | 4451200  | 75     | 4451137  | 13          | 38                  | 4.3                     |
| 20    | 4574025  | 4574200  | 175    | 4574062  | 15          | 99                  | 0                       |
| 20    | 4669650  | 4669750  | 100    | 4669737  | 13          | 49                  | 6.5                     |
| 20    | 4700200  | 4700300  | 100    | 4700212  | 12          | 44                  | 0                       |
| 20    | 4711775  | 4711875  | 100    | 4711812  | 15          | 55                  | 4.3                     |
| 20    | 4726875  | 4727075  | 200    | 4726962  | 14          | 106                 | 15.2                    |
| 20    | 4766575  | 4766650  | 75     | 4766587  | 12          | 36                  | 0                       |
| 20    | 5242600  | 5242650  | 50     | 5242612  | 13          | 25                  | 0                       |
| 20    | 5251050  | 5251100  | 50     | 5251062  | 12          | 24                  | 0                       |
| 20    | 5393225  | 5393575  | 350    | 5393312  | 14          | 178                 | 13                      |
| 20    | 5394150  | 5394200  | 50     | 5394162  | 13          | 25                  | 4.3                     |
| 20    | 5399925  | 5400125  | 200    | 5400062  | 16          | 115                 | 10.8                    |
| 20    | 6136500  | 6136850  | 350    | 6136512  | 15          | 168                 | 17.3                    |
| 20    | 6405375  | 6405425  | 50     | 6405387  | 12          | 24                  | 0                       |
| 20    | 6454150  | 6454175  | 25     | 6454162  | 12          | 12                  | 2.2                     |
| 20    | 6454850  | 6454925  | 75     | 6454862  | 13          | 37                  | 2.2                     |
| 20    | 8034625  | 8034875  | 250    | 8034712  | 21          | 172                 | 19.5                    |
| 20    | 8480275  | 8480325  | 50     | 8480287  | 12          | 24                  | 0                       |
| 20    | 9857400  | 9857425  | 25     | 9857412  | 12          | 12                  | 2.2                     |
| 20    | 10097150 | 10097250 | 100    | 10097212 | 14          | 52                  | 8.7                     |
| 20    | 10246675 | 10246725 | 50     | 10246687 | 12          | 24                  | 0                       |
| 20    | 11364450 | 11364575 | 125    | 11364562 | 14          | 64                  | 2.2                     |
| 20    | 11537150 | 11537350 | 200    | 11537312 | 13          | 87                  | 8.7                     |
| 20    | 11575600 | 11575650 | 50     | 11575637 | 13          | 25                  | 2.2                     |
| 20    | 11809450 | 11809500 | 50     | 11809462 | 12          | 24                  | 0                       |
| 20    | 11926850 | 11926900 | 50     | 11926862 | 12          | 24                  | 2.2                     |
| 20    | 11993950 | 11993975 | 25     | 11993962 | 12          | 12                  | 0                       |
| 20    | 11994325 | 11994575 | 250    | 11994462 | 16          | 119                 | 0                       |
| 20    | 12227375 | 12227425 | 50     | 12227387 | 12          | 24                  | 4.3                     |
| 20    | 12227750 | 12227850 | 100    | 12227762 | 12          | 48                  | 0                       |

|    |          |          |     |          |    |     |      |
|----|----------|----------|-----|----------|----|-----|------|
| 20 | 12379300 | 12379325 | 25  | 12379312 | 12 | 12  | 0    |
| 20 | 12420425 | 12420600 | 175 | 12420562 | 14 | 85  | 0    |
| 20 | 12476550 | 12476600 | 50  | 12476562 | 12 | 24  | 0    |
| 20 | 13148875 | 13148900 | 25  | 13148887 | 18 | 18  | 2.2  |
| 20 | 13511850 | 13511875 | 25  | 13511862 | 13 | 13  | 2.2  |
| 20 | 14455875 | 14455900 | 25  | 14455887 | 12 | 12  | 2.2  |
| 20 | 15137275 | 15137350 | 75  | 15137287 | 12 | 36  | 0    |
| 20 | 15176875 | 15176925 | 50  | 15176887 | 12 | 24  | 2.2  |
| 20 | 16109925 | 16109950 | 25  | 16109937 | 12 | 12  | 0    |
| 20 | 16116375 | 16117350 | 975 | 16116562 | 23 | 661 | 65   |
| 20 | 16188250 | 16188300 | 50  | 16188262 | 13 | 25  | 0    |
| 20 | 16574550 | 16574575 | 25  | 16574562 | 12 | 12  | 2.2  |
| 20 | 16634725 | 16634750 | 25  | 16634737 | 15 | 15  | 2.2  |
| 20 | 16653800 | 16653925 | 125 | 16653862 | 16 | 69  | 8.7  |
| 20 | 16682450 | 16682500 | 50  | 16682462 | 12 | 24  | 4.3  |
| 20 | 16722350 | 16722425 | 75  | 16722362 | 12 | 36  | 0    |
| 20 | 16722875 | 16723200 | 325 | 16722912 | 14 | 171 | 0    |
| 20 | 16736050 | 16736175 | 125 | 16736062 | 16 | 71  | 8.7  |
| 20 | 17379975 | 17380050 | 75  | 17380012 | 13 | 37  | 6.5  |
| 20 | 17382300 | 17382800 | 500 | 17382612 | 38 | 552 | 17.3 |
| 20 | 17410250 | 17410425 | 175 | 17410362 | 18 | 104 | 15.2 |
| 20 | 17413925 | 17414000 | 75  | 17413937 | 12 | 36  | 0    |
| 20 | 17613300 | 17613400 | 100 | 17613337 | 14 | 53  | 4.3  |
| 20 | 17614625 | 17614725 | 100 | 17614637 | 13 | 49  | 4.3  |
| 20 | 17615075 | 17615175 | 100 | 17615087 | 13 | 49  | 0    |
| 20 | 17615475 | 17615675 | 200 | 17615587 | 23 | 150 | 8.7  |
| 20 | 17615950 | 17616050 | 100 | 17615987 | 13 | 50  | 4.3  |
| 20 | 17616675 | 17616700 | 25  | 17616687 | 12 | 12  | 0    |
| 20 | 17651550 | 17651725 | 175 | 17651662 | 14 | 89  | 15.2 |
| 20 | 17664975 | 17665075 | 100 | 17665012 | 23 | 82  | 8.7  |
| 20 | 17668275 | 17668325 | 50  | 17668312 | 13 | 25  | 4.3  |
| 20 | 17668600 | 17668700 | 100 | 17668662 | 13 | 49  | 6.5  |
| 20 | 17785850 | 17786000 | 150 | 17785962 | 18 | 96  | 6.5  |
| 20 | 17817225 | 17817275 | 50  | 17817237 | 12 | 24  | 4.3  |
| 20 | 17949100 | 17949250 | 150 | 17949137 | 14 | 80  | 0    |
| 20 | 17951900 | 17951950 | 50  | 17951912 | 12 | 24  | 0    |
| 20 | 17970275 | 17970300 | 25  | 17970287 | 12 | 12  | 2.2  |
| 20 | 17971650 | 17972250 | 600 | 17971812 | 19 | 317 | 47.7 |
| 20 | 17972800 | 17973000 | 200 | 17972812 | 13 | 91  | 0    |
| 20 | 17973450 | 17973475 | 25  | 17973462 | 12 | 12  | 2.2  |
| 20 | 17981675 | 17981725 | 50  | 17981687 | 12 | 24  | 4.3  |
| 20 | 17982450 | 17982525 | 75  | 17982487 | 14 | 39  | 0    |
| 20 | 17987650 | 17987675 | 25  | 17987662 | 12 | 12  | 2.2  |
| 20 | 17999375 | 17999450 | 75  | 17999387 | 13 | 37  | 6.5  |
| 20 | 18005925 | 18006000 | 75  | 18005962 | 13 | 38  | 6.5  |
| 20 | 18011700 | 18011875 | 175 | 18011762 | 15 | 91  | 0    |
| 20 | 18019125 | 18019425 | 300 | 18019287 | 16 | 150 | 15.2 |
| 20 | 18173925 | 18173950 | 25  | 18173937 | 14 | 14  | 0    |
| 20 | 18174175 | 18174200 | 25  | 18174187 | 12 | 12  | 0    |
| 20 | 18711225 | 18711375 | 150 | 18711262 | 15 | 75  | 10.8 |
| 20 | 18956025 | 18956050 | 25  | 18956037 | 12 | 12  | 0    |
| 20 | 18978450 | 18978500 | 50  | 18978462 | 13 | 25  | 2.2  |
| 20 | 18998775 | 18998900 | 125 | 18998837 | 13 | 62  | 0    |
| 20 | 19003975 | 19004075 | 100 | 19003987 | 15 | 52  | 0    |
| 20 | 19169525 | 19169550 | 25  | 19169537 | 13 | 13  | 2.2  |
| 20 | 19229425 | 19229450 | 25  | 19229437 | 12 | 12  | 2.2  |
| 20 | 19266400 | 19266500 | 100 | 19266412 | 13 | 50  | 0    |
| 20 | 19296975 | 19297150 | 175 | 19297112 | 16 | 92  | 10.8 |
| 20 | 19382425 | 19382450 | 25  | 19382437 | 15 | 15  | 2.2  |
| 20 | 19442900 | 19442925 | 25  | 19442912 | 12 | 12  | 2.2  |
| 20 | 19445250 | 19445325 | 75  | 19445312 | 13 | 36  | 4.3  |
| 20 | 19503275 | 19503300 | 25  | 19503287 | 12 | 12  | 0    |
| 20 | 19512325 | 19512400 | 75  | 19512337 | 12 | 36  | 2.2  |
| 20 | 19582175 | 19582350 | 175 | 19582312 | 15 | 92  | 0    |
| 20 | 19582750 | 19582775 | 25  | 19582762 | 12 | 12  | 2.2  |
| 20 | 19586900 | 19586925 | 25  | 19586912 | 12 | 12  | 2.2  |
| 20 | 19602975 | 19603100 | 125 | 19603062 | 13 | 61  | 0    |
| 20 | 19608600 | 19608725 | 125 | 19608662 | 15 | 68  | 0    |
| 20 | 19635725 | 19635750 | 25  | 19635737 | 12 | 12  | 0    |
| 20 | 19645825 | 19645950 | 125 | 19645862 | 14 | 68  | 0    |
| 20 | 19753625 | 19753700 | 75  | 19753637 | 12 | 36  | 0    |
| 20 | 20227300 | 20227350 | 50  | 20227312 | 12 | 24  | 4.3  |
| 20 | 20302175 | 20302225 | 50  | 20302187 | 17 | 31  | 4.3  |
| 20 | 20696700 | 20697100 | 400 | 20696962 | 25 | 297 | 8.7  |
| 20 | 20703000 | 20703075 | 75  | 20703062 | 14 | 38  | 6.5  |

|    |          |          |     |          |    |     |      |
|----|----------|----------|-----|----------|----|-----|------|
| 20 | 20714275 | 20714625 | 350 | 20714437 | 23 | 244 | 0    |
| 20 | 20733250 | 20733350 | 100 | 20733337 | 13 | 49  | 8.7  |
| 20 | 20734550 | 20734675 | 125 | 20734612 | 16 | 70  | 6.5  |
| 20 | 20750725 | 20750875 | 150 | 20750737 | 13 | 71  | 4.3  |
| 20 | 20752075 | 20752275 | 200 | 20752087 | 14 | 104 | 17.3 |
| 20 | 20760800 | 20760825 | 25  | 20760812 | 14 | 14  | 2.2  |
| 20 | 20873700 | 20873750 | 50  | 20873712 | 12 | 24  | 4.3  |
| 20 | 21030700 | 21030900 | 200 | 21030787 | 20 | 129 | 17.3 |
| 20 | 21031650 | 21031725 | 75  | 21031662 | 13 | 38  | 0    |
| 20 | 21195475 | 21195750 | 275 | 21195712 | 18 | 147 | 19.5 |
| 20 | 21324925 | 21325000 | 75  | 21324937 | 12 | 36  | 0    |
| 20 | 22582475 | 22582500 | 25  | 22582487 | 12 | 12  | 2.2  |
| 20 | 22602450 | 22602600 | 150 | 22602487 | 14 | 81  | 6.5  |
| 20 | 22607100 | 22607175 | 75  | 22607112 | 14 | 41  | 0    |
| 20 | 22607550 | 22607800 | 250 | 22607687 | 21 | 169 | 6.5  |
| 20 | 22923400 | 22923450 | 50  | 22923412 | 13 | 25  | 4.3  |
| 20 | 22965025 | 22965075 | 50  | 22965037 | 12 | 24  | 4.3  |
| 20 | 23117025 | 23117225 | 200 | 23117087 | 15 | 107 | 13   |
| 20 | 23170275 | 23170400 | 125 | 23170337 | 15 | 68  | 0    |
| 20 | 23170825 | 23170950 | 125 | 23170887 | 14 | 62  | 8.7  |
| 20 | 23180825 | 23180975 | 150 | 23180887 | 14 | 80  | 13   |
| 20 | 23197225 | 23197325 | 100 | 23197287 | 14 | 50  | 8.7  |
| 20 | 23203600 | 23203675 | 75  | 23203612 | 13 | 39  | 6.5  |
| 20 | 23227750 | 23227850 | 100 | 23227787 | 17 | 63  | 4.3  |
| 20 | 23233050 | 23233600 | 550 | 23233112 | 17 | 295 | 19.5 |
| 20 | 23243225 | 23243250 | 25  | 23243237 | 13 | 13  | 2.2  |
| 20 | 23252725 | 23252750 | 25  | 23252737 | 12 | 12  | 0    |
| 20 | 23257100 | 23257275 | 175 | 23257187 | 17 | 100 | 0    |
| 20 | 23354000 | 23354050 | 50  | 23354012 | 13 | 25  | 4.3  |
| 20 | 23931575 | 23931725 | 150 | 23931637 | 16 | 85  | 13   |
| 20 | 24136575 | 24136650 | 75  | 24136612 | 15 | 39  | 0    |
| 20 | 24136975 | 24137050 | 75  | 24136987 | 15 | 41  | 4.3  |
| 20 | 24864675 | 24864725 | 50  | 24864687 | 12 | 24  | 0    |
| 20 | 24909450 | 24909500 | 50  | 24909462 | 12 | 24  | 4.3  |
| 20 | 24996450 | 24996600 | 150 | 24996562 | 15 | 83  | 10.8 |
| 20 | 25002350 | 25002500 | 150 | 25002362 | 16 | 88  | 8.7  |
| 20 | 25012650 | 25012700 | 50  | 25012662 | 13 | 25  | 4.3  |
| 20 | 25031600 | 25031625 | 25  | 25031612 | 12 | 12  | 0    |
| 20 | 25047200 | 25047450 | 250 | 25047262 | 14 | 128 | 0    |
| 20 | 25443325 | 25443350 | 25  | 25443337 | 12 | 12  | 2.2  |
| 20 | 25445950 | 25446025 | 75  | 25445962 | 12 | 35  | 2.2  |
| 20 | 25688200 | 25688325 | 125 | 25688262 | 15 | 68  | 6.5  |
| 20 | 25785950 | 25785975 | 25  | 25785962 | 12 | 12  | 0    |
| 20 | 25786850 | 25786875 | 25  | 25786862 | 14 | 14  | 2.2  |
| 20 | 25919150 | 25919175 | 25  | 25919162 | 12 | 12  | 0    |
| 20 | 26205050 | 26205100 | 50  | 26205062 | 14 | 27  | 4.3  |
| 20 | 28131800 | 28131925 | 125 | 28131837 | 21 | 98  | 10.8 |
| 20 | 28132925 | 28133000 | 75  | 28132937 | 16 | 46  | 6.5  |
| 20 | 28209950 | 28210150 | 200 | 28210062 | 16 | 118 | 6.5  |
| 20 | 28259825 | 28259900 | 75  | 28259837 | 13 | 39  | 6.5  |
| 20 | 28265500 | 28265575 | 75  | 28265537 | 15 | 42  | 2.2  |
| 20 | 29278875 | 29278950 | 75  | 29278887 | 12 | 35  | 2.2  |
| 20 | 29909675 | 29909725 | 50  | 29909687 | 12 | 24  | 4.3  |
| 20 | 30102700 | 30102775 | 75  | 30102712 | 12 | 36  | 0    |
| 20 | 30965650 | 30965800 | 150 | 30965662 | 12 | 70  | 0    |
| 20 | 30968725 | 30968925 | 200 | 30968837 | 21 | 134 | 8.7  |
| 20 | 30969750 | 30969925 | 175 | 30969812 | 14 | 92  | 10.8 |
| 20 | 30972250 | 30972300 | 50  | 30972262 | 12 | 24  | 0    |
| 20 | 30981800 | 30981850 | 50  | 30981812 | 13 | 25  | 4.3  |
| 20 | 31009700 | 31009750 | 50  | 31009712 | 12 | 24  | 0    |
| 20 | 31013500 | 31013575 | 75  | 31013512 | 12 | 36  | 0    |
| 20 | 31028650 | 31028675 | 25  | 31028662 | 13 | 13  | 2.2  |
| 20 | 31047025 | 31047250 | 225 | 31047112 | 25 | 181 | 4.3  |
| 20 | 31051525 | 31051550 | 25  | 31051537 | 13 | 13  | 2.2  |
| 20 | 31056900 | 31056925 | 25  | 31056912 | 13 | 13  | 2.2  |
| 20 | 31067875 | 31067950 | 75  | 31067887 | 13 | 38  | 6.5  |
| 20 | 31084550 | 31084700 | 150 | 31084587 | 15 | 81  | 2.2  |
| 20 | 31086375 | 31086550 | 175 | 31086487 | 15 | 97  | 0    |
| 20 | 31091750 | 31091775 | 25  | 31091762 | 12 | 12  | 0    |
| 20 | 31096275 | 31096325 | 50  | 31096287 | 12 | 24  | 0    |
| 20 | 31097700 | 31097800 | 100 | 31097762 | 13 | 50  | 0    |
| 20 | 31098800 | 31098950 | 150 | 31098937 | 22 | 109 | 17.3 |
| 20 | 31099625 | 31099675 | 50  | 31099637 | 12 | 24  | 4.3  |
| 20 | 31137775 | 31137800 | 25  | 31137787 | 13 | 13  | 2.2  |
| 20 | 31191375 | 31191475 | 100 | 31191387 | 13 | 48  | 0    |

|    |          |          |      |          |    |     |      |
|----|----------|----------|------|----------|----|-----|------|
| 20 | 31210475 | 31210500 | 25   | 31210487 | 12 | 12  | 0    |
| 20 | 31220550 | 31220750 | 200  | 31220587 | 14 | 102 | 0    |
| 20 | 31234825 | 31234975 | 150  | 31234912 | 21 | 112 | 13   |
| 20 | 31316625 | 31317625 | 1000 | 31317037 | 21 | 535 | 36.8 |
| 20 | 31317875 | 31317925 | 50   | 31317887 | 15 | 28  | 0    |
| 20 | 31339275 | 31339400 | 125  | 31339312 | 14 | 62  | 10.8 |
| 20 | 31353250 | 31353300 | 50   | 31353287 | 16 | 31  | 4.3  |
| 20 | 31369050 | 31369250 | 200  | 31369087 | 16 | 114 | 2.2  |
| 20 | 31371500 | 31371525 | 25   | 31371512 | 12 | 12  | 2.2  |
| 20 | 31385250 | 31385375 | 125  | 31385312 | 13 | 62  | 2.2  |
| 20 | 31385625 | 31385650 | 25   | 31385637 | 12 | 12  | 0    |
| 20 | 31788375 | 31788425 | 50   | 31788387 | 12 | 24  | 4.3  |
| 20 | 31943850 | 31943875 | 25   | 31943862 | 13 | 13  | 2.2  |
| 20 | 31948300 | 31948350 | 50   | 31948312 | 12 | 24  | 0    |
| 20 | 31999350 | 31999375 | 25   | 31999362 | 12 | 12  | 2.2  |
| 20 | 32000125 | 32000875 | 750  | 32000762 | 17 | 343 | 23.8 |
| 20 | 33624475 | 33624525 | 50   | 33624487 | 12 | 24  | 0    |
| 20 | 33823000 | 33823025 | 25   | 33823012 | 12 | 12  | 2.2  |
| 20 | 34144400 | 34144425 | 25   | 34144412 | 13 | 13  | 2.2  |
| 20 | 34420000 | 34420200 | 200  | 34420037 | 14 | 101 | 0    |
| 20 | 34498050 | 34498125 | 75   | 34498112 | 15 | 40  | 0    |
| 20 | 34511450 | 34511500 | 50   | 34511462 | 12 | 24  | 0    |
| 20 | 34511825 | 34511850 | 25   | 34511837 | 12 | 12  | 0    |
| 20 | 35474050 | 35474075 | 25   | 35474062 | 12 | 12  | 0    |
| 20 | 35478575 | 35478600 | 25   | 35478587 | 12 | 12  | 2.2  |
| 20 | 35481125 | 35481450 | 325  | 35481212 | 16 | 178 | 6.5  |
| 20 | 35482625 | 35482700 | 75   | 35482637 | 14 | 40  | 0    |
| 20 | 35483275 | 35483300 | 25   | 35483287 | 12 | 12  | 0    |
| 20 | 35530875 | 35530950 | 75   | 35530912 | 14 | 38  | 0    |
| 20 | 35537375 | 35537625 | 250  | 35537487 | 22 | 181 | 34.7 |
| 20 | 35540600 | 35540675 | 75   | 35540637 | 15 | 41  | 0    |
| 20 | 35644675 | 35644700 | 25   | 35644687 | 13 | 13  | 2.2  |
| 20 | 35669100 | 35669125 | 25   | 35669112 | 12 | 12  | 2.2  |
| 20 | 36303850 | 36303950 | 100  | 36303862 | 12 | 48  | 4.3  |
| 20 | 36371200 | 36371350 | 150  | 36371262 | 15 | 82  | 6.5  |
| 20 | 36394650 | 36394675 | 25   | 36394662 | 12 | 12  | 2.2  |
| 20 | 36399550 | 36399950 | 400  | 36399762 | 31 | 354 | 17.3 |
| 20 | 36435325 | 36435350 | 25   | 36435337 | 12 | 12  | 2.2  |
| 20 | 36494450 | 36494575 | 125  | 36494462 | 12 | 56  | 10.8 |
| 20 | 36678525 | 36678625 | 100  | 36678537 | 12 | 46  | 0    |
| 20 | 36680600 | 36680625 | 25   | 36680612 | 12 | 12  | 2.2  |
| 20 | 36698025 | 36698075 | 50   | 36698062 | 16 | 29  | 4.3  |
| 20 | 36701000 | 36701050 | 50   | 36701012 | 14 | 27  | 0    |
| 20 | 36701425 | 36701550 | 125  | 36701437 | 14 | 60  | 0    |
| 20 | 36708775 | 36708800 | 25   | 36708787 | 12 | 12  | 0    |
| 20 | 36713775 | 36713950 | 175  | 36713787 | 13 | 84  | 0    |
| 20 | 36718925 | 36719100 | 175  | 36718937 | 13 | 81  | 0    |
| 20 | 36789725 | 36789850 | 125  | 36789737 | 12 | 60  | 8.7  |
| 20 | 36792425 | 36792675 | 250  | 36792537 | 14 | 133 | 0    |
| 20 | 36883300 | 36883325 | 25   | 36883312 | 12 | 12  | 0    |
| 20 | 36893925 | 36894050 | 125  | 36893987 | 17 | 75  | 0    |
| 20 | 36902175 | 36902400 | 225  | 36902262 | 15 | 119 | 10.8 |
| 20 | 36924800 | 36924850 | 50   | 36924837 | 13 | 25  | 0    |
| 20 | 36967300 | 36967475 | 175  | 36967387 | 19 | 113 | 0    |
| 20 | 36968075 | 36968100 | 25   | 36968087 | 12 | 12  | 2.2  |
| 20 | 37122500 | 37122575 | 75   | 37122512 | 12 | 35  | 0    |
| 20 | 37132500 | 37132525 | 25   | 37132512 | 12 | 12  | 0    |
| 20 | 38975750 | 38975850 | 100  | 38975812 | 14 | 53  | 0    |
| 20 | 39000400 | 39000425 | 25   | 39000412 | 12 | 12  | 0    |
| 20 | 39016050 | 39016125 | 75   | 39016112 | 18 | 47  | 6.5  |
| 20 | 39067800 | 39067950 | 150  | 39067887 | 16 | 83  | 0    |
| 20 | 39068275 | 39068450 | 175  | 39068362 | 18 | 112 | 15.2 |
| 20 | 39069275 | 39069300 | 25   | 39069287 | 12 | 12  | 2.2  |
| 20 | 39439400 | 39439450 | 50   | 39439412 | 12 | 24  | 4.3  |
| 20 | 39732875 | 39732900 | 25   | 39732887 | 12 | 12  | 0    |
| 20 | 39754775 | 39754850 | 75   | 39754812 | 18 | 52  | 6.5  |
| 20 | 40993525 | 40993650 | 125  | 40993612 | 15 | 68  | 0    |
| 20 | 41569350 | 41569375 | 25   | 41569362 | 12 | 12  | 0    |
| 20 | 41806500 | 41806525 | 25   | 41806512 | 12 | 12  | 2.2  |
| 20 | 41834025 | 41834050 | 25   | 41834037 | 12 | 12  | 0    |
| 20 | 41892825 | 41893025 | 200  | 41892912 | 15 | 109 | 0    |
| 20 | 41939100 | 41939150 | 50   | 41939112 | 16 | 30  | 0    |
| 20 | 41963550 | 41963575 | 25   | 41963562 | 12 | 12  | 0    |
| 20 | 41970550 | 41970575 | 25   | 41970562 | 12 | 12  | 0    |
| 20 | 42466925 | 42467100 | 175  | 42467087 | 13 | 81  | 4.3  |

|    |          |          |      |          |     |      |       |
|----|----------|----------|------|----------|-----|------|-------|
| 20 | 42486400 | 42486525 | 125  | 42486412 | 15  | 68   | 0     |
| 20 | 42492125 | 42492150 | 25   | 42492137 | 12  | 12   | 0     |
| 20 | 42789425 | 42789450 | 25   | 42789437 | 12  | 12   | 2.2   |
| 20 | 42812125 | 42812150 | 25   | 42812137 | 12  | 12   | 2.2   |
| 20 | 42872975 | 42873425 | 450  | 42873412 | 22  | 274  | 36.8  |
| 20 | 42874200 | 42874225 | 25   | 42874212 | 15  | 15   | 2.2   |
| 20 | 42874475 | 42874575 | 100  | 42874487 | 13  | 49   | 4.3   |
| 20 | 42895025 | 42895050 | 25   | 42895037 | 12  | 12   | 0     |
| 20 | 42899000 | 42899100 | 100  | 42899037 | 16  | 57   | 4.3   |
| 20 | 42906225 | 42906250 | 25   | 42906237 | 12  | 12   | 0     |
| 20 | 43160350 | 43160500 | 150  | 43160387 | 15  | 84   | 10.8  |
| 20 | 43186175 | 43186275 | 100  | 43186187 | 13  | 49   | 0     |
| 20 | 43197275 | 43197300 | 25   | 43197287 | 12  | 12   | 2.2   |
| 20 | 43200775 | 43200800 | 25   | 43200787 | 12  | 12   | 0     |
| 20 | 43211875 | 43211900 | 25   | 43211887 | 12  | 12   | 0     |
| 20 | 43215550 | 43215700 | 150  | 43215637 | 16  | 83   | 0     |
| 20 | 43236950 | 43237075 | 125  | 43237037 | 15  | 71   | 2.2   |
| 20 | 43266575 | 43266625 | 50   | 43266587 | 12  | 24   | 4.3   |
| 20 | 43331750 | 43331775 | 25   | 43331762 | 12  | 12   | 0     |
| 20 | 43345475 | 43345500 | 25   | 43345487 | 12  | 12   | 2.2   |
| 20 | 43507975 | 43508150 | 175  | 43508087 | 15  | 93   | 8.7   |
| 20 | 44073800 | 44074000 | 200  | 44073862 | 16  | 118  | 8.7   |
| 20 | 44084275 | 44084325 | 50   | 44084287 | 14  | 26   | 0     |
| 20 | 44112725 | 44112750 | 25   | 44112737 | 12  | 12   | 2.2   |
| 20 | 44163975 | 44164000 | 25   | 44163987 | 13  | 13   | 2.2   |
| 20 | 44166525 | 44166625 | 100  | 44166537 | 12  | 47   | 0     |
| 20 | 44184975 | 44185050 | 75   | 44184987 | 12  | 33   | 0     |
| 20 | 44271300 | 44271325 | 25   | 44271312 | 12  | 12   | 2.2   |
| 20 | 44519800 | 44519850 | 50   | 44519812 | 13  | 25   | 4.3   |
| 20 | 44520375 | 44520400 | 25   | 44520387 | 12  | 12   | 0     |
| 20 | 44575250 | 44575600 | 350  | 44575412 | 20  | 213  | 34.7  |
| 20 | 44692325 | 44692525 | 200  | 44692412 | 21  | 128  | 10.8  |
| 20 | 44771225 | 44771300 | 75   | 44771287 | 14  | 38   | 6.5   |
| 20 | 44989300 | 44989400 | 100  | 44989312 | 12  | 48   | 8.7   |
| 20 | 45024800 | 45025000 | 200  | 45024937 | 15  | 109  | 8.7   |
| 20 | 45104750 | 45104775 | 25   | 45104762 | 12  | 12   | 0     |
| 20 | 45172725 | 45172775 | 50   | 45172737 | 12  | 24   | 4.3   |
| 20 | 45223150 | 45223175 | 25   | 45223162 | 12  | 12   | 0     |
| 20 | 45225975 | 45226175 | 200  | 45226062 | 19  | 130  | 15.2  |
| 20 | 45227575 | 45227625 | 50   | 45227587 | 12  | 24   | 4.3   |
| 20 | 45582750 | 45583275 | 525  | 45582937 | 28  | 405  | 17.3  |
| 20 | 45810175 | 45810500 | 325  | 45810387 | 15  | 162  | 15.2  |
| 20 | 45826150 | 45826175 | 25   | 45826162 | 12  | 12   | 2.2   |
| 20 | 45826650 | 45826725 | 75   | 45826712 | 16  | 43   | 6.5   |
| 20 | 45832900 | 45833025 | 125  | 45832962 | 14  | 65   | 0     |
| 20 | 45835450 | 45835625 | 175  | 45835537 | 17  | 107  | 6.5   |
| 20 | 45839550 | 45839650 | 100  | 45839612 | 13  | 49   | 8.7   |
| 20 | 45876925 | 45877200 | 275  | 45877037 | 24  | 209  | 0     |
| 20 | 45917250 | 45917275 | 25   | 45917262 | 12  | 12   | 0     |
| 20 | 45924825 | 45924975 | 150  | 45924887 | 16  | 83   | 0     |
| 20 | 45928275 | 45928300 | 25   | 45928287 | 13  | 13   | 0     |
| 20 | 45928775 | 45928850 | 75   | 45928787 | 14  | 41   | 6.5   |
| 20 | 45929825 | 45929900 | 75   | 45929862 | 15  | 41   | 6.5   |
| 20 | 45930300 | 45930400 | 100  | 45930312 | 12  | 45   | 8.7   |
| 20 | 45940525 | 45940550 | 25   | 45940537 | 12  | 12   | 2.2   |
| 20 | 45942075 | 45942100 | 25   | 45942087 | 12  | 12   | 2.2   |
| 20 | 45956700 | 45958275 | 1575 | 45957037 | 149 | 3627 | 550.4 |
| 20 | 45959625 | 45959750 | 125  | 45959737 | 22  | 87   | 4.3   |
| 20 | 45960075 | 45960325 | 250  | 45960262 | 14  | 117  | 13    |
| 20 | 45978375 | 45978450 | 75   | 45978387 | 12  | 36   | 6.5   |
| 20 | 45978775 | 45979000 | 225  | 45978887 | 19  | 142  | 15.2  |
| 20 | 46019175 | 46019225 | 50   | 46019212 | 13  | 25   | 4.3   |
| 20 | 46019475 | 46019500 | 25   | 46019487 | 14  | 14   | 0     |
| 20 | 46042775 | 46042925 | 150  | 46042837 | 14  | 74   | 13    |
| 20 | 46055600 | 46055800 | 200  | 46055662 | 14  | 104  | 0     |
| 20 | 46069125 | 46069200 | 75   | 46069137 | 14  | 39   | 0     |
| 20 | 46073025 | 46073050 | 25   | 46073037 | 12  | 12   | 2.2   |
| 20 | 46084175 | 46084375 | 200  | 46084237 | 16  | 114  | 0     |
| 20 | 46101750 | 46101925 | 175  | 46101812 | 17  | 107  | 15.2  |
| 20 | 46102200 | 46102400 | 200  | 46102337 | 18  | 123  | 4.3   |
| 20 | 46104225 | 46104425 | 200  | 46104362 | 18  | 121  | 17.3  |
| 20 | 46108550 | 46108675 | 125  | 46108637 | 17  | 75   | 10.8  |
| 20 | 46120875 | 46121500 | 625  | 46121487 | 17  | 328  | 32.5  |
| 20 | 46122000 | 46122100 | 100  | 46122037 | 14  | 52   | 4.3   |
| 20 | 46129025 | 46129125 | 100  | 46129112 | 19  | 73   | 10.8  |

|    |          |          |      |          |    |     |      |
|----|----------|----------|------|----------|----|-----|------|
| 20 | 46146950 | 46146975 | 25   | 46146962 | 13 | 13  | 0    |
| 20 | 46151325 | 46151350 | 25   | 46151337 | 12 | 12  | 0    |
| 20 | 46152975 | 46153150 | 175  | 46153037 | 13 | 85  | 2.2  |
| 20 | 46159325 | 46159350 | 25   | 46159337 | 12 | 12  | 0    |
| 20 | 46185450 | 46185750 | 300  | 46185562 | 19 | 184 | 10.8 |
| 20 | 46186200 | 46186325 | 125  | 46186312 | 14 | 64  | 0    |
| 20 | 46203650 | 46203775 | 125  | 46203737 | 14 | 64  | 0    |
| 20 | 46226150 | 46226300 | 150  | 46226187 | 13 | 73  | 6.5  |
| 20 | 46228175 | 46228225 | 50   | 46228187 | 13 | 25  | 4.3  |
| 20 | 46235375 | 46235550 | 175  | 46235487 | 16 | 102 | 6.5  |
| 20 | 46245350 | 46245550 | 200  | 46245387 | 14 | 101 | 10.8 |
| 20 | 46254925 | 46255225 | 300  | 46255112 | 19 | 166 | 19.5 |
| 20 | 46286125 | 46286200 | 75   | 46286137 | 14 | 42  | 0    |
| 20 | 46286425 | 46286450 | 25   | 46286437 | 12 | 12  | 0    |
| 20 | 46293625 | 46293825 | 200  | 46293762 | 16 | 111 | 10.8 |
| 20 | 46304925 | 46305000 | 75   | 46304962 | 13 | 37  | 0    |
| 20 | 46329650 | 46329725 | 75   | 46329687 | 13 | 38  | 6.5  |
| 20 | 46345000 | 46345025 | 25   | 46345012 | 12 | 12  | 2.2  |
| 20 | 46345725 | 46345750 | 25   | 46345737 | 14 | 14  | 2.2  |
| 20 | 46350175 | 46350275 | 100  | 46350187 | 13 | 50  | 8.7  |
| 20 | 46363550 | 46363575 | 25   | 46363562 | 12 | 12  | 0    |
| 20 | 46371575 | 46371900 | 325  | 46371712 | 14 | 151 | 0    |
| 20 | 46377100 | 46377175 | 75   | 46377137 | 14 | 39  | 0    |
| 20 | 46377425 | 46377675 | 250  | 46377562 | 23 | 175 | 0    |
| 20 | 46379625 | 46379875 | 250  | 46379812 | 16 | 134 | 23.8 |
| 20 | 46381325 | 46381675 | 350  | 46381362 | 16 | 191 | 28.2 |
| 20 | 46388275 | 46388425 | 150  | 46388362 | 17 | 84  | 15.2 |
| 20 | 46399900 | 46399950 | 50   | 46399912 | 13 | 25  | 0    |
| 20 | 46414850 | 46414975 | 125  | 46414887 | 14 | 66  | 8.7  |
| 20 | 46417150 | 46417225 | 75   | 46417187 | 13 | 38  | 4.3  |
| 20 | 46427300 | 46427350 | 50   | 46427312 | 12 | 24  | 0    |
| 20 | 46428375 | 46428800 | 425  | 46428637 | 16 | 208 | 34.7 |
| 20 | 46446900 | 46446925 | 25   | 46446912 | 13 | 13  | 0    |
| 20 | 46447800 | 46447900 | 100  | 46447812 | 13 | 50  | 6.5  |
| 20 | 46454625 | 46454900 | 275  | 46454712 | 21 | 191 | 28.2 |
| 20 | 46455175 | 46455425 | 250  | 46455337 | 17 | 137 | 17.3 |
| 20 | 46457100 | 46457275 | 175  | 46457112 | 14 | 92  | 2.2  |
| 20 | 46458425 | 46458450 | 25   | 46458437 | 12 | 12  | 2.2  |
| 20 | 46462375 | 46462400 | 25   | 46462387 | 12 | 12  | 2.2  |
| 20 | 46466350 | 46466525 | 175  | 46466387 | 17 | 114 | 2.2  |
| 20 | 46467650 | 46467750 | 100  | 46467662 | 13 | 49  | 8.7  |
| 20 | 46474100 | 46474225 | 125  | 46474137 | 13 | 62  | 10.8 |
| 20 | 46500350 | 46500475 | 125  | 46500362 | 12 | 59  | 0    |
| 20 | 46515325 | 46515400 | 75   | 46515337 | 13 | 38  | 0    |
| 20 | 46529950 | 46529975 | 25   | 46529962 | 12 | 12  | 2.2  |
| 20 | 46530400 | 46530425 | 25   | 46530412 | 12 | 12  | 2.2  |
| 20 | 46564925 | 46565150 | 225  | 46565137 | 42 | 305 | 26   |
| 20 | 46565625 | 46566000 | 375  | 46565637 | 57 | 636 | 78   |
| 20 | 46591425 | 46591575 | 150  | 46591487 | 14 | 79  | 0    |
| 20 | 46613950 | 46614250 | 300  | 46614112 | 17 | 175 | 0    |
| 20 | 46616075 | 46616200 | 125  | 46616112 | 14 | 65  | 8.7  |
| 20 | 46633350 | 46633375 | 25   | 46633362 | 12 | 12  | 2.2  |
| 20 | 46633800 | 46633950 | 150  | 46633862 | 19 | 89  | 4.3  |
| 20 | 46636325 | 46636375 | 50   | 46636337 | 12 | 24  | 2.2  |
| 20 | 46646625 | 46646650 | 25   | 46646637 | 12 | 12  | 0    |
| 20 | 46650425 | 46650475 | 50   | 46650437 | 12 | 24  | 0    |
| 20 | 46653300 | 46653325 | 25   | 46653312 | 12 | 12  | 2.2  |
| 20 | 46653850 | 46653950 | 100  | 46653937 | 14 | 48  | 0    |
| 20 | 46654525 | 46654600 | 75   | 46654562 | 13 | 37  | 0    |
| 20 | 46655350 | 46655425 | 75   | 46655362 | 13 | 39  | 0    |
| 20 | 46856625 | 46856700 | 75   | 46856687 | 14 | 38  | 6.5  |
| 20 | 46859025 | 46859050 | 25   | 46859037 | 12 | 12  | 2.2  |
| 20 | 46941700 | 46941900 | 200  | 46941762 | 16 | 117 | 0    |
| 20 | 47329850 | 47331050 | 1200 | 47330862 | 26 | 835 | 88.9 |
| 20 | 47332650 | 47332725 | 75   | 47332687 | 16 | 45  | 6.5  |
| 20 | 47336025 | 47336075 | 50   | 47336062 | 15 | 27  | 4.3  |
| 20 | 47336850 | 47336875 | 25   | 47336862 | 13 | 13  | 2.2  |
| 20 | 47394400 | 47394500 | 100  | 47394437 | 13 | 49  | 6.5  |
| 20 | 47401725 | 47401825 | 100  | 47401812 | 16 | 55  | 8.7  |
| 20 | 47422500 | 47422550 | 50   | 47422537 | 13 | 25  | 0    |
| 20 | 47424450 | 47424850 | 400  | 47424737 | 21 | 257 | 23.8 |
| 20 | 47439950 | 47440125 | 175  | 47440012 | 16 | 99  | 4.3  |
| 20 | 47445675 | 47445875 | 200  | 47445712 | 16 | 119 | 0    |
| 20 | 47452150 | 47452350 | 200  | 47452187 | 15 | 105 | 0    |
| 20 | 47464375 | 47464400 | 25   | 47464387 | 12 | 12  | 0    |



|    |          |          |     |          |    |     |      |
|----|----------|----------|-----|----------|----|-----|------|
| 20 | 47466675 | 47466825 | 150 | 47466737 | 13 | 71  | 8.7  |
| 20 | 47498975 | 47499100 | 125 | 47499012 | 15 | 67  | 10.8 |
| 20 | 47502425 | 47502450 | 25  | 47502437 | 12 | 12  | 2.2  |
| 20 | 47504100 | 47504150 | 50  | 47504112 | 13 | 25  | 0    |
| 20 | 47521425 | 47521550 | 125 | 47521437 | 17 | 73  | 6.5  |
| 20 | 47595650 | 47595750 | 100 | 47595687 | 14 | 52  | 6.5  |
| 20 | 47632550 | 47632575 | 25  | 47632562 | 14 | 14  | 2.2  |
| 20 | 47671800 | 47671825 | 25  | 47671812 | 12 | 12  | 0    |
| 20 | 48079600 | 48079650 | 50  | 48079637 | 15 | 28  | 2.2  |
| 20 | 48274450 | 48274525 | 75  | 48274462 | 12 | 36  | 0    |
| 20 | 48671175 | 48671400 | 225 | 48671312 | 18 | 140 | 19.5 |
| 20 | 49043100 | 49043125 | 25  | 49043112 | 12 | 12  | 2.2  |
| 20 | 49073675 | 49073700 | 25  | 49073687 | 12 | 12  | 2.2  |
| 20 | 49081575 | 49081800 | 225 | 49081662 | 18 | 135 | 17.3 |
| 20 | 49082150 | 49082175 | 25  | 49082162 | 12 | 12  | 0    |
| 20 | 49096550 | 49096750 | 200 | 49096637 | 17 | 124 | 4.3  |
| 20 | 49104350 | 49104400 | 50  | 49104362 | 16 | 32  | 4.3  |
| 20 | 49105100 | 49105275 | 175 | 49105237 | 17 | 101 | 4.3  |
| 20 | 49106900 | 49106925 | 25  | 49106912 | 13 | 13  | 2.2  |
| 20 | 49124300 | 49124375 | 75  | 49124337 | 13 | 38  | 0    |
| 20 | 49133100 | 49133600 | 500 | 49133587 | 18 | 226 | 8.7  |
| 20 | 49135800 | 49136075 | 275 | 49135937 | 23 | 195 | 0    |
| 20 | 49137650 | 49137825 | 175 | 49137687 | 15 | 95  | 0    |
| 20 | 49142525 | 49142575 | 50  | 49142537 | 13 | 25  | 2.2  |
| 20 | 49151750 | 49151850 | 100 | 49151787 | 14 | 51  | 4.3  |
| 20 | 49152125 | 49152175 | 50  | 49152137 | 13 | 25  | 0    |
| 20 | 49153075 | 49153125 | 50  | 49153087 | 13 | 25  | 4.3  |
| 20 | 49157125 | 49157475 | 350 | 49157287 | 25 | 257 | 17.3 |
| 20 | 49158850 | 49158950 | 100 | 49158862 | 12 | 46  | 8.7  |
| 20 | 49159200 | 49159350 | 150 | 49159312 | 13 | 69  | 13   |
| 20 | 49162725 | 49162775 | 50  | 49162762 | 17 | 30  | 0    |
| 20 | 49204650 | 49205150 | 500 | 49204687 | 15 | 246 | 34.7 |
| 20 | 49210800 | 49211625 | 825 | 49210962 | 33 | 561 | 17.3 |
| 20 | 49216900 | 49216950 | 50  | 49216912 | 12 | 24  | 2.2  |
| 20 | 49245150 | 49245325 | 175 | 49245237 | 18 | 102 | 13   |
| 20 | 49267200 | 49267350 | 150 | 49267262 | 18 | 91  | 0    |
| 20 | 49267750 | 49267875 | 125 | 49267762 | 15 | 62  | 2.2  |
| 20 | 49274650 | 49274700 | 50  | 49274662 | 12 | 24  | 0    |
| 20 | 49279525 | 49279550 | 25  | 49279537 | 12 | 12  | 2.2  |
| 20 | 49280200 | 49280325 | 125 | 49280237 | 13 | 61  | 8.7  |
| 20 | 49280725 | 49280925 | 200 | 49280862 | 15 | 113 | 2.2  |
| 20 | 49281900 | 49282100 | 200 | 49282062 | 17 | 120 | 6.5  |
| 20 | 49289875 | 49290075 | 200 | 49289987 | 17 | 118 | 6.5  |
| 20 | 49291875 | 49292125 | 250 | 49291987 | 23 | 171 | 6.5  |
| 20 | 49292575 | 49292925 | 350 | 49292687 | 24 | 261 | 2.2  |
| 20 | 49304200 | 49304225 | 25  | 49304212 | 14 | 14  | 2.2  |
| 20 | 49304625 | 49304775 | 150 | 49304687 | 14 | 75  | 0    |
| 20 | 49307500 | 49307525 | 25  | 49307512 | 12 | 12  | 0    |
| 20 | 49315475 | 49315525 | 50  | 49315487 | 13 | 25  | 0    |
| 20 | 49316550 | 49316650 | 100 | 49316612 | 15 | 53  | 4.3  |
| 20 | 49317775 | 49317975 | 200 | 49317912 | 17 | 125 | 0    |
| 20 | 49318875 | 49318925 | 50  | 49318912 | 14 | 26  | 0    |
| 20 | 49325550 | 49325625 | 75  | 49325562 | 17 | 44  | 0    |
| 20 | 49329725 | 49330200 | 475 | 49329762 | 16 | 210 | 0    |
| 20 | 49339775 | 49339825 | 50  | 49339812 | 14 | 26  | 0    |
| 20 | 49347300 | 49347375 | 75  | 49347312 | 12 | 36  | 0    |
| 20 | 49350100 | 49350150 | 50  | 49350137 | 13 | 25  | 0    |
| 20 | 49354050 | 49354075 | 25  | 49354062 | 14 | 14  | 2.2  |
| 20 | 49354750 | 49354825 | 75  | 49354787 | 13 | 37  | 6.5  |
| 20 | 49375400 | 49375575 | 175 | 49375437 | 14 | 87  | 4.3  |
| 20 | 49393500 | 49393525 | 25  | 49393512 | 13 | 13  | 0    |
| 20 | 49561975 | 49562000 | 25  | 49561987 | 12 | 12  | 0    |
| 20 | 49625025 | 49625050 | 25  | 49625037 | 15 | 15  | 2.2  |
| 20 | 49678300 | 49678350 | 50  | 49678312 | 13 | 26  | 0    |
| 20 | 50254225 | 50254275 | 50  | 50254262 | 13 | 25  | 4.3  |
| 20 | 50270375 | 50270450 | 75  | 50270387 | 12 | 36  | 0    |
| 20 | 50303875 | 50303925 | 50  | 50303887 | 13 | 25  | 4.3  |
| 20 | 50386375 | 50386425 | 50  | 50386387 | 12 | 24  | 0    |
| 20 | 50473475 | 50473875 | 400 | 50473537 | 14 | 191 | 17.3 |
| 20 | 50474275 | 50474375 | 100 | 50474287 | 18 | 62  | 6.5  |
| 20 | 51021850 | 51021875 | 25  | 51021862 | 13 | 13  | 2.2  |
| 20 | 51117900 | 51117925 | 25  | 51117912 | 12 | 12  | 0    |
| 20 | 51505075 | 51505225 | 150 | 51505112 | 14 | 77  | 0    |
| 20 | 51909750 | 51909775 | 25  | 51909762 | 12 | 12  | 2.2  |
| 20 | 52047700 | 52047850 | 150 | 52047762 | 15 | 84  | 4.3  |

|    |          |          |     |          |    |     |      |
|----|----------|----------|-----|----------|----|-----|------|
| 20 | 52058300 | 52058400 | 100 | 52058312 | 12 | 45  | 8.7  |
| 20 | 52191675 | 52191775 | 100 | 52191737 | 13 | 50  | 4.3  |
| 20 | 52223075 | 52223100 | 25  | 52223087 | 12 | 12  | 0    |
| 20 | 52223600 | 52223675 | 75  | 52223637 | 24 | 70  | 10.8 |
| 20 | 52282575 | 52282675 | 100 | 52282612 | 13 | 50  | 4.3  |
| 20 | 52286250 | 52286375 | 125 | 52286262 | 14 | 64  | 0    |
| 20 | 54114825 | 54114850 | 25  | 54114837 | 12 | 12  | 2.2  |
| 20 | 54257575 | 54257750 | 175 | 54257737 | 14 | 84  | 13   |
| 20 | 54528675 | 54528975 | 300 | 54528837 | 20 | 184 | 6.5  |
| 20 | 54556150 | 54556275 | 125 | 54556162 | 16 | 67  | 0    |
| 20 | 54556950 | 54556975 | 25  | 54556962 | 12 | 12  | 0    |
| 20 | 54774425 | 54774500 | 75  | 54774437 | 12 | 36  | 6.5  |
| 20 | 54807050 | 54807275 | 225 | 54807087 | 14 | 118 | 17.3 |
| 20 | 54813950 | 54813975 | 25  | 54813962 | 12 | 12  | 2.2  |
| 20 | 54818475 | 54818500 | 25  | 54818487 | 12 | 12  | 0    |
| 20 | 54852075 | 54852100 | 25  | 54852087 | 14 | 14  | 2.2  |
| 20 | 54994575 | 54994625 | 50  | 54994587 | 13 | 25  | 0    |
| 20 | 55006900 | 55007300 | 400 | 55007062 | 20 | 272 | 19.5 |
| 20 | 55043225 | 55043425 | 200 | 55043362 | 16 | 109 | 4.3  |
| 20 | 55063025 | 55063150 | 125 | 55063062 | 15 | 70  | 8.7  |
| 20 | 55091850 | 55091875 | 25  | 55091862 | 12 | 12  | 0    |
| 20 | 55096150 | 55096350 | 200 | 55096287 | 20 | 140 | 10.8 |
| 20 | 55108875 | 55109000 | 125 | 55108912 | 14 | 66  | 0    |
| 20 | 55114300 | 55114325 | 25  | 55114312 | 12 | 12  | 0    |
| 20 | 55114700 | 55114900 | 200 | 55114762 | 13 | 96  | 4.3  |
| 20 | 55123225 | 55123500 | 275 | 55123412 | 15 | 136 | 19.5 |
| 20 | 55124475 | 55124575 | 100 | 55124487 | 15 | 54  | 8.7  |
| 20 | 55164025 | 55164075 | 50  | 55164062 | 13 | 25  | 2.2  |
| 20 | 55173525 | 55173600 | 75  | 55173537 | 17 | 48  | 6.5  |
| 20 | 55244025 | 55244050 | 25  | 55244037 | 12 | 12  | 0    |
| 20 | 55309850 | 55309925 | 75  | 55309887 | 13 | 37  | 2.2  |
| 20 | 55437925 | 55438375 | 450 | 55437937 | 20 | 266 | 32.5 |
| 20 | 55445550 | 55446325 | 775 | 55446137 | 21 | 450 | 32.5 |
| 20 | 55453775 | 55453900 | 125 | 55453787 | 12 | 58  | 0    |
| 20 | 55454125 | 55454625 | 500 | 55454412 | 28 | 447 | 56.3 |
| 20 | 55455325 | 55455400 | 75  | 55455362 | 13 | 38  | 0    |
| 20 | 55465800 | 55466250 | 450 | 55466162 | 35 | 432 | 36.8 |
| 20 | 55466775 | 55467075 | 300 | 55466837 | 16 | 163 | 0    |
| 20 | 55542075 | 55542150 | 75  | 55542087 | 14 | 41  | 6.5  |
| 20 | 55542525 | 55542550 | 25  | 55542537 | 15 | 15  | 2.2  |
| 20 | 55544250 | 55544375 | 125 | 55544287 | 15 | 70  | 10.8 |
| 20 | 55545875 | 55545900 | 25  | 55545887 | 15 | 15  | 2.2  |
| 20 | 55546700 | 55546750 | 50  | 55546712 | 12 | 24  | 0    |
| 20 | 55547300 | 55547325 | 25  | 55547312 | 12 | 12  | 2.2  |
| 20 | 55547700 | 55547800 | 100 | 55547787 | 14 | 52  | 0    |
| 20 | 55548875 | 55549025 | 150 | 55548912 | 18 | 99  | 13   |
| 20 | 55564425 | 55564525 | 100 | 55564512 | 14 | 53  | 0    |
| 20 | 55565175 | 55565250 | 75  | 55565212 | 16 | 46  | 2.2  |
| 20 | 55567325 | 55567425 | 100 | 55567337 | 12 | 47  | 4.3  |
| 20 | 55568800 | 55568825 | 25  | 55568812 | 12 | 12  | 0    |
| 20 | 55569425 | 55569475 | 50  | 55569437 | 12 | 24  | 4.3  |
| 20 | 55569875 | 55569925 | 50  | 55569887 | 12 | 24  | 0    |
| 20 | 55571050 | 55571250 | 200 | 55571212 | 24 | 154 | 2.2  |
| 20 | 55571525 | 55571775 | 250 | 55571687 | 20 | 164 | 0    |
| 20 | 55572650 | 55573025 | 375 | 55572787 | 27 | 281 | 28.2 |
| 20 | 55588400 | 55588450 | 50  | 55588412 | 14 | 26  | 0    |
| 20 | 55592400 | 55592725 | 325 | 55592562 | 18 | 205 | 30.3 |
| 20 | 55595475 | 55595650 | 175 | 55595537 | 15 | 95  | 0    |
| 20 | 55596350 | 55596425 | 75  | 55596362 | 12 | 35  | 6.5  |
| 20 | 55655550 | 55655575 | 25  | 55655562 | 12 | 12  | 0    |
| 20 | 55879750 | 55879800 | 50  | 55879762 | 12 | 24  | 0    |
| 20 | 55930825 | 55930850 | 25  | 55930837 | 12 | 12  | 2.2  |
| 20 | 55965050 | 55965250 | 200 | 55965087 | 15 | 112 | 10.8 |
| 20 | 56012875 | 56012925 | 50  | 56012887 | 14 | 26  | 4.3  |
| 20 | 56085800 | 56085875 | 75  | 56085837 | 14 | 39  | 6.5  |
| 20 | 56135300 | 56135650 | 350 | 56135437 | 16 | 202 | 15.2 |
| 20 | 56156450 | 56156575 | 125 | 56156487 | 16 | 71  | 10.8 |
| 20 | 56227450 | 56227625 | 175 | 56227462 | 22 | 122 | 6.5  |
| 20 | 56236600 | 56236625 | 25  | 56236612 | 16 | 16  | 2.2  |
| 20 | 56250300 | 56250325 | 25  | 56250312 | 12 | 12  | 2.2  |
| 20 | 56389725 | 56389750 | 25  | 56389737 | 12 | 12  | 0    |
| 20 | 56498825 | 56498950 | 125 | 56498862 | 13 | 61  | 4.3  |
| 20 | 56501375 | 56501500 | 125 | 56501387 | 13 | 60  | 0    |
| 20 | 56512700 | 56512775 | 75  | 56512712 | 12 | 35  | 0    |
| 20 | 56513000 | 56513175 | 175 | 56513162 | 19 | 113 | 0    |

|    |          |          |     |          |    |     |      |
|----|----------|----------|-----|----------|----|-----|------|
| 20 | 56514875 | 56515075 | 200 | 56515037 | 15 | 108 | 0    |
| 20 | 56533525 | 56533550 | 25  | 56533537 | 13 | 13  | 2.2  |
| 20 | 56540825 | 56540850 | 25  | 56540837 | 12 | 12  | 2.2  |
| 20 | 56630025 | 56630100 | 75  | 56630037 | 13 | 39  | 2.2  |
| 20 | 56703550 | 56703725 | 175 | 56703612 | 16 | 102 | 4.3  |
| 20 | 56748900 | 56749100 | 200 | 56748937 | 15 | 109 | 0    |
| 20 | 56749775 | 56749875 | 100 | 56749812 | 17 | 63  | 6.5  |
| 20 | 56758600 | 56758625 | 25  | 56758612 | 12 | 12  | 0    |
| 20 | 56764625 | 56764800 | 175 | 56764662 | 17 | 107 | 2.2  |
| 20 | 56770575 | 56770775 | 200 | 56770662 | 18 | 122 | 0    |
| 20 | 56772200 | 56772375 | 175 | 56772287 | 15 | 97  | 4.3  |
| 20 | 56774600 | 56774700 | 100 | 56774612 | 12 | 48  | 4.3  |
| 20 | 56777325 | 56777725 | 400 | 56777687 | 17 | 207 | 17.3 |
| 20 | 56791600 | 56791750 | 150 | 56791712 | 17 | 91  | 6.5  |
| 20 | 56792800 | 56792950 | 150 | 56792912 | 16 | 83  | 2.2  |
| 20 | 56802125 | 56802150 | 25  | 56802137 | 12 | 12  | 0    |
| 20 | 56848800 | 56848975 | 175 | 56848862 | 16 | 97  | 10.8 |
| 20 | 56859725 | 56859850 | 125 | 56859787 | 15 | 70  | 13   |
| 20 | 56863375 | 56863450 | 75  | 56863437 | 18 | 48  | 6.5  |
| 20 | 56976850 | 56976925 | 75  | 56976862 | 12 | 36  | 6.5  |
| 20 | 57121725 | 57121800 | 75  | 57121787 | 14 | 38  | 6.5  |
| 20 | 57124325 | 57124375 | 50  | 57124337 | 13 | 25  | 4.3  |
| 20 | 57128475 | 57128675 | 200 | 57128537 | 18 | 118 | 2.2  |
| 20 | 57130875 | 57131000 | 125 | 57130887 | 15 | 73  | 4.3  |
| 20 | 57150650 | 57150675 | 25  | 57150662 | 14 | 14  | 2.2  |
| 20 | 57157350 | 57157450 | 100 | 57157387 | 15 | 58  | 0    |
| 20 | 57162750 | 57162825 | 75  | 57162787 | 13 | 37  | 4.3  |
| 20 | 57236850 | 57237075 | 225 | 57236937 | 18 | 134 | 0    |
| 20 | 57322550 | 57322575 | 25  | 57322562 | 12 | 12  | 2.2  |
| 20 | 57331050 | 57331100 | 50  | 57331062 | 12 | 24  | 4.3  |
| 20 | 57425500 | 57425550 | 50  | 57425512 | 12 | 24  | 0    |
| 20 | 57527650 | 57527675 | 25  | 57527662 | 12 | 12  | 0    |
| 20 | 57576325 | 57576550 | 225 | 57576462 | 18 | 141 | 17.3 |
| 20 | 57592225 | 57592300 | 75  | 57592287 | 14 | 38  | 0    |
| 20 | 57592600 | 57592750 | 150 | 57592637 | 19 | 101 | 10.8 |
| 20 | 57595650 | 57595725 | 75  | 57595662 | 13 | 38  | 0    |
| 20 | 57611250 | 57611275 | 25  | 57611262 | 12 | 12  | 2.2  |
| 20 | 57634975 | 57635000 | 25  | 57634987 | 12 | 12  | 0    |
| 20 | 57811025 | 57811050 | 25  | 57811037 | 12 | 12  | 0    |
| 20 | 57821525 | 57821550 | 25  | 57821537 | 12 | 12  | 2.2  |
| 20 | 57829800 | 57829875 | 75  | 57829837 | 13 | 38  | 0    |
| 20 | 57838525 | 57838625 | 100 | 57838587 | 15 | 53  | 8.7  |
| 20 | 58035025 | 58035100 | 75  | 58035037 | 13 | 37  | 0    |
| 20 | 58096425 | 58096550 | 125 | 58096512 | 13 | 60  | 6.5  |
| 20 | 58348100 | 58348150 | 50  | 58348112 | 12 | 24  | 0    |
| 20 | 58493825 | 58493975 | 150 | 58493837 | 12 | 70  | 8.7  |
| 20 | 58600400 | 58600450 | 50  | 58600412 | 12 | 24  | 0    |
| 20 | 58608025 | 58608150 | 125 | 58608037 | 12 | 60  | 0    |
| 20 | 58637425 | 58637475 | 50  | 58637437 | 13 | 25  | 2.2  |
| 20 | 58658450 | 58658525 | 75  | 58658487 | 14 | 39  | 0    |
| 20 | 58666150 | 58666175 | 25  | 58666162 | 13 | 13  | 0    |
| 20 | 58692375 | 58692400 | 25  | 58692387 | 12 | 12  | 2.2  |
| 20 | 58882925 | 58882950 | 25  | 58882937 | 12 | 12  | 2.2  |
| 20 | 59291300 | 59291400 | 100 | 59291312 | 19 | 59  | 8.7  |
| 20 | 59291825 | 59291950 | 125 | 59291837 | 16 | 64  | 0    |
| 20 | 59299050 | 59299075 | 25  | 59299062 | 12 | 12  | 0    |
| 20 | 59444525 | 59444600 | 75  | 59444537 | 14 | 39  | 6.5  |
| 20 | 59531450 | 59531475 | 25  | 59531462 | 12 | 12  | 0    |
| 20 | 59694750 | 59695275 | 525 | 59695162 | 24 | 386 | 58.5 |
| 20 | 59709950 | 59710000 | 50  | 59709962 | 12 | 24  | 4.3  |
| 20 | 59853175 | 59853250 | 75  | 59853237 | 14 | 39  | 0    |
| 20 | 59854550 | 59854575 | 25  | 59854562 | 12 | 12  | 0    |
| 20 | 59880050 | 59880100 | 50  | 59880062 | 13 | 26  | 0    |
| 20 | 59917600 | 59917725 | 125 | 59917612 | 14 | 66  | 8.7  |
| 20 | 59918525 | 59918800 | 275 | 59918637 | 19 | 164 | 26   |
| 20 | 59928175 | 59928875 | 700 | 59928487 | 31 | 585 | 52   |
| 20 | 59929350 | 59929800 | 450 | 59929662 | 24 | 304 | 52   |
| 20 | 59931800 | 59932100 | 300 | 59931962 | 17 | 164 | 0    |
| 20 | 59934175 | 59934350 | 175 | 59934187 | 22 | 126 | 15.2 |
| 20 | 59934750 | 59934775 | 25  | 59934762 | 12 | 12  | 2.2  |
| 20 | 59935550 | 59935750 | 200 | 59935562 | 12 | 90  | 0    |
| 20 | 59936150 | 59936500 | 350 | 59936312 | 22 | 242 | 2.2  |
| 20 | 59936725 | 59936900 | 175 | 59936837 | 14 | 86  | 2.2  |
| 20 | 59938125 | 59938200 | 75  | 59938137 | 13 | 39  | 0    |
| 20 | 59938550 | 59938750 | 200 | 59938612 | 17 | 113 | 4.3  |

|    |          |          |     |          |    |      |       |
|----|----------|----------|-----|----------|----|------|-------|
| 20 | 59941075 | 59941225 | 150 | 59941087 | 17 | 89   | 0     |
| 20 | 59947225 | 59947275 | 50  | 59947237 | 12 | 24   | 0     |
| 20 | 59970375 | 59970575 | 200 | 59970487 | 18 | 114  | 0     |
| 20 | 60001175 | 60001200 | 25  | 60001187 | 12 | 12   | 0     |
| 20 | 60047725 | 60047750 | 25  | 60047737 | 12 | 12   | 2.2   |
| 20 | 60082175 | 60082375 | 200 | 60082337 | 13 | 94   | 0     |
| 20 | 60089125 | 60089225 | 100 | 60089137 | 13 | 52   | 2.2   |
| 20 | 60090300 | 60090400 | 100 | 60090337 | 17 | 64   | 2.2   |
| 20 | 60094975 | 60095150 | 175 | 60095012 | 15 | 95   | 0     |
| 20 | 60096025 | 60096300 | 275 | 60096037 | 15 | 153  | 15.2  |
| 20 | 60104900 | 60105025 | 125 | 60104962 | 15 | 70   | 0     |
| 20 | 60107475 | 60107750 | 275 | 60107612 | 23 | 201  | 4.3   |
| 20 | 60108250 | 60109225 | 975 | 60108437 | 27 | 729  | 56.3  |
| 20 | 60110050 | 60110075 | 25  | 60110062 | 12 | 12   | 2.2   |
| 20 | 60110400 | 60110950 | 550 | 60110637 | 14 | 293  | 34.7  |
| 20 | 60112125 | 60112300 | 175 | 60112137 | 16 | 98   | 2.2   |
| 20 | 60112625 | 60112775 | 150 | 60112687 | 14 | 76   | 10.8  |
| 20 | 60116450 | 60116600 | 150 | 60116512 | 18 | 95   | 4.3   |
| 20 | 60120575 | 60120750 | 175 | 60120712 | 16 | 103  | 6.5   |
| 20 | 60121050 | 60121325 | 275 | 60121137 | 22 | 203  | 0     |
| 20 | 60121550 | 60121825 | 275 | 60121737 | 25 | 211  | 0     |
| 20 | 60122100 | 60122400 | 300 | 60122112 | 15 | 159  | 28.2  |
| 20 | 60125250 | 60125850 | 600 | 60125612 | 23 | 353  | 62.8  |
| 20 | 60126200 | 60126400 | 200 | 60126212 | 13 | 98   | 10.8  |
| 20 | 60226875 | 60226925 | 50  | 60226887 | 13 | 25   | 0     |
| 20 | 60237350 | 60237625 | 275 | 60237437 | 21 | 187  | 0     |
| 20 | 60238950 | 60238975 | 25  | 60238962 | 12 | 12   | 2.2   |
| 20 | 60239350 | 60239375 | 25  | 60239362 | 12 | 12   | 2.2   |
| 20 | 60429650 | 60430300 | 650 | 60429837 | 28 | 540  | 49.8  |
| 20 | 60433700 | 60433975 | 275 | 60433812 | 14 | 127  | 4.3   |
| 20 | 60434200 | 60434525 | 325 | 60434287 | 20 | 218  | 13    |
| 20 | 60434875 | 60434900 | 25  | 60434887 | 12 | 12   | 0     |
| 20 | 60444725 | 60444825 | 100 | 60444762 | 13 | 50   | 8.7   |
| 20 | 60450650 | 60450700 | 50  | 60450662 | 13 | 26   | 4.3   |
| 20 | 60521725 | 60521850 | 125 | 60521812 | 14 | 63   | 8.7   |
| 20 | 60552250 | 60552500 | 250 | 60552437 | 18 | 153  | 10.8  |
| 20 | 60553200 | 60553250 | 50  | 60553212 | 12 | 24   | 4.3   |
| 20 | 60586300 | 60586325 | 25  | 60586312 | 12 | 12   | 0     |
| 20 | 60586650 | 60586675 | 25  | 60586662 | 12 | 12   | 0     |
| 20 | 60592575 | 60592600 | 25  | 60592587 | 12 | 12   | 2.2   |
| 20 | 60603900 | 60603950 | 50  | 60603937 | 13 | 25   | 4.3   |
| 20 | 60606475 | 60606500 | 25  | 60606487 | 12 | 12   | 2.2   |
| 20 | 60618600 | 60619075 | 475 | 60618937 | 16 | 228  | 0     |
| 20 | 60785875 | 60785900 | 25  | 60785887 | 12 | 12   | 0     |
| 20 | 60859575 | 60859725 | 150 | 60859637 | 14 | 78   | 13    |
| 20 | 61074550 | 61074600 | 50  | 61074562 | 12 | 24   | 4.3   |
| 20 | 61079400 | 61079550 | 150 | 61079412 | 12 | 67   | 0     |
| 20 | 61088700 | 61088725 | 25  | 61088712 | 14 | 14   | 2.2   |
| 20 | 61089475 | 61089600 | 125 | 61089512 | 15 | 65   | 8.7   |
| 20 | 61122325 | 61122800 | 475 | 61122662 | 26 | 302  | 6.5   |
| 20 | 61123600 | 61123675 | 75  | 61123612 | 12 | 36   | 6.5   |
| 20 | 61125650 | 61125675 | 25  | 61125662 | 12 | 12   | 0     |
| 20 | 61127800 | 61127900 | 100 | 61127837 | 13 | 50   | 8.7   |
| 20 | 61138200 | 61138225 | 25  | 61138212 | 12 | 12   | 0     |
| 20 | 61139925 | 61139950 | 25  | 61139937 | 12 | 12   | 0     |
| 20 | 61146075 | 61146150 | 75  | 61146087 | 12 | 36   | 6.5   |
| 20 | 61151925 | 61151975 | 50  | 61151937 | 13 | 25   | 0     |
| 20 | 61162875 | 61163850 | 975 | 61163637 | 40 | 1131 | 125.7 |
| 20 | 61167150 | 61167175 | 25  | 61167162 | 12 | 12   | 0     |
| 20 | 61214475 | 61214525 | 50  | 61214487 | 12 | 24   | 0     |
| 20 | 61218700 | 61218750 | 50  | 61218712 | 12 | 24   | 0     |
| 20 | 61219400 | 61219450 | 50  | 61219412 | 12 | 24   | 4.3   |
| 20 | 61220275 | 61220350 | 75  | 61220287 | 15 | 42   | 4.3   |
| 20 | 61241900 | 61241925 | 25  | 61241912 | 12 | 12   | 2.2   |
| 20 | 61250150 | 61250625 | 475 | 61250237 | 17 | 233  | 0     |
| 20 | 61260775 | 61260800 | 25  | 61260787 | 12 | 12   | 2.2   |
| 20 | 61286875 | 61287750 | 875 | 61287487 | 21 | 531  | 52    |
| 20 | 61356925 | 61356950 | 25  | 61356937 | 12 | 12   | 2.2   |
| 20 | 61359000 | 61359025 | 25  | 61359012 | 12 | 12   | 0     |
| 20 | 61400650 | 61401000 | 350 | 61400937 | 17 | 184  | 8.7   |
| 20 | 61433900 | 61434200 | 300 | 61434037 | 26 | 226  | 34.7  |
| 20 | 61435475 | 61435650 | 175 | 61435487 | 15 | 91   | 8.7   |
| 20 | 61436725 | 61437050 | 325 | 61436962 | 20 | 205  | 6.5   |
| 20 | 61438475 | 61438500 | 25  | 61438487 | 12 | 12   | 2.2   |
| 20 | 61452300 | 61452500 | 200 | 61452362 | 13 | 100  | 0     |

|    |          |          |     |          |    |     |      |
|----|----------|----------|-----|----------|----|-----|------|
| 20 | 61452975 | 61453200 | 225 | 61453087 | 16 | 125 | 0    |
| 20 | 61481350 | 61481650 | 300 | 61481562 | 15 | 152 | 0    |
| 20 | 61487875 | 61487975 | 100 | 61487937 | 13 | 48  | 0    |
| 20 | 61489200 | 61489950 | 750 | 61489562 | 21 | 459 | 34.7 |
| 20 | 61526675 | 61526900 | 225 | 61526762 | 16 | 130 | 0    |
| 20 | 61567575 | 61567600 | 25  | 61567587 | 12 | 12  | 0    |
| 20 | 61568300 | 61568350 | 50  | 61568312 | 13 | 25  | 2.2  |
| 20 | 61568575 | 61568600 | 25  | 61568587 | 12 | 12  | 0    |
| 20 | 61584800 | 61584850 | 50  | 61584812 | 12 | 24  | 0    |
| 20 | 61606500 | 61606750 | 250 | 61606637 | 21 | 167 | 10.8 |
| 20 | 61606975 | 61607825 | 850 | 61607637 | 24 | 586 | 36.8 |
| 20 | 61621375 | 61621400 | 25  | 61621387 | 12 | 12  | 2.2  |
| 20 | 61624400 | 61624675 | 275 | 61624487 | 20 | 182 | 0    |
| 20 | 61625000 | 61625450 | 450 | 61625287 | 29 | 442 | 26   |
| 20 | 61917275 | 61917500 | 225 | 61917462 | 19 | 145 | 21.7 |
| 20 | 62199900 | 62200025 | 125 | 62199987 | 13 | 60  | 0    |
| 20 | 62208175 | 62208225 | 50  | 62208187 | 12 | 24  | 4.3  |
| 20 | 62208550 | 62208600 | 50  | 62208562 | 12 | 24  | 0    |
| 20 | 62231125 | 62231150 | 25  | 62231137 | 12 | 12  | 2.2  |
| 20 | 62246475 | 62246600 | 125 | 62246587 | 13 | 58  | 4.3  |
| 20 | 62247325 | 62247525 | 200 | 62247362 | 31 | 185 | 10.8 |
| 20 | 62247775 | 62247975 | 200 | 62247862 | 16 | 112 | 0    |
| 20 | 62248725 | 62248875 | 150 | 62248787 | 14 | 76  | 4.3  |
| 20 | 62251575 | 62252000 | 425 | 62251637 | 20 | 254 | 2.2  |
| 20 | 62268575 | 62268700 | 125 | 62268587 | 12 | 55  | 0    |
| 20 | 62280075 | 62280275 | 200 | 62280162 | 16 | 113 | 2.2  |
| 20 | 62280900 | 62281100 | 200 | 62281012 | 14 | 100 | 0    |
| 20 | 62281650 | 62281925 | 275 | 62281762 | 19 | 161 | 17.3 |
| 20 | 62284175 | 62284350 | 175 | 62284212 | 14 | 87  | 6.5  |
| 20 | 62287550 | 62287575 | 25  | 62287562 | 12 | 12  | 0    |
| 20 | 62300300 | 62300450 | 150 | 62300362 | 18 | 92  | 6.5  |
| 20 | 62301050 | 62301125 | 75  | 62301062 | 12 | 36  | 6.5  |
| 20 | 62303525 | 62303625 | 100 | 62303537 | 16 | 60  | 6.5  |
| 20 | 62303950 | 62304450 | 500 | 62304287 | 19 | 271 | 17.3 |
| 20 | 62343875 | 62343900 | 25  | 62343887 | 15 | 15  | 2.2  |
| 21 | 9798875  | 9799075  | 200 | 9799062  | 13 | 79  | 8.7  |
| 21 | 10013250 | 10013300 | 50  | 10013262 | 12 | 24  | 0    |
| 21 | 10093425 | 10093450 | 25  | 10093437 | 13 | 13  | 2.2  |
| 21 | 10136875 | 10136900 | 25  | 10136887 | 12 | 12  | 2.2  |
| 21 | 10149725 | 10149750 | 25  | 10149737 | 12 | 12  | 2.2  |
| 21 | 10152600 | 10152825 | 225 | 10152712 | 21 | 151 | 19.5 |
| 21 | 10155775 | 10156025 | 250 | 10155912 | 18 | 147 | 19.5 |
| 21 | 10166700 | 10166800 | 100 | 10166712 | 13 | 49  | 0    |
| 21 | 10167400 | 10167650 | 250 | 10167587 | 25 | 193 | 34.7 |
| 21 | 10167875 | 10167975 | 100 | 10167912 | 29 | 113 | 17.3 |
| 21 | 10169575 | 10169650 | 75  | 10169587 | 12 | 36  | 0    |
| 21 | 10186475 | 10186500 | 25  | 10186487 | 12 | 12  | 2.2  |
| 21 | 10203450 | 10203750 | 300 | 10203562 | 25 | 228 | 39   |
| 21 | 19044925 | 19044975 | 50  | 19044937 | 13 | 25  | 2.2  |
| 21 | 26128050 | 26128100 | 50  | 26128087 | 13 | 25  | 0    |
| 21 | 26677675 | 26677700 | 25  | 26677687 | 12 | 12  | 0    |
| 21 | 26681525 | 26681550 | 25  | 26681537 | 12 | 12  | 0    |
| 21 | 29511250 | 29511300 | 50  | 29511262 | 13 | 25  | 4.3  |
| 21 | 29516875 | 29516900 | 25  | 29516887 | 12 | 12  | 0    |
| 21 | 29791350 | 29791375 | 25  | 29791362 | 13 | 13  | 0    |
| 21 | 32539750 | 32539825 | 75  | 32539762 | 12 | 36  | 0    |
| 21 | 32547350 | 32547375 | 25  | 32547362 | 12 | 12  | 2.2  |
| 21 | 32827525 | 32827675 | 150 | 32827587 | 16 | 85  | 0    |
| 21 | 33210850 | 33211100 | 250 | 33210912 | 20 | 160 | 0    |
| 21 | 33321150 | 33321550 | 400 | 33321412 | 31 | 334 | 10.8 |
| 21 | 33428975 | 33429050 | 75  | 33428987 | 12 | 36  | 0    |
| 21 | 33461150 | 33461175 | 25  | 33461162 | 12 | 12  | 0    |
| 21 | 33462275 | 33462300 | 25  | 33462287 | 12 | 12  | 0    |
| 21 | 33478250 | 33478325 | 75  | 33478262 | 12 | 36  | 6.5  |
| 21 | 33485425 | 33485500 | 75  | 33485437 | 12 | 36  | 0    |
| 21 | 34954300 | 34954500 | 200 | 34954462 | 14 | 100 | 17.3 |
| 21 | 36271125 | 36271275 | 150 | 36271137 | 13 | 73  | 0    |
| 21 | 36363225 | 36363400 | 175 | 36363262 | 15 | 88  | 0    |
| 21 | 36781000 | 36781025 | 25  | 36781012 | 12 | 12  | 0    |
| 21 | 36819325 | 36819425 | 100 | 36819362 | 16 | 55  | 4.3  |
| 21 | 36819775 | 36819925 | 150 | 36819812 | 14 | 80  | 0    |
| 21 | 36841850 | 36841875 | 25  | 36841862 | 12 | 12  | 0    |
| 21 | 36843825 | 36844025 | 200 | 36843912 | 15 | 100 | 0    |
| 21 | 36859275 | 36859325 | 50  | 36859287 | 13 | 25  | 2.2  |
| 21 | 36882100 | 36882200 | 100 | 36882112 | 12 | 48  | 0    |

|    |          |          |     |          |    |     |      |
|----|----------|----------|-----|----------|----|-----|------|
| 21 | 36904075 | 36904100 | 25  | 36904087 | 12 | 12  | 2.2  |
| 21 | 36911000 | 36911050 | 50  | 36911012 | 12 | 24  | 0    |
| 21 | 37001925 | 37001975 | 50  | 37001962 | 13 | 25  | 2.2  |
| 21 | 37025250 | 37025350 | 100 | 37025262 | 14 | 54  | 0    |
| 21 | 37890125 | 37890550 | 425 | 37890312 | 23 | 277 | 28.2 |
| 21 | 38522875 | 38523150 | 275 | 38523037 | 17 | 157 | 2.2  |
| 21 | 38883125 | 38883225 | 100 | 38883162 | 13 | 48  | 6.5  |
| 21 | 38894900 | 38894925 | 25  | 38894912 | 12 | 12  | 0    |
| 21 | 39181350 | 39181425 | 75  | 39181387 | 14 | 40  | 6.5  |
| 21 | 39208075 | 39208200 | 125 | 39208162 | 13 | 61  | 0    |
| 21 | 39355600 | 39355650 | 50  | 39355612 | 12 | 24  | 4.3  |
| 21 | 39356275 | 39356350 | 75  | 39356287 | 12 | 36  | 0    |
| 21 | 39458800 | 39458900 | 100 | 39458837 | 13 | 50  | 0    |
| 21 | 40003850 | 40003925 | 75  | 40003912 | 13 | 37  | 6.5  |
| 21 | 40004750 | 40004925 | 175 | 40004787 | 16 | 102 | 10.8 |
| 21 | 40006425 | 40006475 | 50  | 40006462 | 13 | 25  | 0    |
| 21 | 41352450 | 41352475 | 25  | 41352462 | 12 | 12  | 0    |
| 21 | 41433000 | 41433025 | 25  | 41433012 | 12 | 12  | 0    |
| 21 | 41433275 | 41433300 | 25  | 41433287 | 12 | 12  | 0    |
| 21 | 41433550 | 41433575 | 25  | 41433562 | 12 | 12  | 0    |
| 21 | 41916300 | 41916350 | 50  | 41916312 | 12 | 24  | 4.3  |
| 21 | 42327825 | 42327950 | 125 | 42327837 | 12 | 57  | 0    |
| 21 | 42433400 | 42433450 | 50  | 42433412 | 15 | 30  | 2.2  |
| 21 | 42570000 | 42570050 | 50  | 42570012 | 13 | 26  | 0    |
| 21 | 42888800 | 42888825 | 25  | 42888812 | 12 | 12  | 2.2  |
| 21 | 42909050 | 42909175 | 125 | 42909162 | 13 | 60  | 0    |
| 21 | 42966500 | 42966550 | 50  | 42966537 | 13 | 25  | 4.3  |
| 21 | 43025325 | 43025475 | 150 | 43025387 | 15 | 82  | 13   |
| 21 | 43062875 | 43062950 | 75  | 43062912 | 15 | 43  | 0    |
| 21 | 43079350 | 43079600 | 250 | 43079437 | 17 | 138 | 0    |
| 21 | 43322275 | 43322375 | 100 | 43322337 | 13 | 49  | 4.3  |
| 21 | 43473625 | 43473675 | 50  | 43473637 | 12 | 24  | 0    |
| 21 | 43478900 | 43479050 | 150 | 43479012 | 16 | 84  | 10.8 |
| 21 | 43479325 | 43479475 | 150 | 43479412 | 16 | 88  | 13   |
| 21 | 43486675 | 43486750 | 75  | 43486737 | 13 | 37  | 2.2  |
| 21 | 43500225 | 43500250 | 25  | 43500237 | 12 | 12  | 2.2  |
| 21 | 44063950 | 44064025 | 75  | 44064012 | 13 | 37  | 6.5  |
| 21 | 44435525 | 44435550 | 25  | 44435537 | 12 | 12  | 2.2  |
| 21 | 44699275 | 44699325 | 50  | 44699287 | 17 | 31  | 4.3  |
| 21 | 44712450 | 44712525 | 75  | 44712462 | 13 | 38  | 6.5  |
| 21 | 44736350 | 44736475 | 125 | 44736437 | 14 | 64  | 10.8 |
| 21 | 44775075 | 44775125 | 50  | 44775087 | 12 | 24  | 0    |
| 21 | 44813250 | 44813300 | 50  | 44813262 | 12 | 24  | 4.3  |
| 21 | 44816300 | 44816450 | 150 | 44816387 | 15 | 82  | 0    |
| 21 | 44816775 | 44816825 | 50  | 44816787 | 13 | 25  | 0    |
| 21 | 44826700 | 44826750 | 50  | 44826712 | 12 | 24  | 4.3  |
| 21 | 44915675 | 44915775 | 100 | 44915687 | 14 | 52  | 0    |
| 21 | 44979975 | 44980175 | 200 | 44980062 | 19 | 121 | 6.5  |
| 21 | 44990225 | 44990375 | 150 | 44990287 | 13 | 75  | 0    |
| 21 | 45146425 | 45146925 | 500 | 45146562 | 18 | 281 | 23.8 |
| 21 | 45244650 | 45244700 | 50  | 45244662 | 12 | 24  | 2.2  |
| 21 | 45249100 | 45249125 | 25  | 45249112 | 12 | 12  | 0    |
| 21 | 45279600 | 45279675 | 75  | 45279612 | 13 | 37  | 0    |
| 21 | 45489525 | 45489550 | 25  | 45489537 | 12 | 12  | 0    |
| 21 | 45502450 | 45502475 | 25  | 45502462 | 12 | 12  | 0    |
| 21 | 45807300 | 45807500 | 200 | 45807387 | 18 | 123 | 10.8 |
| 21 | 45821350 | 45821400 | 50  | 45821362 | 13 | 25  | 4.3  |
| 21 | 45851275 | 45851425 | 150 | 45851362 | 13 | 75  | 0    |
| 21 | 45863350 | 45863750 | 400 | 45863587 | 14 | 191 | 19.5 |
| 21 | 45880225 | 45880250 | 25  | 45880237 | 13 | 13  | 0    |
| 21 | 45990275 | 45990350 | 75  | 45990287 | 12 | 35  | 4.3  |
| 21 | 46033475 | 46033950 | 475 | 46033537 | 17 | 245 | 19.5 |
| 21 | 46175625 | 46176025 | 400 | 46175712 | 15 | 193 | 17.3 |
| 21 | 46176775 | 46176800 | 25  | 46176787 | 12 | 12  | 2.2  |
| 21 | 46177300 | 46177325 | 25  | 46177312 | 12 | 12  | 0    |
| 21 | 46179525 | 46179550 | 25  | 46179537 | 12 | 12  | 0    |
| 21 | 46191775 | 46191825 | 50  | 46191787 | 13 | 25  | 4.3  |
| 21 | 46323075 | 46323100 | 25  | 46323087 | 13 | 13  | 0    |
| 21 | 46838775 | 46838975 | 200 | 46838862 | 16 | 110 | 17.3 |
| 21 | 46854625 | 46854775 | 150 | 46854637 | 16 | 78  | 2.2  |
| 21 | 46869625 | 46869725 | 100 | 46869687 | 13 | 49  | 0    |
| 21 | 46869950 | 46870025 | 75  | 46869962 | 12 | 34  | 0    |
| 21 | 46942525 | 46942675 | 150 | 46942612 | 20 | 100 | 13   |
| 21 | 46943800 | 46943825 | 25  | 46943812 | 14 | 14  | 2.2  |
| 22 | 16208575 | 16208625 | 50  | 16208612 | 15 | 28  | 4.3  |

|    |          |          |     |          |    |     |      |
|----|----------|----------|-----|----------|----|-----|------|
| 22 | 16383200 | 16383250 | 50  | 16383212 | 12 | 24  | 0    |
| 22 | 17258375 | 17258400 | 25  | 17258387 | 14 | 14  | 2.2  |
| 22 | 17297950 | 17297975 | 25  | 17297962 | 12 | 12  | 2.2  |
| 22 | 17348225 | 17348400 | 175 | 17348287 | 15 | 94  | 10.8 |
| 22 | 17532200 | 17532300 | 100 | 17532237 | 13 | 49  | 8.7  |
| 22 | 17536025 | 17536150 | 125 | 17536062 | 13 | 59  | 0    |
| 22 | 17958450 | 17958550 | 100 | 17958487 | 13 | 51  | 6.5  |
| 22 | 18014375 | 18014450 | 75  | 18014387 | 12 | 36  | 6.5  |
| 22 | 18090350 | 18090400 | 50  | 18090362 | 13 | 26  | 4.3  |
| 22 | 18092800 | 18092825 | 25  | 18092812 | 13 | 13  | 2.2  |
| 22 | 18587275 | 18587475 | 200 | 18587287 | 14 | 105 | 8.7  |
| 22 | 18592150 | 18592225 | 75  | 18592212 | 22 | 53  | 8.7  |
| 22 | 18592525 | 18593350 | 825 | 18592837 | 29 | 610 | 52   |
| 22 | 18970125 | 18970150 | 25  | 18970137 | 12 | 12  | 0    |
| 22 | 19337400 | 19337425 | 25  | 19337412 | 12 | 12  | 0    |
| 22 | 19340850 | 19341125 | 275 | 19340962 | 26 | 206 | 0    |
| 22 | 19341600 | 19341675 | 75  | 19341637 | 13 | 38  | 0    |
| 22 | 19348200 | 19348575 | 375 | 19348312 | 19 | 244 | 17.3 |
| 22 | 19662750 | 19662950 | 200 | 19662862 | 19 | 135 | 6.5  |
| 22 | 19663525 | 19663575 | 50  | 19663537 | 14 | 28  | 4.3  |
| 22 | 19750225 | 19750300 | 75  | 19750237 | 12 | 34  | 0    |
| 22 | 19755675 | 19755800 | 125 | 19755687 | 13 | 59  | 0    |
| 22 | 20346400 | 20346425 | 25  | 20346412 | 12 | 12  | 0    |
| 22 | 20637775 | 20637800 | 25  | 20637787 | 13 | 13  | 2.2  |
| 22 | 21137450 | 21137625 | 175 | 21137487 | 14 | 83  | 2.2  |
| 22 | 21143975 | 21144000 | 25  | 21143987 | 12 | 12  | 2.2  |
| 22 | 21193225 | 21193400 | 175 | 21193287 | 17 | 111 | 17.3 |
| 22 | 21728050 | 21728075 | 25  | 21728062 | 12 | 12  | 2.2  |
| 22 | 21732925 | 21732950 | 25  | 21732937 | 12 | 12  | 0    |
| 22 | 21848950 | 21848975 | 25  | 21848962 | 12 | 12  | 0    |
| 22 | 22103775 | 22103825 | 50  | 22103787 | 13 | 26  | 4.3  |
| 22 | 22119025 | 22119325 | 300 | 22119187 | 24 | 215 | 0    |
| 22 | 22221050 | 22221075 | 25  | 22221062 | 12 | 12  | 0    |
| 22 | 22511025 | 22511125 | 100 | 22511037 | 14 | 54  | 8.7  |
| 22 | 22598975 | 22599100 | 125 | 22598987 | 13 | 64  | 10.8 |
| 22 | 22950725 | 22950925 | 200 | 22950762 | 15 | 109 | 10.8 |
| 22 | 23221100 | 23221475 | 375 | 23221212 | 23 | 253 | 32.5 |
| 22 | 23619375 | 23619500 | 125 | 23619412 | 15 | 69  | 10.8 |
| 22 | 23624200 | 23624350 | 150 | 23624212 | 17 | 90  | 0    |
| 22 | 24203450 | 24203550 | 100 | 24203462 | 12 | 46  | 6.5  |
| 22 | 25533525 | 25533725 | 200 | 25533537 | 14 | 106 | 4.3  |
| 22 | 25544250 | 25544275 | 25  | 25544262 | 14 | 14  | 0    |
| 22 | 26155675 | 26155725 | 50  | 26155687 | 13 | 26  | 0    |
| 22 | 26339725 | 26340000 | 275 | 26339887 | 17 | 168 | 28.2 |
| 22 | 26345925 | 26345975 | 50  | 26345937 | 12 | 24  | 0    |
| 22 | 26392625 | 26392825 | 200 | 26392762 | 16 | 111 | 15.2 |
| 22 | 26423250 | 26424175 | 925 | 26423362 | 19 | 536 | 17.3 |
| 22 | 26428000 | 26428175 | 175 | 26428112 | 16 | 95  | 4.3  |
| 22 | 26429700 | 26429875 | 175 | 26429837 | 14 | 88  | 4.3  |
| 22 | 26445600 | 26445675 | 75  | 26445612 | 14 | 40  | 6.5  |
| 22 | 27572350 | 27572400 | 50  | 27572362 | 12 | 24  | 0    |
| 22 | 27898425 | 27898525 | 100 | 27898462 | 13 | 50  | 2.2  |
| 22 | 28215350 | 28215425 | 75  | 28215362 | 12 | 36  | 0    |
| 22 | 29648350 | 29648400 | 50  | 29648362 | 12 | 24  | 4.3  |
| 22 | 29694425 | 29694725 | 300 | 29694587 | 25 | 240 | 41.2 |
| 22 | 29696350 | 29696500 | 150 | 29696412 | 17 | 87  | 0    |
| 22 | 29698975 | 29699025 | 50  | 29698987 | 13 | 25  | 0    |
| 22 | 30120075 | 30120225 | 150 | 30120087 | 12 | 66  | 4.3  |
| 22 | 30848025 | 30848075 | 50  | 30848037 | 12 | 24  | 0    |
| 22 | 30885075 | 30885250 | 175 | 30885087 | 12 | 74  | 0    |
| 22 | 30901600 | 30901750 | 150 | 30901662 | 13 | 72  | 6.5  |
| 22 | 30903375 | 30903400 | 25  | 30903387 | 12 | 12  | 2.2  |
| 22 | 31052850 | 31052875 | 25  | 31052862 | 12 | 12  | 2.2  |
| 22 | 31080750 | 31080825 | 75  | 31080812 | 14 | 39  | 4.3  |
| 22 | 31264000 | 31264050 | 50  | 31264012 | 13 | 26  | 0    |
| 22 | 31397725 | 31397750 | 25  | 31397737 | 12 | 12  | 2.2  |
| 22 | 31641825 | 31642250 | 425 | 31642162 | 20 | 236 | 13   |
| 22 | 31648750 | 31648850 | 100 | 31648762 | 12 | 48  | 2.2  |
| 22 | 31667700 | 31667750 | 50  | 31667737 | 15 | 27  | 4.3  |
| 22 | 31729800 | 31729850 | 50  | 31729837 | 14 | 27  | 0    |
| 22 | 31829550 | 31829625 | 75  | 31829562 | 13 | 38  | 2.2  |
| 22 | 31936525 | 31936675 | 150 | 31936562 | 16 | 81  | 4.3  |
| 22 | 31988375 | 31988400 | 25  | 31988387 | 13 | 13  | 2.2  |
| 22 | 32247400 | 32247425 | 25  | 32247412 | 12 | 12  | 0    |
| 22 | 33772900 | 33773000 | 100 | 33772937 | 15 | 56  | 0    |

|    |          |          |      |          |    |     |      |
|----|----------|----------|------|----------|----|-----|------|
| 22 | 35283200 | 35283275 | 75   | 35283212 | 19 | 56  | 4.3  |
| 22 | 35320925 | 35321000 | 75   | 35320937 | 12 | 36  | 0    |
| 22 | 35335050 | 35335225 | 175  | 35335137 | 20 | 123 | 6.5  |
| 22 | 35335825 | 35335975 | 150  | 35335912 | 16 | 88  | 13   |
| 22 | 35516675 | 35516700 | 25   | 35516687 | 12 | 12  | 2.2  |
| 22 | 35651400 | 35651450 | 50   | 35651412 | 12 | 24  | 0    |
| 22 | 35703475 | 35703525 | 50   | 35703487 | 12 | 24  | 4.3  |
| 22 | 35721275 | 35721550 | 275  | 35721387 | 24 | 204 | 6.5  |
| 22 | 35882075 | 35882125 | 50   | 35882087 | 13 | 26  | 4.3  |
| 22 | 35887575 | 35887850 | 275  | 35887687 | 20 | 172 | 23.8 |
| 22 | 35947300 | 35947525 | 225  | 35947437 | 19 | 135 | 13   |
| 22 | 35948400 | 35948525 | 125  | 35948437 | 14 | 65  | 0    |
| 22 | 35990175 | 35990625 | 450  | 35990187 | 18 | 271 | 34.7 |
| 22 | 36006975 | 36007175 | 200  | 36007087 | 16 | 114 | 8.7  |
| 22 | 36015150 | 36015225 | 75   | 36015162 | 13 | 39  | 0    |
| 22 | 36158600 | 36158725 | 125  | 36158637 | 14 | 67  | 0    |
| 22 | 36159375 | 36159450 | 75   | 36159412 | 13 | 37  | 6.5  |
| 22 | 36159800 | 36159875 | 75   | 36159812 | 13 | 39  | 0    |
| 22 | 36167175 | 36167275 | 100  | 36167212 | 13 | 51  | 0    |
| 22 | 36473800 | 36473850 | 50   | 36473812 | 12 | 24  | 4.3  |
| 22 | 37099800 | 37100000 | 200  | 37099887 | 14 | 104 | 0    |
| 22 | 37153325 | 37153350 | 25   | 37153337 | 12 | 12  | 0    |
| 22 | 37269750 | 37269775 | 25   | 37269762 | 12 | 12  | 2.2  |
| 22 | 37525300 | 37525425 | 125  | 37525312 | 12 | 54  | 6.5  |
| 22 | 37662975 | 37663000 | 25   | 37662987 | 12 | 12  | 0    |
| 22 | 37669550 | 37669600 | 50   | 37669562 | 14 | 28  | 4.3  |
| 22 | 37700725 | 37700800 | 75   | 37700737 | 12 | 36  | 6.5  |
| 22 | 37725750 | 37725775 | 25   | 37725762 | 12 | 12  | 0    |
| 22 | 37879375 | 37879450 | 75   | 37879387 | 12 | 36  | 6.5  |
| 22 | 38010775 | 38010950 | 175  | 38010912 | 18 | 100 | 13   |
| 22 | 38289950 | 38290000 | 50   | 38289962 | 13 | 25  | 0    |
| 22 | 38321850 | 38321975 | 125  | 38321887 | 14 | 68  | 0    |
| 22 | 38331875 | 38331900 | 25   | 38331887 | 12 | 12  | 2.2  |
| 22 | 38338000 | 38338025 | 25   | 38338012 | 12 | 12  | 0    |
| 22 | 38349125 | 38350225 | 1100 | 38349312 | 19 | 578 | 47.7 |
| 22 | 38383700 | 38383750 | 50   | 38383712 | 12 | 24  | 0    |
| 22 | 38396875 | 38396900 | 25   | 38396887 | 14 | 14  | 0    |
| 22 | 38398775 | 38398875 | 100  | 38398787 | 13 | 49  | 8.7  |
| 22 | 38399175 | 38399250 | 75   | 38399237 | 14 | 38  | 4.3  |
| 22 | 38408350 | 38408450 | 100  | 38408412 | 14 | 51  | 0    |
| 22 | 38426625 | 38426725 | 100  | 38426637 | 14 | 50  | 6.5  |
| 22 | 38524575 | 38525175 | 600  | 38525162 | 13 | 264 | 34.7 |
| 22 | 39406825 | 39406950 | 125  | 39406912 | 14 | 62  | 8.7  |
| 22 | 39474300 | 39474700 | 400  | 39474412 | 15 | 195 | 8.7  |
| 22 | 40425350 | 40425400 | 50   | 40425387 | 13 | 25  | 4.3  |
| 22 | 40638625 | 40638650 | 25   | 40638637 | 12 | 12  | 0    |
| 22 | 40759075 | 40759150 | 75   | 40759087 | 12 | 36  | 0    |
| 22 | 40759525 | 40760175 | 650  | 40759812 | 29 | 496 | 34.7 |
| 22 | 40841150 | 40841200 | 50   | 40841187 | 14 | 26  | 0    |
| 22 | 41172975 | 41173125 | 150  | 41173012 | 17 | 87  | 0    |
| 22 | 41583475 | 41583525 | 50   | 41583512 | 14 | 27  | 4.3  |
| 22 | 41821550 | 41821750 | 200  | 41821612 | 15 | 107 | 0    |
| 22 | 41822775 | 41822900 | 125  | 41822887 | 14 | 61  | 8.7  |
| 22 | 42011175 | 42011475 | 300  | 42011337 | 14 | 145 | 15.2 |
| 22 | 42011775 | 42011800 | 25   | 42011787 | 12 | 12  | 2.2  |
| 22 | 42014525 | 42014825 | 300  | 42014662 | 18 | 175 | 8.7  |
| 22 | 42017450 | 42017475 | 25   | 42017462 | 12 | 12  | 0    |
| 22 | 42023200 | 42023225 | 25   | 42023212 | 12 | 12  | 0    |
| 22 | 42024275 | 42024425 | 150  | 42024387 | 15 | 79  | 15.2 |
| 22 | 42025325 | 42025400 | 75   | 42025337 | 14 | 38  | 6.5  |
| 22 | 42026900 | 42026925 | 25   | 42026912 | 12 | 12  | 0    |
| 22 | 42027375 | 42027475 | 100  | 42027437 | 15 | 55  | 0    |
| 22 | 42030250 | 42030425 | 175  | 42030362 | 17 | 101 | 8.7  |
| 22 | 42047175 | 42047250 | 75   | 42047237 | 13 | 37  | 6.5  |
| 22 | 42059900 | 42059925 | 25   | 42059912 | 12 | 12  | 0    |
| 22 | 42107675 | 42107700 | 25   | 42107687 | 12 | 12  | 2.2  |
| 22 | 42266950 | 42266975 | 25   | 42266962 | 12 | 12  | 0    |
| 22 | 42280900 | 42280975 | 75   | 42280912 | 12 | 36  | 6.5  |
| 22 | 42281200 | 42281300 | 100  | 42281212 | 15 | 56  | 4.3  |
| 22 | 42299075 | 42299275 | 200  | 42299112 | 16 | 102 | 17.3 |
| 22 | 42306925 | 42307100 | 175  | 42307037 | 15 | 86  | 0    |
| 22 | 42351425 | 42351500 | 75   | 42351437 | 14 | 40  | 6.5  |
| 22 | 42480525 | 42480550 | 25   | 42480537 | 12 | 12  | 2.2  |
| 22 | 42580325 | 42580475 | 150  | 42580362 | 14 | 78  | 0    |
| 22 | 42590075 | 42590100 | 25   | 42590087 | 12 | 12  | 0    |



|    |          |          |     |          |    |     |      |
|----|----------|----------|-----|----------|----|-----|------|
| 22 | 43194300 | 43194350 | 50  | 43194312 | 12 | 24  | 0    |
| 22 | 43364000 | 43364050 | 50  | 43364012 | 13 | 25  | 4.3  |
| 22 | 43386200 | 43386225 | 25  | 43386212 | 12 | 12  | 0    |
| 22 | 43391975 | 43392050 | 75  | 43391987 | 12 | 35  | 0    |
| 22 | 43392675 | 43392775 | 100 | 43392737 | 14 | 52  | 4.3  |
| 22 | 43510775 | 43510825 | 50  | 43510787 | 13 | 25  | 4.3  |
| 22 | 43520050 | 43520100 | 50  | 43520062 | 13 | 26  | 4.3  |
| 22 | 43551275 | 43551400 | 125 | 43551287 | 12 | 58  | 8.7  |
| 22 | 43612100 | 43612175 | 75  | 43612112 | 13 | 39  | 4.3  |
| 22 | 43646450 | 43646700 | 250 | 43646562 | 25 | 194 | 0    |
| 22 | 43675650 | 43675850 | 200 | 43675712 | 13 | 96  | 0    |
| 22 | 43676500 | 43676625 | 125 | 43676562 | 13 | 60  | 0    |
| 22 | 43681275 | 43681400 | 125 | 43681312 | 13 | 61  | 10.8 |
| 22 | 43693550 | 43693575 | 25  | 43693562 | 12 | 12  | 0    |
| 22 | 43725900 | 43726075 | 175 | 43725962 | 14 | 88  | 6.5  |
| 22 | 43765500 | 43765525 | 25  | 43765512 | 12 | 12  | 2.2  |
| 22 | 43771325 | 43771425 | 100 | 43771337 | 12 | 48  | 4.3  |
| 22 | 43811725 | 43811875 | 150 | 43811812 | 14 | 80  | 4.3  |
| 22 | 43818675 | 43818725 | 50  | 43818687 | 12 | 24  | 0    |
| 22 | 43819150 | 43819175 | 25  | 43819162 | 12 | 12  | 0    |
| 22 | 43823250 | 43823325 | 75  | 43823287 | 13 | 37  | 6.5  |
| 22 | 43830575 | 43830600 | 25  | 43830587 | 15 | 15  | 2.2  |
| 22 | 43830825 | 43830875 | 50  | 43830837 | 15 | 27  | 2.2  |
| 22 | 43831100 | 43831300 | 200 | 43831212 | 18 | 113 | 0    |
| 22 | 43850975 | 43851125 | 150 | 43851062 | 15 | 78  | 0    |
| 22 | 43851650 | 43851725 | 75  | 43851687 | 16 | 42  | 6.5  |
| 22 | 43886975 | 43887025 | 50  | 43886987 | 12 | 24  | 4.3  |
| 22 | 43909000 | 43909025 | 25  | 43909012 | 15 | 15  | 0    |
| 22 | 44688775 | 44688900 | 125 | 44688837 | 14 | 65  | 6.5  |
| 22 | 44713625 | 44713650 | 25  | 44713637 | 12 | 12  | 2.2  |
| 22 | 44759650 | 44759975 | 325 | 44759862 | 25 | 247 | 4.3  |
| 22 | 45033150 | 45033350 | 200 | 45033312 | 15 | 107 | 0    |
| 22 | 45034775 | 45034925 | 150 | 45034812 | 14 | 76  | 8.7  |
| 22 | 45037150 | 45037275 | 125 | 45037187 | 14 | 67  | 0    |
| 22 | 45309325 | 45309475 | 150 | 45309437 | 19 | 104 | 6.5  |
| 22 | 45310375 | 45310400 | 25  | 45310387 | 13 | 13  | 2.2  |
| 22 | 45310700 | 45310775 | 75  | 45310737 | 15 | 41  | 2.2  |
| 22 | 45327500 | 45327675 | 175 | 45327512 | 18 | 113 | 19.5 |
| 22 | 45328325 | 45328350 | 25  | 45328337 | 12 | 12  | 2.2  |
| 22 | 45331775 | 45331975 | 200 | 45331862 | 18 | 111 | 0    |
| 22 | 45796025 | 45796050 | 25  | 45796037 | 12 | 12  | 2.2  |
| 22 | 45974075 | 45974125 | 50  | 45974087 | 12 | 24  | 0    |
| 22 | 45980125 | 45980225 | 100 | 45980137 | 12 | 48  | 0    |
| 22 | 45982050 | 45982125 | 75  | 45982062 | 15 | 41  | 4.3  |
| 22 | 45982475 | 45982550 | 75  | 45982487 | 12 | 36  | 0    |
| 22 | 45993275 | 45993350 | 75  | 45993337 | 15 | 43  | 6.5  |
| 22 | 45999550 | 45999575 | 25  | 45999562 | 13 | 13  | 2.2  |
| 22 | 46007275 | 46007375 | 100 | 46007337 | 16 | 57  | 8.7  |
| 22 | 46008025 | 46008075 | 50  | 46008037 | 13 | 26  | 0    |
| 22 | 46024325 | 46024400 | 75  | 46024337 | 12 | 35  | 6.5  |
| 22 | 46026450 | 46026700 | 250 | 46026637 | 14 | 127 | 0    |
| 22 | 46041050 | 46041125 | 75  | 46041062 | 14 | 38  | 4.3  |
| 22 | 46045425 | 46045450 | 25  | 46045437 | 12 | 12  | 2.2  |
| 22 | 46061125 | 46061150 | 25  | 46061137 | 12 | 12  | 2.2  |
| 22 | 46063725 | 46063925 | 200 | 46063912 | 16 | 108 | 0    |
| 22 | 46065150 | 46065275 | 125 | 46065187 | 14 | 65  | 0    |
| 22 | 46067875 | 46068375 | 500 | 46068287 | 15 | 224 | 8.7  |
| 22 | 46069000 | 46069125 | 125 | 46069112 | 13 | 60  | 0    |
| 22 | 46071550 | 46071675 | 125 | 46071562 | 13 | 61  | 0    |
| 22 | 46078625 | 46078775 | 150 | 46078687 | 13 | 76  | 0    |
| 22 | 46108175 | 46108200 | 25  | 46108187 | 12 | 12  | 2.2  |
| 22 | 46126225 | 46126325 | 100 | 46126237 | 13 | 50  | 0    |
| 22 | 46126575 | 46126725 | 150 | 46126637 | 14 | 77  | 13   |
| 22 | 46247275 | 46247325 | 50  | 46247287 | 12 | 24  | 4.3  |
| 22 | 46327325 | 46327375 | 50  | 46327337 | 13 | 25  | 0    |
| 22 | 46394200 | 46394225 | 25  | 46394212 | 12 | 12  | 0    |
| 22 | 46395025 | 46395100 | 75  | 46395037 | 12 | 35  | 2.2  |
| 22 | 46395725 | 46395800 | 75  | 46395762 | 14 | 39  | 0    |
| 22 | 46397975 | 46398100 | 125 | 46398087 | 15 | 71  | 0    |
| 22 | 46689475 | 46689600 | 125 | 46689487 | 12 | 60  | 4.3  |
| 22 | 46698750 | 46698825 | 75  | 46698762 | 12 | 36  | 0    |
| 22 | 46702400 | 46702425 | 25  | 46702412 | 12 | 12  | 0    |
| 22 | 46719850 | 46719875 | 25  | 46719862 | 12 | 12  | 0    |
| 22 | 46794250 | 46794275 | 25  | 46794262 | 12 | 12  | 0    |
| 22 | 47085275 | 47085425 | 150 | 47085362 | 14 | 75  | 8.7  |

|    |          |          |     |          |    |     |      |
|----|----------|----------|-----|----------|----|-----|------|
| 22 | 47223250 | 47223425 | 175 | 47223312 | 13 | 84  | 4.3  |
| 22 | 47344075 | 47344125 | 50  | 47344087 | 13 | 25  | 4.3  |
| 22 | 47381825 | 47381925 | 100 | 47381837 | 13 | 51  | 8.7  |
| 22 | 47404925 | 47405025 | 100 | 47404937 | 12 | 48  | 4.3  |
| 22 | 47428150 | 47428175 | 25  | 47428162 | 12 | 12  | 0    |
| 22 | 47454825 | 47454900 | 75  | 47454837 | 13 | 39  | 6.5  |
| 22 | 47518700 | 47518725 | 25  | 47518712 | 12 | 12  | 2.2  |
| 22 | 47521250 | 47521425 | 175 | 47521312 | 14 | 88  | 4.3  |
| 22 | 47524475 | 47524500 | 25  | 47524487 | 12 | 12  | 2.2  |
| 22 | 47541475 | 47541500 | 25  | 47541487 | 12 | 12  | 0    |
| 22 | 47547475 | 47547525 | 50  | 47547512 | 13 | 25  | 4.3  |
| 22 | 47554300 | 47554425 | 125 | 47554362 | 14 | 63  | 10.8 |
| 22 | 47558075 | 47558250 | 175 | 47558112 | 19 | 117 | 6.5  |
| 22 | 47559325 | 47559675 | 350 | 47559462 | 28 | 285 | 17.3 |
| 22 | 47560550 | 47560775 | 225 | 47560612 | 17 | 135 | 0    |
| 22 | 47574600 | 47574800 | 200 | 47574662 | 17 | 113 | 4.3  |
| 22 | 47575950 | 47576050 | 100 | 47575962 | 14 | 54  | 8.7  |
| 22 | 47618950 | 47619550 | 600 | 47619412 | 25 | 409 | 4.3  |
| 22 | 47663400 | 47663500 | 100 | 47663437 | 13 | 48  | 0    |
| 22 | 47663875 | 47664050 | 175 | 47663987 | 14 | 91  | 6.5  |
| 22 | 47666250 | 47666350 | 100 | 47666337 | 14 | 53  | 8.7  |
| 22 | 47673725 | 47673750 | 25  | 47673737 | 12 | 12  | 0    |
| 22 | 47739075 | 47739175 | 100 | 47739087 | 13 | 50  | 0    |
| 22 | 47834050 | 47834075 | 25  | 47834062 | 12 | 12  | 2.2  |
| 22 | 47877725 | 47877775 | 50  | 47877762 | 14 | 26  | 4.3  |
| 22 | 48057625 | 48057650 | 25  | 48057637 | 12 | 12  | 0    |
| 22 | 48131225 | 48131325 | 100 | 48131312 | 13 | 49  | 0    |
| 22 | 48173925 | 48173950 | 25  | 48173937 | 12 | 12  | 2.2  |
| 22 | 48220700 | 48220800 | 100 | 48220712 | 13 | 50  | 0    |
| 22 | 48360425 | 48360625 | 200 | 48360512 | 15 | 112 | 13   |
| 22 | 48396450 | 48396500 | 50  | 48396462 | 13 | 26  | 0    |
| 22 | 48397700 | 48397725 | 25  | 48397712 | 12 | 12  | 2.2  |
| 22 | 48442875 | 48442900 | 25  | 48442887 | 14 | 14  | 2.2  |
| 22 | 48443150 | 48443175 | 25  | 48443162 | 13 | 13  | 0    |
| 22 | 48448225 | 48448325 | 100 | 48448287 | 15 | 55  | 8.7  |
| 22 | 48470225 | 48470275 | 50  | 48470262 | 15 | 29  | 4.3  |
| 22 | 48472500 | 48472600 | 100 | 48472562 | 14 | 53  | 6.5  |
| 22 | 48493975 | 48494000 | 25  | 48493987 | 12 | 12  | 0    |
| 22 | 48498100 | 48498125 | 25  | 48498112 | 12 | 12  | 0    |
| 22 | 48608975 | 48609000 | 25  | 48608987 | 12 | 12  | 2.2  |
| 22 | 48627900 | 48627925 | 25  | 48627912 | 12 | 12  | 0    |
| 22 | 48649000 | 48649025 | 25  | 48649012 | 12 | 12  | 2.2  |
| 22 | 48718250 | 48718350 | 100 | 48718287 | 14 | 53  | 0    |
| 22 | 48771100 | 48771125 | 25  | 48771112 | 12 | 12  | 2.2  |
| 22 | 48780825 | 48780850 | 25  | 48780837 | 12 | 12  | 2.2  |
| 22 | 48800125 | 48800225 | 100 | 48800137 | 12 | 47  | 8.7  |
| 22 | 48806575 | 48806750 | 175 | 48806712 | 14 | 83  | 0    |
| 22 | 48816575 | 48816625 | 50  | 48816587 | 12 | 24  | 4.3  |
| 22 | 48820150 | 48820900 | 750 | 48820737 | 31 | 718 | 104  |
| 22 | 48832475 | 48832650 | 175 | 48832562 | 17 | 104 | 13   |
| 22 | 48834550 | 48834800 | 250 | 48834737 | 15 | 132 | 2.2  |
| 22 | 48868100 | 48868300 | 200 | 48868262 | 13 | 90  | 0    |
| 22 | 48871775 | 48871850 | 75  | 48871837 | 13 | 37  | 4.3  |
| 22 | 48899950 | 48899975 | 25  | 48899962 | 12 | 12  | 0    |
| 22 | 48907975 | 48908075 | 100 | 48907987 | 13 | 51  | 0    |
| 22 | 48912575 | 48912700 | 125 | 48912662 | 14 | 65  | 0    |
| 22 | 49443400 | 49443475 | 75  | 49443412 | 12 | 36  | 6.5  |
| 22 | 49460825 | 49461175 | 350 | 49460862 | 21 | 226 | 8.7  |
| 22 | 49528850 | 49528875 | 25  | 49528862 | 12 | 12  | 0    |
| 1  | 840625   | 840650   | 25  | 840637   | 12 | 12  | 2.2  |
| 1  | 852225   | 852325   | 100 | 852262   | 13 | 50  | 0    |
| 1  | 918200   | 918225   | 25  | 918212   | 12 | 12  | 0    |
| 1  | 1049225  | 1049475  | 250 | 1049287  | 25 | 223 | 13   |
| 1  | 1103025  | 1103050  | 25  | 1103037  | 12 | 12  | 2.2  |
| 1  | 1255275  | 1255350  | 75  | 1255287  | 13 | 36  | 2.2  |
| 1  | 1858575  | 1858625  | 50  | 1858612  | 14 | 26  | 4.3  |
| 1  | 1859225  | 1859250  | 25  | 1859237  | 13 | 13  | 0    |
| 1  | 1892425  | 1892525  | 100 | 1892512  | 14 | 51  | 8.7  |
| 1  | 1893000  | 1893025  | 25  | 1893012  | 12 | 12  | 2.2  |
| 1  | 1897250  | 1897450  | 200 | 1897362  | 25 | 161 | 0    |
| 1  | 1900150  | 1900350  | 200 | 1900287  | 18 | 124 | 0    |
| 1  | 1903350  | 1903375  | 25  | 1903362  | 12 | 12  | 0    |
| 1  | 1904700  | 1904750  | 50  | 1904712  | 12 | 24  | 4.3  |
| 1  | 1916225  | 1916300  | 75  | 1916262  | 15 | 41  | 2.2  |
| 1  | 1999525  | 1999550  | 25  | 1999537  | 12 | 12  | 2.2  |

|   |          |          |     |          |    |     |      |
|---|----------|----------|-----|----------|----|-----|------|
| 1 | 2000800  | 2000950  | 150 | 2000912  | 13 | 70  | 4.3  |
| 1 | 2017850  | 2017975  | 125 | 2017912  | 16 | 70  | 0    |
| 1 | 2020500  | 2020525  | 25  | 2020512  | 12 | 12  | 2.2  |
| 1 | 2176900  | 2177000  | 100 | 2176912  | 15 | 51  | 0    |
| 1 | 2351425  | 2351450  | 25  | 2351437  | 12 | 12  | 0    |
| 1 | 2551600  | 2552250  | 650 | 2551837  | 21 | 387 | 0    |
| 1 | 2558100  | 2558300  | 200 | 2558187  | 16 | 105 | 0    |
| 1 | 2558850  | 2558900  | 50  | 2558887  | 14 | 27  | 0    |
| 1 | 2573875  | 2574550  | 675 | 2574262  | 33 | 504 | 52   |
| 1 | 2575450  | 2576325  | 875 | 2576137  | 30 | 575 | 58.5 |
| 1 | 2576875  | 2576900  | 25  | 2576887  | 12 | 12  | 2.2  |
| 1 | 2577425  | 2577575  | 150 | 2577437  | 14 | 81  | 6.5  |
| 1 | 2610825  | 2610925  | 100 | 2610862  | 16 | 60  | 8.7  |
| 1 | 2618075  | 2618100  | 25  | 2618087  | 12 | 12  | 0    |
| 1 | 2618925  | 2619125  | 200 | 2619087  | 31 | 166 | 8.7  |
| 1 | 2678950  | 2679125  | 175 | 2678962  | 16 | 109 | 19.5 |
| 1 | 3087525  | 3087600  | 75  | 3087587  | 13 | 37  | 0    |
| 1 | 3087875  | 3088250  | 375 | 3088162  | 17 | 204 | 13   |
| 1 | 3315025  | 3315200  | 175 | 3315112  | 15 | 90  | 10.8 |
| 1 | 4899200  | 4899250  | 50  | 4899212  | 12 | 24  | 4.3  |
| 1 | 5649950  | 5650375  | 425 | 5650137  | 30 | 361 | 52   |
| 1 | 5651075  | 5651100  | 25  | 5651087  | 16 | 16  | 2.2  |
| 1 | 5652650  | 5652750  | 100 | 5652662  | 17 | 66  | 10.8 |
| 1 | 5653850  | 5653875  | 25  | 5653862  | 12 | 12  | 2.2  |
| 1 | 5654175  | 5654275  | 100 | 5654237  | 18 | 67  | 8.7  |
| 1 | 5655175  | 5655375  | 200 | 5655362  | 14 | 88  | 17.3 |
| 1 | 5791725  | 5791850  | 125 | 5791787  | 13 | 60  | 0    |
| 1 | 5792200  | 5792400  | 200 | 5792337  | 16 | 114 | 0    |
| 1 | 6114525  | 6114725  | 200 | 6114637  | 16 | 116 | 8.7  |
| 1 | 6117075  | 6117175  | 100 | 6117087  | 15 | 52  | 0    |
| 1 | 6117775  | 6117825  | 50  | 6117787  | 12 | 24  | 0    |
| 1 | 6958900  | 6958950  | 50  | 6958912  | 12 | 24  | 0    |
| 1 | 6995450  | 6995600  | 150 | 6995487  | 15 | 78  | 8.7  |
| 1 | 7036575  | 7036600  | 25  | 7036587  | 12 | 12  | 2.2  |
| 1 | 7037150  | 7037375  | 225 | 7037262  | 17 | 128 | 0    |
| 1 | 7071675  | 7071700  | 25  | 7071687  | 12 | 12  | 0    |
| 1 | 7091550  | 7091625  | 75  | 7091587  | 14 | 38  | 4.3  |
| 1 | 7103225  | 7103300  | 75  | 7103237  | 12 | 36  | 6.5  |
| 1 | 7106650  | 7106725  | 75  | 7106662  | 12 | 36  | 6.5  |
| 1 | 7175175  | 7175200  | 25  | 7175187  | 12 | 12  | 2.2  |
| 1 | 7180025  | 7180050  | 25  | 7180037  | 12 | 12  | 2.2  |
| 1 | 7400525  | 7400550  | 25  | 7400537  | 12 | 12  | 2.2  |
| 1 | 7925100  | 7925150  | 50  | 7925112  | 13 | 25  | 4.3  |
| 1 | 8009650  | 8009750  | 100 | 8009687  | 13 | 51  | 4.3  |
| 1 | 9014075  | 9014100  | 25  | 9014087  | 12 | 12  | 0    |
| 1 | 9014675  | 9014725  | 50  | 9014687  | 12 | 24  | 0    |
| 1 | 9377750  | 9377775  | 25  | 9377762  | 12 | 12  | 0    |
| 1 | 10622150 | 10622425 | 275 | 10622287 | 28 | 250 | 8.7  |
| 1 | 10835950 | 10836125 | 175 | 10836012 | 16 | 91  | 0    |
| 1 | 10911425 | 10911675 | 250 | 10911587 | 18 | 152 | 4.3  |
| 1 | 10936375 | 10936400 | 25  | 10936387 | 12 | 12  | 0    |
| 1 | 10936625 | 10936775 | 150 | 10936637 | 12 | 71  | 0    |
| 1 | 11484225 | 11484325 | 100 | 11484237 | 12 | 47  | 0    |
| 1 | 12046475 | 12046600 | 125 | 12046487 | 13 | 62  | 10.8 |
| 1 | 12198500 | 12198550 | 50  | 12198512 | 13 | 25  | 0    |
| 1 | 12613250 | 12613400 | 150 | 12613287 | 16 | 89  | 2.2  |
| 1 | 14883650 | 14883825 | 175 | 14883712 | 13 | 87  | 10.8 |
| 1 | 14899000 | 14899150 | 150 | 14899037 | 17 | 81  | 10.8 |
| 1 | 14910700 | 14910875 | 175 | 14910712 | 14 | 78  | 6.5  |
| 1 | 14916125 | 14916150 | 25  | 14916137 | 12 | 12  | 2.2  |
| 1 | 15039625 | 15039675 | 50  | 15039662 | 13 | 25  | 0    |
| 1 | 15040925 | 15041050 | 125 | 15040937 | 16 | 74  | 0    |
| 1 | 15067000 | 15067150 | 150 | 15067137 | 13 | 69  | 0    |
| 1 | 16734150 | 16734525 | 375 | 16734162 | 14 | 167 | 30.3 |
| 1 | 16735200 | 16735300 | 100 | 16735287 | 13 | 47  | 0    |
| 1 | 16735950 | 16736100 | 150 | 16736062 | 16 | 88  | 13   |
| 1 | 16926650 | 16927200 | 550 | 16926812 | 28 | 526 | 93.2 |
| 1 | 16977075 | 16977225 | 150 | 16977112 | 15 | 79  | 6.5  |
| 1 | 17071850 | 17071875 | 25  | 17071862 | 14 | 14  | 2.2  |
| 1 | 17072700 | 17072750 | 50  | 17072712 | 12 | 24  | 4.3  |
| 1 | 17290875 | 17291050 | 175 | 17290962 | 15 | 94  | 6.5  |
| 1 | 17291400 | 17291475 | 75  | 17291412 | 12 | 35  | 6.5  |
| 1 | 17292550 | 17292675 | 125 | 17292637 | 18 | 75  | 0    |
| 1 | 17532275 | 17532300 | 25  | 17532287 | 12 | 12  | 0    |
| 1 | 17958325 | 17958625 | 300 | 17958437 | 19 | 191 | 4.3  |

|   |          |          |     |          |    |     |      |
|---|----------|----------|-----|----------|----|-----|------|
| 1 | 20133150 | 20133175 | 25  | 20133162 | 12 | 12  | 2.2  |
| 1 | 20760025 | 20760125 | 100 | 20760062 | 15 | 54  | 4.3  |
| 1 | 20761050 | 20761075 | 25  | 20761062 | 12 | 12  | 0    |
| 1 | 20770550 | 20770700 | 150 | 20770612 | 15 | 76  | 0    |
| 1 | 20787850 | 20788025 | 175 | 20788012 | 16 | 100 | 8.7  |
| 1 | 21687950 | 21687975 | 25  | 21687962 | 12 | 12  | 2.2  |
| 1 | 21689925 | 21690175 | 250 | 21690012 | 22 | 174 | 32.5 |
| 1 | 21994000 | 21994125 | 125 | 21994012 | 12 | 60  | 0    |
| 1 | 22396425 | 22396450 | 25  | 22396437 | 12 | 12  | 0    |
| 1 | 22418525 | 22418650 | 125 | 22418537 | 14 | 64  | 0    |
| 1 | 22420575 | 22420675 | 100 | 22420662 | 14 | 52  | 6.5  |
| 1 | 22776875 | 22777025 | 150 | 22776887 | 13 | 67  | 0    |
| 1 | 22777600 | 22777650 | 50  | 22777612 | 12 | 24  | 0    |
| 1 | 23561275 | 23561325 | 50  | 23561287 | 13 | 26  | 0    |
| 1 | 23561550 | 23561800 | 250 | 23561662 | 16 | 134 | 0    |
| 1 | 24261675 | 24261750 | 75  | 24261737 | 14 | 39  | 0    |
| 1 | 25242375 | 25242450 | 75  | 25242387 | 13 | 36  | 0    |
| 1 | 25308125 | 25308150 | 25  | 25308137 | 12 | 12  | 2.2  |
| 1 | 29436375 | 29436500 | 125 | 29436437 | 14 | 65  | 4.3  |
| 1 | 29821925 | 29822350 | 425 | 29822012 | 27 | 305 | 49.8 |
| 1 | 30070900 | 30071075 | 175 | 30070962 | 17 | 95  | 2.2  |
| 1 | 31752050 | 31752075 | 25  | 31752062 | 12 | 12  | 0    |
| 1 | 32010700 | 32010725 | 25  | 32010712 | 12 | 12  | 2.2  |
| 1 | 33130950 | 33131175 | 225 | 33131012 | 24 | 170 | 28.2 |
| 1 | 33540250 | 33540300 | 50  | 33540262 | 12 | 24  | 0    |
| 1 | 33758225 | 33758275 | 50  | 33758237 | 12 | 24  | 4.3  |
| 1 | 33773900 | 33774275 | 375 | 33773937 | 16 | 181 | 13   |
| 1 | 33774825 | 33774875 | 50  | 33774837 | 12 | 24  | 2.2  |
| 1 | 38283925 | 38284000 | 75  | 38283937 | 12 | 36  | 6.5  |
| 1 | 40371425 | 40371500 | 75  | 40371462 | 15 | 39  | 6.5  |
| 1 | 40703275 | 40703300 | 25  | 40703287 | 12 | 12  | 0    |
| 1 | 40840400 | 40840550 | 150 | 40840487 | 13 | 73  | 13   |
| 1 | 41670375 | 41670425 | 50  | 41670387 | 13 | 26  | 4.3  |
| 1 | 41768875 | 41768900 | 25  | 41768887 | 12 | 12  | 0    |
| 1 | 44646375 | 44646425 | 50  | 44646387 | 16 | 32  | 4.3  |
| 1 | 46631100 | 46631525 | 425 | 46631187 | 18 | 255 | 0    |
| 1 | 46631875 | 46632375 | 500 | 46632287 | 16 | 238 | 0    |
| 1 | 46633000 | 46633125 | 125 | 46633012 | 16 | 70  | 2.2  |
| 1 | 46730375 | 46730400 | 25  | 46730387 | 12 | 12  | 0    |
| 1 | 47462375 | 47462450 | 75  | 47462412 | 13 | 37  | 0    |
| 1 | 47463225 | 47463425 | 200 | 47463312 | 17 | 128 | 6.5  |
| 1 | 47469225 | 47469250 | 25  | 47469237 | 12 | 12  | 2.2  |
| 1 | 47469700 | 47469725 | 25  | 47469712 | 12 | 12  | 2.2  |
| 1 | 47470025 | 47470100 | 75  | 47470037 | 15 | 41  | 2.2  |
| 1 | 48293175 | 48293225 | 50  | 48293187 | 12 | 24  | 0    |
| 1 | 48465600 | 48465650 | 50  | 48465612 | 12 | 24  | 4.3  |
| 1 | 52871950 | 52872050 | 100 | 52872012 | 14 | 51  | 0    |
| 1 | 53333750 | 53333950 | 200 | 53333762 | 13 | 98  | 0    |
| 1 | 53334525 | 53334625 | 100 | 53334537 | 12 | 46  | 6.5  |
| 1 | 53334925 | 53335125 | 200 | 53335087 | 16 | 104 | 0    |
| 1 | 53335425 | 53335500 | 75  | 53335487 | 13 | 37  | 0    |
| 1 | 53336975 | 53337150 | 175 | 53336987 | 14 | 86  | 0    |
| 1 | 53337875 | 53338050 | 175 | 53337912 | 16 | 102 | 0    |
| 1 | 53339400 | 53339450 | 50  | 53339412 | 13 | 26  | 4.3  |
| 1 | 53339675 | 53339750 | 75  | 53339687 | 13 | 36  | 6.5  |
| 1 | 53676900 | 53676925 | 25  | 53676912 | 12 | 12  | 0    |
| 1 | 55234300 | 55234375 | 75  | 55234312 | 12 | 36  | 0    |
| 1 | 59895650 | 59895700 | 50  | 59895662 | 14 | 27  | 0    |
| 1 | 60311800 | 60311925 | 125 | 60311887 | 14 | 63  | 10.8 |
| 1 | 71284800 | 71285000 | 200 | 71284987 | 14 | 101 | 4.3  |
| 1 | 71285500 | 71285825 | 325 | 71285587 | 21 | 224 | 23.8 |
| 1 | 75368650 | 75368700 | 50  | 75368662 | 13 | 25  | 4.3  |
| 1 | 75369175 | 75369500 | 325 | 75369337 | 21 | 213 | 4.3  |
| 1 | 75370400 | 75370425 | 25  | 75370412 | 13 | 13  | 2.2  |
| 1 | 75605825 | 75605850 | 25  | 75605837 | 12 | 12  | 2.2  |
| 1 | 76015925 | 76016025 | 100 | 76015937 | 12 | 45  | 6.5  |
| 1 | 77519900 | 77520025 | 125 | 77519912 | 14 | 65  | 0    |
| 1 | 83029225 | 83029300 | 75  | 83029237 | 12 | 36  | 0    |
| 1 | 84843475 | 84843725 | 250 | 84843537 | 16 | 135 | 19.5 |
| 1 | 84844050 | 84844200 | 150 | 84844137 | 13 | 73  | 0    |
| 1 | 86762000 | 86762200 | 200 | 86762037 | 14 | 98  | 15.2 |
| 1 | 86762425 | 86762525 | 100 | 86762487 | 14 | 53  | 0    |
| 1 | 86791500 | 86791625 | 125 | 86791587 | 14 | 63  | 2.2  |
| 1 | 86852400 | 86852450 | 50  | 86852437 | 14 | 27  | 4.3  |
| 1 | 87396675 | 87396700 | 25  | 87396687 | 12 | 12  | 0    |

|   |           |           |     |           |    |     |       |
|---|-----------|-----------|-----|-----------|----|-----|-------|
| 1 | 88873700  | 88873725  | 25  | 88873712  | 12 | 12  | 2.2   |
| 1 | 89281725  | 89282025  | 300 | 89281887  | 14 | 148 | 10.8  |
| 1 | 89474525  | 89474550  | 25  | 89474537  | 12 | 12  | 0     |
| 1 | 89980750  | 89980775  | 25  | 89980762  | 12 | 12  | 2.2   |
| 1 | 90119875  | 90119900  | 25  | 90119887  | 13 | 13  | 0     |
| 1 | 90952100  | 90952175  | 75  | 90952112  | 13 | 38  | 6.5   |
| 1 | 90954650  | 90954850  | 200 | 90954737  | 19 | 127 | 13    |
| 1 | 90963950  | 90963975  | 25  | 90963962  | 12 | 12  | 2.2   |
| 1 | 92626700  | 92626725  | 25  | 92626712  | 13 | 13  | 2.2   |
| 1 | 98083925  | 98084000  | 75  | 98083962  | 13 | 38  | 0     |
| 1 | 108308550 | 108308600 | 50  | 108308562 | 12 | 24  | 4.3   |
| 1 | 108392625 | 108392675 | 50  | 108392662 | 13 | 25  | 0     |
| 1 | 109641075 | 109641100 | 25  | 109641087 | 12 | 12  | 2.2   |
| 1 | 111018125 | 111018150 | 25  | 111018137 | 12 | 12  | 0     |
| 1 | 115420525 | 115420625 | 100 | 115420537 | 12 | 47  | 0     |
| 1 | 115433925 | 115434000 | 75  | 115433937 | 13 | 37  | 6.5   |
| 1 | 115570175 | 115570525 | 350 | 115570312 | 17 | 202 | 2.2   |
| 1 | 115704375 | 115704400 | 25  | 115704387 | 13 | 13  | 0     |
| 1 | 115704850 | 115704950 | 100 | 115704912 | 14 | 51  | 8.7   |
| 1 | 115805025 | 115805075 | 50  | 115805037 | 12 | 24  | 0     |
| 1 | 115958125 | 115958150 | 25  | 115958137 | 13 | 13  | 2.2   |
| 1 | 115983800 | 115983850 | 50  | 115983812 | 13 | 25  | 4.3   |
| 1 | 115985300 | 115985925 | 625 | 115985712 | 22 | 370 | 52    |
| 1 | 116319950 | 116320125 | 175 | 116320037 | 14 | 90  | 8.7   |
| 1 | 116321150 | 116321225 | 75  | 116321162 | 12 | 36  | 0     |
| 1 | 116556200 | 116556300 | 100 | 116556262 | 13 | 48  | 0     |
| 1 | 116620550 | 116620625 | 75  | 116620562 | 12 | 36  | 6.5   |
| 1 | 117086200 | 117086700 | 500 | 117086387 | 17 | 261 | 0     |
| 1 | 117088075 | 117088275 | 200 | 117088162 | 13 | 94  | 0     |
| 1 | 117091300 | 117091400 | 100 | 117091362 | 13 | 48  | 0     |
| 1 | 117967925 | 117968100 | 175 | 117968012 | 14 | 86  | 13    |
| 1 | 117974875 | 117974950 | 75  | 117974887 | 12 | 36  | 0     |
| 1 | 119337325 | 119337575 | 250 | 119337412 | 17 | 144 | 13    |
| 1 | 119350900 | 119351350 | 450 | 119351012 | 15 | 190 | 30.3  |
| 1 | 120108325 | 120108700 | 375 | 120108437 | 17 | 191 | 17.3  |
| 1 | 120920575 | 120920650 | 75  | 120920612 | 13 | 37  | 6.5   |
| 1 | 121053575 | 121053650 | 75  | 121053587 | 13 | 39  | 0     |
| 1 | 121180125 | 121180175 | 50  | 121180162 | 14 | 27  | 2.2   |
| 1 | 121185225 | 121185250 | 25  | 121185237 | 12 | 12  | 0     |
| 1 | 141477775 | 141477800 | 25  | 141477787 | 22 | 22  | 4.3   |
| 1 | 141478175 | 141478200 | 25  | 141478187 | 14 | 14  | 2.2   |
| 1 | 141479400 | 141479450 | 50  | 141479412 | 36 | 71  | 13    |
| 1 | 141479800 | 141480575 | 775 | 141479887 | 39 | 833 | 114.9 |
| 1 | 141481650 | 141481825 | 175 | 141481812 | 22 | 122 | 19.5  |
| 1 | 141483150 | 141483175 | 25  | 141483162 | 12 | 12  | 0     |
| 1 | 141539975 | 141540125 | 150 | 141540012 | 17 | 83  | 10.8  |
| 1 | 141833725 | 141833850 | 125 | 141833737 | 14 | 63  | 10.8  |
| 1 | 141839275 | 141839450 | 175 | 141839312 | 30 | 139 | 17.3  |
| 1 | 141866875 | 141866050 | 175 | 141866587 | 17 | 119 | 10.8  |
| 1 | 142120225 | 142120250 | 25  | 142120237 | 33 | 33  | 6.5   |
| 1 | 142124050 | 142124125 | 75  | 142124087 | 13 | 38  | 6.5   |
| 1 | 142124375 | 142124450 | 75  | 142124387 | 14 | 41  | 6.5   |
| 1 | 142124925 | 142125000 | 75  | 142124962 | 23 | 57  | 10.8  |
| 1 | 142298575 | 142298600 | 25  | 142298587 | 14 | 14  | 2.2   |
| 1 | 142323650 | 142323825 | 175 | 142323737 | 16 | 101 | 0     |
| 1 | 143576750 | 143576775 | 25  | 143576762 | 12 | 12  | 0     |
| 1 | 143754550 | 143754600 | 50  | 143754562 | 18 | 34  | 4.3   |
| 1 | 143786500 | 143786550 | 50  | 143786537 | 14 | 27  | 4.3   |
| 1 | 143988500 | 143988550 | 50  | 143988512 | 13 | 25  | 4.3   |
| 1 | 144269875 | 144269900 | 25  | 144269887 | 12 | 12  | 0     |
| 1 | 145016075 | 145016100 | 25  | 145016087 | 12 | 12  | 0     |
| 1 | 145016475 | 145016675 | 200 | 145016512 | 17 | 110 | 0     |
| 1 | 145016925 | 145017475 | 550 | 145017287 | 16 | 279 | 49.8  |
| 1 | 145017775 | 145018150 | 375 | 145018012 | 18 | 208 | 34.7  |
| 1 | 145174900 | 145175050 | 150 | 145174937 | 15 | 78  | 0     |
| 1 | 145620725 | 145621075 | 350 | 145621012 | 18 | 193 | 2.2   |
| 1 | 145846775 | 145847225 | 450 | 145846912 | 27 | 307 | 19.5  |
| 1 | 146173575 | 146173625 | 50  | 146173587 | 13 | 25  | 4.3   |
| 1 | 146182700 | 146182775 | 75  | 146182762 | 17 | 42  | 0     |
| 1 | 146183000 | 146183125 | 125 | 146183012 | 15 | 65  | 10.8  |
| 1 | 146185425 | 146185525 | 100 | 146185437 | 15 | 56  | 10.8  |
| 1 | 146246375 | 146246400 | 25  | 146246387 | 12 | 12  | 2.2   |
| 1 | 146247850 | 146247975 | 125 | 146247962 | 16 | 73  | 4.3   |
| 1 | 146248300 | 146248375 | 75  | 146248362 | 14 | 39  | 4.3   |
| 1 | 146248975 | 146249225 | 250 | 146249037 | 22 | 185 | 19.5  |

|   |           |           |      |           |    |     |      |
|---|-----------|-----------|------|-----------|----|-----|------|
| 1 | 146818150 | 146818175 | 25   | 146818162 | 13 | 13  | 0    |
| 1 | 146818400 | 146818425 | 25   | 146818412 | 13 | 13  | 2.2  |
| 1 | 147552350 | 147552375 | 25   | 147552362 | 12 | 12  | 0    |
| 1 | 147553600 | 147553950 | 350  | 147553712 | 22 | 228 | 28.2 |
| 1 | 147665500 | 147665625 | 125  | 147665512 | 14 | 67  | 0    |
| 1 | 147939300 | 147939325 | 25   | 147939312 | 13 | 13  | 0    |
| 1 | 147985125 | 147985175 | 50   | 147985137 | 12 | 24  | 4.3  |
| 1 | 149957075 | 149957200 | 125  | 149957087 | 12 | 59  | 4.3  |
| 1 | 150092725 | 150092750 | 25   | 150092737 | 12 | 12  | 2.2  |
| 1 | 150147050 | 150147100 | 50   | 150147062 | 19 | 32  | 0    |
| 1 | 150299300 | 150299350 | 50   | 150299312 | 12 | 24  | 0    |
| 1 | 150348700 | 150348725 | 25   | 150348712 | 13 | 13  | 2.2  |
| 1 | 150350550 | 150350900 | 350  | 150350712 | 24 | 253 | 4.3  |
| 1 | 150351600 | 150351800 | 200  | 150351712 | 17 | 120 | 0    |
| 1 | 151536000 | 151536050 | 50   | 151536012 | 12 | 24  | 4.3  |
| 1 | 152337925 | 152338125 | 200  | 152337937 | 12 | 92  | 17.3 |
| 1 | 152739400 | 152739500 | 100  | 152739462 | 13 | 49  | 8.7  |
| 1 | 152741925 | 152741950 | 25   | 152741937 | 12 | 12  | 2.2  |
| 1 | 152756175 | 152756225 | 50   | 152756187 | 12 | 24  | 4.3  |
| 1 | 153148025 | 153148125 | 100  | 153148112 | 19 | 67  | 0    |
| 1 | 153320150 | 153320175 | 25   | 153320162 | 12 | 12  | 2.2  |
| 1 | 153531550 | 153531575 | 25   | 153531562 | 12 | 12  | 0    |
| 1 | 154351500 | 154351600 | 100  | 154351537 | 15 | 57  | 6.5  |
| 1 | 154657125 | 154657175 | 50   | 154657162 | 13 | 25  | 0    |
| 1 | 155143075 | 155143150 | 75   | 155143112 | 13 | 37  | 6.5  |
| 1 | 156418175 | 156418225 | 50   | 156418187 | 12 | 24  | 4.3  |
| 1 | 158218225 | 158218375 | 150  | 158218287 | 14 | 80  | 8.7  |
| 1 | 158378625 | 158378750 | 125  | 158378687 | 16 | 69  | 2.2  |
| 1 | 159172175 | 159172325 | 150  | 159172187 | 12 | 68  | 10.8 |
| 1 | 159257125 | 159257200 | 75   | 159257162 | 17 | 46  | 6.5  |
| 1 | 159676350 | 159676450 | 100  | 159676437 | 16 | 54  | 8.7  |
| 1 | 159681325 | 159681375 | 50   | 159681337 | 16 | 32  | 0    |
| 1 | 159717000 | 159717075 | 75   | 159717012 | 12 | 35  | 0    |
| 1 | 160220150 | 160220175 | 25   | 160220162 | 12 | 12  | 2.2  |
| 1 | 160544950 | 160545025 | 75   | 160544987 | 14 | 39  | 6.5  |
| 1 | 161259775 | 161259875 | 100  | 161259812 | 16 | 56  | 0    |
| 1 | 163418975 | 163419150 | 175  | 163419012 | 16 | 101 | 0    |
| 1 | 163470975 | 163471175 | 200  | 163471137 | 14 | 97  | 0    |
| 1 | 163526150 | 163526350 | 200  | 163526187 | 17 | 122 | 0    |
| 1 | 163588675 | 163588725 | 50   | 163588687 | 12 | 24  | 4.3  |
| 1 | 163591400 | 163591500 | 100  | 163591462 | 17 | 61  | 6.5  |
| 1 | 163596925 | 163597050 | 125  | 163596962 | 13 | 60  | 10.8 |
| 1 | 163664375 | 163664475 | 100  | 163664462 | 14 | 49  | 2.2  |
| 1 | 163768225 | 163768250 | 25   | 163768237 | 12 | 12  | 0    |
| 1 | 164274825 | 164274850 | 25   | 164274837 | 12 | 12  | 2.2  |
| 1 | 164285625 | 164285650 | 25   | 164285637 | 12 | 12  | 0    |
| 1 | 164487575 | 164487600 | 25   | 164487587 | 13 | 13  | 0    |
| 1 | 165032600 | 165032850 | 250  | 165032737 | 16 | 127 | 0    |
| 1 | 165193950 | 165193975 | 25   | 165193962 | 12 | 12  | 2.2  |
| 1 | 165224825 | 165225050 | 225  | 165224937 | 23 | 163 | 30.3 |
| 1 | 165225375 | 165225475 | 100  | 165225387 | 19 | 66  | 4.3  |
| 1 | 165309425 | 165309525 | 100  | 165309437 | 12 | 46  | 6.5  |
| 1 | 165361750 | 165362825 | 1075 | 165362712 | 17 | 541 | 34.7 |
| 1 | 165363125 | 165363325 | 200  | 165363312 | 28 | 175 | 10.8 |
| 1 | 165363550 | 165363750 | 200  | 165363662 | 13 | 91  | 15.2 |
| 1 | 165445375 | 165445500 | 125  | 165445462 | 15 | 70  | 6.5  |
| 1 | 165445975 | 165446250 | 275  | 165446112 | 20 | 175 | 17.3 |
| 1 | 165807625 | 165807700 | 75   | 165807687 | 13 | 37  | 0    |
| 1 | 165823275 | 165823350 | 75   | 165823337 | 14 | 38  | 0    |
| 1 | 165877825 | 165877850 | 25   | 165877837 | 12 | 12  | 0    |
| 1 | 166710550 | 166710600 | 50   | 166710562 | 12 | 24  | 0    |
| 1 | 166962850 | 166962925 | 75   | 166962862 | 12 | 36  | 0    |
| 1 | 166964975 | 166965025 | 50   | 166965012 | 13 | 25  | 4.3  |
| 1 | 167297950 | 167298075 | 125  | 167298037 | 15 | 69  | 8.7  |
| 1 | 168896975 | 168897200 | 225  | 168897037 | 14 | 111 | 0    |
| 1 | 168902575 | 168903025 | 450  | 168902637 | 26 | 325 | 36.8 |
| 1 | 169541450 | 169541575 | 125  | 169541462 | 14 | 70  | 6.5  |
| 1 | 169617400 | 169617700 | 300  | 169617662 | 14 | 141 | 13   |
| 1 | 169906550 | 169906625 | 75   | 169906612 | 13 | 37  | 6.5  |
| 1 | 170873300 | 170873325 | 25   | 170873312 | 13 | 13  | 2.2  |
| 1 | 171093675 | 171093725 | 50   | 171093687 | 12 | 24  | 4.3  |
| 1 | 171148500 | 171148625 | 125  | 171148512 | 12 | 54  | 0    |
| 1 | 171232600 | 171232650 | 50   | 171232612 | 12 | 24  | 0    |
| 1 | 171339575 | 171339600 | 25   | 171339587 | 12 | 12  | 2.2  |
| 1 | 171370825 | 171370850 | 25   | 171370837 | 13 | 13  | 2.2  |

|   |           |           |     |           |    |     |      |
|---|-----------|-----------|-----|-----------|----|-----|------|
| 1 | 171409425 | 171409575 | 150 | 171409462 | 17 | 90  | 0    |
| 1 | 171873700 | 171874050 | 350 | 171873837 | 19 | 209 | 17.3 |
| 1 | 171891900 | 171891950 | 50  | 171891912 | 12 | 24  | 0    |
| 1 | 172536900 | 172536925 | 25  | 172536912 | 12 | 12  | 2.2  |
| 1 | 172948375 | 172948450 | 75  | 172948387 | 13 | 39  | 4.3  |
| 1 | 173313350 | 173313450 | 100 | 173313412 | 16 | 57  | 8.7  |
| 1 | 173315375 | 173315525 | 150 | 173315512 | 14 | 75  | 0    |
| 1 | 173315950 | 173315975 | 25  | 173315962 | 12 | 12  | 2.2  |
| 1 | 173342775 | 173342925 | 150 | 173342837 | 15 | 83  | 0    |
| 1 | 173605050 | 173605100 | 50  | 173605062 | 12 | 24  | 0    |
| 1 | 176127500 | 176127625 | 125 | 176127562 | 15 | 67  | 0    |
| 1 | 176469375 | 176469400 | 25  | 176469387 | 12 | 12  | 0    |
| 1 | 177188825 | 177188850 | 25  | 177188837 | 12 | 12  | 2.2  |
| 1 | 177231400 | 177231425 | 25  | 177231412 | 12 | 12  | 0    |
| 1 | 177978450 | 177978475 | 25  | 177978462 | 12 | 12  | 0    |
| 1 | 178002975 | 178003000 | 25  | 178002987 | 12 | 12  | 2.2  |
| 1 | 178010350 | 178010500 | 150 | 178010362 | 12 | 70  | 0    |
| 1 | 178464575 | 178464750 | 175 | 178464662 | 17 | 102 | 10.8 |
| 1 | 178796000 | 178796075 | 75  | 178796012 | 13 | 38  | 6.5  |
| 1 | 178796975 | 178797150 | 175 | 178796987 | 16 | 103 | 0    |
| 1 | 180391875 | 180391950 | 75  | 180391887 | 12 | 36  | 6.5  |
| 1 | 180676600 | 180676625 | 25  | 180676612 | 12 | 12  | 0    |
| 1 | 181155900 | 181155925 | 25  | 181155912 | 13 | 13  | 2.2  |
| 1 | 181564325 | 181564500 | 175 | 181564412 | 14 | 91  | 13   |
| 1 | 181653750 | 181653850 | 100 | 181653812 | 16 | 58  | 8.7  |
| 1 | 182382575 | 182382650 | 75  | 182382612 | 14 | 39  | 6.5  |
| 1 | 182772175 | 182772250 | 75  | 182772187 | 12 | 35  | 6.5  |
| 1 | 182865075 | 182865150 | 75  | 182865087 | 13 | 37  | 6.5  |
| 1 | 182900075 | 182900100 | 25  | 182900087 | 12 | 12  | 2.2  |
| 1 | 183237250 | 183237325 | 75  | 183237262 | 12 | 36  | 6.5  |
| 1 | 183263325 | 183263500 | 175 | 183263387 | 15 | 93  | 0    |
| 1 | 183659350 | 183659375 | 25  | 183659362 | 12 | 12  | 0    |
| 1 | 184035400 | 184035525 | 125 | 184035487 | 13 | 61  | 8.7  |
| 1 | 184983450 | 184983700 | 250 | 184983637 | 15 | 130 | 4.3  |
| 1 | 185000475 | 185000550 | 75  | 185000487 | 13 | 38  | 6.5  |
| 1 | 185263375 | 185263525 | 150 | 185263462 | 15 | 79  | 2.2  |
| 1 | 185310625 | 185310700 | 75  | 185310637 | 12 | 36  | 4.3  |
| 1 | 186907600 | 186907800 | 200 | 186907612 | 15 | 109 | 6.5  |
| 1 | 187093275 | 187093425 | 150 | 187093387 | 15 | 85  | 0    |
| 1 | 187486425 | 187486500 | 75  | 187486462 | 13 | 38  | 6.5  |
| 1 | 196145900 | 196146225 | 325 | 196145962 | 18 | 195 | 34.7 |
| 1 | 196146850 | 196147175 | 325 | 196146912 | 19 | 197 | 0    |
| 1 | 196149050 | 196149100 | 50  | 196149062 | 13 | 26  | 4.3  |
| 1 | 196155475 | 196155975 | 500 | 196155587 | 16 | 262 | 34.7 |
| 1 | 197573125 | 197573150 | 25  | 197573137 | 12 | 12  | 0    |
| 1 | 197773875 | 197773950 | 75  | 197773887 | 12 | 36  | 4.3  |
| 1 | 198271700 | 198271775 | 75  | 198271762 | 14 | 37  | 6.5  |
| 1 | 198275275 | 198275300 | 25  | 198275287 | 12 | 12  | 2.2  |
| 1 | 198449375 | 198449575 | 200 | 198449462 | 16 | 115 | 4.3  |
| 1 | 198563375 | 198563450 | 75  | 198563387 | 12 | 35  | 0    |
| 1 | 198715550 | 198715575 | 25  | 198715562 | 12 | 12  | 2.2  |
| 1 | 198776175 | 198776275 | 100 | 198776187 | 12 | 47  | 4.3  |
| 1 | 199183775 | 199183825 | 50  | 199183812 | 13 | 25  | 0    |
| 1 | 199295750 | 199295825 | 75  | 199295762 | 12 | 36  | 0    |
| 1 | 199318950 | 199319100 | 150 | 199318987 | 14 | 79  | 4.3  |
| 1 | 199438175 | 199438200 | 25  | 199438187 | 12 | 12  | 2.2  |
| 1 | 199461700 | 199461850 | 150 | 199461712 | 20 | 102 | 0    |
| 1 | 199494900 | 199494925 | 25  | 199494912 | 12 | 12  | 2.2  |
| 1 | 199526375 | 199526500 | 125 | 199526412 | 14 | 66  | 8.7  |
| 1 | 199528750 | 199528850 | 100 | 199528762 | 15 | 53  | 8.7  |
| 1 | 199534800 | 199534825 | 25  | 199534812 | 12 | 12  | 0    |
| 1 | 199536500 | 199536650 | 150 | 199536512 | 13 | 77  | 15.2 |
| 1 | 199538550 | 199538725 | 175 | 199538687 | 17 | 102 | 0    |
| 1 | 199540700 | 199540800 | 100 | 199540712 | 13 | 49  | 4.3  |
| 1 | 199542000 | 199542125 | 125 | 199542037 | 16 | 74  | 0    |
| 1 | 199578650 | 199578825 | 175 | 199578762 | 16 | 95  | 0    |
| 1 | 199582300 | 199582350 | 50  | 199582312 | 13 | 26  | 2.2  |
| 1 | 199591800 | 199591825 | 25  | 199591812 | 12 | 12  | 0    |
| 1 | 199617250 | 199617400 | 150 | 199617312 | 14 | 75  | 13   |
| 1 | 199636050 | 199636150 | 100 | 199636087 | 14 | 50  | 4.3  |
| 1 | 199650575 | 199650975 | 400 | 199650912 | 19 | 226 | 30.3 |
| 1 | 199651200 | 199651275 | 75  | 199651212 | 12 | 35  | 0    |
| 1 | 199651675 | 199651750 | 75  | 199651687 | 13 | 37  | 6.5  |
| 1 | 199652500 | 199652625 | 125 | 199652512 | 12 | 58  | 0    |
| 1 | 199803100 | 199803125 | 25  | 199803112 | 12 | 12  | 2.2  |

|   |           |           |     |           |    |     |      |
|---|-----------|-----------|-----|-----------|----|-----|------|
| 1 | 199885325 | 199885425 | 100 | 199885337 | 12 | 47  | 0    |
| 1 | 200135500 | 200135750 | 250 | 200135562 | 31 | 237 | 32.5 |
| 1 | 200154025 | 200154050 | 25  | 200154037 | 12 | 12  | 2.2  |
| 1 | 200280550 | 200280575 | 25  | 200280562 | 12 | 12  | 0    |
| 1 | 200448975 | 200449100 | 125 | 200449087 | 17 | 71  | 0    |
| 1 | 200512125 | 200512150 | 25  | 200512137 | 12 | 12  | 0    |
| 1 | 200878450 | 200878625 | 175 | 200878512 | 16 | 98  | 2.2  |
| 1 | 200882025 | 200882150 | 125 | 200882037 | 14 | 61  | 4.3  |
| 1 | 200944350 | 200944375 | 25  | 200944362 | 12 | 12  | 2.2  |
| 1 | 201227125 | 201227225 | 100 | 201227212 | 13 | 49  | 0    |
| 1 | 201349775 | 201349800 | 25  | 201349787 | 12 | 12  | 2.2  |
| 1 | 201492500 | 201492625 | 125 | 201492612 | 13 | 61  | 2.2  |
| 1 | 201583525 | 201583600 | 75  | 201583587 | 14 | 39  | 0    |
| 1 | 201681600 | 201681625 | 25  | 201681612 | 12 | 12  | 0    |
| 1 | 202845900 | 202845925 | 25  | 202845912 | 12 | 12  | 2.2  |
| 1 | 202849575 | 202849600 | 25  | 202849587 | 12 | 12  | 2.2  |
| 1 | 202854000 | 202854025 | 25  | 202854012 | 12 | 12  | 2.2  |
| 1 | 202854350 | 202854800 | 450 | 202854387 | 18 | 278 | 43.3 |
| 1 | 202855275 | 202855575 | 300 | 202855287 | 14 | 135 | 8.7  |
| 1 | 202988275 | 202988500 | 225 | 202988337 | 18 | 137 | 8.7  |
| 1 | 203197875 | 203197950 | 75  | 203197937 | 14 | 38  | 4.3  |
| 1 | 203221875 | 203221900 | 25  | 203221887 | 12 | 12  | 0    |
| 1 | 203236700 | 203236875 | 175 | 203236787 | 14 | 91  | 15.2 |
| 1 | 203248575 | 203248600 | 25  | 203248587 | 12 | 12  | 2.2  |
| 1 | 203255300 | 203255400 | 100 | 203255362 | 15 | 56  | 6.5  |
| 1 | 203255700 | 203255950 | 250 | 203255787 | 17 | 148 | 0    |
| 1 | 203272525 | 203272600 | 75  | 203272537 | 12 | 35  | 6.5  |
| 1 | 203392000 | 203392150 | 150 | 203392062 | 15 | 83  | 0    |
| 1 | 203642425 | 203642450 | 25  | 203642437 | 12 | 12  | 0    |
| 1 | 203710350 | 203710600 | 250 | 203710462 | 25 | 188 | 32.5 |
| 1 | 203719225 | 203719250 | 25  | 203719237 | 12 | 12  | 0    |
| 1 | 203782000 | 203782050 | 50  | 203782012 | 14 | 27  | 4.3  |
| 1 | 203798125 | 203798150 | 25  | 203798137 | 12 | 12  | 2.2  |
| 1 | 203804925 | 203804950 | 25  | 203804937 | 13 | 13  | 2.2  |
| 1 | 203808850 | 203808875 | 25  | 203808862 | 12 | 12  | 0    |
| 1 | 204085675 | 204085925 | 250 | 204085737 | 21 | 180 | 4.3  |
| 1 | 204366600 | 204366725 | 125 | 204366612 | 17 | 77  | 2.2  |
| 1 | 204367100 | 204367250 | 150 | 204367162 | 13 | 72  | 13   |
| 1 | 204369725 | 204369750 | 25  | 204369737 | 13 | 13  | 2.2  |
| 1 | 204390300 | 204390375 | 75  | 204390362 | 13 | 37  | 4.3  |
| 1 | 204767625 | 204767700 | 75  | 204767662 | 13 | 37  | 2.2  |
| 1 | 204904100 | 204904125 | 25  | 204904112 | 13 | 13  | 2.2  |
| 1 | 205164375 | 205164425 | 50  | 205164387 | 14 | 28  | 4.3  |
| 1 | 205661050 | 205661175 | 125 | 205661062 | 12 | 52  | 0    |
| 1 | 205663925 | 205664025 | 100 | 205663937 | 14 | 52  | 0    |
| 1 | 205736100 | 205736125 | 25  | 205736112 | 12 | 12  | 0    |
| 1 | 205852825 | 205852875 | 50  | 205852862 | 20 | 37  | 2.2  |
| 1 | 205885275 | 205885300 | 25  | 205885287 | 12 | 12  | 0    |
| 1 | 205885775 | 205885875 | 100 | 205885787 | 12 | 48  | 0    |
| 1 | 205953750 | 205953975 | 225 | 205953812 | 18 | 130 | 0    |
| 1 | 206195775 | 206195875 | 100 | 206195787 | 13 | 47  | 0    |
| 1 | 206456925 | 206457025 | 100 | 206456937 | 12 | 48  | 0    |
| 1 | 207059450 | 207059600 | 150 | 207059487 | 13 | 76  | 0    |
| 1 | 207671000 | 207671025 | 25  | 207671012 | 12 | 12  | 2.2  |
| 1 | 207851950 | 207851975 | 25  | 207851962 | 12 | 12  | 0    |
| 1 | 207915550 | 207915575 | 25  | 207915562 | 12 | 12  | 2.2  |
| 1 | 207916000 | 207916025 | 25  | 207916012 | 12 | 12  | 0    |
| 1 | 208011025 | 208011475 | 450 | 208011137 | 14 | 200 | 36.8 |
| 1 | 208521075 | 208521225 | 150 | 208521137 | 14 | 77  | 0    |
| 1 | 208893750 | 208893850 | 100 | 208893787 | 16 | 62  | 0    |
| 1 | 209447350 | 209447400 | 50  | 209447387 | 14 | 26  | 0    |
| 1 | 210099550 | 210099650 | 100 | 210099562 | 14 | 54  | 0    |
| 1 | 210113050 | 210113125 | 75  | 210113062 | 14 | 40  | 0    |
| 1 | 210141575 | 210141750 | 175 | 210141712 | 21 | 112 | 6.5  |
| 1 | 210160100 | 210160125 | 25  | 210160112 | 12 | 12  | 0    |
| 1 | 210846075 | 210846125 | 50  | 210846087 | 12 | 24  | 0    |
| 1 | 210865875 | 210865950 | 75  | 210865887 | 14 | 39  | 4.3  |
| 1 | 210866300 | 210866575 | 275 | 210866312 | 12 | 119 | 17.3 |
| 1 | 211064075 | 211064375 | 300 | 211064187 | 18 | 183 | 26   |
| 1 | 211066075 | 211066250 | 175 | 211066162 | 17 | 106 | 15.2 |
| 1 | 211395200 | 211395275 | 75  | 211395212 | 12 | 36  | 6.5  |
| 1 | 211636775 | 211636800 | 25  | 211636787 | 12 | 12  | 2.2  |
| 1 | 211661750 | 211661800 | 50  | 211661762 | 12 | 24  | 4.3  |
| 1 | 211666025 | 211666225 | 200 | 211666112 | 13 | 97  | 0    |
| 1 | 211685775 | 211685925 | 150 | 211685862 | 15 | 80  | 13   |



|   |           |           |     |           |    |     |      |
|---|-----------|-----------|-----|-----------|----|-----|------|
| 1 | 211730475 | 211730675 | 200 | 211730562 | 15 | 109 | 17.3 |
| 1 | 211921125 | 211921150 | 25  | 211921137 | 13 | 13  | 2.2  |
| 1 | 211952000 | 211952050 | 50  | 211952012 | 12 | 24  | 4.3  |
| 1 | 211969250 | 211969275 | 25  | 211969262 | 13 | 13  | 2.2  |
| 1 | 212018700 | 212018750 | 50  | 212018712 | 12 | 24  | 0    |
| 1 | 212357950 | 212358225 | 275 | 212358137 | 18 | 176 | 10.8 |
| 1 | 212443125 | 212443225 | 100 | 212443137 | 12 | 47  | 0    |
| 1 | 213422325 | 213422525 | 200 | 213422437 | 16 | 111 | 13   |
| 1 | 213783425 | 213783450 | 25  | 213783437 | 14 | 14  | 2.2  |
| 1 | 216404475 | 216404550 | 75  | 216404487 | 14 | 38  | 0    |
| 1 | 216994675 | 216994950 | 275 | 216994812 | 17 | 154 | 0    |
| 1 | 217222575 | 217222725 | 150 | 217222662 | 15 | 81  | 8.7  |
| 1 | 217223525 | 217223575 | 50  | 217223537 | 12 | 24  | 0    |
| 1 | 217620400 | 217620425 | 25  | 217620412 | 12 | 12  | 2.2  |
| 1 | 218034275 | 218034475 | 200 | 218034412 | 14 | 99  | 15.2 |
| 1 | 218180100 | 218180225 | 125 | 218180112 | 12 | 54  | 6.5  |
| 1 | 218767425 | 218767450 | 25  | 218767437 | 14 | 14  | 2.2  |
| 1 | 218930650 | 218930700 | 50  | 218930662 | 12 | 24  | 4.3  |
| 1 | 218935100 | 218935125 | 25  | 218935112 | 12 | 12  | 0    |
| 1 | 219118900 | 219118925 | 25  | 219118912 | 12 | 12  | 2.2  |
| 1 | 219131625 | 219131675 | 50  | 219131637 | 13 | 26  | 0    |
| 1 | 219132050 | 219132150 | 100 | 219132062 | 19 | 63  | 6.5  |
| 1 | 219134075 | 219134200 | 125 | 219134137 | 15 | 67  | 0    |
| 1 | 219614650 | 219614850 | 200 | 219614737 | 17 | 114 | 0    |
| 1 | 221009125 | 221009275 | 150 | 221009187 | 17 | 87  | 0    |
| 1 | 221288800 | 221288875 | 75  | 221288837 | 13 | 38  | 0    |
| 1 | 221312300 | 221312375 | 75  | 221312312 | 13 | 39  | 0    |
| 1 | 221337625 | 221337675 | 50  | 221337662 | 13 | 25  | 0    |
| 1 | 221352125 | 221352175 | 50  | 221352162 | 14 | 27  | 4.3  |
| 1 | 221355800 | 221355825 | 25  | 221355812 | 12 | 12  | 2.2  |
| 1 | 221442775 | 221442800 | 25  | 221442787 | 12 | 12  | 2.2  |
| 1 | 221459200 | 221459375 | 175 | 221459212 | 12 | 82  | 0    |
| 1 | 221465475 | 221465600 | 125 | 221465537 | 15 | 68  | 10.8 |
| 1 | 221634775 | 221634925 | 150 | 221634812 | 15 | 84  | 0    |
| 1 | 221684550 | 221684600 | 50  | 221684562 | 12 | 24  | 0    |
| 1 | 221706800 | 221706825 | 25  | 221706812 | 12 | 12  | 0    |
| 1 | 221729625 | 221730075 | 450 | 221729737 | 14 | 201 | 15.2 |
| 1 | 221730375 | 221730425 | 50  | 221730387 | 12 | 24  | 0    |
| 1 | 221756425 | 221756450 | 25  | 221756437 | 12 | 12  | 2.2  |
| 1 | 221759675 | 221759700 | 25  | 221759687 | 12 | 12  | 0    |
| 1 | 221788225 | 221788275 | 50  | 221788237 | 13 | 26  | 4.3  |
| 1 | 221891625 | 221891825 | 200 | 221891687 | 16 | 101 | 17.3 |
| 1 | 221900725 | 221900825 | 100 | 221900737 | 13 | 49  | 0    |
| 1 | 222118600 | 222118950 | 350 | 222118887 | 15 | 168 | 8.7  |
| 1 | 222267550 | 222267675 | 125 | 222267562 | 12 | 56  | 4.3  |
| 1 | 222268300 | 222268325 | 25  | 222268312 | 12 | 12  | 0    |
| 1 | 222269150 | 222269350 | 200 | 222269262 | 17 | 113 | 17.3 |
| 1 | 222794025 | 222794050 | 25  | 222794037 | 12 | 12  | 2.2  |
| 1 | 222828925 | 222829025 | 100 | 222828937 | 12 | 46  | 6.5  |
| 1 | 223013025 | 223013050 | 25  | 223013037 | 12 | 12  | 2.2  |
| 1 | 223013300 | 223013350 | 50  | 223013312 | 18 | 34  | 4.3  |
| 1 | 223074925 | 223075075 | 150 | 223075012 | 15 | 81  | 8.7  |
| 1 | 223140425 | 223140475 | 50  | 223140437 | 12 | 24  | 0    |
| 1 | 223164625 | 223164650 | 25  | 223164637 | 13 | 13  | 0    |
| 1 | 223165025 | 223165125 | 100 | 223165062 | 13 | 50  | 0    |
| 1 | 223169000 | 223169025 | 25  | 223169012 | 15 | 15  | 2.2  |
| 1 | 224210175 | 224210250 | 75  | 224210187 | 12 | 36  | 0    |
| 1 | 224461275 | 224461350 | 75  | 224461287 | 12 | 36  | 6.5  |
| 1 | 224593925 | 224594075 | 150 | 224593937 | 13 | 71  | 0    |
| 1 | 224688250 | 224688275 | 25  | 224688262 | 12 | 12  | 0    |
| 1 | 224718400 | 224718825 | 425 | 224718662 | 16 | 208 | 15.2 |
| 1 | 224736725 | 224736750 | 25  | 224736737 | 12 | 12  | 2.2  |
| 1 | 224737200 | 224737325 | 125 | 224737262 | 13 | 61  | 10.8 |
| 1 | 224771125 | 224771225 | 100 | 224771137 | 14 | 54  | 8.7  |
| 1 | 224803975 | 224804125 | 150 | 224804062 | 15 | 76  | 10.8 |
| 1 | 224810750 | 224810800 | 50  | 224810762 | 13 | 25  | 0    |
| 1 | 224847800 | 224847825 | 25  | 224847812 | 13 | 13  | 0    |
| 1 | 224849925 | 224850125 | 200 | 224850037 | 16 | 107 | 13   |
| 1 | 224850400 | 224850425 | 25  | 224850412 | 13 | 13  | 2.2  |
| 1 | 224851250 | 224851275 | 25  | 224851262 | 13 | 13  | 2.2  |
| 1 | 224871550 | 224871725 | 175 | 224871612 | 15 | 98  | 15.2 |
| 1 | 224872800 | 224872925 | 125 | 224872812 | 14 | 63  | 0    |
| 1 | 224873550 | 224873975 | 425 | 224873587 | 17 | 214 | 30.3 |
| 1 | 225173150 | 225173225 | 75  | 225173162 | 15 | 42  | 6.5  |
| 1 | 225705825 | 225706150 | 325 | 225705837 | 14 | 164 | 10.8 |

|   |           |           |     |           |    |     |      |
|---|-----------|-----------|-----|-----------|----|-----|------|
| 1 | 225718575 | 225718875 | 300 | 225718612 | 15 | 154 | 13   |
| 1 | 225719400 | 225719850 | 450 | 225719787 | 18 | 231 | 13   |
| 1 | 225776225 | 225776650 | 425 | 225776287 | 17 | 216 | 6.5  |
| 1 | 225812775 | 225812925 | 150 | 225812812 | 16 | 84  | 15.2 |
| 1 | 225814150 | 225814225 | 75  | 225814162 | 13 | 37  | 6.5  |
| 1 | 225891825 | 225891850 | 25  | 225891837 | 12 | 12  | 2.2  |
| 1 | 225974325 | 225974725 | 400 | 225974337 | 14 | 193 | 0    |
| 1 | 226052500 | 226052525 | 25  | 226052512 | 12 | 12  | 2.2  |
| 1 | 226070725 | 226070925 | 200 | 226070737 | 14 | 101 | 2.2  |
| 1 | 226111300 | 226111350 | 50  | 226111312 | 12 | 24  | 0    |
| 1 | 226124350 | 226124525 | 175 | 226124437 | 15 | 90  | 15.2 |
| 1 | 226212700 | 226212725 | 25  | 226212712 | 12 | 12  | 2.2  |
| 1 | 226269750 | 226269775 | 25  | 226269762 | 12 | 12  | 0    |
| 1 | 226275750 | 226275825 | 75  | 226275787 | 13 | 38  | 6.5  |
| 1 | 226305225 | 226305250 | 25  | 226305237 | 12 | 12  | 2.2  |
| 1 | 226313900 | 226313925 | 25  | 226313912 | 13 | 13  | 2.2  |
| 1 | 226314250 | 226314375 | 125 | 226314312 | 22 | 105 | 0    |
| 1 | 226348300 | 226348350 | 50  | 226348337 | 14 | 26  | 4.3  |
| 1 | 226412725 | 226412875 | 150 | 226412762 | 16 | 90  | 0    |
| 1 | 226428325 | 226428350 | 25  | 226428337 | 13 | 13  | 2.2  |
| 1 | 226466975 | 226467050 | 75  | 226467012 | 13 | 37  | 6.5  |
| 1 | 226497600 | 226497675 | 75  | 226497637 | 13 | 37  | 0    |
| 1 | 226500900 | 226500925 | 25  | 226500912 | 12 | 12  | 0    |
| 1 | 226513800 | 226513875 | 75  | 226513812 | 14 | 41  | 6.5  |
| 1 | 226543050 | 226543200 | 150 | 226543087 | 13 | 72  | 6.5  |
| 1 | 226552275 | 226552325 | 50  | 226552287 | 12 | 24  | 2.2  |
| 1 | 226557175 | 226557225 | 50  | 226557187 | 12 | 24  | 4.3  |
| 1 | 226762425 | 226762925 | 500 | 226762812 | 25 | 355 | 21.7 |
| 1 | 226850125 | 226850700 | 575 | 226850612 | 21 | 319 | 58.5 |
| 1 | 226945025 | 226945050 | 25  | 226945037 | 12 | 12  | 0    |
| 1 | 226950875 | 226950925 | 50  | 226950887 | 13 | 26  | 4.3  |
| 1 | 226957875 | 226957950 | 75  | 226957887 | 13 | 37  | 0    |
| 1 | 226962725 | 226962800 | 75  | 226962737 | 17 | 49  | 4.3  |
| 1 | 226977425 | 226977575 | 150 | 226977462 | 13 | 70  | 0    |
| 1 | 226978850 | 226978950 | 100 | 226978862 | 14 | 55  | 8.7  |
| 1 | 226984425 | 226985225 | 800 | 226985037 | 18 | 424 | 45.5 |
| 1 | 227006900 | 227006975 | 75  | 227006962 | 13 | 37  | 0    |
| 1 | 227009200 | 227009350 | 150 | 227009237 | 14 | 81  | 8.7  |
| 1 | 227020725 | 227021225 | 500 | 227020862 | 14 | 236 | 34.7 |
| 1 | 227045225 | 227045400 | 175 | 227045312 | 14 | 90  | 0    |
| 1 | 227058100 | 227058200 | 100 | 227058162 | 20 | 72  | 8.7  |
| 1 | 227085950 | 227086000 | 50  | 227085987 | 14 | 26  | 4.3  |
| 1 | 227087025 | 227087125 | 100 | 227087062 | 14 | 52  | 0    |
| 1 | 227094175 | 227094225 | 50  | 227094187 | 15 | 29  | 0    |
| 1 | 227096700 | 227096950 | 250 | 227096787 | 16 | 121 | 2.2  |
| 1 | 227129375 | 227129450 | 75  | 227129387 | 12 | 36  | 6.5  |
| 1 | 227134750 | 227134775 | 25  | 227134762 | 12 | 12  | 2.2  |
| 1 | 227200625 | 227200675 | 50  | 227200637 | 12 | 24  | 4.3  |
| 1 | 227248800 | 227248825 | 25  | 227248812 | 12 | 12  | 0    |
| 1 | 227296975 | 227297050 | 75  | 227296987 | 12 | 35  | 6.5  |
| 1 | 227324875 | 227324900 | 25  | 227324887 | 12 | 12  | 0    |
| 1 | 227325275 | 227325825 | 550 | 227325637 | 21 | 328 | 28.2 |
| 1 | 227331825 | 227331850 | 25  | 227331837 | 14 | 14  | 2.2  |
| 1 | 227341025 | 227341225 | 200 | 227341112 | 17 | 112 | 21.7 |
| 1 | 227347375 | 227347475 | 100 | 227347412 | 13 | 50  | 0    |
| 1 | 227348475 | 227348825 | 350 | 227348487 | 20 | 190 | 36.8 |
| 1 | 227349175 | 227349600 | 425 | 227349587 | 21 | 212 | 13   |
| 1 | 227349975 | 227350100 | 125 | 227350062 | 17 | 71  | 0    |
| 1 | 227351100 | 227351175 | 75  | 227351162 | 16 | 43  | 6.5  |
| 1 | 227411150 | 227411350 | 200 | 227411187 | 14 | 93  | 0    |
| 1 | 227472900 | 227473075 | 175 | 227473062 | 31 | 166 | 26   |
| 1 | 227633825 | 227634100 | 275 | 227633987 | 25 | 213 | 21.7 |
| 1 | 227634650 | 227634750 | 100 | 227634687 | 13 | 50  | 2.2  |
| 1 | 227635600 | 227635625 | 25  | 227635612 | 12 | 12  | 0    |
| 1 | 227952500 | 227952525 | 25  | 227952512 | 12 | 12  | 0    |
| 1 | 227984025 | 227984050 | 25  | 227984037 | 12 | 12  | 0    |
| 1 | 227990425 | 227990650 | 225 | 227990487 | 16 | 129 | 4.3  |
| 1 | 228097900 | 228097950 | 50  | 228097912 | 13 | 26  | 2.2  |
| 1 | 228146950 | 228147050 | 100 | 228146962 | 12 | 44  | 0    |
| 1 | 228177575 | 228177650 | 75  | 228177587 | 12 | 36  | 6.5  |
| 1 | 228208350 | 228208525 | 175 | 228208412 | 17 | 103 | 10.8 |
| 1 | 228209275 | 228209375 | 100 | 228209287 | 16 | 59  | 0    |
| 1 | 228222525 | 228222650 | 125 | 228222612 | 14 | 64  | 0    |
| 1 | 228229800 | 228229825 | 25  | 228229812 | 12 | 12  | 0    |
| 1 | 228254025 | 228254050 | 25  | 228254037 | 12 | 12  | 0    |

|   |           |           |     |           |    |     |      |
|---|-----------|-----------|-----|-----------|----|-----|------|
| 1 | 228255025 | 228255225 | 200 | 228255087 | 19 | 127 | 0    |
| 1 | 228285200 | 228285325 | 125 | 228285262 | 16 | 75  | 4.3  |
| 1 | 228285700 | 228285800 | 100 | 228285712 | 16 | 56  | 8.7  |
| 1 | 228362075 | 228362125 | 50  | 228362087 | 12 | 24  | 4.3  |
| 1 | 228369850 | 228369925 | 75  | 228369862 | 12 | 36  | 0    |
| 1 | 228495975 | 228496000 | 25  | 228495987 | 12 | 12  | 2.2  |
| 1 | 228519200 | 228519450 | 250 | 228519362 | 18 | 150 | 8.7  |
| 1 | 228540775 | 228540850 | 75  | 228540787 | 13 | 38  | 6.5  |
| 1 | 228553175 | 228553325 | 150 | 228553262 | 15 | 83  | 6.5  |
| 1 | 228559275 | 228559425 | 150 | 228559312 | 15 | 79  | 13   |
| 1 | 228559825 | 228559875 | 50  | 228559837 | 12 | 24  | 4.3  |
| 1 | 228572500 | 228572525 | 25  | 228572512 | 12 | 12  | 0    |
| 1 | 228601850 | 228601925 | 75  | 228601862 | 12 | 36  | 6.5  |
| 1 | 228711850 | 228712000 | 150 | 228711937 | 13 | 73  | 13   |
| 1 | 228784050 | 228784175 | 125 | 228784087 | 15 | 72  | 2.2  |
| 1 | 228794475 | 228794525 | 50  | 228794487 | 13 | 25  | 0    |
| 1 | 228965050 | 228965225 | 175 | 228965087 | 17 | 90  | 17.3 |
| 1 | 228972550 | 228973325 | 775 | 228973237 | 24 | 505 | 19.5 |
| 1 | 228979575 | 228979625 | 50  | 228979587 | 13 | 25  | 4.3  |
| 1 | 228980125 | 228980150 | 25  | 228980137 | 12 | 12  | 0    |
| 1 | 229087300 | 229087550 | 250 | 229087362 | 20 | 162 | 23.8 |
| 1 | 229247350 | 229247425 | 75  | 229247362 | 13 | 38  | 0    |
| 1 | 229384900 | 229384975 | 75  | 229384937 | 13 | 38  | 4.3  |
| 1 | 229390750 | 229390900 | 150 | 229390787 | 14 | 78  | 13   |
| 1 | 229392225 | 229392300 | 75  | 229392262 | 14 | 38  | 6.5  |
| 1 | 229514875 | 229515075 | 200 | 229514962 | 17 | 113 | 8.7  |
| 1 | 230009425 | 230009450 | 25  | 230009437 | 12 | 12  | 2.2  |
| 1 | 230535900 | 230536075 | 175 | 230535987 | 16 | 95  | 0    |
| 1 | 230540625 | 230540650 | 25  | 230540637 | 13 | 13  | 0    |
| 1 | 231007900 | 231007950 | 50  | 231007912 | 13 | 26  | 0    |
| 1 | 231008250 | 231008325 | 75  | 231008312 | 13 | 37  | 6.5  |
| 1 | 231097125 | 231097250 | 125 | 231097137 | 18 | 74  | 2.2  |
| 1 | 231101675 | 231101850 | 175 | 231101762 | 14 | 91  | 10.8 |
| 1 | 231112775 | 231112850 | 75  | 231112787 | 12 | 36  | 6.5  |
| 1 | 231142275 | 231142475 | 200 | 231142337 | 14 | 104 | 2.2  |
| 1 | 231211175 | 231211250 | 75  | 231211187 | 13 | 37  | 4.3  |
| 1 | 232301075 | 232301300 | 225 | 232301162 | 15 | 119 | 0    |
| 1 | 232422900 | 232423025 | 125 | 232422962 | 15 | 68  | 0    |
| 1 | 232473125 | 232473150 | 25  | 232473137 | 12 | 12  | 2.2  |
| 1 | 232525525 | 232525575 | 50  | 232525562 | 13 | 25  | 4.3  |
| 1 | 232559075 | 232559275 | 200 | 232559187 | 16 | 110 | 10.8 |
| 1 | 232978850 | 232979175 | 325 | 232979012 | 29 | 269 | 34.7 |
| 1 | 232979425 | 232979450 | 25  | 232979437 | 13 | 13  | 2.2  |
| 1 | 232981075 | 232981150 | 75  | 232981112 | 16 | 44  | 4.3  |
| 1 | 232981450 | 232981575 | 125 | 232981487 | 14 | 65  | 4.3  |
| 1 | 232981900 | 232981975 | 75  | 232981912 | 15 | 39  | 0    |
| 1 | 232982650 | 232982675 | 25  | 232982662 | 12 | 12  | 0    |
| 1 | 232983100 | 232983250 | 150 | 232983187 | 14 | 176 | 21.7 |
| 1 | 232983825 | 232984250 | 425 | 232984087 | 37 | 246 | 30.3 |
| 1 | 233031500 | 233031625 | 125 | 233031537 | 13 | 62  | 0    |
| 1 | 233193325 | 233193375 | 50  | 233193337 | 12 | 24  | 4.3  |
| 1 | 233900450 | 233900575 | 125 | 233900462 | 14 | 64  | 6.5  |
| 1 | 233905500 | 233905575 | 75  | 233905512 | 13 | 37  | 0    |
| 1 | 234207375 | 234207725 | 350 | 234207387 | 17 | 167 | 15.2 |
| 1 | 234208325 | 234208375 | 50  | 234208337 | 12 | 24  | 4.3  |
| 1 | 234391025 | 234391150 | 125 | 234391112 | 15 | 63  | 8.7  |
| 1 | 234681800 | 234681825 | 25  | 234681812 | 12 | 12  | 2.2  |
| 1 | 234852225 | 234852550 | 325 | 234852362 | 17 | 173 | 13   |
| 1 | 234861675 | 234861825 | 150 | 234861737 | 13 | 74  | 0    |
| 1 | 234916000 | 234916050 | 50  | 234916012 | 12 | 24  | 4.3  |
| 1 | 235015550 | 235015675 | 125 | 235015612 | 14 | 63  | 0    |
| 1 | 235016400 | 235016475 | 75  | 235016437 | 17 | 42  | 4.3  |
| 1 | 235209525 | 235209625 | 100 | 235209587 | 16 | 57  | 8.7  |
| 1 | 235278025 | 235278100 | 75  | 235278037 | 13 | 36  | 0    |
| 1 | 236013925 | 236014025 | 100 | 236013937 | 16 | 57  | 2.2  |
| 1 | 236140725 | 236140750 | 25  | 236140737 | 12 | 12  | 0    |
| 1 | 236321325 | 236321350 | 25  | 236321337 | 12 | 12  | 0    |
| 1 | 236759400 | 236759475 | 75  | 236759412 | 14 | 39  | 6.5  |
| 1 | 236760450 | 236760600 | 150 | 236760512 | 14 | 80  | 15.2 |
| 1 | 238221650 | 238221775 | 125 | 238221687 | 13 | 62  | 10.8 |
| 1 | 238884050 | 238884175 | 125 | 238884112 | 14 | 66  | 10.8 |
| 1 | 238959500 | 238959550 | 50  | 238959512 | 14 | 24  | 4.3  |
| 1 | 239536375 | 239536550 | 175 | 239536387 | 13 | 88  | 0    |
| 1 | 241960475 | 241960600 | 125 | 241960537 | 15 | 71  | 10.8 |
| 1 | 241960825 | 241960950 | 125 | 241960837 | 14 | 68  | 10.8 |

|   |           |           |     |           |    |     |      |
|---|-----------|-----------|-----|-----------|----|-----|------|
| 1 | 242140700 | 242140725 | 25  | 242140712 | 12 | 12  | 0    |
| 1 | 242146650 | 242147000 | 350 | 242146662 | 14 | 205 | 34.7 |
| 1 | 242238650 | 242238675 | 25  | 242238662 | 12 | 12  | 2.2  |
| 1 | 242535650 | 242535850 | 200 | 242535812 | 14 | 99  | 0    |
| 1 | 242805175 | 242805550 | 375 | 242805312 | 28 | 288 | 15.2 |
| 1 | 242873100 | 242873150 | 50  | 242873112 | 12 | 24  | 0    |
| 1 | 243372300 | 243372400 | 100 | 243372312 | 13 | 46  | 2.2  |
| 1 | 243373150 | 243373275 | 125 | 243373212 | 17 | 74  | 10.8 |
| 1 | 243437200 | 243437275 | 75  | 243437262 | 15 | 40  | 6.5  |
| 1 | 243441950 | 243441975 | 25  | 243441962 | 12 | 12  | 2.2  |
| 1 | 243733700 | 243733750 | 50  | 243733712 | 13 | 25  | 0    |
| 1 | 243814025 | 243814225 | 200 | 243814112 | 18 | 122 | 6.5  |
| 1 | 243917400 | 243917475 | 75  | 243917412 | 12 | 36  | 4.3  |
| 1 | 244443525 | 244443550 | 25  | 244443537 | 12 | 12  | 0    |
| 1 | 244489825 | 244489875 | 50  | 244489837 | 12 | 24  | 4.3  |
| 1 | 244743350 | 244743475 | 125 | 244743362 | 12 | 54  | 0    |
| 1 | 244743725 | 244743750 | 25  | 244743737 | 12 | 12  | 2.2  |
| 1 | 244746175 | 244746500 | 325 | 244746187 | 14 | 154 | 26   |
| 1 | 244746925 | 244747000 | 75  | 244746962 | 15 | 39  | 0    |
| 1 | 244747375 | 244747575 | 200 | 244747487 | 16 | 110 | 6.5  |
| 1 | 244748850 | 244748950 | 100 | 244748887 | 14 | 53  | 0    |
| 1 | 244750300 | 244750325 | 25  | 244750312 | 12 | 12  | 0    |
| 1 | 244752100 | 244752450 | 350 | 244752137 | 14 | 178 | 19.5 |
| 1 | 244754250 | 244754425 | 175 | 244754337 | 17 | 102 | 8.7  |
| 1 | 244913350 | 244913375 | 25  | 244913362 | 12 | 12  | 0    |
| 1 | 244941975 | 244942050 | 75  | 244941987 | 14 | 39  | 0    |
| 1 | 245015600 | 245015625 | 25  | 245015612 | 29 | 29  | 4.3  |
| 1 | 245032500 | 245032550 | 50  | 245032537 | 13 | 25  | 4.3  |
| 1 | 245044850 | 245044875 | 25  | 245044862 | 12 | 12  | 2.2  |
| 1 | 245315050 | 245315325 | 275 | 245315062 | 12 | 124 | 23.8 |
| 1 | 245318775 | 245318800 | 25  | 245318787 | 12 | 12  | 2.2  |
| 1 | 245330250 | 245330325 | 75  | 245330287 | 14 | 40  | 0    |
| 1 | 245330600 | 245330625 | 25  | 245330612 | 12 | 12  | 0    |
| 1 | 245352550 | 245352700 | 150 | 245352612 | 14 | 78  | 0    |
| 1 | 245449750 | 245449950 | 200 | 245449837 | 16 | 115 | 13   |
| 1 | 245468500 | 245468625 | 125 | 245468537 | 14 | 66  | 0    |
| 1 | 245635975 | 245636125 | 150 | 245636012 | 19 | 106 | 13   |
| 1 | 245681375 | 245681575 | 200 | 245681462 | 15 | 113 | 13   |
| 1 | 245684175 | 245684200 | 25  | 245684187 | 13 | 13  | 2.2  |
| 1 | 245701550 | 245701625 | 75  | 245701587 | 13 | 38  | 0    |
| 1 | 245748450 | 245748650 | 200 | 245748512 | 16 | 119 | 10.8 |
| 1 | 246071525 | 246071575 | 50  | 246071537 | 13 | 26  | 0    |
| 1 | 246166800 | 246167000 | 200 | 246166937 | 19 | 132 | 10.8 |
| 1 | 246633950 | 246634150 | 200 | 246634137 | 18 | 102 | 2.2  |
| 1 | 246922225 | 246922250 | 25  | 246922237 | 12 | 12  | 2.2  |
| 1 | 247063500 | 247063600 | 100 | 247063512 | 12 | 45  | 6.5  |
| 1 | 247064250 | 247064425 | 175 | 247064412 | 15 | 89  | 4.3  |
| 1 | 247158550 | 247158700 | 150 | 247158562 | 17 | 83  | 10.8 |
| 1 | 247166700 | 247166725 | 25  | 247166712 | 13 | 13  | 2.2  |
| 3 | 634725    | 634775    | 50  | 634737    | 12 | 24  | 0    |
| 3 | 5260150   | 5260175   | 25  | 5260162   | 12 | 12  | 0    |
| 3 | 9600250   | 9600275   | 25  | 9600262   | 12 | 12  | 2.2  |
| 3 | 10387875  | 10388025  | 150 | 10387937  | 13 | 72  | 10.8 |
| 3 | 10404675  | 10404700  | 25  | 10404687  | 12 | 12  | 2.2  |
| 3 | 10404975  | 10405025  | 50  | 10404987  | 12 | 24  | 0    |
| 3 | 11033825  | 11033925  | 100 | 11033912  | 13 | 48  | 6.5  |
| 3 | 11042950  | 11043000  | 50  | 11042987  | 13 | 25  | 0    |
| 3 | 11079475  | 11079550  | 75  | 11079487  | 13 | 37  | 4.3  |
| 3 | 12881625  | 12881800  | 175 | 12881737  | 18 | 108 | 0    |
| 3 | 12882050  | 12882350  | 300 | 12882137  | 19 | 189 | 0    |
| 3 | 13090350  | 13090800  | 450 | 13090562  | 29 | 421 | 13   |
| 3 | 13282050  | 13282125  | 75  | 13282087  | 16 | 45  | 2.2  |
| 3 | 13300775  | 13300800  | 25  | 13300787  | 12 | 12  | 0    |
| 3 | 13911675  | 13911700  | 25  | 13911687  | 19 | 19  | 2.2  |
| 3 | 13949700  | 13949925  | 225 | 13949862  | 19 | 139 | 0    |
| 3 | 14285425  | 14285500  | 75  | 14285437  | 13 | 39  | 0    |
| 3 | 14519650  | 14519975  | 325 | 14519712  | 15 | 145 | 0    |
| 3 | 14587950  | 14588050  | 100 | 14588037  | 13 | 47  | 8.7  |
| 3 | 14699550  | 14699575  | 25  | 14699562  | 12 | 12  | 0    |
| 3 | 14814400  | 14814450  | 50  | 14814412  | 12 | 24  | 0    |
| 3 | 14836825  | 14836850  | 25  | 14836837  | 13 | 13  | 2.2  |
| 3 | 14922750  | 14922925  | 175 | 14922787  | 14 | 94  | 8.7  |
| 3 | 15190350  | 15190425  | 75  | 15190362  | 13 | 38  | 6.5  |
| 3 | 15194350  | 15194425  | 75  | 15194362  | 12 | 33  | 2.2  |
| 3 | 22724125  | 22724200  | 75  | 22724137  | 12 | 36  | 6.5  |

|   |           |           |     |           |    |     |      |
|---|-----------|-----------|-----|-----------|----|-----|------|
| 3 | 23638250  | 23638275  | 25  | 23638262  | 12 | 12  | 0    |
| 3 | 27317550  | 27317700  | 150 | 27317587  | 14 | 78  | 13   |
| 3 | 31972250  | 31972400  | 150 | 31972312  | 15 | 84  | 15.2 |
| 3 | 32690150  | 32690275  | 125 | 32690187  | 16 | 70  | 0    |
| 3 | 37234050  | 37234200  | 150 | 37234112  | 14 | 79  | 13   |
| 3 | 38068975  | 38069150  | 175 | 38069062  | 18 | 107 | 0    |
| 3 | 38343175  | 38343250  | 75  | 38343187  | 12 | 36  | 0    |
| 3 | 38567175  | 38567200  | 25  | 38567187  | 12 | 12  | 2.2  |
| 3 | 38666625  | 38666825  | 200 | 38666687  | 14 | 101 | 0    |
| 3 | 38840400  | 38840450  | 50  | 38840412  | 12 | 24  | 4.3  |
| 3 | 39056525  | 39056550  | 25  | 39056537  | 12 | 12  | 2.2  |
| 3 | 39796050  | 39796075  | 25  | 39796062  | 12 | 12  | 2.2  |
| 3 | 43031925  | 43032225  | 300 | 43032162  | 18 | 165 | 0    |
| 3 | 43259325  | 43259350  | 25  | 43259337  | 12 | 12  | 2.2  |
| 3 | 43268375  | 43268400  | 25  | 43268387  | 12 | 12  | 0    |
| 3 | 43833600  | 43833625  | 25  | 43833612  | 12 | 12  | 2.2  |
| 3 | 43837375  | 43837400  | 25  | 43837387  | 12 | 12  | 0    |
| 3 | 44012375  | 44012400  | 25  | 44012387  | 12 | 12  | 2.2  |
| 3 | 44601800  | 44601825  | 25  | 44601812  | 12 | 12  | 2.2  |
| 3 | 44727500  | 44727575  | 75  | 44727512  | 14 | 39  | 6.5  |
| 3 | 44729425  | 44729450  | 25  | 44729437  | 12 | 12  | 2.2  |
| 3 | 45107350  | 45107375  | 25  | 45107362  | 14 | 14  | 2.2  |
| 3 | 45293225  | 45293250  | 25  | 45293237  | 12 | 12  | 0    |
| 3 | 46480450  | 46480525  | 75  | 46480462  | 12 | 36  | 6.5  |
| 3 | 46767275  | 46767475  | 200 | 46767312  | 14 | 101 | 15.2 |
| 3 | 46850000  | 46850175  | 175 | 46850087  | 14 | 90  | 10.8 |
| 3 | 49226275  | 49226325  | 50  | 49226287  | 12 | 24  | 0    |
| 3 | 50207275  | 50207300  | 25  | 50207287  | 12 | 12  | 2.2  |
| 3 | 51316975  | 51317000  | 25  | 51316987  | 12 | 12  | 0    |
| 3 | 53400300  | 53400325  | 25  | 53400312  | 12 | 12  | 2.2  |
| 3 | 54080000  | 54080075  | 75  | 54080012  | 12 | 35  | 0    |
| 3 | 54726775  | 54726800  | 25  | 54726787  | 12 | 12  | 2.2  |
| 3 | 56692575  | 56692850  | 275 | 56692687  | 22 | 186 | 34.7 |
| 3 | 67788900  | 67788925  | 25  | 67788912  | 12 | 12  | 0    |
| 3 | 69064075  | 69064100  | 25  | 69064087  | 12 | 12  | 0    |
| 3 | 69537350  | 69537425  | 75  | 69537362  | 12 | 36  | 6.5  |
| 3 | 69616825  | 69616850  | 25  | 69616837  | 12 | 12  | 0    |
| 3 | 71857650  | 71857675  | 25  | 71857662  | 12 | 12  | 2.2  |
| 3 | 71993050  | 71993175  | 125 | 71993062  | 13 | 62  | 6.5  |
| 3 | 72104050  | 72104200  | 150 | 72104137  | 15 | 80  | 13   |
| 3 | 72188950  | 72188975  | 25  | 72188962  | 12 | 12  | 2.2  |
| 3 | 72286300  | 72286375  | 75  | 72286312  | 13 | 38  | 2.2  |
| 3 | 72750050  | 72750100  | 50  | 72750087  | 13 | 25  | 0    |
| 3 | 74799650  | 74799700  | 50  | 74799662  | 12 | 24  | 4.3  |
| 3 | 75780000  | 75780050  | 50  | 75780012  | 12 | 24  | 0    |
| 3 | 75780925  | 75780950  | 25  | 75780937  | 13 | 13  | 2.2  |
| 3 | 75799875  | 75799925  | 50  | 75799912  | 19 | 37  | 4.3  |
| 3 | 75801625  | 75801750  | 125 | 75801662  | 65 | 307 | 45.5 |
| 3 | 75803425  | 75803450  | 25  | 75803437  | 13 | 13  | 2.2  |
| 3 | 75803825  | 75804350  | 525 | 75803937  | 23 | 396 | 69.3 |
| 3 | 75821225  | 75821250  | 25  | 75821237  | 13 | 13  | 2.2  |
| 3 | 75849425  | 75849525  | 100 | 75849437  | 12 | 45  | 0    |
| 3 | 75870525  | 75870550  | 25  | 75870537  | 12 | 12  | 2.2  |
| 3 | 77230050  | 77230125  | 75  | 77230062  | 15 | 40  | 0    |
| 3 | 87184525  | 87184550  | 25  | 87184537  | 14 | 14  | 0    |
| 3 | 88111500  | 88111525  | 25  | 88111512  | 12 | 12  | 2.2  |
| 3 | 88362375  | 88362475  | 100 | 88362437  | 13 | 49  | 8.7  |
| 3 | 105676425 | 105676450 | 25  | 105676437 | 12 | 12  | 0    |
| 3 | 106961025 | 106961100 | 75  | 106961037 | 13 | 37  | 2.2  |
| 3 | 114734925 | 114734950 | 25  | 114734937 | 12 | 12  | 2.2  |
| 3 | 121242375 | 121242600 | 225 | 121242437 | 14 | 113 | 0    |
| 3 | 122109925 | 122109975 | 50  | 122109962 | 13 | 25  | 0    |
| 3 | 123862975 | 123863175 | 200 | 123863137 | 15 | 101 | 0    |
| 3 | 124113550 | 124113675 | 125 | 124113637 | 17 | 78  | 10.8 |
| 3 | 124114000 | 124114025 | 25  | 124114012 | 12 | 12  | 2.2  |
| 3 | 124115450 | 124115500 | 50  | 124115462 | 14 | 26  | 2.2  |
| 3 | 124197650 | 124197700 | 50  | 124197662 | 12 | 24  | 0    |
| 3 | 124227775 | 124227825 | 50  | 124227787 | 12 | 24  | 4.3  |
| 3 | 124519650 | 124519700 | 50  | 124519662 | 13 | 25  | 2.2  |
| 3 | 124650225 | 124650250 | 25  | 124650237 | 12 | 12  | 2.2  |
| 3 | 127501775 | 127501900 | 125 | 127501862 | 14 | 64  | 0    |
| 3 | 127609050 | 127609075 | 25  | 127609062 | 12 | 12  | 0    |
| 3 | 128251150 | 128251175 | 25  | 128251162 | 12 | 12  | 0    |
| 3 | 128266425 | 128266500 | 75  | 128266462 | 14 | 38  | 2.2  |
| 3 | 128276425 | 128276550 | 125 | 128276437 | 15 | 67  | 2.2  |

|   |           |           |     |           |    |     |      |
|---|-----------|-----------|-----|-----------|----|-----|------|
| 3 | 128282125 | 128282150 | 25  | 128282137 | 12 | 12  | 2.2  |
| 3 | 128830225 | 128830400 | 175 | 128830312 | 16 | 101 | 13   |
| 3 | 129035200 | 129035275 | 75  | 129035212 | 14 | 39  | 0    |
| 3 | 129652300 | 129652325 | 25  | 129652312 | 12 | 12  | 0    |
| 3 | 129652650 | 129652950 | 300 | 129652762 | 21 | 202 | 6.5  |
| 3 | 129667300 | 129667325 | 25  | 129667312 | 12 | 12  | 0    |
| 3 | 129667950 | 129668025 | 75  | 129667962 | 13 | 37  | 6.5  |
| 3 | 129668575 | 129668975 | 400 | 129668887 | 13 | 178 | 15.2 |
| 3 | 129673100 | 129673200 | 100 | 129673137 | 15 | 57  | 0    |
| 3 | 129722250 | 129722375 | 125 | 129722312 | 14 | 63  | 0    |
| 3 | 130055550 | 130055925 | 375 | 130055787 | 14 | 182 | 2.2  |
| 3 | 130060750 | 130061025 | 275 | 130060862 | 24 | 212 | 2.2  |
| 3 | 131116875 | 131117050 | 175 | 131116987 | 15 | 92  | 0    |
| 3 | 131118075 | 131118250 | 175 | 131118112 | 14 | 81  | 0    |
| 3 | 131119450 | 131119600 | 150 | 131119487 | 16 | 84  | 0    |
| 3 | 131245850 | 131245975 | 125 | 131245912 | 16 | 77  | 0    |
| 3 | 132016600 | 132016650 | 50  | 132016612 | 13 | 25  | 2.2  |
| 3 | 132728775 | 132728825 | 50  | 132728787 | 15 | 29  | 0    |
| 3 | 134239225 | 134239425 | 200 | 134239262 | 15 | 102 | 0    |
| 3 | 134985525 | 134985675 | 150 | 134985537 | 14 | 81  | 0    |
| 3 | 135153775 | 135153825 | 50  | 135153787 | 13 | 25  | 4.3  |
| 3 | 139635650 | 139635775 | 125 | 139635687 | 14 | 67  | 8.7  |
| 3 | 139850825 | 139851350 | 525 | 139850837 | 12 | 226 | 17.3 |
| 3 | 139969950 | 139970350 | 400 | 139970087 | 14 | 209 | 28.2 |
| 3 | 140146575 | 140146675 | 100 | 140146587 | 12 | 48  | 0    |
| 3 | 140245475 | 140245875 | 400 | 140245762 | 17 | 222 | 23.8 |
| 3 | 140740350 | 140740475 | 125 | 140740362 | 12 | 56  | 2.2  |
| 3 | 142664275 | 142664700 | 425 | 142664312 | 13 | 192 | 17.3 |
| 3 | 142859200 | 142859325 | 125 | 142859212 | 21 | 77  | 10.8 |
| 3 | 144164225 | 144164600 | 375 | 144164487 | 16 | 176 | 17.3 |
| 3 | 144306875 | 144306950 | 75  | 144306912 | 15 | 40  | 0    |
| 3 | 144323275 | 144323325 | 50  | 144323287 | 12 | 24  | 4.3  |
| 3 | 148613175 | 148613200 | 25  | 148613187 | 12 | 12  | 2.2  |
| 3 | 151903600 | 151903625 | 25  | 151903612 | 12 | 12  | 0    |
| 3 | 158387250 | 158387375 | 125 | 158387287 | 15 | 68  | 0    |
| 3 | 158539875 | 158539975 | 100 | 158539887 | 12 | 48  | 8.7  |
| 3 | 160862600 | 160862625 | 25  | 160862612 | 12 | 12  | 0    |
| 3 | 161190575 | 161190625 | 50  | 161190587 | 12 | 24  | 4.3  |
| 3 | 161220900 | 161221050 | 150 | 161220987 | 17 | 93  | 13   |
| 3 | 161427425 | 161427450 | 25  | 161427437 | 12 | 12  | 0    |
| 3 | 161649975 | 161650050 | 75  | 161649987 | 12 | 36  | 0    |
| 3 | 161650375 | 161650425 | 50  | 161650387 | 13 | 25  | 2.2  |
| 3 | 161670900 | 161671050 | 150 | 161670962 | 14 | 74  | 8.7  |
| 3 | 161956950 | 161956975 | 25  | 161956962 | 12 | 12  | 0    |
| 3 | 161957875 | 161957950 | 75  | 161957937 | 13 | 36  | 6.5  |
| 3 | 162499525 | 162499675 | 150 | 162499587 | 16 | 88  | 0    |
| 3 | 162664925 | 162664950 | 25  | 162664937 | 12 | 12  | 0    |
| 3 | 163085450 | 163085625 | 175 | 163085487 | 15 | 99  | 2.2  |
| 3 | 166395975 | 166396175 | 200 | 166395987 | 13 | 90  | 2.2  |
| 3 | 168259850 | 168260025 | 175 | 168259887 | 14 | 92  | 13   |
| 3 | 170862050 | 170862075 | 25  | 170862062 | 12 | 12  | 0    |
| 3 | 172109250 | 172109775 | 525 | 172109412 | 36 | 400 | 69.3 |
| 3 | 173648325 | 173648850 | 525 | 173648612 | 20 | 317 | 21.7 |
| 3 | 173814975 | 173815000 | 25  | 173814987 | 12 | 12  | 2.2  |
| 3 | 180692875 | 180693250 | 375 | 180692987 | 15 | 188 | 6.5  |
| 3 | 181879925 | 181880125 | 200 | 181880012 | 15 | 99  | 8.7  |
| 3 | 182021025 | 182021125 | 100 | 182021037 | 14 | 54  | 0    |
| 3 | 182596475 | 182596900 | 425 | 182596837 | 14 | 168 | 17.3 |
| 3 | 184316725 | 184316800 | 75  | 184316762 | 13 | 38  | 6.5  |
| 3 | 185104825 | 185104900 | 75  | 185104837 | 12 | 36  | 6.5  |
| 3 | 185475850 | 185475900 | 50  | 185475862 | 12 | 24  | 0    |
| 3 | 185581650 | 185581825 | 175 | 185581787 | 13 | 83  | 0    |
| 3 | 185681475 | 185681525 | 50  | 185681487 | 13 | 25  | 4.3  |
| 3 | 185700150 | 185700225 | 75  | 185700212 | 13 | 36  | 6.5  |
| 3 | 185708650 | 185708725 | 75  | 185708662 | 13 | 37  | 2.2  |
| 3 | 185713800 | 185713900 | 100 | 185713862 | 14 | 51  | 0    |
| 3 | 187973625 | 187973700 | 75  | 187973637 | 13 | 38  | 0    |
| 3 | 188030600 | 188030675 | 75  | 188030637 | 13 | 37  | 6.5  |
| 3 | 188425875 | 188425950 | 75  | 188425887 | 13 | 38  | 0    |
| 3 | 196085850 | 196085925 | 75  | 196085862 | 13 | 38  | 6.5  |
| 3 | 196925725 | 196925925 | 200 | 196925862 | 18 | 124 | 0    |
| 3 | 196927075 | 196927125 | 50  | 196927087 | 12 | 24  | 2.2  |
| 3 | 196949425 | 196949550 | 125 | 196949462 | 14 | 67  | 4.3  |
| 3 | 196952150 | 196952200 | 50  | 196952162 | 14 | 28  | 2.2  |
| 3 | 196959825 | 196960025 | 200 | 196959862 | 15 | 103 | 0    |

|   |           |           |     |           |    |     |      |
|---|-----------|-----------|-----|-----------|----|-----|------|
| 3 | 196995175 | 196995375 | 200 | 196995187 | 14 | 100 | 6.5  |
| 3 | 197215025 | 197215075 | 50  | 197215037 | 12 | 24  | 4.3  |
| 3 | 197219600 | 197219700 | 100 | 197219612 | 12 | 47  | 0    |
| 3 | 197418375 | 197418400 | 25  | 197418387 | 12 | 12  | 2.2  |
| 3 | 197718300 | 197718325 | 25  | 197718312 | 12 | 12  | 2.2  |
| 3 | 198620675 | 198620875 | 200 | 198620812 | 18 | 124 | 8.7  |
| 3 | 198852150 | 198852225 | 75  | 198852162 | 12 | 36  | 2.2  |
| 2 | 309150    | 309225    | 75  | 309187    | 13 | 38  | 4.3  |
| 2 | 347125    | 347300    | 175 | 347262    | 15 | 87  | 0    |
| 2 | 383025    | 383175    | 150 | 383037    | 12 | 71  | 10.8 |
| 2 | 511975    | 512150    | 175 | 512012    | 15 | 94  | 0    |
| 2 | 737825    | 737925    | 100 | 737862    | 14 | 54  | 0    |
| 2 | 1578275   | 1578475   | 200 | 1578412   | 15 | 105 | 10.8 |
| 2 | 1580125   | 1580425   | 300 | 1580137   | 12 | 127 | 2.2  |
| 2 | 1737125   | 1737750   | 625 | 1737287   | 21 | 363 | 52   |
| 2 | 1738000   | 1738200   | 200 | 1738012   | 14 | 104 | 6.5  |
| 2 | 1808775   | 1808800   | 25  | 1808787   | 13 | 13  | 2.2  |
| 2 | 1825900   | 1826000   | 100 | 1825912   | 15 | 57  | 0    |
| 2 | 1844450   | 1844700   | 250 | 1844537   | 15 | 132 | 4.3  |
| 2 | 1905250   | 1905425   | 175 | 1905262   | 15 | 95  | 13   |
| 2 | 2555400   | 2555500   | 100 | 2555412   | 16 | 58  | 6.5  |
| 2 | 3790900   | 3790975   | 75  | 3790937   | 13 | 37  | 0    |
| 2 | 5514025   | 5514075   | 50  | 5514037   | 12 | 24  | 4.3  |
| 2 | 5673725   | 5673775   | 50  | 5673737   | 12 | 24  | 0    |
| 2 | 5857025   | 5857075   | 50  | 5857037   | 12 | 24  | 0    |
| 2 | 6553125   | 6553150   | 25  | 6553137   | 13 | 13  | 0    |
| 2 | 6554175   | 6554200   | 25  | 6554187   | 12 | 12  | 2.2  |
| 2 | 6814975   | 6815100   | 125 | 6815012   | 13 | 62  | 8.7  |
| 2 | 8083950   | 8084000   | 50  | 8083987   | 13 | 25  | 0    |
| 2 | 8084450   | 8084650   | 200 | 8084512   | 17 | 113 | 0    |
| 2 | 8085125   | 8085150   | 25  | 8085137   | 12 | 12  | 2.2  |
| 2 | 8085825   | 8085950   | 125 | 8085887   | 13 | 60  | 8.7  |
| 2 | 8305750   | 8305775   | 25  | 8305762   | 12 | 12  | 2.2  |
| 2 | 8306900   | 8306950   | 50  | 8306912   | 12 | 24  | 0    |
| 2 | 8308450   | 8308575   | 125 | 8308462   | 12 | 60  | 10.8 |
| 2 | 8566250   | 8566375   | 125 | 8566287   | 13 | 63  | 0    |
| 2 | 8571425   | 8571900   | 475 | 8571562   | 22 | 332 | 26   |
| 2 | 8733775   | 8733850   | 75  | 8733837   | 13 | 37  | 4.3  |
| 2 | 10100500  | 10100600  | 100 | 10100537  | 17 | 61  | 4.3  |
| 2 | 10898475  | 10898675  | 200 | 10898562  | 16 | 120 | 0    |
| 2 | 10899100  | 10899200  | 100 | 10899137  | 14 | 54  | 0    |
| 2 | 10970100  | 10970250  | 150 | 10970137  | 14 | 80  | 0    |
| 2 | 10970500  | 10971075  | 575 | 10970687  | 22 | 355 | 47.7 |
| 2 | 11124750  | 11124875  | 125 | 11124762  | 12 | 57  | 0    |
| 2 | 11126400  | 11126475  | 75  | 11126412  | 12 | 35  | 0    |
| 2 | 11170600  | 11170725  | 125 | 11170612  | 14 | 65  | 10.8 |
| 2 | 11714600  | 11714625  | 25  | 11714612  | 13 | 13  | 0    |
| 2 | 11714950  | 11715050  | 100 | 11714987  | 15 | 53  | 0    |
| 2 | 11717475  | 11717850  | 375 | 11717662  | 24 | 263 | 17.3 |
| 2 | 11719475  | 11719500  | 25  | 11719487  | 12 | 12  | 0    |
| 2 | 11988500  | 11988575  | 75  | 11988512  | 12 | 35  | 0    |
| 2 | 12151700  | 12151750  | 50  | 12151712  | 12 | 24  | 0    |
| 2 | 12281275  | 12281300  | 25  | 12281287  | 12 | 12  | 0    |
| 2 | 13031050  | 13031250  | 200 | 13031162  | 17 | 110 | 8.7  |
| 2 | 14691225  | 14691500  | 275 | 14691337  | 15 | 140 | 2.2  |
| 2 | 16029375  | 16029400  | 25  | 16029387  | 12 | 12  | 2.2  |
| 2 | 16084000  | 16084025  | 25  | 16084012  | 12 | 12  | 2.2  |
| 2 | 16096250  | 16096375  | 125 | 16096362  | 13 | 59  | 8.7  |
| 2 | 16266225  | 16266375  | 150 | 16266262  | 18 | 91  | 8.7  |
| 2 | 20645025  | 20645175  | 150 | 20645037  | 12 | 67  | 2.2  |
| 2 | 23421600  | 23421625  | 25  | 23421612  | 12 | 12  | 0    |
| 2 | 23462850  | 23462875  | 25  | 23462862  | 12 | 12  | 2.2  |
| 2 | 25142875  | 25142900  | 25  | 25142887  | 12 | 12  | 2.2  |
| 2 | 25245250  | 25245275  | 25  | 25245262  | 12 | 12  | 2.2  |
| 2 | 26665200  | 26665225  | 25  | 26665212  | 12 | 12  | 0    |
| 2 | 26696175  | 26696375  | 200 | 26696312  | 14 | 101 | 4.3  |
| 2 | 27339700  | 27339825  | 125 | 27339712  | 12 | 59  | 10.8 |
| 2 | 27659500  | 27659525  | 25  | 27659512  | 12 | 12  | 2.2  |
| 2 | 28595900  | 28596050  | 150 | 28595912  | 14 | 74  | 6.5  |
| 2 | 29952800  | 29952875  | 75  | 29952812  | 12 | 35  | 4.3  |
| 2 | 33344825  | 33344900  | 75  | 33344887  | 13 | 37  | 4.3  |
| 2 | 33723100  | 33723125  | 25  | 33723112  | 12 | 12  | 0    |
| 2 | 36811425  | 36811525  | 100 | 36811437  | 12 | 48  | 4.3  |
| 2 | 37955725  | 37955775  | 50  | 37955737  | 12 | 24  | 4.3  |
| 2 | 38154925  | 38155100  | 175 | 38155037  | 18 | 101 | 2.2  |

|   |          |          |     |          |    |     |      |
|---|----------|----------|-----|----------|----|-----|------|
| 2 | 38274425 | 38274500 | 75  | 38274437 | 13 | 39  | 6.5  |
| 2 | 39897550 | 39897725 | 175 | 39897612 | 18 | 110 | 15.2 |
| 2 | 42068725 | 42068750 | 25  | 42068737 | 12 | 12  | 2.2  |
| 2 | 43406875 | 43406975 | 100 | 43406887 | 12 | 48  | 8.7  |
| 2 | 45077100 | 45077225 | 125 | 45077162 | 14 | 65  | 0    |
| 2 | 45089275 | 45089675 | 400 | 45089562 | 22 | 257 | 0    |
| 2 | 45090650 | 45090725 | 75  | 45090712 | 13 | 37  | 6.5  |
| 2 | 45094075 | 45094150 | 75  | 45094112 | 13 | 37  | 0    |
| 2 | 45250775 | 45250800 | 25  | 45250787 | 12 | 12  | 2.2  |
| 2 | 45409950 | 45410000 | 50  | 45409962 | 12 | 24  | 2.2  |
| 2 | 45622675 | 45622875 | 200 | 45622812 | 18 | 130 | 6.5  |
| 2 | 46379250 | 46379275 | 25  | 46379262 | 12 | 12  | 2.2  |
| 2 | 46379800 | 46379875 | 75  | 46379812 | 13 | 39  | 2.2  |
| 2 | 47579900 | 47579950 | 50  | 47579912 | 12 | 24  | 0    |
| 2 | 47580725 | 47580925 | 200 | 47580862 | 15 | 106 | 8.7  |
| 2 | 47589375 | 47589425 | 50  | 47589387 | 12 | 24  | 0    |
| 2 | 48237025 | 48237100 | 75  | 48237062 | 13 | 38  | 2.2  |
| 2 | 60759625 | 60759675 | 50  | 60759637 | 12 | 24  | 0    |
| 2 | 61435425 | 61435575 | 150 | 61435462 | 16 | 84  | 13   |
| 2 | 61845350 | 61845400 | 50  | 61845362 | 12 | 24  | 0    |
| 2 | 62811375 | 62811500 | 125 | 62811412 | 13 | 60  | 8.7  |
| 2 | 63128650 | 63128700 | 50  | 63128662 | 12 | 24  | 0    |
| 2 | 63954575 | 63954775 | 200 | 63954687 | 16 | 108 | 0    |
| 2 | 66713700 | 66713800 | 100 | 66713712 | 15 | 54  | 2.2  |
| 2 | 68529250 | 68529350 | 100 | 68529287 | 15 | 56  | 0    |
| 2 | 68982000 | 68982025 | 25  | 68982012 | 12 | 12  | 0    |
| 2 | 69384925 | 69385000 | 75  | 69384937 | 12 | 36  | 6.5  |
| 2 | 70035750 | 70035900 | 150 | 70035787 | 13 | 70  | 0    |
| 2 | 70424800 | 70424825 | 25  | 70424812 | 12 | 12  | 2.2  |
| 2 | 70828200 | 70828225 | 25  | 70828212 | 12 | 12  | 0    |
| 2 | 70870975 | 70871025 | 50  | 70870987 | 12 | 24  | 2.2  |
| 2 | 70890200 | 70890225 | 25  | 70890212 | 12 | 12  | 0    |
| 2 | 70914750 | 70914775 | 25  | 70914762 | 13 | 13  | 0    |
| 2 | 71092550 | 71092600 | 50  | 71092562 | 12 | 24  | 0    |
| 2 | 71543675 | 71543700 | 25  | 71543687 | 12 | 12  | 2.2  |
| 2 | 71544525 | 71544550 | 25  | 71544537 | 12 | 12  | 0    |
| 2 | 71545325 | 71545350 | 25  | 71545337 | 13 | 13  | 2.2  |
| 2 | 71651400 | 71651500 | 100 | 71651437 | 15 | 51  | 8.7  |
| 2 | 71769400 | 71769475 | 75  | 71769437 | 16 | 46  | 6.5  |
| 2 | 71823925 | 71824125 | 200 | 71823937 | 14 | 98  | 0    |
| 2 | 72227300 | 72227450 | 150 | 72227387 | 14 | 78  | 4.3  |
| 2 | 72229825 | 72230025 | 200 | 72229962 | 17 | 119 | 0    |
| 2 | 72467125 | 72467200 | 75  | 72467162 | 15 | 40  | 4.3  |
| 2 | 72931925 | 72932050 | 125 | 72931962 | 14 | 68  | 0    |
| 2 | 73237725 | 73237800 | 75  | 73237737 | 13 | 37  | 6.5  |
| 2 | 73567925 | 73567950 | 25  | 73567937 | 12 | 12  | 0    |
| 2 | 73729100 | 73729225 | 125 | 73729112 | 14 | 62  | 6.5  |
| 2 | 74578700 | 74578750 | 50  | 74578712 | 12 | 24  | 4.3  |
| 2 | 75803925 | 75803975 | 50  | 75803937 | 12 | 24  | 0    |
| 2 | 77692850 | 77692900 | 50  | 77692862 | 13 | 25  | 0    |
| 2 | 81275550 | 81275700 | 150 | 81275562 | 12 | 70  | 13   |
| 2 | 86870725 | 86870950 | 225 | 86870862 | 19 | 144 | 8.7  |
| 2 | 88371750 | 88371775 | 25  | 88371762 | 12 | 12  | 2.2  |
| 2 | 88533775 | 88533850 | 75  | 88533787 | 12 | 36  | 6.5  |
| 2 | 90998275 | 90998375 | 100 | 90998287 | 12 | 47  | 8.7  |
| 2 | 91003400 | 91003425 | 25  | 91003412 | 12 | 12  | 2.2  |
| 2 | 91043075 | 91043125 | 50  | 91043112 | 13 | 25  | 4.3  |
| 2 | 91124325 | 91124575 | 250 | 91124437 | 15 | 131 | 13   |
| 2 | 91127825 | 91127875 | 50  | 91127837 | 14 | 27  | 4.3  |
| 2 | 91134100 | 91134450 | 350 | 91134187 | 15 | 160 | 6.5  |
| 2 | 91137700 | 91137825 | 125 | 91137787 | 16 | 72  | 10.8 |
| 2 | 91139525 | 91139625 | 100 | 91139562 | 15 | 53  | 0    |
| 2 | 91140950 | 91140975 | 25  | 91140962 | 12 | 12  | 2.2  |
| 2 | 91141650 | 91142050 | 400 | 91141912 | 15 | 217 | 43.3 |
| 2 | 91142875 | 91143300 | 425 | 91142887 | 20 | 242 | 41.2 |
| 2 | 91157525 | 91157575 | 50  | 91157537 | 14 | 28  | 0    |
| 2 | 91163900 | 91164025 | 125 | 91164012 | 21 | 92  | 2.2  |
| 2 | 91164375 | 91164450 | 75  | 91164412 | 17 | 48  | 6.5  |
| 2 | 91165250 | 91165325 | 75  | 91165262 | 13 | 38  | 6.5  |
| 2 | 91166125 | 91166175 | 50  | 91166162 | 14 | 26  | 2.2  |
| 2 | 91182300 | 91182325 | 25  | 91182312 | 14 | 14  | 2.2  |
| 2 | 91184050 | 91184075 | 25  | 91184062 | 15 | 15  | 2.2  |
| 2 | 91185375 | 91185400 | 25  | 91185387 | 12 | 12  | 0    |
| 2 | 91332450 | 91332475 | 25  | 91332462 | 12 | 12  | 0    |
| 2 | 91636800 | 91636825 | 25  | 91636812 | 14 | 14  | 2.2  |



|   |           |           |     |           |    |     |      |
|---|-----------|-----------|-----|-----------|----|-----|------|
| 2 | 91687750  | 91687775  | 25  | 91687762  | 14 | 14  | 0    |
| 2 | 94890975  | 94891000  | 25  | 94890987  | 12 | 12  | 2.2  |
| 2 | 94891850  | 94892000  | 150 | 94891862  | 22 | 111 | 19.5 |
| 2 | 94899175  | 94899200  | 25  | 94899187  | 14 | 14  | 0    |
| 2 | 94904275  | 94904325  | 50  | 94904312  | 15 | 29  | 4.3  |
| 2 | 94909200  | 94909250  | 50  | 94909212  | 12 | 24  | 2.2  |
| 2 | 94910250  | 94910275  | 25  | 94910262  | 13 | 13  | 2.2  |
| 2 | 94977250  | 94977350  | 100 | 94977337  | 13 | 48  | 4.3  |
| 2 | 95024525  | 95024600  | 75  | 95024562  | 15 | 40  | 6.5  |
| 2 | 96134925  | 96135050  | 125 | 96134937  | 17 | 76  | 10.8 |
| 2 | 96946025  | 96946200  | 175 | 96946062  | 13 | 87  | 8.7  |
| 2 | 97097175  | 97097200  | 25  | 97097187  | 12 | 12  | 0    |
| 2 | 97706700  | 97706850  | 150 | 97706762  | 13 | 71  | 0    |
| 2 | 97869475  | 97869675  | 200 | 97869537  | 17 | 120 | 8.7  |
| 2 | 98070375  | 98070475  | 100 | 98070412  | 14 | 52  | 4.3  |
| 2 | 98379425  | 98379800  | 375 | 98379612  | 15 | 197 | 10.8 |
| 2 | 98380225  | 98380275  | 50  | 98380237  | 14 | 27  | 4.3  |
| 2 | 100422950 | 100423075 | 125 | 100422987 | 15 | 69  | 10.8 |
| 2 | 100517375 | 100517475 | 100 | 100517387 | 12 | 47  | 0    |
| 2 | 100645100 | 100645125 | 25  | 100645112 | 12 | 12  | 2.2  |
| 2 | 101910625 | 101910650 | 25  | 101910637 | 12 | 12  | 2.2  |
| 2 | 104839425 | 104839650 | 225 | 104839562 | 15 | 117 | 10.8 |
| 2 | 105146800 | 105146825 | 25  | 105146812 | 12 | 12  | 2.2  |
| 2 | 105549475 | 105549525 | 50  | 105549487 | 12 | 24  | 0    |
| 2 | 106924450 | 106924500 | 50  | 106924462 | 12 | 24  | 2.2  |
| 2 | 108923175 | 108923225 | 50  | 108923187 | 12 | 24  | 4.3  |
| 2 | 108925350 | 108925375 | 25  | 108925362 | 12 | 12  | 2.2  |
| 2 | 108929125 | 108929250 | 125 | 108929137 | 14 | 62  | 8.7  |
| 2 | 108950900 | 108951025 | 125 | 108950912 | 14 | 64  | 10.8 |
| 2 | 109088200 | 109088300 | 100 | 109088237 | 13 | 50  | 8.7  |
| 2 | 109100850 | 109100900 | 50  | 109100862 | 12 | 24  | 4.3  |
| 2 | 109645025 | 109645175 | 150 | 109645087 | 14 | 78  | 0    |
| 2 | 110193975 | 110194000 | 25  | 110193987 | 12 | 12  | 0    |
| 2 | 110198350 | 110198375 | 25  | 110198362 | 13 | 13  | 2.2  |
| 2 | 110200600 | 110200625 | 25  | 110200612 | 12 | 12  | 2.2  |
| 2 | 110201750 | 110201775 | 25  | 110201762 | 12 | 12  | 0    |
| 2 | 111170500 | 111170550 | 50  | 111170537 | 13 | 25  | 4.3  |
| 2 | 111421875 | 111421900 | 25  | 111421887 | 13 | 13  | 0    |
| 2 | 111593250 | 111593475 | 225 | 111593387 | 17 | 150 | 26   |
| 2 | 112140450 | 112140475 | 25  | 112140462 | 12 | 12  | 0    |
| 2 | 113750875 | 113751025 | 150 | 113750887 | 14 | 78  | 0    |
| 2 | 113751925 | 113752100 | 175 | 113752037 | 15 | 93  | 0    |
| 2 | 118698300 | 118698325 | 25  | 118698312 | 12 | 12  | 2.2  |
| 2 | 119330775 | 119330825 | 50  | 119330787 | 13 | 25  | 0    |
| 2 | 119603575 | 119603675 | 100 | 119603612 | 14 | 52  | 0    |
| 2 | 119895425 | 119895500 | 75  | 119895437 | 12 | 36  | 0    |
| 2 | 119920750 | 119920775 | 25  | 119920762 | 12 | 12  | 2.2  |
| 2 | 120696375 | 120696500 | 125 | 120696437 | 15 | 69  | 4.3  |
| 2 | 120696875 | 120696975 | 100 | 120696887 | 19 | 70  | 2.2  |
| 2 | 120803925 | 120803950 | 25  | 120803937 | 12 | 12  | 2.2  |
| 2 | 120862900 | 120863000 | 100 | 120862912 | 12 | 46  | 0    |
| 2 | 120869325 | 120869425 | 100 | 120869387 | 15 | 55  | 6.5  |
| 2 | 120870450 | 120870475 | 25  | 120870462 | 12 | 12  | 2.2  |
| 2 | 120897450 | 120897475 | 25  | 120897462 | 12 | 12  | 0    |
| 2 | 120898425 | 120898575 | 150 | 120898512 | 13 | 70  | 8.7  |
| 2 | 120946450 | 120946600 | 150 | 120946512 | 16 | 84  | 0    |
| 2 | 120954775 | 120954975 | 200 | 120954812 | 15 | 111 | 0    |
| 2 | 121003550 | 121003675 | 125 | 121003562 | 12 | 59  | 10.8 |
| 2 | 121096475 | 121096550 | 75  | 121096512 | 13 | 37  | 6.5  |
| 2 | 121123875 | 121124025 | 150 | 121123912 | 14 | 79  | 0    |
| 2 | 121143250 | 121143275 | 25  | 121143262 | 12 | 12  | 0    |
| 2 | 121143625 | 121143725 | 100 | 121143637 | 13 | 50  | 6.5  |
| 2 | 121149750 | 121149775 | 25  | 121149762 | 12 | 12  | 0    |
| 2 | 121584475 | 121584550 | 75  | 121584487 | 12 | 36  | 6.5  |
| 2 | 121699750 | 121699900 | 150 | 121699762 | 12 | 72  | 0    |
| 2 | 123399775 | 123399825 | 50  | 123399787 | 12 | 24  | 2.2  |
| 2 | 123479725 | 123479850 | 125 | 123479787 | 16 | 71  | 0    |
| 2 | 128557275 | 128557350 | 75  | 128557287 | 13 | 37  | 0    |
| 2 | 128683175 | 128683200 | 25  | 128683187 | 12 | 12  | 0    |
| 2 | 128683550 | 128683725 | 175 | 128683637 | 21 | 130 | 10.8 |
| 2 | 128896075 | 128896100 | 25  | 128896087 | 12 | 12  | 0    |
| 2 | 129211350 | 129211450 | 100 | 129211362 | 12 | 48  | 8.7  |
| 2 | 131477600 | 131477650 | 50  | 131477612 | 12 | 24  | 0    |
| 2 | 131502250 | 131502275 | 25  | 131502262 | 13 | 13  | 0    |
| 2 | 132726350 | 132726550 | 200 | 132726387 | 17 | 106 | 8.7  |

|   |           |           |     |           |    |     |      |
|---|-----------|-----------|-----|-----------|----|-----|------|
| 2 | 132727600 | 132727650 | 50  | 132727612 | 13 | 25  | 4.3  |
| 2 | 132730700 | 132730950 | 250 | 132730837 | 25 | 208 | 23.8 |
| 2 | 132731200 | 132731375 | 175 | 132731212 | 27 | 159 | 8.7  |
| 2 | 132750175 | 132750200 | 25  | 132750187 | 15 | 15  | 2.2  |
| 2 | 132752450 | 132752475 | 25  | 132752462 | 16 | 16  | 2.2  |
| 2 | 132752875 | 132753000 | 125 | 132752887 | 24 | 117 | 4.3  |
| 2 | 132754200 | 132754575 | 375 | 132754312 | 22 | 238 | 30.3 |
| 2 | 132754875 | 132754900 | 25  | 132754887 | 12 | 12  | 2.2  |
| 2 | 132761550 | 132762125 | 575 | 132761987 | 16 | 293 | 32.5 |
| 2 | 132763100 | 132763125 | 25  | 132763112 | 12 | 12  | 2.2  |
| 2 | 132784700 | 132784725 | 25  | 132784712 | 12 | 12  | 0    |
| 2 | 132789025 | 132789150 | 125 | 132789037 | 12 | 58  | 8.7  |
| 2 | 132791550 | 132791625 | 75  | 132791562 | 12 | 36  | 6.5  |
| 2 | 132806600 | 132807075 | 475 | 132806887 | 31 | 407 | 73.7 |
| 2 | 132826825 | 132827125 | 300 | 132827062 | 14 | 143 | 6.5  |
| 2 | 133072050 | 133072175 | 125 | 133072062 | 14 | 62  | 0    |
| 2 | 133598950 | 133599025 | 75  | 133598962 | 12 | 36  | 6.5  |
| 2 | 134368375 | 134368725 | 350 | 134368462 | 17 | 193 | 6.5  |
| 2 | 134549900 | 134550200 | 300 | 134550037 | 19 | 185 | 17.3 |
| 2 | 143035950 | 143036125 | 175 | 143036037 | 13 | 85  | 2.2  |
| 2 | 147624350 | 147624400 | 50  | 147624362 | 12 | 24  | 4.3  |
| 2 | 149074625 | 149074725 | 100 | 149074637 | 19 | 69  | 4.3  |
| 2 | 149077150 | 149077175 | 25  | 149077162 | 12 | 12  | 0    |
| 2 | 149350400 | 149350425 | 25  | 149350412 | 12 | 12  | 2.2  |
| 2 | 151414375 | 151414675 | 300 | 151414487 | 17 | 169 | 10.8 |
| 2 | 153369450 | 153369550 | 100 | 153369487 | 13 | 51  | 8.7  |
| 2 | 157524450 | 157524550 | 100 | 157524512 | 13 | 49  | 0    |
| 2 | 157729375 | 157729400 | 25  | 157729387 | 12 | 12  | 2.2  |
| 2 | 159255475 | 159255500 | 25  | 159255487 | 12 | 12  | 0    |
| 2 | 159502700 | 159502750 | 50  | 159502712 | 12 | 24  | 2.2  |
| 2 | 160469650 | 160469675 | 25  | 160469662 | 12 | 12  | 2.2  |
| 2 | 161843450 | 161843750 | 300 | 161843612 | 17 | 177 | 23.8 |
| 2 | 161846975 | 161847025 | 50  | 161847012 | 15 | 29  | 4.3  |
| 2 | 161981400 | 161981575 | 175 | 161981512 | 14 | 86  | 0    |
| 2 | 162883125 | 162883175 | 50  | 162883137 | 12 | 24  | 0    |
| 2 | 168893475 | 168893500 | 25  | 168893487 | 12 | 12  | 2.2  |
| 2 | 169927325 | 169927350 | 25  | 169927337 | 13 | 13  | 2.2  |
| 2 | 171281950 | 171281975 | 25  | 171281962 | 12 | 12  | 0    |
| 2 | 171480400 | 171480500 | 100 | 171480487 | 13 | 48  | 4.3  |
| 2 | 171489125 | 171489150 | 25  | 171489137 | 12 | 12  | 0    |
| 2 | 172191400 | 172191600 | 200 | 172191462 | 16 | 109 | 0    |
| 2 | 172192175 | 172192525 | 350 | 172192212 | 16 | 195 | 0    |
| 2 | 174166050 | 174166200 | 150 | 174166087 | 16 | 83  | 0    |
| 2 | 174900125 | 174900525 | 400 | 174900262 | 21 | 259 | 13   |
| 2 | 175393575 | 175393600 | 25  | 175393587 | 13 | 13  | 2.2  |
| 2 | 176653700 | 176653975 | 275 | 176653812 | 25 | 209 | 0    |
| 2 | 182257850 | 182257925 | 75  | 182257862 | 12 | 35  | 6.5  |
| 2 | 183643000 | 183643025 | 25  | 183643012 | 13 | 13  | 0    |
| 2 | 187306700 | 187306725 | 25  | 187306712 | 12 | 12  | 2.2  |
| 2 | 187575700 | 187575850 | 150 | 187575762 | 15 | 83  | 15.2 |
| 2 | 188645725 | 188645825 | 100 | 188645762 | 13 | 50  | 0    |
| 2 | 188977950 | 188978050 | 100 | 188977962 | 13 | 51  | 0    |
| 2 | 188978350 | 188978625 | 275 | 188978462 | 19 | 171 | 17.3 |
| 2 | 192768600 | 192768625 | 25  | 192768612 | 12 | 12  | 2.2  |
| 2 | 192768900 | 192769025 | 125 | 192768912 | 14 | 67  | 6.5  |
| 2 | 197391250 | 197391325 | 75  | 197391287 | 14 | 39  | 0    |
| 2 | 200353150 | 200353275 | 125 | 200353187 | 13 | 62  | 4.3  |
| 2 | 202608675 | 202608725 | 50  | 202608712 | 27 | 53  | 8.7  |
| 2 | 202608950 | 202609050 | 100 | 202608962 | 13 | 48  | 4.3  |
| 2 | 204541875 | 204541950 | 75  | 204541937 | 13 | 36  | 0    |
| 2 | 213405200 | 213405525 | 325 | 213405337 | 20 | 217 | 17.3 |
| 2 | 215791850 | 215791950 | 100 | 215791887 | 13 | 49  | 0    |
| 2 | 216998075 | 216998250 | 175 | 216998237 | 22 | 125 | 17.3 |
| 2 | 216998475 | 216998575 | 100 | 216998512 | 14 | 52  | 0    |
| 2 | 217296400 | 217296425 | 25  | 217296412 | 12 | 12  | 2.2  |
| 2 | 217467950 | 217468025 | 75  | 217467962 | 12 | 36  | 0    |
| 2 | 217639675 | 217639825 | 150 | 217639737 | 16 | 86  | 2.2  |
| 2 | 218172575 | 218172800 | 225 | 218172737 | 18 | 137 | 8.7  |
| 2 | 218708525 | 218708550 | 25  | 218708537 | 12 | 12  | 2.2  |
| 2 | 218737450 | 218737500 | 50  | 218737462 | 12 | 24  | 0    |
| 2 | 218940050 | 218940100 | 50  | 218940062 | 12 | 24  | 4.3  |
| 2 | 219533400 | 219533550 | 150 | 219533437 | 14 | 79  | 8.7  |
| 2 | 219886625 | 219886775 | 150 | 219886662 | 16 | 79  | 4.3  |
| 2 | 222144100 | 222144125 | 25  | 222144112 | 13 | 13  | 0    |
| 2 | 223296300 | 223296325 | 25  | 223296312 | 12 | 12  | 0    |

|   |           |           |     |           |    |     |      |
|---|-----------|-----------|-----|-----------|----|-----|------|
| 2 | 223296950 | 223296975 | 25  | 223296962 | 12 | 12  | 2.2  |
| 2 | 224049800 | 224049825 | 25  | 224049812 | 12 | 12  | 2.2  |
| 2 | 224103950 | 224104025 | 75  | 224103987 | 14 | 38  | 6.5  |
| 2 | 224289850 | 224289925 | 75  | 224289862 | 14 | 39  | 0    |
| 2 | 224651600 | 224651775 | 175 | 224651637 | 13 | 87  | 0    |
| 2 | 224791100 | 224791175 | 75  | 224791112 | 13 | 38  | 2.2  |
| 2 | 224978775 | 224978800 | 25  | 224978787 | 12 | 12  | 0    |
| 2 | 227370850 | 227371000 | 150 | 227370862 | 14 | 79  | 2.2  |
| 2 | 227408475 | 227408500 | 25  | 227408487 | 23 | 23  | 4.3  |
| 2 | 231403200 | 231403325 | 125 | 231403237 | 15 | 70  | 0    |
| 2 | 232459275 | 232459300 | 25  | 232459287 | 12 | 12  | 0    |
| 2 | 232960050 | 232960125 | 75  | 232960062 | 12 | 35  | 6.5  |
| 2 | 233608675 | 233608800 | 125 | 233608762 | 13 | 61  | 0    |
| 2 | 233645900 | 233646000 | 100 | 233645912 | 12 | 48  | 8.7  |
| 2 | 233776600 | 233776750 | 150 | 233776637 | 14 | 77  | 6.5  |
| 2 | 234441500 | 234441550 | 50  | 234441512 | 18 | 34  | 4.3  |
| 2 | 235724050 | 235724125 | 75  | 235724112 | 14 | 38  | 0    |
| 2 | 235734725 | 235734925 | 200 | 235734787 | 15 | 103 | 4.3  |
| 2 | 235917775 | 235917950 | 175 | 235917887 | 15 | 94  | 15.2 |
| 2 | 236141825 | 236141900 | 75  | 236141837 | 12 | 36  | 0    |
| 2 | 236509500 | 236509575 | 75  | 236509537 | 14 | 39  | 6.5  |
| 2 | 236909925 | 236910025 | 100 | 236909962 | 13 | 50  | 4.3  |
| 2 | 237070150 | 237070275 | 125 | 237070187 | 14 | 64  | 4.3  |
| 2 | 237217925 | 237218200 | 275 | 237218012 | 14 | 133 | 26   |
| 2 | 237298250 | 237298275 | 25  | 237298262 | 12 | 12  | 2.2  |
| 2 | 237351250 | 237351275 | 25  | 237351262 | 12 | 12  | 0    |
| 2 | 237381800 | 237381975 | 175 | 237381812 | 14 | 86  | 0    |
| 2 | 237587125 | 237587150 | 25  | 237587137 | 12 | 12  | 0    |
| 2 | 237612900 | 237612950 | 50  | 237612912 | 12 | 24  | 4.3  |
| 2 | 237702275 | 237702375 | 100 | 237702312 | 13 | 49  | 4.3  |
| 2 | 238065250 | 238065350 | 100 | 238065337 | 15 | 55  | 0    |
| 2 | 238139900 | 238139950 | 50  | 238139912 | 12 | 24  | 4.3  |
| 2 | 238518275 | 238518400 | 125 | 238518312 | 16 | 70  | 4.3  |
| 2 | 238535625 | 238535750 | 125 | 238535637 | 12 | 58  | 6.5  |
| 2 | 239058400 | 239059200 | 800 | 239058887 | 15 | 410 | 34.7 |
| 2 | 239059425 | 239060200 | 775 | 239059437 | 20 | 403 | 15.2 |
| 2 | 239090575 | 239090725 | 150 | 239090637 | 16 | 81  | 0    |
| 2 | 239127925 | 239127950 | 25  | 239127937 | 12 | 12  | 2.2  |
| 2 | 239207150 | 239207175 | 25  | 239207162 | 12 | 12  | 2.2  |
| 2 | 239209850 | 239209875 | 25  | 239209862 | 12 | 12  | 0    |
| 2 | 239262750 | 239262800 | 50  | 239262762 | 12 | 24  | 0    |
| 2 | 239302625 | 239302650 | 25  | 239302637 | 12 | 12  | 0    |
| 2 | 239461375 | 239461450 | 75  | 239461437 | 13 | 37  | 6.5  |
| 2 | 239465175 | 239465250 | 75  | 239465187 | 12 | 36  | 4.3  |
| 2 | 239526575 | 239526750 | 175 | 239526612 | 14 | 94  | 0    |
| 2 | 239553200 | 239553475 | 275 | 239553387 | 15 | 125 | 6.5  |
| 2 | 239553825 | 239553925 | 100 | 239553837 | 15 | 50  | 8.7  |
| 2 | 239554475 | 239554550 | 75  | 239554487 | 18 | 51  | 6.5  |
| 2 | 239573475 | 239573675 | 200 | 239573587 | 16 | 115 | 0    |
| 2 | 239582975 | 239583000 | 25  | 239582987 | 12 | 12  | 0    |
| 2 | 239587275 | 239587425 | 150 | 239587287 | 12 | 70  | 0    |
| 2 | 239588575 | 239588700 | 125 | 239588637 | 15 | 68  | 0    |
| 2 | 239593325 | 239593525 | 200 | 239593387 | 18 | 123 | 17.3 |
| 2 | 239594800 | 239594850 | 50  | 239594812 | 15 | 28  | 4.3  |
| 2 | 239595850 | 239595975 | 125 | 239595862 | 14 | 64  | 0    |
| 2 | 239596350 | 239596425 | 75  | 239596362 | 14 | 39  | 0    |
| 2 | 239605925 | 239606050 | 125 | 239606012 | 15 | 67  | 10.8 |
| 2 | 239711600 | 239711650 | 50  | 239711637 | 13 | 25  | 2.2  |
| 2 | 239999125 | 239999150 | 25  | 239999137 | 12 | 12  | 2.2  |
| 2 | 240026075 | 240026100 | 25  | 240026087 | 12 | 12  | 2.2  |
| 2 | 240030750 | 240030775 | 25  | 240030762 | 12 | 12  | 0    |
| 2 | 240054350 | 240054400 | 50  | 240054362 | 12 | 24  | 0    |
| 2 | 240055100 | 240055125 | 25  | 240055112 | 12 | 12  | 0    |
| 2 | 240084475 | 240084600 | 125 | 240084512 | 15 | 69  | 10.8 |
| 2 | 240085200 | 240085300 | 100 | 240085237 | 13 | 49  | 8.7  |
| 2 | 240301050 | 240301100 | 50  | 240301062 | 12 | 24  | 0    |
| 2 | 240387650 | 240387725 | 75  | 240387662 | 13 | 38  | 4.3  |
| 2 | 240506275 | 240506450 | 175 | 240506437 | 13 | 81  | 0    |
| 2 | 240506950 | 240507025 | 75  | 240506987 | 13 | 37  | 2.2  |
| 2 | 240507300 | 240507325 | 25  | 240507312 | 12 | 12  | 2.2  |
| 2 | 240780275 | 240780300 | 25  | 240780287 | 12 | 12  | 2.2  |
| 2 | 240785775 | 240785900 | 125 | 240785862 | 14 | 62  | 0    |
| 2 | 240786150 | 240786450 | 300 | 240786387 | 13 | 137 | 10.8 |
| 2 | 240818375 | 240818550 | 175 | 240818487 | 16 | 99  | 8.7  |
| 2 | 240875225 | 240875275 | 50  | 240875237 | 12 | 24  | 0    |

|   |           |           |     |           |    |     |      |
|---|-----------|-----------|-----|-----------|----|-----|------|
| 2 | 240892725 | 240892850 | 125 | 240892737 | 12 | 59  | 8.7  |
| 2 | 240920300 | 240920400 | 100 | 240920312 | 12 | 48  | 8.7  |
| 2 | 240933750 | 240933875 | 125 | 240933762 | 13 | 58  | 0    |
| 2 | 240946975 | 240947000 | 25  | 240946987 | 12 | 12  | 0    |
| 2 | 240948300 | 240948375 | 75  | 240948312 | 12 | 36  | 4.3  |
| 2 | 241009675 | 241009750 | 75  | 241009712 | 15 | 43  | 6.5  |
| 2 | 241012950 | 241012975 | 25  | 241012962 | 15 | 15  | 2.2  |
| 2 | 241014225 | 241014400 | 175 | 241014287 | 16 | 97  | 4.3  |
| 2 | 241114125 | 241114200 | 75  | 241114162 | 14 | 40  | 2.2  |
| 2 | 241234225 | 241234625 | 400 | 241234287 | 18 | 220 | 28.2 |
| 2 | 241235200 | 241235225 | 25  | 241235212 | 13 | 13  | 2.2  |
| 2 | 241366075 | 241366200 | 125 | 241366087 | 13 | 60  | 0    |
| 2 | 241366875 | 241366925 | 50  | 241366887 | 12 | 24  | 2.2  |
| 2 | 241386900 | 241386975 | 75  | 241386937 | 14 | 39  | 6.5  |
| 2 | 241400575 | 241401000 | 425 | 241400912 | 34 | 437 | 34.7 |
| 2 | 241411700 | 241411825 | 125 | 241411712 | 13 | 61  | 0    |
| 2 | 241576250 | 241576650 | 400 | 241576412 | 19 | 257 | 2.2  |
| 2 | 241589950 | 241589975 | 25  | 241589962 | 13 | 13  | 2.2  |
| 2 | 241590275 | 241590300 | 25  | 241590287 | 12 | 12  | 2.2  |
| 2 | 241591050 | 241591075 | 25  | 241591062 | 12 | 12  | 2.2  |
| 2 | 241591300 | 241592125 | 825 | 241591662 | 25 | 573 | 17.3 |
| 2 | 242409050 | 242409325 | 275 | 242409237 | 18 | 146 | 0    |
| 2 | 242455275 | 242455550 | 275 | 242455387 | 17 | 151 | 13   |
| 2 | 242455825 | 242456000 | 175 | 242455962 | 13 | 83  | 6.5  |
| 2 | 242505575 | 242505600 | 25  | 242505587 | 12 | 12  | 0    |
| 2 | 242577675 | 242578200 | 525 | 242578187 | 21 | 279 | 17.3 |
| 2 | 242615575 | 242615700 | 125 | 242615662 | 14 | 61  | 0    |
| 2 | 242615925 | 242616125 | 200 | 242616012 | 14 | 103 | 13   |
| 5 | 195725    | 195825    | 100 | 195762    | 14 | 55  | 8.7  |
| 5 | 628800    | 629000    | 200 | 628862    | 15 | 104 | 0    |
| 5 | 651650    | 651700    | 50  | 651687    | 13 | 25  | 0    |
| 5 | 1004625   | 1004750   | 125 | 1004712   | 15 | 68  | 6.5  |
| 5 | 1209850   | 1210150   | 300 | 1209987   | 18 | 187 | 17.3 |
| 5 | 1265350   | 1265375   | 25  | 1265362   | 12 | 12  | 0    |
| 5 | 1268800   | 1268925   | 125 | 1268812   | 15 | 65  | 0    |
| 5 | 1269200   | 1269250   | 50  | 1269212   | 12 | 24  | 0    |
| 5 | 1275025   | 1275175   | 150 | 1275162   | 14 | 76  | 13   |
| 5 | 1286125   | 1286150   | 25  | 1286137   | 13 | 13  | 2.2  |
| 5 | 1288175   | 1288825   | 650 | 1288662   | 25 | 409 | 23.8 |
| 5 | 1363425   | 1363525   | 100 | 1363462   | 15 | 52  | 0    |
| 5 | 1429025   | 1429100   | 75  | 1429037   | 13 | 38  | 0    |
| 5 | 1433000   | 1433100   | 100 | 1433062   | 13 | 49  | 8.7  |
| 5 | 1462850   | 1463000   | 150 | 1462862   | 12 | 69  | 0    |
| 5 | 1481675   | 1481925   | 250 | 1481837   | 19 | 152 | 4.3  |
| 5 | 1592775   | 1593175   | 400 | 1593037   | 18 | 286 | 52   |
| 5 | 1706700   | 1706825   | 125 | 1706712   | 12 | 60  | 0    |
| 5 | 1710500   | 1710525   | 25  | 1710512   | 13 | 13  | 0    |
| 5 | 1923375   | 1923450   | 75  | 1923387   | 12 | 35  | 0    |
| 5 | 1966000   | 1966050   | 50  | 1966012   | 13 | 25  | 0    |
| 5 | 1982450   | 1983225   | 775 | 1982937   | 17 | 389 | 0    |
| 5 | 2004500   | 2004625   | 125 | 2004587   | 17 | 80  | 0    |
| 5 | 3314075   | 3314125   | 50  | 3314087   | 13 | 25  | 0    |
| 5 | 3365450   | 3365750   | 300 | 3365562   | 18 | 168 | 0    |
| 5 | 3366025   | 3366050   | 25  | 3366037   | 14 | 14  | 0    |
| 5 | 3376850   | 3377225   | 375 | 3377012   | 16 | 207 | 30.3 |
| 5 | 3389700   | 3389725   | 25  | 3389712   | 12 | 12  | 0    |
| 5 | 3588500   | 3588550   | 50  | 3588512   | 12 | 24  | 4.3  |
| 5 | 3628600   | 3628625   | 25  | 3628612   | 12 | 12  | 0    |
| 5 | 3637125   | 3637175   | 50  | 3637137   | 12 | 24  | 4.3  |
| 5 | 3640200   | 3640325   | 125 | 3640262   | 14 | 64  | 0    |
| 5 | 3713150   | 3713225   | 75  | 3713162   | 15 | 42  | 2.2  |
| 5 | 4133675   | 4133725   | 50  | 4133687   | 12 | 24  | 0    |
| 5 | 4182300   | 4182325   | 25  | 4182312   | 12 | 12  | 0    |
| 5 | 4197400   | 4197475   | 75  | 4197437   | 14 | 39  | 4.3  |
| 5 | 4197850   | 4197950   | 100 | 4197862   | 13 | 49  | 0    |
| 5 | 4198325   | 4198350   | 25  | 4198337   | 13 | 13  | 2.2  |
| 5 | 4634150   | 4634500   | 350 | 4634212   | 16 | 202 | 13   |
| 5 | 4958000   | 4958125   | 125 | 4958012   | 12 | 56  | 2.2  |
| 5 | 5070625   | 5070725   | 100 | 5070662   | 14 | 52  | 6.5  |
| 5 | 5105250   | 5105275   | 25  | 5105262   | 12 | 12  | 0    |
| 5 | 5168575   | 5168725   | 150 | 5168662   | 14 | 79  | 0    |
| 5 | 6561925   | 6561950   | 25  | 6561937   | 12 | 12  | 0    |
| 5 | 6884000   | 6884175   | 175 | 6884012   | 14 | 90  | 13   |
| 5 | 10523750  | 10523775  | 25  | 10523762  | 12 | 12  | 0    |
| 5 | 10527675  | 10527725  | 50  | 10527687  | 13 | 25  | 0    |

|   |           |           |      |           |    |      |      |
|---|-----------|-----------|------|-----------|----|------|------|
| 5 | 10531125  | 10531275  | 150  | 10531187  | 14 | 78   | 2.2  |
| 5 | 10547850  | 10548025  | 175  | 10547937  | 16 | 93   | 8.7  |
| 5 | 10601950  | 10602150  | 200  | 10602062  | 14 | 102  | 6.5  |
| 5 | 10832950  | 10833050  | 100  | 10832987  | 14 | 51   | 6.5  |
| 5 | 10906550  | 10906600  | 50   | 10906562  | 12 | 24   | 0    |
| 5 | 10913975  | 10914025  | 50   | 10913987  | 13 | 25   | 4.3  |
| 5 | 31353625  | 31353700  | 75   | 31353637  | 13 | 37   | 6.5  |
| 5 | 31707250  | 31707300  | 50   | 31707262  | 12 | 24   | 0    |
| 5 | 31728625  | 31728650  | 25   | 31728637  | 12 | 12   | 0    |
| 5 | 32818525  | 32818575  | 50   | 32818537  | 12 | 24   | 4.3  |
| 5 | 38237425  | 38237475  | 50   | 38237437  | 13 | 25   | 0    |
| 5 | 42960725  | 42960850  | 125  | 42960762  | 15 | 69   | 0    |
| 5 | 42987550  | 42987750  | 200  | 42987562  | 33 | 197  | 32.5 |
| 5 | 43364475  | 43364600  | 125  | 43364487  | 13 | 62   | 8.7  |
| 5 | 53665575  | 53665600  | 25   | 53665587  | 12 | 12   | 2.2  |
| 5 | 56654700  | 56654775  | 75   | 56654762  | 14 | 39   | 6.5  |
| 5 | 56678450  | 56678650  | 200  | 56678537  | 15 | 103  | 8.7  |
| 5 | 56813750  | 56813925  | 175  | 56813812  | 17 | 114  | 2.2  |
| 5 | 60324700  | 60324750  | 50   | 60324712  | 12 | 24   | 0    |
| 5 | 65834825  | 65834925  | 100  | 65834862  | 14 | 50   | 0    |
| 5 | 68549525  | 68549550  | 25   | 68549537  | 13 | 13   | 2.2  |
| 5 | 71158775  | 71158925  | 150  | 71158812  | 15 | 82   | 0    |
| 5 | 72039975  | 72040075  | 100  | 72040012  | 13 | 51   | 2.2  |
| 5 | 72504900  | 72505000  | 100  | 72504962  | 13 | 49   | 6.5  |
| 5 | 72564850  | 72565075  | 225  | 72564962  | 14 | 112  | 0    |
| 5 | 74462700  | 74462775  | 75   | 74462712  | 13 | 37   | 0    |
| 5 | 74897775  | 74897800  | 25   | 74897787  | 12 | 12   | 2.2  |
| 5 | 75163475  | 75163525  | 50   | 75163487  | 12 | 24   | 2.2  |
| 5 | 75541325  | 75541400  | 75   | 75541337  | 13 | 38   | 0    |
| 5 | 75596375  | 75596400  | 25   | 75596387  | 12 | 12   | 2.2  |
| 5 | 76286100  | 76286125  | 25   | 76286112  | 12 | 12   | 2.2  |
| 5 | 76554175  | 76554275  | 100  | 76554187  | 12 | 48   | 0    |
| 5 | 77182850  | 77183000  | 150  | 77182912  | 13 | 74   | 6.5  |
| 5 | 77952200  | 77952375  | 175  | 77952237  | 15 | 89   | 8.7  |
| 5 | 79631275  | 79631325  | 50   | 79631287  | 12 | 24   | 4.3  |
| 5 | 80410575  | 80410650  | 75   | 80410587  | 12 | 34   | 0    |
| 5 | 81225700  | 81225775  | 75   | 81225712  | 12 | 36   | 0    |
| 5 | 94981700  | 94981750  | 50   | 94981712  | 13 | 26   | 4.3  |
| 5 | 95979850  | 95979900  | 50   | 95979862  | 13 | 25   | 4.3  |
| 5 | 96831775  | 96831850  | 75   | 96831812  | 13 | 38   | 0    |
| 5 | 97939975  | 97940100  | 125  | 97939987  | 17 | 77   | 8.7  |
| 5 | 98715500  | 98715550  | 50   | 98715512  | 12 | 24   | 4.3  |
| 5 | 112797575 | 112797975 | 400  | 112797812 | 20 | 250  | 8.7  |
| 5 | 114059400 | 114059425 | 25   | 114059412 | 12 | 12   | 0    |
| 5 | 114543125 | 114543200 | 75   | 114543137 | 13 | 37   | 6.5  |
| 5 | 116025400 | 116025475 | 75   | 116025412 | 12 | 36   | 0    |
| 5 | 125592725 | 125592825 | 100  | 125592812 | 14 | 50   | 8.7  |
| 5 | 134392400 | 134392925 | 525  | 134392537 | 25 | 434  | 34.7 |
| 5 | 134466600 | 134466625 | 25   | 134466612 | 12 | 12   | 0    |
| 5 | 135216050 | 135216075 | 25   | 135216062 | 12 | 12   | 2.2  |
| 5 | 135615200 | 135615275 | 75   | 135615212 | 12 | 36   | 6.5  |
| 5 | 139179550 | 139179700 | 150  | 139179612 | 16 | 83   | 0    |
| 5 | 139992175 | 139992375 | 200  | 139992187 | 16 | 111  | 13   |
| 5 | 140113225 | 140113250 | 25   | 140113237 | 13 | 13   | 0    |
| 5 | 140146350 | 140146400 | 50   | 140146362 | 15 | 27   | 2.2  |
| 5 | 140146725 | 140148375 | 1650 | 140148187 | 37 | 1300 | 86.7 |
| 5 | 140156475 | 140156650 | 175  | 140156587 | 18 | 109  | 0    |
| 5 | 140162100 | 140162275 | 175  | 140162237 | 14 | 89   | 15.2 |
| 5 | 140162800 | 140162850 | 50   | 140162812 | 14 | 28   | 0    |
| 5 | 140168825 | 140168850 | 25   | 140168837 | 12 | 12   | 0    |
| 5 | 140534025 | 140534050 | 25   | 140534037 | 12 | 12   | 0    |
| 5 | 140534700 | 140534775 | 75   | 140534712 | 12 | 36   | 6.5  |
| 5 | 140538350 | 140538425 | 75   | 140538362 | 12 | 36   | 6.5  |
| 5 | 140539025 | 140539150 | 125  | 140539087 | 14 | 64   | 0    |
| 5 | 140554400 | 140554550 | 150  | 140554512 | 16 | 84   | 0    |
| 5 | 140595550 | 140595850 | 300  | 140595712 | 19 | 186  | 0    |
| 5 | 140596225 | 140596600 | 375  | 140596337 | 24 | 262  | 17.3 |
| 5 | 140600975 | 140601750 | 775  | 140601562 | 23 | 465  | 28.2 |
| 5 | 140605850 | 140606075 | 225  | 140605962 | 19 | 150  | 0    |
| 5 | 140606625 | 140606800 | 175  | 140606662 | 15 | 96   | 0    |
| 5 | 140679125 | 140679150 | 25   | 140679137 | 12 | 12   | 0    |
| 5 | 140679600 | 140679775 | 175  | 140679687 | 23 | 138  | 2.2  |
| 5 | 140680350 | 140680450 | 100  | 140680362 | 13 | 51   | 0    |
| 5 | 140686775 | 140686800 | 25   | 140686787 | 12 | 12   | 2.2  |
| 5 | 140691950 | 140692075 | 125  | 140691987 | 16 | 71   | 0    |

|   |           |           |     |           |    |     |      |
|---|-----------|-----------|-----|-----------|----|-----|------|
| 5 | 140692300 | 140692600 | 300 | 140692412 | 14 | 142 | 19.5 |
| 5 | 140699150 | 140699500 | 350 | 140699337 | 43 | 404 | 15.2 |
| 5 | 140699950 | 140700325 | 375 | 140700087 | 17 | 214 | 0    |
| 5 | 140710650 | 140710825 | 175 | 140710712 | 14 | 89  | 8.7  |
| 5 | 140711250 | 140711425 | 175 | 140711287 | 14 | 88  | 0    |
| 5 | 140712150 | 140712200 | 50  | 140712162 | 14 | 28  | 0    |
| 5 | 140715575 | 140715600 | 25  | 140715587 | 12 | 12  | 2.2  |
| 5 | 140716600 | 140716750 | 150 | 140716712 | 15 | 76  | 6.5  |
| 5 | 140720500 | 140720700 | 200 | 140720587 | 21 | 140 | 10.8 |
| 5 | 140721900 | 140722000 | 100 | 140721937 | 14 | 52  | 0    |
| 5 | 140724050 | 140724225 | 175 | 140724187 | 18 | 101 | 8.7  |
| 5 | 140725925 | 140726325 | 400 | 140726087 | 26 | 339 | 23.8 |
| 5 | 140731500 | 140732225 | 725 | 140731562 | 13 | 304 | 17.3 |
| 5 | 140743275 | 140743425 | 150 | 140743312 | 16 | 89  | 6.5  |
| 5 | 140744725 | 140744750 | 25  | 140744737 | 13 | 13  | 2.2  |
| 5 | 140749650 | 140749750 | 100 | 140749662 | 13 | 51  | 0    |
| 5 | 140752525 | 140752800 | 275 | 140752537 | 12 | 116 | 0    |
| 5 | 140754525 | 140754725 | 200 | 140754612 | 16 | 109 | 0    |
| 5 | 140764675 | 140764925 | 250 | 140764812 | 16 | 129 | 6.5  |
| 5 | 140773425 | 140773650 | 225 | 140773562 | 18 | 145 | 17.3 |
| 5 | 140779475 | 140779650 | 175 | 140779512 | 15 | 98  | 13   |
| 5 | 140782950 | 140782975 | 25  | 140782962 | 13 | 13  | 2.2  |
| 5 | 140787325 | 140787575 | 250 | 140787462 | 17 | 141 | 15.2 |
| 5 | 140836225 | 140836500 | 275 | 140836487 | 33 | 222 | 26   |
| 5 | 140836800 | 140837175 | 375 | 140837087 | 16 | 208 | 26   |
| 5 | 140837575 | 140837675 | 100 | 140837637 | 14 | 51  | 0    |
| 5 | 141839025 | 141839150 | 125 | 141839087 | 14 | 63  | 2.2  |
| 5 | 148434675 | 148435100 | 425 | 148434762 | 15 | 193 | 32.5 |
| 5 | 148705500 | 148705525 | 25  | 148705512 | 13 | 13  | 2.2  |
| 5 | 148969400 | 148969550 | 150 | 148969412 | 13 | 74  | 13   |
| 5 | 150264050 | 150264150 | 100 | 150264087 | 15 | 55  | 0    |
| 5 | 150264400 | 150264450 | 50  | 150264412 | 12 | 24  | 4.3  |
| 5 | 150307000 | 150307025 | 25  | 150307012 | 13 | 13  | 2.2  |
| 5 | 159276375 | 159276500 | 125 | 159276412 | 17 | 79  | 0    |
| 5 | 162724850 | 162724975 | 125 | 162724862 | 12 | 57  | 4.3  |
| 5 | 163960700 | 163960925 | 225 | 163960837 | 19 | 148 | 6.5  |
| 5 | 169807125 | 169807150 | 25  | 169807137 | 12 | 12  | 0    |
| 5 | 172540050 | 172540200 | 150 | 172540112 | 15 | 83  | 10.8 |
| 5 | 172559325 | 172559375 | 50  | 172559337 | 12 | 24  | 0    |
| 5 | 172568000 | 172568225 | 225 | 172568162 | 19 | 132 | 0    |
| 5 | 172938925 | 172939000 | 75  | 172938987 | 14 | 38  | 0    |
| 5 | 173844200 | 173844250 | 50  | 173844212 | 12 | 24  | 0    |
| 5 | 174802450 | 174802475 | 25  | 174802462 | 12 | 12  | 0    |
| 5 | 175093475 | 175093650 | 175 | 175093637 | 14 | 89  | 0    |
| 5 | 175944400 | 175944525 | 125 | 175944437 | 14 | 66  | 0    |
| 5 | 175979450 | 175979575 | 125 | 175979462 | 13 | 63  | 10.8 |
| 5 | 175995000 | 175995200 | 200 | 175995012 | 12 | 92  | 10.8 |
| 5 | 176025525 | 176025625 | 100 | 176025537 | 12 | 44  | 8.7  |
| 5 | 176046975 | 176047025 | 50  | 176047012 | 14 | 27  | 2.2  |
| 5 | 176073275 | 176073325 | 50  | 176073312 | 13 | 25  | 4.3  |
| 5 | 176074675 | 176074875 | 200 | 176074787 | 15 | 101 | 17.3 |
| 5 | 176080150 | 176080775 | 625 | 176080512 | 20 | 367 | 17.3 |
| 5 | 176090350 | 176090550 | 200 | 176090462 | 16 | 111 | 17.3 |
| 5 | 177340225 | 177340250 | 25  | 177340237 | 12 | 12  | 2.2  |
| 5 | 177415150 | 177415225 | 75  | 177415212 | 13 | 36  | 6.5  |
| 5 | 177446200 | 177446225 | 25  | 177446212 | 12 | 12  | 0    |
| 5 | 177454600 | 177454625 | 25  | 177454612 | 12 | 12  | 0    |
| 5 | 177552600 | 177552675 | 75  | 177552662 | 13 | 37  | 0    |
| 5 | 177635500 | 177635600 | 100 | 177635512 | 13 | 51  | 0    |
| 5 | 177944975 | 177945075 | 100 | 177945012 | 18 | 70  | 8.7  |
| 5 | 178000500 | 178000625 | 125 | 178000537 | 14 | 66  | 10.8 |
| 5 | 178235050 | 178235175 | 125 | 178235062 | 15 | 69  | 8.7  |
| 5 | 178299600 | 178299750 | 150 | 178299712 | 14 | 76  | 2.2  |
| 5 | 178300225 | 178300300 | 75  | 178300237 | 18 | 48  | 4.3  |
| 5 | 178302175 | 178302200 | 25  | 178302187 | 12 | 12  | 2.2  |
| 5 | 178672275 | 178672325 | 50  | 178672287 | 13 | 25  | 4.3  |
| 5 | 178734175 | 178734500 | 325 | 178734362 | 22 | 227 | 17.3 |
| 5 | 178850550 | 178850750 | 200 | 178850712 | 18 | 125 | 0    |
| 5 | 178894975 | 178895025 | 50  | 178894987 | 12 | 24  | 0    |
| 5 | 179431975 | 179432150 | 175 | 179432037 | 18 | 108 | 17.3 |
| 5 | 179440250 | 179440325 | 75  | 179440262 | 12 | 36  | 2.2  |
| 5 | 179756625 | 179756650 | 25  | 179756637 | 12 | 12  | 0    |
| 5 | 179761050 | 179761075 | 25  | 179761062 | 12 | 12  | 0    |
| 5 | 179791200 | 179791675 | 475 | 179791562 | 18 | 254 | 0    |
| 5 | 179963775 | 179963800 | 25  | 179963787 | 12 | 12  | 0    |

|   |           |           |     |           |    |     |      |
|---|-----------|-----------|-----|-----------|----|-----|------|
| 5 | 179965900 | 179965950 | 50  | 179965912 | 12 | 24  | 0    |
| 5 | 180210750 | 180210925 | 175 | 180210887 | 13 | 81  | 4.3  |
| 4 | 2350      | 2375      | 25  | 2362      | 12 | 12  | 0    |
| 4 | 39925     | 40150     | 225 | 40062     | 18 | 145 | 21.7 |
| 4 | 40900     | 41050     | 150 | 40987     | 14 | 78  | 6.5  |
| 4 | 41625     | 41750     | 125 | 41737     | 18 | 76  | 15.2 |
| 4 | 47125     | 47200     | 75  | 47187     | 18 | 50  | 2.2  |
| 4 | 58075     | 58150     | 75  | 58087     | 13 | 38  | 2.2  |
| 4 | 79275     | 79300     | 25  | 79287     | 12 | 12  | 0    |
| 4 | 96950     | 97150     | 200 | 97087     | 14 | 102 | 0    |
| 4 | 97850     | 98450     | 600 | 98262     | 30 | 481 | 0    |
| 4 | 115675    | 116000    | 325 | 115812    | 18 | 192 | 8.7  |
| 4 | 189750    | 189925    | 175 | 189887    | 14 | 86  | 13   |
| 4 | 369775    | 370400    | 625 | 369912    | 20 | 362 | 0    |
| 4 | 387850    | 388050    | 200 | 388037    | 14 | 93  | 0    |
| 4 | 390675    | 390700    | 25  | 390687    | 12 | 12  | 0    |
| 4 | 451350    | 451500    | 150 | 451462    | 15 | 82  | 0    |
| 4 | 535175    | 535250    | 75  | 535187    | 13 | 37  | 6.5  |
| 4 | 539075    | 539450    | 375 | 539262    | 17 | 192 | 19.5 |
| 4 | 539825    | 539850    | 25  | 539837    | 12 | 12  | 0    |
| 4 | 540200    | 540225    | 25  | 540212    | 12 | 12  | 0    |
| 4 | 542125    | 542425    | 300 | 542262    | 24 | 226 | 0    |
| 4 | 553675    | 553825    | 150 | 553737    | 16 | 83  | 8.7  |
| 4 | 555875    | 556200    | 325 | 556037    | 22 | 217 | 0    |
| 4 | 571500    | 571600    | 100 | 571587    | 18 | 59  | 6.5  |
| 4 | 572075    | 572200    | 125 | 572187    | 16 | 73  | 0    |
| 4 | 572525    | 572575    | 50  | 572537    | 15 | 28  | 0    |
| 4 | 574325    | 574500    | 175 | 574462    | 14 | 86  | 15.2 |
| 4 | 584325    | 584350    | 25  | 584337    | 12 | 12  | 0    |
| 4 | 593525    | 593625    | 100 | 593587    | 14 | 50  | 8.7  |
| 4 | 596125    | 596350    | 225 | 596162    | 14 | 113 | 2.2  |
| 4 | 596625    | 596800    | 175 | 596662    | 15 | 99  | 8.7  |
| 4 | 606750    | 606875    | 125 | 606812    | 15 | 65  | 10.8 |
| 4 | 614675    | 614750    | 75  | 614712    | 13 | 37  | 0    |
| 4 | 616275    | 616700    | 425 | 616337    | 13 | 185 | 0    |
| 4 | 621550    | 621625    | 75  | 621587    | 13 | 37  | 6.5  |
| 4 | 625175    | 625300    | 125 | 625187    | 13 | 61  | 10.8 |
| 4 | 637550    | 637600    | 50  | 637562    | 12 | 24  | 0    |
| 4 | 643150    | 643350    | 200 | 643212    | 18 | 119 | 0    |
| 4 | 679000    | 679075    | 75  | 679062    | 15 | 43  | 6.5  |
| 4 | 785275    | 785600    | 325 | 785412    | 21 | 219 | 2.2  |
| 4 | 794275    | 794375    | 100 | 794287    | 12 | 47  | 0    |
| 4 | 803550    | 803875    | 325 | 803712    | 33 | 309 | 2.2  |
| 4 | 804175    | 804200    | 25  | 804187    | 12 | 12  | 0    |
| 4 | 804975    | 805025    | 50  | 804987    | 13 | 26  | 4.3  |
| 4 | 815050    | 815225    | 175 | 815187    | 13 | 85  | 0    |
| 4 | 821375    | 821400    | 25  | 821387    | 12 | 12  | 0    |
| 4 | 853750    | 853775    | 25  | 853762    | 12 | 12  | 2.2  |
| 4 | 871350    | 871375    | 25  | 871362    | 12 | 12  | 0    |
| 4 | 992975    | 993050    | 75  | 992987    | 13 | 39  | 0    |
| 4 | 1009450   | 1009550   | 100 | 1009512   | 13 | 48  | 2.2  |
| 4 | 1042500   | 1042650   | 150 | 1042562   | 14 | 77  | 10.8 |
| 4 | 1053325   | 1053400   | 75  | 1053337   | 12 | 36  | 6.5  |
| 4 | 1053725   | 1053925   | 200 | 1053787   | 19 | 132 | 17.3 |
| 4 | 1054275   | 1054425   | 150 | 1054312   | 13 | 76  | 0    |
| 4 | 1061675   | 1062075   | 400 | 1061762   | 15 | 175 | 32.5 |
| 4 | 1062550   | 1062675   | 125 | 1062637   | 14 | 64  | 6.5  |
| 4 | 1062925   | 1063175   | 250 | 1063037   | 26 | 198 | 6.5  |
| 4 | 1063725   | 1063750   | 25  | 1063737   | 14 | 14  | 0    |
| 4 | 1074000   | 1074025   | 25  | 1074012   | 12 | 12  | 2.2  |
| 4 | 1075700   | 1075725   | 25  | 1075712   | 12 | 12  | 2.2  |
| 4 | 1134850   | 1134900   | 50  | 1134862   | 13 | 26  | 0    |
| 4 | 1135650   | 1135925   | 275 | 1135837   | 13 | 131 | 17.3 |
| 4 | 1165525   | 1165575   | 50  | 1165562   | 13 | 25  | 4.3  |
| 4 | 1234775   | 1235225   | 450 | 1235162   | 16 | 224 | 23.8 |
| 4 | 1237625   | 1237750   | 125 | 1237687   | 17 | 74  | 0    |
| 4 | 1249300   | 1249350   | 50  | 1249312   | 13 | 25  | 4.3  |
| 4 | 1261675   | 1261750   | 75  | 1261687   | 12 | 35  | 6.5  |
| 4 | 1269975   | 1270100   | 125 | 1270037   | 17 | 70  | 6.5  |
| 4 | 1484750   | 1485300   | 550 | 1484787   | 14 | 234 | 32.5 |
| 4 | 1495050   | 1495100   | 50  | 1495062   | 14 | 27  | 4.3  |
| 4 | 1527300   | 1527625   | 325 | 1527512   | 18 | 187 | 19.5 |
| 4 | 1528075   | 1528200   | 125 | 1528112   | 13 | 62  | 0    |
| 4 | 1533525   | 1533550   | 25  | 1533537   | 12 | 12  | 2.2  |
| 4 | 1563150   | 1563350   | 200 | 1563162   | 17 | 128 | 0    |

|   |         |         |     |         |    |     |      |
|---|---------|---------|-----|---------|----|-----|------|
| 4 | 1578325 | 1578350 | 25  | 1578337 | 12 | 12  | 2.2  |
| 4 | 1586875 | 1586900 | 25  | 1586887 | 13 | 13  | 2.2  |
| 4 | 1589450 | 1589550 | 100 | 1589462 | 13 | 49  | 0    |
| 4 | 1590275 | 1590300 | 25  | 1590287 | 12 | 12  | 2.2  |
| 4 | 1592475 | 1592575 | 100 | 1592487 | 12 | 48  | 8.7  |
| 4 | 1708600 | 1708800 | 200 | 1708637 | 15 | 111 | 6.5  |
| 4 | 1709375 | 1709400 | 25  | 1709387 | 16 | 16  | 2.2  |
| 4 | 2067425 | 2067550 | 125 | 2067437 | 13 | 63  | 0    |
| 4 | 2073975 | 2074100 | 125 | 2073987 | 13 | 60  | 6.5  |
| 4 | 2076325 | 2076475 | 150 | 2076337 | 13 | 79  | 15.2 |
| 4 | 2420225 | 2420375 | 150 | 2420262 | 16 | 86  | 4.3  |
| 4 | 2952450 | 2952750 | 300 | 2952587 | 17 | 180 | 17.3 |
| 4 | 2953475 | 2953800 | 325 | 2953787 | 13 | 139 | 2.2  |
| 4 | 3255275 | 3255300 | 25  | 3255287 | 13 | 13  | 2.2  |
| 4 | 3432575 | 3432650 | 75  | 3432612 | 13 | 37  | 6.5  |
| 4 | 3439975 | 3440725 | 750 | 3440412 | 19 | 418 | 8.7  |
| 4 | 3463725 | 3463800 | 75  | 3463762 | 16 | 43  | 6.5  |
| 4 | 3535100 | 3535225 | 125 | 3535162 | 14 | 65  | 10.8 |
| 4 | 3553150 | 3553250 | 100 | 3553162 | 13 | 51  | 8.7  |
| 4 | 3560225 | 3560250 | 25  | 3560237 | 12 | 12  | 2.2  |
| 4 | 3570175 | 3570225 | 50  | 3570212 | 15 | 28  | 4.3  |
| 4 | 3570750 | 3570775 | 25  | 3570762 | 12 | 12  | 0    |
| 4 | 3576500 | 3576525 | 25  | 3576512 | 12 | 12  | 0    |
| 4 | 3577325 | 3577475 | 150 | 3577337 | 14 | 78  | 6.5  |
| 4 | 3584425 | 3584550 | 125 | 3584512 | 14 | 65  | 0    |
| 4 | 3597475 | 3597600 | 125 | 3597512 | 15 | 71  | 0    |
| 4 | 3655575 | 3655675 | 100 | 3655587 | 12 | 47  | 4.3  |
| 4 | 3714250 | 3714325 | 75  | 3714262 | 12 | 36  | 2.2  |
| 4 | 3718350 | 3718500 | 150 | 3718362 | 14 | 78  | 10.8 |
| 4 | 3738475 | 3738575 | 100 | 3738512 | 14 | 53  | 8.7  |
| 4 | 4019900 | 4020000 | 100 | 4019962 | 14 | 52  | 0    |
| 4 | 4248025 | 4248125 | 100 | 4248062 | 14 | 51  | 8.7  |
| 4 | 4249900 | 4249975 | 75  | 4249912 | 13 | 38  | 6.5  |
| 4 | 4426300 | 4426475 | 175 | 4426312 | 13 | 79  | 0    |
| 4 | 4428775 | 4428900 | 125 | 4428787 | 13 | 63  | 0    |
| 4 | 4782700 | 4782750 | 50  | 4782712 | 12 | 24  | 4.3  |
| 4 | 4924350 | 4924425 | 75  | 4924362 | 12 | 36  | 6.5  |
| 4 | 4972600 | 4972675 | 75  | 4972612 | 13 | 37  | 6.5  |
| 4 | 5254900 | 5255050 | 150 | 5254912 | 13 | 76  | 0    |
| 4 | 5490675 | 5490850 | 175 | 5490787 | 20 | 120 | 15.2 |
| 4 | 5891625 | 5891700 | 75  | 5891637 | 13 | 38  | 6.5  |
| 4 | 5894025 | 5894150 | 125 | 5894087 | 14 | 64  | 6.5  |
| 4 | 5895200 | 5895325 | 125 | 5895287 | 15 | 69  | 0    |
| 4 | 6011050 | 6011175 | 125 | 6011087 | 15 | 70  | 0    |
| 4 | 6056425 | 6056450 | 25  | 6056437 | 12 | 12  | 0    |
| 4 | 6275200 | 6275250 | 50  | 6275212 | 12 | 24  | 4.3  |
| 4 | 6296900 | 6297050 | 150 | 6296912 | 13 | 75  | 13   |
| 4 | 6375925 | 6376100 | 175 | 6375937 | 16 | 105 | 6.5  |
| 4 | 6384450 | 6384475 | 25  | 6384462 | 12 | 12  | 2.2  |
| 4 | 6425675 | 6425700 | 25  | 6425687 | 13 | 13  | 0    |
| 4 | 6426050 | 6426075 | 25  | 6426062 | 12 | 12  | 0    |
| 4 | 6466900 | 6466975 | 75  | 6466962 | 13 | 37  | 0    |
| 4 | 6588525 | 6588575 | 50  | 6588537 | 12 | 24  | 2.2  |
| 4 | 6620875 | 6620925 | 50  | 6620912 | 13 | 25  | 4.3  |
| 4 | 6717650 | 6717700 | 50  | 6717662 | 12 | 24  | 0    |
| 4 | 6765700 | 6765775 | 75  | 6765712 | 12 | 36  | 0    |
| 4 | 7168575 | 7168600 | 25  | 7168587 | 12 | 12  | 2.2  |
| 4 | 7183450 | 7183650 | 200 | 7183537 | 15 | 108 | 13   |
| 4 | 7391775 | 7391800 | 25  | 7391787 | 12 | 12  | 2.2  |
| 4 | 7438575 | 7438675 | 100 | 7438612 | 14 | 52  | 8.7  |
| 4 | 7469075 | 7469275 | 200 | 7469137 | 19 | 132 | 15.2 |
| 4 | 7486525 | 7486550 | 25  | 7486537 | 13 | 13  | 2.2  |
| 4 | 7502175 | 7502300 | 125 | 7502237 | 15 | 67  | 8.7  |
| 4 | 7518900 | 7519050 | 150 | 7518962 | 16 | 89  | 15.2 |
| 4 | 7573825 | 7573875 | 50  | 7573837 | 13 | 25  | 0    |
| 4 | 7612175 | 7612225 | 50  | 7612187 | 13 | 25  | 4.3  |
| 4 | 7613350 | 7613375 | 25  | 7613362 | 12 | 12  | 0    |
| 4 | 7618350 | 7618375 | 25  | 7618362 | 12 | 12  | 2.2  |
| 4 | 7628700 | 7628825 | 125 | 7628762 | 14 | 65  | 8.7  |
| 4 | 7629250 | 7629400 | 150 | 7629362 | 16 | 85  | 0    |
| 4 | 7629950 | 7630000 | 50  | 7629962 | 13 | 26  | 0    |
| 4 | 7643725 | 7643750 | 25  | 7643737 | 12 | 12  | 0    |
| 4 | 7659300 | 7659325 | 25  | 7659312 | 12 | 12  | 2.2  |
| 4 | 7702175 | 7702225 | 50  | 7702212 | 14 | 27  | 2.2  |
| 4 | 7790600 | 7790625 | 25  | 7790612 | 13 | 13  | 0    |



|   |          |          |      |          |    |     |      |
|---|----------|----------|------|----------|----|-----|------|
| 4 | 8077125  | 8077250  | 125  | 8077162  | 16 | 75  | 0    |
| 4 | 8082975  | 8083125  | 150  | 8082987  | 12 | 71  | 0    |
| 4 | 8107250  | 8107425  | 175  | 8107337  | 14 | 90  | 0    |
| 4 | 8108000  | 8108175  | 175  | 8108012  | 23 | 143 | 26   |
| 4 | 8115550  | 8115575  | 25   | 8115562  | 12 | 12  | 0    |
| 4 | 8116050  | 8116475  | 425  | 8116212  | 25 | 316 | 0    |
| 4 | 8117000  | 8117475  | 475  | 8117362  | 17 | 229 | 8.7  |
| 4 | 8119825  | 8120000  | 175  | 8119887  | 16 | 96  | 10.8 |
| 4 | 8121975  | 8122325  | 350  | 8122062  | 19 | 203 | 8.7  |
| 4 | 8123600  | 8123750  | 150  | 8123612  | 12 | 70  | 2.2  |
| 4 | 8155575  | 8155725  | 150  | 8155637  | 18 | 88  | 2.2  |
| 4 | 8159175  | 8159200  | 25   | 8159187  | 12 | 12  | 2.2  |
| 4 | 8159500  | 8159550  | 50   | 8159537  | 13 | 25  | 2.2  |
| 4 | 8160100  | 8161225  | 1125 | 8160512  | 29 | 828 | 17.3 |
| 4 | 8169975  | 8170025  | 50   | 8169987  | 15 | 27  | 4.3  |
| 4 | 8178225  | 8178350  | 125  | 8178312  | 13 | 61  | 6.5  |
| 4 | 8190300  | 8190350  | 50   | 8190312  | 12 | 24  | 4.3  |
| 4 | 8221075  | 8221775  | 700  | 8221237  | 19 | 373 | 17.3 |
| 4 | 8222000  | 8222175  | 175  | 8222112  | 14 | 87  | 8.7  |
| 4 | 8364000  | 8364075  | 75   | 8364037  | 13 | 37  | 2.2  |
| 4 | 8376150  | 8376175  | 25   | 8376162  | 12 | 12  | 0    |
| 4 | 8384725  | 8384825  | 100  | 8384737  | 12 | 48  | 8.7  |
| 4 | 8385200  | 8385375  | 175  | 8385262  | 13 | 85  | 8.7  |
| 4 | 8387950  | 8388100  | 150  | 8387962  | 14 | 84  | 10.8 |
| 4 | 8405425  | 8405550  | 125  | 8405537  | 13 | 58  | 0    |
| 4 | 8405950  | 8406075  | 125  | 8405962  | 13 | 63  | 10.8 |
| 4 | 8407000  | 8407025  | 25   | 8407012  | 12 | 12  | 2.2  |
| 4 | 8541450  | 8541525  | 75   | 8541462  | 13 | 39  | 0    |
| 4 | 8550500  | 8550600  | 100  | 8550562  | 15 | 55  | 0    |
| 4 | 8551275  | 8551350  | 75   | 8551287  | 13 | 39  | 0    |
| 4 | 8555100  | 8555275  | 175  | 8555162  | 14 | 91  | 8.7  |
| 4 | 8576125  | 8576175  | 50   | 8576137  | 14 | 27  | 2.2  |
| 4 | 8604275  | 8604300  | 25   | 8604287  | 14 | 14  | 0    |
| 4 | 9591775  | 9591850  | 75   | 9591787  | 12 | 35  | 6.5  |
| 4 | 9744075  | 9744150  | 75   | 9744112  | 14 | 41  | 6.5  |
| 4 | 9761800  | 9761925  | 125  | 9761812  | 14 | 66  | 10.8 |
| 4 | 9889100  | 9889175  | 75   | 9889112  | 12 | 35  | 0    |
| 4 | 10067200 | 10067225 | 25   | 10067212 | 14 | 14  | 2.2  |
| 4 | 10068300 | 10068700 | 400  | 10068337 | 17 | 250 | 34.7 |
| 4 | 10574525 | 10574800 | 275  | 10574637 | 18 | 160 | 6.5  |
| 4 | 11039225 | 11039350 | 125  | 11039262 | 14 | 64  | 10.8 |
| 4 | 11568025 | 11568050 | 25   | 11568037 | 12 | 12  | 0    |
| 4 | 12692850 | 12693000 | 150  | 12692887 | 13 | 76  | 0    |
| 4 | 12932875 | 12933050 | 175  | 12932987 | 17 | 98  | 2.2  |
| 4 | 13135500 | 13135700 | 200  | 13135587 | 20 | 143 | 17.3 |
| 4 | 13153625 | 13153650 | 25   | 13153637 | 12 | 12  | 2.2  |
| 4 | 13154025 | 13154075 | 50   | 13154037 | 12 | 24  | 2.2  |
| 4 | 13157850 | 13158000 | 150  | 13157887 | 15 | 87  | 2.2  |
| 4 | 13502025 | 13502150 | 125  | 13502087 | 14 | 66  | 4.3  |
| 4 | 15693625 | 15693750 | 125  | 15693662 | 16 | 77  | 8.7  |
| 4 | 15703525 | 15703550 | 25   | 15703537 | 12 | 12  | 0    |
| 4 | 15746650 | 15746700 | 50   | 15746687 | 14 | 27  | 4.3  |
| 4 | 15971800 | 15971825 | 25   | 15971812 | 12 | 12  | 2.2  |
| 4 | 17048375 | 17048475 | 100  | 17048437 | 15 | 56  | 0    |
| 4 | 18100650 | 18100725 | 75   | 18100712 | 13 | 37  | 4.3  |
| 4 | 23631800 | 23631850 | 50   | 23631812 | 13 | 25  | 4.3  |
| 4 | 24210300 | 24210350 | 50   | 24210312 | 12 | 24  | 4.3  |
| 4 | 24257650 | 24257775 | 125  | 24257737 | 20 | 82  | 0    |
| 4 | 24270725 | 24270825 | 100  | 24270762 | 14 | 52  | 0    |
| 4 | 24292000 | 24292075 | 75   | 24292037 | 14 | 38  | 0    |
| 4 | 24622975 | 24623100 | 125  | 24622987 | 13 | 62  | 6.5  |
| 4 | 24645400 | 24645450 | 50   | 24645412 | 12 | 24  | 4.3  |
| 4 | 24651250 | 24651375 | 125  | 24651312 | 14 | 67  | 0    |
| 4 | 24901175 | 24901325 | 150  | 24901237 | 15 | 78  | 13   |
| 4 | 25116050 | 25116100 | 50   | 25116062 | 12 | 24  | 0    |
| 4 | 25116375 | 25116550 | 175  | 25116462 | 15 | 94  | 4.3  |
| 4 | 25116825 | 25117300 | 475  | 25117112 | 18 | 267 | 6.5  |
| 4 | 25551625 | 25551650 | 25   | 25551637 | 12 | 12  | 2.2  |
| 4 | 26074425 | 26074475 | 50   | 26074437 | 12 | 24  | 0    |
| 4 | 26099900 | 26100075 | 175  | 26099912 | 14 | 89  | 0    |
| 4 | 26102575 | 26102600 | 25   | 26102587 | 12 | 12  | 2.2  |
| 4 | 26666150 | 26666175 | 25   | 26666162 | 12 | 12  | 0    |
| 4 | 26673175 | 26673225 | 50   | 26673212 | 14 | 26  | 4.3  |
| 4 | 26678850 | 26679000 | 150  | 26678912 | 15 | 82  | 10.8 |
| 4 | 29152650 | 29152850 | 200  | 29152687 | 14 | 101 | 8.7  |

|   |           |           |     |           |    |     |      |
|---|-----------|-----------|-----|-----------|----|-----|------|
| 4 | 29201625  | 29201775  | 150 | 29201712  | 13 | 73  | 0    |
| 4 | 30333350  | 30333875  | 525 | 30333387  | 15 | 242 | 17.3 |
| 4 | 30849425  | 30849450  | 25  | 30849437  | 12 | 12  | 2.2  |
| 4 | 33636575  | 33636625  | 50  | 33636587  | 12 | 24  | 0    |
| 4 | 37123050  | 37123075  | 25  | 37123062  | 12 | 12  | 2.2  |
| 4 | 37873500  | 37873750  | 250 | 37873587  | 19 | 164 | 0    |
| 4 | 37874175  | 37874225  | 50  | 37874187  | 12 | 24  | 2.2  |
| 4 | 37909950  | 37910125  | 175 | 37910012  | 16 | 95  | 8.7  |
| 4 | 37976500  | 37976550  | 50  | 37976512  | 12 | 24  | 0    |
| 4 | 38339525  | 38339550  | 25  | 38339537  | 12 | 12  | 2.2  |
| 4 | 39972550  | 39972800  | 250 | 39972737  | 17 | 131 | 8.7  |
| 4 | 40134675  | 40134825  | 150 | 40134762  | 13 | 74  | 0    |
| 4 | 40991425  | 40991575  | 150 | 40991437  | 14 | 76  | 0    |
| 4 | 41076050  | 41076100  | 50  | 41076062  | 12 | 24  | 0    |
| 4 | 41441625  | 41441750  | 125 | 41441712  | 19 | 88  | 4.3  |
| 4 | 41444075  | 41444175  | 100 | 41444087  | 12 | 46  | 8.7  |
| 4 | 41562000  | 41562125  | 125 | 41562062  | 13 | 61  | 10.8 |
| 4 | 46087275  | 46087325  | 50  | 46087287  | 14 | 28  | 4.3  |
| 4 | 48180875  | 48180975  | 100 | 48180937  | 14 | 51  | 0    |
| 4 | 48796525  | 48796625  | 100 | 48796537  | 14 | 49  | 0    |
| 4 | 48796900  | 48797200  | 300 | 48796987  | 22 | 211 | 4.3  |
| 4 | 48800625  | 48800800  | 175 | 48800687  | 21 | 135 | 0    |
| 4 | 48802400  | 48802575  | 175 | 48802487  | 20 | 114 | 10.8 |
| 4 | 48807400  | 48807450  | 50  | 48807412  | 12 | 24  | 4.3  |
| 4 | 48815000  | 48815100  | 100 | 48815012  | 12 | 48  | 8.7  |
| 4 | 48817200  | 48817300  | 100 | 48817262  | 15 | 57  | 8.7  |
| 4 | 48817625  | 48817975  | 350 | 48817862  | 18 | 194 | 34.7 |
| 4 | 48844225  | 48844250  | 25  | 48844237  | 12 | 12  | 2.2  |
| 4 | 48847700  | 48847725  | 25  | 48847712  | 12 | 12  | 2.2  |
| 4 | 48851650  | 48851725  | 75  | 48851662  | 13 | 37  | 6.5  |
| 4 | 48874850  | 48874875  | 25  | 48874862  | 13 | 13  | 2.2  |
| 4 | 48967525  | 48967550  | 25  | 48967537  | 12 | 12  | 2.2  |
| 4 | 48983650  | 48983675  | 25  | 48983662  | 15 | 15  | 2.2  |
| 4 | 48984250  | 48984350  | 100 | 48984312  | 13 | 50  | 8.7  |
| 4 | 49008625  | 49008800  | 175 | 49008637  | 23 | 151 | 15.2 |
| 4 | 49019800  | 49019900  | 100 | 49019812  | 14 | 54  | 8.7  |
| 4 | 49020175  | 49020200  | 25  | 49020187  | 15 | 15  | 0    |
| 4 | 49020950  | 49020975  | 25  | 49020962  | 14 | 14  | 2.2  |
| 4 | 49209700  | 49210250  | 550 | 49209712  | 18 | 267 | 26   |
| 4 | 49211550  | 49211575  | 25  | 49211562  | 37 | 37  | 6.5  |
| 4 | 49329325  | 49329400  | 75  | 49329337  | 14 | 38  | 6.5  |
| 4 | 49334900  | 49335050  | 150 | 49335012  | 15 | 80  | 13   |
| 4 | 49338675  | 49338700  | 25  | 49338687  | 12 | 12  | 0    |
| 4 | 49339125  | 49339250  | 125 | 49339212  | 15 | 68  | 10.8 |
| 4 | 49345925  | 49346100  | 175 | 49345962  | 14 | 95  | 15.2 |
| 4 | 49347125  | 49347325  | 200 | 49347187  | 18 | 134 | 0    |
| 4 | 49354175  | 49354200  | 25  | 49354187  | 29 | 29  | 4.3  |
| 4 | 53311800  | 53311850  | 50  | 53311812  | 13 | 26  | 0    |
| 4 | 53312600  | 53312775  | 175 | 53312712  | 17 | 100 | 0    |
| 4 | 53915300  | 53915350  | 50  | 53915312  | 12 | 24  | 0    |
| 4 | 54661275  | 54661350  | 75  | 54661287  | 16 | 45  | 2.2  |
| 4 | 54662450  | 54662525  | 75  | 54662462  | 13 | 36  | 6.5  |
| 4 | 54662750  | 54662900  | 150 | 54662812  | 16 | 87  | 0    |
| 4 | 54670675  | 54670725  | 50  | 54670687  | 12 | 24  | 4.3  |
| 4 | 54710625  | 54710725  | 100 | 54710637  | 12 | 48  | 8.7  |
| 4 | 56153200  | 56153300  | 100 | 56153237  | 13 | 50  | 2.2  |
| 4 | 57861475  | 57861525  | 50  | 57861487  | 14 | 27  | 0    |
| 4 | 66833425  | 66833450  | 25  | 66833437  | 12 | 12  | 2.2  |
| 4 | 67699275  | 67699300  | 25  | 67699287  | 12 | 12  | 2.2  |
| 4 | 67947475  | 67947500  | 25  | 67947487  | 12 | 12  | 2.2  |
| 4 | 70683800  | 70683825  | 25  | 70683812  | 12 | 12  | 0    |
| 4 | 73300700  | 73300725  | 25  | 73300712  | 12 | 12  | 0    |
| 4 | 75198600  | 75198625  | 25  | 75198612  | 12 | 12  | 0    |
| 4 | 75428475  | 75428525  | 50  | 75428487  | 12 | 24  | 4.3  |
| 4 | 76003850  | 76003900  | 50  | 76003862  | 12 | 24  | 4.3  |
| 4 | 78076800  | 78076875  | 75  | 78076812  | 12 | 35  | 6.5  |
| 4 | 79198125  | 79198175  | 50  | 79198137  | 13 | 25  | 4.3  |
| 4 | 79407350  | 79407450  | 100 | 79407437  | 17 | 59  | 4.3  |
| 4 | 79426625  | 79426650  | 25  | 79426637  | 12 | 12  | 0    |
| 4 | 81338225  | 81338300  | 75  | 81338237  | 12 | 35  | 2.2  |
| 4 | 81341950  | 81342000  | 50  | 81341987  | 19 | 32  | 4.3  |
| 4 | 81348350  | 81348375  | 25  | 81348362  | 13 | 13  | 2.2  |
| 4 | 82570000  | 82570050  | 50  | 82570012  | 14 | 26  | 4.3  |
| 4 | 108928500 | 108928525 | 25  | 108928512 | 12 | 12  | 0    |
| 4 | 113558825 | 113558850 | 25  | 113558837 | 13 | 13  | 0    |

|   |           |           |     |           |    |     |      |
|---|-----------|-----------|-----|-----------|----|-----|------|
| 4 | 141709150 | 141709175 | 25  | 141709162 | 12 | 12  | 2.2  |
| 4 | 151723975 | 151724000 | 25  | 151723987 | 12 | 12  | 2.2  |
| 4 | 155631375 | 155631500 | 125 | 155631437 | 15 | 66  | 10.8 |
| 4 | 171185375 | 171185475 | 100 | 171185387 | 15 | 57  | 6.5  |
| 4 | 175371850 | 175371925 | 75  | 175371862 | 12 | 36  | 0    |
| 4 | 184542025 | 184542050 | 25  | 184542037 | 12 | 12  | 0    |
| 4 | 186145700 | 186145825 | 125 | 186145737 | 15 | 69  | 0    |
| 4 | 187659125 | 187659200 | 75  | 187659137 | 12 | 36  | 2.2  |
| 4 | 189789650 | 189789775 | 125 | 189789712 | 15 | 65  | 8.7  |
| 4 | 190435125 | 190435425 | 300 | 190435412 | 16 | 154 | 30.3 |
| 4 | 190437600 | 190437625 | 25  | 190437612 | 15 | 15  | 2.2  |
| 4 | 190711425 | 190711475 | 50  | 190711437 | 12 | 24  | 4.3  |
| 4 | 190715800 | 190716000 | 200 | 190715812 | 17 | 103 | 4.3  |
| 4 | 190741400 | 190741450 | 50  | 190741412 | 12 | 24  | 4.3  |
| 4 | 190748225 | 190748250 | 25  | 190748237 | 23 | 23  | 4.3  |
| 4 | 190752400 | 190752425 | 25  | 190752412 | 12 | 12  | 2.2  |
| 4 | 190812675 | 190812725 | 50  | 190812687 | 12 | 24  | 4.3  |
| 4 | 190837825 | 190837900 | 75  | 190837837 | 12 | 36  | 0    |
| 4 | 190876300 | 190876325 | 25  | 190876312 | 12 | 12  | 0    |
| 4 | 190880850 | 190880875 | 25  | 190880862 | 16 | 16  | 2.2  |
| 4 | 190887525 | 190887575 | 50  | 190887537 | 12 | 24  | 2.2  |
| 4 | 190899100 | 190899125 | 25  | 190899112 | 12 | 12  | 2.2  |
| 4 | 190993775 | 190994100 | 325 | 190993937 | 29 | 274 | 32.5 |
| 4 | 191054500 | 191054550 | 50  | 191054512 | 12 | 24  | 0    |
| 4 | 191098375 | 191098500 | 125 | 191098387 | 50 | 190 | 30.3 |
| 4 | 191173050 | 191173125 | 75  | 191173087 | 13 | 37  | 0    |
| 4 | 191173375 | 191173400 | 25  | 191173387 | 14 | 14  | 2.2  |
| 4 | 191174100 | 191174275 | 175 | 191174187 | 17 | 100 | 8.7  |
| 4 | 191178875 | 191179225 | 350 | 191179062 | 17 | 191 | 28.2 |
| 7 | 136450    | 136525    | 75  | 136487    | 13 | 38  | 6.5  |
| 7 | 137700    | 137825    | 125 | 137737    | 13 | 60  | 4.3  |
| 7 | 138950    | 139150    | 200 | 138987    | 16 | 119 | 10.8 |
| 7 | 139475    | 139675    | 200 | 139587    | 14 | 101 | 6.5  |
| 7 | 140525    | 140550    | 25  | 140537    | 13 | 13  | 2.2  |
| 7 | 141675    | 141725    | 50  | 141712    | 14 | 26  | 4.3  |
| 7 | 145100    | 145175    | 75  | 145162    | 15 | 41  | 6.5  |
| 7 | 177025    | 177050    | 25  | 177037    | 12 | 12  | 2.2  |
| 7 | 185775    | 186100    | 325 | 185812    | 18 | 203 | 28.2 |
| 7 | 188725    | 188975    | 250 | 188837    | 20 | 168 | 17.3 |
| 7 | 197700    | 197725    | 25  | 197712    | 14 | 14  | 2.2  |
| 7 | 198100    | 198150    | 50  | 198112    | 14 | 26  | 2.2  |
| 7 | 200325    | 200425    | 100 | 200412    | 13 | 49  | 8.7  |
| 7 | 203050    | 203425    | 375 | 203062    | 17 | 213 | 21.7 |
| 7 | 207850    | 208100    | 250 | 207912    | 20 | 176 | 34.7 |
| 7 | 227275    | 227375    | 100 | 227287    | 13 | 48  | 8.7  |
| 7 | 263650    | 263675    | 25  | 263662    | 12 | 12  | 2.2  |
| 7 | 265050    | 265225    | 175 | 265187    | 18 | 112 | 15.2 |
| 7 | 266050    | 266175    | 125 | 266087    | 18 | 80  | 6.5  |
| 7 | 273600    | 273725    | 125 | 273687    | 13 | 62  | 10.8 |
| 7 | 289600    | 289625    | 25  | 289612    | 12 | 12  | 2.2  |
| 7 | 299600    | 299925    | 325 | 299612    | 14 | 152 | 10.8 |
| 7 | 305450    | 305500    | 50  | 305462    | 12 | 24  | 2.2  |
| 7 | 478825    | 478925    | 100 | 478862    | 18 | 64  | 8.7  |
| 7 | 481000    | 481125    | 125 | 481012    | 18 | 77  | 2.2  |
| 7 | 488975    | 489000    | 25  | 488987    | 12 | 12  | 0    |
| 7 | 502850    | 502900    | 50  | 502862    | 14 | 27  | 4.3  |
| 7 | 505275    | 505300    | 25  | 505287    | 14 | 14  | 2.2  |
| 7 | 527525    | 527575    | 50  | 527537    | 12 | 24  | 4.3  |
| 7 | 529375    | 529475    | 100 | 529387    | 12 | 47  | 4.3  |
| 7 | 534075    | 534100    | 25  | 534087    | 12 | 12  | 2.2  |
| 7 | 539800    | 539825    | 25  | 539812    | 12 | 12  | 2.2  |
| 7 | 559125    | 559150    | 25  | 559137    | 12 | 12  | 2.2  |
| 7 | 563550    | 563700    | 150 | 563687    | 17 | 91  | 10.8 |
| 7 | 565625    | 565650    | 25  | 565637    | 12 | 12  | 0    |
| 7 | 566825    | 566850    | 25  | 566837    | 12 | 12  | 2.2  |
| 7 | 572450    | 572750    | 300 | 572612    | 31 | 252 | 17.3 |
| 7 | 589825    | 590025    | 200 | 589837    | 22 | 144 | 0    |
| 7 | 593425    | 593475    | 50  | 593437    | 12 | 24  | 0    |
| 7 | 593850    | 593900    | 50  | 593887    | 13 | 25  | 4.3  |
| 7 | 594550    | 595175    | 625 | 594737    | 37 | 598 | 39   |
| 7 | 602075    | 602100    | 25  | 602087    | 12 | 12  | 2.2  |
| 7 | 627750    | 627800    | 50  | 627762    | 14 | 27  | 4.3  |
| 7 | 631675    | 631825    | 150 | 631762    | 17 | 89  | 0    |
| 7 | 657375    | 657475    | 100 | 657412    | 15 | 53  | 6.5  |
| 7 | 658775    | 659425    | 650 | 659162    | 19 | 353 | 47.7 |

|   |         |         |     |         |    |     |      |
|---|---------|---------|-----|---------|----|-----|------|
| 7 | 660050  | 660250  | 200 | 660137  | 24 | 170 | 15.2 |
| 7 | 660475  | 660850  | 375 | 660662  | 18 | 231 | 17.3 |
| 7 | 687825  | 687900  | 75  | 687862  | 16 | 45  | 6.5  |
| 7 | 690175  | 690275  | 100 | 690187  | 22 | 79  | 13   |
| 7 | 690775  | 690825  | 50  | 690812  | 13 | 25  | 4.3  |
| 7 | 692950  | 693000  | 50  | 692962  | 12 | 24  | 4.3  |
| 7 | 694650  | 694675  | 25  | 694662  | 13 | 13  | 2.2  |
| 7 | 704950  | 704975  | 25  | 704962  | 12 | 12  | 2.2  |
| 7 | 724200  | 724225  | 25  | 724212  | 12 | 12  | 2.2  |
| 7 | 732125  | 732175  | 50  | 732137  | 12 | 24  | 4.3  |
| 7 | 741175  | 741300  | 125 | 741187  | 28 | 132 | 21.7 |
| 7 | 910925  | 910950  | 25  | 910937  | 15 | 15  | 2.2  |
| 7 | 915575  | 915675  | 100 | 915612  | 13 | 49  | 2.2  |
| 7 | 944850  | 945075  | 225 | 944962  | 21 | 167 | 6.5  |
| 7 | 946125  | 946400  | 275 | 946162  | 18 | 164 | 15.2 |
| 7 | 966300  | 966700  | 400 | 966637  | 15 | 199 | 28.2 |
| 7 | 968575  | 968625  | 50  | 968587  | 12 | 24  | 4.3  |
| 7 | 1027300 | 1027325 | 25  | 1027312 | 12 | 12  | 2.2  |
| 7 | 1027775 | 1028450 | 675 | 1028337 | 17 | 334 | 65   |
| 7 | 1076700 | 1076800 | 100 | 1076787 | 24 | 76  | 8.7  |
| 7 | 1103975 | 1104050 | 75  | 1104012 | 13 | 37  | 4.3  |
| 7 | 1104650 | 1104675 | 25  | 1104662 | 12 | 12  | 0    |
| 7 | 1122125 | 1122225 | 100 | 1122137 | 15 | 55  | 6.5  |
| 7 | 1123650 | 1123850 | 200 | 1123662 | 14 | 100 | 8.7  |
| 7 | 1175575 | 1175650 | 75  | 1175612 | 15 | 41  | 0    |
| 7 | 1177325 | 1177350 | 25  | 1177337 | 12 | 12  | 2.2  |
| 7 | 1183500 | 1183525 | 25  | 1183512 | 12 | 12  | 2.2  |
| 7 | 1189075 | 1189200 | 125 | 1189137 | 15 | 70  | 2.2  |
| 7 | 1193600 | 1193625 | 25  | 1193612 | 12 | 12  | 2.2  |
| 7 | 1195400 | 1195500 | 100 | 1195412 | 13 | 47  | 8.7  |
| 7 | 1198325 | 1198475 | 150 | 1198387 | 16 | 82  | 6.5  |
| 7 | 1216825 | 1216900 | 75  | 1216862 | 14 | 41  | 6.5  |
| 7 | 1217200 | 1217300 | 100 | 1217287 | 20 | 61  | 6.5  |
| 7 | 1218100 | 1218150 | 50  | 1218112 | 19 | 34  | 0    |
| 7 | 1221000 | 1221050 | 50  | 1221037 | 14 | 26  | 4.3  |
| 7 | 1224400 | 1224425 | 25  | 1224412 | 13 | 13  | 2.2  |
| 7 | 1225075 | 1225125 | 50  | 1225087 | 12 | 24  | 4.3  |
| 7 | 1227375 | 1227400 | 25  | 1227387 | 12 | 12  | 0    |
| 7 | 1231625 | 1231650 | 25  | 1231637 | 12 | 12  | 0    |
| 7 | 1237425 | 1237700 | 275 | 1237562 | 19 | 166 | 17.3 |
| 7 | 1254700 | 1254725 | 25  | 1254712 | 13 | 13  | 2.2  |
| 7 | 1255125 | 1255150 | 25  | 1255137 | 13 | 13  | 2.2  |
| 7 | 1260025 | 1260050 | 25  | 1260037 | 12 | 12  | 2.2  |
| 7 | 1262450 | 1262500 | 50  | 1262487 | 13 | 25  | 4.3  |
| 7 | 1266475 | 1266675 | 200 | 1266537 | 19 | 129 | 6.5  |
| 7 | 1267450 | 1267500 | 50  | 1267487 | 15 | 28  | 0    |
| 7 | 1269525 | 1269725 | 200 | 1269687 | 17 | 117 | 13   |
| 7 | 1274525 | 1274550 | 25  | 1274537 | 13 | 13  | 2.2  |
| 7 | 1277775 | 1278125 | 350 | 1277937 | 24 | 235 | 34.7 |
| 7 | 1280775 | 1281025 | 250 | 1280837 | 17 | 139 | 21.7 |
| 7 | 1281275 | 1281375 | 100 | 1281312 | 17 | 59  | 6.5  |
| 7 | 1282925 | 1283125 | 200 | 1282937 | 35 | 204 | 6.5  |
| 7 | 1283650 | 1283675 | 25  | 1283662 | 14 | 14  | 2.2  |
| 7 | 1283950 | 1284125 | 175 | 1283962 | 16 | 91  | 0    |
| 7 | 1284800 | 1284850 | 50  | 1284812 | 12 | 24  | 2.2  |
| 7 | 1288925 | 1288975 | 50  | 1288962 | 14 | 27  | 0    |
| 7 | 1292075 | 1292225 | 150 | 1292137 | 14 | 75  | 13   |
| 7 | 1293675 | 1293750 | 75  | 1293687 | 15 | 43  | 6.5  |
| 7 | 1296750 | 1296925 | 175 | 1296787 | 16 | 100 | 19.5 |
| 7 | 1297450 | 1297675 | 225 | 1297512 | 21 | 166 | 21.7 |
| 7 | 1298475 | 1298500 | 25  | 1298487 | 13 | 13  | 2.2  |
| 7 | 1308900 | 1309375 | 475 | 1309287 | 16 | 235 | 10.8 |
| 7 | 1313750 | 1313825 | 75  | 1313812 | 20 | 56  | 6.5  |
| 7 | 1314250 | 1314425 | 175 | 1314337 | 17 | 99  | 10.8 |
| 7 | 1315800 | 1315975 | 175 | 1315862 | 14 | 89  | 0    |
| 7 | 1317000 | 1317100 | 100 | 1317012 | 14 | 55  | 0    |
| 7 | 1318600 | 1319175 | 575 | 1318962 | 35 | 476 | 60.7 |
| 7 | 1324950 | 1325325 | 375 | 1325087 | 20 | 225 | 4.3  |
| 7 | 1336225 | 1336350 | 125 | 1336237 | 12 | 60  | 0    |
| 7 | 1338625 | 1338800 | 175 | 1338687 | 14 | 87  | 0    |
| 7 | 1347075 | 1347150 | 75  | 1347137 | 16 | 40  | 6.5  |
| 7 | 1350525 | 1350575 | 50  | 1350562 | 17 | 31  | 4.3  |
| 7 | 1362075 | 1362250 | 175 | 1362212 | 16 | 92  | 4.3  |
| 7 | 1377375 | 1377425 | 50  | 1377387 | 13 | 25  | 0    |
| 7 | 1379175 | 1379225 | 50  | 1379187 | 15 | 28  | 4.3  |

|   |         |         |      |         |    |      |       |
|---|---------|---------|------|---------|----|------|-------|
| 7 | 1380800 | 1380825 | 25   | 1380812 | 12 | 12   | 2.2   |
| 7 | 1382275 | 1382325 | 50   | 1382312 | 13 | 25   | 4.3   |
| 7 | 1383400 | 1383600 | 200  | 1383562 | 16 | 103  | 8.7   |
| 7 | 1386600 | 1386700 | 100  | 1386637 | 15 | 57   | 8.7   |
| 7 | 1389250 | 1389850 | 600  | 1389687 | 39 | 675  | 30.3  |
| 7 | 1392600 | 1392650 | 50   | 1392612 | 12 | 24   | 2.2   |
| 7 | 1393200 | 1393225 | 25   | 1393212 | 12 | 12   | 2.2   |
| 7 | 1394700 | 1395200 | 500  | 1394812 | 22 | 334  | 34.7  |
| 7 | 1397675 | 1398125 | 450  | 1397862 | 41 | 484  | 54.2  |
| 7 | 1398775 | 1398900 | 125  | 1398837 | 13 | 63   | 10.8  |
| 7 | 1400375 | 1400875 | 500  | 1400712 | 43 | 551  | 71.5  |
| 7 | 1402450 | 1402650 | 200  | 1402612 | 19 | 130  | 19.5  |
| 7 | 1403700 | 1404100 | 400  | 1403762 | 16 | 235  | 0     |
| 7 | 1405250 | 1405400 | 150  | 1405387 | 14 | 80   | 15.2  |
| 7 | 1408400 | 1409075 | 675  | 1408587 | 36 | 550  | 28.2  |
| 7 | 1409825 | 1409900 | 75   | 1409862 | 14 | 41   | 6.5   |
| 7 | 1410625 | 1410700 | 75   | 1410637 | 13 | 38   | 4.3   |
| 7 | 1412775 | 1412800 | 25   | 1412787 | 12 | 12   | 2.2   |
| 7 | 1413925 | 1413950 | 25   | 1413937 | 16 | 16   | 2.2   |
| 7 | 1417825 | 1417925 | 100  | 1417912 | 14 | 51   | 8.7   |
| 7 | 1418375 | 1418450 | 75   | 1418412 | 15 | 41   | 4.3   |
| 7 | 1420850 | 1420875 | 25   | 1420862 | 15 | 15   | 2.2   |
| 7 | 1427125 | 1427200 | 75   | 1427162 | 13 | 37   | 6.5   |
| 7 | 1431700 | 1431725 | 25   | 1431712 | 12 | 12   | 2.2   |
| 7 | 1432125 | 1432150 | 25   | 1432137 | 12 | 12   | 2.2   |
| 7 | 1445600 | 1445725 | 125  | 1445712 | 15 | 68   | 6.5   |
| 7 | 1525000 | 1525325 | 325  | 1525012 | 12 | 146  | 0     |
| 7 | 1531700 | 1531825 | 125  | 1531737 | 14 | 64   | 6.5   |
| 7 | 1537950 | 1538000 | 50   | 1537962 | 12 | 24   | 0     |
| 7 | 1593925 | 1593950 | 25   | 1593937 | 13 | 13   | 2.2   |
| 7 | 1594750 | 1595375 | 625  | 1595362 | 42 | 597  | 47.7  |
| 7 | 1596250 | 1596350 | 100  | 1596337 | 15 | 55   | 4.3   |
| 7 | 1602975 | 1603000 | 25   | 1602987 | 12 | 12   | 2.2   |
| 7 | 1603325 | 1603400 | 75   | 1603362 | 14 | 38   | 6.5   |
| 7 | 1605150 | 1605175 | 25   | 1605162 | 13 | 13   | 2.2   |
| 7 | 1607025 | 1607175 | 150  | 1607162 | 20 | 93   | 10.8  |
| 7 | 1609800 | 1609825 | 25   | 1609812 | 12 | 12   | 0     |
| 7 | 1620625 | 1620850 | 225  | 1620687 | 21 | 155  | 10.8  |
| 7 | 1624775 | 1624900 | 125  | 1624887 | 13 | 59   | 0     |
| 7 | 1625225 | 1625500 | 275  | 1625387 | 16 | 140  | 6.5   |
| 7 | 1631850 | 1631875 | 25   | 1631862 | 16 | 16   | 2.2   |
| 7 | 1637775 | 1637925 | 150  | 1637787 | 14 | 73   | 10.8  |
| 7 | 1643125 | 1643150 | 25   | 1643137 | 12 | 12   | 0     |
| 7 | 1643425 | 1643525 | 100  | 1643512 | 18 | 58   | 8.7   |
| 7 | 1644250 | 1644375 | 125  | 1644337 | 15 | 66   | 10.8  |
| 7 | 1654800 | 1655025 | 225  | 1654987 | 17 | 129  | 13    |
| 7 | 1655375 | 1655425 | 50   | 1655387 | 12 | 24   | 4.3   |
| 7 | 1659625 | 1659650 | 25   | 1659637 | 12 | 12   | 2.2   |
| 7 | 1659875 | 1660400 | 525  | 1659987 | 19 | 282  | 17.3  |
| 7 | 1661400 | 1661450 | 50   | 1661412 | 13 | 25   | 4.3   |
| 7 | 1668250 | 1668500 | 250  | 1668437 | 14 | 119  | 0     |
| 7 | 1705200 | 1705275 | 75   | 1705212 | 13 | 37   | 2.2   |
| 7 | 1707200 | 1707350 | 150  | 1707262 | 16 | 88   | 8.7   |
| 7 | 1709025 | 1709150 | 125  | 1709087 | 14 | 66   | 10.8  |
| 7 | 1710675 | 1710725 | 50   | 1710712 | 13 | 25   | 4.3   |
| 7 | 1715075 | 1715300 | 225  | 1715112 | 14 | 112  | 4.3   |
| 7 | 1716625 | 1716750 | 125  | 1716662 | 13 | 60   | 2.2   |
| 7 | 1720100 | 1720250 | 150  | 1720112 | 13 | 72   | 8.7   |
| 7 | 1721000 | 1721200 | 200  | 1721062 | 18 | 131  | 0     |
| 7 | 1729900 | 1729950 | 50   | 1729912 | 13 | 26   | 2.2   |
| 7 | 1735025 | 1736550 | 1525 | 1735587 | 29 | 1184 | 121.4 |
| 7 | 1742275 | 1742300 | 25   | 1742287 | 13 | 13   | 0     |
| 7 | 1747975 | 1748100 | 125  | 1748037 | 18 | 79   | 8.7   |
| 7 | 1752350 | 1752450 | 100  | 1752387 | 13 | 51   | 0     |
| 7 | 1753175 | 1753250 | 75   | 1753187 | 14 | 42   | 6.5   |
| 7 | 1754325 | 1754375 | 50   | 1754362 | 13 | 25   | 0     |
| 7 | 1754825 | 1754950 | 125  | 1754837 | 12 | 57   | 10.8  |
| 7 | 1755925 | 1755975 | 50   | 1755937 | 12 | 24   | 0     |
| 7 | 1764225 | 1764475 | 250  | 1764312 | 21 | 167  | 17.3  |
| 7 | 1764725 | 1764900 | 175  | 1764762 | 24 | 134  | 23.8  |
| 7 | 1768525 | 1768925 | 400  | 1768737 | 27 | 334  | 41.2  |
| 7 | 1769725 | 1769850 | 125  | 1769737 | 27 | 103  | 13    |
| 7 | 1770750 | 1770775 | 25   | 1770762 | 12 | 12   | 0     |
| 7 | 1773575 | 1773825 | 250  | 1773662 | 15 | 130  | 23.8  |
| 7 | 1774775 | 1774825 | 50   | 1774787 | 16 | 31   | 0     |

|   |         |         |      |         |    |      |       |
|---|---------|---------|------|---------|----|------|-------|
| 7 | 1775050 | 1775175 | 125  | 1775112 | 17 | 78   | 10.8  |
| 7 | 1775825 | 1775850 | 25   | 1775837 | 12 | 12   | 2.2   |
| 7 | 1783500 | 1783575 | 75   | 1783512 | 14 | 41   | 0     |
| 7 | 1792075 | 1792175 | 100  | 1792112 | 13 | 51   | 0     |
| 7 | 1793525 | 1793650 | 125  | 1793637 | 16 | 70   | 8.7   |
| 7 | 1795300 | 1795425 | 125  | 1795387 | 13 | 61   | 10.8  |
| 7 | 1801575 | 1802300 | 725  | 1801862 | 32 | 573  | 17.3  |
| 7 | 1805200 | 1805225 | 25   | 1805212 | 12 | 12   | 0     |
| 7 | 1808850 | 1809325 | 475  | 1809162 | 29 | 376  | 34.7  |
| 7 | 1810400 | 1810750 | 350  | 1810587 | 23 | 242  | 39    |
| 7 | 1814075 | 1814125 | 50   | 1814112 | 13 | 25   | 4.3   |
| 7 | 1814650 | 1814750 | 100  | 1814687 | 15 | 53   | 2.2   |
| 7 | 1835650 | 1835700 | 50   | 1835662 | 14 | 27   | 4.3   |
| 7 | 1877675 | 1877975 | 300  | 1877837 | 21 | 192  | 15.2  |
| 7 | 1878500 | 1878775 | 275  | 1878512 | 17 | 133  | 13    |
| 7 | 1892750 | 1892775 | 25   | 1892762 | 12 | 12   | 2.2   |
| 7 | 1893625 | 1895150 | 1525 | 1894712 | 35 | 1598 | 153.9 |
| 7 | 1895500 | 1895550 | 50   | 1895512 | 13 | 26   | 0     |
| 7 | 1936950 | 1937125 | 175  | 1936962 | 16 | 97   | 8.7   |
| 7 | 1943200 | 1943225 | 25   | 1943212 | 13 | 13   | 2.2   |
| 7 | 1984325 | 1984400 | 75   | 1984337 | 17 | 45   | 6.5   |
| 7 | 1985375 | 1985400 | 25   | 1985387 | 12 | 12   | 2.2   |
| 7 | 2034775 | 2035075 | 300  | 2034937 | 18 | 173  | 4.3   |
| 7 | 2035500 | 2035525 | 25   | 2035512 | 12 | 12   | 2.2   |
| 7 | 2036925 | 2037000 | 75   | 2036937 | 14 | 41   | 6.5   |
| 7 | 2049375 | 2049475 | 100  | 2049412 | 14 | 52   | 8.7   |
| 7 | 2066175 | 2066225 | 50   | 2066187 | 24 | 46   | 8.7   |
| 7 | 2094750 | 2094775 | 25   | 2094762 | 13 | 13   | 0     |
| 7 | 2117225 | 2117400 | 175  | 2117237 | 20 | 133  | 17.3  |
| 7 | 2117950 | 2118075 | 125  | 2117962 | 12 | 55   | 4.3   |
| 7 | 2121800 | 2121850 | 50   | 2121837 | 13 | 25   | 0     |
| 7 | 2124575 | 2124600 | 25   | 2124587 | 12 | 12   | 0     |
| 7 | 2201900 | 2202000 | 100  | 2201912 | 13 | 52   | 6.5   |
| 7 | 2202325 | 2202400 | 75   | 2202337 | 13 | 37   | 6.5   |
| 7 | 2203225 | 2203325 | 100  | 2203237 | 13 | 50   | 8.7   |
| 7 | 2316175 | 2316225 | 50   | 2316187 | 13 | 26   | 2.2   |
| 7 | 2322575 | 2322775 | 200  | 2322662 | 15 | 104  | 0     |
| 7 | 2439550 | 2439750 | 200  | 2439637 | 15 | 112  | 8.7   |
| 7 | 2489225 | 2489250 | 25   | 2489237 | 12 | 12   | 2.2   |
| 7 | 2672800 | 2672875 | 75   | 2672862 | 15 | 41   | 2.2   |
| 7 | 2673150 | 2673325 | 175  | 2673212 | 18 | 108  | 15.2  |
| 7 | 2681700 | 2681800 | 100  | 2681712 | 21 | 65   | 6.5   |
| 7 | 2684675 | 2684825 | 150  | 2684712 | 17 | 92   | 10.8  |
| 7 | 2689400 | 2689500 | 100  | 2689412 | 20 | 63   | 8.7   |
| 7 | 2693950 | 2694050 | 100  | 2694037 | 18 | 66   | 8.7   |
| 7 | 2695950 | 2696025 | 75   | 2695987 | 13 | 38   | 6.5   |
| 7 | 2717225 | 2717350 | 125  | 2717262 | 15 | 72   | 6.5   |
| 7 | 2766325 | 2766450 | 125  | 2766387 | 17 | 79   | 8.7   |
| 7 | 2821325 | 2821375 | 50   | 2821337 | 12 | 24   | 2.2   |
| 7 | 2856400 | 2856600 | 200  | 2856462 | 16 | 115  | 0     |
| 7 | 2862850 | 2862925 | 75   | 2862862 | 13 | 39   | 2.2   |
| 7 | 2885425 | 2886300 | 875  | 2886137 | 23 | 569  | 73.7  |
| 7 | 2889075 | 2889175 | 100  | 2889137 | 14 | 50   | 6.5   |
| 7 | 2889775 | 2889825 | 50   | 2889812 | 14 | 26   | 4.3   |
| 7 | 2891500 | 2891600 | 100  | 2891562 | 15 | 56   | 8.7   |
| 7 | 2896650 | 2896925 | 275  | 2896812 | 22 | 176  | 0     |
| 7 | 2903225 | 2903325 | 100  | 2903262 | 15 | 56   | 10.8  |
| 7 | 2904225 | 2904250 | 25   | 2904237 | 12 | 12   | 2.2   |
| 7 | 2904775 | 2904975 | 200  | 2904962 | 20 | 120  | 10.8  |
| 7 | 2905475 | 2905525 | 50   | 2905487 | 15 | 30   | 2.2   |
| 7 | 2909950 | 2910050 | 100  | 2909962 | 17 | 60   | 6.5   |
| 7 | 2910350 | 2910525 | 175  | 2910387 | 15 | 95   | 6.5   |
| 7 | 2911200 | 2911225 | 25   | 2911212 | 16 | 16   | 2.2   |
| 7 | 2911700 | 2911775 | 75   | 2911712 | 13 | 38   | 6.5   |
| 7 | 2912850 | 2912975 | 125  | 2912862 | 16 | 70   | 2.2   |
| 7 | 2915975 | 2916050 | 75   | 2916037 | 16 | 41   | 6.5   |
| 7 | 2916375 | 2916425 | 50   | 2916387 | 13 | 25   | 4.3   |
| 7 | 2918275 | 2918550 | 275  | 2918362 | 20 | 192  | 30.3  |
| 7 | 2919400 | 2919650 | 250  | 2919537 | 19 | 151  | 10.8  |
| 7 | 2919900 | 2920300 | 400  | 2919912 | 24 | 208  | 17.3  |
| 7 | 2922575 | 2922625 | 50   | 2922612 | 19 | 37   | 4.3   |
| 7 | 2924875 | 2925125 | 250  | 2925012 | 17 | 146  | 15.2  |
| 7 | 2926300 | 2926475 | 175  | 2926337 | 15 | 92   | 0     |
| 7 | 2929775 | 2929825 | 50   | 2929787 | 14 | 27   | 0     |
| 7 | 2932300 | 2932375 | 75   | 2932312 | 13 | 38   | 0     |

|   |         |         |     |         |    |     |      |
|---|---------|---------|-----|---------|----|-----|------|
| 7 | 2933150 | 2933275 | 125 | 2933237 | 13 | 61  | 10.8 |
| 7 | 2933900 | 2933975 | 75  | 2933937 | 14 | 39  | 6.5  |
| 7 | 2935800 | 2935950 | 150 | 2935862 | 15 | 80  | 15.2 |
| 7 | 2937125 | 2937250 | 125 | 2937137 | 18 | 82  | 10.8 |
| 7 | 2938150 | 2938400 | 250 | 2938287 | 15 | 124 | 19.5 |
| 7 | 2938925 | 2939050 | 125 | 2938937 | 15 | 70  | 10.8 |
| 7 | 2940550 | 2940925 | 375 | 2940562 | 13 | 169 | 0    |
| 7 | 2941350 | 2941550 | 200 | 2941437 | 17 | 125 | 17.3 |
| 7 | 2941975 | 2942100 | 125 | 2942037 | 15 | 67  | 0    |
| 7 | 2942625 | 2942750 | 125 | 2942687 | 14 | 63  | 0    |
| 7 | 2943125 | 2943225 | 100 | 2943162 | 13 | 50  | 2.2  |
| 7 | 2943550 | 2943750 | 200 | 2943662 | 16 | 113 | 0    |
| 7 | 2944475 | 2944500 | 25  | 2944487 | 12 | 12  | 2.2  |
| 7 | 2944800 | 2944850 | 50  | 2944837 | 13 | 25  | 4.3  |
| 7 | 2945150 | 2945175 | 25  | 2945162 | 12 | 12  | 2.2  |
| 7 | 2950525 | 2950675 | 150 | 2950537 | 26 | 120 | 15.2 |
| 7 | 2963200 | 2963250 | 50  | 2963237 | 13 | 25  | 4.3  |
| 7 | 2966975 | 2967025 | 50  | 2966987 | 13 | 26  | 4.3  |
| 7 | 2972725 | 2972875 | 150 | 2972762 | 14 | 78  | 13   |
| 7 | 2977125 | 2977325 | 200 | 2977262 | 18 | 112 | 10.8 |
| 7 | 2987025 | 2987075 | 50  | 2987062 | 13 | 25  | 4.3  |
| 7 | 2987625 | 2987800 | 175 | 2987787 | 13 | 82  | 0    |
| 7 | 2988375 | 2988500 | 125 | 2988462 | 22 | 98  | 13   |
| 7 | 2992200 | 2992250 | 50  | 2992212 | 13 | 26  | 2.2  |
| 7 | 3002225 | 3002375 | 150 | 3002287 | 27 | 150 | 21.7 |
| 7 | 3004900 | 3005075 | 175 | 3004987 | 17 | 97  | 2.2  |
| 7 | 3007950 | 3007975 | 25  | 3007962 | 12 | 12  | 2.2  |
| 7 | 3015275 | 3015600 | 325 | 3015462 | 18 | 189 | 17.3 |
| 7 | 3041050 | 3041225 | 175 | 3041112 | 15 | 90  | 10.8 |
| 7 | 3047425 | 3047450 | 25  | 3047437 | 12 | 12  | 2.2  |
| 7 | 3081350 | 3081375 | 25  | 3081362 | 12 | 12  | 0    |
| 7 | 3086425 | 3086475 | 50  | 3086437 | 12 | 24  | 4.3  |
| 7 | 3106825 | 3107050 | 225 | 3106962 | 18 | 136 | 13   |
| 7 | 3109825 | 3109900 | 75  | 3109862 | 14 | 40  | 6.5  |
| 7 | 3114950 | 3115075 | 125 | 3115062 | 13 | 59  | 0    |
| 7 | 3146050 | 3146175 | 125 | 3146062 | 13 | 61  | 6.5  |
| 7 | 3158950 | 3158975 | 25  | 3158962 | 13 | 13  | 2.2  |
| 7 | 3168900 | 3168925 | 25  | 3168912 | 12 | 12  | 0    |
| 7 | 3169350 | 3169525 | 175 | 3169437 | 15 | 93  | 4.3  |
| 7 | 3185150 | 3185200 | 50  | 3185187 | 13 | 25  | 2.2  |
| 7 | 3187675 | 3187725 | 50  | 3187712 | 14 | 26  | 2.2  |
| 7 | 3195600 | 3195625 | 25  | 3195612 | 12 | 12  | 0    |
| 7 | 3204125 | 3204200 | 75  | 3204187 | 16 | 43  | 6.5  |
| 7 | 3239900 | 3239925 | 25  | 3239912 | 14 | 14  | 2.2  |
| 7 | 3241525 | 3241575 | 50  | 3241537 | 14 | 27  | 2.2  |
| 7 | 3247350 | 3247400 | 50  | 3247362 | 12 | 24  | 4.3  |
| 7 | 3252325 | 3252350 | 25  | 3252337 | 12 | 12  | 0    |
| 7 | 3264150 | 3264200 | 50  | 3264162 | 12 | 24  | 4.3  |
| 7 | 3291825 | 3291850 | 25  | 3291837 | 12 | 12  | 0    |
| 7 | 3301150 | 3301175 | 25  | 3301162 | 12 | 12  | 2.2  |
| 7 | 3383500 | 3383775 | 275 | 3383662 | 21 | 186 | 15.2 |
| 7 | 3417400 | 3417425 | 25  | 3417412 | 12 | 12  | 2.2  |
| 7 | 3425525 | 3425575 | 50  | 3425537 | 12 | 24  | 2.2  |
| 7 | 3432375 | 3432525 | 150 | 3432412 | 17 | 95  | 10.8 |
| 7 | 3583500 | 3583700 | 200 | 3583587 | 19 | 124 | 17.3 |
| 7 | 3583975 | 3584000 | 25  | 3583987 | 12 | 12  | 2.2  |
| 7 | 3694950 | 3695075 | 125 | 3694987 | 16 | 73  | 10.8 |
| 7 | 3695450 | 3695475 | 25  | 3695462 | 12 | 12  | 2.2  |
| 7 | 3719175 | 3719225 | 50  | 3719187 | 13 | 25  | 4.3  |
| 7 | 3737425 | 3737550 | 125 | 3737512 | 18 | 82  | 10.8 |
| 7 | 3743800 | 3743850 | 50  | 3743837 | 15 | 29  | 4.3  |
| 7 | 3786650 | 3786750 | 100 | 3786687 | 14 | 51  | 2.2  |
| 7 | 3787350 | 3787500 | 150 | 3787462 | 15 | 79  | 8.7  |
| 7 | 3788250 | 3788525 | 275 | 3788362 | 23 | 198 | 17.3 |
| 7 | 3794300 | 3794325 | 25  | 3794312 | 13 | 13  | 2.2  |
| 7 | 3840925 | 3841050 | 125 | 3840962 | 14 | 64  | 6.5  |
| 7 | 3847300 | 3847375 | 75  | 3847337 | 13 | 38  | 6.5  |
| 7 | 3848325 | 3848350 | 25  | 3848337 | 13 | 13  | 0    |
| 7 | 3849250 | 3849350 | 100 | 3849262 | 14 | 53  | 6.5  |
| 7 | 3873175 | 3873200 | 25  | 3873187 | 15 | 15  | 2.2  |
| 7 | 3877700 | 3877775 | 75  | 3877712 | 15 | 44  | 6.5  |
| 7 | 3888400 | 3888425 | 25  | 3888412 | 12 | 12  | 2.2  |
| 7 | 3899050 | 3899075 | 25  | 3899062 | 12 | 12  | 2.2  |
| 7 | 3899875 | 3899925 | 50  | 3899887 | 13 | 26  | 4.3  |
| 7 | 3905700 | 3905875 | 175 | 3905837 | 23 | 133 | 17.3 |

|   |         |         |     |         |    |     |      |
|---|---------|---------|-----|---------|----|-----|------|
| 7 | 3914425 | 3914575 | 150 | 3914512 | 14 | 74  | 6.5  |
| 7 | 3917600 | 3917650 | 50  | 3917612 | 12 | 24  | 4.3  |
| 7 | 3929900 | 3929925 | 25  | 3929912 | 12 | 12  | 2.2  |
| 7 | 3930525 | 3930550 | 25  | 3930537 | 13 | 13  | 0    |
| 7 | 3941225 | 3941325 | 100 | 3941287 | 14 | 52  | 4.3  |
| 7 | 3943225 | 3943475 | 250 | 3943237 | 12 | 108 | 2.2  |
| 7 | 3957900 | 3957925 | 25  | 3957912 | 14 | 14  | 2.2  |
| 7 | 3995475 | 3995500 | 25  | 3995487 | 12 | 12  | 0    |
| 7 | 3995925 | 3996025 | 100 | 3995962 | 13 | 49  | 2.2  |
| 7 | 3996975 | 3997350 | 375 | 3997162 | 24 | 268 | 10.8 |
| 7 | 3998375 | 3998425 | 50  | 3998387 | 14 | 26  | 4.3  |
| 7 | 3999925 | 3999950 | 25  | 3999937 | 12 | 12  | 0    |
| 7 | 4009625 | 4009950 | 325 | 4009637 | 12 | 133 | 2.2  |
| 7 | 4017550 | 4017575 | 25  | 4017562 | 12 | 12  | 0    |
| 7 | 4020950 | 4021000 | 50  | 4020987 | 13 | 25  | 0    |
| 7 | 4021675 | 4021700 | 25  | 4021687 | 12 | 12  | 2.2  |
| 7 | 4023250 | 4023275 | 25  | 4023262 | 12 | 12  | 2.2  |
| 7 | 4025325 | 4025450 | 125 | 4025437 | 18 | 69  | 2.2  |
| 7 | 4025925 | 4026675 | 750 | 4026362 | 20 | 399 | 60.7 |
| 7 | 4027475 | 4027925 | 450 | 4027562 | 14 | 220 | 28.2 |
| 7 | 4028550 | 4028750 | 200 | 4028662 | 18 | 120 | 23.8 |
| 7 | 4036050 | 4036075 | 25  | 4036062 | 12 | 12  | 2.2  |
| 7 | 4055600 | 4055625 | 25  | 4055612 | 12 | 12  | 2.2  |
| 7 | 4063600 | 4063650 | 50  | 4063637 | 14 | 26  | 2.2  |
| 7 | 4072625 | 4072700 | 75  | 4072637 | 13 | 39  | 2.2  |
| 7 | 4082950 | 4083025 | 75  | 4083012 | 16 | 43  | 4.3  |
| 7 | 4083475 | 4083550 | 75  | 4083487 | 15 | 44  | 6.5  |
| 7 | 4085800 | 4085825 | 25  | 4085812 | 12 | 12  | 2.2  |
| 7 | 4087425 | 4087450 | 25  | 4087437 | 12 | 12  | 2.2  |
| 7 | 4098300 | 4098375 | 75  | 4098337 | 14 | 39  | 6.5  |
| 7 | 4098675 | 4098750 | 75  | 4098687 | 12 | 36  | 6.5  |
| 7 | 4099950 | 4100050 | 100 | 4099962 | 14 | 52  | 8.7  |
| 7 | 4105700 | 4105725 | 25  | 4105712 | 12 | 12  | 2.2  |
| 7 | 4107100 | 4107275 | 175 | 4107137 | 15 | 94  | 4.3  |
| 7 | 4112175 | 4112200 | 25  | 4112187 | 12 | 12  | 2.2  |
| 7 | 4115500 | 4115550 | 50  | 4115512 | 12 | 24  | 4.3  |
| 7 | 4116800 | 4116850 | 50  | 4116812 | 13 | 26  | 2.2  |
| 7 | 4119425 | 4119475 | 50  | 4119462 | 13 | 25  | 4.3  |
| 7 | 4120875 | 4121175 | 300 | 4121012 | 29 | 261 | 34.7 |
| 7 | 4131825 | 4131850 | 25  | 4131837 | 12 | 12  | 2.2  |
| 7 | 4132250 | 4132275 | 25  | 4132262 | 13 | 13  | 2.2  |
| 7 | 4139800 | 4139925 | 125 | 4139862 | 15 | 70  | 10.8 |
| 7 | 4149325 | 4149375 | 50  | 4149337 | 12 | 24  | 0    |
| 7 | 4150525 | 4150550 | 25  | 4150537 | 12 | 12  | 0    |
| 7 | 4151925 | 4151950 | 25  | 4151937 | 12 | 12  | 2.2  |
| 7 | 4162125 | 4162275 | 150 | 4162162 | 17 | 93  | 2.2  |
| 7 | 4167400 | 4167425 | 25  | 4167412 | 14 | 14  | 2.2  |
| 7 | 4179725 | 4179750 | 25  | 4179737 | 12 | 12  | 2.2  |
| 7 | 4180625 | 4180775 | 150 | 4180687 | 13 | 73  | 10.8 |
| 7 | 4181925 | 4181950 | 25  | 4181937 | 17 | 17  | 2.2  |
| 7 | 4183550 | 4183575 | 25  | 4183562 | 12 | 12  | 2.2  |
| 7 | 4184100 | 4184250 | 150 | 4184112 | 14 | 78  | 13   |
| 7 | 4185950 | 4186150 | 200 | 4185962 | 12 | 74  | 10.8 |
| 7 | 4187125 | 4187275 | 150 | 4187187 | 16 | 88  | 10.8 |
| 7 | 4187675 | 4187900 | 225 | 4187712 | 20 | 140 | 0    |
| 7 | 4188900 | 4188950 | 50  | 4188937 | 13 | 25  | 2.2  |
| 7 | 4190975 | 4191325 | 350 | 4191012 | 15 | 201 | 34.7 |
| 7 | 4192600 | 4192625 | 25  | 4192612 | 12 | 12  | 2.2  |
| 7 | 4192950 | 4192975 | 25  | 4192962 | 12 | 12  | 2.2  |
| 7 | 4206825 | 4206850 | 25  | 4206837 | 12 | 12  | 2.2  |
| 7 | 4207875 | 4207975 | 100 | 4207912 | 14 | 51  | 8.7  |
| 7 | 4210975 | 4211375 | 400 | 4211137 | 23 | 282 | 34.7 |
| 7 | 4212325 | 4212350 | 25  | 4212337 | 12 | 12  | 2.2  |
| 7 | 4212625 | 4212725 | 100 | 4212637 | 12 | 48  | 0    |
| 7 | 4221775 | 4222125 | 350 | 4221987 | 15 | 166 | 26   |
| 7 | 4222450 | 4222500 | 50  | 4222462 | 13 | 25  | 0    |
| 7 | 4222925 | 4222950 | 25  | 4222937 | 12 | 12  | 2.2  |
| 7 | 4248100 | 4248150 | 50  | 4248137 | 14 | 27  | 0    |
| 7 | 4250275 | 4250300 | 25  | 4250287 | 13 | 13  | 2.2  |
| 7 | 4250800 | 4250825 | 25  | 4250812 | 12 | 12  | 2.2  |
| 7 | 4251600 | 4251775 | 175 | 4251737 | 14 | 87  | 10.8 |
| 7 | 4264075 | 4264325 | 250 | 4264262 | 17 | 125 | 8.7  |
| 7 | 4270800 | 4270900 | 100 | 4270887 | 15 | 55  | 0    |
| 7 | 4274800 | 4274950 | 150 | 4274837 | 15 | 80  | 0    |
| 7 | 4276425 | 4276550 | 125 | 4276537 | 17 | 70  | 8.7  |



|   |         |         |      |         |    |      |      |
|---|---------|---------|------|---------|----|------|------|
| 7 | 4289325 | 4289350 | 25   | 4289337 | 12 | 12   | 0    |
| 7 | 4289825 | 4289875 | 50   | 4289862 | 13 | 25   | 4.3  |
| 7 | 4291225 | 4291250 | 25   | 4291237 | 12 | 12   | 0    |
| 7 | 4314175 | 4314275 | 100  | 4314187 | 13 | 49   | 4.3  |
| 7 | 4316325 | 4316350 | 25   | 4316337 | 13 | 13   | 2.2  |
| 7 | 4317950 | 4318050 | 100  | 4317987 | 13 | 49   | 8.7  |
| 7 | 4350875 | 4350925 | 50   | 4350912 | 13 | 25   | 0    |
| 7 | 4376825 | 4377150 | 325  | 4377137 | 19 | 222  | 36.8 |
| 7 | 4384625 | 4384650 | 25   | 4384637 | 12 | 12   | 0    |
| 7 | 4470700 | 4470725 | 25   | 4470712 | 12 | 12   | 0    |
| 7 | 4506050 | 4506200 | 150  | 4506087 | 17 | 82   | 8.7  |
| 7 | 4540900 | 4540925 | 25   | 4540912 | 12 | 12   | 2.2  |
| 7 | 4542950 | 4543025 | 75   | 4543012 | 13 | 37   | 6.5  |
| 7 | 4558800 | 4558825 | 25   | 4558812 | 12 | 12   | 0    |
| 7 | 4584925 | 4585050 | 125  | 4584987 | 16 | 72   | 10.8 |
| 7 | 4585300 | 4585725 | 425  | 4585412 | 15 | 197  | 28.2 |
| 7 | 4587925 | 4588050 | 125  | 4587962 | 14 | 64   | 8.7  |
| 7 | 4609400 | 4609725 | 325  | 4609662 | 13 | 125  | 23.8 |
| 7 | 4610150 | 4610425 | 275  | 4610337 | 22 | 176  | 4.3  |
| 7 | 4611400 | 4611675 | 275  | 4611487 | 13 | 115  | 6.5  |
| 7 | 4626000 | 4626025 | 25   | 4626012 | 14 | 14   | 2.2  |
| 7 | 4629525 | 4629625 | 100  | 4629562 | 14 | 53   | 0    |
| 7 | 4633975 | 4634075 | 100  | 4633987 | 16 | 58   | 8.7  |
| 7 | 4664425 | 4664625 | 200  | 4664537 | 15 | 108  | 0    |
| 7 | 4665800 | 4666025 | 225  | 4665837 | 17 | 132  | 0    |
| 7 | 4666400 | 4666475 | 75   | 4666437 | 14 | 38   | 6.5  |
| 7 | 4677025 | 4677225 | 200  | 4677087 | 15 | 113  | 6.5  |
| 7 | 4677725 | 4677750 | 25   | 4677737 | 12 | 12   | 0    |
| 7 | 4680250 | 4680575 | 325  | 4680412 | 29 | 260  | 17.3 |
| 7 | 4813175 | 4813275 | 100  | 4813187 | 15 | 55   | 8.7  |
| 7 | 4814950 | 4815000 | 50   | 4814962 | 17 | 32   | 4.3  |
| 7 | 4819700 | 4820250 | 550  | 4819712 | 22 | 353  | 67.2 |
| 7 | 4820625 | 4820700 | 75   | 4820687 | 16 | 44   | 4.3  |
| 7 | 4821775 | 4821925 | 150  | 4821862 | 17 | 89   | 4.3  |
| 7 | 4822200 | 4822425 | 225  | 4822337 | 16 | 126  | 8.7  |
| 7 | 4827225 | 4827350 | 125  | 4827262 | 16 | 74   | 4.3  |
| 7 | 4828825 | 4828900 | 75   | 4828862 | 13 | 37   | 0    |
| 7 | 4829650 | 4829725 | 75   | 4829712 | 13 | 36   | 6.5  |
| 7 | 4830650 | 4830700 | 50   | 4830662 | 13 | 25   | 0    |
| 7 | 4831475 | 4831500 | 25   | 4831487 | 13 | 13   | 2.2  |
| 7 | 4834975 | 4835050 | 75   | 4835037 | 19 | 43   | 6.5  |
| 7 | 4839075 | 4839125 | 50   | 4839087 | 12 | 24   | 4.3  |
| 7 | 4839400 | 4839450 | 50   | 4839412 | 13 | 25   | 4.3  |
| 7 | 4840000 | 4840175 | 175  | 4840137 | 16 | 96   | 6.5  |
| 7 | 4840525 | 4840625 | 100  | 4840537 | 16 | 58   | 6.5  |
| 7 | 4841425 | 4841575 | 150  | 4841462 | 15 | 82   | 8.7  |
| 7 | 4842300 | 4842450 | 150  | 4842337 | 13 | 73   | 13   |
| 7 | 4856675 | 4856725 | 50   | 4856687 | 12 | 24   | 2.2  |
| 7 | 4857600 | 4858000 | 400  | 4857762 | 22 | 244  | 6.5  |
| 7 | 4861500 | 4861725 | 225  | 4861612 | 22 | 170  | 21.7 |
| 7 | 4866200 | 4866450 | 250  | 4866287 | 18 | 160  | 0    |
| 7 | 4866925 | 4867250 | 325  | 4866937 | 16 | 177  | 17.3 |
| 7 | 4867550 | 4868800 | 1250 | 4868562 | 54 | 1470 | 54.2 |
| 7 | 4874000 | 4874100 | 100  | 4874012 | 14 | 55   | 8.7  |
| 7 | 4874600 | 4874775 | 175  | 4874612 | 24 | 164  | 32.5 |
| 7 | 4881600 | 4881825 | 225  | 4881712 | 15 | 119  | 15.2 |
| 7 | 4883700 | 4884400 | 700  | 4883737 | 20 | 423  | 65   |
| 7 | 4884650 | 4884825 | 175  | 4884712 | 14 | 90   | 2.2  |
| 7 | 4889975 | 4890000 | 25   | 4889987 | 12 | 12   | 0    |
| 7 | 4890225 | 4890250 | 25   | 4890237 | 12 | 12   | 2.2  |
| 7 | 4900425 | 4900875 | 450  | 4900687 | 15 | 199  | 30.3 |
| 7 | 4905050 | 4905175 | 125  | 4905087 | 13 | 62   | 0    |
| 7 | 4908800 | 4908825 | 25   | 4908812 | 12 | 12   | 0    |
| 7 | 4909850 | 4909900 | 50   | 4909862 | 16 | 28   | 4.3  |
| 7 | 4913625 | 4913675 | 50   | 4913662 | 16 | 31   | 4.3  |
| 7 | 4916200 | 4916325 | 125  | 4916212 | 15 | 66   | 10.8 |
| 7 | 4924200 | 4924425 | 225  | 4924237 | 40 | 254  | 43.3 |
| 7 | 4926100 | 4926200 | 100  | 4926162 | 16 | 56   | 4.3  |
| 7 | 4930700 | 4930725 | 25   | 4930712 | 13 | 13   | 2.2  |
| 7 | 4931650 | 4931675 | 25   | 4931662 | 13 | 13   | 0    |
| 7 | 4932525 | 4932550 | 25   | 4932537 | 12 | 12   | 0    |
| 7 | 4950675 | 4950700 | 25   | 4950687 | 12 | 12   | 2.2  |
| 7 | 4952425 | 4952450 | 25   | 4952437 | 13 | 13   | 2.2  |
| 7 | 4962750 | 4962825 | 75   | 4962787 | 13 | 38   | 0    |
| 7 | 4969200 | 4969250 | 50   | 4969212 | 15 | 27   | 2.2  |

|   |         |         |     |         |    |     |      |
|---|---------|---------|-----|---------|----|-----|------|
| 7 | 4969700 | 4969725 | 25  | 4969712 | 12 | 12  | 0    |
| 7 | 5040525 | 5040550 | 25  | 5040537 | 12 | 12  | 0    |
| 7 | 5066825 | 5066900 | 75  | 5066837 | 12 | 36  | 6.5  |
| 7 | 5070575 | 5070800 | 225 | 5070687 | 22 | 161 | 0    |
| 7 | 5076350 | 5076375 | 25  | 5076362 | 13 | 13  | 2.2  |
| 7 | 5078125 | 5078200 | 75  | 5078187 | 29 | 78  | 4.3  |
| 7 | 5078425 | 5078450 | 25  | 5078437 | 13 | 13  | 2.2  |
| 7 | 5079600 | 5079800 | 200 | 5079712 | 18 | 124 | 13   |
| 7 | 5082375 | 5082450 | 75  | 5082412 | 18 | 51  | 4.3  |
| 7 | 5084100 | 5084175 | 75  | 5084112 | 16 | 47  | 6.5  |
| 7 | 5086625 | 5086900 | 275 | 5086712 | 20 | 178 | 30.3 |
| 7 | 5089525 | 5089725 | 200 | 5089537 | 13 | 100 | 6.5  |
| 7 | 5100425 | 5100475 | 50  | 5100437 | 12 | 24  | 0    |
| 7 | 5102000 | 5102100 | 100 | 5102012 | 12 | 48  | 0    |
| 7 | 5120025 | 5120050 | 25  | 5120037 | 12 | 12  | 0    |
| 7 | 5123425 | 5123750 | 325 | 5123587 | 16 | 175 | 17.3 |
| 7 | 5124250 | 5124275 | 25  | 5124262 | 16 | 16  | 2.2  |
| 7 | 5142575 | 5142675 | 100 | 5142587 | 13 | 49  | 2.2  |
| 7 | 5186350 | 5186575 | 225 | 5186487 | 24 | 175 | 2.2  |
| 7 | 5187050 | 5187150 | 100 | 5187062 | 14 | 51  | 8.7  |
| 7 | 5189175 | 5189425 | 250 | 5189412 | 20 | 159 | 6.5  |
| 7 | 5271950 | 5271975 | 25  | 5271962 | 18 | 18  | 2.2  |
| 7 | 5325350 | 5325375 | 25  | 5325362 | 12 | 12  | 2.2  |
| 7 | 5326575 | 5326600 | 25  | 5326587 | 12 | 12  | 0    |
| 7 | 5327350 | 5327375 | 25  | 5327362 | 13 | 13  | 2.2  |
| 7 | 5442250 | 5442300 | 50  | 5442262 | 13 | 26  | 2.2  |
| 7 | 5443625 | 5443700 | 75  | 5443637 | 13 | 39  | 2.2  |
| 7 | 5462250 | 5462400 | 150 | 5462362 | 14 | 78  | 6.5  |
| 7 | 5463325 | 5463800 | 475 | 5463387 | 16 | 221 | 28.2 |
| 7 | 5511400 | 5511600 | 200 | 5511512 | 15 | 107 | 4.3  |
| 7 | 5534500 | 5534525 | 25  | 5534512 | 13 | 13  | 0    |
| 7 | 5870300 | 5870350 | 50  | 5870337 | 13 | 25  | 0    |
| 7 | 6273100 | 6273150 | 50  | 6273137 | 15 | 28  | 4.3  |
| 7 | 6493425 | 6493575 | 150 | 6493462 | 17 | 92  | 17.3 |
| 7 | 6494175 | 6494225 | 50  | 6494187 | 12 | 24  | 0    |
| 7 | 6511025 | 6511075 | 50  | 6511062 | 14 | 26  | 4.3  |
| 7 | 6512350 | 6512450 | 100 | 6512412 | 14 | 51  | 8.7  |
| 7 | 6512675 | 6512725 | 50  | 6512687 | 15 | 28  | 4.3  |
| 7 | 6513125 | 6513175 | 50  | 6513162 | 13 | 25  | 4.3  |
| 7 | 6526600 | 6526775 | 175 | 6526762 | 22 | 119 | 15.2 |
| 7 | 6527000 | 6527025 | 25  | 6527012 | 13 | 13  | 0    |
| 7 | 6532950 | 6533025 | 75  | 6533012 | 15 | 39  | 2.2  |
| 7 | 6534525 | 6534550 | 25  | 6534537 | 13 | 13  | 2.2  |
| 7 | 6621325 | 6621350 | 25  | 6621337 | 12 | 12  | 2.2  |
| 7 | 6655100 | 6655175 | 75  | 6655112 | 12 | 35  | 0    |
| 7 | 6658025 | 6658075 | 50  | 6658062 | 15 | 28  | 0    |
| 7 | 6658500 | 6658525 | 25  | 6658512 | 14 | 14  | 2.2  |
| 7 | 6658900 | 6658950 | 50  | 6658912 | 13 | 25  | 0    |
| 7 | 6666000 | 6666075 | 75  | 6666012 | 17 | 43  | 0    |
| 7 | 6670800 | 6670925 | 125 | 6670812 | 17 | 65  | 10.8 |
| 7 | 6673250 | 6673550 | 300 | 6673412 | 22 | 206 | 15.2 |
| 7 | 6683900 | 6684125 | 225 | 6683962 | 20 | 146 | 15.2 |
| 7 | 6689875 | 6689900 | 25  | 6689887 | 12 | 12  | 0    |
| 7 | 6694125 | 6694175 | 50  | 6694162 | 14 | 27  | 0    |
| 7 | 6695325 | 6695500 | 175 | 6695437 | 17 | 105 | 2.2  |
| 7 | 6697175 | 6697325 | 150 | 6697237 | 13 | 74  | 4.3  |
| 7 | 6697850 | 6698150 | 300 | 6697987 | 17 | 181 | 2.2  |
| 7 | 6700625 | 6700825 | 200 | 6700737 | 18 | 121 | 0    |
| 7 | 6703850 | 6703925 | 75  | 6703862 | 12 | 35  | 0    |
| 7 | 6705575 | 6705750 | 175 | 6705587 | 31 | 159 | 26   |
| 7 | 6707775 | 6707900 | 125 | 6707812 | 15 | 69  | 10.8 |
| 7 | 6708625 | 6708650 | 25  | 6708637 | 12 | 12  | 2.2  |
| 7 | 6709075 | 6709325 | 250 | 6709212 | 24 | 188 | 21.7 |
| 7 | 6709625 | 6710150 | 525 | 6709987 | 32 | 486 | 75.8 |
| 7 | 6711400 | 6711425 | 25  | 6711412 | 12 | 12  | 2.2  |
| 7 | 6712275 | 6712350 | 75  | 6712337 | 15 | 41  | 0    |
| 7 | 6715475 | 6715600 | 125 | 6715487 | 14 | 63  | 4.3  |
| 7 | 6715825 | 6716350 | 525 | 6716212 | 18 | 277 | 10.8 |
| 7 | 6717475 | 6717500 | 25  | 6717487 | 13 | 13  | 0    |
| 7 | 6722000 | 6722300 | 300 | 6722137 | 18 | 186 | 17.3 |
| 7 | 6728000 | 6728050 | 50  | 6728037 | 13 | 25  | 4.3  |
| 7 | 6728425 | 6728450 | 25  | 6728437 | 12 | 12  | 0    |
| 7 | 6888875 | 6888950 | 75  | 6888912 | 13 | 37  | 0    |
| 7 | 6895325 | 6895825 | 500 | 6895487 | 23 | 365 | 32.5 |
| 7 | 6907600 | 6907775 | 175 | 6907612 | 13 | 82  | 15.2 |

|   |          |          |     |          |    |     |      |
|---|----------|----------|-----|----------|----|-----|------|
| 7 | 6927400  | 6927425  | 25  | 6927412  | 12 | 12  | 0    |
| 7 | 6964750  | 6964775  | 25  | 6964762  | 12 | 12  | 2.2  |
| 7 | 6985525  | 6985775  | 250 | 6985612  | 20 | 158 | 2.2  |
| 7 | 6999000  | 6999100  | 100 | 6999012  | 14 | 53  | 8.7  |
| 7 | 7007375  | 7007425  | 50  | 7007387  | 12 | 24  | 4.3  |
| 7 | 7064175  | 7064200  | 25  | 7064187  | 12 | 12  | 2.2  |
| 7 | 7072750  | 7073025  | 275 | 7072987  | 13 | 108 | 2.2  |
| 7 | 7151550  | 7151750  | 200 | 7151662  | 15 | 103 | 17.3 |
| 7 | 7309650  | 7309700  | 50  | 7309662  | 12 | 24  | 0    |
| 7 | 7324875  | 7324900  | 25  | 7324887  | 12 | 12  | 2.2  |
| 7 | 7384875  | 7384925  | 50  | 7384887  | 13 | 25  | 4.3  |
| 7 | 8109625  | 8109650  | 25  | 8109637  | 13 | 13  | 0    |
| 7 | 8118225  | 8118300  | 75  | 8118237  | 12 | 34  | 4.3  |
| 7 | 8119500  | 8119600  | 100 | 8119537  | 14 | 52  | 2.2  |
| 7 | 8128325  | 8128375  | 50  | 8128337  | 13 | 25  | 4.3  |
| 7 | 8159000  | 8159025  | 25  | 8159012  | 17 | 17  | 2.2  |
| 7 | 8167850  | 8167900  | 50  | 8167862  | 13 | 25  | 4.3  |
| 7 | 8261025  | 8261050  | 25  | 8261037  | 12 | 12  | 0    |
| 7 | 8303850  | 8303875  | 25  | 8303862  | 12 | 12  | 0    |
| 7 | 8439625  | 8439725  | 100 | 8439637  | 12 | 48  | 8.7  |
| 7 | 8439950  | 8440075  | 125 | 8439987  | 13 | 63  | 8.7  |
| 7 | 8440425  | 8440450  | 25  | 8440437  | 12 | 12  | 2.2  |
| 7 | 8441175  | 8441225  | 50  | 8441187  | 12 | 24  | 2.2  |
| 7 | 8448775  | 8448950  | 175 | 8448862  | 16 | 102 | 10.8 |
| 7 | 9783025  | 9783125  | 100 | 9783037  | 13 | 50  | 0    |
| 7 | 9977300  | 9977425  | 125 | 9977312  | 13 | 61  | 10.8 |
| 7 | 10220075 | 10220225 | 150 | 10220112 | 15 | 82  | 10.8 |
| 7 | 10253650 | 10253675 | 25  | 10253662 | 16 | 16  | 2.2  |
| 7 | 10254025 | 10254100 | 75  | 10254037 | 18 | 46  | 0    |
| 7 | 10502125 | 10502200 | 75  | 10502137 | 13 | 37  | 6.5  |
| 7 | 10502850 | 10502950 | 100 | 10502862 | 16 | 63  | 0    |
| 7 | 10678700 | 10678725 | 25  | 10678712 | 13 | 13  | 0    |
| 7 | 10786075 | 10786225 | 150 | 10786087 | 17 | 96  | 6.5  |
| 7 | 10861800 | 10862025 | 225 | 10861987 | 18 | 144 | 28.2 |
| 7 | 10910425 | 10910475 | 50  | 10910437 | 15 | 27  | 2.2  |
| 7 | 10965525 | 10966025 | 500 | 10965712 | 32 | 464 | 52   |
| 7 | 10971975 | 10972100 | 125 | 10971987 | 40 | 157 | 13   |
| 7 | 10972400 | 10972500 | 100 | 10972487 | 20 | 66  | 0    |
| 7 | 11001700 | 11001725 | 25  | 11001712 | 12 | 12  | 0    |
| 7 | 11002125 | 11002200 | 75  | 11002137 | 13 | 36  | 0    |
| 7 | 11209525 | 11209575 | 50  | 11209537 | 12 | 24  | 4.3  |
| 7 | 11359850 | 11359875 | 25  | 11359862 | 12 | 12  | 0    |
| 7 | 11398025 | 11398100 | 75  | 11398037 | 12 | 35  | 2.2  |
| 7 | 11426600 | 11426800 | 200 | 11426762 | 14 | 91  | 8.7  |
| 7 | 11472975 | 11473025 | 50  | 11472987 | 13 | 26  | 4.3  |
| 7 | 11488075 | 11488125 | 50  | 11488087 | 15 | 27  | 4.3  |
| 7 | 11543675 | 11543825 | 150 | 11543712 | 13 | 72  | 8.7  |
| 7 | 11956550 | 11956650 | 100 | 11956587 | 14 | 54  | 8.7  |
| 7 | 12061900 | 12062050 | 150 | 12061937 | 15 | 82  | 8.7  |
| 7 | 12296275 | 12296350 | 75  | 12296337 | 15 | 41  | 0    |
| 7 | 12297525 | 12297625 | 100 | 12297537 | 13 | 51  | 0    |
| 7 | 12600175 | 12600400 | 225 | 12600237 | 17 | 143 | 26   |
| 7 | 12634100 | 12634125 | 25  | 12634112 | 12 | 12  | 0    |
| 7 | 12840275 | 12840375 | 100 | 12840337 | 13 | 50  | 8.7  |
| 7 | 12920600 | 12920625 | 25  | 12920612 | 12 | 12  | 2.2  |
| 7 | 12945925 | 12946000 | 75  | 12945937 | 15 | 39  | 6.5  |
| 7 | 12964625 | 12964725 | 100 | 12964687 | 14 | 52  | 8.7  |
| 7 | 13116225 | 13116425 | 200 | 13116387 | 15 | 102 | 6.5  |
| 7 | 13937775 | 13937800 | 25  | 13937787 | 12 | 12  | 2.2  |
| 7 | 14079775 | 14079800 | 25  | 14079787 | 12 | 12  | 2.2  |
| 7 | 14651150 | 14651175 | 25  | 14651162 | 12 | 12  | 2.2  |
| 7 | 14793125 | 14793150 | 25  | 14793137 | 13 | 13  | 0    |
| 7 | 14804300 | 14804325 | 25  | 14804312 | 12 | 12  | 2.2  |
| 7 | 15284350 | 15285050 | 700 | 15284987 | 18 | 396 | 73.7 |
| 7 | 15287675 | 15287725 | 50  | 15287687 | 12 | 24  | 0    |
| 7 | 15403200 | 15403300 | 100 | 15403237 | 13 | 49  | 8.7  |
| 7 | 15531725 | 15531950 | 225 | 15531887 | 17 | 131 | 21.7 |
| 7 | 15591025 | 15591150 | 125 | 15591087 | 17 | 76  | 8.7  |
| 7 | 15649200 | 15649250 | 50  | 15649237 | 14 | 26  | 2.2  |
| 7 | 15693475 | 15693575 | 100 | 15693487 | 33 | 123 | 23.8 |
| 7 | 15693925 | 15694000 | 75  | 15693987 | 16 | 45  | 4.3  |
| 7 | 16048575 | 16048600 | 25  | 16048587 | 12 | 12  | 2.2  |
| 7 | 16070450 | 16070650 | 200 | 16070562 | 20 | 127 | 8.7  |
| 7 | 16112450 | 16112750 | 300 | 16112462 | 15 | 178 | 34.7 |
| 7 | 16151375 | 16151400 | 25  | 16151387 | 13 | 13  | 0    |

|   |          |          |      |          |    |      |       |
|---|----------|----------|------|----------|----|------|-------|
| 7 | 16279650 | 16279750 | 100  | 16279687 | 13 | 49   | 6.5   |
| 7 | 16340700 | 16340750 | 50   | 16340737 | 13 | 25   | 4.3   |
| 7 | 16403150 | 16403600 | 450  | 16403587 | 29 | 416  | 36.8  |
| 7 | 16403875 | 16406575 | 2700 | 16403962 | 62 | 4234 | 459.4 |
| 7 | 16406925 | 16406950 | 25   | 16406937 | 12 | 12   | 2.2   |
| 7 | 16468800 | 16468825 | 25   | 16468812 | 12 | 12   | 0     |
| 7 | 16532950 | 16532975 | 25   | 16532962 | 12 | 12   | 2.2   |
| 7 | 16651450 | 16651475 | 25   | 16651462 | 12 | 12   | 2.2   |
| 7 | 16737400 | 16737450 | 50   | 16737412 | 13 | 25   | 4.3   |
| 7 | 16857100 | 16857125 | 25   | 16857112 | 12 | 12   | 2.2   |
| 7 | 16857400 | 16857475 | 75   | 16857412 | 12 | 36   | 6.5   |
| 7 | 16918925 | 16919000 | 75   | 16918962 | 16 | 45   | 6.5   |
| 7 | 16921000 | 16921250 | 250  | 16921112 | 23 | 178  | 17.3  |
| 7 | 16948900 | 16949475 | 575  | 16949237 | 14 | 312  | 39    |
| 7 | 16951025 | 16951050 | 25   | 16951037 | 12 | 12   | 2.2   |
| 7 | 16972000 | 16972100 | 100  | 16972062 | 14 | 52   | 8.7   |
| 7 | 17034475 | 17034500 | 25   | 17034487 | 12 | 12   | 0     |
| 7 | 17107575 | 17107750 | 175  | 17107687 | 13 | 79   | 0     |
| 7 | 17153725 | 17153775 | 50   | 17153737 | 12 | 24   | 0     |
| 7 | 17265950 | 17265975 | 25   | 17265962 | 12 | 12   | 0     |
| 7 | 17276525 | 17277375 | 850  | 17277137 | 27 | 693  | 86.7  |
| 7 | 17277675 | 17277875 | 200  | 17277687 | 19 | 125  | 17.3  |
| 7 | 17306025 | 17306075 | 50   | 17306037 | 12 | 24   | 2.2   |
| 7 | 17353025 | 17353075 | 50   | 17353037 | 12 | 24   | 4.3   |
| 7 | 17400450 | 17400550 | 100  | 17400487 | 13 | 50   | 6.5   |
| 7 | 17582075 | 17582125 | 50   | 17582087 | 12 | 24   | 0     |
| 7 | 17608750 | 17608875 | 125  | 17608787 | 16 | 73   | 10.8  |
| 7 | 17680300 | 17680525 | 225  | 17680362 | 16 | 117  | 4.3   |
| 7 | 17694450 | 17694550 | 100  | 17694512 | 14 | 50   | 8.7   |
| 7 | 17698025 | 17698425 | 400  | 17698137 | 22 | 284  | 23.8  |
| 7 | 17699025 | 17699100 | 75   | 17699087 | 14 | 38   | 6.5   |
| 7 | 17704350 | 17704450 | 100  | 17704437 | 14 | 51   | 0     |
| 7 | 17705000 | 17705650 | 650  | 17705262 | 34 | 518  | 65    |
| 7 | 17738525 | 17738625 | 100  | 17738562 | 13 | 50   | 8.7   |
| 7 | 17740375 | 17740575 | 200  | 17740462 | 19 | 133  | 10.8  |
| 7 | 17740900 | 17741175 | 275  | 17741012 | 24 | 206  | 6.5   |
| 7 | 17748000 | 17748050 | 50   | 17748012 | 15 | 29   | 4.3   |
| 7 | 17748675 | 17748775 | 100  | 17748687 | 15 | 56   | 4.3   |
| 7 | 17854875 | 17854900 | 25   | 17854887 | 12 | 12   | 0     |
| 7 | 18088700 | 18088725 | 25   | 18088712 | 14 | 14   | 2.2   |
| 7 | 18093275 | 18093475 | 200  | 18093312 | 19 | 143  | 13    |
| 7 | 18098300 | 18098325 | 25   | 18098312 | 12 | 12   | 0     |
| 7 | 18237450 | 18237550 | 100  | 18237487 | 15 | 56   | 8.7   |
| 7 | 18242900 | 18243025 | 125  | 18242937 | 14 | 63   | 0     |
| 7 | 18579675 | 18579800 | 125  | 18579737 | 15 | 64   | 10.8  |
| 7 | 18669675 | 18669700 | 25   | 18669687 | 12 | 12   | 2.2   |
| 7 | 18707000 | 18707050 | 50   | 18707012 | 13 | 25   | 4.3   |
| 7 | 18708250 | 18708300 | 50   | 18708287 | 14 | 26   | 2.2   |
| 7 | 18853775 | 18853800 | 25   | 18853787 | 12 | 12   | 2.2   |
| 7 | 18857450 | 18857500 | 50   | 18857462 | 14 | 26   | 4.3   |
| 7 | 18871600 | 18871625 | 25   | 18871612 | 12 | 12   | 2.2   |
| 7 | 18875300 | 18875325 | 25   | 18875312 | 12 | 12   | 2.2   |
| 7 | 19079975 | 19080025 | 50   | 19079987 | 14 | 28   | 4.3   |
| 7 | 19112600 | 19112700 | 100  | 19112687 | 22 | 78   | 15.2  |
| 7 | 19114150 | 19114200 | 50   | 19114187 | 13 | 25   | 4.3   |
| 7 | 19114700 | 19114775 | 75   | 19114737 | 13 | 37   | 4.3   |
| 7 | 19118700 | 19118750 | 50   | 19118712 | 14 | 26   | 4.3   |
| 7 | 19124375 | 19124500 | 125  | 19124437 | 19 | 79   | 4.3   |
| 7 | 19124875 | 19124925 | 50   | 19124887 | 12 | 24   | 4.3   |
| 7 | 19151100 | 19151925 | 825  | 19151387 | 22 | 485  | 80.2  |
| 7 | 19324700 | 19324725 | 25   | 19324712 | 12 | 12   | 2.2   |
| 7 | 19495600 | 19495725 | 125  | 19495687 | 13 | 61   | 0     |
| 7 | 19601825 | 19601850 | 25   | 19601837 | 12 | 12   | 2.2   |
| 7 | 19608375 | 19608400 | 25   | 19608387 | 13 | 13   | 2.2   |
| 7 | 19608850 | 19609300 | 450  | 19609237 | 23 | 300  | 8.7   |
| 7 | 19640725 | 19640825 | 100  | 19640737 | 12 | 47   | 8.7   |
| 7 | 19665525 | 19665675 | 150  | 19665637 | 14 | 73   | 0     |
| 7 | 19697925 | 19697950 | 25   | 19697937 | 12 | 12   | 2.2   |
| 7 | 19698375 | 19698750 | 375  | 19698562 | 21 | 241  | 19.5  |
| 7 | 19779975 | 19780025 | 50   | 19779987 | 13 | 26   | 0     |
| 7 | 19896050 | 19896150 | 100  | 19896062 | 14 | 51   | 4.3   |
| 7 | 19912625 | 19912650 | 25   | 19912637 | 13 | 13   | 2.2   |
| 7 | 19954250 | 19954275 | 25   | 19954262 | 12 | 12   | 0     |
| 7 | 19961675 | 19961750 | 75   | 19961737 | 14 | 38   | 6.5   |
| 7 | 20074025 | 20074400 | 375  | 20074087 | 19 | 236  | 0     |

|   |          |          |     |          |    |     |      |
|---|----------|----------|-----|----------|----|-----|------|
| 7 | 20215075 | 20215100 | 25  | 20215087 | 12 | 12  | 2.2  |
| 7 | 20215350 | 20215500 | 150 | 20215437 | 19 | 97  | 8.7  |
| 7 | 20231975 | 20232000 | 25  | 20231987 | 12 | 12  | 0    |
| 7 | 20446075 | 20446150 | 75  | 20446137 | 15 | 40  | 6.5  |
| 7 | 20447325 | 20447350 | 25  | 20447337 | 12 | 12  | 2.2  |
| 7 | 20493425 | 20493700 | 275 | 20493587 | 31 | 289 | 17.3 |
| 7 | 20501575 | 20501700 | 125 | 20501612 | 15 | 64  | 10.8 |
| 7 | 20501925 | 20502000 | 75  | 20501987 | 18 | 45  | 2.2  |
| 7 | 20502275 | 20502350 | 75  | 20502287 | 21 | 62  | 2.2  |
| 7 | 20514400 | 20514500 | 100 | 20514412 | 15 | 53  | 4.3  |
| 7 | 20535050 | 20535700 | 650 | 20535562 | 26 | 412 | 82.3 |
| 7 | 20560425 | 20560500 | 75  | 20560462 | 14 | 39  | 4.3  |
| 7 | 20565775 | 20565850 | 75  | 20565787 | 13 | 37  | 6.5  |
| 7 | 20566200 | 20566300 | 100 | 20566212 | 18 | 65  | 8.7  |
| 7 | 20590325 | 20590350 | 25  | 20590337 | 12 | 12  | 0    |
| 7 | 20594950 | 20595050 | 100 | 20595037 | 13 | 49  | 4.3  |
| 7 | 20600300 | 20600525 | 225 | 20600437 | 17 | 141 | 17.3 |
| 7 | 20630875 | 20630900 | 25  | 20630887 | 13 | 13  | 2.2  |
| 7 | 20688700 | 20688950 | 250 | 20688862 | 22 | 171 | 26   |
| 7 | 20692700 | 20692800 | 100 | 20692762 | 15 | 55  | 8.7  |
| 7 | 20709525 | 20709600 | 75  | 20709537 | 12 | 36  | 2.2  |
| 7 | 20725775 | 20725800 | 25  | 20725787 | 14 | 14  | 2.2  |
| 7 | 20757000 | 20757175 | 175 | 20757062 | 13 | 87  | 0    |
| 7 | 20766725 | 20766750 | 25  | 20766737 | 13 | 13  | 2.2  |
| 7 | 20790050 | 20790125 | 75  | 20790087 | 15 | 42  | 6.5  |
| 7 | 20790750 | 20790775 | 25  | 20790762 | 22 | 22  | 4.3  |
| 7 | 20791025 | 20791200 | 175 | 20791087 | 16 | 100 | 13   |
| 7 | 20793325 | 20793650 | 325 | 20793337 | 23 | 236 | 8.7  |
| 7 | 20803550 | 20803675 | 125 | 20803562 | 37 | 151 | 23.8 |
| 7 | 20803975 | 20804050 | 75  | 20803987 | 22 | 55  | 8.7  |
| 7 | 20845325 | 20845350 | 25  | 20845337 | 12 | 12  | 2.2  |
| 7 | 20853100 | 20853325 | 225 | 20853162 | 14 | 115 | 15.2 |
| 7 | 20894675 | 20894750 | 75  | 20894687 | 13 | 37  | 6.5  |
| 7 | 20895225 | 20895275 | 50  | 20895262 | 13 | 25  | 0    |
| 7 | 20900500 | 20900675 | 175 | 20900637 | 15 | 95  | 0    |
| 7 | 20984825 | 20984850 | 25  | 20984837 | 15 | 15  | 2.2  |
| 7 | 21010025 | 21010200 | 175 | 21010087 | 17 | 103 | 0    |
| 7 | 21227300 | 21227400 | 100 | 21227312 | 17 | 61  | 4.3  |
| 7 | 21337025 | 21337100 | 75  | 21337087 | 13 | 37  | 4.3  |
| 7 | 21414275 | 21414300 | 25  | 21414287 | 13 | 13  | 2.2  |
| 7 | 21461200 | 21461325 | 125 | 21461212 | 14 | 66  | 10.8 |
| 7 | 21542700 | 21543125 | 425 | 21542887 | 17 | 213 | 17.3 |
| 7 | 21955275 | 21955325 | 50  | 21955287 | 12 | 24  | 0    |
| 7 | 21971000 | 21971100 | 100 | 21971062 | 14 | 51  | 2.2  |
| 7 | 21976600 | 21976650 | 50  | 21976612 | 12 | 24  | 2.2  |
| 7 | 22029875 | 22030025 | 150 | 22029912 | 14 | 77  | 13   |
| 7 | 22034275 | 22034350 | 75  | 22034312 | 13 | 37  | 0    |
| 7 | 22083950 | 22083975 | 25  | 22083962 | 12 | 12  | 0    |
| 7 | 22096400 | 22096425 | 25  | 22096412 | 12 | 12  | 0    |
| 7 | 22100750 | 22100900 | 150 | 22100862 | 14 | 77  | 13   |
| 7 | 22346625 | 22346950 | 325 | 22346787 | 15 | 162 | 17.3 |
| 7 | 22360825 | 22360950 | 125 | 22360837 | 13 | 59  | 2.2  |
| 7 | 22361750 | 22361775 | 25  | 22361762 | 12 | 12  | 2.2  |
| 7 | 22555375 | 22555450 | 75  | 22555387 | 12 | 35  | 0    |
| 7 | 22652550 | 22652925 | 375 | 22652637 | 17 | 223 | 17.3 |
| 7 | 22687425 | 22687550 | 125 | 22687437 | 13 | 62  | 0    |
| 7 | 22802000 | 22802025 | 25  | 22802012 | 12 | 12  | 0    |
| 7 | 22903275 | 22903375 | 100 | 22903287 | 13 | 50  | 2.2  |
| 7 | 23104025 | 23104525 | 500 | 23104337 | 34 | 423 | 34.7 |
| 7 | 23235150 | 23235250 | 100 | 23235162 | 14 | 48  | 2.2  |
| 7 | 23257325 | 23257350 | 25  | 23257337 | 13 | 13  | 2.2  |
| 7 | 23333925 | 23334075 | 150 | 23334012 | 14 | 78  | 13   |
| 7 | 23577150 | 23577225 | 75  | 23577162 | 13 | 37  | 0    |
| 7 | 23592150 | 23592200 | 50  | 23592162 | 12 | 24  | 4.3  |
| 7 | 23592475 | 23592500 | 25  | 23592487 | 13 | 13  | 2.2  |
| 7 | 23602900 | 23602925 | 25  | 23602912 | 12 | 12  | 2.2  |
| 7 | 23660100 | 23660225 | 125 | 23660112 | 13 | 64  | 10.8 |
| 7 | 23660450 | 23660475 | 25  | 23660462 | 15 | 15  | 2.2  |
| 7 | 23661450 | 23661850 | 400 | 23661687 | 25 | 289 | 34.7 |
| 7 | 23665225 | 23665375 | 150 | 23665262 | 16 | 87  | 13   |
| 7 | 23751175 | 23751200 | 25  | 23751187 | 13 | 13  | 2.2  |
| 7 | 23751800 | 23751825 | 25  | 23751812 | 12 | 12  | 2.2  |
| 7 | 23819925 | 23819975 | 50  | 23819937 | 12 | 24  | 4.3  |
| 7 | 23950500 | 23950600 | 100 | 23950537 | 13 | 50  | 8.7  |
| 7 | 24050800 | 24050925 | 125 | 24050862 | 15 | 72  | 6.5  |

|   |          |          |     |          |    |     |      |
|---|----------|----------|-----|----------|----|-----|------|
| 7 | 24061700 | 24061775 | 75  | 24061712 | 13 | 38  | 6.5  |
| 7 | 24065775 | 24065975 | 200 | 24065862 | 16 | 113 | 17.3 |
| 7 | 24149600 | 24149625 | 25  | 24149612 | 12 | 12  | 2.2  |
| 7 | 24290225 | 24290650 | 425 | 24290362 | 16 | 226 | 4.3  |
| 7 | 24291575 | 24291625 | 50  | 24291587 | 16 | 29  | 2.2  |
| 7 | 24345325 | 24345350 | 25  | 24345337 | 12 | 12  | 2.2  |
| 7 | 24493350 | 24493400 | 50  | 24493362 | 14 | 27  | 4.3  |
| 7 | 24519600 | 24519650 | 50  | 24519612 | 12 | 24  | 0    |
| 7 | 24550900 | 24550925 | 25  | 24550912 | 12 | 12  | 2.2  |
| 7 | 24624925 | 24624950 | 25  | 24624937 | 12 | 12  | 0    |
| 7 | 25008200 | 25008375 | 175 | 25008212 | 16 | 87  | 13   |
| 7 | 25193725 | 25193825 | 100 | 25193762 | 15 | 54  | 2.2  |
| 7 | 25194975 | 25195025 | 50  | 25194987 | 16 | 28  | 4.3  |
| 7 | 25204975 | 25205075 | 100 | 25204987 | 13 | 50  | 0    |
| 7 | 25218450 | 25218625 | 175 | 25218462 | 24 | 121 | 21.7 |
| 7 | 25220300 | 25220325 | 25  | 25220312 | 12 | 12  | 2.2  |
| 7 | 25241750 | 25241800 | 50  | 25241762 | 12 | 24  | 0    |
| 7 | 25256500 | 25256525 | 25  | 25256512 | 13 | 13  | 2.2  |
| 7 | 25327725 | 25327825 | 100 | 25327762 | 14 | 51  | 0    |
| 7 | 25438250 | 25438300 | 50  | 25438262 | 12 | 24  | 0    |
| 7 | 25461800 | 25461825 | 25  | 25461812 | 12 | 12  | 0    |
| 7 | 25489650 | 25489775 | 125 | 25489662 | 15 | 67  | 6.5  |
| 7 | 25524075 | 25524125 | 50  | 25524087 | 13 | 25  | 2.2  |
| 7 | 25527425 | 25527475 | 50  | 25527437 | 12 | 24  | 0    |
| 7 | 25534300 | 25534425 | 125 | 25534337 | 14 | 65  | 10.8 |
| 7 | 25545925 | 25546000 | 75  | 25545937 | 20 | 50  | 4.3  |
| 7 | 25548250 | 25548275 | 25  | 25548262 | 12 | 12  | 0    |
| 7 | 25549625 | 25549650 | 25  | 25549637 | 13 | 13  | 2.2  |
| 7 | 25551450 | 25551625 | 175 | 25551537 | 16 | 93  | 13   |
| 7 | 25605325 | 25605350 | 25  | 25605337 | 13 | 13  | 2.2  |
| 7 | 25620375 | 25620400 | 25  | 25620387 | 14 | 14  | 2.2  |
| 7 | 25627800 | 25627825 | 25  | 25627812 | 12 | 12  | 2.2  |
| 7 | 25669350 | 25669375 | 25  | 25669362 | 12 | 12  | 2.2  |
| 7 | 25687025 | 25687050 | 25  | 25687037 | 12 | 12  | 0    |
| 7 | 25740100 | 25740175 | 75  | 25740112 | 12 | 35  | 2.2  |
| 7 | 25819400 | 25819425 | 25  | 25819412 | 13 | 13  | 2.2  |
| 7 | 25864775 | 25864800 | 25  | 25864787 | 12 | 12  | 2.2  |
| 7 | 25880750 | 25880875 | 125 | 25880787 | 13 | 61  | 0    |
| 7 | 25882725 | 25882750 | 25  | 25882737 | 12 | 12  | 2.2  |
| 7 | 25966875 | 25966975 | 100 | 25966887 | 12 | 47  | 2.2  |
| 7 | 25973775 | 25973875 | 100 | 25973787 | 13 | 48  | 8.7  |
| 7 | 25974300 | 25974350 | 50  | 25974312 | 12 | 24  | 4.3  |
| 7 | 25974700 | 25974750 | 50  | 25974712 | 13 | 25  | 2.2  |
| 7 | 25982725 | 25982900 | 175 | 25982887 | 18 | 96  | 6.5  |
| 7 | 25986200 | 25986225 | 25  | 25986212 | 13 | 13  | 2.2  |
| 7 | 25987125 | 25987175 | 50  | 25987137 | 14 | 27  | 4.3  |
| 7 | 26001150 | 26001300 | 150 | 26001187 | 14 | 78  | 0    |
| 7 | 26008075 | 26008175 | 100 | 26008112 | 13 | 50  | 0    |
| 7 | 26012125 | 26012175 | 50  | 26012137 | 12 | 24  | 0    |
| 7 | 26012875 | 26013025 | 150 | 26012887 | 14 | 81  | 4.3  |
| 7 | 26013350 | 26013550 | 200 | 26013462 | 17 | 110 | 13   |
| 7 | 26014675 | 26014750 | 75  | 26014687 | 13 | 38  | 6.5  |
| 7 | 26016200 | 26016375 | 175 | 26016287 | 16 | 95  | 8.7  |
| 7 | 26024325 | 26024375 | 50  | 26024337 | 14 | 26  | 2.2  |
| 7 | 26047600 | 26047725 | 125 | 26047662 | 17 | 72  | 4.3  |
| 7 | 26062150 | 26062200 | 50  | 26062162 | 13 | 26  | 4.3  |
| 7 | 26064675 | 26064975 | 300 | 26064812 | 21 | 195 | 0    |
| 7 | 26111450 | 26111500 | 50  | 26111462 | 12 | 24  | 0    |
| 7 | 26131950 | 26131975 | 25  | 26131962 | 12 | 12  | 2.2  |
| 7 | 26132200 | 26132275 | 75  | 26132237 | 13 | 37  | 6.5  |
| 7 | 26133675 | 26133825 | 150 | 26133712 | 14 | 76  | 0    |
| 7 | 26544475 | 26544550 | 75  | 26544537 | 15 | 41  | 6.5  |
| 7 | 26545975 | 26546100 | 125 | 26546062 | 16 | 71  | 10.8 |
| 7 | 26550600 | 26550700 | 100 | 26550612 | 15 | 57  | 6.5  |
| 7 | 26554450 | 26554500 | 50  | 26554462 | 13 | 25  | 4.3  |
| 7 | 26587475 | 26587550 | 75  | 26587537 | 17 | 46  | 6.5  |
| 7 | 26594375 | 26594450 | 75  | 26594387 | 12 | 36  | 2.2  |
| 7 | 26596800 | 26596900 | 100 | 26596862 | 14 | 54  | 6.5  |
| 7 | 26599575 | 26599725 | 150 | 26599587 | 16 | 91  | 13   |
| 7 | 26614625 | 26614825 | 200 | 26614737 | 23 | 142 | 8.7  |
| 7 | 26615800 | 26615825 | 25  | 26615812 | 12 | 12  | 2.2  |
| 7 | 26616800 | 26617200 | 400 | 26616912 | 15 | 199 | 0    |
| 7 | 26618800 | 26618875 | 75  | 26618837 | 15 | 40  | 0    |
| 7 | 26619250 | 26619275 | 25  | 26619262 | 12 | 12  | 2.2  |
| 7 | 26619750 | 26619900 | 150 | 26619762 | 13 | 71  | 0    |

|   |          |          |      |          |    |      |       |
|---|----------|----------|------|----------|----|------|-------|
| 7 | 26622250 | 26622625 | 375  | 26622487 | 27 | 289  | 10.8  |
| 7 | 26623050 | 26623225 | 175  | 26623087 | 14 | 90   | 0     |
| 7 | 26624750 | 26624825 | 75   | 26624787 | 13 | 37   | 6.5   |
| 7 | 26626925 | 26626950 | 25   | 26626937 | 14 | 14   | 2.2   |
| 7 | 26634000 | 26634025 | 25   | 26634012 | 12 | 12   | 0     |
| 7 | 26635025 | 26635150 | 125  | 26635037 | 12 | 59   | 10.8  |
| 7 | 26644975 | 26645025 | 50   | 26644987 | 14 | 27   | 0     |
| 7 | 26648575 | 26648725 | 150  | 26648637 | 18 | 95   | 8.7   |
| 7 | 27014425 | 27014450 | 25   | 27014437 | 16 | 16   | 2.2   |
| 7 | 27151850 | 27151900 | 50   | 27151862 | 13 | 26   | 4.3   |
| 7 | 27190975 | 27191125 | 150  | 27191037 | 17 | 95   | 13    |
| 7 | 27195825 | 27195900 | 75   | 27195837 | 12 | 35   | 0     |
| 7 | 27198225 | 27198425 | 200  | 27198387 | 16 | 107  | 6.5   |
| 7 | 27204750 | 27204850 | 100  | 27204762 | 13 | 49   | 8.7   |
| 7 | 27205300 | 27205325 | 25   | 27205312 | 14 | 14   | 2.2   |
| 7 | 27211600 | 27211625 | 25   | 27211612 | 13 | 13   | 2.2   |
| 7 | 27211925 | 27212100 | 175  | 27212087 | 13 | 82   | 6.5   |
| 7 | 27231950 | 27232075 | 125  | 27232062 | 13 | 60   | 0     |
| 7 | 27249000 | 27249075 | 75   | 27249012 | 13 | 37   | 6.5   |
| 7 | 27249500 | 27249675 | 175  | 27249662 | 25 | 137  | 26    |
| 7 | 27250925 | 27251300 | 375  | 27251062 | 19 | 245  | 34.7  |
| 7 | 27251875 | 27252000 | 125  | 27251887 | 12 | 56   | 8.7   |
| 7 | 27257650 | 27258575 | 925  | 27258037 | 22 | 520  | 84.5  |
| 7 | 27279925 | 27279975 | 50   | 27279962 | 13 | 25   | 0     |
| 7 | 27301800 | 27301850 | 50   | 27301812 | 13 | 26   | 4.3   |
| 7 | 27303425 | 27303675 | 250  | 27303562 | 25 | 189  | 23.8  |
| 7 | 27325000 | 27325025 | 25   | 27325012 | 12 | 12   | 2.2   |
| 7 | 27335500 | 27335550 | 50   | 27335512 | 13 | 25   | 0     |
| 7 | 27341175 | 27341200 | 25   | 27341187 | 12 | 12   | 0     |
| 7 | 27344825 | 27344875 | 50   | 27344837 | 12 | 24   | 2.2   |
| 7 | 27355475 | 27355575 | 100  | 27355512 | 14 | 52   | 8.7   |
| 7 | 27374125 | 27374550 | 425  | 27374462 | 17 | 223  | 2.2   |
| 7 | 27374975 | 27375025 | 50   | 27374987 | 12 | 24   | 4.3   |
| 7 | 27384700 | 27384775 | 75   | 27384712 | 14 | 40   | 4.3   |
| 7 | 27386225 | 27386300 | 75   | 27386237 | 14 | 40   | 4.3   |
| 7 | 27400475 | 27400550 | 75   | 27400487 | 15 | 41   | 6.5   |
| 7 | 27412250 | 27412325 | 75   | 27412262 | 13 | 37   | 6.5   |
| 7 | 27412950 | 27413100 | 150  | 27413037 | 17 | 87   | 0     |
| 7 | 27432475 | 27432750 | 275  | 27432587 | 23 | 207  | 23.8  |
| 7 | 27460175 | 27460275 | 100  | 27460187 | 12 | 44   | 0     |
| 7 | 27472400 | 27472425 | 25   | 27472412 | 13 | 13   | 2.2   |
| 7 | 27475150 | 27475250 | 100  | 27475162 | 15 | 50   | 0     |
| 7 | 27480375 | 27480500 | 125  | 27480412 | 14 | 64   | 10.8  |
| 7 | 27481650 | 27481750 | 100  | 27481712 | 15 | 55   | 8.7   |
| 7 | 27482375 | 27482425 | 50   | 27482387 | 12 | 24   | 4.3   |
| 7 | 27483225 | 27483600 | 375  | 27483512 | 23 | 230  | 30.3  |
| 7 | 27487375 | 27487500 | 125  | 27487412 | 13 | 61   | 2.2   |
| 7 | 27494325 | 27494350 | 25   | 27494337 | 15 | 15   | 2.2   |
| 7 | 27495100 | 27495300 | 200  | 27495212 | 17 | 117  | 0     |
| 7 | 27496725 | 27496750 | 25   | 27496737 | 12 | 12   | 2.2   |
| 7 | 27497250 | 27498575 | 1325 | 27497937 | 34 | 1226 | 229.7 |
| 7 | 27498800 | 27498975 | 175  | 27498812 | 24 | 137  | 10.8  |
| 7 | 27515475 | 27515500 | 25   | 27515487 | 12 | 12   | 2.2   |
| 7 | 27625175 | 27625250 | 75   | 27625212 | 15 | 42   | 6.5   |
| 7 | 28021125 | 28021275 | 150  | 28021137 | 22 | 104  | 19.5  |
| 7 | 28031150 | 28031175 | 25   | 28031162 | 13 | 13   | 2.2   |
| 7 | 28231900 | 28231925 | 25   | 28231912 | 12 | 12   | 2.2   |
| 7 | 28288625 | 28288675 | 50   | 28288662 | 13 | 25   | 0     |
| 7 | 28317900 | 28317925 | 25   | 28317912 | 13 | 13   | 2.2   |
| 7 | 28327700 | 28327800 | 100  | 28327762 | 14 | 51   | 4.3   |
| 7 | 28329150 | 28329325 | 175  | 28329237 | 16 | 96   | 0     |
| 7 | 28330300 | 28330325 | 25   | 28330312 | 12 | 12   | 2.2   |
| 7 | 28346700 | 28346900 | 200  | 28346762 | 17 | 124  | 0     |
| 7 | 28354300 | 28354350 | 50   | 28354312 | 12 | 24   | 0     |
| 7 | 28356825 | 28356875 | 50   | 28356837 | 12 | 24   | 4.3   |
| 7 | 28369525 | 28369550 | 25   | 28369537 | 12 | 12   | 0     |
| 7 | 28370825 | 28370875 | 50   | 28370837 | 17 | 31   | 4.3   |
| 7 | 28386450 | 28386500 | 50   | 28386487 | 14 | 27   | 4.3   |
| 7 | 28573850 | 28573875 | 25   | 28573862 | 12 | 12   | 0     |
| 7 | 28668450 | 28668650 | 200  | 28668487 | 14 | 95   | 6.5   |
| 7 | 28778400 | 28778500 | 100  | 28778487 | 14 | 51   | 6.5   |
| 7 | 28810475 | 28810500 | 25   | 28810487 | 13 | 13   | 2.2   |
| 7 | 28853650 | 28853750 | 100  | 28853662 | 12 | 47   | 4.3   |
| 7 | 28854075 | 28854250 | 175  | 28854162 | 17 | 102  | 10.8  |
| 7 | 28860000 | 28860075 | 75   | 28860062 | 16 | 46   | 0     |

|   |          |          |     |          |    |     |      |
|---|----------|----------|-----|----------|----|-----|------|
| 7 | 28897550 | 28897675 | 125 | 28897662 | 15 | 62  | 2.2  |
| 7 | 28925375 | 28925400 | 25  | 28925387 | 13 | 13  | 0    |
| 7 | 28963200 | 28963425 | 225 | 28963387 | 39 | 260 | 4.3  |
| 7 | 28979275 | 28979525 | 250 | 28979337 | 21 | 181 | 0    |
| 7 | 28980000 | 28980050 | 50  | 28980012 | 17 | 30  | 0    |
| 7 | 28980475 | 28980550 | 75  | 28980487 | 13 | 37  | 0    |
| 7 | 28995200 | 28995250 | 50  | 28995237 | 13 | 25  | 0    |
| 7 | 29012200 | 29012225 | 25  | 29012212 | 13 | 13  | 2.2  |
| 7 | 29028125 | 29028225 | 100 | 29028212 | 15 | 56  | 8.7  |
| 7 | 29072650 | 29072700 | 50  | 29072687 | 13 | 25  | 4.3  |
| 7 | 29116925 | 29116950 | 25  | 29116937 | 13 | 13  | 2.2  |
| 7 | 29117425 | 29117525 | 100 | 29117487 | 14 | 51  | 8.7  |
| 7 | 29147175 | 29147325 | 150 | 29147237 | 15 | 83  | 6.5  |
| 7 | 29153375 | 29153425 | 50  | 29153387 | 12 | 24  | 0    |
| 7 | 29154125 | 29154200 | 75  | 29154137 | 12 | 36  | 6.5  |
| 7 | 29155050 | 29155075 | 25  | 29155062 | 12 | 12  | 0    |
| 7 | 29161725 | 29161875 | 150 | 29161862 | 16 | 81  | 4.3  |
| 7 | 29185200 | 29185300 | 100 | 29185287 | 22 | 72  | 2.2  |
| 7 | 29201225 | 29201275 | 50  | 29201262 | 14 | 27  | 4.3  |
| 7 | 29245075 | 29245100 | 25  | 29245087 | 12 | 12  | 2.2  |
| 7 | 29251850 | 29251950 | 100 | 29251912 | 13 | 49  | 8.7  |
| 7 | 29254300 | 29254375 | 75  | 29254362 | 14 | 39  | 4.3  |
| 7 | 29278300 | 29278450 | 150 | 29278312 | 12 | 69  | 0    |
| 7 | 29289150 | 29289300 | 150 | 29289162 | 15 | 84  | 13   |
| 7 | 29299175 | 29299225 | 50  | 29299187 | 12 | 24  | 4.3  |
| 7 | 29299625 | 29299875 | 250 | 29299687 | 20 | 172 | 0    |
| 7 | 29315975 | 29316050 | 75  | 29316012 | 13 | 38  | 0    |
| 7 | 29337425 | 29337600 | 175 | 29337562 | 20 | 119 | 10.8 |
| 7 | 29403025 | 29403050 | 25  | 29403037 | 12 | 12  | 0    |
| 7 | 29405325 | 29405475 | 150 | 29405362 | 17 | 97  | 4.3  |
| 7 | 29417675 | 29418100 | 425 | 29417837 | 18 | 252 | 10.8 |
| 7 | 29420525 | 29421025 | 500 | 29420637 | 18 | 286 | 52   |
| 7 | 29422975 | 29423100 | 125 | 29423087 | 22 | 92  | 17.3 |
| 7 | 29424100 | 29424125 | 25  | 29424112 | 12 | 12  | 0    |
| 7 | 29429975 | 29430075 | 100 | 29429987 | 13 | 50  | 4.3  |
| 7 | 29460700 | 29460825 | 125 | 29460762 | 14 | 65  | 2.2  |
| 7 | 29468550 | 29468600 | 50  | 29468587 | 14 | 26  | 4.3  |
| 7 | 29469950 | 29470000 | 50  | 29469962 | 13 | 25  | 0    |
| 7 | 29477625 | 29477650 | 25  | 29477637 | 12 | 12  | 2.2  |
| 7 | 29534425 | 29534500 | 75  | 29534487 | 13 | 37  | 6.5  |
| 7 | 29566425 | 29566450 | 25  | 29566437 | 13 | 13  | 2.2  |
| 7 | 29572350 | 29572375 | 25  | 29572362 | 18 | 18  | 2.2  |
| 7 | 29578500 | 29578625 | 125 | 29578512 | 13 | 63  | 0    |
| 7 | 29583550 | 29583650 | 100 | 29583587 | 13 | 49  | 0    |
| 7 | 29610625 | 29610650 | 25  | 29610637 | 12 | 12  | 0    |
| 7 | 29617375 | 29617575 | 200 | 29617387 | 13 | 94  | 4.3  |
| 7 | 29620525 | 29620650 | 125 | 29620587 | 16 | 69  | 6.5  |
| 7 | 29656300 | 29656325 | 25  | 29656312 | 12 | 12  | 0    |
| 7 | 29767875 | 29767950 | 75  | 29767887 | 13 | 38  | 6.5  |
| 7 | 29770475 | 29770575 | 100 | 29770487 | 12 | 48  | 8.7  |
| 7 | 29771750 | 29771900 | 150 | 29771787 | 16 | 86  | 0    |
| 7 | 29782925 | 29783050 | 125 | 29782937 | 14 | 67  | 4.3  |
| 7 | 29783425 | 29783500 | 75  | 29783462 | 14 | 39  | 0    |
| 7 | 29789500 | 29789550 | 50  | 29789512 | 19 | 38  | 4.3  |
| 7 | 29804800 | 29804950 | 150 | 29804937 | 13 | 72  | 0    |
| 7 | 29811225 | 29811425 | 200 | 29811312 | 18 | 125 | 0    |
| 7 | 29812175 | 29812250 | 75  | 29812187 | 13 | 36  | 2.2  |
| 7 | 29828600 | 29828625 | 25  | 29828612 | 13 | 13  | 0    |
| 7 | 29842125 | 29842150 | 25  | 29842137 | 13 | 13  | 2.2  |
| 7 | 29850750 | 29850975 | 225 | 29850937 | 16 | 122 | 6.5  |
| 7 | 29854625 | 29854650 | 25  | 29854637 | 12 | 12  | 2.2  |
| 7 | 29856925 | 29856975 | 50  | 29856937 | 12 | 24  | 0    |
| 7 | 29857250 | 29857325 | 75  | 29857312 | 16 | 41  | 0    |
| 7 | 29887125 | 29887200 | 75  | 29887137 | 12 | 36  | 6.5  |
| 7 | 29956225 | 29956250 | 25  | 29956237 | 12 | 12  | 0    |
| 7 | 30002700 | 30002875 | 175 | 30002762 | 18 | 106 | 15.2 |
| 7 | 30104925 | 30104975 | 50  | 30104937 | 12 | 24  | 4.3  |
| 7 | 30199350 | 30199475 | 125 | 30199412 | 15 | 67  | 0    |
| 7 | 30200175 | 30200200 | 25  | 30200187 | 13 | 13  | 2.2  |
| 7 | 30201225 | 30201400 | 175 | 30201287 | 19 | 117 | 2.2  |
| 7 | 30203650 | 30203825 | 175 | 30203737 | 13 | 86  | 6.5  |
| 7 | 30204225 | 30204350 | 125 | 30204237 | 14 | 61  | 4.3  |
| 7 | 30205525 | 30205575 | 50  | 30205537 | 13 | 25  | 4.3  |
| 7 | 30216475 | 30216650 | 175 | 30216487 | 14 | 91  | 13   |
| 7 | 30236325 | 30236600 | 275 | 30236437 | 21 | 192 | 0    |



|   |          |          |     |          |    |     |      |
|---|----------|----------|-----|----------|----|-----|------|
| 7 | 30244175 | 30244200 | 25  | 30244187 | 12 | 12  | 2.2  |
| 7 | 30251750 | 30251775 | 25  | 30251762 | 15 | 15  | 2.2  |
| 7 | 30252275 | 30252375 | 100 | 30252337 | 18 | 70  | 4.3  |
| 7 | 30252975 | 30253075 | 100 | 30253012 | 14 | 53  | 4.3  |
| 7 | 30569925 | 30569950 | 25  | 30569937 | 13 | 13  | 2.2  |
| 7 | 30665050 | 30665150 | 100 | 30665112 | 15 | 54  | 4.3  |
| 7 | 30668450 | 30668525 | 75  | 30668462 | 18 | 44  | 6.5  |
| 7 | 30670850 | 30670875 | 25  | 30670862 | 13 | 13  | 2.2  |
| 7 | 30675625 | 30675700 | 75  | 30675637 | 13 | 36  | 0    |
| 7 | 30682700 | 30682900 | 200 | 30682712 | 13 | 99  | 4.3  |
| 7 | 30687375 | 30687400 | 25  | 30687387 | 12 | 12  | 0    |
| 7 | 30696325 | 30696500 | 175 | 30696337 | 14 | 94  | 6.5  |
| 7 | 30696975 | 30697125 | 150 | 30696987 | 13 | 71  | 13   |
| 7 | 30698675 | 30698775 | 100 | 30698687 | 12 | 47  | 6.5  |
| 7 | 30704675 | 30704950 | 275 | 30704812 | 19 | 157 | 17.3 |
| 7 | 30708000 | 30708175 | 175 | 30708062 | 18 | 112 | 6.5  |
| 7 | 30710975 | 30711350 | 375 | 30711162 | 25 | 294 | 39   |
| 7 | 30713900 | 30713950 | 50  | 30713912 | 13 | 26  | 4.3  |
| 7 | 30715175 | 30715250 | 75  | 30715237 | 15 | 40  | 4.3  |
| 7 | 30720925 | 30721000 | 75  | 30720962 | 14 | 38  | 6.5  |
| 7 | 30726075 | 30726350 | 275 | 30726337 | 18 | 157 | 4.3  |
| 7 | 30726675 | 30726825 | 150 | 30726762 | 16 | 81  | 0    |
| 7 | 30728700 | 30728725 | 25  | 30728712 | 12 | 12  | 2.2  |
| 7 | 30729950 | 30730150 | 200 | 30729987 | 16 | 113 | 15.2 |
| 7 | 30731375 | 30731450 | 75  | 30731437 | 13 | 37  | 2.2  |
| 7 | 30739350 | 30739400 | 50  | 30739387 | 16 | 30  | 4.3  |
| 7 | 30740925 | 30740975 | 50  | 30740937 | 14 | 27  | 4.3  |
| 7 | 30744975 | 30745125 | 150 | 30745012 | 18 | 90  | 13   |
| 7 | 30755925 | 30756025 | 100 | 30755937 | 18 | 63  | 8.7  |
| 7 | 30761725 | 30761775 | 50  | 30761762 | 14 | 26  | 4.3  |
| 7 | 30763500 | 30763550 | 50  | 30763512 | 12 | 24  | 2.2  |
| 7 | 30767050 | 30767075 | 25  | 30767062 | 12 | 12  | 2.2  |
| 7 | 30840075 | 30840100 | 25  | 30840087 | 13 | 13  | 2.2  |
| 7 | 30840500 | 30840525 | 25  | 30840512 | 12 | 12  | 2.2  |
| 7 | 30933475 | 30933575 | 100 | 30933487 | 22 | 78  | 10.8 |
| 7 | 30956075 | 30956200 | 125 | 30956112 | 15 | 69  | 10.8 |
| 7 | 30959650 | 30959800 | 150 | 30959712 | 16 | 89  | 0    |
| 7 | 30970300 | 30970450 | 150 | 30970337 | 17 | 90  | 8.7  |
| 7 | 30970900 | 30970925 | 25  | 30970912 | 12 | 12  | 2.2  |
| 7 | 30987175 | 30987275 | 100 | 30987187 | 13 | 46  | 4.3  |
| 7 | 30998550 | 30998575 | 25  | 30998562 | 12 | 12  | 2.2  |
| 7 | 31000775 | 31000800 | 25  | 31000787 | 14 | 14  | 2.2  |
| 7 | 31001025 | 31001175 | 150 | 31001037 | 13 | 71  | 13   |
| 7 | 31004425 | 31004450 | 25  | 31004437 | 12 | 12  | 0    |
| 7 | 31009650 | 31009775 | 125 | 31009712 | 14 | 67  | 8.7  |
| 7 | 31012625 | 31012650 | 25  | 31012637 | 13 | 13  | 0    |
| 7 | 31012950 | 31013325 | 375 | 31013112 | 14 | 183 | 23.8 |
| 7 | 31017350 | 31017500 | 150 | 31017412 | 13 | 73  | 13   |
| 7 | 31019750 | 31019925 | 175 | 31019862 | 14 | 87  | 0    |
| 7 | 31022675 | 31022875 | 200 | 31022712 | 18 | 125 | 4.3  |
| 7 | 31043850 | 31043875 | 25  | 31043862 | 12 | 12  | 2.2  |
| 7 | 31048425 | 31048575 | 150 | 31048537 | 15 | 80  | 0    |
| 7 | 31048900 | 31049200 | 300 | 31049062 | 16 | 155 | 10.8 |
| 7 | 31050925 | 31051000 | 75  | 31050962 | 13 | 38  | 6.5  |
| 7 | 31083500 | 31083600 | 100 | 31083562 | 13 | 49  | 0    |
| 7 | 31083950 | 31084000 | 50  | 31083962 | 13 | 26  | 0    |
| 7 | 31092375 | 31092425 | 50  | 31092387 | 18 | 35  | 4.3  |
| 7 | 31093325 | 31093350 | 25  | 31093337 | 12 | 12  | 0    |
| 7 | 31102050 | 31102100 | 50  | 31102062 | 13 | 25  | 4.3  |
| 7 | 31105850 | 31105875 | 25  | 31105862 | 13 | 13  | 2.2  |
| 7 | 31153025 | 31153050 | 25  | 31153037 | 12 | 12  | 0    |
| 7 | 31314875 | 31314975 | 100 | 31314887 | 12 | 48  | 0    |
| 7 | 31317975 | 31318025 | 50  | 31317987 | 12 | 24  | 4.3  |
| 7 | 31440950 | 31440975 | 25  | 31440962 | 12 | 12  | 2.2  |
| 7 | 31554750 | 31554775 | 25  | 31554762 | 12 | 12  | 0    |
| 7 | 31647175 | 31647200 | 25  | 31647187 | 12 | 12  | 2.2  |
| 7 | 31677200 | 31677350 | 150 | 31677262 | 15 | 82  | 6.5  |
| 7 | 31725000 | 31725025 | 25  | 31725012 | 13 | 13  | 2.2  |
| 7 | 31952825 | 31952975 | 150 | 31952837 | 14 | 77  | 15.2 |
| 7 | 32229575 | 32229725 | 150 | 32229612 | 14 | 77  | 6.5  |
| 7 | 32232675 | 32233000 | 325 | 32232837 | 31 | 283 | 8.7  |
| 7 | 32233350 | 32233500 | 150 | 32233412 | 17 | 85  | 13   |
| 7 | 32234125 | 32234150 | 25  | 32234137 | 12 | 12  | 2.2  |
| 7 | 32234825 | 32234850 | 25  | 32234837 | 12 | 12  | 2.2  |
| 7 | 32236300 | 32236375 | 75  | 32236312 | 12 | 36  | 4.3  |

|   |          |          |     |          |    |     |      |
|---|----------|----------|-----|----------|----|-----|------|
| 7 | 32251100 | 32251150 | 50  | 32251137 | 13 | 25  | 2.2  |
| 7 | 32305125 | 32305175 | 50  | 32305137 | 12 | 24  | 0    |
| 7 | 32313925 | 32314075 | 150 | 32313962 | 14 | 76  | 0    |
| 7 | 32325300 | 32325700 | 400 | 32325337 | 17 | 194 | 34.7 |
| 7 | 32371375 | 32371475 | 100 | 32371412 | 14 | 52  | 8.7  |
| 7 | 32391975 | 32392125 | 150 | 32392012 | 14 | 77  | 10.8 |
| 7 | 32452525 | 32452575 | 50  | 32452537 | 12 | 24  | 0    |
| 7 | 32452975 | 32453000 | 25  | 32452987 | 12 | 12  | 0    |
| 7 | 32463500 | 32463600 | 100 | 32463537 | 13 | 50  | 4.3  |
| 7 | 32516400 | 32516425 | 25  | 32516412 | 14 | 14  | 2.2  |
| 7 | 32527925 | 32528025 | 100 | 32527962 | 16 | 59  | 8.7  |
| 7 | 32808400 | 32808625 | 225 | 32808587 | 15 | 110 | 17.3 |
| 7 | 32954350 | 32954425 | 75  | 32954362 | 13 | 38  | 4.3  |
| 7 | 32954800 | 32954850 | 50  | 32954812 | 33 | 61  | 8.7  |
| 7 | 33076600 | 33076875 | 275 | 33076737 | 18 | 158 | 8.7  |
| 7 | 33186975 | 33187125 | 150 | 33187037 | 14 | 79  | 8.7  |
| 7 | 33686450 | 33686475 | 25  | 33686462 | 12 | 12  | 2.2  |
| 7 | 33692200 | 33692275 | 75  | 33692262 | 16 | 40  | 2.2  |
| 7 | 33707625 | 33707825 | 200 | 33707787 | 15 | 107 | 0    |
| 7 | 33726150 | 33726175 | 25  | 33726162 | 12 | 12  | 0    |
| 7 | 33788475 | 33788550 | 75  | 33788487 | 13 | 36  | 0    |
| 7 | 33788900 | 33789325 | 425 | 33788987 | 17 | 234 | 23.8 |
| 7 | 33828450 | 33828550 | 100 | 33828512 | 13 | 48  | 8.7  |
| 7 | 33830075 | 33830150 | 75  | 33830087 | 13 | 37  | 6.5  |
| 7 | 33836625 | 33836825 | 200 | 33836737 | 15 | 111 | 0    |
| 7 | 33855150 | 33855200 | 50  | 33855162 | 13 | 25  | 4.3  |
| 7 | 33910225 | 33910300 | 75  | 33910237 | 16 | 45  | 4.3  |
| 7 | 33927900 | 33928025 | 125 | 33927987 | 15 | 69  | 13   |
| 7 | 34085200 | 34085400 | 200 | 34085337 | 19 | 125 | 0    |
| 7 | 34157150 | 34157225 | 75  | 34157187 | 14 | 40  | 0    |
| 7 | 34182625 | 34182650 | 25  | 34182637 | 12 | 12  | 0    |
| 7 | 34316025 | 34316100 | 75  | 34316087 | 14 | 40  | 4.3  |
| 7 | 34845900 | 34846025 | 125 | 34845912 | 14 | 61  | 8.7  |
| 7 | 34889450 | 34889525 | 75  | 34889512 | 14 | 39  | 6.5  |
| 7 | 34911550 | 34911675 | 125 | 34911587 | 14 | 68  | 10.8 |
| 7 | 35259600 | 35260125 | 525 | 35259987 | 18 | 280 | 15.2 |
| 7 | 35260425 | 35260525 | 100 | 35260487 | 19 | 66  | 0    |
| 7 | 35263625 | 35263700 | 75  | 35263637 | 12 | 35  | 4.3  |
| 7 | 35267900 | 35267975 | 75  | 35267962 | 15 | 43  | 0    |
| 7 | 35426125 | 35426175 | 50  | 35426137 | 12 | 24  | 4.3  |
| 7 | 35536900 | 35536950 | 50  | 35536937 | 14 | 26  | 4.3  |
| 7 | 35581025 | 35581100 | 75  | 35581037 | 12 | 36  | 2.2  |
| 7 | 35583450 | 35583525 | 75  | 35583487 | 14 | 39  | 0    |
| 7 | 35586875 | 35587000 | 125 | 35586937 | 16 | 73  | 10.8 |
| 7 | 35977525 | 35977550 | 25  | 35977537 | 13 | 13  | 2.2  |
| 7 | 36035725 | 36035850 | 125 | 36035787 | 17 | 79  | 2.2  |
| 7 | 36067775 | 36067800 | 25  | 36067787 | 13 | 13  | 2.2  |
| 7 | 36071425 | 36071800 | 375 | 36071637 | 15 | 195 | 10.8 |
| 7 | 36072175 | 36072450 | 275 | 36072337 | 17 | 152 | 0    |
| 7 | 36076850 | 36076875 | 25  | 36076862 | 12 | 12  | 2.2  |
| 7 | 36085100 | 36085150 | 50  | 36085137 | 13 | 25  | 0    |
| 7 | 36091525 | 36091575 | 50  | 36091537 | 13 | 25  | 4.3  |
| 7 | 36095350 | 36095475 | 125 | 36095387 | 13 | 63  | 10.8 |
| 7 | 36100725 | 36100800 | 75  | 36100737 | 18 | 48  | 6.5  |
| 7 | 36114475 | 36114625 | 150 | 36114562 | 17 | 90  | 8.7  |
| 7 | 36115350 | 36115450 | 100 | 36115362 | 16 | 57  | 8.7  |
| 7 | 36118625 | 36118650 | 25  | 36118637 | 12 | 12  | 2.2  |
| 7 | 36126275 | 36126475 | 200 | 36126462 | 13 | 86  | 2.2  |
| 7 | 36144750 | 36144950 | 200 | 36144862 | 14 | 101 | 8.7  |
| 7 | 36154775 | 36154875 | 100 | 36154812 | 13 | 50  | 2.2  |
| 7 | 36313000 | 36313050 | 50  | 36313012 | 12 | 24  | 0    |
| 7 | 36556900 | 36556950 | 50  | 36556912 | 13 | 25  | 4.3  |
| 7 | 36572925 | 36572975 | 50  | 36572937 | 12 | 24  | 4.3  |
| 7 | 36581225 | 36581300 | 75  | 36581287 | 13 | 37  | 0    |
| 7 | 36582350 | 36582375 | 25  | 36582362 | 12 | 12  | 2.2  |
| 7 | 36605925 | 36605950 | 25  | 36605937 | 12 | 12  | 2.2  |
| 7 | 36614325 | 36614425 | 100 | 36614337 | 13 | 51  | 0    |
| 7 | 36638400 | 36638450 | 50  | 36638412 | 12 | 24  | 2.2  |
| 7 | 36639175 | 36639350 | 175 | 36639312 | 13 | 82  | 0    |
| 7 | 36639725 | 36639750 | 25  | 36639737 | 14 | 14  | 0    |
| 7 | 36834000 | 36834125 | 125 | 36834012 | 12 | 57  | 4.3  |
| 7 | 36840350 | 36840725 | 375 | 36840462 | 19 | 215 | 0    |
| 7 | 36847200 | 36847225 | 25  | 36847212 | 12 | 12  | 0    |
| 7 | 36861450 | 36861475 | 25  | 36861462 | 12 | 12  | 2.2  |
| 7 | 36944100 | 36944175 | 75  | 36944137 | 15 | 39  | 6.5  |

|   |          |          |     |          |    |     |      |
|---|----------|----------|-----|----------|----|-----|------|
| 7 | 36949050 | 36949125 | 75  | 36949112 | 14 | 38  | 6.5  |
| 7 | 37118600 | 37118625 | 25  | 37118612 | 13 | 13  | 0    |
| 7 | 37369575 | 37369625 | 50  | 37369587 | 13 | 25  | 2.2  |
| 7 | 37392825 | 37392875 | 50  | 37392837 | 13 | 25  | 0    |
| 7 | 37418900 | 37419075 | 175 | 37418987 | 14 | 90  | 8.7  |
| 7 | 37476250 | 37476325 | 75  | 37476287 | 13 | 37  | 0    |
| 7 | 37491975 | 37492025 | 50  | 37491987 | 12 | 24  | 4.3  |
| 7 | 37641525 | 37641650 | 125 | 37641612 | 18 | 80  | 8.7  |
| 7 | 37769225 | 37769250 | 25  | 37769237 | 14 | 14  | 2.2  |
| 7 | 37922300 | 37922525 | 225 | 37922437 | 23 | 169 | 21.7 |
| 7 | 37976400 | 37976425 | 25  | 37976412 | 12 | 12  | 2.2  |
| 7 | 38056475 | 38056550 | 75  | 38056512 | 15 | 39  | 0    |
| 7 | 38170025 | 38170050 | 25  | 38170037 | 14 | 14  | 2.2  |
| 7 | 38296500 | 38296775 | 275 | 38296637 | 13 | 133 | 13   |
| 7 | 38317725 | 38317775 | 50  | 38317737 | 13 | 26  | 0    |
| 7 | 38331775 | 38332050 | 275 | 38331912 | 24 | 211 | 23.8 |
| 7 | 38410375 | 38410450 | 75  | 38410387 | 12 | 36  | 6.5  |
| 7 | 38608225 | 38608250 | 25  | 38608237 | 12 | 12  | 0    |
| 7 | 38677500 | 38677525 | 25  | 38677512 | 12 | 12  | 2.2  |
| 7 | 38686450 | 38686525 | 75  | 38686462 | 12 | 36  | 0    |
| 7 | 38689325 | 38689350 | 25  | 38689337 | 12 | 12  | 2.2  |
| 7 | 38691725 | 38691875 | 150 | 38691787 | 15 | 80  | 13   |
| 7 | 38692500 | 38692550 | 50  | 38692537 | 13 | 25  | 4.3  |
| 7 | 38693600 | 38693625 | 25  | 38693612 | 12 | 12  | 2.2  |
| 7 | 38708225 | 38708800 | 575 | 38708337 | 17 | 289 | 28.2 |
| 7 | 39314875 | 39314925 | 50  | 39314887 | 13 | 25  | 2.2  |
| 7 | 39553900 | 39553950 | 50  | 39553912 | 13 | 25  | 0    |
| 7 | 39683150 | 39683250 | 100 | 39683212 | 14 | 51  | 0    |
| 7 | 39720775 | 39720875 | 100 | 39720812 | 14 | 52  | 4.3  |
| 7 | 39896825 | 39896875 | 50  | 39896837 | 13 | 25  | 0    |
| 7 | 39922900 | 39923000 | 100 | 39922937 | 14 | 55  | 6.5  |
| 7 | 40608500 | 40608700 | 200 | 40608637 | 16 | 105 | 10.8 |
| 7 | 40821550 | 40821725 | 175 | 40821587 | 16 | 103 | 15.2 |
| 7 | 40822125 | 40822150 | 25  | 40822137 | 13 | 13  | 2.2  |
| 7 | 40850100 | 40850225 | 125 | 40850137 | 13 | 60  | 10.8 |
| 7 | 40896775 | 40896800 | 25  | 40896787 | 14 | 14  | 2.2  |
| 7 | 41056275 | 41056300 | 25  | 41056287 | 12 | 12  | 2.2  |
| 7 | 41141800 | 41141925 | 125 | 41141912 | 18 | 86  | 15.2 |
| 7 | 41175575 | 41175675 | 100 | 41175587 | 12 | 46  | 2.2  |
| 7 | 41209600 | 41209625 | 25  | 41209612 | 12 | 12  | 2.2  |
| 7 | 41213400 | 41213500 | 100 | 41213412 | 15 | 57  | 6.5  |
| 7 | 41230950 | 41231475 | 525 | 41231087 | 18 | 287 | 17.3 |
| 7 | 41231875 | 41231900 | 25  | 41231887 | 13 | 13  | 2.2  |
| 7 | 41237975 | 41238000 | 25  | 41237987 | 13 | 13  | 2.2  |
| 7 | 41256425 | 41256450 | 25  | 41256437 | 13 | 13  | 2.2  |
| 7 | 41256675 | 41256875 | 200 | 41256687 | 18 | 129 | 0    |
| 7 | 41257125 | 41257150 | 25  | 41257137 | 12 | 12  | 0    |
| 7 | 41257950 | 41258175 | 225 | 41257962 | 18 | 136 | 23.8 |
| 7 | 41289125 | 41289250 | 125 | 41289212 | 14 | 67  | 4.3  |
| 7 | 41461050 | 41461075 | 25  | 41461062 | 12 | 12  | 2.2  |
| 7 | 41465850 | 41465950 | 100 | 41465862 | 13 | 49  | 2.2  |
| 7 | 41821525 | 41821625 | 100 | 41821537 | 13 | 47  | 8.7  |
| 7 | 41837600 | 41837625 | 25  | 41837612 | 13 | 13  | 0    |
| 7 | 41870750 | 41870800 | 50  | 41870762 | 12 | 24  | 4.3  |
| 7 | 41871225 | 41871375 | 150 | 41871287 | 17 | 95  | 6.5  |
| 7 | 41897175 | 41897375 | 200 | 41897287 | 16 | 114 | 6.5  |
| 7 | 42131475 | 42131500 | 25  | 42131487 | 12 | 12  | 0    |
| 7 | 42324450 | 42324500 | 50  | 42324462 | 12 | 24  | 0    |
| 7 | 42395500 | 42395525 | 25  | 42395512 | 12 | 12  | 0    |
| 7 | 42452950 | 42453275 | 325 | 42453112 | 24 | 224 | 13   |
| 7 | 42454625 | 42454650 | 25  | 42454637 | 12 | 12  | 2.2  |
| 7 | 42473000 | 42473075 | 75  | 42473012 | 13 | 38  | 4.3  |
| 7 | 42483450 | 42483650 | 200 | 42483487 | 16 | 113 | 15.2 |
| 7 | 42559250 | 42559425 | 175 | 42559312 | 15 | 97  | 0    |
| 7 | 42720450 | 42720475 | 25  | 42720462 | 12 | 12  | 0    |
| 7 | 42739275 | 42739700 | 425 | 42739612 | 21 | 282 | 26   |
| 7 | 42743650 | 42743750 | 100 | 42743687 | 16 | 62  | 4.3  |
| 7 | 42765000 | 42765075 | 75  | 42765062 | 16 | 42  | 2.2  |
| 7 | 42770825 | 42770975 | 150 | 42770837 | 14 | 80  | 0    |
| 7 | 42773275 | 42773325 | 50  | 42773312 | 13 | 25  | 4.3  |
| 7 | 42778250 | 42778425 | 175 | 42778337 | 17 | 100 | 6.5  |
| 7 | 42778775 | 42779025 | 250 | 42778862 | 16 | 145 | 19.5 |
| 7 | 42800925 | 42801100 | 175 | 42800987 | 19 | 113 | 10.8 |
| 7 | 42871100 | 42871475 | 375 | 42871387 | 15 | 172 | 8.7  |
| 7 | 42871825 | 42871850 | 25  | 42871837 | 14 | 14  | 2.2  |

|   |          |          |     |          |    |     |      |
|---|----------|----------|-----|----------|----|-----|------|
| 7 | 42966800 | 42966850 | 50  | 42966812 | 12 | 24  | 2.2  |
| 7 | 43094175 | 43094225 | 50  | 43094187 | 14 | 27  | 4.3  |
| 7 | 43094550 | 43094575 | 25  | 43094562 | 12 | 12  | 0    |
| 7 | 43129525 | 43129550 | 25  | 43129537 | 12 | 12  | 2.2  |
| 7 | 43156900 | 43157000 | 100 | 43156962 | 14 | 52  | 6.5  |
| 7 | 43286150 | 43286200 | 50  | 43286162 | 12 | 24  | 4.3  |
| 7 | 43296775 | 43296975 | 200 | 43296837 | 16 | 115 | 0    |
| 7 | 43392250 | 43392325 | 75  | 43392262 | 14 | 38  | 4.3  |
| 7 | 43425175 | 43425250 | 75  | 43425187 | 13 | 39  | 6.5  |
| 7 | 43450950 | 43451300 | 350 | 43450987 | 13 | 127 | 17.3 |
| 7 | 43556725 | 43556750 | 25  | 43556737 | 12 | 12  | 2.2  |
| 7 | 43640500 | 43640550 | 50  | 43640512 | 13 | 25  | 0    |
| 7 | 43755550 | 43755650 | 100 | 43755637 | 13 | 47  | 8.7  |
| 7 | 43863000 | 43863150 | 150 | 43863037 | 14 | 78  | 0    |
| 7 | 44188000 | 44188025 | 25  | 44188012 | 12 | 12  | 0    |
| 7 | 44188450 | 44189300 | 850 | 44188962 | 41 | 739 | 69.3 |
| 7 | 44199225 | 44199375 | 150 | 44199337 | 15 | 82  | 8.7  |
| 7 | 44225150 | 44225275 | 125 | 44225187 | 17 | 76  | 8.7  |
| 7 | 44232350 | 44232500 | 150 | 44232362 | 16 | 89  | 10.8 |
| 7 | 44266100 | 44266200 | 100 | 44266187 | 13 | 48  | 8.7  |
| 7 | 44300375 | 44300475 | 100 | 44300412 | 14 | 50  | 6.5  |
| 7 | 44316700 | 44316725 | 25  | 44316712 | 12 | 12  | 2.2  |
| 7 | 44332200 | 44332225 | 25  | 44332212 | 12 | 12  | 0    |
| 7 | 44356650 | 44356775 | 125 | 44356687 | 15 | 67  | 10.8 |
| 7 | 44374825 | 44374850 | 25  | 44374837 | 13 | 13  | 0    |
| 7 | 44514725 | 44514800 | 75  | 44514762 | 14 | 39  | 0    |
| 7 | 44788925 | 44789025 | 100 | 44788962 | 15 | 56  | 0    |
| 7 | 44790800 | 44790825 | 25  | 44790812 | 12 | 12  | 2.2  |
| 7 | 44959475 | 44959575 | 100 | 44959512 | 13 | 50  | 0    |
| 7 | 44965825 | 44965925 | 100 | 44965837 | 12 | 48  | 8.7  |
| 7 | 44968425 | 44968450 | 25  | 44968437 | 14 | 14  | 2.2  |
| 7 | 45154850 | 45154925 | 75  | 45154862 | 13 | 38  | 6.5  |
| 7 | 45164825 | 45164875 | 50  | 45164837 | 12 | 24  | 4.3  |
| 7 | 45165825 | 45166000 | 175 | 45165937 | 13 | 79  | 10.8 |
| 7 | 45198600 | 45198800 | 200 | 45198687 | 16 | 114 | 6.5  |
| 7 | 45244000 | 45244325 | 325 | 45244062 | 16 | 181 | 17.3 |
| 7 | 45247500 | 45247550 | 50  | 45247512 | 12 | 24  | 4.3  |
| 7 | 45273475 | 45273500 | 25  | 45273487 | 12 | 12  | 2.2  |
| 7 | 45321625 | 45321650 | 25  | 45321637 | 12 | 12  | 0    |
| 7 | 45352925 | 45352975 | 50  | 45352937 | 12 | 24  | 0    |
| 7 | 45425825 | 45425850 | 25  | 45425837 | 12 | 12  | 2.2  |
| 7 | 45566250 | 45566275 | 25  | 45566262 | 12 | 12  | 0    |
| 7 | 45581775 | 45581825 | 50  | 45581787 | 12 | 24  | 0    |
| 7 | 45595225 | 45595425 | 200 | 45595237 | 16 | 118 | 4.3  |
| 7 | 45596975 | 45597075 | 100 | 45596987 | 12 | 47  | 2.2  |
| 7 | 45616200 | 45616275 | 75  | 45616237 | 15 | 44  | 6.5  |
| 7 | 45628525 | 45628550 | 25  | 45628537 | 12 | 12  | 2.2  |
| 7 | 45629650 | 45629675 | 25  | 45629662 | 12 | 12  | 2.2  |
| 7 | 45655650 | 45655850 | 200 | 45655712 | 18 | 126 | 0    |
| 7 | 45676350 | 45676700 | 350 | 45676537 | 25 | 276 | 2.2  |
| 7 | 45677050 | 45677200 | 150 | 45677062 | 13 | 75  | 8.7  |
| 7 | 45709500 | 45709775 | 275 | 45709537 | 23 | 222 | 23.8 |
| 7 | 45886550 | 45886650 | 100 | 45886612 | 16 | 57  | 6.5  |
| 7 | 45981725 | 45981975 | 250 | 45981812 | 19 | 160 | 19.5 |
| 7 | 45987250 | 45987275 | 25  | 45987262 | 12 | 12  | 0    |
| 7 | 45993250 | 45993300 | 50  | 45993262 | 12 | 24  | 4.3  |
| 7 | 46012325 | 46012600 | 275 | 46012462 | 19 | 170 | 0    |
| 7 | 46064900 | 46064975 | 75  | 46064962 | 15 | 41  | 6.5  |
| 7 | 46138375 | 46138450 | 75  | 46138387 | 12 | 36  | 6.5  |
| 7 | 46175650 | 46175750 | 100 | 46175737 | 14 | 50  | 4.3  |
| 7 | 46266950 | 46267150 | 200 | 46267112 | 15 | 102 | 0    |
| 7 | 46301050 | 46301075 | 25  | 46301062 | 12 | 12  | 0    |
| 7 | 46474875 | 46474900 | 25  | 46474887 | 13 | 13  | 0    |
| 7 | 46536825 | 46536975 | 150 | 46536887 | 13 | 75  | 0    |
| 7 | 46814450 | 46814475 | 25  | 46814462 | 12 | 12  | 0    |
| 7 | 46844775 | 46844800 | 25  | 46844787 | 12 | 12  | 2.2  |
| 7 | 46887875 | 46888000 | 125 | 46887912 | 15 | 69  | 0    |
| 7 | 46892875 | 46892925 | 50  | 46892912 | 14 | 27  | 4.3  |
| 7 | 47094475 | 47094600 | 125 | 47094512 | 16 | 72  | 0    |
| 7 | 47110175 | 47110200 | 25  | 47110187 | 12 | 12  | 2.2  |
| 7 | 47123375 | 47123400 | 25  | 47123387 | 13 | 13  | 2.2  |
| 7 | 47127575 | 47127600 | 25  | 47127587 | 13 | 13  | 0    |
| 7 | 47132200 | 47132375 | 175 | 47132312 | 18 | 101 | 4.3  |
| 7 | 47192425 | 47192525 | 100 | 47192487 | 14 | 51  | 0    |
| 7 | 47206725 | 47206850 | 125 | 47206812 | 15 | 69  | 0    |

|   |          |          |     |          |    |     |      |
|---|----------|----------|-----|----------|----|-----|------|
| 7 | 47214200 | 47214275 | 75  | 47214262 | 13 | 37  | 6.5  |
| 7 | 47218425 | 47218500 | 75  | 47218487 | 14 | 39  | 6.5  |
| 7 | 47218975 | 47219000 | 25  | 47218987 | 12 | 12  | 2.2  |
| 7 | 47275750 | 47275875 | 125 | 47275812 | 15 | 66  | 8.7  |
| 7 | 47324650 | 47324700 | 50  | 47324662 | 14 | 27  | 4.3  |
| 7 | 47368900 | 47369300 | 400 | 47369087 | 23 | 278 | 19.5 |
| 7 | 47582525 | 47582550 | 25  | 47582537 | 12 | 12  | 0    |
| 7 | 47602650 | 47602850 | 200 | 47602787 | 17 | 116 | 15.2 |
| 7 | 47604075 | 47604250 | 175 | 47604162 | 15 | 97  | 2.2  |
| 7 | 47604750 | 47604850 | 100 | 47604762 | 12 | 46  | 2.2  |
| 7 | 47705600 | 47705650 | 50  | 47705612 | 12 | 24  | 0    |
| 7 | 47730550 | 47730575 | 25  | 47730562 | 12 | 12  | 0    |
| 7 | 47738675 | 47738700 | 25  | 47738687 | 12 | 12  | 2.2  |
| 7 | 47784100 | 47784125 | 25  | 47784112 | 12 | 12  | 0    |
| 7 | 47869300 | 47869450 | 150 | 47869387 | 14 | 78  | 0    |
| 7 | 47869750 | 47869800 | 50  | 47869762 | 13 | 26  | 0    |
| 7 | 47910700 | 47910750 | 50  | 47910737 | 13 | 25  | 4.3  |
| 7 | 48096375 | 48096400 | 25  | 48096387 | 13 | 13  | 2.2  |
| 7 | 48150775 | 48150800 | 25  | 48150787 | 13 | 13  | 2.2  |
| 7 | 48157600 | 48157725 | 125 | 48157662 | 14 | 66  | 8.7  |
| 7 | 48335900 | 48336350 | 450 | 48335987 | 15 | 223 | 28.2 |
| 7 | 48420650 | 48420800 | 150 | 48420737 | 13 | 74  | 6.5  |
| 7 | 48426625 | 48426875 | 250 | 48426637 | 14 | 127 | 15.2 |
| 7 | 48464550 | 48464625 | 75  | 48464562 | 14 | 41  | 6.5  |
| 7 | 48464975 | 48465225 | 250 | 48465087 | 20 | 168 | 10.8 |
| 7 | 48496925 | 48496950 | 25  | 48496937 | 12 | 12  | 2.2  |
| 7 | 48547900 | 48547975 | 75  | 48547912 | 14 | 41  | 6.5  |
| 7 | 50404600 | 50404825 | 225 | 50404712 | 20 | 148 | 15.2 |
| 7 | 50435025 | 50435050 | 25  | 50435037 | 15 | 15  | 2.2  |
| 7 | 50575025 | 50575175 | 150 | 50575062 | 15 | 86  | 0    |
| 7 | 50590275 | 50590400 | 125 | 50590312 | 14 | 62  | 8.7  |
| 7 | 50593800 | 50594175 | 375 | 50594087 | 17 | 191 | 26   |
| 7 | 50602125 | 50602200 | 75  | 50602137 | 12 | 35  | 6.5  |
| 7 | 50603225 | 50603425 | 200 | 50603287 | 14 | 102 | 0    |
| 7 | 50612725 | 50612800 | 75  | 50612762 | 13 | 37  | 6.5  |
| 7 | 50622175 | 50622350 | 175 | 50622287 | 15 | 94  | 2.2  |
| 7 | 50707400 | 50707600 | 200 | 50707562 | 17 | 121 | 8.7  |
| 7 | 50709550 | 50709675 | 125 | 50709612 | 16 | 71  | 6.5  |
| 7 | 50823025 | 50823075 | 50  | 50823062 | 14 | 27  | 2.2  |
| 7 | 50823725 | 50823950 | 225 | 50823762 | 15 | 111 | 17.3 |
| 7 | 50824500 | 50824675 | 175 | 50824587 | 20 | 129 | 17.3 |
| 7 | 50834925 | 50835100 | 175 | 50835037 | 16 | 92  | 13   |
| 7 | 50884350 | 50884475 | 125 | 50884437 | 15 | 69  | 6.5  |
| 7 | 50953350 | 50953375 | 25  | 50953362 | 12 | 12  | 2.2  |
| 7 | 50981600 | 50982200 | 600 | 50981962 | 19 | 361 | 34.7 |
| 7 | 51005275 | 51005450 | 175 | 51005362 | 18 | 105 | 0    |
| 7 | 51041800 | 51041850 | 50  | 51041812 | 12 | 24  | 4.3  |
| 7 | 51043250 | 51043275 | 25  | 51043262 | 12 | 12  | 2.2  |
| 7 | 51048625 | 51048650 | 25  | 51048637 | 12 | 12  | 0    |
| 7 | 51050900 | 51050925 | 25  | 51050912 | 12 | 12  | 2.2  |
| 7 | 51127150 | 51127275 | 125 | 51127262 | 18 | 79  | 10.8 |
| 7 | 51167450 | 51167550 | 100 | 51167462 | 14 | 53  | 0    |
| 7 | 51181925 | 51182450 | 525 | 51182262 | 42 | 521 | 47.7 |
| 7 | 51265300 | 51265350 | 50  | 51265312 | 14 | 26  | 4.3  |
| 7 | 51266950 | 51267075 | 125 | 51266962 | 12 | 55  | 10.8 |
| 7 | 51290850 | 51291050 | 200 | 51290937 | 18 | 123 | 13   |
| 7 | 51397625 | 51397650 | 25  | 51397637 | 12 | 12  | 2.2  |
| 7 | 51512550 | 51512700 | 150 | 51512587 | 18 | 100 | 10.8 |
| 7 | 51512975 | 51513025 | 50  | 51512987 | 15 | 29  | 4.3  |
| 7 | 51667100 | 51667125 | 25  | 51667112 | 13 | 13  | 2.2  |
| 7 | 52123775 | 52123800 | 25  | 52123787 | 12 | 12  | 0    |
| 7 | 53776300 | 53776400 | 100 | 53776312 | 12 | 46  | 6.5  |
| 7 | 53830100 | 53830300 | 200 | 53830137 | 16 | 115 | 6.5  |
| 7 | 54754675 | 54754875 | 200 | 54754762 | 15 | 102 | 0    |
| 7 | 54820375 | 54820525 | 150 | 54820487 | 16 | 84  | 0    |
| 7 | 54833050 | 54833075 | 25  | 54833062 | 12 | 12  | 2.2  |
| 7 | 54834275 | 54834475 | 200 | 54834337 | 29 | 187 | 21.7 |
| 7 | 54839200 | 54839225 | 25  | 54839212 | 12 | 12  | 0    |
| 7 | 54869625 | 54869775 | 150 | 54869712 | 16 | 83  | 10.8 |
| 7 | 54941425 | 54941475 | 50  | 54941437 | 17 | 34  | 4.3  |
| 7 | 55039025 | 55039075 | 50  | 55039037 | 12 | 24  | 0    |
| 7 | 55039425 | 55039475 | 50  | 55039437 | 12 | 24  | 0    |
| 7 | 55049750 | 55050000 | 250 | 55049887 | 18 | 150 | 8.7  |
| 7 | 55102225 | 55102250 | 25  | 55102237 | 12 | 12  | 2.2  |
| 7 | 55109275 | 55109350 | 75  | 55109287 | 12 | 36  | 6.5  |

|   |          |          |      |          |    |     |      |
|---|----------|----------|------|----------|----|-----|------|
| 7 | 55157600 | 55157650 | 50   | 55157612 | 13 | 25  | 4.3  |
| 7 | 55161375 | 55161425 | 50   | 55161387 | 12 | 24  | 0    |
| 7 | 55216425 | 55216450 | 25   | 55216437 | 12 | 12  | 2.2  |
| 7 | 55288150 | 55288225 | 75   | 55288162 | 12 | 36  | 6.5  |
| 7 | 55295525 | 55295550 | 25   | 55295537 | 12 | 12  | 0    |
| 7 | 55344475 | 55344675 | 200  | 55344537 | 15 | 112 | 15.2 |
| 7 | 55346250 | 55346275 | 25   | 55346262 | 12 | 12  | 0    |
| 7 | 55348275 | 55348450 | 175  | 55348387 | 15 | 95  | 0    |
| 7 | 55350275 | 55350300 | 25   | 55350287 | 13 | 13  | 0    |
| 7 | 55360175 | 55360300 | 125  | 55360262 | 15 | 70  | 4.3  |
| 7 | 55378350 | 55378375 | 25   | 55378362 | 12 | 12  | 2.2  |
| 7 | 55378650 | 55379100 | 450  | 55378837 | 23 | 352 | 60.7 |
| 7 | 55379550 | 55380075 | 525  | 55379812 | 32 | 519 | 17.3 |
| 7 | 55380575 | 55380625 | 50   | 55380612 | 17 | 30  | 4.3  |
| 7 | 55421775 | 55421800 | 25   | 55421787 | 12 | 12  | 2.2  |
| 7 | 55618150 | 55618300 | 150  | 55618287 | 13 | 72  | 10.8 |
| 7 | 55622300 | 55622425 | 125  | 55622312 | 12 | 55  | 0    |
| 7 | 55623425 | 55623525 | 100  | 55623462 | 15 | 53  | 8.7  |
| 7 | 55628750 | 55628775 | 25   | 55628762 | 13 | 13  | 2.2  |
| 7 | 55629825 | 55629850 | 25   | 55629837 | 12 | 12  | 2.2  |
| 7 | 55697375 | 55697525 | 150  | 55697487 | 16 | 78  | 10.8 |
| 7 | 55907350 | 55907500 | 150  | 55907387 | 15 | 81  | 10.8 |
| 7 | 56363650 | 56363800 | 150  | 56363712 | 13 | 76  | 15.2 |
| 7 | 56518425 | 56518550 | 125  | 56518487 | 14 | 63  | 0    |
| 7 | 56519425 | 56519525 | 100  | 56519512 | 13 | 49  | 8.7  |
| 7 | 56527250 | 56527425 | 175  | 56527312 | 16 | 103 | 13   |
| 7 | 56529300 | 56529350 | 50   | 56529312 | 12 | 24  | 2.2  |
| 7 | 57299450 | 57299500 | 50   | 57299462 | 12 | 24  | 4.3  |
| 7 | 57470475 | 57470525 | 50   | 57470487 | 12 | 24  | 4.3  |
| 7 | 57488850 | 57488950 | 100  | 57488912 | 14 | 53  | 0    |
| 7 | 57548800 | 57548950 | 150  | 57548837 | 15 | 82  | 0    |
| 7 | 57551350 | 57551500 | 150  | 57551362 | 13 | 74  | 13   |
| 7 | 58012600 | 58012750 | 150  | 58012612 | 13 | 78  | 13   |
| 7 | 61082975 | 61083000 | 25   | 61082987 | 12 | 12  | 0    |
| 7 | 61268450 | 61268625 | 175  | 61268562 | 14 | 94  | 15.2 |
| 7 | 61377225 | 61377275 | 50   | 61377237 | 12 | 24  | 4.3  |
| 7 | 61459200 | 61459450 | 250  | 61459412 | 32 | 234 | 28.2 |
| 7 | 61459725 | 61459750 | 25   | 61459737 | 12 | 12  | 0    |
| 7 | 61659050 | 61659200 | 150  | 61659062 | 13 | 78  | 13   |
| 7 | 62144225 | 62144250 | 25   | 62144237 | 12 | 12  | 0    |
| 7 | 62665500 | 62665525 | 25   | 62665512 | 12 | 12  | 0    |
| 7 | 62668450 | 62668525 | 75   | 62668462 | 14 | 40  | 6.5  |
| 7 | 63029225 | 63029275 | 50   | 63029237 | 12 | 24  | 0    |
| 7 | 63134700 | 63134800 | 100  | 63134712 | 12 | 46  | 0    |
| 7 | 63135800 | 63135825 | 25   | 63135812 | 12 | 12  | 2.2  |
| 7 | 63143925 | 63144050 | 125  | 63143937 | 14 | 62  | 10.8 |
| 7 | 63155275 | 63155300 | 25   | 63155287 | 12 | 12  | 2.2  |
| 7 | 63199900 | 63199950 | 50   | 63199912 | 12 | 24  | 2.2  |
| 7 | 63212700 | 63212800 | 100  | 63212737 | 14 | 53  | 6.5  |
| 7 | 63449175 | 63449200 | 25   | 63449187 | 12 | 12  | 0    |
| 7 | 63505150 | 63505275 | 125  | 63505162 | 12 | 57  | 2.2  |
| 7 | 63526725 | 63526775 | 50   | 63526737 | 13 | 25  | 0    |
| 7 | 63531600 | 63531675 | 75   | 63531612 | 16 | 46  | 6.5  |
| 7 | 63561525 | 63561650 | 125  | 63561637 | 14 | 62  | 6.5  |
| 7 | 63607600 | 63607625 | 25   | 63607612 | 12 | 12  | 2.2  |
| 7 | 63667075 | 63667300 | 225  | 63667287 | 17 | 131 | 4.3  |
| 7 | 63667575 | 63667625 | 50   | 63667612 | 19 | 36  | 4.3  |
| 7 | 63672775 | 63672875 | 100  | 63672812 | 15 | 56  | 8.7  |
| 7 | 63749525 | 63749625 | 100  | 63749537 | 13 | 48  | 4.3  |
| 7 | 63834625 | 63834775 | 150  | 63834662 | 17 | 89  | 0    |
| 7 | 63837200 | 63837275 | 75   | 63837212 | 12 | 36  | 6.5  |
| 7 | 63961025 | 63961275 | 250  | 63961137 | 23 | 172 | 23.8 |
| 7 | 63961850 | 63961975 | 125  | 63961887 | 13 | 61  | 6.5  |
| 7 | 63964075 | 63964100 | 25   | 63964087 | 12 | 12  | 2.2  |
| 7 | 63965700 | 63965975 | 275  | 63965787 | 20 | 176 | 8.7  |
| 7 | 63966375 | 63967525 | 1150 | 63967262 | 20 | 628 | 45.5 |
| 7 | 63967750 | 63968075 | 325  | 63967912 | 27 | 237 | 30.3 |
| 7 | 63968475 | 63968950 | 475  | 63968762 | 16 | 248 | 6.5  |
| 7 | 63969550 | 63969750 | 200  | 63969637 | 19 | 124 | 4.3  |
| 7 | 63970125 | 63970800 | 675  | 63970387 | 22 | 403 | 67.2 |
| 7 | 63971225 | 63971600 | 375  | 63971312 | 17 | 212 | 13   |
| 7 | 63972700 | 63973325 | 625  | 63973012 | 25 | 512 | 58.5 |
| 7 | 63973750 | 63974225 | 475  | 63973862 | 17 | 271 | 4.3  |
| 7 | 63974625 | 63974650 | 25   | 63974637 | 12 | 12  | 2.2  |
| 7 | 63975000 | 63975150 | 150  | 63975112 | 20 | 100 | 10.8 |

|   |          |          |      |          |    |      |       |
|---|----------|----------|------|----------|----|------|-------|
| 7 | 63976100 | 63976250 | 150  | 63976187 | 15 | 76   | 10.8  |
| 7 | 63977675 | 63977775 | 100  | 63977762 | 13 | 46   | 8.7   |
| 7 | 63978675 | 63979025 | 350  | 63978762 | 24 | 250  | 10.8  |
| 7 | 63979725 | 63979850 | 125  | 63979737 | 25 | 118  | 19.5  |
| 7 | 63980375 | 63980500 | 125  | 63980437 | 21 | 99   | 4.3   |
| 7 | 63980750 | 63980875 | 125  | 63980787 | 16 | 72   | 8.7   |
| 7 | 63981150 | 63981650 | 500  | 63981262 | 19 | 331  | 54.2  |
| 7 | 63982975 | 63983075 | 100  | 63983037 | 15 | 53   | 8.7   |
| 7 | 63986900 | 63986950 | 50   | 63986912 | 14 | 26   | 4.3   |
| 7 | 63987300 | 63987325 | 25   | 63987312 | 12 | 12   | 0     |
| 7 | 64044750 | 64044775 | 25   | 64044762 | 12 | 12   | 2.2   |
| 7 | 64508075 | 64508125 | 50   | 64508087 | 12 | 24   | 0     |
| 7 | 64532100 | 64533275 | 1175 | 64532162 | 29 | 948  | 101.9 |
| 7 | 64579275 | 64579325 | 50   | 64579287 | 12 | 24   | 4.3   |
| 7 | 64582750 | 64582775 | 25   | 64582762 | 12 | 12   | 0     |
| 7 | 64591675 | 64591850 | 175  | 64591712 | 24 | 136  | 6.5   |
| 7 | 64592150 | 64592400 | 250  | 64592312 | 14 | 123  | 13    |
| 7 | 64592800 | 64593000 | 200  | 64592912 | 18 | 114  | 21.7  |
| 7 | 65298075 | 65298100 | 25   | 65298087 | 12 | 12   | 0     |
| 7 | 65298875 | 65298900 | 25   | 65298887 | 12 | 12   | 0     |
| 7 | 65367800 | 65367825 | 25   | 65367812 | 12 | 12   | 0     |
| 7 | 65481500 | 65481550 | 50   | 65481512 | 12 | 24   | 0     |
| 7 | 65482050 | 65482200 | 150  | 65482062 | 13 | 77   | 13    |
| 7 | 65515775 | 65515875 | 100  | 65515812 | 15 | 51   | 0     |
| 7 | 65607925 | 65608200 | 275  | 65608087 | 22 | 198  | 13    |
| 7 | 65926925 | 65926950 | 25   | 65926937 | 12 | 12   | 0     |
| 7 | 65927700 | 65927725 | 25   | 65927712 | 13 | 13   | 2.2   |
| 7 | 65939400 | 65939600 | 200  | 65939537 | 18 | 124  | 6.5   |
| 7 | 66082625 | 66082725 | 100  | 66082662 | 13 | 48   | 0     |
| 7 | 66354650 | 66354675 | 25   | 66354662 | 12 | 12   | 0     |
| 7 | 66447150 | 66447250 | 100  | 66447237 | 13 | 48   | 0     |
| 7 | 66460200 | 66460400 | 200  | 66460337 | 15 | 104  | 0     |
| 7 | 66496750 | 66496875 | 125  | 66496762 | 14 | 65   | 0     |
| 7 | 66728100 | 66728175 | 75   | 66728112 | 12 | 36   | 6.5   |
| 7 | 66869400 | 66869425 | 25   | 66869412 | 13 | 13   | 0     |
| 7 | 66911975 | 66912025 | 50   | 66911987 | 12 | 24   | 0     |
| 7 | 67071525 | 67071575 | 50   | 67071562 | 13 | 25   | 0     |
| 7 | 67773050 | 67773175 | 125  | 67773137 | 15 | 66   | 10.8  |
| 7 | 67856225 | 67856325 | 100  | 67856262 | 14 | 55   | 2.2   |
| 7 | 69599650 | 69599675 | 25   | 69599662 | 13 | 13   | 2.2   |
| 7 | 71544850 | 71544925 | 75   | 71544862 | 14 | 38   | 6.5   |
| 7 | 71548225 | 71548325 | 100  | 71548237 | 14 | 54   | 6.5   |
| 7 | 71550425 | 71551150 | 725  | 71550987 | 20 | 414  | 34.7  |
| 7 | 72412025 | 72412075 | 50   | 72412037 | 15 | 28   | 0     |
| 7 | 72487275 | 72487300 | 25   | 72487287 | 12 | 12   | 2.2   |
| 7 | 72676200 | 72676275 | 75   | 72676212 | 15 | 43   | 4.3   |
| 7 | 72693725 | 72693850 | 125  | 72693737 | 19 | 71   | 2.2   |
| 7 | 72715325 | 72715425 | 100  | 72715337 | 12 | 47   | 6.5   |
| 7 | 73147950 | 73148125 | 175  | 73148012 | 14 | 91   | 6.5   |
| 7 | 73148975 | 73150300 | 1325 | 73149437 | 49 | 1390 | 173.4 |
| 7 | 73197750 | 73197850 | 100  | 73197762 | 12 | 45   | 8.7   |
| 7 | 75110125 | 75110200 | 75   | 75110187 | 14 | 40   | 6.5   |
| 7 | 75273850 | 75274050 | 200  | 75274037 | 15 | 97   | 6.5   |
| 7 | 75274600 | 75274675 | 75   | 75274612 | 13 | 37   | 0     |
| 7 | 75659075 | 75659125 | 50   | 75659112 | 13 | 25   | 0     |
| 7 | 75746850 | 75746875 | 25   | 75746862 | 12 | 12   | 2.2   |
| 7 | 77288725 | 77288850 | 125  | 77288762 | 15 | 67   | 10.8  |
| 7 | 77289100 | 77289125 | 25   | 77289112 | 12 | 12   | 2.2   |
| 7 | 77289625 | 77289650 | 25   | 77289637 | 12 | 12   | 2.2   |
| 7 | 77687625 | 77687675 | 50   | 77687637 | 13 | 26   | 2.2   |
| 7 | 78484225 | 78484250 | 25   | 78484237 | 12 | 12   | 0     |
| 7 | 79083850 | 79083950 | 100  | 79083912 | 13 | 50   | 8.7   |
| 7 | 79389775 | 79390525 | 750  | 79390237 | 16 | 370  | 47.7  |
| 7 | 79414275 | 79414350 | 75   | 79414337 | 14 | 39   | 2.2   |
| 7 | 79554550 | 79554575 | 25   | 79554562 | 12 | 12   | 0     |
| 7 | 80762200 | 80762375 | 175  | 80762312 | 14 | 90   | 15.2  |
| 7 | 80977525 | 80977600 | 75   | 80977562 | 16 | 46   | 2.2   |
| 7 | 81910650 | 81910700 | 50   | 81910662 | 12 | 24   | 0     |
| 7 | 83130550 | 83130575 | 25   | 83130562 | 12 | 12   | 2.2   |
| 7 | 83142025 | 83142225 | 200  | 83142162 | 19 | 119  | 17.3  |
| 7 | 83216775 | 83216925 | 150  | 83216887 | 15 | 76   | 6.5   |
| 7 | 83609125 | 83609275 | 150  | 83609187 | 15 | 77   | 8.7   |
| 7 | 83728875 | 83728900 | 25   | 83728887 | 13 | 13   | 2.2   |
| 7 | 84189975 | 84190025 | 50   | 84189987 | 12 | 24   | 0     |
| 7 | 85082050 | 85082175 | 125  | 85082087 | 14 | 65   | 0     |

|   |           |           |     |           |    |     |      |
|---|-----------|-----------|-----|-----------|----|-----|------|
| 7 | 85095500  | 85095525  | 25  | 85095512  | 13 | 13  | 2.2  |
| 7 | 85213200  | 85213325  | 125 | 85213262  | 14 | 63  | 8.7  |
| 7 | 87252650  | 87252675  | 25  | 87252662  | 13 | 13  | 0    |
| 7 | 87338075  | 87338275  | 200 | 87338237  | 14 | 101 | 0    |
| 7 | 89789200  | 89789225  | 25  | 89789212  | 12 | 12  | 2.2  |
| 7 | 89900775  | 89900950  | 175 | 89900887  | 15 | 85  | 15.2 |
| 7 | 89901200  | 89901800  | 600 | 89901512  | 15 | 318 | 52   |
| 7 | 90693050  | 90693125  | 75  | 90693087  | 13 | 37  | 0    |
| 7 | 90732975  | 90733300  | 325 | 90733287  | 32 | 280 | 52   |
| 7 | 90733625  | 90733750  | 125 | 90733737  | 56 | 270 | 36.8 |
| 7 | 90733975  | 90734275  | 300 | 90734137  | 22 | 225 | 32.5 |
| 7 | 90930675  | 90930800  | 125 | 90930712  | 15 | 66  | 8.7  |
| 7 | 91174800  | 91174825  | 25  | 91174812  | 12 | 12  | 2.2  |
| 7 | 92393325  | 92393400  | 75  | 92393362  | 13 | 37  | 2.2  |
| 7 | 92397125  | 92397150  | 25  | 92397137  | 12 | 12  | 0    |
| 7 | 94131550  | 94131600  | 50  | 94131587  | 14 | 26  | 4.3  |
| 7 | 94345900  | 94346000  | 100 | 94345962  | 14 | 53  | 0    |
| 7 | 94896800  | 94896850  | 50  | 94896812  | 13 | 26  | 4.3  |
| 7 | 95897825  | 95897850  | 25  | 95897837  | 13 | 13  | 2.2  |
| 7 | 96253575  | 96253625  | 50  | 96253587  | 12 | 24  | 4.3  |
| 7 | 96429800  | 96429850  | 50  | 96429812  | 14 | 28  | 2.2  |
| 7 | 96464225  | 96464300  | 75  | 96464237  | 13 | 38  | 0    |
| 7 | 96484400  | 96484450  | 50  | 96484437  | 14 | 26  | 4.3  |
| 7 | 96504425  | 96504550  | 125 | 96504462  | 14 | 68  | 0    |
| 7 | 96597900  | 96597925  | 25  | 96597912  | 13 | 13  | 2.2  |
| 7 | 96606050  | 96606225  | 175 | 96606212  | 25 | 149 | 23.8 |
| 7 | 96700450  | 96700600  | 150 | 96700487  | 13 | 76  | 8.7  |
| 7 | 96731200  | 96731250  | 50  | 96731212  | 12 | 24  | 0    |
| 7 | 96750550  | 96750625  | 75  | 96750562  | 14 | 41  | 2.2  |
| 7 | 96817800  | 96817875  | 75  | 96817812  | 12 | 36  | 6.5  |
| 7 | 96832175  | 96832225  | 50  | 96832187  | 13 | 26  | 4.3  |
| 7 | 97253625  | 97253650  | 25  | 97253637  | 12 | 12  | 2.2  |
| 7 | 97264975  | 97265025  | 50  | 97264987  | 12 | 24  | 2.2  |
| 7 | 97278275  | 97278300  | 25  | 97278287  | 12 | 12  | 0    |
| 7 | 97310050  | 97310075  | 25  | 97310062  | 12 | 12  | 0    |
| 7 | 97310500  | 97310700  | 200 | 97310562  | 17 | 119 | 15.2 |
| 7 | 97473650  | 97473675  | 25  | 97473662  | 12 | 12  | 0    |
| 7 | 97525650  | 97525675  | 25  | 97525662  | 12 | 12  | 0    |
| 7 | 97937875  | 97937900  | 25  | 97937887  | 12 | 12  | 0    |
| 7 | 97953900  | 97954100  | 200 | 97953962  | 16 | 106 | 2.2  |
| 7 | 97963875  | 97963925  | 50  | 97963912  | 14 | 26  | 4.3  |
| 7 | 97978725  | 97978800  | 75  | 97978737  | 13 | 37  | 2.2  |
| 7 | 97999050  | 97999100  | 50  | 97999062  | 13 | 25  | 4.3  |
| 7 | 98239450  | 98239575  | 125 | 98239487  | 14 | 66  | 8.7  |
| 7 | 98246900  | 98246925  | 25  | 98246912  | 12 | 12  | 2.2  |
| 7 | 98283375  | 98283400  | 25  | 98283387  | 12 | 12  | 0    |
| 7 | 98283750  | 98283850  | 100 | 98283762  | 12 | 46  | 0    |
| 7 | 98298750  | 98298900  | 150 | 98298762  | 13 | 77  | 13   |
| 7 | 98745175  | 98745375  | 200 | 98745212  | 17 | 115 | 13   |
| 7 | 98964550  | 98964575  | 25  | 98964562  | 12 | 12  | 0    |
| 7 | 98967125  | 98967300  | 175 | 98967137  | 28 | 142 | 15.2 |
| 7 | 98975050  | 98975075  | 25  | 98975062  | 12 | 12  | 2.2  |
| 7 | 99043200  | 99043225  | 25  | 99043212  | 14 | 14  | 2.2  |
| 7 | 99312025  | 99312100  | 75  | 99312087  | 15 | 40  | 6.5  |
| 7 | 99391025  | 99391050  | 25  | 99391037  | 12 | 12  | 2.2  |
| 7 | 99506600  | 99506625  | 25  | 99506612  | 12 | 12  | 2.2  |
| 7 | 99507125  | 99507450  | 325 | 99507312  | 15 | 167 | 13   |
| 7 | 99507925  | 99508550  | 625 | 99508237  | 29 | 378 | 28.2 |
| 7 | 99509650  | 99509675  | 25  | 99509662  | 12 | 12  | 2.2  |
| 7 | 99863500  | 99863600  | 100 | 99863587  | 27 | 78  | 4.3  |
| 7 | 100084075 | 100084400 | 325 | 100084312 | 17 | 176 | 28.2 |
| 7 | 100090450 | 100090725 | 275 | 100090562 | 21 | 187 | 0    |
| 7 | 100091575 | 100091625 | 50  | 100091587 | 12 | 24  | 0    |
| 7 | 100092175 | 100092200 | 25  | 100092187 | 16 | 16  | 0    |
| 7 | 100152350 | 100152475 | 125 | 100152362 | 14 | 59  | 0    |
| 7 | 100187150 | 100187250 | 100 | 100187162 | 12 | 46  | 8.7  |
| 7 | 100229675 | 100229800 | 125 | 100229787 | 15 | 67  | 4.3  |
| 7 | 100332050 | 100332200 | 150 | 100332087 | 16 | 83  | 8.7  |
| 7 | 100341975 | 100342000 | 25  | 100341987 | 13 | 13  | 2.2  |
| 7 | 100344250 | 100344475 | 225 | 100344362 | 17 | 131 | 0    |
| 7 | 100379650 | 100379750 | 100 | 100379712 | 18 | 62  | 2.2  |
| 7 | 100387425 | 100388125 | 700 | 100387537 | 22 | 396 | 60.7 |
| 7 | 100388400 | 100388550 | 150 | 100388537 | 33 | 101 | 2.2  |
| 7 | 100388925 | 100389250 | 325 | 100388937 | 67 | 492 | 60.7 |
| 7 | 100389500 | 100389525 | 25  | 100389512 | 12 | 12  | 2.2  |



|   |           |           |     |           |    |     |       |
|---|-----------|-----------|-----|-----------|----|-----|-------|
| 7 | 100390475 | 100390525 | 50  | 100390512 | 13 | 25  | 0     |
| 7 | 100394650 | 100394700 | 50  | 100394662 | 13 | 26  | 2.2   |
| 7 | 100396825 | 100396925 | 100 | 100396837 | 14 | 54  | 0     |
| 7 | 100421250 | 100421450 | 200 | 100421262 | 13 | 98  | 0     |
| 7 | 100421850 | 100421925 | 75  | 100421862 | 13 | 35  | 0     |
| 7 | 100428750 | 100428775 | 25  | 100428762 | 12 | 12  | 0     |
| 7 | 100430100 | 100430300 | 200 | 100430112 | 15 | 96  | 0     |
| 7 | 100445375 | 100445525 | 150 | 100445412 | 13 | 74  | 13    |
| 7 | 100450875 | 100450900 | 25  | 100450887 | 12 | 12  | 2.2   |
| 7 | 100462450 | 100462525 | 75  | 100462487 | 14 | 39  | 6.5   |
| 7 | 100584100 | 100584250 | 150 | 100584187 | 17 | 89  | 13    |
| 7 | 100602125 | 100602225 | 100 | 100602162 | 15 | 56  | 6.5   |
| 7 | 100730000 | 100730900 | 900 | 100730512 | 51 | 992 | 101.9 |
| 7 | 100731975 | 100732150 | 175 | 100732037 | 16 | 99  | 0     |
| 7 | 100779825 | 100780100 | 275 | 100779937 | 17 | 158 | 26    |
| 7 | 100839550 | 100839625 | 75  | 100839612 | 13 | 37  | 6.5   |
| 7 | 100856325 | 100856525 | 200 | 100856462 | 16 | 114 | 10.8  |
| 7 | 100866175 | 100866200 | 25  | 100866187 | 12 | 12  | 2.2   |
| 7 | 100872775 | 100872975 | 200 | 100872862 | 21 | 133 | 10.8  |
| 7 | 100877725 | 100877750 | 25  | 100877737 | 12 | 12  | 2.2   |
| 7 | 100879200 | 100879375 | 175 | 100879287 | 15 | 91  | 17.3  |
| 7 | 100902825 | 100902875 | 50  | 100902862 | 13 | 25  | 0     |
| 7 | 100907275 | 100907375 | 100 | 100907312 | 14 | 54  | 0     |
| 7 | 100917350 | 100917375 | 25  | 100917362 | 13 | 13  | 2.2   |
| 7 | 100926100 | 100926275 | 175 | 100926112 | 12 | 84  | 6.5   |
| 7 | 100940425 | 100940525 | 100 | 100940462 | 13 | 51  | 4.3   |
| 7 | 100949500 | 100949700 | 200 | 100949587 | 17 | 119 | 17.3  |
| 7 | 100951500 | 100951525 | 25  | 100951512 | 12 | 12  | 2.2   |
| 7 | 100954850 | 100954925 | 75  | 100954887 | 15 | 43  | 6.5   |
| 7 | 100959950 | 100959975 | 25  | 100959962 | 12 | 12  | 0     |
| 7 | 100966950 | 100966975 | 25  | 100966962 | 12 | 12  | 2.2   |
| 7 | 100992050 | 100992075 | 25  | 100992062 | 12 | 12  | 2.2   |
| 7 | 101006875 | 101006950 | 75  | 101006887 | 12 | 36  | 0     |
| 7 | 101013075 | 101013775 | 700 | 101013187 | 17 | 410 | 49.8  |
| 7 | 101154075 | 101154275 | 200 | 101154112 | 14 | 98  | 0     |
| 7 | 101155100 | 101155250 | 150 | 101155187 | 16 | 82  | 8.7   |
| 7 | 102285250 | 102285275 | 25  | 102285262 | 12 | 12  | 0     |
| 7 | 102833950 | 102834125 | 175 | 102834037 | 16 | 96  | 10.8  |
| 7 | 102873450 | 102873575 | 125 | 102873487 | 15 | 70  | 10.8  |
| 7 | 102911300 | 102911425 | 125 | 102911312 | 13 | 59  | 0     |
| 7 | 102932275 | 102932450 | 175 | 102932287 | 12 | 75  | 10.8  |
| 7 | 103169550 | 103169725 | 175 | 103169662 | 13 | 83  | 15.2  |
| 7 | 104031825 | 104031900 | 75  | 104031837 | 13 | 37  | 6.5   |
| 7 | 104120575 | 104120600 | 25  | 104120587 | 12 | 12  | 0     |
| 7 | 104234900 | 104235050 | 150 | 104234962 | 17 | 91  | 0     |
| 7 | 104291350 | 104291625 | 275 | 104291512 | 20 | 163 | 17.3  |
| 7 | 104331100 | 104331150 | 50  | 104331137 | 14 | 27  | 0     |
| 7 | 104656425 | 104656475 | 50  | 104656437 | 12 | 24  | 4.3   |
| 7 | 105139800 | 105139850 | 50  | 105139812 | 12 | 24  | 0     |
| 7 | 105738700 | 105738750 | 50  | 105738712 | 12 | 24  | 0     |
| 7 | 105782675 | 105782700 | 25  | 105782687 | 12 | 12  | 0     |
| 7 | 105844825 | 105844850 | 25  | 105844837 | 14 | 14  | 2.2   |
| 7 | 106058575 | 106058650 | 75  | 106058637 | 13 | 37  | 0     |
| 7 | 106250150 | 106250300 | 150 | 106250187 | 14 | 75  | 0     |
| 7 | 106787325 | 106787775 | 450 | 106787737 | 17 | 220 | 4.3   |
| 7 | 106788325 | 106788650 | 325 | 106788537 | 14 | 169 | 15.2  |
| 7 | 107089375 | 107089400 | 25  | 107089387 | 12 | 12  | 2.2   |
| 7 | 107513750 | 107513950 | 200 | 107513762 | 33 | 199 | 15.2  |
| 7 | 107705900 | 107706050 | 150 | 107706037 | 13 | 72  | 0     |
| 7 | 108084850 | 108084900 | 50  | 108084862 | 12 | 24  | 0     |
| 7 | 111370025 | 111370075 | 50  | 111370037 | 12 | 24  | 0     |
| 7 | 112217800 | 112217850 | 50  | 112217837 | 13 | 25  | 2.2   |
| 7 | 112722600 | 112722625 | 25  | 112722612 | 12 | 12  | 2.2   |
| 7 | 115614750 | 115614925 | 175 | 115614862 | 14 | 89  | 0     |
| 7 | 116681175 | 116681200 | 25  | 116681187 | 12 | 12  | 0     |
| 7 | 116747825 | 116748125 | 300 | 116747987 | 17 | 164 | 0     |
| 7 | 116854625 | 116854675 | 50  | 116854637 | 12 | 24  | 0     |
| 7 | 117219000 | 117219375 | 375 | 117219212 | 16 | 198 | 30.3  |
| 7 | 119702325 | 119702675 | 350 | 119702537 | 15 | 200 | 34.7  |
| 7 | 120756475 | 120756500 | 25  | 120756487 | 12 | 12  | 2.2   |
| 7 | 120932450 | 120932650 | 200 | 120932612 | 16 | 110 | 0     |
| 7 | 120938425 | 120938575 | 150 | 120938462 | 14 | 77  | 0     |
| 7 | 121742350 | 121742375 | 25  | 121742362 | 12 | 12  | 2.2   |
| 7 | 122313275 | 122313325 | 50  | 122313287 | 12 | 24  | 4.3   |
| 7 | 124188800 | 124188825 | 25  | 124188812 | 13 | 13  | 0     |

|   |           |           |     |           |    |     |      |
|---|-----------|-----------|-----|-----------|----|-----|------|
| 7 | 126112850 | 126112950 | 100 | 126112862 | 12 | 46  | 0    |
| 7 | 126117700 | 126117725 | 25  | 126117712 | 13 | 13  | 0    |
| 7 | 126234300 | 126234425 | 125 | 126234312 | 12 | 60  | 4.3  |
| 7 | 126774850 | 126775025 | 175 | 126774962 | 18 | 103 | 2.2  |
| 7 | 127013175 | 127013200 | 25  | 127013187 | 13 | 13  | 2.2  |
| 7 | 127026675 | 127026875 | 200 | 127026787 | 13 | 97  | 2.2  |
| 7 | 127028200 | 127028325 | 125 | 127028212 | 13 | 63  | 0    |
| 7 | 127035400 | 127035525 | 125 | 127035437 | 17 | 80  | 0    |
| 7 | 127038225 | 127038250 | 25  | 127038237 | 12 | 12  | 0    |
| 7 | 127040900 | 127040975 | 75  | 127040912 | 14 | 41  | 2.2  |
| 7 | 127042300 | 127042375 | 75  | 127042312 | 15 | 42  | 6.5  |
| 7 | 127042600 | 127042650 | 50  | 127042612 | 12 | 24  | 0    |
| 7 | 127043050 | 127043150 | 100 | 127043112 | 14 | 53  | 4.3  |
| 7 | 127456400 | 127456450 | 50  | 127456412 | 12 | 24  | 4.3  |
| 7 | 127541975 | 127542025 | 50  | 127542012 | 15 | 29  | 4.3  |
| 7 | 127542300 | 127542325 | 25  | 127542312 | 16 | 16  | 2.2  |
| 7 | 127595575 | 127595625 | 50  | 127595587 | 12 | 24  | 4.3  |
| 7 | 127611625 | 127611650 | 25  | 127611637 | 12 | 12  | 2.2  |
| 7 | 127621725 | 127622000 | 275 | 127621812 | 14 | 141 | 17.3 |
| 7 | 127628425 | 127628450 | 25  | 127628437 | 12 | 12  | 0    |
| 7 | 127632500 | 127632625 | 125 | 127632562 | 16 | 71  | 0    |
| 7 | 127667750 | 127668050 | 300 | 127667862 | 23 | 227 | 0    |
| 7 | 128206325 | 128206525 | 200 | 128206412 | 13 | 95  | 17.3 |
| 7 | 128333450 | 128333525 | 75  | 128333462 | 12 | 36  | 4.3  |
| 7 | 128554475 | 128554500 | 25  | 128554487 | 12 | 12  | 2.2  |
| 7 | 128585000 | 128585100 | 100 | 128585012 | 13 | 48  | 0    |
| 7 | 128950000 | 128950025 | 25  | 128950012 | 15 | 15  | 2.2  |
| 7 | 129005325 | 129005375 | 50  | 129005337 | 12 | 24  | 0    |
| 7 | 129006025 | 129006050 | 25  | 129006037 | 13 | 13  | 2.2  |
| 7 | 129013575 | 129013650 | 75  | 129013587 | 13 | 39  | 0    |
| 7 | 129208700 | 129208725 | 25  | 129208712 | 13 | 13  | 2.2  |
| 7 | 129209475 | 129209725 | 250 | 129209612 | 18 | 153 | 17.3 |
| 7 | 129209975 | 129210000 | 25  | 129209987 | 12 | 12  | 2.2  |
| 7 | 129210350 | 129210450 | 100 | 129210362 | 12 | 48  | 8.7  |
| 7 | 129579100 | 129579125 | 25  | 129579112 | 12 | 12  | 2.2  |
| 7 | 129579475 | 129579525 | 50  | 129579512 | 13 | 25  | 4.3  |
| 7 | 129702250 | 129702275 | 25  | 129702262 | 12 | 12  | 0    |
| 7 | 129785900 | 129785925 | 25  | 129785912 | 12 | 12  | 2.2  |
| 7 | 129786325 | 129786525 | 200 | 129786437 | 21 | 142 | 0    |
| 7 | 129867475 | 129867550 | 75  | 129867537 | 14 | 39  | 0    |
| 7 | 129913450 | 129913500 | 50  | 129913462 | 14 | 27  | 0    |
| 7 | 129918525 | 129918575 | 50  | 129918562 | 14 | 27  | 4.3  |
| 7 | 129919425 | 129919600 | 175 | 129919487 | 16 | 94  | 0    |
| 7 | 130068525 | 130068825 | 300 | 130068687 | 25 | 234 | 6.5  |
| 7 | 130190950 | 130191100 | 150 | 130190987 | 14 | 79  | 2.2  |
| 7 | 130310050 | 130310250 | 200 | 130310062 | 15 | 100 | 0    |
| 7 | 131000700 | 131000925 | 225 | 131000737 | 18 | 138 | 0    |
| 7 | 131019250 | 131019375 | 125 | 131019287 | 15 | 64  | 0    |
| 7 | 131025325 | 131025475 | 150 | 131025412 | 14 | 73  | 0    |
| 7 | 131211775 | 131211800 | 25  | 131211787 | 12 | 12  | 0    |
| 7 | 131212300 | 131212475 | 175 | 131212387 | 13 | 83  | 0    |
| 7 | 131244325 | 131244350 | 25  | 131244337 | 12 | 12  | 2.2  |
| 7 | 131411825 | 131411925 | 100 | 131411837 | 14 | 48  | 6.5  |
| 7 | 131422900 | 131422975 | 75  | 131422912 | 13 | 38  | 0    |
| 7 | 131459275 | 131459300 | 25  | 131459287 | 12 | 12  | 0    |
| 7 | 131464025 | 131464050 | 25  | 131464037 | 12 | 12  | 0    |
| 7 | 131492700 | 131492725 | 25  | 131492712 | 12 | 12  | 0    |
| 7 | 131503550 | 131503750 | 200 | 131503637 | 17 | 107 | 10.8 |
| 7 | 131522925 | 131522975 | 50  | 131522937 | 13 | 26  | 4.3  |
| 7 | 131523875 | 131523925 | 50  | 131523887 | 12 | 24  | 4.3  |
| 7 | 131661800 | 131661825 | 25  | 131661812 | 12 | 12  | 2.2  |
| 7 | 131681075 | 131681200 | 125 | 131681137 | 13 | 62  | 0    |
| 7 | 131699400 | 131699525 | 125 | 131699512 | 14 | 66  | 0    |
| 7 | 131812725 | 131812775 | 50  | 131812737 | 12 | 24  | 4.3  |
| 7 | 131843475 | 131843650 | 175 | 131843512 | 15 | 92  | 0    |
| 7 | 131886350 | 131886600 | 250 | 131886487 | 18 | 153 | 2.2  |
| 7 | 131926375 | 131926450 | 75  | 131926387 | 13 | 38  | 0    |
| 7 | 131929150 | 131929225 | 75  | 131929212 | 13 | 37  | 0    |
| 7 | 131943175 | 131943200 | 25  | 131943187 | 12 | 12  | 0    |
| 7 | 132021650 | 132021800 | 150 | 132021737 | 14 | 77  | 13   |
| 7 | 132056375 | 132056425 | 50  | 132056387 | 14 | 27  | 4.3  |
| 7 | 132059675 | 132059850 | 175 | 132059787 | 15 | 97  | 6.5  |
| 7 | 132062275 | 132062375 | 100 | 132062287 | 12 | 47  | 6.5  |
| 7 | 132084375 | 132084475 | 100 | 132084387 | 13 | 46  | 6.5  |
| 7 | 132447900 | 132447925 | 25  | 132447912 | 12 | 12  | 2.2  |

|   |           |           |     |           |    |     |      |
|---|-----------|-----------|-----|-----------|----|-----|------|
| 7 | 132452950 | 132453150 | 200 | 132453087 | 16 | 115 | 13   |
| 7 | 132464600 | 132464800 | 200 | 132464612 | 13 | 96  | 0    |
| 7 | 132490575 | 132490600 | 25  | 132490587 | 12 | 12  | 2.2  |
| 7 | 132518325 | 132518375 | 50  | 132518337 | 15 | 28  | 4.3  |
| 7 | 132528500 | 132528525 | 25  | 132528512 | 12 | 12  | 2.2  |
| 7 | 132528775 | 132529700 | 925 | 132529312 | 17 | 459 | 65   |
| 7 | 132543400 | 132543650 | 250 | 132543537 | 16 | 134 | 0    |
| 7 | 133411125 | 133411200 | 75  | 133411162 | 13 | 37  | 0    |
| 7 | 133748675 | 133748800 | 125 | 133748712 | 14 | 66  | 0    |
| 7 | 133750350 | 133750425 | 75  | 133750412 | 13 | 37  | 6.5  |
| 7 | 133799225 | 133799400 | 175 | 133799337 | 14 | 85  | 0    |
| 7 | 133873550 | 133873725 | 175 | 133873637 | 14 | 90  | 0    |
| 7 | 133876100 | 133876150 | 50  | 133876112 | 13 | 25  | 0    |
| 7 | 133900300 | 133900600 | 300 | 133900412 | 17 | 167 | 0    |
| 7 | 133901225 | 133901250 | 25  | 133901237 | 12 | 12  | 0    |
| 7 | 133903800 | 133903825 | 25  | 133903812 | 12 | 12  | 2.2  |
| 7 | 133905950 | 133906125 | 175 | 133906037 | 17 | 99  | 0    |
| 7 | 133934600 | 133934750 | 150 | 133934662 | 13 | 73  | 0    |
| 7 | 134129425 | 134129450 | 25  | 134129437 | 12 | 12  | 2.2  |
| 7 | 134231825 | 134231925 | 100 | 134231837 | 13 | 51  | 0    |
| 7 | 134310700 | 134310875 | 175 | 134310762 | 18 | 108 | 0    |
| 7 | 134517375 | 134517950 | 575 | 134517562 | 20 | 363 | 8.7  |
| 7 | 134598825 | 134599150 | 325 | 134599012 | 26 | 241 | 19.5 |
| 7 | 134624625 | 134624725 | 100 | 134624687 | 16 | 56  | 8.7  |
| 7 | 134663675 | 134663700 | 25  | 134663687 | 12 | 12  | 2.2  |
| 7 | 134865075 | 134865125 | 50  | 134865087 | 12 | 24  | 4.3  |
| 7 | 135093100 | 135093300 | 200 | 135093237 | 18 | 126 | 10.8 |
| 7 | 135193400 | 135193425 | 25  | 135193412 | 12 | 12  | 2.2  |
| 7 | 135862000 | 135862025 | 25  | 135862012 | 12 | 12  | 2.2  |
| 7 | 136798450 | 136798600 | 150 | 136798587 | 15 | 75  | 6.5  |
| 7 | 136798850 | 136798900 | 50  | 136798862 | 12 | 24  | 4.3  |
| 7 | 137523850 | 137523875 | 25  | 137523862 | 12 | 12  | 0    |
| 7 | 137674825 | 137674875 | 50  | 137674837 | 13 | 25  | 0    |
| 7 | 137766950 | 137766975 | 25  | 137766962 | 12 | 12  | 0    |
| 7 | 137776175 | 137776200 | 25  | 137776187 | 12 | 12  | 2.2  |
| 7 | 137776675 | 137776725 | 50  | 137776687 | 13 | 25  | 4.3  |
| 7 | 137777425 | 137777475 | 50  | 137777462 | 13 | 25  | 4.3  |
| 7 | 137900475 | 137900525 | 50  | 137900487 | 14 | 27  | 4.3  |
| 7 | 137969275 | 137969425 | 150 | 137969312 | 18 | 94  | 6.5  |
| 7 | 137983400 | 137983550 | 150 | 137983437 | 14 | 81  | 0    |
| 7 | 137984250 | 137984350 | 100 | 137984262 | 12 | 48  | 0    |
| 7 | 138138125 | 138138275 | 150 | 138138212 | 15 | 81  | 10.8 |
| 7 | 138250750 | 138250825 | 75  | 138250787 | 14 | 40  | 4.3  |
| 7 | 138797525 | 138797625 | 100 | 138797562 | 13 | 51  | 0    |
| 7 | 138818950 | 138819125 | 175 | 138819012 | 14 | 91  | 17.3 |
| 7 | 138827925 | 138828100 | 175 | 138828062 | 13 | 86  | 10.8 |
| 7 | 138848800 | 138848825 | 25  | 138848812 | 12 | 12  | 2.2  |
| 7 | 138856425 | 138856500 | 75  | 138856487 | 17 | 45  | 6.5  |
| 7 | 138857375 | 138857625 | 250 | 138857462 | 15 | 131 | 6.5  |
| 7 | 138860225 | 138860400 | 175 | 138860287 | 17 | 104 | 8.7  |
| 7 | 138864025 | 138864225 | 200 | 138864112 | 21 | 145 | 0    |
| 7 | 138878050 | 138878125 | 75  | 138878112 | 14 | 39  | 6.5  |
| 7 | 139167825 | 139168225 | 400 | 139167862 | 17 | 210 | 17.3 |
| 7 | 139168900 | 139169275 | 375 | 139169162 | 16 | 191 | 8.7  |
| 7 | 139175725 | 139175750 | 25  | 139175737 | 12 | 12  | 2.2  |
| 7 | 139200550 | 139200725 | 175 | 139200662 | 13 | 84  | 0    |
| 7 | 139291550 | 139291600 | 50  | 139291587 | 13 | 25  | 4.3  |
| 7 | 139335225 | 139335250 | 25  | 139335237 | 12 | 12  | 2.2  |
| 7 | 139359825 | 139360550 | 725 | 139359962 | 18 | 325 | 26   |
| 7 | 139777175 | 139777200 | 25  | 139777187 | 12 | 12  | 0    |
| 7 | 140469825 | 140469900 | 75  | 140469837 | 14 | 38  | 2.2  |
| 7 | 140478875 | 140479000 | 125 | 140478937 | 15 | 67  | 10.8 |
| 7 | 140693925 | 140693950 | 25  | 140693937 | 12 | 12  | 0    |
| 7 | 140734050 | 140734100 | 50  | 140734087 | 13 | 25  | 0    |
| 7 | 140858125 | 140858450 | 325 | 140858312 | 17 | 191 | 19.5 |
| 7 | 140866900 | 140866925 | 25  | 140866912 | 12 | 12  | 0    |
| 7 | 140873625 | 140873800 | 175 | 140873712 | 16 | 99  | 15.2 |
| 7 | 141644625 | 141644675 | 50  | 141644662 | 14 | 26  | 0    |
| 7 | 141879675 | 141879700 | 25  | 141879687 | 12 | 12  | 2.2  |
| 7 | 141917850 | 141917900 | 50  | 141917887 | 14 | 26  | 4.3  |
| 7 | 141990050 | 141990100 | 50  | 141990062 | 12 | 24  | 0    |
| 7 | 142637800 | 142637950 | 150 | 142637887 | 15 | 80  | 10.8 |
| 7 | 142656375 | 142656525 | 150 | 142656462 | 15 | 79  | 0    |
| 7 | 142694575 | 142694625 | 50  | 142694587 | 12 | 24  | 4.3  |
| 7 | 142694950 | 142695000 | 50  | 142694962 | 12 | 24  | 4.3  |

|   |           |           |     |           |    |     |      |
|---|-----------|-----------|-----|-----------|----|-----|------|
| 7 | 142749075 | 142749275 | 200 | 142749162 | 15 | 110 | 6.5  |
| 7 | 142763625 | 142763800 | 175 | 142763662 | 15 | 99  | 2.2  |
| 7 | 142767225 | 142767250 | 25  | 142767237 | 12 | 12  | 2.2  |
| 7 | 142770775 | 142770950 | 175 | 142770862 | 18 | 104 | 15.2 |
| 7 | 142829400 | 142829475 | 75  | 142829437 | 13 | 38  | 0    |
| 7 | 142830350 | 142830375 | 25  | 142830362 | 14 | 14  | 2.2  |
| 7 | 142895925 | 142895950 | 25  | 142895937 | 12 | 12  | 0    |
| 7 | 144388300 | 144388425 | 125 | 144388362 | 16 | 71  | 0    |
| 7 | 144497300 | 144497375 | 75  | 144497312 | 13 | 36  | 6.5  |
| 7 | 145248425 | 145248450 | 25  | 145248437 | 13 | 13  | 2.2  |
| 7 | 145445025 | 145445100 | 75  | 145445037 | 13 | 38  | 6.5  |
| 7 | 146998950 | 146999100 | 150 | 146998987 | 13 | 75  | 2.2  |
| 7 | 147035950 | 147036150 | 200 | 147035962 | 14 | 96  | 13   |
| 7 | 147177875 | 147177900 | 25  | 147177887 | 12 | 12  | 2.2  |
| 7 | 147328175 | 147328200 | 25  | 147328187 | 12 | 12  | 2.2  |
| 7 | 147773900 | 147773950 | 50  | 147773912 | 23 | 43  | 6.5  |
| 7 | 147774175 | 147774325 | 150 | 147774187 | 15 | 86  | 13   |
| 7 | 147855725 | 147855800 | 75  | 147855762 | 17 | 49  | 2.2  |
| 7 | 147914250 | 147914300 | 50  | 147914262 | 12 | 24  | 4.3  |
| 7 | 147933325 | 147933600 | 275 | 147933487 | 25 | 212 | 17.3 |
| 7 | 147944775 | 147944800 | 25  | 147944787 | 12 | 12  | 0    |
| 7 | 147945050 | 147945100 | 50  | 147945062 | 12 | 24  | 0    |
| 7 | 147948900 | 147949100 | 200 | 147948962 | 17 | 111 | 17.3 |
| 7 | 147964750 | 147964875 | 125 | 147964837 | 15 | 65  | 4.3  |
| 7 | 147965450 | 147965500 | 50  | 147965462 | 12 | 24  | 0    |
| 7 | 147971225 | 147971375 | 150 | 147971262 | 14 | 82  | 8.7  |
| 7 | 148000200 | 148000225 | 25  | 148000212 | 13 | 13  | 2.2  |
| 7 | 148003125 | 148003250 | 125 | 148003137 | 12 | 59  | 0    |
| 7 | 148382125 | 148382150 | 25  | 148382137 | 12 | 12  | 2.2  |
| 7 | 148627250 | 148627275 | 25  | 148627262 | 12 | 12  | 0    |
| 7 | 148722300 | 148722350 | 50  | 148722312 | 12 | 24  | 4.3  |
| 7 | 148726550 | 148726750 | 200 | 148726712 | 15 | 99  | 4.3  |
| 7 | 148732100 | 148732675 | 575 | 148732512 | 19 | 360 | 54.2 |
| 7 | 148743800 | 148743850 | 50  | 148743812 | 12 | 24  | 0    |
| 7 | 148828950 | 148829025 | 75  | 148828962 | 12 | 35  | 0    |
| 7 | 148837025 | 148837050 | 25  | 148837037 | 12 | 12  | 0    |
| 7 | 148857325 | 148857350 | 25  | 148857337 | 13 | 13  | 0    |
| 7 | 148899025 | 148899125 | 100 | 148899037 | 13 | 48  | 8.7  |
| 7 | 148964950 | 148965150 | 200 | 148965012 | 18 | 110 | 0    |
| 7 | 148965900 | 148966050 | 150 | 148965962 | 15 | 81  | 0    |
| 7 | 148966625 | 148966650 | 25  | 148966637 | 12 | 12  | 0    |
| 7 | 148991025 | 148991125 | 100 | 148991037 | 14 | 53  | 6.5  |
| 7 | 149004775 | 149005000 | 225 | 149004887 | 18 | 133 | 21.7 |
| 7 | 149016750 | 149016775 | 25  | 149016762 | 13 | 13  | 2.2  |
| 7 | 149018525 | 149018625 | 100 | 149018587 | 13 | 48  | 8.7  |
| 7 | 149028800 | 149029025 | 225 | 149028912 | 19 | 138 | 21.7 |
| 7 | 149029275 | 149029700 | 425 | 149029412 | 15 | 218 | 19.5 |
| 7 | 149064200 | 149064325 | 125 | 149064237 | 15 | 64  | 4.3  |
| 7 | 149112100 | 149112125 | 25  | 149112112 | 12 | 12  | 2.2  |
| 7 | 149112725 | 149112750 | 25  | 149112737 | 13 | 13  | 2.2  |
| 7 | 149113025 | 149113200 | 175 | 149113087 | 16 | 99  | 15.2 |
| 7 | 149117125 | 149117175 | 50  | 149117137 | 12 | 24  | 4.3  |
| 7 | 149121500 | 149121550 | 50  | 149121512 | 13 | 25  | 0    |
| 7 | 149160750 | 149160825 | 75  | 149160762 | 15 | 42  | 6.5  |
| 7 | 149161650 | 149161825 | 175 | 149161762 | 15 | 88  | 15.2 |
| 7 | 149162075 | 149162150 | 75  | 149162112 | 13 | 38  | 4.3  |
| 7 | 149669500 | 149669525 | 25  | 149669512 | 13 | 13  | 2.2  |
| 7 | 149670100 | 149670125 | 25  | 149670112 | 12 | 12  | 2.2  |
| 7 | 149758550 | 149758575 | 25  | 149758562 | 12 | 12  | 2.2  |
| 7 | 149769950 | 149770625 | 675 | 149770387 | 23 | 442 | 17.3 |
| 7 | 149771050 | 149771325 | 275 | 149771212 | 21 | 181 | 15.2 |
| 7 | 149772350 | 149772375 | 25  | 149772362 | 12 | 12  | 0    |
| 7 | 149778850 | 149778925 | 75  | 149778862 | 12 | 35  | 6.5  |
| 7 | 149804725 | 149804925 | 200 | 149804812 | 19 | 121 | 8.7  |
| 7 | 149805225 | 149805300 | 75  | 149805237 | 12 | 36  | 0    |
| 7 | 150226825 | 150226875 | 50  | 150226862 | 15 | 28  | 4.3  |
| 7 | 150233625 | 150233750 | 125 | 150233687 | 15 | 68  | 8.7  |
| 7 | 150239000 | 150239150 | 150 | 150239012 | 14 | 78  | 0    |
| 7 | 150316425 | 150316550 | 125 | 150316512 | 18 | 78  | 8.7  |
| 7 | 150318075 | 150318575 | 500 | 150318437 | 16 | 246 | 17.3 |
| 7 | 150319300 | 150319725 | 425 | 150319587 | 14 | 182 | 15.2 |
| 7 | 150336275 | 150336325 | 50  | 150336312 | 13 | 25  | 4.3  |
| 7 | 150501800 | 150501875 | 75  | 150501862 | 13 | 37  | 0    |
| 7 | 150503850 | 150503925 | 75  | 150503862 | 12 | 36  | 0    |
| 7 | 150506325 | 150506475 | 150 | 150506387 | 15 | 83  | 2.2  |

|   |           |           |     |           |    |     |      |
|---|-----------|-----------|-----|-----------|----|-----|------|
| 7 | 150509025 | 150509350 | 325 | 150509162 | 19 | 193 | 28.2 |
| 7 | 150518800 | 150518950 | 150 | 150518862 | 14 | 77  | 6.5  |
| 7 | 150526650 | 150526675 | 25  | 150526662 | 12 | 12  | 2.2  |
| 7 | 150530925 | 150531275 | 350 | 150531137 | 16 | 190 | 2.2  |
| 7 | 150532550 | 150532575 | 25  | 150532562 | 12 | 12  | 2.2  |
| 7 | 150533375 | 150533450 | 75  | 150533387 | 14 | 41  | 6.5  |
| 7 | 150584475 | 150584550 | 75  | 150584512 | 13 | 38  | 6.5  |
| 7 | 150584825 | 150584875 | 50  | 150584837 | 12 | 24  | 4.3  |
| 7 | 150586000 | 150586025 | 25  | 150586012 | 12 | 12  | 0    |
| 7 | 150588725 | 150588900 | 175 | 150588737 | 14 | 89  | 2.2  |
| 7 | 150589475 | 150589625 | 150 | 150589512 | 18 | 94  | 2.2  |
| 7 | 150610300 | 150610475 | 175 | 150610337 | 28 | 173 | 4.3  |
| 7 | 150615125 | 150615275 | 150 | 150615237 | 18 | 90  | 0    |
| 7 | 150619250 | 150619350 | 100 | 150619262 | 12 | 45  | 0    |
| 7 | 150627575 | 150628050 | 475 | 150627662 | 25 | 373 | 56.3 |
| 7 | 150628600 | 150628675 | 75  | 150628662 | 14 | 38  | 2.2  |
| 7 | 150629000 | 150629025 | 25  | 150629012 | 13 | 13  | 0    |
| 7 | 150629550 | 150629800 | 250 | 150629637 | 21 | 169 | 8.7  |
| 7 | 150630375 | 150630500 | 125 | 150630412 | 13 | 62  | 4.3  |
| 7 | 150639450 | 150639700 | 250 | 150639537 | 18 | 146 | 15.2 |
| 7 | 150647925 | 150647975 | 50  | 150647937 | 12 | 24  | 2.2  |
| 7 | 150648550 | 150649050 | 500 | 150648887 | 15 | 237 | 28.2 |
| 7 | 150649300 | 150649325 | 25  | 150649312 | 15 | 15  | 2.2  |
| 7 | 150655275 | 150655325 | 50  | 150655287 | 12 | 24  | 0    |
| 7 | 150712425 | 150712650 | 225 | 150712487 | 17 | 134 | 2.2  |
| 7 | 150715875 | 150715900 | 25  | 150715887 | 12 | 12  | 0    |
| 7 | 150725025 | 150725225 | 200 | 150725212 | 19 | 133 | 21.7 |
| 7 | 150725550 | 150725750 | 200 | 150725562 | 12 | 83  | 10.8 |
| 7 | 150727375 | 150727400 | 25  | 150727387 | 12 | 12  | 2.2  |
| 7 | 150727925 | 150728275 | 350 | 150728212 | 18 | 183 | 21.7 |
| 7 | 150736750 | 150736950 | 200 | 150736887 | 15 | 103 | 13   |
| 7 | 150744350 | 150744450 | 100 | 150744362 | 12 | 46  | 0    |
| 7 | 150749925 | 150750100 | 175 | 150749937 | 18 | 110 | 13   |
| 7 | 150751450 | 150751500 | 50  | 150751487 | 13 | 25  | 4.3  |
| 7 | 150785900 | 150785950 | 50  | 150785912 | 12 | 24  | 0    |
| 7 | 150790400 | 150790525 | 125 | 150790412 | 12 | 59  | 2.2  |
| 7 | 150863375 | 150863400 | 25  | 150863387 | 12 | 12  | 2.2  |
| 7 | 150874475 | 150874600 | 125 | 150874537 | 13 | 61  | 10.8 |
| 7 | 150876650 | 150876750 | 100 | 150876662 | 14 | 51  | 4.3  |
| 7 | 150942925 | 150943050 | 125 | 150942937 | 12 | 59  | 8.7  |
| 7 | 150961000 | 150961025 | 25  | 150961012 | 12 | 12  | 2.2  |
| 7 | 150966125 | 150966150 | 25  | 150966137 | 12 | 12  | 2.2  |
| 7 | 150973375 | 150973450 | 75  | 150973412 | 13 | 37  | 4.3  |
| 7 | 150998025 | 150998050 | 25  | 150998037 | 12 | 12  | 2.2  |
| 7 | 151037575 | 151037975 | 400 | 151037887 | 15 | 194 | 0    |
| 7 | 151052350 | 151052525 | 175 | 151052487 | 15 | 91  | 17.3 |
| 7 | 151067200 | 151067250 | 50  | 151067212 | 13 | 25  | 2.2  |
| 7 | 151090875 | 151090925 | 50  | 151090887 | 15 | 29  | 4.3  |
| 7 | 151091300 | 151091400 | 100 | 151091387 | 19 | 64  | 8.7  |
| 7 | 151091800 | 151091850 | 50  | 151091837 | 13 | 25  | 4.3  |
| 7 | 151092925 | 151093000 | 75  | 151092962 | 13 | 37  | 6.5  |
| 7 | 151100175 | 151100200 | 25  | 151100187 | 12 | 12  | 2.2  |
| 7 | 151104025 | 151104225 | 200 | 151104087 | 17 | 114 | 0    |
| 7 | 151104925 | 151104975 | 50  | 151104937 | 13 | 26  | 2.2  |
| 7 | 151105450 | 151105600 | 150 | 151105587 | 16 | 83  | 13   |
| 7 | 151106100 | 151106275 | 175 | 151106137 | 14 | 88  | 13   |
| 7 | 151106575 | 151106675 | 100 | 151106587 | 16 | 60  | 2.2  |
| 7 | 151107400 | 151107675 | 275 | 151107437 | 13 | 129 | 15.2 |
| 7 | 151114275 | 151114575 | 300 | 151114512 | 19 | 188 | 13   |
| 7 | 151117675 | 151117825 | 150 | 151117762 | 13 | 72  | 4.3  |
| 7 | 151118950 | 151119100 | 150 | 151118987 | 16 | 81  | 6.5  |
| 7 | 151132575 | 151132650 | 75  | 151132612 | 13 | 37  | 4.3  |
| 7 | 151133025 | 151133375 | 350 | 151133187 | 41 | 408 | 0    |
| 7 | 151133875 | 151133900 | 25  | 151133887 | 12 | 12  | 2.2  |
| 7 | 151135050 | 151135150 | 100 | 151135087 | 13 | 49  | 0    |
| 7 | 151137475 | 151137625 | 150 | 151137487 | 13 | 74  | 0    |
| 7 | 151142700 | 151142725 | 25  | 151142712 | 12 | 12  | 2.2  |
| 7 | 151150675 | 151150750 | 75  | 151150687 | 12 | 36  | 0    |
| 7 | 151159650 | 151159825 | 175 | 151159712 | 16 | 100 | 4.3  |
| 7 | 151161325 | 151161525 | 200 | 151161387 | 16 | 115 | 6.5  |
| 7 | 151166225 | 151166250 | 25  | 151166237 | 12 | 12  | 2.2  |
| 7 | 151167850 | 151167900 | 50  | 151167862 | 13 | 26  | 2.2  |
| 7 | 151172250 | 151172450 | 200 | 151172437 | 14 | 102 | 15.2 |
| 7 | 151172925 | 151173250 | 325 | 151173062 | 18 | 191 | 17.3 |
| 7 | 151182750 | 151182775 | 25  | 151182762 | 13 | 13  | 2.2  |

|   |           |           |     |           |    |     |      |
|---|-----------|-----------|-----|-----------|----|-----|------|
| 7 | 151185700 | 151185775 | 75  | 151185737 | 14 | 40  | 6.5  |
| 7 | 151193175 | 151193200 | 25  | 151193187 | 12 | 12  | 0    |
| 7 | 151193450 | 151193500 | 50  | 151193487 | 13 | 25  | 4.3  |
| 7 | 151197525 | 151197675 | 150 | 151197612 | 14 | 81  | 8.7  |
| 7 | 151213350 | 151213375 | 25  | 151213362 | 12 | 12  | 2.2  |
| 7 | 151217650 | 151217675 | 25  | 151217662 | 13 | 13  | 2.2  |
| 7 | 151218125 | 151218150 | 25  | 151218137 | 12 | 12  | 2.2  |
| 7 | 151227250 | 151227375 | 125 | 151227312 | 16 | 74  | 6.5  |
| 7 | 151227650 | 151227825 | 175 | 151227712 | 15 | 90  | 8.7  |
| 7 | 151229600 | 151229700 | 100 | 151229687 | 16 | 54  | 4.3  |
| 7 | 151231750 | 151231850 | 100 | 151231762 | 15 | 57  | 8.7  |
| 7 | 151232325 | 151232475 | 150 | 151232362 | 17 | 91  | 10.8 |
| 7 | 151233500 | 151233600 | 100 | 151233562 | 15 | 54  | 0    |
| 7 | 151249625 | 151249675 | 50  | 151249637 | 13 | 25  | 4.3  |
| 7 | 151250025 | 151250150 | 125 | 151250087 | 16 | 68  | 0    |
| 7 | 151251675 | 151251700 | 25  | 151251687 | 12 | 12  | 2.2  |
| 7 | 151255475 | 151255625 | 150 | 151255562 | 16 | 87  | 4.3  |
| 7 | 151258825 | 151259025 | 200 | 151258912 | 22 | 140 | 17.3 |
| 7 | 151276750 | 151276775 | 25  | 151276762 | 13 | 13  | 2.2  |
| 7 | 151286200 | 151286575 | 375 | 151286362 | 22 | 235 | 0    |
| 7 | 151286900 | 151286975 | 75  | 151286937 | 13 | 38  | 0    |
| 7 | 151296600 | 151296625 | 25  | 151296612 | 12 | 12  | 2.2  |
| 7 | 151298400 | 151298575 | 175 | 151298537 | 16 | 95  | 0    |
| 7 | 151308500 | 151308525 | 25  | 151308512 | 12 | 12  | 0    |
| 7 | 151313650 | 151313675 | 25  | 151313662 | 13 | 13  | 2.2  |
| 7 | 151315850 | 151316450 | 600 | 151316337 | 21 | 408 | 54.2 |
| 7 | 151328375 | 151328625 | 250 | 151328487 | 21 | 157 | 6.5  |
| 7 | 151333350 | 151333500 | 150 | 151333462 | 14 | 74  | 13   |
| 7 | 151416975 | 151417150 | 175 | 151417062 | 15 | 95  | 13   |
| 7 | 151799800 | 151799825 | 25  | 151799812 | 12 | 12  | 2.2  |
| 7 | 151847600 | 151847650 | 50  | 151847612 | 12 | 24  | 4.3  |
| 7 | 151859625 | 151859650 | 25  | 151859637 | 12 | 12  | 0    |
| 7 | 151905000 | 151905150 | 150 | 151905037 | 15 | 81  | 2.2  |
| 7 | 151922975 | 151923100 | 125 | 151923012 | 15 | 69  | 4.3  |
| 7 | 152032700 | 152032725 | 25  | 152032712 | 12 | 12  | 0    |
| 7 | 152062900 | 152062925 | 25  | 152062912 | 12 | 12  | 2.2  |
| 7 | 152219450 | 152219750 | 300 | 152219562 | 20 | 202 | 4.3  |
| 7 | 152224400 | 152224450 | 50  | 152224412 | 12 | 24  | 0    |
| 7 | 152225100 | 152225175 | 75  | 152225112 | 12 | 36  | 0    |
| 7 | 152231275 | 152231325 | 50  | 152231287 | 14 | 26  | 4.3  |
| 7 | 152236175 | 152236200 | 25  | 152236187 | 12 | 12  | 0    |
| 7 | 152236500 | 152236525 | 25  | 152236512 | 12 | 12  | 2.2  |
| 7 | 152240000 | 152240075 | 75  | 152240062 | 13 | 37  | 6.5  |
| 7 | 152240450 | 152240775 | 325 | 152240462 | 13 | 154 | 6.5  |
| 7 | 152247550 | 152247625 | 75  | 152247587 | 14 | 41  | 0    |
| 7 | 152251900 | 152251925 | 25  | 152251912 | 12 | 12  | 0    |
| 7 | 152252925 | 152253000 | 75  | 152252937 | 12 | 36  | 2.2  |
| 7 | 152259500 | 152259550 | 50  | 152259537 | 13 | 25  | 2.2  |
| 7 | 152280300 | 152280350 | 50  | 152280312 | 12 | 24  | 4.3  |
| 7 | 152347375 | 152347575 | 200 | 152347512 | 16 | 116 | 4.3  |
| 7 | 152740075 | 152740275 | 200 | 152740187 | 16 | 114 | 13   |
| 7 | 152741675 | 152741875 | 200 | 152741687 | 15 | 105 | 0    |
| 7 | 152806500 | 152806575 | 75  | 152806512 | 12 | 36  | 0    |
| 7 | 152847700 | 152847950 | 250 | 152847787 | 17 | 137 | 10.8 |
| 7 | 152855100 | 152855200 | 100 | 152855137 | 13 | 50  | 4.3  |
| 7 | 152865450 | 152865475 | 25  | 152865462 | 13 | 13  | 0    |
| 7 | 152912000 | 152912175 | 175 | 152912062 | 17 | 104 | 8.7  |
| 7 | 152970425 | 152970500 | 75  | 152970437 | 12 | 36  | 0    |
| 7 | 152985875 | 152985900 | 25  | 152985887 | 12 | 12  | 2.2  |
| 7 | 152997500 | 152997550 | 50  | 152997512 | 13 | 25  | 0    |
| 7 | 153811000 | 153811175 | 175 | 153811112 | 14 | 87  | 6.5  |
| 7 | 153814775 | 153814875 | 100 | 153814837 | 13 | 49  | 6.5  |
| 7 | 153816675 | 153816700 | 25  | 153816687 | 12 | 12  | 2.2  |
| 7 | 153818350 | 153818400 | 50  | 153818362 | 12 | 24  | 0    |
| 7 | 154004025 | 154004075 | 50  | 154004037 | 12 | 24  | 0    |
| 7 | 154006125 | 154006200 | 75  | 154006137 | 13 | 38  | 2.2  |
| 7 | 154013575 | 154013700 | 125 | 154013612 | 13 | 60  | 6.5  |
| 7 | 154014625 | 154014650 | 25  | 154014637 | 12 | 12  | 0    |
| 7 | 154059450 | 154059750 | 300 | 154059712 | 14 | 136 | 4.3  |
| 7 | 154060600 | 154060675 | 75  | 154060612 | 15 | 40  | 6.5  |
| 7 | 154084900 | 154084925 | 25  | 154084912 | 12 | 12  | 0    |
| 7 | 154120075 | 154120125 | 50  | 154120087 | 13 | 25  | 4.3  |
| 7 | 154132825 | 154132850 | 25  | 154132837 | 15 | 15  | 2.2  |
| 7 | 154142750 | 154142775 | 25  | 154142762 | 13 | 13  | 0    |
| 7 | 154152875 | 154153000 | 125 | 154152887 | 13 | 63  | 8.7  |

|   |           |           |      |           |    |     |      |
|---|-----------|-----------|------|-----------|----|-----|------|
| 7 | 154161725 | 154161775 | 50   | 154161737 | 12 | 24  | 4.3  |
| 7 | 154192400 | 154192550 | 150  | 154192487 | 15 | 81  | 10.8 |
| 7 | 154220575 | 154220700 | 125  | 154220687 | 18 | 78  | 2.2  |
| 7 | 154221800 | 154221925 | 125  | 154221812 | 12 | 53  | 0    |
| 7 | 154223275 | 154223300 | 25   | 154223287 | 12 | 12  | 2.2  |
| 7 | 154224150 | 154224500 | 350  | 154224237 | 17 | 190 | 21.7 |
| 7 | 154255675 | 154255750 | 75   | 154255687 | 12 | 35  | 0    |
| 7 | 154259800 | 154260050 | 250  | 154259912 | 24 | 207 | 17.3 |
| 7 | 154263825 | 154263875 | 50   | 154263837 | 13 | 25  | 4.3  |
| 7 | 154289200 | 154289250 | 50   | 154289212 | 16 | 31  | 0    |
| 7 | 154295950 | 154295975 | 25   | 154295962 | 12 | 12  | 2.2  |
| 7 | 154296425 | 154296725 | 300  | 154296587 | 19 | 176 | 0    |
| 7 | 154298500 | 154298550 | 50   | 154298512 | 16 | 31  | 2.2  |
| 7 | 154304125 | 154304275 | 150  | 154304237 | 14 | 72  | 4.3  |
| 7 | 154305700 | 154307150 | 1450 | 154306062 | 18 | 702 | 26   |
| 7 | 154307400 | 154307600 | 200  | 154307537 | 14 | 94  | 0    |
| 7 | 154310325 | 154310375 | 50   | 154310337 | 12 | 24  | 0    |
| 7 | 154311850 | 154311875 | 25   | 154311862 | 12 | 12  | 2.2  |
| 7 | 154312625 | 154312725 | 100  | 154312637 | 19 | 59  | 0    |
| 7 | 154312950 | 154313000 | 50   | 154312962 | 14 | 26  | 0    |
| 7 | 154315525 | 154315575 | 50   | 154315537 | 12 | 24  | 4.3  |
| 7 | 154321850 | 154321950 | 100  | 154321912 | 15 | 56  | 4.3  |
| 7 | 154326225 | 154326250 | 25   | 154326237 | 12 | 12  | 0    |
| 7 | 154328625 | 154329050 | 425  | 154328987 | 17 | 211 | 0    |
| 7 | 154329650 | 154329900 | 250  | 154329737 | 16 | 133 | 0    |
| 7 | 154330150 | 154330625 | 475  | 154330462 | 31 | 416 | 8.7  |
| 7 | 154331600 | 154331650 | 50   | 154331612 | 12 | 24  | 4.3  |
| 7 | 154333675 | 154334025 | 350  | 154333862 | 21 | 227 | 26   |
| 7 | 154340675 | 154340700 | 25   | 154340687 | 12 | 12  | 0    |
| 7 | 154493975 | 154494000 | 25   | 154493987 | 12 | 12  | 2.2  |
| 7 | 154506875 | 154506925 | 50   | 154506887 | 14 | 26  | 4.3  |
| 7 | 154543300 | 154543350 | 50   | 154543312 | 12 | 24  | 4.3  |
| 7 | 154551925 | 154551950 | 25   | 154551937 | 12 | 12  | 0    |
| 7 | 154595550 | 154595700 | 150  | 154595687 | 19 | 99  | 8.7  |
| 7 | 154605150 | 154605350 | 200  | 154605237 | 16 | 107 | 6.5  |
| 7 | 154607800 | 154607875 | 75   | 154607812 | 14 | 38  | 0    |
| 7 | 154609775 | 154609850 | 75   | 154609837 | 14 | 38  | 2.2  |
| 7 | 154610100 | 154610150 | 50   | 154610137 | 13 | 25  | 4.3  |
| 7 | 154615650 | 154615700 | 50   | 154615662 | 13 | 25  | 4.3  |
| 7 | 154621225 | 154621350 | 125  | 154621287 | 14 | 65  | 0    |
| 7 | 154628575 | 154628750 | 175  | 154628712 | 27 | 151 | 13   |
| 7 | 154630375 | 154630475 | 100  | 154630412 | 15 | 57  | 8.7  |
| 7 | 154658300 | 154658450 | 150  | 154658362 | 15 | 80  | 0    |
| 7 | 154686350 | 154686400 | 50   | 154686387 | 18 | 35  | 0    |
| 7 | 154689075 | 154689200 | 125  | 154689137 | 17 | 79  | 10.8 |
| 7 | 154818050 | 154818375 | 325  | 154818212 | 16 | 170 | 10.8 |
| 7 | 154819350 | 154819725 | 375  | 154819362 | 15 | 196 | 34.7 |
| 7 | 154820100 | 154820425 | 325  | 154820362 | 15 | 149 | 0    |
| 7 | 154822750 | 154822775 | 25   | 154822762 | 12 | 12  | 2.2  |
| 7 | 154840100 | 154840350 | 250  | 154840337 | 19 | 143 | 6.5  |
| 7 | 154845375 | 154845475 | 100  | 154845387 | 12 | 47  | 2.2  |
| 7 | 154848000 | 154848025 | 25   | 154848012 | 12 | 12  | 2.2  |
| 7 | 154854525 | 154854550 | 25   | 154854537 | 12 | 12  | 2.2  |
| 7 | 154857450 | 154857575 | 125  | 154857512 | 16 | 71  | 6.5  |
| 7 | 154861475 | 154861550 | 75   | 154861512 | 14 | 39  | 4.3  |
| 7 | 154867475 | 154867700 | 225  | 154867562 | 17 | 130 | 0    |
| 7 | 154872525 | 154872550 | 25   | 154872537 | 12 | 12  | 2.2  |
| 7 | 154882150 | 154882200 | 50   | 154882162 | 12 | 24  | 2.2  |
| 7 | 154884525 | 154884725 | 200  | 154884637 | 16 | 118 | 8.7  |
| 7 | 154885100 | 154885450 | 350  | 154885187 | 17 | 178 | 19.5 |
| 7 | 154887475 | 154887825 | 350  | 154887662 | 35 | 352 | 0    |
| 7 | 154895900 | 154895925 | 25   | 154895912 | 12 | 12  | 2.2  |
| 7 | 154897850 | 154897875 | 25   | 154897862 | 12 | 12  | 2.2  |
| 7 | 154912800 | 154912850 | 50   | 154912812 | 13 | 25  | 2.2  |
| 7 | 154913450 | 154913550 | 100  | 154913512 | 14 | 50  | 4.3  |
| 7 | 154917425 | 154917500 | 75   | 154917437 | 16 | 42  | 2.2  |
| 7 | 154918050 | 154918150 | 100  | 154918087 | 13 | 49  | 4.3  |
| 7 | 154927250 | 154927375 | 125  | 154927312 | 14 | 66  | 6.5  |
| 7 | 154931125 | 154931325 | 200  | 154931262 | 15 | 104 | 4.3  |
| 7 | 154933825 | 154933925 | 100  | 154933862 | 15 | 57  | 4.3  |
| 7 | 154935300 | 154935375 | 75   | 154935337 | 13 | 37  | 0    |
| 7 | 154935675 | 154935800 | 125  | 154935687 | 14 | 67  | 2.2  |
| 7 | 154937425 | 154937550 | 125  | 154937512 | 15 | 70  | 13   |
| 7 | 154961050 | 154961550 | 500  | 154961212 | 18 | 259 | 21.7 |
| 7 | 154967325 | 154968075 | 750  | 154967937 | 26 | 496 | 78   |

|   |           |           |     |           |    |     |      |
|---|-----------|-----------|-----|-----------|----|-----|------|
| 7 | 154969625 | 154969650 | 25  | 154969637 | 12 | 12  | 2.2  |
| 7 | 154975700 | 154975775 | 75  | 154975712 | 12 | 35  | 6.5  |
| 7 | 154995625 | 154995700 | 75  | 154995637 | 12 | 36  | 6.5  |
| 7 | 155000900 | 155001000 | 100 | 155000962 | 15 | 53  | 8.7  |
| 7 | 155002075 | 155002350 | 275 | 155002162 | 15 | 146 | 28.2 |
| 7 | 155002700 | 155002800 | 100 | 155002787 | 16 | 57  | 2.2  |
| 7 | 155007500 | 155007625 | 125 | 155007587 | 14 | 64  | 10.8 |
| 7 | 155007900 | 155008075 | 175 | 155007987 | 13 | 83  | 0    |
| 7 | 155012275 | 155012375 | 100 | 155012287 | 12 | 48  | 0    |
| 7 | 155013825 | 155014025 | 200 | 155013937 | 13 | 96  | 0    |
| 7 | 155014600 | 155015125 | 525 | 155014887 | 24 | 401 | 47.7 |
| 7 | 155019150 | 155019200 | 50  | 155019162 | 12 | 24  | 4.3  |
| 7 | 155019825 | 155020000 | 175 | 155019862 | 21 | 125 | 17.3 |
| 7 | 155020225 | 155020350 | 125 | 155020287 | 16 | 69  | 2.2  |
| 7 | 155022125 | 155022200 | 75  | 155022137 | 18 | 47  | 6.5  |
| 7 | 155032700 | 155032850 | 150 | 155032737 | 14 | 80  | 8.7  |
| 7 | 155034525 | 155034600 | 75  | 155034537 | 18 | 46  | 6.5  |
| 7 | 155039600 | 155039900 | 300 | 155039712 | 38 | 339 | 4.3  |
| 7 | 155040300 | 155040500 | 200 | 155040362 | 15 | 102 | 17.3 |
| 7 | 155047000 | 155047025 | 25  | 155047012 | 12 | 12  | 2.2  |
| 7 | 155051350 | 155051375 | 25  | 155051362 | 13 | 13  | 2.2  |
| 7 | 155063275 | 155063400 | 125 | 155063312 | 13 | 61  | 4.3  |
| 7 | 155069000 | 155069150 | 150 | 155069112 | 14 | 75  | 0    |
| 7 | 155069900 | 155070075 | 175 | 155069962 | 13 | 82  | 8.7  |
| 7 | 155072425 | 155072475 | 50  | 155072437 | 12 | 24  | 4.3  |
| 7 | 155074600 | 155074675 | 75  | 155074612 | 13 | 39  | 0    |
| 7 | 155079700 | 155079775 | 75  | 155079712 | 13 | 37  | 0    |
| 7 | 155088750 | 155088800 | 50  | 155088762 | 12 | 24  | 0    |
| 7 | 155089050 | 155089175 | 125 | 155089137 | 15 | 69  | 2.2  |
| 7 | 155089925 | 155089950 | 25  | 155089937 | 19 | 19  | 2.2  |
| 7 | 155091900 | 155091950 | 50  | 155091912 | 12 | 24  | 0    |
| 7 | 155094800 | 155094850 | 50  | 155094812 | 13 | 26  | 0    |
| 7 | 155095775 | 155096125 | 350 | 155095962 | 17 | 185 | 23.8 |
| 7 | 155096350 | 155096425 | 75  | 155096412 | 15 | 42  | 6.5  |
| 7 | 155096750 | 155096800 | 50  | 155096762 | 12 | 24  | 0    |
| 7 | 155097700 | 155097800 | 100 | 155097787 | 14 | 52  | 0    |
| 7 | 155104300 | 155104325 | 25  | 155104312 | 13 | 13  | 2.2  |
| 7 | 155107400 | 155107425 | 25  | 155107412 | 12 | 12  | 2.2  |
| 7 | 155111125 | 155111200 | 75  | 155111137 | 12 | 35  | 0    |
| 7 | 155277425 | 155277475 | 50  | 155277462 | 13 | 25  | 0    |
| 7 | 155278925 | 155278975 | 50  | 155278937 | 12 | 24  | 0    |
| 7 | 155285150 | 155285200 | 50  | 155285162 | 12 | 24  | 0    |
| 7 | 155286275 | 155286450 | 175 | 155286287 | 17 | 108 | 17.3 |
| 7 | 155295900 | 155295925 | 25  | 155295912 | 13 | 13  | 2.2  |
| 7 | 155302925 | 155303600 | 675 | 155303412 | 16 | 321 | 0    |
| 7 | 155305800 | 155306450 | 650 | 155305962 | 18 | 319 | 28.2 |
| 7 | 155307475 | 155307500 | 25  | 155307487 | 12 | 12  | 2.2  |
| 7 | 155309200 | 155309275 | 75  | 155309212 | 12 | 35  | 6.5  |
| 7 | 155309700 | 155309875 | 175 | 155309837 | 17 | 103 | 4.3  |
| 7 | 155311175 | 155311350 | 175 | 155311187 | 13 | 88  | 15.2 |
| 7 | 155332550 | 155332625 | 75  | 155332562 | 12 | 36  | 0    |
| 7 | 155350750 | 155350825 | 75  | 155350762 | 12 | 35  | 6.5  |
| 7 | 155354800 | 155354975 | 175 | 155354837 | 13 | 86  | 0    |
| 7 | 155355325 | 155355400 | 75  | 155355337 | 12 | 35  | 6.5  |
| 7 | 155367375 | 155367475 | 100 | 155367412 | 14 | 53  | 8.7  |
| 7 | 155383400 | 155383425 | 25  | 155383412 | 12 | 12  | 0    |
| 7 | 155386275 | 155386350 | 75  | 155386287 | 14 | 37  | 6.5  |
| 7 | 155387000 | 155387025 | 25  | 155387012 | 13 | 13  | 0    |
| 7 | 155389175 | 155389200 | 25  | 155389187 | 12 | 12  | 2.2  |
| 7 | 155389550 | 155389650 | 100 | 155389562 | 12 | 45  | 0    |
| 7 | 155394175 | 155394200 | 25  | 155394187 | 12 | 12  | 2.2  |
| 7 | 155395100 | 155395300 | 200 | 155395137 | 15 | 105 | 13   |
| 7 | 155397425 | 155397600 | 175 | 155397487 | 15 | 92  | 15.2 |
| 7 | 155399850 | 155399875 | 25  | 155399862 | 14 | 14  | 2.2  |
| 7 | 155401625 | 155401650 | 25  | 155401637 | 12 | 12  | 0    |
| 7 | 155401925 | 155402125 | 200 | 155402062 | 18 | 123 | 21.7 |
| 7 | 155404275 | 155404300 | 25  | 155404287 | 12 | 12  | 0    |
| 7 | 155412150 | 155412425 | 275 | 155412237 | 20 | 167 | 10.8 |
| 7 | 155412750 | 155413300 | 550 | 155413162 | 24 | 314 | 4.3  |
| 7 | 155413775 | 155413800 | 25  | 155413787 | 13 | 13  | 2.2  |
| 7 | 155414250 | 155414300 | 50  | 155414262 | 13 | 25  | 4.3  |
| 7 | 155416175 | 155416250 | 75  | 155416212 | 15 | 44  | 2.2  |
| 7 | 155417275 | 155417300 | 25  | 155417287 | 12 | 12  | 0    |
| 7 | 155431225 | 155431700 | 475 | 155431562 | 13 | 214 | 34.7 |
| 7 | 155446275 | 155446450 | 175 | 155446337 | 16 | 100 | 15.2 |



|   |           |           |     |           |    |     |      |
|---|-----------|-----------|-----|-----------|----|-----|------|
| 7 | 155508400 | 155508475 | 75  | 155508462 | 15 | 41  | 6.5  |
| 7 | 155546300 | 155546500 | 200 | 155546312 | 20 | 138 | 2.2  |
| 7 | 155560450 | 155560550 | 100 | 155560462 | 12 | 44  | 0    |
| 7 | 155586825 | 155586850 | 25  | 155586837 | 12 | 12  | 2.2  |
| 7 | 155804450 | 155804550 | 100 | 155804462 | 12 | 48  | 6.5  |
| 7 | 155817475 | 155817525 | 50  | 155817487 | 15 | 29  | 4.3  |
| 7 | 155829950 | 155830000 | 50  | 155829962 | 12 | 24  | 4.3  |
| 7 | 155830825 | 155830850 | 25  | 155830837 | 12 | 12  | 2.2  |
| 7 | 155887850 | 155887900 | 50  | 155887862 | 12 | 24  | 4.3  |
| 7 | 155925425 | 155925575 | 150 | 155925487 | 16 | 76  | 13   |
| 7 | 155926525 | 155926600 | 75  | 155926587 | 16 | 45  | 0    |
| 7 | 155966775 | 155966800 | 25  | 155966787 | 12 | 12  | 2.2  |
| 7 | 155977625 | 155977650 | 25  | 155977637 | 12 | 12  | 0    |
| 7 | 156002525 | 156002850 | 325 | 156002687 | 19 | 190 | 13   |
| 7 | 156004375 | 156004400 | 25  | 156004387 | 12 | 12  | 2.2  |
| 7 | 156009150 | 156009500 | 350 | 156009262 | 20 | 217 | 17.3 |
| 7 | 156033800 | 156033875 | 75  | 156033812 | 18 | 48  | 2.2  |
| 7 | 156124975 | 156125550 | 575 | 156125437 | 34 | 462 | 82.3 |
| 7 | 156126675 | 156126750 | 75  | 156126687 | 15 | 44  | 6.5  |
| 7 | 156135675 | 156135975 | 300 | 156135687 | 24 | 189 | 17.3 |
| 7 | 156426075 | 156426175 | 100 | 156426137 | 15 | 53  | 8.7  |
| 7 | 156426850 | 156427200 | 350 | 156427037 | 36 | 358 | 15.2 |
| 7 | 156504775 | 156504800 | 25  | 156504787 | 14 | 14  | 2.2  |
| 7 | 156505025 | 156505050 | 25  | 156505037 | 13 | 13  | 0    |
| 7 | 156522425 | 156522575 | 150 | 156522512 | 14 | 75  | 0    |
| 7 | 156540425 | 156540650 | 225 | 156540462 | 16 | 120 | 17.3 |
| 7 | 156559700 | 156559875 | 175 | 156559837 | 17 | 105 | 10.8 |
| 7 | 156573400 | 156573525 | 125 | 156573462 | 17 | 76  | 13   |
| 7 | 156574700 | 156574875 | 175 | 156574837 | 14 | 91  | 0    |
| 7 | 156576450 | 156576500 | 50  | 156576462 | 12 | 24  | 4.3  |
| 7 | 156578700 | 156578925 | 225 | 156578712 | 14 | 120 | 17.3 |
| 7 | 156593475 | 156593500 | 25  | 156593487 | 12 | 12  | 2.2  |
| 7 | 156595750 | 156595950 | 200 | 156595837 | 19 | 132 | 8.7  |
| 7 | 156596700 | 156597400 | 700 | 156597112 | 22 | 443 | 49.8 |
| 7 | 156602875 | 156603100 | 225 | 156603037 | 20 | 145 | 0    |
| 7 | 156603375 | 156603600 | 225 | 156603437 | 18 | 132 | 17.3 |
| 7 | 156680800 | 156681025 | 225 | 156680937 | 21 | 158 | 4.3  |
| 7 | 156771225 | 156771325 | 100 | 156771287 | 16 | 60  | 0    |
| 7 | 156784825 | 156784850 | 25  | 156784837 | 12 | 12  | 2.2  |
| 7 | 156821525 | 156821600 | 75  | 156821562 | 13 | 37  | 6.5  |
| 7 | 156918725 | 156919100 | 375 | 156918787 | 20 | 172 | 13   |
| 7 | 156924600 | 156924675 | 75  | 156924637 | 13 | 37  | 0    |
| 7 | 156925350 | 156925450 | 100 | 156925362 | 14 | 52  | 4.3  |
| 7 | 156926400 | 156926550 | 150 | 156926412 | 13 | 72  | 10.8 |
| 7 | 156928200 | 156928225 | 25  | 156928212 | 12 | 12  | 2.2  |
| 7 | 156928650 | 156929075 | 425 | 156928937 | 28 | 356 | 58.5 |
| 7 | 156929550 | 156929625 | 75  | 156929612 | 17 | 46  | 4.3  |
| 7 | 156939800 | 156939950 | 150 | 156939837 | 15 | 84  | 8.7  |
| 7 | 156943350 | 156943450 | 100 | 156943412 | 14 | 50  | 0    |
| 7 | 156947450 | 156947550 | 100 | 156947512 | 13 | 49  | 8.7  |
| 7 | 156950850 | 156950875 | 25  | 156950862 | 12 | 12  | 2.2  |
| 7 | 156952550 | 156952625 | 75  | 156952562 | 19 | 46  | 0    |
| 7 | 156953125 | 156953250 | 125 | 156953187 | 13 | 62  | 10.8 |
| 7 | 156953750 | 156953975 | 225 | 156953937 | 22 | 163 | 13   |
| 7 | 156955650 | 156955750 | 100 | 156955712 | 13 | 49  | 0    |
| 7 | 156956775 | 156957150 | 375 | 156957037 | 21 | 260 | 41.2 |
| 7 | 156957725 | 156958125 | 400 | 156957912 | 26 | 307 | 43.3 |
| 7 | 156961275 | 156961325 | 50  | 156961287 | 12 | 24  | 0    |
| 7 | 156964900 | 156964975 | 75  | 156964912 | 14 | 38  | 2.2  |
| 7 | 156966275 | 156966325 | 50  | 156966287 | 12 | 24  | 4.3  |
| 7 | 156966975 | 156967675 | 700 | 156967237 | 23 | 411 | 0    |
| 7 | 156986975 | 156987125 | 150 | 156987062 | 20 | 105 | 13   |
| 7 | 156988150 | 156988500 | 350 | 156988162 | 24 | 231 | 4.3  |
| 7 | 156991725 | 156992025 | 300 | 156991887 | 19 | 192 | 32.5 |
| 7 | 156994050 | 156994225 | 175 | 156994062 | 18 | 107 | 8.7  |
| 7 | 157006500 | 157006600 | 100 | 157006562 | 13 | 48  | 0    |
| 7 | 157009175 | 157009200 | 25  | 157009187 | 13 | 13  | 2.2  |
| 7 | 157010925 | 157011150 | 225 | 157011112 | 23 | 158 | 13   |
| 7 | 157012350 | 157012400 | 50  | 157012362 | 12 | 24  | 4.3  |
| 7 | 157013475 | 157013500 | 25  | 157013487 | 12 | 12  | 2.2  |
| 7 | 157014325 | 157014525 | 200 | 157014487 | 17 | 131 | 23.8 |
| 7 | 157016025 | 157016175 | 150 | 157016112 | 14 | 75  | 0    |
| 7 | 157016675 | 157016725 | 50  | 157016687 | 12 | 24  | 4.3  |
| 7 | 157023400 | 157023425 | 25  | 157023412 | 12 | 12  | 0    |
| 7 | 157026525 | 157026950 | 425 | 157026862 | 17 | 214 | 4.3  |

|   |           |           |      |           |    |      |       |
|---|-----------|-----------|------|-----------|----|------|-------|
| 7 | 157028125 | 157028150 | 25   | 157028137 | 12 | 12   | 2.2   |
| 7 | 157030175 | 157030375 | 200  | 157030287 | 16 | 113  | 8.7   |
| 7 | 157037225 | 157037325 | 100  | 157037237 | 12 | 44   | 8.7   |
| 7 | 157048425 | 157048650 | 225  | 157048462 | 22 | 137  | 6.5   |
| 7 | 157049100 | 157049450 | 350  | 157049262 | 31 | 285  | 8.7   |
| 7 | 157058650 | 157058775 | 125  | 157058662 | 13 | 63   | 4.3   |
| 7 | 157059700 | 157059750 | 50   | 157059737 | 14 | 27   | 0     |
| 7 | 157062050 | 157062100 | 50   | 157062087 | 13 | 25   | 4.3   |
| 7 | 157062400 | 157062425 | 25   | 157062412 | 13 | 13   | 2.2   |
| 7 | 157063475 | 157063500 | 25   | 157063487 | 14 | 14   | 2.2   |
| 7 | 157066850 | 157066875 | 25   | 157066862 | 13 | 13   | 0     |
| 7 | 157068925 | 157068975 | 50   | 157068937 | 12 | 24   | 4.3   |
| 7 | 157071000 | 157071100 | 100  | 157071012 | 19 | 63   | 8.7   |
| 7 | 157073850 | 157073875 | 25   | 157073862 | 14 | 14   | 2.2   |
| 7 | 157076525 | 157076800 | 275  | 157076662 | 17 | 158  | 0     |
| 7 | 157077325 | 157077400 | 75   | 157077337 | 13 | 38   | 4.3   |
| 7 | 157077725 | 157078825 | 1100 | 157078612 | 51 | 1521 | 138.7 |
| 7 | 157079150 | 157079350 | 200  | 157079212 | 17 | 123  | 6.5   |
| 7 | 157080225 | 157080375 | 150  | 157080237 | 22 | 107  | 6.5   |
| 7 | 157080975 | 157081000 | 25   | 157080987 | 12 | 12   | 2.2   |
| 7 | 157087025 | 157087075 | 50   | 157087062 | 13 | 25   | 4.3   |
| 7 | 157087750 | 157087800 | 50   | 157087787 | 15 | 27   | 2.2   |
| 7 | 157089325 | 157089350 | 25   | 157089337 | 13 | 13   | 0     |
| 7 | 157090625 | 157090650 | 25   | 157090637 | 13 | 13   | 2.2   |
| 7 | 157091150 | 157091300 | 150  | 157091162 | 14 | 73   | 2.2   |
| 7 | 157091525 | 157091650 | 125  | 157091637 | 13 | 60   | 10.8  |
| 7 | 157095200 | 157095250 | 50   | 157095212 | 12 | 24   | 4.3   |
| 7 | 157095500 | 157095725 | 225  | 157095637 | 17 | 133  | 4.3   |
| 7 | 157095950 | 157095975 | 25   | 157095962 | 13 | 13   | 2.2   |
| 7 | 157096250 | 157096525 | 275  | 157096412 | 14 | 125  | 21.7  |
| 7 | 157096975 | 157098275 | 1300 | 157097512 | 38 | 1133 | 54.2  |
| 7 | 157098625 | 157098800 | 175  | 157098687 | 20 | 109  | 17.3  |
| 7 | 157099125 | 157099300 | 175  | 157099162 | 14 | 94   | 17.3  |
| 7 | 157101575 | 157101625 | 50   | 157101587 | 13 | 25   | 4.3   |
| 7 | 157102575 | 157102625 | 50   | 157102587 | 12 | 24   | 4.3   |
| 7 | 157103750 | 157103975 | 225  | 157103887 | 21 | 161  | 4.3   |
| 7 | 157106725 | 157106900 | 175  | 157106887 | 21 | 120  | 2.2   |
| 7 | 157107825 | 157108475 | 650  | 157108312 | 23 | 479  | 0     |
| 7 | 157110000 | 157110050 | 50   | 157110012 | 13 | 25   | 4.3   |
| 7 | 157113825 | 157113875 | 50   | 157113837 | 18 | 34   | 0     |
| 7 | 157114450 | 157114700 | 250  | 157114612 | 18 | 152  | 10.8  |
| 7 | 157119150 | 157119525 | 375  | 157119262 | 16 | 204  | 26    |
| 7 | 157120025 | 157120050 | 25   | 157120037 | 13 | 13   | 2.2   |
| 7 | 157124100 | 157124375 | 275  | 157124287 | 19 | 159  | 15.2  |
| 7 | 157125025 | 157125275 | 250  | 157125187 | 17 | 157  | 28.2  |
| 7 | 157127325 | 157127525 | 200  | 157127512 | 19 | 120  | 17.3  |
| 7 | 157129600 | 157129625 | 25   | 157129612 | 12 | 12   | 0     |
| 7 | 157131100 | 157131125 | 25   | 157131112 | 13 | 13   | 2.2   |
| 7 | 157132325 | 157132400 | 75   | 157132337 | 15 | 39   | 2.2   |
| 7 | 157138900 | 157138925 | 25   | 157138912 | 14 | 14   | 2.2   |
| 7 | 157141375 | 157141400 | 25   | 157141387 | 12 | 12   | 0     |
| 7 | 157141875 | 157142150 | 275  | 157141962 | 17 | 157  | 0     |
| 7 | 157143425 | 157143550 | 125  | 157143437 | 13 | 62   | 8.7   |
| 7 | 157147050 | 157147150 | 100  | 157147137 | 13 | 49   | 0     |
| 7 | 157152300 | 157152425 | 125  | 157152337 | 19 | 77   | 8.7   |
| 7 | 157155450 | 157155500 | 50   | 157155462 | 13 | 25   | 0     |
| 7 | 157161025 | 157161175 | 150  | 157161087 | 15 | 81   | 13    |
| 7 | 157162325 | 157162525 | 200  | 157162412 | 14 | 103  | 4.3   |
| 7 | 157185175 | 157185250 | 75   | 157185212 | 14 | 40   | 4.3   |
| 7 | 157187050 | 157187125 | 75   | 157187062 | 13 | 37   | 6.5   |
| 7 | 157188600 | 157188725 | 125  | 157188687 | 15 | 71   | 4.3   |
| 7 | 157199175 | 157199275 | 100  | 157199237 | 14 | 51   | 8.7   |
| 7 | 157200850 | 157200925 | 75   | 157200862 | 13 | 39   | 2.2   |
| 7 | 157201175 | 157201300 | 125  | 157201237 | 17 | 74   | 4.3   |
| 7 | 157202825 | 157202925 | 100  | 157202837 | 13 | 51   | 8.7   |
| 7 | 157204100 | 157204250 | 150  | 157204162 | 18 | 86   | 2.2   |
| 7 | 157206900 | 157206925 | 25   | 157206912 | 12 | 12   | 2.2   |
| 7 | 157208725 | 157208850 | 125  | 157208737 | 13 | 58   | 10.8  |
| 7 | 157225850 | 157225975 | 125  | 157225862 | 21 | 85   | 13    |
| 7 | 157226825 | 157226850 | 25   | 157226837 | 12 | 12   | 0     |
| 7 | 157228650 | 157228900 | 250  | 157228812 | 21 | 153  | 2.2   |
| 7 | 157229625 | 157229750 | 125  | 157229687 | 15 | 70   | 4.3   |
| 7 | 157237850 | 157237875 | 25   | 157237862 | 12 | 12   | 2.2   |
| 7 | 157239375 | 157239450 | 75   | 157239412 | 13 | 37   | 0     |
| 7 | 157243650 | 157243825 | 175  | 157243662 | 13 | 84   | 10.8  |

|   |           |           |      |           |    |      |      |
|---|-----------|-----------|------|-----------|----|------|------|
| 7 | 157245975 | 157246050 | 75   | 157246012 | 13 | 37   | 0    |
| 7 | 157248750 | 157248775 | 25   | 157248762 | 12 | 12   | 2.2  |
| 7 | 157249150 | 157249175 | 25   | 157249162 | 12 | 12   | 2.2  |
| 7 | 157253000 | 157253125 | 125  | 157253037 | 14 | 66   | 10.8 |
| 7 | 157253750 | 157253925 | 175  | 157253837 | 17 | 100  | 6.5  |
| 7 | 157254950 | 157255125 | 175  | 157255062 | 15 | 94   | 0    |
| 7 | 157256200 | 157256925 | 725  | 157256512 | 22 | 375  | 45.5 |
| 7 | 157257225 | 157257375 | 150  | 157257237 | 22 | 121  | 17.3 |
| 7 | 157257800 | 157257825 | 25   | 157257812 | 12 | 12   | 2.2  |
| 7 | 157259000 | 157259225 | 225  | 157259137 | 19 | 147  | 8.7  |
| 7 | 157259725 | 157260175 | 450  | 157260087 | 17 | 215  | 13   |
| 7 | 157260475 | 157260575 | 100  | 157260562 | 16 | 56   | 0    |
| 7 | 157260825 | 157261250 | 425  | 157260937 | 19 | 247  | 28.2 |
| 7 | 157263600 | 157263775 | 175  | 157263637 | 13 | 85   | 8.7  |
| 7 | 157265175 | 157265325 | 150  | 157265187 | 15 | 84   | 13   |
| 7 | 157265750 | 157266000 | 250  | 157265887 | 20 | 166  | 2.2  |
| 7 | 157266450 | 157266575 | 125  | 157266487 | 18 | 82   | 0    |
| 7 | 157267300 | 157267425 | 125  | 157267312 | 12 | 56   | 8.7  |
| 7 | 157268275 | 157268450 | 175  | 157268312 | 15 | 97   | 8.7  |
| 7 | 157268800 | 157268850 | 50   | 157268812 | 12 | 24   | 4.3  |
| 7 | 157275075 | 157275675 | 600  | 157275562 | 18 | 341  | 23.8 |
| 7 | 157279150 | 157279350 | 200  | 157279237 | 18 | 123  | 6.5  |
| 7 | 157282100 | 157282200 | 100  | 157282137 | 14 | 51   | 0    |
| 7 | 157283075 | 157283100 | 25   | 157283087 | 12 | 12   | 2.2  |
| 7 | 157284825 | 157285025 | 200  | 157284837 | 13 | 92   | 4.3  |
| 7 | 157287350 | 157287400 | 50   | 157287387 | 14 | 27   | 2.2  |
| 7 | 157288850 | 157288950 | 100  | 157288862 | 12 | 47   | 0    |
| 7 | 157293525 | 157293575 | 50   | 157293562 | 15 | 27   | 4.3  |
| 7 | 157303025 | 157303375 | 350  | 157303212 | 14 | 165  | 15.2 |
| 7 | 157312025 | 157312050 | 25   | 157312037 | 15 | 15   | 2.2  |
| 7 | 157323200 | 157323325 | 125  | 157323262 | 20 | 86   | 0    |
| 7 | 157324750 | 157326150 | 1400 | 157325687 | 39 | 1259 | 86.7 |
| 7 | 157329775 | 157329825 | 50   | 157329812 | 14 | 27   | 0    |
| 7 | 157330050 | 157330150 | 100  | 157330137 | 16 | 57   | 2.2  |
| 7 | 157330725 | 157331200 | 475  | 157330887 | 24 | 326  | 32.5 |
| 7 | 157333000 | 157333050 | 50   | 157333012 | 12 | 24   | 0    |
| 7 | 157334175 | 157334200 | 25   | 157334187 | 12 | 12   | 2.2  |
| 7 | 157334700 | 157334925 | 225  | 157334812 | 16 | 121  | 0    |
| 7 | 157338550 | 157338625 | 75   | 157338612 | 14 | 40   | 6.5  |
| 7 | 157339450 | 157339475 | 25   | 157339462 | 12 | 12   | 2.2  |
| 7 | 157359400 | 157359500 | 100  | 157359487 | 14 | 51   | 6.5  |
| 7 | 157360275 | 157360400 | 125  | 157360287 | 14 | 65   | 6.5  |
| 7 | 157386075 | 157386125 | 50   | 157386087 | 13 | 25   | 4.3  |
| 7 | 157387475 | 157388325 | 850  | 157387987 | 17 | 493  | 34.7 |
| 7 | 157415325 | 157415450 | 125  | 157415437 | 14 | 62   | 0    |
| 7 | 157419500 | 157419600 | 100  | 157419512 | 12 | 48   | 8.7  |
| 7 | 157432475 | 157432550 | 75   | 157432487 | 14 | 40   | 0    |
| 7 | 157471825 | 157471850 | 25   | 157471837 | 12 | 12   | 2.2  |
| 7 | 157487125 | 157487225 | 100  | 157487137 | 12 | 45   | 0    |
| 7 | 157488175 | 157488325 | 150  | 157488262 | 16 | 89   | 8.7  |
| 7 | 157493150 | 157493175 | 25   | 157493162 | 12 | 12   | 0    |
| 7 | 157595300 | 157595400 | 100  | 157595312 | 12 | 46   | 8.7  |
| 7 | 157608775 | 157608850 | 75   | 157608812 | 13 | 38   | 6.5  |
| 7 | 157632800 | 157632950 | 150  | 157632912 | 35 | 199  | 28.2 |
| 7 | 157634450 | 157634725 | 275  | 157634537 | 46 | 325  | 41.2 |
| 7 | 157636700 | 157636900 | 200  | 157636887 | 69 | 391  | 32.5 |
| 7 | 157652125 | 157652200 | 75   | 157652137 | 14 | 41   | 4.3  |
| 7 | 157674325 | 157674350 | 25   | 157674337 | 12 | 12   | 0    |
| 7 | 157732575 | 157732675 | 100  | 157732587 | 15 | 55   | 0    |
| 7 | 157734100 | 157734675 | 575  | 157734212 | 15 | 292  | 17.3 |
| 7 | 157747825 | 157747975 | 150  | 157747937 | 14 | 72   | 13   |
| 7 | 157758050 | 157758075 | 25   | 157758062 | 12 | 12   | 2.2  |
| 7 | 157759825 | 157759950 | 125  | 157759862 | 13 | 59   | 10.8 |
| 7 | 157797325 | 157797350 | 25   | 157797337 | 12 | 12   | 2.2  |
| 7 | 157812150 | 157812275 | 125  | 157812162 | 14 | 58   | 0    |
| 7 | 157812625 | 157812650 | 25   | 157812637 | 12 | 12   | 2.2  |
| 7 | 157902225 | 157902250 | 25   | 157902237 | 12 | 12   | 0    |
| 7 | 157917075 | 157917125 | 50   | 157917087 | 15 | 28   | 4.3  |
| 7 | 157941275 | 157941400 | 125  | 157941312 | 16 | 71   | 0    |
| 7 | 157941625 | 157941950 | 325  | 157941687 | 14 | 157  | 4.3  |
| 7 | 157989800 | 157989900 | 100  | 157989812 | 12 | 47   | 0    |
| 7 | 157991475 | 157991500 | 25   | 157991487 | 12 | 12   | 2.2  |
| 7 | 157993600 | 157993750 | 150  | 157993712 | 15 | 81   | 13   |
| 7 | 158080700 | 158080900 | 200  | 158080712 | 21 | 153  | 17.3 |
| 7 | 158193050 | 158193075 | 25   | 158193062 | 12 | 12   | 0    |

|   |           |           |     |           |    |     |      |
|---|-----------|-----------|-----|-----------|----|-----|------|
| 7 | 158267275 | 158267375 | 100 | 158267287 | 12 | 47  | 8.7  |
| 7 | 158267775 | 158267800 | 25  | 158267787 | 12 | 12  | 2.2  |
| 7 | 158400500 | 158400925 | 425 | 158400662 | 27 | 341 | 21.7 |
| 7 | 158443075 | 158443100 | 25  | 158443087 | 12 | 12  | 2.2  |
| 7 | 158443450 | 158443650 | 200 | 158443487 | 18 | 124 | 8.7  |
| 7 | 158444275 | 158444550 | 275 | 158444387 | 16 | 148 | 15.2 |
| 7 | 158447100 | 158447175 | 75  | 158447112 | 13 | 37  | 0    |
| 7 | 158450175 | 158450275 | 100 | 158450187 | 13 | 49  | 0    |
| 7 | 158465650 | 158465700 | 50  | 158465662 | 12 | 24  | 0    |
| 7 | 158466050 | 158466200 | 150 | 158466137 | 14 | 79  | 4.3  |
| 7 | 158466625 | 158466675 | 50  | 158466637 | 13 | 25  | 2.2  |
| 7 | 158478175 | 158478500 | 325 | 158478387 | 21 | 219 | 17.3 |
| 7 | 158480950 | 158481300 | 350 | 158481137 | 15 | 184 | 26   |
| 7 | 158492500 | 158492550 | 50  | 158492512 | 17 | 30  | 0    |
| 7 | 158494000 | 158494075 | 75  | 158494037 | 14 | 40  | 6.5  |
| 7 | 158498900 | 158498925 | 25  | 158498912 | 12 | 12  | 0    |
| 7 | 158502650 | 158502675 | 25  | 158502662 | 13 | 13  | 2.2  |
| 7 | 158510050 | 158510075 | 25  | 158510062 | 12 | 12  | 2.2  |
| 7 | 158526800 | 158526975 | 175 | 158526862 | 14 | 92  | 0    |
| 7 | 158547575 | 158547600 | 25  | 158547587 | 12 | 12  | 2.2  |
| 7 | 158573800 | 158573975 | 175 | 158573812 | 14 | 92  | 8.7  |
| 7 | 158585550 | 158586150 | 600 | 158585612 | 15 | 276 | 30.3 |
| 7 | 158586525 | 158586875 | 350 | 158586712 | 20 | 220 | 15.2 |
| 7 | 158588300 | 158588500 | 200 | 158588412 | 14 | 102 | 15.2 |
| 7 | 158597625 | 158598350 | 725 | 158597762 | 25 | 568 | 62.8 |
| 7 | 158603900 | 158603925 | 25  | 158603912 | 12 | 12  | 2.2  |
| 7 | 158607525 | 158607550 | 25  | 158607537 | 12 | 12  | 0    |
| 7 | 158643550 | 158643625 | 75  | 158643562 | 12 | 36  | 0    |
| 7 | 158655900 | 158656775 | 875 | 158655987 | 18 | 468 | 67.2 |
| 7 | 158657700 | 158657750 | 50  | 158657712 | 13 | 26  | 4.3  |
| 6 | 124275    | 124375    | 100 | 124287    | 12 | 48  | 0    |
| 6 | 125250    | 125425    | 175 | 125362    | 15 | 93  | 0    |
| 6 | 125825    | 125875    | 50  | 125862    | 14 | 27  | 2.2  |
| 6 | 148800    | 148900    | 100 | 148862    | 14 | 51  | 6.5  |
| 6 | 154175    | 154275    | 100 | 154237    | 14 | 51  | 6.5  |
| 6 | 158875    | 159150    | 275 | 159137    | 18 | 151 | 10.8 |
| 6 | 159375    | 159500    | 125 | 159462    | 15 | 68  | 0    |
| 6 | 159750    | 159825    | 75  | 159787    | 14 | 40  | 0    |
| 6 | 169325    | 169450    | 125 | 169412    | 17 | 73  | 2.2  |
| 6 | 184300    | 184350    | 50  | 184312    | 13 | 25  | 4.3  |
| 6 | 185275    | 185350    | 75  | 185287    | 13 | 39  | 2.2  |
| 6 | 191525    | 191675    | 150 | 191612    | 18 | 94  | 10.8 |
| 6 | 204200    | 204275    | 75  | 204212    | 12 | 36  | 6.5  |
| 6 | 222975    | 223050    | 75  | 222987    | 13 | 37  | 6.5  |
| 6 | 224700    | 224900    | 200 | 224812    | 22 | 136 | 8.7  |
| 6 | 227525    | 227800    | 275 | 227612    | 15 | 136 | 15.2 |
| 6 | 228100    | 228125    | 25  | 228112    | 13 | 13  | 2.2  |
| 6 | 231950    | 232075    | 125 | 231962    | 14 | 68  | 6.5  |
| 6 | 232550    | 232725    | 175 | 232662    | 18 | 104 | 15.2 |
| 6 | 233425    | 233600    | 175 | 233487    | 16 | 92  | 6.5  |
| 6 | 313325    | 313375    | 50  | 313337    | 12 | 24  | 4.3  |
| 6 | 315475    | 315675    | 200 | 315612    | 16 | 102 | 15.2 |
| 6 | 317150    | 318000    | 850 | 317337    | 20 | 504 | 75.8 |
| 6 | 320100    | 320150    | 50  | 320112    | 12 | 24  | 0    |
| 6 | 324475    | 324650    | 175 | 324562    | 13 | 86  | 15.2 |
| 6 | 325550    | 325625    | 75  | 325587    | 14 | 38  | 0    |
| 6 | 325875    | 326000    | 125 | 325962    | 15 | 63  | 6.5  |
| 6 | 338200    | 338325    | 125 | 338262    | 14 | 63  | 0    |
| 6 | 372225    | 372250    | 25  | 372237    | 12 | 12  | 2.2  |
| 6 | 461325    | 461350    | 25  | 461337    | 12 | 12  | 2.2  |
| 6 | 465575    | 465750    | 175 | 465737    | 20 | 100 | 4.3  |
| 6 | 661950    | 662050    | 100 | 661962    | 12 | 46  | 0    |
| 6 | 669625    | 669775    | 150 | 669687    | 17 | 91  | 13   |
| 6 | 702100    | 702250    | 150 | 702162    | 14 | 76  | 0    |
| 6 | 706225    | 706250    | 25  | 706237    | 12 | 12  | 2.2  |
| 6 | 708550    | 708600    | 50  | 708587    | 13 | 25  | 4.3  |
| 6 | 710550    | 710625    | 75  | 710562    | 12 | 35  | 6.5  |
| 6 | 731075    | 731125    | 50  | 731087    | 12 | 24  | 2.2  |
| 6 | 735975    | 736125    | 150 | 735987    | 13 | 76  | 0    |
| 6 | 749750    | 749775    | 25  | 749762    | 12 | 12  | 0    |
| 6 | 808275    | 808300    | 25  | 808287    | 14 | 14  | 0    |
| 6 | 940200    | 940375    | 175 | 940337    | 13 | 85  | 10.8 |
| 6 | 948550    | 949150    | 600 | 948587    | 15 | 301 | 34.7 |
| 6 | 957525    | 957625    | 100 | 957562    | 13 | 50  | 0    |
| 6 | 972200    | 972225    | 25  | 972212    | 13 | 13  | 0    |

|   |         |         |     |         |    |     |      |
|---|---------|---------|-----|---------|----|-----|------|
| 6 | 985250  | 985275  | 25  | 985262  | 12 | 12  | 0    |
| 6 | 993225  | 993250  | 25  | 993237  | 12 | 12  | 2.2  |
| 6 | 999075  | 999275  | 200 | 999112  | 24 | 164 | 15.2 |
| 6 | 1041200 | 1041300 | 100 | 1041212 | 12 | 48  | 0    |
| 6 | 1046675 | 1046700 | 25  | 1046687 | 12 | 12  | 2.2  |
| 6 | 1092300 | 1092475 | 175 | 1092412 | 15 | 96  | 0    |
| 6 | 1175100 | 1175175 | 75  | 1175137 | 13 | 38  | 2.2  |
| 6 | 1184125 | 1184150 | 25  | 1184137 | 12 | 12  | 2.2  |
| 6 | 1190200 | 1190300 | 100 | 1190262 | 13 | 50  | 4.3  |
| 6 | 1216750 | 1216775 | 25  | 1216762 | 12 | 12  | 2.2  |
| 6 | 1217950 | 1218000 | 50  | 1217962 | 13 | 25  | 2.2  |
| 6 | 1228150 | 1228175 | 25  | 1228162 | 12 | 12  | 0    |
| 6 | 1317275 | 1317475 | 200 | 1317337 | 19 | 131 | 0    |
| 6 | 1319650 | 1319675 | 25  | 1319662 | 12 | 12  | 0    |
| 6 | 1347525 | 1347600 | 75  | 1347537 | 12 | 35  | 4.3  |
| 6 | 1371825 | 1371850 | 25  | 1371837 | 13 | 13  | 2.2  |
| 6 | 1390675 | 1390725 | 50  | 1390712 | 13 | 25  | 4.3  |
| 6 | 1394575 | 1395050 | 475 | 1394987 | 23 | 299 | 52   |
| 6 | 1396500 | 1396700 | 200 | 1396612 | 15 | 104 | 6.5  |
| 6 | 1441375 | 1441400 | 25  | 1441387 | 12 | 12  | 2.2  |
| 6 | 1491025 | 1491150 | 125 | 1491037 | 12 | 58  | 8.7  |
| 6 | 1500175 | 1500225 | 50  | 1500187 | 13 | 25  | 2.2  |
| 6 | 1508975 | 1509125 | 150 | 1508987 | 14 | 80  | 10.8 |
| 6 | 1536000 | 1536075 | 75  | 1536012 | 13 | 39  | 0    |
| 6 | 1553725 | 1553850 | 125 | 1553737 | 17 | 75  | 6.5  |
| 6 | 1797125 | 1797225 | 100 | 1797162 | 14 | 52  | 6.5  |
| 6 | 2109000 | 2109050 | 50  | 2109037 | 14 | 27  | 4.3  |
| 6 | 2109650 | 2109700 | 50  | 2109662 | 12 | 24  | 4.3  |
| 6 | 2137350 | 2137475 | 125 | 2137437 | 16 | 73  | 8.7  |
| 6 | 2137850 | 2138225 | 375 | 2137912 | 23 | 227 | 39   |
| 6 | 2209325 | 2209375 | 50  | 2209337 | 12 | 24  | 0    |
| 6 | 2231600 | 2231625 | 25  | 2231612 | 12 | 12  | 2.2  |
| 6 | 2242775 | 2242825 | 50  | 2242787 | 12 | 24  | 0    |
| 6 | 2244450 | 2244575 | 125 | 2244512 | 15 | 67  | 0    |
| 6 | 2378500 | 2378575 | 75  | 2378537 | 13 | 37  | 4.3  |
| 6 | 2379700 | 2379775 | 75  | 2379737 | 14 | 39  | 2.2  |
| 6 | 2382050 | 2382200 | 150 | 2382087 | 14 | 80  | 0    |
| 6 | 2427300 | 2427975 | 675 | 2427837 | 18 | 380 | 19.5 |
| 6 | 2436600 | 2436625 | 25  | 2436612 | 12 | 12  | 0    |
| 6 | 2465525 | 2465625 | 100 | 2465537 | 13 | 51  | 8.7  |
| 6 | 2523725 | 2523850 | 125 | 2523762 | 15 | 68  | 8.7  |
| 6 | 2561675 | 2561825 | 150 | 2561787 | 21 | 112 | 10.8 |
| 6 | 2573850 | 2573875 | 25  | 2573862 | 12 | 12  | 0    |
| 6 | 2582600 | 2582625 | 25  | 2582612 | 12 | 12  | 2.2  |
| 6 | 2584600 | 2584650 | 50  | 2584612 | 12 | 24  | 2.2  |
| 6 | 2590100 | 2590150 | 50  | 2590137 | 13 | 25  | 4.3  |
| 6 | 2607850 | 2607900 | 50  | 2607862 | 12 | 24  | 2.2  |
| 6 | 2630400 | 2630600 | 200 | 2630512 | 18 | 129 | 15.2 |
| 6 | 2693600 | 2693725 | 125 | 2693662 | 14 | 66  | 13   |
| 6 | 2852650 | 2852850 | 200 | 2852687 | 16 | 115 | 4.3  |
| 6 | 2993525 | 2993625 | 100 | 2993537 | 13 | 50  | 8.7  |
| 6 | 3332525 | 3332550 | 25  | 3332537 | 12 | 12  | 0    |
| 6 | 3387150 | 3387200 | 50  | 3387162 | 12 | 24  | 0    |
| 6 | 3400825 | 3400900 | 75  | 3400862 | 15 | 43  | 6.5  |
| 6 | 3426700 | 3426775 | 75  | 3426712 | 13 | 39  | 6.5  |
| 6 | 3440525 | 3440600 | 75  | 3440562 | 13 | 37  | 0    |
| 6 | 3450650 | 3450925 | 275 | 3450762 | 20 | 177 | 6.5  |
| 6 | 3477650 | 3477900 | 250 | 3477737 | 18 | 149 | 23.8 |
| 6 | 3494050 | 3494250 | 200 | 3494212 | 17 | 114 | 15.2 |
| 6 | 3548175 | 3548325 | 150 | 3548212 | 15 | 85  | 15.2 |
| 6 | 3625000 | 3625250 | 250 | 3625162 | 20 | 150 | 8.7  |
| 6 | 3653125 | 3653150 | 25  | 3653137 | 13 | 13  | 2.2  |
| 6 | 3681450 | 3681500 | 50  | 3681487 | 13 | 25  | 0    |
| 6 | 3795625 | 3795775 | 150 | 3795662 | 16 | 76  | 13   |
| 6 | 3888725 | 3888775 | 50  | 3888737 | 12 | 24  | 4.3  |
| 6 | 4115700 | 4115750 | 50  | 4115712 | 12 | 24  | 0    |
| 6 | 4126175 | 4126300 | 125 | 4126187 | 13 | 60  | 8.7  |
| 6 | 4134325 | 4134750 | 425 | 4134587 | 19 | 274 | 36.8 |
| 6 | 4136450 | 4136800 | 350 | 4136537 | 16 | 193 | 15.2 |
| 6 | 4137425 | 4137475 | 50  | 4137437 | 12 | 24  | 0    |
| 6 | 4137800 | 4137825 | 25  | 4137812 | 12 | 12  | 0    |
| 6 | 4138350 | 4138450 | 100 | 4138437 | 16 | 58  | 0    |
| 6 | 4150250 | 4150400 | 150 | 4150262 | 12 | 65  | 0    |
| 6 | 4226900 | 4226925 | 25  | 4226912 | 12 | 12  | 2.2  |
| 6 | 4243050 | 4243175 | 125 | 4243112 | 14 | 66  | 4.3  |

|   |          |          |     |          |    |     |      |
|---|----------|----------|-----|----------|----|-----|------|
| 6 | 4321825  | 4321850  | 25  | 4321837  | 12 | 12  | 0    |
| 6 | 4327925  | 4328025  | 100 | 4327962  | 16 | 58  | 4.3  |
| 6 | 4336150  | 4336350  | 200 | 4336262  | 20 | 127 | 21.7 |
| 6 | 4417550  | 4418000  | 450 | 4417837  | 16 | 216 | 10.8 |
| 6 | 4424050  | 4424075  | 25  | 4424062  | 12 | 12  | 2.2  |
| 6 | 4427700  | 4428025  | 325 | 4428012  | 17 | 198 | 34.7 |
| 6 | 4428250  | 4428325  | 75  | 4428262  | 12 | 36  | 2.2  |
| 6 | 4435275  | 4435425  | 150 | 4435337  | 15 | 80  | 0    |
| 6 | 4437150  | 4437175  | 25  | 4437162  | 12 | 12  | 2.2  |
| 6 | 4458425  | 4458450  | 25  | 4458437  | 12 | 12  | 0    |
| 6 | 4460975  | 4461000  | 25  | 4460987  | 13 | 13  | 0    |
| 6 | 4466350  | 4466675  | 325 | 4466487  | 18 | 181 | 28.2 |
| 6 | 4470925  | 4470975  | 50  | 4470937  | 13 | 25  | 4.3  |
| 6 | 4491450  | 4491600  | 150 | 4491562  | 15 | 81  | 0    |
| 6 | 4495150  | 4495350  | 200 | 4495287  | 15 | 106 | 15.2 |
| 6 | 4497300  | 4497325  | 25  | 4497312  | 15 | 15  | 2.2  |
| 6 | 4499900  | 4499975  | 75  | 4499912  | 12 | 35  | 6.5  |
| 6 | 4559075  | 4559175  | 100 | 4559137  | 17 | 61  | 6.5  |
| 6 | 4559800  | 4559975  | 175 | 4559962  | 13 | 77  | 0    |
| 6 | 4560500  | 4560525  | 25  | 4560512  | 12 | 12  | 2.2  |
| 6 | 4561700  | 4561775  | 75  | 4561712  | 12 | 35  | 0    |
| 6 | 4564475  | 4564625  | 150 | 4564562  | 15 | 82  | 0    |
| 6 | 4582675  | 4582700  | 25  | 4582687  | 12 | 12  | 0    |
| 6 | 4668725  | 4668825  | 100 | 4668787  | 14 | 52  | 2.2  |
| 6 | 4669600  | 4669675  | 75  | 4669637  | 14 | 40  | 0    |
| 6 | 4720375  | 4720525  | 150 | 4720487  | 15 | 82  | 13   |
| 6 | 4909500  | 4909575  | 75  | 4909512  | 12 | 36  | 2.2  |
| 6 | 4923100  | 4923175  | 75  | 4923112  | 12 | 36  | 0    |
| 6 | 4924525  | 4924675  | 150 | 4924637  | 14 | 76  | 6.5  |
| 6 | 4991275  | 4991300  | 25  | 4991287  | 12 | 12  | 2.2  |
| 6 | 5784300  | 5784500  | 200 | 5784362  | 21 | 146 | 8.7  |
| 6 | 5791750  | 5791775  | 25  | 5791762  | 12 | 12  | 0    |
| 6 | 5905800  | 5905950  | 150 | 5905862  | 15 | 78  | 13   |
| 6 | 5917650  | 5917700  | 50  | 5917662  | 14 | 27  | 0    |
| 6 | 6467350  | 6467400  | 50  | 6467362  | 12 | 24  | 0    |
| 6 | 6552175  | 6552200  | 25  | 6552187  | 12 | 12  | 2.2  |
| 6 | 6557775  | 6557800  | 25  | 6557787  | 12 | 12  | 0    |
| 6 | 6601150  | 6601175  | 25  | 6601162  | 12 | 12  | 0    |
| 6 | 6606100  | 6606125  | 25  | 6606112  | 12 | 12  | 2.2  |
| 6 | 6608175  | 6608275  | 100 | 6608212  | 13 | 47  | 0    |
| 6 | 6777800  | 6777875  | 75  | 6777862  | 14 | 37  | 2.2  |
| 6 | 6897075  | 6897125  | 50  | 6897087  | 13 | 25  | 0    |
| 6 | 6897375  | 6897575  | 200 | 6897437  | 18 | 124 | 0    |
| 6 | 7307750  | 7307850  | 100 | 7307787  | 15 | 54  | 8.7  |
| 6 | 7400275  | 7400425  | 150 | 7400362  | 17 | 91  | 13   |
| 6 | 7441900  | 7441925  | 25  | 7441912  | 12 | 12  | 0    |
| 6 | 7487100  | 7487275  | 175 | 7487237  | 15 | 96  | 8.7  |
| 6 | 7580650  | 7580700  | 50  | 7580662  | 12 | 24  | 4.3  |
| 6 | 7617925  | 7617950  | 25  | 7617937  | 22 | 22  | 4.3  |
| 6 | 7704125  | 7704150  | 25  | 7704137  | 12 | 12  | 0    |
| 6 | 7818300  | 7818425  | 125 | 7818362  | 14 | 64  | 8.7  |
| 6 | 7871150  | 7871325  | 175 | 7871187  | 13 | 85  | 0    |
| 6 | 8221275  | 8221450  | 175 | 8221312  | 15 | 94  | 2.2  |
| 6 | 8227600  | 8227800  | 200 | 8227637  | 17 | 119 | 4.3  |
| 6 | 8228075  | 8228250  | 175 | 8228087  | 17 | 108 | 4.3  |
| 6 | 8747950  | 8748000  | 50  | 8747962  | 12 | 24  | 4.3  |
| 6 | 10412575 | 10412600 | 25  | 10412587 | 12 | 12  | 2.2  |
| 6 | 10527875 | 10527975 | 100 | 10527912 | 15 | 57  | 8.7  |
| 6 | 10534000 | 10534100 | 100 | 10534062 | 16 | 58  | 8.7  |
| 6 | 10577350 | 10577500 | 150 | 10577462 | 15 | 83  | 8.7  |
| 6 | 10697025 | 10697100 | 75  | 10697062 | 14 | 39  | 2.2  |
| 6 | 10769300 | 10769400 | 100 | 10769312 | 13 | 51  | 6.5  |
| 6 | 10801375 | 10801400 | 25  | 10801387 | 12 | 12  | 2.2  |
| 6 | 10946225 | 10946325 | 100 | 10946262 | 16 | 56  | 2.2  |
| 6 | 10958925 | 10959000 | 75  | 10958962 | 13 | 38  | 0    |
| 6 | 10985525 | 10985550 | 25  | 10985537 | 12 | 12  | 2.2  |
| 6 | 11153025 | 11153100 | 75  | 11153037 | 15 | 40  | 0    |
| 6 | 11427650 | 11427675 | 25  | 11427662 | 12 | 12  | 2.2  |
| 6 | 11599925 | 11600000 | 75  | 11599962 | 14 | 40  | 0    |
| 6 | 11736675 | 11736875 | 200 | 11736687 | 14 | 105 | 17.3 |
| 6 | 11844675 | 11844700 | 25  | 11844687 | 12 | 12  | 2.2  |
| 6 | 13007050 | 13007175 | 125 | 13007137 | 14 | 64  | 0    |
| 6 | 13319900 | 13320025 | 125 | 13319912 | 12 | 54  | 0    |
| 6 | 13449750 | 13449775 | 25  | 13449762 | 12 | 12  | 2.2  |
| 6 | 13450875 | 13451125 | 250 | 13451062 | 18 | 137 | 4.3  |

|   |          |          |     |          |    |     |      |
|---|----------|----------|-----|----------|----|-----|------|
| 6 | 13594600 | 13594625 | 25  | 13594612 | 13 | 13  | 2.2  |
| 6 | 13642975 | 13643025 | 50  | 13642987 | 12 | 24  | 0    |
| 6 | 14123675 | 14123725 | 50  | 14123687 | 12 | 24  | 0    |
| 6 | 14215300 | 14215475 | 175 | 14215337 | 16 | 97  | 0    |
| 6 | 14277550 | 14277700 | 150 | 14277612 | 17 | 91  | 8.7  |
| 6 | 14307725 | 14307800 | 75  | 14307762 | 14 | 40  | 4.3  |
| 6 | 14310525 | 14310600 | 75  | 14310537 | 12 | 36  | 0    |
| 6 | 14360625 | 14360650 | 25  | 14360637 | 12 | 12  | 2.2  |
| 6 | 14369025 | 14369200 | 175 | 14369112 | 17 | 107 | 6.5  |
| 6 | 14379325 | 14379400 | 75  | 14379362 | 13 | 37  | 0    |
| 6 | 14381125 | 14381300 | 175 | 14381187 | 14 | 90  | 10.8 |
| 6 | 14385850 | 14385900 | 50  | 14385862 | 12 | 24  | 4.3  |
| 6 | 14545950 | 14545975 | 25  | 14545962 | 12 | 12  | 2.2  |
| 6 | 14648425 | 14648450 | 25  | 14648437 | 12 | 12  | 2.2  |
| 6 | 14735925 | 14736125 | 200 | 14735987 | 15 | 108 | 19.5 |
| 6 | 14738875 | 14738925 | 50  | 14738887 | 13 | 25  | 4.3  |
| 6 | 14912725 | 14912825 | 100 | 14912812 | 17 | 60  | 8.7  |
| 6 | 14916300 | 14916375 | 75  | 14916312 | 13 | 36  | 0    |
| 6 | 14927300 | 14927450 | 150 | 14927312 | 13 | 71  | 0    |
| 6 | 14930325 | 14930500 | 175 | 14930412 | 15 | 87  | 4.3  |
| 6 | 14937000 | 14937025 | 25  | 14937012 | 12 | 12  | 0    |
| 6 | 15183300 | 15183325 | 25  | 15183312 | 12 | 12  | 2.2  |
| 6 | 15862525 | 15862625 | 100 | 15862612 | 13 | 46  | 8.7  |
| 6 | 15866200 | 15866275 | 75  | 15866212 | 12 | 36  | 0    |
| 6 | 15879025 | 15879200 | 175 | 15879137 | 16 | 97  | 15.2 |
| 6 | 16264200 | 16264550 | 350 | 16264487 | 16 | 202 | 39   |
| 6 | 16266475 | 16266500 | 25  | 16266487 | 12 | 12  | 2.2  |
| 6 | 16290150 | 16290175 | 25  | 16290162 | 12 | 12  | 0    |
| 6 | 16354200 | 16354400 | 200 | 16354262 | 13 | 95  | 15.2 |
| 6 | 16373775 | 16373925 | 150 | 16373837 | 15 | 77  | 13   |
| 6 | 16591425 | 16591575 | 150 | 16591537 | 15 | 83  | 13   |
| 6 | 17030775 | 17030825 | 50  | 17030812 | 14 | 26  | 0    |
| 6 | 17098050 | 17098150 | 100 | 17098087 | 13 | 50  | 0    |
| 6 | 17209750 | 17209800 | 50  | 17209762 | 12 | 24  | 2.2  |
| 6 | 17238525 | 17238550 | 25  | 17238537 | 12 | 12  | 2.2  |
| 6 | 17253300 | 17253325 | 25  | 17253312 | 12 | 12  | 0    |
| 6 | 17285875 | 17286050 | 175 | 17285962 | 14 | 90  | 15.2 |
| 6 | 17318950 | 17319050 | 100 | 17318962 | 12 | 46  | 8.7  |
| 6 | 17349175 | 17349400 | 225 | 17349262 | 19 | 138 | 13   |
| 6 | 17431000 | 17431025 | 25  | 17431012 | 12 | 12  | 2.2  |
| 6 | 17433325 | 17433350 | 25  | 17433337 | 12 | 12  | 2.2  |
| 6 | 17434925 | 17435075 | 150 | 17435037 | 15 | 78  | 0    |
| 6 | 17492175 | 17492250 | 75  | 17492187 | 12 | 36  | 6.5  |
| 6 | 17681900 | 17682050 | 150 | 17682037 | 14 | 71  | 0    |
| 6 | 17685525 | 17685725 | 200 | 17685587 | 15 | 114 | 0    |
| 6 | 17849175 | 17849200 | 25  | 17849187 | 12 | 12  | 2.2  |
| 6 | 18003750 | 18003825 | 75  | 18003787 | 13 | 38  | 0    |
| 6 | 18155525 | 18155550 | 25  | 18155537 | 14 | 14  | 2.2  |
| 6 | 18178350 | 18178525 | 175 | 18178487 | 16 | 95  | 15.2 |
| 6 | 18198050 | 18198125 | 75  | 18198087 | 13 | 37  | 0    |
| 6 | 18199250 | 18199525 | 275 | 18199387 | 14 | 133 | 10.8 |
| 6 | 18205925 | 18205950 | 25  | 18205937 | 12 | 12  | 0    |
| 6 | 18342700 | 18342775 | 75  | 18342737 | 13 | 37  | 6.5  |
| 6 | 18373975 | 18374050 | 75  | 18374012 | 13 | 37  | 0    |
| 6 | 18374325 | 18374550 | 225 | 18374412 | 19 | 145 | 13   |
| 6 | 18649350 | 18649400 | 50  | 18649387 | 13 | 25  | 4.3  |
| 6 | 18651500 | 18651600 | 100 | 18651512 | 12 | 47  | 0    |
| 6 | 18661950 | 18662000 | 50  | 18661962 | 12 | 24  | 4.3  |
| 6 | 18709750 | 18709775 | 25  | 18709762 | 12 | 12  | 2.2  |
| 6 | 18853125 | 18853150 | 25  | 18853137 | 12 | 12  | 0    |
| 6 | 18903400 | 18903425 | 25  | 18903412 | 12 | 12  | 2.2  |
| 6 | 19643225 | 19643275 | 50  | 19643237 | 12 | 24  | 2.2  |
| 6 | 19909650 | 19909675 | 25  | 19909662 | 12 | 12  | 2.2  |
| 6 | 20052525 | 20052550 | 25  | 20052537 | 13 | 13  | 0    |
| 6 | 20092200 | 20092225 | 25  | 20092212 | 12 | 12  | 2.2  |
| 6 | 20150800 | 20150825 | 25  | 20150812 | 12 | 12  | 2.2  |
| 6 | 20426725 | 20427000 | 275 | 20426887 | 18 | 164 | 30.3 |
| 6 | 20427275 | 20427575 | 300 | 20427387 | 19 | 184 | 0    |
| 6 | 20428600 | 20428675 | 75  | 20428612 | 12 | 36  | 6.5  |
| 6 | 20429150 | 20429275 | 125 | 20429187 | 13 | 61  | 10.8 |
| 6 | 20442675 | 20442900 | 225 | 20442712 | 17 | 136 | 4.3  |
| 6 | 20448475 | 20448550 | 75  | 20448512 | 13 | 37  | 4.3  |
| 6 | 20461700 | 20461850 | 150 | 20461787 | 15 | 79  | 0    |
| 6 | 20468900 | 20468925 | 25  | 20468912 | 12 | 12  | 2.2  |
| 6 | 21380400 | 21380450 | 50  | 21380412 | 12 | 24  | 4.3  |

|   |          |          |     |          |    |     |      |
|---|----------|----------|-----|----------|----|-----|------|
| 6 | 21773550 | 21773775 | 225 | 21773662 | 16 | 128 | 19.5 |
| 6 | 22130750 | 22130825 | 75  | 22130787 | 13 | 38  | 0    |
| 6 | 22164675 | 22164725 | 50  | 22164687 | 13 | 26  | 2.2  |
| 6 | 22426750 | 22426950 | 200 | 22426937 | 18 | 125 | 2.2  |
| 6 | 22677825 | 22677950 | 125 | 22677862 | 13 | 62  | 2.2  |
| 6 | 22734725 | 22734800 | 75  | 22734737 | 12 | 36  | 6.5  |
| 6 | 22928050 | 22928075 | 25  | 22928062 | 12 | 12  | 0    |
| 6 | 22942600 | 22942625 | 25  | 22942612 | 12 | 12  | 2.2  |
| 6 | 23015325 | 23015525 | 200 | 23015437 | 21 | 127 | 15.2 |
| 6 | 23144050 | 23144075 | 25  | 23144062 | 13 | 13  | 2.2  |
| 6 | 23451225 | 23451250 | 25  | 23451237 | 13 | 13  | 2.2  |
| 6 | 23762250 | 23762275 | 25  | 23762262 | 12 | 12  | 0    |
| 6 | 23779875 | 23780000 | 125 | 23779937 | 16 | 70  | 0    |
| 6 | 24677850 | 24677925 | 75  | 24677862 | 12 | 36  | 6.5  |
| 6 | 24707600 | 24707800 | 200 | 24707687 | 17 | 113 | 2.2  |
| 6 | 24840325 | 24840350 | 25  | 24840337 | 12 | 12  | 2.2  |
| 6 | 24942475 | 24942575 | 100 | 24942487 | 13 | 52  | 0    |
| 6 | 24986050 | 24986150 | 100 | 24986087 | 15 | 53  | 2.2  |
| 6 | 25834625 | 25834875 | 250 | 25834812 | 18 | 153 | 19.5 |
| 6 | 25840100 | 25840825 | 725 | 25840812 | 30 | 382 | 15.2 |
| 6 | 25924725 | 25924775 | 50  | 25924737 | 12 | 24  | 0    |
| 6 | 26124600 | 26124675 | 75  | 26124662 | 16 | 43  | 6.5  |
| 6 | 26128850 | 26128875 | 25  | 26128862 | 15 | 15  | 2.2  |
| 6 | 26153625 | 26153650 | 25  | 26153637 | 13 | 13  | 2.2  |
| 6 | 26324475 | 26324500 | 25  | 26324487 | 12 | 12  | 2.2  |
| 6 | 26324725 | 26324825 | 100 | 26324737 | 16 | 54  | 6.5  |
| 6 | 26333250 | 26333600 | 350 | 26333437 | 24 | 268 | 30.3 |
| 6 | 26348875 | 26348975 | 100 | 26348887 | 14 | 52  | 0    |
| 6 | 26354800 | 26354925 | 125 | 26354912 | 14 | 64  | 10.8 |
| 6 | 26609650 | 26609725 | 75  | 26609687 | 15 | 42  | 0    |
| 6 | 26610100 | 26610150 | 50  | 26610112 | 14 | 26  | 4.3  |
| 6 | 26686525 | 26686550 | 25  | 26686537 | 12 | 12  | 2.2  |
| 6 | 26721400 | 26721425 | 25  | 26721412 | 12 | 12  | 0    |
| 6 | 26721750 | 26721875 | 125 | 26721837 | 17 | 75  | 4.3  |
| 6 | 26723475 | 26723525 | 50  | 26723487 | 12 | 24  | 4.3  |
| 6 | 26809675 | 26809725 | 50  | 26809687 | 15 | 29  | 4.3  |
| 6 | 26864050 | 26864175 | 125 | 26864062 | 12 | 60  | 0    |
| 6 | 27125975 | 27126075 | 100 | 27126012 | 18 | 67  | 8.7  |
| 6 | 27172700 | 27172800 | 100 | 27172737 | 13 | 51  | 0    |
| 6 | 27254675 | 27254875 | 200 | 27254712 | 16 | 121 | 10.8 |
| 6 | 27293650 | 27293750 | 100 | 27293687 | 24 | 86  | 10.8 |
| 6 | 27314550 | 27314575 | 25  | 27314562 | 12 | 12  | 2.2  |
| 6 | 27318300 | 27318425 | 125 | 27318387 | 15 | 68  | 10.8 |
| 6 | 27328700 | 27328725 | 25  | 27328712 | 12 | 12  | 2.2  |
| 6 | 27336125 | 27336150 | 25  | 27336137 | 13 | 13  | 2.2  |
| 6 | 27344725 | 27344825 | 100 | 27344737 | 12 | 48  | 0    |
| 6 | 27352625 | 27352750 | 125 | 27352687 | 14 | 67  | 8.7  |
| 6 | 27358675 | 27358900 | 225 | 27358737 | 21 | 148 | 8.7  |
| 6 | 27359225 | 27359375 | 150 | 27359312 | 16 | 88  | 10.8 |
| 6 | 27362050 | 27362250 | 200 | 27362137 | 16 | 114 | 0    |
| 6 | 27364300 | 27364350 | 50  | 27364312 | 13 | 25  | 4.3  |
| 6 | 27366375 | 27366525 | 150 | 27366512 | 14 | 71  | 6.5  |
| 6 | 27370925 | 27371100 | 175 | 27371037 | 15 | 95  | 0    |
| 6 | 27387775 | 27387800 | 25  | 27387787 | 13 | 13  | 2.2  |
| 6 | 27443800 | 27444175 | 375 | 27443812 | 20 | 231 | 39   |
| 6 | 27444525 | 27444675 | 150 | 27444637 | 15 | 78  | 15.2 |
| 6 | 27498600 | 27498775 | 175 | 27498662 | 14 | 89  | 2.2  |
| 6 | 27530025 | 27530200 | 175 | 27530062 | 28 | 159 | 21.7 |
| 6 | 27620950 | 27621075 | 125 | 27621037 | 13 | 62  | 6.5  |
| 6 | 27634000 | 27634025 | 25  | 27634012 | 14 | 14  | 2.2  |
| 6 | 27641675 | 27642275 | 600 | 27641837 | 23 | 336 | 45.5 |
| 6 | 27669075 | 27669350 | 275 | 27669187 | 16 | 155 | 30.3 |
| 6 | 27728425 | 27728500 | 75  | 27728462 | 13 | 37  | 0    |
| 6 | 27743475 | 27743525 | 50  | 27743512 | 13 | 25  | 4.3  |
| 6 | 27755850 | 27755875 | 25  | 27755862 | 12 | 12  | 2.2  |
| 6 | 27756325 | 27756650 | 325 | 27756387 | 16 | 164 | 21.7 |
| 6 | 27814125 | 27814175 | 50  | 27814162 | 13 | 25  | 0    |
| 6 | 27890800 | 27891100 | 300 | 27890987 | 29 | 288 | 34.7 |
| 6 | 27949025 | 27949275 | 250 | 27949037 | 24 | 197 | 13   |
| 6 | 27987675 | 27987775 | 100 | 27987687 | 16 | 59  | 0    |
| 6 | 28042825 | 28042875 | 50  | 28042837 | 12 | 24  | 4.3  |
| 6 | 28043175 | 28043225 | 50  | 28043187 | 12 | 24  | 4.3  |
| 6 | 28166750 | 28167175 | 425 | 28167062 | 24 | 314 | 62.8 |
| 6 | 28168500 | 28168550 | 50  | 28168512 | 13 | 26  | 0    |
| 6 | 28237550 | 28237750 | 200 | 28237612 | 29 | 194 | 21.7 |



|   |          |          |     |          |    |     |      |
|---|----------|----------|-----|----------|----|-----|------|
| 6 | 28238050 | 28238125 | 75  | 28238087 | 14 | 39  | 0    |
| 6 | 28275125 | 28275300 | 175 | 28275262 | 16 | 94  | 0    |
| 6 | 28334950 | 28335025 | 75  | 28334962 | 13 | 38  | 6.5  |
| 6 | 28402100 | 28402350 | 250 | 28402187 | 19 | 160 | 0    |
| 6 | 28544350 | 28544550 | 200 | 28544412 | 21 | 147 | 4.3  |
| 6 | 28577350 | 28577525 | 175 | 28577412 | 18 | 110 | 0    |
| 6 | 28587200 | 28587525 | 325 | 28587337 | 19 | 206 | 15.2 |
| 6 | 28588525 | 28588550 | 25  | 28588537 | 12 | 12  | 2.2  |
| 6 | 28662900 | 28662950 | 50  | 28662912 | 17 | 34  | 4.3  |
| 6 | 28691850 | 28692050 | 200 | 28691962 | 19 | 126 | 0    |
| 6 | 28814350 | 28814525 | 175 | 28814412 | 14 | 90  | 6.5  |
| 6 | 28841400 | 28841450 | 50  | 28841412 | 14 | 26  | 4.3  |
| 6 | 28847950 | 28847975 | 25  | 28847962 | 12 | 12  | 2.2  |
| 6 | 28886025 | 28886125 | 100 | 28886112 | 17 | 61  | 0    |
| 6 | 28890225 | 28890250 | 25  | 28890237 | 12 | 12  | 0    |
| 6 | 28941550 | 28941775 | 225 | 28941712 | 20 | 141 | 26   |
| 6 | 28960225 | 28960500 | 275 | 28960262 | 16 | 153 | 13   |
| 6 | 28961725 | 28961800 | 75  | 28961787 | 13 | 36  | 0    |
| 6 | 29045450 | 29045500 | 50  | 29045462 | 12 | 24  | 0    |
| 6 | 29064450 | 29064525 | 75  | 29064462 | 15 | 43  | 6.5  |
| 6 | 29071275 | 29071300 | 25  | 29071287 | 12 | 12  | 0    |
| 6 | 29091800 | 29091825 | 25  | 29091812 | 12 | 12  | 2.2  |
| 6 | 29158275 | 29158300 | 25  | 29158287 | 12 | 12  | 0    |
| 6 | 29629475 | 29629575 | 100 | 29629562 | 23 | 63  | 10.8 |
| 6 | 29749075 | 29749300 | 225 | 29749137 | 18 | 140 | 6.5  |
| 6 | 29756175 | 29756300 | 125 | 29756212 | 13 | 61  | 10.8 |
| 6 | 29799550 | 29799575 | 25  | 29799562 | 15 | 15  | 2.2  |
| 6 | 29868775 | 29868875 | 100 | 29868812 | 16 | 56  | 6.5  |
| 6 | 29869775 | 29869825 | 50  | 29869787 | 17 | 32  | 4.3  |
| 6 | 29876325 | 29876350 | 25  | 29876337 | 13 | 13  | 2.2  |
| 6 | 29926075 | 29926225 | 150 | 29926112 | 16 | 89  | 4.3  |
| 6 | 30082500 | 30082575 | 75  | 30082562 | 13 | 37  | 6.5  |
| 6 | 30151750 | 30151775 | 25  | 30151762 | 12 | 12  | 2.2  |
| 6 | 30166975 | 30167025 | 50  | 30166987 | 13 | 25  | 4.3  |
| 6 | 30239450 | 30239575 | 125 | 30239487 | 15 | 72  | 8.7  |
| 6 | 30240550 | 30240625 | 75  | 30240562 | 12 | 36  | 6.5  |
| 6 | 30247550 | 30247575 | 25  | 30247562 | 12 | 12  | 0    |
| 6 | 30257175 | 30257300 | 125 | 30257187 | 14 | 60  | 4.3  |
| 6 | 30257550 | 30257675 | 125 | 30257637 | 15 | 68  | 0    |
| 6 | 30298150 | 30298450 | 300 | 30298312 | 18 | 175 | 10.8 |
| 6 | 30438375 | 30438400 | 25  | 30438387 | 12 | 12  | 0    |
| 6 | 30446025 | 30446100 | 75  | 30446037 | 13 | 37  | 0    |
| 6 | 30470025 | 30470100 | 75  | 30470087 | 13 | 37  | 6.5  |
| 6 | 30470625 | 30470650 | 25  | 30470637 | 12 | 12  | 0    |
| 6 | 30481200 | 30481225 | 25  | 30481212 | 12 | 12  | 2.2  |
| 6 | 30485150 | 30485425 | 275 | 30485312 | 20 | 178 | 17.3 |
| 6 | 30527450 | 30527475 | 25  | 30527462 | 12 | 12  | 0    |
| 6 | 30530625 | 30530725 | 100 | 30530712 | 14 | 51  | 0    |
| 6 | 30539050 | 30539100 | 50  | 30539087 | 13 | 25  | 4.3  |
| 6 | 30539750 | 30539950 | 200 | 30539837 | 16 | 116 | 15.2 |
| 6 | 30540250 | 30540275 | 25  | 30540262 | 12 | 12  | 0    |
| 6 | 30540850 | 30541400 | 550 | 30541037 | 20 | 359 | 8.7  |
| 6 | 30541875 | 30541900 | 25  | 30541887 | 12 | 12  | 2.2  |
| 6 | 30542450 | 30542675 | 225 | 30542562 | 19 | 152 | 21.7 |
| 6 | 30556325 | 30556350 | 25  | 30556337 | 12 | 12  | 2.2  |
| 6 | 30819175 | 30819600 | 425 | 30819187 | 22 | 211 | 32.5 |
| 6 | 30835675 | 30835850 | 175 | 30835812 | 23 | 123 | 0    |
| 6 | 31004625 | 31004800 | 175 | 31004637 | 13 | 87  | 0    |
| 6 | 31026975 | 31027200 | 225 | 31027112 | 16 | 122 | 0    |
| 6 | 31028700 | 31028850 | 150 | 31028812 | 16 | 86  | 15.2 |
| 6 | 31040075 | 31040575 | 500 | 31040137 | 23 | 301 | 15.2 |
| 6 | 31041000 | 31041050 | 50  | 31041037 | 13 | 25  | 2.2  |
| 6 | 31041775 | 31041800 | 25  | 31041787 | 12 | 12  | 0    |
| 6 | 31048700 | 31048750 | 50  | 31048712 | 12 | 24  | 4.3  |
| 6 | 31053775 | 31053950 | 175 | 31053887 | 16 | 96  | 0    |
| 6 | 31092725 | 31093000 | 275 | 31092912 | 24 | 213 | 4.3  |
| 6 | 31101375 | 31101425 | 50  | 31101412 | 14 | 26  | 4.3  |
| 6 | 31102350 | 31102600 | 250 | 31102537 | 13 | 111 | 8.7  |
| 6 | 31104350 | 31104475 | 125 | 31104362 | 12 | 58  | 0    |
| 6 | 31105625 | 31105650 | 25  | 31105637 | 12 | 12  | 2.2  |
| 6 | 31108075 | 31108225 | 150 | 31108162 | 14 | 79  | 13   |
| 6 | 31113075 | 31113150 | 75  | 31113087 | 13 | 38  | 0    |
| 6 | 31122250 | 31122300 | 50  | 31122287 | 14 | 26  | 0    |
| 6 | 31186000 | 31186050 | 50  | 31186037 | 14 | 27  | 2.2  |
| 6 | 31292175 | 31292425 | 250 | 31292337 | 23 | 185 | 0    |

|   |          |          |     |          |    |     |      |
|---|----------|----------|-----|----------|----|-----|------|
| 6 | 31304475 | 31304500 | 25  | 31304487 | 12 | 12  | 0    |
| 6 | 31356875 | 31356900 | 25  | 31356887 | 12 | 12  | 2.2  |
| 6 | 31359800 | 31360000 | 200 | 31359912 | 19 | 127 | 10.8 |
| 6 | 31381400 | 31381575 | 175 | 31381462 | 18 | 108 | 10.8 |
| 6 | 31382450 | 31382475 | 25  | 31382462 | 12 | 12  | 0    |
| 6 | 31383550 | 31383700 | 150 | 31383662 | 15 | 79  | 10.8 |
| 6 | 31384050 | 31384225 | 175 | 31384162 | 22 | 122 | 8.7  |
| 6 | 31514325 | 31514350 | 25  | 31514337 | 12 | 12  | 0    |
| 6 | 31548600 | 31548700 | 100 | 31548612 | 13 | 48  | 0    |
| 6 | 31550875 | 31550900 | 25  | 31550887 | 12 | 12  | 2.2  |
| 6 | 31556275 | 31556475 | 200 | 31556312 | 13 | 94  | 0    |
| 6 | 31589575 | 31589625 | 50  | 31589587 | 12 | 24  | 0    |
| 6 | 31652700 | 31652725 | 25  | 31652712 | 12 | 12  | 0    |
| 6 | 32171450 | 32171650 | 200 | 32171637 | 14 | 95  | 17.3 |
| 6 | 32172150 | 32172225 | 75  | 32172162 | 12 | 36  | 6.5  |
| 6 | 32172600 | 32172675 | 75  | 32172637 | 14 | 40  | 6.5  |
| 6 | 32172950 | 32173075 | 125 | 32173012 | 13 | 61  | 8.7  |
| 6 | 32180625 | 32180700 | 75  | 32180637 | 12 | 36  | 2.2  |
| 6 | 32280025 | 32280125 | 100 | 32280087 | 15 | 54  | 4.3  |
| 6 | 32290950 | 32291075 | 125 | 32291012 | 16 | 72  | 10.8 |
| 6 | 32293750 | 32293775 | 25  | 32293762 | 13 | 13  | 2.2  |
| 6 | 32295375 | 32295400 | 25  | 32295387 | 12 | 12  | 2.2  |
| 6 | 32296875 | 32296950 | 75  | 32296887 | 13 | 36  | 0    |
| 6 | 32325000 | 32325175 | 175 | 32325037 | 16 | 103 | 0    |
| 6 | 32451550 | 32451575 | 25  | 32451562 | 13 | 13  | 2.2  |
| 6 | 32471875 | 32471975 | 100 | 32471937 | 16 | 55  | 2.2  |
| 6 | 32482000 | 32482050 | 50  | 32482037 | 15 | 28  | 4.3  |
| 6 | 32529225 | 32529250 | 25  | 32529237 | 13 | 13  | 2.2  |
| 6 | 32535325 | 32535525 | 200 | 32535437 | 24 | 164 | 15.2 |
| 6 | 32535975 | 32536250 | 275 | 32535987 | 27 | 198 | 6.5  |
| 6 | 32756000 | 32756050 | 50  | 32756012 | 12 | 24  | 0    |
| 6 | 32815425 | 32815450 | 25  | 32815437 | 12 | 12  | 0    |
| 6 | 32830625 | 32830650 | 25  | 32830637 | 12 | 12  | 2.2  |
| 6 | 32837075 | 32837975 | 900 | 32837362 | 27 | 722 | 67.2 |
| 6 | 32854900 | 32855075 | 175 | 32854987 | 17 | 106 | 0    |
| 6 | 32875075 | 32875275 | 200 | 32875237 | 16 | 96  | 0    |
| 6 | 32883800 | 32883850 | 50  | 32883837 | 16 | 31  | 4.3  |
| 6 | 32888700 | 32889125 | 425 | 32888987 | 17 | 231 | 0    |
| 6 | 32890800 | 32890900 | 100 | 32890837 | 13 | 49  | 0    |
| 6 | 32955575 | 32955650 | 75  | 32955587 | 14 | 42  | 2.2  |
| 6 | 33172625 | 33172675 | 50  | 33172637 | 12 | 24  | 0    |
| 6 | 33172925 | 33172975 | 50  | 33172962 | 13 | 25  | 0    |
| 6 | 33180250 | 33180300 | 50  | 33180262 | 12 | 24  | 0    |
| 6 | 33199150 | 33199350 | 200 | 33199187 | 14 | 105 | 15.2 |
| 6 | 33199700 | 33199875 | 175 | 33199737 | 14 | 92  | 0    |
| 6 | 33204425 | 33204450 | 25  | 33204437 | 12 | 12  | 0    |
| 6 | 33219175 | 33219250 | 75  | 33219187 | 15 | 42  | 6.5  |
| 6 | 33277000 | 33277025 | 25  | 33277012 | 13 | 13  | 2.2  |
| 6 | 33578275 | 33578825 | 550 | 33578462 | 22 | 349 | 34.7 |
| 6 | 33597700 | 33597800 | 100 | 33597762 | 13 | 49  | 8.7  |
| 6 | 33599925 | 33600025 | 100 | 33599987 | 14 | 52  | 8.7  |
| 6 | 33600325 | 33600350 | 25  | 33600337 | 12 | 12  | 0    |
| 6 | 33632825 | 33632875 | 50  | 33632837 | 12 | 24  | 4.3  |
| 6 | 33803875 | 33803950 | 75  | 33803887 | 14 | 37  | 6.5  |
| 6 | 33912750 | 33912875 | 125 | 33912812 | 17 | 77  | 0    |
| 6 | 33937425 | 33937475 | 50  | 33937437 | 12 | 24  | 0    |
| 6 | 33937800 | 33937850 | 50  | 33937812 | 13 | 25  | 4.3  |
| 6 | 33938650 | 33938675 | 25  | 33938662 | 12 | 12  | 2.2  |
| 6 | 33940500 | 33940875 | 375 | 33940662 | 14 | 175 | 8.7  |
| 6 | 33942325 | 33942400 | 75  | 33942362 | 15 | 43  | 2.2  |
| 6 | 33960750 | 33960775 | 25  | 33960762 | 13 | 13  | 2.2  |
| 6 | 33962750 | 33962775 | 25  | 33962762 | 12 | 12  | 2.2  |
| 6 | 33972225 | 33972300 | 75  | 33972262 | 13 | 37  | 0    |
| 6 | 33975500 | 33975575 | 75  | 33975512 | 12 | 36  | 6.5  |
| 6 | 33975975 | 33976400 | 425 | 33976287 | 15 | 200 | 6.5  |
| 6 | 33978800 | 33978825 | 25  | 33978812 | 12 | 12  | 2.2  |
| 6 | 33980050 | 33980075 | 25  | 33980062 | 12 | 12  | 0    |
| 6 | 33989925 | 33989950 | 25  | 33989937 | 12 | 12  | 0    |
| 6 | 33990175 | 33990200 | 25  | 33990187 | 12 | 12  | 0    |
| 6 | 33993550 | 33993600 | 50  | 33993562 | 12 | 24  | 4.3  |
| 6 | 34001750 | 34001900 | 150 | 34001787 | 16 | 83  | 8.7  |
| 6 | 34012675 | 34012900 | 225 | 34012787 | 21 | 153 | 17.3 |
| 6 | 34017525 | 34017575 | 50  | 34017537 | 12 | 24  | 0    |
| 6 | 34019350 | 34019500 | 150 | 34019412 | 16 | 85  | 0    |
| 6 | 34019950 | 34020075 | 125 | 34019987 | 14 | 64  | 6.5  |

|   |          |          |     |          |    |     |      |
|---|----------|----------|-----|----------|----|-----|------|
| 6 | 34020300 | 34020525 | 225 | 34020487 | 18 | 134 | 2.2  |
| 6 | 34027275 | 34027300 | 25  | 34027287 | 12 | 12  | 0    |
| 6 | 34040825 | 34040850 | 25  | 34040837 | 12 | 12  | 2.2  |
| 6 | 34061825 | 34061875 | 50  | 34061862 | 14 | 26  | 4.3  |
| 6 | 34070125 | 34070375 | 250 | 34070237 | 16 | 132 | 0    |
| 6 | 34085550 | 34085650 | 100 | 34085562 | 12 | 46  | 8.7  |
| 6 | 34093650 | 34093700 | 50  | 34093662 | 13 | 26  | 4.3  |
| 6 | 34111500 | 34111675 | 175 | 34111587 | 22 | 131 | 15.2 |
| 6 | 34112025 | 34112050 | 25  | 34112037 | 12 | 12  | 0    |
| 6 | 34147375 | 34147875 | 500 | 34147662 | 16 | 255 | 6.5  |
| 6 | 34148425 | 34148450 | 25  | 34148437 | 12 | 12  | 2.2  |
| 6 | 34148975 | 34149025 | 50  | 34148987 | 12 | 24  | 4.3  |
| 6 | 34153225 | 34153250 | 25  | 34153237 | 12 | 12  | 0    |
| 6 | 34161850 | 34162025 | 175 | 34161987 | 14 | 80  | 10.8 |
| 6 | 34169250 | 34169375 | 125 | 34169312 | 14 | 65  | 0    |
| 6 | 34216100 | 34216125 | 25  | 34216112 | 12 | 12  | 2.2  |
| 6 | 34230200 | 34230225 | 25  | 34230212 | 12 | 12  | 0    |
| 6 | 34236050 | 34236075 | 25  | 34236062 | 12 | 12  | 0    |
| 6 | 34259000 | 34259025 | 25  | 34259012 | 12 | 12  | 0    |
| 6 | 34501475 | 34501500 | 25  | 34501487 | 12 | 12  | 2.2  |
| 6 | 34506625 | 34506800 | 175 | 34506687 | 19 | 107 | 17.3 |
| 6 | 34527350 | 34527525 | 175 | 34527387 | 14 | 85  | 4.3  |
| 6 | 34577925 | 34578075 | 150 | 34577987 | 14 | 77  | 6.5  |
| 6 | 34585875 | 34585900 | 25  | 34585887 | 12 | 12  | 0    |
| 6 | 35245700 | 35245725 | 25  | 35245712 | 12 | 12  | 2.2  |
| 6 | 35289075 | 35289100 | 25  | 35289087 | 12 | 12  | 2.2  |
| 6 | 35393675 | 35393700 | 25  | 35393687 | 12 | 12  | 2.2  |
| 6 | 35407900 | 35408100 | 200 | 35408037 | 14 | 101 | 8.7  |
| 6 | 35504575 | 35504850 | 275 | 35504687 | 22 | 169 | 17.3 |
| 6 | 35824375 | 35824425 | 50  | 35824412 | 13 | 25  | 0    |
| 6 | 35881550 | 35881575 | 25  | 35881562 | 12 | 12  | 2.2  |
| 6 | 35985400 | 35985500 | 100 | 35985412 | 14 | 55  | 0    |
| 6 | 36017775 | 36017800 | 25  | 36017787 | 12 | 12  | 0    |
| 6 | 36341575 | 36341600 | 25  | 36341587 | 12 | 12  | 0    |
| 6 | 36345125 | 36345200 | 75  | 36345137 | 12 | 36  | 0    |
| 6 | 36346575 | 36346625 | 50  | 36346587 | 12 | 24  | 4.3  |
| 6 | 36347450 | 36347475 | 25  | 36347462 | 12 | 12  | 2.2  |
| 6 | 36354825 | 36354875 | 50  | 36354862 | 13 | 25  | 0    |
| 6 | 36359825 | 36359900 | 75  | 36359837 | 12 | 36  | 0    |
| 6 | 36385075 | 36385150 | 75  | 36385087 | 15 | 43  | 6.5  |
| 6 | 36385875 | 36386125 | 250 | 36385937 | 20 | 169 | 0    |
| 6 | 36449350 | 36449425 | 75  | 36449387 | 13 | 37  | 0    |
| 6 | 36462925 | 36463025 | 100 | 36462962 | 14 | 52  | 6.5  |
| 6 | 36463325 | 36463350 | 25  | 36463337 | 13 | 13  | 2.2  |
| 6 | 36463925 | 36463975 | 50  | 36463962 | 13 | 25  | 4.3  |
| 6 | 37006425 | 37006450 | 25  | 37006437 | 12 | 12  | 2.2  |
| 6 | 37066750 | 37066875 | 125 | 37066762 | 13 | 60  | 10.8 |
| 6 | 37149000 | 37149025 | 25  | 37149012 | 12 | 12  | 0    |
| 6 | 37607700 | 37607750 | 50  | 37607712 | 12 | 24  | 2.2  |
| 6 | 37730625 | 37730675 | 50  | 37730637 | 14 | 26  | 0    |
| 6 | 37772325 | 37772350 | 25  | 37772337 | 12 | 12  | 2.2  |
| 6 | 38786375 | 38786500 | 125 | 38786437 | 15 | 68  | 0    |
| 6 | 38795425 | 38795600 | 175 | 38795462 | 13 | 84  | 0    |
| 6 | 38798650 | 38798750 | 100 | 38798737 | 17 | 61  | 4.3  |
| 6 | 39141525 | 39141600 | 75  | 39141537 | 12 | 35  | 0    |
| 6 | 39161825 | 39161850 | 25  | 39161837 | 12 | 12  | 2.2  |
| 6 | 39247300 | 39247400 | 100 | 39247337 | 15 | 54  | 4.3  |
| 6 | 39256625 | 39256650 | 25  | 39256637 | 12 | 12  | 2.2  |
| 6 | 39358275 | 39358300 | 25  | 39358287 | 12 | 12  | 0    |
| 6 | 39499650 | 39499700 | 50  | 39499662 | 12 | 24  | 4.3  |
| 6 | 39844525 | 39844550 | 25  | 39844537 | 12 | 12  | 0    |
| 6 | 40024475 | 40024525 | 50  | 40024487 | 12 | 24  | 0    |
| 6 | 40034900 | 40034950 | 50  | 40034912 | 12 | 24  | 0    |
| 6 | 40074775 | 40074800 | 25  | 40074787 | 12 | 12  | 2.2  |
| 6 | 40508300 | 40508550 | 250 | 40508412 | 14 | 122 | 19.5 |
| 6 | 41234500 | 41234525 | 25  | 41234512 | 12 | 12  | 2.2  |
| 6 | 41264325 | 41264350 | 25  | 41264337 | 12 | 12  | 2.2  |
| 6 | 41266625 | 41266675 | 50  | 41266637 | 12 | 24  | 4.3  |
| 6 | 41290675 | 41290700 | 25  | 41290687 | 13 | 13  | 0    |
| 6 | 41302600 | 41302675 | 75  | 41302637 | 13 | 38  | 0    |
| 6 | 41318700 | 41318750 | 50  | 41318737 | 13 | 25  | 0    |
| 6 | 41421950 | 41422100 | 150 | 41421987 | 15 | 77  | 6.5  |
| 6 | 41424275 | 41424400 | 125 | 41424337 | 14 | 64  | 0    |
| 6 | 41449375 | 41449775 | 400 | 41449712 | 20 | 256 | 34.7 |
| 6 | 41450150 | 41450250 | 100 | 41450162 | 18 | 62  | 8.7  |

|   |          |          |     |          |    |     |      |
|---|----------|----------|-----|----------|----|-----|------|
| 6 | 41460225 | 41460425 | 200 | 41460337 | 18 | 121 | 2.2  |
| 6 | 41466325 | 41466525 | 200 | 41466412 | 21 | 137 | 0    |
| 6 | 41468950 | 41469000 | 50  | 41468962 | 13 | 25  | 4.3  |
| 6 | 41471125 | 41471150 | 25  | 41471137 | 13 | 13  | 2.2  |
| 6 | 41477325 | 41477475 | 150 | 41477362 | 15 | 83  | 0    |
| 6 | 41478675 | 41478750 | 75  | 41478687 | 12 | 35  | 6.5  |
| 6 | 41495125 | 41495250 | 125 | 41495137 | 14 | 65  | 2.2  |
| 6 | 41495725 | 41495825 | 100 | 41495762 | 13 | 51  | 0    |
| 6 | 42218525 | 42218600 | 75  | 42218587 | 15 | 40  | 4.3  |
| 6 | 42382225 | 42382375 | 150 | 42382237 | 17 | 90  | 8.7  |
| 6 | 42542975 | 42543125 | 150 | 42543062 | 16 | 86  | 10.8 |
| 6 | 42787475 | 42787825 | 350 | 42787687 | 18 | 210 | 17.3 |
| 6 | 42999000 | 42999025 | 25  | 42999012 | 13 | 13  | 2.2  |
| 6 | 43313800 | 43313825 | 25  | 43313812 | 12 | 12  | 2.2  |
| 6 | 43369700 | 43369750 | 50  | 43369712 | 13 | 25  | 0    |
| 6 | 43488500 | 43488750 | 250 | 43488637 | 26 | 219 | 17.3 |
| 6 | 43489550 | 43489675 | 125 | 43489637 | 14 | 64  | 0    |
| 6 | 43493200 | 43493275 | 75  | 43493237 | 13 | 37  | 0    |
| 6 | 43532550 | 43532575 | 25  | 43532562 | 12 | 12  | 0    |
| 6 | 43763125 | 43763250 | 125 | 43763187 | 14 | 67  | 10.8 |
| 6 | 43814075 | 43814100 | 25  | 43814087 | 12 | 12  | 2.2  |
| 6 | 44020925 | 44021000 | 75  | 44020962 | 13 | 37  | 6.5  |
| 6 | 44048025 | 44048100 | 75  | 44048062 | 14 | 38  | 4.3  |
| 6 | 44135425 | 44135500 | 75  | 44135437 | 16 | 43  | 2.2  |
| 6 | 44360350 | 44360400 | 50  | 44360387 | 13 | 25  | 4.3  |
| 6 | 44365425 | 44365450 | 25  | 44365437 | 12 | 12  | 0    |
| 6 | 44367750 | 44367875 | 125 | 44367762 | 12 | 59  | 4.3  |
| 6 | 44368500 | 44368550 | 50  | 44368512 | 12 | 24  | 0    |
| 6 | 44373000 | 44373025 | 25  | 44373012 | 22 | 22  | 4.3  |
| 6 | 44373725 | 44373850 | 125 | 44373762 | 14 | 63  | 8.7  |
| 6 | 44432275 | 44432425 | 150 | 44432362 | 19 | 97  | 0    |
| 6 | 44571325 | 44571500 | 175 | 44571387 | 17 | 104 | 2.2  |
| 6 | 44597850 | 44598825 | 975 | 44597987 | 17 | 497 | 32.5 |
| 6 | 44600925 | 44601125 | 200 | 44601062 | 15 | 106 | 10.8 |
| 6 | 44626500 | 44626575 | 75  | 44626537 | 13 | 37  | 6.5  |
| 6 | 44643175 | 44643275 | 100 | 44643262 | 15 | 54  | 6.5  |
| 6 | 44682325 | 44682400 | 75  | 44682337 | 12 | 36  | 6.5  |
| 6 | 44695075 | 44695125 | 50  | 44695112 | 13 | 25  | 4.3  |
| 6 | 44769525 | 44769550 | 25  | 44769537 | 12 | 12  | 0    |
| 6 | 44863875 | 44863950 | 75  | 44863912 | 14 | 39  | 4.3  |
| 6 | 45652775 | 45652800 | 25  | 45652787 | 12 | 12  | 2.2  |
| 6 | 45720150 | 45720175 | 25  | 45720162 | 12 | 12  | 2.2  |
| 6 | 45738650 | 45738675 | 25  | 45738662 | 12 | 12  | 0    |
| 6 | 45751400 | 45751525 | 125 | 45751487 | 14 | 66  | 8.7  |
| 6 | 46030575 | 46030700 | 125 | 46030612 | 13 | 63  | 10.8 |
| 6 | 46077075 | 46077200 | 125 | 46077087 | 13 | 62  | 2.2  |
| 6 | 46092050 | 46092075 | 25  | 46092062 | 12 | 12  | 0    |
| 6 | 46131300 | 46131400 | 100 | 46131312 | 13 | 50  | 0    |
| 6 | 46137175 | 46137225 | 50  | 46137212 | 13 | 25  | 4.3  |
| 6 | 46280775 | 46280850 | 75  | 46280812 | 13 | 37  | 0    |
| 6 | 46466650 | 46466700 | 50  | 46466687 | 13 | 25  | 4.3  |
| 6 | 46467025 | 46467050 | 25  | 46467037 | 12 | 12  | 0    |
| 6 | 46764325 | 46764375 | 50  | 46764337 | 12 | 24  | 4.3  |
| 6 | 46764625 | 46764775 | 150 | 46764687 | 14 | 75  | 4.3  |
| 6 | 46829125 | 46829300 | 175 | 46829237 | 15 | 96  | 4.3  |
| 6 | 46939875 | 46939900 | 25  | 46939887 | 12 | 12  | 2.2  |
| 6 | 48145200 | 48145225 | 25  | 48145212 | 12 | 12  | 2.2  |
| 6 | 48498275 | 48498425 | 150 | 48498287 | 13 | 72  | 13   |
| 6 | 48918150 | 48918200 | 50  | 48918162 | 12 | 24  | 4.3  |
| 6 | 48920900 | 48921175 | 275 | 48920912 | 13 | 120 | 19.5 |
| 6 | 49065200 | 49065225 | 25  | 49065212 | 12 | 12  | 2.2  |
| 6 | 49065675 | 49065725 | 50  | 49065712 | 13 | 25  | 4.3  |
| 6 | 51439200 | 51439225 | 25  | 51439212 | 12 | 12  | 0    |
| 6 | 52199150 | 52199250 | 100 | 52199162 | 13 | 51  | 0    |
| 6 | 52219825 | 52219875 | 50  | 52219837 | 12 | 24  | 4.3  |
| 6 | 52797550 | 52797675 | 125 | 52797562 | 12 | 60  | 0    |
| 6 | 52798250 | 52798275 | 25  | 52798262 | 12 | 12  | 0    |
| 6 | 55922975 | 55923000 | 25  | 55922987 | 12 | 12  | 2.2  |
| 6 | 56220150 | 56220175 | 25  | 56220162 | 12 | 12  | 0    |
| 6 | 56405100 | 56405250 | 150 | 56405187 | 13 | 74  | 2.2  |
| 6 | 64109100 | 64109150 | 50  | 64109112 | 12 | 24  | 4.3  |
| 6 | 64646675 | 64646750 | 75  | 64646712 | 15 | 42  | 6.5  |
| 6 | 65448350 | 65448525 | 175 | 65448437 | 14 | 82  | 10.8 |
| 6 | 66323850 | 66323925 | 75  | 66323887 | 14 | 40  | 2.2  |
| 6 | 66538750 | 66538800 | 50  | 66538762 | 13 | 25  | 2.2  |

|   |           |           |     |           |    |     |      |
|---|-----------|-----------|-----|-----------|----|-----|------|
| 6 | 66696900  | 66696950  | 50  | 66696937  | 13 | 25  | 4.3  |
| 6 | 66756350  | 66756375  | 25  | 66756362  | 12 | 12  | 0    |
| 6 | 66851750  | 66852050  | 300 | 66852037  | 14 | 136 | 13   |
| 6 | 66853600  | 66853775  | 175 | 66853637  | 22 | 119 | 17.3 |
| 6 | 66892050  | 66892100  | 50  | 66892062  | 15 | 29  | 0    |
| 6 | 66912650  | 66912675  | 25  | 66912662  | 12 | 12  | 2.2  |
| 6 | 66940050  | 66940200  | 150 | 66940062  | 16 | 82  | 13   |
| 6 | 67026000  | 67026025  | 25  | 67026012  | 12 | 12  | 0    |
| 6 | 67162700  | 67162775  | 75  | 67162737  | 13 | 38  | 0    |
| 6 | 67702850  | 67703050  | 200 | 67702912  | 16 | 106 | 4.3  |
| 6 | 68400800  | 68400825  | 25  | 68400812  | 12 | 12  | 2.2  |
| 6 | 68653750  | 68653800  | 50  | 68653762  | 12 | 24  | 0    |
| 6 | 71103300  | 71103475  | 175 | 71103337  | 17 | 106 | 10.8 |
| 6 | 71673725  | 71673750  | 25  | 71673737  | 12 | 12  | 2.2  |
| 6 | 71691450  | 71691525  | 75  | 71691512  | 13 | 37  | 0    |
| 6 | 71723825  | 71723875  | 50  | 71723837  | 13 | 25  | 2.2  |
| 6 | 72949225  | 72949275  | 50  | 72949237  | 12 | 24  | 2.2  |
| 6 | 73388025  | 73388050  | 25  | 73388037  | 12 | 12  | 2.2  |
| 6 | 73972750  | 73972775  | 25  | 73972762  | 13 | 13  | 0    |
| 6 | 74669700  | 74669900  | 200 | 74669712  | 13 | 96  | 8.7  |
| 6 | 88814025  | 88814125  | 100 | 88814037  | 13 | 49  | 0    |
| 6 | 88814425  | 88814575  | 150 | 88814487  | 15 | 82  | 13   |
| 6 | 90653150  | 90653175  | 25  | 90653162  | 12 | 12  | 0    |
| 6 | 100173225 | 100173300 | 75  | 100173262 | 15 | 43  | 0    |
| 6 | 100173575 | 100173675 | 100 | 100173637 | 14 | 50  | 8.7  |
| 6 | 110990250 | 110990275 | 25  | 110990262 | 12 | 12  | 2.2  |
| 6 | 125341150 | 125341225 | 75  | 125341187 | 13 | 37  | 0    |
| 6 | 125816100 | 125816200 | 100 | 125816162 | 14 | 52  | 8.7  |
| 6 | 137856625 | 137856700 | 75  | 137856662 | 14 | 40  | 6.5  |
| 6 | 138625625 | 138625650 | 25  | 138625637 | 12 | 12  | 2.2  |
| 6 | 150327325 | 150327650 | 325 | 150327587 | 22 | 233 | 30.3 |
| 6 | 150351600 | 150351625 | 25  | 150351612 | 12 | 12  | 0    |
| 6 | 150415750 | 150415900 | 150 | 150415787 | 13 | 72  | 0    |
| 6 | 163971550 | 163971575 | 25  | 163971562 | 13 | 13  | 0    |
| 6 | 166255125 | 166255400 | 275 | 166255287 | 14 | 129 | 17.3 |
| 6 | 168133650 | 168133675 | 25  | 168133662 | 12 | 12  | 2.2  |
| 6 | 168183525 | 168183600 | 75  | 168183562 | 13 | 37  | 0    |
| 6 | 169999975 | 170000225 | 250 | 170000137 | 19 | 150 | 0    |
| 6 | 170000525 | 170000550 | 25  | 170000537 | 12 | 12  | 0    |
| 6 | 170249750 | 170249775 | 25  | 170249762 | 12 | 12  | 2.2  |
| 6 | 170324850 | 170324925 | 75  | 170324862 | 12 | 36  | 6.5  |
| 6 | 170381950 | 170382025 | 75  | 170381962 | 14 | 41  | 0    |
| 6 | 170646850 | 170646875 | 25  | 170646862 | 12 | 12  | 0    |
| 6 | 170652675 | 170653000 | 325 | 170652737 | 16 | 164 | 0    |
| 6 | 170653225 | 170653425 | 200 | 170653262 | 15 | 102 | 0    |
| 9 | 757450    | 757550    | 100 | 757512    | 14 | 52  | 4.3  |
| 9 | 960400    | 960525    | 125 | 960512    | 14 | 61  | 10.8 |
| 9 | 961025    | 961050    | 25  | 961037    | 12 | 12  | 2.2  |
| 9 | 962800    | 963200    | 400 | 962912    | 21 | 269 | 49.8 |
| 9 | 980400    | 980475    | 75  | 980412    | 12 | 36  | 6.5  |
| 9 | 1016875   | 1016925   | 50  | 1016887   | 15 | 29  | 4.3  |
| 9 | 1035800   | 1036150   | 350 | 1036062   | 16 | 158 | 30.3 |
| 9 | 1042950   | 1042975   | 25  | 1042962   | 12 | 12  | 0    |
| 9 | 2611275   | 2611300   | 25  | 2611287   | 12 | 12  | 2.2  |
| 9 | 2708150   | 2708200   | 50  | 2708187   | 14 | 26  | 4.3  |
| 9 | 3170975   | 3171150   | 175 | 3171037   | 14 | 80  | 0    |
| 9 | 3188600   | 3188725   | 125 | 3188612   | 12 | 57  | 0    |
| 9 | 4186950   | 4187100   | 150 | 4186962   | 17 | 83  | 6.5  |
| 9 | 5031275   | 5031475   | 200 | 5031287   | 14 | 99  | 15.2 |
| 9 | 5317275   | 5317300   | 25  | 5317287   | 12 | 12  | 0    |
| 9 | 6318900   | 6318925   | 25  | 6318912   | 13 | 13  | 0    |
| 9 | 6326000   | 6326100   | 100 | 6326062   | 15 | 54  | 8.7  |
| 9 | 9685300   | 9685325   | 25  | 9685312   | 12 | 12  | 2.2  |
| 9 | 11539450  | 11539475  | 25  | 11539462  | 13 | 13  | 2.2  |
| 9 | 11540500  | 11540650  | 150 | 11540537  | 14 | 79  | 13   |
| 9 | 16082300  | 16082325  | 25  | 16082312  | 12 | 12  | 2.2  |
| 9 | 16224900  | 16225025  | 125 | 16224987  | 13 | 60  | 0    |
| 9 | 18305325  | 18305350  | 25  | 18305337  | 12 | 12  | 2.2  |
| 9 | 18989300  | 18989425  | 125 | 18989337  | 14 | 64  | 0    |
| 9 | 18990375  | 18990500  | 125 | 18990487  | 15 | 70  | 6.5  |
| 9 | 21131350  | 21131375  | 25  | 21131362  | 12 | 12  | 2.2  |
| 9 | 21375225  | 21375350  | 125 | 21375237  | 13 | 56  | 0    |
| 9 | 21761725  | 21761775  | 50  | 21761737  | 12 | 24  | 0    |
| 9 | 22219250  | 22219475  | 225 | 22219312  | 19 | 155 | 19.5 |
| 9 | 22220300  | 22220375  | 75  | 22220312  | 13 | 37  | 2.2  |

|   |          |          |      |          |    |      |       |
|---|----------|----------|------|----------|----|------|-------|
| 9 | 22241450 | 22241625 | 175  | 22241487 | 16 | 104  | 10.8  |
| 9 | 23442275 | 23442475 | 200  | 23442362 | 18 | 116  | 0     |
| 9 | 25962375 | 25962425 | 50   | 25962412 | 13 | 25   | 4.3   |
| 9 | 27148200 | 27148275 | 75   | 27148212 | 12 | 36   | 4.3   |
| 9 | 27334950 | 27334975 | 25   | 27334962 | 12 | 12   | 2.2   |
| 9 | 30565200 | 30565225 | 25   | 30565212 | 12 | 12   | 2.2   |
| 9 | 31243950 | 31244150 | 200  | 31243962 | 14 | 100  | 0     |
| 9 | 31844175 | 31844325 | 150  | 31844287 | 15 | 85   | 10.8  |
| 9 | 33015450 | 33015500 | 50   | 33015462 | 12 | 24   | 4.3   |
| 9 | 33603625 | 33603725 | 100  | 33603662 | 13 | 50   | 6.5   |
| 9 | 34361750 | 34361900 | 150  | 34361837 | 14 | 78   | 0     |
| 9 | 34362250 | 34362325 | 75   | 34362262 | 14 | 40   | 0     |
| 9 | 34371000 | 34371075 | 75   | 34371062 | 15 | 41   | 2.2   |
| 9 | 34371425 | 34371450 | 25   | 34371437 | 12 | 12   | 2.2   |
| 9 | 34477700 | 34477875 | 175  | 34477787 | 15 | 92   | 15.2  |
| 9 | 34504725 | 34504750 | 25   | 34504737 | 12 | 12   | 2.2   |
| 9 | 34526675 | 34526825 | 150  | 34526737 | 15 | 81   | 0     |
| 9 | 34619450 | 34619500 | 50   | 34619462 | 14 | 28   | 2.2   |
| 9 | 35450900 | 35451025 | 125  | 35450987 | 14 | 61   | 0     |
| 9 | 35606600 | 35606675 | 75   | 35606612 | 13 | 37   | 6.5   |
| 9 | 36160525 | 36160675 | 150  | 36160612 | 16 | 91   | 4.3   |
| 9 | 36753025 | 36753050 | 25   | 36753037 | 12 | 12   | 0     |
| 9 | 36762275 | 36762350 | 75   | 36762287 | 12 | 34   | 2.2   |
| 9 | 36783325 | 36783475 | 150  | 36783387 | 15 | 82   | 0     |
| 9 | 36865725 | 36865850 | 125  | 36865762 | 14 | 65   | 10.8  |
| 9 | 36939800 | 36939875 | 75   | 36939812 | 12 | 35   | 4.3   |
| 9 | 36979750 | 36979825 | 75   | 36979762 | 12 | 36   | 0     |
| 9 | 37016100 | 37016175 | 75   | 37016112 | 14 | 38   | 0     |
| 9 | 37017400 | 37017475 | 75   | 37017437 | 15 | 41   | 6.5   |
| 9 | 37025225 | 37025250 | 25   | 37025237 | 12 | 12   | 0     |
| 9 | 37027025 | 37027175 | 150  | 37027037 | 13 | 73   | 8.7   |
| 9 | 37027575 | 37027700 | 125  | 37027612 | 15 | 70   | 0     |
| 9 | 37028075 | 37028250 | 175  | 37028187 | 16 | 101  | 10.8  |
| 9 | 37109600 | 37109875 | 275  | 37109687 | 16 | 151  | 0     |
| 9 | 37110125 | 37110150 | 25   | 37110137 | 15 | 15   | 2.2   |
| 9 | 37641550 | 37641600 | 50   | 37641562 | 13 | 26   | 4.3   |
| 9 | 38118400 | 38118450 | 50   | 38118412 | 14 | 26   | 0     |
| 9 | 38119000 | 38119025 | 25   | 38119012 | 12 | 12   | 0     |
| 9 | 38375275 | 38375600 | 325  | 38375287 | 13 | 148  | 17.3  |
| 9 | 38450125 | 38450200 | 75   | 38450137 | 13 | 38   | 4.3   |
| 9 | 38612100 | 38612125 | 25   | 38612112 | 12 | 12   | 2.2   |
| 9 | 38612500 | 38612550 | 50   | 38612537 | 15 | 29   | 0     |
| 9 | 38737050 | 38737100 | 50   | 38737062 | 12 | 24   | 4.3   |
| 9 | 44818350 | 44818375 | 25   | 44818362 | 12 | 12   | 2.2   |
| 9 | 44819125 | 44819200 | 75   | 44819137 | 12 | 36   | 6.5   |
| 9 | 45242600 | 45242625 | 25   | 45242612 | 12 | 12   | 2.2   |
| 9 | 66194425 | 66194600 | 175  | 66194587 | 26 | 120  | 13    |
| 9 | 66194850 | 66195100 | 250  | 66194862 | 14 | 133  | 19.5  |
| 9 | 66195550 | 66195825 | 275  | 66195637 | 29 | 267  | 34.7  |
| 9 | 66196475 | 66196500 | 25   | 66196487 | 13 | 13   | 2.2   |
| 9 | 66196975 | 66197025 | 50   | 66196987 | 13 | 26   | 4.3   |
| 9 | 66197475 | 66197550 | 75   | 66197487 | 39 | 93   | 15.2  |
| 9 | 66208550 | 66208700 | 150  | 66208612 | 18 | 94   | 13    |
| 9 | 66223600 | 66223700 | 100  | 66223612 | 14 | 52   | 4.3   |
| 9 | 66576400 | 66577925 | 1525 | 66577337 | 47 | 1420 | 227.5 |
| 9 | 66578175 | 66578200 | 25   | 66578187 | 13 | 13   | 2.2   |
| 9 | 66602025 | 66602075 | 50   | 66602037 | 16 | 29   | 4.3   |
| 9 | 67890075 | 67890150 | 75   | 67890112 | 15 | 44   | 4.3   |
| 9 | 67893600 | 67893625 | 25   | 67893612 | 19 | 19   | 2.2   |
| 9 | 67898750 | 67898900 | 150  | 67898762 | 17 | 98   | 13    |
| 9 | 67900250 | 67900450 | 200  | 67900412 | 17 | 114  | 2.2   |
| 9 | 67901000 | 67901050 | 50   | 67901012 | 14 | 28   | 2.2   |
| 9 | 67901650 | 67901750 | 100  | 67901712 | 17 | 62   | 2.2   |
| 9 | 67908825 | 67908850 | 25   | 67908837 | 26 | 26   | 4.3   |
| 9 | 67909175 | 67909300 | 125  | 67909262 | 52 | 238  | 36.8  |
| 9 | 67911275 | 67911300 | 25   | 67911287 | 13 | 13   | 2.2   |
| 9 | 67913750 | 67913775 | 25   | 67913762 | 25 | 25   | 4.3   |
| 9 | 67945475 | 67945925 | 450  | 67945662 | 37 | 422  | 67.2  |
| 9 | 68279125 | 68279300 | 175  | 68279137 | 12 | 81   | 0     |
| 9 | 68286750 | 68286900 | 150  | 68286762 | 17 | 88   | 13    |
| 9 | 68288300 | 68288450 | 150  | 68288337 | 13 | 71   | 0     |
| 9 | 68290100 | 68290175 | 75   | 68290137 | 13 | 38   | 6.5   |
| 9 | 70618800 | 70618825 | 25   | 70618812 | 12 | 12   | 0     |
| 9 | 70817800 | 70818550 | 750  | 70818387 | 32 | 575  | 17.3  |
| 9 | 70834600 | 70834675 | 75   | 70834612 | 13 | 37   | 4.3   |

|   |          |          |      |          |    |     |       |
|---|----------|----------|------|----------|----|-----|-------|
| 9 | 71117650 | 71117700 | 50   | 71117662 | 12 | 24  | 2.2   |
| 9 | 71236550 | 71236625 | 75   | 71236612 | 14 | 36  | 4.3   |
| 9 | 71320700 | 71320875 | 175  | 71320762 | 16 | 95  | 17.3  |
| 9 | 75279900 | 75279950 | 50   | 75279912 | 12 | 24  | 0     |
| 9 | 77324025 | 77324200 | 175  | 77324037 | 12 | 72  | 4.3   |
| 9 | 78375575 | 78375725 | 150  | 78375637 | 15 | 77  | 13    |
| 9 | 78515475 | 78515600 | 125  | 78515512 | 16 | 75  | 8.7   |
| 9 | 78824400 | 78824650 | 250  | 78824537 | 22 | 182 | 6.5   |
| 9 | 78982350 | 78982400 | 50   | 78982387 | 16 | 28  | 0     |
| 9 | 79252500 | 79252525 | 25   | 79252512 | 12 | 12  | 0     |
| 9 | 80150900 | 80150975 | 75   | 80150937 | 13 | 37  | 2.2   |
| 9 | 84020575 | 84020700 | 125  | 84020687 | 14 | 64  | 0     |
| 9 | 84021250 | 84021325 | 75   | 84021287 | 14 | 39  | 6.5   |
| 9 | 84235925 | 84236200 | 275  | 84236012 | 14 | 142 | 8.7   |
| 9 | 84236950 | 84236975 | 25   | 84236962 | 12 | 12  | 0     |
| 9 | 84301150 | 84301175 | 25   | 84301162 | 12 | 12  | 2.2   |
| 9 | 86069175 | 86069250 | 75   | 86069212 | 15 | 40  | 4.3   |
| 9 | 86538925 | 86538950 | 25   | 86538937 | 12 | 12  | 0     |
| 9 | 86973975 | 86974000 | 25   | 86973987 | 12 | 12  | 2.2   |
| 9 | 87069600 | 87069900 | 300  | 87069787 | 21 | 197 | 4.3   |
| 9 | 87093625 | 87093775 | 150  | 87093687 | 16 | 83  | 13    |
| 9 | 87102475 | 87102575 | 100  | 87102487 | 13 | 51  | 8.7   |
| 9 | 87103125 | 87103275 | 150  | 87103262 | 13 | 69  | 0     |
| 9 | 87123925 | 87124025 | 100  | 87123987 | 15 | 53  | 0     |
| 9 | 87142650 | 87142675 | 25   | 87142662 | 12 | 12  | 0     |
| 9 | 87273850 | 87274000 | 150  | 87273937 | 15 | 82  | 0     |
| 9 | 87285100 | 87285125 | 25   | 87285112 | 12 | 12  | 2.2   |
| 9 | 87329675 | 87329725 | 50   | 87329687 | 12 | 24  | 2.2   |
| 9 | 87330100 | 87330350 | 250  | 87330212 | 18 | 142 | 0     |
| 9 | 87857975 | 87858150 | 175  | 87858037 | 18 | 108 | 13    |
| 9 | 87992000 | 87992125 | 125  | 87992037 | 14 | 61  | 10.8  |
| 9 | 87998075 | 87998100 | 25   | 87998087 | 12 | 12  | 2.2   |
| 9 | 88608350 | 88608375 | 25   | 88608362 | 12 | 12  | 2.2   |
| 9 | 88624000 | 88624075 | 75   | 88624012 | 13 | 38  | 0     |
| 9 | 88630050 | 88630075 | 25   | 88630062 | 12 | 12  | 0     |
| 9 | 89086500 | 89086625 | 125  | 89086562 | 14 | 66  | 0     |
| 9 | 89226700 | 89226725 | 25   | 89226712 | 12 | 12  | 0     |
| 9 | 89439275 | 89439525 | 250  | 89439412 | 15 | 124 | 2.2   |
| 9 | 89471550 | 89471575 | 25   | 89471562 | 12 | 12  | 0     |
| 9 | 89471900 | 89472025 | 125  | 89471912 | 12 | 56  | 10.8  |
| 9 | 89499025 | 89499225 | 200  | 89499037 | 13 | 102 | 10.8  |
| 9 | 89661900 | 89662025 | 125  | 89661912 | 12 | 60  | 10.8  |
| 9 | 89674725 | 89674750 | 25   | 89674737 | 13 | 13  | 0     |
| 9 | 89841650 | 89841775 | 125  | 89841712 | 13 | 61  | 8.7   |
| 9 | 89859050 | 89859200 | 150  | 89859187 | 13 | 71  | 0     |
| 9 | 90360675 | 90360725 | 50   | 90360712 | 14 | 27  | 4.3   |
| 9 | 90502200 | 90502275 | 75   | 90502212 | 12 | 36  | 6.5   |
| 9 | 90553300 | 90553325 | 25   | 90553312 | 12 | 12  | 2.2   |
| 9 | 90778550 | 90778575 | 25   | 90778562 | 12 | 12  | 0     |
| 9 | 90778850 | 90779025 | 175  | 90778887 | 14 | 90  | 15.2  |
| 9 | 91058800 | 91059350 | 550  | 91058912 | 22 | 379 | 19.5  |
| 9 | 92643100 | 92643200 | 100  | 92643112 | 12 | 46  | 0     |
| 9 | 92643525 | 92643575 | 50   | 92643537 | 13 | 26  | 0     |
| 9 | 92766550 | 92766600 | 50   | 92766562 | 14 | 26  | 4.3   |
| 9 | 92781475 | 92781525 | 50   | 92781487 | 13 | 25  | 4.3   |
| 9 | 92830525 | 92830825 | 300  | 92830637 | 21 | 193 | 17.3  |
| 9 | 92834575 | 92834600 | 25   | 92834587 | 12 | 12  | 2.2   |
| 9 | 93001975 | 93002075 | 100  | 93001987 | 14 | 55  | 8.7   |
| 9 | 93144375 | 93144400 | 25   | 93144387 | 12 | 12  | 2.2   |
| 9 | 93245575 | 93245925 | 350  | 93245637 | 16 | 176 | 10.8  |
| 9 | 93580325 | 93580350 | 25   | 93580337 | 12 | 12  | 2.2   |
| 9 | 93726375 | 93726450 | 75   | 93726387 | 12 | 36  | 2.2   |
| 9 | 93757125 | 93757175 | 50   | 93757162 | 13 | 25  | 4.3   |
| 9 | 93962375 | 93962575 | 200  | 93962462 | 14 | 102 | 0     |
| 9 | 93974075 | 93974175 | 100  | 93974162 | 18 | 64  | 8.7   |
| 9 | 93974500 | 93975750 | 1250 | 93975387 | 28 | 965 | 114.9 |
| 9 | 94580975 | 94581175 | 200  | 94581037 | 19 | 133 | 6.5   |
| 9 | 94606425 | 94606475 | 50   | 94606437 | 12 | 24  | 0     |
| 9 | 94639175 | 94639225 | 50   | 94639187 | 12 | 24  | 4.3   |
| 9 | 94718500 | 94718550 | 50   | 94718512 | 12 | 24  | 4.3   |
| 9 | 94982800 | 94982825 | 25   | 94982812 | 12 | 12  | 0     |
| 9 | 95012500 | 95012525 | 25   | 95012512 | 13 | 13  | 0     |
| 9 | 95138900 | 95139150 | 250  | 95138987 | 15 | 133 | 8.7   |
| 9 | 95195500 | 95195550 | 50   | 95195537 | 13 | 25  | 2.2   |
| 9 | 95219250 | 95219300 | 50   | 95219262 | 12 | 24  | 0     |

|   |           |           |     |           |    |     |      |
|---|-----------|-----------|-----|-----------|----|-----|------|
| 9 | 95222075  | 95222100  | 25  | 95222087  | 12 | 12  | 2.2  |
| 9 | 95426800  | 95426875  | 75  | 95426837  | 14 | 40  | 0    |
| 9 | 95524075  | 95524150  | 75  | 95524087  | 13 | 37  | 0    |
| 9 | 95711625  | 95711650  | 25  | 95711637  | 12 | 12  | 2.2  |
| 9 | 95728175  | 95728200  | 25  | 95728187  | 12 | 12  | 2.2  |
| 9 | 95752125  | 95752325  | 200 | 95752262  | 16 | 109 | 15.2 |
| 9 | 95752850  | 95753100  | 250 | 95752962  | 19 | 153 | 26   |
| 9 | 95753325  | 95753350  | 25  | 95753337  | 12 | 12  | 2.2  |
| 9 | 95761050  | 95761100  | 50  | 95761062  | 12 | 24  | 0    |
| 9 | 96374150  | 96374225  | 75  | 96374187  | 13 | 37  | 4.3  |
| 9 | 96885600  | 96885750  | 150 | 96885662  | 15 | 79  | 13   |
| 9 | 97139200  | 97139400  | 200 | 97139337  | 14 | 100 | 0    |
| 9 | 97153375  | 97153400  | 25  | 97153387  | 12 | 12  | 2.2  |
| 9 | 97359350  | 97359425  | 75  | 97359362  | 17 | 49  | 6.5  |
| 9 | 97429075  | 97429125  | 50  | 97429087  | 14 | 26  | 2.2  |
| 9 | 97464025  | 97464050  | 25  | 97464037  | 12 | 12  | 2.2  |
| 9 | 97479875  | 97479900  | 25  | 97479887  | 13 | 13  | 2.2  |
| 9 | 97494750  | 97494800  | 50  | 97494762  | 12 | 24  | 0    |
| 9 | 97837300  | 97837375  | 75  | 97837337  | 14 | 41  | 0    |
| 9 | 97839750  | 97839825  | 75  | 97839762  | 13 | 39  | 2.2  |
| 9 | 97974600  | 97974650  | 50  | 97974612  | 13 | 26  | 0    |
| 9 | 97992275  | 97992550  | 275 | 97992362  | 16 | 160 | 30.3 |
| 9 | 98006875  | 98006900  | 25  | 98006887  | 12 | 12  | 0    |
| 9 | 98115800  | 98116000  | 200 | 98115812  | 14 | 102 | 0    |
| 9 | 98597075  | 98597100  | 25  | 98597087  | 12 | 12  | 0    |
| 9 | 98846050  | 98846125  | 75  | 98846062  | 12 | 36  | 4.3  |
| 9 | 99023275  | 99023600  | 325 | 99023537  | 14 | 151 | 0    |
| 9 | 99285275  | 99285325  | 50  | 99285287  | 12 | 24  | 2.2  |
| 9 | 99307625  | 99307675  | 50  | 99307637  | 12 | 24  | 0    |
| 9 | 99522775  | 99522800  | 25  | 99522787  | 12 | 12  | 0    |
| 9 | 99544725  | 99544925  | 200 | 99544837  | 17 | 112 | 19.5 |
| 9 | 99565375  | 99565400  | 25  | 99565387  | 12 | 12  | 0    |
| 9 | 99653775  | 99653925  | 150 | 99653862  | 17 | 91  | 0    |
| 9 | 99657175  | 99657325  | 150 | 99657187  | 13 | 74  | 0    |
| 9 | 99663125  | 99663275  | 150 | 99663237  | 13 | 72  | 4.3  |
| 9 | 100082200 | 100082225 | 25  | 100082212 | 13 | 13  | 0    |
| 9 | 100215800 | 100215825 | 25  | 100215812 | 12 | 12  | 0    |
| 9 | 100309875 | 100309900 | 25  | 100309887 | 13 | 13  | 0    |
| 9 | 100317100 | 100317175 | 75  | 100317112 | 13 | 39  | 4.3  |
| 9 | 100383125 | 100383300 | 175 | 100383212 | 15 | 96  | 0    |
| 9 | 100407125 | 100407150 | 25  | 100407137 | 12 | 12  | 0    |
| 9 | 100426100 | 100426125 | 25  | 100426112 | 12 | 12  | 0    |
| 9 | 100530725 | 100530775 | 50  | 100530737 | 12 | 24  | 4.3  |
| 9 | 100759150 | 100759200 | 50  | 100759187 | 14 | 26  | 4.3  |
| 9 | 102521125 | 102521275 | 150 | 102521137 | 12 | 67  | 6.5  |
| 9 | 102533725 | 102533750 | 25  | 102533737 | 12 | 12  | 0    |
| 9 | 103211575 | 103211725 | 150 | 103211612 | 15 | 83  | 0    |
| 9 | 105801650 | 105801850 | 200 | 105801787 | 15 | 106 | 15.2 |
| 9 | 107259850 | 107260350 | 500 | 107260037 | 19 | 323 | 45.5 |
| 9 | 107625025 | 107625050 | 25  | 107625037 | 12 | 12  | 2.2  |
| 9 | 107860625 | 107860700 | 75  | 107860687 | 13 | 37  | 6.5  |
| 9 | 107860925 | 107860950 | 25  | 107860937 | 13 | 13  | 2.2  |
| 9 | 107861425 | 107861850 | 425 | 107861737 | 15 | 212 | 13   |
| 9 | 108662500 | 108662525 | 25  | 108662512 | 13 | 13  | 2.2  |
| 9 | 108914475 | 108914625 | 150 | 108914562 | 15 | 82  | 6.5  |
| 9 | 110214925 | 110215050 | 125 | 110214987 | 14 | 63  | 10.8 |
| 9 | 110461750 | 110461925 | 175 | 110461837 | 15 | 91  | 8.7  |
| 9 | 110489600 | 110489625 | 25  | 110489612 | 12 | 12  | 0    |
| 9 | 110498375 | 110498450 | 75  | 110498412 | 13 | 37  | 0    |
| 9 | 110555875 | 110555900 | 25  | 110555887 | 12 | 12  | 2.2  |
| 9 | 110572350 | 110572475 | 125 | 110572387 | 14 | 63  | 0    |
| 9 | 110576925 | 110576950 | 25  | 110576937 | 12 | 12  | 2.2  |
| 9 | 110594900 | 110595075 | 175 | 110594912 | 15 | 88  | 0    |
| 9 | 110612375 | 110612475 | 100 | 110612412 | 13 | 49  | 0    |
| 9 | 110955400 | 110955500 | 100 | 110955437 | 14 | 51  | 0    |
| 9 | 110956075 | 110956125 | 50  | 110956087 | 13 | 25  | 2.2  |
| 9 | 111031500 | 111031575 | 75  | 111031537 | 13 | 37  | 6.5  |
| 9 | 111145150 | 111145175 | 25  | 111145162 | 12 | 12  | 0    |
| 9 | 111302275 | 111302300 | 25  | 111302287 | 12 | 12  | 0    |
| 9 | 113130150 | 113130200 | 50  | 113130162 | 13 | 26  | 4.3  |
| 9 | 114736675 | 114736775 | 100 | 114736687 | 12 | 47  | 8.7  |
| 9 | 114747975 | 114748050 | 75  | 114748037 | 13 | 37  | 6.5  |
| 9 | 114864500 | 114864625 | 125 | 114864612 | 16 | 61  | 0    |
| 9 | 114864850 | 114865325 | 475 | 114864987 | 23 | 298 | 0    |
| 9 | 114892025 | 114892600 | 575 | 114892212 | 35 | 410 | 17.3 |



|   |           |           |     |           |    |     |      |
|---|-----------|-----------|-----|-----------|----|-----|------|
| 9 | 115152550 | 115152575 | 25  | 115152562 | 12 | 12  | 0    |
| 9 | 115489500 | 115489525 | 25  | 115489512 | 12 | 12  | 0    |
| 9 | 115499650 | 115499925 | 275 | 115499812 | 14 | 124 | 8.7  |
| 9 | 115591900 | 115592075 | 175 | 115592012 | 16 | 100 | 2.2  |
| 9 | 115595825 | 115595975 | 150 | 115595887 | 14 | 77  | 8.7  |
| 9 | 115644825 | 115645025 | 200 | 115644837 | 15 | 99  | 10.8 |
| 9 | 115653425 | 115653450 | 25  | 115653437 | 12 | 12  | 2.2  |
| 9 | 115938050 | 115938075 | 25  | 115938062 | 12 | 12  | 0    |
| 9 | 116319075 | 116319200 | 125 | 116319087 | 12 | 59  | 4.3  |
| 9 | 116521100 | 116521150 | 50  | 116521112 | 13 | 25  | 0    |
| 9 | 116637950 | 116638025 | 75  | 116637962 | 13 | 38  | 6.5  |
| 9 | 117176425 | 117176650 | 225 | 117176512 | 20 | 150 | 0    |
| 9 | 119653900 | 119654050 | 150 | 119653987 | 18 | 93  | 10.8 |
| 9 | 123172475 | 123172650 | 175 | 123172562 | 22 | 144 | 23.8 |
| 9 | 123214075 | 123214100 | 25  | 123214087 | 12 | 12  | 2.2  |
| 9 | 123248225 | 123248300 | 75  | 123248287 | 13 | 36  | 6.5  |
| 9 | 123553350 | 123553425 | 75  | 123553362 | 15 | 42  | 6.5  |
| 9 | 124015775 | 124015875 | 100 | 124015812 | 14 | 51  | 0    |
| 9 | 124022250 | 124022275 | 25  | 124022262 | 14 | 14  | 2.2  |
| 9 | 124591475 | 124591625 | 150 | 124591487 | 13 | 76  | 2.2  |
| 9 | 124603075 | 124603150 | 75  | 124603087 | 14 | 39  | 6.5  |
| 9 | 125689550 | 125689725 | 175 | 125689587 | 13 | 77  | 13   |
| 9 | 125772700 | 125772875 | 175 | 125772787 | 16 | 94  | 4.3  |
| 9 | 125773250 | 125773350 | 100 | 125773337 | 13 | 48  | 0    |
| 9 | 125773575 | 125773950 | 375 | 125773662 | 20 | 228 | 0    |
| 9 | 125774325 | 125774350 | 25  | 125774337 | 12 | 12  | 2.2  |
| 9 | 125775075 | 125775225 | 150 | 125775112 | 13 | 68  | 2.2  |
| 9 | 125776025 | 125776225 | 200 | 125776137 | 20 | 136 | 0    |
| 9 | 125800275 | 125800325 | 50  | 125800287 | 12 | 24  | 4.3  |
| 9 | 125800950 | 125800975 | 25  | 125800962 | 12 | 12  | 2.2  |
| 9 | 125801225 | 125801300 | 75  | 125801262 | 13 | 37  | 6.5  |
| 9 | 125802975 | 125803050 | 75  | 125803012 | 13 | 37  | 6.5  |
| 9 | 125855750 | 125855950 | 200 | 125855862 | 18 | 129 | 0    |
| 9 | 125856175 | 125856575 | 400 | 125856312 | 20 | 246 | 13   |
| 9 | 125863575 | 125863700 | 125 | 125863612 | 13 | 62  | 0    |
| 9 | 125870550 | 125870750 | 200 | 125870637 | 17 | 123 | 0    |
| 9 | 125899675 | 125899800 | 125 | 125899687 | 12 | 59  | 0    |
| 9 | 125900525 | 125900575 | 50  | 125900537 | 12 | 24  | 4.3  |
| 9 | 125923875 | 125923900 | 25  | 125923887 | 13 | 13  | 2.2  |
| 9 | 125985825 | 125985925 | 100 | 125985912 | 18 | 61  | 6.5  |
| 9 | 125998975 | 125999050 | 75  | 125998987 | 12 | 36  | 0    |
| 9 | 125999375 | 125999700 | 325 | 125999662 | 15 | 163 | 13   |
| 9 | 126217875 | 126218050 | 175 | 126217887 | 22 | 130 | 17.3 |
| 9 | 126241725 | 126241750 | 25  | 126241737 | 12 | 12  | 2.2  |
| 9 | 126305175 | 126305325 | 150 | 126305287 | 13 | 72  | 13   |
| 9 | 127808900 | 127808925 | 25  | 127808912 | 12 | 12  | 0    |
| 9 | 127809575 | 127809900 | 325 | 127809837 | 17 | 164 | 8.7  |
| 9 | 127810700 | 127810850 | 150 | 127810787 | 16 | 85  | 0    |
| 9 | 127811150 | 127811175 | 25  | 127811162 | 12 | 12  | 2.2  |
| 9 | 127823100 | 127823125 | 25  | 127823112 | 12 | 12  | 0    |
| 9 | 127826150 | 127826400 | 250 | 127826262 | 15 | 130 | 2.2  |
| 9 | 127846800 | 127846875 | 75  | 127846812 | 12 | 35  | 0    |
| 9 | 127848375 | 127848450 | 75  | 127848387 | 12 | 35  | 0    |
| 9 | 127896150 | 127896200 | 50  | 127896162 | 13 | 25  | 0    |
| 9 | 127901625 | 127901800 | 175 | 127901712 | 14 | 91  | 10.8 |
| 9 | 127952725 | 127952750 | 25  | 127952737 | 13 | 13  | 0    |
| 9 | 127959000 | 127959225 | 225 | 127959137 | 17 | 128 | 0    |
| 9 | 127962225 | 127962300 | 75  | 127962237 | 12 | 35  | 0    |
| 9 | 127967125 | 127967300 | 175 | 127967187 | 14 | 86  | 10.8 |
| 9 | 127972125 | 127972500 | 375 | 127972462 | 15 | 180 | 32.5 |
| 9 | 127972775 | 127972825 | 50  | 127972787 | 12 | 24  | 4.3  |
| 9 | 127975750 | 127975850 | 100 | 127975837 | 14 | 52  | 0    |
| 9 | 127993825 | 127993925 | 100 | 127993837 | 12 | 48  | 2.2  |
| 9 | 128021200 | 128021275 | 75  | 128021212 | 14 | 41  | 0    |
| 9 | 128024450 | 128024575 | 125 | 128024537 | 15 | 68  | 4.3  |
| 9 | 128034675 | 128034750 | 75  | 128034712 | 13 | 37  | 0    |
| 9 | 128036225 | 128036250 | 25  | 128036237 | 12 | 12  | 2.2  |
| 9 | 128040575 | 128040800 | 225 | 128040662 | 18 | 139 | 2.2  |
| 9 | 128047250 | 128047300 | 50  | 128047262 | 12 | 24  | 0    |
| 9 | 128347975 | 128348025 | 50  | 128347987 | 12 | 24  | 4.3  |
| 9 | 128348400 | 128348500 | 100 | 128348412 | 12 | 47  | 8.7  |
| 9 | 128367975 | 128368350 | 375 | 128368112 | 18 | 211 | 15.2 |
| 9 | 128380425 | 128380475 | 50  | 128380437 | 12 | 24  | 0    |
| 9 | 128390675 | 128390700 | 25  | 128390687 | 12 | 12  | 0    |
| 9 | 128413400 | 128413425 | 25  | 128413412 | 12 | 12  | 2.2  |

|   |           |           |     |           |    |     |      |
|---|-----------|-----------|-----|-----------|----|-----|------|
| 9 | 128415225 | 128415275 | 50  | 128415237 | 13 | 25  | 4.3  |
| 9 | 128416800 | 128416950 | 150 | 128416862 | 16 | 85  | 13   |
| 9 | 128525825 | 128526025 | 200 | 128525887 | 13 | 96  | 17.3 |
| 9 | 128553475 | 128553575 | 100 | 128553537 | 14 | 50  | 0    |
| 9 | 128620525 | 128620650 | 125 | 128620562 | 15 | 70  | 0    |
| 9 | 129026200 | 129026225 | 25  | 129026212 | 12 | 12  | 2.2  |
| 9 | 129186250 | 129186400 | 150 | 129186362 | 18 | 95  | 10.8 |
| 9 | 129187025 | 129187225 | 200 | 129187062 | 16 | 119 | 2.2  |
| 9 | 129325925 | 129326100 | 175 | 129325937 | 27 | 145 | 4.3  |
| 9 | 129651200 | 129651350 | 150 | 129651262 | 15 | 80  | 0    |
| 9 | 129652400 | 129652775 | 375 | 129652462 | 23 | 261 | 6.5  |
| 9 | 129935000 | 129935050 | 50  | 129935012 | 12 | 24  | 0    |
| 9 | 131111100 | 131111400 | 300 | 131111237 | 21 | 188 | 2.2  |
| 9 | 131212550 | 131212575 | 25  | 131212562 | 14 | 14  | 2.2  |
| 9 | 131277025 | 131277200 | 175 | 131277112 | 15 | 95  | 15.2 |
| 9 | 131316175 | 131316375 | 200 | 131316237 | 18 | 126 | 17.3 |
| 9 | 132066950 | 132067000 | 50  | 132066962 | 12 | 24  | 4.3  |
| 9 | 132087650 | 132087700 | 50  | 132087662 | 12 | 24  | 0    |
| 9 | 132273650 | 132273800 | 150 | 132273662 | 13 | 72  | 8.7  |
| 9 | 132279400 | 132279450 | 50  | 132279412 | 12 | 24  | 0    |
| 9 | 132360225 | 132360400 | 175 | 132360237 | 17 | 108 | 6.5  |
| 9 | 132360875 | 132360975 | 100 | 132360937 | 15 | 54  | 0    |
| 9 | 132392200 | 132392225 | 25  | 132392212 | 13 | 13  | 2.2  |
| 9 | 132420350 | 132420650 | 300 | 132420487 | 22 | 195 | 34.7 |
| 9 | 132517175 | 132517400 | 225 | 132517212 | 16 | 122 | 19.5 |
| 9 | 132816075 | 132816100 | 25  | 132816087 | 15 | 15  | 2.2  |
| 9 | 132820875 | 132820900 | 25  | 132820887 | 12 | 12  | 2.2  |
| 9 | 132864175 | 132864250 | 75  | 132864212 | 15 | 41  | 0    |
| 9 | 132866425 | 132866450 | 25  | 132866437 | 12 | 12  | 2.2  |
| 9 | 132881350 | 132881400 | 50  | 132881362 | 12 | 24  | 0    |
| 9 | 132885500 | 132885575 | 75  | 132885512 | 13 | 37  | 6.5  |
| 9 | 132899800 | 132899975 | 175 | 132899812 | 13 | 86  | 13   |
| 9 | 132908025 | 132908150 | 125 | 132908037 | 13 | 57  | 6.5  |
| 9 | 133181150 | 133181400 | 250 | 133181237 | 15 | 134 | 10.8 |
| 9 | 133194150 | 133194225 | 75  | 133194162 | 13 | 37  | 0    |
| 9 | 133410500 | 133410675 | 175 | 133410562 | 20 | 119 | 4.3  |
| 9 | 133410975 | 133411025 | 50  | 133410987 | 17 | 31  | 0    |
| 9 | 133411275 | 133411450 | 175 | 133411412 | 13 | 81  | 0    |
| 9 | 133413825 | 133413900 | 75  | 133413862 | 16 | 44  | 6.5  |
| 9 | 133419575 | 133419725 | 150 | 133419662 | 14 | 77  | 8.7  |
| 9 | 133681225 | 133681400 | 175 | 133681287 | 16 | 102 | 0    |
| 9 | 133691800 | 133691900 | 100 | 133691812 | 12 | 48  | 2.2  |
| 9 | 133698925 | 133699725 | 800 | 133699212 | 30 | 608 | 23.8 |
| 9 | 133711725 | 133711800 | 75  | 133711737 | 13 | 38  | 0    |
| 9 | 133712875 | 133713125 | 250 | 133712937 | 17 | 147 | 0    |
| 9 | 133974575 | 133974625 | 50  | 133974587 | 12 | 24  | 4.3  |
| 9 | 133995050 | 133995075 | 25  | 133995062 | 12 | 12  | 2.2  |
| 9 | 133999475 | 133999600 | 125 | 133999512 | 15 | 71  | 0    |
| 9 | 134005725 | 134005800 | 75  | 134005737 | 13 | 36  | 2.2  |
| 9 | 134038825 | 134038975 | 150 | 134038912 | 22 | 119 | 15.2 |
| 9 | 134058725 | 134058850 | 125 | 134058737 | 13 | 60  | 2.2  |
| 9 | 134063625 | 134064025 | 400 | 134063937 | 15 | 193 | 30.3 |
| 9 | 134064275 | 134064475 | 200 | 134064362 | 19 | 126 | 8.7  |
| 9 | 134064900 | 134064925 | 25  | 134064912 | 13 | 13  | 2.2  |
| 9 | 134067600 | 134067625 | 25  | 134067612 | 12 | 12  | 0    |
| 9 | 134106700 | 134106800 | 100 | 134106737 | 13 | 49  | 0    |
| 9 | 134311600 | 134311625 | 25  | 134311612 | 12 | 12  | 0    |
| 9 | 134333700 | 134333825 | 125 | 134333762 | 13 | 62  | 4.3  |
| 9 | 134338500 | 134338525 | 25  | 134338512 | 12 | 12  | 2.2  |
| 9 | 134358650 | 134358900 | 250 | 134358737 | 15 | 139 | 6.5  |
| 9 | 134383550 | 134383725 | 175 | 134383662 | 15 | 90  | 0    |
| 9 | 134398375 | 134398575 | 200 | 134398537 | 17 | 104 | 0    |
| 9 | 134400125 | 134400225 | 100 | 134400137 | 13 | 51  | 0    |
| 9 | 134582850 | 134582900 | 50  | 134582887 | 13 | 25  | 2.2  |
| 9 | 134609175 | 134609225 | 50  | 134609187 | 12 | 24  | 4.3  |
| 9 | 134823925 | 134824125 | 200 | 134824037 | 14 | 101 | 13   |
| 9 | 134838875 | 134838925 | 50  | 134838887 | 12 | 24  | 0    |
| 9 | 135022825 | 135022850 | 25  | 135022837 | 12 | 12  | 2.2  |
| 9 | 135053200 | 135053300 | 100 | 135053212 | 13 | 50  | 0    |
| 9 | 135076425 | 135076750 | 325 | 135076662 | 19 | 183 | 6.5  |
| 9 | 135090650 | 135090700 | 50  | 135090687 | 14 | 27  | 0    |
| 9 | 135114050 | 135114250 | 200 | 135114137 | 17 | 122 | 17.3 |
| 9 | 135119750 | 135119850 | 100 | 135119762 | 14 | 51  | 8.7  |
| 9 | 135121000 | 135121075 | 75  | 135121012 | 12 | 36  | 0    |
| 9 | 135121775 | 135122200 | 425 | 135121837 | 14 | 188 | 21.7 |

|   |           |           |      |           |    |     |      |
|---|-----------|-----------|------|-----------|----|-----|------|
| 9 | 135142825 | 135143050 | 225  | 135142862 | 18 | 142 | 13   |
| 9 | 135149900 | 135150175 | 275  | 135149987 | 16 | 144 | 17.3 |
| 9 | 135171475 | 135171625 | 150  | 135171562 | 13 | 73  | 2.2  |
| 9 | 135172200 | 135172250 | 50   | 135172212 | 12 | 24  | 4.3  |
| 9 | 135180850 | 135181075 | 225  | 135180887 | 19 | 157 | 26   |
| 9 | 135181450 | 135181550 | 100  | 135181462 | 12 | 48  | 0    |
| 9 | 135280850 | 135281000 | 150  | 135280937 | 17 | 91  | 8.7  |
| 9 | 135350300 | 135351350 | 1050 | 135351037 | 24 | 668 | 34.7 |
| 9 | 135351975 | 135352125 | 150  | 135352037 | 15 | 82  | 0    |
| 9 | 135352400 | 135352425 | 25   | 135352412 | 12 | 12  | 2.2  |
| 9 | 135353125 | 135353900 | 775  | 135353487 | 16 | 408 | 65   |
| 9 | 135356525 | 135356575 | 50   | 135356562 | 13 | 25  | 0    |
| 9 | 135394875 | 135394925 | 50   | 135394887 | 13 | 26  | 4.3  |
| 9 | 135398500 | 135398625 | 125  | 135398537 | 14 | 65  | 0    |
| 9 | 135418150 | 135418550 | 400  | 135418237 | 18 | 236 | 17.3 |
| 9 | 135428875 | 135428925 | 50   | 135428887 | 12 | 24  | 4.3  |
| 9 | 135442250 | 135442425 | 175  | 135442262 | 13 | 86  | 0    |
| 9 | 135443475 | 135443775 | 300  | 135443537 | 31 | 291 | 43.3 |
| 9 | 135450925 | 135450950 | 25   | 135450937 | 12 | 12  | 2.2  |
| 9 | 135451575 | 135451600 | 25   | 135451587 | 12 | 12  | 0    |
| 9 | 135454825 | 135455000 | 175  | 135454862 | 17 | 99  | 8.7  |
| 9 | 135503575 | 135503650 | 75   | 135503587 | 13 | 39  | 0    |
| 9 | 135527000 | 135527200 | 200  | 135527037 | 14 | 101 | 0    |
| 9 | 135527550 | 135527975 | 425  | 135527562 | 14 | 192 | 10.8 |
| 9 | 135622700 | 135622725 | 25   | 135622712 | 12 | 12  | 2.2  |
| 9 | 135623250 | 135623425 | 175  | 135623312 | 14 | 82  | 15.2 |
| 9 | 135770650 | 135770750 | 100  | 135770687 | 13 | 48  | 0    |
| 9 | 135955225 | 135955550 | 325  | 135955412 | 21 | 201 | 4.3  |
| 9 | 135956700 | 135956725 | 25   | 135956712 | 12 | 12  | 2.2  |
| 9 | 135956950 | 135956975 | 25   | 135956962 | 14 | 14  | 2.2  |
| 9 | 135958475 | 135958575 | 100  | 135958487 | 17 | 64  | 6.5  |
| 9 | 136277550 | 136277725 | 175  | 136277612 | 17 | 98  | 0    |
| 9 | 136279825 | 136280200 | 375  | 136279837 | 13 | 166 | 0    |
| 9 | 136280650 | 136280800 | 150  | 136280762 | 21 | 104 | 2.2  |
| 9 | 136281950 | 136282050 | 100  | 136281987 | 13 | 49  | 8.7  |
| 9 | 136289625 | 136289750 | 125  | 136289662 | 14 | 67  | 10.8 |
| 9 | 136309900 | 136310025 | 125  | 136309912 | 23 | 92  | 13   |
| 9 | 136310425 | 136311225 | 800  | 136310987 | 16 | 409 | 34.7 |
| 9 | 136337550 | 136337725 | 175  | 136337687 | 13 | 83  | 10.8 |
| 9 | 136338275 | 136338300 | 25   | 136338287 | 12 | 12  | 0    |
| 9 | 136338575 | 136338700 | 125  | 136338587 | 14 | 57  | 10.8 |
| 9 | 136340025 | 136340800 | 775  | 136340737 | 17 | 404 | 32.5 |
| 9 | 136345275 | 136345300 | 25   | 136345287 | 12 | 12  | 2.2  |
| 9 | 136480000 | 136480025 | 25   | 136480012 | 12 | 12  | 2.2  |
| 9 | 136480550 | 136480750 | 200  | 136480637 | 22 | 140 | 15.2 |
| 9 | 136493350 | 136493675 | 325  | 136493487 | 20 | 210 | 6.5  |
| 9 | 136513500 | 136513525 | 25   | 136513512 | 12 | 12  | 0    |
| 9 | 136514000 | 136514125 | 125  | 136514087 | 15 | 70  | 0    |
| 9 | 136514475 | 136514675 | 200  | 136514487 | 12 | 92  | 0    |
| 9 | 136518900 | 136519000 | 100  | 136518962 | 14 | 52  | 0    |
| 9 | 136533050 | 136533250 | 200  | 136533062 | 16 | 99  | 0    |
| 9 | 136551200 | 136551300 | 100  | 136551237 | 13 | 49  | 4.3  |
| 9 | 136552825 | 136552925 | 100  | 136552837 | 12 | 48  | 8.7  |
| 9 | 136558900 | 136559050 | 150  | 136559012 | 15 | 83  | 6.5  |
| 9 | 136559550 | 136559625 | 75   | 136559612 | 14 | 39  | 4.3  |
| 9 | 136559900 | 136559925 | 25   | 136559912 | 12 | 12  | 0    |
| 9 | 136562375 | 136562500 | 125  | 136562412 | 13 | 62  | 10.8 |
| 9 | 136596275 | 136596475 | 200  | 136596312 | 21 | 128 | 6.5  |
| 9 | 136598600 | 136598750 | 150  | 136598737 | 18 | 87  | 0    |
| 9 | 136618075 | 136618200 | 125  | 136618087 | 12 | 60  | 2.2  |
| 9 | 136632950 | 136632975 | 25   | 136632962 | 12 | 12  | 2.2  |
| 9 | 136776200 | 136776400 | 200  | 136776337 | 16 | 116 | 15.2 |
| 9 | 136779100 | 136779125 | 25   | 136779112 | 13 | 13  | 0    |
| 9 | 136779700 | 136779850 | 150  | 136779762 | 15 | 81  | 2.2  |
| 9 | 136882400 | 136882600 | 200  | 136882437 | 13 | 97  | 0    |
| 9 | 136918250 | 136918300 | 50   | 136918262 | 12 | 24  | 4.3  |
| 9 | 136919650 | 136919750 | 100  | 136919687 | 13 | 49  | 2.2  |
| 9 | 136923300 | 136923600 | 300  | 136923462 | 14 | 146 | 0    |
| 9 | 136924825 | 136924850 | 25   | 136924837 | 12 | 12  | 2.2  |
| 9 | 136968000 | 136968025 | 25   | 136968012 | 12 | 12  | 0    |
| 9 | 137151450 | 137151475 | 25   | 137151462 | 12 | 12  | 0    |
| 9 | 137257400 | 137257500 | 100  | 137257462 | 14 | 50  | 2.2  |
| 9 | 137290975 | 137291000 | 25   | 137290987 | 12 | 12  | 0    |
| 9 | 137562850 | 137562950 | 100  | 137562862 | 12 | 48  | 8.7  |
| 9 | 137658225 | 137658325 | 100  | 137658287 | 13 | 49  | 0    |

|   |           |           |     |           |    |     |      |
|---|-----------|-----------|-----|-----------|----|-----|------|
| 9 | 137682200 | 137682325 | 125 | 137682287 | 15 | 67  | 4.3  |
| 9 | 137692850 | 137692925 | 75  | 137692862 | 14 | 38  | 2.2  |
| 9 | 137705050 | 137705150 | 100 | 137705062 | 12 | 45  | 8.7  |
| 9 | 137712850 | 137712900 | 50  | 137712862 | 13 | 26  | 4.3  |
| 9 | 137722850 | 137723425 | 575 | 137723262 | 19 | 296 | 0    |
| 9 | 137787250 | 137787275 | 25  | 137787262 | 12 | 12  | 0    |
| 9 | 137798250 | 137798450 | 200 | 137798262 | 13 | 94  | 0    |
| 9 | 137805800 | 137806300 | 500 | 137806212 | 22 | 315 | 17.3 |
| 9 | 137940500 | 137940525 | 25  | 137940512 | 12 | 12  | 2.2  |
| 9 | 138156875 | 138157025 | 150 | 138157012 | 13 | 72  | 6.5  |
| 9 | 138165500 | 138166025 | 525 | 138165887 | 17 | 290 | 52   |
| 9 | 138178325 | 138178375 | 50  | 138178337 | 12 | 24  | 0    |
| 9 | 138186775 | 138186825 | 50  | 138186812 | 13 | 25  | 0    |
| 9 | 138615075 | 138615100 | 25  | 138615087 | 13 | 13  | 2.2  |
| 9 | 138645175 | 138645200 | 25  | 138645187 | 12 | 12  | 0    |
| 9 | 138645450 | 138645500 | 50  | 138645462 | 12 | 24  | 0    |
| 9 | 138647125 | 138647400 | 275 | 138647212 | 17 | 167 | 15.2 |
| 9 | 138770525 | 138770775 | 250 | 138770562 | 17 | 157 | 21.7 |
| 9 | 138787725 | 138787925 | 200 | 138787862 | 17 | 115 | 17.3 |
| 9 | 138792450 | 138792475 | 25  | 138792462 | 12 | 12  | 0    |
| 9 | 138860700 | 138860725 | 25  | 138860712 | 13 | 13  | 0    |
| 9 | 139116225 | 139116575 | 350 | 139116387 | 27 | 288 | 17.3 |
| 9 | 139117050 | 139117150 | 100 | 139117062 | 14 | 54  | 8.7  |
| 9 | 139153100 | 139153125 | 25  | 139153112 | 12 | 12  | 0    |
| 9 | 139188425 | 139188450 | 25  | 139188437 | 12 | 12  | 0    |
| 9 | 139308500 | 139308600 | 100 | 139308537 | 14 | 53  | 2.2  |
| 9 | 139308975 | 139309000 | 25  | 139308987 | 14 | 14  | 2.2  |
| 9 | 139344375 | 139344475 | 100 | 139344412 | 14 | 50  | 2.2  |
| 9 | 139344775 | 139344800 | 25  | 139344787 | 13 | 13  | 0    |
| 9 | 139366075 | 139366150 | 75  | 139366112 | 13 | 37  | 6.5  |
| 9 | 139368000 | 139368100 | 100 | 139368037 | 15 | 57  | 0    |
| 9 | 139370175 | 139370350 | 175 | 139370237 | 14 | 80  | 0    |
| 9 | 139371100 | 139371250 | 150 | 139371137 | 14 | 76  | 13   |
| 9 | 139372300 | 139372325 | 25  | 139372312 | 13 | 13  | 2.2  |
| 9 | 139372575 | 139372625 | 50  | 139372587 | 13 | 25  | 2.2  |
| 9 | 139373925 | 139374175 | 250 | 139374012 | 18 | 155 | 17.3 |
| 9 | 139379875 | 139380300 | 425 | 139380137 | 20 | 251 | 28.2 |
| 9 | 139413225 | 139413300 | 75  | 139413237 | 14 | 41  | 0    |
| 9 | 139488625 | 139488675 | 50  | 139488662 | 14 | 26  | 4.3  |
| 9 | 139901250 | 139901400 | 150 | 139901312 | 14 | 77  | 2.2  |
| 9 | 139905150 | 139905175 | 25  | 139905162 | 12 | 12  | 2.2  |
| 9 | 139915025 | 139915100 | 75  | 139915062 | 14 | 39  | 2.2  |
| 9 | 139915350 | 139915375 | 25  | 139915362 | 13 | 13  | 2.2  |
| 9 | 139930825 | 139930875 | 50  | 139930862 | 13 | 25  | 4.3  |
| 9 | 139963100 | 139963275 | 175 | 139963162 | 14 | 88  | 8.7  |
| 9 | 140000625 | 140000700 | 75  | 140000637 | 12 | 35  | 0    |
| 9 | 140113650 | 140113725 | 75  | 140113662 | 12 | 35  | 0    |
| 8 | 217925    | 218075    | 150 | 217962    | 15 | 84  | 10.8 |
| 8 | 223150    | 223275    | 125 | 223187    | 13 | 61  | 0    |
| 8 | 265200    | 265350    | 150 | 265262    | 15 | 79  | 2.2  |
| 8 | 275100    | 275125    | 25  | 275112    | 12 | 12  | 0    |
| 8 | 286925    | 286950    | 25  | 286937    | 12 | 12  | 0    |
| 8 | 313025    | 313225    | 200 | 313062    | 16 | 115 | 0    |
| 8 | 314825    | 315225    | 400 | 315087    | 13 | 178 | 32.5 |
| 8 | 318850    | 318925    | 75  | 318887    | 14 | 40  | 6.5  |
| 8 | 321675    | 321725    | 50  | 321687    | 12 | 24  | 4.3  |
| 8 | 322775    | 322800    | 25  | 322787    | 12 | 12  | 2.2  |
| 8 | 443025    | 443300    | 275 | 443137    | 17 | 164 | 17.3 |
| 8 | 493175    | 493225    | 50  | 493187    | 12 | 24  | 0    |
| 8 | 514675    | 514775    | 100 | 514712    | 15 | 54  | 8.7  |
| 8 | 517625    | 517675    | 50  | 517637    | 12 | 24  | 0    |
| 8 | 518975    | 519150    | 175 | 519062    | 16 | 101 | 8.7  |
| 8 | 519450    | 519475    | 25  | 519462    | 12 | 12  | 2.2  |
| 8 | 519750    | 519800    | 50  | 519762    | 12 | 24  | 4.3  |
| 8 | 557225    | 557350    | 125 | 557312    | 16 | 67  | 6.5  |
| 8 | 557575    | 558250    | 675 | 557862    | 26 | 549 | 0    |
| 8 | 567200    | 567275    | 75  | 567212    | 16 | 42  | 6.5  |
| 8 | 569075    | 569100    | 25  | 569087    | 12 | 12  | 2.2  |
| 8 | 569425    | 569475    | 50  | 569437    | 13 | 25  | 4.3  |
| 8 | 569750    | 569775    | 25  | 569762    | 14 | 14  | 2.2  |
| 8 | 570225    | 570375    | 150 | 570337    | 15 | 81  | 4.3  |
| 8 | 570750    | 570875    | 125 | 570787    | 14 | 67  | 6.5  |
| 8 | 572825    | 572975    | 150 | 572937    | 16 | 85  | 0    |
| 8 | 575800    | 575850    | 50  | 575812    | 14 | 27  | 2.2  |
| 8 | 576950    | 576975    | 25  | 576962    | 13 | 13  | 2.2  |

|   |         |         |     |         |    |     |      |
|---|---------|---------|-----|---------|----|-----|------|
| 8 | 581675  | 581750  | 75  | 581687  | 14 | 40  | 2.2  |
| 8 | 583000  | 583100  | 100 | 583062  | 16 | 53  | 8.7  |
| 8 | 583350  | 583475  | 125 | 583362  | 14 | 66  | 0    |
| 8 | 592075  | 592200  | 125 | 592187  | 16 | 67  | 0    |
| 8 | 594775  | 594900  | 125 | 594812  | 13 | 60  | 10.8 |
| 8 | 596625  | 596750  | 125 | 596637  | 13 | 62  | 8.7  |
| 8 | 684025  | 684250  | 225 | 684162  | 18 | 136 | 6.5  |
| 8 | 684725  | 684750  | 25  | 684737  | 12 | 12  | 2.2  |
| 8 | 688700  | 688725  | 25  | 688712  | 12 | 12  | 2.2  |
| 8 | 692325  | 692400  | 75  | 692337  | 14 | 40  | 6.5  |
| 8 | 696250  | 696325  | 75  | 696287  | 13 | 37  | 6.5  |
| 8 | 697875  | 697925  | 50  | 697912  | 14 | 26  | 0    |
| 8 | 699350  | 699525  | 175 | 699387  | 16 | 100 | 0    |
| 8 | 725950  | 725975  | 25  | 725962  | 14 | 14  | 2.2  |
| 8 | 742150  | 742325  | 175 | 742237  | 17 | 103 | 2.2  |
| 8 | 798550  | 798650  | 100 | 798637  | 14 | 51  | 4.3  |
| 8 | 800925  | 801100  | 175 | 801087  | 13 | 81  | 0    |
| 8 | 899475  | 899525  | 50  | 899487  | 15 | 29  | 2.2  |
| 8 | 904875  | 904950  | 75  | 904912  | 13 | 37  | 0    |
| 8 | 944675  | 944725  | 50  | 944687  | 12 | 24  | 2.2  |
| 8 | 977100  | 977975  | 875 | 977537  | 29 | 685 | 78   |
| 8 | 1003525 | 1003550 | 25  | 1003537 | 12 | 12  | 2.2  |
| 8 | 1075775 | 1075900 | 125 | 1075787 | 14 | 62  | 10.8 |
| 8 | 1076600 | 1076850 | 250 | 1076762 | 13 | 118 | 0    |
| 8 | 1118100 | 1118125 | 25  | 1118112 | 12 | 12  | 0    |
| 8 | 1172650 | 1172775 | 125 | 1172712 | 15 | 66  | 4.3  |
| 8 | 1184275 | 1184375 | 100 | 1184287 | 17 | 66  | 0    |
| 8 | 1184650 | 1184675 | 25  | 1184662 | 15 | 15  | 2.2  |
| 8 | 1189250 | 1189825 | 575 | 1189637 | 20 | 329 | 36.8 |
| 8 | 1219500 | 1219600 | 100 | 1219537 | 13 | 49  | 4.3  |
| 8 | 1262000 | 1262025 | 25  | 1262012 | 12 | 12  | 2.2  |
| 8 | 1295625 | 1295650 | 25  | 1295637 | 12 | 12  | 2.2  |
| 8 | 1296250 | 1296475 | 225 | 1296287 | 16 | 123 | 8.7  |
| 8 | 1313800 | 1314200 | 400 | 1314012 | 31 | 361 | 8.7  |
| 8 | 1348375 | 1348525 | 150 | 1348462 | 16 | 84  | 6.5  |
| 8 | 1374775 | 1374800 | 25  | 1374787 | 13 | 13  | 2.2  |
| 8 | 1375150 | 1375350 | 200 | 1375312 | 16 | 110 | 13   |
| 8 | 1377550 | 1377625 | 75  | 1377587 | 16 | 46  | 6.5  |
| 8 | 1385225 | 1385425 | 200 | 1385362 | 16 | 109 | 6.5  |
| 8 | 1483200 | 1483350 | 150 | 1483212 | 12 | 70  | 13   |
| 8 | 1559125 | 1559175 | 50  | 1559162 | 13 | 25  | 4.3  |
| 8 | 1560075 | 1560125 | 50  | 1560087 | 12 | 24  | 0    |
| 8 | 1598350 | 1598450 | 100 | 1598362 | 12 | 45  | 8.7  |
| 8 | 1606500 | 1606550 | 50  | 1606537 | 14 | 26  | 4.3  |
| 8 | 1612975 | 1613150 | 175 | 1613037 | 16 | 98  | 0    |
| 8 | 1617600 | 1617625 | 25  | 1617612 | 12 | 12  | 0    |
| 8 | 1624500 | 1624525 | 25  | 1624512 | 12 | 12  | 0    |
| 8 | 1627975 | 1628025 | 50  | 1627987 | 12 | 24  | 0    |
| 8 | 1632800 | 1632825 | 25  | 1632812 | 12 | 12  | 0    |
| 8 | 1634375 | 1634575 | 200 | 1634437 | 16 | 108 | 13   |
| 8 | 1638450 | 1638475 | 25  | 1638462 | 12 | 12  | 2.2  |
| 8 | 1677475 | 1677600 | 125 | 1677587 | 13 | 58  | 6.5  |
| 8 | 1677875 | 1677950 | 75  | 1677912 | 17 | 47  | 2.2  |
| 8 | 1731825 | 1731950 | 125 | 1731862 | 14 | 65  | 0    |
| 8 | 1854650 | 1854800 | 150 | 1854662 | 19 | 99  | 6.5  |
| 8 | 1855025 | 1855100 | 75  | 1855037 | 14 | 39  | 6.5  |
| 8 | 1918975 | 1919000 | 25  | 1918987 | 12 | 12  | 2.2  |
| 8 | 1920750 | 1920775 | 25  | 1920762 | 12 | 12  | 2.2  |
| 8 | 1933100 | 1933275 | 175 | 1933162 | 17 | 100 | 0    |
| 8 | 1946375 | 1946425 | 50  | 1946387 | 12 | 24  | 4.3  |
| 8 | 1953925 | 1954225 | 300 | 1953987 | 16 | 176 | 34.7 |
| 8 | 1962425 | 1962500 | 75  | 1962462 | 15 | 44  | 0    |
| 8 | 1971900 | 1972000 | 100 | 1971937 | 13 | 50  | 0    |
| 8 | 1972425 | 1972575 | 150 | 1972437 | 13 | 76  | 6.5  |
| 8 | 1990975 | 1991000 | 25  | 1990987 | 13 | 13  | 2.2  |
| 8 | 2007375 | 2007400 | 25  | 2007387 | 12 | 12  | 2.2  |
| 8 | 2230900 | 2231150 | 250 | 2231037 | 20 | 151 | 26   |
| 8 | 2283650 | 2283675 | 25  | 2283662 | 12 | 12  | 2.2  |
| 8 | 2529375 | 2529425 | 50  | 2529387 | 12 | 24  | 0    |
| 8 | 2712500 | 2712525 | 25  | 2712512 | 12 | 12  | 2.2  |
| 8 | 2720000 | 2720075 | 75  | 2720037 | 14 | 40  | 0    |
| 8 | 2727900 | 2728000 | 100 | 2727912 | 14 | 56  | 2.2  |
| 8 | 2736375 | 2736400 | 25  | 2736387 | 12 | 12  | 0    |
| 8 | 2766675 | 2766700 | 25  | 2766687 | 12 | 12  | 2.2  |
| 8 | 3028575 | 3028675 | 100 | 3028637 | 15 | 54  | 0    |

|   |          |          |     |          |    |     |      |
|---|----------|----------|-----|----------|----|-----|------|
| 8 | 3034975  | 3035025  | 50  | 3034987  | 12 | 24  | 0    |
| 8 | 3491575  | 3491625  | 50  | 3491587  | 13 | 25  | 0    |
| 8 | 3550200  | 3550225  | 25  | 3550212  | 12 | 12  | 0    |
| 8 | 3745300  | 3745350  | 50  | 3745312  | 12 | 24  | 0    |
| 8 | 5897350  | 5897400  | 50  | 5897362  | 12 | 24  | 0    |
| 8 | 6057275  | 6057325  | 50  | 6057312  | 14 | 27  | 4.3  |
| 8 | 6058100  | 6058125  | 25  | 6058112  | 12 | 12  | 0    |
| 8 | 6172375  | 6172450  | 75  | 6172387  | 13 | 38  | 4.3  |
| 8 | 6206000  | 6206025  | 25  | 6206012  | 12 | 12  | 2.2  |
| 8 | 6411875  | 6412175  | 300 | 6412112  | 18 | 171 | 8.7  |
| 8 | 6451450  | 6451475  | 25  | 6451462  | 12 | 12  | 2.2  |
| 8 | 6493100  | 6493125  | 25  | 6493112  | 15 | 15  | 2.2  |
| 8 | 6650875  | 6651075  | 200 | 6650912  | 14 | 101 | 0    |
| 8 | 6651975  | 6652425  | 450 | 6652087  | 16 | 232 | 45.5 |
| 8 | 6655975  | 6656000  | 25  | 6655987  | 12 | 12  | 0    |
| 8 | 6656325  | 6656425  | 100 | 6656412  | 17 | 58  | 8.7  |
| 8 | 6716725  | 6716775  | 50  | 6716737  | 13 | 25  | 0    |
| 8 | 8257075  | 8257450  | 375 | 8257162  | 26 | 289 | 17.3 |
| 8 | 8364500  | 8364625  | 125 | 8364562  | 15 | 68  | 0    |
| 8 | 8397625  | 8397750  | 125 | 8397687  | 14 | 67  | 10.8 |
| 8 | 8401525  | 8401550  | 25  | 8401537  | 12 | 12  | 2.2  |
| 8 | 8602425  | 8602450  | 25  | 8602437  | 12 | 12  | 0    |
| 8 | 8609625  | 8609925  | 300 | 8609787  | 23 | 205 | 32.5 |
| 8 | 8618475  | 8618550  | 75  | 8618487  | 12 | 36  | 6.5  |
| 8 | 8655550  | 8655700  | 150 | 8655587  | 15 | 84  | 0    |
| 8 | 8847575  | 8847600  | 25  | 8847587  | 12 | 12  | 0    |
| 8 | 8854875  | 8855125  | 250 | 8855037  | 13 | 110 | 0    |
| 8 | 8873025  | 8873200  | 175 | 8873087  | 16 | 102 | 15.2 |
| 8 | 9132850  | 9132875  | 25  | 9132862  | 12 | 12  | 0    |
| 8 | 9144800  | 9144875  | 75  | 9144812  | 17 | 44  | 4.3  |
| 8 | 9172200  | 9172225  | 25  | 9172212  | 12 | 12  | 2.2  |
| 8 | 9189000  | 9189125  | 125 | 9189037  | 16 | 72  | 0    |
| 8 | 9190300  | 9190325  | 25  | 9190312  | 13 | 13  | 2.2  |
| 8 | 9202900  | 9203025  | 125 | 9202912  | 12 | 56  | 0    |
| 8 | 9220625  | 9220700  | 75  | 9220662  | 13 | 38  | 6.5  |
| 8 | 9220950  | 9221100  | 150 | 9220962  | 19 | 104 | 19.5 |
| 8 | 9227925  | 9227975  | 50  | 9227937  | 12 | 24  | 0    |
| 8 | 9267025  | 9267050  | 25  | 9267037  | 12 | 12  | 0    |
| 8 | 9314375  | 9314400  | 25  | 9314387  | 12 | 12  | 0    |
| 8 | 9341975  | 9342225  | 250 | 9342037  | 15 | 133 | 6.5  |
| 8 | 9345850  | 9345925  | 75  | 9345912  | 13 | 37  | 0    |
| 8 | 9389750  | 9389875  | 125 | 9389762  | 12 | 55  | 8.7  |
| 8 | 9694300  | 9694775  | 475 | 9694512  | 37 | 467 | 43.3 |
| 8 | 9695075  | 9695300  | 225 | 9695162  | 19 | 151 | 17.3 |
| 8 | 9695550  | 9695650  | 100 | 9695562  | 12 | 47  | 6.5  |
| 8 | 9707225  | 9707500  | 275 | 9707362  | 20 | 175 | 26   |
| 8 | 10007825 | 10007925 | 100 | 10007837 | 12 | 46  | 8.7  |
| 8 | 10424625 | 10424675 | 50  | 10424637 | 13 | 25  | 4.3  |
| 8 | 10446425 | 10446675 | 250 | 10446587 | 15 | 128 | 8.7  |
| 8 | 10460700 | 10460875 | 175 | 10460737 | 14 | 85  | 6.5  |
| 8 | 10487925 | 10488100 | 175 | 10487962 | 14 | 89  | 8.7  |
| 8 | 10505325 | 10505450 | 125 | 10505337 | 16 | 75  | 8.7  |
| 8 | 10525900 | 10525975 | 75  | 10525912 | 12 | 36  | 6.5  |
| 8 | 10527700 | 10527800 | 100 | 10527712 | 13 | 50  | 2.2  |
| 8 | 10529275 | 10529300 | 25  | 10529287 | 12 | 12  | 0    |
| 8 | 10540775 | 10540900 | 125 | 10540787 | 13 | 62  | 4.3  |
| 8 | 10542050 | 10542075 | 25  | 10542062 | 12 | 12  | 0    |
| 8 | 10578075 | 10578225 | 150 | 10578162 | 14 | 79  | 2.2  |
| 8 | 10585175 | 10585550 | 375 | 10585362 | 14 | 176 | 13   |
| 8 | 10586350 | 10586375 | 25  | 10586362 | 13 | 13  | 2.2  |
| 8 | 10588025 | 10588250 | 225 | 10588187 | 17 | 133 | 8.7  |
| 8 | 10591050 | 10591075 | 25  | 10591062 | 12 | 12  | 0    |
| 8 | 10592700 | 10592900 | 200 | 10592762 | 16 | 110 | 0    |
| 8 | 10595050 | 10595100 | 50  | 10595062 | 13 | 25  | 4.3  |
| 8 | 10597025 | 10597050 | 25  | 10597037 | 12 | 12  | 0    |
| 8 | 10597675 | 10597875 | 200 | 10597787 | 16 | 115 | 2.2  |
| 8 | 10604400 | 10604425 | 25  | 10604412 | 13 | 13  | 2.2  |
| 8 | 10620625 | 10620750 | 125 | 10620712 | 15 | 70  | 10.8 |
| 8 | 10630600 | 10630750 | 150 | 10630712 | 14 | 75  | 0    |
| 8 | 10751925 | 10752825 | 900 | 10752737 | 22 | 519 | 62.8 |
| 8 | 10778050 | 10778200 | 150 | 10778162 | 14 | 76  | 0    |
| 8 | 10780050 | 10780250 | 200 | 10780137 | 15 | 109 | 10.8 |
| 8 | 10794175 | 10794225 | 50  | 10794187 | 12 | 24  | 4.3  |
| 8 | 10794475 | 10794550 | 75  | 10794512 | 13 | 37  | 0    |
| 8 | 10799875 | 10799900 | 25  | 10799887 | 12 | 12  | 0    |

|   |          |          |     |          |    |     |      |
|---|----------|----------|-----|----------|----|-----|------|
| 8 | 10815975 | 10816025 | 50  | 10816012 | 14 | 27  | 4.3  |
| 8 | 10816600 | 10816625 | 25  | 10816612 | 12 | 12  | 0    |
| 8 | 10934200 | 10934250 | 50  | 10934237 | 13 | 25  | 4.3  |
| 8 | 10980650 | 10980700 | 50  | 10980662 | 12 | 24  | 4.3  |
| 8 | 10993175 | 10993250 | 75  | 10993187 | 12 | 35  | 4.3  |
| 8 | 10994850 | 10995000 | 150 | 10994887 | 14 | 78  | 0    |
| 8 | 10995925 | 10995950 | 25  | 10995937 | 12 | 12  | 0    |
| 8 | 11096800 | 11096900 | 100 | 11096812 | 25 | 72  | 8.7  |
| 8 | 11124400 | 11124425 | 25  | 11124412 | 12 | 12  | 0    |
| 8 | 11150950 | 11151075 | 125 | 11150962 | 12 | 60  | 2.2  |
| 8 | 11235325 | 11235350 | 25  | 11235337 | 12 | 12  | 0    |
| 8 | 11244050 | 11244100 | 50  | 11244062 | 13 | 25  | 0    |
| 8 | 11245200 | 11245250 | 50  | 11245212 | 12 | 24  | 0    |
| 8 | 11259850 | 11259875 | 25  | 11259862 | 12 | 12  | 2.2  |
| 8 | 11266750 | 11266975 | 225 | 11266887 | 19 | 149 | 0    |
| 8 | 11278825 | 11278975 | 150 | 11278837 | 14 | 79  | 6.5  |
| 8 | 11491775 | 11491800 | 25  | 11491787 | 14 | 14  | 2.2  |
| 8 | 11518350 | 11518400 | 50  | 11518362 | 12 | 24  | 0    |
| 8 | 11553000 | 11553075 | 75  | 11553012 | 12 | 35  | 0    |
| 8 | 11553775 | 11553975 | 200 | 11553837 | 16 | 110 | 0    |
| 8 | 11575325 | 11575475 | 150 | 11575337 | 30 | 131 | 21.7 |
| 8 | 11575725 | 11576000 | 275 | 11575962 | 27 | 234 | 32.5 |
| 8 | 11576225 | 11576325 | 100 | 11576237 | 19 | 67  | 2.2  |
| 8 | 11578525 | 11578600 | 75  | 11578537 | 13 | 37  | 2.2  |
| 8 | 11815475 | 11815525 | 50  | 11815512 | 13 | 25  | 2.2  |
| 8 | 11818475 | 11818600 | 125 | 11818487 | 15 | 73  | 6.5  |
| 8 | 11844975 | 11845000 | 25  | 11844987 | 12 | 12  | 2.2  |
| 8 | 11874900 | 11875075 | 175 | 11874962 | 15 | 96  | 10.8 |
| 8 | 11917475 | 11917775 | 300 | 11917662 | 15 | 158 | 13   |
| 8 | 12024300 | 12024400 | 100 | 12024312 | 14 | 53  | 4.3  |
| 8 | 12026725 | 12026775 | 50  | 12026762 | 14 | 26  | 4.3  |
| 8 | 12027300 | 12027350 | 50  | 12027337 | 14 | 27  | 0    |
| 8 | 12028575 | 12029075 | 500 | 12028612 | 18 | 268 | 0    |
| 8 | 12350100 | 12350125 | 25  | 12350112 | 14 | 14  | 2.2  |
| 8 | 12669900 | 12669950 | 50  | 12669912 | 12 | 24  | 4.3  |
| 8 | 12701750 | 12701850 | 100 | 12701837 | 14 | 52  | 2.2  |
| 8 | 12713350 | 12713525 | 175 | 12713512 | 13 | 82  | 4.3  |
| 8 | 12734625 | 12734675 | 50  | 12734637 | 13 | 25  | 4.3  |
| 8 | 12772900 | 12773000 | 100 | 12772962 | 13 | 49  | 0    |
| 8 | 12833050 | 12833100 | 50  | 12833062 | 15 | 27  | 4.3  |
| 8 | 12844650 | 12844700 | 50  | 12844662 | 12 | 24  | 4.3  |
| 8 | 12884825 | 12884850 | 25  | 12884837 | 12 | 12  | 2.2  |
| 8 | 12899175 | 12899275 | 100 | 12899212 | 15 | 56  | 8.7  |
| 8 | 12932350 | 12932475 | 125 | 12932462 | 13 | 59  | 0    |
| 8 | 12939925 | 12939950 | 25  | 12939937 | 12 | 12  | 2.2  |
| 8 | 12996825 | 12996925 | 100 | 12996912 | 14 | 49  | 0    |
| 8 | 15270650 | 15270700 | 50  | 15270662 | 12 | 24  | 4.3  |
| 8 | 15779175 | 15779200 | 25  | 15779187 | 12 | 12  | 2.2  |
| 8 | 17243300 | 17243325 | 25  | 17243312 | 12 | 12  | 2.2  |
| 8 | 17299500 | 17299650 | 150 | 17299537 | 15 | 78  | 8.7  |
| 8 | 17336000 | 17336125 | 125 | 17336062 | 15 | 67  | 10.8 |
| 8 | 17372500 | 17372525 | 25  | 17372512 | 12 | 12  | 2.2  |
| 8 | 17379250 | 17379725 | 475 | 17379537 | 13 | 203 | 17.3 |
| 8 | 17460200 | 17460325 | 125 | 17460237 | 15 | 67  | 0    |
| 8 | 17479200 | 17479225 | 25  | 17479212 | 13 | 13  | 2.2  |
| 8 | 17531425 | 17531475 | 50  | 17531462 | 13 | 25  | 4.3  |
| 8 | 17531750 | 17531825 | 75  | 17531787 | 14 | 39  | 6.5  |
| 8 | 17649875 | 17649900 | 25  | 17649887 | 12 | 12  | 0    |
| 8 | 17650275 | 17650400 | 125 | 17650387 | 19 | 83  | 6.5  |
| 8 | 17999675 | 17999850 | 175 | 17999737 | 17 | 104 | 0    |
| 8 | 18035300 | 18035400 | 100 | 18035362 | 13 | 49  | 0    |
| 8 | 18043050 | 18043075 | 25  | 18043062 | 12 | 12  | 0    |
| 8 | 18051800 | 18051825 | 25  | 18051812 | 12 | 12  | 2.2  |
| 8 | 18107025 | 18107375 | 350 | 18107037 | 17 | 177 | 6.5  |
| 8 | 18107800 | 18107825 | 25  | 18107812 | 12 | 12  | 2.2  |
| 8 | 18288625 | 18288675 | 50  | 18288637 | 13 | 26  | 0    |
| 8 | 18289175 | 18289450 | 275 | 18289387 | 20 | 186 | 15.2 |
| 8 | 18348800 | 18348875 | 75  | 18348812 | 12 | 35  | 4.3  |
| 8 | 18387875 | 18387975 | 100 | 18387887 | 12 | 46  | 2.2  |
| 8 | 18402350 | 18402375 | 25  | 18402362 | 12 | 12  | 2.2  |
| 8 | 18416975 | 18417125 | 150 | 18417012 | 21 | 109 | 13   |
| 8 | 18805200 | 18805225 | 25  | 18805212 | 12 | 12  | 0    |
| 8 | 18985175 | 18985200 | 25  | 18985187 | 12 | 12  | 0    |
| 8 | 19409200 | 19409225 | 25  | 19409212 | 12 | 12  | 0    |
| 8 | 19440500 | 19440700 | 200 | 19440612 | 19 | 124 | 17.3 |

|   |          |          |      |          |    |      |       |
|---|----------|----------|------|----------|----|------|-------|
| 8 | 19641975 | 19642125 | 150  | 19642012 | 14 | 79   | 8.7   |
| 8 | 19759975 | 19760000 | 25   | 19759987 | 12 | 12   | 2.2   |
| 8 | 19956375 | 19956850 | 475  | 19956462 | 17 | 258  | 17.3  |
| 8 | 20005000 | 20005075 | 75   | 20005037 | 13 | 38   | 6.5   |
| 8 | 20188325 | 20188600 | 275  | 20188412 | 18 | 166  | 17.3  |
| 8 | 20189225 | 20189300 | 75   | 20189237 | 17 | 43   | 2.2   |
| 8 | 20190025 | 20190075 | 50   | 20190062 | 15 | 28   | 0     |
| 8 | 20192950 | 20193050 | 100  | 20192962 | 13 | 49   | 8.7   |
| 8 | 20193525 | 20194200 | 675  | 20194012 | 24 | 438  | 34.7  |
| 8 | 20194425 | 20194500 | 75   | 20194437 | 15 | 42   | 6.5   |
| 8 | 20195025 | 20195100 | 75   | 20195062 | 14 | 40   | 0     |
| 8 | 20245025 | 20245275 | 250  | 20245112 | 17 | 151  | 21.7  |
| 8 | 20297025 | 20297150 | 125  | 20297037 | 14 | 66   | 0     |
| 8 | 20327325 | 20327350 | 25   | 20327337 | 12 | 12   | 2.2   |
| 8 | 20354425 | 20354600 | 175  | 20354537 | 17 | 98   | 0     |
| 8 | 21469350 | 21469475 | 125  | 21469462 | 13 | 58   | 10.8  |
| 8 | 21542975 | 21543025 | 50   | 21542987 | 12 | 24   | 0     |
| 8 | 21684200 | 21684225 | 25   | 21684212 | 12 | 12   | 2.2   |
| 8 | 21730225 | 21730375 | 150  | 21730237 | 15 | 81   | 0     |
| 8 | 21764975 | 21765025 | 50   | 21764987 | 15 | 28   | 4.3   |
| 8 | 21788275 | 21788375 | 100  | 21788312 | 13 | 48   | 8.7   |
| 8 | 21803050 | 21803075 | 25   | 21803062 | 13 | 13   | 0     |
| 8 | 21925225 | 21925275 | 50   | 21925237 | 14 | 28   | 2.2   |
| 8 | 22063350 | 22063525 | 175  | 22063437 | 19 | 122  | 17.3  |
| 8 | 22587275 | 22587300 | 25   | 22587287 | 12 | 12   | 0     |
| 8 | 22679700 | 22679750 | 50   | 22679712 | 12 | 24   | 4.3   |
| 8 | 22742125 | 22742225 | 100  | 22742162 | 14 | 51   | 0     |
| 8 | 22743375 | 22743475 | 100  | 22743387 | 13 | 48   | 8.7   |
| 8 | 22745625 | 22745750 | 125  | 22745687 | 17 | 76   | 6.5   |
| 8 | 22761825 | 22761850 | 25   | 22761837 | 12 | 12   | 2.2   |
| 8 | 22762975 | 22763025 | 50   | 22762987 | 13 | 25   | 0     |
| 8 | 22763875 | 22763925 | 50   | 22763887 | 12 | 24   | 4.3   |
| 8 | 22798925 | 22799000 | 75   | 22798987 | 14 | 39   | 4.3   |
| 8 | 22809475 | 22809525 | 50   | 22809487 | 18 | 31   | 2.2   |
| 8 | 23272975 | 23273325 | 350  | 23273262 | 17 | 167  | 13    |
| 8 | 23512225 | 23512325 | 100  | 23512237 | 12 | 47   | 8.7   |
| 8 | 23589325 | 23589450 | 125  | 23589337 | 14 | 61   | 6.5   |
| 8 | 23596800 | 23596850 | 50   | 23596812 | 14 | 26   | 4.3   |
| 8 | 23619000 | 23619775 | 775  | 23619387 | 19 | 335  | 62.8  |
| 8 | 23620025 | 23620175 | 150  | 23620137 | 21 | 105  | 10.8  |
| 8 | 23620550 | 23620625 | 75   | 23620562 | 12 | 35   | 6.5   |
| 8 | 23622950 | 23623300 | 350  | 23622962 | 19 | 213  | 28.2  |
| 8 | 23641250 | 23641275 | 25   | 23641262 | 12 | 12   | 2.2   |
| 8 | 23911250 | 23911275 | 25   | 23911262 | 12 | 12   | 2.2   |
| 8 | 24827225 | 24828250 | 1025 | 24827762 | 40 | 1138 | 114.9 |
| 8 | 24856550 | 24856725 | 175  | 24856612 | 15 | 95   | 8.7   |
| 8 | 24869825 | 24869900 | 75   | 24869837 | 22 | 51   | 6.5   |
| 8 | 24993475 | 24993575 | 100  | 24993512 | 14 | 54   | 0     |
| 8 | 25041700 | 25042375 | 675  | 25042237 | 18 | 316  | 23.8  |
| 8 | 25292050 | 25292075 | 25   | 25292062 | 12 | 12   | 2.2   |
| 8 | 25433375 | 25433550 | 175  | 25433437 | 19 | 113  | 0     |
| 8 | 25453100 | 25453125 | 25   | 25453112 | 13 | 13   | 2.2   |
| 8 | 25453500 | 25454175 | 675  | 25453712 | 14 | 316  | 47.7  |
| 8 | 25704650 | 25704700 | 50   | 25704662 | 12 | 24   | 4.3   |
| 8 | 25954250 | 25954350 | 100  | 25954337 | 13 | 49   | 8.7   |
| 8 | 25956325 | 25956400 | 75   | 25956337 | 15 | 42   | 6.5   |
| 8 | 25958050 | 25958150 | 100  | 25958112 | 16 | 58   | 2.2   |
| 8 | 25960050 | 25960100 | 50   | 25960087 | 15 | 27   | 4.3   |
| 8 | 25989550 | 25989575 | 25   | 25989562 | 13 | 13   | 2.2   |
| 8 | 25998000 | 25998025 | 25   | 25998012 | 12 | 12   | 2.2   |
| 8 | 26022800 | 26022825 | 25   | 26022812 | 12 | 12   | 2.2   |
| 8 | 26337500 | 26337575 | 75   | 26337512 | 12 | 35   | 6.5   |
| 8 | 26404725 | 26404825 | 100  | 26404737 | 15 | 54   | 2.2   |
| 8 | 26426125 | 26426325 | 200  | 26426137 | 18 | 132  | 15.2  |
| 8 | 26452175 | 26452200 | 25   | 26452187 | 12 | 12   | 2.2   |
| 8 | 26556350 | 26556575 | 225  | 26556462 | 16 | 123  | 0     |
| 8 | 27176025 | 27176100 | 75   | 27176062 | 13 | 38   | 2.2   |
| 8 | 27301850 | 27302075 | 225  | 27301937 | 21 | 152  | 6.5   |
| 8 | 27377075 | 27377100 | 25   | 27377087 | 12 | 12   | 2.2   |
| 8 | 27505475 | 27505500 | 25   | 27505487 | 12 | 12   | 2.2   |
| 8 | 27517725 | 27517750 | 25   | 27517737 | 12 | 12   | 2.2   |
| 8 | 27518450 | 27518475 | 25   | 27518462 | 12 | 12   | 2.2   |
| 8 | 27540400 | 27540425 | 25   | 27540412 | 12 | 12   | 2.2   |
| 8 | 27545350 | 27545400 | 50   | 27545362 | 13 | 25   | 4.3   |
| 8 | 27550825 | 27550850 | 25   | 27550837 | 12 | 12   | 2.2   |



|   |          |          |     |          |    |     |      |
|---|----------|----------|-----|----------|----|-----|------|
| 8 | 27555025 | 27555125 | 100 | 27555037 | 12 | 45  | 6.5  |
| 8 | 27560550 | 27560675 | 125 | 27560562 | 13 | 63  | 10.8 |
| 8 | 27561100 | 27561275 | 175 | 27561237 | 18 | 110 | 19.5 |
| 8 | 27564600 | 27564625 | 25  | 27564612 | 12 | 12  | 0    |
| 8 | 27572025 | 27572050 | 25  | 27572037 | 13 | 13  | 2.2  |
| 8 | 27572475 | 27573125 | 650 | 27572737 | 42 | 643 | 91   |
| 8 | 27584950 | 27585050 | 100 | 27584962 | 12 | 46  | 4.3  |
| 8 | 27636150 | 27636425 | 275 | 27636187 | 15 | 121 | 21.7 |
| 8 | 27827125 | 27827150 | 25  | 27827137 | 12 | 12  | 2.2  |
| 8 | 27958000 | 27958100 | 100 | 27958062 | 14 | 50  | 0    |
| 8 | 28140175 | 28140650 | 475 | 28140562 | 16 | 230 | 34.7 |
| 8 | 28144350 | 28144375 | 25  | 28144362 | 13 | 13  | 2.2  |
| 8 | 28152150 | 28152250 | 100 | 28152187 | 18 | 62  | 8.7  |
| 8 | 28167600 | 28167800 | 200 | 28167662 | 21 | 139 | 13   |
| 8 | 28176150 | 28176250 | 100 | 28176237 | 17 | 56  | 4.3  |
| 8 | 28177000 | 28177300 | 300 | 28177137 | 19 | 182 | 17.3 |
| 8 | 28177850 | 28178000 | 150 | 28177937 | 14 | 79  | 0    |
| 8 | 28180275 | 28180475 | 200 | 28180387 | 13 | 94  | 13   |
| 8 | 28209050 | 28209825 | 775 | 28209387 | 20 | 409 | 69.3 |
| 8 | 28224200 | 28224225 | 25  | 28224212 | 12 | 12  | 2.2  |
| 8 | 28230125 | 28230250 | 125 | 28230137 | 12 | 58  | 8.7  |
| 8 | 28230475 | 28230725 | 250 | 28230562 | 15 | 126 | 13   |
| 8 | 29418175 | 29418275 | 100 | 29418187 | 14 | 49  | 4.3  |
| 8 | 29419200 | 29419550 | 350 | 29419337 | 16 | 193 | 0    |
| 8 | 29423775 | 29423925 | 150 | 29423787 | 12 | 70  | 2.2  |
| 8 | 29440775 | 29440800 | 25  | 29440787 | 12 | 12  | 2.2  |
| 8 | 29560850 | 29560875 | 25  | 29560862 | 14 | 14  | 2.2  |
| 8 | 29615800 | 29615825 | 25  | 29615812 | 12 | 12  | 2.2  |
| 8 | 29948975 | 29949000 | 25  | 29948987 | 12 | 12  | 2.2  |
| 8 | 29967725 | 29967775 | 50  | 29967737 | 13 | 26  | 0    |
| 8 | 30913775 | 30913950 | 175 | 30913837 | 14 | 82  | 13   |
| 8 | 31198025 | 31198050 | 25  | 31198037 | 12 | 12  | 2.2  |
| 8 | 31206075 | 31206100 | 25  | 31206087 | 13 | 13  | 2.2  |
| 8 | 31352525 | 31352550 | 25  | 31352537 | 12 | 12  | 2.2  |
| 8 | 32480875 | 32481025 | 150 | 32480962 | 14 | 78  | 8.7  |
| 8 | 33271600 | 33271725 | 125 | 33271687 | 16 | 68  | 10.8 |
| 8 | 33609000 | 33609075 | 75  | 33609012 | 15 | 43  | 0    |
| 8 | 33609850 | 33609875 | 25  | 33609862 | 13 | 13  | 0    |
| 8 | 33610825 | 33610875 | 50  | 33610837 | 12 | 24  | 0    |
| 8 | 33885625 | 33885650 | 25  | 33885637 | 12 | 12  | 2.2  |
| 8 | 33928750 | 33928850 | 100 | 33928837 | 15 | 54  | 4.3  |
| 8 | 37274025 | 37274050 | 25  | 37274037 | 12 | 12  | 2.2  |
| 8 | 37309375 | 37309475 | 100 | 37309412 | 13 | 49  | 0    |
| 8 | 37430125 | 37430325 | 200 | 37430187 | 14 | 102 | 6.5  |
| 8 | 37471000 | 37471075 | 75  | 37471062 | 14 | 40  | 6.5  |
| 8 | 37482075 | 37482250 | 175 | 37482137 | 15 | 87  | 15.2 |
| 8 | 37505825 | 37505850 | 25  | 37505837 | 12 | 12  | 0    |
| 8 | 37546275 | 37546475 | 200 | 37546337 | 15 | 107 | 2.2  |
| 8 | 37565000 | 37565275 | 275 | 37565087 | 22 | 200 | 2.2  |
| 8 | 37622800 | 37622825 | 25  | 37622812 | 12 | 12  | 2.2  |
| 8 | 37624625 | 37624675 | 50  | 37624637 | 12 | 24  | 0    |
| 8 | 37634600 | 37634750 | 150 | 37634612 | 12 | 69  | 6.5  |
| 8 | 37685575 | 37685725 | 150 | 37685662 | 15 | 79  | 10.8 |
| 8 | 37942500 | 37942525 | 25  | 37942512 | 13 | 13  | 0    |
| 8 | 37950100 | 37950650 | 550 | 37950462 | 17 | 275 | 47.7 |
| 8 | 37969650 | 37969750 | 100 | 37969737 | 14 | 50  | 8.7  |
| 8 | 38552725 | 38552950 | 225 | 38552737 | 12 | 72  | 8.7  |
| 8 | 38594275 | 38594300 | 25  | 38594287 | 12 | 12  | 0    |
| 8 | 38594875 | 38594950 | 75  | 38594887 | 12 | 35  | 2.2  |
| 8 | 38625675 | 38625800 | 125 | 38625737 | 13 | 62  | 6.5  |
| 8 | 38705225 | 38705250 | 25  | 38705237 | 13 | 13  | 2.2  |
| 8 | 38895200 | 38895400 | 200 | 38895237 | 14 | 101 | 0    |
| 8 | 39110600 | 39110625 | 25  | 39110612 | 12 | 12  | 2.2  |
| 8 | 39170750 | 39170775 | 25  | 39170762 | 12 | 12  | 0    |
| 8 | 39171025 | 39171050 | 25  | 39171037 | 13 | 13  | 2.2  |
| 8 | 39243725 | 39243925 | 200 | 39243787 | 15 | 110 | 13   |
| 8 | 39291300 | 39291400 | 100 | 39291362 | 14 | 51  | 0    |
| 8 | 39814775 | 39814975 | 200 | 39814912 | 16 | 108 | 10.8 |
| 8 | 40038075 | 40038125 | 50  | 40038112 | 13 | 25  | 0    |
| 8 | 40263625 | 40263675 | 50  | 40263662 | 13 | 25  | 0    |
| 8 | 40276750 | 40276900 | 150 | 40276837 | 18 | 86  | 10.8 |
| 8 | 40796200 | 40796275 | 75  | 40796237 | 13 | 38  | 6.5  |
| 8 | 40911800 | 40911975 | 175 | 40911887 | 17 | 99  | 0    |
| 8 | 40919150 | 40919275 | 125 | 40919237 | 16 | 72  | 6.5  |
| 8 | 40919875 | 40919900 | 25  | 40919887 | 12 | 12  | 0    |

|   |          |          |     |          |    |     |      |
|---|----------|----------|-----|----------|----|-----|------|
| 8 | 40921350 | 40921525 | 175 | 40921412 | 15 | 95  | 8.7  |
| 8 | 40951250 | 40951300 | 50  | 40951287 | 16 | 29  | 4.3  |
| 8 | 40957025 | 40957125 | 100 | 40957037 | 18 | 67  | 2.2  |
| 8 | 41020750 | 41020850 | 100 | 41020787 | 14 | 49  | 8.7  |
| 8 | 41126050 | 41126200 | 150 | 41126137 | 13 | 72  | 4.3  |
| 8 | 41168125 | 41168325 | 200 | 41168187 | 15 | 108 | 17.3 |
| 8 | 41168725 | 41168750 | 25  | 41168737 | 12 | 12  | 0    |
| 8 | 41177825 | 41177975 | 150 | 41177837 | 13 | 67  | 0    |
| 8 | 41200700 | 41200725 | 25  | 41200712 | 12 | 12  | 0    |
| 8 | 41237250 | 41237300 | 50  | 41237262 | 12 | 24  | 4.3  |
| 8 | 41376150 | 41376200 | 50  | 41376162 | 12 | 24  | 4.3  |
| 8 | 41419150 | 41419225 | 75  | 41419187 | 13 | 38  | 6.5  |
| 8 | 41646525 | 41646600 | 75  | 41646537 | 12 | 36  | 2.2  |
| 8 | 41647925 | 41647975 | 50  | 41647937 | 12 | 24  | 0    |
| 8 | 41649025 | 41649050 | 25  | 41649037 | 12 | 12  | 2.2  |
| 8 | 41671200 | 41671400 | 200 | 41671262 | 15 | 109 | 0    |
| 8 | 41673825 | 41674000 | 175 | 41673862 | 14 | 86  | 8.7  |
| 8 | 41674725 | 41674750 | 25  | 41674737 | 12 | 12  | 2.2  |
| 8 | 41675975 | 41676075 | 100 | 41675987 | 18 | 64  | 6.5  |
| 8 | 41682825 | 41682875 | 50  | 41682837 | 12 | 24  | 0    |
| 8 | 41683850 | 41684350 | 500 | 41684162 | 30 | 374 | 0    |
| 8 | 41685300 | 41685400 | 100 | 41685387 | 23 | 67  | 8.7  |
| 8 | 41685675 | 41685725 | 50  | 41685687 | 13 | 25  | 4.3  |
| 8 | 41687225 | 41687450 | 225 | 41687362 | 16 | 123 | 6.5  |
| 8 | 41702450 | 41702575 | 125 | 41702462 | 18 | 84  | 10.8 |
| 8 | 41716350 | 41716650 | 300 | 41716387 | 18 | 173 | 0    |
| 8 | 41730450 | 41730475 | 25  | 41730462 | 12 | 12  | 2.2  |
| 8 | 41818600 | 41818775 | 175 | 41818637 | 15 | 92  | 15.2 |
| 8 | 41841650 | 41841750 | 100 | 41841662 | 13 | 51  | 4.3  |
| 8 | 41847225 | 41847400 | 175 | 41847287 | 13 | 82  | 13   |
| 8 | 41854550 | 41854575 | 25  | 41854562 | 18 | 18  | 2.2  |
| 8 | 41859450 | 41859550 | 100 | 41859487 | 13 | 51  | 8.7  |
| 8 | 41883750 | 41883775 | 25  | 41883762 | 12 | 12  | 2.2  |
| 8 | 41884300 | 41884375 | 75  | 41884362 | 14 | 40  | 4.3  |
| 8 | 41892150 | 41892200 | 50  | 41892162 | 14 | 28  | 4.3  |
| 8 | 41892600 | 41892700 | 100 | 41892687 | 17 | 55  | 8.7  |
| 8 | 42094725 | 42094750 | 25  | 42094737 | 12 | 12  | 2.2  |
| 8 | 42227925 | 42227950 | 25  | 42227937 | 12 | 12  | 0    |
| 8 | 42483650 | 42483850 | 200 | 42483662 | 24 | 153 | 17.3 |
| 8 | 42549325 | 42549500 | 175 | 42549362 | 16 | 100 | 0    |
| 8 | 42549775 | 42549875 | 100 | 42549837 | 14 | 52  | 0    |
| 8 | 42734675 | 42734850 | 175 | 42734762 | 15 | 93  | 4.3  |
| 8 | 43084625 | 43084650 | 25  | 43084637 | 12 | 12  | 0    |
| 8 | 43096100 | 43096125 | 25  | 43096112 | 12 | 12  | 2.2  |
| 8 | 43185875 | 43185975 | 100 | 43185912 | 13 | 49  | 4.3  |
| 8 | 43255850 | 43255875 | 25  | 43255862 | 12 | 12  | 0    |
| 8 | 43263475 | 43263650 | 175 | 43263537 | 17 | 107 | 8.7  |
| 8 | 43266775 | 43266850 | 75  | 43266787 | 14 | 42  | 2.2  |
| 8 | 43950550 | 43950700 | 150 | 43950562 | 14 | 84  | 13   |
| 8 | 46960700 | 46960725 | 25  | 46960712 | 22 | 22  | 4.3  |
| 8 | 47066800 | 47067175 | 375 | 47066987 | 24 | 255 | 32.5 |
| 8 | 47143775 | 47143800 | 25  | 47143787 | 13 | 13  | 2.2  |
| 8 | 47260575 | 47260650 | 75  | 47260612 | 13 | 38  | 2.2  |
| 8 | 47442275 | 47442300 | 25  | 47442287 | 12 | 12  | 0    |
| 8 | 48163725 | 48163800 | 75  | 48163787 | 15 | 41  | 6.5  |
| 8 | 48211000 | 48211250 | 250 | 48211062 | 21 | 171 | 10.8 |
| 8 | 48327050 | 48327400 | 350 | 48327287 | 17 | 180 | 28.2 |
| 8 | 48737075 | 48737100 | 25  | 48737087 | 13 | 13  | 2.2  |
| 8 | 48835275 | 48835350 | 75  | 48835287 | 13 | 37  | 0    |
| 8 | 49068175 | 49068300 | 125 | 49068187 | 12 | 60  | 0    |
| 8 | 49155775 | 49155900 | 125 | 49155862 | 14 | 62  | 6.5  |
| 8 | 49156200 | 49156375 | 175 | 49156337 | 17 | 97  | 8.7  |
| 8 | 49174650 | 49174675 | 25  | 49174662 | 12 | 12  | 0    |
| 8 | 49244775 | 49244825 | 50  | 49244787 | 12 | 24  | 4.3  |
| 8 | 49255650 | 49255700 | 50  | 49255662 | 12 | 24  | 4.3  |
| 8 | 49264300 | 49264400 | 100 | 49264337 | 15 | 53  | 0    |
| 8 | 49349200 | 49349300 | 100 | 49349287 | 15 | 52  | 8.7  |
| 8 | 49359300 | 49359325 | 25  | 49359312 | 12 | 12  | 2.2  |
| 8 | 49378950 | 49379025 | 75  | 49378987 | 14 | 39  | 0    |
| 8 | 49384850 | 49384875 | 25  | 49384862 | 12 | 12  | 2.2  |
| 8 | 49519150 | 49519200 | 50  | 49519162 | 13 | 25  | 4.3  |
| 8 | 49525600 | 49525625 | 25  | 49525612 | 12 | 12  | 2.2  |
| 8 | 49553100 | 49553200 | 100 | 49553162 | 15 | 56  | 0    |
| 8 | 49573800 | 49573925 | 125 | 49573887 | 13 | 62  | 8.7  |
| 8 | 49661150 | 49661200 | 50  | 49661162 | 13 | 25  | 2.2  |

|   |          |          |      |          |    |     |       |
|---|----------|----------|------|----------|----|-----|-------|
| 8 | 49709650 | 49709800 | 150  | 49709737 | 14 | 78  | 13    |
| 8 | 49791450 | 49791625 | 175  | 49791537 | 18 | 112 | 0     |
| 8 | 49810650 | 49810825 | 175  | 49810762 | 17 | 103 | 15.2  |
| 8 | 49937125 | 49937175 | 50   | 49937137 | 12 | 24  | 0     |
| 8 | 50002650 | 50002700 | 50   | 50002662 | 13 | 25  | 4.3   |
| 8 | 50023400 | 50023475 | 75   | 50023412 | 13 | 37  | 6.5   |
| 8 | 50095125 | 50095200 | 75   | 50095162 | 13 | 37  | 0     |
| 8 | 50099775 | 50099975 | 200  | 50099787 | 14 | 95  | 0     |
| 8 | 50121125 | 50121150 | 25   | 50121137 | 12 | 12  | 2.2   |
| 8 | 50121425 | 50121450 | 25   | 50121437 | 13 | 13  | 2.2   |
| 8 | 50147175 | 50147200 | 25   | 50147187 | 13 | 13  | 2.2   |
| 8 | 51054400 | 51054500 | 100  | 51054412 | 12 | 48  | 0     |
| 8 | 52452525 | 52452600 | 75   | 52452562 | 13 | 37  | 6.5   |
| 8 | 52484200 | 52484325 | 125  | 52484212 | 14 | 66  | 0     |
| 8 | 53036475 | 53036500 | 25   | 53036487 | 12 | 12  | 0     |
| 8 | 53485750 | 53485775 | 25   | 53485762 | 12 | 12  | 2.2   |
| 8 | 53927700 | 53927950 | 250  | 53927712 | 12 | 109 | 0     |
| 8 | 53967925 | 53968125 | 200  | 53968062 | 17 | 122 | 10.8  |
| 8 | 53968350 | 53968575 | 225  | 53968387 | 22 | 156 | 0     |
| 8 | 53969875 | 53970075 | 200  | 53969987 | 19 | 122 | 0     |
| 8 | 54014725 | 54015450 | 725  | 54015287 | 24 | 394 | 17.3  |
| 8 | 54015775 | 54016250 | 475  | 54015787 | 29 | 257 | 26    |
| 8 | 54029025 | 54029200 | 175  | 54029087 | 16 | 100 | 0     |
| 8 | 54036600 | 54036625 | 25   | 54036612 | 12 | 12  | 0     |
| 8 | 54575425 | 54575600 | 175  | 54575512 | 17 | 99  | 0     |
| 8 | 54634500 | 54634600 | 100  | 54634537 | 14 | 53  | 4.3   |
| 8 | 54635025 | 54635075 | 50   | 54635037 | 12 | 24  | 4.3   |
| 8 | 54717725 | 54717850 | 125  | 54717787 | 16 | 75  | 2.2   |
| 8 | 54954800 | 54955000 | 200  | 54954862 | 16 | 121 | 15.2  |
| 8 | 55006925 | 55006950 | 25   | 55006937 | 12 | 12  | 2.2   |
| 8 | 55007450 | 55007575 | 125  | 55007487 | 15 | 67  | 6.5   |
| 8 | 55014250 | 55014375 | 125  | 55014312 | 16 | 72  | 8.7   |
| 8 | 55015950 | 55016000 | 50   | 55015962 | 12 | 24  | 0     |
| 8 | 55250750 | 55250825 | 75   | 55250762 | 12 | 35  | 4.3   |
| 8 | 55258925 | 55259175 | 250  | 55259087 | 15 | 126 | 0     |
| 8 | 55296450 | 55296575 | 125  | 55296462 | 14 | 66  | 13    |
| 8 | 55325225 | 55325375 | 150  | 55325262 | 14 | 81  | 8.7   |
| 8 | 55327075 | 55327100 | 25   | 55327087 | 12 | 12  | 2.2   |
| 8 | 55353825 | 55353950 | 125  | 55353862 | 15 | 65  | 10.8  |
| 8 | 55367100 | 55367225 | 125  | 55367162 | 15 | 65  | 8.7   |
| 8 | 55368575 | 55368600 | 25   | 55368587 | 12 | 12  | 0     |
| 8 | 55448375 | 55448575 | 200  | 55448412 | 13 | 97  | 0     |
| 8 | 55493350 | 55493375 | 25   | 55493362 | 12 | 12  | 2.2   |
| 8 | 55534025 | 55534100 | 75   | 55534062 | 14 | 38  | 6.5   |
| 8 | 55541600 | 55541750 | 150  | 55541612 | 13 | 71  | 8.7   |
| 8 | 55545050 | 55545075 | 25   | 55545062 | 12 | 12  | 0     |
| 8 | 55554675 | 55554875 | 200  | 55554712 | 14 | 102 | 2.2   |
| 8 | 55600375 | 55600400 | 25   | 55600387 | 12 | 12  | 0     |
| 8 | 55601675 | 55601775 | 100  | 55601687 | 12 | 48  | 8.7   |
| 8 | 55696250 | 55696425 | 175  | 55696287 | 18 | 102 | 0     |
| 8 | 55696800 | 55696825 | 25   | 55696812 | 13 | 13  | 0     |
| 8 | 55864450 | 55864475 | 25   | 55864462 | 12 | 12  | 2.2   |
| 8 | 55919650 | 55919675 | 25   | 55919662 | 14 | 14  | 2.2   |
| 8 | 55934250 | 55934325 | 75   | 55934262 | 12 | 36  | 2.2   |
| 8 | 56019425 | 56019450 | 25   | 56019437 | 13 | 13  | 2.2   |
| 8 | 56119825 | 56119875 | 50   | 56119837 | 13 | 25  | 0     |
| 8 | 56177875 | 56177975 | 100  | 56177962 | 17 | 59  | 2.2   |
| 8 | 56178275 | 56178325 | 50   | 56178287 | 18 | 35  | 4.3   |
| 8 | 56246750 | 56246900 | 150  | 56246837 | 14 | 75  | 13    |
| 8 | 56369525 | 56369600 | 75   | 56369537 | 12 | 36  | 4.3   |
| 8 | 56439375 | 56439400 | 25   | 56439387 | 13 | 13  | 2.2   |
| 8 | 56440975 | 56441025 | 50   | 56440987 | 12 | 24  | 0     |
| 8 | 56454825 | 56454950 | 125  | 56454887 | 16 | 70  | 10.8  |
| 8 | 56486850 | 56486875 | 25   | 56486862 | 12 | 12  | 2.2   |
| 8 | 56524750 | 56526000 | 1250 | 56525162 | 34 | 967 | 95.4  |
| 8 | 56526350 | 56527625 | 1275 | 56526512 | 24 | 869 | 140.9 |
| 8 | 56527925 | 56528750 | 825  | 56528337 | 27 | 620 | 23.8  |
| 8 | 56529000 | 56530075 | 1075 | 56529762 | 32 | 917 | 91    |
| 8 | 56569100 | 56569375 | 275  | 56569237 | 28 | 232 | 0     |
| 8 | 56569975 | 56570575 | 600  | 56570262 | 29 | 434 | 36.8  |
| 8 | 56587400 | 56587475 | 75   | 56587412 | 13 | 38  | 0     |
| 8 | 56758125 | 56758150 | 25   | 56758137 | 12 | 12  | 2.2   |
| 8 | 57092275 | 57092425 | 150  | 57092337 | 17 | 89  | 0     |
| 8 | 57188650 | 57188675 | 25   | 57188662 | 12 | 12  | 2.2   |
| 8 | 57192925 | 57193225 | 300  | 57193212 | 21 | 207 | 6.5   |

|   |          |          |     |          |    |     |      |
|---|----------|----------|-----|----------|----|-----|------|
| 8 | 57304175 | 57304200 | 25  | 57304187 | 12 | 12  | 0    |
| 8 | 58268275 | 58268400 | 125 | 58268337 | 14 | 60  | 10.8 |
| 8 | 58277500 | 58277550 | 50  | 58277537 | 13 | 25  | 0    |
| 8 | 58277850 | 58277950 | 100 | 58277937 | 15 | 54  | 2.2  |
| 8 | 58280875 | 58281275 | 400 | 58281037 | 34 | 387 | 47.7 |
| 8 | 58284875 | 58285000 | 125 | 58284987 | 34 | 162 | 13   |
| 8 | 58285450 | 58285600 | 150 | 58285462 | 32 | 148 | 17.3 |
| 8 | 58288125 | 58288325 | 200 | 58288137 | 16 | 105 | 0    |
| 8 | 58289625 | 58289650 | 25  | 58289637 | 12 | 12  | 2.2  |
| 8 | 58290375 | 58290475 | 100 | 58290387 | 14 | 47  | 8.7  |
| 8 | 58290775 | 58290800 | 25  | 58290787 | 12 | 12  | 0    |
| 8 | 58294925 | 58295050 | 125 | 58294962 | 14 | 62  | 10.8 |
| 8 | 59301075 | 59301100 | 25  | 59301087 | 12 | 12  | 0    |
| 8 | 59371450 | 59371475 | 25  | 59371462 | 12 | 12  | 0    |
| 8 | 59434475 | 59434525 | 50  | 59434512 | 16 | 29  | 4.3  |
| 8 | 59571950 | 59571975 | 25  | 59571962 | 12 | 12  | 0    |
| 8 | 60598350 | 60598375 | 25  | 60598362 | 12 | 12  | 2.2  |
| 8 | 60622050 | 60622075 | 25  | 60622062 | 12 | 12  | 0    |
| 8 | 60708600 | 60708625 | 25  | 60708612 | 12 | 12  | 2.2  |
| 8 | 61491000 | 61491075 | 75  | 61491012 | 13 | 38  | 6.5  |
| 8 | 61534550 | 61534600 | 50  | 61534562 | 12 | 24  | 0    |
| 8 | 61568925 | 61569075 | 150 | 61568987 | 14 | 78  | 2.2  |
| 8 | 61680225 | 61680275 | 50  | 61680237 | 12 | 24  | 4.3  |
| 8 | 62014050 | 62014200 | 150 | 62014137 | 16 | 87  | 4.3  |
| 8 | 62025675 | 62025750 | 75  | 62025737 | 13 | 37  | 6.5  |
| 8 | 62123475 | 62123500 | 25  | 62123487 | 12 | 12  | 2.2  |
| 8 | 62127625 | 62127850 | 225 | 62127737 | 18 | 136 | 0    |
| 8 | 62166175 | 62166200 | 25  | 62166187 | 13 | 13  | 2.2  |
| 8 | 62215275 | 62215300 | 25  | 62215287 | 12 | 12  | 0    |
| 8 | 62288125 | 62288175 | 50  | 62288137 | 12 | 24  | 4.3  |
| 8 | 62900500 | 62900575 | 75  | 62900537 | 14 | 38  | 6.5  |
| 8 | 62911475 | 62911525 | 50  | 62911487 | 12 | 24  | 4.3  |
| 8 | 63177775 | 63177975 | 200 | 63177887 | 14 | 100 | 2.2  |
| 8 | 63218725 | 63218750 | 25  | 63218737 | 12 | 12  | 2.2  |
| 8 | 63276700 | 63276750 | 50  | 63276712 | 12 | 24  | 0    |
| 8 | 65653275 | 65653350 | 75  | 65653287 | 15 | 44  | 6.5  |
| 8 | 65656700 | 65656800 | 100 | 65656712 | 15 | 56  | 0    |
| 8 | 65829000 | 65829175 | 175 | 65829137 | 13 | 80  | 13   |
| 8 | 65862075 | 65862175 | 100 | 65862087 | 12 | 45  | 4.3  |
| 8 | 65874275 | 65874300 | 25  | 65874287 | 14 | 14  | 0    |
| 8 | 66085025 | 66085050 | 25  | 66085037 | 12 | 12  | 0    |
| 8 | 66121850 | 66121925 | 75  | 66121862 | 14 | 38  | 0    |
| 8 | 66163550 | 66163675 | 125 | 66163562 | 12 | 58  | 6.5  |
| 8 | 66182075 | 66182175 | 100 | 66182087 | 14 | 50  | 0    |
| 8 | 66454575 | 66454650 | 75  | 66454587 | 12 | 35  | 0    |
| 8 | 66583475 | 66583550 | 75  | 66583487 | 13 | 38  | 6.5  |
| 8 | 67033775 | 67033850 | 75  | 67033812 | 13 | 37  | 2.2  |
| 8 | 67052625 | 67053125 | 500 | 67053037 | 19 | 291 | 0    |
| 8 | 67154500 | 67154550 | 50  | 67154537 | 13 | 25  | 0    |
| 8 | 67162550 | 67162575 | 25  | 67162562 | 12 | 12  | 0    |
| 8 | 67239025 | 67239050 | 25  | 67239037 | 13 | 13  | 2.2  |
| 8 | 67252850 | 67253025 | 175 | 67252887 | 14 | 92  | 0    |
| 8 | 67303250 | 67303275 | 25  | 67303262 | 12 | 12  | 0    |
| 8 | 67324950 | 67325125 | 175 | 67325037 | 14 | 93  | 10.8 |
| 8 | 67334475 | 67334550 | 75  | 67334487 | 15 | 42  | 6.5  |
| 8 | 67600175 | 67600200 | 25  | 67600187 | 12 | 12  | 2.2  |
| 8 | 67635975 | 67636125 | 150 | 67636087 | 17 | 89  | 13   |
| 8 | 67636475 | 67636625 | 150 | 67636537 | 16 | 85  | 13   |
| 8 | 67945825 | 67945875 | 50  | 67945837 | 13 | 25  | 2.2  |
| 8 | 67966500 | 67966550 | 50  | 67966537 | 17 | 32  | 4.3  |
| 8 | 67967475 | 67967525 | 50  | 67967487 | 13 | 26  | 0    |
| 8 | 68035975 | 68036025 | 50  | 68036012 | 13 | 25  | 4.3  |
| 8 | 68036875 | 68037525 | 650 | 68036962 | 18 | 345 | 30.3 |
| 8 | 68705400 | 68705450 | 50  | 68705412 | 12 | 24  | 0    |
| 8 | 68715375 | 68715450 | 75  | 68715387 | 13 | 38  | 4.3  |
| 8 | 68807600 | 68807625 | 25  | 68807612 | 13 | 13  | 2.2  |
| 8 | 69884950 | 69885050 | 100 | 69884962 | 12 | 48  | 8.7  |
| 8 | 69969925 | 69970100 | 175 | 69970062 | 17 | 101 | 15.2 |
| 8 | 70255050 | 70255075 | 25  | 70255062 | 13 | 13  | 2.2  |
| 8 | 70271825 | 70271850 | 25  | 70271837 | 12 | 12  | 0    |
| 8 | 70398025 | 70398825 | 800 | 70398362 | 21 | 401 | 0    |
| 8 | 70399575 | 70399800 | 225 | 70399637 | 19 | 134 | 0    |
| 8 | 70400425 | 70400450 | 25  | 70400437 | 12 | 12  | 0    |
| 8 | 70408750 | 70408800 | 50  | 70408787 | 17 | 33  | 4.3  |
| 8 | 70412875 | 70412900 | 25  | 70412887 | 12 | 12  | 0    |

|   |          |          |     |          |    |     |      |
|---|----------|----------|-----|----------|----|-----|------|
| 8 | 70413700 | 70413725 | 25  | 70413712 | 12 | 12  | 2.2  |
| 8 | 70589850 | 70590175 | 325 | 70590162 | 14 | 148 | 19.5 |
| 8 | 70870725 | 70870750 | 25  | 70870737 | 12 | 12  | 0    |
| 8 | 70918225 | 70918400 | 175 | 70918237 | 13 | 81  | 0    |
| 8 | 71107925 | 71108050 | 125 | 71108012 | 14 | 65  | 4.3  |
| 8 | 71109575 | 71109675 | 100 | 71109587 | 13 | 49  | 8.7  |
| 8 | 71110000 | 71110025 | 25  | 71110012 | 13 | 13  | 2.2  |
| 8 | 71112000 | 71112025 | 25  | 71112012 | 12 | 12  | 0    |
| 8 | 71126850 | 71126950 | 100 | 71126862 | 12 | 45  | 2.2  |
| 8 | 71133300 | 71133325 | 25  | 71133312 | 12 | 12  | 0    |
| 8 | 71143850 | 71144350 | 500 | 71143937 | 18 | 299 | 36.8 |
| 8 | 71145075 | 71145100 | 25  | 71145087 | 12 | 12  | 2.2  |
| 8 | 71145775 | 71145800 | 25  | 71145787 | 12 | 12  | 0    |
| 8 | 71581425 | 71581500 | 75  | 71581462 | 16 | 44  | 2.2  |
| 8 | 71744125 | 71744150 | 25  | 71744137 | 14 | 14  | 2.2  |
| 8 | 71824225 | 71824250 | 25  | 71824237 | 12 | 12  | 0    |
| 8 | 71896425 | 71896450 | 25  | 71896437 | 13 | 13  | 0    |
| 8 | 71969375 | 71969400 | 25  | 71969387 | 12 | 12  | 0    |
| 8 | 72025225 | 72025325 | 100 | 72025262 | 13 | 51  | 0    |
| 8 | 72031450 | 72031550 | 100 | 72031462 | 16 | 59  | 8.7  |
| 8 | 72166725 | 72166775 | 50  | 72166737 | 12 | 24  | 0    |
| 8 | 72473800 | 72473825 | 25  | 72473812 | 12 | 12  | 0    |
| 8 | 72632375 | 72632550 | 175 | 72632462 | 15 | 98  | 6.5  |
| 8 | 72916775 | 72917250 | 475 | 72917162 | 27 | 363 | 62.8 |
| 8 | 73245175 | 73245200 | 25  | 73245187 | 12 | 12  | 0    |
| 8 | 73326075 | 73326300 | 225 | 73326187 | 15 | 123 | 15.2 |
| 8 | 74167625 | 74167650 | 25  | 74167637 | 12 | 12  | 2.2  |
| 8 | 74199975 | 74200000 | 25  | 74199987 | 12 | 12  | 2.2  |
| 8 | 74210075 | 74210125 | 50  | 74210112 | 13 | 25  | 0    |
| 8 | 74308775 | 74308900 | 125 | 74308837 | 13 | 62  | 0    |
| 8 | 74461575 | 74461700 | 125 | 74461612 | 13 | 58  | 8.7  |
| 8 | 74981450 | 74981550 | 100 | 74981487 | 13 | 49  | 4.3  |
| 8 | 74989850 | 74989875 | 25  | 74989862 | 14 | 14  | 2.2  |
| 8 | 75246200 | 75246225 | 25  | 75246212 | 12 | 12  | 0    |
| 8 | 75553100 | 75553125 | 25  | 75553112 | 12 | 12  | 2.2  |
| 8 | 75553675 | 75553700 | 25  | 75553687 | 12 | 12  | 0    |
| 8 | 76481800 | 76481825 | 25  | 76481812 | 13 | 13  | 2.2  |
| 8 | 76790425 | 76790475 | 50  | 76790462 | 14 | 26  | 2.2  |
| 8 | 76859375 | 76859450 | 75  | 76859387 | 12 | 36  | 6.5  |
| 8 | 78158275 | 78158300 | 25  | 78158287 | 15 | 15  | 2.2  |
| 8 | 79879800 | 79879825 | 25  | 79879812 | 12 | 12  | 2.2  |
| 8 | 80806750 | 80806825 | 75  | 80806787 | 17 | 46  | 0    |
| 8 | 80807125 | 80807150 | 25  | 80807137 | 12 | 12  | 2.2  |
| 8 | 81066775 | 81066850 | 75  | 81066787 | 12 | 36  | 0    |
| 8 | 81279350 | 81279500 | 150 | 81279362 | 14 | 80  | 0    |
| 8 | 81854900 | 81854925 | 25  | 81854912 | 12 | 12  | 0    |
| 8 | 81948425 | 81948500 | 75  | 81948437 | 13 | 38  | 6.5  |
| 8 | 82246600 | 82246675 | 75  | 82246612 | 14 | 40  | 6.5  |
| 8 | 82461300 | 82461550 | 250 | 82461462 | 17 | 140 | 8.7  |
| 8 | 82798925 | 82799000 | 75  | 82798937 | 12 | 36  | 6.5  |
| 8 | 83267125 | 83267150 | 25  | 83267137 | 12 | 12  | 2.2  |
| 8 | 84366425 | 84366475 | 50  | 84366437 | 13 | 25  | 4.3  |
| 8 | 86344500 | 86344525 | 25  | 86344512 | 12 | 12  | 0    |
| 8 | 86750500 | 86750525 | 25  | 86750512 | 12 | 12  | 2.2  |
| 8 | 87156375 | 87156525 | 150 | 87156462 | 15 | 82  | 4.3  |
| 8 | 87218825 | 87218850 | 25  | 87218837 | 12 | 12  | 0    |
| 8 | 88805350 | 88805400 | 50  | 88805362 | 12 | 24  | 4.3  |
| 8 | 88913500 | 88913525 | 25  | 88913512 | 13 | 13  | 2.2  |
| 8 | 88954700 | 88955250 | 550 | 88955112 | 15 | 268 | 17.3 |
| 8 | 89018100 | 89018175 | 75  | 89018137 | 14 | 39  | 0    |
| 8 | 89018900 | 89018975 | 75  | 89018912 | 13 | 38  | 6.5  |
| 8 | 89026925 | 89027025 | 100 | 89026962 | 13 | 48  | 8.7  |
| 8 | 89037175 | 89037300 | 125 | 89037262 | 14 | 64  | 8.7  |
| 8 | 89065650 | 89065700 | 50  | 89065662 | 12 | 24  | 4.3  |
| 8 | 90336975 | 90337150 | 175 | 90337012 | 14 | 88  | 15.2 |
| 8 | 90890350 | 90890475 | 125 | 90890362 | 13 | 64  | 6.5  |
| 8 | 91697850 | 91697875 | 25  | 91697862 | 12 | 12  | 2.2  |
| 8 | 91747550 | 91747575 | 25  | 91747562 | 12 | 12  | 2.2  |
| 8 | 91873475 | 91873550 | 75  | 91873487 | 13 | 38  | 6.5  |
| 8 | 91934625 | 91934750 | 125 | 91934662 | 14 | 66  | 10.8 |
| 8 | 94073800 | 94073825 | 25  | 94073812 | 12 | 12  | 0    |
| 8 | 94087775 | 94087825 | 50  | 94087787 | 12 | 24  | 0    |
| 8 | 94576325 | 94576525 | 200 | 94576437 | 16 | 113 | 15.2 |
| 8 | 94645075 | 94645100 | 25  | 94645087 | 12 | 12  | 2.2  |
| 8 | 94684400 | 94684425 | 25  | 94684412 | 12 | 12  | 0    |

|   |           |           |     |           |    |     |      |
|---|-----------|-----------|-----|-----------|----|-----|------|
| 8 | 94687425  | 94687650  | 225 | 94687537  | 16 | 121 | 0    |
| 8 | 94688100  | 94688200  | 100 | 94688187  | 14 | 50  | 6.5  |
| 8 | 94727500  | 94727800  | 300 | 94727637  | 17 | 164 | 0    |
| 8 | 94728150  | 94728325  | 175 | 94728162  | 22 | 125 | 23.8 |
| 8 | 94728700  | 94728750  | 50  | 94728712  | 13 | 26  | 0    |
| 8 | 94731175  | 94731325  | 150 | 94731212  | 16 | 85  | 0    |
| 8 | 94733000  | 94733050  | 50  | 94733012  | 12 | 24  | 0    |
| 8 | 94941200  | 94941275  | 75  | 94941212  | 14 | 39  | 6.5  |
| 8 | 95022300  | 95022475  | 175 | 95022412  | 14 | 86  | 2.2  |
| 8 | 95155750  | 95155925  | 175 | 95155862  | 16 | 95  | 0    |
| 8 | 96289725  | 96289900  | 175 | 96289762  | 13 | 85  | 10.8 |
| 8 | 96299325  | 96299425  | 100 | 96299387  | 13 | 48  | 8.7  |
| 8 | 96301525  | 96301625  | 100 | 96301537  | 12 | 45  | 0    |
| 8 | 96301975  | 96302225  | 250 | 96302012  | 16 | 135 | 0    |
| 8 | 96767000  | 96767150  | 150 | 96767087  | 18 | 86  | 6.5  |
| 8 | 97239400  | 97239675  | 275 | 97239512  | 15 | 141 | 13   |
| 8 | 97442600  | 97442625  | 25  | 97442612  | 13 | 13  | 0    |
| 8 | 97706600  | 97706700  | 100 | 97706637  | 13 | 49  | 2.2  |
| 8 | 97737775  | 97737850  | 75  | 97737812  | 13 | 37  | 0    |
| 8 | 97765825  | 97765900  | 75  | 97765837  | 15 | 41  | 6.5  |
| 8 | 97885225  | 97885375  | 150 | 97885287  | 13 | 74  | 8.7  |
| 8 | 98303450  | 98303750  | 300 | 98303637  | 18 | 181 | 13   |
| 8 | 98387625  | 98387700  | 75  | 98387637  | 12 | 36  | 0    |
| 8 | 98405200  | 98405250  | 50  | 98405212  | 12 | 24  | 4.3  |
| 8 | 98441125  | 98441300  | 175 | 98441237  | 17 | 103 | 4.3  |
| 8 | 98499700  | 98499725  | 25  | 98499712  | 12 | 12  | 2.2  |
| 8 | 98569300  | 98569325  | 25  | 98569312  | 12 | 12  | 2.2  |
| 8 | 98584725  | 98584875  | 150 | 98584812  | 15 | 82  | 10.8 |
| 8 | 98593700  | 98594000  | 300 | 98593837  | 15 | 156 | 10.8 |
| 8 | 98977875  | 98978000  | 125 | 98977937  | 14 | 66  | 0    |
| 8 | 98978250  | 98978275  | 25  | 98978262  | 14 | 14  | 2.2  |
| 8 | 99049375  | 99049450  | 75  | 99049387  | 12 | 36  | 6.5  |
| 8 | 99497500  | 99497525  | 25  | 99497512  | 13 | 13  | 2.2  |
| 8 | 99507625  | 99507700  | 75  | 99507662  | 18 | 51  | 6.5  |
| 8 | 99509800  | 99510425  | 625 | 99509812  | 15 | 275 | 32.5 |
| 8 | 99865750  | 99866025  | 275 | 99865962  | 13 | 119 | 17.3 |
| 8 | 99866700  | 99866725  | 25  | 99866712  | 12 | 12  | 2.2  |
| 8 | 99986525  | 99986550  | 25  | 99986537  | 12 | 12  | 2.2  |
| 8 | 100021350 | 100021375 | 25  | 100021362 | 12 | 12  | 2.2  |
| 8 | 100055800 | 100055875 | 75  | 100055812 | 13 | 37  | 0    |
| 8 | 100777825 | 100777875 | 50  | 100777837 | 12 | 24  | 0    |
| 8 | 101187075 | 101187200 | 125 | 101187137 | 15 | 68  | 0    |
| 8 | 101188125 | 101188150 | 25  | 101188137 | 12 | 12  | 0    |
| 8 | 101472850 | 101472875 | 25  | 101472862 | 12 | 12  | 2.2  |
| 8 | 101473275 | 101473300 | 25  | 101473287 | 13 | 13  | 2.2  |
| 8 | 101491600 | 101491625 | 25  | 101491612 | 12 | 12  | 2.2  |
| 8 | 101500900 | 101501075 | 175 | 101500937 | 14 | 87  | 0    |
| 8 | 101565525 | 101565600 | 75  | 101565562 | 14 | 39  | 0    |
| 8 | 101704325 | 101704350 | 25  | 101704337 | 12 | 12  | 2.2  |
| 8 | 101752500 | 101752575 | 75  | 101752537 | 25 | 69  | 13   |
| 8 | 101920425 | 101920450 | 25  | 101920437 | 12 | 12  | 2.2  |
| 8 | 102204800 | 102204850 | 50  | 102204812 | 14 | 27  | 2.2  |
| 8 | 102354125 | 102354150 | 25  | 102354137 | 12 | 12  | 0    |
| 8 | 102468900 | 102468950 | 50  | 102468937 | 13 | 25  | 0    |
| 8 | 102575475 | 102575675 | 200 | 102575512 | 15 | 108 | 10.8 |
| 8 | 102666275 | 102666475 | 200 | 102666312 | 14 | 100 | 15.2 |
| 8 | 102751950 | 102752000 | 50  | 102751987 | 15 | 28  | 4.3  |
| 8 | 102837625 | 102837925 | 300 | 102837812 | 28 | 257 | 15.2 |
| 8 | 103033575 | 103033625 | 50  | 103033587 | 12 | 24  | 0    |
| 8 | 103081375 | 103081550 | 175 | 103081437 | 19 | 113 | 10.8 |
| 8 | 103097575 | 103097600 | 25  | 103097587 | 12 | 12  | 2.2  |
| 8 | 103267025 | 103267150 | 125 | 103267062 | 13 | 60  | 0    |
| 8 | 103267475 | 103267550 | 75  | 103267487 | 15 | 43  | 4.3  |
| 8 | 103632150 | 103632450 | 300 | 103632412 | 15 | 153 | 0    |
| 8 | 103633175 | 103633300 | 125 | 103633212 | 14 | 64  | 6.5  |
| 8 | 103642025 | 103642225 | 200 | 103642112 | 15 | 109 | 19.5 |
| 8 | 103798775 | 103798900 | 125 | 103798812 | 14 | 65  | 0    |
| 8 | 103805225 | 103805400 | 175 | 103805287 | 14 | 89  | 0    |
| 8 | 104017425 | 104017525 | 100 | 104017462 | 14 | 52  | 8.7  |
| 8 | 104271100 | 104271125 | 25  | 104271112 | 12 | 12  | 2.2  |
| 8 | 104312450 | 104312550 | 100 | 104312462 | 17 | 57  | 6.5  |
| 8 | 104352700 | 104352775 | 75  | 104352712 | 13 | 38  | 6.5  |
| 8 | 104741575 | 104741600 | 25  | 104741587 | 12 | 12  | 0    |
| 8 | 105656650 | 105656675 | 25  | 105656662 | 12 | 12  | 0    |
| 8 | 106400900 | 106400925 | 25  | 106400912 | 12 | 12  | 2.2  |

|   |           |           |     |           |    |     |      |
|---|-----------|-----------|-----|-----------|----|-----|------|
| 8 | 106984150 | 106984200 | 50  | 106984187 | 14 | 26  | 0    |
| 8 | 107069275 | 107069325 | 50  | 107069287 | 12 | 24  | 2.2  |
| 8 | 107297700 | 107297725 | 25  | 107297712 | 12 | 12  | 2.2  |
| 8 | 109212500 | 109212600 | 100 | 109212587 | 16 | 55  | 8.7  |
| 8 | 109212875 | 109212900 | 25  | 109212887 | 13 | 13  | 2.2  |
| 8 | 109213325 | 109213400 | 75  | 109213337 | 16 | 42  | 2.2  |
| 8 | 115902925 | 115903000 | 75  | 115902962 | 13 | 37  | 0    |
| 8 | 115990225 | 115990250 | 25  | 115990237 | 12 | 12  | 0    |
| 8 | 116035075 | 116035100 | 25  | 116035087 | 12 | 12  | 2.2  |
| 8 | 116118275 | 116118475 | 200 | 116118337 | 17 | 121 | 10.8 |
| 8 | 116407100 | 116407150 | 50  | 116407112 | 12 | 24  | 4.3  |
| 8 | 116411975 | 116412025 | 50  | 116411987 | 12 | 24  | 0    |
| 8 | 116553725 | 116553775 | 50  | 116553737 | 12 | 24  | 4.3  |
| 8 | 116804925 | 116805025 | 100 | 116804937 | 12 | 47  | 6.5  |
| 8 | 116834000 | 116834025 | 25  | 116834012 | 12 | 12  | 2.2  |
| 8 | 117354150 | 117354300 | 150 | 117354162 | 14 | 77  | 4.3  |
| 8 | 117963575 | 117963600 | 25  | 117963587 | 12 | 12  | 2.2  |
| 8 | 118029250 | 118029275 | 25  | 118029262 | 13 | 13  | 0    |
| 8 | 118116825 | 118117025 | 200 | 118116912 | 19 | 117 | 4.3  |
| 8 | 118117275 | 118117325 | 50  | 118117312 | 14 | 26  | 4.3  |
| 8 | 118970575 | 118970625 | 50  | 118970587 | 12 | 24  | 2.2  |
| 8 | 119239775 | 119239825 | 50  | 119239787 | 12 | 24  | 4.3  |
| 8 | 119240825 | 119240875 | 50  | 119240837 | 16 | 28  | 0    |
| 8 | 119592025 | 119592100 | 75  | 119592062 | 13 | 37  | 6.5  |
| 8 | 120544400 | 120544475 | 75  | 120544412 | 15 | 43  | 0    |
| 8 | 120560950 | 120561150 | 200 | 120561137 | 16 | 111 | 0    |
| 8 | 120773650 | 120773675 | 25  | 120773662 | 12 | 12  | 2.2  |
| 8 | 121438625 | 121438650 | 25  | 121438637 | 12 | 12  | 2.2  |
| 8 | 121484850 | 121484950 | 100 | 121484912 | 13 | 49  | 8.7  |
| 8 | 121780500 | 121780650 | 150 | 121780562 | 15 | 82  | 0    |
| 8 | 122524075 | 122524225 | 150 | 122524112 | 13 | 75  | 10.8 |
| 8 | 122800600 | 122800925 | 325 | 122800737 | 19 | 195 | 17.3 |
| 8 | 122801350 | 122801575 | 225 | 122801437 | 19 | 144 | 0    |
| 8 | 123188300 | 123188350 | 50  | 123188312 | 12 | 24  | 4.3  |
| 8 | 123783900 | 123783975 | 75  | 123783912 | 15 | 44  | 0    |
| 8 | 123784600 | 123784825 | 225 | 123784737 | 20 | 144 | 0    |
| 8 | 123814150 | 123814350 | 200 | 123814162 | 12 | 91  | 8.7  |
| 8 | 123816550 | 123816675 | 125 | 123816562 | 13 | 62  | 10.8 |
| 8 | 123828275 | 123828300 | 25  | 123828287 | 12 | 12  | 2.2  |
| 8 | 123834975 | 123835100 | 125 | 123835037 | 14 | 61  | 0    |
| 8 | 124034075 | 124034100 | 25  | 124034087 | 12 | 12  | 0    |
| 8 | 124034950 | 124034975 | 25  | 124034962 | 13 | 13  | 0    |
| 8 | 124058550 | 124058575 | 25  | 124058562 | 12 | 12  | 2.2  |
| 8 | 124061650 | 124061800 | 150 | 124061687 | 16 | 85  | 10.8 |
| 8 | 124062450 | 124062475 | 25  | 124062462 | 13 | 13  | 2.2  |
| 8 | 124065300 | 124065400 | 100 | 124065312 | 13 | 50  | 0    |
| 8 | 124078750 | 124079025 | 275 | 124078937 | 16 | 151 | 23.8 |
| 8 | 124083125 | 124083150 | 25  | 124083137 | 12 | 12  | 2.2  |
| 8 | 124154900 | 124154925 | 25  | 124154912 | 12 | 12  | 2.2  |
| 8 | 124243775 | 124243875 | 100 | 124243812 | 17 | 61  | 2.2  |
| 8 | 124250350 | 124250400 | 50  | 124250362 | 12 | 24  | 4.3  |
| 8 | 124260350 | 124260475 | 125 | 124260387 | 13 | 62  | 0    |
| 8 | 124260925 | 124260975 | 50  | 124260962 | 13 | 25  | 0    |
| 8 | 124644725 | 124644800 | 75  | 124644737 | 18 | 45  | 0    |
| 8 | 124836375 | 124836775 | 400 | 124836612 | 21 | 231 | 19.5 |
| 8 | 124961200 | 124961250 | 50  | 124961212 | 12 | 24  | 0    |
| 8 | 124964675 | 124964700 | 25  | 124964687 | 12 | 12  | 2.2  |
| 8 | 125075075 | 125075200 | 125 | 125075112 | 13 | 61  | 0    |
| 8 | 125233500 | 125233525 | 25  | 125233512 | 12 | 12  | 2.2  |
| 8 | 125327225 | 125327275 | 50  | 125327237 | 12 | 24  | 4.3  |
| 8 | 125677225 | 125677500 | 275 | 125677237 | 13 | 129 | 21.7 |
| 8 | 125929275 | 125929300 | 25  | 125929287 | 12 | 12  | 2.2  |
| 8 | 125954525 | 125954625 | 100 | 125954537 | 12 | 46  | 0    |
| 8 | 125980800 | 125980900 | 100 | 125980812 | 12 | 45  | 0    |
| 8 | 125981375 | 125981400 | 25  | 125981387 | 12 | 12  | 0    |
| 8 | 126011775 | 126011875 | 100 | 126011837 | 14 | 53  | 2.2  |
| 8 | 126018200 | 126018225 | 25  | 126018212 | 14 | 14  | 2.2  |
| 8 | 126018550 | 126019200 | 650 | 126019062 | 23 | 355 | 30.3 |
| 8 | 126023500 | 126023600 | 100 | 126023512 | 13 | 52  | 4.3  |
| 8 | 126024350 | 126024450 | 100 | 126024387 | 14 | 54  | 0    |
| 8 | 126207100 | 126207150 | 50  | 126207112 | 12 | 24  | 0    |
| 8 | 126269750 | 126269875 | 125 | 126269787 | 14 | 68  | 0    |
| 8 | 126599550 | 126599700 | 150 | 126599562 | 13 | 73  | 0    |
| 8 | 126601925 | 126602025 | 100 | 126602012 | 14 | 52  | 0    |
| 8 | 126698100 | 126698125 | 25  | 126698112 | 12 | 12  | 2.2  |

|   |           |           |      |           |    |      |      |
|---|-----------|-----------|------|-----------|----|------|------|
| 8 | 126699400 | 126699500 | 100  | 126699412 | 12 | 45   | 8.7  |
| 8 | 126866025 | 126866200 | 175  | 126866037 | 12 | 84   | 0    |
| 8 | 127137725 | 127137750 | 25   | 127137737 | 12 | 12   | 0    |
| 8 | 127304800 | 127304875 | 75   | 127304812 | 13 | 37   | 2.2  |
| 8 | 127341875 | 127342000 | 125  | 127341937 | 14 | 66   | 0    |
| 8 | 127572825 | 127572850 | 25   | 127572837 | 12 | 12   | 0    |
| 8 | 127796550 | 127796575 | 25   | 127796562 | 12 | 12   | 2.2  |
| 8 | 127929150 | 127929375 | 225  | 127929262 | 18 | 140  | 15.2 |
| 8 | 128017525 | 128017550 | 25   | 128017537 | 13 | 13   | 2.2  |
| 8 | 128339175 | 128339225 | 50   | 128339187 | 13 | 25   | 4.3  |
| 8 | 129234750 | 129234800 | 50   | 129234762 | 13 | 25   | 4.3  |
| 8 | 129301800 | 129302075 | 275  | 129301937 | 22 | 184  | 0    |
| 8 | 129737625 | 129737650 | 25   | 129737637 | 12 | 12   | 2.2  |
| 8 | 129881675 | 129881700 | 25   | 129881687 | 12 | 12   | 2.2  |
| 8 | 130251900 | 130251950 | 50   | 130251912 | 12 | 24   | 2.2  |
| 8 | 130277550 | 130277575 | 25   | 130277562 | 12 | 12   | 0    |
| 8 | 130299925 | 130299975 | 50   | 130299937 | 13 | 26   | 0    |
| 8 | 130376675 | 130376700 | 25   | 130376687 | 12 | 12   | 2.2  |
| 8 | 130468000 | 130468025 | 25   | 130468012 | 12 | 12   | 2.2  |
| 8 | 130814475 | 130814500 | 25   | 130814487 | 12 | 12   | 2.2  |
| 8 | 130848200 | 130848750 | 550  | 130848337 | 23 | 343  | 39   |
| 8 | 130849100 | 130849125 | 25   | 130849112 | 12 | 12   | 0    |
| 8 | 130884550 | 130884575 | 25   | 130884562 | 12 | 12   | 2.2  |
| 8 | 131503525 | 131503725 | 200  | 131503612 | 16 | 114  | 4.3  |
| 8 | 131551175 | 131551200 | 25   | 131551187 | 12 | 12   | 2.2  |
| 8 | 131597200 | 131597225 | 25   | 131597212 | 12 | 12   | 0    |
| 8 | 131654700 | 131654725 | 25   | 131654712 | 12 | 12   | 0    |
| 8 | 131675850 | 131675925 | 75   | 131675912 | 13 | 37   | 0    |
| 8 | 131747550 | 131747575 | 25   | 131747562 | 12 | 12   | 0    |
| 8 | 131910450 | 131910650 | 200  | 131910537 | 18 | 117  | 0    |
| 8 | 132013650 | 132013800 | 150  | 132013662 | 14 | 76   | 8.7  |
| 8 | 132122050 | 132122075 | 25   | 132122062 | 13 | 13   | 2.2  |
| 8 | 132123575 | 132123875 | 300  | 132123762 | 17 | 165  | 17.3 |
| 8 | 132568600 | 132568750 | 150  | 132568612 | 13 | 72   | 4.3  |
| 8 | 132915550 | 132915700 | 150  | 132915587 | 16 | 87   | 4.3  |
| 8 | 132964675 | 132964975 | 300  | 132964812 | 17 | 170  | 17.3 |
| 8 | 133139525 | 133139600 | 75   | 133139537 | 14 | 39   | 6.5  |
| 8 | 133210750 | 133210850 | 100  | 133210837 | 13 | 49   | 2.2  |
| 8 | 133797575 | 133797600 | 25   | 133797587 | 12 | 12   | 0    |
| 8 | 133946175 | 133946225 | 50   | 133946212 | 14 | 27   | 4.3  |
| 8 | 134025075 | 134025100 | 25   | 134025087 | 12 | 12   | 0    |
| 8 | 134093325 | 134093400 | 75   | 134093337 | 13 | 38   | 6.5  |
| 8 | 134187900 | 134188000 | 100  | 134187912 | 12 | 47   | 4.3  |
| 8 | 134346750 | 134346800 | 50   | 134346762 | 12 | 24   | 2.2  |
| 8 | 134347375 | 134347425 | 50   | 134347387 | 12 | 24   | 0    |
| 8 | 134444850 | 134444875 | 25   | 134444862 | 12 | 12   | 2.2  |
| 8 | 134497550 | 134497575 | 25   | 134497562 | 12 | 12   | 0    |
| 8 | 134501800 | 134501925 | 125  | 134501862 | 13 | 61   | 0    |
| 8 | 134528150 | 134528200 | 50   | 134528162 | 12 | 24   | 4.3  |
| 8 | 134586725 | 134586825 | 100  | 134586737 | 13 | 49   | 0    |
| 8 | 134605750 | 134606100 | 350  | 134605962 | 33 | 352  | 49.8 |
| 8 | 134607050 | 134607250 | 200  | 134607187 | 16 | 110  | 4.3  |
| 8 | 134608200 | 134608325 | 125  | 134608262 | 13 | 62   | 4.3  |
| 8 | 134686100 | 134686275 | 175  | 134686187 | 14 | 91   | 8.7  |
| 8 | 134690250 | 134690375 | 125  | 134690262 | 22 | 97   | 8.7  |
| 8 | 134690925 | 134690950 | 25   | 134690937 | 12 | 12   | 0    |
| 8 | 134700500 | 134700575 | 75   | 134700512 | 13 | 36   | 0    |
| 8 | 134812325 | 134812375 | 50   | 134812337 | 12 | 24   | 0    |
| 8 | 134818700 | 134819425 | 725  | 134818887 | 50 | 1037 | 41.2 |
| 8 | 134824775 | 134824925 | 150  | 134824837 | 14 | 73   | 0    |
| 8 | 134899625 | 134899650 | 25   | 134899637 | 12 | 12   | 2.2  |
| 8 | 134925975 | 134926100 | 125  | 134926087 | 13 | 59   | 0    |
| 8 | 134944250 | 134944550 | 300  | 134944412 | 17 | 165  | 2.2  |
| 8 | 134973800 | 134974225 | 425  | 134974062 | 17 | 242  | 17.3 |
| 8 | 134982775 | 134982925 | 150  | 134982837 | 15 | 81   | 0    |
| 8 | 134994700 | 134994875 | 175  | 134994712 | 14 | 95   | 0    |
| 8 | 135376500 | 135376575 | 75   | 135376512 | 12 | 35   | 0    |
| 8 | 135401725 | 135401875 | 150  | 135401837 | 14 | 78   | 10.8 |
| 8 | 135528225 | 135528500 | 275  | 135528312 | 25 | 217  | 0    |
| 8 | 135529300 | 135529375 | 75   | 135529312 | 12 | 36   | 6.5  |
| 8 | 135545125 | 135545400 | 275  | 135545237 | 16 | 153  | 10.8 |
| 8 | 135546025 | 135547350 | 1325 | 135546587 | 22 | 735  | 34.7 |
| 8 | 135547850 | 135547900 | 50   | 135547887 | 13 | 25   | 4.3  |
| 8 | 135929200 | 135929650 | 450  | 135929487 | 22 | 293  | 34.7 |
| 8 | 136015900 | 136016100 | 200  | 136016037 | 14 | 101  | 8.7  |



|   |           |           |      |           |    |      |      |
|---|-----------|-----------|------|-----------|----|------|------|
| 8 | 136115350 | 136115625 | 275  | 136115387 | 14 | 132  | 10.8 |
| 8 | 136159225 | 136159275 | 50   | 136159237 | 13 | 26   | 0    |
| 8 | 136223575 | 136223650 | 75   | 136223587 | 12 | 36   | 4.3  |
| 8 | 136290375 | 136290400 | 25   | 136290387 | 12 | 12   | 2.2  |
| 8 | 136315925 | 136315975 | 50   | 136315962 | 17 | 33   | 4.3  |
| 8 | 136355500 | 136355650 | 150  | 136355587 | 17 | 89   | 6.5  |
| 8 | 136423325 | 136423375 | 50   | 136423362 | 14 | 27   | 4.3  |
| 8 | 136435950 | 136435975 | 25   | 136435962 | 12 | 12   | 2.2  |
| 8 | 136457400 | 136457500 | 100  | 136457487 | 13 | 49   | 8.7  |
| 8 | 136476125 | 136476150 | 25   | 136476137 | 12 | 12   | 2.2  |
| 8 | 136483800 | 136483825 | 25   | 136483812 | 12 | 12   | 0    |
| 8 | 136486125 | 136486375 | 250  | 136486137 | 14 | 124  | 13   |
| 8 | 136522850 | 136522900 | 50   | 136522862 | 12 | 24   | 4.3  |
| 8 | 136753350 | 136753375 | 25   | 136753362 | 13 | 13   | 0    |
| 8 | 136754600 | 136754625 | 25   | 136754612 | 13 | 13   | 2.2  |
| 8 | 136761650 | 136761750 | 100  | 136761662 | 15 | 56   | 8.7  |
| 8 | 136763150 | 136763175 | 25   | 136763162 | 12 | 12   | 0    |
| 8 | 136805725 | 136805825 | 100  | 136805787 | 16 | 59   | 2.2  |
| 8 | 136810550 | 136810650 | 100  | 136810587 | 15 | 54   | 6.5  |
| 8 | 137007875 | 137008050 | 175  | 137007887 | 12 | 73   | 0    |
| 8 | 138569575 | 138569625 | 50   | 138569587 | 12 | 24   | 4.3  |
| 8 | 138698800 | 138698875 | 75   | 138698812 | 13 | 38   | 6.5  |
| 8 | 138828725 | 138828750 | 25   | 138828737 | 12 | 12   | 0    |
| 8 | 139287375 | 139287525 | 150  | 139287437 | 15 | 81   | 0    |
| 8 | 139287775 | 139288025 | 250  | 139287937 | 20 | 154  | 17.3 |
| 8 | 139332450 | 139332475 | 25   | 139332462 | 12 | 12   | 0    |
| 8 | 139574025 | 139574325 | 300  | 139574137 | 17 | 169  | 0    |
| 8 | 139581375 | 139581425 | 50   | 139581387 | 13 | 25   | 4.3  |
| 8 | 139594425 | 139594450 | 25   | 139594437 | 12 | 12   | 2.2  |
| 8 | 139625100 | 139625175 | 75   | 139625137 | 14 | 40   | 6.5  |
| 8 | 139639975 | 139640000 | 25   | 139639987 | 12 | 12   | 0    |
| 8 | 139640350 | 139640425 | 75   | 139640412 | 13 | 37   | 6.5  |
| 8 | 139643350 | 139643425 | 75   | 139643362 | 12 | 36   | 4.3  |
| 8 | 139665550 | 139665600 | 50   | 139665562 | 13 | 26   | 4.3  |
| 8 | 139696425 | 139696450 | 25   | 139696437 | 12 | 12   | 0    |
| 8 | 139772975 | 139773025 | 50   | 139772987 | 12 | 24   | 4.3  |
| 8 | 139773275 | 139773500 | 225  | 139773387 | 18 | 136  | 4.3  |
| 8 | 139774150 | 139774175 | 25   | 139774162 | 12 | 12   | 0    |
| 8 | 139886500 | 139886775 | 275  | 139886712 | 16 | 156  | 17.3 |
| 8 | 140083575 | 140083650 | 75   | 140083612 | 18 | 48   | 4.3  |
| 8 | 140108675 | 140108750 | 75   | 140108687 | 12 | 36   | 6.5  |
| 8 | 140288600 | 140288625 | 25   | 140288612 | 12 | 12   | 0    |
| 8 | 140300275 | 140300300 | 25   | 140300287 | 12 | 12   | 2.2  |
| 8 | 140772450 | 140772475 | 25   | 140772462 | 12 | 12   | 2.2  |
| 8 | 140884800 | 140884950 | 150  | 140884837 | 15 | 79   | 8.7  |
| 8 | 140934350 | 140934500 | 150  | 140934462 | 13 | 72   | 4.3  |
| 8 | 140940250 | 140940275 | 25   | 140940262 | 12 | 12   | 2.2  |
| 8 | 140941025 | 140941225 | 200  | 140941137 | 20 | 149  | 0    |
| 8 | 140941500 | 140942525 | 1025 | 140942062 | 31 | 1044 | 75.8 |
| 8 | 140942750 | 140942775 | 25   | 140942762 | 12 | 12   | 2.2  |
| 8 | 140943050 | 140944400 | 1350 | 140943262 | 51 | 1468 | 73.7 |
| 8 | 140947025 | 140947075 | 50   | 140947062 | 13 | 25   | 4.3  |
| 8 | 140948250 | 140948300 | 50   | 140948262 | 15 | 27   | 2.2  |
| 8 | 141076875 | 141077150 | 275  | 141077037 | 18 | 167  | 17.3 |
| 8 | 141155450 | 141155475 | 25   | 141155462 | 12 | 12   | 0    |
| 8 | 141167050 | 141167100 | 50   | 141167062 | 12 | 24   | 4.3  |
| 8 | 141211825 | 141211900 | 75   | 141211887 | 15 | 40   | 0    |
| 8 | 141286250 | 141286325 | 75   | 141286287 | 13 | 38   | 4.3  |
| 8 | 142140975 | 142141150 | 175  | 142141062 | 16 | 100  | 15.2 |
| 8 | 142164400 | 142164425 | 25   | 142164412 | 12 | 12   | 0    |
| 8 | 142179975 | 142180125 | 150  | 142180037 | 18 | 99   | 8.7  |
| 8 | 142187375 | 142187575 | 200  | 142187512 | 14 | 104  | 0    |
| 8 | 142421725 | 142421750 | 25   | 142421737 | 12 | 12   | 2.2  |
| 8 | 142436375 | 142436400 | 25   | 142436387 | 12 | 12   | 2.2  |
| 8 | 142445625 | 142445650 | 25   | 142445637 | 12 | 12   | 0    |
| 8 | 142460300 | 142460325 | 25   | 142460312 | 13 | 13   | 2.2  |
| 8 | 142461325 | 142461625 | 300  | 142461462 | 17 | 172  | 0    |
| 8 | 142462850 | 142462875 | 25   | 142462862 | 12 | 12   | 2.2  |
| 8 | 142470625 | 142470700 | 75   | 142470637 | 22 | 55   | 10.8 |
| 8 | 142516075 | 142516100 | 25   | 142516087 | 12 | 12   | 2.2  |
| 8 | 142552100 | 142552175 | 75   | 142552112 | 12 | 36   | 0    |
| 8 | 142600475 | 142600575 | 100  | 142600537 | 14 | 51   | 8.7  |
| 8 | 142620575 | 142620775 | 200  | 142620662 | 18 | 118  | 0    |
| 8 | 142632500 | 142632525 | 25   | 142632512 | 12 | 12   | 0    |
| 8 | 142634150 | 142634425 | 275  | 142634237 | 16 | 155  | 4.3  |

|   |           |           |     |           |    |     |      |
|---|-----------|-----------|-----|-----------|----|-----|------|
| 8 | 142670850 | 142671025 | 175 | 142670887 | 13 | 82  | 8.7  |
| 8 | 142671550 | 142671775 | 225 | 142671637 | 17 | 135 | 6.5  |
| 8 | 142701800 | 142701825 | 25  | 142701812 | 15 | 15  | 2.2  |
| 8 | 142709850 | 142709875 | 25  | 142709862 | 12 | 12  | 0    |
| 8 | 142722825 | 142722850 | 25  | 142722837 | 12 | 12  | 0    |
| 8 | 142761900 | 142761925 | 25  | 142761912 | 12 | 12  | 2.2  |
| 8 | 142766725 | 142766750 | 25  | 142766737 | 12 | 12  | 2.2  |
| 8 | 142815200 | 142815225 | 25  | 142815212 | 13 | 13  | 2.2  |
| 8 | 142820625 | 142820750 | 125 | 142820687 | 16 | 69  | 10.8 |
| 8 | 142824850 | 142824875 | 25  | 142824862 | 12 | 12  | 0    |
| 8 | 142831400 | 142831475 | 75  | 142831437 | 18 | 50  | 6.5  |
| 8 | 142833025 | 142833050 | 25  | 142833037 | 13 | 13  | 2.2  |
| 8 | 142833950 | 142834000 | 50  | 142833962 | 13 | 25  | 0    |
| 8 | 142835350 | 142835375 | 25  | 142835362 | 13 | 13  | 0    |
| 8 | 142840450 | 142840600 | 150 | 142840512 | 15 | 81  | 0    |
| 8 | 142843275 | 142843700 | 425 | 142843537 | 18 | 243 | 26   |
| 8 | 142844400 | 142844450 | 50  | 142844437 | 13 | 25  | 4.3  |
| 8 | 142849850 | 142850100 | 250 | 142849937 | 15 | 133 | 4.3  |
| 8 | 142851700 | 142851725 | 25  | 142851712 | 12 | 12  | 2.2  |
| 8 | 142857225 | 142857250 | 25  | 142857237 | 12 | 12  | 2.2  |
| 8 | 142858325 | 142858975 | 650 | 142858712 | 21 | 411 | 34.7 |
| 8 | 142873450 | 142873475 | 25  | 142873462 | 13 | 13  | 2.2  |
| 8 | 142878000 | 142878200 | 200 | 142878137 | 16 | 112 | 6.5  |
| 8 | 142884400 | 142884450 | 50  | 142884412 | 14 | 28  | 4.3  |
| 8 | 142884900 | 142884925 | 25  | 142884912 | 12 | 12  | 0    |
| 8 | 142886375 | 142886475 | 100 | 142886412 | 15 | 52  | 8.7  |
| 8 | 142889450 | 142889475 | 25  | 142889462 | 12 | 12  | 2.2  |
| 8 | 142890175 | 142890450 | 275 | 142890187 | 12 | 115 | 0    |
| 8 | 142926350 | 142926400 | 50  | 142926362 | 12 | 24  | 0    |
| 8 | 142933400 | 142933475 | 75  | 142933412 | 12 | 36  | 4.3  |
| 8 | 142942225 | 142942325 | 100 | 142942237 | 12 | 47  | 0    |
| 8 | 142943575 | 142943700 | 125 | 142943612 | 14 | 63  | 6.5  |
| 8 | 142949750 | 142949800 | 50  | 142949787 | 13 | 25  | 4.3  |
| 8 | 142951450 | 142951475 | 25  | 142951462 | 12 | 12  | 2.2  |
| 8 | 142979850 | 142980175 | 325 | 142979987 | 18 | 200 | 8.7  |
| 8 | 143033450 | 143033700 | 250 | 143033537 | 19 | 162 | 21.7 |
| 8 | 143062250 | 143062475 | 225 | 143062362 | 18 | 141 | 8.7  |
| 8 | 143063325 | 143063625 | 300 | 143063462 | 21 | 196 | 21.7 |
| 8 | 143087625 | 143087775 | 150 | 143087662 | 13 | 74  | 2.2  |
| 8 | 143092025 | 143092275 | 250 | 143092062 | 16 | 130 | 13   |
| 8 | 143149350 | 143149400 | 50  | 143149387 | 13 | 25  | 4.3  |
| 8 | 143154300 | 143154375 | 75  | 143154362 | 16 | 43  | 6.5  |
| 8 | 143182575 | 143182600 | 25  | 143182587 | 12 | 12  | 2.2  |
| 8 | 143190000 | 143190125 | 125 | 143190037 | 13 | 61  | 10.8 |
| 8 | 143214575 | 143214650 | 75  | 143214612 | 14 | 39  | 4.3  |
| 8 | 143253575 | 143253625 | 50  | 143253612 | 13 | 25  | 4.3  |
| 8 | 143278300 | 143278700 | 400 | 143278587 | 21 | 275 | 34.7 |
| 8 | 143303625 | 143303650 | 25  | 143303637 | 12 | 12  | 2.2  |
| 8 | 143341000 | 143341100 | 100 | 143341037 | 14 | 54  | 4.3  |
| 8 | 143347350 | 143347650 | 300 | 143347562 | 16 | 160 | 15.2 |
| 8 | 143347875 | 143347975 | 100 | 143347912 | 14 | 53  | 8.7  |
| 8 | 143387675 | 143387825 | 150 | 143387737 | 15 | 82  | 6.5  |
| 8 | 143389575 | 143389775 | 200 | 143389662 | 19 | 132 | 15.2 |
| 8 | 143393975 | 143394075 | 100 | 143394012 | 14 | 51  | 0    |
| 8 | 143405600 | 143405625 | 25  | 143405612 | 12 | 12  | 2.2  |
| 8 | 143406500 | 143407250 | 750 | 143407087 | 21 | 457 | 86.7 |
| 8 | 143408150 | 143408175 | 25  | 143408162 | 12 | 12  | 2.2  |
| 8 | 143408500 | 143408825 | 325 | 143408637 | 15 | 171 | 0    |
| 8 | 143409200 | 143409875 | 675 | 143409562 | 14 | 305 | 54.2 |
| 8 | 143431700 | 143431725 | 25  | 143431712 | 14 | 14  | 0    |
| 8 | 143448300 | 143448400 | 100 | 143448337 | 13 | 50  | 4.3  |
| 8 | 143462825 | 143462850 | 25  | 143462837 | 13 | 13  | 2.2  |
| 8 | 143483675 | 143483700 | 25  | 143483687 | 12 | 12  | 0    |
| 8 | 143486900 | 143486925 | 25  | 143486912 | 13 | 13  | 2.2  |
| 8 | 143492725 | 143493425 | 700 | 143493162 | 30 | 607 | 56.3 |
| 8 | 143494175 | 143494325 | 150 | 143494237 | 18 | 90  | 13   |
| 8 | 143495625 | 143495800 | 175 | 143495712 | 13 | 82  | 10.8 |
| 8 | 143503550 | 143503750 | 200 | 143503637 | 22 | 143 | 26   |
| 8 | 143513100 | 143514000 | 900 | 143513462 | 25 | 659 | 34.7 |
| 8 | 143524075 | 143524975 | 900 | 143524512 | 26 | 643 | 36.8 |
| 8 | 143527500 | 143527550 | 50  | 143527512 | 14 | 27  | 4.3  |
| 8 | 143528775 | 143528850 | 75  | 143528787 | 12 | 36  | 6.5  |
| 8 | 143529100 | 143529200 | 100 | 143529137 | 15 | 55  | 8.7  |
| 8 | 143530050 | 143530150 | 100 | 143530137 | 15 | 53  | 8.7  |
| 8 | 143530800 | 143530875 | 75  | 143530862 | 14 | 40  | 0    |

|   |           |           |     |           |    |     |      |
|---|-----------|-----------|-----|-----------|----|-----|------|
| 8 | 143547600 | 143548100 | 500 | 143547737 | 20 | 319 | 19.5 |
| 8 | 143561150 | 143561225 | 75  | 143561187 | 13 | 37  | 2.2  |
| 8 | 143561550 | 143562075 | 525 | 143561637 | 21 | 304 | 52   |
| 8 | 143572725 | 143572750 | 25  | 143572737 | 12 | 12  | 2.2  |
| 8 | 143579475 | 143579650 | 175 | 143579562 | 15 | 91  | 0    |
| 8 | 143597750 | 143598150 | 400 | 143597837 | 15 | 168 | 30.3 |
| 8 | 143607975 | 143608200 | 225 | 143608137 | 17 | 122 | 15.2 |
| 8 | 143614050 | 143614075 | 25  | 143614062 | 12 | 12  | 2.2  |
| 8 | 143633725 | 143633750 | 25  | 143633737 | 12 | 12  | 2.2  |
| 8 | 143640875 | 143641075 | 200 | 143640937 | 21 | 136 | 4.3  |
| 8 | 143641400 | 143642375 | 975 | 143642087 | 30 | 904 | 62.8 |
| 8 | 143659900 | 143659975 | 75  | 143659937 | 13 | 38  | 2.2  |
| 8 | 143678500 | 143678625 | 125 | 143678512 | 13 | 58  | 6.5  |
| 8 | 143684550 | 143684825 | 275 | 143684662 | 16 | 144 | 17.3 |
| 8 | 143686075 | 143686100 | 25  | 143686087 | 13 | 13  | 2.2  |
| 8 | 143691875 | 143692250 | 375 | 143692162 | 27 | 264 | 32.5 |
| 8 | 143705800 | 143705975 | 175 | 143705962 | 14 | 84  | 4.3  |
| 8 | 143719600 | 143719750 | 150 | 143719662 | 17 | 89  | 13   |
| 8 | 143787900 | 143788075 | 175 | 143787987 | 14 | 88  | 0    |
| 8 | 143796400 | 143796525 | 125 | 143796512 | 24 | 87  | 10.8 |
| 8 | 143840450 | 143840575 | 125 | 143840462 | 13 | 62  | 6.5  |
| 8 | 143854625 | 143854825 | 200 | 143854637 | 13 | 98  | 6.5  |
| 8 | 143886500 | 143886675 | 175 | 143886537 | 15 | 99  | 8.7  |
| 8 | 143887750 | 143887950 | 200 | 143887862 | 17 | 119 | 10.8 |
| 8 | 143890850 | 143890875 | 25  | 143890862 | 12 | 12  | 2.2  |
| 8 | 143891600 | 143891750 | 150 | 143891662 | 15 | 81  | 0    |
| 8 | 143895650 | 143895675 | 25  | 143895662 | 13 | 13  | 0    |
| 8 | 143899625 | 143899675 | 50  | 143899637 | 12 | 24  | 0    |
| 8 | 143918750 | 143918775 | 25  | 143918762 | 13 | 13  | 2.2  |
| 8 | 143928450 | 143928675 | 225 | 143928612 | 16 | 112 | 13   |
| 8 | 143953300 | 143953400 | 100 | 143953312 | 12 | 42  | 4.3  |
| 8 | 143978450 | 143978475 | 25  | 143978462 | 12 | 12  | 0    |
| 8 | 144000375 | 144000450 | 75  | 144000437 | 14 | 39  | 6.5  |
| 8 | 144002200 | 144002225 | 25  | 144002212 | 14 | 14  | 2.2  |
| 8 | 144004225 | 144004250 | 25  | 144004237 | 12 | 12  | 0    |
| 8 | 144114450 | 144114475 | 25  | 144114462 | 15 | 15  | 0    |
| 8 | 144120950 | 144121075 | 125 | 144120962 | 14 | 66  | 6.5  |
| 8 | 144124650 | 144124850 | 200 | 144124687 | 16 | 109 | 13   |
| 8 | 144125100 | 144125150 | 50  | 144125137 | 14 | 27  | 0    |
| 8 | 144126325 | 144126875 | 550 | 144126462 | 22 | 364 | 2.2  |
| 8 | 144130500 | 144130600 | 100 | 144130537 | 16 | 61  | 8.7  |
| 8 | 144142950 | 144143125 | 175 | 144143037 | 19 | 114 | 8.7  |
| 8 | 144210425 | 144210725 | 300 | 144210537 | 19 | 178 | 0    |
| 8 | 144211350 | 144211500 | 150 | 144211487 | 24 | 103 | 4.3  |
| 8 | 144222400 | 144223050 | 650 | 144222912 | 23 | 403 | 26   |
| 8 | 144224450 | 144224725 | 275 | 144224587 | 25 | 209 | 15.2 |
| 8 | 144225800 | 144226050 | 250 | 144226012 | 40 | 317 | 23.8 |
| 8 | 144226275 | 144226625 | 350 | 144226287 | 39 | 333 | 17.3 |
| 8 | 144232625 | 144232675 | 50  | 144232637 | 13 | 25  | 0    |
| 8 | 144235725 | 144235925 | 200 | 144235787 | 14 | 101 | 0    |
| 8 | 144241550 | 144241700 | 150 | 144241612 | 14 | 81  | 0    |
| 8 | 144242400 | 144242450 | 50  | 144242412 | 16 | 28  | 4.3  |
| 8 | 144247250 | 144247300 | 50  | 144247262 | 12 | 24  | 0    |
| 8 | 144247825 | 144248125 | 300 | 144248012 | 17 | 195 | 32.5 |
| 8 | 144259050 | 144259125 | 75  | 144259062 | 13 | 38  | 2.2  |
| 8 | 144261425 | 144261675 | 250 | 144261662 | 18 | 139 | 4.3  |
| 8 | 144274725 | 144274850 | 125 | 144274787 | 13 | 63  | 10.8 |
| 8 | 144275750 | 144276100 | 350 | 144275812 | 19 | 228 | 13   |
| 8 | 144276350 | 144276550 | 200 | 144276412 | 15 | 106 | 10.8 |
| 8 | 144276825 | 144277575 | 750 | 144277187 | 23 | 535 | 52   |
| 8 | 144286475 | 144286500 | 25  | 144286487 | 12 | 12  | 0    |
| 8 | 144295125 | 144295200 | 75  | 144295137 | 13 | 38  | 0    |
| 8 | 144297550 | 144297600 | 50  | 144297562 | 14 | 28  | 4.3  |
| 8 | 144314825 | 144314950 | 125 | 144314837 | 12 | 59  | 0    |
| 8 | 144323400 | 144323425 | 25  | 144323412 | 12 | 12  | 2.2  |
| 8 | 144326075 | 144326200 | 125 | 144326112 | 14 | 61  | 0    |
| 8 | 144335225 | 144335700 | 475 | 144335537 | 22 | 314 | 45.5 |
| 8 | 144344575 | 144344650 | 75  | 144344587 | 14 | 40  | 4.3  |
| 8 | 144354475 | 144354525 | 50  | 144354487 | 14 | 26  | 0    |
| 8 | 144354825 | 144354900 | 75  | 144354837 | 12 | 36  | 0    |
| 8 | 144375625 | 144375675 | 50  | 144375662 | 13 | 25  | 0    |
| 8 | 144383800 | 144383875 | 75  | 144383812 | 12 | 36  | 0    |
| 8 | 144388325 | 144388350 | 25  | 144388337 | 12 | 12  | 0    |
| 8 | 144389725 | 144389775 | 50  | 144389737 | 22 | 43  | 4.3  |
| 8 | 144392575 | 144392600 | 25  | 144392587 | 12 | 12  | 2.2  |

|   |           |           |      |           |    |      |       |
|---|-----------|-----------|------|-----------|----|------|-------|
| 8 | 144392975 | 144393025 | 50   | 144392987 | 12 | 24   | 2.2   |
| 8 | 144394025 | 144394275 | 250  | 144394162 | 19 | 160  | 23.8  |
| 8 | 144399350 | 144399450 | 100  | 144399362 | 22 | 87   | 17.3  |
| 8 | 144429150 | 144429250 | 100  | 144429187 | 18 | 64   | 8.7   |
| 8 | 144476025 | 144476150 | 125  | 144476087 | 16 | 72   | 8.7   |
| 8 | 144477250 | 144477350 | 100  | 144477337 | 22 | 71   | 10.8  |
| 8 | 144563025 | 144563050 | 25   | 144563037 | 12 | 12   | 2.2   |
| 8 | 144565050 | 144565100 | 50   | 144565062 | 12 | 24   | 4.3   |
| 8 | 144565825 | 144565875 | 50   | 144565837 | 12 | 24   | 4.3   |
| 8 | 144568700 | 144568800 | 100  | 144568712 | 12 | 48   | 2.2   |
| 8 | 144570350 | 144570475 | 125  | 144570412 | 16 | 73   | 8.7   |
| 8 | 144580800 | 144580900 | 100  | 144580887 | 22 | 83   | 10.8  |
| 8 | 144581175 | 144581275 | 100  | 144581187 | 17 | 54   | 10.8  |
| 8 | 144582800 | 144582825 | 25   | 144582812 | 14 | 14   | 0     |
| 8 | 144586800 | 144586950 | 150  | 144586812 | 22 | 107  | 17.3  |
| 8 | 144707075 | 144707100 | 25   | 144707087 | 13 | 13   | 2.2   |
| 8 | 144764400 | 144764475 | 75   | 144764412 | 12 | 34   | 6.5   |
| 8 | 144801150 | 144802100 | 950  | 144801937 | 23 | 547  | 88.9  |
| 8 | 144802675 | 144802775 | 100  | 144802712 | 14 | 50   | 0     |
| 8 | 144803600 | 144804325 | 725  | 144803687 | 26 | 469  | 47.7  |
| 8 | 144814550 | 144814925 | 375  | 144814737 | 37 | 386  | 0     |
| 8 | 144817800 | 144818125 | 325  | 144817887 | 21 | 229  | 10.8  |
| 8 | 144818675 | 144818725 | 50   | 144818687 | 12 | 24   | 4.3   |
| 8 | 144820325 | 144820625 | 300  | 144820437 | 20 | 205  | 15.2  |
| 8 | 144821475 | 144821825 | 350  | 144821662 | 27 | 283  | 15.2  |
| 8 | 144822850 | 144822950 | 100  | 144822862 | 15 | 55   | 0     |
| 8 | 144823450 | 144823475 | 25   | 144823462 | 12 | 12   | 2.2   |
| 8 | 144824300 | 144824350 | 50   | 144824312 | 14 | 26   | 2.2   |
| 8 | 144829175 | 144829400 | 225  | 144829287 | 17 | 134  | 4.3   |
| 8 | 144862300 | 144862350 | 50   | 144862312 | 12 | 24   | 0     |
| 8 | 144862600 | 144862825 | 225  | 144862762 | 17 | 124  | 6.5   |
| 8 | 144863600 | 144863925 | 325  | 144863637 | 24 | 223  | 8.7   |
| 8 | 144864750 | 144864825 | 75   | 144864762 | 15 | 43   | 6.5   |
| 8 | 144894600 | 144894675 | 75   | 144894637 | 14 | 40   | 0     |
| 8 | 144896100 | 144896300 | 200  | 144896162 | 20 | 139  | 23.8  |
| 8 | 144899000 | 144899175 | 175  | 144899112 | 15 | 91   | 15.2  |
| 8 | 144910575 | 144910625 | 50   | 144910587 | 12 | 24   | 4.3   |
| 8 | 144913375 | 144913475 | 100  | 144913412 | 14 | 52   | 8.7   |
| 8 | 144914150 | 144914325 | 175  | 144914162 | 17 | 112  | 19.5  |
| 8 | 144938375 | 144938500 | 125  | 144938387 | 12 | 59   | 2.2   |
| 8 | 144950600 | 144950650 | 50   | 144950612 | 12 | 24   | 4.3   |
| 8 | 144996100 | 144996200 | 100  | 144996187 | 14 | 52   | 0     |
| 8 | 145001700 | 145002025 | 325  | 145001862 | 30 | 293  | 10.8  |
| 8 | 145002500 | 145003550 | 1050 | 145003237 | 48 | 987  | 75.8  |
| 8 | 145005100 | 145005175 | 75   | 145005137 | 13 | 37   | 6.5   |
| 8 | 145012100 | 145012900 | 800  | 145012687 | 34 | 665  | 86.7  |
| 8 | 145065375 | 145065400 | 25   | 145065387 | 13 | 13   | 0     |
| 8 | 145066950 | 145067000 | 50   | 145066987 | 14 | 27   | 0     |
| 8 | 145083000 | 145083150 | 150  | 145083012 | 27 | 112  | 17.3  |
| 8 | 145176700 | 145176925 | 225  | 145176837 | 19 | 150  | 23.8  |
| 8 | 145177150 | 145177200 | 50   | 145177187 | 15 | 27   | 2.2   |
| 8 | 145252350 | 145252525 | 175  | 145252362 | 14 | 93   | 2.2   |
| 8 | 145529500 | 145529600 | 100  | 145529537 | 13 | 50   | 0     |
| 8 | 145529875 | 145529900 | 25   | 145529887 | 13 | 13   | 2.2   |
| 8 | 145534000 | 145534575 | 575  | 145534487 | 20 | 279  | 13    |
| 8 | 145758925 | 145759000 | 75   | 145758937 | 13 | 39   | 0     |
| 8 | 145796150 | 145799500 | 3350 | 145797462 | 39 | 2937 | 502.8 |
| 8 | 145815875 | 145816300 | 425  | 145816187 | 23 | 283  | 54.2  |
| 8 | 145832800 | 145832825 | 25   | 145832812 | 12 | 12   | 2.2   |
| 8 | 145860625 | 145860700 | 75   | 145860637 | 12 | 36   | 6.5   |
| 8 | 145882575 | 145882600 | 25   | 145882587 | 13 | 13   | 2.2   |
| 8 | 145883875 | 145883950 | 75   | 145883887 | 16 | 46   | 2.2   |
| 8 | 145896725 | 145897325 | 600  | 145896837 | 23 | 452  | 36.8  |
| 8 | 145897550 | 145897650 | 100  | 145897612 | 19 | 70   | 6.5   |
| 8 | 145900425 | 145900500 | 75   | 145900437 | 12 | 36   | 6.5   |
| 8 | 145900900 | 145901100 | 200  | 145900962 | 19 | 147  | 23.8  |
| 8 | 145901650 | 145902525 | 875  | 145902312 | 18 | 498  | 67.2  |
| 8 | 145903400 | 145903525 | 125  | 145903412 | 13 | 63   | 4.3   |
| 8 | 145907500 | 145907750 | 250  | 145907562 | 13 | 123  | 13    |
| 8 | 145908175 | 145908300 | 125  | 145908212 | 14 | 63   | 0     |
| 8 | 145909450 | 145910700 | 1250 | 145910387 | 31 | 1035 | 73.7  |
| 8 | 145918325 | 145918500 | 175  | 145918362 | 16 | 103  | 4.3   |
| 8 | 146030450 | 146030625 | 175  | 146030537 | 17 | 105  | 10.8  |
| 8 | 146032350 | 146032500 | 150  | 146032437 | 14 | 78   | 0     |
| 8 | 146033225 | 146033875 | 650  | 146033662 | 24 | 447  | 86.7  |

|   |           |           |      |           |    |      |       |
|---|-----------|-----------|------|-----------|----|------|-------|
| 8 | 146034425 | 146034800 | 375  | 146034687 | 23 | 274  | 19.5  |
| 8 | 146035400 | 146035575 | 175  | 146035437 | 17 | 107  | 13    |
| 8 | 146036075 | 146036500 | 425  | 146036387 | 38 | 372  | 34.7  |
| 8 | 146036925 | 146039050 | 2125 | 146037162 | 28 | 1502 | 270.9 |
| 8 | 146041475 | 146042150 | 675  | 146042062 | 19 | 357  | 56.3  |
| 8 | 146043425 | 146043450 | 25   | 146043437 | 15 | 15   | 2.2   |
| 8 | 146050375 | 146050725 | 350  | 146050537 | 14 | 176  | 23.8  |
| 8 | 146098700 | 146098725 | 25   | 146098712 | 13 | 13   | 2.2   |
| 8 | 146100750 | 146100775 | 25   | 146100762 | 13 | 13   | 2.2   |
| 8 | 146106025 | 146106200 | 175  | 146106137 | 18 | 107  | 0     |
| 8 | 146107050 | 146107225 | 175  | 146107187 | 19 | 109  | 17.3  |
| 8 | 146126800 | 146127450 | 650  | 146127387 | 25 | 353  | 41.2  |
| 8 | 146127700 | 146128400 | 700  | 146127862 | 20 | 397  | 47.7  |
| 8 | 146128800 | 146129575 | 775  | 146128987 | 20 | 436  | 26    |
| 8 | 146172925 | 146172950 | 25   | 146172937 | 12 | 12   | 2.2   |
| 8 | 146187250 | 146187300 | 50   | 146187262 | 12 | 24   | 0     |
| X | 111625    | 111700    | 75   | 111662    | 14 | 39   | 4.3   |
| X | 241425    | 241450    | 25   | 241437    | 12 | 12   | 0     |
| X | 244050    | 244400    | 350  | 244087    | 14 | 166  | 21.7  |
| X | 343600    | 343650    | 50   | 343612    | 12 | 24   | 0     |
| X | 1131000   | 1131025   | 25   | 1131012   | 12 | 12   | 0     |
| X | 1420700   | 1420750   | 50   | 1420712   | 12 | 24   | 2.2   |
| X | 1431075   | 1431200   | 125  | 1431162   | 15 | 67   | 6.5   |
| X | 1497200   | 1497425   | 225  | 1497387   | 20 | 143  | 6.5   |
| X | 1633725   | 1633825   | 100  | 1633737   | 13 | 51   | 0     |
| X | 1634475   | 1634550   | 75   | 1634487   | 13 | 39   | 2.2   |
| X | 2181425   | 2181450   | 25   | 2181437   | 12 | 12   | 0     |
| X | 2737875   | 2737900   | 25   | 2737887   | 12 | 12   | 0     |
| X | 2756450   | 2756475   | 25   | 2756462   | 12 | 12   | 0     |
| X | 3070675   | 3070800   | 125  | 3070737   | 14 | 66   | 6.5   |
| X | 3071275   | 3071450   | 175  | 3071437   | 14 | 87   | 2.2   |
| X | 3238350   | 3238375   | 25   | 3238362   | 12 | 12   | 0     |
| X | 3238625   | 3239050   | 425  | 3238637   | 24 | 257  | 30.3  |
| X | 3610250   | 3610275   | 25   | 3610262   | 12 | 12   | 0     |
| X | 9228900   | 9228950   | 50   | 9228912   | 12 | 24   | 0     |
| X | 9231625   | 9231700   | 75   | 9231637   | 12 | 36   | 6.5   |
| X | 9650950   | 9650975   | 25   | 9650962   | 12 | 12   | 0     |
| X | 10495300  | 10495400  | 100  | 10495337  | 13 | 50   | 4.3   |
| X | 11632175  | 11632275  | 100  | 11632187  | 12 | 48   | 0     |
| X | 12056050  | 12056125  | 75   | 12056062  | 13 | 36   | 6.5   |
| X | 12644825  | 12644875  | 50   | 12644837  | 12 | 24   | 4.3   |
| X | 13547800  | 13547875  | 75   | 13547812  | 13 | 39   | 6.5   |
| X | 24941025  | 24941175  | 150  | 24941037  | 12 | 68   | 0     |
| X | 30720200  | 30720375  | 175  | 30720212  | 12 | 83   | 0     |
| X | 30734625  | 30734650  | 25   | 30734637  | 12 | 12   | 0     |
| X | 30999650  | 30999900  | 250  | 30999837  | 16 | 128  | 23.8  |
| X | 34315825  | 34316050  | 225  | 34315937  | 13 | 112  | 8.7   |
| X | 34871250  | 34871275  | 25   | 34871262  | 13 | 13   | 0     |
| X | 34871775  | 34871950  | 175  | 34871937  | 14 | 85   | 10.8  |
| X | 37006300  | 37006450  | 150  | 37006337  | 16 | 90   | 0     |
| X | 37287300  | 37287325  | 25   | 37287312  | 12 | 12   | 2.2   |
| X | 37662700  | 37662975  | 275  | 37662837  | 20 | 168  | 0     |
| X | 39295150  | 39295175  | 25   | 39295162  | 12 | 12   | 2.2   |
| X | 40367700  | 40367825  | 125  | 40367812  | 14 | 57   | 4.3   |
| X | 46319125  | 46319150  | 25   | 46319137  | 12 | 12   | 0     |
| X | 48962625  | 48962650  | 25   | 48962637  | 12 | 12   | 0     |
| X | 54401775  | 54401875  | 100  | 54401862  | 14 | 53   | 6.5   |
| X | 55118300  | 55118425  | 125  | 55118337  | 15 | 70   | 10.8  |
| X | 56977825  | 56977950  | 125  | 56977912  | 14 | 65   | 0     |
| X | 69198600  | 69198625  | 25   | 69198612  | 12 | 12   | 0     |
| X | 69199600  | 69199800  | 200  | 69199612  | 16 | 117  | 0     |
| X | 82650200  | 82650250  | 50   | 82650212  | 13 | 25   | 0     |
| X | 99549150  | 99549525  | 375  | 99549187  | 14 | 159  | 0     |
| X | 103181175 | 103181250 | 75   | 103181187 | 12 | 36   | 0     |
| X | 103189650 | 103189675 | 25   | 103189662 | 12 | 12   | 0     |
| X | 107023875 | 107023900 | 25   | 107023887 | 12 | 12   | 0     |
| X | 113724725 | 113724825 | 100  | 113724762 | 14 | 53   | 2.2   |
| X | 114210125 | 114210150 | 25   | 114210137 | 12 | 12   | 2.2   |
| X | 117991375 | 117991400 | 25   | 117991387 | 13 | 13   | 0     |
| X | 119018325 | 119018500 | 175  | 119018337 | 13 | 82   | 4.3   |
| X | 119327500 | 119327550 | 50   | 119327512 | 12 | 24   | 4.3   |
| X | 124281525 | 124281550 | 25   | 124281537 | 12 | 12   | 0     |
| X | 133037800 | 133037975 | 175  | 133037887 | 16 | 93   | 15.2  |
| X | 134279550 | 134279575 | 25   | 134279562 | 12 | 12   | 2.2   |
| X | 136348225 | 136348250 | 25   | 136348237 | 13 | 13   | 2.2   |

|    |           |           |     |           |    |     |      |
|----|-----------|-----------|-----|-----------|----|-----|------|
| X  | 139002075 | 139002200 | 125 | 139002187 | 13 | 58  | 0    |
| X  | 150848775 | 150848925 | 150 | 150848837 | 13 | 73  | 2.2  |
| X  | 150941500 | 150941550 | 50  | 150941512 | 12 | 24  | 2.2  |
| X  | 152608425 | 152608550 | 125 | 152608512 | 13 | 58  | 8.7  |
| X  | 153158650 | 153158900 | 250 | 153158762 | 21 | 171 | 0    |
| 11 | 487075    | 487175    | 100 | 487112    | 13 | 51  | 6.5  |
| 11 | 632700    | 632725    | 25  | 632712    | 12 | 12  | 2.2  |
| 11 | 1007000   | 1007100   | 100 | 1007062   | 16 | 61  | 2.2  |
| 11 | 1007325   | 1007350   | 25  | 1007337   | 12 | 12  | 2.2  |
| 11 | 1078300   | 1078450   | 150 | 1078312   | 12 | 72  | 2.2  |
| 11 | 1079175   | 1079375   | 200 | 1079212   | 14 | 96  | 0    |
| 11 | 1083025   | 1083050   | 25  | 1083037   | 13 | 13  | 2.2  |
| 11 | 1083500   | 1083550   | 50  | 1083512   | 15 | 30  | 4.3  |
| 11 | 1095225   | 1095275   | 50  | 1095237   | 14 | 27  | 0    |
| 11 | 1127300   | 1127400   | 100 | 1127312   | 13 | 50  | 8.7  |
| 11 | 1131700   | 1132125   | 425 | 1131787   | 20 | 262 | 19.5 |
| 11 | 1169400   | 1169450   | 50  | 1169437   | 21 | 36  | 2.2  |
| 11 | 1170100   | 1170125   | 25  | 1170112   | 23 | 23  | 4.3  |
| 11 | 1229175   | 1229250   | 75  | 1229237   | 15 | 40  | 0    |
| 11 | 1229800   | 1229950   | 150 | 1229912   | 14 | 77  | 0    |
| 11 | 1311625   | 1311925   | 300 | 1311812   | 22 | 209 | 34.7 |
| 11 | 1331875   | 1332250   | 375 | 1331937   | 13 | 163 | 0    |
| 11 | 1556350   | 1556475   | 125 | 1556362   | 12 | 60  | 0    |
| 11 | 1648350   | 1648600   | 250 | 1648362   | 17 | 167 | 32.5 |
| 11 | 1673775   | 1673950   | 175 | 1673912   | 14 | 86  | 15.2 |
| 11 | 1674525   | 1674550   | 25  | 1674537   | 12 | 12  | 0    |
| 11 | 1678375   | 1678425   | 50  | 1678412   | 14 | 26  | 4.3  |
| 11 | 1709400   | 1709475   | 75  | 1709437   | 13 | 37  | 4.3  |
| 11 | 1715300   | 1715425   | 125 | 1715387   | 15 | 68  | 0    |
| 11 | 1780725   | 1780975   | 250 | 1780787   | 14 | 119 | 0    |
| 11 | 1781225   | 1781600   | 375 | 1781237   | 22 | 218 | 32.5 |
| 11 | 1783475   | 1783575   | 100 | 1783562   | 14 | 50  | 0    |
| 11 | 1790150   | 1790300   | 150 | 1790262   | 18 | 94  | 10.8 |
| 11 | 1796700   | 1796850   | 150 | 1796762   | 16 | 84  | 13   |
| 11 | 1989350   | 1989700   | 350 | 1989387   | 18 | 196 | 26   |
| 11 | 2062675   | 2062975   | 300 | 2062837   | 19 | 201 | 0    |
| 11 | 2063225   | 2063325   | 100 | 2063237   | 13 | 49  | 8.7  |
| 11 | 2064675   | 2064875   | 200 | 2064737   | 15 | 111 | 0    |
| 11 | 2109250   | 2109825   | 575 | 2109337   | 27 | 481 | 10.8 |
| 11 | 2168800   | 2168850   | 50  | 2168812   | 12 | 24  | 4.3  |
| 11 | 2253525   | 2253600   | 75  | 2253537   | 12 | 36  | 0    |
| 11 | 2295625   | 2295650   | 25  | 2295637   | 12 | 12  | 0    |
| 11 | 2307900   | 2307950   | 50  | 2307912   | 12 | 24  | 2.2  |
| 11 | 2329725   | 2329775   | 50  | 2329762   | 13 | 25  | 4.3  |
| 11 | 2406300   | 2406400   | 100 | 2406337   | 14 | 54  | 8.7  |
| 11 | 2411675   | 2411700   | 25  | 2411687   | 12 | 12  | 0    |
| 11 | 2412100   | 2412125   | 25  | 2412112   | 12 | 12  | 0    |
| 11 | 2431475   | 2431550   | 75  | 2431512   | 13 | 38  | 2.2  |
| 11 | 2570475   | 2570500   | 25  | 2570487   | 12 | 12  | 2.2  |
| 11 | 2571425   | 2571650   | 225 | 2571587   | 15 | 122 | 10.8 |
| 11 | 2623025   | 2623675   | 650 | 2623587   | 16 | 290 | 17.3 |
| 11 | 2629225   | 2629425   | 200 | 2629312   | 16 | 109 | 0    |
| 11 | 2639825   | 2639850   | 25  | 2639837   | 12 | 12  | 0    |
| 11 | 2640325   | 2640425   | 100 | 2640387   | 13 | 49  | 0    |
| 11 | 2641350   | 2641475   | 125 | 2641362   | 13 | 60  | 0    |
| 11 | 2704725   | 2705575   | 850 | 2705412   | 20 | 504 | 47.7 |
| 11 | 2736725   | 2736775   | 50  | 2736737   | 12 | 24  | 4.3  |
| 11 | 2776775   | 2776925   | 150 | 2776912   | 13 | 63  | 10.8 |
| 11 | 2777200   | 2777400   | 200 | 2777287   | 16 | 106 | 8.7  |
| 11 | 2794200   | 2794475   | 275 | 2794362   | 13 | 116 | 0    |
| 11 | 2798800   | 2798950   | 150 | 2798837   | 14 | 76  | 0    |
| 11 | 2806275   | 2806500   | 225 | 2806362   | 20 | 142 | 0    |
| 11 | 2856675   | 2856825   | 150 | 2856737   | 15 | 86  | 0    |
| 11 | 2877100   | 2877200   | 100 | 2877187   | 14 | 51  | 2.2  |
| 11 | 3151675   | 3151725   | 50  | 3151687   | 12 | 24  | 0    |
| 11 | 3153625   | 3153725   | 100 | 3153662   | 13 | 50  | 0    |
| 11 | 3210450   | 3210475   | 25  | 3210462   | 12 | 12  | 0    |
| 11 | 3210900   | 3210975   | 75  | 3210937   | 14 | 38  | 0    |
| 11 | 3324475   | 3324675   | 200 | 3324562   | 16 | 115 | 10.8 |
| 11 | 3362475   | 3362550   | 75  | 3362512   | 14 | 38  | 0    |
| 11 | 3364200   | 3364275   | 75  | 3364212   | 12 | 36  | 6.5  |
| 11 | 8146700   | 8146900   | 200 | 8146787   | 16 | 109 | 17.3 |
| 11 | 9017325   | 9017350   | 25  | 9017337   | 12 | 12  | 0    |
| 11 | 9018525   | 9018800   | 275 | 9018687   | 23 | 197 | 0    |
| 11 | 10022925  | 10023125  | 200 | 10022987  | 14 | 95  | 0    |

|    |          |          |     |          |    |     |      |
|----|----------|----------|-----|----------|----|-----|------|
| 11 | 10979825 | 10979875 | 50  | 10979837 | 12 | 24  | 0    |
| 11 | 11319000 | 11319025 | 25  | 11319012 | 12 | 12  | 0    |
| 11 | 11737625 | 11737650 | 25  | 11737637 | 12 | 12  | 2.2  |
| 11 | 12011900 | 12011925 | 25  | 12011912 | 14 | 14  | 2.2  |
| 11 | 12986800 | 12986925 | 125 | 12986812 | 18 | 75  | 8.7  |
| 11 | 12989075 | 12989100 | 25  | 12989087 | 12 | 12  | 0    |
| 11 | 13174950 | 13175125 | 175 | 13175087 | 15 | 87  | 15.2 |
| 11 | 13458325 | 13458475 | 150 | 13458337 | 12 | 70  | 13   |
| 11 | 14132500 | 14132675 | 175 | 14132562 | 15 | 96  | 0    |
| 11 | 15538525 | 15538550 | 25  | 15538537 | 12 | 12  | 0    |
| 11 | 15908775 | 15908850 | 75  | 15908787 | 14 | 40  | 2.2  |
| 11 | 17055325 | 17055425 | 100 | 17055362 | 14 | 53  | 8.7  |
| 11 | 17351575 | 17351650 | 75  | 17351612 | 14 | 39  | 0    |
| 11 | 17418800 | 17418875 | 75  | 17418837 | 16 | 44  | 6.5  |
| 11 | 17548350 | 17548450 | 100 | 17548412 | 14 | 52  | 8.7  |
| 11 | 17571775 | 17571950 | 175 | 17571862 | 15 | 93  | 0    |
| 11 | 17661725 | 17661775 | 50  | 17661762 | 13 | 25  | 4.3  |
| 11 | 17714300 | 17714400 | 100 | 17714362 | 13 | 49  | 0    |
| 11 | 18115500 | 18115700 | 200 | 18115612 | 14 | 85  | 2.2  |
| 11 | 18151750 | 18151775 | 25  | 18151762 | 19 | 19  | 2.2  |
| 11 | 18198650 | 18198675 | 25  | 18198662 | 12 | 12  | 2.2  |
| 11 | 18683975 | 18684150 | 175 | 18684112 | 18 | 112 | 8.7  |
| 11 | 18690000 | 18690025 | 25  | 18690012 | 12 | 12  | 2.2  |
| 11 | 18690300 | 18690425 | 125 | 18690362 | 13 | 62  | 4.3  |
| 11 | 18691875 | 18692025 | 150 | 18691962 | 14 | 81  | 6.5  |
| 11 | 18695925 | 18696125 | 200 | 18695987 | 15 | 108 | 0    |
| 11 | 18912450 | 18912750 | 300 | 18912712 | 13 | 122 | 19.5 |
| 11 | 19017900 | 19017925 | 25  | 19017912 | 12 | 12  | 0    |
| 11 | 19323075 | 19323200 | 125 | 19323112 | 15 | 65  | 6.5  |
| 11 | 20137250 | 20137425 | 175 | 20137337 | 16 | 99  | 2.2  |
| 11 | 20160300 | 20160350 | 50  | 20160337 | 13 | 25  | 2.2  |
| 11 | 22319225 | 22319250 | 25  | 22319237 | 14 | 14  | 2.2  |
| 11 | 23382800 | 23382825 | 25  | 23382812 | 12 | 12  | 2.2  |
| 11 | 23383450 | 23383500 | 50  | 23383462 | 13 | 26  | 4.3  |
| 11 | 26127975 | 26128000 | 25  | 26127987 | 13 | 13  | 2.2  |
| 11 | 29735025 | 29735050 | 25  | 29735037 | 12 | 12  | 2.2  |
| 11 | 30561975 | 30562125 | 150 | 30562112 | 19 | 97  | 15.2 |
| 11 | 30562475 | 30562600 | 125 | 30562512 | 13 | 63  | 0    |
| 11 | 30613575 | 30613725 | 150 | 30613637 | 14 | 74  | 0    |
| 11 | 31781225 | 31781300 | 75  | 31781237 | 12 | 36  | 0    |
| 11 | 31965150 | 31965350 | 200 | 31965187 | 15 | 111 | 0    |
| 11 | 32358225 | 32358250 | 25  | 32358237 | 12 | 12  | 0    |
| 11 | 32406600 | 32406750 | 150 | 32406737 | 13 | 72  | 0    |
| 11 | 33055275 | 33055300 | 25  | 33055287 | 13 | 13  | 2.2  |
| 11 | 33799300 | 33799400 | 100 | 33799362 | 13 | 49  | 0    |
| 11 | 34679650 | 34679700 | 50  | 34679662 | 13 | 25  | 0    |
| 11 | 34879350 | 34879450 | 100 | 34879412 | 16 | 55  | 6.5  |
| 11 | 35226675 | 35227050 | 375 | 35226682 | 26 | 275 | 17.3 |
| 11 | 35407450 | 35407625 | 175 | 35407512 | 15 | 94  | 0    |
| 11 | 35409075 | 35409125 | 50  | 35409087 | 12 | 24  | 0    |
| 11 | 35410725 | 35410850 | 125 | 35410787 | 16 | 72  | 0    |
| 11 | 35412800 | 35412850 | 50  | 35412812 | 15 | 29  | 0    |
| 11 | 35427775 | 35427850 | 75  | 35427812 | 14 | 38  | 0    |
| 11 | 35641325 | 35641775 | 450 | 35641637 | 23 | 306 | 26   |
| 11 | 36492100 | 36492250 | 150 | 36492187 | 13 | 74  | 0    |
| 11 | 36552000 | 36552125 | 125 | 36552037 | 13 | 62  | 0    |
| 11 | 39658075 | 39658200 | 125 | 39658112 | 16 | 76  | 10.8 |
| 11 | 43267650 | 43267750 | 100 | 43267687 | 13 | 50  | 0    |
| 11 | 43279200 | 43279250 | 50  | 43279212 | 12 | 24  | 4.3  |
| 11 | 43490100 | 43490200 | 100 | 43490137 | 14 | 54  | 8.7  |
| 11 | 43500225 | 43500250 | 25  | 43500237 | 12 | 12  | 2.2  |
| 11 | 43500475 | 43500500 | 25  | 43500487 | 15 | 15  | 2.2  |
| 11 | 43851575 | 43851750 | 175 | 43851612 | 14 | 85  | 13   |
| 11 | 44268050 | 44268075 | 25  | 44268062 | 12 | 12  | 0    |
| 11 | 44442050 | 44442150 | 100 | 44442062 | 12 | 44  | 8.7  |
| 11 | 44512575 | 44512700 | 125 | 44512612 | 14 | 68  | 10.8 |
| 11 | 44561300 | 44561325 | 25  | 44561312 | 12 | 12  | 2.2  |
| 11 | 44751800 | 44751875 | 75  | 44751812 | 12 | 36  | 4.3  |
| 11 | 45205275 | 45205475 | 200 | 45205337 | 15 | 104 | 13   |
| 11 | 45582650 | 45582675 | 25  | 45582662 | 12 | 12  | 2.2  |
| 11 | 45598375 | 45598425 | 50  | 45598387 | 13 | 26  | 4.3  |
| 11 | 45729250 | 45729350 | 100 | 45729262 | 12 | 47  | 0    |
| 11 | 45749325 | 45749350 | 25  | 45749337 | 12 | 12  | 2.2  |
| 11 | 47335325 | 47335525 | 200 | 47335412 | 15 | 99  | 0    |
| 11 | 51423675 | 51423850 | 175 | 51423687 | 14 | 98  | 15.2 |

|    |          |          |     |          |    |     |      |
|----|----------|----------|-----|----------|----|-----|------|
| 11 | 56760625 | 56760775 | 150 | 56760737 | 15 | 76  | 15.2 |
| 11 | 57092225 | 57092275 | 50  | 57092237 | 13 | 25  | 4.3  |
| 11 | 57752050 | 57752225 | 175 | 57752087 | 14 | 91  | 6.5  |
| 11 | 57752650 | 57752775 | 125 | 57752737 | 13 | 60  | 0    |
| 11 | 59273225 | 59273475 | 250 | 59273237 | 12 | 111 | 15.2 |
| 11 | 60039275 | 60039300 | 25  | 60039287 | 12 | 12  | 0    |
| 11 | 60291575 | 60291625 | 50  | 60291587 | 13 | 26  | 0    |
| 11 | 60295900 | 60295925 | 25  | 60295912 | 12 | 12  | 0    |
| 11 | 60315500 | 60315575 | 75  | 60315512 | 12 | 36  | 0    |
| 11 | 60340975 | 60341125 | 150 | 60341037 | 13 | 75  | 0    |
| 11 | 60513400 | 60513450 | 50  | 60513412 | 14 | 28  | 4.3  |
| 11 | 60540675 | 60540700 | 25  | 60540687 | 13 | 13  | 2.2  |
| 11 | 60618175 | 60618375 | 200 | 60618212 | 15 | 101 | 0    |
| 11 | 60685000 | 60685100 | 100 | 60685062 | 16 | 58  | 8.7  |
| 11 | 61047150 | 61047275 | 125 | 61047162 | 13 | 62  | 8.7  |
| 11 | 61048125 | 61048150 | 25  | 61048137 | 12 | 12  | 0    |
| 11 | 61058425 | 61058550 | 125 | 61058462 | 14 | 64  | 4.3  |
| 11 | 61070850 | 61070875 | 25  | 61070862 | 12 | 12  | 2.2  |
| 11 | 61136200 | 61136325 | 125 | 61136262 | 14 | 65  | 2.2  |
| 11 | 61558725 | 61558825 | 100 | 61558737 | 13 | 50  | 0    |
| 11 | 61693725 | 61693750 | 25  | 61693737 | 13 | 13  | 2.2  |
| 11 | 62424375 | 62424550 | 175 | 62424412 | 14 | 91  | 0    |
| 11 | 63098075 | 63098225 | 150 | 63098162 | 17 | 87  | 10.8 |
| 11 | 63532625 | 63532725 | 100 | 63532662 | 15 | 57  | 0    |
| 11 | 63903600 | 63903900 | 300 | 63903762 | 15 | 154 | 2.2  |
| 11 | 63904175 | 63904350 | 175 | 63904187 | 18 | 111 | 10.8 |
| 11 | 63914050 | 63914125 | 75  | 63914062 | 15 | 42  | 2.2  |
| 11 | 63927975 | 63928125 | 150 | 63928087 | 14 | 75  | 13   |
| 11 | 63928475 | 63928625 | 150 | 63928487 | 22 | 114 | 21.7 |
| 11 | 63934675 | 63934750 | 75  | 63934712 | 13 | 38  | 0    |
| 11 | 63969050 | 63969150 | 100 | 63969087 | 13 | 49  | 0    |
| 11 | 63973275 | 63973300 | 25  | 63973287 | 12 | 12  | 0    |
| 11 | 63977725 | 63977800 | 75  | 63977737 | 12 | 36  | 2.2  |
| 11 | 63999625 | 63999675 | 50  | 63999637 | 13 | 26  | 4.3  |
| 11 | 64013700 | 64013875 | 175 | 64013762 | 13 | 80  | 0    |
| 11 | 64029175 | 64029200 | 25  | 64029187 | 18 | 18  | 0    |
| 11 | 64029525 | 64029675 | 150 | 64029562 | 17 | 88  | 4.3  |
| 11 | 64059250 | 64059275 | 25  | 64059262 | 12 | 12  | 0    |
| 11 | 64059975 | 64060150 | 175 | 64060037 | 16 | 92  | 0    |
| 11 | 64062825 | 64062850 | 25  | 64062837 | 12 | 12  | 0    |
| 11 | 64066750 | 64066875 | 125 | 64066787 | 14 | 66  | 0    |
| 11 | 64069200 | 64069225 | 25  | 64069212 | 12 | 12  | 0    |
| 11 | 64106275 | 64106450 | 175 | 64106337 | 15 | 99  | 0    |
| 11 | 64113475 | 64113575 | 100 | 64113537 | 16 | 55  | 2.2  |
| 11 | 64267975 | 64268275 | 300 | 64268212 | 16 | 154 | 10.8 |
| 11 | 65251375 | 65251500 | 125 | 65251387 | 12 | 59  | 0    |
| 11 | 65251750 | 65251800 | 50  | 65251787 | 13 | 25  | 4.3  |
| 11 | 65311275 | 65311475 | 200 | 65311437 | 15 | 108 | 13   |
| 11 | 65927625 | 65927675 | 50  | 65927637 | 12 | 24  | 0    |
| 11 | 66116525 | 66116550 | 25  | 66116537 | 12 | 12  | 2.2  |
| 11 | 67054250 | 67054300 | 50  | 67054262 | 16 | 29  | 4.3  |
| 11 | 67057800 | 67057875 | 75  | 67057812 | 14 | 38  | 0    |
| 11 | 67095575 | 67095675 | 100 | 67095587 | 14 | 52  | 2.2  |
| 11 | 67100850 | 67100900 | 50  | 67100862 | 13 | 25  | 0    |
| 11 | 67748800 | 67748875 | 75  | 67748812 | 15 | 41  | 0    |
| 11 | 67749650 | 67750075 | 425 | 67749887 | 23 | 298 | 34.7 |
| 11 | 67953375 | 67953525 | 150 | 67953487 | 14 | 68  | 6.5  |
| 11 | 68164900 | 68164975 | 75  | 68164962 | 16 | 42  | 4.3  |
| 11 | 68166025 | 68166175 | 150 | 68166087 | 16 | 78  | 4.3  |
| 11 | 68171175 | 68171250 | 75  | 68171187 | 13 | 37  | 6.5  |
| 11 | 68182025 | 68182150 | 125 | 68182137 | 15 | 64  | 6.5  |
| 11 | 68185625 | 68185650 | 25  | 68185637 | 12 | 12  | 2.2  |
| 11 | 68186525 | 68186925 | 400 | 68186562 | 14 | 168 | 0    |
| 11 | 68187450 | 68187750 | 300 | 68187612 | 17 | 168 | 2.2  |
| 11 | 68189100 | 68189250 | 150 | 68189187 | 17 | 86  | 10.8 |
| 11 | 68194000 | 68194075 | 75  | 68194012 | 12 | 36  | 6.5  |
| 11 | 68194525 | 68194650 | 125 | 68194612 | 15 | 65  | 6.5  |
| 11 | 68217125 | 68217150 | 25  | 68217137 | 14 | 14  | 2.2  |
| 11 | 68219950 | 68219975 | 25  | 68219962 | 12 | 12  | 0    |
| 11 | 68220250 | 68220275 | 25  | 68220262 | 12 | 12  | 0    |
| 11 | 68230375 | 68230400 | 25  | 68230387 | 14 | 14  | 2.2  |
| 11 | 68236850 | 68236950 | 100 | 68236912 | 15 | 55  | 2.2  |
| 11 | 68240575 | 68241125 | 550 | 68241037 | 17 | 278 | 34.7 |
| 11 | 68256100 | 68256125 | 25  | 68256112 | 14 | 14  | 2.2  |
| 11 | 68388000 | 68388025 | 25  | 68388012 | 12 | 12  | 0    |



|    |          |          |      |          |    |     |      |
|----|----------|----------|------|----------|----|-----|------|
| 11 | 68388250 | 68388325 | 75   | 68388262 | 18 | 51  | 2.2  |
| 11 | 68487950 | 68488175 | 225  | 68488087 | 46 | 335 | 28.2 |
| 11 | 68504700 | 68504750 | 50   | 68504712 | 15 | 30  | 4.3  |
| 11 | 68631725 | 68631800 | 75   | 68631787 | 13 | 36  | 6.5  |
| 11 | 68671600 | 68671725 | 125  | 68671637 | 16 | 68  | 0    |
| 11 | 68699425 | 68699450 | 25   | 68699437 | 12 | 12  | 2.2  |
| 11 | 68703750 | 68703900 | 150  | 68703862 | 15 | 78  | 13   |
| 11 | 68711750 | 68711850 | 100  | 68711787 | 14 | 53  | 8.7  |
| 11 | 68769800 | 68769900 | 100  | 68769837 | 17 | 56  | 0    |
| 11 | 68773800 | 68773875 | 75   | 68773862 | 13 | 37  | 6.5  |
| 11 | 68776900 | 68777075 | 175  | 68777012 | 16 | 93  | 0    |
| 11 | 68777375 | 68777525 | 150  | 68777462 | 15 | 78  | 4.3  |
| 11 | 68778650 | 68778675 | 25   | 68778662 | 12 | 12  | 0    |
| 11 | 68997125 | 68997150 | 25   | 68997137 | 12 | 12  | 0    |
| 11 | 69125650 | 69125750 | 100  | 69125662 | 12 | 45  | 2.2  |
| 11 | 69262225 | 69262675 | 450  | 69262512 | 21 | 252 | 21.7 |
| 11 | 69286700 | 69286800 | 100  | 69286712 | 13 | 52  | 8.7  |
| 11 | 69287275 | 69287775 | 500  | 69287362 | 23 | 361 | 41.2 |
| 11 | 69293325 | 69293575 | 250  | 69293387 | 18 | 152 | 0    |
| 11 | 69364900 | 69365100 | 200  | 69365062 | 17 | 118 | 13   |
| 11 | 69375825 | 69375875 | 50   | 69375837 | 12 | 24  | 0    |
| 11 | 69561225 | 69561275 | 50   | 69561237 | 12 | 24  | 4.3  |
| 11 | 69562400 | 69562475 | 75   | 69562437 | 13 | 38  | 0    |
| 11 | 70009950 | 70010100 | 150  | 70010087 | 13 | 72  | 6.5  |
| 11 | 70010950 | 70010975 | 25   | 70010962 | 12 | 12  | 0    |
| 11 | 70015475 | 70015550 | 75   | 70015487 | 12 | 36  | 0    |
| 11 | 70143475 | 70143550 | 75   | 70143512 | 14 | 38  | 0    |
| 11 | 70160050 | 70160250 | 200  | 70160212 | 14 | 100 | 17.3 |
| 11 | 70249225 | 70249300 | 75   | 70249237 | 12 | 36  | 0    |
| 11 | 70352450 | 70352500 | 50   | 70352462 | 12 | 24  | 0    |
| 11 | 70497025 | 70497050 | 25   | 70497037 | 12 | 12  | 2.2  |
| 11 | 70654600 | 70654625 | 25   | 70654612 | 12 | 12  | 0    |
| 11 | 70712850 | 70712875 | 25   | 70712862 | 12 | 12  | 0    |
| 11 | 70729200 | 70729275 | 75   | 70729212 | 13 | 38  | 0    |
| 11 | 70776125 | 70777175 | 1050 | 70776487 | 21 | 617 | 52   |
| 11 | 70791575 | 70792000 | 425  | 70791662 | 20 | 269 | 17.3 |
| 11 | 70793400 | 70793425 | 25   | 70793412 | 14 | 14  | 2.2  |
| 11 | 70919975 | 70920025 | 50   | 70919987 | 12 | 24  | 0    |
| 11 | 71163550 | 71163650 | 100  | 71163612 | 14 | 50  | 0    |
| 11 | 71565425 | 71565450 | 25   | 71565437 | 12 | 12  | 0    |
| 11 | 71876050 | 71876075 | 25   | 71876062 | 12 | 12  | 0    |
| 11 | 71899600 | 71899625 | 25   | 71899612 | 12 | 12  | 0    |
| 11 | 72607450 | 72607475 | 25   | 72607462 | 12 | 12  | 0    |
| 11 | 74101075 | 74101100 | 25   | 74101087 | 12 | 12  | 0    |
| 11 | 74254300 | 74254350 | 50   | 74254312 | 14 | 26  | 0    |
| 11 | 74818225 | 74818300 | 75   | 74818287 | 14 | 39  | 4.3  |
| 11 | 75062850 | 75062875 | 25   | 75062862 | 12 | 12  | 0    |
| 11 | 75066875 | 75066900 | 25   | 75066887 | 13 | 13  | 2.2  |
| 11 | 75538575 | 75538700 | 125  | 75538587 | 12 | 60  | 6.5  |
| 11 | 75555075 | 75555100 | 25   | 75555087 | 12 | 12  | 2.2  |
| 11 | 75639025 | 75639225 | 200  | 75639112 | 22 | 151 | 13   |
| 11 | 75639475 | 75639500 | 25   | 75639487 | 12 | 12  | 0    |
| 11 | 75649050 | 75649075 | 25   | 75649062 | 12 | 12  | 0    |
| 11 | 75663525 | 75663725 | 200  | 75663612 | 16 | 119 | 0    |
| 11 | 75723700 | 75723725 | 25   | 75723712 | 12 | 12  | 2.2  |
| 11 | 76027600 | 76027725 | 125  | 76027712 | 13 | 61  | 0    |
| 11 | 76037100 | 76037125 | 25   | 76037112 | 12 | 12  | 2.2  |
| 11 | 76366475 | 76366625 | 150  | 76366512 | 14 | 75  | 8.7  |
| 11 | 76547825 | 76547850 | 25   | 76547837 | 12 | 12  | 2.2  |
| 11 | 76642725 | 76642750 | 25   | 76642737 | 12 | 12  | 0    |
| 11 | 77777000 | 77777075 | 75   | 77777037 | 13 | 38  | 6.5  |
| 11 | 78372275 | 78372350 | 75   | 78372287 | 13 | 37  | 2.2  |
| 11 | 78387325 | 78387425 | 100  | 78387412 | 14 | 52  | 0    |
| 11 | 78542250 | 78542425 | 175  | 78542312 | 14 | 89  | 10.8 |
| 11 | 82122150 | 82122300 | 150  | 82122237 | 15 | 80  | 13   |
| 11 | 82122700 | 82122950 | 250  | 82122812 | 23 | 178 | 6.5  |
| 11 | 86766400 | 86766550 | 150  | 86766512 | 14 | 69  | 0    |
| 11 | 88130150 | 88130600 | 450  | 88130487 | 13 | 202 | 15.2 |
| 11 | 91598400 | 91598425 | 25   | 91598412 | 13 | 13  | 2.2  |
| 11 | 92288475 | 92288800 | 325  | 92288662 | 19 | 191 | 19.5 |
| 11 | 92342175 | 92342275 | 100  | 92342187 | 14 | 54  | 0    |
| 11 | 92346300 | 92346325 | 25   | 92346312 | 12 | 12  | 2.2  |
| 11 | 94045525 | 94045600 | 75   | 94045562 | 16 | 45  | 2.2  |
| 11 | 94384875 | 94384900 | 25   | 94384887 | 12 | 12  | 0    |
| 11 | 94403800 | 94403825 | 25   | 94403812 | 12 | 12  | 0    |

|    |           |           |      |           |    |     |      |
|----|-----------|-----------|------|-----------|----|-----|------|
| 11 | 97561300  | 97561325  | 25   | 97561312  | 12 | 12  | 2.2  |
| 11 | 102029850 | 102030050 | 200  | 102029962 | 19 | 125 | 0    |
| 11 | 104487725 | 104487850 | 125  | 104487737 | 13 | 63  | 6.5  |
| 11 | 104891475 | 104891600 | 125  | 104891537 | 13 | 62  | 2.2  |
| 11 | 104986075 | 104986100 | 25   | 104986087 | 12 | 12  | 2.2  |
| 11 | 105599325 | 105599400 | 75   | 105599337 | 14 | 42  | 6.5  |
| 11 | 105770275 | 105770325 | 50   | 105770287 | 12 | 24  | 0    |
| 11 | 106394975 | 106395000 | 25   | 106394987 | 12 | 12  | 2.2  |
| 11 | 106842325 | 106842350 | 25   | 106842337 | 12 | 12  | 0    |
| 11 | 107582200 | 107582250 | 50   | 107582237 | 15 | 29  | 4.3  |
| 11 | 107583350 | 107583375 | 25   | 107583362 | 12 | 12  | 2.2  |
| 11 | 108004350 | 108004550 | 200  | 108004512 | 19 | 126 | 13   |
| 11 | 108004775 | 108004800 | 25   | 108004787 | 12 | 12  | 0    |
| 11 | 108005100 | 108005375 | 275  | 108005237 | 16 | 150 | 0    |
| 11 | 109976325 | 109976475 | 150  | 109976362 | 15 | 78  | 13   |
| 11 | 110154950 | 110155175 | 225  | 110155062 | 17 | 139 | 19.5 |
| 11 | 111901900 | 111901925 | 25   | 111901912 | 12 | 12  | 0    |
| 11 | 111911700 | 111911725 | 25   | 111911712 | 12 | 12  | 0    |
| 11 | 112104300 | 112104375 | 75   | 112104312 | 12 | 36  | 0    |
| 11 | 112295550 | 112295575 | 25   | 112295562 | 12 | 12  | 0    |
| 11 | 112953425 | 112953500 | 75   | 112953487 | 13 | 37  | 6.5  |
| 11 | 113025800 | 113025850 | 50   | 113025812 | 13 | 26  | 2.2  |
| 11 | 113439425 | 113439700 | 275  | 113439612 | 16 | 145 | 17.3 |
| 11 | 113517000 | 113517025 | 25   | 113517012 | 12 | 12  | 0    |
| 11 | 113533675 | 113533825 | 150  | 113533762 | 15 | 80  | 6.5  |
| 11 | 113536875 | 113536925 | 50   | 113536887 | 12 | 24  | 4.3  |
| 11 | 113545425 | 113545625 | 200  | 113545512 | 16 | 108 | 4.3  |
| 11 | 113546200 | 113546350 | 150  | 113546287 | 14 | 77  | 2.2  |
| 11 | 113548175 | 113548300 | 125  | 113548187 | 13 | 58  | 0    |
| 11 | 113681000 | 113681200 | 200  | 113681087 | 19 | 137 | 0    |
| 11 | 113716600 | 113716700 | 100  | 113716612 | 14 | 54  | 8.7  |
| 11 | 114522800 | 114522875 | 75   | 114522812 | 12 | 36  | 0    |
| 11 | 115326525 | 115326575 | 50   | 115326537 | 12 | 24  | 4.3  |
| 11 | 115520575 | 115520650 | 75   | 115520587 | 13 | 37  | 6.5  |
| 11 | 115864550 | 115864575 | 25   | 115864562 | 12 | 12  | 0    |
| 11 | 115915400 | 115915425 | 25   | 115915412 | 13 | 13  | 0    |
| 11 | 115924875 | 115925100 | 225  | 115924962 | 18 | 138 | 0    |
| 11 | 115925325 | 115925425 | 100  | 115925337 | 14 | 48  | 0    |
| 11 | 115989275 | 115989375 | 100  | 115989287 | 12 | 46  | 0    |
| 11 | 116919325 | 116919350 | 25   | 116919337 | 12 | 12  | 2.2  |
| 11 | 116921725 | 116921925 | 200  | 116921762 | 15 | 103 | 0    |
| 11 | 117462450 | 117462575 | 125  | 117462512 | 14 | 65  | 0    |
| 11 | 117628100 | 117628300 | 200  | 117628112 | 25 | 166 | 30.3 |
| 11 | 118923525 | 118923675 | 150  | 118923562 | 16 | 81  | 4.3  |
| 11 | 118979400 | 118979475 | 75   | 118979437 | 13 | 38  | 0    |
| 11 | 119158900 | 119158925 | 25   | 119158912 | 12 | 12  | 0    |
| 11 | 119159575 | 119159675 | 100  | 119159587 | 13 | 52  | 0    |
| 11 | 119160050 | 119160200 | 150  | 119160062 | 13 | 77  | 6.5  |
| 11 | 119173825 | 119173875 | 50   | 119173837 | 12 | 24  | 0    |
| 11 | 119437800 | 119437825 | 25   | 119437812 | 12 | 12  | 0    |
| 11 | 119497100 | 119497175 | 75   | 119497112 | 12 | 36  | 0    |
| 11 | 119523925 | 119523950 | 25   | 119523937 | 12 | 12  | 0    |
| 11 | 119544775 | 119544850 | 75   | 119544837 | 14 | 39  | 6.5  |
| 11 | 119641225 | 119641350 | 125  | 119641237 | 13 | 64  | 6.5  |
| 11 | 120245275 | 120245300 | 25   | 120245287 | 12 | 12  | 0    |
| 11 | 120367875 | 120367900 | 25   | 120367887 | 12 | 12  | 0    |
| 11 | 120506075 | 120506100 | 25   | 120506087 | 12 | 12  | 2.2  |
| 11 | 120513075 | 120513100 | 25   | 120513087 | 13 | 13  | 0    |
| 11 | 120521750 | 120521875 | 125  | 120521812 | 14 | 65  | 0    |
| 11 | 120533700 | 120534150 | 450  | 120534062 | 21 | 243 | 4.3  |
| 11 | 120641725 | 120641825 | 100  | 120641737 | 13 | 49  | 4.3  |
| 11 | 120971600 | 120971675 | 75   | 120971637 | 13 | 37  | 0    |
| 11 | 122045100 | 122045175 | 75   | 122045137 | 15 | 42  | 6.5  |
| 11 | 123992250 | 123992350 | 100  | 123992312 | 14 | 51  | 8.7  |
| 11 | 124182925 | 124183050 | 125  | 124182962 | 14 | 67  | 10.8 |
| 11 | 124244300 | 124244325 | 25   | 124244312 | 12 | 12  | 0    |
| 11 | 124296725 | 124296750 | 25   | 124296737 | 15 | 15  | 0    |
| 11 | 124928650 | 124928675 | 25   | 124928662 | 13 | 13  | 2.2  |
| 11 | 124929300 | 124929450 | 150  | 124929362 | 15 | 81  | 0    |
| 11 | 125178225 | 125178250 | 25   | 125178237 | 12 | 12  | 0    |
| 11 | 125279725 | 125279950 | 225  | 125279762 | 17 | 122 | 13   |
| 11 | 125825400 | 125826575 | 1175 | 125825962 | 23 | 703 | 34.7 |
| 11 | 125883900 | 125883975 | 75   | 125883937 | 13 | 38  | 2.2  |
| 11 | 126375500 | 126375525 | 25   | 126375512 | 12 | 12  | 2.2  |
| 11 | 128060150 | 128060325 | 175  | 128060287 | 23 | 124 | 21.7 |

|    |           |           |     |           |    |     |      |
|----|-----------|-----------|-----|-----------|----|-----|------|
| 11 | 128061450 | 128061750 | 300 | 128061662 | 16 | 163 | 21.7 |
| 11 | 128062050 | 128062075 | 25  | 128062062 | 14 | 14  | 2.2  |
| 11 | 128287200 | 128287300 | 100 | 128287237 | 13 | 50  | 2.2  |
| 11 | 128751575 | 128751625 | 50  | 128751587 | 15 | 27  | 4.3  |
| 11 | 128781600 | 128781675 | 75  | 128781637 | 13 | 37  | 4.3  |
| 11 | 128806025 | 128806200 | 175 | 128806037 | 14 | 82  | 0    |
| 11 | 128811700 | 128811825 | 125 | 128811812 | 14 | 64  | 10.8 |
| 11 | 128814000 | 128814200 | 200 | 128814087 | 19 | 126 | 8.7  |
| 11 | 128893375 | 128893425 | 50  | 128893387 | 13 | 26  | 4.3  |
| 11 | 128901625 | 128901700 | 75  | 128901637 | 15 | 41  | 2.2  |
| 11 | 128932825 | 128932975 | 150 | 128932837 | 13 | 73  | 0    |
| 11 | 128944875 | 128944950 | 75  | 128944887 | 13 | 38  | 6.5  |
| 11 | 128950550 | 128950600 | 50  | 128950562 | 13 | 25  | 4.3  |
| 11 | 129013100 | 129013150 | 50  | 129013137 | 13 | 25  | 0    |
| 11 | 129029725 | 129029925 | 200 | 129029787 | 13 | 98  | 13   |
| 11 | 129085525 | 129085700 | 175 | 129085662 | 17 | 101 | 0    |
| 11 | 129087750 | 129087825 | 75  | 129087762 | 13 | 37  | 6.5  |
| 11 | 129096600 | 129096650 | 50  | 129096612 | 12 | 24  | 0    |
| 11 | 129101425 | 129101450 | 25  | 129101437 | 12 | 12  | 0    |
| 11 | 129142175 | 129142200 | 25  | 129142187 | 12 | 12  | 0    |
| 11 | 129189750 | 129189950 | 200 | 129189862 | 16 | 113 | 0    |
| 11 | 129550025 | 129550075 | 50  | 129550037 | 12 | 24  | 0    |
| 11 | 129577600 | 129577800 | 200 | 129577737 | 18 | 122 | 0    |
| 11 | 129791350 | 129791375 | 25  | 129791362 | 12 | 12  | 2.2  |
| 11 | 129796400 | 129796425 | 25  | 129796412 | 12 | 12  | 0    |
| 11 | 129796950 | 129797125 | 175 | 129797012 | 15 | 100 | 10.8 |
| 11 | 129976925 | 129977025 | 100 | 129976962 | 14 | 52  | 6.5  |
| 11 | 130105775 | 130105825 | 50  | 130105787 | 12 | 24  | 0    |
| 11 | 130389125 | 130389150 | 25  | 130389137 | 13 | 13  | 0    |
| 11 | 131055475 | 131055500 | 25  | 131055487 | 12 | 12  | 0    |
| 11 | 132439550 | 132439650 | 100 | 132439562 | 12 | 48  | 8.7  |
| 11 | 133277025 | 133277075 | 50  | 133277037 | 12 | 24  | 4.3  |
| 11 | 133299150 | 133299250 | 100 | 133299162 | 13 | 50  | 0    |
| 11 | 133299925 | 133299975 | 50  | 133299937 | 12 | 24  | 0    |
| 11 | 133300575 | 133300625 | 50  | 133300587 | 12 | 24  | 0    |
| 11 | 133309425 | 133309475 | 50  | 133309437 | 13 | 25  | 4.3  |
| 11 | 133315450 | 133315825 | 375 | 133315637 | 19 | 217 | 4.3  |
| 11 | 133319300 | 133319325 | 25  | 133319312 | 12 | 12  | 2.2  |
| 11 | 133343175 | 133343325 | 150 | 133343212 | 13 | 73  | 8.7  |
| 11 | 133361125 | 133361225 | 100 | 133361137 | 12 | 46  | 2.2  |
| 11 | 133368450 | 133368550 | 100 | 133368487 | 14 | 51  | 8.7  |
| 11 | 133392975 | 133393150 | 175 | 133393037 | 15 | 93  | 13   |
| 11 | 133395500 | 133395950 | 450 | 133395612 | 16 | 238 | 8.7  |
| 11 | 133396275 | 133396425 | 150 | 133396312 | 18 | 90  | 2.2  |
| 11 | 133402025 | 133402075 | 50  | 133402037 | 12 | 24  | 0    |
| 11 | 133407350 | 133407425 | 75  | 133407362 | 12 | 35  | 2.2  |
| 11 | 133707175 | 133707250 | 75  | 133707212 | 16 | 46  | 6.5  |
| 11 | 133897275 | 133897325 | 50  | 133897287 | 12 | 24  | 0    |
| 11 | 133907550 | 133907600 | 50  | 133907562 | 13 | 25  | 0    |
| 11 | 133940525 | 133940725 | 200 | 133940687 | 19 | 132 | 26   |
| 11 | 134037825 | 134037875 | 50  | 134037837 | 12 | 24  | 0    |
| 11 | 134044075 | 134044150 | 75  | 134044112 | 15 | 42  | 6.5  |
| 11 | 134076000 | 134076175 | 175 | 134076012 | 13 | 87  | 0    |
| 11 | 134138100 | 134138150 | 50  | 134138137 | 13 | 25  | 4.3  |
| 11 | 134349000 | 134349200 | 200 | 134349012 | 13 | 99  | 15.2 |
| 10 | 140000    | 140075    | 75  | 140012    | 19 | 47  | 6.5  |
| 10 | 707975    | 708000    | 25  | 707987    | 12 | 12  | 0    |
| 10 | 736025    | 736450    | 425 | 736137    | 23 | 247 | 28.2 |
| 10 | 750100    | 750225    | 125 | 750137    | 14 | 64  | 0    |
| 10 | 754350    | 754450    | 100 | 754362    | 14 | 51  | 8.7  |
| 10 | 760050    | 760125    | 75  | 760062    | 12 | 36  | 0    |
| 10 | 762550    | 762825    | 275 | 762687    | 17 | 155 | 0    |
| 10 | 763050    | 763150    | 100 | 763087    | 16 | 56  | 0    |
| 10 | 765675    | 765700    | 25  | 765687    | 12 | 12  | 2.2  |
| 10 | 775575    | 775650    | 75  | 775612    | 13 | 37  | 6.5  |
| 10 | 791175    | 791200    | 25  | 791187    | 13 | 13  | 0    |
| 10 | 1196575   | 1196700   | 125 | 1196587   | 13 | 65  | 4.3  |
| 10 | 1210025   | 1210125   | 100 | 1210087   | 14 | 51  | 0    |
| 10 | 1218900   | 1218975   | 75  | 1218937   | 13 | 38  | 0    |
| 10 | 1225700   | 1225725   | 25  | 1225712   | 12 | 12  | 0    |
| 10 | 1408000   | 1408025   | 25  | 1408012   | 13 | 13  | 2.2  |
| 10 | 1537250   | 1537325   | 75  | 1537262   | 14 | 39  | 6.5  |
| 10 | 3045750   | 3045775   | 25  | 3045762   | 12 | 12  | 0    |
| 10 | 3056475   | 3056525   | 50  | 3056487   | 12 | 24  | 0    |
| 10 | 3443375   | 3443425   | 50  | 3443387   | 12 | 24  | 2.2  |

|    |          |          |     |          |    |     |      |
|----|----------|----------|-----|----------|----|-----|------|
| 10 | 3572325  | 3572375  | 50  | 3572337  | 12 | 24  | 0    |
| 10 | 4130700  | 4130750  | 50  | 4130712  | 12 | 24  | 4.3  |
| 10 | 5427225  | 5427250  | 25  | 5427237  | 12 | 12  | 2.2  |
| 10 | 6513300  | 6513475  | 175 | 6513312  | 13 | 89  | 8.7  |
| 10 | 6568225  | 6568250  | 25  | 6568237  | 12 | 12  | 0    |
| 10 | 7276150  | 7276225  | 75  | 7276162  | 12 | 35  | 6.5  |
| 10 | 7803525  | 7803725  | 200 | 7803587  | 16 | 102 | 0    |
| 10 | 7804875  | 7805050  | 175 | 7804912  | 13 | 85  | 15.2 |
| 10 | 8378075  | 8378100  | 25  | 8378087  | 12 | 12  | 0    |
| 10 | 8420725  | 8420775  | 50  | 8420737  | 12 | 24  | 4.3  |
| 10 | 11494275 | 11494400 | 125 | 11494287 | 12 | 60  | 2.2  |
| 10 | 14318400 | 14318575 | 175 | 14318537 | 16 | 99  | 0    |
| 10 | 14801700 | 14801825 | 125 | 14801712 | 14 | 66  | 10.8 |
| 10 | 15174200 | 15174225 | 25  | 15174212 | 12 | 12  | 0    |
| 10 | 17537300 | 17537500 | 200 | 17537387 | 20 | 137 | 15.2 |
| 10 | 22651100 | 22651150 | 50  | 22651112 | 13 | 26  | 4.3  |
| 10 | 22674025 | 22674150 | 125 | 22674062 | 14 | 65  | 8.7  |
| 10 | 22674575 | 22674675 | 100 | 22674612 | 13 | 50  | 8.7  |
| 10 | 27275525 | 27275650 | 125 | 27275537 | 12 | 57  | 10.8 |
| 10 | 27588225 | 27588250 | 25  | 27588237 | 12 | 12  | 0    |
| 10 | 27742675 | 27742825 | 150 | 27742687 | 17 | 96  | 13   |
| 10 | 28765850 | 28765950 | 100 | 28765862 | 12 | 48  | 0    |
| 10 | 29643050 | 29643200 | 150 | 29643112 | 14 | 78  | 0    |
| 10 | 30461675 | 30461725 | 50  | 30461687 | 12 | 24  | 4.3  |
| 10 | 32855825 | 32855850 | 25  | 32855837 | 12 | 12  | 0    |
| 10 | 36118375 | 36118875 | 500 | 36118437 | 24 | 359 | 41.2 |
| 10 | 36396075 | 36396550 | 475 | 36396362 | 15 | 237 | 15.2 |
| 10 | 37318325 | 37318450 | 125 | 37318412 | 14 | 60  | 0    |
| 10 | 37379325 | 37379425 | 100 | 37379337 | 12 | 45  | 0    |
| 10 | 38814500 | 38814700 | 200 | 38814512 | 18 | 99  | 17.3 |
| 10 | 39119000 | 39119025 | 25  | 39119012 | 12 | 12  | 2.2  |
| 10 | 39134125 | 39134150 | 25  | 39134137 | 12 | 12  | 2.2  |
| 10 | 39134425 | 39134625 | 200 | 39134437 | 26 | 161 | 8.7  |
| 10 | 39178175 | 39178325 | 150 | 39178187 | 14 | 79  | 13   |
| 10 | 39190850 | 39190975 | 125 | 39190862 | 15 | 67  | 8.7  |
| 10 | 41675350 | 41675525 | 175 | 41675462 | 15 | 98  | 0    |
| 10 | 41676375 | 41676450 | 75  | 41676387 | 16 | 45  | 2.2  |
| 10 | 41677525 | 41677650 | 125 | 41677587 | 15 | 67  | 10.8 |
| 10 | 41678175 | 41678350 | 175 | 41678212 | 18 | 104 | 13   |
| 10 | 41696800 | 41696825 | 25  | 41696812 | 12 | 12  | 0    |
| 10 | 41697550 | 41697725 | 175 | 41697562 | 15 | 88  | 0    |
| 10 | 41698775 | 41698825 | 50  | 41698812 | 15 | 28  | 2.2  |
| 10 | 41699300 | 41699325 | 25  | 41699312 | 13 | 13  | 2.2  |
| 10 | 41699600 | 41699700 | 100 | 41699687 | 15 | 54  | 8.7  |
| 10 | 41701075 | 41701200 | 125 | 41701087 | 16 | 73  | 0    |
| 10 | 41701750 | 41701775 | 25  | 41701762 | 13 | 13  | 2.2  |
| 10 | 41704175 | 41704225 | 50  | 41704187 | 22 | 42  | 6.5  |
| 10 | 41709125 | 41709250 | 125 | 41709162 | 18 | 83  | 10.8 |
| 10 | 41710400 | 41710525 | 125 | 41710412 | 17 | 70  | 2.2  |
| 10 | 41714825 | 41715000 | 175 | 41714937 | 24 | 139 | 15.2 |
| 10 | 41725100 | 41725125 | 25  | 41725112 | 13 | 13  | 2.2  |
| 10 | 41850625 | 41850700 | 75  | 41850637 | 13 | 36  | 6.5  |
| 10 | 41858975 | 41859000 | 25  | 41858987 | 14 | 14  | 0    |
| 10 | 41965000 | 41965025 | 25  | 41965012 | 15 | 15  | 2.2  |
| 10 | 42119725 | 42119800 | 75  | 42119737 | 12 | 35  | 6.5  |
| 10 | 42569925 | 42569950 | 25  | 42569937 | 12 | 12  | 0    |
| 10 | 43389375 | 43389625 | 250 | 43389487 | 23 | 186 | 17.3 |
| 10 | 43421675 | 43421700 | 25  | 43421687 | 17 | 17  | 2.2  |
| 10 | 43459900 | 43460025 | 125 | 43459937 | 14 | 65  | 0    |
| 10 | 43642025 | 43642050 | 25  | 43642037 | 12 | 12  | 2.2  |
| 10 | 44635100 | 44635125 | 25  | 44635112 | 12 | 12  | 0    |
| 10 | 45040275 | 45040300 | 25  | 45040287 | 12 | 12  | 2.2  |
| 10 | 46479550 | 46479575 | 25  | 46479562 | 12 | 12  | 0    |
| 10 | 46504175 | 46504200 | 25  | 46504187 | 12 | 12  | 0    |
| 10 | 46507725 | 46507775 | 50  | 46507737 | 12 | 24  | 2.2  |
| 10 | 46549500 | 46549550 | 50  | 46549537 | 13 | 25  | 0    |
| 10 | 51456325 | 51456500 | 175 | 51456387 | 14 | 93  | 10.8 |
| 10 | 58525975 | 58526175 | 200 | 58526087 | 17 | 113 | 0    |
| 10 | 62470500 | 62470525 | 25  | 62470512 | 12 | 12  | 2.2  |
| 10 | 63894950 | 63894975 | 25  | 63894962 | 12 | 12  | 2.2  |
| 10 | 65402850 | 65403300 | 450 | 65402962 | 15 | 218 | 13   |
| 10 | 71684600 | 71684700 | 100 | 71684637 | 17 | 59  | 0    |
| 10 | 71685475 | 71685525 | 50  | 71685487 | 12 | 24  | 4.3  |
| 10 | 72052450 | 72052575 | 125 | 72052487 | 13 | 63  | 2.2  |
| 10 | 72060225 | 72060350 | 125 | 72060312 | 16 | 69  | 0    |

|    |           |           |     |           |    |     |      |
|----|-----------|-----------|-----|-----------|----|-----|------|
| 10 | 72195625  | 72195825  | 200 | 72195737  | 15 | 106 | 13   |
| 10 | 72341825  | 72341850  | 25  | 72341837  | 13 | 13  | 0    |
| 10 | 73137375  | 73137475  | 100 | 73137437  | 13 | 49  | 2.2  |
| 10 | 76473225  | 76473325  | 100 | 76473237  | 13 | 50  | 0    |
| 10 | 77485450  | 77485475  | 25  | 77485462  | 12 | 12  | 0    |
| 10 | 77486200  | 77486375  | 175 | 77486312  | 15 | 93  | 10.8 |
| 10 | 78275150  | 78275175  | 25  | 78275162  | 12 | 12  | 2.2  |
| 10 | 79383400  | 79383425  | 25  | 79383412  | 12 | 12  | 2.2  |
| 10 | 79623175  | 79623400  | 225 | 79623262  | 19 | 135 | 0    |
| 10 | 79766875  | 79767025  | 150 | 79766962  | 13 | 72  | 0    |
| 10 | 79921625  | 79921675  | 50  | 79921637  | 12 | 24  | 0    |
| 10 | 80149150  | 80149175  | 25  | 80149162  | 12 | 12  | 0    |
| 10 | 80149975  | 80150100  | 125 | 80150062  | 15 | 68  | 8.7  |
| 10 | 80807625  | 80807750  | 125 | 80807662  | 15 | 69  | 0    |
| 10 | 88781100  | 88781225  | 125 | 88781137  | 14 | 65  | 0    |
| 10 | 89653425  | 89653500  | 75  | 89653462  | 14 | 40  | 0    |
| 10 | 90332725  | 90332925  | 200 | 90332862  | 16 | 119 | 19.5 |
| 10 | 91014225  | 91014400  | 175 | 91014262  | 20 | 116 | 0    |
| 10 | 97840425  | 97840600  | 175 | 97840437  | 24 | 129 | 6.5  |
| 10 | 97879325  | 97879375  | 50  | 97879362  | 16 | 29  | 0    |
| 10 | 98106775  | 98106800  | 25  | 98106787  | 12 | 12  | 0    |
| 10 | 98551350  | 98551375  | 25  | 98551362  | 18 | 18  | 2.2  |
| 10 | 100096550 | 100096950 | 400 | 100096887 | 16 | 200 | 6.5  |
| 10 | 100414100 | 100414275 | 175 | 100414212 | 19 | 107 | 10.8 |
| 10 | 100983850 | 100984050 | 200 | 100983962 | 17 | 113 | 0    |
| 10 | 102312100 | 102312125 | 25  | 102312112 | 13 | 13  | 0    |
| 10 | 102578250 | 102578300 | 50  | 102578287 | 13 | 25  | 4.3  |
| 10 | 102849350 | 102849575 | 225 | 102849387 | 15 | 122 | 0    |
| 10 | 102916800 | 102916875 | 75  | 102916837 | 14 | 39  | 0    |
| 10 | 103073625 | 103073675 | 50  | 103073662 | 13 | 25  | 0    |
| 10 | 103942275 | 103942425 | 150 | 103942312 | 15 | 75  | 13   |
| 10 | 103950725 | 103951225 | 500 | 103951112 | 25 | 299 | 54.2 |
| 10 | 105027625 | 105027875 | 250 | 105027712 | 22 | 170 | 0    |
| 10 | 105212300 | 105212525 | 225 | 105212487 | 16 | 125 | 2.2  |
| 10 | 105284525 | 105284800 | 275 | 105284637 | 14 | 118 | 13   |
| 10 | 112828125 | 112828250 | 125 | 112828137 | 18 | 82  | 4.3  |
| 10 | 113989200 | 113989500 | 300 | 113989387 | 18 | 186 | 28.2 |
| 10 | 113989850 | 113989925 | 75  | 113989887 | 13 | 38  | 2.2  |
| 10 | 113990350 | 113990600 | 250 | 113990487 | 16 | 132 | 0    |
| 10 | 115207125 | 115207150 | 25  | 115207137 | 12 | 12  | 2.2  |
| 10 | 115229325 | 115229550 | 225 | 115229387 | 21 | 166 | 0    |
| 10 | 115350750 | 115350925 | 175 | 115350837 | 16 | 98  | 4.3  |
| 10 | 115794175 | 115794625 | 450 | 115794237 | 24 | 331 | 19.5 |
| 10 | 116258950 | 116258975 | 25  | 116258962 | 12 | 12  | 2.2  |
| 10 | 119291375 | 119291425 | 50  | 119291387 | 12 | 24  | 4.3  |
| 10 | 120743775 | 120743825 | 50  | 120743787 | 12 | 24  | 0    |
| 10 | 120751625 | 120751675 | 50  | 120751662 | 14 | 26  | 4.3  |
| 10 | 122699150 | 122699350 | 200 | 122699187 | 16 | 115 | 15.2 |
| 10 | 122707800 | 122707850 | 50  | 122707812 | 12 | 24  | 0    |
| 10 | 122736750 | 122736775 | 25  | 122736762 | 12 | 12  | 0    |
| 10 | 123236600 | 123236650 | 50  | 123236612 | 12 | 24  | 0    |
| 10 | 123259825 | 123259875 | 50  | 123259837 | 13 | 26  | 4.3  |
| 10 | 123281075 | 123281150 | 75  | 123281087 | 13 | 39  | 0    |
| 10 | 123395350 | 123395500 | 150 | 123395412 | 13 | 74  | 6.5  |
| 10 | 123403175 | 123403450 | 275 | 123403337 | 22 | 174 | 0    |
| 10 | 124704200 | 124704325 | 125 | 124704212 | 30 | 109 | 10.8 |
| 10 | 124889550 | 124889625 | 75  | 124889587 | 13 | 37  | 6.5  |
| 10 | 124894725 | 124894875 | 150 | 124894837 | 13 | 71  | 0    |
| 10 | 125845875 | 125846150 | 275 | 125846062 | 18 | 162 | 8.7  |
| 10 | 126071475 | 126071525 | 50  | 126071487 | 12 | 24  | 4.3  |
| 10 | 126239950 | 126239975 | 25  | 126239962 | 12 | 12  | 0    |
| 10 | 126954050 | 126954075 | 25  | 126954062 | 12 | 12  | 2.2  |
| 10 | 127227400 | 127227775 | 375 | 127227437 | 14 | 174 | 19.5 |
| 10 | 127297900 | 127297975 | 75  | 127297912 | 14 | 41  | 0    |
| 10 | 127397700 | 127397800 | 100 | 127397787 | 14 | 50  | 4.3  |
| 10 | 127564500 | 127564525 | 25  | 127564512 | 12 | 12  | 2.2  |
| 10 | 127571075 | 127571125 | 50  | 127571087 | 12 | 24  | 4.3  |
| 10 | 127576950 | 127577075 | 125 | 127577062 | 26 | 117 | 19.5 |
| 10 | 127580100 | 127580175 | 75  | 127580112 | 18 | 46  | 6.5  |
| 10 | 127589700 | 127589825 | 125 | 127589712 | 19 | 89  | 17.3 |
| 10 | 127590625 | 127590675 | 50  | 127590637 | 12 | 24  | 4.3  |
| 10 | 127593275 | 127593350 | 75  | 127593337 | 13 | 36  | 2.2  |
| 10 | 128072275 | 128072375 | 100 | 128072287 | 13 | 49  | 0    |
| 10 | 128072850 | 128072875 | 25  | 128072862 | 12 | 12  | 2.2  |
| 10 | 128102475 | 128102675 | 200 | 128102512 | 14 | 103 | 0    |

|    |           |           |     |           |    |     |      |
|----|-----------|-----------|-----|-----------|----|-----|------|
| 10 | 128505000 | 128505125 | 125 | 128505062 | 14 | 64  | 0    |
| 10 | 128515725 | 128515975 | 250 | 128515887 | 16 | 137 | 2.2  |
| 10 | 129156025 | 129156125 | 100 | 129156062 | 14 | 55  | 2.2  |
| 10 | 131092375 | 131092400 | 25  | 131092387 | 13 | 13  | 2.2  |
| 10 | 131103800 | 131103975 | 175 | 131103837 | 14 | 94  | 6.5  |
| 10 | 131481100 | 131481250 | 150 | 131481137 | 15 | 83  | 0    |
| 10 | 131502575 | 131502675 | 100 | 131502612 | 13 | 50  | 0    |
| 10 | 131505175 | 131505250 | 75  | 131505212 | 14 | 39  | 0    |
| 10 | 131690175 | 131690250 | 75  | 131690187 | 13 | 37  | 0    |
| 10 | 133440450 | 133440550 | 100 | 133440462 | 13 | 51  | 0    |
| 10 | 133932600 | 133932750 | 150 | 133932612 | 13 | 68  | 4.3  |
| 10 | 134028025 | 134028075 | 50  | 134028037 | 16 | 29  | 2.2  |
| 10 | 134035175 | 134035450 | 275 | 134035262 | 16 | 153 | 13   |
| 10 | 134042875 | 134042950 | 75  | 134042887 | 12 | 36  | 2.2  |
| 10 | 134089050 | 134089100 | 50  | 134089087 | 14 | 26  | 0    |
| 10 | 134103300 | 134103350 | 50  | 134103312 | 12 | 24  | 0    |
| 10 | 134368825 | 134368975 | 150 | 134368837 | 13 | 74  | 13   |
| 10 | 134370225 | 134370300 | 75  | 134370287 | 13 | 37  | 0    |
| 10 | 134418600 | 134418700 | 100 | 134418637 | 15 | 53  | 0    |
| 10 | 134465575 | 134465700 | 125 | 134465637 | 14 | 66  | 2.2  |
| 10 | 134481575 | 134481625 | 50  | 134481587 | 12 | 24  | 2.2  |
| 10 | 134483800 | 134483975 | 175 | 134483887 | 15 | 90  | 13   |
| 10 | 134490600 | 134490800 | 200 | 134490787 | 14 | 93  | 10.8 |
| 10 | 134500875 | 134501275 | 400 | 134501162 | 15 | 198 | 17.3 |
| 10 | 134597225 | 134597425 | 200 | 134597387 | 17 | 106 | 8.7  |
| 10 | 134661300 | 134661350 | 50  | 134661312 | 12 | 24  | 0    |
| 10 | 134709200 | 134709300 | 100 | 134709212 | 13 | 51  | 0    |
| 10 | 134785250 | 134785275 | 25  | 134785262 | 13 | 13  | 0    |
| 10 | 134794475 | 134794500 | 25  | 134794487 | 12 | 12  | 2.2  |
| 10 | 134841125 | 134841650 | 525 | 134841487 | 18 | 292 | 8.7  |
| 10 | 134847975 | 134848000 | 25  | 134847987 | 12 | 12  | 2.2  |
| 10 | 134998100 | 134998475 | 375 | 134998187 | 19 | 204 | 0    |
| 10 | 135002175 | 135002225 | 50  | 135002187 | 13 | 26  | 4.3  |
| 10 | 135003350 | 135003500 | 150 | 135003462 | 13 | 69  | 0    |
| 10 | 135348900 | 135348975 | 75  | 135348912 | 14 | 42  | 6.5  |
| 10 | 135374100 | 135374125 | 25  | 135374112 | 22 | 22  | 4.3  |
| 13 | 18543275  | 18543300  | 25  | 18543287  | 12 | 12  | 0    |
| 13 | 18653600  | 18654225  | 625 | 18653687  | 16 | 310 | 26   |
| 13 | 19036800  | 19036950  | 150 | 19036812  | 14 | 77  | 0    |
| 13 | 19664050  | 19664225  | 175 | 19664112  | 16 | 100 | 10.8 |
| 13 | 19745700  | 19745725  | 25  | 19745712  | 12 | 12  | 0    |
| 13 | 19798050  | 19798175  | 125 | 19798137  | 15 | 67  | 6.5  |
| 13 | 19798850  | 19799175  | 325 | 19799037  | 13 | 143 | 6.5  |
| 13 | 19821000  | 19821300  | 300 | 19821137  | 17 | 170 | 0    |
| 13 | 19844825  | 19844900  | 75  | 19844837  | 12 | 36  | 0    |
| 13 | 19850125  | 19850225  | 100 | 19850212  | 13 | 49  | 0    |
| 13 | 20574225  | 20574300  | 75  | 20574262  | 13 | 38  | 4.3  |
| 13 | 22405775  | 22405900  | 125 | 22405812  | 13 | 62  | 0    |
| 13 | 22614425  | 22614500  | 75  | 22614462  | 15 | 43  | 0    |
| 13 | 23604075  | 23604300  | 225 | 23604237  | 20 | 150 | 0    |
| 13 | 23828525  | 23828550  | 25  | 23828537  | 12 | 12  | 0    |
| 13 | 24170950  | 24170975  | 25  | 24170962  | 12 | 12  | 0    |
| 13 | 24644175  | 24644350  | 175 | 24644237  | 15 | 96  | 10.8 |
| 13 | 24700075  | 24700100  | 25  | 24700087  | 12 | 12  | 0    |
| 13 | 24700725  | 24700750  | 25  | 24700737  | 12 | 12  | 2.2  |
| 13 | 24838075  | 24838150  | 75  | 24838112  | 13 | 37  | 6.5  |
| 13 | 25484400  | 25484475  | 75  | 25484412  | 12 | 35  | 6.5  |
| 13 | 25563575  | 25563725  | 150 | 25563687  | 16 | 83  | 2.2  |
| 13 | 26445525  | 26445650  | 125 | 26445562  | 15 | 68  | 10.8 |
| 13 | 26780475  | 26780525  | 50  | 26780487  | 12 | 24  | 2.2  |
| 13 | 28007325  | 28007350  | 25  | 28007337  | 12 | 12  | 0    |
| 13 | 29083950  | 29084050  | 100 | 29083987  | 13 | 51  | 4.3  |
| 13 | 30330825  | 30330950  | 125 | 30330887  | 14 | 64  | 6.5  |
| 13 | 30527100  | 30527125  | 25  | 30527112  | 12 | 12  | 0    |
| 13 | 30591825  | 30591975  | 150 | 30591837  | 12 | 71  | 0    |
| 13 | 32329875  | 32329950  | 75  | 32329887  | 13 | 38  | 6.5  |
| 13 | 33624625  | 33624650  | 25  | 33624637  | 12 | 12  | 0    |
| 13 | 33632275  | 33632375  | 100 | 33632337  | 14 | 52  | 0    |
| 13 | 38160300  | 38160650  | 350 | 38160462  | 24 | 250 | 26   |
| 13 | 38161525  | 38161675  | 150 | 38161587  | 13 | 73  | 4.3  |
| 13 | 38797300  | 38797325  | 25  | 38797312  | 13 | 13  | 0    |
| 13 | 39329000  | 39329025  | 25  | 39329012  | 12 | 12  | 2.2  |
| 13 | 40665650  | 40666075  | 425 | 40665937  | 22 | 290 | 28.2 |
| 13 | 40930575  | 40930650  | 75  | 40930612  | 13 | 37  | 4.3  |
| 13 | 41014425  | 41014650  | 225 | 41014512  | 20 | 153 | 21.7 |

|    |           |           |      |           |    |     |      |
|----|-----------|-----------|------|-----------|----|-----|------|
| 13 | 41743500  | 41743725  | 225  | 41743562  | 22 | 175 | 15.2 |
| 13 | 42653050  | 42653100  | 50   | 42653062  | 12 | 24  | 2.2  |
| 13 | 47792375  | 47792425  | 50   | 47792387  | 12 | 24  | 0    |
| 13 | 48024000  | 48024200  | 200  | 48024087  | 17 | 113 | 0    |
| 13 | 48692625  | 48692800  | 175  | 48692712  | 13 | 88  | 8.7  |
| 13 | 49351000  | 49351100  | 100  | 49351062  | 13 | 49  | 0    |
| 13 | 50328400  | 50328475  | 75   | 50328412  | 13 | 38  | 6.5  |
| 13 | 50694225  | 50694250  | 25   | 50694237  | 16 | 16  | 2.2  |
| 13 | 51355075  | 51355125  | 50   | 51355087  | 12 | 24  | 2.2  |
| 13 | 57104850  | 57105525  | 675  | 57104887  | 17 | 347 | 17.3 |
| 13 | 57106125  | 57106200  | 75   | 57106162  | 13 | 37  | 6.5  |
| 13 | 60618375  | 60618450  | 75   | 60618437  | 14 | 40  | 0    |
| 13 | 61866825  | 61866850  | 25   | 61866837  | 12 | 12  | 0    |
| 13 | 63678700  | 63678775  | 75   | 63678712  | 13 | 39  | 0    |
| 13 | 72882300  | 72882350  | 50   | 72882312  | 12 | 24  | 0    |
| 13 | 72912375  | 72912450  | 75   | 72912412  | 14 | 39  | 0    |
| 13 | 73886375  | 73886700  | 325  | 73886437  | 15 | 160 | 6.5  |
| 13 | 77263025  | 77263200  | 175  | 77263037  | 13 | 81  | 10.8 |
| 13 | 78073775  | 78073950  | 175  | 78073887  | 18 | 112 | 19.5 |
| 13 | 84903000  | 84903025  | 25   | 84903012  | 12 | 12  | 2.2  |
| 13 | 85326650  | 85326675  | 25   | 85326662  | 12 | 12  | 2.2  |
| 13 | 95003025  | 95003125  | 100  | 95003087  | 13 | 49  | 0    |
| 13 | 95484775  | 95484825  | 50   | 95484787  | 12 | 24  | 4.3  |
| 13 | 96397075  | 96397100  | 25   | 96397087  | 12 | 12  | 0    |
| 13 | 97057700  | 97057725  | 25   | 97057712  | 12 | 12  | 2.2  |
| 13 | 97180175  | 97180300  | 125  | 97180212  | 14 | 67  | 10.8 |
| 13 | 97654300  | 97654325  | 25   | 97654312  | 12 | 12  | 0    |
| 13 | 98201875  | 98201950  | 75   | 98201887  | 13 | 37  | 0    |
| 13 | 98203375  | 98203400  | 25   | 98203387  | 12 | 12  | 0    |
| 13 | 98231825  | 98232025  | 200  | 98231837  | 15 | 105 | 0    |
| 13 | 98858275  | 98858800  | 525  | 98858662  | 18 | 278 | 17.3 |
| 13 | 98862225  | 98862400  | 175  | 98862262  | 16 | 100 | 0    |
| 13 | 98867150  | 98867200  | 50   | 98867187  | 13 | 25  | 0    |
| 13 | 98905200  | 98905300  | 100  | 98905287  | 14 | 48  | 8.7  |
| 13 | 99420400  | 99420425  | 25   | 99420412  | 13 | 13  | 2.2  |
| 13 | 99433250  | 99433525  | 275  | 99433337  | 30 | 259 | 15.2 |
| 13 | 99441025  | 99441175  | 150  | 99441062  | 14 | 81  | 4.3  |
| 13 | 99507125  | 99507200  | 75   | 99507137  | 13 | 37  | 6.5  |
| 13 | 100722225 | 100722250 | 25   | 100722237 | 12 | 12  | 2.2  |
| 13 | 101985825 | 101985875 | 50   | 101985837 | 12 | 24  | 0    |
| 13 | 102159500 | 102159625 | 125  | 102159512 | 12 | 56  | 0    |
| 13 | 102224475 | 102224550 | 75   | 102224512 | 13 | 37  | 2.2  |
| 13 | 103462475 | 103462500 | 25   | 103462487 | 12 | 12  | 0    |
| 13 | 105025525 | 105025550 | 25   | 105025537 | 12 | 12  | 0    |
| 13 | 105825550 | 105825575 | 25   | 105825562 | 13 | 13  | 2.2  |
| 13 | 105943550 | 105943575 | 25   | 105943562 | 12 | 12  | 0    |
| 13 | 109090550 | 109090575 | 25   | 109090562 | 12 | 12  | 0    |
| 13 | 109307900 | 109307925 | 25   | 109307912 | 12 | 12  | 2.2  |
| 13 | 109947175 | 109947325 | 150  | 109947262 | 13 | 74  | 10.8 |
| 13 | 109951275 | 109951325 | 50   | 109951312 | 13 | 25  | 0    |
| 13 | 110243225 | 110243250 | 25   | 110243237 | 12 | 12  | 2.2  |
| 13 | 110243750 | 110243875 | 125  | 110243762 | 13 | 59  | 0    |
| 13 | 110244575 | 110244725 | 150  | 110244587 | 19 | 91  | 8.7  |
| 13 | 110543775 | 110543875 | 100  | 110543837 | 17 | 60  | 0    |
| 13 | 110565100 | 110565175 | 75   | 110565112 | 12 | 36  | 6.5  |
| 13 | 110792250 | 110792375 | 125  | 110792312 | 17 | 74  | 0    |
| 13 | 111919900 | 111919925 | 25   | 111919912 | 12 | 12  | 0    |
| 13 | 112158750 | 112158800 | 50   | 112158762 | 15 | 29  | 0    |
| 13 | 112159075 | 112159200 | 125  | 112159112 | 13 | 63  | 0    |
| 13 | 112340700 | 112340750 | 50   | 112340712 | 13 | 26  | 0    |
| 13 | 112367975 | 112368900 | 925  | 112368512 | 16 | 436 | 67.2 |
| 13 | 112597775 | 112597825 | 50   | 112597812 | 13 | 25  | 4.3  |
| 13 | 112606000 | 112607175 | 1175 | 112607037 | 31 | 817 | 10.8 |
| 13 | 112607425 | 112607600 | 175  | 112607487 | 16 | 101 | 0    |
| 13 | 112608475 | 112608950 | 475  | 112608762 | 31 | 391 | 17.3 |
| 13 | 112618925 | 112619025 | 100  | 112618962 | 15 | 55  | 4.3  |
| 13 | 112619350 | 112619400 | 50   | 112619387 | 13 | 25  | 4.3  |
| 13 | 112619825 | 112619900 | 75   | 112619887 | 13 | 37  | 0    |
| 13 | 112626350 | 112626475 | 125  | 112626437 | 13 | 61  | 6.5  |
| 13 | 112673625 | 112673700 | 75   | 112673637 | 12 | 34  | 0    |
| 13 | 112714875 | 112714900 | 25   | 112714887 | 13 | 13  | 0    |
| 13 | 112758075 | 112758425 | 350  | 112758362 | 14 | 152 | 2.2  |
| 13 | 112797875 | 112797900 | 25   | 112797887 | 12 | 12  | 0    |
| 13 | 112820725 | 112821225 | 500  | 112821087 | 17 | 242 | 34.7 |
| 13 | 112821725 | 112822075 | 350  | 112821912 | 21 | 224 | 6.5  |

|    |           |           |     |           |    |     |      |
|----|-----------|-----------|-----|-----------|----|-----|------|
| 13 | 112981475 | 112981625 | 150 | 112981512 | 14 | 79  | 0    |
| 13 | 113049750 | 113049900 | 150 | 113049812 | 16 | 82  | 0    |
| 13 | 113496475 | 113496575 | 100 | 113496487 | 12 | 46  | 4.3  |
| 13 | 113534600 | 113534675 | 75  | 113534662 | 14 | 40  | 0    |
| 13 | 113603075 | 113603350 | 275 | 113603162 | 16 | 144 | 0    |
| 13 | 113636125 | 113636300 | 175 | 113636262 | 14 | 79  | 0    |
| 13 | 113822225 | 113822300 | 75  | 113822262 | 13 | 38  | 4.3  |
| 13 | 113924950 | 113924975 | 25  | 113924962 | 12 | 12  | 2.2  |
| 13 | 113969350 | 113969550 | 200 | 113969462 | 17 | 115 | 13   |
| 12 | 24825     | 25025     | 200 | 24862     | 15 | 111 | 10.8 |
| 12 | 33375     | 33425     | 50  | 33387     | 14 | 27  | 2.2  |
| 12 | 34525     | 34900     | 375 | 34562     | 15 | 188 | 4.3  |
| 12 | 36200     | 36475     | 275 | 36362     | 15 | 149 | 21.7 |
| 12 | 82150     | 82200     | 50  | 82162     | 12 | 24  | 4.3  |
| 12 | 203350    | 203375    | 25  | 203362    | 12 | 12  | 0    |
| 12 | 212650    | 212675    | 25  | 212662    | 12 | 12  | 0    |
| 12 | 214400    | 214625    | 225 | 214512    | 16 | 122 | 21.7 |
| 12 | 218550    | 218800    | 250 | 218562    | 15 | 125 | 6.5  |
| 12 | 1553800   | 1553850   | 50  | 1553812   | 12 | 24  | 4.3  |
| 12 | 1833225   | 1833250   | 25  | 1833237   | 12 | 12  | 0    |
| 12 | 1834925   | 1834950   | 25  | 1834937   | 12 | 12  | 0    |
| 12 | 1835275   | 1835325   | 50  | 1835287   | 12 | 24  | 0    |
| 12 | 1837850   | 1837925   | 75  | 1837887   | 13 | 38  | 6.5  |
| 12 | 1848625   | 1848875   | 250 | 1848787   | 19 | 154 | 19.5 |
| 12 | 1849675   | 1849750   | 75  | 1849687   | 12 | 34  | 6.5  |
| 12 | 1850400   | 1851200   | 800 | 1850587   | 25 | 585 | 4.3  |
| 12 | 1852000   | 1852075   | 75  | 1852062   | 13 | 37  | 0    |
| 12 | 1855275   | 1855400   | 125 | 1855362   | 14 | 66  | 10.8 |
| 12 | 1860400   | 1860450   | 50  | 1860412   | 13 | 25  | 4.3  |
| 12 | 1864425   | 1864700   | 275 | 1864437   | 13 | 119 | 0    |
| 12 | 1865925   | 1866025   | 100 | 1865962   | 13 | 49  | 6.5  |
| 12 | 1867450   | 1867600   | 150 | 1867537   | 15 | 82  | 0    |
| 12 | 1870125   | 1870200   | 75  | 1870137   | 14 | 39  | 4.3  |
| 12 | 1887100   | 1887275   | 175 | 1887212   | 16 | 100 | 6.5  |
| 12 | 2235375   | 2235450   | 75  | 2235437   | 41 | 108 | 19.5 |
| 12 | 2676675   | 2676700   | 25  | 2676687   | 12 | 12  | 0    |
| 12 | 2732375   | 2732450   | 75  | 2732387   | 13 | 38  | 2.2  |
| 12 | 2739375   | 2739400   | 25  | 2739387   | 12 | 12  | 0    |
| 12 | 3313600   | 3313675   | 75  | 3313612   | 12 | 36  | 6.5  |
| 12 | 3579075   | 3579125   | 50  | 3579087   | 13 | 25  | 4.3  |
| 12 | 3891650   | 3891775   | 125 | 3891662   | 12 | 57  | 0    |
| 12 | 4223250   | 4223275   | 25  | 4223262   | 12 | 12  | 2.2  |
| 12 | 4251800   | 4252250   | 450 | 4252037   | 21 | 321 | 19.5 |
| 12 | 6006550   | 6006700   | 150 | 6006587   | 14 | 80  | 0    |
| 12 | 6115950   | 6116150   | 200 | 6116037   | 17 | 111 | 17.3 |
| 12 | 6116525   | 6116725   | 200 | 6116612   | 16 | 108 | 0    |
| 12 | 6622825   | 6622975   | 150 | 6622837   | 13 | 77  | 8.7  |
| 12 | 6623400   | 6623875   | 475 | 6623837   | 17 | 209 | 19.5 |
| 12 | 7045100   | 7045175   | 75  | 7045112   | 14 | 40  | 0    |
| 12 | 7483800   | 7483825   | 25  | 7483812   | 12 | 12  | 0    |
| 12 | 8555600   | 8555650   | 50  | 8555612   | 12 | 24  | 4.3  |
| 12 | 8649225   | 8649375   | 150 | 8649237   | 14 | 75  | 6.5  |
| 12 | 9012975   | 9013200   | 225 | 9013087   | 17 | 125 | 4.3  |
| 12 | 9109125   | 9109600   | 475 | 9109237   | 18 | 269 | 52   |
| 12 | 9397475   | 9397525   | 50  | 9397487   | 12 | 24  | 4.3  |
| 12 | 9397850   | 9397975   | 125 | 9397887   | 14 | 64  | 0    |
| 12 | 9695325   | 9695425   | 100 | 9695362   | 13 | 49  | 6.5  |
| 12 | 10899825  | 10899875  | 50  | 10899837  | 12 | 24  | 4.3  |
| 12 | 12993975  | 12994050  | 75  | 12993987  | 12 | 36  | 0    |
| 12 | 13339550  | 13339575  | 25  | 13339562  | 12 | 12  | 2.2  |
| 12 | 13607875  | 13608000  | 125 | 13607987  | 15 | 69  | 0    |
| 12 | 13608350  | 13608475  | 125 | 13608362  | 12 | 60  | 0    |
| 12 | 13891875  | 13891900  | 25  | 13891887  | 12 | 12  | 0    |
| 12 | 13978825  | 13978875  | 50  | 13978837  | 12 | 24  | 0    |
| 12 | 14026575  | 14026600  | 25  | 14026587  | 12 | 12  | 2.2  |
| 12 | 14302475  | 14302525  | 50  | 14302487  | 15 | 28  | 0    |
| 12 | 19770650  | 19770750  | 100 | 19770662  | 13 | 47  | 0    |
| 12 | 20596175  | 20596225  | 50  | 20596187  | 14 | 27  | 4.3  |
| 12 | 21571925  | 21571950  | 25  | 21571937  | 13 | 13  | 2.2  |
| 12 | 21732150  | 21732375  | 225 | 21732212  | 19 | 137 | 15.2 |
| 12 | 22378275  | 22378300  | 25  | 22378287  | 12 | 12  | 2.2  |
| 12 | 22444450  | 22444650  | 200 | 22444562  | 14 | 103 | 0    |
| 12 | 22737200  | 22737225  | 25  | 22737212  | 13 | 13  | 0    |
| 12 | 22823450  | 22823625  | 175 | 22823512  | 17 | 114 | 10.8 |
| 12 | 22996375  | 22996425  | 50  | 22996387  | 13 | 25  | 0    |



|    |          |          |     |          |    |     |      |
|----|----------|----------|-----|----------|----|-----|------|
| 12 | 27287975 | 27288200 | 225 | 27288187 | 38 | 207 | 21.7 |
| 12 | 28957175 | 28957225 | 50  | 28957187 | 12 | 24  | 0    |
| 12 | 29142875 | 29142950 | 75  | 29142887 | 12 | 36  | 0    |
| 12 | 29143975 | 29144025 | 50  | 29143987 | 12 | 24  | 0    |
| 12 | 29835400 | 29835450 | 50  | 29835412 | 12 | 24  | 2.2  |
| 12 | 29836650 | 29836675 | 25  | 29836662 | 12 | 12  | 0    |
| 12 | 30491475 | 30491500 | 25  | 30491487 | 12 | 12  | 2.2  |
| 12 | 30877225 | 30877250 | 25  | 30877237 | 12 | 12  | 2.2  |
| 12 | 30878075 | 30878100 | 25  | 30878087 | 12 | 12  | 2.2  |
| 12 | 30881075 | 30881175 | 100 | 30881087 | 12 | 48  | 0    |
| 12 | 31276000 | 31276175 | 175 | 31276112 | 16 | 102 | 13   |
| 12 | 31877175 | 31877300 | 125 | 31877262 | 13 | 61  | 8.7  |
| 12 | 34253300 | 34253350 | 50  | 34253312 | 14 | 28  | 4.3  |
| 12 | 34399350 | 34399450 | 100 | 34399387 | 14 | 52  | 8.7  |
| 12 | 36730125 | 36730300 | 175 | 36730237 | 14 | 94  | 15.2 |
| 12 | 42230925 | 42231250 | 325 | 42231062 | 17 | 170 | 8.7  |
| 12 | 43174900 | 43175000 | 100 | 43174962 | 13 | 49  | 0    |
| 12 | 44191325 | 44191425 | 100 | 44191337 | 13 | 50  | 6.5  |
| 12 | 44758125 | 44758200 | 75  | 44758137 | 12 | 36  | 0    |
| 12 | 44764950 | 44764975 | 25  | 44764962 | 12 | 12  | 2.2  |
| 12 | 44962075 | 44962225 | 150 | 44962187 | 16 | 88  | 17.3 |
| 12 | 45512500 | 45512625 | 125 | 45512537 | 15 | 70  | 6.5  |
| 12 | 45557300 | 45557350 | 50  | 45557312 | 12 | 24  | 0    |
| 12 | 46178100 | 46178200 | 100 | 46178162 | 15 | 54  | 0    |
| 12 | 46233425 | 46233600 | 175 | 46233462 | 16 | 96  | 10.8 |
| 12 | 46864300 | 46864475 | 175 | 46864362 | 16 | 96  | 2.2  |
| 12 | 46996000 | 46996100 | 100 | 46996012 | 13 | 51  | 0    |
| 12 | 47009925 | 47009950 | 25  | 47009937 | 12 | 12  | 0    |
| 12 | 47266350 | 47266475 | 125 | 47266362 | 12 | 57  | 0    |
| 12 | 47659025 | 47659150 | 125 | 47659112 | 15 | 63  | 10.8 |
| 12 | 47659700 | 47659800 | 100 | 47659762 | 15 | 53  | 0    |
| 12 | 47661100 | 47661125 | 25  | 47661112 | 13 | 13  | 0    |
| 12 | 47661675 | 47661900 | 225 | 47661762 | 17 | 129 | 2.2  |
| 12 | 48534850 | 48535100 | 250 | 48534937 | 19 | 156 | 0    |
| 12 | 49521050 | 49521100 | 50  | 49521062 | 13 | 25  | 4.3  |
| 12 | 49530775 | 49530800 | 25  | 49530787 | 12 | 12  | 0    |
| 12 | 49592125 | 49592300 | 175 | 49592187 | 17 | 112 | 0    |
| 12 | 49596650 | 49596750 | 100 | 49596662 | 12 | 48  | 8.7  |
| 12 | 49617700 | 49618000 | 300 | 49617712 | 12 | 125 | 0    |
| 12 | 50217500 | 50217650 | 150 | 50217512 | 13 | 73  | 8.7  |
| 12 | 50324200 | 50324325 | 125 | 50324212 | 12 | 59  | 0    |
| 12 | 50454200 | 50454275 | 75  | 50454237 | 13 | 38  | 0    |
| 12 | 50487125 | 50487175 | 50  | 50487137 | 13 | 26  | 4.3  |
| 12 | 50774675 | 50774775 | 100 | 50774687 | 12 | 48  | 0    |
| 12 | 51015875 | 51015950 | 75  | 51015887 | 12 | 36  | 0    |
| 12 | 51114275 | 51114475 | 200 | 51114287 | 17 | 103 | 0    |
| 12 | 51127450 | 51127525 | 75  | 51127462 | 13 | 38  | 4.3  |
| 12 | 51149350 | 51149550 | 200 | 51149437 | 17 | 106 | 2.2  |
| 12 | 51395625 | 51395650 | 25  | 51395637 | 13 | 13  | 0    |
| 12 | 51506825 | 51506875 | 50  | 51506837 | 13 | 26  | 4.3  |
| 12 | 51524525 | 51524725 | 200 | 51524612 | 15 | 111 | 13   |
| 12 | 51537450 | 51537575 | 125 | 51537512 | 15 | 67  | 10.8 |
| 12 | 52635075 | 52635175 | 100 | 52635112 | 15 | 56  | 0    |
| 12 | 52771375 | 52771400 | 25  | 52771387 | 13 | 13  | 2.2  |
| 12 | 54387550 | 54387575 | 25  | 54387562 | 12 | 12  | 2.2  |
| 12 | 55168725 | 55168975 | 250 | 55168812 | 30 | 233 | 6.5  |
| 12 | 55489225 | 55489275 | 50  | 55489237 | 14 | 28  | 4.3  |
| 12 | 55638450 | 55638625 | 175 | 55638512 | 13 | 86  | 4.3  |
| 12 | 55896150 | 55896250 | 100 | 55896162 | 12 | 46  | 0    |
| 12 | 56146050 | 56146325 | 275 | 56146187 | 17 | 158 | 17.3 |
| 12 | 56301200 | 56301275 | 75  | 56301212 | 14 | 40  | 2.2  |
| 12 | 56407350 | 56407375 | 25  | 56407362 | 12 | 12  | 2.2  |
| 12 | 56678175 | 56678225 | 50  | 56678187 | 12 | 24  | 0    |
| 12 | 57521650 | 57521675 | 25  | 57521662 | 12 | 12  | 2.2  |
| 12 | 60870975 | 60871150 | 175 | 60871062 | 14 | 89  | 15.2 |
| 12 | 60871675 | 60871850 | 175 | 60871837 | 22 | 116 | 21.7 |
| 12 | 60872125 | 60872225 | 100 | 60872137 | 27 | 99  | 17.3 |
| 12 | 61356700 | 61356900 | 200 | 61356787 | 14 | 100 | 17.3 |
| 12 | 61683650 | 61683725 | 75  | 61683662 | 13 | 39  | 4.3  |
| 12 | 61830225 | 61830725 | 500 | 61830387 | 19 | 344 | 54.2 |
| 12 | 63555300 | 63555475 | 175 | 63555412 | 13 | 84  | 13   |
| 12 | 63701525 | 63701575 | 50  | 63701537 | 15 | 30  | 4.3  |
| 12 | 63716450 | 63716500 | 50  | 63716462 | 12 | 24  | 0    |
| 12 | 63791050 | 63791075 | 25  | 63791062 | 12 | 12  | 0    |
| 12 | 63801225 | 63801275 | 50  | 63801237 | 13 | 26  | 0    |

|    |           |           |     |           |    |     |      |
|----|-----------|-----------|-----|-----------|----|-----|------|
| 12 | 63801750  | 63801950  | 200 | 63801837  | 17 | 123 | 2.2  |
| 12 | 64011850  | 64011875  | 25  | 64011862  | 13 | 13  | 2.2  |
| 12 | 64188825  | 64188850  | 25  | 64188837  | 12 | 12  | 2.2  |
| 12 | 65787525  | 65787550  | 25  | 65787537  | 12 | 12  | 2.2  |
| 12 | 66177575  | 66177600  | 25  | 66177587  | 12 | 12  | 2.2  |
| 12 | 66499025  | 66499075  | 50  | 66499037  | 15 | 29  | 0    |
| 12 | 67070025  | 67070150  | 125 | 67070037  | 12 | 59  | 0    |
| 12 | 67636100  | 67636275  | 175 | 67636262  | 15 | 90  | 17.3 |
| 12 | 67799925  | 67800075  | 150 | 67799987  | 15 | 81  | 0    |
| 12 | 68418475  | 68418550  | 75  | 68418487  | 13 | 38  | 4.3  |
| 12 | 70116275  | 70116300  | 25  | 70116287  | 12 | 12  | 2.2  |
| 12 | 70116575  | 70116700  | 125 | 70116587  | 15 | 67  | 2.2  |
| 12 | 70953200  | 70953250  | 50  | 70953237  | 13 | 25  | 0    |
| 12 | 73888025  | 73888250  | 225 | 73888062  | 16 | 129 | 0    |
| 12 | 74459925  | 74459950  | 25  | 74459937  | 12 | 12  | 0    |
| 12 | 74685000  | 74685150  | 150 | 74685012  | 12 | 69  | 13   |
| 12 | 76686200  | 76686350  | 150 | 76686312  | 14 | 74  | 6.5  |
| 12 | 83091050  | 83091150  | 100 | 83091062  | 13 | 51  | 8.7  |
| 12 | 83091800  | 83092025  | 225 | 83091837  | 13 | 108 | 2.2  |
| 12 | 83893950  | 83894000  | 50  | 83893987  | 13 | 25  | 0    |
| 12 | 89039650  | 89039725  | 75  | 89039662  | 12 | 36  | 4.3  |
| 12 | 92037850  | 92038025  | 175 | 92037937  | 17 | 103 | 13   |
| 12 | 92542100  | 92542225  | 125 | 92542137  | 14 | 65  | 0    |
| 12 | 92901600  | 92901675  | 75  | 92901637  | 13 | 37  | 6.5  |
| 12 | 93347475  | 93347500  | 25  | 93347487  | 12 | 12  | 2.2  |
| 12 | 93465975  | 93466000  | 25  | 93465987  | 12 | 12  | 2.2  |
| 12 | 93866425  | 93866450  | 25  | 93866437  | 12 | 12  | 2.2  |
| 12 | 94466975  | 94467025  | 50  | 94467012  | 13 | 25  | 0    |
| 12 | 94895750  | 94895875  | 125 | 94895837  | 18 | 77  | 8.7  |
| 12 | 94908400  | 94908425  | 25  | 94908412  | 12 | 12  | 2.2  |
| 12 | 102553450 | 102553625 | 175 | 102553512 | 17 | 106 | 15.2 |
| 12 | 102643450 | 102643500 | 50  | 102643462 | 12 | 24  | 4.3  |
| 12 | 103101775 | 103101850 | 75  | 103101787 | 13 | 39  | 0    |
| 12 | 103425125 | 103425175 | 50  | 103425162 | 15 | 29  | 2.2  |
| 12 | 104341900 | 104341925 | 25  | 104341912 | 12 | 12  | 2.2  |
| 12 | 104513625 | 104513650 | 25  | 104513637 | 12 | 12  | 2.2  |
| 12 | 107068600 | 107068650 | 50  | 107068612 | 12 | 24  | 4.3  |
| 12 | 107281350 | 107281375 | 25  | 107281362 | 12 | 12  | 0    |
| 12 | 107541700 | 107541750 | 50  | 107541712 | 12 | 24  | 4.3  |
| 12 | 107830300 | 107830625 | 325 | 107830387 | 16 | 170 | 17.3 |
| 12 | 107837925 | 107838000 | 75  | 107837962 | 13 | 37  | 0    |
| 12 | 108176300 | 108176350 | 50  | 108176312 | 12 | 24  | 0    |
| 12 | 108532850 | 108532875 | 25  | 108532862 | 12 | 12  | 2.2  |
| 12 | 108558325 | 108558350 | 25  | 108558337 | 12 | 12  | 0    |
| 12 | 108594775 | 108594825 | 50  | 108594787 | 12 | 24  | 0    |
| 12 | 108685050 | 108685100 | 50  | 108685087 | 13 | 25  | 4.3  |
| 12 | 108704700 | 108704750 | 50  | 108704712 | 12 | 24  | 4.3  |
| 12 | 108736700 | 108736800 | 100 | 108736787 | 13 | 47  | 8.7  |
| 12 | 109607550 | 109607575 | 25  | 109607562 | 12 | 12  | 0    |
| 12 | 110069875 | 110069925 | 50  | 110069887 | 12 | 24  | 0    |
| 12 | 110110850 | 110110900 | 50  | 110110862 | 12 | 24  | 4.3  |
| 12 | 110166550 | 110166600 | 50  | 110166562 | 12 | 24  | 4.3  |
| 12 | 110214100 | 110214250 | 150 | 110214187 | 14 | 74  | 10.8 |
| 12 | 110226250 | 110226475 | 225 | 110226312 | 20 | 156 | 0    |
| 12 | 110229175 | 110229250 | 75  | 110229212 | 13 | 37  | 0    |
| 12 | 110232700 | 110232950 | 250 | 110232787 | 16 | 136 | 6.5  |
| 12 | 110270475 | 110270625 | 150 | 110270537 | 13 | 75  | 4.3  |
| 12 | 110271550 | 110271675 | 125 | 110271562 | 14 | 67  | 0    |
| 12 | 112317625 | 112317825 | 200 | 112317687 | 17 | 116 | 17.3 |
| 12 | 112389125 | 112389150 | 25  | 112389137 | 12 | 12  | 0    |
| 12 | 112533050 | 112533100 | 50  | 112533062 | 12 | 24  | 0    |
| 12 | 112593950 | 112594075 | 125 | 112593962 | 14 | 69  | 4.3  |
| 12 | 112648425 | 112648525 | 100 | 112648487 | 13 | 47  | 0    |
| 12 | 113658450 | 113658650 | 200 | 113658562 | 18 | 124 | 0    |
| 12 | 113851925 | 113851950 | 25  | 113851937 | 12 | 12  | 0    |
| 12 | 114312900 | 114312925 | 25  | 114312912 | 12 | 12  | 2.2  |
| 12 | 114457150 | 114457175 | 25  | 114457162 | 13 | 13  | 2.2  |
| 12 | 114547000 | 114547075 | 75  | 114547037 | 14 | 38  | 0    |
| 12 | 114845325 | 114845600 | 275 | 114845462 | 16 | 138 | 4.3  |
| 12 | 115819800 | 115819850 | 50  | 115819812 | 12 | 24  | 4.3  |
| 12 | 116020500 | 116020650 | 150 | 116020587 | 14 | 74  | 13   |
| 12 | 116124350 | 116124525 | 175 | 116124412 | 16 | 99  | 0    |
| 12 | 116715325 | 116715775 | 450 | 116715687 | 15 | 235 | 15.2 |
| 12 | 118947675 | 118947750 | 75  | 118947687 | 12 | 36  | 0    |
| 12 | 118993975 | 118994075 | 100 | 118993987 | 18 | 59  | 8.7  |

|    |           |           |     |           |    |     |      |
|----|-----------|-----------|-----|-----------|----|-----|------|
| 12 | 119001075 | 119001275 | 200 | 119001112 | 16 | 112 | 6.5  |
| 12 | 119563875 | 119563900 | 25  | 119563887 | 13 | 13  | 0    |
| 12 | 120018100 | 120018125 | 25  | 120018112 | 15 | 15  | 2.2  |
| 12 | 120077025 | 120077100 | 75  | 120077087 | 14 | 38  | 6.5  |
| 12 | 121946925 | 121946975 | 50  | 121946937 | 13 | 25  | 2.2  |
| 12 | 122823400 | 122823425 | 25  | 122823412 | 12 | 12  | 0    |
| 12 | 122871275 | 122871300 | 25  | 122871287 | 13 | 13  | 2.2  |
| 12 | 122877950 | 122878325 | 375 | 122878112 | 18 | 207 | 30.3 |
| 12 | 122879250 | 122879350 | 100 | 122879312 | 14 | 51  | 8.7  |
| 12 | 122880100 | 122880250 | 150 | 122880112 | 14 | 79  | 0    |
| 12 | 122891700 | 122891800 | 100 | 122891762 | 14 | 51  | 0    |
| 12 | 122898625 | 122898650 | 25  | 122898637 | 12 | 12  | 2.2  |
| 12 | 122903875 | 122903900 | 25  | 122903887 | 12 | 12  | 0    |
| 12 | 122907700 | 122907725 | 25  | 122907712 | 12 | 12  | 0    |
| 12 | 122908825 | 122908875 | 50  | 122908837 | 12 | 24  | 0    |
| 12 | 122911950 | 122912175 | 225 | 122912062 | 20 | 150 | 17.3 |
| 12 | 122922300 | 122922350 | 50  | 122922312 | 13 | 25  | 0    |
| 12 | 122930350 | 122930375 | 25  | 122930362 | 12 | 12  | 0    |
| 12 | 122932175 | 122932350 | 175 | 122932262 | 15 | 95  | 13   |
| 12 | 122934875 | 122935075 | 200 | 122934937 | 17 | 113 | 15.2 |
| 12 | 122937000 | 122937025 | 25  | 122937012 | 12 | 12  | 2.2  |
| 12 | 122949275 | 122949350 | 75  | 122949287 | 12 | 35  | 6.5  |
| 12 | 122949775 | 122950050 | 275 | 122949862 | 24 | 211 | 21.7 |
| 12 | 122979675 | 122979875 | 200 | 122979737 | 15 | 105 | 0    |
| 12 | 122980775 | 122980850 | 75  | 122980787 | 12 | 36  | 0    |
| 12 | 123098400 | 123098450 | 50  | 123098412 | 12 | 24  | 0    |
| 12 | 123113350 | 123113475 | 125 | 123113387 | 14 | 65  | 10.8 |
| 12 | 123129225 | 123129250 | 25  | 123129237 | 12 | 12  | 2.2  |
| 12 | 123143425 | 123143475 | 50  | 123143462 | 13 | 25  | 0    |
| 12 | 123143825 | 123144025 | 200 | 123143862 | 14 | 95  | 0    |
| 12 | 123166500 | 123166525 | 25  | 123166512 | 13 | 13  | 0    |
| 12 | 123193175 | 123193350 | 175 | 123193187 | 12 | 80  | 0    |
| 12 | 123201400 | 123201450 | 50  | 123201412 | 13 | 26  | 4.3  |
| 12 | 123212900 | 123213075 | 175 | 123212987 | 15 | 93  | 13   |
| 12 | 123217900 | 123218000 | 100 | 123217937 | 14 | 54  | 6.5  |
| 12 | 123244000 | 123244175 | 175 | 123244087 | 14 | 86  | 0    |
| 12 | 123245975 | 123246000 | 25  | 123245987 | 13 | 13  | 2.2  |
| 12 | 123246850 | 123247150 | 300 | 123247012 | 25 | 239 | 39   |
| 12 | 123255525 | 123255550 | 25  | 123255537 | 12 | 12  | 0    |
| 12 | 123258850 | 123258875 | 25  | 123258862 | 14 | 14  | 2.2  |
| 12 | 123262125 | 123262150 | 25  | 123262137 | 12 | 12  | 0    |
| 12 | 123265100 | 123265125 | 25  | 123265112 | 12 | 12  | 0    |
| 12 | 123275325 | 123275350 | 25  | 123275337 | 13 | 13  | 2.2  |
| 12 | 123275975 | 123276075 | 100 | 123276062 | 13 | 49  | 0    |
| 12 | 123277200 | 123277625 | 425 | 123277587 | 14 | 167 | 15.2 |
| 12 | 123278625 | 123278650 | 25  | 123278637 | 13 | 13  | 2.2  |
| 12 | 123290750 | 123291200 | 450 | 123291062 | 15 | 224 | 41.2 |
| 12 | 123291700 | 123291725 | 25  | 123291712 | 12 | 12  | 0    |
| 12 | 123292200 | 123292275 | 75  | 123292262 | 15 | 42  | 0    |
| 12 | 123296675 | 123296850 | 175 | 123296787 | 16 | 100 | 4.3  |
| 12 | 123298075 | 123298100 | 25  | 123298087 | 12 | 12  | 0    |
| 12 | 123298375 | 123298450 | 75  | 123298387 | 13 | 38  | 0    |
| 12 | 123307325 | 123307475 | 150 | 123307437 | 17 | 88  | 2.2  |
| 12 | 123315550 | 123315675 | 125 | 123315562 | 13 | 62  | 0    |
| 12 | 123319775 | 123319925 | 150 | 123319862 | 19 | 101 | 13   |
| 12 | 123326500 | 123326625 | 125 | 123326537 | 13 | 64  | 0    |
| 12 | 123327850 | 123327900 | 50  | 123327862 | 13 | 26  | 0    |
| 12 | 123334925 | 123335275 | 350 | 123335087 | 28 | 290 | 23.8 |
| 12 | 123336075 | 123336350 | 275 | 123336237 | 14 | 124 | 13   |
| 12 | 123349100 | 123349375 | 275 | 123349187 | 22 | 183 | 6.5  |
| 12 | 123374150 | 123374675 | 525 | 123374487 | 20 | 338 | 0    |
| 12 | 123375325 | 123375450 | 125 | 123375337 | 12 | 59  | 0    |
| 12 | 123376875 | 123376925 | 50  | 123376887 | 13 | 25  | 0    |
| 12 | 123627375 | 123627575 | 200 | 123627462 | 17 | 118 | 8.7  |
| 12 | 123630875 | 123631075 | 200 | 123631012 | 17 | 121 | 15.2 |
| 12 | 123657050 | 123657075 | 25  | 123657062 | 12 | 12  | 0    |
| 12 | 123790150 | 123790175 | 25  | 123790162 | 12 | 12  | 2.2  |
| 12 | 123790475 | 123790650 | 175 | 123790587 | 15 | 95  | 10.8 |
| 12 | 123804875 | 123804925 | 50  | 123804887 | 17 | 34  | 4.3  |
| 12 | 123813075 | 123813325 | 250 | 123813187 | 18 | 144 | 2.2  |
| 12 | 123815250 | 123815425 | 175 | 123815312 | 17 | 103 | 0    |
| 12 | 123880900 | 123881025 | 125 | 123880962 | 13 | 62  | 8.7  |
| 12 | 124228850 | 124228875 | 25  | 124228862 | 13 | 13  | 2.2  |
| 12 | 124298125 | 124298200 | 75  | 124298162 | 15 | 43  | 0    |
| 12 | 125617450 | 125617725 | 275 | 125617637 | 17 | 160 | 0    |

|    |           |           |      |           |    |      |      |
|----|-----------|-----------|------|-----------|----|------|------|
| 12 | 125942325 | 125942475 | 150  | 125942362 | 14 | 77   | 0    |
| 12 | 126270225 | 126270325 | 100  | 126270237 | 12 | 47   | 0    |
| 12 | 126349725 | 126349825 | 100  | 126349762 | 15 | 55   | 0    |
| 12 | 126355825 | 126355900 | 75   | 126355862 | 13 | 37   | 6.5  |
| 12 | 126456650 | 126456800 | 150  | 126456737 | 15 | 82   | 4.3  |
| 12 | 126749550 | 126749725 | 175  | 126749637 | 17 | 102  | 13   |
| 12 | 126752850 | 126753050 | 200  | 126752937 | 16 | 116  | 15.2 |
| 12 | 126877550 | 126877650 | 100  | 126877562 | 12 | 47   | 0    |
| 12 | 127714575 | 127714650 | 75   | 127714587 | 13 | 37   | 4.3  |
| 12 | 127831800 | 127831825 | 25   | 127831812 | 12 | 12   | 2.2  |
| 12 | 127913125 | 127913325 | 200  | 127913187 | 14 | 104  | 0    |
| 12 | 128034450 | 128034575 | 125  | 128034562 | 13 | 61   | 0    |
| 12 | 129778825 | 129779050 | 225  | 129778987 | 17 | 131  | 0    |
| 12 | 129814975 | 129815375 | 400  | 129815137 | 19 | 238  | 0    |
| 12 | 129815700 | 129815875 | 175  | 129815787 | 18 | 110  | 2.2  |
| 12 | 129816150 | 129816200 | 50   | 129816162 | 12 | 24   | 0    |
| 12 | 129907675 | 129907700 | 25   | 129907687 | 12 | 12   | 2.2  |
| 12 | 129948775 | 129948900 | 125  | 129948887 | 13 | 59   | 2.2  |
| 12 | 130007825 | 130007875 | 50   | 130007837 | 12 | 24   | 2.2  |
| 12 | 130068225 | 130068375 | 150  | 130068237 | 15 | 81   | 13   |
| 12 | 130079250 | 130079350 | 100  | 130079262 | 16 | 56   | 6.5  |
| 12 | 130096350 | 130096475 | 125  | 130096362 | 12 | 57   | 6.5  |
| 12 | 130607025 | 130607150 | 125  | 130607062 | 14 | 65   | 10.8 |
| 12 | 130627500 | 130627550 | 50   | 130627512 | 13 | 26   | 0    |
| 12 | 131206750 | 131206925 | 175  | 131206837 | 15 | 92   | 13   |
| 12 | 131207375 | 131207525 | 150  | 131207437 | 17 | 88   | 13   |
| 12 | 131218675 | 131218725 | 50   | 131218687 | 12 | 24   | 2.2  |
| 12 | 131231625 | 131232300 | 675  | 131232137 | 27 | 507  | 13   |
| 12 | 131243400 | 131245175 | 1775 | 131244587 | 27 | 1119 | 99.7 |
| 12 | 131253575 | 131253600 | 25   | 131253587 | 12 | 12   | 2.2  |
| 12 | 131258200 | 131258300 | 100  | 131258212 | 12 | 47   | 8.7  |
| 12 | 131258875 | 131259375 | 500  | 131259262 | 15 | 239  | 6.5  |
| 12 | 131261000 | 131261100 | 100  | 131261012 | 13 | 47   | 6.5  |
| 12 | 131337550 | 131337675 | 125  | 131337562 | 13 | 59   | 0    |
| 12 | 131338725 | 131338750 | 25   | 131338737 | 12 | 12   | 0    |
| 12 | 131354350 | 131354900 | 550  | 131354487 | 24 | 389  | 52   |
| 12 | 131382825 | 131382975 | 150  | 131382937 | 14 | 77   | 10.8 |
| 12 | 131398075 | 131398475 | 400  | 131398337 | 22 | 260  | 32.5 |
| 12 | 131417225 | 131417375 | 150  | 131417362 | 14 | 76   | 0    |
| 12 | 131421950 | 131422325 | 375  | 131422187 | 23 | 266  | 17.3 |
| 12 | 131429600 | 131429875 | 275  | 131429687 | 16 | 152  | 17.3 |
| 12 | 131446300 | 131446425 | 125  | 131446362 | 15 | 64   | 0    |
| 12 | 131493700 | 131493725 | 25   | 131493712 | 12 | 12   | 0    |
| 12 | 131507575 | 131507600 | 25   | 131507587 | 13 | 13   | 2.2  |
| 12 | 131509925 | 131509950 | 25   | 131509937 | 12 | 12   | 2.2  |
| 12 | 131511675 | 131512025 | 350  | 131511687 | 20 | 193  | 26   |
| 12 | 131513050 | 131513200 | 150  | 131513112 | 15 | 81   | 0    |
| 12 | 131524375 | 131524500 | 125  | 131524437 | 13 | 63   | 0    |
| 12 | 131542125 | 131542800 | 675  | 131542437 | 19 | 403  | 36.8 |
| 12 | 131569525 | 131569600 | 75   | 131569562 | 13 | 37   | 4.3  |
| 12 | 131572500 | 131572525 | 25   | 131572512 | 12 | 12   | 0    |
| 12 | 131622675 | 131622700 | 25   | 131622687 | 12 | 12   | 2.2  |
| 12 | 131631400 | 131631425 | 25   | 131631412 | 12 | 12   | 2.2  |
| 12 | 131675700 | 131675775 | 75   | 131675712 | 14 | 40   | 0    |
| 12 | 131682875 | 131682900 | 25   | 131682887 | 12 | 12   | 0    |
| 12 | 131698425 | 131698500 | 75   | 131698462 | 14 | 40   | 0    |
| 12 | 132005625 | 132005700 | 75   | 132005637 | 12 | 36   | 0    |
| 12 | 132016775 | 132016825 | 50   | 132016787 | 12 | 24   | 0    |
| 12 | 132029300 | 132029450 | 150  | 132029362 | 15 | 77   | 10.8 |
| 12 | 132035450 | 132035525 | 75   | 132035512 | 14 | 39   | 6.5  |
| 12 | 132037000 | 132038075 | 1075 | 132037162 | 21 | 634  | 54.2 |
| 12 | 132038375 | 132038450 | 75   | 132038387 | 12 | 36   | 6.5  |
| 12 | 132041450 | 132041550 | 100  | 132041512 | 14 | 52   | 6.5  |
| 12 | 132136850 | 132136975 | 125  | 132136862 | 12 | 60   | 0    |
| 12 | 132138325 | 132138350 | 25   | 132138337 | 12 | 12   | 0    |
| 12 | 132166125 | 132166275 | 150  | 132166187 | 14 | 79   | 0    |
| 12 | 132168225 | 132168350 | 125  | 132168237 | 12 | 58   | 4.3  |
| 15 | 18806275  | 18806375  | 100  | 18806312  | 14 | 52   | 4.3  |
| 15 | 18806675  | 18806700  | 25   | 18806687  | 13 | 13   | 2.2  |
| 15 | 19158925  | 19159000  | 75   | 19158937  | 13 | 37   | 6.5  |
| 15 | 19410500  | 19410675  | 175  | 19410587  | 15 | 93   | 0    |
| 15 | 19411200  | 19411225  | 25   | 19411212  | 13 | 13   | 2.2  |
| 15 | 19411775  | 19411800  | 25   | 19411787  | 12 | 12   | 2.2  |
| 15 | 21236925  | 21237000  | 75   | 21236962  | 14 | 39   | 0    |
| 15 | 21237250  | 21237550  | 300  | 21237362  | 21 | 195  | 0    |

|    |          |          |     |          |    |     |      |
|----|----------|----------|-----|----------|----|-----|------|
| 15 | 22855075 | 22855175 | 100 | 22855087 | 12 | 47  | 0    |
| 15 | 22865300 | 22865425 | 125 | 22865312 | 12 | 57  | 0    |
| 15 | 22868075 | 22868225 | 150 | 22868162 | 14 | 77  | 0    |
| 15 | 24896175 | 24896200 | 25  | 24896187 | 12 | 12  | 2.2  |
| 15 | 24903775 | 24903850 | 75  | 24903787 | 13 | 38  | 4.3  |
| 15 | 25036275 | 25036300 | 25  | 25036287 | 12 | 12  | 2.2  |
| 15 | 25493425 | 25493475 | 50  | 25493462 | 13 | 25  | 4.3  |
| 15 | 25767625 | 25767775 | 150 | 25767687 | 13 | 75  | 4.3  |
| 15 | 25780725 | 25780900 | 175 | 25780812 | 16 | 95  | 8.7  |
| 15 | 26017875 | 26017925 | 50  | 26017912 | 13 | 25  | 4.3  |
| 15 | 27305250 | 27305300 | 50  | 27305262 | 12 | 24  | 0    |
| 15 | 27570525 | 27570650 | 125 | 27570587 | 14 | 67  | 10.8 |
| 15 | 27717450 | 27717475 | 25  | 27717462 | 13 | 13  | 2.2  |
| 15 | 29394950 | 29395100 | 150 | 29395062 | 14 | 76  | 2.2  |
| 15 | 30797000 | 30797050 | 50  | 30797037 | 13 | 25  | 4.3  |
| 15 | 30798650 | 30798675 | 25  | 30798662 | 12 | 12  | 0    |
| 15 | 35661725 | 35661875 | 150 | 35661787 | 14 | 78  | 13   |
| 15 | 42069350 | 42069375 | 25  | 42069362 | 12 | 12  | 2.2  |
| 15 | 43177675 | 43177700 | 25  | 43177687 | 12 | 12  | 2.2  |
| 15 | 43653375 | 43653400 | 25  | 43653387 | 12 | 12  | 2.2  |
| 15 | 43653800 | 43653825 | 25  | 43653812 | 12 | 12  | 0    |
| 15 | 52861500 | 52861525 | 25  | 52861512 | 12 | 12  | 0    |
| 15 | 56144600 | 56144900 | 300 | 56144787 | 19 | 181 | 17.3 |
| 15 | 60343000 | 60343175 | 175 | 60343112 | 13 | 77  | 0    |
| 15 | 60350100 | 60350275 | 175 | 60350112 | 12 | 79  | 4.3  |
| 15 | 60685175 | 60685375 | 200 | 60685187 | 17 | 117 | 6.5  |
| 15 | 60686325 | 60686500 | 175 | 60686362 | 16 | 100 | 15.2 |
| 15 | 66125075 | 66125100 | 25  | 66125087 | 12 | 12  | 2.2  |
| 15 | 67010225 | 67010250 | 25  | 67010237 | 12 | 12  | 0    |
| 15 | 67564725 | 67564750 | 25  | 67564737 | 12 | 12  | 0    |
| 15 | 67569975 | 67570000 | 25  | 67569987 | 12 | 12  | 0    |
| 15 | 67570275 | 67570625 | 350 | 67570487 | 16 | 174 | 17.3 |
| 15 | 67605475 | 67605625 | 150 | 67605537 | 16 | 84  | 6.5  |
| 15 | 67710600 | 67710625 | 25  | 67710612 | 12 | 12  | 2.2  |
| 15 | 67901000 | 67901125 | 125 | 67901087 | 15 | 66  | 10.8 |
| 15 | 68270925 | 68271025 | 100 | 68271012 | 13 | 48  | 8.7  |
| 15 | 68522125 | 68522175 | 50  | 68522162 | 14 | 27  | 4.3  |
| 15 | 68589100 | 68589150 | 50  | 68589112 | 12 | 24  | 4.3  |
| 15 | 68690850 | 68690900 | 50  | 68690862 | 13 | 25  | 4.3  |
| 15 | 71522225 | 71522300 | 75  | 71522287 | 13 | 37  | 4.3  |
| 15 | 71522600 | 71522750 | 150 | 71522687 | 14 | 78  | 15.2 |
| 15 | 71971150 | 71971225 | 75  | 71971162 | 13 | 39  | 2.2  |
| 15 | 71971875 | 71972025 | 150 | 71971937 | 16 | 89  | 0    |
| 15 | 72210350 | 72210400 | 50  | 72210362 | 12 | 24  | 0    |
| 15 | 72821850 | 72822050 | 200 | 72821912 | 16 | 118 | 0    |
| 15 | 73155800 | 73155900 | 100 | 73155812 | 13 | 46  | 4.3  |
| 15 | 73193750 | 73193825 | 75  | 73193812 | 13 | 37  | 0    |
| 15 | 73223625 | 73223750 | 125 | 73223637 | 15 | 65  | 6.5  |
| 15 | 75058400 | 75059100 | 700 | 75058687 | 21 | 392 | 2.2  |
| 15 | 75733550 | 75733575 | 25  | 75733562 | 12 | 12  | 2.2  |
| 15 | 76708700 | 76708900 | 200 | 76708762 | 16 | 112 | 8.7  |
| 15 | 76784450 | 76784600 | 150 | 76784537 | 17 | 95  | 0    |
| 15 | 78720075 | 78720250 | 175 | 78720112 | 16 | 102 | 8.7  |
| 15 | 78720750 | 78720825 | 75  | 78720762 | 12 | 35  | 0    |
| 15 | 79480300 | 79480350 | 50  | 79480312 | 13 | 26  | 4.3  |
| 15 | 80152725 | 80153050 | 325 | 80152912 | 13 | 144 | 23.8 |
| 15 | 81147400 | 81147425 | 25  | 81147412 | 12 | 12  | 2.2  |
| 15 | 81538600 | 81538675 | 75  | 81538637 | 16 | 43  | 6.5  |
| 15 | 81743450 | 81743500 | 50  | 81743462 | 12 | 24  | 4.3  |
| 15 | 82965900 | 82966025 | 125 | 82966012 | 15 | 67  | 2.2  |
| 15 | 87213025 | 87213225 | 200 | 87213037 | 14 | 88  | 17.3 |
| 15 | 87214000 | 87214075 | 75  | 87214012 | 12 | 34  | 0    |
| 15 | 87214300 | 87214625 | 325 | 87214462 | 19 | 195 | 26   |
| 15 | 87303975 | 87304150 | 175 | 87304037 | 14 | 84  | 0    |
| 15 | 89413975 | 89414050 | 75  | 89414012 | 13 | 37  | 0    |
| 15 | 89640750 | 89640900 | 150 | 89640787 | 14 | 78  | 2.2  |
| 15 | 90516175 | 90516200 | 25  | 90516187 | 12 | 12  | 0    |
| 15 | 91390950 | 91391000 | 50  | 91390987 | 13 | 25  | 2.2  |
| 15 | 91436350 | 91436375 | 25  | 91436362 | 12 | 12  | 2.2  |
| 15 | 91643325 | 91643425 | 100 | 91643387 | 13 | 49  | 0    |
| 15 | 96086950 | 96086975 | 25  | 96086962 | 12 | 12  | 2.2  |
| 15 | 96854450 | 96854600 | 150 | 96854487 | 14 | 78  | 0    |
| 15 | 97192675 | 97192825 | 150 | 97192712 | 14 | 82  | 8.7  |
| 15 | 98346550 | 98346700 | 150 | 98346662 | 16 | 84  | 8.7  |
| 15 | 98529275 | 98529300 | 25  | 98529287 | 12 | 12  | 2.2  |

|    |          |          |     |          |    |     |      |
|----|----------|----------|-----|----------|----|-----|------|
| 15 | 98586325 | 98586375 | 50  | 98586337 | 13 | 25  | 0    |
| 15 | 99218225 | 99218250 | 25  | 99218237 | 13 | 13  | 2.2  |
| 15 | 99227125 | 99227150 | 25  | 99227137 | 12 | 12  | 0    |
| 15 | 99527350 | 99527425 | 75  | 99527362 | 12 | 36  | 6.5  |
| 14 | 18108225 | 18108425 | 200 | 18108412 | 14 | 97  | 0    |
| 14 | 18109150 | 18109200 | 50  | 18109162 | 12 | 24  | 4.3  |
| 14 | 18179450 | 18179900 | 450 | 18179812 | 20 | 240 | 43.3 |
| 14 | 19207250 | 19207300 | 50  | 19207287 | 14 | 27  | 0    |
| 14 | 19207650 | 19207700 | 50  | 19207662 | 13 | 25  | 2.2  |
| 14 | 19216325 | 19216475 | 150 | 19216412 | 15 | 80  | 0    |
| 14 | 19218025 | 19218075 | 50  | 19218062 | 13 | 25  | 0    |
| 14 | 19308975 | 19309025 | 50  | 19308987 | 12 | 24  | 0    |
| 14 | 20290925 | 20291050 | 125 | 20290987 | 14 | 64  | 4.3  |
| 14 | 20693750 | 20693800 | 50  | 20693762 | 12 | 24  | 0    |
| 14 | 22241850 | 22241950 | 100 | 22241887 | 13 | 50  | 0    |
| 14 | 22944650 | 22944750 | 100 | 22944712 | 14 | 50  | 4.3  |
| 14 | 27388700 | 27388750 | 50  | 27388712 | 13 | 25  | 4.3  |
| 14 | 27904275 | 27904425 | 150 | 27904287 | 12 | 72  | 6.5  |
| 14 | 28007475 | 28007600 | 125 | 28007512 | 13 | 60  | 6.5  |
| 14 | 28306900 | 28307150 | 250 | 28306912 | 14 | 105 | 0    |
| 14 | 31802375 | 31802525 | 150 | 31802387 | 12 | 72  | 0    |
| 14 | 33338900 | 33338950 | 50  | 33338912 | 12 | 24  | 4.3  |
| 14 | 33489325 | 33489425 | 100 | 33489387 | 13 | 49  | 8.7  |
| 14 | 36046325 | 36046375 | 50  | 36046337 | 13 | 25  | 4.3  |
| 14 | 36194075 | 36194125 | 50  | 36194087 | 14 | 26  | 0    |
| 14 | 36195325 | 36195375 | 50  | 36195362 | 13 | 25  | 4.3  |
| 14 | 36196825 | 36196850 | 25  | 36196837 | 12 | 12  | 2.2  |
| 14 | 44792700 | 44792725 | 25  | 44792712 | 12 | 12  | 2.2  |
| 14 | 51703475 | 51703500 | 25  | 51703487 | 12 | 12  | 0    |
| 14 | 51851425 | 51851575 | 150 | 51851537 | 13 | 69  | 2.2  |
| 14 | 53490325 | 53490400 | 75  | 53490337 | 12 | 36  | 6.5  |
| 14 | 53499775 | 53499825 | 50  | 53499787 | 15 | 29  | 4.3  |
| 14 | 55302725 | 55302825 | 100 | 55302762 | 13 | 50  | 6.5  |
| 14 | 55358475 | 55358500 | 25  | 55358487 | 12 | 12  | 0    |
| 14 | 60021800 | 60021900 | 100 | 60021837 | 15 | 54  | 0    |
| 14 | 60046125 | 60046200 | 75  | 60046162 | 13 | 37  | 6.5  |
| 14 | 60858725 | 60858775 | 50  | 60858762 | 13 | 25  | 4.3  |
| 14 | 61088950 | 61088975 | 25  | 61088962 | 12 | 12  | 2.2  |
| 14 | 63130900 | 63131150 | 250 | 63131087 | 17 | 144 | 0    |
| 14 | 63199600 | 63199625 | 25  | 63199612 | 12 | 12  | 2.2  |
| 14 | 64077675 | 64077850 | 175 | 64077737 | 17 | 100 | 6.5  |
| 14 | 64309150 | 64309250 | 100 | 64309187 | 15 | 55  | 4.3  |
| 14 | 64309750 | 64309825 | 75  | 64309762 | 12 | 36  | 0    |
| 14 | 64408900 | 64408925 | 25  | 64408912 | 12 | 12  | 2.2  |
| 14 | 64816475 | 64816500 | 25  | 64816487 | 12 | 12  | 2.2  |
| 14 | 67900300 | 67900325 | 25  | 67900312 | 12 | 12  | 2.2  |
| 14 | 68326600 | 68326650 | 50  | 68326612 | 14 | 27  | 0    |
| 14 | 69979200 | 69979325 | 125 | 69979237 | 16 | 71  | 2.2  |
| 14 | 72018900 | 72019025 | 125 | 72018987 | 17 | 69  | 0    |
| 14 | 72178475 | 72178600 | 125 | 72178512 | 14 | 67  | 10.8 |
| 14 | 73768300 | 73768500 | 200 | 73768337 | 13 | 94  | 0    |
| 14 | 73893550 | 73893775 | 225 | 73893612 | 16 | 129 | 0    |
| 14 | 75144600 | 75144675 | 75  | 75144612 | 12 | 36  | 0    |
| 14 | 75975625 | 75975650 | 25  | 75975637 | 12 | 12  | 0    |
| 14 | 77515150 | 77515250 | 100 | 77515187 | 15 | 56  | 0    |
| 14 | 79747275 | 79747350 | 75  | 79747287 | 12 | 36  | 0    |
| 14 | 88328200 | 88328250 | 50  | 88328212 | 12 | 24  | 4.3  |
| 14 | 89983925 | 89984000 | 75  | 89983937 | 12 | 36  | 0    |
| 14 | 90829375 | 90829475 | 100 | 90829387 | 20 | 77  | 8.7  |
| 14 | 91927300 | 91927625 | 325 | 91927337 | 13 | 149 | 0    |
| 14 | 91969200 | 91969300 | 100 | 91969237 | 14 | 54  | 0    |
| 14 | 92163575 | 92163700 | 125 | 92163612 | 15 | 68  | 0    |
| 14 | 92181250 | 92181300 | 50  | 92181262 | 15 | 28  | 4.3  |
| 14 | 92421400 | 92421475 | 75  | 92421437 | 14 | 39  | 0    |
| 14 | 92515075 | 92515100 | 25  | 92515087 | 12 | 12  | 0    |
| 14 | 94041950 | 94042000 | 50  | 94041962 | 12 | 24  | 2.2  |
| 14 | 94148950 | 94149050 | 100 | 94149037 | 14 | 52  | 6.5  |
| 14 | 94149575 | 94150025 | 450 | 94149862 | 20 | 282 | 4.3  |
| 14 | 94151500 | 94151525 | 25  | 94151512 | 12 | 12  | 2.2  |
| 14 | 94152175 | 94152725 | 550 | 94152337 | 16 | 310 | 17.3 |
| 14 | 94431475 | 94431500 | 25  | 94431487 | 12 | 12  | 2.2  |
| 14 | 94576075 | 94576100 | 25  | 94576087 | 12 | 12  | 2.2  |
| 14 | 94584375 | 94584400 | 25  | 94584387 | 12 | 12  | 0    |
| 14 | 96270725 | 96270775 | 50  | 96270737 | 13 | 26  | 0    |
| 14 | 96281625 | 96281725 | 100 | 96281662 | 15 | 55  | 0    |

|    |           |           |     |           |    |     |      |
|----|-----------|-----------|-----|-----------|----|-----|------|
| 14 | 98869300  | 98869475  | 175 | 98869362  | 19 | 112 | 15.2 |
| 14 | 98883975  | 98884125  | 150 | 98884087  | 16 | 84  | 0    |
| 14 | 99213575  | 99213725  | 150 | 99213712  | 17 | 88  | 6.5  |
| 14 | 99239725  | 99239875  | 150 | 99239737  | 13 | 70  | 0    |
| 14 | 99507100  | 99507350  | 250 | 99507212  | 21 | 162 | 10.8 |
| 14 | 100062950 | 100063100 | 150 | 100062987 | 15 | 82  | 0    |
| 14 | 100243100 | 100243150 | 50  | 100243137 | 14 | 27  | 2.2  |
| 14 | 100305175 | 100305350 | 175 | 100305312 | 16 | 98  | 6.5  |
| 14 | 100343875 | 100343950 | 75  | 100343912 | 15 | 42  | 2.2  |
| 14 | 100344500 | 100345050 | 550 | 100344562 | 15 | 274 | 23.8 |
| 14 | 100363675 | 100363800 | 125 | 100363787 | 14 | 64  | 6.5  |
| 14 | 100398575 | 100398675 | 100 | 100398612 | 13 | 51  | 0    |
| 14 | 100419500 | 100419550 | 50  | 100419512 | 12 | 24  | 4.3  |
| 14 | 100586250 | 100586350 | 100 | 100586287 | 16 | 56  | 0    |
| 14 | 100591350 | 100591400 | 50  | 100591362 | 13 | 26  | 0    |
| 14 | 100655525 | 100655625 | 100 | 100655537 | 13 | 51  | 0    |
| 14 | 100663875 | 100663950 | 75  | 100663912 | 13 | 37  | 0    |
| 14 | 100664750 | 100664875 | 125 | 100664837 | 14 | 63  | 4.3  |
| 14 | 100705350 | 100705500 | 150 | 100705387 | 14 | 79  | 13   |
| 14 | 100716100 | 100716125 | 25  | 100716112 | 12 | 12  | 0    |
| 14 | 100718600 | 100718650 | 50  | 100718612 | 12 | 24  | 4.3  |
| 14 | 100739275 | 100739325 | 50  | 100739287 | 12 | 24  | 4.3  |
| 14 | 100757350 | 100757450 | 100 | 100757387 | 15 | 55  | 0    |
| 14 | 100758050 | 100758075 | 25  | 100758062 | 13 | 13  | 0    |
| 14 | 100780325 | 100780350 | 25  | 100780337 | 12 | 12  | 0    |
| 14 | 100783000 | 100783200 | 200 | 100783137 | 17 | 119 | 10.8 |
| 14 | 101039750 | 101039875 | 125 | 101039812 | 15 | 67  | 2.2  |
| 14 | 101097800 | 101097925 | 125 | 101097812 | 15 | 70  | 0    |
| 14 | 101098450 | 101098475 | 25  | 101098462 | 15 | 15  | 2.2  |
| 14 | 101119500 | 101119650 | 150 | 101119562 | 15 | 83  | 0    |
| 14 | 101120600 | 101120825 | 225 | 101120737 | 20 | 156 | 19.5 |
| 14 | 101203350 | 101203500 | 150 | 101203412 | 13 | 75  | 0    |
| 14 | 102577700 | 102577875 | 175 | 102577737 | 14 | 95  | 6.5  |
| 14 | 102698000 | 102698175 | 175 | 102698112 | 15 | 95  | 0    |
| 14 | 102740550 | 102740650 | 100 | 102740587 | 14 | 51  | 0    |
| 14 | 102777025 | 102777125 | 100 | 102777037 | 13 | 51  | 0    |
| 14 | 103525575 | 103525600 | 25  | 103525587 | 12 | 12  | 0    |
| 14 | 104485775 | 104485825 | 50  | 104485787 | 13 | 26  | 0    |
| 14 | 104487300 | 104487325 | 25  | 104487312 | 12 | 12  | 0    |
| 14 | 104489775 | 104489900 | 125 | 104489787 | 14 | 63  | 10.8 |
| 14 | 104617750 | 104617800 | 50  | 104617762 | 13 | 25  | 4.3  |
| 14 | 104640400 | 104640550 | 150 | 104640512 | 16 | 81  | 13   |
| 14 | 104659400 | 104659725 | 325 | 104659587 | 17 | 189 | 10.8 |
| 14 | 104676950 | 104676975 | 25  | 104676962 | 12 | 12  | 2.2  |
| 14 | 105081075 | 105081150 | 75  | 105081087 | 12 | 36  | 0    |
| 14 | 105086825 | 105086900 | 75  | 105086862 | 16 | 46  | 2.2  |
| 14 | 105120250 | 105120300 | 50  | 105120262 | 15 | 29  | 0    |
| 17 | 94850     | 95000     | 150 | 94862     | 12 | 72  | 0    |
| 17 | 165225    | 165375    | 150 | 165287    | 17 | 82  | 2.2  |
| 17 | 186425    | 186450    | 25  | 186437    | 12 | 12  | 0    |
| 17 | 206400    | 206875    | 475 | 206587    | 16 | 231 | 0    |
| 17 | 212650    | 212750    | 100 | 212712    | 14 | 53  | 0    |
| 17 | 217650    | 217700    | 50  | 217662    | 13 | 26  | 0    |
| 17 | 241625    | 241650    | 25  | 241637    | 12 | 12  | 0    |
| 17 | 270800    | 270950    | 150 | 270837    | 14 | 80  | 0    |
| 17 | 354375    | 354600    | 225 | 354412    | 14 | 112 | 0    |
| 17 | 599675    | 599725    | 50  | 599687    | 12 | 24  | 4.3  |
| 17 | 691425    | 691575    | 150 | 691487    | 16 | 82  | 13   |
| 17 | 1161600   | 1161725   | 125 | 1161662   | 15 | 65  | 0    |
| 17 | 1162475   | 1162525   | 50  | 1162487   | 12 | 24  | 0    |
| 17 | 1820550   | 1820650   | 100 | 1820612   | 16 | 56  | 0    |
| 17 | 2684025   | 2684125   | 100 | 2684112   | 13 | 49  | 6.5  |
| 17 | 2893950   | 2894400   | 450 | 2894062   | 21 | 287 | 0    |
| 17 | 3609950   | 3610075   | 125 | 3609962   | 12 | 57  | 10.8 |
| 17 | 3851175   | 3851200   | 25  | 3851187   | 12 | 12  | 2.2  |
| 17 | 4310100   | 4310225   | 125 | 4310137   | 14 | 63  | 0    |
| 17 | 4472100   | 4472125   | 25  | 4472112   | 12 | 12  | 0    |
| 17 | 4632600   | 4632850   | 250 | 4632837   | 15 | 110 | 17.3 |
| 17 | 4922000   | 4922150   | 150 | 4922137   | 20 | 85  | 8.7  |
| 17 | 4922750   | 4922775   | 25  | 4922762   | 13 | 13  | 0    |
| 17 | 4938050   | 4938075   | 25  | 4938062   | 12 | 12  | 2.2  |
| 17 | 4941175   | 4941375   | 200 | 4941337   | 23 | 150 | 0    |
| 17 | 4943650   | 4943750   | 100 | 4943737   | 13 | 48  | 0    |
| 17 | 5030225   | 5030250   | 25  | 5030237   | 12 | 12  | 0    |
| 17 | 6382950   | 6383000   | 50  | 6382987   | 14 | 27  | 4.3  |

|    |          |          |     |          |    |     |      |
|----|----------|----------|-----|----------|----|-----|------|
| 17 | 6398975  | 6399050  | 75  | 6398987  | 14 | 39  | 0    |
| 17 | 6496000  | 6496575  | 575 | 6496087  | 26 | 446 | 34.7 |
| 17 | 6675250  | 6675275  | 25  | 6675262  | 12 | 12  | 0    |
| 17 | 6675750  | 6675950  | 200 | 6675862  | 19 | 128 | 0    |
| 17 | 6803925  | 6804025  | 100 | 6804012  | 14 | 50  | 0    |
| 17 | 6909900  | 6909950  | 50  | 6909912  | 13 | 25  | 0    |
| 17 | 6951725  | 6951750  | 25  | 6951737  | 12 | 12  | 2.2  |
| 17 | 7381775  | 7382125  | 350 | 7381937  | 28 | 298 | 32.5 |
| 17 | 7518175  | 7518225  | 50  | 7518187  | 12 | 24  | 4.3  |
| 17 | 7584475  | 7584550  | 75  | 7584487  | 14 | 41  | 6.5  |
| 17 | 7848075  | 7848100  | 25  | 7848087  | 12 | 12  | 0    |
| 17 | 7961825  | 7962025  | 200 | 7961937  | 16 | 112 | 17.3 |
| 17 | 7966950  | 7966975  | 25  | 7966962  | 12 | 12  | 2.2  |
| 17 | 8170975  | 8171050  | 75  | 8170987  | 15 | 43  | 2.2  |
| 17 | 8240500  | 8240650  | 150 | 8240587  | 17 | 82  | 10.8 |
| 17 | 8547350  | 8547475  | 125 | 8547462  | 14 | 61  | 10.8 |
| 17 | 8580550  | 8580575  | 25  | 8580562  | 12 | 12  | 0    |
| 17 | 8599825  | 8599875  | 50  | 8599837  | 12 | 24  | 0    |
| 17 | 8600500  | 8600525  | 25  | 8600512  | 12 | 12  | 0    |
| 17 | 8601600  | 8601625  | 25  | 8601612  | 12 | 12  | 0    |
| 17 | 8602350  | 8602425  | 75  | 8602362  | 16 | 45  | 6.5  |
| 17 | 8642700  | 8642750  | 50  | 8642712  | 12 | 24  | 2.2  |
| 17 | 8668350  | 8668650  | 300 | 8668487  | 16 | 152 | 17.3 |
| 17 | 8673275  | 8673675  | 400 | 8673587  | 14 | 185 | 13   |
| 17 | 8805000  | 8805025  | 25  | 8805012  | 12 | 12  | 2.2  |
| 17 | 8811725  | 8811775  | 50  | 8811737  | 12 | 24  | 0    |
| 17 | 8864825  | 8864925  | 100 | 8864912  | 13 | 48  | 0    |
| 17 | 8866725  | 8866975  | 250 | 8866837  | 24 | 190 | 34.7 |
| 17 | 8948625  | 8948675  | 50  | 8948637  | 12 | 24  | 4.3  |
| 17 | 8979850  | 8980050  | 200 | 8980012  | 18 | 129 | 15.2 |
| 17 | 8999150  | 8999175  | 25  | 8999162  | 12 | 12  | 0    |
| 17 | 9026550  | 9026575  | 25  | 9026562  | 12 | 12  | 0    |
| 17 | 9050000  | 9050050  | 50  | 9050012  | 14 | 28  | 4.3  |
| 17 | 9489200  | 9489250  | 50  | 9489212  | 12 | 24  | 0    |
| 17 | 9657750  | 9657800  | 50  | 9657762  | 12 | 24  | 0    |
| 17 | 9661200  | 9661225  | 25  | 9661212  | 12 | 12  | 0    |
| 17 | 9731800  | 9731875  | 75  | 9731812  | 13 | 39  | 6.5  |
| 17 | 10049750 | 10049875 | 125 | 10049787 | 14 | 67  | 10.8 |
| 17 | 10482125 | 10482275 | 150 | 10482212 | 16 | 78  | 2.2  |
| 17 | 11612225 | 11612375 | 150 | 11612312 | 14 | 79  | 15.2 |
| 17 | 11715875 | 11716000 | 125 | 11715937 | 13 | 62  | 0    |
| 17 | 12737375 | 12737550 | 175 | 12737487 | 14 | 89  | 4.3  |
| 17 | 12798550 | 12798600 | 50  | 12798562 | 12 | 24  | 2.2  |
| 17 | 13491850 | 13491875 | 25  | 13491862 | 12 | 12  | 0    |
| 17 | 14139925 | 14140050 | 125 | 14139962 | 16 | 72  | 0    |
| 17 | 14142375 | 14142400 | 25  | 14142387 | 12 | 12  | 2.2  |
| 17 | 14143625 | 14143800 | 175 | 14143737 | 16 | 98  | 2.2  |
| 17 | 14144575 | 14144875 | 300 | 14144762 | 20 | 195 | 19.5 |
| 17 | 15759250 | 15759300 | 50  | 15759262 | 13 | 25  | 0    |
| 17 | 16335125 | 16335275 | 150 | 16335212 | 13 | 73  | 6.5  |
| 17 | 16428675 | 16428775 | 100 | 16428687 | 15 | 53  | 0    |
| 17 | 16445100 | 16445675 | 575 | 16445387 | 22 | 361 | 17.3 |
| 17 | 16461750 | 16461850 | 100 | 16461762 | 15 | 55  | 4.3  |
| 17 | 16723850 | 16724025 | 175 | 16723887 | 14 | 90  | 0    |
| 17 | 16744475 | 16744500 | 25  | 16744487 | 12 | 12  | 0    |
| 17 | 16790125 | 16790150 | 25  | 16790137 | 12 | 12  | 2.2  |
| 17 | 16792875 | 16793000 | 125 | 16792887 | 13 | 63  | 4.3  |
| 17 | 16821300 | 16821400 | 100 | 16821312 | 12 | 46  | 0    |
| 17 | 17240300 | 17240475 | 175 | 17240437 | 16 | 98  | 8.7  |
| 17 | 17264150 | 17264175 | 25  | 17264162 | 12 | 12  | 0    |
| 17 | 17269150 | 17269250 | 100 | 17269162 | 16 | 56  | 8.7  |
| 17 | 17284275 | 17284350 | 75  | 17284287 | 12 | 36  | 6.5  |
| 17 | 17304175 | 17304300 | 125 | 17304287 | 14 | 59  | 6.5  |
| 17 | 17308025 | 17308075 | 50  | 17308037 | 12 | 24  | 0    |
| 17 | 17339475 | 17339675 | 200 | 17339487 | 22 | 145 | 13   |
| 17 | 17339950 | 17340100 | 150 | 17340012 | 16 | 88  | 13   |
| 17 | 17964025 | 17964075 | 50  | 17964037 | 12 | 24  | 0    |
| 17 | 18011450 | 18011750 | 300 | 18011612 | 19 | 192 | 0    |
| 17 | 19822125 | 19822200 | 75  | 19822162 | 13 | 37  | 6.5  |
| 17 | 19897550 | 19897575 | 25  | 19897562 | 12 | 12  | 2.2  |
| 17 | 20711850 | 20712075 | 225 | 20711887 | 29 | 213 | 21.7 |
| 17 | 20909600 | 20909775 | 175 | 20909687 | 16 | 102 | 0    |
| 17 | 21167375 | 21167475 | 100 | 21167387 | 16 | 61  | 4.3  |
| 17 | 21167800 | 21168025 | 225 | 21167912 | 16 | 126 | 19.5 |
| 17 | 21174975 | 21175000 | 25  | 21174987 | 14 | 14  | 2.2  |



|    |          |          |     |          |    |     |      |
|----|----------|----------|-----|----------|----|-----|------|
| 17 | 21177875 | 21177975 | 100 | 21177887 | 12 | 48  | 2.2  |
| 17 | 21259500 | 21259550 | 50  | 21259512 | 14 | 28  | 2.2  |
| 17 | 21285350 | 21285525 | 175 | 21285387 | 17 | 103 | 8.7  |
| 17 | 21322200 | 21322225 | 25  | 21322212 | 13 | 13  | 2.2  |
| 17 | 21456825 | 21457175 | 350 | 21457062 | 19 | 232 | 17.3 |
| 17 | 21754825 | 21754950 | 125 | 21754887 | 13 | 62  | 0    |
| 17 | 22184175 | 22184375 | 200 | 22184187 | 13 | 104 | 17.3 |
| 17 | 22287275 | 22287525 | 250 | 22287337 | 20 | 155 | 21.7 |
| 17 | 22287900 | 22288000 | 100 | 22287937 | 14 | 54  | 8.7  |
| 17 | 22288925 | 22289325 | 400 | 22289237 | 46 | 481 | 80.2 |
| 17 | 22290300 | 22290325 | 25  | 22290312 | 12 | 12  | 2.2  |
| 17 | 22290725 | 22290850 | 125 | 22290812 | 15 | 67  | 8.7  |
| 17 | 24266525 | 24266575 | 50  | 24266562 | 13 | 25  | 0    |
| 17 | 25413600 | 25413875 | 275 | 25413737 | 13 | 120 | 0    |
| 17 | 25414450 | 25414700 | 250 | 25414462 | 12 | 97  | 0    |
| 17 | 25426875 | 25426925 | 50  | 25426887 | 12 | 24  | 0    |
| 17 | 26875325 | 26875350 | 25  | 26875337 | 12 | 12  | 2.2  |
| 17 | 26996750 | 26996925 | 175 | 26996762 | 12 | 78  | 0    |
| 17 | 30517700 | 30517750 | 50  | 30517712 | 13 | 26  | 2.2  |
| 17 | 30799875 | 30800075 | 200 | 30799912 | 16 | 110 | 15.2 |
| 17 | 30846925 | 30846950 | 25  | 30846937 | 12 | 12  | 0    |
| 17 | 32171625 | 32171825 | 200 | 32171812 | 13 | 95  | 15.2 |
| 17 | 32191425 | 32191550 | 125 | 32191437 | 15 | 62  | 2.2  |
| 17 | 33162875 | 33162925 | 50  | 33162887 | 12 | 24  | 0    |
| 17 | 33170825 | 33170900 | 75  | 33170837 | 14 | 39  | 4.3  |
| 17 | 34021500 | 34021525 | 25  | 34021512 | 12 | 12  | 0    |
| 17 | 34262850 | 34262875 | 25  | 34262862 | 12 | 12  | 2.2  |
| 17 | 34456050 | 34456325 | 275 | 34456187 | 22 | 186 | 0    |
| 17 | 35175525 | 35176075 | 550 | 35175637 | 25 | 378 | 28.2 |
| 17 | 35176500 | 35176575 | 75  | 35176512 | 12 | 36  | 6.5  |
| 17 | 35277650 | 35278250 | 600 | 35278137 | 22 | 304 | 32.5 |
| 17 | 35354025 | 35354075 | 50  | 35354037 | 12 | 24  | 4.3  |
| 17 | 35936475 | 35936650 | 175 | 35936587 | 16 | 96  | 10.8 |
| 17 | 36549875 | 36550025 | 150 | 36549887 | 13 | 71  | 4.3  |
| 17 | 36711900 | 36711925 | 25  | 36711912 | 12 | 12  | 2.2  |
| 17 | 36712400 | 36712525 | 125 | 36712437 | 14 | 65  | 4.3  |
| 17 | 36742225 | 36742250 | 25  | 36742237 | 12 | 12  | 2.2  |
| 17 | 36821200 | 36821275 | 75  | 36821212 | 13 | 38  | 0    |
| 17 | 36832600 | 36832650 | 50  | 36832612 | 12 | 24  | 4.3  |
| 17 | 36834100 | 36834125 | 25  | 36834112 | 12 | 12  | 2.2  |
| 17 | 36850475 | 36850650 | 175 | 36850487 | 14 | 91  | 8.7  |
| 17 | 36854925 | 36854975 | 50  | 36854937 | 12 | 24  | 4.3  |
| 17 | 36858850 | 36858900 | 50  | 36858862 | 13 | 25  | 0    |
| 17 | 36873875 | 36873925 | 50  | 36873887 | 12 | 24  | 0    |
| 17 | 36925125 | 36925200 | 75  | 36925137 | 12 | 36  | 0    |
| 17 | 36978275 | 36978400 | 125 | 36978287 | 12 | 60  | 0    |
| 17 | 36982525 | 36982550 | 25  | 36982537 | 12 | 12  | 0    |
| 17 | 38737800 | 38737850 | 50  | 38737812 | 26 | 48  | 8.7  |
| 17 | 39223425 | 39223550 | 125 | 39223437 | 14 | 64  | 6.5  |
| 17 | 39301400 | 39301575 | 175 | 39301437 | 14 | 89  | 13   |
| 17 | 39385750 | 39385950 | 200 | 39385912 | 17 | 118 | 8.7  |
| 17 | 39386325 | 39386425 | 100 | 39386387 | 13 | 47  | 0    |
| 17 | 39438925 | 39438975 | 50  | 39438937 | 13 | 26  | 0    |
| 17 | 39991650 | 39991875 | 225 | 39991812 | 18 | 127 | 0    |
| 17 | 40088850 | 40088975 | 125 | 40088912 | 15 | 70  | 6.5  |
| 17 | 41105700 | 41105775 | 75  | 41105712 | 14 | 39  | 6.5  |
| 17 | 41113450 | 41113475 | 25  | 41113462 | 12 | 12  | 0    |
| 17 | 41148250 | 41148425 | 175 | 41148387 | 15 | 89  | 0    |
| 17 | 41361675 | 41361700 | 25  | 41361687 | 12 | 12  | 0    |
| 17 | 41405225 | 41405300 | 75  | 41405262 | 14 | 39  | 6.5  |
| 17 | 41700650 | 41700675 | 25  | 41700662 | 12 | 12  | 2.2  |
| 17 | 42222275 | 42222425 | 150 | 42222362 | 15 | 83  | 2.2  |
| 17 | 42273625 | 42273700 | 75  | 42273662 | 14 | 39  | 6.5  |
| 17 | 42274150 | 42274250 | 100 | 42274212 | 13 | 49  | 0    |
| 17 | 42570975 | 42571100 | 125 | 42570987 | 20 | 100 | 10.8 |
| 17 | 42574275 | 42574425 | 150 | 42574337 | 26 | 145 | 13   |
| 17 | 42589525 | 42589550 | 25  | 42589537 | 18 | 18  | 2.2  |
| 17 | 42670100 | 42670150 | 50  | 42670112 | 14 | 28  | 0    |
| 17 | 43153225 | 43153300 | 75  | 43153237 | 13 | 34  | 4.3  |
| 17 | 44151250 | 44151275 | 25  | 44151262 | 12 | 12  | 2.2  |
| 17 | 44561325 | 44561550 | 225 | 44561487 | 17 | 118 | 2.2  |
| 17 | 44564975 | 44565425 | 450 | 44565287 | 16 | 246 | 39   |
| 17 | 45395950 | 45396200 | 250 | 45396037 | 16 | 130 | 17.3 |
| 17 | 45400775 | 45400825 | 50  | 45400787 | 12 | 24  | 4.3  |
| 17 | 45401900 | 45401925 | 25  | 45401912 | 13 | 13  | 2.2  |

|    |          |          |     |          |    |     |      |
|----|----------|----------|-----|----------|----|-----|------|
| 17 | 45404325 | 45404500 | 175 | 45404337 | 15 | 96  | 4.3  |
| 17 | 45425400 | 45425500 | 100 | 45425462 | 13 | 48  | 0    |
| 17 | 45426975 | 45427275 | 300 | 45427162 | 24 | 238 | 13   |
| 17 | 50659975 | 50660000 | 25  | 50659987 | 13 | 13  | 2.2  |
| 17 | 51119575 | 51119700 | 125 | 51119612 | 15 | 71  | 8.7  |
| 17 | 51120000 | 51120025 | 25  | 51120012 | 13 | 13  | 2.2  |
| 17 | 51246975 | 51247000 | 25  | 51246987 | 13 | 13  | 0    |
| 17 | 51259575 | 51259600 | 25  | 51259587 | 12 | 12  | 2.2  |
| 17 | 52123475 | 52123500 | 25  | 52123487 | 12 | 12  | 2.2  |
| 17 | 52176350 | 52176400 | 50  | 52176387 | 13 | 25  | 4.3  |
| 17 | 52194800 | 52194825 | 25  | 52194812 | 12 | 12  | 2.2  |
| 17 | 52478000 | 52478150 | 150 | 52478062 | 15 | 79  | 0    |
| 17 | 52581550 | 52581625 | 75  | 52581562 | 12 | 36  | 0    |
| 17 | 52581950 | 52582000 | 50  | 52581962 | 12 | 24  | 0    |
| 17 | 52584275 | 52584325 | 50  | 52584287 | 13 | 25  | 4.3  |
| 17 | 53146850 | 53147175 | 325 | 53146987 | 15 | 167 | 0    |
| 17 | 53148100 | 53148175 | 75  | 53148112 | 13 | 37  | 6.5  |
| 17 | 53149475 | 53149575 | 100 | 53149512 | 13 | 49  | 0    |
| 17 | 53221800 | 53222000 | 200 | 53221887 | 17 | 123 | 0    |
| 17 | 53549850 | 53549900 | 50  | 53549862 | 12 | 24  | 0    |
| 17 | 53675300 | 53675325 | 25  | 53675312 | 12 | 12  | 2.2  |
| 17 | 53976350 | 53976425 | 75  | 53976362 | 13 | 37  | 6.5  |
| 17 | 54997150 | 54997375 | 225 | 54997362 | 26 | 159 | 13   |
| 17 | 56596650 | 56596725 | 75  | 56596687 | 14 | 39  | 6.5  |
| 17 | 57023300 | 57023350 | 50  | 57023312 | 12 | 24  | 4.3  |
| 17 | 57557475 | 57557600 | 125 | 57557537 | 13 | 62  | 0    |
| 17 | 57569325 | 57569375 | 50  | 57569337 | 12 | 24  | 4.3  |
| 17 | 58127425 | 58127525 | 100 | 58127437 | 20 | 62  | 8.7  |
| 17 | 58127800 | 58127975 | 175 | 58127887 | 17 | 98  | 15.2 |
| 17 | 58138725 | 58138775 | 50  | 58138737 | 18 | 34  | 2.2  |
| 17 | 58792425 | 58792725 | 300 | 58792587 | 19 | 184 | 17.3 |
| 17 | 58937900 | 58938025 | 125 | 58937937 | 13 | 61  | 0    |
| 17 | 58939400 | 58939475 | 75  | 58939437 | 13 | 38  | 6.5  |
| 17 | 59372400 | 59372500 | 100 | 59372412 | 12 | 48  | 0    |
| 17 | 59372800 | 59373000 | 200 | 59372962 | 19 | 130 | 8.7  |
| 17 | 59388425 | 59388525 | 100 | 59388462 | 13 | 48  | 8.7  |
| 17 | 59430925 | 59431025 | 100 | 59430937 | 14 | 53  | 8.7  |
| 17 | 60730525 | 60730575 | 50  | 60730537 | 12 | 24  | 4.3  |
| 17 | 60813050 | 60813100 | 50  | 60813062 | 13 | 26  | 2.2  |
| 17 | 62244950 | 62245050 | 100 | 62245012 | 14 | 50  | 0    |
| 17 | 62296825 | 62296900 | 75  | 62296837 | 15 | 40  | 0    |
| 17 | 62338875 | 62338925 | 50  | 62338912 | 13 | 25  | 0    |
| 17 | 62357650 | 62357725 | 75  | 62357662 | 12 | 36  | 0    |
| 17 | 62363700 | 62363900 | 200 | 62363762 | 16 | 112 | 8.7  |
| 17 | 62365700 | 62365800 | 100 | 62365762 | 13 | 50  | 0    |
| 17 | 62414750 | 62414825 | 75  | 62414787 | 13 | 37  | 0    |
| 17 | 62416725 | 62416825 | 100 | 62416812 | 13 | 49  | 8.7  |
| 17 | 62428125 | 62428200 | 75  | 62428162 | 15 | 40  | 6.5  |
| 17 | 62439250 | 62439275 | 25  | 62439262 | 12 | 12  | 2.2  |
| 17 | 62467150 | 62467450 | 300 | 62467212 | 14 | 151 | 17.3 |
| 17 | 62468300 | 62468500 | 200 | 62468437 | 15 | 103 | 6.5  |
| 17 | 62481425 | 62481450 | 25  | 62481437 | 12 | 12  | 0    |
| 17 | 62884500 | 62884725 | 225 | 62884562 | 20 | 154 | 4.3  |
| 17 | 62933850 | 62933900 | 50  | 62933862 | 12 | 24  | 0    |
| 17 | 62934425 | 62934475 | 50  | 62934437 | 12 | 24  | 2.2  |
| 17 | 62983800 | 62983825 | 25  | 62983812 | 12 | 12  | 2.2  |
| 17 | 64096975 | 64097025 | 50  | 64096987 | 16 | 30  | 4.3  |
| 17 | 64125275 | 64125350 | 75  | 64125312 | 13 | 37  | 0    |
| 17 | 64252975 | 64253050 | 75  | 64252987 | 13 | 37  | 4.3  |
| 17 | 64387600 | 64387625 | 25  | 64387612 | 12 | 12  | 2.2  |
| 17 | 64388400 | 64388500 | 100 | 64388412 | 13 | 49  | 6.5  |
| 17 | 65640400 | 65640425 | 25  | 65640412 | 12 | 12  | 0    |
| 17 | 67811575 | 67811750 | 175 | 67811612 | 17 | 99  | 0    |
| 17 | 68061175 | 68061200 | 25  | 68061187 | 12 | 12  | 0    |
| 17 | 68061450 | 68061600 | 150 | 68061512 | 14 | 77  | 6.5  |
| 17 | 68948450 | 68948475 | 25  | 68948462 | 12 | 12  | 2.2  |
| 17 | 68992125 | 68992175 | 50  | 68992162 | 13 | 25  | 0    |
| 17 | 68992925 | 68993050 | 125 | 68993037 | 14 | 62  | 10.8 |
| 17 | 68995125 | 68995525 | 400 | 68995137 | 13 | 215 | 34.7 |
| 17 | 69006150 | 69006225 | 75  | 69006187 | 13 | 37  | 6.5  |
| 17 | 69011375 | 69011525 | 150 | 69011437 | 15 | 83  | 0    |
| 17 | 69032650 | 69032675 | 25  | 69032662 | 12 | 12  | 2.2  |
| 17 | 69033800 | 69033825 | 25  | 69033812 | 12 | 12  | 0    |
| 17 | 69112200 | 69112225 | 25  | 69112212 | 12 | 12  | 2.2  |
| 17 | 69593225 | 69593375 | 150 | 69593337 | 14 | 80  | 8.7  |

|    |          |          |     |          |    |     |      |
|----|----------|----------|-----|----------|----|-----|------|
| 17 | 69694250 | 69694425 | 175 | 69694312 | 15 | 90  | 15.2 |
| 17 | 69775500 | 69775575 | 75  | 69775537 | 14 | 39  | 4.3  |
| 17 | 69820400 | 69820425 | 25  | 69820412 | 12 | 12  | 0    |
| 17 | 69829925 | 69829975 | 50  | 69829937 | 14 | 26  | 0    |
| 17 | 69973325 | 69973450 | 125 | 69973437 | 13 | 59  | 2.2  |
| 17 | 70084550 | 70084575 | 25  | 70084562 | 12 | 12  | 2.2  |
| 17 | 70179175 | 70179275 | 100 | 70179237 | 17 | 61  | 4.3  |
| 17 | 70237175 | 70237225 | 50  | 70237187 | 12 | 24  | 0    |
| 17 | 70240500 | 70240525 | 25  | 70240512 | 12 | 12  | 0    |
| 17 | 70256700 | 70256725 | 25  | 70256712 | 12 | 12  | 0    |
| 17 | 70489700 | 70489850 | 150 | 70489837 | 14 | 70  | 10.8 |
| 17 | 71089225 | 71089275 | 50  | 71089237 | 12 | 24  | 4.3  |
| 17 | 71517350 | 71517525 | 175 | 71517387 | 14 | 93  | 15.2 |
| 17 | 72153400 | 72153425 | 25  | 72153412 | 12 | 12  | 2.2  |
| 17 | 72178875 | 72179025 | 150 | 72178912 | 16 | 83  | 2.2  |
| 17 | 72363975 | 72364150 | 175 | 72363987 | 13 | 87  | 0    |
| 17 | 72366700 | 72366725 | 25  | 72366712 | 12 | 12  | 2.2  |
| 17 | 72474275 | 72474350 | 75  | 72474312 | 14 | 39  | 4.3  |
| 17 | 72482250 | 72482650 | 400 | 72482387 | 20 | 259 | 10.8 |
| 17 | 72544450 | 72544500 | 50  | 72544487 | 13 | 25  | 4.3  |
| 17 | 72548775 | 72548800 | 25  | 72548787 | 12 | 12  | 0    |
| 17 | 72682050 | 72682175 | 125 | 72682062 | 14 | 68  | 0    |
| 17 | 73070725 | 73070775 | 50  | 73070737 | 12 | 24  | 2.2  |
| 17 | 73071400 | 73071525 | 125 | 73071462 | 18 | 79  | 8.7  |
| 17 | 73084050 | 73084075 | 25  | 73084062 | 12 | 12  | 2.2  |
| 17 | 73108200 | 73108250 | 50  | 73108212 | 12 | 24  | 0    |
| 17 | 73117100 | 73117250 | 150 | 73117187 | 15 | 82  | 2.2  |
| 17 | 73119325 | 73119450 | 125 | 73119337 | 13 | 58  | 0    |
| 17 | 73143625 | 73143650 | 25  | 73143637 | 13 | 13  | 2.2  |
| 17 | 73153850 | 73153900 | 50  | 73153862 | 12 | 24  | 4.3  |
| 17 | 73155375 | 73155500 | 125 | 73155387 | 12 | 56  | 0    |
| 17 | 73165775 | 73165900 | 125 | 73165887 | 13 | 58  | 0    |
| 17 | 73207250 | 73207350 | 100 | 73207287 | 13 | 49  | 0    |
| 17 | 73226075 | 73226200 | 125 | 73226087 | 12 | 60  | 0    |
| 17 | 73231650 | 73231750 | 100 | 73231712 | 14 | 52  | 8.7  |
| 17 | 73233125 | 73233150 | 25  | 73233137 | 14 | 14  | 2.2  |
| 17 | 73233425 | 73233525 | 100 | 73233437 | 12 | 46  | 4.3  |
| 17 | 73234625 | 73234650 | 25  | 73234637 | 12 | 12  | 2.2  |
| 17 | 73250300 | 73250325 | 25  | 73250312 | 12 | 12  | 2.2  |
| 17 | 73262750 | 73262875 | 125 | 73262787 | 14 | 64  | 0    |
| 17 | 73263125 | 73263350 | 225 | 73263262 | 15 | 116 | 10.8 |
| 17 | 73263600 | 73263625 | 25  | 73263612 | 12 | 12  | 0    |
| 17 | 73269100 | 73269250 | 150 | 73269112 | 14 | 76  | 0    |
| 17 | 73296250 | 73296275 | 25  | 73296262 | 12 | 12  | 0    |
| 17 | 73309675 | 73309700 | 25  | 73309687 | 12 | 12  | 2.2  |
| 17 | 73317675 | 73317725 | 50  | 73317687 | 12 | 24  | 0    |
| 17 | 73362925 | 73363075 | 150 | 73362962 | 15 | 79  | 13   |
| 17 | 73380750 | 73380850 | 100 | 73380762 | 12 | 47  | 8.7  |
| 17 | 73382500 | 73382600 | 100 | 73382587 | 14 | 50  | 2.2  |
| 17 | 73383575 | 73383800 | 225 | 73383762 | 18 | 132 | 2.2  |
| 17 | 73384050 | 73384325 | 275 | 73384187 | 20 | 177 | 0    |
| 17 | 73409325 | 73409350 | 25  | 73409337 | 12 | 12  | 0    |
| 17 | 73415500 | 73415625 | 125 | 73415537 | 16 | 68  | 6.5  |
| 17 | 73417475 | 73417675 | 200 | 73417637 | 15 | 103 | 15.2 |
| 17 | 73424875 | 73424950 | 75  | 73424937 | 13 | 37  | 0    |
| 17 | 73425725 | 73425750 | 25  | 73425737 | 12 | 12  | 2.2  |
| 17 | 73427675 | 73427700 | 25  | 73427687 | 12 | 12  | 0    |
| 17 | 73429500 | 73429550 | 50  | 73429512 | 12 | 24  | 4.3  |
| 17 | 73459900 | 73460100 | 200 | 73459937 | 15 | 101 | 0    |
| 17 | 73461050 | 73461250 | 200 | 73461137 | 19 | 128 | 10.8 |
| 17 | 74074425 | 74074625 | 200 | 74074537 | 14 | 105 | 13   |
| 17 | 74458350 | 74458550 | 200 | 74458387 | 14 | 104 | 15.2 |
| 17 | 74638825 | 74638850 | 25  | 74638837 | 13 | 13  | 2.2  |
| 17 | 74646075 | 74646100 | 25  | 74646087 | 12 | 12  | 0    |
| 17 | 74646375 | 74646525 | 150 | 74646487 | 18 | 95  | 4.3  |
| 17 | 75255800 | 75255825 | 25  | 75255812 | 12 | 12  | 0    |
| 17 | 75270700 | 75270725 | 25  | 75270712 | 12 | 12  | 0    |
| 17 | 75279700 | 75279875 | 175 | 75279787 | 14 | 88  | 0    |
| 17 | 75392275 | 75392525 | 250 | 75392462 | 20 | 165 | 15.2 |
| 17 | 75400000 | 75400100 | 100 | 75400037 | 13 | 51  | 8.7  |
| 17 | 75428775 | 75428875 | 100 | 75428837 | 14 | 53  | 8.7  |
| 17 | 75482675 | 75482775 | 100 | 75482737 | 14 | 52  | 0    |
| 17 | 75491025 | 75491050 | 25  | 75491037 | 12 | 12  | 0    |
| 17 | 75493050 | 75493075 | 25  | 75493062 | 12 | 12  | 0    |
| 17 | 76111400 | 76111950 | 550 | 76111537 | 22 | 350 | 32.5 |

|    |          |          |      |          |    |     |      |
|----|----------|----------|------|----------|----|-----|------|
| 17 | 76222600 | 76222800 | 200  | 76222712 | 17 | 111 | 13   |
| 17 | 76242800 | 76242875 | 75   | 76242812 | 13 | 36  | 0    |
| 17 | 76612125 | 76612150 | 25   | 76612137 | 12 | 12  | 2.2  |
| 17 | 76726775 | 76726800 | 25   | 76726787 | 12 | 12  | 0    |
| 17 | 77110700 | 77111075 | 375  | 77110837 | 15 | 204 | 34.7 |
| 17 | 77869475 | 77869500 | 25   | 77869487 | 12 | 12  | 2.2  |
| 17 | 77870025 | 77870375 | 350  | 77870112 | 17 | 187 | 26   |
| 17 | 77870600 | 77870725 | 125  | 77870687 | 13 | 62  | 8.7  |
| 17 | 77927725 | 77927750 | 25   | 77927737 | 12 | 12  | 0    |
| 17 | 78250625 | 78250675 | 50   | 78250662 | 14 | 27  | 0    |
| 17 | 78556175 | 78556200 | 25   | 78556187 | 12 | 12  | 2.2  |
| 17 | 78569300 | 78569450 | 150  | 78569337 | 15 | 86  | 10.8 |
| 16 | 803450   | 803550   | 100  | 803462   | 14 | 54  | 0    |
| 16 | 808475   | 808950   | 475  | 808862   | 16 | 229 | 0    |
| 16 | 814725   | 815000   | 275  | 814862   | 17 | 154 | 26   |
| 16 | 815250   | 815300   | 50   | 815262   | 13 | 26  | 2.2  |
| 16 | 820600   | 820625   | 25   | 820612   | 12 | 12  | 2.2  |
| 16 | 825950   | 825975   | 25   | 825962   | 12 | 12  | 2.2  |
| 16 | 834775   | 834950   | 175  | 834887   | 15 | 88  | 4.3  |
| 16 | 837125   | 837250   | 125  | 837137   | 12 | 60  | 0    |
| 16 | 837675   | 837775   | 100  | 837687   | 12 | 46  | 6.5  |
| 16 | 838725   | 839150   | 425  | 839037   | 20 | 225 | 17.3 |
| 16 | 840150   | 841100   | 950  | 840812   | 25 | 643 | 34.7 |
| 16 | 841575   | 841600   | 25   | 841587   | 12 | 12  | 0    |
| 16 | 904775   | 904800   | 25   | 904787   | 12 | 12  | 0    |
| 16 | 916225   | 916325   | 100  | 916262   | 14 | 52  | 2.2  |
| 16 | 956050   | 956225   | 175  | 956187   | 22 | 127 | 10.8 |
| 16 | 961600   | 961625   | 25   | 961612   | 13 | 13  | 2.2  |
| 16 | 965450   | 965625   | 175  | 965462   | 13 | 84  | 15.2 |
| 16 | 984925   | 986075   | 1150 | 985112   | 30 | 775 | 34.7 |
| 16 | 991325   | 991350   | 25   | 991337   | 13 | 13  | 2.2  |
| 16 | 1001875  | 1001900  | 25   | 1001887  | 13 | 13  | 2.2  |
| 16 | 1014250  | 1014275  | 25   | 1014262  | 12 | 12  | 2.2  |
| 16 | 1037050  | 1037250  | 200  | 1037062  | 12 | 87  | 2.2  |
| 16 | 1074325  | 1074400  | 75   | 1074337  | 12 | 35  | 6.5  |
| 16 | 1074825  | 1075225  | 400  | 1074887  | 21 | 287 | 19.5 |
| 16 | 1100775  | 1100800  | 25   | 1100787  | 12 | 12  | 0    |
| 16 | 1140775  | 1140825  | 50   | 1140787  | 12 | 24  | 2.2  |
| 16 | 1174450  | 1174650  | 200  | 1174612  | 13 | 93  | 0    |
| 16 | 1254675  | 1254725  | 50   | 1254712  | 13 | 25  | 0    |
| 16 | 1256625  | 1256775  | 150  | 1256687  | 16 | 84  | 8.7  |
| 16 | 1271625  | 1271775  | 150  | 1271637  | 12 | 64  | 0    |
| 16 | 1289175  | 1289200  | 25   | 1289187  | 12 | 12  | 0    |
| 16 | 1725525  | 1725675  | 150  | 1725537  | 17 | 80  | 4.3  |
| 16 | 1726650  | 1726675  | 25   | 1726662  | 12 | 12  | 0    |
| 16 | 1728475  | 1728750  | 275  | 1728612  | 20 | 166 | 26   |
| 16 | 1729475  | 1729500  | 25   | 1729487  | 12 | 12  | 0    |
| 16 | 2298175  | 2298375  | 200  | 2298287  | 17 | 115 | 15.2 |
| 16 | 2307650  | 2307850  | 200  | 2307712  | 17 | 111 | 0    |
| 16 | 2378925  | 2379125  | 200  | 2379012  | 17 | 121 | 0    |
| 16 | 2794150  | 2794450  | 300  | 2794337  | 20 | 212 | 26   |
| 16 | 2794825  | 2794875  | 50   | 2794862  | 14 | 27  | 2.2  |
| 16 | 2796225  | 2796300  | 75   | 2796237  | 15 | 44  | 0    |
| 16 | 2798275  | 2798425  | 150  | 2798337  | 14 | 77  | 0    |
| 16 | 2801500  | 2801525  | 25   | 2801512  | 12 | 12  | 2.2  |
| 16 | 3183125  | 3183325  | 200  | 3183137  | 12 | 93  | 2.2  |
| 16 | 3184925  | 3185100  | 175  | 3184962  | 13 | 83  | 10.8 |
| 16 | 3205925  | 3205975  | 50   | 3205937  | 14 | 28  | 4.3  |
| 16 | 3211550  | 3211575  | 25   | 3211562  | 12 | 12  | 0    |
| 16 | 3278575  | 3278600  | 25   | 3278587  | 13 | 13  | 0    |
| 16 | 3279500  | 3279975  | 475  | 3279862  | 18 | 238 | 0    |
| 16 | 3346250  | 3346725  | 475  | 3346287  | 16 | 281 | 34.7 |
| 16 | 3355375  | 3355475  | 100  | 3355387  | 16 | 55  | 8.7  |
| 16 | 3355775  | 3356050  | 275  | 3355937  | 17 | 149 | 26   |
| 16 | 3372625  | 3372900  | 275  | 3372762  | 21 | 188 | 13   |
| 16 | 3373175  | 3373350  | 175  | 3373187  | 14 | 95  | 0    |
| 16 | 3398600  | 3398775  | 175  | 3398762  | 14 | 84  | 6.5  |
| 16 | 3421500  | 3421775  | 275  | 3421762  | 18 | 151 | 10.8 |
| 16 | 3422025  | 3422075  | 50   | 3422037  | 15 | 29  | 4.3  |
| 16 | 4211775  | 4211925  | 150  | 4211862  | 15 | 81  | 10.8 |
| 16 | 4529025  | 4529100  | 75   | 4529037  | 14 | 36  | 0    |
| 16 | 8691450  | 8691600  | 150  | 8691512  | 17 | 92  | 0    |
| 16 | 10357200 | 10357225 | 25   | 10357212 | 13 | 13  | 2.2  |
| 16 | 10486800 | 10486875 | 75   | 10486862 | 15 | 42  | 6.5  |
| 16 | 10605425 | 10605575 | 150  | 10605462 | 14 | 77  | 0    |

|    |          |          |     |          |     |     |      |
|----|----------|----------|-----|----------|-----|-----|------|
| 16 | 10636050 | 10636125 | 75  | 10636062 | 12  | 36  | 0    |
| 16 | 10683200 | 10683225 | 25  | 10683212 | 12  | 12  | 2.2  |
| 16 | 10692750 | 10692900 | 150 | 10692837 | 13  | 73  | 0    |
| 16 | 11483550 | 11483575 | 25  | 11483562 | 12  | 12  | 0    |
| 16 | 11486275 | 11486300 | 25  | 11486287 | 12  | 12  | 0    |
| 16 | 11557375 | 11558050 | 675 | 11557462 | 21  | 415 | 17.3 |
| 16 | 12602700 | 12602975 | 275 | 12602787 | 18  | 150 | 8.7  |
| 16 | 14344575 | 14344700 | 125 | 14344587 | 13  | 64  | 0    |
| 16 | 15588775 | 15589050 | 275 | 15588887 | 21  | 187 | 6.5  |
| 16 | 16162975 | 16163000 | 25  | 16162987 | 12  | 12  | 0    |
| 16 | 16180100 | 16180200 | 100 | 16180162 | 13  | 49  | 0    |
| 16 | 16954475 | 16954525 | 50  | 16954512 | 13  | 25  | 4.3  |
| 16 | 17481175 | 17481200 | 25  | 17481187 | 12  | 12  | 0    |
| 16 | 17481675 | 17481750 | 75  | 17481712 | 13  | 37  | 0    |
| 16 | 19066575 | 19066600 | 25  | 19066587 | 12  | 12  | 0    |
| 16 | 19102575 | 19102600 | 25  | 19102587 | 12  | 12  | 2.2  |
| 16 | 19336600 | 19336675 | 75  | 19336612 | 13  | 38  | 6.5  |
| 16 | 19809800 | 19809875 | 75  | 19809812 | 12  | 35  | 0    |
| 16 | 19835000 | 19835175 | 175 | 19835037 | 14  | 90  | 15.2 |
| 16 | 22254950 | 22255000 | 50  | 22254962 | 13  | 25  | 4.3  |
| 16 | 23229825 | 23229875 | 50  | 23229837 | 12  | 24  | 0    |
| 16 | 27109325 | 27109400 | 75  | 27109337 | 12  | 35  | 0    |
| 16 | 27302750 | 27302900 | 150 | 27302762 | 14  | 75  | 4.3  |
| 16 | 27363125 | 27363175 | 50  | 27363162 | 13  | 25  | 4.3  |
| 16 | 27364000 | 27364025 | 25  | 27364012 | 12  | 12  | 0    |
| 16 | 27645525 | 27645550 | 25  | 27645537 | 12  | 12  | 2.2  |
| 16 | 27815625 | 27815650 | 25  | 27815637 | 12  | 12  | 0    |
| 16 | 27965575 | 27965625 | 50  | 27965587 | 13  | 25  | 0    |
| 16 | 28159125 | 28159250 | 125 | 28159162 | 14  | 67  | 2.2  |
| 16 | 28522750 | 28522800 | 50  | 28522787 | 13  | 25  | 4.3  |
| 16 | 29138100 | 29138125 | 25  | 29138112 | 12  | 12  | 2.2  |
| 16 | 29138550 | 29138800 | 250 | 29138737 | 18  | 154 | 13   |
| 16 | 29955325 | 29955525 | 200 | 29955362 | 17  | 123 | 15.2 |
| 16 | 30015525 | 30015650 | 125 | 30015612 | 17  | 76  | 10.8 |
| 16 | 30016275 | 30016300 | 25  | 30016287 | 12  | 12  | 2.2  |
| 16 | 31250625 | 31250825 | 200 | 31250687 | 16  | 110 | 17.3 |
| 16 | 31346275 | 31346425 | 150 | 31346312 | 16  | 76  | 4.3  |
| 16 | 31407750 | 31407925 | 175 | 31407762 | 12  | 80  | 10.8 |
| 16 | 31668300 | 31668325 | 25  | 31668312 | 12  | 12  | 0    |
| 16 | 31832225 | 31832300 | 75  | 31832237 | 12  | 36  | 0    |
| 16 | 31832875 | 31833025 | 150 | 31832937 | 17  | 85  | 6.5  |
| 16 | 33201650 | 33201700 | 50  | 33201662 | 12  | 24  | 4.3  |
| 16 | 33772550 | 33772825 | 275 | 33772737 | 40  | 297 | 43.3 |
| 16 | 33781900 | 33781925 | 25  | 33781912 | 12  | 12  | 2.2  |
| 16 | 33807225 | 33807400 | 175 | 33807312 | 15  | 97  | 15.2 |
| 16 | 33843550 | 33843625 | 75  | 33843612 | 25  | 67  | 10.8 |
| 16 | 33844725 | 33844900 | 175 | 33844837 | 18  | 111 | 8.7  |
| 16 | 33850475 | 33850750 | 275 | 33850737 | 45  | 339 | 45.5 |
| 16 | 33851175 | 33851225 | 50  | 33851187 | 27  | 52  | 6.5  |
| 16 | 33851975 | 33852250 | 275 | 33851987 | 28  | 204 | 21.7 |
| 16 | 33852525 | 33852650 | 125 | 33852637 | 24  | 110 | 19.5 |
| 16 | 33857225 | 33857250 | 25  | 33857237 | 16  | 16  | 2.2  |
| 16 | 33857875 | 33857950 | 75  | 33857912 | 101 | 299 | 56.3 |
| 16 | 33863075 | 33863125 | 50  | 33863087 | 18  | 35  | 0    |
| 16 | 33865800 | 33865950 | 150 | 33865937 | 18  | 96  | 13   |
| 16 | 33869100 | 33869125 | 25  | 33869112 | 26  | 26  | 4.3  |
| 16 | 33869450 | 33869475 | 25  | 33869462 | 12  | 12  | 2.2  |
| 16 | 33871850 | 33872150 | 300 | 33872037 | 22  | 233 | 19.5 |
| 16 | 33873950 | 33874000 | 50  | 33873962 | 13  | 26  | 0    |
| 16 | 34609075 | 34609150 | 75  | 34609087 | 13  | 36  | 2.2  |
| 16 | 44945800 | 44945900 | 100 | 44945887 | 26  | 79  | 8.7  |
| 16 | 44949725 | 44949750 | 25  | 44949737 | 12  | 12  | 0    |
| 16 | 44959300 | 44959325 | 25  | 44959312 | 12  | 12  | 2.2  |
| 16 | 44977000 | 44977150 | 150 | 44977137 | 14  | 71  | 13   |
| 16 | 44984475 | 44984525 | 50  | 44984487 | 12  | 24  | 4.3  |
| 16 | 45583775 | 45583925 | 150 | 45583812 | 13  | 73  | 0    |
| 16 | 46789350 | 46789375 | 25  | 46789362 | 12  | 12  | 0    |
| 16 | 47522025 | 47522125 | 100 | 47522062 | 13  | 51  | 8.7  |
| 16 | 47523600 | 47523675 | 75  | 47523662 | 13  | 37  | 6.5  |
| 16 | 47523900 | 47524250 | 350 | 47524187 | 14  | 146 | 4.3  |
| 16 | 48422025 | 48422050 | 25  | 48422037 | 12  | 12  | 0    |
| 16 | 48530200 | 48530250 | 50  | 48530212 | 12  | 24  | 0    |
| 16 | 48649650 | 48649700 | 50  | 48649687 | 14  | 26  | 4.3  |
| 16 | 48650025 | 48650075 | 50  | 48650037 | 12  | 24  | 2.2  |
| 16 | 49032850 | 49032975 | 125 | 49032912 | 14  | 65  | 6.5  |

|    |          |          |     |          |    |     |      |
|----|----------|----------|-----|----------|----|-----|------|
| 16 | 49475125 | 49475200 | 75  | 49475187 | 15 | 42  | 4.3  |
| 16 | 51031700 | 51031800 | 100 | 51031737 | 14 | 52  | 0    |
| 16 | 51964475 | 51964575 | 100 | 51964562 | 14 | 52  | 6.5  |
| 16 | 52004175 | 52004200 | 25  | 52004187 | 12 | 12  | 0    |
| 16 | 52740625 | 52740750 | 125 | 52740637 | 13 | 60  | 2.2  |
| 16 | 52745025 | 52745100 | 75  | 52745037 | 12 | 35  | 6.5  |
| 16 | 52747850 | 52747950 | 100 | 52747862 | 14 | 52  | 0    |
| 16 | 52800600 | 52800625 | 25  | 52800612 | 12 | 12  | 0    |
| 16 | 53421500 | 53421525 | 25  | 53421512 | 12 | 12  | 0    |
| 16 | 53691300 | 53691350 | 50  | 53691312 | 12 | 24  | 4.3  |
| 16 | 53714400 | 53714425 | 25  | 53714412 | 14 | 14  | 0    |
| 16 | 54246125 | 54246325 | 200 | 54246187 | 17 | 123 | 4.3  |
| 16 | 55289075 | 55289150 | 75  | 55289087 | 13 | 38  | 6.5  |
| 16 | 56235850 | 56235900 | 50  | 56235862 | 13 | 25  | 4.3  |
| 16 | 56943875 | 56943900 | 25  | 56943887 | 12 | 12  | 0    |
| 16 | 58277475 | 58277525 | 50  | 58277512 | 14 | 26  | 0    |
| 16 | 62207850 | 62207975 | 125 | 62207937 | 14 | 65  | 6.5  |
| 16 | 62426150 | 62426200 | 50  | 62426162 | 13 | 26  | 4.3  |
| 16 | 62972575 | 62972650 | 75  | 62972637 | 13 | 37  | 0    |
| 16 | 62973450 | 62973525 | 75  | 62973512 | 13 | 37  | 0    |
| 16 | 64388850 | 64388950 | 100 | 64388862 | 13 | 50  | 0    |
| 16 | 64831750 | 64831800 | 50  | 64831762 | 12 | 24  | 0    |
| 16 | 64928200 | 64928400 | 200 | 64928287 | 18 | 132 | 8.7  |
| 16 | 64929525 | 64929600 | 75  | 64929537 | 13 | 37  | 0    |
| 16 | 67155275 | 67155300 | 25  | 67155287 | 12 | 12  | 2.2  |
| 16 | 67166575 | 67166725 | 150 | 67166612 | 14 | 73  | 13   |
| 16 | 67208275 | 67208400 | 125 | 67208312 | 13 | 60  | 6.5  |
| 16 | 69409550 | 69409725 | 175 | 69409712 | 16 | 96  | 4.3  |
| 16 | 69471875 | 69471925 | 50  | 69471887 | 12 | 24  | 2.2  |
| 16 | 69474050 | 69474175 | 125 | 69474062 | 12 | 58  | 10.8 |
| 16 | 69483625 | 69483725 | 100 | 69483637 | 13 | 49  | 0    |
| 16 | 69491250 | 69491350 | 100 | 69491262 | 14 | 53  | 4.3  |
| 16 | 69526850 | 69526975 | 125 | 69526887 | 13 | 64  | 10.8 |
| 16 | 69537975 | 69538050 | 75  | 69537987 | 12 | 36  | 6.5  |
| 16 | 69565150 | 69565175 | 25  | 69565162 | 12 | 12  | 0    |
| 16 | 69570125 | 69570325 | 200 | 69570187 | 19 | 121 | 4.3  |
| 16 | 69604550 | 69604625 | 75  | 69604587 | 13 | 38  | 2.2  |
| 16 | 69701200 | 69701250 | 50  | 69701212 | 12 | 24  | 4.3  |
| 16 | 69712750 | 69712775 | 25  | 69712762 | 12 | 12  | 0    |
| 16 | 69717975 | 69718000 | 25  | 69717987 | 12 | 12  | 2.2  |
| 16 | 69757225 | 69757300 | 75  | 69757287 | 14 | 39  | 4.3  |
| 16 | 71878075 | 71878200 | 125 | 71878087 | 14 | 62  | 10.8 |
| 16 | 71879050 | 71879075 | 25  | 71879062 | 12 | 12  | 2.2  |
| 16 | 73766625 | 73766650 | 25  | 73766637 | 12 | 12  | 2.2  |
| 16 | 74310850 | 74310900 | 50  | 74310862 | 12 | 24  | 0    |
| 16 | 78642525 | 78642700 | 175 | 78642612 | 16 | 99  | 15.2 |
| 16 | 79504250 | 79504350 | 100 | 79504262 | 12 | 46  | 0    |
| 16 | 79510775 | 79510900 | 125 | 79510862 | 13 | 61  | 0    |
| 16 | 79751975 | 79752025 | 50  | 79751987 | 13 | 25  | 4.3  |
| 16 | 79836625 | 79836750 | 125 | 79836637 | 18 | 78  | 4.3  |
| 16 | 79861225 | 79861350 | 125 | 79861287 | 13 | 62  | 4.3  |
| 16 | 80483225 | 80483250 | 25  | 80483237 | 13 | 13  | 0    |
| 16 | 82368325 | 82368425 | 100 | 82368412 | 13 | 49  | 8.7  |
| 16 | 82568700 | 82568800 | 100 | 82568712 | 14 | 52  | 8.7  |
| 16 | 82569775 | 82570000 | 225 | 82569887 | 18 | 144 | 21.7 |
| 16 | 82599925 | 82600125 | 200 | 82600087 | 15 | 107 | 15.2 |
| 16 | 82600450 | 82600475 | 25  | 82600462 | 12 | 12  | 2.2  |
| 16 | 82607625 | 82607825 | 200 | 82607762 | 19 | 116 | 17.3 |
| 16 | 82610975 | 82611075 | 100 | 82611037 | 15 | 55  | 0    |
| 16 | 82613300 | 82613500 | 200 | 82613412 | 17 | 115 | 0    |
| 16 | 82627525 | 82627975 | 450 | 82627862 | 18 | 265 | 15.2 |
| 16 | 82631825 | 82631850 | 25  | 82631837 | 12 | 12  | 2.2  |
| 16 | 82909325 | 82909525 | 200 | 82909337 | 15 | 112 | 13   |
| 16 | 82909925 | 82910000 | 75  | 82909937 | 13 | 38  | 0    |
| 16 | 82974425 | 82974450 | 25  | 82974437 | 12 | 12  | 0    |
| 16 | 83014350 | 83014400 | 50  | 83014362 | 12 | 24  | 4.3  |
| 16 | 83404925 | 83405000 | 75  | 83404937 | 14 | 39  | 6.5  |
| 16 | 84418125 | 84418150 | 25  | 84418137 | 12 | 12  | 0    |
| 16 | 84426450 | 84426500 | 50  | 84426462 | 12 | 24  | 4.3  |
| 16 | 84582225 | 84582275 | 50  | 84582237 | 12 | 24  | 4.3  |
| 16 | 84744125 | 84744150 | 25  | 84744137 | 12 | 12  | 0    |
| 16 | 84940675 | 84940750 | 75  | 84940687 | 12 | 36  | 4.3  |
| 16 | 85034825 | 85034850 | 25  | 85034837 | 12 | 12  | 0    |
| 16 | 85075300 | 85075775 | 475 | 85075687 | 19 | 278 | 41.2 |
| 16 | 85211400 | 85211425 | 25  | 85211412 | 12 | 12  | 2.2  |

|    |          |          |     |          |    |     |      |
|----|----------|----------|-----|----------|----|-----|------|
| 16 | 85231775 | 85231875 | 100 | 85231787 | 16 | 58  | 6.5  |
| 16 | 85233825 | 85233900 | 75  | 85233862 | 13 | 38  | 0    |
| 16 | 85320275 | 85320300 | 25  | 85320287 | 12 | 12  | 0    |
| 16 | 85343925 | 85343950 | 25  | 85343937 | 13 | 13  | 2.2  |
| 16 | 85461800 | 85462250 | 450 | 85462112 | 24 | 265 | 0    |
| 16 | 85470550 | 85470650 | 100 | 85470587 | 14 | 53  | 0    |
| 16 | 85512625 | 85512750 | 125 | 85512662 | 14 | 67  | 0    |
| 16 | 85564875 | 85564975 | 100 | 85564912 | 13 | 50  | 0    |
| 16 | 85583625 | 85583825 | 200 | 85583787 | 16 | 114 | 0    |
| 16 | 85589775 | 85589950 | 175 | 85589937 | 15 | 92  | 13   |
| 16 | 85666675 | 85666700 | 25  | 85666687 | 13 | 13  | 0    |
| 16 | 85737025 | 85737175 | 150 | 85737037 | 17 | 92  | 4.3  |
| 16 | 85751200 | 85751250 | 50  | 85751237 | 14 | 26  | 4.3  |
| 16 | 85778775 | 85778800 | 25  | 85778787 | 12 | 12  | 0    |
| 16 | 85801000 | 85801050 | 50  | 85801012 | 15 | 30  | 4.3  |
| 16 | 85806050 | 85806075 | 25  | 85806062 | 12 | 12  | 2.2  |
| 16 | 86120275 | 86120375 | 100 | 86120312 | 14 | 52  | 8.7  |
| 16 | 86122550 | 86122625 | 75  | 86122562 | 13 | 38  | 6.5  |
| 16 | 86124050 | 86124100 | 50  | 86124062 | 12 | 24  | 0    |
| 16 | 86124425 | 86124500 | 75  | 86124437 | 13 | 38  | 4.3  |
| 16 | 86126525 | 86126675 | 150 | 86126562 | 16 | 89  | 0    |
| 16 | 86127050 | 86127200 | 150 | 86127187 | 15 | 78  | 2.2  |
| 16 | 86137275 | 86137625 | 350 | 86137412 | 17 | 203 | 0    |
| 16 | 86138725 | 86138800 | 75  | 86138737 | 13 | 39  | 4.3  |
| 16 | 86140875 | 86141400 | 525 | 86141212 | 20 | 320 | 17.3 |
| 16 | 86144900 | 86145025 | 125 | 86144962 | 13 | 60  | 0    |
| 16 | 86155275 | 86155475 | 200 | 86155312 | 15 | 109 | 6.5  |
| 16 | 86160375 | 86160475 | 100 | 86160387 | 14 | 51  | 0    |
| 16 | 86161250 | 86161375 | 125 | 86161337 | 18 | 78  | 4.3  |
| 16 | 86240025 | 86240150 | 125 | 86240037 | 12 | 56  | 8.7  |
| 16 | 86407650 | 86407825 | 175 | 86407787 | 14 | 90  | 13   |
| 16 | 86713325 | 86713350 | 25  | 86713337 | 12 | 12  | 2.2  |
| 16 | 86776800 | 86777100 | 300 | 86776962 | 25 | 218 | 2.2  |
| 16 | 86868525 | 86868550 | 25  | 86868537 | 13 | 13  | 0    |
| 16 | 86871325 | 86871525 | 200 | 86871512 | 14 | 98  | 2.2  |
| 16 | 86871775 | 86871975 | 200 | 86871862 | 17 | 120 | 0    |
| 16 | 86872450 | 86872475 | 25  | 86872462 | 12 | 12  | 2.2  |
| 16 | 86880075 | 86880425 | 350 | 86880262 | 20 | 225 | 4.3  |
| 16 | 87135875 | 87136750 | 875 | 87135962 | 17 | 450 | 28.2 |
| 16 | 87139525 | 87139575 | 50  | 87139537 | 12 | 24  | 0    |
| 16 | 87151450 | 87151475 | 25  | 87151462 | 12 | 12  | 2.2  |
| 16 | 87484975 | 87485100 | 125 | 87485037 | 14 | 65  | 4.3  |
| 16 | 87506975 | 87507325 | 350 | 87507162 | 14 | 169 | 17.3 |
| 16 | 87508150 | 87508225 | 75  | 87508162 | 13 | 38  | 0    |
| 16 | 87509925 | 87510125 | 200 | 87510012 | 14 | 97  | 0    |
| 16 | 87513800 | 87513825 | 25  | 87513812 | 12 | 12  | 2.2  |
| 16 | 87594150 | 87594225 | 75  | 87594162 | 12 | 35  | 6.5  |
| 16 | 87610275 | 87610475 | 200 | 87610437 | 17 | 112 | 2.2  |
| 16 | 87670175 | 87670350 | 175 | 87670187 | 12 | 79  | 0    |
| 16 | 87753200 | 87753225 | 25  | 87753212 | 12 | 12  | 0    |
| 16 | 87754025 | 87754075 | 50  | 87754037 | 12 | 24  | 2.2  |
| 16 | 87784950 | 87784975 | 25  | 87784962 | 12 | 12  | 0    |
| 16 | 88175075 | 88175100 | 25  | 88175087 | 12 | 12  | 2.2  |
| 16 | 88500825 | 88500850 | 25  | 88500837 | 12 | 12  | 0    |
| 16 | 88565350 | 88565525 | 175 | 88565412 | 17 | 104 | 10.8 |
| 16 | 88565825 | 88566050 | 225 | 88566012 | 18 | 133 | 4.3  |
| 16 | 88625775 | 88626000 | 225 | 88625887 | 22 | 173 | 0    |
| 19 | 296125   | 296200   | 75  | 296137   | 12 | 35  | 6.5  |
| 19 | 321800   | 321825   | 25  | 321812   | 12 | 12  | 2.2  |
| 19 | 323475   | 323575   | 100 | 323562   | 13 | 49  | 4.3  |
| 19 | 339000   | 339050   | 50  | 339037   | 13 | 25  | 4.3  |
| 19 | 340225   | 340250   | 25  | 340237   | 12 | 12  | 0    |
| 19 | 341600   | 341850   | 250 | 341762   | 17 | 130 | 13   |
| 19 | 342700   | 342975   | 275 | 342962   | 17 | 149 | 19.5 |
| 19 | 385250   | 385825   | 575 | 385462   | 27 | 398 | 28.2 |
| 19 | 395600   | 395700   | 100 | 395612   | 15 | 54  | 8.7  |
| 19 | 406800   | 406825   | 25  | 406812   | 12 | 12  | 2.2  |
| 19 | 431250   | 431275   | 25  | 431262   | 13 | 13  | 0    |
| 19 | 666575   | 666600   | 25  | 666587   | 12 | 12  | 2.2  |
| 19 | 709375   | 709625   | 250 | 709462   | 20 | 152 | 13   |
| 19 | 956200   | 956225   | 25  | 956212   | 12 | 12  | 2.2  |
| 19 | 1007300  | 1007375  | 75  | 1007337  | 14 | 38  | 0    |
| 19 | 1007875  | 1007925  | 50  | 1007887  | 12 | 24  | 0    |
| 19 | 1008275  | 1008425  | 150 | 1008337  | 14 | 79  | 2.2  |
| 19 | 1009675  | 1009725  | 50  | 1009687  | 12 | 24  | 0    |

|    |         |         |     |         |    |     |      |
|----|---------|---------|-----|---------|----|-----|------|
| 19 | 1402175 | 1402350 | 175 | 1402237 | 17 | 98  | 2.2  |
| 19 | 1456550 | 1456575 | 25  | 1456562 | 12 | 12  | 2.2  |
| 19 | 1679950 | 1680175 | 225 | 1680087 | 17 | 132 | 17.3 |
| 19 | 1680400 | 1680600 | 200 | 1680537 | 15 | 104 | 15.2 |
| 19 | 1690150 | 1690200 | 50  | 1690187 | 13 | 25  | 0    |
| 19 | 1691050 | 1691175 | 125 | 1691162 | 25 | 88  | 10.8 |
| 19 | 1691625 | 1691700 | 75  | 1691687 | 13 | 37  | 0    |
| 19 | 1726000 | 1726375 | 375 | 1726237 | 27 | 240 | 15.2 |
| 19 | 1733125 | 1733775 | 650 | 1733312 | 23 | 377 | 17.3 |
| 19 | 1734100 | 1734550 | 450 | 1734187 | 15 | 202 | 17.3 |
| 19 | 1735950 | 1736000 | 50  | 1735962 | 14 | 28  | 4.3  |
| 19 | 1741850 | 1741975 | 125 | 1741912 | 15 | 71  | 10.8 |
| 19 | 1886675 | 1886700 | 25  | 1886687 | 12 | 12  | 0    |
| 19 | 2240000 | 2240075 | 75  | 2240012 | 15 | 41  | 6.5  |
| 19 | 2666400 | 2666425 | 25  | 2666412 | 12 | 12  | 0    |
| 19 | 2785275 | 2785350 | 75  | 2785287 | 12 | 36  | 4.3  |
| 19 | 2803650 | 2803675 | 25  | 2803662 | 12 | 12  | 0    |
| 19 | 2844875 | 2844975 | 100 | 2844887 | 13 | 52  | 2.2  |
| 19 | 2847825 | 2847925 | 100 | 2847912 | 13 | 48  | 0    |
| 19 | 2884625 | 2885075 | 450 | 2884737 | 22 | 261 | 13   |
| 19 | 3196025 | 3196075 | 50  | 3196037 | 14 | 26  | 0    |
| 19 | 3201950 | 3201975 | 25  | 3201962 | 12 | 12  | 0    |
| 19 | 3224100 | 3224125 | 25  | 3224112 | 12 | 12  | 2.2  |
| 19 | 3233225 | 3233475 | 250 | 3233337 | 19 | 145 | 0    |
| 19 | 3236250 | 3236325 | 75  | 3236287 | 14 | 41  | 4.3  |
| 19 | 3250300 | 3250400 | 100 | 3250337 | 14 | 53  | 0    |
| 19 | 3259225 | 3259375 | 150 | 3259237 | 12 | 64  | 0    |
| 19 | 3672350 | 3672375 | 25  | 3672362 | 12 | 12  | 2.2  |
| 19 | 3672750 | 3672775 | 25  | 3672762 | 12 | 12  | 2.2  |
| 19 | 3683025 | 3683150 | 125 | 3683062 | 14 | 64  | 2.2  |
| 19 | 3684975 | 3685000 | 25  | 3684987 | 12 | 12  | 0    |
| 19 | 3732425 | 3732650 | 225 | 3732512 | 14 | 106 | 2.2  |
| 19 | 3741500 | 3741525 | 25  | 3741512 | 12 | 12  | 0    |
| 19 | 3741800 | 3742000 | 200 | 3741912 | 19 | 126 | 0    |
| 19 | 3752450 | 3752600 | 150 | 3752537 | 14 | 76  | 0    |
| 19 | 3758500 | 3759175 | 675 | 3758912 | 26 | 491 | 52   |
| 19 | 3764625 | 3764900 | 275 | 3764737 | 18 | 164 | 0    |
| 19 | 3773150 | 3773175 | 25  | 3773162 | 15 | 15  | 2.2  |
| 19 | 3781900 | 3782075 | 175 | 3781937 | 14 | 89  | 0    |
| 19 | 3784725 | 3784775 | 50  | 3784737 | 14 | 27  | 4.3  |
| 19 | 3788275 | 3789150 | 875 | 3788462 | 32 | 764 | 21.7 |
| 19 | 3803125 | 3803300 | 175 | 3803137 | 13 | 88  | 0    |
| 19 | 3806575 | 3806600 | 25  | 3806587 | 12 | 12  | 0    |
| 19 | 3820175 | 3820300 | 125 | 3820262 | 16 | 72  | 2.2  |
| 19 | 3849425 | 3849575 | 150 | 3849537 | 16 | 85  | 2.2  |
| 19 | 3853650 | 3853675 | 25  | 3853662 | 12 | 12  | 2.2  |
| 19 | 3860425 | 3860575 | 150 | 3860512 | 13 | 74  | 8.7  |
| 19 | 3861150 | 3861500 | 350 | 3861162 | 14 | 170 | 0    |
| 19 | 3861800 | 3861950 | 150 | 3861837 | 13 | 72  | 0    |
| 19 | 3870975 | 3871100 | 125 | 3871012 | 14 | 64  | 0    |
| 19 | 4151025 | 4151075 | 50  | 4151037 | 13 | 26  | 4.3  |
| 19 | 4158525 | 4158700 | 175 | 4158612 | 17 | 101 | 10.8 |
| 19 | 4233925 | 4234125 | 200 | 4233962 | 14 | 104 | 2.2  |
| 19 | 5309875 | 5309900 | 25  | 5309887 | 12 | 12  | 2.2  |
| 19 | 5323325 | 5323350 | 25  | 5323337 | 12 | 12  | 0    |
| 19 | 5405925 | 5406000 | 75  | 5405962 | 13 | 37  | 6.5  |
| 19 | 5407350 | 5407425 | 75  | 5407387 | 13 | 37  | 6.5  |
| 19 | 5429800 | 5429825 | 25  | 5429812 | 12 | 12  | 2.2  |
| 19 | 5432600 | 5432800 | 200 | 5432737 | 17 | 114 | 0    |
| 19 | 5433100 | 5433175 | 75  | 5433112 | 13 | 37  | 0    |
| 19 | 5447550 | 5447575 | 25  | 5447562 | 12 | 12  | 2.2  |
| 19 | 5448550 | 5448725 | 175 | 5448662 | 15 | 93  | 0    |
| 19 | 5465300 | 5465350 | 50  | 5465312 | 12 | 24  | 0    |
| 19 | 5471525 | 5471725 | 200 | 5471612 | 15 | 109 | 0    |
| 19 | 5485850 | 5486075 | 225 | 5485912 | 15 | 122 | 4.3  |
| 19 | 5516075 | 5516350 | 275 | 5516112 | 13 | 116 | 8.7  |
| 19 | 5728350 | 5728425 | 75  | 5728362 | 13 | 38  | 0    |
| 19 | 6084425 | 6084450 | 25  | 6084437 | 12 | 12  | 2.2  |
| 19 | 6237875 | 6238500 | 625 | 6238012 | 15 | 283 | 0    |
| 19 | 6249500 | 6249600 | 100 | 6249512 | 12 | 47  | 2.2  |
| 19 | 6264750 | 6264800 | 50  | 6264787 | 13 | 25  | 4.3  |
| 19 | 6376775 | 6376900 | 125 | 6376837 | 24 | 113 | 15.2 |
| 19 | 6426925 | 6426975 | 50  | 6426937 | 13 | 26  | 4.3  |
| 19 | 6668800 | 6668975 | 175 | 6668862 | 18 | 101 | 2.2  |
| 19 | 6723050 | 6723250 | 200 | 6723137 | 17 | 123 | 17.3 |



|    |          |          |      |          |    |     |      |
|----|----------|----------|------|----------|----|-----|------|
| 19 | 6934150  | 6934225  | 75   | 6934187  | 13 | 38  | 0    |
| 19 | 7030800  | 7031000  | 200  | 7030862  | 14 | 104 | 13   |
| 19 | 7034100  | 7034375  | 275  | 7034262  | 17 | 143 | 17.3 |
| 19 | 7317625  | 7317650  | 25   | 7317637  | 13 | 13  | 2.2  |
| 19 | 7322000  | 7322150  | 150  | 7322037  | 14 | 77  | 0    |
| 19 | 7421175  | 7421425  | 250  | 7421362  | 25 | 203 | 6.5  |
| 19 | 7421850  | 7422100  | 250  | 7421862  | 20 | 155 | 6.5  |
| 19 | 7648850  | 7648925  | 75   | 7648862  | 14 | 39  | 6.5  |
| 19 | 7662400  | 7662525  | 125  | 7662412  | 14 | 63  | 0    |
| 19 | 7687850  | 7687900  | 50   | 7687862  | 12 | 24  | 0    |
| 19 | 7711050  | 7711150  | 100  | 7711062  | 12 | 48  | 0    |
| 19 | 7750650  | 7750700  | 50   | 7750662  | 12 | 24  | 0    |
| 19 | 7787925  | 7787950  | 25   | 7787937  | 12 | 12  | 2.2  |
| 19 | 7833325  | 7833350  | 25   | 7833337  | 12 | 12  | 2.2  |
| 19 | 7852975  | 7853000  | 25   | 7852987  | 12 | 12  | 0    |
| 19 | 8040700  | 8040850  | 150  | 8040737  | 13 | 74  | 13   |
| 19 | 8041400  | 8041425  | 25   | 8041412  | 12 | 12  | 0    |
| 19 | 8042225  | 8042250  | 25   | 8042237  | 12 | 12  | 2.2  |
| 19 | 8042975  | 8043975  | 1000 | 8043262  | 25 | 632 | 60.7 |
| 19 | 8044300  | 8044350  | 50   | 8044337  | 13 | 25  | 2.2  |
| 19 | 8045175  | 8045425  | 250  | 8045237  | 19 | 148 | 4.3  |
| 19 | 8046175  | 8046375  | 200  | 8046262  | 16 | 114 | 10.8 |
| 19 | 8058000  | 8058025  | 25   | 8058012  | 12 | 12  | 2.2  |
| 19 | 8065425  | 8065625  | 200  | 8065562  | 15 | 106 | 17.3 |
| 19 | 8066275  | 8066450  | 175  | 8066387  | 16 | 97  | 6.5  |
| 19 | 8066975  | 8067475  | 500  | 8066987  | 16 | 286 | 30.3 |
| 19 | 8067750  | 8067850  | 100  | 8067762  | 14 | 52  | 0    |
| 19 | 8068100  | 8068125  | 25   | 8068112  | 13 | 13  | 2.2  |
| 19 | 8088750  | 8088775  | 25   | 8088762  | 12 | 12  | 2.2  |
| 19 | 8089600  | 8090325  | 725  | 8089712  | 23 | 439 | 17.3 |
| 19 | 8105300  | 8105400  | 100  | 8105312  | 12 | 48  | 4.3  |
| 19 | 8497800  | 8497850  | 50   | 8497812  | 12 | 24  | 4.3  |
| 19 | 8563250  | 8563600  | 350  | 8563337  | 24 | 275 | 2.2  |
| 19 | 8575875  | 8576100  | 225  | 8575987  | 20 | 143 | 15.2 |
| 19 | 9240325  | 9240450  | 125  | 9240337  | 12 | 58  | 0    |
| 19 | 9242575  | 9242625  | 50   | 9242587  | 13 | 25  | 2.2  |
| 19 | 9353150  | 9353250  | 100  | 9353162  | 16 | 57  | 8.7  |
| 19 | 9426075  | 9426125  | 50   | 9426087  | 13 | 25  | 0    |
| 19 | 9519625  | 9519950  | 325  | 9519712  | 17 | 190 | 36.8 |
| 19 | 9539450  | 9539600  | 150  | 9539487  | 14 | 76  | 0    |
| 19 | 9544250  | 9544275  | 25   | 9544262  | 12 | 12  | 0    |
| 19 | 9553775  | 9553825  | 50   | 9553787  | 12 | 24  | 0    |
| 19 | 9562250  | 9562375  | 125  | 9562287  | 14 | 67  | 10.8 |
| 19 | 9707975  | 9708025  | 50   | 9707987  | 14 | 26  | 4.3  |
| 19 | 10014425 | 10014575 | 150  | 10014537 | 13 | 73  | 0    |
| 19 | 10021575 | 10021625 | 50   | 10021587 | 12 | 24  | 4.3  |
| 19 | 10266025 | 10266050 | 25   | 10266037 | 12 | 12  | 2.2  |
| 19 | 10808575 | 10808775 | 200  | 10808662 | 21 | 147 | 13   |
| 19 | 11193475 | 11193575 | 100  | 11193512 | 13 | 49  | 4.3  |
| 19 | 11393300 | 11393325 | 25   | 11393312 | 12 | 12  | 0    |
| 19 | 11436875 | 11436975 | 100  | 11436887 | 12 | 47  | 4.3  |
| 19 | 11605200 | 11605225 | 25   | 11605212 | 12 | 12  | 0    |
| 19 | 11731675 | 11731775 | 100  | 11731737 | 14 | 52  | 4.3  |
| 19 | 11852775 | 11852975 | 200  | 11852937 | 14 | 102 | 0    |
| 19 | 11878125 | 11878300 | 175  | 11878162 | 14 | 91  | 0    |
| 19 | 11921525 | 11921550 | 25   | 11921537 | 12 | 12  | 0    |
| 19 | 12232125 | 12232275 | 150  | 12232162 | 14 | 79  | 2.2  |
| 19 | 12483825 | 12483925 | 100  | 12483837 | 12 | 47  | 8.7  |
| 19 | 12797675 | 12797725 | 50   | 12797687 | 13 | 25  | 4.3  |
| 19 | 12812400 | 12812475 | 75   | 12812412 | 15 | 42  | 6.5  |
| 19 | 12855600 | 12855775 | 175  | 12855637 | 13 | 83  | 13   |
| 19 | 12856025 | 12856075 | 50   | 12856037 | 13 | 25  | 0    |
| 19 | 13207000 | 13207425 | 425  | 13207137 | 15 | 190 | 34.7 |
| 19 | 13207975 | 13208425 | 450  | 13208087 | 18 | 257 | 15.2 |
| 19 | 13212125 | 13212450 | 325  | 13212212 | 17 | 187 | 21.7 |
| 19 | 13241350 | 13241525 | 175  | 13241462 | 18 | 110 | 13   |
| 19 | 13244050 | 13244100 | 50   | 13244087 | 17 | 31  | 4.3  |
| 19 | 13250175 | 13250200 | 25   | 13250187 | 12 | 12  | 2.2  |
| 19 | 13255125 | 13255150 | 25   | 13255137 | 12 | 12  | 2.2  |
| 19 | 13307625 | 13307650 | 25   | 13307637 | 12 | 12  | 0    |
| 19 | 13308875 | 13309000 | 125  | 13308912 | 14 | 65  | 0    |
| 19 | 13331450 | 13331625 | 175  | 13331587 | 16 | 97  | 0    |
| 19 | 13395075 | 13395125 | 50   | 13395087 | 13 | 26  | 0    |
| 19 | 13602050 | 13602075 | 25   | 13602062 | 13 | 13  | 2.2  |
| 19 | 13719425 | 13719450 | 25   | 13719437 | 13 | 13  | 2.2  |

|    |          |          |     |          |    |     |      |
|----|----------|----------|-----|----------|----|-----|------|
| 19 | 13892650 | 13892725 | 75  | 13892662 | 13 | 39  | 0    |
| 19 | 14249175 | 14249475 | 300 | 14249237 | 17 | 166 | 15.2 |
| 19 | 14250500 | 14250600 | 100 | 14250512 | 12 | 47  | 0    |
| 19 | 14567550 | 14567575 | 25  | 14567562 | 12 | 12  | 0    |
| 19 | 14650075 | 14650200 | 125 | 14650137 | 13 | 63  | 0    |
| 19 | 15113700 | 15113725 | 25  | 15113712 | 13 | 13  | 2.2  |
| 19 | 15137600 | 15137700 | 100 | 15137662 | 16 | 58  | 8.7  |
| 19 | 15139050 | 15139200 | 150 | 15139087 | 13 | 72  | 6.5  |
| 19 | 15177800 | 15177900 | 100 | 15177887 | 13 | 47  | 8.7  |
| 19 | 15424725 | 15424875 | 150 | 15424787 | 16 | 87  | 13   |
| 19 | 15443850 | 15443875 | 25  | 15443862 | 12 | 12  | 0    |
| 19 | 15479150 | 15479175 | 25  | 15479162 | 12 | 12  | 0    |
| 19 | 16694625 | 16694675 | 50  | 16694637 | 15 | 29  | 4.3  |
| 19 | 16721275 | 16721525 | 250 | 16721287 | 12 | 97  | 0    |
| 19 | 16730925 | 16731100 | 175 | 16731012 | 17 | 110 | 15.2 |
| 19 | 16732900 | 16732925 | 25  | 16732912 | 12 | 12  | 2.2  |
| 19 | 16779475 | 16779550 | 75  | 16779512 | 15 | 39  | 0    |
| 19 | 16784825 | 16784900 | 75  | 16784837 | 13 | 38  | 6.5  |
| 19 | 16855150 | 16855175 | 25  | 16855162 | 12 | 12  | 2.2  |
| 19 | 16887025 | 16887150 | 125 | 16887112 | 14 | 61  | 2.2  |
| 19 | 16891450 | 16891975 | 525 | 16891812 | 17 | 282 | 0    |
| 19 | 16918900 | 16918925 | 25  | 16918912 | 12 | 12  | 0    |
| 19 | 16921500 | 16921550 | 50  | 16921512 | 12 | 24  | 2.2  |
| 19 | 16940125 | 16940150 | 25  | 16940137 | 12 | 12  | 0    |
| 19 | 16981000 | 16981100 | 100 | 16981062 | 13 | 49  | 0    |
| 19 | 16981600 | 16981775 | 175 | 16981612 | 12 | 77  | 0    |
| 19 | 16987250 | 16987350 | 100 | 16987262 | 13 | 50  | 2.2  |
| 19 | 17229850 | 17229925 | 75  | 17229862 | 12 | 35  | 6.5  |
| 19 | 17231625 | 17231800 | 175 | 17231712 | 16 | 94  | 2.2  |
| 19 | 17500375 | 17500425 | 50  | 17500387 | 13 | 26  | 4.3  |
| 19 | 17500675 | 17500875 | 200 | 17500762 | 16 | 102 | 15.2 |
| 19 | 17620325 | 17620350 | 25  | 17620337 | 13 | 13  | 0    |
| 19 | 17626925 | 17626950 | 25  | 17626937 | 13 | 13  | 2.2  |
| 19 | 17783375 | 17783400 | 25  | 17783387 | 12 | 12  | 0    |
| 19 | 17929525 | 17929550 | 25  | 17929537 | 12 | 12  | 0    |
| 19 | 19206625 | 19206800 | 175 | 19206637 | 14 | 89  | 13   |
| 19 | 19486975 | 19487125 | 150 | 19487062 | 14 | 75  | 13   |
| 19 | 19679200 | 19679225 | 25  | 19679212 | 13 | 13  | 2.2  |
| 19 | 19714475 | 19714575 | 100 | 19714537 | 15 | 57  | 4.3  |
| 19 | 19715150 | 19715300 | 150 | 19715162 | 14 | 75  | 10.8 |
| 19 | 19715650 | 19715825 | 175 | 19715787 | 16 | 95  | 0    |
| 19 | 19716500 | 19716525 | 25  | 19716512 | 13 | 13  | 0    |
| 19 | 19717975 | 19718125 | 150 | 19717987 | 12 | 67  | 4.3  |
| 19 | 19718475 | 19718525 | 50  | 19718487 | 12 | 24  | 0    |
| 19 | 19722625 | 19722675 | 50  | 19722637 | 12 | 24  | 4.3  |
| 19 | 19723200 | 19723225 | 25  | 19723212 | 12 | 12  | 2.2  |
| 19 | 19832675 | 19832725 | 50  | 19832712 | 16 | 30  | 4.3  |
| 19 | 19833075 | 19833125 | 50  | 19833087 | 13 | 26  | 4.3  |
| 19 | 19906700 | 19906775 | 75  | 19906712 | 13 | 37  | 0    |
| 19 | 20096950 | 20097000 | 50  | 20096962 | 13 | 25  | 0    |
| 19 | 20109150 | 20109250 | 100 | 20109212 | 13 | 50  | 8.7  |
| 19 | 20215950 | 20216275 | 325 | 20216087 | 21 | 212 | 32.5 |
| 19 | 21185225 | 21185275 | 50  | 21185237 | 13 | 26  | 4.3  |
| 19 | 21458550 | 21458575 | 25  | 21458562 | 12 | 12  | 0    |
| 19 | 22603150 | 22603175 | 25  | 22603162 | 13 | 13  | 0    |
| 19 | 22977750 | 22977775 | 25  | 22977762 | 13 | 13  | 0    |
| 19 | 23325425 | 23325500 | 75  | 23325487 | 14 | 39  | 4.3  |
| 19 | 23359650 | 23359750 | 100 | 23359712 | 15 | 56  | 0    |
| 19 | 23798225 | 23798250 | 25  | 23798237 | 13 | 13  | 2.2  |
| 19 | 23938300 | 23938325 | 25  | 23938312 | 13 | 13  | 0    |
| 19 | 23972025 | 23972225 | 200 | 23972037 | 12 | 80  | 2.2  |
| 19 | 23973150 | 23973225 | 75  | 23973162 | 12 | 35  | 6.5  |
| 19 | 23977325 | 23977375 | 50  | 23977337 | 12 | 24  | 4.3  |
| 19 | 23978375 | 23978400 | 25  | 23978387 | 12 | 12  | 2.2  |
| 19 | 32425375 | 32425500 | 125 | 32425387 | 36 | 100 | 19.5 |
| 19 | 32427300 | 32427350 | 50  | 32427337 | 14 | 26  | 4.3  |
| 19 | 34454175 | 34454200 | 25  | 34454187 | 12 | 12  | 2.2  |
| 19 | 34838650 | 34838675 | 25  | 34838662 | 12 | 12  | 2.2  |
| 19 | 34873425 | 34873725 | 300 | 34873537 | 23 | 220 | 4.3  |
| 19 | 34947150 | 34947275 | 125 | 34947237 | 13 | 61  | 2.2  |
| 19 | 35045275 | 35045300 | 25  | 35045287 | 12 | 12  | 0    |
| 19 | 35046525 | 35046725 | 200 | 35046687 | 17 | 118 | 17.3 |
| 19 | 35062250 | 35062275 | 25  | 35062262 | 12 | 12  | 2.2  |
| 19 | 35101200 | 35101250 | 50  | 35101237 | 13 | 25  | 0    |
| 19 | 35261425 | 35261450 | 25  | 35261437 | 12 | 12  | 0    |

|    |          |          |     |          |    |     |      |
|----|----------|----------|-----|----------|----|-----|------|
| 19 | 35284975 | 35285100 | 125 | 35285012 | 13 | 63  | 0    |
| 19 | 35327500 | 35327550 | 50  | 35327512 | 12 | 24  | 0    |
| 19 | 35355250 | 35355350 | 100 | 35355262 | 12 | 48  | 2.2  |
| 19 | 35389025 | 35389075 | 50  | 35389037 | 12 | 24  | 0    |
| 19 | 35390050 | 35390550 | 500 | 35390437 | 22 | 357 | 30.3 |
| 19 | 35393350 | 35393375 | 25  | 35393362 | 14 | 14  | 0    |
| 19 | 35395450 | 35395625 | 175 | 35395462 | 19 | 122 | 13   |
| 19 | 35558375 | 35558525 | 150 | 35558462 | 16 | 81  | 0    |
| 19 | 36461950 | 36462200 | 250 | 36462037 | 17 | 150 | 0    |
| 19 | 37963125 | 37963275 | 150 | 37963187 | 15 | 82  | 13   |
| 19 | 38006950 | 38007150 | 200 | 38007087 | 15 | 101 | 0    |
| 19 | 38007825 | 38007850 | 25  | 38007837 | 13 | 13  | 2.2  |
| 19 | 38409125 | 38409425 | 300 | 38409287 | 22 | 190 | 13   |
| 19 | 38409925 | 38410425 | 500 | 38410262 | 27 | 410 | 52   |
| 19 | 38417475 | 38417550 | 75  | 38417512 | 13 | 38  | 2.2  |
| 19 | 38433625 | 38433725 | 100 | 38433687 | 13 | 49  | 4.3  |
| 19 | 38472950 | 38472975 | 25  | 38472962 | 13 | 13  | 2.2  |
| 19 | 38728425 | 38728800 | 375 | 38728562 | 23 | 257 | 17.3 |
| 19 | 38737275 | 38737400 | 125 | 38737337 | 15 | 65  | 6.5  |
| 19 | 38912125 | 38912150 | 25  | 38912137 | 12 | 12  | 2.2  |
| 19 | 39116875 | 39117175 | 300 | 39117062 | 17 | 168 | 10.8 |
| 19 | 39117450 | 39117650 | 200 | 39117612 | 27 | 161 | 4.3  |
| 19 | 39213775 | 39213875 | 100 | 39213787 | 13 | 50  | 0    |
| 19 | 39695275 | 39695350 | 75  | 39695287 | 12 | 36  | 6.5  |
| 19 | 39890475 | 39890500 | 25  | 39890487 | 12 | 12  | 0    |
| 19 | 39942775 | 39942875 | 100 | 39942812 | 14 | 54  | 0    |
| 19 | 40141100 | 40141325 | 225 | 40141212 | 20 | 149 | 2.2  |
| 19 | 40141675 | 40142125 | 450 | 40141762 | 14 | 211 | 17.3 |
| 19 | 40142450 | 40142550 | 100 | 40142487 | 15 | 58  | 8.7  |
| 19 | 40143425 | 40143450 | 25  | 40143437 | 13 | 13  | 0    |
| 19 | 40150450 | 40151050 | 600 | 40150837 | 28 | 395 | 2.2  |
| 19 | 40159500 | 40159825 | 325 | 40159637 | 17 | 180 | 4.3  |
| 19 | 40344525 | 40344550 | 25  | 40344537 | 12 | 12  | 0    |
| 19 | 40345725 | 40345775 | 50  | 40345762 | 15 | 29  | 4.3  |
| 19 | 40346950 | 40347050 | 100 | 40346987 | 15 | 53  | 0    |
| 19 | 40405675 | 40405875 | 200 | 40405737 | 15 | 111 | 8.7  |
| 19 | 40432825 | 40432950 | 125 | 40432887 | 15 | 68  | 0    |
| 19 | 40581300 | 40581325 | 25  | 40581312 | 12 | 12  | 0    |
| 19 | 40604150 | 40604325 | 175 | 40604237 | 16 | 100 | 10.8 |
| 19 | 40612025 | 40612075 | 50  | 40612037 | 12 | 24  | 0    |
| 19 | 40617325 | 40617350 | 25  | 40617337 | 12 | 12  | 0    |
| 19 | 40619725 | 40619775 | 50  | 40619737 | 13 | 25  | 0    |
| 19 | 40628375 | 40628725 | 350 | 40628437 | 15 | 175 | 34.7 |
| 19 | 40672650 | 40672675 | 25  | 40672662 | 12 | 12  | 2.2  |
| 19 | 40688900 | 40689000 | 100 | 40688937 | 13 | 50  | 8.7  |
| 19 | 40710650 | 40710750 | 100 | 40710712 | 13 | 49  | 8.7  |
| 19 | 40711350 | 40711550 | 200 | 40711487 | 19 | 131 | 10.8 |
| 19 | 40741150 | 40741300 | 150 | 40741237 | 14 | 76  | 8.7  |
| 19 | 40759600 | 40759625 | 25  | 40759612 | 12 | 12  | 0    |
| 19 | 40768850 | 40768875 | 25  | 40768862 | 13 | 13  | 2.2  |
| 19 | 40866875 | 40866925 | 50  | 40866887 | 12 | 24  | 4.3  |
| 19 | 41108625 | 41108650 | 25  | 41108637 | 12 | 12  | 0    |
| 19 | 41428850 | 41429050 | 200 | 41428912 | 14 | 98  | 15.2 |
| 19 | 41438025 | 41438225 | 200 | 41438087 | 17 | 124 | 8.7  |
| 19 | 41438625 | 41438650 | 25  | 41438637 | 12 | 12  | 2.2  |
| 19 | 41438975 | 41439075 | 100 | 41439037 | 13 | 49  | 0    |
| 19 | 41439775 | 41439975 | 200 | 41439912 | 16 | 116 | 4.3  |
| 19 | 41680525 | 41680675 | 150 | 41680537 | 12 | 66  | 0    |
| 19 | 41956125 | 41956175 | 50  | 41956137 | 24 | 47  | 4.3  |
| 19 | 42190275 | 42190300 | 25  | 42190287 | 12 | 12  | 0    |
| 19 | 42190725 | 42191250 | 525 | 42190762 | 23 | 264 | 2.2  |
| 19 | 42192325 | 42192450 | 125 | 42192362 | 15 | 64  | 0    |
| 19 | 42192775 | 42193325 | 550 | 42192962 | 20 | 287 | 28.2 |
| 19 | 42193800 | 42193825 | 25  | 42193812 | 12 | 12  | 0    |
| 19 | 42194050 | 42194625 | 575 | 42194512 | 20 | 318 | 17.3 |
| 19 | 42195125 | 42195375 | 250 | 42195287 | 21 | 169 | 17.3 |
| 19 | 42196750 | 42197350 | 600 | 42197337 | 19 | 268 | 13   |
| 19 | 42238250 | 42238425 | 175 | 42238312 | 18 | 108 | 0    |
| 19 | 42238750 | 42238775 | 25  | 42238762 | 12 | 12  | 0    |
| 19 | 42239075 | 42239150 | 75  | 42239087 | 13 | 37  | 6.5  |
| 19 | 42240675 | 42240775 | 100 | 42240712 | 14 | 52  | 0    |
| 19 | 42241050 | 42241825 | 775 | 42241512 | 32 | 658 | 52   |
| 19 | 42242225 | 42242800 | 575 | 42242412 | 26 | 361 | 41.2 |
| 19 | 42284475 | 42284500 | 25  | 42284487 | 12 | 12  | 0    |
| 19 | 42365250 | 42365275 | 25  | 42365262 | 12 | 12  | 2.2  |

|    |          |          |     |          |    |     |      |
|----|----------|----------|-----|----------|----|-----|------|
| 19 | 42476025 | 42476200 | 175 | 42476037 | 19 | 99  | 0    |
| 19 | 42486775 | 42486800 | 25  | 42486787 | 16 | 16  | 2.2  |
| 19 | 42487300 | 42487325 | 25  | 42487312 | 12 | 12  | 2.2  |
| 19 | 42487625 | 42487800 | 175 | 42487762 | 16 | 105 | 10.8 |
| 19 | 42488650 | 42488675 | 25  | 42488662 | 12 | 12  | 2.2  |
| 19 | 42489150 | 42489575 | 425 | 42489162 | 13 | 194 | 19.5 |
| 19 | 42585900 | 42586600 | 700 | 42586587 | 33 | 568 | 0    |
| 19 | 42731250 | 42731275 | 25  | 42731262 | 12 | 12  | 0    |
| 19 | 42731575 | 42732075 | 500 | 42731587 | 21 | 305 | 43.3 |
| 19 | 42732300 | 42733000 | 700 | 42732612 | 17 | 346 | 62.8 |
| 19 | 42733350 | 42733775 | 425 | 42733462 | 28 | 335 | 39   |
| 19 | 42734200 | 42734275 | 75  | 42734262 | 21 | 50  | 6.5  |
| 19 | 42978825 | 42979050 | 225 | 42978887 | 18 | 126 | 15.2 |
| 19 | 43000175 | 43000225 | 50  | 43000212 | 13 | 25  | 0    |
| 19 | 43037475 | 43038000 | 525 | 43037837 | 23 | 352 | 65   |
| 19 | 43038300 | 43038500 | 200 | 43038412 | 17 | 123 | 13   |
| 19 | 43038975 | 43039000 | 25  | 43038987 | 12 | 12  | 2.2  |
| 19 | 43067500 | 43067550 | 50  | 43067512 | 12 | 24  | 4.3  |
| 19 | 43068375 | 43068550 | 175 | 43068412 | 16 | 100 | 6.5  |
| 19 | 43647000 | 43647075 | 75  | 43647012 | 12 | 36  | 0    |
| 19 | 43678750 | 43678775 | 25  | 43678762 | 12 | 12  | 0    |
| 19 | 43680675 | 43680700 | 25  | 43680687 | 12 | 12  | 2.2  |
| 19 | 43707975 | 43708075 | 100 | 43707987 | 12 | 46  | 8.7  |
| 19 | 43717100 | 43717900 | 800 | 43717737 | 23 | 558 | 34.7 |
| 19 | 43719650 | 43719675 | 25  | 43719662 | 12 | 12  | 0    |
| 19 | 43720125 | 43720325 | 200 | 43720212 | 17 | 116 | 17.3 |
| 19 | 43730725 | 43730850 | 125 | 43730762 | 14 | 62  | 8.7  |
| 19 | 44163600 | 44163725 | 125 | 44163662 | 15 | 66  | 2.2  |
| 19 | 44229100 | 44229125 | 25  | 44229112 | 12 | 12  | 2.2  |
| 19 | 44397650 | 44397775 | 125 | 44397687 | 14 | 65  | 8.7  |
| 19 | 44429450 | 44429650 | 200 | 44429537 | 24 | 162 | 15.2 |
| 19 | 44446725 | 44446800 | 75  | 44446737 | 12 | 35  | 6.5  |
| 19 | 44447425 | 44447475 | 50  | 44447437 | 12 | 24  | 0    |
| 19 | 44698850 | 44698925 | 75  | 44698862 | 12 | 35  | 0    |
| 19 | 44970350 | 44970600 | 250 | 44970487 | 19 | 157 | 13   |
| 19 | 45122200 | 45122225 | 25  | 45122212 | 12 | 12  | 0    |
| 19 | 45222125 | 45222325 | 200 | 45222212 | 15 | 110 | 6.5  |
| 19 | 45664525 | 45664550 | 25  | 45664537 | 12 | 12  | 2.2  |
| 19 | 45701600 | 45701725 | 125 | 45701637 | 14 | 67  | 2.2  |
| 19 | 45710250 | 45710275 | 25  | 45710262 | 12 | 12  | 2.2  |
| 19 | 46644900 | 46644925 | 25  | 46644912 | 15 | 15  | 2.2  |
| 19 | 47040550 | 47040850 | 300 | 47040712 | 17 | 162 | 4.3  |
| 19 | 47109000 | 47109100 | 100 | 47109062 | 14 | 50  | 6.5  |
| 19 | 47112225 | 47112425 | 200 | 47112237 | 17 | 112 | 2.2  |
| 19 | 47116000 | 47116600 | 600 | 47116537 | 26 | 451 | 36.8 |
| 19 | 47125100 | 47125325 | 225 | 47125187 | 19 | 126 | 17.3 |
| 19 | 47173850 | 47173975 | 125 | 47173887 | 13 | 57  | 8.7  |
| 19 | 47201750 | 47201850 | 100 | 47201787 | 14 | 53  | 0    |
| 19 | 47389400 | 47389600 | 200 | 47389512 | 20 | 132 | 0    |
| 19 | 47585875 | 47586000 | 125 | 47585912 | 15 | 67  | 0    |
| 19 | 48524050 | 48524225 | 175 | 48524162 | 15 | 92  | 15.2 |
| 19 | 48610275 | 48610950 | 675 | 48610712 | 28 | 480 | 47.7 |
| 19 | 48887700 | 48887725 | 25  | 48887712 | 12 | 12  | 2.2  |
| 19 | 48892300 | 48892400 | 100 | 48892387 | 13 | 49  | 8.7  |
| 19 | 49016250 | 49016450 | 200 | 49016362 | 19 | 129 | 0    |
| 19 | 49023025 | 49023050 | 25  | 49023037 | 13 | 13  | 2.2  |
| 19 | 49098100 | 49098300 | 200 | 49098162 | 22 | 140 | 23.8 |
| 19 | 49109675 | 49109875 | 200 | 49109787 | 13 | 95  | 0    |
| 19 | 49110425 | 49110500 | 75  | 49110462 | 14 | 39  | 0    |
| 19 | 49161900 | 49161925 | 25  | 49161912 | 13 | 13  | 0    |
| 19 | 49165825 | 49165875 | 50  | 49165837 | 12 | 24  | 4.3  |
| 19 | 49403275 | 49403325 | 50  | 49403287 | 12 | 24  | 0    |
| 19 | 49567725 | 49567775 | 50  | 49567737 | 13 | 26  | 0    |
| 19 | 49597225 | 49597300 | 75  | 49597287 | 13 | 37  | 6.5  |
| 19 | 49604350 | 49604450 | 100 | 49604362 | 13 | 50  | 0    |
| 19 | 49607075 | 49607275 | 200 | 49607162 | 16 | 105 | 10.8 |
| 19 | 49625075 | 49625175 | 100 | 49625087 | 12 | 48  | 8.7  |
| 19 | 49647725 | 49648075 | 350 | 49647887 | 30 | 296 | 34.7 |
| 19 | 49648325 | 49649200 | 875 | 49648937 | 20 | 511 | 17.3 |
| 19 | 49652875 | 49653450 | 575 | 49653262 | 19 | 307 | 17.3 |
| 19 | 49653850 | 49653875 | 25  | 49653862 | 12 | 12  | 0    |
| 19 | 49680650 | 49680675 | 25  | 49680662 | 12 | 12  | 0    |
| 19 | 49691200 | 49691600 | 400 | 49691362 | 19 | 244 | 17.3 |
| 19 | 49694450 | 49695250 | 800 | 49695087 | 21 | 506 | 30.3 |
| 19 | 49712650 | 49712775 | 125 | 49712762 | 13 | 59  | 0    |

|    |          |          |     |          |    |     |      |
|----|----------|----------|-----|----------|----|-----|------|
| 19 | 49735225 | 49735275 | 50  | 49735237 | 12 | 24  | 0    |
| 19 | 49808975 | 49809000 | 25  | 49808987 | 12 | 12  | 2.2  |
| 19 | 49900700 | 49900750 | 50  | 49900712 | 12 | 24  | 0    |
| 19 | 49903000 | 49903125 | 125 | 49903087 | 15 | 62  | 6.5  |
| 19 | 50347875 | 50348175 | 300 | 50348112 | 33 | 297 | 28.2 |
| 19 | 51157375 | 51157550 | 175 | 51157462 | 15 | 97  | 0    |
| 19 | 51169300 | 51169325 | 25  | 51169312 | 12 | 12  | 2.2  |
| 19 | 51244875 | 51245025 | 150 | 51244962 | 16 | 87  | 2.2  |
| 19 | 51276050 | 51276075 | 25  | 51276062 | 12 | 12  | 2.2  |
| 19 | 51285700 | 51285875 | 175 | 51285737 | 13 | 84  | 10.8 |
| 19 | 51314325 | 51314400 | 75  | 51314387 | 15 | 41  | 4.3  |
| 19 | 51355650 | 51355825 | 175 | 51355762 | 15 | 91  | 0    |
| 19 | 51403325 | 51403475 | 150 | 51403387 | 15 | 80  | 10.8 |
| 19 | 52515050 | 52516000 | 950 | 52515712 | 18 | 542 | 26   |
| 19 | 52639725 | 52639750 | 25  | 52639737 | 14 | 14  | 2.2  |
| 19 | 52642600 | 52642675 | 75  | 52642612 | 14 | 38  | 6.5  |
| 19 | 52651975 | 52652100 | 125 | 52651987 | 13 | 63  | 0    |
| 19 | 53217400 | 53217525 | 125 | 53217412 | 12 | 60  | 0    |
| 19 | 53243275 | 53243375 | 100 | 53243287 | 12 | 46  | 0    |
| 19 | 53249000 | 53249175 | 175 | 53249012 | 13 | 78  | 4.3  |
| 19 | 53696475 | 53696600 | 125 | 53696537 | 13 | 62  | 8.7  |
| 19 | 53707625 | 53707700 | 75  | 53707637 | 12 | 35  | 0    |
| 19 | 53919825 | 53919850 | 25  | 53919837 | 12 | 12  | 2.2  |
| 19 | 54265650 | 54265975 | 325 | 54265912 | 15 | 172 | 23.8 |
| 19 | 54450425 | 54450575 | 150 | 54450462 | 14 | 77  | 2.2  |
| 19 | 54564775 | 54565125 | 350 | 54564787 | 20 | 224 | 13   |
| 19 | 54625850 | 54626050 | 200 | 54625862 | 13 | 96  | 2.2  |
| 19 | 54626475 | 54626675 | 200 | 54626637 | 23 | 138 | 13   |
| 19 | 54627100 | 54627400 | 300 | 54627162 | 15 | 162 | 13   |
| 19 | 54627625 | 54627700 | 75  | 54627637 | 17 | 47  | 2.2  |
| 19 | 54631550 | 54631750 | 200 | 54631612 | 17 | 120 | 0    |
| 19 | 55182525 | 55182550 | 25  | 55182537 | 16 | 16  | 2.2  |
| 19 | 55236975 | 55237000 | 25  | 55236987 | 12 | 12  | 0    |
| 19 | 55239175 | 55239300 | 125 | 55239287 | 13 | 60  | 0    |
| 19 | 55240525 | 55240550 | 25  | 55240537 | 12 | 12  | 0    |
| 19 | 55240850 | 55240975 | 125 | 55240862 | 12 | 59  | 8.7  |
| 19 | 55241775 | 55242075 | 300 | 55241887 | 14 | 160 | 0    |
| 19 | 55253525 | 55253850 | 325 | 55253812 | 16 | 162 | 15.2 |
| 19 | 55254150 | 55254675 | 525 | 55254562 | 26 | 350 | 67.2 |
| 19 | 55254900 | 55255450 | 550 | 55254962 | 22 | 317 | 17.3 |
| 19 | 55392500 | 55392700 | 200 | 55392587 | 18 | 114 | 0    |
| 19 | 55539750 | 55539800 | 50  | 55539762 | 12 | 24  | 0    |
| 19 | 55643125 | 55643375 | 250 | 55643187 | 15 | 123 | 0    |
| 19 | 55685750 | 55686150 | 400 | 55686012 | 17 | 193 | 0    |
| 19 | 55727775 | 55727975 | 200 | 55727837 | 16 | 111 | 4.3  |
| 19 | 55745400 | 55745425 | 25  | 55745412 | 12 | 12  | 0    |
| 19 | 55748625 | 55748650 | 25  | 55748637 | 12 | 12  | 0    |
| 19 | 55803200 | 55803225 | 25  | 55803212 | 16 | 16  | 2.2  |
| 19 | 55853900 | 55854050 | 150 | 55853937 | 15 | 78  | 6.5  |
| 19 | 55934300 | 55934375 | 75  | 55934312 | 12 | 36  | 6.5  |
| 19 | 56006525 | 56006675 | 150 | 56006587 | 18 | 94  | 0    |
| 19 | 56013300 | 56013325 | 25  | 56013312 | 12 | 12  | 2.2  |
| 19 | 56065250 | 56065275 | 25  | 56065262 | 15 | 15  | 2.2  |
| 19 | 56065975 | 56066000 | 25  | 56065987 | 12 | 12  | 2.2  |
| 19 | 56445925 | 56446125 | 200 | 56446087 | 19 | 121 | 2.2  |
| 19 | 56446400 | 56446475 | 75  | 56446412 | 13 | 38  | 2.2  |
| 19 | 56655850 | 56655875 | 25  | 56655862 | 12 | 12  | 2.2  |
| 19 | 56793750 | 56793900 | 150 | 56793837 | 19 | 96  | 8.7  |
| 19 | 57035000 | 57035050 | 50  | 57035012 | 12 | 24  | 0    |
| 19 | 57042825 | 57042925 | 100 | 57042912 | 16 | 55  | 0    |
| 19 | 57043175 | 57043200 | 25  | 57043187 | 15 | 15  | 2.2  |
| 19 | 57140625 | 57140650 | 25  | 57140637 | 12 | 12  | 0    |
| 19 | 57166575 | 57166600 | 25  | 57166587 | 12 | 12  | 2.2  |
| 19 | 57320725 | 57320850 | 125 | 57320762 | 15 | 69  | 0    |
| 19 | 57452550 | 57452725 | 175 | 57452687 | 17 | 100 | 0    |
| 19 | 57503025 | 57503225 | 200 | 57503162 | 17 | 120 | 8.7  |
| 19 | 57504450 | 57504475 | 25  | 57504462 | 12 | 12  | 2.2  |
| 19 | 57618550 | 57618600 | 50  | 57618562 | 12 | 24  | 0    |
| 19 | 57621025 | 57621100 | 75  | 57621062 | 13 | 37  | 0    |
| 19 | 57624175 | 57624350 | 175 | 57624262 | 15 | 91  | 4.3  |
| 19 | 57648225 | 57648300 | 75  | 57648262 | 14 | 40  | 6.5  |
| 19 | 57648850 | 57649100 | 250 | 57648912 | 20 | 157 | 21.7 |
| 19 | 58199875 | 58200025 | 150 | 58199912 | 13 | 75  | 10.8 |
| 19 | 58205150 | 58205175 | 25  | 58205162 | 12 | 12  | 0    |
| 19 | 58242550 | 58242625 | 75  | 58242587 | 13 | 38  | 4.3  |

|    |          |          |      |          |    |      |      |
|----|----------|----------|------|----------|----|------|------|
| 19 | 58327350 | 58327525 | 175  | 58327387 | 13 | 88   | 15.2 |
| 19 | 58503325 | 58503525 | 200  | 58503412 | 15 | 105  | 2.2  |
| 19 | 58519500 | 58519525 | 25   | 58519512 | 12 | 12   | 0    |
| 19 | 59173300 | 59173500 | 200  | 59173487 | 22 | 147  | 15.2 |
| 19 | 59176450 | 59176475 | 25   | 59176462 | 12 | 12   | 2.2  |
| 19 | 59178850 | 59178875 | 25   | 59178862 | 12 | 12   | 2.2  |
| 19 | 59209950 | 59210025 | 75   | 59209962 | 12 | 35   | 0    |
| 19 | 59264825 | 59264925 | 100  | 59264912 | 19 | 69   | 2.2  |
| 19 | 59276275 | 59276575 | 300  | 59276437 | 22 | 199  | 0    |
| 19 | 59557600 | 59557725 | 125  | 59557662 | 15 | 67   | 10.8 |
| 19 | 59596725 | 59596900 | 175  | 59596862 | 28 | 152  | 13   |
| 19 | 59602250 | 59602475 | 225  | 59602312 | 21 | 167  | 0    |
| 19 | 59617325 | 59617700 | 375  | 59617662 | 14 | 148  | 15.2 |
| 19 | 59695850 | 59695900 | 50   | 59695862 | 12 | 24   | 0    |
| 19 | 60208775 | 60208875 | 100  | 60208812 | 13 | 49   | 8.7  |
| 19 | 60209325 | 60209475 | 150  | 60209412 | 15 | 82   | 0    |
| 19 | 60235200 | 60235225 | 25   | 60235212 | 12 | 12   | 0    |
| 19 | 60378150 | 60378175 | 25   | 60378162 | 12 | 12   | 2.2  |
| 19 | 60378425 | 60379000 | 575  | 60378562 | 14 | 267  | 49.8 |
| 19 | 60555500 | 60555550 | 50   | 60555512 | 13 | 25   | 0    |
| 19 | 60560700 | 60560725 | 25   | 60560712 | 12 | 12   | 2.2  |
| 19 | 60642275 | 60642525 | 250  | 60642337 | 15 | 141  | 21.7 |
| 19 | 60644100 | 60644275 | 175  | 60644137 | 15 | 89   | 10.8 |
| 19 | 60651200 | 60651250 | 50   | 60651212 | 12 | 24   | 4.3  |
| 19 | 60730750 | 60730925 | 175  | 60730887 | 14 | 92   | 8.7  |
| 19 | 60914925 | 60914975 | 50   | 60914962 | 13 | 25   | 0    |
| 19 | 60960050 | 60960125 | 75   | 60960112 | 14 | 38   | 4.3  |
| 19 | 61012575 | 61012625 | 50   | 61012587 | 13 | 26   | 4.3  |
| 19 | 61267925 | 61267975 | 50   | 61267937 | 14 | 26   | 0    |
| 19 | 61571400 | 61571475 | 75   | 61571412 | 19 | 48   | 6.5  |
| 19 | 61607650 | 61607675 | 25   | 61607662 | 14 | 14   | 2.2  |
| 19 | 61608175 | 61608375 | 200  | 61608212 | 24 | 167  | 8.7  |
| 19 | 61771350 | 61771375 | 25   | 61771362 | 12 | 12   | 0    |
| 19 | 61874400 | 61874450 | 50   | 61874412 | 12 | 24   | 4.3  |
| 19 | 61967850 | 61967900 | 50   | 61967862 | 14 | 28   | 0    |
| 19 | 61968250 | 61968400 | 150  | 61968287 | 17 | 88   | 10.8 |
| 19 | 61998700 | 61998825 | 125  | 61998712 | 12 | 55   | 8.7  |
| 19 | 62067750 | 62067775 | 25   | 62067762 | 14 | 14   | 2.2  |
| 19 | 62394025 | 62394425 | 400  | 62394387 | 28 | 315  | 34.7 |
| 19 | 62677450 | 62678225 | 775  | 62678137 | 19 | 354  | 13   |
| 19 | 62678700 | 62679175 | 475  | 62678862 | 19 | 271  | 0    |
| 19 | 62679700 | 62679925 | 225  | 62679812 | 21 | 145  | 21.7 |
| 19 | 62740500 | 62740525 | 25   | 62740512 | 12 | 12   | 2.2  |
| 19 | 62750200 | 62750375 | 175  | 62750212 | 15 | 90   | 10.8 |
| 19 | 62778425 | 62778450 | 25   | 62778437 | 12 | 12   | 0    |
| 19 | 62780000 | 62780075 | 75   | 62780012 | 13 | 38   | 6.5  |
| 19 | 62786625 | 62786825 | 200  | 62786812 | 29 | 162  | 26   |
| 19 | 62818100 | 62818600 | 500  | 62818287 | 16 | 288  | 34.7 |
| 19 | 62819100 | 62819125 | 25   | 62819112 | 13 | 13   | 0    |
| 19 | 62820225 | 62820375 | 150  | 62820337 | 15 | 79   | 0    |
| 19 | 62820850 | 62821050 | 200  | 62821012 | 15 | 104  | 0    |
| 19 | 62824375 | 62824650 | 275  | 62824512 | 22 | 186  | 13   |
| 19 | 62825725 | 62825850 | 125  | 62825762 | 13 | 63   | 0    |
| 19 | 62886200 | 62886375 | 175  | 62886362 | 22 | 129  | 17.3 |
| 19 | 62886700 | 62887075 | 375  | 62886762 | 15 | 172  | 32.5 |
| 19 | 62888075 | 62888325 | 250  | 62888262 | 13 | 110  | 10.8 |
| 19 | 62889000 | 62889025 | 25   | 62889012 | 12 | 12   | 2.2  |
| 19 | 62889300 | 62889350 | 50   | 62889312 | 12 | 24   | 0    |
| 19 | 62891325 | 62891375 | 50   | 62891337 | 12 | 24   | 0    |
| 19 | 62924475 | 62924500 | 25   | 62924487 | 12 | 12   | 0    |
| 19 | 63153725 | 63153975 | 250  | 63153787 | 13 | 116  | 4.3  |
| 19 | 63184375 | 63184400 | 25   | 63184387 | 12 | 12   | 0    |
| 19 | 63186925 | 63186975 | 50   | 63186937 | 12 | 24   | 0    |
| 19 | 63205200 | 63205400 | 200  | 63205237 | 18 | 128  | 8.7  |
| 19 | 63206175 | 63206250 | 75   | 63206237 | 18 | 51   | 4.3  |
| 19 | 63206475 | 63206725 | 250  | 63206537 | 30 | 239  | 13   |
| 19 | 63207275 | 63207600 | 325  | 63207437 | 23 | 227  | 23.8 |
| 19 | 63216175 | 63216350 | 175  | 63216262 | 16 | 93   | 8.7  |
| 19 | 63220525 | 63220625 | 100  | 63220562 | 13 | 51   | 0    |
| 19 | 63229050 | 63229250 | 200  | 63229062 | 15 | 107  | 10.8 |
| 19 | 63243450 | 63243500 | 50   | 63243487 | 14 | 26   | 4.3  |
| 19 | 63245875 | 63246575 | 700  | 63246012 | 26 | 581  | 10.8 |
| 19 | 63247900 | 63249275 | 1375 | 63248262 | 48 | 1291 | 28.2 |
| 19 | 63249650 | 63249725 | 75   | 63249662 | 13 | 38   | 4.3  |
| 19 | 63250200 | 63250400 | 200  | 63250237 | 17 | 121  | 15.2 |

|    |          |          |     |          |    |     |      |
|----|----------|----------|-----|----------|----|-----|------|
| 19 | 63250850 | 63251175 | 325 | 63250987 | 16 | 179 | 0    |
| 19 | 63252575 | 63252850 | 275 | 63252837 | 13 | 113 | 0    |
| 19 | 63255175 | 63255275 | 100 | 63255187 | 13 | 50  | 0    |
| 19 | 63255525 | 63256050 | 525 | 63255937 | 17 | 252 | 34.7 |
| 19 | 63256475 | 63257175 | 700 | 63256637 | 24 | 512 | 6.5  |
| 19 | 63257400 | 63257475 | 75  | 63257412 | 14 | 39  | 6.5  |
| 19 | 63258925 | 63259100 | 175 | 63259012 | 17 | 97  | 6.5  |
| 19 | 63261775 | 63261825 | 50  | 63261787 | 12 | 24  | 4.3  |
| 19 | 63263025 | 63263250 | 225 | 63263162 | 22 | 167 | 15.2 |
| 19 | 63270775 | 63271225 | 450 | 63271037 | 19 | 254 | 15.2 |
| 19 | 63287450 | 63287650 | 200 | 63287512 | 15 | 110 | 10.8 |
| 19 | 63288050 | 63288225 | 175 | 63288137 | 14 | 86  | 0    |
| 19 | 63290200 | 63290275 | 75  | 63290212 | 13 | 37  | 4.3  |
| 19 | 63298825 | 63298900 | 75  | 63298837 | 15 | 42  | 6.5  |
| 19 | 63299750 | 63299925 | 175 | 63299862 | 13 | 82  | 15.2 |
| 19 | 63319825 | 63319925 | 100 | 63319862 | 13 | 49  | 2.2  |
| 19 | 63321350 | 63321550 | 200 | 63321462 | 19 | 137 | 0    |
| 19 | 63333900 | 63333950 | 50  | 63333912 | 13 | 26  | 0    |
| 19 | 63341625 | 63341750 | 125 | 63341687 | 15 | 67  | 10.8 |
| 19 | 63385300 | 63385800 | 500 | 63385712 | 29 | 398 | 23.8 |
| 19 | 63386225 | 63386250 | 25  | 63386237 | 12 | 12  | 2.2  |
| 19 | 63387000 | 63387350 | 350 | 63387137 | 29 | 324 | 19.5 |
| 19 | 63388900 | 63388975 | 75  | 63388937 | 14 | 38  | 6.5  |
| 19 | 63394825 | 63394850 | 25  | 63394837 | 12 | 12  | 0    |
| 19 | 63395325 | 63395500 | 175 | 63395412 | 14 | 87  | 0    |
| 19 | 63407125 | 63407450 | 325 | 63407287 | 20 | 204 | 17.3 |
| 19 | 63410200 | 63410375 | 175 | 63410237 | 16 | 93  | 8.7  |
| 19 | 63412975 | 63413250 | 275 | 63413087 | 16 | 159 | 6.5  |
| 19 | 63420250 | 63420400 | 150 | 63420262 | 14 | 74  | 4.3  |
| 19 | 63447325 | 63447500 | 175 | 63447337 | 12 | 76  | 0    |
| 19 | 63461550 | 63461775 | 225 | 63461637 | 16 | 125 | 0    |
| 19 | 63464875 | 63464900 | 25  | 63464887 | 12 | 12  | 0    |
| 19 | 63465975 | 63466150 | 175 | 63466062 | 14 | 93  | 13   |
| 19 | 63636025 | 63636150 | 125 | 63636037 | 13 | 62  | 0    |
| 19 | 63637925 | 63638225 | 300 | 63638062 | 14 | 152 | 0    |
| 19 | 63642325 | 63642700 | 375 | 63642437 | 26 | 278 | 13   |
| 19 | 63642925 | 63643125 | 200 | 63643087 | 36 | 227 | 21.7 |
| 19 | 63643650 | 63644325 | 675 | 63644037 | 25 | 550 | 82.3 |
| 18 | 4500725  | 4500850  | 125 | 4500737  | 12 | 55  | 0    |
| 18 | 7059675  | 7059700  | 25  | 7059687  | 12 | 12  | 2.2  |
| 18 | 8370775  | 8370800  | 25  | 8370787  | 12 | 12  | 2.2  |
| 18 | 10140750 | 10140900 | 150 | 10140837 | 14 | 71  | 8.7  |
| 18 | 12236850 | 12236975 | 125 | 12236937 | 14 | 65  | 0    |
| 18 | 12901775 | 12901800 | 25  | 12901787 | 13 | 13  | 0    |
| 18 | 12938625 | 12938675 | 50  | 12938662 | 13 | 25  | 4.3  |
| 18 | 13488325 | 13488525 | 200 | 13488337 | 14 | 108 | 0    |
| 18 | 13488825 | 13488925 | 100 | 13488837 | 12 | 48  | 0    |
| 18 | 13622325 | 13622350 | 25  | 13622337 | 12 | 12  | 2.2  |
| 18 | 13816000 | 13816050 | 50  | 13816012 | 12 | 24  | 0    |
| 18 | 13859900 | 13859925 | 25  | 13859912 | 12 | 12  | 2.2  |
| 18 | 13875000 | 13875150 | 150 | 13875037 | 16 | 85  | 0    |
| 18 | 16765050 | 16765100 | 50  | 16765062 | 13 | 26  | 0    |
| 18 | 16765375 | 16765400 | 25  | 16765387 | 14 | 14  | 0    |
| 18 | 16769675 | 16769950 | 275 | 16769812 | 31 | 233 | 15.2 |
| 18 | 16773525 | 16773700 | 175 | 16773687 | 23 | 100 | 8.7  |
| 18 | 18251750 | 18251900 | 150 | 18251812 | 15 | 80  | 0    |
| 18 | 19476350 | 19476475 | 125 | 19476412 | 14 | 62  | 0    |
| 18 | 21312500 | 21312600 | 100 | 21312537 | 14 | 50  | 0    |
| 18 | 22381225 | 22381525 | 300 | 22381287 | 14 | 154 | 30.3 |
| 18 | 27111125 | 27111150 | 25  | 27111137 | 12 | 12  | 0    |
| 18 | 27312100 | 27312125 | 25  | 27312112 | 12 | 12  | 0    |
| 18 | 28603700 | 28603725 | 25  | 28603712 | 12 | 12  | 0    |
| 18 | 28604025 | 28604150 | 125 | 28604062 | 15 | 65  | 4.3  |
| 18 | 28604500 | 28604525 | 25  | 28604512 | 12 | 12  | 2.2  |
| 18 | 31935675 | 31935825 | 150 | 31935687 | 13 | 77  | 6.5  |
| 18 | 41341250 | 41341400 | 150 | 41341312 | 13 | 74  | 0    |
| 18 | 42137150 | 42137275 | 125 | 42137162 | 12 | 58  | 0    |
| 18 | 42394125 | 42394225 | 100 | 42394137 | 12 | 47  | 0    |
| 18 | 42809100 | 42809250 | 150 | 42809112 | 12 | 72  | 0    |
| 18 | 43756175 | 43756275 | 100 | 43756237 | 13 | 49  | 0    |
| 18 | 44252400 | 44252550 | 150 | 44252462 | 13 | 72  | 13   |
| 18 | 44305225 | 44305300 | 75  | 44305262 | 14 | 41  | 4.3  |
| 18 | 47071075 | 47071150 | 75  | 47071087 | 14 | 41  | 0    |
| 18 | 51751125 | 51751150 | 25  | 51751137 | 12 | 12  | 2.2  |
| 18 | 58507375 | 58507400 | 25  | 58507387 | 12 | 12  | 0    |

|    |          |          |     |          |    |     |      |
|----|----------|----------|-----|----------|----|-----|------|
| 18 | 69998775 | 69998925 | 150 | 69998837 | 14 | 77  | 0    |
| 18 | 70244225 | 70244350 | 125 | 70244287 | 15 | 70  | 8.7  |
| 18 | 70245900 | 70246025 | 125 | 70245937 | 14 | 62  | 4.3  |
| 18 | 72737125 | 72737150 | 25  | 72737137 | 12 | 12  | 0    |
| 18 | 74671075 | 74671100 | 25  | 74671087 | 12 | 12  | 0    |
| 18 | 74855250 | 74855275 | 25  | 74855262 | 13 | 13  | 2.2  |
| 18 | 74865225 | 74865275 | 50  | 74865237 | 12 | 24  | 0    |
| 18 | 74882775 | 74882875 | 100 | 74882837 | 14 | 53  | 2.2  |
| 18 | 74891825 | 74891900 | 75  | 74891837 | 12 | 35  | 6.5  |
| 18 | 74923850 | 74923950 | 100 | 74923887 | 13 | 50  | 0    |
| 18 | 75188600 | 75188625 | 25  | 75188612 | 13 | 13  | 0    |
| 18 | 75336050 | 75336550 | 500 | 75336387 | 28 | 401 | 19.5 |
| 18 | 75398775 | 75398975 | 200 | 75398837 | 19 | 136 | 17.3 |
| 18 | 75410050 | 75410150 | 100 | 75410087 | 13 | 47  | 0    |
| 18 | 75413200 | 75413225 | 25  | 75413212 | 12 | 12  | 0    |
| 18 | 75414950 | 75414975 | 25  | 75414962 | 12 | 12  | 2.2  |
| 18 | 75419350 | 75419700 | 350 | 75419537 | 24 | 260 | 10.8 |
| 18 | 75419975 | 75420025 | 50  | 75420012 | 15 | 29  | 4.3  |
| 18 | 75420300 | 75420425 | 125 | 75420337 | 16 | 73  | 8.7  |
| 18 | 75421000 | 75421125 | 125 | 75421012 | 14 | 67  | 0    |
| 18 | 75429700 | 75429750 | 50  | 75429712 | 12 | 24  | 0    |
| 18 | 75430675 | 75431075 | 400 | 75430837 | 37 | 413 | 60.7 |
| 18 | 75432650 | 75432800 | 150 | 75432787 | 16 | 84  | 10.8 |
| 18 | 75433050 | 75433300 | 250 | 75433212 | 19 | 159 | 10.8 |
| 18 | 75433800 | 75434150 | 350 | 75433912 | 21 | 234 | 0    |
| 18 | 75434400 | 75434525 | 125 | 75434412 | 14 | 65  | 10.8 |
| 18 | 75434875 | 75435350 | 475 | 75434987 | 27 | 358 | 17.3 |
| 18 | 75440125 | 75440200 | 75  | 75440187 | 14 | 40  | 6.5  |
| 18 | 75443725 | 75443850 | 125 | 75443737 | 17 | 71  | 6.5  |
| 18 | 75480725 | 75481075 | 350 | 75480837 | 22 | 248 | 17.3 |
| 18 | 75592100 | 75592125 | 25  | 75592112 | 12 | 12  | 2.2  |
| 18 | 75624725 | 75624750 | 25  | 75624737 | 14 | 14  | 0    |
| 18 | 75628275 | 75628425 | 150 | 75628362 | 16 | 86  | 0    |
| 18 | 75630950 | 75631000 | 50  | 75630962 | 13 | 25  | 0    |
| 18 | 75633475 | 75633575 | 100 | 75633487 | 12 | 48  | 6.5  |
| 18 | 75638150 | 75638275 | 125 | 75638237 | 14 | 63  | 10.8 |
| 18 | 75645150 | 75645250 | 100 | 75645162 | 13 | 47  | 4.3  |
| 18 | 75650075 | 75650425 | 350 | 75650237 | 19 | 220 | 21.7 |
| 18 | 75670600 | 75670775 | 175 | 75670712 | 14 | 90  | 15.2 |
| 18 | 75677925 | 75678675 | 750 | 75678562 | 22 | 506 | 43.3 |
| 18 | 75686950 | 75687200 | 250 | 75686962 | 13 | 110 | 10.8 |
| 18 | 75689600 | 75689650 | 50  | 75689612 | 12 | 24  | 0    |
| 18 | 75693225 | 75693475 | 250 | 75693337 | 18 | 151 | 13   |
| 18 | 75731450 | 75731500 | 50  | 75731462 | 12 | 24  | 4.3  |
| 18 | 75739975 | 75740025 | 50  | 75740012 | 15 | 27  | 2.2  |
| 18 | 75740675 | 75740725 | 50  | 75740687 | 12 | 24  | 2.2  |
| 18 | 75780275 | 75780300 | 25  | 75780287 | 12 | 12  | 0    |
| 18 | 75936925 | 75937025 | 100 | 75936937 | 15 | 55  | 6.5  |



**Table S2 - Summary of bound regions**

**MCAF1 (10E-9) in WM262**

| CHROM | START    | END      | LENGTH | PEAK POS | PEAK HEIGHT | TOTAL TARGET COUNTS | TOTAL BACKGROUND COUNTS |
|-------|----------|----------|--------|----------|-------------|---------------------|-------------------------|
| 20    | 219575   | 219625   | 50     | 219587   | 12          | 24                  | 4.1                     |
| 20    | 256350   | 256375   | 25     | 256362   | 14          | 14                  | 2.1                     |
| 20    | 300150   | 300175   | 25     | 300162   | 13          | 13                  | 2.1                     |
| 20    | 328050   | 328150   | 100    | 328062   | 16          | 60                  | 0                       |
| 20    | 410500   | 410550   | 50     | 410512   | 13          | 26                  | 4.1                     |
| 20    | 472425   | 472450   | 25     | 472437   | 12          | 12                  | 2.1                     |
| 20    | 1331025  | 1331075  | 50     | 1331037  | 15          | 28                  | 4.1                     |
| 20    | 1344850  | 1344875  | 25     | 1344862  | 13          | 13                  | 2.1                     |
| 20    | 1394450  | 1394525  | 75     | 1394462  | 13          | 39                  | 6.2                     |
| 20    | 1498175  | 1498200  | 25     | 1498187  | 12          | 12                  | 0                       |
| 20    | 2271250  | 2271325  | 75     | 2271262  | 12          | 36                  | 0                       |
| 20    | 2450550  | 2450575  | 25     | 2450562  | 13          | 13                  | 2.1                     |
| 20    | 2734700  | 2734775  | 75     | 2734712  | 13          | 37                  | 4.1                     |
| 20    | 2799075  | 2799250  | 175    | 2799212  | 17          | 102                 | 12.4                    |
| 20    | 2842825  | 2842850  | 25     | 2842837  | 13          | 13                  | 2.1                     |
| 20    | 3548550  | 3548600  | 50     | 3548562  | 12          | 24                  | 4.1                     |
| 20    | 3736150  | 3736175  | 25     | 3736162  | 14          | 14                  | 2.1                     |
| 20    | 3740650  | 3740675  | 25     | 3740662  | 21          | 21                  | 4.1                     |
| 20    | 3945525  | 3945600  | 75     | 3945537  | 12          | 36                  | 0                       |
| 20    | 3956250  | 3956325  | 75     | 3956262  | 12          | 36                  | 6.2                     |
| 20    | 3994900  | 3995050  | 150    | 3994987  | 16          | 87                  | 10.3                    |
| 20    | 4019575  | 4019625  | 50     | 4019587  | 12          | 24                  | 4.1                     |
| 20    | 4089400  | 4089475  | 75     | 4089462  | 14          | 38                  | 2.1                     |
| 20    | 4101500  | 4101675  | 175    | 4101587  | 16          | 102                 | 6.2                     |
| 20    | 4540275  | 4540325  | 50     | 4540287  | 12          | 24                  | 2.1                     |
| 20    | 4542925  | 4543050  | 125    | 4542987  | 16          | 70                  | 6.2                     |
| 20    | 4614975  | 4615000  | 25     | 4614987  | 12          | 12                  | 2.1                     |
| 20    | 4875675  | 4875700  | 25     | 4875687  | 14          | 14                  | 0                       |
| 20    | 4929050  | 4929100  | 50     | 4929087  | 14          | 26                  | 0                       |
| 20    | 4985525  | 4985750  | 225    | 4985687  | 16          | 112                 | 20.7                    |
| 20    | 4994650  | 4994675  | 25     | 4994662  | 26          | 26                  | 4.1                     |
| 20    | 4994975  | 4995025  | 50     | 4994987  | 16          | 29                  | 2.1                     |
| 20    | 5002175  | 5002200  | 25     | 5002187  | 12          | 12                  | 2.1                     |
| 20    | 5247250  | 5247325  | 75     | 5247262  | 14          | 38                  | 0                       |
| 20    | 5541450  | 5541600  | 150    | 5541512  | 14          | 76                  | 0                       |
| 20    | 5774400  | 5774550  | 150    | 5774462  | 16          | 84                  | 0                       |
| 20    | 6107275  | 6107425  | 150    | 6107312  | 13          | 76                  | 2.1                     |
| 20    | 6317425  | 6317550  | 125    | 6317462  | 15          | 73                  | 2.1                     |
| 20    | 6421025  | 6421100  | 75     | 6421062  | 16          | 47                  | 4.1                     |
| 20    | 6462500  | 6462575  | 75     | 6462512  | 13          | 39                  | 0                       |
| 20    | 6463250  | 6463275  | 25     | 6463262  | 12          | 12                  | 2.1                     |
| 20    | 6555575  | 6555650  | 75     | 6555587  | 13          | 39                  | 0                       |
| 20    | 6698475  | 6698525  | 50     | 6698487  | 12          | 24                  | 4.1                     |
| 20    | 7431475  | 7431550  | 75     | 7431487  | 12          | 36                  | 0                       |
| 20    | 7626975  | 7627000  | 25     | 7626987  | 12          | 12                  | 2.1                     |
| 20    | 7823775  | 7823850  | 75     | 7823787  | 16          | 40                  | 0                       |
| 20    | 7840750  | 7840850  | 100    | 7840762  | 17          | 60                  | 8.3                     |
| 20    | 7853550  | 7853725  | 175    | 7853612  | 16          | 102                 | 10.3                    |
| 20    | 7865300  | 7865375  | 75     | 7865312  | 18          | 48                  | 6.2                     |
| 20    | 7960825  | 7960900  | 75     | 7960837  | 12          | 36                  | 0                       |
| 20    | 8260775  | 8260825  | 50     | 8260787  | 12          | 24                  | 2.1                     |
| 20    | 8980350  | 8980375  | 25     | 8980362  | 12          | 12                  | 2.1                     |
| 20    | 9107925  | 9107950  | 25     | 9107937  | 13          | 13                  | 2.1                     |
| 20    | 10042525 | 10042550 | 25     | 10042537 | 13          | 13                  | 0                       |
| 20    | 10101050 | 10101075 | 25     | 10101062 | 12          | 12                  | 0                       |
| 20    | 10101325 | 10101375 | 50     | 10101362 | 14          | 26                  | 4.1                     |
| 20    | 10114500 | 10114575 | 75     | 10114512 | 15          | 39                  | 0                       |
| 20    | 10148775 | 10148800 | 25     | 10148787 | 12          | 12                  | 2.1                     |
| 20    | 10465825 | 10465975 | 150    | 10465862 | 16          | 88                  | 0                       |
| 20    | 10466600 | 10466775 | 175    | 10466762 | 17          | 105                 | 12.4                    |
| 20    | 10481150 | 10481175 | 25     | 10481162 | 12          | 12                  | 2.1                     |
| 20    | 10599650 | 10599675 | 25     | 10599662 | 12          | 12                  | 0                       |
| 20    | 10839175 | 10839200 | 25     | 10839187 | 12          | 12                  | 0                       |
| 20    | 10879000 | 10879100 | 100    | 10879037 | 13          | 51                  | 0                       |
| 20    | 11046650 | 11046725 | 75     | 11046662 | 13          | 37                  | 6.2                     |
| 20    | 11087375 | 11087425 | 50     | 11087387 | 12          | 24                  | 0                       |
| 20    | 11134050 | 11134100 | 50     | 11134062 | 14          | 27                  | 4.1                     |
| 20    | 11136425 | 11136675 | 250    | 11136512 | 20          | 165                 | 12.4                    |
| 20    | 11161250 | 11161275 | 25     | 11161262 | 13          | 13                  | 2.1                     |
| 20    | 11196050 | 11196175 | 125    | 11196062 | 15          | 68                  | 10.3                    |

|    |          |          |     |          |    |     |      |
|----|----------|----------|-----|----------|----|-----|------|
| 20 | 11402725 | 11402825 | 100 | 11402737 | 13 | 50  | 8.3  |
| 20 | 11472475 | 11472500 | 25  | 11472487 | 12 | 12  | 0    |
| 20 | 11700950 | 11701125 | 175 | 11701037 | 18 | 112 | 2.1  |
| 20 | 11721125 | 11721425 | 300 | 11721312 | 29 | 266 | 12.4 |
| 20 | 11821550 | 11821575 | 25  | 11821562 | 12 | 12  | 2.1  |
| 20 | 11866475 | 11866550 | 75  | 11866512 | 14 | 38  | 0    |
| 20 | 12042000 | 12042025 | 25  | 12042012 | 12 | 12  | 2.1  |
| 20 | 12082350 | 12082650 | 300 | 12082487 | 38 | 334 | 45.5 |
| 20 | 12094850 | 12095050 | 200 | 12094987 | 25 | 191 | 22.8 |
| 20 | 12105875 | 12105900 | 25  | 12105887 | 12 | 12  | 2.1  |
| 20 | 12248000 | 12248025 | 25  | 12248012 | 13 | 13  | 2.1  |
| 20 | 13277175 | 13277225 | 50  | 13277187 | 12 | 24  | 0    |
| 20 | 13640850 | 13640950 | 100 | 13640862 | 14 | 53  | 0    |
| 20 | 14070875 | 14070950 | 75  | 14070887 | 14 | 42  | 6.2  |
| 20 | 14150175 | 14150200 | 25  | 14150187 | 12 | 12  | 0    |
| 20 | 14647150 | 14647200 | 50  | 14647162 | 12 | 24  | 4.1  |
| 20 | 14749400 | 14749475 | 75  | 14749412 | 14 | 38  | 4.1  |
| 20 | 14817050 | 14817075 | 25  | 14817062 | 12 | 12  | 2.1  |
| 20 | 14832675 | 14832700 | 25  | 14832687 | 12 | 12  | 0    |
| 20 | 14880625 | 14880675 | 50  | 14880637 | 12 | 24  | 0    |
| 20 | 14912625 | 14912650 | 25  | 14912637 | 12 | 12  | 0    |
| 20 | 15149900 | 15149925 | 25  | 15149912 | 12 | 12  | 2.1  |
| 20 | 15153050 | 15153100 | 50  | 15153062 | 12 | 24  | 0    |
| 20 | 15324150 | 15324175 | 25  | 15324162 | 12 | 12  | 0    |
| 20 | 15490400 | 15490525 | 125 | 15490462 | 14 | 67  | 0    |
| 20 | 15856125 | 15856150 | 25  | 15856137 | 14 | 14  | 2.1  |
| 20 | 15949600 | 15949700 | 100 | 15949637 | 15 | 55  | 0    |
| 20 | 15951125 | 15951225 | 100 | 15951212 | 13 | 49  | 6.2  |
| 20 | 16054050 | 16054075 | 25  | 16054062 | 12 | 12  | 2.1  |
| 20 | 16134400 | 16134425 | 25  | 16134412 | 12 | 12  | 0    |
| 20 | 16170775 | 16170875 | 100 | 16170787 | 14 | 55  | 6.2  |
| 20 | 16411625 | 16411650 | 25  | 16411637 | 12 | 12  | 2.1  |
| 20 | 16446125 | 16446150 | 25  | 16446137 | 12 | 12  | 2.1  |
| 20 | 16503275 | 16503450 | 175 | 16503412 | 28 | 146 | 18.6 |
| 20 | 16538450 | 16538500 | 50  | 16538462 | 13 | 26  | 0    |
| 20 | 16637825 | 16637875 | 50  | 16637837 | 12 | 24  | 2.1  |
| 20 | 16645075 | 16645200 | 125 | 16645087 | 13 | 65  | 10.3 |
| 20 | 16662375 | 16662400 | 25  | 16662387 | 12 | 12  | 0    |
| 20 | 16794225 | 16794250 | 25  | 16794237 | 12 | 12  | 2.1  |
| 20 | 16827925 | 16828025 | 100 | 16827962 | 14 | 52  | 8.3  |
| 20 | 16835625 | 16835750 | 125 | 16835637 | 13 | 62  | 0    |
| 20 | 17688350 | 17688425 | 75  | 17688362 | 12 | 36  | 0    |
| 20 | 17764950 | 17764975 | 25  | 17764962 | 12 | 12  | 2.1  |
| 20 | 17778350 | 17778400 | 50  | 17778362 | 13 | 26  | 0    |
| 20 | 17784850 | 17785050 | 200 | 17784962 | 14 | 99  | 8.3  |
| 20 | 17803075 | 17803175 | 100 | 17803087 | 13 | 48  | 0    |
| 20 | 17827350 | 17827425 | 75  | 17827387 | 13 | 38  | 0    |
| 20 | 18243650 | 18243700 | 50  | 18243687 | 14 | 26  | 2.1  |
| 20 | 18332975 | 18333000 | 25  | 18332987 | 12 | 12  | 0    |
| 20 | 18722575 | 18722625 | 50  | 18722612 | 23 | 44  | 8.3  |
| 20 | 19170700 | 19170750 | 50  | 19170712 | 12 | 24  | 4.1  |
| 20 | 19419700 | 19419725 | 25  | 19419712 | 12 | 12  | 0    |
| 20 | 19779075 | 19779100 | 25  | 19779087 | 12 | 12  | 2.1  |
| 20 | 19819425 | 19819475 | 50  | 19819437 | 12 | 24  | 0    |
| 20 | 19823950 | 19823975 | 25  | 19823962 | 12 | 12  | 2.1  |
| 20 | 19864300 | 19864350 | 50  | 19864312 | 12 | 24  | 4.1  |
| 20 | 20380925 | 20381050 | 125 | 20381037 | 25 | 88  | 12.4 |
| 20 | 20888300 | 20888350 | 50  | 20888312 | 16 | 29  | 4.1  |
| 20 | 20976800 | 20976875 | 75  | 20976812 | 12 | 36  | 6.2  |
| 20 | 22434800 | 22434875 | 75  | 22434862 | 14 | 38  | 0    |
| 20 | 22757900 | 22757925 | 25  | 22757912 | 12 | 12  | 0    |
| 20 | 24738300 | 24738450 | 150 | 24738312 | 15 | 88  | 10.3 |
| 20 | 24990725 | 24990775 | 50  | 24990737 | 12 | 24  | 4.1  |
| 20 | 25158125 | 25158175 | 50  | 25158137 | 12 | 24  | 2.1  |
| 20 | 25174000 | 25174075 | 75  | 25174012 | 15 | 41  | 0    |
| 20 | 25187350 | 25187400 | 50  | 25187362 | 12 | 24  | 0    |
| 20 | 25401825 | 25401850 | 25  | 25401837 | 12 | 12  | 2.1  |
| 20 | 25443425 | 25443575 | 150 | 25443537 | 15 | 77  | 10.3 |
| 20 | 25471825 | 25471975 | 150 | 25471862 | 15 | 88  | 12.4 |
| 20 | 26266475 | 26266525 | 50  | 26266487 | 14 | 26  | 0    |
| 20 | 28131825 | 28131925 | 100 | 28131837 | 13 | 52  | 8.3  |
| 20 | 28232550 | 28232625 | 75  | 28232562 | 13 | 39  | 0    |
| 20 | 28251400 | 28251425 | 25  | 28251412 | 12 | 12  | 2.1  |
| 20 | 28251975 | 28252050 | 75  | 28252012 | 16 | 42  | 6.2  |
| 20 | 29278875 | 29278925 | 50  | 29278887 | 12 | 24  | 2.1  |

|    |          |          |     |          |    |     |      |
|----|----------|----------|-----|----------|----|-----|------|
| 20 | 29336950 | 29337000 | 50  | 29336987 | 13 | 25  | 4.1  |
| 20 | 29500900 | 29501050 | 150 | 29500912 | 14 | 75  | 8.3  |
| 20 | 29512050 | 29512150 | 100 | 29512112 | 14 | 52  | 4.1  |
| 20 | 29528225 | 29528425 | 200 | 29528262 | 18 | 129 | 18.6 |
| 20 | 29540375 | 29540500 | 125 | 29540412 | 15 | 73  | 0    |
| 20 | 29647425 | 29647450 | 25  | 29647437 | 12 | 12  | 2.1  |
| 20 | 29658225 | 29658250 | 25  | 29658237 | 12 | 12  | 2.1  |
| 20 | 29765275 | 29765300 | 25  | 29765287 | 13 | 13  | 2.1  |
| 20 | 30243225 | 30243250 | 25  | 30243237 | 13 | 13  | 0    |
| 20 | 30494250 | 30494300 | 50  | 30494262 | 12 | 24  | 0    |
| 20 | 30824750 | 30824900 | 150 | 30824787 | 15 | 80  | 6.2  |
| 20 | 30873150 | 30873200 | 50  | 30873162 | 12 | 24  | 2.1  |
| 20 | 31029725 | 31029750 | 25  | 31029737 | 12 | 12  | 2.1  |
| 20 | 31113925 | 31113975 | 50  | 31113937 | 12 | 24  | 0    |
| 20 | 31583025 | 31583200 | 175 | 31583162 | 13 | 83  | 0    |
| 20 | 31583850 | 31583925 | 75  | 31583862 | 12 | 36  | 0    |
| 20 | 31606425 | 31606550 | 125 | 31606487 | 16 | 66  | 12.4 |
| 20 | 31772175 | 31772200 | 25  | 31772187 | 13 | 13  | 0    |
| 20 | 31961175 | 31961200 | 25  | 31961187 | 12 | 12  | 0    |
| 20 | 32194675 | 32194875 | 200 | 32194712 | 16 | 102 | 4.1  |
| 20 | 32755350 | 32755375 | 25  | 32755362 | 12 | 12  | 2.1  |
| 20 | 33199750 | 33199775 | 25  | 33199762 | 12 | 12  | 0    |
| 20 | 33371100 | 33371250 | 150 | 33371112 | 12 | 64  | 12.4 |
| 20 | 33386000 | 33386175 | 175 | 33386037 | 15 | 90  | 10.3 |
| 20 | 33498550 | 33498575 | 25  | 33498562 | 13 | 13  | 2.1  |
| 20 | 33565650 | 33565675 | 25  | 33565662 | 12 | 12  | 2.1  |
| 20 | 34023575 | 34023650 | 75  | 34023612 | 13 | 38  | 0    |
| 20 | 34023950 | 34024000 | 50  | 34023962 | 12 | 24  | 4.1  |
| 20 | 34461625 | 34461700 | 75  | 34461662 | 16 | 41  | 0    |
| 20 | 36077675 | 36077775 | 100 | 36077712 | 15 | 55  | 2.1  |
| 20 | 36193475 | 36193500 | 25  | 36193487 | 12 | 12  | 0    |
| 20 | 36196550 | 36196600 | 50  | 36196587 | 13 | 25  | 4.1  |
| 20 | 36214175 | 36214200 | 25  | 36214187 | 14 | 14  | 2.1  |
| 20 | 36304925 | 36304950 | 25  | 36304937 | 14 | 14  | 2.1  |
| 20 | 36399500 | 36399825 | 325 | 36399687 | 21 | 200 | 12.4 |
| 20 | 36470725 | 36470825 | 100 | 36470737 | 17 | 58  | 8.3  |
| 20 | 36994650 | 36994800 | 150 | 36994762 | 15 | 76  | 8.3  |
| 20 | 37111850 | 37111875 | 25  | 37111862 | 12 | 12  | 2.1  |
| 20 | 38540025 | 38540050 | 25  | 38540037 | 12 | 12  | 0    |
| 20 | 39068675 | 39068800 | 125 | 39068712 | 15 | 72  | 10.3 |
| 20 | 39133725 | 39133975 | 250 | 39133887 | 13 | 111 | 2.1  |
| 20 | 39182200 | 39182250 | 50  | 39182212 | 12 | 24  | 4.1  |
| 20 | 39311525 | 39311600 | 75  | 39311537 | 14 | 42  | 6.2  |
| 20 | 39661950 | 39662175 | 225 | 39662062 | 27 | 174 | 24.8 |
| 20 | 39755500 | 39755550 | 50  | 39755512 | 14 | 28  | 2.1  |
| 20 | 41858900 | 41858950 | 50  | 41858912 | 12 | 24  | 4.1  |
| 20 | 41907575 | 41907600 | 25  | 41907587 | 12 | 12  | 0    |
| 20 | 42017525 | 42017550 | 25  | 42017537 | 12 | 12  | 0    |
| 20 | 42025100 | 42025225 | 125 | 42025112 | 12 | 60  | 2.1  |
| 20 | 42068150 | 42068175 | 25  | 42068162 | 12 | 12  | 0    |
| 20 | 42103500 | 42103550 | 50  | 42103512 | 12 | 24  | 0    |
| 20 | 42598525 | 42598600 | 75  | 42598537 | 12 | 36  | 6.2  |
| 20 | 42704500 | 42704600 | 100 | 42704512 | 12 | 44  | 8.3  |
| 20 | 42755100 | 42755250 | 150 | 42755137 | 23 | 119 | 8.3  |
| 20 | 42795500 | 42795575 | 75  | 42795512 | 17 | 48  | 6.2  |
| 20 | 42971850 | 42971875 | 25  | 42971862 | 13 | 13  | 0    |
| 20 | 43082650 | 43082750 | 100 | 43082687 | 14 | 55  | 0    |
| 20 | 43256500 | 43256575 | 75  | 43256537 | 14 | 41  | 0    |
| 20 | 43355525 | 43355650 | 125 | 43355612 | 19 | 80  | 0    |
| 20 | 43403950 | 43403975 | 25  | 43403962 | 13 | 13  | 2.1  |
| 20 | 43547725 | 43547875 | 150 | 43547812 | 16 | 81  | 0    |
| 20 | 43833275 | 43833475 | 200 | 43833337 | 22 | 139 | 12.4 |
| 20 | 43846125 | 43846150 | 25  | 43846137 | 12 | 12  | 2.1  |
| 20 | 43974350 | 43974375 | 25  | 43974362 | 12 | 12  | 2.1  |
| 20 | 44034450 | 44034725 | 275 | 44034537 | 19 | 181 | 6.2  |
| 20 | 44119375 | 44119450 | 75  | 44119387 | 15 | 41  | 4.1  |
| 20 | 44426600 | 44426625 | 25  | 44426612 | 14 | 14  | 2.1  |
| 20 | 44583250 | 44583300 | 50  | 44583262 | 14 | 27  | 4.1  |
| 20 | 44683600 | 44683750 | 150 | 44683612 | 14 | 76  | 12.4 |
| 20 | 44684100 | 44684125 | 25  | 44684112 | 12 | 12  | 0    |
| 20 | 44699750 | 44699800 | 50  | 44699762 | 15 | 28  | 2.1  |
| 20 | 44764650 | 44764675 | 25  | 44764662 | 12 | 12  | 0    |
| 20 | 45316400 | 45316525 | 125 | 45316437 | 14 | 66  | 0    |
| 20 | 45411025 | 45411050 | 25  | 45411037 | 12 | 12  | 2.1  |
| 20 | 45421250 | 45421275 | 25  | 45421262 | 13 | 13  | 2.1  |

|    |          |          |     |          |    |     |      |
|----|----------|----------|-----|----------|----|-----|------|
| 20 | 45454175 | 45454525 | 350 | 45454187 | 15 | 174 | 16.6 |
| 20 | 45638950 | 45639000 | 50  | 45638962 | 21 | 34  | 6.2  |
| 20 | 45917050 | 45917275 | 225 | 45917137 | 23 | 172 | 14.5 |
| 20 | 46035800 | 46035850 | 50  | 46035837 | 16 | 28  | 4.1  |
| 20 | 46573200 | 46573275 | 75  | 46573237 | 14 | 38  | 6.2  |
| 20 | 46778800 | 46778825 | 25  | 46778812 | 13 | 13  | 2.1  |
| 20 | 46863525 | 46863550 | 25  | 46863537 | 12 | 12  | 0    |
| 20 | 46891175 | 46891200 | 25  | 46891187 | 12 | 12  | 2.1  |
| 20 | 46979525 | 46979575 | 50  | 46979537 | 13 | 26  | 4.1  |
| 20 | 47329900 | 47330000 | 100 | 47329912 | 12 | 48  | 8.3  |
| 20 | 47331075 | 47331175 | 100 | 47331112 | 18 | 63  | 4.1  |
| 20 | 47336925 | 47337125 | 200 | 47337062 | 24 | 148 | 12.4 |
| 20 | 47693050 | 47693125 | 75  | 47693087 | 14 | 40  | 0    |
| 20 | 48039950 | 48040000 | 50  | 48039987 | 22 | 40  | 6.2  |
| 20 | 48042600 | 48042625 | 25  | 48042612 | 12 | 12  | 0    |
| 20 | 48084525 | 48084550 | 25  | 48084537 | 13 | 13  | 0    |
| 20 | 48309475 | 48309550 | 75  | 48309487 | 13 | 39  | 0    |
| 20 | 48317600 | 48317625 | 25  | 48317612 | 12 | 12  | 2.1  |
| 20 | 48347525 | 48347575 | 50  | 48347537 | 13 | 26  | 4.1  |
| 20 | 48464350 | 48464475 | 125 | 48464387 | 14 | 64  | 10.3 |
| 20 | 48490800 | 48490900 | 100 | 48490812 | 16 | 54  | 8.3  |
| 20 | 48549475 | 48549600 | 125 | 48549562 | 15 | 67  | 6.2  |
| 20 | 48564275 | 48564300 | 25  | 48564287 | 13 | 13  | 0    |
| 20 | 48583600 | 48583725 | 125 | 48583612 | 13 | 63  | 4.1  |
| 20 | 48587950 | 48588000 | 50  | 48587962 | 15 | 30  | 4.1  |
| 20 | 48630900 | 48630950 | 50  | 48630912 | 12 | 24  | 0    |
| 20 | 48745150 | 48745175 | 25  | 48745162 | 12 | 12  | 0    |
| 20 | 48775000 | 48775150 | 150 | 48775087 | 17 | 89  | 12.4 |
| 20 | 48794600 | 48794625 | 25  | 48794612 | 12 | 12  | 2.1  |
| 20 | 49030075 | 49030100 | 25  | 49030087 | 12 | 12  | 0    |
| 20 | 49030625 | 49030675 | 50  | 49030662 | 13 | 25  | 4.1  |
| 20 | 49170075 | 49170275 | 200 | 49170112 | 18 | 124 | 0    |
| 20 | 49397450 | 49397475 | 25  | 49397462 | 15 | 15  | 0    |
| 20 | 49437850 | 49437900 | 50  | 49437862 | 12 | 24  | 0    |
| 20 | 49466900 | 49466975 | 75  | 49466962 | 13 | 35  | 6.2  |
| 20 | 49473925 | 49473950 | 25  | 49473937 | 13 | 13  | 0    |
| 20 | 49478350 | 49478375 | 25  | 49478362 | 12 | 12  | 2.1  |
| 20 | 49484750 | 49484775 | 25  | 49484762 | 12 | 12  | 0    |
| 20 | 49501000 | 49501125 | 125 | 49501012 | 13 | 61  | 8.3  |
| 20 | 49507125 | 49507250 | 125 | 49507237 | 24 | 94  | 14.5 |
| 20 | 49509325 | 49509375 | 50  | 49509337 | 12 | 24  | 4.1  |
| 20 | 49524125 | 49524225 | 100 | 49524162 | 14 | 53  | 0    |
| 20 | 49527225 | 49527350 | 125 | 49527262 | 16 | 66  | 0    |
| 20 | 49539150 | 49539200 | 50  | 49539162 | 13 | 26  | 2.1  |
| 20 | 49547925 | 49547950 | 25  | 49547937 | 13 | 13  | 2.1  |
| 20 | 49559875 | 49560050 | 175 | 49559987 | 18 | 108 | 14.5 |
| 20 | 49611600 | 49611750 | 150 | 49611687 | 14 | 77  | 12.4 |
| 20 | 49644025 | 49644050 | 25  | 49644037 | 12 | 12  | 2.1  |
| 20 | 49681000 | 49681125 | 125 | 49681062 | 17 | 70  | 4.1  |
| 20 | 49681775 | 49681825 | 50  | 49681787 | 18 | 31  | 4.1  |
| 20 | 49686175 | 49686225 | 50  | 49686187 | 13 | 26  | 2.1  |
| 20 | 49710600 | 49710700 | 100 | 49710612 | 16 | 61  | 0    |
| 20 | 49710950 | 49710975 | 25  | 49710962 | 12 | 12  | 2.1  |
| 20 | 49964925 | 49965000 | 75  | 49964937 | 16 | 42  | 4.1  |
| 20 | 49981125 | 49981150 | 25  | 49981137 | 14 | 14  | 2.1  |
| 20 | 49996075 | 49996100 | 25  | 49996087 | 12 | 12  | 2.1  |
| 20 | 50044850 | 50044925 | 75  | 50044862 | 12 | 34  | 6.2  |
| 20 | 50372950 | 50373000 | 50  | 50372962 | 13 | 25  | 4.1  |
| 20 | 51101600 | 51101675 | 75  | 51101612 | 12 | 36  | 0    |
| 20 | 51790475 | 51790525 | 50  | 51790512 | 13 | 25  | 4.1  |
| 20 | 51879425 | 51879625 | 200 | 51879512 | 16 | 102 | 0    |
| 20 | 51919900 | 51919950 | 50  | 51919912 | 12 | 24  | 0    |
| 20 | 51942025 | 51942050 | 25  | 51942037 | 14 | 14  | 2.1  |
| 20 | 52143600 | 52143650 | 50  | 52143612 | 12 | 24  | 4.1  |
| 20 | 52143875 | 52144000 | 125 | 52143937 | 18 | 73  | 4.1  |
| 20 | 52153350 | 52153375 | 25  | 52153362 | 13 | 13  | 2.1  |
| 20 | 52182850 | 52182900 | 50  | 52182862 | 12 | 24  | 4.1  |
| 20 | 52272400 | 52272475 | 75  | 52272412 | 18 | 46  | 6.2  |
| 20 | 53722300 | 53722425 | 125 | 53722362 | 14 | 64  | 0    |
| 20 | 54563375 | 54563775 | 400 | 54563662 | 31 | 291 | 18.6 |
| 20 | 54711425 | 54711450 | 25  | 54711437 | 13 | 13  | 2.1  |
| 20 | 54715425 | 54715650 | 225 | 54715437 | 14 | 87  | 10.3 |
| 20 | 54769775 | 54769800 | 25  | 54769787 | 12 | 12  | 0    |
| 20 | 54787125 | 54787175 | 50  | 54787162 | 14 | 26  | 4.1  |
| 20 | 54941900 | 54941950 | 50  | 54941912 | 16 | 30  | 4.1  |

|    |          |          |     |          |    |     |      |
|----|----------|----------|-----|----------|----|-----|------|
| 20 | 54989250 | 54989300 | 50  | 54989262 | 13 | 26  | 4.1  |
| 20 | 54995975 | 54996175 | 200 | 54996012 | 21 | 129 | 12.4 |
| 20 | 55039150 | 55039300 | 150 | 55039212 | 15 | 83  | 6.2  |
| 20 | 55140550 | 55140600 | 50  | 55140562 | 12 | 24  | 4.1  |
| 20 | 55609950 | 55610000 | 50  | 55609962 | 14 | 26  | 4.1  |
| 20 | 55894425 | 55894450 | 25  | 55894437 | 12 | 12  | 0    |
| 20 | 55993850 | 55993925 | 75  | 55993862 | 12 | 36  | 6.2  |
| 20 | 56046125 | 56046150 | 25  | 56046137 | 15 | 15  | 2.1  |
| 20 | 56052725 | 56052775 | 50  | 56052737 | 12 | 24  | 4.1  |
| 20 | 56092975 | 56093025 | 50  | 56092987 | 16 | 31  | 4.1  |
| 20 | 56093650 | 56093675 | 25  | 56093662 | 19 | 19  | 2.1  |
| 20 | 56093925 | 56094100 | 175 | 56093937 | 13 | 78  | 0    |
| 20 | 56096400 | 56096475 | 75  | 56096462 | 13 | 37  | 6.2  |
| 20 | 56110050 | 56110175 | 125 | 56110062 | 12 | 60  | 4.1  |
| 20 | 56136125 | 56136150 | 25  | 56136137 | 12 | 12  | 2.1  |
| 20 | 56140275 | 56140350 | 75  | 56140312 | 14 | 38  | 4.1  |
| 20 | 56141875 | 56141950 | 75  | 56141887 | 13 | 39  | 2.1  |
| 20 | 56182000 | 56182050 | 50  | 56182012 | 12 | 24  | 0    |
| 20 | 56250400 | 56250450 | 50  | 56250412 | 12 | 24  | 4.1  |
| 20 | 56358200 | 56358250 | 50  | 56358212 | 14 | 26  | 4.1  |
| 20 | 56399300 | 56399400 | 100 | 56399312 | 14 | 54  | 0    |
| 20 | 56475175 | 56475200 | 25  | 56475187 | 12 | 12  | 2.1  |
| 20 | 56533150 | 56533175 | 25  | 56533162 | 12 | 12  | 0    |
| 20 | 56826950 | 56827000 | 50  | 56826987 | 16 | 30  | 4.1  |
| 20 | 56838275 | 56838425 | 150 | 56838287 | 21 | 102 | 8.3  |
| 20 | 56884250 | 56884275 | 25  | 56884262 | 13 | 13  | 2.1  |
| 20 | 57019525 | 57019550 | 25  | 57019537 | 13 | 13  | 2.1  |
| 20 | 57033350 | 57033450 | 100 | 57033437 | 14 | 50  | 0    |
| 20 | 57127525 | 57127550 | 25  | 57127537 | 12 | 12  | 0    |
| 20 | 57238375 | 57238450 | 75  | 57238387 | 13 | 39  | 2.1  |
| 20 | 57255850 | 57255900 | 50  | 57255887 | 13 | 25  | 4.1  |
| 20 | 57336075 | 57336150 | 75  | 57336087 | 12 | 35  | 4.1  |
| 20 | 57398975 | 57399000 | 25  | 57398987 | 12 | 12  | 2.1  |
| 20 | 57508600 | 57508675 | 75  | 57508637 | 15 | 41  | 0    |
| 20 | 57734750 | 57734800 | 50  | 57734762 | 12 | 24  | 0    |
| 20 | 58521150 | 58521175 | 25  | 58521162 | 21 | 21  | 4.1  |
| 20 | 58595125 | 58595325 | 200 | 58595212 | 21 | 138 | 26.9 |
| 20 | 59978875 | 59978950 | 75  | 59978887 | 13 | 37  | 4.1  |
| 20 | 60214725 | 60214750 | 25  | 60214737 | 13 | 13  | 2.1  |
| 20 | 60613650 | 60613800 | 150 | 60613662 | 12 | 68  | 0    |
| 20 | 60793225 | 60793425 | 200 | 60793387 | 26 | 155 | 12.4 |
| 20 | 60797950 | 60797975 | 25  | 60797962 | 12 | 12  | 2.1  |
| 20 | 60808025 | 60808075 | 50  | 60808037 | 12 | 24  | 2.1  |
| 20 | 60841450 | 60841575 | 125 | 60841487 | 15 | 66  | 6.2  |
| 20 | 60933450 | 60933475 | 25  | 60933462 | 12 | 12  | 2.1  |
| 20 | 60992425 | 60992450 | 25  | 60992437 | 12 | 12  | 2.1  |
| 20 | 61639850 | 61639950 | 100 | 61639862 | 18 | 68  | 8.3  |
| 20 | 61730275 | 61730425 | 150 | 61730412 | 14 | 64  | 0    |
| 20 | 61784350 | 61784375 | 25  | 61784362 | 13 | 13  | 2.1  |
| 20 | 61794900 | 61795000 | 100 | 61794912 | 12 | 48  | 0    |
| 20 | 62180025 | 62180050 | 25  | 62180037 | 12 | 12  | 0    |
| 21 | 9724300  | 9724450  | 150 | 9724387  | 14 | 76  | 2.1  |
| 21 | 9811925  | 9812000  | 75  | 9811937  | 12 | 36  | 4.1  |
| 21 | 9817675  | 9817700  | 25  | 9817687  | 12 | 12  | 2.1  |
| 21 | 10115950 | 10115975 | 25  | 10115962 | 12 | 12  | 0    |
| 21 | 10193150 | 10193200 | 50  | 10193162 | 12 | 24  | 0    |
| 21 | 10203675 | 10203725 | 50  | 10203687 | 12 | 24  | 2.1  |
| 21 | 13287000 | 13287175 | 175 | 13287012 | 12 | 84  | 14.5 |
| 21 | 15170975 | 15171025 | 50  | 15170987 | 12 | 24  | 0    |
| 21 | 16488225 | 16488300 | 75  | 16488237 | 12 | 36  | 0    |
| 21 | 21659075 | 21659175 | 100 | 21659112 | 16 | 62  | 8.3  |
| 21 | 22263275 | 22263325 | 50  | 22263287 | 12 | 24  | 4.1  |
| 21 | 22530475 | 22530525 | 50  | 22530487 | 12 | 24  | 4.1  |
| 21 | 26363500 | 26363550 | 50  | 26363512 | 12 | 24  | 0    |
| 21 | 29296850 | 29296875 | 25  | 29296862 | 17 | 17  | 2.1  |
| 21 | 29490600 | 29490675 | 75  | 29490637 | 17 | 45  | 6.2  |
| 21 | 29528425 | 29528450 | 25  | 29528437 | 12 | 12  | 2.1  |
| 21 | 29944800 | 29944825 | 25  | 29944812 | 12 | 12  | 0    |
| 21 | 30043150 | 30043225 | 75  | 30043162 | 16 | 42  | 6.2  |
| 21 | 30521875 | 30521975 | 100 | 30521937 | 15 | 57  | 2.1  |
| 21 | 31665325 | 31665350 | 25  | 31665337 | 12 | 12  | 0    |
| 21 | 32241725 | 32241750 | 25  | 32241737 | 14 | 14  | 2.1  |
| 21 | 32721125 | 32721175 | 50  | 32721137 | 16 | 32  | 4.1  |
| 21 | 33066075 | 33066350 | 275 | 33066237 | 17 | 148 | 0    |
| 21 | 33410100 | 33410150 | 50  | 33410112 | 18 | 36  | 4.1  |

|    |          |          |     |          |    |     |      |
|----|----------|----------|-----|----------|----|-----|------|
| 21 | 33675075 | 33675100 | 25  | 33675087 | 12 | 12  | 0    |
| 21 | 34188875 | 34188925 | 50  | 34188887 | 12 | 24  | 0    |
| 21 | 34893875 | 34894025 | 150 | 34893887 | 13 | 73  | 0    |
| 21 | 34935150 | 34935225 | 75  | 34935162 | 12 | 36  | 4.1  |
| 21 | 35024975 | 35025050 | 75  | 35024987 | 12 | 36  | 0    |
| 21 | 35215575 | 35215700 | 125 | 35215612 | 14 | 65  | 0    |
| 21 | 35352650 | 35352725 | 75  | 35352662 | 14 | 41  | 0    |
| 21 | 35380825 | 35380900 | 75  | 35380862 | 15 | 43  | 6.2  |
| 21 | 35802775 | 35802825 | 50  | 35802787 | 13 | 26  | 4.1  |
| 21 | 35900975 | 35901250 | 275 | 35901087 | 27 | 223 | 6.2  |
| 21 | 37013600 | 37013625 | 25  | 37013612 | 12 | 12  | 2.1  |
| 21 | 37514875 | 37514900 | 25  | 37514887 | 12 | 12  | 2.1  |
| 21 | 38617525 | 38617725 | 200 | 38617562 | 16 | 117 | 6.2  |
| 21 | 38733300 | 38733425 | 125 | 38733312 | 12 | 60  | 0    |
| 21 | 38914900 | 38914925 | 25  | 38914912 | 12 | 12  | 0    |
| 21 | 39259900 | 39259950 | 50  | 39259937 | 14 | 26  | 2.1  |
| 21 | 39283750 | 39283800 | 50  | 39283762 | 14 | 27  | 4.1  |
| 21 | 39800750 | 39800800 | 50  | 39800762 | 12 | 24  | 4.1  |
| 21 | 41346775 | 41346850 | 75  | 41346787 | 12 | 36  | 0    |
| 21 | 41577125 | 41577225 | 100 | 41577162 | 14 | 52  | 8.3  |
| 21 | 41713700 | 41713850 | 150 | 41713712 | 12 | 68  | 12.4 |
| 21 | 41906075 | 41906100 | 25  | 41906087 | 14 | 14  | 2.1  |
| 21 | 41909950 | 41910000 | 50  | 41909962 | 14 | 26  | 4.1  |
| 21 | 41923700 | 41923725 | 25  | 41923712 | 12 | 12  | 2.1  |
| 21 | 42079825 | 42080025 | 200 | 42079962 | 17 | 114 | 12.4 |
| 21 | 43456250 | 43456275 | 25  | 43456262 | 14 | 14  | 2.1  |
| 21 | 43545450 | 43545475 | 25  | 43545462 | 12 | 12  | 2.1  |
| 21 | 44457725 | 44457750 | 25  | 44457737 | 12 | 12  | 0    |
| 21 | 45245400 | 45245600 | 200 | 45245487 | 24 | 146 | 2.1  |
| 21 | 45281450 | 45281525 | 75  | 45281462 | 13 | 39  | 0    |
| 21 | 45297500 | 45297600 | 100 | 45297512 | 12 | 48  | 6.2  |
| 21 | 45344125 | 45344150 | 25  | 45344137 | 12 | 12  | 2.1  |
| 21 | 45347100 | 45347275 | 175 | 45347162 | 16 | 94  | 14.5 |
| 21 | 45622950 | 45623025 | 75  | 45622962 | 13 | 39  | 6.2  |
| 21 | 46469700 | 46469750 | 50  | 46469712 | 12 | 24  | 0    |
| 21 | 46849750 | 46849800 | 50  | 46849762 | 16 | 30  | 0    |
| 22 | 15778450 | 15778500 | 50  | 15778462 | 12 | 24  | 4.1  |
| 22 | 16813750 | 16813825 | 75  | 16813762 | 13 | 39  | 6.2  |
| 22 | 16918800 | 16918825 | 25  | 16918812 | 14 | 14  | 2.1  |
| 22 | 16920550 | 16920575 | 25  | 16920562 | 12 | 12  | 0    |
| 22 | 16926450 | 16926475 | 25  | 16926462 | 13 | 13  | 0    |
| 22 | 16928525 | 16928550 | 25  | 16928537 | 12 | 12  | 0    |
| 22 | 16955150 | 16955175 | 25  | 16955162 | 12 | 12  | 2.1  |
| 22 | 17258275 | 17258400 | 125 | 17258387 | 15 | 67  | 10.3 |
| 22 | 17657950 | 17657975 | 25  | 17657962 | 12 | 12  | 2.1  |
| 22 | 19666300 | 19666450 | 150 | 19666412 | 15 | 80  | 12.4 |
| 22 | 19698300 | 19698350 | 50  | 19698312 | 14 | 28  | 4.1  |
| 22 | 22181750 | 22181825 | 75  | 22181812 | 15 | 39  | 0    |
| 22 | 22193475 | 22193500 | 25  | 22193487 | 12 | 12  | 2.1  |
| 22 | 22529600 | 22529650 | 50  | 22529612 | 12 | 24  | 4.1  |
| 22 | 22656700 | 22656825 | 125 | 22656812 | 13 | 59  | 6.2  |
| 22 | 25522350 | 25522425 | 75  | 25522412 | 13 | 37  | 6.2  |
| 22 | 25534600 | 25534650 | 50  | 25534612 | 12 | 24  | 0    |
| 22 | 27930375 | 27930400 | 25  | 27930387 | 12 | 12  | 0    |
| 22 | 28351675 | 28351875 | 200 | 28351737 | 16 | 112 | 0    |
| 22 | 28525575 | 28525650 | 75  | 28525612 | 13 | 38  | 0    |
| 22 | 28678600 | 28678625 | 25  | 28678612 | 12 | 12  | 0    |
| 22 | 28916775 | 28916900 | 125 | 28916837 | 16 | 67  | 0    |
| 22 | 28922750 | 28922900 | 150 | 28922762 | 13 | 73  | 12.4 |
| 22 | 28937325 | 28937500 | 175 | 28937337 | 13 | 88  | 12.4 |
| 22 | 28988450 | 28988475 | 25  | 28988462 | 12 | 12  | 2.1  |
| 22 | 29673925 | 29674000 | 75  | 29673937 | 13 | 39  | 0    |
| 22 | 29694700 | 29694900 | 200 | 29694712 | 14 | 91  | 2.1  |
| 22 | 29695175 | 29695200 | 25  | 29695187 | 32 | 32  | 4.1  |
| 22 | 29956400 | 29956425 | 25  | 29956412 | 13 | 13  | 0    |
| 22 | 29970100 | 29970150 | 50  | 29970137 | 13 | 25  | 0    |
| 22 | 29970625 | 29970750 | 125 | 29970662 | 16 | 67  | 0    |
| 22 | 30016525 | 30016550 | 25  | 30016537 | 12 | 12  | 2.1  |
| 22 | 30356000 | 30356025 | 25  | 30356012 | 13 | 13  | 2.1  |
| 22 | 30555500 | 30555725 | 225 | 30555562 | 23 | 185 | 18.6 |
| 22 | 31209900 | 31210025 | 125 | 31209912 | 13 | 62  | 8.3  |
| 22 | 31248700 | 31248850 | 150 | 31248737 | 14 | 78  | 6.2  |
| 22 | 31253925 | 31253975 | 50  | 31253937 | 12 | 24  | 4.1  |
| 22 | 31301775 | 31301825 | 50  | 31301787 | 13 | 25  | 0    |
| 22 | 31387500 | 31387625 | 125 | 31387612 | 14 | 64  | 8.3  |

|    |          |          |     |          |    |     |      |
|----|----------|----------|-----|----------|----|-----|------|
| 22 | 31388000 | 31388075 | 75  | 31388037 | 15 | 43  | 0    |
| 22 | 31432375 | 31432400 | 25  | 31432387 | 12 | 12  | 0    |
| 22 | 31435200 | 31435250 | 50  | 31435212 | 12 | 24  | 4.1  |
| 22 | 31445075 | 31445100 | 25  | 31445087 | 12 | 12  | 2.1  |
| 22 | 31521950 | 31522000 | 50  | 31521962 | 13 | 26  | 4.1  |
| 22 | 32238900 | 32238925 | 25  | 32238912 | 12 | 12  | 0    |
| 22 | 32743425 | 32743475 | 50  | 32743437 | 12 | 24  | 0    |
| 22 | 34566375 | 34566525 | 150 | 34566487 | 15 | 76  | 8.3  |
| 22 | 34621125 | 34621175 | 50  | 34621137 | 12 | 24  | 2.1  |
| 22 | 35057600 | 35057650 | 50  | 35057637 | 14 | 26  | 4.1  |
| 22 | 36363425 | 36363475 | 50  | 36363437 | 12 | 24  | 4.1  |
| 22 | 36401025 | 36401150 | 125 | 36401062 | 17 | 72  | 10.3 |
| 22 | 36479625 | 36479725 | 100 | 36479637 | 12 | 48  | 0    |
| 22 | 36531875 | 36531975 | 100 | 36531937 | 15 | 53  | 0    |
| 22 | 36624725 | 36624825 | 100 | 36624787 | 26 | 92  | 10.3 |
| 22 | 36696900 | 36697075 | 175 | 36696987 | 14 | 86  | 14.5 |
| 22 | 36764600 | 36764625 | 25  | 36764612 | 13 | 13  | 0    |
| 22 | 36898825 | 36898975 | 150 | 36898837 | 15 | 83  | 16.6 |
| 22 | 37047075 | 37047100 | 25  | 37047087 | 12 | 12  | 0    |
| 22 | 37297025 | 37297050 | 25  | 37297037 | 12 | 12  | 2.1  |
| 22 | 37382975 | 37383000 | 25  | 37382987 | 13 | 13  | 2.1  |
| 22 | 37407750 | 37407775 | 25  | 37407762 | 12 | 12  | 2.1  |
| 22 | 37546050 | 37546100 | 50  | 37546062 | 13 | 26  | 4.1  |
| 22 | 38010525 | 38010650 | 125 | 38010562 | 15 | 72  | 8.3  |
| 22 | 38228900 | 38228925 | 25  | 38228912 | 13 | 13  | 2.1  |
| 22 | 38667075 | 38667100 | 25  | 38667087 | 12 | 12  | 2.1  |
| 22 | 39225150 | 39225200 | 50  | 39225187 | 16 | 30  | 2.1  |
| 22 | 39409025 | 39409075 | 50  | 39409037 | 14 | 26  | 4.1  |
| 22 | 39447200 | 39447225 | 25  | 39447212 | 21 | 21  | 4.1  |
| 22 | 40558975 | 40559025 | 50  | 40558987 | 21 | 34  | 6.2  |
| 22 | 40841425 | 40841550 | 125 | 40841437 | 12 | 60  | 0    |
| 22 | 41474175 | 41474200 | 25  | 41474187 | 15 | 15  | 2.1  |
| 22 | 41655325 | 41655425 | 100 | 41655362 | 13 | 51  | 0    |
| 22 | 41673175 | 41673225 | 50  | 41673187 | 15 | 27  | 2.1  |
| 22 | 41719975 | 41720250 | 275 | 41720112 | 16 | 137 | 8.3  |
| 22 | 42025175 | 42025200 | 25  | 42025187 | 12 | 12  | 0    |
| 22 | 43017975 | 43018075 | 100 | 43017987 | 14 | 54  | 4.1  |
| 22 | 43138500 | 43138525 | 25  | 43138512 | 12 | 12  | 0    |
| 22 | 43386575 | 43386675 | 100 | 43386612 | 14 | 50  | 4.1  |
| 22 | 43897425 | 43897475 | 50  | 43897437 | 12 | 24  | 4.1  |
| 22 | 44310175 | 44310225 | 50  | 44310187 | 13 | 26  | 0    |
| 22 | 44484075 | 44484100 | 25  | 44484087 | 12 | 12  | 2.1  |
| 22 | 44570650 | 44570700 | 50  | 44570662 | 12 | 24  | 0    |
| 22 | 44609425 | 44609450 | 25  | 44609437 | 12 | 12  | 2.1  |
| 22 | 44896250 | 44896300 | 50  | 44896262 | 12 | 24  | 4.1  |
| 22 | 45302850 | 45302875 | 25  | 45302862 | 12 | 12  | 2.1  |
| 22 | 45319900 | 45319950 | 50  | 45319912 | 12 | 24  | 0    |
| 22 | 45514175 | 45514225 | 50  | 45514187 | 12 | 24  | 2.1  |
| 22 | 46021475 | 46021525 | 50  | 46021487 | 12 | 24  | 4.1  |
| 22 | 46763175 | 46763200 | 25  | 46763187 | 12 | 12  | 0    |
| 22 | 48546950 | 48547150 | 200 | 48547087 | 32 | 198 | 4.1  |
| 22 | 48641775 | 48641900 | 125 | 48641862 | 14 | 62  | 2.1  |
| 22 | 49325025 | 49325125 | 100 | 49325037 | 13 | 50  | 8.3  |
| 1  | 1326225  | 1326300  | 75  | 1326237  | 13 | 37  | 4.1  |
| 1  | 5900550  | 5900675  | 125 | 5900662  | 13 | 59  | 6.2  |
| 1  | 6473750  | 6473850  | 100 | 6473762  | 12 | 40  | 4.1  |
| 1  | 6535900  | 6535950  | 50  | 6535912  | 12 | 24  | 4.1  |
| 1  | 6943150  | 6943275  | 125 | 6943162  | 15 | 70  | 2.1  |
| 1  | 7318000  | 7318200  | 200 | 7318112  | 14 | 98  | 0    |
| 1  | 7454600  | 7454625  | 25  | 7454612  | 13 | 13  | 0    |
| 1  | 8030425  | 8030575  | 150 | 8030512  | 17 | 90  | 10.3 |
| 1  | 8065775  | 8065825  | 50  | 8065787  | 12 | 24  | 2.1  |
| 1  | 8242175  | 8242225  | 50  | 8242187  | 12 | 24  | 4.1  |
| 1  | 8284675  | 8284725  | 50  | 8284687  | 12 | 24  | 0    |
| 1  | 8970825  | 8970875  | 50  | 8970837  | 12 | 24  | 0    |
| 1  | 9084325  | 9084375  | 50  | 9084337  | 13 | 25  | 4.1  |
| 1  | 9093550  | 9093600  | 50  | 9093562  | 12 | 24  | 4.1  |
| 1  | 10962275 | 10962375 | 100 | 10962287 | 16 | 60  | 8.3  |
| 1  | 11117200 | 11117225 | 25  | 11117212 | 14 | 14  | 2.1  |
| 1  | 11128725 | 11128750 | 25  | 11128737 | 12 | 12  | 2.1  |
| 1  | 11140625 | 11140675 | 50  | 11140637 | 13 | 26  | 0    |
| 1  | 11157450 | 11157475 | 25  | 11157462 | 13 | 13  | 2.1  |
| 1  | 11163200 | 11163325 | 125 | 11163237 | 17 | 83  | 10.3 |
| 1  | 11863425 | 11863475 | 50  | 11863437 | 12 | 24  | 0    |
| 1  | 11892300 | 11892375 | 75  | 11892337 | 14 | 38  | 4.1  |

|   |          |          |     |          |    |     |      |
|---|----------|----------|-----|----------|----|-----|------|
| 1 | 12416150 | 12416375 | 225 | 12416212 | 16 | 121 | 16.6 |
| 1 | 12437325 | 12437475 | 150 | 12437362 | 13 | 72  | 0    |
| 1 | 12601550 | 12601575 | 25  | 12601562 | 13 | 13  | 2.1  |
| 1 | 15551700 | 15551850 | 150 | 15551712 | 15 | 82  | 8.3  |
| 1 | 16034025 | 16034075 | 50  | 16034037 | 13 | 26  | 0    |
| 1 | 16153475 | 16153550 | 75  | 16153487 | 12 | 36  | 0    |
| 1 | 16375150 | 16375200 | 50  | 16375162 | 12 | 24  | 0    |
| 1 | 16713100 | 16713150 | 50  | 16713137 | 23 | 40  | 4.1  |
| 1 | 16898250 | 16898275 | 25  | 16898262 | 12 | 12  | 2.1  |
| 1 | 17095225 | 17095275 | 50  | 17095237 | 12 | 24  | 4.1  |
| 1 | 20174575 | 20174675 | 100 | 20174587 | 12 | 48  | 0    |
| 1 | 20798875 | 20798975 | 100 | 20798912 | 17 | 58  | 0    |
| 1 | 22135425 | 22135450 | 25  | 22135437 | 12 | 12  | 0    |
| 1 | 22138950 | 22138975 | 25  | 22138962 | 13 | 13  | 2.1  |
| 1 | 23561300 | 23561775 | 475 | 23561337 | 16 | 228 | 0    |
| 1 | 23725925 | 23725975 | 50  | 23725937 | 12 | 24  | 0    |
| 1 | 24724900 | 24724925 | 25  | 24724912 | 12 | 12  | 0    |
| 1 | 24761925 | 24762075 | 150 | 24762062 | 14 | 75  | 0    |
| 1 | 24882950 | 24883100 | 150 | 24883012 | 15 | 81  | 0    |
| 1 | 25293700 | 25293775 | 75  | 25293712 | 13 | 37  | 0    |
| 1 | 26229100 | 26229125 | 25  | 26229112 | 12 | 12  | 2.1  |
| 1 | 26773850 | 26773875 | 25  | 26773862 | 12 | 12  | 2.1  |
| 1 | 26819200 | 26819275 | 75  | 26819212 | 14 | 42  | 6.2  |
| 1 | 26891300 | 26891525 | 225 | 26891412 | 19 | 140 | 2.1  |
| 1 | 26894575 | 26894600 | 25  | 26894587 | 12 | 12  | 2.1  |
| 1 | 26970400 | 26970425 | 25  | 26970412 | 12 | 12  | 0    |
| 1 | 27739475 | 27739575 | 100 | 27739487 | 13 | 52  | 0    |
| 1 | 28114050 | 28114075 | 25  | 28114062 | 16 | 16  | 0    |
| 1 | 28989800 | 28989975 | 175 | 28989912 | 14 | 90  | 2.1  |
| 1 | 29549250 | 29549400 | 150 | 29549287 | 14 | 80  | 2.1  |
| 1 | 29821575 | 29821750 | 175 | 29821612 | 13 | 79  | 4.1  |
| 1 | 29885675 | 29885750 | 75  | 29885687 | 13 | 37  | 6.2  |
| 1 | 31025300 | 31025325 | 25  | 31025312 | 12 | 12  | 2.1  |
| 1 | 31397900 | 31398100 | 200 | 31397937 | 17 | 130 | 6.2  |
| 1 | 31668250 | 31668300 | 50  | 31668262 | 12 | 24  | 4.1  |
| 1 | 32702900 | 32702950 | 50  | 32702912 | 13 | 26  | 2.1  |
| 1 | 32889000 | 32889150 | 150 | 32889087 | 21 | 114 | 12.4 |
| 1 | 33337900 | 33338125 | 225 | 33337987 | 15 | 118 | 14.5 |
| 1 | 33572325 | 33572400 | 75  | 33572337 | 13 | 39  | 6.2  |
| 1 | 33621100 | 33621200 | 100 | 33621112 | 12 | 48  | 4.1  |
| 1 | 35270100 | 35270200 | 100 | 35270112 | 14 | 54  | 6.2  |
| 1 | 36461675 | 36461725 | 50  | 36461687 | 12 | 24  | 2.1  |
| 1 | 38250600 | 38250825 | 225 | 38250712 | 47 | 325 | 33.1 |
| 1 | 39276475 | 39276575 | 100 | 39276537 | 15 | 54  | 0    |
| 1 | 39285825 | 39285925 | 100 | 39285862 | 17 | 56  | 0    |
| 1 | 39452500 | 39452575 | 75  | 39452512 | 14 | 40  | 6.2  |
| 1 | 39894025 | 39894125 | 100 | 39894037 | 12 | 48  | 0    |
| 1 | 40615800 | 40615825 | 25  | 40615812 | 12 | 12  | 0    |
| 1 | 40701325 | 40701775 | 450 | 40701662 | 21 | 247 | 0    |
| 1 | 41099025 | 41099050 | 25  | 41099037 | 13 | 13  | 2.1  |
| 1 | 41114150 | 41114250 | 100 | 41114212 | 18 | 60  | 10.3 |
| 1 | 41114725 | 41114750 | 25  | 41114737 | 12 | 12  | 0    |
| 1 | 41140225 | 41140450 | 225 | 41140337 | 20 | 144 | 22.8 |
| 1 | 41157025 | 41157050 | 25  | 41157037 | 12 | 12  | 2.1  |
| 1 | 41838325 | 41838375 | 50  | 41838337 | 14 | 27  | 0    |
| 1 | 41935575 | 41935625 | 50  | 41935587 | 12 | 24  | 0    |
| 1 | 43620125 | 43620275 | 150 | 43620137 | 14 | 70  | 2.1  |
| 1 | 43888800 | 43888825 | 25  | 43888812 | 13 | 13  | 2.1  |
| 1 | 45028125 | 45028150 | 25  | 45028137 | 12 | 12  | 0    |
| 1 | 45429775 | 45429825 | 50  | 45429787 | 12 | 24  | 0    |
| 1 | 45565000 | 45565100 | 100 | 45565087 | 14 | 46  | 8.3  |
| 1 | 45566175 | 45566250 | 75  | 45566187 | 14 | 40  | 6.2  |
| 1 | 46151525 | 46151575 | 50  | 46151537 | 12 | 24  | 0    |
| 1 | 46541575 | 46541600 | 25  | 46541587 | 13 | 13  | 2.1  |
| 1 | 47417475 | 47417625 | 150 | 47417562 | 16 | 87  | 10.3 |
| 1 | 47681350 | 47681425 | 75  | 47681362 | 12 | 36  | 4.1  |
| 1 | 47706125 | 47706150 | 25  | 47706137 | 12 | 12  | 0    |
| 1 | 52023600 | 52023625 | 25  | 52023612 | 13 | 13  | 2.1  |
| 1 | 55774925 | 55774950 | 25  | 55774937 | 12 | 12  | 0    |
| 1 | 56474350 | 56474375 | 25  | 56474362 | 12 | 12  | 0    |
| 1 | 56593400 | 56593475 | 75  | 56593412 | 12 | 36  | 6.2  |
| 1 | 56673950 | 56674075 | 125 | 56674062 | 14 | 66  | 4.1  |
| 1 | 57430775 | 57430800 | 25  | 57430787 | 12 | 12  | 0    |
| 1 | 57724475 | 57724550 | 75  | 57724512 | 14 | 38  | 0    |
| 1 | 57815300 | 57815375 | 75  | 57815337 | 14 | 39  | 0    |



|   |           |           |     |           |    |     |      |
|---|-----------|-----------|-----|-----------|----|-----|------|
| 1 | 58783975  | 58784000  | 25  | 58783987  | 13 | 13  | 0    |
| 1 | 58888300  | 58888375  | 75  | 58888312  | 14 | 40  | 6.2  |
| 1 | 58992550  | 58992575  | 25  | 58992562  | 13 | 13  | 2.1  |
| 1 | 58993975  | 58994000  | 25  | 58993987  | 16 | 16  | 2.1  |
| 1 | 59053875  | 59053950  | 75  | 59053912  | 15 | 43  | 0    |
| 1 | 59384900  | 59384925  | 25  | 59384912  | 12 | 12  | 2.1  |
| 1 | 59908275  | 59908325  | 50  | 59908287  | 13 | 26  | 2.1  |
| 1 | 61071400  | 61071500  | 100 | 61071412  | 12 | 44  | 0    |
| 1 | 61110825  | 61110850  | 25  | 61110837  | 12 | 12  | 0    |
| 1 | 61391025  | 61391100  | 75  | 61391037  | 15 | 45  | 6.2  |
| 1 | 61698450  | 61698475  | 25  | 61698462  | 12 | 12  | 0    |
| 1 | 62539400  | 62539450  | 50  | 62539412  | 12 | 24  | 0    |
| 1 | 62973650  | 62973775  | 125 | 62973662  | 12 | 58  | 8.3  |
| 1 | 63249325  | 63249350  | 25  | 63249337  | 12 | 12  | 2.1  |
| 1 | 63301725  | 63301750  | 25  | 63301737  | 13 | 13  | 0    |
| 1 | 63386275  | 63386325  | 50  | 63386287  | 12 | 24  | 0    |
| 1 | 63761325  | 63761425  | 100 | 63761412  | 19 | 56  | 8.3  |
| 1 | 63876925  | 63877050  | 125 | 63876937  | 15 | 66  | 6.2  |
| 1 | 63936575  | 63936650  | 75  | 63936587  | 13 | 36  | 0    |
| 1 | 64277850  | 64277900  | 50  | 64277862  | 20 | 39  | 4.1  |
| 1 | 64312025  | 64312050  | 25  | 64312037  | 12 | 12  | 2.1  |
| 1 | 66500550  | 66500625  | 75  | 66500562  | 12 | 36  | 0    |
| 1 | 66802675  | 66802700  | 25  | 66802687  | 14 | 14  | 2.1  |
| 1 | 66815200  | 66815225  | 25  | 66815212  | 13 | 13  | 0    |
| 1 | 66964475  | 66964525  | 50  | 66964512  | 15 | 28  | 4.1  |
| 1 | 67257900  | 67257950  | 50  | 67257912  | 12 | 24  | 4.1  |
| 1 | 67949125  | 67949150  | 25  | 67949137  | 12 | 12  | 2.1  |
| 1 | 67972025  | 67972100  | 75  | 67972037  | 13 | 38  | 2.1  |
| 1 | 68622550  | 68622800  | 250 | 68622687  | 31 | 245 | 0    |
| 1 | 70760500  | 70760550  | 50  | 70760512  | 12 | 24  | 0    |
| 1 | 71160725  | 71160775  | 50  | 71160737  | 12 | 24  | 0    |
| 1 | 74891175  | 74891200  | 25  | 74891187  | 15 | 15  | 2.1  |
| 1 | 74968425  | 74968525  | 100 | 74968437  | 13 | 50  | 0    |
| 1 | 74971175  | 74971200  | 25  | 74971187  | 12 | 12  | 2.1  |
| 1 | 76492500  | 76492775  | 275 | 76492612  | 22 | 192 | 0    |
| 1 | 77772100  | 77772125  | 25  | 77772112  | 12 | 12  | 2.1  |
| 1 | 78217525  | 78217550  | 25  | 78217537  | 18 | 18  | 2.1  |
| 1 | 78855950  | 78856025  | 75  | 78855962  | 12 | 36  | 0    |
| 1 | 80016950  | 80017000  | 50  | 80016962  | 13 | 25  | 0    |
| 1 | 82162375  | 82162425  | 50  | 82162387  | 12 | 24  | 0    |
| 1 | 83989500  | 83989575  | 75  | 83989512  | 14 | 40  | 0    |
| 1 | 84717325  | 84717500  | 175 | 84717412  | 15 | 96  | 6.2  |
| 1 | 84843575  | 84843600  | 25  | 84843587  | 12 | 12  | 2.1  |
| 1 | 85023525  | 85023550  | 25  | 85023537  | 14 | 14  | 2.1  |
| 1 | 85085850  | 85085875  | 25  | 85085862  | 12 | 12  | 2.1  |
| 1 | 85582200  | 85582250  | 50  | 85582212  | 12 | 24  | 4.1  |
| 1 | 85655500  | 85655575  | 75  | 85655512  | 12 | 36  | 6.2  |
| 1 | 85765625  | 85765750  | 125 | 85765637  | 12 | 56  | 6.2  |
| 1 | 86668200  | 86668250  | 50  | 86668237  | 13 | 25  | 4.1  |
| 1 | 86725550  | 86725650  | 100 | 86725637  | 20 | 62  | 8.3  |
| 1 | 87072325  | 87072400  | 75  | 87072337  | 12 | 36  | 0    |
| 1 | 87084750  | 87084800  | 50  | 87084762  | 12 | 24  | 4.1  |
| 1 | 87598050  | 87598125  | 75  | 87598062  | 12 | 36  | 6.2  |
| 1 | 87756250  | 87756275  | 25  | 87756262  | 12 | 12  | 0    |
| 1 | 87922850  | 87922975  | 125 | 87922862  | 13 | 63  | 8.3  |
| 1 | 88206950  | 88207000  | 50  | 88206962  | 12 | 24  | 4.1  |
| 1 | 88566275  | 88566300  | 25  | 88566287  | 12 | 12  | 2.1  |
| 1 | 89231450  | 89231475  | 25  | 89231462  | 14 | 14  | 2.1  |
| 1 | 89844025  | 89844075  | 50  | 89844037  | 14 | 26  | 4.1  |
| 1 | 89992750  | 89992800  | 50  | 89992762  | 13 | 25  | 2.1  |
| 1 | 90128225  | 90128250  | 25  | 90128237  | 13 | 13  | 2.1  |
| 1 | 90144900  | 90145100  | 200 | 90144987  | 19 | 123 | 14.5 |
| 1 | 90177575  | 90177625  | 50  | 90177587  | 12 | 24  | 4.1  |
| 1 | 90641425  | 90641600  | 175 | 90641562  | 15 | 88  | 10.3 |
| 1 | 91411975  | 91412000  | 25  | 91411987  | 12 | 12  | 2.1  |
| 1 | 91739725  | 91739875  | 150 | 91739862  | 15 | 80  | 12.4 |
| 1 | 92020400  | 92020425  | 25  | 92020412  | 14 | 14  | 2.1  |
| 1 | 92065375  | 92065525  | 150 | 92065387  | 12 | 64  | 0    |
| 1 | 93867300  | 93867400  | 100 | 93867312  | 12 | 48  | 0    |
| 1 | 93962525  | 93962575  | 50  | 93962537  | 12 | 24  | 0    |
| 1 | 95069650  | 95069675  | 25  | 95069662  | 12 | 12  | 0    |
| 1 | 98145150  | 98145175  | 25  | 98145162  | 14 | 14  | 2.1  |
| 1 | 101133900 | 101134025 | 125 | 101133962 | 15 | 69  | 4.1  |
| 1 | 103346750 | 103346825 | 75  | 103346812 | 14 | 39  | 6.2  |
| 1 | 103488875 | 103488900 | 25  | 103488887 | 14 | 14  | 0    |

|   |           |           |     |           |    |     |      |
|---|-----------|-----------|-----|-----------|----|-----|------|
| 1 | 108344950 | 108345075 | 125 | 108344987 | 14 | 65  | 10.3 |
| 1 | 109741300 | 109741425 | 125 | 109741312 | 12 | 54  | 4.1  |
| 1 | 110694875 | 110694925 | 50  | 110694887 | 12 | 24  | 0    |
| 1 | 110836225 | 110836275 | 50  | 110836237 | 12 | 24  | 0    |
| 1 | 111308200 | 111308450 | 250 | 111308262 | 32 | 258 | 22.8 |
| 1 | 111880025 | 111880075 | 50  | 111880037 | 12 | 24  | 4.1  |
| 1 | 113416900 | 113416925 | 25  | 113416912 | 12 | 12  | 2.1  |
| 1 | 114103850 | 114104000 | 150 | 114103962 | 14 | 72  | 2.1  |
| 1 | 114249350 | 114249375 | 25  | 114249362 | 13 | 13  | 2.1  |
| 1 | 115631275 | 115631350 | 75  | 115631287 | 13 | 37  | 6.2  |
| 1 | 115889950 | 115889975 | 25  | 115889962 | 12 | 12  | 2.1  |
| 1 | 116467150 | 116467175 | 25  | 116467162 | 12 | 12  | 0    |
| 1 | 116637475 | 116637500 | 25  | 116637487 | 12 | 12  | 0    |
| 1 | 116725075 | 116725100 | 25  | 116725087 | 13 | 13  | 0    |
| 1 | 116777950 | 116777975 | 25  | 116777962 | 14 | 14  | 2.1  |
| 1 | 116830475 | 116830575 | 100 | 116830487 | 14 | 50  | 0    |
| 1 | 116833425 | 116833500 | 75  | 116833487 | 21 | 50  | 8.3  |
| 1 | 116840000 | 116840200 | 200 | 116840062 | 17 | 118 | 10.3 |
| 1 | 117218325 | 117218375 | 50  | 117218337 | 14 | 26  | 0    |
| 1 | 117332600 | 117332650 | 50  | 117332612 | 14 | 28  | 4.1  |
| 1 | 117680400 | 117680450 | 50  | 117680412 | 13 | 26  | 4.1  |
| 1 | 118158475 | 118158500 | 25  | 118158487 | 12 | 12  | 0    |
| 1 | 118170675 | 118170700 | 25  | 118170687 | 13 | 13  | 2.1  |
| 1 | 120310475 | 120310525 | 50  | 120310487 | 12 | 24  | 4.1  |
| 1 | 141483075 | 141483100 | 25  | 141483087 | 12 | 12  | 2.1  |
| 1 | 141858100 | 141858125 | 25  | 141858112 | 12 | 12  | 0    |
| 1 | 142124075 | 142124125 | 50  | 142124087 | 13 | 26  | 4.1  |
| 1 | 142297475 | 142297625 | 150 | 142297487 | 13 | 67  | 0    |
| 1 | 143720725 | 143720900 | 175 | 143720887 | 25 | 119 | 20.7 |
| 1 | 143727000 | 143727025 | 25  | 143727012 | 12 | 12  | 0    |
| 1 | 143727750 | 143727775 | 25  | 143727762 | 12 | 12  | 2.1  |
| 1 | 143728700 | 143728750 | 50  | 143728712 | 12 | 24  | 2.1  |
| 1 | 143730725 | 143730800 | 75  | 143730737 | 12 | 36  | 0    |
| 1 | 143735750 | 143735850 | 100 | 143735787 | 15 | 53  | 0    |
| 1 | 143757300 | 143757400 | 100 | 143757312 | 15 | 50  | 0    |
| 1 | 143766500 | 143766525 | 25  | 143766512 | 13 | 13  | 2.1  |
| 1 | 143771350 | 143771675 | 325 | 143771387 | 15 | 179 | 31   |
| 1 | 143772150 | 143772200 | 50  | 143772162 | 13 | 26  | 0    |
| 1 | 143828975 | 143829075 | 100 | 143828987 | 12 | 46  | 6.2  |
| 1 | 144149875 | 144149925 | 50  | 144149887 | 13 | 26  | 0    |
| 1 | 144396650 | 144396725 | 75  | 144396712 | 13 | 37  | 2.1  |
| 1 | 145616525 | 145616550 | 25  | 145616537 | 13 | 13  | 2.1  |
| 1 | 146273200 | 146273300 | 100 | 146273287 | 15 | 52  | 4.1  |
| 1 | 147301800 | 147301825 | 25  | 147301812 | 13 | 13  | 2.1  |
| 1 | 148126175 | 148126325 | 150 | 148126237 | 21 | 105 | 12.4 |
| 1 | 148743725 | 148743800 | 75  | 148743787 | 14 | 38  | 6.2  |
| 1 | 148806800 | 148806850 | 50  | 148806837 | 14 | 26  | 4.1  |
| 1 | 148819350 | 148819400 | 50  | 148819362 | 13 | 25  | 0    |
| 1 | 149299350 | 149299400 | 50  | 149299387 | 13 | 25  | 2.1  |
| 1 | 149405550 | 149405725 | 175 | 149405612 | 17 | 104 | 8.3  |
| 1 | 149477600 | 149477825 | 225 | 149477712 | 20 | 151 | 0    |
| 1 | 149550850 | 149550900 | 50  | 149550862 | 13 | 25  | 4.1  |
| 1 | 149698525 | 149698700 | 175 | 149698562 | 18 | 106 | 0    |
| 1 | 150002650 | 150002675 | 25  | 150002662 | 12 | 12  | 2.1  |
| 1 | 150172350 | 150172450 | 100 | 150172362 | 16 | 54  | 4.1  |
| 1 | 150219425 | 150219450 | 25  | 150219437 | 14 | 14  | 2.1  |
| 1 | 150221800 | 150221925 | 125 | 150221812 | 12 | 60  | 0    |
| 1 | 150252950 | 150252975 | 25  | 150252962 | 12 | 12  | 2.1  |
| 1 | 150422175 | 150422200 | 25  | 150422187 | 13 | 13  | 2.1  |
| 1 | 150699375 | 150699550 | 175 | 150699462 | 16 | 96  | 14.5 |
| 1 | 152126425 | 152126475 | 50  | 152126437 | 12 | 24  | 0    |
| 1 | 152663825 | 152663850 | 25  | 152663837 | 13 | 13  | 2.1  |
| 1 | 152666725 | 152666800 | 75  | 152666787 | 13 | 36  | 6.2  |
| 1 | 152719000 | 152719075 | 75  | 152719012 | 16 | 45  | 4.1  |
| 1 | 152847775 | 152847800 | 25  | 152847787 | 13 | 13  | 2.1  |
| 1 | 153038425 | 153038575 | 150 | 153038437 | 13 | 77  | 10.3 |
| 1 | 153211625 | 153211975 | 350 | 153211787 | 17 | 187 | 24.8 |
| 1 | 153289925 | 153290000 | 75  | 153289987 | 14 | 38  | 6.2  |
| 1 | 153332400 | 153332450 | 50  | 153332412 | 12 | 24  | 0    |
| 1 | 153434075 | 153434100 | 25  | 153434087 | 12 | 12  | 0    |
| 1 | 153477750 | 153477825 | 75  | 153477762 | 16 | 40  | 0    |
| 1 | 153509325 | 153509350 | 25  | 153509337 | 12 | 12  | 2.1  |
| 1 | 153879700 | 153879725 | 25  | 153879712 | 13 | 13  | 2.1  |
| 1 | 154343925 | 154343950 | 25  | 154343937 | 12 | 12  | 0    |
| 1 | 154365450 | 154365525 | 75  | 154365462 | 12 | 35  | 6.2  |

|   |           |           |     |           |    |     |      |
|---|-----------|-----------|-----|-----------|----|-----|------|
| 1 | 154366575 | 154366600 | 25  | 154366587 | 14 | 14  | 2.1  |
| 1 | 154382325 | 154382350 | 25  | 154382337 | 12 | 12  | 2.1  |
| 1 | 154430175 | 154430425 | 250 | 154430337 | 18 | 158 | 16.6 |
| 1 | 154483700 | 154483875 | 175 | 154483862 | 14 | 80  | 4.1  |
| 1 | 154693900 | 154693975 | 75  | 154693912 | 20 | 47  | 2.1  |
| 1 | 155003350 | 155003550 | 200 | 155003537 | 21 | 131 | 18.6 |
| 1 | 155326725 | 155326750 | 25  | 155326737 | 13 | 13  | 2.1  |
| 1 | 156248275 | 156248325 | 50  | 156248312 | 14 | 26  | 2.1  |
| 1 | 157236050 | 157236325 | 275 | 157236162 | 22 | 211 | 33.1 |
| 1 | 158032175 | 158032250 | 75  | 158032187 | 15 | 45  | 4.1  |
| 1 | 158126275 | 158126550 | 275 | 158126387 | 26 | 223 | 18.6 |
| 1 | 159188600 | 159188625 | 25  | 159188612 | 12 | 12  | 2.1  |
| 1 | 159282550 | 159282575 | 25  | 159282562 | 21 | 21  | 4.1  |
| 1 | 159371425 | 159371525 | 100 | 159371437 | 14 | 54  | 0    |
| 1 | 159390625 | 159390700 | 75  | 159390637 | 17 | 42  | 6.2  |
| 1 | 159729325 | 159729475 | 150 | 159729362 | 14 | 77  | 12.4 |
| 1 | 159743000 | 159743250 | 250 | 159743087 | 22 | 165 | 8.3  |
| 1 | 159884325 | 159884350 | 25  | 159884337 | 13 | 13  | 2.1  |
| 1 | 160273575 | 160273600 | 25  | 160273587 | 12 | 12  | 2.1  |
| 1 | 160344200 | 160344250 | 50  | 160344212 | 12 | 24  | 0    |
| 1 | 160485450 | 160485625 | 175 | 160485462 | 13 | 84  | 12.4 |
| 1 | 160927650 | 160927675 | 25  | 160927662 | 12 | 12  | 2.1  |
| 1 | 160989700 | 160989775 | 75  | 160989762 | 14 | 39  | 6.2  |
| 1 | 161182025 | 161182075 | 50  | 161182037 | 12 | 24  | 0    |
| 1 | 161272300 | 161272425 | 125 | 161272412 | 13 | 61  | 0    |
| 1 | 161404600 | 161404650 | 50  | 161404612 | 12 | 24  | 4.1  |
| 1 | 161409750 | 161409900 | 150 | 161409787 | 14 | 80  | 0    |
| 1 | 161557700 | 161557775 | 75  | 161557737 | 14 | 40  | 2.1  |
| 1 | 163618100 | 163618175 | 75  | 163618112 | 12 | 36  | 6.2  |
| 1 | 163679375 | 163679450 | 75  | 163679412 | 13 | 38  | 4.1  |
| 1 | 163703900 | 163703950 | 50  | 163703912 | 18 | 30  | 4.1  |
| 1 | 163775150 | 163775400 | 250 | 163775287 | 25 | 210 | 20.7 |
| 1 | 163866900 | 163866975 | 75  | 163866912 | 23 | 53  | 6.2  |
| 1 | 164064550 | 164064600 | 50  | 164064562 | 14 | 28  | 2.1  |
| 1 | 164300050 | 164300100 | 50  | 164300062 | 12 | 24  | 4.1  |
| 1 | 164406650 | 164406725 | 75  | 164406712 | 16 | 44  | 6.2  |
| 1 | 164410675 | 164410725 | 50  | 164410687 | 12 | 24  | 4.1  |
| 1 | 165341200 | 165341250 | 50  | 165341212 | 12 | 24  | 0    |
| 1 | 165456600 | 165456625 | 25  | 165456612 | 12 | 12  | 2.1  |
| 1 | 165582100 | 165582125 | 25  | 165582112 | 12 | 12  | 0    |
| 1 | 166021225 | 166021250 | 25  | 166021237 | 12 | 12  | 2.1  |
| 1 | 166056000 | 166056050 | 50  | 166056012 | 18 | 31  | 4.1  |
| 1 | 166226100 | 166226125 | 25  | 166226112 | 12 | 12  | 0    |
| 1 | 166439225 | 166439475 | 250 | 166439362 | 19 | 143 | 10.3 |
| 1 | 166463475 | 166463500 | 25  | 166463487 | 12 | 12  | 2.1  |
| 1 | 166556800 | 166556850 | 50  | 166556812 | 12 | 24  | 4.1  |
| 1 | 166578750 | 166578775 | 25  | 166578762 | 12 | 12  | 2.1  |
| 1 | 166599400 | 166599525 | 125 | 166599412 | 14 | 64  | 0    |
| 1 | 166707175 | 166707250 | 75  | 166707187 | 12 | 36  | 0    |
| 1 | 166712500 | 166712925 | 425 | 166712512 | 13 | 184 | 33.1 |
| 1 | 167604075 | 167604125 | 50  | 167604087 | 12 | 24  | 4.1  |
| 1 | 167719450 | 167719525 | 75  | 167719462 | 13 | 37  | 6.2  |
| 1 | 168384525 | 168384575 | 50  | 168384562 | 15 | 28  | 4.1  |
| 1 | 168398250 | 168398275 | 25  | 168398262 | 12 | 12  | 2.1  |
| 1 | 168486625 | 168486700 | 75  | 168486637 | 12 | 36  | 0    |
| 1 | 168732825 | 168732850 | 25  | 168732837 | 12 | 12  | 0    |
| 1 | 168752475 | 168752500 | 25  | 168752487 | 13 | 13  | 0    |
| 1 | 168756475 | 168756550 | 75  | 168756487 | 13 | 39  | 0    |
| 1 | 168854350 | 168854375 | 25  | 168854362 | 12 | 12  | 0    |
| 1 | 168859075 | 168859125 | 50  | 168859087 | 12 | 24  | 4.1  |
| 1 | 168899450 | 168899500 | 50  | 168899462 | 12 | 24  | 0    |
| 1 | 168932525 | 168932600 | 75  | 168932562 | 13 | 38  | 6.2  |
| 1 | 168943850 | 168944100 | 250 | 168943937 | 25 | 186 | 0    |
| 1 | 169495450 | 169495475 | 25  | 169495462 | 13 | 13  | 2.1  |
| 1 | 169528625 | 169528725 | 100 | 169528637 | 12 | 46  | 0    |
| 1 | 169978400 | 169978425 | 25  | 169978412 | 12 | 12  | 2.1  |
| 1 | 170005075 | 170005125 | 50  | 170005087 | 12 | 24  | 4.1  |
| 1 | 170134775 | 170134925 | 150 | 170134837 | 15 | 86  | 8.3  |
| 1 | 170240225 | 170240250 | 25  | 170240237 | 12 | 12  | 0    |
| 1 | 170381175 | 170381350 | 175 | 170381337 | 17 | 109 | 6.2  |
| 1 | 170594875 | 170594925 | 50  | 170594887 | 12 | 24  | 0    |
| 1 | 170759200 | 170759225 | 25  | 170759212 | 13 | 13  | 2.1  |
| 1 | 170873300 | 170873325 | 25  | 170873312 | 15 | 15  | 2.1  |
| 1 | 170980875 | 170980975 | 100 | 170980887 | 23 | 82  | 8.3  |
| 1 | 171057300 | 171057375 | 75  | 171057312 | 12 | 36  | 0    |

|   |           |           |     |           |    |     |      |
|---|-----------|-----------|-----|-----------|----|-----|------|
| 1 | 171206175 | 171206300 | 125 | 171206212 | 15 | 66  | 4.1  |
| 1 | 171216400 | 171216525 | 125 | 171216487 | 13 | 62  | 4.1  |
| 1 | 171491200 | 171491275 | 75  | 171491212 | 12 | 36  | 6.2  |
| 1 | 171505375 | 171505550 | 175 | 171505387 | 14 | 88  | 2.1  |
| 1 | 171667225 | 171667250 | 25  | 171667237 | 12 | 12  | 2.1  |
| 1 | 172394325 | 172394450 | 125 | 172394337 | 13 | 61  | 0    |
| 1 | 172498550 | 172498750 | 200 | 172498612 | 16 | 104 | 14.5 |
| 1 | 172649500 | 172649550 | 50  | 172649512 | 15 | 30  | 2.1  |
| 1 | 172949375 | 172949825 | 450 | 172949687 | 22 | 262 | 12.4 |
| 1 | 173212575 | 173212600 | 25  | 173212587 | 12 | 12  | 2.1  |
| 1 | 173265650 | 173265675 | 25  | 173265662 | 12 | 12  | 2.1  |
| 1 | 173365425 | 173365450 | 25  | 173365437 | 12 | 12  | 2.1  |
| 1 | 173909225 | 173909250 | 25  | 173909237 | 12 | 12  | 2.1  |
| 1 | 174205175 | 174205225 | 50  | 174205187 | 12 | 24  | 0    |
| 1 | 175093600 | 175093625 | 25  | 175093612 | 12 | 12  | 0    |
| 1 | 175492325 | 175492350 | 25  | 175492337 | 12 | 12  | 2.1  |
| 1 | 176213875 | 176213900 | 25  | 176213887 | 12 | 12  | 0    |
| 1 | 176294250 | 176294275 | 25  | 176294262 | 12 | 12  | 2.1  |
| 1 | 176849425 | 176849525 | 100 | 176849462 | 14 | 54  | 6.2  |
| 1 | 176850025 | 176850175 | 150 | 176850087 | 14 | 78  | 8.3  |
| 1 | 177106900 | 177107100 | 200 | 177106987 | 15 | 115 | 14.5 |
| 1 | 177131775 | 177131875 | 100 | 177131787 | 12 | 48  | 8.3  |
| 1 | 178162650 | 178162800 | 150 | 178162737 | 19 | 94  | 0    |
| 1 | 178909325 | 178909350 | 25  | 178909337 | 12 | 12  | 2.1  |
| 1 | 179220725 | 179220775 | 50  | 179220737 | 12 | 24  | 0    |
| 1 | 180223400 | 180223450 | 50  | 180223412 | 12 | 24  | 0    |
| 1 | 180642250 | 180642275 | 25  | 180642262 | 12 | 12  | 0    |
| 1 | 180751600 | 180751625 | 25  | 180751612 | 14 | 14  | 2.1  |
| 1 | 181055900 | 181055925 | 25  | 181055912 | 12 | 12  | 0    |
| 1 | 181074700 | 181074725 | 25  | 181074712 | 12 | 12  | 2.1  |
| 1 | 181307175 | 181307225 | 50  | 181307187 | 12 | 24  | 0    |
| 1 | 181326225 | 181326350 | 125 | 181326312 | 22 | 88  | 12.4 |
| 1 | 181326600 | 181326625 | 25  | 181326612 | 13 | 13  | 2.1  |
| 1 | 181375075 | 181375100 | 25  | 181375087 | 12 | 12  | 2.1  |
| 1 | 181824500 | 181824525 | 25  | 181824512 | 12 | 12  | 0    |
| 1 | 181871725 | 181871750 | 25  | 181871737 | 12 | 12  | 2.1  |
| 1 | 182078450 | 182078525 | 75  | 182078462 | 12 | 36  | 6.2  |
| 1 | 182079200 | 182079400 | 200 | 182079212 | 13 | 97  | 14.5 |
| 1 | 182104050 | 182104075 | 25  | 182104062 | 12 | 12  | 2.1  |
| 1 | 182106425 | 182106525 | 100 | 182106487 | 14 | 50  | 8.3  |
| 1 | 182111825 | 182111875 | 50  | 182111862 | 13 | 25  | 4.1  |
| 1 | 182178800 | 182178950 | 150 | 182178837 | 17 | 91  | 0    |
| 1 | 182204225 | 182204250 | 25  | 182204237 | 17 | 17  | 2.1  |
| 1 | 182265500 | 182265550 | 50  | 182265512 | 12 | 24  | 2.1  |
| 1 | 182314575 | 182314775 | 200 | 182314687 | 20 | 132 | 4.1  |
| 1 | 182388450 | 182388500 | 50  | 182388462 | 13 | 26  | 4.1  |
| 1 | 182392425 | 182392450 | 25  | 182392437 | 13 | 13  | 2.1  |
| 1 | 182850950 | 182851150 | 200 | 182851087 | 24 | 171 | 14.5 |
| 1 | 182858175 | 182858200 | 25  | 182858187 | 12 | 12  | 2.1  |
| 1 | 182897400 | 182897425 | 25  | 182897412 | 12 | 12  | 2.1  |
| 1 | 183049300 | 183049500 | 200 | 183049412 | 19 | 120 | 0    |
| 1 | 183074425 | 183074650 | 225 | 183074512 | 26 | 194 | 10.3 |
| 1 | 183645900 | 183645925 | 25  | 183645912 | 12 | 12  | 2.1  |
| 1 | 183954925 | 183954950 | 25  | 183954937 | 12 | 12  | 2.1  |
| 1 | 183969325 | 183969350 | 25  | 183969337 | 13 | 13  | 0    |
| 1 | 184011225 | 184011400 | 175 | 184011287 | 25 | 148 | 6.2  |
| 1 | 184023700 | 184023825 | 125 | 184023712 | 13 | 62  | 0    |
| 1 | 184024225 | 184024250 | 25  | 184024237 | 13 | 13  | 2.1  |
| 1 | 184026175 | 184026225 | 50  | 184026187 | 15 | 30  | 4.1  |
| 1 | 184026550 | 184026575 | 25  | 184026562 | 12 | 12  | 2.1  |
| 1 | 184091800 | 184091825 | 25  | 184091812 | 13 | 13  | 0    |
| 1 | 184318300 | 184318400 | 100 | 184318312 | 20 | 69  | 8.3  |
| 1 | 184611350 | 184611425 | 75  | 184611412 | 25 | 58  | 10.3 |
| 1 | 184813475 | 184813500 | 25  | 184813487 | 12 | 12  | 0    |
| 1 | 184854475 | 184854500 | 25  | 184854487 | 12 | 12  | 0    |
| 1 | 184916350 | 184916375 | 25  | 184916362 | 14 | 14  | 2.1  |
| 1 | 185001650 | 185001775 | 125 | 185001712 | 13 | 61  | 2.1  |
| 1 | 185064950 | 185065100 | 150 | 185065037 | 14 | 76  | 0    |
| 1 | 185081250 | 185081350 | 100 | 185081262 | 14 | 50  | 8.3  |
| 1 | 186837725 | 186837750 | 25  | 186837737 | 12 | 12  | 0    |
| 1 | 186942700 | 186942800 | 100 | 186942737 | 17 | 56  | 4.1  |
| 1 | 187305075 | 187305100 | 25  | 187305087 | 12 | 12  | 0    |
| 1 | 187504875 | 187505100 | 225 | 187504962 | 23 | 149 | 0    |
| 1 | 187852800 | 187852900 | 100 | 187852812 | 16 | 56  | 0    |
| 1 | 189692150 | 189692275 | 125 | 189692162 | 12 | 56  | 0    |

|   |           |           |     |           |    |     |      |
|---|-----------|-----------|-----|-----------|----|-----|------|
| 1 | 190049475 | 190049575 | 100 | 190049512 | 14 | 52  | 0    |
| 1 | 190795325 | 190795425 | 100 | 190795387 | 14 | 50  | 4.1  |
| 1 | 190936675 | 190936825 | 150 | 190936712 | 17 | 85  | 10.3 |
| 1 | 191123275 | 191123300 | 25  | 191123287 | 12 | 12  | 2.1  |
| 1 | 191358225 | 191358325 | 100 | 191358237 | 15 | 52  | 8.3  |
| 1 | 191469025 | 191469050 | 25  | 191469037 | 12 | 12  | 2.1  |
| 1 | 191571675 | 191571750 | 75  | 191571687 | 13 | 39  | 6.2  |
| 1 | 191794500 | 191794525 | 25  | 191794512 | 12 | 12  | 2.1  |
| 1 | 193153850 | 193153900 | 50  | 193153862 | 13 | 26  | 4.1  |
| 1 | 194417025 | 194417150 | 125 | 194417087 | 14 | 66  | 0    |
| 1 | 195335975 | 195336000 | 25  | 195335987 | 13 | 13  | 0    |
| 1 | 195635725 | 195635750 | 25  | 195635737 | 12 | 12  | 2.1  |
| 1 | 195961000 | 195961025 | 25  | 195961012 | 12 | 12  | 0    |
| 1 | 195972775 | 195972875 | 100 | 195972812 | 14 | 50  | 8.3  |
| 1 | 197171150 | 197171525 | 375 | 197171337 | 20 | 217 | 41.4 |
| 1 | 197461625 | 197461675 | 50  | 197461637 | 12 | 24  | 0    |
| 1 | 198599100 | 198599150 | 50  | 198599112 | 12 | 24  | 0    |
| 1 | 198905925 | 198905975 | 50  | 198905937 | 12 | 24  | 2.1  |
| 1 | 199116275 | 199116300 | 25  | 199116287 | 12 | 12  | 2.1  |
| 1 | 199373400 | 199373425 | 25  | 199373412 | 14 | 14  | 2.1  |
| 1 | 199406325 | 199406375 | 50  | 199406337 | 13 | 26  | 4.1  |
| 1 | 199690950 | 199691000 | 50  | 199690962 | 13 | 25  | 0    |
| 1 | 199692875 | 199693000 | 125 | 199692887 | 13 | 61  | 6.2  |
| 1 | 199725050 | 199725075 | 25  | 199725062 | 18 | 18  | 2.1  |
| 1 | 199748950 | 199748975 | 25  | 199748962 | 12 | 12  | 2.1  |
| 1 | 199826650 | 199826675 | 25  | 199826662 | 12 | 12  | 0    |
| 1 | 199898425 | 199898625 | 200 | 199898487 | 16 | 111 | 12.4 |
| 1 | 199995250 | 199995325 | 75  | 199995262 | 12 | 36  | 0    |
| 1 | 200002375 | 200002500 | 125 | 200002387 | 12 | 58  | 0    |
| 1 | 200541375 | 200541400 | 25  | 200541387 | 12 | 12  | 2.1  |
| 1 | 201162975 | 201163100 | 125 | 201163062 | 19 | 88  | 10.3 |
| 1 | 201302900 | 201302975 | 75  | 201302912 | 14 | 40  | 6.2  |
| 1 | 201380375 | 201380425 | 50  | 201380387 | 13 | 26  | 0    |
| 1 | 201638600 | 201638625 | 25  | 201638612 | 14 | 14  | 0    |
| 1 | 201791850 | 201791900 | 50  | 201791862 | 12 | 24  | 0    |
| 1 | 201794125 | 201794175 | 50  | 201794137 | 15 | 30  | 4.1  |
| 1 | 201855150 | 201855175 | 25  | 201855162 | 12 | 12  | 0    |
| 1 | 201876650 | 201876675 | 25  | 201876662 | 12 | 12  | 0    |
| 1 | 201907375 | 201907400 | 25  | 201907387 | 13 | 13  | 0    |
| 1 | 201909425 | 201909450 | 25  | 201909437 | 12 | 12  | 2.1  |
| 1 | 202032250 | 202032300 | 50  | 202032262 | 12 | 24  | 0    |
| 1 | 202106950 | 202107000 | 50  | 202106987 | 13 | 25  | 4.1  |
| 1 | 202202675 | 202202825 | 150 | 202202687 | 16 | 76  | 0    |
| 1 | 202231875 | 202231950 | 75  | 202231937 | 14 | 38  | 6.2  |
| 1 | 202338525 | 202338550 | 25  | 202338537 | 12 | 12  | 2.1  |
| 1 | 202355075 | 202355100 | 25  | 202355087 | 12 | 12  | 2.1  |
| 1 | 202729650 | 202729700 | 50  | 202729662 | 13 | 25  | 2.1  |
| 1 | 202742125 | 202742425 | 300 | 202742262 | 13 | 136 | 20.7 |
| 1 | 202742800 | 202742825 | 25  | 202742812 | 13 | 13  | 2.1  |
| 1 | 202833150 | 202833250 | 100 | 202833162 | 12 | 48  | 6.2  |
| 1 | 203358175 | 203358200 | 25  | 203358187 | 13 | 13  | 2.1  |
| 1 | 203415725 | 203415825 | 100 | 203415737 | 13 | 52  | 0    |
| 1 | 203555225 | 203555275 | 50  | 203555237 | 14 | 26  | 4.1  |
| 1 | 203558400 | 203558425 | 25  | 203558412 | 12 | 12  | 0    |
| 1 | 203562450 | 203562500 | 50  | 203562462 | 13 | 26  | 2.1  |
| 1 | 204154875 | 204154925 | 50  | 204154912 | 16 | 28  | 2.1  |
| 1 | 204169675 | 204169875 | 200 | 204169812 | 18 | 118 | 0    |
| 1 | 204710300 | 204710325 | 25  | 204710312 | 12 | 12  | 2.1  |
| 1 | 204776625 | 204776675 | 50  | 204776637 | 12 | 24  | 2.1  |
| 1 | 204810725 | 204810825 | 100 | 204810737 | 12 | 48  | 4.1  |
| 1 | 204871200 | 204871225 | 25  | 204871212 | 13 | 13  | 2.1  |
| 1 | 204874325 | 204874400 | 75  | 204874362 | 14 | 40  | 6.2  |
| 1 | 204875425 | 204875450 | 25  | 204875437 | 13 | 13  | 2.1  |
| 1 | 205034625 | 205034750 | 125 | 205034637 | 12 | 60  | 0    |
| 1 | 205132000 | 205132125 | 125 | 205132012 | 16 | 74  | 0    |
| 1 | 205247175 | 205247325 | 150 | 205247262 | 16 | 77  | 10.3 |
| 1 | 205249500 | 205249700 | 200 | 205249587 | 18 | 117 | 12.4 |
| 1 | 205290925 | 205291150 | 225 | 205291037 | 33 | 255 | 41.4 |
| 1 | 205549825 | 205549875 | 50  | 205549837 | 13 | 26  | 0    |
| 1 | 205633475 | 205633575 | 100 | 205633487 | 19 | 58  | 6.2  |
| 1 | 205991950 | 205991975 | 25  | 205991962 | 12 | 12  | 2.1  |
| 1 | 206108075 | 206108100 | 25  | 206108087 | 12 | 12  | 2.1  |
| 1 | 206209325 | 206209350 | 25  | 206209337 | 12 | 12  | 0    |
| 1 | 206918475 | 206918575 | 100 | 206918487 | 12 | 48  | 0    |
| 1 | 207828000 | 207828025 | 25  | 207828012 | 12 | 12  | 2.1  |

|   |           |           |     |           |    |     |      |
|---|-----------|-----------|-----|-----------|----|-----|------|
| 1 | 208063175 | 208063300 | 125 | 208063237 | 16 | 72  | 0    |
| 1 | 208109175 | 208109525 | 350 | 208109462 | 19 | 226 | 33.1 |
| 1 | 208115975 | 208116025 | 50  | 208115987 | 12 | 24  | 0    |
| 1 | 208453450 | 208453475 | 25  | 208453462 | 13 | 13  | 2.1  |
| 1 | 208477250 | 208477275 | 25  | 208477262 | 12 | 12  | 2.1  |
| 1 | 208490850 | 208490875 | 25  | 208490862 | 12 | 12  | 2.1  |
| 1 | 209832200 | 209832225 | 25  | 209832212 | 12 | 12  | 0    |
| 1 | 209872275 | 209872300 | 25  | 209872287 | 12 | 12  | 2.1  |
| 1 | 209915100 | 209915125 | 25  | 209915112 | 12 | 12  | 0    |
| 1 | 210328550 | 210328700 | 150 | 210328637 | 14 | 76  | 12.4 |
| 1 | 210474625 | 210474775 | 150 | 210474712 | 14 | 77  | 0    |
| 1 | 210482375 | 210482525 | 150 | 210482412 | 16 | 87  | 2.1  |
| 1 | 210510875 | 210510900 | 25  | 210510887 | 13 | 13  | 2.1  |
| 1 | 210656675 | 210656700 | 25  | 210656687 | 13 | 13  | 0    |
| 1 | 210807100 | 210807175 | 75  | 210807137 | 14 | 38  | 6.2  |
| 1 | 210836125 | 210836150 | 25  | 210836137 | 12 | 12  | 0    |
| 1 | 210836675 | 210836700 | 25  | 210836687 | 12 | 12  | 2.1  |
| 1 | 211029775 | 211029825 | 50  | 211029787 | 12 | 24  | 0    |
| 1 | 211278300 | 211278350 | 50  | 211278337 | 13 | 25  | 2.1  |
| 1 | 211372475 | 211372600 | 125 | 211372537 | 15 | 65  | 0    |
| 1 | 211567400 | 211567425 | 25  | 211567412 | 15 | 15  | 2.1  |
| 1 | 211863125 | 211863475 | 350 | 211863262 | 20 | 227 | 2.1  |
| 1 | 211925825 | 211925875 | 50  | 211925837 | 12 | 24  | 0    |
| 1 | 211927125 | 211927325 | 200 | 211927162 | 26 | 167 | 4.1  |
| 1 | 211957000 | 211957050 | 50  | 211957012 | 14 | 28  | 2.1  |
| 1 | 212213200 | 212213300 | 100 | 212213212 | 15 | 52  | 6.2  |
| 1 | 212249175 | 212249275 | 100 | 212249237 | 14 | 50  | 0    |
| 1 | 212363200 | 212363350 | 150 | 212363337 | 16 | 83  | 8.3  |
| 1 | 212580400 | 212580450 | 50  | 212580412 | 12 | 24  | 4.1  |
| 1 | 212626550 | 212626600 | 50  | 212626562 | 12 | 24  | 0    |
| 1 | 212681400 | 212681600 | 200 | 212681462 | 24 | 154 | 8.3  |
| 1 | 213726225 | 213726250 | 25  | 213726237 | 12 | 12  | 2.1  |
| 1 | 216128400 | 216128525 | 125 | 216128412 | 13 | 61  | 2.1  |
| 1 | 216684250 | 216684375 | 125 | 216684362 | 13 | 61  | 2.1  |
| 1 | 216703150 | 216703200 | 50  | 216703162 | 13 | 26  | 4.1  |
| 1 | 216736575 | 216736675 | 100 | 216736637 | 19 | 69  | 8.3  |
| 1 | 216946375 | 216946400 | 25  | 216946387 | 12 | 12  | 0    |
| 1 | 217018800 | 217019000 | 200 | 217018862 | 15 | 112 | 0    |
| 1 | 217031575 | 217031750 | 175 | 217031637 | 14 | 92  | 12.4 |
| 1 | 217281275 | 217281300 | 25  | 217281287 | 12 | 12  | 0    |
| 1 | 217306775 | 217306800 | 25  | 217306787 | 14 | 14  | 2.1  |
| 1 | 217516475 | 217516550 | 75  | 217516512 | 14 | 39  | 6.2  |
| 1 | 217619375 | 217619525 | 150 | 217619387 | 13 | 73  | 8.3  |
| 1 | 217699900 | 217699925 | 25  | 217699912 | 12 | 12  | 0    |
| 1 | 217701325 | 217701400 | 75  | 217701337 | 13 | 39  | 0    |
| 1 | 217705175 | 217705425 | 250 | 217705287 | 15 | 122 | 4.1  |
| 1 | 217795875 | 217795975 | 100 | 217795962 | 18 | 51  | 4.1  |
| 1 | 217803275 | 217803350 | 75  | 217803287 | 12 | 36  | 2.1  |
| 1 | 217899325 | 217899350 | 25  | 217899337 | 12 | 12  | 0    |
| 1 | 217940025 | 217940050 | 25  | 217940037 | 12 | 12  | 2.1  |
| 1 | 217966500 | 217966625 | 125 | 217966562 | 17 | 78  | 0    |
| 1 | 217972900 | 217973100 | 200 | 217973087 | 14 | 92  | 16.6 |
| 1 | 218480325 | 218480350 | 25  | 218480337 | 13 | 13  | 0    |
| 1 | 218514475 | 218514525 | 50  | 218514512 | 14 | 27  | 4.1  |
| 1 | 219053125 | 219053275 | 150 | 219053137 | 15 | 81  | 2.1  |
| 1 | 219679600 | 219679650 | 50  | 219679612 | 16 | 31  | 4.1  |
| 1 | 220067025 | 220067050 | 25  | 220067037 | 13 | 13  | 2.1  |
| 1 | 220079825 | 220079850 | 25  | 220079837 | 14 | 14  | 2.1  |
| 1 | 220128675 | 220128775 | 100 | 220128687 | 14 | 53  | 4.1  |
| 1 | 220228150 | 220228200 | 50  | 220228187 | 13 | 25  | 2.1  |
| 1 | 220234750 | 220234775 | 25  | 220234762 | 13 | 13  | 2.1  |
| 1 | 220439650 | 220439675 | 25  | 220439662 | 12 | 12  | 0    |
| 1 | 221053975 | 221054025 | 50  | 221053987 | 12 | 24  | 4.1  |
| 1 | 221054450 | 221054500 | 50  | 221054462 | 12 | 24  | 0    |
| 1 | 221271800 | 221271825 | 25  | 221271812 | 13 | 13  | 0    |
| 1 | 221952700 | 221952725 | 25  | 221952712 | 12 | 12  | 2.1  |
| 1 | 221956025 | 221956050 | 25  | 221956037 | 12 | 12  | 0    |
| 1 | 222099525 | 222099675 | 150 | 222099662 | 15 | 71  | 2.1  |
| 1 | 222334750 | 222334775 | 25  | 222334762 | 14 | 14  | 2.1  |
| 1 | 222640225 | 222640250 | 25  | 222640237 | 12 | 12  | 0    |
| 1 | 222687650 | 222687675 | 25  | 222687662 | 12 | 12  | 0    |
| 1 | 222757050 | 222757100 | 50  | 222757087 | 13 | 25  | 0    |
| 1 | 222797425 | 222797600 | 175 | 222797437 | 26 | 135 | 12.4 |
| 1 | 222819575 | 222819625 | 50  | 222819612 | 18 | 34  | 0    |
| 1 | 222834100 | 222834250 | 150 | 222834112 | 18 | 94  | 12.4 |

|   |           |           |     |           |    |     |      |
|---|-----------|-----------|-----|-----------|----|-----|------|
| 1 | 222880850 | 222880900 | 50  | 222880862 | 12 | 24  | 0    |
| 1 | 222981075 | 222981125 | 50  | 222981112 | 13 | 25  | 0    |
| 1 | 222981600 | 222981700 | 100 | 222981612 | 14 | 56  | 0    |
| 1 | 222984650 | 222984725 | 75  | 222984662 | 12 | 36  | 6.2  |
| 1 | 222991525 | 222991575 | 50  | 222991537 | 12 | 24  | 0    |
| 1 | 223177075 | 223177100 | 25  | 223177087 | 12 | 12  | 0    |
| 1 | 223614725 | 223614750 | 25  | 223614737 | 12 | 12  | 2.1  |
| 1 | 223690850 | 223690875 | 25  | 223690862 | 13 | 13  | 2.1  |
| 1 | 223911975 | 223912125 | 150 | 223912012 | 15 | 79  | 0    |
| 1 | 223954625 | 223954775 | 150 | 223954687 | 27 | 135 | 20.7 |
| 1 | 224021350 | 224021525 | 175 | 224021387 | 25 | 141 | 4.1  |
| 1 | 224390550 | 224390575 | 25  | 224390562 | 12 | 12  | 2.1  |
| 1 | 224881075 | 224881125 | 50  | 224881112 | 13 | 25  | 2.1  |
| 1 | 225195575 | 225195625 | 50  | 225195587 | 13 | 26  | 4.1  |
| 1 | 225491100 | 225491200 | 100 | 225491112 | 13 | 52  | 0    |
| 1 | 225633150 | 225633175 | 25  | 225633162 | 12 | 12  | 0    |
| 1 | 225633575 | 225633625 | 50  | 225633587 | 14 | 27  | 4.1  |
| 1 | 225909350 | 225909450 | 100 | 225909362 | 12 | 48  | 4.1  |
| 1 | 226357600 | 226357750 | 150 | 226357737 | 13 | 58  | 10.3 |
| 1 | 226358325 | 226358425 | 100 | 226358337 | 16 | 62  | 2.1  |
| 1 | 226712075 | 226712125 | 50  | 226712087 | 12 | 24  | 2.1  |
| 1 | 227140925 | 227140975 | 50  | 227140937 | 13 | 26  | 4.1  |
| 1 | 227147475 | 227147500 | 25  | 227147487 | 15 | 15  | 2.1  |
| 1 | 227402225 | 227402275 | 50  | 227402237 | 12 | 24  | 4.1  |
| 1 | 227407350 | 227407475 | 125 | 227407412 | 15 | 66  | 0    |
| 1 | 227623075 | 227623125 | 50  | 227623087 | 12 | 24  | 0    |
| 1 | 227866550 | 227866775 | 225 | 227866637 | 24 | 176 | 14.5 |
| 1 | 228323500 | 228323525 | 25  | 228323512 | 12 | 12  | 2.1  |
| 1 | 228513050 | 228513175 | 125 | 228513087 | 18 | 79  | 8.3  |
| 1 | 228835750 | 228835775 | 25  | 228835762 | 12 | 12  | 0    |
| 1 | 228976650 | 228976675 | 25  | 228976662 | 13 | 13  | 0    |
| 1 | 229342300 | 229342425 | 125 | 229342412 | 22 | 79  | 10.3 |
| 1 | 229619950 | 229620000 | 50  | 229619962 | 13 | 26  | 4.1  |
| 1 | 229681375 | 229681400 | 25  | 229681387 | 12 | 12  | 0    |
| 1 | 229701625 | 229701700 | 75  | 229701662 | 15 | 43  | 6.2  |
| 1 | 230030800 | 230030850 | 50  | 230030812 | 12 | 24  | 2.1  |
| 1 | 230188475 | 230188500 | 25  | 230188487 | 12 | 12  | 2.1  |
| 1 | 230189400 | 230189425 | 25  | 230189412 | 12 | 12  | 2.1  |
| 1 | 230214300 | 230214375 | 75  | 230214312 | 14 | 40  | 6.2  |
| 1 | 230215300 | 230215550 | 250 | 230215412 | 21 | 172 | 31   |
| 1 | 230349900 | 230349975 | 75  | 230349937 | 15 | 44  | 4.1  |
| 1 | 230354750 | 230354850 | 100 | 230354787 | 14 | 54  | 8.3  |
| 1 | 230495950 | 230496025 | 75  | 230495962 | 12 | 36  | 2.1  |
| 1 | 230575625 | 230575650 | 25  | 230575637 | 12 | 12  | 2.1  |
| 1 | 230675125 | 230675150 | 25  | 230675137 | 12 | 12  | 0    |
| 1 | 230726200 | 230726275 | 75  | 230726212 | 13 | 37  | 6.2  |
| 1 | 230752950 | 230752975 | 25  | 230752962 | 12 | 12  | 2.1  |
| 1 | 231082875 | 231082900 | 25  | 231082887 | 13 | 13  | 0    |
| 1 | 231257375 | 231257575 | 200 | 231257537 | 15 | 107 | 0    |
| 1 | 231594050 | 231594175 | 125 | 231594062 | 12 | 60  | 0    |
| 1 | 232456300 | 232456325 | 25  | 232456312 | 12 | 12  | 2.1  |
| 1 | 232715350 | 232715400 | 50  | 232715362 | 12 | 24  | 4.1  |
| 1 | 232718225 | 232718425 | 200 | 232718237 | 18 | 129 | 16.6 |
| 1 | 232736425 | 232736525 | 100 | 232736462 | 14 | 54  | 8.3  |
| 1 | 232741500 | 232741625 | 125 | 232741512 | 13 | 64  | 4.1  |
| 1 | 232808350 | 232808400 | 50  | 232808362 | 13 | 26  | 0    |
| 1 | 232820100 | 232820125 | 25  | 232820112 | 12 | 12  | 0    |
| 1 | 232824050 | 232824075 | 25  | 232824062 | 12 | 12  | 2.1  |
| 1 | 232926450 | 232926600 | 150 | 232926537 | 24 | 124 | 18.6 |
| 1 | 232927200 | 232927225 | 25  | 232927212 | 12 | 12  | 2.1  |
| 1 | 232927775 | 232927800 | 25  | 232927787 | 12 | 12  | 2.1  |
| 1 | 233064350 | 233064425 | 75  | 233064387 | 15 | 42  | 0    |
| 1 | 233201100 | 233201125 | 25  | 233201112 | 12 | 12  | 2.1  |
| 1 | 233221600 | 233221675 | 75  | 233221612 | 12 | 36  | 0    |
| 1 | 233254675 | 233254700 | 25  | 233254687 | 12 | 12  | 2.1  |
| 1 | 233334050 | 233334075 | 25  | 233334062 | 12 | 12  | 0    |
| 1 | 233391250 | 233391275 | 25  | 233391262 | 12 | 12  | 2.1  |
| 1 | 233900200 | 233900425 | 225 | 233900262 | 21 | 158 | 0    |
| 1 | 234142400 | 234142450 | 50  | 234142437 | 14 | 26  | 0    |
| 1 | 234147375 | 234147575 | 200 | 234147562 | 32 | 177 | 16.6 |
| 1 | 234149325 | 234149350 | 25  | 234149337 | 12 | 12  | 2.1  |
| 1 | 234150800 | 234150825 | 25  | 234150812 | 13 | 13  | 2.1  |
| 1 | 234201775 | 234201800 | 25  | 234201787 | 24 | 24  | 4.1  |
| 1 | 234209850 | 234209875 | 25  | 234209862 | 32 | 32  | 4.1  |
| 1 | 234257125 | 234257275 | 150 | 234257262 | 21 | 88  | 10.3 |

|   |           |           |     |           |    |     |      |
|---|-----------|-----------|-----|-----------|----|-----|------|
| 1 | 234646000 | 234646050 | 50  | 234646012 | 12 | 24  | 4.1  |
| 1 | 234853250 | 234853550 | 300 | 234853412 | 31 | 252 | 18.6 |
| 1 | 235019750 | 235019775 | 25  | 235019762 | 12 | 12  | 0    |
| 1 | 236094950 | 236095025 | 75  | 236094962 | 20 | 50  | 4.1  |
| 1 | 236103600 | 236103650 | 50  | 236103612 | 12 | 24  | 4.1  |
| 1 | 236104250 | 236104275 | 25  | 236104262 | 12 | 12  | 0    |
| 1 | 236121850 | 236121900 | 50  | 236121862 | 15 | 30  | 4.1  |
| 1 | 236131250 | 236131350 | 100 | 236131337 | 17 | 57  | 6.2  |
| 1 | 236313300 | 236313400 | 100 | 236313337 | 15 | 52  | 0    |
| 1 | 236341350 | 236341400 | 50  | 236341387 | 14 | 27  | 4.1  |
| 1 | 236355000 | 236355175 | 175 | 236355087 | 17 | 102 | 16.6 |
| 1 | 236676650 | 236676900 | 250 | 236676787 | 21 | 156 | 0    |
| 1 | 236695475 | 236695650 | 175 | 236695562 | 16 | 98  | 12.4 |
| 1 | 236699125 | 236699175 | 50  | 236699137 | 14 | 28  | 4.1  |
| 1 | 236836900 | 236837075 | 175 | 236836937 | 14 | 87  | 12.4 |
| 1 | 237041450 | 237041550 | 100 | 237041462 | 14 | 52  | 0    |
| 1 | 237122550 | 237122750 | 200 | 237122712 | 21 | 131 | 10.3 |
| 1 | 237185575 | 237185725 | 150 | 237185612 | 14 | 78  | 8.3  |
| 1 | 237221700 | 237221800 | 100 | 237221737 | 16 | 55  | 0    |
| 1 | 237455450 | 237455600 | 150 | 237455512 | 16 | 86  | 6.2  |
| 1 | 237492575 | 237492650 | 75  | 237492637 | 13 | 37  | 0    |
| 1 | 237591425 | 237591475 | 50  | 237591437 | 17 | 30  | 4.1  |
| 1 | 237684225 | 237684325 | 100 | 237684262 | 15 | 56  | 6.2  |
| 1 | 237949625 | 237949675 | 50  | 237949662 | 16 | 30  | 4.1  |
| 1 | 237949900 | 237949925 | 25  | 237949912 | 12 | 12  | 2.1  |
| 1 | 238207300 | 238207350 | 50  | 238207312 | 12 | 24  | 0    |
| 1 | 238944700 | 238944725 | 25  | 238944712 | 12 | 12  | 2.1  |
| 1 | 239648225 | 239648250 | 25  | 239648237 | 12 | 12  | 0    |
| 1 | 239749825 | 239749850 | 25  | 239749837 | 14 | 14  | 2.1  |
| 1 | 239870800 | 239870825 | 25  | 239870812 | 13 | 13  | 0    |
| 1 | 240371975 | 240372100 | 125 | 240372087 | 13 | 61  | 4.1  |
| 1 | 241500175 | 241500225 | 50  | 241500187 | 13 | 26  | 4.1  |
| 1 | 241517725 | 241517825 | 100 | 241517762 | 14 | 52  | 0    |
| 1 | 241547975 | 241548000 | 25  | 241547987 | 12 | 12  | 0    |
| 1 | 242074225 | 242074300 | 75  | 242074237 | 12 | 36  | 0    |
| 1 | 242207775 | 242207800 | 25  | 242207787 | 12 | 12  | 0    |
| 1 | 242295400 | 242295450 | 50  | 242295412 | 12 | 24  | 4.1  |
| 1 | 242502650 | 242502675 | 25  | 242502662 | 12 | 12  | 0    |
| 1 | 242553125 | 242553325 | 200 | 242553237 | 18 | 121 | 6.2  |
| 1 | 243199525 | 243199550 | 25  | 243199537 | 12 | 12  | 2.1  |
| 1 | 243315600 | 243315625 | 25  | 243315612 | 12 | 12  | 2.1  |
| 1 | 243321700 | 243321825 | 125 | 243321762 | 16 | 73  | 4.1  |
| 1 | 243437050 | 243437300 | 250 | 243437237 | 26 | 199 | 12.4 |
| 1 | 243446475 | 243446575 | 100 | 243446487 | 14 | 52  | 6.2  |
| 1 | 243642475 | 243642500 | 25  | 243642487 | 12 | 12  | 2.1  |
| 1 | 243680200 | 243680400 | 200 | 243680287 | 19 | 127 | 12.4 |
| 1 | 243680875 | 243680925 | 50  | 243680887 | 12 | 24  | 0    |
| 1 | 244125050 | 244125125 | 75  | 244125112 | 14 | 40  | 6.2  |
| 1 | 244369000 | 244369025 | 25  | 244369012 | 13 | 13  | 2.1  |
| 1 | 244372525 | 244372550 | 25  | 244372537 | 14 | 14  | 2.1  |
| 1 | 244444900 | 244444950 | 50  | 244444937 | 14 | 27  | 4.1  |
| 1 | 244745350 | 244745625 | 275 | 244745462 | 22 | 181 | 0    |
| 1 | 244909500 | 244909600 | 100 | 244909512 | 12 | 44  | 4.1  |
| 1 | 244912300 | 244912425 | 125 | 244912412 | 19 | 68  | 10.3 |
| 1 | 244957100 | 244957125 | 25  | 244957112 | 12 | 12  | 2.1  |
| 1 | 245292725 | 245292750 | 25  | 245292737 | 12 | 12  | 2.1  |
| 1 | 245386625 | 245386800 | 175 | 245386687 | 17 | 101 | 0    |
| 1 | 245572975 | 245573000 | 25  | 245572987 | 12 | 12  | 2.1  |
| 1 | 246960900 | 246960950 | 50  | 246960912 | 19 | 38  | 4.1  |
| 1 | 247166925 | 247166950 | 25  | 247166937 | 15 | 15  | 2.1  |
| 3 | 382125    | 382150    | 25  | 382137    | 12 | 12  | 0    |
| 3 | 607275    | 607325    | 50  | 607287    | 12 | 24  | 4.1  |
| 3 | 4433700   | 4433775   | 75  | 4433737   | 17 | 49  | 6.2  |
| 3 | 4747275   | 4747425   | 150 | 4747362   | 16 | 86  | 12.4 |
| 3 | 4838325   | 4838350   | 25  | 4838337   | 13 | 13  | 2.1  |
| 3 | 8462575   | 8462600   | 25  | 8462587   | 12 | 12  | 0    |
| 3 | 8515900   | 8515975   | 75  | 8515912   | 14 | 40  | 6.2  |
| 3 | 9379450   | 9379525   | 75  | 9379512   | 13 | 37  | 6.2  |
| 3 | 9413650   | 9413675   | 25  | 9413662   | 12 | 12  | 2.1  |
| 3 | 9809025   | 9809100   | 75  | 9809037   | 13 | 39  | 6.2  |
| 3 | 10222550  | 10222600  | 50  | 10222562  | 16 | 29  | 4.1  |
| 3 | 11262875  | 11263000  | 125 | 11262962  | 13 | 62  | 4.1  |
| 3 | 11546800  | 11546825  | 25  | 11546812  | 12 | 12  | 2.1  |
| 3 | 11627400  | 11627450  | 50  | 11627412  | 12 | 24  | 0    |
| 3 | 12452150  | 12452325  | 175 | 12452162  | 12 | 82  | 6.2  |



|   |          |          |     |          |    |     |      |
|---|----------|----------|-----|----------|----|-----|------|
| 3 | 13831700 | 13831775 | 75  | 13831712 | 12 | 36  | 6.2  |
| 3 | 14333875 | 14333950 | 75  | 14333937 | 17 | 45  | 6.2  |
| 3 | 14362375 | 14362475 | 100 | 14362387 | 20 | 64  | 2.1  |
| 3 | 14448950 | 14448975 | 25  | 14448962 | 12 | 12  | 2.1  |
| 3 | 15125625 | 15125675 | 50  | 15125637 | 13 | 25  | 4.1  |
| 3 | 15317550 | 15317575 | 25  | 15317562 | 14 | 14  | 2.1  |
| 3 | 15672950 | 15673150 | 200 | 15672987 | 22 | 157 | 0    |
| 3 | 16077100 | 16077175 | 75  | 16077112 | 14 | 40  | 6.2  |
| 3 | 16080300 | 16080450 | 150 | 16080312 | 21 | 100 | 14.5 |
| 3 | 16465450 | 16465525 | 75  | 16465462 | 12 | 34  | 6.2  |
| 3 | 16888950 | 16889000 | 50  | 16888962 | 15 | 30  | 0    |
| 3 | 19950725 | 19950750 | 25  | 19950737 | 12 | 12  | 0    |
| 3 | 20941175 | 20941225 | 50  | 20941187 | 13 | 26  | 0    |
| 3 | 20946725 | 20946750 | 25  | 20946737 | 13 | 13  | 0    |
| 3 | 23702625 | 23702650 | 25  | 23702637 | 13 | 13  | 2.1  |
| 3 | 24008425 | 24008450 | 25  | 24008437 | 12 | 12  | 2.1  |
| 3 | 24258800 | 24258900 | 100 | 24258812 | 16 | 61  | 4.1  |
| 3 | 25444600 | 25444700 | 100 | 25444662 | 13 | 48  | 2.1  |
| 3 | 25470900 | 25470975 | 75  | 25470912 | 12 | 36  | 0    |
| 3 | 27163850 | 27163950 | 100 | 27163912 | 17 | 62  | 8.3  |
| 3 | 27244950 | 27244975 | 25  | 27244962 | 12 | 12  | 0    |
| 3 | 27607050 | 27607250 | 200 | 27607062 | 15 | 106 | 0    |
| 3 | 27639750 | 27639825 | 75  | 27639762 | 12 | 34  | 6.2  |
| 3 | 27658625 | 27658825 | 200 | 27658712 | 20 | 132 | 20.7 |
| 3 | 27697750 | 27697775 | 25  | 27697762 | 13 | 13  | 2.1  |
| 3 | 27774825 | 27774875 | 50  | 27774837 | 12 | 24  | 4.1  |
| 3 | 29172675 | 29172775 | 100 | 29172687 | 14 | 56  | 0    |
| 3 | 29297725 | 29297800 | 75  | 29297737 | 12 | 36  | 0    |
| 3 | 29344350 | 29344400 | 50  | 29344362 | 12 | 24  | 0    |
| 3 | 29351975 | 29352225 | 250 | 29352037 | 22 | 167 | 12.4 |
| 3 | 29446925 | 29447000 | 75  | 29446937 | 12 | 36  | 0    |
| 3 | 29469950 | 29469975 | 25  | 29469962 | 15 | 15  | 0    |
| 3 | 29874975 | 29875025 | 50  | 29874987 | 12 | 24  | 0    |
| 3 | 30108075 | 30108125 | 50  | 30108087 | 12 | 24  | 4.1  |
| 3 | 30566400 | 30566450 | 50  | 30566412 | 16 | 30  | 4.1  |
| 3 | 30675200 | 30675250 | 50  | 30675212 | 12 | 24  | 0    |
| 3 | 30705775 | 30705850 | 75  | 30705837 | 18 | 50  | 0    |
| 3 | 30787025 | 30787200 | 175 | 30787162 | 16 | 97  | 10.3 |
| 3 | 31555275 | 31555300 | 25  | 31555287 | 12 | 12  | 0    |
| 3 | 31721350 | 31721450 | 100 | 31721362 | 18 | 65  | 8.3  |
| 3 | 31953850 | 31954025 | 175 | 31953912 | 16 | 102 | 12.4 |
| 3 | 31954400 | 31954425 | 25  | 31954412 | 12 | 12  | 2.1  |
| 3 | 31985500 | 31985650 | 150 | 31985512 | 12 | 68  | 8.3  |
| 3 | 32253550 | 32253625 | 75  | 32253562 | 12 | 36  | 0    |
| 3 | 32436575 | 32436650 | 75  | 32436637 | 14 | 38  | 4.1  |
| 3 | 32438825 | 32438875 | 50  | 32438837 | 12 | 24  | 4.1  |
| 3 | 33457825 | 33457850 | 25  | 33457837 | 12 | 12  | 2.1  |
| 3 | 36763125 | 36763150 | 25  | 36763137 | 12 | 12  | 0    |
| 3 | 37214975 | 37215050 | 75  | 37214987 | 13 | 38  | 0    |
| 3 | 37704575 | 37704625 | 50  | 37704587 | 12 | 24  | 0    |
| 3 | 37876875 | 37876900 | 25  | 37876887 | 12 | 12  | 2.1  |
| 3 | 37924100 | 37924150 | 50  | 37924112 | 12 | 24  | 0    |
| 3 | 38344050 | 38344350 | 300 | 38344212 | 25 | 222 | 31   |
| 3 | 38679200 | 38679325 | 125 | 38679262 | 15 | 67  | 0    |
| 3 | 40707975 | 40708050 | 75  | 40708037 | 13 | 36  | 6.2  |
| 3 | 40799275 | 40799300 | 25  | 40799287 | 13 | 13  | 0    |
| 3 | 40985525 | 40985550 | 25  | 40985537 | 13 | 13  | 0    |
| 3 | 41133950 | 41133975 | 25  | 41133962 | 14 | 14  | 2.1  |
| 3 | 42069425 | 42069450 | 25  | 42069437 | 13 | 13  | 2.1  |
| 3 | 43556675 | 43556700 | 25  | 43556687 | 12 | 12  | 0    |
| 3 | 44116700 | 44116725 | 25  | 44116712 | 12 | 12  | 2.1  |
| 3 | 44123225 | 44123425 | 200 | 44123337 | 16 | 112 | 0    |
| 3 | 44729025 | 44729200 | 175 | 44729112 | 23 | 142 | 14.5 |
| 3 | 45081600 | 45081750 | 150 | 45081737 | 15 | 81  | 2.1  |
| 3 | 45084225 | 45084275 | 50  | 45084237 | 13 | 26  | 0    |
| 3 | 45183575 | 45183825 | 250 | 45183687 | 15 | 119 | 16.6 |
| 3 | 46533400 | 46533525 | 125 | 46533412 | 14 | 68  | 0    |
| 3 | 47617850 | 47618100 | 250 | 47617962 | 17 | 135 | 18.6 |
| 3 | 49532000 | 49532125 | 125 | 49532012 | 21 | 85  | 10.3 |
| 3 | 49686125 | 49686300 | 175 | 49686262 | 22 | 128 | 24.8 |
| 3 | 50312525 | 50312550 | 25  | 50312537 | 12 | 12  | 0    |
| 3 | 51397675 | 51397700 | 25  | 51397687 | 12 | 12  | 0    |
| 3 | 51529150 | 51529200 | 50  | 51529162 | 13 | 26  | 4.1  |
| 3 | 52065075 | 52065125 | 50  | 52065087 | 13 | 26  | 0    |
| 3 | 53139975 | 53140150 | 175 | 53140037 | 14 | 93  | 0    |

|   |           |           |     |           |    |     |      |
|---|-----------|-----------|-----|-----------|----|-----|------|
| 3 | 53312950  | 53313050  | 100 | 53312962  | 13 | 48  | 6.2  |
| 3 | 54253525  | 54253575  | 50  | 54253537  | 13 | 26  | 0    |
| 3 | 54259975  | 54260025  | 50  | 54259987  | 12 | 24  | 2.1  |
| 3 | 54382050  | 54382075  | 25  | 54382062  | 12 | 12  | 0    |
| 3 | 54566700  | 54566800  | 100 | 54566762  | 14 | 52  | 6.2  |
| 3 | 54722700  | 54722775  | 75  | 54722712  | 13 | 39  | 0    |
| 3 | 54969100  | 54969200  | 100 | 54969112  | 12 | 46  | 0    |
| 3 | 55091225  | 55091275  | 50  | 55091237  | 12 | 24  | 4.1  |
| 3 | 56692450  | 56692575  | 125 | 56692462  | 14 | 63  | 10.3 |
| 3 | 56784750  | 56784775  | 25  | 56784762  | 14 | 14  | 2.1  |
| 3 | 58002875  | 58002975  | 100 | 58002912  | 14 | 52  | 8.3  |
| 3 | 58266875  | 58266900  | 25  | 58266887  | 12 | 12  | 2.1  |
| 3 | 63189525  | 63189625  | 100 | 63189537  | 14 | 56  | 0    |
| 3 | 64137500  | 64137550  | 50  | 64137512  | 12 | 24  | 0    |
| 3 | 64251900  | 64251925  | 25  | 64251912  | 12 | 12  | 2.1  |
| 3 | 64649000  | 64649025  | 25  | 64649012  | 15 | 15  | 2.1  |
| 3 | 65136500  | 65136525  | 25  | 65136512  | 12 | 12  | 0    |
| 3 | 66762950  | 66762975  | 25  | 66762962  | 12 | 12  | 0    |
| 3 | 67659500  | 67659675  | 175 | 67659637  | 16 | 94  | 4.1  |
| 3 | 67727075  | 67727100  | 25  | 67727087  | 12 | 12  | 2.1  |
| 3 | 69008125  | 69008150  | 25  | 69008137  | 12 | 12  | 0    |
| 3 | 69216525  | 69216675  | 150 | 69216587  | 13 | 72  | 2.1  |
| 3 | 69373400  | 69373425  | 25  | 69373412  | 12 | 12  | 0    |
| 3 | 69426525  | 69426550  | 25  | 69426537  | 12 | 12  | 2.1  |
| 3 | 69496150  | 69496175  | 25  | 69496162  | 12 | 12  | 2.1  |
| 3 | 69679475  | 69679600  | 125 | 69679512  | 18 | 77  | 2.1  |
| 3 | 69781175  | 69781250  | 75  | 69781187  | 17 | 41  | 6.2  |
| 3 | 69923975  | 69924075  | 100 | 69923987  | 13 | 46  | 8.3  |
| 3 | 69987525  | 69987575  | 50  | 69987537  | 12 | 24  | 0    |
| 3 | 70960950  | 70961100  | 150 | 70960962  | 12 | 72  | 12.4 |
| 3 | 71143100  | 71143125  | 25  | 71143112  | 12 | 12  | 0    |
| 3 | 72285425  | 72285450  | 25  | 72285437  | 12 | 12  | 2.1  |
| 3 | 72291350  | 72291425  | 75  | 72291362  | 13 | 38  | 0    |
| 3 | 72328300  | 72328425  | 125 | 72328337  | 15 | 67  | 10.3 |
| 3 | 72679125  | 72679175  | 50  | 72679137  | 12 | 24  | 0    |
| 3 | 73026975  | 73027050  | 75  | 73026987  | 12 | 36  | 6.2  |
| 3 | 73070425  | 73070625  | 200 | 73070587  | 18 | 116 | 14.5 |
| 3 | 73217925  | 73218050  | 125 | 73218012  | 15 | 70  | 0    |
| 3 | 73642300  | 73642375  | 75  | 73642362  | 13 | 37  | 6.2  |
| 3 | 73681275  | 73681300  | 25  | 73681287  | 13 | 13  | 2.1  |
| 3 | 73734150  | 73734300  | 150 | 73734187  | 15 | 77  | 0    |
| 3 | 73898900  | 73898950  | 50  | 73898912  | 12 | 24  | 2.1  |
| 3 | 74669150  | 74669250  | 100 | 74669162  | 12 | 46  | 8.3  |
| 3 | 75780050  | 75780100  | 50  | 75780087  | 14 | 27  | 2.1  |
| 3 | 75868600  | 75868825  | 225 | 75868762  | 19 | 147 | 14.5 |
| 3 | 75869175  | 75870000  | 825 | 75869712  | 26 | 542 | 33.1 |
| 3 | 78831600  | 78831675  | 75  | 78831612  | 12 | 36  | 0    |
| 3 | 81427975  | 81428025  | 50  | 81427987  | 12 | 24  | 0    |
| 3 | 81503100  | 81503125  | 25  | 81503112  | 12 | 12  | 0    |
| 3 | 82786625  | 82786750  | 125 | 82786737  | 16 | 70  | 0    |
| 3 | 83356425  | 83356475  | 50  | 83356437  | 13 | 26  | 2.1  |
| 3 | 84060900  | 84061000  | 100 | 84060912  | 19 | 61  | 4.1  |
| 3 | 87086300  | 87086375  | 75  | 87086312  | 12 | 36  | 0    |
| 3 | 89277950  | 89278075  | 125 | 89278012  | 15 | 69  | 8.3  |
| 3 | 89303600  | 89303800  | 200 | 89303712  | 18 | 126 | 6.2  |
| 3 | 89814500  | 89814525  | 25  | 89814512  | 12 | 12  | 2.1  |
| 3 | 95045550  | 95045675  | 125 | 95045637  | 15 | 68  | 10.3 |
| 3 | 95895550  | 95895675  | 125 | 95895662  | 15 | 61  | 2.1  |
| 3 | 95934700  | 95934800  | 100 | 95934712  | 12 | 48  | 0    |
| 3 | 96314000  | 96314100  | 100 | 96314037  | 16 | 56  | 0    |
| 3 | 99073875  | 99073900  | 25  | 99073887  | 14 | 14  | 2.1  |
| 3 | 100846800 | 100846900 | 100 | 100846812 | 12 | 48  | 4.1  |
| 3 | 100860100 | 100860150 | 50  | 100860112 | 12 | 24  | 0    |
| 3 | 100879700 | 100879900 | 200 | 100879737 | 18 | 118 | 2.1  |
| 3 | 101536750 | 101536775 | 25  | 101536762 | 12 | 12  | 2.1  |
| 3 | 101737750 | 101737800 | 50  | 101737762 | 13 | 26  | 0    |
| 3 | 102180475 | 102180525 | 50  | 102180487 | 12 | 24  | 4.1  |
| 3 | 103425900 | 103425950 | 50  | 103425912 | 12 | 24  | 4.1  |
| 3 | 105639525 | 105639600 | 75  | 105639537 | 14 | 40  | 6.2  |
| 3 | 106848750 | 106848775 | 25  | 106848762 | 13 | 13  | 2.1  |
| 3 | 108270600 | 108270800 | 200 | 108270637 | 18 | 128 | 4.1  |
| 3 | 108319750 | 108319875 | 125 | 108319812 | 18 | 82  | 10.3 |
| 3 | 108476325 | 108476350 | 25  | 108476337 | 13 | 13  | 2.1  |
| 3 | 109673650 | 109673875 | 225 | 109673687 | 22 | 151 | 14.5 |
| 3 | 109791000 | 109791175 | 175 | 109791137 | 14 | 89  | 6.2  |

|   |           |           |     |           |    |     |      |
|---|-----------|-----------|-----|-----------|----|-----|------|
| 3 | 111516225 | 111516250 | 25  | 111516237 | 12 | 12  | 2.1  |
| 3 | 112005075 | 112005125 | 50  | 112005087 | 12 | 24  | 2.1  |
| 3 | 112970525 | 112970575 | 50  | 112970537 | 12 | 24  | 0    |
| 3 | 113180250 | 113180400 | 150 | 113180287 | 15 | 83  | 6.2  |
| 3 | 113592600 | 113592650 | 50  | 113592637 | 16 | 29  | 2.1  |
| 3 | 113593025 | 113593125 | 100 | 113593062 | 13 | 48  | 2.1  |
| 3 | 114221325 | 114221425 | 100 | 114221387 | 14 | 52  | 8.3  |
| 3 | 114342600 | 114342625 | 25  | 114342612 | 13 | 13  | 2.1  |
| 3 | 114349125 | 114349150 | 25  | 114349137 | 14 | 14  | 0    |
| 3 | 114828350 | 114828400 | 50  | 114828362 | 12 | 24  | 4.1  |
| 3 | 115826425 | 115826600 | 175 | 115826537 | 19 | 113 | 12.4 |
| 3 | 116049875 | 116050050 | 175 | 116049887 | 15 | 102 | 8.3  |
| 3 | 116273300 | 116273325 | 25  | 116273312 | 12 | 12  | 2.1  |
| 3 | 116349300 | 116349325 | 25  | 116349312 | 12 | 12  | 2.1  |
| 3 | 116357975 | 116358175 | 200 | 116357987 | 21 | 155 | 20.7 |
| 3 | 116782150 | 116782250 | 100 | 116782162 | 12 | 48  | 2.1  |
| 3 | 116898950 | 116899125 | 175 | 116898987 | 16 | 92  | 2.1  |
| 3 | 119189425 | 119189500 | 75  | 119189437 | 14 | 42  | 0    |
| 3 | 120431850 | 120431975 | 125 | 120431862 | 15 | 65  | 6.2  |
| 3 | 121227400 | 121227450 | 50  | 121227412 | 12 | 24  | 0    |
| 3 | 121354950 | 121355225 | 275 | 121355087 | 22 | 172 | 12.4 |
| 3 | 121361800 | 121361875 | 75  | 121361812 | 12 | 34  | 6.2  |
| 3 | 121364800 | 121364900 | 100 | 121364862 | 14 | 52  | 0    |
| 3 | 121798275 | 121798300 | 25  | 121798287 | 12 | 12  | 2.1  |
| 3 | 123765200 | 123765250 | 50  | 123765212 | 16 | 30  | 4.1  |
| 3 | 124822100 | 124822175 | 75  | 124822162 | 15 | 40  | 6.2  |
| 3 | 124844125 | 124844150 | 25  | 124844137 | 12 | 12  | 0    |
| 3 | 125586350 | 125586400 | 50  | 125586362 | 12 | 24  | 2.1  |
| 3 | 125669875 | 125670000 | 125 | 125669937 | 16 | 75  | 10.3 |
| 3 | 125700375 | 125700400 | 25  | 125700387 | 12 | 12  | 0    |
| 3 | 126039025 | 126039050 | 25  | 126039037 | 13 | 13  | 0    |
| 3 | 127462700 | 127462775 | 75  | 127462712 | 13 | 37  | 0    |
| 3 | 128112750 | 128112825 | 75  | 128112762 | 14 | 42  | 0    |
| 3 | 128952350 | 128952550 | 200 | 128952512 | 21 | 141 | 16.6 |
| 3 | 129071600 | 129071650 | 50  | 129071612 | 12 | 24  | 4.1  |
| 3 | 129367775 | 129367800 | 25  | 129367787 | 13 | 13  | 2.1  |
| 3 | 129852475 | 129852500 | 25  | 129852487 | 12 | 12  | 2.1  |
| 3 | 130001825 | 130002000 | 175 | 130001837 | 12 | 78  | 6.2  |
| 3 | 130061125 | 130061375 | 250 | 130061212 | 27 | 223 | 14.5 |
| 3 | 131031175 | 131031250 | 75  | 131031187 | 12 | 36  | 6.2  |
| 3 | 131132650 | 131132675 | 25  | 131132662 | 12 | 12  | 0    |
| 3 | 132704425 | 132704675 | 250 | 132704512 | 41 | 312 | 20.7 |
| 3 | 135510025 | 135510100 | 75  | 135510037 | 13 | 39  | 6.2  |
| 3 | 135565750 | 135565775 | 25  | 135565762 | 12 | 12  | 2.1  |
| 3 | 135639600 | 135639675 | 75  | 135639637 | 14 | 38  | 6.2  |
| 3 | 135687425 | 135687450 | 25  | 135687437 | 12 | 12  | 2.1  |
| 3 | 137545350 | 137545425 | 75  | 137545362 | 13 | 39  | 6.2  |
| 3 | 138064350 | 138064375 | 25  | 138064362 | 13 | 13  | 2.1  |
| 3 | 138215475 | 138215550 | 75  | 138215487 | 12 | 36  | 6.2  |
| 3 | 139583975 | 139584025 | 50  | 139583987 | 13 | 25  | 4.1  |
| 3 | 140148550 | 140148600 | 50  | 140148587 | 14 | 26  | 4.1  |
| 3 | 140734450 | 140734575 | 125 | 140734462 | 12 | 56  | 6.2  |
| 3 | 140735700 | 140735725 | 25  | 140735712 | 13 | 13  | 2.1  |
| 3 | 142503850 | 142504000 | 150 | 142503962 | 18 | 88  | 8.3  |
| 3 | 142568825 | 142568975 | 150 | 142568862 | 17 | 87  | 4.1  |
| 3 | 143427000 | 143427025 | 25  | 143427012 | 12 | 12  | 0    |
| 3 | 143846875 | 143847075 | 200 | 143846962 | 16 | 111 | 0    |
| 3 | 144195625 | 144195700 | 75  | 144195687 | 15 | 43  | 6.2  |
| 3 | 145443075 | 145443125 | 50  | 145443112 | 14 | 26  | 0    |
| 3 | 145705375 | 145705400 | 25  | 145705387 | 12 | 12  | 0    |
| 3 | 147360650 | 147360675 | 25  | 147360662 | 12 | 12  | 2.1  |
| 3 | 149082725 | 149082775 | 50  | 149082737 | 12 | 24  | 4.1  |
| 3 | 149097800 | 149097825 | 25  | 149097812 | 12 | 12  | 2.1  |
| 3 | 149279900 | 149279925 | 25  | 149279912 | 12 | 12  | 2.1  |
| 3 | 149908850 | 149908875 | 25  | 149908862 | 13 | 13  | 0    |
| 3 | 150425600 | 150425650 | 50  | 150425612 | 12 | 24  | 0    |
| 3 | 150782225 | 150782300 | 75  | 150782262 | 19 | 51  | 4.1  |
| 3 | 150826650 | 150826675 | 25  | 150826662 | 12 | 12  | 0    |
| 3 | 152870700 | 152870725 | 25  | 152870712 | 12 | 12  | 2.1  |
| 3 | 153498925 | 153499000 | 75  | 153498937 | 12 | 36  | 6.2  |
| 3 | 155177850 | 155177875 | 25  | 155177862 | 12 | 12  | 2.1  |
| 3 | 158274400 | 158274525 | 125 | 158274487 | 17 | 70  | 2.1  |
| 3 | 158276825 | 158276950 | 125 | 158276837 | 16 | 72  | 12.4 |
| 3 | 158282000 | 158282025 | 25  | 158282012 | 12 | 12  | 2.1  |
| 3 | 158617900 | 158617950 | 50  | 158617912 | 12 | 24  | 0    |

|   |           |           |     |           |    |     |      |
|---|-----------|-----------|-----|-----------|----|-----|------|
| 3 | 158985900 | 158985950 | 50  | 158985912 | 12 | 24  | 4.1  |
| 3 | 159992000 | 159992025 | 25  | 159992012 | 12 | 12  | 0    |
| 3 | 160408350 | 160408375 | 25  | 160408362 | 13 | 13  | 0    |
| 3 | 160557225 | 160557250 | 25  | 160557237 | 12 | 12  | 2.1  |
| 3 | 160912450 | 160912500 | 50  | 160912462 | 17 | 32  | 2.1  |
| 3 | 160966300 | 160966375 | 75  | 160966312 | 13 | 38  | 2.1  |
| 3 | 161005800 | 161005825 | 25  | 161005812 | 13 | 13  | 0    |
| 3 | 161065200 | 161065225 | 25  | 161065212 | 12 | 12  | 2.1  |
| 3 | 161680450 | 161680475 | 25  | 161680462 | 12 | 12  | 0    |
| 3 | 161956775 | 161956875 | 100 | 161956837 | 15 | 56  | 8.3  |
| 3 | 162130025 | 162130150 | 125 | 162130112 | 20 | 86  | 10.3 |
| 3 | 162136075 | 162136125 | 50  | 162136087 | 12 | 24  | 4.1  |
| 3 | 162235750 | 162235950 | 200 | 162235812 | 20 | 139 | 4.1  |
| 3 | 162305025 | 162305050 | 25  | 162305037 | 12 | 12  | 0    |
| 3 | 162371750 | 162371900 | 150 | 162371812 | 14 | 71  | 4.1  |
| 3 | 162613800 | 162613825 | 25  | 162613812 | 13 | 13  | 2.1  |
| 3 | 162622925 | 162623025 | 100 | 162622937 | 13 | 47  | 0    |
| 3 | 162630825 | 162631000 | 175 | 162630887 | 14 | 84  | 14.5 |
| 3 | 162644550 | 162644925 | 375 | 162644612 | 14 | 173 | 20.7 |
| 3 | 163052675 | 163052725 | 50  | 163052687 | 12 | 24  | 4.1  |
| 3 | 163053550 | 163053650 | 100 | 163053612 | 14 | 52  | 8.3  |
| 3 | 163091275 | 163091375 | 100 | 163091287 | 16 | 53  | 8.3  |
| 3 | 163112725 | 163112750 | 25  | 163112737 | 12 | 12  | 2.1  |
| 3 | 163189750 | 163189775 | 25  | 163189762 | 12 | 12  | 0    |
| 3 | 169015125 | 169015225 | 100 | 169015137 | 16 | 55  | 2.1  |
| 3 | 169224975 | 169225125 | 150 | 169224987 | 13 | 68  | 0    |
| 3 | 169352650 | 169352725 | 75  | 169352662 | 12 | 36  | 0    |
| 3 | 171676900 | 171676925 | 25  | 171676912 | 12 | 12  | 2.1  |
| 3 | 172070450 | 172070525 | 75  | 172070512 | 13 | 36  | 4.1  |
| 3 | 172203075 | 172203100 | 25  | 172203087 | 12 | 12  | 0    |
| 3 | 172749550 | 172749675 | 125 | 172749587 | 13 | 61  | 0    |
| 3 | 172815300 | 172815325 | 25  | 172815312 | 15 | 15  | 0    |
| 3 | 172817100 | 172817200 | 100 | 172817112 | 12 | 48  | 0    |
| 3 | 172973275 | 172973375 | 100 | 172973287 | 12 | 46  | 2.1  |
| 3 | 172977825 | 172977850 | 25  | 172977837 | 12 | 12  | 0    |
| 3 | 172979150 | 172979175 | 25  | 172979162 | 13 | 13  | 0    |
| 3 | 173030550 | 173030725 | 175 | 173030562 | 12 | 72  | 6.2  |
| 3 | 173157075 | 173157100 | 25  | 173157087 | 12 | 12  | 0    |
| 3 | 173369975 | 173370050 | 75  | 173369987 | 13 | 39  | 0    |
| 3 | 173818525 | 173818650 | 125 | 173818587 | 13 | 60  | 0    |
| 3 | 174045075 | 174045100 | 25  | 174045087 | 12 | 12  | 2.1  |
| 3 | 174118750 | 174118800 | 50  | 174118762 | 12 | 24  | 4.1  |
| 3 | 174946850 | 174946975 | 125 | 174946862 | 12 | 60  | 10.3 |
| 3 | 175133300 | 175133375 | 75  | 175133312 | 13 | 39  | 0    |
| 3 | 178546075 | 178546100 | 25  | 178546087 | 13 | 13  | 2.1  |
| 3 | 178691250 | 178691500 | 250 | 178691362 | 16 | 141 | 20.7 |
| 3 | 178692300 | 178692325 | 25  | 178692312 | 15 | 15  | 2.1  |
| 3 | 178798100 | 178798175 | 75  | 178798162 | 13 | 35  | 4.1  |
| 3 | 178815750 | 178815800 | 50  | 178815762 | 12 | 24  | 4.1  |
| 3 | 178880475 | 178880500 | 25  | 178880487 | 13 | 13  | 0    |
| 3 | 178945875 | 178945900 | 25  | 178945887 | 12 | 12  | 0    |
| 3 | 179025075 | 179025250 | 175 | 179025187 | 14 | 87  | 0    |
| 3 | 180237775 | 180237850 | 75  | 180237787 | 14 | 39  | 2.1  |
| 3 | 180745450 | 180745675 | 225 | 180745537 | 19 | 141 | 0    |
| 3 | 182912425 | 182912625 | 200 | 182912462 | 19 | 129 | 14.5 |
| 3 | 182958950 | 182958975 | 25  | 182958962 | 12 | 12  | 0    |
| 3 | 183329525 | 183329575 | 50  | 183329537 | 12 | 24  | 4.1  |
| 3 | 183493200 | 183493350 | 150 | 183493212 | 20 | 95  | 8.3  |
| 3 | 184350375 | 184350400 | 25  | 184350387 | 12 | 12  | 2.1  |
| 3 | 184853825 | 184853900 | 75  | 184853837 | 14 | 38  | 0    |
| 3 | 185071175 | 185071225 | 50  | 185071187 | 12 | 24  | 4.1  |
| 3 | 185803325 | 185803375 | 50  | 185803362 | 16 | 31  | 4.1  |
| 3 | 185825925 | 185826000 | 75  | 185825987 | 13 | 37  | 0    |
| 3 | 186097725 | 186097750 | 25  | 186097737 | 12 | 12  | 0    |
| 3 | 186471175 | 186471225 | 50  | 186471187 | 13 | 25  | 0    |
| 3 | 186889675 | 186889800 | 125 | 186889787 | 20 | 86  | 10.3 |
| 3 | 187133600 | 187133625 | 25  | 187133612 | 13 | 13  | 0    |
| 3 | 187138725 | 187138775 | 50  | 187138737 | 14 | 27  | 0    |
| 3 | 187281600 | 187281725 | 125 | 187281687 | 13 | 59  | 10.3 |
| 3 | 188200575 | 188200600 | 25  | 188200587 | 15 | 15  | 2.1  |
| 3 | 188568950 | 188569125 | 175 | 188568987 | 16 | 94  | 0    |
| 3 | 188771850 | 188771900 | 50  | 188771862 | 13 | 26  | 0    |
| 3 | 188972875 | 188972925 | 50  | 188972887 | 12 | 24  | 0    |
| 3 | 189707975 | 189708100 | 125 | 189707987 | 12 | 55  | 4.1  |
| 3 | 191142100 | 191142150 | 50  | 191142112 | 13 | 26  | 4.1  |

|   |           |           |     |           |    |     |      |
|---|-----------|-----------|-----|-----------|----|-----|------|
| 3 | 191167925 | 191167975 | 50  | 191167937 | 13 | 26  | 4.1  |
| 3 | 191733925 | 191734050 | 125 | 191733987 | 14 | 66  | 2.1  |
| 3 | 191766850 | 191766950 | 100 | 191766887 | 14 | 55  | 8.3  |
| 3 | 191767400 | 191767425 | 25  | 191767412 | 12 | 12  | 2.1  |
| 3 | 194749125 | 194749175 | 50  | 194749137 | 15 | 28  | 0    |
| 3 | 195561650 | 195561675 | 25  | 195561662 | 14 | 14  | 2.1  |
| 3 | 195775950 | 195776025 | 75  | 195776012 | 15 | 41  | 6.2  |
| 3 | 195884750 | 195884775 | 25  | 195884762 | 12 | 12  | 2.1  |
| 3 | 195914200 | 195914275 | 75  | 195914212 | 12 | 36  | 6.2  |
| 3 | 195932425 | 195932550 | 125 | 195932437 | 14 | 61  | 8.3  |
| 3 | 196108200 | 196108375 | 175 | 196108287 | 14 | 86  | 14.5 |
| 3 | 196109175 | 196109250 | 75  | 196109212 | 14 | 38  | 0    |
| 3 | 196461600 | 196461625 | 25  | 196461612 | 12 | 12  | 2.1  |
| 3 | 197108075 | 197108100 | 25  | 197108087 | 12 | 12  | 2.1  |
| 3 | 197495025 | 197495050 | 25  | 197495037 | 12 | 12  | 2.1  |
| 3 | 197730550 | 197730575 | 25  | 197730562 | 12 | 12  | 0    |
| 3 | 197731050 | 197731250 | 200 | 197731137 | 17 | 119 | 0    |
| 3 | 197862375 | 197862425 | 50  | 197862412 | 13 | 25  | 0    |
| 3 | 198242900 | 198243000 | 100 | 198242912 | 14 | 55  | 8.3  |
| 2 | 1648075   | 1648100   | 25  | 1648087   | 14 | 14  | 0    |
| 2 | 1699800   | 1700000   | 200 | 1699812   | 14 | 87  | 12.4 |
| 2 | 1704200   | 1704225   | 25  | 1704212   | 13 | 13  | 2.1  |
| 2 | 3806375   | 3806400   | 25  | 3806387   | 12 | 12  | 2.1  |
| 2 | 4698575   | 4698750   | 175 | 4698712   | 24 | 129 | 10.3 |
| 2 | 5247550   | 5247575   | 25  | 5247562   | 12 | 12  | 2.1  |
| 2 | 5382150   | 5382175   | 25  | 5382162   | 12 | 12  | 2.1  |
| 2 | 5903425   | 5903600   | 175 | 5903437   | 14 | 94  | 0    |
| 2 | 5976975   | 5977000   | 25  | 5976987   | 12 | 12  | 0    |
| 2 | 6420775   | 6420875   | 100 | 6420862   | 13 | 49  | 0    |
| 2 | 6685075   | 6685225   | 150 | 6685087   | 12 | 67  | 0    |
| 2 | 6902950   | 6903250   | 300 | 6903137   | 25 | 219 | 0    |
| 2 | 7009150   | 7009175   | 25  | 7009162   | 12 | 12  | 2.1  |
| 2 | 7068125   | 7068275   | 150 | 7068137   | 20 | 98  | 8.3  |
| 2 | 7574800   | 7574825   | 25  | 7574812   | 12 | 12  | 0    |
| 2 | 8034750   | 8034825   | 75  | 8034762   | 12 | 36  | 0    |
| 2 | 9248600   | 9248650   | 50  | 9248612   | 14 | 28  | 4.1  |
| 2 | 9299425   | 9299525   | 100 | 9299437   | 12 | 48  | 4.1  |
| 2 | 9391300   | 9391400   | 100 | 9391337   | 14 | 50  | 8.3  |
| 2 | 10182550  | 10182575  | 25  | 10182562  | 13 | 13  | 2.1  |
| 2 | 10341000  | 10341025  | 25  | 10341012  | 13 | 13  | 2.1  |
| 2 | 10341800  | 10341825  | 25  | 10341812  | 13 | 13  | 2.1  |
| 2 | 10356050  | 10356075  | 25  | 10356062  | 12 | 12  | 2.1  |
| 2 | 10401850  | 10401925  | 75  | 10401862  | 12 | 36  | 4.1  |
| 2 | 10548725  | 10548775  | 50  | 10548737  | 13 | 26  | 4.1  |
| 2 | 11000725  | 11000750  | 25  | 11000737  | 13 | 13  | 2.1  |
| 2 | 11061900  | 11062000  | 100 | 11061962  | 14 | 52  | 6.2  |
| 2 | 11128900  | 11129050  | 150 | 11128987  | 16 | 85  | 0    |
| 2 | 11431975  | 11432000  | 25  | 11431987  | 13 | 13  | 2.1  |
| 2 | 11801500  | 11801650  | 150 | 11801562  | 14 | 80  | 4.1  |
| 2 | 11887600  | 11887650  | 50  | 11887612  | 12 | 24  | 4.1  |
| 2 | 11887925  | 11888000  | 75  | 11887962  | 16 | 43  | 6.2  |
| 2 | 11930200  | 11930275  | 75  | 11930212  | 12 | 36  | 6.2  |
| 2 | 12059575  | 12059600  | 25  | 12059587  | 13 | 13  | 2.1  |
| 2 | 12140700  | 12140900  | 200 | 12140887  | 13 | 94  | 0    |
| 2 | 12163975  | 12164025  | 50  | 12163987  | 17 | 34  | 4.1  |
| 2 | 12225375  | 12225450  | 75  | 12225387  | 20 | 52  | 4.1  |
| 2 | 12227350  | 12227425  | 75  | 12227387  | 13 | 38  | 6.2  |
| 2 | 12257800  | 12257825  | 25  | 12257812  | 12 | 12  | 2.1  |
| 2 | 12281450  | 12281500  | 50  | 12281487  | 13 | 25  | 0    |
| 2 | 12458375  | 12458400  | 25  | 12458387  | 12 | 12  | 2.1  |
| 2 | 12498425  | 12498450  | 25  | 12498437  | 13 | 13  | 0    |
| 2 | 12664350  | 12664375  | 25  | 12664362  | 12 | 12  | 0    |
| 2 | 12854400  | 12854475  | 75  | 12854412  | 13 | 38  | 6.2  |
| 2 | 12950175  | 12950200  | 25  | 12950187  | 12 | 12  | 2.1  |
| 2 | 12986000  | 12986200  | 200 | 12986137  | 16 | 112 | 14.5 |
| 2 | 15649275  | 15649300  | 25  | 15649287  | 12 | 12  | 2.1  |
| 2 | 15822625  | 15822675  | 50  | 15822637  | 13 | 25  | 0    |
| 2 | 15843725  | 15843750  | 25  | 15843737  | 12 | 12  | 0    |
| 2 | 15883825  | 15884000  | 175 | 15883912  | 13 | 86  | 12.4 |
| 2 | 15969775  | 15969800  | 25  | 15969787  | 15 | 15  | 2.1  |
| 2 | 15970075  | 15970100  | 25  | 15970087  | 12 | 12  | 2.1  |
| 2 | 15989925  | 15990025  | 100 | 15989962  | 13 | 49  | 8.3  |
| 2 | 16361350  | 16361375  | 25  | 16361362  | 12 | 12  | 0    |
| 2 | 17660375  | 17660625  | 250 | 17660462  | 22 | 163 | 24.8 |
| 2 | 17896550  | 17896675  | 125 | 17896562  | 14 | 70  | 2.1  |

|   |          |          |     |          |    |     |      |
|---|----------|----------|-----|----------|----|-----|------|
| 2 | 18112525 | 18112625 | 100 | 18112562 | 14 | 50  | 8.3  |
| 2 | 19021475 | 19021500 | 25  | 19021487 | 14 | 14  | 2.1  |
| 2 | 19142325 | 19142400 | 75  | 19142337 | 13 | 37  | 4.1  |
| 2 | 19182975 | 19183150 | 175 | 19183037 | 13 | 81  | 4.1  |
| 2 | 20250525 | 20250550 | 25  | 20250537 | 13 | 13  | 0    |
| 2 | 20433550 | 20433575 | 25  | 20433562 | 13 | 13  | 0    |
| 2 | 20641275 | 20641375 | 100 | 20641312 | 20 | 76  | 0    |
| 2 | 20663725 | 20663825 | 100 | 20663762 | 17 | 65  | 8.3  |
| 2 | 22920775 | 22920825 | 50  | 22920787 | 12 | 24  | 0    |
| 2 | 23580100 | 23580150 | 50  | 23580112 | 14 | 26  | 4.1  |
| 2 | 23834625 | 23834650 | 25  | 23834637 | 12 | 12  | 0    |
| 2 | 24995850 | 24995900 | 50  | 24995862 | 14 | 28  | 4.1  |
| 2 | 25144525 | 25144550 | 25  | 25144537 | 12 | 12  | 0    |
| 2 | 25438750 | 25438825 | 75  | 25438812 | 13 | 36  | 2.1  |
| 2 | 25928050 | 25928075 | 25  | 25928062 | 12 | 12  | 2.1  |
| 2 | 26835050 | 26835075 | 25  | 26835062 | 13 | 13  | 2.1  |
| 2 | 26861825 | 26861850 | 25  | 26861837 | 12 | 12  | 2.1  |
| 2 | 27127725 | 27127750 | 25  | 27127737 | 14 | 14  | 2.1  |
| 2 | 27740200 | 27740225 | 25  | 27740212 | 13 | 13  | 2.1  |
| 2 | 28031750 | 28031800 | 50  | 28031762 | 12 | 24  | 4.1  |
| 2 | 28759500 | 28759600 | 100 | 28759512 | 12 | 46  | 4.1  |
| 2 | 28792800 | 28793000 | 200 | 28792887 | 15 | 108 | 0    |
| 2 | 28793925 | 28794000 | 75  | 28793962 | 14 | 39  | 6.2  |
| 2 | 29173375 | 29173525 | 150 | 29173462 | 13 | 72  | 2.1  |
| 2 | 29173975 | 29174100 | 125 | 29174037 | 17 | 75  | 4.1  |
| 2 | 29340150 | 29340275 | 125 | 29340187 | 13 | 64  | 0    |
| 2 | 29698350 | 29698375 | 25  | 29698362 | 12 | 12  | 0    |
| 2 | 30788050 | 30788225 | 175 | 30788087 | 17 | 103 | 8.3  |
| 2 | 31772525 | 31772650 | 125 | 31772537 | 15 | 68  | 10.3 |
| 2 | 33400100 | 33400175 | 75  | 33400112 | 14 | 41  | 6.2  |
| 2 | 33554700 | 33554750 | 50  | 33554712 | 12 | 24  | 2.1  |
| 2 | 33600500 | 33600550 | 50  | 33600512 | 12 | 24  | 4.1  |
| 2 | 34311850 | 34311950 | 100 | 34311862 | 13 | 48  | 0    |
| 2 | 35263125 | 35263250 | 125 | 35263137 | 13 | 62  | 8.3  |
| 2 | 37547625 | 37547675 | 50  | 37547637 | 12 | 24  | 0    |
| 2 | 37719675 | 37719775 | 100 | 37719762 | 17 | 55  | 8.3  |
| 2 | 37722400 | 37722425 | 25  | 37722412 | 12 | 12  | 2.1  |
| 2 | 37737400 | 37737425 | 25  | 37737412 | 12 | 12  | 0    |
| 2 | 37794100 | 37794150 | 50  | 37794112 | 12 | 24  | 4.1  |
| 2 | 38196050 | 38196075 | 25  | 38196062 | 12 | 12  | 2.1  |
| 2 | 38227200 | 38227275 | 75  | 38227237 | 16 | 45  | 6.2  |
| 2 | 38284175 | 38284300 | 125 | 38284237 | 17 | 76  | 6.2  |
| 2 | 38476825 | 38476850 | 25  | 38476837 | 13 | 13  | 2.1  |
| 2 | 38788075 | 38788125 | 50  | 38788087 | 12 | 24  | 0    |
| 2 | 42213700 | 42213725 | 25  | 42213712 | 13 | 13  | 2.1  |
| 2 | 42575800 | 42575875 | 75  | 42575862 | 14 | 40  | 6.2  |
| 2 | 42679600 | 42679625 | 25  | 42679612 | 12 | 12  | 2.1  |
| 2 | 43102375 | 43102425 | 50  | 43102387 | 12 | 24  | 4.1  |
| 2 | 43122750 | 43122825 | 75  | 43122762 | 19 | 54  | 0    |
| 2 | 43155725 | 43155750 | 25  | 43155737 | 12 | 12  | 2.1  |
| 2 | 43405875 | 43406275 | 400 | 43406062 | 31 | 326 | 4.1  |
| 2 | 44560150 | 44560225 | 75  | 44560212 | 14 | 38  | 0    |
| 2 | 46019500 | 46019825 | 325 | 46019662 | 28 | 232 | 24.8 |
| 2 | 46024825 | 46025000 | 175 | 46024937 | 18 | 108 | 2.1  |
| 2 | 46628600 | 46628650 | 50  | 46628612 | 12 | 24  | 0    |
| 2 | 46884950 | 46885025 | 75  | 46884987 | 13 | 37  | 0    |
| 2 | 47036150 | 47036200 | 50  | 47036162 | 12 | 24  | 0    |
| 2 | 47166025 | 47166250 | 225 | 47166112 | 20 | 141 | 4.1  |
| 2 | 47279625 | 47279725 | 100 | 47279712 | 17 | 55  | 8.3  |
| 2 | 47295975 | 47296050 | 75  | 47295987 | 13 | 36  | 0    |
| 2 | 47454325 | 47454350 | 25  | 47454337 | 12 | 12  | 0    |
| 2 | 47965850 | 47965875 | 25  | 47965862 | 13 | 13  | 0    |
| 2 | 48191750 | 48191775 | 25  | 48191762 | 13 | 13  | 2.1  |
| 2 | 48280150 | 48280200 | 50  | 48280162 | 14 | 28  | 0    |
| 2 | 48611825 | 48611875 | 50  | 48611837 | 12 | 24  | 4.1  |
| 2 | 51081625 | 51081650 | 25  | 51081637 | 14 | 14  | 0    |
| 2 | 55022400 | 55022425 | 25  | 55022412 | 12 | 12  | 0    |
| 2 | 55028300 | 55028400 | 100 | 55028337 | 16 | 59  | 8.3  |
| 2 | 55214525 | 55214625 | 100 | 55214562 | 14 | 51  | 6.2  |
| 2 | 55256175 | 55256225 | 50  | 55256187 | 12 | 24  | 0    |
| 2 | 55350050 | 55350075 | 25  | 55350062 | 12 | 12  | 2.1  |
| 2 | 55444975 | 55445000 | 25  | 55444987 | 13 | 13  | 0    |
| 2 | 55500525 | 55500600 | 75  | 55500537 | 12 | 36  | 0    |
| 2 | 60428700 | 60428750 | 50  | 60428712 | 12 | 24  | 0    |
| 2 | 61935475 | 61935600 | 125 | 61935537 | 14 | 62  | 4.1  |

|   |           |           |     |           |    |     |      |
|---|-----------|-----------|-----|-----------|----|-----|------|
| 2 | 62298975  | 62299000  | 25  | 62298987  | 13 | 13  | 2.1  |
| 2 | 62607425  | 62607450  | 25  | 62607437  | 12 | 12  | 2.1  |
| 2 | 62676975  | 62677100  | 125 | 62677037  | 17 | 75  | 2.1  |
| 2 | 63115375  | 63115400  | 25  | 63115387  | 12 | 12  | 2.1  |
| 2 | 63485075  | 63485225  | 150 | 63485087  | 13 | 74  | 0    |
| 2 | 63955775  | 63955800  | 25  | 63955787  | 12 | 12  | 2.1  |
| 2 | 64096200  | 64096225  | 25  | 64096212  | 12 | 12  | 2.1  |
| 2 | 64133175  | 64133375  | 200 | 64133287  | 18 | 118 | 14.5 |
| 2 | 64225450  | 64225475  | 25  | 64225462  | 12 | 12  | 0    |
| 2 | 64632625  | 64632750  | 125 | 64632637  | 15 | 68  | 10.3 |
| 2 | 64797350  | 64797375  | 25  | 64797362  | 12 | 12  | 2.1  |
| 2 | 64911775  | 64911825  | 50  | 64911812  | 14 | 26  | 4.1  |
| 2 | 65513450  | 65513600  | 150 | 65513462  | 14 | 75  | 4.1  |
| 2 | 65756875  | 65756950  | 75  | 65756887  | 13 | 37  | 0    |
| 2 | 65772700  | 65772750  | 50  | 65772712  | 12 | 24  | 4.1  |
| 2 | 66969650  | 66969675  | 25  | 66969662  | 12 | 12  | 2.1  |
| 2 | 67315250  | 67315275  | 25  | 67315262  | 12 | 12  | 2.1  |
| 2 | 68266250  | 68266400  | 150 | 68266337  | 17 | 81  | 2.1  |
| 2 | 68914750  | 68914775  | 25  | 68914762  | 13 | 13  | 0    |
| 2 | 70338125  | 70338175  | 50  | 70338137  | 12 | 24  | 4.1  |
| 2 | 73797450  | 73797550  | 100 | 73797462  | 12 | 48  | 0    |
| 2 | 74634725  | 74634800  | 75  | 74634737  | 14 | 40  | 6.2  |
| 2 | 75039625  | 75039775  | 150 | 75039687  | 19 | 93  | 10.3 |
| 2 | 76125475  | 76125575  | 100 | 76125512  | 17 | 64  | 8.3  |
| 2 | 85045875  | 85045900  | 25  | 85045887  | 12 | 12  | 2.1  |
| 2 | 85072250  | 85072350  | 100 | 85072262  | 12 | 48  | 0    |
| 2 | 85620150  | 85620175  | 25  | 85620162  | 12 | 12  | 2.1  |
| 2 | 85826025  | 85826075  | 50  | 85826037  | 12 | 24  | 4.1  |
| 2 | 85841150  | 85841200  | 50  | 85841162  | 14 | 28  | 0    |
| 2 | 85985850  | 85985875  | 25  | 85985862  | 12 | 12  | 0    |
| 2 | 86001550  | 86001750  | 200 | 86001662  | 18 | 114 | 10.3 |
| 2 | 86521200  | 86521250  | 50  | 86521237  | 17 | 32  | 0    |
| 2 | 86521600  | 86521725  | 125 | 86521612  | 22 | 89  | 10.3 |
| 2 | 88163775  | 88163825  | 50  | 88163787  | 12 | 24  | 4.1  |
| 2 | 91633225  | 91633250  | 25  | 91633237  | 13 | 13  | 2.1  |
| 2 | 91636625  | 91636825  | 200 | 91636812  | 15 | 99  | 16.6 |
| 2 | 91653975  | 91654025  | 50  | 91653987  | 13 | 26  | 4.1  |
| 2 | 91679150  | 91679325  | 175 | 91679162  | 12 | 84  | 14.5 |
| 2 | 91685050  | 91685175  | 125 | 91685062  | 28 | 138 | 20.7 |
| 2 | 91687725  | 91687775  | 50  | 91687762  | 16 | 29  | 0    |
| 2 | 94899175  | 94899225  | 50  | 94899187  | 13 | 26  | 2.1  |
| 2 | 94924800  | 94924825  | 25  | 94924812  | 12 | 12  | 0    |
| 2 | 95178975  | 95179050  | 75  | 95178987  | 12 | 36  | 6.2  |
| 2 | 95244575  | 95244775  | 200 | 95244637  | 17 | 111 | 12.4 |
| 2 | 96436325  | 96436350  | 25  | 96436337  | 12 | 12  | 2.1  |
| 2 | 96441050  | 96441200  | 150 | 96441162  | 15 | 83  | 0    |
| 2 | 96982675  | 96982750  | 75  | 96982712  | 13 | 38  | 0    |
| 2 | 97855050  | 97855200  | 150 | 97855062  | 12 | 70  | 6.2  |
| 2 | 98782050  | 98782075  | 25  | 98782062  | 13 | 13  | 0    |
| 2 | 100777975 | 100778100 | 125 | 100777987 | 16 | 72  | 6.2  |
| 2 | 100985025 | 100985150 | 125 | 100985037 | 22 | 98  | 10.3 |
| 2 | 101047275 | 101047300 | 25  | 101047287 | 12 | 12  | 2.1  |
| 2 | 101096875 | 101097000 | 125 | 101096937 | 15 | 67  | 0    |
| 2 | 105578750 | 105578900 | 150 | 105578762 | 23 | 115 | 10.3 |
| 2 | 105593550 | 105593725 | 175 | 105593687 | 13 | 79  | 12.4 |
| 2 | 105665175 | 105665200 | 25  | 105665187 | 12 | 12  | 0    |
| 2 | 105902050 | 105902350 | 300 | 105902312 | 17 | 176 | 35.2 |
| 2 | 108566675 | 108566700 | 25  | 108566687 | 12 | 12  | 0    |
| 2 | 109220350 | 109220400 | 50  | 109220362 | 12 | 24  | 0    |
| 2 | 109728950 | 109729075 | 125 | 109728962 | 13 | 58  | 10.3 |
| 2 | 111281200 | 111281275 | 75  | 111281212 | 13 | 37  | 0    |
| 2 | 111568925 | 111569025 | 100 | 111569012 | 16 | 57  | 6.2  |
| 2 | 113343725 | 113343825 | 100 | 113343787 | 16 | 55  | 0    |
| 2 | 113395050 | 113395225 | 175 | 113395137 | 15 | 92  | 0    |
| 2 | 114292725 | 114292775 | 50  | 114292737 | 13 | 26  | 4.1  |
| 2 | 118532350 | 118532375 | 25  | 118532362 | 12 | 12  | 0    |
| 2 | 118536275 | 118536350 | 75  | 118536287 | 15 | 39  | 0    |
| 2 | 118605850 | 118605875 | 25  | 118605862 | 12 | 12  | 0    |
| 2 | 118660525 | 118660550 | 25  | 118660537 | 12 | 12  | 0    |
| 2 | 119845125 | 119845275 | 150 | 119845262 | 18 | 85  | 10.3 |
| 2 | 120173450 | 120173625 | 175 | 120173562 | 15 | 89  | 0    |
| 2 | 121170000 | 121170025 | 25  | 121170012 | 12 | 12  | 2.1  |
| 2 | 121394100 | 121394300 | 200 | 121394237 | 17 | 110 | 16.6 |
| 2 | 121549375 | 121549400 | 25  | 121549387 | 12 | 12  | 2.1  |
| 2 | 121554375 | 121554425 | 50  | 121554387 | 13 | 26  | 4.1  |

|   |           |           |     |           |    |     |      |
|---|-----------|-----------|-----|-----------|----|-----|------|
| 2 | 122005075 | 122005175 | 100 | 122005137 | 21 | 73  | 8.3  |
| 2 | 122039625 | 122039700 | 75  | 122039637 | 13 | 38  | 2.1  |
| 2 | 122122500 | 122122525 | 25  | 122122512 | 13 | 13  | 0    |
| 2 | 122358825 | 122358975 | 150 | 122358837 | 23 | 118 | 22.8 |
| 2 | 122473350 | 122473375 | 25  | 122473362 | 12 | 12  | 0    |
| 2 | 122743625 | 122743650 | 25  | 122743637 | 12 | 12  | 0    |
| 2 | 123435225 | 123435325 | 100 | 123435262 | 14 | 52  | 2.1  |
| 2 | 125459650 | 125459750 | 100 | 125459687 | 13 | 49  | 8.3  |
| 2 | 127982775 | 127982800 | 25  | 127982787 | 12 | 12  | 2.1  |
| 2 | 128502900 | 128502950 | 50  | 128502912 | 13 | 26  | 0    |
| 2 | 132730200 | 132730250 | 50  | 132730212 | 14 | 26  | 0    |
| 2 | 132738550 | 132738625 | 75  | 132738562 | 12 | 36  | 6.2  |
| 2 | 132740375 | 132740400 | 25  | 132740387 | 12 | 12  | 2.1  |
| 2 | 132743625 | 132743650 | 25  | 132743637 | 21 | 21  | 4.1  |
| 2 | 132754550 | 132754575 | 25  | 132754562 | 13 | 13  | 2.1  |
| 2 | 132821150 | 132821300 | 150 | 132821212 | 17 | 85  | 12.4 |
| 2 | 133373250 | 133373325 | 75  | 133373287 | 13 | 38  | 0    |
| 2 | 133547450 | 133547500 | 50  | 133547462 | 12 | 24  | 0    |
| 2 | 133604750 | 133604800 | 50  | 133604762 | 13 | 26  | 0    |
| 2 | 133726925 | 133727025 | 100 | 133727012 | 13 | 49  | 8.3  |
| 2 | 133898325 | 133898350 | 25  | 133898337 | 12 | 12  | 2.1  |
| 2 | 134192925 | 134192950 | 25  | 134192937 | 13 | 13  | 2.1  |
| 2 | 134544350 | 134544400 | 50  | 134544362 | 13 | 25  | 0    |
| 2 | 138443350 | 138443475 | 125 | 138443462 | 15 | 63  | 0    |
| 2 | 138562975 | 138563025 | 50  | 138562987 | 12 | 24  | 0    |
| 2 | 139885050 | 139885125 | 75  | 139885062 | 12 | 36  | 6.2  |
| 2 | 142590325 | 142590375 | 50  | 142590337 | 12 | 24  | 0    |
| 2 | 143217025 | 143217125 | 100 | 143217037 | 12 | 46  | 8.3  |
| 2 | 143347075 | 143347125 | 50  | 143347087 | 12 | 24  | 0    |
| 2 | 144081900 | 144081925 | 25  | 144081912 | 12 | 12  | 0    |
| 2 | 144997900 | 144997925 | 25  | 144997912 | 15 | 15  | 2.1  |
| 2 | 146274175 | 146274250 | 75  | 146274187 | 13 | 38  | 6.2  |
| 2 | 147464700 | 147464875 | 175 | 147464737 | 15 | 100 | 14.5 |
| 2 | 150213725 | 150213800 | 75  | 150213737 | 15 | 39  | 6.2  |
| 2 | 150285400 | 150285475 | 75  | 150285412 | 12 | 36  | 2.1  |
| 2 | 151052575 | 151052650 | 75  | 151052587 | 14 | 38  | 4.1  |
| 2 | 151094475 | 151094500 | 25  | 151094487 | 14 | 14  | 0    |
| 2 | 151151650 | 151151850 | 200 | 151151787 | 16 | 112 | 4.1  |
| 2 | 151270250 | 151270300 | 50  | 151270262 | 13 | 25  | 0    |
| 2 | 151352650 | 151352725 | 75  | 151352687 | 13 | 38  | 0    |
| 2 | 151656975 | 151657050 | 75  | 151656987 | 12 | 34  | 0    |
| 2 | 151812350 | 151812400 | 50  | 151812362 | 12 | 24  | 0    |
| 2 | 151871525 | 151871650 | 125 | 151871562 | 14 | 67  | 10.3 |
| 2 | 152976550 | 152976600 | 50  | 152976562 | 12 | 24  | 0    |
| 2 | 153027525 | 153027550 | 25  | 153027537 | 12 | 12  | 2.1  |
| 2 | 153032225 | 153032275 | 50  | 153032237 | 12 | 24  | 0    |
| 2 | 153084075 | 153084150 | 75  | 153084137 | 13 | 35  | 2.1  |
| 2 | 153107800 | 153107850 | 50  | 153107812 | 14 | 28  | 4.1  |
| 2 | 153935650 | 153935675 | 25  | 153935662 | 12 | 12  | 0    |
| 2 | 154551425 | 154551575 | 150 | 154551462 | 19 | 96  | 12.4 |
| 2 | 155969475 | 155969575 | 100 | 155969562 | 13 | 47  | 0    |
| 2 | 156906675 | 156906750 | 75  | 156906687 | 14 | 40  | 6.2  |
| 2 | 157738600 | 157738650 | 50  | 157738612 | 14 | 26  | 4.1  |
| 2 | 159251175 | 159251200 | 25  | 159251187 | 12 | 12  | 2.1  |
| 2 | 159288025 | 159288075 | 50  | 159288037 | 13 | 26  | 4.1  |
| 2 | 159400350 | 159400475 | 125 | 159400362 | 12 | 60  | 0    |
| 2 | 159563475 | 159563600 | 125 | 159563512 | 17 | 70  | 10.3 |
| 2 | 159656275 | 159656375 | 100 | 159656312 | 15 | 58  | 8.3  |
| 2 | 159665825 | 159665875 | 50  | 159665837 | 12 | 24  | 4.1  |
| 2 | 160180250 | 160180275 | 25  | 160180262 | 12 | 12  | 2.1  |
| 2 | 160652625 | 160652800 | 175 | 160652762 | 22 | 115 | 20.7 |
| 2 | 160674750 | 160674900 | 150 | 160674887 | 18 | 92  | 10.3 |
| 2 | 160806600 | 160806800 | 200 | 160806687 | 15 | 104 | 16.6 |
| 2 | 161216350 | 161216425 | 75  | 161216387 | 13 | 38  | 6.2  |
| 2 | 161222025 | 161222175 | 150 | 161222112 | 17 | 94  | 10.3 |
| 2 | 161485575 | 161485625 | 50  | 161485587 | 13 | 26  | 0    |
| 2 | 164080750 | 164080875 | 125 | 164080787 | 16 | 76  | 10.3 |
| 2 | 165442075 | 165442100 | 25  | 165442087 | 12 | 12  | 2.1  |
| 2 | 166138950 | 166139025 | 75  | 166138962 | 12 | 36  | 6.2  |
| 2 | 166215250 | 166215275 | 25  | 166215262 | 12 | 12  | 0    |
| 2 | 167396825 | 167396850 | 25  | 167396837 | 12 | 12  | 0    |
| 2 | 167613850 | 167613975 | 125 | 167613887 | 14 | 62  | 2.1  |
| 2 | 167668175 | 167668350 | 175 | 167668187 | 13 | 75  | 6.2  |
| 2 | 168002975 | 168003025 | 50  | 168002987 | 12 | 24  | 2.1  |
| 2 | 168158500 | 168158550 | 50  | 168158512 | 13 | 26  | 0    |



|   |           |           |     |           |    |     |      |
|---|-----------|-----------|-----|-----------|----|-----|------|
| 2 | 168216400 | 168216750 | 350 | 168216612 | 15 | 188 | 16.6 |
| 2 | 168246825 | 168246900 | 75  | 168246862 | 15 | 41  | 6.2  |
| 2 | 169660425 | 169660450 | 25  | 169660437 | 13 | 13  | 0    |
| 2 | 170393150 | 170393175 | 25  | 170393162 | 13 | 13  | 2.1  |
| 2 | 170396250 | 170396275 | 25  | 170396262 | 12 | 12  | 2.1  |
| 2 | 171746350 | 171746375 | 25  | 171746362 | 12 | 12  | 0    |
| 2 | 173063150 | 173063225 | 75  | 173063162 | 12 | 36  | 6.2  |
| 2 | 173266500 | 173266525 | 25  | 173266512 | 12 | 12  | 2.1  |
| 2 | 173277575 | 173277625 | 50  | 173277587 | 12 | 24  | 0    |
| 2 | 173314425 | 173314450 | 25  | 173314437 | 12 | 12  | 2.1  |
| 2 | 173379575 | 173379650 | 75  | 173379587 | 12 | 36  | 0    |
| 2 | 173595050 | 173595075 | 25  | 173595062 | 13 | 13  | 0    |
| 2 | 173621900 | 173621950 | 50  | 173621912 | 12 | 24  | 0    |
| 2 | 173783775 | 173783800 | 25  | 173783787 | 13 | 13  | 2.1  |
| 2 | 174163650 | 174163675 | 25  | 174163662 | 12 | 12  | 2.1  |
| 2 | 174612900 | 174613000 | 100 | 174612912 | 20 | 60  | 8.3  |
| 2 | 175083650 | 175083800 | 150 | 175083737 | 17 | 83  | 12.4 |
| 2 | 176712575 | 176712625 | 50  | 176712587 | 12 | 24  | 4.1  |
| 2 | 176848800 | 176848925 | 125 | 176848812 | 14 | 66  | 8.3  |
| 2 | 177155975 | 177156025 | 50  | 177155987 | 16 | 28  | 4.1  |
| 2 | 178172325 | 178172500 | 175 | 178172437 | 17 | 100 | 4.1  |
| 2 | 178323950 | 178323975 | 25  | 178323962 | 12 | 12  | 2.1  |
| 2 | 179793600 | 179793675 | 75  | 179793612 | 12 | 36  | 6.2  |
| 2 | 179837975 | 179838000 | 25  | 179837987 | 12 | 12  | 0    |
| 2 | 179917825 | 179917875 | 50  | 179917837 | 12 | 24  | 2.1  |
| 2 | 182550750 | 182550825 | 75  | 182550762 | 12 | 36  | 2.1  |
| 2 | 184471775 | 184471900 | 125 | 184471812 | 17 | 77  | 6.2  |
| 2 | 186848025 | 186848125 | 100 | 186848037 | 13 | 49  | 0    |
| 2 | 187056725 | 187056750 | 25  | 187056737 | 12 | 12  | 0    |
| 2 | 187812375 | 187812475 | 100 | 187812387 | 12 | 48  | 0    |
| 2 | 188866525 | 188866575 | 50  | 188866537 | 13 | 26  | 2.1  |
| 2 | 189085550 | 189085575 | 25  | 189085562 | 12 | 12  | 0    |
| 2 | 191253400 | 191253475 | 75  | 191253412 | 12 | 36  | 6.2  |
| 2 | 191296450 | 191296575 | 125 | 191296462 | 14 | 65  | 2.1  |
| 2 | 191587175 | 191587275 | 100 | 191587237 | 15 | 56  | 6.2  |
| 2 | 191739150 | 191739200 | 50  | 191739187 | 14 | 26  | 4.1  |
| 2 | 191950375 | 191950400 | 25  | 191950387 | 13 | 13  | 2.1  |
| 2 | 192250425 | 192250450 | 25  | 192250437 | 12 | 12  | 0    |
| 2 | 194956425 | 194956575 | 150 | 194956537 | 14 | 75  | 0    |
| 2 | 195877400 | 195877525 | 125 | 195877462 | 17 | 69  | 0    |
| 2 | 197866775 | 197866825 | 50  | 197866787 | 12 | 24  | 0    |
| 2 | 198072875 | 198073025 | 150 | 198072962 | 23 | 114 | 18.6 |
| 2 | 198201225 | 198201250 | 25  | 198201237 | 14 | 14  | 2.1  |
| 2 | 198446350 | 198446550 | 200 | 198446362 | 14 | 88  | 10.3 |
| 2 | 200034550 | 200034575 | 25  | 200034562 | 12 | 12  | 0    |
| 2 | 200738750 | 200738875 | 125 | 200738812 | 15 | 69  | 0    |
| 2 | 201099075 | 201099150 | 75  | 201099112 | 15 | 42  | 4.1  |
| 2 | 201930300 | 201930325 | 25  | 201930312 | 13 | 13  | 2.1  |
| 2 | 204596550 | 204596575 | 25  | 204596562 | 12 | 12  | 0    |
| 2 | 206223450 | 206223475 | 25  | 206223462 | 25 | 25  | 4.1  |
| 2 | 206273300 | 206273425 | 125 | 206273312 | 12 | 58  | 6.2  |
| 2 | 206521200 | 206521250 | 50  | 206521212 | 12 | 24  | 2.1  |
| 2 | 206635850 | 206635900 | 50  | 206635862 | 12 | 24  | 0    |
| 2 | 207707650 | 207707700 | 50  | 207707662 | 12 | 24  | 0    |
| 2 | 207884375 | 207884475 | 100 | 207884387 | 19 | 76  | 8.3  |
| 2 | 208607350 | 208607375 | 25  | 208607362 | 12 | 12  | 0    |
| 2 | 208645400 | 208645425 | 25  | 208645412 | 12 | 12  | 2.1  |
| 2 | 210534050 | 210534150 | 100 | 210534087 | 17 | 62  | 8.3  |
| 2 | 210743600 | 210743750 | 150 | 210743712 | 15 | 79  | 10.3 |
| 2 | 210911125 | 210911250 | 125 | 210911137 | 13 | 64  | 10.3 |
| 2 | 211092725 | 211092750 | 25  | 211092737 | 13 | 13  | 0    |
| 2 | 211355725 | 211355800 | 75  | 211355762 | 14 | 41  | 0    |
| 2 | 213436225 | 213436350 | 125 | 213436262 | 18 | 74  | 4.1  |
| 2 | 213857125 | 213857300 | 175 | 213857287 | 15 | 93  | 8.3  |
| 2 | 214806450 | 214806475 | 25  | 214806462 | 12 | 12  | 0    |
| 2 | 215842475 | 215842525 | 50  | 215842487 | 13 | 26  | 0    |
| 2 | 215884975 | 215885000 | 25  | 215884987 | 12 | 12  | 2.1  |
| 2 | 216099650 | 216099675 | 25  | 216099662 | 13 | 13  | 0    |
| 2 | 216101625 | 216101800 | 175 | 216101762 | 26 | 144 | 20.7 |
| 2 | 217051250 | 217051275 | 25  | 217051262 | 16 | 16  | 2.1  |
| 2 | 217735725 | 217735875 | 150 | 217735837 | 13 | 72  | 2.1  |
| 2 | 218280100 | 218280150 | 50  | 218280137 | 17 | 31  | 4.1  |
| 2 | 219300900 | 219300925 | 25  | 219300912 | 12 | 12  | 0    |
| 2 | 219304675 | 219304725 | 50  | 219304687 | 13 | 26  | 4.1  |
| 2 | 219420875 | 219420900 | 25  | 219420887 | 12 | 12  | 2.1  |

|   |           |           |     |           |    |     |      |
|---|-----------|-----------|-----|-----------|----|-----|------|
| 2 | 219426725 | 219426750 | 25  | 219426737 | 13 | 13  | 0    |
| 2 | 220255175 | 220255200 | 25  | 220255187 | 13 | 13  | 2.1  |
| 2 | 220274925 | 220275100 | 175 | 220274937 | 14 | 88  | 8.3  |
| 2 | 220542675 | 220542775 | 100 | 220542712 | 16 | 62  | 0    |
| 2 | 223282300 | 223282325 | 25  | 223282312 | 12 | 12  | 0    |
| 2 | 223295675 | 223295925 | 250 | 223295812 | 26 | 185 | 16.6 |
| 2 | 223306975 | 223307000 | 25  | 223306987 | 13 | 13  | 2.1  |
| 2 | 223307375 | 223307425 | 50  | 223307387 | 16 | 30  | 4.1  |
| 2 | 223386525 | 223386775 | 250 | 223386662 | 14 | 120 | 6.2  |
| 2 | 223614550 | 223614575 | 25  | 223614562 | 17 | 17  | 2.1  |
| 2 | 224157650 | 224157725 | 75  | 224157687 | 14 | 38  | 0    |
| 2 | 224297100 | 224297125 | 25  | 224297112 | 12 | 12  | 2.1  |
| 2 | 224333975 | 224334000 | 25  | 224333987 | 12 | 12  | 2.1  |
| 2 | 224769250 | 224769325 | 75  | 224769287 | 14 | 38  | 6.2  |
| 2 | 224794700 | 224794725 | 25  | 224794712 | 12 | 12  | 2.1  |
| 2 | 227364275 | 227364400 | 125 | 227364287 | 13 | 65  | 10.3 |
| 2 | 227897975 | 227898175 | 200 | 227898012 | 17 | 125 | 22.8 |
| 2 | 228039175 | 228039225 | 50  | 228039187 | 15 | 29  | 2.1  |
| 2 | 228395525 | 228395725 | 200 | 228395687 | 13 | 87  | 0    |
| 2 | 231938225 | 231938525 | 300 | 231938362 | 24 | 249 | 33.1 |
| 2 | 232253600 | 232253625 | 25  | 232253612 | 15 | 15  | 2.1  |
| 2 | 232938825 | 232938850 | 25  | 232938837 | 12 | 12  | 0    |
| 2 | 233848175 | 233848225 | 50  | 233848187 | 12 | 24  | 4.1  |
| 2 | 233987450 | 233987625 | 175 | 233987512 | 14 | 86  | 10.3 |
| 2 | 234000100 | 234000225 | 125 | 234000162 | 14 | 61  | 6.2  |
| 2 | 234732275 | 234732375 | 100 | 234732337 | 16 | 54  | 2.1  |
| 2 | 234752425 | 234752550 | 125 | 234752437 | 15 | 63  | 2.1  |
| 2 | 235124150 | 235124350 | 200 | 235124312 | 13 | 90  | 16.6 |
| 2 | 235562550 | 235562575 | 25  | 235562562 | 12 | 12  | 0    |
| 2 | 236042425 | 236042550 | 125 | 236042462 | 18 | 76  | 10.3 |
| 2 | 236656550 | 236656650 | 100 | 236656562 | 13 | 50  | 0    |
| 2 | 237852075 | 237852125 | 50  | 237852087 | 12 | 24  | 4.1  |
| 2 | 237864975 | 237865050 | 75  | 237864987 | 13 | 39  | 6.2  |
| 2 | 238006100 | 238006125 | 25  | 238006112 | 16 | 16  | 2.1  |
| 2 | 238176850 | 238176900 | 50  | 238176887 | 13 | 25  | 2.1  |
| 2 | 239000225 | 239000250 | 25  | 239000237 | 12 | 12  | 2.1  |
| 2 | 239844275 | 239844325 | 50  | 239844287 | 12 | 24  | 0    |
| 2 | 240843900 | 240843925 | 25  | 240843912 | 12 | 12  | 0    |
| 2 | 241576300 | 241576475 | 175 | 241576337 | 13 | 86  | 0    |
| 2 | 241589900 | 241589925 | 25  | 241589912 | 13 | 13  | 2.1  |
| 2 | 241813200 | 241813225 | 25  | 241813212 | 12 | 12  | 0    |
| 2 | 241857925 | 241858000 | 75  | 241857937 | 12 | 36  | 6.2  |
| 2 | 241999225 | 241999275 | 50  | 241999237 | 13 | 25  | 4.1  |
| 5 | 446350    | 446400    | 50  | 446362    | 12 | 24  | 4.1  |
| 5 | 1846000   | 1846150   | 150 | 1846062   | 15 | 78  | 10.3 |
| 5 | 1847675   | 1847700   | 25  | 1847687   | 12 | 12  | 2.1  |
| 5 | 1848700   | 1848800   | 100 | 1848737   | 15 | 57  | 8.3  |
| 5 | 4420150   | 4420175   | 25  | 4420162   | 12 | 12  | 2.1  |
| 5 | 4657575   | 4657625   | 50  | 4657587   | 13 | 26  | 4.1  |
| 5 | 5123125   | 5123150   | 25  | 5123137   | 12 | 12  | 0    |
| 5 | 5324275   | 5324400   | 125 | 5324362   | 14 | 60  | 0    |
| 5 | 5371800   | 5371825   | 25  | 5371812   | 13 | 13  | 2.1  |
| 5 | 5397200   | 5397300   | 100 | 5397262   | 17 | 64  | 2.1  |
| 5 | 5404500   | 5404650   | 150 | 5404587   | 16 | 80  | 2.1  |
| 5 | 5576375   | 5576450   | 75  | 5576387   | 13 | 39  | 0    |
| 5 | 6753350   | 6753375   | 25  | 6753362   | 13 | 13  | 0    |
| 5 | 8897525   | 8897600   | 75  | 8897537   | 12 | 36  | 2.1  |
| 5 | 10305175  | 10305250  | 75  | 10305187  | 13 | 39  | 6.2  |
| 5 | 10531250  | 10531300  | 50  | 10531262  | 12 | 24  | 4.1  |
| 5 | 10742775  | 10742825  | 50  | 10742787  | 12 | 24  | 4.1  |
| 5 | 10781750  | 10781800  | 50  | 10781762  | 12 | 24  | 2.1  |
| 5 | 12338575  | 12338650  | 75  | 12338587  | 12 | 36  | 6.2  |
| 5 | 13530275  | 13530400  | 125 | 13530362  | 15 | 67  | 4.1  |
| 5 | 13748300  | 13748325  | 25  | 13748312  | 12 | 12  | 0    |
| 5 | 14486575  | 14486600  | 25  | 14486587  | 12 | 12  | 2.1  |
| 5 | 14502650  | 14502800  | 150 | 14502687  | 17 | 86  | 10.3 |
| 5 | 14793850  | 14793875  | 25  | 14793862  | 12 | 12  | 0    |
| 5 | 14834275  | 14834325  | 50  | 14834287  | 12 | 24  | 0    |
| 5 | 14863050  | 14863075  | 25  | 14863062  | 14 | 14  | 2.1  |
| 5 | 14942700  | 14942775  | 75  | 14942737  | 14 | 38  | 6.2  |
| 5 | 15006200  | 15006325  | 125 | 15006287  | 13 | 60  | 0    |
| 5 | 16622675  | 16622700  | 25  | 16622687  | 12 | 12  | 0    |
| 5 | 16628375  | 16628400  | 25  | 16628387  | 12 | 12  | 0    |
| 5 | 16649900  | 16649925  | 25  | 16649912  | 14 | 14  | 2.1  |
| 5 | 16987200  | 16987225  | 25  | 16987212  | 12 | 12  | 0    |

|   |          |          |     |          |    |     |      |
|---|----------|----------|-----|----------|----|-----|------|
| 5 | 17045575 | 17045700 | 125 | 17045687 | 13 | 60  | 0    |
| 5 | 17106925 | 17106975 | 50  | 17106937 | 13 | 25  | 0    |
| 5 | 17171950 | 17172000 | 50  | 17171962 | 14 | 27  | 4.1  |
| 5 | 21716325 | 21716350 | 25  | 21716337 | 12 | 12  | 2.1  |
| 5 | 23543175 | 23543200 | 25  | 23543187 | 12 | 12  | 2.1  |
| 5 | 29001650 | 29001700 | 50  | 29001662 | 13 | 26  | 0    |
| 5 | 31973200 | 31973250 | 50  | 31973212 | 12 | 24  | 4.1  |
| 5 | 32027000 | 32027025 | 25  | 32027012 | 12 | 12  | 2.1  |
| 5 | 32066300 | 32066400 | 100 | 32066337 | 18 | 61  | 4.1  |
| 5 | 32525850 | 32525875 | 25  | 32525862 | 12 | 12  | 2.1  |
| 5 | 32622100 | 32622125 | 25  | 32622112 | 12 | 12  | 2.1  |
| 5 | 34005700 | 34005750 | 50  | 34005712 | 12 | 24  | 0    |
| 5 | 34083200 | 34083225 | 25  | 34083212 | 12 | 12  | 2.1  |
| 5 | 34772975 | 34773000 | 25  | 34772987 | 12 | 12  | 0    |
| 5 | 37894925 | 37895100 | 175 | 37895037 | 13 | 83  | 6.2  |
| 5 | 37925800 | 37926000 | 200 | 37925912 | 17 | 121 | 10.3 |
| 5 | 38184350 | 38184425 | 75  | 38184412 | 16 | 44  | 4.1  |
| 5 | 38187125 | 38187275 | 150 | 38187187 | 16 | 80  | 0    |
| 5 | 38352775 | 38352875 | 100 | 38352812 | 14 | 50  | 8.3  |
| 5 | 38808350 | 38808400 | 50  | 38808387 | 16 | 29  | 0    |
| 5 | 38819150 | 38819175 | 25  | 38819162 | 12 | 12  | 0    |
| 5 | 38845850 | 38845875 | 25  | 38845862 | 12 | 12  | 2.1  |
| 5 | 39500100 | 39500225 | 125 | 39500137 | 15 | 69  | 0    |
| 5 | 40871350 | 40871375 | 25  | 40871362 | 13 | 13  | 2.1  |
| 5 | 43100625 | 43100650 | 25  | 43100637 | 12 | 12  | 2.1  |
| 5 | 44882975 | 44883025 | 50  | 44882987 | 12 | 24  | 4.1  |
| 5 | 44911925 | 44911950 | 25  | 44911937 | 12 | 12  | 0    |
| 5 | 44914950 | 44915025 | 75  | 44914962 | 13 | 37  | 4.1  |
| 5 | 44978475 | 44978525 | 50  | 44978487 | 13 | 26  | 0    |
| 5 | 44987475 | 44987575 | 100 | 44987562 | 15 | 54  | 0    |
| 5 | 45019050 | 45019100 | 50  | 45019062 | 12 | 24  | 0    |
| 5 | 52431200 | 52431275 | 75  | 52431212 | 12 | 36  | 6.2  |
| 5 | 53423325 | 53423375 | 50  | 53423337 | 12 | 24  | 0    |
| 5 | 53424775 | 53424850 | 75  | 53424837 | 14 | 38  | 6.2  |
| 5 | 55734475 | 55734500 | 25  | 55734487 | 12 | 12  | 0    |
| 5 | 55741400 | 55741425 | 25  | 55741412 | 12 | 12  | 2.1  |
| 5 | 55780450 | 55780500 | 50  | 55780462 | 16 | 28  | 4.1  |
| 5 | 56633800 | 56633900 | 100 | 56633837 | 18 | 68  | 8.3  |
| 5 | 56648575 | 56648600 | 25  | 56648587 | 12 | 12  | 2.1  |
| 5 | 56649525 | 56649675 | 150 | 56649537 | 12 | 64  | 12.4 |
| 5 | 56655375 | 56655900 | 525 | 56655562 | 51 | 620 | 68.3 |
| 5 | 56714750 | 56715125 | 375 | 56714912 | 25 | 303 | 33.1 |
| 5 | 56715350 | 56715425 | 75  | 56715362 | 12 | 36  | 6.2  |
| 5 | 56728025 | 56728050 | 25  | 56728037 | 12 | 12  | 0    |
| 5 | 56773300 | 56773425 | 125 | 56773312 | 13 | 61  | 4.1  |
| 5 | 56787750 | 56788000 | 250 | 56787862 | 16 | 133 | 14.5 |
| 5 | 56798375 | 56798400 | 25  | 56798387 | 12 | 12  | 2.1  |
| 5 | 56820100 | 56820125 | 25  | 56820112 | 13 | 13  | 2.1  |
| 5 | 56826400 | 56826425 | 25  | 56826412 | 13 | 13  | 2.1  |
| 5 | 59077025 | 59077125 | 100 | 59077037 | 13 | 50  | 6.2  |
| 5 | 59118200 | 59118250 | 50  | 59118237 | 13 | 25  | 2.1  |
| 5 | 59827450 | 59827500 | 50  | 59827462 | 15 | 30  | 2.1  |
| 5 | 60633375 | 60633575 | 200 | 60633537 | 16 | 102 | 16.6 |
| 5 | 61265725 | 61265800 | 75  | 61265737 | 12 | 34  | 0    |
| 5 | 65564225 | 65564300 | 75  | 65564237 | 12 | 36  | 0    |
| 5 | 66632925 | 66632950 | 25  | 66632937 | 12 | 12  | 2.1  |
| 5 | 66682375 | 66682400 | 25  | 66682387 | 12 | 12  | 0    |
| 5 | 68374700 | 68374725 | 25  | 68374712 | 14 | 14  | 0    |
| 5 | 71802350 | 71802400 | 50  | 71802362 | 12 | 24  | 0    |
| 5 | 73326775 | 73326800 | 25  | 73326787 | 12 | 12  | 2.1  |
| 5 | 73875225 | 73875325 | 100 | 73875237 | 13 | 48  | 0    |
| 5 | 74363975 | 74364000 | 25  | 74363987 | 12 | 12  | 0    |
| 5 | 74986900 | 74987075 | 175 | 74986912 | 12 | 84  | 0    |
| 5 | 74994950 | 74995100 | 150 | 74995012 | 14 | 71  | 8.3  |
| 5 | 76070650 | 76070675 | 25  | 76070662 | 12 | 12  | 2.1  |
| 5 | 76122350 | 76122450 | 100 | 76122412 | 15 | 57  | 8.3  |
| 5 | 76749750 | 76749800 | 50  | 76749762 | 13 | 26  | 0    |
| 5 | 77284550 | 77284675 | 125 | 77284562 | 15 | 68  | 10.3 |
| 5 | 77287025 | 77287050 | 25  | 77287037 | 12 | 12  | 0    |
| 5 | 77290525 | 77290575 | 50  | 77290537 | 12 | 24  | 0    |
| 5 | 77850100 | 77850125 | 25  | 77850112 | 13 | 13  | 2.1  |
| 5 | 77926600 | 77926850 | 250 | 77926712 | 19 | 155 | 12.4 |
| 5 | 78031325 | 78031375 | 50  | 78031337 | 12 | 24  | 4.1  |
| 5 | 79586825 | 79587000 | 175 | 79586937 | 14 | 86  | 8.3  |
| 5 | 79820000 | 79820075 | 75  | 79820012 | 12 | 36  | 6.2  |

|   |           |           |     |           |    |     |      |
|---|-----------|-----------|-----|-----------|----|-----|------|
| 5 | 81728700  | 81728725  | 25  | 81728712  | 12 | 12  | 0    |
| 5 | 81738025  | 81738050  | 25  | 81738037  | 13 | 13  | 0    |
| 5 | 82080525  | 82080575  | 50  | 82080562  | 14 | 26  | 4.1  |
| 5 | 83073925  | 83074000  | 75  | 83073937  | 13 | 38  | 0    |
| 5 | 83147250  | 83147350  | 100 | 83147262  | 12 | 44  | 0    |
| 5 | 83149425  | 83149475  | 50  | 83149437  | 13 | 26  | 4.1  |
| 5 | 83258825  | 83258850  | 25  | 83258837  | 13 | 13  | 0    |
| 5 | 85215025  | 85215075  | 50  | 85215037  | 12 | 24  | 4.1  |
| 5 | 88146000  | 88146025  | 25  | 88146012  | 13 | 13  | 2.1  |
| 5 | 88366450  | 88366475  | 25  | 88366462  | 12 | 12  | 2.1  |
| 5 | 88381800  | 88381950  | 150 | 88381862  | 14 | 79  | 0    |
| 5 | 88789825  | 88789850  | 25  | 88789837  | 12 | 12  | 2.1  |
| 5 | 90477925  | 90478075  | 150 | 90477987  | 18 | 93  | 0    |
| 5 | 90544550  | 90544650  | 100 | 90544562  | 15 | 51  | 2.1  |
| 5 | 94410900  | 94410925  | 25  | 94410912  | 12 | 12  | 0    |
| 5 | 95222875  | 95223175  | 300 | 95222987  | 20 | 188 | 16.6 |
| 5 | 96011650  | 96011700  | 50  | 96011687  | 14 | 26  | 4.1  |
| 5 | 96463100  | 96463200  | 100 | 96463112  | 13 | 47  | 6.2  |
| 5 | 97673475  | 97673600  | 125 | 97673587  | 19 | 75  | 10.3 |
| 5 | 97713500  | 97713525  | 25  | 97713512  | 13 | 13  | 0    |
| 5 | 102483900 | 102483925 | 25  | 102483912 | 14 | 14  | 2.1  |
| 5 | 102792225 | 102792500 | 275 | 102792387 | 18 | 162 | 14.5 |
| 5 | 103453075 | 103453275 | 200 | 103453187 | 18 | 122 | 0    |
| 5 | 104274575 | 104274600 | 25  | 104274587 | 12 | 12  | 2.1  |
| 5 | 105761325 | 105761400 | 75  | 105761362 | 14 | 40  | 6.2  |
| 5 | 106745075 | 106745100 | 25  | 106745087 | 12 | 12  | 2.1  |
| 5 | 106833100 | 106833200 | 100 | 106833112 | 12 | 46  | 0    |
| 5 | 107219025 | 107219075 | 50  | 107219037 | 13 | 26  | 0    |
| 5 | 108814950 | 108815000 | 50  | 108814962 | 12 | 24  | 4.1  |
| 5 | 110825050 | 110825175 | 125 | 110825062 | 15 | 66  | 0    |
| 5 | 110914425 | 110914475 | 50  | 110914437 | 16 | 28  | 2.1  |
| 5 | 111524225 | 111524250 | 25  | 111524237 | 12 | 12  | 2.1  |
| 5 | 112055400 | 112055500 | 100 | 112055437 | 16 | 60  | 8.3  |
| 5 | 115136625 | 115136700 | 75  | 115136662 | 14 | 38  | 0    |
| 5 | 115855750 | 115855825 | 75  | 115855762 | 12 | 36  | 6.2  |
| 5 | 115873150 | 115873175 | 25  | 115873162 | 13 | 13  | 2.1  |
| 5 | 115898200 | 115898250 | 50  | 115898212 | 12 | 24  | 4.1  |
| 5 | 115938375 | 115938400 | 25  | 115938387 | 13 | 13  | 2.1  |
| 5 | 117077325 | 117077350 | 25  | 117077337 | 13 | 13  | 0    |
| 5 | 117917450 | 117917575 | 125 | 117917487 | 14 | 67  | 2.1  |
| 5 | 118215550 | 118215600 | 50  | 118215562 | 12 | 24  | 0    |
| 5 | 118524675 | 118524825 | 150 | 118524762 | 14 | 77  | 0    |
| 5 | 122875525 | 122875550 | 25  | 122875537 | 14 | 14  | 2.1  |
| 5 | 123116300 | 123116425 | 125 | 123116337 | 14 | 65  | 10.3 |
| 5 | 123239600 | 123239675 | 75  | 123239612 | 13 | 39  | 0    |
| 5 | 124015175 | 124015250 | 75  | 124015187 | 12 | 36  | 2.1  |
| 5 | 124019625 | 124019650 | 25  | 124019637 | 15 | 15  | 2.1  |
| 5 | 124026725 | 124027025 | 300 | 124026862 | 17 | 154 | 16.6 |
| 5 | 124110850 | 124110925 | 75  | 124110862 | 13 | 38  | 0    |
| 5 | 124119275 | 124119300 | 25  | 124119287 | 12 | 12  | 0    |
| 5 | 124170075 | 124170150 | 75  | 124170112 | 15 | 42  | 0    |
| 5 | 124427525 | 124427550 | 25  | 124427537 | 12 | 12  | 0    |
| 5 | 124514875 | 124514950 | 75  | 124514887 | 12 | 36  | 0    |
| 5 | 125779100 | 125779175 | 75  | 125779112 | 12 | 36  | 0    |
| 5 | 125895200 | 125895350 | 150 | 125895287 | 17 | 85  | 6.2  |
| 5 | 126140125 | 126140175 | 50  | 126140162 | 16 | 31  | 4.1  |
| 5 | 126792575 | 126792600 | 25  | 126792587 | 12 | 12  | 2.1  |
| 5 | 127333250 | 127333275 | 25  | 127333262 | 12 | 12  | 0    |
| 5 | 127446725 | 127446800 | 75  | 127446737 | 15 | 40  | 6.2  |
| 5 | 127623425 | 127623475 | 50  | 127623437 | 12 | 24  | 4.1  |
| 5 | 127959750 | 127959800 | 50  | 127959762 | 13 | 26  | 0    |
| 5 | 130998850 | 130999125 | 275 | 130998937 | 24 | 196 | 22.8 |
| 5 | 133403150 | 133403225 | 75  | 133403162 | 13 | 37  | 0    |
| 5 | 135380775 | 135380825 | 50  | 135380787 | 14 | 28  | 4.1  |
| 5 | 135400975 | 135401000 | 25  | 135400987 | 13 | 13  | 0    |
| 5 | 135406575 | 135406675 | 100 | 135406662 | 13 | 48  | 0    |
| 5 | 135419575 | 135419600 | 25  | 135419587 | 12 | 12  | 2.1  |
| 5 | 135574425 | 135574500 | 75  | 135574437 | 12 | 36  | 0    |
| 5 | 136796750 | 136796775 | 25  | 136796762 | 12 | 12  | 0    |
| 5 | 137607375 | 137607575 | 200 | 137607412 | 17 | 125 | 2.1  |
| 5 | 137715925 | 137716200 | 275 | 137716112 | 33 | 262 | 24.8 |
| 5 | 138634750 | 138634975 | 225 | 138634787 | 20 | 156 | 0    |
| 5 | 138637050 | 138637125 | 75  | 138637062 | 15 | 41  | 6.2  |
| 5 | 138920525 | 138920550 | 25  | 138920537 | 12 | 12  | 2.1  |
| 5 | 139579575 | 139579650 | 75  | 139579587 | 15 | 43  | 0    |

|   |           |           |     |           |    |     |      |
|---|-----------|-----------|-----|-----------|----|-----|------|
| 5 | 140401100 | 140401150 | 50  | 140401112 | 18 | 30  | 4.1  |
| 5 | 140444325 | 140444500 | 175 | 140444412 | 18 | 110 | 10.3 |
| 5 | 140620800 | 140621000 | 200 | 140620862 | 17 | 118 | 0    |
| 5 | 140679625 | 140679775 | 150 | 140679637 | 12 | 72  | 0    |
| 5 | 140680025 | 140680525 | 500 | 140680337 | 28 | 370 | 60   |
| 5 | 140690675 | 140690700 | 25  | 140690687 | 12 | 12  | 0    |
| 5 | 140868850 | 140868875 | 25  | 140868862 | 12 | 12  | 2.1  |
| 5 | 140888800 | 140889000 | 200 | 140888962 | 22 | 137 | 10.3 |
| 5 | 140917725 | 140917900 | 175 | 140917762 | 25 | 148 | 18.6 |
| 5 | 140920575 | 140920650 | 75  | 140920637 | 18 | 45  | 4.1  |
| 5 | 140920925 | 140921000 | 75  | 140920937 | 12 | 36  | 6.2  |
| 5 | 140923950 | 140924150 | 200 | 140924087 | 25 | 170 | 20.7 |
| 5 | 141053075 | 141053150 | 75  | 141053087 | 13 | 37  | 0    |
| 5 | 141575875 | 141575900 | 25  | 141575887 | 12 | 12  | 0    |
| 5 | 141675850 | 141675925 | 75  | 141675862 | 12 | 36  | 0    |
| 5 | 141716025 | 141716350 | 325 | 141716312 | 17 | 167 | 16.6 |
| 5 | 141722650 | 141722750 | 100 | 141722662 | 17 | 58  | 6.2  |
| 5 | 141799150 | 141799175 | 25  | 141799162 | 14 | 14  | 2.1  |
| 5 | 141826575 | 141826650 | 75  | 141826637 | 15 | 41  | 0    |
| 5 | 141886775 | 141886825 | 50  | 141886812 | 13 | 25  | 0    |
| 5 | 141957850 | 141957875 | 25  | 141957862 | 13 | 13  | 2.1  |
| 5 | 142082225 | 142082300 | 75  | 142082237 | 12 | 36  | 0    |
| 5 | 142108175 | 142108250 | 75  | 142108187 | 13 | 39  | 4.1  |
| 5 | 142183100 | 142183125 | 25  | 142183112 | 12 | 12  | 0    |
| 5 | 142337900 | 142337950 | 50  | 142337912 | 13 | 26  | 0    |
| 5 | 142462325 | 142462350 | 25  | 142462337 | 12 | 12  | 0    |
| 5 | 145806850 | 145806875 | 25  | 145806862 | 20 | 20  | 2.1  |
| 5 | 146104250 | 146104275 | 25  | 146104262 | 12 | 12  | 2.1  |
| 5 | 146458050 | 146458525 | 475 | 146458187 | 21 | 259 | 43.5 |
| 5 | 148361725 | 148361775 | 50  | 148361737 | 12 | 24  | 0    |
| 5 | 148378750 | 148378800 | 50  | 148378787 | 13 | 25  | 0    |
| 5 | 148422250 | 148422475 | 225 | 148422387 | 25 | 177 | 18.6 |
| 5 | 148474550 | 148474575 | 25  | 148474562 | 12 | 12  | 2.1  |
| 5 | 148494325 | 148494375 | 50  | 148494337 | 12 | 24  | 0    |
| 5 | 148627125 | 148627175 | 50  | 148627137 | 20 | 38  | 4.1  |
| 5 | 148727300 | 148727350 | 50  | 148727312 | 12 | 24  | 0    |
| 5 | 149261450 | 149261500 | 50  | 149261462 | 12 | 24  | 0    |
| 5 | 149317925 | 149317975 | 50  | 149317937 | 12 | 24  | 2.1  |
| 5 | 149809975 | 149810000 | 25  | 149809987 | 12 | 12  | 0    |
| 5 | 149860800 | 149860825 | 25  | 149860812 | 12 | 12  | 2.1  |
| 5 | 150141550 | 150141700 | 150 | 150141687 | 13 | 65  | 0    |
| 5 | 150255325 | 150255375 | 50  | 150255337 | 12 | 24  | 0    |
| 5 | 151062850 | 151062900 | 50  | 151062862 | 13 | 26  | 4.1  |
| 5 | 151068000 | 151068025 | 25  | 151068012 | 13 | 13  | 2.1  |
| 5 | 151180800 | 151180900 | 100 | 151180837 | 14 | 52  | 4.1  |
| 5 | 153297675 | 153297775 | 100 | 153297687 | 16 | 58  | 0    |
| 5 | 153970175 | 153970225 | 50  | 153970187 | 12 | 24  | 0    |
| 5 | 154010100 | 154010150 | 50  | 154010112 | 12 | 24  | 0    |
| 5 | 156075000 | 156075200 | 200 | 156075137 | 17 | 119 | 0    |
| 5 | 156077525 | 156077550 | 25  | 156077537 | 12 | 12  | 2.1  |
| 5 | 156744675 | 156744775 | 100 | 156744687 | 14 | 50  | 2.1  |
| 5 | 156831500 | 156831550 | 50  | 156831512 | 12 | 24  | 0    |
| 5 | 157277525 | 157277700 | 175 | 157277612 | 17 | 102 | 14.5 |
| 5 | 158003425 | 158003500 | 75  | 158003437 | 14 | 40  | 0    |
| 5 | 158087600 | 158087625 | 25  | 158087612 | 12 | 12  | 2.1  |
| 5 | 158535250 | 158535350 | 100 | 158535262 | 12 | 48  | 0    |
| 5 | 158561850 | 158561950 | 100 | 158561937 | 14 | 50  | 0    |
| 5 | 158600000 | 158600025 | 25  | 158600012 | 13 | 13  | 0    |
| 5 | 159839625 | 159839750 | 125 | 159839712 | 13 | 61  | 0    |
| 5 | 159856550 | 159856575 | 25  | 159856562 | 12 | 12  | 2.1  |
| 5 | 164589250 | 164589300 | 50  | 164589262 | 12 | 24  | 0    |
| 5 | 169056700 | 169056825 | 125 | 169056762 | 14 | 64  | 8.3  |
| 5 | 169077075 | 169077150 | 75  | 169077087 | 12 | 36  | 0    |
| 5 | 169123050 | 169123100 | 50  | 169123062 | 12 | 24  | 4.1  |
| 5 | 169851075 | 169851225 | 150 | 169851137 | 17 | 88  | 12.4 |
| 5 | 170683100 | 170683150 | 50  | 170683112 | 12 | 24  | 4.1  |
| 5 | 170748100 | 170748200 | 100 | 170748162 | 27 | 86  | 4.1  |
| 5 | 171522925 | 171523050 | 125 | 171522937 | 12 | 56  | 6.2  |
| 5 | 171740200 | 171740300 | 100 | 171740212 | 13 | 51  | 4.1  |
| 5 | 172318800 | 172318850 | 50  | 172318812 | 12 | 24  | 2.1  |
| 5 | 172370350 | 172370400 | 50  | 172370362 | 16 | 28  | 4.1  |
| 5 | 173112375 | 173112400 | 25  | 173112387 | 12 | 12  | 2.1  |
| 5 | 173112950 | 173113000 | 50  | 173112962 | 12 | 24  | 0    |
| 5 | 173137775 | 173137850 | 75  | 173137787 | 12 | 36  | 4.1  |
| 5 | 173138475 | 173138525 | 50  | 173138487 | 12 | 24  | 0    |

|   |           |           |     |           |    |     |      |
|---|-----------|-----------|-----|-----------|----|-----|------|
| 5 | 174821925 | 174821950 | 25  | 174821937 | 12 | 12  | 0    |
| 5 | 174950250 | 174950350 | 100 | 174950312 | 16 | 54  | 0    |
| 5 | 175011800 | 175011850 | 50  | 175011812 | 12 | 24  | 0    |
| 5 | 176906075 | 176906225 | 150 | 176906137 | 18 | 94  | 8.3  |
| 5 | 177434050 | 177434175 | 125 | 177434112 | 17 | 73  | 10.3 |
| 5 | 178002000 | 178002225 | 225 | 178002162 | 25 | 177 | 26.9 |
| 5 | 178383225 | 178383250 | 25  | 178383237 | 12 | 12  | 0    |
| 5 | 180191250 | 180191425 | 175 | 180191362 | 17 | 99  | 14.5 |
| 4 | 357000    | 357175    | 175 | 357037    | 15 | 93  | 4.1  |
| 4 | 426700    | 426825    | 125 | 426737    | 19 | 82  | 0    |
| 4 | 427200    | 427375    | 175 | 427287    | 15 | 94  | 0    |
| 4 | 565700    | 565775    | 75  | 565712    | 14 | 38  | 2.1  |
| 4 | 751725    | 751750    | 25  | 751737    | 12 | 12  | 0    |
| 4 | 1019625   | 1019650   | 25  | 1019637   | 12 | 12  | 2.1  |
| 4 | 1156425   | 1156450   | 25  | 1156437   | 12 | 12  | 0    |
| 4 | 1176200   | 1176225   | 25  | 1176212   | 12 | 12  | 2.1  |
| 4 | 1712100   | 1712125   | 25  | 1712112   | 12 | 12  | 0    |
| 4 | 1882325   | 1882400   | 75  | 1882337   | 12 | 36  | 4.1  |
| 4 | 2191675   | 2191725   | 50  | 2191687   | 12 | 24  | 0    |
| 4 | 2404300   | 2404350   | 50  | 2404312   | 12 | 24  | 0    |
| 4 | 2541825   | 2541850   | 25  | 2541837   | 12 | 12  | 0    |
| 4 | 2728250   | 2728425   | 175 | 2728312   | 15 | 95  | 16.6 |
| 4 | 2791750   | 2791775   | 25  | 2791762   | 12 | 12  | 2.1  |
| 4 | 4699775   | 4699950   | 175 | 4699862   | 15 | 91  | 0    |
| 4 | 5086100   | 5086275   | 175 | 5086137   | 17 | 106 | 4.1  |
| 4 | 5259025   | 5259050   | 25  | 5259037   | 13 | 13  | 0    |
| 4 | 5259275   | 5259475   | 200 | 5259362   | 21 | 130 | 20.7 |
| 4 | 5319425   | 5319525   | 100 | 5319437   | 13 | 47  | 8.3  |
| 4 | 5329250   | 5329575   | 325 | 5329487   | 19 | 203 | 0    |
| 4 | 5389575   | 5389625   | 50  | 5389587   | 12 | 24  | 0    |
| 4 | 5418700   | 5418750   | 50  | 5418712   | 14 | 28  | 4.1  |
| 4 | 5419100   | 5419200   | 100 | 5419137   | 13 | 50  | 8.3  |
| 4 | 5765400   | 5765475   | 75  | 5765412   | 13 | 39  | 2.1  |
| 4 | 6228950   | 6229000   | 50  | 6228962   | 12 | 24  | 4.1  |
| 4 | 7141775   | 7141825   | 50  | 7141787   | 13 | 26  | 0    |
| 4 | 7333975   | 7334000   | 25  | 7333987   | 12 | 12  | 0    |
| 4 | 7710725   | 7710750   | 25  | 7710737   | 12 | 12  | 0    |
| 4 | 7994825   | 7994900   | 75  | 7994837   | 13 | 37  | 6.2  |
| 4 | 8008875   | 8008975   | 100 | 8008912   | 15 | 54  | 0    |
| 4 | 8455900   | 8455925   | 25  | 8455912   | 13 | 13  | 0    |
| 4 | 9717475   | 9717500   | 25  | 9717487   | 13 | 13  | 2.1  |
| 4 | 10443625  | 10443650  | 25  | 10443637  | 12 | 12  | 0    |
| 4 | 10744200  | 10744300  | 100 | 10744237  | 14 | 52  | 8.3  |
| 4 | 12499850  | 12499875  | 25  | 12499862  | 15 | 15  | 0    |
| 4 | 12936775  | 12936850  | 75  | 12936787  | 14 | 39  | 0    |
| 4 | 12940300  | 12940550  | 250 | 12940387  | 16 | 135 | 6.2  |
| 4 | 13138975  | 13139025  | 50  | 13138987  | 13 | 26  | 0    |
| 4 | 13312625  | 13312675  | 50  | 13312637  | 13 | 25  | 4.1  |
| 4 | 14645200  | 14645275  | 75  | 14645212  | 12 | 36  | 6.2  |
| 4 | 15172925  | 15172950  | 25  | 15172937  | 13 | 13  | 0    |
| 4 | 15173800  | 15173950  | 150 | 15173812  | 13 | 71  | 12.4 |
| 4 | 15306075  | 15306125  | 50  | 15306112  | 13 | 25  | 4.1  |
| 4 | 15390400  | 15390475  | 75  | 15390412  | 13 | 36  | 2.1  |
| 4 | 15399075  | 15399125  | 50  | 15399087  | 12 | 24  | 0    |
| 4 | 15524375  | 15524400  | 25  | 15524387  | 13 | 13  | 0    |
| 4 | 17105925  | 17105975  | 50  | 17105937  | 12 | 24  | 0    |
| 4 | 17187775  | 17187800  | 25  | 17187787  | 12 | 12  | 2.1  |
| 4 | 17188550  | 17188700  | 150 | 17188562  | 14 | 73  | 8.3  |
| 4 | 17247700  | 17247725  | 25  | 17247712  | 21 | 21  | 4.1  |
| 4 | 17409725  | 17409825  | 100 | 17409762  | 14 | 52  | 0    |
| 4 | 20036875  | 20036925  | 50  | 20036887  | 12 | 24  | 0    |
| 4 | 23492750  | 23492850  | 100 | 23492812  | 14 | 50  | 0    |
| 4 | 24262100  | 24262225  | 125 | 24262137  | 14 | 62  | 0    |
| 4 | 24380950  | 24380975  | 25  | 24380962  | 12 | 12  | 2.1  |
| 4 | 24389175  | 24389200  | 25  | 24389187  | 13 | 13  | 2.1  |
| 4 | 24393025  | 24393125  | 100 | 24393087  | 15 | 54  | 2.1  |
| 4 | 24460525  | 24460550  | 25  | 24460537  | 14 | 14  | 2.1  |
| 4 | 24725500  | 24725525  | 25  | 24725512  | 14 | 14  | 2.1  |
| 4 | 24834475  | 24834800  | 325 | 24834637  | 29 | 261 | 12.4 |
| 4 | 24845550  | 24845600  | 50  | 24845562  | 13 | 26  | 4.1  |
| 4 | 25145975  | 25146075  | 100 | 25145987  | 15 | 58  | 4.1  |
| 4 | 25537950  | 25538000  | 50  | 25537962  | 13 | 26  | 0    |
| 4 | 25549575  | 25549625  | 50  | 25549587  | 14 | 28  | 0    |
| 4 | 25633100  | 25633300  | 200 | 25633112  | 12 | 83  | 0    |
| 4 | 25716475  | 25716650  | 175 | 25716487  | 17 | 110 | 6.2  |

|   |          |          |     |          |    |     |      |
|---|----------|----------|-----|----------|----|-----|------|
| 4 | 26426550 | 26426750 | 200 | 26426637 | 16 | 116 | 18.6 |
| 4 | 26796500 | 26796525 | 25  | 26796512 | 12 | 12  | 2.1  |
| 4 | 27470050 | 27470075 | 25  | 27470062 | 12 | 12  | 0    |
| 4 | 27531325 | 27531375 | 50  | 27531337 | 13 | 26  | 4.1  |
| 4 | 27965825 | 27965875 | 50  | 27965837 | 12 | 24  | 0    |
| 4 | 28618125 | 28618150 | 25  | 28618137 | 12 | 12  | 0    |
| 4 | 28887900 | 28888300 | 400 | 28888037 | 24 | 278 | 10.3 |
| 4 | 29034950 | 29035050 | 100 | 29034962 | 12 | 46  | 8.3  |
| 4 | 29727225 | 29727275 | 50  | 29727237 | 13 | 25  | 0    |
| 4 | 29767300 | 29767425 | 125 | 29767312 | 13 | 57  | 0    |
| 4 | 30561600 | 30561675 | 75  | 30561612 | 15 | 39  | 0    |
| 4 | 30717125 | 30717325 | 200 | 30717212 | 25 | 155 | 12.4 |
| 4 | 30772000 | 30772225 | 225 | 30772112 | 21 | 153 | 12.4 |
| 4 | 30883425 | 30883475 | 50  | 30883437 | 12 | 24  | 4.1  |
| 4 | 33560950 | 33560975 | 25  | 33560962 | 12 | 12  | 2.1  |
| 4 | 37074325 | 37074375 | 50  | 37074362 | 13 | 25  | 4.1  |
| 4 | 37112825 | 37112900 | 75  | 37112837 | 13 | 39  | 0    |
| 4 | 37202225 | 37202250 | 25  | 37202237 | 12 | 12  | 0    |
| 4 | 37309125 | 37309150 | 25  | 37309137 | 12 | 12  | 2.1  |
| 4 | 37407225 | 37407250 | 25  | 37407237 | 13 | 13  | 2.1  |
| 4 | 37407475 | 37407675 | 200 | 37407562 | 15 | 105 | 8.3  |
| 4 | 37996900 | 37996925 | 25  | 37996912 | 13 | 13  | 2.1  |
| 4 | 38616150 | 38616275 | 125 | 38616212 | 14 | 64  | 10.3 |
| 4 | 39542475 | 39542500 | 25  | 39542487 | 12 | 12  | 2.1  |
| 4 | 39812350 | 39812600 | 250 | 39812462 | 18 | 140 | 2.1  |
| 4 | 39872750 | 39872775 | 25  | 39872762 | 12 | 12  | 0    |
| 4 | 40540525 | 40540600 | 75  | 40540562 | 14 | 41  | 6.2  |
| 4 | 44357175 | 44357325 | 150 | 44357212 | 13 | 76  | 14.5 |
| 4 | 45308475 | 45308575 | 100 | 45308537 | 13 | 48  | 6.2  |
| 4 | 46181775 | 46181825 | 50  | 46181787 | 12 | 24  | 0    |
| 4 | 47824950 | 47824975 | 25  | 47824962 | 12 | 12  | 2.1  |
| 4 | 48037775 | 48037825 | 50  | 48037787 | 12 | 24  | 4.1  |
| 4 | 48278675 | 48278700 | 25  | 48278687 | 12 | 12  | 0    |
| 4 | 48610275 | 48610375 | 100 | 48610287 | 12 | 48  | 8.3  |
| 4 | 48788050 | 48788075 | 25  | 48788062 | 12 | 12  | 0    |
| 4 | 48796525 | 48796550 | 25  | 48796537 | 12 | 12  | 0    |
| 4 | 48796800 | 48796825 | 25  | 48796812 | 12 | 12  | 0    |
| 4 | 48802475 | 48802500 | 25  | 48802487 | 12 | 12  | 2.1  |
| 4 | 48845775 | 48845825 | 50  | 48845787 | 13 | 26  | 4.1  |
| 4 | 48847700 | 48847725 | 25  | 48847712 | 12 | 12  | 2.1  |
| 4 | 49329325 | 49329400 | 75  | 49329337 | 13 | 39  | 6.2  |
| 4 | 52601125 | 52601275 | 150 | 52601162 | 15 | 82  | 10.3 |
| 4 | 53868600 | 53868700 | 100 | 53868612 | 13 | 50  | 8.3  |
| 4 | 53882800 | 53882975 | 175 | 53882912 | 17 | 105 | 0    |
| 4 | 53908500 | 53908525 | 25  | 53908512 | 13 | 13  | 2.1  |
| 4 | 54263500 | 54263575 | 75  | 54263512 | 12 | 36  | 4.1  |
| 4 | 54794350 | 54794375 | 25  | 54794362 | 12 | 12  | 2.1  |
| 4 | 54802300 | 54802400 | 100 | 54802337 | 16 | 59  | 0    |
| 4 | 55396950 | 55396975 | 25  | 55396962 | 13 | 13  | 0    |
| 4 | 55445925 | 55446050 | 125 | 55445937 | 12 | 60  | 0    |
| 4 | 55897600 | 55897775 | 175 | 55897662 | 16 | 94  | 6.2  |
| 4 | 56414200 | 56414225 | 25  | 56414212 | 12 | 12  | 0    |
| 4 | 56610925 | 56610975 | 50  | 56610937 | 12 | 24  | 4.1  |
| 4 | 56887600 | 56887650 | 50  | 56887612 | 13 | 26  | 4.1  |
| 4 | 57026775 | 57026800 | 25  | 57026787 | 12 | 12  | 0    |
| 4 | 57029125 | 57029250 | 125 | 57029212 | 16 | 72  | 0    |
| 4 | 57635425 | 57635450 | 25  | 57635437 | 14 | 14  | 2.1  |
| 4 | 57635900 | 57635925 | 25  | 57635912 | 15 | 15  | 2.1  |
| 4 | 57656750 | 57656775 | 25  | 57656762 | 12 | 12  | 0    |
| 4 | 57971300 | 57971350 | 50  | 57971312 | 12 | 24  | 4.1  |
| 4 | 60146500 | 60146525 | 25  | 60146512 | 12 | 12  | 2.1  |
| 4 | 61089775 | 61089800 | 25  | 61089787 | 13 | 13  | 2.1  |
| 4 | 61232400 | 61232500 | 100 | 61232462 | 13 | 48  | 0    |
| 4 | 62451900 | 62451925 | 25  | 62451912 | 12 | 12  | 2.1  |
| 4 | 66458350 | 66458400 | 50  | 66458362 | 12 | 24  | 0    |
| 4 | 66517150 | 66517275 | 125 | 66517162 | 14 | 63  | 8.3  |
| 4 | 66571125 | 66571150 | 25  | 66571137 | 12 | 12  | 2.1  |
| 4 | 67631900 | 67631925 | 25  | 67631912 | 12 | 12  | 2.1  |
| 4 | 67947100 | 67947125 | 25  | 67947112 | 22 | 22  | 4.1  |
| 4 | 67947475 | 67947550 | 75  | 67947487 | 24 | 66  | 10.3 |
| 4 | 71977125 | 71977175 | 50  | 71977137 | 15 | 29  | 4.1  |
| 4 | 72043450 | 72043550 | 100 | 72043462 | 13 | 48  | 8.3  |
| 4 | 73402775 | 73402850 | 75  | 73402812 | 14 | 38  | 0    |
| 4 | 73404450 | 73404550 | 100 | 73404462 | 14 | 52  | 0    |
| 4 | 73590325 | 73590400 | 75  | 73590337 | 15 | 41  | 6.2  |

|   |           |           |     |           |    |     |      |
|---|-----------|-----------|-----|-----------|----|-----|------|
| 4 | 73654675  | 73654725  | 50  | 73654687  | 12 | 24  | 2.1  |
| 4 | 74307600  | 74307800  | 200 | 74307687  | 25 | 166 | 4.1  |
| 4 | 74753325  | 74753525  | 200 | 74753362  | 17 | 110 | 0    |
| 4 | 74757975  | 74758025  | 50  | 74757987  | 12 | 24  | 0    |
| 4 | 74764750  | 74764775  | 25  | 74764762  | 12 | 12  | 2.1  |
| 4 | 74814300  | 74814375  | 75  | 74814312  | 15 | 45  | 0    |
| 4 | 74862250  | 74862375  | 125 | 74862337  | 16 | 69  | 2.1  |
| 4 | 75201750  | 75201900  | 150 | 75201812  | 15 | 76  | 8.3  |
| 4 | 75776950  | 75777050  | 100 | 75776962  | 12 | 48  | 4.1  |
| 4 | 75882775  | 75882825  | 50  | 75882787  | 13 | 26  | 0    |
| 4 | 75949900  | 75949975  | 75  | 75949937  | 14 | 38  | 0    |
| 4 | 76087350  | 76087400  | 50  | 76087362  | 12 | 24  | 0    |
| 4 | 76815525  | 76815700  | 175 | 76815562  | 13 | 88  | 8.3  |
| 4 | 77348550  | 77348675  | 125 | 77348562  | 17 | 76  | 4.1  |
| 4 | 77354400  | 77354425  | 25  | 77354412  | 12 | 12  | 2.1  |
| 4 | 77445725  | 77445775  | 50  | 77445737  | 13 | 26  | 0    |
| 4 | 77571000  | 77571150  | 150 | 77571137  | 13 | 70  | 8.3  |
| 4 | 77651375  | 77651425  | 50  | 77651387  | 13 | 26  | 0    |
| 4 | 77894225  | 77894325  | 100 | 77894237  | 14 | 54  | 6.2  |
| 4 | 77943750  | 77943875  | 125 | 77943787  | 14 | 66  | 4.1  |
| 4 | 78103550  | 78103625  | 75  | 78103562  | 12 | 36  | 4.1  |
| 4 | 78216450  | 78216500  | 50  | 78216462  | 16 | 28  | 4.1  |
| 4 | 79296525  | 79296625  | 100 | 79296537  | 13 | 49  | 0    |
| 4 | 79408175  | 79408325  | 150 | 79408187  | 15 | 80  | 6.2  |
| 4 | 81275525  | 81275600  | 75  | 81275537  | 13 | 38  | 0    |
| 4 | 81311500  | 81311600  | 100 | 81311512  | 12 | 48  | 8.3  |
| 4 | 84175000  | 84175175  | 175 | 84175162  | 22 | 111 | 4.1  |
| 4 | 85359400  | 85359450  | 50  | 85359412  | 12 | 24  | 4.1  |
| 4 | 86921175  | 86921225  | 50  | 86921187  | 12 | 24  | 2.1  |
| 4 | 95595475  | 95595500  | 25  | 95595487  | 12 | 12  | 2.1  |
| 4 | 95684850  | 95684975  | 125 | 95684912  | 13 | 63  | 0    |
| 4 | 96142000  | 96142050  | 50  | 96142012  | 12 | 24  | 0    |
| 4 | 97310450  | 97310650  | 200 | 97310487  | 17 | 106 | 8.3  |
| 4 | 109258175 | 109258275 | 100 | 109258212 | 16 | 57  | 0    |
| 4 | 111247025 | 111247075 | 50  | 111247037 | 12 | 24  | 0    |
| 4 | 115287650 | 115287775 | 125 | 115287712 | 17 | 73  | 0    |
| 4 | 116494150 | 116494250 | 100 | 116494162 | 15 | 55  | 0    |
| 4 | 119825950 | 119825975 | 25  | 119825962 | 12 | 12  | 2.1  |
| 4 | 124841325 | 124841375 | 50  | 124841337 | 13 | 26  | 4.1  |
| 4 | 124973250 | 124973375 | 125 | 124973262 | 12 | 56  | 0    |
| 4 | 134303700 | 134303850 | 150 | 134303712 | 12 | 72  | 12.4 |
| 4 | 140594275 | 140594300 | 25  | 140594287 | 12 | 12  | 2.1  |
| 4 | 140806450 | 140806475 | 25  | 140806462 | 12 | 12  | 2.1  |
| 4 | 140924475 | 140924625 | 150 | 140924562 | 16 | 89  | 10.3 |
| 4 | 140999150 | 140999175 | 25  | 140999162 | 12 | 12  | 2.1  |
| 4 | 141013025 | 141013175 | 150 | 141013087 | 16 | 84  | 8.3  |
| 4 | 141212725 | 141212750 | 25  | 141212737 | 12 | 12  | 0    |
| 4 | 141242925 | 141243075 | 150 | 141242937 | 13 | 74  | 8.3  |
| 4 | 141513950 | 141513975 | 25  | 141513962 | 12 | 12  | 2.1  |
| 4 | 142152775 | 142152850 | 75  | 142152787 | 12 | 36  | 6.2  |
| 4 | 142361450 | 142361500 | 50  | 142361462 | 13 | 26  | 2.1  |
| 4 | 143719325 | 143719350 | 25  | 143719337 | 12 | 12  | 0    |
| 4 | 148659725 | 148659775 | 50  | 148659737 | 12 | 24  | 2.1  |
| 4 | 148904875 | 148904900 | 25  | 148904887 | 12 | 12  | 2.1  |
| 4 | 152239750 | 152239800 | 50  | 152239787 | 15 | 28  | 4.1  |
| 4 | 153493400 | 153493625 | 225 | 153493462 | 22 | 153 | 12.4 |
| 4 | 154283700 | 154283725 | 25  | 154283712 | 13 | 13  | 0    |
| 4 | 156382200 | 156382225 | 25  | 156382212 | 12 | 12  | 0    |
| 4 | 156560025 | 156560100 | 75  | 156560037 | 13 | 39  | 0    |
| 4 | 156583000 | 156583150 | 150 | 156583012 | 14 | 76  | 12.4 |
| 4 | 157047625 | 157047650 | 25  | 157047637 | 12 | 12  | 0    |
| 4 | 166168375 | 166168450 | 75  | 166168437 | 14 | 39  | 0    |
| 4 | 171185325 | 171185400 | 75  | 171185337 | 18 | 48  | 6.2  |
| 4 | 175017150 | 175017350 | 200 | 175017237 | 20 | 124 | 12.4 |
| 4 | 178600400 | 178600500 | 100 | 178600437 | 17 | 61  | 8.3  |
| 4 | 182308525 | 182308600 | 75  | 182308587 | 13 | 37  | 6.2  |
| 4 | 182575250 | 182575300 | 50  | 182575262 | 13 | 26  | 0    |
| 4 | 184080600 | 184080650 | 50  | 184080612 | 12 | 24  | 4.1  |
| 4 | 184134200 | 184134225 | 25  | 184134212 | 12 | 12  | 0    |
| 4 | 184169600 | 184169625 | 25  | 184169612 | 12 | 12  | 0    |
| 4 | 184317150 | 184317175 | 25  | 184317162 | 12 | 12  | 0    |
| 4 | 185583150 | 185583275 | 125 | 185583162 | 12 | 60  | 0    |
| 4 | 187362500 | 187362550 | 50  | 187362537 | 16 | 30  | 4.1  |
| 4 | 189558675 | 189558700 | 25  | 189558687 | 12 | 12  | 2.1  |
| 4 | 190431850 | 190431875 | 25  | 190431862 | 12 | 12  | 0    |



|   |           |           |      |           |    |      |      |
|---|-----------|-----------|------|-----------|----|------|------|
| 4 | 190715850 | 190715900 | 50   | 190715862 | 12 | 24   | 0    |
| 4 | 190861225 | 190861250 | 25   | 190861237 | 13 | 13   | 2.1  |
| 4 | 190898850 | 190898875 | 25   | 190898862 | 13 | 13   | 2.1  |
| 4 | 191062700 | 191062800 | 100  | 191062737 | 14 | 54   | 8.3  |
| 7 | 137050    | 137175    | 125  | 137137    | 14 | 63   | 10.3 |
| 7 | 184975    | 185025    | 50   | 184987    | 13 | 26   | 4.1  |
| 7 | 185275    | 185375    | 100  | 185362    | 15 | 55   | 8.3  |
| 7 | 189725    | 189750    | 25   | 189737    | 12 | 12   | 0    |
| 7 | 190475    | 190500    | 25   | 190487    | 13 | 13   | 2.1  |
| 7 | 195850    | 195875    | 25   | 195862    | 13 | 13   | 0    |
| 7 | 196725    | 196750    | 25   | 196737    | 29 | 29   | 4.1  |
| 7 | 257625    | 257750    | 125  | 257712    | 18 | 74   | 12.4 |
| 7 | 291425    | 291475    | 50   | 291437    | 14 | 26   | 0    |
| 7 | 297175    | 297250    | 75   | 297237    | 14 | 38   | 0    |
| 7 | 308600    | 308725    | 125  | 308612    | 17 | 73   | 8.3  |
| 7 | 496175    | 496200    | 25   | 496187    | 13 | 13   | 2.1  |
| 7 | 503950    | 504000    | 50   | 503962    | 13 | 26   | 0    |
| 7 | 504975    | 505125    | 150  | 505012    | 14 | 78   | 8.3  |
| 7 | 514100    | 514125    | 25   | 514112    | 12 | 12   | 2.1  |
| 7 | 549950    | 550025    | 75   | 549962    | 13 | 39   | 2.1  |
| 7 | 602025    | 602100    | 75   | 602037    | 13 | 37   | 6.2  |
| 7 | 610650    | 610675    | 25   | 610662    | 25 | 25   | 4.1  |
| 7 | 616450    | 616475    | 25   | 616462    | 13 | 13   | 2.1  |
| 7 | 638200    | 638225    | 25   | 638212    | 12 | 12   | 2.1  |
| 7 | 814800    | 814850    | 50   | 814812    | 13 | 26   | 0    |
| 7 | 819325    | 819350    | 25   | 819337    | 22 | 22   | 4.1  |
| 7 | 826725    | 826800    | 75   | 826737    | 13 | 37   | 6.2  |
| 7 | 848200    | 848225    | 25   | 848212    | 12 | 12   | 2.1  |
| 7 | 882550    | 882625    | 75   | 882562    | 16 | 45   | 4.1  |
| 7 | 1161850   | 1161875   | 25   | 1161862   | 13 | 13   | 2.1  |
| 7 | 1651025   | 1651150   | 125  | 1651062   | 14 | 66   | 10.3 |
| 7 | 1964800   | 1964875   | 75   | 1964812   | 13 | 38   | 0    |
| 7 | 1976150   | 1976325   | 175  | 1976287   | 19 | 108  | 4.1  |
| 7 | 2096150   | 2096175   | 25   | 2096162   | 13 | 13   | 2.1  |
| 7 | 2114450   | 2114500   | 50   | 2114462   | 12 | 24   | 4.1  |
| 7 | 2116725   | 2116750   | 25   | 2116737   | 14 | 14   | 2.1  |
| 7 | 2180400   | 2180425   | 25   | 2180412   | 12 | 12   | 2.1  |
| 7 | 2231350   | 2231375   | 25   | 2231362   | 12 | 12   | 2.1  |
| 7 | 2242775   | 2242875   | 100  | 2242787   | 12 | 48   | 2.1  |
| 7 | 2263900   | 2263925   | 25   | 2263912   | 12 | 12   | 0    |
| 7 | 2271825   | 2271850   | 25   | 2271837   | 13 | 13   | 2.1  |
| 7 | 2272900   | 2273000   | 100  | 2272937   | 13 | 50   | 2.1  |
| 7 | 2302025   | 2302100   | 75   | 2302037   | 13 | 39   | 0    |
| 7 | 2306225   | 2306250   | 25   | 2306237   | 12 | 12   | 2.1  |
| 7 | 2345175   | 2345250   | 75   | 2345187   | 13 | 39   | 6.2  |
| 7 | 2354225   | 2354250   | 25   | 2354237   | 13 | 13   | 0    |
| 7 | 2409150   | 2409225   | 75   | 2409212   | 16 | 42   | 6.2  |
| 7 | 2413275   | 2413300   | 25   | 2413287   | 12 | 12   | 2.1  |
| 7 | 2526900   | 2526975   | 75   | 2526912   | 12 | 36   | 0    |
| 7 | 2595700   | 2595725   | 25   | 2595712   | 12 | 12   | 0    |
| 7 | 2619375   | 2619400   | 25   | 2619387   | 13 | 13   | 2.1  |
| 7 | 2647875   | 2647950   | 75   | 2647887   | 23 | 57   | 10.3 |
| 7 | 2880225   | 2880425   | 200  | 2880337   | 17 | 116  | 2.1  |
| 7 | 3308575   | 3308625   | 50   | 3308587   | 12 | 24   | 2.1  |
| 7 | 3440700   | 3440725   | 25   | 3440712   | 12 | 12   | 0    |
| 7 | 3571800   | 3571925   | 125  | 3571887   | 14 | 65   | 0    |
| 7 | 3709150   | 3709175   | 25   | 3709162   | 12 | 12   | 0    |
| 7 | 3749350   | 3749375   | 25   | 3749362   | 12 | 12   | 0    |
| 7 | 3787900   | 3788050   | 150  | 3787987   | 15 | 80   | 0    |
| 7 | 3841275   | 3841325   | 50   | 3841287   | 12 | 24   | 4.1  |
| 7 | 3853675   | 3853750   | 75   | 3853712   | 14 | 38   | 0    |
| 7 | 3867725   | 3867900   | 175  | 3867762   | 15 | 95   | 0    |
| 7 | 3876450   | 3876475   | 25   | 3876462   | 12 | 12   | 0    |
| 7 | 3916625   | 3916700   | 75   | 3916637   | 14 | 38   | 6.2  |
| 7 | 3949725   | 3949850   | 125  | 3949737   | 15 | 75   | 4.1  |
| 7 | 4096875   | 4096900   | 25   | 4096887   | 12 | 12   | 2.1  |
| 7 | 4613350   | 4613475   | 125  | 4613437   | 14 | 62   | 6.2  |
| 7 | 4688025   | 4688100   | 75   | 4688037   | 12 | 36   | 6.2  |
| 7 | 4701225   | 4701250   | 25   | 4701237   | 13 | 13   | 2.1  |
| 7 | 5043000   | 5043075   | 75   | 5043012   | 12 | 36   | 0    |
| 7 | 5070225   | 5071525   | 1300 | 5070587   | 42 | 1070 | 49.7 |
| 7 | 5360750   | 5360775   | 25   | 5360762   | 12 | 12   | 2.1  |
| 7 | 5372450   | 5372475   | 25   | 5372462   | 12 | 12   | 2.1  |
| 7 | 5506300   | 5506350   | 50   | 5506312   | 13 | 26   | 0    |
| 7 | 5591775   | 5591825   | 50   | 5591787   | 12 | 24   | 0    |

|   |          |          |     |          |    |     |      |
|---|----------|----------|-----|----------|----|-----|------|
| 7 | 5594925  | 5594950  | 25  | 5594937  | 13 | 13  | 2.1  |
| 7 | 5650400  | 5650475  | 75  | 5650412  | 12 | 36  | 0    |
| 7 | 5669075  | 5669100  | 25  | 5669087  | 13 | 13  | 2.1  |
| 7 | 6087400  | 6087425  | 25  | 6087412  | 14 | 14  | 2.1  |
| 7 | 6109175  | 6109225  | 50  | 6109212  | 13 | 25  | 4.1  |
| 7 | 6179100  | 6179175  | 75  | 6179112  | 13 | 39  | 4.1  |
| 7 | 6183650  | 6183800  | 150 | 6183737  | 15 | 79  | 10.3 |
| 7 | 6215050  | 6215100  | 50  | 6215062  | 12 | 24  | 0    |
| 7 | 6228225  | 6228325  | 100 | 6228237  | 13 | 52  | 0    |
| 7 | 6240300  | 6240325  | 25  | 6240312  | 12 | 12  | 0    |
| 7 | 6285600  | 6285700  | 100 | 6285637  | 14 | 52  | 0    |
| 7 | 6329175  | 6329200  | 25  | 6329187  | 14 | 14  | 0    |
| 7 | 6502975  | 6503075  | 100 | 6502987  | 14 | 52  | 0    |
| 7 | 6608150  | 6608200  | 50  | 6608162  | 13 | 26  | 0    |
| 7 | 6663775  | 6663800  | 25  | 6663787  | 12 | 12  | 2.1  |
| 7 | 6681075  | 6681475  | 400 | 6681237  | 36 | 385 | 16.6 |
| 7 | 6681900  | 6682475  | 575 | 6682162  | 37 | 511 | 33.1 |
| 7 | 6687175  | 6687200  | 25  | 6687187  | 12 | 12  | 2.1  |
| 7 | 6697200  | 6698025  | 825 | 6697337  | 30 | 618 | 16.6 |
| 7 | 6712325  | 6712350  | 25  | 6712337  | 12 | 12  | 0    |
| 7 | 6716100  | 6716250  | 150 | 6716162  | 18 | 91  | 0    |
| 7 | 7018500  | 7018525  | 25  | 7018512  | 12 | 12  | 0    |
| 7 | 7106000  | 7106050  | 50  | 7106012  | 16 | 28  | 2.1  |
| 7 | 7215350  | 7215375  | 25  | 7215362  | 12 | 12  | 0    |
| 7 | 7243975  | 7244050  | 75  | 7243987  | 14 | 40  | 6.2  |
| 7 | 7431450  | 7431500  | 50  | 7431462  | 12 | 24  | 0    |
| 7 | 7459600  | 7459725  | 125 | 7459612  | 14 | 69  | 4.1  |
| 7 | 7502525  | 7502625  | 100 | 7502537  | 12 | 48  | 8.3  |
| 7 | 7519775  | 7519900  | 125 | 7519887  | 14 | 64  | 0    |
| 7 | 7748550  | 7748725  | 175 | 7748662  | 15 | 86  | 16.6 |
| 7 | 7764625  | 7764675  | 50  | 7764637  | 12 | 24  | 0    |
| 7 | 7768750  | 7768900  | 150 | 7768812  | 15 | 84  | 16.6 |
| 7 | 7778775  | 7778825  | 50  | 7778787  | 12 | 24  | 4.1  |
| 7 | 7840950  | 7841050  | 100 | 7841012  | 13 | 49  | 8.3  |
| 7 | 8094100  | 8094200  | 100 | 8094162  | 14 | 52  | 0    |
| 7 | 8096925  | 8096950  | 25  | 8096937  | 12 | 12  | 0    |
| 7 | 8216125  | 8216175  | 50  | 8216137  | 12 | 24  | 0    |
| 7 | 8223375  | 8223500  | 125 | 8223412  | 16 | 72  | 0    |
| 7 | 8617825  | 8617850  | 25  | 8617837  | 12 | 12  | 0    |
| 7 | 8938600  | 8938675  | 75  | 8938612  | 12 | 36  | 6.2  |
| 7 | 9432825  | 9432950  | 125 | 9432912  | 13 | 60  | 10.3 |
| 7 | 9449425  | 9449450  | 25  | 9449437  | 13 | 13  | 0    |
| 7 | 9717625  | 9717725  | 100 | 9717637  | 16 | 59  | 0    |
| 7 | 9919900  | 9919925  | 25  | 9919912  | 13 | 13  | 0    |
| 7 | 10083050 | 10083100 | 50  | 10083062 | 13 | 26  | 4.1  |
| 7 | 10314700 | 10314875 | 175 | 10314837 | 15 | 85  | 4.1  |
| 7 | 10458500 | 10458525 | 25  | 10458512 | 12 | 12  | 0    |
| 7 | 10489825 | 10489900 | 75  | 10489887 | 19 | 51  | 6.2  |
| 7 | 10598775 | 10598800 | 25  | 10598787 | 12 | 12  | 0    |
| 7 | 10739825 | 10739850 | 25  | 10739837 | 13 | 13  | 2.1  |
| 7 | 10742000 | 10742150 | 150 | 10742062 | 16 | 89  | 12.4 |
| 7 | 10742925 | 10743050 | 125 | 10742937 | 14 | 68  | 8.3  |
| 7 | 10765350 | 10765575 | 225 | 10765487 | 26 | 182 | 0    |
| 7 | 10822000 | 10822025 | 25  | 10822012 | 13 | 13  | 2.1  |
| 7 | 10914750 | 10914775 | 25  | 10914762 | 14 | 14  | 2.1  |
| 7 | 10938175 | 10938325 | 150 | 10938287 | 16 | 85  | 2.1  |
| 7 | 10977250 | 10977325 | 75  | 10977262 | 13 | 37  | 2.1  |
| 7 | 10979475 | 10979500 | 25  | 10979487 | 13 | 13  | 2.1  |
| 7 | 11078000 | 11078025 | 25  | 11078012 | 12 | 12  | 2.1  |
| 7 | 11174525 | 11174550 | 25  | 11174537 | 12 | 12  | 0    |
| 7 | 11194850 | 11194900 | 50  | 11194887 | 13 | 25  | 0    |
| 7 | 11323025 | 11323100 | 75  | 11323037 | 12 | 36  | 6.2  |
| 7 | 11347650 | 11347675 | 25  | 11347662 | 12 | 12  | 2.1  |
| 7 | 11351350 | 11351500 | 150 | 11351412 | 13 | 74  | 0    |
| 7 | 11480100 | 11480125 | 25  | 11480112 | 12 | 12  | 2.1  |
| 7 | 11487800 | 11487850 | 50  | 11487812 | 12 | 24  | 2.1  |
| 7 | 11546675 | 11546775 | 100 | 11546687 | 13 | 48  | 2.1  |
| 7 | 11563950 | 11563975 | 25  | 11563962 | 12 | 12  | 2.1  |
| 7 | 11637400 | 11637425 | 25  | 11637412 | 12 | 12  | 2.1  |
| 7 | 11679325 | 11679400 | 75  | 11679337 | 14 | 40  | 0    |
| 7 | 11782725 | 11782775 | 50  | 11782737 | 12 | 24  | 0    |
| 7 | 12177850 | 12177875 | 25  | 12177862 | 12 | 12  | 2.1  |
| 7 | 12289725 | 12289775 | 50  | 12289737 | 12 | 24  | 0    |
| 7 | 12385900 | 12385950 | 50  | 12385912 | 13 | 26  | 0    |
| 7 | 12559775 | 12559825 | 50  | 12559787 | 12 | 24  | 0    |

|   |          |          |     |          |    |     |      |
|---|----------|----------|-----|----------|----|-----|------|
| 7 | 12629075 | 12629150 | 75  | 12629087 | 12 | 36  | 6.2  |
| 7 | 12653925 | 12654000 | 75  | 12653937 | 17 | 48  | 6.2  |
| 7 | 12692975 | 12693025 | 50  | 12692987 | 14 | 28  | 4.1  |
| 7 | 12721950 | 12721975 | 25  | 12721962 | 32 | 32  | 4.1  |
| 7 | 12730850 | 12730925 | 75  | 12730862 | 13 | 38  | 0    |
| 7 | 12771100 | 12771150 | 50  | 12771112 | 12 | 24  | 0    |
| 7 | 12812300 | 12812350 | 50  | 12812312 | 12 | 24  | 2.1  |
| 7 | 13069175 | 13069250 | 75  | 13069212 | 13 | 37  | 0    |
| 7 | 13203525 | 13203575 | 50  | 13203537 | 12 | 24  | 0    |
| 7 | 13318600 | 13318675 | 75  | 13318612 | 14 | 41  | 0    |
| 7 | 13514850 | 13515125 | 275 | 13514962 | 27 | 214 | 6.2  |
| 7 | 13546150 | 13546175 | 25  | 13546162 | 12 | 12  | 2.1  |
| 7 | 13648175 | 13648200 | 25  | 13648187 | 12 | 12  | 0    |
| 7 | 13749900 | 13749925 | 25  | 13749912 | 12 | 12  | 0    |
| 7 | 13756125 | 13756275 | 150 | 13756212 | 15 | 76  | 12.4 |
| 7 | 13783600 | 13783675 | 75  | 13783612 | 13 | 39  | 4.1  |
| 7 | 13785050 | 13785175 | 125 | 13785162 | 24 | 87  | 16.6 |
| 7 | 13785400 | 13785425 | 25  | 13785412 | 13 | 13  | 2.1  |
| 7 | 13807300 | 13807500 | 200 | 13807437 | 17 | 121 | 0    |
| 7 | 13856525 | 13856600 | 75  | 13856537 | 21 | 51  | 6.2  |
| 7 | 13858100 | 13858225 | 125 | 13858187 | 13 | 62  | 4.1  |
| 7 | 13865175 | 13865225 | 50  | 13865187 | 12 | 24  | 0    |
| 7 | 13886275 | 13886325 | 50  | 13886312 | 15 | 29  | 4.1  |
| 7 | 13910325 | 13910350 | 25  | 13910337 | 12 | 12  | 2.1  |
| 7 | 13930325 | 13930425 | 100 | 13930337 | 12 | 48  | 8.3  |
| 7 | 13938775 | 13938800 | 25  | 13938787 | 13 | 13  | 0    |
| 7 | 13939975 | 13940050 | 75  | 13939987 | 12 | 36  | 6.2  |
| 7 | 13999175 | 13999200 | 25  | 13999187 | 12 | 12  | 0    |
| 7 | 13999600 | 13999650 | 50  | 13999612 | 12 | 24  | 4.1  |
| 7 | 14006725 | 14006775 | 50  | 14006737 | 13 | 25  | 4.1  |
| 7 | 14027350 | 14027450 | 100 | 14027437 | 14 | 46  | 0    |
| 7 | 14092175 | 14092350 | 175 | 14092237 | 14 | 87  | 12.4 |
| 7 | 14413625 | 14413675 | 50  | 14413637 | 13 | 26  | 0    |
| 7 | 14417150 | 14417225 | 75  | 14417162 | 13 | 39  | 0    |
| 7 | 14456925 | 14456975 | 50  | 14456937 | 14 | 26  | 4.1  |
| 7 | 14649200 | 14649250 | 50  | 14649212 | 12 | 24  | 0    |
| 7 | 14751550 | 14751650 | 100 | 14751612 | 14 | 52  | 4.1  |
| 7 | 14801700 | 14801750 | 50  | 14801712 | 12 | 24  | 4.1  |
| 7 | 14895325 | 14895400 | 75  | 14895362 | 13 | 38  | 2.1  |
| 7 | 14913400 | 14913425 | 25  | 14913412 | 12 | 12  | 0    |
| 7 | 14977175 | 14977200 | 25  | 14977187 | 13 | 13  | 2.1  |
| 7 | 14995050 | 14995175 | 125 | 14995162 | 18 | 74  | 10.3 |
| 7 | 15077450 | 15077475 | 25  | 15077462 | 12 | 12  | 0    |
| 7 | 15124850 | 15124900 | 50  | 15124862 | 12 | 24  | 0    |
| 7 | 15164775 | 15164875 | 100 | 15164787 | 18 | 64  | 0    |
| 7 | 15205100 | 15205200 | 100 | 15205112 | 21 | 68  | 12.4 |
| 7 | 15429950 | 15429975 | 25  | 15429962 | 12 | 12  | 0    |
| 7 | 15435425 | 15435475 | 50  | 15435437 | 12 | 24  | 0    |
| 7 | 15445925 | 15445950 | 25  | 15445937 | 12 | 12  | 2.1  |
| 7 | 15465375 | 15465425 | 50  | 15465412 | 14 | 27  | 4.1  |
| 7 | 15469425 | 15469650 | 225 | 15469512 | 25 | 179 | 0    |
| 7 | 15492200 | 15492325 | 125 | 15492237 | 13 | 60  | 10.3 |
| 7 | 15495525 | 15495625 | 100 | 15495612 | 14 | 48  | 0    |
| 7 | 15498225 | 15498250 | 25  | 15498237 | 12 | 12  | 2.1  |
| 7 | 15510650 | 15510850 | 200 | 15510687 | 15 | 100 | 16.6 |
| 7 | 15513425 | 15513525 | 100 | 15513512 | 16 | 56  | 6.2  |
| 7 | 15518025 | 15518125 | 100 | 15518037 | 14 | 54  | 6.2  |
| 7 | 15523950 | 15524000 | 50  | 15523987 | 14 | 26  | 4.1  |
| 7 | 15567100 | 15567175 | 75  | 15567112 | 12 | 36  | 6.2  |
| 7 | 15589525 | 15589550 | 25  | 15589537 | 12 | 12  | 0    |
| 7 | 15590875 | 15590925 | 50  | 15590887 | 12 | 24  | 4.1  |
| 7 | 15614300 | 15614325 | 25  | 15614312 | 12 | 12  | 0    |
| 7 | 15636225 | 15636400 | 175 | 15636287 | 16 | 96  | 12.4 |
| 7 | 15654825 | 15654925 | 100 | 15654887 | 22 | 74  | 8.3  |
| 7 | 15657075 | 15657225 | 150 | 15657187 | 15 | 75  | 10.3 |
| 7 | 15790025 | 15790075 | 50  | 15790062 | 13 | 25  | 4.1  |
| 7 | 15812200 | 15812325 | 125 | 15812262 | 13 | 61  | 2.1  |
| 7 | 15824100 | 15824225 | 125 | 15824112 | 16 | 74  | 6.2  |
| 7 | 15827725 | 15827800 | 75  | 15827762 | 14 | 39  | 0    |
| 7 | 16137075 | 16137100 | 25  | 16137087 | 12 | 12  | 2.1  |
| 7 | 16406375 | 16406500 | 125 | 16406412 | 15 | 69  | 4.1  |
| 7 | 16426550 | 16426650 | 100 | 16426637 | 15 | 47  | 8.3  |
| 7 | 16478850 | 16479000 | 150 | 16478912 | 15 | 79  | 4.1  |
| 7 | 16499500 | 16499600 | 100 | 16499537 | 13 | 51  | 8.3  |
| 7 | 16637050 | 16637100 | 50  | 16637062 | 13 | 26  | 2.1  |

|   |          |          |     |          |    |     |      |
|---|----------|----------|-----|----------|----|-----|------|
| 7 | 16652975 | 16653025 | 50  | 16652987 | 12 | 24  | 0    |
| 7 | 16658375 | 16658400 | 25  | 16658387 | 13 | 13  | 2.1  |
| 7 | 16668200 | 16668225 | 25  | 16668212 | 12 | 12  | 2.1  |
| 7 | 16745525 | 16745575 | 50  | 16745537 | 12 | 24  | 4.1  |
| 7 | 16746475 | 16746775 | 300 | 16746512 | 32 | 279 | 43.5 |
| 7 | 16748225 | 16748250 | 25  | 16748237 | 12 | 12  | 2.1  |
| 7 | 16749150 | 16749325 | 175 | 16749287 | 16 | 99  | 0    |
| 7 | 16749600 | 16749750 | 150 | 16749612 | 13 | 78  | 12.4 |
| 7 | 16751525 | 16751575 | 50  | 16751562 | 13 | 25  | 4.1  |
| 7 | 16807325 | 16807450 | 125 | 16807362 | 14 | 64  | 0    |
| 7 | 16844875 | 16845050 | 175 | 16844962 | 14 | 92  | 0    |
| 7 | 16897525 | 16897575 | 50  | 16897537 | 12 | 24  | 4.1  |
| 7 | 16924600 | 16924675 | 75  | 16924612 | 13 | 37  | 0    |
| 7 | 16932325 | 16932725 | 400 | 16932587 | 15 | 193 | 6.2  |
| 7 | 16944075 | 16944175 | 100 | 16944087 | 19 | 65  | 6.2  |
| 7 | 16951600 | 16951650 | 50  | 16951612 | 12 | 24  | 4.1  |
| 7 | 16957950 | 16958050 | 100 | 16958012 | 13 | 50  | 0    |
| 7 | 16967925 | 16967950 | 25  | 16967937 | 12 | 12  | 0    |
| 7 | 16983725 | 16983775 | 50  | 16983737 | 12 | 24  | 0    |
| 7 | 16993575 | 16993600 | 25  | 16993587 | 12 | 12  | 2.1  |
| 7 | 16997675 | 16997700 | 25  | 16997687 | 12 | 12  | 2.1  |
| 7 | 17049175 | 17049375 | 200 | 17049237 | 15 | 110 | 16.6 |
| 7 | 17096950 | 17097250 | 300 | 17097062 | 17 | 171 | 16.6 |
| 7 | 17098625 | 17098650 | 25  | 17098637 | 12 | 12  | 2.1  |
| 7 | 17145825 | 17145925 | 100 | 17145837 | 13 | 47  | 6.2  |
| 7 | 17149200 | 17149475 | 275 | 17149462 | 13 | 100 | 2.1  |
| 7 | 17151325 | 17151450 | 125 | 17151412 | 16 | 70  | 10.3 |
| 7 | 17240250 | 17240475 | 225 | 17240287 | 17 | 134 | 18.6 |
| 7 | 17276075 | 17276300 | 225 | 17276137 | 21 | 149 | 0    |
| 7 | 17280700 | 17281025 | 325 | 17280912 | 25 | 239 | 33.1 |
| 7 | 17304000 | 17304075 | 75  | 17304062 | 13 | 36  | 6.2  |
| 7 | 17304750 | 17304875 | 125 | 17304787 | 15 | 67  | 8.3  |
| 7 | 17309000 | 17309075 | 75  | 17309062 | 15 | 41  | 4.1  |
| 7 | 17370900 | 17370925 | 25  | 17370912 | 12 | 12  | 0    |
| 7 | 17407875 | 17408000 | 125 | 17407887 | 13 | 62  | 0    |
| 7 | 17512925 | 17512950 | 25  | 17512937 | 12 | 12  | 0    |
| 7 | 17562300 | 17562350 | 50  | 17562312 | 12 | 24  | 4.1  |
| 7 | 17632525 | 17632575 | 50  | 17632537 | 12 | 24  | 0    |
| 7 | 17652725 | 17652825 | 100 | 17652787 | 15 | 52  | 0    |
| 7 | 17658100 | 17658125 | 25  | 17658112 | 13 | 13  | 2.1  |
| 7 | 17702075 | 17702100 | 25  | 17702087 | 12 | 12  | 0    |
| 7 | 17702825 | 17702925 | 100 | 17702837 | 29 | 86  | 10.3 |
| 7 | 17781350 | 17781375 | 25  | 17781362 | 13 | 13  | 0    |
| 7 | 18046525 | 18046600 | 75  | 18046562 | 15 | 42  | 2.1  |
| 7 | 18138650 | 18138675 | 25  | 18138662 | 12 | 12  | 2.1  |
| 7 | 18323700 | 18323800 | 100 | 18323712 | 14 | 54  | 2.1  |
| 7 | 18358525 | 18358875 | 350 | 18358662 | 24 | 256 | 43.5 |
| 7 | 18395700 | 18395775 | 75  | 18395737 | 16 | 40  | 2.1  |
| 7 | 18404100 | 18404200 | 100 | 18404112 | 12 | 48  | 6.2  |
| 7 | 18464950 | 18465050 | 100 | 18464962 | 12 | 48  | 6.2  |
| 7 | 18481200 | 18481225 | 25  | 18481212 | 13 | 13  | 2.1  |
| 7 | 18503375 | 18503400 | 25  | 18503387 | 12 | 12  | 0    |
| 7 | 18515225 | 18515250 | 25  | 18515237 | 14 | 14  | 2.1  |
| 7 | 18539400 | 18539450 | 50  | 18539412 | 12 | 24  | 0    |
| 7 | 18557700 | 18557900 | 200 | 18557737 | 13 | 99  | 0    |
| 7 | 18686850 | 18687150 | 300 | 18686987 | 28 | 241 | 24.8 |
| 7 | 18699675 | 18699875 | 200 | 18699687 | 13 | 95  | 10.3 |
| 7 | 18703100 | 18703150 | 50  | 18703112 | 12 | 24  | 0    |
| 7 | 18704550 | 18704625 | 75  | 18704562 | 14 | 41  | 2.1  |
| 7 | 18731075 | 18731125 | 50  | 18731087 | 12 | 24  | 4.1  |
| 7 | 18761200 | 18761275 | 75  | 18761212 | 14 | 40  | 0    |
| 7 | 18786175 | 18786225 | 50  | 18786187 | 13 | 26  | 4.1  |
| 7 | 18821650 | 18821675 | 25  | 18821662 | 12 | 12  | 2.1  |
| 7 | 18840975 | 18841025 | 50  | 18840987 | 12 | 24  | 4.1  |
| 7 | 18852450 | 18852500 | 50  | 18852462 | 12 | 24  | 2.1  |
| 7 | 18896425 | 18896450 | 25  | 18896437 | 12 | 12  | 2.1  |
| 7 | 18908150 | 18908175 | 25  | 18908162 | 13 | 13  | 0    |
| 7 | 18908450 | 18908575 | 125 | 18908537 | 14 | 60  | 10.3 |
| 7 | 18939400 | 18939425 | 25  | 18939412 | 12 | 12  | 2.1  |
| 7 | 18981175 | 18981225 | 50  | 18981187 | 17 | 30  | 4.1  |
| 7 | 18983950 | 18984175 | 225 | 18984037 | 20 | 149 | 12.4 |
| 7 | 18984450 | 18984600 | 150 | 18984512 | 16 | 87  | 6.2  |
| 7 | 19103375 | 19103425 | 50  | 19103387 | 13 | 26  | 0    |
| 7 | 19118425 | 19118450 | 25  | 19118437 | 13 | 13  | 0    |
| 7 | 19120075 | 19120150 | 75  | 19120087 | 14 | 42  | 6.2  |

|   |          |          |     |          |    |     |      |
|---|----------|----------|-----|----------|----|-----|------|
| 7 | 19325925 | 19325950 | 25  | 19325937 | 18 | 18  | 2.1  |
| 7 | 19328450 | 19328600 | 150 | 19328587 | 14 | 67  | 10.3 |
| 7 | 19385000 | 19385025 | 25  | 19385012 | 13 | 13  | 0    |
| 7 | 19411875 | 19411975 | 100 | 19411937 | 16 | 54  | 0    |
| 7 | 19515125 | 19515150 | 25  | 19515137 | 12 | 12  | 0    |
| 7 | 19668500 | 19668650 | 150 | 19668587 | 17 | 90  | 0    |
| 7 | 19683625 | 19683750 | 125 | 19683662 | 16 | 71  | 0    |
| 7 | 19715475 | 19715500 | 25  | 19715487 | 13 | 13  | 2.1  |
| 7 | 19964625 | 19964750 | 125 | 19964662 | 14 | 64  | 8.3  |
| 7 | 19989300 | 19989325 | 25  | 19989312 | 13 | 13  | 2.1  |
| 7 | 20071600 | 20071625 | 25  | 20071612 | 12 | 12  | 0    |
| 7 | 20165375 | 20165475 | 100 | 20165412 | 17 | 62  | 8.3  |
| 7 | 20224600 | 20224675 | 75  | 20224637 | 13 | 37  | 6.2  |
| 7 | 20227600 | 20227625 | 25  | 20227612 | 13 | 13  | 2.1  |
| 7 | 20301150 | 20301350 | 200 | 20301212 | 19 | 115 | 8.3  |
| 7 | 20314050 | 20314325 | 275 | 20314187 | 21 | 183 | 18.6 |
| 7 | 20347800 | 20347825 | 25  | 20347812 | 13 | 13  | 2.1  |
| 7 | 20357400 | 20357425 | 25  | 20357412 | 12 | 12  | 2.1  |
| 7 | 20359100 | 20359150 | 50  | 20359137 | 22 | 43  | 8.3  |
| 7 | 20366075 | 20366225 | 150 | 20366087 | 13 | 69  | 12.4 |
| 7 | 20399800 | 20399825 | 25  | 20399812 | 13 | 13  | 2.1  |
| 7 | 20414525 | 20414550 | 25  | 20414537 | 14 | 14  | 2.1  |
| 7 | 20414775 | 20414900 | 125 | 20414837 | 16 | 72  | 4.1  |
| 7 | 20426225 | 20426325 | 100 | 20426312 | 15 | 57  | 8.3  |
| 7 | 20443150 | 20443325 | 175 | 20443187 | 16 | 93  | 0    |
| 7 | 20465450 | 20465575 | 125 | 20465537 | 13 | 61  | 0    |
| 7 | 20514200 | 20514250 | 50  | 20514237 | 18 | 33  | 4.1  |
| 7 | 20521825 | 20521850 | 25  | 20521837 | 12 | 12  | 2.1  |
| 7 | 20539475 | 20539500 | 25  | 20539487 | 12 | 12  | 2.1  |
| 7 | 20567800 | 20567825 | 25  | 20567812 | 12 | 12  | 0    |
| 7 | 20601400 | 20601450 | 50  | 20601412 | 12 | 24  | 4.1  |
| 7 | 20603000 | 20603125 | 125 | 20603037 | 14 | 67  | 12.4 |
| 7 | 20787000 | 20787125 | 125 | 20787112 | 17 | 70  | 2.1  |
| 7 | 20927725 | 20927925 | 200 | 20927837 | 16 | 111 | 16.6 |
| 7 | 20939500 | 20939525 | 25  | 20939512 | 12 | 12  | 0    |
| 7 | 21112775 | 21112825 | 50  | 21112787 | 12 | 24  | 0    |
| 7 | 21378375 | 21378400 | 25  | 21378387 | 12 | 12  | 0    |
| 7 | 21952725 | 21952800 | 75  | 21952762 | 13 | 38  | 0    |
| 7 | 22020075 | 22020125 | 50  | 22020087 | 12 | 24  | 0    |
| 7 | 22049675 | 22049750 | 75  | 22049687 | 12 | 36  | 0    |
| 7 | 22070950 | 22070975 | 25  | 22070962 | 13 | 13  | 2.1  |
| 7 | 22088550 | 22088575 | 25  | 22088562 | 12 | 12  | 0    |
| 7 | 22095350 | 22095425 | 75  | 22095362 | 12 | 36  | 0    |
| 7 | 22136600 | 22136625 | 25  | 22136612 | 12 | 12  | 0    |
| 7 | 22164000 | 22164025 | 25  | 22164012 | 12 | 12  | 2.1  |
| 7 | 22244200 | 22244250 | 50  | 22244212 | 12 | 24  | 0    |
| 7 | 22447775 | 22447825 | 50  | 22447787 | 13 | 26  | 0    |
| 7 | 22578625 | 22578650 | 25  | 22578637 | 14 | 14  | 2.1  |
| 7 | 22593000 | 22593050 | 50  | 22593012 | 12 | 24  | 4.1  |
| 7 | 22615050 | 22615075 | 25  | 22615062 | 12 | 12  | 0    |
| 7 | 22629750 | 22629825 | 75  | 22629762 | 13 | 38  | 4.1  |
| 7 | 22737700 | 22737775 | 75  | 22737712 | 19 | 48  | 4.1  |
| 7 | 22770850 | 22770900 | 50  | 22770862 | 12 | 24  | 4.1  |
| 7 | 22785925 | 22785950 | 25  | 22785937 | 12 | 12  | 0    |
| 7 | 22788775 | 22788800 | 25  | 22788787 | 13 | 13  | 2.1  |
| 7 | 22850025 | 22850050 | 25  | 22850037 | 12 | 12  | 2.1  |
| 7 | 22864600 | 22864800 | 200 | 22864787 | 29 | 162 | 20.7 |
| 7 | 22865525 | 22865675 | 150 | 22865537 | 21 | 107 | 14.5 |
| 7 | 22956150 | 22956325 | 175 | 22956212 | 17 | 107 | 0    |
| 7 | 22974175 | 22974200 | 25  | 22974187 | 13 | 13  | 0    |
| 7 | 23009825 | 23009925 | 100 | 23009887 | 15 | 56  | 6.2  |
| 7 | 23020600 | 23020650 | 50  | 23020612 | 15 | 29  | 4.1  |
| 7 | 23112775 | 23112825 | 50  | 23112787 | 14 | 26  | 4.1  |
| 7 | 23186925 | 23186975 | 50  | 23186937 | 12 | 24  | 0    |
| 7 | 23233300 | 23233400 | 100 | 23233312 | 12 | 48  | 0    |
| 7 | 23252800 | 23252875 | 75  | 23252862 | 16 | 42  | 2.1  |
| 7 | 23271375 | 23271425 | 50  | 23271387 | 14 | 28  | 4.1  |
| 7 | 23341950 | 23341975 | 25  | 23341962 | 12 | 12  | 2.1  |
| 7 | 23343650 | 23343700 | 50  | 23343662 | 13 | 26  | 4.1  |
| 7 | 23354350 | 23354375 | 25  | 23354362 | 12 | 12  | 2.1  |
| 7 | 23355525 | 23355550 | 25  | 23355537 | 13 | 13  | 2.1  |
| 7 | 23471175 | 23471225 | 50  | 23471187 | 12 | 24  | 2.1  |
| 7 | 23487425 | 23487475 | 50  | 23487437 | 13 | 25  | 2.1  |
| 7 | 23665275 | 23665450 | 175 | 23665337 | 19 | 120 | 8.3  |
| 7 | 23925425 | 23925450 | 25  | 23925437 | 12 | 12  | 0    |

|   |          |          |     |          |    |     |      |
|---|----------|----------|-----|----------|----|-----|------|
| 7 | 24151850 | 24151925 | 75  | 24151862 | 12 | 36  | 6.2  |
| 7 | 24352525 | 24352550 | 25  | 24352537 | 13 | 13  | 0    |
| 7 | 24578650 | 24578725 | 75  | 24578662 | 12 | 36  | 2.1  |
| 7 | 24671925 | 24671950 | 25  | 24671937 | 13 | 13  | 2.1  |
| 7 | 24706200 | 24706400 | 200 | 24706287 | 13 | 95  | 0    |
| 7 | 24707625 | 24707650 | 25  | 24707637 | 12 | 12  | 0    |
| 7 | 24712575 | 24712600 | 25  | 24712587 | 12 | 12  | 2.1  |
| 7 | 24715825 | 24715950 | 125 | 24715887 | 13 | 61  | 2.1  |
| 7 | 24832125 | 24832250 | 125 | 24832137 | 13 | 58  | 2.1  |
| 7 | 24837225 | 24837300 | 75  | 24837262 | 13 | 38  | 0    |
| 7 | 24850125 | 24850225 | 100 | 24850137 | 14 | 55  | 2.1  |
| 7 | 24871050 | 24871125 | 75  | 24871087 | 14 | 38  | 0    |
| 7 | 24894925 | 24895050 | 125 | 24894962 | 16 | 72  | 0    |
| 7 | 24917225 | 24917250 | 25  | 24917237 | 12 | 12  | 2.1  |
| 7 | 24942675 | 24942700 | 25  | 24942687 | 12 | 12  | 2.1  |
| 7 | 24962425 | 24962525 | 100 | 24962462 | 15 | 58  | 6.2  |
| 7 | 24978400 | 24978450 | 50  | 24978412 | 12 | 24  | 4.1  |
| 7 | 25034450 | 25034500 | 50  | 25034487 | 16 | 28  | 4.1  |
| 7 | 25075550 | 25075575 | 25  | 25075562 | 12 | 12  | 2.1  |
| 7 | 25099475 | 25099500 | 25  | 25099487 | 12 | 12  | 2.1  |
| 7 | 25256550 | 25256600 | 50  | 25256562 | 12 | 24  | 0    |
| 7 | 25598575 | 25598600 | 25  | 25598587 | 12 | 12  | 2.1  |
| 7 | 25662875 | 25662950 | 75  | 25662887 | 12 | 35  | 6.2  |
| 7 | 25675525 | 25675600 | 75  | 25675587 | 21 | 58  | 8.3  |
| 7 | 25677175 | 25677250 | 75  | 25677212 | 13 | 38  | 6.2  |
| 7 | 25678500 | 25678575 | 75  | 25678562 | 15 | 41  | 0    |
| 7 | 25758375 | 25758400 | 25  | 25758387 | 13 | 13  | 2.1  |
| 7 | 25771325 | 25771500 | 175 | 25771362 | 14 | 90  | 8.3  |
| 7 | 25781050 | 25781125 | 75  | 25781062 | 12 | 36  | 6.2  |
| 7 | 25801250 | 25801425 | 175 | 25801362 | 14 | 87  | 8.3  |
| 7 | 25827525 | 25827600 | 75  | 25827537 | 12 | 36  | 6.2  |
| 7 | 25852950 | 25852975 | 25  | 25852962 | 13 | 13  | 2.1  |
| 7 | 25861150 | 25861250 | 100 | 25861237 | 22 | 63  | 10.3 |
| 7 | 25862800 | 25862850 | 50  | 25862812 | 12 | 24  | 2.1  |
| 7 | 25868175 | 25868275 | 100 | 25868262 | 15 | 54  | 0    |
| 7 | 26067275 | 26067325 | 50  | 26067287 | 15 | 29  | 4.1  |
| 7 | 26155575 | 26155600 | 25  | 26155587 | 12 | 12  | 0    |
| 7 | 26160400 | 26160575 | 175 | 26160437 | 17 | 94  | 12.4 |
| 7 | 26162625 | 26162850 | 225 | 26162662 | 18 | 142 | 0    |
| 7 | 26165100 | 26165200 | 100 | 26165112 | 12 | 48  | 0    |
| 7 | 26173300 | 26173325 | 25  | 26173312 | 12 | 12  | 2.1  |
| 7 | 26209425 | 26209450 | 25  | 26209437 | 12 | 12  | 0    |
| 7 | 26313350 | 26313375 | 25  | 26313362 | 13 | 13  | 2.1  |
| 7 | 26327175 | 26327225 | 50  | 26327187 | 15 | 28  | 4.1  |
| 7 | 26349700 | 26349725 | 25  | 26349712 | 12 | 12  | 0    |
| 7 | 26423775 | 26423800 | 25  | 26423787 | 13 | 13  | 2.1  |
| 7 | 26444375 | 26444425 | 50  | 26444387 | 12 | 24  | 0    |
| 7 | 26530425 | 26530475 | 50  | 26530437 | 12 | 24  | 0    |
| 7 | 26543250 | 26543300 | 50  | 26543262 | 12 | 24  | 0    |
| 7 | 26652400 | 26652550 | 150 | 26652437 | 17 | 98  | 12.4 |
| 7 | 26710825 | 26710850 | 25  | 26710837 | 12 | 12  | 2.1  |
| 7 | 26821725 | 26821875 | 150 | 26821787 | 17 | 85  | 8.3  |
| 7 | 26864400 | 26864525 | 125 | 26864487 | 13 | 62  | 10.3 |
| 7 | 26871325 | 26871375 | 50  | 26871337 | 14 | 27  | 2.1  |
| 7 | 26926750 | 26926800 | 50  | 26926762 | 12 | 24  | 0    |
| 7 | 26965800 | 26965850 | 50  | 26965812 | 12 | 24  | 0    |
| 7 | 27105275 | 27105550 | 275 | 27105362 | 17 | 150 | 10.3 |
| 7 | 27123500 | 27123525 | 25  | 27123512 | 12 | 12  | 2.1  |
| 7 | 27146525 | 27146625 | 100 | 27146612 | 14 | 48  | 2.1  |
| 7 | 27150375 | 27150400 | 25  | 27150387 | 13 | 13  | 2.1  |
| 7 | 27159925 | 27160000 | 75  | 27159937 | 12 | 36  | 6.2  |
| 7 | 27165100 | 27165200 | 100 | 27165112 | 14 | 50  | 0    |
| 7 | 27174100 | 27174175 | 75  | 27174112 | 13 | 39  | 6.2  |
| 7 | 27177775 | 27177825 | 50  | 27177787 | 13 | 26  | 4.1  |
| 7 | 27183150 | 27183175 | 25  | 27183162 | 13 | 13  | 2.1  |
| 7 | 27190525 | 27190550 | 25  | 27190537 | 12 | 12  | 2.1  |
| 7 | 27191175 | 27191200 | 25  | 27191187 | 12 | 12  | 2.1  |
| 7 | 27246425 | 27246475 | 50  | 27246437 | 12 | 24  | 4.1  |
| 7 | 27253550 | 27253575 | 25  | 27253562 | 12 | 12  | 0    |
| 7 | 27647300 | 27647325 | 25  | 27647312 | 20 | 20  | 2.1  |
| 7 | 27647975 | 27648000 | 25  | 27647987 | 12 | 12  | 0    |
| 7 | 27670575 | 27670700 | 125 | 27670587 | 13 | 65  | 10.3 |
| 7 | 27684075 | 27684225 | 150 | 27684212 | 27 | 105 | 20.7 |
| 7 | 27696525 | 27696550 | 25  | 27696537 | 12 | 12  | 0    |
| 7 | 27721175 | 27721225 | 50  | 27721187 | 15 | 30  | 4.1  |

|   |          |          |     |          |    |     |      |
|---|----------|----------|-----|----------|----|-----|------|
| 7 | 27745400 | 27745550 | 150 | 27745412 | 13 | 63  | 0    |
| 7 | 27781675 | 27781700 | 25  | 27781687 | 13 | 13  | 2.1  |
| 7 | 27814925 | 27815000 | 75  | 27814987 | 15 | 41  | 6.2  |
| 7 | 27820450 | 27820525 | 75  | 27820462 | 15 | 39  | 4.1  |
| 7 | 27927650 | 27927700 | 50  | 27927662 | 18 | 35  | 0    |
| 7 | 27938325 | 27938375 | 50  | 27938337 | 12 | 24  | 4.1  |
| 7 | 27940075 | 27940175 | 100 | 27940137 | 15 | 52  | 6.2  |
| 7 | 27967675 | 27967700 | 25  | 27967687 | 14 | 14  | 2.1  |
| 7 | 27999575 | 27999650 | 75  | 27999587 | 21 | 55  | 8.3  |
| 7 | 28000975 | 28001175 | 200 | 28000987 | 26 | 153 | 14.5 |
| 7 | 28016150 | 28016175 | 25  | 28016162 | 12 | 12  | 2.1  |
| 7 | 28023625 | 28023650 | 25  | 28023637 | 12 | 12  | 2.1  |
| 7 | 28025625 | 28025700 | 75  | 28025687 | 13 | 37  | 0    |
| 7 | 28043275 | 28043350 | 75  | 28043312 | 14 | 38  | 0    |
| 7 | 28044950 | 28044975 | 25  | 28044962 | 12 | 12  | 2.1  |
| 7 | 28081175 | 28081375 | 200 | 28081262 | 20 | 129 | 14.5 |
| 7 | 28113175 | 28113200 | 25  | 28113187 | 12 | 12  | 2.1  |
| 7 | 28114125 | 28114300 | 175 | 28114262 | 19 | 101 | 2.1  |
| 7 | 28139300 | 28139325 | 25  | 28139312 | 13 | 13  | 2.1  |
| 7 | 28247075 | 28247125 | 50  | 28247087 | 12 | 24  | 4.1  |
| 7 | 28322875 | 28322975 | 100 | 28322887 | 12 | 47  | 0    |
| 7 | 28415250 | 28415300 | 50  | 28415262 | 13 | 25  | 4.1  |
| 7 | 28417450 | 28417525 | 75  | 28417462 | 14 | 40  | 2.1  |
| 7 | 28445600 | 28445625 | 25  | 28445612 | 12 | 12  | 0    |
| 7 | 28471550 | 28471600 | 50  | 28471562 | 12 | 24  | 0    |
| 7 | 28483050 | 28483100 | 50  | 28483087 | 15 | 28  | 4.1  |
| 7 | 28506025 | 28506050 | 25  | 28506037 | 12 | 12  | 2.1  |
| 7 | 28519050 | 28519075 | 25  | 28519062 | 12 | 12  | 0    |
| 7 | 28548650 | 28548675 | 25  | 28548662 | 12 | 12  | 0    |
| 7 | 28559600 | 28559700 | 100 | 28559612 | 13 | 47  | 0    |
| 7 | 28578775 | 28578850 | 75  | 28578787 | 12 | 36  | 0    |
| 7 | 28595050 | 28595125 | 75  | 28595062 | 12 | 36  | 0    |
| 7 | 28685750 | 28685775 | 25  | 28685762 | 12 | 12  | 2.1  |
| 7 | 28692300 | 28692325 | 25  | 28692312 | 12 | 12  | 2.1  |
| 7 | 28755425 | 28755525 | 100 | 28755512 | 15 | 55  | 6.2  |
| 7 | 28815650 | 28815675 | 25  | 28815662 | 12 | 12  | 2.1  |
| 7 | 28819600 | 28819650 | 50  | 28819612 | 12 | 24  | 0    |
| 7 | 28825175 | 28825350 | 175 | 28825262 | 15 | 99  | 10.3 |
| 7 | 28869275 | 28869450 | 175 | 28869287 | 20 | 111 | 6.2  |
| 7 | 28926600 | 28926650 | 50  | 28926612 | 14 | 27  | 4.1  |
| 7 | 28956175 | 28956200 | 25  | 28956187 | 12 | 12  | 2.1  |
| 7 | 28965075 | 28965100 | 25  | 28965087 | 18 | 18  | 2.1  |
| 7 | 29012200 | 29012225 | 25  | 29012212 | 16 | 16  | 2.1  |
| 7 | 29063300 | 29063375 | 75  | 29063312 | 13 | 37  | 0    |
| 7 | 29094225 | 29094250 | 25  | 29094237 | 13 | 13  | 2.1  |
| 7 | 29095650 | 29095675 | 25  | 29095662 | 12 | 12  | 2.1  |
| 7 | 29097225 | 29097250 | 25  | 29097237 | 15 | 15  | 0    |
| 7 | 29128400 | 29128475 | 75  | 29128412 | 13 | 39  | 6.2  |
| 7 | 29231775 | 29231900 | 125 | 29231812 | 14 | 68  | 0    |
| 7 | 29382525 | 29382550 | 25  | 29382537 | 12 | 12  | 2.1  |
| 7 | 29571600 | 29571625 | 25  | 29571612 | 12 | 12  | 2.1  |
| 7 | 29883625 | 29883675 | 50  | 29883637 | 14 | 26  | 2.1  |
| 7 | 29933125 | 29933275 | 150 | 29933137 | 16 | 82  | 4.1  |
| 7 | 29938125 | 29938325 | 200 | 29938287 | 17 | 107 | 18.6 |
| 7 | 29994175 | 29994300 | 125 | 29994187 | 20 | 96  | 2.1  |
| 7 | 30028800 | 30028850 | 50  | 30028812 | 13 | 26  | 4.1  |
| 7 | 30170450 | 30170525 | 75  | 30170462 | 16 | 42  | 6.2  |
| 7 | 30179200 | 30179225 | 25  | 30179212 | 17 | 17  | 2.1  |
| 7 | 30195275 | 30195425 | 150 | 30195362 | 15 | 78  | 6.2  |
| 7 | 30218550 | 30218600 | 50  | 30218562 | 13 | 26  | 4.1  |
| 7 | 30218950 | 30218975 | 25  | 30218962 | 12 | 12  | 2.1  |
| 7 | 30282425 | 30282475 | 50  | 30282437 | 12 | 24  | 4.1  |
| 7 | 30456550 | 30456600 | 50  | 30456562 | 15 | 28  | 0    |
| 7 | 30475525 | 30475550 | 25  | 30475537 | 12 | 12  | 2.1  |
| 7 | 30567975 | 30568000 | 25  | 30567987 | 12 | 12  | 2.1  |
| 7 | 30568825 | 30568925 | 100 | 30568862 | 13 | 51  | 8.3  |
| 7 | 30600950 | 30601000 | 50  | 30600962 | 13 | 25  | 4.1  |
| 7 | 30757025 | 30757050 | 25  | 30757037 | 12 | 12  | 2.1  |
| 7 | 30757475 | 30757525 | 50  | 30757487 | 18 | 34  | 4.1  |
| 7 | 30793650 | 30793750 | 100 | 30793662 | 14 | 52  | 8.3  |
| 7 | 30825800 | 30825825 | 25  | 30825812 | 12 | 12  | 0    |
| 7 | 30870800 | 30870875 | 75  | 30870862 | 13 | 37  | 6.2  |
| 7 | 30882300 | 30882325 | 25  | 30882312 | 12 | 12  | 2.1  |
| 7 | 30942750 | 30942800 | 50  | 30942787 | 14 | 26  | 4.1  |
| 7 | 31002975 | 31003050 | 75  | 31002987 | 12 | 36  | 0    |

|   |          |          |     |          |    |     |      |
|---|----------|----------|-----|----------|----|-----|------|
| 7 | 31039700 | 31039725 | 25  | 31039712 | 12 | 12  | 2.1  |
| 7 | 31379500 | 31379550 | 50  | 31379512 | 12 | 24  | 4.1  |
| 7 | 31391050 | 31391075 | 25  | 31391062 | 12 | 12  | 2.1  |
| 7 | 31439050 | 31439075 | 25  | 31439062 | 12 | 12  | 0    |
| 7 | 31459550 | 31459600 | 50  | 31459562 | 12 | 24  | 4.1  |
| 7 | 31483550 | 31483625 | 75  | 31483587 | 14 | 38  | 0    |
| 7 | 31757900 | 31758000 | 100 | 31757962 | 15 | 56  | 4.1  |
| 7 | 31834250 | 31834275 | 25  | 31834262 | 13 | 13  | 2.1  |
| 7 | 31941500 | 31941525 | 25  | 31941512 | 12 | 12  | 2.1  |
| 7 | 31945150 | 31945200 | 50  | 31945162 | 14 | 26  | 2.1  |
| 7 | 31994725 | 31994750 | 25  | 31994737 | 12 | 12  | 0    |
| 7 | 32038775 | 32038900 | 125 | 32038812 | 15 | 65  | 4.1  |
| 7 | 32057350 | 32057650 | 300 | 32057512 | 39 | 372 | 35.2 |
| 7 | 32061025 | 32061175 | 150 | 32061087 | 14 | 76  | 0    |
| 7 | 32067850 | 32067900 | 50  | 32067862 | 14 | 27  | 4.1  |
| 7 | 32169350 | 32169425 | 75  | 32169362 | 19 | 54  | 6.2  |
| 7 | 32171900 | 32171925 | 25  | 32171912 | 12 | 12  | 0    |
| 7 | 32268750 | 32268775 | 25  | 32268762 | 12 | 12  | 2.1  |
| 7 | 32524825 | 32524850 | 25  | 32524837 | 12 | 12  | 0    |
| 7 | 32780825 | 32780950 | 125 | 32780887 | 13 | 61  | 8.3  |
| 7 | 32783675 | 32783750 | 75  | 32783687 | 12 | 36  | 6.2  |
| 7 | 32882475 | 32882525 | 50  | 32882487 | 13 | 26  | 2.1  |
| 7 | 33150375 | 33150400 | 25  | 33150387 | 12 | 12  | 2.1  |
| 7 | 33267575 | 33267675 | 100 | 33267612 | 16 | 55  | 0    |
| 7 | 33418500 | 33418675 | 175 | 33418587 | 17 | 96  | 2.1  |
| 7 | 33501650 | 33501675 | 25  | 33501662 | 12 | 12  | 0    |
| 7 | 33566650 | 33566675 | 25  | 33566662 | 13 | 13  | 2.1  |
| 7 | 33617100 | 33617300 | 200 | 33617112 | 12 | 89  | 12.4 |
| 7 | 33646800 | 33646875 | 75  | 33646812 | 12 | 36  | 0    |
| 7 | 33678875 | 33678900 | 25  | 33678887 | 12 | 12  | 0    |
| 7 | 33699025 | 33699400 | 375 | 33699112 | 17 | 200 | 24.8 |
| 7 | 33726300 | 33726325 | 25  | 33726312 | 12 | 12  | 2.1  |
| 7 | 33728125 | 33728150 | 25  | 33728137 | 12 | 12  | 0    |
| 7 | 33939700 | 33939750 | 50  | 33939712 | 12 | 24  | 4.1  |
| 7 | 33940250 | 33940300 | 50  | 33940262 | 12 | 24  | 4.1  |
| 7 | 33974175 | 33974200 | 25  | 33974187 | 13 | 13  | 2.1  |
| 7 | 33986300 | 33986325 | 25  | 33986312 | 12 | 12  | 2.1  |
| 7 | 33988150 | 33988175 | 25  | 33988162 | 12 | 12  | 0    |
| 7 | 34026025 | 34026050 | 25  | 34026037 | 12 | 12  | 0    |
| 7 | 34061725 | 34061925 | 200 | 34061762 | 18 | 126 | 2.1  |
| 7 | 34065875 | 34065950 | 75  | 34065912 | 13 | 37  | 2.1  |
| 7 | 34092675 | 34092725 | 50  | 34092687 | 13 | 26  | 0    |
| 7 | 34113725 | 34113775 | 50  | 34113737 | 12 | 24  | 0    |
| 7 | 35001125 | 35001150 | 25  | 35001137 | 13 | 13  | 0    |
| 7 | 35697675 | 35697700 | 25  | 35697687 | 12 | 12  | 0    |
| 7 | 35722775 | 35722975 | 200 | 35722862 | 18 | 117 | 0    |
| 7 | 35740600 | 35740625 | 25  | 35740612 | 14 | 14  | 2.1  |
| 7 | 35760350 | 35760525 | 175 | 35760487 | 25 | 163 | 31   |
| 7 | 36043525 | 36043700 | 175 | 36043587 | 26 | 159 | 10.3 |
| 7 | 36054625 | 36054725 | 100 | 36054637 | 13 | 49  | 4.1  |
| 7 | 36132475 | 36132500 | 25  | 36132487 | 13 | 13  | 0    |
| 7 | 36134875 | 36134900 | 25  | 36134887 | 12 | 12  | 2.1  |
| 7 | 36522250 | 36522275 | 25  | 36522262 | 12 | 12  | 2.1  |
| 7 | 36570875 | 36570925 | 50  | 36570887 | 13 | 26  | 0    |
| 7 | 36661775 | 36661825 | 50  | 36661787 | 12 | 24  | 0    |
| 7 | 36787700 | 36787725 | 25  | 36787712 | 14 | 14  | 0    |
| 7 | 37038000 | 37038025 | 25  | 37038012 | 14 | 14  | 2.1  |
| 7 | 37114825 | 37114975 | 150 | 37114837 | 12 | 70  | 0    |
| 7 | 37254125 | 37254300 | 175 | 37254162 | 14 | 87  | 16.6 |
| 7 | 37256825 | 37257250 | 425 | 37257112 | 22 | 283 | 51.7 |
| 7 | 37290925 | 37290950 | 25  | 37290937 | 12 | 12  | 2.1  |
| 7 | 37345075 | 37345100 | 25  | 37345087 | 12 | 12  | 0    |
| 7 | 37366425 | 37366450 | 25  | 37366437 | 13 | 13  | 0    |
| 7 | 37369450 | 37369500 | 50  | 37369462 | 13 | 26  | 4.1  |
| 7 | 37376350 | 37376475 | 125 | 37376362 | 20 | 83  | 10.3 |
| 7 | 37412300 | 37412375 | 75  | 37412362 | 14 | 38  | 0    |
| 7 | 37420950 | 37421050 | 100 | 37420962 | 12 | 47  | 0    |
| 7 | 37498625 | 37498750 | 125 | 37498662 | 32 | 129 | 10.3 |
| 7 | 37777175 | 37777250 | 75  | 37777187 | 12 | 36  | 6.2  |
| 7 | 37839850 | 37839900 | 50  | 37839862 | 16 | 30  | 4.1  |
| 7 | 38185000 | 38185050 | 50  | 38185037 | 15 | 28  | 4.1  |
| 7 | 38896550 | 38896675 | 125 | 38896562 | 14 | 66  | 10.3 |
| 7 | 38980125 | 38980150 | 25  | 38980137 | 12 | 12  | 2.1  |
| 7 | 39010600 | 39010625 | 25  | 39010612 | 13 | 13  | 0    |
| 7 | 39011700 | 39011825 | 125 | 39011762 | 22 | 94  | 2.1  |



|   |          |          |     |          |    |     |      |
|---|----------|----------|-----|----------|----|-----|------|
| 7 | 39209725 | 39209775 | 50  | 39209737 | 12 | 24  | 4.1  |
| 7 | 39328225 | 39328325 | 100 | 39328312 | 13 | 48  | 8.3  |
| 7 | 39362375 | 39362500 | 125 | 39362387 | 14 | 62  | 0    |
| 7 | 39420300 | 39420350 | 50  | 39420312 | 13 | 26  | 4.1  |
| 7 | 39465800 | 39465825 | 25  | 39465812 | 13 | 13  | 2.1  |
| 7 | 39640775 | 39640800 | 25  | 39640787 | 12 | 12  | 0    |
| 7 | 40141075 | 40141125 | 50  | 40141087 | 14 | 28  | 4.1  |
| 7 | 40220100 | 40220150 | 50  | 40220137 | 15 | 28  | 4.1  |
| 7 | 40337575 | 40337675 | 100 | 40337662 | 17 | 57  | 8.3  |
| 7 | 40476375 | 40476400 | 25  | 40476387 | 13 | 13  | 2.1  |
| 7 | 40548150 | 40548225 | 75  | 40548162 | 12 | 36  | 0    |
| 7 | 40591350 | 40591375 | 25  | 40591362 | 13 | 13  | 2.1  |
| 7 | 40601375 | 40601400 | 25  | 40601387 | 12 | 12  | 2.1  |
| 7 | 40607300 | 40607450 | 150 | 40607362 | 14 | 76  | 12.4 |
| 7 | 40665050 | 40665175 | 125 | 40665087 | 14 | 66  | 8.3  |
| 7 | 40680525 | 40680750 | 225 | 40680687 | 24 | 166 | 16.6 |
| 7 | 40683800 | 40683825 | 25  | 40683812 | 13 | 13  | 2.1  |
| 7 | 40701850 | 40701875 | 25  | 40701862 | 13 | 13  | 2.1  |
| 7 | 40723400 | 40723425 | 25  | 40723412 | 13 | 13  | 0    |
| 7 | 40769325 | 40769350 | 25  | 40769337 | 12 | 12  | 2.1  |
| 7 | 40840100 | 40840150 | 50  | 40840112 | 12 | 24  | 0    |
| 7 | 40872950 | 40873000 | 50  | 40872962 | 13 | 25  | 4.1  |
| 7 | 40891825 | 40891975 | 150 | 40891862 | 18 | 85  | 12.4 |
| 7 | 41057800 | 41057900 | 100 | 41057812 | 12 | 48  | 0    |
| 7 | 41114625 | 41114650 | 25  | 41114637 | 12 | 12  | 2.1  |
| 7 | 41144450 | 41144500 | 50  | 41144462 | 12 | 24  | 4.1  |
| 7 | 41148625 | 41148800 | 175 | 41148637 | 14 | 86  | 14.5 |
| 7 | 41196300 | 41196325 | 25  | 41196312 | 13 | 13  | 2.1  |
| 7 | 41201050 | 41201125 | 75  | 41201112 | 13 | 37  | 6.2  |
| 7 | 41203100 | 41203300 | 200 | 41203212 | 22 | 138 | 0    |
| 7 | 41204250 | 41204450 | 200 | 41204262 | 15 | 97  | 6.2  |
| 7 | 41205300 | 41205550 | 250 | 41205462 | 22 | 190 | 31   |
| 7 | 41205800 | 41205850 | 50  | 41205812 | 12 | 24  | 2.1  |
| 7 | 41223600 | 41223625 | 25  | 41223612 | 15 | 15  | 2.1  |
| 7 | 41226725 | 41226825 | 100 | 41226737 | 16 | 56  | 8.3  |
| 7 | 41228500 | 41228525 | 25  | 41228512 | 12 | 12  | 0    |
| 7 | 41261625 | 41261675 | 50  | 41261637 | 13 | 26  | 4.1  |
| 7 | 41330075 | 41330125 | 50  | 41330087 | 12 | 24  | 4.1  |
| 7 | 41334750 | 41334775 | 25  | 41334762 | 12 | 12  | 0    |
| 7 | 41432200 | 41432375 | 175 | 41432262 | 16 | 102 | 0    |
| 7 | 41662850 | 41662900 | 50  | 41662862 | 12 | 24  | 4.1  |
| 7 | 41702000 | 41702050 | 50  | 41702012 | 14 | 28  | 2.1  |
| 7 | 41709125 | 41709225 | 100 | 41709212 | 25 | 82  | 14.5 |
| 7 | 41711400 | 41711425 | 25  | 41711412 | 12 | 12  | 2.1  |
| 7 | 41715850 | 41715900 | 50  | 41715862 | 13 | 25  | 4.1  |
| 7 | 41762975 | 41763175 | 200 | 41763087 | 20 | 136 | 2.1  |
| 7 | 41946850 | 41946975 | 125 | 41946912 | 14 | 62  | 10.3 |
| 7 | 42020900 | 42020925 | 25  | 42020912 | 12 | 12  | 2.1  |
| 7 | 42150875 | 42151050 | 175 | 42150987 | 15 | 93  | 10.3 |
| 7 | 42235200 | 42235275 | 75  | 42235212 | 12 | 36  | 6.2  |
| 7 | 42238375 | 42238475 | 100 | 42238462 | 21 | 67  | 10.3 |
| 7 | 42244750 | 42244800 | 50  | 42244787 | 14 | 27  | 2.1  |
| 7 | 42247900 | 42247975 | 75  | 42247937 | 15 | 41  | 0    |
| 7 | 42344450 | 42344550 | 100 | 42344462 | 13 | 52  | 0    |
| 7 | 42344875 | 42345025 | 150 | 42344937 | 14 | 80  | 2.1  |
| 7 | 42348675 | 42348825 | 150 | 42348737 | 18 | 87  | 0    |
| 7 | 42412100 | 42412150 | 50  | 42412137 | 13 | 25  | 0    |
| 7 | 42436375 | 42436425 | 50  | 42436387 | 12 | 24  | 4.1  |
| 7 | 42480725 | 42480775 | 50  | 42480737 | 12 | 24  | 0    |
| 7 | 42486250 | 42486450 | 200 | 42486362 | 15 | 108 | 16.6 |
| 7 | 42500200 | 42500275 | 75  | 42500212 | 14 | 40  | 6.2  |
| 7 | 42500875 | 42500900 | 25  | 42500887 | 14 | 14  | 0    |
| 7 | 42528250 | 42528300 | 50  | 42528262 | 12 | 24  | 4.1  |
| 7 | 42556075 | 42556150 | 75  | 42556087 | 12 | 36  | 0    |
| 7 | 42655775 | 42655975 | 200 | 42655912 | 14 | 100 | 8.3  |
| 7 | 42837800 | 42837825 | 25  | 42837812 | 14 | 14  | 2.1  |
| 7 | 42935575 | 42935625 | 50  | 42935587 | 13 | 25  | 0    |
| 7 | 42938950 | 42939075 | 125 | 42939012 | 15 | 68  | 4.1  |
| 7 | 43009900 | 43009925 | 25  | 43009912 | 12 | 12  | 2.1  |
| 7 | 43015300 | 43015375 | 75  | 43015337 | 14 | 39  | 6.2  |
| 7 | 43111600 | 43111650 | 50  | 43111612 | 14 | 28  | 4.1  |
| 7 | 43197475 | 43197625 | 150 | 43197562 | 15 | 79  | 12.4 |
| 7 | 43254875 | 43255025 | 150 | 43254937 | 15 | 81  | 0    |
| 7 | 43390975 | 43391125 | 150 | 43391062 | 17 | 90  | 12.4 |
| 7 | 43405675 | 43405700 | 25  | 43405687 | 12 | 12  | 2.1  |

|   |          |          |     |          |    |     |      |
|---|----------|----------|-----|----------|----|-----|------|
| 7 | 43527550 | 43527700 | 150 | 43527562 | 13 | 78  | 6.2  |
| 7 | 43574650 | 43574775 | 125 | 43574662 | 14 | 70  | 4.1  |
| 7 | 43646450 | 43646475 | 25  | 43646462 | 12 | 12  | 2.1  |
| 7 | 43651450 | 43651600 | 150 | 43651487 | 15 | 79  | 10.3 |
| 7 | 43654675 | 43655075 | 400 | 43654962 | 30 | 278 | 47.6 |
| 7 | 43705800 | 43705825 | 25  | 43705812 | 12 | 12  | 0    |
| 7 | 43845800 | 43845825 | 25  | 43845812 | 12 | 12  | 0    |
| 7 | 44109425 | 44109450 | 25  | 44109437 | 12 | 12  | 2.1  |
| 7 | 44129475 | 44129525 | 50  | 44129512 | 13 | 25  | 4.1  |
| 7 | 44340300 | 44340450 | 150 | 44340337 | 14 | 72  | 10.3 |
| 7 | 44468850 | 44468875 | 25  | 44468862 | 12 | 12  | 2.1  |
| 7 | 44716275 | 44716325 | 50  | 44716287 | 12 | 24  | 4.1  |
| 7 | 44747650 | 44747725 | 75  | 44747662 | 12 | 36  | 6.2  |
| 7 | 44863300 | 44863425 | 125 | 44863312 | 21 | 88  | 8.3  |
| 7 | 44889500 | 44889550 | 50  | 44889512 | 12 | 24  | 4.1  |
| 7 | 45095700 | 45095775 | 75  | 45095712 | 13 | 36  | 6.2  |
| 7 | 45186775 | 45186875 | 100 | 45186812 | 13 | 51  | 8.3  |
| 7 | 45247900 | 45247950 | 50  | 45247937 | 13 | 25  | 0    |
| 7 | 45704500 | 45704550 | 50  | 45704512 | 13 | 26  | 0    |
| 7 | 45973250 | 45973325 | 75  | 45973262 | 14 | 41  | 0    |
| 7 | 45979900 | 45979950 | 50  | 45979912 | 13 | 26  | 4.1  |
| 7 | 45988625 | 45989125 | 500 | 45988812 | 17 | 243 | 20.7 |
| 7 | 46013450 | 46013550 | 100 | 46013487 | 16 | 55  | 0    |
| 7 | 46188125 | 46188150 | 25  | 46188137 | 12 | 12  | 0    |
| 7 | 46222525 | 46222675 | 150 | 46222562 | 28 | 114 | 10.3 |
| 7 | 46225275 | 46225350 | 75  | 46225337 | 17 | 43  | 6.2  |
| 7 | 46267925 | 46268075 | 150 | 46268062 | 14 | 74  | 0    |
| 7 | 46297050 | 46297125 | 75  | 46297112 | 15 | 41  | 0    |
| 7 | 46356900 | 46356950 | 50  | 46356912 | 14 | 28  | 4.1  |
| 7 | 46431700 | 46431875 | 175 | 46431837 | 14 | 90  | 4.1  |
| 7 | 46474900 | 46475250 | 350 | 46475012 | 50 | 541 | 99.3 |
| 7 | 46751550 | 46751675 | 125 | 46751562 | 13 | 62  | 0    |
| 7 | 46760600 | 46760750 | 150 | 46760637 | 17 | 85  | 12.4 |
| 7 | 46770275 | 46770325 | 50  | 46770312 | 19 | 34  | 4.1  |
| 7 | 46809100 | 46809150 | 50  | 46809112 | 13 | 26  | 0    |
| 7 | 46816875 | 46817025 | 150 | 46816962 | 18 | 86  | 2.1  |
| 7 | 46820725 | 46820875 | 150 | 46820812 | 15 | 85  | 0    |
| 7 | 46866075 | 46866125 | 50  | 46866087 | 15 | 30  | 4.1  |
| 7 | 46916000 | 46916150 | 150 | 46916087 | 15 | 80  | 12.4 |
| 7 | 46936600 | 46936625 | 25  | 46936612 | 13 | 13  | 0    |
| 7 | 46939075 | 46939125 | 50  | 46939087 | 13 | 26  | 4.1  |
| 7 | 47186500 | 47186525 | 25  | 47186512 | 12 | 12  | 0    |
| 7 | 47321400 | 47321450 | 50  | 47321412 | 21 | 42  | 6.2  |
| 7 | 47332950 | 47332975 | 25  | 47332962 | 14 | 14  | 2.1  |
| 7 | 47333225 | 47333275 | 50  | 47333237 | 12 | 24  | 2.1  |
| 7 | 47409825 | 47409925 | 100 | 47409837 | 15 | 60  | 0    |
| 7 | 47423000 | 47423025 | 25  | 47423012 | 12 | 12  | 2.1  |
| 7 | 47502350 | 47502375 | 25  | 47502362 | 13 | 13  | 2.1  |
| 7 | 47580150 | 47580250 | 100 | 47580162 | 12 | 47  | 2.1  |
| 7 | 47603175 | 47603225 | 50  | 47603187 | 12 | 24  | 4.1  |
| 7 | 47619550 | 47619575 | 25  | 47619562 | 13 | 13  | 2.1  |
| 7 | 47669800 | 47669850 | 50  | 47669812 | 12 | 24  | 0    |
| 7 | 47683350 | 47683500 | 150 | 47683387 | 18 | 92  | 12.4 |
| 7 | 47745125 | 47745225 | 100 | 47745162 | 14 | 52  | 8.3  |
| 7 | 47769750 | 47769900 | 150 | 47769762 | 16 | 85  | 6.2  |
| 7 | 47793075 | 47793225 | 150 | 47793087 | 16 | 82  | 0    |
| 7 | 47930150 | 47930175 | 25  | 47930162 | 14 | 14  | 0    |
| 7 | 48018075 | 48018225 | 150 | 48018212 | 18 | 82  | 8.3  |
| 7 | 48790625 | 48790825 | 200 | 48790712 | 15 | 106 | 0    |
| 7 | 49283050 | 49283150 | 100 | 49283062 | 15 | 56  | 2.1  |
| 7 | 50732250 | 50732275 | 25  | 50732262 | 13 | 13  | 0    |
| 7 | 50759250 | 50759325 | 75  | 50759262 | 12 | 36  | 2.1  |
| 7 | 50856975 | 50857000 | 25  | 50856987 | 12 | 12  | 2.1  |
| 7 | 50904750 | 50904875 | 125 | 50904762 | 14 | 64  | 6.2  |
| 7 | 51125575 | 51126000 | 425 | 51125862 | 24 | 318 | 16.6 |
| 7 | 51169450 | 51169500 | 50  | 51169487 | 13 | 25  | 0    |
| 7 | 51210950 | 51210975 | 25  | 51210962 | 12 | 12  | 2.1  |
| 7 | 51350750 | 51350775 | 25  | 51350762 | 13 | 13  | 2.1  |
| 7 | 51666375 | 51666425 | 50  | 51666387 | 14 | 28  | 0    |
| 7 | 52547975 | 52548000 | 25  | 52547987 | 12 | 12  | 0    |
| 7 | 52790900 | 52791025 | 125 | 52790912 | 14 | 68  | 4.1  |
| 7 | 52923750 | 52923775 | 25  | 52923762 | 12 | 12  | 0    |
| 7 | 53140050 | 53140075 | 25  | 53140062 | 12 | 12  | 0    |
| 7 | 54090200 | 54090275 | 75  | 54090237 | 14 | 39  | 0    |
| 7 | 54465850 | 54465875 | 25  | 54465862 | 12 | 12  | 2.1  |

|   |          |          |     |          |    |     |      |
|---|----------|----------|-----|----------|----|-----|------|
| 7 | 54793900 | 54793925 | 25  | 54793912 | 12 | 12  | 2.1  |
| 7 | 54795125 | 54795150 | 25  | 54795137 | 12 | 12  | 2.1  |
| 7 | 55100425 | 55100475 | 50  | 55100437 | 23 | 45  | 8.3  |
| 7 | 55109200 | 55109375 | 175 | 55109262 | 14 | 85  | 10.3 |
| 7 | 55122200 | 55122250 | 50  | 55122237 | 15 | 28  | 4.1  |
| 7 | 55143300 | 55143350 | 50  | 55143312 | 12 | 24  | 4.1  |
| 7 | 55167800 | 55167975 | 175 | 55167962 | 14 | 84  | 6.2  |
| 7 | 55604025 | 55604050 | 25  | 55604037 | 12 | 12  | 2.1  |
| 7 | 55734500 | 55734525 | 25  | 55734512 | 12 | 12  | 2.1  |
| 7 | 55947325 | 55947400 | 75  | 55947337 | 12 | 34  | 0    |
| 7 | 56501875 | 56502000 | 125 | 56501912 | 17 | 75  | 10.3 |
| 7 | 56721625 | 56721750 | 125 | 56721637 | 13 | 63  | 0    |
| 7 | 57961800 | 57961850 | 50  | 57961812 | 12 | 24  | 0    |
| 7 | 58012600 | 58012750 | 150 | 58012612 | 17 | 98  | 12.4 |
| 7 | 61083575 | 61083750 | 175 | 61083612 | 18 | 116 | 14.5 |
| 7 | 61390675 | 61390875 | 200 | 61390737 | 14 | 104 | 10.3 |
| 7 | 61607450 | 61607600 | 150 | 61607487 | 22 | 131 | 24.8 |
| 7 | 61608300 | 61608325 | 25  | 61608312 | 15 | 15  | 2.1  |
| 7 | 61608875 | 61608900 | 25  | 61608887 | 14 | 14  | 2.1  |
| 7 | 61609125 | 61609200 | 75  | 61609162 | 14 | 39  | 6.2  |
| 7 | 61613625 | 61613650 | 25  | 61613637 | 21 | 21  | 0    |
| 7 | 62748500 | 62748525 | 25  | 62748512 | 13 | 13  | 2.1  |
| 7 | 63176400 | 63176475 | 75  | 63176412 | 12 | 36  | 6.2  |
| 7 | 63561450 | 63561650 | 200 | 63561562 | 16 | 117 | 12.4 |
| 7 | 63634250 | 63634275 | 25  | 63634262 | 12 | 12  | 2.1  |
| 7 | 64549575 | 64549625 | 50  | 64549587 | 15 | 28  | 0    |
| 7 | 65030200 | 65030275 | 75  | 65030212 | 13 | 39  | 2.1  |
| 7 | 65043000 | 65043025 | 25  | 65043012 | 12 | 12  | 2.1  |
| 7 | 65242000 | 65242025 | 25  | 65242012 | 12 | 12  | 0    |
| 7 | 65249325 | 65249350 | 25  | 65249337 | 12 | 12  | 2.1  |
| 7 | 65361025 | 65361225 | 200 | 65361037 | 22 | 141 | 18.6 |
| 7 | 65368150 | 65368300 | 150 | 65368187 | 13 | 74  | 14.5 |
| 7 | 65385350 | 65385450 | 100 | 65385362 | 13 | 46  | 6.2  |
| 7 | 65454525 | 65454625 | 100 | 65454562 | 14 | 51  | 4.1  |
| 7 | 65459625 | 65459750 | 125 | 65459662 | 14 | 64  | 2.1  |
| 7 | 66147750 | 66147775 | 25  | 66147762 | 12 | 12  | 2.1  |
| 7 | 66148275 | 66148675 | 400 | 66148662 | 22 | 245 | 43.5 |
| 7 | 66149275 | 66149325 | 50  | 66149287 | 12 | 24  | 4.1  |
| 7 | 66178650 | 66178700 | 50  | 66178687 | 15 | 28  | 0    |
| 7 | 66231775 | 66231825 | 50  | 66231787 | 13 | 26  | 4.1  |
| 7 | 66907450 | 66907475 | 25  | 66907462 | 12 | 12  | 0    |
| 7 | 67040275 | 67040325 | 50  | 67040312 | 14 | 26  | 4.1  |
| 7 | 67057575 | 67057625 | 50  | 67057587 | 12 | 24  | 2.1  |
| 7 | 67325100 | 67325150 | 50  | 67325112 | 12 | 24  | 0    |
| 7 | 67818600 | 67818625 | 25  | 67818612 | 12 | 12  | 0    |
| 7 | 67992050 | 67992175 | 125 | 67992062 | 14 | 64  | 6.2  |
| 7 | 68159300 | 68159350 | 50  | 68159312 | 13 | 25  | 0    |
| 7 | 68812000 | 68812025 | 25  | 68812012 | 12 | 12  | 0    |
| 7 | 69134050 | 69134100 | 50  | 69134062 | 12 | 24  | 2.1  |
| 7 | 69548150 | 69548250 | 100 | 69548187 | 13 | 49  | 0    |
| 7 | 69626450 | 69626600 | 150 | 69626562 | 13 | 68  | 8.3  |
| 7 | 69636575 | 69636675 | 100 | 69636612 | 14 | 52  | 2.1  |
| 7 | 69666000 | 69666075 | 75  | 69666012 | 15 | 43  | 0    |
| 7 | 70658275 | 70658300 | 25  | 70658287 | 12 | 12  | 0    |
| 7 | 70736700 | 70736750 | 50  | 70736712 | 12 | 24  | 0    |
| 7 | 71884375 | 71884500 | 125 | 71884387 | 19 | 88  | 4.1  |
| 7 | 72360925 | 72360975 | 50  | 72360937 | 18 | 31  | 4.1  |
| 7 | 72439650 | 72439675 | 25  | 72439662 | 12 | 12  | 0    |
| 7 | 72447900 | 72447925 | 25  | 72447912 | 12 | 12  | 0    |
| 7 | 72477400 | 72477475 | 75  | 72477462 | 13 | 37  | 6.2  |
| 7 | 72744400 | 72744425 | 25  | 72744412 | 12 | 12  | 0    |
| 7 | 72831325 | 72831350 | 25  | 72831337 | 12 | 12  | 0    |
| 7 | 72903800 | 72904025 | 225 | 72903887 | 22 | 153 | 2.1  |
| 7 | 72908100 | 72908150 | 50  | 72908112 | 13 | 26  | 2.1  |
| 7 | 72926075 | 72926150 | 75  | 72926087 | 15 | 41  | 4.1  |
| 7 | 73039750 | 73039800 | 50  | 73039762 | 12 | 24  | 0    |
| 7 | 73040550 | 73040575 | 25  | 73040562 | 16 | 16  | 2.1  |
| 7 | 73150200 | 73150400 | 200 | 73150287 | 28 | 196 | 22.8 |
| 7 | 73306925 | 73306950 | 25  | 73306937 | 12 | 12  | 2.1  |
| 7 | 73324800 | 73324850 | 50  | 73324812 | 14 | 28  | 4.1  |
| 7 | 73707450 | 73707625 | 175 | 73707487 | 15 | 95  | 8.3  |
| 7 | 75135250 | 75135300 | 50  | 75135262 | 13 | 26  | 0    |
| 7 | 75442750 | 75442825 | 75  | 75442762 | 12 | 36  | 6.2  |
| 7 | 75515375 | 75515400 | 25  | 75515387 | 12 | 12  | 0    |
| 7 | 75831900 | 75831925 | 25  | 75831912 | 12 | 12  | 2.1  |

|   |          |          |     |          |    |     |      |
|---|----------|----------|-----|----------|----|-----|------|
| 7 | 75864650 | 75864975 | 325 | 75864787 | 14 | 143 | 20.7 |
| 7 | 76688800 | 76688825 | 25  | 76688812 | 13 | 13  | 2.1  |
| 7 | 76902200 | 76902250 | 50  | 76902212 | 13 | 26  | 4.1  |
| 7 | 76907025 | 76907125 | 100 | 76907037 | 13 | 50  | 8.3  |
| 7 | 76918550 | 76918625 | 75  | 76918562 | 12 | 36  | 0    |
| 7 | 77032750 | 77032875 | 125 | 77032787 | 15 | 66  | 0    |
| 7 | 77609500 | 77609675 | 175 | 77609537 | 14 | 92  | 0    |
| 7 | 77637225 | 77637250 | 25  | 77637237 | 12 | 12  | 2.1  |
| 7 | 77645125 | 77645225 | 100 | 77645137 | 12 | 48  | 0    |
| 7 | 77646750 | 77646800 | 50  | 77646762 | 12 | 24  | 4.1  |
| 7 | 77963700 | 77963800 | 100 | 77963737 | 15 | 55  | 6.2  |
| 7 | 77970200 | 77970225 | 25  | 77970212 | 12 | 12  | 0    |
| 7 | 78517800 | 78517850 | 50  | 78517812 | 13 | 25  | 0    |
| 7 | 79603300 | 79603325 | 25  | 79603312 | 13 | 13  | 0    |
| 7 | 79712150 | 79712225 | 75  | 79712162 | 12 | 36  | 6.2  |
| 7 | 79907825 | 79907900 | 75  | 79907837 | 13 | 39  | 4.1  |
| 7 | 79947925 | 79948100 | 175 | 79948037 | 16 | 94  | 14.5 |
| 7 | 80249275 | 80249300 | 25  | 80249287 | 13 | 13  | 2.1  |
| 7 | 80314325 | 80314350 | 25  | 80314337 | 13 | 13  | 2.1  |
| 7 | 80350775 | 80350925 | 150 | 80350862 | 15 | 81  | 12.4 |
| 7 | 80374750 | 80374800 | 50  | 80374762 | 12 | 24  | 4.1  |
| 7 | 80579025 | 80579325 | 300 | 80579187 | 31 | 270 | 22.8 |
| 7 | 80607475 | 80607675 | 200 | 80607562 | 14 | 105 | 16.6 |
| 7 | 80623000 | 80623050 | 50  | 80623012 | 12 | 24  | 0    |
| 7 | 80649550 | 80649600 | 50  | 80649562 | 12 | 24  | 4.1  |
| 7 | 81084425 | 81084500 | 75  | 81084437 | 14 | 40  | 6.2  |
| 7 | 81085700 | 81085775 | 75  | 81085762 | 14 | 38  | 0    |
| 7 | 81616625 | 81616675 | 50  | 81616662 | 14 | 26  | 0    |
| 7 | 82237000 | 82237050 | 50  | 82237012 | 12 | 24  | 0    |
| 7 | 83047175 | 83047300 | 125 | 83047187 | 13 | 63  | 10.3 |
| 7 | 83407875 | 83407950 | 75  | 83407887 | 13 | 39  | 6.2  |
| 7 | 83492800 | 83492975 | 175 | 83492837 | 17 | 100 | 10.3 |
| 7 | 83507800 | 83507875 | 75  | 83507812 | 13 | 39  | 6.2  |
| 7 | 83511025 | 83511050 | 25  | 83511037 | 13 | 13  | 0    |
| 7 | 83516325 | 83516525 | 200 | 83516412 | 19 | 127 | 0    |
| 7 | 83607575 | 83607625 | 50  | 83607587 | 14 | 27  | 0    |
| 7 | 84169225 | 84169375 | 150 | 84169312 | 22 | 115 | 20.7 |
| 7 | 85131900 | 85131950 | 50  | 85131912 | 15 | 29  | 4.1  |
| 7 | 85163100 | 85163125 | 25  | 85163112 | 13 | 13  | 0    |
| 7 | 86432225 | 86432250 | 25  | 86432237 | 13 | 13  | 0    |
| 7 | 86795650 | 86795725 | 75  | 86795662 | 12 | 36  | 6.2  |
| 7 | 86822125 | 86822225 | 100 | 86822187 | 17 | 60  | 0    |
| 7 | 86976050 | 86976100 | 50  | 86976062 | 12 | 24  | 0    |
| 7 | 88297250 | 88297275 | 25  | 88297262 | 12 | 12  | 0    |
| 7 | 89870825 | 89870900 | 75  | 89870837 | 16 | 48  | 8.3  |
| 7 | 90080400 | 90080600 | 200 | 90080512 | 18 | 125 | 0    |
| 7 | 90091775 | 90091800 | 25  | 90091787 | 13 | 13  | 2.1  |
| 7 | 90122975 | 90123075 | 100 | 90123012 | 15 | 52  | 6.2  |
| 7 | 90128950 | 90129000 | 50  | 90128962 | 13 | 26  | 4.1  |
| 7 | 90232225 | 90232275 | 50  | 90232237 | 12 | 24  | 4.1  |
| 7 | 90604125 | 90604200 | 75  | 90604137 | 12 | 36  | 0    |
| 7 | 90632200 | 90632300 | 100 | 90632237 | 15 | 55  | 6.2  |
| 7 | 90679950 | 90680100 | 150 | 90680012 | 14 | 74  | 10.3 |
| 7 | 91293750 | 91293950 | 200 | 91293812 | 15 | 96  | 0    |
| 7 | 91319675 | 91319850 | 175 | 91319687 | 15 | 89  | 0    |
| 7 | 91347200 | 91347225 | 25  | 91347212 | 13 | 13  | 2.1  |
| 7 | 91995750 | 91995825 | 75  | 91995812 | 21 | 47  | 6.2  |
| 7 | 92100800 | 92100875 | 75  | 92100837 | 16 | 45  | 6.2  |
| 7 | 92113300 | 92113325 | 25  | 92113312 | 12 | 12  | 0    |
| 7 | 92165450 | 92165525 | 75  | 92165512 | 17 | 43  | 4.1  |
| 7 | 92166000 | 92166100 | 100 | 92166012 | 12 | 48  | 2.1  |
| 7 | 92264675 | 92264750 | 75  | 92264712 | 14 | 38  | 6.2  |
| 7 | 92584700 | 92584875 | 175 | 92584737 | 14 | 86  | 14.5 |
| 7 | 92992700 | 92992750 | 50  | 92992712 | 12 | 24  | 0    |
| 7 | 93138425 | 93138500 | 75  | 93138437 | 13 | 37  | 0    |
| 7 | 93756425 | 93756450 | 25  | 93756437 | 24 | 24  | 4.1  |
| 7 | 93781325 | 93781350 | 25  | 93781337 | 12 | 12  | 0    |
| 7 | 93782675 | 93782775 | 100 | 93782712 | 16 | 56  | 0    |
| 7 | 93815375 | 93815550 | 175 | 93815437 | 16 | 100 | 0    |
| 7 | 93843175 | 93843200 | 25  | 93843187 | 12 | 12  | 0    |
| 7 | 93862425 | 93862575 | 150 | 93862487 | 14 | 80  | 0    |
| 7 | 93901125 | 93901175 | 50  | 93901137 | 13 | 26  | 4.1  |
| 7 | 93908175 | 93908225 | 50  | 93908187 | 17 | 34  | 4.1  |
| 7 | 94066025 | 94066125 | 100 | 94066062 | 15 | 56  | 2.1  |
| 7 | 94088050 | 94088300 | 250 | 94088112 | 27 | 212 | 16.6 |

|   |           |           |     |           |    |     |      |
|---|-----------|-----------|-----|-----------|----|-----|------|
| 7 | 94132600  | 94132650  | 50  | 94132612  | 14 | 26  | 0    |
| 7 | 94164550  | 94164675  | 125 | 94164562  | 12 | 56  | 10.3 |
| 7 | 94306100  | 94306150  | 50  | 94306112  | 12 | 24  | 0    |
| 7 | 94375425  | 94375550  | 125 | 94375487  | 16 | 72  | 2.1  |
| 7 | 94624250  | 94624325  | 75  | 94624262  | 12 | 36  | 0    |
| 7 | 94945675  | 94945700  | 25  | 94945687  | 12 | 12  | 0    |
| 7 | 94978600  | 94978625  | 25  | 94978612  | 12 | 12  | 0    |
| 7 | 95017550  | 95017675  | 125 | 95017612  | 15 | 69  | 12.4 |
| 7 | 95262225  | 95262275  | 50  | 95262237  | 14 | 26  | 0    |
| 7 | 95271350  | 95271425  | 75  | 95271387  | 15 | 43  | 6.2  |
| 7 | 95279250  | 95279400  | 150 | 95279337  | 14 | 76  | 6.2  |
| 7 | 95310625  | 95310750  | 125 | 95310637  | 13 | 65  | 10.3 |
| 7 | 95703475  | 95703650  | 175 | 95703587  | 17 | 99  | 0    |
| 7 | 96574550  | 96574700  | 150 | 96574612  | 17 | 93  | 12.4 |
| 7 | 96775100  | 96775200  | 100 | 96775137  | 14 | 53  | 8.3  |
| 7 | 96821275  | 96821300  | 25  | 96821287  | 12 | 12  | 0    |
| 7 | 96907025  | 96907075  | 50  | 96907062  | 14 | 26  | 4.1  |
| 7 | 97821600  | 97821700  | 100 | 97821687  | 22 | 81  | 14.5 |
| 7 | 97845475  | 97845600  | 125 | 97845487  | 15 | 73  | 0    |
| 7 | 98156725  | 98156750  | 25  | 98156737  | 12 | 12  | 2.1  |
| 7 | 98544500  | 98544550  | 50  | 98544512  | 13 | 26  | 0    |
| 7 | 98966825  | 98966900  | 75  | 98966887  | 17 | 45  | 0    |
| 7 | 98967125  | 98967200  | 75  | 98967137  | 16 | 43  | 6.2  |
| 7 | 99351200  | 99351400  | 200 | 99351312  | 18 | 123 | 8.3  |
| 7 | 99379275  | 99379375  | 100 | 99379337  | 15 | 54  | 2.1  |
| 7 | 99429725  | 99429825  | 100 | 99429787  | 16 | 58  | 8.3  |
| 7 | 99439400  | 99439450  | 50  | 99439412  | 13 | 26  | 4.1  |
| 7 | 99506825  | 99507400  | 575 | 99507287  | 27 | 373 | 37.2 |
| 7 | 99613225  | 99613275  | 50  | 99613262  | 36 | 71  | 10.3 |
| 7 | 99614550  | 99614575  | 25  | 99614562  | 12 | 12  | 2.1  |
| 7 | 100130075 | 100130100 | 25  | 100130087 | 12 | 12  | 2.1  |
| 7 | 100447125 | 100447175 | 50  | 100447162 | 15 | 27  | 4.1  |
| 7 | 100514975 | 100515025 | 50  | 100514987 | 12 | 24  | 4.1  |
| 7 | 100554850 | 100554925 | 75  | 100554862 | 16 | 44  | 6.2  |
| 7 | 100615325 | 100615400 | 75  | 100615387 | 14 | 40  | 6.2  |
| 7 | 100646750 | 100646850 | 100 | 100646837 | 14 | 50  | 6.2  |
| 7 | 100794075 | 100794100 | 25  | 100794087 | 12 | 12  | 2.1  |
| 7 | 100831950 | 100832100 | 150 | 100832087 | 15 | 78  | 10.3 |
| 7 | 101059475 | 101059575 | 100 | 101059537 | 14 | 51  | 4.1  |
| 7 | 101324900 | 101324950 | 50  | 101324912 | 12 | 24  | 0    |
| 7 | 102265150 | 102265175 | 25  | 102265162 | 13 | 13  | 0    |
| 7 | 102476525 | 102476725 | 200 | 102476637 | 17 | 117 | 0    |
| 7 | 102497225 | 102497250 | 25  | 102497237 | 12 | 12  | 2.1  |
| 7 | 102541000 | 102541150 | 150 | 102541037 | 14 | 72  | 4.1  |
| 7 | 103107775 | 103107800 | 25  | 103107787 | 12 | 12  | 0    |
| 7 | 103168650 | 103168675 | 25  | 103168662 | 13 | 13  | 0    |
| 7 | 104541900 | 104541925 | 25  | 104541912 | 12 | 12  | 2.1  |
| 7 | 104778550 | 104778575 | 25  | 104778562 | 13 | 13  | 2.1  |
| 7 | 105258100 | 105258225 | 125 | 105258187 | 14 | 66  | 6.2  |
| 7 | 105303350 | 105303425 | 75  | 105303362 | 14 | 38  | 6.2  |
| 7 | 105550200 | 105550450 | 250 | 105550337 | 17 | 137 | 0    |
| 7 | 105604475 | 105604500 | 25  | 105604487 | 14 | 14  | 2.1  |
| 7 | 105785825 | 105786025 | 200 | 105785887 | 19 | 114 | 4.1  |
| 7 | 105852800 | 105852825 | 25  | 105852812 | 12 | 12  | 2.1  |
| 7 | 105996400 | 105996550 | 150 | 105996412 | 12 | 72  | 10.3 |
| 7 | 106089025 | 106089250 | 225 | 106089112 | 21 | 148 | 14.5 |
| 7 | 106203375 | 106203700 | 325 | 106203587 | 16 | 163 | 22.8 |
| 7 | 106251575 | 106251600 | 25  | 106251587 | 12 | 12  | 2.1  |
| 7 | 106440600 | 106440650 | 50  | 106440612 | 14 | 28  | 0    |
| 7 | 106595725 | 106595825 | 100 | 106595737 | 12 | 46  | 0    |
| 7 | 107128900 | 107129075 | 175 | 107128912 | 13 | 82  | 12.4 |
| 7 | 107362800 | 107362900 | 100 | 107362862 | 16 | 56  | 0    |
| 7 | 107373025 | 107373125 | 100 | 107373062 | 14 | 52  | 0    |
| 7 | 107377450 | 107377500 | 50  | 107377462 | 12 | 24  | 0    |
| 7 | 107410325 | 107410400 | 75  | 107410337 | 13 | 37  | 0    |
| 7 | 107507325 | 107507350 | 25  | 107507337 | 12 | 12  | 0    |
| 7 | 107569575 | 107569600 | 25  | 107569587 | 13 | 13  | 2.1  |
| 7 | 107722375 | 107722400 | 25  | 107722387 | 12 | 12  | 0    |
| 7 | 107823625 | 107823700 | 75  | 107823637 | 12 | 36  | 0    |
| 7 | 107858800 | 107859100 | 300 | 107858912 | 28 | 259 | 33.1 |
| 7 | 107895400 | 107895600 | 200 | 107895562 | 16 | 112 | 4.1  |
| 7 | 107960800 | 107960850 | 50  | 107960812 | 12 | 24  | 0    |
| 7 | 111358525 | 111358575 | 50  | 111358537 | 13 | 25  | 2.1  |
| 7 | 111359600 | 111359625 | 25  | 111359612 | 12 | 12  | 0    |
| 7 | 111370150 | 111370225 | 75  | 111370162 | 16 | 44  | 6.2  |

|   |           |           |     |           |    |     |      |
|---|-----------|-----------|-----|-----------|----|-----|------|
| 7 | 111428400 | 111428550 | 150 | 111428487 | 18 | 87  | 8.3  |
| 7 | 111540050 | 111540200 | 150 | 111540062 | 13 | 74  | 6.2  |
| 7 | 111566425 | 111566550 | 125 | 111566512 | 14 | 66  | 0    |
| 7 | 111570550 | 111570600 | 50  | 111570562 | 12 | 24  | 4.1  |
| 7 | 111578275 | 111578300 | 25  | 111578287 | 12 | 12  | 2.1  |
| 7 | 111589475 | 111589500 | 25  | 111589487 | 12 | 12  | 2.1  |
| 7 | 111684900 | 111684925 | 25  | 111684912 | 12 | 12  | 0    |
| 7 | 111838600 | 111838675 | 75  | 111838612 | 13 | 38  | 6.2  |
| 7 | 111912100 | 111912125 | 25  | 111912112 | 12 | 12  | 2.1  |
| 7 | 112358325 | 112358350 | 25  | 112358337 | 13 | 13  | 2.1  |
| 7 | 112425275 | 112425400 | 125 | 112425387 | 18 | 79  | 10.3 |
| 7 | 112513250 | 112513325 | 75  | 112513262 | 12 | 36  | 6.2  |
| 7 | 112545650 | 112545750 | 100 | 112545737 | 16 | 54  | 8.3  |
| 7 | 112695200 | 112695325 | 125 | 112695212 | 12 | 57  | 6.2  |
| 7 | 114293100 | 114293125 | 25  | 114293112 | 13 | 13  | 2.1  |
| 7 | 114412400 | 114412450 | 50  | 114412412 | 13 | 25  | 2.1  |
| 7 | 114524350 | 114524375 | 25  | 114524362 | 13 | 13  | 2.1  |
| 7 | 114525025 | 114525150 | 125 | 114525037 | 13 | 58  | 10.3 |
| 7 | 114796475 | 114796525 | 50  | 114796487 | 12 | 24  | 4.1  |
| 7 | 115699150 | 115699175 | 25  | 115699162 | 12 | 12  | 2.1  |
| 7 | 115744375 | 115744400 | 25  | 115744387 | 12 | 12  | 0    |
| 7 | 115744825 | 115744900 | 75  | 115744837 | 13 | 37  | 4.1  |
| 7 | 115845025 | 115845050 | 25  | 115845037 | 12 | 12  | 2.1  |
| 7 | 115937425 | 115937475 | 50  | 115937437 | 12 | 24  | 4.1  |
| 7 | 115955325 | 115955375 | 50  | 115955337 | 14 | 27  | 2.1  |
| 7 | 115971025 | 115971200 | 175 | 115971137 | 18 | 106 | 0    |
| 7 | 115997600 | 115997700 | 100 | 115997662 | 14 | 52  | 0    |
| 7 | 116015650 | 116015750 | 100 | 116015687 | 14 | 53  | 2.1  |
| 7 | 116101925 | 116101950 | 25  | 116101937 | 12 | 12  | 2.1  |
| 7 | 116180075 | 116180150 | 75  | 116180087 | 12 | 36  | 4.1  |
| 7 | 116230250 | 116230325 | 75  | 116230262 | 13 | 39  | 0    |
| 7 | 116546925 | 116546950 | 25  | 116546937 | 12 | 12  | 2.1  |
| 7 | 116710500 | 116710550 | 50  | 116710512 | 12 | 24  | 0    |
| 7 | 117190225 | 117190250 | 25  | 117190237 | 13 | 13  | 2.1  |
| 7 | 117255650 | 117255675 | 25  | 117255662 | 12 | 12  | 2.1  |
| 7 | 117302975 | 117303025 | 50  | 117302987 | 12 | 24  | 4.1  |
| 7 | 118594925 | 118594975 | 50  | 118594937 | 12 | 24  | 0    |
| 7 | 120230900 | 120230950 | 50  | 120230912 | 12 | 24  | 2.1  |
| 7 | 120416200 | 120416225 | 25  | 120416212 | 12 | 12  | 2.1  |
| 7 | 120624625 | 120624950 | 325 | 120624787 | 17 | 177 | 2.1  |
| 7 | 120631925 | 120632025 | 100 | 120631937 | 12 | 46  | 8.3  |
| 7 | 120907600 | 120907750 | 150 | 120907612 | 12 | 64  | 10.3 |
| 7 | 120908100 | 120908150 | 50  | 120908112 | 12 | 24  | 4.1  |
| 7 | 120938350 | 120938375 | 25  | 120938362 | 21 | 21  | 4.1  |
| 7 | 120958825 | 120958875 | 50  | 120958837 | 12 | 24  | 4.1  |
| 7 | 121032050 | 121032100 | 50  | 121032062 | 12 | 24  | 4.1  |
| 7 | 121060650 | 121060800 | 150 | 121060687 | 15 | 79  | 10.3 |
| 7 | 121077700 | 121077825 | 125 | 121077787 | 16 | 68  | 10.3 |
| 7 | 121145050 | 121145075 | 25  | 121145062 | 12 | 12  | 0    |
| 7 | 121226475 | 121226850 | 375 | 121226762 | 14 | 169 | 29   |
| 7 | 121228725 | 121228775 | 50  | 121228762 | 13 | 25  | 0    |
| 7 | 121259250 | 121259275 | 25  | 121259262 | 12 | 12  | 2.1  |
| 7 | 121520325 | 121520375 | 50  | 121520362 | 14 | 26  | 4.1  |
| 7 | 122189800 | 122189850 | 50  | 122189812 | 12 | 24  | 0    |
| 7 | 122632175 | 122632250 | 75  | 122632187 | 14 | 40  | 0    |
| 7 | 122947675 | 122947725 | 50  | 122947687 | 13 | 26  | 0    |
| 7 | 123026750 | 123026800 | 50  | 123026762 | 12 | 24  | 4.1  |
| 7 | 123077475 | 123077575 | 100 | 123077537 | 13 | 49  | 0    |
| 7 | 123195850 | 123195875 | 25  | 123195862 | 13 | 13  | 0    |
| 7 | 123196950 | 123196975 | 25  | 123196962 | 13 | 13  | 2.1  |
| 7 | 123512550 | 123512600 | 50  | 123512562 | 12 | 24  | 4.1  |
| 7 | 123680625 | 123680675 | 50  | 123680637 | 12 | 24  | 2.1  |
| 7 | 123933500 | 123933675 | 175 | 123933637 | 13 | 82  | 8.3  |
| 7 | 123982325 | 123982350 | 25  | 123982337 | 12 | 12  | 0    |
| 7 | 123994075 | 123994100 | 25  | 123994087 | 25 | 25  | 4.1  |
| 7 | 124065925 | 124065950 | 25  | 124065937 | 13 | 13  | 0    |
| 7 | 124070625 | 124070750 | 125 | 124070737 | 15 | 67  | 0    |
| 7 | 124205475 | 124205525 | 50  | 124205487 | 13 | 25  | 0    |
| 7 | 125962900 | 125963000 | 100 | 125962962 | 13 | 50  | 4.1  |
| 7 | 126226900 | 126226950 | 50  | 126226912 | 12 | 24  | 0    |
| 7 | 126242250 | 126242600 | 350 | 126242262 | 15 | 173 | 26.9 |
| 7 | 126729225 | 126729300 | 75  | 126729262 | 14 | 39  | 0    |
| 7 | 126767225 | 126767275 | 50  | 126767237 | 12 | 24  | 0    |
| 7 | 127087500 | 127087550 | 50  | 127087512 | 13 | 25  | 0    |
| 7 | 127729750 | 127729850 | 100 | 127729762 | 13 | 51  | 8.3  |

|   |           |           |     |           |    |     |      |
|---|-----------|-----------|-----|-----------|----|-----|------|
| 7 | 128202050 | 128202100 | 50  | 128202062 | 12 | 24  | 4.1  |
| 7 | 128538075 | 128538100 | 25  | 128538087 | 14 | 14  | 2.1  |
| 7 | 128743050 | 128743075 | 25  | 128743062 | 13 | 13  | 2.1  |
| 7 | 128815475 | 128815525 | 50  | 128815512 | 14 | 26  | 4.1  |
| 7 | 128952325 | 128952400 | 75  | 128952337 | 12 | 36  | 6.2  |
| 7 | 129062850 | 129062875 | 25  | 129062862 | 12 | 12  | 0    |
| 7 | 129092325 | 129092350 | 25  | 129092337 | 13 | 13  | 0    |
| 7 | 129385925 | 129385950 | 25  | 129385937 | 19 | 19  | 2.1  |
| 7 | 129397275 | 129397300 | 25  | 129397287 | 12 | 12  | 2.1  |
| 7 | 129404950 | 129405000 | 50  | 129404962 | 14 | 26  | 4.1  |
| 7 | 129623600 | 129623675 | 75  | 129623662 | 14 | 38  | 6.2  |
| 7 | 129704025 | 129704075 | 50  | 129704037 | 13 | 26  | 4.1  |
| 7 | 129778025 | 129778050 | 25  | 129778037 | 12 | 12  | 0    |
| 7 | 129778925 | 129778950 | 25  | 129778937 | 12 | 12  | 2.1  |
| 7 | 129783450 | 129783550 | 100 | 129783487 | 14 | 54  | 2.1  |
| 7 | 130048600 | 130048700 | 100 | 130048612 | 13 | 52  | 8.3  |
| 7 | 130200800 | 130200875 | 75  | 130200812 | 12 | 36  | 0    |
| 7 | 130245525 | 130245725 | 200 | 130245612 | 20 | 128 | 2.1  |
| 7 | 130295800 | 130295925 | 125 | 130295887 | 16 | 74  | 10.3 |
| 7 | 130385275 | 130385325 | 50  | 130385287 | 12 | 24  | 0    |
| 7 | 130485150 | 130485275 | 125 | 130485212 | 13 | 62  | 2.1  |
| 7 | 130524000 | 130524100 | 100 | 130524012 | 20 | 62  | 8.3  |
| 7 | 130957925 | 130957950 | 25  | 130957937 | 12 | 12  | 0    |
| 7 | 131386775 | 131386825 | 50  | 131386787 | 12 | 24  | 4.1  |
| 7 | 131589825 | 131589900 | 75  | 131589862 | 14 | 40  | 6.2  |
| 7 | 131612575 | 131612650 | 75  | 131612587 | 12 | 36  | 6.2  |
| 7 | 131635400 | 131635475 | 75  | 131635412 | 13 | 39  | 0    |
| 7 | 132032875 | 132032950 | 75  | 132032887 | 12 | 36  | 6.2  |
| 7 | 132566050 | 132566125 | 75  | 132566062 | 12 | 36  | 6.2  |
| 7 | 132628825 | 132628925 | 100 | 132628862 | 14 | 50  | 0    |
| 7 | 132786325 | 132786350 | 25  | 132786337 | 12 | 12  | 0    |
| 7 | 133329250 | 133329275 | 25  | 133329262 | 12 | 12  | 2.1  |
| 7 | 133463150 | 133463250 | 100 | 133463237 | 13 | 49  | 4.1  |
| 7 | 133531800 | 133531875 | 75  | 133531812 | 13 | 37  | 4.1  |
| 7 | 133703900 | 133703950 | 50  | 133703912 | 12 | 24  | 0    |
| 7 | 133704225 | 133704250 | 25  | 133704237 | 14 | 14  | 2.1  |
| 7 | 133794350 | 133794375 | 25  | 133794362 | 13 | 13  | 2.1  |
| 7 | 133929175 | 133929200 | 25  | 133929187 | 12 | 12  | 2.1  |
| 7 | 133989525 | 133989575 | 50  | 133989537 | 12 | 24  | 4.1  |
| 7 | 134026475 | 134026575 | 100 | 134026562 | 14 | 51  | 6.2  |
| 7 | 134028250 | 134028275 | 25  | 134028262 | 12 | 12  | 0    |
| 7 | 134030575 | 134030750 | 175 | 134030687 | 15 | 94  | 4.1  |
| 7 | 134046700 | 134046725 | 25  | 134046712 | 13 | 13  | 2.1  |
| 7 | 134075925 | 134075950 | 25  | 134075937 | 15 | 15  | 2.1  |
| 7 | 134116175 | 134116200 | 25  | 134116187 | 12 | 12  | 0    |
| 7 | 134147650 | 134147700 | 50  | 134147662 | 13 | 25  | 0    |
| 7 | 134190225 | 134190325 | 100 | 134190287 | 13 | 48  | 0    |
| 7 | 134215600 | 134215675 | 75  | 134215612 | 13 | 36  | 4.1  |
| 7 | 134399200 | 134399250 | 50  | 134399212 | 12 | 24  | 4.1  |
| 7 | 134595700 | 134595725 | 25  | 134595712 | 12 | 12  | 2.1  |
| 7 | 134997650 | 134997675 | 25  | 134997662 | 22 | 22  | 4.1  |
| 7 | 135237475 | 135237500 | 25  | 135237487 | 12 | 12  | 0    |
| 7 | 135422150 | 135422200 | 50  | 135422162 | 14 | 28  | 2.1  |
| 7 | 135469950 | 135470050 | 100 | 135469987 | 15 | 53  | 0    |
| 7 | 135741600 | 135741650 | 50  | 135741612 | 13 | 25  | 4.1  |
| 7 | 136812125 | 136812175 | 50  | 136812137 | 12 | 24  | 4.1  |
| 7 | 136874300 | 136874325 | 25  | 136874312 | 12 | 12  | 0    |
| 7 | 136907950 | 136908000 | 50  | 136907987 | 13 | 25  | 2.1  |
| 7 | 136927250 | 136927400 | 150 | 136927287 | 15 | 84  | 0    |
| 7 | 137315450 | 137315575 | 125 | 137315537 | 16 | 71  | 10.3 |
| 7 | 137319275 | 137319350 | 75  | 137319312 | 18 | 47  | 2.1  |
| 7 | 137496775 | 137496825 | 50  | 137496812 | 21 | 37  | 4.1  |
| 7 | 137522550 | 137522675 | 125 | 137522637 | 14 | 64  | 0    |
| 7 | 137728675 | 137728700 | 25  | 137728687 | 12 | 12  | 0    |
| 7 | 137765000 | 137765075 | 75  | 137765012 | 12 | 36  | 0    |
| 7 | 137795075 | 137795225 | 150 | 137795187 | 18 | 90  | 6.2  |
| 7 | 137850350 | 137850475 | 125 | 137850412 | 15 | 67  | 2.1  |
| 7 | 137863000 | 137863275 | 275 | 137863112 | 26 | 198 | 8.3  |
| 7 | 137900875 | 137900925 | 50  | 137900887 | 12 | 24  | 0    |
| 7 | 138201225 | 138201275 | 50  | 138201237 | 13 | 26  | 4.1  |
| 7 | 138235900 | 138235950 | 50  | 138235912 | 13 | 26  | 4.1  |
| 7 | 138270225 | 138270250 | 25  | 138270237 | 15 | 15  | 2.1  |
| 7 | 138270850 | 138270925 | 75  | 138270912 | 21 | 50  | 6.2  |
| 7 | 138675725 | 138675875 | 150 | 138675762 | 19 | 103 | 4.1  |
| 7 | 138877600 | 138877675 | 75  | 138877662 | 14 | 39  | 6.2  |

|   |           |           |     |           |    |     |      |
|---|-----------|-----------|-----|-----------|----|-----|------|
| 7 | 138982425 | 138982550 | 125 | 138982512 | 16 | 70  | 0    |
| 7 | 138989325 | 138989500 | 175 | 138989387 | 18 | 111 | 4.1  |
| 7 | 138994250 | 138994275 | 25  | 138994262 | 15 | 15  | 2.1  |
| 7 | 139015050 | 139015375 | 325 | 139015287 | 14 | 139 | 12.4 |
| 7 | 139078475 | 139078525 | 50  | 139078487 | 12 | 24  | 4.1  |
| 7 | 139296100 | 139296175 | 75  | 139296137 | 14 | 40  | 6.2  |
| 7 | 139726425 | 139726600 | 175 | 139726487 | 16 | 92  | 0    |
| 7 | 139970925 | 139971000 | 75  | 139970937 | 13 | 38  | 2.1  |
| 7 | 139999775 | 140000000 | 225 | 139999837 | 20 | 133 | 2.1  |
| 7 | 140021650 | 140021825 | 175 | 140021687 | 17 | 107 | 0    |
| 7 | 140087075 | 140087275 | 200 | 140087137 | 17 | 115 | 12.4 |
| 7 | 140270150 | 140270250 | 100 | 140270162 | 14 | 50  | 8.3  |
| 7 | 141459425 | 141459475 | 50  | 141459437 | 13 | 25  | 2.1  |
| 7 | 141753975 | 141754050 | 75  | 141753987 | 14 | 42  | 6.2  |
| 7 | 142220425 | 142220475 | 50  | 142220437 | 13 | 26  | 4.1  |
| 7 | 142724250 | 142724300 | 50  | 142724262 | 12 | 24  | 4.1  |
| 7 | 142769600 | 142769625 | 25  | 142769612 | 12 | 12  | 0    |
| 7 | 142779250 | 142779375 | 125 | 142779287 | 14 | 66  | 0    |
| 7 | 144183075 | 144183150 | 75  | 144183087 | 13 | 39  | 0    |
| 7 | 144594950 | 144594975 | 25  | 144594962 | 12 | 12  | 2.1  |
| 7 | 145019825 | 145019850 | 25  | 145019837 | 12 | 12  | 2.1  |
| 7 | 145020225 | 145020275 | 50  | 145020262 | 16 | 31  | 4.1  |
| 7 | 147052700 | 147052800 | 100 | 147052737 | 15 | 58  | 0    |
| 7 | 147087675 | 147087850 | 175 | 147087787 | 24 | 140 | 12.4 |
| 7 | 147162200 | 147162400 | 200 | 147162212 | 12 | 83  | 0    |
| 7 | 147207425 | 147207450 | 25  | 147207437 | 12 | 12  | 0    |
| 7 | 147265675 | 147265725 | 50  | 147265687 | 12 | 24  | 4.1  |
| 7 | 148029975 | 148030025 | 50  | 148029987 | 12 | 24  | 0    |
| 7 | 148273475 | 148273550 | 75  | 148273537 | 13 | 36  | 0    |
| 7 | 148315125 | 148315300 | 175 | 148315162 | 15 | 101 | 4.1  |
| 7 | 148356625 | 148356650 | 25  | 148356637 | 12 | 12  | 0    |
| 7 | 148537650 | 148537675 | 25  | 148537662 | 12 | 12  | 2.1  |
| 7 | 148650050 | 148650075 | 25  | 148650062 | 12 | 12  | 0    |
| 7 | 148857250 | 148857425 | 175 | 148857287 | 25 | 128 | 12.4 |
| 7 | 149038975 | 149039025 | 50  | 149038987 | 12 | 24  | 4.1  |
| 7 | 149099950 | 149100025 | 75  | 149099962 | 12 | 36  | 0    |
| 7 | 149138425 | 149138525 | 100 | 149138437 | 12 | 48  | 0    |
| 7 | 149196025 | 149196050 | 25  | 149196037 | 12 | 12  | 0    |
| 7 | 149199875 | 149199975 | 100 | 149199912 | 13 | 50  | 8.3  |
| 7 | 150020350 | 150020400 | 50  | 150020362 | 12 | 24  | 0    |
| 7 | 150500750 | 150500775 | 25  | 150500762 | 12 | 12  | 2.1  |
| 7 | 150633150 | 150633225 | 75  | 150633162 | 12 | 36  | 0    |
| 7 | 150848275 | 150848300 | 25  | 150848287 | 23 | 23  | 4.1  |
| 7 | 150982350 | 150982375 | 25  | 150982362 | 12 | 12  | 2.1  |
| 7 | 151273375 | 151273450 | 75  | 151273387 | 12 | 36  | 0    |
| 7 | 151378725 | 151378750 | 25  | 151378737 | 14 | 14  | 2.1  |
| 7 | 151409300 | 151409500 | 200 | 151409412 | 21 | 141 | 8.3  |
| 7 | 151465775 | 151465825 | 50  | 151465787 | 13 | 26  | 0    |
| 7 | 151613175 | 151613200 | 25  | 151613187 | 12 | 12  | 0    |
| 7 | 151669525 | 151669600 | 75  | 151669537 | 12 | 36  | 0    |
| 7 | 151739250 | 151739300 | 50  | 151739287 | 13 | 25  | 0    |
| 7 | 152061300 | 152061575 | 275 | 152061462 | 23 | 204 | 0    |
| 7 | 152087575 | 152087650 | 75  | 152087587 | 14 | 38  | 0    |
| 7 | 152237825 | 152237900 | 75  | 152237837 | 12 | 36  | 6.2  |
| 7 | 152295750 | 152295900 | 150 | 152295837 | 16 | 82  | 0    |
| 7 | 152565925 | 152566000 | 75  | 152565937 | 14 | 40  | 6.2  |
| 7 | 152840850 | 152840950 | 100 | 152840862 | 12 | 48  | 4.1  |
| 7 | 152846850 | 152847100 | 250 | 152846887 | 22 | 181 | 29   |
| 7 | 152858250 | 152858275 | 25  | 152858262 | 12 | 12  | 2.1  |
| 7 | 152894800 | 152894900 | 100 | 152894812 | 15 | 56  | 4.1  |
| 7 | 152895475 | 152895875 | 400 | 152895662 | 17 | 209 | 31   |
| 7 | 153003250 | 153003350 | 100 | 153003287 | 16 | 58  | 8.3  |
| 7 | 153240375 | 153240400 | 25  | 153240387 | 13 | 13  | 2.1  |
| 7 | 153803775 | 153803825 | 50  | 153803787 | 12 | 24  | 0    |
| 7 | 154061100 | 154061175 | 75  | 154061112 | 12 | 36  | 2.1  |
| 7 | 154062150 | 154062175 | 25  | 154062162 | 13 | 13  | 2.1  |
| 7 | 154074250 | 154074375 | 125 | 154074337 | 14 | 58  | 6.2  |
| 7 | 154119325 | 154119400 | 75  | 154119387 | 16 | 43  | 6.2  |
| 7 | 154189475 | 154189575 | 100 | 154189487 | 14 | 54  | 0    |
| 7 | 154315025 | 154315050 | 25  | 154315037 | 13 | 13  | 2.1  |
| 7 | 154386700 | 154386725 | 25  | 154386712 | 14 | 14  | 0    |
| 7 | 154440600 | 154440650 | 50  | 154440612 | 12 | 24  | 4.1  |
| 7 | 154628325 | 154628350 | 25  | 154628337 | 13 | 13  | 2.1  |
| 7 | 154677550 | 154677600 | 50  | 154677562 | 12 | 24  | 4.1  |
| 7 | 154731500 | 154731550 | 50  | 154731512 | 12 | 24  | 0    |



|   |           |           |     |           |    |     |      |
|---|-----------|-----------|-----|-----------|----|-----|------|
| 7 | 154942125 | 154942200 | 75  | 154942187 | 17 | 45  | 2.1  |
| 7 | 155098175 | 155098350 | 175 | 155098287 | 20 | 110 | 14.5 |
| 7 | 155134425 | 155134475 | 50  | 155134462 | 15 | 28  | 2.1  |
| 7 | 155145525 | 155145575 | 50  | 155145537 | 12 | 24  | 4.1  |
| 7 | 155155850 | 155155875 | 25  | 155155862 | 12 | 12  | 2.1  |
| 7 | 155249075 | 155249150 | 75  | 155249112 | 15 | 43  | 6.2  |
| 7 | 155253825 | 155253875 | 50  | 155253837 | 13 | 26  | 2.1  |
| 7 | 155437100 | 155437150 | 50  | 155437112 | 13 | 25  | 4.1  |
| 7 | 155454650 | 155454750 | 100 | 155454687 | 14 | 50  | 4.1  |
| 7 | 155803975 | 155804075 | 100 | 155803987 | 13 | 52  | 0    |
| 7 | 156237300 | 156237350 | 50  | 156237312 | 12 | 24  | 0    |
| 7 | 156436375 | 156436400 | 25  | 156436387 | 13 | 13  | 0    |
| 7 | 156528250 | 156528275 | 25  | 156528262 | 13 | 13  | 2.1  |
| 7 | 156680550 | 156680775 | 225 | 156680612 | 18 | 136 | 0    |
| 7 | 156824200 | 156824250 | 50  | 156824212 | 12 | 24  | 2.1  |
| 7 | 156974500 | 156974575 | 75  | 156974512 | 12 | 36  | 0    |
| 7 | 157050325 | 157050400 | 75  | 157050362 | 18 | 48  | 0    |
| 7 | 158226525 | 158226575 | 50  | 158226537 | 16 | 32  | 4.1  |
| 7 | 158467925 | 158467975 | 50  | 158467937 | 12 | 24  | 2.1  |
| 6 | 238950    | 238975    | 25  | 238962    | 12 | 12  | 0    |
| 6 | 300775    | 300850    | 75  | 300787    | 12 | 36  | 4.1  |
| 6 | 344850    | 344900    | 50  | 344862    | 12 | 24  | 0    |
| 6 | 559375    | 559475    | 100 | 559387    | 12 | 44  | 0    |
| 6 | 1102925   | 1103000   | 75  | 1102937   | 15 | 41  | 6.2  |
| 6 | 1449825   | 1450025   | 200 | 1449887   | 14 | 99  | 14.5 |
| 6 | 1495575   | 1495650   | 75  | 1495587   | 12 | 36  | 0    |
| 6 | 1507500   | 1507625   | 125 | 1507562   | 15 | 71  | 2.1  |
| 6 | 1516225   | 1516300   | 75  | 1516237   | 12 | 36  | 0    |
| 6 | 1691275   | 1691300   | 25  | 1691287   | 14 | 14  | 2.1  |
| 6 | 1767250   | 1767275   | 25  | 1767262   | 12 | 12  | 2.1  |
| 6 | 1809875   | 1810075   | 200 | 1809887   | 18 | 118 | 8.3  |
| 6 | 1810900   | 1811000   | 100 | 1810912   | 14 | 54  | 8.3  |
| 6 | 1940250   | 1940350   | 100 | 1940262   | 12 | 48  | 6.2  |
| 6 | 2057775   | 2057800   | 25  | 2057787   | 13 | 13  | 0    |
| 6 | 2103150   | 2103175   | 25  | 2103162   | 12 | 12  | 2.1  |
| 6 | 2130200   | 2130225   | 25  | 2130212   | 12 | 12  | 2.1  |
| 6 | 2412175   | 2412225   | 50  | 2412187   | 12 | 24  | 4.1  |
| 6 | 2524975   | 2525100   | 125 | 2524987   | 14 | 64  | 8.3  |
| 6 | 2561925   | 2561950   | 25  | 2561937   | 12 | 12  | 2.1  |
| 6 | 2575725   | 2575825   | 100 | 2575737   | 15 | 59  | 8.3  |
| 6 | 2589650   | 2589725   | 75  | 2589662   | 14 | 38  | 2.1  |
| 6 | 2597275   | 2597500   | 225 | 2597387   | 28 | 206 | 0    |
| 6 | 2630225   | 2630250   | 25  | 2630237   | 12 | 12  | 0    |
| 6 | 2693675   | 2693725   | 50  | 2693687   | 12 | 24  | 4.1  |
| 6 | 2799425   | 2799450   | 25  | 2799437   | 13 | 13  | 2.1  |
| 6 | 2894000   | 2894075   | 75  | 2894012   | 14 | 40  | 0    |
| 6 | 2922075   | 2922100   | 25  | 2922087   | 12 | 12  | 0    |
| 6 | 3111150   | 3111225   | 75  | 3111187   | 18 | 48  | 2.1  |
| 6 | 3191550   | 3191625   | 75  | 3191562   | 12 | 36  | 2.1  |
| 6 | 3200350   | 3200400   | 50  | 3200362   | 12 | 24  | 4.1  |
| 6 | 3227075   | 3227100   | 25  | 3227087   | 12 | 12  | 0    |
| 6 | 3269650   | 3269825   | 175 | 3269712   | 16 | 99  | 2.1  |
| 6 | 3296375   | 3296475   | 100 | 3296437   | 26 | 89  | 10.3 |
| 6 | 3302175   | 3302350   | 175 | 3302262   | 14 | 91  | 10.3 |
| 6 | 3418325   | 3418600   | 275 | 3418487   | 26 | 194 | 26.9 |
| 6 | 3446250   | 3446300   | 50  | 3446262   | 12 | 24  | 0    |
| 6 | 3456700   | 3456800   | 100 | 3456787   | 17 | 57  | 2.1  |
| 6 | 3514050   | 3514225   | 175 | 3514112   | 16 | 100 | 2.1  |
| 6 | 3688325   | 3688375   | 50  | 3688337   | 14 | 27  | 4.1  |
| 6 | 3768275   | 3768350   | 75  | 3768287   | 13 | 38  | 6.2  |
| 6 | 3905900   | 3905925   | 25  | 3905912   | 13 | 13  | 0    |
| 6 | 3908300   | 3908325   | 25  | 3908312   | 15 | 15  | 2.1  |
| 6 | 3910325   | 3910375   | 50  | 3910337   | 12 | 24  | 4.1  |
| 6 | 3910875   | 3910950   | 75  | 3910887   | 18 | 46  | 2.1  |
| 6 | 3923475   | 3923625   | 150 | 3923587   | 15 | 83  | 4.1  |
| 6 | 3964675   | 3964700   | 25  | 3964687   | 12 | 12  | 0    |
| 6 | 4079650   | 4079675   | 25  | 4079662   | 12 | 12  | 0    |
| 6 | 4347750   | 4347800   | 50  | 4347762   | 12 | 24  | 0    |
| 6 | 4348450   | 4348500   | 50  | 4348462   | 12 | 24  | 0    |
| 6 | 4531400   | 4531425   | 25  | 4531412   | 12 | 12  | 0    |
| 6 | 4949250   | 4949275   | 25  | 4949262   | 12 | 12  | 2.1  |
| 6 | 5151325   | 5151425   | 100 | 5151387   | 15 | 54  | 2.1  |
| 6 | 5256275   | 5256300   | 25  | 5256287   | 12 | 12  | 0    |
| 6 | 5495800   | 5496100   | 300 | 5495962   | 53 | 429 | 14.5 |
| 6 | 5583200   | 5583350   | 150 | 5583237   | 16 | 82  | 10.3 |

|   |          |          |     |          |    |     |      |
|---|----------|----------|-----|----------|----|-----|------|
| 6 | 5626750  | 5626850  | 100 | 5626762  | 14 | 51  | 0    |
| 6 | 5697625  | 5697650  | 25  | 5697637  | 12 | 12  | 0    |
| 6 | 5812300  | 5812325  | 25  | 5812312  | 12 | 12  | 0    |
| 6 | 6745175  | 6745200  | 25  | 6745187  | 12 | 12  | 2.1  |
| 6 | 6788050  | 6788175  | 125 | 6788137  | 14 | 63  | 4.1  |
| 6 | 6917850  | 6917975  | 125 | 6917862  | 13 | 64  | 4.1  |
| 6 | 7044425  | 7044475  | 50  | 7044437  | 12 | 24  | 0    |
| 6 | 7083475  | 7083500  | 25  | 7083487  | 12 | 12  | 0    |
| 6 | 7088900  | 7088925  | 25  | 7088912  | 12 | 12  | 2.1  |
| 6 | 7119000  | 7119025  | 25  | 7119012  | 12 | 12  | 0    |
| 6 | 7617625  | 7617700  | 75  | 7617687  | 16 | 43  | 6.2  |
| 6 | 7620700  | 7620725  | 25  | 7620712  | 13 | 13  | 2.1  |
| 6 | 7638775  | 7638800  | 25  | 7638787  | 12 | 12  | 2.1  |
| 6 | 7643125  | 7643150  | 25  | 7643137  | 12 | 12  | 2.1  |
| 6 | 7667025  | 7667050  | 25  | 7667037  | 12 | 12  | 0    |
| 6 | 7970000  | 7970050  | 50  | 7970012  | 15 | 28  | 0    |
| 6 | 7977500  | 7977600  | 100 | 7977512  | 12 | 48  | 0    |
| 6 | 8009800  | 8009900  | 100 | 8009837  | 25 | 92  | 6.2  |
| 6 | 8053375  | 8053475  | 100 | 8053437  | 18 | 62  | 2.1  |
| 6 | 8053800  | 8053825  | 25  | 8053812  | 13 | 13  | 2.1  |
| 6 | 8681475  | 8681600  | 125 | 8681562  | 17 | 75  | 8.3  |
| 6 | 8688400  | 8688450  | 50  | 8688412  | 13 | 26  | 4.1  |
| 6 | 8689500  | 8689625  | 125 | 8689562  | 14 | 66  | 0    |
| 6 | 8747950  | 8747975  | 25  | 8747962  | 12 | 12  | 2.1  |
| 6 | 8748550  | 8748575  | 25  | 8748562  | 12 | 12  | 2.1  |
| 6 | 8755525  | 8755600  | 75  | 8755537  | 16 | 46  | 2.1  |
| 6 | 8775375  | 8775450  | 75  | 8775387  | 13 | 37  | 4.1  |
| 6 | 9072500  | 9072600  | 100 | 9072512  | 12 | 48  | 0    |
| 6 | 10066250 | 10066300 | 50  | 10066262 | 13 | 26  | 0    |
| 6 | 10247625 | 10247650 | 25  | 10247637 | 12 | 12  | 0    |
| 6 | 10248550 | 10248750 | 200 | 10248612 | 18 | 113 | 4.1  |
| 6 | 10249125 | 10249250 | 125 | 10249187 | 14 | 64  | 2.1  |
| 6 | 10281275 | 10281375 | 100 | 10281287 | 12 | 48  | 4.1  |
| 6 | 10385100 | 10385275 | 175 | 10385137 | 17 | 86  | 12.4 |
| 6 | 10424750 | 10424825 | 75  | 10424762 | 16 | 41  | 4.1  |
| 6 | 10483825 | 10483850 | 25  | 10483837 | 15 | 15  | 2.1  |
| 6 | 10492775 | 10492800 | 25  | 10492787 | 12 | 12  | 2.1  |
| 6 | 10494475 | 10494825 | 350 | 10494662 | 20 | 207 | 18.6 |
| 6 | 10495100 | 10495125 | 25  | 10495112 | 12 | 12  | 2.1  |
| 6 | 10799200 | 10799225 | 25  | 10799212 | 14 | 14  | 0    |
| 6 | 10799450 | 10799475 | 25  | 10799462 | 12 | 12  | 2.1  |
| 6 | 10915325 | 10915350 | 25  | 10915337 | 12 | 12  | 0    |
| 6 | 11128825 | 11128925 | 100 | 11128887 | 16 | 56  | 2.1  |
| 6 | 11135650 | 11135725 | 75  | 11135662 | 12 | 36  | 0    |
| 6 | 11153125 | 11153150 | 25  | 11153137 | 12 | 12  | 0    |
| 6 | 11218425 | 11218575 | 150 | 11218437 | 12 | 71  | 0    |
| 6 | 11251900 | 11251975 | 75  | 11251962 | 18 | 48  | 6.2  |
| 6 | 11262625 | 11262700 | 75  | 11262637 | 14 | 38  | 4.1  |
| 6 | 11280700 | 11280800 | 100 | 11280787 | 21 | 64  | 12.4 |
| 6 | 11332825 | 11332900 | 75  | 11332862 | 15 | 42  | 2.1  |
| 6 | 11336075 | 11336200 | 125 | 11336112 | 15 | 66  | 10.3 |
| 6 | 11336875 | 11336950 | 75  | 11336912 | 13 | 38  | 0    |
| 6 | 11380375 | 11380400 | 25  | 11380387 | 12 | 12  | 2.1  |
| 6 | 11385300 | 11385325 | 25  | 11385312 | 12 | 12  | 2.1  |
| 6 | 11416350 | 11416425 | 75  | 11416362 | 13 | 39  | 6.2  |
| 6 | 11538300 | 11538450 | 150 | 11538312 | 12 | 66  | 0    |
| 6 | 11809625 | 11809725 | 100 | 11809637 | 12 | 48  | 8.3  |
| 6 | 12119325 | 12119350 | 25  | 12119337 | 12 | 12  | 0    |
| 6 | 12568650 | 12568675 | 25  | 12568662 | 12 | 12  | 0    |
| 6 | 12681525 | 12681550 | 25  | 12681537 | 17 | 17  | 2.1  |
| 6 | 12693150 | 12693175 | 25  | 12693162 | 12 | 12  | 2.1  |
| 6 | 12731100 | 12731125 | 25  | 12731112 | 12 | 12  | 0    |
| 6 | 12765575 | 12765650 | 75  | 12765587 | 12 | 36  | 0    |
| 6 | 13484000 | 13484025 | 25  | 13484012 | 12 | 12  | 0    |
| 6 | 13739575 | 13739600 | 25  | 13739587 | 12 | 12  | 2.1  |
| 6 | 13978625 | 13978750 | 125 | 13978637 | 21 | 87  | 16.6 |
| 6 | 14145175 | 14145350 | 175 | 14145212 | 16 | 92  | 0    |
| 6 | 14201825 | 14201875 | 50  | 14201837 | 13 | 26  | 4.1  |
| 6 | 14267500 | 14267525 | 25  | 14267512 | 12 | 12  | 2.1  |
| 6 | 14285975 | 14286025 | 50  | 14285987 | 14 | 28  | 4.1  |
| 6 | 14302725 | 14302750 | 25  | 14302737 | 12 | 12  | 0    |
| 6 | 14391250 | 14391275 | 25  | 14391262 | 13 | 13  | 0    |
| 6 | 14545050 | 14545100 | 50  | 14545062 | 12 | 24  | 0    |
| 6 | 14640325 | 14640450 | 125 | 14640337 | 12 | 60  | 0    |
| 6 | 14851275 | 14851375 | 100 | 14851337 | 14 | 50  | 0    |

|   |          |          |     |          |    |     |      |
|---|----------|----------|-----|----------|----|-----|------|
| 6 | 14851725 | 14851850 | 125 | 14851737 | 17 | 73  | 4.1  |
| 6 | 14913100 | 14913125 | 25  | 14913112 | 13 | 13  | 2.1  |
| 6 | 14924475 | 14924500 | 25  | 14924487 | 28 | 28  | 4.1  |
| 6 | 14926900 | 14926925 | 25  | 14926912 | 13 | 13  | 2.1  |
| 6 | 14928275 | 14928450 | 175 | 14928412 | 13 | 84  | 0    |
| 6 | 14932575 | 14932600 | 25  | 14932587 | 12 | 12  | 2.1  |
| 6 | 14934250 | 14934375 | 125 | 14934262 | 15 | 75  | 4.1  |
| 6 | 14985575 | 14985600 | 25  | 14985587 | 23 | 23  | 2.1  |
| 6 | 15041000 | 15041050 | 50  | 15041012 | 13 | 26  | 4.1  |
| 6 | 15092725 | 15092925 | 200 | 15092862 | 18 | 126 | 14.5 |
| 6 | 15187650 | 15187700 | 50  | 15187662 | 12 | 24  | 4.1  |
| 6 | 15351625 | 15351650 | 25  | 15351637 | 12 | 12  | 2.1  |
| 6 | 15373400 | 15373450 | 50  | 15373412 | 12 | 24  | 0    |
| 6 | 15408250 | 15408400 | 150 | 15408262 | 13 | 65  | 2.1  |
| 6 | 15449775 | 15449875 | 100 | 15449862 | 13 | 47  | 0    |
| 6 | 15599625 | 15599700 | 75  | 15599637 | 14 | 39  | 4.1  |
| 6 | 15909250 | 15909275 | 25  | 15909262 | 13 | 13  | 0    |
| 6 | 15917525 | 15917600 | 75  | 15917537 | 12 | 36  | 0    |
| 6 | 15988450 | 15988475 | 25  | 15988462 | 15 | 15  | 2.1  |
| 6 | 16031425 | 16031575 | 150 | 16031462 | 15 | 82  | 10.3 |
| 6 | 16061050 | 16061300 | 250 | 16061087 | 15 | 137 | 12.4 |
| 6 | 16070025 | 16070125 | 100 | 16070037 | 13 | 52  | 0    |
| 6 | 16096475 | 16096500 | 25  | 16096487 | 12 | 12  | 2.1  |
| 6 | 16151975 | 16152000 | 25  | 16151987 | 13 | 13  | 2.1  |
| 6 | 16156150 | 16156250 | 100 | 16156162 | 12 | 48  | 2.1  |
| 6 | 16217625 | 16217650 | 25  | 16217637 | 12 | 12  | 0    |
| 6 | 16261700 | 16261825 | 125 | 16261812 | 16 | 68  | 10.3 |
| 6 | 16277250 | 16277275 | 25  | 16277262 | 13 | 13  | 2.1  |
| 6 | 16290200 | 16290250 | 50  | 16290237 | 14 | 27  | 2.1  |
| 6 | 16293425 | 16293500 | 75  | 16293437 | 13 | 39  | 0    |
| 6 | 16314850 | 16314950 | 100 | 16314862 | 12 | 44  | 4.1  |
| 6 | 16323900 | 16323975 | 75  | 16323912 | 13 | 39  | 4.1  |
| 6 | 16351300 | 16351350 | 50  | 16351312 | 12 | 24  | 2.1  |
| 6 | 16358325 | 16358350 | 25  | 16358337 | 12 | 12  | 2.1  |
| 6 | 16429125 | 16429175 | 50  | 16429162 | 14 | 26  | 4.1  |
| 6 | 16453700 | 16453850 | 150 | 16453837 | 21 | 90  | 8.3  |
| 6 | 16547575 | 16547650 | 75  | 16547612 | 14 | 38  | 0    |
| 6 | 16740425 | 16740500 | 75  | 16740462 | 15 | 43  | 0    |
| 6 | 16741975 | 16742000 | 25  | 16741987 | 12 | 12  | 2.1  |
| 6 | 16799250 | 16799400 | 150 | 16799262 | 12 | 69  | 12.4 |
| 6 | 16821500 | 16821525 | 25  | 16821512 | 17 | 17  | 2.1  |
| 6 | 16825475 | 16825675 | 200 | 16825512 | 14 | 107 | 8.3  |
| 6 | 16871375 | 16871450 | 75  | 16871387 | 15 | 41  | 0    |
| 6 | 16872925 | 16873025 | 100 | 16872937 | 12 | 46  | 0    |
| 6 | 16877525 | 16877575 | 50  | 16877537 | 19 | 37  | 4.1  |
| 6 | 16958125 | 16958325 | 200 | 16958262 | 19 | 131 | 10.3 |
| 6 | 17010175 | 17010250 | 75  | 17010187 | 12 | 36  | 0    |
| 6 | 17011950 | 17011975 | 25  | 17011962 | 12 | 12  | 2.1  |
| 6 | 17013525 | 17013575 | 50  | 17013537 | 13 | 25  | 0    |
| 6 | 17033825 | 17033850 | 25  | 17033837 | 12 | 12  | 0    |
| 6 | 17038150 | 17038175 | 25  | 17038162 | 13 | 13  | 0    |
| 6 | 17121075 | 17121125 | 50  | 17121087 | 19 | 36  | 4.1  |
| 6 | 17194675 | 17194750 | 75  | 17194737 | 19 | 50  | 6.2  |
| 6 | 17673825 | 17673900 | 75  | 17673862 | 13 | 37  | 4.1  |
| 6 | 17692475 | 17692675 | 200 | 17692537 | 19 | 134 | 6.2  |
| 6 | 17862200 | 17862250 | 50  | 17862212 | 12 | 24  | 0    |
| 6 | 17963650 | 17963775 | 125 | 17963712 | 14 | 65  | 10.3 |
| 6 | 17973075 | 17973150 | 75  | 17973087 | 12 | 34  | 0    |
| 6 | 17973925 | 17974000 | 75  | 17973987 | 18 | 46  | 6.2  |
| 6 | 18008400 | 18008425 | 25  | 18008412 | 12 | 12  | 0    |
| 6 | 18155275 | 18155750 | 475 | 18155712 | 17 | 232 | 26.9 |
| 6 | 18195525 | 18195575 | 50  | 18195562 | 23 | 44  | 4.1  |
| 6 | 18218525 | 18218575 | 50  | 18218537 | 12 | 24  | 0    |
| 6 | 18261000 | 18261050 | 50  | 18261037 | 17 | 29  | 4.1  |
| 6 | 18612075 | 18612125 | 50  | 18612087 | 13 | 25  | 4.1  |
| 6 | 18622875 | 18622900 | 25  | 18622887 | 12 | 12  | 2.1  |
| 6 | 18624125 | 18624275 | 150 | 18624187 | 17 | 85  | 4.1  |
| 6 | 18638500 | 18638525 | 25  | 18638512 | 14 | 14  | 0    |
| 6 | 18644625 | 18644775 | 150 | 18644762 | 17 | 85  | 12.4 |
| 6 | 18689400 | 18689450 | 50  | 18689412 | 12 | 24  | 0    |
| 6 | 18691750 | 18691775 | 25  | 18691762 | 13 | 13  | 2.1  |
| 6 | 18704425 | 18704725 | 300 | 18704612 | 24 | 215 | 35.2 |
| 6 | 18709100 | 18709225 | 125 | 18709137 | 16 | 73  | 2.1  |
| 6 | 18850650 | 18850875 | 225 | 18850787 | 19 | 138 | 0    |
| 6 | 18932125 | 18932200 | 75  | 18932162 | 13 | 38  | 0    |

|   |          |          |     |          |    |     |      |
|---|----------|----------|-----|----------|----|-----|------|
| 6 | 19133175 | 19133300 | 125 | 19133187 | 15 | 73  | 0    |
| 6 | 19143025 | 19143100 | 75  | 19143087 | 13 | 37  | 0    |
| 6 | 19143475 | 19143550 | 75  | 19143487 | 15 | 39  | 0    |
| 6 | 19241425 | 19241450 | 25  | 19241437 | 12 | 12  | 2.1  |
| 6 | 19428275 | 19428350 | 75  | 19428337 | 18 | 44  | 6.2  |
| 6 | 19433850 | 19433950 | 100 | 19433887 | 16 | 54  | 8.3  |
| 6 | 19541000 | 19541050 | 50  | 19541012 | 12 | 24  | 0    |
| 6 | 19541850 | 19541975 | 125 | 19541937 | 16 | 70  | 8.3  |
| 6 | 19580775 | 19580800 | 25  | 19580787 | 13 | 13  | 0    |
| 6 | 19723350 | 19723375 | 25  | 19723362 | 13 | 13  | 2.1  |
| 6 | 19913750 | 19913825 | 75  | 19913762 | 12 | 36  | 6.2  |
| 6 | 19975500 | 19975650 | 150 | 19975612 | 26 | 112 | 16.6 |
| 6 | 19981400 | 19981475 | 75  | 19981412 | 12 | 36  | 0    |
| 6 | 20235575 | 20235600 | 25  | 20235587 | 12 | 12  | 2.1  |
| 6 | 20649350 | 20649425 | 75  | 20649412 | 13 | 37  | 0    |
| 6 | 20749025 | 20749050 | 25  | 20749037 | 13 | 13  | 0    |
| 6 | 21111925 | 21111975 | 50  | 21111962 | 14 | 26  | 4.1  |
| 6 | 21139650 | 21139700 | 50  | 21139662 | 12 | 24  | 0    |
| 6 | 21381575 | 21381825 | 250 | 21381637 | 16 | 142 | 12.4 |
| 6 | 21463275 | 21463300 | 25  | 21463287 | 12 | 12  | 2.1  |
| 6 | 21480225 | 21480300 | 75  | 21480262 | 15 | 42  | 0    |
| 6 | 21552925 | 21552975 | 50  | 21552937 | 12 | 24  | 0    |
| 6 | 21577525 | 21577550 | 25  | 21577537 | 12 | 12  | 0    |
| 6 | 21615925 | 21616050 | 125 | 21615987 | 17 | 77  | 8.3  |
| 6 | 21617025 | 21617050 | 25  | 21617037 | 13 | 13  | 2.1  |
| 6 | 21646750 | 21646775 | 25  | 21646762 | 12 | 12  | 2.1  |
| 6 | 21655825 | 21655850 | 25  | 21655837 | 12 | 12  | 0    |
| 6 | 21691025 | 21691175 | 150 | 21691037 | 22 | 112 | 12.4 |
| 6 | 21855925 | 21856075 | 150 | 21855937 | 19 | 92  | 0    |
| 6 | 21860025 | 21860075 | 50  | 21860037 | 12 | 24  | 4.1  |
| 6 | 21981775 | 21981975 | 200 | 21981862 | 19 | 124 | 12.4 |
| 6 | 21994075 | 21994125 | 50  | 21994087 | 13 | 26  | 4.1  |
| 6 | 22321725 | 22321750 | 25  | 22321737 | 14 | 14  | 2.1  |
| 6 | 22519125 | 22519150 | 25  | 22519137 | 12 | 12  | 0    |
| 6 | 22683525 | 22683625 | 100 | 22683537 | 14 | 50  | 0    |
| 6 | 22762675 | 22762850 | 175 | 22762762 | 16 | 97  | 4.1  |
| 6 | 22766625 | 22766825 | 200 | 22766762 | 19 | 116 | 0    |
| 6 | 22826300 | 22826325 | 25  | 22826312 | 13 | 13  | 2.1  |
| 6 | 22845325 | 22845850 | 525 | 22845437 | 21 | 261 | 45.5 |
| 6 | 22907425 | 22907600 | 175 | 22907512 | 14 | 86  | 0    |
| 6 | 23011975 | 23012000 | 25  | 23011987 | 13 | 13  | 0    |
| 6 | 23014525 | 23014550 | 25  | 23014537 | 15 | 15  | 2.1  |
| 6 | 23112450 | 23112575 | 125 | 23112537 | 14 | 64  | 10.3 |
| 6 | 23327250 | 23327325 | 75  | 23327262 | 12 | 34  | 4.1  |
| 6 | 23455725 | 23455775 | 50  | 23455762 | 14 | 27  | 4.1  |
| 6 | 23764525 | 23764650 | 125 | 23764537 | 15 | 73  | 10.3 |
| 6 | 23813500 | 23813525 | 25  | 23813512 | 12 | 12  | 2.1  |
| 6 | 23843450 | 23843525 | 75  | 23843512 | 13 | 36  | 0    |
| 6 | 24500050 | 24500100 | 50  | 24500062 | 12 | 24  | 0    |
| 6 | 24696900 | 24696950 | 50  | 24696912 | 12 | 24  | 4.1  |
| 6 | 24830400 | 24830425 | 25  | 24830412 | 12 | 12  | 2.1  |
| 6 | 24911850 | 24911950 | 100 | 24911862 | 13 | 52  | 8.3  |
| 6 | 24956775 | 24956900 | 125 | 24956837 | 15 | 66  | 6.2  |
| 6 | 25124450 | 25124475 | 25  | 25124462 | 12 | 12  | 2.1  |
| 6 | 25149550 | 25149575 | 25  | 25149562 | 12 | 12  | 2.1  |
| 6 | 25162275 | 25162375 | 100 | 25162287 | 13 | 50  | 8.3  |
| 6 | 25278850 | 25278925 | 75  | 25278862 | 14 | 38  | 0    |
| 6 | 25436325 | 25436525 | 200 | 25436412 | 14 | 103 | 0    |
| 6 | 25497900 | 25498000 | 100 | 25497937 | 17 | 59  | 0    |
| 6 | 25859650 | 25859750 | 100 | 25859687 | 14 | 52  | 8.3  |
| 6 | 26125750 | 26125775 | 25  | 26125762 | 14 | 14  | 2.1  |
| 6 | 26129750 | 26129875 | 125 | 26129837 | 16 | 70  | 12.4 |
| 6 | 26211975 | 26212000 | 25  | 26211987 | 12 | 12  | 2.1  |
| 6 | 26212650 | 26212675 | 25  | 26212662 | 12 | 12  | 2.1  |
| 6 | 26230675 | 26230875 | 200 | 26230762 | 18 | 124 | 6.2  |
| 6 | 26291600 | 26291700 | 100 | 26291637 | 13 | 51  | 0    |
| 6 | 26297325 | 26297375 | 50  | 26297337 | 12 | 24  | 4.1  |
| 6 | 26307675 | 26307725 | 50  | 26307687 | 13 | 26  | 2.1  |
| 6 | 26312550 | 26312575 | 25  | 26312562 | 12 | 12  | 2.1  |
| 6 | 26324950 | 26324975 | 25  | 26324962 | 12 | 12  | 0    |
| 6 | 26332375 | 26332450 | 75  | 26332412 | 16 | 47  | 6.2  |
| 6 | 26358050 | 26358075 | 25  | 26358062 | 12 | 12  | 2.1  |
| 6 | 26393900 | 26393925 | 25  | 26393912 | 17 | 17  | 2.1  |
| 6 | 26423400 | 26423450 | 50  | 26423412 | 12 | 24  | 0    |
| 6 | 26431150 | 26431325 | 175 | 26431162 | 12 | 84  | 8.3  |

|   |          |          |     |          |    |     |      |
|---|----------|----------|-----|----------|----|-----|------|
| 6 | 26579525 | 26579550 | 25  | 26579537 | 12 | 12  | 2.1  |
| 6 | 26621625 | 26621775 | 150 | 26621662 | 14 | 81  | 0    |
| 6 | 26646325 | 26646350 | 25  | 26646337 | 12 | 12  | 2.1  |
| 6 | 26658725 | 26658800 | 75  | 26658737 | 13 | 39  | 6.2  |
| 6 | 26663450 | 26663550 | 100 | 26663487 | 15 | 56  | 2.1  |
| 6 | 27031875 | 27031900 | 25  | 27031887 | 13 | 13  | 2.1  |
| 6 | 27167600 | 27167650 | 50  | 27167637 | 17 | 30  | 4.1  |
| 6 | 27203100 | 27203125 | 25  | 27203112 | 23 | 23  | 4.1  |
| 6 | 27208575 | 27208600 | 25  | 27208587 | 34 | 34  | 6.2  |
| 6 | 27254000 | 27254175 | 175 | 27254037 | 17 | 100 | 14.5 |
| 6 | 27264150 | 27264250 | 100 | 27264212 | 17 | 58  | 0    |
| 6 | 27281700 | 27281775 | 75  | 27281712 | 14 | 38  | 6.2  |
| 6 | 27412875 | 27412925 | 50  | 27412887 | 12 | 24  | 0    |
| 6 | 27434725 | 27434800 | 75  | 27434762 | 13 | 37  | 0    |
| 6 | 27490900 | 27491025 | 125 | 27490987 | 13 | 62  | 2.1  |
| 6 | 27528300 | 27528525 | 225 | 27528337 | 17 | 124 | 10.3 |
| 6 | 27578625 | 27578700 | 75  | 27578637 | 12 | 36  | 6.2  |
| 6 | 27620550 | 27620575 | 25  | 27620562 | 13 | 13  | 0    |
| 6 | 27659325 | 27659350 | 25  | 27659337 | 13 | 13  | 2.1  |
| 6 | 27685150 | 27685200 | 50  | 27685162 | 13 | 26  | 0    |
| 6 | 27883800 | 27883825 | 25  | 27883812 | 12 | 12  | 0    |
| 6 | 27885725 | 27885775 | 50  | 27885737 | 14 | 26  | 4.1  |
| 6 | 27890625 | 27890875 | 250 | 27890812 | 17 | 140 | 16.6 |
| 6 | 27914300 | 27914325 | 25  | 27914312 | 12 | 12  | 2.1  |
| 6 | 27940875 | 27940950 | 75  | 27940937 | 19 | 52  | 4.1  |
| 6 | 27948025 | 27948075 | 50  | 27948037 | 13 | 26  | 0    |
| 6 | 27948575 | 27948600 | 25  | 27948587 | 12 | 12  | 0    |
| 6 | 28156525 | 28156575 | 50  | 28156562 | 19 | 34  | 4.1  |
| 6 | 28200750 | 28200775 | 25  | 28200762 | 13 | 13  | 2.1  |
| 6 | 28212375 | 28212400 | 25  | 28212387 | 15 | 15  | 2.1  |
| 6 | 28237575 | 28237600 | 25  | 28237587 | 14 | 14  | 2.1  |
| 6 | 28294750 | 28294950 | 200 | 28294837 | 20 | 133 | 12.4 |
| 6 | 28345200 | 28345400 | 200 | 28345312 | 22 | 147 | 2.1  |
| 6 | 28402200 | 28402375 | 175 | 28402237 | 14 | 88  | 2.1  |
| 6 | 28456400 | 28456425 | 25  | 28456412 | 12 | 12  | 0    |
| 6 | 28475450 | 28475475 | 25  | 28475462 | 38 | 38  | 6.2  |
| 6 | 28804675 | 28804725 | 50  | 28804687 | 13 | 26  | 4.1  |
| 6 | 29026700 | 29026875 | 175 | 29026712 | 18 | 102 | 0    |
| 6 | 29053600 | 29053750 | 150 | 29053637 | 14 | 73  | 10.3 |
| 6 | 29060800 | 29060850 | 50  | 29060812 | 14 | 26  | 0    |
| 6 | 29061425 | 29061550 | 125 | 29061437 | 28 | 105 | 18.6 |
| 6 | 29089775 | 29089825 | 50  | 29089787 | 12 | 24  | 4.1  |
| 6 | 29849825 | 29849850 | 25  | 29849837 | 12 | 12  | 0    |
| 6 | 29937425 | 29937500 | 75  | 29937487 | 13 | 37  | 0    |
| 6 | 30134600 | 30134650 | 50  | 30134612 | 13 | 26  | 4.1  |
| 6 | 30176950 | 30177075 | 125 | 30176962 | 18 | 72  | 8.3  |
| 6 | 30390550 | 30390575 | 25  | 30390562 | 12 | 12  | 2.1  |
| 6 | 30670425 | 30670475 | 50  | 30670437 | 13 | 26  | 0    |
| 6 | 30793600 | 30793625 | 25  | 30793612 | 12 | 12  | 2.1  |
| 6 | 30803975 | 30804000 | 25  | 30803987 | 14 | 14  | 2.1  |
| 6 | 30837600 | 30837675 | 75  | 30837612 | 12 | 36  | 0    |
| 6 | 30839675 | 30839725 | 50  | 30839712 | 14 | 26  | 4.1  |
| 6 | 30839950 | 30840075 | 125 | 30839962 | 12 | 53  | 6.2  |
| 6 | 30855200 | 30855225 | 25  | 30855212 | 13 | 13  | 0    |
| 6 | 30857750 | 30857775 | 25  | 30857762 | 29 | 29  | 4.1  |
| 6 | 30858375 | 30858425 | 50  | 30858387 | 13 | 25  | 4.1  |
| 6 | 30875200 | 30875350 | 150 | 30875212 | 13 | 73  | 4.1  |
| 6 | 30885550 | 30885575 | 25  | 30885562 | 12 | 12  | 2.1  |
| 6 | 30951875 | 30952050 | 175 | 30951962 | 16 | 104 | 12.4 |
| 6 | 30961875 | 30961900 | 25  | 30961887 | 16 | 16  | 0    |
| 6 | 31190325 | 31190350 | 25  | 31190337 | 15 | 15  | 2.1  |
| 6 | 31847850 | 31847900 | 50  | 31847862 | 12 | 24  | 2.1  |
| 6 | 32037300 | 32037325 | 25  | 32037312 | 12 | 12  | 0    |
| 6 | 32124400 | 32124425 | 25  | 32124412 | 12 | 12  | 2.1  |
| 6 | 32243975 | 32244025 | 50  | 32243987 | 13 | 26  | 0    |
| 6 | 32331000 | 32331175 | 175 | 32331137 | 17 | 104 | 8.3  |
| 6 | 32503025 | 32503050 | 25  | 32503037 | 15 | 15  | 0    |
| 6 | 33042575 | 33042600 | 25  | 33042587 | 12 | 12  | 0    |
| 6 | 33059375 | 33059400 | 25  | 33059387 | 12 | 12  | 2.1  |
| 6 | 33199650 | 33199850 | 200 | 33199687 | 19 | 136 | 4.1  |
| 6 | 33365400 | 33365450 | 50  | 33365412 | 12 | 24  | 4.1  |
| 6 | 33487475 | 33487525 | 50  | 33487487 | 13 | 26  | 4.1  |
| 6 | 33683525 | 33683600 | 75  | 33683537 | 12 | 36  | 0    |
| 6 | 33810875 | 33810925 | 50  | 33810887 | 12 | 24  | 4.1  |
| 6 | 33915825 | 33915850 | 25  | 33915837 | 15 | 15  | 2.1  |

|   |          |          |     |          |    |     |      |
|---|----------|----------|-----|----------|----|-----|------|
| 6 | 34094175 | 34094200 | 25  | 34094187 | 12 | 12  | 0    |
| 6 | 34300075 | 34300100 | 25  | 34300087 | 12 | 12  | 2.1  |
| 6 | 34319475 | 34319575 | 100 | 34319512 | 16 | 63  | 4.1  |
| 6 | 34351150 | 34351175 | 25  | 34351162 | 12 | 12  | 2.1  |
| 6 | 34353275 | 34353475 | 200 | 34353387 | 15 | 108 | 8.3  |
| 6 | 34400525 | 34400750 | 225 | 34400587 | 18 | 138 | 20.7 |
| 6 | 34488100 | 34488150 | 50  | 34488112 | 12 | 24  | 4.1  |
| 6 | 34785525 | 34785600 | 75  | 34785537 | 13 | 38  | 0    |
| 6 | 34868175 | 34868300 | 125 | 34868187 | 13 | 59  | 10.3 |
| 6 | 34948150 | 34948175 | 25  | 34948162 | 12 | 12  | 0    |
| 6 | 34963725 | 34963975 | 250 | 34963787 | 17 | 149 | 4.1  |
| 6 | 35084875 | 35084975 | 100 | 35084887 | 17 | 55  | 2.1  |
| 6 | 35093175 | 35093225 | 50  | 35093212 | 13 | 25  | 2.1  |
| 6 | 35167625 | 35167800 | 175 | 35167687 | 15 | 87  | 0    |
| 6 | 35325175 | 35325225 | 50  | 35325187 | 12 | 24  | 0    |
| 6 | 35334400 | 35334575 | 175 | 35334462 | 15 | 92  | 0    |
| 6 | 35575125 | 35575175 | 50  | 35575137 | 12 | 24  | 0    |
| 6 | 35760600 | 35760650 | 50  | 35760612 | 12 | 24  | 0    |
| 6 | 35763000 | 35763175 | 175 | 35763012 | 13 | 82  | 0    |
| 6 | 35770325 | 35770400 | 75  | 35770337 | 14 | 40  | 0    |
| 6 | 35807025 | 35807050 | 25  | 35807037 | 13 | 13  | 0    |
| 6 | 35814575 | 35814600 | 25  | 35814587 | 13 | 13  | 2.1  |
| 6 | 35866575 | 35866900 | 325 | 35866637 | 36 | 326 | 29   |
| 6 | 35868675 | 35868725 | 50  | 35868687 | 14 | 27  | 4.1  |
| 6 | 36378425 | 36378450 | 25  | 36378437 | 13 | 13  | 2.1  |
| 6 | 36434400 | 36434475 | 75  | 36434437 | 15 | 43  | 6.2  |
| 6 | 36575650 | 36575675 | 25  | 36575662 | 14 | 14  | 2.1  |
| 6 | 36655525 | 36655625 | 100 | 36655537 | 13 | 48  | 4.1  |
| 6 | 36908425 | 36908450 | 25  | 36908437 | 12 | 12  | 0    |
| 6 | 37023600 | 37023625 | 25  | 37023612 | 12 | 12  | 2.1  |
| 6 | 37025275 | 37025400 | 125 | 37025312 | 16 | 68  | 6.2  |
| 6 | 37094625 | 37094650 | 25  | 37094637 | 12 | 12  | 0    |
| 6 | 37706250 | 37706300 | 50  | 37706262 | 21 | 41  | 6.2  |
| 6 | 37742600 | 37742625 | 25  | 37742612 | 12 | 12  | 0    |
| 6 | 37767575 | 37767625 | 50  | 37767587 | 13 | 26  | 0    |
| 6 | 37780575 | 37780600 | 25  | 37780587 | 12 | 12  | 0    |
| 6 | 38133900 | 38134075 | 175 | 38133912 | 15 | 99  | 16.6 |
| 6 | 38289250 | 38289350 | 100 | 38289287 | 16 | 61  | 4.1  |
| 6 | 38778525 | 38778575 | 50  | 38778537 | 18 | 33  | 4.1  |
| 6 | 38952300 | 38952350 | 50  | 38952337 | 13 | 25  | 4.1  |
| 6 | 39268900 | 39269025 | 125 | 39268937 | 15 | 71  | 8.3  |
| 6 | 39454250 | 39454350 | 100 | 39454287 | 14 | 53  | 4.1  |
| 6 | 39457325 | 39457400 | 75  | 39457362 | 14 | 41  | 0    |
| 6 | 39463775 | 39463900 | 125 | 39463787 | 13 | 62  | 6.2  |
| 6 | 39473125 | 39473175 | 50  | 39473137 | 12 | 24  | 0    |
| 6 | 39478150 | 39478175 | 25  | 39478162 | 24 | 24  | 4.1  |
| 6 | 39487300 | 39487575 | 275 | 39487337 | 18 | 170 | 16.6 |
| 6 | 39488550 | 39488650 | 100 | 39488562 | 14 | 48  | 0    |
| 6 | 39527775 | 39527800 | 25  | 39527787 | 12 | 12  | 2.1  |
| 6 | 39676250 | 39676350 | 100 | 39676262 | 14 | 51  | 4.1  |
| 6 | 39742425 | 39742500 | 75  | 39742437 | 13 | 36  | 2.1  |
| 6 | 39801700 | 39801775 | 75  | 39801712 | 14 | 38  | 6.2  |
| 6 | 39861075 | 39861350 | 275 | 39861262 | 17 | 163 | 12.4 |
| 6 | 39952700 | 39952725 | 25  | 39952712 | 12 | 12  | 2.1  |
| 6 | 40240200 | 40240250 | 50  | 40240212 | 15 | 28  | 4.1  |
| 6 | 41194900 | 41195000 | 100 | 41194912 | 13 | 51  | 0    |
| 6 | 41525625 | 41525750 | 125 | 41525662 | 16 | 72  | 10.3 |
| 6 | 41874400 | 41874475 | 75  | 41874412 | 13 | 37  | 6.2  |
| 6 | 41922475 | 41922500 | 25  | 41922487 | 13 | 13  | 2.1  |
| 6 | 41981225 | 41981250 | 25  | 41981237 | 12 | 12  | 2.1  |
| 6 | 42000950 | 42000975 | 25  | 42000962 | 14 | 14  | 0    |
| 6 | 42502300 | 42502325 | 25  | 42502312 | 13 | 13  | 0    |
| 6 | 42529050 | 42529075 | 25  | 42529062 | 12 | 12  | 2.1  |
| 6 | 42737275 | 42737425 | 150 | 42737412 | 17 | 76  | 10.3 |
| 6 | 42823075 | 42823125 | 50  | 42823087 | 14 | 28  | 0    |
| 6 | 43129500 | 43129525 | 25  | 43129512 | 12 | 12  | 2.1  |
| 6 | 43257475 | 43257525 | 50  | 43257512 | 14 | 26  | 4.1  |
| 6 | 43258075 | 43258200 | 125 | 43258087 | 12 | 56  | 0    |
| 6 | 43473600 | 43473625 | 25  | 43473612 | 13 | 13  | 0    |
| 6 | 43513300 | 43513325 | 25  | 43513312 | 13 | 13  | 2.1  |
| 6 | 43854050 | 43854075 | 25  | 43854062 | 12 | 12  | 2.1  |
| 6 | 43885700 | 43885725 | 25  | 43885712 | 13 | 13  | 0    |
| 6 | 43956925 | 43956950 | 25  | 43956937 | 12 | 12  | 2.1  |
| 6 | 44002250 | 44002275 | 25  | 44002262 | 13 | 13  | 2.1  |
| 6 | 44019375 | 44019500 | 125 | 44019387 | 12 | 56  | 10.3 |

|   |          |          |     |          |    |     |      |
|---|----------|----------|-----|----------|----|-----|------|
| 6 | 44026625 | 44026675 | 50  | 44026637 | 12 | 24  | 4.1  |
| 6 | 44047525 | 44047675 | 150 | 44047537 | 12 | 67  | 6.2  |
| 6 | 44135425 | 44135450 | 25  | 44135437 | 15 | 15  | 2.1  |
| 6 | 44137525 | 44137575 | 50  | 44137537 | 13 | 26  | 4.1  |
| 6 | 44388975 | 44389025 | 50  | 44389012 | 13 | 25  | 2.1  |
| 6 | 44389250 | 44389275 | 25  | 44389262 | 13 | 13  | 2.1  |
| 6 | 44527925 | 44527975 | 50  | 44527937 | 14 | 27  | 2.1  |
| 6 | 44706175 | 44706200 | 25  | 44706187 | 12 | 12  | 0    |
| 6 | 44867325 | 44867350 | 25  | 44867337 | 12 | 12  | 2.1  |
| 6 | 45249625 | 45249700 | 75  | 45249662 | 13 | 38  | 2.1  |
| 6 | 45403700 | 45403775 | 75  | 45403737 | 13 | 37  | 2.1  |
| 6 | 45491250 | 45491325 | 75  | 45491262 | 13 | 37  | 2.1  |
| 6 | 45496650 | 45496700 | 50  | 45496662 | 12 | 24  | 0    |
| 6 | 45521625 | 45521650 | 25  | 45521637 | 13 | 13  | 2.1  |
| 6 | 45521875 | 45521900 | 25  | 45521887 | 12 | 12  | 2.1  |
| 6 | 45526625 | 45526725 | 100 | 45526637 | 12 | 48  | 0    |
| 6 | 45548250 | 45548325 | 75  | 45548262 | 14 | 38  | 6.2  |
| 6 | 45556975 | 45557100 | 125 | 45557062 | 14 | 65  | 8.3  |
| 6 | 45558800 | 45558875 | 75  | 45558837 | 14 | 39  | 6.2  |
| 6 | 45666850 | 45666875 | 25  | 45666862 | 12 | 12  | 2.1  |
| 6 | 45702100 | 45702175 | 75  | 45702112 | 12 | 36  | 6.2  |
| 6 | 45790450 | 45790475 | 25  | 45790462 | 13 | 13  | 0    |
| 6 | 45830500 | 45830575 | 75  | 45830512 | 13 | 39  | 6.2  |
| 6 | 45877175 | 45877250 | 75  | 45877237 | 13 | 37  | 6.2  |
| 6 | 45877750 | 45877775 | 25  | 45877762 | 12 | 12  | 0    |
| 6 | 46810025 | 46810050 | 25  | 46810037 | 16 | 16  | 2.1  |
| 6 | 47058875 | 47058925 | 50  | 47058887 | 13 | 26  | 0    |
| 6 | 47093700 | 47093850 | 150 | 47093762 | 15 | 74  | 8.3  |
| 6 | 47101600 | 47101675 | 75  | 47101612 | 13 | 39  | 4.1  |
| 6 | 47110400 | 47110450 | 50  | 47110412 | 13 | 26  | 4.1  |
| 6 | 47151750 | 47151925 | 175 | 47151812 | 19 | 106 | 14.5 |
| 6 | 47170225 | 47170250 | 25  | 47170237 | 13 | 13  | 2.1  |
| 6 | 47175150 | 47175250 | 100 | 47175162 | 12 | 48  | 2.1  |
| 6 | 47211650 | 47211675 | 25  | 47211662 | 13 | 13  | 2.1  |
| 6 | 47318400 | 47318575 | 175 | 47318462 | 18 | 102 | 12.4 |
| 6 | 47328725 | 47328825 | 100 | 47328737 | 15 | 60  | 8.3  |
| 6 | 47893550 | 47893575 | 25  | 47893562 | 12 | 12  | 2.1  |
| 6 | 47995450 | 47995550 | 100 | 47995462 | 12 | 46  | 0    |
| 6 | 47998025 | 47998050 | 25  | 47998037 | 13 | 13  | 0    |
| 6 | 48112125 | 48112175 | 50  | 48112137 | 13 | 26  | 4.1  |
| 6 | 48218400 | 48218900 | 500 | 48218862 | 14 | 217 | 16.6 |
| 6 | 48222350 | 48222375 | 25  | 48222362 | 12 | 12  | 0    |
| 6 | 48252975 | 48253050 | 75  | 48252987 | 13 | 37  | 0    |
| 6 | 48502375 | 48502500 | 125 | 48502412 | 16 | 74  | 10.3 |
| 6 | 48504900 | 48505025 | 125 | 48504912 | 13 | 65  | 8.3  |
| 6 | 48546900 | 48547200 | 300 | 48547037 | 25 | 226 | 26.9 |
| 6 | 48550225 | 48550250 | 25  | 48550237 | 12 | 12  | 2.1  |
| 6 | 49446525 | 49446575 | 50  | 49446537 | 12 | 24  | 4.1  |
| 6 | 49618825 | 49618975 | 150 | 49618887 | 16 | 80  | 0    |
| 6 | 49626050 | 49626075 | 25  | 49626062 | 12 | 12  | 2.1  |
| 6 | 49631700 | 49631725 | 25  | 49631712 | 12 | 12  | 2.1  |
| 6 | 50922725 | 50922750 | 25  | 50922737 | 12 | 12  | 2.1  |
| 6 | 50925900 | 50926025 | 125 | 50925912 | 13 | 61  | 8.3  |
| 6 | 51322625 | 51322950 | 325 | 51322762 | 21 | 225 | 31   |
| 6 | 51360475 | 51360500 | 25  | 51360487 | 12 | 12  | 2.1  |
| 6 | 51370925 | 51371100 | 175 | 51370937 | 14 | 87  | 0    |
| 6 | 51468700 | 51468850 | 150 | 51468737 | 16 | 84  | 0    |
| 6 | 52372700 | 52372725 | 25  | 52372712 | 12 | 12  | 2.1  |
| 6 | 52549475 | 52549625 | 150 | 52549562 | 14 | 78  | 0    |
| 6 | 52567700 | 52567750 | 50  | 52567712 | 13 | 26  | 4.1  |
| 6 | 52571100 | 52571150 | 50  | 52571112 | 12 | 24  | 4.1  |
| 6 | 52584925 | 52584950 | 25  | 52584937 | 14 | 14  | 2.1  |
| 6 | 52614650 | 52614675 | 25  | 52614662 | 12 | 12  | 0    |
| 6 | 52616050 | 52616100 | 50  | 52616062 | 12 | 24  | 4.1  |
| 6 | 52624900 | 52625050 | 150 | 52624962 | 16 | 85  | 10.3 |
| 6 | 52969550 | 52969575 | 25  | 52969562 | 12 | 12  | 2.1  |
| 6 | 53299350 | 53299775 | 425 | 53299587 | 42 | 462 | 39.3 |
| 6 | 53424075 | 53424175 | 100 | 53424137 | 15 | 53  | 0    |
| 6 | 53835975 | 53836000 | 25  | 53835987 | 12 | 12  | 2.1  |
| 6 | 54281525 | 54281725 | 200 | 54281687 | 14 | 96  | 0    |
| 6 | 56775375 | 56775500 | 125 | 56775487 | 24 | 106 | 16.6 |
| 6 | 56911500 | 56911550 | 50  | 56911512 | 16 | 32  | 4.1  |
| 6 | 57555700 | 57555800 | 100 | 57555712 | 12 | 48  | 0    |
| 6 | 57570700 | 57570750 | 50  | 57570712 | 12 | 24  | 4.1  |
| 6 | 57571475 | 57571525 | 50  | 57571487 | 13 | 26  | 0    |

|   |           |           |     |           |    |     |      |
|---|-----------|-----------|-----|-----------|----|-----|------|
| 6 | 58882675  | 58882700  | 25  | 58882687  | 12 | 12  | 2.1  |
| 6 | 62390400  | 62390450  | 50  | 62390437  | 14 | 26  | 4.1  |
| 6 | 62393475  | 62393500  | 25  | 62393487  | 12 | 12  | 2.1  |
| 6 | 62417875  | 62417925  | 50  | 62417912  | 14 | 26  | 0    |
| 6 | 62420450  | 62420750  | 300 | 62420587  | 19 | 173 | 16.6 |
| 6 | 62918000  | 62918100  | 100 | 62918037  | 13 | 51  | 0    |
| 6 | 64629600  | 64629800  | 200 | 64629662  | 21 | 148 | 0    |
| 6 | 64780500  | 64780525  | 25  | 64780512  | 12 | 12  | 2.1  |
| 6 | 64891325  | 64891350  | 25  | 64891337  | 12 | 12  | 2.1  |
| 6 | 65486225  | 65486250  | 25  | 65486237  | 12 | 12  | 2.1  |
| 6 | 66478850  | 66478925  | 75  | 66478862  | 12 | 36  | 6.2  |
| 6 | 66928150  | 66928325  | 175 | 66928312  | 25 | 128 | 2.1  |
| 6 | 66940375  | 66940400  | 25  | 66940387  | 19 | 19  | 2.1  |
| 6 | 67075125  | 67075225  | 100 | 67075212  | 13 | 45  | 8.3  |
| 6 | 67305525  | 67305600  | 75  | 67305537  | 14 | 38  | 4.1  |
| 6 | 67501850  | 67502050  | 200 | 67501912  | 17 | 120 | 4.1  |
| 6 | 67869425  | 67869450  | 25  | 67869437  | 12 | 12  | 0    |
| 6 | 70405600  | 70405625  | 25  | 70405612  | 12 | 12  | 2.1  |
| 6 | 70684600  | 70684625  | 25  | 70684612  | 20 | 20  | 2.1  |
| 6 | 70700075  | 70700125  | 50  | 70700087  | 12 | 24  | 0    |
| 6 | 70710575  | 70710675  | 100 | 70710587  | 14 | 52  | 0    |
| 6 | 71008625  | 71008800  | 175 | 71008787  | 16 | 92  | 12.4 |
| 6 | 71674300  | 71674350  | 50  | 71674312  | 12 | 24  | 4.1  |
| 6 | 73468950  | 73469125  | 175 | 73468962  | 12 | 83  | 4.1  |
| 6 | 73469675  | 73469750  | 75  | 73469687  | 12 | 36  | 0    |
| 6 | 73719075  | 73719125  | 50  | 73719087  | 13 | 25  | 0    |
| 6 | 73743175  | 73743250  | 75  | 73743187  | 12 | 36  | 6.2  |
| 6 | 74346400  | 74346450  | 50  | 74346412  | 13 | 26  | 4.1  |
| 6 | 75186900  | 75186950  | 50  | 75186912  | 12 | 24  | 4.1  |
| 6 | 75344625  | 75344775  | 150 | 75344712  | 16 | 88  | 2.1  |
| 6 | 75346350  | 75346525  | 175 | 75346437  | 15 | 100 | 0    |
| 6 | 75894000  | 75894025  | 25  | 75894012  | 12 | 12  | 0    |
| 6 | 75970600  | 75970800  | 200 | 75970737  | 18 | 112 | 0    |
| 6 | 80872950  | 80872975  | 25  | 80872962  | 13 | 13  | 2.1  |
| 6 | 81223825  | 81223875  | 50  | 81223837  | 12 | 24  | 0    |
| 6 | 81405200  | 81405250  | 50  | 81405212  | 12 | 24  | 2.1  |
| 6 | 82807100  | 82807225  | 125 | 82807137  | 15 | 70  | 0    |
| 6 | 82851175  | 82851325  | 150 | 82851237  | 14 | 74  | 0    |
| 6 | 88088850  | 88088875  | 25  | 88088862  | 12 | 12  | 0    |
| 6 | 89848525  | 89848650  | 125 | 89848612  | 15 | 61  | 2.1  |
| 6 | 90765750  | 90765775  | 25  | 90765762  | 12 | 12  | 2.1  |
| 6 | 91353800  | 91353825  | 25  | 91353812  | 12 | 12  | 2.1  |
| 6 | 94186025  | 94186100  | 75  | 94186037  | 16 | 43  | 2.1  |
| 6 | 99342700  | 99342775  | 75  | 99342712  | 12 | 34  | 6.2  |
| 6 | 99948700  | 99948800  | 100 | 99948712  | 13 | 45  | 8.3  |
| 6 | 100757425 | 100757450 | 25  | 100757437 | 12 | 12  | 0    |
| 6 | 106142200 | 106142225 | 25  | 106142212 | 18 | 18  | 2.1  |
| 6 | 107544425 | 107544450 | 25  | 107544437 | 12 | 12  | 0    |
| 6 | 108722500 | 108722575 | 75  | 108722562 | 13 | 37  | 4.1  |
| 6 | 109192725 | 109192775 | 50  | 109192737 | 13 | 26  | 4.1  |
| 6 | 110962800 | 110962850 | 50  | 110962837 | 15 | 28  | 4.1  |
| 6 | 110983100 | 110983175 | 75  | 110983162 | 15 | 43  | 6.2  |
| 6 | 112286325 | 112286350 | 25  | 112286337 | 12 | 12  | 0    |
| 6 | 112756925 | 112756975 | 50  | 112756937 | 15 | 30  | 0    |
| 6 | 113384750 | 113384800 | 50  | 113384762 | 12 | 24  | 0    |
| 6 | 114050050 | 114050075 | 25  | 114050062 | 12 | 12  | 0    |
| 6 | 114239650 | 114239675 | 25  | 114239662 | 12 | 12  | 0    |
| 6 | 116529700 | 116529725 | 25  | 116529712 | 12 | 12  | 0    |
| 6 | 126286250 | 126286275 | 25  | 126286262 | 13 | 13  | 2.1  |
| 6 | 134990450 | 134990525 | 75  | 134990462 | 12 | 36  | 0    |
| 6 | 139018825 | 139018975 | 150 | 139018862 | 13 | 75  | 0    |
| 6 | 140682100 | 140682125 | 25  | 140682112 | 12 | 12  | 2.1  |
| 6 | 144376525 | 144376575 | 50  | 144376537 | 12 | 24  | 4.1  |
| 6 | 144779200 | 144779250 | 50  | 144779237 | 15 | 28  | 4.1  |
| 6 | 151428125 | 151428150 | 25  | 151428137 | 12 | 12  | 0    |
| 6 | 155677875 | 155677950 | 75  | 155677912 | 14 | 40  | 4.1  |
| 6 | 157856175 | 157856275 | 100 | 157856187 | 14 | 52  | 8.3  |
| 6 | 157876675 | 157876725 | 50  | 157876687 | 12 | 24  | 4.1  |
| 6 | 158801100 | 158801125 | 25  | 158801112 | 12 | 12  | 0    |
| 6 | 158906975 | 158907000 | 25  | 158906987 | 12 | 12  | 2.1  |
| 6 | 165035150 | 165035250 | 100 | 165035187 | 14 | 54  | 0    |
| 6 | 166018875 | 166018900 | 25  | 166018887 | 13 | 13  | 0    |
| 6 | 166255675 | 166255700 | 25  | 166255687 | 13 | 13  | 0    |
| 6 | 166256250 | 166256275 | 25  | 166256262 | 14 | 14  | 0    |
| 6 | 166366575 | 166366600 | 25  | 166366587 | 12 | 12  | 2.1  |



|   |           |           |     |           |    |     |      |
|---|-----------|-----------|-----|-----------|----|-----|------|
| 6 | 166932425 | 166932450 | 25  | 166932437 | 13 | 13  | 0    |
| 6 | 169212750 | 169212800 | 50  | 169212762 | 12 | 24  | 0    |
| 6 | 170551400 | 170551425 | 25  | 170551412 | 12 | 12  | 0    |
| 9 | 640600    | 640725    | 125 | 640612    | 13 | 55  | 0    |
| 9 | 684525    | 684550    | 25  | 684537    | 17 | 17  | 2.1  |
| 9 | 728900    | 728950    | 50  | 728912    | 13 | 26  | 2.1  |
| 9 | 883800    | 883825    | 25  | 883812    | 12 | 12  | 0    |
| 9 | 2148050   | 2148100   | 50  | 2148062   | 12 | 24  | 2.1  |
| 9 | 3327675   | 3327875   | 200 | 3327687   | 14 | 109 | 6.2  |
| 9 | 3499100   | 3499175   | 75  | 3499112   | 14 | 40  | 0    |
| 9 | 3516450   | 3516500   | 50  | 3516462   | 15 | 27  | 4.1  |
| 9 | 3723225   | 3723325   | 100 | 3723312   | 14 | 50  | 0    |
| 9 | 3736700   | 3736775   | 75  | 3736712   | 12 | 36  | 6.2  |
| 9 | 3898950   | 3899000   | 50  | 3898987   | 14 | 26  | 4.1  |
| 9 | 3953475   | 3953525   | 50  | 3953487   | 12 | 24  | 4.1  |
| 9 | 3970775   | 3970900   | 125 | 3970887   | 18 | 72  | 2.1  |
| 9 | 4356950   | 4357000   | 50  | 4356962   | 14 | 26  | 2.1  |
| 9 | 4361400   | 4361475   | 75  | 4361412   | 13 | 39  | 2.1  |
| 9 | 4520350   | 4520375   | 25  | 4520362   | 13 | 13  | 2.1  |
| 9 | 4553375   | 4553475   | 100 | 4553387   | 12 | 44  | 0    |
| 9 | 4630550   | 4630575   | 25  | 4630562   | 13 | 13  | 0    |
| 9 | 5788800   | 5788950   | 150 | 5788862   | 14 | 76  | 0    |
| 9 | 5835875   | 5835900   | 25  | 5835887   | 12 | 12  | 0    |
| 9 | 7358525   | 7358700   | 175 | 7358587   | 15 | 92  | 16.6 |
| 9 | 7666650   | 7666675   | 25  | 7666662   | 13 | 13  | 2.1  |
| 9 | 9634275   | 9634850   | 575 | 9634712   | 29 | 333 | 35.2 |
| 9 | 9743325   | 9743500   | 175 | 9743437   | 17 | 107 | 2.1  |
| 9 | 9780275   | 9780300   | 25  | 9780287   | 12 | 12  | 0    |
| 9 | 11054950  | 11055025  | 75  | 11054962  | 12 | 34  | 2.1  |
| 9 | 12804600  | 12804650  | 50  | 12804612  | 13 | 25  | 0    |
| 9 | 12906150  | 12906175  | 25  | 12906162  | 12 | 12  | 2.1  |
| 9 | 14160250  | 14160300  | 50  | 14160262  | 12 | 24  | 4.1  |
| 9 | 14342825  | 14342850  | 25  | 14342837  | 12 | 12  | 0    |
| 9 | 16093475  | 16093675  | 200 | 16093562  | 20 | 125 | 10.3 |
| 9 | 16511975  | 16512050  | 75  | 16512012  | 17 | 49  | 4.1  |
| 9 | 16616750  | 16616775  | 25  | 16616762  | 15 | 15  | 2.1  |
| 9 | 16679400  | 16679600  | 200 | 16679437  | 16 | 103 | 16.6 |
| 9 | 16854575  | 16854675  | 100 | 16854587  | 14 | 54  | 8.3  |
| 9 | 16995175  | 16995200  | 25  | 16995187  | 12 | 12  | 2.1  |
| 9 | 17008550  | 17008575  | 25  | 17008562  | 15 | 15  | 2.1  |
| 9 | 18026125  | 18026175  | 50  | 18026137  | 12 | 24  | 0    |
| 9 | 18534975  | 18535025  | 50  | 18534987  | 12 | 24  | 0    |
| 9 | 19094900  | 19095000  | 100 | 19094937  | 14 | 54  | 8.3  |
| 9 | 19174325  | 19174400  | 75  | 19174337  | 14 | 40  | 4.1  |
| 9 | 19447450  | 19447525  | 75  | 19447487  | 14 | 41  | 6.2  |
| 9 | 19912450  | 19912475  | 25  | 19912462  | 12 | 12  | 0    |
| 9 | 19932425  | 19932475  | 50  | 19932437  | 12 | 24  | 0    |
| 9 | 19989500  | 19989875  | 375 | 19989687  | 24 | 269 | 35.2 |
| 9 | 20243850  | 20243875  | 25  | 20243862  | 12 | 12  | 0    |
| 9 | 20905100  | 20905125  | 25  | 20905112  | 13 | 13  | 0    |
| 9 | 21423525  | 21423550  | 25  | 21423537  | 13 | 13  | 2.1  |
| 9 | 21490650  | 21490700  | 50  | 21490662  | 14 | 26  | 2.1  |
| 9 | 21791175  | 21791250  | 75  | 21791187  | 12 | 36  | 0    |
| 9 | 21826525  | 21826550  | 25  | 21826537  | 12 | 12  | 2.1  |
| 9 | 21985900  | 21985975  | 75  | 21985962  | 18 | 44  | 6.2  |
| 9 | 22046550  | 22046575  | 25  | 22046562  | 12 | 12  | 0    |
| 9 | 22070300  | 22070325  | 25  | 22070312  | 12 | 12  | 2.1  |
| 9 | 22138200  | 22138225  | 25  | 22138212  | 12 | 12  | 2.1  |
| 9 | 22204375  | 22204575  | 200 | 22204487  | 19 | 124 | 22.8 |
| 9 | 23332500  | 23332575  | 75  | 23332512  | 14 | 42  | 6.2  |
| 9 | 23480100  | 23480225  | 125 | 23480137  | 14 | 66  | 10.3 |
| 9 | 23516950  | 23517075  | 125 | 23517012  | 14 | 64  | 8.3  |
| 9 | 23654025  | 23654050  | 25  | 23654037  | 12 | 12  | 2.1  |
| 9 | 26882075  | 26882125  | 50  | 26882087  | 12 | 24  | 2.1  |
| 9 | 27084550  | 27084650  | 100 | 27084637  | 16 | 52  | 2.1  |
| 9 | 32541150  | 32541200  | 50  | 32541162  | 12 | 24  | 4.1  |
| 9 | 33209825  | 33209950  | 125 | 33209912  | 14 | 62  | 6.2  |
| 9 | 33277150  | 33277250  | 100 | 33277162  | 12 | 48  | 0    |
| 9 | 34114250  | 34114325  | 75  | 34114262  | 17 | 43  | 4.1  |
| 9 | 34574900  | 34575000  | 100 | 34574937  | 14 | 54  | 6.2  |
| 9 | 35500925  | 35501025  | 100 | 35500962  | 15 | 54  | 8.3  |
| 9 | 35507125  | 35507175  | 50  | 35507137  | 13 | 26  | 0    |
| 9 | 35593725  | 35593800  | 75  | 35593737  | 13 | 38  | 4.1  |
| 9 | 35666275  | 35666325  | 50  | 35666287  | 12 | 24  | 0    |
| 9 | 35693675  | 35693750  | 75  | 35693687  | 12 | 36  | 0    |

|   |          |          |     |          |    |     |      |
|---|----------|----------|-----|----------|----|-----|------|
| 9 | 35805125 | 35805150 | 25  | 35805137 | 12 | 12  | 2.1  |
| 9 | 36615375 | 36615425 | 50  | 36615387 | 23 | 45  | 8.3  |
| 9 | 37109750 | 37110175 | 425 | 37110112 | 24 | 266 | 39.3 |
| 9 | 37582600 | 37582650 | 50  | 37582612 | 12 | 24  | 4.1  |
| 9 | 38152850 | 38153025 | 175 | 38152962 | 17 | 107 | 2.1  |
| 9 | 38662650 | 38662725 | 75  | 38662662 | 24 | 64  | 10.3 |
| 9 | 66574025 | 66574150 | 125 | 66574137 | 17 | 65  | 10.3 |
| 9 | 66574950 | 66575050 | 100 | 66574962 | 12 | 48  | 8.3  |
| 9 | 66983000 | 66983025 | 25  | 66983012 | 13 | 13  | 2.1  |
| 9 | 67905400 | 67905550 | 150 | 67905437 | 16 | 86  | 2.1  |
| 9 | 67911300 | 67911425 | 125 | 67911312 | 13 | 62  | 2.1  |
| 9 | 67916350 | 67916400 | 50  | 67916362 | 13 | 26  | 4.1  |
| 9 | 67916850 | 67916900 | 50  | 67916862 | 13 | 26  | 4.1  |
| 9 | 70759850 | 70759925 | 75  | 70759862 | 12 | 36  | 2.1  |
| 9 | 70840150 | 70840250 | 100 | 70840162 | 13 | 49  | 8.3  |
| 9 | 71144600 | 71144650 | 50  | 71144612 | 12 | 24  | 0    |
| 9 | 71280375 | 71280475 | 100 | 71280412 | 13 | 50  | 6.2  |
| 9 | 71354150 | 71354200 | 50  | 71354162 | 14 | 27  | 4.1  |
| 9 | 71811275 | 71811300 | 25  | 71811287 | 12 | 12  | 0    |
| 9 | 71825975 | 71826000 | 25  | 71825987 | 13 | 13  | 2.1  |
| 9 | 71845350 | 71845375 | 25  | 71845362 | 12 | 12  | 2.1  |
| 9 | 72223900 | 72223925 | 25  | 72223912 | 12 | 12  | 2.1  |
| 9 | 72382050 | 72382125 | 75  | 72382112 | 13 | 37  | 4.1  |
| 9 | 72391275 | 72391425 | 150 | 72391312 | 13 | 76  | 0    |
| 9 | 72393250 | 72393300 | 50  | 72393287 | 13 | 25  | 4.1  |
| 9 | 72440650 | 72440800 | 150 | 72440712 | 22 | 118 | 18.6 |
| 9 | 72707875 | 72707900 | 25  | 72707887 | 12 | 12  | 2.1  |
| 9 | 73566775 | 73566825 | 50  | 73566787 | 13 | 26  | 0    |
| 9 | 73611775 | 73611825 | 50  | 73611787 | 12 | 24  | 2.1  |
| 9 | 73716425 | 73716450 | 25  | 73716437 | 13 | 13  | 2.1  |
| 9 | 73749675 | 73749725 | 50  | 73749687 | 12 | 24  | 0    |
| 9 | 73818100 | 73818175 | 75  | 73818112 | 12 | 36  | 6.2  |
| 9 | 73834350 | 73834450 | 100 | 73834362 | 13 | 50  | 8.3  |
| 9 | 74282625 | 74282700 | 75  | 74282637 | 13 | 39  | 0    |
| 9 | 74382375 | 74382500 | 125 | 74382387 | 15 | 68  | 0    |
| 9 | 74937150 | 74937175 | 25  | 74937162 | 12 | 12  | 2.1  |
| 9 | 74981450 | 74981475 | 25  | 74981462 | 12 | 12  | 0    |
| 9 | 76316525 | 76316550 | 25  | 76316537 | 13 | 13  | 0    |
| 9 | 77771025 | 77771050 | 25  | 77771037 | 13 | 13  | 2.1  |
| 9 | 77877400 | 77877450 | 50  | 77877412 | 12 | 24  | 0    |
| 9 | 77897300 | 77897450 | 150 | 77897362 | 16 | 78  | 4.1  |
| 9 | 78017625 | 78017800 | 175 | 78017737 | 18 | 96  | 0    |
| 9 | 78020000 | 78020025 | 25  | 78020012 | 14 | 14  | 2.1  |
| 9 | 78022875 | 78022925 | 50  | 78022912 | 14 | 26  | 0    |
| 9 | 78623350 | 78623400 | 50  | 78623362 | 16 | 28  | 0    |
| 9 | 79625175 | 79625225 | 50  | 79625187 | 12 | 24  | 4.1  |
| 9 | 80101850 | 80101875 | 25  | 80101862 | 12 | 12  | 2.1  |
| 9 | 80661225 | 80661250 | 25  | 80661237 | 17 | 17  | 2.1  |
| 9 | 80827675 | 80827700 | 25  | 80827687 | 12 | 12  | 2.1  |
| 9 | 80877625 | 80877825 | 200 | 80877637 | 22 | 146 | 0    |
| 9 | 80920025 | 80920050 | 25  | 80920037 | 12 | 12  | 2.1  |
| 9 | 81294350 | 81294375 | 25  | 81294362 | 12 | 12  | 2.1  |
| 9 | 81386825 | 81386875 | 50  | 81386837 | 17 | 30  | 2.1  |
| 9 | 82833425 | 82833525 | 100 | 82833437 | 16 | 55  | 2.1  |
| 9 | 82837025 | 82837200 | 175 | 82837137 | 18 | 110 | 0    |
| 9 | 83362300 | 83362400 | 100 | 83362337 | 14 | 52  | 0    |
| 9 | 83407000 | 83407025 | 25  | 83407012 | 15 | 15  | 2.1  |
| 9 | 83592950 | 83593025 | 75  | 83592962 | 12 | 36  | 2.1  |
| 9 | 83776450 | 83776475 | 25  | 83776462 | 15 | 15  | 2.1  |
| 9 | 83826075 | 83826100 | 25  | 83826087 | 12 | 12  | 0    |
| 9 | 85109825 | 85109925 | 100 | 85109912 | 15 | 53  | 10.3 |
| 9 | 85315750 | 85315825 | 75  | 85315762 | 12 | 36  | 4.1  |
| 9 | 85331700 | 85331900 | 200 | 85331762 | 17 | 108 | 2.1  |
| 9 | 86990425 | 86990450 | 25  | 86990437 | 12 | 12  | 2.1  |
| 9 | 87664100 | 87664125 | 25  | 87664112 | 12 | 12  | 0    |
| 9 | 87981575 | 87981625 | 50  | 87981587 | 12 | 24  | 0    |
| 9 | 88158975 | 88159025 | 50  | 88159012 | 15 | 28  | 4.1  |
| 9 | 88546550 | 88546675 | 125 | 88546562 | 12 | 57  | 6.2  |
| 9 | 88889800 | 88889825 | 25  | 88889812 | 13 | 13  | 0    |
| 9 | 88893450 | 88893475 | 25  | 88893462 | 12 | 12  | 0    |
| 9 | 88997450 | 88997475 | 25  | 88997462 | 12 | 12  | 2.1  |
| 9 | 89004325 | 89004350 | 25  | 89004337 | 13 | 13  | 0    |
| 9 | 89004650 | 89004675 | 25  | 89004662 | 12 | 12  | 2.1  |
| 9 | 89017675 | 89017750 | 75  | 89017687 | 15 | 40  | 4.1  |
| 9 | 89020900 | 89021050 | 150 | 89020912 | 15 | 83  | 10.3 |

|   |           |           |     |           |    |     |      |
|---|-----------|-----------|-----|-----------|----|-----|------|
| 9 | 89061750  | 89061950  | 200 | 89061912  | 26 | 170 | 18.6 |
| 9 | 89085125  | 89085275  | 150 | 89085212  | 16 | 80  | 12.4 |
| 9 | 89118925  | 89118950  | 25  | 89118937  | 12 | 12  | 0    |
| 9 | 89849125  | 89849150  | 25  | 89849137  | 13 | 13  | 0    |
| 9 | 90388600  | 90388750  | 150 | 90388687  | 15 | 79  | 0    |
| 9 | 90510725  | 90510800  | 75  | 90510787  | 14 | 36  | 6.2  |
| 9 | 90759175  | 90759250  | 75  | 90759187  | 12 | 36  | 0    |
| 9 | 90884300  | 90884375  | 75  | 90884337  | 15 | 41  | 0    |
| 9 | 91253975  | 91254075  | 100 | 91253987  | 12 | 48  | 0    |
| 9 | 92999575  | 92999600  | 25  | 92999587  | 12 | 12  | 0    |
| 9 | 93596050  | 93596075  | 25  | 93596062  | 12 | 12  | 0    |
| 9 | 93707275  | 93707325  | 50  | 93707287  | 12 | 24  | 0    |
| 9 | 93719825  | 93719850  | 25  | 93719837  | 12 | 12  | 0    |
| 9 | 94127450  | 94127500  | 50  | 94127487  | 14 | 26  | 4.1  |
| 9 | 94224625  | 94224650  | 25  | 94224637  | 12 | 12  | 0    |
| 9 | 94786275  | 94786300  | 25  | 94786287  | 12 | 12  | 2.1  |
| 9 | 94893600  | 94893800  | 200 | 94893687  | 33 | 212 | 24.8 |
| 9 | 94938375  | 94938400  | 25  | 94938387  | 12 | 12  | 0    |
| 9 | 95967775  | 95967825  | 50  | 95967812  | 14 | 26  | 2.1  |
| 9 | 96357025  | 96357175  | 150 | 96357112  | 14 | 77  | 12.4 |
| 9 | 96450150  | 96450250  | 100 | 96450162  | 12 | 48  | 0    |
| 9 | 96585650  | 96585675  | 25  | 96585662  | 12 | 12  | 2.1  |
| 9 | 96604950  | 96605075  | 125 | 96604962  | 12 | 58  | 4.1  |
| 9 | 96671625  | 96671650  | 25  | 96671637  | 13 | 13  | 2.1  |
| 9 | 96730775  | 96730825  | 50  | 96730812  | 14 | 27  | 4.1  |
| 9 | 96827950  | 96828025  | 75  | 96828012  | 13 | 35  | 6.2  |
| 9 | 96843250  | 96843375  | 125 | 96843262  | 13 | 61  | 0    |
| 9 | 96927850  | 96927875  | 25  | 96927862  | 12 | 12  | 2.1  |
| 9 | 97119675  | 97119725  | 50  | 97119687  | 13 | 25  | 4.1  |
| 9 | 97648650  | 97648675  | 25  | 97648662  | 12 | 12  | 2.1  |
| 9 | 97852100  | 97852200  | 100 | 97852112  | 13 | 49  | 0    |
| 9 | 97861450  | 97861475  | 25  | 97861462  | 12 | 12  | 2.1  |
| 9 | 98059250  | 98059325  | 75  | 98059262  | 15 | 41  | 0    |
| 9 | 98561100  | 98561150  | 50  | 98561112  | 14 | 26  | 0    |
| 9 | 98620800  | 98621000  | 200 | 98620912  | 19 | 114 | 10.3 |
| 9 | 99859625  | 99859650  | 25  | 99859637  | 12 | 12  | 2.1  |
| 9 | 100352850 | 100352875 | 25  | 100352862 | 12 | 12  | 0    |
| 9 | 100610475 | 100610600 | 125 | 100610587 | 13 | 49  | 8.3  |
| 9 | 100710925 | 100710950 | 25  | 100710937 | 12 | 12  | 0    |
| 9 | 100757725 | 100757750 | 25  | 100757737 | 12 | 12  | 2.1  |
| 9 | 100972100 | 100972250 | 150 | 100972112 | 13 | 75  | 2.1  |
| 9 | 100978750 | 100978775 | 25  | 100978762 | 12 | 12  | 2.1  |
| 9 | 101153950 | 101153975 | 25  | 101153962 | 12 | 12  | 2.1  |
| 9 | 101163075 | 101163125 | 50  | 101163087 | 12 | 24  | 0    |
| 9 | 101235700 | 101235900 | 200 | 101235787 | 21 | 138 | 22.8 |
| 9 | 101622675 | 101622700 | 25  | 101622687 | 12 | 12  | 2.1  |
| 9 | 101835975 | 101836150 | 175 | 101835987 | 16 | 94  | 0    |
| 9 | 102213975 | 102214000 | 25  | 102213987 | 13 | 13  | 2.1  |
| 9 | 102528700 | 102528750 | 50  | 102528712 | 12 | 24  | 4.1  |
| 9 | 103200025 | 103200075 | 50  | 103200037 | 13 | 26  | 0    |
| 9 | 103200450 | 103200475 | 25  | 103200462 | 12 | 12  | 2.1  |
| 9 | 103211000 | 103211025 | 25  | 103211012 | 13 | 13  | 2.1  |
| 9 | 103211250 | 103211475 | 225 | 103211387 | 22 | 171 | 8.3  |
| 9 | 103247800 | 103247850 | 50  | 103247812 | 12 | 24  | 4.1  |
| 9 | 105910625 | 105910800 | 175 | 105910637 | 18 | 103 | 10.3 |
| 9 | 106034825 | 106034925 | 100 | 106034862 | 14 | 52  | 4.1  |
| 9 | 106613200 | 106613225 | 25  | 106613212 | 13 | 13  | 2.1  |
| 9 | 106675475 | 106675575 | 100 | 106675537 | 15 | 51  | 4.1  |
| 9 | 106793075 | 106793200 | 125 | 106793112 | 17 | 75  | 0    |
| 9 | 107774750 | 107774775 | 25  | 107774762 | 13 | 13  | 2.1  |
| 9 | 107775325 | 107775375 | 50  | 107775337 | 12 | 24  | 0    |
| 9 | 107777250 | 107777275 | 25  | 107777262 | 14 | 14  | 2.1  |
| 9 | 107780550 | 107780600 | 50  | 107780562 | 12 | 24  | 4.1  |
| 9 | 107781550 | 107781675 | 125 | 107781637 | 15 | 65  | 0    |
| 9 | 108080075 | 108080125 | 50  | 108080112 | 14 | 27  | 0    |
| 9 | 108772450 | 108772475 | 25  | 108772462 | 12 | 12  | 2.1  |
| 9 | 109195300 | 109195325 | 25  | 109195312 | 12 | 12  | 0    |
| 9 | 109292550 | 109292575 | 25  | 109292562 | 12 | 12  | 2.1  |
| 9 | 109307050 | 109307250 | 200 | 109307112 | 15 | 109 | 12.4 |
| 9 | 109350575 | 109350675 | 100 | 109350587 | 12 | 48  | 6.2  |
| 9 | 109437275 | 109437400 | 125 | 109437337 | 16 | 72  | 0    |
| 9 | 109533700 | 109533775 | 75  | 109533712 | 13 | 38  | 6.2  |
| 9 | 109534825 | 109534950 | 125 | 109534937 | 16 | 73  | 14.5 |
| 9 | 109539600 | 109539625 | 25  | 109539612 | 12 | 12  | 2.1  |
| 9 | 109842950 | 109843125 | 175 | 109843012 | 14 | 90  | 14.5 |

|   |           |           |     |           |    |     |      |
|---|-----------|-----------|-----|-----------|----|-----|------|
| 9 | 109853150 | 109853325 | 175 | 109853162 | 15 | 97  | 0    |
| 9 | 109990975 | 109991050 | 75  | 109991037 | 14 | 38  | 0    |
| 9 | 110037325 | 110037500 | 175 | 110037437 | 15 | 93  | 12.4 |
| 9 | 110245550 | 110245750 | 200 | 110245712 | 13 | 92  | 0    |
| 9 | 110246950 | 110247025 | 75  | 110246962 | 15 | 41  | 0    |
| 9 | 110247900 | 110248150 | 250 | 110247987 | 18 | 159 | 14.5 |
| 9 | 110271975 | 110272000 | 25  | 110271987 | 12 | 12  | 2.1  |
| 9 | 110408650 | 110408725 | 75  | 110408662 | 13 | 38  | 6.2  |
| 9 | 110672675 | 110672750 | 75  | 110672687 | 12 | 36  | 0    |
| 9 | 110784525 | 110784600 | 75  | 110784537 | 12 | 36  | 0    |
| 9 | 110899500 | 110899625 | 125 | 110899512 | 14 | 62  | 0    |
| 9 | 111402475 | 111402575 | 100 | 111402512 | 17 | 61  | 8.3  |
| 9 | 111604925 | 111604950 | 25  | 111604937 | 14 | 14  | 2.1  |
| 9 | 111618650 | 111618775 | 125 | 111618687 | 15 | 67  | 4.1  |
| 9 | 111697425 | 111697450 | 25  | 111697437 | 12 | 12  | 2.1  |
| 9 | 111707000 | 111707100 | 100 | 111707012 | 14 | 52  | 8.3  |
| 9 | 111853250 | 111853275 | 25  | 111853262 | 13 | 13  | 2.1  |
| 9 | 111959175 | 111959250 | 75  | 111959187 | 13 | 38  | 6.2  |
| 9 | 112452450 | 112452550 | 100 | 112452487 | 13 | 51  | 6.2  |
| 9 | 112555025 | 112555050 | 25  | 112555037 | 12 | 12  | 0    |
| 9 | 112647200 | 112647250 | 50  | 112647212 | 12 | 24  | 4.1  |
| 9 | 112702975 | 112703100 | 125 | 112702987 | 14 | 64  | 0    |
| 9 | 112756200 | 112756275 | 75  | 112756262 | 13 | 37  | 0    |
| 9 | 112871025 | 112871325 | 300 | 112871162 | 20 | 179 | 6.2  |
| 9 | 113344625 | 113344725 | 100 | 113344637 | 14 | 52  | 0    |
| 9 | 113346175 | 113346225 | 50  | 113346212 | 13 | 25  | 0    |
| 9 | 114552675 | 114552700 | 25  | 114552687 | 13 | 13  | 2.1  |
| 9 | 114665425 | 114665450 | 25  | 114665437 | 12 | 12  | 2.1  |
| 9 | 114844950 | 114845100 | 150 | 114845037 | 16 | 82  | 10.3 |
| 9 | 114845525 | 114845550 | 25  | 114845537 | 12 | 12  | 0    |
| 9 | 115142475 | 115142500 | 25  | 115142487 | 12 | 12  | 2.1  |
| 9 | 115147375 | 115147550 | 175 | 115147412 | 15 | 98  | 14.5 |
| 9 | 115147950 | 115148000 | 50  | 115147962 | 12 | 24  | 0    |
| 9 | 115422725 | 115422800 | 75  | 115422737 | 23 | 65  | 12.4 |
| 9 | 115451350 | 115451450 | 100 | 115451387 | 14 | 54  | 8.3  |
| 9 | 115498175 | 115498250 | 75  | 115498237 | 14 | 40  | 6.2  |
| 9 | 116613525 | 116613550 | 25  | 116613537 | 12 | 12  | 0    |
| 9 | 117171425 | 117171450 | 25  | 117171437 | 13 | 13  | 2.1  |
| 9 | 117175525 | 117175675 | 150 | 117175637 | 20 | 103 | 10.3 |
| 9 | 117175950 | 117176175 | 225 | 117176012 | 29 | 216 | 22.8 |
| 9 | 117214200 | 117214250 | 50  | 117214212 | 13 | 26  | 0    |
| 9 | 117392250 | 117392275 | 25  | 117392262 | 13 | 13  | 2.1  |
| 9 | 117726225 | 117726300 | 75  | 117726237 | 12 | 36  | 6.2  |
| 9 | 117745425 | 117745500 | 75  | 117745437 | 12 | 36  | 6.2  |
| 9 | 117886775 | 117886800 | 25  | 117886787 | 14 | 14  | 2.1  |
| 9 | 122340625 | 122340650 | 25  | 122340637 | 12 | 12  | 2.1  |
| 9 | 122386150 | 122386275 | 125 | 122386162 | 14 | 66  | 10.3 |
| 9 | 122514600 | 122514650 | 50  | 122514612 | 12 | 24  | 0    |
| 9 | 122609775 | 122609975 | 200 | 122609862 | 20 | 129 | 6.2  |
| 9 | 122752975 | 122753225 | 250 | 122752987 | 18 | 140 | 4.1  |
| 9 | 123004275 | 123004375 | 100 | 123004287 | 14 | 52  | 8.3  |
| 9 | 123034900 | 123034925 | 25  | 123034912 | 13 | 13  | 2.1  |
| 9 | 123071775 | 123071800 | 25  | 123071787 | 13 | 13  | 2.1  |
| 9 | 123085025 | 123085125 | 100 | 123085037 | 18 | 66  | 4.1  |
| 9 | 123358900 | 123359000 | 100 | 123358937 | 14 | 50  | 8.3  |
| 9 | 123552900 | 123552925 | 25  | 123552912 | 14 | 14  | 2.1  |
| 9 | 123802775 | 123802800 | 25  | 123802787 | 12 | 12  | 0    |
| 9 | 123804475 | 123804575 | 100 | 123804487 | 12 | 48  | 0    |
| 9 | 123888725 | 123888775 | 50  | 123888737 | 12 | 24  | 0    |
| 9 | 123961500 | 123961575 | 75  | 123961512 | 12 | 36  | 2.1  |
| 9 | 124053600 | 124053675 | 75  | 124053612 | 13 | 37  | 2.1  |
| 9 | 124055100 | 124055175 | 75  | 124055162 | 14 | 38  | 6.2  |
| 9 | 124168150 | 124168250 | 100 | 124168162 | 13 | 51  | 0    |
| 9 | 124204550 | 124204675 | 125 | 124204612 | 16 | 68  | 6.2  |
| 9 | 124793600 | 124793625 | 25  | 124793612 | 12 | 12  | 0    |
| 9 | 125993200 | 125993325 | 125 | 125993212 | 15 | 66  | 10.3 |
| 9 | 126019275 | 126019325 | 50  | 126019312 | 15 | 27  | 2.1  |
| 9 | 126217650 | 126217675 | 25  | 126217662 | 44 | 44  | 8.3  |
| 9 | 126419700 | 126419775 | 75  | 126419737 | 14 | 40  | 2.1  |
| 9 | 126461450 | 126461500 | 50  | 126461462 | 14 | 28  | 4.1  |
| 9 | 126465275 | 126465425 | 150 | 126465362 | 15 | 79  | 2.1  |
| 9 | 126673300 | 126673350 | 50  | 126673337 | 14 | 26  | 4.1  |
| 9 | 127324225 | 127324250 | 25  | 127324237 | 13 | 13  | 0    |
| 9 | 127325175 | 127325225 | 50  | 127325187 | 12 | 24  | 4.1  |
| 9 | 127360675 | 127360725 | 50  | 127360687 | 14 | 28  | 4.1  |

|   |           |           |     |           |    |     |      |
|---|-----------|-----------|-----|-----------|----|-----|------|
| 9 | 127442050 | 127442100 | 50  | 127442062 | 13 | 26  | 4.1  |
| 9 | 127734100 | 127734225 | 125 | 127734212 | 15 | 64  | 6.2  |
| 9 | 127805200 | 127805300 | 100 | 127805262 | 14 | 52  | 2.1  |
| 9 | 127884900 | 127884975 | 75  | 127884937 | 16 | 44  | 6.2  |
| 9 | 128104325 | 128104400 | 75  | 128104337 | 15 | 40  | 2.1  |
| 9 | 128183000 | 128183025 | 25  | 128183012 | 12 | 12  | 0    |
| 9 | 128788175 | 128788275 | 100 | 128788187 | 15 | 58  | 8.3  |
| 9 | 128828875 | 128828925 | 50  | 128828887 | 12 | 24  | 2.1  |
| 9 | 129246725 | 129246925 | 200 | 129246862 | 18 | 121 | 0    |
| 9 | 129436325 | 129436500 | 175 | 129436412 | 22 | 127 | 10.3 |
| 9 | 129589325 | 129589375 | 50  | 129589337 | 13 | 26  | 4.1  |
| 9 | 129896425 | 129896450 | 25  | 129896437 | 12 | 12  | 2.1  |
| 9 | 130109425 | 130109525 | 100 | 130109437 | 12 | 47  | 6.2  |
| 9 | 130631025 | 130631125 | 100 | 130631037 | 13 | 50  | 8.3  |
| 9 | 130694625 | 130694650 | 25  | 130694637 | 15 | 15  | 2.1  |
| 9 | 131311725 | 131311925 | 200 | 131311837 | 18 | 130 | 6.2  |
| 9 | 131514600 | 131514625 | 25  | 131514612 | 12 | 12  | 2.1  |
| 9 | 131516525 | 131516550 | 25  | 131516537 | 12 | 12  | 0    |
| 9 | 131545050 | 131545175 | 125 | 131545112 | 16 | 68  | 10.3 |
| 9 | 131764475 | 131764775 | 300 | 131764587 | 17 | 170 | 31   |
| 9 | 131830725 | 131830875 | 150 | 131830737 | 12 | 70  | 0    |
| 9 | 131845625 | 131845650 | 25  | 131845637 | 12 | 12  | 2.1  |
| 9 | 132045400 | 132045475 | 75  | 132045412 | 14 | 40  | 6.2  |
| 9 | 132734475 | 132734575 | 100 | 132734487 | 12 | 46  | 0    |
| 9 | 136019675 | 136019750 | 75  | 136019737 | 23 | 56  | 8.3  |
| 9 | 136650850 | 136650975 | 125 | 136650912 | 14 | 62  | 10.3 |
| 9 | 136904375 | 136904425 | 50  | 136904387 | 12 | 24  | 0    |
| 9 | 137009500 | 137009550 | 50  | 137009512 | 13 | 26  | 0    |
| 9 | 138132700 | 138132725 | 25  | 138132712 | 12 | 12  | 2.1  |
| 9 | 138256850 | 138256875 | 25  | 138256862 | 12 | 12  | 2.1  |
| 9 | 138346800 | 138346875 | 75  | 138346837 | 14 | 40  | 2.1  |
| 9 | 138490050 | 138490075 | 25  | 138490062 | 12 | 12  | 2.1  |
| 9 | 138561000 | 138561050 | 50  | 138561012 | 13 | 25  | 2.1  |
| 9 | 138655700 | 138655800 | 100 | 138655712 | 14 | 52  | 0    |
| 9 | 138738275 | 138738350 | 75  | 138738287 | 12 | 36  | 2.1  |
| 9 | 138911475 | 138911500 | 25  | 138911487 | 13 | 13  | 2.1  |
| 8 | 185650    | 186125    | 475 | 186037    | 22 | 248 | 16.6 |
| 8 | 427000    | 427025    | 25  | 427012    | 12 | 12  | 0    |
| 8 | 1387600   | 1387625   | 25  | 1387612   | 12 | 12  | 2.1  |
| 8 | 1830700   | 1830725   | 25  | 1830712   | 13 | 13  | 0    |
| 8 | 1851400   | 1851450   | 50  | 1851412   | 12 | 24  | 4.1  |
| 8 | 1854725   | 1854775   | 50  | 1854737   | 12 | 24  | 0    |
| 8 | 2763700   | 2763750   | 50  | 2763712   | 12 | 24  | 0    |
| 8 | 2942375   | 2942450   | 75  | 2942412   | 15 | 43  | 6.2  |
| 8 | 3483550   | 3483600   | 50  | 3483562   | 12 | 24  | 0    |
| 8 | 6376700   | 6376725   | 25  | 6376712   | 12 | 12  | 2.1  |
| 8 | 6471775   | 6471800   | 25  | 6471787   | 12 | 12  | 2.1  |
| 8 | 6472100   | 6472125   | 25  | 6472112   | 12 | 12  | 2.1  |
| 8 | 6475775   | 6475850   | 75  | 6475787   | 12 | 36  | 0    |
| 8 | 6490150   | 6490175   | 25  | 6490162   | 12 | 12  | 2.1  |
| 8 | 6506725   | 6506750   | 25  | 6506737   | 13 | 13  | 2.1  |
| 8 | 6509750   | 6509850   | 100 | 6509762   | 12 | 48  | 4.1  |
| 8 | 6527500   | 6527625   | 125 | 6527512   | 24 | 85  | 14.5 |
| 8 | 8200700   | 8200825   | 125 | 8200812   | 18 | 78  | 8.3  |
| 8 | 8228850   | 8228875   | 25  | 8228862   | 12 | 12  | 2.1  |
| 8 | 8257525   | 8257575   | 50  | 8257537   | 12 | 24  | 0    |
| 8 | 8513325   | 8513400   | 75  | 8513337   | 12 | 36  | 4.1  |
| 8 | 8610350   | 8610375   | 25  | 8610362   | 12 | 12  | 0    |
| 8 | 8948400   | 8948500   | 100 | 8948462   | 13 | 50  | 4.1  |
| 8 | 8977050   | 8977075   | 25  | 8977062   | 13 | 13  | 2.1  |
| 8 | 9599000   | 9599050   | 50  | 9599012   | 12 | 24  | 0    |
| 8 | 10488225  | 10488250  | 25  | 10488237  | 12 | 12  | 0    |
| 8 | 10733850  | 10733900  | 50  | 10733862  | 12 | 24  | 4.1  |
| 8 | 11104850  | 11105050  | 200 | 11104912  | 16 | 110 | 6.2  |
| 8 | 11179075  | 11179125  | 50  | 11179112  | 27 | 42  | 4.1  |
| 8 | 11375450  | 11375550  | 100 | 11375487  | 14 | 53  | 8.3  |
| 8 | 11473200  | 11473250  | 50  | 11473212  | 13 | 26  | 0    |
| 8 | 11772075  | 11772100  | 25  | 11772087  | 12 | 12  | 0    |
| 8 | 12774750  | 12774775  | 25  | 12774762  | 12 | 12  | 0    |
| 8 | 12858700  | 12858725  | 25  | 12858712  | 14 | 14  | 0    |
| 8 | 13214850  | 13215000  | 150 | 13214862  | 16 | 85  | 4.1  |
| 8 | 13278000  | 13278050  | 50  | 13278037  | 13 | 25  | 0    |
| 8 | 13279725  | 13279750  | 25  | 13279737  | 12 | 12  | 2.1  |
| 8 | 13310425  | 13310550  | 125 | 13310462  | 15 | 68  | 10.3 |
| 8 | 13347225  | 13347250  | 25  | 13347237  | 13 | 13  | 2.1  |

|   |          |          |     |          |    |     |      |
|---|----------|----------|-----|----------|----|-----|------|
| 8 | 14397725 | 14397825 | 100 | 14397787 | 15 | 54  | 8.3  |
| 8 | 15408975 | 15409050 | 75  | 15408987 | 12 | 36  | 0    |
| 8 | 15588025 | 15588050 | 25  | 15588037 | 12 | 12  | 0    |
| 8 | 15631650 | 15631725 | 75  | 15631712 | 13 | 37  | 0    |
| 8 | 15679200 | 15679250 | 50  | 15679212 | 12 | 24  | 4.1  |
| 8 | 17510300 | 17510325 | 25  | 17510312 | 13 | 13  | 2.1  |
| 8 | 17511575 | 17511600 | 25  | 17511587 | 12 | 12  | 2.1  |
| 8 | 17525175 | 17525225 | 50  | 17525187 | 22 | 44  | 8.3  |
| 8 | 17530275 | 17530325 | 50  | 17530287 | 13 | 26  | 2.1  |
| 8 | 17551850 | 17551950 | 100 | 17551887 | 14 | 50  | 0    |
| 8 | 17556150 | 17556500 | 350 | 17556262 | 19 | 191 | 29   |
| 8 | 17738500 | 17738575 | 75  | 17738512 | 13 | 39  | 6.2  |
| 8 | 17749200 | 17749350 | 150 | 17749262 | 15 | 84  | 12.4 |
| 8 | 17752575 | 17752625 | 50  | 17752587 | 12 | 24  | 0    |
| 8 | 17818350 | 17818400 | 50  | 17818387 | 14 | 26  | 0    |
| 8 | 18753325 | 18753400 | 75  | 18753362 | 13 | 38  | 4.1  |
| 8 | 18755425 | 18755550 | 125 | 18755537 | 13 | 59  | 8.3  |
| 8 | 18861225 | 18861275 | 50  | 18861237 | 12 | 24  | 2.1  |
| 8 | 18912725 | 18912800 | 75  | 18912737 | 13 | 39  | 6.2  |
| 8 | 18921475 | 18921550 | 75  | 18921487 | 12 | 36  | 0    |
| 8 | 19008175 | 19008200 | 25  | 19008187 | 13 | 13  | 2.1  |
| 8 | 19037575 | 19037850 | 275 | 19037687 | 26 | 214 | 14.5 |
| 8 | 19053725 | 19053800 | 75  | 19053787 | 16 | 41  | 4.1  |
| 8 | 19169375 | 19169425 | 50  | 19169387 | 14 | 28  | 4.1  |
| 8 | 19175325 | 19175375 | 50  | 19175337 | 12 | 24  | 4.1  |
| 8 | 19310950 | 19311000 | 50  | 19310962 | 18 | 34  | 4.1  |
| 8 | 19359925 | 19360125 | 200 | 19359962 | 25 | 169 | 16.6 |
| 8 | 19375500 | 19375600 | 100 | 19375562 | 13 | 48  | 0    |
| 8 | 19405000 | 19405125 | 125 | 19405062 | 14 | 62  | 10.3 |
| 8 | 19408500 | 19408525 | 25  | 19408512 | 14 | 14  | 0    |
| 8 | 19410075 | 19410100 | 25  | 19410087 | 12 | 12  | 0    |
| 8 | 19410875 | 19410900 | 25  | 19410887 | 13 | 13  | 0    |
| 8 | 19480800 | 19480825 | 25  | 19480812 | 12 | 12  | 2.1  |
| 8 | 19510575 | 19510600 | 25  | 19510587 | 12 | 12  | 2.1  |
| 8 | 19527050 | 19527075 | 25  | 19527062 | 13 | 13  | 2.1  |
| 8 | 19528825 | 19528950 | 125 | 19528912 | 15 | 68  | 0    |
| 8 | 19535450 | 19535500 | 50  | 19535462 | 12 | 24  | 4.1  |
| 8 | 19554950 | 19555000 | 50  | 19554962 | 15 | 28  | 4.1  |
| 8 | 19730325 | 19730350 | 25  | 19730337 | 12 | 12  | 2.1  |
| 8 | 19877750 | 19877825 | 75  | 19877762 | 12 | 36  | 0    |
| 8 | 20049075 | 20049150 | 75  | 20049087 | 12 | 36  | 0    |
| 8 | 20084875 | 20085050 | 175 | 20085012 | 14 | 87  | 10.3 |
| 8 | 20101025 | 20101100 | 75  | 20101062 | 13 | 38  | 0    |
| 8 | 20133575 | 20133600 | 25  | 20133587 | 12 | 12  | 2.1  |
| 8 | 20155900 | 20156075 | 175 | 20156062 | 21 | 109 | 8.3  |
| 8 | 20167900 | 20167925 | 25  | 20167912 | 12 | 12  | 0    |
| 8 | 20174600 | 20174700 | 100 | 20174687 | 13 | 47  | 0    |
| 8 | 20186600 | 20186650 | 50  | 20186612 | 13 | 25  | 4.1  |
| 8 | 20188275 | 20188325 | 50  | 20188287 | 12 | 24  | 0    |
| 8 | 20211650 | 20211825 | 175 | 20211687 | 16 | 101 | 0    |
| 8 | 20252000 | 20252125 | 125 | 20252037 | 13 | 62  | 2.1  |
| 8 | 20338525 | 20338550 | 25  | 20338537 | 12 | 12  | 2.1  |
| 8 | 20339625 | 20339650 | 25  | 20339637 | 12 | 12  | 2.1  |
| 8 | 21111500 | 21111600 | 100 | 21111537 | 14 | 50  | 8.3  |
| 8 | 21454825 | 21454900 | 75  | 21454837 | 12 | 36  | 6.2  |
| 8 | 21632500 | 21632525 | 25  | 21632512 | 12 | 12  | 2.1  |
| 8 | 21737075 | 21737250 | 175 | 21737162 | 18 | 106 | 14.5 |
| 8 | 22559350 | 22559450 | 100 | 22559362 | 16 | 62  | 2.1  |
| 8 | 22564275 | 22564450 | 175 | 22564437 | 15 | 92  | 14.5 |
| 8 | 22579900 | 22579950 | 50  | 22579937 | 14 | 26  | 4.1  |
| 8 | 22580700 | 22580750 | 50  | 22580712 | 14 | 26  | 4.1  |
| 8 | 22606875 | 22606900 | 25  | 22606887 | 12 | 12  | 2.1  |
| 8 | 22608950 | 22609000 | 50  | 22608962 | 13 | 26  | 2.1  |
| 8 | 22833525 | 22833550 | 25  | 22833537 | 12 | 12  | 0    |
| 8 | 22933725 | 22933750 | 25  | 22933737 | 12 | 12  | 2.1  |
| 8 | 22934850 | 22934925 | 75  | 22934862 | 13 | 39  | 0    |
| 8 | 23043225 | 23043275 | 50  | 23043237 | 12 | 24  | 0    |
| 8 | 23090725 | 23090750 | 25  | 23090737 | 13 | 13  | 2.1  |
| 8 | 23176175 | 23176200 | 25  | 23176187 | 13 | 13  | 0    |
| 8 | 23267625 | 23267675 | 50  | 23267662 | 14 | 26  | 2.1  |
| 8 | 23269600 | 23269675 | 75  | 23269662 | 18 | 46  | 0    |
| 8 | 23453300 | 23453425 | 125 | 23453362 | 14 | 64  | 0    |
| 8 | 23467700 | 23467825 | 125 | 23467787 | 14 | 64  | 10.3 |
| 8 | 23513850 | 23514000 | 150 | 23513912 | 15 | 82  | 0    |
| 8 | 23595175 | 23595225 | 50  | 23595187 | 13 | 25  | 0    |

|   |          |          |     |          |    |     |      |
|---|----------|----------|-----|----------|----|-----|------|
| 8 | 23812325 | 23812525 | 200 | 23812387 | 17 | 110 | 8.3  |
| 8 | 23836375 | 23836400 | 25  | 23836387 | 12 | 12  | 2.1  |
| 8 | 23883250 | 23883300 | 50  | 23883262 | 12 | 24  | 4.1  |
| 8 | 24015525 | 24015550 | 25  | 24015537 | 12 | 12  | 2.1  |
| 8 | 24132375 | 24132400 | 25  | 24132387 | 22 | 22  | 4.1  |
| 8 | 24784900 | 24784950 | 50  | 24784912 | 12 | 24  | 0    |
| 8 | 24914425 | 24914450 | 25  | 24914437 | 13 | 13  | 2.1  |
| 8 | 24964400 | 24964475 | 75  | 24964462 | 15 | 41  | 6.2  |
| 8 | 24965475 | 24965550 | 75  | 24965537 | 16 | 40  | 6.2  |
| 8 | 24977725 | 24977775 | 50  | 24977737 | 13 | 26  | 0    |
| 8 | 25088650 | 25088700 | 50  | 25088687 | 14 | 26  | 2.1  |
| 8 | 25097700 | 25097725 | 25  | 25097712 | 12 | 12  | 2.1  |
| 8 | 25164600 | 25164675 | 75  | 25164612 | 13 | 39  | 0    |
| 8 | 25293950 | 25293975 | 25  | 25293962 | 12 | 12  | 2.1  |
| 8 | 25306200 | 25306300 | 100 | 25306262 | 16 | 56  | 8.3  |
| 8 | 25977900 | 25978025 | 125 | 25977962 | 14 | 63  | 0    |
| 8 | 26163925 | 26164025 | 100 | 26163962 | 14 | 50  | 8.3  |
| 8 | 26278250 | 26278300 | 50  | 26278262 | 12 | 24  | 4.1  |
| 8 | 26287525 | 26287575 | 50  | 26287537 | 13 | 26  | 0    |
| 8 | 26501025 | 26501075 | 50  | 26501062 | 18 | 35  | 4.1  |
| 8 | 26522475 | 26522625 | 150 | 26522512 | 14 | 80  | 10.3 |
| 8 | 26528050 | 26528175 | 125 | 26528062 | 13 | 61  | 8.3  |
| 8 | 26552775 | 26552800 | 25  | 26552787 | 12 | 12  | 2.1  |
| 8 | 26569150 | 26569300 | 150 | 26569162 | 15 | 68  | 2.1  |
| 8 | 27444775 | 27444800 | 25  | 27444787 | 13 | 13  | 2.1  |
| 8 | 27814875 | 27814925 | 50  | 27814887 | 12 | 24  | 0    |
| 8 | 27828350 | 27828375 | 25  | 27828362 | 14 | 14  | 2.1  |
| 8 | 28522400 | 28522850 | 450 | 28522712 | 22 | 334 | 60   |
| 8 | 29084600 | 29084800 | 200 | 29084712 | 15 | 108 | 16.6 |
| 8 | 29089125 | 29089325 | 200 | 29089262 | 19 | 124 | 8.3  |
| 8 | 29425300 | 29425375 | 75  | 29425312 | 14 | 40  | 4.1  |
| 8 | 29436350 | 29436500 | 150 | 29436387 | 20 | 98  | 14.5 |
| 8 | 29443750 | 29443775 | 25  | 29443762 | 12 | 12  | 2.1  |
| 8 | 29468850 | 29468900 | 50  | 29468887 | 13 | 25  | 2.1  |
| 8 | 29493200 | 29493225 | 25  | 29493212 | 18 | 18  | 2.1  |
| 8 | 29497175 | 29497250 | 75  | 29497237 | 14 | 38  | 6.2  |
| 8 | 29501525 | 29501550 | 25  | 29501537 | 14 | 14  | 2.1  |
| 8 | 29551200 | 29551250 | 50  | 29551212 | 23 | 46  | 8.3  |
| 8 | 29553675 | 29553800 | 125 | 29553737 | 13 | 60  | 6.2  |
| 8 | 29562975 | 29563175 | 200 | 29563137 | 18 | 129 | 4.1  |
| 8 | 29564000 | 29564025 | 25  | 29564012 | 12 | 12  | 2.1  |
| 8 | 29568725 | 29568850 | 125 | 29568812 | 13 | 58  | 10.3 |
| 8 | 29589000 | 29589075 | 75  | 29589012 | 14 | 38  | 2.1  |
| 8 | 29651625 | 29651675 | 50  | 29651637 | 13 | 25  | 4.1  |
| 8 | 29667350 | 29667525 | 175 | 29667437 | 19 | 111 | 12.4 |
| 8 | 29683950 | 29684025 | 75  | 29684012 | 14 | 38  | 6.2  |
| 8 | 29803425 | 29803450 | 25  | 29803437 | 12 | 12  | 2.1  |
| 8 | 29821200 | 29821325 | 125 | 29821237 | 14 | 66  | 0    |
| 8 | 29882550 | 29882600 | 50  | 29882562 | 22 | 40  | 6.2  |
| 8 | 30231600 | 30231650 | 50  | 30231637 | 13 | 25  | 0    |
| 8 | 30232225 | 30232400 | 175 | 30232237 | 19 | 108 | 14.5 |
| 8 | 30382450 | 30382500 | 50  | 30382462 | 15 | 30  | 4.1  |
| 8 | 30410025 | 30410150 | 125 | 30410062 | 15 | 64  | 10.3 |
| 8 | 30467875 | 30467900 | 25  | 30467887 | 12 | 12  | 0    |
| 8 | 30636075 | 30636175 | 100 | 30636087 | 12 | 48  | 0    |
| 8 | 30704950 | 30705200 | 250 | 30705062 | 29 | 236 | 26.9 |
| 8 | 30722125 | 30722175 | 50  | 30722137 | 12 | 24  | 2.1  |
| 8 | 30748650 | 30748750 | 100 | 30748662 | 12 | 48  | 8.3  |
| 8 | 30781475 | 30781675 | 200 | 30781612 | 19 | 126 | 6.2  |
| 8 | 30911025 | 30911075 | 50  | 30911037 | 12 | 24  | 4.1  |
| 8 | 31188450 | 31188525 | 75  | 31188487 | 14 | 38  | 6.2  |
| 8 | 31193975 | 31194000 | 25  | 31193987 | 13 | 13  | 0    |
| 8 | 31216175 | 31216225 | 50  | 31216187 | 13 | 26  | 4.1  |
| 8 | 31327325 | 31327475 | 150 | 31327437 | 15 | 86  | 0    |
| 8 | 31800225 | 31800250 | 25  | 31800237 | 13 | 13  | 0    |
| 8 | 32257225 | 32257325 | 100 | 32257262 | 14 | 52  | 0    |
| 8 | 32850400 | 32850425 | 25  | 32850412 | 12 | 12  | 2.1  |
| 8 | 32850650 | 32850675 | 25  | 32850662 | 12 | 12  | 2.1  |
| 8 | 33083800 | 33083850 | 50  | 33083812 | 12 | 24  | 0    |
| 8 | 33287975 | 33288050 | 75  | 33287987 | 12 | 36  | 0    |
| 8 | 33617425 | 33617550 | 125 | 33617462 | 15 | 71  | 2.1  |
| 8 | 34079475 | 34079500 | 25  | 34079487 | 12 | 12  | 0    |
| 8 | 35030575 | 35030600 | 25  | 35030587 | 12 | 12  | 0    |
| 8 | 36634875 | 36634900 | 25  | 36634887 | 12 | 12  | 2.1  |
| 8 | 36886075 | 36886125 | 50  | 36886087 | 12 | 24  | 0    |

|   |          |          |     |          |    |     |      |
|---|----------|----------|-----|----------|----|-----|------|
| 8 | 37600525 | 37600575 | 50  | 37600537 | 12 | 24  | 0    |
| 8 | 37713225 | 37713350 | 125 | 37713312 | 28 | 128 | 18.6 |
| 8 | 37773325 | 37773375 | 50  | 37773337 | 13 | 25  | 4.1  |
| 8 | 37881950 | 37882000 | 50  | 37881962 | 12 | 24  | 4.1  |
| 8 | 37977000 | 37977025 | 25  | 37977012 | 12 | 12  | 2.1  |
| 8 | 38043950 | 38044050 | 100 | 38043962 | 21 | 73  | 12.4 |
| 8 | 38382050 | 38382075 | 25  | 38382062 | 12 | 12  | 2.1  |
| 8 | 38459600 | 38459700 | 100 | 38459612 | 14 | 54  | 4.1  |
| 8 | 38505100 | 38505150 | 50  | 38505112 | 14 | 28  | 2.1  |
| 8 | 38698150 | 38698225 | 75  | 38698212 | 15 | 39  | 2.1  |
| 8 | 38711700 | 38711850 | 150 | 38711737 | 27 | 121 | 6.2  |
| 8 | 38737800 | 38737825 | 25  | 38737812 | 12 | 12  | 0    |
| 8 | 38922125 | 38922175 | 50  | 38922137 | 12 | 24  | 4.1  |
| 8 | 39018700 | 39018750 | 50  | 39018712 | 12 | 24  | 0    |
| 8 | 39919725 | 39919875 | 150 | 39919737 | 13 | 73  | 4.1  |
| 8 | 39921925 | 39922125 | 200 | 39922012 | 18 | 119 | 12.4 |
| 8 | 40017725 | 40017850 | 125 | 40017762 | 14 | 66  | 10.3 |
| 8 | 40083125 | 40083175 | 50  | 40083162 | 16 | 29  | 4.1  |
| 8 | 40129175 | 40129250 | 75  | 40129187 | 12 | 36  | 6.2  |
| 8 | 40148975 | 40149000 | 25  | 40148987 | 14 | 14  | 2.1  |
| 8 | 40151250 | 40151325 | 75  | 40151287 | 13 | 38  | 0    |
| 8 | 40178425 | 40178575 | 150 | 40178537 | 19 | 94  | 8.3  |
| 8 | 40179700 | 40179950 | 250 | 40179762 | 25 | 181 | 22.8 |
| 8 | 40184925 | 40185075 | 150 | 40185062 | 14 | 72  | 12.4 |
| 8 | 40433950 | 40433975 | 25  | 40433962 | 13 | 13  | 0    |
| 8 | 40741175 | 40741250 | 75  | 40741187 | 13 | 36  | 0    |
| 8 | 41073900 | 41073950 | 50  | 41073912 | 13 | 26  | 4.1  |
| 8 | 41123375 | 41123400 | 25  | 41123387 | 16 | 16  | 2.1  |
| 8 | 41173225 | 41173375 | 150 | 41173337 | 17 | 86  | 10.3 |
| 8 | 41226375 | 41226400 | 25  | 41226387 | 25 | 25  | 4.1  |
| 8 | 41257200 | 41257275 | 75  | 41257262 | 14 | 38  | 0    |
| 8 | 41266075 | 41266100 | 25  | 41266087 | 12 | 12  | 2.1  |
| 8 | 41319875 | 41319925 | 50  | 41319887 | 12 | 24  | 0    |
| 8 | 41397900 | 41397975 | 75  | 41397937 | 14 | 38  | 0    |
| 8 | 41504175 | 41504200 | 25  | 41504187 | 12 | 12  | 2.1  |
| 8 | 41505550 | 41505575 | 25  | 41505562 | 12 | 12  | 2.1  |
| 8 | 41579425 | 41579525 | 100 | 41579437 | 13 | 49  | 2.1  |
| 8 | 41776175 | 41776200 | 25  | 41776187 | 14 | 14  | 2.1  |
| 8 | 42122950 | 42123050 | 100 | 42123012 | 14 | 52  | 8.3  |
| 8 | 42132300 | 42132475 | 175 | 42132412 | 20 | 116 | 0    |
| 8 | 42186225 | 42186250 | 25  | 42186237 | 12 | 12  | 2.1  |
| 8 | 42215600 | 42215650 | 50  | 42215612 | 12 | 24  | 4.1  |
| 8 | 42613700 | 42613850 | 150 | 42613737 | 18 | 86  | 12.4 |
| 8 | 42735475 | 42735500 | 25  | 42735487 | 12 | 12  | 0    |
| 8 | 42736100 | 42736125 | 25  | 42736112 | 14 | 14  | 2.1  |
| 8 | 42949875 | 42949900 | 25  | 42949887 | 12 | 12  | 2.1  |
| 8 | 43052325 | 43052350 | 25  | 43052337 | 13 | 13  | 2.1  |
| 8 | 43068225 | 43068325 | 100 | 43068237 | 17 | 57  | 8.3  |
| 8 | 43084675 | 43084875 | 200 | 43084812 | 21 | 127 | 2.1  |
| 8 | 43098850 | 43098875 | 25  | 43098862 | 12 | 12  | 0    |
| 8 | 46960525 | 46960625 | 100 | 46960537 | 13 | 52  | 8.3  |
| 8 | 47066975 | 47067025 | 50  | 47066987 | 13 | 25  | 4.1  |
| 8 | 47961500 | 47961550 | 50  | 47961512 | 12 | 24  | 0    |
| 8 | 48415875 | 48415950 | 75  | 48415887 | 12 | 36  | 6.2  |
| 8 | 49540125 | 49540175 | 50  | 49540137 | 12 | 24  | 0    |
| 8 | 49590475 | 49590525 | 50  | 49590512 | 15 | 28  | 4.1  |
| 8 | 49598150 | 49598225 | 75  | 49598212 | 13 | 37  | 0    |
| 8 | 49603675 | 49603725 | 50  | 49603712 | 16 | 31  | 4.1  |
| 8 | 49629450 | 49629475 | 25  | 49629462 | 12 | 12  | 2.1  |
| 8 | 49656225 | 49656250 | 25  | 49656237 | 12 | 12  | 2.1  |
| 8 | 49696125 | 49696150 | 25  | 49696137 | 12 | 12  | 0    |
| 8 | 49781175 | 49781250 | 75  | 49781187 | 13 | 39  | 4.1  |
| 8 | 49828500 | 49828525 | 25  | 49828512 | 12 | 12  | 2.1  |
| 8 | 49828750 | 49828800 | 50  | 49828787 | 13 | 25  | 2.1  |
| 8 | 49839550 | 49839575 | 25  | 49839562 | 13 | 13  | 2.1  |
| 8 | 49974925 | 49974950 | 25  | 49974937 | 12 | 12  | 2.1  |
| 8 | 50326625 | 50326650 | 25  | 50326637 | 12 | 12  | 0    |
| 8 | 52575600 | 52575625 | 25  | 52575612 | 12 | 12  | 2.1  |
| 8 | 52904575 | 52904675 | 100 | 52904587 | 13 | 49  | 8.3  |
| 8 | 53482825 | 53482925 | 100 | 53482837 | 14 | 54  | 8.3  |
| 8 | 54611650 | 54611675 | 25  | 54611662 | 13 | 13  | 0    |
| 8 | 55020275 | 55020325 | 50  | 55020287 | 12 | 24  | 4.1  |
| 8 | 55097800 | 55097825 | 25  | 55097812 | 14 | 14  | 0    |
| 8 | 55177350 | 55177400 | 50  | 55177362 | 12 | 24  | 4.1  |
| 8 | 55228150 | 55228225 | 75  | 55228212 | 13 | 37  | 6.2  |



|   |          |          |     |          |    |     |      |
|---|----------|----------|-----|----------|----|-----|------|
| 8 | 55401925 | 55401950 | 25  | 55401937 | 13 | 13  | 2.1  |
| 8 | 55809000 | 55809025 | 25  | 55809012 | 13 | 13  | 0    |
| 8 | 55835400 | 55835475 | 75  | 55835412 | 13 | 38  | 0    |
| 8 | 55922350 | 55922750 | 400 | 55922462 | 24 | 296 | 43.5 |
| 8 | 55958325 | 55958425 | 100 | 55958337 | 13 | 46  | 8.3  |
| 8 | 55964075 | 55964100 | 25  | 55964087 | 13 | 13  | 2.1  |
| 8 | 56513150 | 56513375 | 225 | 56513212 | 21 | 151 | 22.8 |
| 8 | 56600600 | 56600700 | 100 | 56600612 | 13 | 50  | 0    |
| 8 | 56620225 | 56620375 | 150 | 56620262 | 15 | 87  | 10.3 |
| 8 | 57135475 | 57135525 | 50  | 57135487 | 12 | 24  | 4.1  |
| 8 | 57826675 | 57826825 | 150 | 57826687 | 14 | 82  | 6.2  |
| 8 | 57951075 | 57951125 | 50  | 57951087 | 12 | 24  | 4.1  |
| 8 | 57964050 | 57964075 | 25  | 57964062 | 12 | 12  | 0    |
| 8 | 58672725 | 58672975 | 250 | 58672887 | 25 | 188 | 0    |
| 8 | 59301400 | 59301425 | 25  | 59301412 | 12 | 12  | 0    |
| 8 | 59304125 | 59304300 | 175 | 59304262 | 16 | 99  | 10.3 |
| 8 | 59890575 | 59890625 | 50  | 59890587 | 12 | 24  | 4.1  |
| 8 | 60678975 | 60679000 | 25  | 60678987 | 12 | 12  | 2.1  |
| 8 | 61211550 | 61211575 | 25  | 61211562 | 12 | 12  | 2.1  |
| 8 | 61471450 | 61471550 | 100 | 61471462 | 14 | 52  | 0    |
| 8 | 61480275 | 61480300 | 25  | 61480287 | 12 | 12  | 2.1  |
| 8 | 61491300 | 61491450 | 150 | 61491312 | 24 | 133 | 20.7 |
| 8 | 61811650 | 61811750 | 100 | 61811662 | 12 | 48  | 0    |
| 8 | 61949475 | 61949525 | 50  | 61949487 | 12 | 24  | 4.1  |
| 8 | 61974950 | 61975025 | 75  | 61974987 | 14 | 40  | 6.2  |
| 8 | 61978300 | 61978350 | 50  | 61978312 | 12 | 24  | 0    |
| 8 | 62088075 | 62088125 | 50  | 62088087 | 14 | 28  | 0    |
| 8 | 62187975 | 62188000 | 25  | 62187987 | 13 | 13  | 2.1  |
| 8 | 62782500 | 62782550 | 50  | 62782537 | 13 | 25  | 2.1  |
| 8 | 62834975 | 62835075 | 100 | 62835037 | 13 | 48  | 8.3  |
| 8 | 62835800 | 62835975 | 175 | 62835837 | 24 | 135 | 22.8 |
| 8 | 62837725 | 62837775 | 50  | 62837737 | 12 | 24  | 4.1  |
| 8 | 63006850 | 63006950 | 100 | 63006937 | 13 | 47  | 8.3  |
| 8 | 63178000 | 63178125 | 125 | 63178012 | 14 | 67  | 10.3 |
| 8 | 63237400 | 63237450 | 50  | 63237412 | 14 | 28  | 4.1  |
| 8 | 63240600 | 63240650 | 50  | 63240637 | 15 | 28  | 4.1  |
| 8 | 63510100 | 63510150 | 50  | 63510112 | 13 | 25  | 4.1  |
| 8 | 65456500 | 65456600 | 100 | 65456512 | 12 | 46  | 0    |
| 8 | 65990175 | 65990250 | 75  | 65990187 | 12 | 36  | 6.2  |
| 8 | 66106000 | 66106025 | 25  | 66106012 | 12 | 12  | 2.1  |
| 8 | 66221225 | 66221275 | 50  | 66221262 | 15 | 27  | 2.1  |
| 8 | 66709050 | 66709125 | 75  | 66709112 | 17 | 46  | 6.2  |
| 8 | 66734125 | 66734175 | 50  | 66734137 | 14 | 28  | 0    |
| 8 | 67149500 | 67149625 | 125 | 67149562 | 18 | 74  | 8.3  |
| 8 | 67188650 | 67188725 | 75  | 67188712 | 16 | 42  | 4.1  |
| 8 | 67189175 | 67189200 | 25  | 67189187 | 13 | 13  | 2.1  |
| 8 | 67502900 | 67502950 | 50  | 67502912 | 13 | 26  | 4.1  |
| 8 | 67505175 | 67505200 | 25  | 67505187 | 12 | 12  | 0    |
| 8 | 67609275 | 67609400 | 125 | 67609287 | 15 | 69  | 10.3 |
| 8 | 67635825 | 67635900 | 75  | 67635837 | 23 | 65  | 2.1  |
| 8 | 67726550 | 67726675 | 125 | 67726587 | 14 | 62  | 6.2  |
| 8 | 67810150 | 67810300 | 150 | 67810212 | 13 | 73  | 0    |
| 8 | 68291450 | 68291500 | 50  | 68291487 | 13 | 25  | 4.1  |
| 8 | 69919150 | 69919200 | 50  | 69919162 | 13 | 26  | 4.1  |
| 8 | 69928400 | 69928450 | 50  | 69928437 | 14 | 26  | 4.1  |
| 8 | 70253050 | 70253075 | 25  | 70253062 | 16 | 16  | 2.1  |
| 8 | 70326825 | 70326875 | 50  | 70326837 | 14 | 28  | 0    |
| 8 | 70522475 | 70522525 | 50  | 70522487 | 13 | 26  | 0    |
| 8 | 70558825 | 70558875 | 50  | 70558837 | 13 | 26  | 0    |
| 8 | 70618650 | 70618700 | 50  | 70618662 | 13 | 26  | 4.1  |
| 8 | 70719050 | 70719075 | 25  | 70719062 | 12 | 12  | 0    |
| 8 | 70823825 | 70823850 | 25  | 70823837 | 17 | 17  | 2.1  |
| 8 | 70946550 | 70946700 | 150 | 70946562 | 17 | 91  | 6.2  |
| 8 | 70966450 | 70966525 | 75  | 70966462 | 12 | 36  | 0    |
| 8 | 71224050 | 71224075 | 25  | 71224062 | 13 | 13  | 0    |
| 8 | 71419375 | 71419475 | 100 | 71419387 | 13 | 51  | 6.2  |
| 8 | 71479350 | 71479450 | 100 | 71479412 | 14 | 51  | 6.2  |
| 8 | 71744025 | 71744175 | 150 | 71744112 | 37 | 201 | 14.5 |
| 8 | 72117750 | 72117800 | 50  | 72117762 | 12 | 24  | 0    |
| 8 | 72120025 | 72120050 | 25  | 72120037 | 12 | 12  | 0    |
| 8 | 72154750 | 72154850 | 100 | 72154812 | 13 | 50  | 4.1  |
| 8 | 72347600 | 72347625 | 25  | 72347612 | 12 | 12  | 0    |
| 8 | 72360925 | 72361125 | 200 | 72360987 | 13 | 96  | 8.3  |
| 8 | 72682100 | 72682150 | 50  | 72682112 | 27 | 54  | 6.2  |
| 8 | 72865600 | 72865625 | 25  | 72865612 | 13 | 13  | 2.1  |

|   |          |          |     |          |    |     |      |
|---|----------|----------|-----|----------|----|-----|------|
| 8 | 72906150 | 72906250 | 100 | 72906187 | 14 | 52  | 6.2  |
| 8 | 73050125 | 73050200 | 75  | 73050162 | 15 | 43  | 0    |
| 8 | 74525200 | 74525225 | 25  | 74525212 | 12 | 12  | 0    |
| 8 | 74541700 | 74541725 | 25  | 74541712 | 13 | 13  | 2.1  |
| 8 | 75426175 | 75426200 | 25  | 75426187 | 12 | 12  | 0    |
| 8 | 76151150 | 76151225 | 75  | 76151212 | 13 | 36  | 2.1  |
| 8 | 76151525 | 76151550 | 25  | 76151537 | 12 | 12  | 0    |
| 8 | 76323625 | 76323675 | 50  | 76323637 | 12 | 24  | 0    |
| 8 | 76622050 | 76622125 | 75  | 76622062 | 13 | 39  | 6.2  |
| 8 | 77042900 | 77042950 | 50  | 77042912 | 12 | 24  | 0    |
| 8 | 77756900 | 77756925 | 25  | 77756912 | 12 | 12  | 2.1  |
| 8 | 77867625 | 77867650 | 25  | 77867637 | 15 | 15  | 2.1  |
| 8 | 80770475 | 80770550 | 75  | 80770487 | 13 | 37  | 0    |
| 8 | 80868550 | 80868600 | 50  | 80868562 | 12 | 24  | 4.1  |
| 8 | 80951825 | 80951850 | 25  | 80951837 | 12 | 12  | 2.1  |
| 8 | 80955375 | 80955400 | 25  | 80955387 | 12 | 12  | 2.1  |
| 8 | 80975200 | 80975225 | 25  | 80975212 | 13 | 13  | 2.1  |
| 8 | 81038425 | 81038450 | 25  | 81038437 | 12 | 12  | 2.1  |
| 8 | 81104400 | 81104450 | 50  | 81104437 | 13 | 25  | 4.1  |
| 8 | 81278450 | 81278600 | 150 | 81278587 | 21 | 117 | 22.8 |
| 8 | 81576200 | 81576225 | 25  | 81576212 | 12 | 12  | 0    |
| 8 | 81664550 | 81664725 | 175 | 81664687 | 15 | 87  | 14.5 |
| 8 | 81773425 | 81773450 | 25  | 81773437 | 12 | 12  | 2.1  |
| 8 | 81828075 | 81828175 | 100 | 81828087 | 17 | 56  | 4.1  |
| 8 | 81849575 | 81849600 | 25  | 81849587 | 12 | 12  | 2.1  |
| 8 | 81968550 | 81968600 | 50  | 81968587 | 14 | 27  | 4.1  |
| 8 | 82101150 | 82101200 | 50  | 82101187 | 19 | 32  | 4.1  |
| 8 | 82125525 | 82125575 | 50  | 82125537 | 12 | 24  | 4.1  |
| 8 | 82758450 | 82758550 | 100 | 82758462 | 12 | 48  | 2.1  |
| 8 | 82761250 | 82761275 | 25  | 82761262 | 13 | 13  | 2.1  |
| 8 | 82917550 | 82917575 | 25  | 82917562 | 12 | 12  | 0    |
| 8 | 84611850 | 84612075 | 225 | 84611937 | 21 | 148 | 16.6 |
| 8 | 84647725 | 84647775 | 50  | 84647737 | 12 | 24  | 0    |
| 8 | 86946600 | 86946625 | 25  | 86946612 | 12 | 12  | 2.1  |
| 8 | 87683075 | 87683150 | 75  | 87683087 | 12 | 36  | 2.1  |
| 8 | 88336975 | 88337025 | 50  | 88336987 | 12 | 24  | 0    |
| 8 | 88776700 | 88776725 | 25  | 88776712 | 12 | 12  | 0    |
| 8 | 88804825 | 88804925 | 100 | 88804887 | 30 | 112 | 16.6 |
| 8 | 88947225 | 88947375 | 150 | 88947287 | 16 | 83  | 0    |
| 8 | 88999900 | 88999950 | 50  | 88999912 | 12 | 24  | 4.1  |
| 8 | 89020500 | 89020525 | 25  | 89020512 | 14 | 14  | 2.1  |
| 8 | 89027125 | 89027150 | 25  | 89027137 | 15 | 15  | 0    |
| 8 | 89055325 | 89055450 | 125 | 89055362 | 15 | 74  | 12.4 |
| 8 | 89060250 | 89060675 | 425 | 89060487 | 22 | 304 | 55.9 |
| 8 | 89245450 | 89245550 | 100 | 89245487 | 16 | 62  | 6.2  |
| 8 | 89308900 | 89308950 | 50  | 89308912 | 13 | 25  | 4.1  |
| 8 | 89325025 | 89325175 | 150 | 89325037 | 13 | 76  | 12.4 |
| 8 | 89330675 | 89330800 | 125 | 89330712 | 17 | 81  | 8.3  |
| 8 | 89341250 | 89341275 | 25  | 89341262 | 12 | 12  | 2.1  |
| 8 | 89362275 | 89362350 | 75  | 89362287 | 13 | 39  | 4.1  |
| 8 | 89378875 | 89379000 | 125 | 89378912 | 13 | 59  | 8.3  |
| 8 | 89382450 | 89382475 | 25  | 89382462 | 12 | 12  | 0    |
| 8 | 89396025 | 89396075 | 50  | 89396037 | 12 | 24  | 4.1  |
| 8 | 90403750 | 90403800 | 50  | 90403762 | 12 | 24  | 4.1  |
| 8 | 90555375 | 90555725 | 350 | 90555712 | 18 | 171 | 26.9 |
| 8 | 90625225 | 90625325 | 100 | 90625237 | 14 | 54  | 0    |
| 8 | 90627100 | 90627175 | 75  | 90627112 | 12 | 36  | 0    |
| 8 | 90981000 | 90981025 | 25  | 90981012 | 13 | 13  | 0    |
| 8 | 92151400 | 92151450 | 50  | 92151437 | 20 | 39  | 2.1  |
| 8 | 92597375 | 92597400 | 25  | 92597387 | 12 | 12  | 0    |
| 8 | 93215225 | 93215300 | 75  | 93215237 | 13 | 37  | 0    |
| 8 | 93271125 | 93271225 | 100 | 93271162 | 15 | 54  | 2.1  |
| 8 | 93442575 | 93442725 | 150 | 93442712 | 13 | 70  | 0    |
| 8 | 93839400 | 93839425 | 25  | 93839412 | 12 | 12  | 2.1  |
| 8 | 93979800 | 93979825 | 25  | 93979812 | 12 | 12  | 2.1  |
| 8 | 94305550 | 94305675 | 125 | 94305587 | 16 | 74  | 10.3 |
| 8 | 94720525 | 94720725 | 200 | 94720712 | 15 | 108 | 8.3  |
| 8 | 94827725 | 94827800 | 75  | 94827787 | 14 | 38  | 4.1  |
| 8 | 94905025 | 94905125 | 100 | 94905087 | 14 | 51  | 0    |
| 8 | 94928000 | 94928250 | 250 | 94928112 | 27 | 209 | 33.1 |
| 8 | 94942975 | 94943025 | 50  | 94942987 | 12 | 24  | 4.1  |
| 8 | 94955450 | 94955650 | 200 | 94955462 | 21 | 140 | 22.8 |
| 8 | 94961925 | 94962000 | 75  | 94961937 | 14 | 40  | 2.1  |
| 8 | 94989650 | 94989675 | 25  | 94989662 | 12 | 12  | 0    |
| 8 | 95100050 | 95100150 | 100 | 95100062 | 13 | 48  | 0    |

|   |           |           |     |           |    |     |      |
|---|-----------|-----------|-----|-----------|----|-----|------|
| 8 | 95106900  | 95107025  | 125 | 95106962  | 15 | 66  | 6.2  |
| 8 | 95155875  | 95156000  | 125 | 95155887  | 13 | 62  | 0    |
| 8 | 95323750  | 95323775  | 25  | 95323762  | 13 | 13  | 2.1  |
| 8 | 95343725  | 95343925  | 200 | 95343812  | 16 | 111 | 0    |
| 8 | 96140625  | 96140650  | 25  | 96140637  | 12 | 12  | 0    |
| 8 | 97344225  | 97344300  | 75  | 97344237  | 13 | 38  | 6.2  |
| 8 | 98146775  | 98146800  | 25  | 98146787  | 12 | 12  | 0    |
| 8 | 98278500  | 98278825  | 325 | 98278612  | 30 | 290 | 6.2  |
| 8 | 98300675  | 98300700  | 25  | 98300687  | 12 | 12  | 2.1  |
| 8 | 98342900  | 98343000  | 100 | 98342962  | 34 | 132 | 24.8 |
| 8 | 98343275  | 98343475  | 200 | 98343287  | 35 | 216 | 39.3 |
| 8 | 98366500  | 98366750  | 250 | 98366612  | 23 | 180 | 14.5 |
| 8 | 98367150  | 98367200  | 50  | 98367162  | 12 | 24  | 4.1  |
| 8 | 98375925  | 98375950  | 25  | 98375937  | 13 | 13  | 0    |
| 8 | 98424975  | 98425000  | 25  | 98424987  | 17 | 17  | 2.1  |
| 8 | 98433175  | 98433350  | 175 | 98433237  | 20 | 117 | 12.4 |
| 8 | 98434025  | 98434275  | 250 | 98434212  | 21 | 161 | 20.7 |
| 8 | 98436250  | 98436325  | 75  | 98436287  | 23 | 65  | 6.2  |
| 8 | 98456375  | 98456425  | 50  | 98456387  | 15 | 29  | 4.1  |
| 8 | 98490750  | 98490975  | 225 | 98490862  | 19 | 149 | 0    |
| 8 | 98493850  | 98493925  | 75  | 98493862  | 12 | 36  | 6.2  |
| 8 | 98505550  | 98505575  | 25  | 98505562  | 13 | 13  | 2.1  |
| 8 | 98507350  | 98507375  | 25  | 98507362  | 12 | 12  | 2.1  |
| 8 | 98515325  | 98515350  | 25  | 98515337  | 12 | 12  | 0    |
| 8 | 98515925  | 98515950  | 25  | 98515937  | 13 | 13  | 2.1  |
| 8 | 98519850  | 98519925  | 75  | 98519862  | 14 | 38  | 6.2  |
| 8 | 98528250  | 98528275  | 25  | 98528262  | 12 | 12  | 2.1  |
| 8 | 98621225  | 98621250  | 25  | 98621237  | 13 | 13  | 2.1  |
| 8 | 98858100  | 98858150  | 50  | 98858112  | 12 | 24  | 4.1  |
| 8 | 98946150  | 98946225  | 75  | 98946162  | 12 | 36  | 0    |
| 8 | 99023975  | 99024025  | 50  | 99024012  | 13 | 25  | 0    |
| 8 | 99061575  | 99061775  | 200 | 99061712  | 17 | 105 | 18.6 |
| 8 | 99083275  | 99083300  | 25  | 99083287  | 23 | 23  | 4.1  |
| 8 | 99084075  | 99084150  | 75  | 99084112  | 14 | 40  | 0    |
| 8 | 99118525  | 99118650  | 125 | 99118537  | 12 | 60  | 6.2  |
| 8 | 99449450  | 99449475  | 25  | 99449462  | 12 | 12  | 2.1  |
| 8 | 99453500  | 99453550  | 50  | 99453512  | 12 | 24  | 2.1  |
| 8 | 99658300  | 99658350  | 50  | 99658312  | 14 | 27  | 0    |
| 8 | 99907600  | 99907650  | 50  | 99907612  | 13 | 26  | 4.1  |
| 8 | 100491800 | 100491825 | 25  | 100491812 | 12 | 12  | 0    |
| 8 | 101225425 | 101225475 | 50  | 101225462 | 15 | 28  | 0    |
| 8 | 101391500 | 101391525 | 25  | 101391512 | 16 | 16  | 2.1  |
| 8 | 101407500 | 101407575 | 75  | 101407512 | 12 | 36  | 0    |
| 8 | 102012800 | 102012900 | 100 | 102012837 | 13 | 51  | 0    |
| 8 | 102070775 | 102070800 | 25  | 102070787 | 12 | 12  | 0    |
| 8 | 102240325 | 102240550 | 225 | 102240512 | 17 | 130 | 8.3  |
| 8 | 102533400 | 102533425 | 25  | 102533412 | 12 | 12  | 0    |
| 8 | 102555700 | 102555750 | 50  | 102555712 | 15 | 27  | 0    |
| 8 | 102715050 | 102715100 | 50  | 102715062 | 12 | 24  | 0    |
| 8 | 102822550 | 102822700 | 150 | 102822587 | 16 | 83  | 8.3  |
| 8 | 102825275 | 102825300 | 25  | 102825287 | 12 | 12  | 0    |
| 8 | 102826125 | 102826225 | 100 | 102826162 | 16 | 54  | 2.1  |
| 8 | 102837775 | 102837850 | 75  | 102837787 | 13 | 37  | 2.1  |
| 8 | 102851275 | 102851350 | 75  | 102851337 | 13 | 37  | 4.1  |
| 8 | 102855650 | 102855700 | 50  | 102855662 | 12 | 24  | 4.1  |
| 8 | 102867225 | 102867300 | 75  | 102867237 | 12 | 36  | 0    |
| 8 | 102913325 | 102913350 | 25  | 102913337 | 12 | 12  | 2.1  |
| 8 | 103079425 | 103079450 | 25  | 103079437 | 13 | 13  | 2.1  |
| 8 | 103734925 | 103735050 | 125 | 103735037 | 18 | 66  | 0    |
| 8 | 103821575 | 103821625 | 50  | 103821587 | 12 | 24  | 4.1  |
| 8 | 103895450 | 103895625 | 175 | 103895537 | 16 | 96  | 2.1  |
| 8 | 103991475 | 103991550 | 75  | 103991487 | 18 | 46  | 2.1  |
| 8 | 104006900 | 104006925 | 25  | 104006912 | 12 | 12  | 0    |
| 8 | 104185750 | 104185775 | 25  | 104185762 | 13 | 13  | 2.1  |
| 8 | 104206475 | 104206500 | 25  | 104206487 | 15 | 15  | 2.1  |
| 8 | 104218675 | 104218825 | 150 | 104218737 | 18 | 96  | 6.2  |
| 8 | 104266125 | 104266175 | 50  | 104266137 | 14 | 28  | 4.1  |
| 8 | 104282625 | 104282675 | 50  | 104282637 | 12 | 24  | 4.1  |
| 8 | 104293175 | 104293200 | 25  | 104293187 | 12 | 12  | 0    |
| 8 | 104362600 | 104362750 | 150 | 104362637 | 18 | 92  | 12.4 |
| 8 | 104363525 | 104363575 | 50  | 104363537 | 12 | 24  | 0    |
| 8 | 104429950 | 104429975 | 25  | 104429962 | 13 | 13  | 0    |
| 8 | 104615450 | 104615475 | 25  | 104615462 | 13 | 13  | 0    |
| 8 | 104788850 | 104788875 | 25  | 104788862 | 12 | 12  | 0    |
| 8 | 105103300 | 105103350 | 50  | 105103312 | 14 | 26  | 4.1  |

|   |           |           |     |           |    |     |      |
|---|-----------|-----------|-----|-----------|----|-----|------|
| 8 | 105360275 | 105360300 | 25  | 105360287 | 13 | 13  | 2.1  |
| 8 | 105619375 | 105619500 | 125 | 105619462 | 14 | 67  | 0    |
| 8 | 105699500 | 105699625 | 125 | 105699587 | 13 | 62  | 0    |
| 8 | 105785750 | 105785850 | 100 | 105785762 | 13 | 50  | 8.3  |
| 8 | 106248350 | 106248400 | 50  | 106248362 | 12 | 24  | 0    |
| 8 | 106884425 | 106884450 | 25  | 106884437 | 12 | 12  | 2.1  |
| 8 | 106990100 | 106990125 | 25  | 106990112 | 12 | 12  | 0    |
| 8 | 107142050 | 107142075 | 25  | 107142062 | 12 | 12  | 2.1  |
| 8 | 107209650 | 107209700 | 50  | 107209662 | 13 | 26  | 4.1  |
| 8 | 107210725 | 107210825 | 100 | 107210762 | 13 | 49  | 0    |
| 8 | 107273825 | 107273875 | 50  | 107273837 | 12 | 24  | 2.1  |
| 8 | 107398900 | 107398925 | 25  | 107398912 | 13 | 13  | 0    |
| 8 | 107537700 | 107537800 | 100 | 107537712 | 25 | 75  | 4.1  |
| 8 | 107582675 | 107582775 | 100 | 107582762 | 14 | 50  | 2.1  |
| 8 | 107608825 | 107609000 | 175 | 107608837 | 15 | 87  | 0    |
| 8 | 107738825 | 107738925 | 100 | 107738862 | 14 | 52  | 4.1  |
| 8 | 108213675 | 108213775 | 100 | 108213762 | 14 | 53  | 0    |
| 8 | 108320575 | 108320650 | 75  | 108320587 | 12 | 36  | 0    |
| 8 | 108567650 | 108567700 | 50  | 108567662 | 12 | 24  | 2.1  |
| 8 | 108571600 | 108571625 | 25  | 108571612 | 13 | 13  | 0    |
| 8 | 108579450 | 108579475 | 25  | 108579462 | 12 | 12  | 2.1  |
| 8 | 108749200 | 108749275 | 75  | 108749212 | 12 | 36  | 6.2  |
| 8 | 108819025 | 108819150 | 125 | 108819062 | 14 | 67  | 6.2  |
| 8 | 109498500 | 109498650 | 150 | 109498512 | 12 | 72  | 0    |
| 8 | 110539925 | 110540000 | 75  | 110539937 | 12 | 36  | 0    |
| 8 | 110692525 | 110692675 | 150 | 110692612 | 14 | 70  | 0    |
| 8 | 111941100 | 111941150 | 50  | 111941137 | 14 | 26  | 4.1  |
| 8 | 113701900 | 113701925 | 25  | 113701912 | 13 | 13  | 2.1  |
| 8 | 114821850 | 114821925 | 75  | 114821862 | 13 | 39  | 6.2  |
| 8 | 115998350 | 115998525 | 175 | 115998412 | 19 | 113 | 2.1  |
| 8 | 116130950 | 116131125 | 175 | 116131012 | 18 | 113 | 0    |
| 8 | 116158250 | 116158275 | 25  | 116158262 | 13 | 13  | 2.1  |
| 8 | 116300125 | 116300200 | 75  | 116300162 | 16 | 44  | 6.2  |
| 8 | 116528450 | 116528600 | 150 | 116528537 | 17 | 82  | 0    |
| 8 | 116539375 | 116539575 | 200 | 116539462 | 20 | 136 | 0    |
| 8 | 116724450 | 116724475 | 25  | 116724462 | 12 | 12  | 0    |
| 8 | 116919675 | 116919700 | 25  | 116919687 | 12 | 12  | 2.1  |
| 8 | 116920025 | 116920125 | 100 | 116920087 | 15 | 54  | 2.1  |
| 8 | 117150675 | 117150950 | 275 | 117150812 | 23 | 165 | 16.6 |
| 8 | 117276825 | 117276925 | 100 | 117276862 | 13 | 49  | 0    |
| 8 | 117425650 | 117425675 | 25  | 117425662 | 13 | 13  | 2.1  |
| 8 | 117535500 | 117535525 | 25  | 117535512 | 12 | 12  | 0    |
| 8 | 117682975 | 117683000 | 25  | 117682987 | 12 | 12  | 0    |
| 8 | 117791350 | 117791475 | 125 | 117791437 | 17 | 78  | 10.3 |
| 8 | 117791950 | 117792000 | 50  | 117791962 | 12 | 24  | 4.1  |
| 8 | 117983300 | 117983350 | 50  | 117983312 | 13 | 26  | 4.1  |
| 8 | 118751300 | 118751350 | 50  | 118751312 | 12 | 24  | 0    |
| 8 | 118907850 | 118907900 | 50  | 118907862 | 12 | 24  | 0    |
| 8 | 118982850 | 118982900 | 50  | 118982862 | 14 | 26  | 0    |
| 8 | 119073500 | 119073525 | 25  | 119073512 | 12 | 12  | 2.1  |
| 8 | 119099275 | 119099425 | 150 | 119099387 | 15 | 76  | 6.2  |
| 8 | 119100125 | 119100275 | 150 | 119100137 | 13 | 77  | 12.4 |
| 8 | 119134175 | 119134225 | 50  | 119134187 | 12 | 24  | 2.1  |
| 8 | 120132925 | 120132975 | 50  | 120132937 | 12 | 24  | 4.1  |
| 8 | 120473625 | 120473650 | 25  | 120473637 | 13 | 13  | 2.1  |
| 8 | 120647900 | 120647925 | 25  | 120647912 | 12 | 12  | 2.1  |
| 8 | 120668325 | 120668425 | 100 | 120668337 | 25 | 98  | 18.6 |
| 8 | 120723075 | 120723225 | 150 | 120723137 | 15 | 83  | 6.2  |
| 8 | 120731975 | 120732125 | 150 | 120732062 | 14 | 76  | 12.4 |
| 8 | 120754475 | 120754500 | 25  | 120754487 | 15 | 15  | 2.1  |
| 8 | 120775575 | 120775650 | 75  | 120775587 | 12 | 36  | 6.2  |
| 8 | 120956000 | 120956025 | 25  | 120956012 | 15 | 15  | 0    |
| 8 | 121072250 | 121072300 | 50  | 121072262 | 13 | 26  | 0    |
| 8 | 121082750 | 121082775 | 25  | 121082762 | 12 | 12  | 2.1  |
| 8 | 121084600 | 121084675 | 75  | 121084612 | 12 | 35  | 0    |
| 8 | 121339675 | 121339750 | 75  | 121339737 | 19 | 51  | 6.2  |
| 8 | 121843525 | 121843575 | 50  | 121843562 | 13 | 25  | 4.1  |
| 8 | 121850825 | 121850850 | 25  | 121850837 | 12 | 12  | 0    |
| 8 | 121858300 | 121858325 | 25  | 121858312 | 12 | 12  | 0    |
| 8 | 121890150 | 121890175 | 25  | 121890162 | 12 | 12  | 2.1  |
| 8 | 121892200 | 121892225 | 25  | 121892212 | 20 | 20  | 2.1  |
| 8 | 121907425 | 121907450 | 25  | 121907437 | 13 | 13  | 0    |
| 8 | 121909150 | 121909550 | 400 | 121909437 | 16 | 211 | 22.8 |
| 8 | 121919925 | 121920025 | 100 | 121920012 | 15 | 55  | 8.3  |
| 8 | 121930800 | 121930850 | 50  | 121930812 | 12 | 24  | 4.1  |

|   |           |           |     |           |    |     |      |
|---|-----------|-----------|-----|-----------|----|-----|------|
| 8 | 122014725 | 122014775 | 50  | 122014737 | 13 | 26  | 4.1  |
| 8 | 122019650 | 122019800 | 150 | 122019762 | 14 | 77  | 8.3  |
| 8 | 122066375 | 122066475 | 100 | 122066412 | 15 | 56  | 0    |
| 8 | 122176150 | 122176200 | 50  | 122176162 | 12 | 24  | 0    |
| 8 | 122430425 | 122430450 | 25  | 122430437 | 12 | 12  | 2.1  |
| 8 | 122437975 | 122438000 | 25  | 122437987 | 12 | 12  | 2.1  |
| 8 | 122454150 | 122454175 | 25  | 122454162 | 13 | 13  | 2.1  |
| 8 | 122612050 | 122612150 | 100 | 122612062 | 20 | 66  | 2.1  |
| 8 | 122627550 | 122627600 | 50  | 122627587 | 13 | 25  | 4.1  |
| 8 | 122641600 | 122641775 | 175 | 122641737 | 17 | 106 | 2.1  |
| 8 | 122655900 | 122655925 | 25  | 122655912 | 12 | 12  | 2.1  |
| 8 | 123041950 | 123042125 | 175 | 123042037 | 16 | 97  | 12.4 |
| 8 | 123113950 | 123114150 | 200 | 123114012 | 16 | 109 | 6.2  |
| 8 | 123237325 | 123237425 | 100 | 123237362 | 15 | 55  | 0    |
| 8 | 123267125 | 123267300 | 175 | 123267237 | 17 | 101 | 0    |
| 8 | 123277300 | 123277400 | 100 | 123277362 | 14 | 53  | 8.3  |
| 8 | 123467925 | 123468375 | 450 | 123468087 | 23 | 289 | 12.4 |
| 8 | 123468700 | 123468725 | 25  | 123468712 | 12 | 12  | 2.1  |
| 8 | 123721050 | 123721200 | 150 | 123721187 | 13 | 66  | 12.4 |
| 8 | 123740475 | 123740500 | 25  | 123740487 | 12 | 12  | 0    |
| 8 | 123754950 | 123754975 | 25  | 123754962 | 13 | 13  | 2.1  |
| 8 | 123775425 | 123775500 | 75  | 123775462 | 15 | 41  | 0    |
| 8 | 123995175 | 123995250 | 75  | 123995187 | 13 | 39  | 6.2  |
| 8 | 124100425 | 124100500 | 75  | 124100437 | 12 | 36  | 6.2  |
| 8 | 124250325 | 124250400 | 75  | 124250337 | 12 | 36  | 6.2  |
| 8 | 124267700 | 124267775 | 75  | 124267712 | 12 | 36  | 0    |
| 8 | 124547500 | 124547525 | 25  | 124547512 | 13 | 13  | 2.1  |
| 8 | 124775200 | 124775375 | 175 | 124775262 | 20 | 118 | 2.1  |
| 8 | 124776225 | 124776300 | 75  | 124776237 | 12 | 36  | 0    |
| 8 | 124780050 | 124780175 | 125 | 124780062 | 12 | 60  | 6.2  |
| 8 | 124813400 | 124813450 | 50  | 124813412 | 13 | 26  | 0    |
| 8 | 125241950 | 125242025 | 75  | 125241962 | 14 | 38  | 2.1  |
| 8 | 125650275 | 125650700 | 425 | 125650287 | 15 | 237 | 39.3 |
| 8 | 125853900 | 125854000 | 100 | 125853912 | 21 | 74  | 8.3  |
| 8 | 125888300 | 125888325 | 25  | 125888312 | 12 | 12  | 0    |
| 8 | 125916025 | 125916050 | 25  | 125916037 | 12 | 12  | 2.1  |
| 8 | 126058200 | 126058500 | 300 | 126058337 | 36 | 316 | 0    |
| 8 | 126300900 | 126301000 | 100 | 126300937 | 13 | 50  | 2.1  |
| 8 | 126495200 | 126495275 | 75  | 126495212 | 21 | 50  | 6.2  |
| 8 | 126511050 | 126511100 | 50  | 126511062 | 13 | 25  | 4.1  |
| 8 | 126645025 | 126645125 | 100 | 126645087 | 13 | 49  | 8.3  |
| 8 | 127357350 | 127357425 | 75  | 127357362 | 12 | 36  | 0    |
| 8 | 127382725 | 127382750 | 25  | 127382737 | 13 | 13  | 0    |
| 8 | 127578400 | 127578775 | 375 | 127578612 | 27 | 301 | 41.4 |
| 8 | 127582650 | 127582775 | 125 | 127582662 | 15 | 67  | 0    |
| 8 | 127624400 | 127624450 | 50  | 127624412 | 12 | 24  | 4.1  |
| 8 | 127632150 | 127632175 | 25  | 127632162 | 12 | 12  | 2.1  |
| 8 | 127636700 | 127636750 | 50  | 127636712 | 12 | 24  | 4.1  |
| 8 | 127639625 | 127639775 | 150 | 127639687 | 16 | 87  | 4.1  |
| 8 | 127664325 | 127664375 | 50  | 127664337 | 12 | 24  | 0    |
| 8 | 127712400 | 127712450 | 50  | 127712412 | 13 | 26  | 0    |
| 8 | 127716900 | 127716925 | 25  | 127716912 | 13 | 13  | 2.1  |
| 8 | 127901200 | 127901225 | 25  | 127901212 | 13 | 13  | 0    |
| 8 | 127910150 | 127910200 | 50  | 127910162 | 14 | 26  | 4.1  |
| 8 | 127915700 | 127915800 | 100 | 127915787 | 15 | 55  | 10.3 |
| 8 | 127921750 | 127921875 | 125 | 127921762 | 12 | 60  | 0    |
| 8 | 128090375 | 128090575 | 200 | 128090462 | 19 | 121 | 4.1  |
| 8 | 128117075 | 128117200 | 125 | 128117162 | 17 | 72  | 6.2  |
| 8 | 128287000 | 128287025 | 25  | 128287012 | 12 | 12  | 2.1  |
| 8 | 128315550 | 128315700 | 150 | 128315612 | 22 | 116 | 12.4 |
| 8 | 128335275 | 128335300 | 25  | 128335287 | 13 | 13  | 2.1  |
| 8 | 128388775 | 128388850 | 75  | 128388787 | 14 | 38  | 4.1  |
| 8 | 128389275 | 128389375 | 100 | 128389287 | 13 | 50  | 8.3  |
| 8 | 128411650 | 128411675 | 25  | 128411662 | 12 | 12  | 0    |
| 8 | 128423525 | 128423575 | 50  | 128423537 | 12 | 24  | 0    |
| 8 | 128501100 | 128501225 | 125 | 128501162 | 15 | 63  | 10.3 |
| 8 | 128528450 | 128528550 | 100 | 128528462 | 15 | 54  | 0    |
| 8 | 128648700 | 128648750 | 50  | 128648712 | 14 | 26  | 4.1  |
| 8 | 128654900 | 128654925 | 25  | 128654912 | 12 | 12  | 0    |
| 8 | 128669100 | 128669150 | 50  | 128669112 | 12 | 24  | 0    |
| 8 | 128699875 | 128700025 | 150 | 128699912 | 17 | 90  | 4.1  |
| 8 | 128717625 | 128717825 | 200 | 128717737 | 16 | 104 | 16.6 |
| 8 | 128720625 | 128720700 | 75  | 128720687 | 14 | 38  | 6.2  |
| 8 | 128725725 | 128725775 | 50  | 128725737 | 12 | 24  | 0    |
| 8 | 128877225 | 128877275 | 50  | 128877237 | 14 | 27  | 4.1  |

|   |           |           |     |           |    |     |      |
|---|-----------|-----------|-----|-----------|----|-----|------|
| 8 | 128935225 | 128935350 | 125 | 128935287 | 18 | 76  | 12.4 |
| 8 | 128993200 | 128993225 | 25  | 128993212 | 13 | 13  | 0    |
| 8 | 128998325 | 128998350 | 25  | 128998337 | 13 | 13  | 0    |
| 8 | 129026775 | 129026825 | 50  | 129026787 | 12 | 24  | 4.1  |
| 8 | 129049900 | 129050150 | 250 | 129049962 | 17 | 138 | 16.6 |
| 8 | 129138425 | 129138575 | 150 | 129138462 | 16 | 85  | 0    |
| 8 | 129139050 | 129139075 | 25  | 129139062 | 13 | 13  | 2.1  |
| 8 | 129190375 | 129190400 | 25  | 129190387 | 14 | 14  | 2.1  |
| 8 | 129226575 | 129226775 | 200 | 129226612 | 17 | 114 | 6.2  |
| 8 | 129258050 | 129258125 | 75  | 129258062 | 14 | 40  | 6.2  |
| 8 | 129333300 | 129333375 | 75  | 129333312 | 12 | 36  | 6.2  |
| 8 | 129349025 | 129349050 | 25  | 129349037 | 13 | 13  | 0    |
| 8 | 129385800 | 129385825 | 25  | 129385812 | 12 | 12  | 0    |
| 8 | 129735875 | 129736225 | 350 | 129736037 | 26 | 261 | 37.2 |
| 8 | 129932400 | 129932425 | 25  | 129932412 | 12 | 12  | 2.1  |
| 8 | 129943125 | 129943200 | 75  | 129943162 | 16 | 43  | 0    |
| 8 | 130011700 | 130011875 | 175 | 130011787 | 15 | 94  | 0    |
| 8 | 130204250 | 130204350 | 100 | 130204287 | 15 | 54  | 0    |
| 8 | 130388300 | 130388500 | 200 | 130388362 | 14 | 102 | 0    |
| 8 | 130394725 | 130394775 | 50  | 130394737 | 16 | 32  | 4.1  |
| 8 | 130398225 | 130398300 | 75  | 130398262 | 13 | 38  | 4.1  |
| 8 | 130561725 | 130561775 | 50  | 130561737 | 13 | 26  | 4.1  |
| 8 | 130632700 | 130632725 | 25  | 130632712 | 12 | 12  | 2.1  |
| 8 | 130633825 | 130634275 | 450 | 130634037 | 42 | 498 | 22.8 |
| 8 | 130710100 | 130710225 | 125 | 130710212 | 24 | 96  | 10.3 |
| 8 | 130719600 | 130719675 | 75  | 130719637 | 13 | 38  | 6.2  |
| 8 | 130760725 | 130760750 | 25  | 130760737 | 12 | 12  | 2.1  |
| 8 | 130763300 | 130763350 | 50  | 130763337 | 16 | 28  | 4.1  |
| 8 | 130768400 | 130768500 | 100 | 130768412 | 13 | 48  | 0    |
| 8 | 131076950 | 131076975 | 25  | 131076962 | 12 | 12  | 2.1  |
| 8 | 131096150 | 131096225 | 75  | 131096212 | 18 | 47  | 0    |
| 8 | 131143775 | 131143825 | 50  | 131143787 | 12 | 24  | 4.1  |
| 8 | 131345600 | 131345625 | 25  | 131345612 | 12 | 12  | 0    |
| 8 | 131371850 | 131371925 | 75  | 131371862 | 12 | 36  | 6.2  |
| 8 | 131384200 | 131384225 | 25  | 131384212 | 12 | 12  | 2.1  |
| 8 | 131408450 | 131408525 | 75  | 131408487 | 15 | 40  | 6.2  |
| 8 | 131438025 | 131438075 | 50  | 131438037 | 13 | 26  | 4.1  |
| 8 | 131478200 | 131478225 | 25  | 131478212 | 12 | 12  | 2.1  |
| 8 | 131513975 | 131514075 | 100 | 131513987 | 12 | 44  | 8.3  |
| 8 | 131523600 | 131523725 | 125 | 131523687 | 14 | 67  | 0    |
| 8 | 131910450 | 131910675 | 225 | 131910537 | 27 | 180 | 0    |
| 8 | 132069500 | 132069550 | 50  | 132069512 | 12 | 24  | 4.1  |
| 8 | 132922925 | 132922950 | 25  | 132922937 | 12 | 12  | 0    |
| 8 | 132941125 | 132941225 | 100 | 132941137 | 15 | 55  | 4.1  |
| 8 | 133857375 | 133857425 | 50  | 133857387 | 14 | 26  | 4.1  |
| 8 | 134019650 | 134019725 | 75  | 134019662 | 12 | 36  | 0    |
| 8 | 134041675 | 134041825 | 150 | 134041787 | 14 | 76  | 4.1  |
| 8 | 134338325 | 134338350 | 25  | 134338337 | 12 | 12  | 2.1  |
| 8 | 134345750 | 134345775 | 25  | 134345762 | 12 | 12  | 2.1  |
| 8 | 134599425 | 134599500 | 75  | 134599437 | 12 | 34  | 6.2  |
| 8 | 134654600 | 134654675 | 75  | 134654612 | 14 | 42  | 6.2  |
| 8 | 134726850 | 134726875 | 25  | 134726862 | 14 | 14  | 2.1  |
| 8 | 134806600 | 134806675 | 75  | 134806662 | 20 | 54  | 4.1  |
| 8 | 134848700 | 134848875 | 175 | 134848787 | 32 | 197 | 26.9 |
| 8 | 135120825 | 135120875 | 50  | 135120837 | 15 | 30  | 4.1  |
| 8 | 135416675 | 135416800 | 125 | 135416687 | 13 | 60  | 2.1  |
| 8 | 135772725 | 135772775 | 50  | 135772737 | 12 | 24  | 2.1  |
| 8 | 135777925 | 135777975 | 50  | 135777937 | 12 | 24  | 4.1  |
| 8 | 135794175 | 135794225 | 50  | 135794187 | 15 | 30  | 0    |
| 8 | 135835300 | 135835350 | 50  | 135835312 | 16 | 30  | 4.1  |
| 8 | 135919725 | 135919850 | 125 | 135919762 | 16 | 70  | 10.3 |
| 8 | 135974525 | 135974550 | 25  | 135974537 | 13 | 13  | 2.1  |
| 8 | 136053775 | 136053825 | 50  | 136053787 | 14 | 28  | 2.1  |
| 8 | 136306450 | 136306500 | 50  | 136306462 | 15 | 28  | 4.1  |
| 8 | 136454325 | 136454350 | 25  | 136454337 | 12 | 12  | 2.1  |
| 8 | 136459800 | 136459850 | 50  | 136459812 | 12 | 24  | 4.1  |
| 8 | 136499550 | 136499650 | 100 | 136499587 | 14 | 52  | 2.1  |
| 8 | 136992600 | 136992625 | 25  | 136992612 | 12 | 12  | 0    |
| 8 | 137320625 | 137320775 | 150 | 137320687 | 16 | 79  | 4.1  |
| 8 | 137747050 | 137747175 | 125 | 137747087 | 15 | 69  | 10.3 |
| 8 | 138379225 | 138379250 | 25  | 138379237 | 13 | 13  | 0    |
| 8 | 138695925 | 138696250 | 325 | 138696112 | 24 | 210 | 24.8 |
| 8 | 139395875 | 139395900 | 25  | 139395887 | 12 | 12  | 2.1  |
| 8 | 139754625 | 139754675 | 50  | 139754637 | 14 | 28  | 4.1  |
| 8 | 139912650 | 139912675 | 25  | 139912662 | 15 | 15  | 2.1  |

|   |           |           |     |           |     |      |       |
|---|-----------|-----------|-----|-----------|-----|------|-------|
| 8 | 139929675 | 139929700 | 25  | 139929687 | 12  | 12   | 2.1   |
| 8 | 139937200 | 139937275 | 75  | 139937212 | 13  | 39   | 6.2   |
| 8 | 140033050 | 140033075 | 25  | 140033062 | 13  | 13   | 2.1   |
| 8 | 140296700 | 140296775 | 75  | 140296762 | 18  | 48   | 6.2   |
| 8 | 141118350 | 141118375 | 25  | 141118362 | 12  | 12   | 0     |
| 8 | 141200475 | 141200500 | 25  | 141200487 | 13  | 13   | 2.1   |
| 8 | 141546550 | 141546700 | 150 | 141546637 | 25  | 137  | 20.7  |
| 8 | 141548600 | 141548775 | 175 | 141548737 | 18  | 104  | 0     |
| 8 | 141551175 | 141551300 | 125 | 141551237 | 17  | 79   | 10.3  |
| 8 | 141600950 | 141601100 | 150 | 141600962 | 13  | 74   | 12.4  |
| 8 | 141617875 | 141617975 | 100 | 141617887 | 14  | 52   | 4.1   |
| 8 | 141640925 | 141640950 | 25  | 141640937 | 12  | 12   | 0     |
| 8 | 141693975 | 141694000 | 25  | 141693987 | 13  | 13   | 2.1   |
| 8 | 141711450 | 141711475 | 25  | 141711462 | 12  | 12   | 2.1   |
| 8 | 141725225 | 141725275 | 50  | 141725262 | 23  | 44   | 8.3   |
| 8 | 141725500 | 141725550 | 50  | 141725512 | 14  | 26   | 0     |
| 8 | 141778950 | 141778975 | 25  | 141778962 | 13  | 13   | 2.1   |
| 8 | 141784475 | 141784500 | 25  | 141784487 | 12  | 12   | 2.1   |
| 8 | 141806525 | 141806575 | 50  | 141806537 | 14  | 28   | 0     |
| 8 | 142164400 | 142164475 | 75  | 142164412 | 15  | 40   | 0     |
| 8 | 142385400 | 142385500 | 100 | 142385412 | 13  | 49   | 0     |
| 8 | 142662775 | 142662900 | 125 | 142662837 | 18  | 78   | 10.3  |
| 8 | 142815750 | 142815775 | 25  | 142815762 | 12  | 12   | 2.1   |
| 8 | 142906125 | 142906225 | 100 | 142906137 | 12  | 48   | 8.3   |
| 8 | 142971275 | 142971375 | 100 | 142971312 | 14  | 52   | 8.3   |
| 8 | 143503475 | 143503500 | 25  | 143503487 | 12  | 12   | 2.1   |
| 8 | 143579275 | 143579325 | 50  | 143579287 | 12  | 24   | 4.1   |
| 8 | 143723975 | 143724150 | 175 | 143724062 | 16  | 97   | 0     |
| 8 | 143755200 | 143755300 | 100 | 143755287 | 29  | 97   | 12.4  |
| 8 | 143758350 | 143758400 | 50  | 143758362 | 12  | 24   | 0     |
| 8 | 143856325 | 143856450 | 125 | 143856337 | 12  | 56   | 6.2   |
| 8 | 144205975 | 144206025 | 50  | 144205987 | 13  | 26   | 4.1   |
| 8 | 144711575 | 144711725 | 150 | 144711687 | 13  | 70   | 4.1   |
| 8 | 144788050 | 144788125 | 75  | 144788087 | 15  | 40   | 6.2   |
| 8 | 144803600 | 144804150 | 550 | 144804062 | 17  | 306  | 45.5  |
| 8 | 145208825 | 145208850 | 25  | 145208837 | 12  | 12   | 2.1   |
| 8 | 145672350 | 145672375 | 25  | 145672362 | 12  | 12   | 2.1   |
| 8 | 145963500 | 145963775 | 275 | 145963687 | 23  | 188  | 16.6  |
| 8 | 146023825 | 146023850 | 25  | 146023837 | 14  | 14   | 2.1   |
| 8 | 146038400 | 146038575 | 175 | 146038512 | 20  | 124  | 18.6  |
| 8 | 146038800 | 146039000 | 200 | 146038812 | 14  | 100  | 16.6  |
| 8 | 146049275 | 146049300 | 25  | 146049287 | 12  | 12   | 2.1   |
| 8 | 146078250 | 146078300 | 50  | 146078262 | 15  | 29   | 4.1   |
| 8 | 146127675 | 146127800 | 125 | 146127712 | 14  | 60   | 2.1   |
| 8 | 146241200 | 146241350 | 150 | 146241312 | 15  | 77   | 8.3   |
| X | 870725    | 870900    | 175 | 870887    | 24  | 132  | 14.5  |
| X | 9079875   | 9079900   | 25  | 9079887   | 12  | 12   | 0     |
| X | 9254575   | 9254650   | 75  | 9254587   | 13  | 37   | 6.2   |
| X | 9787675   | 9787825   | 150 | 9787687   | 16  | 76   | 8.3   |
| X | 9813350   | 9813375   | 25  | 9813362   | 12  | 12   | 2.1   |
| X | 9923825   | 9923950   | 125 | 9923937   | 23  | 89   | 4.1   |
| X | 10047500  | 10047900  | 400 | 10047662  | 115 | 1200 | 109.7 |
| X | 11616900  | 11617000  | 100 | 11616937  | 14  | 52   | 0     |
| X | 11935975  | 11936150  | 175 | 11935987  | 13  | 75   | 12.4  |
| X | 13326625  | 13326675  | 50  | 13326637  | 13  | 26   | 0     |
| X | 13616975  | 13617000  | 25  | 13616987  | 12  | 12   | 2.1   |
| X | 13804825  | 13804850  | 25  | 13804837  | 14  | 14   | 2.1   |
| X | 13993050  | 13993200  | 150 | 13993162  | 23  | 114  | 16.6  |
| X | 14864775  | 14864850  | 75  | 14864787  | 15  | 43   | 0     |
| X | 14868050  | 14868175  | 125 | 14868062  | 12  | 60   | 0     |
| X | 15043025  | 15043200  | 175 | 15043112  | 16  | 94   | 12.4  |
| X | 15782975  | 15783075  | 100 | 15783012  | 13  | 51   | 0     |
| X | 16538050  | 16538225  | 175 | 16538162  | 14  | 87   | 14.5  |
| X | 18602850  | 18602925  | 75  | 18602912  | 17  | 46   | 8.3   |
| X | 19183600  | 19183675  | 75  | 19183662  | 14  | 36   | 0     |
| X | 19483450  | 19483525  | 75  | 19483462  | 12  | 36   | 6.2   |
| X | 19803300  | 19803350  | 50  | 19803312  | 12  | 24   | 4.1   |
| X | 20368300  | 20368350  | 50  | 20368312  | 12  | 24   | 4.1   |
| X | 20444400  | 20444450  | 50  | 20444412  | 12  | 24   | 0     |
| X | 20557700  | 20557775  | 75  | 20557712  | 12  | 36   | 6.2   |
| X | 21860525  | 21860725  | 200 | 21860587  | 21  | 147  | 14.5  |
| X | 23225675  | 23225800  | 125 | 23225737  | 16  | 69   | 0     |
| X | 23709800  | 23709875  | 75  | 23709812  | 12  | 36   | 6.2   |
| X | 23710975  | 23711000  | 25  | 23710987  | 12  | 12   | 0     |
| X | 23829175  | 23829350  | 175 | 23829237  | 16  | 96   | 8.3   |

|    |           |           |     |           |    |     |      |
|----|-----------|-----------|-----|-----------|----|-----|------|
| X  | 27327150  | 27327225  | 75  | 27327162  | 15 | 42  | 2.1  |
| X  | 30965150  | 30965325  | 175 | 30965162  | 15 | 101 | 8.3  |
| X  | 32012950  | 32012975  | 25  | 32012962  | 15 | 15  | 2.1  |
| X  | 32033150  | 32033275  | 125 | 32033162  | 17 | 71  | 0    |
| X  | 32113325  | 32113400  | 75  | 32113387  | 15 | 41  | 6.2  |
| X  | 32318025  | 32318050  | 25  | 32318037  | 12 | 12  | 0    |
| X  | 32895150  | 32895175  | 25  | 32895162  | 12 | 12  | 2.1  |
| X  | 32902825  | 32902900  | 75  | 32902837  | 12 | 36  | 0    |
| X  | 32929350  | 32929425  | 75  | 32929362  | 16 | 44  | 0    |
| X  | 34557950  | 34558025  | 75  | 34558012  | 13 | 37  | 6.2  |
| X  | 37526825  | 37526925  | 100 | 37526887  | 14 | 50  | 0    |
| X  | 37627525  | 37627575  | 50  | 37627562  | 15 | 28  | 4.1  |
| X  | 37978225  | 37978325  | 100 | 37978237  | 13 | 50  | 8.3  |
| X  | 37978550  | 37978650  | 100 | 37978587  | 14 | 53  | 0    |
| X  | 39524025  | 39524200  | 175 | 39524062  | 16 | 98  | 6.2  |
| X  | 43756925  | 43756975  | 50  | 43756937  | 16 | 32  | 4.1  |
| X  | 45251325  | 45251425  | 100 | 45251387  | 14 | 53  | 0    |
| X  | 45552400  | 45552425  | 25  | 45552412  | 12 | 12  | 0    |
| X  | 47111000  | 47111075  | 75  | 47111012  | 12 | 36  | 0    |
| X  | 47326675  | 47326750  | 75  | 47326712  | 15 | 41  | 6.2  |
| X  | 48335000  | 48335025  | 25  | 48335012  | 12 | 12  | 2.1  |
| X  | 48446200  | 48446225  | 25  | 48446212  | 12 | 12  | 0    |
| X  | 50242700  | 50242725  | 25  | 50242712  | 12 | 12  | 0    |
| X  | 51562700  | 51562975  | 275 | 51562837  | 29 | 243 | 0    |
| X  | 53217175  | 53217200  | 25  | 53217187  | 12 | 12  | 0    |
| X  | 53875250  | 53875300  | 50  | 53875262  | 12 | 24  | 0    |
| X  | 54528300  | 54528475  | 175 | 54528362  | 14 | 90  | 0    |
| X  | 57038625  | 57038675  | 50  | 57038662  | 13 | 25  | 2.1  |
| X  | 57164650  | 57164700  | 50  | 57164662  | 14 | 28  | 4.1  |
| X  | 64718850  | 64718875  | 25  | 64718862  | 12 | 12  | 0    |
| X  | 67647950  | 67648200  | 250 | 67648037  | 18 | 144 | 0    |
| X  | 71518425  | 71518450  | 25  | 71518437  | 12 | 12  | 0    |
| X  | 71713175  | 71713200  | 25  | 71713187  | 13 | 13  | 0    |
| X  | 73427475  | 73427525  | 50  | 73427487  | 13 | 26  | 0    |
| X  | 79566050  | 79566075  | 25  | 79566062  | 13 | 13  | 2.1  |
| X  | 82987075  | 82987150  | 75  | 82987112  | 17 | 45  | 6.2  |
| X  | 91834475  | 91834500  | 25  | 91834487  | 12 | 12  | 0    |
| X  | 95456750  | 95456875  | 125 | 95456762  | 12 | 59  | 4.1  |
| X  | 95514550  | 95514575  | 25  | 95514562  | 12 | 12  | 0    |
| X  | 97344800  | 97344900  | 100 | 97344812  | 14 | 52  | 0    |
| X  | 102514575 | 102514725 | 150 | 102514587 | 12 | 68  | 0    |
| X  | 102595375 | 102595425 | 50  | 102595387 | 12 | 24  | 0    |
| X  | 106882050 | 106882150 | 100 | 106882062 | 12 | 42  | 0    |
| X  | 109795750 | 109795800 | 50  | 109795762 | 12 | 24  | 0    |
| X  | 112570350 | 112570375 | 25  | 112570362 | 12 | 12  | 0    |
| X  | 119463425 | 119463450 | 25  | 119463437 | 12 | 12  | 2.1  |
| X  | 119621525 | 119621725 | 200 | 119621637 | 15 | 109 | 16.6 |
| X  | 119752900 | 119753025 | 125 | 119752937 | 14 | 65  | 10.3 |
| X  | 119786350 | 119786375 | 25  | 119786362 | 13 | 13  | 2.1  |
| X  | 120113950 | 120114075 | 125 | 120113962 | 12 | 60  | 8.3  |
| X  | 123290425 | 123290600 | 175 | 123290462 | 16 | 102 | 6.2  |
| X  | 129230650 | 129230800 | 150 | 129230662 | 34 | 136 | 14.5 |
| X  | 132310950 | 132310975 | 25  | 132310962 | 13 | 13  | 0    |
| X  | 133504300 | 133504375 | 75  | 133504337 | 14 | 40  | 4.1  |
| X  | 134014150 | 134014175 | 25  | 134014162 | 12 | 12  | 2.1  |
| X  | 134294100 | 134294125 | 25  | 134294112 | 12 | 12  | 0    |
| X  | 135790575 | 135790600 | 25  | 135790587 | 15 | 15  | 2.1  |
| X  | 136348225 | 136348275 | 50  | 136348237 | 17 | 33  | 4.1  |
| X  | 137767025 | 137767075 | 50  | 137767037 | 14 | 26  | 0    |
| X  | 142530750 | 142530850 | 100 | 142530762 | 15 | 54  | 0    |
| X  | 144619050 | 144619075 | 25  | 144619062 | 13 | 13  | 0    |
| X  | 149210225 | 149210250 | 25  | 149210237 | 19 | 19  | 2.1  |
| X  | 149609450 | 149609600 | 150 | 149609487 | 17 | 92  | 0    |
| X  | 153251250 | 153251275 | 25  | 153251262 | 12 | 12  | 2.1  |
| X  | 153630200 | 153630325 | 125 | 153630212 | 13 | 65  | 8.3  |
| X  | 153643900 | 153643925 | 25  | 153643912 | 12 | 12  | 2.1  |
| 11 | 2675350   | 2675400   | 50  | 2675362   | 12 | 24  | 0    |
| 11 | 2710300   | 2710325   | 25  | 2710312   | 12 | 12  | 2.1  |
| 11 | 2876725   | 2876875   | 150 | 2876787   | 18 | 90  | 12.4 |
| 11 | 5766125   | 5766175   | 50  | 5766137   | 12 | 24  | 0    |
| 11 | 7629150   | 7629250   | 100 | 7629187   | 15 | 57  | 6.2  |
| 11 | 8201875   | 8201900   | 25  | 8201887   | 13 | 13  | 0    |
| 11 | 8711100   | 8711125   | 25  | 8711112   | 12 | 12  | 2.1  |
| 11 | 9737875   | 9737925   | 50  | 9737887   | 14 | 26  | 4.1  |
| 11 | 9741850   | 9741925   | 75  | 9741862   | 13 | 39  | 0    |



|    |          |          |     |          |    |     |      |
|----|----------|----------|-----|----------|----|-----|------|
| 11 | 10280400 | 10280475 | 75  | 10280412 | 12 | 36  | 6.2  |
| 11 | 10344900 | 10344925 | 25  | 10344912 | 12 | 12  | 0    |
| 11 | 10384500 | 10384525 | 25  | 10384512 | 12 | 12  | 2.1  |
| 11 | 10918800 | 10918825 | 25  | 10918812 | 12 | 12  | 0    |
| 11 | 11791575 | 11791725 | 150 | 11791612 | 20 | 102 | 4.1  |
| 11 | 11995450 | 11995600 | 150 | 11995512 | 20 | 96  | 8.3  |
| 11 | 11997525 | 11997675 | 150 | 11997662 | 22 | 103 | 14.5 |
| 11 | 12008250 | 12008325 | 75  | 12008262 | 15 | 40  | 4.1  |
| 11 | 12164150 | 12164225 | 75  | 12164212 | 14 | 39  | 6.2  |
| 11 | 12727450 | 12727550 | 100 | 12727462 | 13 | 52  | 0    |
| 11 | 12770850 | 12770875 | 25  | 12770862 | 13 | 13  | 2.1  |
| 11 | 12841025 | 12841050 | 25  | 12841037 | 12 | 12  | 2.1  |
| 11 | 12846275 | 12846400 | 125 | 12846312 | 19 | 77  | 4.1  |
| 11 | 13093025 | 13093050 | 25  | 13093037 | 12 | 12  | 0    |
| 11 | 13104700 | 13104875 | 175 | 13104837 | 26 | 131 | 16.6 |
| 11 | 13118475 | 13118600 | 125 | 13118587 | 23 | 94  | 18.6 |
| 11 | 13340850 | 13340900 | 50  | 13340862 | 13 | 25  | 4.1  |
| 11 | 13441450 | 13441500 | 50  | 13441487 | 17 | 29  | 4.1  |
| 11 | 14227600 | 14227625 | 25  | 14227612 | 12 | 12  | 2.1  |
| 11 | 15666650 | 15666700 | 50  | 15666662 | 14 | 28  | 4.1  |
| 11 | 15795325 | 15795400 | 75  | 15795337 | 12 | 36  | 0    |
| 11 | 15797875 | 15797900 | 25  | 15797887 | 14 | 14  | 2.1  |
| 11 | 15806800 | 15806925 | 125 | 15806862 | 16 | 72  | 0    |
| 11 | 15921200 | 15921225 | 25  | 15921212 | 13 | 13  | 0    |
| 11 | 15947600 | 15947625 | 25  | 15947612 | 12 | 12  | 2.1  |
| 11 | 16960125 | 16960150 | 25  | 16960137 | 15 | 15  | 2.1  |
| 11 | 17508475 | 17508525 | 50  | 17508487 | 12 | 24  | 4.1  |
| 11 | 18345150 | 18345200 | 50  | 18345162 | 12 | 24  | 0    |
| 11 | 18613125 | 18613150 | 25  | 18613137 | 12 | 12  | 2.1  |
| 11 | 19606200 | 19606250 | 50  | 19606212 | 12 | 24  | 4.1  |
| 11 | 19634500 | 19634625 | 125 | 19634512 | 26 | 94  | 10.3 |
| 11 | 19698375 | 19698425 | 50  | 19698387 | 12 | 24  | 4.1  |
| 11 | 19897675 | 19897775 | 100 | 19897687 | 18 | 60  | 8.3  |
| 11 | 22604100 | 22604175 | 75  | 22604137 | 14 | 39  | 4.1  |
| 11 | 22763375 | 22763525 | 150 | 22763512 | 19 | 95  | 12.4 |
| 11 | 25544950 | 25545025 | 75  | 25544962 | 16 | 44  | 6.2  |
| 11 | 26054850 | 26054900 | 50  | 26054862 | 12 | 24  | 4.1  |
| 11 | 26177325 | 26177350 | 25  | 26177337 | 12 | 12  | 0    |
| 11 | 26818750 | 26818775 | 25  | 26818762 | 12 | 12  | 2.1  |
| 11 | 27137075 | 27137100 | 25  | 27137087 | 12 | 12  | 2.1  |
| 11 | 27196875 | 27197050 | 175 | 27196912 | 18 | 103 | 12.4 |
| 11 | 27260350 | 27260450 | 100 | 27260362 | 17 | 62  | 4.1  |
| 11 | 27295925 | 27296000 | 75  | 27295987 | 13 | 35  | 0    |
| 11 | 28088225 | 28088375 | 150 | 28088312 | 21 | 112 | 14.5 |
| 11 | 28959400 | 28959525 | 125 | 28959412 | 13 | 59  | 0    |
| 11 | 29307100 | 29307250 | 150 | 29307137 | 18 | 92  | 4.1  |
| 11 | 29901975 | 29902050 | 75  | 29901987 | 12 | 36  | 4.1  |
| 11 | 33054650 | 33054700 | 50  | 33054662 | 12 | 24  | 4.1  |
| 11 | 33340450 | 33340550 | 100 | 33340512 | 16 | 56  | 8.3  |
| 11 | 33361500 | 33361525 | 25  | 33361512 | 13 | 13  | 0    |
| 11 | 33405350 | 33405400 | 50  | 33405362 | 12 | 24  | 4.1  |
| 11 | 33521225 | 33521275 | 50  | 33521262 | 16 | 30  | 4.1  |
| 11 | 33668975 | 33669000 | 25  | 33668987 | 14 | 14  | 2.1  |
| 11 | 33670300 | 33670375 | 75  | 33670312 | 15 | 43  | 0    |
| 11 | 33679350 | 33679375 | 25  | 33679362 | 13 | 13  | 2.1  |
| 11 | 33699575 | 33699775 | 200 | 33699737 | 19 | 136 | 20.7 |
| 11 | 33701675 | 33701725 | 50  | 33701687 | 13 | 26  | 4.1  |
| 11 | 33919975 | 33920000 | 25  | 33919987 | 12 | 12  | 2.1  |
| 11 | 33974875 | 33974900 | 25  | 33974887 | 12 | 12  | 2.1  |
| 11 | 33975750 | 33975775 | 25  | 33975762 | 12 | 12  | 2.1  |
| 11 | 34158200 | 34158250 | 50  | 34158212 | 13 | 25  | 4.1  |
| 11 | 34241850 | 34241875 | 25  | 34241862 | 12 | 12  | 2.1  |
| 11 | 34246550 | 34246575 | 25  | 34246562 | 12 | 12  | 2.1  |
| 11 | 34294525 | 34294550 | 25  | 34294537 | 13 | 13  | 2.1  |
| 11 | 34294975 | 34295075 | 100 | 34295037 | 15 | 52  | 4.1  |
| 11 | 34302825 | 34302850 | 25  | 34302837 | 13 | 13  | 2.1  |
| 11 | 34309450 | 34309650 | 200 | 34309637 | 16 | 99  | 14.5 |
| 11 | 34337500 | 34337525 | 25  | 34337512 | 14 | 14  | 2.1  |
| 11 | 34383325 | 34383400 | 75  | 34383337 | 15 | 41  | 4.1  |
| 11 | 34460200 | 34460250 | 50  | 34460212 | 12 | 24  | 4.1  |
| 11 | 34801850 | 34802050 | 200 | 34801887 | 15 | 112 | 12.4 |
| 11 | 34803650 | 34803775 | 125 | 34803687 | 16 | 75  | 14.5 |
| 11 | 34908200 | 34908300 | 100 | 34908237 | 14 | 48  | 8.3  |
| 11 | 34987550 | 34987600 | 50  | 34987562 | 12 | 24  | 4.1  |
| 11 | 35077525 | 35077575 | 50  | 35077537 | 13 | 26  | 4.1  |

|    |          |          |     |          |    |     |      |
|----|----------|----------|-----|----------|----|-----|------|
| 11 | 35078300 | 35078325 | 25  | 35078312 | 12 | 12  | 2.1  |
| 11 | 35081800 | 35081825 | 25  | 35081812 | 13 | 13  | 2.1  |
| 11 | 35121825 | 35121850 | 25  | 35121837 | 13 | 13  | 2.1  |
| 11 | 35142450 | 35142500 | 50  | 35142462 | 12 | 24  | 4.1  |
| 11 | 35144075 | 35144375 | 300 | 35144262 | 15 | 156 | 0    |
| 11 | 35144900 | 35145175 | 275 | 35145037 | 27 | 246 | 41.4 |
| 11 | 35322900 | 35322975 | 75  | 35322912 | 13 | 39  | 4.1  |
| 11 | 35325925 | 35326325 | 400 | 35326062 | 22 | 263 | 43.5 |
| 11 | 35382725 | 35382750 | 25  | 35382737 | 12 | 12  | 2.1  |
| 11 | 35641275 | 35641475 | 200 | 35641312 | 15 | 106 | 16.6 |
| 11 | 35766700 | 35766750 | 50  | 35766712 | 12 | 24  | 4.1  |
| 11 | 35800450 | 35800500 | 50  | 35800462 | 12 | 24  | 0    |
| 11 | 35808400 | 35808425 | 25  | 35808412 | 12 | 12  | 2.1  |
| 11 | 35969950 | 35969975 | 25  | 35969962 | 12 | 12  | 2.1  |
| 11 | 37482375 | 37482425 | 50  | 37482387 | 14 | 28  | 4.1  |
| 11 | 38572000 | 38572050 | 50  | 38572012 | 12 | 24  | 0    |
| 11 | 38965175 | 38965225 | 50  | 38965187 | 12 | 24  | 0    |
| 11 | 40307475 | 40307525 | 50  | 40307512 | 14 | 26  | 4.1  |
| 11 | 44180800 | 44180850 | 50  | 44180812 | 13 | 26  | 4.1  |
| 11 | 45871375 | 45871450 | 75  | 45871387 | 14 | 41  | 0    |
| 11 | 46554550 | 46554600 | 50  | 46554562 | 12 | 24  | 2.1  |
| 11 | 46804975 | 46805050 | 75  | 46804987 | 12 | 36  | 0    |
| 11 | 46898150 | 46898200 | 50  | 46898162 | 12 | 24  | 4.1  |
| 11 | 46962075 | 46962100 | 25  | 46962087 | 12 | 12  | 0    |
| 11 | 47194475 | 47194625 | 150 | 47194512 | 15 | 79  | 4.1  |
| 11 | 47292475 | 47292625 | 150 | 47292587 | 13 | 72  | 12.4 |
| 11 | 48014350 | 48014375 | 25  | 48014362 | 12 | 12  | 0    |
| 11 | 48059625 | 48059675 | 50  | 48059637 | 15 | 30  | 4.1  |
| 11 | 48072900 | 48072950 | 50  | 48072937 | 15 | 27  | 0    |
| 11 | 48082475 | 48082525 | 50  | 48082487 | 12 | 24  | 2.1  |
| 11 | 49973775 | 49973850 | 75  | 49973787 | 12 | 36  | 6.2  |
| 11 | 51426675 | 51426850 | 175 | 51426687 | 13 | 91  | 14.5 |
| 11 | 51433475 | 51433550 | 75  | 51433487 | 12 | 36  | 0    |
| 11 | 51449600 | 51449725 | 125 | 51449612 | 12 | 60  | 6.2  |
| 11 | 55358525 | 55358600 | 75  | 55358537 | 12 | 36  | 0    |
| 11 | 55459900 | 55459975 | 75  | 55459912 | 13 | 37  | 0    |
| 11 | 56218225 | 56218325 | 100 | 56218237 | 12 | 48  | 8.3  |
| 11 | 56953700 | 56953775 | 75  | 56953712 | 12 | 36  | 6.2  |
| 11 | 57091300 | 57091325 | 25  | 57091312 | 12 | 12  | 2.1  |
| 11 | 57172150 | 57172175 | 25  | 57172162 | 12 | 12  | 2.1  |
| 11 | 57858900 | 57858950 | 50  | 57858912 | 12 | 24  | 4.1  |
| 11 | 58164475 | 58164500 | 25  | 58164487 | 13 | 13  | 2.1  |
| 11 | 58312575 | 58312600 | 25  | 58312587 | 12 | 12  | 2.1  |
| 11 | 58668825 | 58668850 | 25  | 58668837 | 12 | 12  | 2.1  |
| 11 | 59448025 | 59448075 | 50  | 59448037 | 12 | 24  | 4.1  |
| 11 | 60352975 | 60353000 | 25  | 60352987 | 12 | 12  | 2.1  |
| 11 | 61424225 | 61424250 | 25  | 61424237 | 12 | 12  | 0    |
| 11 | 62032550 | 62032725 | 175 | 62032662 | 24 | 145 | 14.5 |
| 11 | 62065975 | 62066025 | 50  | 62065987 | 12 | 24  | 2.1  |
| 11 | 62123100 | 62123125 | 25  | 62123112 | 12 | 12  | 2.1  |
| 11 | 62188750 | 62188825 | 75  | 62188762 | 12 | 36  | 6.2  |
| 11 | 62191100 | 62191150 | 50  | 62191137 | 14 | 26  | 0    |
| 11 | 62251800 | 62251825 | 25  | 62251812 | 14 | 14  | 2.1  |
| 11 | 62252550 | 62252575 | 25  | 62252562 | 16 | 16  | 2.1  |
| 11 | 63710250 | 63710275 | 25  | 63710262 | 13 | 13  | 2.1  |
| 11 | 64014375 | 64014400 | 25  | 64014387 | 13 | 13  | 2.1  |
| 11 | 64284550 | 64284700 | 150 | 64284562 | 12 | 72  | 0    |
| 11 | 64297475 | 64297525 | 50  | 64297487 | 13 | 25  | 4.1  |
| 11 | 64909500 | 64909525 | 25  | 64909512 | 12 | 12  | 0    |
| 11 | 65021275 | 65021300 | 25  | 65021287 | 13 | 13  | 2.1  |
| 11 | 65605500 | 65605575 | 75  | 65605512 | 13 | 37  | 0    |
| 11 | 65836825 | 65836975 | 150 | 65836937 | 22 | 106 | 2.1  |
| 11 | 65872150 | 65872275 | 125 | 65872162 | 12 | 60  | 10.3 |
| 11 | 66011525 | 66011550 | 25  | 66011537 | 12 | 12  | 2.1  |
| 11 | 66034425 | 66034450 | 25  | 66034437 | 14 | 14  | 2.1  |
| 11 | 66165225 | 66165300 | 75  | 66165237 | 15 | 43  | 0    |
| 11 | 66250625 | 66250750 | 125 | 66250637 | 13 | 65  | 6.2  |
| 11 | 66764475 | 66764500 | 25  | 66764487 | 12 | 12  | 2.1  |
| 11 | 66776300 | 66776325 | 25  | 66776312 | 12 | 12  | 0    |
| 11 | 67007525 | 67007550 | 25  | 67007537 | 14 | 14  | 2.1  |
| 11 | 67030375 | 67030475 | 100 | 67030387 | 12 | 46  | 2.1  |
| 11 | 67058175 | 67058350 | 175 | 67058237 | 15 | 97  | 0    |
| 11 | 67697650 | 67697675 | 25  | 67697662 | 12 | 12  | 0    |
| 11 | 67791100 | 67791175 | 75  | 67791112 | 12 | 36  | 6.2  |
| 11 | 67800200 | 67800250 | 50  | 67800212 | 12 | 24  | 0    |

|    |          |          |     |          |    |     |      |
|----|----------|----------|-----|----------|----|-----|------|
| 11 | 68173775 | 68173825 | 50  | 68173787 | 12 | 24  | 4.1  |
| 11 | 68516775 | 68516875 | 100 | 68516837 | 13 | 50  | 0    |
| 11 | 68525025 | 68525075 | 50  | 68525037 | 13 | 26  | 0    |
| 11 | 68821150 | 68821275 | 125 | 68821187 | 16 | 74  | 8.3  |
| 11 | 68825400 | 68825475 | 75  | 68825412 | 12 | 36  | 6.2  |
| 11 | 68995175 | 68995225 | 50  | 68995187 | 13 | 26  | 2.1  |
| 11 | 69123875 | 69123900 | 25  | 69123887 | 12 | 12  | 2.1  |
| 11 | 69194425 | 69194450 | 25  | 69194437 | 12 | 12  | 2.1  |
| 11 | 69756925 | 69757000 | 75  | 69756987 | 13 | 37  | 6.2  |
| 11 | 71412975 | 71413025 | 50  | 71412987 | 13 | 26  | 4.1  |
| 11 | 71437700 | 71437775 | 75  | 71437712 | 12 | 36  | 0    |
| 11 | 71492300 | 71492350 | 50  | 71492312 | 19 | 34  | 4.1  |
| 11 | 71741800 | 71741875 | 75  | 71741862 | 14 | 38  | 6.2  |
| 11 | 71773825 | 71773925 | 100 | 71773837 | 13 | 51  | 0    |
| 11 | 72092725 | 72092750 | 25  | 72092737 | 12 | 12  | 2.1  |
| 11 | 72209275 | 72209350 | 75  | 72209287 | 12 | 36  | 6.2  |
| 11 | 72562125 | 72562175 | 50  | 72562162 | 13 | 25  | 4.1  |
| 11 | 72605675 | 72605700 | 25  | 72605687 | 12 | 12  | 2.1  |
| 11 | 72720775 | 72720850 | 75  | 72720787 | 12 | 36  | 2.1  |
| 11 | 72927450 | 72927575 | 125 | 72927462 | 14 | 70  | 10.3 |
| 11 | 73176475 | 73176525 | 50  | 73176487 | 13 | 26  | 4.1  |
| 11 | 73559250 | 73559275 | 25  | 73559262 | 12 | 12  | 2.1  |
| 11 | 73708150 | 73708325 | 175 | 73708187 | 16 | 103 | 12.4 |
| 11 | 73952025 | 73952100 | 75  | 73952037 | 12 | 36  | 0    |
| 11 | 74076000 | 74076150 | 150 | 74076062 | 15 | 81  | 0    |
| 11 | 74337600 | 74337625 | 25  | 74337612 | 12 | 12  | 2.1  |
| 11 | 74729050 | 74729075 | 25  | 74729062 | 12 | 12  | 2.1  |
| 11 | 74926900 | 74926950 | 50  | 74926912 | 12 | 24  | 0    |
| 11 | 74950800 | 74951000 | 200 | 74950912 | 27 | 174 | 26.9 |
| 11 | 74966050 | 74966225 | 175 | 74966212 | 13 | 78  | 12.4 |
| 11 | 75313825 | 75313950 | 125 | 75313887 | 15 | 68  | 10.3 |
| 11 | 75581375 | 75581425 | 50  | 75581387 | 12 | 24  | 0    |
| 11 | 75833000 | 75833100 | 100 | 75833087 | 13 | 46  | 2.1  |
| 11 | 76274375 | 76274450 | 75  | 76274387 | 14 | 37  | 6.2  |
| 11 | 76475225 | 76475350 | 125 | 76475312 | 14 | 62  | 10.3 |
| 11 | 76969600 | 76969625 | 25  | 76969612 | 13 | 13  | 0    |
| 11 | 77115075 | 77115100 | 25  | 77115087 | 12 | 12  | 0    |
| 11 | 77383375 | 77383475 | 100 | 77383437 | 19 | 73  | 8.3  |
| 11 | 77528775 | 77528800 | 25  | 77528787 | 13 | 13  | 0    |
| 11 | 77720725 | 77720750 | 25  | 77720737 | 13 | 13  | 2.1  |
| 11 | 77739625 | 77739675 | 50  | 77739662 | 15 | 28  | 4.1  |
| 11 | 77905675 | 77905700 | 25  | 77905687 | 13 | 13  | 0    |
| 11 | 78349650 | 78349675 | 25  | 78349662 | 12 | 12  | 2.1  |
| 11 | 78470300 | 78470375 | 75  | 78470312 | 12 | 36  | 2.1  |
| 11 | 85151075 | 85151150 | 75  | 85151087 | 12 | 36  | 6.2  |
| 11 | 85336075 | 85336175 | 100 | 85336137 | 18 | 60  | 4.1  |
| 11 | 85344250 | 85344375 | 125 | 85344287 | 15 | 64  | 10.3 |
| 11 | 85680750 | 85680825 | 75  | 85680762 | 13 | 39  | 6.2  |
| 11 | 85883225 | 85883325 | 100 | 85883312 | 14 | 52  | 2.1  |
| 11 | 86048800 | 86048950 | 150 | 86048812 | 15 | 83  | 10.3 |
| 11 | 86102350 | 86102400 | 50  | 86102387 | 13 | 25  | 0    |
| 11 | 86129850 | 86129900 | 50  | 86129887 | 14 | 26  | 0    |
| 11 | 86190250 | 86190350 | 100 | 86190287 | 15 | 56  | 0    |
| 11 | 86384175 | 86384250 | 75  | 86384187 | 12 | 36  | 0    |
| 11 | 87166850 | 87166900 | 50  | 87166887 | 16 | 28  | 4.1  |
| 11 | 87771300 | 87771500 | 200 | 87771412 | 17 | 117 | 8.3  |
| 11 | 91149550 | 91149750 | 200 | 91149712 | 16 | 114 | 0    |
| 11 | 91244800 | 91244825 | 25  | 91244812 | 15 | 15  | 2.1  |
| 11 | 91305550 | 91305575 | 25  | 91305562 | 12 | 12  | 2.1  |
| 11 | 91666975 | 91667175 | 200 | 91667062 | 22 | 130 | 2.1  |
| 11 | 91756275 | 91756450 | 175 | 91756387 | 17 | 98  | 8.3  |
| 11 | 91763775 | 91763850 | 75  | 91763787 | 13 | 39  | 6.2  |
| 11 | 92432850 | 92432875 | 25  | 92432862 | 12 | 12  | 2.1  |
| 11 | 93949775 | 93949925 | 150 | 93949787 | 12 | 72  | 0    |
| 11 | 94114075 | 94114100 | 25  | 94114087 | 16 | 16  | 2.1  |
| 11 | 94167525 | 94167550 | 25  | 94167537 | 12 | 12  | 2.1  |
| 11 | 94167775 | 94167800 | 25  | 94167787 | 12 | 12  | 2.1  |
| 11 | 94175325 | 94175350 | 25  | 94175337 | 13 | 13  | 2.1  |
| 11 | 94188600 | 94188850 | 250 | 94188687 | 21 | 171 | 0    |
| 11 | 94204100 | 94204125 | 25  | 94204112 | 13 | 13  | 0    |
| 11 | 94208000 | 94208025 | 25  | 94208012 | 12 | 12  | 2.1  |
| 11 | 94221725 | 94221775 | 50  | 94221737 | 13 | 25  | 4.1  |
| 11 | 94299150 | 94299300 | 150 | 94299162 | 13 | 77  | 12.4 |
| 11 | 94299925 | 94299950 | 25  | 94299937 | 13 | 13  | 2.1  |
| 11 | 94301200 | 94301250 | 50  | 94301212 | 14 | 27  | 0    |

|    |           |           |     |           |    |     |      |
|----|-----------|-----------|-----|-----------|----|-----|------|
| 11 | 94311450  | 94311550  | 100 | 94311462  | 22 | 66  | 8.3  |
| 11 | 94604300  | 94604500  | 200 | 94604312  | 22 | 137 | 20.7 |
| 11 | 94826475  | 94826500  | 25  | 94826487  | 14 | 14  | 2.1  |
| 11 | 94926950  | 94927050  | 100 | 94926987  | 18 | 64  | 8.3  |
| 11 | 94929525  | 94929575  | 50  | 94929537  | 12 | 24  | 4.1  |
| 11 | 94961625  | 94961700  | 75  | 94961637  | 12 | 36  | 2.1  |
| 11 | 95078550  | 95078625  | 75  | 95078612  | 13 | 36  | 4.1  |
| 11 | 95429000  | 95429025  | 25  | 95429012  | 12 | 12  | 2.1  |
| 11 | 95448375  | 95448525  | 150 | 95448387  | 14 | 71  | 8.3  |
| 11 | 95495600  | 95495725  | 125 | 95495687  | 14 | 62  | 10.3 |
| 11 | 95535800  | 95535825  | 25  | 95535812  | 14 | 14  | 0    |
| 11 | 95559600  | 95559650  | 50  | 95559612  | 13 | 26  | 0    |
| 11 | 95560900  | 95560925  | 25  | 95560912  | 12 | 12  | 0    |
| 11 | 95561525  | 95561600  | 75  | 95561537  | 12 | 36  | 0    |
| 11 | 95627100  | 95627225  | 125 | 95627137  | 16 | 74  | 10.3 |
| 11 | 95712525  | 95712550  | 25  | 95712537  | 12 | 12  | 2.1  |
| 11 | 95837650  | 95837850  | 200 | 95837737  | 14 | 98  | 16.6 |
| 11 | 96703625  | 96703675  | 50  | 96703637  | 12 | 24  | 0    |
| 11 | 98990450  | 98990625  | 175 | 98990587  | 17 | 93  | 0    |
| 11 | 101515325 | 101515350 | 25  | 101515337 | 12 | 12  | 2.1  |
| 11 | 101602125 | 101602150 | 25  | 101602137 | 13 | 13  | 2.1  |
| 11 | 101719300 | 101719450 | 150 | 101719437 | 13 | 71  | 0    |
| 11 | 101980225 | 101980250 | 25  | 101980237 | 12 | 12  | 2.1  |
| 11 | 102015100 | 102015150 | 50  | 102015112 | 12 | 24  | 4.1  |
| 11 | 104468625 | 104468700 | 75  | 104468637 | 14 | 42  | 0    |
| 11 | 104732875 | 104733100 | 225 | 104732962 | 23 | 169 | 0    |
| 11 | 105275875 | 105275950 | 75  | 105275887 | 13 | 37  | 6.2  |
| 11 | 105313925 | 105313975 | 50  | 105313937 | 13 | 26  | 0    |
| 11 | 105720200 | 105720225 | 25  | 105720212 | 12 | 12  | 2.1  |
| 11 | 107075500 | 107075625 | 125 | 107075512 | 14 | 60  | 4.1  |
| 11 | 107873525 | 107873650 | 125 | 107873537 | 14 | 68  | 10.3 |
| 11 | 108271875 | 108271925 | 50  | 108271887 | 12 | 24  | 2.1  |
| 11 | 108282350 | 108282450 | 100 | 108282362 | 12 | 44  | 8.3  |
| 11 | 108298375 | 108298400 | 25  | 108298387 | 12 | 12  | 0    |
| 11 | 108315400 | 108315425 | 25  | 108315412 | 12 | 12  | 0    |
| 11 | 109316900 | 109316925 | 25  | 109316912 | 13 | 13  | 2.1  |
| 11 | 109685450 | 109685550 | 100 | 109685462 | 13 | 49  | 0    |
| 11 | 110208950 | 110209050 | 100 | 110208987 | 14 | 52  | 8.3  |
| 11 | 110259250 | 110259275 | 25  | 110259262 | 12 | 12  | 2.1  |
| 11 | 110349600 | 110349650 | 50  | 110349612 | 12 | 24  | 2.1  |
| 11 | 110441675 | 110441750 | 75  | 110441687 | 12 | 34  | 6.2  |
| 11 | 110473550 | 110473625 | 75  | 110473562 | 12 | 36  | 6.2  |
| 11 | 111109550 | 111109600 | 50  | 111109562 | 13 | 25  | 0    |
| 11 | 111551475 | 111551500 | 25  | 111551487 | 12 | 12  | 2.1  |
| 11 | 112572750 | 112572775 | 25  | 112572762 | 12 | 12  | 0    |
| 11 | 112704325 | 112704375 | 50  | 112704337 | 12 | 24  | 0    |
| 11 | 112718475 | 112718500 | 25  | 112718487 | 12 | 12  | 0    |
| 11 | 113670975 | 113671000 | 25  | 113670987 | 15 | 15  | 2.1  |
| 11 | 113754375 | 113754450 | 75  | 113754412 | 14 | 39  | 0    |
| 11 | 113817125 | 113817175 | 50  | 113817137 | 12 | 24  | 4.1  |
| 11 | 114705675 | 114705750 | 75  | 114705687 | 12 | 36  | 6.2  |
| 11 | 115317425 | 115317475 | 50  | 115317462 | 16 | 29  | 4.1  |
| 11 | 115443000 | 115443050 | 50  | 115443012 | 13 | 26  | 4.1  |
| 11 | 116255875 | 116255900 | 25  | 116255887 | 12 | 12  | 2.1  |
| 11 | 116370425 | 116370600 | 175 | 116370537 | 17 | 95  | 0    |
| 11 | 116438675 | 116438700 | 25  | 116438687 | 12 | 12  | 0    |
| 11 | 116473575 | 116473650 | 75  | 116473587 | 12 | 36  | 6.2  |
| 11 | 117735600 | 117735625 | 25  | 117735612 | 15 | 15  | 2.1  |
| 11 | 117993800 | 117993850 | 50  | 117993812 | 12 | 24  | 4.1  |
| 11 | 118295450 | 118295550 | 100 | 118295487 | 14 | 52  | 6.2  |
| 11 | 119583725 | 119583850 | 125 | 119583737 | 14 | 66  | 4.1  |
| 11 | 120318100 | 120318175 | 75  | 120318112 | 12 | 36  | 0    |
| 11 | 120626825 | 120626850 | 25  | 120626837 | 13 | 13  | 2.1  |
| 11 | 120971625 | 120971675 | 50  | 120971662 | 15 | 27  | 0    |
| 11 | 121488125 | 121488175 | 50  | 121488137 | 12 | 24  | 4.1  |
| 11 | 121517800 | 121517925 | 125 | 121517862 | 13 | 62  | 8.3  |
| 11 | 121532925 | 121532950 | 25  | 121532937 | 12 | 12  | 0    |
| 11 | 121548800 | 121548825 | 25  | 121548812 | 12 | 12  | 2.1  |
| 11 | 121556650 | 121556700 | 50  | 121556662 | 17 | 34  | 4.1  |
| 11 | 121562450 | 121562525 | 75  | 121562462 | 18 | 44  | 6.2  |
| 11 | 121573125 | 121573150 | 25  | 121573137 | 20 | 20  | 2.1  |
| 11 | 121957275 | 121957300 | 25  | 121957287 | 14 | 14  | 2.1  |
| 11 | 122010500 | 122010600 | 100 | 122010587 | 17 | 56  | 2.1  |
| 11 | 122018250 | 122018625 | 375 | 122018387 | 20 | 225 | 31   |
| 11 | 122091300 | 122091325 | 25  | 122091312 | 14 | 14  | 0    |

|    |           |           |     |           |    |     |      |
|----|-----------|-----------|-----|-----------|----|-----|------|
| 11 | 122131125 | 122131175 | 50  | 122131137 | 12 | 24  | 4.1  |
| 11 | 122430350 | 122430450 | 100 | 122430387 | 16 | 59  | 0    |
| 11 | 122506500 | 122506600 | 100 | 122506562 | 13 | 50  | 6.2  |
| 11 | 122513875 | 122514000 | 125 | 122513912 | 18 | 79  | 6.2  |
| 11 | 122707000 | 122707025 | 25  | 122707012 | 12 | 12  | 2.1  |
| 11 | 122836625 | 122836675 | 50  | 122836637 | 14 | 28  | 2.1  |
| 11 | 124127975 | 124128000 | 25  | 124127987 | 12 | 12  | 0    |
| 11 | 124499375 | 124499425 | 50  | 124499387 | 15 | 30  | 0    |
| 11 | 124577175 | 124577200 | 25  | 124577187 | 12 | 12  | 2.1  |
| 11 | 124928600 | 124928675 | 75  | 124928612 | 14 | 38  | 6.2  |
| 11 | 125455075 | 125455100 | 25  | 125455087 | 12 | 12  | 2.1  |
| 11 | 125685425 | 125685600 | 175 | 125685512 | 17 | 103 | 18.6 |
| 11 | 125731775 | 125731800 | 25  | 125731787 | 12 | 12  | 2.1  |
| 11 | 125768625 | 125768800 | 175 | 125768687 | 16 | 99  | 0    |
| 11 | 125769800 | 125769825 | 25  | 125769812 | 13 | 13  | 2.1  |
| 11 | 126052500 | 126052625 | 125 | 126052512 | 13 | 63  | 0    |
| 11 | 127414875 | 127414925 | 50  | 127414887 | 12 | 24  | 4.1  |
| 11 | 127585875 | 127585925 | 50  | 127585887 | 12 | 24  | 0    |
| 11 | 127875675 | 127875725 | 50  | 127875687 | 12 | 24  | 2.1  |
| 11 | 127979075 | 127979175 | 100 | 127979087 | 14 | 50  | 0    |
| 11 | 128132500 | 128132675 | 175 | 128132537 | 14 | 94  | 12.4 |
| 11 | 128150700 | 128150750 | 50  | 128150712 | 18 | 30  | 4.1  |
| 11 | 128694475 | 128694500 | 25  | 128694487 | 12 | 12  | 0    |
| 11 | 129018350 | 129018375 | 25  | 129018362 | 12 | 12  | 2.1  |
| 11 | 129378725 | 129378850 | 125 | 129378762 | 15 | 71  | 8.3  |
| 11 | 129507250 | 129507325 | 75  | 129507262 | 14 | 40  | 4.1  |
| 11 | 129697425 | 129697500 | 75  | 129697437 | 13 | 39  | 0    |
| 11 | 129809725 | 129809750 | 25  | 129809737 | 12 | 12  | 2.1  |
| 11 | 130853025 | 130853050 | 25  | 130853037 | 12 | 12  | 2.1  |
| 11 | 131124350 | 131124450 | 100 | 131124387 | 13 | 51  | 8.3  |
| 11 | 131426075 | 131426125 | 50  | 131426087 | 13 | 26  | 0    |
| 11 | 131440175 | 131440200 | 25  | 131440187 | 12 | 12  | 2.1  |
| 11 | 131459600 | 131459700 | 100 | 131459687 | 13 | 49  | 0    |
| 11 | 131487725 | 131487900 | 175 | 131487762 | 13 | 80  | 14.5 |
| 11 | 133310050 | 133310075 | 25  | 133310062 | 14 | 14  | 2.1  |
| 11 | 134324425 | 134324450 | 25  | 134324437 | 14 | 14  | 2.1  |
| 10 | 424125    | 424175    | 50  | 424137    | 13 | 26  | 4.1  |
| 10 | 3230000   | 3230025   | 25  | 3230012   | 12 | 12  | 2.1  |
| 10 | 3314025   | 3314100   | 75  | 3314037   | 13 | 38  | 6.2  |
| 10 | 3484450   | 3484500   | 50  | 3484462   | 12 | 24  | 0    |
| 10 | 4695250   | 4695700   | 450 | 4695662   | 20 | 242 | 18.6 |
| 10 | 4703975   | 4704125   | 150 | 4704012   | 14 | 74  | 0    |
| 10 | 4718200   | 4718225   | 25  | 4718212   | 13 | 13  | 0    |
| 10 | 5197900   | 5198025   | 125 | 5197912   | 13 | 64  | 0    |
| 10 | 5626850   | 5626875   | 25  | 5626862   | 15 | 15  | 2.1  |
| 10 | 5678125   | 5678150   | 25  | 5678137   | 12 | 12  | 2.1  |
| 10 | 5922300   | 5922325   | 25  | 5922312   | 14 | 14  | 2.1  |
| 10 | 6361400   | 6361475   | 75  | 6361462   | 22 | 52  | 8.3  |
| 10 | 6382575   | 6382675   | 100 | 6382587   | 12 | 48  | 4.1  |
| 10 | 13766600  | 13766625  | 25  | 13766612  | 13 | 13  | 2.1  |
| 10 | 13798575  | 13798600  | 25  | 13798587  | 12 | 12  | 2.1  |
| 10 | 14235525  | 14235550  | 25  | 14235537  | 12 | 12  | 2.1  |
| 10 | 15018950  | 15018975  | 25  | 15018962  | 14 | 14  | 2.1  |
| 10 | 15426950  | 15426975  | 25  | 15426962  | 12 | 12  | 2.1  |
| 10 | 16027775  | 16027800  | 25  | 16027787  | 12 | 12  | 0    |
| 10 | 17068275  | 17068425  | 150 | 17068362  | 13 | 71  | 8.3  |
| 10 | 17120850  | 17120875  | 25  | 17120862  | 12 | 12  | 0    |
| 10 | 20042900  | 20043050  | 150 | 20042987  | 14 | 74  | 0    |
| 10 | 21428800  | 21428825  | 25  | 21428812  | 12 | 12  | 0    |
| 10 | 21463875  | 21463975  | 100 | 21463912  | 18 | 64  | 8.3  |
| 10 | 22883525  | 22883550  | 25  | 22883537  | 12 | 12  | 0    |
| 10 | 23339000  | 23339025  | 25  | 23339012  | 12 | 12  | 0    |
| 10 | 24536750  | 24536800  | 50  | 24536762  | 13 | 26  | 4.1  |
| 10 | 25236975  | 25237125  | 150 | 25237062  | 15 | 83  | 0    |
| 10 | 25410275  | 25410400  | 125 | 25410287  | 13 | 59  | 0    |
| 10 | 25822175  | 25822300  | 125 | 25822212  | 16 | 70  | 0    |
| 10 | 26029875  | 26029925  | 50  | 26029887  | 13 | 26  | 4.1  |
| 10 | 29138250  | 29138325  | 75  | 29138262  | 16 | 42  | 4.1  |
| 10 | 29222225  | 29222325  | 100 | 29222237  | 13 | 52  | 0    |
| 10 | 29226600  | 29226775  | 175 | 29226612  | 13 | 85  | 12.4 |
| 10 | 29304900  | 29305325  | 425 | 29304987  | 23 | 260 | 45.5 |
| 10 | 29337100  | 29337125  | 25  | 29337112  | 12 | 12  | 2.1  |
| 10 | 29412075  | 29412250  | 175 | 29412187  | 17 | 100 | 0    |
| 10 | 29449250  | 29449475  | 225 | 29449337  | 22 | 154 | 6.2  |
| 10 | 29487250  | 29487550  | 300 | 29487412  | 17 | 165 | 0    |

|    |          |          |     |          |    |     |      |
|----|----------|----------|-----|----------|----|-----|------|
| 10 | 29533225 | 29533325 | 100 | 29533237 | 12 | 48  | 4.1  |
| 10 | 29583400 | 29583450 | 50  | 29583437 | 13 | 25  | 0    |
| 10 | 29583875 | 29583950 | 75  | 29583887 | 13 | 38  | 6.2  |
| 10 | 29585400 | 29585425 | 25  | 29585412 | 12 | 12  | 2.1  |
| 10 | 29672475 | 29672525 | 50  | 29672487 | 13 | 26  | 0    |
| 10 | 29672750 | 29672850 | 100 | 29672762 | 12 | 48  | 0    |
| 10 | 29705025 | 29705050 | 25  | 29705037 | 12 | 12  | 0    |
| 10 | 29884875 | 29884950 | 75  | 29884887 | 12 | 35  | 0    |
| 10 | 29886675 | 29886725 | 50  | 29886687 | 12 | 24  | 4.1  |
| 10 | 29962375 | 29962500 | 125 | 29962462 | 16 | 69  | 2.1  |
| 10 | 29963850 | 29963875 | 25  | 29963862 | 12 | 12  | 2.1  |
| 10 | 30018175 | 30018325 | 150 | 30018187 | 14 | 74  | 6.2  |
| 10 | 30179400 | 30179500 | 100 | 30179412 | 13 | 52  | 8.3  |
| 10 | 31133425 | 31133475 | 50  | 31133462 | 14 | 27  | 4.1  |
| 10 | 31399275 | 31399375 | 100 | 31399287 | 13 | 52  | 0    |
| 10 | 31948750 | 31948775 | 25  | 31948762 | 12 | 12  | 2.1  |
| 10 | 32269875 | 32269900 | 25  | 32269887 | 14 | 14  | 2.1  |
| 10 | 32333300 | 32333350 | 50  | 32333312 | 13 | 26  | 4.1  |
| 10 | 32334075 | 32334125 | 50  | 32334087 | 15 | 30  | 4.1  |
| 10 | 32362450 | 32362525 | 75  | 32362462 | 12 | 36  | 0    |
| 10 | 34565700 | 34565750 | 50  | 34565712 | 13 | 26  | 0    |
| 10 | 34721800 | 34721950 | 150 | 34721837 | 15 | 80  | 0    |
| 10 | 35115000 | 35115050 | 50  | 35115012 | 14 | 26  | 4.1  |
| 10 | 35236950 | 35237000 | 50  | 35236962 | 13 | 25  | 0    |
| 10 | 35350600 | 35350625 | 25  | 35350612 | 12 | 12  | 2.1  |
| 10 | 36118825 | 36119075 | 250 | 36118912 | 32 | 227 | 12.4 |
| 10 | 36213050 | 36213100 | 50  | 36213062 | 12 | 24  | 0    |
| 10 | 36470850 | 36470875 | 25  | 36470862 | 13 | 13  | 2.1  |
| 10 | 36679100 | 36679150 | 50  | 36679112 | 12 | 24  | 0    |
| 10 | 36720375 | 36720450 | 75  | 36720387 | 14 | 39  | 0    |
| 10 | 36818775 | 36818800 | 25  | 36818787 | 12 | 12  | 2.1  |
| 10 | 36823650 | 36823725 | 75  | 36823712 | 13 | 35  | 6.2  |
| 10 | 36863775 | 36863975 | 200 | 36863862 | 26 | 169 | 24.8 |
| 10 | 36867825 | 36868150 | 325 | 36867962 | 31 | 298 | 2.1  |
| 10 | 36884125 | 36884175 | 50  | 36884137 | 14 | 27  | 4.1  |
| 10 | 37021625 | 37021675 | 50  | 37021637 | 12 | 24  | 4.1  |
| 10 | 37054500 | 37054700 | 200 | 37054537 | 17 | 127 | 14.5 |
| 10 | 37096050 | 37096175 | 125 | 37096112 | 13 | 61  | 0    |
| 10 | 37108350 | 37108425 | 75  | 37108362 | 12 | 36  | 2.1  |
| 10 | 37651550 | 37651600 | 50  | 37651562 | 12 | 24  | 4.1  |
| 10 | 39123250 | 39123375 | 125 | 39123312 | 15 | 70  | 6.2  |
| 10 | 39130150 | 39130225 | 75  | 39130162 | 13 | 39  | 6.2  |
| 10 | 39134350 | 39134525 | 175 | 39134437 | 18 | 97  | 14.5 |
| 10 | 39184175 | 39184250 | 75  | 39184187 | 13 | 37  | 4.1  |
| 10 | 39190675 | 39190875 | 200 | 39190862 | 19 | 91  | 0    |
| 10 | 41678175 | 41678200 | 25  | 41678187 | 15 | 15  | 2.1  |
| 10 | 41704125 | 41704225 | 100 | 41704187 | 23 | 85  | 14.5 |
| 10 | 41709125 | 41709325 | 200 | 41709162 | 27 | 192 | 16.6 |
| 10 | 41710400 | 41710575 | 175 | 41710412 | 23 | 114 | 2.1  |
| 10 | 41711225 | 41711250 | 25  | 41711237 | 18 | 18  | 2.1  |
| 10 | 41712925 | 41713125 | 200 | 41712987 | 16 | 92  | 14.5 |
| 10 | 41714750 | 41714925 | 175 | 41714812 | 19 | 120 | 2.1  |
| 10 | 41849450 | 41849475 | 25  | 41849462 | 42 | 42  | 8.3  |
| 10 | 41850625 | 41850650 | 25  | 41850637 | 13 | 13  | 2.1  |
| 10 | 41917850 | 41918200 | 350 | 41917937 | 16 | 145 | 24.8 |
| 10 | 42359025 | 42359150 | 125 | 42359037 | 12 | 58  | 6.2  |
| 10 | 42360575 | 42360650 | 75  | 42360612 | 14 | 40  | 0    |
| 10 | 44668700 | 44668725 | 25  | 44668712 | 12 | 12  | 2.1  |
| 10 | 44723625 | 44723725 | 100 | 44723637 | 14 | 54  | 2.1  |
| 10 | 47063875 | 47063900 | 25  | 47063887 | 12 | 12  | 2.1  |
| 10 | 49404650 | 49404675 | 25  | 49404662 | 13 | 13  | 0    |
| 10 | 52670875 | 52670975 | 100 | 52670887 | 12 | 48  | 0    |
| 10 | 53234450 | 53234525 | 75  | 53234462 | 13 | 38  | 2.1  |
| 10 | 54209900 | 54209925 | 25  | 54209912 | 13 | 13  | 2.1  |
| 10 | 61807550 | 61807600 | 50  | 61807562 | 15 | 30  | 4.1  |
| 10 | 63467225 | 63467350 | 125 | 63467237 | 12 | 60  | 10.3 |
| 10 | 63478900 | 63478950 | 50  | 63478912 | 15 | 30  | 4.1  |
| 10 | 63696125 | 63696175 | 50  | 63696137 | 12 | 24  | 0    |
| 10 | 64421975 | 64422000 | 25  | 64421987 | 12 | 12  | 0    |
| 10 | 64562875 | 64563025 | 150 | 64562912 | 23 | 108 | 14.5 |
| 10 | 64698900 | 64699000 | 100 | 64698962 | 16 | 57  | 2.1  |
| 10 | 64945275 | 64945325 | 50  | 64945287 | 12 | 24  | 2.1  |
| 10 | 65636325 | 65636400 | 75  | 65636337 | 12 | 36  | 0    |
| 10 | 66724150 | 66724350 | 200 | 66724262 | 18 | 111 | 16.6 |
| 10 | 66772325 | 66772525 | 200 | 66772362 | 13 | 85  | 0    |

|    |           |           |     |           |    |     |      |
|----|-----------|-----------|-----|-----------|----|-----|------|
| 10 | 66776275  | 66776450  | 175 | 66776412  | 17 | 93  | 14.5 |
| 10 | 67242975  | 67243000  | 25  | 67242987  | 12 | 12  | 0    |
| 10 | 67675100  | 67675125  | 25  | 67675112  | 12 | 12  | 0    |
| 10 | 69609050  | 69609075  | 25  | 69609062  | 12 | 12  | 2.1  |
| 10 | 70655000  | 70655200  | 200 | 70655087  | 16 | 113 | 4.1  |
| 10 | 72145850  | 72145900  | 50  | 72145862  | 13 | 26  | 2.1  |
| 10 | 73478475  | 73478500  | 25  | 73478487  | 12 | 12  | 2.1  |
| 10 | 73600900  | 73600950  | 50  | 73600912  | 12 | 24  | 0    |
| 10 | 73678075  | 73678100  | 25  | 73678087  | 13 | 13  | 0    |
| 10 | 73750325  | 73750350  | 25  | 73750337  | 12 | 12  | 0    |
| 10 | 74925950  | 74925975  | 25  | 74925962  | 13 | 13  | 2.1  |
| 10 | 75205100  | 75205125  | 25  | 75205112  | 12 | 12  | 0    |
| 10 | 75339100  | 75339125  | 25  | 75339112  | 12 | 12  | 2.1  |
| 10 | 77204775  | 77204975  | 200 | 77204787  | 12 | 63  | 0    |
| 10 | 78560875  | 78560925  | 50  | 78560887  | 12 | 24  | 0    |
| 10 | 78785650  | 78785950  | 300 | 78785662  | 13 | 132 | 14.5 |
| 10 | 78941675  | 78941700  | 25  | 78941687  | 12 | 12  | 0    |
| 10 | 78957250  | 78957400  | 150 | 78957262  | 13 | 72  | 12.4 |
| 10 | 79016975  | 79017025  | 50  | 79016987  | 14 | 26  | 0    |
| 10 | 79043775  | 79043875  | 100 | 79043787  | 15 | 53  | 0    |
| 10 | 79050750  | 79050850  | 100 | 79050812  | 16 | 57  | 6.2  |
| 10 | 79296950  | 79297000  | 50  | 79296962  | 12 | 24  | 2.1  |
| 10 | 80046325  | 80046375  | 50  | 80046337  | 13 | 26  | 4.1  |
| 10 | 80394925  | 80395050  | 125 | 80394937  | 22 | 96  | 14.5 |
| 10 | 80833625  | 80833650  | 25  | 80833637  | 12 | 12  | 0    |
| 10 | 80843050  | 80843100  | 50  | 80843087  | 17 | 30  | 2.1  |
| 10 | 81908475  | 81908550  | 75  | 81908537  | 13 | 37  | 4.1  |
| 10 | 82255550  | 82255575  | 25  | 82255562  | 12 | 12  | 2.1  |
| 10 | 88715475  | 88715500  | 25  | 88715487  | 12 | 12  | 0    |
| 10 | 89328700  | 89328800  | 100 | 89328787  | 13 | 49  | 8.3  |
| 10 | 89902550  | 89902625  | 75  | 89902562  | 12 | 36  | 0    |
| 10 | 90965400  | 90965500  | 100 | 90965412  | 13 | 50  | 8.3  |
| 10 | 91097975  | 91098225  | 250 | 91098037  | 13 | 114 | 6.2  |
| 10 | 91208975  | 91209000  | 25  | 91208987  | 12 | 12  | 0    |
| 10 | 92706675  | 92706700  | 25  | 92706687  | 12 | 12  | 0    |
| 10 | 93301550  | 93301575  | 25  | 93301562  | 12 | 12  | 0    |
| 10 | 93301850  | 93301875  | 25  | 93301862  | 12 | 12  | 2.1  |
| 10 | 93353750  | 93353775  | 25  | 93353762  | 12 | 12  | 2.1  |
| 10 | 93354500  | 93354525  | 25  | 93354512  | 13 | 13  | 0    |
| 10 | 94510600  | 94510650  | 50  | 94510612  | 12 | 24  | 0    |
| 10 | 94949025  | 94949350  | 325 | 94949187  | 22 | 221 | 29   |
| 10 | 95186775  | 95186850  | 75  | 95186837  | 13 | 37  | 0    |
| 10 | 96227425  | 96227450  | 25  | 96227437  | 12 | 12  | 2.1  |
| 10 | 97217225  | 97217325  | 100 | 97217237  | 17 | 61  | 6.2  |
| 10 | 97278825  | 97278875  | 50  | 97278837  | 12 | 24  | 4.1  |
| 10 | 99041875  | 99041925  | 50  | 99041887  | 13 | 26  | 2.1  |
| 10 | 99398775  | 99398925  | 150 | 99398812  | 13 | 75  | 0    |
| 10 | 99486825  | 99486850  | 25  | 99486837  | 12 | 12  | 2.1  |
| 10 | 99812875  | 99812900  | 25  | 99812887  | 13 | 13  | 0    |
| 10 | 100066575 | 100066600 | 25  | 100066587 | 12 | 12  | 2.1  |
| 10 | 100090950 | 100091025 | 75  | 100091012 | 15 | 43  | 2.1  |
| 10 | 100115925 | 100116375 | 450 | 100116037 | 24 | 324 | 31   |
| 10 | 100117775 | 100117825 | 50  | 100117787 | 23 | 46  | 8.3  |
| 10 | 100118550 | 100118775 | 225 | 100118687 | 21 | 154 | 14.5 |
| 10 | 100220075 | 100220100 | 25  | 100220087 | 12 | 12  | 0    |
| 10 | 100227025 | 100227100 | 75  | 100227037 | 13 | 39  | 4.1  |
| 10 | 100792700 | 100792775 | 75  | 100792712 | 12 | 36  | 0    |
| 10 | 102094000 | 102094025 | 25  | 102094012 | 12 | 12  | 0    |
| 10 | 102581600 | 102581725 | 125 | 102581612 | 15 | 70  | 0    |
| 10 | 102640400 | 102640475 | 75  | 102640437 | 14 | 40  | 2.1  |
| 10 | 102647075 | 102647100 | 25  | 102647087 | 13 | 13  | 0    |
| 10 | 102662350 | 102662425 | 75  | 102662387 | 14 | 41  | 0    |
| 10 | 102762900 | 102762925 | 25  | 102762912 | 12 | 12  | 2.1  |
| 10 | 102800400 | 102800475 | 75  | 102800412 | 12 | 36  | 0    |
| 10 | 102867600 | 102867825 | 225 | 102867737 | 22 | 146 | 0    |
| 10 | 103976075 | 103976225 | 150 | 103976112 | 15 | 81  | 8.3  |
| 10 | 105145375 | 105145400 | 25  | 105145387 | 12 | 12  | 0    |
| 10 | 105458350 | 105458400 | 50  | 105458362 | 12 | 24  | 4.1  |
| 10 | 105600050 | 105600075 | 25  | 105600062 | 12 | 12  | 2.1  |
| 10 | 105644375 | 105644400 | 25  | 105644387 | 12 | 12  | 0    |
| 10 | 106230125 | 106230275 | 150 | 106230137 | 15 | 88  | 6.2  |
| 10 | 109665275 | 109665325 | 50  | 109665287 | 12 | 24  | 4.1  |
| 10 | 112430325 | 112430400 | 75  | 112430337 | 12 | 36  | 6.2  |
| 10 | 112489675 | 112489800 | 125 | 112489687 | 16 | 73  | 6.2  |
| 10 | 113506700 | 113506775 | 75  | 113506737 | 15 | 44  | 6.2  |

|    |           |           |     |           |    |      |      |
|----|-----------|-----------|-----|-----------|----|------|------|
| 10 | 113953275 | 113953300 | 25  | 113953287 | 12 | 12   | 2.1  |
| 10 | 114482575 | 114482625 | 50  | 114482587 | 14 | 28   | 0    |
| 10 | 114485450 | 114485550 | 100 | 114485462 | 12 | 48   | 0    |
| 10 | 114561750 | 114561800 | 50  | 114561762 | 15 | 28   | 4.1  |
| 10 | 115135025 | 115135075 | 50  | 115135062 | 13 | 25   | 4.1  |
| 10 | 115208275 | 115208300 | 25  | 115208287 | 12 | 12   | 2.1  |
| 10 | 116098075 | 116098125 | 50  | 116098087 | 12 | 24   | 0    |
| 10 | 116745225 | 116745425 | 200 | 116745337 | 14 | 98   | 16.6 |
| 10 | 116813450 | 116813475 | 25  | 116813462 | 12 | 12   | 2.1  |
| 10 | 120005925 | 120005950 | 25  | 120005937 | 12 | 12   | 0    |
| 10 | 120504475 | 120504525 | 50  | 120504512 | 15 | 29   | 4.1  |
| 10 | 121443100 | 121443200 | 100 | 121443137 | 13 | 49   | 6.2  |
| 10 | 122160575 | 122160600 | 25  | 122160587 | 12 | 12   | 2.1  |
| 10 | 122711875 | 122711900 | 25  | 122711887 | 13 | 13   | 0    |
| 10 | 122792625 | 122792775 | 150 | 122792737 | 25 | 119  | 8.3  |
| 10 | 122868700 | 122868775 | 75  | 122868712 | 12 | 36   | 0    |
| 10 | 123801575 | 123801600 | 25  | 123801587 | 13 | 13   | 2.1  |
| 10 | 123812950 | 123812975 | 25  | 123812962 | 12 | 12   | 2.1  |
| 10 | 123901000 | 123901075 | 75  | 123901012 | 14 | 42   | 0    |
| 10 | 124007375 | 124007400 | 25  | 124007387 | 12 | 12   | 0    |
| 10 | 126113725 | 126113775 | 50  | 126113762 | 14 | 27   | 0    |
| 10 | 126924150 | 126924175 | 25  | 126924162 | 12 | 12   | 0    |
| 10 | 127312075 | 127312100 | 25  | 127312087 | 13 | 13   | 2.1  |
| 10 | 127570300 | 127570325 | 25  | 127570312 | 13 | 13   | 2.1  |
| 10 | 127570700 | 127570725 | 25  | 127570712 | 12 | 12   | 0    |
| 10 | 127571550 | 127571750 | 200 | 127571662 | 19 | 131  | 16.6 |
| 10 | 127575600 | 127575725 | 125 | 127575687 | 13 | 60   | 10.3 |
| 10 | 127603925 | 127604000 | 75  | 127603937 | 14 | 38   | 0    |
| 10 | 127878000 | 127878100 | 100 | 127878012 | 16 | 58   | 6.2  |
| 10 | 128069850 | 128070025 | 175 | 128070012 | 15 | 93   | 14.5 |
| 10 | 128313650 | 128313750 | 100 | 128313662 | 17 | 56   | 2.1  |
| 10 | 128324875 | 128324925 | 50  | 128324887 | 14 | 27   | 4.1  |
| 10 | 128343000 | 128343050 | 50  | 128343012 | 13 | 26   | 0    |
| 10 | 128717925 | 128718000 | 75  | 128717937 | 12 | 36   | 2.1  |
| 10 | 130979375 | 130979500 | 125 | 130979387 | 12 | 60   | 4.1  |
| 10 | 131573975 | 131574025 | 50  | 131573987 | 12 | 24   | 2.1  |
| 10 | 131576300 | 131576325 | 25  | 131576312 | 12 | 12   | 2.1  |
| 10 | 131709600 | 131709625 | 25  | 131709612 | 16 | 16   | 0    |
| 10 | 132462425 | 132462450 | 25  | 132462437 | 12 | 12   | 0    |
| 10 | 134180750 | 134180900 | 150 | 134180862 | 18 | 97   | 4.1  |
| 10 | 134348975 | 134349000 | 25  | 134348987 | 12 | 12   | 2.1  |
| 13 | 18590250  | 18590800  | 550 | 18590587  | 69 | 1015 | 99.3 |
| 13 | 19059400  | 19059525  | 125 | 19059437  | 16 | 68   | 0    |
| 13 | 20415775  | 20415800  | 25  | 20415787  | 12 | 12   | 2.1  |
| 13 | 20908025  | 20908075  | 50  | 20908062  | 17 | 32   | 2.1  |
| 13 | 23050675  | 23050775  | 100 | 23050687  | 12 | 48   | 2.1  |
| 13 | 23983800  | 23983900  | 100 | 23983887  | 13 | 48   | 6.2  |
| 13 | 25353275  | 25353375  | 100 | 25353287  | 13 | 49   | 8.3  |
| 13 | 26655400  | 26655475  | 75  | 26655437  | 14 | 40   | 6.2  |
| 13 | 27860975  | 27861000  | 25  | 27860987  | 12 | 12   | 0    |
| 13 | 27962425  | 27962575  | 150 | 27962437  | 13 | 71   | 10.3 |
| 13 | 27972100  | 27972225  | 125 | 27972137  | 14 | 64   | 2.1  |
| 13 | 27972475  | 27972500  | 25  | 27972487  | 12 | 12   | 2.1  |
| 13 | 28046975  | 28047025  | 50  | 28046987  | 13 | 25   | 4.1  |
| 13 | 29205700  | 29205725  | 25  | 29205712  | 13 | 13   | 2.1  |
| 13 | 29364600  | 29364625  | 25  | 29364612  | 12 | 12   | 0    |
| 13 | 29591700  | 29591775  | 75  | 29591712  | 13 | 37   | 6.2  |
| 13 | 29606900  | 29607075  | 175 | 29606937  | 22 | 120  | 12.4 |
| 13 | 30089800  | 30089825  | 25  | 30089812  | 21 | 21   | 4.1  |
| 13 | 31945775  | 31945800  | 25  | 31945787  | 12 | 12   | 0    |
| 13 | 33023575  | 33023675  | 100 | 33023612  | 16 | 57   | 0    |
| 13 | 33083175  | 33083425  | 250 | 33083337  | 19 | 159  | 26.9 |
| 13 | 33085175  | 33085300  | 125 | 33085187  | 17 | 78   | 10.3 |
| 13 | 33628175  | 33628400  | 225 | 33628262  | 16 | 120  | 6.2  |
| 13 | 34220200  | 34220500  | 300 | 34220312  | 15 | 162  | 29   |
| 13 | 34486800  | 34486825  | 25  | 34486812  | 12 | 12   | 0    |
| 13 | 35070400  | 35070550  | 150 | 35070412  | 13 | 75   | 12.4 |
| 13 | 35327925  | 35327950  | 25  | 35327937  | 12 | 12   | 0    |
| 13 | 35451525  | 35451725  | 200 | 35451662  | 21 | 138  | 6.2  |
| 13 | 35514975  | 35515050  | 75  | 35514987  | 12 | 36   | 0    |
| 13 | 37006550  | 37006575  | 25  | 37006562  | 12 | 12   | 0    |
| 13 | 38158175  | 38158225  | 50  | 38158187  | 13 | 26   | 4.1  |
| 13 | 38248300  | 38248375  | 75  | 38248312  | 13 | 39   | 6.2  |
| 13 | 38602875  | 38602900  | 25  | 38602887  | 12 | 12   | 0    |
| 13 | 39926075  | 39926275  | 200 | 39926212  | 14 | 98   | 8.3  |



|    |          |          |     |          |    |     |      |
|----|----------|----------|-----|----------|----|-----|------|
| 13 | 40041950 | 40042025 | 75  | 40041962 | 12 | 36  | 0    |
| 13 | 40095800 | 40095825 | 25  | 40095812 | 13 | 13  | 0    |
| 13 | 40577350 | 40577375 | 25  | 40577362 | 12 | 12  | 0    |
| 13 | 41744100 | 41744150 | 50  | 41744112 | 16 | 28  | 4.1  |
| 13 | 43260250 | 43260300 | 50  | 43260262 | 12 | 24  | 0    |
| 13 | 43485875 | 43486075 | 200 | 43485887 | 16 | 108 | 8.3  |
| 13 | 43592975 | 43593175 | 200 | 43593162 | 14 | 94  | 0    |
| 13 | 43613275 | 43613300 | 25  | 43613287 | 12 | 12  | 0    |
| 13 | 43744850 | 43744900 | 50  | 43744862 | 12 | 24  | 2.1  |
| 13 | 43803975 | 43804000 | 25  | 43803987 | 12 | 12  | 0    |
| 13 | 43901550 | 43901725 | 175 | 43901562 | 14 | 87  | 14.5 |
| 13 | 44528150 | 44528175 | 25  | 44528162 | 13 | 13  | 2.1  |
| 13 | 44812475 | 44812625 | 150 | 44812587 | 16 | 84  | 10.3 |
| 13 | 44866225 | 44866350 | 125 | 44866312 | 13 | 60  | 6.2  |
| 13 | 45147075 | 45147150 | 75  | 45147087 | 14 | 40  | 6.2  |
| 13 | 45826900 | 45826925 | 25  | 45826912 | 12 | 12  | 2.1  |
| 13 | 46106575 | 46106625 | 50  | 46106587 | 13 | 25  | 0    |
| 13 | 46369125 | 46369150 | 25  | 46369137 | 13 | 13  | 2.1  |
| 13 | 47602825 | 47602875 | 50  | 47602837 | 12 | 24  | 4.1  |
| 13 | 47775625 | 47775700 | 75  | 47775687 | 13 | 36  | 4.1  |
| 13 | 48422725 | 48422775 | 50  | 48422737 | 12 | 24  | 4.1  |
| 13 | 48426375 | 48426525 | 150 | 48426512 | 13 | 66  | 12.4 |
| 13 | 49349875 | 49349925 | 50  | 49349887 | 12 | 24  | 0    |
| 13 | 49858750 | 49858900 | 150 | 49858787 | 15 | 86  | 10.3 |
| 13 | 50118400 | 50118450 | 50  | 50118437 | 14 | 26  | 4.1  |
| 13 | 51105375 | 51105400 | 25  | 51105387 | 16 | 16  | 0    |
| 13 | 51275875 | 51275900 | 25  | 51275887 | 13 | 13  | 2.1  |
| 13 | 53823275 | 53823350 | 75  | 53823312 | 14 | 40  | 6.2  |
| 13 | 58393375 | 58393450 | 75  | 58393387 | 13 | 37  | 4.1  |
| 13 | 58466250 | 58466275 | 25  | 58466262 | 12 | 12  | 0    |
| 13 | 58722575 | 58722600 | 25  | 58722587 | 12 | 12  | 2.1  |
| 13 | 58741775 | 58741900 | 125 | 58741862 | 16 | 71  | 4.1  |
| 13 | 58751275 | 58751375 | 100 | 58751287 | 13 | 50  | 8.3  |
| 13 | 59735800 | 59735875 | 75  | 59735812 | 12 | 36  | 0    |
| 13 | 61765250 | 61765425 | 175 | 61765387 | 17 | 93  | 6.2  |
| 13 | 62858850 | 62858875 | 25  | 62858862 | 12 | 12  | 0    |
| 13 | 62908075 | 62908100 | 25  | 62908087 | 12 | 12  | 2.1  |
| 13 | 64397400 | 64397450 | 50  | 64397412 | 12 | 24  | 2.1  |
| 13 | 64851225 | 64851325 | 100 | 64851262 | 16 | 56  | 0    |
| 13 | 66698450 | 66698550 | 100 | 66698462 | 12 | 44  | 0    |
| 13 | 71582300 | 71582325 | 25  | 71582312 | 12 | 12  | 2.1  |
| 13 | 72472875 | 72472975 | 100 | 72472912 | 14 | 50  | 0    |
| 13 | 72723950 | 72724000 | 50  | 72723962 | 12 | 24  | 0    |
| 13 | 72809325 | 72809400 | 75  | 72809362 | 13 | 38  | 0    |
| 13 | 72912600 | 72912625 | 25  | 72912612 | 13 | 13  | 0    |
| 13 | 73168100 | 73168200 | 100 | 73168137 | 15 | 51  | 0    |
| 13 | 73608000 | 73608075 | 75  | 73608012 | 15 | 43  | 6.2  |
| 13 | 74359025 | 74359100 | 75  | 74359037 | 13 | 39  | 4.1  |
| 13 | 76789575 | 76789600 | 25  | 76789587 | 12 | 12  | 0    |
| 13 | 78976150 | 78976175 | 25  | 78976162 | 12 | 12  | 0    |
| 13 | 79063450 | 79063575 | 125 | 79063512 | 15 | 65  | 0    |
| 13 | 79103550 | 79103575 | 25  | 79103562 | 12 | 12  | 2.1  |
| 13 | 79140900 | 79140925 | 25  | 79140912 | 12 | 12  | 2.1  |
| 13 | 79151500 | 79151625 | 125 | 79151512 | 13 | 62  | 8.3  |
| 13 | 79373475 | 79373625 | 150 | 79373562 | 22 | 107 | 6.2  |
| 13 | 79408875 | 79409150 | 275 | 79408962 | 18 | 157 | 2.1  |
| 13 | 79460925 | 79460950 | 25  | 79460937 | 12 | 12  | 0    |
| 13 | 79484025 | 79484125 | 100 | 79484062 | 17 | 58  | 0    |
| 13 | 79556675 | 79556875 | 200 | 79556812 | 15 | 97  | 10.3 |
| 13 | 79605175 | 79605250 | 75  | 79605237 | 13 | 37  | 0    |
| 13 | 79609250 | 79609275 | 25  | 79609262 | 13 | 13  | 2.1  |
| 13 | 79668975 | 79669150 | 175 | 79669012 | 15 | 97  | 6.2  |
| 13 | 79908600 | 79908725 | 125 | 79908612 | 14 | 58  | 0    |
| 13 | 80044675 | 80044700 | 25  | 80044687 | 15 | 15  | 2.1  |
| 13 | 80256075 | 80256150 | 75  | 80256087 | 12 | 36  | 6.2  |
| 13 | 80530700 | 80530800 | 100 | 80530787 | 13 | 49  | 4.1  |
| 13 | 80774200 | 80774250 | 50  | 80774212 | 12 | 24  | 0    |
| 13 | 81217325 | 81217425 | 100 | 81217387 | 15 | 53  | 0    |
| 13 | 84504150 | 84504175 | 25  | 84504162 | 12 | 12  | 2.1  |
| 13 | 84976025 | 84976125 | 100 | 84976087 | 16 | 58  | 8.3  |
| 13 | 85009950 | 85009975 | 25  | 85009962 | 13 | 13  | 0    |
| 13 | 85058500 | 85058700 | 200 | 85058612 | 17 | 115 | 14.5 |
| 13 | 88613575 | 88613675 | 100 | 88613662 | 16 | 54  | 8.3  |
| 13 | 89935775 | 89935950 | 175 | 89935812 | 16 | 90  | 0    |
| 13 | 90168025 | 90168100 | 75  | 90168037 | 12 | 36  | 6.2  |

|    |           |           |     |           |    |     |      |
|----|-----------|-----------|-----|-----------|----|-----|------|
| 13 | 92668225  | 92668325  | 100 | 92668237  | 16 | 59  | 8.3  |
| 13 | 92698900  | 92699125  | 225 | 92699037  | 22 | 167 | 20.7 |
| 13 | 92699900  | 92700100  | 200 | 92699987  | 18 | 115 | 0    |
| 13 | 92924900  | 92924975  | 75  | 92924912  | 12 | 36  | 0    |
| 13 | 93886175  | 93886225  | 50  | 93886187  | 12 | 24  | 0    |
| 13 | 93932350  | 93932500  | 150 | 93932437  | 16 | 82  | 4.1  |
| 13 | 94752375  | 94752425  | 50  | 94752387  | 14 | 28  | 4.1  |
| 13 | 94774550  | 94774575  | 25  | 94774562  | 13 | 13  | 2.1  |
| 13 | 95969675  | 95969825  | 150 | 95969712  | 14 | 78  | 0    |
| 13 | 96708375  | 96708450  | 75  | 96708387  | 13 | 39  | 0    |
| 13 | 96949650  | 96949725  | 75  | 96949687  | 14 | 38  | 0    |
| 13 | 97025300  | 97025350  | 50  | 97025312  | 13 | 25  | 4.1  |
| 13 | 97230975  | 97231075  | 100 | 97230987  | 16 | 60  | 6.2  |
| 13 | 97232375  | 97232550  | 175 | 97232512  | 14 | 82  | 2.1  |
| 13 | 97249200  | 97249275  | 75  | 97249262  | 13 | 37  | 6.2  |
| 13 | 97751350  | 97751550  | 200 | 97751512  | 28 | 151 | 14.5 |
| 13 | 97774375  | 97774450  | 75  | 97774412  | 16 | 40  | 2.1  |
| 13 | 97775775  | 97775800  | 25  | 97775787  | 13 | 13  | 2.1  |
| 13 | 97776100  | 97776150  | 50  | 97776112  | 12 | 24  | 0    |
| 13 | 97931150  | 97931200  | 50  | 97931162  | 12 | 24  | 0    |
| 13 | 98965250  | 98965300  | 50  | 98965262  | 13 | 26  | 0    |
| 13 | 99963375  | 99963400  | 25  | 99963387  | 12 | 12  | 2.1  |
| 13 | 103465850 | 103465875 | 25  | 103465862 | 13 | 13  | 0    |
| 13 | 105038300 | 105038375 | 75  | 105038312 | 15 | 42  | 0    |
| 13 | 105571475 | 105571625 | 150 | 105571487 | 13 | 77  | 0    |
| 13 | 105807625 | 105807825 | 200 | 105807787 | 18 | 118 | 0    |
| 13 | 106653000 | 106653175 | 175 | 106653112 | 27 | 155 | 14.5 |
| 13 | 108437800 | 108437825 | 25  | 108437812 | 13 | 13  | 0    |
| 13 | 108832400 | 108832525 | 125 | 108832412 | 13 | 56  | 10.3 |
| 13 | 109221050 | 109221125 | 75  | 109221087 | 14 | 40  | 6.2  |
| 13 | 109543575 | 109543625 | 50  | 109543587 | 14 | 26  | 4.1  |
| 13 | 109576675 | 109576825 | 150 | 109576812 | 13 | 67  | 0    |
| 13 | 109577175 | 109577200 | 25  | 109577187 | 12 | 12  | 2.1  |
| 13 | 109666275 | 109666300 | 25  | 109666287 | 13 | 13  | 0    |
| 13 | 109949975 | 109950075 | 100 | 109949987 | 16 | 60  | 8.3  |
| 13 | 109950450 | 109950475 | 25  | 109950462 | 13 | 13  | 2.1  |
| 13 | 110320650 | 110320900 | 250 | 110320787 | 36 | 272 | 39.3 |
| 13 | 112290450 | 112290550 | 100 | 112290537 | 15 | 55  | 0    |
| 13 | 112601650 | 112601725 | 75  | 112601662 | 12 | 36  | 0    |
| 13 | 112999250 | 112999425 | 175 | 112999362 | 16 | 97  | 8.3  |
| 13 | 113902800 | 113902950 | 150 | 113902937 | 14 | 76  | 4.1  |
| 13 | 113912800 | 113912825 | 25  | 113912812 | 12 | 12  | 0    |
| 13 | 114018225 | 114018275 | 50  | 114018262 | 16 | 28  | 4.1  |
| 13 | 114123450 | 114123500 | 50  | 114123462 | 12 | 24  | 4.1  |
| 12 | 32825     | 32925     | 100 | 32837     | 14 | 54  | 0    |
| 12 | 432800    | 432875    | 75  | 432837    | 19 | 51  | 6.2  |
| 12 | 1219575   | 1219650   | 75  | 1219587   | 12 | 36  | 6.2  |
| 12 | 1266925   | 1266950   | 25  | 1266937   | 12 | 12  | 0    |
| 12 | 1454350   | 1454375   | 25  | 1454362   | 13 | 13  | 2.1  |
| 12 | 1917550   | 1917575   | 25  | 1917562   | 12 | 12  | 0    |
| 12 | 1983875   | 1983925   | 50  | 1983912   | 27 | 48  | 8.3  |
| 12 | 1984525   | 1984625   | 100 | 1984537   | 12 | 48  | 0    |
| 12 | 2108625   | 2108650   | 25  | 2108637   | 13 | 13  | 2.1  |
| 12 | 2264700   | 2264725   | 25  | 2264712   | 12 | 12  | 0    |
| 12 | 2272350   | 2272400   | 50  | 2272362   | 12 | 24  | 2.1  |
| 12 | 2418800   | 2418825   | 25  | 2418812   | 12 | 12  | 2.1  |
| 12 | 2872575   | 2872650   | 75  | 2872587   | 13 | 39  | 6.2  |
| 12 | 3471975   | 3472000   | 25  | 3471987   | 12 | 12  | 0    |
| 12 | 4628400   | 4628500   | 100 | 4628462   | 14 | 50  | 0    |
| 12 | 5225825   | 5225875   | 50  | 5225837   | 12 | 24  | 2.1  |
| 12 | 5239675   | 5239825   | 150 | 5239787   | 16 | 82  | 12.4 |
| 12 | 6027375   | 6027425   | 50  | 6027387   | 12 | 24  | 0    |
| 12 | 6315825   | 6315875   | 50  | 6315862   | 16 | 30  | 4.1  |
| 12 | 6351875   | 6351925   | 50  | 6351887   | 17 | 33  | 4.1  |
| 12 | 6363375   | 6363575   | 200 | 6363512   | 17 | 114 | 8.3  |
| 12 | 6447825   | 6447900   | 75  | 6447837   | 12 | 36  | 0    |
| 12 | 6513700   | 6513750   | 50  | 6513712   | 14 | 28  | 4.1  |
| 12 | 6703675   | 6703700   | 25  | 6703687   | 21 | 21  | 4.1  |
| 12 | 6940500   | 6940525   | 25  | 6940512   | 12 | 12  | 2.1  |
| 12 | 6941475   | 6941500   | 25  | 6941487   | 13 | 13  | 2.1  |
| 12 | 8683250   | 8683275   | 25  | 8683262   | 12 | 12  | 2.1  |
| 12 | 9162075   | 9162100   | 25  | 9162087   | 12 | 12  | 0    |
| 12 | 9369400   | 9369475   | 75  | 9369412   | 12 | 36  | 0    |
| 12 | 9378050   | 9378375   | 325 | 9378237   | 17 | 172 | 18.6 |
| 12 | 9916850   | 9916925   | 75  | 9916862   | 12 | 36  | 0    |

|    |          |          |     |          |    |     |      |
|----|----------|----------|-----|----------|----|-----|------|
| 12 | 10144975 | 10145075 | 100 | 10145062 | 16 | 52  | 2.1  |
| 12 | 10256375 | 10256475 | 100 | 10256387 | 13 | 48  | 8.3  |
| 12 | 10917375 | 10917425 | 50  | 10917412 | 13 | 25  | 0    |
| 12 | 11530850 | 11530875 | 25  | 11530862 | 12 | 12  | 2.1  |
| 12 | 11692975 | 11693050 | 75  | 11692987 | 16 | 40  | 4.1  |
| 12 | 11696775 | 11696800 | 25  | 11696787 | 12 | 12  | 2.1  |
| 12 | 11703400 | 11703450 | 50  | 11703412 | 12 | 24  | 4.1  |
| 12 | 11905900 | 11905925 | 25  | 11905912 | 13 | 13  | 2.1  |
| 12 | 11907650 | 11907775 | 125 | 11907662 | 14 | 62  | 12.4 |
| 12 | 11995650 | 11995675 | 25  | 11995662 | 13 | 13  | 2.1  |
| 12 | 12282950 | 12283000 | 50  | 12282962 | 13 | 26  | 0    |
| 12 | 12382850 | 12382925 | 75  | 12382912 | 18 | 50  | 6.2  |
| 12 | 12803300 | 12803375 | 75  | 12803312 | 15 | 44  | 2.1  |
| 12 | 12927450 | 12927500 | 50  | 12927462 | 15 | 28  | 4.1  |
| 12 | 12932275 | 12932300 | 25  | 12932287 | 12 | 12  | 0    |
| 12 | 13625475 | 13625600 | 125 | 13625587 | 17 | 67  | 0    |
| 12 | 13771975 | 13772000 | 25  | 13771987 | 12 | 12  | 2.1  |
| 12 | 14300800 | 14300975 | 175 | 14300887 | 17 | 96  | 6.2  |
| 12 | 14301750 | 14301825 | 75  | 14301812 | 27 | 64  | 6.2  |
| 12 | 14302200 | 14302250 | 50  | 14302212 | 34 | 60  | 8.3  |
| 12 | 14409975 | 14410000 | 25  | 14409987 | 12 | 12  | 2.1  |
| 12 | 14429200 | 14429275 | 75  | 14429212 | 12 | 34  | 6.2  |
| 12 | 14438750 | 14438925 | 175 | 14438787 | 17 | 107 | 0    |
| 12 | 14881375 | 14881450 | 75  | 14881387 | 13 | 35  | 6.2  |
| 12 | 15028350 | 15028475 | 125 | 15028462 | 15 | 68  | 10.3 |
| 12 | 15571475 | 15571575 | 100 | 15571512 | 14 | 55  | 0    |
| 12 | 15578175 | 15578350 | 175 | 15578212 | 14 | 90  | 0    |
| 12 | 15641950 | 15642075 | 125 | 15642012 | 16 | 67  | 0    |
| 12 | 15707525 | 15707600 | 75  | 15707562 | 13 | 38  | 6.2  |
| 12 | 16075550 | 16075625 | 75  | 16075562 | 12 | 36  | 0    |
| 12 | 19318100 | 19318250 | 150 | 19318212 | 20 | 98  | 8.3  |
| 12 | 19476275 | 19476375 | 100 | 19476287 | 12 | 48  | 8.3  |
| 12 | 19483375 | 19483550 | 175 | 19483387 | 21 | 127 | 16.6 |
| 12 | 22122200 | 22122250 | 50  | 22122212 | 12 | 24  | 4.1  |
| 12 | 22320275 | 22320300 | 25  | 22320287 | 12 | 12  | 2.1  |
| 12 | 22766300 | 22766500 | 200 | 22766412 | 26 | 169 | 16.6 |
| 12 | 22785025 | 22785050 | 25  | 22785037 | 13 | 13  | 2.1  |
| 12 | 23801850 | 23801875 | 25  | 23801862 | 12 | 12  | 2.1  |
| 12 | 23815550 | 23815850 | 300 | 23815737 | 19 | 175 | 14.5 |
| 12 | 23952400 | 23952475 | 75  | 23952412 | 12 | 36  | 4.1  |
| 12 | 24060050 | 24060325 | 275 | 24060137 | 19 | 173 | 12.4 |
| 12 | 24064850 | 24064975 | 125 | 24064887 | 17 | 76  | 4.1  |
| 12 | 24084075 | 24084125 | 50  | 24084087 | 13 | 26  | 0    |
| 12 | 24090075 | 24090175 | 100 | 24090162 | 23 | 72  | 8.3  |
| 12 | 24107325 | 24107350 | 25  | 24107337 | 12 | 12  | 0    |
| 12 | 24111150 | 24111250 | 100 | 24111162 | 18 | 66  | 2.1  |
| 12 | 24121375 | 24121425 | 50  | 24121387 | 12 | 24  | 0    |
| 12 | 24271300 | 24271375 | 75  | 24271312 | 12 | 36  | 0    |
| 12 | 24291175 | 24291650 | 475 | 24291337 | 20 | 258 | 22.8 |
| 12 | 24604975 | 24605050 | 75  | 24605037 | 15 | 41  | 6.2  |
| 12 | 24801200 | 24801225 | 25  | 24801212 | 12 | 12  | 2.1  |
| 12 | 24998675 | 24998875 | 200 | 24998737 | 13 | 94  | 0    |
| 12 | 25295150 | 25295175 | 25  | 25295162 | 13 | 13  | 2.1  |
| 12 | 25412725 | 25412825 | 100 | 25412787 | 14 | 50  | 0    |
| 12 | 25502350 | 25502450 | 100 | 25502437 | 16 | 54  | 6.2  |
| 12 | 25539950 | 25540000 | 50  | 25539962 | 13 | 25  | 4.1  |
| 12 | 25726725 | 25726775 | 50  | 25726737 | 12 | 24  | 2.1  |
| 12 | 25738400 | 25738550 | 150 | 25738462 | 15 | 75  | 12.4 |
| 12 | 25905675 | 25905700 | 25  | 25905687 | 16 | 16  | 2.1  |
| 12 | 25968975 | 25969000 | 25  | 25968987 | 13 | 13  | 2.1  |
| 12 | 26318975 | 26319000 | 25  | 26318987 | 12 | 12  | 2.1  |
| 12 | 26658475 | 26658625 | 150 | 26658587 | 17 | 92  | 8.3  |
| 12 | 26735800 | 26735900 | 100 | 26735862 | 20 | 73  | 8.3  |
| 12 | 26830875 | 26830900 | 25  | 26830887 | 12 | 12  | 0    |
| 12 | 27367750 | 27367775 | 25  | 27367762 | 13 | 13  | 2.1  |
| 12 | 27648750 | 27648800 | 50  | 27648762 | 12 | 24  | 4.1  |
| 12 | 27663775 | 27663800 | 25  | 27663787 | 12 | 12  | 2.1  |
| 12 | 28096425 | 28096475 | 50  | 28096437 | 12 | 24  | 0    |
| 12 | 28501375 | 28501400 | 25  | 28501387 | 13 | 13  | 0    |
| 12 | 28983350 | 28983400 | 50  | 28983362 | 12 | 24  | 4.1  |
| 12 | 29118000 | 29118100 | 100 | 29118012 | 13 | 50  | 2.1  |
| 12 | 29617300 | 29617325 | 25  | 29617312 | 12 | 12  | 0    |
| 12 | 30798450 | 30798550 | 100 | 30798462 | 12 | 48  | 0    |
| 12 | 30839400 | 30839550 | 150 | 30839437 | 14 | 77  | 0    |
| 12 | 30953000 | 30953025 | 25  | 30953012 | 13 | 13  | 2.1  |

|    |          |          |     |          |    |     |      |
|----|----------|----------|-----|----------|----|-----|------|
| 12 | 31283350 | 31283375 | 25  | 31283362 | 12 | 12  | 2.1  |
| 12 | 31626950 | 31626975 | 25  | 31626962 | 12 | 12  | 0    |
| 12 | 31726400 | 31726650 | 250 | 31726562 | 38 | 288 | 22.8 |
| 12 | 31997250 | 31997400 | 150 | 31997312 | 14 | 80  | 14.5 |
| 12 | 31999300 | 31999400 | 100 | 31999362 | 14 | 51  | 0    |
| 12 | 32095850 | 32095950 | 100 | 32095887 | 14 | 54  | 0    |
| 12 | 32160000 | 32160075 | 75  | 32160037 | 17 | 49  | 6.2  |
| 12 | 32799250 | 32799375 | 125 | 32799337 | 15 | 70  | 2.1  |
| 12 | 34066425 | 34066650 | 225 | 34066612 | 26 | 188 | 22.8 |
| 12 | 34737700 | 34737725 | 25  | 34737712 | 12 | 12  | 2.1  |
| 12 | 36736400 | 36736450 | 50  | 36736412 | 13 | 25  | 0    |
| 12 | 36962625 | 36962725 | 100 | 36962637 | 12 | 48  | 0    |
| 12 | 37601275 | 37601325 | 50  | 37601287 | 12 | 24  | 4.1  |
| 12 | 38990400 | 38990525 | 125 | 38990487 | 14 | 64  | 8.3  |
| 12 | 40661900 | 40662000 | 100 | 40661912 | 13 | 47  | 0    |
| 12 | 41470300 | 41470450 | 150 | 41470362 | 22 | 114 | 20.7 |
| 12 | 41495250 | 41495325 | 75  | 41495262 | 15 | 43  | 4.1  |
| 12 | 41539775 | 41539925 | 150 | 41539862 | 18 | 98  | 12.4 |
| 12 | 43628725 | 43628750 | 25  | 43628737 | 13 | 13  | 0    |
| 12 | 43850750 | 43850875 | 125 | 43850762 | 12 | 58  | 2.1  |
| 12 | 43897025 | 43897200 | 175 | 43897037 | 16 | 101 | 18.6 |
| 12 | 44031075 | 44031125 | 50  | 44031087 | 12 | 24  | 4.1  |
| 12 | 44139550 | 44139750 | 200 | 44139637 | 16 | 114 | 12.4 |
| 12 | 45084850 | 45084875 | 25  | 45084862 | 12 | 12  | 2.1  |
| 12 | 45170225 | 45170375 | 150 | 45170312 | 13 | 72  | 6.2  |
| 12 | 45243075 | 45243175 | 100 | 45243112 | 16 | 54  | 0    |
| 12 | 45748575 | 45748600 | 25  | 45748587 | 12 | 12  | 2.1  |
| 12 | 45765975 | 45766025 | 50  | 45765987 | 12 | 24  | 2.1  |
| 12 | 45951425 | 45951475 | 50  | 45951437 | 12 | 24  | 0    |
| 12 | 46231500 | 46231575 | 75  | 46231512 | 13 | 38  | 0    |
| 12 | 46397675 | 46397700 | 25  | 46397687 | 12 | 12  | 2.1  |
| 12 | 46682725 | 46683150 | 425 | 46682987 | 21 | 280 | 2.1  |
| 12 | 46708725 | 46708775 | 50  | 46708737 | 13 | 25  | 4.1  |
| 12 | 46840400 | 46840525 | 125 | 46840437 | 16 | 72  | 8.3  |
| 12 | 47818575 | 47818875 | 300 | 47818737 | 15 | 153 | 16.6 |
| 12 | 47867425 | 47867450 | 25  | 47867437 | 13 | 13  | 2.1  |
| 12 | 48011600 | 48011625 | 25  | 48011612 | 12 | 12  | 2.1  |
| 12 | 48708025 | 48708150 | 125 | 48708087 | 17 | 71  | 8.3  |
| 12 | 48901375 | 48901500 | 125 | 48901387 | 15 | 67  | 2.1  |
| 12 | 49082125 | 49082150 | 25  | 49082137 | 13 | 13  | 0    |
| 12 | 49605025 | 49605100 | 75  | 49605037 | 16 | 44  | 6.2  |
| 12 | 50439375 | 50439450 | 75  | 50439387 | 12 | 36  | 0    |
| 12 | 50742400 | 50742450 | 50  | 50742412 | 16 | 29  | 4.1  |
| 12 | 50805900 | 50805950 | 50  | 50805912 | 13 | 26  | 0    |
| 12 | 51554050 | 51554075 | 25  | 51554062 | 13 | 13  | 2.1  |
| 12 | 51975025 | 51975150 | 125 | 51975137 | 13 | 59  | 6.2  |
| 12 | 52354650 | 52354700 | 50  | 52354662 | 13 | 26  | 0    |
| 12 | 52505550 | 52505675 | 125 | 52505612 | 13 | 63  | 8.3  |
| 12 | 52686075 | 52686225 | 150 | 52686162 | 16 | 95  | 16.6 |
| 12 | 52987375 | 52987425 | 50  | 52987412 | 15 | 28  | 2.1  |
| 12 | 53112575 | 53112725 | 150 | 53112612 | 15 | 78  | 10.3 |
| 12 | 54797900 | 54797925 | 25  | 54797912 | 12 | 12  | 2.1  |
| 12 | 54869775 | 54869800 | 25  | 54869787 | 13 | 13  | 2.1  |
| 12 | 55201750 | 55201900 | 150 | 55201787 | 17 | 92  | 0    |
| 12 | 55317100 | 55317275 | 175 | 55317137 | 22 | 126 | 18.6 |
| 12 | 55792350 | 55792375 | 25  | 55792362 | 15 | 15  | 2.1  |
| 12 | 55807400 | 55807450 | 50  | 55807412 | 13 | 26  | 4.1  |
| 12 | 55902150 | 55902225 | 75  | 55902162 | 12 | 36  | 0    |
| 12 | 56425200 | 56425225 | 25  | 56425212 | 12 | 12  | 2.1  |
| 12 | 56511750 | 56511775 | 25  | 56511762 | 13 | 13  | 0    |
| 12 | 56991100 | 56991325 | 225 | 56991187 | 18 | 131 | 14.5 |
| 12 | 57100650 | 57100675 | 25  | 57100662 | 12 | 12  | 2.1  |
| 12 | 57105625 | 57105900 | 275 | 57105762 | 18 | 148 | 14.5 |
| 12 | 57124200 | 57124350 | 150 | 57124212 | 13 | 73  | 4.1  |
| 12 | 57721350 | 57721400 | 50  | 57721362 | 12 | 24  | 0    |
| 12 | 57747350 | 57747500 | 150 | 57747462 | 17 | 93  | 2.1  |
| 12 | 61312175 | 61312200 | 25  | 61312187 | 12 | 12  | 2.1  |
| 12 | 61315750 | 61315775 | 25  | 61315762 | 13 | 13  | 0    |
| 12 | 61327900 | 61327925 | 25  | 61327912 | 18 | 18  | 2.1  |
| 12 | 61382675 | 61382900 | 225 | 61382787 | 22 | 160 | 0    |
| 12 | 61394550 | 61394575 | 25  | 61394562 | 12 | 12  | 2.1  |
| 12 | 61466500 | 61466700 | 200 | 61466512 | 14 | 96  | 14.5 |
| 12 | 62705825 | 62705875 | 50  | 62705837 | 12 | 24  | 4.1  |
| 12 | 63305925 | 63305950 | 25  | 63305937 | 12 | 12  | 2.1  |
| 12 | 63626150 | 63626275 | 125 | 63626162 | 13 | 60  | 10.3 |

|    |          |          |     |          |    |     |      |
|----|----------|----------|-----|----------|----|-----|------|
| 12 | 63626550 | 63626675 | 125 | 63626637 | 18 | 84  | 4.1  |
| 12 | 63626900 | 63626925 | 25  | 63626912 | 12 | 12  | 0    |
| 12 | 64005700 | 64005750 | 50  | 64005712 | 13 | 25  | 0    |
| 12 | 64191575 | 64191600 | 25  | 64191587 | 12 | 12  | 0    |
| 12 | 64214325 | 64214350 | 25  | 64214337 | 12 | 12  | 0    |
| 12 | 64311875 | 64311950 | 75  | 64311912 | 26 | 73  | 10.3 |
| 12 | 64329375 | 64329425 | 50  | 64329387 | 15 | 28  | 4.1  |
| 12 | 64337125 | 64337225 | 100 | 64337187 | 15 | 54  | 0    |
| 12 | 64572150 | 64572200 | 50  | 64572162 | 15 | 30  | 4.1  |
| 12 | 64628875 | 64629075 | 200 | 64628887 | 15 | 111 | 8.3  |
| 12 | 64838775 | 64838800 | 25  | 64838787 | 12 | 12  | 0    |
| 12 | 64849600 | 64849650 | 50  | 64849637 | 19 | 35  | 4.1  |
| 12 | 65108575 | 65108675 | 100 | 65108612 | 13 | 51  | 6.2  |
| 12 | 65504500 | 65504650 | 150 | 65504537 | 18 | 103 | 12.4 |
| 12 | 66093825 | 66093850 | 25  | 66093837 | 13 | 13  | 0    |
| 12 | 66115100 | 66115200 | 100 | 66115137 | 14 | 51  | 0    |
| 12 | 66358925 | 66359025 | 100 | 66358962 | 13 | 51  | 0    |
| 12 | 67281825 | 67281850 | 25  | 67281837 | 12 | 12  | 2.1  |
| 12 | 67487800 | 67488000 | 200 | 67487937 | 14 | 97  | 2.1  |
| 12 | 67500875 | 67501025 | 150 | 67500887 | 13 | 74  | 0    |
| 12 | 68039525 | 68039600 | 75  | 68039537 | 14 | 41  | 0    |
| 12 | 68502150 | 68502175 | 25  | 68502162 | 12 | 12  | 2.1  |
| 12 | 68605225 | 68605275 | 50  | 68605237 | 12 | 24  | 0    |
| 12 | 68894000 | 68894025 | 25  | 68894012 | 13 | 13  | 0    |
| 12 | 69007475 | 69007600 | 125 | 69007487 | 12 | 60  | 10.3 |
| 12 | 69107400 | 69107425 | 25  | 69107412 | 12 | 12  | 0    |
| 12 | 70236975 | 70237050 | 75  | 70237037 | 16 | 42  | 6.2  |
| 12 | 70344275 | 70344325 | 50  | 70344312 | 14 | 26  | 4.1  |
| 12 | 70519475 | 70519575 | 100 | 70519537 | 15 | 55  | 0    |
| 12 | 73217775 | 73217800 | 25  | 73217787 | 12 | 12  | 2.1  |
| 12 | 74071175 | 74071200 | 25  | 74071187 | 14 | 14  | 2.1  |
| 12 | 74191950 | 74192050 | 100 | 74191962 | 12 | 46  | 4.1  |
| 12 | 74248725 | 74248750 | 25  | 74248737 | 12 | 12  | 2.1  |
| 12 | 74431125 | 74431275 | 150 | 74431162 | 17 | 85  | 10.3 |
| 12 | 74528600 | 74528675 | 75  | 74528637 | 14 | 38  | 2.1  |
| 12 | 74558475 | 74558600 | 125 | 74558512 | 14 | 64  | 8.3  |
| 12 | 74643075 | 74643225 | 150 | 74643162 | 17 | 86  | 12.4 |
| 12 | 74656425 | 74656525 | 100 | 74656437 | 12 | 48  | 0    |
| 12 | 74659275 | 74659325 | 50  | 74659287 | 12 | 24  | 4.1  |
| 12 | 74700650 | 74700725 | 75  | 74700662 | 14 | 39  | 6.2  |
| 12 | 74700975 | 74701400 | 425 | 74701062 | 15 | 228 | 45.5 |
| 12 | 74706975 | 74707075 | 100 | 74706987 | 14 | 56  | 8.3  |
| 12 | 75373825 | 75373900 | 75  | 75373837 | 13 | 39  | 0    |
| 12 | 75469425 | 75469475 | 50  | 75469437 | 12 | 24  | 0    |
| 12 | 75599125 | 75599150 | 25  | 75599137 | 12 | 12  | 0    |
| 12 | 75787675 | 75787750 | 75  | 75787687 | 14 | 40  | 0    |
| 12 | 76025175 | 76025250 | 75  | 76025187 | 12 | 36  | 0    |
| 12 | 76387400 | 76387450 | 50  | 76387412 | 12 | 24  | 4.1  |
| 12 | 76995850 | 76995875 | 25  | 76995862 | 12 | 12  | 2.1  |
| 12 | 78370075 | 78370100 | 25  | 78370087 | 13 | 13  | 2.1  |
| 12 | 78466050 | 78466100 | 50  | 78466062 | 12 | 24  | 0    |
| 12 | 78736925 | 78737000 | 75  | 78736937 | 12 | 36  | 0    |
| 12 | 78851375 | 78851400 | 25  | 78851387 | 12 | 12  | 0    |
| 12 | 78981975 | 78982200 | 225 | 78982137 | 19 | 147 | 14.5 |
| 12 | 79104750 | 79104825 | 75  | 79104762 | 14 | 38  | 4.1  |
| 12 | 79498350 | 79498400 | 50  | 79498362 | 12 | 24  | 4.1  |
| 12 | 80128100 | 80128175 | 75  | 80128112 | 13 | 39  | 6.2  |
| 12 | 80215125 | 80215175 | 50  | 80215137 | 12 | 24  | 0    |
| 12 | 81568650 | 81568700 | 50  | 81568662 | 14 | 27  | 4.1  |
| 12 | 81756950 | 81757025 | 75  | 81756987 | 15 | 42  | 0    |
| 12 | 82065325 | 82065500 | 175 | 82065412 | 14 | 86  | 6.2  |
| 12 | 82200425 | 82200525 | 100 | 82200437 | 12 | 48  | 2.1  |
| 12 | 82745350 | 82745375 | 25  | 82745362 | 12 | 12  | 2.1  |
| 12 | 82988250 | 82988450 | 200 | 82988362 | 16 | 108 | 8.3  |
| 12 | 83088725 | 83088800 | 75  | 83088737 | 12 | 36  | 6.2  |
| 12 | 83934600 | 83934675 | 75  | 83934612 | 12 | 34  | 0    |
| 12 | 84682000 | 84682125 | 125 | 84682087 | 17 | 70  | 2.1  |
| 12 | 86702600 | 86702625 | 25  | 86702612 | 12 | 12  | 2.1  |
| 12 | 86745575 | 86745625 | 50  | 86745587 | 13 | 26  | 4.1  |
| 12 | 87160150 | 87160225 | 75  | 87160162 | 12 | 34  | 6.2  |
| 12 | 87243000 | 87243200 | 200 | 87243062 | 17 | 122 | 4.1  |
| 12 | 87937525 | 87937650 | 125 | 87937587 | 19 | 85  | 0    |
| 12 | 87956400 | 87956550 | 150 | 87956412 | 12 | 72  | 0    |
| 12 | 88080825 | 88080875 | 50  | 88080837 | 13 | 26  | 4.1  |
| 12 | 88129525 | 88129925 | 400 | 88129787 | 14 | 189 | 16.6 |

|    |           |           |     |           |    |     |      |
|----|-----------|-----------|-----|-----------|----|-----|------|
| 12 | 88246450  | 88246575  | 125 | 88246487  | 13 | 62  | 4.1  |
| 12 | 88444125  | 88444150  | 25  | 88444137  | 14 | 14  | 2.1  |
| 12 | 88802100  | 88802150  | 50  | 88802112  | 14 | 28  | 4.1  |
| 12 | 90334300  | 90334325  | 25  | 90334312  | 13 | 13  | 0    |
| 12 | 91055150  | 91055250  | 100 | 91055187  | 15 | 53  | 8.3  |
| 12 | 91065475  | 91065500  | 25  | 91065487  | 12 | 12  | 2.1  |
| 12 | 91287600  | 91287650  | 50  | 91287612  | 13 | 25  | 4.1  |
| 12 | 91488500  | 91488525  | 25  | 91488512  | 13 | 13  | 0    |
| 12 | 91516400  | 91516425  | 25  | 91516412  | 12 | 12  | 0    |
| 12 | 91584750  | 91584850  | 100 | 91584762  | 14 | 56  | 8.3  |
| 12 | 91677950  | 91678000  | 50  | 91677962  | 13 | 26  | 2.1  |
| 12 | 91816950  | 91817050  | 100 | 91817037  | 13 | 49  | 0    |
| 12 | 91999450  | 91999475  | 25  | 91999462  | 12 | 12  | 0    |
| 12 | 92139950  | 92140025  | 75  | 92139987  | 15 | 42  | 2.1  |
| 12 | 92542550  | 92542650  | 100 | 92542562  | 18 | 66  | 12.4 |
| 12 | 92626450  | 92626525  | 75  | 92626462  | 14 | 42  | 0    |
| 12 | 92703200  | 92703275  | 75  | 92703212  | 13 | 39  | 2.1  |
| 12 | 92836050  | 92836275  | 225 | 92836237  | 25 | 173 | 18.6 |
| 12 | 92882925  | 92883050  | 125 | 92883012  | 14 | 66  | 2.1  |
| 12 | 92889250  | 92889425  | 175 | 92889412  | 22 | 127 | 18.6 |
| 12 | 92931875  | 92932100  | 225 | 92931987  | 21 | 156 | 0    |
| 12 | 93026575  | 93026675  | 100 | 93026662  | 16 | 54  | 0    |
| 12 | 94450850  | 94450900  | 50  | 94450862  | 13 | 25  | 4.1  |
| 12 | 94501975  | 94502075  | 100 | 94502012  | 14 | 54  | 8.3  |
| 12 | 94753300  | 94753375  | 75  | 94753312  | 12 | 36  | 0    |
| 12 | 95053900  | 95054000  | 100 | 95053987  | 18 | 60  | 2.1  |
| 12 | 97342900  | 97342950  | 50  | 97342912  | 12 | 24  | 4.1  |
| 12 | 97726375  | 97726400  | 25  | 97726387  | 12 | 12  | 2.1  |
| 12 | 98175700  | 98175750  | 50  | 98175712  | 12 | 24  | 4.1  |
| 12 | 99970300  | 99970325  | 25  | 99970312  | 13 | 13  | 2.1  |
| 12 | 100484100 | 100484125 | 25  | 100484112 | 13 | 13  | 0    |
| 12 | 100567700 | 100567725 | 25  | 100567712 | 12 | 12  | 0    |
| 12 | 102721775 | 102721850 | 75  | 102721787 | 12 | 36  | 0    |
| 12 | 103153000 | 103153025 | 25  | 103153012 | 12 | 12  | 2.1  |
| 12 | 103374525 | 103374725 | 200 | 103374662 | 17 | 113 | 16.6 |
| 12 | 103454000 | 103454050 | 50  | 103454012 | 13 | 26  | 0    |
| 12 | 103496975 | 103497000 | 25  | 103496987 | 12 | 12  | 0    |
| 12 | 103522125 | 103522150 | 25  | 103522137 | 12 | 12  | 2.1  |
| 12 | 103651050 | 103651075 | 25  | 103651062 | 12 | 12  | 2.1  |
| 12 | 104189000 | 104189025 | 25  | 104189012 | 12 | 12  | 2.1  |
| 12 | 104234050 | 104234075 | 25  | 104234062 | 12 | 12  | 2.1  |
| 12 | 104483750 | 104483800 | 50  | 104483762 | 13 | 26  | 0    |
| 12 | 104852150 | 104852425 | 275 | 104852262 | 21 | 187 | 10.3 |
| 12 | 104948000 | 104948050 | 50  | 104948012 | 12 | 24  | 4.1  |
| 12 | 105009075 | 105009125 | 50  | 105009112 | 14 | 27  | 4.1  |
| 12 | 105654100 | 105654150 | 50  | 105654137 | 14 | 26  | 0    |
| 12 | 105654475 | 105654600 | 125 | 105654562 | 14 | 64  | 10.3 |
| 12 | 105697825 | 105698000 | 175 | 105697962 | 15 | 86  | 14.5 |
| 12 | 105816650 | 105816675 | 25  | 105816662 | 12 | 12  | 2.1  |
| 12 | 105873300 | 105873350 | 50  | 105873337 | 13 | 25  | 4.1  |
| 12 | 107514950 | 107515000 | 50  | 107514962 | 12 | 24  | 0    |
| 12 | 107649550 | 107649600 | 50  | 107649587 | 14 | 27  | 4.1  |
| 12 | 107756400 | 107756425 | 25  | 107756412 | 28 | 28  | 4.1  |
| 12 | 107758675 | 107758700 | 25  | 107758687 | 12 | 12  | 2.1  |
| 12 | 108386100 | 108386150 | 50  | 108386137 | 13 | 25  | 4.1  |
| 12 | 108619275 | 108619300 | 25  | 108619287 | 12 | 12  | 2.1  |
| 12 | 108859750 | 108859775 | 25  | 108859762 | 12 | 12  | 2.1  |
| 12 | 108871475 | 108871525 | 50  | 108871487 | 14 | 28  | 4.1  |
| 12 | 109030250 | 109030275 | 25  | 109030262 | 14 | 14  | 0    |
| 12 | 109105800 | 109105825 | 25  | 109105812 | 12 | 12  | 0    |
| 12 | 109424625 | 109424650 | 25  | 109424637 | 13 | 13  | 2.1  |
| 12 | 109524225 | 109524275 | 50  | 109524237 | 12 | 24  | 0    |
| 12 | 110425075 | 110425125 | 50  | 110425087 | 12 | 24  | 0    |
| 12 | 110468375 | 110468525 | 150 | 110468487 | 14 | 74  | 0    |
| 12 | 110935450 | 110935475 | 25  | 110935462 | 12 | 12  | 0    |
| 12 | 111378300 | 111378350 | 50  | 111378312 | 13 | 26  | 4.1  |
| 12 | 112056025 | 112056100 | 75  | 112056037 | 12 | 36  | 0    |
| 12 | 113858725 | 113859175 | 450 | 113859012 | 18 | 267 | 33.1 |
| 12 | 113861075 | 113861125 | 50  | 113861087 | 14 | 26  | 4.1  |
| 12 | 113966300 | 113966375 | 75  | 113966312 | 13 | 38  | 0    |
| 12 | 114263750 | 114263775 | 25  | 114263762 | 13 | 13  | 2.1  |
| 12 | 115065725 | 115065800 | 75  | 115065737 | 14 | 40  | 0    |
| 12 | 115293450 | 115293475 | 25  | 115293462 | 12 | 12  | 2.1  |
| 12 | 115420600 | 115420625 | 25  | 115420612 | 12 | 12  | 2.1  |
| 12 | 115480800 | 115480900 | 100 | 115480887 | 14 | 50  | 6.2  |

|    |           |           |     |           |    |     |      |
|----|-----------|-----------|-----|-----------|----|-----|------|
| 12 | 116950975 | 116951075 | 100 | 116950987 | 13 | 52  | 0    |
| 12 | 119064650 | 119064725 | 75  | 119064687 | 13 | 38  | 6.2  |
| 12 | 119153825 | 119153850 | 25  | 119153837 | 18 | 18  | 2.1  |
| 12 | 119213700 | 119214000 | 300 | 119213937 | 15 | 167 | 33.1 |
| 12 | 119352925 | 119352975 | 50  | 119352937 | 13 | 26  | 2.1  |
| 12 | 120504525 | 120504550 | 25  | 120504537 | 12 | 12  | 2.1  |
| 12 | 120547175 | 120547200 | 25  | 120547187 | 12 | 12  | 2.1  |
| 12 | 120552250 | 120552325 | 75  | 120552262 | 12 | 36  | 6.2  |
| 12 | 120765675 | 120765725 | 50  | 120765687 | 12 | 24  | 0    |
| 12 | 120825475 | 120825525 | 50  | 120825487 | 12 | 24  | 0    |
| 12 | 121277000 | 121277025 | 25  | 121277012 | 12 | 12  | 0    |
| 12 | 121451000 | 121451200 | 200 | 121451112 | 18 | 122 | 12.4 |
| 12 | 121927900 | 121928025 | 125 | 121927912 | 12 | 60  | 10.3 |
| 12 | 122176950 | 122177025 | 75  | 122177012 | 15 | 41  | 6.2  |
| 12 | 122634750 | 122634775 | 25  | 122634762 | 13 | 13  | 2.1  |
| 12 | 123612825 | 123612925 | 100 | 123612837 | 12 | 48  | 6.2  |
| 12 | 123677450 | 123677475 | 25  | 123677462 | 13 | 13  | 2.1  |
| 12 | 123714750 | 123714775 | 25  | 123714762 | 12 | 12  | 2.1  |
| 12 | 123730175 | 123730300 | 125 | 123730187 | 18 | 88  | 8.3  |
| 12 | 123732525 | 123732550 | 25  | 123732537 | 12 | 12  | 0    |
| 12 | 123764225 | 123764275 | 50  | 123764237 | 13 | 26  | 4.1  |
| 12 | 123777700 | 123777750 | 50  | 123777737 | 14 | 26  | 2.1  |
| 12 | 123778125 | 123778175 | 50  | 123778137 | 15 | 29  | 4.1  |
| 12 | 123783500 | 123783550 | 50  | 123783512 | 12 | 24  | 2.1  |
| 12 | 123796475 | 123796500 | 25  | 123796487 | 14 | 14  | 2.1  |
| 12 | 123805050 | 123805075 | 25  | 123805062 | 12 | 12  | 2.1  |
| 12 | 123825025 | 123825050 | 25  | 123825037 | 13 | 13  | 2.1  |
| 12 | 123914600 | 123914650 | 50  | 123914612 | 12 | 24  | 4.1  |
| 12 | 123968125 | 123968150 | 25  | 123968137 | 13 | 13  | 0    |
| 12 | 125120075 | 125120400 | 325 | 125120262 | 41 | 346 | 0    |
| 12 | 125663450 | 125663525 | 75  | 125663462 | 12 | 36  | 6.2  |
| 12 | 125822825 | 125822925 | 100 | 125822837 | 16 | 55  | 6.2  |
| 12 | 126331525 | 126331575 | 50  | 126331537 | 12 | 24  | 2.1  |
| 12 | 126536300 | 126536375 | 75  | 126536362 | 17 | 49  | 4.1  |
| 12 | 126568750 | 126568775 | 25  | 126568762 | 13 | 13  | 0    |
| 12 | 126728125 | 126728175 | 50  | 126728137 | 16 | 32  | 4.1  |
| 12 | 126796500 | 126796650 | 150 | 126796587 | 16 | 79  | 2.1  |
| 12 | 126860725 | 126860825 | 100 | 126860737 | 12 | 46  | 8.3  |
| 12 | 129895400 | 129895475 | 75  | 129895412 | 13 | 39  | 6.2  |
| 12 | 130095450 | 130095475 | 25  | 130095462 | 12 | 12  | 0    |
| 12 | 131974275 | 131974300 | 25  | 131974287 | 14 | 14  | 0    |
| 12 | 132012425 | 132012650 | 225 | 132012487 | 20 | 141 | 0    |
| 12 | 132144175 | 132144425 | 250 | 132144287 | 17 | 148 | 4.1  |
| 12 | 132144875 | 132145700 | 825 | 132145062 | 45 | 738 | 33.1 |
| 12 | 132192925 | 132193300 | 375 | 132193137 | 21 | 243 | 41.4 |
| 15 | 20443150  | 20443300  | 150 | 20443212  | 14 | 76  | 0    |
| 15 | 22569250  | 22569275  | 25  | 22569262  | 13 | 13  | 2.1  |
| 15 | 23304675  | 23304725  | 50  | 23304687  | 12 | 24  | 4.1  |
| 15 | 25511250  | 25511300  | 50  | 25511262  | 13 | 25  | 0    |
| 15 | 26014600  | 26014675  | 75  | 26014662  | 15 | 41  | 6.2  |
| 15 | 27747750  | 27747825  | 75  | 27747762  | 12 | 36  | 0    |
| 15 | 28983325  | 28983400  | 75  | 28983337  | 14 | 40  | 6.2  |
| 15 | 29002600  | 29002675  | 75  | 29002612  | 12 | 36  | 6.2  |
| 15 | 29355150  | 29355175  | 25  | 29355162  | 12 | 12  | 2.1  |
| 15 | 31309700  | 31309775  | 75  | 31309712  | 12 | 36  | 6.2  |
| 15 | 31359225  | 31359400  | 175 | 31359312  | 18 | 98  | 4.1  |
| 15 | 32181600  | 32181625  | 25  | 32181612  | 12 | 12  | 2.1  |
| 15 | 33368675  | 33368775  | 100 | 33368687  | 12 | 48  | 6.2  |
| 15 | 33587600  | 33587625  | 25  | 33587612  | 12 | 12  | 2.1  |
| 15 | 36306625  | 36306725  | 100 | 36306687  | 17 | 60  | 8.3  |
| 15 | 36331050  | 36331200  | 150 | 36331137  | 17 | 87  | 14.5 |
| 15 | 36748075  | 36748150  | 75  | 36748087  | 12 | 36  | 6.2  |
| 15 | 37070725  | 37070800  | 75  | 37070787  | 15 | 41  | 0    |
| 15 | 37219725  | 37219850  | 125 | 37219812  | 13 | 60  | 0    |
| 15 | 37278625  | 37278825  | 200 | 37278687  | 18 | 120 | 6.2  |
| 15 | 37293050  | 37293200  | 150 | 37293062  | 13 | 67  | 0    |
| 15 | 37310100  | 37310125  | 25  | 37310112  | 12 | 12  | 2.1  |
| 15 | 37312200  | 37312225  | 25  | 37312212  | 13 | 13  | 0    |
| 15 | 37484400  | 37484775  | 375 | 37484487  | 17 | 202 | 24.8 |
| 15 | 38887850  | 38887875  | 25  | 38887862  | 12 | 12  | 0    |
| 15 | 39626250  | 39626350  | 100 | 39626262  | 14 | 52  | 0    |
| 15 | 39700875  | 39701050  | 175 | 39700887  | 33 | 167 | 22.8 |
| 15 | 39741600  | 39741650  | 50  | 39741637  | 14 | 27  | 4.1  |
| 15 | 40352225  | 40352275  | 50  | 40352262  | 14 | 26  | 4.1  |
| 15 | 41440925  | 41441125  | 200 | 41440987  | 17 | 122 | 0    |

|    |          |          |     |          |    |     |      |
|----|----------|----------|-----|----------|----|-----|------|
| 15 | 42295225 | 42295250 | 25  | 42295237 | 12 | 12  | 2.1  |
| 15 | 42615425 | 42615525 | 100 | 42615487 | 13 | 47  | 4.1  |
| 15 | 43280075 | 43280225 | 150 | 43280112 | 17 | 88  | 0    |
| 15 | 43533475 | 43533500 | 25  | 43533487 | 13 | 13  | 2.1  |
| 15 | 44378025 | 44378050 | 25  | 44378037 | 12 | 12  | 0    |
| 15 | 47315300 | 47315325 | 25  | 47315312 | 12 | 12  | 2.1  |
| 15 | 48435025 | 48435175 | 150 | 48435112 | 13 | 75  | 2.1  |
| 15 | 49800325 | 49800375 | 50  | 49800337 | 12 | 24  | 0    |
| 15 | 50100725 | 50100800 | 75  | 50100762 | 13 | 38  | 4.1  |
| 15 | 51387975 | 51388000 | 25  | 51387987 | 12 | 12  | 2.1  |
| 15 | 54323850 | 54323875 | 25  | 54323862 | 13 | 13  | 2.1  |
| 15 | 54919275 | 54919375 | 100 | 54919312 | 15 | 58  | 0    |
| 15 | 55785925 | 55785975 | 50  | 55785937 | 12 | 24  | 4.1  |
| 15 | 56633400 | 56633450 | 50  | 56633412 | 12 | 24  | 4.1  |
| 15 | 56818525 | 56818600 | 75  | 56818537 | 14 | 38  | 2.1  |
| 15 | 60686350 | 60686425 | 75  | 60686362 | 12 | 36  | 6.2  |
| 15 | 60976375 | 60976450 | 75  | 60976412 | 15 | 40  | 6.2  |
| 15 | 61036475 | 61036525 | 50  | 61036487 | 12 | 24  | 4.1  |
| 15 | 61559000 | 61559125 | 125 | 61559087 | 15 | 66  | 6.2  |
| 15 | 62202300 | 62202500 | 200 | 62202412 | 15 | 104 | 6.2  |
| 15 | 62224100 | 62224125 | 25  | 62224112 | 12 | 12  | 2.1  |
| 15 | 64963000 | 64963075 | 75  | 64963012 | 17 | 44  | 6.2  |
| 15 | 65103950 | 65104025 | 75  | 65103962 | 12 | 36  | 6.2  |
| 15 | 65229875 | 65229975 | 100 | 65229887 | 16 | 57  | 6.2  |
| 15 | 66618550 | 66618675 | 125 | 66618612 | 15 | 68  | 0    |
| 15 | 68538925 | 68539000 | 75  | 68538987 | 13 | 37  | 0    |
| 15 | 68874825 | 68874900 | 75  | 68874887 | 14 | 38  | 6.2  |
| 15 | 69331075 | 69331175 | 100 | 69331112 | 15 | 56  | 4.1  |
| 15 | 70260425 | 70260450 | 25  | 70260437 | 13 | 13  | 2.1  |
| 15 | 71771000 | 71771025 | 25  | 71771012 | 12 | 12  | 0    |
| 15 | 72501175 | 72501200 | 25  | 72501187 | 14 | 14  | 2.1  |
| 15 | 73029925 | 73029950 | 25  | 73029937 | 13 | 13  | 2.1  |
| 15 | 73123575 | 73123600 | 25  | 73123587 | 12 | 12  | 2.1  |
| 15 | 77384500 | 77384650 | 150 | 77384512 | 13 | 75  | 10.3 |
| 15 | 77995325 | 77995375 | 50  | 77995337 | 14 | 28  | 0    |
| 15 | 77999675 | 77999700 | 25  | 77999687 | 12 | 12  | 0    |
| 15 | 78355450 | 78355575 | 125 | 78355487 | 13 | 61  | 10.3 |
| 15 | 78582600 | 78582625 | 25  | 78582612 | 12 | 12  | 0    |
| 15 | 79036750 | 79036775 | 25  | 79036762 | 12 | 12  | 0    |
| 15 | 79095725 | 79095775 | 50  | 79095737 | 12 | 24  | 4.1  |
| 15 | 79436725 | 79436775 | 50  | 79436737 | 12 | 24  | 0    |
| 15 | 80126600 | 80126625 | 25  | 80126612 | 12 | 12  | 0    |
| 15 | 81445675 | 81445750 | 75  | 81445687 | 23 | 65  | 10.3 |
| 15 | 82944550 | 82944600 | 50  | 82944562 | 13 | 25  | 4.1  |
| 15 | 82965825 | 82965850 | 25  | 82965837 | 13 | 13  | 0    |
| 15 | 83494300 | 83494350 | 50  | 83494312 | 12 | 24  | 4.1  |
| 15 | 83904375 | 83904400 | 25  | 83904387 | 12 | 12  | 2.1  |
| 15 | 86865375 | 86865500 | 125 | 86865387 | 12 | 60  | 0    |
| 15 | 87121050 | 87121075 | 25  | 87121062 | 12 | 12  | 0    |
| 15 | 87257200 | 87257225 | 25  | 87257212 | 12 | 12  | 2.1  |
| 15 | 87276700 | 87276850 | 150 | 87276712 | 14 | 74  | 0    |
| 15 | 87424200 | 87424350 | 150 | 87424337 | 19 | 96  | 2.1  |
| 15 | 87901025 | 87901100 | 75  | 87901037 | 12 | 36  | 0    |
| 15 | 88007075 | 88007150 | 75  | 88007087 | 15 | 43  | 4.1  |
| 15 | 88502375 | 88502400 | 25  | 88502387 | 12 | 12  | 2.1  |
| 15 | 88518950 | 88519000 | 50  | 88518962 | 13 | 25  | 4.1  |
| 15 | 90038600 | 90038675 | 75  | 90038662 | 14 | 38  | 6.2  |
| 15 | 91155000 | 91155025 | 25  | 91155012 | 12 | 12  | 2.1  |
| 15 | 91189500 | 91189550 | 50  | 91189512 | 13 | 26  | 4.1  |
| 15 | 91241875 | 91241900 | 25  | 91241887 | 12 | 12  | 2.1  |
| 15 | 91294000 | 91294150 | 150 | 91294012 | 13 | 75  | 0    |
| 15 | 91373025 | 91373075 | 50  | 91373037 | 12 | 24  | 2.1  |
| 15 | 91805900 | 91805950 | 50  | 91805912 | 12 | 24  | 0    |
| 15 | 92370725 | 92370750 | 25  | 92370737 | 12 | 12  | 2.1  |
| 15 | 92414825 | 92414925 | 100 | 92414837 | 15 | 55  | 8.3  |
| 15 | 94961125 | 94961175 | 50  | 94961137 | 12 | 24  | 0    |
| 15 | 96269725 | 96269775 | 50  | 96269737 | 12 | 24  | 0    |
| 15 | 96803275 | 96803350 | 75  | 96803337 | 15 | 41  | 6.2  |
| 15 | 97149025 | 97149225 | 200 | 97149087 | 21 | 148 | 10.3 |
| 15 | 97190800 | 97191050 | 250 | 97190862 | 18 | 158 | 22.8 |
| 15 | 97227425 | 97227450 | 25  | 97227437 | 12 | 12  | 0    |
| 15 | 97264400 | 97264425 | 25  | 97264412 | 12 | 12  | 2.1  |
| 15 | 97609050 | 97609125 | 75  | 97609062 | 20 | 49  | 2.1  |
| 15 | 98489850 | 98489900 | 50  | 98489862 | 14 | 27  | 0    |
| 15 | 99249250 | 99249400 | 150 | 99249262 | 22 | 111 | 12.4 |



|    |          |          |     |          |    |     |      |
|----|----------|----------|-----|----------|----|-----|------|
| 15 | 99369350 | 99369375 | 25  | 99369362 | 12 | 12  | 0    |
| 15 | 99428400 | 99428825 | 425 | 99428762 | 16 | 225 | 12.4 |
| 15 | 99449300 | 99449500 | 200 | 99449312 | 15 | 93  | 6.2  |
| 14 | 19800900 | 19800975 | 75  | 19800937 | 15 | 40  | 6.2  |
| 14 | 20220725 | 20220750 | 25  | 20220737 | 15 | 15  | 2.1  |
| 14 | 20499700 | 20499750 | 50  | 20499712 | 13 | 26  | 0    |
| 14 | 20632100 | 20632225 | 125 | 20632137 | 14 | 64  | 0    |
| 14 | 20994375 | 20994400 | 25  | 20994387 | 12 | 12  | 2.1  |
| 14 | 21015025 | 21015075 | 50  | 21015062 | 15 | 27  | 2.1  |
| 14 | 22891525 | 22891600 | 75  | 22891537 | 13 | 39  | 6.2  |
| 14 | 23008250 | 23008300 | 50  | 23008287 | 14 | 26  | 2.1  |
| 14 | 23634000 | 23634125 | 125 | 23634037 | 17 | 81  | 8.3  |
| 14 | 24378175 | 24378200 | 25  | 24378187 | 12 | 12  | 0    |
| 14 | 24439825 | 24439900 | 75  | 24439862 | 13 | 38  | 6.2  |
| 14 | 24588425 | 24588500 | 75  | 24588462 | 13 | 38  | 0    |
| 14 | 24651725 | 24651750 | 25  | 24651737 | 13 | 13  | 2.1  |
| 14 | 25476800 | 25476825 | 25  | 25476812 | 13 | 13  | 0    |
| 14 | 26793150 | 26793175 | 25  | 26793162 | 13 | 13  | 2.1  |
| 14 | 29404600 | 29404775 | 175 | 29404687 | 13 | 83  | 4.1  |
| 14 | 31499125 | 31499175 | 50  | 31499137 | 12 | 24  | 0    |
| 14 | 31529575 | 31529750 | 175 | 31529687 | 19 | 114 | 12.4 |
| 14 | 31798725 | 31798800 | 75  | 31798737 | 13 | 38  | 6.2  |
| 14 | 33046825 | 33046950 | 125 | 33046862 | 15 | 70  | 0    |
| 14 | 33320275 | 33320300 | 25  | 33320287 | 12 | 12  | 0    |
| 14 | 33879450 | 33879475 | 25  | 33879462 | 13 | 13  | 2.1  |
| 14 | 34904675 | 34904700 | 25  | 34904687 | 13 | 13  | 2.1  |
| 14 | 35859825 | 35859850 | 25  | 35859837 | 13 | 13  | 2.1  |
| 14 | 42543375 | 42543425 | 50  | 42543387 | 13 | 26  | 0    |
| 14 | 43329700 | 43329750 | 50  | 43329712 | 14 | 28  | 0    |
| 14 | 43865975 | 43866025 | 50  | 43865987 | 12 | 24  | 2.1  |
| 14 | 47814500 | 47814625 | 125 | 47814562 | 14 | 64  | 10.3 |
| 14 | 50560525 | 50560575 | 50  | 50560537 | 12 | 24  | 0    |
| 14 | 50976050 | 50976175 | 125 | 50976062 | 12 | 55  | 10.3 |
| 14 | 51145200 | 51145250 | 50  | 51145212 | 14 | 28  | 4.1  |
| 14 | 51159000 | 51159075 | 75  | 51159012 | 13 | 39  | 0    |
| 14 | 51213850 | 51213875 | 25  | 51213862 | 15 | 15  | 2.1  |
| 14 | 51238900 | 51239050 | 150 | 51238962 | 14 | 80  | 0    |
| 14 | 51396925 | 51396975 | 50  | 51396937 | 14 | 28  | 0    |
| 14 | 52488425 | 52488450 | 25  | 52488437 | 13 | 13  | 2.1  |
| 14 | 54274525 | 54274600 | 75  | 54274537 | 14 | 41  | 6.2  |
| 14 | 54872800 | 54872825 | 25  | 54872812 | 12 | 12  | 2.1  |
| 14 | 54984950 | 54984975 | 25  | 54984962 | 12 | 12  | 2.1  |
| 14 | 55226575 | 55226600 | 25  | 55226587 | 12 | 12  | 2.1  |
| 14 | 55870275 | 55870325 | 50  | 55870287 | 13 | 26  | 0    |
| 14 | 57963950 | 57964000 | 50  | 57963987 | 14 | 26  | 4.1  |
| 14 | 58234775 | 58234800 | 25  | 58234787 | 12 | 12  | 2.1  |
| 14 | 58478125 | 58478225 | 100 | 58478137 | 13 | 52  | 4.1  |
| 14 | 58564950 | 58565025 | 75  | 58565012 | 18 | 46  | 4.1  |
| 14 | 60641500 | 60641525 | 25  | 60641512 | 12 | 12  | 2.1  |
| 14 | 60684475 | 60684650 | 175 | 60684562 | 14 | 88  | 10.3 |
| 14 | 60714900 | 60714925 | 25  | 60714912 | 12 | 12  | 0    |
| 14 | 60759275 | 60759300 | 25  | 60759287 | 12 | 12  | 2.1  |
| 14 | 61026550 | 61026575 | 25  | 61026562 | 12 | 12  | 2.1  |
| 14 | 61042550 | 61042600 | 50  | 61042562 | 12 | 24  | 4.1  |
| 14 | 61231700 | 61231775 | 75  | 61231737 | 13 | 38  | 6.2  |
| 14 | 61789475 | 61789500 | 25  | 61789487 | 12 | 12  | 0    |
| 14 | 62711425 | 62711600 | 175 | 62711462 | 13 | 82  | 0    |
| 14 | 62740600 | 62740625 | 25  | 62740612 | 12 | 12  | 2.1  |
| 14 | 64297075 | 64297100 | 25  | 64297087 | 12 | 12  | 0    |
| 14 | 64639200 | 64639225 | 25  | 64639212 | 17 | 17  | 2.1  |
| 14 | 65582075 | 65582100 | 25  | 65582087 | 12 | 12  | 2.1  |
| 14 | 66469050 | 66469225 | 175 | 66469162 | 18 | 106 | 0    |
| 14 | 67117125 | 67117175 | 50  | 67117162 | 13 | 25  | 4.1  |
| 14 | 67674275 | 67674650 | 375 | 67674462 | 19 | 231 | 16.6 |
| 14 | 67679875 | 67679950 | 75  | 67679937 | 14 | 39  | 6.2  |
| 14 | 67901575 | 67901650 | 75  | 67901587 | 12 | 36  | 0    |
| 14 | 68135350 | 68135475 | 125 | 68135462 | 19 | 77  | 8.3  |
| 14 | 68487725 | 68487750 | 25  | 68487737 | 13 | 13  | 2.1  |
| 14 | 68514025 | 68514100 | 75  | 68514037 | 14 | 38  | 0    |
| 14 | 68630475 | 68630500 | 25  | 68630487 | 13 | 13  | 0    |
| 14 | 68665925 | 68666000 | 75  | 68665937 | 12 | 36  | 6.2  |
| 14 | 69233225 | 69233300 | 75  | 69233237 | 12 | 34  | 4.1  |
| 14 | 69953575 | 69953650 | 75  | 69953587 | 12 | 36  | 0    |
| 14 | 71028675 | 71028725 | 50  | 71028687 | 15 | 30  | 4.1  |
| 14 | 72153850 | 72153925 | 75  | 72153862 | 16 | 44  | 2.1  |

|    |           |           |      |           |    |     |      |
|----|-----------|-----------|------|-----------|----|-----|------|
| 14 | 73105650  | 73105725  | 75   | 73105712  | 16 | 44  | 6.2  |
| 14 | 73251150  | 73251175  | 25   | 73251162  | 12 | 12  | 0    |
| 14 | 73389125  | 73389225  | 100  | 73389187  | 13 | 49  | 8.3  |
| 14 | 73486925  | 73486950  | 25   | 73486937  | 13 | 13  | 2.1  |
| 14 | 74249050  | 74249100  | 50   | 74249062  | 13 | 25  | 0    |
| 14 | 74795500  | 74795600  | 100  | 74795587  | 28 | 92  | 8.3  |
| 14 | 74831025  | 74831050  | 25   | 74831037  | 13 | 13  | 0    |
| 14 | 75097150  | 75097300  | 150  | 75097212  | 19 | 98  | 6.2  |
| 14 | 75404125  | 75404200  | 75   | 75404137  | 12 | 34  | 4.1  |
| 14 | 76465475  | 76465550  | 75   | 76465487  | 13 | 38  | 0    |
| 14 | 76492850  | 76493050  | 200  | 76492962  | 16 | 106 | 18.6 |
| 14 | 76495375  | 76495450  | 75   | 76495387  | 13 | 38  | 6.2  |
| 14 | 76497950  | 76498125  | 175  | 76498037  | 24 | 148 | 16.6 |
| 14 | 76569275  | 76569300  | 25   | 76569287  | 12 | 12  | 2.1  |
| 14 | 76591625  | 76591650  | 25   | 76591637  | 12 | 12  | 2.1  |
| 14 | 76595700  | 76595725  | 25   | 76595712  | 12 | 12  | 2.1  |
| 14 | 79357425  | 79357500  | 75   | 79357437  | 13 | 39  | 0    |
| 14 | 80755300  | 80755425  | 125  | 80755387  | 15 | 66  | 8.3  |
| 14 | 82979675  | 82979875  | 200  | 82979737  | 15 | 110 | 10.3 |
| 14 | 85102200  | 85102325  | 125  | 85102237  | 14 | 64  | 0    |
| 14 | 89026050  | 89026100  | 50   | 89026062  | 14 | 28  | 2.1  |
| 14 | 89867225  | 89867300  | 75   | 89867237  | 13 | 39  | 0    |
| 14 | 92036825  | 92037075  | 250  | 92036987  | 32 | 259 | 18.6 |
| 14 | 92161575  | 92161650  | 75   | 92161587  | 12 | 36  | 2.1  |
| 14 | 92509150  | 92509200  | 50   | 92509162  | 13 | 26  | 0    |
| 14 | 92556675  | 92556725  | 50   | 92556687  | 12 | 24  | 0    |
| 14 | 93441950  | 93441975  | 25   | 93441962  | 12 | 12  | 0    |
| 14 | 93698450  | 93698525  | 75   | 93698462  | 13 | 39  | 6.2  |
| 14 | 94146850  | 94146900  | 50   | 94146862  | 12 | 24  | 4.1  |
| 14 | 94148350  | 94148675  | 325  | 94148662  | 15 | 150 | 26.9 |
| 14 | 94154175  | 94154375  | 200  | 94154312  | 22 | 138 | 14.5 |
| 14 | 94801450  | 94801475  | 25   | 94801462  | 13 | 13  | 2.1  |
| 14 | 95019500  | 95019550  | 50   | 95019512  | 14 | 26  | 4.1  |
| 14 | 95658775  | 95658800  | 25   | 95658787  | 14 | 14  | 0    |
| 14 | 95782550  | 95782700  | 150  | 95782662  | 15 | 82  | 0    |
| 14 | 95835600  | 95835625  | 25   | 95835612  | 12 | 12  | 2.1  |
| 14 | 98940375  | 98940425  | 50   | 98940387  | 12 | 24  | 0    |
| 14 | 98978900  | 98978950  | 50   | 98978912  | 12 | 24  | 0    |
| 14 | 99540400  | 99540475  | 75   | 99540412  | 12 | 35  | 0    |
| 14 | 99567750  | 99567825  | 75   | 99567762  | 12 | 36  | 6.2  |
| 14 | 99691300  | 99691325  | 25   | 99691312  | 12 | 12  | 0    |
| 14 | 100010025 | 100010050 | 25   | 100010037 | 12 | 12  | 2.1  |
| 14 | 100154300 | 100154425 | 125  | 100154362 | 15 | 64  | 10.3 |
| 14 | 100322375 | 100322400 | 25   | 100322387 | 16 | 16  | 2.1  |
| 14 | 101411575 | 101411625 | 50   | 101411587 | 12 | 24  | 0    |
| 14 | 102427875 | 102427900 | 25   | 102427887 | 12 | 12  | 0    |
| 14 | 102524275 | 102524325 | 50   | 102524287 | 13 | 26  | 4.1  |
| 14 | 102964075 | 102964175 | 100  | 102964087 | 12 | 48  | 0    |
| 14 | 103012875 | 103012900 | 25   | 103012887 | 13 | 13  | 0    |
| 17 | 410150    | 410225    | 75   | 410162    | 13 | 37  | 6.2  |
| 17 | 1629825   | 1629875   | 50   | 1629837   | 12 | 24  | 4.1  |
| 17 | 1880225   | 1880250   | 25   | 1880237   | 13 | 13  | 2.1  |
| 17 | 2152825   | 2152875   | 50   | 2152837   | 12 | 24  | 4.1  |
| 17 | 3326300   | 3326375   | 75   | 3326312   | 13 | 38  | 0    |
| 17 | 3573900   | 3573925   | 25   | 3573912   | 12 | 12  | 2.1  |
| 17 | 4688550   | 4688575   | 25   | 4688562   | 12 | 12  | 0    |
| 17 | 4913725   | 4913950   | 225  | 4913837   | 20 | 157 | 0    |
| 17 | 5025400   | 5026450   | 1050 | 5026062   | 18 | 567 | 47.6 |
| 17 | 5026725   | 5026875   | 150  | 5026762   | 14 | 72  | 12.4 |
| 17 | 5027150   | 5027250   | 100  | 5027212   | 15 | 52  | 0    |
| 17 | 5035975   | 5036100   | 125  | 5036037   | 28 | 126 | 20.7 |
| 17 | 5595025   | 5595075   | 50   | 5595037   | 12 | 24  | 4.1  |
| 17 | 5653800   | 5653825   | 25   | 5653812   | 13 | 13  | 0    |
| 17 | 6992725   | 6992750   | 25   | 6992737   | 13 | 13  | 2.1  |
| 17 | 7288225   | 7288250   | 25   | 7288237   | 13 | 13  | 2.1  |
| 17 | 7416325   | 7416350   | 25   | 7416337   | 13 | 13  | 2.1  |
| 17 | 7423100   | 7423150   | 50   | 7423112   | 13 | 26  | 0    |
| 17 | 7594350   | 7594375   | 25   | 7594362   | 12 | 12  | 2.1  |
| 17 | 7766775   | 7766800   | 25   | 7766787   | 12 | 12  | 0    |
| 17 | 7902100   | 7902150   | 50   | 7902112   | 12 | 24  | 4.1  |
| 17 | 8017350   | 8017450   | 100  | 8017362   | 13 | 52  | 0    |
| 17 | 8070400   | 8070425   | 25   | 8070412   | 12 | 12  | 2.1  |
| 17 | 8254125   | 8254200   | 75   | 8254137   | 12 | 36  | 4.1  |
| 17 | 8525050   | 8525075   | 25   | 8525062   | 15 | 15  | 2.1  |
| 17 | 8525650   | 8525850   | 200  | 8525662   | 16 | 114 | 10.3 |

|    |          |          |     |          |    |     |      |
|----|----------|----------|-----|----------|----|-----|------|
| 17 | 8760275  | 8760375  | 100 | 8760287  | 15 | 56  | 6.2  |
| 17 | 9866650  | 9866675  | 25  | 9866662  | 13 | 13  | 2.1  |
| 17 | 9880700  | 9880825  | 125 | 9880737  | 23 | 113 | 20.7 |
| 17 | 9907975  | 9908100  | 125 | 9908087  | 16 | 69  | 12.4 |
| 17 | 9959400  | 9959475  | 75  | 9959437  | 23 | 66  | 8.3  |
| 17 | 10139875 | 10139900 | 25  | 10139887 | 14 | 14  | 2.1  |
| 17 | 12803025 | 12803050 | 25  | 12803037 | 12 | 12  | 0    |
| 17 | 13181975 | 13182125 | 150 | 13182062 | 17 | 95  | 6.2  |
| 17 | 13194500 | 13194550 | 50  | 13194512 | 12 | 24  | 0    |
| 17 | 13273400 | 13273450 | 50  | 13273412 | 16 | 28  | 4.1  |
| 17 | 13306150 | 13306475 | 325 | 13306287 | 22 | 212 | 16.6 |
| 17 | 13388550 | 13388600 | 50  | 13388562 | 14 | 26  | 4.1  |
| 17 | 15106625 | 15106675 | 50  | 15106662 | 14 | 26  | 4.1  |
| 17 | 15185500 | 15185525 | 25  | 15185512 | 12 | 12  | 2.1  |
| 17 | 15286675 | 15286800 | 125 | 15286712 | 15 | 62  | 6.2  |
| 17 | 15325600 | 15325625 | 25  | 15325612 | 13 | 13  | 0    |
| 17 | 15765150 | 15765250 | 100 | 15765162 | 24 | 79  | 10.3 |
| 17 | 16061025 | 16061100 | 75  | 16061062 | 14 | 41  | 6.2  |
| 17 | 16224850 | 16224950 | 100 | 16224887 | 21 | 80  | 14.5 |
| 17 | 16263325 | 16263350 | 25  | 16263337 | 18 | 18  | 2.1  |
| 17 | 16365575 | 16365600 | 25  | 16365587 | 12 | 12  | 2.1  |
| 17 | 17682550 | 17682600 | 50  | 17682562 | 12 | 24  | 0    |
| 17 | 17685450 | 17685525 | 75  | 17685487 | 14 | 38  | 2.1  |
| 17 | 18079750 | 18079800 | 50  | 18079762 | 13 | 26  | 4.1  |
| 17 | 20033500 | 20033550 | 50  | 20033512 | 13 | 25  | 4.1  |
| 17 | 20712200 | 20712250 | 50  | 20712212 | 12 | 24  | 0    |
| 17 | 22175725 | 22175750 | 25  | 22175737 | 13 | 13  | 2.1  |
| 17 | 22287325 | 22287525 | 200 | 22287337 | 16 | 108 | 16.6 |
| 17 | 22291975 | 22292025 | 50  | 22291987 | 15 | 28  | 4.1  |
| 17 | 22596425 | 22596525 | 100 | 22596437 | 12 | 48  | 8.3  |
| 17 | 22717675 | 22717725 | 50  | 22717687 | 12 | 24  | 0    |
| 17 | 23046550 | 23046625 | 75  | 23046562 | 12 | 36  | 4.1  |
| 17 | 23385500 | 23385675 | 175 | 23385562 | 14 | 88  | 0    |
| 17 | 23686625 | 23686650 | 25  | 23686637 | 12 | 12  | 2.1  |
| 17 | 23833625 | 23833700 | 75  | 23833637 | 12 | 36  | 0    |
| 17 | 24266025 | 24266075 | 50  | 24266037 | 14 | 28  | 2.1  |
| 17 | 24502675 | 24502725 | 50  | 24502712 | 15 | 27  | 4.1  |
| 17 | 24721500 | 24721600 | 100 | 24721512 | 14 | 48  | 8.3  |
| 17 | 24727900 | 24727925 | 25  | 24727912 | 12 | 12  | 0    |
| 17 | 25870825 | 25870850 | 25  | 25870837 | 12 | 12  | 2.1  |
| 17 | 26308275 | 26308300 | 25  | 26308287 | 12 | 12  | 0    |
| 17 | 26632675 | 26632700 | 25  | 26632687 | 12 | 12  | 0    |
| 17 | 26947925 | 26947975 | 50  | 26947962 | 29 | 57  | 8.3  |
| 17 | 30493450 | 30493525 | 75  | 30493462 | 15 | 42  | 0    |
| 17 | 30783625 | 30783700 | 75  | 30783687 | 16 | 44  | 8.3  |
| 17 | 32337150 | 32337175 | 25  | 32337162 | 13 | 13  | 0    |
| 17 | 32495425 | 32495450 | 25  | 32495437 | 12 | 12  | 0    |
| 17 | 33982850 | 33982875 | 25  | 33982862 | 12 | 12  | 0    |
| 17 | 34065625 | 34065725 | 100 | 34065662 | 15 | 55  | 6.2  |
| 17 | 34861000 | 34861025 | 25  | 34861012 | 13 | 13  | 2.1  |
| 17 | 34870950 | 34870975 | 25  | 34870962 | 14 | 14  | 2.1  |
| 17 | 36084150 | 36084200 | 50  | 36084162 | 13 | 26  | 0    |
| 17 | 36458200 | 36458275 | 75  | 36458212 | 13 | 39  | 4.1  |
| 17 | 36881775 | 36881850 | 75  | 36881787 | 13 | 38  | 0    |
| 17 | 37239575 | 37239675 | 100 | 37239587 | 14 | 52  | 8.3  |
| 17 | 37924025 | 37924050 | 25  | 37924037 | 13 | 13  | 2.1  |
| 17 | 37924325 | 37924350 | 25  | 37924337 | 12 | 12  | 2.1  |
| 17 | 38178800 | 38178825 | 25  | 38178812 | 12 | 12  | 2.1  |
| 17 | 38220775 | 38220825 | 50  | 38220812 | 13 | 25  | 0    |
| 17 | 38416425 | 38416500 | 75  | 38416437 | 12 | 36  | 6.2  |
| 17 | 38564425 | 38564450 | 25  | 38564437 | 12 | 12  | 0    |
| 17 | 38800925 | 38800950 | 25  | 38800937 | 12 | 12  | 2.1  |
| 17 | 38839675 | 38839725 | 50  | 38839687 | 12 | 24  | 4.1  |
| 17 | 39759825 | 39759850 | 25  | 39759837 | 12 | 12  | 2.1  |
| 17 | 40186775 | 40186800 | 25  | 40186787 | 12 | 12  | 2.1  |
| 17 | 40220125 | 40220150 | 25  | 40220137 | 12 | 12  | 0    |
| 17 | 40334025 | 40334075 | 50  | 40334037 | 12 | 24  | 2.1  |
| 17 | 40568325 | 40568400 | 75  | 40568387 | 16 | 44  | 6.2  |
| 17 | 40581975 | 40582000 | 25  | 40581987 | 13 | 13  | 2.1  |
| 17 | 40604400 | 40604500 | 100 | 40604462 | 15 | 54  | 6.2  |
| 17 | 40804225 | 40804250 | 25  | 40804237 | 12 | 12  | 0    |
| 17 | 41606325 | 41606350 | 25  | 41606337 | 12 | 12  | 0    |
| 17 | 42589525 | 42589550 | 25  | 42589537 | 16 | 16  | 2.1  |
| 17 | 43373475 | 43373550 | 75  | 43373487 | 15 | 44  | 6.2  |
| 17 | 43727800 | 43727925 | 125 | 43727912 | 13 | 60  | 0    |

|    |          |          |     |          |    |     |      |
|----|----------|----------|-----|----------|----|-----|------|
| 17 | 44017700 | 44017750 | 50  | 44017712 | 12 | 24  | 4.1  |
| 17 | 44104200 | 44104375 | 175 | 44104287 | 15 | 92  | 8.3  |
| 17 | 44451100 | 44451125 | 25  | 44451112 | 12 | 12  | 0    |
| 17 | 44693000 | 44693025 | 25  | 44693012 | 13 | 13  | 2.1  |
| 17 | 44876350 | 44876375 | 25  | 44876362 | 12 | 12  | 2.1  |
| 17 | 45630425 | 45630525 | 100 | 45630487 | 15 | 52  | 0    |
| 17 | 46804050 | 46804075 | 25  | 46804062 | 13 | 13  | 2.1  |
| 17 | 46805000 | 46805250 | 250 | 46805112 | 19 | 158 | 4.1  |
| 17 | 47672350 | 47672400 | 50  | 47672362 | 12 | 24  | 2.1  |
| 17 | 48261175 | 48261300 | 125 | 48261237 | 29 | 120 | 18.6 |
| 17 | 51009850 | 51009900 | 50  | 51009862 | 12 | 24  | 4.1  |
| 17 | 51043700 | 51043750 | 50  | 51043712 | 13 | 25  | 0    |
| 17 | 51791000 | 51791100 | 100 | 51791062 | 13 | 49  | 0    |
| 17 | 52445525 | 52445575 | 50  | 52445537 | 12 | 24  | 4.1  |
| 17 | 52846525 | 52846600 | 75  | 52846537 | 12 | 35  | 0    |
| 17 | 53290400 | 53290525 | 125 | 53290412 | 13 | 65  | 0    |
| 17 | 53324425 | 53324600 | 175 | 53324537 | 19 | 111 | 8.3  |
| 17 | 53325650 | 53325775 | 125 | 53325712 | 16 | 76  | 4.1  |
| 17 | 53335225 | 53335425 | 200 | 53335287 | 17 | 117 | 12.4 |
| 17 | 53485525 | 53485675 | 150 | 53485587 | 14 | 75  | 8.3  |
| 17 | 54091400 | 54091575 | 175 | 54091562 | 21 | 113 | 14.5 |
| 17 | 54516925 | 54516950 | 25  | 54516937 | 12 | 12  | 2.1  |
| 17 | 55215875 | 55215925 | 50  | 55215887 | 12 | 24  | 0    |
| 17 | 55257925 | 55258050 | 125 | 55257962 | 17 | 80  | 8.3  |
| 17 | 55270025 | 55270075 | 50  | 55270037 | 13 | 26  | 4.1  |
| 17 | 56404175 | 56404250 | 75  | 56404187 | 18 | 45  | 4.1  |
| 17 | 56744300 | 56744625 | 325 | 56744462 | 25 | 239 | 24.8 |
| 17 | 56751125 | 56751200 | 75  | 56751137 | 15 | 39  | 6.2  |
| 17 | 56755525 | 56755550 | 25  | 56755537 | 13 | 13  | 2.1  |
| 17 | 56757875 | 56758025 | 150 | 56757887 | 12 | 68  | 0    |
| 17 | 56918550 | 56918675 | 125 | 56918637 | 14 | 58  | 8.3  |
| 17 | 56928900 | 56929200 | 300 | 56929087 | 13 | 138 | 4.1  |
| 17 | 58255775 | 58255825 | 50  | 58255787 | 13 | 26  | 4.1  |
| 17 | 58396375 | 58396400 | 25  | 58396387 | 12 | 12  | 0    |
| 17 | 58399725 | 58399775 | 50  | 58399737 | 13 | 25  | 0    |
| 17 | 58563575 | 58563650 | 75  | 58563587 | 15 | 41  | 2.1  |
| 17 | 58788450 | 58788475 | 25  | 58788462 | 13 | 13  | 0    |
| 17 | 58800475 | 58800500 | 25  | 58800487 | 13 | 13  | 2.1  |
| 17 | 59106600 | 59106650 | 50  | 59106612 | 13 | 26  | 0    |
| 17 | 59204850 | 59204875 | 25  | 59204862 | 12 | 12  | 2.1  |
| 17 | 59259100 | 59259125 | 25  | 59259112 | 13 | 13  | 2.1  |
| 17 | 59279975 | 59280025 | 50  | 59280012 | 15 | 28  | 4.1  |
| 17 | 59713175 | 59713225 | 50  | 59713187 | 12 | 24  | 0    |
| 17 | 59738175 | 59738250 | 75  | 59738187 | 15 | 41  | 0    |
| 17 | 59752350 | 59752375 | 25  | 59752362 | 13 | 13  | 2.1  |
| 17 | 59812125 | 59812150 | 25  | 59812137 | 14 | 14  | 2.1  |
| 17 | 59829025 | 59829150 | 125 | 59829037 | 17 | 80  | 10.3 |
| 17 | 60159150 | 60159200 | 50  | 60159162 | 13 | 26  | 4.1  |
| 17 | 60489175 | 60489200 | 25  | 60489187 | 12 | 12  | 0    |
| 17 | 60879300 | 60879325 | 25  | 60879312 | 16 | 16  | 2.1  |
| 17 | 61920475 | 61920550 | 75  | 61920537 | 14 | 38  | 2.1  |
| 17 | 61935975 | 61936250 | 275 | 61935987 | 13 | 130 | 24.8 |
| 17 | 61966725 | 61966775 | 50  | 61966762 | 13 | 25  | 2.1  |
| 17 | 62100650 | 62100675 | 25  | 62100662 | 12 | 12  | 2.1  |
| 17 | 62147275 | 62147325 | 50  | 62147287 | 12 | 24  | 4.1  |
| 17 | 62848425 | 62848450 | 25  | 62848437 | 12 | 12  | 2.1  |
| 17 | 62905825 | 62905900 | 75  | 62905837 | 12 | 36  | 0    |
| 17 | 62936625 | 62936675 | 50  | 62936637 | 16 | 32  | 4.1  |
| 17 | 63028700 | 63028775 | 75  | 63028737 | 15 | 40  | 0    |
| 17 | 63102075 | 63102100 | 25  | 63102087 | 12 | 12  | 0    |
| 17 | 63693025 | 63693100 | 75  | 63693037 | 13 | 37  | 2.1  |
| 17 | 63708650 | 63708675 | 25  | 63708662 | 12 | 12  | 2.1  |
| 17 | 63888775 | 63888875 | 100 | 63888862 | 14 | 51  | 6.2  |
| 17 | 64017475 | 64017525 | 50  | 64017487 | 18 | 35  | 2.1  |
| 17 | 64037175 | 64037200 | 25  | 64037187 | 13 | 13  | 2.1  |
| 17 | 64073925 | 64074050 | 125 | 64073937 | 12 | 60  | 10.3 |
| 17 | 64088300 | 64088325 | 25  | 64088312 | 13 | 13  | 2.1  |
| 17 | 64203100 | 64203300 | 200 | 64203237 | 23 | 156 | 0    |
| 17 | 64218525 | 64218575 | 50  | 64218537 | 13 | 26  | 2.1  |
| 17 | 64267475 | 64267525 | 50  | 64267512 | 15 | 28  | 0    |
| 17 | 64285100 | 64285200 | 100 | 64285187 | 13 | 49  | 4.1  |
| 17 | 64285625 | 64285650 | 25  | 64285637 | 12 | 12  | 0    |
| 17 | 64288375 | 64288450 | 75  | 64288387 | 12 | 36  | 6.2  |
| 17 | 64687225 | 64687350 | 125 | 64687237 | 14 | 62  | 6.2  |
| 17 | 65581225 | 65581250 | 25  | 65581237 | 13 | 13  | 2.1  |

|    |          |          |     |          |    |     |      |
|----|----------|----------|-----|----------|----|-----|------|
| 17 | 67414425 | 67414450 | 25  | 67414437 | 12 | 12  | 0    |
| 17 | 67471500 | 67471525 | 25  | 67471512 | 12 | 12  | 0    |
| 17 | 67472400 | 67472575 | 175 | 67472412 | 16 | 100 | 0    |
| 17 | 67712450 | 67712475 | 25  | 67712462 | 12 | 12  | 0    |
| 17 | 67930725 | 67930950 | 225 | 67930762 | 15 | 119 | 8.3  |
| 17 | 68121825 | 68121925 | 100 | 68121837 | 12 | 48  | 4.1  |
| 17 | 68128600 | 68128650 | 50  | 68128612 | 12 | 24  | 4.1  |
| 17 | 68205300 | 68205325 | 25  | 68205312 | 14 | 14  | 2.1  |
| 17 | 68224025 | 68224250 | 225 | 68224112 | 18 | 138 | 20.7 |
| 17 | 68494225 | 68494250 | 25  | 68494237 | 12 | 12  | 2.1  |
| 17 | 68700750 | 68700775 | 25  | 68700762 | 15 | 15  | 0    |
| 17 | 71199050 | 71199075 | 25  | 71199062 | 12 | 12  | 0    |
| 17 | 71283150 | 71283175 | 25  | 71283162 | 13 | 13  | 0    |
| 17 | 72873575 | 72873600 | 25  | 72873587 | 12 | 12  | 2.1  |
| 17 | 72943775 | 72944025 | 250 | 72943862 | 17 | 144 | 16.6 |
| 17 | 73815675 | 73815775 | 100 | 73815687 | 14 | 53  | 8.3  |
| 17 | 73823500 | 73823525 | 25  | 73823512 | 12 | 12  | 2.1  |
| 17 | 74224875 | 74224900 | 25  | 74224887 | 12 | 12  | 2.1  |
| 17 | 74351975 | 74352025 | 50  | 74351987 | 12 | 24  | 4.1  |
| 17 | 74370075 | 74370125 | 50  | 74370112 | 14 | 27  | 4.1  |
| 17 | 74391450 | 74391475 | 25  | 74391462 | 12 | 12  | 2.1  |
| 17 | 74460000 | 74460025 | 25  | 74460012 | 12 | 12  | 2.1  |
| 17 | 74534625 | 74534700 | 75  | 74534637 | 12 | 36  | 6.2  |
| 17 | 75465625 | 75465700 | 75  | 75465637 | 12 | 36  | 4.1  |
| 17 | 76238050 | 76238100 | 50  | 76238087 | 14 | 26  | 4.1  |
| 17 | 76378050 | 76378100 | 50  | 76378087 | 14 | 26  | 2.1  |
| 17 | 76380225 | 76380325 | 100 | 76380312 | 18 | 58  | 6.2  |
| 17 | 76444900 | 76445125 | 225 | 76445037 | 23 | 182 | 29   |
| 17 | 76558825 | 76558875 | 50  | 76558837 | 12 | 24  | 4.1  |
| 17 | 76837825 | 76837925 | 100 | 76837837 | 13 | 52  | 2.1  |
| 17 | 76938325 | 76938450 | 125 | 76938387 | 14 | 64  | 10.3 |
| 17 | 77932350 | 77932375 | 25  | 77932362 | 12 | 12  | 2.1  |
| 17 | 78077050 | 78077200 | 150 | 78077137 | 18 | 88  | 0    |
| 16 | 638350   | 638425   | 75  | 638362   | 13 | 38  | 6.2  |
| 16 | 650725   | 650850   | 125 | 650837   | 14 | 64  | 6.2  |
| 16 | 1465050  | 1465075  | 25  | 1465062  | 12 | 12  | 2.1  |
| 16 | 1670375  | 1670400  | 25  | 1670387  | 12 | 12  | 2.1  |
| 16 | 2000550  | 2000575  | 25  | 2000562  | 12 | 12  | 0    |
| 16 | 2510275  | 2510325  | 50  | 2510287  | 12 | 24  | 4.1  |
| 16 | 3144025  | 3144050  | 25  | 3144037  | 12 | 12  | 2.1  |
| 16 | 3213850  | 3214175  | 325 | 3214037  | 23 | 219 | 31   |
| 16 | 3307350  | 3307525  | 175 | 3307437  | 20 | 113 | 0    |
| 16 | 3373000  | 3373350  | 350 | 3373162  | 14 | 177 | 0    |
| 16 | 3398650  | 3398900  | 250 | 3398762  | 24 | 181 | 2.1  |
| 16 | 3421900  | 3421975  | 75  | 3421962  | 22 | 64  | 12.4 |
| 16 | 3453200  | 3453225  | 25  | 3453212  | 12 | 12  | 2.1  |
| 16 | 4876325  | 4876375  | 50  | 4876337  | 12 | 24  | 0    |
| 16 | 8099550  | 8099775  | 225 | 8099637  | 23 | 160 | 22.8 |
| 16 | 9018375  | 9018400  | 25  | 9018387  | 12 | 12  | 2.1  |
| 16 | 10743400 | 10743475 | 75  | 10743412 | 12 | 36  | 0    |
| 16 | 11190525 | 11190575 | 50  | 11190537 | 12 | 24  | 4.1  |
| 16 | 11351475 | 11351525 | 50  | 11351487 | 13 | 26  | 4.1  |
| 16 | 11546400 | 11546450 | 50  | 11546412 | 12 | 24  | 4.1  |
| 16 | 11598800 | 11598825 | 25  | 11598812 | 12 | 12  | 2.1  |
| 16 | 11668950 | 11669000 | 50  | 11668962 | 13 | 26  | 0    |
| 16 | 12231375 | 12231425 | 50  | 12231387 | 12 | 24  | 4.1  |
| 16 | 12302575 | 12302625 | 50  | 12302587 | 12 | 24  | 4.1  |
| 16 | 12723400 | 12723600 | 200 | 12723412 | 15 | 101 | 0    |
| 16 | 12804750 | 12804775 | 25  | 12804762 | 12 | 12  | 0    |
| 16 | 12820700 | 12820725 | 25  | 12820712 | 13 | 13  | 0    |
| 16 | 13107250 | 13107300 | 50  | 13107262 | 12 | 24  | 4.1  |
| 16 | 13958075 | 13958175 | 100 | 13958087 | 12 | 44  | 2.1  |
| 16 | 14264125 | 14264200 | 75  | 14264162 | 15 | 44  | 2.1  |
| 16 | 15503925 | 15503950 | 25  | 15503937 | 21 | 21  | 4.1  |
| 16 | 15592225 | 15592325 | 100 | 15592312 | 15 | 57  | 2.1  |
| 16 | 15592575 | 15592650 | 75  | 15592587 | 16 | 40  | 0    |
| 16 | 17366625 | 17366725 | 100 | 17366662 | 14 | 50  | 8.3  |
| 16 | 18888775 | 18888800 | 25  | 18888787 | 13 | 13  | 0    |
| 16 | 18902550 | 18902600 | 50  | 18902562 | 13 | 26  | 2.1  |
| 16 | 18917575 | 18917625 | 50  | 18917587 | 13 | 26  | 4.1  |
| 16 | 19346300 | 19346375 | 75  | 19346312 | 14 | 38  | 0    |
| 16 | 19675950 | 19676000 | 50  | 19675962 | 12 | 24  | 0    |
| 16 | 20055350 | 20055375 | 25  | 20055362 | 12 | 12  | 2.1  |
| 16 | 22323550 | 22323575 | 25  | 22323562 | 12 | 12  | 0    |
| 16 | 23569600 | 23569625 | 25  | 23569612 | 13 | 13  | 2.1  |

|    |          |          |     |          |    |     |      |
|----|----------|----------|-----|----------|----|-----|------|
| 16 | 24529375 | 24529400 | 25  | 24529387 | 13 | 13  | 0    |
| 16 | 24619825 | 24619850 | 25  | 24619837 | 16 | 16  | 2.1  |
| 16 | 27641125 | 27641175 | 50  | 27641137 | 14 | 27  | 4.1  |
| 16 | 29184050 | 29184125 | 75  | 29184087 | 16 | 44  | 2.1  |
| 16 | 30765725 | 30765750 | 25  | 30765737 | 13 | 13  | 2.1  |
| 16 | 30909350 | 30909375 | 25  | 30909362 | 12 | 12  | 0    |
| 16 | 31391600 | 31391625 | 25  | 31391612 | 12 | 12  | 2.1  |
| 16 | 31407975 | 31408050 | 75  | 31407987 | 15 | 43  | 6.2  |
| 16 | 31674050 | 31674075 | 25  | 31674062 | 12 | 12  | 0    |
| 16 | 33772725 | 33772750 | 25  | 33772737 | 12 | 12  | 2.1  |
| 16 | 33809275 | 33809300 | 25  | 33809287 | 12 | 12  | 2.1  |
| 16 | 33863075 | 33863125 | 50  | 33863087 | 17 | 34  | 0    |
| 16 | 33865850 | 33865950 | 100 | 33865862 | 14 | 56  | 8.3  |
| 16 | 44945725 | 44945900 | 175 | 44945887 | 32 | 121 | 8.3  |
| 16 | 44949700 | 44949900 | 200 | 44949712 | 35 | 117 | 6.2  |
| 16 | 44958725 | 44958825 | 100 | 44958737 | 12 | 48  | 8.3  |
| 16 | 44959275 | 44959350 | 75  | 44959312 | 14 | 38  | 6.2  |
| 16 | 44960700 | 44960875 | 175 | 44960712 | 15 | 105 | 14.5 |
| 16 | 44974350 | 44974425 | 75  | 44974362 | 14 | 40  | 6.2  |
| 16 | 44976975 | 44977150 | 175 | 44977037 | 24 | 156 | 14.5 |
| 16 | 44983625 | 44983750 | 125 | 44983662 | 13 | 64  | 10.3 |
| 16 | 44984350 | 44984475 | 125 | 44984462 | 13 | 61  | 6.2  |
| 16 | 44985050 | 44985075 | 25  | 44985062 | 23 | 23  | 4.1  |
| 16 | 45005400 | 45005450 | 50  | 45005412 | 12 | 24  | 0    |
| 16 | 45733275 | 45733300 | 25  | 45733287 | 12 | 12  | 2.1  |
| 16 | 46957925 | 46958000 | 75  | 46957962 | 14 | 38  | 6.2  |
| 16 | 48616375 | 48616400 | 25  | 48616387 | 14 | 14  | 0    |
| 16 | 48963325 | 48963475 | 150 | 48963387 | 15 | 82  | 2.1  |
| 16 | 49263200 | 49263275 | 75  | 49263212 | 13 | 39  | 0    |
| 16 | 49453550 | 49453600 | 50  | 49453562 | 12 | 24  | 0    |
| 16 | 49751275 | 49751350 | 75  | 49751312 | 14 | 40  | 0    |
| 16 | 49865450 | 49865475 | 25  | 49865462 | 12 | 12  | 0    |
| 16 | 51683575 | 51683675 | 100 | 51683587 | 17 | 54  | 8.3  |
| 16 | 51799925 | 51799950 | 25  | 51799937 | 13 | 13  | 2.1  |
| 16 | 52550550 | 52550625 | 75  | 52550562 | 12 | 36  | 6.2  |
| 16 | 52672375 | 52672425 | 50  | 52672387 | 14 | 26  | 0    |
| 16 | 52828325 | 52828450 | 125 | 52828337 | 15 | 73  | 4.1  |
| 16 | 52980950 | 52980975 | 25  | 52980962 | 12 | 12  | 2.1  |
| 16 | 53520950 | 53521025 | 75  | 53520962 | 22 | 53  | 4.1  |
| 16 | 53708600 | 53708725 | 125 | 53708687 | 15 | 68  | 0    |
| 16 | 54874075 | 54874150 | 75  | 54874112 | 14 | 38  | 0    |
| 16 | 55201075 | 55201100 | 25  | 55201087 | 12 | 12  | 0    |
| 16 | 56156450 | 56156500 | 50  | 56156462 | 12 | 24  | 0    |
| 16 | 58389225 | 58389300 | 75  | 58389237 | 12 | 36  | 0    |
| 16 | 60817225 | 60817275 | 50  | 60817237 | 14 | 27  | 4.1  |
| 16 | 63525500 | 63525550 | 50  | 63525512 | 12 | 24  | 4.1  |
| 16 | 63984650 | 63984825 | 175 | 63984737 | 18 | 106 | 8.3  |
| 16 | 64123850 | 64124025 | 175 | 64123987 | 14 | 85  | 8.3  |
| 16 | 65108300 | 65108325 | 25  | 65108312 | 12 | 12  | 2.1  |
| 16 | 67155725 | 67156025 | 300 | 67155962 | 17 | 171 | 0    |
| 16 | 67378150 | 67378250 | 100 | 67378187 | 14 | 50  | 0    |
| 16 | 67922050 | 67922075 | 25  | 67922062 | 12 | 12  | 0    |
| 16 | 68068650 | 68068725 | 75  | 68068662 | 12 | 36  | 0    |
| 16 | 68346175 | 68346200 | 25  | 68346187 | 12 | 12  | 2.1  |
| 16 | 68391150 | 68391225 | 75  | 68391187 | 17 | 46  | 2.1  |
| 16 | 68412600 | 68412650 | 50  | 68412612 | 12 | 24  | 4.1  |
| 16 | 69283375 | 69283425 | 50  | 69283412 | 15 | 27  | 4.1  |
| 16 | 69362625 | 69362650 | 25  | 69362637 | 15 | 15  | 2.1  |
| 16 | 69590850 | 69590875 | 25  | 69590862 | 13 | 13  | 0    |
| 16 | 69660600 | 69660625 | 25  | 69660612 | 12 | 12  | 2.1  |
| 16 | 69758675 | 69758825 | 150 | 69758812 | 13 | 69  | 0    |
| 16 | 71416250 | 71416300 | 50  | 71416262 | 13 | 26  | 0    |
| 16 | 71581075 | 71581250 | 175 | 71581087 | 13 | 87  | 0    |
| 16 | 71592700 | 71592825 | 125 | 71592762 | 15 | 63  | 8.3  |
| 16 | 71597500 | 71597525 | 25  | 71597512 | 12 | 12  | 0    |
| 16 | 71611925 | 71611975 | 50  | 71611937 | 12 | 24  | 4.1  |
| 16 | 71704725 | 71704850 | 125 | 71704762 | 14 | 66  | 8.3  |
| 16 | 74051475 | 74051525 | 50  | 74051487 | 12 | 24  | 0    |
| 16 | 74098125 | 74098275 | 150 | 74098237 | 14 | 75  | 0    |
| 16 | 75538425 | 75538600 | 175 | 75538462 | 16 | 100 | 14.5 |
| 16 | 75539425 | 75539475 | 50  | 75539462 | 13 | 25  | 0    |
| 16 | 75921650 | 75921800 | 150 | 75921662 | 13 | 74  | 4.1  |
| 16 | 78196650 | 78196675 | 25  | 78196662 | 12 | 12  | 0    |
| 16 | 78249725 | 78249975 | 250 | 78249812 | 21 | 174 | 26.9 |
| 16 | 80337450 | 80337500 | 50  | 80337462 | 12 | 24  | 4.1  |

|    |          |          |     |          |    |     |      |
|----|----------|----------|-----|----------|----|-----|------|
| 16 | 81205050 | 81205175 | 125 | 81205137 | 13 | 60  | 10.3 |
| 16 | 81225425 | 81225450 | 25  | 81225437 | 13 | 13  | 2.1  |
| 16 | 81231225 | 81231325 | 100 | 81231262 | 15 | 55  | 4.1  |
| 16 | 81264125 | 81264275 | 150 | 81264137 | 12 | 68  | 0    |
| 16 | 81364150 | 81364175 | 25  | 81364162 | 13 | 13  | 2.1  |
| 16 | 81892550 | 81892575 | 25  | 81892562 | 12 | 12  | 0    |
| 16 | 81934950 | 81934975 | 25  | 81934962 | 12 | 12  | 0    |
| 16 | 81935200 | 81935250 | 50  | 81935212 | 12 | 24  | 0    |
| 16 | 82353600 | 82353650 | 50  | 82353612 | 13 | 26  | 4.1  |
| 16 | 82425725 | 82425775 | 50  | 82425737 | 12 | 24  | 4.1  |
| 16 | 83241900 | 83241925 | 25  | 83241912 | 12 | 12  | 2.1  |
| 16 | 83576525 | 83576550 | 25  | 83576537 | 12 | 12  | 0    |
| 16 | 85146375 | 85146450 | 75  | 85146412 | 15 | 42  | 6.2  |
| 16 | 85792375 | 85792400 | 25  | 85792387 | 12 | 12  | 0    |
| 16 | 85923750 | 85923775 | 25  | 85923762 | 13 | 13  | 2.1  |
| 16 | 86400750 | 86400825 | 75  | 86400787 | 14 | 38  | 6.2  |
| 16 | 86439375 | 86439450 | 75  | 86439437 | 16 | 42  | 6.2  |
| 16 | 86462750 | 86462775 | 25  | 86462762 | 12 | 12  | 0    |
| 16 | 86522550 | 86522575 | 25  | 86522562 | 13 | 13  | 0    |
| 16 | 86969700 | 86969725 | 25  | 86969712 | 12 | 12  | 2.1  |
| 16 | 87957625 | 87957750 | 125 | 87957737 | 13 | 59  | 10.3 |
| 16 | 88410750 | 88410800 | 50  | 88410762 | 12 | 24  | 0    |
| 16 | 88468450 | 88468525 | 75  | 88468462 | 14 | 40  | 2.1  |
| 16 | 88511650 | 88511700 | 50  | 88511662 | 14 | 26  | 4.1  |
| 16 | 88626025 | 88626100 | 75  | 88626062 | 16 | 44  | 0    |
| 19 | 198150   | 198350   | 200 | 198237   | 22 | 161 | 12.4 |
| 19 | 435900   | 435975   | 75  | 435912   | 13 | 37  | 6.2  |
| 19 | 1008575  | 1008750  | 175 | 1008637  | 16 | 102 | 0    |
| 19 | 1225925  | 1225975  | 50  | 1225937  | 12 | 24  | 2.1  |
| 19 | 1458775  | 1458900  | 125 | 1458862  | 18 | 78  | 4.1  |
| 19 | 1856475  | 1856500  | 25  | 1856487  | 12 | 12  | 0    |
| 19 | 2313375  | 2313400  | 25  | 2313387  | 12 | 12  | 2.1  |
| 19 | 2325800  | 2325850  | 50  | 2325812  | 13 | 26  | 0    |
| 19 | 2332100  | 2332150  | 50  | 2332112  | 14 | 26  | 4.1  |
| 19 | 2599875  | 2599900  | 25  | 2599887  | 16 | 16  | 2.1  |
| 19 | 2804050  | 2804150  | 100 | 2804112  | 16 | 55  | 4.1  |
| 19 | 2829050  | 2829075  | 25  | 2829062  | 12 | 12  | 0    |
| 19 | 2884525  | 2884775  | 250 | 2884612  | 21 | 167 | 0    |
| 19 | 3106450  | 3106475  | 25  | 3106462  | 16 | 16  | 2.1  |
| 19 | 3460300  | 3460375  | 75  | 3460337  | 14 | 40  | 6.2  |
| 19 | 3499775  | 3499850  | 75  | 3499787  | 12 | 36  | 0    |
| 19 | 3503875  | 3503900  | 25  | 3503887  | 12 | 12  | 2.1  |
| 19 | 3516225  | 3516400  | 175 | 3516312  | 17 | 102 | 18.6 |
| 19 | 3531425  | 3531525  | 100 | 3531487  | 18 | 65  | 0    |
| 19 | 3934225  | 3934275  | 50  | 3934262  | 17 | 32  | 4.1  |
| 19 | 3941225  | 3941325  | 100 | 3941312  | 14 | 52  | 2.1  |
| 19 | 4821300  | 4821400  | 100 | 4821312  | 24 | 78  | 12.4 |
| 19 | 4923450  | 4923625  | 175 | 4923487  | 16 | 104 | 12.4 |
| 19 | 5857700  | 5857725  | 25  | 5857712  | 12 | 12  | 0    |
| 19 | 6077475  | 6077575  | 100 | 6077512  | 14 | 53  | 6.2  |
| 19 | 6243200  | 6243275  | 75  | 6243237  | 19 | 48  | 6.2  |
| 19 | 7034025  | 7034775  | 750 | 7034437  | 24 | 455 | 20.7 |
| 19 | 7459950  | 7459975  | 25  | 7459962  | 12 | 12  | 2.1  |
| 19 | 7915275  | 7915525  | 250 | 7915387  | 17 | 134 | 18.6 |
| 19 | 8040300  | 8040475  | 175 | 8040362  | 44 | 277 | 22.8 |
| 19 | 8485125  | 8485150  | 25  | 8485137  | 13 | 13  | 2.1  |
| 19 | 8523775  | 8523800  | 25  | 8523787  | 12 | 12  | 2.1  |
| 19 | 8783125  | 8783250  | 125 | 8783137  | 12 | 60  | 4.1  |
| 19 | 8804375  | 8804400  | 25  | 8804387  | 12 | 12  | 0    |
| 19 | 9047325  | 9047350  | 25  | 9047337  | 12 | 12  | 0    |
| 19 | 9379025  | 9379075  | 50  | 9379037  | 12 | 24  | 4.1  |
| 19 | 9407100  | 9407125  | 25  | 9407112  | 13 | 13  | 0    |
| 19 | 9495725  | 9495825  | 100 | 9495787  | 17 | 63  | 8.3  |
| 19 | 9500375  | 9500750  | 375 | 9500612  | 27 | 302 | 14.5 |
| 19 | 9645575  | 9645850  | 275 | 9645712  | 20 | 168 | 16.6 |
| 19 | 10015075 | 10015125 | 50  | 10015087 | 12 | 24  | 2.1  |
| 19 | 10086650 | 10086725 | 75  | 10086662 | 14 | 42  | 6.2  |
| 19 | 10544350 | 10544400 | 50  | 10544362 | 14 | 26  | 0    |
| 19 | 10808225 | 10808250 | 25  | 10808237 | 16 | 16  | 2.1  |
| 19 | 11832750 | 11832875 | 125 | 11832762 | 12 | 60  | 10.3 |
| 19 | 11877800 | 11877975 | 175 | 11877862 | 15 | 97  | 18.6 |
| 19 | 11921075 | 11921100 | 25  | 11921087 | 12 | 12  | 2.1  |
| 19 | 11987425 | 11987450 | 25  | 11987437 | 12 | 12  | 0    |
| 19 | 12015950 | 12016000 | 50  | 12015962 | 13 | 25  | 0    |
| 19 | 12048250 | 12048450 | 200 | 12048337 | 19 | 129 | 0    |

|    |          |          |     |          |    |     |      |
|----|----------|----------|-----|----------|----|-----|------|
| 19 | 12049350 | 12049450 | 100 | 12049387 | 14 | 55  | 0    |
| 19 | 12498625 | 12498750 | 125 | 12498687 | 15 | 69  | 0    |
| 19 | 12499075 | 12499550 | 475 | 12499237 | 16 | 229 | 2.1  |
| 19 | 12760700 | 12760725 | 25  | 12760712 | 12 | 12  | 2.1  |
| 19 | 12960375 | 12960500 | 125 | 12960387 | 14 | 70  | 0    |
| 19 | 13693175 | 13693350 | 175 | 13693212 | 16 | 96  | 2.1  |
| 19 | 14179300 | 14179325 | 25  | 14179312 | 12 | 12  | 2.1  |
| 19 | 14690375 | 14690675 | 300 | 14690537 | 26 | 227 | 39.3 |
| 19 | 15934250 | 15934350 | 100 | 15934287 | 14 | 54  | 8.3  |
| 19 | 16047925 | 16048125 | 200 | 16047987 | 14 | 103 | 2.1  |
| 19 | 16265325 | 16265375 | 50  | 16265337 | 12 | 24  | 2.1  |
| 19 | 17080000 | 17080125 | 125 | 17080012 | 13 | 64  | 10.3 |
| 19 | 17377450 | 17377500 | 50  | 17377462 | 13 | 26  | 4.1  |
| 19 | 17910050 | 17910075 | 25  | 17910062 | 13 | 13  | 0    |
| 19 | 18124475 | 18124575 | 100 | 18124487 | 18 | 62  | 2.1  |
| 19 | 18251550 | 18251575 | 25  | 18251562 | 12 | 12  | 2.1  |
| 19 | 18277000 | 18277050 | 50  | 18277012 | 12 | 24  | 4.1  |
| 19 | 18357950 | 18358050 | 100 | 18358012 | 14 | 50  | 4.1  |
| 19 | 18529475 | 18529550 | 75  | 18529487 | 13 | 36  | 4.1  |
| 19 | 19554100 | 19554150 | 50  | 19554112 | 12 | 24  | 4.1  |
| 19 | 19793625 | 19793725 | 100 | 19793662 | 17 | 62  | 8.3  |
| 19 | 20151950 | 20152050 | 100 | 20151962 | 12 | 48  | 0    |
| 19 | 21297425 | 21297500 | 75  | 21297462 | 14 | 40  | 6.2  |
| 19 | 21371425 | 21371525 | 100 | 21371462 | 16 | 59  | 8.3  |
| 19 | 21882325 | 21882350 | 25  | 21882337 | 12 | 12  | 2.1  |
| 19 | 21922450 | 21922625 | 175 | 21922587 | 17 | 105 | 8.3  |
| 19 | 22119100 | 22119300 | 200 | 22119212 | 20 | 116 | 0    |
| 19 | 22920350 | 22920425 | 75  | 22920362 | 13 | 39  | 4.1  |
| 19 | 23737675 | 23737700 | 25  | 23737687 | 12 | 12  | 0    |
| 19 | 32423600 | 32423625 | 25  | 32423612 | 12 | 12  | 2.1  |
| 19 | 32425375 | 32425500 | 125 | 32425387 | 37 | 123 | 18.6 |
| 19 | 32425875 | 32425900 | 25  | 32425887 | 29 | 29  | 4.1  |
| 19 | 32427225 | 32427325 | 100 | 32427237 | 23 | 71  | 6.2  |
| 19 | 32428150 | 32428175 | 25  | 32428162 | 22 | 22  | 4.1  |
| 19 | 32448900 | 32449100 | 200 | 32448912 | 12 | 96  | 16.6 |
| 19 | 32456475 | 32456500 | 25  | 32456487 | 13 | 13  | 2.1  |
| 19 | 34116325 | 34116375 | 50  | 34116337 | 12 | 24  | 0    |
| 19 | 34770300 | 34770375 | 75  | 34770312 | 12 | 36  | 0    |
| 19 | 34854275 | 34854425 | 150 | 34854387 | 14 | 74  | 4.1  |
| 19 | 34873750 | 34873800 | 50  | 34873762 | 14 | 27  | 4.1  |
| 19 | 35143250 | 35143275 | 25  | 35143262 | 12 | 12  | 0    |
| 19 | 35637050 | 35637100 | 50  | 35637087 | 13 | 25  | 4.1  |
| 19 | 36397150 | 36397175 | 25  | 36397162 | 12 | 12  | 2.1  |
| 19 | 36591625 | 36591700 | 75  | 36591637 | 12 | 36  | 0    |
| 19 | 37600775 | 37600900 | 125 | 37600812 | 13 | 64  | 0    |
| 19 | 38263525 | 38263550 | 25  | 38263537 | 12 | 12  | 2.1  |
| 19 | 38358925 | 38359025 | 100 | 38358962 | 14 | 54  | 2.1  |
| 19 | 38646050 | 38646175 | 125 | 38646062 | 22 | 76  | 12.4 |
| 19 | 39061050 | 39061250 | 200 | 39061062 | 12 | 91  | 0    |
| 19 | 39574400 | 39574450 | 50  | 39574412 | 13 | 26  | 4.1  |
| 19 | 40141275 | 40141300 | 25  | 40141287 | 12 | 12  | 0    |
| 19 | 40298800 | 40298900 | 100 | 40298862 | 15 | 55  | 8.3  |
| 19 | 40303375 | 40303400 | 25  | 40303387 | 21 | 21  | 4.1  |
| 19 | 41311425 | 41311475 | 50  | 41311437 | 13 | 26  | 4.1  |
| 19 | 41696900 | 41696925 | 25  | 41696912 | 12 | 12  | 0    |
| 19 | 41821775 | 41821800 | 25  | 41821787 | 13 | 13  | 0    |
| 19 | 41902425 | 41902775 | 350 | 41902562 | 25 | 264 | 14.5 |
| 19 | 42311050 | 42311700 | 650 | 42311362 | 23 | 410 | 0    |
| 19 | 42355425 | 42355450 | 25  | 42355437 | 13 | 13  | 2.1  |
| 19 | 42667675 | 42667725 | 50  | 42667687 | 13 | 26  | 2.1  |
| 19 | 42720200 | 42720225 | 25  | 42720212 | 12 | 12  | 2.1  |
| 19 | 42733950 | 42733975 | 25  | 42733962 | 12 | 12  | 2.1  |
| 19 | 42734600 | 42734725 | 125 | 42734612 | 17 | 73  | 0    |
| 19 | 43037825 | 43037875 | 50  | 43037862 | 14 | 26  | 4.1  |
| 19 | 43180425 | 43180575 | 150 | 43180537 | 18 | 92  | 12.4 |
| 19 | 43832250 | 43832275 | 25  | 43832262 | 12 | 12  | 2.1  |
| 19 | 43975650 | 43975775 | 125 | 43975762 | 13 | 60  | 0    |
| 19 | 44261150 | 44261375 | 225 | 44261262 | 21 | 156 | 6.2  |
| 19 | 44327000 | 44327050 | 50  | 44327012 | 12 | 24  | 4.1  |
| 19 | 45345125 | 45345250 | 125 | 45345137 | 13 | 61  | 8.3  |
| 19 | 45345500 | 45345575 | 75  | 45345537 | 14 | 40  | 0    |
| 19 | 45580275 | 45580300 | 25  | 45580287 | 12 | 12  | 0    |
| 19 | 46497850 | 46497875 | 25  | 46497862 | 12 | 12  | 2.1  |
| 19 | 47477575 | 47477625 | 50  | 47477587 | 12 | 24  | 4.1  |
| 19 | 47498625 | 47498650 | 25  | 47498637 | 13 | 13  | 0    |



|    |          |          |      |          |    |     |      |
|----|----------|----------|------|----------|----|-----|------|
| 19 | 47593625 | 47593700 | 75   | 47593662 | 15 | 42  | 4.1  |
| 19 | 47664575 | 47664600 | 25   | 47664587 | 12 | 12  | 2.1  |
| 19 | 48424850 | 48424875 | 25   | 48424862 | 12 | 12  | 2.1  |
| 19 | 48964850 | 48964875 | 25   | 48964862 | 12 | 12  | 2.1  |
| 19 | 48973750 | 48973800 | 50   | 48973762 | 13 | 25  | 0    |
| 19 | 49006025 | 49006050 | 25   | 49006037 | 12 | 12  | 0    |
| 19 | 49097725 | 49097800 | 75   | 49097762 | 22 | 63  | 6.2  |
| 19 | 49179925 | 49179950 | 25   | 49179937 | 13 | 13  | 2.1  |
| 19 | 49200025 | 49200050 | 25   | 49200037 | 13 | 13  | 2.1  |
| 19 | 49206525 | 49206700 | 175  | 49206537 | 16 | 100 | 0    |
| 19 | 49228075 | 49228200 | 125  | 49228162 | 15 | 66  | 0    |
| 19 | 49262275 | 49262450 | 175  | 49262337 | 15 | 94  | 0    |
| 19 | 49308000 | 49308025 | 25   | 49308012 | 13 | 13  | 0    |
| 19 | 49360800 | 49360825 | 25   | 49360812 | 13 | 13  | 2.1  |
| 19 | 49361050 | 49361100 | 50   | 49361087 | 17 | 33  | 4.1  |
| 19 | 49403300 | 49403500 | 200  | 49403412 | 24 | 156 | 10.3 |
| 19 | 49672550 | 49673475 | 925  | 49672912 | 40 | 957 | 33.1 |
| 19 | 49783200 | 49783225 | 25   | 49783212 | 14 | 14  | 2.1  |
| 19 | 49937000 | 49937050 | 50   | 49937037 | 20 | 34  | 4.1  |
| 19 | 50120500 | 50120550 | 50   | 50120537 | 14 | 27  | 2.1  |
| 19 | 50619550 | 50619675 | 125  | 50619562 | 24 | 87  | 10.3 |
| 19 | 50739475 | 50739500 | 25   | 50739487 | 12 | 12  | 2.1  |
| 19 | 50776000 | 50776075 | 75   | 50776062 | 16 | 42  | 4.1  |
| 19 | 50949000 | 50949050 | 50   | 50949012 | 12 | 24  | 0    |
| 19 | 51802975 | 51803025 | 50   | 51802987 | 12 | 24  | 0    |
| 19 | 52051800 | 52051825 | 25   | 52051812 | 25 | 25  | 4.1  |
| 19 | 52057700 | 52057725 | 25   | 52057712 | 13 | 13  | 2.1  |
| 19 | 52096725 | 52096775 | 50   | 52096737 | 13 | 26  | 0    |
| 19 | 52122175 | 52122200 | 25   | 52122187 | 12 | 12  | 0    |
| 19 | 52162150 | 52162250 | 100  | 52162162 | 12 | 44  | 8.3  |
| 19 | 52177125 | 52177150 | 25   | 52177137 | 12 | 12  | 2.1  |
| 19 | 52436650 | 52436675 | 25   | 52436662 | 12 | 12  | 2.1  |
| 19 | 52818775 | 52818825 | 50   | 52818787 | 12 | 24  | 0    |
| 19 | 53317025 | 53317150 | 125  | 53317062 | 25 | 110 | 10.3 |
| 19 | 53828000 | 53828050 | 50   | 53828012 | 12 | 24  | 4.1  |
| 19 | 53871850 | 53871875 | 25   | 53871862 | 12 | 12  | 2.1  |
| 19 | 54301950 | 54301975 | 25   | 54301962 | 12 | 12  | 0    |
| 19 | 54323025 | 54323100 | 75   | 54323062 | 16 | 43  | 6.2  |
| 19 | 55070825 | 55070875 | 50   | 55070837 | 13 | 26  | 0    |
| 19 | 55125725 | 55125850 | 125  | 55125787 | 15 | 65  | 8.3  |
| 19 | 55182525 | 55182550 | 25   | 55182537 | 15 | 15  | 2.1  |
| 19 | 55240075 | 55240125 | 50   | 55240087 | 12 | 24  | 4.1  |
| 19 | 56560975 | 56561125 | 150  | 56560987 | 17 | 88  | 2.1  |
| 19 | 57086400 | 57086600 | 200  | 57086512 | 21 | 136 | 2.1  |
| 19 | 57188900 | 57188925 | 25   | 57188912 | 13 | 13  | 0    |
| 19 | 57229250 | 57229750 | 500  | 57229337 | 19 | 249 | 0    |
| 19 | 57310650 | 57310875 | 225  | 57310787 | 21 | 157 | 14.5 |
| 19 | 57334825 | 57335125 | 300  | 57334962 | 26 | 204 | 14.5 |
| 19 | 57564675 | 57564725 | 50   | 57564687 | 13 | 26  | 4.1  |
| 19 | 57611050 | 57611075 | 25   | 57611062 | 12 | 12  | 2.1  |
| 19 | 57669100 | 57669150 | 50   | 57669112 | 13 | 25  | 0    |
| 19 | 57960025 | 57960075 | 50   | 57960037 | 12 | 24  | 0    |
| 19 | 58360825 | 58360925 | 100  | 58360862 | 15 | 54  | 0    |
| 19 | 58547475 | 58547550 | 75   | 58547487 | 12 | 36  | 0    |
| 19 | 58715800 | 58715850 | 50   | 58715837 | 16 | 30  | 4.1  |
| 19 | 59074825 | 59074875 | 50   | 59074837 | 12 | 24  | 2.1  |
| 19 | 60209175 | 60209525 | 350  | 60209362 | 30 | 277 | 2.1  |
| 19 | 60707050 | 60707075 | 25   | 60707062 | 12 | 12  | 2.1  |
| 19 | 61578225 | 61578250 | 25   | 61578237 | 13 | 13  | 0    |
| 19 | 61627250 | 61627425 | 175  | 61627337 | 13 | 84  | 0    |
| 19 | 61728175 | 61728750 | 575  | 61728462 | 19 | 286 | 0    |
| 19 | 61770625 | 61770650 | 25   | 61770637 | 13 | 13  | 2.1  |
| 19 | 61781025 | 61781225 | 200  | 61781062 | 18 | 120 | 0    |
| 19 | 62676950 | 62677175 | 225  | 62677087 | 18 | 139 | 22.8 |
| 19 | 62741050 | 62741100 | 50   | 62741062 | 13 | 26  | 0    |
| 19 | 62769750 | 62769775 | 25   | 62769762 | 13 | 13  | 2.1  |
| 19 | 62778525 | 62778550 | 25   | 62778537 | 12 | 12  | 0    |
| 19 | 62824000 | 62824200 | 200  | 62824037 | 22 | 138 | 20.7 |
| 19 | 63181850 | 63181950 | 100  | 63181862 | 12 | 48  | 0    |
| 19 | 63270525 | 63270575 | 50   | 63270537 | 12 | 24  | 2.1  |
| 19 | 63331225 | 63331575 | 350  | 63331337 | 22 | 234 | 8.3  |
| 19 | 63331825 | 63331875 | 50   | 63331837 | 12 | 24  | 0    |
| 19 | 63369975 | 63370025 | 50   | 63369987 | 13 | 26  | 0    |
| 19 | 63399875 | 63400500 | 625  | 63400262 | 34 | 558 | 33.1 |
| 19 | 63464900 | 63466275 | 1375 | 63465762 | 29 | 896 | 33.1 |

|    |          |          |     |          |    |     |      |
|----|----------|----------|-----|----------|----|-----|------|
| 19 | 63637450 | 63637650 | 200 | 63637562 | 16 | 113 | 10.3 |
| 19 | 63643325 | 63643350 | 25  | 63643337 | 16 | 16  | 2.1  |
| 18 | 386200   | 386325   | 125 | 386212   | 13 | 59  | 2.1  |
| 18 | 468700   | 468725   | 25  | 468712   | 12 | 12  | 0    |
| 18 | 477000   | 477225   | 225 | 477087   | 24 | 166 | 0    |
| 18 | 624575   | 624750   | 175 | 624587   | 13 | 84  | 4.1  |
| 18 | 634500   | 634525   | 25  | 634512   | 12 | 12  | 2.1  |
| 18 | 668250   | 668350   | 100 | 668262   | 15 | 57  | 8.3  |
| 18 | 705850   | 705900   | 50  | 705862   | 12 | 24  | 0    |
| 18 | 3272625  | 3272650  | 25  | 3272637  | 12 | 12  | 2.1  |
| 18 | 3273575  | 3273750  | 175 | 3273737  | 16 | 96  | 16.6 |
| 18 | 3592675  | 3592700  | 25  | 3592687  | 12 | 12  | 0    |
| 18 | 4534300  | 4534450  | 150 | 4534362  | 18 | 92  | 0    |
| 18 | 7911925  | 7912125  | 200 | 7912062  | 25 | 171 | 16.6 |
| 18 | 8333775  | 8333800  | 25  | 8333787  | 13 | 13  | 2.1  |
| 18 | 8413175  | 8413250  | 75  | 8413187  | 13 | 37  | 6.2  |
| 18 | 9007575  | 9007600  | 25  | 9007587  | 14 | 14  | 2.1  |
| 18 | 11104725 | 11104825 | 100 | 11104787 | 13 | 50  | 0    |
| 18 | 11257700 | 11257775 | 75  | 11257712 | 13 | 38  | 0    |
| 18 | 11356475 | 11356525 | 50  | 11356512 | 14 | 27  | 2.1  |
| 18 | 12038850 | 12038950 | 100 | 12038887 | 14 | 52  | 0    |
| 18 | 12985575 | 12985600 | 25  | 12985587 | 12 | 12  | 0    |
| 18 | 13671775 | 13672000 | 225 | 13671987 | 14 | 131 | 24.8 |
| 18 | 16764950 | 16765125 | 175 | 16765112 | 26 | 110 | 4.1  |
| 18 | 16765350 | 16765425 | 75  | 16765412 | 26 | 68  | 4.1  |
| 18 | 16766400 | 16766425 | 25  | 16766412 | 32 | 32  | 6.2  |
| 18 | 16769650 | 16769950 | 300 | 16769812 | 24 | 201 | 14.5 |
| 18 | 16770350 | 16770375 | 25  | 16770362 | 17 | 17  | 2.1  |
| 18 | 16773625 | 16773725 | 100 | 16773662 | 28 | 95  | 12.4 |
| 18 | 17503925 | 17504075 | 150 | 17504062 | 15 | 76  | 10.3 |
| 18 | 18948350 | 18948425 | 75  | 18948362 | 12 | 36  | 4.1  |
| 18 | 18949725 | 18949850 | 125 | 18949737 | 18 | 76  | 10.3 |
| 18 | 18977550 | 18977575 | 25  | 18977562 | 13 | 13  | 2.1  |
| 18 | 19116250 | 19116300 | 50  | 19116262 | 15 | 28  | 4.1  |
| 18 | 19689350 | 19689425 | 75  | 19689362 | 13 | 37  | 0    |
| 18 | 20231700 | 20231725 | 25  | 20231712 | 13 | 13  | 2.1  |
| 18 | 24023475 | 24023500 | 25  | 24023487 | 12 | 12  | 2.1  |
| 18 | 24518825 | 24518850 | 25  | 24518837 | 12 | 12  | 2.1  |
| 18 | 24998025 | 24998075 | 50  | 24998037 | 12 | 24  | 0    |
| 18 | 28414825 | 28414900 | 75  | 28414837 | 12 | 36  | 0    |
| 18 | 30791475 | 30791500 | 25  | 30791487 | 12 | 12  | 2.1  |
| 18 | 31189275 | 31189350 | 75  | 31189287 | 14 | 38  | 6.2  |
| 18 | 31963400 | 31963425 | 25  | 31963412 | 15 | 15  | 2.1  |
| 18 | 34774850 | 34775050 | 200 | 34774912 | 19 | 130 | 14.5 |
| 18 | 35481950 | 35481975 | 25  | 35481962 | 12 | 12  | 2.1  |
| 18 | 35669650 | 35669725 | 75  | 35669662 | 14 | 42  | 0    |
| 18 | 37715675 | 37715700 | 25  | 37715687 | 12 | 12  | 0    |
| 18 | 37882275 | 37882300 | 25  | 37882287 | 12 | 12  | 2.1  |
| 18 | 40876900 | 40876950 | 50  | 40876912 | 12 | 24  | 0    |
| 18 | 41031425 | 41031700 | 275 | 41031537 | 25 | 212 | 8.3  |
| 18 | 41422150 | 41422250 | 100 | 41422162 | 12 | 48  | 2.1  |
| 18 | 41424250 | 41424300 | 50  | 41424262 | 12 | 24  | 4.1  |
| 18 | 43365950 | 43365975 | 25  | 43365962 | 12 | 12  | 0    |
| 18 | 44404000 | 44404075 | 75  | 44404037 | 13 | 38  | 0    |
| 18 | 44521500 | 44521525 | 25  | 44521512 | 16 | 16  | 2.1  |
| 18 | 44536975 | 44537000 | 25  | 44536987 | 12 | 12  | 2.1  |
| 18 | 44613325 | 44613350 | 25  | 44613337 | 12 | 12  | 2.1  |
| 18 | 44615225 | 44615250 | 25  | 44615237 | 12 | 12  | 2.1  |
| 18 | 44682450 | 44682600 | 150 | 44682487 | 15 | 82  | 8.3  |
| 18 | 44829025 | 44829050 | 25  | 44829037 | 12 | 12  | 0    |
| 18 | 46154950 | 46155125 | 175 | 46154962 | 12 | 82  | 4.1  |
| 18 | 46978750 | 46978800 | 50  | 46978762 | 13 | 25  | 4.1  |
| 18 | 53844750 | 53844800 | 50  | 53844762 | 12 | 24  | 0    |
| 18 | 54607475 | 54607875 | 400 | 54607562 | 20 | 227 | 6.2  |
| 18 | 57616550 | 57616575 | 25  | 57616562 | 13 | 13  | 0    |
| 18 | 65614100 | 65614275 | 175 | 65614112 | 13 | 84  | 12.4 |
| 18 | 72502400 | 72502475 | 75  | 72502437 | 14 | 40  | 0    |
| 18 | 72581525 | 72581550 | 25  | 72581537 | 12 | 12  | 0    |
| 18 | 75357550 | 75357575 | 25  | 75357562 | 13 | 13  | 2.1  |
| 18 | 75883825 | 75883850 | 25  | 75883837 | 15 | 15  | 2.1  |

**Table S2 - Summary of bound regions**

**SETDB1 (10E-12) in WM262**

| CHROM | START    | END      | LENGTH | PEAK POS | PEAK HEIGHT | TOTAL TARGET COUNTS | TOTAL BACKGROUND COUNTS |
|-------|----------|----------|--------|----------|-------------|---------------------|-------------------------|
| 20    | 218975   | 219200   | 225    | 219087   | 21          | 145                 | 2.7                     |
| 20    | 225875   | 225950   | 75     | 225912   | 13          | 35                  | 2.7                     |
| 20    | 237400   | 237475   | 75     | 237437   | 14          | 40                  | 0.9                     |
| 20    | 238500   | 238525   | 25     | 238512   | 11          | 11                  | 1.8                     |
| 20    | 270425   | 270725   | 300    | 270587   | 22          | 205                 | 1.8                     |
| 20    | 276050   | 276175   | 125    | 276087   | 17          | 82                  | 14.6                    |
| 20    | 300600   | 300750   | 150    | 300662   | 27          | 138                 | 21                      |
| 20    | 337450   | 337525   | 75     | 337462   | 12          | 36                  | 5.5                     |
| 20    | 472400   | 472650   | 250    | 472512   | 20          | 146                 | 17.4                    |
| 20    | 762650   | 762675   | 25     | 762662   | 11          | 11                  | 1.8                     |
| 20    | 762950   | 762975   | 25     | 762962   | 11          | 11                  | 1.8                     |
| 20    | 1344825  | 1344875  | 50     | 1344837  | 16          | 27                  | 3.7                     |
| 20    | 1346000  | 1346100  | 100    | 1346037  | 16          | 62                  | 8.2                     |
| 20    | 1706175  | 1706200  | 25     | 1706187  | 14          | 14                  | 2.7                     |
| 20    | 1818000  | 1818125  | 125    | 1818037  | 13          | 57                  | 9.1                     |
| 20    | 1819250  | 1819275  | 25     | 1819262  | 11          | 11                  | 1.8                     |
| 20    | 2030975  | 2031175  | 200    | 2031087  | 20          | 139                 | 22                      |
| 20    | 2453125  | 2453225  | 100    | 2453137  | 11          | 44                  | 5.5                     |
| 20    | 2580900  | 2581050  | 150    | 2580987  | 15          | 81                  | 13.7                    |
| 20    | 3102450  | 3102575  | 125    | 3102512  | 16          | 70                  | 7.3                     |
| 20    | 3137975  | 3138125  | 150    | 3138037  | 14          | 72                  | 3.7                     |
| 20    | 3155475  | 3155575  | 100    | 3155537  | 12          | 46                  | 0.9                     |
| 20    | 3337425  | 3337450  | 25     | 3337437  | 13          | 13                  | 1.8                     |
| 20    | 3673900  | 3673925  | 25     | 3673912  | 12          | 12                  | 1.8                     |
| 20    | 3696550  | 3696600  | 50     | 3696587  | 13          | 24                  | 3.7                     |
| 20    | 3736400  | 3736475  | 75     | 3736412  | 19          | 51                  | 10.1                    |
| 20    | 3739900  | 3740050  | 150    | 3740012  | 13          | 68                  | 1.8                     |
| 20    | 3740500  | 3740800  | 300    | 3740512  | 23          | 204                 | 35.7                    |
| 20    | 3861750  | 3861875  | 125    | 3861862  | 12          | 53                  | 0.9                     |
| 20    | 3944425  | 3944450  | 25     | 3944437  | 11          | 11                  | 1.8                     |
| 20    | 4064150  | 4064200  | 50     | 4064162  | 12          | 23                  | 1.8                     |
| 20    | 4880075  | 4880275  | 200    | 4880212  | 20          | 119                 | 3.7                     |
| 20    | 4928975  | 4929050  | 75     | 4928987  | 11          | 33                  | 0                       |
| 20    | 4985425  | 4985850  | 425    | 4985612  | 26          | 347                 | 17.4                    |
| 20    | 4994650  | 4994675  | 25     | 4994662  | 13          | 13                  | 1.8                     |
| 20    | 5585775  | 5585800  | 25     | 5585787  | 14          | 14                  | 2.7                     |
| 20    | 5678800  | 5678950  | 150    | 5678812  | 12          | 66                  | 6.4                     |
| 20    | 6203250  | 6203300  | 50     | 6203262  | 11          | 22                  | 0                       |
| 20    | 6317475  | 6317575  | 100    | 6317487  | 11          | 44                  | 2.7                     |
| 20    | 6418675  | 6418825  | 150    | 6418762  | 12          | 67                  | 4.6                     |
| 20    | 6421025  | 6421425  | 400    | 6421062  | 14          | 167                 | 20.1                    |
| 20    | 6429500  | 6429700  | 200    | 6429612  | 25          | 173                 | 15.6                    |
| 20    | 7840675  | 7840750  | 75     | 7840687  | 12          | 34                  | 5.5                     |
| 20    | 7865075  | 7865100  | 25     | 7865087  | 14          | 14                  | 2.7                     |
| 20    | 7949000  | 7949175  | 175    | 7949062  | 17          | 98                  | 0                       |
| 20    | 8060475  | 8060575  | 100    | 8060537  | 15          | 55                  | 6.4                     |
| 20    | 8950450  | 8950550  | 100    | 8950462  | 11          | 44                  | 0                       |
| 20    | 8980450  | 8980475  | 25     | 8980462  | 12          | 12                  | 1.8                     |
| 20    | 9115150  | 9115325  | 175    | 9115212  | 14          | 89                  | 11                      |
| 20    | 10022225 | 10022250 | 25     | 10022237 | 11          | 11                  | 0.9                     |
| 20    | 10363250 | 10363325 | 75     | 10363262 | 14          | 40                  | 5.5                     |
| 20    | 10363725 | 10363950 | 225    | 10363837 | 34          | 247                 | 35.7                    |
| 20    | 10396775 | 10396825 | 50     | 10396812 | 13          | 24                  | 0                       |
| 20    | 10430225 | 10430350 | 125    | 10430262 | 17          | 72                  | 11.9                    |
| 20    | 10521675 | 10521750 | 75     | 10521687 | 11          | 33                  | 0                       |
| 20    | 11196025 | 11196200 | 175    | 11196087 | 16          | 103                 | 6.4                     |
| 20    | 11402825 | 11402900 | 75     | 11402837 | 13          | 35                  | 3.7                     |
| 20    | 11701050 | 11701075 | 25     | 11701062 | 11          | 11                  | 0                       |
| 20    | 11721200 | 11721300 | 100    | 11721237 | 13          | 48                  | 0.9                     |
| 20    | 11925675 | 11925750 | 75     | 11925737 | 13          | 37                  | 0                       |
| 20    | 12042050 | 12042075 | 25     | 12042062 | 11          | 11                  | 1.8                     |
| 20    | 12042350 | 12042375 | 25     | 12042362 | 11          | 11                  | 1.8                     |
| 20    | 12042725 | 12042900 | 175    | 12042762 | 13          | 87                  | 7.3                     |
| 20    | 12082500 | 12082675 | 175    | 12082512 | 15          | 93                  | 6.4                     |
| 20    | 12094875 | 12095175 | 300    | 12095012 | 18          | 174                 | 17.4                    |
| 20    | 14217650 | 14217675 | 25     | 14217662 | 13          | 13                  | 1.8                     |
| 20    | 14789175 | 14789250 | 75     | 14789187 | 11          | 33                  | 3.7                     |
| 20    | 15149600 | 15149700 | 100    | 15149662 | 13          | 47                  | 3.7                     |
| 20    | 15324350 | 15324475 | 125    | 15324362 | 12          | 56                  | 4.6                     |
| 20    | 16503325 | 16503500 | 175    | 16503487 | 25          | 133                 | 12.8                    |

|    |          |          |     |          |    |     |       |
|----|----------|----------|-----|----------|----|-----|-------|
| 20 | 16543900 | 16543925 | 25  | 16543912 | 11 | 11  | 0     |
| 20 | 16620575 | 16620650 | 75  | 16620612 | 14 | 38  | 0     |
| 20 | 16650175 | 16650225 | 50  | 16650187 | 11 | 22  | 0     |
| 20 | 16658275 | 16658800 | 525 | 16658587 | 44 | 669 | 120.8 |
| 20 | 16794175 | 16794275 | 100 | 16794237 | 13 | 48  | 5.5   |
| 20 | 16876225 | 16876375 | 150 | 16876237 | 11 | 62  | 11    |
| 20 | 16988325 | 16988350 | 25  | 16988337 | 12 | 12  | 1.8   |
| 20 | 17433900 | 17434050 | 150 | 17433912 | 12 | 70  | 6.4   |
| 20 | 17460100 | 17460125 | 25  | 17460112 | 11 | 11  | 1.8   |
| 20 | 17487500 | 17487650 | 150 | 17487562 | 24 | 115 | 10.1  |
| 20 | 17784975 | 17785150 | 175 | 17785012 | 19 | 99  | 6.4   |
| 20 | 17810750 | 17810825 | 75  | 17810812 | 25 | 59  | 9.1   |
| 20 | 17919325 | 17919350 | 25  | 17919337 | 11 | 11  | 0.9   |
| 20 | 17930425 | 17930500 | 75  | 17930437 | 14 | 42  | 8.2   |
| 20 | 18066275 | 18066350 | 75  | 18066287 | 15 | 43  | 7.3   |
| 20 | 18217000 | 18217025 | 25  | 18217012 | 17 | 17  | 1.8   |
| 20 | 18395100 | 18395150 | 50  | 18395112 | 11 | 22  | 1.8   |
| 20 | 18436225 | 18436425 | 200 | 18436237 | 18 | 130 | 12.8  |
| 20 | 19170475 | 19170650 | 175 | 19170562 | 14 | 91  | 8.2   |
| 20 | 19778650 | 19778750 | 100 | 19778662 | 11 | 43  | 0     |
| 20 | 19818000 | 19818100 | 100 | 19818062 | 13 | 46  | 7.3   |
| 20 | 19922125 | 19922225 | 100 | 19922137 | 14 | 51  | 7.3   |
| 20 | 20381000 | 20381075 | 75  | 20381012 | 14 | 42  | 5.5   |
| 20 | 23074300 | 23074325 | 25  | 23074312 | 11 | 11  | 1.8   |
| 20 | 23076775 | 23076800 | 25  | 23076787 | 14 | 14  | 2.7   |
| 20 | 23186700 | 23186750 | 50  | 23186712 | 11 | 22  | 0.9   |
| 20 | 24381625 | 24381650 | 25  | 24381637 | 12 | 12  | 0.9   |
| 20 | 24961050 | 24961075 | 25  | 24961062 | 14 | 14  | 2.7   |
| 20 | 24987125 | 24987200 | 75  | 24987137 | 12 | 34  | 0     |
| 20 | 25165250 | 25165275 | 25  | 25165262 | 15 | 15  | 2.7   |
| 20 | 25179850 | 25179875 | 25  | 25179862 | 11 | 11  | 0.9   |
| 20 | 25331350 | 25331400 | 50  | 25331362 | 13 | 26  | 1.8   |
| 20 | 25551800 | 25551825 | 25  | 25551812 | 11 | 11  | 1.8   |
| 20 | 25553200 | 25553225 | 25  | 25553212 | 15 | 15  | 2.7   |
| 20 | 25625725 | 25625775 | 50  | 25625737 | 13 | 24  | 2.7   |
| 20 | 25782575 | 25782650 | 75  | 25782587 | 19 | 51  | 5.5   |
| 20 | 26266475 | 26266500 | 25  | 26266487 | 11 | 11  | 0     |
| 20 | 28042550 | 28042600 | 50  | 28042562 | 11 | 22  | 3.7   |
| 20 | 29537400 | 29537450 | 50  | 29537412 | 23 | 43  | 8.2   |
| 20 | 29565675 | 29565825 | 150 | 29565762 | 15 | 77  | 7.3   |
| 20 | 29595525 | 29595575 | 50  | 29595537 | 14 | 28  | 3.7   |
| 20 | 29622425 | 29622450 | 25  | 29622437 | 19 | 19  | 3.7   |
| 20 | 29645275 | 29645450 | 175 | 29645362 | 17 | 99  | 8.2   |
| 20 | 29647400 | 29647525 | 125 | 29647487 | 16 | 72  | 5.5   |
| 20 | 29656750 | 29656825 | 75  | 29656762 | 21 | 47  | 6.4   |
| 20 | 29659875 | 29659925 | 50  | 29659887 | 18 | 33  | 5.5   |
| 20 | 29664150 | 29664175 | 25  | 29664162 | 11 | 11  | 0     |
| 20 | 30054625 | 30054675 | 50  | 30054637 | 11 | 22  | 1.8   |
| 20 | 30161450 | 30161550 | 100 | 30161512 | 13 | 47  | 6.4   |
| 20 | 30287600 | 30287625 | 25  | 30287612 | 11 | 11  | 0     |
| 20 | 30409375 | 30409475 | 100 | 30409412 | 18 | 67  | 10.1  |
| 20 | 30409700 | 30409800 | 100 | 30409712 | 19 | 58  | 8.2   |
| 20 | 30521225 | 30521325 | 100 | 30521237 | 11 | 44  | 3.7   |
| 20 | 30559675 | 30559750 | 75  | 30559687 | 12 | 36  | 2.7   |
| 20 | 30568825 | 30568850 | 25  | 30568837 | 27 | 27  | 3.7   |
| 20 | 30679150 | 30679225 | 75  | 30679162 | 11 | 33  | 5.5   |
| 20 | 31060950 | 31061000 | 50  | 31060987 | 14 | 26  | 4.6   |
| 20 | 31329000 | 31329100 | 100 | 31329012 | 12 | 48  | 1.8   |
| 20 | 31329475 | 31329625 | 150 | 31329537 | 18 | 99  | 18.3  |
| 20 | 31453100 | 31453125 | 25  | 31453112 | 12 | 12  | 1.8   |
| 20 | 31725325 | 31725400 | 75  | 31725337 | 13 | 39  | 3.7   |
| 20 | 32273850 | 32273975 | 125 | 32273862 | 14 | 64  | 1.8   |
| 20 | 32355100 | 32355125 | 25  | 32355112 | 12 | 12  | 1.8   |
| 20 | 32414475 | 32414500 | 25  | 32414487 | 11 | 11  | 0.9   |
| 20 | 32755200 | 32755300 | 100 | 32755212 | 11 | 44  | 6.4   |
| 20 | 32928025 | 32928125 | 100 | 32928062 | 13 | 49  | 4.6   |
| 20 | 32959075 | 32959325 | 250 | 32959237 | 18 | 148 | 16.5  |
| 20 | 33354325 | 33354350 | 25  | 33354337 | 11 | 11  | 1.8   |
| 20 | 33356450 | 33356700 | 250 | 33356587 | 17 | 141 | 6.4   |
| 20 | 33357075 | 33357300 | 225 | 33357187 | 20 | 158 | 22    |
| 20 | 33385050 | 33385125 | 75  | 33385062 | 12 | 36  | 1.8   |
| 20 | 33668100 | 33668250 | 150 | 33668162 | 23 | 124 | 11    |
| 20 | 33793550 | 33793700 | 150 | 33793662 | 38 | 192 | 26.5  |
| 20 | 33822950 | 33823175 | 225 | 33823087 | 30 | 229 | 18.3  |
| 20 | 34121850 | 34122050 | 200 | 34121962 | 31 | 203 | 16.5  |

|    |          |          |     |          |    |     |      |
|----|----------|----------|-----|----------|----|-----|------|
| 20 | 34228500 | 34228525 | 25  | 34228512 | 11 | 11  | 0.9  |
| 20 | 34523025 | 34523050 | 25  | 34523037 | 14 | 14  | 2.7  |
| 20 | 34808150 | 34808175 | 25  | 34808162 | 11 | 11  | 0.9  |
| 20 | 35351200 | 35351225 | 25  | 35351212 | 11 | 11  | 1.8  |
| 20 | 35446850 | 35446875 | 25  | 35446862 | 16 | 16  | 2.7  |
| 20 | 35833700 | 35833825 | 125 | 35833712 | 11 | 55  | 0    |
| 20 | 35981675 | 35981800 | 125 | 35981687 | 11 | 55  | 4.6  |
| 20 | 36206025 | 36206150 | 125 | 36206112 | 16 | 73  | 11   |
| 20 | 36214750 | 36214800 | 50  | 36214762 | 13 | 26  | 3.7  |
| 20 | 36304700 | 36304975 | 275 | 36304812 | 22 | 166 | 20.1 |
| 20 | 36349125 | 36349200 | 75  | 36349137 | 20 | 55  | 7.3  |
| 20 | 36353125 | 36353225 | 100 | 36353162 | 13 | 48  | 6.4  |
| 20 | 36399600 | 36399800 | 200 | 36399712 | 16 | 108 | 1.8  |
| 20 | 36988250 | 36988275 | 25  | 36988262 | 11 | 11  | 1.8  |
| 20 | 38945250 | 38945375 | 125 | 38945262 | 12 | 60  | 2.7  |
| 20 | 38946675 | 38946750 | 75  | 38946712 | 13 | 36  | 1.8  |
| 20 | 39403175 | 39403275 | 100 | 39403262 | 12 | 43  | 8.2  |
| 20 | 39471300 | 39471325 | 25  | 39471312 | 11 | 11  | 1.8  |
| 20 | 39661875 | 39662250 | 375 | 39662037 | 45 | 436 | 13.7 |
| 20 | 41519700 | 41519875 | 175 | 41519762 | 15 | 87  | 4.6  |
| 20 | 41987400 | 41987450 | 50  | 41987412 | 11 | 22  | 3.7  |
| 20 | 41988050 | 41988100 | 50  | 41988062 | 11 | 22  | 1.8  |
| 20 | 42615275 | 42615325 | 50  | 42615287 | 11 | 22  | 3.7  |
| 20 | 42777275 | 42777300 | 25  | 42777287 | 14 | 14  | 2.7  |
| 20 | 42947600 | 42947675 | 75  | 42947612 | 13 | 39  | 5.5  |
| 20 | 43150375 | 43150425 | 50  | 43150412 | 14 | 26  | 4.6  |
| 20 | 43155775 | 43155800 | 25  | 43155787 | 11 | 11  | 0.9  |
| 20 | 43355250 | 43355375 | 125 | 43355262 | 14 | 64  | 9.1  |
| 20 | 43363075 | 43363150 | 75  | 43363087 | 11 | 33  | 3.7  |
| 20 | 43403825 | 43403975 | 150 | 43403937 | 15 | 83  | 10.1 |
| 20 | 43407700 | 43407875 | 175 | 43407737 | 15 | 85  | 7.3  |
| 20 | 43841650 | 43841800 | 150 | 43841687 | 13 | 66  | 1.8  |
| 20 | 43973850 | 43973925 | 75  | 43973862 | 11 | 31  | 4.6  |
| 20 | 44033425 | 44033600 | 175 | 44033537 | 19 | 95  | 18.3 |
| 20 | 44034225 | 44034250 | 25  | 44034237 | 27 | 27  | 3.7  |
| 20 | 44426100 | 44426275 | 175 | 44426137 | 22 | 145 | 12.8 |
| 20 | 44468900 | 44468975 | 75  | 44468937 | 13 | 35  | 4.6  |
| 20 | 44634150 | 44634225 | 75  | 44634212 | 15 | 42  | 8.2  |
| 20 | 44693325 | 44693450 | 125 | 44693362 | 14 | 66  | 6.4  |
| 20 | 44700725 | 44700825 | 100 | 44700737 | 16 | 53  | 10.1 |
| 20 | 44761675 | 44761825 | 150 | 44761787 | 20 | 92  | 0    |
| 20 | 45377925 | 45378175 | 250 | 45378037 | 15 | 125 | 24.7 |
| 20 | 45396375 | 45396450 | 75  | 45396387 | 14 | 38  | 7.3  |
| 20 | 45419050 | 45419150 | 100 | 45419062 | 15 | 50  | 8.2  |
| 20 | 45421225 | 45421500 | 275 | 45421337 | 19 | 160 | 21   |
| 20 | 45454300 | 45454525 | 225 | 45454412 | 17 | 127 | 6.4  |
| 20 | 45726125 | 45726150 | 25  | 45726137 | 11 | 11  | 1.8  |
| 20 | 45917025 | 45917350 | 325 | 45917162 | 32 | 285 | 7.3  |
| 20 | 46034375 | 46034650 | 275 | 46034512 | 16 | 138 | 14.6 |
| 20 | 46035050 | 46035200 | 150 | 46035062 | 11 | 64  | 7.3  |
| 20 | 46074600 | 46074775 | 175 | 46074712 | 15 | 91  | 12.8 |
| 20 | 46435100 | 46435200 | 100 | 46435112 | 11 | 44  | 2.7  |
| 20 | 46670925 | 46670950 | 25  | 46670937 | 11 | 11  | 1.8  |
| 20 | 46759700 | 46759775 | 75  | 46759737 | 12 | 34  | 5.5  |
| 20 | 46772125 | 46772275 | 150 | 46772137 | 12 | 65  | 0.9  |
| 20 | 46797375 | 46797525 | 150 | 46797412 | 26 | 129 | 13.7 |
| 20 | 46821750 | 46821775 | 25  | 46821762 | 14 | 14  | 1.8  |
| 20 | 47238575 | 47238675 | 100 | 47238587 | 12 | 48  | 2.7  |
| 20 | 47330950 | 47331250 | 300 | 47331112 | 45 | 367 | 9.1  |
| 20 | 47336850 | 47337200 | 350 | 47337012 | 28 | 284 | 11   |
| 20 | 47662225 | 47662250 | 25  | 47662237 | 12 | 12  | 1.8  |
| 20 | 48041775 | 48041825 | 50  | 48041812 | 12 | 23  | 1.8  |
| 20 | 48079875 | 48079950 | 75  | 48079912 | 22 | 61  | 9.1  |
| 20 | 48100700 | 48100800 | 100 | 48100712 | 12 | 48  | 3.7  |
| 20 | 48295750 | 48295775 | 25  | 48295762 | 12 | 12  | 1.8  |
| 20 | 48314700 | 48315000 | 300 | 48314712 | 15 | 139 | 19.2 |
| 20 | 48317275 | 48317350 | 75  | 48317312 | 17 | 50  | 3.7  |
| 20 | 48335525 | 48335825 | 300 | 48335662 | 18 | 154 | 5.5  |
| 20 | 48342300 | 48342350 | 50  | 48342312 | 12 | 24  | 3.7  |
| 20 | 48344175 | 48344250 | 75  | 48344187 | 11 | 33  | 0    |
| 20 | 48355400 | 48355450 | 50  | 48355412 | 12 | 24  | 1.8  |
| 20 | 48360850 | 48360875 | 25  | 48360862 | 12 | 12  | 0.9  |
| 20 | 48362800 | 48362825 | 25  | 48362812 | 11 | 11  | 0    |
| 20 | 48393875 | 48393900 | 25  | 48393887 | 19 | 19  | 3.7  |
| 20 | 48432250 | 48432300 | 50  | 48432262 | 11 | 22  | 0    |

|    |          |          |     |          |    |     |      |
|----|----------|----------|-----|----------|----|-----|------|
| 20 | 48484600 | 48484775 | 175 | 48484612 | 14 | 81  | 5.5  |
| 20 | 48611150 | 48611375 | 225 | 48611262 | 16 | 121 | 3.7  |
| 20 | 48638125 | 48638225 | 100 | 48638137 | 11 | 44  | 3.7  |
| 20 | 48774975 | 48775175 | 200 | 48774987 | 11 | 75  | 8.2  |
| 20 | 48863775 | 48863975 | 200 | 48863862 | 16 | 117 | 4.6  |
| 20 | 49083725 | 49083825 | 100 | 49083787 | 13 | 47  | 0    |
| 20 | 49096675 | 49096700 | 25  | 49096687 | 12 | 12  | 0    |
| 20 | 49350200 | 49350250 | 50  | 49350212 | 11 | 22  | 0    |
| 20 | 49395975 | 49396125 | 150 | 49396037 | 14 | 76  | 0    |
| 20 | 49474650 | 49474750 | 100 | 49474662 | 12 | 48  | 0.9  |
| 20 | 49507050 | 49507275 | 225 | 49507162 | 25 | 179 | 11.9 |
| 20 | 49560175 | 49560225 | 50  | 49560187 | 11 | 22  | 0.9  |
| 20 | 49612800 | 49612825 | 25  | 49612812 | 11 | 11  | 1.8  |
| 20 | 49645400 | 49645475 | 75  | 49645412 | 12 | 36  | 5.5  |
| 20 | 49681100 | 49681500 | 400 | 49681462 | 15 | 179 | 33.9 |
| 20 | 49686150 | 49686225 | 75  | 49686162 | 11 | 33  | 0.9  |
| 20 | 49800125 | 49800250 | 125 | 49800187 | 12 | 56  | 7.3  |
| 20 | 49850200 | 49850325 | 125 | 49850237 | 17 | 68  | 4.6  |
| 20 | 49964875 | 49964900 | 25  | 49964887 | 11 | 11  | 1.8  |
| 20 | 49977775 | 49977900 | 125 | 49977887 | 12 | 52  | 9.1  |
| 20 | 51552875 | 51552950 | 75  | 51552887 | 11 | 33  | 1.8  |
| 20 | 51628775 | 51628800 | 25  | 51628787 | 11 | 11  | 0.9  |
| 20 | 51949475 | 51949500 | 25  | 51949487 | 14 | 14  | 2.7  |
| 20 | 52143500 | 52143675 | 175 | 52143562 | 14 | 82  | 8.2  |
| 20 | 52189300 | 52189400 | 100 | 52189337 | 14 | 50  | 4.6  |
| 20 | 52257800 | 52258000 | 200 | 52257837 | 17 | 118 | 18.3 |
| 20 | 52260175 | 52260225 | 50  | 52260187 | 11 | 22  | 0    |
| 20 | 52317550 | 52317625 | 75  | 52317562 | 12 | 35  | 5.5  |
| 20 | 52319200 | 52319225 | 25  | 52319212 | 12 | 12  | 0    |
| 20 | 52674675 | 52674875 | 200 | 52674712 | 14 | 100 | 3.7  |
| 20 | 54208975 | 54209050 | 75  | 54208987 | 13 | 37  | 0    |
| 20 | 54563575 | 54563725 | 150 | 54563662 | 13 | 68  | 2.7  |
| 20 | 54643050 | 54643250 | 200 | 54643062 | 14 | 96  | 12.8 |
| 20 | 54710775 | 54710900 | 125 | 54710837 | 14 | 64  | 1.8  |
| 20 | 54715600 | 54715750 | 150 | 54715637 | 15 | 84  | 0    |
| 20 | 54738525 | 54738600 | 75  | 54738562 | 13 | 37  | 2.7  |
| 20 | 54787300 | 54787375 | 75  | 54787362 | 16 | 43  | 6.4  |
| 20 | 54787600 | 54787725 | 125 | 54787612 | 17 | 71  | 11   |
| 20 | 54789800 | 54789875 | 75  | 54789812 | 12 | 34  | 2.7  |
| 20 | 54796925 | 54797000 | 75  | 54796987 | 13 | 37  | 4.6  |
| 20 | 54943750 | 54943800 | 50  | 54943762 | 11 | 22  | 1.8  |
| 20 | 54995475 | 54995725 | 250 | 54995612 | 24 | 179 | 3.7  |
| 20 | 55005400 | 55005500 | 100 | 55005412 | 11 | 44  | 0    |
| 20 | 55008725 | 55008800 | 75  | 55008762 | 14 | 39  | 1.8  |
| 20 | 55039850 | 55039975 | 125 | 55039862 | 19 | 81  | 14.6 |
| 20 | 55607400 | 55607425 | 25  | 55607412 | 11 | 11  | 1.8  |
| 20 | 55706975 | 55707150 | 175 | 55707062 | 12 | 81  | 5.5  |
| 20 | 55848575 | 55848600 | 25  | 55848587 | 12 | 12  | 1.8  |
| 20 | 55956450 | 55956500 | 50  | 55956462 | 11 | 22  | 3.7  |
| 20 | 55999700 | 55999950 | 250 | 55999787 | 21 | 188 | 23.8 |
| 20 | 56025650 | 56025675 | 25  | 56025662 | 14 | 14  | 2.7  |
| 20 | 56047725 | 56047875 | 150 | 56047787 | 16 | 85  | 11   |
| 20 | 56048550 | 56048575 | 25  | 56048562 | 19 | 19  | 3.7  |
| 20 | 56052775 | 56052850 | 75  | 56052787 | 12 | 36  | 5.5  |
| 20 | 56055275 | 56055300 | 25  | 56055287 | 11 | 11  | 1.8  |
| 20 | 56088000 | 56088025 | 25  | 56088012 | 11 | 11  | 0    |
| 20 | 56096350 | 56096400 | 50  | 56096362 | 11 | 22  | 1.8  |
| 20 | 56401925 | 56402000 | 75  | 56401937 | 11 | 33  | 2.7  |
| 20 | 56448525 | 56448650 | 125 | 56448587 | 17 | 77  | 11   |
| 20 | 56631150 | 56631425 | 275 | 56631312 | 22 | 179 | 17.4 |
| 20 | 56632400 | 56632425 | 25  | 56632412 | 11 | 11  | 1.8  |
| 20 | 56634575 | 56634750 | 175 | 56634587 | 11 | 75  | 11.9 |
| 20 | 56659625 | 56659675 | 50  | 56659662 | 16 | 28  | 3.7  |
| 20 | 56798875 | 56798975 | 100 | 56798912 | 14 | 53  | 7.3  |
| 20 | 56838200 | 56838350 | 150 | 56838212 | 19 | 100 | 11.9 |
| 20 | 56878750 | 56878775 | 25  | 56878762 | 12 | 12  | 1.8  |
| 20 | 56884450 | 56884525 | 75  | 56884462 | 13 | 35  | 5.5  |
| 20 | 57016075 | 57016150 | 75  | 57016087 | 12 | 36  | 3.7  |
| 20 | 57019200 | 57019300 | 100 | 57019262 | 15 | 52  | 1.8  |
| 20 | 57462300 | 57462425 | 125 | 57462312 | 14 | 66  | 5.5  |
| 20 | 57524150 | 57524175 | 25  | 57524162 | 16 | 16  | 2.7  |
| 20 | 58058750 | 58058850 | 100 | 58058762 | 12 | 43  | 0.9  |
| 20 | 58521150 | 58521200 | 50  | 58521162 | 14 | 28  | 3.7  |
| 20 | 58758750 | 58758925 | 175 | 58758787 | 16 | 92  | 0    |
| 20 | 60754125 | 60754250 | 125 | 60754187 | 17 | 75  | 5.5  |

|    |          |          |     |          |    |     |      |
|----|----------|----------|-----|----------|----|-----|------|
| 20 | 60769025 | 60769175 | 150 | 60769137 | 14 | 70  | 7.3  |
| 20 | 60793275 | 60793475 | 200 | 60793437 | 24 | 149 | 11.9 |
| 20 | 60799500 | 60799525 | 25  | 60799512 | 11 | 11  | 1.8  |
| 20 | 60842050 | 60842250 | 200 | 60842112 | 19 | 132 | 4.6  |
| 20 | 60906150 | 60906225 | 75  | 60906162 | 11 | 32  | 4.6  |
| 20 | 60910175 | 60910200 | 25  | 60910187 | 13 | 13  | 0.9  |
| 20 | 60917550 | 60917675 | 125 | 60917562 | 13 | 56  | 8.2  |
| 20 | 60921200 | 60921400 | 200 | 60921387 | 15 | 105 | 16.5 |
| 20 | 61392825 | 61393050 | 225 | 61392937 | 19 | 126 | 20.1 |
| 20 | 61433850 | 61433875 | 25  | 61433862 | 11 | 11  | 0    |
| 20 | 61753625 | 61753725 | 100 | 61753637 | 11 | 44  | 7.3  |
| 20 | 61759900 | 61760075 | 175 | 61760012 | 18 | 107 | 13.7 |
| 20 | 61780825 | 61780850 | 25  | 61780837 | 11 | 11  | 0.9  |
| 20 | 62112950 | 62113025 | 75  | 62112962 | 13 | 39  | 4.6  |
| 21 | 10120800 | 10120925 | 125 | 10120812 | 30 | 119 | 16.5 |
| 21 | 16574550 | 16574650 | 100 | 16574562 | 11 | 44  | 6.4  |
| 21 | 21659175 | 21659225 | 50  | 21659187 | 12 | 24  | 3.7  |
| 21 | 26434375 | 26434725 | 350 | 26434612 | 14 | 173 | 24.7 |
| 21 | 28108125 | 28108175 | 50  | 28108137 | 14 | 27  | 4.6  |
| 21 | 29179375 | 29179450 | 75  | 29179412 | 31 | 88  | 12.8 |
| 21 | 29286900 | 29287025 | 125 | 29287012 | 18 | 72  | 10.1 |
| 21 | 29468925 | 29468950 | 25  | 29468937 | 11 | 11  | 1.8  |
| 21 | 29490625 | 29490750 | 125 | 29490637 | 12 | 57  | 7.3  |
| 21 | 30043600 | 30043700 | 100 | 30043612 | 11 | 44  | 0    |
| 21 | 30521925 | 30521950 | 25  | 30521937 | 12 | 12  | 0    |
| 21 | 31643525 | 31643700 | 175 | 31643562 | 15 | 83  | 0    |
| 21 | 31645750 | 31645800 | 50  | 31645762 | 11 | 22  | 3.7  |
| 21 | 31953500 | 31953600 | 100 | 31953512 | 11 | 44  | 0.9  |
| 21 | 32241550 | 32241750 | 200 | 32241637 | 15 | 104 | 5.5  |
| 21 | 32630025 | 32630125 | 100 | 32630037 | 11 | 42  | 5.5  |
| 21 | 32906650 | 32906700 | 50  | 32906687 | 14 | 26  | 3.7  |
| 21 | 33022625 | 33022650 | 25  | 33022637 | 11 | 11  | 0.9  |
| 21 | 33066050 | 33066375 | 325 | 33066237 | 24 | 220 | 0    |
| 21 | 33373475 | 33373550 | 75  | 33373487 | 15 | 37  | 5.5  |
| 21 | 33411150 | 33411175 | 25  | 33411162 | 12 | 12  | 0.9  |
| 21 | 33661750 | 33661950 | 200 | 33661837 | 20 | 132 | 5.5  |
| 21 | 33675025 | 33675075 | 50  | 33675037 | 14 | 28  | 2.7  |
| 21 | 34209750 | 34209800 | 50  | 34209762 | 11 | 22  | 2.7  |
| 21 | 34218400 | 34218425 | 25  | 34218412 | 11 | 11  | 1.8  |
| 21 | 34262500 | 34262575 | 75  | 34262512 | 11 | 33  | 5.5  |
| 21 | 34270025 | 34270100 | 75  | 34270037 | 11 | 33  | 5.5  |
| 21 | 34460900 | 34460975 | 75  | 34460962 | 12 | 33  | 0    |
| 21 | 34793400 | 34793550 | 150 | 34793412 | 11 | 66  | 0    |
| 21 | 35185300 | 35185350 | 50  | 35185312 | 11 | 22  | 3.7  |
| 21 | 35380650 | 35380850 | 200 | 35380712 | 15 | 105 | 8.2  |
| 21 | 35499525 | 35499575 | 50  | 35499537 | 11 | 22  | 1.8  |
| 21 | 35901000 | 35901350 | 350 | 35901162 | 26 | 236 | 6.4  |
| 21 | 35953150 | 35953275 | 125 | 35953187 | 13 | 59  | 2.7  |
| 21 | 36363850 | 36363925 | 75  | 36363912 | 19 | 50  | 7.3  |
| 21 | 36583525 | 36583925 | 400 | 36583812 | 21 | 251 | 11   |
| 21 | 36614325 | 36614400 | 75  | 36614337 | 14 | 40  | 6.4  |
| 21 | 36948450 | 36948475 | 25  | 36948462 | 11 | 11  | 0    |
| 21 | 37013175 | 37013325 | 150 | 37013287 | 22 | 122 | 12.8 |
| 21 | 37857525 | 37857725 | 200 | 37857562 | 19 | 124 | 22   |
| 21 | 38517800 | 38517900 | 100 | 38517812 | 12 | 45  | 0    |
| 21 | 38523175 | 38523425 | 250 | 38523237 | 15 | 126 | 19.2 |
| 21 | 38617525 | 38617600 | 75  | 38617537 | 11 | 33  | 2.7  |
| 21 | 38955300 | 38955325 | 25  | 38955312 | 11 | 11  | 1.8  |
| 21 | 39239650 | 39239700 | 50  | 39239687 | 12 | 23  | 1.8  |
| 21 | 39283300 | 39283325 | 25  | 39283312 | 11 | 11  | 1.8  |
| 21 | 39283700 | 39283900 | 200 | 39283787 | 14 | 100 | 6.4  |
| 21 | 39328050 | 39328225 | 175 | 39328187 | 20 | 115 | 17.4 |
| 21 | 39328600 | 39328800 | 200 | 39328612 | 16 | 111 | 12.8 |
| 21 | 39381600 | 39381750 | 150 | 39381612 | 11 | 62  | 4.6  |
| 21 | 39408975 | 39409000 | 25  | 39408987 | 16 | 16  | 2.7  |
| 21 | 39607550 | 39607600 | 50  | 39607562 | 13 | 26  | 3.7  |
| 21 | 41548000 | 41548050 | 50  | 41548012 | 11 | 22  | 1.8  |
| 21 | 41858750 | 41858775 | 25  | 41858762 | 11 | 11  | 1.8  |
| 21 | 41908800 | 41908950 | 150 | 41908912 | 12 | 67  | 5.5  |
| 21 | 42071725 | 42071775 | 50  | 42071737 | 11 | 22  | 3.7  |
| 21 | 42079775 | 42079925 | 150 | 42079837 | 16 | 80  | 5.5  |
| 21 | 42303375 | 42303500 | 125 | 42303387 | 15 | 71  | 2.7  |
| 21 | 43299875 | 43299900 | 25  | 43299887 | 12 | 12  | 1.8  |
| 21 | 43321900 | 43321975 | 75  | 43321912 | 11 | 31  | 2.7  |
| 21 | 43373150 | 43373225 | 75  | 43373162 | 12 | 36  | 1.8  |

|    |          |          |     |          |     |      |      |
|----|----------|----------|-----|----------|-----|------|------|
| 21 | 43564000 | 43564025 | 25  | 43564012 | 11  | 11   | 0.9  |
| 21 | 43903475 | 43903500 | 25  | 43903487 | 11  | 11   | 1.8  |
| 21 | 44452350 | 44452525 | 175 | 44452487 | 14  | 86   | 6.4  |
| 21 | 44982450 | 44982475 | 25  | 44982462 | 11  | 11   | 0    |
| 21 | 45255250 | 45255350 | 100 | 45255262 | 13  | 50   | 7.3  |
| 21 | 45538850 | 45539050 | 200 | 45538912 | 17  | 114  | 3.7  |
| 21 | 45551500 | 45551525 | 25  | 45551512 | 22  | 22   | 3.7  |
| 21 | 45562400 | 45562550 | 150 | 45562412 | 12  | 72   | 6.4  |
| 21 | 45672100 | 45672125 | 25  | 45672112 | 15  | 15   | 2.7  |
| 21 | 46842325 | 46842350 | 25  | 46842337 | 11  | 11   | 0.9  |
| 21 | 46849350 | 46849800 | 450 | 46849587 | 20  | 298  | 50.3 |
| 22 | 16864450 | 16864500 | 50  | 16864462 | 16  | 28   | 4.6  |
| 22 | 16919125 | 16919300 | 175 | 16919162 | 14  | 85   | 0.9  |
| 22 | 18152250 | 18152325 | 75  | 18152262 | 12  | 36   | 5.5  |
| 22 | 18248825 | 18248875 | 50  | 18248837 | 14  | 28   | 5.5  |
| 22 | 18310575 | 18310725 | 150 | 18310662 | 13  | 75   | 9.1  |
| 22 | 19191975 | 19192075 | 100 | 19192062 | 12  | 44   | 8.2  |
| 22 | 19642350 | 19642450 | 100 | 19642412 | 13  | 48   | 5.5  |
| 22 | 20336050 | 20336250 | 200 | 20336087 | 16  | 103  | 19.2 |
| 22 | 21231500 | 21231550 | 50  | 21231537 | 18  | 34   | 5.5  |
| 22 | 21978325 | 21978475 | 150 | 21978387 | 18  | 87   | 11.9 |
| 22 | 22181675 | 22181875 | 200 | 22181837 | 19  | 132  | 4.6  |
| 22 | 22209850 | 22209925 | 75  | 22209912 | 13  | 37   | 2.7  |
| 22 | 22440400 | 22440475 | 75  | 22440437 | 17  | 46   | 2.7  |
| 22 | 22511400 | 22511450 | 50  | 22511437 | 24  | 47   | 9.1  |
| 22 | 22586425 | 22586450 | 25  | 22586437 | 13  | 13   | 1.8  |
| 22 | 22597475 | 22597675 | 200 | 22597562 | 17  | 112  | 0    |
| 22 | 22737375 | 22737525 | 150 | 22737387 | 11  | 64   | 4.6  |
| 22 | 22973600 | 22973675 | 75  | 22973612 | 12  | 36   | 5.5  |
| 22 | 23722550 | 23722575 | 25  | 23722562 | 11  | 11   | 0.9  |
| 22 | 23794100 | 23794125 | 25  | 23794112 | 11  | 11   | 0.9  |
| 22 | 25238575 | 25238675 | 100 | 25238612 | 15  | 53   | 1.8  |
| 22 | 25398700 | 25399075 | 375 | 25398812 | 22  | 227  | 36.6 |
| 22 | 25530725 | 25530900 | 175 | 25530812 | 15  | 94   | 11.9 |
| 22 | 25653850 | 25653950 | 100 | 25653862 | 13  | 51   | 3.7  |
| 22 | 26444225 | 26444275 | 50  | 26444262 | 14  | 25   | 4.6  |
| 22 | 26547275 | 26547325 | 50  | 26547287 | 13  | 26   | 3.7  |
| 22 | 27468250 | 27468275 | 25  | 27468262 | 11  | 11   | 1.8  |
| 22 | 27823075 | 27823125 | 50  | 27823087 | 11  | 22   | 0    |
| 22 | 27876175 | 27876425 | 250 | 27876312 | 17  | 148  | 13.7 |
| 22 | 28330200 | 28330250 | 50  | 28330212 | 11  | 22   | 3.7  |
| 22 | 28564225 | 28564300 | 75  | 28564287 | 18  | 47   | 8.2  |
| 22 | 28921975 | 28922175 | 200 | 28922137 | 14  | 97   | 15.6 |
| 22 | 28930900 | 28931000 | 100 | 28930962 | 13  | 47   | 6.4  |
| 22 | 28950300 | 28950375 | 75  | 28950337 | 13  | 36   | 0    |
| 22 | 28973300 | 28973400 | 100 | 28973312 | 11  | 44   | 6.4  |
| 22 | 29058875 | 29059050 | 175 | 29058887 | 14  | 87   | 10.1 |
| 22 | 29146850 | 29146925 | 75  | 29146862 | 12  | 36   | 3.7  |
| 22 | 29301775 | 29301825 | 50  | 29301787 | 11  | 22   | 0    |
| 22 | 29394075 | 29394100 | 25  | 29394087 | 11  | 11   | 0.9  |
| 22 | 29648200 | 29648375 | 175 | 29648287 | 16  | 97   | 11.9 |
| 22 | 29673325 | 29673350 | 25  | 29673337 | 11  | 11   | 1.8  |
| 22 | 29694300 | 29694475 | 175 | 29694387 | 16  | 92   | 10.1 |
| 22 | 29694850 | 29695350 | 500 | 29695062 | 121 | 1411 | 89.7 |
| 22 | 29807375 | 29807400 | 25  | 29807387 | 13  | 13   | 1.8  |
| 22 | 30016875 | 30017025 | 150 | 30016912 | 15  | 80   | 10.1 |
| 22 | 30479675 | 30479775 | 100 | 30479737 | 15  | 52   | 6.4  |
| 22 | 31258525 | 31258575 | 50  | 31258537 | 28  | 56   | 11   |
| 22 | 31290125 | 31290275 | 150 | 31290212 | 17  | 89   | 12.8 |
| 22 | 31301675 | 31301700 | 25  | 31301687 | 11  | 11   | 0    |
| 22 | 31387425 | 31387550 | 125 | 31387437 | 24  | 97   | 9.1  |
| 22 | 31432250 | 31432400 | 150 | 31432337 | 15  | 76   | 0    |
| 22 | 31449775 | 31449975 | 200 | 31449837 | 15  | 111  | 0.9  |
| 22 | 31546400 | 31546475 | 75  | 31546412 | 11  | 33   | 3.7  |
| 22 | 31726850 | 31726875 | 25  | 31726862 | 12  | 12   | 1.8  |
| 22 | 32060700 | 32060875 | 175 | 32060762 | 16  | 104  | 10.1 |
| 22 | 32203425 | 32203850 | 425 | 32203562 | 21  | 217  | 27.4 |
| 22 | 32244600 | 32244625 | 25  | 32244612 | 11  | 11   | 1.8  |
| 22 | 32648100 | 32648175 | 75  | 32648112 | 14  | 39   | 7.3  |
| 22 | 32697600 | 32697825 | 225 | 32697712 | 19  | 148  | 8.2  |
| 22 | 34193975 | 34194050 | 75  | 34193987 | 12  | 34   | 5.5  |
| 22 | 34697700 | 34697900 | 200 | 34697737 | 13  | 99   | 5.5  |
| 22 | 34755225 | 34755375 | 150 | 34755237 | 12  | 68   | 7.3  |
| 22 | 34791675 | 34791825 | 150 | 34791762 | 22  | 119  | 11   |
| 22 | 35055625 | 35055725 | 100 | 35055662 | 13  | 48   | 6.4  |



|    |          |          |     |          |    |     |      |
|----|----------|----------|-----|----------|----|-----|------|
| 22 | 35094725 | 35094850 | 125 | 35094812 | 12 | 56  | 9.1  |
| 22 | 35208025 | 35208050 | 25  | 35208037 | 11 | 11  | 0.9  |
| 22 | 35871325 | 35871375 | 50  | 35871362 | 13 | 24  | 0    |
| 22 | 36033850 | 36033900 | 50  | 36033862 | 12 | 24  | 3.7  |
| 22 | 36251575 | 36251725 | 150 | 36251612 | 17 | 89  | 8.2  |
| 22 | 36292200 | 36292250 | 50  | 36292212 | 11 | 22  | 0    |
| 22 | 36327775 | 36327825 | 50  | 36327787 | 11 | 22  | 1.8  |
| 22 | 36334350 | 36334575 | 225 | 36334462 | 17 | 132 | 11.9 |
| 22 | 36384025 | 36384275 | 250 | 36384162 | 26 | 195 | 17.4 |
| 22 | 36412075 | 36412300 | 225 | 36412287 | 25 | 185 | 22   |
| 22 | 36478575 | 36478750 | 175 | 36478587 | 34 | 195 | 36.6 |
| 22 | 36570675 | 36570800 | 125 | 36570712 | 18 | 80  | 9.1  |
| 22 | 36708575 | 36708600 | 25  | 36708587 | 11 | 11  | 1.8  |
| 22 | 36711225 | 36711250 | 25  | 36711237 | 11 | 11  | 0.9  |
| 22 | 36753000 | 36753025 | 25  | 36753012 | 14 | 14  | 2.7  |
| 22 | 36758850 | 36758975 | 125 | 36758862 | 11 | 55  | 5.5  |
| 22 | 36944925 | 36945125 | 200 | 36944937 | 14 | 95  | 13.7 |
| 22 | 37204975 | 37205175 | 200 | 37205062 | 18 | 124 | 0    |
| 22 | 37630150 | 37630275 | 125 | 37630187 | 17 | 70  | 0    |
| 22 | 37708325 | 37708425 | 100 | 37708337 | 11 | 44  | 3.7  |
| 22 | 37741300 | 37741325 | 25  | 37741312 | 11 | 11  | 0    |
| 22 | 38034875 | 38034900 | 25  | 38034887 | 11 | 11  | 1.8  |
| 22 | 38045475 | 38045900 | 425 | 38045737 | 18 | 240 | 28.4 |
| 22 | 38058775 | 38058875 | 100 | 38058812 | 13 | 46  | 4.6  |
| 22 | 38246275 | 38246325 | 50  | 38246312 | 22 | 40  | 6.4  |
| 22 | 38248725 | 38248750 | 25  | 38248737 | 11 | 11  | 0    |
| 22 | 38672900 | 38672925 | 25  | 38672912 | 17 | 17  | 2.7  |
| 22 | 39226025 | 39226125 | 100 | 39226037 | 13 | 49  | 0    |
| 22 | 39377650 | 39377675 | 25  | 39377662 | 11 | 11  | 1.8  |
| 22 | 39377950 | 39378100 | 150 | 39377962 | 28 | 139 | 27.4 |
| 22 | 39409000 | 39409100 | 100 | 39409037 | 14 | 53  | 4.6  |
| 22 | 39437925 | 39438000 | 75  | 39437937 | 20 | 49  | 7.3  |
| 22 | 39447150 | 39447325 | 175 | 39447237 | 20 | 111 | 16.5 |
| 22 | 40011075 | 40011200 | 125 | 40011087 | 12 | 60  | 4.6  |
| 22 | 40012350 | 40012500 | 150 | 40012362 | 23 | 112 | 14.6 |
| 22 | 40120075 | 40120275 | 200 | 40120162 | 19 | 126 | 8.2  |
| 22 | 40120625 | 40120650 | 25  | 40120637 | 12 | 12  | 0.9  |
| 22 | 40174625 | 40174675 | 50  | 40174637 | 15 | 30  | 4.6  |
| 22 | 40558725 | 40559025 | 300 | 40558887 | 36 | 334 | 43   |
| 22 | 40724575 | 40724800 | 225 | 40724737 | 28 | 188 | 21   |
| 22 | 41017800 | 41017900 | 100 | 41017837 | 13 | 48  | 0.9  |
| 22 | 41334900 | 41334925 | 25  | 41334912 | 11 | 11  | 1.8  |
| 22 | 41341175 | 41341275 | 100 | 41341212 | 15 | 57  | 9.1  |
| 22 | 41473875 | 41473950 | 75  | 41473937 | 14 | 38  | 4.6  |
| 22 | 41583450 | 41583475 | 25  | 41583462 | 11 | 11  | 0    |
| 22 | 41750900 | 41751075 | 175 | 41751012 | 13 | 83  | 2.7  |
| 22 | 41822475 | 41822700 | 225 | 41822587 | 18 | 132 | 0    |
| 22 | 41913600 | 41913675 | 75  | 41913612 | 11 | 33  | 2.7  |
| 22 | 41922625 | 41922650 | 25  | 41922637 | 11 | 11  | 0    |
| 22 | 42451100 | 42451150 | 50  | 42451112 | 12 | 24  | 0    |
| 22 | 43325225 | 43325425 | 200 | 43325262 | 14 | 104 | 8.2  |
| 22 | 43386575 | 43386775 | 200 | 43386637 | 18 | 128 | 5.5  |
| 22 | 43459200 | 43459300 | 100 | 43459212 | 11 | 44  | 5.5  |
| 22 | 43909000 | 43909150 | 150 | 43909012 | 12 | 69  | 9.1  |
| 22 | 44084075 | 44084125 | 50  | 44084087 | 13 | 25  | 1.8  |
| 22 | 44726975 | 44727100 | 125 | 44727012 | 14 | 64  | 5.5  |
| 22 | 44862425 | 44862450 | 25  | 44862437 | 12 | 12  | 1.8  |
| 22 | 44892125 | 44892150 | 25  | 44892137 | 11 | 11  | 0.9  |
| 22 | 45165625 | 45165650 | 25  | 45165637 | 11 | 11  | 1.8  |
| 22 | 45316975 | 45317000 | 25  | 45316987 | 12 | 12  | 1.8  |
| 22 | 45394525 | 45394575 | 50  | 45394537 | 11 | 22  | 0    |
| 22 | 45416225 | 45416325 | 100 | 45416262 | 13 | 46  | 0    |
| 22 | 46034475 | 46034675 | 200 | 46034537 | 17 | 107 | 0.9  |
| 22 | 46405875 | 46405900 | 25  | 46405887 | 11 | 11  | 1.8  |
| 22 | 46406175 | 46406200 | 25  | 46406187 | 14 | 14  | 2.7  |
| 22 | 48546950 | 48547250 | 300 | 48547062 | 28 | 247 | 9.1  |
| 22 | 48990400 | 48990475 | 75  | 48990412 | 11 | 33  | 6.4  |
| 22 | 49259100 | 49259275 | 175 | 49259237 | 15 | 92  | 10.1 |
| 1  | 1300600  | 1300675  | 75  | 1300637  | 14 | 39  | 5.5  |
| 1  | 2056500  | 2056575  | 75  | 2056537  | 12 | 35  | 1.8  |
| 1  | 2129250  | 2129300  | 50  | 2129262  | 11 | 22  | 1.8  |
| 1  | 3763850  | 3763900  | 50  | 3763862  | 12 | 24  | 2.7  |
| 1  | 3807150  | 3807275  | 125 | 3807162  | 15 | 71  | 7.3  |
| 1  | 5900375  | 5900575  | 200 | 5900562  | 13 | 78  | 0    |
| 1  | 6182175  | 6182200  | 25  | 6182187  | 11 | 11  | 1.8  |

|   |          |          |     |          |    |     |      |
|---|----------|----------|-----|----------|----|-----|------|
| 1 | 6406850  | 6406950  | 100 | 6406862  | 12 | 48  | 2.7  |
| 1 | 6473050  | 6473200  | 150 | 6473137  | 15 | 80  | 3.7  |
| 1 | 7454450  | 7454575  | 125 | 7454462  | 15 | 59  | 6.4  |
| 1 | 7766025  | 7766175  | 150 | 7766087  | 14 | 79  | 4.6  |
| 1 | 7852300  | 7852500  | 200 | 7852337  | 16 | 107 | 3.7  |
| 1 | 8065800  | 8065825  | 25  | 8065812  | 12 | 12  | 0.9  |
| 1 | 8099700  | 8099875  | 175 | 8099787  | 16 | 98  | 11   |
| 1 | 8120450  | 8120575  | 125 | 8120562  | 12 | 56  | 1.8  |
| 1 | 8284900  | 8284925  | 25  | 8284912  | 11 | 11  | 0.9  |
| 1 | 8856250  | 8856400  | 150 | 8856362  | 14 | 76  | 6.4  |
| 1 | 8930125  | 8930275  | 150 | 8930187  | 14 | 80  | 11   |
| 1 | 8970525  | 8970575  | 50  | 8970537  | 12 | 24  | 3.7  |
| 1 | 9217000  | 9217075  | 75  | 9217012  | 12 | 35  | 0    |
| 1 | 9271700  | 9271775  | 75  | 9271737  | 12 | 35  | 2.7  |
| 1 | 9421350  | 9421450  | 100 | 9421362  | 11 | 44  | 5.5  |
| 1 | 10962250 | 10962275 | 25  | 10962262 | 11 | 11  | 1.8  |
| 1 | 11245325 | 11245525 | 200 | 11245437 | 21 | 137 | 25.6 |
| 1 | 12126500 | 12126525 | 25  | 12126512 | 11 | 11  | 0    |
| 1 | 12416200 | 12416450 | 250 | 12416337 | 13 | 103 | 9.1  |
| 1 | 12431900 | 12432050 | 150 | 12431937 | 13 | 72  | 1.8  |
| 1 | 12468650 | 12468675 | 25  | 12468662 | 11 | 11  | 1.8  |
| 1 | 12604800 | 12604900 | 100 | 12604812 | 12 | 47  | 3.7  |
| 1 | 12622975 | 12623000 | 25  | 12622987 | 11 | 11  | 0    |
| 1 | 15025375 | 15025400 | 25  | 15025387 | 14 | 14  | 0    |
| 1 | 15802825 | 15803000 | 175 | 15802862 | 43 | 216 | 25.6 |
| 1 | 15903750 | 15903825 | 75  | 15903762 | 11 | 33  | 2.7  |
| 1 | 16032325 | 16032350 | 25  | 16032337 | 11 | 11  | 0    |
| 1 | 16035175 | 16035325 | 150 | 16035237 | 18 | 94  | 13.7 |
| 1 | 16046375 | 16046425 | 50  | 16046387 | 12 | 24  | 0    |
| 1 | 16344950 | 16345025 | 75  | 16344962 | 11 | 33  | 5.5  |
| 1 | 16713100 | 16713125 | 25  | 16713112 | 13 | 13  | 0.9  |
| 1 | 16820950 | 16821125 | 175 | 16821037 | 16 | 95  | 1.8  |
| 1 | 16926675 | 16926700 | 25  | 16926687 | 11 | 11  | 0.9  |
| 1 | 17103375 | 17103400 | 25  | 17103387 | 11 | 11  | 0    |
| 1 | 17104675 | 17104925 | 250 | 17104812 | 21 | 151 | 9.1  |
| 1 | 17253100 | 17253150 | 50  | 17253112 | 13 | 24  | 3.7  |
| 1 | 17444650 | 17444775 | 125 | 17444662 | 12 | 54  | 0    |
| 1 | 17731050 | 17731075 | 25  | 17731062 | 13 | 13  | 1.8  |
| 1 | 19074225 | 19074325 | 100 | 19074237 | 11 | 44  | 2.7  |
| 1 | 19210000 | 19210125 | 125 | 19210012 | 11 | 54  | 4.6  |
| 1 | 19679575 | 19679650 | 75  | 19679587 | 11 | 33  | 0    |
| 1 | 19844425 | 19844475 | 50  | 19844437 | 11 | 22  | 1.8  |
| 1 | 20707150 | 20707300 | 150 | 20707287 | 14 | 66  | 7.3  |
| 1 | 20812950 | 20813400 | 450 | 20813262 | 39 | 440 | 61.3 |
| 1 | 20860475 | 20860625 | 150 | 20860612 | 14 | 70  | 9.1  |
| 1 | 21533700 | 21533800 | 100 | 21533712 | 13 | 51  | 3.7  |
| 1 | 21577950 | 21578000 | 50  | 21577962 | 11 | 22  | 1.8  |
| 1 | 22138875 | 22138975 | 100 | 22138887 | 11 | 44  | 0.9  |
| 1 | 22583275 | 22583300 | 25  | 22583287 | 11 | 11  | 0.9  |
| 1 | 22650675 | 22650700 | 25  | 22650687 | 11 | 11  | 0    |
| 1 | 23544000 | 23544025 | 25  | 23544012 | 11 | 11  | 0.9  |
| 1 | 23561225 | 23561850 | 625 | 23561362 | 40 | 657 | 0    |
| 1 | 23568625 | 23568725 | 100 | 23568712 | 13 | 46  | 7.3  |
| 1 | 23584475 | 23584575 | 100 | 23584487 | 14 | 51  | 8.2  |
| 1 | 23754700 | 23754725 | 25  | 23754712 | 11 | 11  | 0.9  |
| 1 | 23758700 | 23758900 | 200 | 23758737 | 16 | 103 | 13.7 |
| 1 | 24158125 | 24158325 | 200 | 24158212 | 18 | 127 | 15.6 |
| 1 | 24245550 | 24245600 | 50  | 24245562 | 12 | 24  | 3.7  |
| 1 | 24786475 | 24786525 | 50  | 24786487 | 12 | 23  | 1.8  |
| 1 | 24841925 | 24841950 | 25  | 24841937 | 11 | 11  | 1.8  |
| 1 | 25222025 | 25222150 | 125 | 25222112 | 14 | 62  | 5.5  |
| 1 | 25431450 | 25431475 | 25  | 25431462 | 15 | 15  | 2.7  |
| 1 | 25906875 | 25906925 | 50  | 25906887 | 11 | 22  | 3.7  |
| 1 | 26197400 | 26197450 | 50  | 26197412 | 22 | 41  | 7.3  |
| 1 | 26607700 | 26607775 | 75  | 26607712 | 12 | 36  | 4.6  |
| 1 | 26891925 | 26892350 | 425 | 26892212 | 23 | 262 | 35.7 |
| 1 | 26894525 | 26894600 | 75  | 26894562 | 14 | 39  | 0.9  |
| 1 | 27256700 | 27256750 | 50  | 27256712 | 12 | 24  | 3.7  |
| 1 | 27591325 | 27591375 | 50  | 27591337 | 12 | 23  | 2.7  |
| 1 | 27598525 | 27598550 | 25  | 27598537 | 11 | 11  | 0.9  |
| 1 | 27689425 | 27689575 | 150 | 27689462 | 13 | 76  | 3.7  |
| 1 | 27704025 | 27704050 | 25  | 27704037 | 11 | 11  | 1.8  |
| 1 | 27924425 | 27924625 | 200 | 27924587 | 14 | 80  | 12.8 |
| 1 | 28113875 | 28114150 | 275 | 28113962 | 57 | 480 | 43.9 |
| 1 | 29821650 | 29821850 | 200 | 29821787 | 20 | 140 | 4.6  |

|   |          |          |     |          |    |     |      |
|---|----------|----------|-----|----------|----|-----|------|
| 1 | 29955125 | 29955175 | 50  | 29955162 | 14 | 26  | 3.7  |
| 1 | 30978125 | 30978325 | 200 | 30978162 | 26 | 176 | 22   |
| 1 | 30994550 | 30994575 | 25  | 30994562 | 11 | 11  | 1.8  |
| 1 | 31025125 | 31025150 | 25  | 31025137 | 11 | 11  | 1.8  |
| 1 | 31032175 | 31032275 | 100 | 31032237 | 13 | 45  | 0    |
| 1 | 31062525 | 31062600 | 75  | 31062537 | 11 | 33  | 0    |
| 1 | 31681050 | 31681250 | 200 | 31681137 | 18 | 124 | 0.9  |
| 1 | 31703875 | 31703950 | 75  | 31703887 | 11 | 33  | 0.9  |
| 1 | 31939450 | 31939475 | 25  | 31939462 | 14 | 14  | 2.7  |
| 1 | 32183125 | 32183175 | 50  | 32183137 | 12 | 23  | 0.9  |
| 1 | 32589125 | 32589325 | 200 | 32589162 | 20 | 144 | 0    |
| 1 | 32941825 | 32941875 | 50  | 32941837 | 12 | 24  | 3.7  |
| 1 | 33007850 | 33007900 | 50  | 33007887 | 13 | 24  | 0    |
| 1 | 33275025 | 33275075 | 50  | 33275037 | 11 | 22  | 2.7  |
| 1 | 33312900 | 33312975 | 75  | 33312912 | 11 | 33  | 2.7  |
| 1 | 33337900 | 33337950 | 50  | 33337937 | 12 | 23  | 1.8  |
| 1 | 33365700 | 33365725 | 25  | 33365712 | 14 | 14  | 2.7  |
| 1 | 33482500 | 33482525 | 25  | 33482512 | 11 | 11  | 1.8  |
| 1 | 33539900 | 33539950 | 50  | 33539937 | 13 | 24  | 0    |
| 1 | 33853825 | 33853975 | 150 | 33853887 | 12 | 65  | 5.5  |
| 1 | 36438250 | 36438525 | 275 | 36438337 | 18 | 157 | 29.3 |
| 1 | 36545300 | 36545350 | 50  | 36545312 | 11 | 22  | 0    |
| 1 | 36588550 | 36588700 | 150 | 36588562 | 15 | 80  | 9.1  |
| 1 | 36589000 | 36589025 | 25  | 36589012 | 11 | 11  | 1.8  |
| 1 | 36624350 | 36624500 | 150 | 36624412 | 13 | 69  | 11.9 |
| 1 | 37792450 | 37792500 | 50  | 37792487 | 14 | 26  | 4.6  |
| 1 | 37834100 | 37834250 | 150 | 37834137 | 13 | 73  | 3.7  |
| 1 | 37930575 | 37930600 | 25  | 37930587 | 15 | 15  | 2.7  |
| 1 | 38097675 | 38097875 | 200 | 38097837 | 14 | 95  | 13.7 |
| 1 | 38169675 | 38169700 | 25  | 38169687 | 11 | 11  | 0.9  |
| 1 | 38250575 | 38250925 | 350 | 38250787 | 52 | 483 | 30.2 |
| 1 | 39264400 | 39264500 | 100 | 39264487 | 14 | 51  | 10.1 |
| 1 | 39649375 | 39649400 | 25  | 39649387 | 11 | 11  | 1.8  |
| 1 | 40278150 | 40278175 | 25  | 40278162 | 12 | 12  | 0.9  |
| 1 | 40701225 | 40701275 | 50  | 40701237 | 12 | 23  | 0    |
| 1 | 40746750 | 40746950 | 200 | 40746787 | 18 | 126 | 7.3  |
| 1 | 41085600 | 41085650 | 50  | 41085612 | 11 | 22  | 0    |
| 1 | 41116050 | 41116075 | 25  | 41116062 | 14 | 14  | 1.8  |
| 1 | 41152950 | 41152975 | 25  | 41152962 | 11 | 11  | 1.8  |
| 1 | 42037550 | 42037650 | 100 | 42037562 | 11 | 44  | 0    |
| 1 | 42173650 | 42173700 | 50  | 42173662 | 14 | 28  | 3.7  |
| 1 | 42194150 | 42194250 | 100 | 42194187 | 13 | 49  | 7.3  |
| 1 | 42573825 | 42573875 | 50  | 42573837 | 11 | 22  | 1.8  |
| 1 | 42896500 | 42896625 | 125 | 42896587 | 22 | 94  | 14.6 |
| 1 | 43161300 | 43161325 | 25  | 43161312 | 11 | 11  | 1.8  |
| 1 | 43627950 | 43628000 | 50  | 43627962 | 13 | 24  | 2.7  |
| 1 | 44073375 | 44073575 | 200 | 44073512 | 18 | 129 | 5.5  |
| 1 | 44451850 | 44451900 | 50  | 44451887 | 12 | 23  | 1.8  |
| 1 | 45250400 | 45250500 | 100 | 45250437 | 13 | 48  | 4.6  |
| 1 | 45541875 | 45541975 | 100 | 45541962 | 15 | 52  | 10.1 |
| 1 | 45760300 | 45760450 | 150 | 45760437 | 14 | 71  | 3.7  |
| 1 | 45822125 | 45822225 | 100 | 45822212 | 21 | 69  | 12.8 |
| 1 | 46631775 | 46631875 | 100 | 46631787 | 13 | 50  | 0    |
| 1 | 47807250 | 47807275 | 25  | 47807262 | 11 | 11  | 1.8  |
| 1 | 47816475 | 47816600 | 125 | 47816487 | 13 | 59  | 3.7  |
| 1 | 48286375 | 48286575 | 200 | 48286512 | 16 | 89  | 0.9  |
| 1 | 48353025 | 48353075 | 50  | 48353037 | 11 | 22  | 1.8  |
| 1 | 48709650 | 48709700 | 50  | 48709662 | 11 | 22  | 0    |
| 1 | 52841525 | 52841575 | 50  | 52841537 | 13 | 26  | 0    |
| 1 | 53780350 | 53780650 | 300 | 53780362 | 14 | 114 | 20.1 |
| 1 | 53822350 | 53822375 | 25  | 53822362 | 13 | 13  | 1.8  |
| 1 | 54525675 | 54525700 | 25  | 54525687 | 11 | 11  | 1.8  |
| 1 | 54954050 | 54954075 | 25  | 54954062 | 12 | 12  | 1.8  |
| 1 | 55513425 | 55513450 | 25  | 55513437 | 12 | 12  | 1.8  |
| 1 | 56796175 | 56796250 | 75  | 56796187 | 16 | 42  | 6.4  |
| 1 | 56817850 | 56817875 | 25  | 56817862 | 12 | 12  | 0.9  |
| 1 | 57430675 | 57430900 | 225 | 57430812 | 19 | 137 | 0    |
| 1 | 58938200 | 58938450 | 250 | 58938387 | 19 | 155 | 11.9 |
| 1 | 58965950 | 58966000 | 50  | 58965962 | 14 | 28  | 3.7  |
| 1 | 58970375 | 58970400 | 25  | 58970387 | 11 | 11  | 0.9  |
| 1 | 58993950 | 58994000 | 50  | 58993962 | 13 | 24  | 2.7  |
| 1 | 59282150 | 59282200 | 50  | 59282162 | 11 | 22  | 1.8  |
| 1 | 61071550 | 61071675 | 125 | 61071612 | 15 | 70  | 0    |
| 1 | 62674750 | 62675025 | 275 | 62674937 | 20 | 189 | 34.8 |
| 1 | 63605500 | 63605525 | 25  | 63605512 | 11 | 11  | 1.8  |

|   |           |           |     |           |    |     |      |
|---|-----------|-----------|-----|-----------|----|-----|------|
| 1 | 65221600  | 65221700  | 100 | 65221612  | 12 | 48  | 0    |
| 1 | 66781575  | 66781625  | 50  | 66781587  | 11 | 22  | 0    |
| 1 | 66801900  | 66801925  | 25  | 66801912  | 11 | 11  | 1.8  |
| 1 | 66963450  | 66963500  | 50  | 66963462  | 11 | 22  | 0    |
| 1 | 68622625  | 68622825  | 200 | 68622687  | 17 | 111 | 0    |
| 1 | 70443850  | 70443875  | 25  | 70443862  | 15 | 15  | 2.7  |
| 1 | 71319325  | 71319525  | 200 | 71319487  | 28 | 185 | 28.4 |
| 1 | 72779425  | 72779450  | 25  | 72779437  | 11 | 11  | 0    |
| 1 | 74702075  | 74702125  | 50  | 74702087  | 11 | 22  | 0    |
| 1 | 76079700  | 76079725  | 25  | 76079712  | 11 | 11  | 0.9  |
| 1 | 76492550  | 76492750  | 200 | 76492637  | 13 | 96  | 0    |
| 1 | 77752800  | 77752825  | 25  | 77752812  | 11 | 11  | 1.8  |
| 1 | 78217100  | 78217125  | 25  | 78217112  | 11 | 11  | 1.8  |
| 1 | 78217475  | 78217550  | 75  | 78217537  | 15 | 41  | 4.6  |
| 1 | 78856000  | 78856025  | 25  | 78856012  | 11 | 11  | 0    |
| 1 | 79283700  | 79283850  | 150 | 79283712  | 21 | 102 | 11.9 |
| 1 | 82158850  | 82158925  | 75  | 82158862  | 11 | 33  | 1.8  |
| 1 | 83753975  | 83754100  | 125 | 83754062  | 13 | 60  | 7.3  |
| 1 | 84717450  | 84717775  | 325 | 84717637  | 34 | 297 | 22.9 |
| 1 | 84842200  | 84842300  | 100 | 84842212  | 12 | 48  | 4.6  |
| 1 | 84843475  | 84843775  | 300 | 84843662  | 23 | 189 | 8.2  |
| 1 | 84936675  | 84936850  | 175 | 84936787  | 14 | 86  | 3.7  |
| 1 | 84957700  | 84957750  | 50  | 84957712  | 11 | 22  | 1.8  |
| 1 | 85818575  | 85818675  | 100 | 85818587  | 14 | 47  | 7.3  |
| 1 | 85820200  | 85820225  | 25  | 85820212  | 12 | 12  | 1.8  |
| 1 | 85867275  | 85867350  | 75  | 85867287  | 11 | 33  | 0.9  |
| 1 | 86634275  | 86634300  | 25  | 86634287  | 11 | 11  | 1.8  |
| 1 | 86942825  | 86942950  | 125 | 86942837  | 14 | 64  | 9.1  |
| 1 | 87567400  | 87567425  | 25  | 87567412  | 11 | 11  | 1.8  |
| 1 | 89230450  | 89230500  | 50  | 89230462  | 12 | 24  | 3.7  |
| 1 | 89231100  | 89231175  | 75  | 89231162  | 15 | 40  | 4.6  |
| 1 | 89231400  | 89231550  | 150 | 89231462  | 20 | 96  | 9.1  |
| 1 | 90029600  | 90029750  | 150 | 90029737  | 12 | 67  | 0    |
| 1 | 90177500  | 90177625  | 125 | 90177512  | 11 | 55  | 4.6  |
| 1 | 90641400  | 90641575  | 175 | 90641562  | 12 | 75  | 6.4  |
| 1 | 90945550  | 90945575  | 25  | 90945562  | 11 | 11  | 1.8  |
| 1 | 91260550  | 91260600  | 50  | 91260562  | 15 | 27  | 3.7  |
| 1 | 91988875  | 91988900  | 25  | 91988887  | 11 | 11  | 0.9  |
| 1 | 92992550  | 92992775  | 225 | 92992687  | 23 | 163 | 0    |
| 1 | 93918975  | 93919125  | 150 | 93919037  | 14 | 74  | 9.1  |
| 1 | 94656125  | 94656175  | 50  | 94656162  | 13 | 25  | 3.7  |
| 1 | 95465875  | 95466075  | 200 | 95465962  | 17 | 110 | 6.4  |
| 1 | 99741625  | 99741675  | 50  | 99741637  | 12 | 24  | 0    |
| 1 | 100487900 | 100488025 | 125 | 100487912 | 15 | 61  | 0    |
| 1 | 101134200 | 101134350 | 150 | 101134237 | 18 | 88  | 5.5  |
| 1 | 101263825 | 101263925 | 100 | 101263887 | 16 | 56  | 3.7  |
| 1 | 103346800 | 103346925 | 125 | 103346862 | 12 | 58  | 3.7  |
| 1 | 109036650 | 109036675 | 25  | 109036662 | 14 | 14  | 2.7  |
| 1 | 109064175 | 109064250 | 75  | 109064187 | 11 | 33  | 1.8  |
| 1 | 109220400 | 109220425 | 25  | 109220412 | 11 | 11  | 0    |
| 1 | 109307675 | 109307750 | 75  | 109307712 | 13 | 35  | 2.7  |
| 1 | 109434750 | 109435075 | 325 | 109434762 | 35 | 305 | 43.9 |
| 1 | 109444150 | 109444175 | 25  | 109444162 | 23 | 23  | 4.6  |
| 1 | 109444500 | 109444550 | 50  | 109444512 | 22 | 36  | 4.6  |
| 1 | 109619025 | 109619100 | 75  | 109619037 | 12 | 32  | 0    |
| 1 | 109627300 | 109627325 | 25  | 109627312 | 14 | 14  | 2.7  |
| 1 | 109643125 | 109643150 | 25  | 109643137 | 11 | 11  | 0    |
| 1 | 109644075 | 109644175 | 100 | 109644137 | 15 | 56  | 10.1 |
| 1 | 110683750 | 110683775 | 25  | 110683762 | 12 | 12  | 1.8  |
| 1 | 111307275 | 111307525 | 250 | 111307337 | 17 | 137 | 0    |
| 1 | 111308175 | 111308625 | 450 | 111308287 | 31 | 402 | 24.7 |
| 1 | 111587200 | 111587275 | 75  | 111587212 | 11 | 31  | 0    |
| 1 | 111857900 | 111858100 | 200 | 111857962 | 16 | 112 | 4.6  |
| 1 | 113018625 | 113018700 | 75  | 113018662 | 17 | 46  | 8.2  |
| 1 | 113049125 | 113049175 | 50  | 113049137 | 11 | 22  | 3.7  |
| 1 | 114156475 | 114156525 | 50  | 114156487 | 12 | 24  | 3.7  |
| 1 | 114249225 | 114249400 | 175 | 114249362 | 13 | 74  | 7.3  |
| 1 | 116673800 | 116673825 | 25  | 116673812 | 12 | 12  | 1.8  |
| 1 | 116777650 | 116778100 | 450 | 116777912 | 27 | 357 | 52.2 |
| 1 | 116779075 | 116779175 | 100 | 116779087 | 12 | 48  | 6.4  |
| 1 | 116833450 | 116833525 | 75  | 116833512 | 15 | 39  | 5.5  |
| 1 | 117087775 | 117087975 | 200 | 117087787 | 11 | 85  | 3.7  |
| 1 | 117335025 | 117335100 | 75  | 117335037 | 12 | 36  | 4.6  |
| 1 | 119485025 | 119485075 | 50  | 119485037 | 11 | 22  | 0    |
| 1 | 119485300 | 119485325 | 25  | 119485312 | 12 | 12  | 0.9  |

|   |           |           |     |           |    |     |      |
|---|-----------|-----------|-----|-----------|----|-----|------|
| 1 | 120215325 | 120215425 | 100 | 120215337 | 12 | 47  | 5.5  |
| 1 | 141853075 | 141853100 | 25  | 141853087 | 11 | 11  | 1.8  |
| 1 | 141854875 | 141855000 | 125 | 141854887 | 11 | 55  | 5.5  |
| 1 | 142720275 | 142720350 | 75  | 142720312 | 13 | 36  | 5.5  |
| 1 | 143240650 | 143240750 | 100 | 143240662 | 11 | 44  | 6.4  |
| 1 | 143720750 | 143720875 | 125 | 143720762 | 13 | 60  | 6.4  |
| 1 | 143807550 | 143807725 | 175 | 143807712 | 20 | 103 | 11.9 |
| 1 | 144110150 | 144110200 | 50  | 144110162 | 11 | 22  | 0    |
| 1 | 144110800 | 144110825 | 25  | 144110812 | 11 | 11  | 1.8  |
| 1 | 144181875 | 144181950 | 75  | 144181912 | 21 | 59  | 10.1 |
| 1 | 144253700 | 144253775 | 75  | 144253712 | 13 | 39  | 4.6  |
| 1 | 144254125 | 144254475 | 350 | 144254312 | 26 | 275 | 27.4 |
| 1 | 144287175 | 144287200 | 25  | 144287187 | 14 | 14  | 2.7  |
| 1 | 145023000 | 145023025 | 25  | 145023012 | 15 | 15  | 2.7  |
| 1 | 145110900 | 145111025 | 125 | 145111012 | 18 | 70  | 8.2  |
| 1 | 145111300 | 145111350 | 50  | 145111312 | 11 | 22  | 0    |
| 1 | 145616350 | 145616775 | 425 | 145616537 | 29 | 353 | 7.3  |
| 1 | 146202600 | 146202625 | 25  | 146202612 | 11 | 11  | 0.9  |
| 1 | 148050400 | 148050575 | 175 | 148050537 | 16 | 98  | 16.5 |
| 1 | 148126150 | 148126350 | 200 | 148126187 | 15 | 102 | 8.2  |
| 1 | 148305875 | 148306025 | 150 | 148306012 | 16 | 76  | 8.2  |
| 1 | 148475125 | 148475150 | 25  | 148475137 | 12 | 12  | 1.8  |
| 1 | 148508375 | 148508425 | 50  | 148508387 | 11 | 22  | 2.7  |
| 1 | 148533050 | 148533075 | 25  | 148533062 | 13 | 13  | 0.9  |
| 1 | 148602950 | 148603000 | 50  | 148602962 | 14 | 28  | 4.6  |
| 1 | 148850925 | 148851250 | 325 | 148850937 | 11 | 124 | 0.9  |
| 1 | 148868875 | 148868900 | 25  | 148868887 | 12 | 12  | 1.8  |
| 1 | 149385925 | 149386000 | 75  | 149385987 | 12 | 34  | 4.6  |
| 1 | 149429350 | 149429525 | 175 | 149429362 | 20 | 99  | 14.6 |
| 1 | 149550725 | 149550900 | 175 | 149550837 | 15 | 89  | 10.1 |
| 1 | 149698550 | 149698750 | 200 | 149698637 | 18 | 116 | 0    |
| 1 | 149776475 | 149776500 | 25  | 149776487 | 11 | 11  | 1.8  |
| 1 | 150002625 | 150002700 | 75  | 150002662 | 12 | 34  | 3.7  |
| 1 | 150078525 | 150078675 | 150 | 150078537 | 11 | 60  | 6.4  |
| 1 | 150146625 | 150146850 | 225 | 150146712 | 16 | 118 | 7.3  |
| 1 | 150149200 | 150149250 | 50  | 150149212 | 11 | 22  | 1.8  |
| 1 | 150173200 | 150173325 | 125 | 150173262 | 13 | 63  | 0    |
| 1 | 150219675 | 150219750 | 75  | 150219687 | 12 | 36  | 4.6  |
| 1 | 150231450 | 150231475 | 25  | 150231462 | 15 | 15  | 2.7  |
| 1 | 150286575 | 150286650 | 75  | 150286587 | 11 | 33  | 3.7  |
| 1 | 150287275 | 150287325 | 50  | 150287312 | 26 | 49  | 7.3  |
| 1 | 150429050 | 150429075 | 25  | 150429062 | 12 | 12  | 0.9  |
| 1 | 151805350 | 151805500 | 150 | 151805462 | 15 | 80  | 3.7  |
| 1 | 151805725 | 151805750 | 25  | 151805737 | 21 | 21  | 2.7  |
| 1 | 151866025 | 151866125 | 100 | 151866062 | 13 | 46  | 5.5  |
| 1 | 151867350 | 151867425 | 75  | 151867362 | 13 | 38  | 5.5  |
| 1 | 151873200 | 151873325 | 125 | 151873287 | 15 | 65  | 11   |
| 1 | 151966625 | 151966775 | 150 | 151966762 | 20 | 110 | 16.5 |
| 1 | 152036450 | 152036525 | 75  | 152036462 | 12 | 35  | 1.8  |
| 1 | 152168425 | 152168450 | 25  | 152168437 | 11 | 11  | 1.8  |
| 1 | 152203325 | 152203375 | 50  | 152203337 | 11 | 22  | 2.7  |
| 1 | 152206550 | 152206650 | 100 | 152206562 | 19 | 70  | 11   |
| 1 | 152394600 | 152394675 | 75  | 152394637 | 14 | 39  | 5.5  |
| 1 | 152645575 | 152645675 | 100 | 152645587 | 15 | 56  | 5.5  |
| 1 | 152797875 | 152798075 | 200 | 152797937 | 20 | 131 | 19.2 |
| 1 | 152798750 | 152798800 | 50  | 152798762 | 14 | 28  | 5.5  |
| 1 | 153209600 | 153209650 | 50  | 153209612 | 11 | 22  | 2.7  |
| 1 | 153323900 | 153323975 | 75  | 153323937 | 13 | 37  | 2.7  |
| 1 | 153369400 | 153369475 | 75  | 153369412 | 11 | 33  | 0    |
| 1 | 153463700 | 153463750 | 50  | 153463712 | 13 | 24  | 2.7  |
| 1 | 153481275 | 153481325 | 50  | 153481287 | 24 | 48  | 6.4  |
| 1 | 153561400 | 153561425 | 25  | 153561412 | 11 | 11  | 1.8  |
| 1 | 154147150 | 154147325 | 175 | 154147237 | 14 | 83  | 8.2  |
| 1 | 154219875 | 154219950 | 75  | 154219937 | 17 | 43  | 6.4  |
| 1 | 154339150 | 154339225 | 75  | 154339187 | 16 | 46  | 8.2  |
| 1 | 154343250 | 154343350 | 100 | 154343262 | 12 | 47  | 5.5  |
| 1 | 154350475 | 154350500 | 25  | 154350487 | 11 | 11  | 1.8  |
| 1 | 154359175 | 154359275 | 100 | 154359237 | 14 | 53  | 5.5  |
| 1 | 154396900 | 154397025 | 125 | 154396912 | 17 | 71  | 9.1  |
| 1 | 154430300 | 154430425 | 125 | 154430312 | 12 | 59  | 2.7  |
| 1 | 154450925 | 154451125 | 200 | 154451037 | 17 | 105 | 5.5  |
| 1 | 154518650 | 154518775 | 125 | 154518712 | 12 | 58  | 0.9  |
| 1 | 154519400 | 154519425 | 25  | 154519412 | 15 | 15  | 2.7  |
| 1 | 154532000 | 154532075 | 75  | 154532012 | 11 | 33  | 2.7  |
| 1 | 154693875 | 154693975 | 100 | 154693887 | 15 | 54  | 2.7  |

|   |           |           |     |           |    |     |      |
|---|-----------|-----------|-----|-----------|----|-----|------|
| 1 | 154741750 | 154741950 | 200 | 154741837 | 27 | 164 | 31.1 |
| 1 | 154838025 | 154838050 | 25  | 154838037 | 12 | 12  | 1.8  |
| 1 | 154903625 | 154903725 | 100 | 154903637 | 13 | 51  | 1.8  |
| 1 | 154914475 | 154914625 | 150 | 154914487 | 13 | 72  | 11.9 |
| 1 | 154940375 | 154940400 | 25  | 154940387 | 11 | 11  | 0    |
| 1 | 155003625 | 155003700 | 75  | 155003687 | 15 | 37  | 6.4  |
| 1 | 155270900 | 155270925 | 25  | 155270912 | 11 | 11  | 1.8  |
| 1 | 156230475 | 156230525 | 50  | 156230487 | 11 | 22  | 2.7  |
| 1 | 157292950 | 157293100 | 150 | 157293062 | 13 | 73  | 10.1 |
| 1 | 157313800 | 157313825 | 25  | 157313812 | 14 | 14  | 1.8  |
| 1 | 158017125 | 158017150 | 25  | 158017137 | 17 | 17  | 2.7  |
| 1 | 158126250 | 158126450 | 200 | 158126337 | 21 | 143 | 7.3  |
| 1 | 158268300 | 158268475 | 175 | 158268337 | 18 | 109 | 10.1 |
| 1 | 158406125 | 158406200 | 75  | 158406162 | 13 | 36  | 5.5  |
| 1 | 159436225 | 159436350 | 125 | 159436287 | 14 | 66  | 5.5  |
| 1 | 159438875 | 159438900 | 25  | 159438887 | 11 | 11  | 1.8  |
| 1 | 159462375 | 159462575 | 200 | 159462412 | 17 | 107 | 20.1 |
| 1 | 159742975 | 159743125 | 150 | 159742987 | 16 | 89  | 6.4  |
| 1 | 159848925 | 159849050 | 125 | 159848962 | 14 | 58  | 8.2  |
| 1 | 159858125 | 159858300 | 175 | 159858137 | 11 | 70  | 11.9 |
| 1 | 159912950 | 159913025 | 75  | 159912962 | 11 | 33  | 5.5  |
| 1 | 159986375 | 159986450 | 75  | 159986387 | 15 | 45  | 4.6  |
| 1 | 160450100 | 160450175 | 75  | 160450162 | 16 | 44  | 6.4  |
| 1 | 160826800 | 160826925 | 125 | 160826812 | 13 | 58  | 6.4  |
| 1 | 160927150 | 160927300 | 150 | 160927212 | 13 | 75  | 4.6  |
| 1 | 161558250 | 161558300 | 50  | 161558262 | 38 | 73  | 11.9 |
| 1 | 162794650 | 162794700 | 50  | 162794687 | 13 | 24  | 3.7  |
| 1 | 163703900 | 163704025 | 125 | 163703912 | 16 | 72  | 2.7  |
| 1 | 163712900 | 163713025 | 125 | 163712937 | 13 | 57  | 0    |
| 1 | 163775150 | 163775400 | 250 | 163775262 | 27 | 201 | 9.1  |
| 1 | 164406850 | 164406875 | 25  | 164406862 | 14 | 14  | 2.7  |
| 1 | 165224850 | 165225225 | 375 | 165224962 | 22 | 252 | 22   |
| 1 | 166318175 | 166318200 | 25  | 166318187 | 11 | 11  | 1.8  |
| 1 | 166348900 | 166348975 | 75  | 166348912 | 12 | 34  | 2.7  |
| 1 | 166462975 | 166463025 | 50  | 166462987 | 12 | 23  | 1.8  |
| 1 | 166707125 | 166707250 | 125 | 166707162 | 13 | 59  | 0    |
| 1 | 167338675 | 167338775 | 100 | 167338712 | 18 | 65  | 9.1  |
| 1 | 167603825 | 167604200 | 375 | 167603912 | 25 | 268 | 24.7 |
| 1 | 168030800 | 168030850 | 50  | 168030812 | 20 | 35  | 5.5  |
| 1 | 168129500 | 168129525 | 25  | 168129512 | 12 | 12  | 1.8  |
| 1 | 168129900 | 168130025 | 125 | 168129962 | 21 | 87  | 13.7 |
| 1 | 168532450 | 168532500 | 50  | 168532462 | 11 | 22  | 3.7  |
| 1 | 168756525 | 168756625 | 100 | 168756537 | 11 | 44  | 0    |
| 1 | 168767450 | 168767475 | 25  | 168767462 | 11 | 11  | 0.9  |
| 1 | 168767725 | 168767775 | 50  | 168767762 | 22 | 41  | 7.3  |
| 1 | 168798800 | 168798900 | 100 | 168798887 | 15 | 50  | 6.4  |
| 1 | 168934925 | 168935050 | 125 | 168934937 | 16 | 73  | 8.2  |
| 1 | 169487575 | 169487700 | 125 | 169487662 | 13 | 56  | 9.1  |
| 1 | 169494825 | 169494950 | 125 | 169494887 | 13 | 61  | 10.1 |
| 1 | 169978000 | 169978125 | 125 | 169978062 | 16 | 66  | 11.9 |
| 1 | 170380650 | 170380700 | 50  | 170380662 | 19 | 38  | 7.3  |
| 1 | 170626600 | 170626625 | 25  | 170626612 | 11 | 11  | 1.8  |
| 1 | 170634925 | 170634975 | 50  | 170634937 | 11 | 22  | 1.8  |
| 1 | 170768375 | 170768450 | 75  | 170768437 | 25 | 63  | 8.2  |
| 1 | 170856400 | 170856600 | 200 | 170856487 | 16 | 117 | 0    |
| 1 | 170873275 | 170873325 | 50  | 170873287 | 15 | 30  | 2.7  |
| 1 | 171094825 | 171094850 | 25  | 171094837 | 12 | 12  | 0    |
| 1 | 171153900 | 171153975 | 75  | 171153912 | 11 | 33  | 2.7  |
| 1 | 171206125 | 171206175 | 50  | 171206137 | 11 | 22  | 3.7  |
| 1 | 171358825 | 171358925 | 100 | 171358837 | 15 | 60  | 7.3  |
| 1 | 171873600 | 171873650 | 50  | 171873612 | 11 | 22  | 0    |
| 1 | 172258475 | 172258500 | 25  | 172258487 | 12 | 12  | 1.8  |
| 1 | 172556725 | 172556750 | 25  | 172556737 | 11 | 11  | 0    |
| 1 | 173235250 | 173235275 | 25  | 173235262 | 23 | 23  | 4.6  |
| 1 | 173259400 | 173259575 | 175 | 173259437 | 20 | 119 | 11.9 |
| 1 | 173308250 | 173308275 | 25  | 173308262 | 11 | 11  | 0.9  |
| 1 | 175492100 | 175492400 | 300 | 175492237 | 30 | 253 | 22.9 |
| 1 | 176329275 | 176329325 | 50  | 176329312 | 15 | 26  | 3.7  |
| 1 | 176887000 | 176887025 | 25  | 176887012 | 11 | 11  | 0    |
| 1 | 177601625 | 177601725 | 100 | 177601637 | 15 | 57  | 7.3  |
| 1 | 178050925 | 178051000 | 75  | 178050937 | 12 | 34  | 2.7  |
| 1 | 178113375 | 178113525 | 150 | 178113512 | 22 | 109 | 14.6 |
| 1 | 178738400 | 178738600 | 200 | 178738562 | 23 | 152 | 19.2 |
| 1 | 179324075 | 179324275 | 200 | 179324162 | 14 | 102 | 6.4  |
| 1 | 179344225 | 179344300 | 75  | 179344287 | 13 | 37  | 0    |

|   |           |           |     |           |    |     |      |
|---|-----------|-----------|-----|-----------|----|-----|------|
| 1 | 181416175 | 181416275 | 100 | 181416237 | 13 | 48  | 6.4  |
| 1 | 181471500 | 181471525 | 25  | 181471512 | 12 | 12  | 1.8  |
| 1 | 181585150 | 181585200 | 50  | 181585162 | 11 | 22  | 2.7  |
| 1 | 181706800 | 181706825 | 25  | 181706812 | 12 | 12  | 1.8  |
| 1 | 181707925 | 181707975 | 50  | 181707937 | 27 | 48  | 7.3  |
| 1 | 181871475 | 181871500 | 25  | 181871487 | 11 | 11  | 1.8  |
| 1 | 182168200 | 182168425 | 225 | 182168312 | 25 | 179 | 18.3 |
| 1 | 182238025 | 182238150 | 125 | 182238062 | 20 | 84  | 12.8 |
| 1 | 182272075 | 182272100 | 25  | 182272087 | 11 | 11  | 0.9  |
| 1 | 182900150 | 182900175 | 25  | 182900162 | 11 | 11  | 1.8  |
| 1 | 183028325 | 183028525 | 200 | 183028387 | 21 | 130 | 18.3 |
| 1 | 183049450 | 183049600 | 150 | 183049512 | 13 | 73  | 0    |
| 1 | 183662700 | 183662725 | 25  | 183662712 | 12 | 12  | 1.8  |
| 1 | 183969950 | 183969975 | 25  | 183969962 | 12 | 12  | 1.8  |
| 1 | 184026425 | 184026450 | 25  | 184026437 | 13 | 13  | 1.8  |
| 1 | 184611350 | 184611425 | 75  | 184611412 | 16 | 43  | 4.6  |
| 1 | 184896125 | 184896150 | 25  | 184896137 | 11 | 11  | 0    |
| 1 | 184983550 | 184983725 | 175 | 184983612 | 14 | 90  | 2.7  |
| 1 | 185016175 | 185016325 | 150 | 185016237 | 16 | 88  | 6.4  |
| 1 | 185680850 | 185681025 | 175 | 185680912 | 13 | 86  | 5.5  |
| 1 | 187504900 | 187504950 | 50  | 187504912 | 12 | 24  | 0    |
| 1 | 190666525 | 190666600 | 75  | 190666537 | 13 | 37  | 2.7  |
| 1 | 191357575 | 191357675 | 100 | 191357587 | 11 | 44  | 7.3  |
| 1 | 191357975 | 191358025 | 50  | 191357987 | 12 | 24  | 3.7  |
| 1 | 195436450 | 195436575 | 125 | 195436562 | 15 | 67  | 12.8 |
| 1 | 197171350 | 197171550 | 200 | 197171437 | 17 | 120 | 8.2  |
| 1 | 197173050 | 197173125 | 75  | 197173112 | 13 | 37  | 5.5  |
| 1 | 198265000 | 198265175 | 175 | 198265087 | 15 | 89  | 2.7  |
| 1 | 199124025 | 199124100 | 75  | 199124037 | 11 | 33  | 0    |
| 1 | 199215400 | 199215475 | 75  | 199215412 | 14 | 39  | 4.6  |
| 1 | 199458725 | 199458875 | 150 | 199458787 | 14 | 75  | 10.1 |
| 1 | 199644350 | 199644375 | 25  | 199644362 | 12 | 12  | 1.8  |
| 1 | 199891275 | 199891325 | 50  | 199891287 | 18 | 34  | 1.8  |
| 1 | 200005975 | 200006100 | 125 | 200005987 | 14 | 64  | 6.4  |
| 1 | 200164200 | 200164300 | 100 | 200164212 | 11 | 44  | 3.7  |
| 1 | 200191400 | 200191425 | 25  | 200191412 | 12 | 12  | 1.8  |
| 1 | 200577825 | 200577950 | 125 | 200577837 | 20 | 85  | 11.9 |
| 1 | 200803925 | 200804000 | 75  | 200803962 | 12 | 35  | 1.8  |
| 1 | 200854300 | 200854550 | 250 | 200854412 | 21 | 156 | 7.3  |
| 1 | 201046475 | 201046550 | 75  | 201046487 | 25 | 71  | 13.7 |
| 1 | 201163100 | 201163250 | 150 | 201163162 | 15 | 79  | 10.1 |
| 1 | 201203325 | 201203400 | 75  | 201203337 | 12 | 34  | 1.8  |
| 1 | 201293775 | 201293875 | 100 | 201293812 | 13 | 46  | 1.8  |
| 1 | 201361875 | 201361925 | 50  | 201361887 | 11 | 22  | 0    |
| 1 | 201380450 | 201380500 | 50  | 201380462 | 12 | 23  | 2.7  |
| 1 | 201563900 | 201563950 | 50  | 201563912 | 14 | 26  | 3.7  |
| 1 | 201684350 | 201684625 | 275 | 201684562 | 19 | 177 | 29.3 |
| 1 | 201792075 | 201792225 | 150 | 201792187 | 17 | 86  | 14.6 |
| 1 | 201863375 | 201863400 | 25  | 201863387 | 11 | 11  | 0.9  |
| 1 | 201909575 | 201909625 | 50  | 201909587 | 12 | 23  | 3.7  |
| 1 | 201979800 | 201979875 | 75  | 201979812 | 12 | 33  | 0    |
| 1 | 202031400 | 202031550 | 150 | 202031487 | 16 | 83  | 8.2  |
| 1 | 202202700 | 202202825 | 125 | 202202712 | 11 | 55  | 0    |
| 1 | 202232275 | 202232400 | 125 | 202232287 | 12 | 58  | 2.7  |
| 1 | 202647400 | 202647600 | 200 | 202647462 | 25 | 178 | 14.6 |
| 1 | 202653100 | 202653175 | 75  | 202653112 | 11 | 33  | 5.5  |
| 1 | 202742050 | 202742175 | 125 | 202742062 | 11 | 55  | 6.4  |
| 1 | 202759500 | 202759650 | 150 | 202759612 | 15 | 75  | 3.7  |
| 1 | 203225375 | 203225450 | 75  | 203225387 | 11 | 33  | 4.6  |
| 1 | 203530475 | 203530500 | 25  | 203530487 | 12 | 12  | 0.9  |
| 1 | 203596075 | 203596150 | 75  | 203596112 | 13 | 35  | 5.5  |
| 1 | 203764725 | 203764825 | 100 | 203764737 | 13 | 46  | 7.3  |
| 1 | 203985150 | 203985325 | 175 | 203985162 | 16 | 93  | 18.3 |
| 1 | 203986000 | 203986375 | 375 | 203986012 | 18 | 188 | 37.5 |
| 1 | 204747375 | 204747400 | 25  | 204747387 | 11 | 11  | 0.9  |
| 1 | 204874275 | 204874450 | 175 | 204874287 | 13 | 88  | 8.2  |
| 1 | 204875300 | 204875350 | 50  | 204875312 | 11 | 22  | 3.7  |
| 1 | 205138675 | 205138725 | 50  | 205138687 | 14 | 28  | 5.5  |
| 1 | 205247675 | 205247750 | 75  | 205247712 | 12 | 35  | 0.9  |
| 1 | 205249300 | 205249375 | 75  | 205249337 | 14 | 38  | 5.5  |
| 1 | 205290925 | 205291150 | 225 | 205291087 | 21 | 161 | 18.3 |
| 1 | 205444950 | 205445075 | 125 | 205445012 | 18 | 80  | 9.1  |
| 1 | 205459100 | 205459200 | 100 | 205459112 | 14 | 50  | 6.4  |
| 1 | 205633475 | 205633700 | 225 | 205633637 | 16 | 126 | 9.1  |
| 1 | 205644225 | 205644250 | 25  | 205644237 | 11 | 11  | 1.8  |

|   |           |           |     |           |    |     |      |
|---|-----------|-----------|-----|-----------|----|-----|------|
| 1 | 206165225 | 206165250 | 25  | 206165237 | 11 | 11  | 1.8  |
| 1 | 206328200 | 206328225 | 25  | 206328212 | 11 | 11  | 0.9  |
| 1 | 206459800 | 206459900 | 100 | 206459887 | 13 | 46  | 3.7  |
| 1 | 207683450 | 207683500 | 50  | 207683462 | 11 | 22  | 0    |
| 1 | 208009200 | 208009375 | 175 | 208009287 | 15 | 88  | 6.4  |
| 1 | 208024725 | 208024925 | 200 | 208024737 | 28 | 151 | 19.2 |
| 1 | 208062650 | 208062775 | 125 | 208062662 | 11 | 55  | 1.8  |
| 1 | 208085050 | 208085200 | 150 | 208085112 | 13 | 72  | 0    |
| 1 | 208119725 | 208119750 | 25  | 208119737 | 11 | 11  | 1.8  |
| 1 | 208453400 | 208453575 | 175 | 208453462 | 22 | 138 | 12.8 |
| 1 | 209622375 | 209622800 | 425 | 209622787 | 19 | 212 | 26.5 |
| 1 | 209971350 | 209971375 | 25  | 209971362 | 11 | 11  | 1.8  |
| 1 | 209975750 | 209975775 | 25  | 209975762 | 23 | 23  | 4.6  |
| 1 | 209976600 | 209976725 | 125 | 209976612 | 19 | 80  | 15.6 |
| 1 | 210524700 | 210524775 | 75  | 210524762 | 16 | 42  | 6.4  |
| 1 | 210655075 | 210655100 | 25  | 210655087 | 11 | 11  | 1.8  |
| 1 | 210697950 | 210697975 | 25  | 210697962 | 12 | 12  | 0.9  |
| 1 | 210896175 | 210896225 | 50  | 210896212 | 12 | 23  | 3.7  |
| 1 | 210907775 | 210907800 | 25  | 210907787 | 14 | 14  | 2.7  |
| 1 | 211032275 | 211032300 | 25  | 211032287 | 11 | 11  | 1.8  |
| 1 | 211065750 | 211066075 | 325 | 211065912 | 32 | 290 | 1.8  |
| 1 | 211190425 | 211190575 | 150 | 211190437 | 25 | 118 | 19.2 |
| 1 | 211291150 | 211291175 | 25  | 211291162 | 11 | 11  | 1.8  |
| 1 | 211855650 | 211855750 | 100 | 211855712 | 13 | 47  | 3.7  |
| 1 | 211954825 | 211954850 | 25  | 211954837 | 17 | 17  | 2.7  |
| 1 | 211965225 | 211965575 | 350 | 211965387 | 23 | 253 | 45.7 |
| 1 | 212521600 | 212521675 | 75  | 212521612 | 12 | 36  | 5.5  |
| 1 | 212681175 | 212681250 | 75  | 212681187 | 12 | 33  | 4.6  |
| 1 | 212687075 | 212687100 | 25  | 212687087 | 11 | 11  | 1.8  |
| 1 | 212843150 | 212843200 | 50  | 212843162 | 15 | 30  | 3.7  |
| 1 | 213321675 | 213321725 | 50  | 213321687 | 11 | 22  | 1.8  |
| 1 | 213807775 | 213807875 | 100 | 213807862 | 14 | 49  | 8.2  |
| 1 | 215871125 | 215871200 | 75  | 215871162 | 13 | 36  | 5.5  |
| 1 | 216747675 | 216747850 | 175 | 216747737 | 14 | 84  | 2.7  |
| 1 | 216764975 | 216765175 | 200 | 216765087 | 18 | 113 | 8.2  |
| 1 | 216825525 | 216825775 | 250 | 216825587 | 16 | 131 | 22   |
| 1 | 216990775 | 216990950 | 175 | 216990937 | 13 | 80  | 5.5  |
| 1 | 217115025 | 217115250 | 225 | 217115162 | 18 | 128 | 12.8 |
| 1 | 217306550 | 217306625 | 75  | 217306612 | 14 | 38  | 7.3  |
| 1 | 217413850 | 217414000 | 150 | 217413937 | 18 | 93  | 11.9 |
| 1 | 217901300 | 217901375 | 75  | 217901362 | 16 | 44  | 8.2  |
| 1 | 217925875 | 217925975 | 100 | 217925887 | 11 | 44  | 3.7  |
| 1 | 218010975 | 218011075 | 100 | 218010987 | 12 | 46  | 7.3  |
| 1 | 218052750 | 218052775 | 25  | 218052762 | 11 | 11  | 1.8  |
| 1 | 218286450 | 218286475 | 25  | 218286462 | 11 | 11  | 0.9  |
| 1 | 218512275 | 218512450 | 175 | 218512362 | 25 | 145 | 14.6 |
| 1 | 219016875 | 219016900 | 25  | 219016887 | 12 | 12  | 1.8  |
| 1 | 219049075 | 219049125 | 50  | 219049087 | 11 | 22  | 1.8  |
| 1 | 219982150 | 219982325 | 175 | 219982262 | 27 | 174 | 22.9 |
| 1 | 220065550 | 220065600 | 50  | 220065562 | 12 | 24  | 1.8  |
| 1 | 220066900 | 220067075 | 175 | 220066987 | 13 | 81  | 7.3  |
| 1 | 220201725 | 220201975 | 250 | 220201787 | 14 | 107 | 6.4  |
| 1 | 220705625 | 220705875 | 250 | 220705662 | 25 | 204 | 18.3 |
| 1 | 221382825 | 221382950 | 125 | 221382837 | 12 | 60  | 6.4  |
| 1 | 221907125 | 221907150 | 25  | 221907137 | 15 | 15  | 2.7  |
| 1 | 222246850 | 222246875 | 25  | 222246862 | 13 | 13  | 1.8  |
| 1 | 222452675 | 222452775 | 100 | 222452687 | 12 | 48  | 6.4  |
| 1 | 222584475 | 222584675 | 200 | 222584537 | 25 | 166 | 27.4 |
| 1 | 222783450 | 222783475 | 25  | 222783462 | 11 | 11  | 1.8  |
| 1 | 222797700 | 222797725 | 25  | 222797712 | 11 | 11  | 0    |
| 1 | 222833850 | 222834275 | 425 | 222834112 | 14 | 195 | 19.2 |
| 1 | 222981650 | 222981675 | 25  | 222981662 | 11 | 11  | 0    |
| 1 | 222991350 | 222991550 | 200 | 222991362 | 35 | 195 | 31.1 |
| 1 | 223013600 | 223013650 | 50  | 223013612 | 18 | 36  | 5.5  |
| 1 | 224021350 | 224021550 | 200 | 224021462 | 21 | 129 | 1.8  |
| 1 | 224026750 | 224026800 | 50  | 224026787 | 14 | 27  | 4.6  |
| 1 | 224072000 | 224072200 | 200 | 224072037 | 15 | 104 | 13.7 |
| 1 | 224253650 | 224253725 | 75  | 224253712 | 14 | 38  | 4.6  |
| 1 | 224364200 | 224364225 | 25  | 224364212 | 11 | 11  | 1.8  |
| 1 | 224662650 | 224662850 | 200 | 224662762 | 23 | 156 | 17.4 |
| 1 | 224917600 | 224917675 | 75  | 224917612 | 13 | 39  | 2.7  |
| 1 | 225018250 | 225018400 | 150 | 225018287 | 16 | 90  | 11.9 |
| 1 | 225611750 | 225611825 | 75  | 225611812 | 13 | 35  | 2.7  |
| 1 | 225909150 | 225909225 | 75  | 225909162 | 11 | 33  | 0    |
| 1 | 226111675 | 226111850 | 175 | 226111762 | 17 | 98  | 0    |



|   |           |           |     |           |    |     |      |
|---|-----------|-----------|-----|-----------|----|-----|------|
| 1 | 226364450 | 226364475 | 25  | 226364462 | 11 | 11  | 1.8  |
| 1 | 226420925 | 226421000 | 75  | 226420987 | 14 | 38  | 3.7  |
| 1 | 226479275 | 226479325 | 50  | 226479287 | 11 | 22  | 0    |
| 1 | 226712400 | 226712425 | 25  | 226712412 | 14 | 14  | 2.7  |
| 1 | 226719100 | 226719150 | 50  | 226719112 | 15 | 30  | 5.5  |
| 1 | 226741175 | 226741375 | 200 | 226741262 | 30 | 225 | 43   |
| 1 | 227105375 | 227105525 | 150 | 227105437 | 14 | 74  | 10.1 |
| 1 | 227126400 | 227126475 | 75  | 227126437 | 12 | 35  | 0    |
| 1 | 227206075 | 227206125 | 50  | 227206087 | 14 | 28  | 5.5  |
| 1 | 228356200 | 228356250 | 50  | 228356212 | 11 | 22  | 3.7  |
| 1 | 228491000 | 228491075 | 75  | 228491062 | 12 | 33  | 2.7  |
| 1 | 229058300 | 229058350 | 50  | 229058337 | 15 | 29  | 5.5  |
| 1 | 229061725 | 229061925 | 200 | 229061762 | 19 | 130 | 21   |
| 1 | 229308950 | 229309000 | 50  | 229308962 | 12 | 23  | 0    |
| 1 | 229342375 | 229342425 | 50  | 229342387 | 12 | 24  | 3.7  |
| 1 | 229625200 | 229625275 | 75  | 229625212 | 12 | 34  | 5.5  |
| 1 | 229701525 | 229701700 | 175 | 229701562 | 12 | 78  | 3.7  |
| 1 | 229829000 | 229829075 | 75  | 229829012 | 16 | 46  | 5.5  |
| 1 | 230345150 | 230345225 | 75  | 230345212 | 25 | 66  | 11.9 |
| 1 | 230951525 | 230951825 | 300 | 230951637 | 22 | 188 | 0    |
| 1 | 231071400 | 231071475 | 75  | 231071412 | 13 | 36  | 4.6  |
| 1 | 231173300 | 231173325 | 25  | 231173312 | 11 | 11  | 0.9  |
| 1 | 231941375 | 231941400 | 25  | 231941387 | 11 | 11  | 1.8  |
| 1 | 232718325 | 232718400 | 75  | 232718387 | 12 | 34  | 2.7  |
| 1 | 232785550 | 232785575 | 25  | 232785562 | 11 | 11  | 0.9  |
| 1 | 232802725 | 232802900 | 175 | 232802812 | 15 | 85  | 3.7  |
| 1 | 232810575 | 232810600 | 25  | 232810587 | 11 | 11  | 1.8  |
| 1 | 232902675 | 232902850 | 175 | 232902737 | 14 | 90  | 6.4  |
| 1 | 232926875 | 232927375 | 500 | 232927137 | 20 | 322 | 34.8 |
| 1 | 232927750 | 232927900 | 150 | 232927862 | 14 | 75  | 8.2  |
| 1 | 232974850 | 232974875 | 25  | 232974862 | 25 | 25  | 4.6  |
| 1 | 233165725 | 233165950 | 225 | 233165787 | 25 | 168 | 16.5 |
| 1 | 233172625 | 233172775 | 150 | 233172712 | 15 | 76  | 6.4  |
| 1 | 233173400 | 233173425 | 25  | 233173412 | 12 | 12  | 1.8  |
| 1 | 233183325 | 233183350 | 25  | 233183337 | 26 | 26  | 3.7  |
| 1 | 233186425 | 233186600 | 175 | 233186562 | 23 | 128 | 16.5 |
| 1 | 233220600 | 233220700 | 100 | 233220612 | 15 | 60  | 10.1 |
| 1 | 233558175 | 233558225 | 50  | 233558212 | 12 | 23  | 3.7  |
| 1 | 233597025 | 233597075 | 50  | 233597037 | 11 | 22  | 1.8  |
| 1 | 233597400 | 233597550 | 150 | 233597437 | 15 | 85  | 7.3  |
| 1 | 233872250 | 233872350 | 100 | 233872262 | 16 | 63  | 6.4  |
| 1 | 233900150 | 233900400 | 250 | 233900262 | 21 | 156 | 2.7  |
| 1 | 233905350 | 233905500 | 150 | 233905412 | 16 | 84  | 11   |
| 1 | 234147250 | 234147325 | 75  | 234147262 | 11 | 31  | 5.5  |
| 1 | 234150175 | 234150225 | 50  | 234150212 | 13 | 24  | 2.7  |
| 1 | 234327300 | 234327375 | 75  | 234327312 | 12 | 36  | 5.5  |
| 1 | 234329900 | 234329950 | 50  | 234329937 | 13 | 25  | 3.7  |
| 1 | 234763900 | 234764000 | 100 | 234763937 | 12 | 45  | 3.7  |
| 1 | 234852525 | 234852675 | 150 | 234852662 | 13 | 66  | 5.5  |
| 1 | 234853350 | 234853525 | 175 | 234853437 | 15 | 93  | 5.5  |
| 1 | 236504925 | 236505000 | 75  | 236504937 | 12 | 35  | 0    |
| 1 | 236695500 | 236695550 | 50  | 236695512 | 11 | 22  | 0.9  |
| 1 | 236699325 | 236699350 | 25  | 236699337 | 11 | 11  | 1.8  |
| 1 | 236878100 | 236878125 | 25  | 236878112 | 12 | 12  | 0.9  |
| 1 | 236902325 | 236902350 | 25  | 236902337 | 11 | 11  | 0    |
| 1 | 236994775 | 236995075 | 300 | 236994887 | 22 | 190 | 15.6 |
| 1 | 237122750 | 237122850 | 100 | 237122762 | 11 | 44  | 7.3  |
| 1 | 237616550 | 237616575 | 25  | 237616562 | 11 | 11  | 1.8  |
| 1 | 237709200 | 237709375 | 175 | 237709312 | 15 | 91  | 1.8  |
| 1 | 238002675 | 238002725 | 50  | 238002687 | 12 | 24  | 3.7  |
| 1 | 238792175 | 238792225 | 50  | 238792187 | 11 | 22  | 1.8  |
| 1 | 238959900 | 238960075 | 175 | 238960012 | 16 | 104 | 7.3  |
| 1 | 242242500 | 242242550 | 50  | 242242512 | 12 | 24  | 0    |
| 1 | 242283725 | 242283775 | 50  | 242283737 | 11 | 22  | 0.9  |
| 1 | 242393750 | 242393875 | 125 | 242393862 | 12 | 54  | 8.2  |
| 1 | 242442675 | 242442850 | 175 | 242442837 | 14 | 89  | 5.5  |
| 1 | 242458900 | 242459000 | 100 | 242458912 | 13 | 46  | 3.7  |
| 1 | 242504050 | 242504175 | 125 | 242504062 | 12 | 53  | 4.6  |
| 1 | 242682025 | 242682275 | 250 | 242682187 | 25 | 198 | 26.5 |
| 1 | 242803825 | 242804050 | 225 | 242803887 | 22 | 146 | 0    |
| 1 | 242806275 | 242806325 | 50  | 242806287 | 14 | 25  | 1.8  |
| 1 | 242960000 | 242960075 | 75  | 242960037 | 13 | 37  | 2.7  |
| 1 | 243314725 | 243314875 | 150 | 243314787 | 15 | 81  | 0    |
| 1 | 243321800 | 243321850 | 50  | 243321812 | 12 | 24  | 2.7  |
| 1 | 243436950 | 243437325 | 375 | 243437137 | 33 | 342 | 6.4  |

|   |           |           |     |           |    |     |      |
|---|-----------|-----------|-----|-----------|----|-----|------|
| 1 | 243460125 | 243460200 | 75  | 243460137 | 11 | 33  | 0    |
| 1 | 244387050 | 244387075 | 25  | 244387062 | 11 | 11  | 0    |
| 1 | 244745350 | 244745675 | 325 | 244745537 | 44 | 371 | 0.9  |
| 1 | 244795475 | 244795500 | 25  | 244795487 | 12 | 12  | 0    |
| 1 | 245045925 | 245045975 | 50  | 245045937 | 11 | 22  | 3.7  |
| 1 | 245293900 | 245294025 | 125 | 245293912 | 11 | 49  | 7.3  |
| 1 | 245308925 | 245309025 | 100 | 245308937 | 16 | 56  | 7.3  |
| 1 | 245334300 | 245334325 | 25  | 245334312 | 21 | 21  | 3.7  |
| 1 | 245386600 | 245386925 | 325 | 245386762 | 27 | 248 | 0    |
| 1 | 245614450 | 245614550 | 100 | 245614462 | 12 | 48  | 7.3  |
| 1 | 247087125 | 247087150 | 25  | 247087137 | 17 | 17  | 2.7  |
| 1 | 247134675 | 247134775 | 100 | 247134687 | 21 | 72  | 12.8 |
| 1 | 247166725 | 247166750 | 25  | 247166737 | 14 | 14  | 2.7  |
| 1 | 247167050 | 247167350 | 300 | 247167187 | 41 | 340 | 38.4 |
| 3 | 3143850   | 3143925   | 75  | 3143887   | 12 | 35  | 2.7  |
| 3 | 4747300   | 4747475   | 175 | 4747437   | 15 | 94  | 8.2  |
| 3 | 5003625   | 5003825   | 200 | 5003737   | 21 | 142 | 26.5 |
| 3 | 5011850   | 5011925   | 75  | 5011862   | 11 | 33  | 5.5  |
| 3 | 6786625   | 6786800   | 175 | 6786662   | 17 | 85  | 10.1 |
| 3 | 8518450   | 8518550   | 100 | 8518487   | 14 | 50  | 6.4  |
| 3 | 9333800   | 9333825   | 25  | 9333812   | 15 | 15  | 2.7  |
| 3 | 9379600   | 9379775   | 175 | 9379737   | 32 | 206 | 40.3 |
| 3 | 9413675   | 9413775   | 100 | 9413687   | 13 | 46  | 4.6  |
| 3 | 9665800   | 9665925   | 125 | 9665887   | 22 | 88  | 4.6  |
| 3 | 9766400   | 9766525   | 125 | 9766462   | 19 | 85  | 13.7 |
| 3 | 9808825   | 9809025   | 200 | 9808937   | 21 | 139 | 14.6 |
| 3 | 9880825   | 9880850   | 25  | 9880837   | 13 | 13  | 0.9  |
| 3 | 10190775  | 10190800  | 25  | 10190787  | 11 | 11  | 1.8  |
| 3 | 10213425  | 10213475  | 50  | 10213437  | 12 | 24  | 3.7  |
| 3 | 10264775  | 10264825  | 50  | 10264812  | 19 | 33  | 6.4  |
| 3 | 11567625  | 11567650  | 25  | 11567637  | 11 | 11  | 1.8  |
| 3 | 11570075  | 11570100  | 25  | 11570087  | 14 | 14  | 2.7  |
| 3 | 11617125  | 11617175  | 50  | 11617137  | 12 | 24  | 1.8  |
| 3 | 11659125  | 11659225  | 100 | 11659187  | 16 | 56  | 7.3  |
| 3 | 12461050  | 12461125  | 75  | 12461112  | 13 | 35  | 5.5  |
| 3 | 12881800  | 12881975  | 175 | 12881837  | 13 | 86  | 0    |
| 3 | 13071475  | 13071600  | 125 | 13071537  | 14 | 62  | 2.7  |
| 3 | 13468375  | 13468450  | 75  | 13468412  | 15 | 43  | 6.4  |
| 3 | 13831675  | 13831875  | 200 | 13831687  | 19 | 126 | 7.3  |
| 3 | 14336325  | 14336375  | 50  | 14336337  | 11 | 22  | 1.8  |
| 3 | 14362400  | 14362600  | 200 | 14362487  | 17 | 111 | 5.5  |
| 3 | 15115575  | 15115675  | 100 | 15115662  | 16 | 54  | 9.1  |
| 3 | 15286350  | 15286425  | 75  | 15286362  | 13 | 39  | 5.5  |
| 3 | 15407500  | 15407600  | 100 | 15407512  | 11 | 44  | 0.9  |
| 3 | 15672875  | 15673250  | 375 | 15673062  | 36 | 368 | 0    |
| 3 | 16348275  | 16348300  | 25  | 16348287  | 11 | 11  | 0    |
| 3 | 20202500  | 20202600  | 100 | 20202587  | 12 | 45  | 8.2  |
| 3 | 25606225  | 25606250  | 25  | 25606237  | 11 | 11  | 1.8  |
| 3 | 27163825  | 27163850  | 25  | 27163837  | 11 | 11  | 0    |
| 3 | 27774400  | 27774875  | 475 | 27774737  | 24 | 277 | 25.6 |
| 3 | 28364950  | 28365050  | 100 | 28364962  | 12 | 39  | 3.7  |
| 3 | 29297450  | 29297475  | 25  | 29297462  | 12 | 12  | 1.8  |
| 3 | 31953825  | 31954125  | 300 | 31953987  | 22 | 191 | 6.4  |
| 3 | 32436925  | 32436950  | 25  | 32436937  | 11 | 11  | 1.8  |
| 3 | 33814950  | 33815025  | 75  | 33814962  | 13 | 39  | 4.6  |
| 3 | 36960700  | 36960725  | 25  | 36960712  | 11 | 11  | 1.8  |
| 3 | 37214150  | 37214275  | 125 | 37214237  | 12 | 55  | 0    |
| 3 | 37509675  | 37509800  | 125 | 37509737  | 15 | 68  | 11.9 |
| 3 | 37554375  | 37554550  | 175 | 37554412  | 13 | 85  | 3.7  |
| 3 | 37876825  | 37876950  | 125 | 37876912  | 14 | 63  | 3.7  |
| 3 | 37925750  | 37926000  | 250 | 37925837  | 17 | 140 | 19.2 |
| 3 | 37927725  | 37927750  | 25  | 37927737  | 11 | 11  | 0    |
| 3 | 38343850  | 38343950  | 100 | 38343862  | 13 | 47  | 0    |
| 3 | 38449500  | 38449550  | 50  | 38449512  | 11 | 22  | 0.9  |
| 3 | 38850650  | 38850725  | 75  | 38850687  | 15 | 41  | 4.6  |
| 3 | 39055900  | 39056000  | 100 | 39055912  | 11 | 43  | 7.3  |
| 3 | 40708150  | 40708200  | 50  | 40708162  | 12 | 24  | 0    |
| 3 | 40894500  | 40894575  | 75  | 40894512  | 11 | 33  | 0    |
| 3 | 40895100  | 40895150  | 50  | 40895112  | 11 | 22  | 0.9  |
| 3 | 41978825  | 41978950  | 125 | 41978837  | 20 | 88  | 16.5 |
| 3 | 42616750  | 42616775  | 25  | 42616762  | 11 | 11  | 1.8  |
| 3 | 42617175  | 42617200  | 25  | 42617187  | 12 | 12  | 0.9  |
| 3 | 42820875  | 42820900  | 25  | 42820887  | 11 | 11  | 0    |
| 3 | 43888950  | 43889050  | 100 | 43889037  | 12 | 43  | 1.8  |
| 3 | 44354650  | 44354800  | 150 | 44354687  | 17 | 84  | 11.9 |

|   |          |          |     |          |    |     |      |
|---|----------|----------|-----|----------|----|-----|------|
| 3 | 44702100 | 44702225 | 125 | 44702162 | 14 | 65  | 2.7  |
| 3 | 44729000 | 44729225 | 225 | 44729162 | 23 | 153 | 10.1 |
| 3 | 44737850 | 44738150 | 300 | 44737962 | 21 | 178 | 0    |
| 3 | 45405025 | 45405150 | 125 | 45405062 | 20 | 93  | 7.3  |
| 3 | 45576750 | 45576925 | 175 | 45576812 | 15 | 93  | 9.1  |
| 3 | 45583475 | 45583525 | 50  | 45583487 | 11 | 22  | 2.7  |
| 3 | 45609975 | 45610000 | 25  | 45609987 | 11 | 11  | 0.9  |
| 3 | 45628200 | 45628275 | 75  | 45628212 | 14 | 38  | 5.5  |
| 3 | 45858775 | 45858950 | 175 | 45858862 | 18 | 106 | 4.6  |
| 3 | 46951275 | 46951350 | 75  | 46951337 | 12 | 34  | 5.5  |
| 3 | 47617950 | 47618100 | 150 | 47617987 | 15 | 80  | 5.5  |
| 3 | 48104150 | 48104300 | 150 | 48104237 | 16 | 89  | 11   |
| 3 | 48317725 | 48317975 | 250 | 48317887 | 22 | 178 | 19.2 |
| 3 | 48443025 | 48443150 | 125 | 48443062 | 14 | 64  | 0    |
| 3 | 48630000 | 48630200 | 200 | 48630162 | 21 | 133 | 0    |
| 3 | 48675850 | 48675975 | 125 | 48675912 | 16 | 74  | 10.1 |
| 3 | 49106425 | 49106450 | 25  | 49106437 | 11 | 11  | 0.9  |
| 3 | 49106875 | 49107075 | 200 | 49106987 | 24 | 146 | 8.2  |
| 3 | 49117375 | 49117425 | 50  | 49117387 | 13 | 24  | 2.7  |
| 3 | 49178200 | 49178250 | 50  | 49178212 | 12 | 24  | 3.7  |
| 3 | 49178975 | 49179000 | 25  | 49178987 | 14 | 14  | 1.8  |
| 3 | 49183725 | 49183875 | 150 | 49183787 | 16 | 88  | 10.1 |
| 3 | 49352875 | 49352950 | 75  | 49352887 | 16 | 42  | 7.3  |
| 3 | 49371100 | 49371175 | 75  | 49371137 | 16 | 44  | 6.4  |
| 3 | 49424550 | 49424625 | 75  | 49424587 | 25 | 69  | 11.9 |
| 3 | 49686075 | 49686450 | 375 | 49686287 | 37 | 402 | 26.5 |
| 3 | 49952600 | 49952625 | 25  | 49952612 | 11 | 11  | 1.8  |
| 3 | 50194850 | 50194975 | 125 | 50194862 | 11 | 53  | 1.8  |
| 3 | 50281175 | 50281225 | 50  | 50281187 | 12 | 24  | 2.7  |
| 3 | 50334000 | 50334050 | 50  | 50334037 | 17 | 32  | 5.5  |
| 3 | 50334450 | 50334575 | 125 | 50334462 | 15 | 65  | 5.5  |
| 3 | 50581800 | 50581925 | 125 | 50581812 | 15 | 65  | 10.1 |
| 3 | 51397325 | 51397675 | 350 | 51397512 | 82 | 724 | 49.4 |
| 3 | 51509075 | 51509200 | 125 | 51509162 | 15 | 62  | 0    |
| 3 | 51715850 | 51715875 | 25  | 51715862 | 11 | 11  | 1.8  |
| 3 | 52056675 | 52056700 | 25  | 52056687 | 11 | 11  | 0    |
| 3 | 52206775 | 52206950 | 175 | 52206887 | 12 | 77  | 12.8 |
| 3 | 53175775 | 53175850 | 75  | 53175787 | 11 | 31  | 1.8  |
| 3 | 53900975 | 53901050 | 75  | 53901012 | 17 | 48  | 8.2  |
| 3 | 55416175 | 55416325 | 150 | 55416262 | 12 | 67  | 0    |
| 3 | 55440300 | 55440375 | 75  | 55440312 | 11 | 33  | 0    |
| 3 | 55490125 | 55490175 | 50  | 55490137 | 11 | 22  | 2.7  |
| 3 | 56566275 | 56566400 | 125 | 56566287 | 24 | 82  | 11   |
| 3 | 56692475 | 56692675 | 200 | 56692587 | 20 | 134 | 8.2  |
| 3 | 56815275 | 56815500 | 225 | 56815437 | 18 | 132 | 19.2 |
| 3 | 57237550 | 57237650 | 100 | 57237562 | 11 | 43  | 5.5  |
| 3 | 57764475 | 57764600 | 125 | 57764537 | 14 | 61  | 1.8  |
| 3 | 58233225 | 58233250 | 25  | 58233237 | 11 | 11  | 0    |
| 3 | 58266800 | 58266950 | 150 | 58266937 | 19 | 90  | 6.4  |
| 3 | 59227350 | 59227475 | 125 | 59227437 | 15 | 61  | 5.5  |
| 3 | 60704800 | 60704825 | 25  | 60704812 | 11 | 11  | 1.8  |
| 3 | 60764150 | 60764175 | 25  | 60764162 | 11 | 11  | 0.9  |
| 3 | 61522325 | 61522350 | 25  | 61522337 | 12 | 12  | 1.8  |
| 3 | 61888025 | 61888175 | 150 | 61888062 | 15 | 83  | 7.3  |
| 3 | 62279900 | 62280050 | 150 | 62280012 | 12 | 66  | 4.6  |
| 3 | 64147750 | 64147775 | 25  | 64147762 | 12 | 12  | 1.8  |
| 3 | 64450375 | 64450400 | 25  | 64450387 | 11 | 11  | 1.8  |
| 3 | 65011500 | 65011525 | 25  | 65011512 | 11 | 11  | 0    |
| 3 | 66540975 | 66541150 | 175 | 66541062 | 14 | 86  | 11.9 |
| 3 | 66562050 | 66562125 | 75  | 66562062 | 12 | 35  | 5.5  |
| 3 | 69145825 | 69145900 | 75  | 69145837 | 11 | 33  | 2.7  |
| 3 | 70131475 | 70131500 | 25  | 70131487 | 11 | 11  | 1.8  |
| 3 | 70459325 | 70459350 | 25  | 70459337 | 11 | 11  | 0    |
| 3 | 72406750 | 72406825 | 75  | 72406762 | 11 | 33  | 0    |
| 3 | 72466925 | 72467075 | 150 | 72466962 | 14 | 74  | 4.6  |
| 3 | 72479975 | 72480225 | 250 | 72480037 | 17 | 140 | 22   |
| 3 | 72793125 | 72793150 | 25  | 72793137 | 12 | 12  | 1.8  |
| 3 | 72980400 | 72980425 | 25  | 72980412 | 15 | 15  | 2.7  |
| 3 | 73226600 | 73226650 | 50  | 73226612 | 12 | 24  | 3.7  |
| 3 | 75781225 | 75781250 | 25  | 75781237 | 11 | 11  | 1.8  |
| 3 | 75802700 | 75802725 | 25  | 75802712 | 12 | 12  | 1.8  |
| 3 | 75868975 | 75869025 | 50  | 75868987 | 12 | 23  | 0    |
| 3 | 75869475 | 75869600 | 125 | 75869512 | 13 | 58  | 0    |
| 3 | 75869900 | 75870100 | 200 | 75869912 | 11 | 87  | 6.4  |
| 3 | 79151325 | 79151500 | 175 | 79151337 | 14 | 97  | 11.9 |

|   |           |           |     |           |    |     |      |
|---|-----------|-----------|-----|-----------|----|-----|------|
| 3 | 80902250  | 80902425  | 175 | 80902337  | 20 | 117 | 15.6 |
| 3 | 83355925  | 83356125  | 200 | 83356037  | 20 | 142 | 15.6 |
| 3 | 83567175  | 83567200  | 25  | 83567187  | 11 | 11  | 1.8  |
| 3 | 84060825  | 84061050  | 225 | 84060912  | 22 | 150 | 7.3  |
| 3 | 89239250  | 89239275  | 25  | 89239262  | 12 | 12  | 1.8  |
| 3 | 99945675  | 99945700  | 25  | 99945687  | 11 | 11  | 0    |
| 3 | 99980675  | 99980800  | 125 | 99980687  | 15 | 65  | 12.8 |
| 3 | 100103450 | 100103500 | 50  | 100103462 | 12 | 24  | 3.7  |
| 3 | 100179175 | 100179300 | 125 | 100179237 | 12 | 56  | 0    |
| 3 | 100312875 | 100312925 | 50  | 100312887 | 11 | 22  | 2.7  |
| 3 | 100360750 | 100360925 | 175 | 100360862 | 17 | 99  | 0    |
| 3 | 101418525 | 101418600 | 75  | 101418562 | 14 | 38  | 1.8  |
| 3 | 101727250 | 101727475 | 225 | 101727362 | 19 | 148 | 17.4 |
| 3 | 102509825 | 102509850 | 25  | 102509837 | 11 | 11  | 0.9  |
| 3 | 102714800 | 102714825 | 25  | 102714812 | 21 | 21  | 3.7  |
| 3 | 102888175 | 102888425 | 250 | 102888262 | 25 | 190 | 21   |
| 3 | 103152250 | 103152375 | 125 | 103152287 | 13 | 57  | 0    |
| 3 | 105568800 | 105568825 | 25  | 105568812 | 11 | 11  | 0.9  |
| 3 | 107199350 | 107199550 | 200 | 107199487 | 15 | 101 | 3.7  |
| 3 | 108270550 | 108270625 | 75  | 108270562 | 11 | 33  | 0.9  |
| 3 | 109002300 | 109002375 | 75  | 109002362 | 13 | 34  | 3.7  |
| 3 | 109791000 | 109791275 | 275 | 109791112 | 19 | 163 | 7.3  |
| 3 | 109819375 | 109819425 | 50  | 109819387 | 11 | 22  | 0    |
| 3 | 113180225 | 113180325 | 100 | 113180262 | 17 | 61  | 0    |
| 3 | 113200400 | 113200425 | 25  | 113200412 | 12 | 12  | 1.8  |
| 3 | 114221250 | 114221500 | 250 | 114221362 | 23 | 181 | 11   |
| 3 | 114349900 | 114349975 | 75  | 114349912 | 11 | 33  | 5.5  |
| 3 | 114477525 | 114477600 | 75  | 114477537 | 11 | 33  | 5.5  |
| 3 | 115354350 | 115354375 | 25  | 115354362 | 11 | 11  | 1.8  |
| 3 | 115606175 | 115606300 | 125 | 115606237 | 13 | 59  | 5.5  |
| 3 | 115787850 | 115787975 | 125 | 115787887 | 14 | 62  | 6.4  |
| 3 | 116894475 | 116894550 | 75  | 116894487 | 11 | 33  | 1.8  |
| 3 | 120531450 | 120531475 | 25  | 120531462 | 11 | 11  | 0.9  |
| 3 | 121241275 | 121241500 | 225 | 121241337 | 22 | 154 | 0    |
| 3 | 121247175 | 121247200 | 25  | 121247187 | 12 | 12  | 0    |
| 3 | 121296750 | 121296850 | 100 | 121296812 | 13 | 47  | 2.7  |
| 3 | 121356425 | 121356525 | 100 | 121356462 | 14 | 50  | 0    |
| 3 | 121622850 | 121623050 | 200 | 121622987 | 20 | 126 | 15.6 |
| 3 | 121697475 | 121697750 | 275 | 121697587 | 23 | 184 | 26.5 |
| 3 | 121760925 | 121760975 | 50  | 121760937 | 12 | 24  | 3.7  |
| 3 | 122951000 | 122951025 | 25  | 122951012 | 14 | 14  | 2.7  |
| 3 | 122951625 | 122951750 | 125 | 122951687 | 16 | 70  | 12.8 |
| 3 | 123584800 | 123584825 | 25  | 123584812 | 13 | 13  | 1.8  |
| 3 | 123774625 | 123774650 | 25  | 123774637 | 11 | 11  | 1.8  |
| 3 | 124138075 | 124138150 | 75  | 124138087 | 11 | 33  | 0    |
| 3 | 124997175 | 124997250 | 75  | 124997187 | 12 | 36  | 0.9  |
| 3 | 125162675 | 125162725 | 50  | 125162687 | 13 | 26  | 1.8  |
| 3 | 125402000 | 125402100 | 100 | 125402037 | 12 | 45  | 0    |
| 3 | 126233900 | 126233925 | 25  | 126233912 | 11 | 11  | 0.9  |
| 3 | 127191975 | 127192175 | 200 | 127192087 | 18 | 124 | 16.5 |
| 3 | 128112800 | 128112950 | 150 | 128112862 | 16 | 86  | 13.7 |
| 3 | 128113250 | 128113350 | 100 | 128113262 | 11 | 42  | 4.6  |
| 3 | 128134200 | 128134300 | 100 | 128134237 | 13 | 46  | 3.7  |
| 3 | 129354775 | 129354900 | 125 | 129354787 | 15 | 67  | 9.1  |
| 3 | 129852400 | 129852550 | 150 | 129852487 | 14 | 71  | 5.5  |
| 3 | 129927550 | 129927650 | 100 | 129927587 | 13 | 48  | 3.7  |
| 3 | 130061100 | 130061400 | 300 | 130061237 | 36 | 291 | 8.2  |
| 3 | 130228450 | 130228650 | 200 | 130228612 | 16 | 103 | 3.7  |
| 3 | 130691925 | 130691950 | 25  | 130691937 | 11 | 11  | 1.8  |
| 3 | 131118975 | 131119250 | 275 | 131119087 | 27 | 224 | 11.9 |
| 3 | 132228350 | 132228375 | 25  | 132228362 | 11 | 11  | 1.8  |
| 3 | 132704375 | 132704625 | 250 | 132704487 | 24 | 194 | 11   |
| 3 | 132996400 | 132996475 | 75  | 132996412 | 12 | 36  | 0    |
| 3 | 133750925 | 133750950 | 25  | 133750937 | 12 | 12  | 0.9  |
| 3 | 135146800 | 135146975 | 175 | 135146812 | 14 | 89  | 12.8 |
| 3 | 135568500 | 135568600 | 100 | 135568562 | 13 | 46  | 2.7  |
| 3 | 135687200 | 135687500 | 300 | 135687312 | 22 | 208 | 31.1 |
| 3 | 136048700 | 136048750 | 50  | 136048712 | 12 | 23  | 3.7  |
| 3 | 136395350 | 136395375 | 25  | 136395362 | 12 | 12  | 0    |
| 3 | 137398275 | 137398325 | 50  | 137398287 | 16 | 32  | 4.6  |
| 3 | 139795575 | 139796025 | 450 | 139795687 | 19 | 265 | 32.9 |
| 3 | 139875200 | 139875225 | 25  | 139875212 | 12 | 12  | 0.9  |
| 3 | 139969775 | 139969950 | 175 | 139969887 | 17 | 102 | 1.8  |
| 3 | 140036675 | 140036700 | 25  | 140036687 | 12 | 12  | 1.8  |
| 3 | 142513225 | 142513350 | 125 | 142513287 | 21 | 87  | 14.6 |

|   |           |           |     |           |    |     |      |
|---|-----------|-----------|-----|-----------|----|-----|------|
| 3 | 142664600 | 142664925 | 325 | 142664737 | 21 | 204 | 0    |
| 3 | 143077675 | 143077850 | 175 | 143077837 | 12 | 67  | 1.8  |
| 3 | 143141825 | 143141900 | 75  | 143141837 | 11 | 33  | 1.8  |
| 3 | 143780450 | 143780625 | 175 | 143780462 | 29 | 147 | 16.5 |
| 3 | 144202850 | 144203100 | 250 | 144202987 | 29 | 220 | 20.1 |
| 3 | 146534500 | 146534700 | 200 | 146534612 | 15 | 109 | 0    |
| 3 | 146558125 | 146558150 | 25  | 146558137 | 11 | 11  | 0    |
| 3 | 150287225 | 150287375 | 150 | 150287237 | 29 | 121 | 15.6 |
| 3 | 150540475 | 150540675 | 200 | 150540587 | 19 | 124 | 11   |
| 3 | 151307350 | 151307550 | 200 | 151307462 | 20 | 129 | 6.4  |
| 3 | 151585350 | 151585450 | 100 | 151585362 | 12 | 48  | 2.7  |
| 3 | 153469425 | 153469575 | 150 | 153469512 | 13 | 73  | 9.1  |
| 3 | 154557500 | 154557575 | 75  | 154557562 | 14 | 37  | 6.4  |
| 3 | 156945775 | 156945925 | 150 | 156945787 | 11 | 66  | 10.1 |
| 3 | 157055050 | 157055100 | 50  | 157055062 | 48 | 85  | 15.6 |
| 3 | 157070625 | 157070750 | 125 | 157070712 | 16 | 69  | 10.1 |
| 3 | 158017250 | 158017425 | 175 | 158017287 | 17 | 107 | 1.8  |
| 3 | 158093225 | 158093325 | 100 | 158093237 | 12 | 46  | 3.7  |
| 3 | 158638550 | 158638575 | 25  | 158638562 | 11 | 11  | 0.9  |
| 3 | 160966325 | 160966575 | 250 | 160966337 | 11 | 83  | 2.7  |
| 3 | 161359800 | 161359900 | 100 | 161359887 | 15 | 53  | 10.1 |
| 3 | 161766000 | 161766350 | 350 | 161766187 | 24 | 268 | 44.8 |
| 3 | 161955625 | 161955700 | 75  | 161955687 | 13 | 35  | 4.6  |
| 3 | 162421775 | 162421800 | 25  | 162421787 | 14 | 14  | 2.7  |
| 3 | 162644800 | 162644925 | 125 | 162644837 | 13 | 64  | 2.7  |
| 3 | 163055200 | 163055275 | 75  | 163055212 | 18 | 46  | 9.1  |
| 3 | 163090675 | 163090700 | 25  | 163090687 | 11 | 11  | 1.8  |
| 3 | 163091400 | 163091450 | 50  | 163091437 | 12 | 23  | 0.9  |
| 3 | 163200350 | 163200525 | 175 | 163200387 | 15 | 94  | 0    |
| 3 | 163568725 | 163568750 | 25  | 163568737 | 11 | 11  | 0    |
| 3 | 169203525 | 169203600 | 75  | 169203537 | 11 | 33  | 2.7  |
| 3 | 170965600 | 170965800 | 200 | 170965662 | 24 | 132 | 5.5  |
| 3 | 171167025 | 171167100 | 75  | 171167062 | 14 | 39  | 6.4  |
| 3 | 171916900 | 171916925 | 25  | 171916912 | 11 | 11  | 0.9  |
| 3 | 172070525 | 172070925 | 400 | 172070687 | 19 | 250 | 28.4 |
| 3 | 172109150 | 172109375 | 225 | 172109237 | 29 | 203 | 14.6 |
| 3 | 172202875 | 172202925 | 50  | 172202887 | 11 | 22  | 3.7  |
| 3 | 173335900 | 173335950 | 50  | 173335912 | 11 | 22  | 2.7  |
| 3 | 174595800 | 174596000 | 200 | 174595912 | 15 | 107 | 11   |
| 3 | 178558850 | 178558900 | 50  | 178558862 | 12 | 24  | 1.8  |
| 3 | 178798125 | 178798150 | 25  | 178798137 | 12 | 12  | 0.9  |
| 3 | 180745525 | 180745675 | 150 | 180745637 | 16 | 81  | 0    |
| 3 | 181802225 | 181802800 | 575 | 181802537 | 36 | 501 | 70.5 |
| 3 | 182657800 | 182657950 | 150 | 182657812 | 14 | 71  | 11.9 |
| 3 | 182952700 | 182952725 | 25  | 182952712 | 11 | 11  | 1.8  |
| 3 | 183993550 | 183993625 | 75  | 183993562 | 12 | 36  | 5.5  |
| 3 | 184853825 | 184854000 | 175 | 184853937 | 17 | 102 | 0    |
| 3 | 185334825 | 185334875 | 50  | 185334837 | 12 | 24  | 1.8  |
| 3 | 185377250 | 185377325 | 75  | 185377262 | 11 | 31  | 5.5  |
| 3 | 185546275 | 185546300 | 25  | 185546287 | 12 | 12  | 0    |
| 3 | 185793400 | 185793425 | 25  | 185793412 | 11 | 11  | 1.8  |
| 3 | 185825800 | 185825975 | 175 | 185825837 | 15 | 94  | 0    |
| 3 | 185837175 | 185837575 | 400 | 185837362 | 16 | 210 | 30.2 |
| 3 | 185857025 | 185857100 | 75  | 185857037 | 12 | 34  | 3.7  |
| 3 | 186699600 | 186699650 | 50  | 186699637 | 14 | 26  | 3.7  |
| 3 | 186889650 | 186889850 | 200 | 186889737 | 24 | 167 | 9.1  |
| 3 | 187031500 | 187031700 | 200 | 187031512 | 13 | 92  | 8.2  |
| 3 | 187138650 | 187138750 | 100 | 187138662 | 14 | 51  | 7.3  |
| 3 | 187771000 | 187771025 | 25  | 187771012 | 11 | 11  | 1.8  |
| 3 | 187817725 | 187817775 | 50  | 187817737 | 12 | 24  | 0.9  |
| 3 | 187983800 | 187983900 | 100 | 187983887 | 16 | 55  | 9.1  |
| 3 | 188130975 | 188131000 | 25  | 188130987 | 14 | 14  | 2.7  |
| 3 | 188200500 | 188200600 | 100 | 188200512 | 11 | 42  | 6.4  |
| 3 | 188940200 | 188940375 | 175 | 188940312 | 19 | 108 | 8.2  |
| 3 | 188946000 | 188946100 | 100 | 188946062 | 24 | 86  | 14.6 |
| 3 | 189353875 | 189353900 | 25  | 189353887 | 11 | 11  | 1.8  |
| 3 | 190149125 | 190149150 | 25  | 190149137 | 11 | 11  | 0.9  |
| 3 | 190332975 | 190333125 | 150 | 190333062 | 14 | 79  | 13.7 |
| 3 | 191128825 | 191129025 | 200 | 191128887 | 15 | 109 | 7.3  |
| 3 | 191162200 | 191162225 | 25  | 191162212 | 11 | 11  | 0    |
| 3 | 191734025 | 191734050 | 25  | 191734037 | 11 | 11  | 0.9  |
| 3 | 194988750 | 194988775 | 25  | 194988762 | 12 | 12  | 1.8  |
| 3 | 195160925 | 195161025 | 100 | 195161012 | 15 | 51  | 7.3  |
| 3 | 195161250 | 195161300 | 50  | 195161262 | 11 | 22  | 3.7  |
| 3 | 195204100 | 195204225 | 125 | 195204137 | 13 | 55  | 3.7  |

|   |           |           |     |           |    |     |      |
|---|-----------|-----------|-----|-----------|----|-----|------|
| 3 | 195270975 | 195271100 | 125 | 195271012 | 13 | 60  | 9.1  |
| 3 | 195472050 | 195472075 | 25  | 195472062 | 12 | 12  | 1.8  |
| 3 | 195785950 | 195786050 | 100 | 195785962 | 12 | 44  | 2.7  |
| 3 | 195887750 | 195887925 | 175 | 195887862 | 15 | 94  | 9.1  |
| 3 | 195932475 | 195932575 | 100 | 195932487 | 12 | 44  | 4.6  |
| 3 | 195971325 | 195971500 | 175 | 195971462 | 14 | 87  | 7.3  |
| 3 | 197293400 | 197293450 | 50  | 197293412 | 15 | 29  | 4.6  |
| 3 | 197731025 | 197731350 | 325 | 197731187 | 22 | 203 | 0    |
| 3 | 197968175 | 197968225 | 50  | 197968187 | 14 | 27  | 0    |
| 3 | 198690275 | 198690325 | 50  | 198690287 | 11 | 22  | 3.7  |
| 3 | 199161300 | 199161400 | 100 | 199161387 | 13 | 46  | 5.5  |
| 2 | 667425    | 667450    | 25  | 667437    | 11 | 11  | 1.8  |
| 2 | 667700    | 667725    | 25  | 667712    | 14 | 14  | 2.7  |
| 2 | 1597075   | 1597150   | 75  | 1597087   | 12 | 36  | 4.6  |
| 2 | 1700075   | 1700100   | 25  | 1700087   | 11 | 11  | 1.8  |
| 2 | 1714900   | 1715100   | 200 | 1714987   | 18 | 122 | 4.6  |
| 2 | 1725600   | 1725775   | 175 | 1725637   | 15 | 93  | 10.1 |
| 2 | 1737300   | 1737425   | 125 | 1737362   | 16 | 68  | 9.1  |
| 2 | 1738375   | 1738425   | 50  | 1738387   | 11 | 22  | 2.7  |
| 2 | 1800175   | 1800250   | 75  | 1800187   | 11 | 33  | 2.7  |
| 2 | 3151225   | 3151325   | 100 | 3151262   | 14 | 53  | 4.6  |
| 2 | 3362275   | 3362375   | 100 | 3362312   | 17 | 61  | 9.1  |
| 2 | 5423550   | 5423675   | 125 | 5423587   | 13 | 57  | 6.4  |
| 2 | 6902950   | 6903300   | 350 | 6903112   | 54 | 484 | 0    |
| 2 | 7382475   | 7382550   | 75  | 7382487   | 12 | 36  | 0.9  |
| 2 | 7488625   | 7488825   | 200 | 7488737   | 19 | 126 | 11   |
| 2 | 7588650   | 7588775   | 125 | 7588662   | 11 | 51  | 8.2  |
| 2 | 7677475   | 7677500   | 25  | 7677487   | 11 | 11  | 0    |
| 2 | 8735475   | 8735650   | 175 | 8735512   | 14 | 93  | 15.6 |
| 2 | 9236850   | 9237150   | 300 | 9236887   | 12 | 110 | 11   |
| 2 | 10115125  | 10115150  | 25  | 10115137  | 11 | 11  | 1.8  |
| 2 | 10341100  | 10341125  | 25  | 10341112  | 11 | 11  | 0.9  |
| 2 | 10343025  | 10343350  | 325 | 10343112  | 20 | 217 | 11.9 |
| 2 | 10362200  | 10362225  | 25  | 10362212  | 11 | 11  | 1.8  |
| 2 | 10506725  | 10506825  | 100 | 10506737  | 11 | 44  | 8.2  |
| 2 | 11401425  | 11401450  | 25  | 11401437  | 11 | 11  | 1.8  |
| 2 | 11801600  | 11801775  | 175 | 11801612  | 12 | 66  | 11   |
| 2 | 11887100  | 11887125  | 25  | 11887112  | 13 | 13  | 1.8  |
| 2 | 11887875  | 11888000  | 125 | 11887887  | 14 | 61  | 8.2  |
| 2 | 11921625  | 11921925  | 300 | 11921762  | 15 | 143 | 22   |
| 2 | 12071800  | 12071850  | 50  | 12071812  | 11 | 22  | 1.8  |
| 2 | 12226825  | 12226850  | 25  | 12226837  | 11 | 11  | 1.8  |
| 2 | 12281475  | 12281550  | 75  | 12281512  | 16 | 39  | 0    |
| 2 | 12376050  | 12376075  | 25  | 12376062  | 11 | 11  | 0.9  |
| 2 | 12795925  | 12796025  | 100 | 12795937  | 14 | 56  | 3.7  |
| 2 | 12798225  | 12798350  | 125 | 12798287  | 15 | 70  | 7.3  |
| 2 | 15618675  | 15618700  | 25  | 15618687  | 12 | 12  | 1.8  |
| 2 | 15649250  | 15649400  | 150 | 15649262  | 17 | 82  | 3.7  |
| 2 | 15876100  | 15876300  | 200 | 15876137  | 27 | 165 | 18.3 |
| 2 | 15970025  | 15970150  | 125 | 15970037  | 16 | 67  | 4.6  |
| 2 | 16127875  | 16128075  | 200 | 16127887  | 11 | 84  | 11.9 |
| 2 | 17515625  | 17515700  | 75  | 17515687  | 14 | 39  | 6.4  |
| 2 | 17563250  | 17563325  | 75  | 17563262  | 16 | 41  | 5.5  |
| 2 | 18432650  | 18432800  | 150 | 18432712  | 13 | 75  | 2.7  |
| 2 | 19142400  | 19142450  | 50  | 19142437  | 13 | 24  | 2.7  |
| 2 | 19965000  | 19965100  | 100 | 19965062  | 24 | 90  | 15.6 |
| 2 | 20641250  | 20641325  | 75  | 20641262  | 12 | 34  | 1.8  |
| 2 | 20663175  | 20663325  | 150 | 20663187  | 17 | 98  | 16.5 |
| 2 | 22932200  | 22932325  | 125 | 22932212  | 15 | 70  | 11.9 |
| 2 | 23578550  | 23578675  | 125 | 23578562  | 11 | 55  | 4.6  |
| 2 | 24152425  | 24152875  | 450 | 24152762  | 25 | 297 | 54   |
| 2 | 24869700  | 24869825  | 125 | 24869712  | 20 | 90  | 11.9 |
| 2 | 25139075  | 25139100  | 25  | 25139087  | 11 | 11  | 1.8  |
| 2 | 25274550  | 25274575  | 25  | 25274562  | 12 | 12  | 0    |
| 2 | 25402850  | 25403025  | 175 | 25402887  | 14 | 89  | 5.5  |
| 2 | 25768650  | 25768700  | 50  | 25768662  | 11 | 22  | 3.7  |
| 2 | 25955125  | 25955225  | 100 | 25955162  | 19 | 69  | 2.7  |
| 2 | 26048450  | 26048525  | 75  | 26048487  | 14 | 40  | 4.6  |
| 2 | 26700650  | 26700675  | 25  | 26700662  | 11 | 11  | 1.8  |
| 2 | 26800625  | 26800700  | 75  | 26800662  | 12 | 34  | 5.5  |
| 2 | 26861975  | 26862175  | 200 | 26862062  | 24 | 164 | 14.6 |
| 2 | 27127000  | 27127200  | 200 | 27127137  | 23 | 155 | 21   |
| 2 | 27659425  | 27659500  | 75  | 27659437  | 12 | 36  | 1.8  |
| 2 | 27814425  | 27814450  | 25  | 27814437  | 11 | 11  | 0.9  |
| 2 | 27848150  | 27848175  | 25  | 27848162  | 12 | 12  | 1.8  |

|   |          |          |     |          |    |     |      |
|---|----------|----------|-----|----------|----|-----|------|
| 2 | 27966650 | 27966750 | 100 | 27966712 | 15 | 56  | 5.5  |
| 2 | 28759625 | 28759650 | 25  | 28759637 | 12 | 12  | 0.9  |
| 2 | 28946700 | 28946725 | 25  | 28946712 | 11 | 11  | 1.8  |
| 2 | 28970725 | 28970825 | 100 | 28970812 | 18 | 60  | 10.1 |
| 2 | 30101925 | 30101975 | 50  | 30101937 | 12 | 24  | 3.7  |
| 2 | 30102250 | 30102425 | 175 | 30102387 | 15 | 91  | 11   |
| 2 | 31310400 | 31310525 | 125 | 31310412 | 11 | 55  | 5.5  |
| 2 | 31772525 | 31772750 | 225 | 31772612 | 19 | 145 | 4.6  |
| 2 | 32142050 | 32142075 | 25  | 32142062 | 14 | 14  | 2.7  |
| 2 | 32244375 | 32244550 | 175 | 32244387 | 17 | 79  | 10.1 |
| 2 | 33345350 | 33345400 | 50  | 33345362 | 12 | 24  | 3.7  |
| 2 | 35298975 | 35299250 | 275 | 35299162 | 20 | 178 | 0    |
| 2 | 36645325 | 36645400 | 75  | 36645337 | 14 | 40  | 0    |
| 2 | 37277025 | 37277150 | 125 | 37277037 | 17 | 80  | 13.7 |
| 2 | 37312225 | 37312275 | 50  | 37312237 | 15 | 29  | 4.6  |
| 2 | 37738175 | 37738200 | 25  | 37738187 | 11 | 11  | 0    |
| 2 | 38006000 | 38006425 | 425 | 38006112 | 21 | 275 | 51.2 |
| 2 | 38284200 | 38284250 | 50  | 38284212 | 12 | 24  | 0.9  |
| 2 | 38621475 | 38621550 | 75  | 38621487 | 12 | 33  | 4.6  |
| 2 | 38746750 | 38746775 | 25  | 38746762 | 11 | 11  | 1.8  |
| 2 | 39517850 | 39517975 | 125 | 39517862 | 12 | 60  | 0    |
| 2 | 39594525 | 39594550 | 25  | 39594537 | 11 | 11  | 0    |
| 2 | 40826875 | 40826900 | 25  | 40826887 | 11 | 11  | 0    |
| 2 | 42047250 | 42047325 | 75  | 42047287 | 12 | 35  | 5.5  |
| 2 | 42441900 | 42442025 | 125 | 42442012 | 15 | 62  | 9.1  |
| 2 | 43081250 | 43081425 | 175 | 43081262 | 16 | 100 | 15.6 |
| 2 | 43102925 | 43103050 | 125 | 43102987 | 23 | 100 | 15.6 |
| 2 | 43154125 | 43154150 | 25  | 43154137 | 12 | 12  | 1.8  |
| 2 | 43216775 | 43216800 | 25  | 43216787 | 11 | 11  | 0.9  |
| 2 | 43249775 | 43249800 | 25  | 43249787 | 12 | 12  | 0    |
| 2 | 43255800 | 43255825 | 25  | 43255812 | 11 | 11  | 0.9  |
| 2 | 43300600 | 43300975 | 375 | 43300862 | 22 | 215 | 41.2 |
| 2 | 43302675 | 43302700 | 25  | 43302687 | 15 | 15  | 2.7  |
| 2 | 43305875 | 43306075 | 200 | 43305937 | 17 | 114 | 7.3  |
| 2 | 43374375 | 43374525 | 150 | 43374512 | 13 | 68  | 2.7  |
| 2 | 43405875 | 43406075 | 200 | 43405912 | 14 | 96  | 0.9  |
| 2 | 43421725 | 43421850 | 125 | 43421737 | 11 | 47  | 0    |
| 2 | 43676600 | 43676650 | 50  | 43676612 | 17 | 33  | 5.5  |
| 2 | 43854625 | 43854750 | 125 | 43854687 | 12 | 57  | 9.1  |
| 2 | 44350700 | 44350725 | 25  | 44350712 | 12 | 12  | 1.8  |
| 2 | 44442275 | 44442325 | 50  | 44442287 | 12 | 23  | 3.7  |
| 2 | 45691875 | 45691925 | 50  | 45691887 | 15 | 30  | 5.5  |
| 2 | 45731000 | 45731075 | 75  | 45731062 | 14 | 38  | 4.6  |
| 2 | 45733375 | 45733550 | 175 | 45733437 | 15 | 91  | 6.4  |
| 2 | 46024825 | 46025000 | 175 | 46024962 | 15 | 89  | 0.9  |
| 2 | 46045175 | 46045200 | 25  | 46045187 | 11 | 11  | 1.8  |
| 2 | 46416625 | 46416725 | 100 | 46416637 | 14 | 51  | 7.3  |
| 2 | 46541050 | 46541250 | 200 | 46541062 | 14 | 100 | 10.1 |
| 2 | 46954250 | 46954400 | 150 | 46954337 | 15 | 79  | 9.1  |
| 2 | 47114775 | 47115000 | 225 | 47114887 | 30 | 230 | 38.4 |
| 2 | 47198225 | 47198275 | 50  | 47198237 | 11 | 22  | 3.7  |
| 2 | 47279625 | 47279725 | 100 | 47279687 | 13 | 48  | 3.7  |
| 2 | 48128050 | 48128075 | 25  | 48128062 | 11 | 11  | 1.8  |
| 2 | 48188350 | 48188425 | 75  | 48188362 | 12 | 36  | 1.8  |
| 2 | 48191975 | 48192275 | 300 | 48192012 | 22 | 172 | 24.7 |
| 2 | 53848550 | 53848675 | 125 | 53848587 | 17 | 78  | 11.9 |
| 2 | 54467775 | 54467850 | 75  | 54467787 | 12 | 34  | 4.6  |
| 2 | 54476925 | 54477075 | 150 | 54477037 | 16 | 88  | 1.8  |
| 2 | 55131875 | 55132050 | 175 | 55131912 | 14 | 91  | 14.6 |
| 2 | 55214625 | 55214650 | 25  | 55214637 | 12 | 12  | 0    |
| 2 | 55349950 | 55349975 | 25  | 55349962 | 11 | 11  | 1.8  |
| 2 | 55600275 | 55600425 | 150 | 55600287 | 19 | 100 | 11.9 |
| 2 | 55774325 | 55774375 | 50  | 55774337 | 12 | 24  | 2.7  |
| 2 | 55943475 | 55943625 | 150 | 55943487 | 13 | 72  | 10.1 |
| 2 | 58528800 | 58528950 | 150 | 58528887 | 16 | 86  | 11.9 |
| 2 | 61097900 | 61098075 | 175 | 61097987 | 17 | 107 | 18.3 |
| 2 | 61225425 | 61225450 | 25  | 61225437 | 15 | 15  | 1.8  |
| 2 | 62406075 | 62406225 | 150 | 62406187 | 17 | 77  | 5.5  |
| 2 | 62658675 | 62659075 | 400 | 62658737 | 16 | 214 | 20.1 |
| 2 | 62667775 | 62667850 | 75  | 62667812 | 13 | 35  | 2.7  |
| 2 | 63921300 | 63921350 | 50  | 63921337 | 14 | 27  | 3.7  |
| 2 | 63955400 | 63955750 | 350 | 63955587 | 17 | 192 | 0    |
| 2 | 64392975 | 64393000 | 25  | 64392987 | 12 | 12  | 0.9  |
| 2 | 64440600 | 64440700 | 100 | 64440612 | 14 | 53  | 9.1  |
| 2 | 64911800 | 64911900 | 100 | 64911887 | 20 | 63  | 10.1 |

|   |           |           |     |           |    |     |      |
|---|-----------|-----------|-----|-----------|----|-----|------|
| 2 | 64912125  | 64912200  | 75  | 64912137  | 13 | 37  | 4.6  |
| 2 | 65513350  | 65513500  | 150 | 65513387  | 16 | 81  | 5.5  |
| 2 | 66514075  | 66514175  | 100 | 66514112  | 14 | 51  | 9.1  |
| 2 | 66969425  | 66969450  | 25  | 66969437  | 11 | 11  | 1.8  |
| 2 | 66969750  | 66969800  | 50  | 66969762  | 11 | 22  | 0    |
| 2 | 67237650  | 67237675  | 25  | 67237662  | 11 | 11  | 0    |
| 2 | 68078525  | 68078550  | 25  | 68078537  | 11 | 11  | 0    |
| 2 | 68143625  | 68143825  | 200 | 68143737  | 12 | 87  | 11.9 |
| 2 | 68400400  | 68400500  | 100 | 68400412  | 12 | 47  | 4.6  |
| 2 | 68909900  | 68910075  | 175 | 68910012  | 17 | 103 | 11   |
| 2 | 69035575  | 69035600  | 25  | 69035587  | 11 | 11  | 1.8  |
| 2 | 69233825  | 69233850  | 25  | 69233837  | 11 | 11  | 0    |
| 2 | 69390500  | 69390525  | 25  | 69390512  | 12 | 12  | 0.9  |
| 2 | 70167925  | 70168050  | 125 | 70167937  | 12 | 58  | 8.2  |
| 2 | 70189675  | 70189725  | 50  | 70189687  | 19 | 36  | 5.5  |
| 2 | 70687925  | 70688075  | 150 | 70688037  | 16 | 84  | 11.9 |
| 2 | 70968100  | 70968125  | 25  | 70968112  | 12 | 12  | 0    |
| 2 | 71211050  | 71211100  | 50  | 71211087  | 20 | 35  | 5.5  |
| 2 | 71629375  | 71629450  | 75  | 71629437  | 14 | 38  | 5.5  |
| 2 | 71659675  | 71659700  | 25  | 71659687  | 16 | 16  | 1.8  |
| 2 | 74007550  | 74007575  | 25  | 74007562  | 20 | 20  | 3.7  |
| 2 | 74201000  | 74201275  | 275 | 74201037  | 35 | 276 | 49.4 |
| 2 | 74472575  | 74472700  | 125 | 74472637  | 18 | 80  | 8.2  |
| 2 | 74553350  | 74553450  | 100 | 74553362  | 19 | 60  | 9.1  |
| 2 | 74563725  | 74563775  | 50  | 74563737  | 11 | 22  | 3.7  |
| 2 | 74579900  | 74580025  | 125 | 74579912  | 11 | 51  | 0    |
| 2 | 74610575  | 74610600  | 25  | 74610587  | 11 | 11  | 1.8  |
| 2 | 74974225  | 74974275  | 50  | 74974237  | 11 | 22  | 3.7  |
| 2 | 74998475  | 74998700  | 225 | 74998512  | 17 | 133 | 21   |
| 2 | 75726975  | 75727350  | 375 | 75727262  | 14 | 151 | 22.9 |
| 2 | 78622575  | 78622600  | 25  | 78622587  | 11 | 11  | 1.8  |
| 2 | 81562200  | 81562225  | 25  | 81562212  | 28 | 28  | 5.5  |
| 2 | 81562525  | 81562575  | 50  | 81562537  | 12 | 23  | 3.7  |
| 2 | 85642200  | 85642400  | 200 | 85642287  | 14 | 99  | 10.1 |
| 2 | 85692700  | 85692900  | 200 | 85692762  | 18 | 135 | 15.6 |
| 2 | 85809675  | 85809700  | 25  | 85809687  | 13 | 13  | 1.8  |
| 2 | 85853275  | 85853300  | 25  | 85853287  | 12 | 12  | 1.8  |
| 2 | 86077600  | 86077675  | 75  | 86077612  | 13 | 39  | 5.5  |
| 2 | 86101775  | 86101875  | 100 | 86101812  | 16 | 54  | 10.1 |
| 2 | 86187000  | 86187050  | 50  | 86187037  | 12 | 23  | 3.7  |
| 2 | 86276375  | 86276425  | 50  | 86276387  | 11 | 22  | 2.7  |
| 2 | 86521225  | 86521775  | 550 | 86521487  | 40 | 659 | 85.1 |
| 2 | 86644275  | 86644300  | 25  | 86644287  | 12 | 12  | 1.8  |
| 2 | 88136550  | 88136575  | 25  | 88136562  | 12 | 12  | 0.9  |
| 2 | 88163625  | 88163650  | 25  | 88163637  | 11 | 11  | 1.8  |
| 2 | 88764375  | 88764400  | 25  | 88764387  | 11 | 11  | 0    |
| 2 | 91140325  | 91140500  | 175 | 91140337  | 12 | 78  | 11   |
| 2 | 91191500  | 91191550  | 50  | 91191537  | 13 | 24  | 0.9  |
| 2 | 91660375  | 91660500  | 125 | 91660437  | 18 | 76  | 13.7 |
| 2 | 91685050  | 91685175  | 125 | 91685062  | 11 | 55  | 9.1  |
| 2 | 91687775  | 91687925  | 150 | 91687787  | 12 | 72  | 11   |
| 2 | 95178950  | 95178975  | 25  | 95178962  | 11 | 11  | 0.9  |
| 2 | 95194875  | 95195150  | 275 | 95194987  | 17 | 149 | 24.7 |
| 2 | 95236700  | 95236975  | 275 | 95236962  | 19 | 123 | 22   |
| 2 | 95244650  | 95244800  | 150 | 95244662  | 14 | 76  | 5.5  |
| 2 | 95604125  | 95604200  | 75  | 95604162  | 12 | 35  | 0    |
| 2 | 96178000  | 96178025  | 25  | 96178012  | 14 | 14  | 2.7  |
| 2 | 96271875  | 96271900  | 25  | 96271887  | 11 | 11  | 1.8  |
| 2 | 96437175  | 96437325  | 150 | 96437187  | 17 | 91  | 11.9 |
| 2 | 96563325  | 96563375  | 50  | 96563337  | 12 | 24  | 1.8  |
| 2 | 99138000  | 99138025  | 25  | 99138012  | 11 | 11  | 1.8  |
| 2 | 100303925 | 100303950 | 25  | 100303937 | 11 | 11  | 0.9  |
| 2 | 100545825 | 100545925 | 100 | 100545887 | 13 | 47  | 4.6  |
| 2 | 100740575 | 100740775 | 200 | 100740712 | 19 | 120 | 13.7 |
| 2 | 100750375 | 100750400 | 25  | 100750387 | 13 | 13  | 1.8  |
| 2 | 100763750 | 100763800 | 50  | 100763762 | 12 | 24  | 1.8  |
| 2 | 100885850 | 100886150 | 300 | 100886012 | 24 | 212 | 37.5 |
| 2 | 100985050 | 100985175 | 125 | 100985137 | 15 | 62  | 5.5  |
| 2 | 101096850 | 101096900 | 50  | 101096887 | 14 | 26  | 0    |
| 2 | 102048650 | 102048800 | 150 | 102048662 | 12 | 68  | 1.8  |
| 2 | 102210750 | 102211025 | 275 | 102210837 | 23 | 204 | 29.3 |
| 2 | 104837050 | 104837100 | 50  | 104837062 | 11 | 22  | 1.8  |
| 2 | 105320225 | 105320275 | 50  | 105320237 | 11 | 22  | 2.7  |
| 2 | 105389350 | 105389375 | 25  | 105389362 | 11 | 11  | 1.8  |
| 2 | 105658775 | 105658800 | 25  | 105658787 | 13 | 13  | 1.8  |



|   |           |           |     |           |    |     |      |
|---|-----------|-----------|-----|-----------|----|-----|------|
| 2 | 105902300 | 105902350 | 50  | 105902312 | 12 | 24  | 0.9  |
| 2 | 109091875 | 109091900 | 25  | 109091887 | 11 | 11  | 0.9  |
| 2 | 109315600 | 109315625 | 25  | 109315612 | 12 | 12  | 0.9  |
| 2 | 110220625 | 110220650 | 25  | 110220637 | 11 | 11  | 0    |
| 2 | 111152425 | 111152450 | 25  | 111152437 | 11 | 11  | 1.8  |
| 2 | 113119650 | 113119725 | 75  | 113119662 | 12 | 36  | 0    |
| 2 | 113692275 | 113692300 | 25  | 113692287 | 11 | 11  | 1.8  |
| 2 | 114452050 | 114452075 | 25  | 114452062 | 11 | 11  | 1.8  |
| 2 | 119905575 | 119905675 | 100 | 119905612 | 14 | 49  | 4.6  |
| 2 | 121027350 | 121027425 | 75  | 121027362 | 11 | 33  | 5.5  |
| 2 | 122005100 | 122005125 | 25  | 122005112 | 11 | 11  | 0.9  |
| 2 | 122124125 | 122124225 | 100 | 122124187 | 16 | 55  | 2.7  |
| 2 | 122156950 | 122156975 | 25  | 122156962 | 12 | 12  | 0.9  |
| 2 | 122342875 | 122342900 | 25  | 122342887 | 12 | 12  | 0    |
| 2 | 122358800 | 122358950 | 150 | 122358837 | 17 | 78  | 10.1 |
| 2 | 122418350 | 122418550 | 200 | 122418412 | 13 | 99  | 0    |
| 2 | 122446900 | 122446925 | 25  | 122446912 | 11 | 11  | 0.9  |
| 2 | 122574625 | 122574750 | 125 | 122574712 | 14 | 65  | 6.4  |
| 2 | 123996025 | 123996125 | 100 | 123996037 | 11 | 44  | 0    |
| 2 | 125459225 | 125459625 | 400 | 125459387 | 20 | 213 | 21   |
| 2 | 127618300 | 127618400 | 100 | 127618312 | 12 | 45  | 7.3  |
| 2 | 127700850 | 127701000 | 150 | 127700862 | 15 | 82  | 11.9 |
| 2 | 128511175 | 128511400 | 225 | 128511212 | 20 | 150 | 9.1  |
| 2 | 128734525 | 128734600 | 75  | 128734537 | 12 | 33  | 0.9  |
| 2 | 132821300 | 132821325 | 25  | 132821312 | 11 | 11  | 1.8  |
| 2 | 132890600 | 132890800 | 200 | 132890687 | 19 | 125 | 3.7  |
| 2 | 133145400 | 133145525 | 125 | 133145462 | 13 | 60  | 0    |
| 2 | 134311975 | 134312075 | 100 | 134312062 | 14 | 49  | 8.2  |
| 2 | 134544175 | 134544375 | 200 | 134544312 | 17 | 110 | 0    |
| 2 | 135392250 | 135392300 | 50  | 135392262 | 12 | 24  | 3.7  |
| 2 | 135392925 | 135392950 | 25  | 135392937 | 12 | 12  | 0.9  |
| 2 | 136459800 | 136459850 | 50  | 136459812 | 11 | 22  | 1.8  |
| 2 | 138443625 | 138443675 | 50  | 138443637 | 11 | 22  | 1.8  |
| 2 | 139884825 | 139884900 | 75  | 139884837 | 12 | 36  | 5.5  |
| 2 | 144984350 | 144984475 | 125 | 144984387 | 13 | 62  | 2.7  |
| 2 | 146795175 | 146795300 | 125 | 146795187 | 13 | 61  | 6.4  |
| 2 | 150799675 | 150799875 | 200 | 150799737 | 20 | 121 | 13.7 |
| 2 | 150861500 | 150861550 | 50  | 150861512 | 11 | 22  | 0    |
| 2 | 151122950 | 151123050 | 100 | 151122962 | 11 | 44  | 1.8  |
| 2 | 151266875 | 151266975 | 100 | 151266887 | 12 | 48  | 0    |
| 2 | 151899150 | 151899175 | 25  | 151899162 | 11 | 11  | 0.9  |
| 2 | 153090275 | 153090300 | 25  | 153090287 | 14 | 14  | 2.7  |
| 2 | 155969425 | 155969700 | 275 | 155969612 | 23 | 197 | 0    |
| 2 | 156899350 | 156899375 | 25  | 156899362 | 15 | 15  | 2.7  |
| 2 | 157822700 | 157822875 | 175 | 157822762 | 13 | 83  | 6.4  |
| 2 | 159281000 | 159281050 | 50  | 159281012 | 12 | 23  | 0.9  |
| 2 | 159501825 | 159502025 | 200 | 159501862 | 15 | 98  | 12.8 |
| 2 | 159563400 | 159563475 | 75  | 159563437 | 16 | 42  | 6.4  |
| 2 | 159564650 | 159564675 | 25  | 159564662 | 11 | 11  | 0.9  |
| 2 | 159661225 | 159661425 | 200 | 159661262 | 16 | 112 | 18.3 |
| 2 | 160652725 | 160652950 | 225 | 160652837 | 28 | 203 | 19.2 |
| 2 | 160770375 | 160770400 | 25  | 160770387 | 15 | 15  | 2.7  |
| 2 | 161216350 | 161216425 | 75  | 161216362 | 12 | 36  | 2.7  |
| 2 | 166940225 | 166940275 | 50  | 166940237 | 11 | 22  | 0.9  |
| 2 | 167968700 | 167968850 | 150 | 167968787 | 14 | 71  | 10.1 |
| 2 | 168216650 | 168216700 | 50  | 168216662 | 12 | 24  | 1.8  |
| 2 | 169021250 | 169021375 | 125 | 169021262 | 13 | 65  | 5.5  |
| 2 | 170149600 | 170149650 | 50  | 170149637 | 13 | 24  | 3.7  |
| 2 | 171438050 | 171438125 | 75  | 171438062 | 12 | 35  | 5.5  |
| 2 | 172196150 | 172196275 | 125 | 172196187 | 13 | 62  | 0    |
| 2 | 172458675 | 172458800 | 125 | 172458687 | 11 | 52  | 6.4  |
| 2 | 172645375 | 172645400 | 25  | 172645387 | 11 | 11  | 1.8  |
| 2 | 172668425 | 172668450 | 25  | 172668437 | 14 | 14  | 1.8  |
| 2 | 173356050 | 173356200 | 150 | 173356112 | 15 | 75  | 0.9  |
| 2 | 175083725 | 175083900 | 175 | 175083762 | 13 | 86  | 4.6  |
| 2 | 175134500 | 175134525 | 25  | 175134512 | 11 | 11  | 0    |
| 2 | 175360700 | 175360725 | 25  | 175360712 | 11 | 11  | 0    |
| 2 | 175741000 | 175741100 | 100 | 175741012 | 11 | 44  | 6.4  |
| 2 | 176702075 | 176702100 | 25  | 176702087 | 15 | 15  | 2.7  |
| 2 | 176713625 | 176713900 | 275 | 176713787 | 15 | 139 | 22   |
| 2 | 176748025 | 176748075 | 50  | 176748037 | 14 | 25  | 4.6  |
| 2 | 176748400 | 176748500 | 100 | 176748412 | 11 | 43  | 3.7  |
| 2 | 177127175 | 177127225 | 50  | 177127212 | 12 | 23  | 2.7  |
| 2 | 178125950 | 178126000 | 50  | 178125962 | 11 | 22  | 2.7  |
| 2 | 178645825 | 178645950 | 125 | 178645837 | 11 | 55  | 4.6  |

|   |           |           |     |           |    |     |      |
|---|-----------|-----------|-----|-----------|----|-----|------|
| 2 | 179052500 | 179052525 | 25  | 179052512 | 11 | 11  | 0    |
| 2 | 180033775 | 180033900 | 125 | 180033812 | 14 | 60  | 0    |
| 2 | 187576175 | 187576200 | 25  | 187576187 | 13 | 13  | 0.9  |
| 2 | 187779025 | 187779175 | 150 | 187779037 | 11 | 61  | 5.5  |
| 2 | 190013950 | 190014150 | 200 | 190014062 | 12 | 82  | 7.3  |
| 2 | 190892625 | 190892650 | 25  | 190892637 | 12 | 12  | 0    |
| 2 | 191107925 | 191108075 | 150 | 191108037 | 12 | 68  | 0    |
| 2 | 191144800 | 191144825 | 25  | 191144812 | 12 | 12  | 1.8  |
| 2 | 191453425 | 191453475 | 50  | 191453437 | 11 | 22  | 1.8  |
| 2 | 191587250 | 191587275 | 25  | 191587262 | 11 | 11  | 0.9  |
| 2 | 191593525 | 191593575 | 50  | 191593562 | 12 | 23  | 1.8  |
| 2 | 196705400 | 196705425 | 25  | 196705412 | 12 | 12  | 0    |
| 2 | 196744425 | 196744500 | 75  | 196744462 | 14 | 40  | 4.6  |
| 2 | 198026650 | 198026700 | 50  | 198026687 | 16 | 30  | 4.6  |
| 2 | 198762250 | 198762425 | 175 | 198762312 | 16 | 92  | 8.2  |
| 2 | 200175350 | 200175375 | 25  | 200175362 | 11 | 11  | 0.9  |
| 2 | 200176475 | 200176700 | 225 | 200176587 | 19 | 144 | 2.7  |
| 2 | 201099100 | 201099250 | 150 | 201099137 | 15 | 73  | 7.3  |
| 2 | 201805225 | 201805525 | 300 | 201805337 | 17 | 160 | 15.6 |
| 2 | 202024300 | 202024400 | 100 | 202024387 | 16 | 52  | 4.6  |
| 2 | 202216075 | 202216100 | 25  | 202216087 | 12 | 12  | 1.8  |
| 2 | 202282850 | 202283000 | 150 | 202282862 | 12 | 70  | 5.5  |
| 2 | 203484450 | 203484475 | 25  | 203484462 | 14 | 14  | 2.7  |
| 2 | 203811650 | 203811675 | 25  | 203811662 | 13 | 13  | 1.8  |
| 2 | 208206175 | 208206200 | 25  | 208206187 | 11 | 11  | 0.9  |
| 2 | 208598475 | 208598575 | 100 | 208598512 | 12 | 46  | 2.7  |
| 2 | 208607325 | 208607475 | 150 | 208607437 | 13 | 69  | 1.8  |
| 2 | 208838875 | 208838900 | 25  | 208838887 | 11 | 11  | 0.9  |
| 2 | 213436175 | 213436375 | 200 | 213436237 | 17 | 123 | 2.7  |
| 2 | 213857300 | 213857400 | 100 | 213857312 | 12 | 48  | 4.6  |
| 2 | 215884925 | 215885025 | 100 | 215884937 | 11 | 44  | 3.7  |
| 2 | 216009200 | 216009275 | 75  | 216009237 | 12 | 35  | 4.6  |
| 2 | 216096675 | 216096725 | 50  | 216096687 | 11 | 22  | 0    |
| 2 | 216473100 | 216473125 | 25  | 216473112 | 11 | 11  | 1.8  |
| 2 | 216579375 | 216579550 | 175 | 216579462 | 17 | 106 | 10.1 |
| 2 | 218290775 | 218290825 | 50  | 218290787 | 11 | 22  | 0    |
| 2 | 218969125 | 218969500 | 375 | 218969312 | 25 | 273 | 35.7 |
| 2 | 219142075 | 219142200 | 125 | 219142112 | 17 | 80  | 11.9 |
| 2 | 219244825 | 219244850 | 25  | 219244837 | 12 | 12  | 1.8  |
| 2 | 219319000 | 219319200 | 200 | 219319012 | 16 | 114 | 10.1 |
| 2 | 219377900 | 219377975 | 75  | 219377912 | 11 | 32  | 0    |
| 2 | 219481975 | 219482075 | 100 | 219481987 | 23 | 90  | 16.5 |
| 2 | 219779400 | 219779450 | 50  | 219779412 | 11 | 22  | 2.7  |
| 2 | 219791900 | 219792000 | 100 | 219791937 | 14 | 54  | 9.1  |
| 2 | 219818125 | 219818150 | 25  | 219818137 | 11 | 11  | 1.8  |
| 2 | 220071675 | 220071775 | 100 | 220071737 | 15 | 53  | 3.7  |
| 2 | 220218875 | 220218925 | 50  | 220218887 | 11 | 22  | 3.7  |
| 2 | 222871600 | 222871675 | 75  | 222871662 | 13 | 37  | 5.5  |
| 2 | 222893500 | 222893650 | 150 | 222893587 | 18 | 90  | 0    |
| 2 | 223229125 | 223229200 | 75  | 223229162 | 14 | 41  | 5.5  |
| 2 | 223295400 | 223296000 | 600 | 223295812 | 25 | 371 | 10.1 |
| 2 | 223307250 | 223307350 | 100 | 223307262 | 12 | 48  | 2.7  |
| 2 | 224122325 | 224122450 | 125 | 224122337 | 15 | 68  | 11.9 |
| 2 | 224768750 | 224769050 | 300 | 224768762 | 12 | 130 | 12.8 |
| 2 | 225158750 | 225158775 | 25  | 225158762 | 16 | 16  | 2.7  |
| 2 | 225556475 | 225556500 | 25  | 225556487 | 11 | 11  | 0.9  |
| 2 | 225556900 | 225556975 | 75  | 225556962 | 13 | 37  | 0    |
| 2 | 227364250 | 227364400 | 150 | 227364262 | 12 | 63  | 6.4  |
| 2 | 227408475 | 227408925 | 450 | 227408662 | 25 | 289 | 54   |
| 2 | 227801150 | 227801200 | 50  | 227801162 | 11 | 22  | 3.7  |
| 2 | 228033200 | 228033250 | 50  | 228033212 | 11 | 22  | 3.7  |
| 2 | 228390925 | 228390975 | 50  | 228390937 | 11 | 22  | 3.7  |
| 2 | 228391225 | 228391325 | 100 | 228391237 | 11 | 44  | 6.4  |
| 2 | 230154075 | 230154150 | 75  | 230154087 | 11 | 33  | 2.7  |
| 2 | 231938525 | 231938650 | 125 | 231938637 | 17 | 77  | 10.1 |
| 2 | 231961700 | 231961800 | 100 | 231961787 | 20 | 66  | 10.1 |
| 2 | 232184975 | 232185000 | 25  | 232184987 | 12 | 12  | 0.9  |
| 2 | 232280225 | 232280375 | 150 | 232280237 | 24 | 120 | 13.7 |
| 2 | 232316425 | 232316475 | 50  | 232316437 | 12 | 24  | 3.7  |
| 2 | 233445475 | 233445625 | 150 | 233445487 | 12 | 68  | 9.1  |
| 2 | 233445925 | 233446025 | 100 | 233445987 | 15 | 53  | 1.8  |
| 2 | 233610250 | 233610400 | 150 | 233610362 | 12 | 67  | 0    |
| 2 | 233739075 | 233739125 | 50  | 233739087 | 13 | 26  | 1.8  |
| 2 | 233928750 | 233928875 | 125 | 233928762 | 12 | 60  | 9.1  |
| 2 | 233987475 | 233987525 | 50  | 233987487 | 12 | 24  | 1.8  |

|   |           |           |     |           |    |     |      |
|---|-----------|-----------|-----|-----------|----|-----|------|
| 2 | 234000050 | 234000200 | 150 | 234000062 | 13 | 76  | 4.6  |
| 2 | 234539625 | 234539775 | 150 | 234539662 | 13 | 74  | 0    |
| 2 | 234546700 | 234546725 | 25  | 234546712 | 11 | 11  | 1.8  |
| 2 | 235250400 | 235250475 | 75  | 235250412 | 11 | 33  | 4.6  |
| 2 | 235436850 | 235436900 | 50  | 235436862 | 11 | 22  | 1.8  |
| 2 | 235554725 | 235554750 | 25  | 235554737 | 15 | 15  | 2.7  |
| 2 | 235722400 | 235722550 | 150 | 235722487 | 13 | 68  | 8.2  |
| 2 | 237775650 | 237775700 | 50  | 237775662 | 12 | 24  | 0    |
| 2 | 237801175 | 237801225 | 50  | 237801187 | 12 | 24  | 0    |
| 2 | 237888900 | 237888925 | 25  | 237888912 | 12 | 12  | 1.8  |
| 2 | 238006150 | 238006300 | 150 | 238006287 | 20 | 101 | 18.3 |
| 2 | 238177800 | 238177825 | 25  | 238177812 | 11 | 11  | 0    |
| 2 | 238274075 | 238274100 | 25  | 238274087 | 14 | 14  | 1.8  |
| 2 | 238471950 | 238472025 | 75  | 238471962 | 19 | 55  | 9.1  |
| 2 | 238535875 | 238536100 | 225 | 238536012 | 19 | 134 | 1.8  |
| 2 | 238789825 | 238790025 | 200 | 238789987 | 15 | 93  | 0    |
| 2 | 239589875 | 239589900 | 25  | 239589887 | 12 | 12  | 1.8  |
| 2 | 239742525 | 239742625 | 100 | 239742537 | 12 | 45  | 7.3  |
| 2 | 240505825 | 240505900 | 75  | 240505862 | 13 | 37  | 0    |
| 2 | 240908325 | 240908375 | 50  | 240908337 | 12 | 24  | 2.7  |
| 2 | 241045250 | 241045400 | 150 | 241045337 | 12 | 69  | 8.2  |
| 2 | 241504825 | 241504850 | 25  | 241504837 | 11 | 11  | 1.8  |
| 2 | 241580025 | 241580125 | 100 | 241580037 | 17 | 58  | 7.3  |
| 2 | 241690350 | 241690500 | 150 | 241690437 | 14 | 76  | 3.7  |
| 2 | 241999275 | 241999350 | 75  | 241999287 | 11 | 33  | 1.8  |
| 2 | 242556875 | 242556900 | 25  | 242556887 | 11 | 11  | 1.8  |
| 2 | 242558800 | 242559125 | 325 | 242558987 | 20 | 182 | 14.6 |
| 5 | 1010075   | 1010625   | 550 | 1010487   | 25 | 362 | 17.4 |
| 5 | 1214750   | 1214850   | 100 | 1214812   | 15 | 53  | 4.6  |
| 5 | 1577575   | 1577600   | 25  | 1577587   | 11 | 11  | 1.8  |
| 5 | 1847850   | 1848300   | 450 | 1847987   | 19 | 222 | 30.2 |
| 5 | 1853075   | 1853225   | 150 | 1853187   | 15 | 75  | 0    |
| 5 | 3364150   | 3364400   | 250 | 3364262   | 19 | 153 | 11.9 |
| 5 | 5324200   | 5324400   | 200 | 5324362   | 14 | 100 | 0    |
| 5 | 5372225   | 5372250   | 25  | 5372237   | 11 | 11  | 1.8  |
| 5 | 5397300   | 5397500   | 200 | 5397387   | 18 | 127 | 17.4 |
| 5 | 5403225   | 5403500   | 275 | 5403412   | 19 | 163 | 22.9 |
| 5 | 5475425   | 5475550   | 125 | 5475537   | 24 | 104 | 18.3 |
| 5 | 8393750   | 8393775   | 25  | 8393762   | 11 | 11  | 1.8  |
| 5 | 8897525   | 8897600   | 75  | 8897537   | 12 | 36  | 0.9  |
| 5 | 10777950  | 10777975  | 25  | 10777962  | 13 | 13  | 1.8  |
| 5 | 10778350  | 10778550  | 200 | 10778487  | 18 | 127 | 22.9 |
| 5 | 14717450  | 14717600  | 150 | 14717487  | 16 | 88  | 12.8 |
| 5 | 16947750  | 16947875  | 125 | 16947862  | 13 | 57  | 7.3  |
| 5 | 17242525  | 17242650  | 125 | 17242537  | 15 | 71  | 11   |
| 5 | 23486300  | 23486325  | 25  | 23486312  | 12 | 12  | 0.9  |
| 5 | 31890000  | 31890025  | 25  | 31890012  | 11 | 11  | 1.8  |
| 5 | 32063850  | 32063925  | 75  | 32063912  | 12 | 34  | 0    |
| 5 | 32621275  | 32621425  | 150 | 32621362  | 14 | 72  | 11   |
| 5 | 33476375  | 33476550  | 175 | 33476387  | 19 | 112 | 20.1 |
| 5 | 36277800  | 36277900  | 100 | 36277812  | 14 | 51  | 5.5  |
| 5 | 36698475  | 36698625  | 150 | 36698487  | 11 | 63  | 4.6  |
| 5 | 37406800  | 37406925  | 125 | 37406887  | 13 | 59  | 4.6  |
| 5 | 38716500  | 38716625  | 125 | 38716562  | 15 | 65  | 0.9  |
| 5 | 38842650  | 38842775  | 125 | 38842687  | 14 | 63  | 0    |
| 5 | 40715300  | 40715475  | 175 | 40715412  | 16 | 91  | 13.7 |
| 5 | 41940200  | 41940275  | 75  | 41940262  | 14 | 40  | 6.4  |
| 5 | 43043575  | 43043600  | 25  | 43043587  | 11 | 11  | 1.8  |
| 5 | 43054125  | 43054225  | 100 | 43054162  | 14 | 51  | 7.3  |
| 5 | 43638725  | 43638850  | 125 | 43638737  | 13 | 59  | 4.6  |
| 5 | 45421700  | 45421800  | 100 | 45421712  | 11 | 44  | 0    |
| 5 | 52119650  | 52119675  | 25  | 52119662  | 11 | 11  | 0.9  |
| 5 | 52131750  | 52131800  | 50  | 52131762  | 14 | 28  | 4.6  |
| 5 | 52769775  | 52769800  | 25  | 52769787  | 11 | 11  | 1.8  |
| 5 | 53991350  | 53991425  | 75  | 53991387  | 12 | 34  | 5.5  |
| 5 | 54076175  | 54076275  | 100 | 54076212  | 15 | 56  | 4.6  |
| 5 | 54559350  | 54559375  | 25  | 54559362  | 12 | 12  | 0.9  |
| 5 | 55044050  | 55044100  | 50  | 55044062  | 13 | 25  | 2.7  |
| 5 | 55651350  | 55651550  | 200 | 55651512  | 19 | 125 | 20.1 |
| 5 | 55812125  | 55812150  | 25  | 55812137  | 14 | 14  | 2.7  |
| 5 | 56655325  | 56655825  | 500 | 56655512  | 53 | 665 | 30.2 |
| 5 | 56726875  | 56727075  | 200 | 56726962  | 15 | 99  | 2.7  |
| 5 | 56787575  | 56787675  | 100 | 56787587  | 12 | 48  | 7.3  |
| 5 | 60633475  | 60633750  | 275 | 60633662  | 17 | 142 | 5.5  |
| 5 | 60663575  | 60663875  | 300 | 60663737  | 86 | 694 | 75.9 |

|   |           |           |     |           |    |     |      |
|---|-----------|-----------|-----|-----------|----|-----|------|
| 5 | 60782650  | 60782750  | 100 | 60782687  | 13 | 49  | 4.6  |
| 5 | 60963125  | 60963150  | 25  | 60963137  | 11 | 11  | 0.9  |
| 5 | 61637550  | 61637575  | 25  | 61637562  | 11 | 11  | 1.8  |
| 5 | 64366900  | 64367075  | 175 | 64366912  | 16 | 96  | 17.4 |
| 5 | 64894850  | 64894875  | 25  | 64894862  | 19 | 19  | 3.7  |
| 5 | 65421150  | 65421325  | 175 | 65421212  | 14 | 86  | 0    |
| 5 | 66632925  | 66633125  | 200 | 66632987  | 19 | 133 | 14.6 |
| 5 | 67765550  | 67765925  | 375 | 67765912  | 18 | 175 | 28.4 |
| 5 | 68264525  | 68264600  | 75  | 68264537  | 12 | 36  | 0    |
| 5 | 71498125  | 71498225  | 100 | 71498137  | 12 | 48  | 7.3  |
| 5 | 71711550  | 71711600  | 50  | 71711562  | 11 | 22  | 0    |
| 5 | 71842425  | 71842600  | 175 | 71842512  | 16 | 103 | 11.9 |
| 5 | 72778275  | 72778350  | 75  | 72778312  | 13 | 36  | 4.6  |
| 5 | 73974875  | 73975050  | 175 | 73974962  | 13 | 81  | 0    |
| 5 | 74652550  | 74652600  | 50  | 74652562  | 11 | 22  | 0.9  |
| 5 | 74986675  | 74986700  | 25  | 74986687  | 12 | 12  | 0    |
| 5 | 75048825  | 75048925  | 100 | 75048912  | 14 | 52  | 10.1 |
| 5 | 76977550  | 76977575  | 25  | 76977562  | 11 | 11  | 0    |
| 5 | 77970175  | 77970350  | 175 | 77970262  | 18 | 95  | 11.9 |
| 5 | 77979100  | 77979275  | 175 | 77979187  | 14 | 85  | 6.4  |
| 5 | 79323225  | 79323250  | 25  | 79323237  | 12 | 12  | 0    |
| 5 | 79986625  | 79986725  | 100 | 79986687  | 13 | 46  | 1.8  |
| 5 | 80526750  | 80526775  | 25  | 80526762  | 14 | 14  | 2.7  |
| 5 | 82005075  | 82005250  | 175 | 82005137  | 16 | 93  | 10.1 |
| 5 | 86599125  | 86599300  | 175 | 86599162  | 13 | 84  | 1.8  |
| 5 | 87600275  | 87600300  | 25  | 87600287  | 11 | 11  | 1.8  |
| 5 | 87769675  | 87769775  | 100 | 87769712  | 12 | 47  | 3.7  |
| 5 | 88004825  | 88005025  | 200 | 88004837  | 13 | 93  | 10.1 |
| 5 | 88011850  | 88011950  | 100 | 88011862  | 14 | 53  | 0    |
| 5 | 88145950  | 88146050  | 100 | 88145962  | 12 | 47  | 4.6  |
| 5 | 89740850  | 89740900  | 50  | 89740862  | 12 | 23  | 3.7  |
| 5 | 89741650  | 89741750  | 100 | 89741737  | 13 | 47  | 7.3  |
| 5 | 90355750  | 90355775  | 25  | 90355762  | 11 | 11  | 0    |
| 5 | 90611250  | 90611275  | 25  | 90611262  | 12 | 12  | 1.8  |
| 5 | 90612325  | 90612450  | 125 | 90612337  | 12 | 59  | 11   |
| 5 | 93472925  | 93472950  | 25  | 93472937  | 11 | 11  | 1.8  |
| 5 | 95239575  | 95239600  | 25  | 95239587  | 11 | 11  | 1.8  |
| 5 | 96169600  | 96169650  | 50  | 96169637  | 13 | 25  | 3.7  |
| 5 | 96545350  | 96545425  | 75  | 96545362  | 16 | 44  | 6.4  |
| 5 | 98136825  | 98137000  | 175 | 98136937  | 23 | 138 | 23.8 |
| 5 | 103543425 | 103543600 | 175 | 103543437 | 14 | 93  | 0    |
| 5 | 104756400 | 104756750 | 350 | 104756687 | 14 | 145 | 0.9  |
| 5 | 108092125 | 108092225 | 100 | 108092137 | 11 | 42  | 5.5  |
| 5 | 108819450 | 108819550 | 100 | 108819487 | 14 | 54  | 1.8  |
| 5 | 109052600 | 109052775 | 175 | 109052712 | 15 | 92  | 11   |
| 5 | 110455625 | 110456075 | 450 | 110455787 | 38 | 433 | 74.1 |
| 5 | 110914400 | 110914425 | 25  | 110914412 | 11 | 11  | 1.8  |
| 5 | 111121525 | 111121625 | 100 | 111121562 | 14 | 54  | 8.2  |
| 5 | 111524300 | 111524325 | 25  | 111524312 | 16 | 16  | 2.7  |
| 5 | 112340175 | 112340200 | 25  | 112340187 | 22 | 22  | 3.7  |
| 5 | 114908675 | 114908950 | 275 | 114908787 | 17 | 151 | 0    |
| 5 | 114935075 | 114935100 | 25  | 114935087 | 11 | 11  | 1.8  |
| 5 | 116038950 | 116039050 | 100 | 116038962 | 11 | 43  | 0    |
| 5 | 116353775 | 116353925 | 150 | 116353812 | 15 | 78  | 3.7  |
| 5 | 118632325 | 118632350 | 25  | 118632337 | 13 | 13  | 1.8  |
| 5 | 121325325 | 121325400 | 75  | 121325387 | 23 | 58  | 5.5  |
| 5 | 121325675 | 121325725 | 50  | 121325687 | 14 | 26  | 4.6  |
| 5 | 121442075 | 121442100 | 25  | 121442087 | 12 | 12  | 1.8  |
| 5 | 122875400 | 122875800 | 400 | 122875737 | 26 | 305 | 32.9 |
| 5 | 123300125 | 123300150 | 25  | 123300137 | 11 | 11  | 0    |
| 5 | 124015575 | 124015600 | 25  | 124015587 | 11 | 11  | 1.8  |
| 5 | 124112400 | 124112425 | 25  | 124112412 | 11 | 11  | 0    |
| 5 | 124562375 | 124562400 | 25  | 124562387 | 11 | 11  | 1.8  |
| 5 | 125958775 | 125958900 | 125 | 125958812 | 37 | 161 | 26.5 |
| 5 | 126593200 | 126593225 | 25  | 126593212 | 11 | 11  | 0.9  |
| 5 | 128457900 | 128458000 | 100 | 128457987 | 13 | 46  | 6.4  |
| 5 | 130998975 | 130999175 | 200 | 130999037 | 16 | 107 | 7.3  |
| 5 | 131869825 | 131869850 | 25  | 131869837 | 11 | 11  | 0    |
| 5 | 131920325 | 131920350 | 25  | 131920337 | 13 | 13  | 0.9  |
| 5 | 132171075 | 132171200 | 125 | 132171137 | 14 | 64  | 11.9 |
| 5 | 132204850 | 132204875 | 25  | 132204862 | 11 | 11  | 1.8  |
| 5 | 132604175 | 132604250 | 75  | 132604187 | 11 | 33  | 0    |
| 5 | 133478025 | 133478100 | 75  | 133478037 | 11 | 33  | 5.5  |
| 5 | 133564325 | 133564375 | 50  | 133564337 | 13 | 25  | 0    |
| 5 | 133996400 | 133996450 | 50  | 133996412 | 18 | 31  | 1.8  |

|   |           |           |     |           |    |     |      |
|---|-----------|-----------|-----|-----------|----|-----|------|
| 5 | 134101725 | 134101925 | 200 | 134101862 | 19 | 133 | 7.3  |
| 5 | 134290825 | 134290850 | 25  | 134290837 | 12 | 12  | 1.8  |
| 5 | 135357525 | 135357550 | 25  | 135357537 | 11 | 11  | 0.9  |
| 5 | 135496125 | 135496225 | 100 | 135496137 | 12 | 48  | 9.1  |
| 5 | 137701400 | 137701550 | 150 | 137701437 | 13 | 76  | 7.3  |
| 5 | 137715900 | 137716150 | 250 | 137716037 | 37 | 280 | 11   |
| 5 | 137828575 | 137829075 | 500 | 137828612 | 23 | 310 | 30.2 |
| 5 | 137855200 | 137855325 | 125 | 137855212 | 12 | 60  | 4.6  |
| 5 | 137938875 | 137939075 | 200 | 137939062 | 23 | 122 | 11.9 |
| 5 | 137998850 | 137998925 | 75  | 137998862 | 12 | 36  | 0    |
| 5 | 138005575 | 138005625 | 50  | 138005587 | 11 | 22  | 0    |
| 5 | 138025750 | 138025775 | 25  | 138025762 | 12 | 12  | 0    |
| 5 | 138634575 | 138634975 | 400 | 138634687 | 24 | 269 | 0    |
| 5 | 138705425 | 138705475 | 50  | 138705437 | 17 | 31  | 4.6  |
| 5 | 138767475 | 138767500 | 25  | 138767487 | 12 | 12  | 1.8  |
| 5 | 138993850 | 138993925 | 75  | 138993862 | 11 | 33  | 0.9  |
| 5 | 139031225 | 139031350 | 125 | 139031262 | 20 | 87  | 16.5 |
| 5 | 139924225 | 139924425 | 200 | 139924412 | 33 | 223 | 32   |
| 5 | 140007475 | 140007525 | 50  | 140007487 | 11 | 22  | 1.8  |
| 5 | 140078800 | 140079025 | 225 | 140078987 | 17 | 132 | 0    |
| 5 | 140155100 | 140155150 | 50  | 140155112 | 11 | 22  | 1.8  |
| 5 | 140400875 | 140400900 | 25  | 140400887 | 11 | 11  | 0.9  |
| 5 | 140454575 | 140454600 | 25  | 140454587 | 12 | 12  | 1.8  |
| 5 | 140495775 | 140495925 | 150 | 140495812 | 15 | 80  | 11   |
| 5 | 140680050 | 140680900 | 850 | 140680737 | 36 | 642 | 77.8 |
| 5 | 140698550 | 140698750 | 200 | 140698687 | 17 | 117 | 16.5 |
| 5 | 140742575 | 140742700 | 125 | 140742662 | 14 | 60  | 4.6  |
| 5 | 140835825 | 140835950 | 125 | 140835837 | 13 | 60  | 6.4  |
| 5 | 140836250 | 140836425 | 175 | 140836287 | 15 | 91  | 4.6  |
| 5 | 140873675 | 140873875 | 200 | 140873787 | 20 | 126 | 20.1 |
| 5 | 140881150 | 140881350 | 200 | 140881212 | 18 | 118 | 14.6 |
| 5 | 141225975 | 141226000 | 25  | 141225987 | 15 | 15  | 1.8  |
| 5 | 141283525 | 141283700 | 175 | 141283612 | 17 | 103 | 16.5 |
| 5 | 141684800 | 141684950 | 150 | 141684812 | 17 | 96  | 16.5 |
| 5 | 141826400 | 141826600 | 200 | 141826437 | 19 | 121 | 12.8 |
| 5 | 141828325 | 141828350 | 25  | 141828337 | 11 | 11  | 0.9  |
| 5 | 141851525 | 141851550 | 25  | 141851537 | 11 | 11  | 0    |
| 5 | 141960625 | 141960675 | 50  | 141960637 | 14 | 28  | 3.7  |
| 5 | 142765125 | 142765175 | 50  | 142765162 | 16 | 29  | 4.6  |
| 5 | 144855650 | 144855700 | 50  | 144855662 | 11 | 22  | 1.8  |
| 5 | 145806775 | 145807000 | 225 | 145806837 | 25 | 183 | 17.4 |
| 5 | 146458200 | 146458425 | 225 | 146458262 | 20 | 143 | 12.8 |
| 5 | 146670150 | 146670300 | 150 | 146670237 | 18 | 86  | 9.1  |
| 5 | 147842800 | 147842825 | 25  | 147842812 | 11 | 11  | 0    |
| 5 | 148422100 | 148422300 | 200 | 148422287 | 13 | 87  | 11   |
| 5 | 148422775 | 148422800 | 25  | 148422787 | 12 | 12  | 0.9  |
| 5 | 148423125 | 148423225 | 100 | 148423137 | 14 | 46  | 7.3  |
| 5 | 148425525 | 148425550 | 25  | 148425537 | 11 | 11  | 0.9  |
| 5 | 148627125 | 148627150 | 25  | 148627137 | 11 | 11  | 0.9  |
| 5 | 148766500 | 148766575 | 75  | 148766512 | 11 | 33  | 5.5  |
| 5 | 148922425 | 148922475 | 50  | 148922437 | 11 | 22  | 0    |
| 5 | 149300975 | 149301100 | 125 | 149301062 | 12 | 57  | 3.7  |
| 5 | 149355325 | 149355350 | 25  | 149355337 | 11 | 11  | 1.8  |
| 5 | 149809825 | 149809950 | 125 | 149809837 | 25 | 107 | 12.8 |
| 5 | 150118375 | 150118550 | 175 | 150118512 | 16 | 98  | 17.4 |
| 5 | 150150275 | 150150350 | 75  | 150150287 | 11 | 32  | 3.7  |
| 5 | 150255700 | 150255725 | 25  | 150255712 | 11 | 11  | 0    |
| 5 | 150291150 | 150291250 | 100 | 150291237 | 14 | 51  | 3.7  |
| 5 | 151047025 | 151047100 | 75  | 151047037 | 11 | 33  | 0    |
| 5 | 151089425 | 151089625 | 200 | 151089587 | 17 | 110 | 0    |
| 5 | 151105025 | 151105150 | 125 | 151105087 | 14 | 64  | 10.1 |
| 5 | 151111475 | 151111550 | 75  | 151111487 | 11 | 33  | 0    |
| 5 | 151130925 | 151131125 | 200 | 151131012 | 22 | 136 | 10.1 |
| 5 | 152865950 | 152865975 | 25  | 152865962 | 11 | 11  | 0    |
| 5 | 154218225 | 154218250 | 25  | 154218237 | 12 | 12  | 1.8  |
| 5 | 154245700 | 154245800 | 100 | 154245712 | 11 | 42  | 3.7  |
| 5 | 156963400 | 156963450 | 50  | 156963412 | 11 | 22  | 0    |
| 5 | 157626925 | 157626950 | 25  | 157626937 | 11 | 11  | 0.9  |
| 5 | 157628000 | 157628175 | 175 | 157628112 | 15 | 89  | 4.6  |
| 5 | 157920000 | 157920025 | 25  | 157920012 | 12 | 12  | 1.8  |
| 5 | 158003425 | 158003475 | 50  | 158003437 | 11 | 22  | 0    |
| 5 | 159647300 | 159647350 | 50  | 159647312 | 11 | 22  | 2.7  |
| 5 | 159818750 | 159818800 | 50  | 159818762 | 13 | 25  | 3.7  |
| 5 | 159827275 | 159827300 | 25  | 159827287 | 11 | 11  | 1.8  |
| 5 | 162796925 | 162796950 | 25  | 162796937 | 12 | 12  | 0    |

|   |           |           |     |           |    |     |      |
|---|-----------|-----------|-----|-----------|----|-----|------|
| 5 | 167846050 | 167846125 | 75  | 167846062 | 20 | 52  | 7.3  |
| 5 | 168298675 | 168298850 | 175 | 168298737 | 13 | 78  | 0.9  |
| 5 | 168943200 | 168943225 | 25  | 168943212 | 11 | 11  | 1.8  |
| 5 | 169056700 | 169056900 | 200 | 169056812 | 19 | 137 | 6.4  |
| 5 | 170748000 | 170748275 | 275 | 170748087 | 26 | 225 | 15.6 |
| 5 | 171339300 | 171339425 | 125 | 171339337 | 15 | 72  | 4.6  |
| 5 | 171539125 | 171539300 | 175 | 171539212 | 18 | 112 | 3.7  |
| 5 | 171730475 | 171730525 | 50  | 171730487 | 11 | 22  | 1.8  |
| 5 | 171740600 | 171740800 | 200 | 171740662 | 15 | 109 | 11.9 |
| 5 | 172066975 | 172067025 | 50  | 172066987 | 11 | 22  | 1.8  |
| 5 | 172076600 | 172076625 | 25  | 172076612 | 13 | 13  | 1.8  |
| 5 | 172318575 | 172319075 | 500 | 172318962 | 23 | 273 | 34.8 |
| 5 | 172598200 | 172598300 | 100 | 172598212 | 11 | 44  | 2.7  |
| 5 | 172617825 | 172617900 | 75  | 172617837 | 13 | 36  | 5.5  |
| 5 | 172831950 | 172832050 | 100 | 172831962 | 11 | 44  | 4.6  |
| 5 | 172976250 | 172976425 | 175 | 172976362 | 19 | 108 | 11.9 |
| 5 | 173892175 | 173892350 | 175 | 173892262 | 22 | 131 | 14.6 |
| 5 | 175013025 | 175013300 | 275 | 175013162 | 19 | 155 | 17.4 |
| 5 | 176805925 | 176805975 | 50  | 176805937 | 11 | 22  | 3.7  |
| 5 | 176905900 | 176906075 | 175 | 176905912 | 14 | 87  | 3.7  |
| 5 | 177434250 | 177434575 | 325 | 177434412 | 30 | 258 | 33.9 |
| 5 | 177513325 | 177513350 | 25  | 177513337 | 11 | 11  | 0.9  |
| 5 | 177986625 | 177986725 | 100 | 177986637 | 11 | 44  | 5.5  |
| 5 | 177986975 | 177987000 | 25  | 177986987 | 12 | 12  | 1.8  |
| 5 | 178002150 | 178002350 | 200 | 178002212 | 14 | 99  | 13.7 |
| 5 | 178090300 | 178090325 | 25  | 178090312 | 11 | 11  | 0.9  |
| 5 | 178300850 | 178300875 | 25  | 178300862 | 11 | 11  | 0.9  |
| 5 | 178325175 | 178325275 | 100 | 178325187 | 12 | 45  | 0    |
| 5 | 179057875 | 179057975 | 100 | 179057887 | 14 | 51  | 3.7  |
| 5 | 179092325 | 179092400 | 75  | 179092337 | 14 | 40  | 4.6  |
| 5 | 179180225 | 179180275 | 50  | 179180237 | 11 | 22  | 1.8  |
| 5 | 179431875 | 179431925 | 50  | 179431887 | 12 | 24  | 1.8  |
| 5 | 179618300 | 179618350 | 50  | 179618312 | 11 | 22  | 0    |
| 5 | 180168350 | 180168400 | 50  | 180168362 | 12 | 24  | 0.9  |
| 5 | 180548650 | 180548675 | 25  | 180548662 | 11 | 11  | 1.8  |
| 4 | 114150    | 114325    | 175 | 114187    | 15 | 99  | 18.3 |
| 4 | 255525    | 255550    | 25  | 255537    | 11 | 11  | 0    |
| 4 | 390675    | 390725    | 50  | 390687    | 11 | 22  | 0    |
| 4 | 427175    | 427325    | 150 | 427287    | 13 | 71  | 0    |
| 4 | 457700    | 457900    | 200 | 457762    | 18 | 132 | 14.6 |
| 4 | 565875    | 565900    | 25  | 565887    | 11 | 11  | 0    |
| 4 | 882875    | 882975    | 100 | 882887    | 11 | 42  | 2.7  |
| 4 | 1011725   | 1011800   | 75  | 1011787   | 15 | 42  | 7.3  |
| 4 | 1027425   | 1027700   | 275 | 1027562   | 29 | 229 | 36.6 |
| 4 | 1028675   | 1028850   | 175 | 1028712   | 17 | 105 | 12.8 |
| 4 | 1344325   | 1344475   | 150 | 1344337   | 11 | 64  | 10.1 |
| 4 | 1503100   | 1503200   | 100 | 1503112   | 11 | 44  | 2.7  |
| 4 | 1698050   | 1698125   | 75  | 1698112   | 12 | 34  | 3.7  |
| 4 | 1710050   | 1710175   | 125 | 1710112   | 13 | 60  | 0    |
| 4 | 2949250   | 2949375   | 125 | 2949262   | 14 | 68  | 11   |
| 4 | 3718325   | 3718500   | 175 | 3718362   | 17 | 107 | 6.4  |
| 4 | 5043925   | 5044075   | 150 | 5043937   | 21 | 95  | 15.6 |
| 4 | 5086250   | 5086400   | 150 | 5086287   | 15 | 87  | 0    |
| 4 | 5329250   | 5329500   | 250 | 5329362   | 17 | 132 | 0    |
| 4 | 6111275   | 6111475   | 200 | 6111337   | 19 | 127 | 3.7  |
| 4 | 6768550   | 6768800   | 250 | 6768687   | 23 | 181 | 1.8  |
| 4 | 6779750   | 6779775   | 25  | 6779762   | 11 | 11  | 1.8  |
| 4 | 6969425   | 6969475   | 50  | 6969437   | 12 | 24  | 3.7  |
| 4 | 7258350   | 7258475   | 125 | 7258362   | 18 | 77  | 3.7  |
| 4 | 7334350   | 7334400   | 50  | 7334362   | 14 | 25  | 1.8  |
| 4 | 7379400   | 7379475   | 75  | 7379412   | 12 | 36  | 2.7  |
| 4 | 7395825   | 7395925   | 100 | 7395912   | 14 | 51  | 10.1 |
| 4 | 7702425   | 7702550   | 125 | 7702512   | 16 | 74  | 12.8 |
| 4 | 7880950   | 7881000   | 50  | 7880962   | 13 | 26  | 1.8  |
| 4 | 7895250   | 7895525   | 275 | 7895437   | 17 | 145 | 17.4 |
| 4 | 8116600   | 8116950   | 350 | 8116787   | 22 | 212 | 7.3  |
| 4 | 8295050   | 8295225   | 175 | 8295187   | 16 | 97  | 15.6 |
| 4 | 8481275   | 8481425   | 150 | 8481362   | 18 | 84  | 7.3  |
| 4 | 9717425   | 9717500   | 75  | 9717437   | 12 | 36  | 4.6  |
| 4 | 9727850   | 9727975   | 125 | 9727962   | 14 | 61  | 11.9 |
| 4 | 9907400   | 9907525   | 125 | 9907437   | 12 | 57  | 8.2  |
| 4 | 10140050  | 10140125  | 75  | 10140062  | 12 | 36  | 0.9  |
| 4 | 10975700  | 10975725  | 25  | 10975712  | 12 | 12  | 0    |
| 4 | 12499925  | 12500025  | 100 | 12499937  | 12 | 47  | 7.3  |
| 4 | 12851000  | 12851050  | 50  | 12851012  | 13 | 25  | 0    |

|   |          |          |     |          |    |     |      |
|---|----------|----------|-----|----------|----|-----|------|
| 4 | 13155875 | 13156025 | 150 | 13155887 | 23 | 107 | 11.9 |
| 4 | 13265025 | 13265075 | 50  | 13265062 | 18 | 33  | 5.5  |
| 4 | 14612975 | 14613050 | 75  | 14612987 | 11 | 33  | 0    |
| 4 | 14644900 | 14645025 | 125 | 14644912 | 11 | 55  | 4.6  |
| 4 | 15172900 | 15172950 | 50  | 15172912 | 11 | 22  | 0    |
| 4 | 17298650 | 17298875 | 225 | 17298787 | 19 | 151 | 9.1  |
| 4 | 17686675 | 17686825 | 150 | 17686737 | 15 | 84  | 0    |
| 4 | 20310700 | 20310825 | 125 | 20310737 | 14 | 67  | 0.9  |
| 4 | 24380900 | 24381050 | 150 | 24380962 | 15 | 78  | 4.6  |
| 4 | 24834575 | 24834850 | 275 | 24834687 | 33 | 277 | 7.3  |
| 4 | 25146000 | 25146025 | 25  | 25146012 | 11 | 11  | 0    |
| 4 | 25403100 | 25403225 | 125 | 25403187 | 14 | 64  | 9.1  |
| 4 | 25552325 | 25552350 | 25  | 25552337 | 11 | 11  | 0    |
| 4 | 25633375 | 25633525 | 150 | 25633462 | 17 | 83  | 6.4  |
| 4 | 25669250 | 25669300 | 50  | 25669287 | 14 | 26  | 4.6  |
| 4 | 25724125 | 25724200 | 75  | 25724137 | 11 | 33  | 2.7  |
| 4 | 25782800 | 25782975 | 175 | 25782837 | 14 | 86  | 0    |
| 4 | 25931550 | 25931575 | 25  | 25931562 | 12 | 12  | 1.8  |
| 4 | 26017200 | 26017375 | 175 | 26017237 | 17 | 115 | 0    |
| 4 | 26303225 | 26303400 | 175 | 26303312 | 17 | 96  | 8.2  |
| 4 | 28887950 | 28888175 | 225 | 28888087 | 22 | 168 | 2.7  |
| 4 | 33060050 | 33060100 | 50  | 33060062 | 12 | 23  | 1.8  |
| 4 | 37294200 | 37294225 | 25  | 37294212 | 11 | 11  | 0.9  |
| 4 | 37326275 | 37326325 | 50  | 37326287 | 12 | 24  | 1.8  |
| 4 | 37407300 | 37407475 | 175 | 37407387 | 16 | 95  | 15.6 |
| 4 | 37448750 | 37448800 | 50  | 37448762 | 11 | 22  | 0    |
| 4 | 37869000 | 37869050 | 50  | 37869012 | 12 | 23  | 0    |
| 4 | 38860725 | 38860850 | 125 | 38860737 | 12 | 56  | 3.7  |
| 4 | 39734300 | 39734375 | 75  | 39734362 | 14 | 39  | 6.4  |
| 4 | 40030775 | 40030975 | 200 | 40030887 | 17 | 112 | 19.2 |
| 4 | 40985075 | 40985100 | 25  | 40985087 | 12 | 12  | 0    |
| 4 | 41309550 | 41309575 | 25  | 41309562 | 13 | 13  | 1.8  |
| 4 | 41631825 | 41631900 | 75  | 41631837 | 13 | 35  | 4.6  |
| 4 | 41687175 | 41687325 | 150 | 41687312 | 15 | 70  | 3.7  |
| 4 | 44423075 | 44423125 | 50  | 44423087 | 11 | 22  | 2.7  |
| 4 | 47182025 | 47182175 | 150 | 47182062 | 12 | 68  | 11.9 |
| 4 | 47533400 | 47533475 | 75  | 47533462 | 14 | 39  | 6.4  |
| 4 | 47721925 | 47721950 | 25  | 47721937 | 12 | 12  | 0    |
| 4 | 48528025 | 48528100 | 75  | 48528037 | 14 | 42  | 5.5  |
| 4 | 48610075 | 48610275 | 200 | 48610162 | 18 | 115 | 9.1  |
| 4 | 52612725 | 52612825 | 100 | 52612812 | 17 | 54  | 6.4  |
| 4 | 52613050 | 52613075 | 25  | 52613062 | 12 | 12  | 1.8  |
| 4 | 53219425 | 53219525 | 100 | 53219437 | 13 | 48  | 6.4  |
| 4 | 53867825 | 53867875 | 50  | 53867862 | 13 | 25  | 2.7  |
| 4 | 53882950 | 53882975 | 25  | 53882962 | 11 | 11  | 0    |
| 4 | 54037625 | 54037775 | 150 | 54037687 | 16 | 83  | 5.5  |
| 4 | 54068950 | 54069075 | 125 | 54068962 | 11 | 55  | 9.1  |
| 4 | 54263500 | 54263625 | 125 | 54263512 | 13 | 56  | 3.7  |
| 4 | 54788825 | 54788875 | 50  | 54788837 | 11 | 22  | 1.8  |
| 4 | 54789975 | 54790075 | 100 | 54789987 | 12 | 48  | 2.7  |
| 4 | 54793750 | 54793925 | 175 | 54793887 | 13 | 81  | 12.8 |
| 4 | 56108325 | 56108400 | 75  | 56108362 | 13 | 38  | 5.5  |
| 4 | 56114600 | 56114650 | 50  | 56114612 | 11 | 22  | 1.8  |
| 4 | 56609600 | 56609700 | 100 | 56609637 | 14 | 54  | 7.3  |
| 4 | 57642325 | 57642450 | 125 | 57642362 | 16 | 71  | 0    |
| 4 | 57724550 | 57724575 | 25  | 57724562 | 14 | 14  | 2.7  |
| 4 | 64779275 | 64779400 | 125 | 64779312 | 14 | 64  | 1.8  |
| 4 | 67123500 | 67123625 | 125 | 67123562 | 14 | 61  | 5.5  |
| 4 | 68093600 | 68093650 | 50  | 68093612 | 19 | 38  | 4.6  |
| 4 | 69958125 | 69958275 | 150 | 69958137 | 15 | 80  | 9.1  |
| 4 | 71772700 | 71772900 | 200 | 71772887 | 29 | 180 | 23.8 |
| 4 | 71773175 | 71773200 | 25  | 71773187 | 16 | 16  | 1.8  |
| 4 | 71986700 | 71986825 | 125 | 71986762 | 13 | 60  | 5.5  |
| 4 | 72077875 | 72077925 | 50  | 72077887 | 12 | 24  | 1.8  |
| 4 | 73123750 | 73123825 | 75  | 73123812 | 14 | 38  | 4.6  |
| 4 | 74154550 | 74154600 | 50  | 74154562 | 17 | 32  | 5.5  |
| 4 | 74343725 | 74343800 | 75  | 74343762 | 13 | 36  | 3.7  |
| 4 | 74753300 | 74753500 | 200 | 74753337 | 14 | 102 | 0    |
| 4 | 74757850 | 74757900 | 50  | 74757862 | 13 | 26  | 0    |
| 4 | 74953850 | 74954000 | 150 | 74953862 | 14 | 72  | 11.9 |
| 4 | 75123425 | 75123525 | 100 | 75123437 | 14 | 51  | 9.1  |
| 4 | 75459150 | 75459350 | 200 | 75459212 | 19 | 123 | 12.8 |
| 4 | 76819325 | 76819350 | 25  | 76819337 | 11 | 11  | 0.9  |
| 4 | 77131025 | 77131200 | 175 | 77131137 | 15 | 92  | 11.9 |
| 4 | 77288575 | 77288625 | 50  | 77288587 | 29 | 55  | 8.2  |

|   |           |           |     |           |    |     |      |
|---|-----------|-----------|-----|-----------|----|-----|------|
| 4 | 77338100  | 77338150  | 50  | 77338137  | 14 | 25  | 3.7  |
| 4 | 77836350  | 77836550  | 200 | 77836437  | 20 | 139 | 4.6  |
| 4 | 77894050  | 77894225  | 175 | 77894112  | 16 | 93  | 8.2  |
| 4 | 77903000  | 77903075  | 75  | 77903012  | 11 | 33  | 0    |
| 4 | 78297225  | 78297350  | 125 | 78297237  | 19 | 77  | 14.6 |
| 4 | 78367925  | 78367950  | 25  | 78367937  | 12 | 12  | 0.9  |
| 4 | 78777200  | 78777425  | 225 | 78777312  | 17 | 132 | 5.5  |
| 4 | 78960750  | 78960800  | 50  | 78960762  | 16 | 30  | 3.7  |
| 4 | 81189850  | 81189900  | 50  | 81189862  | 12 | 24  | 0    |
| 4 | 81238050  | 81238175  | 125 | 81238087  | 14 | 63  | 0    |
| 4 | 83425225  | 83425275  | 50  | 83425262  | 13 | 25  | 3.7  |
| 4 | 84174950  | 84175150  | 200 | 84175012  | 18 | 114 | 0    |
| 4 | 88562700  | 88562975  | 275 | 88562787  | 19 | 163 | 21   |
| 4 | 89597125  | 89597150  | 25  | 89597137  | 12 | 12  | 0.9  |
| 4 | 93323475  | 93323500  | 25  | 93323487  | 11 | 11  | 0.9  |
| 4 | 97310300  | 97310575  | 275 | 97310412  | 22 | 165 | 7.3  |
| 4 | 106849400 | 106849425 | 25  | 106849412 | 16 | 16  | 2.7  |
| 4 | 108861100 | 108861150 | 50  | 108861137 | 12 | 23  | 2.7  |
| 4 | 113426650 | 113426750 | 100 | 113426737 | 13 | 49  | 3.7  |
| 4 | 117155800 | 117156000 | 200 | 117155887 | 19 | 128 | 0    |
| 4 | 119419425 | 119419500 | 75  | 119419437 | 12 | 36  | 5.5  |
| 4 | 119732200 | 119732300 | 100 | 119732287 | 16 | 49  | 6.4  |
| 4 | 122941775 | 122941875 | 100 | 122941812 | 15 | 56  | 10.1 |
| 4 | 132520200 | 132520325 | 125 | 132520212 | 13 | 59  | 4.6  |
| 4 | 140997800 | 140997875 | 75  | 140997837 | 13 | 35  | 0    |
| 4 | 141294950 | 141295125 | 175 | 141295112 | 14 | 82  | 9.1  |
| 4 | 141707450 | 141707550 | 100 | 141707462 | 11 | 44  | 0    |
| 4 | 143796800 | 143796850 | 50  | 143796812 | 11 | 22  | 0    |
| 4 | 158649875 | 158649975 | 100 | 158649937 | 14 | 50  | 3.7  |
| 4 | 159311350 | 159311400 | 50  | 159311362 | 11 | 22  | 2.7  |
| 4 | 164634950 | 164635175 | 225 | 164635137 | 17 | 130 | 12.8 |
| 4 | 166097525 | 166097625 | 100 | 166097537 | 13 | 50  | 3.7  |
| 4 | 171185150 | 171185575 | 425 | 171185412 | 36 | 421 | 18.3 |
| 4 | 174527675 | 174527725 | 50  | 174527687 | 15 | 26  | 2.7  |
| 4 | 174680300 | 174680550 | 250 | 174680462 | 13 | 117 | 16.5 |
| 4 | 178600375 | 178600400 | 25  | 178600387 | 11 | 11  | 0.9  |
| 4 | 183111000 | 183111025 | 25  | 183111012 | 12 | 12  | 0    |
| 4 | 185892425 | 185892500 | 75  | 185892437 | 12 | 35  | 2.7  |
| 4 | 186732200 | 186732275 | 75  | 186732212 | 16 | 42  | 2.7  |
| 4 | 187362425 | 187362525 | 100 | 187362487 | 14 | 48  | 6.4  |
| 4 | 188415225 | 188415300 | 75  | 188415237 | 11 | 33  | 1.8  |
| 4 | 188663375 | 188663400 | 25  | 188663387 | 12 | 12  | 1.8  |
| 4 | 190748225 | 190748250 | 25  | 190748237 | 13 | 13  | 1.8  |
| 4 | 190880625 | 190880875 | 250 | 190880712 | 17 | 153 | 21   |
| 4 | 191098375 | 191098525 | 150 | 191098387 | 26 | 147 | 16.5 |
| 4 | 191098775 | 191098800 | 25  | 191098787 | 13 | 13  | 0.9  |
| 7 | 159475    | 159600    | 125 | 159487    | 20 | 86  | 8.2  |
| 7 | 168025    | 168050    | 25  | 168037    | 14 | 14  | 2.7  |
| 7 | 178025    | 178075    | 50  | 178037    | 11 | 22  | 1.8  |
| 7 | 186400    | 186425    | 25  | 186412    | 11 | 11  | 1.8  |
| 7 | 189750    | 189775    | 25  | 189762    | 11 | 11  | 0    |
| 7 | 190425    | 190500    | 75  | 190437    | 11 | 33  | 4.6  |
| 7 | 196725    | 197025    | 300 | 196862    | 30 | 286 | 49.4 |
| 7 | 257150    | 257200    | 50  | 257162    | 11 | 22  | 0    |
| 7 | 271350    | 271450    | 100 | 271362    | 11 | 44  | 4.6  |
| 7 | 282200    | 282225    | 25  | 282212    | 11 | 11  | 1.8  |
| 7 | 312750    | 313000    | 250 | 312862    | 19 | 151 | 7.3  |
| 7 | 496325    | 496350    | 25  | 496337    | 11 | 11  | 0    |
| 7 | 505075    | 505200    | 125 | 505087    | 11 | 55  | 5.5  |
| 7 | 523975    | 524025    | 50  | 523987    | 13 | 25  | 1.8  |
| 7 | 544575    | 544775    | 200 | 544612    | 15 | 109 | 15.6 |
| 7 | 549350    | 549375    | 25  | 549362    | 19 | 19  | 3.7  |
| 7 | 609075    | 609250    | 175 | 609162    | 16 | 102 | 10.1 |
| 7 | 610625    | 610775    | 150 | 610662    | 24 | 130 | 19.2 |
| 7 | 719925    | 720000    | 75  | 719937    | 11 | 33  | 2.7  |
| 7 | 819200    | 819500    | 300 | 819312    | 25 | 238 | 32   |
| 7 | 984900    | 984950    | 50  | 984912    | 14 | 27  | 3.7  |
| 7 | 1030925   | 1030975   | 50  | 1030937   | 11 | 22  | 0    |
| 7 | 1035275   | 1035325   | 50  | 1035287   | 16 | 31  | 5.5  |
| 7 | 1093050   | 1093075   | 25  | 1093062   | 14 | 14  | 2.7  |
| 7 | 1093475   | 1093525   | 50  | 1093487   | 14 | 26  | 2.7  |
| 7 | 1143800   | 1143825   | 25  | 1143812   | 13 | 13  | 1.8  |
| 7 | 1183250   | 1183325   | 75  | 1183262   | 11 | 33  | 3.7  |
| 7 | 1460875   | 1460900   | 25  | 1460887   | 12 | 12  | 1.8  |
| 7 | 1466425   | 1466475   | 50  | 1466437   | 12 | 24  | 2.7  |



|   |          |          |      |          |    |      |      |
|---|----------|----------|------|----------|----|------|------|
| 7 | 1573250  | 1573425  | 175  | 1573337  | 23 | 143  | 14.6 |
| 7 | 1575650  | 1575850  | 200  | 1575737  | 17 | 120  | 12.8 |
| 7 | 1748150  | 1748200  | 50   | 1748162  | 12 | 23   | 3.7  |
| 7 | 1809125  | 1809175  | 50   | 1809137  | 13 | 25   | 3.7  |
| 7 | 2066175  | 2066275  | 100  | 2066262  | 20 | 62   | 11   |
| 7 | 2109350  | 2109425  | 75   | 2109362  | 12 | 36   | 4.6  |
| 7 | 2115475  | 2115550  | 75   | 2115487  | 34 | 96   | 14.6 |
| 7 | 2116575  | 2116775  | 200  | 2116587  | 41 | 244  | 32.9 |
| 7 | 2170225  | 2170325  | 100  | 2170237  | 11 | 44   | 1.8  |
| 7 | 2305275  | 2305525  | 250  | 2305437  | 16 | 129  | 11.9 |
| 7 | 2306200  | 2306225  | 25   | 2306212  | 11 | 11   | 0    |
| 7 | 2360500  | 2360600  | 100  | 2360512  | 19 | 71   | 13.7 |
| 7 | 2363550  | 2363575  | 25   | 2363562  | 11 | 11   | 1.8  |
| 7 | 2534600  | 2534625  | 25   | 2534612  | 12 | 12   | 0    |
| 7 | 2562175  | 2562200  | 25   | 2562187  | 12 | 12   | 1.8  |
| 7 | 2578625  | 2578675  | 50   | 2578637  | 11 | 22   | 3.7  |
| 7 | 2615350  | 2615425  | 75   | 2615362  | 13 | 37   | 3.7  |
| 7 | 2647750  | 2647875  | 125  | 2647762  | 14 | 67   | 11.9 |
| 7 | 2670325  | 2670375  | 50   | 2670337  | 11 | 22   | 0    |
| 7 | 2764600  | 2764625  | 25   | 2764612  | 14 | 14   | 2.7  |
| 7 | 2850850  | 2850875  | 25   | 2850862  | 14 | 14   | 2.7  |
| 7 | 2871775  | 2871800  | 25   | 2871787  | 11 | 11   | 1.8  |
| 7 | 2880400  | 2880475  | 75   | 2880412  | 11 | 33   | 3.7  |
| 7 | 4648450  | 4648675  | 225  | 4648562  | 29 | 202  | 23.8 |
| 7 | 4799025  | 4799150  | 125  | 4799037  | 14 | 66   | 10.1 |
| 7 | 4810225  | 4810250  | 25   | 4810237  | 11 | 11   | 0.9  |
| 7 | 4979850  | 4979950  | 100  | 4979937  | 25 | 72   | 11   |
| 7 | 5070350  | 5070900  | 550  | 5070587  | 69 | 892  | 7.3  |
| 7 | 5071175  | 5071400  | 225  | 5071337  | 17 | 133  | 8.2  |
| 7 | 5403400  | 5403450  | 50   | 5403437  | 21 | 41   | 7.3  |
| 7 | 5431575  | 5431725  | 150  | 5431662  | 16 | 86   | 11   |
| 7 | 5432025  | 5432500  | 475  | 5432137  | 33 | 354  | 56.7 |
| 7 | 5435625  | 5435650  | 25   | 5435637  | 11 | 11   | 1.8  |
| 7 | 5443775  | 5443875  | 100  | 5443837  | 13 | 46   | 3.7  |
| 7 | 5532650  | 5532675  | 25   | 5532662  | 12 | 12   | 1.8  |
| 7 | 5535900  | 5536000  | 100  | 5535937  | 16 | 62   | 9.1  |
| 7 | 5536750  | 5536975  | 225  | 5536837  | 29 | 202  | 20.1 |
| 7 | 5562650  | 5562675  | 25   | 5562662  | 11 | 11   | 0.9  |
| 7 | 5576575  | 5576700  | 125  | 5576587  | 20 | 83   | 14.6 |
| 7 | 5636425  | 5636450  | 25   | 5636437  | 11 | 11   | 1.8  |
| 7 | 5642925  | 5642950  | 25   | 5642937  | 12 | 12   | 0.9  |
| 7 | 5698300  | 5698425  | 125  | 5698337  | 13 | 61   | 4.6  |
| 7 | 6355350  | 6355450  | 100  | 6355362  | 24 | 74   | 10.1 |
| 7 | 6381750  | 6381775  | 25   | 6381762  | 11 | 11   | 1.8  |
| 7 | 6455600  | 6455775  | 175  | 6455687  | 17 | 103  | 15.6 |
| 7 | 6456100  | 6456325  | 225  | 6456212  | 19 | 125  | 3.7  |
| 7 | 6681200  | 6681450  | 250  | 6681287  | 36 | 287  | 7.3  |
| 7 | 6682050  | 6682325  | 275  | 6682137  | 19 | 155  | 4.6  |
| 7 | 6697125  | 6698350  | 1225 | 6697337  | 41 | 1272 | 18.3 |
| 7 | 6716100  | 6716175  | 75   | 6716137  | 12 | 35   | 0    |
| 7 | 6735625  | 6735650  | 25   | 6735637  | 11 | 11   | 1.8  |
| 7 | 6832425  | 6832625  | 200  | 6832462  | 25 | 169  | 31.1 |
| 7 | 7105925  | 7105975  | 50   | 7105937  | 12 | 24   | 3.7  |
| 7 | 7109250  | 7109300  | 50   | 7109262  | 11 | 22   | 2.7  |
| 7 | 7647725  | 7647750  | 25   | 7647737  | 11 | 11   | 0    |
| 7 | 8449225  | 8449325  | 100  | 8449287  | 16 | 59   | 10.1 |
| 7 | 10243600 | 10243775 | 175  | 10243662 | 31 | 188  | 24.7 |
| 7 | 10765375 | 10765650 | 275  | 10765512 | 30 | 259  | 0    |
| 7 | 10895600 | 10895625 | 25   | 10895612 | 11 | 11   | 1.8  |
| 7 | 10918625 | 10918750 | 125  | 10918662 | 12 | 58   | 4.6  |
| 7 | 10946400 | 10946550 | 150  | 10946437 | 54 | 278  | 43.9 |
| 7 | 10972325 | 10972500 | 175  | 10972462 | 12 | 75   | 0    |
| 7 | 10979400 | 10979825 | 425  | 10979762 | 24 | 302  | 25.6 |
| 7 | 12693925 | 12693950 | 25   | 12693937 | 14 | 14   | 2.7  |
| 7 | 12721950 | 12722075 | 125  | 12721962 | 28 | 126  | 17.4 |
| 7 | 13318600 | 13318625 | 25   | 13318612 | 11 | 11   | 0    |
| 7 | 13785150 | 13785450 | 300  | 13785337 | 27 | 243  | 47.6 |
| 7 | 13854825 | 13854850 | 25   | 13854837 | 11 | 11   | 1.8  |
| 7 | 13856200 | 13856275 | 75   | 13856212 | 12 | 34   | 5.5  |
| 7 | 13856650 | 13856825 | 175  | 13856712 | 20 | 117  | 12.8 |
| 7 | 13926500 | 13926550 | 50   | 13926537 | 18 | 32   | 5.5  |
| 7 | 13995525 | 13995575 | 50   | 13995562 | 13 | 24   | 1.8  |
| 7 | 13996525 | 13996650 | 125  | 13996587 | 19 | 84   | 15.6 |
| 7 | 15204800 | 15204975 | 175  | 15204912 | 23 | 141  | 27.4 |
| 7 | 15469450 | 15469700 | 250  | 15469637 | 23 | 185  | 0    |

|   |          |          |     |          |    |     |      |
|---|----------|----------|-----|----------|----|-----|------|
| 7 | 15495575 | 15495675 | 100 | 15495662 | 16 | 55  | 4.6  |
| 7 | 15522900 | 15522925 | 25  | 15522912 | 11 | 11  | 0.9  |
| 7 | 15524125 | 15524300 | 175 | 15524137 | 11 | 73  | 7.3  |
| 7 | 15532200 | 15532250 | 50  | 15532212 | 11 | 22  | 2.7  |
| 7 | 15590900 | 15591075 | 175 | 15590962 | 16 | 99  | 10.1 |
| 7 | 15693775 | 15693825 | 50  | 15693812 | 12 | 23  | 1.8  |
| 7 | 15710175 | 15710200 | 25  | 15710187 | 11 | 11  | 0.9  |
| 7 | 15788250 | 15788275 | 25  | 15788262 | 11 | 11  | 0.9  |
| 7 | 16403450 | 16403500 | 50  | 16403462 | 12 | 24  | 0.9  |
| 7 | 16471925 | 16472000 | 75  | 16471937 | 11 | 31  | 2.7  |
| 7 | 16652000 | 16652125 | 125 | 16652112 | 37 | 135 | 21   |
| 7 | 16714825 | 16714900 | 75  | 16714837 | 11 | 33  | 2.7  |
| 7 | 16745900 | 16745975 | 75  | 16745937 | 14 | 39  | 2.7  |
| 7 | 16824375 | 16824450 | 75  | 16824387 | 13 | 37  | 5.5  |
| 7 | 16921750 | 16921775 | 25  | 16921762 | 11 | 11  | 1.8  |
| 7 | 16922600 | 16922675 | 75  | 16922637 | 13 | 38  | 4.6  |
| 7 | 16996025 | 16996325 | 300 | 16996212 | 29 | 269 | 40.3 |
| 7 | 17101125 | 17101200 | 75  | 17101162 | 20 | 54  | 8.2  |
| 7 | 17150725 | 17150850 | 125 | 17150762 | 14 | 59  | 3.7  |
| 7 | 17280800 | 17280925 | 125 | 17280837 | 14 | 67  | 9.1  |
| 7 | 17304475 | 17304650 | 175 | 17304487 | 18 | 118 | 13.7 |
| 7 | 17305525 | 17305575 | 50  | 17305537 | 11 | 22  | 2.7  |
| 7 | 17414875 | 17415000 | 125 | 17414887 | 13 | 62  | 3.7  |
| 7 | 17445925 | 17446100 | 175 | 17445962 | 13 | 85  | 0    |
| 7 | 17658250 | 17658275 | 25  | 17658262 | 15 | 15  | 2.7  |
| 7 | 17700550 | 17700625 | 75  | 17700562 | 12 | 34  | 0.9  |
| 7 | 18207650 | 18207725 | 75  | 18207687 | 14 | 40  | 0.9  |
| 7 | 18396275 | 18396475 | 200 | 18396437 | 18 | 116 | 8.2  |
| 7 | 18673700 | 18673875 | 175 | 18673712 | 16 | 105 | 17.4 |
| 7 | 18686850 | 18686925 | 75  | 18686862 | 11 | 33  | 3.7  |
| 7 | 18705150 | 18705175 | 25  | 18705162 | 11 | 11  | 0.9  |
| 7 | 18832475 | 18832500 | 25  | 18832487 | 12 | 12  | 0.9  |
| 7 | 18835175 | 18835200 | 25  | 18835187 | 11 | 11  | 1.8  |
| 7 | 18841325 | 18841425 | 100 | 18841412 | 14 | 51  | 7.3  |
| 7 | 18852850 | 18853125 | 275 | 18853012 | 21 | 184 | 35.7 |
| 7 | 18981150 | 18981225 | 75  | 18981162 | 18 | 41  | 3.7  |
| 7 | 18984000 | 18984050 | 50  | 18984012 | 13 | 24  | 0.9  |
| 7 | 18984325 | 18984400 | 75  | 18984337 | 11 | 32  | 2.7  |
| 7 | 19125575 | 19125650 | 75  | 19125587 | 11 | 33  | 6.4  |
| 7 | 19328300 | 19328450 | 150 | 19328387 | 12 | 67  | 2.7  |
| 7 | 19383800 | 19383825 | 25  | 19383812 | 11 | 11  | 1.8  |
| 7 | 19715425 | 19715500 | 75  | 19715437 | 19 | 47  | 6.4  |
| 7 | 20225600 | 20225775 | 175 | 20225712 | 19 | 119 | 22   |
| 7 | 20226225 | 20226400 | 175 | 20226262 | 41 | 217 | 41.2 |
| 7 | 20227250 | 20227575 | 325 | 20227437 | 18 | 161 | 16.5 |
| 7 | 20337625 | 20337650 | 25  | 20337637 | 11 | 11  | 0.9  |
| 7 | 20358250 | 20358275 | 25  | 20358262 | 11 | 11  | 1.8  |
| 7 | 20414075 | 20414100 | 25  | 20414087 | 11 | 11  | 1.8  |
| 7 | 20535300 | 20535500 | 200 | 20535337 | 13 | 89  | 17.4 |
| 7 | 20550875 | 20550900 | 25  | 20550887 | 12 | 12  | 0.9  |
| 7 | 20567825 | 20567925 | 100 | 20567887 | 13 | 49  | 7.3  |
| 7 | 20602975 | 20603100 | 125 | 20603012 | 15 | 64  | 5.5  |
| 7 | 20603700 | 20603875 | 175 | 20603712 | 12 | 67  | 11   |
| 7 | 22450875 | 22450975 | 100 | 22450887 | 15 | 56  | 7.3  |
| 7 | 22495075 | 22495250 | 175 | 22495162 | 18 | 104 | 10.1 |
| 7 | 22732375 | 22732450 | 75  | 22732387 | 11 | 33  | 5.5  |
| 7 | 22862125 | 22862375 | 250 | 22862237 | 23 | 186 | 18.3 |
| 7 | 22864600 | 22864875 | 275 | 22864837 | 24 | 183 | 19.2 |
| 7 | 23061925 | 23061950 | 25  | 23061937 | 11 | 11  | 0.9  |
| 7 | 23111650 | 23111675 | 25  | 23111662 | 12 | 12  | 1.8  |
| 7 | 23209300 | 23209400 | 100 | 23209312 | 12 | 48  | 0.9  |
| 7 | 23302050 | 23302075 | 25  | 23302062 | 12 | 12  | 1.8  |
| 7 | 23305075 | 23305100 | 25  | 23305087 | 11 | 11  | 1.8  |
| 7 | 23340000 | 23340025 | 25  | 23340012 | 13 | 13  | 1.8  |
| 7 | 23343675 | 23343700 | 25  | 23343687 | 11 | 11  | 0.9  |
| 7 | 23357625 | 23357675 | 50  | 23357637 | 11 | 22  | 2.7  |
| 7 | 23359350 | 23359400 | 50  | 23359362 | 14 | 28  | 4.6  |
| 7 | 23480950 | 23480975 | 25  | 23480962 | 12 | 12  | 1.8  |
| 7 | 23603225 | 23603475 | 250 | 23603362 | 69 | 520 | 48.5 |
| 7 | 23660100 | 23660475 | 375 | 23660287 | 16 | 206 | 21   |
| 7 | 23665200 | 23665350 | 150 | 23665287 | 17 | 90  | 5.5  |
| 7 | 23685975 | 23686175 | 200 | 23686087 | 25 | 170 | 12.8 |
| 7 | 24148125 | 24148175 | 50  | 24148137 | 11 | 22  | 3.7  |
| 7 | 24415575 | 24415600 | 25  | 24415587 | 11 | 11  | 0.9  |
| 7 | 24580250 | 24580275 | 25  | 24580262 | 13 | 13  | 0.9  |

|   |          |          |     |          |    |     |      |
|---|----------|----------|-----|----------|----|-----|------|
| 7 | 24849200 | 24849375 | 175 | 24849237 | 17 | 115 | 16.5 |
| 7 | 24962150 | 24962200 | 50  | 24962162 | 13 | 26  | 3.7  |
| 7 | 24985175 | 24985225 | 50  | 24985187 | 12 | 24  | 3.7  |
| 7 | 25039775 | 25039875 | 100 | 25039787 | 12 | 45  | 0    |
| 7 | 25099575 | 25099625 | 50  | 25099587 | 14 | 28  | 5.5  |
| 7 | 25326700 | 25326825 | 125 | 25326737 | 16 | 67  | 4.6  |
| 7 | 25662525 | 25663000 | 475 | 25662862 | 18 | 268 | 40.3 |
| 7 | 25838250 | 25838450 | 200 | 25838262 | 12 | 95  | 16.5 |
| 7 | 25852875 | 25853000 | 125 | 25852887 | 13 | 60  | 3.7  |
| 7 | 25861125 | 25861375 | 250 | 25861187 | 19 | 170 | 21   |
| 7 | 25863575 | 25863600 | 25  | 25863587 | 11 | 11  | 1.8  |
| 7 | 25863925 | 25863975 | 50  | 25863937 | 14 | 28  | 4.6  |
| 7 | 25864350 | 25864375 | 25  | 25864362 | 11 | 11  | 0.9  |
| 7 | 25868700 | 25868725 | 25  | 25868712 | 21 | 21  | 3.7  |
| 7 | 25869025 | 25869050 | 25  | 25869037 | 11 | 11  | 1.8  |
| 7 | 25928575 | 25928625 | 50  | 25928612 | 13 | 25  | 3.7  |
| 7 | 26157200 | 26157350 | 150 | 26157212 | 11 | 61  | 8.2  |
| 7 | 26158200 | 26158250 | 50  | 26158212 | 14 | 25  | 4.6  |
| 7 | 26162850 | 26163000 | 150 | 26162862 | 11 | 57  | 3.7  |
| 7 | 26456000 | 26456175 | 175 | 26456087 | 20 | 126 | 22   |
| 7 | 26864275 | 26864350 | 75  | 26864312 | 12 | 35  | 0.9  |
| 7 | 27117500 | 27117525 | 25  | 27117512 | 14 | 14  | 2.7  |
| 7 | 27142775 | 27142850 | 75  | 27142787 | 15 | 42  | 8.2  |
| 7 | 27157225 | 27157250 | 25  | 27157237 | 23 | 23  | 4.6  |
| 7 | 27176475 | 27176500 | 25  | 27176487 | 12 | 12  | 0    |
| 7 | 27177525 | 27177550 | 25  | 27177537 | 11 | 11  | 0.9  |
| 7 | 27178925 | 27179175 | 250 | 27179012 | 26 | 198 | 22   |
| 7 | 27189975 | 27190325 | 350 | 27190162 | 19 | 215 | 32.9 |
| 7 | 27194425 | 27194500 | 75  | 27194462 | 14 | 40  | 3.7  |
| 7 | 27217075 | 27217125 | 50  | 27217087 | 12 | 24  | 3.7  |
| 7 | 27650075 | 27650100 | 25  | 27650087 | 11 | 11  | 0    |
| 7 | 27695725 | 27695850 | 125 | 27695812 | 15 | 69  | 10.1 |
| 7 | 27716050 | 27716075 | 25  | 27716062 | 11 | 11  | 0.9  |
| 7 | 27722075 | 27722150 | 75  | 27722087 | 12 | 33  | 2.7  |
| 7 | 27723200 | 27723300 | 100 | 27723237 | 13 | 49  | 6.4  |
| 7 | 27747125 | 27747200 | 75  | 27747137 | 14 | 40  | 7.3  |
| 7 | 27927400 | 27927425 | 25  | 27927412 | 12 | 12  | 1.8  |
| 7 | 28000825 | 28001025 | 200 | 28000837 | 18 | 105 | 19.2 |
| 7 | 28016400 | 28016450 | 50  | 28016437 | 13 | 24  | 1.8  |
| 7 | 28023625 | 28023650 | 25  | 28023637 | 11 | 11  | 0.9  |
| 7 | 28278725 | 28278825 | 100 | 28278812 | 13 | 49  | 7.3  |
| 7 | 28364800 | 28364825 | 25  | 28364812 | 11 | 11  | 1.8  |
| 7 | 28414750 | 28414775 | 25  | 28414762 | 12 | 12  | 1.8  |
| 7 | 28483100 | 28483125 | 25  | 28483112 | 11 | 11  | 1.8  |
| 7 | 28483350 | 28483500 | 150 | 28483362 | 18 | 99  | 12.8 |
| 7 | 28497250 | 28497275 | 25  | 28497262 | 11 | 11  | 1.8  |
| 7 | 28540250 | 28540325 | 75  | 28540262 | 14 | 40  | 6.4  |
| 7 | 28691925 | 28691975 | 50  | 28691937 | 11 | 22  | 1.8  |
| 7 | 28861975 | 28862125 | 150 | 28862087 | 19 | 100 | 19.2 |
| 7 | 28869225 | 28869275 | 50  | 28869237 | 18 | 35  | 4.6  |
| 7 | 28925900 | 28925950 | 50  | 28925912 | 15 | 29  | 4.6  |
| 7 | 28965075 | 28965100 | 25  | 28965087 | 12 | 12  | 0.9  |
| 7 | 29097250 | 29097275 | 25  | 29097262 | 14 | 14  | 1.8  |
| 7 | 29097525 | 29097550 | 25  | 29097537 | 19 | 19  | 2.7  |
| 7 | 29103875 | 29103975 | 100 | 29103887 | 12 | 48  | 3.7  |
| 7 | 29460075 | 29460125 | 50  | 29460087 | 11 | 22  | 0    |
| 7 | 29629950 | 29630100 | 150 | 29629987 | 13 | 72  | 3.7  |
| 7 | 29648925 | 29649125 | 200 | 29649062 | 19 | 118 | 13.7 |
| 7 | 29883450 | 29883575 | 125 | 29883537 | 14 | 61  | 9.1  |
| 7 | 29994925 | 29994950 | 25  | 29994937 | 11 | 11  | 1.8  |
| 7 | 30163350 | 30163525 | 175 | 30163412 | 19 | 115 | 11   |
| 7 | 30179200 | 30179225 | 25  | 30179212 | 12 | 12  | 0.9  |
| 7 | 30510650 | 30510775 | 125 | 30510762 | 21 | 85  | 11.9 |
| 7 | 30511475 | 30511500 | 25  | 30511487 | 13 | 13  | 0.9  |
| 7 | 30726750 | 30726775 | 25  | 30726762 | 11 | 11  | 0    |
| 7 | 30756825 | 30756950 | 125 | 30756887 | 12 | 56  | 6.4  |
| 7 | 30918075 | 30918225 | 150 | 30918187 | 13 | 64  | 9.1  |
| 7 | 30991125 | 30991275 | 150 | 30991262 | 12 | 65  | 0    |
| 7 | 31556550 | 31556700 | 150 | 31556687 | 21 | 97  | 14.6 |
| 7 | 31941425 | 31941450 | 25  | 31941437 | 12 | 12  | 1.8  |
| 7 | 32057500 | 32057650 | 150 | 32057612 | 18 | 91  | 7.3  |
| 7 | 32063825 | 32063850 | 25  | 32063837 | 11 | 11  | 0    |
| 7 | 32169325 | 32169550 | 225 | 32169437 | 23 | 172 | 15.6 |
| 7 | 32270975 | 32271025 | 50  | 32270987 | 11 | 22  | 2.7  |
| 7 | 32496225 | 32496275 | 50  | 32496262 | 15 | 26  | 4.6  |

|   |          |          |     |          |    |     |      |
|---|----------|----------|-----|----------|----|-----|------|
| 7 | 32496775 | 32496875 | 100 | 32496787 | 19 | 58  | 9.1  |
| 7 | 32963400 | 32963475 | 75  | 32963412 | 23 | 61  | 9.1  |
| 7 | 33076600 | 33076775 | 175 | 33076662 | 14 | 84  | 3.7  |
| 7 | 33656925 | 33656950 | 25  | 33656937 | 13 | 13  | 0.9  |
| 7 | 34065700 | 34065775 | 75  | 34065712 | 16 | 42  | 6.4  |
| 7 | 34072650 | 34072725 | 75  | 34072662 | 12 | 36  | 5.5  |
| 7 | 34858625 | 34858675 | 50  | 34858637 | 11 | 22  | 3.7  |
| 7 | 35543500 | 35543525 | 25  | 35543512 | 11 | 11  | 1.8  |
| 7 | 35740250 | 35740275 | 25  | 35740262 | 11 | 11  | 1.8  |
| 7 | 35760350 | 35760450 | 100 | 35760412 | 15 | 53  | 7.3  |
| 7 | 35788025 | 35788150 | 125 | 35788037 | 15 | 70  | 4.6  |
| 7 | 35799450 | 35799475 | 25  | 35799462 | 11 | 11  | 1.8  |
| 7 | 35806825 | 35806900 | 75  | 35806837 | 24 | 68  | 12.8 |
| 7 | 35808075 | 35808125 | 50  | 35808087 | 11 | 22  | 1.8  |
| 7 | 36395150 | 36395325 | 175 | 36395162 | 12 | 83  | 13.7 |
| 7 | 36396025 | 36396075 | 50  | 36396037 | 11 | 22  | 3.7  |
| 7 | 36665525 | 36665550 | 25  | 36665537 | 11 | 11  | 0.9  |
| 7 | 36787675 | 36787775 | 100 | 36787687 | 12 | 47  | 3.7  |
| 7 | 36797150 | 36797175 | 25  | 36797162 | 11 | 11  | 0    |
| 7 | 37256950 | 37257000 | 50  | 37256962 | 11 | 22  | 1.8  |
| 7 | 37365550 | 37365600 | 50  | 37365562 | 12 | 24  | 1.8  |
| 7 | 37382750 | 37382800 | 50  | 37382762 | 14 | 28  | 1.8  |
| 7 | 37414400 | 37414575 | 175 | 37414487 | 18 | 102 | 17.4 |
| 7 | 37453550 | 37453575 | 25  | 37453562 | 14 | 14  | 2.7  |
| 7 | 37494275 | 37494425 | 150 | 37494387 | 14 | 73  | 2.7  |
| 7 | 37498575 | 37498800 | 225 | 37498637 | 24 | 179 | 15.6 |
| 7 | 37791025 | 37791075 | 50  | 37791037 | 11 | 22  | 0.9  |
| 7 | 38183900 | 38183925 | 25  | 38183912 | 11 | 11  | 1.8  |
| 7 | 38984125 | 38984175 | 50  | 38984137 | 11 | 22  | 0    |
| 7 | 39078200 | 39078275 | 75  | 39078212 | 11 | 33  | 2.7  |
| 7 | 39161025 | 39161050 | 25  | 39161037 | 11 | 11  | 0.9  |
| 7 | 39385625 | 39385650 | 25  | 39385637 | 11 | 11  | 1.8  |
| 7 | 39420575 | 39420625 | 50  | 39420587 | 11 | 22  | 2.7  |
| 7 | 39739650 | 39739900 | 250 | 39739662 | 43 | 306 | 45.7 |
| 7 | 39888300 | 39888500 | 200 | 39888462 | 17 | 116 | 7.3  |
| 7 | 40140950 | 40141175 | 225 | 40140962 | 17 | 83  | 15.6 |
| 7 | 40475650 | 40475675 | 25  | 40475662 | 12 | 12  | 1.8  |
| 7 | 40887950 | 40887975 | 25  | 40887962 | 11 | 11  | 1.8  |
| 7 | 41189975 | 41190150 | 175 | 41189987 | 17 | 103 | 16.5 |
| 7 | 41220875 | 41220975 | 100 | 41220887 | 12 | 47  | 5.5  |
| 7 | 41223575 | 41223650 | 75  | 41223587 | 11 | 33  | 4.6  |
| 7 | 41259225 | 41259300 | 75  | 41259237 | 13 | 37  | 3.7  |
| 7 | 41695900 | 41695950 | 50  | 41695912 | 12 | 24  | 1.8  |
| 7 | 41709150 | 41709450 | 300 | 41709312 | 27 | 248 | 30.2 |
| 7 | 41949475 | 41949575 | 100 | 41949487 | 14 | 54  | 8.2  |
| 7 | 42020900 | 42020925 | 25  | 42020912 | 11 | 11  | 0.9  |
| 7 | 42243450 | 42243600 | 150 | 42243512 | 23 | 130 | 21   |
| 7 | 42245050 | 42245075 | 25  | 42245062 | 13 | 13  | 0.9  |
| 7 | 42344650 | 42344700 | 50  | 42344662 | 11 | 22  | 3.7  |
| 7 | 42462100 | 42462200 | 100 | 42462112 | 13 | 46  | 2.7  |
| 7 | 42486900 | 42486975 | 75  | 42486912 | 11 | 33  | 5.5  |
| 7 | 42500875 | 42501075 | 200 | 42501062 | 19 | 126 | 19.2 |
| 7 | 42528325 | 42528400 | 75  | 42528387 | 24 | 63  | 9.1  |
| 7 | 42561225 | 42561300 | 75  | 42561237 | 11 | 33  | 0    |
| 7 | 42624450 | 42624550 | 100 | 42624487 | 12 | 46  | 5.5  |
| 7 | 42656775 | 42656875 | 100 | 42656812 | 15 | 56  | 6.4  |
| 7 | 43114525 | 43114575 | 50  | 43114537 | 11 | 22  | 3.7  |
| 7 | 43297250 | 43297300 | 50  | 43297262 | 12 | 24  | 0    |
| 7 | 43300550 | 43300625 | 75  | 43300562 | 12 | 36  | 0    |
| 7 | 43392250 | 43392275 | 25  | 43392262 | 11 | 11  | 0.9  |
| 7 | 43495075 | 43495250 | 175 | 43495087 | 18 | 117 | 15.6 |
| 7 | 43575850 | 43575875 | 25  | 43575862 | 15 | 15  | 2.7  |
| 7 | 43643575 | 43643725 | 150 | 43643712 | 14 | 70  | 10.1 |
| 7 | 43700975 | 43701075 | 100 | 43701037 | 12 | 46  | 0    |
| 7 | 43734700 | 43734725 | 25  | 43734712 | 11 | 11  | 0.9  |
| 7 | 43876150 | 43876175 | 25  | 43876162 | 12 | 12  | 1.8  |
| 7 | 44087125 | 44087250 | 125 | 44087212 | 14 | 62  | 8.2  |
| 7 | 44088175 | 44088225 | 50  | 44088187 | 11 | 22  | 2.7  |
| 7 | 44094500 | 44094525 | 25  | 44094512 | 11 | 11  | 1.8  |
| 7 | 44095100 | 44095150 | 50  | 44095137 | 12 | 23  | 1.8  |
| 7 | 44119075 | 44119150 | 75  | 44119087 | 12 | 36  | 2.7  |
| 7 | 44265850 | 44265875 | 25  | 44265862 | 13 | 13  | 1.8  |
| 7 | 44496850 | 44496900 | 50  | 44496862 | 11 | 22  | 1.8  |
| 7 | 44646050 | 44646100 | 50  | 44646062 | 12 | 24  | 3.7  |
| 7 | 44797825 | 44797900 | 75  | 44797837 | 11 | 33  | 1.8  |

|   |          |          |     |          |    |     |      |
|---|----------|----------|-----|----------|----|-----|------|
| 7 | 44992250 | 44992350 | 100 | 44992262 | 14 | 58  | 11   |
| 7 | 44992950 | 44992975 | 25  | 44992962 | 29 | 29  | 5.5  |
| 7 | 45105350 | 45105450 | 100 | 45105387 | 13 | 46  | 4.6  |
| 7 | 45606575 | 45606625 | 50  | 45606587 | 11 | 22  | 0    |
| 7 | 45689000 | 45689200 | 200 | 45689162 | 23 | 150 | 7.3  |
| 7 | 45929450 | 45929600 | 150 | 45929462 | 12 | 70  | 11   |
| 7 | 46060625 | 46060775 | 150 | 46060687 | 13 | 68  | 9.1  |
| 7 | 46267900 | 46267925 | 25  | 46267912 | 11 | 11  | 0    |
| 7 | 46474850 | 46475275 | 425 | 46475087 | 47 | 539 | 44.8 |
| 7 | 46760175 | 46760275 | 100 | 46760187 | 14 | 53  | 7.3  |
| 7 | 46770300 | 46770325 | 25  | 46770312 | 14 | 14  | 0.9  |
| 7 | 46775300 | 46775450 | 150 | 46775337 | 13 | 75  | 0    |
| 7 | 46939025 | 46939075 | 50  | 46939037 | 11 | 22  | 2.7  |
| 7 | 47306800 | 47306825 | 25  | 47306812 | 15 | 15  | 2.7  |
| 7 | 47320600 | 47320625 | 25  | 47320612 | 11 | 11  | 0    |
| 7 | 47333700 | 47333750 | 50  | 47333712 | 15 | 28  | 4.6  |
| 7 | 47334075 | 47334275 | 200 | 47334187 | 31 | 208 | 33.9 |
| 7 | 47388475 | 47388600 | 125 | 47388562 | 15 | 64  | 7.3  |
| 7 | 47484400 | 47484475 | 75  | 47484412 | 12 | 36  | 5.5  |
| 7 | 47520350 | 47520450 | 100 | 47520387 | 12 | 47  | 3.7  |
| 7 | 47575075 | 47575125 | 50  | 47575087 | 12 | 23  | 3.7  |
| 7 | 47603200 | 47603450 | 250 | 47603337 | 19 | 154 | 6.4  |
| 7 | 47606825 | 47606900 | 75  | 47606837 | 11 | 34  | 6.4  |
| 7 | 47777600 | 47777650 | 50  | 47777612 | 12 | 23  | 3.7  |
| 7 | 47792700 | 47792750 | 50  | 47792737 | 15 | 28  | 3.7  |
| 7 | 47802100 | 47802225 | 125 | 47802112 | 11 | 55  | 0    |
| 7 | 47893350 | 47893375 | 25  | 47893362 | 11 | 11  | 1.8  |
| 7 | 47956950 | 47957025 | 75  | 47956987 | 21 | 60  | 11   |
| 7 | 47985675 | 47985725 | 50  | 47985687 | 25 | 45  | 7.3  |
| 7 | 48094875 | 48095075 | 200 | 48094962 | 23 | 153 | 22.9 |
| 7 | 48146425 | 48146475 | 50  | 48146437 | 14 | 28  | 3.7  |
| 7 | 48256150 | 48256175 | 25  | 48256162 | 12 | 12  | 0.9  |
| 7 | 50618625 | 50618700 | 75  | 50618637 | 11 | 32  | 2.7  |
| 7 | 50827700 | 50827725 | 25  | 50827712 | 12 | 12  | 1.8  |
| 7 | 50861925 | 50862275 | 350 | 50862037 | 27 | 272 | 32   |
| 7 | 50989025 | 50989125 | 100 | 50989037 | 13 | 49  | 0    |
| 7 | 51125700 | 51125725 | 25  | 51125712 | 12 | 12  | 0.9  |
| 7 | 51182400 | 51182650 | 250 | 51182487 | 18 | 134 | 6.4  |
| 7 | 51594575 | 51594675 | 100 | 51594587 | 12 | 47  | 0    |
| 7 | 53847275 | 53847600 | 325 | 53847287 | 17 | 177 | 14.6 |
| 7 | 54794700 | 54794725 | 25  | 54794712 | 16 | 16  | 2.7  |
| 7 | 55122050 | 55122325 | 275 | 55122087 | 13 | 111 | 19.2 |
| 7 | 55657600 | 55657625 | 25  | 55657612 | 11 | 11  | 0.9  |
| 7 | 62998400 | 62998450 | 50  | 62998437 | 14 | 25  | 4.6  |
| 7 | 63024000 | 63024175 | 175 | 63024037 | 17 | 101 | 5.5  |
| 7 | 63176600 | 63176650 | 50  | 63176637 | 12 | 23  | 1.8  |
| 7 | 63561475 | 63561700 | 225 | 63561587 | 25 | 187 | 10.1 |
| 7 | 63607650 | 63607700 | 50  | 63607662 | 11 | 22  | 1.8  |
| 7 | 63717700 | 63717750 | 50  | 63717712 | 11 | 22  | 0    |
| 7 | 63892025 | 63892050 | 25  | 63892037 | 15 | 15  | 2.7  |
| 7 | 64104250 | 64104275 | 25  | 64104262 | 14 | 14  | 2.7  |
| 7 | 64506475 | 64506725 | 250 | 64506587 | 33 | 254 | 5.5  |
| 7 | 65368125 | 65368275 | 150 | 65368212 | 14 | 77  | 6.4  |
| 7 | 65730350 | 65730475 | 125 | 65730412 | 14 | 60  | 4.6  |
| 7 | 65756700 | 65756775 | 75  | 65756762 | 24 | 68  | 7.3  |
| 7 | 66098125 | 66098250 | 125 | 66098137 | 12 | 56  | 0.9  |
| 7 | 66147775 | 66147875 | 100 | 66147787 | 12 | 48  | 0.9  |
| 7 | 66148450 | 66148675 | 225 | 66148537 | 19 | 146 | 12.8 |
| 7 | 66178650 | 66178800 | 150 | 66178712 | 13 | 68  | 0    |
| 7 | 66354475 | 66354625 | 150 | 66354537 | 14 | 70  | 5.5  |
| 7 | 69678050 | 69678075 | 25  | 69678062 | 12 | 12  | 1.8  |
| 7 | 71641500 | 71641525 | 25  | 71641512 | 11 | 11  | 0    |
| 7 | 71641950 | 71641975 | 25  | 71641962 | 11 | 11  | 1.8  |
| 7 | 71884075 | 71884525 | 450 | 71884212 | 22 | 262 | 25.6 |
| 7 | 72398925 | 72399025 | 100 | 72398937 | 12 | 47  | 4.6  |
| 7 | 72476475 | 72476525 | 50  | 72476487 | 11 | 22  | 3.7  |
| 7 | 72630900 | 72630925 | 25  | 72630912 | 11 | 11  | 0.9  |
| 7 | 72631550 | 72631725 | 175 | 72631662 | 15 | 93  | 11.9 |
| 7 | 72756700 | 72756750 | 50  | 72756712 | 12 | 24  | 2.7  |
| 7 | 72767925 | 72768000 | 75  | 72767937 | 11 | 31  | 4.6  |
| 7 | 72881625 | 72881825 | 200 | 72881712 | 16 | 103 | 6.4  |
| 7 | 72961825 | 72961850 | 25  | 72961837 | 12 | 12  | 1.8  |
| 7 | 73040550 | 73040575 | 25  | 73040562 | 14 | 14  | 0.9  |
| 7 | 73055050 | 73055250 | 200 | 73055162 | 23 | 150 | 22.9 |
| 7 | 73082300 | 73082350 | 50  | 73082312 | 12 | 24  | 0.9  |

|   |           |           |     |           |    |      |       |
|---|-----------|-----------|-----|-----------|----|------|-------|
| 7 | 73150050  | 73150475  | 425 | 73150287  | 46 | 484  | 19.2  |
| 7 | 73324850  | 73324900  | 50  | 73324887  | 15 | 29   | 4.6   |
| 7 | 73504775  | 73504850  | 75  | 73504787  | 11 | 32   | 0     |
| 7 | 73653200  | 73653275  | 75  | 73653212  | 11 | 33   | 1.8   |
| 7 | 73687950  | 73687975  | 25  | 73687962  | 12 | 12   | 1.8   |
| 7 | 75066875  | 75067000  | 125 | 75066887  | 24 | 98   | 18.3  |
| 7 | 75273975  | 75274000  | 25  | 75273987  | 11 | 11   | 0.9   |
| 7 | 75297025  | 75297050  | 25  | 75297037  | 11 | 11   | 0     |
| 7 | 75357075  | 75357100  | 25  | 75357087  | 12 | 12   | 1.8   |
| 7 | 75381550  | 75381625  | 75  | 75381562  | 12 | 36   | 3.7   |
| 7 | 75515350  | 75515375  | 25  | 75515362  | 12 | 12   | 1.8   |
| 7 | 75737250  | 75737350  | 100 | 75737262  | 11 | 44   | 7.3   |
| 7 | 75761800  | 75762000  | 200 | 75761887  | 26 | 176  | 23.8  |
| 7 | 75770750  | 75770875  | 125 | 75770862  | 14 | 58   | 11    |
| 7 | 75826875  | 75826900  | 25  | 75826887  | 11 | 11   | 1.8   |
| 7 | 76918125  | 76918275  | 150 | 76918162  | 12 | 70   | 4.6   |
| 7 | 77003925  | 77003950  | 25  | 77003937  | 12 | 12   | 1.8   |
| 7 | 77618950  | 77619050  | 100 | 77618962  | 20 | 70   | 8.2   |
| 7 | 78007175  | 78007200  | 25  | 78007187  | 12 | 12   | 0.9   |
| 7 | 78919725  | 78919750  | 25  | 78919737  | 16 | 16   | 2.7   |
| 7 | 80579200  | 80579275  | 75  | 80579212  | 11 | 33   | 1.8   |
| 7 | 80752900  | 80752975  | 75  | 80752962  | 12 | 34   | 0     |
| 7 | 80800675  | 80800775  | 100 | 80800737  | 15 | 58   | 7.3   |
| 7 | 81157500  | 81157600  | 100 | 81157512  | 11 | 44   | 0.9   |
| 7 | 83607675  | 83607800  | 125 | 83607687  | 11 | 50   | 3.7   |
| 7 | 83839250  | 83839325  | 75  | 83839262  | 11 | 33   | 4.6   |
| 7 | 84156125  | 84156225  | 100 | 84156162  | 13 | 48   | 0     |
| 7 | 86619450  | 86619500  | 50  | 86619462  | 17 | 30   | 3.7   |
| 7 | 86795550  | 86795750  | 200 | 86795662  | 13 | 94   | 6.4   |
| 7 | 86812750  | 86812800  | 50  | 86812762  | 11 | 22   | 3.7   |
| 7 | 86982475  | 86982550  | 75  | 86982487  | 11 | 33   | 2.7   |
| 7 | 87686150  | 87686275  | 125 | 87686237  | 12 | 57   | 5.5   |
| 7 | 89870800  | 89870850  | 50  | 89870812  | 12 | 24   | 2.7   |
| 7 | 90062850  | 90063000  | 150 | 90062912  | 12 | 64   | 7.3   |
| 7 | 90080475  | 90080675  | 200 | 90080512  | 16 | 103  | 0     |
| 7 | 90226700  | 90226850  | 150 | 90226837  | 12 | 67   | 7.3   |
| 7 | 90733200  | 90733250  | 50  | 90733212  | 12 | 24   | 3.7   |
| 7 | 90733675  | 90733725  | 50  | 90733687  | 11 | 22   | 3.7   |
| 7 | 90734800  | 90734925  | 125 | 90734812  | 12 | 56   | 9.1   |
| 7 | 91891775  | 91891800  | 25  | 91891787  | 12 | 12   | 1.8   |
| 7 | 92165725  | 92165825  | 100 | 92165812  | 19 | 68   | 10.1  |
| 7 | 92185350  | 92185375  | 25  | 92185362  | 12 | 12   | 1.8   |
| 7 | 92301300  | 92301375  | 75  | 92301362  | 15 | 40   | 4.6   |
| 7 | 93781350  | 93781450  | 100 | 93781362  | 13 | 51   | 0     |
| 7 | 93835775  | 93835925  | 150 | 93835812  | 12 | 70   | 0     |
| 7 | 94088025  | 94088175  | 150 | 94088062  | 16 | 87   | 9.1   |
| 7 | 94123950  | 94123975  | 25  | 94123962  | 11 | 11   | 1.8   |
| 7 | 94901275  | 94901375  | 100 | 94901337  | 13 | 48   | 0     |
| 7 | 94941050  | 94941075  | 25  | 94941062  | 11 | 11   | 0.9   |
| 7 | 95063700  | 95063750  | 50  | 95063737  | 14 | 25   | 3.7   |
| 7 | 95076250  | 95076300  | 50  | 95076262  | 15 | 26   | 3.7   |
| 7 | 95703575  | 95703625  | 50  | 95703587  | 12 | 24   | 0     |
| 7 | 96177175  | 96177375  | 200 | 96177212  | 17 | 111  | 11.9  |
| 7 | 96574600  | 96574800  | 200 | 96574637  | 18 | 114  | 5.5   |
| 7 | 97439725  | 97439775  | 50  | 97439737  | 12 | 24   | 3.7   |
| 7 | 98036975  | 98037150  | 175 | 98037062  | 12 | 79   | 2.7   |
| 7 | 98535400  | 98535475  | 75  | 98535412  | 14 | 40   | 1.8   |
| 7 | 98598125  | 98598175  | 50  | 98598137  | 11 | 22   | 2.7   |
| 7 | 98703175  | 98703200  | 25  | 98703187  | 23 | 23   | 4.6   |
| 7 | 98908125  | 98908200  | 75  | 98908162  | 14 | 38   | 2.7   |
| 7 | 98929425  | 98929600  | 175 | 98929437  | 12 | 72   | 4.6   |
| 7 | 98966875  | 98967250  | 375 | 98967087  | 36 | 385  | 41.2  |
| 7 | 98976150  | 98976475  | 325 | 98976262  | 17 | 184  | 12.8  |
| 7 | 99354925  | 99354950  | 25  | 99354937  | 11 | 11   | 0.9   |
| 7 | 99485150  | 99485325  | 175 | 99485237  | 29 | 167  | 15.6  |
| 7 | 99506750  | 99507275  | 525 | 99506937  | 56 | 736  | 24.7  |
| 7 | 99517325  | 99517450  | 125 | 99517337  | 26 | 101  | 9.1   |
| 7 | 99613225  | 99613525  | 300 | 99613337  | 79 | 760  | 74.1  |
| 7 | 99863525  | 99864100  | 575 | 99863762  | 77 | 1028 | 112.5 |
| 7 | 99902025  | 99902075  | 50  | 99902037  | 12 | 23   | 0     |
| 7 | 99950725  | 99950800  | 75  | 99950762  | 12 | 35   | 5.5   |
| 7 | 100092025 | 100092075 | 50  | 100092037 | 12 | 24   | 3.7   |
| 7 | 100180825 | 100180975 | 150 | 100180912 | 18 | 86   | 11.9  |
| 7 | 100302800 | 100302825 | 25  | 100302812 | 11 | 11   | 1.8   |
| 7 | 100325425 | 100325600 | 175 | 100325462 | 18 | 109  | 17.4  |

|   |           |           |     |           |    |     |      |
|---|-----------|-----------|-----|-----------|----|-----|------|
| 7 | 100326100 | 100326175 | 75  | 100326112 | 12 | 36  | 1.8  |
| 7 | 100518750 | 100518875 | 125 | 100518812 | 12 | 57  | 4.6  |
| 7 | 100530100 | 100530125 | 25  | 100530112 | 14 | 14  | 2.7  |
| 7 | 100568625 | 100568800 | 175 | 100568637 | 22 | 137 | 14.6 |
| 7 | 100584150 | 100584300 | 150 | 100584187 | 15 | 78  | 7.3  |
| 7 | 100674975 | 100675075 | 100 | 100674987 | 15 | 52  | 10.1 |
| 7 | 100803900 | 100804100 | 200 | 100803962 | 20 | 130 | 13.7 |
| 7 | 100850575 | 100850625 | 50  | 100850587 | 11 | 22  | 0    |
| 7 | 100966825 | 100966875 | 50  | 100966837 | 11 | 22  | 3.7  |
| 7 | 101057950 | 101057975 | 25  | 101057962 | 11 | 11  | 1.8  |
| 7 | 101059350 | 101059625 | 275 | 101059512 | 18 | 156 | 7.3  |
| 7 | 101060800 | 101060825 | 25  | 101060812 | 14 | 14  | 2.7  |
| 7 | 101283925 | 101283950 | 25  | 101283937 | 11 | 11  | 0    |
| 7 | 101550150 | 101550250 | 100 | 101550162 | 13 | 46  | 4.6  |
| 7 | 101840550 | 101840575 | 25  | 101840562 | 12 | 12  | 0    |
| 7 | 104151050 | 104151125 | 75  | 104151062 | 12 | 34  | 5.5  |
| 7 | 104328125 | 104328525 | 400 | 104328212 | 16 | 227 | 40.3 |
| 7 | 104331500 | 104331525 | 25  | 104331512 | 11 | 11  | 0    |
| 7 | 104384975 | 104385125 | 150 | 104385012 | 15 | 86  | 6.4  |
| 7 | 104440150 | 104440200 | 50  | 104440187 | 12 | 23  | 3.7  |
| 7 | 104440550 | 104440675 | 125 | 104440587 | 17 | 76  | 11   |
| 7 | 104949225 | 104949300 | 75  | 104949237 | 11 | 33  | 5.5  |
| 7 | 105007750 | 105007875 | 125 | 105007787 | 12 | 59  | 0    |
| 7 | 105076775 | 105076800 | 25  | 105076787 | 12 | 12  | 1.8  |
| 7 | 105492900 | 105493025 | 125 | 105492962 | 23 | 105 | 17.4 |
| 7 | 105996475 | 105996500 | 25  | 105996487 | 11 | 11  | 0.9  |
| 7 | 106257375 | 106257400 | 25  | 106257387 | 11 | 11  | 0    |
| 7 | 106270000 | 106270025 | 25  | 106270012 | 12 | 12  | 0.9  |
| 7 | 106442625 | 106442650 | 25  | 106442637 | 11 | 11  | 1.8  |
| 7 | 106597625 | 106597725 | 100 | 106597637 | 19 | 67  | 10.1 |
| 7 | 107374650 | 107374675 | 25  | 107374662 | 12 | 12  | 1.8  |
| 7 | 107423250 | 107423275 | 25  | 107423262 | 11 | 11  | 0    |
| 7 | 107858800 | 107859025 | 225 | 107858937 | 20 | 148 | 11   |
| 7 | 108579825 | 108579900 | 75  | 108579837 | 11 | 33  | 0.9  |
| 7 | 110625725 | 110625750 | 25  | 110625737 | 16 | 16  | 2.7  |
| 7 | 111224100 | 111224300 | 200 | 111224187 | 15 | 109 | 9.1  |
| 7 | 111358425 | 111358500 | 75  | 111358437 | 15 | 40  | 6.4  |
| 7 | 111370050 | 111370350 | 300 | 111370162 | 25 | 224 | 7.3  |
| 7 | 111436600 | 111436725 | 125 | 111436637 | 14 | 68  | 0    |
| 7 | 111540925 | 111541025 | 100 | 111540937 | 12 | 43  | 4.6  |
| 7 | 111589450 | 111589525 | 75  | 111589487 | 14 | 40  | 3.7  |
| 7 | 111818575 | 111818650 | 75  | 111818612 | 12 | 34  | 0    |
| 7 | 111819300 | 111819450 | 150 | 111819337 | 13 | 75  | 9.1  |
| 7 | 112217475 | 112217600 | 125 | 112217537 | 21 | 95  | 16.5 |
| 7 | 112425275 | 112425325 | 50  | 112425287 | 11 | 22  | 1.8  |
| 7 | 112545775 | 112545850 | 75  | 112545837 | 21 | 50  | 8.2  |
| 7 | 112695175 | 112695250 | 75  | 112695237 | 14 | 38  | 0    |
| 7 | 115699350 | 115699550 | 200 | 115699437 | 19 | 126 | 2.7  |
| 7 | 115715375 | 115715425 | 50  | 115715412 | 14 | 27  | 2.7  |
| 7 | 115953650 | 115953725 | 75  | 115953712 | 13 | 36  | 4.6  |
| 7 | 115955350 | 115955525 | 175 | 115955487 | 14 | 88  | 11.9 |
| 7 | 116380975 | 116381000 | 25  | 116380987 | 15 | 15  | 2.7  |
| 7 | 116381675 | 116381725 | 50  | 116381687 | 12 | 24  | 1.8  |
| 7 | 117156325 | 117156450 | 125 | 117156387 | 13 | 59  | 11   |
| 7 | 120378075 | 120378100 | 25  | 120378087 | 11 | 11  | 1.8  |
| 7 | 120453550 | 120453625 | 75  | 120453562 | 11 | 33  | 0    |
| 7 | 120623500 | 120623575 | 75  | 120623512 | 11 | 33  | 2.7  |
| 7 | 120907300 | 120907325 | 25  | 120907312 | 11 | 11  | 1.8  |
| 7 | 120932800 | 120933150 | 350 | 120933037 | 43 | 408 | 6.4  |
| 7 | 120938200 | 120938525 | 325 | 120938362 | 46 | 386 | 17.4 |
| 7 | 120957725 | 120957875 | 150 | 120957837 | 19 | 100 | 17.4 |
| 7 | 120985000 | 120985025 | 25  | 120985012 | 13 | 13  | 1.8  |
| 7 | 121077625 | 121077800 | 175 | 121077762 | 17 | 103 | 5.5  |
| 7 | 121258675 | 121258800 | 125 | 121258787 | 14 | 59  | 11   |
| 7 | 123176500 | 123176525 | 25  | 123176512 | 12 | 12  | 0.9  |
| 7 | 123530700 | 123530875 | 175 | 123530787 | 16 | 98  | 0    |
| 7 | 124192700 | 124192725 | 25  | 124192712 | 11 | 11  | 1.8  |
| 7 | 124193050 | 124193075 | 25  | 124193062 | 13 | 13  | 1.8  |
| 7 | 124357400 | 124357500 | 100 | 124357412 | 29 | 79  | 13.7 |
| 7 | 126242500 | 126242575 | 75  | 126242562 | 12 | 33  | 0    |
| 7 | 127013025 | 127013200 | 175 | 127013137 | 16 | 99  | 14.6 |
| 7 | 127836775 | 127836875 | 100 | 127836862 | 12 | 49  | 9.1  |
| 7 | 128482450 | 128482475 | 25  | 128482462 | 11 | 11  | 1.8  |
| 7 | 128651550 | 128651800 | 250 | 128651687 | 22 | 171 | 26.5 |
| 7 | 128652925 | 128653025 | 100 | 128652937 | 16 | 53  | 8.2  |

|   |           |           |     |           |    |     |      |
|---|-----------|-----------|-----|-----------|----|-----|------|
| 7 | 128743100 | 128743125 | 25  | 128743112 | 11 | 11  | 1.8  |
| 7 | 129333850 | 129333900 | 50  | 129333862 | 12 | 24  | 3.7  |
| 7 | 129497350 | 129497400 | 50  | 129497387 | 30 | 57  | 9.1  |
| 7 | 129632625 | 129632725 | 100 | 129632637 | 16 | 54  | 10.1 |
| 7 | 129783500 | 129783575 | 75  | 129783562 | 12 | 34  | 1.8  |
| 7 | 130241075 | 130241125 | 50  | 130241087 | 11 | 22  | 1.8  |
| 7 | 130248500 | 130248650 | 150 | 130248587 | 19 | 101 | 15.6 |
| 7 | 130407450 | 130407600 | 150 | 130407462 | 12 | 69  | 0    |
| 7 | 130571225 | 130571250 | 25  | 130571237 | 11 | 11  | 0    |
| 7 | 130672450 | 130672475 | 25  | 130672462 | 11 | 11  | 0    |
| 7 | 130838350 | 130838450 | 100 | 130838412 | 15 | 51  | 7.3  |
| 7 | 130939200 | 130939225 | 25  | 130939212 | 13 | 13  | 0.9  |
| 7 | 130943450 | 130943650 | 200 | 130943612 | 13 | 92  | 16.5 |
| 7 | 130956050 | 130956400 | 350 | 130956162 | 35 | 354 | 48.5 |
| 7 | 131481075 | 131481125 | 50  | 131481087 | 13 | 25  | 3.7  |
| 7 | 131628200 | 131628250 | 50  | 131628237 | 25 | 44  | 7.3  |
| 7 | 131654350 | 131654400 | 50  | 131654362 | 12 | 24  | 1.8  |
| 7 | 133424775 | 133424975 | 200 | 133424912 | 19 | 129 | 1.8  |
| 7 | 133652125 | 133652150 | 25  | 133652137 | 12 | 12  | 1.8  |
| 7 | 133767950 | 133768175 | 225 | 133768112 | 13 | 95  | 11.9 |
| 7 | 133901825 | 133901875 | 50  | 133901837 | 12 | 24  | 2.7  |
| 7 | 133929225 | 133929450 | 225 | 133929287 | 16 | 114 | 13.7 |
| 7 | 134028775 | 134028950 | 175 | 134028837 | 26 | 148 | 18.3 |
| 7 | 134049850 | 134049900 | 50  | 134049862 | 12 | 23  | 1.8  |
| 7 | 134114550 | 134114650 | 100 | 134114562 | 11 | 44  | 2.7  |
| 7 | 134231400 | 134231600 | 200 | 134231412 | 13 | 97  | 3.7  |
| 7 | 134321550 | 134321750 | 200 | 134321687 | 32 | 182 | 16.5 |
| 7 | 134507225 | 134507250 | 25  | 134507237 | 11 | 11  | 1.8  |
| 7 | 134589525 | 134589725 | 200 | 134589562 | 23 | 160 | 29.3 |
| 7 | 134893625 | 134893650 | 25  | 134893637 | 11 | 11  | 1.8  |
| 7 | 135136000 | 135136050 | 50  | 135136037 | 13 | 24  | 1.8  |
| 7 | 135198075 | 135198150 | 75  | 135198087 | 11 | 33  | 2.7  |
| 7 | 135599625 | 135599775 | 150 | 135599637 | 12 | 63  | 3.7  |
| 7 | 136642200 | 136642275 | 75  | 136642212 | 12 | 36  | 2.7  |
| 7 | 136679025 | 136679050 | 25  | 136679037 | 12 | 12  | 1.8  |
| 7 | 136689800 | 136689825 | 25  | 136689812 | 11 | 11  | 1.8  |
| 7 | 136788300 | 136788475 | 175 | 136788412 | 14 | 84  | 7.3  |
| 7 | 136797500 | 136797575 | 75  | 136797512 | 12 | 36  | 0.9  |
| 7 | 137313925 | 137314100 | 175 | 137314012 | 19 | 126 | 21   |
| 7 | 137337275 | 137337300 | 25  | 137337287 | 16 | 16  | 2.7  |
| 7 | 137523550 | 137523925 | 375 | 137523762 | 45 | 437 | 0.9  |
| 7 | 137764875 | 137765150 | 275 | 137764987 | 24 | 182 | 0    |
| 7 | 137795125 | 137795325 | 200 | 137795237 | 15 | 100 | 10.1 |
| 7 | 137863000 | 137863250 | 250 | 137863112 | 25 | 182 | 2.7  |
| 7 | 137892375 | 137892600 | 225 | 137892437 | 17 | 122 | 1.8  |
| 7 | 137900950 | 137901075 | 125 | 137900962 | 14 | 60  | 0    |
| 7 | 138226275 | 138226325 | 50  | 138226312 | 18 | 32  | 5.5  |
| 7 | 138233650 | 138233700 | 50  | 138233662 | 11 | 22  | 0    |
| 7 | 138236150 | 138236250 | 100 | 138236187 | 14 | 49  | 5.5  |
| 7 | 138270900 | 138270925 | 25  | 138270912 | 11 | 11  | 1.8  |
| 7 | 138283700 | 138283725 | 25  | 138283712 | 11 | 11  | 1.8  |
| 7 | 138468800 | 138468925 | 125 | 138468887 | 21 | 89  | 11   |
| 7 | 138675200 | 138676025 | 825 | 138675462 | 49 | 836 | 81.4 |
| 7 | 138695050 | 138695125 | 75  | 138695062 | 24 | 61  | 8.2  |
| 7 | 138695375 | 138695400 | 25  | 138695387 | 15 | 15  | 2.7  |
| 7 | 139015500 | 139015525 | 25  | 139015512 | 11 | 11  | 1.8  |
| 7 | 139991050 | 139991200 | 150 | 139991062 | 12 | 69  | 6.4  |
| 7 | 141008825 | 141008875 | 50  | 141008837 | 13 | 24  | 0    |
| 7 | 141083625 | 141083675 | 50  | 141083662 | 13 | 24  | 3.7  |
| 7 | 141084350 | 141084425 | 75  | 141084412 | 23 | 50  | 6.4  |
| 7 | 141726100 | 141726200 | 100 | 141726112 | 11 | 44  | 7.3  |
| 7 | 142695000 | 142695375 | 375 | 142695287 | 40 | 428 | 54.9 |
| 7 | 142779525 | 142779575 | 50  | 142779537 | 12 | 24  | 0    |
| 7 | 143229925 | 143229975 | 50  | 143229937 | 12 | 24  | 2.7  |
| 7 | 144164050 | 144164225 | 175 | 144164137 | 21 | 135 | 19.2 |
| 7 | 144981425 | 144981475 | 50  | 144981437 | 11 | 22  | 3.7  |
| 7 | 145026925 | 145027125 | 200 | 145027062 | 19 | 124 | 13.7 |
| 7 | 148312000 | 148312100 | 100 | 148312012 | 11 | 44  | 3.7  |
| 7 | 148523600 | 148523625 | 25  | 148523612 | 12 | 12  | 1.8  |
| 7 | 148524350 | 148524450 | 100 | 148524362 | 14 | 53  | 6.4  |
| 7 | 148759200 | 148759225 | 25  | 148759212 | 11 | 11  | 0.9  |
| 7 | 148857225 | 148857475 | 250 | 148857312 | 27 | 206 | 8.2  |
| 7 | 148923625 | 148923650 | 25  | 148923637 | 11 | 11  | 0.9  |
| 7 | 149019400 | 149019475 | 75  | 149019412 | 13 | 35  | 4.6  |
| 7 | 149038825 | 149039025 | 200 | 149038987 | 19 | 135 | 2.7  |



|   |           |           |     |           |    |     |      |
|---|-----------|-----------|-----|-----------|----|-----|------|
| 7 | 149048700 | 149048800 | 100 | 149048712 | 11 | 44  | 4.6  |
| 7 | 149697325 | 149697350 | 25  | 149697337 | 12 | 12  | 0    |
| 7 | 150281425 | 150281500 | 75  | 150281437 | 13 | 37  | 4.6  |
| 7 | 150318700 | 150318725 | 25  | 150318712 | 12 | 12  | 0.9  |
| 7 | 150415975 | 150416050 | 75  | 150416037 | 14 | 38  | 6.4  |
| 7 | 150416475 | 150416500 | 25  | 150416487 | 11 | 11  | 1.8  |
| 7 | 150439825 | 150439900 | 75  | 150439837 | 12 | 36  | 0.9  |
| 7 | 150796275 | 150796400 | 125 | 150796337 | 13 | 61  | 8.2  |
| 7 | 150848250 | 150848300 | 50  | 150848262 | 17 | 32  | 4.6  |
| 7 | 151082175 | 151082400 | 225 | 151082262 | 32 | 252 | 32   |
| 7 | 151087700 | 151087800 | 100 | 151087737 | 13 | 48  | 7.3  |
| 7 | 151378700 | 151378800 | 100 | 151378712 | 13 | 51  | 6.4  |
| 7 | 151404500 | 151404550 | 50  | 151404512 | 11 | 22  | 1.8  |
| 7 | 151409375 | 151409475 | 100 | 151409437 | 12 | 45  | 0.9  |
| 7 | 151509050 | 151509075 | 25  | 151509062 | 11 | 11  | 1.8  |
| 7 | 151788050 | 151788200 | 150 | 151788112 | 12 | 68  | 9.1  |
| 7 | 151792925 | 151793025 | 100 | 151792987 | 17 | 64  | 9.1  |
| 7 | 151799450 | 151799550 | 100 | 151799462 | 14 | 53  | 0    |
| 7 | 152061275 | 152061675 | 400 | 152061537 | 24 | 266 | 0    |
| 7 | 152846825 | 152847225 | 400 | 152847012 | 35 | 373 | 23.8 |
| 7 | 153665950 | 153666025 | 75  | 153665962 | 11 | 33  | 0    |
| 7 | 154060600 | 154060725 | 125 | 154060612 | 11 | 54  | 5.5  |
| 7 | 154061025 | 154061125 | 100 | 154061037 | 12 | 47  | 5.5  |
| 7 | 154074275 | 154074450 | 175 | 154074412 | 15 | 84  | 10.1 |
| 7 | 154489175 | 154489225 | 50  | 154489187 | 12 | 23  | 1.8  |
| 7 | 154628100 | 154628350 | 250 | 154628187 | 26 | 192 | 35.7 |
| 7 | 154652675 | 154652775 | 100 | 154652762 | 14 | 50  | 6.4  |
| 7 | 154705475 | 154705500 | 25  | 154705487 | 12 | 12  | 1.8  |
| 7 | 155235200 | 155235275 | 75  | 155235212 | 11 | 33  | 2.7  |
| 7 | 155404500 | 155404700 | 200 | 155404612 | 22 | 137 | 12.8 |
| 7 | 156433225 | 156433325 | 100 | 156433237 | 12 | 45  | 7.3  |
| 7 | 156504600 | 156504625 | 25  | 156504612 | 12 | 12  | 0.9  |
| 7 | 156507475 | 156507500 | 25  | 156507487 | 11 | 11  | 0.9  |
| 7 | 156680725 | 156680850 | 125 | 156680737 | 12 | 56  | 0    |
| 7 | 156985100 | 156985225 | 125 | 156985112 | 11 | 53  | 5.5  |
| 7 | 157050225 | 157050475 | 250 | 157050362 | 17 | 144 | 12.8 |
| 7 | 157071375 | 157071425 | 50  | 157071387 | 11 | 22  | 0.9  |
| 7 | 157270675 | 157270700 | 25  | 157270687 | 11 | 11  | 1.8  |
| 7 | 158226500 | 158226700 | 200 | 158226637 | 26 | 180 | 11   |
| 6 | 341200    | 341250    | 50  | 341212    | 11 | 22  | 3.7  |
| 6 | 381325    | 381425    | 100 | 381387    | 12 | 46  | 7.3  |
| 6 | 1471700   | 1471725   | 25  | 1471712   | 14 | 14  | 2.7  |
| 6 | 1472550   | 1472750   | 200 | 1472587   | 37 | 227 | 26.5 |
| 6 | 1520825   | 1521475   | 650 | 1520862   | 20 | 394 | 70.5 |
| 6 | 1539500   | 1539525   | 25  | 1539512   | 11 | 11  | 1.8  |
| 6 | 1552225   | 1552375   | 150 | 1552312   | 13 | 73  | 1.8  |
| 6 | 1616375   | 1616525   | 150 | 1616437   | 16 | 86  | 9.1  |
| 6 | 1831150   | 1831175   | 25  | 1831162   | 16 | 16  | 2.7  |
| 6 | 2087300   | 2087325   | 25  | 2087312   | 11 | 11  | 1.8  |
| 6 | 2102725   | 2102850   | 125 | 2102787   | 12 | 57  | 7.3  |
| 6 | 2405775   | 2405875   | 100 | 2405812   | 12 | 47  | 3.7  |
| 6 | 2467700   | 2468100   | 400 | 2467962   | 15 | 191 | 25.6 |
| 6 | 2524875   | 2524900   | 25  | 2524887   | 12 | 12  | 1.8  |
| 6 | 2561800   | 2561950   | 150 | 2561812   | 11 | 62  | 8.2  |
| 6 | 2576175   | 2576275   | 100 | 2576187   | 14 | 50  | 4.6  |
| 6 | 2597325   | 2597450   | 125 | 2597362   | 14 | 64  | 0    |
| 6 | 2604350   | 2604550   | 200 | 2604387   | 23 | 140 | 15.6 |
| 6 | 2708125   | 2708225   | 100 | 2708137   | 11 | 44  | 1.8  |
| 6 | 2931750   | 2931825   | 75  | 2931762   | 11 | 33  | 1.8  |
| 6 | 2934925   | 2935100   | 175 | 2935037   | 21 | 130 | 20.1 |
| 6 | 2958800   | 2958900   | 100 | 2958812   | 11 | 43  | 3.7  |
| 6 | 2998850   | 2998875   | 25  | 2998862   | 11 | 11  | 0.9  |
| 6 | 3192825   | 3192850   | 25  | 3192837   | 15 | 15  | 2.7  |
| 6 | 3269500   | 3269725   | 225 | 3269587   | 28 | 186 | 18.3 |
| 6 | 3273550   | 3273575   | 25  | 3273562   | 12 | 12  | 1.8  |
| 6 | 3283025   | 3283150   | 125 | 3283037   | 12 | 56  | 7.3  |
| 6 | 3296775   | 3296800   | 25  | 3296787   | 15 | 15  | 2.7  |
| 6 | 3301150   | 3301175   | 25  | 3301162   | 11 | 11  | 1.8  |
| 6 | 3301625   | 3301800   | 175 | 3301637   | 17 | 94  | 11   |
| 6 | 3322175   | 3322225   | 50  | 3322187   | 12 | 24  | 3.7  |
| 6 | 3327775   | 3327875   | 100 | 3327812   | 15 | 53  | 7.3  |
| 6 | 3660225   | 3660300   | 75  | 3660237   | 11 | 33  | 5.5  |
| 6 | 3687775   | 3687800   | 25  | 3687787   | 12 | 12  | 1.8  |
| 6 | 3768725   | 3768800   | 75  | 3768737   | 16 | 42  | 3.7  |
| 6 | 3794175   | 3794200   | 25  | 3794187   | 11 | 11  | 1.8  |

|   |          |          |     |          |    |     |      |
|---|----------|----------|-----|----------|----|-----|------|
| 6 | 3910850  | 3910925  | 75  | 3910862  | 14 | 41  | 2.7  |
| 6 | 4298100  | 4298125  | 25  | 4298112  | 11 | 11  | 0.9  |
| 6 | 4329275  | 4329550  | 275 | 4329387  | 24 | 210 | 0    |
| 6 | 4347850  | 4347950  | 100 | 4347862  | 12 | 48  | 7.3  |
| 6 | 4433650  | 4433850  | 200 | 4433687  | 15 | 109 | 0.9  |
| 6 | 4575125  | 4575325  | 200 | 4575187  | 18 | 113 | 12.8 |
| 6 | 4720775  | 4720800  | 25  | 4720787  | 11 | 11  | 0    |
| 6 | 4948900  | 4948925  | 25  | 4948912  | 19 | 19  | 3.7  |
| 6 | 5206275  | 5206450  | 175 | 5206387  | 14 | 88  | 6.4  |
| 6 | 5495700  | 5496125  | 425 | 5495887  | 69 | 690 | 15.6 |
| 6 | 5697850  | 5697875  | 25  | 5697862  | 11 | 11  | 1.8  |
| 6 | 5708825  | 5708875  | 50  | 5708837  | 12 | 24  | 1.8  |
| 6 | 5941575  | 5941750  | 175 | 5941637  | 14 | 87  | 8.2  |
| 6 | 6632550  | 6632675  | 125 | 6632612  | 13 | 59  | 4.6  |
| 6 | 6669550  | 6669600  | 50  | 6669562  | 11 | 22  | 3.7  |
| 6 | 6669875  | 6670025  | 150 | 6669887  | 24 | 116 | 17.4 |
| 6 | 6750300  | 6750400  | 100 | 6750337  | 13 | 46  | 0    |
| 6 | 7617500  | 7617800  | 300 | 7617687  | 21 | 203 | 22.9 |
| 6 | 7646925  | 7647050  | 125 | 7646962  | 13 | 57  | 0    |
| 6 | 7671225  | 7671275  | 50  | 7671237  | 15 | 29  | 5.5  |
| 6 | 7920400  | 7920550  | 150 | 7920437  | 27 | 151 | 27.4 |
| 6 | 8747750  | 8747925  | 175 | 8747787  | 13 | 78  | 9.1  |
| 6 | 8755750  | 8755800  | 50  | 8755762  | 12 | 23  | 3.7  |
| 6 | 8759825  | 8759900  | 75  | 8759887  | 12 | 34  | 2.7  |
| 6 | 10201650 | 10201675 | 25  | 10201662 | 11 | 11  | 0    |
| 6 | 10422475 | 10422500 | 25  | 10422487 | 12 | 12  | 1.8  |
| 6 | 10424675 | 10424800 | 125 | 10424687 | 13 | 61  | 6.4  |
| 6 | 10430500 | 10430575 | 75  | 10430512 | 12 | 36  | 0.9  |
| 6 | 10491475 | 10491500 | 25  | 10491487 | 12 | 12  | 1.8  |
| 6 | 10491925 | 10492050 | 125 | 10492037 | 23 | 101 | 18.3 |
| 6 | 10492425 | 10492450 | 25  | 10492437 | 13 | 13  | 1.8  |
| 6 | 10512725 | 10512900 | 175 | 10512862 | 25 | 143 | 16.5 |
| 6 | 10521250 | 10521425 | 175 | 10521362 | 13 | 84  | 11   |
| 6 | 10525225 | 10525275 | 50  | 10525237 | 12 | 24  | 1.8  |
| 6 | 10534650 | 10534800 | 150 | 10534762 | 19 | 94  | 15.6 |
| 6 | 10629700 | 10629850 | 150 | 10629737 | 24 | 128 | 15.6 |
| 6 | 10802875 | 10803050 | 175 | 10802887 | 26 | 142 | 23.8 |
| 6 | 10855975 | 10856200 | 225 | 10856037 | 16 | 129 | 21   |
| 6 | 10995300 | 10995475 | 175 | 10995437 | 16 | 98  | 10.1 |
| 6 | 11062800 | 11062825 | 25  | 11062812 | 11 | 11  | 1.8  |
| 6 | 11117325 | 11117400 | 75  | 11117337 | 11 | 33  | 3.7  |
| 6 | 11269575 | 11269600 | 25  | 11269587 | 12 | 12  | 1.8  |
| 6 | 11309250 | 11309350 | 100 | 11309287 | 14 | 54  | 7.3  |
| 6 | 11311000 | 11311075 | 75  | 11311037 | 14 | 41  | 2.7  |
| 6 | 11359975 | 11360075 | 100 | 11360037 | 14 | 48  | 5.5  |
| 6 | 11385250 | 11385375 | 125 | 11385287 | 12 | 59  | 6.4  |
| 6 | 11407525 | 11407550 | 25  | 11407537 | 11 | 11  | 0    |
| 6 | 11426575 | 11426625 | 50  | 11426587 | 12 | 24  | 2.7  |
| 6 | 11538150 | 11538225 | 75  | 11538187 | 12 | 35  | 5.5  |
| 6 | 11607375 | 11607425 | 50  | 11607387 | 12 | 24  | 3.7  |
| 6 | 13066050 | 13066125 | 75  | 13066062 | 12 | 34  | 4.6  |
| 6 | 13664100 | 13664175 | 75  | 13664112 | 11 | 33  | 1.8  |
| 6 | 13682825 | 13682850 | 25  | 13682837 | 11 | 11  | 1.8  |
| 6 | 13723250 | 13723300 | 50  | 13723287 | 20 | 39  | 6.4  |
| 6 | 13724275 | 13724300 | 25  | 13724287 | 11 | 11  | 1.8  |
| 6 | 13976700 | 13976725 | 25  | 13976712 | 11 | 11  | 0.9  |
| 6 | 14183125 | 14183175 | 50  | 14183137 | 11 | 22  | 2.7  |
| 6 | 14201575 | 14201850 | 275 | 14201687 | 16 | 141 | 6.4  |
| 6 | 14852225 | 14852375 | 150 | 14852337 | 16 | 90  | 15.6 |
| 6 | 14912775 | 14912850 | 75  | 14912837 | 16 | 40  | 4.6  |
| 6 | 14913200 | 14913350 | 150 | 14913262 | 14 | 73  | 4.6  |
| 6 | 14924475 | 14924650 | 175 | 14924487 | 12 | 80  | 15.6 |
| 6 | 14985150 | 14985225 | 75  | 14985212 | 17 | 46  | 6.4  |
| 6 | 15041025 | 15041150 | 125 | 15041112 | 18 | 77  | 7.3  |
| 6 | 15182600 | 15182625 | 25  | 15182612 | 11 | 11  | 0.9  |
| 6 | 15613075 | 15613150 | 75  | 15613087 | 11 | 33  | 1.8  |
| 6 | 15620350 | 15620400 | 50  | 15620362 | 12 | 23  | 3.7  |
| 6 | 15988425 | 15988500 | 75  | 15988437 | 15 | 41  | 5.5  |
| 6 | 16236700 | 16237075 | 375 | 16236887 | 15 | 185 | 33.9 |
| 6 | 16263450 | 16263475 | 25  | 16263462 | 12 | 12  | 1.8  |
| 6 | 16264300 | 16264350 | 50  | 16264312 | 11 | 22  | 1.8  |
| 6 | 16268100 | 16268200 | 100 | 16268112 | 14 | 50  | 0    |
| 6 | 16428175 | 16428225 | 50  | 16428212 | 15 | 29  | 5.5  |
| 6 | 16428725 | 16428775 | 50  | 16428737 | 11 | 22  | 2.7  |
| 6 | 16447250 | 16447300 | 50  | 16447287 | 20 | 34  | 6.4  |

|   |          |          |     |          |    |     |      |
|---|----------|----------|-----|----------|----|-----|------|
| 6 | 16461150 | 16461200 | 50  | 16461162 | 11 | 22  | 1.8  |
| 6 | 16748025 | 16748175 | 150 | 16748087 | 14 | 76  | 12.8 |
| 6 | 16821150 | 16821300 | 150 | 16821162 | 11 | 64  | 11.9 |
| 6 | 16825625 | 16825675 | 50  | 16825637 | 11 | 22  | 1.8  |
| 6 | 16957875 | 16958075 | 200 | 16957937 | 13 | 95  | 8.2  |
| 6 | 17011550 | 17011625 | 75  | 17011587 | 15 | 41  | 3.7  |
| 6 | 17065050 | 17065150 | 100 | 17065062 | 11 | 44  | 6.4  |
| 6 | 17073150 | 17073200 | 50  | 17073162 | 19 | 38  | 5.5  |
| 6 | 17120800 | 17120850 | 50  | 17120812 | 16 | 31  | 5.5  |
| 6 | 17151200 | 17151225 | 25  | 17151212 | 13 | 13  | 1.8  |
| 6 | 17815050 | 17815075 | 25  | 17815062 | 11 | 11  | 1.8  |
| 6 | 18070775 | 18070825 | 50  | 18070787 | 11 | 22  | 3.7  |
| 6 | 18101975 | 18102075 | 100 | 18101987 | 14 | 47  | 5.5  |
| 6 | 18372050 | 18372100 | 50  | 18372062 | 11 | 22  | 3.7  |
| 6 | 18644400 | 18644850 | 450 | 18644787 | 17 | 185 | 22.9 |
| 6 | 18669375 | 18669425 | 50  | 18669387 | 15 | 28  | 4.6  |
| 6 | 18932050 | 18932225 | 175 | 18932137 | 17 | 99  | 0    |
| 6 | 19242875 | 19242900 | 25  | 19242887 | 11 | 11  | 0    |
| 6 | 19245775 | 19245875 | 100 | 19245787 | 12 | 48  | 2.7  |
| 6 | 19287675 | 19287800 | 125 | 19287712 | 14 | 67  | 0    |
| 6 | 19428325 | 19428475 | 150 | 19428462 | 15 | 71  | 12.8 |
| 6 | 19433725 | 19433900 | 175 | 19433737 | 12 | 81  | 11   |
| 6 | 19643500 | 19643575 | 75  | 19643537 | 12 | 35  | 0.9  |
| 6 | 19665050 | 19665400 | 350 | 19665212 | 20 | 187 | 7.3  |
| 6 | 20004825 | 20004850 | 25  | 20004837 | 20 | 20  | 3.7  |
| 6 | 20005075 | 20005225 | 150 | 20005087 | 16 | 88  | 7.3  |
| 6 | 20354950 | 20355050 | 100 | 20354962 | 11 | 42  | 3.7  |
| 6 | 21061000 | 21061025 | 25  | 21061012 | 11 | 11  | 1.8  |
| 6 | 21549475 | 21549500 | 25  | 21549487 | 11 | 11  | 1.8  |
| 6 | 21646775 | 21646800 | 25  | 21646787 | 12 | 12  | 1.8  |
| 6 | 21691000 | 21691200 | 200 | 21691037 | 15 | 114 | 7.3  |
| 6 | 21696550 | 21696675 | 125 | 21696562 | 26 | 109 | 13.7 |
| 6 | 21819200 | 21819375 | 175 | 21819287 | 18 | 106 | 7.3  |
| 6 | 21982000 | 21982125 | 125 | 21982012 | 14 | 65  | 0    |
| 6 | 21994000 | 21994075 | 75  | 21994012 | 13 | 37  | 5.5  |
| 6 | 22062725 | 22062850 | 125 | 22062762 | 14 | 67  | 2.7  |
| 6 | 22134000 | 22134025 | 25  | 22134012 | 14 | 14  | 0    |
| 6 | 22180000 | 22180025 | 25  | 22180012 | 11 | 11  | 1.8  |
| 6 | 23060300 | 23060425 | 125 | 23060312 | 12 | 58  | 0    |
| 6 | 23111900 | 23111925 | 25  | 23111912 | 18 | 18  | 2.7  |
| 6 | 23285700 | 23285725 | 25  | 23285712 | 11 | 11  | 0    |
| 6 | 23442825 | 23442875 | 50  | 23442837 | 13 | 25  | 1.8  |
| 6 | 24683125 | 24683325 | 200 | 24683237 | 15 | 94  | 12.8 |
| 6 | 24830075 | 24830100 | 25  | 24830087 | 12 | 12  | 0.9  |
| 6 | 25114800 | 25114850 | 50  | 25114812 | 11 | 22  | 0    |
| 6 | 25162300 | 25162350 | 50  | 25162312 | 12 | 24  | 1.8  |
| 6 | 25266150 | 25266350 | 200 | 25266237 | 17 | 116 | 0    |
| 6 | 25421175 | 25421325 | 150 | 25421187 | 14 | 77  | 1.8  |
| 6 | 25612975 | 25613050 | 75  | 25612987 | 11 | 33  | 5.5  |
| 6 | 26125650 | 26125750 | 100 | 26125687 | 14 | 52  | 7.3  |
| 6 | 26129550 | 26129900 | 350 | 26129887 | 17 | 192 | 20.1 |
| 6 | 26135400 | 26135425 | 25  | 26135412 | 14 | 14  | 2.7  |
| 6 | 26142025 | 26142200 | 175 | 26142037 | 13 | 83  | 10.1 |
| 6 | 26164725 | 26164950 | 225 | 26164812 | 18 | 137 | 11   |
| 6 | 26211925 | 26212075 | 150 | 26212037 | 30 | 147 | 11   |
| 6 | 26231200 | 26231225 | 25  | 26231212 | 18 | 18  | 2.7  |
| 6 | 26266350 | 26266375 | 25  | 26266362 | 12 | 12  | 1.8  |
| 6 | 26296600 | 26296625 | 25  | 26296612 | 11 | 11  | 0.9  |
| 6 | 26297250 | 26297475 | 225 | 26297287 | 26 | 204 | 11.9 |
| 6 | 26307575 | 26307725 | 150 | 26307687 | 12 | 66  | 4.6  |
| 6 | 26313050 | 26313150 | 100 | 26313062 | 19 | 60  | 5.5  |
| 6 | 26325150 | 26325325 | 175 | 26325237 | 15 | 88  | 9.1  |
| 6 | 26331975 | 26332175 | 200 | 26332112 | 18 | 122 | 19.2 |
| 6 | 26333300 | 26333350 | 50  | 26333312 | 11 | 22  | 1.8  |
| 6 | 26429200 | 26429300 | 100 | 26429212 | 11 | 44  | 5.5  |
| 6 | 26430350 | 26430425 | 75  | 26430412 | 15 | 45  | 8.2  |
| 6 | 26430700 | 26430850 | 150 | 26430812 | 18 | 93  | 10.1 |
| 6 | 26582600 | 26582800 | 200 | 26582737 | 13 | 87  | 4.6  |
| 6 | 26645725 | 26645750 | 25  | 26645737 | 21 | 21  | 3.7  |
| 6 | 26677575 | 26677600 | 25  | 26677587 | 11 | 11  | 0.9  |
| 6 | 26680900 | 26680950 | 50  | 26680912 | 12 | 23  | 1.8  |
| 6 | 26703975 | 26704000 | 25  | 26703987 | 11 | 11  | 1.8  |
| 6 | 27095575 | 27095625 | 50  | 27095612 | 14 | 25  | 3.7  |
| 6 | 27096150 | 27096225 | 75  | 27096162 | 13 | 35  | 6.4  |
| 6 | 27202000 | 27202075 | 75  | 27202012 | 11 | 33  | 2.7  |

|   |          |          |     |          |    |     |      |
|---|----------|----------|-----|----------|----|-----|------|
| 6 | 27208700 | 27208775 | 75  | 27208762 | 30 | 88  | 16.5 |
| 6 | 27233925 | 27234050 | 125 | 27233937 | 12 | 53  | 1.8  |
| 6 | 27253825 | 27254325 | 500 | 27253837 | 19 | 271 | 34.8 |
| 6 | 27528275 | 27528375 | 100 | 27528362 | 13 | 49  | 0    |
| 6 | 27555575 | 27555600 | 25  | 27555587 | 12 | 12  | 1.8  |
| 6 | 27571675 | 27571725 | 50  | 27571687 | 11 | 22  | 1.8  |
| 6 | 27578400 | 27578575 | 175 | 27578562 | 13 | 84  | 12.8 |
| 6 | 27668675 | 27668700 | 25  | 27668687 | 11 | 11  | 0.9  |
| 6 | 27763925 | 27763950 | 25  | 27763937 | 12 | 12  | 1.8  |
| 6 | 27828800 | 27828850 | 50  | 27828812 | 11 | 22  | 2.7  |
| 6 | 27883475 | 27884000 | 525 | 27883562 | 17 | 269 | 29.3 |
| 6 | 27899525 | 27899650 | 125 | 27899587 | 15 | 68  | 5.5  |
| 6 | 27914200 | 27914250 | 50  | 27914212 | 14 | 27  | 3.7  |
| 6 | 27940800 | 27940825 | 25  | 27940812 | 11 | 11  | 0.9  |
| 6 | 27966200 | 27966250 | 50  | 27966212 | 12 | 23  | 3.7  |
| 6 | 27969125 | 27969225 | 100 | 27969212 | 17 | 56  | 9.1  |
| 6 | 27970225 | 27970250 | 25  | 27970237 | 13 | 13  | 1.8  |
| 6 | 27978175 | 27978350 | 175 | 27978312 | 13 | 82  | 9.1  |
| 6 | 28164875 | 28165175 | 300 | 28165062 | 32 | 264 | 0    |
| 6 | 28200225 | 28200400 | 175 | 28200337 | 19 | 111 | 15.6 |
| 6 | 28237550 | 28237750 | 200 | 28237562 | 18 | 127 | 9.1  |
| 6 | 28263850 | 28264175 | 325 | 28264012 | 15 | 161 | 16.5 |
| 6 | 28402225 | 28402400 | 175 | 28402237 | 12 | 81  | 1.8  |
| 6 | 28459025 | 28459050 | 25  | 28459037 | 11 | 11  | 1.8  |
| 6 | 28475350 | 28475625 | 275 | 28475512 | 41 | 371 | 46.7 |
| 6 | 28749650 | 28749800 | 150 | 28749662 | 12 | 70  | 11.9 |
| 6 | 28805000 | 28805025 | 25  | 28805012 | 13 | 13  | 1.8  |
| 6 | 28914100 | 28914300 | 200 | 28914162 | 15 | 97  | 18.3 |
| 6 | 28971250 | 28971325 | 75  | 28971287 | 16 | 40  | 5.5  |
| 6 | 28971925 | 28972025 | 100 | 28972012 | 23 | 72  | 11   |
| 6 | 29017400 | 29017575 | 175 | 29017437 | 16 | 90  | 10.1 |
| 6 | 29019475 | 29019500 | 25  | 29019487 | 19 | 19  | 3.7  |
| 6 | 29053600 | 29053800 | 200 | 29053662 | 17 | 116 | 7.3  |
| 6 | 29058025 | 29058100 | 75  | 29058037 | 21 | 49  | 2.7  |
| 6 | 29061425 | 29061475 | 50  | 29061462 | 13 | 24  | 3.7  |
| 6 | 29081275 | 29081300 | 25  | 29081287 | 16 | 16  | 2.7  |
| 6 | 30041875 | 30042000 | 125 | 30041962 | 15 | 67  | 6.4  |
| 6 | 30167700 | 30167725 | 25  | 30167712 | 13 | 13  | 1.8  |
| 6 | 30230650 | 30230675 | 25  | 30230662 | 13 | 13  | 1.8  |
| 6 | 30344500 | 30344600 | 100 | 30344512 | 11 | 44  | 0    |
| 6 | 30564925 | 30565125 | 200 | 30564987 | 16 | 109 | 14.6 |
| 6 | 30566000 | 30566100 | 100 | 30566062 | 14 | 49  | 0.9  |
| 6 | 30592425 | 30592475 | 50  | 30592437 | 11 | 22  | 2.7  |
| 6 | 30693775 | 30693850 | 75  | 30693837 | 17 | 47  | 6.4  |
| 6 | 30796125 | 30796250 | 125 | 30796187 | 13 | 59  | 6.4  |
| 6 | 30815650 | 30815675 | 25  | 30815662 | 12 | 12  | 1.8  |
| 6 | 30817900 | 30818050 | 150 | 30818012 | 21 | 112 | 22   |
| 6 | 30819500 | 30819550 | 50  | 30819512 | 12 | 24  | 1.8  |
| 6 | 30820625 | 30820700 | 75  | 30820687 | 12 | 34  | 3.7  |
| 6 | 30824750 | 30824775 | 25  | 30824762 | 20 | 20  | 3.7  |
| 6 | 30828000 | 30828025 | 25  | 30828012 | 11 | 11  | 0.9  |
| 6 | 30835675 | 30835775 | 100 | 30835712 | 13 | 49  | 0    |
| 6 | 30842725 | 30842750 | 25  | 30842737 | 12 | 12  | 0    |
| 6 | 30857375 | 30857475 | 100 | 30857412 | 13 | 47  | 3.7  |
| 6 | 30857700 | 30857800 | 100 | 30857712 | 30 | 111 | 11.9 |
| 6 | 30951125 | 30951250 | 125 | 30951212 | 14 | 63  | 11   |
| 6 | 30961825 | 30962025 | 200 | 30962012 | 22 | 148 | 18.3 |
| 6 | 30983925 | 30983950 | 25  | 30983937 | 14 | 14  | 2.7  |
| 6 | 31233725 | 31233750 | 25  | 31233737 | 14 | 14  | 2.7  |
| 6 | 31273350 | 31273450 | 100 | 31273412 | 14 | 52  | 4.6  |
| 6 | 31292325 | 31292475 | 150 | 31292362 | 13 | 75  | 0    |
| 6 | 31412775 | 31412950 | 175 | 31412812 | 15 | 91  | 0    |
| 6 | 31605500 | 31605550 | 50  | 31605512 | 11 | 22  | 1.8  |
| 6 | 31618000 | 31618025 | 25  | 31618012 | 16 | 16  | 2.7  |
| 6 | 31728700 | 31728800 | 100 | 31728712 | 21 | 79  | 13.7 |
| 6 | 31741225 | 31741250 | 25  | 31741237 | 11 | 11  | 1.8  |
| 6 | 31812300 | 31812325 | 25  | 31812312 | 16 | 16  | 2.7  |
| 6 | 31842200 | 31842300 | 100 | 31842212 | 12 | 45  | 5.5  |
| 6 | 31897625 | 31897750 | 125 | 31897637 | 16 | 67  | 3.7  |
| 6 | 31939475 | 31939800 | 325 | 31939612 | 28 | 262 | 27.4 |
| 6 | 31978200 | 31978375 | 175 | 31978337 | 14 | 82  | 10.1 |
| 6 | 32047950 | 32048025 | 75  | 32047962 | 16 | 44  | 7.3  |
| 6 | 32158000 | 32158025 | 25  | 32158012 | 11 | 11  | 0.9  |
| 6 | 32206250 | 32206325 | 75  | 32206262 | 15 | 42  | 5.5  |
| 6 | 32239950 | 32240000 | 50  | 32239962 | 14 | 25  | 4.6  |

|   |          |          |     |          |    |     |      |
|---|----------|----------|-----|----------|----|-----|------|
| 6 | 32272375 | 32272475 | 100 | 32272387 | 28 | 94  | 17.4 |
| 6 | 32503075 | 32503150 | 75  | 32503087 | 11 | 33  | 5.5  |
| 6 | 33029075 | 33029225 | 150 | 33029137 | 14 | 75  | 0.9  |
| 6 | 33044625 | 33044825 | 200 | 33044687 | 16 | 117 | 9.1  |
| 6 | 33046850 | 33046975 | 125 | 33046887 | 16 | 70  | 6.4  |
| 6 | 33047775 | 33047825 | 50  | 33047787 | 32 | 64  | 11   |
| 6 | 33157175 | 33157250 | 75  | 33157237 | 13 | 37  | 3.7  |
| 6 | 33176900 | 33177125 | 225 | 33177012 | 22 | 165 | 0    |
| 6 | 33280475 | 33280500 | 25  | 33280487 | 19 | 19  | 3.7  |
| 6 | 33346900 | 33347100 | 200 | 33346987 | 20 | 132 | 10.1 |
| 6 | 33353400 | 33353425 | 25  | 33353412 | 11 | 11  | 1.8  |
| 6 | 33365000 | 33365125 | 125 | 33365112 | 12 | 44  | 2.7  |
| 6 | 33493650 | 33493750 | 100 | 33493737 | 14 | 47  | 9.1  |
| 6 | 33530525 | 33530600 | 75  | 33530537 | 16 | 46  | 8.2  |
| 6 | 33655825 | 33655900 | 75  | 33655837 | 12 | 36  | 4.6  |
| 6 | 33770425 | 33770450 | 25  | 33770437 | 12 | 12  | 1.8  |
| 6 | 33772100 | 33772125 | 25  | 33772112 | 11 | 11  | 1.8  |
| 6 | 33787000 | 33787025 | 25  | 33787012 | 11 | 11  | 1.8  |
| 6 | 33915700 | 33915900 | 200 | 33915887 | 17 | 109 | 12.8 |
| 6 | 33919475 | 33919575 | 100 | 33919512 | 14 | 52  | 4.6  |
| 6 | 34016175 | 34016225 | 50  | 34016187 | 11 | 22  | 0    |
| 6 | 34319900 | 34319925 | 25  | 34319912 | 12 | 12  | 1.8  |
| 6 | 34501950 | 34501975 | 25  | 34501962 | 13 | 13  | 1.8  |
| 6 | 35092625 | 35092650 | 25  | 35092637 | 11 | 11  | 0.9  |
| 6 | 35222525 | 35222550 | 25  | 35222537 | 11 | 11  | 1.8  |
| 6 | 35278275 | 35278350 | 75  | 35278287 | 12 | 36  | 2.7  |
| 6 | 35278975 | 35279000 | 25  | 35278987 | 11 | 11  | 0.9  |
| 6 | 35310750 | 35310925 | 175 | 35310837 | 17 | 97  | 15.6 |
| 6 | 35335325 | 35335500 | 175 | 35335362 | 18 | 115 | 9.1  |
| 6 | 35435775 | 35435975 | 200 | 35435812 | 18 | 115 | 5.5  |
| 6 | 35444300 | 35444475 | 175 | 35444387 | 15 | 94  | 11   |
| 6 | 35573550 | 35573675 | 125 | 35573662 | 14 | 62  | 7.3  |
| 6 | 35866475 | 35866950 | 475 | 35866562 | 42 | 445 | 29.3 |
| 6 | 35872275 | 35872300 | 25  | 35872287 | 11 | 11  | 0.9  |
| 6 | 36103075 | 36103100 | 25  | 36103087 | 12 | 12  | 0    |
| 6 | 36103375 | 36103575 | 200 | 36103387 | 37 | 218 | 35.7 |
| 6 | 36104575 | 36104600 | 25  | 36104587 | 12 | 12  | 0.9  |
| 6 | 36289825 | 36289900 | 75  | 36289837 | 11 | 33  | 0    |
| 6 | 36378425 | 36378575 | 150 | 36378512 | 13 | 72  | 3.7  |
| 6 | 36434250 | 36434375 | 125 | 36434312 | 13 | 60  | 1.8  |
| 6 | 36499150 | 36499175 | 25  | 36499162 | 28 | 28  | 5.5  |
| 6 | 36669875 | 36669900 | 25  | 36669887 | 14 | 14  | 2.7  |
| 6 | 36725650 | 36725700 | 50  | 36725662 | 11 | 22  | 1.8  |
| 6 | 36755950 | 36756050 | 100 | 36755962 | 16 | 56  | 8.2  |
| 6 | 36842050 | 36842100 | 50  | 36842062 | 12 | 24  | 3.7  |
| 6 | 37062550 | 37062675 | 125 | 37062562 | 12 | 57  | 4.6  |
| 6 | 37245425 | 37245500 | 75  | 37245437 | 15 | 39  | 7.3  |
| 6 | 38289175 | 38289325 | 150 | 38289237 | 12 | 68  | 0.9  |
| 6 | 38779025 | 38779050 | 25  | 38779037 | 12 | 12  | 1.8  |
| 6 | 39190275 | 39190325 | 50  | 39190287 | 11 | 22  | 2.7  |
| 6 | 39190600 | 39190775 | 175 | 39190687 | 21 | 128 | 19.2 |
| 6 | 39304750 | 39304800 | 50  | 39304762 | 14 | 28  | 5.5  |
| 6 | 39464575 | 39464600 | 25  | 39464587 | 11 | 11  | 0.9  |
| 6 | 39487300 | 39487325 | 25  | 39487312 | 12 | 12  | 0.9  |
| 6 | 39507050 | 39507075 | 25  | 39507062 | 11 | 11  | 1.8  |
| 6 | 39853575 | 39853625 | 50  | 39853612 | 13 | 25  | 3.7  |
| 6 | 41504350 | 41504450 | 100 | 41504362 | 12 | 45  | 4.6  |
| 6 | 41518625 | 41518700 | 75  | 41518637 | 16 | 44  | 8.2  |
| 6 | 41621850 | 41621925 | 75  | 41621862 | 16 | 44  | 7.3  |
| 6 | 41809375 | 41809425 | 50  | 41809387 | 12 | 23  | 3.7  |
| 6 | 41843100 | 41843125 | 25  | 41843112 | 11 | 11  | 1.8  |
| 6 | 42193950 | 42193975 | 25  | 42193962 | 12 | 12  | 1.8  |
| 6 | 42382200 | 42382375 | 175 | 42382262 | 16 | 95  | 4.6  |
| 6 | 42529450 | 42529475 | 25  | 42529462 | 11 | 11  | 1.8  |
| 6 | 42530075 | 42530150 | 75  | 42530087 | 13 | 35  | 4.6  |
| 6 | 43171800 | 43171850 | 50  | 43171812 | 11 | 22  | 0    |
| 6 | 43172725 | 43172750 | 25  | 43172737 | 11 | 11  | 1.8  |
| 6 | 43202950 | 43202975 | 25  | 43202962 | 12 | 12  | 0.9  |
| 6 | 43512225 | 43512500 | 275 | 43512362 | 24 | 196 | 11   |
| 6 | 43567875 | 43567900 | 25  | 43567887 | 11 | 11  | 0.9  |
| 6 | 43569875 | 43569925 | 50  | 43569887 | 12 | 23  | 3.7  |
| 6 | 43592500 | 43592525 | 25  | 43592512 | 11 | 11  | 1.8  |
| 6 | 43703250 | 43703300 | 50  | 43703262 | 11 | 22  | 3.7  |
| 6 | 43705925 | 43706000 | 75  | 43705937 | 14 | 38  | 4.6  |
| 6 | 43716175 | 43716275 | 100 | 43716262 | 16 | 61  | 9.1  |

|   |           |           |     |           |    |     |      |
|---|-----------|-----------|-----|-----------|----|-----|------|
| 6 | 43720825  | 43720850  | 25  | 43720837  | 17 | 17  | 2.7  |
| 6 | 43743100  | 43743150  | 50  | 43743112  | 14 | 28  | 4.6  |
| 6 | 43844775  | 43844800  | 25  | 43844787  | 15 | 15  | 2.7  |
| 6 | 43845125  | 43845200  | 75  | 43845187  | 16 | 43  | 4.6  |
| 6 | 43846300  | 43846325  | 25  | 43846312  | 14 | 14  | 2.7  |
| 6 | 43999275  | 43999300  | 25  | 43999287  | 11 | 11  | 0.9  |
| 6 | 44048725  | 44048750  | 25  | 44048737  | 12 | 12  | 1.8  |
| 6 | 44056250  | 44056400  | 150 | 44056287  | 13 | 71  | 2.7  |
| 6 | 44105400  | 44105525  | 125 | 44105487  | 18 | 85  | 9.1  |
| 6 | 44135425  | 44135700  | 275 | 44135512  | 30 | 257 | 14.6 |
| 6 | 44173100  | 44173250  | 150 | 44173187  | 13 | 68  | 2.7  |
| 6 | 44209875  | 44209925  | 50  | 44209887  | 11 | 22  | 1.8  |
| 6 | 44389000  | 44389100  | 100 | 44389087  | 24 | 80  | 11.9 |
| 6 | 44556200  | 44556275  | 75  | 44556212  | 12 | 33  | 5.5  |
| 6 | 44566125  | 44566175  | 50  | 44566137  | 11 | 22  | 3.7  |
| 6 | 44814125  | 44814700  | 575 | 44814612  | 16 | 266 | 43.9 |
| 6 | 45521550  | 45521725  | 175 | 45521687  | 19 | 114 | 11.9 |
| 6 | 45558700  | 45558950  | 250 | 45558887  | 17 | 139 | 10.1 |
| 6 | 47138900  | 47138950  | 50  | 47138912  | 11 | 22  | 1.8  |
| 6 | 47151625  | 47151875  | 250 | 47151712  | 18 | 145 | 14.6 |
| 6 | 47170225  | 47170250  | 25  | 47170237  | 11 | 11  | 0.9  |
| 6 | 47243950  | 47243975  | 25  | 47243962  | 11 | 11  | 1.8  |
| 6 | 47246225  | 47246275  | 50  | 47246237  | 11 | 22  | 2.7  |
| 6 | 47318150  | 47318400  | 250 | 47318287  | 26 | 195 | 22.9 |
| 6 | 47333050  | 47333100  | 50  | 47333062  | 12 | 24  | 0.9  |
| 6 | 47998250  | 47998450  | 200 | 47998362  | 14 | 100 | 13.7 |
| 6 | 48174950  | 48174975  | 25  | 48174962  | 11 | 11  | 1.8  |
| 6 | 48218575  | 48218800  | 225 | 48218712  | 18 | 131 | 6.4  |
| 6 | 48228500  | 48228650  | 150 | 48228562  | 12 | 69  | 0    |
| 6 | 48504600  | 48504650  | 50  | 48504612  | 12 | 24  | 3.7  |
| 6 | 49641750  | 49641925  | 175 | 49641787  | 13 | 83  | 3.7  |
| 6 | 50925925  | 50926000  | 75  | 50925962  | 13 | 35  | 2.7  |
| 6 | 51370775  | 51371075  | 300 | 51370962  | 15 | 135 | 9.1  |
| 6 | 53320925  | 53320975  | 50  | 53320937  | 11 | 22  | 2.7  |
| 6 | 53331800  | 53331900  | 100 | 53331812  | 11 | 43  | 6.4  |
| 6 | 53889975  | 53890025  | 50  | 53889987  | 11 | 22  | 3.7  |
| 6 | 56688100  | 56688125  | 25  | 56688112  | 13 | 13  | 1.8  |
| 6 | 56911500  | 56911650  | 150 | 56911612  | 15 | 79  | 5.5  |
| 6 | 56928200  | 56928225  | 25  | 56928212  | 15 | 15  | 1.8  |
| 6 | 58395725  | 58395750  | 25  | 58395737  | 12 | 12  | 1.8  |
| 6 | 62390650  | 62390800  | 150 | 62390737  | 15 | 81  | 4.6  |
| 6 | 64607450  | 64607525  | 75  | 64607462  | 11 | 33  | 0.9  |
| 6 | 65450325  | 65450350  | 25  | 65450337  | 15 | 15  | 2.7  |
| 6 | 66697425  | 66697450  | 25  | 66697437  | 11 | 11  | 1.8  |
| 6 | 66928175  | 66928525  | 350 | 66928337  | 44 | 390 | 22   |
| 6 | 66940150  | 66940500  | 350 | 66940312  | 29 | 291 | 24.7 |
| 6 | 67025850  | 67025925  | 75  | 67025912  | 12 | 34  | 0    |
| 6 | 67826250  | 67826450  | 200 | 67826387  | 19 | 130 | 8.2  |
| 6 | 67833200  | 67833275  | 75  | 67833212  | 11 | 33  | 2.7  |
| 6 | 68225050  | 68225125  | 75  | 68225062  | 11 | 33  | 0    |
| 6 | 68436250  | 68436450  | 200 | 68436287  | 12 | 87  | 4.6  |
| 6 | 70684575  | 70684650  | 75  | 70684637  | 14 | 37  | 4.6  |
| 6 | 70703300  | 70703425  | 125 | 70703312  | 12 | 54  | 1.8  |
| 6 | 71179475  | 71179775  | 300 | 71179587  | 27 | 249 | 29.3 |
| 6 | 72187300  | 72187325  | 25  | 72187312  | 15 | 15  | 2.7  |
| 6 | 74076025  | 74076050  | 25  | 74076037  | 12 | 12  | 0.9  |
| 6 | 74217750  | 74217850  | 100 | 74217787  | 13 | 49  | 6.4  |
| 6 | 74287325  | 74287375  | 50  | 74287362  | 19 | 36  | 6.4  |
| 6 | 74287850  | 74287900  | 50  | 74287887  | 15 | 29  | 5.5  |
| 6 | 74462175  | 74462375  | 200 | 74462287  | 12 | 91  | 15.6 |
| 6 | 75970300  | 75970425  | 125 | 75970312  | 11 | 55  | 0.9  |
| 6 | 80000975  | 80001000  | 25  | 80000987  | 11 | 11  | 0    |
| 6 | 80872875  | 80873000  | 125 | 80872887  | 12 | 55  | 8.2  |
| 6 | 84197800  | 84197875  | 75  | 84197837  | 16 | 46  | 8.2  |
| 6 | 86409175  | 86409300  | 125 | 86409187  | 11 | 55  | 3.7  |
| 6 | 86445050  | 86445250  | 200 | 86445087  | 16 | 103 | 11   |
| 6 | 88554125  | 88554225  | 100 | 88554137  | 11 | 44  | 0    |
| 6 | 89730025  | 89730125  | 100 | 89730062  | 20 | 70  | 9.1  |
| 6 | 90405125  | 90405150  | 25  | 90405137  | 14 | 14  | 2.7  |
| 6 | 90984925  | 90984950  | 25  | 90984937  | 11 | 11  | 0.9  |
| 6 | 91353675  | 91353700  | 25  | 91353687  | 11 | 11  | 1.8  |
| 6 | 97837775  | 97838000  | 225 | 97837862  | 17 | 128 | 12.8 |
| 6 | 99378575  | 99378600  | 25  | 99378587  | 11 | 11  | 0.9  |
| 6 | 106365000 | 106365175 | 175 | 106365087 | 15 | 98  | 12.8 |
| 6 | 107074850 | 107074875 | 25  | 107074862 | 11 | 11  | 0    |

|   |           |           |     |           |    |     |      |
|---|-----------|-----------|-----|-----------|----|-----|------|
| 6 | 109764325 | 109764350 | 25  | 109764337 | 12 | 12  | 1.8  |
| 6 | 109810700 | 109810825 | 125 | 109810762 | 14 | 66  | 11.9 |
| 6 | 110969725 | 110969875 | 150 | 110969787 | 14 | 77  | 13.7 |
| 6 | 111687050 | 111687225 | 175 | 111687137 | 16 | 98  | 15.6 |
| 6 | 113790750 | 113790825 | 75  | 113790762 | 14 | 38  | 0    |
| 6 | 116310225 | 116310250 | 25  | 116310237 | 11 | 11  | 0    |
| 6 | 116833225 | 116833350 | 125 | 116833287 | 13 | 59  | 3.7  |
| 6 | 124899150 | 124899175 | 25  | 124899162 | 11 | 11  | 0.9  |
| 6 | 125679600 | 125679800 | 200 | 125679687 | 16 | 106 | 19.2 |
| 6 | 125720650 | 125720700 | 50  | 125720662 | 11 | 22  | 3.7  |
| 6 | 125816700 | 125816750 | 50  | 125816712 | 12 | 24  | 0    |
| 6 | 129863925 | 129864075 | 150 | 129863987 | 15 | 83  | 11   |
| 6 | 131991200 | 131991275 | 75  | 131991262 | 25 | 69  | 11   |
| 6 | 132495875 | 132495950 | 75  | 132495887 | 12 | 36  | 0    |
| 6 | 133605500 | 133605575 | 75  | 133605537 | 12 | 35  | 1.8  |
| 6 | 134711425 | 134711500 | 75  | 134711437 | 11 | 33  | 0.9  |
| 6 | 138229450 | 138229475 | 25  | 138229462 | 12 | 12  | 0    |
| 6 | 146177750 | 146177900 | 150 | 146177837 | 15 | 82  | 5.5  |
| 6 | 146327150 | 146327350 | 200 | 146327162 | 15 | 95  | 15.6 |
| 6 | 151244925 | 151244975 | 50  | 151244937 | 11 | 22  | 1.8  |
| 6 | 158105575 | 158105725 | 150 | 158105662 | 16 | 86  | 9.1  |
| 6 | 158299175 | 158299200 | 25  | 158299187 | 11 | 11  | 0    |
| 6 | 158350000 | 158350075 | 75  | 158350062 | 14 | 38  | 0    |
| 6 | 160130600 | 160130625 | 25  | 160130612 | 11 | 11  | 1.8  |
| 6 | 164426725 | 164426750 | 25  | 164426737 | 11 | 11  | 1.8  |
| 6 | 165480200 | 165480250 | 50  | 165480212 | 11 | 22  | 0    |
| 6 | 166273975 | 166274000 | 25  | 166273987 | 11 | 11  | 1.8  |
| 6 | 166321250 | 166321275 | 25  | 166321262 | 11 | 11  | 1.8  |
| 6 | 166321575 | 166321625 | 50  | 166321587 | 11 | 22  | 3.7  |
| 6 | 166340050 | 166340100 | 50  | 166340062 | 12 | 24  | 1.8  |
| 6 | 166366450 | 166366500 | 50  | 166366462 | 11 | 22  | 3.7  |
| 6 | 167826800 | 167826950 | 150 | 167826862 | 16 | 86  | 8.2  |
| 6 | 169212700 | 169212800 | 100 | 169212762 | 13 | 46  | 0    |
| 6 | 169304900 | 169304925 | 25  | 169304912 | 11 | 11  | 1.8  |
| 6 | 169305150 | 169305175 | 25  | 169305162 | 11 | 11  | 1.8  |
| 6 | 169796550 | 169796825 | 275 | 169796687 | 36 | 279 | 24.7 |
| 6 | 170304375 | 170304500 | 125 | 170304437 | 14 | 64  | 4.6  |
| 9 | 2833900   | 2833925   | 25  | 2833912   | 12 | 12  | 0.9  |
| 9 | 3516400   | 3516450   | 50  | 3516437   | 14 | 27  | 3.7  |
| 9 | 3517175   | 3517225   | 50  | 3517187   | 11 | 22  | 1.8  |
| 9 | 3763325   | 3763400   | 75  | 3763362   | 12 | 35  | 0    |
| 9 | 3865500   | 3865550   | 50  | 3865512   | 11 | 22  | 0.9  |
| 9 | 3952175   | 3952200   | 25  | 3952187   | 11 | 11  | 0.9  |
| 9 | 3961425   | 3961525   | 100 | 3961487   | 13 | 49  | 1.8  |
| 9 | 3961850   | 3962000   | 150 | 3961912   | 14 | 74  | 0    |
| 9 | 3970875   | 3970900   | 25  | 3970887   | 12 | 12  | 0.9  |
| 9 | 4334200   | 4334225   | 25  | 4334212   | 11 | 11  | 0    |
| 9 | 4669925   | 4669950   | 25  | 4669937   | 11 | 11  | 0.9  |
| 9 | 5834925   | 5835050   | 125 | 5834962   | 13 | 60  | 0    |
| 9 | 5998675   | 5998725   | 50  | 5998687   | 12 | 24  | 2.7  |
| 9 | 6528800   | 6528875   | 75  | 6528837   | 13 | 36  | 2.7  |
| 9 | 6556575   | 6556675   | 100 | 6556587   | 18 | 62  | 9.1  |
| 9 | 6671325   | 6671675   | 350 | 6671587   | 35 | 308 | 45.7 |
| 9 | 6694525   | 6694600   | 75  | 6694537   | 14 | 38  | 6.4  |
| 9 | 7257000   | 7257025   | 25  | 7257012   | 11 | 11  | 1.8  |
| 9 | 7666950   | 7667000   | 50  | 7666987   | 14 | 26  | 3.7  |
| 9 | 9634625   | 9634775   | 150 | 9634687   | 16 | 84  | 4.6  |
| 9 | 12766100  | 12766125  | 25  | 12766112  | 11 | 11  | 0.9  |
| 9 | 14337900  | 14338000  | 100 | 14337987  | 20 | 65  | 6.4  |
| 9 | 14455650  | 14455675  | 25  | 14455662  | 11 | 11  | 0    |
| 9 | 14784450  | 14784500  | 50  | 14784462  | 11 | 22  | 3.7  |
| 9 | 16093400  | 16093550  | 150 | 16093437  | 15 | 82  | 5.5  |
| 9 | 16096275  | 16096450  | 175 | 16096287  | 12 | 72  | 9.1  |
| 9 | 16182150  | 16182175  | 25  | 16182162  | 11 | 11  | 1.8  |
| 9 | 16658100  | 16658150  | 50  | 16658112  | 11 | 22  | 2.7  |
| 9 | 17008400  | 17008425  | 25  | 17008412  | 19 | 19  | 3.7  |
| 9 | 19039300  | 19039425  | 125 | 19039337  | 18 | 78  | 12.8 |
| 9 | 20031450  | 20031525  | 75  | 20031487  | 13 | 36  | 2.7  |
| 9 | 21701700  | 21701750  | 50  | 21701712  | 14 | 26  | 3.7  |
| 9 | 21792450  | 21792475  | 25  | 21792462  | 12 | 12  | 1.8  |
| 9 | 22149100  | 22149125  | 25  | 22149112  | 12 | 12  | 1.8  |
| 9 | 22245450  | 22245550  | 100 | 22245462  | 12 | 44  | 2.7  |
| 9 | 23553625  | 23553750  | 125 | 23553687  | 15 | 67  | 3.7  |
| 9 | 26799875  | 26799950  | 75  | 26799887  | 11 | 32  | 4.6  |
| 9 | 26946450  | 26946475  | 25  | 26946462  | 14 | 14  | 1.8  |

|   |          |          |     |          |    |     |      |
|---|----------|----------|-----|----------|----|-----|------|
| 9 | 32563175 | 32563275 | 100 | 32563212 | 20 | 69  | 12.8 |
| 9 | 33198500 | 33198600 | 100 | 33198512 | 11 | 44  | 0    |
| 9 | 33712150 | 33712275 | 125 | 33712212 | 16 | 64  | 5.5  |
| 9 | 34492350 | 34492425 | 75  | 34492387 | 12 | 34  | 5.5  |
| 9 | 34575750 | 34575775 | 25  | 34575762 | 11 | 11  | 0    |
| 9 | 35105075 | 35105150 | 75  | 35105087 | 11 | 33  | 0    |
| 9 | 35593500 | 35594000 | 500 | 35593987 | 25 | 235 | 21   |
| 9 | 35718725 | 35718800 | 75  | 35718737 | 11 | 33  | 0    |
| 9 | 35914600 | 35914775 | 175 | 35914762 | 14 | 85  | 10.1 |
| 9 | 36248475 | 36248625 | 150 | 36248612 | 23 | 114 | 21   |
| 9 | 36755900 | 36755950 | 50  | 36755912 | 11 | 22  | 2.7  |
| 9 | 37069325 | 37069750 | 425 | 37069437 | 46 | 511 | 57.6 |
| 9 | 37109825 | 37110350 | 525 | 37110062 | 75 | 835 | 29.3 |
| 9 | 37110600 | 37110625 | 25  | 37110612 | 11 | 11  | 1.8  |
| 9 | 37455575 | 37455675 | 100 | 37455587 | 12 | 45  | 8.2  |
| 9 | 37456750 | 37456775 | 25  | 37456762 | 11 | 11  | 1.8  |
| 9 | 37894475 | 37894625 | 150 | 37894487 | 21 | 106 | 11.9 |
| 9 | 37975025 | 37975050 | 25  | 37975037 | 11 | 11  | 1.8  |
| 9 | 67945475 | 67945675 | 200 | 67945637 | 19 | 117 | 15.6 |
| 9 | 68355200 | 68355250 | 50  | 68355237 | 13 | 24  | 1.8  |
| 9 | 71477675 | 71477725 | 50  | 71477687 | 14 | 28  | 3.7  |
| 9 | 71738375 | 71738500 | 125 | 71738387 | 12 | 60  | 4.6  |
| 9 | 71751675 | 71751775 | 100 | 71751687 | 11 | 43  | 0    |
| 9 | 71818950 | 71818975 | 25  | 71818962 | 11 | 11  | 1.8  |
| 9 | 72217700 | 72217825 | 125 | 72217712 | 12 | 56  | 2.7  |
| 9 | 72223375 | 72223425 | 50  | 72223387 | 19 | 34  | 5.5  |
| 9 | 72394675 | 72394700 | 25  | 72394687 | 12 | 12  | 0.9  |
| 9 | 72406025 | 72406175 | 150 | 72406087 | 18 | 96  | 15.6 |
| 9 | 72406450 | 72406550 | 100 | 72406462 | 16 | 54  | 8.2  |
| 9 | 72432950 | 72433100 | 150 | 72433012 | 18 | 92  | 5.5  |
| 9 | 72440575 | 72440775 | 200 | 72440637 | 12 | 89  | 13.7 |
| 9 | 72446625 | 72446675 | 50  | 72446637 | 11 | 22  | 1.8  |
| 9 | 72707500 | 72707650 | 150 | 72707587 | 21 | 107 | 10.1 |
| 9 | 73573075 | 73573100 | 25  | 73573087 | 12 | 12  | 1.8  |
| 9 | 74170200 | 74170250 | 50  | 74170212 | 11 | 22  | 3.7  |
| 9 | 74290525 | 74290600 | 75  | 74290537 | 13 | 37  | 7.3  |
| 9 | 74362250 | 74362450 | 200 | 74362387 | 15 | 104 | 11.9 |
| 9 | 74388400 | 74388425 | 25  | 74388412 | 11 | 11  | 0.9  |
| 9 | 78981975 | 78982025 | 50  | 78981987 | 13 | 24  | 3.7  |
| 9 | 79661725 | 79661800 | 75  | 79661787 | 14 | 38  | 2.7  |
| 9 | 80616325 | 80616400 | 75  | 80616387 | 14 | 40  | 6.4  |
| 9 | 80893875 | 80894000 | 125 | 80893962 | 12 | 56  | 7.3  |
| 9 | 81751775 | 81751800 | 25  | 81751787 | 11 | 11  | 1.8  |
| 9 | 83201275 | 83201450 | 175 | 83201312 | 14 | 93  | 11.9 |
| 9 | 83576375 | 83576575 | 200 | 83576437 | 18 | 126 | 8.2  |
| 9 | 83631100 | 83631250 | 150 | 83631137 | 16 | 88  | 6.4  |
| 9 | 85725575 | 85725600 | 25  | 85725587 | 11 | 11  | 1.8  |
| 9 | 87329600 | 87329725 | 125 | 87329612 | 11 | 55  | 3.7  |
| 9 | 87745550 | 87745600 | 50  | 87745587 | 22 | 42  | 6.4  |
| 9 | 87898800 | 87898900 | 100 | 87898837 | 17 | 63  | 7.3  |
| 9 | 87990575 | 87990950 | 375 | 87990812 | 23 | 218 | 23.8 |
| 9 | 88158975 | 88159150 | 175 | 88159037 | 14 | 78  | 11   |
| 9 | 88571850 | 88571975 | 125 | 88571887 | 18 | 77  | 10.1 |
| 9 | 88889800 | 88890000 | 200 | 88889937 | 17 | 123 | 16.5 |
| 9 | 88890425 | 88890600 | 175 | 88890537 | 21 | 125 | 22   |
| 9 | 88891050 | 88891075 | 25  | 88891062 | 11 | 11  | 1.8  |
| 9 | 88953150 | 88953375 | 225 | 88953262 | 16 | 129 | 13.7 |
| 9 | 89017625 | 89017700 | 75  | 89017637 | 11 | 33  | 4.6  |
| 9 | 89075250 | 89075375 | 125 | 89075287 | 13 | 62  | 1.8  |
| 9 | 90192575 | 90192600 | 25  | 90192587 | 11 | 11  | 0    |
| 9 | 90224050 | 90224250 | 200 | 90224162 | 16 | 102 | 6.4  |
| 9 | 90758200 | 90758350 | 150 | 90758287 | 14 | 75  | 3.7  |
| 9 | 90980900 | 90980975 | 75  | 90980912 | 12 | 36  | 0    |
| 9 | 90985075 | 90985225 | 150 | 90985112 | 17 | 77  | 11   |
| 9 | 91122950 | 91122975 | 25  | 91122962 | 11 | 11  | 1.8  |
| 9 | 92967050 | 92967200 | 150 | 92967162 | 12 | 68  | 0    |
| 9 | 92994175 | 92994200 | 25  | 92994187 | 11 | 11  | 0    |
| 9 | 92994925 | 92995025 | 100 | 92994987 | 13 | 46  | 3.7  |
| 9 | 93226925 | 93226950 | 25  | 93226937 | 11 | 11  | 0.9  |
| 9 | 93732600 | 93732800 | 200 | 93732687 | 17 | 120 | 7.3  |
| 9 | 93936250 | 93936300 | 50  | 93936262 | 13 | 26  | 0    |
| 9 | 93948850 | 93949025 | 175 | 93948912 | 14 | 96  | 0    |
| 9 | 94096000 | 94096050 | 50  | 94096012 | 14 | 27  | 1.8  |
| 9 | 94127325 | 94127725 | 400 | 94127587 | 18 | 241 | 34.8 |
| 9 | 94472950 | 94473000 | 50  | 94472962 | 11 | 22  | 0    |



|   |           |           |     |           |    |     |      |
|---|-----------|-----------|-----|-----------|----|-----|------|
| 9 | 94893575  | 94893875  | 300 | 94893687  | 30 | 279 | 18.3 |
| 9 | 94921950  | 94922175  | 225 | 94922112  | 21 | 153 | 18.3 |
| 9 | 95967825  | 95968075  | 250 | 95967987  | 25 | 184 | 25.6 |
| 9 | 96604925  | 96605050  | 125 | 96605037  | 14 | 57  | 3.7  |
| 9 | 96730750  | 96730850  | 100 | 96730787  | 12 | 47  | 3.7  |
| 9 | 96783150  | 96783500  | 350 | 96783237  | 20 | 202 | 27.4 |
| 9 | 96889050  | 96889100  | 50  | 96889062  | 12 | 24  | 2.7  |
| 9 | 97119575  | 97119725  | 150 | 97119662  | 15 | 83  | 6.4  |
| 9 | 97313350  | 97313375  | 25  | 97313362  | 12 | 12  | 1.8  |
| 9 | 97677750  | 97677850  | 100 | 97677762  | 22 | 76  | 11   |
| 9 | 97851475  | 97851600  | 125 | 97851562  | 17 | 75  | 12.8 |
| 9 | 97851950  | 97852625  | 675 | 97852512  | 16 | 312 | 40.3 |
| 9 | 98059150  | 98059200  | 50  | 98059162  | 12 | 24  | 3.7  |
| 9 | 98222625  | 98222725  | 100 | 98222712  | 13 | 47  | 3.7  |
| 9 | 98489200  | 98489350  | 150 | 98489312  | 20 | 101 | 10.1 |
| 9 | 98655950  | 98655975  | 25  | 98655962  | 11 | 11  | 0    |
| 9 | 98656750  | 98656775  | 25  | 98656762  | 11 | 11  | 1.8  |
| 9 | 99040600  | 99040625  | 25  | 99040612  | 12 | 12  | 1.8  |
| 9 | 99678875  | 99679025  | 150 | 99678937  | 21 | 110 | 17.4 |
| 9 | 100057875 | 100057950 | 75  | 100057937 | 14 | 37  | 4.6  |
| 9 | 100340825 | 100340950 | 125 | 100340862 | 14 | 61  | 9.1  |
| 9 | 100354300 | 100354400 | 100 | 100354387 | 12 | 45  | 6.4  |
| 9 | 100775850 | 100776000 | 150 | 100775887 | 18 | 94  | 0    |
| 9 | 101170700 | 101170750 | 50  | 101170712 | 14 | 28  | 3.7  |
| 9 | 101187950 | 101188225 | 275 | 101188112 | 20 | 165 | 13.7 |
| 9 | 101235825 | 101235950 | 125 | 101235887 | 18 | 75  | 10.1 |
| 9 | 101836050 | 101836200 | 150 | 101836062 | 11 | 66  | 0    |
| 9 | 102230875 | 102230900 | 25  | 102230887 | 11 | 11  | 0    |
| 9 | 102231475 | 102231600 | 125 | 102231537 | 14 | 65  | 5.5  |
| 9 | 103211300 | 103211525 | 225 | 103211462 | 28 | 210 | 5.5  |
| 9 | 105896025 | 105896100 | 75  | 105896037 | 17 | 51  | 6.4  |
| 9 | 105896325 | 105896350 | 25  | 105896337 | 13 | 13  | 1.8  |
| 9 | 106770750 | 106770850 | 100 | 106770837 | 15 | 45  | 8.2  |
| 9 | 106793425 | 106793600 | 175 | 106793437 | 14 | 97  | 8.2  |
| 9 | 106866625 | 106866850 | 225 | 106866762 | 18 | 132 | 12.8 |
| 9 | 107046275 | 107046300 | 25  | 107046287 | 19 | 19  | 3.7  |
| 9 | 107777425 | 107777625 | 200 | 107777587 | 16 | 93  | 6.4  |
| 9 | 107780825 | 107780950 | 125 | 107780837 | 15 | 72  | 13.7 |
| 9 | 107912000 | 107912075 | 75  | 107912012 | 11 | 33  | 5.5  |
| 9 | 109015875 | 109016100 | 225 | 109016037 | 13 | 99  | 6.4  |
| 9 | 109082825 | 109082875 | 50  | 109082837 | 11 | 22  | 1.8  |
| 9 | 109165625 | 109165850 | 225 | 109165687 | 20 | 146 | 13.7 |
| 9 | 109534975 | 109535000 | 25  | 109534987 | 12 | 12  | 1.8  |
| 9 | 109859625 | 109859650 | 25  | 109859637 | 11 | 11  | 1.8  |
| 9 | 110074650 | 110074675 | 25  | 110074662 | 12 | 12  | 0    |
| 9 | 110246625 | 110246875 | 250 | 110246737 | 22 | 169 | 17.4 |
| 9 | 110248025 | 110248050 | 25  | 110248037 | 12 | 12  | 0.9  |
| 9 | 110814700 | 110814725 | 25  | 110814712 | 11 | 11  | 1.8  |
| 9 | 110922125 | 110922150 | 25  | 110922137 | 11 | 11  | 1.8  |
| 9 | 111618775 | 111618825 | 50  | 111618787 | 11 | 22  | 3.7  |
| 9 | 111853225 | 111853250 | 25  | 111853237 | 11 | 11  | 0.9  |
| 9 | 112871200 | 112871275 | 75  | 112871212 | 13 | 37  | 0.9  |
| 9 | 113158750 | 113158925 | 175 | 113158837 | 15 | 91  | 6.4  |
| 9 | 113344625 | 113344775 | 150 | 113344662 | 14 | 81  | 0    |
| 9 | 114134875 | 114134950 | 75  | 114134887 | 11 | 33  | 0    |
| 9 | 114181750 | 114181825 | 75  | 114181812 | 21 | 57  | 9.1  |
| 9 | 114549300 | 114549500 | 200 | 114549362 | 15 | 104 | 7.3  |
| 9 | 114683700 | 114683875 | 175 | 114683837 | 16 | 89  | 0.9  |
| 9 | 114844975 | 114845175 | 200 | 114845087 | 15 | 111 | 3.7  |
| 9 | 114845500 | 114845625 | 125 | 114845587 | 13 | 57  | 0    |
| 9 | 115077575 | 115077625 | 50  | 115077587 | 19 | 38  | 6.4  |
| 9 | 115142425 | 115142600 | 175 | 115142462 | 14 | 88  | 11   |
| 9 | 115423450 | 115423525 | 75  | 115423462 | 12 | 35  | 5.5  |
| 9 | 115451400 | 115451450 | 50  | 115451437 | 12 | 23  | 1.8  |
| 9 | 115498300 | 115498375 | 75  | 115498337 | 12 | 35  | 5.5  |
| 9 | 115975075 | 115975125 | 50  | 115975087 | 12 | 24  | 2.7  |
| 9 | 116093100 | 116093225 | 125 | 116093162 | 14 | 63  | 9.1  |
| 9 | 116174575 | 116174700 | 125 | 116174587 | 12 | 59  | 4.6  |
| 9 | 116966775 | 116966875 | 100 | 116966812 | 15 | 58  | 9.1  |
| 9 | 117004975 | 117005000 | 25  | 117004987 | 11 | 11  | 0.9  |
| 9 | 117005250 | 117005425 | 175 | 117005337 | 12 | 79  | 10.1 |
| 9 | 117175550 | 117176225 | 675 | 117176037 | 30 | 492 | 39.3 |
| 9 | 117726025 | 117726200 | 175 | 117726062 | 14 | 86  | 9.1  |
| 9 | 117746625 | 117746675 | 50  | 117746637 | 14 | 28  | 5.5  |
| 9 | 117747000 | 117747100 | 100 | 117747012 | 13 | 46  | 1.8  |

|   |           |           |     |           |    |     |      |
|---|-----------|-----------|-----|-----------|----|-----|------|
| 9 | 117886300 | 117886425 | 125 | 117886412 | 18 | 72  | 9.1  |
| 9 | 118351475 | 118351625 | 150 | 118351512 | 15 | 81  | 4.6  |
| 9 | 118455900 | 118456025 | 125 | 118455912 | 12 | 60  | 3.7  |
| 9 | 119506450 | 119506525 | 75  | 119506512 | 14 | 38  | 6.4  |
| 9 | 119575225 | 119575375 | 150 | 119575262 | 17 | 91  | 11.9 |
| 9 | 122382225 | 122382250 | 25  | 122382237 | 12 | 12  | 1.8  |
| 9 | 122386150 | 122386225 | 75  | 122386187 | 12 | 34  | 2.7  |
| 9 | 122644925 | 122645325 | 400 | 122645062 | 43 | 532 | 95.2 |
| 9 | 122876775 | 122876875 | 100 | 122876812 | 16 | 63  | 11.9 |
| 9 | 122923700 | 122923950 | 250 | 122923837 | 24 | 196 | 13.7 |
| 9 | 123091425 | 123091450 | 25  | 123091437 | 15 | 15  | 1.8  |
| 9 | 123348200 | 123348275 | 75  | 123348237 | 12 | 35  | 2.7  |
| 9 | 123359700 | 123359725 | 25  | 123359712 | 12 | 12  | 1.8  |
| 9 | 123979125 | 123979200 | 75  | 123979137 | 11 | 33  | 5.5  |
| 9 | 124015800 | 124015975 | 175 | 124015812 | 17 | 111 | 2.7  |
| 9 | 124066575 | 124066600 | 25  | 124066587 | 11 | 11  | 1.8  |
| 9 | 124733950 | 124734025 | 75  | 124733987 | 13 | 36  | 5.5  |
| 9 | 125176300 | 125176350 | 50  | 125176312 | 11 | 22  | 0    |
| 9 | 125256225 | 125256275 | 50  | 125256237 | 11 | 22  | 0.9  |
| 9 | 126217400 | 126217900 | 500 | 126217637 | 52 | 711 | 92.4 |
| 9 | 126598300 | 126598325 | 25  | 126598312 | 11 | 11  | 1.8  |
| 9 | 126614725 | 126614825 | 100 | 126614737 | 13 | 47  | 2.7  |
| 9 | 126622825 | 126622925 | 100 | 126622912 | 24 | 91  | 13.7 |
| 9 | 126635075 | 126635100 | 25  | 126635087 | 12 | 12  | 1.8  |
| 9 | 126651925 | 126652050 | 125 | 126651962 | 12 | 57  | 4.6  |
| 9 | 126991950 | 126992000 | 50  | 126991987 | 12 | 23  | 1.8  |
| 9 | 127043375 | 127043575 | 200 | 127043537 | 29 | 186 | 33.9 |
| 9 | 127063700 | 127063800 | 100 | 127063712 | 19 | 66  | 7.3  |
| 9 | 127201500 | 127201525 | 25  | 127201512 | 11 | 11  | 0.9  |
| 9 | 127275450 | 127275475 | 25  | 127275462 | 15 | 15  | 2.7  |
| 9 | 127548300 | 127548500 | 200 | 127548337 | 47 | 345 | 56.7 |
| 9 | 127811225 | 127811375 | 150 | 127811287 | 18 | 91  | 12.8 |
| 9 | 128923800 | 128923825 | 25  | 128923812 | 11 | 11  | 0.9  |
| 9 | 128989150 | 128989175 | 25  | 128989162 | 12 | 12  | 1.8  |
| 9 | 129077000 | 129077075 | 75  | 129077012 | 11 | 33  | 0    |
| 9 | 129138825 | 129139025 | 200 | 129138962 | 18 | 113 | 4.6  |
| 9 | 129219300 | 129219325 | 25  | 129219312 | 11 | 11  | 1.8  |
| 9 | 129246825 | 129246950 | 125 | 129246862 | 13 | 57  | 0    |
| 9 | 129347825 | 129347925 | 100 | 129347862 | 14 | 51  | 1.8  |
| 9 | 129356400 | 129356550 | 150 | 129356462 | 14 | 76  | 11   |
| 9 | 129359575 | 129359625 | 50  | 129359587 | 14 | 28  | 4.6  |
| 9 | 129501700 | 129501725 | 25  | 129501712 | 11 | 11  | 1.8  |
| 9 | 129517850 | 129517975 | 125 | 129517887 | 19 | 89  | 17.4 |
| 9 | 129566225 | 129566250 | 25  | 129566237 | 12 | 12  | 0.9  |
| 9 | 129586950 | 129587125 | 175 | 129587037 | 17 | 95  | 12.8 |
| 9 | 129640925 | 129641000 | 75  | 129640937 | 17 | 40  | 4.6  |
| 9 | 129651350 | 129651425 | 75  | 129651362 | 13 | 38  | 0    |
| 9 | 129721775 | 129721800 | 25  | 129721787 | 15 | 15  | 1.8  |
| 9 | 129739725 | 129739750 | 25  | 129739737 | 11 | 11  | 1.8  |
| 9 | 129767700 | 129767725 | 25  | 129767712 | 14 | 14  | 2.7  |
| 9 | 129768075 | 129768150 | 75  | 129768087 | 13 | 37  | 2.7  |
| 9 | 129869225 | 129869300 | 75  | 129869237 | 15 | 45  | 5.5  |
| 9 | 129930325 | 129930425 | 100 | 129930362 | 17 | 65  | 11   |
| 9 | 130006675 | 130006700 | 25  | 130006687 | 11 | 11  | 0.9  |
| 9 | 130173650 | 130173675 | 25  | 130173662 | 15 | 15  | 2.7  |
| 9 | 130458950 | 130459000 | 50  | 130458962 | 16 | 32  | 5.5  |
| 9 | 130683625 | 130683700 | 75  | 130683637 | 12 | 36  | 5.5  |
| 9 | 130825625 | 130825725 | 100 | 130825637 | 12 | 48  | 3.7  |
| 9 | 130945250 | 130945300 | 50  | 130945262 | 11 | 22  | 3.7  |
| 9 | 130976500 | 130976575 | 75  | 130976512 | 12 | 36  | 5.5  |
| 9 | 131047450 | 131047550 | 100 | 131047462 | 11 | 44  | 3.7  |
| 9 | 131119800 | 131119925 | 125 | 131119812 | 12 | 55  | 0    |
| 9 | 131285500 | 131285550 | 50  | 131285512 | 11 | 22  | 2.7  |
| 9 | 131291050 | 131291075 | 25  | 131291062 | 15 | 15  | 2.7  |
| 9 | 131311800 | 131311975 | 175 | 131311887 | 17 | 99  | 4.6  |
| 9 | 131315475 | 131315650 | 175 | 131315512 | 15 | 93  | 0    |
| 9 | 131415450 | 131415575 | 125 | 131415537 | 13 | 57  | 8.2  |
| 9 | 131505675 | 131505825 | 150 | 131505762 | 13 | 71  | 8.2  |
| 9 | 131528175 | 131528350 | 175 | 131528237 | 30 | 185 | 5.5  |
| 9 | 131855750 | 131855925 | 175 | 131855787 | 17 | 111 | 15.6 |
| 9 | 132444650 | 132444800 | 150 | 132444687 | 14 | 79  | 11   |
| 9 | 132559175 | 132559350 | 175 | 132559312 | 15 | 87  | 6.4  |
| 9 | 132711825 | 132711850 | 25  | 132711837 | 11 | 11  | 1.8  |
| 9 | 132713000 | 132713075 | 75  | 132713012 | 14 | 40  | 2.7  |
| 9 | 133155725 | 133155900 | 175 | 133155787 | 14 | 94  | 1.8  |

|   |           |           |     |           |    |     |      |
|---|-----------|-----------|-----|-----------|----|-----|------|
| 9 | 133215250 | 133215350 | 100 | 133215287 | 13 | 50  | 0    |
| 9 | 133238625 | 133238650 | 25  | 133238637 | 26 | 26  | 3.7  |
| 9 | 133239025 | 133239050 | 25  | 133239037 | 11 | 11  | 1.8  |
| 9 | 133258875 | 133258900 | 25  | 133258887 | 11 | 11  | 0.9  |
| 9 | 133598850 | 133598925 | 75  | 133598862 | 12 | 36  | 3.7  |
| 9 | 133826850 | 133826900 | 50  | 133826862 | 12 | 24  | 1.8  |
| 9 | 134534725 | 134534800 | 75  | 134534737 | 12 | 36  | 2.7  |
| 9 | 134535075 | 134535150 | 75  | 134535112 | 13 | 38  | 5.5  |
| 9 | 135314675 | 135314850 | 175 | 135314837 | 25 | 148 | 25.6 |
| 9 | 135771475 | 135771500 | 25  | 135771487 | 14 | 14  | 1.8  |
| 9 | 135805675 | 135805750 | 75  | 135805737 | 21 | 53  | 8.2  |
| 9 | 136019675 | 136019800 | 125 | 136019787 | 17 | 71  | 9.1  |
| 9 | 136020100 | 136020175 | 75  | 136020112 | 11 | 33  | 5.5  |
| 9 | 136634600 | 136634625 | 25  | 136634612 | 14 | 14  | 2.7  |
| 9 | 138139325 | 138139450 | 125 | 138139337 | 11 | 55  | 0.9  |
| 9 | 138340650 | 138340775 | 125 | 138340662 | 14 | 61  | 11   |
| 9 | 138341175 | 138341225 | 50  | 138341187 | 11 | 22  | 0.9  |
| 9 | 138526725 | 138526775 | 50  | 138526737 | 14 | 28  | 5.5  |
| 9 | 138540975 | 138541000 | 25  | 138540987 | 11 | 11  | 0.9  |
| 9 | 138579450 | 138579550 | 100 | 138579487 | 13 | 47  | 2.7  |
| 9 | 138614450 | 138614475 | 25  | 138614462 | 15 | 15  | 2.7  |
| 9 | 138818725 | 138818750 | 25  | 138818737 | 11 | 11  | 0    |
| 9 | 138862125 | 138862150 | 25  | 138862137 | 12 | 12  | 1.8  |
| 9 | 138863775 | 138863800 | 25  | 138863787 | 12 | 12  | 1.8  |
| 9 | 138886850 | 138887050 | 200 | 138886987 | 18 | 125 | 3.7  |
| 9 | 139070025 | 139070125 | 100 | 139070062 | 20 | 73  | 9.1  |
| 9 | 139085400 | 139085600 | 200 | 139085487 | 15 | 113 | 11.9 |
| 9 | 139143775 | 139143825 | 50  | 139143787 | 13 | 26  | 2.7  |
| 9 | 139385225 | 139385250 | 25  | 139385237 | 11 | 11  | 1.8  |
| 9 | 139453800 | 139453825 | 25  | 139453812 | 11 | 11  | 0.9  |
| 8 | 185475    | 185600    | 125 | 185537    | 14 | 64  | 9.1  |
| 8 | 570850    | 570900    | 50  | 570862    | 11 | 22  | 2.7  |
| 8 | 1682000   | 1682025   | 25  | 1682012   | 11 | 11  | 1.8  |
| 8 | 1749875   | 1749975   | 100 | 1749887   | 11 | 44  | 7.3  |
| 8 | 2222875   | 2222900   | 25  | 2222887   | 11 | 11  | 0.9  |
| 8 | 2578525   | 2578550   | 25  | 2578537   | 12 | 12  | 0.9  |
| 8 | 3537075   | 3537100   | 25  | 3537087   | 11 | 11  | 1.8  |
| 8 | 4879675   | 4879700   | 25  | 4879687   | 11 | 11  | 1.8  |
| 8 | 6392625   | 6392725   | 100 | 6392637   | 17 | 68  | 10.1 |
| 8 | 6430775   | 6430800   | 25  | 6430787   | 13 | 13  | 1.8  |
| 8 | 6439125   | 6439325   | 200 | 6439237   | 20 | 138 | 27.4 |
| 8 | 6471200   | 6471325   | 125 | 6471237   | 17 | 81  | 5.5  |
| 8 | 6472150   | 6472200   | 50  | 6472162   | 12 | 24  | 3.7  |
| 8 | 6506375   | 6506750   | 375 | 6506512   | 24 | 277 | 45.7 |
| 8 | 6507050   | 6507100   | 50  | 6507062   | 11 | 22  | 3.7  |
| 8 | 6527500   | 6527525   | 25  | 6527512   | 11 | 11  | 1.8  |
| 8 | 6620700   | 6620775   | 75  | 6620712   | 12 | 36  | 3.7  |
| 8 | 6632725   | 6632900   | 175 | 6632837   | 12 | 78  | 11.9 |
| 8 | 6639300   | 6639425   | 125 | 6639412   | 12 | 54  | 6.4  |
| 8 | 6639800   | 6639825   | 25  | 6639812   | 11 | 11  | 1.8  |
| 8 | 6645850   | 6646000   | 150 | 6645912   | 20 | 102 | 15.6 |
| 8 | 8191375   | 8191400   | 25  | 8191387   | 13 | 13  | 1.8  |
| 8 | 8253525   | 8253750   | 225 | 8253637   | 19 | 153 | 12.8 |
| 8 | 8257500   | 8257550   | 50  | 8257537   | 14 | 27  | 0    |
| 8 | 8494925   | 8495000   | 75  | 8494937   | 14 | 41  | 8.2  |
| 8 | 8505775   | 8505950   | 175 | 8505787   | 13 | 90  | 12.8 |
| 8 | 8513175   | 8513200   | 25  | 8513187   | 11 | 11  | 0.9  |
| 8 | 8564625   | 8564725   | 100 | 8564637   | 11 | 44  | 3.7  |
| 8 | 11096325  | 11096825  | 500 | 11096637  | 65 | 723 | 64   |
| 8 | 11179975  | 11180000  | 25  | 11179987  | 14 | 14  | 1.8  |
| 8 | 11481200  | 11481250  | 50  | 11481237  | 12 | 23  | 1.8  |
| 8 | 11508100  | 11508150  | 50  | 11508112  | 13 | 24  | 1.8  |
| 8 | 11698100  | 11698175  | 75  | 11698112  | 12 | 36  | 1.8  |
| 8 | 11772275  | 11772300  | 25  | 11772287  | 11 | 11  | 0.9  |
| 8 | 11797650  | 11797675  | 25  | 11797662  | 11 | 11  | 1.8  |
| 8 | 12853200  | 12853275  | 75  | 12853212  | 11 | 33  | 5.5  |
| 8 | 13033450  | 13033825  | 375 | 13033712  | 21 | 206 | 39.3 |
| 8 | 13264125  | 13264150  | 25  | 13264137  | 23 | 23  | 4.6  |
| 8 | 13268725  | 13268825  | 100 | 13268737  | 11 | 44  | 2.7  |
| 8 | 13309300  | 13309350  | 50  | 13309312  | 13 | 26  | 2.7  |
| 8 | 13416700  | 13416875  | 175 | 13416737  | 16 | 95  | 11.9 |
| 8 | 13460900  | 13461025  | 125 | 13461012  | 16 | 74  | 10.1 |
| 8 | 13468825  | 13468925  | 100 | 13468862  | 18 | 64  | 11   |
| 8 | 17504575  | 17504725  | 150 | 17504587  | 14 | 72  | 12.8 |
| 8 | 17507575  | 17507600  | 25  | 17507587  | 11 | 11  | 0.9  |

|   |          |          |     |          |    |     |      |
|---|----------|----------|-----|----------|----|-----|------|
| 8 | 17556450 | 17556550 | 100 | 17556512 | 18 | 59  | 6.4  |
| 8 | 17890575 | 17890600 | 25  | 17890587 | 11 | 11  | 0    |
| 8 | 18962450 | 18962650 | 200 | 18962537 | 18 | 114 | 5.5  |
| 8 | 18986450 | 18986525 | 75  | 18986462 | 13 | 37  | 2.7  |
| 8 | 19070975 | 19071000 | 25  | 19070987 | 20 | 20  | 3.7  |
| 8 | 19072725 | 19073175 | 450 | 19073112 | 16 | 193 | 31.1 |
| 8 | 19169325 | 19169500 | 175 | 19169412 | 18 | 108 | 11.9 |
| 8 | 19408450 | 19408650 | 200 | 19408487 | 17 | 114 | 11   |
| 8 | 19412800 | 19413050 | 250 | 19412937 | 26 | 212 | 24.7 |
| 8 | 19567150 | 19567175 | 25  | 19567162 | 11 | 11  | 1.8  |
| 8 | 19719150 | 19719175 | 25  | 19719162 | 19 | 19  | 2.7  |
| 8 | 19803650 | 19803775 | 125 | 19803662 | 11 | 55  | 4.6  |
| 8 | 20088775 | 20088850 | 75  | 20088837 | 12 | 32  | 4.6  |
| 8 | 20099225 | 20099275 | 50  | 20099237 | 15 | 29  | 5.5  |
| 8 | 20155700 | 20156100 | 400 | 20156087 | 18 | 198 | 21   |
| 8 | 20167050 | 20167150 | 100 | 20167087 | 12 | 45  | 7.3  |
| 8 | 20186000 | 20186125 | 125 | 20186112 | 13 | 57  | 9.1  |
| 8 | 20188300 | 20188400 | 100 | 20188312 | 12 | 48  | 2.7  |
| 8 | 20251925 | 20251975 | 50  | 20251937 | 14 | 26  | 3.7  |
| 8 | 20276250 | 20276325 | 75  | 20276262 | 11 | 33  | 2.7  |
| 8 | 21485750 | 21485825 | 75  | 21485762 | 12 | 34  | 0.9  |
| 8 | 21713275 | 21713325 | 50  | 21713312 | 12 | 23  | 1.8  |
| 8 | 22002325 | 22002400 | 75  | 22002362 | 14 | 39  | 6.4  |
| 8 | 22266250 | 22266275 | 25  | 22266262 | 14 | 14  | 2.7  |
| 8 | 22296625 | 22296750 | 125 | 22296662 | 12 | 58  | 5.5  |
| 8 | 22512075 | 22512175 | 100 | 22512087 | 11 | 46  | 9.1  |
| 8 | 22517825 | 22517950 | 125 | 22517937 | 28 | 93  | 9.1  |
| 8 | 22534750 | 22534875 | 125 | 22534812 | 13 | 61  | 7.3  |
| 8 | 22549150 | 22549175 | 25  | 22549162 | 11 | 11  | 1.8  |
| 8 | 22578700 | 22578825 | 125 | 22578712 | 12 | 56  | 10.1 |
| 8 | 22580200 | 22580225 | 25  | 22580212 | 15 | 15  | 2.7  |
| 8 | 22586600 | 22586625 | 25  | 22586612 | 15 | 15  | 2.7  |
| 8 | 22607125 | 22607150 | 25  | 22607137 | 15 | 15  | 2.7  |
| 8 | 22687450 | 22687525 | 75  | 22687462 | 12 | 36  | 2.7  |
| 8 | 22835575 | 22835625 | 50  | 22835587 | 11 | 22  | 2.7  |
| 8 | 22867300 | 22867375 | 75  | 22867312 | 15 | 42  | 8.2  |
| 8 | 22982575 | 22982750 | 175 | 22982637 | 33 | 212 | 28.4 |
| 8 | 23006025 | 23006075 | 50  | 23006037 | 13 | 25  | 0.9  |
| 8 | 23076200 | 23076250 | 50  | 23076212 | 11 | 22  | 0    |
| 8 | 23144725 | 23144750 | 25  | 23144737 | 12 | 12  | 0.9  |
| 8 | 23217775 | 23217800 | 25  | 23217787 | 11 | 11  | 1.8  |
| 8 | 23249325 | 23249475 | 150 | 23249412 | 18 | 92  | 9.1  |
| 8 | 23257225 | 23257425 | 200 | 23257262 | 16 | 114 | 21   |
| 8 | 23267500 | 23267675 | 175 | 23267662 | 18 | 100 | 0.9  |
| 8 | 23269550 | 23269825 | 275 | 23269562 | 14 | 132 | 11   |
| 8 | 23303400 | 23303425 | 25  | 23303412 | 11 | 11  | 0.9  |
| 8 | 23442125 | 23442150 | 25  | 23442137 | 14 | 14  | 2.7  |
| 8 | 24088675 | 24088750 | 75  | 24088712 | 13 | 35  | 2.7  |
| 8 | 24132250 | 24132425 | 175 | 24132312 | 14 | 82  | 14.6 |
| 8 | 24915075 | 24915100 | 25  | 24915087 | 11 | 11  | 1.8  |
| 8 | 25222350 | 25222525 | 175 | 25222387 | 13 | 86  | 11   |
| 8 | 25875900 | 25875925 | 25  | 25875912 | 11 | 11  | 0    |
| 8 | 25958950 | 25959025 | 75  | 25959012 | 13 | 36  | 5.5  |
| 8 | 26491375 | 26491400 | 25  | 26491387 | 17 | 17  | 0.9  |
| 8 | 26522800 | 26522950 | 150 | 26522912 | 15 | 77  | 13.7 |
| 8 | 26523975 | 26524125 | 150 | 26524037 | 15 | 81  | 4.6  |
| 8 | 26525400 | 26525475 | 75  | 26525412 | 17 | 44  | 7.3  |
| 8 | 26549525 | 26549550 | 25  | 26549537 | 13 | 13  | 1.8  |
| 8 | 26555350 | 26555375 | 25  | 26555362 | 15 | 15  | 2.7  |
| 8 | 27225100 | 27225125 | 25  | 27225112 | 16 | 16  | 2.7  |
| 8 | 27616025 | 27616100 | 75  | 27616037 | 20 | 57  | 6.4  |
| 8 | 27616600 | 27616625 | 25  | 27616612 | 11 | 11  | 1.8  |
| 8 | 27777525 | 27777650 | 125 | 27777537 | 16 | 66  | 12.8 |
| 8 | 27786100 | 27786125 | 25  | 27786112 | 11 | 11  | 1.8  |
| 8 | 27861800 | 27861825 | 25  | 27861812 | 11 | 11  | 1.8  |
| 8 | 27905625 | 27905650 | 25  | 27905637 | 11 | 11  | 1.8  |
| 8 | 27908125 | 27908225 | 100 | 27908187 | 15 | 54  | 8.2  |
| 8 | 28032075 | 28032175 | 100 | 28032087 | 13 | 49  | 6.4  |
| 8 | 28179475 | 28179575 | 100 | 28179512 | 15 | 54  | 0    |
| 8 | 28264975 | 28265175 | 200 | 28265112 | 15 | 103 | 11.9 |
| 8 | 28314975 | 28315075 | 100 | 28314987 | 15 | 54  | 8.2  |
| 8 | 28522525 | 28522650 | 125 | 28522562 | 15 | 68  | 9.1  |
| 8 | 29089125 | 29089175 | 50  | 29089137 | 12 | 24  | 1.8  |
| 8 | 29108950 | 29109075 | 125 | 29109037 | 24 | 89  | 6.4  |
| 8 | 29425075 | 29425325 | 250 | 29425187 | 25 | 201 | 29.3 |

|   |          |          |     |          |    |     |      |
|---|----------|----------|-----|----------|----|-----|------|
| 8 | 29436275 | 29436450 | 175 | 29436287 | 23 | 124 | 12.8 |
| 8 | 29443275 | 29443300 | 25  | 29443287 | 12 | 12  | 0.9  |
| 8 | 29685250 | 29685275 | 25  | 29685262 | 11 | 11  | 1.8  |
| 8 | 29882500 | 29882575 | 75  | 29882537 | 17 | 46  | 7.3  |
| 8 | 30059450 | 30059525 | 75  | 30059487 | 16 | 44  | 6.4  |
| 8 | 30133275 | 30133425 | 150 | 30133337 | 15 | 84  | 11.9 |
| 8 | 30232275 | 30232700 | 425 | 30232537 | 34 | 394 | 20.1 |
| 8 | 30704975 | 30705300 | 325 | 30705137 | 28 | 242 | 16.5 |
| 8 | 30721025 | 30721050 | 25  | 30721037 | 13 | 13  | 1.8  |
| 8 | 31188450 | 31188475 | 25  | 31188462 | 11 | 11  | 0.9  |
| 8 | 31642875 | 31643100 | 225 | 31642962 | 23 | 173 | 0    |
| 8 | 33450250 | 33450300 | 50  | 33450287 | 13 | 24  | 1.8  |
| 8 | 33462450 | 33462475 | 25  | 33462462 | 14 | 14  | 2.7  |
| 8 | 33490825 | 33490875 | 50  | 33490837 | 11 | 22  | 3.7  |
| 8 | 33872200 | 33872350 | 150 | 33872237 | 13 | 73  | 9.1  |
| 8 | 34815550 | 34815625 | 75  | 34815562 | 11 | 33  | 2.7  |
| 8 | 36620700 | 36620775 | 75  | 36620712 | 13 | 37  | 0    |
| 8 | 37120275 | 37120300 | 25  | 37120287 | 11 | 11  | 0    |
| 8 | 37668125 | 37668150 | 25  | 37668137 | 15 | 15  | 2.7  |
| 8 | 37676900 | 37676975 | 75  | 37676962 | 15 | 37  | 7.3  |
| 8 | 37713225 | 37713425 | 200 | 37713287 | 19 | 128 | 16.5 |
| 8 | 37714225 | 37714250 | 25  | 37714237 | 13 | 13  | 1.8  |
| 8 | 37739300 | 37739325 | 25  | 37739312 | 12 | 12  | 1.8  |
| 8 | 37762800 | 37762850 | 50  | 37762812 | 11 | 22  | 0    |
| 8 | 37775225 | 37775250 | 25  | 37775237 | 11 | 11  | 1.8  |
| 8 | 37778750 | 37778775 | 25  | 37778762 | 11 | 11  | 1.8  |
| 8 | 37779100 | 37779125 | 25  | 37779112 | 11 | 11  | 1.8  |
| 8 | 38034825 | 38035000 | 175 | 38034912 | 19 | 115 | 17.4 |
| 8 | 38082650 | 38082675 | 25  | 38082662 | 11 | 11  | 0.9  |
| 8 | 38359750 | 38359925 | 175 | 38359837 | 13 | 83  | 11.9 |
| 8 | 38913550 | 38913675 | 125 | 38913612 | 14 | 66  | 8.2  |
| 8 | 38973025 | 38973250 | 225 | 38973212 | 32 | 188 | 29.3 |
| 8 | 38973500 | 38973825 | 325 | 38973737 | 22 | 217 | 8.2  |
| 8 | 38976700 | 38976750 | 50  | 38976712 | 16 | 30  | 3.7  |
| 8 | 40031725 | 40031875 | 150 | 40031737 | 20 | 97  | 13.7 |
| 8 | 40181825 | 40182000 | 175 | 40181887 | 26 | 147 | 21   |
| 8 | 40185075 | 40185225 | 150 | 40185162 | 17 | 84  | 14.6 |
| 8 | 40969400 | 40969425 | 25  | 40969412 | 12 | 12  | 1.8  |
| 8 | 41070475 | 41070750 | 275 | 41070537 | 19 | 176 | 22   |
| 8 | 41226350 | 41226475 | 125 | 41226437 | 22 | 87  | 11.9 |
| 8 | 41262900 | 41262925 | 25  | 41262912 | 14 | 14  | 1.8  |
| 8 | 41287650 | 41287775 | 125 | 41287662 | 15 | 68  | 2.7  |
| 8 | 41307675 | 41307875 | 200 | 41307712 | 14 | 104 | 5.5  |
| 8 | 41370250 | 41370400 | 150 | 41370387 | 17 | 91  | 11.9 |
| 8 | 41768425 | 41768450 | 25  | 41768437 | 11 | 11  | 1.8  |
| 8 | 41769100 | 41769350 | 250 | 41769212 | 36 | 299 | 34.8 |
| 8 | 41769850 | 41769900 | 50  | 41769887 | 12 | 23  | 3.7  |
| 8 | 41775550 | 41775575 | 25  | 41775562 | 12 | 12  | 1.8  |
| 8 | 41804950 | 41805000 | 50  | 41804987 | 16 | 30  | 4.6  |
| 8 | 42027675 | 42027700 | 25  | 42027687 | 11 | 11  | 1.8  |
| 8 | 42129550 | 42129650 | 100 | 42129562 | 36 | 103 | 14.6 |
| 8 | 42148325 | 42148375 | 50  | 42148337 | 11 | 22  | 2.7  |
| 8 | 42186500 | 42186675 | 175 | 42186587 | 26 | 151 | 23.8 |
| 8 | 42279675 | 42279800 | 125 | 42279687 | 12 | 54  | 9.1  |
| 8 | 42368150 | 42368175 | 25  | 42368162 | 11 | 11  | 1.8  |
| 8 | 43031175 | 43031200 | 25  | 43031187 | 13 | 13  | 1.8  |
| 8 | 43084625 | 43085000 | 375 | 43084812 | 18 | 205 | 5.5  |
| 8 | 43098750 | 43099000 | 250 | 43098887 | 22 | 158 | 4.6  |
| 8 | 48587525 | 48587625 | 100 | 48587612 | 12 | 47  | 9.1  |
| 8 | 48956250 | 48956325 | 75  | 48956262 | 11 | 33  | 2.7  |
| 8 | 49503125 | 49503175 | 50  | 49503137 | 15 | 26  | 3.7  |
| 8 | 49589400 | 49589425 | 25  | 49589412 | 13 | 13  | 1.8  |
| 8 | 49787200 | 49787325 | 125 | 49787287 | 15 | 65  | 8.2  |
| 8 | 49826050 | 49826075 | 25  | 49826062 | 12 | 12  | 1.8  |
| 8 | 49828100 | 49828225 | 125 | 49828162 | 12 | 57  | 3.7  |
| 8 | 49974925 | 49974950 | 25  | 49974937 | 13 | 13  | 0.9  |
| 8 | 49975225 | 49975250 | 25  | 49975237 | 19 | 19  | 2.7  |
| 8 | 49996875 | 49997125 | 250 | 49997112 | 28 | 193 | 35.7 |
| 8 | 50326700 | 50326725 | 25  | 50326712 | 12 | 12  | 1.8  |
| 8 | 54598975 | 54599150 | 175 | 54599062 | 16 | 95  | 5.5  |
| 8 | 54611550 | 54611575 | 25  | 54611562 | 14 | 14  | 2.7  |
| 8 | 54613675 | 54613700 | 25  | 54613687 | 11 | 11  | 0.9  |
| 8 | 54733350 | 54733425 | 75  | 54733362 | 12 | 36  | 5.5  |
| 8 | 54940075 | 54940225 | 150 | 54940187 | 20 | 98  | 11   |
| 8 | 55020250 | 55020450 | 200 | 55020387 | 21 | 133 | 14.6 |

|   |          |          |     |          |    |     |      |
|---|----------|----------|-----|----------|----|-----|------|
| 8 | 55629650 | 55629825 | 175 | 55629662 | 14 | 78  | 12.8 |
| 8 | 55946025 | 55946100 | 75  | 55946037 | 11 | 33  | 2.7  |
| 8 | 55971225 | 55971275 | 50  | 55971237 | 11 | 22  | 3.7  |
| 8 | 56080425 | 56080525 | 100 | 56080437 | 14 | 56  | 10.1 |
| 8 | 56596325 | 56596350 | 25  | 56596337 | 12 | 12  | 1.8  |
| 8 | 56620250 | 56620450 | 200 | 56620362 | 15 | 101 | 8.2  |
| 8 | 57149575 | 57149775 | 200 | 57149687 | 35 | 252 | 42.1 |
| 8 | 57286175 | 57286275 | 100 | 57286187 | 15 | 52  | 0    |
| 8 | 57793025 | 57793050 | 25  | 57793037 | 11 | 11  | 1.8  |
| 8 | 57965275 | 57965300 | 25  | 57965287 | 15 | 15  | 2.7  |
| 8 | 58068200 | 58068225 | 25  | 58068212 | 12 | 12  | 1.8  |
| 8 | 58672725 | 58673000 | 275 | 58672912 | 27 | 226 | 0    |
| 8 | 59310625 | 59310650 | 25  | 59310637 | 11 | 11  | 0    |
| 8 | 61491200 | 61491500 | 300 | 61491312 | 31 | 253 | 27.4 |
| 8 | 61680450 | 61680525 | 75  | 61680462 | 12 | 34  | 0    |
| 8 | 61815300 | 61815375 | 75  | 61815312 | 12 | 36  | 0    |
| 8 | 61984000 | 61984050 | 50  | 61984012 | 15 | 30  | 5.5  |
| 8 | 62088750 | 62088950 | 200 | 62088862 | 20 | 128 | 5.5  |
| 8 | 62789750 | 62789800 | 50  | 62789787 | 19 | 31  | 5.5  |
| 8 | 62835325 | 62835425 | 100 | 62835337 | 37 | 132 | 19.2 |
| 8 | 62836675 | 62836700 | 25  | 62836687 | 12 | 12  | 1.8  |
| 8 | 62885325 | 62885425 | 100 | 62885412 | 16 | 54  | 6.4  |
| 8 | 62899650 | 62899675 | 25  | 62899662 | 11 | 11  | 0    |
| 8 | 63025200 | 63025250 | 50  | 63025212 | 11 | 22  | 0    |
| 8 | 63324775 | 63324825 | 50  | 63324787 | 11 | 22  | 1.8  |
| 8 | 66181100 | 66181125 | 25  | 66181112 | 11 | 11  | 0    |
| 8 | 66227350 | 66227425 | 75  | 66227362 | 12 | 34  | 5.5  |
| 8 | 66709000 | 66709150 | 150 | 66709012 | 14 | 68  | 10.1 |
| 8 | 66916025 | 66916150 | 125 | 66916037 | 16 | 68  | 11.9 |
| 8 | 66917150 | 66917375 | 225 | 66917262 | 24 | 180 | 21   |
| 8 | 67582150 | 67582175 | 25  | 67582162 | 11 | 11  | 0    |
| 8 | 67586950 | 67586975 | 25  | 67586962 | 11 | 11  | 0.9  |
| 8 | 67593575 | 67593600 | 25  | 67593587 | 13 | 13  | 1.8  |
| 8 | 67630550 | 67630625 | 75  | 67630612 | 12 | 34  | 5.5  |
| 8 | 67635625 | 67636075 | 450 | 67635737 | 43 | 445 | 33.9 |
| 8 | 67999825 | 67999850 | 25  | 67999837 | 12 | 12  | 1.8  |
| 8 | 68037975 | 68038075 | 100 | 68037987 | 12 | 48  | 7.3  |
| 8 | 68081275 | 68081425 | 150 | 68081287 | 11 | 66  | 0    |
| 8 | 69969825 | 69970075 | 250 | 69969937 | 25 | 194 | 8.2  |
| 8 | 70248075 | 70248150 | 75  | 70248087 | 11 | 33  | 0.9  |
| 8 | 70441950 | 70442025 | 75  | 70441962 | 13 | 37  | 2.7  |
| 8 | 70567525 | 70567675 | 150 | 70567637 | 15 | 83  | 12.8 |
| 8 | 70966400 | 70966425 | 25  | 70966412 | 12 | 12  | 0    |
| 8 | 71047150 | 71047250 | 100 | 71047162 | 12 | 48  | 3.7  |
| 8 | 71744025 | 71744300 | 275 | 71744237 | 27 | 247 | 24.7 |
| 8 | 72031200 | 72031275 | 75  | 72031212 | 11 | 33  | 1.8  |
| 8 | 72163175 | 72163300 | 125 | 72163212 | 14 | 62  | 9.1  |
| 8 | 72333075 | 72333125 | 50  | 72333087 | 11 | 22  | 3.7  |
| 8 | 72622000 | 72622175 | 175 | 72622087 | 20 | 115 | 13.7 |
| 8 | 72681950 | 72682150 | 200 | 72682012 | 23 | 149 | 22.9 |
| 8 | 73136800 | 73136825 | 25  | 73136812 | 11 | 11  | 0.9  |
| 8 | 74368550 | 74368575 | 25  | 74368562 | 14 | 14  | 2.7  |
| 8 | 74822275 | 74822300 | 25  | 74822287 | 11 | 11  | 0.9  |
| 8 | 75046900 | 75046925 | 25  | 75046912 | 14 | 14  | 2.7  |
| 8 | 75047375 | 75047450 | 75  | 75047387 | 17 | 46  | 5.5  |
| 8 | 75982525 | 75982550 | 25  | 75982537 | 11 | 11  | 0.9  |
| 8 | 76481825 | 76481850 | 25  | 76481837 | 11 | 11  | 1.8  |
| 8 | 80951625 | 80951875 | 250 | 80951737 | 21 | 167 | 21   |
| 8 | 80955050 | 80955150 | 100 | 80955112 | 15 | 52  | 8.2  |
| 8 | 81178400 | 81178425 | 25  | 81178412 | 11 | 11  | 0    |
| 8 | 81214700 | 81214750 | 50  | 81214712 | 14 | 28  | 5.5  |
| 8 | 81279050 | 81279250 | 200 | 81279212 | 17 | 115 | 3.7  |
| 8 | 81405325 | 81405350 | 25  | 81405337 | 11 | 11  | 0    |
| 8 | 81441775 | 81441875 | 100 | 81441862 | 17 | 54  | 6.4  |
| 8 | 81560400 | 81560475 | 75  | 81560437 | 13 | 38  | 4.6  |
| 8 | 81828025 | 81828150 | 125 | 81828087 | 17 | 74  | 6.4  |
| 8 | 81968400 | 81968500 | 100 | 81968412 | 12 | 46  | 5.5  |
| 8 | 82104575 | 82104675 | 100 | 82104587 | 11 | 44  | 5.5  |
| 8 | 86917400 | 86917550 | 150 | 86917462 | 15 | 82  | 0    |
| 8 | 86917950 | 86918000 | 50  | 86917962 | 12 | 23  | 3.7  |
| 8 | 87423525 | 87423950 | 425 | 87423687 | 26 | 318 | 34.8 |
| 8 | 87590100 | 87590300 | 200 | 87590112 | 34 | 195 | 35.7 |
| 8 | 88322325 | 88322400 | 75  | 88322337 | 11 | 33  | 2.7  |
| 8 | 88651000 | 88651175 | 175 | 88651162 | 13 | 81  | 2.7  |
| 8 | 88787400 | 88787650 | 250 | 88787562 | 22 | 148 | 3.7  |

|   |           |           |     |           |    |     |      |
|---|-----------|-----------|-----|-----------|----|-----|------|
| 8 | 88804825  | 88805075  | 250 | 88805037  | 13 | 113 | 13.7 |
| 8 | 89017725  | 89017900  | 175 | 89017812  | 24 | 149 | 18.3 |
| 8 | 89026975  | 89027325  | 350 | 89027162  | 32 | 329 | 2.7  |
| 8 | 89055450  | 89055475  | 25  | 89055462  | 11 | 11  | 1.8  |
| 8 | 89060250  | 89060450  | 200 | 89060387  | 18 | 123 | 10.1 |
| 8 | 90403675  | 90403850  | 175 | 90403737  | 13 | 79  | 8.2  |
| 8 | 90693075  | 90693250  | 175 | 90693087  | 12 | 72  | 6.4  |
| 8 | 90898325  | 90898375  | 50  | 90898337  | 12 | 23  | 1.8  |
| 8 | 91065450  | 91065475  | 25  | 91065462  | 13 | 13  | 0.9  |
| 8 | 91082475  | 91082500  | 25  | 91082487  | 11 | 11  | 1.8  |
| 8 | 91739050  | 91739125  | 75  | 91739062  | 12 | 36  | 0    |
| 8 | 91752450  | 91752550  | 100 | 91752462  | 12 | 46  | 7.3  |
| 8 | 92097000  | 92097025  | 25  | 92097012  | 11 | 11  | 0    |
| 8 | 92694075  | 92694150  | 75  | 92694087  | 13 | 37  | 0    |
| 8 | 93176775  | 93176875  | 100 | 93176787  | 15 | 60  | 8.2  |
| 8 | 93209675  | 93210000  | 325 | 93209837  | 36 | 295 | 6.4  |
| 8 | 93839975  | 93840075  | 100 | 93839987  | 11 | 44  | 1.8  |
| 8 | 94047550  | 94047800  | 250 | 94047662  | 24 | 181 | 26.5 |
| 8 | 94822650  | 94822700  | 50  | 94822662  | 11 | 22  | 3.7  |
| 8 | 94927975  | 94928175  | 200 | 94928087  | 20 | 130 | 11   |
| 8 | 94961575  | 94961675  | 100 | 94961637  | 15 | 53  | 7.3  |
| 8 | 94989525  | 94989725  | 200 | 94989587  | 18 | 119 | 0    |
| 8 | 95072775  | 95072850  | 75  | 95072812  | 13 | 36  | 0.9  |
| 8 | 95323775  | 95323925  | 150 | 95323787  | 11 | 52  | 3.7  |
| 8 | 95517850  | 95517875  | 25  | 95517862  | 11 | 11  | 1.8  |
| 8 | 95518150  | 95518300  | 150 | 95518162  | 11 | 62  | 7.3  |
| 8 | 95556475  | 95556500  | 25  | 95556487  | 24 | 24  | 4.6  |
| 8 | 95904250  | 95904325  | 75  | 95904312  | 13 | 35  | 4.6  |
| 8 | 96106075  | 96106300  | 225 | 96106187  | 27 | 213 | 36.6 |
| 8 | 96194700  | 96194825  | 125 | 96194762  | 12 | 56  | 9.1  |
| 8 | 96214925  | 96214975  | 50  | 96214937  | 14 | 28  | 3.7  |
| 8 | 97416525  | 97416575  | 50  | 97416537  | 12 | 24  | 3.7  |
| 8 | 97726300  | 97726325  | 25  | 97726312  | 11 | 11  | 0.9  |
| 8 | 98165875  | 98166075  | 200 | 98165937  | 17 | 121 | 0.9  |
| 8 | 98278450  | 98278650  | 200 | 98278537  | 25 | 162 | 8.2  |
| 8 | 98342975  | 98343000  | 25  | 98342987  | 14 | 14  | 2.7  |
| 8 | 98443550  | 98443600  | 50  | 98443562  | 11 | 22  | 0    |
| 8 | 98456750  | 98456775  | 25  | 98456762  | 11 | 11  | 0.9  |
| 8 | 98515500  | 98515575  | 75  | 98515512  | 13 | 39  | 5.5  |
| 8 | 98520175  | 98520200  | 25  | 98520187  | 11 | 11  | 1.8  |
| 8 | 98557925  | 98558225  | 300 | 98558037  | 15 | 121 | 22.9 |
| 8 | 98641475  | 98641650  | 175 | 98641612  | 16 | 91  | 11.9 |
| 8 | 98856675  | 98856700  | 25  | 98856687  | 11 | 11  | 0    |
| 8 | 99010575  | 99010600  | 25  | 99010587  | 11 | 11  | 1.8  |
| 8 | 99083500  | 99083750  | 250 | 99083637  | 19 | 153 | 17.4 |
| 8 | 99375100  | 99375225  | 125 | 99375137  | 13 | 58  | 5.5  |
| 8 | 99446475  | 99446575  | 100 | 99446487  | 15 | 54  | 7.3  |
| 8 | 99464050  | 99464075  | 25  | 99464062  | 12 | 12  | 1.8  |
| 8 | 99907425  | 99907525  | 100 | 99907462  | 15 | 58  | 10.1 |
| 8 | 100026100 | 100026125 | 25  | 100026112 | 12 | 12  | 1.8  |
| 8 | 101583775 | 101583950 | 175 | 101583887 | 15 | 96  | 11   |
| 8 | 101584625 | 101584675 | 50  | 101584637 | 12 | 24  | 2.7  |
| 8 | 101640650 | 101640675 | 25  | 101640662 | 11 | 11  | 0.9  |
| 8 | 101803325 | 101803450 | 125 | 101803337 | 12 | 59  | 4.6  |
| 8 | 101917400 | 101917425 | 25  | 101917412 | 12 | 12  | 0    |
| 8 | 101982075 | 101982125 | 50  | 101982087 | 12 | 24  | 3.7  |
| 8 | 102185350 | 102185425 | 75  | 102185362 | 12 | 36  | 5.5  |
| 8 | 102190400 | 102190625 | 225 | 102190462 | 27 | 200 | 21   |
| 8 | 102240175 | 102240200 | 25  | 102240187 | 12 | 12  | 1.8  |
| 8 | 102414525 | 102414675 | 150 | 102414537 | 12 | 68  | 8.2  |
| 8 | 102541550 | 102541600 | 50  | 102541562 | 11 | 22  | 3.7  |
| 8 | 102555675 | 102555875 | 200 | 102555787 | 18 | 116 | 11   |
| 8 | 102585900 | 102586075 | 175 | 102585962 | 15 | 92  | 1.8  |
| 8 | 102735975 | 102736025 | 50  | 102735987 | 11 | 22  | 0    |
| 8 | 102771825 | 102771875 | 50  | 102771837 | 12 | 24  | 3.7  |
| 8 | 102841050 | 102841100 | 50  | 102841062 | 11 | 22  | 1.8  |
| 8 | 102913200 | 102913375 | 175 | 102913237 | 16 | 95  | 4.6  |
| 8 | 103944375 | 103944400 | 25  | 103944387 | 11 | 11  | 1.8  |
| 8 | 104186925 | 104187000 | 75  | 104186937 | 11 | 33  | 2.7  |
| 8 | 104190700 | 104190725 | 25  | 104190712 | 12 | 12  | 0    |
| 8 | 104439325 | 104439350 | 25  | 104439337 | 11 | 11  | 0.9  |
| 8 | 104497000 | 104497025 | 25  | 104497012 | 15 | 15  | 2.7  |
| 8 | 105156525 | 105156675 | 150 | 105156637 | 15 | 77  | 8.2  |
| 8 | 105785925 | 105786100 | 175 | 105786012 | 17 | 103 | 6.4  |
| 8 | 107339425 | 107339650 | 225 | 107339487 | 20 | 146 | 0    |

|   |           |           |     |           |    |     |      |
|---|-----------|-----------|-----|-----------|----|-----|------|
| 8 | 107739000 | 107739050 | 50  | 107739012 | 11 | 22  | 1.8  |
| 8 | 109330050 | 109330100 | 50  | 109330062 | 12 | 24  | 3.7  |
| 8 | 109524700 | 109524725 | 25  | 109524712 | 14 | 14  | 1.8  |
| 8 | 110415500 | 110415525 | 25  | 110415512 | 17 | 17  | 2.7  |
| 8 | 110621525 | 110621550 | 25  | 110621537 | 14 | 14  | 2.7  |
| 8 | 110621800 | 110621900 | 100 | 110621862 | 14 | 51  | 6.4  |
| 8 | 113697975 | 113698250 | 275 | 113698087 | 12 | 113 | 18.3 |
| 8 | 114424025 | 114424075 | 50  | 114424062 | 12 | 23  | 0    |
| 8 | 116130950 | 116131050 | 100 | 116131012 | 13 | 49  | 0    |
| 8 | 116300400 | 116300500 | 100 | 116300412 | 12 | 46  | 7.3  |
| 8 | 116530750 | 116530850 | 100 | 116530837 | 13 | 48  | 6.4  |
| 8 | 116750250 | 116750425 | 175 | 116750287 | 13 | 86  | 5.5  |
| 8 | 117150775 | 117151000 | 225 | 117150837 | 24 | 181 | 6.4  |
| 8 | 117505350 | 117505425 | 75  | 117505362 | 11 | 33  | 4.6  |
| 8 | 117629700 | 117629800 | 100 | 117629737 | 14 | 55  | 3.7  |
| 8 | 117847575 | 117847675 | 100 | 117847662 | 18 | 59  | 5.5  |
| 8 | 118974800 | 118974825 | 25  | 118974812 | 11 | 11  | 1.8  |
| 8 | 119027875 | 119027900 | 25  | 119027887 | 12 | 12  | 1.8  |
| 8 | 119131175 | 119131325 | 150 | 119131262 | 15 | 80  | 10.1 |
| 8 | 119162850 | 119162875 | 25  | 119162862 | 11 | 11  | 0    |
| 8 | 119193700 | 119193800 | 100 | 119193762 | 14 | 50  | 0    |
| 8 | 120635125 | 120635200 | 75  | 120635137 | 14 | 38  | 7.3  |
| 8 | 120913875 | 120913950 | 75  | 120913912 | 14 | 40  | 5.5  |
| 8 | 120956125 | 120956150 | 25  | 120956137 | 11 | 11  | 0    |
| 8 | 121064125 | 121064200 | 75  | 121064137 | 20 | 56  | 8.2  |
| 8 | 121644150 | 121644200 | 50  | 121644162 | 11 | 22  | 3.7  |
| 8 | 121892175 | 121892275 | 100 | 121892212 | 16 | 55  | 7.3  |
| 8 | 121907500 | 121907525 | 25  | 121907512 | 12 | 12  | 0    |
| 8 | 121909250 | 121909450 | 200 | 121909287 | 14 | 101 | 5.5  |
| 8 | 121930775 | 121930800 | 25  | 121930787 | 11 | 11  | 1.8  |
| 8 | 122014350 | 122014525 | 175 | 122014462 | 14 | 89  | 6.4  |
| 8 | 122300525 | 122300700 | 175 | 122300562 | 16 | 104 | 0.9  |
| 8 | 122430650 | 122430700 | 50  | 122430662 | 11 | 22  | 2.7  |
| 8 | 122627350 | 122627750 | 400 | 122627687 | 16 | 186 | 22   |
| 8 | 122656075 | 122656100 | 25  | 122656087 | 14 | 14  | 2.7  |
| 8 | 122720700 | 122720725 | 25  | 122720712 | 17 | 17  | 2.7  |
| 8 | 123267150 | 123267300 | 150 | 123267262 | 14 | 75  | 0    |
| 8 | 123277450 | 123277550 | 100 | 123277537 | 19 | 65  | 11.9 |
| 8 | 123313825 | 123314100 | 275 | 123313937 | 19 | 167 | 0    |
| 8 | 123570850 | 123570900 | 50  | 123570862 | 11 | 22  | 1.8  |
| 8 | 123571225 | 123571350 | 125 | 123571287 | 24 | 103 | 18.3 |
| 8 | 123681675 | 123681700 | 25  | 123681687 | 11 | 11  | 0.9  |
| 8 | 123775425 | 123775500 | 75  | 123775462 | 13 | 38  | 0    |
| 8 | 124547625 | 124547675 | 50  | 124547662 | 12 | 23  | 3.7  |
| 8 | 124598700 | 124598725 | 25  | 124598712 | 12 | 12  | 1.8  |
| 8 | 124601600 | 124601650 | 50  | 124601612 | 11 | 22  | 1.8  |
| 8 | 124622700 | 124622800 | 100 | 124622712 | 17 | 57  | 11   |
| 8 | 124789575 | 124789925 | 350 | 124789812 | 18 | 205 | 32.9 |
| 8 | 124792750 | 124792850 | 100 | 124792837 | 12 | 43  | 3.7  |
| 8 | 125607450 | 125607500 | 50  | 125607462 | 11 | 22  | 0    |
| 8 | 125650000 | 125650100 | 100 | 125650037 | 12 | 47  | 0    |
| 8 | 125808400 | 125808525 | 125 | 125808487 | 16 | 69  | 10.1 |
| 8 | 125809700 | 125809725 | 25  | 125809712 | 11 | 11  | 0.9  |
| 8 | 125993100 | 125993125 | 25  | 125993112 | 11 | 11  | 0    |
| 8 | 126058000 | 126058475 | 475 | 126058262 | 33 | 459 | 0    |
| 8 | 126491550 | 126491725 | 175 | 126491662 | 18 | 107 | 13.7 |
| 8 | 126495200 | 126495350 | 150 | 126495212 | 17 | 82  | 6.4  |
| 8 | 126510500 | 126510525 | 25  | 126510512 | 12 | 12  | 1.8  |
| 8 | 126511275 | 126511300 | 25  | 126511287 | 11 | 11  | 0.9  |
| 8 | 126511850 | 126511975 | 125 | 126511862 | 16 | 70  | 11.9 |
| 8 | 127360875 | 127360975 | 100 | 127360937 | 12 | 46  | 6.4  |
| 8 | 127578450 | 127578700 | 250 | 127578612 | 19 | 151 | 14.6 |
| 8 | 127616150 | 127616175 | 25  | 127616162 | 11 | 11  | 0    |
| 8 | 127628250 | 127628275 | 25  | 127628262 | 11 | 11  | 0    |
| 8 | 127628600 | 127628775 | 175 | 127628637 | 20 | 120 | 14.6 |
| 8 | 127629125 | 127629150 | 25  | 127629137 | 11 | 11  | 1.8  |
| 8 | 127636600 | 127636650 | 50  | 127636612 | 11 | 22  | 1.8  |
| 8 | 127639675 | 127639800 | 125 | 127639762 | 17 | 70  | 3.7  |
| 8 | 127660800 | 127660825 | 25  | 127660812 | 11 | 11  | 0    |
| 8 | 127679725 | 127679825 | 100 | 127679737 | 12 | 46  | 0    |
| 8 | 127909025 | 127909225 | 200 | 127909087 | 14 | 89  | 13.7 |
| 8 | 127915575 | 127915675 | 100 | 127915587 | 19 | 69  | 10.1 |
| 8 | 127955675 | 127955725 | 50  | 127955687 | 16 | 28  | 3.7  |
| 8 | 127957850 | 127957975 | 125 | 127957912 | 15 | 67  | 4.6  |
| 8 | 127958300 | 127958375 | 75  | 127958337 | 14 | 41  | 2.7  |



|   |           |           |     |           |    |     |      |
|---|-----------|-----------|-----|-----------|----|-----|------|
| 8 | 128049950 | 128050000 | 50  | 128049962 | 11 | 22  | 3.7  |
| 8 | 128090325 | 128090625 | 300 | 128090512 | 14 | 152 | 3.7  |
| 8 | 128289075 | 128289100 | 25  | 128289087 | 11 | 11  | 1.8  |
| 8 | 128447525 | 128447600 | 75  | 128447537 | 19 | 55  | 9.1  |
| 8 | 128816625 | 128816675 | 50  | 128816637 | 11 | 22  | 1.8  |
| 8 | 128817800 | 128817925 | 125 | 128817862 | 20 | 90  | 13.7 |
| 8 | 128891025 | 128891050 | 25  | 128891037 | 11 | 11  | 1.8  |
| 8 | 128993100 | 128993200 | 100 | 128993112 | 22 | 74  | 10.1 |
| 8 | 129026675 | 129026825 | 150 | 129026687 | 11 | 66  | 7.3  |
| 8 | 129249900 | 129250025 | 125 | 129249937 | 12 | 57  | 2.7  |
| 8 | 129736125 | 129736275 | 150 | 129736212 | 13 | 74  | 7.3  |
| 8 | 129943900 | 129943950 | 50  | 129943912 | 11 | 22  | 0    |
| 8 | 130317925 | 130317950 | 25  | 130317937 | 11 | 11  | 0.9  |
| 8 | 130397550 | 130397575 | 25  | 130397562 | 11 | 11  | 1.8  |
| 8 | 130561825 | 130561900 | 75  | 130561887 | 13 | 37  | 5.5  |
| 8 | 130633775 | 130634100 | 325 | 130633962 | 30 | 281 | 5.5  |
| 8 | 130710075 | 130710250 | 175 | 130710187 | 27 | 160 | 10.1 |
| 8 | 130791700 | 130791725 | 25  | 130791712 | 11 | 11  | 0    |
| 8 | 130999975 | 131000050 | 75  | 130999987 | 11 | 33  | 0    |
| 8 | 131732500 | 131732550 | 50  | 131732512 | 11 | 22  | 2.7  |
| 8 | 131910425 | 131910625 | 200 | 131910487 | 20 | 122 | 0    |
| 8 | 132029625 | 132029650 | 25  | 132029637 | 11 | 11  | 0.9  |
| 8 | 132090500 | 132090700 | 200 | 132090662 | 22 | 120 | 16.5 |
| 8 | 134299050 | 134299100 | 50  | 134299062 | 11 | 22  | 2.7  |
| 8 | 134472525 | 134472675 | 150 | 134472612 | 14 | 75  | 2.7  |
| 8 | 134585800 | 134586200 | 400 | 134586012 | 27 | 308 | 26.5 |
| 8 | 134654175 | 134654225 | 50  | 134654212 | 12 | 23  | 1.8  |
| 8 | 134848675 | 134848875 | 200 | 134848762 | 18 | 118 | 14.6 |
| 8 | 134898300 | 134898375 | 75  | 134898312 | 14 | 42  | 6.4  |
| 8 | 135794275 | 135794625 | 350 | 135794287 | 12 | 115 | 20.1 |
| 8 | 135913925 | 135914400 | 475 | 135913987 | 44 | 567 | 88.8 |
| 8 | 135919700 | 135919725 | 25  | 135919712 | 12 | 12  | 0    |
| 8 | 135974475 | 135974550 | 75  | 135974487 | 13 | 39  | 3.7  |
| 8 | 136054300 | 136054325 | 25  | 136054312 | 11 | 11  | 0.9  |
| 8 | 136455125 | 136455250 | 125 | 136455187 | 12 | 54  | 1.8  |
| 8 | 138695950 | 138696075 | 125 | 138695962 | 11 | 51  | 4.6  |
| 8 | 139597400 | 139597675 | 275 | 139597562 | 12 | 113 | 17.4 |
| 8 | 139602100 | 139602125 | 25  | 139602112 | 14 | 14  | 2.7  |
| 8 | 139618475 | 139618550 | 75  | 139618487 | 24 | 68  | 8.2  |
| 8 | 139644775 | 139644850 | 75  | 139644787 | 11 | 33  | 0    |
| 8 | 139912650 | 139912675 | 25  | 139912662 | 12 | 12  | 0.9  |
| 8 | 139913800 | 139913875 | 75  | 139913812 | 12 | 36  | 6.4  |
| 8 | 139995100 | 139995125 | 25  | 139995112 | 11 | 11  | 0.9  |
| 8 | 140017450 | 140017675 | 225 | 140017512 | 17 | 138 | 11.9 |
| 8 | 140296750 | 140296800 | 50  | 140296787 | 12 | 23  | 2.7  |
| 8 | 140297500 | 140297525 | 25  | 140297512 | 12 | 12  | 1.8  |
| 8 | 140359125 | 140359150 | 25  | 140359137 | 12 | 12  | 0.9  |
| 8 | 140942425 | 140942700 | 275 | 140942512 | 21 | 179 | 7.3  |
| 8 | 140945425 | 140945650 | 225 | 140945512 | 18 | 136 | 14.6 |
| 8 | 141007350 | 141007375 | 25  | 141007362 | 13 | 13  | 1.8  |
| 8 | 141104250 | 141104350 | 100 | 141104262 | 12 | 45  | 5.5  |
| 8 | 141668225 | 141668350 | 125 | 141668237 | 23 | 93  | 11.9 |
| 8 | 141716650 | 141716675 | 25  | 141716662 | 14 | 14  | 2.7  |
| 8 | 141717075 | 141717100 | 25  | 141717087 | 11 | 11  | 0.9  |
| 8 | 141725100 | 141725550 | 450 | 141725387 | 21 | 271 | 36.6 |
| 8 | 142079600 | 142079625 | 25  | 142079612 | 16 | 16  | 2.7  |
| 8 | 142117950 | 142117975 | 25  | 142117962 | 12 | 12  | 1.8  |
| 8 | 142207425 | 142207450 | 25  | 142207437 | 14 | 14  | 2.7  |
| 8 | 142209075 | 142209125 | 50  | 142209087 | 11 | 22  | 1.8  |
| 8 | 142422025 | 142422075 | 50  | 142422037 | 11 | 22  | 2.7  |
| 8 | 142470975 | 142471050 | 75  | 142470987 | 12 | 36  | 5.5  |
| 8 | 142840750 | 142840775 | 25  | 142840762 | 12 | 12  | 0.9  |
| 8 | 142866500 | 142866600 | 100 | 142866562 | 19 | 67  | 8.2  |
| 8 | 142868675 | 142868700 | 25  | 142868687 | 11 | 11  | 0    |
| 8 | 143329325 | 143329475 | 150 | 143329387 | 14 | 74  | 5.5  |
| 8 | 143353075 | 143353125 | 50  | 143353087 | 13 | 26  | 3.7  |
| 8 | 143407725 | 143408000 | 275 | 143407812 | 28 | 228 | 22.9 |
| 8 | 143551475 | 143551500 | 25  | 143551487 | 11 | 11  | 1.8  |
| 8 | 143553575 | 143553600 | 25  | 143553587 | 11 | 11  | 1.8  |
| 8 | 143554400 | 143554450 | 50  | 143554412 | 11 | 22  | 3.7  |
| 8 | 143723975 | 143724100 | 125 | 143724037 | 13 | 62  | 0    |
| 8 | 143748300 | 143748325 | 25  | 143748312 | 14 | 14  | 2.7  |
| 8 | 143748650 | 143748800 | 150 | 143748737 | 16 | 80  | 6.4  |
| 8 | 143754825 | 143754850 | 25  | 143754837 | 28 | 28  | 5.5  |
| 8 | 143755100 | 143755325 | 225 | 143755287 | 17 | 129 | 15.6 |

|   |           |           |      |           |    |      |      |
|---|-----------|-----------|------|-----------|----|------|------|
| 8 | 143772675 | 143772700 | 25   | 143772687 | 11 | 11   | 1.8  |
| 8 | 143778275 | 143778475 | 200  | 143778387 | 42 | 288  | 49.4 |
| 8 | 143788650 | 143788750 | 100  | 143788662 | 13 | 52   | 3.7  |
| 8 | 143796675 | 143796700 | 25   | 143796687 | 19 | 19   | 3.7  |
| 8 | 143894900 | 143894950 | 50   | 143894937 | 13 | 24   | 3.7  |
| 8 | 144126150 | 144126350 | 200  | 144126237 | 20 | 130  | 5.5  |
| 8 | 144166725 | 144166750 | 25   | 144166737 | 11 | 11   | 1.8  |
| 8 | 144429775 | 144429800 | 25   | 144429787 | 12 | 12   | 0    |
| 8 | 144521100 | 144521125 | 25   | 144521112 | 14 | 14   | 1.8  |
| 8 | 144674850 | 144674875 | 25   | 144674862 | 11 | 11   | 0.9  |
| 8 | 144788825 | 144788850 | 25   | 144788837 | 11 | 11   | 1.8  |
| 8 | 144803700 | 144803950 | 250  | 144803787 | 33 | 264  | 13.7 |
| 8 | 144822575 | 144822900 | 325  | 144822712 | 35 | 323  | 14.6 |
| 8 | 144996975 | 144997025 | 50   | 144996987 | 17 | 30   | 3.7  |
| 8 | 145051075 | 145051225 | 150  | 145051087 | 14 | 68   | 10.1 |
| 8 | 145082700 | 145083050 | 350  | 145082887 | 46 | 477  | 90.6 |
| 8 | 145095900 | 145095925 | 25   | 145095912 | 14 | 14   | 2.7  |
| 8 | 145201350 | 145201425 | 75   | 145201362 | 11 | 33   | 0    |
| 8 | 145222850 | 145222875 | 25   | 145222862 | 11 | 11   | 1.8  |
| 8 | 145703675 | 145703700 | 25   | 145703687 | 11 | 11   | 0.9  |
| 8 | 145718525 | 145718550 | 25   | 145718537 | 23 | 23   | 3.7  |
| 8 | 145861950 | 145862025 | 75   | 145861987 | 13 | 37   | 0    |
| 8 | 145882600 | 145882625 | 25   | 145882612 | 12 | 12   | 1.8  |
| 8 | 145897125 | 145897200 | 75   | 145897137 | 11 | 31   | 0    |
| 8 | 145897850 | 145897900 | 50   | 145897862 | 12 | 24   | 1.8  |
| 8 | 145902000 | 145902050 | 50   | 145902012 | 12 | 23   | 2.7  |
| 8 | 145904175 | 145904375 | 200  | 145904262 | 15 | 103  | 5.5  |
| 8 | 145963475 | 145963700 | 225  | 145963537 | 19 | 119  | 7.3  |
| 8 | 145995925 | 145995950 | 25   | 145995937 | 11 | 11   | 0.9  |
| 8 | 146037900 | 146039125 | 1225 | 146038212 | 33 | 1020 | 66.8 |
| 8 | 146050925 | 146051050 | 125  | 146050937 | 14 | 66   | 5.5  |
| 8 | 146097600 | 146097625 | 25   | 146097612 | 15 | 15   | 2.7  |
| 8 | 146127100 | 146127125 | 25   | 146127112 | 11 | 11   | 0.9  |
| 8 | 146128025 | 146128400 | 375  | 146128162 | 26 | 287  | 17.4 |
| 8 | 146172875 | 146173175 | 300  | 146173012 | 15 | 150  | 13.7 |
| 8 | 146173400 | 146173425 | 25   | 146173412 | 11 | 11   | 0    |
| X | 268200    | 268325    | 125  | 268212    | 11 | 47   | 0    |
| X | 1497375   | 1497425   | 50   | 1497387   | 11 | 22   | 1.8  |
| X | 2330000   | 2330025   | 25   | 2330012   | 11 | 11   | 0.9  |
| X | 3088925   | 3089050   | 125  | 3088962   | 13 | 63   | 0    |
| X | 4566200   | 4566450   | 250  | 4566262   | 20 | 151  | 6.4  |
| X | 7855775   | 7855975   | 200  | 7855787   | 16 | 109  | 10.1 |
| X | 8773175   | 8773200   | 25   | 8773187   | 12 | 12   | 0.9  |
| X | 9079925   | 9080100   | 175  | 9079937   | 13 | 86   | 0    |
| X | 9506575   | 9506675   | 100  | 9506587   | 15 | 58   | 8.2  |
| X | 9835750   | 9835875   | 125  | 9835762   | 14 | 69   | 0.9  |
| X | 10047625  | 10047825  | 200  | 10047687  | 34 | 217  | 23.8 |
| X | 10548550  | 10548575  | 25   | 10548562  | 11 | 11   | 1.8  |
| X | 11233975  | 11234150  | 175  | 11234087  | 13 | 81   | 0    |
| X | 11935700  | 11935725  | 25   | 11935712  | 11 | 11   | 1.8  |
| X | 18353450  | 18353525  | 75   | 18353462  | 12 | 35   | 3.7  |
| X | 19601625  | 19601700  | 75   | 19601637  | 15 | 43   | 5.5  |
| X | 21081575  | 21081750  | 175  | 21081687  | 18 | 105  | 14.6 |
| X | 21574050  | 21574150  | 100  | 21574087  | 13 | 48   | 6.4  |
| X | 21925025  | 21925075  | 50   | 21925037  | 11 | 22   | 3.7  |
| X | 22728525  | 22728575  | 50   | 22728537  | 11 | 22   | 0    |
| X | 23709525  | 23709925  | 400  | 23709787  | 17 | 202  | 32   |
| X | 23710975  | 23711175  | 200  | 23711062  | 19 | 134  | 12.8 |
| X | 23735525  | 23735550  | 25   | 23735537  | 11 | 11   | 1.8  |
| X | 30817400  | 30817550  | 150  | 30817412  | 12 | 68   | 11   |
| X | 33067125  | 33067200  | 75   | 33067137  | 11 | 33   | 2.7  |
| X | 33139550  | 33139625  | 75   | 33139562  | 11 | 33   | 2.7  |
| X | 37650350  | 37650450  | 100  | 37650362  | 12 | 47   | 3.7  |
| X | 37965150  | 37965200  | 50   | 37965162  | 11 | 22   | 1.8  |
| X | 38545750  | 38545825  | 75   | 38545787  | 13 | 35   | 5.5  |
| X | 39422550  | 39422625  | 75   | 39422587  | 15 | 43   | 1.8  |
| X | 39897025  | 39897050  | 25   | 39897037  | 11 | 11   | 0.9  |
| X | 39920025  | 39920150  | 125  | 39920062  | 13 | 62   | 4.6  |
| X | 40741125  | 40741250  | 125  | 40741187  | 12 | 56   | 3.7  |
| X | 40754750  | 40754775  | 25   | 40754762  | 11 | 11   | 1.8  |
| X | 40828525  | 40828650  | 125  | 40828537  | 12 | 59   | 3.7  |
| X | 43196550  | 43196650  | 100  | 43196637  | 12 | 41   | 0    |
| X | 44878625  | 44878650  | 25   | 44878637  | 14 | 14   | 2.7  |
| X | 46961675  | 46961725  | 50   | 46961687  | 12 | 23   | 1.8  |
| X | 46962275  | 46962325  | 50   | 46962287  | 12 | 24   | 2.7  |

|    |           |           |     |           |    |     |      |
|----|-----------|-----------|-----|-----------|----|-----|------|
| X  | 47395075  | 47395100  | 25  | 47395087  | 15 | 15  | 2.7  |
| X  | 47403475  | 47403500  | 25  | 47403487  | 13 | 13  | 1.8  |
| X  | 47748275  | 47748300  | 25  | 47748287  | 12 | 12  | 0    |
| X  | 48208450  | 48208475  | 25  | 48208462  | 11 | 11  | 0    |
| X  | 48219500  | 48219550  | 50  | 48219512  | 16 | 29  | 4.6  |
| X  | 48653925  | 48654025  | 100 | 48653937  | 11 | 44  | 7.3  |
| X  | 48743525  | 48743800  | 275 | 48743637  | 21 | 182 | 18.3 |
| X  | 48899350  | 48899400  | 50  | 48899362  | 11 | 22  | 2.7  |
| X  | 50529350  | 50529500  | 150 | 50529487  | 12 | 61  | 3.7  |
| X  | 51653375  | 51653400  | 25  | 51653387  | 11 | 11  | 0    |
| X  | 52980675  | 52980725  | 50  | 52980712  | 24 | 43  | 8.2  |
| X  | 53139775  | 53139825  | 50  | 53139787  | 12 | 23  | 1.8  |
| X  | 53728100  | 53728150  | 50  | 53728112  | 14 | 27  | 2.7  |
| X  | 54401700  | 54401950  | 250 | 54401837  | 24 | 188 | 10.1 |
| X  | 54683225  | 54683275  | 50  | 54683237  | 11 | 22  | 3.7  |
| X  | 55043300  | 55043475  | 175 | 55043337  | 19 | 98  | 5.5  |
| X  | 55118250  | 55118400  | 150 | 55118337  | 18 | 89  | 5.5  |
| X  | 55204375  | 55204450  | 75  | 55204412  | 12 | 35  | 1.8  |
| X  | 55322975  | 55323050  | 75  | 55323037  | 16 | 38  | 5.5  |
| X  | 55495275  | 55495400  | 125 | 55495287  | 13 | 60  | 11.9 |
| X  | 57038800  | 57038850  | 50  | 57038812  | 11 | 22  | 1.8  |
| X  | 66180575  | 66180700  | 125 | 66180587  | 11 | 55  | 0    |
| X  | 70205225  | 70205250  | 25  | 70205237  | 13 | 13  | 1.8  |
| X  | 71318100  | 71318325  | 225 | 71318212  | 21 | 162 | 26.5 |
| X  | 73423675  | 73423875  | 200 | 73423737  | 15 | 116 | 0    |
| X  | 73480700  | 73480725  | 25  | 73480712  | 11 | 11  | 0    |
| X  | 74292750  | 74292900  | 150 | 74292762  | 13 | 69  | 8.2  |
| X  | 77052550  | 77052725  | 175 | 77052662  | 24 | 138 | 22.9 |
| X  | 79477500  | 79477525  | 25  | 79477512  | 11 | 11  | 1.8  |
| X  | 83643425  | 83643450  | 25  | 83643437  | 12 | 12  | 1.8  |
| X  | 100490475 | 100490500 | 25  | 100490487 | 12 | 12  | 0    |
| X  | 100532400 | 100532475 | 75  | 100532462 | 15 | 39  | 6.4  |
| X  | 109340675 | 109340775 | 100 | 109340712 | 13 | 48  | 8.2  |
| X  | 109925625 | 109925650 | 25  | 109925637 | 12 | 12  | 0    |
| X  | 110811075 | 110811175 | 100 | 110811087 | 15 | 55  | 3.7  |
| X  | 114549675 | 114549750 | 75  | 114549737 | 12 | 34  | 2.7  |
| X  | 117857525 | 117857625 | 100 | 117857537 | 12 | 48  | 0    |
| X  | 118500650 | 118500675 | 25  | 118500662 | 14 | 14  | 1.8  |
| X  | 118889525 | 118889850 | 325 | 118889587 | 14 | 152 | 11.9 |
| X  | 119503950 | 119504075 | 125 | 119503962 | 19 | 78  | 10.1 |
| X  | 119752800 | 119752825 | 25  | 119752812 | 11 | 11  | 0.9  |
| X  | 120159100 | 120159125 | 25  | 120159112 | 11 | 11  | 0    |
| X  | 128894625 | 128894650 | 25  | 128894637 | 11 | 11  | 0.9  |
| X  | 129127850 | 129127875 | 25  | 129127862 | 11 | 11  | 1.8  |
| X  | 129230600 | 129230775 | 175 | 129230637 | 29 | 151 | 13.7 |
| X  | 133334975 | 133335125 | 150 | 133335012 | 22 | 105 | 11.9 |
| X  | 133584200 | 133584225 | 25  | 133584212 | 11 | 11  | 0    |
| X  | 135406550 | 135406600 | 50  | 135406562 | 14 | 26  | 2.7  |
| X  | 149210175 | 149210200 | 25  | 149210187 | 11 | 11  | 1.8  |
| X  | 149609350 | 149609600 | 250 | 149609462 | 34 | 269 | 0    |
| X  | 151878175 | 151878275 | 100 | 151878212 | 15 | 56  | 5.5  |
| X  | 152645650 | 152645675 | 25  | 152645662 | 12 | 12  | 1.8  |
| X  | 153423300 | 153423425 | 125 | 153423362 | 15 | 67  | 6.4  |
| X  | 153482375 | 153482550 | 175 | 153482387 | 14 | 88  | 0    |
| 11 | 199100    | 199225    | 125 | 199112    | 12 | 53  | 2.7  |
| 11 | 364350    | 364375    | 25  | 364362    | 14 | 14  | 2.7  |
| 11 | 397425    | 397450    | 25  | 397437    | 13 | 13  | 0.9  |
| 11 | 441575    | 441675    | 100 | 441587    | 11 | 44  | 3.7  |
| 11 | 459725    | 459750    | 25  | 459737    | 11 | 11  | 1.8  |
| 11 | 834025    | 834100    | 75  | 834087    | 14 | 40  | 6.4  |
| 11 | 1760750   | 1760825   | 75  | 1760762   | 12 | 36  | 0    |
| 11 | 1925975   | 1926100   | 125 | 1926062   | 15 | 67  | 5.5  |
| 11 | 1931350   | 1931400   | 50  | 1931362   | 11 | 22  | 2.7  |
| 11 | 1931750   | 1931775   | 25  | 1931762   | 11 | 11  | 0    |
| 11 | 2292675   | 2292750   | 75  | 2292687   | 12 | 36  | 2.7  |
| 11 | 2378000   | 2378150   | 150 | 2378137   | 22 | 104 | 11.9 |
| 11 | 2695050   | 2695075   | 25  | 2695062   | 11 | 11  | 0.9  |
| 11 | 2710100   | 2710450   | 350 | 2710387   | 21 | 184 | 15.6 |
| 11 | 2876675   | 2876875   | 200 | 2876737   | 23 | 147 | 11   |
| 11 | 2929675   | 2929725   | 50  | 2929687   | 12 | 23  | 2.7  |
| 11 | 3073825   | 3074050   | 225 | 3073887   | 21 | 154 | 14.6 |
| 11 | 3337125   | 3337150   | 25  | 3337137   | 12 | 12  | 0    |
| 11 | 3356775   | 3356825   | 50  | 3356787   | 11 | 22  | 3.7  |
| 11 | 3775800   | 3775975   | 175 | 3775912   | 14 | 88  | 8.2  |
| 11 | 4022900   | 4023000   | 100 | 4022987   | 16 | 55  | 5.5  |

|    |          |          |     |          |    |     |      |
|----|----------|----------|-----|----------|----|-----|------|
| 11 | 4072350  | 4072575  | 225 | 4072487  | 21 | 156 | 26.5 |
| 11 | 4585925  | 4586000  | 75  | 4585937  | 13 | 37  | 4.6  |
| 11 | 5662650  | 5662675  | 25  | 5662662  | 11 | 11  | 1.8  |
| 11 | 6298725  | 6298800  | 75  | 6298737  | 11 | 33  | 4.6  |
| 11 | 6632400  | 6632475  | 75  | 6632412  | 12 | 36  | 0    |
| 11 | 6714450  | 6714500  | 50  | 6714462  | 12 | 24  | 3.7  |
| 11 | 8201650  | 8201850  | 200 | 8201687  | 18 | 131 | 15.6 |
| 11 | 8307150  | 8307175  | 25  | 8307162  | 11 | 11  | 1.8  |
| 11 | 8386900  | 8387075  | 175 | 8386937  | 13 | 86  | 10.1 |
| 11 | 9342525  | 9342650  | 125 | 9342537  | 12 | 56  | 6.4  |
| 11 | 9642725  | 9642800  | 75  | 9642737  | 12 | 36  | 5.5  |
| 11 | 10022950 | 10022975 | 25  | 10022962 | 11 | 11  | 0    |
| 11 | 10282875 | 10282900 | 25  | 10282887 | 11 | 11  | 0.9  |
| 11 | 10469025 | 10469050 | 25  | 10469037 | 11 | 11  | 1.8  |
| 11 | 10878225 | 10878250 | 25  | 10878237 | 11 | 11  | 1.8  |
| 11 | 11791575 | 11791650 | 75  | 11791587 | 13 | 37  | 1.8  |
| 11 | 11819850 | 11820025 | 175 | 11819887 | 20 | 123 | 15.6 |
| 11 | 11965675 | 11965875 | 200 | 11965762 | 14 | 99  | 5.5  |
| 11 | 11995500 | 11995525 | 25  | 11995512 | 11 | 11  | 0    |
| 11 | 11997500 | 11997675 | 175 | 11997562 | 15 | 96  | 7.3  |
| 11 | 12020425 | 12020500 | 75  | 12020437 | 12 | 36  | 0    |
| 11 | 12022225 | 12022500 | 275 | 12022387 | 17 | 158 | 24.7 |
| 11 | 12025775 | 12025825 | 50  | 12025787 | 12 | 23  | 2.7  |
| 11 | 12058475 | 12058650 | 175 | 12058487 | 13 | 80  | 11.9 |
| 11 | 12202450 | 12202500 | 50  | 12202487 | 14 | 26  | 2.7  |
| 11 | 12202875 | 12202925 | 50  | 12202887 | 12 | 24  | 1.8  |
| 11 | 12355525 | 12355575 | 50  | 12355537 | 14 | 28  | 5.5  |
| 11 | 12652000 | 12652200 | 200 | 12652062 | 23 | 146 | 7.3  |
| 11 | 12658650 | 12658675 | 25  | 12658662 | 15 | 15  | 2.7  |
| 11 | 12670500 | 12670875 | 375 | 12670787 | 19 | 232 | 13.7 |
| 11 | 12702575 | 12702650 | 75  | 12702637 | 13 | 35  | 4.6  |
| 11 | 12802950 | 12803025 | 75  | 12802962 | 12 | 36  | 2.7  |
| 11 | 13080625 | 13080675 | 50  | 13080637 | 11 | 22  | 0    |
| 11 | 13194350 | 13194375 | 25  | 13194362 | 11 | 11  | 1.8  |
| 11 | 13441325 | 13441525 | 200 | 13441437 | 17 | 118 | 12.8 |
| 11 | 14498400 | 14498525 | 125 | 14498487 | 26 | 110 | 15.6 |
| 11 | 14621500 | 14621525 | 25  | 14621512 | 11 | 11  | 1.8  |
| 11 | 14869550 | 14869700 | 150 | 14869662 | 30 | 146 | 27.4 |
| 11 | 15898225 | 15898325 | 100 | 15898237 | 12 | 48  | 7.3  |
| 11 | 16716575 | 16716725 | 150 | 16716712 | 20 | 102 | 11.9 |
| 11 | 16959900 | 16960000 | 100 | 16959962 | 15 | 56  | 10.1 |
| 11 | 17349900 | 17350025 | 125 | 17349962 | 13 | 57  | 1.8  |
| 11 | 18084175 | 18084200 | 25  | 18084187 | 11 | 11  | 1.8  |
| 11 | 18361775 | 18361800 | 25  | 18361787 | 12 | 12  | 1.8  |
| 11 | 19606175 | 19606400 | 225 | 19606237 | 20 | 139 | 12.8 |
| 11 | 19634825 | 19634900 | 75  | 19634837 | 11 | 33  | 2.7  |
| 11 | 19658350 | 19658400 | 50  | 19658362 | 11 | 22  | 3.7  |
| 11 | 19690525 | 19690575 | 50  | 19690562 | 17 | 33  | 5.5  |
| 11 | 19691250 | 19691300 | 50  | 19691262 | 12 | 24  | 1.8  |
| 11 | 20365475 | 20365625 | 150 | 20365512 | 24 | 106 | 12.8 |
| 11 | 22604275 | 22604350 | 75  | 22604287 | 12 | 34  | 0    |
| 11 | 26054875 | 26054975 | 100 | 26054887 | 14 | 53  | 1.8  |
| 11 | 26206875 | 26206975 | 100 | 26206887 | 12 | 45  | 0    |
| 11 | 27180075 | 27180275 | 200 | 27180137 | 17 | 113 | 12.8 |
| 11 | 27422050 | 27422125 | 75  | 27422062 | 12 | 34  | 4.6  |
| 11 | 27484775 | 27484975 | 200 | 27484937 | 24 | 148 | 18.3 |
| 11 | 29098375 | 29098450 | 75  | 29098387 | 14 | 41  | 0    |
| 11 | 29778875 | 29778925 | 50  | 29778887 | 12 | 24  | 0.9  |
| 11 | 31947350 | 31947400 | 50  | 31947362 | 12 | 24  | 3.7  |
| 11 | 32188650 | 32188675 | 25  | 32188662 | 11 | 11  | 1.8  |
| 11 | 33017475 | 33017525 | 50  | 33017512 | 15 | 29  | 5.5  |
| 11 | 33054625 | 33054750 | 125 | 33054687 | 15 | 69  | 5.5  |
| 11 | 33139750 | 33139850 | 100 | 33139762 | 25 | 83  | 13.7 |
| 11 | 33236475 | 33236525 | 50  | 33236487 | 13 | 26  | 3.7  |
| 11 | 33670250 | 33670300 | 50  | 33670262 | 12 | 23  | 1.8  |
| 11 | 33780825 | 33780850 | 25  | 33780837 | 30 | 30  | 4.6  |
| 11 | 33910000 | 33910075 | 75  | 33910037 | 12 | 35  | 2.7  |
| 11 | 33919975 | 33920025 | 50  | 33919987 | 11 | 22  | 2.7  |
| 11 | 34159475 | 34159500 | 25  | 34159487 | 13 | 13  | 1.8  |
| 11 | 34164475 | 34164600 | 125 | 34164487 | 12 | 57  | 0    |
| 11 | 34634400 | 34634425 | 25  | 34634412 | 11 | 11  | 0    |
| 11 | 34770900 | 34771075 | 175 | 34771012 | 19 | 109 | 3.7  |
| 11 | 34877750 | 34878050 | 300 | 34877887 | 18 | 169 | 1.8  |
| 11 | 34894925 | 34894950 | 25  | 34894937 | 11 | 11  | 1.8  |
| 11 | 35144850 | 35145175 | 325 | 35145037 | 18 | 168 | 20.1 |

|    |          |          |     |          |    |     |      |
|----|----------|----------|-----|----------|----|-----|------|
| 11 | 35148675 | 35148700 | 25  | 35148687 | 11 | 11  | 0.9  |
| 11 | 35315325 | 35315475 | 150 | 35315362 | 14 | 80  | 11   |
| 11 | 35325850 | 35326125 | 275 | 35325987 | 20 | 161 | 1.8  |
| 11 | 35641250 | 35641500 | 250 | 35641362 | 34 | 262 | 9.1  |
| 11 | 35800125 | 35800250 | 125 | 35800162 | 16 | 71  | 8.2  |
| 11 | 35931325 | 35931500 | 175 | 35931387 | 15 | 96  | 8.2  |
| 11 | 36572400 | 36572425 | 25  | 36572412 | 11 | 11  | 1.8  |
| 11 | 38204925 | 38205150 | 225 | 38205037 | 21 | 154 | 12.8 |
| 11 | 38878250 | 38878400 | 150 | 38878287 | 13 | 77  | 2.7  |
| 11 | 39139900 | 39139950 | 50  | 39139937 | 16 | 31  | 5.5  |
| 11 | 40083150 | 40083500 | 350 | 40083312 | 14 | 158 | 6.4  |
| 11 | 43622200 | 43622225 | 25  | 43622212 | 14 | 14  | 2.7  |
| 11 | 43658375 | 43658575 | 200 | 43658562 | 28 | 151 | 22   |
| 11 | 43658800 | 43658825 | 25  | 43658812 | 13 | 13  | 1.8  |
| 11 | 43858650 | 43859000 | 350 | 43858837 | 60 | 565 | 70.5 |
| 11 | 43898825 | 43898850 | 25  | 43898837 | 11 | 11  | 0.9  |
| 11 | 44543925 | 44543975 | 50  | 44543937 | 12 | 24  | 3.7  |
| 11 | 45749475 | 45749525 | 50  | 45749487 | 12 | 24  | 3.7  |
| 11 | 45784200 | 45784225 | 25  | 45784212 | 11 | 11  | 1.8  |
| 11 | 45909800 | 45909950 | 150 | 45909812 | 11 | 66  | 0    |
| 11 | 46128175 | 46128250 | 75  | 46128187 | 12 | 36  | 2.7  |
| 11 | 46341575 | 46341600 | 25  | 46341587 | 16 | 16  | 1.8  |
| 11 | 46359025 | 46359100 | 75  | 46359037 | 12 | 35  | 0.9  |
| 11 | 46400850 | 46400875 | 25  | 46400862 | 11 | 11  | 0    |
| 11 | 46595650 | 46595700 | 50  | 46595687 | 12 | 23  | 1.8  |
| 11 | 46678925 | 46679075 | 150 | 46678937 | 19 | 95  | 17.4 |
| 11 | 46867925 | 46867975 | 50  | 46867937 | 12 | 24  | 1.8  |
| 11 | 47163125 | 47163300 | 175 | 47163162 | 17 | 103 | 11   |
| 11 | 47192650 | 47192800 | 150 | 47192787 | 15 | 80  | 1.8  |
| 11 | 47227000 | 47227025 | 25  | 47227012 | 11 | 11  | 1.8  |
| 11 | 47232750 | 47232800 | 50  | 47232762 | 11 | 22  | 3.7  |
| 11 | 47247375 | 47247500 | 125 | 47247387 | 17 | 66  | 9.1  |
| 11 | 47854025 | 47854225 | 200 | 47854137 | 21 | 136 | 0    |
| 11 | 47883675 | 47883925 | 250 | 47883787 | 18 | 149 | 28.4 |
| 11 | 48059875 | 48059900 | 25  | 48059887 | 14 | 14  | 2.7  |
| 11 | 56849225 | 56849275 | 50  | 56849237 | 18 | 34  | 5.5  |
| 11 | 57191175 | 57191350 | 175 | 57191262 | 17 | 105 | 9.1  |
| 11 | 58102650 | 58102675 | 25  | 58102662 | 13 | 13  | 1.8  |
| 11 | 58103750 | 58104025 | 275 | 58103937 | 18 | 166 | 11   |
| 11 | 59069225 | 59069275 | 50  | 59069237 | 11 | 22  | 1.8  |
| 11 | 59080150 | 59080175 | 25  | 59080162 | 11 | 11  | 0.9  |
| 11 | 59192525 | 59192600 | 75  | 59192537 | 13 | 38  | 4.6  |
| 11 | 59193450 | 59193625 | 175 | 59193537 | 17 | 100 | 9.1  |
| 11 | 59334825 | 59335000 | 175 | 59334862 | 28 | 167 | 23.8 |
| 11 | 59447950 | 59448100 | 150 | 59447987 | 13 | 71  | 3.7  |
| 11 | 60384275 | 60384300 | 25  | 60384287 | 11 | 11  | 0.9  |
| 11 | 60387725 | 60387775 | 50  | 60387737 | 12 | 23  | 0    |
| 11 | 60437950 | 60438125 | 175 | 60438037 | 19 | 115 | 9.1  |
| 11 | 61105525 | 61105625 | 100 | 61105562 | 16 | 60  | 8.2  |
| 11 | 61273950 | 61273975 | 25  | 61273962 | 15 | 15  | 2.7  |
| 11 | 61316450 | 61316575 | 125 | 61316537 | 20 | 87  | 12.8 |
| 11 | 61968825 | 61968850 | 25  | 61968837 | 14 | 14  | 2.7  |
| 11 | 62032650 | 62032850 | 200 | 62032737 | 23 | 155 | 18.3 |
| 11 | 62094600 | 62094625 | 25  | 62094612 | 11 | 11  | 0    |
| 11 | 62278525 | 62278550 | 25  | 62278537 | 11 | 11  | 1.8  |
| 11 | 62365925 | 62365950 | 25  | 62365937 | 32 | 32  | 5.5  |
| 11 | 63315975 | 63316025 | 50  | 63315987 | 12 | 24  | 3.7  |
| 11 | 63628625 | 63628650 | 25  | 63628637 | 11 | 11  | 0    |
| 11 | 63709375 | 63709425 | 50  | 63709387 | 11 | 22  | 1.8  |
| 11 | 63710150 | 63710200 | 50  | 63710162 | 12 | 24  | 3.7  |
| 11 | 63771375 | 63771425 | 50  | 63771412 | 16 | 30  | 5.5  |
| 11 | 63841550 | 63841600 | 50  | 63841587 | 15 | 29  | 5.5  |
| 11 | 63841975 | 63842000 | 25  | 63841987 | 11 | 11  | 1.8  |
| 11 | 63897350 | 63897375 | 25  | 63897362 | 11 | 11  | 1.8  |
| 11 | 64394675 | 64394825 | 150 | 64394687 | 12 | 70  | 7.3  |
| 11 | 64448525 | 64448600 | 75  | 64448537 | 14 | 42  | 5.5  |
| 11 | 64608100 | 64608150 | 50  | 64608137 | 13 | 24  | 2.7  |
| 11 | 64626625 | 64626700 | 75  | 64626637 | 11 | 33  | 0    |
| 11 | 64814925 | 64815050 | 125 | 64815012 | 13 | 57  | 6.4  |
| 11 | 64857650 | 64857750 | 100 | 64857662 | 14 | 51  | 9.1  |
| 11 | 64939775 | 64939825 | 50  | 64939787 | 11 | 22  | 0    |
| 11 | 65018050 | 65018075 | 25  | 65018062 | 12 | 12  | 0    |
| 11 | 65138375 | 65138400 | 25  | 65138387 | 16 | 16  | 2.7  |
| 11 | 65440275 | 65440300 | 25  | 65440287 | 14 | 14  | 1.8  |
| 11 | 65526250 | 65526275 | 25  | 65526262 | 16 | 16  | 1.8  |

|    |          |          |     |          |    |     |      |
|----|----------|----------|-----|----------|----|-----|------|
| 11 | 65813250 | 65813350 | 100 | 65813262 | 11 | 44  | 7.3  |
| 11 | 65836700 | 65836950 | 250 | 65836712 | 16 | 125 | 12.8 |
| 11 | 65860625 | 65860800 | 175 | 65860637 | 19 | 104 | 15.6 |
| 11 | 65945750 | 65945775 | 25  | 65945762 | 21 | 21  | 3.7  |
| 11 | 66034425 | 66034450 | 25  | 66034437 | 11 | 11  | 0.9  |
| 11 | 66117425 | 66117475 | 50  | 66117437 | 15 | 28  | 3.7  |
| 11 | 66140825 | 66140875 | 50  | 66140837 | 24 | 45  | 8.2  |
| 11 | 66244025 | 66244050 | 25  | 66244037 | 11 | 11  | 0    |
| 11 | 66380100 | 66380200 | 100 | 66380112 | 12 | 48  | 7.3  |
| 11 | 66482700 | 66483000 | 300 | 66482837 | 55 | 477 | 60.4 |
| 11 | 66494675 | 66494800 | 125 | 66494687 | 12 | 58  | 2.7  |
| 11 | 66546475 | 66546575 | 100 | 66546512 | 14 | 52  | 8.2  |
| 11 | 66953425 | 66953550 | 125 | 66953537 | 12 | 54  | 2.7  |
| 11 | 66988325 | 66988375 | 50  | 66988337 | 12 | 24  | 1.8  |
| 11 | 67007275 | 67007675 | 400 | 67007362 | 53 | 552 | 77.8 |
| 11 | 67781575 | 67781675 | 100 | 67781637 | 14 | 50  | 8.2  |
| 11 | 67866900 | 67867025 | 125 | 67867012 | 13 | 57  | 0    |
| 11 | 67966000 | 67966175 | 175 | 67966112 | 16 | 96  | 0.9  |
| 11 | 68367100 | 68367250 | 150 | 68367187 | 13 | 71  | 10.1 |
| 11 | 68599575 | 68599775 | 200 | 68599612 | 21 | 139 | 17.4 |
| 11 | 68690750 | 68690950 | 200 | 68690812 | 15 | 94  | 4.6  |
| 11 | 68819975 | 68820000 | 25  | 68819987 | 12 | 12  | 0.9  |
| 11 | 68820825 | 68821325 | 500 | 68821187 | 18 | 251 | 27.4 |
| 11 | 69021350 | 69021375 | 25  | 69021362 | 14 | 14  | 2.7  |
| 11 | 69092125 | 69092175 | 50  | 69092137 | 11 | 22  | 3.7  |
| 11 | 69412350 | 69412375 | 25  | 69412362 | 11 | 11  | 1.8  |
| 11 | 69474075 | 69474100 | 25  | 69474087 | 11 | 11  | 0.9  |
| 11 | 69635800 | 69635825 | 25  | 69635812 | 15 | 15  | 1.8  |
| 11 | 69636850 | 69636900 | 50  | 69636862 | 11 | 22  | 2.7  |
| 11 | 71429725 | 71429775 | 50  | 71429762 | 12 | 23  | 3.7  |
| 11 | 71469250 | 71469325 | 75  | 71469312 | 14 | 36  | 6.4  |
| 11 | 71501325 | 71501475 | 150 | 71501437 | 23 | 102 | 17.4 |
| 11 | 71823200 | 71823350 | 150 | 71823237 | 17 | 97  | 14.6 |
| 11 | 72698025 | 72698050 | 25  | 72698037 | 11 | 11  | 1.8  |
| 11 | 72729250 | 72729275 | 25  | 72729262 | 12 | 12  | 0.9  |
| 11 | 73176550 | 73176700 | 150 | 73176637 | 14 | 73  | 10.1 |
| 11 | 74259875 | 74259950 | 75  | 74259887 | 12 | 34  | 2.7  |
| 11 | 74787900 | 74788025 | 125 | 74787937 | 13 | 60  | 5.5  |
| 11 | 74937275 | 74937400 | 125 | 74937387 | 14 | 57  | 11   |
| 11 | 74947000 | 74947125 | 125 | 74947012 | 15 | 63  | 10.1 |
| 11 | 75965975 | 75966025 | 50  | 75965987 | 17 | 34  | 5.5  |
| 11 | 75967625 | 75967700 | 75  | 75967662 | 14 | 37  | 5.5  |
| 11 | 76204450 | 76204575 | 125 | 76204562 | 14 | 62  | 0    |
| 11 | 76212400 | 76212600 | 200 | 76212512 | 12 | 86  | 5.5  |
| 11 | 76735825 | 76735850 | 25  | 76735837 | 11 | 11  | 1.8  |
| 11 | 77383400 | 77383475 | 75  | 77383437 | 14 | 38  | 2.7  |
| 11 | 77528275 | 77528500 | 225 | 77528337 | 25 | 176 | 13.7 |
| 11 | 77707450 | 77707650 | 200 | 77707587 | 16 | 106 | 5.5  |
| 11 | 77720625 | 77720825 | 200 | 77720712 | 20 | 128 | 11   |
| 11 | 77733650 | 77733850 | 200 | 77733687 | 20 | 109 | 14.6 |
| 11 | 78189925 | 78189975 | 50  | 78189937 | 11 | 22  | 0    |
| 11 | 82503675 | 82503725 | 50  | 82503687 | 11 | 22  | 1.8  |
| 11 | 82546800 | 82546850 | 50  | 82546812 | 11 | 22  | 3.7  |
| 11 | 85016600 | 85016675 | 75  | 85016662 | 13 | 35  | 0    |
| 11 | 85053925 | 85053950 | 25  | 85053937 | 12 | 12  | 0.9  |
| 11 | 85243525 | 85243625 | 100 | 85243537 | 16 | 57  | 8.2  |
| 11 | 85458475 | 85458500 | 25  | 85458487 | 11 | 11  | 0    |
| 11 | 85633175 | 85633300 | 125 | 85633212 | 12 | 55  | 9.1  |
| 11 | 85633850 | 85633900 | 50  | 85633887 | 12 | 23  | 3.7  |
| 11 | 85690800 | 85690950 | 150 | 85690887 | 16 | 83  | 11   |
| 11 | 86021700 | 86021750 | 50  | 86021737 | 12 | 23  | 3.7  |
| 11 | 86127675 | 86127725 | 50  | 86127687 | 12 | 24  | 2.7  |
| 11 | 86129725 | 86129925 | 200 | 86129787 | 16 | 112 | 7.3  |
| 11 | 86207350 | 86207400 | 50  | 86207362 | 11 | 22  | 0    |
| 11 | 86321150 | 86321200 | 50  | 86321162 | 12 | 24  | 1.8  |
| 11 | 86418325 | 86418500 | 175 | 86418362 | 20 | 116 | 16.5 |
| 11 | 87710500 | 87710750 | 250 | 87710612 | 22 | 171 | 16.5 |
| 11 | 91667000 | 91667150 | 150 | 91667087 | 15 | 82  | 0    |
| 11 | 91956275 | 91956350 | 75  | 91956287 | 12 | 36  | 5.5  |
| 11 | 93114300 | 93114450 | 150 | 93114312 | 18 | 97  | 18.3 |
| 11 | 93157325 | 93157350 | 25  | 93157337 | 12 | 12  | 1.8  |
| 11 | 93866900 | 93866925 | 25  | 93866912 | 16 | 16  | 2.7  |
| 11 | 93916400 | 93916450 | 50  | 93916412 | 12 | 24  | 1.8  |
| 11 | 94163525 | 94163650 | 125 | 94163537 | 12 | 53  | 9.1  |
| 11 | 94167550 | 94167575 | 25  | 94167562 | 11 | 11  | 0.9  |

|    |           |           |     |           |    |     |      |
|----|-----------|-----------|-----|-----------|----|-----|------|
| 11 | 94169200  | 94169225  | 25  | 94169212  | 11 | 11  | 0.9  |
| 11 | 94311475  | 94311500  | 25  | 94311487  | 11 | 11  | 0.9  |
| 11 | 94523225  | 94523325  | 100 | 94523287  | 13 | 50  | 2.7  |
| 11 | 94942125  | 94942200  | 75  | 94942137  | 11 | 33  | 0    |
| 11 | 95463800  | 95463900  | 100 | 95463837  | 13 | 48  | 6.4  |
| 11 | 95478175  | 95478250  | 75  | 95478237  | 12 | 34  | 2.7  |
| 11 | 95528875  | 95529075  | 200 | 95528962  | 21 | 138 | 14.6 |
| 11 | 95608125  | 95608175  | 50  | 95608137  | 11 | 22  | 3.7  |
| 11 | 95712150  | 95712550  | 400 | 95712337  | 35 | 358 | 40.3 |
| 11 | 100063950 | 100063975 | 25  | 100063962 | 12 | 12  | 0    |
| 11 | 101291375 | 101291400 | 25  | 101291387 | 11 | 11  | 0.9  |
| 11 | 102485100 | 102485275 | 175 | 102485187 | 15 | 94  | 5.5  |
| 11 | 104733100 | 104733225 | 125 | 104733212 | 12 | 56  | 0    |
| 11 | 105313825 | 105313975 | 150 | 105313837 | 14 | 74  | 8.2  |
| 11 | 105398250 | 105398350 | 100 | 105398287 | 34 | 127 | 19.2 |
| 11 | 105521425 | 105521525 | 100 | 105521437 | 11 | 44  | 3.7  |
| 11 | 105598575 | 105598775 | 200 | 105598612 | 16 | 116 | 4.6  |
| 11 | 105775275 | 105775300 | 25  | 105775287 | 11 | 11  | 1.8  |
| 11 | 107041000 | 107041100 | 100 | 107041087 | 17 | 60  | 7.3  |
| 11 | 107075325 | 107075800 | 475 | 107075737 | 14 | 195 | 17.4 |
| 11 | 107873625 | 107873750 | 125 | 107873687 | 18 | 83  | 9.1  |
| 11 | 107874550 | 107874650 | 100 | 107874562 | 11 | 44  | 4.6  |
| 11 | 110473300 | 110473500 | 200 | 110473337 | 19 | 126 | 3.7  |
| 11 | 111112325 | 111112475 | 150 | 111112337 | 11 | 64  | 6.4  |
| 11 | 111290075 | 111290175 | 100 | 111290112 | 16 | 59  | 9.1  |
| 11 | 111312950 | 111313000 | 50  | 111312962 | 11 | 22  | 3.7  |
| 11 | 111401000 | 111401025 | 25  | 111401012 | 11 | 11  | 1.8  |
| 11 | 111450075 | 111450275 | 200 | 111450162 | 18 | 118 | 18.3 |
| 11 | 112162150 | 112162250 | 100 | 112162162 | 12 | 48  | 7.3  |
| 11 | 112523275 | 112523425 | 150 | 112523362 | 14 | 73  | 2.7  |
| 11 | 113250925 | 113251125 | 200 | 113251012 | 17 | 112 | 10.1 |
| 11 | 113670950 | 113671000 | 50  | 113670962 | 11 | 22  | 2.7  |
| 11 | 113776750 | 113776775 | 25  | 113776762 | 14 | 14  | 2.7  |
| 11 | 113854750 | 113854875 | 125 | 113854812 | 16 | 74  | 11   |
| 11 | 114999100 | 114999150 | 50  | 114999112 | 12 | 23  | 3.7  |
| 11 | 115088225 | 115088325 | 100 | 115088237 | 12 | 47  | 3.7  |
| 11 | 115317475 | 115317500 | 25  | 115317487 | 13 | 13  | 1.8  |
| 11 | 115351900 | 115351925 | 25  | 115351912 | 11 | 11  | 0.9  |
| 11 | 115939175 | 115939200 | 25  | 115939187 | 11 | 11  | 0    |
| 11 | 117628100 | 117628175 | 75  | 117628112 | 15 | 39  | 6.4  |
| 11 | 117735550 | 117735625 | 75  | 117735562 | 19 | 45  | 4.6  |
| 11 | 117985150 | 117985175 | 25  | 117985162 | 12 | 12  | 1.8  |
| 11 | 117995225 | 117995400 | 175 | 117995387 | 16 | 99  | 19.2 |
| 11 | 117995700 | 117995725 | 25  | 117995712 | 11 | 11  | 1.8  |
| 11 | 118166775 | 118166850 | 75  | 118166787 | 12 | 36  | 0    |
| 11 | 118285300 | 118285425 | 125 | 118285337 | 14 | 63  | 6.4  |
| 11 | 118294500 | 118294575 | 75  | 118294537 | 13 | 37  | 5.5  |
| 11 | 118304200 | 118304275 | 75  | 118304212 | 14 | 42  | 6.4  |
| 11 | 118471350 | 118471500 | 150 | 118471462 | 21 | 101 | 12.8 |
| 11 | 118477800 | 118477825 | 25  | 118477812 | 19 | 19  | 3.7  |
| 11 | 118691550 | 118691625 | 75  | 118691562 | 14 | 36  | 6.4  |
| 11 | 118710075 | 118710200 | 125 | 118710187 | 12 | 53  | 9.1  |
| 11 | 119060575 | 119060650 | 75  | 119060587 | 13 | 37  | 1.8  |
| 11 | 119159950 | 119160100 | 150 | 119160062 | 13 | 72  | 5.5  |
| 11 | 119593925 | 119594100 | 175 | 119593962 | 17 | 104 | 4.6  |
| 11 | 119682625 | 119682650 | 25  | 119682637 | 11 | 11  | 1.8  |
| 11 | 120842650 | 120842675 | 25  | 120842662 | 11 | 11  | 0.9  |
| 11 | 121099450 | 121099525 | 75  | 121099462 | 11 | 33  | 5.5  |
| 11 | 121476825 | 121476900 | 75  | 121476837 | 11 | 33  | 3.7  |
| 11 | 121556675 | 121556750 | 75  | 121556687 | 12 | 34  | 2.7  |
| 11 | 121562250 | 121562575 | 325 | 121562387 | 26 | 251 | 14.6 |
| 11 | 121573075 | 121573200 | 125 | 121573112 | 17 | 69  | 10.1 |
| 11 | 121957250 | 121957300 | 50  | 121957287 | 12 | 23  | 1.8  |
| 11 | 121999950 | 122000075 | 125 | 121999987 | 14 | 66  | 0    |
| 11 | 122022950 | 122023050 | 100 | 122023012 | 12 | 46  | 5.5  |
| 11 | 122098075 | 122098100 | 25  | 122098087 | 12 | 12  | 0.9  |
| 11 | 122438575 | 122438825 | 250 | 122438662 | 14 | 115 | 22.9 |
| 11 | 122564450 | 122564625 | 175 | 122564587 | 12 | 76  | 5.5  |
| 11 | 122829900 | 122829950 | 50  | 122829912 | 11 | 22  | 2.7  |
| 11 | 122836575 | 122836650 | 75  | 122836612 | 13 | 36  | 0    |
| 11 | 122887325 | 122887375 | 50  | 122887337 | 15 | 26  | 4.6  |
| 11 | 123491225 | 123491425 | 200 | 123491312 | 22 | 153 | 19.2 |
| 11 | 124048950 | 124048975 | 25  | 124048962 | 11 | 11  | 1.8  |
| 11 | 124638675 | 124638750 | 75  | 124638712 | 27 | 75  | 12.8 |
| 11 | 124718800 | 124718825 | 25  | 124718812 | 11 | 11  | 1.8  |

|    |           |           |     |           |    |     |      |
|----|-----------|-----------|-----|-----------|----|-----|------|
| 11 | 124928600 | 124928675 | 75  | 124928612 | 12 | 34  | 2.7  |
| 11 | 124967900 | 124967925 | 25  | 124967912 | 11 | 11  | 1.8  |
| 11 | 125263500 | 125263525 | 25  | 125263512 | 11 | 11  | 0.9  |
| 11 | 125521450 | 125521550 | 100 | 125521487 | 15 | 55  | 5.5  |
| 11 | 125678375 | 125678400 | 25  | 125678387 | 11 | 11  | 1.8  |
| 11 | 125685650 | 125685700 | 50  | 125685687 | 15 | 28  | 4.6  |
| 11 | 125796700 | 125796725 | 25  | 125796712 | 14 | 14  | 2.7  |
| 11 | 125960975 | 125961150 | 175 | 125960987 | 11 | 68  | 10.1 |
| 11 | 125977100 | 125977150 | 50  | 125977112 | 11 | 22  | 1.8  |
| 11 | 126245200 | 126245300 | 100 | 126245262 | 12 | 45  | 7.3  |
| 11 | 127555800 | 127555850 | 50  | 127555812 | 11 | 22  | 1.8  |
| 11 | 127928275 | 127928300 | 25  | 127928287 | 11 | 11  | 1.8  |
| 11 | 128154325 | 128154550 | 225 | 128154387 | 19 | 150 | 11   |
| 11 | 128654975 | 128655025 | 50  | 128654987 | 11 | 22  | 2.7  |
| 11 | 128749200 | 128749250 | 50  | 128749212 | 11 | 22  | 1.8  |
| 11 | 128987350 | 128987500 | 150 | 128987362 | 12 | 70  | 10.1 |
| 11 | 129018150 | 129018475 | 325 | 129018387 | 14 | 150 | 23.8 |
| 11 | 129079250 | 129079425 | 175 | 129079287 | 13 | 82  | 9.1  |
| 11 | 129377850 | 129377875 | 25  | 129377862 | 11 | 11  | 0.9  |
| 11 | 129496125 | 129496250 | 125 | 129496137 | 11 | 55  | 0    |
| 11 | 131034350 | 131034400 | 50  | 131034362 | 11 | 22  | 1.8  |
| 11 | 131119975 | 131120125 | 150 | 131119987 | 11 | 64  | 7.3  |
| 11 | 131144600 | 131144750 | 150 | 131144662 | 13 | 72  | 6.4  |
| 11 | 131253075 | 131253100 | 25  | 131253087 | 11 | 11  | 0.9  |
| 11 | 132274025 | 132274050 | 25  | 132274037 | 11 | 11  | 1.8  |
| 11 | 133425775 | 133425800 | 25  | 133425787 | 11 | 11  | 1.8  |
| 11 | 134137500 | 134137700 | 200 | 134137537 | 17 | 106 | 12.8 |
| 11 | 134324300 | 134324375 | 75  | 134324312 | 12 | 33  | 5.5  |
| 10 | 359925    | 359975    | 50  | 359937    | 11 | 22  | 3.7  |
| 10 | 616700    | 616825    | 125 | 616712    | 11 | 55  | 8.2  |
| 10 | 1070875   | 1070925   | 50  | 1070887   | 12 | 24  | 1.8  |
| 10 | 1084925   | 1085400   | 475 | 1084987   | 14 | 237 | 44.8 |
| 10 | 2347300   | 2347325   | 25  | 2347312   | 11 | 11  | 0.9  |
| 10 | 2347550   | 2347575   | 25  | 2347562   | 12 | 12  | 0.9  |
| 10 | 2931725   | 2931825   | 100 | 2931762   | 14 | 50  | 7.3  |
| 10 | 3225500   | 3225525   | 25  | 3225512   | 12 | 12  | 0.9  |
| 10 | 3371800   | 3372050   | 250 | 3372037   | 20 | 140 | 23.8 |
| 10 | 3431550   | 3431575   | 25  | 3431562   | 14 | 14  | 2.7  |
| 10 | 3432050   | 3432075   | 25  | 3432062   | 12 | 12  | 0    |
| 10 | 3487550   | 3487775   | 225 | 3487712   | 19 | 126 | 24.7 |
| 10 | 3514600   | 3514725   | 125 | 3514612   | 14 | 65  | 7.3  |
| 10 | 4348625   | 4348650   | 25  | 4348637   | 11 | 11  | 1.8  |
| 10 | 5580100   | 5580225   | 125 | 5580112   | 11 | 53  | 3.7  |
| 10 | 5678125   | 5678300   | 175 | 5678187   | 13 | 81  | 9.1  |
| 10 | 5766375   | 5766650   | 275 | 5766537   | 27 | 230 | 22   |
| 10 | 6301375   | 6301575   | 200 | 6301437   | 20 | 134 | 4.6  |
| 10 | 6320850   | 6321050   | 200 | 6321012   | 15 | 97  | 0    |
| 10 | 6329600   | 6329625   | 25  | 6329612   | 12 | 12  | 1.8  |
| 10 | 6357500   | 6357525   | 25  | 6357512   | 14 | 14  | 0.9  |
| 10 | 6381275   | 6381400   | 125 | 6381287   | 12 | 60  | 0    |
| 10 | 6505050   | 6505200   | 150 | 6505087   | 15 | 80  | 6.4  |
| 10 | 7069250   | 7069425   | 175 | 7069337   | 15 | 93  | 0    |
| 10 | 7870125   | 7870225   | 100 | 7870162   | 13 | 46  | 6.4  |
| 10 | 12278225  | 12278250  | 25  | 12278237  | 11 | 11  | 1.8  |
| 10 | 13181275  | 13181325  | 50  | 13181287  | 11 | 22  | 1.8  |
| 10 | 13243450  | 13243475  | 25  | 13243462  | 14 | 14  | 2.7  |
| 10 | 13766550  | 13766675  | 125 | 13766562  | 14 | 67  | 7.3  |
| 10 | 15041775  | 15041800  | 25  | 15041787  | 11 | 11  | 1.8  |
| 10 | 15942500  | 15942775  | 275 | 15942587  | 20 | 171 | 22   |
| 10 | 16518750  | 16518775  | 25  | 16518762  | 12 | 12  | 1.8  |
| 10 | 16899700  | 16899900  | 200 | 16899712  | 13 | 82  | 12.8 |
| 10 | 17048225  | 17048325  | 100 | 17048262  | 16 | 57  | 8.2  |
| 10 | 17070175  | 17070325  | 150 | 17070312  | 16 | 83  | 2.7  |
| 10 | 17195675  | 17195700  | 25  | 17195687  | 11 | 11  | 0    |
| 10 | 18980575  | 18980600  | 25  | 18980587  | 25 | 25  | 4.6  |
| 10 | 21702075  | 21702100  | 25  | 21702087  | 12 | 12  | 1.8  |
| 10 | 22053775  | 22053825  | 50  | 22053787  | 11 | 22  | 1.8  |
| 10 | 22558250  | 22558350  | 100 | 22558337  | 16 | 54  | 8.2  |
| 10 | 22949650  | 22949700  | 50  | 22949662  | 11 | 22  | 0    |
| 10 | 24537775  | 24537825  | 50  | 24537812  | 12 | 23  | 3.7  |
| 10 | 25140725  | 25140875  | 150 | 25140737  | 11 | 66  | 0    |
| 10 | 25237100  | 25237150  | 50  | 25237112  | 11 | 22  | 0    |
| 10 | 25273825  | 25273875  | 50  | 25273837  | 12 | 24  | 1.8  |
| 10 | 27569975  | 27570025  | 50  | 27569987  | 13 | 26  | 0    |
| 10 | 29050975  | 29051150  | 175 | 29050987  | 13 | 87  | 3.7  |



|    |          |          |     |          |    |     |      |
|----|----------|----------|-----|----------|----|-----|------|
| 10 | 29268450 | 29268475 | 25  | 29268462 | 11 | 11  | 1.8  |
| 10 | 29268925 | 29269100 | 175 | 29269012 | 14 | 86  | 5.5  |
| 10 | 29320225 | 29320350 | 125 | 29320287 | 17 | 74  | 2.7  |
| 10 | 29336350 | 29336550 | 200 | 29336412 | 17 | 120 | 12.8 |
| 10 | 29336975 | 29337125 | 150 | 29337012 | 12 | 66  | 7.3  |
| 10 | 29486525 | 29486600 | 75  | 29486537 | 12 | 35  | 1.8  |
| 10 | 29647575 | 29647650 | 75  | 29647587 | 11 | 33  | 2.7  |
| 10 | 29673450 | 29673625 | 175 | 29673612 | 15 | 87  | 12.8 |
| 10 | 29675150 | 29675175 | 25  | 29675162 | 11 | 11  | 0.9  |
| 10 | 30011075 | 30011100 | 25  | 30011087 | 11 | 11  | 0    |
| 10 | 30224450 | 30224475 | 25  | 30224462 | 11 | 11  | 1.8  |
| 10 | 31114500 | 31114625 | 125 | 31114612 | 14 | 64  | 11   |
| 10 | 31361125 | 31361200 | 75  | 31361187 | 16 | 45  | 8.2  |
| 10 | 31932725 | 31933075 | 350 | 31932887 | 15 | 159 | 17.4 |
| 10 | 31940300 | 31940350 | 50  | 31940312 | 17 | 30  | 4.6  |
| 10 | 31949300 | 31949450 | 150 | 31949312 | 11 | 66  | 11.9 |
| 10 | 31998250 | 31998325 | 75  | 31998262 | 12 | 36  | 3.7  |
| 10 | 32074650 | 32074850 | 200 | 32074662 | 11 | 84  | 5.5  |
| 10 | 32269875 | 32269950 | 75  | 32269887 | 11 | 33  | 2.7  |
| 10 | 33695100 | 33695325 | 225 | 33695187 | 18 | 143 | 9.1  |
| 10 | 35772825 | 35772925 | 100 | 35772837 | 12 | 45  | 0    |
| 10 | 36118600 | 36119100 | 500 | 36118912 | 36 | 416 | 16.5 |
| 10 | 36818775 | 36818825 | 50  | 36818787 | 11 | 22  | 0.9  |
| 10 | 36863750 | 36863875 | 125 | 36863787 | 15 | 69  | 9.1  |
| 10 | 36868075 | 36868275 | 200 | 36868162 | 19 | 123 | 5.5  |
| 10 | 38423175 | 38423375 | 200 | 38423187 | 14 | 97  | 12.8 |
| 10 | 38447125 | 38447400 | 275 | 38447162 | 15 | 135 | 4.6  |
| 10 | 41850625 | 41850650 | 25  | 41850637 | 12 | 12  | 0.9  |
| 10 | 42291025 | 42291050 | 25  | 42291037 | 12 | 12  | 1.8  |
| 10 | 42507200 | 42507275 | 75  | 42507212 | 11 | 33  | 5.5  |
| 10 | 43223550 | 43223575 | 25  | 43223562 | 12 | 12  | 1.8  |
| 10 | 43389950 | 43390150 | 200 | 43390087 | 13 | 94  | 12.8 |
| 10 | 43422175 | 43422300 | 125 | 43422212 | 13 | 61  | 3.7  |
| 10 | 44519800 | 44519900 | 100 | 44519812 | 14 | 49  | 2.7  |
| 10 | 44718600 | 44718650 | 50  | 44718612 | 14 | 28  | 3.7  |
| 10 | 45488550 | 45488600 | 50  | 45488562 | 11 | 22  | 1.8  |
| 10 | 49404625 | 49404800 | 175 | 49404662 | 15 | 87  | 3.7  |
| 10 | 52053850 | 52053925 | 75  | 52053862 | 12 | 36  | 5.5  |
| 10 | 56449450 | 56449500 | 50  | 56449462 | 12 | 24  | 1.8  |
| 10 | 57790950 | 57791000 | 50  | 57790962 | 11 | 22  | 0.9  |
| 10 | 59698975 | 59699100 | 125 | 59699037 | 14 | 65  | 7.3  |
| 10 | 60983175 | 60983225 | 50  | 60983187 | 15 | 30  | 5.5  |
| 10 | 63478950 | 63479250 | 300 | 63479062 | 20 | 192 | 30.2 |
| 10 | 64246450 | 64246600 | 150 | 64246562 | 14 | 80  | 7.3  |
| 10 | 64562800 | 64562825 | 25  | 64562812 | 12 | 12  | 1.8  |
| 10 | 64950700 | 64950775 | 75  | 64950712 | 16 | 46  | 7.3  |
| 10 | 67089675 | 67089750 | 75  | 67089687 | 11 | 33  | 1.8  |
| 10 | 70331050 | 70331250 | 200 | 70331112 | 18 | 122 | 7.3  |
| 10 | 70655300 | 70655500 | 200 | 70655312 | 14 | 98  | 11   |
| 10 | 70667450 | 70667475 | 25  | 70667462 | 11 | 11  | 1.8  |
| 10 | 70924725 | 70924750 | 25  | 70924737 | 14 | 14  | 2.7  |
| 10 | 73290400 | 73290475 | 75  | 73290462 | 13 | 37  | 5.5  |
| 10 | 73375750 | 73375825 | 75  | 73375787 | 13 | 36  | 0    |
| 10 | 73410925 | 73411125 | 200 | 73411012 | 31 | 225 | 30.2 |
| 10 | 73411425 | 73411500 | 75  | 73411437 | 12 | 35  | 0    |
| 10 | 73672500 | 73672600 | 100 | 73672562 | 14 | 54  | 9.1  |
| 10 | 73678625 | 73678700 | 75  | 73678687 | 17 | 47  | 6.4  |
| 10 | 73690375 | 73690400 | 25  | 73690387 | 11 | 11  | 1.8  |
| 10 | 73727475 | 73727550 | 75  | 73727487 | 14 | 38  | 6.4  |
| 10 | 74788600 | 74788700 | 100 | 74788612 | 20 | 64  | 10.1 |
| 10 | 75055750 | 75055900 | 150 | 75055887 | 22 | 109 | 20.1 |
| 10 | 75336900 | 75336950 | 50  | 75336912 | 11 | 22  | 1.8  |
| 10 | 75338850 | 75339050 | 200 | 75338987 | 20 | 130 | 18.3 |
| 10 | 76724525 | 76724625 | 100 | 76724537 | 11 | 44  | 2.7  |
| 10 | 77204725 | 77204850 | 125 | 77204787 | 12 | 56  | 0    |
| 10 | 77828175 | 77828250 | 75  | 77828237 | 14 | 38  | 2.7  |
| 10 | 78822800 | 78822875 | 75  | 78822812 | 11 | 33  | 4.6  |
| 10 | 79059175 | 79059250 | 75  | 79059187 | 12 | 35  | 3.7  |
| 10 | 79059925 | 79059950 | 25  | 79059937 | 11 | 11  | 1.8  |
| 10 | 79317500 | 79317575 | 75  | 79317512 | 11 | 33  | 5.5  |
| 10 | 80295750 | 80295800 | 50  | 80295762 | 11 | 22  | 0    |
| 10 | 80394750 | 80394950 | 200 | 80394887 | 17 | 102 | 16.5 |
| 10 | 80522200 | 80522225 | 25  | 80522212 | 11 | 11  | 0    |
| 10 | 80829000 | 80829075 | 75  | 80829037 | 21 | 59  | 4.6  |
| 10 | 80833225 | 80833275 | 50  | 80833237 | 12 | 23  | 0    |

|    |           |           |     |           |    |     |      |
|----|-----------|-----------|-----|-----------|----|-----|------|
| 10 | 80833550  | 80833600  | 50  | 80833562  | 11 | 22  | 2.7  |
| 10 | 81908350  | 81908600  | 250 | 81908487  | 19 | 155 | 17.4 |
| 10 | 85889000  | 85889150  | 150 | 85889137  | 20 | 97  | 13.7 |
| 10 | 88702425  | 88702550  | 125 | 88702437  | 11 | 53  | 0    |
| 10 | 89902550  | 89902825  | 275 | 89902687  | 18 | 158 | 2.7  |
| 10 | 91001600  | 91001625  | 25  | 91001612  | 12 | 12  | 1.8  |
| 10 | 91097775  | 91097850  | 75  | 91097837  | 12 | 33  | 0    |
| 10 | 91142400  | 91142450  | 50  | 91142412  | 11 | 22  | 3.7  |
| 10 | 91451325  | 91451350  | 25  | 91451337  | 16 | 16  | 1.8  |
| 10 | 91886575  | 91886675  | 100 | 91886637  | 15 | 54  | 3.7  |
| 10 | 92525275  | 92525375  | 100 | 92525287  | 13 | 48  | 3.7  |
| 10 | 93048250  | 93048325  | 75  | 93048262  | 15 | 47  | 9.1  |
| 10 | 93363625  | 93363675  | 50  | 93363637  | 11 | 22  | 3.7  |
| 10 | 94040600  | 94040700  | 100 | 94040662  | 12 | 46  | 6.4  |
| 10 | 94438675  | 94438825  | 150 | 94438712  | 15 | 84  | 2.7  |
| 10 | 94449450  | 94449625  | 175 | 94449562  | 13 | 80  | 0    |
| 10 | 95452400  | 95452425  | 25  | 95452412  | 19 | 19  | 3.7  |
| 10 | 97069100  | 97069250  | 150 | 97069112  | 12 | 67  | 4.6  |
| 10 | 97879625  | 97880075  | 450 | 97879887  | 32 | 433 | 41.2 |
| 10 | 98166475  | 98166550  | 75  | 98166487  | 13 | 37  | 5.5  |
| 10 | 99298750  | 99298825  | 75  | 99298762  | 11 | 33  | 4.6  |
| 10 | 99486575  | 99486850  | 275 | 99486662  | 40 | 303 | 45.7 |
| 10 | 100066000 | 100066025 | 25  | 100066012 | 13 | 13  | 1.8  |
| 10 | 100096600 | 100096875 | 275 | 100096762 | 28 | 225 | 0.9  |
| 10 | 100102975 | 100103000 | 25  | 100102987 | 11 | 11  | 1.8  |
| 10 | 100115600 | 100116125 | 525 | 100115987 | 21 | 327 | 53.1 |
| 10 | 100165125 | 100165225 | 100 | 100165212 | 12 | 45  | 5.5  |
| 10 | 101371150 | 101371175 | 25  | 101371162 | 15 | 15  | 2.7  |
| 10 | 102123300 | 102123450 | 150 | 102123362 | 17 | 85  | 15.6 |
| 10 | 102632400 | 102632700 | 300 | 102632562 | 16 | 142 | 14.6 |
| 10 | 102640500 | 102640600 | 100 | 102640587 | 14 | 48  | 9.1  |
| 10 | 102662525 | 102662675 | 150 | 102662637 | 17 | 85  | 14.6 |
| 10 | 102744025 | 102744050 | 25  | 102744037 | 11 | 11  | 1.8  |
| 10 | 102810450 | 102810500 | 50  | 102810462 | 11 | 22  | 1.8  |
| 10 | 102955150 | 102955175 | 25  | 102955162 | 12 | 12  | 1.8  |
| 10 | 102958650 | 102958775 | 125 | 102958712 | 13 | 59  | 0    |
| 10 | 103806025 | 103806125 | 100 | 103806062 | 12 | 45  | 3.7  |
| 10 | 103902075 | 103902100 | 25  | 103902087 | 14 | 14  | 2.7  |
| 10 | 103976025 | 103976275 | 250 | 103976112 | 27 | 220 | 11   |
| 10 | 105604450 | 105604500 | 50  | 105604462 | 14 | 28  | 5.5  |
| 10 | 105644300 | 105644375 | 75  | 105644337 | 13 | 35  | 0    |
| 10 | 106229925 | 106230200 | 275 | 106230087 | 17 | 140 | 19.2 |
| 10 | 108332225 | 108332300 | 75  | 108332237 | 12 | 36  | 1.8  |
| 10 | 108647725 | 108647750 | 25  | 108647737 | 11 | 11  | 0.9  |
| 10 | 108723325 | 108723375 | 50  | 108723337 | 11 | 22  | 1.8  |
| 10 | 109191975 | 109192075 | 100 | 109191987 | 12 | 45  | 0    |
| 10 | 111975975 | 111976200 | 225 | 111976087 | 23 | 176 | 11.9 |
| 10 | 112054775 | 112054800 | 25  | 112054787 | 16 | 16  | 2.7  |
| 10 | 112316975 | 112317000 | 25  | 112316987 | 11 | 11  | 1.8  |
| 10 | 112584650 | 112584750 | 100 | 112584687 | 13 | 48  | 6.4  |
| 10 | 114506025 | 114506050 | 25  | 114506037 | 12 | 12  | 1.8  |
| 10 | 115461075 | 115461125 | 50  | 115461087 | 11 | 22  | 0.9  |
| 10 | 116572325 | 116572375 | 50  | 116572337 | 11 | 22  | 2.7  |
| 10 | 116745250 | 116745325 | 75  | 116745262 | 11 | 33  | 2.7  |
| 10 | 116842250 | 116842450 | 200 | 116842387 | 16 | 105 | 9.1  |
| 10 | 118533000 | 118533100 | 100 | 118533087 | 12 | 45  | 2.7  |
| 10 | 118754000 | 118754175 | 175 | 118754012 | 12 | 82  | 0.9  |
| 10 | 120775500 | 120775600 | 100 | 120775512 | 12 | 46  | 2.7  |
| 10 | 121003375 | 121003425 | 50  | 121003387 | 12 | 23  | 3.7  |
| 10 | 121394600 | 121394750 | 150 | 121394637 | 14 | 77  | 0    |
| 10 | 121417400 | 121417450 | 50  | 121417412 | 14 | 28  | 3.7  |
| 10 | 121476450 | 121476600 | 150 | 121476487 | 15 | 84  | 0.9  |
| 10 | 122186650 | 122186725 | 75  | 122186662 | 12 | 36  | 0    |
| 10 | 122439400 | 122439450 | 50  | 122439412 | 11 | 22  | 1.8  |
| 10 | 122792600 | 122792800 | 200 | 122792687 | 22 | 159 | 9.1  |
| 10 | 122904425 | 122904450 | 25  | 122904437 | 11 | 11  | 0    |
| 10 | 123890825 | 123890875 | 50  | 123890837 | 11 | 22  | 2.7  |
| 10 | 124704075 | 124704125 | 50  | 124704087 | 30 | 57  | 10.1 |
| 10 | 124758300 | 124758400 | 100 | 124758312 | 15 | 54  | 3.7  |
| 10 | 127193400 | 127193550 | 150 | 127193462 | 17 | 97  | 5.5  |
| 10 | 127397775 | 127398025 | 250 | 127397962 | 30 | 235 | 34.8 |
| 10 | 127632400 | 127632675 | 275 | 127632562 | 15 | 134 | 5.5  |
| 10 | 127877925 | 127878050 | 125 | 127878012 | 15 | 66  | 6.4  |
| 10 | 128069925 | 128070075 | 150 | 128069962 | 14 | 75  | 5.5  |
| 10 | 128118600 | 128118675 | 75  | 128118637 | 12 | 35  | 4.6  |

|    |           |           |     |           |    |     |      |
|----|-----------|-----------|-----|-----------|----|-----|------|
| 10 | 128248725 | 128248775 | 50  | 128248737 | 11 | 22  | 1.8  |
| 10 | 131551500 | 131551675 | 175 | 131551612 | 15 | 92  | 9.1  |
| 10 | 131576675 | 131576700 | 25  | 131576687 | 11 | 11  | 1.8  |
| 10 | 131634225 | 131634550 | 325 | 131634412 | 19 | 160 | 18.3 |
| 10 | 131710975 | 131711150 | 175 | 131711137 | 16 | 98  | 7.3  |
| 10 | 131970925 | 131970975 | 50  | 131970937 | 11 | 22  | 0    |
| 10 | 134180725 | 134180875 | 150 | 134180787 | 12 | 68  | 1.8  |
| 10 | 134348825 | 134348850 | 25  | 134348837 | 11 | 11  | 0.9  |
| 10 | 134364550 | 134364575 | 25  | 134364562 | 11 | 11  | 0    |
| 10 | 134922875 | 134922900 | 25  | 134922887 | 14 | 14  | 2.7  |
| 13 | 18536600  | 18536750  | 150 | 18536637  | 13 | 74  | 0    |
| 13 | 18590150  | 18590775  | 625 | 18590537  | 33 | 597 | 47.6 |
| 13 | 19333075  | 19333225  | 150 | 19333112  | 13 | 69  | 2.7  |
| 13 | 19334900  | 19335025  | 125 | 19334912  | 14 | 66  | 8.2  |
| 13 | 19349375  | 19349400  | 25  | 19349387  | 11 | 11  | 0.9  |
| 13 | 19591425  | 19591450  | 25  | 19591437  | 11 | 11  | 1.8  |
| 13 | 20025625  | 20025775  | 150 | 20025712  | 16 | 86  | 8.2  |
| 13 | 20037575  | 20037775  | 200 | 20037662  | 20 | 115 | 0    |
| 13 | 22939425  | 22939475  | 50  | 22939437  | 15 | 30  | 4.6  |
| 13 | 23622025  | 23622100  | 75  | 23622062  | 13 | 36  | 4.6  |
| 13 | 25273500  | 25273525  | 25  | 25273512  | 12 | 12  | 0.9  |
| 13 | 25377950  | 25378050  | 100 | 25377987  | 13 | 48  | 4.6  |
| 13 | 25658625  | 25658825  | 200 | 25658637  | 20 | 132 | 12.8 |
| 13 | 28003250  | 28003375  | 125 | 28003312  | 16 | 71  | 6.4  |
| 13 | 28046900  | 28047000  | 100 | 28046912  | 14 | 54  | 7.3  |
| 13 | 30089725  | 30089775  | 50  | 30089737  | 13 | 25  | 3.7  |
| 13 | 30275150  | 30275175  | 25  | 30275162  | 11 | 11  | 0    |
| 13 | 32011025  | 32011350  | 325 | 32011187  | 23 | 218 | 23.8 |
| 13 | 32582775  | 32582975  | 200 | 32582862  | 19 | 119 | 5.5  |
| 13 | 32701875  | 32701950  | 75  | 32701887  | 11 | 33  | 2.7  |
| 13 | 33014925  | 33014975  | 50  | 33014937  | 36 | 71  | 12.8 |
| 13 | 33083150  | 33083700  | 550 | 33083212  | 19 | 334 | 13.7 |
| 13 | 33151450  | 33151525  | 75  | 33151462  | 11 | 33  | 5.5  |
| 13 | 33290500  | 33290625  | 125 | 33290537  | 15 | 62  | 11.9 |
| 13 | 33629075  | 33629100  | 25  | 33629087  | 11 | 11  | 0    |
| 13 | 33833825  | 33833950  | 125 | 33833862  | 14 | 63  | 0    |
| 13 | 34220325  | 34220475  | 150 | 34220337  | 12 | 69  | 10.1 |
| 13 | 35185700  | 35185850  | 150 | 35185737  | 16 | 85  | 4.6  |
| 13 | 35544375  | 35544475  | 100 | 35544412  | 14 | 53  | 2.7  |
| 13 | 36472500  | 36472525  | 25  | 36472512  | 11 | 11  | 0.9  |
| 13 | 38510025  | 38510100  | 75  | 38510087  | 15 | 41  | 2.7  |
| 13 | 39850575  | 39850650  | 75  | 39850612  | 12 | 35  | 0.9  |
| 13 | 39867025  | 39867075  | 50  | 39867037  | 11 | 22  | 0    |
| 13 | 39925850  | 39926225  | 375 | 39926037  | 20 | 226 | 14.6 |
| 13 | 40261950  | 40262100  | 150 | 40261987  | 15 | 87  | 7.3  |
| 13 | 40533950  | 40534125  | 175 | 40533962  | 13 | 81  | 6.4  |
| 13 | 40604450  | 40604575  | 125 | 40604512  | 13 | 63  | 0.9  |
| 13 | 40620975  | 40621075  | 100 | 40621012  | 14 | 49  | 1.8  |
| 13 | 41519900  | 41519950  | 50  | 41519912  | 11 | 22  | 1.8  |
| 13 | 41743975  | 41744150  | 175 | 41744012  | 30 | 146 | 16.5 |
| 13 | 42495575  | 42495850  | 275 | 42495687  | 14 | 136 | 16.5 |
| 13 | 43258225  | 43258300  | 75  | 43258287  | 13 | 37  | 5.5  |
| 13 | 43485750  | 43485800  | 50  | 43485762  | 12 | 23  | 0.9  |
| 13 | 43486150  | 43486275  | 125 | 43486187  | 16 | 69  | 9.1  |
| 13 | 43715925  | 43716125  | 200 | 43715962  | 16 | 109 | 9.1  |
| 13 | 43778825  | 43778875  | 50  | 43778862  | 12 | 23  | 3.7  |
| 13 | 43902000  | 43902075  | 75  | 43902012  | 12 | 34  | 0    |
| 13 | 43909150  | 43909325  | 175 | 43909212  | 16 | 102 | 20.1 |
| 13 | 44389875  | 44390100  | 225 | 44390062  | 15 | 115 | 16.5 |
| 13 | 44390725  | 44390850  | 125 | 44390737  | 14 | 61  | 9.1  |
| 13 | 44592400  | 44592425  | 25  | 44592412  | 13 | 13  | 1.8  |
| 13 | 44936750  | 44936775  | 25  | 44936762  | 11 | 11  | 1.8  |
| 13 | 46269275  | 46269375  | 100 | 46269287  | 14 | 55  | 7.3  |
| 13 | 47473575  | 47473750  | 175 | 47473712  | 14 | 87  | 11.9 |
| 13 | 47509950  | 47510050  | 100 | 47510037  | 19 | 61  | 10.1 |
| 13 | 48775925  | 48776100  | 175 | 48776062  | 13 | 75  | 8.2  |
| 13 | 48786175  | 48786225  | 50  | 48786187  | 11 | 22  | 0    |
| 13 | 48935500  | 48935625  | 125 | 48935512  | 11 | 53  | 4.6  |
| 13 | 50001875  | 50001925  | 50  | 50001887  | 11 | 22  | 3.7  |
| 13 | 50542275  | 50542325  | 50  | 50542287  | 11 | 22  | 0    |
| 13 | 51220425  | 51220450  | 25  | 51220437  | 11 | 11  | 0    |
| 13 | 51539425  | 51539500  | 75  | 51539437  | 13 | 37  | 3.7  |
| 13 | 51922225  | 51922275  | 50  | 51922237  | 14 | 28  | 4.6  |
| 13 | 52124325  | 52124350  | 25  | 52124337  | 11 | 11  | 1.8  |
| 13 | 52281750  | 52281850  | 100 | 52281762  | 11 | 44  | 3.7  |

|    |           |           |     |           |    |     |      |
|----|-----------|-----------|-----|-----------|----|-----|------|
| 13 | 58421925  | 58422075  | 150 | 58421937  | 14 | 76  | 0    |
| 13 | 58741825  | 58742025  | 200 | 58741862  | 17 | 121 | 11   |
| 13 | 58752425  | 58752475  | 50  | 58752462  | 12 | 23  | 1.8  |
| 13 | 61143725  | 61143750  | 25  | 61143737  | 11 | 11  | 0    |
| 13 | 64195975  | 64196050  | 75  | 64195987  | 11 | 33  | 3.7  |
| 13 | 66702350  | 66702525  | 175 | 66702512  | 12 | 66  | 5.5  |
| 13 | 67241850  | 67241875  | 25  | 67241862  | 11 | 11  | 0.9  |
| 13 | 72199875  | 72199975  | 100 | 72199937  | 18 | 66  | 9.1  |
| 13 | 74551475  | 74551500  | 25  | 74551487  | 11 | 11  | 0.9  |
| 13 | 77391825  | 77391875  | 50  | 77391837  | 23 | 45  | 7.3  |
| 13 | 79408800  | 79408825  | 25  | 79408812  | 11 | 11  | 0.9  |
| 13 | 79605100  | 79605150  | 50  | 79605112  | 11 | 22  | 0    |
| 13 | 79811100  | 79811200  | 100 | 79811137  | 13 | 49  | 5.5  |
| 13 | 80867600  | 80867625  | 25  | 80867612  | 11 | 11  | 0.9  |
| 13 | 85058550  | 85058700  | 150 | 85058637  | 14 | 73  | 4.6  |
| 13 | 88613500  | 88613675  | 175 | 88613587  | 25 | 130 | 12.8 |
| 13 | 92698850  | 92699025  | 175 | 92698962  | 13 | 82  | 7.3  |
| 13 | 92699975  | 92700150  | 175 | 92700062  | 16 | 90  | 0    |
| 13 | 93835050  | 93835100  | 50  | 93835062  | 11 | 22  | 2.7  |
| 13 | 94046425  | 94046525  | 100 | 94046437  | 19 | 66  | 11   |
| 13 | 94051600  | 94051775  | 175 | 94051762  | 27 | 140 | 14.6 |
| 13 | 94052000  | 94052025  | 25  | 94052012  | 13 | 13  | 1.8  |
| 13 | 96418375  | 96418550  | 175 | 96418462  | 18 | 103 | 0    |
| 13 | 96644925  | 96644975  | 50  | 96644937  | 11 | 22  | 1.8  |
| 13 | 96883250  | 96883700  | 450 | 96883512  | 36 | 463 | 85.1 |
| 13 | 96949550  | 96949750  | 200 | 96949662  | 16 | 108 | 0    |
| 13 | 96949975  | 96950175  | 200 | 96950112  | 14 | 90  | 1.8  |
| 13 | 97230950  | 97231050  | 100 | 97230962  | 12 | 47  | 4.6  |
| 13 | 97895525  | 97895550  | 25  | 97895537  | 11 | 11  | 0.9  |
| 13 | 98948925  | 98948950  | 25  | 98948937  | 12 | 12  | 1.8  |
| 13 | 98951425  | 98951525  | 100 | 98951462  | 14 | 49  | 6.4  |
| 13 | 99539200  | 99539375  | 175 | 99539237  | 16 | 103 | 16.5 |
| 13 | 100602525 | 100602625 | 100 | 100602587 | 17 | 64  | 9.1  |
| 13 | 101768000 | 101768125 | 125 | 101768012 | 11 | 53  | 4.6  |
| 13 | 102224375 | 102224500 | 125 | 102224387 | 11 | 53  | 2.7  |
| 13 | 102296125 | 102296150 | 25  | 102296137 | 23 | 23  | 4.6  |
| 13 | 105807700 | 105807825 | 125 | 105807737 | 13 | 58  | 0    |
| 13 | 105942525 | 105942550 | 25  | 105942537 | 13 | 13  | 1.8  |
| 13 | 106901450 | 106901550 | 100 | 106901462 | 14 | 52  | 6.4  |
| 13 | 109169200 | 109169225 | 25  | 109169212 | 11 | 11  | 1.8  |
| 13 | 109575925 | 109575975 | 50  | 109575937 | 11 | 22  | 2.7  |
| 13 | 109577175 | 109577375 | 200 | 109577237 | 19 | 127 | 2.7  |
| 13 | 109950450 | 109950625 | 175 | 109950562 | 15 | 90  | 7.3  |
| 13 | 109951000 | 109951100 | 100 | 109951037 | 13 | 50  | 2.7  |
| 13 | 110165575 | 110165650 | 75  | 110165637 | 14 | 38  | 2.7  |
| 13 | 110320650 | 110320675 | 25  | 110320662 | 13 | 13  | 0.9  |
| 13 | 110527200 | 110527325 | 125 | 110527212 | 12 | 60  | 0    |
| 13 | 112607425 | 112607600 | 175 | 112607487 | 18 | 109 | 0    |
| 13 | 112619875 | 112619925 | 50  | 112619887 | 12 | 24  | 0    |
| 13 | 112725225 | 112725275 | 50  | 112725237 | 14 | 26  | 2.7  |
| 13 | 112759775 | 112759825 | 50  | 112759787 | 12 | 24  | 0    |
| 13 | 113572925 | 113572975 | 50  | 113572962 | 13 | 24  | 3.7  |
| 13 | 113625975 | 113626050 | 75  | 113625987 | 11 | 31  | 0    |
| 13 | 113848800 | 113848850 | 50  | 113848837 | 12 | 23  | 3.7  |
| 13 | 114018200 | 114018450 | 250 | 114018337 | 27 | 201 | 25.6 |
| 13 | 114097525 | 114097600 | 75  | 114097587 | 13 | 35  | 2.7  |
| 12 | 386400    | 386475    | 75  | 386412    | 11 | 33  | 2.7  |
| 12 | 490050    | 490075    | 25  | 490062    | 11 | 11  | 1.8  |
| 12 | 551650    | 551675    | 25  | 551662    | 11 | 11  | 0    |
| 12 | 555525    | 555575    | 50  | 555537    | 11 | 22  | 1.8  |
| 12 | 1670100   | 1670300   | 200 | 1670162   | 21 | 131 | 18.3 |
| 12 | 1791075   | 1791425   | 350 | 1791087   | 20 | 187 | 31.1 |
| 12 | 1898900   | 1898975   | 75  | 1898912   | 12 | 36  | 5.5  |
| 12 | 1983850   | 1983950   | 100 | 1983937   | 28 | 100 | 11   |
| 12 | 2281575   | 2281600   | 25  | 2281587   | 14 | 14  | 1.8  |
| 12 | 2377325   | 2377375   | 50  | 2377337   | 11 | 22  | 3.7  |
| 12 | 2791900   | 2792025   | 125 | 2792012   | 20 | 87  | 15.6 |
| 12 | 2939575   | 2939675   | 100 | 2939587   | 14 | 52  | 7.3  |
| 12 | 4628575   | 4628775   | 200 | 4628637   | 19 | 138 | 12.8 |
| 12 | 5180150   | 5180325   | 175 | 5180162   | 13 | 85  | 11.9 |
| 12 | 5201400   | 5201475   | 75  | 5201437   | 12 | 35  | 0    |
| 12 | 6147225   | 6147350   | 125 | 6147262   | 16 | 65  | 4.6  |
| 12 | 6175400   | 6175450   | 50  | 6175412   | 11 | 22  | 3.7  |
| 12 | 6315100   | 6315150   | 50  | 6315112   | 12 | 24  | 3.7  |
| 12 | 6472475   | 6472575   | 100 | 6472537   | 14 | 53  | 5.5  |

|    |          |          |     |          |    |     |      |
|----|----------|----------|-----|----------|----|-----|------|
| 12 | 6512725  | 6512850  | 125 | 6512787  | 16 | 75  | 10.1 |
| 12 | 6513475  | 6513575  | 100 | 6513487  | 11 | 44  | 3.7  |
| 12 | 6592475  | 6592600  | 125 | 6592512  | 13 | 60  | 7.3  |
| 12 | 6642475  | 6642800  | 325 | 6642637  | 16 | 175 | 33.9 |
| 12 | 6703325  | 6703350  | 25  | 6703337  | 11 | 11  | 1.8  |
| 12 | 6703650  | 6703700  | 50  | 6703687  | 16 | 30  | 4.6  |
| 12 | 6744100  | 6744125  | 25  | 6744112  | 12 | 12  | 1.8  |
| 12 | 6851975  | 6852025  | 50  | 6851987  | 11 | 22  | 3.7  |
| 12 | 6870800  | 6870825  | 25  | 6870812  | 14 | 14  | 2.7  |
| 12 | 6923300  | 6923475  | 175 | 6923462  | 15 | 97  | 14.6 |
| 12 | 6949575  | 6949725  | 150 | 6949637  | 17 | 91  | 10.1 |
| 12 | 7413250  | 7413375  | 125 | 7413312  | 15 | 71  | 10.1 |
| 12 | 8070400  | 8070425  | 25  | 8070412  | 11 | 11  | 0.9  |
| 12 | 8071075  | 8071150  | 75  | 8071087  | 16 | 42  | 6.4  |
| 12 | 9397950  | 9398150  | 200 | 9398012  | 21 | 148 | 0    |
| 12 | 9691650  | 9691675  | 25  | 9691662  | 12 | 12  | 1.8  |
| 12 | 9954700  | 9955025  | 325 | 9954812  | 18 | 190 | 0    |
| 12 | 10257125 | 10257325 | 200 | 10257137 | 14 | 96  | 7.3  |
| 12 | 11215350 | 11215450 | 100 | 11215437 | 21 | 62  | 11.9 |
| 12 | 11857250 | 11857375 | 125 | 11857262 | 11 | 53  | 1.8  |
| 12 | 12052225 | 12052250 | 25  | 12052237 | 11 | 11  | 0    |
| 12 | 12053550 | 12053575 | 25  | 12053562 | 19 | 19  | 3.7  |
| 12 | 12054850 | 12055000 | 150 | 12054962 | 14 | 70  | 2.7  |
| 12 | 12077400 | 12077525 | 125 | 12077437 | 15 | 64  | 5.5  |
| 12 | 12740500 | 12740575 | 75  | 12740512 | 14 | 41  | 6.4  |
| 12 | 12769500 | 12769750 | 250 | 12769562 | 19 | 157 | 11   |
| 12 | 12770000 | 12770025 | 25  | 12770012 | 12 | 12  | 1.8  |
| 12 | 12885075 | 12885225 | 150 | 12885087 | 14 | 74  | 10.1 |
| 12 | 12927425 | 12927500 | 75  | 12927437 | 11 | 33  | 2.7  |
| 12 | 13180200 | 13180300 | 100 | 13180212 | 19 | 60  | 10.1 |
| 12 | 13247375 | 13247425 | 50  | 13247387 | 12 | 24  | 0.9  |
| 12 | 14293775 | 14293900 | 125 | 14293787 | 13 | 61  | 0    |
| 12 | 14301775 | 14302350 | 575 | 14301987 | 34 | 549 | 97   |
| 12 | 14304275 | 14304350 | 75  | 14304287 | 11 | 33  | 0    |
| 12 | 14308700 | 14308775 | 75  | 14308712 | 11 | 33  | 5.5  |
| 12 | 14409800 | 14410375 | 575 | 14410187 | 26 | 380 | 60.4 |
| 12 | 14429300 | 14429375 | 75  | 14429312 | 11 | 31  | 3.7  |
| 12 | 14787425 | 14787475 | 50  | 14787437 | 11 | 22  | 0    |
| 12 | 14815300 | 14815425 | 125 | 14815312 | 16 | 66  | 8.2  |
| 12 | 14968950 | 14968975 | 25  | 14968962 | 11 | 11  | 0    |
| 12 | 19426550 | 19426625 | 75  | 19426562 | 14 | 42  | 0    |
| 12 | 19483350 | 19483550 | 200 | 19483437 | 17 | 122 | 10.1 |
| 12 | 21545625 | 21545650 | 25  | 21545637 | 12 | 12  | 1.8  |
| 12 | 21701525 | 21701650 | 125 | 21701587 | 12 | 56  | 6.4  |
| 12 | 22356750 | 22356775 | 25  | 22356762 | 11 | 11  | 1.8  |
| 12 | 22588575 | 22588800 | 225 | 22588712 | 46 | 322 | 44.8 |
| 12 | 22766425 | 22766625 | 200 | 22766487 | 15 | 101 | 17.4 |
| 12 | 24062050 | 24062100 | 50  | 24062062 | 11 | 22  | 1.8  |
| 12 | 24090150 | 24090175 | 25  | 24090162 | 11 | 11  | 0.9  |
| 12 | 24511650 | 24511750 | 100 | 24511662 | 11 | 42  | 3.7  |
| 12 | 24544175 | 24544250 | 75  | 24544187 | 11 | 33  | 2.7  |
| 12 | 25738425 | 25738525 | 100 | 25738487 | 14 | 49  | 3.7  |
| 12 | 26054525 | 26054750 | 225 | 26054612 | 17 | 135 | 11.9 |
| 12 | 26157525 | 26157550 | 25  | 26157537 | 11 | 11  | 1.8  |
| 12 | 26876225 | 26876350 | 125 | 26876287 | 12 | 58  | 1.8  |
| 12 | 26982200 | 26982250 | 50  | 26982237 | 13 | 25  | 3.7  |
| 12 | 26982525 | 26982725 | 200 | 26982662 | 39 | 264 | 41.2 |
| 12 | 27288200 | 27288425 | 225 | 27288312 | 27 | 211 | 37.5 |
| 12 | 27567975 | 27568125 | 150 | 27568112 | 16 | 88  | 7.3  |
| 12 | 27649100 | 27649300 | 200 | 27649212 | 14 | 98  | 0    |
| 12 | 28071050 | 28071100 | 50  | 28071062 | 11 | 22  | 1.8  |
| 12 | 28234575 | 28234625 | 50  | 28234587 | 14 | 27  | 4.6  |
| 12 | 30839375 | 30839500 | 125 | 30839437 | 13 | 60  | 0    |
| 12 | 30839925 | 30839975 | 50  | 30839962 | 14 | 26  | 4.6  |
| 12 | 31118250 | 31118400 | 150 | 31118262 | 17 | 78  | 7.3  |
| 12 | 31370300 | 31370325 | 25  | 31370312 | 11 | 11  | 1.8  |
| 12 | 31652575 | 31652750 | 175 | 31652637 | 14 | 88  | 0    |
| 12 | 31726350 | 31726725 | 375 | 31726587 | 35 | 373 | 17.4 |
| 12 | 31773275 | 31773475 | 200 | 31773462 | 41 | 265 | 48.5 |
| 12 | 31793375 | 31793475 | 100 | 31793437 | 13 | 48  | 0    |
| 12 | 31951100 | 31951250 | 150 | 31951187 | 16 | 89  | 0    |
| 12 | 31967150 | 31967450 | 300 | 31967262 | 33 | 292 | 12.8 |
| 12 | 32160050 | 32160200 | 150 | 32160062 | 12 | 68  | 10.1 |
| 12 | 34066425 | 34066625 | 200 | 34066537 | 17 | 118 | 8.2  |
| 12 | 36996600 | 36996725 | 125 | 36996712 | 28 | 100 | 15.6 |

|    |          |          |     |          |    |     |      |
|----|----------|----------|-----|----------|----|-----|------|
| 12 | 38122600 | 38122650 | 50  | 38122612 | 11 | 22  | 1.8  |
| 12 | 39470275 | 39470425 | 150 | 39470362 | 14 | 75  | 2.7  |
| 12 | 40562375 | 40562475 | 100 | 40562387 | 14 | 54  | 3.7  |
| 12 | 41006300 | 41006325 | 25  | 41006312 | 12 | 12  | 1.8  |
| 12 | 41268600 | 41268725 | 125 | 41268712 | 15 | 63  | 7.3  |
| 12 | 44890100 | 44890275 | 175 | 44890162 | 15 | 96  | 1.8  |
| 12 | 45051500 | 45051575 | 75  | 45051512 | 11 | 33  | 5.5  |
| 12 | 45060125 | 45060175 | 50  | 45060137 | 11 | 22  | 3.7  |
| 12 | 45123725 | 45123750 | 25  | 45123737 | 11 | 11  | 0.9  |
| 12 | 45153825 | 45153900 | 75  | 45153837 | 11 | 31  | 2.7  |
| 12 | 45748850 | 45748875 | 25  | 45748862 | 11 | 11  | 0.9  |
| 12 | 46293225 | 46293250 | 25  | 46293237 | 11 | 11  | 1.8  |
| 12 | 46397700 | 46397825 | 125 | 46397737 | 13 | 61  | 5.5  |
| 12 | 46417000 | 46417175 | 175 | 46417112 | 17 | 94  | 12.8 |
| 12 | 46623750 | 46623950 | 200 | 46623862 | 13 | 88  | 1.8  |
| 12 | 46681775 | 46681850 | 75  | 46681837 | 13 | 37  | 5.5  |
| 12 | 46682075 | 46682200 | 125 | 46682112 | 21 | 93  | 7.3  |
| 12 | 46682900 | 46682925 | 25  | 46682912 | 11 | 11  | 0    |
| 12 | 46702025 | 46702075 | 50  | 46702037 | 11 | 22  | 1.8  |
| 12 | 46715075 | 46715300 | 225 | 46715212 | 25 | 168 | 5.5  |
| 12 | 46715600 | 46715650 | 50  | 46715612 | 11 | 22  | 3.7  |
| 12 | 46799550 | 46799625 | 75  | 46799562 | 12 | 34  | 5.5  |
| 12 | 47397125 | 47397200 | 75  | 47397137 | 22 | 48  | 8.2  |
| 12 | 47469225 | 47469350 | 125 | 47469287 | 15 | 66  | 4.6  |
| 12 | 47636250 | 47636400 | 150 | 47636312 | 17 | 87  | 6.4  |
| 12 | 47810450 | 47810575 | 125 | 47810462 | 33 | 120 | 23.8 |
| 12 | 47811150 | 47811325 | 175 | 47811237 | 17 | 99  | 17.4 |
| 12 | 48248150 | 48248275 | 125 | 48248187 | 16 | 73  | 4.6  |
| 12 | 48302925 | 48303025 | 100 | 48302937 | 13 | 52  | 4.6  |
| 12 | 48308125 | 48308200 | 75  | 48308137 | 11 | 33  | 0    |
| 12 | 48386650 | 48386675 | 25  | 48386662 | 11 | 11  | 0.9  |
| 12 | 48639875 | 48639975 | 100 | 48639887 | 11 | 42  | 4.6  |
| 12 | 48791800 | 48791850 | 50  | 48791812 | 11 | 22  | 2.7  |
| 12 | 48792400 | 48792425 | 25  | 48792412 | 12 | 12  | 1.8  |
| 12 | 48850225 | 48850300 | 75  | 48850237 | 12 | 34  | 0    |
| 12 | 49178350 | 49178375 | 25  | 49178362 | 12 | 12  | 0    |
| 12 | 49919325 | 49919400 | 75  | 49919337 | 13 | 35  | 5.5  |
| 12 | 50631375 | 50631475 | 100 | 50631387 | 12 | 48  | 0    |
| 12 | 50742025 | 50742075 | 50  | 50742037 | 15 | 28  | 4.6  |
| 12 | 50749875 | 50749900 | 25  | 50749887 | 11 | 11  | 1.8  |
| 12 | 50862625 | 50862675 | 50  | 50862637 | 11 | 22  | 1.8  |
| 12 | 51551000 | 51551175 | 175 | 51551087 | 13 | 77  | 0    |
| 12 | 51686725 | 51686900 | 175 | 51686837 | 21 | 121 | 9.1  |
| 12 | 51758925 | 51759000 | 75  | 51758962 | 13 | 37  | 2.7  |
| 12 | 52001775 | 52001800 | 25  | 52001787 | 15 | 15  | 2.7  |
| 12 | 52431475 | 52431550 | 75  | 52431487 | 12 | 35  | 5.5  |
| 12 | 52618475 | 52618625 | 150 | 52618537 | 20 | 100 | 11.9 |
| 12 | 52875975 | 52876025 | 50  | 52875987 | 11 | 22  | 3.7  |
| 12 | 52959950 | 52959975 | 25  | 52959962 | 20 | 20  | 3.7  |
| 12 | 53010125 | 53010200 | 75  | 53010137 | 12 | 36  | 4.6  |
| 12 | 53039475 | 53039500 | 25  | 53039487 | 12 | 12  | 1.8  |
| 12 | 53103500 | 53103600 | 100 | 53103512 | 12 | 47  | 0    |
| 12 | 54509400 | 54509500 | 100 | 54509437 | 13 | 50  | 7.3  |
| 12 | 54509975 | 54510125 | 150 | 54509987 | 20 | 99  | 17.4 |
| 12 | 54687350 | 54687500 | 150 | 54687387 | 16 | 82  | 9.1  |
| 12 | 54721950 | 54721975 | 25  | 54721962 | 19 | 19  | 3.7  |
| 12 | 54763125 | 54763150 | 25  | 54763137 | 14 | 14  | 2.7  |
| 12 | 54763525 | 54763575 | 50  | 54763537 | 11 | 22  | 1.8  |
| 12 | 54784375 | 54784525 | 150 | 54784412 | 32 | 178 | 30.2 |
| 12 | 54796750 | 54796900 | 150 | 54796887 | 17 | 94  | 15.6 |
| 12 | 54996050 | 54996075 | 25  | 54996062 | 13 | 13  | 1.8  |
| 12 | 55040075 | 55040600 | 525 | 55040437 | 24 | 337 | 46.7 |
| 12 | 55317075 | 55317125 | 50  | 55317087 | 11 | 22  | 3.7  |
| 12 | 55368700 | 55368850 | 150 | 55368787 | 17 | 93  | 14.6 |
| 12 | 55791775 | 55791800 | 25  | 55791787 | 14 | 14  | 1.8  |
| 12 | 56200900 | 56201025 | 125 | 56200987 | 15 | 67  | 8.2  |
| 12 | 57105575 | 57105750 | 175 | 57105687 | 15 | 89  | 6.4  |
| 12 | 58277550 | 58277775 | 225 | 58277637 | 16 | 123 | 10.1 |
| 12 | 60940200 | 60940375 | 175 | 60940262 | 27 | 153 | 22.9 |
| 12 | 61282725 | 61282800 | 75  | 61282737 | 14 | 40  | 7.3  |
| 12 | 61381825 | 61381875 | 50  | 61381837 | 11 | 22  | 0    |
| 12 | 62348225 | 62348425 | 200 | 62348362 | 16 | 109 | 1.8  |
| 12 | 62902425 | 62902475 | 50  | 62902462 | 13 | 25  | 3.7  |
| 12 | 63264325 | 63264350 | 25  | 63264337 | 11 | 11  | 0    |
| 12 | 63313925 | 63314200 | 275 | 63314037 | 19 | 172 | 5.5  |

|    |           |           |     |           |    |     |       |
|----|-----------|-----------|-----|-----------|----|-----|-------|
| 12 | 63358475  | 63358500  | 25  | 63358487  | 12 | 12  | 0     |
| 12 | 63359850  | 63359900  | 50  | 63359862  | 13 | 26  | 3.7   |
| 12 | 63404025  | 63404050  | 25  | 63404037  | 11 | 11  | 0     |
| 12 | 63626225  | 63626700  | 475 | 63626587  | 20 | 264 | 47.6  |
| 12 | 63986725  | 63986900  | 175 | 63986862  | 20 | 108 | 11.9  |
| 12 | 64212775  | 64212925  | 150 | 64212887  | 25 | 111 | 13.7  |
| 12 | 64329250  | 64329375  | 125 | 64329337  | 15 | 65  | 10.1  |
| 12 | 64347100  | 64347225  | 125 | 64347112  | 12 | 58  | 1.8   |
| 12 | 64547850  | 64547900  | 50  | 64547862  | 12 | 24  | 1.8   |
| 12 | 64572250  | 64572300  | 50  | 64572262  | 11 | 22  | 3.7   |
| 12 | 64628850  | 64628875  | 25  | 64628862  | 12 | 12  | 1.8   |
| 12 | 64849950  | 64850050  | 100 | 64849962  | 24 | 78  | 14.6  |
| 12 | 65504475  | 65504525  | 50  | 65504487  | 11 | 22  | 2.7   |
| 12 | 65917500  | 65917600  | 100 | 65917512  | 11 | 44  | 7.3   |
| 12 | 65949175  | 65949200  | 25  | 65949187  | 12 | 12  | 1.8   |
| 12 | 65949525  | 65949550  | 25  | 65949537  | 13 | 13  | 1.8   |
| 12 | 66377700  | 66377725  | 25  | 66377712  | 12 | 12  | 0.9   |
| 12 | 67367025  | 67367050  | 25  | 67367037  | 11 | 11  | 1.8   |
| 12 | 68150400  | 68150425  | 25  | 68150412  | 12 | 12  | 1.8   |
| 12 | 68580875  | 68580925  | 50  | 68580887  | 11 | 22  | 0     |
| 12 | 69832900  | 69832925  | 25  | 69832912  | 11 | 11  | 0     |
| 12 | 70116600  | 70116650  | 50  | 70116612  | 12 | 24  | 0     |
| 12 | 70283400  | 70283450  | 50  | 70283412  | 11 | 22  | 2.7   |
| 12 | 70519550  | 70519650  | 100 | 70519637  | 23 | 75  | 11    |
| 12 | 70952025  | 70952125  | 100 | 70952112  | 15 | 54  | 10.1  |
| 12 | 73217825  | 73217850  | 25  | 73217837  | 11 | 11  | 1.8   |
| 12 | 73700300  | 73700500  | 200 | 73700337  | 14 | 88  | 0     |
| 12 | 74191950  | 74192000  | 50  | 74191962  | 11 | 22  | 1.8   |
| 12 | 74386375  | 74386425  | 50  | 74386387  | 12 | 23  | 1.8   |
| 12 | 74516975  | 74517150  | 175 | 74517062  | 14 | 81  | 11.9  |
| 12 | 74700900  | 74701000  | 100 | 74700912  | 12 | 44  | 3.7   |
| 12 | 74711200  | 74711325  | 125 | 74711212  | 11 | 55  | 8.2   |
| 12 | 75266300  | 75266350  | 50  | 75266312  | 15 | 29  | 5.5   |
| 12 | 75781300  | 75781375  | 75  | 75781312  | 14 | 38  | 6.4   |
| 12 | 75827325  | 75827400  | 75  | 75827362  | 12 | 35  | 3.7   |
| 12 | 78852950  | 78853075  | 125 | 78852962  | 14 | 61  | 11    |
| 12 | 78951475  | 78951500  | 25  | 78951487  | 11 | 11  | 0     |
| 12 | 81276300  | 81276825  | 525 | 81276537  | 49 | 711 | 106.1 |
| 12 | 81616875  | 81616950  | 75  | 81616912  | 13 | 37  | 2.7   |
| 12 | 81928350  | 81928450  | 100 | 81928362  | 11 | 44  | 5.5   |
| 12 | 81933300  | 81933375  | 75  | 81933312  | 12 | 36  | 3.7   |
| 12 | 83830650  | 83830800  | 150 | 83830662  | 25 | 123 | 13.7  |
| 12 | 84590075  | 84590150  | 75  | 84590087  | 11 | 33  | 2.7   |
| 12 | 87060525  | 87060600  | 75  | 87060537  | 12 | 36  | 0.9   |
| 12 | 88270200  | 88270400  | 200 | 88270337  | 16 | 103 | 6.4   |
| 12 | 88302300  | 88302400  | 100 | 88302312  | 11 | 42  | 3.7   |
| 12 | 88443900  | 88444175  | 275 | 88443987  | 30 | 254 | 20.1  |
| 12 | 89168800  | 89168825  | 25  | 89168812  | 11 | 11  | 0.9   |
| 12 | 89171800  | 89171950  | 150 | 89171837  | 14 | 72  | 7.3   |
| 12 | 90299250  | 90299400  | 150 | 90299312  | 15 | 80  | 3.7   |
| 12 | 91206425  | 91206850  | 425 | 91206712  | 23 | 271 | 32.9  |
| 12 | 91208675  | 91208725  | 50  | 91208687  | 11 | 22  | 0     |
| 12 | 91520225  | 91520425  | 200 | 91520337  | 18 | 124 | 0.9   |
| 12 | 92054625  | 92054650  | 25  | 92054637  | 15 | 15  | 2.7   |
| 12 | 92139825  | 92139950  | 125 | 92139862  | 12 | 56  | 0     |
| 12 | 92542450  | 92542625  | 175 | 92542537  | 16 | 90  | 11.9  |
| 12 | 92836225  | 92836325  | 100 | 92836262  | 18 | 64  | 7.3   |
| 12 | 93020200  | 93020275  | 75  | 93020212  | 15 | 43  | 5.5   |
| 12 | 93340175  | 93340250  | 75  | 93340187  | 12 | 34  | 0     |
| 12 | 93378275  | 93378300  | 25  | 93378287  | 12 | 12  | 1.8   |
| 12 | 93991625  | 93991775  | 150 | 93991637  | 14 | 72  | 4.6   |
| 12 | 94392150  | 94392350  | 200 | 94392237  | 24 | 157 | 12.8  |
| 12 | 94567475  | 94567550  | 75  | 94567487  | 12 | 32  | 3.7   |
| 12 | 94707675  | 94707700  | 25  | 94707687  | 14 | 14  | 2.7   |
| 12 | 97421225  | 97421450  | 225 | 97421337  | 19 | 131 | 11.9  |
| 12 | 99184875  | 99185025  | 150 | 99184937  | 23 | 132 | 17.4  |
| 12 | 99603450  | 99603475  | 25  | 99603462  | 11 | 11  | 1.8   |
| 12 | 99634825  | 99634850  | 25  | 99634837  | 11 | 11  | 1.8   |
| 12 | 99729325  | 99729475  | 150 | 99729337  | 11 | 66  | 0     |
| 12 | 100325600 | 100325650 | 50  | 100325637 | 15 | 28  | 3.7   |
| 12 | 102875075 | 102875425 | 350 | 102875162 | 38 | 315 | 24.7  |
| 12 | 102944875 | 102944900 | 25  | 102944887 | 11 | 11  | 0.9   |
| 12 | 102967975 | 102968050 | 75  | 102967987 | 11 | 33  | 5.5   |
| 12 | 102982100 | 102982275 | 175 | 102982162 | 15 | 93  | 9.1   |
| 12 | 103132075 | 103132175 | 100 | 103132137 | 13 | 47  | 7.3   |

|    |           |           |     |           |    |     |      |
|----|-----------|-----------|-----|-----------|----|-----|------|
| 12 | 103138050 | 103138075 | 25  | 103138062 | 11 | 11  | 1.8  |
| 12 | 103152850 | 103153075 | 225 | 103152962 | 19 | 144 | 7.3  |
| 12 | 103295200 | 103295225 | 25  | 103295212 | 16 | 16  | 2.7  |
| 12 | 103397725 | 103397800 | 75  | 103397737 | 11 | 33  | 0    |
| 12 | 103522075 | 103522225 | 150 | 103522187 | 15 | 72  | 7.3  |
| 12 | 104117475 | 104117575 | 100 | 104117487 | 12 | 46  | 7.3  |
| 12 | 105562775 | 105562875 | 100 | 105562812 | 13 | 47  | 7.3  |
| 12 | 105675900 | 105675925 | 25  | 105675912 | 11 | 11  | 0    |
| 12 | 107649575 | 107649700 | 125 | 107649662 | 20 | 80  | 11   |
| 12 | 107756350 | 107756425 | 75  | 107756387 | 22 | 65  | 8.2  |
| 12 | 107757300 | 107757325 | 25  | 107757312 | 14 | 14  | 2.7  |
| 12 | 107974775 | 107974800 | 25  | 107974787 | 12 | 12  | 1.8  |
| 12 | 108019400 | 108019525 | 125 | 108019437 | 12 | 58  | 4.6  |
| 12 | 108385400 | 108385500 | 100 | 108385437 | 14 | 54  | 8.2  |
| 12 | 108399550 | 108399600 | 50  | 108399562 | 14 | 27  | 3.7  |
| 12 | 108495250 | 108495375 | 125 | 108495287 | 15 | 74  | 11.9 |
| 12 | 108656450 | 108656575 | 125 | 108656462 | 11 | 55  | 6.4  |
| 12 | 108859550 | 108859725 | 175 | 108859687 | 13 | 74  | 11.9 |
| 12 | 108921225 | 108921425 | 200 | 108921237 | 14 | 93  | 15.6 |
| 12 | 108970875 | 108971000 | 125 | 108970887 | 19 | 75  | 9.1  |
| 12 | 109424325 | 109424375 | 50  | 109424362 | 28 | 48  | 9.1  |
| 12 | 109810200 | 109810225 | 25  | 109810212 | 12 | 12  | 1.8  |
| 12 | 110226900 | 110227125 | 225 | 110226987 | 22 | 169 | 1.8  |
| 12 | 110291425 | 110291575 | 150 | 110291512 | 13 | 73  | 4.6  |
| 12 | 110319300 | 110319350 | 50  | 110319337 | 14 | 25  | 3.7  |
| 12 | 110332150 | 110332300 | 150 | 110332212 | 17 | 91  | 14.6 |
| 12 | 110357375 | 110357475 | 100 | 110357387 | 12 | 46  | 0    |
| 12 | 110935450 | 110935475 | 25  | 110935462 | 13 | 13  | 0    |
| 12 | 111992775 | 111992875 | 100 | 111992787 | 12 | 44  | 5.5  |
| 12 | 113606025 | 113606375 | 350 | 113606362 | 23 | 239 | 20.1 |
| 12 | 113860625 | 113860825 | 200 | 113860762 | 16 | 106 | 5.5  |
| 12 | 113966375 | 113966475 | 100 | 113966387 | 12 | 47  | 0    |
| 12 | 114345950 | 114345975 | 25  | 114345962 | 13 | 13  | 0.9  |
| 12 | 115281450 | 115281575 | 125 | 115281487 | 15 | 71  | 10.1 |
| 12 | 115377150 | 115377225 | 75  | 115377187 | 15 | 42  | 6.4  |
| 12 | 115660250 | 115660275 | 25  | 115660262 | 11 | 11  | 0.9  |
| 12 | 115735675 | 115735700 | 25  | 115735687 | 11 | 11  | 0    |
| 12 | 115999150 | 115999175 | 25  | 115999162 | 11 | 11  | 0.9  |
| 12 | 116013050 | 116013075 | 25  | 116013062 | 12 | 12  | 1.8  |
| 12 | 117295125 | 117295375 | 250 | 117295212 | 20 | 169 | 18.3 |
| 12 | 119153725 | 119153825 | 100 | 119153737 | 19 | 63  | 11.9 |
| 12 | 119185400 | 119185425 | 25  | 119185412 | 18 | 18  | 2.7  |
| 12 | 119352925 | 119352950 | 25  | 119352937 | 12 | 12  | 0.9  |
| 12 | 120727000 | 120727075 | 75  | 120727037 | 12 | 34  | 4.6  |
| 12 | 120810725 | 120811125 | 400 | 120810887 | 31 | 353 | 33.9 |
| 12 | 120986600 | 120986700 | 100 | 120986612 | 16 | 53  | 3.7  |
| 12 | 121316925 | 121317100 | 175 | 121316962 | 22 | 135 | 22   |
| 12 | 121780150 | 121780225 | 75  | 121780162 | 11 | 33  | 2.7  |
| 12 | 121803225 | 121803300 | 75  | 121803237 | 14 | 42  | 6.4  |
| 12 | 121967875 | 121968025 | 150 | 121967912 | 14 | 81  | 5.5  |
| 12 | 121968325 | 121968400 | 75  | 121968337 | 15 | 43  | 7.3  |
| 12 | 122319575 | 122319675 | 100 | 122319612 | 12 | 47  | 1.8  |
| 12 | 122320375 | 122320400 | 25  | 122320387 | 11 | 11  | 1.8  |
| 12 | 122415675 | 122415700 | 25  | 122415687 | 11 | 11  | 1.8  |
| 12 | 122508600 | 122508625 | 25  | 122508612 | 11 | 11  | 1.8  |
| 12 | 122684400 | 122684500 | 100 | 122684412 | 22 | 70  | 8.2  |
| 12 | 123340200 | 123340300 | 100 | 123340287 | 14 | 48  | 3.7  |
| 12 | 123567750 | 123567800 | 50  | 123567762 | 13 | 26  | 3.7  |
| 12 | 123595200 | 123595325 | 125 | 123595212 | 14 | 58  | 0.9  |
| 12 | 123617000 | 123617100 | 100 | 123617062 | 13 | 46  | 6.4  |
| 12 | 123619375 | 123619425 | 50  | 123619387 | 12 | 24  | 1.8  |
| 12 | 123642800 | 123642825 | 25  | 123642812 | 11 | 11  | 0    |
| 12 | 123644200 | 123644300 | 100 | 123644212 | 12 | 48  | 8.2  |
| 12 | 123714700 | 123714825 | 125 | 123714712 | 15 | 64  | 3.7  |
| 12 | 123730075 | 123730175 | 100 | 123730112 | 14 | 51  | 5.5  |
| 12 | 123731975 | 123732000 | 25  | 123731987 | 13 | 13  | 1.8  |
| 12 | 123758425 | 123758475 | 50  | 123758462 | 12 | 23  | 3.7  |
| 12 | 123764200 | 123764275 | 75  | 123764262 | 14 | 40  | 2.7  |
| 12 | 123777725 | 123777775 | 50  | 123777737 | 12 | 23  | 1.8  |
| 12 | 123796525 | 123796550 | 25  | 123796537 | 12 | 12  | 1.8  |
| 12 | 123796775 | 123796800 | 25  | 123796787 | 25 | 25  | 4.6  |
| 12 | 123955300 | 123955350 | 50  | 123955312 | 12 | 24  | 1.8  |
| 12 | 123965175 | 123965375 | 200 | 123965237 | 24 | 165 | 9.1  |
| 12 | 123967725 | 123967800 | 75  | 123967787 | 15 | 40  | 6.4  |
| 12 | 123977725 | 123977750 | 25  | 123977737 | 12 | 12  | 1.8  |



|    |           |           |     |           |    |     |      |
|----|-----------|-----------|-----|-----------|----|-----|------|
| 12 | 124066625 | 124066725 | 100 | 124066637 | 11 | 43  | 3.7  |
| 12 | 124100500 | 124100550 | 50  | 124100537 | 12 | 23  | 3.7  |
| 12 | 124453725 | 124453875 | 150 | 124453737 | 12 | 71  | 11   |
| 12 | 125120200 | 125120450 | 250 | 125120337 | 28 | 219 | 0    |
| 12 | 125540625 | 125540650 | 25  | 125540637 | 11 | 11  | 1.8  |
| 12 | 126110850 | 126110875 | 25  | 126110862 | 14 | 14  | 2.7  |
| 12 | 126111100 | 126111150 | 50  | 126111137 | 15 | 26  | 3.7  |
| 12 | 126504700 | 126504725 | 25  | 126504712 | 11 | 11  | 0    |
| 12 | 126610200 | 126610375 | 175 | 126610312 | 14 | 87  | 14.6 |
| 12 | 127191125 | 127191225 | 100 | 127191162 | 15 | 53  | 7.3  |
| 12 | 128706275 | 128706375 | 100 | 128706312 | 13 | 48  | 1.8  |
| 12 | 128710500 | 128710525 | 25  | 128710512 | 11 | 11  | 0.9  |
| 12 | 130094750 | 130094800 | 50  | 130094787 | 12 | 23  | 1.8  |
| 12 | 130095300 | 130095475 | 175 | 130095362 | 17 | 108 | 11.9 |
| 12 | 130834775 | 130834875 | 100 | 130834837 | 12 | 45  | 4.6  |
| 12 | 131532700 | 131532900 | 200 | 131532762 | 15 | 103 | 3.7  |
| 12 | 131593650 | 131593775 | 125 | 131593662 | 12 | 58  | 11   |
| 12 | 131915500 | 131915750 | 250 | 131915637 | 35 | 267 | 20.1 |
| 12 | 131994725 | 131994800 | 75  | 131994737 | 11 | 33  | 3.7  |
| 12 | 131995400 | 131995425 | 25  | 131995412 | 16 | 16  | 2.7  |
| 12 | 132012275 | 132012650 | 375 | 132012337 | 19 | 227 | 0    |
| 12 | 132013000 | 132013425 | 425 | 132013112 | 15 | 208 | 0.9  |
| 12 | 132042425 | 132042475 | 50  | 132042437 | 12 | 24  | 0.9  |
| 12 | 132123900 | 132123925 | 25  | 132123912 | 15 | 15  | 2.7  |
| 12 | 132144050 | 132144375 | 325 | 132144237 | 25 | 254 | 6.4  |
| 12 | 132144700 | 132145475 | 775 | 132145087 | 30 | 586 | 11   |
| 12 | 132166750 | 132166925 | 175 | 132166762 | 14 | 81  | 15.6 |
| 12 | 132192950 | 132193150 | 200 | 132193087 | 21 | 127 | 8.2  |
| 12 | 132207075 | 132207100 | 25  | 132207087 | 11 | 11  | 0    |
| 12 | 132217300 | 132217575 | 275 | 132217412 | 17 | 137 | 14.6 |
| 12 | 132267875 | 132268200 | 325 | 132268037 | 24 | 241 | 44.8 |
| 12 | 132289250 | 132289375 | 125 | 132289262 | 13 | 59  | 1.8  |
| 15 | 20354875  | 20354900  | 25  | 20354887  | 12 | 12  | 1.8  |
| 15 | 22569350  | 22569675  | 325 | 22569512  | 46 | 398 | 39.3 |
| 15 | 25687975  | 25688175  | 200 | 25688037  | 17 | 121 | 0    |
| 15 | 25736425  | 25736500  | 75  | 25736437  | 11 | 31  | 0    |
| 15 | 25940300  | 25940425  | 125 | 25940312  | 14 | 67  | 9.1  |
| 15 | 26014650  | 26014725  | 75  | 26014712  | 12 | 33  | 4.6  |
| 15 | 28983300  | 28983400  | 100 | 28983337  | 17 | 63  | 5.5  |
| 15 | 29359850  | 29359900  | 50  | 29359862  | 11 | 22  | 3.7  |
| 15 | 29476950  | 29476975  | 25  | 29476962  | 11 | 11  | 1.8  |
| 15 | 30751425  | 30751650  | 225 | 30751562  | 19 | 131 | 2.7  |
| 15 | 31171850  | 31172050  | 200 | 31171962  | 15 | 101 | 19.2 |
| 15 | 31234350  | 31234375  | 25  | 31234362  | 11 | 11  | 1.8  |
| 15 | 32117825  | 32118025  | 200 | 32117937  | 19 | 125 | 4.6  |
| 15 | 32240800  | 32241125  | 325 | 32240937  | 24 | 224 | 7.3  |
| 15 | 32289725  | 32289825  | 100 | 32289737  | 12 | 46  | 5.5  |
| 15 | 32304475  | 32304500  | 25  | 32304487  | 14 | 14  | 1.8  |
| 15 | 35181025  | 35181075  | 50  | 35181037  | 12 | 24  | 3.7  |
| 15 | 36152225  | 36152250  | 25  | 36152237  | 14 | 14  | 2.7  |
| 15 | 36897975  | 36898100  | 125 | 36898012  | 13 | 63  | 9.1  |
| 15 | 37293225  | 37293275  | 50  | 37293237  | 11 | 22  | 0    |
| 15 | 37312075  | 37312175  | 100 | 37312087  | 12 | 47  | 0    |
| 15 | 37349225  | 37349275  | 50  | 37349237  | 11 | 22  | 0.9  |
| 15 | 37861750  | 37861875  | 125 | 37861812  | 14 | 63  | 0    |
| 15 | 37999800  | 37999825  | 25  | 37999812  | 14 | 14  | 2.7  |
| 15 | 38013100  | 38013250  | 150 | 38013187  | 14 | 72  | 6.4  |
| 15 | 38188775  | 38188850  | 75  | 38188787  | 11 | 33  | 5.5  |
| 15 | 38644700  | 38644725  | 25  | 38644712  | 12 | 12  | 1.8  |
| 15 | 39310350  | 39310425  | 75  | 39310362  | 12 | 35  | 0.9  |
| 15 | 39320875  | 39320925  | 50  | 39320887  | 11 | 22  | 3.7  |
| 15 | 39363300  | 39363450  | 150 | 39363362  | 15 | 77  | 2.7  |
| 15 | 39700700  | 39700975  | 275 | 39700787  | 39 | 313 | 26.5 |
| 15 | 39701250  | 39701500  | 250 | 39701337  | 28 | 226 | 21   |
| 15 | 39740025  | 39740125  | 100 | 39740037  | 12 | 46  | 5.5  |
| 15 | 40352650  | 40352950  | 300 | 40352812  | 22 | 209 | 32   |
| 15 | 41409600  | 41409750  | 150 | 41409687  | 13 | 71  | 4.6  |
| 15 | 41440975  | 41441100  | 125 | 41441012  | 15 | 64  | 0    |
| 15 | 41450850  | 41450875  | 25  | 41450862  | 11 | 11  | 1.8  |
| 15 | 41589925  | 41590000  | 75  | 41589987  | 12 | 34  | 4.6  |
| 15 | 41904050  | 41904175  | 125 | 41904087  | 12 | 57  | 8.2  |
| 15 | 41990925  | 41990950  | 25  | 41990937  | 12 | 12  | 0.9  |
| 15 | 46725150  | 46725225  | 75  | 46725212  | 12 | 34  | 0    |
| 15 | 47005325  | 47005350  | 25  | 47005337  | 11 | 11  | 0.9  |
| 15 | 47043125  | 47043275  | 150 | 47043187  | 12 | 68  | 11   |

|    |          |          |     |          |    |     |      |
|----|----------|----------|-----|----------|----|-----|------|
| 15 | 47055850 | 47056025 | 175 | 47055962 | 17 | 102 | 16.5 |
| 15 | 47235200 | 47235225 | 25  | 47235212 | 11 | 11  | 1.8  |
| 15 | 54966375 | 54966575 | 200 | 54966487 | 25 | 149 | 18.3 |
| 15 | 54997700 | 54997850 | 150 | 54997737 | 18 | 89  | 11.9 |
| 15 | 55848800 | 55848850 | 50  | 55848837 | 15 | 26  | 4.6  |
| 15 | 56553325 | 56553350 | 25  | 56553337 | 11 | 11  | 0    |
| 15 | 58470550 | 58470575 | 25  | 58470562 | 11 | 11  | 0.9  |
| 15 | 60341900 | 60342100 | 200 | 60341937 | 19 | 130 | 1.8  |
| 15 | 60349125 | 60349200 | 75  | 60349137 | 12 | 36  | 0    |
| 15 | 60685950 | 60686150 | 200 | 60686087 | 16 | 104 | 12.8 |
| 15 | 60976425 | 60976450 | 25  | 60976437 | 11 | 11  | 0.9  |
| 15 | 62224050 | 62224375 | 325 | 62224112 | 21 | 215 | 23.8 |
| 15 | 62466900 | 62467150 | 250 | 62467037 | 46 | 339 | 43   |
| 15 | 63452900 | 63452975 | 75  | 63452912 | 11 | 33  | 4.6  |
| 15 | 63597050 | 63597125 | 75  | 63597062 | 11 | 33  | 5.5  |
| 15 | 64033800 | 64033850 | 50  | 64033812 | 12 | 24  | 3.7  |
| 15 | 64690900 | 64690925 | 25  | 64690912 | 11 | 11  | 0.9  |
| 15 | 64962925 | 64963100 | 175 | 64962962 | 20 | 112 | 11.9 |
| 15 | 65014625 | 65014725 | 100 | 65014637 | 12 | 48  | 3.7  |
| 15 | 65103950 | 65104075 | 125 | 65103962 | 13 | 62  | 6.4  |
| 15 | 65185125 | 65185250 | 125 | 65185212 | 16 | 72  | 10.1 |
| 15 | 66430100 | 66430200 | 100 | 66430112 | 11 | 44  | 0.9  |
| 15 | 66464075 | 66464100 | 25  | 66464087 | 16 | 16  | 1.8  |
| 15 | 68176000 | 68176100 | 100 | 68176037 | 12 | 46  | 0    |
| 15 | 68942975 | 68943025 | 50  | 68943012 | 14 | 27  | 3.7  |
| 15 | 70765350 | 70765525 | 175 | 70765512 | 15 | 87  | 17.4 |
| 15 | 72105275 | 72105400 | 125 | 72105312 | 14 | 64  | 0    |
| 15 | 72281275 | 72281300 | 25  | 72281287 | 11 | 11  | 0.9  |
| 15 | 72312425 | 72312450 | 25  | 72312437 | 11 | 11  | 0    |
| 15 | 72898175 | 72898250 | 75  | 72898187 | 13 | 38  | 4.6  |
| 15 | 73037175 | 73037325 | 150 | 73037187 | 11 | 66  | 5.5  |
| 15 | 73074800 | 73074850 | 50  | 73074812 | 11 | 22  | 1.8  |
| 15 | 73102900 | 73102925 | 25  | 73102912 | 11 | 11  | 1.8  |
| 15 | 73123125 | 73123200 | 75  | 73123162 | 14 | 39  | 3.7  |
| 15 | 73533250 | 73533275 | 25  | 73533262 | 11 | 11  | 1.8  |
| 15 | 73922225 | 73922275 | 50  | 73922262 | 12 | 23  | 0    |
| 15 | 74416100 | 74416225 | 125 | 74416112 | 17 | 76  | 7.3  |
| 15 | 75500125 | 75500225 | 100 | 75500187 | 12 | 45  | 0    |
| 15 | 76395950 | 76396075 | 125 | 76395987 | 14 | 61  | 6.4  |
| 15 | 77995250 | 77995475 | 225 | 77995337 | 18 | 129 | 0    |
| 15 | 77999625 | 77999825 | 200 | 77999687 | 18 | 125 | 0    |
| 15 | 78003375 | 78003525 | 150 | 78003387 | 28 | 158 | 31.1 |
| 15 | 78447125 | 78447325 | 200 | 78447287 | 16 | 105 | 0    |
| 15 | 78495050 | 78495125 | 75  | 78495087 | 12 | 35  | 3.7  |
| 15 | 78553525 | 78553625 | 100 | 78553562 | 12 | 47  | 0.9  |
| 15 | 78659475 | 78659725 | 250 | 78659537 | 17 | 146 | 9.1  |
| 15 | 78720200 | 78720350 | 150 | 78720237 | 13 | 73  | 4.6  |
| 15 | 81216050 | 81216075 | 25  | 81216062 | 15 | 15  | 2.7  |
| 15 | 81315975 | 81316050 | 75  | 81315987 | 13 | 35  | 0    |
| 15 | 81445700 | 81445800 | 100 | 81445787 | 13 | 49  | 5.5  |
| 15 | 82944600 | 82944925 | 325 | 82944762 | 32 | 298 | 36.6 |
| 15 | 83675575 | 83675625 | 50  | 83675612 | 16 | 28  | 4.6  |
| 15 | 86811725 | 86811750 | 25  | 86811737 | 17 | 17  | 2.7  |
| 15 | 87003800 | 87003850 | 50  | 87003837 | 12 | 23  | 3.7  |
| 15 | 87113825 | 87113850 | 25  | 87113837 | 11 | 11  | 1.8  |
| 15 | 87178375 | 87178450 | 75  | 87178387 | 13 | 35  | 0    |
| 15 | 87402150 | 87402275 | 125 | 87402162 | 13 | 59  | 7.3  |
| 15 | 87411275 | 87411425 | 150 | 87411387 | 17 | 82  | 0    |
| 15 | 87432175 | 87432200 | 25  | 87432187 | 14 | 14  | 2.7  |
| 15 | 88446875 | 88447075 | 200 | 88446962 | 15 | 98  | 5.5  |
| 15 | 88609750 | 88609775 | 25  | 88609762 | 11 | 11  | 0.9  |
| 15 | 91176025 | 91176150 | 125 | 91176037 | 11 | 49  | 9.1  |
| 15 | 91293950 | 91294150 | 200 | 91294087 | 13 | 90  | 0    |
| 15 | 91416650 | 91416850 | 200 | 91416762 | 15 | 98  | 0    |
| 15 | 92244900 | 92244950 | 50  | 92244937 | 17 | 33  | 5.5  |
| 15 | 92366100 | 92366150 | 50  | 92366112 | 11 | 22  | 0    |
| 15 | 96803325 | 96803375 | 50  | 96803337 | 11 | 22  | 2.7  |
| 15 | 96880000 | 96880050 | 50  | 96880012 | 11 | 22  | 1.8  |
| 15 | 97088275 | 97088300 | 25  | 97088287 | 11 | 11  | 0.9  |
| 15 | 97140625 | 97140650 | 25  | 97140637 | 11 | 11  | 1.8  |
| 15 | 97191100 | 97191150 | 50  | 97191112 | 12 | 24  | 1.8  |
| 15 | 97393850 | 97393900 | 50  | 97393862 | 11 | 22  | 0    |
| 15 | 97812925 | 97813000 | 75  | 97812937 | 11 | 33  | 3.7  |
| 15 | 98091350 | 98091525 | 175 | 98091412 | 16 | 105 | 8.2  |
| 15 | 98346075 | 98346150 | 75  | 98346112 | 13 | 35  | 0    |

|    |           |           |     |           |    |     |      |
|----|-----------|-----------|-----|-----------|----|-----|------|
| 15 | 99079725  | 99079775  | 50  | 99079737  | 11 | 22  | 1.8  |
| 15 | 99249275  | 99249450  | 175 | 99249387  | 12 | 78  | 3.7  |
| 15 | 99366200  | 99366350  | 150 | 99366262  | 20 | 99  | 9.1  |
| 15 | 99421825  | 99421900  | 75  | 99421837  | 12 | 35  | 5.5  |
| 15 | 99428650  | 99428700  | 50  | 99428662  | 11 | 22  | 0    |
| 15 | 99482700  | 99482900  | 200 | 99482812  | 14 | 102 | 12.8 |
| 15 | 99526225  | 99526400  | 175 | 99526387  | 20 | 109 | 11   |
| 15 | 100165350 | 100165375 | 25  | 100165362 | 11 | 11  | 1.8  |
| 14 | 19880675  | 19881000  | 325 | 19880962  | 12 | 120 | 0    |
| 14 | 19999525  | 19999625  | 100 | 19999587  | 19 | 66  | 9.1  |
| 14 | 20151825  | 20151875  | 50  | 20151837  | 16 | 29  | 3.7  |
| 14 | 20219750  | 20219800  | 50  | 20219762  | 11 | 22  | 0    |
| 14 | 20411725  | 20411925  | 200 | 20411812  | 18 | 120 | 6.4  |
| 14 | 20922150  | 20922250  | 100 | 20922162  | 22 | 85  | 12.8 |
| 14 | 21049375  | 21049500  | 125 | 21049387  | 16 | 70  | 12.8 |
| 14 | 21569475  | 21569550  | 75  | 21569487  | 11 | 33  | 0    |
| 14 | 22095825  | 22095850  | 25  | 22095837  | 11 | 11  | 1.8  |
| 14 | 22098250  | 22098275  | 25  | 22098262  | 11 | 11  | 0.9  |
| 14 | 22127775  | 22127800  | 25  | 22127787  | 11 | 11  | 0.9  |
| 14 | 22306050  | 22306100  | 50  | 22306062  | 11 | 22  | 1.8  |
| 14 | 22375350  | 22375375  | 25  | 22375362  | 11 | 11  | 0.9  |
| 14 | 22410500  | 22410700  | 200 | 22410587  | 18 | 119 | 6.4  |
| 14 | 22546125  | 22546175  | 50  | 22546137  | 12 | 24  | 0    |
| 14 | 22573900  | 22573925  | 25  | 22573912  | 11 | 11  | 0.9  |
| 14 | 22840350  | 22840525  | 175 | 22840437  | 17 | 97  | 9.1  |
| 14 | 22845625  | 22845675  | 50  | 22845662  | 15 | 28  | 4.6  |
| 14 | 23008200  | 23008400  | 200 | 23008312  | 17 | 118 | 11   |
| 14 | 23575975  | 23576025  | 50  | 23575987  | 11 | 22  | 3.7  |
| 14 | 23653300  | 23653450  | 150 | 23653362  | 18 | 96  | 17.4 |
| 14 | 23686475  | 23686500  | 25  | 23686487  | 11 | 11  | 1.8  |
| 14 | 23734275  | 23734350  | 75  | 23734287  | 17 | 49  | 6.4  |
| 14 | 23781750  | 23781775  | 25  | 23781762  | 17 | 17  | 2.7  |
| 14 | 23835950  | 23836000  | 50  | 23835962  | 12 | 24  | 3.7  |
| 14 | 24249900  | 24249925  | 25  | 24249912  | 11 | 11  | 0.9  |
| 14 | 24345350  | 24345400  | 50  | 24345362  | 11 | 22  | 1.8  |
| 14 | 28324650  | 28324700  | 50  | 28324662  | 11 | 22  | 1.8  |
| 14 | 29465400  | 29465450  | 50  | 29465437  | 12 | 23  | 3.7  |
| 14 | 30161175  | 30161200  | 25  | 30161187  | 11 | 11  | 1.8  |
| 14 | 32162875  | 32162900  | 25  | 32162887  | 11 | 11  | 0    |
| 14 | 32566125  | 32566200  | 75  | 32566187  | 17 | 47  | 8.2  |
| 14 | 32887725  | 32887925  | 200 | 32887737  | 11 | 73  | 9.1  |
| 14 | 33331850  | 33331925  | 75  | 33331862  | 12 | 36  | 0    |
| 14 | 33879325  | 33879375  | 50  | 33879337  | 12 | 24  | 1.8  |
| 14 | 34880700  | 34880925  | 225 | 34880762  | 19 | 146 | 22.9 |
| 14 | 35348300  | 35348375  | 75  | 35348312  | 17 | 45  | 7.3  |
| 14 | 36736975  | 36737100  | 125 | 36736987  | 14 | 68  | 4.6  |
| 14 | 36745375  | 36745425  | 50  | 36745387  | 11 | 22  | 1.8  |
| 14 | 38595025  | 38595200  | 175 | 38595087  | 15 | 93  | 1.8  |
| 14 | 38971725  | 38971800  | 75  | 38971737  | 12 | 36  | 1.8  |
| 14 | 44436025  | 44436225  | 200 | 44436062  | 13 | 95  | 13.7 |
| 14 | 49123200  | 49123225  | 25  | 49123212  | 11 | 11  | 1.8  |
| 14 | 49135125  | 49135175  | 50  | 49135137  | 12 | 24  | 3.7  |
| 14 | 49399250  | 49399375  | 125 | 49399312  | 15 | 64  | 9.1  |
| 14 | 49404425  | 49404925  | 500 | 49404537  | 16 | 200 | 18.3 |
| 14 | 50152400  | 50152425  | 25  | 50152412  | 11 | 11  | 0    |
| 14 | 50559300  | 50559450  | 150 | 50559312  | 15 | 78  | 12.8 |
| 14 | 50981650  | 50981775  | 125 | 50981687  | 13 | 58  | 0    |
| 14 | 51044425  | 51044475  | 50  | 51044462  | 16 | 28  | 3.7  |
| 14 | 51153525  | 51153600  | 75  | 51153537  | 12 | 36  | 1.8  |
| 14 | 51322775  | 51322925  | 150 | 51322887  | 14 | 74  | 0    |
| 14 | 51442075  | 51442250  | 175 | 51442162  | 14 | 92  | 0    |
| 14 | 51459225  | 51459350  | 125 | 51459337  | 15 | 67  | 4.6  |
| 14 | 54309600  | 54309800  | 200 | 54309612  | 11 | 77  | 11   |
| 14 | 54644350  | 54644425  | 75  | 54644412  | 26 | 56  | 11   |
| 14 | 55136000  | 55136100  | 100 | 55136012  | 15 | 56  | 0    |
| 14 | 56805575  | 56805775  | 200 | 56805737  | 12 | 81  | 8.2  |
| 14 | 57834400  | 57834475  | 75  | 57834412  | 20 | 55  | 10.1 |
| 14 | 57963900  | 57963975  | 75  | 57963912  | 12 | 36  | 2.7  |
| 14 | 59627700  | 59627725  | 25  | 59627712  | 12 | 12  | 1.8  |
| 14 | 60022400  | 60022750  | 350 | 60022587  | 16 | 181 | 24.7 |
| 14 | 60684250  | 60684375  | 125 | 60684362  | 15 | 61  | 8.2  |
| 14 | 61231650  | 61231700  | 50  | 61231662  | 17 | 29  | 4.6  |
| 14 | 62740725  | 62740800  | 75  | 62740737  | 22 | 60  | 11   |
| 14 | 63178175  | 63178300  | 125 | 63178237  | 24 | 106 | 11.9 |
| 14 | 63254375  | 63254500  | 125 | 63254437  | 12 | 56  | 3.7  |

|    |           |           |     |           |    |     |      |
|----|-----------|-----------|-----|-----------|----|-----|------|
| 14 | 63877350  | 63877450  | 100 | 63877362  | 12 | 48  | 1.8  |
| 14 | 64041950  | 64041975  | 25  | 64041962  | 11 | 11  | 0.9  |
| 14 | 64076925  | 64076950  | 25  | 64076937  | 14 | 14  | 2.7  |
| 14 | 64077175  | 64077300  | 125 | 64077187  | 16 | 72  | 9.1  |
| 14 | 64450850  | 64451050  | 200 | 64450987  | 23 | 147 | 25.6 |
| 14 | 66896350  | 66896400  | 50  | 66896387  | 15 | 29  | 5.5  |
| 14 | 67029925  | 67030125  | 200 | 67029937  | 13 | 88  | 7.3  |
| 14 | 67853100  | 67853150  | 50  | 67853112  | 11 | 22  | 3.7  |
| 14 | 68126050  | 68126100  | 50  | 68126062  | 11 | 22  | 1.8  |
| 14 | 68487625  | 68487725  | 100 | 68487637  | 23 | 80  | 8.2  |
| 14 | 69303575  | 69303700  | 125 | 69303662  | 14 | 64  | 6.4  |
| 14 | 71262450  | 71262500  | 50  | 71262462  | 11 | 22  | 1.8  |
| 14 | 72145000  | 72145025  | 25  | 72145012  | 11 | 11  | 0.9  |
| 14 | 72151950  | 72152050  | 100 | 72152037  | 13 | 47  | 3.7  |
| 14 | 73289525  | 73289550  | 25  | 73289537  | 14 | 14  | 2.7  |
| 14 | 73388425  | 73388525  | 100 | 73388462  | 14 | 51  | 6.4  |
| 14 | 73422850  | 73422900  | 50  | 73422862  | 11 | 22  | 3.7  |
| 14 | 74131500  | 74131525  | 25  | 74131512  | 11 | 11  | 0    |
| 14 | 74299600  | 74299650  | 50  | 74299612  | 12 | 24  | 3.7  |
| 14 | 74795400  | 74795600  | 200 | 74795487  | 16 | 116 | 11   |
| 14 | 75172450  | 75172475  | 25  | 75172462  | 11 | 11  | 1.8  |
| 14 | 76441025  | 76441125  | 100 | 76441062  | 14 | 53  | 7.3  |
| 14 | 76497875  | 76498200  | 325 | 76498012  | 25 | 232 | 19.2 |
| 14 | 76521225  | 76521325  | 100 | 76521237  | 14 | 51  | 4.6  |
| 14 | 76569525  | 76569550  | 25  | 76569537  | 16 | 16  | 2.7  |
| 14 | 76612550  | 76612650  | 100 | 76612587  | 13 | 48  | 7.3  |
| 14 | 77243900  | 77243950  | 50  | 77243912  | 11 | 22  | 0    |
| 14 | 77426275  | 77426525  | 250 | 77426437  | 20 | 150 | 7.3  |
| 14 | 77525700  | 77525900  | 200 | 77525787  | 21 | 136 | 23.8 |
| 14 | 88360425  | 88360625  | 200 | 88360562  | 16 | 96  | 14.6 |
| 14 | 88536700  | 88536800  | 100 | 88536712  | 12 | 48  | 3.7  |
| 14 | 89237900  | 89238000  | 100 | 89237962  | 16 | 56  | 7.3  |
| 14 | 89792475  | 89792525  | 50  | 89792512  | 14 | 26  | 3.7  |
| 14 | 89919375  | 89919425  | 50  | 89919412  | 17 | 30  | 3.7  |
| 14 | 90597275  | 90597300  | 25  | 90597287  | 12 | 12  | 1.8  |
| 14 | 90722775  | 90722850  | 75  | 90722812  | 12 | 35  | 0    |
| 14 | 91046300  | 91046325  | 25  | 91046312  | 12 | 12  | 0.9  |
| 14 | 92036775  | 92037150  | 375 | 92036987  | 25 | 290 | 13.7 |
| 14 | 92545900  | 92545925  | 25  | 92545912  | 17 | 17  | 2.7  |
| 14 | 92568850  | 92568875  | 25  | 92568862  | 11 | 11  | 0.9  |
| 14 | 92572925  | 92573125  | 200 | 92572987  | 16 | 110 | 11   |
| 14 | 92743100  | 92743175  | 75  | 92743112  | 16 | 41  | 6.4  |
| 14 | 94134800  | 94134925  | 125 | 94134912  | 14 | 64  | 5.5  |
| 14 | 94136550  | 94136725  | 175 | 94136612  | 19 | 119 | 6.4  |
| 14 | 94154225  | 94154350  | 125 | 94154287  | 14 | 64  | 4.6  |
| 14 | 94182700  | 94182775  | 75  | 94182762  | 12 | 33  | 3.7  |
| 14 | 95037550  | 95037650  | 100 | 95037587  | 13 | 50  | 0    |
| 14 | 95707450  | 95707500  | 50  | 95707462  | 11 | 22  | 1.8  |
| 14 | 95811625  | 95811650  | 25  | 95811637  | 11 | 11  | 1.8  |
| 14 | 100216625 | 100216750 | 125 | 100216637 | 13 | 61  | 3.7  |
| 14 | 100322325 | 100322400 | 75  | 100322362 | 14 | 40  | 4.6  |
| 14 | 100745850 | 100745875 | 25  | 100745862 | 11 | 11  | 0    |
| 14 | 101120750 | 101120850 | 100 | 101120787 | 15 | 54  | 4.6  |
| 14 | 101484300 | 101484375 | 75  | 101484312 | 29 | 80  | 15.6 |
| 14 | 101771525 | 101771625 | 100 | 101771537 | 12 | 43  | 4.6  |
| 14 | 102060775 | 102060800 | 25  | 102060787 | 11 | 11  | 1.8  |
| 14 | 102061075 | 102061125 | 50  | 102061087 | 14 | 25  | 4.6  |
| 14 | 102899100 | 102899225 | 125 | 102899137 | 14 | 63  | 1.8  |
| 14 | 103130225 | 103130400 | 175 | 103130387 | 31 | 163 | 20.1 |
| 14 | 104082625 | 104082700 | 75  | 104082637 | 11 | 33  | 0    |
| 14 | 105018275 | 105018375 | 100 | 105018337 | 14 | 50  | 7.3  |
| 14 | 105836300 | 105836325 | 25  | 105836312 | 12 | 12  | 0    |
| 17 | 624450    | 624600    | 150 | 624512    | 13 | 68  | 2.7  |
| 17 | 961525    | 961550    | 25  | 961537    | 15 | 15  | 2.7  |
| 17 | 961850    | 961925    | 75  | 961862    | 11 | 33  | 5.5  |
| 17 | 962925    | 963000    | 75  | 962937    | 12 | 34  | 5.5  |
| 17 | 965250    | 965475    | 225 | 965362    | 37 | 263 | 29.3 |
| 17 | 1313425   | 1313500   | 75  | 1313462   | 12 | 35  | 5.5  |
| 17 | 1611875   | 1611925   | 50  | 1611887   | 11 | 22  | 3.7  |
| 17 | 1892525   | 1892575   | 50  | 1892537   | 11 | 22  | 3.7  |
| 17 | 2042375   | 2042725   | 350 | 2042587   | 32 | 312 | 34.8 |
| 17 | 2186550   | 2186625   | 75  | 2186612   | 15 | 40  | 7.3  |
| 17 | 2251525   | 2251550   | 25  | 2251537   | 12 | 12  | 1.8  |
| 17 | 2825625   | 2825650   | 25  | 2825637   | 12 | 12  | 1.8  |
| 17 | 2854525   | 2854650   | 125 | 2854537   | 13 | 61  | 8.2  |

|    |          |          |     |          |    |     |      |
|----|----------|----------|-----|----------|----|-----|------|
| 17 | 3497425  | 3497475  | 50  | 3497437  | 13 | 24  | 1.8  |
| 17 | 4404850  | 4404950  | 100 | 4404862  | 11 | 44  | 3.7  |
| 17 | 4580775  | 4580800  | 25  | 4580787  | 11 | 11  | 0.9  |
| 17 | 4581700  | 4581725  | 25  | 4581712  | 14 | 14  | 2.7  |
| 17 | 4646200  | 4646300  | 100 | 4646287  | 14 | 49  | 8.2  |
| 17 | 4783850  | 4783925  | 75  | 4783862  | 15 | 43  | 2.7  |
| 17 | 4811575  | 4811625  | 50  | 4811587  | 14 | 28  | 3.7  |
| 17 | 4955900  | 4955975  | 75  | 4955937  | 12 | 35  | 5.5  |
| 17 | 5025550  | 5025600  | 50  | 5025562  | 11 | 22  | 0.9  |
| 17 | 5026025  | 5026800  | 775 | 5026187  | 47 | 646 | 18.3 |
| 17 | 5027100  | 5027175  | 75  | 5027162  | 14 | 40  | 0    |
| 17 | 5035475  | 5035600  | 125 | 5035562  | 16 | 66  | 10.1 |
| 17 | 5035925  | 5036200  | 275 | 5036087  | 21 | 180 | 19.2 |
| 17 | 5313025  | 5313275  | 250 | 5313187  | 26 | 202 | 20.1 |
| 17 | 6485225  | 6485375  | 150 | 6485287  | 15 | 79  | 4.6  |
| 17 | 6496025  | 6496350  | 325 | 6496212  | 22 | 210 | 8.2  |
| 17 | 7086325  | 7086350  | 25  | 7086337  | 11 | 11  | 0.9  |
| 17 | 7159550  | 7159675  | 125 | 7159587  | 15 | 66  | 6.4  |
| 17 | 7247950  | 7248000  | 50  | 7247987  | 15 | 29  | 5.5  |
| 17 | 7300300  | 7300400  | 100 | 7300312  | 12 | 48  | 1.8  |
| 17 | 7328050  | 7328125  | 75  | 7328062  | 16 | 47  | 9.1  |
| 17 | 7328450  | 7328550  | 100 | 7328462  | 16 | 52  | 8.2  |
| 17 | 7427600  | 7427625  | 25  | 7427612  | 11 | 11  | 1.8  |
| 17 | 7459450  | 7459525  | 75  | 7459462  | 13 | 37  | 2.7  |
| 17 | 7531300  | 7531425  | 125 | 7531337  | 15 | 77  | 13.7 |
| 17 | 7594600  | 7594625  | 25  | 7594612  | 11 | 11  | 0    |
| 17 | 7701775  | 7701825  | 50  | 7701787  | 12 | 24  | 3.7  |
| 17 | 7759825  | 7760275  | 450 | 7759837  | 23 | 236 | 41.2 |
| 17 | 7775975  | 7776025  | 50  | 7775987  | 13 | 26  | 3.7  |
| 17 | 8139625  | 8139650  | 25  | 8139637  | 15 | 15  | 2.7  |
| 17 | 8204100  | 8204150  | 50  | 8204112  | 12 | 23  | 1.8  |
| 17 | 8517725  | 8517775  | 50  | 8517737  | 11 | 22  | 3.7  |
| 17 | 8525075  | 8525125  | 50  | 8525112  | 17 | 32  | 3.7  |
| 17 | 8525700  | 8525900  | 200 | 8525812  | 18 | 121 | 4.6  |
| 17 | 9879000  | 9879150  | 150 | 9879012  | 13 | 71  | 10.1 |
| 17 | 9898050  | 9898075  | 25  | 9898062  | 11 | 11  | 1.8  |
| 17 | 9907950  | 9908250  | 300 | 9908137  | 20 | 189 | 26.5 |
| 17 | 9959075  | 9959475  | 400 | 9959262  | 22 | 278 | 25.6 |
| 17 | 9968225  | 9968250  | 25  | 9968237  | 12 | 12  | 0.9  |
| 17 | 10541700 | 10541725 | 25  | 10541712 | 14 | 14  | 1.8  |
| 17 | 11698050 | 11698075 | 25  | 11698062 | 11 | 11  | 1.8  |
| 17 | 12862250 | 12862300 | 50  | 12862262 | 15 | 30  | 5.5  |
| 17 | 13191425 | 13191650 | 225 | 13191487 | 26 | 199 | 13.7 |
| 17 | 13306275 | 13306750 | 475 | 13306387 | 19 | 214 | 22   |
| 17 | 13913500 | 13913525 | 25  | 13913512 | 16 | 16  | 2.7  |
| 17 | 14144775 | 14144875 | 100 | 14144787 | 12 | 44  | 3.7  |
| 17 | 15101550 | 15101650 | 100 | 15101562 | 12 | 45  | 4.6  |
| 17 | 15221800 | 15221975 | 175 | 15221837 | 15 | 92  | 17.4 |
| 17 | 15301425 | 15301450 | 25  | 15301437 | 14 | 14  | 2.7  |
| 17 | 15302050 | 15302100 | 50  | 15302062 | 12 | 24  | 1.8  |
| 17 | 15334950 | 15335125 | 175 | 15334962 | 18 | 117 | 14.6 |
| 17 | 15561050 | 15561250 | 200 | 15561162 | 21 | 146 | 0    |
| 17 | 15764825 | 15765225 | 400 | 15764987 | 36 | 401 | 70.5 |
| 17 | 16130225 | 16130350 | 125 | 16130237 | 11 | 50  | 4.6  |
| 17 | 16224575 | 16225000 | 425 | 16224912 | 28 | 313 | 38.4 |
| 17 | 16263300 | 16263350 | 50  | 16263312 | 13 | 25  | 2.7  |
| 17 | 16379525 | 16379550 | 25  | 16379537 | 16 | 16  | 2.7  |
| 17 | 16995750 | 16995825 | 75  | 16995787 | 13 | 35  | 5.5  |
| 17 | 17196300 | 17196425 | 125 | 17196312 | 14 | 68  | 6.4  |
| 17 | 17435625 | 17435925 | 300 | 17435812 | 33 | 300 | 48.5 |
| 17 | 17538450 | 17538575 | 125 | 17538462 | 11 | 55  | 6.4  |
| 17 | 17666225 | 17666300 | 75  | 17666237 | 12 | 34  | 4.6  |
| 17 | 17745300 | 17745325 | 25  | 17745312 | 11 | 11  | 0.9  |
| 17 | 17931800 | 17931825 | 25  | 17931812 | 11 | 11  | 1.8  |
| 17 | 18080025 | 18080150 | 125 | 18080037 | 11 | 51  | 8.2  |
| 17 | 18506150 | 18506275 | 125 | 18506187 | 14 | 66  | 0    |
| 17 | 19491725 | 19491775 | 50  | 19491737 | 11 | 22  | 3.7  |
| 17 | 19583375 | 19583400 | 25  | 19583387 | 11 | 11  | 0.9  |
| 17 | 19822625 | 19822800 | 175 | 19822637 | 11 | 70  | 9.1  |
| 17 | 20645700 | 20645850 | 150 | 20645787 | 14 | 74  | 5.5  |
| 17 | 20909200 | 20909225 | 25  | 20909212 | 11 | 11  | 0    |
| 17 | 20919475 | 20919600 | 125 | 20919487 | 17 | 75  | 12.8 |
| 17 | 21166400 | 21166425 | 25  | 21166412 | 11 | 11  | 1.8  |
| 17 | 23156850 | 23156875 | 25  | 23156862 | 11 | 11  | 0.9  |
| 17 | 23392525 | 23392625 | 100 | 23392562 | 18 | 67  | 7.3  |

|    |          |          |     |          |    |     |      |
|----|----------|----------|-----|----------|----|-----|------|
| 17 | 23613375 | 23613525 | 150 | 23613437 | 18 | 90  | 0    |
| 17 | 23686600 | 23686675 | 75  | 23686662 | 16 | 40  | 4.6  |
| 17 | 23708775 | 23708800 | 25  | 23708787 | 11 | 11  | 1.8  |
| 17 | 24013125 | 24013175 | 50  | 24013137 | 11 | 22  | 3.7  |
| 17 | 24070750 | 24071150 | 400 | 24071137 | 18 | 190 | 27.4 |
| 17 | 24076875 | 24076925 | 50  | 24076912 | 13 | 25  | 3.7  |
| 17 | 24248900 | 24248950 | 50  | 24248912 | 11 | 22  | 2.7  |
| 17 | 24502700 | 24502750 | 50  | 24502737 | 13 | 24  | 2.7  |
| 17 | 24506450 | 24506650 | 200 | 24506537 | 18 | 127 | 13.7 |
| 17 | 24741350 | 24741475 | 125 | 24741387 | 34 | 159 | 21   |
| 17 | 25455975 | 25456000 | 25  | 25455987 | 11 | 11  | 1.8  |
| 17 | 26911575 | 26911600 | 25  | 26911587 | 12 | 12  | 1.8  |
| 17 | 26947925 | 26947975 | 50  | 26947937 | 17 | 32  | 3.7  |
| 17 | 30373975 | 30374075 | 100 | 30374037 | 14 | 52  | 5.5  |
| 17 | 30890575 | 30890700 | 125 | 30890587 | 12 | 57  | 3.7  |
| 17 | 30929750 | 30929925 | 175 | 30929912 | 17 | 99  | 13.7 |
| 17 | 30938625 | 30938650 | 25  | 30938637 | 11 | 11  | 0    |
| 17 | 31965525 | 31965750 | 225 | 31965587 | 23 | 172 | 17.4 |
| 17 | 34065600 | 34065800 | 200 | 34065612 | 16 | 110 | 5.5  |
| 17 | 34156950 | 34157050 | 100 | 34156962 | 11 | 44  | 2.7  |
| 17 | 34159650 | 34159775 | 125 | 34159737 | 13 | 61  | 11   |
| 17 | 34235075 | 34235250 | 175 | 34235162 | 19 | 107 | 20.1 |
| 17 | 34279550 | 34279575 | 25  | 34279562 | 11 | 11  | 0.9  |
| 17 | 34412100 | 34412275 | 175 | 34412162 | 18 | 111 | 14.6 |
| 17 | 34456775 | 34457000 | 225 | 34456912 | 24 | 171 | 0.9  |
| 17 | 34575000 | 34575025 | 25  | 34575012 | 11 | 11  | 1.8  |
| 17 | 34609700 | 34609725 | 25  | 34609712 | 12 | 12  | 1.8  |
| 17 | 34870950 | 34871175 | 225 | 34871112 | 22 | 168 | 23.8 |
| 17 | 34983850 | 34983925 | 75  | 34983862 | 12 | 36  | 4.6  |
| 17 | 35337500 | 35337600 | 100 | 35337537 | 18 | 70  | 10.1 |
| 17 | 35521375 | 35521425 | 50  | 35521387 | 12 | 24  | 2.7  |
| 17 | 35533450 | 35533475 | 25  | 35533462 | 11 | 11  | 0.9  |
| 17 | 35550100 | 35550125 | 25  | 35550112 | 12 | 12  | 1.8  |
| 17 | 35697550 | 35697875 | 325 | 35697712 | 17 | 166 | 10.1 |
| 17 | 35745125 | 35745175 | 50  | 35745137 | 11 | 22  | 2.7  |
| 17 | 35827975 | 35828125 | 150 | 35828037 | 13 | 75  | 10.1 |
| 17 | 35828350 | 35828375 | 25  | 35828362 | 11 | 11  | 0    |
| 17 | 36006300 | 36006400 | 100 | 36006337 | 13 | 51  | 2.7  |
| 17 | 36057725 | 36057825 | 100 | 36057737 | 14 | 54  | 10.1 |
| 17 | 36931275 | 36931300 | 25  | 36931287 | 11 | 11  | 1.8  |
| 17 | 37220750 | 37220775 | 25  | 37220762 | 11 | 11  | 1.8  |
| 17 | 37585475 | 37585525 | 50  | 37585487 | 11 | 22  | 0.9  |
| 17 | 37682500 | 37682650 | 150 | 37682537 | 18 | 99  | 12.8 |
| 17 | 37717525 | 37717550 | 25  | 37717537 | 11 | 11  | 0    |
| 17 | 37794375 | 37794450 | 75  | 37794387 | 14 | 36  | 6.4  |
| 17 | 37925725 | 37925875 | 150 | 37925737 | 24 | 122 | 18.3 |
| 17 | 37941600 | 37941675 | 75  | 37941612 | 15 | 41  | 6.4  |
| 17 | 38064675 | 38064700 | 25  | 38064687 | 12 | 12  | 1.8  |
| 17 | 38179050 | 38179175 | 125 | 38179062 | 15 | 66  | 12.8 |
| 17 | 38385450 | 38385475 | 25  | 38385462 | 13 | 13  | 0.9  |
| 17 | 38403975 | 38404150 | 175 | 38403987 | 17 | 102 | 12.8 |
| 17 | 38531125 | 38531175 | 50  | 38531162 | 14 | 26  | 3.7  |
| 17 | 38737800 | 38737825 | 25  | 38737812 | 14 | 14  | 1.8  |
| 17 | 38748725 | 38748825 | 100 | 38748737 | 12 | 46  | 2.7  |
| 17 | 38794300 | 38794325 | 25  | 38794312 | 12 | 12  | 0.9  |
| 17 | 38801050 | 38801100 | 50  | 38801062 | 11 | 22  | 3.7  |
| 17 | 38813225 | 38813425 | 200 | 38813362 | 17 | 119 | 5.5  |
| 17 | 38916800 | 38916900 | 100 | 38916812 | 14 | 50  | 8.2  |
| 17 | 38979325 | 38979425 | 100 | 38979337 | 11 | 44  | 7.3  |
| 17 | 39447900 | 39448050 | 150 | 39447912 | 21 | 104 | 14.6 |
| 17 | 39619875 | 39619975 | 100 | 39619887 | 21 | 66  | 10.1 |
| 17 | 39757050 | 39757075 | 25  | 39757062 | 11 | 11  | 1.8  |
| 17 | 39818100 | 39818150 | 50  | 39818112 | 11 | 22  | 1.8  |
| 17 | 39990000 | 39990250 | 250 | 39990087 | 25 | 193 | 21   |
| 17 | 40088775 | 40088800 | 25  | 40088787 | 11 | 11  | 0.9  |
| 17 | 40262200 | 40262300 | 100 | 40262212 | 15 | 54  | 0    |
| 17 | 40476800 | 40476825 | 25  | 40476812 | 11 | 11  | 1.8  |
| 17 | 40568300 | 40568400 | 100 | 40568337 | 17 | 63  | 4.6  |
| 17 | 40581000 | 40581050 | 50  | 40581012 | 12 | 23  | 3.7  |
| 17 | 42695075 | 42695175 | 100 | 42695112 | 12 | 46  | 7.3  |
| 17 | 42924850 | 42925000 | 150 | 42924987 | 15 | 79  | 11.9 |
| 17 | 43082200 | 43082225 | 25  | 43082212 | 14 | 14  | 2.7  |
| 17 | 43328225 | 43328275 | 50  | 43328237 | 12 | 24  | 1.8  |
| 17 | 43373675 | 43373700 | 25  | 43373687 | 35 | 35  | 6.4  |
| 17 | 43403700 | 43403750 | 50  | 43403712 | 12 | 24  | 0.9  |

|    |          |          |     |          |    |     |      |
|----|----------|----------|-----|----------|----|-----|------|
| 17 | 43434975 | 43435125 | 150 | 43435037 | 13 | 72  | 2.7  |
| 17 | 43456650 | 43456750 | 100 | 43456662 | 13 | 52  | 3.7  |
| 17 | 43480175 | 43480375 | 200 | 43480337 | 21 | 132 | 25.6 |
| 17 | 43915900 | 43916000 | 100 | 43915987 | 12 | 43  | 6.4  |
| 17 | 44324925 | 44325150 | 225 | 44324937 | 17 | 126 | 14.6 |
| 17 | 44404875 | 44404925 | 50  | 44404887 | 11 | 22  | 1.8  |
| 17 | 44834600 | 44834625 | 25  | 44834612 | 11 | 11  | 1.8  |
| 17 | 44947775 | 44947825 | 50  | 44947787 | 11 | 22  | 3.7  |
| 17 | 45110550 | 45110875 | 325 | 45110712 | 71 | 609 | 66.8 |
| 17 | 45196475 | 45196525 | 50  | 45196512 | 13 | 24  | 3.7  |
| 17 | 45196750 | 45196800 | 50  | 45196762 | 13 | 25  | 3.7  |
| 17 | 45220950 | 45220975 | 25  | 45220962 | 14 | 14  | 2.7  |
| 17 | 45526875 | 45526950 | 75  | 45526912 | 13 | 36  | 1.8  |
| 17 | 45527375 | 45527600 | 225 | 45527537 | 21 | 159 | 14.6 |
| 17 | 45583450 | 45583475 | 25  | 45583462 | 14 | 14  | 0.9  |
| 17 | 45610675 | 45610725 | 50  | 45610687 | 13 | 25  | 2.7  |
| 17 | 45611025 | 45611050 | 25  | 45611037 | 11 | 11  | 0.9  |
| 17 | 45701425 | 45701450 | 25  | 45701437 | 11 | 11  | 0.9  |
| 17 | 45974700 | 45974800 | 100 | 45974737 | 14 | 54  | 0    |
| 17 | 46081700 | 46081750 | 50  | 46081712 | 11 | 22  | 0    |
| 17 | 46151700 | 46151725 | 25  | 46151712 | 11 | 11  | 1.8  |
| 17 | 46299650 | 46299675 | 25  | 46299662 | 11 | 11  | 1.8  |
| 17 | 46325700 | 46325775 | 75  | 46325737 | 15 | 44  | 8.2  |
| 17 | 46326125 | 46326250 | 125 | 46326162 | 23 | 99  | 12.8 |
| 17 | 46553550 | 46553575 | 25  | 46553562 | 11 | 11  | 1.8  |
| 17 | 48261200 | 48261250 | 50  | 48261212 | 11 | 22  | 3.7  |
| 17 | 50853125 | 50853200 | 75  | 50853187 | 12 | 34  | 3.7  |
| 17 | 51008425 | 51008450 | 25  | 51008437 | 11 | 11  | 0.9  |
| 17 | 53055525 | 53055725 | 200 | 53055637 | 17 | 107 | 15.6 |
| 17 | 53282450 | 53282700 | 250 | 53282512 | 38 | 300 | 40.3 |
| 17 | 53323300 | 53323350 | 50  | 53323312 | 12 | 23  | 3.7  |
| 17 | 53325650 | 53325775 | 125 | 53325662 | 11 | 55  | 1.8  |
| 17 | 53339350 | 53339525 | 175 | 53339462 | 17 | 104 | 11.9 |
| 17 | 53359150 | 53359175 | 25  | 53359162 | 16 | 16  | 2.7  |
| 17 | 53368225 | 53368400 | 175 | 53368387 | 16 | 87  | 10.1 |
| 17 | 53368675 | 53368700 | 25  | 53368687 | 19 | 19  | 3.7  |
| 17 | 53386825 | 53387000 | 175 | 53386887 | 17 | 100 | 16.5 |
| 17 | 53439600 | 53439700 | 100 | 53439662 | 28 | 105 | 15.6 |
| 17 | 53957525 | 53957625 | 100 | 53957537 | 11 | 44  | 7.3  |
| 17 | 54091350 | 54091500 | 150 | 54091362 | 11 | 61  | 1.8  |
| 17 | 54097650 | 54097775 | 125 | 54097662 | 14 | 69  | 11.9 |
| 17 | 54124825 | 54124850 | 25  | 54124837 | 11 | 11  | 1.8  |
| 17 | 54587500 | 54587725 | 225 | 54587612 | 27 | 193 | 7.3  |
| 17 | 54728800 | 54728975 | 175 | 54728862 | 17 | 102 | 6.4  |
| 17 | 54997350 | 54997625 | 275 | 54997537 | 55 | 441 | 64   |
| 17 | 55051300 | 55051400 | 100 | 55051362 | 15 | 55  | 9.1  |
| 17 | 55567875 | 55567975 | 100 | 55567937 | 26 | 101 | 14.6 |
| 17 | 55823925 | 55824025 | 100 | 55823987 | 13 | 48  | 5.5  |
| 17 | 56831825 | 56831875 | 50  | 56831837 | 11 | 22  | 2.7  |
| 17 | 56876850 | 56877025 | 175 | 56876862 | 13 | 89  | 9.1  |
| 17 | 56926925 | 56926975 | 50  | 56926937 | 11 | 22  | 3.7  |
| 17 | 56927525 | 56927725 | 200 | 56927537 | 17 | 124 | 22.9 |
| 17 | 56928900 | 56928925 | 25  | 56928912 | 12 | 12  | 0.9  |
| 17 | 58125525 | 58125575 | 50  | 58125537 | 11 | 22  | 3.7  |
| 17 | 58125850 | 58125900 | 50  | 58125862 | 11 | 22  | 1.8  |
| 17 | 58126325 | 58126500 | 175 | 58126437 | 19 | 111 | 9.1  |
| 17 | 58136800 | 58136875 | 75  | 58136862 | 14 | 38  | 3.7  |
| 17 | 58398025 | 58398075 | 50  | 58398037 | 11 | 22  | 3.7  |
| 17 | 58864450 | 58864475 | 25  | 58864462 | 12 | 12  | 1.8  |
| 17 | 59032025 | 59032050 | 25  | 59032037 | 17 | 17  | 2.7  |
| 17 | 59258225 | 59258400 | 175 | 59258287 | 20 | 109 | 11.9 |
| 17 | 59279850 | 59280225 | 375 | 59280112 | 34 | 339 | 36.6 |
| 17 | 59561625 | 59561650 | 25  | 59561637 | 11 | 11  | 1.8  |
| 17 | 59864675 | 59864725 | 50  | 59864687 | 11 | 22  | 0    |
| 17 | 59932750 | 59932775 | 25  | 59932762 | 15 | 15  | 2.7  |
| 17 | 59933400 | 59933525 | 125 | 59933462 | 27 | 120 | 22.9 |
| 17 | 60515250 | 60515275 | 25  | 60515262 | 12 | 12  | 1.8  |
| 17 | 61618950 | 61619050 | 100 | 61618962 | 12 | 48  | 3.7  |
| 17 | 61936125 | 61936325 | 200 | 61936262 | 16 | 104 | 11.9 |
| 17 | 61968400 | 61968425 | 25  | 61968412 | 11 | 11  | 0.9  |
| 17 | 62215875 | 62216000 | 125 | 62215962 | 14 | 61  | 5.5  |
| 17 | 62901825 | 62901850 | 25  | 62901837 | 11 | 11  | 1.8  |
| 17 | 62936825 | 62937025 | 200 | 62936912 | 17 | 119 | 8.2  |
| 17 | 63055275 | 63055325 | 50  | 63055312 | 12 | 23  | 3.7  |
| 17 | 63889150 | 63889175 | 25  | 63889162 | 12 | 12  | 1.8  |

|    |          |          |     |          |    |     |      |
|----|----------|----------|-----|----------|----|-----|------|
| 17 | 63896025 | 63896225 | 200 | 63896087 | 14 | 98  | 7.3  |
| 17 | 64017450 | 64017525 | 75  | 64017512 | 12 | 33  | 2.7  |
| 17 | 64019750 | 64019900 | 150 | 64019762 | 21 | 110 | 19.2 |
| 17 | 64074775 | 64074950 | 175 | 64074862 | 15 | 96  | 9.1  |
| 17 | 64202675 | 64202700 | 25  | 64202687 | 11 | 11  | 1.8  |
| 17 | 64203100 | 64203375 | 275 | 64203187 | 23 | 196 | 5.5  |
| 17 | 64267625 | 64267700 | 75  | 64267637 | 11 | 33  | 5.5  |
| 17 | 64835100 | 64835300 | 200 | 64835237 | 24 | 152 | 10.1 |
| 17 | 67471250 | 67471400 | 150 | 67471362 | 13 | 69  | 4.6  |
| 17 | 67846850 | 67846900 | 50  | 67846862 | 11 | 22  | 3.7  |
| 17 | 68123100 | 68123125 | 25  | 68123112 | 11 | 11  | 1.8  |
| 17 | 68162575 | 68162650 | 75  | 68162637 | 22 | 56  | 5.5  |
| 17 | 68164000 | 68164025 | 25  | 68164012 | 13 | 13  | 1.8  |
| 17 | 68168275 | 68168475 | 200 | 68168337 | 12 | 91  | 0    |
| 17 | 68207275 | 68207425 | 150 | 68207412 | 16 | 76  | 11   |
| 17 | 68223925 | 68224150 | 225 | 68223987 | 20 | 151 | 10.1 |
| 17 | 68227425 | 68227575 | 150 | 68227437 | 14 | 63  | 7.3  |
| 17 | 68740550 | 68740575 | 25  | 68740562 | 11 | 11  | 1.8  |
| 17 | 68800000 | 68800025 | 25  | 68800012 | 11 | 11  | 0.9  |
| 17 | 68857375 | 68857425 | 50  | 68857387 | 11 | 22  | 1.8  |
| 17 | 70541650 | 70541725 | 75  | 70541712 | 13 | 35  | 5.5  |
| 17 | 70662250 | 70662425 | 175 | 70662262 | 29 | 147 | 24.7 |
| 17 | 70690550 | 70690775 | 225 | 70690637 | 29 | 217 | 11.9 |
| 17 | 70912100 | 70912150 | 50  | 70912112 | 13 | 24  | 3.7  |
| 17 | 70964175 | 70964250 | 75  | 70964187 | 11 | 33  | 5.5  |
| 17 | 71201225 | 71201250 | 25  | 71201237 | 11 | 11  | 1.8  |
| 17 | 71287725 | 71287775 | 50  | 71287737 | 12 | 24  | 3.7  |
| 17 | 71611500 | 71611575 | 75  | 71611512 | 16 | 47  | 8.2  |
| 17 | 71760025 | 71760125 | 100 | 71760037 | 17 | 56  | 9.1  |
| 17 | 71891450 | 71891575 | 125 | 71891562 | 15 | 68  | 3.7  |
| 17 | 72048850 | 72048900 | 50  | 72048862 | 11 | 22  | 2.7  |
| 17 | 72078700 | 72078775 | 75  | 72078712 | 11 | 33  | 5.5  |
| 17 | 72196525 | 72196750 | 225 | 72196612 | 19 | 147 | 12.8 |
| 17 | 72204625 | 72204775 | 150 | 72204662 | 17 | 92  | 5.5  |
| 17 | 72245425 | 72245475 | 50  | 72245437 | 11 | 22  | 3.7  |
| 17 | 72375750 | 72375825 | 75  | 72375762 | 11 | 33  | 3.7  |
| 17 | 72510075 | 72510100 | 25  | 72510087 | 11 | 11  | 0    |
| 17 | 72648125 | 72648175 | 50  | 72648137 | 11 | 22  | 1.8  |
| 17 | 72675425 | 72675625 | 200 | 72675512 | 21 | 136 | 0.9  |
| 17 | 72682375 | 72682650 | 275 | 72682462 | 30 | 249 | 9.1  |
| 17 | 72840675 | 72840875 | 200 | 72840737 | 15 | 91  | 0    |
| 17 | 72880550 | 72880650 | 100 | 72880587 | 14 | 50  | 0    |
| 17 | 72959850 | 72960050 | 200 | 72959937 | 16 | 114 | 18.3 |
| 17 | 72963450 | 72963500 | 50  | 72963462 | 11 | 22  | 3.7  |
| 17 | 72985025 | 72985125 | 100 | 72985087 | 15 | 54  | 6.4  |
| 17 | 73592675 | 73592725 | 50  | 73592687 | 11 | 22  | 0    |
| 17 | 73721925 | 73721950 | 25  | 73721937 | 11 | 11  | 0.9  |
| 17 | 73823475 | 73823625 | 150 | 73823587 | 17 | 90  | 9.1  |
| 17 | 74386700 | 74386850 | 150 | 74386737 | 16 | 84  | 6.4  |
| 17 | 74391675 | 74391725 | 50  | 74391687 | 19 | 36  | 5.5  |
| 17 | 75398525 | 75398675 | 150 | 75398612 | 18 | 98  | 0    |
| 17 | 75428650 | 75428700 | 50  | 75428662 | 11 | 22  | 3.7  |
| 17 | 75512875 | 75513000 | 125 | 75512962 | 12 | 56  | 8.2  |
| 17 | 75540250 | 75540300 | 50  | 75540262 | 11 | 22  | 3.7  |
| 17 | 75671100 | 75671150 | 50  | 75671112 | 11 | 22  | 3.7  |
| 17 | 75705125 | 75705200 | 75  | 75705137 | 11 | 33  | 0    |
| 17 | 75808325 | 75808400 | 75  | 75808362 | 13 | 35  | 2.7  |
| 17 | 76133050 | 76133075 | 25  | 76133062 | 12 | 12  | 0.9  |
| 17 | 76238125 | 76238150 | 25  | 76238137 | 11 | 11  | 1.8  |
| 17 | 76613750 | 76614000 | 250 | 76613887 | 23 | 181 | 30.2 |
| 17 | 76806150 | 76806225 | 75  | 76806162 | 12 | 36  | 0    |
| 17 | 76827425 | 76827525 | 100 | 76827462 | 13 | 50  | 4.6  |
| 17 | 76884125 | 76884150 | 25  | 76884137 | 11 | 11  | 1.8  |
| 17 | 76982400 | 76982425 | 25  | 76982412 | 19 | 19  | 3.7  |
| 17 | 76983650 | 76983750 | 100 | 76983662 | 12 | 47  | 7.3  |
| 17 | 77280725 | 77280775 | 50  | 77280737 | 14 | 26  | 2.7  |
| 17 | 77524725 | 77524900 | 175 | 77524737 | 11 | 77  | 0    |
| 17 | 77554875 | 77554925 | 50  | 77554912 | 12 | 23  | 2.7  |
| 17 | 77843950 | 77843975 | 25  | 77843962 | 16 | 16  | 2.7  |
| 17 | 77849325 | 77849450 | 125 | 77849337 | 14 | 67  | 11.9 |
| 17 | 77879400 | 77879425 | 25  | 77879412 | 11 | 11  | 0.9  |
| 17 | 78099250 | 78099350 | 100 | 78099262 | 11 | 44  | 7.3  |
| 16 | 61650    | 61675    | 25  | 61662    | 12 | 12  | 0.9  |
| 16 | 556850   | 556900   | 50  | 556862   | 11 | 22  | 0    |
| 16 | 626425   | 626625   | 200 | 626587   | 16 | 126 | 23.8 |



|    |          |          |     |          |    |     |      |
|----|----------|----------|-----|----------|----|-----|------|
| 16 | 791325   | 791425   | 100 | 791337   | 11 | 44  | 0    |
| 16 | 797950   | 798000   | 50  | 797962   | 15 | 30  | 5.5  |
| 16 | 992950   | 993150   | 200 | 992987   | 21 | 142 | 23.8 |
| 16 | 1473900  | 1473950  | 50  | 1473912  | 12 | 24  | 0    |
| 16 | 1602000  | 1602150  | 150 | 1602012  | 20 | 89  | 12.8 |
| 16 | 1686800  | 1686825  | 25  | 1686812  | 11 | 11  | 0    |
| 16 | 1954675  | 1954700  | 25  | 1954687  | 11 | 11  | 0.9  |
| 16 | 2141525  | 2141675  | 150 | 2141612  | 12 | 68  | 6.4  |
| 16 | 2742125  | 2742325  | 200 | 2742237  | 22 | 138 | 19.2 |
| 16 | 2901775  | 2901850  | 75  | 2901837  | 14 | 40  | 7.3  |
| 16 | 3124825  | 3125050  | 225 | 3124912  | 19 | 146 | 17.4 |
| 16 | 3213850  | 3214275  | 425 | 3214087  | 43 | 480 | 13.7 |
| 16 | 3254650  | 3254700  | 50  | 3254662  | 25 | 46  | 8.2  |
| 16 | 3272575  | 3272650  | 75  | 3272637  | 15 | 37  | 5.5  |
| 16 | 3295225  | 3295400  | 175 | 3295287  | 18 | 114 | 14.6 |
| 16 | 3307400  | 3307700  | 300 | 3307562  | 33 | 285 | 0    |
| 16 | 3354775  | 3355125  | 350 | 3355062  | 29 | 247 | 47.6 |
| 16 | 3372950  | 3373500  | 550 | 3373162  | 51 | 648 | 0    |
| 16 | 3398475  | 3399000  | 525 | 3398712  | 61 | 704 | 13.7 |
| 16 | 3421850  | 3422025  | 175 | 3421912  | 17 | 93  | 12.8 |
| 16 | 3490675  | 3490775  | 100 | 3490762  | 20 | 68  | 8.2  |
| 16 | 4261350  | 4261375  | 25  | 4261362  | 11 | 11  | 1.8  |
| 16 | 4298025  | 4298050  | 25  | 4298037  | 12 | 12  | 1.8  |
| 16 | 4528775  | 4529100  | 325 | 4528912  | 42 | 375 | 33.9 |
| 16 | 4792950  | 4793125  | 175 | 4793062  | 17 | 97  | 11   |
| 16 | 4934900  | 4934925  | 25  | 4934912  | 11 | 11  | 1.8  |
| 16 | 8872200  | 8872225  | 25  | 8872212  | 13 | 13  | 1.8  |
| 16 | 9049300  | 9049525  | 225 | 9049362  | 16 | 122 | 22.9 |
| 16 | 10387100 | 10387275 | 175 | 10387162 | 17 | 104 | 11.9 |
| 16 | 10560625 | 10560800 | 175 | 10560712 | 16 | 100 | 8.2  |
| 16 | 10830450 | 10830500 | 50  | 10830462 | 17 | 34  | 5.5  |
| 16 | 10878525 | 10878575 | 50  | 10878537 | 11 | 22  | 1.8  |
| 16 | 11634050 | 11634225 | 175 | 11634162 | 14 | 86  | 8.2  |
| 16 | 11784825 | 11785025 | 200 | 11784887 | 19 | 134 | 11.9 |
| 16 | 11957300 | 11957325 | 25  | 11957312 | 12 | 12  | 1.8  |
| 16 | 12302600 | 12302775 | 175 | 12302637 | 13 | 75  | 6.4  |
| 16 | 12804925 | 12805100 | 175 | 12804987 | 32 | 193 | 27.4 |
| 16 | 13111575 | 13111825 | 250 | 13111662 | 21 | 172 | 14.6 |
| 16 | 13958825 | 13958850 | 25  | 13958837 | 12 | 12  | 1.8  |
| 16 | 14960575 | 14960675 | 100 | 14960587 | 23 | 63  | 8.2  |
| 16 | 15592550 | 15592600 | 50  | 15592562 | 11 | 22  | 1.8  |
| 16 | 20725425 | 20725450 | 25  | 20725437 | 12 | 12  | 1.8  |
| 16 | 21518100 | 21518225 | 125 | 21518137 | 13 | 62  | 9.1  |
| 16 | 22107475 | 22107525 | 50  | 22107487 | 12 | 24  | 3.7  |
| 16 | 22109650 | 22109775 | 125 | 22109712 | 12 | 57  | 4.6  |
| 16 | 22111175 | 22111350 | 175 | 22111262 | 13 | 83  | 14.6 |
| 16 | 22293750 | 22293800 | 50  | 22293762 | 12 | 24  | 3.7  |
| 16 | 23597525 | 23597550 | 25  | 23597537 | 20 | 20  | 3.7  |
| 16 | 24588050 | 24588500 | 450 | 24588137 | 16 | 224 | 29.3 |
| 16 | 24619850 | 24619875 | 25  | 24619862 | 12 | 12  | 1.8  |
| 16 | 27122175 | 27122325 | 150 | 27122312 | 26 | 119 | 19.2 |
| 16 | 28410950 | 28411100 | 150 | 28411037 | 17 | 86  | 10.1 |
| 16 | 28473400 | 28473425 | 25  | 28473412 | 11 | 11  | 1.8  |
| 16 | 29184425 | 29184625 | 200 | 29184437 | 18 | 127 | 0    |
| 16 | 29235025 | 29235075 | 50  | 29235037 | 12 | 24  | 0    |
| 16 | 29724250 | 29724425 | 175 | 29724262 | 12 | 83  | 9.1  |
| 16 | 29735150 | 29735300 | 150 | 29735162 | 11 | 57  | 8.2  |
| 16 | 29740025 | 29740125 | 100 | 29740062 | 14 | 54  | 0    |
| 16 | 29782300 | 29782450 | 150 | 29782437 | 23 | 86  | 16.5 |
| 16 | 29914975 | 29915050 | 75  | 29915012 | 12 | 34  | 2.7  |
| 16 | 29984250 | 29984300 | 50  | 29984262 | 11 | 22  | 3.7  |
| 16 | 30015475 | 30016075 | 600 | 30015912 | 50 | 538 | 23.8 |
| 16 | 30289775 | 30289825 | 50  | 30289787 | 11 | 22  | 1.8  |
| 16 | 30319375 | 30319575 | 200 | 30319412 | 21 | 160 | 21   |
| 16 | 30364775 | 30364825 | 50  | 30364787 | 16 | 32  | 5.5  |
| 16 | 30577625 | 30577800 | 175 | 30577637 | 14 | 80  | 5.5  |
| 16 | 30617000 | 30617100 | 100 | 30617087 | 20 | 60  | 9.1  |
| 16 | 30618000 | 30618025 | 25  | 30618012 | 12 | 12  | 1.8  |
| 16 | 30705975 | 30706025 | 50  | 30705987 | 16 | 32  | 4.6  |
| 16 | 30733375 | 30733400 | 25  | 30733387 | 11 | 11  | 0    |
| 16 | 30904050 | 30904075 | 25  | 30904062 | 11 | 11  | 1.8  |
| 16 | 31346275 | 31346400 | 125 | 31346287 | 12 | 60  | 1.8  |
| 16 | 31799550 | 31799675 | 125 | 31799587 | 13 | 63  | 6.4  |
| 16 | 33846550 | 33846575 | 25  | 33846562 | 11 | 11  | 1.8  |
| 16 | 33866175 | 33866200 | 25  | 33866187 | 11 | 11  | 1.8  |

|    |          |          |     |          |    |     |      |
|----|----------|----------|-----|----------|----|-----|------|
| 16 | 45565225 | 45565400 | 175 | 45565237 | 12 | 77  | 2.7  |
| 16 | 46604725 | 46604825 | 100 | 46604812 | 12 | 45  | 0    |
| 16 | 47201675 | 47201800 | 125 | 47201762 | 15 | 67  | 5.5  |
| 16 | 47268375 | 47268400 | 25  | 47268387 | 11 | 11  | 0.9  |
| 16 | 47562825 | 47563125 | 300 | 47563012 | 18 | 160 | 13.7 |
| 16 | 48616375 | 48616525 | 150 | 48616437 | 18 | 87  | 5.5  |
| 16 | 48743300 | 48743350 | 50  | 48743312 | 14 | 26  | 3.7  |
| 16 | 48906950 | 48906975 | 25  | 48906962 | 11 | 11  | 0    |
| 16 | 49190975 | 49191275 | 300 | 49191112 | 23 | 206 | 11.9 |
| 16 | 49195225 | 49195325 | 100 | 49195237 | 11 | 44  | 3.7  |
| 16 | 49263225 | 49263325 | 100 | 49263237 | 11 | 44  | 0    |
| 16 | 53521925 | 53521975 | 50  | 53521937 | 14 | 25  | 1.8  |
| 16 | 53738550 | 53738575 | 25  | 53738562 | 11 | 11  | 0    |
| 16 | 54071650 | 54071675 | 25  | 54071662 | 11 | 11  | 1.8  |
| 16 | 54072350 | 54072475 | 125 | 54072387 | 12 | 58  | 4.6  |
| 16 | 55068800 | 55068825 | 25  | 55068812 | 14 | 14  | 2.7  |
| 16 | 55198700 | 55198750 | 50  | 55198712 | 14 | 26  | 3.7  |
| 16 | 55201675 | 55201725 | 50  | 55201712 | 14 | 25  | 4.6  |
| 16 | 56223825 | 56223950 | 125 | 56223912 | 16 | 70  | 4.6  |
| 16 | 56228925 | 56229075 | 150 | 56228937 | 14 | 69  | 12.8 |
| 16 | 56983625 | 56983725 | 100 | 56983712 | 24 | 74  | 14.6 |
| 16 | 57106700 | 57106725 | 25  | 57106712 | 11 | 11  | 1.8  |
| 16 | 62729650 | 62729675 | 25  | 62729662 | 11 | 11  | 1.8  |
| 16 | 62743600 | 62743625 | 25  | 62743612 | 14 | 14  | 0.9  |
| 16 | 64842200 | 64842225 | 25  | 64842212 | 11 | 11  | 1.8  |
| 16 | 65108175 | 65108375 | 200 | 65108212 | 21 | 146 | 17.4 |
| 16 | 65144050 | 65144200 | 150 | 65144062 | 14 | 79  | 4.6  |
| 16 | 65570775 | 65570825 | 50  | 65570787 | 11 | 22  | 0.9  |
| 16 | 65609475 | 65609650 | 175 | 65609562 | 17 | 97  | 2.7  |
| 16 | 65752425 | 65752525 | 100 | 65752487 | 14 | 49  | 7.3  |
| 16 | 66476200 | 66476225 | 25  | 66476212 | 12 | 12  | 0.9  |
| 16 | 67130400 | 67130475 | 75  | 67130412 | 11 | 31  | 3.7  |
| 16 | 67155800 | 67156150 | 350 | 67155962 | 17 | 196 | 0    |
| 16 | 67757900 | 67757975 | 75  | 67757912 | 13 | 39  | 3.7  |
| 16 | 67931025 | 67931150 | 125 | 67931112 | 26 | 121 | 20.1 |
| 16 | 68318100 | 68318325 | 225 | 68318212 | 27 | 172 | 21   |
| 16 | 68346150 | 68346250 | 100 | 68346237 | 20 | 58  | 7.3  |
| 16 | 68391300 | 68391325 | 25  | 68391312 | 11 | 11  | 1.8  |
| 16 | 68482000 | 68482025 | 25  | 68482012 | 11 | 11  | 0.9  |
| 16 | 68482425 | 68482450 | 25  | 68482437 | 11 | 11  | 0.9  |
| 16 | 70039975 | 70040125 | 150 | 70040062 | 16 | 77  | 5.5  |
| 16 | 70040750 | 70040825 | 75  | 70040762 | 14 | 38  | 1.8  |
| 16 | 70400325 | 70400450 | 125 | 70400387 | 15 | 67  | 10.1 |
| 16 | 70599875 | 70599900 | 25  | 70599887 | 12 | 12  | 1.8  |
| 16 | 71450200 | 71450350 | 150 | 71450287 | 14 | 78  | 11   |
| 16 | 71592750 | 71592775 | 25  | 71592762 | 12 | 12  | 0.9  |
| 16 | 71660300 | 71660400 | 100 | 71660312 | 12 | 47  | 8.2  |
| 16 | 72887875 | 72887950 | 75  | 72887937 | 14 | 36  | 2.7  |
| 16 | 72912200 | 72912250 | 50  | 72912212 | 11 | 22  | 3.7  |
| 16 | 73713500 | 73713650 | 150 | 73713512 | 13 | 68  | 0    |
| 16 | 73896950 | 73897075 | 125 | 73896962 | 19 | 87  | 17.4 |
| 16 | 74024700 | 74024750 | 50  | 74024737 | 16 | 31  | 5.5  |
| 16 | 74025250 | 74025275 | 25  | 74025262 | 12 | 12  | 1.8  |
| 16 | 74098050 | 74098125 | 75  | 74098062 | 11 | 33  | 0    |
| 16 | 74108900 | 74109025 | 125 | 74108912 | 18 | 77  | 10.1 |
| 16 | 74146775 | 74146825 | 50  | 74146787 | 13 | 25  | 3.7  |
| 16 | 74214675 | 74214800 | 125 | 74214787 | 18 | 74  | 12.8 |
| 16 | 76461850 | 76461975 | 125 | 76461912 | 13 | 59  | 0    |
| 16 | 76691125 | 76691200 | 75  | 76691137 | 12 | 36  | 0    |
| 16 | 78109700 | 78109725 | 25  | 78109712 | 11 | 11  | 0    |
| 16 | 78183750 | 78183925 | 175 | 78183762 | 11 | 69  | 0.9  |
| 16 | 78242800 | 78242975 | 175 | 78242937 | 17 | 104 | 17.4 |
| 16 | 78249975 | 78250000 | 25  | 78249987 | 11 | 11  | 1.8  |
| 16 | 79132100 | 79132300 | 200 | 79132187 | 26 | 183 | 27.4 |
| 16 | 79718225 | 79718375 | 150 | 79718262 | 14 | 82  | 11   |
| 16 | 80337400 | 80337675 | 275 | 80337512 | 14 | 129 | 11.9 |
| 16 | 80761575 | 80761725 | 150 | 80761637 | 18 | 89  | 16.5 |
| 16 | 81225275 | 81225450 | 175 | 81225287 | 12 | 70  | 11.9 |
| 16 | 81587050 | 81587100 | 50  | 81587062 | 11 | 22  | 2.7  |
| 16 | 82335725 | 82335750 | 25  | 82335737 | 12 | 12  | 0.9  |
| 16 | 82473025 | 82473100 | 75  | 82473037 | 11 | 33  | 0    |
| 16 | 82875100 | 82875175 | 75  | 82875162 | 13 | 35  | 2.7  |
| 16 | 83129125 | 83129150 | 25  | 83129137 | 12 | 12  | 1.8  |
| 16 | 83210050 | 83210075 | 25  | 83210062 | 12 | 12  | 1.8  |
| 16 | 83476550 | 83476575 | 25  | 83476562 | 12 | 12  | 0.9  |

|    |          |          |     |          |    |     |      |
|----|----------|----------|-----|----------|----|-----|------|
| 16 | 83568300 | 83568500 | 200 | 83568337 | 12 | 91  | 0    |
| 16 | 83728575 | 83728625 | 50  | 83728587 | 11 | 22  | 1.8  |
| 16 | 84308100 | 84308275 | 175 | 84308187 | 14 | 85  | 10.1 |
| 16 | 85256325 | 85256375 | 50  | 85256337 | 12 | 24  | 0    |
| 16 | 85723800 | 85723950 | 150 | 85723812 | 13 | 70  | 10.1 |
| 16 | 85789375 | 85789525 | 150 | 85789387 | 15 | 86  | 11   |
| 16 | 85908950 | 85909000 | 50  | 85908962 | 11 | 22  | 1.8  |
| 16 | 86369750 | 86369850 | 100 | 86369787 | 14 | 52  | 5.5  |
| 16 | 86439300 | 86439625 | 325 | 86439437 | 15 | 154 | 21   |
| 16 | 86444925 | 86445050 | 125 | 86444987 | 13 | 61  | 2.7  |
| 16 | 86445625 | 86445675 | 50  | 86445637 | 12 | 24  | 1.8  |
| 16 | 86542100 | 86542225 | 125 | 86542137 | 25 | 107 | 17.4 |
| 16 | 86834075 | 86834150 | 75  | 86834137 | 13 | 35  | 4.6  |
| 16 | 86921425 | 86921475 | 50  | 86921437 | 11 | 22  | 1.8  |
| 16 | 86923150 | 86923350 | 200 | 86923262 | 20 | 142 | 12.8 |
| 16 | 87137275 | 87137300 | 25  | 87137287 | 11 | 11  | 0    |
| 16 | 88196475 | 88196550 | 75  | 88196537 | 12 | 34  | 4.6  |
| 16 | 88512750 | 88512775 | 25  | 88512762 | 11 | 11  | 0.9  |
| 16 | 88515975 | 88516100 | 125 | 88516062 | 12 | 56  | 3.7  |
| 16 | 88566075 | 88566350 | 275 | 88566187 | 27 | 220 | 29.3 |
| 16 | 88575425 | 88575600 | 175 | 88575437 | 12 | 74  | 10.1 |
| 16 | 88616325 | 88616525 | 200 | 88616362 | 20 | 139 | 20.1 |
| 19 | 457975   | 458125   | 150 | 457987   | 23 | 108 | 21   |
| 19 | 896225   | 896300   | 75  | 896237   | 11 | 33  | 2.7  |
| 19 | 972425   | 972525   | 100 | 972487   | 15 | 55  | 0.9  |
| 19 | 1008400  | 1008750  | 350 | 1008562  | 30 | 288 | 0    |
| 19 | 1050750  | 1050900  | 150 | 1050762  | 12 | 64  | 0    |
| 19 | 1083275  | 1083325  | 50  | 1083287  | 11 | 22  | 3.7  |
| 19 | 1203350  | 1203425  | 75  | 1203362  | 12 | 36  | 5.5  |
| 19 | 1204175  | 1204375  | 200 | 1204212  | 14 | 85  | 10.1 |
| 19 | 1211700  | 1211725  | 25  | 1211712  | 11 | 11  | 1.8  |
| 19 | 1334325  | 1334350  | 25  | 1334337  | 17 | 17  | 2.7  |
| 19 | 1389325  | 1389350  | 25  | 1389337  | 11 | 11  | 1.8  |
| 19 | 1406725  | 1406825  | 100 | 1406762  | 13 | 47  | 7.3  |
| 19 | 1458900  | 1458950  | 50  | 1458937  | 15 | 26  | 4.6  |
| 19 | 1522475  | 1522500  | 25  | 1522487  | 11 | 11  | 0.9  |
| 19 | 1831925  | 1831950  | 25  | 1831937  | 11 | 11  | 1.8  |
| 19 | 1856700  | 1856750  | 50  | 1856712  | 12 | 24  | 3.7  |
| 19 | 1970650  | 1970675  | 25  | 1970662  | 11 | 11  | 1.8  |
| 19 | 2114525  | 2114550  | 25  | 2114537  | 14 | 14  | 0.9  |
| 19 | 2127825  | 2127875  | 50  | 2127837  | 11 | 22  | 0    |
| 19 | 2220350  | 2220375  | 25  | 2220362  | 11 | 11  | 1.8  |
| 19 | 2331700  | 2331750  | 50  | 2331712  | 12 | 24  | 1.8  |
| 19 | 2336575  | 2336600  | 25  | 2336587  | 11 | 11  | 0.9  |
| 19 | 2413975  | 2414300  | 325 | 2414162  | 20 | 195 | 29.3 |
| 19 | 2485500  | 2485575  | 75  | 2485512  | 12 | 35  | 0    |
| 19 | 2599800  | 2599900  | 100 | 2599837  | 17 | 57  | 9.1  |
| 19 | 2674225  | 2674250  | 25  | 2674237  | 11 | 11  | 0.9  |
| 19 | 2785250  | 2785350  | 100 | 2785287  | 12 | 44  | 2.7  |
| 19 | 2785575  | 2785700  | 125 | 2785662  | 15 | 62  | 0    |
| 19 | 2828450  | 2829150  | 700 | 2828637  | 31 | 503 | 37.5 |
| 19 | 2884375  | 2884775  | 400 | 2884587  | 60 | 595 | 0    |
| 19 | 2901300  | 2901450  | 150 | 2901337  | 15 | 82  | 6.4  |
| 19 | 2933800  | 2934250  | 450 | 2934112  | 21 | 249 | 45.7 |
| 19 | 3093225  | 3093275  | 50  | 3093237  | 11 | 22  | 0.9  |
| 19 | 3106375  | 3106425  | 50  | 3106387  | 13 | 24  | 3.7  |
| 19 | 3106850  | 3106950  | 100 | 3106887  | 14 | 54  | 7.3  |
| 19 | 3338800  | 3338900  | 100 | 3338837  | 15 | 55  | 9.1  |
| 19 | 3356250  | 3356325  | 75  | 3356262  | 14 | 42  | 8.2  |
| 19 | 3516350  | 3516375  | 25  | 3516362  | 11 | 11  | 1.8  |
| 19 | 3521125  | 3521225  | 100 | 3521212  | 12 | 42  | 1.8  |
| 19 | 3577800  | 3577825  | 25  | 3577812  | 14 | 14  | 2.7  |
| 19 | 3672375  | 3672500  | 125 | 3672437  | 12 | 58  | 9.1  |
| 19 | 4003950  | 4004000  | 50  | 4003962  | 11 | 22  | 2.7  |
| 19 | 4009450  | 4009475  | 25  | 4009462  | 12 | 12  | 1.8  |
| 19 | 4133525  | 4133550  | 25  | 4133537  | 14 | 14  | 2.7  |
| 19 | 4197950  | 4198050  | 100 | 4197962  | 15 | 53  | 6.4  |
| 19 | 4293975  | 4294025  | 50  | 4293987  | 13 | 26  | 3.7  |
| 19 | 4351700  | 4351750  | 50  | 4351712  | 11 | 22  | 3.7  |
| 19 | 4591000  | 4591075  | 75  | 4591012  | 11 | 33  | 6.4  |
| 19 | 4645350  | 4645400  | 50  | 4645362  | 11 | 22  | 3.7  |
| 19 | 4764475  | 4764500  | 25  | 4764487  | 12 | 12  | 0.9  |
| 19 | 4766900  | 4767050  | 150 | 4766937  | 13 | 68  | 6.4  |
| 19 | 4821225  | 4821375  | 150 | 4821287  | 16 | 84  | 13.7 |
| 19 | 4866200  | 4866225  | 25  | 4866212  | 11 | 11  | 1.8  |

|    |          |          |     |          |    |     |      |
|----|----------|----------|-----|----------|----|-----|------|
| 19 | 5245325  | 5245350  | 25  | 5245337  | 11 | 11  | 1.8  |
| 19 | 5292300  | 5292325  | 25  | 5292312  | 11 | 11  | 0.9  |
| 19 | 5833400  | 5833450  | 50  | 5833412  | 11 | 22  | 2.7  |
| 19 | 5854850  | 5854875  | 25  | 5854862  | 16 | 16  | 2.7  |
| 19 | 5861125  | 5861200  | 75  | 5861137  | 14 | 40  | 7.3  |
| 19 | 5865400  | 5865450  | 50  | 5865412  | 11 | 22  | 2.7  |
| 19 | 6200650  | 6200725  | 75  | 6200662  | 16 | 43  | 3.7  |
| 19 | 6243150  | 6243250  | 100 | 6243212  | 19 | 67  | 6.4  |
| 19 | 6376450  | 6376750  | 300 | 6376612  | 26 | 238 | 36.6 |
| 19 | 6672000  | 6672050  | 50  | 6672012  | 11 | 22  | 3.7  |
| 19 | 6689775  | 6689800  | 25  | 6689787  | 12 | 12  | 1.8  |
| 19 | 7034000  | 7034575  | 575 | 7034187  | 38 | 556 | 11   |
| 19 | 7148225  | 7148400  | 175 | 7148262  | 15 | 87  | 10.1 |
| 19 | 7915175  | 7915300  | 125 | 7915187  | 12 | 55  | 8.2  |
| 19 | 8021625  | 8021675  | 50  | 8021637  | 12 | 24  | 1.8  |
| 19 | 8040225  | 8040650  | 425 | 8040437  | 52 | 656 | 36.6 |
| 19 | 8126050  | 8126075  | 25  | 8126062  | 11 | 11  | 1.8  |
| 19 | 8239950  | 8240100  | 150 | 8240037  | 16 | 85  | 8.2  |
| 19 | 8360750  | 8360900  | 150 | 8360887  | 31 | 137 | 18.3 |
| 19 | 8783050  | 8783325  | 275 | 8783137  | 19 | 163 | 4.6  |
| 19 | 9295400  | 9295600  | 200 | 9295587  | 13 | 89  | 7.3  |
| 19 | 9295900  | 9295950  | 50  | 9295937  | 19 | 36  | 4.6  |
| 19 | 9352900  | 9353075  | 175 | 9352962  | 14 | 83  | 4.6  |
| 19 | 9385125  | 9385425  | 300 | 9385287  | 13 | 126 | 15.6 |
| 19 | 9407025  | 9407150  | 125 | 9407137  | 17 | 69  | 4.6  |
| 19 | 9438300  | 9438425  | 125 | 9438312  | 12 | 57  | 0    |
| 19 | 9438900  | 9439075  | 175 | 9438962  | 15 | 92  | 3.7  |
| 19 | 9458725  | 9458950  | 225 | 9458762  | 16 | 121 | 0    |
| 19 | 9469800  | 9470400  | 600 | 9470337  | 26 | 430 | 72.3 |
| 19 | 9495650  | 9495900  | 250 | 9495787  | 29 | 228 | 7.3  |
| 19 | 9500125  | 9500175  | 50  | 9500137  | 12 | 24  | 1.8  |
| 19 | 9500525  | 9500700  | 175 | 9500612  | 18 | 103 | 4.6  |
| 19 | 9510200  | 9510225  | 25  | 9510212  | 11 | 11  | 1.8  |
| 19 | 9593075  | 9593500  | 425 | 9593087  | 20 | 185 | 17.4 |
| 19 | 9645500  | 9645850  | 350 | 9645687  | 29 | 275 | 7.3  |
| 19 | 9646925  | 9647000  | 75  | 9646962  | 14 | 39  | 4.6  |
| 19 | 9672100  | 9672125  | 25  | 9672112  | 20 | 20  | 3.7  |
| 19 | 9740325  | 9740600  | 275 | 9740437  | 29 | 232 | 20.1 |
| 19 | 9790625  | 9790650  | 25  | 9790637  | 19 | 19  | 3.7  |
| 19 | 9999350  | 9999425  | 75  | 9999412  | 12 | 34  | 5.5  |
| 19 | 10015100 | 10015325 | 225 | 10015162 | 22 | 153 | 0    |
| 19 | 10091525 | 10091550 | 25  | 10091537 | 12 | 12  | 1.8  |
| 19 | 10166075 | 10166250 | 175 | 10166187 | 13 | 83  | 11   |
| 19 | 10178025 | 10178075 | 50  | 10178062 | 16 | 27  | 4.6  |
| 19 | 10200600 | 10200775 | 175 | 10200612 | 11 | 66  | 9.1  |
| 19 | 10263650 | 10263675 | 25  | 10263662 | 11 | 11  | 0.9  |
| 19 | 10388600 | 10388625 | 25  | 10388612 | 14 | 14  | 2.7  |
| 19 | 10391575 | 10391650 | 75  | 10391637 | 12 | 33  | 3.7  |
| 19 | 10450700 | 10450750 | 50  | 10450737 | 16 | 29  | 3.7  |
| 19 | 10565675 | 10565825 | 150 | 10565712 | 17 | 83  | 0.9  |
| 19 | 10625275 | 10625300 | 25  | 10625287 | 11 | 11  | 1.8  |
| 19 | 10625700 | 10625750 | 50  | 10625712 | 14 | 27  | 3.7  |
| 19 | 10806925 | 10807100 | 175 | 10807012 | 15 | 90  | 3.7  |
| 19 | 10807675 | 10807800 | 125 | 10807687 | 19 | 89  | 11   |
| 19 | 10808150 | 10808400 | 250 | 10808337 | 35 | 250 | 27.4 |
| 19 | 11061275 | 11061325 | 50  | 11061287 | 11 | 22  | 3.7  |
| 19 | 11109450 | 11109500 | 50  | 11109487 | 13 | 24  | 2.7  |
| 19 | 11316225 | 11316275 | 50  | 11316262 | 13 | 24  | 3.7  |
| 19 | 11353700 | 11353800 | 100 | 11353712 | 12 | 43  | 6.4  |
| 19 | 11589425 | 11589500 | 75  | 11589437 | 11 | 33  | 1.8  |
| 19 | 11769600 | 11769675 | 75  | 11769637 | 14 | 37  | 4.6  |
| 19 | 11778750 | 11778950 | 200 | 11778862 | 19 | 129 | 0    |
| 19 | 11786150 | 11786225 | 75  | 11786162 | 16 | 46  | 5.5  |
| 19 | 11804625 | 11804725 | 100 | 11804662 | 12 | 43  | 3.7  |
| 19 | 11840125 | 11840325 | 200 | 11840262 | 18 | 135 | 0    |
| 19 | 11877300 | 11878025 | 725 | 11877837 | 24 | 346 | 19.2 |
| 19 | 11921025 | 11921775 | 750 | 11921637 | 20 | 401 | 22   |
| 19 | 11951450 | 11951650 | 200 | 11951487 | 17 | 120 | 0    |
| 19 | 12016025 | 12016075 | 50  | 12016037 | 11 | 22  | 0    |
| 19 | 12048275 | 12048525 | 250 | 12048437 | 21 | 169 | 0.9  |
| 19 | 12049300 | 12049500 | 200 | 12049337 | 15 | 108 | 0    |
| 19 | 12166850 | 12166875 | 25  | 12166862 | 11 | 11  | 1.8  |
| 19 | 12305575 | 12305600 | 25  | 12305587 | 14 | 14  | 1.8  |
| 19 | 12373300 | 12373325 | 25  | 12373312 | 11 | 11  | 0    |
| 19 | 12499125 | 12499575 | 450 | 12499437 | 45 | 522 | 0    |

|    |          |          |     |          |    |     |      |
|----|----------|----------|-----|----------|----|-----|------|
| 19 | 12536150 | 12536175 | 25  | 12536162 | 11 | 11  | 1.8  |
| 19 | 12599900 | 12599975 | 75  | 12599912 | 12 | 35  | 2.7  |
| 19 | 12640900 | 12641000 | 100 | 12640912 | 11 | 41  | 7.3  |
| 19 | 12778100 | 12778175 | 75  | 12778162 | 15 | 40  | 5.5  |
| 19 | 12804400 | 12804450 | 50  | 12804412 | 11 | 22  | 3.7  |
| 19 | 12853450 | 12853475 | 25  | 12853462 | 11 | 11  | 1.8  |
| 19 | 12910275 | 12910300 | 25  | 12910287 | 11 | 11  | 1.8  |
| 19 | 13088725 | 13088750 | 25  | 13088737 | 11 | 11  | 1.8  |
| 19 | 13123475 | 13123725 | 250 | 13123537 | 15 | 103 | 11   |
| 19 | 13124500 | 13124525 | 25  | 13124512 | 11 | 11  | 1.8  |
| 19 | 13370525 | 13370675 | 150 | 13370662 | 12 | 65  | 0.9  |
| 19 | 13373425 | 13373475 | 50  | 13373462 | 12 | 23  | 1.8  |
| 19 | 13719425 | 13719500 | 75  | 13719437 | 16 | 43  | 5.5  |
| 19 | 13746475 | 13746550 | 75  | 13746487 | 15 | 37  | 7.3  |
| 19 | 13756900 | 13757050 | 150 | 13756912 | 17 | 82  | 13.7 |
| 19 | 13813475 | 13813500 | 25  | 13813487 | 11 | 11  | 1.8  |
| 19 | 13872175 | 13872250 | 75  | 13872187 | 12 | 36  | 5.5  |
| 19 | 14063400 | 14063425 | 25  | 14063412 | 13 | 13  | 1.8  |
| 19 | 14090375 | 14090425 | 50  | 14090387 | 12 | 24  | 1.8  |
| 19 | 14179150 | 14179175 | 25  | 14179162 | 11 | 11  | 1.8  |
| 19 | 14468375 | 14468525 | 150 | 14468387 | 18 | 89  | 13.7 |
| 19 | 14491525 | 14491575 | 50  | 14491562 | 17 | 31  | 4.6  |
| 19 | 14491925 | 14491950 | 25  | 14491937 | 14 | 14  | 2.7  |
| 19 | 14544050 | 14544100 | 50  | 14544062 | 13 | 26  | 1.8  |
| 19 | 14690300 | 14690700 | 400 | 14690562 | 26 | 283 | 20.1 |
| 19 | 15110675 | 15110725 | 50  | 15110687 | 11 | 22  | 2.7  |
| 19 | 15237550 | 15237575 | 25  | 15237562 | 12 | 12  | 1.8  |
| 19 | 15808750 | 15808950 | 200 | 15808837 | 19 | 125 | 18.3 |
| 19 | 16169500 | 16169525 | 25  | 16169512 | 11 | 11  | 1.8  |
| 19 | 16632125 | 16632175 | 50  | 16632137 | 15 | 27  | 2.7  |
| 19 | 16674075 | 16674125 | 50  | 16674087 | 13 | 24  | 3.7  |
| 19 | 16854100 | 16854125 | 25  | 16854112 | 11 | 11  | 1.8  |
| 19 | 17051975 | 17052025 | 50  | 17052012 | 12 | 23  | 1.8  |
| 19 | 17079950 | 17080150 | 200 | 17079962 | 16 | 116 | 10.1 |
| 19 | 17107275 | 17107475 | 200 | 17107412 | 16 | 114 | 20.1 |
| 19 | 17308325 | 17308550 | 225 | 17308487 | 16 | 121 | 7.3  |
| 19 | 17309150 | 17309200 | 50  | 17309162 | 13 | 24  | 3.7  |
| 19 | 17361925 | 17361975 | 50  | 17361937 | 11 | 22  | 1.8  |
| 19 | 17362750 | 17362900 | 150 | 17362787 | 14 | 75  | 7.3  |
| 19 | 17391525 | 17391550 | 25  | 17391537 | 19 | 19  | 3.7  |
| 19 | 17447500 | 17447525 | 25  | 17447512 | 11 | 11  | 1.8  |
| 19 | 17479725 | 17479775 | 50  | 17479762 | 15 | 29  | 5.5  |
| 19 | 17480000 | 17480175 | 175 | 17480012 | 13 | 83  | 7.3  |
| 19 | 17978775 | 17978950 | 175 | 17978887 | 15 | 90  | 12.8 |
| 19 | 18176250 | 18176450 | 200 | 18176337 | 17 | 115 | 16.5 |
| 19 | 18253825 | 18253950 | 125 | 18253912 | 18 | 75  | 10.1 |
| 19 | 18295200 | 18295225 | 25  | 18295212 | 13 | 13  | 0.9  |
| 19 | 18300300 | 18300325 | 25  | 18300312 | 13 | 13  | 0.9  |
| 19 | 18336800 | 18336950 | 150 | 18336812 | 15 | 85  | 10.1 |
| 19 | 18346200 | 18346325 | 125 | 18346287 | 34 | 142 | 28.4 |
| 19 | 18357950 | 18358050 | 100 | 18358012 | 13 | 50  | 1.8  |
| 19 | 18388550 | 18388575 | 25  | 18388562 | 11 | 11  | 1.8  |
| 19 | 18513225 | 18513250 | 25  | 18513237 | 11 | 11  | 1.8  |
| 19 | 18560325 | 18560525 | 200 | 18560362 | 14 | 103 | 3.7  |
| 19 | 18650050 | 18650125 | 75  | 18650062 | 15 | 41  | 7.3  |
| 19 | 18757275 | 18757425 | 150 | 18757337 | 15 | 76  | 11.9 |
| 19 | 19111475 | 19111625 | 150 | 19111587 | 16 | 79  | 2.7  |
| 19 | 19164100 | 19164250 | 150 | 19164187 | 15 | 81  | 13.7 |
| 19 | 19175425 | 19175450 | 25  | 19175437 | 14 | 14  | 0.9  |
| 19 | 19292450 | 19292600 | 150 | 19292562 | 14 | 78  | 11   |
| 19 | 19440300 | 19440400 | 100 | 19440362 | 13 | 48  | 1.8  |
| 19 | 19488025 | 19488200 | 175 | 19488087 | 25 | 135 | 11.9 |
| 19 | 19563050 | 19563150 | 100 | 19563087 | 15 | 57  | 9.1  |
| 19 | 19636025 | 19636100 | 75  | 19636062 | 14 | 41  | 1.8  |
| 19 | 19640700 | 19640775 | 75  | 19640712 | 15 | 43  | 5.5  |
| 19 | 19793475 | 19793550 | 75  | 19793487 | 22 | 57  | 10.1 |
| 19 | 19837875 | 19837950 | 75  | 19837912 | 17 | 45  | 6.4  |
| 19 | 20011500 | 20011525 | 25  | 20011512 | 11 | 11  | 1.8  |
| 19 | 20519375 | 20519450 | 75  | 20519387 | 12 | 36  | 2.7  |
| 19 | 20636025 | 20636200 | 175 | 20636137 | 15 | 96  | 7.3  |
| 19 | 21333525 | 21333625 | 100 | 21333587 | 14 | 51  | 4.6  |
| 19 | 21543875 | 21543900 | 25  | 21543887 | 14 | 14  | 2.7  |
| 19 | 21742025 | 21742125 | 100 | 21742037 | 12 | 43  | 4.6  |
| 19 | 21922525 | 21922750 | 225 | 21922637 | 24 | 157 | 7.3  |
| 19 | 22119200 | 22119300 | 100 | 22119212 | 15 | 51  | 0    |

|    |          |          |     |          |    |     |      |
|----|----------|----------|-----|----------|----|-----|------|
| 19 | 22260950 | 22260975 | 25  | 22260962 | 14 | 14  | 2.7  |
| 19 | 22608625 | 22608650 | 25  | 22608637 | 12 | 12  | 1.8  |
| 19 | 22920300 | 22920500 | 200 | 22920387 | 21 | 137 | 4.6  |
| 19 | 22977600 | 22977725 | 125 | 22977637 | 14 | 62  | 4.6  |
| 19 | 23248350 | 23248400 | 50  | 23248362 | 12 | 23  | 1.8  |
| 19 | 23889425 | 23889525 | 100 | 23889437 | 12 | 46  | 5.5  |
| 19 | 24061775 | 24061825 | 50  | 24061787 | 15 | 30  | 5.5  |
| 19 | 34845725 | 34845800 | 75  | 34845737 | 11 | 33  | 1.8  |
| 19 | 34870100 | 34870125 | 25  | 34870112 | 11 | 11  | 1.8  |
| 19 | 34873700 | 34873925 | 225 | 34873787 | 22 | 158 | 7.3  |
| 19 | 35633050 | 35633100 | 50  | 35633062 | 11 | 22  | 2.7  |
| 19 | 35828675 | 35828700 | 25  | 35828687 | 11 | 11  | 1.8  |
| 19 | 37528050 | 37528225 | 175 | 37528062 | 13 | 83  | 12.8 |
| 19 | 38238250 | 38238800 | 550 | 38238637 | 19 | 238 | 34.8 |
| 19 | 38246300 | 38246450 | 150 | 38246312 | 11 | 66  | 10.1 |
| 19 | 38339350 | 38339375 | 25  | 38339362 | 11 | 11  | 1.8  |
| 19 | 38379600 | 38379700 | 100 | 38379612 | 12 | 47  | 0.9  |
| 19 | 39003275 | 39003550 | 275 | 39003362 | 27 | 226 | 30.2 |
| 19 | 39051675 | 39051775 | 100 | 39051737 | 15 | 52  | 2.7  |
| 19 | 39548000 | 39548100 | 100 | 39548012 | 12 | 48  | 5.5  |
| 19 | 39860075 | 39860100 | 25  | 39860087 | 13 | 13  | 1.8  |
| 19 | 39860475 | 39860775 | 300 | 39860737 | 13 | 104 | 4.6  |
| 19 | 39942275 | 39942425 | 150 | 39942337 | 17 | 79  | 5.5  |
| 19 | 39942700 | 39942950 | 250 | 39942837 | 16 | 133 | 0    |
| 19 | 40140800 | 40141600 | 800 | 40141412 | 16 | 360 | 22.9 |
| 19 | 40291600 | 40291650 | 50  | 40291637 | 13 | 24  | 3.7  |
| 19 | 40297950 | 40297975 | 25  | 40297962 | 13 | 13  | 1.8  |
| 19 | 40303200 | 40303300 | 100 | 40303212 | 12 | 46  | 7.3  |
| 19 | 40337750 | 40338100 | 350 | 40337912 | 22 | 208 | 35.7 |
| 19 | 40678150 | 40678175 | 25  | 40678162 | 11 | 11  | 1.8  |
| 19 | 40795275 | 40795325 | 50  | 40795287 | 14 | 26  | 3.7  |
| 19 | 40927975 | 40928025 | 50  | 40927987 | 14 | 25  | 4.6  |
| 19 | 41114050 | 41114200 | 150 | 41114062 | 12 | 68  | 7.3  |
| 19 | 41397150 | 41397200 | 50  | 41397162 | 11 | 22  | 3.7  |
| 19 | 41397850 | 41398000 | 150 | 41397862 | 15 | 73  | 9.1  |
| 19 | 41711275 | 41711425 | 150 | 41711287 | 11 | 60  | 10.1 |
| 19 | 41849750 | 41849800 | 50  | 41849762 | 15 | 29  | 5.5  |
| 19 | 41902375 | 41902700 | 325 | 41902512 | 24 | 216 | 9.1  |
| 19 | 41955625 | 41955700 | 75  | 41955662 | 25 | 67  | 9.1  |
| 19 | 42190675 | 42190700 | 25  | 42190687 | 11 | 11  | 1.8  |
| 19 | 42311175 | 42311325 | 150 | 42311287 | 12 | 64  | 0    |
| 19 | 42596375 | 42596525 | 150 | 42596487 | 13 | 72  | 0    |
| 19 | 42650200 | 42650425 | 225 | 42650237 | 26 | 180 | 26.5 |
| 19 | 42667550 | 42667700 | 150 | 42667587 | 14 | 72  | 5.5  |
| 19 | 42734300 | 42734350 | 50  | 42734337 | 17 | 31  | 5.5  |
| 19 | 42838550 | 42838625 | 75  | 42838562 | 14 | 40  | 7.3  |
| 19 | 42839175 | 42839200 | 25  | 42839187 | 11 | 11  | 1.8  |
| 19 | 42875075 | 42875225 | 150 | 42875087 | 19 | 105 | 18.3 |
| 19 | 42902675 | 42902700 | 25  | 42902687 | 11 | 11  | 1.8  |
| 19 | 42961975 | 42962000 | 25  | 42961987 | 11 | 11  | 1.8  |
| 19 | 42985925 | 42985975 | 50  | 42985937 | 11 | 22  | 0.9  |
| 19 | 43089175 | 43089325 | 150 | 43089212 | 12 | 64  | 5.5  |
| 19 | 43089600 | 43089725 | 125 | 43089637 | 15 | 66  | 11.9 |
| 19 | 43711000 | 43711025 | 25  | 43711012 | 11 | 11  | 0    |
| 19 | 43726800 | 43726825 | 25  | 43726812 | 11 | 11  | 0.9  |
| 19 | 43801325 | 43801375 | 50  | 43801337 | 12 | 24  | 3.7  |
| 19 | 43841275 | 43841325 | 50  | 43841287 | 12 | 23  | 2.7  |
| 19 | 43853600 | 43853650 | 50  | 43853612 | 12 | 24  | 1.8  |
| 19 | 44014550 | 44014575 | 25  | 44014562 | 16 | 16  | 2.7  |
| 19 | 44524150 | 44524475 | 325 | 44524387 | 37 | 309 | 54   |
| 19 | 44573400 | 44573500 | 100 | 44573412 | 14 | 56  | 10.1 |
| 19 | 44584700 | 44584750 | 50  | 44584712 | 11 | 22  | 0    |
| 19 | 44594625 | 44594650 | 25  | 44594637 | 15 | 15  | 2.7  |
| 19 | 45253675 | 45253700 | 25  | 45253687 | 12 | 12  | 0.9  |
| 19 | 45388150 | 45388550 | 400 | 45388287 | 19 | 220 | 11   |
| 19 | 45440050 | 45440075 | 25  | 45440062 | 12 | 12  | 0    |
| 19 | 45623550 | 45623575 | 25  | 45623562 | 13 | 13  | 1.8  |
| 19 | 46463300 | 46463325 | 25  | 46463312 | 11 | 11  | 0    |
| 19 | 46506275 | 46506300 | 25  | 46506287 | 12 | 12  | 1.8  |
| 19 | 46519725 | 46519775 | 50  | 46519737 | 11 | 22  | 2.7  |
| 19 | 47055700 | 47055800 | 100 | 47055712 | 17 | 65  | 11.9 |
| 19 | 47271675 | 47271700 | 25  | 47271687 | 11 | 11  | 1.8  |
| 19 | 47440650 | 47440675 | 25  | 47440662 | 11 | 11  | 1.8  |
| 19 | 47451775 | 47451800 | 25  | 47451787 | 11 | 11  | 1.8  |
| 19 | 47464075 | 47464225 | 150 | 47464112 | 14 | 79  | 10.1 |

|    |          |          |      |          |    |      |      |
|----|----------|----------|------|----------|----|------|------|
| 19 | 47464900 | 47465050 | 150  | 47465012 | 13 | 67   | 9.1  |
| 19 | 47477850 | 47477875 | 25   | 47477862 | 11 | 11   | 1.8  |
| 19 | 47521200 | 47521350 | 150  | 47521287 | 17 | 86   | 9.1  |
| 19 | 47619750 | 47619900 | 150  | 47619862 | 13 | 68   | 11   |
| 19 | 47629650 | 47629675 | 25   | 47629662 | 11 | 11   | 1.8  |
| 19 | 47664475 | 47664600 | 125  | 47664487 | 15 | 67   | 9.1  |
| 19 | 48659875 | 48659900 | 25   | 48659887 | 15 | 15   | 2.7  |
| 19 | 48729150 | 48729250 | 100  | 48729187 | 21 | 82   | 14.6 |
| 19 | 48729825 | 48729850 | 25   | 48729837 | 15 | 15   | 1.8  |
| 19 | 48815575 | 48815775 | 200  | 48815762 | 20 | 121  | 13.7 |
| 19 | 48951425 | 48951850 | 425  | 48951737 | 16 | 210  | 32   |
| 19 | 49000625 | 49000650 | 25   | 49000637 | 11 | 11   | 1.8  |
| 19 | 49097650 | 49097850 | 200  | 49097737 | 16 | 116  | 13.7 |
| 19 | 49098075 | 49098100 | 25   | 49098087 | 11 | 11   | 1.8  |
| 19 | 49109575 | 49109775 | 200  | 49109737 | 17 | 117  | 0.9  |
| 19 | 49131150 | 49131175 | 25   | 49131162 | 14 | 14   | 2.7  |
| 19 | 49147300 | 49147325 | 25   | 49147312 | 21 | 21   | 3.7  |
| 19 | 49162125 | 49162450 | 325  | 49162287 | 14 | 150  | 0    |
| 19 | 49180150 | 49180200 | 50   | 49180162 | 15 | 30   | 4.6  |
| 19 | 49206500 | 49206700 | 200  | 49206562 | 19 | 133  | 0    |
| 19 | 49228050 | 49228325 | 275  | 49228137 | 25 | 226  | 0    |
| 19 | 49262300 | 49262500 | 200  | 49262412 | 16 | 107  | 0    |
| 19 | 49267825 | 49267875 | 50   | 49267837 | 11 | 22   | 3.7  |
| 19 | 49302825 | 49302875 | 50   | 49302837 | 11 | 22   | 1.8  |
| 19 | 49361050 | 49361150 | 100  | 49361137 | 17 | 50   | 6.4  |
| 19 | 49403250 | 49403625 | 375  | 49403412 | 30 | 306  | 19.2 |
| 19 | 49408000 | 49408025 | 25   | 49408012 | 11 | 11   | 1.8  |
| 19 | 49501025 | 49501075 | 50   | 49501037 | 22 | 44   | 7.3  |
| 19 | 49597175 | 49597400 | 225  | 49597312 | 26 | 181  | 12.8 |
| 19 | 49672525 | 49673550 | 1025 | 49672837 | 70 | 1231 | 14.6 |
| 19 | 49937325 | 49937375 | 50   | 49937337 | 15 | 27   | 2.7  |
| 19 | 49948325 | 49948375 | 50   | 49948337 | 14 | 26   | 1.8  |
| 19 | 50120575 | 50120675 | 100  | 50120587 | 12 | 48   | 3.7  |
| 19 | 50274575 | 50274600 | 25   | 50274587 | 12 | 12   | 0.9  |
| 19 | 50601750 | 50601775 | 25   | 50601762 | 13 | 13   | 1.8  |
| 19 | 50619475 | 50619675 | 200  | 50619562 | 17 | 113  | 12.8 |
| 19 | 50721500 | 50721525 | 25   | 50721512 | 11 | 11   | 1.8  |
| 19 | 50739475 | 50739525 | 50   | 50739487 | 11 | 22   | 1.8  |
| 19 | 50779525 | 50779675 | 150  | 50779562 | 13 | 75   | 5.5  |
| 19 | 50841100 | 50841375 | 275  | 50841287 | 18 | 157  | 27.4 |
| 19 | 50964050 | 50964100 | 50   | 50964087 | 13 | 24   | 3.7  |
| 19 | 51058475 | 51058500 | 25   | 51058487 | 13 | 13   | 1.8  |
| 19 | 51081925 | 51081950 | 25   | 51081937 | 14 | 14   | 2.7  |
| 19 | 51082225 | 51082250 | 25   | 51082237 | 11 | 11   | 1.8  |
| 19 | 51274100 | 51274300 | 200  | 51274237 | 18 | 118  | 8.2  |
| 19 | 51909050 | 51909100 | 50   | 51909062 | 12 | 24   | 3.7  |
| 19 | 51956625 | 51956850 | 225  | 51956712 | 26 | 176  | 27.4 |
| 19 | 52046175 | 52046200 | 25   | 52046187 | 11 | 11   | 1.8  |
| 19 | 52051800 | 52052100 | 300  | 52051937 | 20 | 195  | 22   |
| 19 | 52055000 | 52055125 | 125  | 52055112 | 23 | 89   | 13.7 |
| 19 | 52171525 | 52171650 | 125  | 52171562 | 24 | 103  | 14.6 |
| 19 | 52320175 | 52320200 | 25   | 52320187 | 12 | 12   | 0    |
| 19 | 52451450 | 52451600 | 150  | 52451537 | 16 | 97   | 18.3 |
| 19 | 52484925 | 52484950 | 25   | 52484937 | 11 | 11   | 1.8  |
| 19 | 52544500 | 52544650 | 150  | 52544512 | 15 | 81   | 11   |
| 19 | 52634100 | 52634125 | 25   | 52634112 | 11 | 11   | 0    |
| 19 | 52795950 | 52796025 | 75   | 52795987 | 13 | 36   | 3.7  |
| 19 | 52938575 | 52938600 | 25   | 52938587 | 11 | 11   | 0.9  |
| 19 | 53316900 | 53317175 | 275  | 53317037 | 25 | 210  | 16.5 |
| 19 | 53376725 | 53376800 | 75   | 53376737 | 11 | 33   | 0    |
| 19 | 53559325 | 53559425 | 100  | 53559412 | 16 | 56   | 8.2  |
| 19 | 53640750 | 53640800 | 50   | 53640787 | 14 | 26   | 1.8  |
| 19 | 53709125 | 53709175 | 50   | 53709162 | 12 | 23   | 0.9  |
| 19 | 53814075 | 53814100 | 25   | 53814087 | 11 | 11   | 1.8  |
| 19 | 53915550 | 53915575 | 25   | 53915562 | 11 | 11   | 1.8  |
| 19 | 54128450 | 54128575 | 125  | 54128462 | 12 | 58   | 8.2  |
| 19 | 54313825 | 54313850 | 25   | 54313837 | 15 | 15   | 2.7  |
| 19 | 54346900 | 54346925 | 25   | 54346912 | 11 | 11   | 1.8  |
| 19 | 54564150 | 54564175 | 25   | 54564162 | 11 | 11   | 0    |
| 19 | 54648050 | 54648075 | 25   | 54648062 | 12 | 12   | 0.9  |
| 19 | 54775700 | 54775800 | 100  | 54775712 | 14 | 51   | 9.1  |
| 19 | 54860850 | 54860925 | 75   | 54860887 | 27 | 77   | 12.8 |
| 19 | 54871625 | 54871775 | 150  | 54871637 | 21 | 96   | 8.2  |
| 19 | 55124675 | 55124775 | 100  | 55124762 | 20 | 71   | 11   |
| 19 | 55182450 | 55182525 | 75   | 55182462 | 15 | 41   | 7.3  |

|    |          |          |     |          |    |     |      |
|----|----------|----------|-----|----------|----|-----|------|
| 19 | 55221050 | 55221300 | 250 | 55221137 | 35 | 263 | 40.3 |
| 19 | 55240100 | 55240175 | 75  | 55240162 | 15 | 41  | 5.5  |
| 19 | 55529000 | 55529200 | 200 | 55529137 | 42 | 290 | 48.5 |
| 19 | 55999750 | 55999975 | 225 | 55999887 | 24 | 178 | 21   |
| 19 | 56589400 | 56589550 | 150 | 56589537 | 30 | 114 | 18.3 |
| 19 | 56899175 | 56899250 | 75  | 56899237 | 13 | 35  | 5.5  |
| 19 | 57086325 | 57086425 | 100 | 57086387 | 17 | 58  | 4.6  |
| 19 | 57140025 | 57140050 | 25  | 57140037 | 12 | 12  | 0    |
| 19 | 57188950 | 57189100 | 150 | 57189037 | 13 | 74  | 0    |
| 19 | 57189400 | 57189425 | 25  | 57189412 | 11 | 11  | 0    |
| 19 | 57229150 | 57229375 | 225 | 57229312 | 19 | 145 | 0    |
| 19 | 57334400 | 57334450 | 50  | 57334412 | 13 | 24  | 3.7  |
| 19 | 57334875 | 57334900 | 25  | 57334887 | 12 | 12  | 0.9  |
| 19 | 57384450 | 57384475 | 25  | 57384462 | 11 | 11  | 1.8  |
| 19 | 57592850 | 57592950 | 100 | 57592862 | 18 | 68  | 7.3  |
| 19 | 57648200 | 57648225 | 25  | 57648212 | 11 | 11  | 1.8  |
| 19 | 57765050 | 57765075 | 25  | 57765062 | 11 | 11  | 1.8  |
| 19 | 57796000 | 57796025 | 25  | 57796012 | 11 | 11  | 0    |
| 19 | 57885750 | 57885800 | 50  | 57885787 | 13 | 25  | 1.8  |
| 19 | 58137475 | 58137525 | 50  | 58137512 | 16 | 30  | 5.5  |
| 19 | 58232950 | 58233175 | 225 | 58233062 | 21 | 153 | 25.6 |
| 19 | 58392400 | 58392425 | 25  | 58392412 | 11 | 11  | 1.8  |
| 19 | 58449750 | 58450675 | 925 | 58450187 | 27 | 555 | 85.1 |
| 19 | 58490050 | 58490200 | 150 | 58490087 | 13 | 70  | 4.6  |
| 19 | 58524025 | 58524225 | 200 | 58524137 | 17 | 124 | 7.3  |
| 19 | 58590075 | 58590125 | 50  | 58590087 | 16 | 30  | 5.5  |
| 19 | 58715475 | 58715850 | 375 | 58715737 | 24 | 262 | 21   |
| 19 | 59064600 | 59064650 | 50  | 59064612 | 11 | 22  | 3.7  |
| 19 | 59297425 | 59297600 | 175 | 59297437 | 13 | 65  | 8.2  |
| 19 | 59310375 | 59310800 | 425 | 59310762 | 15 | 200 | 34.8 |
| 19 | 59621975 | 59622075 | 100 | 59621987 | 11 | 42  | 6.4  |
| 19 | 59666900 | 59667100 | 200 | 59666962 | 16 | 107 | 12.8 |
| 19 | 60209375 | 60209400 | 25  | 60209387 | 11 | 11  | 0    |
| 19 | 60321175 | 60321200 | 25  | 60321187 | 12 | 12  | 1.8  |
| 19 | 60344550 | 60344575 | 25  | 60344562 | 11 | 11  | 0    |
| 19 | 60370025 | 60370050 | 25  | 60370037 | 11 | 11  | 1.8  |
| 19 | 60419850 | 60419875 | 25  | 60419862 | 23 | 23  | 4.6  |
| 19 | 60611050 | 60611200 | 150 | 60611087 | 17 | 98  | 18.3 |
| 19 | 60679325 | 60679400 | 75  | 60679387 | 23 | 60  | 9.1  |
| 19 | 60706700 | 60707075 | 375 | 60706987 | 22 | 235 | 25.6 |
| 19 | 60750725 | 60750775 | 50  | 60750737 | 13 | 25  | 2.7  |
| 19 | 61295200 | 61295225 | 25  | 61295212 | 12 | 12  | 1.8  |
| 19 | 61571275 | 61571375 | 100 | 61571287 | 20 | 72  | 11   |
| 19 | 61596850 | 61597000 | 150 | 61596862 | 33 | 146 | 27.4 |
| 19 | 61606900 | 61606975 | 75  | 61606962 | 14 | 37  | 5.5  |
| 19 | 61681025 | 61681175 | 150 | 61681037 | 16 | 84  | 16.5 |
| 19 | 61770350 | 61770425 | 75  | 61770412 | 14 | 38  | 5.5  |
| 19 | 61781050 | 61781100 | 50  | 61781087 | 13 | 24  | 0    |
| 19 | 62043050 | 62043100 | 50  | 62043062 | 12 | 24  | 3.7  |
| 19 | 62680325 | 62680375 | 50  | 62680337 | 11 | 22  | 3.7  |
| 19 | 62716200 | 62716300 | 100 | 62716212 | 13 | 45  | 0    |
| 19 | 62769625 | 62769800 | 175 | 62769712 | 17 | 103 | 1.8  |
| 19 | 62775575 | 62775775 | 200 | 62775637 | 14 | 100 | 3.7  |
| 19 | 62781575 | 62781675 | 100 | 62781587 | 12 | 45  | 3.7  |
| 19 | 62786750 | 62786825 | 75  | 62786787 | 14 | 40  | 5.5  |
| 19 | 62818550 | 62818800 | 250 | 62818637 | 22 | 179 | 14.6 |
| 19 | 62823850 | 62824225 | 375 | 62824037 | 28 | 285 | 22   |
| 19 | 62890675 | 62890850 | 175 | 62890762 | 13 | 82  | 0.9  |
| 19 | 63138550 | 63138650 | 100 | 63138587 | 16 | 55  | 10.1 |
| 19 | 63213100 | 63213150 | 50  | 63213112 | 11 | 22  | 1.8  |
| 19 | 63236925 | 63237025 | 100 | 63236962 | 13 | 50  | 0.9  |
| 19 | 63262325 | 63262450 | 125 | 63262337 | 14 | 62  | 10.1 |
| 19 | 63270975 | 63271175 | 200 | 63271037 | 14 | 104 | 0    |
| 19 | 63331300 | 63331775 | 475 | 63331512 | 26 | 337 | 0.9  |
| 19 | 63386125 | 63386275 | 150 | 63386237 | 19 | 98  | 4.6  |
| 19 | 63400175 | 63400525 | 350 | 63400337 | 47 | 419 | 12.8 |
| 19 | 63464925 | 63465900 | 975 | 63465362 | 32 | 715 | 7.3  |
| 19 | 63565400 | 63565525 | 125 | 63565437 | 16 | 69  | 8.2  |
| 19 | 63634575 | 63634675 | 100 | 63634637 | 12 | 45  | 0.9  |
| 19 | 63636550 | 63636750 | 200 | 63636612 | 15 | 111 | 0    |
| 19 | 63643275 | 63644075 | 800 | 63643412 | 38 | 698 | 97.9 |
| 19 | 63702225 | 63702375 | 150 | 63702312 | 14 | 77  | 11   |
| 19 | 63702725 | 63702900 | 175 | 63702737 | 33 | 158 | 21   |
| 19 | 63747450 | 63747475 | 25  | 63747462 | 14 | 14  | 2.7  |
| 19 | 63762575 | 63762600 | 25  | 63762587 | 11 | 11  | 1.8  |



|    |          |          |     |          |    |     |      |
|----|----------|----------|-----|----------|----|-----|------|
| 18 | 385775   | 385925   | 150 | 385862   | 16 | 89  | 8.2  |
| 18 | 634550   | 634850   | 300 | 634712   | 28 | 256 | 23.8 |
| 18 | 802800   | 802925   | 125 | 802837   | 14 | 59  | 8.2  |
| 18 | 1498975  | 1499150  | 175 | 1499062  | 14 | 86  | 3.7  |
| 18 | 3003425  | 3003600  | 175 | 3003512  | 16 | 103 | 9.1  |
| 18 | 3236650  | 3236850  | 200 | 3236687  | 21 | 135 | 7.3  |
| 18 | 3585000  | 3585100  | 100 | 3585012  | 11 | 44  | 2.7  |
| 18 | 3614375  | 3614475  | 100 | 3614387  | 16 | 52  | 4.6  |
| 18 | 5286075  | 5286200  | 125 | 5286137  | 16 | 75  | 5.5  |
| 18 | 5286675  | 5286725  | 50  | 5286687  | 11 | 22  | 0.9  |
| 18 | 6719350  | 6719550  | 200 | 6719437  | 16 | 110 | 10.1 |
| 18 | 7911850  | 7912225  | 375 | 7912012  | 38 | 395 | 18.3 |
| 18 | 8694800  | 8694825  | 25  | 8694812  | 12 | 12  | 0.9  |
| 18 | 9092400  | 9092450  | 50  | 9092412  | 12 | 24  | 3.7  |
| 18 | 9324125  | 9324225  | 100 | 9324162  | 15 | 58  | 8.2  |
| 18 | 9465250  | 9465375  | 125 | 9465262  | 12 | 56  | 9.1  |
| 18 | 9728000  | 9728050  | 50  | 9728012  | 12 | 23  | 1.8  |
| 18 | 11126350 | 11126400 | 50  | 11126362 | 11 | 22  | 1.8  |
| 18 | 11313525 | 11313675 | 150 | 11313587 | 14 | 77  | 9.1  |
| 18 | 11356775 | 11356800 | 25  | 11356787 | 12 | 12  | 0    |
| 18 | 11534250 | 11534300 | 50  | 11534262 | 11 | 22  | 3.7  |
| 18 | 12938625 | 12938825 | 200 | 12938712 | 18 | 117 | 4.6  |
| 18 | 13700850 | 13701025 | 175 | 13700887 | 15 | 91  | 0    |
| 18 | 17106225 | 17106250 | 25  | 17106237 | 11 | 11  | 1.8  |
| 18 | 17446300 | 17446425 | 125 | 17446337 | 13 | 62  | 1.8  |
| 18 | 18989775 | 18989825 | 50  | 18989787 | 11 | 22  | 1.8  |
| 18 | 19503650 | 19503675 | 25  | 19503662 | 11 | 11  | 0.9  |
| 18 | 20588550 | 20588625 | 75  | 20588562 | 11 | 33  | 3.7  |
| 18 | 20597825 | 20598000 | 175 | 20597912 | 16 | 97  | 7.3  |
| 18 | 21923450 | 21923475 | 25  | 21923462 | 11 | 11  | 1.8  |
| 18 | 23245975 | 23246075 | 100 | 23245987 | 11 | 44  | 3.7  |
| 18 | 23756050 | 23756075 | 25  | 23756062 | 11 | 11  | 1.8  |
| 18 | 24518775 | 24518950 | 175 | 24518862 | 15 | 92  | 6.4  |
| 18 | 27040925 | 27040950 | 25  | 27040937 | 11 | 11  | 0.9  |
| 18 | 27518375 | 27518425 | 50  | 27518387 | 11 | 22  | 3.7  |
| 18 | 27808125 | 27808225 | 100 | 27808137 | 11 | 44  | 0    |
| 18 | 27812575 | 27812800 | 225 | 27812712 | 20 | 145 | 3.7  |
| 18 | 29993550 | 29993650 | 100 | 29993562 | 11 | 44  | 0    |
| 18 | 30493725 | 30493875 | 150 | 30493787 | 14 | 74  | 9.1  |
| 18 | 31331850 | 31332025 | 175 | 31331862 | 19 | 100 | 19.2 |
| 18 | 31529900 | 31530075 | 175 | 31530037 | 17 | 101 | 8.2  |
| 18 | 34775025 | 34775050 | 25  | 34775037 | 11 | 11  | 0.9  |
| 18 | 40530875 | 40531050 | 175 | 40530987 | 13 | 82  | 0.9  |
| 18 | 41208775 | 41208800 | 25  | 41208787 | 11 | 11  | 0    |
| 18 | 42702600 | 42702650 | 50  | 42702612 | 12 | 23  | 0    |
| 18 | 44070900 | 44071025 | 125 | 44070962 | 18 | 84  | 12.8 |
| 18 | 44319225 | 44319250 | 25  | 44319237 | 11 | 11  | 0.9  |
| 18 | 44521375 | 44521400 | 25  | 44521387 | 11 | 11  | 0.9  |
| 18 | 44523550 | 44523675 | 125 | 44523562 | 17 | 71  | 6.4  |
| 18 | 44605625 | 44605650 | 25  | 44605637 | 11 | 11  | 1.8  |
| 18 | 44614900 | 44615250 | 350 | 44614962 | 17 | 182 | 21   |
| 18 | 46048975 | 46049075 | 100 | 46048987 | 13 | 49  | 8.2  |
| 18 | 46061850 | 46061875 | 25  | 46061862 | 11 | 11  | 1.8  |
| 18 | 46978600 | 46978825 | 225 | 46978737 | 24 | 176 | 20.1 |
| 18 | 50049675 | 50049875 | 200 | 50049712 | 17 | 126 | 9.1  |
| 18 | 53986950 | 53986975 | 25  | 53986962 | 11 | 11  | 0    |
| 18 | 54134050 | 54134100 | 50  | 54134062 | 14 | 26  | 0.9  |
| 18 | 54418450 | 54418550 | 100 | 54418462 | 12 | 48  | 0    |
| 18 | 54607450 | 54607825 | 375 | 54607612 | 32 | 343 | 0.9  |
| 18 | 62539775 | 62539850 | 75  | 62539787 | 11 | 33  | 0    |
| 18 | 66261225 | 66261475 | 250 | 66261337 | 19 | 143 | 0    |
| 18 | 66846850 | 66846925 | 75  | 66846862 | 12 | 35  | 1.8  |
| 18 | 75227350 | 75227425 | 75  | 75227362 | 14 | 40  | 4.6  |
| 18 | 75359725 | 75359925 | 200 | 75359862 | 19 | 131 | 2.7  |
| 18 | 75871375 | 75871525 | 150 | 75871437 | 13 | 67  | 8.2  |
| 18 | 75883650 | 75883975 | 325 | 75883837 | 35 | 317 | 18.3 |

**Table S2 - Summary of bound regions**

**H3K9me3 (10E-9) in WM451Lu**

| CHROM | START   | END     | LENGTH | PEAK POS | PEAK HEIGHT | TOTAL TARGET COUNTS | TOTAL BACKGROUND COUNTS |
|-------|---------|---------|--------|----------|-------------|---------------------|-------------------------|
| 20    | 44025   | 44225   | 200    | 44162    | 18          | 126                 | 17.5                    |
| 20    | 78275   | 78450   | 175    | 78287    | 13          | 81                  | 0                       |
| 20    | 117075  | 117125  | 50     | 117087   | 12          | 24                  | 4.4                     |
| 20    | 118525  | 118550  | 25     | 118537   | 12          | 12                  | 0                       |
| 20    | 618250  | 618275  | 25     | 618262   | 14          | 14                  | 2.2                     |
| 20    | 630675  | 630725  | 50     | 630687   | 12          | 24                  | 0                       |
| 20    | 714325  | 714425  | 100    | 714337   | 12          | 47                  | 6.6                     |
| 20    | 801525  | 801600  | 75     | 801562   | 13          | 37                  | 4.4                     |
| 20    | 875625  | 875700  | 75     | 875637   | 13          | 37                  | 6.6                     |
| 20    | 937875  | 937975  | 100    | 937937   | 14          | 50                  | 0                       |
| 20    | 1019400 | 1019525 | 125    | 1019462  | 14          | 65                  | 4.4                     |
| 20    | 1123175 | 1123325 | 150    | 1123287  | 13          | 70                  | 0                       |
| 20    | 1126300 | 1126325 | 25     | 1126312  | 12          | 12                  | 0                       |
| 20    | 1206375 | 1206500 | 125    | 1206462  | 13          | 61                  | 0                       |
| 20    | 1444125 | 1444350 | 225    | 1444262  | 17          | 131                 | 0                       |
| 20    | 1487175 | 1487250 | 75     | 1487237  | 14          | 40                  | 0                       |
| 20    | 1493825 | 1494000 | 175    | 1493837  | 15          | 102                 | 6.6                     |
| 20    | 1496975 | 1497000 | 25     | 1496987  | 12          | 12                  | 2.2                     |
| 20    | 1506575 | 1506675 | 100    | 1506587  | 12          | 48                  | 0                       |
| 20    | 1574175 | 1574200 | 25     | 1574187  | 12          | 12                  | 0                       |
| 20    | 1575825 | 1575875 | 50     | 1575862  | 15          | 29                  | 4.4                     |
| 20    | 1593800 | 1593850 | 50     | 1593812  | 12          | 24                  | 2.2                     |
| 20    | 1619850 | 1620000 | 150    | 1619887  | 14          | 78                  | 0                       |
| 20    | 1658325 | 1658350 | 25     | 1658337  | 12          | 12                  | 2.2                     |
| 20    | 1805850 | 1805875 | 25     | 1805862  | 12          | 12                  | 0                       |
| 20    | 1922625 | 1922650 | 25     | 1922637  | 12          | 12                  | 2.2                     |
| 20    | 1925275 | 1925300 | 25     | 1925287  | 12          | 12                  | 0                       |
| 20    | 1954825 | 1954875 | 50     | 1954837  | 13          | 25                  | 4.4                     |
| 20    | 1977800 | 1977925 | 125    | 1977887  | 14          | 65                  | 0                       |
| 20    | 1982425 | 1982450 | 25     | 1982437  | 13          | 13                  | 0                       |
| 20    | 2112775 | 2112800 | 25     | 2112787  | 13          | 13                  | 0                       |
| 20    | 2135650 | 2135750 | 100    | 2135712  | 16          | 60                  | 8.8                     |
| 20    | 2225725 | 2225850 | 125    | 2225762  | 15          | 66                  | 0                       |
| 20    | 2238850 | 2238950 | 100    | 2238887  | 14          | 51                  | 0                       |
| 20    | 2253125 | 2253150 | 25     | 2253137  | 13          | 13                  | 0                       |
| 20    | 2253850 | 2254050 | 200    | 2253987  | 15          | 109                 | 13.1                    |
| 20    | 2254925 | 2255025 | 100    | 2254937  | 13          | 50                  | 0                       |
| 20    | 2256875 | 2256900 | 25     | 2256887  | 12          | 12                  | 2.2                     |
| 20    | 2263825 | 2263875 | 50     | 2263837  | 12          | 24                  | 0                       |
| 20    | 2298750 | 2298825 | 75     | 2298762  | 13          | 38                  | 0                       |
| 20    | 2313325 | 2313350 | 25     | 2313337  | 12          | 12                  | 2.2                     |
| 20    | 2316100 | 2316450 | 350    | 2316437  | 14          | 152                 | 8.8                     |
| 20    | 2317900 | 2317925 | 25     | 2317912  | 12          | 12                  | 0                       |
| 20    | 2320825 | 2320850 | 25     | 2320837  | 12          | 12                  | 0                       |
| 20    | 2323125 | 2323275 | 150    | 2323162  | 15          | 79                  | 0                       |
| 20    | 2325975 | 2326025 | 50     | 2326012  | 13          | 25                  | 0                       |
| 20    | 2328150 | 2328275 | 125    | 2328262  | 14          | 63                  | 0                       |
| 20    | 2486950 | 2487000 | 50     | 2486987  | 14          | 27                  | 2.2                     |
| 20    | 2487275 | 2487425 | 150    | 2487412  | 14          | 77                  | 13.1                    |
| 20    | 2534475 | 2534500 | 25     | 2534487  | 12          | 12                  | 2.2                     |
| 20    | 2545800 | 2545925 | 125    | 2545837  | 16          | 69                  | 0                       |
| 20    | 2629775 | 2629800 | 25     | 2629787  | 12          | 12                  | 0                       |
| 20    | 2723125 | 2723150 | 25     | 2723137  | 13          | 13                  | 2.2                     |
| 20    | 2723700 | 2723775 | 75     | 2723712  | 13          | 38                  | 2.2                     |
| 20    | 2724000 | 2724400 | 400    | 2724212  | 18          | 234                 | 32.8                    |
| 20    | 2728775 | 2729000 | 225    | 2728837  | 20          | 142                 | 0                       |
| 20    | 2750275 | 2750350 | 75     | 2750312  | 14          | 40                  | 6.6                     |
| 20    | 3044125 | 3044150 | 25     | 3044137  | 13          | 13                  | 2.2                     |
| 20    | 3168725 | 3168775 | 50     | 3168737  | 12          | 24                  | 4.4                     |
| 20    | 3603575 | 3603600 | 25     | 3603587  | 12          | 12                  | 2.2                     |
| 20    | 3969275 | 3969300 | 25     | 3969287  | 12          | 12                  | 0                       |
| 20    | 4209575 | 4209600 | 25     | 4209587  | 12          | 12                  | 2.2                     |
| 20    | 4260675 | 4260700 | 25     | 4260687  | 12          | 12                  | 0                       |
| 20    | 4263575 | 4263600 | 25     | 4263587  | 12          | 12                  | 2.2                     |
| 20    | 4298450 | 4298475 | 25     | 4298462  | 12          | 12                  | 2.2                     |
| 20    | 4404075 | 4404150 | 75     | 4404137  | 14          | 38                  | 6.6                     |
| 20    | 4431050 | 4431100 | 50     | 4431062  | 12          | 24                  | 0                       |
| 20    | 4451125 | 4451175 | 50     | 4451137  | 13          | 25                  | 4.4                     |
| 20    | 4505775 | 4505800 | 25     | 4505787  | 12          | 12                  | 2.2                     |
| 20    | 4554225 | 4554275 | 50     | 4554262  | 13          | 25                  | 2.2                     |

|    |          |          |     |          |    |     |      |
|----|----------|----------|-----|----------|----|-----|------|
| 20 | 4563600  | 4563625  | 25  | 4563612  | 12 | 12  | 0    |
| 20 | 4564700  | 4564775  | 75  | 4564737  | 15 | 42  | 0    |
| 20 | 4607950  | 4607975  | 25  | 4607962  | 12 | 12  | 0    |
| 20 | 4642275  | 4642300  | 25  | 4642287  | 12 | 12  | 0    |
| 20 | 4643700  | 4643775  | 75  | 4643762  | 13 | 37  | 0    |
| 20 | 4661500  | 4661550  | 50  | 4661512  | 13 | 25  | 4.4  |
| 20 | 4666975  | 4667000  | 25  | 4666987  | 12 | 12  | 2.2  |
| 20 | 4677150  | 4677200  | 50  | 4677162  | 12 | 24  | 0    |
| 20 | 4711875  | 4711900  | 25  | 4711887  | 12 | 12  | 2.2  |
| 20 | 4718175  | 4718325  | 150 | 4718237  | 15 | 83  | 0    |
| 20 | 4726925  | 4727100  | 175 | 4726987  | 15 | 98  | 6.6  |
| 20 | 4729850  | 4729925  | 75  | 4729862  | 12 | 36  | 0    |
| 20 | 5230475  | 5231350  | 875 | 5230762  | 18 | 468 | 50.3 |
| 20 | 5243025  | 5243100  | 75  | 5243087  | 14 | 39  | 6.6  |
| 20 | 5247075  | 5247100  | 25  | 5247087  | 12 | 12  | 0    |
| 20 | 5262700  | 5262725  | 25  | 5262712  | 12 | 12  | 0    |
| 20 | 5276950  | 5277000  | 50  | 5276962  | 12 | 24  | 4.4  |
| 20 | 5341450  | 5341525  | 75  | 5341462  | 12 | 36  | 0    |
| 20 | 5393800  | 5393950  | 150 | 5393887  | 14 | 79  | 0    |
| 20 | 5398550  | 5398575  | 25  | 5398562  | 13 | 13  | 2.2  |
| 20 | 5400025  | 5400075  | 50  | 5400062  | 13 | 25  | 0    |
| 20 | 5433125  | 5433150  | 25  | 5433137  | 12 | 12  | 0    |
| 20 | 5825325  | 5825400  | 75  | 5825337  | 12 | 36  | 0    |
| 20 | 5856925  | 5857125  | 200 | 5856937  | 17 | 107 | 10.9 |
| 20 | 6453950  | 6454050  | 100 | 6453962  | 12 | 48  | 8.8  |
| 20 | 6528300  | 6528325  | 25  | 6528312  | 12 | 12  | 2.2  |
| 20 | 7293600  | 7293750  | 150 | 7293687  | 15 | 84  | 0    |
| 20 | 7836175  | 7836200  | 25  | 7836187  | 12 | 12  | 2.2  |
| 20 | 8034625  | 8034650  | 25  | 8034637  | 12 | 12  | 0    |
| 20 | 9434925  | 9434950  | 25  | 9434937  | 12 | 12  | 2.2  |
| 20 | 9437450  | 9437575  | 125 | 9437512  | 14 | 67  | 8.8  |
| 20 | 9443200  | 9443250  | 50  | 9443212  | 12 | 24  | 0    |
| 20 | 9458600  | 9458700  | 100 | 9458612  | 12 | 45  | 0    |
| 20 | 9468000  | 9468050  | 50  | 9468012  | 12 | 24  | 4.4  |
| 20 | 9508800  | 9508900  | 100 | 9508837  | 13 | 49  | 0    |
| 20 | 9526425  | 9526450  | 25  | 9526437  | 12 | 12  | 0    |
| 20 | 9768050  | 9768150  | 100 | 9768087  | 13 | 49  | 2.2  |
| 20 | 9819225  | 9819300  | 75  | 9819287  | 13 | 37  | 0    |
| 20 | 9950975  | 9951125  | 150 | 9951087  | 13 | 74  | 13.1 |
| 20 | 9992325  | 9992375  | 50  | 9992337  | 13 | 25  | 0    |
| 20 | 10013275 | 10013300 | 25  | 10013287 | 13 | 13  | 2.2  |
| 20 | 10270875 | 10271075 | 200 | 10270962 | 13 | 95  | 8.8  |
| 20 | 10317525 | 10317550 | 25  | 10317537 | 12 | 12  | 2.2  |
| 20 | 10736550 | 10736575 | 25  | 10736562 | 12 | 12  | 0    |
| 20 | 11207900 | 11207925 | 25  | 11207912 | 12 | 12  | 0    |
| 20 | 11397850 | 11397950 | 100 | 11397862 | 13 | 49  | 6.6  |
| 20 | 11804850 | 11804875 | 25  | 11804862 | 12 | 12  | 0    |
| 20 | 11809400 | 11809575 | 175 | 11809437 | 18 | 107 | 0    |
| 20 | 12026800 | 12027000 | 200 | 12026812 | 14 | 97  | 6.6  |
| 20 | 13923700 | 13923725 | 25  | 13923712 | 12 | 12  | 2.2  |
| 20 | 15099150 | 15099250 | 100 | 15099212 | 13 | 50  | 0    |
| 20 | 15528675 | 15528850 | 175 | 15528737 | 14 | 90  | 6.6  |
| 20 | 15844950 | 15844975 | 25  | 15844962 | 12 | 12  | 2.2  |
| 20 | 16044675 | 16044700 | 25  | 16044687 | 12 | 12  | 0    |
| 20 | 16116500 | 16117350 | 850 | 16116912 | 19 | 495 | 17.5 |
| 20 | 16194100 | 16194175 | 75  | 16194112 | 13 | 37  | 0    |
| 20 | 16483525 | 16483725 | 200 | 16483562 | 18 | 129 | 17.5 |
| 20 | 16682525 | 16682550 | 25  | 16682537 | 12 | 12  | 0    |
| 20 | 16684550 | 16684575 | 25  | 16684562 | 12 | 12  | 0    |
| 20 | 16736350 | 16736375 | 25  | 16736362 | 12 | 12  | 0    |
| 20 | 16799375 | 16799400 | 25  | 16799387 | 12 | 12  | 2.2  |
| 20 | 16920025 | 16920150 | 125 | 16920062 | 16 | 71  | 0    |
| 20 | 16970600 | 16970675 | 75  | 16970612 | 14 | 38  | 0    |
| 20 | 17108750 | 17109125 | 375 | 17108787 | 14 | 166 | 0    |
| 20 | 17169175 | 17169225 | 50  | 17169187 | 13 | 25  | 4.4  |
| 20 | 17256100 | 17256125 | 25  | 17256112 | 12 | 12  | 0    |
| 20 | 17379975 | 17380100 | 125 | 17380062 | 13 | 60  | 0    |
| 20 | 17381225 | 17381325 | 100 | 17381287 | 14 | 50  | 8.8  |
| 20 | 17382350 | 17382725 | 375 | 17382537 | 28 | 288 | 17.5 |
| 20 | 17383450 | 17383500 | 50  | 17383487 | 13 | 25  | 4.4  |
| 20 | 17410550 | 17410650 | 100 | 17410637 | 14 | 52  | 2.2  |
| 20 | 17413925 | 17413950 | 25  | 17413937 | 12 | 12  | 2.2  |
| 20 | 17614975 | 17615100 | 125 | 17615062 | 15 | 67  | 0    |
| 20 | 17615525 | 17615700 | 175 | 17615562 | 13 | 88  | 6.6  |
| 20 | 17622525 | 17622725 | 200 | 17622587 | 16 | 118 | 0    |

|    |          |          |     |          |    |     |      |
|----|----------|----------|-----|----------|----|-----|------|
| 20 | 17653625 | 17653650 | 25  | 17653637 | 12 | 12  | 0    |
| 20 | 17658975 | 17659000 | 25  | 17658987 | 12 | 12  | 0    |
| 20 | 17669850 | 17669875 | 25  | 17669862 | 12 | 12  | 0    |
| 20 | 17721025 | 17721100 | 75  | 17721062 | 15 | 41  | 2.2  |
| 20 | 17818400 | 17818525 | 125 | 17818462 | 15 | 68  | 0    |
| 20 | 17970150 | 17970425 | 275 | 17970337 | 17 | 161 | 0    |
| 20 | 17972950 | 17973075 | 125 | 17973012 | 13 | 62  | 0    |
| 20 | 17973600 | 17973725 | 125 | 17973637 | 15 | 69  | 2.2  |
| 20 | 17979025 | 17979050 | 25  | 17979037 | 12 | 12  | 0    |
| 20 | 18011775 | 18011800 | 25  | 18011787 | 12 | 12  | 0    |
| 20 | 18022100 | 18022125 | 25  | 18022112 | 12 | 12  | 0    |
| 20 | 18174125 | 18174325 | 200 | 18174187 | 19 | 133 | 0    |
| 20 | 18215750 | 18215775 | 25  | 18215762 | 12 | 12  | 2.2  |
| 20 | 18281800 | 18281925 | 125 | 18281862 | 14 | 64  | 0    |
| 20 | 18736325 | 18736375 | 50  | 18736337 | 12 | 24  | 4.4  |
| 20 | 18742425 | 18742475 | 50  | 18742437 | 13 | 25  | 2.2  |
| 20 | 18753750 | 18753775 | 25  | 18753762 | 12 | 12  | 2.2  |
| 20 | 18774050 | 18774125 | 75  | 18774062 | 13 | 38  | 0    |
| 20 | 18776000 | 18776275 | 275 | 18776137 | 24 | 200 | 0    |
| 20 | 18944825 | 18944900 | 75  | 18944887 | 13 | 37  | 0    |
| 20 | 18981825 | 18981875 | 50  | 18981837 | 12 | 24  | 4.4  |
| 20 | 19027850 | 19027900 | 50  | 19027862 | 14 | 27  | 4.4  |
| 20 | 19031375 | 19031450 | 75  | 19031387 | 12 | 36  | 0    |
| 20 | 19367225 | 19367300 | 75  | 19367237 | 14 | 42  | 6.6  |
| 20 | 19377900 | 19377925 | 25  | 19377912 | 12 | 12  | 0    |
| 20 | 19382375 | 19382475 | 100 | 19382412 | 14 | 51  | 0    |
| 20 | 19402400 | 19402425 | 25  | 19402412 | 12 | 12  | 2.2  |
| 20 | 19463975 | 19464000 | 25  | 19463987 | 12 | 12  | 0    |
| 20 | 19531425 | 19531525 | 100 | 19531437 | 12 | 48  | 0    |
| 20 | 19539550 | 19539625 | 75  | 19539612 | 15 | 42  | 0    |
| 20 | 19582200 | 19582300 | 100 | 19582212 | 13 | 51  | 8.8  |
| 20 | 19582700 | 19582775 | 75  | 19582737 | 14 | 39  | 2.2  |
| 20 | 19597525 | 19597725 | 200 | 19597637 | 15 | 102 | 10.9 |
| 20 | 19598825 | 19598950 | 125 | 19598887 | 13 | 61  | 0    |
| 20 | 19610525 | 19610600 | 75  | 19610562 | 14 | 39  | 0    |
| 20 | 19614975 | 19615000 | 25  | 19614987 | 12 | 12  | 2.2  |
| 20 | 19633325 | 19633425 | 100 | 19633362 | 15 | 53  | 0    |
| 20 | 19639925 | 19640125 | 200 | 19639987 | 16 | 116 | 13.1 |
| 20 | 19721200 | 19721225 | 25  | 19721212 | 12 | 12  | 2.2  |
| 20 | 20013275 | 20013325 | 50  | 20013287 | 12 | 24  | 2.2  |
| 20 | 20175975 | 20176025 | 50  | 20176012 | 15 | 27  | 4.4  |
| 20 | 20233125 | 20233200 | 75  | 20233187 | 13 | 37  | 6.6  |
| 20 | 20383750 | 20383900 | 150 | 20383812 | 17 | 93  | 6.6  |
| 20 | 20443100 | 20443225 | 125 | 20443187 | 15 | 69  | 0    |
| 20 | 20670050 | 20670125 | 75  | 20670062 | 12 | 36  | 0    |
| 20 | 20673850 | 20674050 | 200 | 20674012 | 15 | 106 | 0    |
| 20 | 20699850 | 20699875 | 25  | 20699862 | 12 | 12  | 0    |
| 20 | 20714100 | 20714125 | 25  | 20714112 | 12 | 12  | 0    |
| 20 | 20714500 | 20714550 | 50  | 20714512 | 15 | 27  | 4.4  |
| 20 | 20715700 | 20715750 | 50  | 20715712 | 12 | 24  | 4.4  |
| 20 | 20734725 | 20734750 | 25  | 20734737 | 12 | 12  | 2.2  |
| 20 | 20739275 | 20739300 | 25  | 20739287 | 12 | 12  | 2.2  |
| 20 | 20753550 | 20753575 | 25  | 20753562 | 12 | 12  | 0    |
| 20 | 20841200 | 20841225 | 25  | 20841212 | 12 | 12  | 0    |
| 20 | 20866900 | 20866925 | 25  | 20866912 | 12 | 12  | 2.2  |
| 20 | 20880075 | 20880100 | 25  | 20880087 | 12 | 12  | 0    |
| 20 | 21431500 | 21431550 | 50  | 21431512 | 12 | 24  | 0    |
| 20 | 21538825 | 21539000 | 175 | 21538862 | 15 | 94  | 4.4  |
| 20 | 21635200 | 21635225 | 25  | 21635212 | 12 | 12  | 0    |
| 20 | 22154225 | 22154425 | 200 | 22154312 | 18 | 118 | 15.3 |
| 20 | 22552075 | 22552175 | 100 | 22552112 | 16 | 57  | 0    |
| 20 | 22581150 | 22581225 | 75  | 22581187 | 13 | 38  | 0    |
| 20 | 22602525 | 22602575 | 50  | 22602537 | 12 | 24  | 0    |
| 20 | 22607625 | 22607725 | 100 | 22607662 | 13 | 50  | 2.2  |
| 20 | 22631200 | 22631250 | 50  | 22631212 | 12 | 24  | 0    |
| 20 | 22651750 | 22651875 | 125 | 22651812 | 14 | 61  | 0    |
| 20 | 22683775 | 22683825 | 50  | 22683787 | 13 | 25  | 2.2  |
| 20 | 22716800 | 22716825 | 25  | 22716812 | 12 | 12  | 2.2  |
| 20 | 22909675 | 22909725 | 50  | 22909687 | 12 | 24  | 0    |
| 20 | 22976950 | 22977050 | 100 | 22976987 | 15 | 57  | 0    |
| 20 | 23002075 | 23002150 | 75  | 23002087 | 12 | 36  | 0    |
| 20 | 23022725 | 23022800 | 75  | 23022762 | 15 | 41  | 6.6  |
| 20 | 23074050 | 23074075 | 25  | 23074062 | 12 | 12  | 0    |
| 20 | 23078025 | 23078125 | 100 | 23078087 | 13 | 49  | 4.4  |
| 20 | 23117375 | 23117425 | 50  | 23117387 | 12 | 24  | 4.4  |

|    |          |          |     |          |    |     |      |
|----|----------|----------|-----|----------|----|-----|------|
| 20 | 23118700 | 23118725 | 25  | 23118712 | 12 | 12  | 0    |
| 20 | 23159425 | 23159450 | 25  | 23159437 | 14 | 14  | 2.2  |
| 20 | 23201775 | 23201800 | 25  | 23201787 | 12 | 12  | 0    |
| 20 | 23203525 | 23203675 | 150 | 23203587 | 17 | 94  | 0    |
| 20 | 23217950 | 23218100 | 150 | 23217962 | 13 | 74  | 4.4  |
| 20 | 23226250 | 23226425 | 175 | 23226312 | 15 | 95  | 0    |
| 20 | 23230000 | 23230225 | 225 | 23230187 | 24 | 162 | 6.6  |
| 20 | 23233475 | 23233575 | 100 | 23233512 | 13 | 49  | 4.4  |
| 20 | 23245800 | 23245950 | 150 | 23245812 | 12 | 69  | 2.2  |
| 20 | 23256350 | 23256525 | 175 | 23256487 | 17 | 98  | 0    |
| 20 | 23257200 | 23257225 | 25  | 23257212 | 13 | 13  | 0    |
| 20 | 23405050 | 23405425 | 375 | 23405262 | 25 | 289 | 0    |
| 20 | 23447725 | 23447850 | 125 | 23447737 | 14 | 63  | 0    |
| 20 | 23448175 | 23448200 | 25  | 23448187 | 13 | 13  | 0    |
| 20 | 23449475 | 23449750 | 275 | 23449487 | 17 | 162 | 28.4 |
| 20 | 23458550 | 23458625 | 75  | 23458587 | 13 | 37  | 0    |
| 20 | 23463775 | 23463950 | 175 | 23463787 | 12 | 72  | 0    |
| 20 | 23491775 | 23491850 | 75  | 23491812 | 13 | 37  | 0    |
| 20 | 23631825 | 23631925 | 100 | 23631862 | 13 | 49  | 0    |
| 20 | 23931575 | 23931775 | 200 | 23931662 | 15 | 106 | 0    |
| 20 | 23941150 | 23941250 | 100 | 23941162 | 13 | 50  | 4.4  |
| 20 | 24037875 | 24037925 | 50  | 24037887 | 12 | 24  | 0    |
| 20 | 24069375 | 24069400 | 25  | 24069387 | 12 | 12  | 2.2  |
| 20 | 24069850 | 24069900 | 50  | 24069887 | 13 | 25  | 0    |
| 20 | 24079150 | 24079225 | 75  | 24079187 | 13 | 38  | 6.6  |
| 20 | 24136650 | 24136925 | 275 | 24136887 | 13 | 118 | 15.3 |
| 20 | 24232100 | 24232125 | 25  | 24232112 | 12 | 12  | 0    |
| 20 | 24290175 | 24290200 | 25  | 24290187 | 12 | 12  | 2.2  |
| 20 | 24291025 | 24291125 | 100 | 24291037 | 13 | 49  | 8.8  |
| 20 | 24298950 | 24299150 | 200 | 24298987 | 17 | 116 | 10.9 |
| 20 | 24408475 | 24408500 | 25  | 24408487 | 12 | 12  | 2.2  |
| 20 | 24607425 | 24607450 | 25  | 24607437 | 12 | 12  | 0    |
| 20 | 24621200 | 24621250 | 50  | 24621237 | 14 | 27  | 0    |
| 20 | 24662875 | 24663050 | 175 | 24662962 | 14 | 87  | 0    |
| 20 | 24681350 | 24681525 | 175 | 24681487 | 15 | 98  | 0    |
| 20 | 24692575 | 24692600 | 25  | 24692587 | 12 | 12  | 0    |
| 20 | 24692875 | 24693075 | 200 | 24693012 | 13 | 92  | 10.9 |
| 20 | 24722500 | 24722675 | 175 | 24722537 | 14 | 92  | 6.6  |
| 20 | 24725050 | 24725275 | 225 | 24725187 | 15 | 124 | 8.8  |
| 20 | 24728000 | 24728200 | 200 | 24728137 | 15 | 106 | 0    |
| 20 | 24750200 | 24750250 | 50  | 24750237 | 14 | 27  | 0    |
| 20 | 24803050 | 24803100 | 50  | 24803062 | 12 | 24  | 4.4  |
| 20 | 24803725 | 24804050 | 325 | 24803862 | 14 | 161 | 2.2  |
| 20 | 24822700 | 24822900 | 200 | 24822737 | 15 | 101 | 0    |
| 20 | 24864500 | 24864625 | 125 | 24864512 | 13 | 64  | 10.9 |
| 20 | 24865675 | 24865700 | 25  | 24865687 | 12 | 12  | 0    |
| 20 | 24871475 | 24871525 | 50  | 24871512 | 13 | 25  | 0    |
| 20 | 24878025 | 24878050 | 25  | 24878037 | 13 | 13  | 0    |
| 20 | 24909250 | 24909400 | 150 | 24909262 | 15 | 82  | 0    |
| 20 | 24990675 | 24990700 | 25  | 24990687 | 12 | 12  | 0    |
| 20 | 24996300 | 24996325 | 25  | 24996312 | 12 | 12  | 2.2  |
| 20 | 25013675 | 25013725 | 50  | 25013687 | 14 | 28  | 0    |
| 20 | 25033300 | 25033500 | 200 | 25033362 | 18 | 131 | 13.1 |
| 20 | 25047050 | 25047525 | 475 | 25047387 | 24 | 295 | 10.9 |
| 20 | 25688150 | 25688275 | 125 | 25688262 | 13 | 61  | 0    |
| 20 | 25796375 | 25796400 | 25  | 25796387 | 12 | 12  | 2.2  |
| 20 | 28132925 | 28133050 | 125 | 28132937 | 13 | 58  | 10.9 |
| 20 | 28248875 | 28248900 | 25  | 28248887 | 14 | 14  | 2.2  |
| 20 | 28265450 | 28265500 | 50  | 28265462 | 12 | 24  | 2.2  |
| 20 | 28266750 | 28266825 | 75  | 28266812 | 16 | 43  | 6.6  |
| 20 | 28267125 | 28267250 | 125 | 28267162 | 35 | 152 | 19.7 |
| 20 | 29278900 | 29279075 | 175 | 29278912 | 15 | 97  | 0    |
| 20 | 29560475 | 29560525 | 50  | 29560487 | 12 | 24  | 0    |
| 20 | 29999650 | 29999850 | 200 | 29999787 | 17 | 113 | 13.1 |
| 20 | 30968675 | 30968825 | 150 | 30968737 | 14 | 80  | 0    |
| 20 | 31013350 | 31013425 | 75  | 31013387 | 13 | 37  | 0    |
| 20 | 31029400 | 31029525 | 125 | 31029412 | 15 | 64  | 4.4  |
| 20 | 31047125 | 31047150 | 25  | 31047137 | 12 | 12  | 0    |
| 20 | 31072300 | 31072350 | 50  | 31072312 | 12 | 24  | 4.4  |
| 20 | 31085600 | 31085775 | 175 | 31085737 | 16 | 97  | 0    |
| 20 | 31086475 | 31086500 | 25  | 31086487 | 12 | 12  | 0    |
| 20 | 31087775 | 31087800 | 25  | 31087787 | 12 | 12  | 2.2  |
| 20 | 31088050 | 31088100 | 50  | 31088062 | 12 | 24  | 4.4  |
| 20 | 31132950 | 31133050 | 100 | 31132962 | 12 | 48  | 0    |
| 20 | 31176450 | 31176475 | 25  | 31176462 | 12 | 12  | 2.2  |

|    |          |          |     |          |    |     |      |
|----|----------|----------|-----|----------|----|-----|------|
| 20 | 31176850 | 31176875 | 25  | 31176862 | 12 | 12  | 2.2  |
| 20 | 31225575 | 31225650 | 75  | 31225612 | 13 | 38  | 6.6  |
| 20 | 31234825 | 31234925 | 100 | 31234862 | 14 | 54  | 0    |
| 20 | 31253075 | 31253125 | 50  | 31253087 | 13 | 26  | 0    |
| 20 | 31276625 | 31276675 | 50  | 31276637 | 12 | 24  | 2.2  |
| 20 | 31277275 | 31277300 | 25  | 31277287 | 12 | 12  | 2.2  |
| 20 | 31318450 | 31318500 | 50  | 31318462 | 12 | 24  | 4.4  |
| 20 | 31338650 | 31338675 | 25  | 31338662 | 12 | 12  | 0    |
| 20 | 31368875 | 31369025 | 150 | 31368912 | 13 | 75  | 0    |
| 20 | 31808550 | 31808575 | 25  | 31808562 | 12 | 12  | 2.2  |
| 20 | 31934100 | 31934250 | 150 | 31934162 | 15 | 79  | 0    |
| 20 | 31938175 | 31938225 | 50  | 31938187 | 12 | 24  | 0    |
| 20 | 32000600 | 32000725 | 125 | 32000662 | 14 | 63  | 4.4  |
| 20 | 32000950 | 32001025 | 75  | 32000962 | 14 | 41  | 0    |
| 20 | 32261725 | 32262025 | 300 | 32261887 | 17 | 166 | 28.4 |
| 20 | 32928675 | 32928700 | 25  | 32928687 | 12 | 12  | 2.2  |
| 20 | 33287225 | 33287250 | 25  | 33287237 | 12 | 12  | 0    |
| 20 | 33616300 | 33616325 | 25  | 33616312 | 12 | 12  | 0    |
| 20 | 34078025 | 34078075 | 50  | 34078037 | 12 | 24  | 0    |
| 20 | 34144575 | 34144625 | 50  | 34144612 | 13 | 25  | 4.4  |
| 20 | 34331275 | 34331375 | 100 | 34331287 | 13 | 50  | 6.6  |
| 20 | 34458325 | 34458375 | 50  | 34458337 | 13 | 26  | 0    |
| 20 | 34481425 | 34481525 | 100 | 34481437 | 13 | 51  | 8.8  |
| 20 | 35540225 | 35540400 | 175 | 35540312 | 15 | 94  | 10.9 |
| 20 | 35540650 | 35540925 | 275 | 35540687 | 14 | 129 | 17.5 |
| 20 | 35541650 | 35541875 | 225 | 35541787 | 14 | 111 | 0    |
| 20 | 35696225 | 35696325 | 100 | 35696237 | 12 | 45  | 8.8  |
| 20 | 35707475 | 35707500 | 25  | 35707487 | 12 | 12  | 2.2  |
| 20 | 35993825 | 35993900 | 75  | 35993887 | 13 | 37  | 6.6  |
| 20 | 36257525 | 36257550 | 25  | 36257537 | 12 | 12  | 2.2  |
| 20 | 36303050 | 36303400 | 350 | 36303212 | 20 | 215 | 0    |
| 20 | 36303825 | 36304000 | 175 | 36303837 | 18 | 108 | 19.7 |
| 20 | 36305500 | 36305625 | 125 | 36305512 | 13 | 60  | 0    |
| 20 | 36331975 | 36332025 | 50  | 36331987 | 12 | 24  | 0    |
| 20 | 36345300 | 36345450 | 150 | 36345337 | 15 | 81  | 6.6  |
| 20 | 36346800 | 36347150 | 350 | 36347087 | 16 | 216 | 35   |
| 20 | 36348050 | 36348150 | 100 | 36348087 | 13 | 50  | 0    |
| 20 | 36353375 | 36353425 | 50  | 36353387 | 16 | 29  | 4.4  |
| 20 | 36354825 | 36354875 | 50  | 36354837 | 12 | 24  | 2.2  |
| 20 | 36355875 | 36356050 | 175 | 36355962 | 15 | 92  | 6.6  |
| 20 | 36396100 | 36396175 | 75  | 36396112 | 12 | 36  | 0    |
| 20 | 36399750 | 36399925 | 175 | 36399787 | 16 | 93  | 8.8  |
| 20 | 36406475 | 36406525 | 50  | 36406487 | 12 | 24  | 0    |
| 20 | 36445925 | 36445975 | 50  | 36445937 | 12 | 24  | 0    |
| 20 | 36456525 | 36456550 | 25  | 36456537 | 12 | 12  | 0    |
| 20 | 36663875 | 36663925 | 50  | 36663887 | 13 | 26  | 0    |
| 20 | 36713650 | 36713725 | 75  | 36713662 | 13 | 38  | 0    |
| 20 | 36763525 | 36763550 | 25  | 36763537 | 12 | 12  | 0    |
| 20 | 36764250 | 36764325 | 75  | 36764262 | 12 | 36  | 0    |
| 20 | 36790100 | 36790125 | 25  | 36790112 | 14 | 14  | 2.2  |
| 20 | 36792450 | 36792475 | 25  | 36792462 | 12 | 12  | 0    |
| 20 | 36949800 | 36949900 | 100 | 36949862 | 16 | 58  | 2.2  |
| 20 | 36964650 | 36964750 | 100 | 36964687 | 14 | 54  | 0    |
| 20 | 36967975 | 36968075 | 100 | 36967987 | 12 | 47  | 0    |
| 20 | 36970075 | 36970300 | 225 | 36970112 | 14 | 114 | 6.6  |
| 20 | 37164800 | 37164825 | 25  | 37164812 | 13 | 13  | 2.2  |
| 20 | 37165500 | 37165625 | 125 | 37165562 | 15 | 66  | 0    |
| 20 | 37183150 | 37183275 | 125 | 37183187 | 13 | 59  | 0    |
| 20 | 37213750 | 37213800 | 50  | 37213762 | 12 | 24  | 0    |
| 20 | 38832950 | 38832975 | 25  | 38832962 | 13 | 13  | 0    |
| 20 | 38988675 | 38988700 | 25  | 38988687 | 12 | 12  | 2.2  |
| 20 | 39016000 | 39016025 | 25  | 39016012 | 12 | 12  | 2.2  |
| 20 | 39016625 | 39016650 | 25  | 39016637 | 12 | 12  | 0    |
| 20 | 39069150 | 39069175 | 25  | 39069162 | 12 | 12  | 0    |
| 20 | 39253925 | 39254425 | 500 | 39254037 | 19 | 266 | 8.8  |
| 20 | 39434600 | 39434700 | 100 | 39434612 | 12 | 48  | 0    |
| 20 | 39523900 | 39524050 | 150 | 39523937 | 13 | 76  | 0    |
| 20 | 39664550 | 39664600 | 50  | 39664562 | 12 | 24  | 0    |
| 20 | 39784600 | 39784750 | 150 | 39784637 | 13 | 69  | 13.1 |
| 20 | 39840600 | 39840625 | 25  | 39840612 | 12 | 12  | 0    |
| 20 | 41043500 | 41043575 | 75  | 41043537 | 14 | 39  | 6.6  |
| 20 | 41417800 | 41417850 | 50  | 41417812 | 13 | 25  | 0    |
| 20 | 41427875 | 41427900 | 25  | 41427887 | 12 | 12  | 0    |
| 20 | 41793775 | 41793900 | 125 | 41793862 | 14 | 64  | 8.8  |
| 20 | 41837000 | 41837150 | 150 | 41837037 | 13 | 74  | 2.2  |

|    |          |          |     |          |    |     |      |
|----|----------|----------|-----|----------|----|-----|------|
| 20 | 41838800 | 41838925 | 125 | 41838862 | 14 | 64  | 0    |
| 20 | 41840575 | 41840625 | 50  | 41840587 | 13 | 25  | 4.4  |
| 20 | 41860025 | 41860075 | 50  | 41860037 | 13 | 25  | 2.2  |
| 20 | 41861675 | 41861750 | 75  | 41861687 | 13 | 38  | 6.6  |
| 20 | 41889625 | 41889650 | 25  | 41889637 | 12 | 12  | 0    |
| 20 | 41957125 | 41957175 | 50  | 41957137 | 12 | 24  | 0    |
| 20 | 41963500 | 41963575 | 75  | 41963512 | 13 | 39  | 2.2  |
| 20 | 41975875 | 41975925 | 50  | 41975887 | 14 | 27  | 0    |
| 20 | 41977475 | 41977500 | 25  | 41977487 | 18 | 18  | 2.2  |
| 20 | 42054125 | 42054225 | 100 | 42054137 | 14 | 53  | 6.6  |
| 20 | 42093225 | 42093575 | 350 | 42093487 | 16 | 180 | 0    |
| 20 | 42097025 | 42097225 | 200 | 42097137 | 15 | 106 | 0    |
| 20 | 42101275 | 42101325 | 50  | 42101287 | 12 | 24  | 4.4  |
| 20 | 42167225 | 42167275 | 50  | 42167237 | 13 | 25  | 2.2  |
| 20 | 42221775 | 42221850 | 75  | 42221812 | 13 | 37  | 4.4  |
| 20 | 42341075 | 42341250 | 175 | 42341212 | 17 | 104 | 4.4  |
| 20 | 42486025 | 42486050 | 25  | 42486037 | 12 | 12  | 2.2  |
| 20 | 42683975 | 42684025 | 50  | 42683987 | 13 | 26  | 4.4  |
| 20 | 42716975 | 42717150 | 175 | 42717037 | 15 | 94  | 10.9 |
| 20 | 42717725 | 42717925 | 200 | 42717762 | 18 | 128 | 0    |
| 20 | 42872900 | 42873750 | 850 | 42873612 | 25 | 579 | 59.1 |
| 20 | 42894700 | 42895050 | 350 | 42894737 | 16 | 183 | 8.8  |
| 20 | 42904075 | 42904200 | 125 | 42904112 | 14 | 68  | 0    |
| 20 | 42906075 | 42906175 | 100 | 42906087 | 13 | 52  | 0    |
| 20 | 43238175 | 43238350 | 175 | 43238212 | 15 | 84  | 0    |
| 20 | 43241150 | 43241200 | 50  | 43241187 | 13 | 25  | 4.4  |
| 20 | 43280800 | 43280900 | 100 | 43280812 | 12 | 47  | 0    |
| 20 | 43297800 | 43297900 | 100 | 43297812 | 12 | 45  | 0    |
| 20 | 43298300 | 43298350 | 50  | 43298312 | 13 | 25  | 4.4  |
| 20 | 43320525 | 43320550 | 25  | 43320537 | 14 | 14  | 0    |
| 20 | 43457100 | 43457250 | 150 | 43457112 | 13 | 71  | 0    |
| 20 | 43533125 | 43533300 | 175 | 43533212 | 16 | 97  | 13.1 |
| 20 | 43533550 | 43533700 | 150 | 43533587 | 15 | 76  | 0    |
| 20 | 43559175 | 43559200 | 25  | 43559187 | 12 | 12  | 2.2  |
| 20 | 43562150 | 43562175 | 25  | 43562162 | 12 | 12  | 2.2  |
| 20 | 43641300 | 43641325 | 25  | 43641312 | 12 | 12  | 0    |
| 20 | 43764175 | 43764300 | 125 | 43764237 | 15 | 68  | 4.4  |
| 20 | 43776000 | 43776075 | 75  | 43776012 | 12 | 35  | 4.4  |
| 20 | 43788475 | 43788550 | 75  | 43788487 | 12 | 35  | 0    |
| 20 | 43808775 | 43808825 | 50  | 43808787 | 12 | 24  | 0    |
| 20 | 43896375 | 43896425 | 50  | 43896387 | 12 | 24  | 4.4  |
| 20 | 44032150 | 44032200 | 50  | 44032162 | 12 | 24  | 4.4  |
| 20 | 44164100 | 44164125 | 25  | 44164112 | 12 | 12  | 0    |
| 20 | 44166575 | 44166650 | 75  | 44166587 | 16 | 42  | 0    |
| 20 | 44175725 | 44175775 | 50  | 44175737 | 12 | 24  | 4.4  |
| 20 | 44289550 | 44289825 | 275 | 44289662 | 23 | 188 | 0    |
| 20 | 44334700 | 44334825 | 125 | 44334762 | 14 | 65  | 0    |
| 20 | 44495050 | 44495075 | 25  | 44495062 | 12 | 12  | 2.2  |
| 20 | 44507125 | 44507225 | 100 | 44507187 | 20 | 65  | 6.6  |
| 20 | 44507925 | 44508125 | 200 | 44508037 | 16 | 117 | 0    |
| 20 | 44519700 | 44519775 | 75  | 44519712 | 22 | 57  | 10.9 |
| 20 | 44520300 | 44520375 | 75  | 44520337 | 13 | 38  | 0    |
| 20 | 44521125 | 44521300 | 175 | 44521237 | 15 | 93  | 15.3 |
| 20 | 44608125 | 44608225 | 100 | 44608162 | 13 | 48  | 0    |
| 20 | 44646125 | 44646225 | 100 | 44646137 | 13 | 51  | 8.8  |
| 20 | 44787750 | 44787775 | 25  | 44787762 | 12 | 12  | 0    |
| 20 | 44802125 | 44802350 | 225 | 44802262 | 14 | 110 | 4.4  |
| 20 | 44856350 | 44856500 | 150 | 44856362 | 14 | 82  | 0    |
| 20 | 44865875 | 44865900 | 25  | 44865887 | 12 | 12  | 0    |
| 20 | 44907250 | 44907325 | 75  | 44907262 | 12 | 36  | 6.6  |
| 20 | 44909800 | 44909850 | 50  | 44909812 | 12 | 24  | 0    |
| 20 | 44957200 | 44957300 | 100 | 44957237 | 13 | 51  | 2.2  |
| 20 | 44975725 | 44975925 | 200 | 44975887 | 18 | 123 | 8.8  |
| 20 | 45018750 | 45018775 | 25  | 45018762 | 12 | 12  | 0    |
| 20 | 45025075 | 45025150 | 75  | 45025112 | 14 | 40  | 0    |
| 20 | 45096550 | 45096600 | 50  | 45096562 | 12 | 24  | 0    |
| 20 | 45105425 | 45105525 | 100 | 45105437 | 13 | 49  | 4.4  |
| 20 | 45108500 | 45108525 | 25  | 45108512 | 12 | 12  | 2.2  |
| 20 | 45112925 | 45113200 | 275 | 45112937 | 12 | 115 | 0    |
| 20 | 45117175 | 45117225 | 50  | 45117187 | 13 | 25  | 0    |
| 20 | 45120425 | 45120525 | 100 | 45120437 | 12 | 48  | 4.4  |
| 20 | 45123925 | 45123975 | 50  | 45123937 | 13 | 25  | 4.4  |
| 20 | 45130400 | 45130500 | 100 | 45130412 | 13 | 47  | 0    |
| 20 | 45139300 | 45139325 | 25  | 45139312 | 12 | 12  | 0    |
| 20 | 45160525 | 45160575 | 50  | 45160537 | 13 | 25  | 0    |

|    |          |          |     |          |    |     |      |
|----|----------|----------|-----|----------|----|-----|------|
| 20 | 45173525 | 45173750 | 225 | 45173662 | 17 | 131 | 0    |
| 20 | 45225900 | 45226200 | 300 | 45226012 | 18 | 176 | 17.5 |
| 20 | 45252850 | 45252875 | 25  | 45252862 | 12 | 12  | 2.2  |
| 20 | 45253500 | 45253550 | 50  | 45253537 | 15 | 28  | 0    |
| 20 | 45771525 | 45771650 | 125 | 45771587 | 17 | 78  | 6.6  |
| 20 | 45825975 | 45826075 | 100 | 45826037 | 13 | 49  | 8.8  |
| 20 | 45833150 | 45833175 | 25  | 45833162 | 13 | 13  | 0    |
| 20 | 45869100 | 45869225 | 125 | 45869112 | 13 | 60  | 8.8  |
| 20 | 45922125 | 45922325 | 200 | 45922212 | 15 | 104 | 0    |
| 20 | 45922675 | 45922750 | 75  | 45922687 | 15 | 42  | 4.4  |
| 20 | 45930100 | 45930125 | 25  | 45930112 | 12 | 12  | 0    |
| 20 | 45931100 | 45931125 | 25  | 45931112 | 12 | 12  | 0    |
| 20 | 45934550 | 45934600 | 50  | 45934562 | 13 | 26  | 2.2  |
| 20 | 45957450 | 45957575 | 125 | 45957462 | 35 | 145 | 13.1 |
| 20 | 45957975 | 45958075 | 100 | 45958012 | 22 | 80  | 8.8  |
| 20 | 45978275 | 45978325 | 50  | 45978287 | 12 | 24  | 4.4  |
| 20 | 45980775 | 45980800 | 25  | 45980787 | 12 | 12  | 2.2  |
| 20 | 46054200 | 46054425 | 225 | 46054362 | 16 | 124 | 0    |
| 20 | 46056550 | 46056600 | 50  | 46056562 | 14 | 28  | 0    |
| 20 | 46080125 | 46080200 | 75  | 46080137 | 12 | 34  | 4.4  |
| 20 | 46129275 | 46129300 | 25  | 46129287 | 12 | 12  | 0    |
| 20 | 46183850 | 46183875 | 25  | 46183862 | 12 | 12  | 0    |
| 20 | 46185425 | 46185575 | 150 | 46185562 | 18 | 90  | 0    |
| 20 | 46216625 | 46216725 | 100 | 46216687 | 14 | 52  | 2.2  |
| 20 | 46235475 | 46235500 | 25  | 46235487 | 12 | 12  | 0    |
| 20 | 46239200 | 46239250 | 50  | 46239212 | 12 | 24  | 0    |
| 20 | 46293650 | 46293825 | 175 | 46293762 | 14 | 87  | 0    |
| 20 | 46296500 | 46296600 | 100 | 46296562 | 14 | 52  | 0    |
| 20 | 46345150 | 46345175 | 25  | 46345162 | 16 | 16  | 0    |
| 20 | 46346025 | 46346050 | 25  | 46346037 | 12 | 12  | 2.2  |
| 20 | 46396150 | 46396200 | 50  | 46396162 | 13 | 25  | 0    |
| 20 | 46404450 | 46404475 | 25  | 46404462 | 13 | 13  | 0    |
| 20 | 46454700 | 46454775 | 75  | 46454737 | 13 | 37  | 4.4  |
| 20 | 46517100 | 46517125 | 25  | 46517112 | 12 | 12  | 0    |
| 20 | 46529425 | 46529450 | 25  | 46529437 | 12 | 12  | 0    |
| 20 | 46542275 | 46542300 | 25  | 46542287 | 12 | 12  | 2.2  |
| 20 | 46564825 | 46565100 | 275 | 46565062 | 35 | 257 | 21.9 |
| 20 | 46565375 | 46565575 | 200 | 46565437 | 73 | 528 | 54.7 |
| 20 | 46604375 | 46604400 | 25  | 46604387 | 12 | 12  | 0    |
| 20 | 46616025 | 46616125 | 100 | 46616037 | 14 | 54  | 2.2  |
| 20 | 46649250 | 46649350 | 100 | 46649262 | 13 | 51  | 0    |
| 20 | 46651050 | 46651150 | 100 | 46651137 | 15 | 54  | 0    |
| 20 | 46651775 | 46651975 | 200 | 46651912 | 14 | 100 | 0    |
| 20 | 46903475 | 46903525 | 50  | 46903487 | 12 | 24  | 0    |
| 20 | 47329075 | 47329100 | 25  | 47329087 | 12 | 12  | 0    |
| 20 | 47374975 | 47375050 | 75  | 47375037 | 15 | 42  | 4.4  |
| 20 | 47422575 | 47423025 | 450 | 47422912 | 15 | 205 | 2.2  |
| 20 | 47423300 | 47423325 | 25  | 47423312 | 12 | 12  | 0    |
| 20 | 47424450 | 47424625 | 175 | 47424562 | 16 | 98  | 0    |
| 20 | 47439975 | 47440000 | 25  | 47439987 | 12 | 12  | 0    |
| 20 | 47555475 | 47555550 | 75  | 47555487 | 14 | 40  | 6.6  |
| 20 | 47564425 | 47564575 | 150 | 47564462 | 13 | 74  | 0    |
| 20 | 47573775 | 47574275 | 500 | 47573912 | 26 | 324 | 17.5 |
| 20 | 47574875 | 47575050 | 175 | 47574987 | 22 | 135 | 4.4  |
| 20 | 47589275 | 47589375 | 100 | 47589287 | 14 | 54  | 8.8  |
| 20 | 47589700 | 47589975 | 275 | 47589887 | 16 | 148 | 0    |
| 20 | 47595425 | 47596100 | 675 | 47595562 | 22 | 426 | 50.3 |
| 20 | 47623775 | 47623800 | 25  | 47623787 | 12 | 12  | 0    |
| 20 | 47632400 | 47632475 | 75  | 47632437 | 13 | 38  | 4.4  |
| 20 | 47633525 | 47633725 | 200 | 47633537 | 13 | 88  | 6.6  |
| 20 | 47775825 | 47775900 | 75  | 47775837 | 13 | 38  | 0    |
| 20 | 48289600 | 48289650 | 50  | 48289612 | 12 | 24  | 0    |
| 20 | 48883700 | 48883825 | 125 | 48883712 | 12 | 60  | 0    |
| 20 | 48930250 | 48930275 | 25  | 48930262 | 12 | 12  | 0    |
| 20 | 49082425 | 49082475 | 50  | 49082437 | 12 | 24  | 4.4  |
| 20 | 49107000 | 49107075 | 75  | 49107012 | 14 | 40  | 6.6  |
| 20 | 49151700 | 49151750 | 50  | 49151712 | 13 | 26  | 4.4  |
| 20 | 49192650 | 49192675 | 25  | 49192662 | 12 | 12  | 0    |
| 20 | 49194525 | 49194675 | 150 | 49194612 | 16 | 88  | 0    |
| 20 | 49204275 | 49204300 | 25  | 49204287 | 12 | 12  | 0    |
| 20 | 49205075 | 49205100 | 25  | 49205087 | 12 | 12  | 2.2  |
| 20 | 49206700 | 49206875 | 175 | 49206787 | 14 | 88  | 0    |
| 20 | 49207700 | 49207775 | 75  | 49207762 | 14 | 40  | 2.2  |
| 20 | 49211050 | 49211075 | 25  | 49211062 | 12 | 12  | 2.2  |
| 20 | 49223150 | 49223250 | 100 | 49223237 | 13 | 49  | 0    |



|    |          |          |     |          |    |     |      |
|----|----------|----------|-----|----------|----|-----|------|
| 20 | 49231375 | 49231525 | 150 | 49231487 | 18 | 92  | 0    |
| 20 | 49243200 | 49243225 | 25  | 49243212 | 12 | 12  | 0    |
| 20 | 49244050 | 49244175 | 125 | 49244087 | 16 | 70  | 8.8  |
| 20 | 49245150 | 49245400 | 250 | 49245212 | 20 | 162 | 17.5 |
| 20 | 49272225 | 49272250 | 25  | 49272237 | 13 | 13  | 0    |
| 20 | 49279975 | 49280075 | 100 | 49280012 | 13 | 48  | 4.4  |
| 20 | 49292925 | 49293100 | 175 | 49293012 | 15 | 94  | 0    |
| 20 | 49295825 | 49295850 | 25  | 49295837 | 12 | 12  | 2.2  |
| 20 | 49299750 | 49299900 | 150 | 49299837 | 15 | 79  | 0    |
| 20 | 49301600 | 49301775 | 175 | 49301712 | 13 | 85  | 0    |
| 20 | 49302500 | 49302525 | 25  | 49302512 | 12 | 12  | 0    |
| 20 | 49322950 | 49322975 | 25  | 49322962 | 12 | 12  | 2.2  |
| 20 | 49348675 | 49348725 | 50  | 49348687 | 12 | 24  | 0    |
| 20 | 49353575 | 49353775 | 200 | 49353687 | 16 | 115 | 0    |
| 20 | 49354725 | 49354750 | 25  | 49354737 | 13 | 13  | 0    |
| 20 | 49366450 | 49366575 | 125 | 49366487 | 15 | 69  | 8.8  |
| 20 | 49380950 | 49380975 | 25  | 49380962 | 12 | 12  | 2.2  |
| 20 | 49624950 | 49624975 | 25  | 49624962 | 14 | 14  | 0    |
| 20 | 49841650 | 49841875 | 225 | 49841737 | 21 | 164 | 17.5 |
| 20 | 50154450 | 50154575 | 125 | 50154562 | 19 | 81  | 10.9 |
| 20 | 50160900 | 50160950 | 50  | 50160912 | 13 | 25  | 0    |
| 20 | 50257400 | 50257425 | 25  | 50257412 | 12 | 12  | 2.2  |
| 20 | 50303675 | 50303725 | 50  | 50303712 | 13 | 25  | 0    |
| 20 | 50417850 | 50417900 | 50  | 50417862 | 12 | 24  | 4.4  |
| 20 | 50487425 | 50487500 | 75  | 50487437 | 13 | 38  | 0    |
| 20 | 51006350 | 51006375 | 25  | 51006362 | 12 | 12  | 2.2  |
| 20 | 51034150 | 51034250 | 100 | 51034162 | 14 | 52  | 4.4  |
| 20 | 51191775 | 51191875 | 100 | 51191787 | 14 | 55  | 0    |
| 20 | 51303700 | 51303800 | 100 | 51303737 | 14 | 53  | 2.2  |
| 20 | 51304050 | 51304125 | 75  | 51304062 | 17 | 46  | 6.6  |
| 20 | 51304550 | 51304575 | 25  | 51304562 | 13 | 13  | 2.2  |
| 20 | 51305625 | 51305750 | 125 | 51305637 | 24 | 90  | 4.4  |
| 20 | 51357325 | 51357375 | 50  | 51357362 | 14 | 26  | 4.4  |
| 20 | 51358325 | 51358425 | 100 | 51358362 | 15 | 55  | 0    |
| 20 | 51375325 | 51375475 | 150 | 51375387 | 17 | 91  | 0    |
| 20 | 51493575 | 51493625 | 50  | 51493587 | 13 | 25  | 0    |
| 20 | 51494075 | 51494175 | 100 | 51494087 | 13 | 51  | 0    |
| 20 | 51909625 | 51909650 | 25  | 51909637 | 12 | 12  | 0    |
| 20 | 52037825 | 52037925 | 100 | 52037912 | 13 | 49  | 6.6  |
| 20 | 52047750 | 52047775 | 25  | 52047762 | 12 | 12  | 2.2  |
| 20 | 52223075 | 52223925 | 850 | 52223612 | 25 | 544 | 65.6 |
| 20 | 52524950 | 52525050 | 100 | 52524987 | 14 | 50  | 0    |
| 20 | 53982950 | 53983050 | 100 | 53982962 | 12 | 47  | 6.6  |
| 20 | 54013525 | 54013725 | 200 | 54013587 | 21 | 133 | 0    |
| 20 | 54114950 | 54115075 | 125 | 54114987 | 15 | 68  | 4.4  |
| 20 | 54257500 | 54257700 | 200 | 54257687 | 21 | 127 | 0    |
| 20 | 54278200 | 54278225 | 25  | 54278212 | 12 | 12  | 2.2  |
| 20 | 54307975 | 54308000 | 25  | 54307987 | 12 | 12  | 2.2  |
| 20 | 54759275 | 54759350 | 75  | 54759312 | 14 | 41  | 0    |
| 20 | 54909500 | 54909550 | 50  | 54909512 | 12 | 24  | 0    |
| 20 | 54910025 | 54910050 | 25  | 54910037 | 12 | 12  | 2.2  |
| 20 | 55006975 | 55007075 | 100 | 55006987 | 13 | 51  | 0    |
| 20 | 55042550 | 55042700 | 150 | 55042612 | 14 | 73  | 8.8  |
| 20 | 55043200 | 55043350 | 150 | 55043212 | 12 | 68  | 13.1 |
| 20 | 55062000 | 55062050 | 50  | 55062012 | 12 | 24  | 0    |
| 20 | 55062975 | 55063000 | 25  | 55062987 | 12 | 12  | 0    |
| 20 | 55063500 | 55063550 | 50  | 55063512 | 12 | 24  | 0    |
| 20 | 55078375 | 55078475 | 100 | 55078412 | 15 | 52  | 2.2  |
| 20 | 55134050 | 55134200 | 150 | 55134062 | 12 | 67  | 0    |
| 20 | 55173375 | 55173775 | 400 | 55173612 | 22 | 261 | 32.8 |
| 20 | 55187125 | 55187225 | 100 | 55187212 | 13 | 48  | 0    |
| 20 | 55211000 | 55211075 | 75  | 55211062 | 13 | 36  | 0    |
| 20 | 55311400 | 55311425 | 25  | 55311412 | 12 | 12  | 0    |
| 20 | 55422300 | 55422450 | 150 | 55422362 | 14 | 78  | 0    |
| 20 | 55445575 | 55445775 | 200 | 55445637 | 29 | 180 | 10.9 |
| 20 | 55446300 | 55446350 | 50  | 55446312 | 21 | 40  | 4.4  |
| 20 | 55448575 | 55448650 | 75  | 55448612 | 13 | 37  | 0    |
| 20 | 55449075 | 55449150 | 75  | 55449137 | 14 | 39  | 6.6  |
| 20 | 55454050 | 55454625 | 575 | 55454562 | 15 | 298 | 52.5 |
| 20 | 55455550 | 55455575 | 25  | 55455562 | 12 | 12  | 0    |
| 20 | 55463475 | 55463625 | 150 | 55463512 | 13 | 75  | 0    |
| 20 | 55466175 | 55466800 | 625 | 55466337 | 28 | 435 | 32.8 |
| 20 | 55467125 | 55467325 | 200 | 55467237 | 13 | 94  | 2.2  |
| 20 | 55470275 | 55470325 | 50  | 55470312 | 14 | 27  | 4.4  |
| 20 | 55470700 | 55470725 | 25  | 55470712 | 12 | 12  | 0    |

|    |          |          |      |          |    |     |      |
|----|----------|----------|------|----------|----|-----|------|
| 20 | 55473875 | 55473925 | 50   | 55473887 | 12 | 24  | 0    |
| 20 | 55481825 | 55481950 | 125  | 55481837 | 13 | 60  | 4.4  |
| 20 | 55493375 | 55493425 | 50   | 55493412 | 14 | 27  | 0    |
| 20 | 55542375 | 55542525 | 150  | 55542412 | 15 | 83  | 10.9 |
| 20 | 55545725 | 55545800 | 75   | 55545737 | 13 | 37  | 6.6  |
| 20 | 55564325 | 55564450 | 125  | 55564337 | 13 | 60  | 0    |
| 20 | 55565225 | 55565550 | 325  | 55565387 | 22 | 228 | 15.3 |
| 20 | 55567750 | 55567775 | 25   | 55567762 | 12 | 12  | 2.2  |
| 20 | 55570425 | 55570475 | 50   | 55570462 | 14 | 26  | 4.4  |
| 20 | 55731900 | 55731925 | 25   | 55731912 | 12 | 12  | 2.2  |
| 20 | 55764200 | 55764275 | 75   | 55764212 | 12 | 36  | 0    |
| 20 | 55765450 | 55765550 | 100  | 55765487 | 13 | 49  | 0    |
| 20 | 55769250 | 55769450 | 200  | 55769312 | 15 | 107 | 4.4  |
| 20 | 55769675 | 55769750 | 75   | 55769687 | 17 | 43  | 2.2  |
| 20 | 55773050 | 55773150 | 100  | 55773062 | 14 | 53  | 0    |
| 20 | 55801225 | 55801375 | 150  | 55801287 | 18 | 92  | 4.4  |
| 20 | 55806625 | 55806675 | 50   | 55806637 | 12 | 24  | 0    |
| 20 | 55814975 | 55815075 | 100  | 55814987 | 14 | 55  | 8.8  |
| 20 | 55822500 | 55822550 | 50   | 55822537 | 14 | 26  | 0    |
| 20 | 55822800 | 55822975 | 175  | 55822862 | 14 | 89  | 6.6  |
| 20 | 55823225 | 55823300 | 75   | 55823237 | 12 | 35  | 0    |
| 20 | 55827125 | 55827175 | 50   | 55827137 | 13 | 25  | 0    |
| 20 | 55827500 | 55828625 | 1125 | 55827937 | 28 | 681 | 105  |
| 20 | 55828975 | 55829075 | 100  | 55829012 | 13 | 51  | 0    |
| 20 | 55857975 | 55858050 | 75   | 55858012 | 13 | 37  | 0    |
| 20 | 55869050 | 55869175 | 125  | 55869162 | 14 | 62  | 0    |
| 20 | 55870375 | 55870500 | 125  | 55870412 | 17 | 74  | 4.4  |
| 20 | 55879150 | 55879225 | 75   | 55879162 | 12 | 35  | 0    |
| 20 | 55879750 | 55880300 | 550  | 55879912 | 20 | 272 | 17.5 |
| 20 | 55881300 | 55881750 | 450  | 55881612 | 16 | 243 | 17.5 |
| 20 | 55887475 | 55887575 | 100  | 55887512 | 14 | 53  | 0    |
| 20 | 55903825 | 55904125 | 300  | 55903937 | 15 | 152 | 4.4  |
| 20 | 55906875 | 55906950 | 75   | 55906887 | 12 | 35  | 0    |
| 20 | 55920675 | 55920800 | 125  | 55920712 | 14 | 67  | 8.8  |
| 20 | 55921600 | 55921950 | 350  | 55921787 | 14 | 165 | 8.8  |
| 20 | 55924650 | 55924675 | 25   | 55924662 | 12 | 12  | 2.2  |
| 20 | 55929475 | 55929675 | 200  | 55929512 | 15 | 106 | 13.1 |
| 20 | 55930650 | 55930950 | 300  | 55930762 | 27 | 237 | 0    |
| 20 | 55931750 | 55931825 | 75   | 55931787 | 14 | 39  | 0    |
| 20 | 55932200 | 55932225 | 25   | 55932212 | 12 | 12  | 2.2  |
| 20 | 55935500 | 55935600 | 100  | 55935512 | 12 | 48  | 6.6  |
| 20 | 55949825 | 55949900 | 75   | 55949887 | 13 | 36  | 6.6  |
| 20 | 55952325 | 55952425 | 100  | 55952412 | 13 | 49  | 0    |
| 20 | 55964350 | 55964375 | 25   | 55964362 | 12 | 12  | 0    |
| 20 | 55973550 | 55973700 | 150  | 55973587 | 16 | 84  | 0    |
| 20 | 55973925 | 55974075 | 150  | 55974037 | 18 | 83  | 2.2  |
| 20 | 55974325 | 55974350 | 25   | 55974337 | 18 | 18  | 2.2  |
| 20 | 55982600 | 55982675 | 75   | 55982612 | 16 | 44  | 6.6  |
| 20 | 56013450 | 56013500 | 50   | 56013462 | 12 | 24  | 4.4  |
| 20 | 56077550 | 56077575 | 25   | 56077562 | 13 | 13  | 0    |
| 20 | 56078400 | 56078625 | 225  | 56078437 | 15 | 127 | 0    |
| 20 | 56079350 | 56079375 | 25   | 56079362 | 13 | 13  | 2.2  |
| 20 | 56099725 | 56099800 | 75   | 56099737 | 12 | 36  | 6.6  |
| 20 | 56101150 | 56101250 | 100  | 56101212 | 16 | 58  | 8.8  |
| 20 | 56105500 | 56105525 | 25   | 56105512 | 12 | 12  | 0    |
| 20 | 56146850 | 56146900 | 50   | 56146887 | 13 | 25  | 4.4  |
| 20 | 56151425 | 56151450 | 25   | 56151437 | 12 | 12  | 2.2  |
| 20 | 56155825 | 56155975 | 150  | 56155887 | 14 | 78  | 0    |
| 20 | 56156500 | 56156700 | 200  | 56156537 | 18 | 130 | 15.3 |
| 20 | 56162425 | 56162500 | 75   | 56162437 | 12 | 36  | 6.6  |
| 20 | 56174250 | 56174275 | 25   | 56174262 | 13 | 13  | 0    |
| 20 | 56195875 | 56195925 | 50   | 56195887 | 13 | 25  | 4.4  |
| 20 | 56211925 | 56211975 | 50   | 56211937 | 12 | 24  | 0    |
| 20 | 56213275 | 56213450 | 175  | 56213287 | 13 | 84  | 0    |
| 20 | 56228450 | 56228675 | 225  | 56228612 | 24 | 177 | 4.4  |
| 20 | 56229550 | 56229925 | 375  | 56229612 | 21 | 236 | 6.6  |
| 20 | 56230625 | 56230750 | 125  | 56230637 | 16 | 72  | 0    |
| 20 | 56236425 | 56236800 | 375  | 56236712 | 23 | 236 | 2.2  |
| 20 | 56398275 | 56398300 | 25   | 56398287 | 13 | 13  | 2.2  |
| 20 | 56462875 | 56462950 | 75   | 56462887 | 13 | 38  | 4.4  |
| 20 | 56484100 | 56484175 | 75   | 56484112 | 14 | 38  | 0    |
| 20 | 56498800 | 56498975 | 175  | 56498862 | 16 | 103 | 6.6  |
| 20 | 56501225 | 56501350 | 125  | 56501262 | 13 | 63  | 0    |
| 20 | 56504000 | 56504200 | 200  | 56504112 | 17 | 112 | 0    |
| 20 | 56507075 | 56507200 | 125  | 56507162 | 14 | 63  | 0    |

|    |          |          |     |          |    |     |      |
|----|----------|----------|-----|----------|----|-----|------|
| 20 | 56510250 | 56510300 | 50  | 56510262 | 12 | 24  | 4.4  |
| 20 | 56512550 | 56512650 | 100 | 56512587 | 13 | 50  | 6.6  |
| 20 | 56566575 | 56566625 | 50  | 56566587 | 13 | 25  | 0    |
| 20 | 56574725 | 56574800 | 75  | 56574737 | 12 | 36  | 6.6  |
| 20 | 56584325 | 56584375 | 50  | 56584337 | 12 | 24  | 4.4  |
| 20 | 56611675 | 56611725 | 50  | 56611687 | 12 | 24  | 0    |
| 20 | 56626325 | 56626400 | 75  | 56626337 | 15 | 44  | 4.4  |
| 20 | 56629150 | 56629325 | 175 | 56629162 | 16 | 100 | 13.1 |
| 20 | 56632075 | 56632300 | 225 | 56632237 | 18 | 138 | 15.3 |
| 20 | 56694375 | 56694400 | 25  | 56694387 | 12 | 12  | 0    |
| 20 | 56703525 | 56703675 | 150 | 56703637 | 15 | 82  | 4.4  |
| 20 | 56728000 | 56728025 | 25  | 56728012 | 13 | 13  | 2.2  |
| 20 | 56730850 | 56730900 | 50  | 56730862 | 13 | 25  | 0    |
| 20 | 56731775 | 56732275 | 500 | 56731862 | 15 | 261 | 0    |
| 20 | 56756575 | 56756625 | 50  | 56756612 | 13 | 25  | 0    |
| 20 | 56758550 | 56758575 | 25  | 56758562 | 14 | 14  | 2.2  |
| 20 | 56760000 | 56760025 | 25  | 56760012 | 16 | 16  | 0    |
| 20 | 56760875 | 56761300 | 425 | 56761212 | 15 | 196 | 10.9 |
| 20 | 56771300 | 56771325 | 25  | 56771312 | 12 | 12  | 0    |
| 20 | 56771775 | 56771800 | 25  | 56771787 | 12 | 12  | 0    |
| 20 | 56772125 | 56772350 | 225 | 56772212 | 20 | 139 | 15.3 |
| 20 | 56786800 | 56787000 | 200 | 56786912 | 17 | 116 | 4.4  |
| 20 | 56787750 | 56787800 | 50  | 56787762 | 12 | 24  | 0    |
| 20 | 56791500 | 56791825 | 325 | 56791737 | 22 | 216 | 0    |
| 20 | 56793075 | 56793625 | 550 | 56793312 | 24 | 375 | 21.9 |
| 20 | 56797225 | 56797275 | 50  | 56797237 | 12 | 24  | 0    |
| 20 | 56802050 | 56802325 | 275 | 56802237 | 22 | 180 | 2.2  |
| 20 | 56802550 | 56802650 | 100 | 56802562 | 13 | 49  | 8.8  |
| 20 | 56803300 | 56803325 | 25  | 56803312 | 12 | 12  | 0    |
| 20 | 56804900 | 56804950 | 50  | 56804912 | 14 | 27  | 4.4  |
| 20 | 56811650 | 56811700 | 50  | 56811687 | 13 | 25  | 0    |
| 20 | 56812725 | 56812800 | 75  | 56812787 | 16 | 41  | 2.2  |
| 20 | 56817350 | 56817400 | 50  | 56817362 | 12 | 24  | 0    |
| 20 | 56820425 | 56821125 | 700 | 56820812 | 16 | 347 | 52.5 |
| 20 | 56821475 | 56821625 | 150 | 56821562 | 15 | 85  | 4.4  |
| 20 | 56822000 | 56822100 | 100 | 56822012 | 16 | 60  | 0    |
| 20 | 56822750 | 56822900 | 150 | 56822762 | 12 | 65  | 0    |
| 20 | 56824150 | 56824175 | 25  | 56824162 | 13 | 13  | 2.2  |
| 20 | 56824600 | 56824625 | 25  | 56824612 | 13 | 13  | 0    |
| 20 | 56825125 | 56825250 | 125 | 56825137 | 17 | 75  | 4.4  |
| 20 | 56828300 | 56828525 | 225 | 56828437 | 19 | 152 | 8.8  |
| 20 | 56828825 | 56828850 | 25  | 56828837 | 15 | 15  | 2.2  |
| 20 | 56829375 | 56829850 | 475 | 56829562 | 50 | 519 | 83.1 |
| 20 | 56831225 | 56831475 | 250 | 56831312 | 21 | 156 | 0    |
| 20 | 56833400 | 56833425 | 25  | 56833412 | 12 | 12  | 0    |
| 20 | 56859750 | 56859775 | 25  | 56859762 | 12 | 12  | 0    |
| 20 | 56863400 | 56863450 | 50  | 56863437 | 15 | 28  | 2.2  |
| 20 | 56864325 | 56864350 | 25  | 56864337 | 12 | 12  | 2.2  |
| 20 | 56976450 | 56976525 | 75  | 56976487 | 16 | 44  | 0    |
| 20 | 56976875 | 56976950 | 75  | 56976887 | 13 | 38  | 6.6  |
| 20 | 57130000 | 57130300 | 300 | 57130137 | 16 | 154 | 4.4  |
| 20 | 57130850 | 57130875 | 25  | 57130862 | 12 | 12  | 0    |
| 20 | 57133025 | 57133100 | 75  | 57133037 | 12 | 36  | 6.6  |
| 20 | 57150425 | 57150525 | 100 | 57150462 | 13 | 50  | 8.8  |
| 20 | 57157450 | 57157500 | 50  | 57157462 | 13 | 26  | 2.2  |
| 20 | 57158150 | 57158200 | 50  | 57158162 | 12 | 24  | 0    |
| 20 | 57159500 | 57159675 | 175 | 57159637 | 16 | 91  | 0    |
| 20 | 57162650 | 57162800 | 150 | 57162737 | 14 | 74  | 8.8  |
| 20 | 57168225 | 57168475 | 250 | 57168362 | 16 | 131 | 2.2  |
| 20 | 57180850 | 57180900 | 50  | 57180862 | 12 | 24  | 0    |
| 20 | 57200850 | 57200875 | 25  | 57200862 | 12 | 12  | 2.2  |
| 20 | 57201625 | 57201750 | 125 | 57201637 | 13 | 58  | 0    |
| 20 | 57202950 | 57203050 | 100 | 57202962 | 12 | 48  | 0    |
| 20 | 57287225 | 57287400 | 175 | 57287312 | 15 | 94  | 2.2  |
| 20 | 57297850 | 57297875 | 25  | 57297862 | 14 | 14  | 0    |
| 20 | 57300275 | 57300375 | 100 | 57300287 | 15 | 57  | 2.2  |
| 20 | 57300725 | 57300750 | 25  | 57300737 | 13 | 13  | 2.2  |
| 20 | 57314400 | 57314425 | 25  | 57314412 | 12 | 12  | 0    |
| 20 | 57314800 | 57314850 | 50  | 57314812 | 12 | 24  | 4.4  |
| 20 | 57317175 | 57317200 | 25  | 57317187 | 13 | 13  | 0    |
| 20 | 57322575 | 57322725 | 150 | 57322587 | 14 | 76  | 0    |
| 20 | 57331000 | 57331025 | 25  | 57331012 | 14 | 14  | 2.2  |
| 20 | 57336000 | 57336025 | 25  | 57336012 | 13 | 13  | 2.2  |
| 20 | 57339650 | 57339950 | 300 | 57339687 | 13 | 131 | 4.4  |
| 20 | 57340450 | 57340475 | 25  | 57340462 | 12 | 12  | 2.2  |

|    |          |          |     |          |    |     |      |
|----|----------|----------|-----|----------|----|-----|------|
| 20 | 57348675 | 57348700 | 25  | 57348687 | 12 | 12  | 0    |
| 20 | 57351450 | 57351475 | 25  | 57351462 | 12 | 12  | 0    |
| 20 | 57365400 | 57365425 | 25  | 57365412 | 12 | 12  | 2.2  |
| 20 | 57388025 | 57388050 | 25  | 57388037 | 12 | 12  | 2.2  |
| 20 | 57390150 | 57390175 | 25  | 57390162 | 12 | 12  | 0    |
| 20 | 57397000 | 57397025 | 25  | 57397012 | 12 | 12  | 2.2  |
| 20 | 57397875 | 57397925 | 50  | 57397887 | 13 | 26  | 0    |
| 20 | 57398225 | 57398425 | 200 | 57398287 | 15 | 106 | 0    |
| 20 | 57398750 | 57399200 | 450 | 57399112 | 18 | 231 | 0    |
| 20 | 57404450 | 57404475 | 25  | 57404462 | 12 | 12  | 2.2  |
| 20 | 57426500 | 57426525 | 25  | 57426512 | 12 | 12  | 0    |
| 20 | 57428725 | 57428750 | 25  | 57428737 | 13 | 13  | 0    |
| 20 | 57469025 | 57469100 | 75  | 57469037 | 13 | 38  | 0    |
| 20 | 57492700 | 57492825 | 125 | 57492762 | 16 | 70  | 10.9 |
| 20 | 57555750 | 57555800 | 50  | 57555762 | 13 | 26  | 0    |
| 20 | 57589700 | 57589775 | 75  | 57589712 | 12 | 35  | 0    |
| 20 | 57592825 | 57592850 | 25  | 57592837 | 14 | 14  | 0    |
| 20 | 57595775 | 57595825 | 50  | 57595787 | 12 | 24  | 0    |
| 20 | 57597200 | 57597225 | 25  | 57597212 | 12 | 12  | 2.2  |
| 20 | 57672075 | 57672100 | 25  | 57672087 | 12 | 12  | 2.2  |
| 20 | 57694150 | 57694175 | 25  | 57694162 | 12 | 12  | 2.2  |
| 20 | 57747425 | 57747525 | 100 | 57747437 | 13 | 47  | 0    |
| 20 | 57810600 | 57810750 | 150 | 57810612 | 12 | 66  | 0    |
| 20 | 58044675 | 58044700 | 25  | 58044687 | 13 | 13  | 2.2  |
| 20 | 58076075 | 58076100 | 25  | 58076087 | 13 | 13  | 0    |
| 20 | 58096450 | 58096525 | 75  | 58096462 | 14 | 38  | 4.4  |
| 20 | 58223800 | 58223850 | 50  | 58223812 | 12 | 24  | 4.4  |
| 20 | 58246825 | 58246850 | 25  | 58246837 | 12 | 12  | 0    |
| 20 | 58248950 | 58249150 | 200 | 58249012 | 17 | 112 | 0    |
| 20 | 58255475 | 58255500 | 25  | 58255487 | 12 | 12  | 0    |
| 20 | 58348850 | 58348950 | 100 | 58348912 | 14 | 51  | 0    |
| 20 | 58361675 | 58361750 | 75  | 58361687 | 12 | 36  | 0    |
| 20 | 58478975 | 58479100 | 125 | 58479012 | 15 | 65  | 0    |
| 20 | 58494650 | 58494675 | 25  | 58494662 | 12 | 12  | 0    |
| 20 | 58562675 | 58562700 | 25  | 58562687 | 12 | 12  | 2.2  |
| 20 | 58607075 | 58607250 | 175 | 58607187 | 17 | 101 | 6.6  |
| 20 | 58608525 | 58608575 | 50  | 58608562 | 13 | 25  | 0    |
| 20 | 58648150 | 58648200 | 50  | 58648162 | 14 | 27  | 0    |
| 20 | 58650525 | 58650550 | 25  | 58650537 | 12 | 12  | 2.2  |
| 20 | 58665100 | 58665125 | 25  | 58665112 | 12 | 12  | 0    |
| 20 | 58667775 | 58667800 | 25  | 58667787 | 12 | 12  | 0    |
| 20 | 58669950 | 58670100 | 150 | 58669987 | 16 | 86  | 0    |
| 20 | 58680325 | 58680350 | 25  | 58680337 | 12 | 12  | 2.2  |
| 20 | 58761200 | 58761600 | 400 | 58761287 | 16 | 216 | 4.4  |
| 20 | 58774525 | 58774650 | 125 | 58774562 | 15 | 66  | 4.4  |
| 20 | 58783150 | 58783175 | 25  | 58783162 | 12 | 12  | 0    |
| 20 | 58788200 | 58788250 | 50  | 58788212 | 13 | 26  | 0    |
| 20 | 58815600 | 58815625 | 25  | 58815612 | 12 | 12  | 2.2  |
| 20 | 58886300 | 58886450 | 150 | 58886412 | 15 | 78  | 6.6  |
| 20 | 59065225 | 59065350 | 125 | 59065237 | 13 | 62  | 6.6  |
| 20 | 59140275 | 59140400 | 125 | 59140337 | 14 | 64  | 4.4  |
| 20 | 59144650 | 59144700 | 50  | 59144662 | 13 | 26  | 0    |
| 20 | 59196025 | 59196050 | 25  | 59196037 | 12 | 12  | 2.2  |
| 20 | 59203425 | 59203575 | 150 | 59203512 | 15 | 79  | 0    |
| 20 | 59214775 | 59214925 | 150 | 59214787 | 15 | 80  | 10.9 |
| 20 | 59239850 | 59240125 | 275 | 59239987 | 19 | 168 | 6.6  |
| 20 | 59242250 | 59242325 | 75  | 59242262 | 13 | 38  | 0    |
| 20 | 59291150 | 59291250 | 100 | 59291212 | 17 | 60  | 0    |
| 20 | 59297875 | 59297900 | 25  | 59297887 | 12 | 12  | 0    |
| 20 | 59299475 | 59299550 | 75  | 59299512 | 14 | 38  | 0    |
| 20 | 59299950 | 59300075 | 125 | 59300012 | 15 | 70  | 0    |
| 20 | 59301825 | 59301925 | 100 | 59301837 | 12 | 48  | 0    |
| 20 | 59313300 | 59313475 | 175 | 59313412 | 15 | 95  | 0    |
| 20 | 59337575 | 59338000 | 425 | 59337737 | 28 | 360 | 52.5 |
| 20 | 59352100 | 59352125 | 25  | 59352112 | 12 | 12  | 0    |
| 20 | 59355625 | 59355650 | 25  | 59355637 | 12 | 12  | 2.2  |
| 20 | 59365750 | 59365875 | 125 | 59365837 | 14 | 62  | 0    |
| 20 | 59367175 | 59367200 | 25  | 59367187 | 12 | 12  | 0    |
| 20 | 59367825 | 59368000 | 175 | 59367987 | 14 | 85  | 0    |
| 20 | 59368775 | 59368800 | 25  | 59368787 | 12 | 12  | 0    |
| 20 | 59370900 | 59370975 | 75  | 59370912 | 15 | 40  | 6.6  |
| 20 | 59371400 | 59371425 | 25  | 59371412 | 12 | 12  | 0    |
| 20 | 59374125 | 59374175 | 50  | 59374162 | 13 | 25  | 0    |
| 20 | 59382700 | 59382725 | 25  | 59382712 | 12 | 12  | 0    |
| 20 | 59383850 | 59384025 | 175 | 59383862 | 13 | 80  | 0    |

|    |          |          |     |          |    |     |      |
|----|----------|----------|-----|----------|----|-----|------|
| 20 | 59385175 | 59385225 | 50  | 59385212 | 13 | 25  | 0    |
| 20 | 59421825 | 59422150 | 325 | 59421887 | 15 | 166 | 10.9 |
| 20 | 59433625 | 59433650 | 25  | 59433637 | 13 | 13  | 0    |
| 20 | 59447775 | 59447925 | 150 | 59447787 | 13 | 73  | 13.1 |
| 20 | 59490950 | 59490975 | 25  | 59490962 | 12 | 12  | 0    |
| 20 | 59500250 | 59500300 | 50  | 59500262 | 12 | 24  | 0    |
| 20 | 59512425 | 59512575 | 150 | 59512437 | 12 | 69  | 0    |
| 20 | 59512975 | 59513000 | 25  | 59512987 | 12 | 12  | 2.2  |
| 20 | 59517425 | 59517575 | 150 | 59517512 | 16 | 79  | 13.1 |
| 20 | 59518050 | 59518225 | 175 | 59518087 | 14 | 93  | 0    |
| 20 | 59521250 | 59521300 | 50  | 59521287 | 13 | 25  | 4.4  |
| 20 | 59530650 | 59530675 | 25  | 59530662 | 12 | 12  | 2.2  |
| 20 | 59531475 | 59531525 | 50  | 59531512 | 14 | 27  | 4.4  |
| 20 | 59541750 | 59541950 | 200 | 59541887 | 14 | 94  | 15.3 |
| 20 | 59552925 | 59553000 | 75  | 59552987 | 15 | 39  | 0    |
| 20 | 59582100 | 59582125 | 25  | 59582112 | 12 | 12  | 2.2  |
| 20 | 59590025 | 59590150 | 125 | 59590062 | 16 | 71  | 10.9 |
| 20 | 59603675 | 59603825 | 150 | 59603812 | 13 | 73  | 4.4  |
| 20 | 59610725 | 59610750 | 25  | 59610737 | 12 | 12  | 2.2  |
| 20 | 59625750 | 59625775 | 25  | 59625762 | 12 | 12  | 0    |
| 20 | 59648800 | 59648825 | 25  | 59648812 | 12 | 12  | 0    |
| 20 | 59659525 | 59659575 | 50  | 59659537 | 13 | 25  | 4.4  |
| 20 | 59663200 | 59663375 | 175 | 59663312 | 16 | 97  | 10.9 |
| 20 | 59671375 | 59671400 | 25  | 59671387 | 13 | 13  | 2.2  |
| 20 | 59694775 | 59695225 | 450 | 59695062 | 22 | 310 | 35   |
| 20 | 59706675 | 59706700 | 25  | 59706687 | 12 | 12  | 2.2  |
| 20 | 59708600 | 59708675 | 75  | 59708612 | 13 | 36  | 0    |
| 20 | 59709375 | 59710175 | 800 | 59709512 | 17 | 425 | 52.5 |
| 20 | 59710650 | 59710675 | 25  | 59710662 | 12 | 12  | 0    |
| 20 | 59715800 | 59715850 | 50  | 59715812 | 14 | 26  | 4.4  |
| 20 | 59717475 | 59717500 | 25  | 59717487 | 12 | 12  | 2.2  |
| 20 | 59720575 | 59720650 | 75  | 59720587 | 12 | 35  | 0    |
| 20 | 59725650 | 59725825 | 175 | 59725712 | 17 | 106 | 10.9 |
| 20 | 59726925 | 59726950 | 25  | 59726937 | 13 | 13  | 2.2  |
| 20 | 59735125 | 59735550 | 425 | 59735287 | 19 | 227 | 6.6  |
| 20 | 59769975 | 59770000 | 25  | 59769987 | 13 | 13  | 2.2  |
| 20 | 59770525 | 59770550 | 25  | 59770537 | 13 | 13  | 2.2  |
| 20 | 59781775 | 59781800 | 25  | 59781787 | 12 | 12  | 0    |
| 20 | 59782525 | 59782625 | 100 | 59782562 | 13 | 49  | 0    |
| 20 | 59788600 | 59788850 | 250 | 59788612 | 13 | 106 | 0    |
| 20 | 59793600 | 59793800 | 200 | 59793687 | 14 | 101 | 0    |
| 20 | 59800025 | 59800100 | 75  | 59800037 | 13 | 37  | 2.2  |
| 20 | 59800325 | 59800350 | 25  | 59800337 | 12 | 12  | 0    |
| 20 | 59836975 | 59837000 | 25  | 59836987 | 12 | 12  | 2.2  |
| 20 | 59837500 | 59837600 | 100 | 59837537 | 13 | 50  | 0    |
| 20 | 59838675 | 59838800 | 125 | 59838712 | 14 | 65  | 0    |
| 20 | 59840550 | 59840600 | 50  | 59840587 | 13 | 25  | 2.2  |
| 20 | 59841425 | 59841500 | 75  | 59841462 | 13 | 37  | 0    |
| 20 | 59853875 | 59853900 | 25  | 59853887 | 13 | 13  | 2.2  |
| 20 | 59854150 | 59854200 | 50  | 59854162 | 13 | 26  | 2.2  |
| 20 | 59861275 | 59861300 | 25  | 59861287 | 13 | 13  | 2.2  |
| 20 | 59868175 | 59868225 | 50  | 59868187 | 12 | 24  | 4.4  |
| 20 | 59869550 | 59869600 | 50  | 59869562 | 12 | 24  | 2.2  |
| 20 | 59878500 | 59878975 | 475 | 59878912 | 15 | 215 | 4.4  |
| 20 | 59879900 | 59879950 | 50  | 59879912 | 12 | 24  | 0    |
| 20 | 59880225 | 59880925 | 700 | 59880587 | 16 | 340 | 19.7 |
| 20 | 59881250 | 59881425 | 175 | 59881287 | 14 | 87  | 0    |
| 20 | 59900225 | 59900250 | 25  | 59900237 | 15 | 15  | 2.2  |
| 20 | 59908500 | 59908600 | 100 | 59908587 | 14 | 50  | 8.8  |
| 20 | 59908975 | 59909000 | 25  | 59908987 | 12 | 12  | 2.2  |
| 20 | 59917725 | 59917850 | 125 | 59917737 | 14 | 64  | 8.8  |
| 20 | 59918675 | 59919150 | 475 | 59918812 | 17 | 263 | 17.5 |
| 20 | 59921550 | 59921600 | 50  | 59921562 | 13 | 25  | 0    |
| 20 | 59922325 | 59922425 | 100 | 59922387 | 14 | 52  | 0    |
| 20 | 59923825 | 59923875 | 50  | 59923862 | 18 | 31  | 0    |
| 20 | 59926925 | 59926950 | 25  | 59926937 | 12 | 12  | 0    |
| 20 | 59928150 | 59928725 | 575 | 59928462 | 24 | 436 | 70   |
| 20 | 59929500 | 59929550 | 50  | 59929537 | 14 | 26  | 4.4  |
| 20 | 59934250 | 59934300 | 50  | 59934262 | 14 | 28  | 4.4  |
| 20 | 59936400 | 59936425 | 25  | 59936412 | 12 | 12  | 0    |
| 20 | 59938100 | 59938200 | 100 | 59938187 | 18 | 57  | 0    |
| 20 | 59941200 | 59941225 | 25  | 59941212 | 12 | 12  | 0    |
| 20 | 59943375 | 59943400 | 25  | 59943387 | 12 | 12  | 2.2  |
| 20 | 59950375 | 59950400 | 25  | 59950387 | 12 | 12  | 0    |
| 20 | 59970625 | 59970700 | 75  | 59970687 | 15 | 40  | 2.2  |

|    |          |          |     |          |    |     |      |
|----|----------|----------|-----|----------|----|-----|------|
| 20 | 60093650 | 60093700 | 50  | 60093687 | 14 | 26  | 2.2  |
| 20 | 60093950 | 60094000 | 50  | 60093962 | 12 | 24  | 2.2  |
| 20 | 60095000 | 60095150 | 150 | 60095062 | 15 | 82  | 0    |
| 20 | 60095675 | 60096275 | 600 | 60096012 | 17 | 317 | 56.9 |
| 20 | 60096550 | 60096850 | 300 | 60096587 | 16 | 163 | 2.2  |
| 20 | 60100125 | 60100175 | 50  | 60100137 | 12 | 24  | 2.2  |
| 20 | 60107400 | 60107700 | 300 | 60107562 | 16 | 164 | 17.5 |
| 20 | 60108225 | 60108250 | 25  | 60108237 | 15 | 15  | 2.2  |
| 20 | 60112225 | 60112450 | 225 | 60112362 | 23 | 170 | 8.8  |
| 20 | 60121250 | 60121275 | 25  | 60121262 | 12 | 12  | 2.2  |
| 20 | 60121550 | 60121775 | 225 | 60121587 | 17 | 131 | 6.6  |
| 20 | 60125700 | 60125900 | 200 | 60125787 | 17 | 109 | 0    |
| 20 | 60226825 | 60226850 | 25  | 60226837 | 12 | 12  | 2.2  |
| 20 | 60429825 | 60430350 | 525 | 60430262 | 20 | 271 | 17.5 |
| 20 | 60440825 | 60441025 | 200 | 60440862 | 13 | 89  | 0    |
| 20 | 60445425 | 60445450 | 25  | 60445437 | 12 | 12  | 2.2  |
| 20 | 60452750 | 60452925 | 175 | 60452762 | 14 | 76  | 6.6  |
| 20 | 60552275 | 60552475 | 200 | 60552387 | 13 | 94  | 0    |
| 20 | 60579075 | 60579100 | 25  | 60579087 | 12 | 12  | 0    |
| 20 | 60579800 | 60579925 | 125 | 60579862 | 15 | 66  | 4.4  |
| 20 | 60603950 | 60604050 | 100 | 60603962 | 13 | 47  | 2.2  |
| 20 | 60606625 | 60606675 | 50  | 60606637 | 14 | 26  | 4.4  |
| 20 | 60618125 | 60618175 | 50  | 60618137 | 13 | 25  | 4.4  |
| 20 | 60619000 | 60619125 | 125 | 60619012 | 18 | 81  | 4.4  |
| 20 | 60816275 | 60816400 | 125 | 60816387 | 17 | 77  | 4.4  |
| 20 | 60817075 | 60817300 | 225 | 60817262 | 17 | 136 | 0    |
| 20 | 60819100 | 60819350 | 250 | 60819112 | 13 | 114 | 4.4  |
| 20 | 60819750 | 60820000 | 250 | 60819812 | 16 | 132 | 2.2  |
| 20 | 60824050 | 60824550 | 500 | 60824162 | 19 | 291 | 0    |
| 20 | 60825225 | 60825725 | 500 | 60825362 | 19 | 281 | 13.1 |
| 20 | 60826825 | 60827000 | 175 | 60826937 | 13 | 85  | 13.1 |
| 20 | 60827300 | 60827375 | 75  | 60827312 | 16 | 44  | 0    |
| 20 | 60832325 | 60832425 | 100 | 60832412 | 14 | 51  | 2.2  |
| 20 | 60853450 | 60853475 | 25  | 60853462 | 12 | 12  | 0    |
| 20 | 60867450 | 60867475 | 25  | 60867462 | 13 | 13  | 0    |
| 20 | 60963975 | 60964100 | 125 | 60964037 | 17 | 73  | 0    |
| 20 | 61047800 | 61047825 | 25  | 61047812 | 12 | 12  | 2.2  |
| 20 | 61101475 | 61101675 | 200 | 61101637 | 15 | 104 | 8.8  |
| 20 | 61136975 | 61137025 | 50  | 61136987 | 13 | 26  | 0    |
| 20 | 61139925 | 61140025 | 100 | 61139937 | 15 | 56  | 4.4  |
| 20 | 61150500 | 61150525 | 25  | 61150512 | 13 | 13  | 2.2  |
| 20 | 61151450 | 61151575 | 125 | 61151487 | 13 | 59  | 10.9 |
| 20 | 61153150 | 61153225 | 75  | 61153162 | 14 | 40  | 0    |
| 20 | 61163200 | 61163750 | 550 | 61163712 | 25 | 399 | 37.2 |
| 20 | 61166200 | 61166350 | 150 | 61166337 | 14 | 73  | 0    |
| 20 | 61178300 | 61178375 | 75  | 61178337 | 13 | 37  | 0    |
| 20 | 61208650 | 61208700 | 50  | 61208687 | 13 | 25  | 2.2  |
| 20 | 61209050 | 61209350 | 300 | 61209337 | 13 | 121 | 13.1 |
| 20 | 61209650 | 61209700 | 50  | 61209662 | 12 | 24  | 4.4  |
| 20 | 61214400 | 61214525 | 125 | 61214462 | 17 | 75  | 0    |
| 20 | 61217100 | 61217150 | 50  | 61217137 | 13 | 25  | 2.2  |
| 20 | 61218700 | 61218725 | 25  | 61218712 | 13 | 13  | 0    |
| 20 | 61225050 | 61225275 | 225 | 61225187 | 19 | 144 | 0    |
| 20 | 61244825 | 61244875 | 50  | 61244837 | 13 | 25  | 0    |
| 20 | 61250450 | 61250475 | 25  | 61250462 | 12 | 12  | 0    |
| 20 | 61250775 | 61250850 | 75  | 61250787 | 15 | 40  | 0    |
| 20 | 61251500 | 61251550 | 50  | 61251512 | 12 | 24  | 0    |
| 20 | 61263250 | 61263275 | 25  | 61263262 | 12 | 12  | 2.2  |
| 20 | 61287200 | 61287400 | 200 | 61287287 | 15 | 100 | 0    |
| 20 | 61354800 | 61354850 | 50  | 61354812 | 12 | 24  | 4.4  |
| 20 | 61435075 | 61435275 | 200 | 61435212 | 15 | 109 | 0    |
| 20 | 61444300 | 61444450 | 150 | 61444362 | 15 | 78  | 0    |
| 20 | 61452175 | 61452525 | 350 | 61452262 | 15 | 189 | 15.3 |
| 20 | 61488100 | 61488325 | 225 | 61488212 | 16 | 128 | 0    |
| 20 | 61493425 | 61493450 | 25  | 61493437 | 13 | 13  | 2.2  |
| 20 | 61532875 | 61532900 | 25  | 61532887 | 12 | 12  | 2.2  |
| 20 | 61609275 | 61609300 | 25  | 61609287 | 12 | 12  | 0    |
| 20 | 62245375 | 62245475 | 100 | 62245387 | 12 | 48  | 4.4  |
| 20 | 62247275 | 62247475 | 200 | 62247337 | 21 | 151 | 0    |
| 20 | 62247850 | 62247925 | 75  | 62247887 | 14 | 40  | 6.6  |
| 20 | 62249100 | 62249300 | 200 | 62249262 | 16 | 115 | 0    |
| 20 | 62251600 | 62251625 | 25  | 62251612 | 12 | 12  | 0    |
| 20 | 62251975 | 62252125 | 150 | 62252037 | 13 | 74  | 0    |
| 20 | 62253775 | 62253900 | 125 | 62253812 | 14 | 62  | 0    |
| 20 | 62268650 | 62268675 | 25  | 62268662 | 16 | 16  | 2.2  |

|    |          |          |     |          |    |     |      |
|----|----------|----------|-----|----------|----|-----|------|
| 20 | 62281725 | 62281875 | 150 | 62281812 | 13 | 70  | 0    |
| 20 | 62284050 | 62284300 | 250 | 62284162 | 17 | 138 | 0    |
| 20 | 62348525 | 62348550 | 25  | 62348537 | 12 | 12  | 2.2  |
| 20 | 62371800 | 62372325 | 525 | 62371812 | 15 | 275 | 52.5 |
| 21 | 9734550  | 9734575  | 25  | 9734562  | 12 | 12  | 2.2  |
| 21 | 10076775 | 10076925 | 150 | 10076812 | 15 | 86  | 13.1 |
| 21 | 10166950 | 10166975 | 25  | 10166962 | 13 | 13  | 2.2  |
| 21 | 10167775 | 10167850 | 75  | 10167812 | 15 | 43  | 2.2  |
| 21 | 16076050 | 16076075 | 25  | 16076062 | 12 | 12  | 0    |
| 21 | 16076475 | 16076500 | 25  | 16076487 | 12 | 12  | 0    |
| 21 | 21691675 | 21691775 | 100 | 21691687 | 12 | 47  | 0    |
| 21 | 31780500 | 31780700 | 200 | 31780537 | 14 | 99  | 15.3 |
| 21 | 32337800 | 32338000 | 200 | 32337887 | 16 | 114 | 10.9 |
| 21 | 32534300 | 32534350 | 50  | 32534312 | 12 | 24  | 0    |
| 21 | 32594800 | 32594825 | 25  | 32594812 | 12 | 12  | 0    |
| 21 | 32827625 | 32827800 | 175 | 32827662 | 16 | 101 | 0    |
| 21 | 32878650 | 32878675 | 25  | 32878662 | 12 | 12  | 2.2  |
| 21 | 33160475 | 33160500 | 25  | 33160487 | 12 | 12  | 2.2  |
| 21 | 33165000 | 33165200 | 200 | 33165037 | 15 | 109 | 0    |
| 21 | 33320325 | 33320400 | 75  | 33320362 | 15 | 43  | 0    |
| 21 | 33321275 | 33321425 | 150 | 33321387 | 19 | 99  | 6.6  |
| 21 | 34303600 | 34303625 | 25  | 34303612 | 14 | 14  | 0    |
| 21 | 34429750 | 34429800 | 50  | 34429762 | 12 | 24  | 0    |
| 21 | 34564925 | 34564975 | 50  | 34564937 | 12 | 24  | 4.4  |
| 21 | 34623925 | 34624100 | 175 | 34624037 | 16 | 97  | 2.2  |
| 21 | 34637050 | 34637100 | 50  | 34637062 | 12 | 24  | 4.4  |
| 21 | 34706050 | 34706150 | 100 | 34706112 | 14 | 53  | 0    |
| 21 | 34743075 | 34743175 | 100 | 34743087 | 14 | 50  | 4.4  |
| 21 | 35209125 | 35209150 | 25  | 35209137 | 12 | 12  | 0    |
| 21 | 35870875 | 35870925 | 50  | 35870887 | 12 | 24  | 0    |
| 21 | 35898525 | 35898550 | 25  | 35898537 | 14 | 14  | 2.2  |
| 21 | 36044075 | 36044175 | 100 | 36044087 | 12 | 48  | 0    |
| 21 | 36190200 | 36190250 | 50  | 36190212 | 12 | 24  | 0    |
| 21 | 36245850 | 36245975 | 125 | 36245962 | 14 | 65  | 0    |
| 21 | 36249575 | 36249700 | 125 | 36249662 | 15 | 69  | 10.9 |
| 21 | 36363200 | 36363250 | 50  | 36363237 | 13 | 25  | 0    |
| 21 | 36819400 | 36819425 | 25  | 36819412 | 14 | 14  | 2.2  |
| 21 | 36991925 | 36991950 | 25  | 36991937 | 12 | 12  | 0    |
| 21 | 37000200 | 37000325 | 125 | 37000212 | 14 | 61  | 4.4  |
| 21 | 37001350 | 37001375 | 25  | 37001362 | 13 | 13  | 2.2  |
| 21 | 37002475 | 37002600 | 125 | 37002537 | 16 | 70  | 0    |
| 21 | 37025200 | 37025225 | 25  | 37025212 | 12 | 12  | 2.2  |
| 21 | 37857800 | 37857825 | 25  | 37857812 | 12 | 12  | 2.2  |
| 21 | 37892675 | 37892700 | 25  | 37892687 | 12 | 12  | 0    |
| 21 | 37916925 | 37916950 | 25  | 37916937 | 12 | 12  | 2.2  |
| 21 | 38519800 | 38519850 | 50  | 38519812 | 13 | 26  | 0    |
| 21 | 38642400 | 38642475 | 75  | 38642412 | 13 | 38  | 4.4  |
| 21 | 38677850 | 38677900 | 50  | 38677862 | 13 | 25  | 0    |
| 21 | 38883050 | 38883150 | 100 | 38883087 | 13 | 50  | 0    |
| 21 | 38905125 | 38905200 | 75  | 38905187 | 14 | 37  | 6.6  |
| 21 | 39866125 | 39866200 | 75  | 39866137 | 13 | 37  | 6.6  |
| 21 | 40006125 | 40006175 | 50  | 40006137 | 13 | 26  | 4.4  |
| 21 | 40044700 | 40044775 | 75  | 40044737 | 15 | 42  | 6.6  |
| 21 | 40248550 | 40248575 | 25  | 40248562 | 12 | 12  | 0    |
| 21 | 41390350 | 41390450 | 100 | 41390362 | 12 | 47  | 0    |
| 21 | 41394175 | 41394225 | 50  | 41394187 | 12 | 24  | 0    |
| 21 | 41398250 | 41398325 | 75  | 41398262 | 13 | 38  | 6.6  |
| 21 | 41431175 | 41431350 | 175 | 41431337 | 16 | 100 | 13.1 |
| 21 | 41432650 | 41432750 | 100 | 41432662 | 12 | 47  | 0    |
| 21 | 41433250 | 41433350 | 100 | 41433287 | 14 | 51  | 0    |
| 21 | 41661575 | 41661625 | 50  | 41661587 | 12 | 24  | 0    |
| 21 | 41725975 | 41726075 | 100 | 41726012 | 14 | 51  | 8.8  |
| 21 | 41758175 | 41758250 | 75  | 41758187 | 12 | 36  | 0    |
| 21 | 42383400 | 42383425 | 25  | 42383412 | 12 | 12  | 0    |
| 21 | 42385075 | 42385200 | 125 | 42385087 | 13 | 62  | 0    |
| 21 | 42468675 | 42468700 | 25  | 42468687 | 12 | 12  | 0    |
| 21 | 42475925 | 42475950 | 25  | 42475937 | 12 | 12  | 0    |
| 21 | 42509675 | 42509750 | 75  | 42509687 | 12 | 36  | 0    |
| 21 | 42510125 | 42510325 | 200 | 42510237 | 18 | 124 | 17.5 |
| 21 | 42521950 | 42522250 | 300 | 42522212 | 17 | 169 | 6.6  |
| 21 | 42580400 | 42580675 | 275 | 42580412 | 12 | 119 | 6.6  |
| 21 | 42581050 | 42581075 | 25  | 42581062 | 12 | 12  | 0    |
| 21 | 42587000 | 42587025 | 25  | 42587012 | 12 | 12  | 2.2  |
| 21 | 42618175 | 42618350 | 175 | 42618237 | 19 | 109 | 8.8  |
| 21 | 42645925 | 42646025 | 100 | 42645937 | 13 | 51  | 4.4  |

|    |          |          |     |          |    |     |      |
|----|----------|----------|-----|----------|----|-----|------|
| 21 | 42646550 | 42646650 | 100 | 42646587 | 18 | 64  | 0    |
| 21 | 42652375 | 42652425 | 50  | 42652387 | 13 | 26  | 4.4  |
| 21 | 42653375 | 42653775 | 400 | 42653687 | 16 | 200 | 0    |
| 21 | 42724250 | 42724275 | 25  | 42724262 | 12 | 12  | 2.2  |
| 21 | 42725275 | 42725325 | 50  | 42725312 | 13 | 25  | 4.4  |
| 21 | 42773975 | 42774125 | 150 | 42774012 | 13 | 71  | 0    |
| 21 | 42899475 | 42899650 | 175 | 42899487 | 14 | 94  | 0    |
| 21 | 42903075 | 42903200 | 125 | 42903137 | 14 | 62  | 10.9 |
| 21 | 42920775 | 42921000 | 225 | 42920912 | 13 | 97  | 0    |
| 21 | 43062775 | 43062800 | 25  | 43062787 | 12 | 12  | 0    |
| 21 | 43449300 | 43449325 | 25  | 43449312 | 12 | 12  | 2.2  |
| 21 | 43494400 | 43494500 | 100 | 43494462 | 13 | 50  | 8.8  |
| 21 | 43499500 | 43499675 | 175 | 43499612 | 15 | 97  | 0    |
| 21 | 43500200 | 43500250 | 50  | 43500212 | 12 | 24  | 0    |
| 21 | 44031500 | 44031525 | 25  | 44031512 | 12 | 12  | 2.2  |
| 21 | 44423925 | 44423950 | 25  | 44423937 | 12 | 12  | 2.2  |
| 21 | 44425100 | 44425225 | 125 | 44425137 | 15 | 71  | 2.2  |
| 21 | 44620400 | 44620475 | 75  | 44620412 | 13 | 37  | 0    |
| 21 | 44622575 | 44622675 | 100 | 44622587 | 13 | 52  | 8.8  |
| 21 | 44622925 | 44623000 | 75  | 44622937 | 12 | 36  | 2.2  |
| 21 | 44658550 | 44658700 | 150 | 44658612 | 17 | 92  | 10.9 |
| 21 | 44663450 | 44663550 | 100 | 44663462 | 15 | 54  | 0    |
| 21 | 44672300 | 44672350 | 50  | 44672312 | 12 | 24  | 4.4  |
| 21 | 44694800 | 44695075 | 275 | 44694937 | 14 | 133 | 2.2  |
| 21 | 44736325 | 44736550 | 225 | 44736412 | 20 | 149 | 0    |
| 21 | 44761700 | 44761975 | 275 | 44761837 | 20 | 181 | 2.2  |
| 21 | 44777275 | 44777300 | 25  | 44777287 | 12 | 12  | 2.2  |
| 21 | 44824350 | 44824450 | 100 | 44824362 | 12 | 48  | 6.6  |
| 21 | 44848300 | 44848350 | 50  | 44848337 | 15 | 27  | 0    |
| 21 | 44856375 | 44856475 | 100 | 44856387 | 13 | 49  | 0    |
| 21 | 44873550 | 44873575 | 25  | 44873562 | 12 | 12  | 0    |
| 21 | 44902325 | 44902450 | 125 | 44902337 | 14 | 63  | 0    |
| 21 | 44950675 | 44950850 | 175 | 44950687 | 12 | 83  | 8.8  |
| 21 | 44997200 | 44997350 | 150 | 44997237 | 13 | 74  | 0    |
| 21 | 45002600 | 45002625 | 25  | 45002612 | 12 | 12  | 0    |
| 21 | 45064275 | 45064300 | 25  | 45064287 | 12 | 12  | 0    |
| 21 | 45066375 | 45066400 | 25  | 45066387 | 12 | 12  | 2.2  |
| 21 | 45146625 | 45146850 | 225 | 45146712 | 17 | 126 | 0    |
| 21 | 45147100 | 45147225 | 125 | 45147112 | 13 | 62  | 6.6  |
| 21 | 45164475 | 45164550 | 75  | 45164537 | 13 | 36  | 0    |
| 21 | 45165750 | 45165775 | 25  | 45165762 | 12 | 12  | 0    |
| 21 | 45170800 | 45170850 | 50  | 45170812 | 12 | 24  | 4.4  |
| 21 | 45171325 | 45171350 | 25  | 45171337 | 12 | 12  | 2.2  |
| 21 | 45270475 | 45270550 | 75  | 45270487 | 12 | 35  | 4.4  |
| 21 | 45420500 | 45420650 | 150 | 45420562 | 15 | 81  | 0    |
| 21 | 45481025 | 45481050 | 25  | 45481037 | 12 | 12  | 0    |
| 21 | 45617400 | 45617550 | 150 | 45617512 | 20 | 102 | 0    |
| 21 | 45636325 | 45636400 | 75  | 45636337 | 12 | 35  | 0    |
| 21 | 45646500 | 45646550 | 50  | 45646512 | 12 | 24  | 4.4  |
| 21 | 45689550 | 45689800 | 250 | 45689612 | 15 | 131 | 6.6  |
| 21 | 45704175 | 45704250 | 75  | 45704187 | 12 | 36  | 0    |
| 21 | 45704625 | 45704650 | 25  | 45704637 | 14 | 14  | 2.2  |
| 21 | 45707525 | 45707575 | 50  | 45707537 | 12 | 24  | 0    |
| 21 | 45708300 | 45708450 | 150 | 45708387 | 15 | 83  | 0    |
| 21 | 45728675 | 45728775 | 100 | 45728687 | 12 | 45  | 0    |
| 21 | 45807400 | 45807425 | 25  | 45807412 | 12 | 12  | 0    |
| 21 | 45816625 | 45816775 | 150 | 45816712 | 15 | 80  | 0    |
| 21 | 45856575 | 45856725 | 150 | 45856637 | 13 | 74  | 0    |
| 21 | 45873850 | 45873975 | 125 | 45873862 | 14 | 65  | 4.4  |
| 21 | 45876000 | 45876075 | 75  | 45876037 | 14 | 40  | 6.6  |
| 21 | 46090075 | 46090275 | 200 | 46090087 | 12 | 80  | 0    |
| 21 | 46102200 | 46102225 | 25  | 46102212 | 13 | 13  | 2.2  |
| 21 | 46103775 | 46103975 | 200 | 46103887 | 17 | 120 | 0    |
| 21 | 46105175 | 46105200 | 25  | 46105187 | 12 | 12  | 0    |
| 21 | 46174800 | 46174950 | 150 | 46174837 | 16 | 88  | 0    |
| 21 | 46175600 | 46175625 | 25  | 46175612 | 12 | 12  | 0    |
| 21 | 46303050 | 46303175 | 125 | 46303062 | 16 | 74  | 6.6  |
| 21 | 46304350 | 46304375 | 25  | 46304362 | 12 | 12  | 0    |
| 21 | 46384775 | 46384800 | 25  | 46384787 | 12 | 12  | 0    |
| 21 | 46616475 | 46616700 | 225 | 46616587 | 19 | 140 | 24.1 |
| 21 | 46869100 | 46869275 | 175 | 46869237 | 15 | 87  | 0    |
| 21 | 46895150 | 46895250 | 100 | 46895162 | 13 | 50  | 0    |
| 21 | 46896100 | 46896225 | 125 | 46896137 | 16 | 71  | 2.2  |
| 22 | 16967375 | 16967500 | 125 | 16967412 | 13 | 61  | 6.6  |
| 22 | 17259900 | 17259975 | 75  | 17259912 | 13 | 39  | 6.6  |



|    |          |          |     |          |    |     |      |
|----|----------|----------|-----|----------|----|-----|------|
| 22 | 17261925 | 17262075 | 150 | 17262037 | 18 | 82  | 2.2  |
| 22 | 17346725 | 17346750 | 25  | 17346737 | 12 | 12  | 2.2  |
| 22 | 17350800 | 17350925 | 125 | 17350812 | 12 | 56  | 6.6  |
| 22 | 17358050 | 17358150 | 100 | 17358062 | 13 | 51  | 4.4  |
| 22 | 17361850 | 17361900 | 50  | 17361862 | 12 | 24  | 4.4  |
| 22 | 17364700 | 17364850 | 150 | 17364712 | 12 | 68  | 4.4  |
| 22 | 17365650 | 17365725 | 75  | 17365712 | 15 | 39  | 0    |
| 22 | 17654850 | 17655050 | 200 | 17654887 | 16 | 122 | 0    |
| 22 | 17698600 | 17698700 | 100 | 17698612 | 13 | 49  | 8.8  |
| 22 | 17941475 | 17941500 | 25  | 17941487 | 12 | 12  | 0    |
| 22 | 18133175 | 18133200 | 25  | 18133187 | 12 | 12  | 0    |
| 22 | 18150150 | 18150575 | 425 | 18150462 | 15 | 193 | 0    |
| 22 | 18151200 | 18151250 | 50  | 18151212 | 12 | 24  | 4.4  |
| 22 | 18587325 | 18587475 | 150 | 18587362 | 19 | 100 | 0    |
| 22 | 18592225 | 18592975 | 750 | 18592712 | 26 | 541 | 17.5 |
| 22 | 19180375 | 19180450 | 75  | 19180437 | 15 | 42  | 4.4  |
| 22 | 19337400 | 19337450 | 50  | 19337412 | 12 | 24  | 4.4  |
| 22 | 19338750 | 19338925 | 175 | 19338762 | 14 | 86  | 0    |
| 22 | 19341675 | 19341725 | 50  | 19341687 | 12 | 24  | 0    |
| 22 | 19348250 | 19348550 | 300 | 19348387 | 15 | 149 | 0    |
| 22 | 19662700 | 19662900 | 200 | 19662762 | 19 | 132 | 0    |
| 22 | 19755425 | 19755650 | 225 | 19755437 | 13 | 109 | 4.4  |
| 22 | 19757125 | 19757300 | 175 | 19757137 | 13 | 83  | 0    |
| 22 | 19758325 | 19758525 | 200 | 19758462 | 14 | 97  | 13.1 |
| 22 | 20870425 | 20870625 | 200 | 20870537 | 19 | 126 | 0    |
| 22 | 21137625 | 21137825 | 200 | 21137712 | 16 | 112 | 21.9 |
| 22 | 21540650 | 21540850 | 200 | 21540737 | 16 | 112 | 15.3 |
| 22 | 21542400 | 21542450 | 50  | 21542412 | 12 | 24  | 0    |
| 22 | 21583625 | 21583700 | 75  | 21583662 | 13 | 38  | 0    |
| 22 | 21623625 | 21623675 | 50  | 21623637 | 12 | 24  | 4.4  |
| 22 | 21668750 | 21668950 | 200 | 21668837 | 20 | 143 | 0    |
| 22 | 21685850 | 21685900 | 50  | 21685862 | 12 | 24  | 0    |
| 22 | 21709600 | 21709750 | 150 | 21709687 | 14 | 78  | 13.1 |
| 22 | 21726375 | 21726450 | 75  | 21726387 | 12 | 35  | 6.6  |
| 22 | 21749325 | 21749450 | 125 | 21749412 | 16 | 68  | 8.8  |
| 22 | 21750125 | 21750225 | 100 | 21750162 | 13 | 51  | 8.8  |
| 22 | 21836950 | 21836975 | 25  | 21836962 | 12 | 12  | 0    |
| 22 | 22035300 | 22035425 | 125 | 22035337 | 15 | 63  | 0    |
| 22 | 22103800 | 22103900 | 100 | 22103812 | 17 | 60  | 2.2  |
| 22 | 22104150 | 22104200 | 50  | 22104187 | 13 | 25  | 0    |
| 22 | 22119025 | 22119175 | 150 | 22119062 | 14 | 80  | 13.1 |
| 22 | 22129125 | 22129200 | 75  | 22129162 | 13 | 37  | 6.6  |
| 22 | 22220250 | 22220275 | 25  | 22220262 | 12 | 12  | 0    |
| 22 | 22294325 | 22294375 | 50  | 22294337 | 12 | 24  | 2.2  |
| 22 | 22511075 | 22511175 | 100 | 22511137 | 14 | 52  | 8.8  |
| 22 | 22598950 | 22599050 | 100 | 22598987 | 13 | 50  | 2.2  |
| 22 | 22942575 | 22942600 | 25  | 22942587 | 12 | 12  | 2.2  |
| 22 | 22951075 | 22951125 | 50  | 22951087 | 12 | 24  | 0    |
| 22 | 23221375 | 23221450 | 75  | 23221387 | 12 | 36  | 2.2  |
| 22 | 23240375 | 23240425 | 50  | 23240387 | 12 | 24  | 2.2  |
| 22 | 23405150 | 23405300 | 150 | 23405262 | 15 | 81  | 0    |
| 22 | 23442500 | 23442550 | 50  | 23442512 | 12 | 24  | 4.4  |
| 22 | 23464275 | 23464300 | 25  | 23464287 | 12 | 12  | 0    |
| 22 | 23581350 | 23581375 | 25  | 23581362 | 13 | 13  | 0    |
| 22 | 23582425 | 23582525 | 100 | 23582462 | 14 | 54  | 4.4  |
| 22 | 23585650 | 23585800 | 150 | 23585662 | 12 | 68  | 0    |
| 22 | 23623875 | 23624300 | 425 | 23624187 | 22 | 277 | 17.5 |
| 22 | 24141250 | 24141350 | 100 | 24141337 | 13 | 46  | 2.2  |
| 22 | 24486850 | 24486875 | 25  | 24486862 | 12 | 12  | 2.2  |
| 22 | 24494125 | 24494175 | 50  | 24494137 | 13 | 25  | 2.2  |
| 22 | 24495000 | 24495050 | 50  | 24495037 | 13 | 25  | 0    |
| 22 | 24548450 | 24548550 | 100 | 24548537 | 15 | 55  | 0    |
| 22 | 24556450 | 24556675 | 225 | 24556512 | 21 | 150 | 15.3 |
| 22 | 24634275 | 24634475 | 200 | 24634337 | 19 | 130 | 0    |
| 22 | 24748775 | 24748800 | 25  | 24748787 | 12 | 12  | 2.2  |
| 22 | 25053375 | 25053625 | 250 | 25053487 | 19 | 156 | 15.3 |
| 22 | 25073725 | 25073750 | 25  | 25073737 | 12 | 12  | 2.2  |
| 22 | 25137425 | 25137550 | 125 | 25137487 | 17 | 72  | 4.4  |
| 22 | 25149750 | 25149775 | 25  | 25149762 | 12 | 12  | 2.2  |
| 22 | 25469325 | 25469350 | 25  | 25469337 | 12 | 12  | 2.2  |
| 22 | 25493125 | 25493150 | 25  | 25493137 | 12 | 12  | 0    |
| 22 | 25495450 | 25495475 | 25  | 25495462 | 12 | 12  | 2.2  |
| 22 | 25544075 | 25544100 | 25  | 25544087 | 12 | 12  | 0    |
| 22 | 25546350 | 25546400 | 50  | 25546362 | 12 | 24  | 4.4  |
| 22 | 25630550 | 25630600 | 50  | 25630562 | 13 | 25  | 0    |

|    |          |          |     |          |    |     |      |
|----|----------|----------|-----|----------|----|-----|------|
| 22 | 25797000 | 25797050 | 50  | 25797012 | 13 | 25  | 0    |
| 22 | 25797350 | 25797475 | 125 | 25797362 | 16 | 71  | 0    |
| 22 | 25798250 | 25798275 | 25  | 25798262 | 12 | 12  | 2.2  |
| 22 | 25825750 | 25825875 | 125 | 25825762 | 15 | 70  | 4.4  |
| 22 | 25833225 | 25833325 | 100 | 25833237 | 12 | 48  | 8.8  |
| 22 | 25842350 | 25842375 | 25  | 25842362 | 12 | 12  | 0    |
| 22 | 26038725 | 26038775 | 50  | 26038737 | 13 | 25  | 0    |
| 22 | 26189650 | 26189925 | 275 | 26189812 | 17 | 130 | 0    |
| 22 | 26217125 | 26217225 | 100 | 26217137 | 13 | 51  | 0    |
| 22 | 26279250 | 26279300 | 50  | 26279262 | 14 | 27  | 2.2  |
| 22 | 26290125 | 26290150 | 25  | 26290137 | 13 | 13  | 0    |
| 22 | 26298225 | 26298250 | 25  | 26298237 | 13 | 13  | 2.2  |
| 22 | 26298525 | 26298550 | 25  | 26298537 | 13 | 13  | 0    |
| 22 | 26385150 | 26385225 | 75  | 26385162 | 15 | 44  | 0    |
| 22 | 26392575 | 26392725 | 150 | 26392637 | 17 | 87  | 0    |
| 22 | 26430125 | 26430200 | 75  | 26430137 | 12 | 36  | 0    |
| 22 | 26442175 | 26442200 | 25  | 26442187 | 12 | 12  | 2.2  |
| 22 | 26467775 | 26467800 | 25  | 26467787 | 13 | 13  | 0    |
| 22 | 26757475 | 26757500 | 25  | 26757487 | 12 | 12  | 0    |
| 22 | 26862925 | 26863600 | 675 | 26863237 | 16 | 366 | 35   |
| 22 | 26889150 | 26889275 | 125 | 26889162 | 13 | 61  | 0    |
| 22 | 27968125 | 27968250 | 125 | 27968187 | 15 | 65  | 0    |
| 22 | 28772475 | 28772500 | 25  | 28772487 | 12 | 12  | 2.2  |
| 22 | 29194400 | 29194425 | 25  | 29194412 | 12 | 12  | 2.2  |
| 22 | 29504250 | 29504300 | 50  | 29504262 | 12 | 24  | 0    |
| 22 | 29550200 | 29550350 | 150 | 29550237 | 17 | 84  | 0    |
| 22 | 29628550 | 29628575 | 25  | 29628562 | 12 | 12  | 0    |
| 22 | 29698950 | 29699100 | 150 | 29698962 | 22 | 103 | 19.7 |
| 22 | 29795550 | 29795675 | 125 | 29795637 | 13 | 61  | 8.8  |
| 22 | 30800075 | 30800100 | 25  | 30800087 | 12 | 12  | 2.2  |
| 22 | 30944550 | 30944675 | 125 | 30944562 | 12 | 59  | 0    |
| 22 | 30981275 | 30981300 | 25  | 30981287 | 13 | 13  | 0    |
| 22 | 30997800 | 30997825 | 25  | 30997812 | 12 | 12  | 2.2  |
| 22 | 31031750 | 31031925 | 175 | 31031862 | 18 | 109 | 0    |
| 22 | 31078525 | 31078650 | 125 | 31078637 | 18 | 79  | 2.2  |
| 22 | 31303800 | 31303825 | 25  | 31303812 | 12 | 12  | 2.2  |
| 22 | 31384500 | 31384525 | 25  | 31384512 | 12 | 12  | 2.2  |
| 22 | 31397525 | 31397825 | 300 | 31397662 | 18 | 187 | 0    |
| 22 | 31456825 | 31456925 | 100 | 31456912 | 18 | 61  | 6.6  |
| 22 | 31460525 | 31460650 | 125 | 31460537 | 18 | 78  | 0    |
| 22 | 31487400 | 31487475 | 75  | 31487412 | 12 | 35  | 0    |
| 22 | 31642050 | 31642075 | 25  | 31642062 | 12 | 12  | 0    |
| 22 | 31695200 | 31695225 | 25  | 31695212 | 12 | 12  | 0    |
| 22 | 31729775 | 31729875 | 100 | 31729862 | 20 | 64  | 4.4  |
| 22 | 32137125 | 32137150 | 25  | 32137137 | 12 | 12  | 2.2  |
| 22 | 32145275 | 32145375 | 100 | 32145287 | 12 | 48  | 8.8  |
| 22 | 32156450 | 32156625 | 175 | 32156512 | 13 | 86  | 15.3 |
| 22 | 32157925 | 32158075 | 150 | 32157937 | 12 | 71  | 0    |
| 22 | 32158875 | 32159025 | 150 | 32158887 | 14 | 80  | 6.6  |
| 22 | 32209850 | 32209925 | 75  | 32209887 | 13 | 37  | 6.6  |
| 22 | 32828775 | 32828825 | 50  | 32828812 | 15 | 28  | 0    |
| 22 | 33485550 | 33485600 | 50  | 33485562 | 13 | 26  | 4.4  |
| 22 | 33489100 | 33489175 | 75  | 33489112 | 12 | 36  | 0    |
| 22 | 33551600 | 33551775 | 175 | 33551737 | 13 | 84  | 10.9 |
| 22 | 33634700 | 33634750 | 50  | 33634712 | 13 | 26  | 0    |
| 22 | 33820700 | 33820850 | 150 | 33820737 | 13 | 75  | 6.6  |
| 22 | 33835175 | 33835200 | 25  | 33835187 | 12 | 12  | 2.2  |
| 22 | 33839825 | 33839850 | 25  | 33839837 | 13 | 13  | 0    |
| 22 | 33901500 | 33901650 | 150 | 33901562 | 14 | 79  | 0    |
| 22 | 34197075 | 34197225 | 150 | 34197112 | 16 | 87  | 0    |
| 22 | 34258400 | 34258475 | 75  | 34258412 | 12 | 36  | 0    |
| 22 | 34259725 | 34259750 | 25  | 34259737 | 12 | 12  | 0    |
| 22 | 34284750 | 34284850 | 100 | 34284762 | 13 | 50  | 8.8  |
| 22 | 34407875 | 34407900 | 25  | 34407887 | 12 | 12  | 0    |
| 22 | 34453400 | 34453600 | 200 | 34453412 | 13 | 85  | 6.6  |
| 22 | 34993900 | 34994000 | 100 | 34993912 | 12 | 48  | 0    |
| 22 | 35319750 | 35319800 | 50  | 35319787 | 13 | 25  | 0    |
| 22 | 35320700 | 35320750 | 50  | 35320712 | 16 | 30  | 4.4  |
| 22 | 35321000 | 35321050 | 50  | 35321037 | 14 | 26  | 0    |
| 22 | 35325850 | 35325975 | 125 | 35325937 | 15 | 67  | 0    |
| 22 | 35342875 | 35342925 | 50  | 35342887 | 13 | 25  | 0    |
| 22 | 35344300 | 35344325 | 25  | 35344312 | 12 | 12  | 2.2  |
| 22 | 35361800 | 35361850 | 50  | 35361812 | 13 | 26  | 4.4  |
| 22 | 35378300 | 35378400 | 100 | 35378312 | 13 | 49  | 8.8  |
| 22 | 35391175 | 35391250 | 75  | 35391187 | 15 | 41  | 0    |

|    |          |          |     |          |    |     |      |
|----|----------|----------|-----|----------|----|-----|------|
| 22 | 35394000 | 35394025 | 25  | 35394012 | 12 | 12  | 0    |
| 22 | 35564425 | 35564625 | 200 | 35564462 | 16 | 107 | 15.3 |
| 22 | 35564975 | 35565025 | 50  | 35564987 | 16 | 30  | 2.2  |
| 22 | 35578750 | 35578775 | 25  | 35578762 | 13 | 13  | 0    |
| 22 | 35605375 | 35605450 | 75  | 35605387 | 12 | 36  | 0    |
| 22 | 35633550 | 35633600 | 50  | 35633587 | 13 | 25  | 0    |
| 22 | 35843625 | 35843775 | 150 | 35843662 | 16 | 82  | 6.6  |
| 22 | 35990225 | 35990475 | 250 | 35990362 | 15 | 128 | 4.4  |
| 22 | 36007025 | 36007150 | 125 | 36007137 | 14 | 61  | 8.8  |
| 22 | 36080175 | 36080200 | 25  | 36080187 | 12 | 12  | 2.2  |
| 22 | 36170700 | 36170750 | 50  | 36170712 | 12 | 24  | 4.4  |
| 22 | 36282375 | 36282400 | 25  | 36282387 | 12 | 12  | 2.2  |
| 22 | 37269675 | 37269775 | 100 | 37269737 | 13 | 49  | 0    |
| 22 | 37525225 | 37525300 | 75  | 37525287 | 14 | 39  | 6.6  |
| 22 | 37539475 | 37539550 | 75  | 37539512 | 16 | 45  | 6.6  |
| 22 | 37541200 | 37541275 | 75  | 37541237 | 13 | 38  | 4.4  |
| 22 | 37547625 | 37547650 | 25  | 37547637 | 12 | 12  | 2.2  |
| 22 | 37554625 | 37554650 | 25  | 37554637 | 13 | 13  | 0    |
| 22 | 37555700 | 37555750 | 50  | 37555712 | 15 | 29  | 2.2  |
| 22 | 37723150 | 37723525 | 375 | 37723337 | 23 | 260 | 8.8  |
| 22 | 37945200 | 37945350 | 150 | 37945312 | 14 | 74  | 0    |
| 22 | 37987925 | 37988025 | 100 | 37988012 | 13 | 49  | 0    |
| 22 | 38184775 | 38184850 | 75  | 38184787 | 13 | 39  | 2.2  |
| 22 | 38304975 | 38305200 | 225 | 38305087 | 13 | 109 | 10.9 |
| 22 | 38327425 | 38327450 | 25  | 38327437 | 12 | 12  | 0    |
| 22 | 38331850 | 38331900 | 50  | 38331862 | 12 | 24  | 0    |
| 22 | 38383700 | 38383750 | 50  | 38383712 | 12 | 24  | 0    |
| 22 | 38398875 | 38399050 | 175 | 38398887 | 17 | 108 | 6.6  |
| 22 | 38400100 | 38400150 | 50  | 38400112 | 13 | 25  | 4.4  |
| 22 | 38460975 | 38461000 | 25  | 38460987 | 12 | 12  | 2.2  |
| 22 | 38524800 | 38524875 | 75  | 38524812 | 12 | 36  | 0    |
| 22 | 38810900 | 38810950 | 50  | 38810912 | 13 | 25  | 0    |
| 22 | 39717025 | 39717125 | 100 | 39717062 | 13 | 50  | 0    |
| 22 | 40698675 | 40698850 | 175 | 40698812 | 13 | 86  | 8.8  |
| 22 | 40759625 | 40759675 | 50  | 40759662 | 13 | 25  | 0    |
| 22 | 40759900 | 40759950 | 50  | 40759937 | 14 | 26  | 0    |
| 22 | 41194925 | 41195075 | 150 | 41194987 | 15 | 81  | 4.4  |
| 22 | 41444775 | 41444800 | 25  | 41444787 | 12 | 12  | 2.2  |
| 22 | 41447675 | 41447775 | 100 | 41447737 | 14 | 51  | 0    |
| 22 | 41458100 | 41458175 | 75  | 41458112 | 13 | 37  | 2.2  |
| 22 | 41583675 | 41583700 | 25  | 41583687 | 15 | 15  | 2.2  |
| 22 | 42024500 | 42024575 | 75  | 42024512 | 16 | 44  | 0    |
| 22 | 42025800 | 42025975 | 175 | 42025912 | 16 | 97  | 0    |
| 22 | 42027875 | 42027900 | 25  | 42027887 | 14 | 14  | 0    |
| 22 | 42029175 | 42029400 | 225 | 42029287 | 16 | 129 | 0    |
| 22 | 42030050 | 42030650 | 600 | 42030362 | 19 | 331 | 6.6  |
| 22 | 42058975 | 42059025 | 50  | 42059012 | 13 | 25  | 4.4  |
| 22 | 42075975 | 42076000 | 25  | 42075987 | 12 | 12  | 2.2  |
| 22 | 42132500 | 42132600 | 100 | 42132562 | 13 | 49  | 0    |
| 22 | 42154250 | 42154275 | 25  | 42154262 | 12 | 12  | 2.2  |
| 22 | 42191200 | 42191250 | 50  | 42191212 | 14 | 26  | 4.4  |
| 22 | 42270125 | 42270200 | 75  | 42270137 | 12 | 35  | 0    |
| 22 | 42280750 | 42280875 | 125 | 42280762 | 12 | 57  | 10.9 |
| 22 | 42281400 | 42281450 | 50  | 42281437 | 14 | 26  | 0    |
| 22 | 42283200 | 42283275 | 75  | 42283237 | 13 | 38  | 2.2  |
| 22 | 42299250 | 42299375 | 125 | 42299287 | 14 | 65  | 8.8  |
| 22 | 42307300 | 42307350 | 50  | 42307312 | 12 | 24  | 0    |
| 22 | 42318800 | 42318900 | 100 | 42318837 | 15 | 55  | 0    |
| 22 | 42329150 | 42329175 | 25  | 42329162 | 12 | 12  | 0    |
| 22 | 42331525 | 42331600 | 75  | 42331587 | 15 | 41  | 6.6  |
| 22 | 42416575 | 42416600 | 25  | 42416587 | 12 | 12  | 0    |
| 22 | 42440725 | 42440825 | 100 | 42440737 | 16 | 59  | 8.8  |
| 22 | 42442475 | 42442575 | 100 | 42442512 | 13 | 50  | 0    |
| 22 | 42501675 | 42501825 | 150 | 42501737 | 15 | 85  | 0    |
| 22 | 42589925 | 42590100 | 175 | 42590037 | 17 | 104 | 0    |
| 22 | 42919775 | 42919825 | 50  | 42919812 | 14 | 27  | 0    |
| 22 | 42948900 | 42948925 | 25  | 42948912 | 13 | 13  | 0    |
| 22 | 42954725 | 42954800 | 75  | 42954737 | 12 | 36  | 2.2  |
| 22 | 43153125 | 43153225 | 100 | 43153187 | 14 | 52  | 0    |
| 22 | 43224375 | 43224475 | 100 | 43224437 | 13 | 49  | 0    |
| 22 | 43233975 | 43234000 | 25  | 43233987 | 13 | 13  | 0    |
| 22 | 43271900 | 43272075 | 175 | 43271937 | 14 | 89  | 10.9 |
| 22 | 43301300 | 43301350 | 50  | 43301337 | 14 | 26  | 0    |
| 22 | 43345950 | 43346075 | 125 | 43346012 | 13 | 61  | 0    |
| 22 | 43352000 | 43352150 | 150 | 43352112 | 15 | 79  | 0    |

|    |          |          |     |          |    |     |      |
|----|----------|----------|-----|----------|----|-----|------|
| 22 | 43357725 | 43357850 | 125 | 43357737 | 13 | 65  | 8.8  |
| 22 | 43364750 | 43364875 | 125 | 43364787 | 14 | 61  | 0    |
| 22 | 43366650 | 43366675 | 25  | 43366662 | 14 | 14  | 2.2  |
| 22 | 43383350 | 43383425 | 75  | 43383362 | 12 | 35  | 0    |
| 22 | 43391800 | 43392225 | 425 | 43392137 | 22 | 229 | 21.9 |
| 22 | 43392625 | 43392650 | 25  | 43392637 | 12 | 12  | 2.2  |
| 22 | 43420075 | 43420625 | 550 | 43420237 | 23 | 320 | 28.4 |
| 22 | 43507400 | 43507475 | 75  | 43507412 | 13 | 38  | 4.4  |
| 22 | 43535625 | 43535725 | 100 | 43535662 | 13 | 49  | 8.8  |
| 22 | 43541025 | 43541075 | 50  | 43541037 | 12 | 24  | 4.4  |
| 22 | 43614500 | 43614525 | 25  | 43614512 | 12 | 12  | 2.2  |
| 22 | 43615375 | 43615500 | 125 | 43615462 | 16 | 75  | 6.6  |
| 22 | 43616300 | 43616400 | 100 | 43616362 | 14 | 51  | 8.8  |
| 22 | 43701025 | 43701225 | 200 | 43701137 | 18 | 117 | 0    |
| 22 | 43760775 | 43760900 | 125 | 43760837 | 14 | 65  | 0    |
| 22 | 43787200 | 43787350 | 150 | 43787287 | 15 | 81  | 0    |
| 22 | 43798100 | 43798200 | 100 | 43798137 | 13 | 49  | 0    |
| 22 | 43812225 | 43812300 | 75  | 43812287 | 14 | 39  | 2.2  |
| 22 | 43818625 | 43818725 | 100 | 43818687 | 13 | 49  | 0    |
| 22 | 43821825 | 43822075 | 250 | 43822012 | 28 | 225 | 21.9 |
| 22 | 43823325 | 43823500 | 175 | 43823387 | 15 | 93  | 0    |
| 22 | 43826050 | 43826250 | 200 | 43826137 | 14 | 99  | 0    |
| 22 | 43826675 | 43826700 | 25  | 43826687 | 13 | 13  | 2.2  |
| 22 | 43852225 | 43852525 | 300 | 43852337 | 19 | 190 | 13.1 |
| 22 | 43909075 | 43909100 | 25  | 43909087 | 12 | 12  | 2.2  |
| 22 | 44066125 | 44066275 | 150 | 44066162 | 15 | 80  | 6.6  |
| 22 | 44172700 | 44172725 | 25  | 44172712 | 12 | 12  | 2.2  |
| 22 | 44187500 | 44187550 | 50  | 44187512 | 12 | 24  | 0    |
| 22 | 44188175 | 44188375 | 200 | 44188312 | 18 | 124 | 13.1 |
| 22 | 44257875 | 44257900 | 25  | 44257887 | 12 | 12  | 2.2  |
| 22 | 44298850 | 44298875 | 25  | 44298862 | 13 | 13  | 2.2  |
| 22 | 44312300 | 44312375 | 75  | 44312312 | 12 | 36  | 6.6  |
| 22 | 44316175 | 44316200 | 25  | 44316187 | 12 | 12  | 0    |
| 22 | 44319350 | 44319400 | 50  | 44319387 | 13 | 25  | 0    |
| 22 | 44324750 | 44325100 | 350 | 44325087 | 44 | 378 | 24.1 |
| 22 | 44336875 | 44337300 | 425 | 44337112 | 18 | 235 | 41.6 |
| 22 | 44337825 | 44337900 | 75  | 44337837 | 13 | 39  | 0    |
| 22 | 44338450 | 44338900 | 450 | 44338862 | 14 | 199 | 35   |
| 22 | 44339175 | 44340050 | 875 | 44339937 | 21 | 434 | 17.5 |
| 22 | 44414050 | 44414075 | 25  | 44414062 | 12 | 12  | 0    |
| 22 | 44662075 | 44662150 | 75  | 44662087 | 12 | 36  | 0    |
| 22 | 44675275 | 44675300 | 25  | 44675287 | 12 | 12  | 2.2  |
| 22 | 44688625 | 44688725 | 100 | 44688637 | 16 | 56  | 2.2  |
| 22 | 44759675 | 44759700 | 25  | 44759687 | 12 | 12  | 2.2  |
| 22 | 44918100 | 44918125 | 25  | 44918112 | 12 | 12  | 0    |
| 22 | 45034750 | 45034875 | 125 | 45034787 | 19 | 80  | 6.6  |
| 22 | 45224875 | 45224925 | 50  | 45224887 | 12 | 24  | 0    |
| 22 | 45309350 | 45309450 | 100 | 45309412 | 15 | 56  | 0    |
| 22 | 45309950 | 45310025 | 75  | 45309962 | 13 | 38  | 2.2  |
| 22 | 45310250 | 45310400 | 150 | 45310337 | 15 | 81  | 0    |
| 22 | 45326825 | 45327050 | 225 | 45326887 | 15 | 114 | 0    |
| 22 | 45328275 | 45328425 | 150 | 45328312 | 14 | 79  | 0    |
| 22 | 45331825 | 45331875 | 50  | 45331837 | 13 | 26  | 4.4  |
| 22 | 45387875 | 45387900 | 25  | 45387887 | 12 | 12  | 2.2  |
| 22 | 45413900 | 45413925 | 25  | 45413912 | 12 | 12  | 0    |
| 22 | 45602475 | 45602500 | 25  | 45602487 | 12 | 12  | 0    |
| 22 | 45609125 | 45609450 | 325 | 45609412 | 15 | 154 | 6.6  |
| 22 | 45796100 | 45796250 | 150 | 45796112 | 14 | 79  | 0    |
| 22 | 45873175 | 45873225 | 50  | 45873187 | 13 | 25  | 4.4  |
| 22 | 45939425 | 45939525 | 100 | 45939487 | 13 | 50  | 0    |
| 22 | 45988225 | 45988375 | 150 | 45988237 | 12 | 66  | 6.6  |
| 22 | 46000700 | 46000725 | 25  | 46000712 | 12 | 12  | 2.2  |
| 22 | 46024175 | 46024200 | 25  | 46024187 | 13 | 13  | 2.2  |
| 22 | 46033800 | 46033925 | 125 | 46033837 | 16 | 72  | 0    |
| 22 | 46053200 | 46053325 | 125 | 46053312 | 17 | 66  | 2.2  |
| 22 | 46062225 | 46062300 | 75  | 46062262 | 13 | 37  | 0    |
| 22 | 46067950 | 46068150 | 200 | 46068037 | 15 | 111 | 8.8  |
| 22 | 46069625 | 46069650 | 25  | 46069637 | 12 | 12  | 0    |
| 22 | 46069950 | 46070200 | 250 | 46069962 | 17 | 134 | 0    |
| 22 | 46071325 | 46071525 | 200 | 46071412 | 15 | 104 | 0    |
| 22 | 46071925 | 46071975 | 50  | 46071937 | 12 | 24  | 0    |
| 22 | 46072650 | 46072825 | 175 | 46072662 | 13 | 82  | 0    |
| 22 | 46097000 | 46097200 | 200 | 46097037 | 14 | 96  | 0    |
| 22 | 46117950 | 46117975 | 25  | 46117962 | 12 | 12  | 2.2  |
| 22 | 46119075 | 46119100 | 25  | 46119087 | 12 | 12  | 2.2  |

|    |          |          |     |          |    |     |      |
|----|----------|----------|-----|----------|----|-----|------|
| 22 | 46126525 | 46126825 | 300 | 46126687 | 16 | 152 | 0    |
| 22 | 46131725 | 46131825 | 100 | 46131737 | 15 | 53  | 6.6  |
| 22 | 46159375 | 46159675 | 300 | 46159537 | 24 | 227 | 10.9 |
| 22 | 46209125 | 46209300 | 175 | 46209162 | 16 | 103 | 2.2  |
| 22 | 46212100 | 46212300 | 200 | 46212237 | 21 | 143 | 0    |
| 22 | 46238825 | 46238850 | 25  | 46238837 | 12 | 12  | 0    |
| 22 | 46247250 | 46247300 | 50  | 46247262 | 13 | 25  | 0    |
| 22 | 46314600 | 46314625 | 25  | 46314612 | 12 | 12  | 2.2  |
| 22 | 46344350 | 46344450 | 100 | 46344387 | 14 | 53  | 2.2  |
| 22 | 46367850 | 46367925 | 75  | 46367887 | 14 | 38  | 0    |
| 22 | 46368600 | 46368675 | 75  | 46368612 | 16 | 44  | 0    |
| 22 | 46456625 | 46456775 | 150 | 46456687 | 14 | 77  | 0    |
| 22 | 46584125 | 46584200 | 75  | 46584162 | 13 | 37  | 6.6  |
| 22 | 46588850 | 46589250 | 400 | 46589187 | 18 | 246 | 0    |
| 22 | 46607100 | 46607325 | 225 | 46607187 | 17 | 131 | 0    |
| 22 | 46608150 | 46608175 | 25  | 46608162 | 12 | 12  | 0    |
| 22 | 46608400 | 46608425 | 25  | 46608412 | 13 | 13  | 0    |
| 22 | 46694925 | 46695100 | 175 | 46695037 | 16 | 95  | 10.9 |
| 22 | 46696200 | 46696250 | 50  | 46696212 | 12 | 24  | 4.4  |
| 22 | 46702400 | 46702425 | 25  | 46702412 | 13 | 13  | 0    |
| 22 | 46791425 | 46791475 | 50  | 46791437 | 12 | 24  | 0    |
| 22 | 46793975 | 46794075 | 100 | 46794012 | 13 | 51  | 0    |
| 22 | 46842075 | 46842150 | 75  | 46842087 | 14 | 39  | 0    |
| 22 | 46844450 | 46844525 | 75  | 46844512 | 14 | 38  | 0    |
| 22 | 46855425 | 46855625 | 200 | 46855537 | 16 | 105 | 0    |
| 22 | 46856350 | 46856375 | 25  | 46856362 | 12 | 12  | 0    |
| 22 | 46868575 | 46868650 | 75  | 46868612 | 13 | 37  | 0    |
| 22 | 46876225 | 46876300 | 75  | 46876287 | 13 | 37  | 0    |
| 22 | 46878825 | 46879025 | 200 | 46878962 | 20 | 130 | 0    |
| 22 | 46883450 | 46883600 | 150 | 46883512 | 14 | 76  | 0    |
| 22 | 46896550 | 46896700 | 150 | 46896612 | 14 | 78  | 0    |
| 22 | 46916650 | 46916775 | 125 | 46916662 | 12 | 56  | 8.8  |
| 22 | 46993650 | 46993700 | 50  | 46993662 | 12 | 24  | 4.4  |
| 22 | 47008600 | 47008725 | 125 | 47008612 | 13 | 64  | 0    |
| 22 | 47018300 | 47018350 | 50  | 47018312 | 12 | 24  | 2.2  |
| 22 | 47033550 | 47033675 | 125 | 47033612 | 14 | 65  | 8.8  |
| 22 | 47107400 | 47107475 | 75  | 47107437 | 13 | 38  | 0    |
| 22 | 47131800 | 47131825 | 25  | 47131812 | 12 | 12  | 2.2  |
| 22 | 47133800 | 47133950 | 150 | 47133862 | 18 | 94  | 8.8  |
| 22 | 47177300 | 47177375 | 75  | 47177337 | 13 | 38  | 0    |
| 22 | 47221350 | 47221375 | 25  | 47221362 | 13 | 13  | 2.2  |
| 22 | 47223150 | 47223575 | 425 | 47223362 | 19 | 252 | 4.4  |
| 22 | 47226050 | 47226200 | 150 | 47226087 | 17 | 90  | 0    |
| 22 | 47252800 | 47252925 | 125 | 47252912 | 13 | 60  | 0    |
| 22 | 47308925 | 47309000 | 75  | 47308937 | 13 | 39  | 6.6  |
| 22 | 47319225 | 47319275 | 50  | 47319237 | 12 | 24  | 0    |
| 22 | 47320650 | 47320825 | 175 | 47320787 | 15 | 95  | 4.4  |
| 22 | 47324125 | 47324225 | 100 | 47324187 | 16 | 58  | 0    |
| 22 | 47338500 | 47338525 | 25  | 47338512 | 12 | 12  | 0    |
| 22 | 47340075 | 47340200 | 125 | 47340137 | 17 | 76  | 8.8  |
| 22 | 47343450 | 47343500 | 50  | 47343487 | 15 | 29  | 0    |
| 22 | 47343950 | 47344125 | 175 | 47344087 | 23 | 136 | 4.4  |
| 22 | 47346900 | 47347000 | 100 | 47346962 | 17 | 61  | 0    |
| 22 | 47348800 | 47348875 | 75  | 47348837 | 14 | 38  | 0    |
| 22 | 47379875 | 47380025 | 150 | 47379912 | 13 | 73  | 8.8  |
| 22 | 47381875 | 47381925 | 50  | 47381912 | 15 | 29  | 4.4  |
| 22 | 47434050 | 47434150 | 100 | 47434062 | 13 | 50  | 8.8  |
| 22 | 47453800 | 47453875 | 75  | 47453812 | 12 | 36  | 2.2  |
| 22 | 47484925 | 47485075 | 150 | 47485037 | 16 | 86  | 8.8  |
| 22 | 47491475 | 47491500 | 25  | 47491487 | 12 | 12  | 0    |
| 22 | 47493575 | 47493600 | 25  | 47493587 | 12 | 12  | 2.2  |
| 22 | 47521625 | 47521800 | 175 | 47521637 | 12 | 77  | 0    |
| 22 | 47541300 | 47541475 | 175 | 47541312 | 13 | 78  | 0    |
| 22 | 47542575 | 47542825 | 250 | 47542737 | 16 | 127 | 0    |
| 22 | 47554425 | 47554525 | 100 | 47554462 | 14 | 53  | 0    |
| 22 | 47561125 | 47561200 | 75  | 47561137 | 13 | 39  | 6.6  |
| 22 | 47581000 | 47581025 | 25  | 47581012 | 12 | 12  | 0    |
| 22 | 47617400 | 47617425 | 25  | 47617412 | 12 | 12  | 0    |
| 22 | 47618825 | 47619400 | 575 | 47619337 | 19 | 291 | 8.8  |
| 22 | 47639225 | 47639325 | 100 | 47639262 | 15 | 55  | 0    |
| 22 | 47664025 | 47664175 | 150 | 47664087 | 17 | 91  | 0    |
| 22 | 47673250 | 47673350 | 100 | 47673287 | 13 | 50  | 0    |
| 22 | 47698850 | 47698975 | 125 | 47698862 | 14 | 61  | 2.2  |
| 22 | 47719150 | 47719250 | 100 | 47719187 | 13 | 48  | 0    |
| 22 | 47761250 | 47761325 | 75  | 47761312 | 15 | 38  | 0    |

|    |          |          |     |          |    |     |       |
|----|----------|----------|-----|----------|----|-----|-------|
| 22 | 47786900 | 47786925 | 25  | 47786912 | 12 | 12  | 0     |
| 22 | 47882225 | 47882250 | 25  | 47882237 | 12 | 12  | 2.2   |
| 22 | 47900725 | 47900775 | 50  | 47900762 | 13 | 25  | 0     |
| 22 | 47905450 | 47905725 | 275 | 47905637 | 13 | 121 | 0     |
| 22 | 47939775 | 47939875 | 100 | 47939837 | 14 | 51  | 0     |
| 22 | 47950375 | 47950400 | 25  | 47950387 | 12 | 12  | 0     |
| 22 | 47959900 | 47960050 | 150 | 47959987 | 14 | 78  | 6.6   |
| 22 | 47965875 | 47965950 | 75  | 47965937 | 13 | 37  | 0     |
| 22 | 47975175 | 47975200 | 25  | 47975187 | 13 | 13  | 0     |
| 22 | 47988375 | 47988500 | 125 | 47988387 | 14 | 67  | 8.8   |
| 22 | 47996975 | 47997100 | 125 | 47997062 | 13 | 61  | 8.8   |
| 22 | 48023350 | 48023525 | 175 | 48023387 | 14 | 86  | 0     |
| 22 | 48035975 | 48036000 | 25  | 48035987 | 12 | 12  | 0     |
| 22 | 48057525 | 48057700 | 175 | 48057637 | 15 | 92  | 6.6   |
| 22 | 48060250 | 48060375 | 125 | 48060337 | 14 | 62  | 6.6   |
| 22 | 48064575 | 48064725 | 150 | 48064662 | 15 | 80  | 0     |
| 22 | 48065075 | 48065125 | 50  | 48065087 | 14 | 28  | 0     |
| 22 | 48066175 | 48066250 | 75  | 48066237 | 14 | 39  | 6.6   |
| 22 | 48068325 | 48068475 | 150 | 48068412 | 14 | 80  | 8.8   |
| 22 | 48075000 | 48075100 | 100 | 48075037 | 15 | 57  | 0     |
| 22 | 48078675 | 48078725 | 50  | 48078687 | 14 | 26  | 4.4   |
| 22 | 48105650 | 48105675 | 25  | 48105662 | 12 | 12  | 2.2   |
| 22 | 48107375 | 48107400 | 25  | 48107387 | 12 | 12  | 2.2   |
| 22 | 48108550 | 48108600 | 50  | 48108562 | 12 | 24  | 0     |
| 22 | 48113075 | 48113175 | 100 | 48113087 | 15 | 54  | 0     |
| 22 | 48114100 | 48114125 | 25  | 48114112 | 12 | 12  | 2.2   |
| 22 | 48115200 | 48115225 | 25  | 48115212 | 12 | 12  | 0     |
| 22 | 48116725 | 48116750 | 25  | 48116737 | 12 | 12  | 0     |
| 22 | 48122550 | 48122700 | 150 | 48122562 | 13 | 71  | 4.4   |
| 22 | 48131225 | 48131300 | 75  | 48131237 | 12 | 36  | 0     |
| 22 | 48146400 | 48146450 | 50  | 48146412 | 14 | 26  | 0     |
| 22 | 48197700 | 48197725 | 25  | 48197712 | 12 | 12  | 0     |
| 22 | 48202525 | 48202550 | 25  | 48202537 | 12 | 12  | 0     |
| 22 | 48220625 | 48220825 | 200 | 48220687 | 18 | 122 | 0     |
| 22 | 48230875 | 48230925 | 50  | 48230887 | 14 | 28  | 4.4   |
| 22 | 48238025 | 48238325 | 300 | 48238162 | 21 | 193 | 17.5  |
| 22 | 48274525 | 48274625 | 100 | 48274612 | 13 | 49  | 8.8   |
| 22 | 48304450 | 48304600 | 150 | 48304537 | 14 | 72  | 0     |
| 22 | 48313750 | 48313775 | 25  | 48313762 | 14 | 14  | 2.2   |
| 22 | 48344825 | 48344850 | 25  | 48344837 | 12 | 12  | 0     |
| 22 | 48366175 | 48366225 | 50  | 48366187 | 13 | 25  | 4.4   |
| 22 | 48382300 | 48382325 | 25  | 48382312 | 12 | 12  | 0     |
| 22 | 48394825 | 48395050 | 225 | 48394912 | 18 | 139 | 15.3  |
| 22 | 48442475 | 48442550 | 75  | 48442512 | 13 | 37  | 6.6   |
| 22 | 48442875 | 48443125 | 250 | 48442887 | 13 | 115 | 2.2   |
| 22 | 48451475 | 48451525 | 50  | 48451487 | 12 | 24  | 4.4   |
| 22 | 48467175 | 48467225 | 50  | 48467187 | 12 | 24  | 4.4   |
| 22 | 48468000 | 48468025 | 25  | 48468012 | 12 | 12  | 0     |
| 22 | 48470450 | 48470475 | 25  | 48470462 | 17 | 17  | 2.2   |
| 22 | 48478150 | 48478275 | 125 | 48478162 | 12 | 55  | 0     |
| 22 | 48484675 | 48484725 | 50  | 48484687 | 12 | 24  | 4.4   |
| 22 | 48498075 | 48498250 | 175 | 48498162 | 14 | 94  | 0     |
| 22 | 48665625 | 48665675 | 50  | 48665662 | 14 | 27  | 4.4   |
| 22 | 48668475 | 48668500 | 25  | 48668487 | 14 | 14  | 0     |
| 22 | 48681200 | 48681225 | 25  | 48681212 | 13 | 13  | 2.2   |
| 22 | 48769100 | 48769300 | 200 | 48769212 | 16 | 107 | 15.3  |
| 22 | 48820175 | 48820950 | 775 | 48820637 | 36 | 685 | 122.5 |
| 22 | 48821400 | 48821425 | 25  | 48821412 | 12 | 12  | 2.2   |
| 22 | 48867950 | 48868525 | 575 | 48868162 | 30 | 516 | 43.8  |
| 22 | 48870875 | 48871050 | 175 | 48870962 | 17 | 103 | 0     |
| 22 | 48883625 | 48883800 | 175 | 48883662 | 13 | 88  | 0     |
| 22 | 48896350 | 48896425 | 75  | 48896362 | 12 | 35  | 6.6   |
| 22 | 48899275 | 48899400 | 125 | 48899287 | 13 | 64  | 4.4   |
| 22 | 48902300 | 48902325 | 25  | 48902312 | 12 | 12  | 2.2   |
| 22 | 48905200 | 48905375 | 175 | 48905287 | 17 | 101 | 0     |
| 22 | 48907625 | 48907800 | 175 | 48907687 | 15 | 90  | 0     |
| 22 | 48912425 | 48912600 | 175 | 48912487 | 14 | 92  | 0     |
| 22 | 49460675 | 49461150 | 475 | 49460837 | 15 | 228 | 2.2   |
| 1  | 812075   | 812175   | 100 | 812112   | 13 | 50  | 2.2   |
| 1  | 815800   | 816150   | 350 | 815987   | 18 | 215 | 0     |
| 1  | 1038925  | 1039075  | 150 | 1038937  | 12 | 68  | 4.4   |
| 1  | 1896250  | 1896400  | 150 | 1896337  | 14 | 76  | 0     |
| 1  | 1900825  | 1900850  | 25  | 1900837  | 12 | 12  | 0     |
| 1  | 2043025  | 2043225  | 200 | 2043037  | 13 | 86  | 2.2   |
| 1  | 2101825  | 2101850  | 25  | 2101837  | 12 | 12  | 0     |

|   |           |           |     |           |    |     |      |
|---|-----------|-----------|-----|-----------|----|-----|------|
| 1 | 2199100   | 2199125   | 25  | 2199112   | 12 | 12  | 0    |
| 1 | 2552125   | 2552200   | 75  | 2552137   | 12 | 36  | 6.6  |
| 1 | 2961100   | 2961125   | 25  | 2961112   | 12 | 12  | 0    |
| 1 | 3024450   | 3024475   | 25  | 3024462   | 12 | 12  | 0    |
| 1 | 3145275   | 3145450   | 175 | 3145387   | 15 | 94  | 0    |
| 1 | 3204375   | 3204800   | 425 | 3204737   | 16 | 211 | 13.1 |
| 1 | 3315400   | 3315500   | 100 | 3315412   | 12 | 46  | 0    |
| 1 | 3394725   | 3394875   | 150 | 3394787   | 15 | 83  | 0    |
| 1 | 3417975   | 3418000   | 25  | 3417987   | 12 | 12  | 0    |
| 1 | 3418400   | 3418550   | 150 | 3418437   | 14 | 77  | 0    |
| 1 | 5650225   | 5650250   | 25  | 5650237   | 23 | 23  | 4.4  |
| 1 | 5651150   | 5651175   | 25  | 5651162   | 22 | 22  | 4.4  |
| 1 | 5653350   | 5653425   | 75  | 5653362   | 13 | 39  | 6.6  |
| 1 | 5654525   | 5655400   | 875 | 5655137   | 20 | 470 | 89.7 |
| 1 | 5746775   | 5746800   | 25  | 5746787   | 12 | 12  | 0    |
| 1 | 5791550   | 5791675   | 125 | 5791587   | 13 | 61  | 0    |
| 1 | 5792225   | 5792300   | 75  | 5792262   | 13 | 37  | 0    |
| 1 | 7036550   | 7036625   | 75  | 7036562   | 12 | 36  | 0    |
| 1 | 7241375   | 7241425   | 50  | 7241387   | 12 | 24  | 0    |
| 1 | 7330825   | 7330950   | 125 | 7330912   | 14 | 65  | 10.9 |
| 1 | 7695775   | 7695800   | 25  | 7695787   | 12 | 12  | 0    |
| 1 | 8108350   | 8108375   | 25  | 8108362   | 12 | 12  | 0    |
| 1 | 9393725   | 9393775   | 50  | 9393737   | 12 | 24  | 0    |
| 1 | 9699200   | 9699250   | 50  | 9699212   | 12 | 24  | 0    |
| 1 | 10825650  | 10825675  | 25  | 10825662  | 12 | 12  | 0    |
| 1 | 10936450  | 10936575  | 125 | 10936462  | 13 | 62  | 8.8  |
| 1 | 12046375  | 12046400  | 25  | 12046387  | 12 | 12  | 0    |
| 1 | 14952950  | 14953025  | 75  | 14952987  | 13 | 37  | 0    |
| 1 | 16927025  | 16927075  | 50  | 16927037  | 13 | 25  | 0    |
| 1 | 17274000  | 17274125  | 125 | 17274012  | 13 | 64  | 0    |
| 1 | 17290900  | 17291075  | 175 | 17290962  | 15 | 96  | 0    |
| 1 | 17291325  | 17291550  | 225 | 17291387  | 22 | 165 | 13.1 |
| 1 | 17292600  | 17292800  | 200 | 17292662  | 15 | 111 | 0    |
| 1 | 17354625  | 17354650  | 25  | 17354637  | 12 | 12  | 0    |
| 1 | 20296100  | 20296200  | 100 | 20296137  | 13 | 49  | 0    |
| 1 | 21994075  | 21994100  | 25  | 21994087  | 12 | 12  | 2.2  |
| 1 | 22060975  | 22061025  | 50  | 22060987  | 12 | 24  | 0    |
| 1 | 23561500  | 23561700  | 200 | 23561637  | 15 | 103 | 0    |
| 1 | 29699850  | 29699950  | 100 | 29699862  | 12 | 48  | 2.2  |
| 1 | 33810650  | 33810775  | 125 | 33810662  | 13 | 62  | 2.2  |
| 1 | 33824275  | 33824325  | 50  | 33824312  | 13 | 25  | 0    |
| 1 | 34999725  | 34999750  | 25  | 34999737  | 13 | 13  | 0    |
| 1 | 35769100  | 35769325  | 225 | 35769112  | 14 | 111 | 13.1 |
| 1 | 44358800  | 44358875  | 75  | 44358812  | 12 | 36  | 0    |
| 1 | 44744550  | 44744575  | 25  | 44744562  | 12 | 12  | 0    |
| 1 | 47469975  | 47470000  | 25  | 47469987  | 13 | 13  | 0    |
| 1 | 48010150  | 48010300  | 150 | 48010237  | 13 | 72  | 0    |
| 1 | 52187700  | 52188050  | 350 | 52187937  | 17 | 197 | 0    |
| 1 | 64430375  | 64430400  | 25  | 64430387  | 12 | 12  | 2.2  |
| 1 | 96090975  | 96091000  | 25  | 96090987  | 12 | 12  | 0    |
| 1 | 110505075 | 110505225 | 150 | 110505112 | 15 | 82  | 0    |
| 1 | 110861975 | 110862150 | 175 | 110862062 | 14 | 89  | 10.9 |
| 1 | 112326475 | 112326650 | 175 | 112326537 | 14 | 93  | 4.4  |
| 1 | 141479350 | 141479650 | 300 | 141479412 | 22 | 203 | 13.1 |
| 1 | 141481900 | 141481925 | 25  | 141481912 | 14 | 14  | 2.2  |
| 1 | 141602800 | 141602925 | 125 | 141602862 | 14 | 65  | 0    |
| 1 | 141815400 | 141815550 | 150 | 141815462 | 16 | 89  | 6.6  |
| 1 | 142120100 | 142120125 | 25  | 142120112 | 12 | 12  | 2.2  |
| 1 | 142298150 | 142298225 | 75  | 142298187 | 15 | 41  | 6.6  |
| 1 | 142299125 | 142299150 | 25  | 142299137 | 14 | 14  | 2.2  |
| 1 | 142310200 | 142310225 | 25  | 142310212 | 12 | 12  | 2.2  |
| 1 | 142310475 | 142310675 | 200 | 142310512 | 19 | 113 | 15.3 |
| 1 | 143555000 | 143555075 | 75  | 143555012 | 12 | 36  | 6.6  |
| 1 | 143576725 | 143576800 | 75  | 143576737 | 17 | 49  | 0    |
| 1 | 143705875 | 143705900 | 25  | 143705887 | 12 | 12  | 2.2  |
| 1 | 143714025 | 143714050 | 25  | 143714037 | 12 | 12  | 0    |
| 1 | 143734925 | 143735000 | 75  | 143734937 | 12 | 35  | 0    |
| 1 | 143787400 | 143787425 | 25  | 143787412 | 12 | 12  | 2.2  |
| 1 | 146185550 | 146185575 | 25  | 146185562 | 12 | 12  | 2.2  |
| 1 | 146818150 | 146818225 | 75  | 146818212 | 15 | 42  | 0    |
| 1 | 150348775 | 150348825 | 50  | 150348812 | 13 | 25  | 0    |
| 1 | 150350850 | 150350950 | 100 | 150350887 | 15 | 54  | 8.8  |
| 1 | 150552725 | 150552800 | 75  | 150552737 | 12 | 36  | 0    |
| 1 | 151619750 | 151619925 | 175 | 151619862 | 15 | 94  | 13.1 |
| 1 | 153861575 | 153861600 | 25  | 153861587 | 12 | 12  | 0    |

|   |           |           |     |           |    |     |      |
|---|-----------|-----------|-----|-----------|----|-----|------|
| 1 | 156417850 | 156417975 | 125 | 156417912 | 14 | 64  | 6.6  |
| 1 | 159285875 | 159285950 | 75  | 159285887 | 12 | 36  | 0    |
| 1 | 163589125 | 163589150 | 25  | 163589137 | 12 | 12  | 0    |
| 1 | 171873775 | 171873825 | 50  | 171873812 | 14 | 27  | 0    |
| 1 | 177811050 | 177811075 | 25  | 177811062 | 12 | 12  | 0    |
| 1 | 178010300 | 178010350 | 50  | 178010312 | 12 | 24  | 0    |
| 1 | 200860775 | 200860800 | 25  | 200860787 | 15 | 15  | 2.2  |
| 1 | 202424900 | 202424975 | 75  | 202424912 | 14 | 42  | 4.4  |
| 1 | 205164250 | 205164375 | 125 | 205164262 | 13 | 60  | 6.6  |
| 1 | 205885275 | 205885400 | 125 | 205885287 | 13 | 61  | 0    |
| 1 | 211962600 | 211962625 | 25  | 211962612 | 12 | 12  | 2.2  |
| 1 | 212357950 | 212358100 | 150 | 212358062 | 14 | 76  | 10.9 |
| 1 | 221729550 | 221729575 | 25  | 221729562 | 12 | 12  | 2.2  |
| 1 | 224871475 | 224871500 | 25  | 224871487 | 12 | 12  | 0    |
| 1 | 226344350 | 226344500 | 150 | 226344437 | 16 | 83  | 10.9 |
| 1 | 226348450 | 226348525 | 75  | 226348487 | 16 | 45  | 4.4  |
| 1 | 226762800 | 226762925 | 125 | 226762862 | 13 | 62  | 0    |
| 1 | 227094050 | 227094125 | 75  | 227094062 | 12 | 36  | 4.4  |
| 1 | 227099900 | 227100025 | 125 | 227099937 | 14 | 64  | 0    |
| 1 | 227633825 | 227633900 | 75  | 227633837 | 13 | 39  | 0    |
| 1 | 228185025 | 228185050 | 25  | 228185037 | 12 | 12  | 0    |
| 1 | 228208775 | 228208800 | 25  | 228208787 | 12 | 12  | 0    |
| 1 | 228222525 | 228222650 | 125 | 228222587 | 14 | 63  | 0    |
| 1 | 231101800 | 231101850 | 50  | 231101837 | 13 | 25  | 0    |
| 1 | 232981600 | 232981725 | 125 | 232981687 | 14 | 65  | 8.8  |
| 1 | 233045075 | 233045100 | 25  | 233045087 | 12 | 12  | 0    |
| 1 | 233819100 | 233819200 | 100 | 233819162 | 16 | 55  | 0    |
| 1 | 242805425 | 242805475 | 50  | 242805462 | 13 | 25  | 2.2  |
| 1 | 244747475 | 244747575 | 100 | 244747512 | 13 | 51  | 0    |
| 1 | 245015775 | 245015800 | 25  | 245015787 | 18 | 18  | 0    |
| 1 | 246634125 | 246634150 | 25  | 246634137 | 12 | 12  | 2.2  |
| 3 | 9237700   | 9237775   | 75  | 9237737   | 13 | 37  | 0    |
| 3 | 10588050  | 10588075  | 25  | 10588062  | 12 | 12  | 2.2  |
| 3 | 14707325  | 14707350  | 25  | 14707337  | 12 | 12  | 2.2  |
| 3 | 14835975  | 14836000  | 25  | 14835987  | 12 | 12  | 2.2  |
| 3 | 14922900  | 14922925  | 25  | 14922912  | 12 | 12  | 0    |
| 3 | 15894900  | 15894925  | 25  | 15894912  | 14 | 14  | 0    |
| 3 | 31470000  | 31470075  | 75  | 31470012  | 14 | 42  | 0    |
| 3 | 31665075  | 31665200  | 125 | 31665087  | 12 | 57  | 0    |
| 3 | 42281325  | 42281500  | 175 | 42281387  | 16 | 102 | 0    |
| 3 | 42338225  | 42338275  | 50  | 42338237  | 13 | 25  | 0    |
| 3 | 42923075  | 42923100  | 25  | 42923087  | 12 | 12  | 0    |
| 3 | 44189800  | 44189825  | 25  | 44189812  | 12 | 12  | 0    |
| 3 | 44729350  | 44729450  | 100 | 44729362  | 12 | 46  | 0    |
| 3 | 45922075  | 45922125  | 50  | 45922087  | 12 | 24  | 0    |
| 3 | 49644200  | 49644225  | 25  | 49644212  | 12 | 12  | 0    |
| 3 | 54402775  | 54402825  | 50  | 54402812  | 13 | 25  | 0    |
| 3 | 56692775  | 56692800  | 25  | 56692787  | 13 | 13  | 2.2  |
| 3 | 58068525  | 58068550  | 25  | 58068537  | 12 | 12  | 0    |
| 3 | 58069950  | 58070025  | 75  | 58069962  | 13 | 37  | 0    |
| 3 | 58072650  | 58072675  | 25  | 58072662  | 12 | 12  | 0    |
| 3 | 58642000  | 58642100  | 100 | 58642062  | 14 | 51  | 0    |
| 3 | 60485450  | 60485525  | 75  | 60485462  | 14 | 38  | 6.6  |
| 3 | 60511750  | 60511850  | 100 | 60511787  | 14 | 50  | 0    |
| 3 | 60518875  | 60518900  | 25  | 60518887  | 12 | 12  | 0    |
| 3 | 60519300  | 60519325  | 25  | 60519312  | 12 | 12  | 2.2  |
| 3 | 60536600  | 60536650  | 50  | 60536612  | 13 | 25  | 0    |
| 3 | 60555225  | 60555325  | 100 | 60555237  | 13 | 50  | 6.6  |
| 3 | 60583725  | 60583750  | 25  | 60583737  | 13 | 13  | 2.2  |
| 3 | 60590775  | 60590800  | 25  | 60590787  | 12 | 12  | 2.2  |
| 3 | 60591375  | 60591400  | 25  | 60591387  | 14 | 14  | 2.2  |
| 3 | 60593250  | 60593300  | 50  | 60593262  | 14 | 26  | 2.2  |
| 3 | 60594550  | 60594675  | 125 | 60594562  | 17 | 76  | 4.4  |
| 3 | 60594975  | 60595000  | 25  | 60594987  | 13 | 13  | 0    |
| 3 | 60606025  | 60606050  | 25  | 60606037  | 12 | 12  | 2.2  |
| 3 | 60691275  | 60691375  | 100 | 60691362  | 17 | 59  | 6.6  |
| 3 | 60692925  | 60693350  | 425 | 60692962  | 14 | 208 | 32.8 |
| 3 | 60710800  | 60710825  | 25  | 60710812  | 13 | 13  | 2.2  |
| 3 | 60711575  | 60711850  | 275 | 60711762  | 26 | 226 | 8.8  |
| 3 | 60713100  | 60713300  | 200 | 60713187  | 18 | 120 | 13.1 |
| 3 | 60718600  | 60718675  | 75  | 60718612  | 13 | 37  | 4.4  |
| 3 | 60720975  | 60721175  | 200 | 60721062  | 18 | 114 | 4.4  |
| 3 | 60726600  | 60726650  | 50  | 60726612  | 12 | 24  | 4.4  |
| 3 | 60736075  | 60736625  | 550 | 60736512  | 19 | 274 | 13.1 |
| 3 | 60786225  | 60786375  | 150 | 60786312  | 14 | 77  | 8.8  |



|   |          |          |     |          |    |     |      |
|---|----------|----------|-----|----------|----|-----|------|
| 3 | 60817575 | 60817600 | 25  | 60817587 | 12 | 12  | 2.2  |
| 3 | 60838125 | 60838175 | 50  | 60838137 | 13 | 25  | 4.4  |
| 3 | 60853075 | 60853100 | 25  | 60853087 | 12 | 12  | 2.2  |
| 3 | 60917050 | 60917075 | 25  | 60917062 | 12 | 12  | 2.2  |
| 3 | 60944200 | 60944375 | 175 | 60944262 | 32 | 200 | 24.1 |
| 3 | 60955375 | 60955525 | 150 | 60955412 | 15 | 84  | 6.6  |
| 3 | 61027800 | 61027825 | 25  | 61027812 | 13 | 13  | 2.2  |
| 3 | 61087700 | 61087725 | 25  | 61087712 | 12 | 12  | 2.2  |
| 3 | 61182650 | 61182700 | 50  | 61182662 | 12 | 24  | 4.4  |
| 3 | 61210925 | 61211025 | 100 | 61210962 | 15 | 53  | 2.2  |
| 3 | 61214025 | 61214100 | 75  | 61214062 | 15 | 43  | 0    |
| 3 | 61216800 | 61216825 | 25  | 61216812 | 12 | 12  | 2.2  |
| 3 | 61266000 | 61266025 | 25  | 61266012 | 13 | 13  | 0    |
| 3 | 61275375 | 61275400 | 25  | 61275387 | 13 | 13  | 2.2  |
| 3 | 61276650 | 61276725 | 75  | 61276687 | 14 | 39  | 6.6  |
| 3 | 61284050 | 61284125 | 75  | 61284112 | 13 | 37  | 0    |
| 3 | 61306525 | 61306575 | 50  | 61306537 | 13 | 25  | 4.4  |
| 3 | 61309525 | 61309600 | 75  | 61309537 | 12 | 36  | 0    |
| 3 | 61316750 | 61316800 | 50  | 61316762 | 15 | 29  | 2.2  |
| 3 | 61324925 | 61324975 | 50  | 61324962 | 13 | 25  | 0    |
| 3 | 61369925 | 61369975 | 50  | 61369937 | 12 | 24  | 0    |
| 3 | 61370475 | 61370550 | 75  | 61370487 | 12 | 36  | 0    |
| 3 | 61372575 | 61372750 | 175 | 61372662 | 16 | 99  | 13.1 |
| 3 | 61381350 | 61381400 | 50  | 61381362 | 12 | 24  | 2.2  |
| 3 | 61389900 | 61389925 | 25  | 61389912 | 13 | 13  | 2.2  |
| 3 | 61402925 | 61403025 | 100 | 61402962 | 14 | 53  | 2.2  |
| 3 | 61413450 | 61413575 | 125 | 61413512 | 15 | 67  | 8.8  |
| 3 | 61466600 | 61466650 | 50  | 61466637 | 18 | 33  | 2.2  |
| 3 | 61519125 | 61519175 | 50  | 61519137 | 17 | 33  | 4.4  |
| 3 | 61520075 | 61520250 | 175 | 61520187 | 14 | 92  | 4.4  |
| 3 | 61525275 | 61525350 | 75  | 61525287 | 16 | 43  | 2.2  |
| 3 | 61566850 | 61566925 | 75  | 61566887 | 13 | 37  | 6.6  |
| 3 | 61630450 | 61630650 | 200 | 61630537 | 17 | 116 | 0    |
| 3 | 61644900 | 61645325 | 425 | 61644987 | 17 | 201 | 15.3 |
| 3 | 61676275 | 61676350 | 75  | 61676287 | 13 | 38  | 0    |
| 3 | 61746575 | 61746600 | 25  | 61746587 | 12 | 12  | 0    |
| 3 | 61757200 | 61757225 | 25  | 61757212 | 12 | 12  | 0    |
| 3 | 61808175 | 61808225 | 50  | 61808187 | 13 | 25  | 4.4  |
| 3 | 61825675 | 61825700 | 25  | 61825687 | 12 | 12  | 2.2  |
| 3 | 61989625 | 61989775 | 150 | 61989737 | 18 | 92  | 2.2  |
| 3 | 62055525 | 62055575 | 50  | 62055537 | 14 | 26  | 4.4  |
| 3 | 62070550 | 62070575 | 25  | 62070562 | 12 | 12  | 2.2  |
| 3 | 62083500 | 62083650 | 150 | 62083537 | 13 | 77  | 4.4  |
| 3 | 62096775 | 62096950 | 175 | 62096812 | 15 | 96  | 8.8  |
| 3 | 62119300 | 62119400 | 100 | 62119337 | 13 | 50  | 8.8  |
| 3 | 62136550 | 62136575 | 25  | 62136562 | 12 | 12  | 2.2  |
| 3 | 62138350 | 62138400 | 50  | 62138362 | 12 | 24  | 4.4  |
| 3 | 62140325 | 62140425 | 100 | 62140337 | 14 | 54  | 8.8  |
| 3 | 62169275 | 62169300 | 25  | 62169287 | 12 | 12  | 0    |
| 3 | 62173375 | 62173400 | 25  | 62173387 | 12 | 12  | 0    |
| 3 | 62180750 | 62180800 | 50  | 62180762 | 13 | 26  | 0    |
| 3 | 62280450 | 62280600 | 150 | 62280487 | 20 | 113 | 13.1 |
| 3 | 62316100 | 62316125 | 25  | 62316112 | 14 | 14  | 2.2  |
| 3 | 62320225 | 62320250 | 25  | 62320237 | 14 | 14  | 2.2  |
| 3 | 62325875 | 62326000 | 125 | 62325937 | 14 | 64  | 0    |
| 3 | 62326525 | 62326550 | 25  | 62326537 | 12 | 12  | 2.2  |
| 3 | 62328325 | 62328475 | 150 | 62328387 | 16 | 84  | 0    |
| 3 | 62328750 | 62329300 | 550 | 62329287 | 22 | 351 | 26.3 |
| 3 | 62330800 | 62331075 | 275 | 62330912 | 20 | 184 | 2.2  |
| 3 | 62331700 | 62331875 | 175 | 62331837 | 27 | 143 | 28.4 |
| 3 | 62334025 | 62334075 | 50  | 62334062 | 13 | 25  | 0    |
| 3 | 62334500 | 62334525 | 25  | 62334512 | 12 | 12  | 2.2  |
| 3 | 62334775 | 62334850 | 75  | 62334787 | 12 | 36  | 6.6  |
| 3 | 62337675 | 62337700 | 25  | 62337687 | 18 | 18  | 2.2  |
| 3 | 62339075 | 62339100 | 25  | 62339087 | 12 | 12  | 0    |
| 3 | 62339850 | 62339875 | 25  | 62339862 | 12 | 12  | 0    |
| 3 | 62342325 | 62342525 | 200 | 62342387 | 17 | 121 | 17.5 |
| 3 | 62345350 | 62345550 | 200 | 62345462 | 14 | 105 | 17.5 |
| 3 | 62346350 | 62346500 | 150 | 62346362 | 14 | 77  | 8.8  |
| 3 | 62350500 | 62350525 | 25  | 62350512 | 14 | 14  | 2.2  |
| 3 | 62351225 | 62351325 | 100 | 62351237 | 16 | 58  | 6.6  |
| 3 | 62360050 | 62360200 | 150 | 62360087 | 14 | 80  | 10.9 |
| 3 | 62363925 | 62363950 | 25  | 62363937 | 13 | 13  | 0    |
| 3 | 62386500 | 62386525 | 25  | 62386512 | 12 | 12  | 0    |
| 3 | 62394050 | 62394075 | 25  | 62394062 | 12 | 12  | 0    |

|   |          |          |     |          |    |     |      |
|---|----------|----------|-----|----------|----|-----|------|
| 3 | 62411075 | 62411275 | 200 | 62411212 | 19 | 134 | 13.1 |
| 3 | 62422200 | 62422250 | 50  | 62422237 | 13 | 25  | 4.4  |
| 3 | 62437325 | 62437350 | 25  | 62437337 | 12 | 12  | 0    |
| 3 | 62438325 | 62438375 | 50  | 62438337 | 12 | 24  | 0    |
| 3 | 62438825 | 62439000 | 175 | 62438887 | 16 | 103 | 13.1 |
| 3 | 62439225 | 62439350 | 125 | 62439312 | 14 | 65  | 0    |
| 3 | 62443825 | 62443875 | 50  | 62443837 | 15 | 28  | 4.4  |
| 3 | 62461675 | 62461850 | 175 | 62461712 | 17 | 106 | 2.2  |
| 3 | 62476375 | 62476425 | 50  | 62476387 | 15 | 28  | 4.4  |
| 3 | 62499100 | 62499125 | 25  | 62499112 | 15 | 15  | 2.2  |
| 3 | 62503225 | 62503250 | 25  | 62503237 | 12 | 12  | 2.2  |
| 3 | 62510625 | 62510725 | 100 | 62510712 | 15 | 52  | 2.2  |
| 3 | 62528900 | 62528925 | 25  | 62528912 | 12 | 12  | 2.2  |
| 3 | 62567400 | 62567475 | 75  | 62567437 | 16 | 46  | 6.6  |
| 3 | 62568125 | 62568175 | 50  | 62568162 | 21 | 41  | 4.4  |
| 3 | 62568475 | 62568500 | 25  | 62568487 | 13 | 13  | 2.2  |
| 3 | 62604000 | 62604050 | 50  | 62604012 | 12 | 24  | 0    |
| 3 | 62633175 | 62633200 | 25  | 62633187 | 14 | 14  | 2.2  |
| 3 | 62641150 | 62641200 | 50  | 62641162 | 14 | 26  | 2.2  |
| 3 | 62641600 | 62641825 | 225 | 62641687 | 21 | 145 | 0    |
| 3 | 62643675 | 62643850 | 175 | 62643737 | 17 | 104 | 8.8  |
| 3 | 62651225 | 62651325 | 100 | 62651287 | 15 | 55  | 10.9 |
| 3 | 62653825 | 62653850 | 25  | 62653837 | 12 | 12  | 0    |
| 3 | 62654750 | 62654825 | 75  | 62654762 | 15 | 41  | 0    |
| 3 | 62674425 | 62674450 | 25  | 62674437 | 12 | 12  | 2.2  |
| 3 | 62683000 | 62683275 | 275 | 62683037 | 22 | 191 | 15.3 |
| 3 | 62686550 | 62686600 | 50  | 62686587 | 13 | 25  | 4.4  |
| 3 | 62690925 | 62690950 | 25  | 62690937 | 14 | 14  | 2.2  |
| 3 | 62694850 | 62695000 | 150 | 62694912 | 15 | 85  | 13.1 |
| 3 | 62700800 | 62700975 | 175 | 62700937 | 17 | 98  | 4.4  |
| 3 | 62717550 | 62717575 | 25  | 62717562 | 12 | 12  | 2.2  |
| 3 | 62740325 | 62740375 | 50  | 62740337 | 12 | 24  | 0    |
| 3 | 62741925 | 62741975 | 50  | 62741937 | 12 | 24  | 4.4  |
| 3 | 62759725 | 62759925 | 200 | 62759787 | 16 | 116 | 13.1 |
| 3 | 62769325 | 62769475 | 150 | 62769337 | 12 | 71  | 8.8  |
| 3 | 62782675 | 62782700 | 25  | 62782687 | 12 | 12  | 2.2  |
| 3 | 62786475 | 62786500 | 25  | 62786487 | 12 | 12  | 0    |
| 3 | 62800175 | 62800700 | 525 | 62800287 | 35 | 431 | 85.3 |
| 3 | 62805725 | 62805900 | 175 | 62805837 | 16 | 91  | 0    |
| 3 | 62824200 | 62824350 | 150 | 62824262 | 16 | 87  | 4.4  |
| 3 | 62842525 | 62842600 | 75  | 62842537 | 14 | 41  | 2.2  |
| 3 | 62852850 | 62852975 | 125 | 62852887 | 15 | 70  | 8.8  |
| 3 | 62866425 | 62866450 | 25  | 62866437 | 12 | 12  | 0    |
| 3 | 62867825 | 62867850 | 25  | 62867837 | 12 | 12  | 2.2  |
| 3 | 62868275 | 62868300 | 25  | 62868287 | 13 | 13  | 0    |
| 3 | 62875400 | 62875550 | 150 | 62875412 | 15 | 83  | 2.2  |
| 3 | 62885725 | 62885750 | 25  | 62885737 | 12 | 12  | 2.2  |
| 3 | 62918175 | 62918225 | 50  | 62918187 | 14 | 26  | 0    |
| 3 | 62927775 | 62927900 | 125 | 62927862 | 13 | 61  | 10.9 |
| 3 | 62945800 | 62945825 | 25  | 62945812 | 12 | 12  | 0    |
| 3 | 62963300 | 62963325 | 25  | 62963312 | 12 | 12  | 2.2  |
| 3 | 62976000 | 62976075 | 75  | 62976062 | 13 | 37  | 6.6  |
| 3 | 63002150 | 63002200 | 50  | 63002162 | 12 | 24  | 4.4  |
| 3 | 63002675 | 63002700 | 25  | 63002687 | 12 | 12  | 2.2  |
| 3 | 63005975 | 63006100 | 125 | 63005987 | 15 | 65  | 8.8  |
| 3 | 63015125 | 63015200 | 75  | 63015137 | 12 | 36  | 0    |
| 3 | 63019375 | 63019450 | 75  | 63019387 | 22 | 52  | 8.8  |
| 3 | 63026650 | 63026700 | 50  | 63026662 | 13 | 26  | 4.4  |
| 3 | 63057725 | 63057850 | 125 | 63057737 | 17 | 77  | 6.6  |
| 3 | 63058200 | 63058225 | 25  | 63058212 | 17 | 17  | 2.2  |
| 3 | 63064250 | 63064300 | 50  | 63064262 | 13 | 26  | 0    |
| 3 | 63093650 | 63093700 | 50  | 63093662 | 14 | 27  | 4.4  |
| 3 | 63107600 | 63107625 | 25  | 63107612 | 13 | 13  | 2.2  |
| 3 | 63119975 | 63120000 | 25  | 63119987 | 12 | 12  | 0    |
| 3 | 63128125 | 63128225 | 100 | 63128137 | 19 | 71  | 8.8  |
| 3 | 63132850 | 63132975 | 125 | 63132887 | 13 | 63  | 2.2  |
| 3 | 63164300 | 63164350 | 50  | 63164312 | 15 | 27  | 0    |
| 3 | 63185675 | 63185750 | 75  | 63185737 | 17 | 47  | 0    |
| 3 | 63200100 | 63200175 | 75  | 63200162 | 19 | 49  | 6.6  |
| 3 | 63216425 | 63216450 | 25  | 63216437 | 12 | 12  | 0    |
| 3 | 63224300 | 63224350 | 50  | 63224337 | 13 | 25  | 0    |
| 3 | 63239275 | 63239300 | 25  | 63239287 | 15 | 15  | 2.2  |
| 3 | 63239600 | 63239850 | 250 | 63239687 | 21 | 179 | 2.2  |
| 3 | 63247825 | 63248250 | 425 | 63247937 | 15 | 211 | 4.4  |
| 3 | 63257050 | 63257075 | 25  | 63257062 | 13 | 13  | 2.2  |

|   |          |          |     |          |    |     |      |
|---|----------|----------|-----|----------|----|-----|------|
| 3 | 63259225 | 63259300 | 75  | 63259287 | 18 | 48  | 6.6  |
| 3 | 63273350 | 63273400 | 50  | 63273362 | 12 | 24  | 4.4  |
| 3 | 63299600 | 63299625 | 25  | 63299612 | 12 | 12  | 0    |
| 3 | 63316075 | 63316200 | 125 | 63316112 | 14 | 65  | 10.9 |
| 3 | 63332275 | 63332425 | 150 | 63332287 | 13 | 75  | 4.4  |
| 3 | 63333075 | 63333200 | 125 | 63333087 | 14 | 64  | 4.4  |
| 3 | 63343025 | 63343075 | 50  | 63343062 | 15 | 29  | 4.4  |
| 3 | 63351175 | 63351250 | 75  | 63351187 | 14 | 39  | 4.4  |
| 3 | 63417400 | 63417525 | 125 | 63417462 | 15 | 69  | 0    |
| 3 | 63419075 | 63419275 | 200 | 63419137 | 16 | 105 | 6.6  |
| 3 | 63438300 | 63438550 | 250 | 63438462 | 21 | 175 | 15.3 |
| 3 | 63448600 | 63448775 | 175 | 63448637 | 19 | 115 | 21.9 |
| 3 | 63451000 | 63451050 | 50  | 63451012 | 13 | 25  | 0    |
| 3 | 63455375 | 63455400 | 25  | 63455387 | 14 | 14  | 2.2  |
| 3 | 63458775 | 63458850 | 75  | 63458812 | 13 | 38  | 6.6  |
| 3 | 63459400 | 63459450 | 50  | 63459412 | 13 | 26  | 0    |
| 3 | 63481400 | 63481475 | 75  | 63481437 | 14 | 38  | 6.6  |
| 3 | 63482525 | 63482550 | 25  | 63482537 | 12 | 12  | 2.2  |
| 3 | 63485275 | 63485350 | 75  | 63485287 | 12 | 36  | 6.6  |
| 3 | 63486825 | 63486925 | 100 | 63486887 | 13 | 49  | 0    |
| 3 | 63491000 | 63491025 | 25  | 63491012 | 12 | 12  | 2.2  |
| 3 | 63491800 | 63491850 | 50  | 63491812 | 13 | 26  | 4.4  |
| 3 | 63494425 | 63494450 | 25  | 63494437 | 12 | 12  | 2.2  |
| 3 | 63495450 | 63495475 | 25  | 63495462 | 12 | 12  | 2.2  |
| 3 | 63517275 | 63517325 | 50  | 63517287 | 12 | 24  | 0    |
| 3 | 63526250 | 63526275 | 25  | 63526262 | 14 | 14  | 2.2  |
| 3 | 63530850 | 63530875 | 25  | 63530862 | 12 | 12  | 2.2  |
| 3 | 63538900 | 63539025 | 125 | 63538962 | 16 | 73  | 2.2  |
| 3 | 63549725 | 63549775 | 50  | 63549762 | 13 | 25  | 4.4  |
| 3 | 63576000 | 63576150 | 150 | 63576112 | 16 | 79  | 0    |
| 3 | 63577875 | 63577900 | 25  | 63577887 | 12 | 12  | 0    |
| 3 | 63594250 | 63594275 | 25  | 63594262 | 12 | 12  | 0    |
| 3 | 63613075 | 63613150 | 75  | 63613112 | 14 | 39  | 6.6  |
| 3 | 63613400 | 63613425 | 25  | 63613412 | 12 | 12  | 0    |
| 3 | 63615825 | 63615850 | 25  | 63615837 | 12 | 12  | 2.2  |
| 3 | 63628050 | 63628075 | 25  | 63628062 | 12 | 12  | 0    |
| 3 | 63646275 | 63646425 | 150 | 63646412 | 13 | 72  | 10.9 |
| 3 | 63654850 | 63654875 | 25  | 63654862 | 12 | 12  | 2.2  |
| 3 | 63665975 | 63666100 | 125 | 63666012 | 18 | 83  | 13.1 |
| 3 | 63667500 | 63667525 | 25  | 63667512 | 12 | 12  | 2.2  |
| 3 | 63688000 | 63688050 | 50  | 63688037 | 19 | 35  | 4.4  |
| 3 | 63691075 | 63691225 | 150 | 63691162 | 17 | 92  | 0    |
| 3 | 63721025 | 63721225 | 200 | 63721112 | 17 | 121 | 15.3 |
| 3 | 63738100 | 63738175 | 75  | 63738137 | 14 | 38  | 0    |
| 3 | 63764125 | 63764250 | 125 | 63764187 | 16 | 75  | 13.1 |
| 3 | 63769500 | 63769550 | 50  | 63769512 | 13 | 26  | 4.4  |
| 3 | 63770275 | 63770325 | 50  | 63770287 | 14 | 28  | 0    |
| 3 | 63812700 | 63812900 | 200 | 63812837 | 13 | 94  | 0    |
| 3 | 63933675 | 63933800 | 125 | 63933712 | 15 | 71  | 6.6  |
| 3 | 63994775 | 63995075 | 300 | 63994837 | 24 | 204 | 4.4  |
| 3 | 64000675 | 64000775 | 100 | 64000737 | 14 | 54  | 2.2  |
| 3 | 64010075 | 64010125 | 50  | 64010112 | 13 | 25  | 4.4  |
| 3 | 64018675 | 64018875 | 200 | 64018687 | 16 | 110 | 0    |
| 3 | 64021850 | 64021900 | 50  | 64021887 | 15 | 28  | 0    |
| 3 | 64023250 | 64023300 | 50  | 64023262 | 12 | 24  | 0    |
| 3 | 64028100 | 64028175 | 75  | 64028162 | 13 | 37  | 6.6  |
| 3 | 64032175 | 64032325 | 150 | 64032187 | 23 | 118 | 13.1 |
| 3 | 64034200 | 64034325 | 125 | 64034212 | 16 | 77  | 2.2  |
| 3 | 64040075 | 64040100 | 25  | 64040087 | 15 | 15  | 2.2  |
| 3 | 64040950 | 64041200 | 250 | 64041037 | 18 | 153 | 6.6  |
| 3 | 64042750 | 64042875 | 125 | 64042787 | 14 | 64  | 0    |
| 3 | 64043975 | 64044425 | 450 | 64044087 | 20 | 242 | 35   |
| 3 | 64047725 | 64047750 | 25  | 64047737 | 12 | 12  | 2.2  |
| 3 | 64054875 | 64054900 | 25  | 64054887 | 13 | 13  | 2.2  |
| 3 | 64056625 | 64056750 | 125 | 64056687 | 13 | 62  | 10.9 |
| 3 | 64057025 | 64057125 | 100 | 64057087 | 14 | 50  | 0    |
| 3 | 64059850 | 64059900 | 50  | 64059887 | 15 | 27  | 4.4  |
| 3 | 64068875 | 64068925 | 50  | 64068912 | 13 | 25  | 4.4  |
| 3 | 64074200 | 64074300 | 100 | 64074287 | 18 | 65  | 8.8  |
| 3 | 64074550 | 64074575 | 25  | 64074562 | 16 | 16  | 2.2  |
| 3 | 64081150 | 64081175 | 25  | 64081162 | 12 | 12  | 0    |
| 3 | 64085200 | 64085300 | 100 | 64085237 | 13 | 49  | 0    |
| 3 | 64088500 | 64088525 | 25  | 64088512 | 12 | 12  | 2.2  |
| 3 | 64090600 | 64090900 | 300 | 64090612 | 12 | 120 | 0    |
| 3 | 64094225 | 64094350 | 125 | 64094312 | 14 | 65  | 2.2  |

|   |          |          |     |          |    |     |      |
|---|----------|----------|-----|----------|----|-----|------|
| 3 | 64095700 | 64095775 | 75  | 64095712 | 15 | 39  | 6.6  |
| 3 | 64097225 | 64097475 | 250 | 64097362 | 16 | 129 | 10.9 |
| 3 | 64099075 | 64099175 | 100 | 64099112 | 15 | 53  | 6.6  |
| 3 | 64101500 | 64101575 | 75  | 64101512 | 14 | 38  | 0    |
| 3 | 64110950 | 64111025 | 75  | 64110962 | 13 | 38  | 6.6  |
| 3 | 64111250 | 64111300 | 50  | 64111262 | 14 | 27  | 0    |
| 3 | 64119200 | 64119325 | 125 | 64119262 | 15 | 64  | 0    |
| 3 | 64154900 | 64155175 | 275 | 64154987 | 18 | 173 | 2.2  |
| 3 | 64170525 | 64170550 | 25  | 64170537 | 12 | 12  | 2.2  |
| 3 | 64173275 | 64173325 | 50  | 64173287 | 12 | 24  | 4.4  |
| 3 | 64213150 | 64213350 | 200 | 64213212 | 19 | 129 | 8.8  |
| 3 | 64216600 | 64216625 | 25  | 64216612 | 12 | 12  | 2.2  |
| 3 | 64230625 | 64230650 | 25  | 64230637 | 12 | 12  | 2.2  |
| 3 | 64232025 | 64232325 | 300 | 64232062 | 15 | 164 | 4.4  |
| 3 | 64233225 | 64233275 | 50  | 64233237 | 14 | 26  | 4.4  |
| 3 | 64233600 | 64233775 | 175 | 64233637 | 15 | 96  | 0    |
| 3 | 64241450 | 64241600 | 150 | 64241537 | 16 | 82  | 4.4  |
| 3 | 64243100 | 64243250 | 150 | 64243237 | 22 | 103 | 8.8  |
| 3 | 64246675 | 64247025 | 350 | 64246962 | 13 | 167 | 32.8 |
| 3 | 64254175 | 64254250 | 75  | 64254237 | 23 | 57  | 2.2  |
| 3 | 64257725 | 64257750 | 25  | 64257737 | 19 | 19  | 2.2  |
| 3 | 64258275 | 64258350 | 75  | 64258287 | 14 | 38  | 2.2  |
| 3 | 64264325 | 64264400 | 75  | 64264337 | 13 | 37  | 2.2  |
| 3 | 64265350 | 64265425 | 75  | 64265412 | 13 | 37  | 0    |
| 3 | 64265725 | 64265850 | 125 | 64265737 | 17 | 73  | 0    |
| 3 | 64280275 | 64280300 | 25  | 64280287 | 13 | 13  | 2.2  |
| 3 | 64287875 | 64288500 | 625 | 64288162 | 14 | 314 | 61.3 |
| 3 | 64289800 | 64289950 | 150 | 64289812 | 15 | 80  | 13.1 |
| 3 | 64292225 | 64292600 | 375 | 64292387 | 15 | 184 | 15.3 |
| 3 | 64318375 | 64318450 | 75  | 64318412 | 14 | 39  | 6.6  |
| 3 | 64323250 | 64323300 | 50  | 64323262 | 12 | 24  | 0    |
| 3 | 64323700 | 64323775 | 75  | 64323712 | 12 | 36  | 6.6  |
| 3 | 64324100 | 64324125 | 25  | 64324112 | 12 | 12  | 2.2  |
| 3 | 64331000 | 64331075 | 75  | 64331012 | 16 | 40  | 6.6  |
| 3 | 64350350 | 64350375 | 25  | 64350362 | 12 | 12  | 2.2  |
| 3 | 64353850 | 64353900 | 50  | 64353887 | 14 | 26  | 4.4  |
| 3 | 64367425 | 64367625 | 200 | 64367587 | 23 | 131 | 10.9 |
| 3 | 64368025 | 64368300 | 275 | 64368212 | 17 | 145 | 13.1 |
| 3 | 64374650 | 64374725 | 75  | 64374687 | 13 | 37  | 6.6  |
| 3 | 64381375 | 64381425 | 50  | 64381387 | 13 | 25  | 4.4  |
| 3 | 64383900 | 64383975 | 75  | 64383912 | 12 | 36  | 6.6  |
| 3 | 64387025 | 64387050 | 25  | 64387037 | 12 | 12  | 0    |
| 3 | 64387400 | 64387475 | 75  | 64387437 | 14 | 38  | 0    |
| 3 | 64391350 | 64391600 | 250 | 64391462 | 19 | 151 | 24.1 |
| 3 | 64392700 | 64392900 | 200 | 64392762 | 16 | 111 | 17.5 |
| 3 | 64393575 | 64393775 | 200 | 64393637 | 19 | 137 | 0    |
| 3 | 64394425 | 64394525 | 100 | 64394437 | 12 | 47  | 0    |
| 3 | 64395375 | 64395500 | 125 | 64395437 | 18 | 82  | 6.6  |
| 3 | 64402300 | 64402425 | 125 | 64402412 | 14 | 65  | 10.9 |
| 3 | 64402950 | 64403000 | 50  | 64402987 | 15 | 29  | 4.4  |
| 3 | 64403700 | 64403875 | 175 | 64403837 | 16 | 99  | 10.9 |
| 3 | 64408400 | 64408475 | 75  | 64408462 | 16 | 40  | 0    |
| 3 | 64411375 | 64411450 | 75  | 64411387 | 14 | 41  | 6.6  |
| 3 | 64428450 | 64428550 | 100 | 64428462 | 12 | 47  | 8.8  |
| 3 | 64430550 | 64430650 | 100 | 64430562 | 12 | 46  | 4.4  |
| 3 | 64436000 | 64436025 | 25  | 64436012 | 12 | 12  | 0    |
| 3 | 64451875 | 64451975 | 100 | 64451937 | 13 | 49  | 8.8  |
| 3 | 64453250 | 64453325 | 75  | 64453262 | 12 | 36  | 6.6  |
| 3 | 64454200 | 64454300 | 100 | 64454287 | 13 | 49  | 8.8  |
| 3 | 64455275 | 64455475 | 200 | 64455387 | 18 | 125 | 21.9 |
| 3 | 64461750 | 64461825 | 75  | 64461762 | 14 | 40  | 6.6  |
| 3 | 64469350 | 64469500 | 150 | 64469412 | 19 | 102 | 4.4  |
| 3 | 64473350 | 64473450 | 100 | 64473387 | 15 | 52  | 0    |
| 3 | 64475550 | 64475575 | 25  | 64475562 | 13 | 13  | 2.2  |
| 3 | 64479200 | 64479375 | 175 | 64479262 | 15 | 86  | 0    |
| 3 | 64482875 | 64482925 | 50  | 64482887 | 12 | 24  | 0    |
| 3 | 64507350 | 64507525 | 175 | 64507512 | 14 | 88  | 6.6  |
| 3 | 64507825 | 64507900 | 75  | 64507837 | 18 | 49  | 4.4  |
| 3 | 64509625 | 64509700 | 75  | 64509637 | 12 | 36  | 2.2  |
| 3 | 64519525 | 64519700 | 175 | 64519587 | 18 | 108 | 8.8  |
| 3 | 64522250 | 64522275 | 25  | 64522262 | 13 | 13  | 2.2  |
| 3 | 64524750 | 64524825 | 75  | 64524787 | 14 | 40  | 6.6  |
| 3 | 64528750 | 64529150 | 400 | 64529062 | 17 | 213 | 2.2  |
| 3 | 64547775 | 64547800 | 25  | 64547787 | 12 | 12  | 0    |
| 3 | 64562875 | 64562900 | 25  | 64562887 | 17 | 17  | 2.2  |

|   |          |          |     |          |    |     |      |
|---|----------|----------|-----|----------|----|-----|------|
| 3 | 64563225 | 64563350 | 125 | 64563312 | 15 | 67  | 2.2  |
| 3 | 64583900 | 64583925 | 25  | 64583912 | 12 | 12  | 0    |
| 3 | 64594100 | 64594200 | 100 | 64594112 | 12 | 46  | 6.6  |
| 3 | 64684925 | 64685000 | 75  | 64684937 | 12 | 36  | 0    |
| 3 | 64689250 | 64689300 | 50  | 64689262 | 12 | 24  | 2.2  |
| 3 | 64691800 | 64691975 | 175 | 64691937 | 14 | 90  | 2.2  |
| 3 | 64705400 | 64705425 | 25  | 64705412 | 12 | 12  | 2.2  |
| 3 | 64709325 | 64709375 | 50  | 64709362 | 15 | 29  | 4.4  |
| 3 | 64710900 | 64711000 | 100 | 64710937 | 13 | 50  | 0    |
| 3 | 64714950 | 64715050 | 100 | 64714962 | 13 | 52  | 4.4  |
| 3 | 64730275 | 64730300 | 25  | 64730287 | 12 | 12  | 2.2  |
| 3 | 64734000 | 64734150 | 150 | 64734037 | 16 | 86  | 2.2  |
| 3 | 64762700 | 64762725 | 25  | 64762712 | 12 | 12  | 2.2  |
| 3 | 64771125 | 64771200 | 75  | 64771187 | 13 | 37  | 6.6  |
| 3 | 64776725 | 64776750 | 25  | 64776737 | 14 | 14  | 2.2  |
| 3 | 64777150 | 64777225 | 75  | 64777162 | 13 | 39  | 6.6  |
| 3 | 64777800 | 64777825 | 25  | 64777812 | 14 | 14  | 2.2  |
| 3 | 64806175 | 64806200 | 25  | 64806187 | 13 | 13  | 0    |
| 3 | 64818525 | 64818550 | 25  | 64818537 | 12 | 12  | 0    |
| 3 | 64823650 | 64823675 | 25  | 64823662 | 12 | 12  | 2.2  |
| 3 | 64834875 | 64835025 | 150 | 64834887 | 13 | 72  | 0    |
| 3 | 64841375 | 64841525 | 150 | 64841387 | 12 | 71  | 8.8  |
| 3 | 64850825 | 64850925 | 100 | 64850862 | 14 | 49  | 4.4  |
| 3 | 64853650 | 64853900 | 250 | 64853737 | 24 | 192 | 2.2  |
| 3 | 64870000 | 64870175 | 175 | 64870062 | 16 | 100 | 0    |
| 3 | 64886500 | 64886525 | 25  | 64886512 | 12 | 12  | 2.2  |
| 3 | 64887250 | 64887275 | 25  | 64887262 | 13 | 13  | 2.2  |
| 3 | 64892875 | 64893025 | 150 | 64892912 | 16 | 81  | 0    |
| 3 | 64893625 | 64893725 | 100 | 64893662 | 13 | 49  | 8.8  |
| 3 | 64895300 | 64895375 | 75  | 64895312 | 15 | 41  | 6.6  |
| 3 | 64899175 | 64899200 | 25  | 64899187 | 12 | 12  | 2.2  |
| 3 | 64900350 | 64900500 | 150 | 64900362 | 13 | 76  | 8.8  |
| 3 | 64900900 | 64901025 | 125 | 64900912 | 15 | 68  | 8.8  |
| 3 | 64901800 | 64902000 | 200 | 64901862 | 16 | 113 | 19.7 |
| 3 | 64903150 | 64903350 | 200 | 64903212 | 17 | 112 | 19.7 |
| 3 | 64908500 | 64908550 | 50  | 64908512 | 13 | 26  | 4.4  |
| 3 | 64910750 | 64910850 | 100 | 64910812 | 14 | 49  | 4.4  |
| 3 | 64949050 | 64949075 | 25  | 64949062 | 12 | 12  | 2.2  |
| 3 | 64950025 | 64950050 | 25  | 64950037 | 12 | 12  | 2.2  |
| 3 | 64986750 | 64986775 | 25  | 64986762 | 12 | 12  | 0    |
| 3 | 64991400 | 64991500 | 100 | 64991437 | 13 | 49  | 0    |
| 3 | 64997625 | 64997650 | 25  | 64997637 | 12 | 12  | 2.2  |
| 3 | 65000200 | 65000400 | 200 | 65000262 | 16 | 110 | 10.9 |
| 3 | 65001550 | 65001700 | 150 | 65001662 | 14 | 76  | 0    |
| 3 | 65011475 | 65011625 | 150 | 65011512 | 17 | 90  | 0    |
| 3 | 65029150 | 65029350 | 200 | 65029212 | 16 | 107 | 0    |
| 3 | 65039825 | 65039850 | 25  | 65039837 | 12 | 12  | 0    |
| 3 | 65059225 | 65059350 | 125 | 65059262 | 14 | 63  | 0    |
| 3 | 65073800 | 65073875 | 75  | 65073837 | 14 | 41  | 2.2  |
| 3 | 65095600 | 65095625 | 25  | 65095612 | 12 | 12  | 2.2  |
| 3 | 65098700 | 65098750 | 50  | 65098712 | 12 | 24  | 2.2  |
| 3 | 65101050 | 65101100 | 50  | 65101087 | 19 | 36  | 2.2  |
| 3 | 65109475 | 65109525 | 50  | 65109487 | 12 | 24  | 4.4  |
| 3 | 65113025 | 65113200 | 175 | 65113087 | 16 | 97  | 6.6  |
| 3 | 65116175 | 65116200 | 25  | 65116187 | 12 | 12  | 0    |
| 3 | 65117050 | 65117275 | 225 | 65117087 | 14 | 109 | 4.4  |
| 3 | 65145700 | 65145850 | 150 | 65145737 | 15 | 81  | 10.9 |
| 3 | 65151350 | 65151550 | 200 | 65151437 | 17 | 123 | 10.9 |
| 3 | 65162125 | 65162275 | 150 | 65162212 | 13 | 73  | 4.4  |
| 3 | 65191525 | 65191550 | 25  | 65191537 | 12 | 12  | 2.2  |
| 3 | 65209325 | 65209600 | 275 | 65209412 | 19 | 179 | 6.6  |
| 3 | 65220400 | 65220450 | 50  | 65220412 | 13 | 26  | 0    |
| 3 | 65238225 | 65238375 | 150 | 65238312 | 15 | 81  | 15.3 |
| 3 | 65242600 | 65242700 | 100 | 65242612 | 13 | 50  | 0    |
| 3 | 65250600 | 65250750 | 150 | 65250712 | 15 | 84  | 0    |
| 3 | 65255850 | 65255900 | 50  | 65255862 | 12 | 24  | 0    |
| 3 | 65261050 | 65261150 | 100 | 65261062 | 15 | 57  | 8.8  |
| 3 | 65264275 | 65264575 | 300 | 65264387 | 14 | 151 | 13.1 |
| 3 | 65271750 | 65271925 | 175 | 65271837 | 17 | 99  | 13.1 |
| 3 | 65281225 | 65281250 | 25  | 65281237 | 14 | 14  | 0    |
| 3 | 65282875 | 65282975 | 100 | 65282887 | 12 | 47  | 4.4  |
| 3 | 65287300 | 65287400 | 100 | 65287337 | 15 | 55  | 0    |
| 3 | 65288475 | 65288650 | 175 | 65288487 | 14 | 93  | 15.3 |
| 3 | 65289750 | 65289775 | 25  | 65289762 | 12 | 12  | 0    |
| 3 | 65296200 | 65296250 | 50  | 65296212 | 13 | 26  | 4.4  |

|   |          |          |     |          |    |     |      |
|---|----------|----------|-----|----------|----|-----|------|
| 3 | 65296650 | 65296800 | 150 | 65296787 | 16 | 77  | 4.4  |
| 3 | 65297125 | 65297300 | 175 | 65297212 | 19 | 109 | 17.5 |
| 3 | 65301075 | 65301375 | 300 | 65301162 | 26 | 256 | 32.8 |
| 3 | 65317200 | 65317450 | 250 | 65317337 | 15 | 118 | 15.3 |
| 3 | 65331450 | 65331475 | 25  | 65331462 | 12 | 12  | 2.2  |
| 3 | 65338550 | 65338700 | 150 | 65338637 | 15 | 83  | 0    |
| 3 | 65340550 | 65340725 | 175 | 65340612 | 18 | 108 | 0    |
| 3 | 65350800 | 65350950 | 150 | 65350812 | 19 | 99  | 4.4  |
| 3 | 65354550 | 65354575 | 25  | 65354562 | 12 | 12  | 2.2  |
| 3 | 65357925 | 65357950 | 25  | 65357937 | 13 | 13  | 2.2  |
| 3 | 65363575 | 65363600 | 25  | 65363587 | 12 | 12  | 2.2  |
| 3 | 65365550 | 65365625 | 75  | 65365562 | 12 | 36  | 0    |
| 3 | 65381000 | 65381025 | 25  | 65381012 | 12 | 12  | 2.2  |
| 3 | 65436975 | 65437025 | 50  | 65437012 | 13 | 25  | 4.4  |
| 3 | 65499600 | 65499900 | 300 | 65499762 | 13 | 127 | 2.2  |
| 3 | 65518000 | 65518025 | 25  | 65518012 | 13 | 13  | 0    |
| 3 | 65539950 | 65540050 | 100 | 65539962 | 13 | 49  | 0    |
| 3 | 65543425 | 65543450 | 25  | 65543437 | 12 | 12  | 2.2  |
| 3 | 65558875 | 65558900 | 25  | 65558887 | 12 | 12  | 2.2  |
| 3 | 65578575 | 65578700 | 125 | 65578612 | 14 | 64  | 0    |
| 3 | 65590975 | 65591075 | 100 | 65591012 | 13 | 49  | 6.6  |
| 3 | 65595225 | 65595250 | 25  | 65595237 | 12 | 12  | 2.2  |
| 3 | 65608975 | 65609025 | 50  | 65608987 | 12 | 24  | 0    |
| 3 | 65656025 | 65656100 | 75  | 65656037 | 12 | 36  | 4.4  |
| 3 | 65667225 | 65667250 | 25  | 65667237 | 13 | 13  | 2.2  |
| 3 | 65825275 | 65825300 | 25  | 65825287 | 12 | 12  | 2.2  |
| 3 | 65833875 | 65833900 | 25  | 65833887 | 12 | 12  | 2.2  |
| 3 | 65865475 | 65865500 | 25  | 65865487 | 12 | 12  | 2.2  |
| 3 | 65894050 | 65894250 | 200 | 65894112 | 16 | 115 | 10.9 |
| 3 | 65896450 | 65896650 | 200 | 65896612 | 21 | 130 | 0    |
| 3 | 66029075 | 66029150 | 75  | 66029112 | 14 | 39  | 0    |
| 3 | 66044050 | 66044100 | 50  | 66044062 | 12 | 24  | 2.2  |
| 3 | 66055925 | 66056050 | 125 | 66055937 | 14 | 65  | 10.9 |
| 3 | 66087725 | 66087825 | 100 | 66087737 | 12 | 48  | 2.2  |
| 3 | 66103000 | 66103025 | 25  | 66103012 | 12 | 12  | 0    |
| 3 | 66105400 | 66105425 | 25  | 66105412 | 12 | 12  | 2.2  |
| 3 | 66109075 | 66109125 | 50  | 66109112 | 14 | 26  | 0    |
| 3 | 66113475 | 66113600 | 125 | 66113512 | 15 | 71  | 2.2  |
| 3 | 66114550 | 66114575 | 25  | 66114562 | 12 | 12  | 2.2  |
| 3 | 66400525 | 66400550 | 25  | 66400537 | 12 | 12  | 0    |
| 3 | 66445250 | 66445325 | 75  | 66445287 | 13 | 38  | 0    |
| 3 | 66456225 | 66456275 | 50  | 66456237 | 13 | 26  | 4.4  |
| 3 | 66459700 | 66459725 | 25  | 66459712 | 12 | 12  | 2.2  |
| 3 | 66514000 | 66514050 | 50  | 66514012 | 13 | 26  | 4.4  |
| 3 | 66515625 | 66515675 | 50  | 66515662 | 14 | 26  | 2.2  |
| 3 | 66516050 | 66516325 | 275 | 66516212 | 28 | 249 | 24.1 |
| 3 | 66518975 | 66519100 | 125 | 66519087 | 25 | 90  | 8.8  |
| 3 | 66519425 | 66519725 | 300 | 66519562 | 13 | 136 | 17.5 |
| 3 | 66520525 | 66520575 | 50  | 66520537 | 13 | 26  | 4.4  |
| 3 | 66526250 | 66526425 | 175 | 66526312 | 17 | 109 | 15.3 |
| 3 | 66527600 | 66527625 | 25  | 66527612 | 17 | 17  | 2.2  |
| 3 | 66528275 | 66528475 | 200 | 66528287 | 22 | 146 | 10.9 |
| 3 | 66528750 | 66528775 | 25  | 66528762 | 12 | 12  | 2.2  |
| 3 | 66529925 | 66530250 | 325 | 66530062 | 26 | 254 | 17.5 |
| 3 | 66531525 | 66531700 | 175 | 66531537 | 13 | 88  | 0    |
| 3 | 66543425 | 66543450 | 25  | 66543437 | 12 | 12  | 0    |
| 3 | 66551775 | 66551950 | 175 | 66551887 | 14 | 89  | 6.6  |
| 3 | 66552400 | 66552425 | 25  | 66552412 | 12 | 12  | 2.2  |
| 3 | 66552675 | 66552850 | 175 | 66552787 | 26 | 154 | 10.9 |
| 3 | 66555025 | 66555100 | 75  | 66555087 | 17 | 46  | 2.2  |
| 3 | 66557400 | 66557425 | 25  | 66557412 | 12 | 12  | 2.2  |
| 3 | 66560300 | 66560375 | 75  | 66560362 | 13 | 37  | 2.2  |
| 3 | 66564075 | 66564225 | 150 | 66564162 | 17 | 85  | 8.8  |
| 3 | 66564600 | 66564950 | 350 | 66564887 | 18 | 204 | 26.3 |
| 3 | 66571700 | 66571750 | 50  | 66571712 | 13 | 25  | 4.4  |
| 3 | 66574575 | 66574600 | 25  | 66574587 | 12 | 12  | 0    |
| 3 | 66578875 | 66579000 | 125 | 66578887 | 12 | 59  | 4.4  |
| 3 | 66582200 | 66582350 | 150 | 66582262 | 14 | 78  | 0    |
| 3 | 66582575 | 66582850 | 275 | 66582662 | 17 | 165 | 15.3 |
| 3 | 66583150 | 66583350 | 200 | 66583312 | 15 | 104 | 0    |
| 3 | 66584650 | 66584675 | 25  | 66584662 | 12 | 12  | 2.2  |
| 3 | 66584950 | 66585150 | 200 | 66585062 | 13 | 99  | 19.7 |
| 3 | 66600050 | 66600175 | 125 | 66600112 | 14 | 65  | 10.9 |
| 3 | 66605600 | 66605675 | 75  | 66605612 | 12 | 36  | 6.6  |
| 3 | 66616825 | 66617025 | 200 | 66616962 | 18 | 129 | 17.5 |

|   |          |          |     |          |    |     |      |
|---|----------|----------|-----|----------|----|-----|------|
| 3 | 66618575 | 66618625 | 50  | 66618587 | 15 | 27  | 4.4  |
| 3 | 66618925 | 66619000 | 75  | 66618937 | 12 | 35  | 0    |
| 3 | 66627425 | 66627500 | 75  | 66627437 | 13 | 36  | 6.6  |
| 3 | 66632500 | 66632575 | 75  | 66632562 | 18 | 46  | 6.6  |
| 3 | 66632975 | 66633225 | 250 | 66633137 | 34 | 258 | 28.4 |
| 3 | 66636600 | 66636775 | 175 | 66636662 | 16 | 97  | 0    |
| 3 | 66709575 | 66709600 | 25  | 66709587 | 14 | 14  | 2.2  |
| 3 | 66711550 | 66711650 | 100 | 66711637 | 21 | 70  | 4.4  |
| 3 | 66713550 | 66713600 | 50  | 66713562 | 12 | 24  | 0    |
| 3 | 66715550 | 66715800 | 250 | 66715712 | 18 | 154 | 4.4  |
| 3 | 66730525 | 66730725 | 200 | 66730612 | 17 | 119 | 10.9 |
| 3 | 66735550 | 66735675 | 125 | 66735587 | 14 | 65  | 0    |
| 3 | 66745350 | 66745375 | 25  | 66745362 | 12 | 12  | 2.2  |
| 3 | 66751050 | 66751100 | 50  | 66751062 | 12 | 24  | 0    |
| 3 | 66755525 | 66755650 | 125 | 66755537 | 12 | 58  | 8.8  |
| 3 | 66759150 | 66759200 | 50  | 66759162 | 15 | 28  | 4.4  |
| 3 | 66768125 | 66768225 | 100 | 66768137 | 18 | 60  | 0    |
| 3 | 66777575 | 66777700 | 125 | 66777612 | 13 | 63  | 8.8  |
| 3 | 66784450 | 66784500 | 50  | 66784462 | 12 | 24  | 0    |
| 3 | 66788775 | 66788800 | 25  | 66788787 | 12 | 12  | 2.2  |
| 3 | 66792625 | 66792725 | 100 | 66792637 | 16 | 67  | 13.1 |
| 3 | 66802175 | 66802200 | 25  | 66802187 | 12 | 12  | 0    |
| 3 | 66822625 | 66822875 | 250 | 66822712 | 27 | 214 | 0    |
| 3 | 66829275 | 66829325 | 50  | 66829312 | 17 | 31  | 2.2  |
| 3 | 66832125 | 66832150 | 25  | 66832137 | 12 | 12  | 0    |
| 3 | 66842950 | 66843100 | 150 | 66842962 | 12 | 71  | 10.9 |
| 3 | 66850375 | 66850500 | 125 | 66850387 | 13 | 60  | 0    |
| 3 | 66862225 | 66862300 | 75  | 66862262 | 17 | 46  | 6.6  |
| 3 | 66864675 | 66864800 | 125 | 66864787 | 16 | 70  | 6.6  |
| 3 | 66865625 | 66865675 | 50  | 66865637 | 12 | 24  | 2.2  |
| 3 | 66865900 | 66865925 | 25  | 66865912 | 12 | 12  | 0    |
| 3 | 66866950 | 66867025 | 75  | 66866962 | 14 | 42  | 6.6  |
| 3 | 66871100 | 66871200 | 100 | 66871112 | 14 | 52  | 2.2  |
| 3 | 66871825 | 66872050 | 225 | 66871887 | 20 | 149 | 15.3 |
| 3 | 66874350 | 66874550 | 200 | 66874512 | 16 | 108 | 8.8  |
| 3 | 66878700 | 66878750 | 50  | 66878712 | 13 | 25  | 4.4  |
| 3 | 66886025 | 66886050 | 25  | 66886037 | 12 | 12  | 0    |
| 3 | 66887800 | 66887925 | 125 | 66887837 | 14 | 68  | 10.9 |
| 3 | 66888250 | 66888350 | 100 | 66888287 | 13 | 49  | 4.4  |
| 3 | 66905300 | 66905375 | 75  | 66905312 | 12 | 36  | 0    |
| 3 | 66905625 | 66905675 | 50  | 66905637 | 12 | 24  | 4.4  |
| 3 | 66909750 | 66909950 | 200 | 66909887 | 14 | 94  | 17.5 |
| 3 | 66918050 | 66918075 | 25  | 66918062 | 12 | 12  | 0    |
| 3 | 66923150 | 66923175 | 25  | 66923162 | 12 | 12  | 0    |
| 3 | 66926375 | 66926550 | 175 | 66926437 | 15 | 91  | 10.9 |
| 3 | 66932725 | 66932850 | 125 | 66932787 | 16 | 76  | 0    |
| 3 | 66962100 | 66962125 | 25  | 66962112 | 12 | 12  | 2.2  |
| 3 | 66965050 | 66965200 | 150 | 66965062 | 13 | 74  | 0    |
| 3 | 66972875 | 66973025 | 150 | 66972937 | 13 | 74  | 13.1 |
| 3 | 66976175 | 66976200 | 25  | 66976187 | 13 | 13  | 2.2  |
| 3 | 66986525 | 66986600 | 75  | 66986587 | 18 | 50  | 6.6  |
| 3 | 66989825 | 66989875 | 50  | 66989837 | 12 | 24  | 0    |
| 3 | 66991400 | 66991475 | 75  | 66991462 | 18 | 46  | 2.2  |
| 3 | 67001900 | 67001975 | 75  | 67001962 | 13 | 37  | 0    |
| 3 | 67080500 | 67080525 | 25  | 67080512 | 12 | 12  | 2.2  |
| 3 | 67080850 | 67080875 | 25  | 67080862 | 12 | 12  | 2.2  |
| 3 | 67083075 | 67083125 | 50  | 67083087 | 13 | 26  | 4.4  |
| 3 | 67086225 | 67086300 | 75  | 67086287 | 15 | 42  | 4.4  |
| 3 | 67088000 | 67088025 | 25  | 67088012 | 12 | 12  | 2.2  |
| 3 | 67090525 | 67090675 | 150 | 67090612 | 15 | 78  | 10.9 |
| 3 | 67094950 | 67095125 | 175 | 67095087 | 14 | 86  | 15.3 |
| 3 | 67097550 | 67097650 | 100 | 67097562 | 18 | 63  | 4.4  |
| 3 | 67109150 | 67109350 | 200 | 67109212 | 17 | 118 | 0    |
| 3 | 67111275 | 67111350 | 75  | 67111337 | 14 | 39  | 0    |
| 3 | 67152050 | 67152100 | 50  | 67152087 | 13 | 25  | 4.4  |
| 3 | 67192775 | 67192875 | 100 | 67192787 | 18 | 60  | 8.8  |
| 3 | 67204975 | 67205100 | 125 | 67205012 | 15 | 68  | 0    |
| 3 | 67213375 | 67213400 | 25  | 67213387 | 13 | 13  | 2.2  |
| 3 | 67215750 | 67215800 | 50  | 67215787 | 13 | 25  | 4.4  |
| 3 | 67216550 | 67216650 | 100 | 67216587 | 17 | 57  | 0    |
| 3 | 67225675 | 67225750 | 75  | 67225712 | 13 | 37  | 0    |
| 3 | 67230275 | 67230300 | 25  | 67230287 | 13 | 13  | 0    |
| 3 | 67348400 | 67348475 | 75  | 67348437 | 14 | 41  | 2.2  |
| 3 | 67364075 | 67364100 | 25  | 67364087 | 13 | 13  | 2.2  |
| 3 | 67380275 | 67380325 | 50  | 67380287 | 12 | 24  | 0    |

|   |          |          |     |          |    |     |       |
|---|----------|----------|-----|----------|----|-----|-------|
| 3 | 67400225 | 67400250 | 25  | 67400237 | 12 | 12  | 0     |
| 3 | 67405225 | 67405250 | 25  | 67405237 | 17 | 17  | 2.2   |
| 3 | 67412150 | 67412200 | 50  | 67412162 | 14 | 26  | 2.2   |
| 3 | 67461975 | 67462025 | 50  | 67461987 | 13 | 25  | 4.4   |
| 3 | 67462500 | 67462650 | 150 | 67462562 | 14 | 76  | 0     |
| 3 | 67565100 | 67565250 | 150 | 67565212 | 14 | 75  | 0     |
| 3 | 67789400 | 67789550 | 150 | 67789412 | 14 | 78  | 2.2   |
| 3 | 67810100 | 67810175 | 75  | 67810162 | 13 | 37  | 0     |
| 3 | 67827725 | 67827800 | 75  | 67827737 | 13 | 37  | 6.6   |
| 3 | 67907825 | 67907975 | 150 | 67907912 | 14 | 79  | 8.8   |
| 3 | 67914525 | 67914625 | 100 | 67914537 | 13 | 48  | 0     |
| 3 | 67992450 | 67992500 | 50  | 67992462 | 13 | 26  | 0     |
| 3 | 68245975 | 68246150 | 175 | 68246012 | 19 | 115 | 15.3  |
| 3 | 68255050 | 68255075 | 25  | 68255062 | 12 | 12  | 0     |
| 3 | 68369975 | 68370025 | 50  | 68369987 | 13 | 25  | 2.2   |
| 3 | 68740400 | 68740425 | 25  | 68740412 | 12 | 12  | 2.2   |
| 3 | 68765650 | 68766125 | 475 | 68765712 | 15 | 250 | 35    |
| 3 | 68801925 | 68802050 | 125 | 68802012 | 17 | 79  | 0     |
| 3 | 68833550 | 68833600 | 50  | 68833587 | 13 | 25  | 0     |
| 3 | 68834850 | 68834925 | 75  | 68834887 | 15 | 41  | 6.6   |
| 3 | 68857050 | 68857075 | 25  | 68857062 | 12 | 12  | 2.2   |
| 3 | 68887425 | 68887450 | 25  | 68887437 | 12 | 12  | 2.2   |
| 3 | 68887700 | 68887825 | 125 | 68887712 | 13 | 60  | 0     |
| 3 | 68904450 | 68904575 | 125 | 68904462 | 15 | 72  | 8.8   |
| 3 | 68964875 | 68965000 | 125 | 68964887 | 17 | 79  | 4.4   |
| 3 | 68984275 | 68984325 | 50  | 68984287 | 12 | 24  | 4.4   |
| 3 | 68986025 | 68986300 | 275 | 68986187 | 22 | 187 | 21.9  |
| 3 | 69012600 | 69012625 | 25  | 69012612 | 13 | 13  | 0     |
| 3 | 69013675 | 69013800 | 125 | 69013737 | 15 | 67  | 0     |
| 3 | 69014625 | 69015075 | 450 | 69014962 | 23 | 304 | 43.8  |
| 3 | 69016200 | 69016325 | 125 | 69016312 | 14 | 64  | 2.2   |
| 3 | 69039325 | 69039425 | 100 | 69039362 | 13 | 51  | 0     |
| 3 | 69041825 | 69041875 | 50  | 69041837 | 13 | 25  | 0     |
| 3 | 69057600 | 69057725 | 125 | 69057637 | 14 | 67  | 0     |
| 3 | 69060400 | 69060600 | 200 | 69060512 | 18 | 118 | 8.8   |
| 3 | 69064625 | 69064650 | 25  | 69064637 | 12 | 12  | 2.2   |
| 3 | 69065500 | 69065700 | 200 | 69065612 | 20 | 138 | 0     |
| 3 | 69065950 | 69066025 | 75  | 69065987 | 15 | 40  | 0     |
| 3 | 69075900 | 69075950 | 50  | 69075912 | 13 | 26  | 4.4   |
| 3 | 69080500 | 69080550 | 50  | 69080537 | 13 | 25  | 0     |
| 3 | 69089175 | 69089200 | 25  | 69089187 | 14 | 14  | 2.2   |
| 3 | 69126925 | 69127075 | 150 | 69126937 | 13 | 74  | 2.2   |
| 3 | 69263700 | 69263725 | 25  | 69263712 | 12 | 12  | 2.2   |
| 3 | 69286550 | 69286625 | 75  | 69286587 | 13 | 38  | 0     |
| 3 | 69391950 | 69392075 | 125 | 69391987 | 15 | 73  | 0     |
| 3 | 69439675 | 69439700 | 25  | 69439687 | 12 | 12  | 2.2   |
| 3 | 69506600 | 69506625 | 25  | 69506612 | 12 | 12  | 2.2   |
| 3 | 69509250 | 69509300 | 50  | 69509262 | 12 | 24  | 2.2   |
| 3 | 69536550 | 69536750 | 200 | 69536662 | 19 | 125 | 0     |
| 3 | 69537075 | 69537600 | 525 | 69537162 | 33 | 563 | 107.2 |
| 3 | 69538375 | 69538400 | 25  | 69538387 | 12 | 12  | 2.2   |
| 3 | 69578325 | 69578350 | 25  | 69578337 | 14 | 14  | 0     |
| 3 | 69587325 | 69587425 | 100 | 69587362 | 24 | 92  | 17.5  |
| 3 | 69594425 | 69594550 | 125 | 69594437 | 13 | 65  | 2.2   |
| 3 | 69606800 | 69606850 | 50  | 69606812 | 13 | 26  | 2.2   |
| 3 | 69617475 | 69617750 | 275 | 69617487 | 22 | 179 | 8.8   |
| 3 | 69622425 | 69622500 | 75  | 69622462 | 13 | 37  | 0     |
| 3 | 69632350 | 69632375 | 25  | 69632362 | 15 | 15  | 2.2   |
| 3 | 69653700 | 69653800 | 100 | 69653712 | 17 | 60  | 8.8   |
| 3 | 69654500 | 69654525 | 25  | 69654512 | 12 | 12  | 2.2   |
| 3 | 69656525 | 69656550 | 25  | 69656537 | 12 | 12  | 2.2   |
| 3 | 69660725 | 69660775 | 50  | 69660737 | 12 | 24  | 0     |
| 3 | 69686900 | 69687125 | 225 | 69687112 | 15 | 119 | 6.6   |
| 3 | 69687700 | 69687900 | 200 | 69687737 | 15 | 111 | 0     |
| 3 | 69697300 | 69697350 | 50  | 69697312 | 12 | 24  | 4.4   |
| 3 | 69698900 | 69698950 | 50  | 69698937 | 15 | 27  | 0     |
| 3 | 69702200 | 69702300 | 100 | 69702287 | 20 | 72  | 8.8   |
| 3 | 69711975 | 69712025 | 50  | 69712012 | 14 | 26  | 0     |
| 3 | 69713975 | 69714100 | 125 | 69713987 | 13 | 57  | 0     |
| 3 | 69716350 | 69716550 | 200 | 69716412 | 14 | 102 | 4.4   |
| 3 | 69718225 | 69718250 | 25  | 69718237 | 12 | 12  | 2.2   |
| 3 | 69719875 | 69720100 | 225 | 69720037 | 17 | 117 | 10.9  |
| 3 | 69724500 | 69725025 | 525 | 69724662 | 24 | 324 | 32.8  |
| 3 | 69733425 | 69733600 | 175 | 69733437 | 21 | 111 | 10.9  |
| 3 | 69734500 | 69734675 | 175 | 69734587 | 17 | 108 | 0     |



|   |          |          |     |          |    |     |      |
|---|----------|----------|-----|----------|----|-----|------|
| 3 | 69735850 | 69736000 | 150 | 69735962 | 15 | 83  | 0    |
| 3 | 69739700 | 69739800 | 100 | 69739737 | 16 | 59  | 8.8  |
| 3 | 69743475 | 69743575 | 100 | 69743537 | 17 | 60  | 0    |
| 3 | 69750650 | 69750675 | 25  | 69750662 | 12 | 12  | 2.2  |
| 3 | 69753550 | 69753625 | 75  | 69753587 | 13 | 37  | 6.6  |
| 3 | 69753875 | 69754050 | 175 | 69753887 | 19 | 113 | 6.6  |
| 3 | 69768975 | 69769075 | 100 | 69768987 | 15 | 52  | 6.6  |
| 3 | 69778675 | 69778825 | 150 | 69778712 | 20 | 108 | 0    |
| 3 | 69793250 | 69793325 | 75  | 69793287 | 14 | 39  | 6.6  |
| 3 | 69805725 | 69805750 | 25  | 69805737 | 12 | 12  | 2.2  |
| 3 | 69829175 | 69829200 | 25  | 69829187 | 12 | 12  | 0    |
| 3 | 69832525 | 69832675 | 150 | 69832612 | 18 | 100 | 15.3 |
| 3 | 69843050 | 69843225 | 175 | 69843137 | 14 | 84  | 0    |
| 3 | 69843750 | 69843775 | 25  | 69843762 | 12 | 12  | 0    |
| 3 | 69849925 | 69850000 | 75  | 69849937 | 12 | 35  | 4.4  |
| 3 | 69865400 | 69865500 | 100 | 69865412 | 12 | 48  | 2.2  |
| 3 | 69867800 | 69867875 | 75  | 69867812 | 12 | 34  | 6.6  |
| 3 | 69877450 | 69877575 | 125 | 69877512 | 15 | 65  | 8.8  |
| 3 | 69880500 | 69880575 | 75  | 69880537 | 13 | 37  | 6.6  |
| 3 | 69885100 | 69885125 | 25  | 69885112 | 19 | 19  | 2.2  |
| 3 | 69892375 | 69892425 | 50  | 69892387 | 12 | 24  | 0    |
| 3 | 69899650 | 69899700 | 50  | 69899662 | 14 | 27  | 4.4  |
| 3 | 69904975 | 69905175 | 200 | 69905087 | 17 | 119 | 10.9 |
| 3 | 69909925 | 69910025 | 100 | 69909962 | 16 | 60  | 8.8  |
| 3 | 69957425 | 69957525 | 100 | 69957437 | 13 | 52  | 8.8  |
| 3 | 69962025 | 69962050 | 25  | 69962037 | 13 | 13  | 2.2  |
| 3 | 69963775 | 69963800 | 25  | 69963787 | 14 | 14  | 2.2  |
| 3 | 69968700 | 69968900 | 200 | 69968762 | 21 | 145 | 17.5 |
| 3 | 69977650 | 69977675 | 25  | 69977662 | 12 | 12  | 0    |
| 3 | 70011175 | 70011200 | 25  | 70011187 | 22 | 22  | 4.4  |
| 3 | 70029000 | 70029075 | 75  | 70029012 | 14 | 42  | 6.6  |
| 3 | 70030325 | 70030350 | 25  | 70030337 | 12 | 12  | 2.2  |
| 3 | 70033775 | 70033875 | 100 | 70033787 | 18 | 65  | 2.2  |
| 3 | 70043225 | 70043300 | 75  | 70043237 | 13 | 37  | 0    |
| 3 | 70047625 | 70047750 | 125 | 70047637 | 24 | 118 | 17.5 |
| 3 | 70091300 | 70091350 | 50  | 70091312 | 13 | 26  | 0    |
| 3 | 70103925 | 70103950 | 25  | 70103937 | 12 | 12  | 2.2  |
| 3 | 70106350 | 70106375 | 25  | 70106362 | 12 | 12  | 2.2  |
| 3 | 70109550 | 70109625 | 75  | 70109612 | 13 | 37  | 0    |
| 3 | 70111400 | 70111500 | 100 | 70111437 | 14 | 55  | 0    |
| 3 | 70112375 | 70112425 | 50  | 70112412 | 13 | 25  | 0    |
| 3 | 70112975 | 70113125 | 150 | 70113112 | 17 | 90  | 0    |
| 3 | 70115825 | 70115925 | 100 | 70115887 | 14 | 53  | 0    |
| 3 | 70117025 | 70117100 | 75  | 70117062 | 13 | 37  | 6.6  |
| 3 | 70143850 | 70143925 | 75  | 70143862 | 12 | 36  | 6.6  |
| 3 | 70165450 | 70165550 | 100 | 70165462 | 15 | 55  | 4.4  |
| 3 | 70206625 | 70206700 | 75  | 70206687 | 14 | 37  | 4.4  |
| 3 | 70209725 | 70209800 | 75  | 70209737 | 13 | 38  | 0    |
| 3 | 70213775 | 70213925 | 150 | 70213887 | 14 | 77  | 2.2  |
| 3 | 70255325 | 70255500 | 175 | 70255462 | 16 | 96  | 6.6  |
| 3 | 70258375 | 70258425 | 50  | 70258387 | 16 | 29  | 4.4  |
| 3 | 70262525 | 70262575 | 50  | 70262537 | 13 | 26  | 0    |
| 3 | 70286200 | 70286325 | 125 | 70286212 | 14 | 66  | 4.4  |
| 3 | 70314200 | 70314300 | 100 | 70314287 | 15 | 49  | 8.8  |
| 3 | 70316600 | 70316625 | 25  | 70316612 | 13 | 13  | 0    |
| 3 | 70328875 | 70328975 | 100 | 70328887 | 16 | 59  | 2.2  |
| 3 | 70339925 | 70339950 | 25  | 70339937 | 12 | 12  | 0    |
| 3 | 70363725 | 70363750 | 25  | 70363737 | 12 | 12  | 2.2  |
| 3 | 70375550 | 70375575 | 25  | 70375562 | 12 | 12  | 0    |
| 3 | 70393725 | 70393875 | 150 | 70393787 | 13 | 76  | 0    |
| 3 | 70435950 | 70436025 | 75  | 70435987 | 14 | 40  | 0    |
| 3 | 70444325 | 70444425 | 100 | 70444362 | 14 | 53  | 8.8  |
| 3 | 70506475 | 70506500 | 25  | 70506487 | 12 | 12  | 2.2  |
| 3 | 70517900 | 70517925 | 25  | 70517912 | 12 | 12  | 2.2  |
| 3 | 70521425 | 70521550 | 125 | 70521512 | 14 | 62  | 8.8  |
| 3 | 70542000 | 70542025 | 25  | 70542012 | 12 | 12  | 0    |
| 3 | 70548850 | 70549025 | 175 | 70548912 | 15 | 89  | 10.9 |
| 3 | 70571325 | 70571375 | 50  | 70571362 | 14 | 26  | 4.4  |
| 3 | 70573425 | 70573900 | 475 | 70573487 | 17 | 255 | 37.2 |
| 3 | 70608950 | 70609075 | 125 | 70608987 | 16 | 76  | 4.4  |
| 3 | 70645425 | 70645650 | 225 | 70645537 | 19 | 147 | 19.7 |
| 3 | 70657700 | 70657925 | 225 | 70657787 | 15 | 121 | 15.3 |
| 3 | 70675900 | 70676100 | 200 | 70675937 | 15 | 111 | 0    |
| 3 | 70696275 | 70696375 | 100 | 70696287 | 13 | 51  | 0    |
| 3 | 70702100 | 70702175 | 75  | 70702112 | 12 | 35  | 6.6  |

|   |          |          |     |          |    |     |      |
|---|----------|----------|-----|----------|----|-----|------|
| 3 | 70723675 | 70723775 | 100 | 70723712 | 13 | 49  | 2.2  |
| 3 | 70733425 | 70733450 | 25  | 70733437 | 12 | 12  | 2.2  |
| 3 | 70744850 | 70744950 | 100 | 70744862 | 12 | 48  | 8.8  |
| 3 | 70746850 | 70746900 | 50  | 70746862 | 14 | 27  | 4.4  |
| 3 | 70780775 | 70780875 | 100 | 70780787 | 13 | 48  | 0    |
| 3 | 70783350 | 70783375 | 25  | 70783362 | 12 | 12  | 0    |
| 3 | 70787800 | 70787875 | 75  | 70787812 | 12 | 34  | 2.2  |
| 3 | 70789850 | 70789875 | 25  | 70789862 | 12 | 12  | 2.2  |
| 3 | 70790575 | 70790625 | 50  | 70790587 | 12 | 24  | 0    |
| 3 | 70802225 | 70802250 | 25  | 70802237 | 12 | 12  | 0    |
| 3 | 70835625 | 70835850 | 225 | 70835737 | 19 | 149 | 13.1 |
| 3 | 70844175 | 70844625 | 450 | 70844587 | 18 | 249 | 39.4 |
| 3 | 70891825 | 70891850 | 25  | 70891837 | 12 | 12  | 0    |
| 3 | 70895000 | 70895050 | 50  | 70895012 | 14 | 27  | 4.4  |
| 3 | 70932950 | 70933025 | 75  | 70932962 | 12 | 36  | 4.4  |
| 3 | 70950075 | 70950100 | 25  | 70950087 | 13 | 13  | 2.2  |
| 3 | 70962475 | 70962625 | 150 | 70962537 | 14 | 74  | 8.8  |
| 3 | 70997175 | 70997200 | 25  | 70997187 | 12 | 12  | 0    |
| 3 | 70998550 | 70998675 | 125 | 70998562 | 16 | 70  | 2.2  |
| 3 | 71000175 | 71000225 | 50  | 71000187 | 15 | 27  | 2.2  |
| 3 | 71001575 | 71001600 | 25  | 71001587 | 12 | 12  | 2.2  |
| 3 | 71003925 | 71004025 | 100 | 71003937 | 14 | 51  | 0    |
| 3 | 71008950 | 71009025 | 75  | 71008962 | 13 | 37  | 6.6  |
| 3 | 71012900 | 71012925 | 25  | 71012912 | 13 | 13  | 0    |
| 3 | 71015900 | 71015925 | 25  | 71015912 | 14 | 14  | 2.2  |
| 3 | 71038900 | 71038950 | 50  | 71038912 | 13 | 26  | 2.2  |
| 3 | 71043550 | 71043650 | 100 | 71043612 | 17 | 59  | 2.2  |
| 3 | 71046550 | 71046650 | 100 | 71046562 | 14 | 55  | 4.4  |
| 3 | 71059675 | 71059700 | 25  | 71059687 | 13 | 13  | 2.2  |
| 3 | 71061825 | 71061875 | 50  | 71061837 | 12 | 24  | 2.2  |
| 3 | 71065700 | 71065725 | 25  | 71065712 | 12 | 12  | 0    |
| 3 | 71079575 | 71079725 | 150 | 71079637 | 18 | 98  | 13.1 |
| 3 | 71097850 | 71097875 | 25  | 71097862 | 13 | 13  | 2.2  |
| 3 | 71103900 | 71103950 | 50  | 71103912 | 13 | 25  | 2.2  |
| 3 | 71119500 | 71119550 | 50  | 71119512 | 12 | 24  | 4.4  |
| 3 | 71158300 | 71158425 | 125 | 71158387 | 16 | 67  | 0    |
| 3 | 71175250 | 71175350 | 100 | 71175287 | 14 | 52  | 0    |
| 3 | 71177875 | 71177975 | 100 | 71177887 | 19 | 66  | 8.8  |
| 3 | 71178600 | 71179275 | 675 | 71179062 | 29 | 567 | 74.4 |
| 3 | 71183750 | 71183775 | 25  | 71183762 | 13 | 13  | 2.2  |
| 3 | 71184125 | 71184150 | 25  | 71184137 | 12 | 12  | 2.2  |
| 3 | 71184975 | 71185025 | 50  | 71185012 | 14 | 27  | 0    |
| 3 | 71186250 | 71186300 | 50  | 71186262 | 12 | 24  | 4.4  |
| 3 | 71187000 | 71187100 | 100 | 71187062 | 17 | 65  | 6.6  |
| 3 | 71188425 | 71188525 | 100 | 71188462 | 15 | 53  | 8.8  |
| 3 | 71188800 | 71188900 | 100 | 71188812 | 13 | 51  | 8.8  |
| 3 | 71189550 | 71189700 | 150 | 71189612 | 15 | 78  | 13.1 |
| 3 | 71196175 | 71196500 | 325 | 71196462 | 19 | 175 | 19.7 |
| 3 | 71208225 | 71208400 | 175 | 71208337 | 18 | 112 | 15.3 |
| 3 | 71210825 | 71210850 | 25  | 71210837 | 12 | 12  | 2.2  |
| 3 | 71214975 | 71215000 | 25  | 71214987 | 13 | 13  | 2.2  |
| 3 | 71215700 | 71215725 | 25  | 71215712 | 13 | 13  | 2.2  |
| 3 | 71219025 | 71219200 | 175 | 71219137 | 14 | 91  | 8.8  |
| 3 | 71221075 | 71221275 | 200 | 71221162 | 18 | 132 | 10.9 |
| 3 | 71226600 | 71226700 | 100 | 71226637 | 14 | 54  | 8.8  |
| 3 | 71228825 | 71228850 | 25  | 71228837 | 12 | 12  | 0    |
| 3 | 71249800 | 71250025 | 225 | 71249937 | 19 | 148 | 0    |
| 3 | 71251100 | 71251200 | 100 | 71251162 | 16 | 57  | 0    |
| 3 | 71252425 | 71252450 | 25  | 71252437 | 13 | 13  | 2.2  |
| 3 | 71269350 | 71269475 | 125 | 71269362 | 14 | 64  | 0    |
| 3 | 71271425 | 71271575 | 150 | 71271537 | 19 | 100 | 6.6  |
| 3 | 71278900 | 71278925 | 25  | 71278912 | 13 | 13  | 2.2  |
| 3 | 71279175 | 71279275 | 100 | 71279212 | 17 | 60  | 4.4  |
| 3 | 71288500 | 71288525 | 25  | 71288512 | 12 | 12  | 0    |
| 3 | 71290800 | 71290875 | 75  | 71290812 | 12 | 36  | 0    |
| 3 | 71297450 | 71297800 | 350 | 71297662 | 24 | 277 | 35   |
| 3 | 71298025 | 71298200 | 175 | 71298037 | 25 | 146 | 15.3 |
| 3 | 71298775 | 71298925 | 150 | 71298837 | 17 | 91  | 2.2  |
| 3 | 71326750 | 71326925 | 175 | 71326762 | 15 | 99  | 19.7 |
| 3 | 71328500 | 71328575 | 75  | 71328562 | 13 | 37  | 0    |
| 3 | 71329525 | 71329550 | 25  | 71329537 | 12 | 12  | 2.2  |
| 3 | 71336450 | 71336575 | 125 | 71336462 | 21 | 80  | 4.4  |
| 3 | 71345800 | 71346000 | 200 | 71345937 | 24 | 154 | 10.9 |
| 3 | 71349675 | 71349950 | 275 | 71349687 | 16 | 149 | 0    |
| 3 | 71351650 | 71351800 | 150 | 71351712 | 14 | 76  | 0    |

|   |          |          |     |          |    |     |      |
|---|----------|----------|-----|----------|----|-----|------|
| 3 | 71354000 | 71354100 | 100 | 71354037 | 13 | 49  | 4.4  |
| 3 | 71354550 | 71354575 | 25  | 71354562 | 12 | 12  | 0    |
| 3 | 71356150 | 71356500 | 350 | 71356337 | 13 | 149 | 17.5 |
| 3 | 71366225 | 71366250 | 25  | 71366237 | 12 | 12  | 2.2  |
| 3 | 71369250 | 71369425 | 175 | 71369412 | 14 | 84  | 10.9 |
| 3 | 71370125 | 71370175 | 50  | 71370162 | 13 | 25  | 0    |
| 3 | 71379725 | 71379775 | 50  | 71379737 | 14 | 27  | 4.4  |
| 3 | 71384825 | 71384875 | 50  | 71384837 | 16 | 30  | 0    |
| 3 | 71397675 | 71397875 | 200 | 71397837 | 15 | 105 | 0    |
| 3 | 71400525 | 71400600 | 75  | 71400562 | 14 | 39  | 0    |
| 3 | 71404775 | 71405125 | 350 | 71404862 | 18 | 204 | 15.3 |
| 3 | 71413300 | 71413425 | 125 | 71413312 | 16 | 73  | 0    |
| 3 | 71414800 | 71414875 | 75  | 71414837 | 13 | 38  | 6.6  |
| 3 | 71421975 | 71422050 | 75  | 71421987 | 13 | 39  | 0    |
| 3 | 71425200 | 71425250 | 50  | 71425212 | 12 | 24  | 0    |
| 3 | 71426700 | 71426825 | 125 | 71426712 | 13 | 59  | 10.9 |
| 3 | 71447925 | 71447975 | 50  | 71447962 | 16 | 29  | 4.4  |
| 3 | 71451700 | 71452050 | 350 | 71451862 | 15 | 182 | 10.9 |
| 3 | 71468650 | 71468750 | 100 | 71468662 | 13 | 51  | 8.8  |
| 3 | 71469850 | 71469875 | 25  | 71469862 | 12 | 12  | 2.2  |
| 3 | 71495575 | 71495675 | 100 | 71495662 | 15 | 52  | 0    |
| 3 | 71498975 | 71499175 | 200 | 71499087 | 27 | 192 | 30.6 |
| 3 | 71503375 | 71503600 | 225 | 71503587 | 15 | 106 | 2.2  |
| 3 | 71537025 | 71537075 | 50  | 71537037 | 14 | 27  | 2.2  |
| 3 | 71546075 | 71546100 | 25  | 71546087 | 14 | 14  | 2.2  |
| 3 | 71554175 | 71554350 | 175 | 71554287 | 16 | 94  | 0    |
| 3 | 71556075 | 71556350 | 275 | 71556187 | 14 | 138 | 10.9 |
| 3 | 71559950 | 71560150 | 200 | 71560037 | 16 | 108 | 0    |
| 3 | 71576000 | 71576050 | 50  | 71576037 | 15 | 29  | 0    |
| 3 | 71578800 | 71578875 | 75  | 71578812 | 12 | 36  | 4.4  |
| 3 | 71582825 | 71583000 | 175 | 71582837 | 13 | 89  | 0    |
| 3 | 71586425 | 71586500 | 75  | 71586437 | 14 | 39  | 6.6  |
| 3 | 71596350 | 71596450 | 100 | 71596437 | 20 | 65  | 6.6  |
| 3 | 71597425 | 71597600 | 175 | 71597437 | 18 | 85  | 15.3 |
| 3 | 71597975 | 71598100 | 125 | 71598037 | 14 | 66  | 8.8  |
| 3 | 71600225 | 71600250 | 25  | 71600237 | 12 | 12  | 2.2  |
| 3 | 71606825 | 71606850 | 25  | 71606837 | 12 | 12  | 2.2  |
| 3 | 71626975 | 71627050 | 75  | 71626987 | 15 | 45  | 6.6  |
| 3 | 71632375 | 71632575 | 200 | 71632562 | 13 | 92  | 10.9 |
| 3 | 71633575 | 71633675 | 100 | 71633612 | 19 | 67  | 4.4  |
| 3 | 71636425 | 71636575 | 150 | 71636487 | 13 | 72  | 13.1 |
| 3 | 71638350 | 71638400 | 50  | 71638362 | 13 | 26  | 4.4  |
| 3 | 71644700 | 71645375 | 675 | 71644762 | 17 | 338 | 32.8 |
| 3 | 71645625 | 71645750 | 125 | 71645637 | 19 | 87  | 8.8  |
| 3 | 71646500 | 71646700 | 200 | 71646562 | 17 | 124 | 0    |
| 3 | 71653625 | 71653775 | 150 | 71653737 | 16 | 83  | 0    |
| 3 | 71666850 | 71666925 | 75  | 71666862 | 12 | 35  | 6.6  |
| 3 | 71668700 | 71668975 | 275 | 71668787 | 15 | 151 | 0    |
| 3 | 71674700 | 71674725 | 25  | 71674712 | 13 | 13  | 2.2  |
| 3 | 71675175 | 71675475 | 300 | 71675337 | 29 | 249 | 0    |
| 3 | 71691525 | 71691550 | 25  | 71691537 | 13 | 13  | 2.2  |
| 3 | 71697950 | 71698175 | 225 | 71698012 | 25 | 186 | 19.7 |
| 3 | 71698575 | 71698800 | 225 | 71698637 | 17 | 129 | 6.6  |
| 3 | 71701875 | 71701975 | 100 | 71701887 | 15 | 57  | 4.4  |
| 3 | 71702200 | 71702475 | 275 | 71702312 | 19 | 166 | 10.9 |
| 3 | 71707250 | 71707450 | 200 | 71707337 | 16 | 111 | 0    |
| 3 | 71713500 | 71713525 | 25  | 71713512 | 13 | 13  | 2.2  |
| 3 | 71714225 | 71714500 | 275 | 71714337 | 19 | 182 | 2.2  |
| 3 | 71727950 | 71728000 | 50  | 71727962 | 14 | 26  | 4.4  |
| 3 | 71730825 | 71731025 | 200 | 71730837 | 16 | 104 | 8.8  |
| 3 | 71733125 | 71733225 | 100 | 71733137 | 13 | 49  | 2.2  |
| 3 | 71738575 | 71738750 | 175 | 71738712 | 24 | 139 | 13.1 |
| 3 | 71740375 | 71740400 | 25  | 71740387 | 12 | 12  | 2.2  |
| 3 | 71745650 | 71745850 | 200 | 71745687 | 16 | 115 | 17.5 |
| 3 | 71746500 | 71746600 | 100 | 71746512 | 16 | 60  | 0    |
| 3 | 71747950 | 71748025 | 75  | 71747962 | 12 | 36  | 0    |
| 3 | 71751175 | 71751225 | 50  | 71751187 | 12 | 24  | 0    |
| 3 | 71752425 | 71752525 | 100 | 71752512 | 16 | 55  | 6.6  |
| 3 | 71753700 | 71753825 | 125 | 71753737 | 16 | 67  | 2.2  |
| 3 | 71754550 | 71754750 | 200 | 71754737 | 20 | 128 | 4.4  |
| 3 | 71755500 | 71755550 | 50  | 71755537 | 17 | 32  | 4.4  |
| 3 | 71759500 | 71759750 | 250 | 71759612 | 18 | 162 | 0    |
| 3 | 71762025 | 71762200 | 175 | 71762062 | 19 | 113 | 13.1 |
| 3 | 71762975 | 71763375 | 400 | 71763262 | 17 | 226 | 10.9 |
| 3 | 71775350 | 71775475 | 125 | 71775387 | 15 | 68  | 0    |

|   |          |          |     |          |    |     |      |
|---|----------|----------|-----|----------|----|-----|------|
| 3 | 71778275 | 71778300 | 25  | 71778287 | 12 | 12  | 2.2  |
| 3 | 71783725 | 71783775 | 50  | 71783737 | 12 | 24  | 0    |
| 3 | 71790200 | 71790300 | 100 | 71790212 | 12 | 47  | 8.8  |
| 3 | 71791375 | 71791425 | 50  | 71791387 | 13 | 26  | 4.4  |
| 3 | 71795475 | 71795500 | 25  | 71795487 | 12 | 12  | 2.2  |
| 3 | 71795800 | 71795850 | 50  | 71795812 | 14 | 27  | 4.4  |
| 3 | 71807700 | 71807850 | 150 | 71807737 | 13 | 74  | 4.4  |
| 3 | 71830050 | 71830225 | 175 | 71830212 | 18 | 106 | 0    |
| 3 | 71854725 | 71854750 | 25  | 71854737 | 12 | 12  | 2.2  |
| 3 | 71856550 | 71856625 | 75  | 71856612 | 29 | 83  | 10.9 |
| 3 | 71857950 | 71857975 | 25  | 71857962 | 12 | 12  | 0    |
| 3 | 71864975 | 71865000 | 25  | 71864987 | 12 | 12  | 0    |
| 3 | 71881400 | 71881425 | 25  | 71881412 | 13 | 13  | 2.2  |
| 3 | 71883250 | 71883350 | 100 | 71883287 | 14 | 52  | 8.8  |
| 3 | 71884850 | 71885150 | 300 | 71884987 | 22 | 207 | 2.2  |
| 3 | 71886725 | 71886850 | 125 | 71886837 | 21 | 88  | 10.9 |
| 3 | 71889050 | 71889225 | 175 | 71889162 | 14 | 87  | 15.3 |
| 3 | 71890950 | 71891025 | 75  | 71890962 | 12 | 36  | 4.4  |
| 3 | 71891250 | 71891600 | 350 | 71891387 | 21 | 234 | 17.5 |
| 3 | 71896250 | 71896325 | 75  | 71896262 | 15 | 43  | 6.6  |
| 3 | 71900775 | 71900800 | 25  | 71900787 | 12 | 12  | 2.2  |
| 3 | 71903000 | 71903025 | 25  | 71903012 | 12 | 12  | 0    |
| 3 | 71903850 | 71903950 | 100 | 71903887 | 13 | 49  | 8.8  |
| 3 | 71907775 | 71907800 | 25  | 71907787 | 12 | 12  | 0    |
| 3 | 71916250 | 71916275 | 25  | 71916262 | 12 | 12  | 2.2  |
| 3 | 71917600 | 71917650 | 50  | 71917612 | 15 | 30  | 4.4  |
| 3 | 71917875 | 71917975 | 100 | 71917887 | 15 | 55  | 8.8  |
| 3 | 71918225 | 71918250 | 25  | 71918237 | 12 | 12  | 0    |
| 3 | 71919925 | 71919975 | 50  | 71919937 | 16 | 29  | 4.4  |
| 3 | 71931250 | 71931650 | 400 | 71931337 | 18 | 229 | 24.1 |
| 3 | 71940950 | 71941100 | 150 | 71940987 | 13 | 68  | 0    |
| 3 | 71941700 | 71941750 | 50  | 71941712 | 14 | 27  | 4.4  |
| 3 | 71969025 | 71969050 | 25  | 71969037 | 12 | 12  | 2.2  |
| 3 | 71971800 | 71971850 | 50  | 71971812 | 12 | 24  | 0    |
| 3 | 71979650 | 71979800 | 150 | 71979762 | 24 | 117 | 15.3 |
| 3 | 71985525 | 71985625 | 100 | 71985537 | 15 | 58  | 0    |
| 3 | 71986100 | 71986225 | 125 | 71986212 | 22 | 92  | 10.9 |
| 3 | 71986825 | 71987025 | 200 | 71986912 | 19 | 125 | 17.5 |
| 3 | 71993950 | 71993975 | 25  | 71993962 | 12 | 12  | 2.2  |
| 3 | 71995750 | 71995800 | 50  | 71995762 | 13 | 26  | 0    |
| 3 | 71996500 | 71996625 | 125 | 71996537 | 14 | 66  | 0    |
| 3 | 72019975 | 72020275 | 300 | 72020262 | 14 | 138 | 13.1 |
| 3 | 72020700 | 72020900 | 200 | 72020862 | 17 | 120 | 15.3 |
| 3 | 72025000 | 72025175 | 175 | 72025062 | 16 | 98  | 4.4  |
| 3 | 72027600 | 72027825 | 225 | 72027737 | 19 | 140 | 0    |
| 3 | 72029925 | 72030275 | 350 | 72030087 | 27 | 281 | 28.4 |
| 3 | 72032000 | 72032050 | 50  | 72032037 | 15 | 28  | 0    |
| 3 | 72036000 | 72036125 | 125 | 72036112 | 15 | 70  | 10.9 |
| 3 | 72040850 | 72040975 | 125 | 72040862 | 14 | 66  | 0    |
| 3 | 72041750 | 72041775 | 25  | 72041762 | 12 | 12  | 2.2  |
| 3 | 72044225 | 72044325 | 100 | 72044237 | 12 | 47  | 4.4  |
| 3 | 72049100 | 72049225 | 125 | 72049137 | 19 | 87  | 0    |
| 3 | 72051425 | 72051550 | 125 | 72051487 | 18 | 85  | 8.8  |
| 3 | 72052300 | 72052325 | 25  | 72052312 | 14 | 14  | 2.2  |
| 3 | 72053175 | 72053200 | 25  | 72053187 | 12 | 12  | 0    |
| 3 | 72053625 | 72053675 | 50  | 72053662 | 18 | 35  | 2.2  |
| 3 | 72054575 | 72054600 | 25  | 72054587 | 12 | 12  | 2.2  |
| 3 | 72062475 | 72062575 | 100 | 72062512 | 13 | 50  | 8.8  |
| 3 | 72066025 | 72066275 | 250 | 72066187 | 34 | 257 | 19.7 |
| 3 | 72067925 | 72068375 | 450 | 72068287 | 17 | 227 | 6.6  |
| 3 | 72069200 | 72069300 | 100 | 72069212 | 18 | 69  | 2.2  |
| 3 | 72071375 | 72071525 | 150 | 72071512 | 15 | 79  | 2.2  |
| 3 | 72074325 | 72074375 | 50  | 72074337 | 12 | 24  | 4.4  |
| 3 | 72074800 | 72074975 | 175 | 72074812 | 22 | 135 | 8.8  |
| 3 | 72075775 | 72075875 | 100 | 72075862 | 18 | 58  | 8.8  |
| 3 | 72076100 | 72076275 | 175 | 72076112 | 31 | 153 | 10.9 |
| 3 | 72077125 | 72077275 | 150 | 72077162 | 25 | 126 | 4.4  |
| 3 | 72077775 | 72078350 | 575 | 72077962 | 21 | 366 | 37.2 |
| 3 | 72079225 | 72079250 | 25  | 72079237 | 15 | 15  | 2.2  |
| 3 | 72079575 | 72079750 | 175 | 72079587 | 13 | 82  | 8.8  |
| 3 | 72080175 | 72080325 | 150 | 72080187 | 15 | 69  | 8.8  |
| 3 | 72083475 | 72083650 | 175 | 72083487 | 12 | 80  | 0    |
| 3 | 72084000 | 72084025 | 25  | 72084012 | 12 | 12  | 0    |
| 3 | 72085550 | 72085600 | 50  | 72085562 | 12 | 24  | 4.4  |
| 3 | 72094425 | 72094475 | 50  | 72094437 | 13 | 25  | 0    |

|   |          |          |     |          |    |     |      |
|---|----------|----------|-----|----------|----|-----|------|
| 3 | 72096725 | 72096750 | 25  | 72096737 | 12 | 12  | 2.2  |
| 3 | 72097150 | 72097200 | 50  | 72097162 | 17 | 30  | 4.4  |
| 3 | 72098250 | 72098425 | 175 | 72098337 | 17 | 102 | 13.1 |
| 3 | 72098975 | 72099550 | 575 | 72099012 | 15 | 277 | 0    |
| 3 | 72100275 | 72100400 | 125 | 72100312 | 17 | 76  | 0    |
| 3 | 72101700 | 72101925 | 225 | 72101787 | 22 | 161 | 0    |
| 3 | 72102725 | 72102850 | 125 | 72102762 | 17 | 72  | 8.8  |
| 3 | 72104700 | 72105050 | 350 | 72104887 | 21 | 217 | 0    |
| 3 | 72105425 | 72105675 | 250 | 72105437 | 26 | 208 | 2.2  |
| 3 | 72105950 | 72106025 | 75  | 72105987 | 18 | 51  | 6.6  |
| 3 | 72107900 | 72108075 | 175 | 72107937 | 19 | 120 | 21.9 |
| 3 | 72108325 | 72108425 | 100 | 72108337 | 13 | 47  | 8.8  |
| 3 | 72115700 | 72115775 | 75  | 72115712 | 15 | 42  | 4.4  |
| 3 | 72124350 | 72124500 | 150 | 72124412 | 15 | 79  | 13.1 |
| 3 | 72125375 | 72125575 | 200 | 72125437 | 21 | 140 | 13.1 |
| 3 | 72126275 | 72126600 | 325 | 72126337 | 27 | 255 | 19.7 |
| 3 | 72127050 | 72127275 | 225 | 72127162 | 17 | 133 | 0    |
| 3 | 72128425 | 72128500 | 75  | 72128437 | 12 | 36  | 6.6  |
| 3 | 72129775 | 72129900 | 125 | 72129862 | 14 | 66  | 0    |
| 3 | 72130675 | 72130725 | 50  | 72130687 | 17 | 29  | 4.4  |
| 3 | 72132600 | 72132950 | 350 | 72132837 | 32 | 333 | 17.5 |
| 3 | 72139625 | 72139700 | 75  | 72139637 | 13 | 37  | 0    |
| 3 | 72140550 | 72140900 | 350 | 72140737 | 22 | 233 | 17.5 |
| 3 | 72141125 | 72141400 | 275 | 72141287 | 25 | 201 | 19.7 |
| 3 | 72142400 | 72142425 | 25  | 72142412 | 12 | 12  | 0    |
| 3 | 72142750 | 72142900 | 150 | 72142862 | 31 | 162 | 13.1 |
| 3 | 72143200 | 72143250 | 50  | 72143212 | 12 | 24  | 2.2  |
| 3 | 72145100 | 72145175 | 75  | 72145112 | 13 | 37  | 0    |
| 3 | 72146475 | 72146700 | 225 | 72146612 | 18 | 134 | 26.3 |
| 3 | 72147300 | 72147475 | 175 | 72147337 | 15 | 96  | 8.8  |
| 3 | 72166975 | 72167000 | 25  | 72166987 | 13 | 13  | 2.2  |
| 3 | 72167700 | 72167750 | 50  | 72167712 | 13 | 25  | 2.2  |
| 3 | 72168650 | 72168775 | 125 | 72168687 | 16 | 66  | 10.9 |
| 3 | 72171750 | 72171775 | 25  | 72171762 | 13 | 13  | 2.2  |
| 3 | 72173600 | 72173675 | 75  | 72173637 | 16 | 46  | 6.6  |
| 3 | 72176150 | 72176200 | 50  | 72176162 | 12 | 24  | 2.2  |
| 3 | 72177925 | 72178000 | 75  | 72177962 | 14 | 40  | 4.4  |
| 3 | 72180925 | 72181000 | 75  | 72180937 | 13 | 39  | 6.6  |
| 3 | 72183225 | 72183325 | 100 | 72183262 | 14 | 51  | 8.8  |
| 3 | 72187475 | 72187525 | 50  | 72187512 | 13 | 25  | 0    |
| 3 | 72189025 | 72189125 | 100 | 72189037 | 22 | 76  | 13.1 |
| 3 | 72189850 | 72190025 | 175 | 72189887 | 13 | 88  | 0    |
| 3 | 72190600 | 72190650 | 50  | 72190612 | 15 | 29  | 4.4  |
| 3 | 72191625 | 72191775 | 150 | 72191662 | 16 | 91  | 0    |
| 3 | 72199775 | 72199900 | 125 | 72199787 | 14 | 66  | 8.8  |
| 3 | 72204350 | 72204450 | 100 | 72204412 | 13 | 48  | 0    |
| 3 | 72211525 | 72211600 | 75  | 72211537 | 15 | 42  | 0    |
| 3 | 72212225 | 72212325 | 100 | 72212237 | 14 | 47  | 0    |
| 3 | 72212950 | 72212975 | 25  | 72212962 | 12 | 12  | 0    |
| 3 | 72213250 | 72213300 | 50  | 72213262 | 12 | 24  | 0    |
| 3 | 72215250 | 72215300 | 50  | 72215287 | 13 | 25  | 4.4  |
| 3 | 72215975 | 72216375 | 400 | 72216087 | 15 | 178 | 8.8  |
| 3 | 72217225 | 72217725 | 500 | 72217562 | 24 | 365 | 30.6 |
| 3 | 72219375 | 72219400 | 25  | 72219387 | 16 | 16  | 2.2  |
| 3 | 72222875 | 72222900 | 25  | 72222887 | 12 | 12  | 0    |
| 3 | 72225825 | 72225850 | 25  | 72225837 | 12 | 12  | 2.2  |
| 3 | 72230175 | 72230250 | 75  | 72230187 | 16 | 44  | 2.2  |
| 3 | 72239625 | 72239800 | 175 | 72239662 | 14 | 94  | 6.6  |
| 3 | 72241300 | 72241450 | 150 | 72241312 | 12 | 59  | 0    |
| 3 | 72241950 | 72242050 | 100 | 72241962 | 16 | 61  | 4.4  |
| 3 | 72242650 | 72242725 | 75  | 72242712 | 14 | 39  | 4.4  |
| 3 | 72245500 | 72245550 | 50  | 72245512 | 13 | 25  | 4.4  |
| 3 | 72246825 | 72246875 | 50  | 72246837 | 12 | 24  | 4.4  |
| 3 | 72247350 | 72247375 | 25  | 72247362 | 14 | 14  | 2.2  |
| 3 | 72248475 | 72248775 | 300 | 72248712 | 16 | 143 | 19.7 |
| 3 | 72249575 | 72249625 | 50  | 72249587 | 12 | 24  | 4.4  |
| 3 | 72251350 | 72251500 | 150 | 72251362 | 13 | 71  | 13.1 |
| 3 | 72252500 | 72252600 | 100 | 72252512 | 13 | 50  | 8.8  |
| 3 | 72253500 | 72253525 | 25  | 72253512 | 12 | 12  | 2.2  |
| 3 | 72255800 | 72255900 | 100 | 72255862 | 14 | 52  | 2.2  |
| 3 | 72260000 | 72260325 | 325 | 72260062 | 16 | 175 | 17.5 |
| 3 | 72260875 | 72260975 | 100 | 72260937 | 16 | 57  | 4.4  |
| 3 | 72265300 | 72265400 | 100 | 72265312 | 14 | 50  | 8.8  |
| 3 | 72265725 | 72265900 | 175 | 72265762 | 13 | 83  | 4.4  |
| 3 | 72267225 | 72267625 | 400 | 72267387 | 19 | 230 | 2.2  |

|   |          |          |     |          |    |     |      |
|---|----------|----------|-----|----------|----|-----|------|
| 3 | 72269825 | 72269875 | 50  | 72269837 | 12 | 24  | 2.2  |
| 3 | 72270200 | 72270400 | 200 | 72270287 | 15 | 101 | 10.9 |
| 3 | 72273250 | 72273300 | 50  | 72273287 | 14 | 27  | 4.4  |
| 3 | 72278150 | 72278500 | 350 | 72278312 | 18 | 189 | 26.3 |
| 3 | 72279925 | 72280675 | 750 | 72280037 | 17 | 367 | 19.7 |
| 3 | 72285400 | 72285500 | 100 | 72285412 | 13 | 49  | 8.8  |
| 3 | 72286300 | 72286425 | 125 | 72286337 | 15 | 69  | 8.8  |
| 3 | 72288400 | 72288425 | 25  | 72288412 | 12 | 12  | 2.2  |
| 3 | 72293975 | 72294075 | 100 | 72294062 | 16 | 56  | 8.8  |
| 3 | 72295375 | 72295475 | 100 | 72295387 | 12 | 47  | 8.8  |
| 3 | 72299675 | 72299875 | 200 | 72299762 | 19 | 132 | 0    |
| 3 | 72300625 | 72300650 | 25  | 72300637 | 12 | 12  | 2.2  |
| 3 | 72301525 | 72301550 | 25  | 72301537 | 14 | 14  | 2.2  |
| 3 | 72301875 | 72302100 | 225 | 72301887 | 12 | 103 | 8.8  |
| 3 | 72306325 | 72306425 | 100 | 72306387 | 14 | 50  | 0    |
| 3 | 72307400 | 72307500 | 100 | 72307412 | 13 | 48  | 0    |
| 3 | 72307725 | 72307800 | 75  | 72307737 | 13 | 39  | 4.4  |
| 3 | 72309925 | 72309975 | 50  | 72309937 | 16 | 28  | 2.2  |
| 3 | 72314875 | 72315075 | 200 | 72315037 | 14 | 89  | 0    |
| 3 | 72319400 | 72319475 | 75  | 72319412 | 13 | 37  | 6.6  |
| 3 | 72320575 | 72320625 | 50  | 72320587 | 12 | 24  | 4.4  |
| 3 | 72321850 | 72322200 | 350 | 72322162 | 14 | 161 | 6.6  |
| 3 | 72324425 | 72324550 | 125 | 72324437 | 13 | 59  | 0    |
| 3 | 72325400 | 72325575 | 175 | 72325462 | 15 | 99  | 15.3 |
| 3 | 72331175 | 72331425 | 250 | 72331287 | 14 | 119 | 0    |
| 3 | 72332600 | 72333000 | 400 | 72332712 | 18 | 237 | 0    |
| 3 | 72333900 | 72333925 | 25  | 72333912 | 13 | 13  | 2.2  |
| 3 | 72335525 | 72335725 | 200 | 72335612 | 19 | 130 | 6.6  |
| 3 | 72335950 | 72336225 | 275 | 72335962 | 27 | 201 | 10.9 |
| 3 | 72348700 | 72348725 | 25  | 72348712 | 13 | 13  | 0    |
| 3 | 72353950 | 72354025 | 75  | 72353962 | 15 | 44  | 6.6  |
| 3 | 72355475 | 72355600 | 125 | 72355487 | 18 | 71  | 6.6  |
| 3 | 72358275 | 72358325 | 50  | 72358287 | 17 | 34  | 4.4  |
| 3 | 72360250 | 72360275 | 25  | 72360262 | 14 | 14  | 2.2  |
| 3 | 72361075 | 72361275 | 200 | 72361187 | 16 | 110 | 6.6  |
| 3 | 72362175 | 72362200 | 25  | 72362187 | 13 | 13  | 2.2  |
| 3 | 72365125 | 72365175 | 50  | 72365137 | 13 | 25  | 4.4  |
| 3 | 72365550 | 72365725 | 175 | 72365662 | 24 | 130 | 15.3 |
| 3 | 72368725 | 72368775 | 50  | 72368737 | 13 | 25  | 4.4  |
| 3 | 72369000 | 72369100 | 100 | 72369037 | 13 | 49  | 6.6  |
| 3 | 72369350 | 72369400 | 50  | 72369362 | 12 | 24  | 0    |
| 3 | 72375525 | 72375725 | 200 | 72375587 | 16 | 119 | 15.3 |
| 3 | 72376275 | 72376300 | 25  | 72376287 | 12 | 12  | 0    |
| 3 | 72376800 | 72377150 | 350 | 72377112 | 16 | 191 | 28.4 |
| 3 | 72377450 | 72377675 | 225 | 72377487 | 22 | 163 | 15.3 |
| 3 | 72379225 | 72379700 | 475 | 72379562 | 24 | 321 | 15.3 |
| 3 | 72380700 | 72380725 | 25  | 72380712 | 12 | 12  | 0    |
| 3 | 72382375 | 72382400 | 25  | 72382387 | 13 | 13  | 0    |
| 3 | 72383650 | 72383675 | 25  | 72383662 | 13 | 13  | 2.2  |
| 3 | 72385825 | 72385950 | 125 | 72385937 | 15 | 64  | 4.4  |
| 3 | 72387100 | 72387225 | 125 | 72387187 | 17 | 77  | 6.6  |
| 3 | 72388300 | 72388400 | 100 | 72388312 | 14 | 54  | 8.8  |
| 3 | 72389650 | 72389675 | 25  | 72389662 | 12 | 12  | 2.2  |
| 3 | 72390400 | 72390450 | 50  | 72390412 | 13 | 25  | 2.2  |
| 3 | 72390975 | 72391150 | 175 | 72390987 | 12 | 73  | 0    |
| 3 | 72391875 | 72392050 | 175 | 72391937 | 16 | 95  | 15.3 |
| 3 | 72392700 | 72392825 | 125 | 72392712 | 22 | 84  | 15.3 |
| 3 | 72394525 | 72394575 | 50  | 72394537 | 12 | 24  | 4.4  |
| 3 | 72404450 | 72404475 | 25  | 72404462 | 12 | 12  | 2.2  |
| 3 | 72407775 | 72407825 | 50  | 72407787 | 14 | 26  | 2.2  |
| 3 | 72408925 | 72409400 | 475 | 72409212 | 24 | 358 | 32.8 |
| 3 | 72410550 | 72410625 | 75  | 72410612 | 19 | 50  | 8.8  |
| 3 | 72411475 | 72411500 | 25  | 72411487 | 12 | 12  | 2.2  |
| 3 | 72412800 | 72412925 | 125 | 72412887 | 22 | 99  | 4.4  |
| 3 | 72414475 | 72415000 | 525 | 72414537 | 34 | 474 | 35   |
| 3 | 72415925 | 72416075 | 150 | 72416012 | 23 | 123 | 8.8  |
| 3 | 72417775 | 72417825 | 50  | 72417812 | 14 | 26  | 0    |
| 3 | 72419350 | 72419525 | 175 | 72419362 | 23 | 129 | 17.5 |
| 3 | 72422600 | 72423150 | 550 | 72422662 | 17 | 279 | 17.5 |
| 3 | 72425325 | 72425350 | 25  | 72425337 | 31 | 31  | 4.4  |
| 3 | 72425775 | 72425975 | 200 | 72425912 | 16 | 115 | 6.6  |
| 3 | 72426575 | 72426750 | 175 | 72426612 | 22 | 126 | 19.7 |
| 3 | 72428125 | 72428150 | 25  | 72428137 | 13 | 13  | 2.2  |
| 3 | 72430150 | 72430175 | 25  | 72430162 | 12 | 12  | 2.2  |
| 3 | 72430675 | 72430800 | 125 | 72430712 | 15 | 70  | 6.6  |

|   |          |          |     |          |    |     |      |
|---|----------|----------|-----|----------|----|-----|------|
| 3 | 72431375 | 72432200 | 825 | 72431487 | 22 | 558 | 91.9 |
| 3 | 72432900 | 72433025 | 125 | 72432937 | 16 | 71  | 10.9 |
| 3 | 72433850 | 72433950 | 100 | 72433862 | 29 | 98  | 6.6  |
| 3 | 72434850 | 72434925 | 75  | 72434887 | 14 | 39  | 6.6  |
| 3 | 72435625 | 72435650 | 25  | 72435637 | 15 | 15  | 0    |
| 3 | 72436050 | 72436175 | 125 | 72436062 | 13 | 63  | 6.6  |
| 3 | 72436425 | 72436475 | 50  | 72436437 | 15 | 28  | 2.2  |
| 3 | 72436700 | 72436725 | 25  | 72436712 | 14 | 14  | 2.2  |
| 3 | 72439250 | 72439300 | 50  | 72439262 | 14 | 28  | 2.2  |
| 3 | 72442950 | 72442975 | 25  | 72442962 | 15 | 15  | 2.2  |
| 3 | 72443325 | 72443425 | 100 | 72443337 | 22 | 69  | 10.9 |
| 3 | 72446225 | 72446850 | 625 | 72446737 | 27 | 437 | 13.1 |
| 3 | 72451100 | 72451200 | 100 | 72451112 | 12 | 45  | 0    |
| 3 | 72452925 | 72453100 | 175 | 72453087 | 22 | 124 | 0    |
| 3 | 72453950 | 72454000 | 50  | 72453987 | 14 | 26  | 2.2  |
| 3 | 72454700 | 72454925 | 225 | 72454712 | 22 | 151 | 15.3 |
| 3 | 72455375 | 72455400 | 25  | 72455387 | 12 | 12  | 2.2  |
| 3 | 72456250 | 72456625 | 375 | 72456612 | 16 | 164 | 4.4  |
| 3 | 72457550 | 72457650 | 100 | 72457587 | 13 | 49  | 0    |
| 3 | 72459025 | 72459050 | 25  | 72459037 | 12 | 12  | 0    |
| 3 | 72460775 | 72460800 | 25  | 72460787 | 12 | 12  | 2.2  |
| 3 | 72461975 | 72462025 | 50  | 72461987 | 12 | 24  | 2.2  |
| 3 | 72463875 | 72464050 | 175 | 72463887 | 14 | 79  | 10.9 |
| 3 | 72469625 | 72469650 | 25  | 72469637 | 26 | 26  | 4.4  |
| 3 | 72470025 | 72470375 | 350 | 72470187 | 30 | 338 | 61.3 |
| 3 | 72470650 | 72470675 | 25  | 72470662 | 33 | 33  | 6.6  |
| 3 | 72474450 | 72474475 | 25  | 72474462 | 13 | 13  | 2.2  |
| 3 | 72481325 | 72481350 | 25  | 72481337 | 12 | 12  | 2.2  |
| 3 | 72482375 | 72482425 | 50  | 72482412 | 14 | 26  | 0    |
| 3 | 72482750 | 72482975 | 225 | 72482912 | 27 | 221 | 13.1 |
| 3 | 72483800 | 72483825 | 25  | 72483812 | 12 | 12  | 2.2  |
| 3 | 72484200 | 72484475 | 275 | 72484212 | 17 | 172 | 26.3 |
| 3 | 72485350 | 72485550 | 200 | 72485437 | 17 | 113 | 4.4  |
| 3 | 72493300 | 72493400 | 100 | 72493312 | 20 | 68  | 0    |
| 3 | 72494550 | 72494625 | 75  | 72494562 | 23 | 63  | 8.8  |
| 3 | 72496200 | 72496250 | 50  | 72496237 | 14 | 26  | 4.4  |
| 3 | 72496925 | 72497125 | 200 | 72497087 | 15 | 101 | 6.6  |
| 3 | 72498400 | 72498475 | 75  | 72498462 | 17 | 43  | 0    |
| 3 | 72510125 | 72510175 | 50  | 72510162 | 14 | 27  | 0    |
| 3 | 72534775 | 72534875 | 100 | 72534812 | 13 | 49  | 0    |
| 3 | 72548525 | 72548550 | 25  | 72548537 | 12 | 12  | 2.2  |
| 3 | 72579975 | 72580000 | 25  | 72579987 | 12 | 12  | 2.2  |
| 3 | 72581775 | 72581800 | 25  | 72581787 | 15 | 15  | 2.2  |
| 3 | 72583525 | 72583575 | 50  | 72583537 | 13 | 25  | 4.4  |
| 3 | 72584700 | 72584850 | 150 | 72584737 | 18 | 93  | 13.1 |
| 3 | 72586600 | 72586625 | 25  | 72586612 | 12 | 12  | 0    |
| 3 | 72586850 | 72587300 | 450 | 72587212 | 29 | 368 | 48.1 |
| 3 | 72590375 | 72590450 | 75  | 72590387 | 16 | 44  | 0    |
| 3 | 72590675 | 72590975 | 300 | 72590687 | 17 | 153 | 17.5 |
| 3 | 72591625 | 72591775 | 150 | 72591737 | 22 | 108 | 13.1 |
| 3 | 72592400 | 72592600 | 200 | 72592487 | 14 | 106 | 4.4  |
| 3 | 72595550 | 72595575 | 25  | 72595562 | 12 | 12  | 2.2  |
| 3 | 72597275 | 72597350 | 75  | 72597287 | 15 | 37  | 6.6  |
| 3 | 72602100 | 72602250 | 150 | 72602112 | 14 | 80  | 4.4  |
| 3 | 72609225 | 72609475 | 250 | 72609237 | 12 | 109 | 2.2  |
| 3 | 72610875 | 72611050 | 175 | 72610912 | 13 | 88  | 10.9 |
| 3 | 72612400 | 72612450 | 50  | 72612412 | 14 | 26  | 2.2  |
| 3 | 72612675 | 72612700 | 25  | 72612687 | 12 | 12  | 0    |
| 3 | 72613725 | 72613750 | 25  | 72613737 | 12 | 12  | 2.2  |
| 3 | 72616550 | 72616600 | 50  | 72616562 | 13 | 26  | 4.4  |
| 3 | 72617775 | 72617850 | 75  | 72617787 | 15 | 40  | 6.6  |
| 3 | 72626175 | 72626525 | 350 | 72626237 | 53 | 529 | 30.6 |
| 3 | 72628825 | 72628875 | 50  | 72628837 | 13 | 26  | 0    |
| 3 | 72633625 | 72633675 | 50  | 72633637 | 12 | 24  | 4.4  |
| 3 | 72635750 | 72635925 | 175 | 72635787 | 17 | 102 | 15.3 |
| 3 | 72636800 | 72636850 | 50  | 72636812 | 13 | 25  | 2.2  |
| 3 | 72638175 | 72638275 | 100 | 72638187 | 29 | 107 | 17.5 |
| 3 | 72638525 | 72638550 | 25  | 72638537 | 12 | 12  | 0    |
| 3 | 72651900 | 72652675 | 775 | 72652587 | 23 | 494 | 30.6 |
| 3 | 72654400 | 72654525 | 125 | 72654412 | 18 | 87  | 10.9 |
| 3 | 72655625 | 72655650 | 25  | 72655637 | 14 | 14  | 2.2  |
| 3 | 72658250 | 72658675 | 425 | 72658537 | 18 | 233 | 35   |
| 3 | 72659625 | 72659750 | 125 | 72659687 | 23 | 93  | 17.5 |
| 3 | 72660950 | 72661075 | 125 | 72660987 | 14 | 65  | 10.9 |
| 3 | 72664850 | 72665000 | 150 | 72664937 | 16 | 85  | 0    |

|   |          |          |     |          |    |     |      |
|---|----------|----------|-----|----------|----|-----|------|
| 3 | 72665700 | 72666050 | 350 | 72665712 | 17 | 200 | 32.8 |
| 3 | 72666800 | 72666925 | 125 | 72666862 | 15 | 70  | 0    |
| 3 | 72667700 | 72667750 | 50  | 72667737 | 16 | 30  | 4.4  |
| 3 | 72669325 | 72669525 | 200 | 72669437 | 15 | 104 | 2.2  |
| 3 | 72670300 | 72670325 | 25  | 72670312 | 12 | 12  | 2.2  |
| 3 | 72671100 | 72671125 | 25  | 72671112 | 12 | 12  | 0    |
| 3 | 72673650 | 72673725 | 75  | 72673687 | 15 | 44  | 2.2  |
| 3 | 72678225 | 72678250 | 25  | 72678237 | 12 | 12  | 2.2  |
| 3 | 72685175 | 72685325 | 150 | 72685212 | 15 | 78  | 10.9 |
| 3 | 72689450 | 72689550 | 100 | 72689487 | 16 | 55  | 0    |
| 3 | 72697475 | 72697600 | 125 | 72697512 | 16 | 75  | 6.6  |
| 3 | 72700125 | 72700225 | 100 | 72700187 | 18 | 65  | 4.4  |
| 3 | 72702775 | 72702800 | 25  | 72702787 | 12 | 12  | 2.2  |
| 3 | 72704475 | 72704850 | 375 | 72704687 | 22 | 275 | 4.4  |
| 3 | 72709975 | 72710125 | 150 | 72709987 | 22 | 112 | 6.6  |
| 3 | 72711550 | 72711650 | 100 | 72711587 | 15 | 54  | 0    |
| 3 | 72712550 | 72712625 | 75  | 72712562 | 21 | 55  | 0    |
| 3 | 72718450 | 72718475 | 25  | 72718462 | 12 | 12  | 2.2  |
| 3 | 72719525 | 72719600 | 75  | 72719537 | 12 | 34  | 4.4  |
| 3 | 72720950 | 72721050 | 100 | 72720962 | 14 | 52  | 0    |
| 3 | 72724275 | 72724375 | 100 | 72724362 | 19 | 61  | 6.6  |
| 3 | 72726925 | 72726975 | 50  | 72726937 | 13 | 25  | 0    |
| 3 | 72735675 | 72735700 | 25  | 72735687 | 12 | 12  | 0    |
| 3 | 72736575 | 72736600 | 25  | 72736587 | 13 | 13  | 0    |
| 3 | 72739700 | 72739775 | 75  | 72739712 | 14 | 39  | 6.6  |
| 3 | 72749025 | 72749050 | 25  | 72749037 | 12 | 12  | 0    |
| 3 | 72749325 | 72749425 | 100 | 72749387 | 14 | 51  | 8.8  |
| 3 | 72749900 | 72750075 | 175 | 72750037 | 31 | 148 | 2.2  |
| 3 | 72750750 | 72750900 | 150 | 72750887 | 22 | 105 | 4.4  |
| 3 | 72752050 | 72752275 | 225 | 72752187 | 19 | 151 | 15.3 |
| 3 | 72753775 | 72753850 | 75  | 72753787 | 15 | 39  | 6.6  |
| 3 | 72754950 | 72755275 | 325 | 72755012 | 19 | 208 | 19.7 |
| 3 | 72755850 | 72755975 | 125 | 72755862 | 15 | 64  | 8.8  |
| 3 | 72756900 | 72756950 | 50  | 72756912 | 12 | 24  | 0    |
| 3 | 72757675 | 72757700 | 25  | 72757687 | 16 | 16  | 2.2  |
| 3 | 72759850 | 72759900 | 50  | 72759887 | 15 | 27  | 0    |
| 3 | 72761675 | 72761700 | 25  | 72761687 | 13 | 13  | 2.2  |
| 3 | 72763125 | 72763175 | 50  | 72763162 | 13 | 25  | 4.4  |
| 3 | 72763425 | 72763600 | 175 | 72763462 | 16 | 103 | 10.9 |
| 3 | 72766575 | 72767050 | 475 | 72766637 | 24 | 278 | 30.6 |
| 3 | 72768500 | 72768625 | 125 | 72768512 | 13 | 64  | 10.9 |
| 3 | 72772775 | 72773150 | 375 | 72772862 | 15 | 176 | 17.5 |
| 3 | 72774350 | 72774475 | 125 | 72774387 | 16 | 66  | 8.8  |
| 3 | 72779725 | 72779825 | 100 | 72779737 | 16 | 58  | 6.6  |
| 3 | 72784150 | 72784225 | 75  | 72784212 | 20 | 50  | 2.2  |
| 3 | 72784975 | 72785175 | 200 | 72785062 | 21 | 138 | 0    |
| 3 | 72786925 | 72786975 | 50  | 72786962 | 16 | 28  | 4.4  |
| 3 | 72787200 | 72787225 | 25  | 72787212 | 13 | 13  | 2.2  |
| 3 | 72788125 | 72788150 | 25  | 72788137 | 13 | 13  | 2.2  |
| 3 | 72791125 | 72791150 | 25  | 72791137 | 12 | 12  | 0    |
| 3 | 72792475 | 72792550 | 75  | 72792512 | 14 | 38  | 4.4  |
| 3 | 72793375 | 72793525 | 150 | 72793412 | 16 | 90  | 2.2  |
| 3 | 72797000 | 72797025 | 25  | 72797012 | 12 | 12  | 2.2  |
| 3 | 72800275 | 72800500 | 225 | 72800462 | 15 | 97  | 2.2  |
| 3 | 72803025 | 72803150 | 125 | 72803112 | 15 | 69  | 2.2  |
| 3 | 72803875 | 72804025 | 150 | 72804012 | 35 | 161 | 6.6  |
| 3 | 72808025 | 72808325 | 300 | 72808312 | 17 | 168 | 21.9 |
| 3 | 72809125 | 72809325 | 200 | 72809187 | 19 | 130 | 6.6  |
| 3 | 72811725 | 72811825 | 100 | 72811787 | 14 | 51  | 0    |
| 3 | 72812325 | 72812550 | 225 | 72812537 | 19 | 128 | 6.6  |
| 3 | 72815500 | 72815550 | 50  | 72815537 | 15 | 29  | 0    |
| 3 | 72816925 | 72817000 | 75  | 72816987 | 15 | 41  | 6.6  |
| 3 | 72822375 | 72822400 | 25  | 72822387 | 15 | 15  | 2.2  |
| 3 | 72824100 | 72824125 | 25  | 72824112 | 12 | 12  | 0    |
| 3 | 72827950 | 72827975 | 25  | 72827962 | 12 | 12  | 2.2  |
| 3 | 72838300 | 72838325 | 25  | 72838312 | 12 | 12  | 2.2  |
| 3 | 72840675 | 72840700 | 25  | 72840687 | 12 | 12  | 2.2  |
| 3 | 72852200 | 72852300 | 100 | 72852212 | 12 | 47  | 6.6  |
| 3 | 72857050 | 72857250 | 200 | 72857187 | 18 | 127 | 21.9 |
| 3 | 72869775 | 72869900 | 125 | 72869787 | 15 | 72  | 8.8  |
| 3 | 72870650 | 72870675 | 25  | 72870662 | 12 | 12  | 0    |
| 3 | 72871400 | 72871750 | 350 | 72871737 | 23 | 175 | 28.4 |
| 3 | 72940975 | 72941025 | 50  | 72940987 | 12 | 24  | 0    |
| 3 | 72998900 | 72999000 | 100 | 72998937 | 14 | 51  | 4.4  |
| 3 | 73015150 | 73015600 | 450 | 73015462 | 15 | 222 | 17.5 |



|   |          |          |     |          |    |     |      |
|---|----------|----------|-----|----------|----|-----|------|
| 3 | 73015975 | 73016150 | 175 | 73016037 | 17 | 104 | 0    |
| 3 | 73017150 | 73017250 | 100 | 73017187 | 14 | 52  | 8.8  |
| 3 | 73025150 | 73025175 | 25  | 73025162 | 12 | 12  | 2.2  |
| 3 | 73038050 | 73038125 | 75  | 73038062 | 12 | 36  | 0    |
| 3 | 73056475 | 73056500 | 25  | 73056487 | 12 | 12  | 0    |
| 3 | 73059825 | 73059875 | 50  | 73059837 | 12 | 24  | 4.4  |
| 3 | 73060250 | 73060525 | 275 | 73060387 | 20 | 180 | 0    |
| 3 | 73061050 | 73061250 | 200 | 73061062 | 15 | 100 | 0    |
| 3 | 73099575 | 73099625 | 50  | 73099587 | 12 | 24  | 0    |
| 3 | 73105475 | 73105500 | 25  | 73105487 | 12 | 12  | 2.2  |
| 3 | 73114625 | 73114800 | 175 | 73114712 | 16 | 105 | 17.5 |
| 3 | 73220300 | 73220350 | 50  | 73220312 | 12 | 24  | 4.4  |
| 3 | 73230050 | 73230100 | 50  | 73230062 | 15 | 30  | 4.4  |
| 3 | 73242150 | 73242200 | 50  | 73242162 | 12 | 24  | 0    |
| 3 | 73244150 | 73244200 | 50  | 73244162 | 15 | 27  | 4.4  |
| 3 | 73247025 | 73247075 | 50  | 73247037 | 15 | 30  | 2.2  |
| 3 | 73249050 | 73249100 | 50  | 73249062 | 15 | 29  | 4.4  |
| 3 | 73256725 | 73256775 | 50  | 73256762 | 15 | 28  | 2.2  |
| 3 | 73264350 | 73264500 | 150 | 73264462 | 17 | 84  | 0    |
| 3 | 73265975 | 73266200 | 225 | 73266037 | 22 | 176 | 4.4  |
| 3 | 73266700 | 73266725 | 25  | 73266712 | 13 | 13  | 0    |
| 3 | 73269675 | 73269800 | 125 | 73269737 | 15 | 68  | 0    |
| 3 | 73272950 | 73273125 | 175 | 73273012 | 16 | 100 | 13.1 |
| 3 | 73276750 | 73276900 | 150 | 73276837 | 21 | 104 | 13.1 |
| 3 | 73278850 | 73278875 | 25  | 73278862 | 26 | 26  | 2.2  |
| 3 | 73289750 | 73289850 | 100 | 73289762 | 13 | 51  | 0    |
| 3 | 73290525 | 73291050 | 525 | 73290962 | 17 | 299 | 10.9 |
| 3 | 73291325 | 73291375 | 50  | 73291337 | 12 | 24  | 0    |
| 3 | 73292225 | 73292250 | 25  | 73292237 | 12 | 12  | 2.2  |
| 3 | 73293525 | 73293600 | 75  | 73293537 | 13 | 36  | 0    |
| 3 | 73301825 | 73301850 | 25  | 73301837 | 12 | 12  | 2.2  |
| 3 | 73303275 | 73303325 | 50  | 73303287 | 13 | 25  | 2.2  |
| 3 | 73304900 | 73305000 | 100 | 73304987 | 20 | 64  | 0    |
| 3 | 73305975 | 73306300 | 325 | 73306112 | 27 | 273 | 35   |
| 3 | 73307300 | 73307325 | 25  | 73307312 | 12 | 12  | 0    |
| 3 | 73308525 | 73308550 | 25  | 73308537 | 12 | 12  | 2.2  |
| 3 | 73309925 | 73310125 | 200 | 73309987 | 16 | 112 | 2.2  |
| 3 | 73315025 | 73315425 | 400 | 73315387 | 19 | 234 | 15.3 |
| 3 | 73316550 | 73316725 | 175 | 73316637 | 14 | 91  | 0    |
| 3 | 73321275 | 73321800 | 525 | 73321462 | 14 | 257 | 43.8 |
| 3 | 73330025 | 73330200 | 175 | 73330062 | 14 | 89  | 8.8  |
| 3 | 73341400 | 73341425 | 25  | 73341412 | 12 | 12  | 2.2  |
| 3 | 73343000 | 73343300 | 300 | 73343262 | 16 | 140 | 17.5 |
| 3 | 73344425 | 73344450 | 25  | 73344437 | 12 | 12  | 0    |
| 3 | 73345550 | 73345625 | 75  | 73345562 | 12 | 36  | 0    |
| 3 | 73349300 | 73349400 | 100 | 73349337 | 14 | 53  | 8.8  |
| 3 | 73351650 | 73351800 | 150 | 73351737 | 20 | 97  | 13.1 |
| 3 | 73354800 | 73354850 | 50  | 73354812 | 15 | 29  | 4.4  |
| 3 | 73356050 | 73356075 | 25  | 73356062 | 13 | 13  | 0    |
| 3 | 73356425 | 73356625 | 200 | 73356512 | 20 | 133 | 8.8  |
| 3 | 73357400 | 73357475 | 75  | 73357412 | 12 | 36  | 0    |
| 3 | 73365225 | 73365250 | 25  | 73365237 | 16 | 16  | 2.2  |
| 3 | 73366575 | 73366750 | 175 | 73366712 | 13 | 81  | 0    |
| 3 | 73367650 | 73367825 | 175 | 73367687 | 25 | 153 | 28.4 |
| 3 | 73369225 | 73369250 | 25  | 73369237 | 12 | 12  | 2.2  |
| 3 | 73376800 | 73376825 | 25  | 73376812 | 12 | 12  | 0    |
| 3 | 73378550 | 73378675 | 125 | 73378612 | 14 | 66  | 6.6  |
| 3 | 73386650 | 73386675 | 25  | 73386662 | 12 | 12  | 0    |
| 3 | 73393025 | 73393225 | 200 | 73393062 | 17 | 125 | 0    |
| 3 | 73405900 | 73406025 | 125 | 73405912 | 19 | 75  | 10.9 |
| 3 | 73408400 | 73408800 | 400 | 73408437 | 13 | 169 | 19.7 |
| 3 | 73409775 | 73410000 | 225 | 73409912 | 21 | 157 | 0    |
| 3 | 73412150 | 73412225 | 75  | 73412162 | 13 | 38  | 0    |
| 3 | 73412825 | 73412875 | 50  | 73412837 | 15 | 29  | 4.4  |
| 3 | 73420050 | 73420100 | 50  | 73420087 | 14 | 26  | 4.4  |
| 3 | 73424650 | 73424725 | 75  | 73424712 | 13 | 36  | 0    |
| 3 | 73426575 | 73426625 | 50  | 73426612 | 13 | 25  | 2.2  |
| 3 | 73429750 | 73429875 | 125 | 73429812 | 14 | 63  | 0    |
| 3 | 73434250 | 73434350 | 100 | 73434337 | 19 | 66  | 0    |
| 3 | 73434925 | 73434975 | 50  | 73434962 | 13 | 25  | 2.2  |
| 3 | 73435775 | 73436050 | 275 | 73435887 | 19 | 164 | 8.8  |
| 3 | 73440525 | 73440575 | 50  | 73440537 | 13 | 26  | 4.4  |
| 3 | 73443325 | 73443425 | 100 | 73443362 | 13 | 50  | 0    |
| 3 | 73446100 | 73446125 | 25  | 73446112 | 12 | 12  | 0    |
| 3 | 73446500 | 73446600 | 100 | 73446537 | 13 | 50  | 4.4  |

|   |          |          |     |          |    |     |      |
|---|----------|----------|-----|----------|----|-----|------|
| 3 | 73452800 | 73452850 | 50  | 73452812 | 12 | 24  | 4.4  |
| 3 | 73453875 | 73453975 | 100 | 73453962 | 18 | 62  | 8.8  |
| 3 | 73455350 | 73455550 | 200 | 73455462 | 28 | 193 | 21.9 |
| 3 | 73456125 | 73456350 | 225 | 73456212 | 17 | 129 | 0    |
| 3 | 73470050 | 73470200 | 150 | 73470162 | 14 | 78  | 2.2  |
| 3 | 73470925 | 73471050 | 125 | 73470962 | 16 | 77  | 6.6  |
| 3 | 73471525 | 73471825 | 300 | 73471537 | 35 | 274 | 4.4  |
| 3 | 73477050 | 73477175 | 125 | 73477087 | 13 | 59  | 10.9 |
| 3 | 73487250 | 73487325 | 75  | 73487312 | 17 | 43  | 6.6  |
| 3 | 73488025 | 73488125 | 100 | 73488087 | 18 | 62  | 4.4  |
| 3 | 73494400 | 73494425 | 25  | 73494412 | 14 | 14  | 2.2  |
| 3 | 73495100 | 73495275 | 175 | 73495162 | 22 | 124 | 21.9 |
| 3 | 73498975 | 73499100 | 125 | 73499037 | 15 | 69  | 13.1 |
| 3 | 73506250 | 73506425 | 175 | 73506312 | 15 | 97  | 0    |
| 3 | 73508600 | 73508950 | 350 | 73508762 | 20 | 211 | 17.5 |
| 3 | 73515425 | 73515600 | 175 | 73515512 | 19 | 112 | 10.9 |
| 3 | 73516125 | 73516250 | 125 | 73516237 | 17 | 74  | 2.2  |
| 3 | 73516625 | 73516675 | 50  | 73516637 | 22 | 44  | 6.6  |
| 3 | 73520525 | 73520600 | 75  | 73520537 | 13 | 37  | 6.6  |
| 3 | 73539775 | 73539825 | 50  | 73539787 | 14 | 27  | 0    |
| 3 | 73545550 | 73545625 | 75  | 73545562 | 12 | 36  | 6.6  |
| 3 | 73554075 | 73554125 | 50  | 73554087 | 14 | 26  | 0    |
| 3 | 73559925 | 73560075 | 150 | 73559987 | 17 | 94  | 6.6  |
| 3 | 73562350 | 73562400 | 50  | 73562362 | 12 | 24  | 4.4  |
| 3 | 73580725 | 73580750 | 25  | 73580737 | 12 | 12  | 0    |
| 3 | 73593600 | 73593775 | 175 | 73593687 | 15 | 94  | 6.6  |
| 3 | 73610000 | 73610200 | 200 | 73610112 | 19 | 122 | 0    |
| 3 | 73625425 | 73625450 | 25  | 73625437 | 12 | 12  | 0    |
| 3 | 73683925 | 73683950 | 25  | 73683937 | 13 | 13  | 0    |
| 3 | 73698625 | 73698650 | 25  | 73698637 | 12 | 12  | 0    |
| 3 | 73733750 | 73733775 | 25  | 73733762 | 12 | 12  | 0    |
| 3 | 73748850 | 73748925 | 75  | 73748862 | 15 | 45  | 2.2  |
| 3 | 73816125 | 73816225 | 100 | 73816137 | 12 | 46  | 2.2  |
| 3 | 73820200 | 73820225 | 25  | 73820212 | 12 | 12  | 0    |
| 3 | 73825800 | 73826050 | 250 | 73825937 | 18 | 149 | 0    |
| 3 | 73832250 | 73832375 | 125 | 73832312 | 13 | 62  | 6.6  |
| 3 | 73843000 | 73843250 | 250 | 73843112 | 14 | 117 | 0    |
| 3 | 73845375 | 73845575 | 200 | 73845437 | 18 | 122 | 15.3 |
| 3 | 73849475 | 73849600 | 125 | 73849487 | 17 | 72  | 8.8  |
| 3 | 73853250 | 73853275 | 25  | 73853262 | 14 | 14  | 2.2  |
| 3 | 73854150 | 73854225 | 75  | 73854212 | 13 | 36  | 6.6  |
| 3 | 73876025 | 73876075 | 50  | 73876037 | 20 | 36  | 4.4  |
| 3 | 73878700 | 73878825 | 125 | 73878787 | 15 | 65  | 6.6  |
| 3 | 73886750 | 73886875 | 125 | 73886762 | 16 | 77  | 2.2  |
| 3 | 73909600 | 73909675 | 75  | 73909637 | 14 | 39  | 6.6  |
| 3 | 73936000 | 73936025 | 25  | 73936012 | 15 | 15  | 0    |
| 3 | 73940950 | 73941075 | 125 | 73940987 | 15 | 69  | 4.4  |
| 3 | 73948250 | 73948325 | 75  | 73948262 | 13 | 39  | 6.6  |
| 3 | 73953450 | 73953550 | 100 | 73953462 | 14 | 52  | 4.4  |
| 3 | 73953775 | 73953825 | 50  | 73953787 | 13 | 26  | 2.2  |
| 3 | 73972975 | 73973000 | 25  | 73972987 | 12 | 12  | 0    |
| 3 | 74014450 | 74014575 | 125 | 74014512 | 15 | 67  | 13.1 |
| 3 | 74016050 | 74016125 | 75  | 74016112 | 14 | 39  | 2.2  |
| 3 | 74016900 | 74017025 | 125 | 74016962 | 16 | 72  | 10.9 |
| 3 | 74034400 | 74034575 | 175 | 74034487 | 18 | 109 | 15.3 |
| 3 | 74051375 | 74051400 | 25  | 74051387 | 14 | 14  | 2.2  |
| 3 | 74063725 | 74063750 | 25  | 74063737 | 12 | 12  | 0    |
| 3 | 74135775 | 74135950 | 175 | 74135812 | 14 | 92  | 15.3 |
| 3 | 74137425 | 74137525 | 100 | 74137487 | 15 | 55  | 4.4  |
| 3 | 74159225 | 74159275 | 50  | 74159262 | 15 | 28  | 4.4  |
| 3 | 74160625 | 74160675 | 50  | 74160637 | 14 | 26  | 4.4  |
| 3 | 74171875 | 74171950 | 75  | 74171887 | 12 | 36  | 2.2  |
| 3 | 74181775 | 74181800 | 25  | 74181787 | 13 | 13  | 2.2  |
| 3 | 74195525 | 74195675 | 150 | 74195612 | 15 | 78  | 2.2  |
| 3 | 74233375 | 74233400 | 25  | 74233387 | 12 | 12  | 0    |
| 3 | 74329400 | 74329425 | 25  | 74329412 | 12 | 12  | 2.2  |
| 3 | 74412650 | 74412675 | 25  | 74412662 | 12 | 12  | 2.2  |
| 3 | 74503025 | 74503150 | 125 | 74503087 | 15 | 65  | 2.2  |
| 3 | 74621700 | 74621750 | 50  | 74621712 | 12 | 24  | 0    |
| 3 | 74633000 | 74633125 | 125 | 74633012 | 15 | 72  | 2.2  |
| 3 | 74667375 | 74667475 | 100 | 74667387 | 13 | 47  | 8.8  |
| 3 | 74716275 | 74716400 | 125 | 74716312 | 13 | 63  | 4.4  |
| 3 | 74745425 | 74745475 | 50  | 74745437 | 12 | 24  | 4.4  |
| 3 | 74745800 | 74745875 | 75  | 74745837 | 17 | 49  | 6.6  |
| 3 | 74799625 | 74799975 | 350 | 74799812 | 22 | 237 | 17.5 |

|   |           |           |     |           |    |     |      |
|---|-----------|-----------|-----|-----------|----|-----|------|
| 3 | 74826650  | 74826675  | 25  | 74826662  | 14 | 14  | 2.2  |
| 3 | 74832275  | 74832300  | 25  | 74832287  | 12 | 12  | 0    |
| 3 | 74869450  | 74869475  | 25  | 74869462  | 12 | 12  | 0    |
| 3 | 74926175  | 74926225  | 50  | 74926212  | 13 | 25  | 2.2  |
| 3 | 74957300  | 74957325  | 25  | 74957312  | 12 | 12  | 2.2  |
| 3 | 75459225  | 75459425  | 200 | 75459312  | 16 | 115 | 8.8  |
| 3 | 75460175  | 75460350  | 175 | 75460312  | 18 | 107 | 10.9 |
| 3 | 75467300  | 75467425  | 125 | 75467312  | 13 | 62  | 0    |
| 3 | 75467775  | 75467800  | 25  | 75467787  | 12 | 12  | 0    |
| 3 | 75469825  | 75469975  | 150 | 75469862  | 13 | 74  | 0    |
| 3 | 75762150  | 75762225  | 75  | 75762162  | 12 | 36  | 4.4  |
| 3 | 75779850  | 75779900  | 50  | 75779862  | 12 | 24  | 4.4  |
| 3 | 75781175  | 75781200  | 25  | 75781187  | 12 | 12  | 2.2  |
| 3 | 75787650  | 75787675  | 25  | 75787662  | 12 | 12  | 2.2  |
| 3 | 75790075  | 75790225  | 150 | 75790087  | 12 | 68  | 10.9 |
| 3 | 75790500  | 75790525  | 25  | 75790512  | 12 | 12  | 2.2  |
| 3 | 75790750  | 75790850  | 100 | 75790812  | 16 | 60  | 0    |
| 3 | 75795225  | 75795375  | 150 | 75795237  | 13 | 73  | 4.4  |
| 3 | 75801300  | 75801400  | 100 | 75801312  | 31 | 96  | 6.6  |
| 3 | 75802500  | 75802700  | 200 | 75802512  | 42 | 202 | 32.8 |
| 3 | 75803200  | 75803350  | 150 | 75803212  | 17 | 95  | 13.1 |
| 3 | 75815975  | 75816075  | 100 | 75815987  | 13 | 52  | 2.2  |
| 3 | 75819375  | 75819625  | 250 | 75819437  | 20 | 162 | 13.1 |
| 3 | 75849400  | 75849500  | 100 | 75849412  | 12 | 48  | 0    |
| 3 | 75868500  | 75868650  | 150 | 75868562  | 17 | 90  | 0    |
| 3 | 75873525  | 75873650  | 125 | 75873537  | 20 | 84  | 2.2  |
| 3 | 75901075  | 75901225  | 150 | 75901162  | 17 | 87  | 6.6  |
| 3 | 75914325  | 75914725  | 400 | 75914612  | 18 | 241 | 0    |
| 3 | 75924200  | 75924225  | 25  | 75924212  | 12 | 12  | 2.2  |
| 3 | 76038400  | 76038475  | 75  | 76038462  | 18 | 46  | 0    |
| 3 | 76038850  | 76038875  | 25  | 76038862  | 14 | 14  | 2.2  |
| 3 | 76165600  | 76165625  | 25  | 76165612  | 12 | 12  | 2.2  |
| 3 | 76229000  | 76229150  | 150 | 76229037  | 13 | 74  | 6.6  |
| 3 | 76479850  | 76480125  | 275 | 76479962  | 22 | 191 | 24.1 |
| 3 | 76683175  | 76683250  | 75  | 76683212  | 13 | 37  | 0    |
| 3 | 76742225  | 76742250  | 25  | 76742237  | 12 | 12  | 0    |
| 3 | 77193550  | 77193700  | 150 | 77193562  | 14 | 77  | 0    |
| 3 | 77336775  | 77336800  | 25  | 77336787  | 12 | 12  | 0    |
| 3 | 77337250  | 77337350  | 100 | 77337262  | 17 | 58  | 2.2  |
| 3 | 78363475  | 78363550  | 75  | 78363512  | 13 | 37  | 6.6  |
| 3 | 78378075  | 78378325  | 250 | 78378187  | 20 | 163 | 17.5 |
| 3 | 78382375  | 78382500  | 125 | 78382412  | 13 | 63  | 0    |
| 3 | 78400100  | 78400200  | 100 | 78400112  | 12 | 46  | 8.8  |
| 3 | 80184200  | 80184325  | 125 | 80184262  | 14 | 65  | 2.2  |
| 3 | 82638175  | 82638375  | 200 | 82638287  | 18 | 119 | 4.4  |
| 3 | 82947375  | 82947400  | 25  | 82947387  | 12 | 12  | 2.2  |
| 3 | 83070750  | 83070825  | 75  | 83070762  | 13 | 37  | 6.6  |
| 3 | 83072075  | 83072100  | 25  | 83072087  | 12 | 12  | 0    |
| 3 | 84329300  | 84329400  | 100 | 84329337  | 16 | 58  | 8.8  |
| 3 | 86841025  | 86841150  | 125 | 86841062  | 13 | 61  | 2.2  |
| 3 | 87507950  | 87508050  | 100 | 87507962  | 13 | 52  | 4.4  |
| 3 | 88111875  | 88111950  | 75  | 88111937  | 13 | 36  | 0    |
| 3 | 88435250  | 88435300  | 50  | 88435262  | 12 | 24  | 2.2  |
| 3 | 88449275  | 88449325  | 50  | 88449287  | 12 | 24  | 4.4  |
| 3 | 88450850  | 88450900  | 50  | 88450862  | 12 | 24  | 4.4  |
| 3 | 88559400  | 88559425  | 25  | 88559412  | 12 | 12  | 2.2  |
| 3 | 89518325  | 89518350  | 25  | 89518337  | 12 | 12  | 2.2  |
| 3 | 89519100  | 89519125  | 25  | 89519112  | 12 | 12  | 0    |
| 3 | 89893775  | 89893850  | 75  | 89893837  | 16 | 44  | 0    |
| 3 | 89940125  | 89940250  | 125 | 89940162  | 15 | 69  | 0    |
| 3 | 90196775  | 90196800  | 25  | 90196787  | 12 | 12  | 0    |
| 3 | 90573475  | 90573550  | 75  | 90573487  | 13 | 37  | 6.6  |
| 3 | 95461425  | 95461525  | 100 | 95461437  | 13 | 50  | 0    |
| 3 | 95562750  | 95562775  | 25  | 95562762  | 12 | 12  | 2.2  |
| 3 | 95704250  | 95704300  | 50  | 95704262  | 12 | 24  | 0    |
| 3 | 99297725  | 99297850  | 125 | 99297812  | 15 | 68  | 0    |
| 3 | 100940850 | 100940875 | 25  | 100940862 | 12 | 12  | 0    |
| 3 | 101883950 | 101883975 | 25  | 101883962 | 12 | 12  | 0    |
| 3 | 108332175 | 108332300 | 125 | 108332187 | 12 | 57  | 0    |
| 3 | 111051200 | 111051275 | 75  | 111051237 | 13 | 38  | 6.6  |
| 3 | 112819500 | 112819575 | 75  | 112819537 | 13 | 38  | 0    |
| 3 | 113840925 | 113840950 | 25  | 113840937 | 12 | 12  | 0    |
| 3 | 114350150 | 114350225 | 75  | 114350187 | 13 | 38  | 6.6  |
| 3 | 114452175 | 114452250 | 75  | 114452237 | 14 | 40  | 0    |
| 3 | 114734800 | 114734925 | 125 | 114734862 | 14 | 63  | 6.6  |

|   |           |           |     |           |    |     |      |
|---|-----------|-----------|-----|-----------|----|-----|------|
| 3 | 115553200 | 115553275 | 75  | 115553212 | 12 | 35  | 4.4  |
| 3 | 116797150 | 116797175 | 25  | 116797162 | 12 | 12  | 0    |
| 3 | 116878025 | 116878050 | 25  | 116878037 | 13 | 13  | 2.2  |
| 3 | 120491350 | 120491375 | 25  | 120491362 | 12 | 12  | 0    |
| 3 | 121375825 | 121375900 | 75  | 121375837 | 12 | 36  | 0    |
| 3 | 123431900 | 123431925 | 25  | 123431912 | 12 | 12  | 2.2  |
| 3 | 123862700 | 123862850 | 150 | 123862812 | 13 | 72  | 13.1 |
| 3 | 124197750 | 124197775 | 25  | 124197762 | 12 | 12  | 0    |
| 3 | 124383025 | 124383075 | 50  | 124383037 | 12 | 24  | 0    |
| 3 | 124481475 | 124481525 | 50  | 124481487 | 12 | 24  | 0    |
| 3 | 124491625 | 124491650 | 25  | 124491637 | 12 | 12  | 0    |
| 3 | 124492750 | 124492950 | 200 | 124492862 | 14 | 103 | 10.9 |
| 3 | 124505850 | 124505925 | 75  | 124505887 | 14 | 40  | 0    |
| 3 | 124506950 | 124507000 | 50  | 124506962 | 15 | 27  | 4.4  |
| 3 | 124519600 | 124519625 | 25  | 124519612 | 12 | 12  | 2.2  |
| 3 | 124603550 | 124603575 | 25  | 124603562 | 12 | 12  | 0    |
| 3 | 124620100 | 124620125 | 25  | 124620112 | 12 | 12  | 0    |
| 3 | 124938825 | 124939025 | 200 | 124938862 | 14 | 103 | 17.5 |
| 3 | 124942225 | 124942400 | 175 | 124942262 | 15 | 95  | 0    |
| 3 | 125063575 | 125063600 | 25  | 125063587 | 12 | 12  | 0    |
| 3 | 125198325 | 125198350 | 25  | 125198337 | 12 | 12  | 0    |
| 3 | 125292650 | 125292700 | 50  | 125292662 | 15 | 28  | 0    |
| 3 | 125296250 | 125296275 | 25  | 125296262 | 13 | 13  | 2.2  |
| 3 | 125304650 | 125304800 | 150 | 125304737 | 15 | 76  | 13.1 |
| 3 | 125433775 | 125433800 | 25  | 125433787 | 13 | 13  | 0    |
| 3 | 125500325 | 125500375 | 50  | 125500337 | 12 | 24  | 0    |
| 3 | 127448675 | 127448725 | 50  | 127448687 | 12 | 24  | 4.4  |
| 3 | 127581025 | 127581100 | 75  | 127581062 | 13 | 37  | 0    |
| 3 | 127862275 | 127862325 | 50  | 127862287 | 13 | 25  | 4.4  |
| 3 | 127863375 | 127863500 | 125 | 127863387 | 14 | 68  | 6.6  |
| 3 | 128174525 | 128174550 | 25  | 128174537 | 12 | 12  | 2.2  |
| 3 | 128251275 | 128251300 | 25  | 128251287 | 16 | 16  | 0    |
| 3 | 128283025 | 128283050 | 25  | 128283037 | 12 | 12  | 0    |
| 3 | 128302100 | 128302125 | 25  | 128302112 | 13 | 13  | 0    |
| 3 | 128372375 | 128372475 | 100 | 128372412 | 14 | 53  | 0    |
| 3 | 128394800 | 128395000 | 200 | 128394937 | 16 | 105 | 0    |
| 3 | 128475550 | 128475725 | 175 | 128475662 | 14 | 91  | 4.4  |
| 3 | 128694125 | 128694250 | 125 | 128694137 | 12 | 59  | 0    |
| 3 | 128761675 | 128761775 | 100 | 128761712 | 14 | 53  | 8.8  |
| 3 | 128770475 | 128770500 | 25  | 128770487 | 12 | 12  | 0    |
| 3 | 128830175 | 128830275 | 100 | 128830237 | 18 | 65  | 2.2  |
| 3 | 128831825 | 128831850 | 25  | 128831837 | 12 | 12  | 0    |
| 3 | 128954975 | 128955075 | 100 | 128955037 | 14 | 51  | 8.8  |
| 3 | 128955375 | 128955575 | 200 | 128955437 | 16 | 113 | 13.1 |
| 3 | 128979075 | 128979150 | 75  | 128979137 | 14 | 39  | 2.2  |
| 3 | 129017125 | 129017375 | 250 | 129017312 | 13 | 113 | 8.8  |
| 3 | 129043700 | 129043725 | 25  | 129043712 | 12 | 12  | 0    |
| 3 | 129159650 | 129159675 | 25  | 129159662 | 12 | 12  | 0    |
| 3 | 129199525 | 129199700 | 175 | 129199637 | 16 | 95  | 6.6  |
| 3 | 129201200 | 129201425 | 225 | 129201287 | 20 | 152 | 0    |
| 3 | 129203200 | 129203250 | 50  | 129203237 | 13 | 25  | 0    |
| 3 | 129653700 | 129653800 | 100 | 129653762 | 14 | 53  | 6.6  |
| 3 | 129691775 | 129691800 | 25  | 129691787 | 12 | 12  | 2.2  |
| 3 | 129781675 | 129781700 | 25  | 129781687 | 12 | 12  | 2.2  |
| 3 | 130055650 | 130055825 | 175 | 130055662 | 12 | 82  | 10.9 |
| 3 | 130198500 | 130198575 | 75  | 130198512 | 13 | 37  | 0    |
| 3 | 130202625 | 130202700 | 75  | 130202637 | 13 | 37  | 0    |
| 3 | 130215700 | 130215800 | 100 | 130215737 | 13 | 50  | 0    |
| 3 | 131116950 | 131117125 | 175 | 131117062 | 13 | 83  | 8.8  |
| 3 | 131119525 | 131119675 | 150 | 131119537 | 14 | 77  | 2.2  |
| 3 | 131756250 | 131756275 | 25  | 131756262 | 13 | 13  | 0    |
| 3 | 134961000 | 134961150 | 150 | 134961037 | 13 | 75  | 6.6  |
| 3 | 135153825 | 135153925 | 100 | 135153862 | 14 | 52  | 0    |
| 3 | 135201550 | 135201600 | 50  | 135201562 | 12 | 24  | 0    |
| 3 | 135526050 | 135526175 | 125 | 135526062 | 13 | 60  | 0    |
| 3 | 135597700 | 135598000 | 300 | 135597962 | 16 | 126 | 19.7 |
| 3 | 135605875 | 135605925 | 50  | 135605887 | 14 | 28  | 0    |
| 3 | 135640250 | 135640300 | 50  | 135640262 | 12 | 24  | 0    |
| 3 | 135796475 | 135796625 | 150 | 135796562 | 14 | 77  | 0    |
| 3 | 138971950 | 138972100 | 150 | 138971962 | 13 | 78  | 0    |
| 3 | 155629175 | 155629275 | 100 | 155629187 | 12 | 47  | 0    |
| 3 | 158387325 | 158387400 | 75  | 158387337 | 12 | 36  | 0    |
| 3 | 171785600 | 171785625 | 25  | 171785612 | 12 | 12  | 2.2  |
| 3 | 172109450 | 172109500 | 50  | 172109462 | 15 | 29  | 0    |
| 3 | 173648150 | 173648300 | 150 | 173648162 | 12 | 63  | 0    |

|   |           |           |     |           |    |     |      |
|---|-----------|-----------|-----|-----------|----|-----|------|
| 3 | 174341525 | 174341700 | 175 | 174341612 | 13 | 85  | 0    |
| 3 | 174347300 | 174347375 | 75  | 174347362 | 13 | 37  | 6.6  |
| 3 | 174551400 | 174551425 | 25  | 174551412 | 12 | 12  | 0    |
| 3 | 174712575 | 174712600 | 25  | 174712587 | 12 | 12  | 2.2  |
| 3 | 178827850 | 178828075 | 225 | 178827962 | 22 | 163 | 0    |
| 3 | 180692775 | 180692850 | 75  | 180692812 | 16 | 46  | 0    |
| 3 | 181302550 | 181302575 | 25  | 181302562 | 12 | 12  | 0    |
| 3 | 181682000 | 181682125 | 125 | 181682037 | 13 | 63  | 0    |
| 3 | 182029350 | 182029500 | 150 | 182029362 | 13 | 74  | 0    |
| 3 | 182913375 | 182913475 | 100 | 182913437 | 15 | 55  | 0    |
| 3 | 183600500 | 183600550 | 50  | 183600512 | 13 | 26  | 2.2  |
| 3 | 186382950 | 186383050 | 100 | 186382962 | 12 | 46  | 0    |
| 3 | 186699700 | 186699775 | 75  | 186699712 | 12 | 36  | 6.6  |
| 3 | 187892550 | 187892700 | 150 | 187892587 | 15 | 86  | 0    |
| 3 | 188360325 | 188360400 | 75  | 188360337 | 15 | 41  | 0    |
| 3 | 189208525 | 189208550 | 25  | 189208537 | 12 | 12  | 0    |
| 3 | 189320225 | 189320275 | 50  | 189320237 | 12 | 24  | 4.4  |
| 3 | 194301725 | 194301775 | 50  | 194301737 | 12 | 24  | 0    |
| 3 | 194758350 | 194758425 | 75  | 194758387 | 13 | 37  | 2.2  |
| 3 | 194991075 | 194991175 | 100 | 194991137 | 14 | 50  | 0    |
| 3 | 195026100 | 195026150 | 50  | 195026137 | 14 | 27  | 0    |
| 3 | 195032175 | 195032200 | 25  | 195032187 | 12 | 12  | 0    |
| 3 | 195034300 | 195034325 | 25  | 195034312 | 12 | 12  | 2.2  |
| 3 | 195055475 | 195055500 | 25  | 195055487 | 12 | 12  | 0    |
| 3 | 195064225 | 195064425 | 200 | 195064312 | 17 | 124 | 0    |
| 3 | 195067550 | 195067600 | 50  | 195067587 | 17 | 31  | 4.4  |
| 3 | 195265700 | 195265750 | 50  | 195265712 | 12 | 24  | 0    |
| 3 | 195266200 | 195266350 | 150 | 195266287 | 15 | 82  | 0    |
| 3 | 195269800 | 195269950 | 150 | 195269837 | 13 | 72  | 8.8  |
| 3 | 195271050 | 195271075 | 25  | 195271062 | 12 | 12  | 2.2  |
| 3 | 195272625 | 195272700 | 75  | 195272662 | 13 | 37  | 6.6  |
| 3 | 195299825 | 195300025 | 200 | 195299987 | 16 | 114 | 0    |
| 3 | 195301475 | 195301500 | 25  | 195301487 | 12 | 12  | 0    |
| 3 | 195302450 | 195302475 | 25  | 195302462 | 14 | 14  | 0    |
| 3 | 195316175 | 195316225 | 50  | 195316187 | 13 | 25  | 0    |
| 3 | 195319600 | 195319625 | 25  | 195319612 | 12 | 12  | 2.2  |
| 3 | 195338150 | 195338250 | 100 | 195338212 | 13 | 49  | 6.6  |
| 3 | 195354925 | 195355050 | 125 | 195354962 | 16 | 69  | 8.8  |
| 3 | 195504800 | 195504975 | 175 | 195504887 | 16 | 102 | 0    |
| 3 | 195561300 | 195561475 | 175 | 195561337 | 15 | 97  | 0    |
| 3 | 195960850 | 195960900 | 50  | 195960862 | 13 | 26  | 0    |
| 3 | 196006875 | 196006925 | 50  | 196006887 | 12 | 24  | 4.4  |
| 3 | 196026675 | 196026750 | 75  | 196026687 | 12 | 36  | 0    |
| 3 | 196085500 | 196085525 | 25  | 196085512 | 12 | 12  | 2.2  |
| 3 | 196145350 | 196145425 | 75  | 196145412 | 13 | 36  | 0    |
| 3 | 196219400 | 196219475 | 75  | 196219412 | 13 | 38  | 0    |
| 3 | 196222000 | 196222050 | 50  | 196222012 | 12 | 24  | 4.4  |
| 3 | 196521400 | 196521475 | 75  | 196521437 | 14 | 40  | 0    |
| 3 | 196920525 | 196920600 | 75  | 196920537 | 13 | 37  | 0    |
| 3 | 196959875 | 196959900 | 25  | 196959887 | 12 | 12  | 2.2  |
| 3 | 197046825 | 197046850 | 25  | 197046837 | 12 | 12  | 0    |
| 3 | 197339750 | 197339775 | 25  | 197339762 | 12 | 12  | 0    |
| 3 | 197718175 | 197718300 | 125 | 197718287 | 16 | 71  | 2.2  |
| 3 | 198869750 | 198869775 | 25  | 198869762 | 14 | 14  | 2.2  |
| 3 | 199124150 | 199124175 | 25  | 199124162 | 12 | 12  | 2.2  |
| 3 | 199257350 | 199257475 | 125 | 199257462 | 14 | 64  | 6.6  |
| 3 | 199292800 | 199292850 | 50  | 199292812 | 12 | 24  | 4.4  |
| 3 | 199320375 | 199320400 | 25  | 199320387 | 12 | 12  | 0    |
| 2 | 37500     | 37575     | 75  | 37512     | 12 | 35  | 0    |
| 2 | 382950    | 383000    | 50  | 382962    | 12 | 24  | 0    |
| 2 | 536150    | 536300    | 150 | 536162    | 12 | 63  | 2.2  |
| 2 | 548000    | 548175    | 175 | 548112    | 14 | 92  | 0    |
| 2 | 553125    | 553175    | 50  | 553137    | 12 | 24  | 0    |
| 2 | 583925    | 583950    | 25  | 583937    | 12 | 12  | 2.2  |
| 2 | 626925    | 626975    | 50  | 626962    | 13 | 25  | 2.2  |
| 2 | 640025    | 640300    | 275 | 640212    | 15 | 138 | 8.8  |
| 2 | 878600    | 878750    | 150 | 878687    | 13 | 74  | 0    |
| 2 | 879100    | 879125    | 25  | 879112    | 12 | 12  | 2.2  |
| 2 | 915775    | 916025    | 250 | 915862    | 20 | 160 | 0    |
| 2 | 1070050   | 1070150   | 100 | 1070137   | 16 | 55  | 0    |
| 2 | 1355300   | 1355325   | 25  | 1355312   | 13 | 13  | 0    |
| 2 | 1430975   | 1431100   | 125 | 1431037   | 15 | 69  | 8.8  |
| 2 | 1431350   | 1431550   | 200 | 1431412   | 13 | 97  | 10.9 |
| 2 | 1546325   | 1546475   | 150 | 1546437   | 15 | 77  | 0    |
| 2 | 1565925   | 1566075   | 150 | 1565937   | 13 | 73  | 0    |

|   |          |          |     |          |    |     |      |
|---|----------|----------|-----|----------|----|-----|------|
| 2 | 1631475  | 1631600  | 125 | 1631512  | 15 | 65  | 0    |
| 2 | 1647100  | 1647125  | 25  | 1647112  | 12 | 12  | 2.2  |
| 2 | 1736850  | 1737125  | 275 | 1736937  | 19 | 170 | 0    |
| 2 | 1737375  | 1737550  | 175 | 1737537  | 18 | 114 | 2.2  |
| 2 | 1771475  | 1771675  | 200 | 1771487  | 14 | 102 | 17.5 |
| 2 | 1865000  | 1865025  | 25  | 1865012  | 13 | 13  | 0    |
| 2 | 1905375  | 1905575  | 200 | 1905437  | 16 | 115 | 0    |
| 2 | 1996050  | 1996125  | 75  | 1996062  | 13 | 37  | 4.4  |
| 2 | 2098775  | 2098950  | 175 | 2098812  | 14 | 87  | 15.3 |
| 2 | 2555325  | 2555550  | 225 | 2555362  | 15 | 124 | 0    |
| 2 | 2807925  | 2807975  | 50  | 2807937  | 12 | 24  | 0    |
| 2 | 2929800  | 2929825  | 25  | 2929812  | 12 | 12  | 0    |
| 2 | 2931500  | 2931550  | 50  | 2931512  | 13 | 26  | 0    |
| 2 | 2990350  | 2990525  | 175 | 2990387  | 16 | 101 | 0    |
| 2 | 2992550  | 2992575  | 25  | 2992562  | 12 | 12  | 0    |
| 2 | 3085400  | 3085475  | 75  | 3085412  | 15 | 40  | 0    |
| 2 | 3093000  | 3093125  | 125 | 3093012  | 14 | 68  | 0    |
| 2 | 3163625  | 3164075  | 450 | 3163687  | 23 | 347 | 67.8 |
| 2 | 3332325  | 3332400  | 75  | 3332337  | 12 | 35  | 6.6  |
| 2 | 3469025  | 3469200  | 175 | 3469137  | 16 | 95  | 0    |
| 2 | 3639125  | 3639150  | 25  | 3639137  | 12 | 12  | 2.2  |
| 2 | 3653200  | 3653275  | 75  | 3653212  | 12 | 36  | 0    |
| 2 | 3769575  | 3769700  | 125 | 3769662  | 17 | 73  | 2.2  |
| 2 | 3771600  | 3771625  | 25  | 3771612  | 12 | 12  | 0    |
| 2 | 3772900  | 3772925  | 25  | 3772912  | 12 | 12  | 0    |
| 2 | 3997375  | 3997425  | 50  | 3997387  | 13 | 26  | 0    |
| 2 | 6450100  | 6450150  | 50  | 6450137  | 15 | 29  | 0    |
| 2 | 6817725  | 6817900  | 175 | 6817737  | 12 | 76  | 0    |
| 2 | 6874850  | 6874950  | 100 | 6874862  | 14 | 50  | 8.8  |
| 2 | 6878550  | 6878725  | 175 | 6878637  | 15 | 95  | 0    |
| 2 | 6907050  | 6907075  | 25  | 6907062  | 12 | 12  | 2.2  |
| 2 | 6940575  | 6940625  | 50  | 6940587  | 12 | 24  | 0    |
| 2 | 7414550  | 7414575  | 25  | 7414562  | 12 | 12  | 0    |
| 2 | 7612975  | 7613025  | 50  | 7612987  | 12 | 24  | 0    |
| 2 | 7704375  | 7704525  | 150 | 7704487  | 17 | 88  | 13.1 |
| 2 | 7862225  | 7862250  | 25  | 7862237  | 12 | 12  | 0    |
| 2 | 8207800  | 8207825  | 25  | 8207812  | 12 | 12  | 2.2  |
| 2 | 8472650  | 8472700  | 50  | 8472662  | 13 | 26  | 0    |
| 2 | 8560650  | 8560700  | 50  | 8560662  | 12 | 24  | 0    |
| 2 | 8669025  | 8669050  | 25  | 8669037  | 13 | 13  | 0    |
| 2 | 8671975  | 8672400  | 425 | 8672087  | 16 | 204 | 0    |
| 2 | 8672950  | 8673150  | 200 | 8673012  | 17 | 112 | 0    |
| 2 | 8675200  | 8675325  | 125 | 8675212  | 12 | 58  | 0    |
| 2 | 9011975  | 9012050  | 75  | 9011987  | 13 | 39  | 0    |
| 2 | 9721750  | 9721800  | 50  | 9721762  | 13 | 25  | 0    |
| 2 | 10100550 | 10100600 | 50  | 10100562 | 12 | 24  | 4.4  |
| 2 | 10469950 | 10470000 | 50  | 10469962 | 14 | 26  | 0    |
| 2 | 10970750 | 10970825 | 75  | 10970762 | 13 | 36  | 0    |
| 2 | 10991450 | 10991525 | 75  | 10991512 | 14 | 38  | 0    |
| 2 | 10997675 | 10997700 | 25  | 10997687 | 12 | 12  | 0    |
| 2 | 11008650 | 11008825 | 175 | 11008712 | 19 | 118 | 13.1 |
| 2 | 11029300 | 11029375 | 75  | 11029312 | 13 | 38  | 0    |
| 2 | 11039725 | 11039750 | 25  | 11039737 | 12 | 12  | 0    |
| 2 | 11040875 | 11040925 | 50  | 11040912 | 13 | 25  | 0    |
| 2 | 11048375 | 11048425 | 50  | 11048387 | 12 | 24  | 0    |
| 2 | 11051500 | 11051575 | 75  | 11051537 | 13 | 38  | 6.6  |
| 2 | 11053000 | 11053050 | 50  | 11053012 | 12 | 24  | 0    |
| 2 | 11068250 | 11068275 | 25  | 11068262 | 12 | 12  | 2.2  |
| 2 | 11069850 | 11069950 | 100 | 11069912 | 14 | 53  | 0    |
| 2 | 11072200 | 11072225 | 25  | 11072212 | 12 | 12  | 2.2  |
| 2 | 11077425 | 11077500 | 75  | 11077462 | 13 | 38  | 0    |
| 2 | 11124775 | 11124875 | 100 | 11124862 | 14 | 51  | 0    |
| 2 | 11574675 | 11574850 | 175 | 11574712 | 15 | 94  | 10.9 |
| 2 | 11715450 | 11715525 | 75  | 11715462 | 13 | 38  | 6.6  |
| 2 | 11935650 | 11935700 | 50  | 11935662 | 12 | 24  | 2.2  |
| 2 | 12381575 | 12381700 | 125 | 12381587 | 12 | 57  | 2.2  |
| 2 | 12384025 | 12384175 | 150 | 12384112 | 17 | 85  | 10.9 |
| 2 | 12395500 | 12395550 | 50  | 12395512 | 12 | 24  | 4.4  |
| 2 | 12460275 | 12460450 | 175 | 12460312 | 14 | 91  | 0    |
| 2 | 14691425 | 14691450 | 25  | 14691437 | 12 | 12  | 0    |
| 2 | 15187075 | 15187125 | 50  | 15187112 | 13 | 25  | 0    |
| 2 | 15714575 | 15714600 | 25  | 15714587 | 13 | 13  | 2.2  |
| 2 | 15811775 | 15811950 | 175 | 15811862 | 16 | 100 | 0    |
| 2 | 15816475 | 15816600 | 125 | 15816562 | 14 | 66  | 2.2  |
| 2 | 15819200 | 15819250 | 50  | 15819212 | 15 | 28  | 4.4  |

|   |          |          |     |          |    |     |      |
|---|----------|----------|-----|----------|----|-----|------|
| 2 | 15893500 | 15893625 | 125 | 15893537 | 13 | 61  | 0    |
| 2 | 16028400 | 16028450 | 50  | 16028412 | 12 | 24  | 4.4  |
| 2 | 16677525 | 16677550 | 25  | 16677537 | 12 | 12  | 0    |
| 2 | 17989075 | 17989125 | 50  | 17989087 | 12 | 24  | 0    |
| 2 | 19327250 | 19327400 | 150 | 19327262 | 14 | 79  | 6.6  |
| 2 | 19475675 | 19475750 | 75  | 19475687 | 14 | 39  | 0    |
| 2 | 19881450 | 19881475 | 25  | 19881462 | 12 | 12  | 2.2  |
| 2 | 19947475 | 19947550 | 75  | 19947512 | 14 | 39  | 4.4  |
| 2 | 20547825 | 20547850 | 25  | 20547837 | 12 | 12  | 0    |
| 2 | 21073025 | 21073150 | 125 | 21073112 | 13 | 61  | 10.9 |
| 2 | 23397625 | 23397650 | 25  | 23397637 | 12 | 12  | 0    |
| 2 | 23452475 | 23452500 | 25  | 23452487 | 12 | 12  | 0    |
| 2 | 23518000 | 23518025 | 25  | 23518012 | 12 | 12  | 2.2  |
| 2 | 23524975 | 23525575 | 600 | 23525462 | 16 | 300 | 4.4  |
| 2 | 23527650 | 23527725 | 75  | 23527662 | 13 | 39  | 2.2  |
| 2 | 23533350 | 23533400 | 50  | 23533362 | 13 | 25  | 4.4  |
| 2 | 23544150 | 23544200 | 50  | 23544162 | 14 | 26  | 0    |
| 2 | 23686900 | 23686950 | 50  | 23686912 | 12 | 24  | 0    |
| 2 | 23718750 | 23718800 | 50  | 23718762 | 12 | 24  | 2.2  |
| 2 | 23775550 | 23775725 | 175 | 23775662 | 18 | 97  | 10.9 |
| 2 | 26667725 | 26667800 | 75  | 26667737 | 12 | 36  | 0    |
| 2 | 26726525 | 26726550 | 25  | 26726537 | 12 | 12  | 0    |
| 2 | 26726975 | 26727025 | 50  | 26726987 | 14 | 27  | 4.4  |
| 2 | 26754150 | 26754250 | 100 | 26754187 | 15 | 53  | 6.6  |
| 2 | 26975075 | 26975100 | 25  | 26975087 | 12 | 12  | 2.2  |
| 2 | 27825350 | 27825375 | 25  | 27825362 | 12 | 12  | 0    |
| 2 | 28591725 | 28591750 | 25  | 28591737 | 12 | 12  | 0    |
| 2 | 29104675 | 29104700 | 25  | 29104687 | 12 | 12  | 0    |
| 2 | 29157100 | 29157125 | 25  | 29157112 | 12 | 12  | 0    |
| 2 | 29157350 | 29157650 | 300 | 29157362 | 12 | 129 | 4.4  |
| 2 | 29340550 | 29340575 | 25  | 29340562 | 12 | 12  | 0    |
| 2 | 29343575 | 29343625 | 50  | 29343612 | 13 | 25  | 0    |
| 2 | 29475925 | 29475950 | 25  | 29475937 | 12 | 12  | 0    |
| 2 | 29553450 | 29553475 | 25  | 29553462 | 12 | 12  | 0    |
| 2 | 29655225 | 29655250 | 25  | 29655237 | 12 | 12  | 0    |
| 2 | 29735750 | 29735775 | 25  | 29735762 | 12 | 12  | 2.2  |
| 2 | 30110725 | 30110775 | 50  | 30110737 | 13 | 25  | 4.4  |
| 2 | 31105575 | 31105625 | 50  | 31105587 | 12 | 24  | 0    |
| 2 | 31856750 | 31856775 | 25  | 31856762 | 12 | 12  | 2.2  |
| 2 | 31857300 | 31857375 | 75  | 31857362 | 13 | 37  | 0    |
| 2 | 33930125 | 33930250 | 125 | 33930162 | 14 | 65  | 0    |
| 2 | 36881125 | 36881200 | 75  | 36881162 | 13 | 37  | 0    |
| 2 | 37657950 | 37657975 | 25  | 37657962 | 12 | 12  | 2.2  |
| 2 | 37852500 | 37852825 | 325 | 37852512 | 12 | 139 | 21.9 |
| 2 | 37981225 | 37981250 | 25  | 37981237 | 12 | 12  | 0    |
| 2 | 38348200 | 38348225 | 25  | 38348212 | 12 | 12  | 2.2  |
| 2 | 39745775 | 39745925 | 150 | 39745837 | 13 | 73  | 2.2  |
| 2 | 39883050 | 39883075 | 25  | 39883062 | 12 | 12  | 0    |
| 2 | 39897675 | 39897750 | 75  | 39897687 | 12 | 36  | 2.2  |
| 2 | 41810500 | 41810550 | 50  | 41810537 | 13 | 25  | 0    |
| 2 | 42081550 | 42081650 | 100 | 42081562 | 12 | 48  | 0    |
| 2 | 42181075 | 42181100 | 25  | 42181087 | 12 | 12  | 2.2  |
| 2 | 42249475 | 42249550 | 75  | 42249537 | 14 | 38  | 6.6  |
| 2 | 43089075 | 43089225 | 150 | 43089162 | 13 | 72  | 4.4  |
| 2 | 44912900 | 44912925 | 25  | 44912912 | 12 | 12  | 0    |
| 2 | 44987650 | 44987800 | 150 | 44987737 | 15 | 80  | 10.9 |
| 2 | 45271275 | 45271300 | 25  | 45271287 | 12 | 12  | 2.2  |
| 2 | 45622800 | 45622875 | 75  | 45622837 | 13 | 37  | 0    |
| 2 | 46470125 | 46470150 | 25  | 46470137 | 12 | 12  | 0    |
| 2 | 46509875 | 46509925 | 50  | 46509887 | 12 | 24  | 4.4  |
| 2 | 46935175 | 46935200 | 25  | 46935187 | 12 | 12  | 2.2  |
| 2 | 47284775 | 47284800 | 25  | 47284787 | 12 | 12  | 2.2  |
| 2 | 47292050 | 47292300 | 250 | 47292112 | 17 | 139 | 0    |
| 2 | 47314525 | 47314700 | 175 | 47314537 | 14 | 92  | 0    |
| 2 | 47579850 | 47580000 | 150 | 47579887 | 16 | 87  | 0    |
| 2 | 47824900 | 47825000 | 100 | 47824912 | 13 | 51  | 0    |
| 2 | 48787925 | 48787950 | 25  | 48787937 | 12 | 12  | 0    |
| 2 | 48996625 | 48996650 | 25  | 48996637 | 13 | 13  | 2.2  |
| 2 | 48996925 | 48996950 | 25  | 48996937 | 12 | 12  | 0    |
| 2 | 50928300 | 50928475 | 175 | 50928312 | 12 | 77  | 0    |
| 2 | 54538625 | 54538650 | 25  | 54538637 | 12 | 12  | 2.2  |
| 2 | 55009025 | 55009150 | 125 | 55009062 | 13 | 62  | 2.2  |
| 2 | 60732700 | 60732750 | 50  | 60732712 | 12 | 24  | 2.2  |
| 2 | 60742875 | 60742950 | 75  | 60742887 | 12 | 36  | 0    |
| 2 | 62153125 | 62153550 | 425 | 62153287 | 16 | 233 | 17.5 |

|   |          |          |     |          |    |     |      |
|---|----------|----------|-----|----------|----|-----|------|
| 2 | 62507675 | 62507750 | 75  | 62507687 | 12 | 36  | 4.4  |
| 2 | 64450600 | 64450650 | 50  | 64450612 | 12 | 24  | 4.4  |
| 2 | 64949825 | 64949875 | 50  | 64949837 | 12 | 24  | 2.2  |
| 2 | 65553450 | 65553525 | 75  | 65553487 | 13 | 38  | 0    |
| 2 | 68042350 | 68042375 | 25  | 68042362 | 12 | 12  | 0    |
| 2 | 68735825 | 68735900 | 75  | 68735837 | 13 | 38  | 0    |
| 2 | 68904100 | 68904125 | 25  | 68904112 | 12 | 12  | 0    |
| 2 | 68927900 | 68928075 | 175 | 68927987 | 15 | 95  | 6.6  |
| 2 | 68954325 | 68954425 | 100 | 68954337 | 13 | 50  | 2.2  |
| 2 | 69339975 | 69340000 | 25  | 69339987 | 12 | 12  | 0    |
| 2 | 70168775 | 70168800 | 25  | 70168787 | 12 | 12  | 2.2  |
| 2 | 70599425 | 70599450 | 25  | 70599437 | 12 | 12  | 2.2  |
| 2 | 70745350 | 70745400 | 50  | 70745362 | 12 | 24  | 4.4  |
| 2 | 70786175 | 70786200 | 25  | 70786187 | 12 | 12  | 2.2  |
| 2 | 70828100 | 70828125 | 25  | 70828112 | 12 | 12  | 2.2  |
| 2 | 70848775 | 70848850 | 75  | 70848787 | 15 | 43  | 0    |
| 2 | 70896375 | 70896425 | 50  | 70896387 | 12 | 24  | 0    |
| 2 | 70923275 | 70923325 | 50  | 70923287 | 13 | 25  | 4.4  |
| 2 | 71629200 | 71629225 | 25  | 71629212 | 13 | 13  | 2.2  |
| 2 | 71652025 | 71652075 | 50  | 71652037 | 12 | 24  | 0    |
| 2 | 71726750 | 71726825 | 75  | 71726762 | 12 | 36  | 0    |
| 2 | 71749175 | 71749200 | 25  | 71749187 | 12 | 12  | 2.2  |
| 2 | 71792350 | 71792450 | 100 | 71792412 | 15 | 55  | 0    |
| 2 | 71967925 | 71967950 | 25  | 71967937 | 12 | 12  | 2.2  |
| 2 | 71974475 | 71974500 | 25  | 71974487 | 12 | 12  | 2.2  |
| 2 | 72112425 | 72112450 | 25  | 72112437 | 13 | 13  | 0    |
| 2 | 72162100 | 72162250 | 150 | 72162162 | 15 | 82  | 0    |
| 2 | 72199200 | 72199275 | 75  | 72199212 | 13 | 38  | 0    |
| 2 | 72227450 | 72227525 | 75  | 72227462 | 12 | 36  | 0    |
| 2 | 72932125 | 72932150 | 25  | 72932137 | 12 | 12  | 0    |
| 2 | 73388550 | 73388575 | 25  | 73388562 | 12 | 12  | 0    |
| 2 | 74367425 | 74367500 | 75  | 74367437 | 12 | 36  | 0    |
| 2 | 74979025 | 74979075 | 50  | 74979037 | 12 | 24  | 0    |
| 2 | 75079400 | 75079525 | 125 | 75079412 | 14 | 67  | 0    |
| 2 | 75318150 | 75318175 | 25  | 75318162 | 13 | 13  | 0    |
| 2 | 77692550 | 77692625 | 75  | 77692562 | 13 | 38  | 0    |
| 2 | 80383300 | 80383900 | 600 | 80383687 | 19 | 315 | 17.5 |
| 2 | 81561975 | 81562050 | 75  | 81562037 | 13 | 37  | 6.6  |
| 2 | 84783650 | 84783750 | 100 | 84783712 | 13 | 49  | 0    |
| 2 | 84989975 | 84990125 | 150 | 84989987 | 13 | 76  | 0    |
| 2 | 86094800 | 86094925 | 125 | 86094812 | 12 | 56  | 0    |
| 2 | 87479575 | 87479725 | 150 | 87479662 | 16 | 89  | 0    |
| 2 | 88548725 | 88548825 | 100 | 88548737 | 13 | 49  | 0    |
| 2 | 88844875 | 88845000 | 125 | 88844962 | 13 | 62  | 0    |
| 2 | 88845225 | 88845275 | 50  | 88845237 | 13 | 25  | 0    |
| 2 | 90960425 | 90960775 | 350 | 90960762 | 19 | 197 | 24.1 |
| 2 | 90961425 | 90961975 | 550 | 90961787 | 26 | 381 | 52.5 |
| 2 | 90963375 | 90963675 | 300 | 90963437 | 30 | 255 | 39.4 |
| 2 | 90966850 | 90966875 | 25  | 90966862 | 12 | 12  | 2.2  |
| 2 | 90968300 | 90968350 | 50  | 90968337 | 22 | 37  | 0    |
| 2 | 90969925 | 90969950 | 25  | 90969937 | 14 | 14  | 0    |
| 2 | 90972925 | 90973425 | 500 | 90973087 | 17 | 241 | 48.1 |
| 2 | 90975375 | 90975400 | 25  | 90975387 | 13 | 13  | 0    |
| 2 | 90976450 | 90976575 | 125 | 90976537 | 14 | 63  | 10.9 |
| 2 | 90977225 | 90977700 | 475 | 90977562 | 17 | 219 | 43.8 |
| 2 | 91133400 | 91133525 | 125 | 91133437 | 15 | 68  | 10.9 |
| 2 | 91136250 | 91136275 | 25  | 91136262 | 13 | 13  | 2.2  |
| 2 | 91138950 | 91139000 | 50  | 91138962 | 12 | 24  | 4.4  |
| 2 | 91157675 | 91157875 | 200 | 91157712 | 15 | 104 | 4.4  |
| 2 | 91159200 | 91159250 | 50  | 91159212 | 16 | 31  | 4.4  |
| 2 | 91163975 | 91164000 | 25  | 91163987 | 18 | 18  | 2.2  |
| 2 | 91184375 | 91184500 | 125 | 91184437 | 14 | 64  | 8.8  |
| 2 | 91185325 | 91185400 | 75  | 91185362 | 14 | 40  | 6.6  |
| 2 | 91284300 | 91284325 | 25  | 91284312 | 12 | 12  | 2.2  |
| 2 | 91526150 | 91526200 | 50  | 91526187 | 13 | 25  | 0    |
| 2 | 91682775 | 91682825 | 50  | 91682787 | 12 | 24  | 4.4  |
| 2 | 94910125 | 94910225 | 100 | 94910212 | 13 | 46  | 8.8  |
| 2 | 95158975 | 95159000 | 25  | 95158987 | 12 | 12  | 0    |
| 2 | 95304325 | 95304350 | 25  | 95304337 | 12 | 12  | 2.2  |
| 2 | 95304775 | 95304800 | 25  | 95304787 | 12 | 12  | 0    |
| 2 | 95789825 | 95789850 | 25  | 95789837 | 12 | 12  | 0    |
| 2 | 96134100 | 96134175 | 75  | 96134137 | 13 | 38  | 0    |
| 2 | 96134750 | 96134950 | 200 | 96134787 | 14 | 104 | 0    |
| 2 | 96459975 | 96460025 | 50  | 96460012 | 15 | 28  | 4.4  |
| 2 | 96460775 | 96460800 | 25  | 96460787 | 12 | 12  | 0    |



|   |           |           |     |           |    |     |      |
|---|-----------|-----------|-----|-----------|----|-----|------|
| 2 | 96942625  | 96942725  | 100 | 96942662  | 14 | 52  | 0    |
| 2 | 96946225  | 96946400  | 175 | 96946387  | 13 | 81  | 8.8  |
| 2 | 98196225  | 98196425  | 200 | 98196337  | 17 | 113 | 10.9 |
| 2 | 98291475  | 98291500  | 25  | 98291487  | 12 | 12  | 2.2  |
| 2 | 98294400  | 98294600  | 200 | 98294512  | 17 | 115 | 0    |
| 2 | 98322550  | 98322650  | 100 | 98322587  | 14 | 52  | 8.8  |
| 2 | 98379550  | 98379875  | 325 | 98379812  | 14 | 158 | 4.4  |
| 2 | 98784875  | 98784950  | 75  | 98784887  | 12 | 36  | 0    |
| 2 | 99124875  | 99124900  | 25  | 99124887  | 12 | 12  | 2.2  |
| 2 | 99642700  | 99642750  | 50  | 99642712  | 12 | 24  | 0    |
| 2 | 100650925 | 100650950 | 25  | 100650937 | 12 | 12  | 2.2  |
| 2 | 100984775 | 100984825 | 50  | 100984787 | 14 | 28  | 4.4  |
| 2 | 101475200 | 101475300 | 100 | 101475237 | 14 | 51  | 6.6  |
| 2 | 101547375 | 101547450 | 75  | 101547412 | 13 | 37  | 0    |
| 2 | 101572325 | 101572400 | 75  | 101572362 | 16 | 41  | 4.4  |
| 2 | 101601425 | 101601475 | 50  | 101601462 | 13 | 25  | 0    |
| 2 | 102233125 | 102233175 | 50  | 102233137 | 13 | 25  | 2.2  |
| 2 | 104882125 | 104882200 | 75  | 104882137 | 15 | 41  | 0    |
| 2 | 104892400 | 104892525 | 125 | 104892437 | 14 | 66  | 8.8  |
| 2 | 104959775 | 104959800 | 25  | 104959787 | 12 | 12  | 0    |
| 2 | 105546375 | 105546475 | 100 | 105546387 | 13 | 49  | 0    |
| 2 | 105572050 | 105572075 | 25  | 105572062 | 13 | 13  | 0    |
| 2 | 105705925 | 105706000 | 75  | 105705937 | 14 | 39  | 0    |
| 2 | 105710375 | 105710425 | 50  | 105710412 | 13 | 25  | 0    |
| 2 | 105915725 | 105915825 | 100 | 105915737 | 12 | 47  | 0    |
| 2 | 106841800 | 106841825 | 25  | 106841812 | 12 | 12  | 0    |
| 2 | 108892900 | 108892975 | 75  | 108892912 | 12 | 36  | 0    |
| 2 | 108918800 | 108918825 | 25  | 108918812 | 12 | 12  | 2.2  |
| 2 | 109195800 | 109195900 | 100 | 109195812 | 15 | 52  | 0    |
| 2 | 109255500 | 109255625 | 125 | 109255587 | 13 | 60  | 2.2  |
| 2 | 109273550 | 109273600 | 50  | 109273562 | 12 | 24  | 0    |
| 2 | 109402400 | 109402425 | 25  | 109402412 | 12 | 12  | 2.2  |
| 2 | 109416925 | 109416950 | 25  | 109416937 | 12 | 12  | 0    |
| 2 | 109452825 | 109452900 | 75  | 109452862 | 13 | 37  | 6.6  |
| 2 | 110200725 | 110200800 | 75  | 110200787 | 15 | 41  | 0    |
| 2 | 111170600 | 111170675 | 75  | 111170612 | 12 | 36  | 0    |
| 2 | 111186150 | 111186200 | 50  | 111186187 | 13 | 25  | 0    |
| 2 | 111194525 | 111194600 | 75  | 111194537 | 12 | 34  | 0    |
| 2 | 111377950 | 111378000 | 50  | 111377962 | 12 | 24  | 0    |
| 2 | 111446275 | 111446300 | 25  | 111446287 | 13 | 13  | 0    |
| 2 | 111515275 | 111515400 | 125 | 111515287 | 12 | 59  | 0    |
| 2 | 111672925 | 111672950 | 25  | 111672937 | 12 | 12  | 0    |
| 2 | 112611875 | 112611975 | 100 | 112611937 | 14 | 53  | 6.6  |
| 2 | 112661275 | 112661450 | 175 | 112661412 | 16 | 95  | 0    |
| 2 | 113507000 | 113507050 | 50  | 113507012 | 12 | 24  | 0    |
| 2 | 113536250 | 113536400 | 150 | 113536362 | 18 | 91  | 8.8  |
| 2 | 113536800 | 113536825 | 25  | 113536812 | 13 | 13  | 2.2  |
| 2 | 113539075 | 113539125 | 50  | 113539087 | 13 | 25  | 0    |
| 2 | 115232000 | 115232025 | 25  | 115232012 | 12 | 12  | 0    |
| 2 | 118320225 | 118320275 | 50  | 118320237 | 13 | 25  | 0    |
| 2 | 118364975 | 118365000 | 25  | 118364987 | 12 | 12  | 2.2  |
| 2 | 118365600 | 118365625 | 25  | 118365612 | 12 | 12  | 0    |
| 2 | 119084925 | 119085050 | 125 | 119085037 | 13 | 60  | 6.6  |
| 2 | 119529750 | 119529775 | 25  | 119529762 | 12 | 12  | 0    |
| 2 | 120123525 | 120123600 | 75  | 120123562 | 15 | 40  | 0    |
| 2 | 120630500 | 120630625 | 125 | 120630587 | 13 | 61  | 10.9 |
| 2 | 120696300 | 120696975 | 675 | 120696787 | 31 | 624 | 87.5 |
| 2 | 120802650 | 120802775 | 125 | 120802662 | 18 | 79  | 2.2  |
| 2 | 120874125 | 120874150 | 25  | 120874137 | 12 | 12  | 2.2  |
| 2 | 121143000 | 121143125 | 125 | 121143037 | 14 | 64  | 8.8  |
| 2 | 121143600 | 121143675 | 75  | 121143662 | 16 | 41  | 0    |
| 2 | 121339275 | 121339300 | 25  | 121339287 | 12 | 12  | 2.2  |
| 2 | 121404700 | 121404850 | 150 | 121404812 | 16 | 89  | 13.1 |
| 2 | 121676625 | 121676675 | 50  | 121676662 | 14 | 26  | 0    |
| 2 | 122260000 | 122260100 | 100 | 122260037 | 14 | 51  | 0    |
| 2 | 122359875 | 122359900 | 25  | 122359887 | 13 | 13  | 2.2  |
| 2 | 122391600 | 122391650 | 50  | 122391612 | 12 | 24  | 4.4  |
| 2 | 123479725 | 123479825 | 100 | 123479787 | 14 | 52  | 8.8  |
| 2 | 125121850 | 125121875 | 25  | 125121862 | 12 | 12  | 0    |
| 2 | 126989150 | 126989200 | 50  | 126989187 | 13 | 25  | 0    |
| 2 | 127352400 | 127352425 | 25  | 127352412 | 12 | 12  | 0    |
| 2 | 127369025 | 127369050 | 25  | 127369037 | 12 | 12  | 0    |
| 2 | 127377875 | 127377900 | 25  | 127377887 | 12 | 12  | 0    |
| 2 | 127614850 | 127614875 | 25  | 127614862 | 13 | 13  | 0    |
| 2 | 128056200 | 128056225 | 25  | 128056212 | 12 | 12  | 2.2  |

|   |           |           |     |           |    |     |      |
|---|-----------|-----------|-----|-----------|----|-----|------|
| 2 | 128086400 | 128086550 | 150 | 128086537 | 15 | 80  | 10.9 |
| 2 | 128507100 | 128507125 | 25  | 128507112 | 12 | 12  | 2.2  |
| 2 | 128747500 | 128747675 | 175 | 128747612 | 14 | 89  | 0    |
| 2 | 128988775 | 128988900 | 125 | 128988837 | 13 | 61  | 8.8  |
| 2 | 129033700 | 129033725 | 25  | 129033712 | 12 | 12  | 2.2  |
| 2 | 129170650 | 129170675 | 25  | 129170662 | 12 | 12  | 0    |
| 2 | 130201425 | 130201500 | 75  | 130201437 | 12 | 36  | 0    |
| 2 | 131352975 | 131353150 | 175 | 131353062 | 14 | 92  | 15.3 |
| 2 | 131422000 | 131422075 | 75  | 131422062 | 14 | 39  | 4.4  |
| 2 | 131451225 | 131451300 | 75  | 131451237 | 12 | 36  | 0    |
| 2 | 131675125 | 131675175 | 50  | 131675137 | 12 | 24  | 4.4  |
| 2 | 131908350 | 131908400 | 50  | 131908362 | 13 | 25  | 2.2  |
| 2 | 132065225 | 132065250 | 25  | 132065237 | 12 | 12  | 0    |
| 2 | 132728175 | 132728200 | 25  | 132728187 | 12 | 12  | 0    |
| 2 | 132732000 | 132732050 | 50  | 132732012 | 17 | 34  | 4.4  |
| 2 | 132735575 | 132735600 | 25  | 132735587 | 49 | 49  | 8.8  |
| 2 | 132737050 | 132737550 | 500 | 132737462 | 15 | 196 | 17.5 |
| 2 | 132739350 | 132739450 | 100 | 132739412 | 25 | 79  | 6.6  |
| 2 | 132754875 | 132754900 | 25  | 132754887 | 13 | 13  | 2.2  |
| 2 | 132760875 | 132760900 | 25  | 132760887 | 13 | 13  | 0    |
| 2 | 132761600 | 132761725 | 125 | 132761712 | 13 | 58  | 0    |
| 2 | 132778800 | 132779275 | 475 | 132779137 | 23 | 269 | 13.1 |
| 2 | 132789050 | 132789100 | 50  | 132789087 | 25 | 47  | 8.8  |
| 2 | 132790825 | 132791000 | 175 | 132790862 | 15 | 95  | 8.8  |
| 2 | 132791425 | 132791450 | 25  | 132791437 | 12 | 12  | 0    |
| 2 | 132795175 | 132795300 | 125 | 132795187 | 17 | 73  | 0    |
| 2 | 132795750 | 132795775 | 25  | 132795762 | 13 | 13  | 2.2  |
| 2 | 132806800 | 132806825 | 25  | 132806812 | 12 | 12  | 0    |
| 2 | 132827125 | 132827175 | 50  | 132827137 | 12 | 24  | 4.4  |
| 2 | 132891500 | 132891550 | 50  | 132891512 | 14 | 28  | 4.4  |
| 2 | 132939475 | 132939500 | 25  | 132939487 | 12 | 12  | 0    |
| 2 | 134549500 | 134549675 | 175 | 134549612 | 18 | 106 | 15.3 |
| 2 | 134569100 | 134569150 | 50  | 134569112 | 13 | 26  | 0    |
| 2 | 139376625 | 139376675 | 50  | 139376637 | 14 | 27  | 0    |
| 2 | 139426125 | 139426250 | 125 | 139426137 | 14 | 64  | 0    |
| 2 | 139428900 | 139428925 | 25  | 139428912 | 12 | 12  | 2.2  |
| 2 | 144165450 | 144165475 | 25  | 144165462 | 12 | 12  | 0    |
| 2 | 149051125 | 149051150 | 25  | 149051137 | 12 | 12  | 0    |
| 2 | 149574950 | 149575000 | 50  | 149574962 | 13 | 26  | 0    |
| 2 | 150501375 | 150501400 | 25  | 150501387 | 12 | 12  | 0    |
| 2 | 153377375 | 153377525 | 150 | 153377412 | 15 | 80  | 0    |
| 2 | 153442100 | 153442175 | 75  | 153442112 | 13 | 39  | 6.6  |
| 2 | 160621650 | 160621700 | 50  | 160621662 | 13 | 25  | 0    |
| 2 | 161844975 | 161845025 | 50  | 161844987 | 20 | 39  | 4.4  |
| 2 | 162652500 | 162652575 | 75  | 162652512 | 12 | 36  | 6.6  |
| 2 | 166182250 | 166182325 | 75  | 166182262 | 13 | 37  | 0    |
| 2 | 168991150 | 168991175 | 25  | 168991162 | 12 | 12  | 0    |
| 2 | 171487900 | 171487925 | 25  | 171487912 | 12 | 12  | 0    |
| 2 | 171489250 | 171489275 | 25  | 171489262 | 13 | 13  | 0    |
| 2 | 172196125 | 172196175 | 50  | 172196137 | 14 | 26  | 0    |
| 2 | 173286325 | 173286450 | 125 | 173286337 | 16 | 75  | 0    |
| 2 | 173374350 | 173374500 | 150 | 173374387 | 13 | 75  | 0    |
| 2 | 173871125 | 173871200 | 75  | 173871137 | 12 | 33  | 2.2  |
| 2 | 174227075 | 174227150 | 75  | 174227112 | 16 | 46  | 4.4  |
| 2 | 174238025 | 174238075 | 50  | 174238037 | 13 | 25  | 4.4  |
| 2 | 174417775 | 174417850 | 75  | 174417812 | 13 | 37  | 2.2  |
| 2 | 174420375 | 174420475 | 100 | 174420387 | 12 | 47  | 2.2  |
| 2 | 174431375 | 174431500 | 125 | 174431412 | 15 | 63  | 0    |
| 2 | 174450125 | 174450150 | 25  | 174450137 | 13 | 13  | 2.2  |
| 2 | 174900100 | 174900200 | 100 | 174900112 | 12 | 44  | 0    |
| 2 | 175265700 | 175265775 | 75  | 175265762 | 13 | 37  | 0    |
| 2 | 175303175 | 175303250 | 75  | 175303187 | 13 | 38  | 6.6  |
| 2 | 175844525 | 175844650 | 125 | 175844587 | 14 | 65  | 10.9 |
| 2 | 178038525 | 178038650 | 125 | 178038537 | 15 | 69  | 4.4  |
| 2 | 178747025 | 178747100 | 75  | 178747037 | 12 | 36  | 4.4  |
| 2 | 182229625 | 182229725 | 100 | 182229637 | 12 | 47  | 8.8  |
| 2 | 182251175 | 182251200 | 25  | 182251187 | 12 | 12  | 2.2  |
| 2 | 182253950 | 182254275 | 325 | 182254087 | 16 | 173 | 0    |
| 2 | 182254625 | 182254750 | 125 | 182254637 | 13 | 62  | 0    |
| 2 | 182256050 | 182256150 | 100 | 182256112 | 15 | 52  | 8.8  |
| 2 | 182301675 | 182301700 | 25  | 182301687 | 12 | 12  | 0    |
| 2 | 196800575 | 196800625 | 50  | 196800587 | 12 | 24  | 4.4  |
| 2 | 196927300 | 196927350 | 50  | 196927312 | 13 | 25  | 2.2  |
| 2 | 196930100 | 196930125 | 25  | 196930112 | 12 | 12  | 0    |
| 2 | 196988450 | 196988600 | 150 | 196988462 | 12 | 71  | 0    |

|   |           |           |     |           |    |     |      |
|---|-----------|-----------|-----|-----------|----|-----|------|
| 2 | 197166650 | 197166700 | 50  | 197166687 | 14 | 26  | 0    |
| 2 | 200269275 | 200269300 | 25  | 200269287 | 13 | 13  | 0    |
| 2 | 200781875 | 200781900 | 25  | 200781887 | 12 | 12  | 0    |
| 2 | 200827750 | 200827800 | 50  | 200827762 | 12 | 24  | 4.4  |
| 2 | 201096325 | 201096500 | 175 | 201096337 | 14 | 91  | 0    |
| 2 | 201893400 | 201893425 | 25  | 201893412 | 12 | 12  | 2.2  |
| 2 | 202608650 | 202608725 | 75  | 202608712 | 16 | 43  | 0    |
| 2 | 202608975 | 202609000 | 25  | 202608987 | 16 | 16  | 0    |
| 2 | 204708650 | 204708725 | 75  | 204708662 | 12 | 35  | 0    |
| 2 | 204878525 | 204878550 | 25  | 204878537 | 12 | 12  | 0    |
| 2 | 206165825 | 206165875 | 50  | 206165862 | 14 | 27  | 4.4  |
| 2 | 206188225 | 206188250 | 25  | 206188237 | 12 | 12  | 0    |
| 2 | 216827375 | 216827400 | 25  | 216827387 | 12 | 12  | 2.2  |
| 2 | 216841125 | 216841150 | 25  | 216841137 | 12 | 12  | 0    |
| 2 | 216907150 | 216907275 | 125 | 216907187 | 13 | 63  | 0    |
| 2 | 216911225 | 216911250 | 25  | 216911237 | 12 | 12  | 0    |
| 2 | 216923450 | 216923500 | 50  | 216923487 | 13 | 25  | 0    |
| 2 | 216998150 | 216998250 | 100 | 216998237 | 18 | 62  | 0    |
| 2 | 217305025 | 217305175 | 150 | 217305087 | 13 | 74  | 13.1 |
| 2 | 217327575 | 217327625 | 50  | 217327587 | 12 | 24  | 0    |
| 2 | 217337025 | 217337050 | 25  | 217337037 | 12 | 12  | 0    |
| 2 | 217661125 | 217661150 | 25  | 217661137 | 13 | 13  | 0    |
| 2 | 217864575 | 217864650 | 75  | 217864612 | 13 | 38  | 0    |
| 2 | 217924000 | 217924200 | 200 | 217924062 | 15 | 101 | 0    |
| 2 | 218096375 | 218096475 | 100 | 218096387 | 13 | 51  | 0    |
| 2 | 218159000 | 218159025 | 25  | 218159012 | 12 | 12  | 0    |
| 2 | 218172450 | 218172475 | 25  | 218172462 | 12 | 12  | 2.2  |
| 2 | 218583050 | 218583100 | 50  | 218583062 | 13 | 26  | 0    |
| 2 | 218617050 | 218617075 | 25  | 218617062 | 12 | 12  | 2.2  |
| 2 | 218633525 | 218633950 | 425 | 218633662 | 16 | 223 | 0    |
| 2 | 218664700 | 218664750 | 50  | 218664712 | 12 | 24  | 0    |
| 2 | 218665625 | 218665700 | 75  | 218665637 | 12 | 36  | 0    |
| 2 | 218708200 | 218708400 | 200 | 218708237 | 13 | 96  | 0    |
| 2 | 218737150 | 218737500 | 350 | 218737337 | 19 | 213 | 17.5 |
| 2 | 218771700 | 218771775 | 75  | 218771762 | 14 | 40  | 6.6  |
| 2 | 219533450 | 219533475 | 25  | 219533462 | 12 | 12  | 2.2  |
| 2 | 220385775 | 220385825 | 50  | 220385787 | 12 | 24  | 2.2  |
| 2 | 223077300 | 223077325 | 25  | 223077312 | 12 | 12  | 0    |
| 2 | 224123175 | 224123225 | 50  | 224123212 | 13 | 25  | 0    |
| 2 | 224678400 | 224678425 | 25  | 224678412 | 12 | 12  | 2.2  |
| 2 | 224737200 | 224737250 | 50  | 224737212 | 13 | 25  | 0    |
| 2 | 231401925 | 231401950 | 25  | 231401937 | 12 | 12  | 0    |
| 2 | 231402650 | 231402675 | 25  | 231402662 | 12 | 12  | 0    |
| 2 | 231403100 | 231403325 | 225 | 231403212 | 20 | 147 | 2.2  |
| 2 | 231760850 | 231760875 | 25  | 231760862 | 12 | 12  | 2.2  |
| 2 | 232993100 | 232993300 | 200 | 232993187 | 15 | 113 | 0    |
| 2 | 233461200 | 233461450 | 250 | 233461337 | 23 | 186 | 0    |
| 2 | 233497525 | 233497600 | 75  | 233497537 | 14 | 40  | 0    |
| 2 | 233577150 | 233577300 | 150 | 233577237 | 16 | 89  | 0    |
| 2 | 233609025 | 233609100 | 75  | 233609037 | 12 | 34  | 0    |
| 2 | 233614350 | 233614475 | 125 | 233614437 | 13 | 58  | 0    |
| 2 | 233776525 | 233776550 | 25  | 233776537 | 12 | 12  | 0    |
| 2 | 233893875 | 233893950 | 75  | 233893912 | 14 | 38  | 0    |
| 2 | 234158025 | 234158150 | 125 | 234158062 | 13 | 62  | 8.8  |
| 2 | 234293300 | 234293350 | 50  | 234293312 | 12 | 24  | 0    |
| 2 | 234301225 | 234301300 | 75  | 234301237 | 13 | 38  | 2.2  |
| 2 | 234310900 | 234311050 | 150 | 234310912 | 12 | 72  | 0    |
| 2 | 234328325 | 234328450 | 125 | 234328387 | 15 | 69  | 8.8  |
| 2 | 234345700 | 234345725 | 25  | 234345712 | 13 | 13  | 0    |
| 2 | 234353075 | 234353100 | 25  | 234353087 | 12 | 12  | 0    |
| 2 | 234367650 | 234367750 | 100 | 234367712 | 14 | 51  | 8.8  |
| 2 | 234382075 | 234382300 | 225 | 234382187 | 16 | 130 | 8.8  |
| 2 | 234565975 | 234566075 | 100 | 234565987 | 13 | 51  | 0    |
| 2 | 235069800 | 235069850 | 50  | 235069812 | 12 | 24  | 4.4  |
| 2 | 235658200 | 235658225 | 25  | 235658212 | 12 | 12  | 2.2  |
| 2 | 235714075 | 235714100 | 25  | 235714087 | 12 | 12  | 0    |
| 2 | 235723850 | 235723900 | 50  | 235723862 | 12 | 24  | 4.4  |
| 2 | 235749650 | 235749675 | 25  | 235749662 | 12 | 12  | 2.2  |
| 2 | 235779900 | 235779925 | 25  | 235779912 | 12 | 12  | 0    |
| 2 | 235916025 | 235916050 | 25  | 235916037 | 12 | 12  | 0    |
| 2 | 235917975 | 235918000 | 25  | 235917987 | 12 | 12  | 0    |
| 2 | 235942825 | 235942975 | 150 | 235942912 | 13 | 74  | 8.8  |
| 2 | 235958525 | 235958575 | 50  | 235958562 | 13 | 25  | 0    |
| 2 | 236141500 | 236141525 | 25  | 236141512 | 14 | 14  | 0    |
| 2 | 236839175 | 236839225 | 50  | 236839212 | 13 | 25  | 0    |

|   |           |           |     |           |    |     |      |
|---|-----------|-----------|-----|-----------|----|-----|------|
| 2 | 236841225 | 236841300 | 75  | 236841262 | 14 | 39  | 6.6  |
| 2 | 237117825 | 237117900 | 75  | 237117837 | 12 | 36  | 0    |
| 2 | 237151575 | 237151675 | 100 | 237151637 | 18 | 63  | 2.2  |
| 2 | 237166175 | 237166275 | 100 | 237166187 | 12 | 48  | 0    |
| 2 | 237183775 | 237183850 | 75  | 237183787 | 12 | 35  | 0    |
| 2 | 237188650 | 237188775 | 125 | 237188662 | 17 | 74  | 8.8  |
| 2 | 237189825 | 237189875 | 50  | 237189837 | 13 | 25  | 0    |
| 2 | 237201400 | 237201525 | 125 | 237201412 | 12 | 57  | 0    |
| 2 | 237214650 | 237214700 | 50  | 237214662 | 12 | 24  | 0    |
| 2 | 237246525 | 237246850 | 325 | 237246637 | 17 | 188 | 0    |
| 2 | 237256100 | 237256125 | 25  | 237256112 | 12 | 12  | 0    |
| 2 | 237266475 | 237266500 | 25  | 237266487 | 12 | 12  | 0    |
| 2 | 237351050 | 237351075 | 25  | 237351062 | 12 | 12  | 0    |
| 2 | 237394450 | 237394475 | 25  | 237394462 | 12 | 12  | 0    |
| 2 | 237415025 | 237415200 | 175 | 237415112 | 15 | 93  | 13.1 |
| 2 | 237481950 | 237482050 | 100 | 237481987 | 15 | 55  | 0    |
| 2 | 237534075 | 237534200 | 125 | 237534137 | 13 | 61  | 0    |
| 2 | 237702075 | 237702275 | 200 | 237702137 | 16 | 113 | 0    |
| 2 | 237702700 | 237702900 | 200 | 237702862 | 14 | 99  | 10.9 |
| 2 | 237773975 | 237774050 | 75  | 237774012 | 13 | 38  | 0    |
| 2 | 237874425 | 237874550 | 125 | 237874462 | 14 | 66  | 0    |
| 2 | 237920850 | 237920875 | 25  | 237920862 | 12 | 12  | 0    |
| 2 | 237922100 | 237922125 | 25  | 237922112 | 12 | 12  | 0    |
| 2 | 237931100 | 237931125 | 25  | 237931112 | 12 | 12  | 2.2  |
| 2 | 237952425 | 237952450 | 25  | 237952437 | 12 | 12  | 0    |
| 2 | 237990450 | 237990525 | 75  | 237990487 | 14 | 39  | 2.2  |
| 2 | 238023025 | 238023125 | 100 | 238023087 | 14 | 51  | 2.2  |
| 2 | 238023675 | 238023700 | 25  | 238023687 | 12 | 12  | 2.2  |
| 2 | 238064675 | 238064850 | 175 | 238064812 | 26 | 149 | 4.4  |
| 2 | 238517175 | 238517200 | 25  | 238517187 | 12 | 12  | 0    |
| 2 | 238518850 | 238518875 | 25  | 238518862 | 12 | 12  | 0    |
| 2 | 238989125 | 238989175 | 50  | 238989162 | 13 | 25  | 0    |
| 2 | 239029400 | 239029450 | 50  | 239029437 | 14 | 26  | 4.4  |
| 2 | 239058975 | 239059000 | 25  | 239058987 | 12 | 12  | 0    |
| 2 | 239060100 | 239060175 | 75  | 239060162 | 14 | 39  | 6.6  |
| 2 | 239075650 | 239075675 | 25  | 239075662 | 12 | 12  | 2.2  |
| 2 | 239079175 | 239079200 | 25  | 239079187 | 12 | 12  | 0    |
| 2 | 239098275 | 239098300 | 25  | 239098287 | 12 | 12  | 0    |
| 2 | 239131550 | 239131650 | 100 | 239131562 | 12 | 45  | 4.4  |
| 2 | 239137175 | 239137300 | 125 | 239137187 | 13 | 60  | 0    |
| 2 | 239139600 | 239139625 | 25  | 239139612 | 12 | 12  | 2.2  |
| 2 | 239143175 | 239143200 | 25  | 239143187 | 12 | 12  | 0    |
| 2 | 239146700 | 239146725 | 25  | 239146712 | 13 | 13  | 2.2  |
| 2 | 239151750 | 239151950 | 200 | 239151787 | 17 | 118 | 15.3 |
| 2 | 239161325 | 239161525 | 200 | 239161412 | 20 | 128 | 6.6  |
| 2 | 239206225 | 239206625 | 400 | 239206537 | 14 | 200 | 0    |
| 2 | 239207025 | 239207125 | 100 | 239207087 | 15 | 58  | 8.8  |
| 2 | 239223450 | 239223550 | 100 | 239223462 | 16 | 60  | 2.2  |
| 2 | 239226350 | 239226475 | 125 | 239226387 | 15 | 69  | 0    |
| 2 | 239227150 | 239227325 | 175 | 239227212 | 19 | 123 | 15.3 |
| 2 | 239262650 | 239262900 | 250 | 239262762 | 18 | 147 | 0    |
| 2 | 239369750 | 239369925 | 175 | 239369887 | 15 | 93  | 13.1 |
| 2 | 239379425 | 239379575 | 150 | 239379437 | 16 | 82  | 6.6  |
| 2 | 239386525 | 239386800 | 275 | 239386562 | 15 | 141 | 0    |
| 2 | 239498550 | 239498575 | 25  | 239498562 | 12 | 12  | 0    |
| 2 | 239526850 | 239526975 | 125 | 239526887 | 14 | 67  | 10.9 |
| 2 | 239535675 | 239535825 | 150 | 239535712 | 13 | 76  | 13.1 |
| 2 | 239582900 | 239582925 | 25  | 239582912 | 12 | 12  | 0    |
| 2 | 239585950 | 239585975 | 25  | 239585962 | 12 | 12  | 2.2  |
| 2 | 239588600 | 239588625 | 25  | 239588612 | 12 | 12  | 0    |
| 2 | 239599100 | 239599225 | 125 | 239599162 | 17 | 74  | 4.4  |
| 2 | 239605900 | 239606100 | 200 | 239605987 | 16 | 115 | 0    |
| 2 | 239609175 | 239609225 | 50  | 239609187 | 12 | 24  | 0    |
| 2 | 239711550 | 239711600 | 50  | 239711562 | 13 | 26  | 0    |
| 2 | 239741775 | 239741800 | 25  | 239741787 | 12 | 12  | 0    |
| 2 | 240012925 | 240013000 | 75  | 240012937 | 12 | 34  | 6.6  |
| 2 | 240022800 | 240022975 | 175 | 240022812 | 15 | 95  | 0    |
| 2 | 240029675 | 240029775 | 100 | 240029687 | 12 | 48  | 8.8  |
| 2 | 240030750 | 240031100 | 350 | 240030937 | 14 | 175 | 30.6 |
| 2 | 240045800 | 240045825 | 25  | 240045812 | 12 | 12  | 0    |
| 2 | 240054150 | 240054275 | 125 | 240054162 | 12 | 56  | 8.8  |
| 2 | 240054575 | 240054600 | 25  | 240054587 | 12 | 12  | 2.2  |
| 2 | 240055625 | 240055650 | 25  | 240055637 | 12 | 12  | 0    |
| 2 | 240076250 | 240076350 | 100 | 240076262 | 14 | 52  | 8.8  |
| 2 | 240084075 | 240084250 | 175 | 240084087 | 18 | 106 | 10.9 |

|   |           |           |     |           |    |     |      |
|---|-----------|-----------|-----|-----------|----|-----|------|
| 2 | 240085400 | 240085450 | 50  | 240085412 | 12 | 24  | 0    |
| 2 | 240085675 | 240085725 | 50  | 240085687 | 13 | 25  | 0    |
| 2 | 240108975 | 240109025 | 50  | 240109012 | 13 | 25  | 0    |
| 2 | 240126325 | 240126375 | 50  | 240126362 | 13 | 25  | 0    |
| 2 | 240145400 | 240145450 | 50  | 240145437 | 13 | 25  | 0    |
| 2 | 240148350 | 240148600 | 250 | 240148462 | 20 | 166 | 26.3 |
| 2 | 240152200 | 240152250 | 50  | 240152237 | 13 | 25  | 0    |
| 2 | 240152675 | 240152850 | 175 | 240152787 | 14 | 89  | 0    |
| 2 | 240157700 | 240157725 | 25  | 240157712 | 12 | 12  | 0    |
| 2 | 240165200 | 240165425 | 225 | 240165337 | 16 | 126 | 0    |
| 2 | 240179200 | 240179375 | 175 | 240179287 | 17 | 108 | 0    |
| 2 | 240189425 | 240189475 | 50  | 240189437 | 13 | 25  | 0    |
| 2 | 240196875 | 240196900 | 25  | 240196887 | 12 | 12  | 2.2  |
| 2 | 240235400 | 240235500 | 100 | 240235462 | 13 | 50  | 8.8  |
| 2 | 240319025 | 240319050 | 25  | 240319037 | 12 | 12  | 0    |
| 2 | 240356650 | 240356675 | 25  | 240356662 | 13 | 13  | 0    |
| 2 | 240388975 | 240389050 | 75  | 240388987 | 12 | 35  | 0    |
| 2 | 240419875 | 240420025 | 150 | 240419937 | 14 | 78  | 0    |
| 2 | 240484725 | 240484800 | 75  | 240484762 | 14 | 39  | 0    |
| 2 | 240506925 | 240507025 | 100 | 240506937 | 13 | 51  | 8.8  |
| 2 | 240508350 | 240508375 | 25  | 240508362 | 12 | 12  | 0    |
| 2 | 240627900 | 240627925 | 25  | 240627912 | 12 | 12  | 0    |
| 2 | 240677200 | 240677275 | 75  | 240677262 | 13 | 37  | 0    |
| 2 | 240684075 | 240684250 | 175 | 240684162 | 19 | 117 | 2.2  |
| 2 | 240706975 | 240707000 | 25  | 240706987 | 12 | 12  | 0    |
| 2 | 240735700 | 240735750 | 50  | 240735712 | 13 | 25  | 0    |
| 2 | 240779250 | 240779425 | 175 | 240779262 | 14 | 91  | 2.2  |
| 2 | 240784925 | 240784950 | 25  | 240784937 | 12 | 12  | 0    |
| 2 | 240785875 | 240785975 | 100 | 240785887 | 12 | 45  | 0    |
| 2 | 240792700 | 240792800 | 100 | 240792737 | 14 | 51  | 4.4  |
| 2 | 240834175 | 240834225 | 50  | 240834212 | 14 | 27  | 4.4  |
| 2 | 240921325 | 240921375 | 50  | 240921337 | 12 | 24  | 0    |
| 2 | 240949950 | 240950150 | 200 | 240950087 | 16 | 108 | 0    |
| 2 | 240950625 | 240950650 | 25  | 240950637 | 12 | 12  | 2.2  |
| 2 | 240974125 | 240974175 | 50  | 240974137 | 12 | 24  | 0    |
| 2 | 241009650 | 241009850 | 200 | 241009687 | 16 | 112 | 17.5 |
| 2 | 241112250 | 241112300 | 50  | 241112262 | 12 | 24  | 0    |
| 2 | 241114150 | 241114225 | 75  | 241114212 | 14 | 38  | 6.6  |
| 2 | 241235450 | 241235575 | 125 | 241235537 | 13 | 60  | 10.9 |
| 2 | 241238850 | 241239050 | 200 | 241238962 | 15 | 106 | 0    |
| 2 | 241239425 | 241239500 | 75  | 241239437 | 13 | 38  | 0    |
| 2 | 241400600 | 241401175 | 575 | 241401012 | 21 | 372 | 6.6  |
| 2 | 241535450 | 241535475 | 25  | 241535462 | 14 | 14  | 2.2  |
| 2 | 241590575 | 241590625 | 50  | 241590612 | 14 | 27  | 0    |
| 2 | 241591400 | 241591600 | 200 | 241591462 | 17 | 120 | 0    |
| 2 | 241591975 | 241592175 | 200 | 241592087 | 16 | 109 | 13.1 |
| 2 | 242227225 | 242227325 | 100 | 242227237 | 14 | 53  | 0    |
| 2 | 242309975 | 242310000 | 25  | 242309987 | 12 | 12  | 0    |
| 2 | 242455225 | 242455275 | 50  | 242455237 | 12 | 24  | 4.4  |
| 2 | 242536750 | 242536900 | 150 | 242536812 | 18 | 94  | 0    |
| 2 | 242537925 | 242537950 | 25  | 242537937 | 12 | 12  | 2.2  |
| 2 | 242575300 | 242575350 | 50  | 242575312 | 12 | 24  | 0    |
| 2 | 242576450 | 242576475 | 25  | 242576462 | 13 | 13  | 2.2  |
| 2 | 242578075 | 242578200 | 125 | 242578087 | 12 | 58  | 0    |
| 2 | 242631575 | 242631600 | 25  | 242631587 | 12 | 12  | 2.2  |
| 5 | 628975    | 629025    | 50  | 628987    | 13 | 25  | 0    |
| 5 | 707250    | 707275    | 25  | 707262    | 12 | 12  | 0    |
| 5 | 1004625   | 1004750   | 125 | 1004662   | 13 | 62  | 0    |
| 5 | 1288650   | 1288850   | 200 | 1288687   | 16 | 119 | 8.8  |
| 5 | 1762575   | 1762625   | 50  | 1762587   | 12 | 24  | 4.4  |
| 5 | 1982825   | 1982875   | 50  | 1982837   | 12 | 24  | 4.4  |
| 5 | 2004600   | 2004775   | 175 | 2004662   | 15 | 96  | 0    |
| 5 | 2013625   | 2013725   | 100 | 2013712   | 13 | 48  | 6.6  |
| 5 | 2257525   | 2257575   | 50  | 2257537   | 13 | 25  | 0    |
| 5 | 2594975   | 2595075   | 100 | 2594987   | 13 | 49  | 0    |
| 5 | 2756250   | 2756275   | 25  | 2756262   | 12 | 12  | 0    |
| 5 | 2817750   | 2817875   | 125 | 2817787   | 15 | 67  | 0    |
| 5 | 3365900   | 3365975   | 75  | 3365937   | 15 | 41  | 0    |
| 5 | 4633925   | 4634300   | 375 | 4634237   | 15 | 193 | 4.4  |
| 5 | 5462725   | 5462825   | 100 | 5462787   | 13 | 50  | 0    |
| 5 | 6884175   | 6884200   | 25  | 6884187   | 13 | 13  | 0    |
| 5 | 8111925   | 8112050   | 125 | 8112012   | 16 | 72  | 4.4  |
| 5 | 9841050   | 9841125   | 75  | 9841087   | 13 | 37  | 0    |
| 5 | 9928675   | 9928850   | 175 | 9928687   | 12 | 80  | 0    |
| 5 | 10000375  | 10000425  | 50  | 10000412  | 14 | 26  | 0    |

|   |           |           |     |           |    |     |      |
|---|-----------|-----------|-----|-----------|----|-----|------|
| 5 | 10601950  | 10602150  | 200 | 10602087  | 14 | 100 | 0    |
| 5 | 10908350  | 10908425  | 75  | 10908387  | 13 | 37  | 6.6  |
| 5 | 14049850  | 14049875  | 25  | 14049862  | 12 | 12  | 2.2  |
| 5 | 14575075  | 14575125  | 50  | 14575087  | 13 | 25  | 4.4  |
| 5 | 14630675  | 14630700  | 25  | 14630687  | 12 | 12  | 0    |
| 5 | 14631775  | 14631875  | 100 | 14631812  | 14 | 52  | 0    |
| 5 | 31960050  | 31960150  | 100 | 31960087  | 14 | 52  | 0    |
| 5 | 32052450  | 32052475  | 25  | 32052462  | 12 | 12  | 0    |
| 5 | 32812825  | 32812900  | 75  | 32812837  | 14 | 41  | 4.4  |
| 5 | 32818425  | 32818625  | 200 | 32818487  | 17 | 119 | 0    |
| 5 | 38494350  | 38494375  | 25  | 38494362  | 12 | 12  | 2.2  |
| 5 | 49475875  | 49476025  | 150 | 49475887  | 12 | 72  | 0    |
| 5 | 56401000  | 56401100  | 100 | 56401037  | 13 | 49  | 8.8  |
| 5 | 56881800  | 56881900  | 100 | 56881812  | 12 | 45  | 8.8  |
| 5 | 71050875  | 71050925  | 50  | 71050887  | 14 | 28  | 0    |
| 5 | 71438575  | 71438675  | 100 | 71438612  | 13 | 48  | 8.8  |
| 5 | 72039850  | 72039900  | 50  | 72039862  | 13 | 26  | 4.4  |
| 5 | 81790575  | 81790625  | 50  | 81790587  | 12 | 24  | 2.2  |
| 5 | 126536225 | 126536250 | 25  | 126536237 | 13 | 13  | 0    |
| 5 | 130359150 | 130359250 | 100 | 130359212 | 15 | 57  | 4.4  |
| 5 | 133212825 | 133212850 | 25  | 133212837 | 13 | 13  | 2.2  |
| 5 | 134941950 | 134942125 | 175 | 134941962 | 13 | 86  | 0    |
| 5 | 135072175 | 135072250 | 75  | 135072187 | 12 | 35  | 0    |
| 5 | 140148225 | 140148350 | 125 | 140148262 | 14 | 65  | 0    |
| 5 | 140210375 | 140210500 | 125 | 140210412 | 15 | 65  | 8.8  |
| 5 | 140287050 | 140287075 | 25  | 140287062 | 12 | 12  | 0    |
| 5 | 140411325 | 140411425 | 100 | 140411337 | 13 | 49  | 4.4  |
| 5 | 140679600 | 140679650 | 50  | 140679637 | 13 | 25  | 0    |
| 5 | 140836750 | 140837125 | 375 | 140836962 | 14 | 179 | 17.5 |
| 5 | 145138375 | 145138425 | 50  | 145138387 | 12 | 24  | 4.4  |
| 5 | 149053750 | 149053775 | 25  | 149053762 | 12 | 12  | 0    |
| 5 | 149135100 | 149135200 | 100 | 149135137 | 13 | 50  | 0    |
| 5 | 149435750 | 149435800 | 50  | 149435762 | 12 | 24  | 4.4  |
| 5 | 150200975 | 150201075 | 100 | 150201012 | 14 | 52  | 8.8  |
| 5 | 167645000 | 167645125 | 125 | 167645012 | 14 | 68  | 0    |
| 5 | 173764675 | 173764700 | 25  | 173764687 | 12 | 12  | 0    |
| 5 | 174957450 | 174957525 | 75  | 174957487 | 13 | 37  | 0    |
| 5 | 175009525 | 175009625 | 100 | 175009537 | 14 | 54  | 0    |
| 5 | 175093425 | 175093500 | 75  | 175093437 | 14 | 40  | 0    |
| 5 | 175926325 | 175926375 | 50  | 175926337 | 12 | 24  | 0    |
| 5 | 176074700 | 176074875 | 175 | 176074837 | 13 | 84  | 0    |
| 5 | 176190100 | 176190125 | 25  | 176190112 | 12 | 12  | 0    |
| 5 | 177945100 | 177945125 | 25  | 177945112 | 33 | 33  | 4.4  |
| 5 | 178022125 | 178022250 | 125 | 178022137 | 13 | 62  | 0    |
| 5 | 178028650 | 178028725 | 75  | 178028687 | 15 | 42  | 2.2  |
| 5 | 178029650 | 178029725 | 75  | 178029687 | 14 | 39  | 0    |
| 5 | 178733875 | 178733975 | 100 | 178733887 | 13 | 49  | 0    |
| 5 | 179432100 | 179432325 | 225 | 179432287 | 16 | 115 | 17.5 |
| 5 | 180283975 | 180284025 | 50  | 180283987 | 12 | 24  | 0    |
| 5 | 180391500 | 180391525 | 25  | 180391512 | 12 | 12  | 2.2  |
| 5 | 180444575 | 180444625 | 50  | 180444612 | 13 | 25  | 4.4  |
| 5 | 180474925 | 180475125 | 200 | 180474987 | 13 | 91  | 0    |
| 5 | 180491050 | 180491075 | 25  | 180491062 | 12 | 12  | 0    |
| 4 | 44100     | 44125     | 25  | 44112     | 13 | 13  | 2.2  |
| 4 | 853725    | 853750    | 25  | 853737    | 12 | 12  | 0    |
| 4 | 8970375   | 8970400   | 25  | 8970387   | 12 | 12  | 0    |
| 4 | 48797050  | 48797175  | 125 | 48797112  | 16 | 73  | 10.9 |
| 4 | 48800425  | 48800625  | 200 | 48800612  | 15 | 109 | 0    |
| 4 | 48813875  | 48814075  | 200 | 48813887  | 14 | 100 | 0    |
| 4 | 48814750  | 48814950  | 200 | 48814912  | 17 | 124 | 4.4  |
| 4 | 48816325  | 48816375  | 50  | 48816337  | 12 | 24  | 4.4  |
| 4 | 48817750  | 48817875  | 125 | 48817762  | 20 | 81  | 0    |
| 4 | 48844225  | 48844250  | 25  | 48844237  | 13 | 13  | 0    |
| 4 | 48845775  | 48845825  | 50  | 48845787  | 13 | 25  | 4.4  |
| 4 | 48847275  | 48847675  | 400 | 48847462  | 20 | 214 | 0    |
| 4 | 48850400  | 48850475  | 75  | 48850412  | 18 | 50  | 0    |
| 4 | 48858350  | 48858400  | 50  | 48858362  | 16 | 30  | 4.4  |
| 4 | 48874950  | 48875050  | 100 | 48874962  | 16 | 58  | 2.2  |
| 4 | 49333800  | 49333850  | 50  | 49333837  | 13 | 25  | 0    |
| 4 | 55308750  | 55308775  | 25  | 55308762  | 13 | 13  | 2.2  |
| 4 | 67949350  | 67949375  | 25  | 67949362  | 14 | 14  | 2.2  |
| 4 | 75418725  | 75418800  | 75  | 75418737  | 14 | 40  | 0    |
| 4 | 95467550  | 95467600  | 50  | 95467562  | 12 | 24  | 0    |
| 4 | 109822050 | 109822075 | 25  | 109822062 | 12 | 12  | 0    |
| 4 | 122520975 | 122521075 | 100 | 122521012 | 13 | 49  | 0    |

|   |           |           |     |           |    |     |      |
|---|-----------|-----------|-----|-----------|----|-----|------|
| 4 | 134291800 | 134291825 | 25  | 134291812 | 12 | 12  | 2.2  |
| 4 | 161300100 | 161300125 | 25  | 161300112 | 12 | 12  | 2.2  |
| 4 | 175371475 | 175371550 | 75  | 175371487 | 13 | 39  | 2.2  |
| 4 | 184013575 | 184013625 | 50  | 184013587 | 12 | 24  | 0    |
| 4 | 184509075 | 184509125 | 50  | 184509087 | 12 | 24  | 0    |
| 4 | 184543175 | 184543350 | 175 | 184543262 | 15 | 98  | 10.9 |
| 4 | 186145775 | 186145925 | 150 | 186145787 | 13 | 67  | 0    |
| 4 | 190434975 | 190435250 | 275 | 190435037 | 15 | 123 | 21.9 |
| 4 | 190437800 | 190437825 | 25  | 190437812 | 18 | 18  | 2.2  |
| 4 | 190711500 | 190711525 | 25  | 190711512 | 14 | 14  | 2.2  |
| 4 | 190712200 | 190712325 | 125 | 190712287 | 14 | 62  | 0    |
| 4 | 190726300 | 190726350 | 50  | 190726337 | 16 | 28  | 4.4  |
| 4 | 190752025 | 190752050 | 25  | 190752037 | 12 | 12  | 0    |
| 4 | 190752325 | 190752525 | 200 | 190752487 | 14 | 99  | 2.2  |
| 4 | 190758475 | 190758875 | 400 | 190758587 | 15 | 205 | 19.7 |
| 4 | 190766350 | 190766375 | 25  | 190766362 | 12 | 12  | 2.2  |
| 4 | 190820475 | 190820725 | 250 | 190820562 | 23 | 180 | 8.8  |
| 4 | 190879075 | 190879125 | 50  | 190879087 | 12 | 24  | 0    |
| 4 | 190879825 | 190879850 | 25  | 190879837 | 13 | 13  | 0    |
| 4 | 190880375 | 190880400 | 25  | 190880387 | 13 | 13  | 2.2  |
| 4 | 190884800 | 190884950 | 150 | 190884887 | 16 | 84  | 8.8  |
| 4 | 190886700 | 190886875 | 175 | 190886737 | 19 | 120 | 0    |
| 4 | 190898925 | 190899350 | 425 | 190898987 | 16 | 193 | 8.8  |
| 4 | 190916825 | 190916850 | 25  | 190916837 | 12 | 12  | 2.2  |
| 4 | 191098200 | 191098375 | 175 | 191098362 | 20 | 110 | 13.1 |
| 4 | 191178600 | 191178675 | 75  | 191178612 | 13 | 38  | 6.6  |
| 4 | 191179175 | 191179250 | 75  | 191179187 | 20 | 53  | 4.4  |
| 7 | 492625    | 492650    | 25  | 492637    | 12 | 12  | 0    |
| 7 | 590325    | 590450    | 125 | 590337    | 14 | 64  | 2.2  |
| 7 | 741425    | 741550    | 125 | 741437    | 13 | 64  | 0    |
| 7 | 1076925   | 1077100   | 175 | 1077037   | 15 | 89  | 0    |
| 7 | 1397825   | 1397875   | 50  | 1397837   | 13 | 26  | 0    |
| 7 | 1620675   | 1620700   | 25  | 1620687   | 12 | 12  | 2.2  |
| 7 | 1894675   | 1894825   | 150 | 1894737   | 13 | 72  | 0    |
| 7 | 1969750   | 1969825   | 75  | 1969762   | 12 | 35  | 2.2  |
| 7 | 2987375   | 2987400   | 25  | 2987387   | 12 | 12  | 0    |
| 7 | 16403450  | 16403525  | 75  | 16403462  | 13 | 36  | 0    |
| 7 | 16403750  | 16404325  | 575 | 16403887  | 21 | 336 | 0    |
| 7 | 16405775  | 16406225  | 450 | 16405812  | 15 | 228 | 17.5 |
| 7 | 22561825  | 22561875  | 50  | 22561862  | 13 | 25  | 0    |
| 7 | 22671300  | 22671325  | 25  | 22671312  | 12 | 12  | 0    |
| 7 | 28963400  | 28963600  | 200 | 28963512  | 18 | 120 | 13.1 |
| 7 | 30880775  | 30880850  | 75  | 30880787  | 13 | 38  | 0    |
| 7 | 32954725  | 32954775  | 50  | 32954737  | 13 | 25  | 0    |
| 7 | 43287325  | 43287375  | 50  | 43287337  | 13 | 25  | 0    |
| 7 | 43451475  | 43451550  | 75  | 43451487  | 12 | 36  | 0    |
| 7 | 43833025  | 43833075  | 50  | 43833037  | 12 | 24  | 0    |
| 7 | 43858250  | 43858300  | 50  | 43858262  | 13 | 26  | 0    |
| 7 | 43861450  | 43861500  | 50  | 43861462  | 12 | 24  | 0    |
| 7 | 44189775  | 44189800  | 25  | 44189787  | 12 | 12  | 0    |
| 7 | 47513850  | 47513925  | 75  | 47513862  | 12 | 36  | 0    |
| 7 | 48253175  | 48253250  | 75  | 48253187  | 12 | 36  | 6.6  |
| 7 | 50823650  | 50823775  | 125 | 50823737  | 13 | 61  | 0    |
| 7 | 55858700  | 55858825  | 125 | 55858737  | 14 | 68  | 0    |
| 7 | 57553400  | 57553600  | 200 | 57553487  | 15 | 106 | 17.5 |
| 7 | 61384400  | 61384425  | 25  | 61384412  | 12 | 12  | 0    |
| 7 | 63972800  | 63972900  | 100 | 63972862  | 14 | 52  | 0    |
| 7 | 63979725  | 63979825  | 100 | 63979737  | 13 | 50  | 0    |
| 7 | 64532075  | 64532175  | 100 | 64532137  | 14 | 51  | 0    |
| 7 | 65831125  | 65831200  | 75  | 65831137  | 14 | 39  | 6.6  |
| 7 | 66869425  | 66869450  | 25  | 66869437  | 12 | 12  | 0    |
| 7 | 66991475  | 66991625  | 150 | 66991487  | 15 | 78  | 6.6  |
| 7 | 69787600  | 69787625  | 25  | 69787612  | 12 | 12  | 0    |
| 7 | 71550800  | 71550875  | 75  | 71550812  | 12 | 36  | 0    |
| 7 | 71570250  | 71570275  | 25  | 71570262  | 14 | 14  | 2.2  |
| 7 | 72406250  | 72406300  | 50  | 72406262  | 12 | 24  | 4.4  |
| 7 | 72448525  | 72448600  | 75  | 72448537  | 12 | 35  | 0    |
| 7 | 72950025  | 72950175  | 150 | 72950112  | 16 | 91  | 13.1 |
| 7 | 82158375  | 82158400  | 25  | 82158387  | 12 | 12  | 2.2  |
| 7 | 85597850  | 85597900  | 50  | 85597862  | 12 | 24  | 2.2  |
| 7 | 86112250  | 86112275  | 25  | 86112262  | 12 | 12  | 0    |
| 7 | 87067550  | 87067700  | 150 | 87067587  | 15 | 81  | 0    |
| 7 | 89643900  | 89644025  | 125 | 89643962  | 15 | 66  | 10.9 |
| 7 | 89788650  | 89788750  | 100 | 89788662  | 13 | 50  | 0    |
| 7 | 89900600  | 89900700  | 100 | 89900612  | 14 | 53  | 8.8  |

|   |           |           |     |           |    |     |      |
|---|-----------|-----------|-----|-----------|----|-----|------|
| 7 | 89901100  | 89901275  | 175 | 89901112  | 13 | 87  | 2.2  |
| 7 | 90472375  | 90472400  | 25  | 90472387  | 13 | 13  | 2.2  |
| 7 | 90733600  | 90733725  | 125 | 90733662  | 14 | 61  | 6.6  |
| 7 | 91312300  | 91312350  | 50  | 91312337  | 13 | 25  | 0    |
| 7 | 92307725  | 92307800  | 75  | 92307762  | 13 | 37  | 0    |
| 7 | 92392150  | 92392400  | 250 | 92392262  | 17 | 140 | 0    |
| 7 | 92395150  | 92395275  | 125 | 92395187  | 13 | 62  | 0    |
| 7 | 92397000  | 92397100  | 100 | 92397062  | 14 | 50  | 0    |
| 7 | 92407175  | 92407200  | 25  | 92407187  | 12 | 12  | 0    |
| 7 | 92564750  | 92564800  | 50  | 92564762  | 13 | 25  | 0    |
| 7 | 92607375  | 92607400  | 25  | 92607387  | 12 | 12  | 0    |
| 7 | 93041600  | 93041625  | 25  | 93041612  | 12 | 12  | 2.2  |
| 7 | 93649450  | 93649475  | 25  | 93649462  | 12 | 12  | 0    |
| 7 | 94123800  | 94123825  | 25  | 94123812  | 12 | 12  | 2.2  |
| 7 | 94302400  | 94302500  | 100 | 94302437  | 13 | 50  | 0    |
| 7 | 94345700  | 94345800  | 100 | 94345712  | 14 | 51  | 4.4  |
| 7 | 95205825  | 95205875  | 50  | 95205837  | 12 | 24  | 0    |
| 7 | 95531200  | 95531275  | 75  | 95531212  | 13 | 37  | 6.6  |
| 7 | 96097425  | 96097450  | 25  | 96097437  | 12 | 12  | 2.2  |
| 7 | 96098450  | 96098500  | 50  | 96098462  | 12 | 24  | 0    |
| 7 | 96241775  | 96241925  | 150 | 96241837  | 13 | 74  | 13.1 |
| 7 | 96459975  | 96460000  | 25  | 96459987  | 12 | 12  | 2.2  |
| 7 | 97199975  | 97200075  | 100 | 97200012  | 14 | 50  | 0    |
| 7 | 97798050  | 97798075  | 25  | 97798062  | 12 | 12  | 2.2  |
| 7 | 98089725  | 98089900  | 175 | 98089812  | 18 | 111 | 0    |
| 7 | 98092100  | 98092450  | 350 | 98092262  | 20 | 221 | 0    |
| 7 | 98093850  | 98093900  | 50  | 98093862  | 14 | 28  | 0    |
| 7 | 98094225  | 98094300  | 75  | 98094287  | 13 | 36  | 4.4  |
| 7 | 98131750  | 98131825  | 75  | 98131812  | 13 | 37  | 0    |
| 7 | 98145475  | 98145500  | 25  | 98145487  | 12 | 12  | 2.2  |
| 7 | 98156600  | 98156675  | 75  | 98156612  | 13 | 39  | 6.6  |
| 7 | 98171425  | 98171475  | 50  | 98171437  | 12 | 24  | 4.4  |
| 7 | 98179025  | 98179175  | 150 | 98179137  | 16 | 80  | 6.6  |
| 7 | 98239125  | 98239250  | 125 | 98239162  | 16 | 72  | 0    |
| 7 | 98295975  | 98296100  | 125 | 98296037  | 14 | 64  | 0    |
| 7 | 98629000  | 98629025  | 25  | 98629012  | 12 | 12  | 0    |
| 7 | 98674625  | 98674675  | 50  | 98674662  | 13 | 25  | 2.2  |
| 7 | 98674975  | 98675050  | 75  | 98674987  | 12 | 36  | 6.6  |
| 7 | 98678850  | 98678875  | 25  | 98678862  | 13 | 13  | 0    |
| 7 | 98701225  | 98701425  | 200 | 98701237  | 15 | 108 | 6.6  |
| 7 | 98702425  | 98702550  | 125 | 98702487  | 13 | 61  | 8.8  |
| 7 | 98966925  | 98967325  | 400 | 98967012  | 28 | 355 | 52.5 |
| 7 | 98968550  | 98968575  | 25  | 98968562  | 12 | 12  | 2.2  |
| 7 | 98968950  | 98968975  | 25  | 98968962  | 12 | 12  | 0    |
| 7 | 98976275  | 98976350  | 75  | 98976287  | 15 | 43  | 2.2  |
| 7 | 99226050  | 99226075  | 25  | 99226062  | 12 | 12  | 0    |
| 7 | 99259750  | 99259875  | 125 | 99259762  | 16 | 71  | 0    |
| 7 | 99307850  | 99307950  | 100 | 99307862  | 14 | 55  | 0    |
| 7 | 99370250  | 99370425  | 175 | 99370312  | 14 | 87  | 2.2  |
| 7 | 99507150  | 99507175  | 25  | 99507162  | 15 | 15  | 2.2  |
| 7 | 100049000 | 100049025 | 25  | 100049012 | 13 | 13  | 0    |
| 7 | 100090500 | 100090625 | 125 | 100090512 | 14 | 65  | 0    |
| 7 | 100379650 | 100379850 | 200 | 100379737 | 16 | 115 | 2.2  |
| 7 | 100387800 | 100387975 | 175 | 100387887 | 15 | 91  | 6.6  |
| 7 | 100388275 | 100388525 | 250 | 100388287 | 13 | 107 | 2.2  |
| 7 | 100388925 | 100389100 | 175 | 100388937 | 57 | 320 | 24.1 |
| 7 | 100390700 | 100391000 | 300 | 100390962 | 14 | 137 | 13.1 |
| 7 | 100394425 | 100394650 | 225 | 100394562 | 18 | 134 | 2.2  |
| 7 | 100397325 | 100397350 | 25  | 100397337 | 12 | 12  | 2.2  |
| 7 | 100420825 | 100420875 | 50  | 100420837 | 12 | 24  | 4.4  |
| 7 | 100421175 | 100421375 | 200 | 100421262 | 18 | 116 | 0    |
| 7 | 100421675 | 100422250 | 575 | 100421862 | 19 | 336 | 21.9 |
| 7 | 100423875 | 100423925 | 50  | 100423912 | 13 | 25  | 0    |
| 7 | 100430300 | 100430325 | 25  | 100430312 | 15 | 15  | 0    |
| 7 | 100435350 | 100435400 | 50  | 100435387 | 14 | 27  | 0    |
| 7 | 100442825 | 100443100 | 275 | 100442912 | 14 | 122 | 13.1 |
| 7 | 100451875 | 100451900 | 25  | 100451887 | 12 | 12  | 0    |
| 7 | 100473600 | 100473675 | 75  | 100473612 | 12 | 36  | 0    |
| 7 | 100481000 | 100481075 | 75  | 100481012 | 12 | 36  | 6.6  |
| 7 | 100730325 | 100730525 | 200 | 100730512 | 14 | 95  | 0    |
| 7 | 100738425 | 100738525 | 100 | 100738437 | 15 | 57  | 0    |
| 7 | 100800975 | 100801025 | 50  | 100800987 | 12 | 24  | 0    |
| 7 | 100827000 | 100827025 | 25  | 100827012 | 12 | 12  | 0    |
| 7 | 100947200 | 100947325 | 125 | 100947237 | 14 | 65  | 0    |
| 7 | 100948325 | 100948400 | 75  | 100948337 | 14 | 38  | 6.6  |



|   |           |           |     |           |    |     |      |
|---|-----------|-----------|-----|-----------|----|-----|------|
| 7 | 100995075 | 100995125 | 50  | 100995087 | 12 | 24  | 0    |
| 7 | 101013150 | 101013250 | 100 | 101013187 | 13 | 49  | 0    |
| 7 | 101013575 | 101013700 | 125 | 101013587 | 14 | 62  | 0    |
| 7 | 101208325 | 101208425 | 100 | 101208337 | 13 | 51  | 0    |
| 7 | 102547675 | 102547725 | 50  | 102547687 | 12 | 24  | 4.4  |
| 7 | 102857425 | 102857500 | 75  | 102857462 | 13 | 37  | 0    |
| 7 | 102885100 | 102885175 | 75  | 102885112 | 14 | 37  | 6.6  |
| 7 | 102911325 | 102911450 | 125 | 102911337 | 15 | 71  | 0    |
| 7 | 102932200 | 102932225 | 25  | 102932212 | 12 | 12  | 2.2  |
| 7 | 102932475 | 102932500 | 25  | 102932487 | 14 | 14  | 2.2  |
| 7 | 103011550 | 103011575 | 25  | 103011562 | 13 | 13  | 0    |
| 7 | 103755600 | 103755625 | 25  | 103755612 | 12 | 12  | 0    |
| 7 | 103850800 | 103850875 | 75  | 103850812 | 13 | 39  | 0    |
| 7 | 104031925 | 104031950 | 25  | 104031937 | 13 | 13  | 0    |
| 7 | 104088775 | 104088900 | 125 | 104088787 | 13 | 62  | 2.2  |
| 7 | 104324325 | 104324400 | 75  | 104324387 | 13 | 37  | 6.6  |
| 7 | 104391750 | 104391775 | 25  | 104391762 | 12 | 12  | 2.2  |
| 7 | 105379925 | 105380100 | 175 | 105379962 | 14 | 92  | 0    |
| 7 | 105390050 | 105390250 | 200 | 105390112 | 16 | 110 | 13.1 |
| 7 | 105408975 | 105409075 | 100 | 105409037 | 13 | 48  | 4.4  |
| 7 | 105432275 | 105432300 | 25  | 105432287 | 13 | 13  | 2.2  |
| 7 | 105440900 | 105440925 | 25  | 105440912 | 12 | 12  | 0    |
| 7 | 105446425 | 105446450 | 25  | 105446437 | 13 | 13  | 2.2  |
| 7 | 105452075 | 105452400 | 325 | 105452162 | 14 | 164 | 2.2  |
| 7 | 105484675 | 105484700 | 25  | 105484687 | 12 | 12  | 0    |
| 7 | 105488700 | 105488775 | 75  | 105488712 | 13 | 37  | 0    |
| 7 | 105570600 | 105570625 | 25  | 105570612 | 12 | 12  | 0    |
| 7 | 105571200 | 105571325 | 125 | 105571212 | 13 | 64  | 0    |
| 7 | 105571850 | 105571875 | 25  | 105571862 | 12 | 12  | 2.2  |
| 7 | 105733350 | 105733450 | 100 | 105733362 | 12 | 48  | 2.2  |
| 7 | 105799475 | 105799575 | 100 | 105799487 | 14 | 53  | 2.2  |
| 7 | 105853300 | 105853350 | 50  | 105853312 | 13 | 26  | 4.4  |
| 7 | 106055425 | 106055500 | 75  | 106055437 | 12 | 36  | 6.6  |
| 7 | 106058775 | 106058800 | 25  | 106058787 | 12 | 12  | 0    |
| 7 | 106059550 | 106059600 | 50  | 106059562 | 13 | 26  | 0    |
| 7 | 106191575 | 106191625 | 50  | 106191587 | 12 | 24  | 4.4  |
| 7 | 106250275 | 106250350 | 75  | 106250287 | 13 | 36  | 0    |
| 7 | 106787600 | 106787925 | 325 | 106787762 | 20 | 206 | 17.5 |
| 7 | 107513725 | 107513775 | 50  | 107513737 | 12 | 24  | 0    |
| 7 | 108008150 | 108008275 | 125 | 108008262 | 18 | 78  | 0    |
| 7 | 108291275 | 108291350 | 75  | 108291287 | 15 | 42  | 0    |
| 7 | 108422225 | 108422375 | 150 | 108422312 | 13 | 73  | 2.2  |
| 7 | 109576050 | 109576150 | 100 | 109576137 | 14 | 50  | 0    |
| 7 | 110047725 | 110047800 | 75  | 110047737 | 14 | 40  | 0    |
| 7 | 111650575 | 111650650 | 75  | 111650587 | 14 | 40  | 0    |
| 7 | 112472800 | 112472875 | 75  | 112472862 | 15 | 41  | 0    |
| 7 | 112759200 | 112759250 | 50  | 112759212 | 12 | 24  | 0    |
| 7 | 112883850 | 112884025 | 175 | 112883987 | 16 | 95  | 0    |
| 7 | 115532950 | 115532975 | 25  | 115532962 | 13 | 13  | 0    |
| 7 | 116170175 | 116170300 | 125 | 116170237 | 15 | 66  | 0    |
| 7 | 116263625 | 116263675 | 50  | 116263637 | 12 | 24  | 0    |
| 7 | 116268900 | 116269000 | 100 | 116268987 | 13 | 48  | 8.8  |
| 7 | 116679250 | 116679325 | 75  | 116679262 | 12 | 36  | 0    |
| 7 | 116702300 | 116702375 | 75  | 116702362 | 14 | 38  | 2.2  |
| 7 | 116731175 | 116731300 | 125 | 116731187 | 12 | 57  | 0    |
| 7 | 116748000 | 116748025 | 25  | 116748012 | 13 | 13  | 0    |
| 7 | 116750075 | 116750350 | 275 | 116750212 | 22 | 180 | 0    |
| 7 | 116750775 | 116751050 | 275 | 116750787 | 16 | 147 | 8.8  |
| 7 | 116751275 | 116751300 | 25  | 116751287 | 13 | 13  | 2.2  |
| 7 | 116854550 | 116854600 | 50  | 116854562 | 12 | 24  | 0    |
| 7 | 116898075 | 116898225 | 150 | 116898212 | 14 | 79  | 8.8  |
| 7 | 117714025 | 117714075 | 50  | 117714037 | 12 | 24  | 0    |
| 7 | 119880575 | 119880600 | 25  | 119880587 | 12 | 12  | 0    |
| 7 | 120756025 | 120756225 | 200 | 120756087 | 17 | 114 | 6.6  |
| 7 | 120756875 | 120757125 | 250 | 120756962 | 20 | 148 | 0    |
| 7 | 122757700 | 122757725 | 25  | 122757712 | 12 | 12  | 2.2  |
| 7 | 123089675 | 123089800 | 125 | 123089687 | 15 | 67  | 6.6  |
| 7 | 123284650 | 123284750 | 100 | 123284662 | 13 | 47  | 6.6  |
| 7 | 124372375 | 124372750 | 375 | 124372387 | 13 | 168 | 0    |
| 7 | 125275525 | 125275550 | 25  | 125275537 | 12 | 12  | 2.2  |
| 7 | 125468950 | 125468975 | 25  | 125468962 | 12 | 12  | 2.2  |
| 7 | 126118600 | 126118725 | 125 | 126118612 | 14 | 64  | 0    |
| 7 | 126679125 | 126679250 | 125 | 126679162 | 14 | 64  | 0    |
| 7 | 126845300 | 126845325 | 25  | 126845312 | 12 | 12  | 2.2  |
| 7 | 127022750 | 127022825 | 75  | 127022762 | 17 | 51  | 0    |

|   |           |           |     |           |    |     |      |
|---|-----------|-----------|-----|-----------|----|-----|------|
| 7 | 127042425 | 127042525 | 100 | 127042437 | 14 | 52  | 0    |
| 7 | 127590450 | 127590550 | 100 | 127590462 | 13 | 52  | 8.8  |
| 7 | 127615775 | 127615875 | 100 | 127615837 | 13 | 49  | 0    |
| 7 | 127620175 | 127620200 | 25  | 127620187 | 12 | 12  | 2.2  |
| 7 | 127621875 | 127621925 | 50  | 127621887 | 14 | 27  | 4.4  |
| 7 | 127650175 | 127650250 | 75  | 127650237 | 13 | 36  | 0    |
| 7 | 127800850 | 127800875 | 25  | 127800862 | 12 | 12  | 0    |
| 7 | 128124775 | 128124800 | 25  | 128124787 | 12 | 12  | 0    |
| 7 | 128125550 | 128125700 | 150 | 128125562 | 12 | 67  | 13.1 |
| 7 | 128344625 | 128344700 | 75  | 128344637 | 14 | 40  | 0    |
| 7 | 128484175 | 128484200 | 25  | 128484187 | 12 | 12  | 0    |
| 7 | 128541575 | 128541625 | 50  | 128541587 | 12 | 24  | 0    |
| 7 | 128542475 | 128542600 | 125 | 128542537 | 19 | 81  | 6.6  |
| 7 | 128548625 | 128548825 | 200 | 128548712 | 14 | 102 | 0    |
| 7 | 128549175 | 128549375 | 200 | 128549312 | 17 | 119 | 0    |
| 7 | 128585125 | 128585150 | 25  | 128585137 | 12 | 12  | 2.2  |
| 7 | 128601650 | 128601675 | 25  | 128601662 | 12 | 12  | 2.2  |
| 7 | 129689775 | 129689825 | 50  | 129689787 | 12 | 24  | 4.4  |
| 7 | 129722400 | 129722450 | 50  | 129722412 | 13 | 26  | 0    |
| 7 | 129724425 | 129724550 | 125 | 129724437 | 13 | 61  | 10.9 |
| 7 | 129726975 | 129727000 | 25  | 129726987 | 12 | 12  | 2.2  |
| 7 | 129788500 | 129788550 | 50  | 129788512 | 12 | 24  | 4.4  |
| 7 | 129790200 | 129790475 | 275 | 129790337 | 16 | 136 | 2.2  |
| 7 | 129810675 | 129810825 | 150 | 129810687 | 14 | 74  | 13.1 |
| 7 | 129867475 | 129867750 | 275 | 129867637 | 24 | 196 | 24.1 |
| 7 | 130121850 | 130122000 | 150 | 130121987 | 14 | 73  | 0    |
| 7 | 130191525 | 130191550 | 25  | 130191537 | 12 | 12  | 2.2  |
| 7 | 130585250 | 130585275 | 25  | 130585262 | 12 | 12  | 0    |
| 7 | 130865000 | 130865075 | 75  | 130865037 | 13 | 38  | 0    |
| 7 | 130902625 | 130902650 | 25  | 130902637 | 12 | 12  | 0    |
| 7 | 130911275 | 130911400 | 125 | 130911337 | 15 | 69  | 13.1 |
| 7 | 130921775 | 130921850 | 75  | 130921787 | 12 | 36  | 4.4  |
| 7 | 130922275 | 130922675 | 400 | 130922337 | 15 | 190 | 0    |
| 7 | 130932425 | 130932475 | 50  | 130932437 | 12 | 24  | 4.4  |
| 7 | 130937325 | 130937800 | 475 | 130937387 | 14 | 222 | 0    |
| 7 | 130941125 | 130941150 | 25  | 130941137 | 12 | 12  | 0    |
| 7 | 130952700 | 130952800 | 100 | 130952712 | 13 | 48  | 8.8  |
| 7 | 130959650 | 130960050 | 400 | 130959812 | 16 | 215 | 19.7 |
| 7 | 130972375 | 130972400 | 25  | 130972387 | 12 | 12  | 0    |
| 7 | 130973875 | 130973900 | 25  | 130973887 | 12 | 12  | 2.2  |
| 7 | 130976250 | 130976375 | 125 | 130976262 | 13 | 63  | 10.9 |
| 7 | 131211450 | 131211475 | 25  | 131211462 | 12 | 12  | 2.2  |
| 7 | 131244175 | 131244300 | 125 | 131244262 | 14 | 65  | 8.8  |
| 7 | 131272750 | 131273050 | 300 | 131272862 | 14 | 152 | 8.8  |
| 7 | 131322125 | 131322250 | 125 | 131322187 | 13 | 62  | 0    |
| 7 | 131363975 | 131364050 | 75  | 131364012 | 13 | 37  | 0    |
| 7 | 131422225 | 131422250 | 25  | 131422237 | 12 | 12  | 2.2  |
| 7 | 131423025 | 131423175 | 150 | 131423112 | 13 | 74  | 0    |
| 7 | 131427775 | 131427875 | 100 | 131427837 | 15 | 54  | 8.8  |
| 7 | 131440225 | 131440250 | 25  | 131440237 | 12 | 12  | 0    |
| 7 | 131471425 | 131471500 | 75  | 131471462 | 15 | 41  | 0    |
| 7 | 131492450 | 131492650 | 200 | 131492562 | 15 | 111 | 0    |
| 7 | 131573175 | 131573225 | 50  | 131573187 | 13 | 26  | 0    |
| 7 | 131573750 | 131573775 | 25  | 131573762 | 12 | 12  | 2.2  |
| 7 | 131596800 | 131596825 | 25  | 131596812 | 13 | 13  | 2.2  |
| 7 | 131598675 | 131598700 | 25  | 131598687 | 12 | 12  | 0    |
| 7 | 131601050 | 131601125 | 75  | 131601062 | 12 | 36  | 0    |
| 7 | 131661050 | 131661150 | 100 | 131661062 | 12 | 46  | 0    |
| 7 | 131687750 | 131687775 | 25  | 131687762 | 13 | 13  | 2.2  |
| 7 | 131706150 | 131706225 | 75  | 131706212 | 13 | 36  | 0    |
| 7 | 131738725 | 131738775 | 50  | 131738737 | 14 | 27  | 4.4  |
| 7 | 131745600 | 131745700 | 100 | 131745612 | 14 | 53  | 0    |
| 7 | 131787800 | 131787850 | 50  | 131787812 | 12 | 24  | 2.2  |
| 7 | 131790200 | 131790350 | 150 | 131790312 | 14 | 71  | 0    |
| 7 | 131802525 | 131802550 | 25  | 131802537 | 12 | 12  | 0    |
| 7 | 131885525 | 131885550 | 25  | 131885537 | 12 | 12  | 0    |
| 7 | 131886025 | 131886050 | 25  | 131886037 | 13 | 13  | 0    |
| 7 | 131951425 | 131951500 | 75  | 131951437 | 13 | 38  | 0    |
| 7 | 132062350 | 132062375 | 25  | 132062362 | 12 | 12  | 0    |
| 7 | 132102125 | 132102225 | 100 | 132102137 | 13 | 49  | 0    |
| 7 | 132464625 | 132464650 | 25  | 132464637 | 12 | 12  | 2.2  |
| 7 | 132490625 | 132490650 | 25  | 132490637 | 15 | 15  | 2.2  |
| 7 | 133204425 | 133204450 | 25  | 133204437 | 12 | 12  | 2.2  |
| 7 | 133291000 | 133291150 | 150 | 133291037 | 15 | 81  | 0    |
| 7 | 133497425 | 133497450 | 25  | 133497437 | 12 | 12  | 0    |

|   |           |           |     |           |    |     |      |
|---|-----------|-----------|-----|-----------|----|-----|------|
| 7 | 133502775 | 133502975 | 200 | 133502887 | 17 | 121 | 24.1 |
| 7 | 133680900 | 133680925 | 25  | 133680912 | 13 | 13  | 0    |
| 7 | 133710075 | 133710200 | 125 | 133710162 | 15 | 69  | 0    |
| 7 | 133736225 | 133736300 | 75  | 133736237 | 13 | 39  | 4.4  |
| 7 | 133741675 | 133741700 | 25  | 133741687 | 12 | 12  | 0    |
| 7 | 133864250 | 133864275 | 25  | 133864262 | 12 | 12  | 0    |
| 7 | 133901550 | 133901675 | 125 | 133901587 | 14 | 66  | 0    |
| 7 | 134310700 | 134310875 | 175 | 134310762 | 16 | 105 | 13.1 |
| 7 | 134444650 | 134444675 | 25  | 134444662 | 12 | 12  | 2.2  |
| 7 | 134583125 | 134583225 | 100 | 134583162 | 14 | 52  | 6.6  |
| 7 | 134585325 | 134585350 | 25  | 134585337 | 12 | 12  | 2.2  |
| 7 | 134652100 | 134652200 | 100 | 134652112 | 13 | 50  | 0    |
| 7 | 134664800 | 134664850 | 50  | 134664837 | 13 | 25  | 4.4  |
| 7 | 135041450 | 135041625 | 175 | 135041487 | 15 | 92  | 15.3 |
| 7 | 135256025 | 135256050 | 25  | 135256037 | 12 | 12  | 0    |
| 7 | 135334525 | 135334650 | 125 | 135334587 | 15 | 71  | 0    |
| 7 | 135534775 | 135534825 | 50  | 135534787 | 12 | 24  | 0    |
| 7 | 135862050 | 135862075 | 25  | 135862062 | 12 | 12  | 0    |
| 7 | 136702925 | 136703000 | 75  | 136702937 | 12 | 36  | 0    |
| 7 | 137776275 | 137776625 | 350 | 137776387 | 17 | 201 | 0    |
| 7 | 137777450 | 137777550 | 100 | 137777462 | 13 | 50  | 0    |
| 7 | 137999575 | 137999600 | 25  | 137999587 | 12 | 12  | 2.2  |
| 7 | 138085950 | 138085975 | 25  | 138085962 | 13 | 13  | 2.2  |
| 7 | 138138150 | 138138225 | 75  | 138138162 | 13 | 37  | 0    |
| 7 | 138196450 | 138196500 | 50  | 138196462 | 12 | 24  | 4.4  |
| 7 | 138249775 | 138249850 | 75  | 138249837 | 13 | 37  | 2.2  |
| 7 | 138251175 | 138251275 | 100 | 138251187 | 17 | 64  | 8.8  |
| 7 | 138252100 | 138252425 | 325 | 138252162 | 14 | 166 | 6.6  |
| 7 | 138268175 | 138268400 | 225 | 138268312 | 25 | 171 | 28.4 |
| 7 | 138283600 | 138283625 | 25  | 138283612 | 12 | 12  | 2.2  |
| 7 | 138286675 | 138286700 | 25  | 138286687 | 13 | 13  | 2.2  |
| 7 | 138831525 | 138831550 | 25  | 138831537 | 13 | 13  | 2.2  |
| 7 | 138860175 | 138860375 | 200 | 138860237 | 15 | 95  | 0    |
| 7 | 138861275 | 138861300 | 25  | 138861287 | 13 | 13  | 2.2  |
| 7 | 138864800 | 138864825 | 25  | 138864812 | 12 | 12  | 2.2  |
| 7 | 138877675 | 138877825 | 150 | 138877787 | 16 | 90  | 6.6  |
| 7 | 138879175 | 138879275 | 100 | 138879212 | 15 | 54  | 8.8  |
| 7 | 139163050 | 139163200 | 150 | 139163087 | 13 | 77  | 2.2  |
| 7 | 139163425 | 139163450 | 25  | 139163437 | 12 | 12  | 0    |
| 7 | 139204850 | 139204950 | 100 | 139204912 | 13 | 49  | 0    |
| 7 | 139321775 | 139321875 | 100 | 139321787 | 12 | 48  | 0    |
| 7 | 139577350 | 139577475 | 125 | 139577362 | 12 | 56  | 0    |
| 7 | 139879800 | 139879900 | 100 | 139879812 | 12 | 47  | 4.4  |
| 7 | 140454850 | 140454875 | 25  | 140454862 | 12 | 12  | 0    |
| 7 | 140573975 | 140574000 | 25  | 140573987 | 12 | 12  | 0    |
| 7 | 140612200 | 140612250 | 50  | 140612212 | 13 | 26  | 0    |
| 7 | 140685550 | 140685575 | 25  | 140685562 | 12 | 12  | 0    |
| 7 | 140718550 | 140718625 | 75  | 140718562 | 14 | 41  | 0    |
| 7 | 140734100 | 140734325 | 225 | 140734137 | 21 | 162 | 2.2  |
| 7 | 140790925 | 140791025 | 100 | 140790937 | 13 | 51  | 0    |
| 7 | 140824600 | 140824625 | 25  | 140824612 | 12 | 12  | 0    |
| 7 | 140858400 | 140858475 | 75  | 140858412 | 17 | 42  | 2.2  |
| 7 | 141055325 | 141055375 | 50  | 141055337 | 12 | 24  | 0    |
| 7 | 141658900 | 141659025 | 125 | 141658962 | 14 | 66  | 6.6  |
| 7 | 141720825 | 141720850 | 25  | 141720837 | 12 | 12  | 0    |
| 7 | 141879000 | 141879050 | 50  | 141879037 | 13 | 25  | 4.4  |
| 7 | 142356000 | 142356050 | 50  | 142356012 | 12 | 24  | 2.2  |
| 7 | 142361600 | 142361700 | 100 | 142361612 | 14 | 55  | 0    |
| 7 | 142459850 | 142459925 | 75  | 142459862 | 12 | 36  | 6.6  |
| 7 | 142469925 | 142470200 | 275 | 142469962 | 18 | 153 | 19.7 |
| 7 | 142476400 | 142476425 | 25  | 142476412 | 12 | 12  | 0    |
| 7 | 142644950 | 142645075 | 125 | 142644962 | 15 | 64  | 4.4  |
| 7 | 142749225 | 142749250 | 25  | 142749237 | 12 | 12  | 0    |
| 7 | 142757675 | 142757700 | 25  | 142757687 | 12 | 12  | 2.2  |
| 7 | 142762475 | 142762575 | 100 | 142762512 | 13 | 49  | 0    |
| 7 | 142763375 | 142763400 | 25  | 142763387 | 12 | 12  | 2.2  |
| 7 | 142770375 | 142770400 | 25  | 142770387 | 12 | 12  | 0    |
| 7 | 142804900 | 142804925 | 25  | 142804912 | 12 | 12  | 0    |
| 7 | 142812550 | 142812575 | 25  | 142812562 | 12 | 12  | 2.2  |
| 7 | 142829400 | 142829500 | 100 | 142829412 | 13 | 51  | 8.8  |
| 7 | 143309600 | 143309675 | 75  | 143309612 | 13 | 37  | 6.6  |
| 7 | 144652275 | 144652400 | 125 | 144652337 | 15 | 68  | 0    |
| 7 | 147472400 | 147472475 | 75  | 147472437 | 13 | 38  | 0    |
| 7 | 147659625 | 147659675 | 50  | 147659637 | 18 | 34  | 2.2  |
| 7 | 147970825 | 147970850 | 25  | 147970837 | 12 | 12  | 0    |

|   |           |           |     |           |    |     |      |
|---|-----------|-----------|-----|-----------|----|-----|------|
| 7 | 148687250 | 148687275 | 25  | 148687262 | 12 | 12  | 0    |
| 7 | 148724100 | 148724150 | 50  | 148724112 | 12 | 24  | 0    |
| 7 | 148732200 | 148732225 | 25  | 148732212 | 12 | 12  | 0    |
| 7 | 148836325 | 148836350 | 25  | 148836337 | 12 | 12  | 0    |
| 7 | 149028825 | 149028900 | 75  | 149028862 | 16 | 45  | 0    |
| 7 | 149331550 | 149331725 | 175 | 149331587 | 13 | 86  | 0    |
| 7 | 149486875 | 149487025 | 150 | 149486962 | 16 | 84  | 10.9 |
| 7 | 149532775 | 149532875 | 100 | 149532787 | 13 | 50  | 0    |
| 7 | 149804950 | 149805275 | 325 | 149805087 | 13 | 152 | 0    |
| 7 | 149848200 | 149848250 | 50  | 149848212 | 12 | 24  | 0    |
| 7 | 150048150 | 150048175 | 25  | 150048162 | 12 | 12  | 2.2  |
| 7 | 150177475 | 150177500 | 25  | 150177487 | 12 | 12  | 2.2  |
| 7 | 150627475 | 150627950 | 475 | 150627587 | 18 | 238 | 0    |
| 7 | 150745200 | 150745275 | 75  | 150745262 | 13 | 37  | 6.6  |
| 7 | 150755600 | 150755625 | 25  | 150755612 | 12 | 12  | 0    |
| 7 | 150792125 | 150792250 | 125 | 150792137 | 13 | 62  | 6.6  |
| 7 | 150795600 | 150795675 | 75  | 150795637 | 13 | 37  | 6.6  |
| 7 | 151286450 | 151286600 | 150 | 151286487 | 13 | 71  | 8.8  |
| 7 | 152336250 | 152336275 | 25  | 152336262 | 12 | 12  | 0    |
| 7 | 152347500 | 152347625 | 125 | 152347562 | 13 | 62  | 0    |
| 7 | 152919075 | 152919100 | 25  | 152919087 | 12 | 12  | 0    |
| 7 | 152967325 | 152967425 | 100 | 152967337 | 12 | 46  | 0    |
| 7 | 152998150 | 152998325 | 175 | 152998162 | 15 | 97  | 13.1 |
| 7 | 153136225 | 153136400 | 175 | 153136287 | 18 | 111 | 0    |
| 7 | 154015175 | 154015225 | 50  | 154015212 | 14 | 26  | 2.2  |
| 7 | 154312450 | 154312525 | 75  | 154312462 | 12 | 36  | 0    |
| 7 | 154333775 | 154333825 | 50  | 154333787 | 15 | 30  | 4.4  |
| 7 | 154494075 | 154494100 | 25  | 154494087 | 13 | 13  | 0    |
| 7 | 154504750 | 154504875 | 125 | 154504762 | 14 | 63  | 0    |
| 7 | 154506775 | 154507025 | 250 | 154506912 | 19 | 161 | 0    |
| 7 | 154517950 | 154518075 | 125 | 154517962 | 13 | 60  | 0    |
| 7 | 154529150 | 154529175 | 25  | 154529162 | 12 | 12  | 2.2  |
| 7 | 154547575 | 154547625 | 50  | 154547587 | 12 | 24  | 0    |
| 7 | 154548175 | 154548350 | 175 | 154548262 | 15 | 95  | 6.6  |
| 7 | 154553350 | 154553375 | 25  | 154553362 | 12 | 12  | 0    |
| 7 | 154576600 | 154576750 | 150 | 154576662 | 13 | 72  | 0    |
| 7 | 154577450 | 154577500 | 50  | 154577462 | 14 | 27  | 4.4  |
| 7 | 154621225 | 154621375 | 150 | 154621237 | 14 | 78  | 0    |
| 7 | 154628625 | 154628650 | 25  | 154628637 | 12 | 12  | 2.2  |
| 7 | 154637350 | 154637375 | 25  | 154637362 | 12 | 12  | 0    |
| 7 | 154695700 | 154695850 | 150 | 154695712 | 14 | 80  | 0    |
| 7 | 154860275 | 154860300 | 25  | 154860287 | 12 | 12  | 0    |
| 7 | 154885200 | 154885275 | 75  | 154885212 | 16 | 45  | 6.6  |
| 7 | 154887525 | 154887725 | 200 | 154887587 | 15 | 100 | 6.6  |
| 7 | 154913425 | 154913475 | 50  | 154913437 | 12 | 24  | 0    |
| 7 | 155000525 | 155000550 | 25  | 155000537 | 12 | 12  | 0    |
| 7 | 155001900 | 155001950 | 50  | 155001912 | 13 | 26  | 4.4  |
| 7 | 155002225 | 155002375 | 150 | 155002287 | 19 | 103 | 0    |
| 7 | 155039800 | 155039825 | 25  | 155039812 | 12 | 12  | 0    |
| 7 | 155305800 | 155305925 | 125 | 155305912 | 14 | 61  | 2.2  |
| 7 | 155367525 | 155367550 | 25  | 155367537 | 12 | 12  | 2.2  |
| 7 | 155372075 | 155372225 | 150 | 155372162 | 15 | 81  | 0    |
| 7 | 155383525 | 155383600 | 75  | 155383537 | 13 | 38  | 0    |
| 7 | 155385700 | 155385750 | 50  | 155385712 | 13 | 25  | 4.4  |
| 7 | 155386950 | 155386975 | 25  | 155386962 | 12 | 12  | 0    |
| 7 | 155388925 | 155389075 | 150 | 155388987 | 16 | 82  | 10.9 |
| 7 | 155389525 | 155389675 | 150 | 155389587 | 14 | 79  | 0    |
| 7 | 155395250 | 155395300 | 50  | 155395262 | 13 | 26  | 4.4  |
| 7 | 155395700 | 155395825 | 125 | 155395737 | 14 | 66  | 4.4  |
| 7 | 155431400 | 155431425 | 25  | 155431412 | 12 | 12  | 0    |
| 7 | 155440200 | 155440400 | 200 | 155440237 | 16 | 116 | 0    |
| 7 | 155479600 | 155479625 | 25  | 155479612 | 12 | 12  | 0    |
| 7 | 155480925 | 155481000 | 75  | 155480962 | 13 | 37  | 0    |
| 7 | 155499775 | 155499800 | 25  | 155499787 | 12 | 12  | 0    |
| 7 | 155515275 | 155515300 | 25  | 155515287 | 14 | 14  | 0    |
| 7 | 155529425 | 155529650 | 225 | 155529512 | 16 | 121 | 10.9 |
| 7 | 155541825 | 155541900 | 75  | 155541887 | 14 | 39  | 2.2  |
| 7 | 155544325 | 155544400 | 75  | 155544337 | 14 | 40  | 0    |
| 7 | 155546200 | 155546400 | 200 | 155546362 | 16 | 109 | 0    |
| 7 | 155546825 | 155546925 | 100 | 155546837 | 14 | 50  | 0    |
| 7 | 155547500 | 155547575 | 75  | 155547512 | 17 | 47  | 2.2  |
| 7 | 155547900 | 155547925 | 25  | 155547912 | 12 | 12  | 2.2  |
| 7 | 155552600 | 155552850 | 250 | 155552662 | 14 | 123 | 0    |
| 7 | 155574700 | 155574775 | 75  | 155574762 | 15 | 41  | 0    |
| 7 | 155577800 | 155577950 | 150 | 155577837 | 14 | 77  | 0    |

|   |           |           |     |           |    |     |      |
|---|-----------|-----------|-----|-----------|----|-----|------|
| 7 | 155584450 | 155584600 | 150 | 155584462 | 13 | 77  | 0    |
| 7 | 155628900 | 155628950 | 50  | 155628912 | 13 | 26  | 0    |
| 7 | 155817075 | 155817100 | 25  | 155817087 | 12 | 12  | 0    |
| 7 | 155851000 | 155851025 | 25  | 155851012 | 13 | 13  | 0    |
| 7 | 155963850 | 155964025 | 175 | 155963937 | 15 | 89  | 6.6  |
| 7 | 155966775 | 155966800 | 25  | 155966787 | 12 | 12  | 0    |
| 7 | 156064300 | 156064375 | 75  | 156064362 | 13 | 37  | 0    |
| 7 | 156125025 | 156125175 | 150 | 156125137 | 14 | 78  | 0    |
| 7 | 156426950 | 156427150 | 200 | 156427112 | 13 | 93  | 0    |
| 7 | 156430400 | 156430425 | 25  | 156430412 | 12 | 12  | 0    |
| 7 | 156542425 | 156542450 | 25  | 156542437 | 12 | 12  | 2.2  |
| 7 | 156557700 | 156557750 | 50  | 156557712 | 12 | 24  | 2.2  |
| 7 | 156562550 | 156562750 | 200 | 156562612 | 13 | 97  | 4.4  |
| 7 | 156576175 | 156576400 | 225 | 156576212 | 19 | 150 | 6.6  |
| 7 | 156593550 | 156593575 | 25  | 156593562 | 12 | 12  | 0    |
| 7 | 156595775 | 156595850 | 75  | 156595787 | 14 | 40  | 6.6  |
| 7 | 156605850 | 156605950 | 100 | 156605937 | 14 | 52  | 0    |
| 7 | 156943450 | 156943475 | 25  | 156943462 | 13 | 13  | 0    |
| 7 | 156957100 | 156957125 | 25  | 156957112 | 14 | 14  | 0    |
| 7 | 156991775 | 156991850 | 75  | 156991787 | 13 | 38  | 4.4  |
| 7 | 157023150 | 157023175 | 25  | 157023162 | 12 | 12  | 0    |
| 7 | 157025550 | 157025600 | 50  | 157025587 | 13 | 25  | 2.2  |
| 7 | 157033750 | 157033900 | 150 | 157033787 | 14 | 76  | 8.8  |
| 7 | 157048125 | 157048150 | 25  | 157048137 | 12 | 12  | 0    |
| 7 | 157058625 | 157058675 | 50  | 157058637 | 13 | 26  | 0    |
| 7 | 157070900 | 157071200 | 300 | 157071037 | 15 | 144 | 6.6  |
| 7 | 157078050 | 157078225 | 175 | 157078137 | 14 | 91  | 0    |
| 7 | 157087850 | 157088075 | 225 | 157087912 | 17 | 120 | 13.1 |
| 7 | 157091750 | 157091775 | 25  | 157091762 | 12 | 12  | 2.2  |
| 7 | 157105400 | 157105425 | 25  | 157105412 | 12 | 12  | 0    |
| 7 | 157120450 | 157120500 | 50  | 157120462 | 13 | 25  | 4.4  |
| 7 | 157124300 | 157124350 | 50  | 157124337 | 13 | 25  | 0    |
| 7 | 157129150 | 157129325 | 175 | 157129162 | 14 | 97  | 0    |
| 7 | 157186375 | 157186475 | 100 | 157186412 | 14 | 52  | 0    |
| 7 | 157201100 | 157201525 | 425 | 157201487 | 18 | 233 | 28.4 |
| 7 | 157292750 | 157292775 | 25  | 157292762 | 12 | 12  | 2.2  |
| 7 | 157325425 | 157325875 | 450 | 157325587 | 24 | 313 | 10.9 |
| 7 | 157330850 | 157330875 | 25  | 157330862 | 12 | 12  | 0    |
| 7 | 157334750 | 157334825 | 75  | 157334787 | 19 | 53  | 6.6  |
| 7 | 157386525 | 157386600 | 75  | 157386537 | 13 | 38  | 0    |
| 7 | 157422125 | 157422150 | 25  | 157422137 | 12 | 12  | 0    |
| 7 | 157430575 | 157430625 | 50  | 157430587 | 13 | 25  | 0    |
| 7 | 157633150 | 157633325 | 175 | 157633162 | 16 | 112 | 4.4  |
| 7 | 157634525 | 157634550 | 25  | 157634537 | 13 | 13  | 2.2  |
| 7 | 157635800 | 157635900 | 100 | 157635812 | 12 | 48  | 0    |
| 7 | 157636875 | 157636900 | 25  | 157636887 | 14 | 14  | 2.2  |
| 7 | 157661425 | 157661450 | 25  | 157661437 | 13 | 13  | 2.2  |
| 7 | 157744475 | 157744600 | 125 | 157744487 | 12 | 55  | 8.8  |
| 7 | 157762675 | 157762700 | 25  | 157762687 | 12 | 12  | 0    |
| 7 | 157811650 | 157811675 | 25  | 157811662 | 12 | 12  | 0    |
| 7 | 157852600 | 157852675 | 75  | 157852612 | 13 | 37  | 0    |
| 7 | 157903200 | 157903325 | 125 | 157903262 | 13 | 63  | 0    |
| 7 | 157903850 | 157904000 | 150 | 157903937 | 14 | 80  | 0    |
| 7 | 157904950 | 157904975 | 25  | 157904962 | 12 | 12  | 0    |
| 7 | 157916775 | 157917075 | 300 | 157916912 | 17 | 166 | 0    |
| 7 | 157933400 | 157933475 | 75  | 157933462 | 13 | 37  | 0    |
| 7 | 157944550 | 157944575 | 25  | 157944562 | 12 | 12  | 0    |
| 7 | 157963450 | 157963775 | 325 | 157963637 | 19 | 194 | 0    |
| 7 | 157965075 | 157965225 | 150 | 157965187 | 16 | 86  | 8.8  |
| 7 | 157991450 | 157991625 | 175 | 157991512 | 14 | 90  | 4.4  |
| 7 | 157997075 | 157997175 | 100 | 157997137 | 13 | 49  | 0    |
| 7 | 158047300 | 158047400 | 100 | 158047312 | 14 | 52  | 0    |
| 7 | 158450075 | 158450275 | 200 | 158450162 | 16 | 116 | 0    |
| 7 | 158465675 | 158465725 | 50  | 158465712 | 14 | 26  | 0    |
| 7 | 158478175 | 158478300 | 125 | 158478187 | 14 | 69  | 0    |
| 7 | 158487425 | 158487500 | 75  | 158487487 | 13 | 36  | 6.6  |
| 7 | 158598225 | 158598325 | 100 | 158598237 | 12 | 48  | 0    |
| 7 | 158697300 | 158697350 | 50  | 158697312 | 12 | 24  | 0    |
| 6 | 288650    | 288675    | 25  | 288662    | 12 | 12  | 2.2  |
| 6 | 308975    | 309025    | 50  | 309012    | 14 | 26  | 0    |
| 6 | 1196225   | 1196425   | 200 | 1196337   | 16 | 108 | 0    |
| 6 | 1258325   | 1258450   | 125 | 1258362   | 14 | 65  | 8.8  |
| 6 | 1654725   | 1654850   | 125 | 1654762   | 14 | 62  | 0    |
| 6 | 7654475   | 7654550   | 75  | 7654512   | 15 | 42  | 2.2  |
| 6 | 7921925   | 7921950   | 25  | 7921937   | 12 | 12  | 0    |

|   |           |           |      |           |    |     |       |
|---|-----------|-----------|------|-----------|----|-----|-------|
| 6 | 14912075  | 14912375  | 300  | 14912137  | 16 | 170 | 17.5  |
| 6 | 15979575  | 15979625  | 50   | 15979587  | 13 | 25  | 0     |
| 6 | 15991250  | 15991275  | 25   | 15991262  | 12 | 12  | 0     |
| 6 | 29623025  | 29623100  | 75   | 29623037  | 12 | 36  | 0     |
| 6 | 31040000  | 31040075  | 75   | 31040037  | 15 | 41  | 6.6   |
| 6 | 33976375  | 33976450  | 75   | 33976387  | 13 | 38  | 0     |
| 6 | 47755000  | 47755025  | 25   | 47755012  | 12 | 12  | 0     |
| 6 | 57662775  | 57662800  | 25   | 57662787  | 12 | 12  | 0     |
| 6 | 73923300  | 73923350  | 50   | 73923312  | 12 | 24  | 0     |
| 6 | 80531775  | 80531825  | 50   | 80531812  | 14 | 26  | 0     |
| 6 | 88911300  | 88911400  | 100  | 88911312  | 13 | 49  | 0     |
| 6 | 91715200  | 91715225  | 25   | 91715212  | 12 | 12  | 0     |
| 6 | 94186300  | 94186325  | 25   | 94186312  | 12 | 12  | 2.2   |
| 6 | 137856625 | 137856775 | 150  | 137856637 | 15 | 84  | 0     |
| 6 | 150327125 | 150327850 | 725  | 150327237 | 18 | 424 | 52.5  |
| 6 | 150328425 | 150328575 | 150  | 150328437 | 15 | 78  | 0     |
| 6 | 150415900 | 150416000 | 100  | 150415962 | 15 | 54  | 2.2   |
| 6 | 151857550 | 151857675 | 125  | 151857562 | 13 | 61  | 0     |
| 6 | 166255225 | 166255275 | 50   | 166255262 | 14 | 26  | 4.4   |
| 6 | 166501925 | 166502000 | 75   | 166501987 | 13 | 37  | 0     |
| 6 | 166981475 | 166981650 | 175  | 166981512 | 13 | 80  | 0     |
| 6 | 166989325 | 166989350 | 25   | 166989337 | 13 | 13  | 0     |
| 6 | 167059250 | 167059350 | 100  | 167059312 | 15 | 55  | 8.8   |
| 6 | 167232325 | 167232400 | 75   | 167232337 | 12 | 36  | 0     |
| 6 | 167433800 | 167433875 | 75   | 167433812 | 12 | 36  | 4.4   |
| 6 | 167478125 | 167478300 | 175  | 167478187 | 15 | 98  | 4.4   |
| 6 | 167568675 | 167568775 | 100  | 167568712 | 15 | 53  | 0     |
| 6 | 167856350 | 167856475 | 125  | 167856412 | 13 | 61  | 10.9  |
| 6 | 167910925 | 167910950 | 25   | 167910937 | 12 | 12  | 2.2   |
| 6 | 167911475 | 167911525 | 50   | 167911487 | 12 | 24  | 0     |
| 6 | 168148150 | 168148325 | 175  | 168148287 | 21 | 119 | 4.4   |
| 6 | 168148600 | 168148775 | 175  | 168148737 | 18 | 102 | 2.2   |
| 6 | 168156000 | 168156400 | 400  | 168156087 | 16 | 223 | 17.5  |
| 6 | 168156650 | 168157375 | 725  | 168157062 | 19 | 396 | 17.5  |
| 6 | 168159775 | 168159900 | 125  | 168159837 | 13 | 63  | 10.9  |
| 6 | 168178800 | 168178825 | 25   | 168178812 | 12 | 12  | 2.2   |
| 6 | 168182175 | 168182325 | 150  | 168182262 | 16 | 83  | 0     |
| 6 | 168183525 | 168183650 | 125  | 168183637 | 14 | 64  | 0     |
| 6 | 169598975 | 169599000 | 25   | 169598987 | 12 | 12  | 2.2   |
| 6 | 169766150 | 169766175 | 25   | 169766162 | 12 | 12  | 0     |
| 6 | 170248700 | 170248750 | 50   | 170248712 | 12 | 24  | 4.4   |
| 6 | 170248975 | 170250250 | 1275 | 170249512 | 22 | 773 | 65.6  |
| 6 | 170250525 | 170250550 | 25   | 170250537 | 12 | 12  | 0     |
| 6 | 170250825 | 170250925 | 100  | 170250862 | 14 | 54  | 0     |
| 6 | 170251175 | 170251525 | 350  | 170251362 | 20 | 223 | 4.4   |
| 6 | 170255100 | 170255125 | 25   | 170255112 | 12 | 12  | 0     |
| 6 | 170382250 | 170382275 | 25   | 170382262 | 12 | 12  | 0     |
| 9 | 37026650  | 37026825  | 175  | 37026737  | 18 | 111 | 0     |
| 9 | 44815975  | 44816000  | 25   | 44815987  | 14 | 14  | 2.2   |
| 9 | 44818475  | 44818525  | 50   | 44818487  | 12 | 24  | 0     |
| 9 | 44820075  | 44820125  | 50   | 44820087  | 15 | 29  | 0     |
| 9 | 44933000  | 44933175  | 175  | 44933037  | 23 | 148 | 15.3  |
| 9 | 66194575  | 66194775  | 200  | 66194712  | 16 | 111 | 13.1  |
| 9 | 66195200  | 66195250  | 50   | 66195212  | 12 | 24  | 4.4   |
| 9 | 66196125  | 66196150  | 25   | 66196137  | 16 | 16  | 0     |
| 9 | 66196425  | 66196450  | 25   | 66196437  | 12 | 12  | 0     |
| 9 | 66196925  | 66196975  | 50   | 66196937  | 13 | 25  | 4.4   |
| 9 | 66203125  | 66203225  | 100  | 66203212  | 16 | 55  | 0     |
| 9 | 66210825  | 66211025  | 200  | 66211012  | 17 | 99  | 17.5  |
| 9 | 66256650  | 66256675  | 25   | 66256662  | 13 | 13  | 0     |
| 9 | 66577400  | 66577450  | 50   | 66577412  | 13 | 25  | 4.4   |
| 9 | 66599875  | 66599900  | 25   | 66599887  | 14 | 14  | 2.2   |
| 9 | 67893525  | 67893600  | 75   | 67893537  | 14 | 40  | 6.6   |
| 9 | 67902500  | 67902575  | 75   | 67902512  | 20 | 49  | 6.6   |
| 9 | 67903475  | 67903650  | 175  | 67903587  | 36 | 201 | 26.3  |
| 9 | 67908575  | 67908850  | 275  | 67908612  | 35 | 291 | 48.1  |
| 9 | 67909100  | 67909375  | 275  | 67909262  | 32 | 279 | 15.3  |
| 9 | 67911150  | 67911225  | 75   | 67911187  | 13 | 37  | 4.4   |
| 9 | 67913700  | 67914750  | 1050 | 67913837  | 34 | 996 | 109.4 |
| 9 | 67916100  | 67916750  | 650  | 67916112  | 35 | 523 | 37.2  |
| 9 | 88889050  | 88889150  | 100  | 88889087  | 15 | 55  | 2.2   |
| 9 | 91329825  | 91329950  | 125  | 91329837  | 12 | 60  | 0     |
| 9 | 91331800  | 91332075  | 275  | 91331912  | 23 | 195 | 0     |
| 9 | 91336650  | 91336675  | 25   | 91336662  | 12 | 12  | 2.2   |
| 9 | 91339650  | 91339775  | 125  | 91339712  | 14 | 65  | 0     |

|   |           |           |     |           |    |     |      |
|---|-----------|-----------|-----|-----------|----|-----|------|
| 9 | 93509150  | 93509225  | 75  | 93509162  | 12 | 35  | 0    |
| 9 | 93974950  | 93975125  | 175 | 93975062  | 15 | 90  | 15.3 |
| 9 | 94600525  | 94600575  | 50  | 94600537  | 12 | 24  | 0    |
| 9 | 95222250  | 95222350  | 100 | 95222262  | 12 | 47  | 0    |
| 9 | 96885675  | 96885700  | 25  | 96885687  | 12 | 12  | 0    |
| 9 | 97480825  | 97480850  | 25  | 97480837  | 12 | 12  | 0    |
| 9 | 99650800  | 99650925  | 125 | 99650862  | 14 | 67  | 0    |
| 9 | 100426275 | 100426300 | 25  | 100426287 | 12 | 12  | 0    |
| 9 | 114858525 | 114858650 | 125 | 114858612 | 16 | 73  | 4.4  |
| 9 | 114939925 | 114940000 | 75  | 114939937 | 13 | 38  | 0    |
| 9 | 116522900 | 116522975 | 75  | 116522912 | 12 | 36  | 0    |
| 9 | 116641950 | 116641975 | 25  | 116641962 | 12 | 12  | 2.2  |
| 9 | 125775375 | 125775400 | 25  | 125775387 | 13 | 13  | 0    |
| 9 | 125855400 | 125855425 | 25  | 125855412 | 14 | 14  | 2.2  |
| 9 | 129026275 | 129026300 | 25  | 129026287 | 12 | 12  | 2.2  |
| 9 | 129186525 | 129186850 | 325 | 129186687 | 18 | 191 | 28.4 |
| 9 | 129187200 | 129187225 | 25  | 129187212 | 12 | 12  | 2.2  |
| 9 | 129187700 | 129187925 | 225 | 129187887 | 13 | 97  | 0    |
| 9 | 129325725 | 129325975 | 250 | 129325862 | 22 | 174 | 0    |
| 9 | 131060200 | 131060325 | 125 | 131060237 | 13 | 61  | 2.2  |
| 9 | 132361000 | 132361050 | 50  | 132361012 | 12 | 24  | 0    |
| 9 | 132816000 | 132816125 | 125 | 132816062 | 14 | 65  | 0    |
| 9 | 133698775 | 133698925 | 150 | 133698887 | 13 | 70  | 0    |
| 9 | 135443425 | 135443625 | 200 | 135443562 | 20 | 126 | 10.9 |
| 9 | 135454850 | 135454875 | 25  | 135454862 | 12 | 12  | 2.2  |
| 9 | 136526650 | 136526675 | 25  | 136526662 | 12 | 12  | 0    |
| 9 | 136596225 | 136596475 | 250 | 136596387 | 18 | 133 | 0    |
| 9 | 136635375 | 136635400 | 25  | 136635387 | 12 | 12  | 0    |
| 9 | 136792450 | 136792525 | 75  | 136792462 | 12 | 36  | 0    |
| 9 | 136991600 | 136991675 | 75  | 136991637 | 13 | 37  | 0    |
| 9 | 137158200 | 137158375 | 175 | 137158212 | 13 | 77  | 2.2  |
| 9 | 137244900 | 137244950 | 50  | 137244912 | 12 | 24  | 0    |
| 9 | 137689725 | 137689750 | 25  | 137689737 | 12 | 12  | 0    |
| 9 | 139116150 | 139116600 | 450 | 139116487 | 20 | 276 | 17.5 |
| 9 | 139116950 | 139116975 | 25  | 139116962 | 12 | 12  | 0    |
| 9 | 139819400 | 139819550 | 150 | 139819537 | 13 | 71  | 0    |
| 9 | 139999200 | 139999225 | 25  | 139999212 | 12 | 12  | 0    |
| 9 | 140001150 | 140001200 | 50  | 140001187 | 13 | 25  | 0    |
| 9 | 140072500 | 140072600 | 100 | 140072512 | 14 | 55  | 6.6  |
| 9 | 140113825 | 140113875 | 50  | 140113837 | 14 | 26  | 4.4  |
| 9 | 140137100 | 140137175 | 75  | 140137137 | 14 | 38  | 2.2  |
| 8 | 195700    | 195875    | 175 | 195787    | 17 | 102 | 0    |
| 8 | 212325    | 212450    | 125 | 212337    | 12 | 59  | 0    |
| 8 | 272750    | 272800    | 50  | 272762    | 12 | 24  | 0    |
| 8 | 277325    | 277375    | 50  | 277337    | 12 | 24  | 0    |
| 8 | 287550    | 287625    | 75  | 287587    | 13 | 38  | 0    |
| 8 | 301250    | 301275    | 25  | 301262    | 12 | 12  | 0    |
| 8 | 302550    | 302625    | 75  | 302562    | 13 | 37  | 0    |
| 8 | 313275    | 313325    | 50  | 313287    | 13 | 26  | 4.4  |
| 8 | 314950    | 315000    | 50  | 314987    | 13 | 25  | 0    |
| 8 | 325650    | 325725    | 75  | 325687    | 13 | 37  | 0    |
| 8 | 443250    | 443525    | 275 | 443362    | 21 | 182 | 6.6  |
| 8 | 446500    | 446600    | 100 | 446512    | 14 | 54  | 8.8  |
| 8 | 454475    | 454500    | 25  | 454487    | 12 | 12  | 2.2  |
| 8 | 504450    | 504650    | 200 | 504562    | 17 | 117 | 13.1 |
| 8 | 518925    | 519225    | 300 | 519062    | 17 | 170 | 4.4  |
| 8 | 554125    | 554150    | 25  | 554137    | 12 | 12  | 2.2  |
| 8 | 557800    | 558275    | 475 | 557812    | 14 | 224 | 10.9 |
| 8 | 567125    | 567150    | 25  | 567137    | 13 | 13  | 0    |
| 8 | 571350    | 571375    | 25  | 571362    | 14 | 14  | 0    |
| 8 | 572825    | 572850    | 25  | 572837    | 13 | 13  | 2.2  |
| 8 | 576725    | 576850    | 125 | 576787    | 14 | 61  | 0    |
| 8 | 578850    | 578875    | 25  | 578862    | 12 | 12  | 0    |
| 8 | 598700    | 598725    | 25  | 598712    | 12 | 12  | 2.2  |
| 8 | 642725    | 642750    | 25  | 642737    | 12 | 12  | 0    |
| 8 | 666600    | 666725    | 125 | 666662    | 14 | 64  | 10.9 |
| 8 | 686450    | 686475    | 25  | 686462    | 13 | 13  | 2.2  |
| 8 | 694125    | 694250    | 125 | 694187    | 14 | 66  | 0    |
| 8 | 700700    | 700775    | 75  | 700762    | 13 | 37  | 0    |
| 8 | 703225    | 703300    | 75  | 703237    | 12 | 36  | 0    |
| 8 | 706275    | 706325    | 50  | 706287    | 12 | 24  | 0    |
| 8 | 727900    | 727925    | 25  | 727912    | 13 | 13  | 2.2  |
| 8 | 728450    | 728475    | 25  | 728462    | 16 | 16  | 0    |
| 8 | 741775    | 741850    | 75  | 741837    | 14 | 39  | 6.6  |
| 8 | 742400    | 742500    | 100 | 742487    | 13 | 48  | 4.4  |

|   |         |         |     |         |    |     |      |
|---|---------|---------|-----|---------|----|-----|------|
| 8 | 752025  | 752050  | 25  | 752037  | 12 | 12  | 0    |
| 8 | 752350  | 752375  | 25  | 752362  | 13 | 13  | 0    |
| 8 | 793475  | 793525  | 50  | 793487  | 13 | 25  | 4.4  |
| 8 | 798575  | 798600  | 25  | 798587  | 13 | 13  | 0    |
| 8 | 846400  | 846500  | 100 | 846487  | 17 | 60  | 0    |
| 8 | 866850  | 866900  | 50  | 866862  | 14 | 26  | 0    |
| 8 | 877700  | 877825  | 125 | 877787  | 15 | 68  | 0    |
| 8 | 889575  | 889625  | 50  | 889587  | 13 | 25  | 0    |
| 8 | 902825  | 902875  | 50  | 902837  | 15 | 28  | 2.2  |
| 8 | 904675  | 904700  | 25  | 904687  | 12 | 12  | 0    |
| 8 | 909300  | 909350  | 50  | 909312  | 12 | 24  | 4.4  |
| 8 | 966525  | 966550  | 25  | 966537  | 12 | 12  | 0    |
| 8 | 975425  | 975475  | 50  | 975462  | 13 | 25  | 4.4  |
| 8 | 977350  | 977675  | 325 | 977512  | 24 | 225 | 4.4  |
| 8 | 981900  | 981925  | 25  | 981912  | 12 | 12  | 0    |
| 8 | 987125  | 987275  | 150 | 987237  | 14 | 77  | 0    |
| 8 | 995800  | 995975  | 175 | 995887  | 16 | 94  | 0    |
| 8 | 996950  | 997200  | 250 | 997062  | 14 | 124 | 10.9 |
| 8 | 997750  | 997925  | 175 | 997812  | 13 | 85  | 0    |
| 8 | 999050  | 999150  | 100 | 999062  | 15 | 58  | 6.6  |
| 8 | 999775  | 999825  | 50  | 999812  | 15 | 29  | 0    |
| 8 | 1003575 | 1003625 | 50  | 1003612 | 14 | 27  | 0    |
| 8 | 1003875 | 1004275 | 400 | 1004187 | 23 | 312 | 52.5 |
| 8 | 1004575 | 1004900 | 325 | 1004812 | 13 | 146 | 13.1 |
| 8 | 1008275 | 1008325 | 50  | 1008287 | 12 | 24  | 0    |
| 8 | 1009900 | 1009975 | 75  | 1009912 | 12 | 36  | 0    |
| 8 | 1011775 | 1011825 | 50  | 1011787 | 12 | 24  | 0    |
| 8 | 1012325 | 1012400 | 75  | 1012337 | 13 | 38  | 4.4  |
| 8 | 1013550 | 1013675 | 125 | 1013587 | 17 | 81  | 2.2  |
| 8 | 1030725 | 1030750 | 25  | 1030737 | 12 | 12  | 0    |
| 8 | 1031325 | 1031500 | 175 | 1031362 | 13 | 83  | 0    |
| 8 | 1053375 | 1053400 | 25  | 1053387 | 12 | 12  | 2.2  |
| 8 | 1057575 | 1057600 | 25  | 1057587 | 12 | 12  | 2.2  |
| 8 | 1074425 | 1074725 | 300 | 1074462 | 13 | 132 | 0    |
| 8 | 1075550 | 1075775 | 225 | 1075562 | 13 | 108 | 6.6  |
| 8 | 1077550 | 1077725 | 175 | 1077687 | 16 | 96  | 4.4  |
| 8 | 1080125 | 1080225 | 100 | 1080187 | 16 | 56  | 0    |
| 8 | 1084150 | 1084175 | 25  | 1084162 | 12 | 12  | 2.2  |
| 8 | 1093250 | 1093275 | 25  | 1093262 | 12 | 12  | 2.2  |
| 8 | 1093700 | 1093875 | 175 | 1093812 | 17 | 102 | 0    |
| 8 | 1097500 | 1097525 | 25  | 1097512 | 12 | 12  | 0    |
| 8 | 1120100 | 1120150 | 50  | 1120112 | 13 | 26  | 0    |
| 8 | 1128225 | 1128250 | 25  | 1128237 | 12 | 12  | 0    |
| 8 | 1136300 | 1136325 | 25  | 1136312 | 12 | 12  | 0    |
| 8 | 1137525 | 1137550 | 25  | 1137537 | 12 | 12  | 0    |
| 8 | 1147550 | 1147600 | 50  | 1147562 | 12 | 24  | 0    |
| 8 | 1172150 | 1172325 | 175 | 1172162 | 12 | 82  | 0    |
| 8 | 1172650 | 1172775 | 125 | 1172687 | 15 | 65  | 0    |
| 8 | 1181475 | 1181525 | 50  | 1181487 | 13 | 25  | 0    |
| 8 | 1189500 | 1189925 | 425 | 1189712 | 23 | 317 | 0    |
| 8 | 1193750 | 1193775 | 25  | 1193762 | 13 | 13  | 0    |
| 8 | 1194100 | 1194200 | 100 | 1194162 | 13 | 49  | 0    |
| 8 | 1206625 | 1206825 | 200 | 1206712 | 18 | 125 | 13.1 |
| 8 | 1218050 | 1218075 | 25  | 1218062 | 12 | 12  | 2.2  |
| 8 | 1219750 | 1220125 | 375 | 1219812 | 28 | 315 | 21.9 |
| 8 | 1236100 | 1236125 | 25  | 1236112 | 12 | 12  | 2.2  |
| 8 | 1236750 | 1236850 | 100 | 1236762 | 22 | 69  | 13.1 |
| 8 | 1238325 | 1238475 | 150 | 1238387 | 15 | 85  | 10.9 |
| 8 | 1256350 | 1256875 | 525 | 1256412 | 14 | 244 | 17.5 |
| 8 | 1268575 | 1268600 | 25  | 1268587 | 12 | 12  | 2.2  |
| 8 | 1279375 | 1279500 | 125 | 1279437 | 16 | 70  | 10.9 |
| 8 | 1296050 | 1296250 | 200 | 1296187 | 14 | 96  | 0    |
| 8 | 1296725 | 1296850 | 125 | 1296737 | 18 | 81  | 10.9 |
| 8 | 1298050 | 1298175 | 125 | 1298112 | 13 | 61  | 0    |
| 8 | 1309350 | 1309375 | 25  | 1309362 | 12 | 12  | 0    |
| 8 | 1313875 | 1313950 | 75  | 1313912 | 15 | 43  | 6.6  |
| 8 | 1350075 | 1350150 | 75  | 1350087 | 13 | 37  | 2.2  |
| 8 | 1360125 | 1360250 | 125 | 1360212 | 17 | 77  | 8.8  |
| 8 | 1364300 | 1364400 | 100 | 1364312 | 12 | 47  | 6.6  |
| 8 | 1374900 | 1375450 | 550 | 1375287 | 19 | 295 | 32.8 |
| 8 | 1385100 | 1385400 | 300 | 1385237 | 16 | 152 | 15.3 |
| 8 | 1412650 | 1412825 | 175 | 1412737 | 17 | 100 | 4.4  |
| 8 | 1414050 | 1414075 | 25  | 1414062 | 12 | 12  | 0    |
| 8 | 1462475 | 1462525 | 50  | 1462512 | 14 | 26  | 0    |
| 8 | 1470925 | 1471025 | 100 | 1470937 | 13 | 51  | 8.8  |



|   |          |          |     |          |    |     |      |
|---|----------|----------|-----|----------|----|-----|------|
| 8 | 1472425  | 1472800  | 375 | 1472512  | 14 | 176 | 35   |
| 8 | 1474900  | 1474975  | 75  | 1474962  | 14 | 40  | 4.4  |
| 8 | 1485125  | 1485200  | 75  | 1485137  | 13 | 39  | 2.2  |
| 8 | 1549925  | 1550025  | 100 | 1549937  | 12 | 47  | 0    |
| 8 | 1555375  | 1555450  | 75  | 1555412  | 13 | 37  | 0    |
| 8 | 1556850  | 1556975  | 125 | 1556887  | 15 | 69  | 10.9 |
| 8 | 1558950  | 1559100  | 150 | 1559087  | 13 | 72  | 6.6  |
| 8 | 1574475  | 1574575  | 100 | 1574537  | 14 | 51  | 6.6  |
| 8 | 1575925  | 1576050  | 125 | 1575962  | 14 | 67  | 0    |
| 8 | 1588700  | 1588775  | 75  | 1588762  | 13 | 37  | 0    |
| 8 | 1591350  | 1591525  | 175 | 1591462  | 18 | 112 | 15.3 |
| 8 | 1596525  | 1596550  | 25  | 1596537  | 13 | 13  | 0    |
| 8 | 1598300  | 1598525  | 225 | 1598362  | 19 | 135 | 0    |
| 8 | 1612975  | 1613000  | 25  | 1612987  | 12 | 12  | 0    |
| 8 | 1620850  | 1620875  | 25  | 1620862  | 12 | 12  | 2.2  |
| 8 | 1625100  | 1625300  | 200 | 1625137  | 16 | 115 | 8.8  |
| 8 | 1644150  | 1644200  | 50  | 1644187  | 18 | 35  | 4.4  |
| 8 | 1733550  | 1733575  | 25  | 1733562  | 12 | 12  | 0    |
| 8 | 1734500  | 1734600  | 100 | 1734537  | 14 | 49  | 4.4  |
| 8 | 1851475  | 1851775  | 300 | 1851637  | 18 | 177 | 17.5 |
| 8 | 1918750  | 1918775  | 25  | 1918762  | 13 | 13  | 0    |
| 8 | 1989525  | 1989550  | 25  | 1989537  | 12 | 12  | 2.2  |
| 8 | 2042825  | 2042850  | 25  | 2042837  | 12 | 12  | 2.2  |
| 8 | 2046900  | 2046925  | 25  | 2046912  | 12 | 12  | 2.2  |
| 8 | 2048350  | 2048675  | 325 | 2048487  | 17 | 178 | 4.4  |
| 8 | 2104475  | 2104525  | 50  | 2104487  | 13 | 25  | 0    |
| 8 | 2136225  | 2136375  | 150 | 2136312  | 15 | 79  | 0    |
| 8 | 2163975  | 2164025  | 50  | 2164012  | 14 | 26  | 0    |
| 8 | 2183875  | 2183950  | 75  | 2183887  | 12 | 35  | 6.6  |
| 8 | 2186275  | 2186650  | 375 | 2186287  | 14 | 158 | 4.4  |
| 8 | 2187275  | 2187325  | 50  | 2187287  | 12 | 24  | 0    |
| 8 | 2187600  | 2187700  | 100 | 2187612  | 17 | 59  | 0    |
| 8 | 2188300  | 2188450  | 150 | 2188362  | 16 | 82  | 0    |
| 8 | 2189950  | 2190125  | 175 | 2189987  | 14 | 92  | 0    |
| 8 | 2191075  | 2191275  | 200 | 2191162  | 17 | 113 | 0    |
| 8 | 2193925  | 2194125  | 200 | 2194012  | 18 | 127 | 0    |
| 8 | 2195125  | 2195250  | 125 | 2195212  | 15 | 69  | 2.2  |
| 8 | 2199175  | 2199200  | 25  | 2199187  | 13 | 13  | 2.2  |
| 8 | 2199525  | 2199550  | 25  | 2199537  | 12 | 12  | 2.2  |
| 8 | 2202625  | 2202750  | 125 | 2202687  | 13 | 61  | 0    |
| 8 | 2208500  | 2208650  | 150 | 2208587  | 14 | 74  | 0    |
| 8 | 2209800  | 2209950  | 150 | 2209812  | 17 | 90  | 10.9 |
| 8 | 2211575  | 2211600  | 25  | 2211587  | 12 | 12  | 0    |
| 8 | 2215650  | 2215775  | 125 | 2215737  | 14 | 66  | 0    |
| 8 | 2217850  | 2218050  | 200 | 2217912  | 17 | 109 | 6.6  |
| 8 | 2222850  | 2222925  | 75  | 2222887  | 15 | 43  | 0    |
| 8 | 2225775  | 2225800  | 25  | 2225787  | 15 | 15  | 2.2  |
| 8 | 2243850  | 2243900  | 50  | 2243862  | 12 | 24  | 4.4  |
| 8 | 2259250  | 2259525  | 275 | 2259287  | 19 | 150 | 0    |
| 8 | 2339750  | 2339775  | 25  | 2339762  | 12 | 12  | 2.2  |
| 8 | 2350500  | 2350625  | 125 | 2350612  | 14 | 63  | 10.9 |
| 8 | 2351575  | 2351625  | 50  | 2351612  | 14 | 26  | 2.2  |
| 8 | 2416450  | 2416475  | 25  | 2416462  | 12 | 12  | 2.2  |
| 8 | 2422625  | 2422650  | 25  | 2422637  | 12 | 12  | 0    |
| 8 | 5452200  | 5452250  | 50  | 5452212  | 13 | 25  | 0    |
| 8 | 6203575  | 6203600  | 25  | 6203587  | 12 | 12  | 2.2  |
| 8 | 6411500  | 6411550  | 50  | 6411512  | 15 | 28  | 0    |
| 8 | 6412125  | 6412325  | 200 | 6412237  | 15 | 108 | 13.1 |
| 8 | 6451500  | 6451625  | 125 | 6451587  | 15 | 66  | 2.2  |
| 8 | 6494175  | 6494300  | 125 | 6494187  | 12 | 57  | 0    |
| 8 | 6508575  | 6508650  | 75  | 6508587  | 12 | 36  | 0    |
| 8 | 6735450  | 6735500  | 50  | 6735462  | 12 | 24  | 0    |
| 8 | 6759325  | 6759350  | 25  | 6759337  | 12 | 12  | 2.2  |
| 8 | 6820725  | 6820750  | 25  | 6820737  | 12 | 12  | 2.2  |
| 8 | 8509775  | 8509800  | 25  | 8509787  | 12 | 12  | 0    |
| 8 | 8609775  | 8609850  | 75  | 8609812  | 13 | 38  | 0    |
| 8 | 9694525  | 9694600  | 75  | 9694562  | 14 | 39  | 2.2  |
| 8 | 10793150 | 10793225 | 75  | 10793187 | 14 | 40  | 0    |
| 8 | 10793750 | 10793775 | 25  | 10793762 | 13 | 13  | 2.2  |
| 8 | 10859675 | 10859700 | 25  | 10859687 | 13 | 13  | 0    |
| 8 | 17038500 | 17038575 | 75  | 17038512 | 12 | 36  | 0    |
| 8 | 17556675 | 17556700 | 25  | 17556687 | 12 | 12  | 0    |
| 8 | 20189150 | 20189200 | 50  | 20189162 | 12 | 24  | 0    |
| 8 | 20476075 | 20476100 | 25  | 20476087 | 12 | 12  | 0    |
| 8 | 21774500 | 21774525 | 25  | 21774512 | 12 | 12  | 0    |

|   |          |          |     |          |    |     |      |
|---|----------|----------|-----|----------|----|-----|------|
| 8 | 21782125 | 21782175 | 50  | 21782137 | 12 | 24  | 0    |
| 8 | 22745200 | 22745225 | 25  | 22745212 | 12 | 12  | 0    |
| 8 | 23620225 | 23620300 | 75  | 23620237 | 12 | 36  | 0    |
| 8 | 24869750 | 24869800 | 50  | 24869787 | 13 | 25  | 0    |
| 8 | 25956475 | 25956625 | 150 | 25956512 | 13 | 74  | 0    |
| 8 | 26503300 | 26503400 | 100 | 26503312 | 12 | 47  | 0    |
| 8 | 26556675 | 26557600 | 925 | 26557462 | 26 | 561 | 28.4 |
| 8 | 27303600 | 27303625 | 25  | 27303612 | 12 | 12  | 0    |
| 8 | 27572675 | 27572775 | 100 | 27572712 | 14 | 54  | 0    |
| 8 | 27824000 | 27824125 | 125 | 27824062 | 14 | 65  | 0    |
| 8 | 27824375 | 27824400 | 25  | 27824387 | 12 | 12  | 2.2  |
| 8 | 27865050 | 27865175 | 125 | 27865062 | 12 | 59  | 0    |
| 8 | 27878975 | 27879175 | 200 | 27878987 | 15 | 102 | 4.4  |
| 8 | 29315650 | 29315700 | 50  | 29315687 | 14 | 26  | 0    |
| 8 | 29832725 | 29832750 | 25  | 29832737 | 12 | 12  | 0    |
| 8 | 32836800 | 32836850 | 50  | 32836812 | 12 | 24  | 0    |
| 8 | 39814875 | 39814900 | 25  | 39814887 | 12 | 12  | 0    |
| 8 | 41125450 | 41125475 | 25  | 41125462 | 12 | 12  | 2.2  |
| 8 | 41168200 | 41168250 | 50  | 41168212 | 12 | 24  | 0    |
| 8 | 41685450 | 41685600 | 150 | 41685562 | 15 | 77  | 0    |
| 8 | 41713200 | 41713225 | 25  | 41713212 | 12 | 12  | 0    |
| 8 | 41883650 | 41883825 | 175 | 41883712 | 15 | 91  | 0    |
| 8 | 48163950 | 48163975 | 25  | 48163962 | 12 | 12  | 0    |
| 8 | 48183800 | 48183825 | 25  | 48183812 | 12 | 12  | 2.2  |
| 8 | 48218650 | 48218675 | 25  | 48218662 | 13 | 13  | 0    |
| 8 | 49384425 | 49384875 | 450 | 49384812 | 17 | 204 | 0    |
| 8 | 49811050 | 49811100 | 50  | 49811062 | 13 | 25  | 4.4  |
| 8 | 50104075 | 50104100 | 25  | 50104087 | 12 | 12  | 2.2  |
| 8 | 53243425 | 53243500 | 75  | 53243437 | 13 | 36  | 0    |
| 8 | 53477450 | 53477500 | 50  | 53477462 | 12 | 24  | 0    |
| 8 | 54015175 | 54015300 | 125 | 54015237 | 15 | 67  | 0    |
| 8 | 54015625 | 54015950 | 325 | 54015812 | 17 | 180 | 17.5 |
| 8 | 54290275 | 54290350 | 75  | 54290337 | 13 | 37  | 4.4  |
| 8 | 54480950 | 54481100 | 150 | 54481037 | 18 | 85  | 0    |
| 8 | 54634275 | 54634400 | 125 | 54634312 | 13 | 61  | 0    |
| 8 | 54717600 | 54717650 | 50  | 54717612 | 14 | 27  | 4.4  |
| 8 | 55006175 | 55006225 | 50  | 55006187 | 13 | 25  | 0    |
| 8 | 55191350 | 55191375 | 25  | 55191362 | 12 | 12  | 0    |
| 8 | 55325000 | 55325025 | 25  | 55325012 | 12 | 12  | 0    |
| 8 | 55325300 | 55325325 | 25  | 55325312 | 13 | 13  | 2.2  |
| 8 | 55353900 | 55354000 | 100 | 55353962 | 13 | 49  | 0    |
| 8 | 55668750 | 55668800 | 50  | 55668787 | 14 | 27  | 0    |
| 8 | 55934125 | 55934150 | 25  | 55934137 | 12 | 12  | 0    |
| 8 | 55994375 | 55994550 | 175 | 55994412 | 13 | 87  | 0    |
| 8 | 56178250 | 56178300 | 50  | 56178262 | 15 | 28  | 2.2  |
| 8 | 56570175 | 56570200 | 25  | 56570187 | 12 | 12  | 2.2  |
| 8 | 56757825 | 56757850 | 25  | 56757837 | 12 | 12  | 0    |
| 8 | 57211050 | 57211075 | 25  | 57211062 | 12 | 12  | 0    |
| 8 | 57977025 | 57977200 | 175 | 57977037 | 13 | 84  | 0    |
| 8 | 58279100 | 58279325 | 225 | 58279187 | 18 | 138 | 0    |
| 8 | 58280825 | 58280900 | 75  | 58280887 | 21 | 57  | 4.4  |
| 8 | 58285875 | 58286025 | 150 | 58285912 | 16 | 85  | 4.4  |
| 8 | 58288125 | 58288150 | 25  | 58288137 | 14 | 14  | 2.2  |
| 8 | 58290300 | 58290350 | 50  | 58290312 | 19 | 38  | 4.4  |
| 8 | 58291225 | 58291350 | 125 | 58291237 | 13 | 65  | 0    |
| 8 | 59221325 | 59221400 | 75  | 59221337 | 12 | 35  | 2.2  |
| 8 | 59221950 | 59221975 | 25  | 59221962 | 12 | 12  | 0    |
| 8 | 59222400 | 59222475 | 75  | 59222412 | 12 | 36  | 2.2  |
| 8 | 59434425 | 59434500 | 75  | 59434437 | 13 | 37  | 0    |
| 8 | 61966400 | 61966475 | 75  | 61966437 | 14 | 40  | 6.6  |
| 8 | 62087650 | 62087775 | 125 | 62087712 | 14 | 65  | 0    |
| 8 | 62127125 | 62127150 | 25  | 62127137 | 12 | 12  | 0    |
| 8 | 62201325 | 62201400 | 75  | 62201387 | 14 | 38  | 0    |
| 8 | 63276650 | 63276700 | 50  | 63276662 | 12 | 24  | 0    |
| 8 | 64226750 | 64226775 | 25  | 64226762 | 12 | 12  | 0    |
| 8 | 64634250 | 64634275 | 25  | 64634262 | 12 | 12  | 0    |
| 8 | 65029450 | 65029475 | 25  | 65029462 | 13 | 13  | 0    |
| 8 | 65861975 | 65862050 | 75  | 65862012 | 13 | 37  | 0    |
| 8 | 67134500 | 67134525 | 25  | 67134512 | 12 | 12  | 2.2  |
| 8 | 67945700 | 67945725 | 25  | 67945712 | 12 | 12  | 2.2  |
| 8 | 68015850 | 68015900 | 50  | 68015862 | 12 | 24  | 0    |
| 8 | 68036900 | 68037150 | 250 | 68037062 | 15 | 136 | 0    |
| 8 | 68037575 | 68037850 | 275 | 68037587 | 12 | 120 | 15.3 |
| 8 | 68066750 | 68066875 | 125 | 68066812 | 15 | 67  | 0    |
| 8 | 68715775 | 68715850 | 75  | 68715837 | 13 | 37  | 6.6  |

|   |           |           |     |           |    |     |      |
|---|-----------|-----------|-----|-----------|----|-----|------|
| 8 | 73742950  | 73743025  | 75  | 73742987  | 13 | 37  | 0    |
| 8 | 74499750  | 74499875  | 125 | 74499787  | 14 | 64  | 0    |
| 8 | 77747575  | 77747625  | 50  | 77747587  | 12 | 24  | 2.2  |
| 8 | 81767725  | 81767825  | 100 | 81767737  | 12 | 47  | 2.2  |
| 8 | 82240575  | 82240600  | 25  | 82240587  | 12 | 12  | 0    |
| 8 | 82431750  | 82431825  | 75  | 82431762  | 12 | 35  | 4.4  |
| 8 | 82461500  | 82461525  | 25  | 82461512  | 12 | 12  | 2.2  |
| 8 | 82798975  | 82799025  | 50  | 82798987  | 14 | 27  | 0    |
| 8 | 85000550  | 85000600  | 50  | 85000562  | 13 | 25  | 0    |
| 8 | 86895825  | 86895875  | 50  | 86895837  | 16 | 31  | 2.2  |
| 8 | 87043125  | 87043200  | 75  | 87043137  | 13 | 36  | 6.6  |
| 8 | 87675625  | 87675825  | 200 | 87675637  | 14 | 100 | 15.3 |
| 8 | 87740550  | 87740600  | 50  | 87740562  | 12 | 24  | 4.4  |
| 8 | 88954725  | 88954775  | 50  | 88954737  | 12 | 24  | 4.4  |
| 8 | 93763650  | 93763725  | 75  | 93763662  | 13 | 38  | 0    |
| 8 | 94687450  | 94687500  | 50  | 94687462  | 13 | 26  | 0    |
| 8 | 96205525  | 96205600  | 75  | 96205537  | 12 | 36  | 0    |
| 8 | 97241125  | 97241250  | 125 | 97241187  | 13 | 62  | 0    |
| 8 | 99057175  | 99057225  | 50  | 99057187  | 13 | 26  | 0    |
| 8 | 99063075  | 99063250  | 175 | 99063112  | 15 | 91  | 8.8  |
| 8 | 99093150  | 99093175  | 25  | 99093162  | 12 | 12  | 0    |
| 8 | 99096750  | 99096775  | 25  | 99096762  | 12 | 12  | 0    |
| 8 | 99509600  | 99509625  | 25  | 99509612  | 12 | 12  | 0    |
| 8 | 99865800  | 99866375  | 575 | 99865987  | 21 | 341 | 21.9 |
| 8 | 99866625  | 99866850  | 225 | 99866687  | 14 | 114 | 8.8  |
| 8 | 100059700 | 100059775 | 75  | 100059712 | 12 | 36  | 0    |
| 8 | 101752425 | 101752600 | 175 | 101752587 | 17 | 92  | 13.1 |
| 8 | 101954475 | 101954550 | 75  | 101954487 | 12 | 36  | 0    |
| 8 | 102443475 | 102443525 | 50  | 102443512 | 13 | 25  | 0    |
| 8 | 102521875 | 102521950 | 75  | 102521887 | 12 | 36  | 0    |
| 8 | 102752000 | 102752100 | 100 | 102752037 | 14 | 50  | 0    |
| 8 | 103632750 | 103632800 | 50  | 103632762 | 12 | 24  | 0    |
| 8 | 103808100 | 103808125 | 25  | 103808112 | 12 | 12  | 2.2  |
| 8 | 104580575 | 104580600 | 25  | 104580587 | 12 | 12  | 2.2  |
| 8 | 104741575 | 104741700 | 125 | 104741637 | 14 | 64  | 0    |
| 8 | 105815050 | 105815100 | 50  | 105815062 | 12 | 24  | 4.4  |
| 8 | 106400575 | 106400675 | 100 | 106400612 | 14 | 48  | 4.4  |
| 8 | 109092050 | 109092075 | 25  | 109092062 | 12 | 12  | 0    |
| 8 | 109212625 | 109212825 | 200 | 109212687 | 17 | 121 | 10.9 |
| 8 | 110444000 | 110444025 | 25  | 110444012 | 13 | 13  | 2.2  |
| 8 | 113299400 | 113299425 | 25  | 113299412 | 12 | 12  | 0    |
| 8 | 116035100 | 116035125 | 25  | 116035112 | 12 | 12  | 0    |
| 8 | 118738375 | 118738450 | 75  | 118738387 | 14 | 40  | 6.6  |
| 8 | 121867650 | 121867675 | 25  | 121867662 | 12 | 12  | 0    |
| 8 | 123764800 | 123764825 | 25  | 123764812 | 12 | 12  | 0    |
| 8 | 123784625 | 123784775 | 150 | 123784662 | 13 | 75  | 0    |
| 8 | 124033975 | 124034050 | 75  | 124034012 | 14 | 39  | 2.2  |
| 8 | 124061400 | 124061425 | 25  | 124061412 | 12 | 12  | 2.2  |
| 8 | 124835700 | 124835725 | 25  | 124835712 | 13 | 13  | 2.2  |
| 8 | 124933675 | 124933825 | 150 | 124933762 | 14 | 77  | 0    |
| 8 | 124935200 | 124935225 | 25  | 124935212 | 12 | 12  | 2.2  |
| 8 | 125033325 | 125033350 | 25  | 125033337 | 12 | 12  | 0    |
| 8 | 125034975 | 125035025 | 50  | 125034987 | 12 | 24  | 4.4  |
| 8 | 125141550 | 125141575 | 25  | 125141562 | 12 | 12  | 0    |
| 8 | 125708450 | 125708475 | 25  | 125708462 | 12 | 12  | 0    |
| 8 | 126878100 | 126878175 | 75  | 126878112 | 13 | 38  | 6.6  |
| 8 | 127929175 | 127929300 | 125 | 127929212 | 14 | 66  | 10.9 |
| 8 | 128757600 | 128757625 | 25  | 128757612 | 13 | 13  | 2.2  |
| 8 | 129223375 | 129223400 | 25  | 129223387 | 13 | 13  | 2.2  |
| 8 | 129467275 | 129467800 | 525 | 129467537 | 13 | 234 | 17.5 |
| 8 | 129476375 | 129476400 | 25  | 129476387 | 12 | 12  | 0    |
| 8 | 130051775 | 130051800 | 25  | 130051787 | 12 | 12  | 0    |
| 8 | 130794350 | 130794450 | 100 | 130794412 | 16 | 57  | 0    |
| 8 | 130849050 | 130849075 | 25  | 130849062 | 12 | 12  | 0    |
| 8 | 130849375 | 130849400 | 25  | 130849387 | 13 | 13  | 0    |
| 8 | 130897750 | 130897825 | 75  | 130897812 | 14 | 39  | 0    |
| 8 | 131677675 | 131677700 | 25  | 131677687 | 13 | 13  | 2.2  |
| 8 | 131727600 | 131727625 | 25  | 131727612 | 12 | 12  | 0    |
| 8 | 132064975 | 132065000 | 25  | 132064987 | 12 | 12  | 2.2  |
| 8 | 132122025 | 132122125 | 100 | 132122037 | 14 | 52  | 8.8  |
| 8 | 132122850 | 132122975 | 125 | 132122862 | 14 | 67  | 0    |
| 8 | 132123700 | 132123925 | 225 | 132123812 | 20 | 145 | 17.5 |
| 8 | 133532175 | 133532200 | 25  | 133532187 | 13 | 13  | 0    |
| 8 | 134144400 | 134144425 | 25  | 134144412 | 12 | 12  | 0    |
| 8 | 134215100 | 134215150 | 50  | 134215137 | 13 | 25  | 0    |

|   |           |           |     |           |    |     |      |
|---|-----------|-----------|-----|-----------|----|-----|------|
| 8 | 134233075 | 134233125 | 50  | 134233087 | 12 | 24  | 0    |
| 8 | 134252575 | 134252600 | 25  | 134252587 | 13 | 13  | 2.2  |
| 8 | 134290600 | 134290700 | 100 | 134290637 | 13 | 49  | 2.2  |
| 8 | 134484675 | 134484700 | 25  | 134484687 | 12 | 12  | 2.2  |
| 8 | 134497750 | 134497775 | 25  | 134497762 | 12 | 12  | 0    |
| 8 | 135804700 | 135804725 | 25  | 135804712 | 12 | 12  | 0    |
| 8 | 135929400 | 135929500 | 100 | 135929437 | 14 | 53  | 8.8  |
| 8 | 136016125 | 136016150 | 25  | 136016137 | 12 | 12  | 0    |
| 8 | 136315925 | 136315950 | 25  | 136315937 | 12 | 12  | 0    |
| 8 | 136355675 | 136355725 | 50  | 136355687 | 12 | 24  | 0    |
| 8 | 136459025 | 136459075 | 50  | 136459037 | 12 | 24  | 0    |
| 8 | 136872125 | 136872150 | 25  | 136872137 | 12 | 12  | 0    |
| 8 | 139577575 | 139577650 | 75  | 139577587 | 12 | 36  | 0    |
| 8 | 139801200 | 139801225 | 25  | 139801212 | 12 | 12  | 2.2  |
| 8 | 139838500 | 139838575 | 75  | 139838512 | 12 | 36  | 0    |
| 8 | 140037025 | 140037150 | 125 | 140037037 | 12 | 59  | 0    |
| 8 | 140565100 | 140565175 | 75  | 140565112 | 13 | 38  | 6.6  |
| 8 | 140773525 | 140773550 | 25  | 140773537 | 12 | 12  | 0    |
| 8 | 140787900 | 140787925 | 25  | 140787912 | 12 | 12  | 2.2  |
| 8 | 141725900 | 141725950 | 50  | 141725912 | 13 | 26  | 4.4  |
| 8 | 142634550 | 142634575 | 25  | 142634562 | 13 | 13  | 0    |
| 8 | 142664850 | 142664900 | 50  | 142664887 | 13 | 25  | 0    |
| 8 | 142666175 | 142666250 | 75  | 142666187 | 14 | 40  | 0    |
| 8 | 142671575 | 142671750 | 175 | 142671687 | 16 | 95  | 10.9 |
| 8 | 142842500 | 142842525 | 25  | 142842512 | 12 | 12  | 2.2  |
| 8 | 142843125 | 142843150 | 25  | 142843137 | 12 | 12  | 0    |
| 8 | 142858425 | 142858725 | 300 | 142858487 | 13 | 136 | 4.4  |
| 8 | 142873975 | 142874000 | 25  | 142873987 | 12 | 12  | 0    |
| 8 | 142886125 | 142886150 | 25  | 142886137 | 12 | 12  | 0    |
| 8 | 142923100 | 142923125 | 25  | 142923112 | 14 | 14  | 2.2  |
| 8 | 142951200 | 142951300 | 100 | 142951287 | 13 | 47  | 0    |
| 8 | 142959825 | 142959975 | 150 | 142959912 | 16 | 87  | 4.4  |
| 8 | 142961025 | 142961100 | 75  | 142961087 | 13 | 36  | 6.6  |
| 8 | 142988600 | 142988650 | 50  | 142988612 | 12 | 24  | 0    |
| 8 | 143092175 | 143092225 | 50  | 143092187 | 15 | 27  | 4.4  |
| 8 | 143143525 | 143143825 | 300 | 143143562 | 13 | 137 | 0    |
| 8 | 143149425 | 143149450 | 25  | 143149437 | 12 | 12  | 0    |
| 8 | 143200250 | 143200275 | 25  | 143200262 | 12 | 12  | 0    |
| 8 | 143201825 | 143202050 | 225 | 143201912 | 16 | 125 | 0    |
| 8 | 143278675 | 143278700 | 25  | 143278687 | 12 | 12  | 2.2  |
| 8 | 143395475 | 143395525 | 50  | 143395487 | 13 | 25  | 0    |
| 8 | 143396125 | 143396150 | 25  | 143396137 | 12 | 12  | 0    |
| 8 | 143407050 | 143407125 | 75  | 143407062 | 12 | 36  | 0    |
| 8 | 143492600 | 143492650 | 50  | 143492612 | 12 | 24  | 0    |
| 8 | 143493250 | 143493325 | 75  | 143493287 | 14 | 39  | 0    |
| 8 | 143513200 | 143513925 | 725 | 143513537 | 18 | 412 | 4.4  |
| 8 | 143524925 | 143524950 | 25  | 143524937 | 16 | 16  | 0    |
| 8 | 143527375 | 143527400 | 25  | 143527387 | 16 | 16  | 2.2  |
| 8 | 143579125 | 143579375 | 250 | 143579137 | 13 | 119 | 17.5 |
| 8 | 143608050 | 143608200 | 150 | 143608062 | 13 | 67  | 0    |
| 8 | 143640875 | 143640900 | 25  | 143640887 | 12 | 12  | 0    |
| 8 | 143641300 | 143641325 | 25  | 143641312 | 12 | 12  | 0    |
| 8 | 143641550 | 143641750 | 200 | 143641687 | 15 | 105 | 10.9 |
| 8 | 143750400 | 143750425 | 25  | 143750412 | 13 | 13  | 2.2  |
| 8 | 143890675 | 143890875 | 200 | 143890837 | 17 | 116 | 0    |
| 8 | 143953100 | 143953225 | 125 | 143953162 | 14 | 65  | 4.4  |
| 8 | 143980300 | 143980325 | 25  | 143980312 | 12 | 12  | 0    |
| 8 | 143980775 | 143980850 | 75  | 143980787 | 12 | 36  | 4.4  |
| 8 | 144004900 | 144005000 | 100 | 144004962 | 13 | 49  | 8.8  |
| 8 | 144111450 | 144111475 | 25  | 144111462 | 12 | 12  | 0    |
| 8 | 144126450 | 144126575 | 125 | 144126462 | 12 | 59  | 4.4  |
| 8 | 144160750 | 144160950 | 200 | 144160837 | 17 | 121 | 17.5 |
| 8 | 144238050 | 144238225 | 175 | 144238112 | 14 | 92  | 8.8  |
| 8 | 144245200 | 144245250 | 50  | 144245212 | 13 | 26  | 2.2  |
| 8 | 144255000 | 144255100 | 100 | 144255012 | 15 | 55  | 0    |
| 8 | 144256950 | 144256975 | 25  | 144256962 | 12 | 12  | 0    |
| 8 | 144275225 | 144275250 | 25  | 144275237 | 13 | 13  | 0    |
| 8 | 144275575 | 144275675 | 100 | 144275612 | 14 | 51  | 0    |
| 8 | 144275925 | 144275950 | 25  | 144275937 | 13 | 13  | 2.2  |
| 8 | 144313700 | 144313825 | 125 | 144313787 | 14 | 65  | 10.9 |
| 8 | 144801650 | 144801700 | 50  | 144801687 | 13 | 25  | 0    |
| 8 | 144802000 | 144802050 | 50  | 144802012 | 12 | 24  | 0    |
| 8 | 144803575 | 144803825 | 250 | 144803662 | 14 | 122 | 17.5 |
| 8 | 144820350 | 144820475 | 125 | 144820387 | 13 | 60  | 0    |
| 8 | 144913225 | 144913275 | 50  | 144913237 | 13 | 25  | 0    |

|    |           |           |     |           |    |     |      |
|----|-----------|-----------|-----|-----------|----|-----|------|
| 8  | 145001825 | 145001875 | 50  | 145001837 | 15 | 29  | 0    |
| 8  | 145003150 | 145003375 | 225 | 145003262 | 21 | 165 | 0    |
| 8  | 145066125 | 145066175 | 50  | 145066137 | 12 | 24  | 0    |
| 8  | 145074325 | 145074425 | 100 | 145074362 | 17 | 64  | 0    |
| 8  | 145749925 | 145750050 | 125 | 145749987 | 14 | 65  | 0    |
| 8  | 145750625 | 145750800 | 175 | 145750712 | 15 | 92  | 0    |
| 8  | 145786350 | 145786400 | 50  | 145786362 | 12 | 24  | 0    |
| 8  | 145793100 | 145793125 | 25  | 145793112 | 12 | 12  | 2.2  |
| 8  | 145796675 | 145796900 | 225 | 145796737 | 20 | 150 | 10.9 |
| 8  | 145797350 | 145797475 | 125 | 145797362 | 14 | 66  | 0    |
| 8  | 145797925 | 145798150 | 225 | 145798062 | 16 | 121 | 4.4  |
| 8  | 145799400 | 145799450 | 50  | 145799412 | 13 | 25  | 0    |
| 8  | 145802200 | 145802300 | 100 | 145802237 | 13 | 50  | 8.8  |
| 8  | 145815550 | 145816025 | 475 | 145815662 | 18 | 237 | 17.5 |
| 8  | 145896550 | 145896600 | 50  | 145896562 | 13 | 25  | 2.2  |
| 8  | 145897150 | 145897200 | 50  | 145897162 | 13 | 25  | 0    |
| 8  | 145897700 | 145897950 | 250 | 145897787 | 20 | 148 | 2.2  |
| 8  | 145901200 | 145901225 | 25  | 145901212 | 12 | 12  | 0    |
| 8  | 145909100 | 145909125 | 25  | 145909112 | 13 | 13  | 2.2  |
| 8  | 145969575 | 145969650 | 75  | 145969612 | 14 | 40  | 0    |
| 8  | 146026325 | 146026400 | 75  | 146026337 | 13 | 38  | 6.6  |
| 8  | 146033225 | 146033250 | 25  | 146033237 | 12 | 12  | 2.2  |
| 8  | 146036900 | 146037300 | 400 | 146036987 | 17 | 218 | 26.3 |
| 8  | 146041200 | 146041225 | 25  | 146041212 | 12 | 12  | 0    |
| 8  | 146053075 | 146053125 | 50  | 146053112 | 14 | 27  | 0    |
| 8  | 146078075 | 146078275 | 200 | 146078237 | 15 | 105 | 0    |
| 8  | 146129000 | 146129025 | 25  | 146129012 | 12 | 12  | 0    |
| 8  | 146129775 | 146129875 | 100 | 146129812 | 14 | 51  | 0    |
| X  | 244175    | 244225    | 50  | 244187    | 12 | 24  | 0    |
| X  | 9333800   | 9333850   | 50  | 9333837   | 13 | 25  | 0    |
| X  | 148748325 | 148748375 | 50  | 148748337 | 12 | 24  | 0    |
| 11 | 179775    | 179800    | 25  | 179787    | 12 | 12  | 2.2  |
| 11 | 1007775   | 1007900   | 125 | 1007787   | 19 | 82  | 10.9 |
| 11 | 1008275   | 1008300   | 25  | 1008287   | 12 | 12  | 2.2  |
| 11 | 1169525   | 1169625   | 100 | 1169537   | 14 | 54  | 2.2  |
| 11 | 1170200   | 1170225   | 25  | 1170212   | 14 | 14  | 2.2  |
| 11 | 2571375   | 2571475   | 100 | 2571462   | 13 | 47  | 0    |
| 11 | 2676950   | 2677125   | 175 | 2677037   | 18 | 106 | 10.9 |
| 11 | 2729350   | 2729375   | 25  | 2729362   | 12 | 12  | 2.2  |
| 11 | 2729825   | 2729975   | 150 | 2729837   | 15 | 82  | 0    |
| 11 | 2744125   | 2744225   | 100 | 2744187   | 14 | 51  | 0    |
| 11 | 2789175   | 2789200   | 25  | 2789187   | 12 | 12  | 2.2  |
| 11 | 2915475   | 2915500   | 25  | 2915487   | 12 | 12  | 0    |
| 11 | 5959925   | 5960025   | 100 | 5959937   | 12 | 48  | 0    |
| 11 | 9659150   | 9659175   | 25  | 9659162   | 13 | 13  | 2.2  |
| 11 | 11392500  | 11392525  | 25  | 11392512  | 12 | 12  | 0    |
| 11 | 14908750  | 14908825  | 75  | 14908762  | 12 | 36  | 0    |
| 11 | 15093300  | 15093475  | 175 | 15093412  | 14 | 89  | 0    |
| 11 | 17416975  | 17417075  | 100 | 17417012  | 13 | 49  | 0    |
| 11 | 18912450  | 18912525  | 75  | 18912512  | 13 | 37  | 0    |
| 11 | 35427800  | 35427875  | 75  | 35427812  | 12 | 36  | 4.4  |
| 11 | 36420000  | 36420025  | 25  | 36420012  | 12 | 12  | 0    |
| 11 | 36427600  | 36427700  | 100 | 36427612  | 13 | 51  | 6.6  |
| 11 | 45700475  | 45700525  | 50  | 45700487  | 12 | 24  | 0    |
| 11 | 64050575  | 64050675  | 100 | 64050612  | 13 | 50  | 0    |
| 11 | 67749750  | 67749975  | 225 | 67749887  | 15 | 123 | 15.3 |
| 11 | 68672350  | 68672525  | 175 | 68672437  | 13 | 85  | 0    |
| 11 | 68683175  | 68683350  | 175 | 68683212  | 17 | 101 | 0    |
| 11 | 68703150  | 68703300  | 150 | 68703212  | 16 | 85  | 0    |
| 11 | 68703775  | 68703800  | 25  | 68703787  | 13 | 13  | 2.2  |
| 11 | 68734075  | 68734250  | 175 | 68734212  | 14 | 86  | 0    |
| 11 | 68831025  | 68831225  | 200 | 68831087  | 24 | 156 | 13.1 |
| 11 | 68838825  | 68838850  | 25  | 68838837  | 12 | 12  | 0    |
| 11 | 68840450  | 68840475  | 25  | 68840462  | 12 | 12  | 2.2  |
| 11 | 68841275  | 68841375  | 100 | 68841287  | 17 | 66  | 10.9 |
| 11 | 68841625  | 68841650  | 25  | 68841637  | 12 | 12  | 2.2  |
| 11 | 68843750  | 68843775  | 25  | 68843762  | 14 | 14  | 2.2  |
| 11 | 68844750  | 68844800  | 50  | 68844762  | 13 | 26  | 2.2  |
| 11 | 68852075  | 68852100  | 25  | 68852087  | 14 | 14  | 2.2  |
| 11 | 68859125  | 68859150  | 25  | 68859137  | 15 | 15  | 0    |
| 11 | 68859725  | 68859925  | 200 | 68859837  | 20 | 125 | 17.5 |
| 11 | 68863100  | 68863175  | 75  | 68863162  | 16 | 40  | 2.2  |
| 11 | 68863750  | 68863775  | 25  | 68863762  | 14 | 14  | 2.2  |
| 11 | 68864300  | 68864625  | 325 | 68864612  | 16 | 155 | 13.1 |
| 11 | 68867500  | 68867750  | 250 | 68867587  | 21 | 168 | 24.1 |

|    |          |          |     |          |    |     |      |
|----|----------|----------|-----|----------|----|-----|------|
| 11 | 68868525 | 68868550 | 25  | 68868537 | 12 | 12  | 2.2  |
| 11 | 68872600 | 68872625 | 25  | 68872612 | 21 | 21  | 2.2  |
| 11 | 68883225 | 68883350 | 125 | 68883262 | 25 | 119 | 21.9 |
| 11 | 68893025 | 68893175 | 150 | 68893087 | 16 | 85  | 13.1 |
| 11 | 68893850 | 68894525 | 675 | 68894037 | 30 | 408 | 52.5 |
| 11 | 68896000 | 68896225 | 225 | 68896112 | 16 | 126 | 19.7 |
| 11 | 68896900 | 68897000 | 100 | 68896937 | 19 | 71  | 8.8  |
| 11 | 68905850 | 68905900 | 50  | 68905862 | 19 | 36  | 0    |
| 11 | 68906375 | 68906550 | 175 | 68906412 | 19 | 116 | 2.2  |
| 11 | 68906775 | 68906950 | 175 | 68906837 | 13 | 83  | 2.2  |
| 11 | 68908600 | 68908775 | 175 | 68908637 | 20 | 121 | 0    |
| 11 | 68910050 | 68910075 | 25  | 68910062 | 12 | 12  | 2.2  |
| 11 | 68910800 | 68910900 | 100 | 68910862 | 18 | 65  | 4.4  |
| 11 | 68911850 | 68911975 | 125 | 68911862 | 22 | 95  | 13.1 |
| 11 | 68913925 | 68914025 | 100 | 68914012 | 17 | 60  | 8.8  |
| 11 | 68914600 | 68914675 | 75  | 68914637 | 13 | 37  | 6.6  |
| 11 | 68914975 | 68915100 | 125 | 68915062 | 30 | 128 | 19.7 |
| 11 | 68915325 | 68915350 | 25  | 68915337 | 12 | 12  | 2.2  |
| 11 | 68915800 | 68915825 | 25  | 68915812 | 12 | 12  | 2.2  |
| 11 | 68916800 | 68916875 | 75  | 68916862 | 17 | 46  | 6.6  |
| 11 | 68919450 | 68919475 | 25  | 68919462 | 12 | 12  | 2.2  |
| 11 | 68921075 | 68921225 | 150 | 68921087 | 23 | 106 | 19.7 |
| 11 | 68921475 | 68921500 | 25  | 68921487 | 13 | 13  | 2.2  |
| 11 | 68922600 | 68922625 | 25  | 68922612 | 12 | 12  | 2.2  |
| 11 | 68923475 | 68923500 | 25  | 68923487 | 22 | 22  | 4.4  |
| 11 | 68925025 | 68925050 | 25  | 68925037 | 12 | 12  | 2.2  |
| 11 | 68926500 | 68926700 | 200 | 68926512 | 22 | 138 | 10.9 |
| 11 | 68937450 | 68937550 | 100 | 68937462 | 17 | 56  | 2.2  |
| 11 | 68948850 | 68949050 | 200 | 68948912 | 15 | 107 | 10.9 |
| 11 | 68949275 | 68949350 | 75  | 68949337 | 18 | 43  | 0    |
| 11 | 68976900 | 68976925 | 25  | 68976912 | 14 | 14  | 0    |
| 11 | 68978575 | 68978675 | 100 | 68978587 | 14 | 52  | 8.8  |
| 11 | 68980650 | 68980725 | 75  | 68980712 | 15 | 40  | 4.4  |
| 11 | 68983750 | 68983800 | 50  | 68983787 | 13 | 25  | 0    |
| 11 | 68984800 | 68984900 | 100 | 68984837 | 15 | 57  | 0    |
| 11 | 68985400 | 68986150 | 750 | 68985412 | 25 | 543 | 87.5 |
| 11 | 68986400 | 68986575 | 175 | 68986412 | 25 | 128 | 19.7 |
| 11 | 68986825 | 68986850 | 25  | 68986837 | 22 | 22  | 4.4  |
| 11 | 68987125 | 68987275 | 150 | 68987212 | 15 | 78  | 8.8  |
| 11 | 68997625 | 68997675 | 50  | 68997637 | 13 | 25  | 4.4  |
| 11 | 68998150 | 68998200 | 50  | 68998187 | 16 | 31  | 4.4  |
| 11 | 68999075 | 68999200 | 125 | 68999162 | 18 | 83  | 15.3 |
| 11 | 69000000 | 69000175 | 175 | 69000012 | 12 | 81  | 10.9 |
| 11 | 69002325 | 69002350 | 25  | 69002337 | 13 | 13  | 0    |
| 11 | 69003600 | 69003725 | 125 | 69003712 | 15 | 65  | 4.4  |
| 11 | 69003975 | 69004000 | 25  | 69003987 | 13 | 13  | 2.2  |
| 11 | 69004275 | 69004325 | 50  | 69004287 | 13 | 25  | 0    |
| 11 | 69004675 | 69004775 | 100 | 69004762 | 15 | 55  | 6.6  |
| 11 | 69005475 | 69005850 | 375 | 69005487 | 17 | 205 | 30.6 |
| 11 | 69008100 | 69008325 | 225 | 69008287 | 14 | 111 | 10.9 |
| 11 | 69010050 | 69010150 | 100 | 69010112 | 18 | 64  | 8.8  |
| 11 | 69011900 | 69012050 | 150 | 69012012 | 14 | 77  | 2.2  |
| 11 | 69012775 | 69012875 | 100 | 69012812 | 14 | 54  | 6.6  |
| 11 | 69014675 | 69014700 | 25  | 69014687 | 16 | 16  | 0    |
| 11 | 69015275 | 69015550 | 275 | 69015287 | 18 | 130 | 6.6  |
| 11 | 69015900 | 69015950 | 50  | 69015912 | 22 | 42  | 0    |
| 11 | 69016200 | 69016250 | 50  | 69016212 | 21 | 41  | 0    |
| 11 | 69016750 | 69016900 | 150 | 69016887 | 24 | 93  | 17.5 |
| 11 | 69025000 | 69025050 | 50  | 69025012 | 17 | 33  | 0    |
| 11 | 69026775 | 69026800 | 25  | 69026787 | 13 | 13  | 2.2  |
| 11 | 69028150 | 69028300 | 150 | 69028262 | 19 | 97  | 13.1 |
| 11 | 69028850 | 69028900 | 50  | 69028887 | 15 | 27  | 4.4  |
| 11 | 69029675 | 69030450 | 775 | 69029687 | 23 | 436 | 35   |
| 11 | 69033375 | 69033625 | 250 | 69033512 | 17 | 145 | 21.9 |
| 11 | 69034575 | 69034825 | 250 | 69034612 | 16 | 126 | 21.9 |
| 11 | 69035200 | 69035225 | 25  | 69035212 | 12 | 12  | 0    |
| 11 | 69035675 | 69035725 | 50  | 69035687 | 13 | 25  | 0    |
| 11 | 69037100 | 69037150 | 50  | 69037112 | 17 | 34  | 0    |
| 11 | 69039425 | 69039450 | 25  | 69039437 | 15 | 15  | 0    |
| 11 | 69041050 | 69041225 | 175 | 69041062 | 24 | 128 | 4.4  |
| 11 | 69042175 | 69042350 | 175 | 69042262 | 17 | 112 | 15.3 |
| 11 | 69043175 | 69043275 | 100 | 69043187 | 27 | 92  | 15.3 |
| 11 | 69046950 | 69047275 | 325 | 69046962 | 18 | 181 | 4.4  |
| 11 | 69047525 | 69047600 | 75  | 69047537 | 22 | 65  | 6.6  |
| 11 | 69053375 | 69053550 | 175 | 69053512 | 14 | 86  | 0    |

|    |          |          |     |          |    |     |      |
|----|----------|----------|-----|----------|----|-----|------|
| 11 | 69054825 | 69055025 | 200 | 69054862 | 26 | 141 | 2.2  |
| 11 | 69062300 | 69062325 | 25  | 69062312 | 12 | 12  | 0    |
| 11 | 69066775 | 69066800 | 25  | 69066787 | 15 | 15  | 2.2  |
| 11 | 69068350 | 69068475 | 125 | 69068412 | 13 | 62  | 10.9 |
| 11 | 69070175 | 69070225 | 50  | 69070187 | 20 | 39  | 0    |
| 11 | 69070875 | 69070950 | 75  | 69070887 | 16 | 47  | 6.6  |
| 11 | 69077900 | 69077925 | 25  | 69077912 | 12 | 12  | 2.2  |
| 11 | 69080325 | 69080425 | 100 | 69080337 | 13 | 51  | 8.8  |
| 11 | 69082225 | 69082250 | 25  | 69082237 | 12 | 12  | 2.2  |
| 11 | 69094075 | 69094100 | 25  | 69094087 | 13 | 13  | 0    |
| 11 | 69096925 | 69097125 | 200 | 69097037 | 16 | 110 | 0    |
| 11 | 69097400 | 69097475 | 75  | 69097412 | 15 | 41  | 0    |
| 11 | 69098600 | 69098650 | 50  | 69098612 | 13 | 26  | 2.2  |
| 11 | 69099050 | 69099075 | 25  | 69099062 | 14 | 14  | 2.2  |
| 11 | 69100425 | 69100600 | 175 | 69100462 | 13 | 89  | 6.6  |
| 11 | 69101425 | 69101625 | 200 | 69101562 | 15 | 106 | 15.3 |
| 11 | 69111600 | 69111625 | 25  | 69111612 | 13 | 13  | 2.2  |
| 11 | 69117375 | 69117625 | 250 | 69117537 | 27 | 197 | 0    |
| 11 | 69117875 | 69118075 | 200 | 69117887 | 17 | 118 | 10.9 |
| 11 | 69118500 | 69118550 | 50  | 69118512 | 12 | 24  | 2.2  |
| 11 | 69119650 | 69120350 | 700 | 69119762 | 23 | 457 | 6.6  |
| 11 | 69125450 | 69125600 | 150 | 69125587 | 17 | 90  | 15.3 |
| 11 | 69127225 | 69127250 | 25  | 69127237 | 12 | 12  | 2.2  |
| 11 | 69127525 | 69127575 | 50  | 69127537 | 16 | 31  | 0    |
| 11 | 69128575 | 69128600 | 25  | 69128587 | 12 | 12  | 2.2  |
| 11 | 69129700 | 69129850 | 150 | 69129712 | 12 | 62  | 10.9 |
| 11 | 69130175 | 69130750 | 575 | 69130287 | 31 | 397 | 19.7 |
| 11 | 69131600 | 69131625 | 25  | 69131612 | 12 | 12  | 2.2  |
| 11 | 69133250 | 69133400 | 150 | 69133262 | 24 | 118 | 10.9 |
| 11 | 69133675 | 69134125 | 450 | 69133987 | 23 | 290 | 35   |
| 11 | 69136250 | 69136275 | 25  | 69136262 | 13 | 13  | 2.2  |
| 11 | 69142400 | 69142475 | 75  | 69142462 | 18 | 46  | 0    |
| 11 | 69150125 | 69150150 | 25  | 69150137 | 12 | 12  | 2.2  |
| 11 | 69152650 | 69152800 | 150 | 69152662 | 22 | 103 | 8.8  |
| 11 | 69153100 | 69153175 | 75  | 69153137 | 13 | 38  | 0    |
| 11 | 69153775 | 69153850 | 75  | 69153812 | 14 | 39  | 2.2  |
| 11 | 69154550 | 69154750 | 200 | 69154562 | 27 | 185 | 26.3 |
| 11 | 69218700 | 69218800 | 100 | 69218712 | 12 | 48  | 2.2  |
| 11 | 69227250 | 69227300 | 50  | 69227262 | 12 | 24  | 4.4  |
| 11 | 69252350 | 69252450 | 100 | 69252387 | 13 | 49  | 0    |
| 11 | 69252850 | 69252875 | 25  | 69252862 | 12 | 12  | 0    |
| 11 | 69261975 | 69262100 | 125 | 69262062 | 19 | 83  | 0    |
| 11 | 69262425 | 69263050 | 625 | 69262587 | 24 | 423 | 52.5 |
| 11 | 69274875 | 69274900 | 25  | 69274887 | 12 | 12  | 2.2  |
| 11 | 69275725 | 69275750 | 25  | 69275737 | 12 | 12  | 0    |
| 11 | 69282550 | 69282575 | 25  | 69282562 | 15 | 15  | 0    |
| 11 | 69285050 | 69285125 | 75  | 69285112 | 14 | 38  | 6.6  |
| 11 | 69286725 | 69286825 | 100 | 69286812 | 15 | 55  | 8.8  |
| 11 | 69287425 | 69287800 | 375 | 69287637 | 28 | 324 | 37.2 |
| 11 | 69292375 | 69293250 | 875 | 69292612 | 27 | 563 | 70   |
| 11 | 69297525 | 69297625 | 100 | 69297537 | 13 | 48  | 8.8  |
| 11 | 69305975 | 69306125 | 150 | 69306062 | 14 | 76  | 10.9 |
| 11 | 69316225 | 69316275 | 50  | 69316237 | 13 | 25  | 4.4  |
| 11 | 69323800 | 69323975 | 175 | 69323937 | 16 | 99  | 0    |
| 11 | 69332000 | 69332025 | 25  | 69332012 | 12 | 12  | 2.2  |
| 11 | 69337850 | 69337975 | 125 | 69337862 | 14 | 69  | 0    |
| 11 | 69364800 | 69364850 | 50  | 69364837 | 13 | 25  | 4.4  |
| 11 | 69365650 | 69365725 | 75  | 69365662 | 16 | 45  | 6.6  |
| 11 | 69374475 | 69374500 | 25  | 69374487 | 12 | 12  | 0    |
| 11 | 69375050 | 69375150 | 100 | 69375062 | 19 | 61  | 8.8  |
| 11 | 69375725 | 69375950 | 225 | 69375762 | 21 | 158 | 8.8  |
| 11 | 69382925 | 69383275 | 350 | 69383112 | 17 | 197 | 17.5 |
| 11 | 69385500 | 69385550 | 50  | 69385537 | 15 | 28  | 2.2  |
| 11 | 69399825 | 69399850 | 25  | 69399837 | 13 | 13  | 2.2  |
| 11 | 69400700 | 69400975 | 275 | 69400787 | 17 | 147 | 21.9 |
| 11 | 69420925 | 69421000 | 75  | 69420987 | 13 | 37  | 0    |
| 11 | 69458525 | 69458575 | 50  | 69458537 | 13 | 25  | 4.4  |
| 11 | 69459100 | 69459175 | 75  | 69459112 | 12 | 36  | 6.6  |
| 11 | 69464200 | 69464350 | 150 | 69464262 | 15 | 83  | 0    |
| 11 | 69474175 | 69474300 | 125 | 69474187 | 36 | 142 | 8.8  |
| 11 | 69474825 | 69475375 | 550 | 69475287 | 20 | 300 | 19.7 |
| 11 | 69475675 | 69476050 | 375 | 69475837 | 21 | 264 | 17.5 |
| 11 | 69476975 | 69477025 | 50  | 69476987 | 12 | 24  | 4.4  |
| 11 | 69481125 | 69481200 | 75  | 69481137 | 12 | 36  | 0    |
| 11 | 69481925 | 69481975 | 50  | 69481937 | 12 | 24  | 0    |

|    |          |          |     |          |    |     |      |
|----|----------|----------|-----|----------|----|-----|------|
| 11 | 69483150 | 69483250 | 100 | 69483212 | 17 | 63  | 2.2  |
| 11 | 69484500 | 69484625 | 125 | 69484512 | 17 | 85  | 2.2  |
| 11 | 69485550 | 69485575 | 25  | 69485562 | 12 | 12  | 0    |
| 11 | 69486125 | 69486225 | 100 | 69486137 | 14 | 55  | 2.2  |
| 11 | 69488775 | 69488800 | 25  | 69488787 | 12 | 12  | 0    |
| 11 | 69501300 | 69501350 | 50  | 69501337 | 16 | 31  | 2.2  |
| 11 | 69503375 | 69503550 | 175 | 69503462 | 18 | 110 | 2.2  |
| 11 | 69505025 | 69505075 | 50  | 69505037 | 13 | 25  | 4.4  |
| 11 | 69513250 | 69513375 | 125 | 69513262 | 13 | 57  | 6.6  |
| 11 | 69516750 | 69516950 | 200 | 69516837 | 17 | 121 | 13.1 |
| 11 | 69517600 | 69517700 | 100 | 69517612 | 14 | 51  | 8.8  |
| 11 | 69523275 | 69523475 | 200 | 69523287 | 13 | 102 | 17.5 |
| 11 | 69525150 | 69525200 | 50  | 69525162 | 13 | 25  | 0    |
| 11 | 69527150 | 69527225 | 75  | 69527162 | 13 | 39  | 0    |
| 11 | 69531500 | 69531525 | 25  | 69531512 | 13 | 13  | 2.2  |
| 11 | 69532725 | 69533025 | 300 | 69532737 | 23 | 178 | 4.4  |
| 11 | 69534525 | 69534575 | 50  | 69534537 | 12 | 24  | 4.4  |
| 11 | 69538175 | 69538250 | 75  | 69538237 | 17 | 45  | 0    |
| 11 | 69542175 | 69542225 | 50  | 69542212 | 16 | 28  | 2.2  |
| 11 | 69542675 | 69542700 | 25  | 69542687 | 12 | 12  | 0    |
| 11 | 69546550 | 69547150 | 600 | 69547012 | 23 | 441 | 81   |
| 11 | 69547550 | 69547775 | 225 | 69547587 | 16 | 119 | 0    |
| 11 | 69548050 | 69548175 | 125 | 69548162 | 28 | 120 | 10.9 |
| 11 | 69549000 | 69549050 | 50  | 69549012 | 16 | 30  | 0    |
| 11 | 69551350 | 69551500 | 150 | 69551362 | 12 | 70  | 0    |
| 11 | 69555700 | 69555725 | 25  | 69555712 | 12 | 12  | 0    |
| 11 | 69557175 | 69557425 | 250 | 69557262 | 25 | 199 | 0    |
| 11 | 69558900 | 69559025 | 125 | 69558912 | 16 | 72  | 6.6  |
| 11 | 69559850 | 69559975 | 125 | 69559937 | 18 | 83  | 8.8  |
| 11 | 69560600 | 69560650 | 50  | 69560637 | 14 | 26  | 0    |
| 11 | 69561025 | 69561700 | 675 | 69561262 | 32 | 530 | 52.5 |
| 11 | 69563800 | 69563875 | 75  | 69563812 | 13 | 37  | 6.6  |
| 11 | 69564300 | 69564425 | 125 | 69564362 | 15 | 71  | 2.2  |
| 11 | 69566175 | 69566425 | 250 | 69566412 | 21 | 147 | 0    |
| 11 | 69569675 | 69569700 | 25  | 69569687 | 12 | 12  | 2.2  |
| 11 | 69594525 | 69594625 | 100 | 69594612 | 21 | 66  | 0    |
| 11 | 69597050 | 69597100 | 50  | 69597062 | 16 | 31  | 4.4  |
| 11 | 69598500 | 69598550 | 50  | 69598512 | 12 | 24  | 0    |
| 11 | 69615525 | 69616325 | 800 | 69616162 | 25 | 529 | 52.5 |
| 11 | 69617575 | 69617700 | 125 | 69617637 | 15 | 66  | 13.1 |
| 11 | 69618250 | 69618300 | 50  | 69618262 | 18 | 34  | 4.4  |
| 11 | 69642625 | 69642725 | 100 | 69642687 | 13 | 49  | 4.4  |
| 11 | 69644000 | 69644100 | 100 | 69644087 | 18 | 61  | 8.8  |
| 11 | 69649950 | 69649975 | 25  | 69649962 | 12 | 12  | 0    |
| 11 | 69700875 | 69700900 | 25  | 69700887 | 12 | 12  | 2.2  |
| 11 | 69753525 | 69753600 | 75  | 69753537 | 12 | 36  | 2.2  |
| 11 | 69757575 | 69757675 | 100 | 69757587 | 24 | 82  | 10.9 |
| 11 | 69760175 | 69760325 | 150 | 69760237 | 16 | 88  | 10.9 |
| 11 | 69764500 | 69764600 | 100 | 69764512 | 19 | 65  | 8.8  |
| 11 | 69766450 | 69766525 | 75  | 69766512 | 13 | 37  | 2.2  |
| 11 | 69768500 | 69768525 | 25  | 69768512 | 12 | 12  | 2.2  |
| 11 | 69776100 | 69776150 | 50  | 69776112 | 12 | 24  | 2.2  |
| 11 | 69779325 | 69779425 | 100 | 69779362 | 14 | 54  | 2.2  |
| 11 | 69895175 | 69895350 | 175 | 69895237 | 26 | 146 | 15.3 |
| 11 | 69971500 | 69971525 | 25  | 69971512 | 12 | 12  | 0    |
| 11 | 69973400 | 69973575 | 175 | 69973462 | 18 | 110 | 0    |
| 11 | 69974700 | 69974775 | 75  | 69974762 | 17 | 47  | 2.2  |
| 11 | 69978000 | 69978125 | 125 | 69978062 | 17 | 67  | 10.9 |
| 11 | 69983875 | 69984000 | 125 | 69983987 | 18 | 75  | 0    |
| 11 | 69985575 | 69985875 | 300 | 69985712 | 18 | 188 | 26.3 |
| 11 | 69986350 | 69986650 | 300 | 69986587 | 25 | 212 | 4.4  |
| 11 | 69986925 | 69986950 | 25  | 69986937 | 12 | 12  | 2.2  |
| 11 | 69998100 | 69998125 | 25  | 69998112 | 13 | 13  | 2.2  |
| 11 | 69998450 | 69998750 | 300 | 69998662 | 14 | 139 | 6.6  |
| 11 | 70008975 | 70009100 | 125 | 70008987 | 16 | 76  | 10.9 |
| 11 | 70009600 | 70010250 | 650 | 70010037 | 27 | 409 | 41.6 |
| 11 | 70010725 | 70010825 | 100 | 70010737 | 12 | 43  | 4.4  |
| 11 | 70014575 | 70014850 | 275 | 70014712 | 19 | 171 | 2.2  |
| 11 | 70015400 | 70015450 | 50  | 70015437 | 16 | 28  | 2.2  |
| 11 | 70016025 | 70016225 | 200 | 70016037 | 21 | 139 | 6.6  |
| 11 | 70019675 | 70019825 | 150 | 70019712 | 15 | 83  | 4.4  |
| 11 | 70030375 | 70030400 | 25  | 70030387 | 12 | 12  | 2.2  |
| 11 | 70033150 | 70033400 | 250 | 70033237 | 18 | 154 | 0    |
| 11 | 70034450 | 70035000 | 550 | 70034887 | 15 | 262 | 15.3 |
| 11 | 70045375 | 70045550 | 175 | 70045462 | 24 | 145 | 26.3 |



|    |          |          |     |          |    |     |      |
|----|----------|----------|-----|----------|----|-----|------|
| 11 | 70057500 | 70057725 | 225 | 70057637 | 22 | 159 | 0    |
| 11 | 70058275 | 70058625 | 350 | 70058537 | 26 | 292 | 15.3 |
| 11 | 70058850 | 70058950 | 100 | 70058862 | 17 | 61  | 8.8  |
| 11 | 70060075 | 70060150 | 75  | 70060112 | 19 | 53  | 6.6  |
| 11 | 70061750 | 70061775 | 25  | 70061762 | 12 | 12  | 0    |
| 11 | 70062225 | 70062325 | 100 | 70062237 | 17 | 59  | 0    |
| 11 | 70062825 | 70063000 | 175 | 70062887 | 18 | 113 | 0    |
| 11 | 70064025 | 70064075 | 50  | 70064037 | 14 | 26  | 4.4  |
| 11 | 70065150 | 70065400 | 250 | 70065162 | 20 | 158 | 10.9 |
| 11 | 70065650 | 70065825 | 175 | 70065737 | 18 | 100 | 0    |
| 11 | 70068325 | 70068425 | 100 | 70068337 | 17 | 69  | 13.1 |
| 11 | 70071300 | 70071375 | 75  | 70071312 | 13 | 37  | 0    |
| 11 | 70071725 | 70071900 | 175 | 70071787 | 14 | 88  | 13.1 |
| 11 | 70073300 | 70073350 | 50  | 70073312 | 13 | 25  | 0    |
| 11 | 70074625 | 70074650 | 25  | 70074637 | 12 | 12  | 0    |
| 11 | 70077250 | 70077275 | 25  | 70077262 | 13 | 13  | 0    |
| 11 | 70082225 | 70082300 | 75  | 70082287 | 13 | 36  | 0    |
| 11 | 70083300 | 70083325 | 25  | 70083312 | 12 | 12  | 2.2  |
| 11 | 70101825 | 70101900 | 75  | 70101887 | 20 | 54  | 6.6  |
| 11 | 70102275 | 70102300 | 25  | 70102287 | 14 | 14  | 2.2  |
| 11 | 70106050 | 70106200 | 150 | 70106112 | 13 | 73  | 10.9 |
| 11 | 70107450 | 70107575 | 125 | 70107562 | 13 | 60  | 0    |
| 11 | 70110600 | 70110900 | 300 | 70110812 | 19 | 171 | 6.6  |
| 11 | 70115900 | 70116525 | 625 | 70116012 | 24 | 412 | 39.4 |
| 11 | 70118525 | 70118550 | 25  | 70118537 | 12 | 12  | 2.2  |
| 11 | 70121575 | 70121800 | 225 | 70121712 | 19 | 149 | 8.8  |
| 11 | 70130600 | 70130650 | 50  | 70130612 | 13 | 26  | 4.4  |
| 11 | 70138750 | 70139025 | 275 | 70138987 | 15 | 145 | 17.5 |
| 11 | 70139575 | 70139600 | 25  | 70139587 | 13 | 13  | 0    |
| 11 | 70140300 | 70140325 | 25  | 70140312 | 12 | 12  | 2.2  |
| 11 | 70140700 | 70140900 | 200 | 70140712 | 16 | 105 | 4.4  |
| 11 | 70143000 | 70143025 | 25  | 70143012 | 13 | 13  | 2.2  |
| 11 | 70143525 | 70143750 | 225 | 70143562 | 15 | 126 | 4.4  |
| 11 | 70144800 | 70145000 | 200 | 70144812 | 14 | 103 | 4.4  |
| 11 | 70145550 | 70145700 | 150 | 70145612 | 15 | 84  | 4.4  |
| 11 | 70150450 | 70150525 | 75  | 70150487 | 15 | 43  | 4.4  |
| 11 | 70151100 | 70151200 | 100 | 70151112 | 13 | 50  | 8.8  |
| 11 | 70157675 | 70157700 | 25  | 70157687 | 13 | 13  | 2.2  |
| 11 | 70159950 | 70160350 | 400 | 70160187 | 19 | 251 | 32.8 |
| 11 | 70160950 | 70160975 | 25  | 70160962 | 12 | 12  | 2.2  |
| 11 | 70165375 | 70165450 | 75  | 70165387 | 14 | 37  | 6.6  |
| 11 | 70167650 | 70167675 | 25  | 70167662 | 13 | 13  | 0    |
| 11 | 70168250 | 70168425 | 175 | 70168412 | 16 | 98  | 10.9 |
| 11 | 70170025 | 70170075 | 50  | 70170062 | 13 | 25  | 2.2  |
| 11 | 70171275 | 70171300 | 25  | 70171287 | 12 | 12  | 0    |
| 11 | 70179700 | 70179725 | 25  | 70179712 | 15 | 15  | 2.2  |
| 11 | 70182550 | 70182650 | 100 | 70182612 | 14 | 53  | 8.8  |
| 11 | 70184525 | 70184600 | 75  | 70184562 | 14 | 40  | 6.6  |
| 11 | 70187175 | 70187525 | 350 | 70187412 | 18 | 202 | 17.5 |
| 11 | 70187775 | 70187850 | 75  | 70187787 | 13 | 38  | 6.6  |
| 11 | 70190225 | 70190350 | 125 | 70190262 | 16 | 75  | 2.2  |
| 11 | 70191100 | 70191125 | 25  | 70191112 | 12 | 12  | 0    |
| 11 | 70192400 | 70192650 | 250 | 70192612 | 24 | 177 | 13.1 |
| 11 | 70197400 | 70197475 | 75  | 70197462 | 13 | 37  | 6.6  |
| 11 | 70201150 | 70201175 | 25  | 70201162 | 12 | 12  | 2.2  |
| 11 | 70201400 | 70201600 | 200 | 70201412 | 21 | 139 | 15.3 |
| 11 | 70203100 | 70203250 | 150 | 70203162 | 15 | 84  | 8.8  |
| 11 | 70205300 | 70205500 | 200 | 70205387 | 19 | 126 | 13.1 |
| 11 | 70206075 | 70206150 | 75  | 70206087 | 15 | 44  | 6.6  |
| 11 | 70206425 | 70206475 | 50  | 70206462 | 14 | 26  | 4.4  |
| 11 | 70207175 | 70207225 | 50  | 70207187 | 13 | 25  | 0    |
| 11 | 70208550 | 70208725 | 175 | 70208562 | 12 | 69  | 13.1 |
| 11 | 70211000 | 70211025 | 25  | 70211012 | 12 | 12  | 2.2  |
| 11 | 70212000 | 70212150 | 150 | 70212012 | 15 | 81  | 13.1 |
| 11 | 70212575 | 70212650 | 75  | 70212587 | 12 | 36  | 2.2  |
| 11 | 70213800 | 70213875 | 75  | 70213812 | 13 | 38  | 6.6  |
| 11 | 70217075 | 70217100 | 25  | 70217087 | 13 | 13  | 0    |
| 11 | 70218625 | 70218775 | 150 | 70218637 | 12 | 70  | 0    |
| 11 | 70220050 | 70220225 | 175 | 70220112 | 14 | 89  | 2.2  |
| 11 | 70222000 | 70222025 | 25  | 70222012 | 12 | 12  | 2.2  |
| 11 | 70223625 | 70223750 | 125 | 70223662 | 13 | 63  | 0    |
| 11 | 70226200 | 70226250 | 50  | 70226212 | 12 | 24  | 4.4  |
| 11 | 70227425 | 70227525 | 100 | 70227462 | 17 | 62  | 4.4  |
| 11 | 70229725 | 70230175 | 450 | 70229837 | 22 | 287 | 2.2  |
| 11 | 70234925 | 70235100 | 175 | 70235012 | 16 | 98  | 2.2  |

|    |          |          |      |          |    |     |       |
|----|----------|----------|------|----------|----|-----|-------|
| 11 | 70236625 | 70236875 | 250  | 70236762 | 21 | 177 | 15.3  |
| 11 | 70237100 | 70237225 | 125  | 70237187 | 14 | 63  | 6.6   |
| 11 | 70239050 | 70239075 | 25   | 70239062 | 15 | 15  | 2.2   |
| 11 | 70240475 | 70240600 | 125  | 70240487 | 13 | 62  | 2.2   |
| 11 | 70242850 | 70243125 | 275  | 70243112 | 21 | 174 | 30.6  |
| 11 | 70244350 | 70244475 | 125  | 70244462 | 19 | 85  | 2.2   |
| 11 | 70245300 | 70245325 | 25   | 70245312 | 13 | 13  | 2.2   |
| 11 | 70247250 | 70247425 | 175  | 70247262 | 14 | 89  | 0     |
| 11 | 70248375 | 70248575 | 200  | 70248512 | 16 | 109 | 0     |
| 11 | 70249100 | 70250125 | 1025 | 70249287 | 27 | 645 | 118.2 |
| 11 | 70250475 | 70250750 | 275  | 70250612 | 24 | 190 | 0     |
| 11 | 70251225 | 70251325 | 100  | 70251287 | 15 | 52  | 0     |
| 11 | 70251850 | 70251900 | 50   | 70251862 | 13 | 25  | 4.4   |
| 11 | 70254200 | 70254300 | 100  | 70254287 | 16 | 60  | 0     |
| 11 | 70255825 | 70255900 | 75   | 70255887 | 14 | 40  | 6.6   |
| 11 | 70256400 | 70256425 | 25   | 70256412 | 12 | 12  | 0     |
| 11 | 70256800 | 70256825 | 25   | 70256812 | 14 | 14  | 2.2   |
| 11 | 70261825 | 70262075 | 250  | 70262012 | 13 | 112 | 19.7  |
| 11 | 70268600 | 70268675 | 75   | 70268612 | 14 | 41  | 2.2   |
| 11 | 70269275 | 70269350 | 75   | 70269287 | 13 | 38  | 0     |
| 11 | 70270400 | 70270425 | 25   | 70270412 | 13 | 13  | 0     |
| 11 | 70271325 | 70271625 | 300  | 70271512 | 24 | 216 | 8.8   |
| 11 | 70281200 | 70281275 | 75   | 70281212 | 12 | 36  | 0     |
| 11 | 70282100 | 70282275 | 175  | 70282212 | 13 | 84  | 15.3  |
| 11 | 70283925 | 70283950 | 25   | 70283937 | 12 | 12  | 2.2   |
| 11 | 70284250 | 70284375 | 125  | 70284312 | 15 | 66  | 0     |
| 11 | 70286425 | 70286500 | 75   | 70286462 | 13 | 38  | 0     |
| 11 | 70291350 | 70291400 | 50   | 70291387 | 13 | 25  | 0     |
| 11 | 70293475 | 70293500 | 25   | 70293487 | 14 | 14  | 0     |
| 11 | 70296350 | 70296450 | 100  | 70296362 | 12 | 48  | 0     |
| 11 | 70297075 | 70297100 | 25   | 70297087 | 14 | 14  | 2.2   |
| 11 | 70303475 | 70303500 | 25   | 70303487 | 12 | 12  | 2.2   |
| 11 | 70306500 | 70306525 | 25   | 70306512 | 12 | 12  | 2.2   |
| 11 | 70310650 | 70310725 | 75   | 70310712 | 17 | 45  | 4.4   |
| 11 | 70311000 | 70311050 | 50   | 70311012 | 13 | 25  | 0     |
| 11 | 70314025 | 70314150 | 125  | 70314062 | 18 | 79  | 10.9  |
| 11 | 70314500 | 70314600 | 100  | 70314537 | 15 | 56  | 8.8   |
| 11 | 70319625 | 70319650 | 25   | 70319637 | 12 | 12  | 2.2   |
| 11 | 70320225 | 70320550 | 325  | 70320362 | 27 | 290 | 10.9  |
| 11 | 70321100 | 70321475 | 375  | 70321212 | 18 | 247 | 35    |
| 11 | 70322050 | 70322425 | 375  | 70322162 | 23 | 257 | 17.5  |
| 11 | 70325550 | 70325575 | 25   | 70325562 | 12 | 12  | 2.2   |
| 11 | 70326675 | 70326775 | 100  | 70326687 | 12 | 48  | 0     |
| 11 | 70327750 | 70327775 | 25   | 70327762 | 12 | 12  | 2.2   |
| 11 | 70328100 | 70328125 | 25   | 70328112 | 16 | 16  | 2.2   |
| 11 | 70329000 | 70329050 | 50   | 70329012 | 13 | 26  | 4.4   |
| 11 | 70330575 | 70330600 | 25   | 70330587 | 12 | 12  | 2.2   |
| 11 | 70331100 | 70331125 | 25   | 70331112 | 16 | 16  | 2.2   |
| 11 | 70333950 | 70334050 | 100  | 70333962 | 12 | 47  | 0     |
| 11 | 70334625 | 70334700 | 75   | 70334637 | 17 | 45  | 6.6   |
| 11 | 70337225 | 70337250 | 25   | 70337237 | 12 | 12  | 2.2   |
| 11 | 70344625 | 70344850 | 225  | 70344737 | 19 | 142 | 0     |
| 11 | 70347475 | 70348200 | 725  | 70347862 | 17 | 370 | 35    |
| 11 | 70349950 | 70350075 | 125  | 70350037 | 14 | 63  | 2.2   |
| 11 | 70351600 | 70351725 | 125  | 70351612 | 14 | 65  | 0     |
| 11 | 70352225 | 70352850 | 625  | 70352487 | 25 | 515 | 87.5  |
| 11 | 70359050 | 70359175 | 125  | 70359062 | 12 | 59  | 2.2   |
| 11 | 70360225 | 70360300 | 75   | 70360262 | 18 | 53  | 6.6   |
| 11 | 70361175 | 70361225 | 50   | 70361187 | 15 | 27  | 0     |
| 11 | 70363125 | 70363300 | 175  | 70363162 | 15 | 99  | 2.2   |
| 11 | 70363825 | 70364050 | 225  | 70363862 | 18 | 135 | 6.6   |
| 11 | 70365175 | 70365225 | 50   | 70365187 | 22 | 44  | 6.6   |
| 11 | 70365675 | 70365825 | 150  | 70365712 | 15 | 80  | 10.9  |
| 11 | 70367750 | 70367775 | 25   | 70367762 | 12 | 12  | 0     |
| 11 | 70369650 | 70369675 | 25   | 70369662 | 12 | 12  | 0     |
| 11 | 70370425 | 70370475 | 50   | 70370437 | 16 | 32  | 0     |
| 11 | 70371625 | 70371700 | 75   | 70371637 | 20 | 58  | 2.2   |
| 11 | 70372400 | 70372700 | 300  | 70372512 | 19 | 183 | 4.4   |
| 11 | 70376825 | 70376850 | 25   | 70376837 | 12 | 12  | 0     |
| 11 | 70377350 | 70377550 | 200  | 70377462 | 16 | 111 | 15.3  |
| 11 | 70378100 | 70378175 | 75   | 70378137 | 13 | 38  | 4.4   |
| 11 | 70381350 | 70381375 | 25   | 70381362 | 12 | 12  | 2.2   |
| 11 | 70386275 | 70386375 | 100  | 70386312 | 17 | 60  | 0     |
| 11 | 70386950 | 70387050 | 100  | 70386987 | 14 | 53  | 0     |
| 11 | 70389250 | 70389300 | 50   | 70389287 | 13 | 25  | 0     |

|    |          |          |     |          |    |     |      |
|----|----------|----------|-----|----------|----|-----|------|
| 11 | 70391000 | 70391025 | 25  | 70391012 | 13 | 13  | 0    |
| 11 | 70392500 | 70392550 | 50  | 70392537 | 13 | 25  | 0    |
| 11 | 70393350 | 70393375 | 25  | 70393362 | 12 | 12  | 0    |
| 11 | 70395575 | 70395600 | 25  | 70395587 | 12 | 12  | 2.2  |
| 11 | 70396775 | 70396800 | 25  | 70396787 | 12 | 12  | 2.2  |
| 11 | 70401750 | 70401850 | 100 | 70401787 | 17 | 57  | 0    |
| 11 | 70402800 | 70402900 | 100 | 70402812 | 12 | 48  | 8.8  |
| 11 | 70409000 | 70409075 | 75  | 70409062 | 17 | 45  | 4.4  |
| 11 | 70413700 | 70413725 | 25  | 70413712 | 13 | 13  | 0    |
| 11 | 70419300 | 70419325 | 25  | 70419312 | 15 | 15  | 2.2  |
| 11 | 70420925 | 70421200 | 275 | 70421062 | 17 | 153 | 0    |
| 11 | 70422800 | 70422900 | 100 | 70422812 | 13 | 50  | 0    |
| 11 | 70423400 | 70423550 | 150 | 70423512 | 23 | 121 | 8.8  |
| 11 | 70425600 | 70425650 | 50  | 70425612 | 12 | 24  | 4.4  |
| 11 | 70427725 | 70427800 | 75  | 70427737 | 15 | 42  | 4.4  |
| 11 | 70428800 | 70429000 | 200 | 70428962 | 16 | 112 | 0    |
| 11 | 70429900 | 70430200 | 300 | 70430012 | 21 | 209 | 10.9 |
| 11 | 70430825 | 70430875 | 50  | 70430837 | 13 | 25  | 0    |
| 11 | 70431975 | 70432025 | 50  | 70432012 | 23 | 42  | 4.4  |
| 11 | 70440075 | 70440225 | 150 | 70440087 | 13 | 71  | 13.1 |
| 11 | 70447600 | 70447750 | 150 | 70447687 | 16 | 81  | 6.6  |
| 11 | 70449500 | 70449550 | 50  | 70449512 | 12 | 24  | 4.4  |
| 11 | 70450025 | 70450075 | 50  | 70450037 | 12 | 24  | 0    |
| 11 | 70452700 | 70452725 | 25  | 70452712 | 13 | 13  | 2.2  |
| 11 | 70454775 | 70454825 | 50  | 70454787 | 12 | 24  | 0    |
| 11 | 70455200 | 70455475 | 275 | 70455287 | 21 | 181 | 0    |
| 11 | 70456350 | 70456425 | 75  | 70456387 | 13 | 37  | 6.6  |
| 11 | 70458600 | 70458650 | 50  | 70458637 | 16 | 30  | 0    |
| 11 | 70462350 | 70462500 | 150 | 70462462 | 17 | 88  | 13.1 |
| 11 | 70463275 | 70463300 | 25  | 70463287 | 12 | 12  | 2.2  |
| 11 | 70465975 | 70466625 | 650 | 70466437 | 18 | 315 | 17.5 |
| 11 | 70466850 | 70466900 | 50  | 70466862 | 16 | 32  | 4.4  |
| 11 | 70469100 | 70469275 | 175 | 70469237 | 15 | 93  | 6.6  |
| 11 | 70473000 | 70473100 | 100 | 70473087 | 18 | 57  | 0    |
| 11 | 70476400 | 70476875 | 475 | 70476762 | 16 | 234 | 0    |
| 11 | 70477525 | 70477600 | 75  | 70477562 | 16 | 45  | 0    |
| 11 | 70478175 | 70478275 | 100 | 70478187 | 14 | 52  | 8.8  |
| 11 | 70482625 | 70482750 | 125 | 70482637 | 22 | 85  | 10.9 |
| 11 | 70483075 | 70483375 | 300 | 70483212 | 20 | 178 | 15.3 |
| 11 | 70483775 | 70484025 | 250 | 70483937 | 19 | 146 | 0    |
| 11 | 70486350 | 70486450 | 100 | 70486437 | 19 | 63  | 8.8  |
| 11 | 70486675 | 70487025 | 350 | 70486862 | 26 | 295 | 37.2 |
| 11 | 70489775 | 70489800 | 25  | 70489787 | 12 | 12  | 2.2  |
| 11 | 70490400 | 70490525 | 125 | 70490412 | 14 | 62  | 0    |
| 11 | 70493075 | 70493250 | 175 | 70493187 | 13 | 84  | 8.8  |
| 11 | 70495975 | 70496000 | 25  | 70495987 | 12 | 12  | 0    |
| 11 | 70498250 | 70498400 | 150 | 70498262 | 17 | 81  | 4.4  |
| 11 | 70498650 | 70498675 | 25  | 70498662 | 16 | 16  | 2.2  |
| 11 | 70499900 | 70500100 | 200 | 70499987 | 16 | 112 | 4.4  |
| 11 | 70501700 | 70501725 | 25  | 70501712 | 12 | 12  | 0    |
| 11 | 70504425 | 70504450 | 25  | 70504437 | 12 | 12  | 2.2  |
| 11 | 70504750 | 70505200 | 450 | 70505012 | 17 | 282 | 46   |
| 11 | 70505425 | 70505550 | 125 | 70505462 | 15 | 64  | 4.4  |
| 11 | 70506350 | 70506400 | 50  | 70506362 | 15 | 29  | 0    |
| 11 | 70507425 | 70507725 | 300 | 70507587 | 24 | 213 | 17.5 |
| 11 | 70511500 | 70511875 | 375 | 70511762 | 16 | 204 | 6.6  |
| 11 | 70512550 | 70513075 | 525 | 70513012 | 16 | 231 | 26.3 |
| 11 | 70516600 | 70517375 | 775 | 70516762 | 33 | 524 | 35   |
| 11 | 70518900 | 70518975 | 75  | 70518937 | 13 | 38  | 0    |
| 11 | 70519750 | 70520175 | 425 | 70520087 | 19 | 209 | 17.5 |
| 11 | 70521050 | 70521125 | 75  | 70521062 | 13 | 37  | 6.6  |
| 11 | 70523750 | 70523800 | 50  | 70523787 | 14 | 27  | 0    |
| 11 | 70524650 | 70524700 | 50  | 70524662 | 13 | 25  | 4.4  |
| 11 | 70526200 | 70526275 | 75  | 70526262 | 15 | 40  | 6.6  |
| 11 | 70526675 | 70526700 | 25  | 70526687 | 12 | 12  | 2.2  |
| 11 | 70529100 | 70529150 | 50  | 70529137 | 16 | 29  | 2.2  |
| 11 | 70529725 | 70529800 | 75  | 70529737 | 15 | 42  | 2.2  |
| 11 | 70532950 | 70532975 | 25  | 70532962 | 12 | 12  | 2.2  |
| 11 | 70534300 | 70534900 | 600 | 70534737 | 17 | 326 | 8.8  |
| 11 | 70536075 | 70536150 | 75  | 70536137 | 15 | 40  | 0    |
| 11 | 70536550 | 70536575 | 25  | 70536562 | 12 | 12  | 2.2  |
| 11 | 70537075 | 70537475 | 400 | 70537237 | 20 | 242 | 0    |
| 11 | 70539400 | 70539575 | 175 | 70539412 | 13 | 85  | 0    |
| 11 | 70540075 | 70540225 | 150 | 70540112 | 18 | 90  | 10.9 |
| 11 | 70543050 | 70543100 | 50  | 70543062 | 14 | 26  | 4.4  |

|    |          |          |     |          |    |     |      |
|----|----------|----------|-----|----------|----|-----|------|
| 11 | 70544800 | 70545250 | 450 | 70544812 | 24 | 283 | 52.5 |
| 11 | 70549225 | 70549275 | 50  | 70549237 | 14 | 26  | 0    |
| 11 | 70554500 | 70555025 | 525 | 70554737 | 25 | 401 | 17.5 |
| 11 | 70559550 | 70559600 | 50  | 70559562 | 23 | 45  | 8.8  |
| 11 | 70560850 | 70560925 | 75  | 70560912 | 13 | 37  | 6.6  |
| 11 | 70562550 | 70562600 | 50  | 70562562 | 12 | 24  | 0    |
| 11 | 70563950 | 70564050 | 100 | 70563962 | 18 | 59  | 0    |
| 11 | 70568650 | 70568675 | 25  | 70568662 | 12 | 12  | 2.2  |
| 11 | 70569825 | 70569875 | 50  | 70569837 | 12 | 24  | 2.2  |
| 11 | 70571075 | 70571175 | 100 | 70571162 | 15 | 54  | 8.8  |
| 11 | 70571525 | 70571650 | 125 | 70571587 | 17 | 78  | 8.8  |
| 11 | 70571975 | 70572100 | 125 | 70571987 | 12 | 58  | 0    |
| 11 | 70572450 | 70572650 | 200 | 70572512 | 16 | 118 | 4.4  |
| 11 | 70573275 | 70573400 | 125 | 70573312 | 13 | 62  | 4.4  |
| 11 | 70573875 | 70573900 | 25  | 70573887 | 12 | 12  | 0    |
| 11 | 70574625 | 70574675 | 50  | 70574637 | 13 | 26  | 0    |
| 11 | 70574925 | 70574975 | 50  | 70574937 | 12 | 24  | 0    |
| 11 | 70575325 | 70575600 | 275 | 70575387 | 22 | 185 | 17.5 |
| 11 | 70576525 | 70576750 | 225 | 70576587 | 16 | 118 | 0    |
| 11 | 70577000 | 70577175 | 175 | 70577037 | 17 | 100 | 8.8  |
| 11 | 70577600 | 70577625 | 25  | 70577612 | 12 | 12  | 2.2  |
| 11 | 70578475 | 70578850 | 375 | 70578512 | 16 | 216 | 4.4  |
| 11 | 70579225 | 70579250 | 25  | 70579237 | 12 | 12  | 2.2  |
| 11 | 70579525 | 70579550 | 25  | 70579537 | 14 | 14  | 0    |
| 11 | 70582125 | 70582150 | 25  | 70582137 | 12 | 12  | 0    |
| 11 | 70582850 | 70583225 | 375 | 70582912 | 15 | 181 | 17.5 |
| 11 | 70585775 | 70585950 | 175 | 70585862 | 15 | 90  | 6.6  |
| 11 | 70587650 | 70587675 | 25  | 70587662 | 14 | 14  | 2.2  |
| 11 | 70588900 | 70588975 | 75  | 70588912 | 12 | 35  | 4.4  |
| 11 | 70593625 | 70593650 | 25  | 70593637 | 15 | 15  | 0    |
| 11 | 70594275 | 70594400 | 125 | 70594287 | 12 | 58  | 10.9 |
| 11 | 70596550 | 70596600 | 50  | 70596562 | 15 | 27  | 0    |
| 11 | 70596975 | 70597050 | 75  | 70596987 | 24 | 68  | 0    |
| 11 | 70597375 | 70597500 | 125 | 70597387 | 13 | 60  | 4.4  |
| 11 | 70597900 | 70598375 | 475 | 70598212 | 26 | 459 | 81   |
| 11 | 70603675 | 70603800 | 125 | 70603712 | 22 | 99  | 6.6  |
| 11 | 70604025 | 70604200 | 175 | 70604137 | 15 | 91  | 6.6  |
| 11 | 70613050 | 70613225 | 175 | 70613087 | 17 | 106 | 10.9 |
| 11 | 70622100 | 70622125 | 25  | 70622112 | 13 | 13  | 2.2  |
| 11 | 70623375 | 70623425 | 50  | 70623387 | 12 | 24  | 4.4  |
| 11 | 70624525 | 70624650 | 125 | 70624537 | 14 | 62  | 10.9 |
| 11 | 70644200 | 70644325 | 125 | 70644237 | 14 | 60  | 8.8  |
| 11 | 70651350 | 70651375 | 25  | 70651362 | 12 | 12  | 0    |
| 11 | 70654325 | 70654450 | 125 | 70654337 | 14 | 65  | 0    |
| 11 | 70658750 | 70658775 | 25  | 70658762 | 12 | 12  | 0    |
| 11 | 70661250 | 70661475 | 225 | 70661387 | 16 | 126 | 17.5 |
| 11 | 70662200 | 70662325 | 125 | 70662237 | 15 | 66  | 10.9 |
| 11 | 70663450 | 70663550 | 100 | 70663462 | 13 | 49  | 8.8  |
| 11 | 70673675 | 70673750 | 75  | 70673737 | 18 | 50  | 6.6  |
| 11 | 70674000 | 70674075 | 75  | 70674012 | 16 | 47  | 6.6  |
| 11 | 70675650 | 70675750 | 100 | 70675687 | 15 | 53  | 2.2  |
| 11 | 70682550 | 70682575 | 25  | 70682562 | 12 | 12  | 2.2  |
| 11 | 70683475 | 70683500 | 25  | 70683487 | 12 | 12  | 0    |
| 11 | 70689775 | 70689875 | 100 | 70689787 | 16 | 57  | 4.4  |
| 11 | 70690500 | 70690525 | 25  | 70690512 | 13 | 13  | 2.2  |
| 11 | 70691075 | 70691125 | 50  | 70691087 | 16 | 28  | 4.4  |
| 11 | 70694350 | 70694450 | 100 | 70694362 | 20 | 62  | 0    |
| 11 | 70698125 | 70698425 | 300 | 70698137 | 17 | 128 | 4.4  |
| 11 | 70700350 | 70700475 | 125 | 70700412 | 15 | 69  | 0    |
| 11 | 70709100 | 70709175 | 75  | 70709137 | 14 | 39  | 6.6  |
| 11 | 70710375 | 70710600 | 225 | 70710412 | 19 | 150 | 15.3 |
| 11 | 70711000 | 70711125 | 125 | 70711062 | 13 | 62  | 4.4  |
| 11 | 70711825 | 70712450 | 625 | 70712137 | 13 | 283 | 28.4 |
| 11 | 70712675 | 70712825 | 150 | 70712787 | 15 | 80  | 13.1 |
| 11 | 70714650 | 70714675 | 25  | 70714662 | 13 | 13  | 2.2  |
| 11 | 70714950 | 70715000 | 50  | 70714962 | 12 | 24  | 0    |
| 11 | 70715375 | 70715575 | 200 | 70715462 | 19 | 124 | 6.6  |
| 11 | 70720900 | 70720975 | 75  | 70720962 | 17 | 46  | 0    |
| 11 | 70728175 | 70728200 | 25  | 70728187 | 13 | 13  | 2.2  |
| 11 | 70728975 | 70729225 | 250 | 70729112 | 20 | 163 | 13.1 |
| 11 | 70733525 | 70733675 | 150 | 70733587 | 14 | 76  | 6.6  |
| 11 | 70735900 | 70735925 | 25  | 70735912 | 12 | 12  | 0    |
| 11 | 70738675 | 70738700 | 25  | 70738687 | 14 | 14  | 0    |
| 11 | 70741450 | 70741525 | 75  | 70741512 | 22 | 50  | 6.6  |
| 11 | 70743600 | 70743650 | 50  | 70743612 | 13 | 25  | 4.4  |

|    |          |          |     |          |    |     |      |
|----|----------|----------|-----|----------|----|-----|------|
| 11 | 70745700 | 70745750 | 50  | 70745712 | 13 | 26  | 0    |
| 11 | 70753250 | 70753450 | 200 | 70753362 | 16 | 118 | 2.2  |
| 11 | 70753950 | 70753975 | 25  | 70753962 | 12 | 12  | 2.2  |
| 11 | 70758125 | 70758375 | 250 | 70758137 | 12 | 104 | 4.4  |
| 11 | 70758875 | 70759225 | 350 | 70758962 | 14 | 159 | 0    |
| 11 | 70770650 | 70770925 | 275 | 70770912 | 16 | 136 | 13.1 |
| 11 | 70771250 | 70771300 | 50  | 70771262 | 12 | 24  | 4.4  |
| 11 | 70772350 | 70772475 | 125 | 70772387 | 15 | 66  | 10.9 |
| 11 | 70773075 | 70773125 | 50  | 70773087 | 13 | 26  | 4.4  |
| 11 | 70773475 | 70773500 | 25  | 70773487 | 12 | 12  | 2.2  |
| 11 | 70775275 | 70775425 | 150 | 70775362 | 21 | 103 | 8.8  |
| 11 | 70780000 | 70780025 | 25  | 70780012 | 13 | 13  | 2.2  |
| 11 | 70782100 | 70782250 | 150 | 70782137 | 15 | 84  | 0    |
| 11 | 70782550 | 70782750 | 200 | 70782637 | 18 | 127 | 10.9 |
| 11 | 70784050 | 70784100 | 50  | 70784062 | 12 | 24  | 4.4  |
| 11 | 70786875 | 70787075 | 200 | 70786962 | 17 | 114 | 10.9 |
| 11 | 70790650 | 70790675 | 25  | 70790662 | 12 | 12  | 2.2  |
| 11 | 70791200 | 70792050 | 850 | 70791787 | 42 | 903 | 87.5 |
| 11 | 70792950 | 70793275 | 325 | 70793012 | 17 | 192 | 0    |
| 11 | 70795300 | 70795325 | 25  | 70795312 | 18 | 18  | 2.2  |
| 11 | 70796325 | 70796425 | 100 | 70796387 | 15 | 58  | 6.6  |
| 11 | 70801475 | 70801550 | 75  | 70801537 | 13 | 36  | 6.6  |
| 11 | 70818975 | 70819100 | 125 | 70819062 | 15 | 68  | 10.9 |
| 11 | 70830025 | 70830050 | 25  | 70830037 | 13 | 13  | 2.2  |
| 11 | 70832350 | 70832450 | 100 | 70832362 | 18 | 68  | 8.8  |
| 11 | 70832900 | 70832925 | 25  | 70832912 | 13 | 13  | 2.2  |
| 11 | 70833750 | 70833825 | 75  | 70833812 | 15 | 38  | 6.6  |
| 11 | 70834075 | 70834225 | 150 | 70834087 | 14 | 80  | 2.2  |
| 11 | 70852800 | 70852825 | 25  | 70852812 | 14 | 14  | 2.2  |
| 11 | 70854050 | 70854075 | 25  | 70854062 | 12 | 12  | 2.2  |
| 11 | 70871675 | 70871725 | 50  | 70871712 | 14 | 27  | 0    |
| 11 | 70899500 | 70899700 | 200 | 70899637 | 17 | 123 | 0    |
| 11 | 70910000 | 70910375 | 375 | 70910262 | 17 | 181 | 0    |
| 11 | 70927925 | 70928775 | 850 | 70928112 | 27 | 481 | 50.3 |
| 11 | 70930425 | 70930725 | 300 | 70930587 | 27 | 242 | 0    |
| 11 | 70931725 | 70931850 | 125 | 70931837 | 23 | 86  | 0    |
| 11 | 70936000 | 70936075 | 75  | 70936012 | 18 | 47  | 4.4  |
| 11 | 70936375 | 70936675 | 300 | 70936387 | 21 | 165 | 32.8 |
| 11 | 70937550 | 70937700 | 150 | 70937637 | 16 | 83  | 2.2  |
| 11 | 70942475 | 70942525 | 50  | 70942487 | 12 | 24  | 4.4  |
| 11 | 70943675 | 70943725 | 50  | 70943687 | 12 | 24  | 0    |
| 11 | 70944350 | 70944475 | 125 | 70944387 | 27 | 119 | 21.9 |
| 11 | 70954800 | 70954825 | 25  | 70954812 | 12 | 12  | 2.2  |
| 11 | 71011500 | 71011525 | 25  | 71011512 | 12 | 12  | 0    |
| 11 | 71017875 | 71017900 | 25  | 71017887 | 12 | 12  | 0    |
| 11 | 71020325 | 71020350 | 25  | 71020337 | 12 | 12  | 0    |
| 11 | 71152050 | 71152150 | 100 | 71152087 | 13 | 49  | 2.2  |
| 11 | 71392525 | 71392600 | 75  | 71392537 | 12 | 36  | 6.6  |
| 11 | 71430800 | 71430850 | 50  | 71430812 | 13 | 25  | 0    |
| 11 | 71509575 | 71509725 | 150 | 71509612 | 16 | 84  | 10.9 |
| 11 | 71524875 | 71524950 | 75  | 71524887 | 17 | 46  | 6.6  |
| 11 | 71525675 | 71525775 | 100 | 71525712 | 15 | 57  | 4.4  |
| 11 | 71548250 | 71548350 | 100 | 71548287 | 16 | 62  | 8.8  |
| 11 | 71552625 | 71552650 | 25  | 71552637 | 12 | 12  | 2.2  |
| 11 | 71561850 | 71562075 | 225 | 71561937 | 18 | 147 | 17.5 |
| 11 | 71596925 | 71596950 | 25  | 71596937 | 12 | 12  | 2.2  |
| 11 | 71597250 | 71597400 | 150 | 71597312 | 14 | 79  | 0    |
| 11 | 71607375 | 71607425 | 50  | 71607387 | 12 | 24  | 4.4  |
| 11 | 71607800 | 71607825 | 25  | 71607812 | 12 | 12  | 0    |
| 11 | 71629700 | 71629900 | 200 | 71629812 | 15 | 103 | 0    |
| 11 | 71631900 | 71632000 | 100 | 71631987 | 18 | 59  | 2.2  |
| 11 | 71632400 | 71632450 | 50  | 71632412 | 16 | 29  | 0    |
| 11 | 71633450 | 71633625 | 175 | 71633562 | 16 | 99  | 13.1 |
| 11 | 71639700 | 71639750 | 50  | 71639737 | 14 | 26  | 2.2  |
| 11 | 71641500 | 71641600 | 100 | 71641537 | 13 | 50  | 6.6  |
| 11 | 71642225 | 71642250 | 25  | 71642237 | 12 | 12  | 2.2  |
| 11 | 71642900 | 71642925 | 25  | 71642912 | 12 | 12  | 0    |
| 11 | 71643425 | 71643450 | 25  | 71643437 | 17 | 17  | 2.2  |
| 11 | 71644925 | 71645100 | 175 | 71644987 | 14 | 88  | 10.9 |
| 11 | 71669650 | 71669675 | 25  | 71669662 | 16 | 16  | 2.2  |
| 11 | 71672525 | 71672625 | 100 | 71672537 | 12 | 46  | 8.8  |
| 11 | 71778000 | 71778025 | 25  | 71778012 | 13 | 13  | 2.2  |
| 11 | 71780025 | 71780100 | 75  | 71780062 | 13 | 38  | 4.4  |
| 11 | 71847825 | 71847975 | 150 | 71847937 | 15 | 83  | 13.1 |
| 11 | 71879850 | 71879875 | 25  | 71879862 | 12 | 12  | 2.2  |

|    |          |          |      |          |    |     |      |
|----|----------|----------|------|----------|----|-----|------|
| 11 | 71898975 | 71899425 | 450  | 71899087 | 34 | 454 | 32.8 |
| 11 | 71899800 | 71900225 | 425  | 71899812 | 17 | 271 | 35   |
| 11 | 71906025 | 71906050 | 25   | 71906037 | 12 | 12  | 0    |
| 11 | 71910975 | 71911200 | 225  | 71911062 | 21 | 150 | 15.3 |
| 11 | 71927425 | 71927550 | 125  | 71927512 | 14 | 64  | 0    |
| 11 | 71931175 | 71931200 | 25   | 71931187 | 13 | 13  | 2.2  |
| 11 | 71932125 | 71932450 | 325  | 71932212 | 17 | 214 | 37.2 |
| 11 | 71934225 | 71934375 | 150  | 71934337 | 14 | 75  | 6.6  |
| 11 | 71942500 | 71942525 | 25   | 71942512 | 23 | 23  | 4.4  |
| 11 | 71946275 | 71946400 | 125  | 71946312 | 14 | 65  | 10.9 |
| 11 | 71948850 | 71948975 | 125  | 71948862 | 13 | 63  | 0    |
| 11 | 71950375 | 71950425 | 50   | 71950412 | 13 | 25  | 0    |
| 11 | 71971025 | 71971050 | 25   | 71971037 | 12 | 12  | 2.2  |
| 11 | 71971975 | 71972100 | 125  | 71971987 | 13 | 62  | 0    |
| 11 | 71972575 | 71972625 | 50   | 71972587 | 13 | 25  | 2.2  |
| 11 | 71993775 | 71993825 | 50   | 71993812 | 13 | 25  | 2.2  |
| 11 | 72001825 | 72001850 | 25   | 72001837 | 12 | 12  | 2.2  |
| 11 | 72002075 | 72002200 | 125  | 72002087 | 13 | 62  | 2.2  |
| 11 | 72002925 | 72003075 | 150  | 72002937 | 18 | 92  | 0    |
| 11 | 72010125 | 72010350 | 225  | 72010187 | 16 | 131 | 8.8  |
| 11 | 72013150 | 72013325 | 175  | 72013212 | 16 | 102 | 13.1 |
| 11 | 72025375 | 72025450 | 75   | 72025387 | 12 | 35  | 4.4  |
| 11 | 72027500 | 72027575 | 75   | 72027512 | 12 | 36  | 2.2  |
| 11 | 72027950 | 72028075 | 125  | 72028037 | 17 | 75  | 2.2  |
| 11 | 72028900 | 72029125 | 225  | 72029012 | 15 | 117 | 2.2  |
| 11 | 72042175 | 72042200 | 25   | 72042187 | 12 | 12  | 0    |
| 11 | 72047900 | 72048000 | 100  | 72047912 | 19 | 58  | 8.8  |
| 11 | 72048500 | 72048525 | 25   | 72048512 | 13 | 13  | 0    |
| 11 | 72049525 | 72049550 | 25   | 72049537 | 13 | 13  | 0    |
| 11 | 72055975 | 72057000 | 1025 | 72056362 | 22 | 653 | 87.5 |
| 11 | 72057350 | 72057500 | 150  | 72057487 | 16 | 88  | 2.2  |
| 11 | 72060500 | 72060625 | 125  | 72060512 | 17 | 70  | 4.4  |
| 11 | 72064825 | 72064875 | 50   | 72064862 | 17 | 31  | 4.4  |
| 11 | 72067400 | 72067425 | 25   | 72067412 | 13 | 13  | 0    |
| 11 | 72112500 | 72112525 | 25   | 72112512 | 12 | 12  | 2.2  |
| 11 | 72399525 | 72399550 | 25   | 72399537 | 14 | 14  | 2.2  |
| 11 | 72418300 | 72418375 | 75   | 72418312 | 15 | 39  | 6.6  |
| 11 | 72503875 | 72503900 | 25   | 72503887 | 12 | 12  | 2.2  |
| 11 | 72545500 | 72545525 | 25   | 72545512 | 14 | 14  | 2.2  |
| 11 | 72552275 | 72552325 | 50   | 72552312 | 14 | 26  | 4.4  |
| 11 | 72584500 | 72584525 | 25   | 72584512 | 12 | 12  | 2.2  |
| 11 | 72607300 | 72607400 | 100  | 72607337 | 16 | 63  | 2.2  |
| 11 | 72608100 | 72608175 | 75   | 72608112 | 13 | 39  | 0    |
| 11 | 72609200 | 72609225 | 25   | 72609212 | 12 | 12  | 0    |
| 11 | 72634550 | 72634625 | 75   | 72634612 | 16 | 45  | 6.6  |
| 11 | 73330750 | 73330825 | 75   | 73330762 | 13 | 39  | 6.6  |
| 11 | 73365500 | 73365525 | 25   | 73365512 | 12 | 12  | 0    |
| 11 | 73366275 | 73366325 | 50   | 73366287 | 12 | 24  | 2.2  |
| 11 | 73371725 | 73371750 | 25   | 73371737 | 12 | 12  | 2.2  |
| 11 | 73392175 | 73392200 | 25   | 73392187 | 12 | 12  | 2.2  |
| 11 | 73395500 | 73395525 | 25   | 73395512 | 12 | 12  | 2.2  |
| 11 | 73600950 | 73600975 | 25   | 73600962 | 12 | 12  | 2.2  |
| 11 | 73649525 | 73649825 | 300  | 73649662 | 26 | 245 | 17.5 |
| 11 | 73650400 | 73650675 | 275  | 73650537 | 22 | 173 | 17.5 |
| 11 | 73658200 | 73658325 | 125  | 73658262 | 18 | 78  | 2.2  |
| 11 | 73659775 | 73659825 | 50   | 73659812 | 14 | 26  | 0    |
| 11 | 73660275 | 73660300 | 25   | 73660287 | 12 | 12  | 0    |
| 11 | 73699625 | 73699950 | 325  | 73699762 | 25 | 257 | 21.9 |
| 11 | 73700650 | 73700725 | 75   | 73700687 | 14 | 39  | 6.6  |
| 11 | 73702125 | 73702300 | 175  | 73702237 | 15 | 95  | 0    |
| 11 | 73929700 | 73929825 | 125  | 73929712 | 13 | 63  | 0    |
| 11 | 73932625 | 73932775 | 150  | 73932687 | 18 | 89  | 13.1 |
| 11 | 74120475 | 74120500 | 25   | 74120487 | 12 | 12  | 0    |
| 11 | 74254575 | 74254600 | 25   | 74254587 | 13 | 13  | 0    |
| 11 | 74598475 | 74598500 | 25   | 74598487 | 12 | 12  | 2.2  |
| 11 | 74994800 | 74994950 | 150  | 74994862 | 16 | 87  | 2.2  |
| 11 | 75000800 | 75000850 | 50   | 75000812 | 15 | 28  | 0    |
| 11 | 75076625 | 75076675 | 50   | 75076637 | 13 | 25  | 4.4  |
| 11 | 75125950 | 75126075 | 125  | 75125962 | 12 | 54  | 2.2  |
| 11 | 75158000 | 75158175 | 175  | 75158087 | 18 | 115 | 15.3 |
| 11 | 75159575 | 75159675 | 100  | 75159587 | 12 | 48  | 0    |
| 11 | 75649075 | 75649100 | 25   | 75649087 | 14 | 14  | 2.2  |
| 11 | 75658400 | 75658500 | 100  | 75658437 | 13 | 47  | 0    |
| 11 | 75663350 | 75663550 | 200  | 75663487 | 17 | 120 | 0    |
| 11 | 75664250 | 75664300 | 50   | 75664262 | 17 | 32  | 4.4  |

|    |           |           |     |           |    |     |      |
|----|-----------|-----------|-----|-----------|----|-----|------|
| 11 | 76445175  | 76445200  | 25  | 76445187  | 13 | 13  | 2.2  |
| 11 | 76599625  | 76599675  | 50  | 76599637  | 13 | 25  | 0    |
| 11 | 76603925  | 76603950  | 25  | 76603937  | 12 | 12  | 0    |
| 11 | 76676975  | 76677025  | 50  | 76676987  | 12 | 24  | 4.4  |
| 11 | 77222200  | 77222250  | 50  | 77222212  | 12 | 24  | 0    |
| 11 | 78022300  | 78022350  | 50  | 78022312  | 13 | 26  | 4.4  |
| 11 | 78045300  | 78045325  | 25  | 78045312  | 12 | 12  | 0    |
| 11 | 78045800  | 78045825  | 25  | 78045812  | 12 | 12  | 0    |
| 11 | 78046950  | 78047100  | 150 | 78046987  | 16 | 84  | 10.9 |
| 11 | 78064900  | 78064925  | 25  | 78064912  | 12 | 12  | 0    |
| 11 | 78090425  | 78090500  | 75  | 78090462  | 15 | 41  | 0    |
| 11 | 78159825  | 78159900  | 75  | 78159837  | 12 | 35  | 0    |
| 11 | 78182900  | 78182950  | 50  | 78182912  | 14 | 27  | 4.4  |
| 11 | 78211625  | 78211675  | 50  | 78211662  | 15 | 28  | 0    |
| 11 | 78242575  | 78242650  | 75  | 78242612  | 14 | 39  | 6.6  |
| 11 | 78291075  | 78291150  | 75  | 78291137  | 14 | 38  | 0    |
| 11 | 78291600  | 78291850  | 250 | 78291737  | 17 | 130 | 17.5 |
| 11 | 78308650  | 78308675  | 25  | 78308662  | 13 | 13  | 0    |
| 11 | 78338775  | 78338800  | 25  | 78338787  | 14 | 14  | 2.2  |
| 11 | 78339800  | 78339900  | 100 | 78339812  | 14 | 54  | 0    |
| 11 | 78341525  | 78341550  | 25  | 78341537  | 12 | 12  | 2.2  |
| 11 | 85334350  | 85334375  | 25  | 85334362  | 13 | 13  | 2.2  |
| 11 | 93611150  | 93611175  | 25  | 93611162  | 13 | 13  | 2.2  |
| 11 | 94045650  | 94045675  | 25  | 94045662  | 12 | 12  | 2.2  |
| 11 | 96216075  | 96216100  | 25  | 96216087  | 12 | 12  | 2.2  |
| 11 | 113533700 | 113533800 | 100 | 113533737 | 13 | 48  | 8.8  |
| 11 | 117412475 | 117412500 | 25  | 117412487 | 13 | 13  | 0    |
| 11 | 119159600 | 119159650 | 50  | 119159612 | 12 | 24  | 0    |
| 11 | 119413200 | 119413300 | 100 | 119413262 | 14 | 52  | 0    |
| 11 | 124530600 | 124530725 | 125 | 124530612 | 12 | 60  | 0    |
| 11 | 125838400 | 125838450 | 50  | 125838412 | 12 | 24  | 2.2  |
| 11 | 128061650 | 128061725 | 75  | 128061662 | 12 | 36  | 0    |
| 11 | 128062075 | 128062125 | 50  | 128062112 | 13 | 25  | 0    |
| 11 | 129976900 | 129976975 | 75  | 129976937 | 14 | 41  | 6.6  |
| 11 | 130026225 | 130026250 | 25  | 130026237 | 12 | 12  | 2.2  |
| 11 | 133396275 | 133396300 | 25  | 133396287 | 12 | 12  | 0    |
| 11 | 133650975 | 133651050 | 75  | 133650987 | 12 | 35  | 0    |
| 11 | 133653700 | 133653725 | 25  | 133653712 | 12 | 12  | 0    |
| 11 | 134332825 | 134332925 | 100 | 134332862 | 13 | 50  | 0    |
| 11 | 134333475 | 134333575 | 100 | 134333487 | 13 | 52  | 0    |
| 11 | 134431875 | 134431975 | 100 | 134431887 | 14 | 49  | 2.2  |
| 10 | 1196600   | 1196800   | 200 | 1196662   | 16 | 113 | 0    |
| 10 | 1359950   | 1359975   | 25  | 1359962   | 12 | 12  | 0    |
| 10 | 1779250   | 1779275   | 25  | 1779262   | 12 | 12  | 2.2  |
| 10 | 1798400   | 1798450   | 50  | 1798412   | 12 | 24  | 0    |
| 10 | 2239600   | 2239625   | 25  | 2239612   | 12 | 12  | 0    |
| 10 | 2364175   | 2364325   | 150 | 2364212   | 15 | 80  | 0    |
| 10 | 2522450   | 2522500   | 50  | 2522462   | 12 | 24  | 0    |
| 10 | 2627325   | 2627400   | 75  | 2627387   | 14 | 39  | 0    |
| 10 | 2948000   | 2948025   | 25  | 2948012   | 12 | 12  | 0    |
| 10 | 2964700   | 2964725   | 25  | 2964712   | 12 | 12  | 0    |
| 10 | 3412100   | 3412125   | 25  | 3412112   | 12 | 12  | 0    |
| 10 | 3572275   | 3572300   | 25  | 3572287   | 12 | 12  | 0    |
| 10 | 5614200   | 5614325   | 125 | 5614237   | 13 | 63  | 0    |
| 10 | 6852150   | 6852250   | 100 | 6852187   | 14 | 49  | 0    |
| 10 | 7803575   | 7803625   | 50  | 7803587   | 14 | 26  | 0    |
| 10 | 7805075   | 7805150   | 75  | 7805087   | 16 | 44  | 6.6  |
| 10 | 8554325   | 8554375   | 50  | 8554337   | 12 | 24  | 0    |
| 10 | 11180225  | 11180250  | 25  | 11180237  | 12 | 12  | 0    |
| 10 | 12659000  | 12659025  | 25  | 12659012  | 12 | 12  | 0    |
| 10 | 13943100  | 13943125  | 25  | 13943112  | 12 | 12  | 0    |
| 10 | 14186200  | 14186275  | 75  | 14186212  | 12 | 36  | 0    |
| 10 | 14246275  | 14246375  | 100 | 14246337  | 15 | 57  | 0    |
| 10 | 14565575  | 14565650  | 75  | 14565587  | 13 | 36  | 0    |
| 10 | 33410525  | 33410550  | 25  | 33410537  | 12 | 12  | 2.2  |
| 10 | 37604325  | 37604350  | 25  | 37604337  | 12 | 12  | 2.2  |
| 10 | 38814500  | 38814525  | 25  | 38814512  | 13 | 13  | 2.2  |
| 10 | 38857175  | 38857350  | 175 | 38857312  | 18 | 97  | 13.1 |
| 10 | 39130200  | 39130275  | 75  | 39130212  | 12 | 36  | 6.6  |
| 10 | 39161450  | 39161500  | 50  | 39161462  | 13 | 25  | 4.4  |
| 10 | 39190875  | 39190950  | 75  | 39190887  | 13 | 39  | 6.6  |
| 10 | 41678300  | 41678350  | 50  | 41678312  | 13 | 26  | 4.4  |
| 10 | 41682700  | 41682800  | 100 | 41682712  | 15 | 58  | 10.9 |
| 10 | 41689300  | 41689325  | 25  | 41689312  | 12 | 12  | 2.2  |
| 10 | 41698625  | 41698775  | 150 | 41698687  | 19 | 95  | 8.8  |

|    |           |           |     |           |    |     |      |
|----|-----------|-----------|-----|-----------|----|-----|------|
| 10 | 41702450  | 41702500  | 50  | 41702462  | 13 | 26  | 0    |
| 10 | 41703675  | 41703700  | 25  | 41703687  | 13 | 13  | 2.2  |
| 10 | 41704175  | 41704325  | 150 | 41704262  | 17 | 92  | 6.6  |
| 10 | 41707550  | 41707575  | 25  | 41707562  | 12 | 12  | 0    |
| 10 | 41710400  | 41710425  | 25  | 41710412  | 12 | 12  | 2.2  |
| 10 | 41714275  | 41714300  | 25  | 41714287  | 22 | 22  | 2.2  |
| 10 | 41714875  | 41714900  | 25  | 41714887  | 12 | 12  | 2.2  |
| 10 | 41716400  | 41716575  | 175 | 41716437  | 24 | 135 | 21.9 |
| 10 | 41858975  | 41859000  | 25  | 41858987  | 13 | 13  | 2.2  |
| 10 | 43568750  | 43568775  | 25  | 43568762  | 12 | 12  | 0    |
| 10 | 45289775  | 45289850  | 75  | 45289812  | 14 | 38  | 0    |
| 10 | 45290600  | 45291300  | 700 | 45290987  | 20 | 380 | 26.3 |
| 10 | 46398025  | 46398225  | 200 | 46398162  | 19 | 133 | 17.5 |
| 10 | 46433700  | 46433800  | 100 | 46433787  | 13 | 48  | 8.8  |
| 10 | 46473575  | 46473675  | 100 | 46473662  | 16 | 56  | 8.8  |
| 10 | 46516725  | 46516825  | 100 | 46516762  | 13 | 49  | 0    |
| 10 | 46541825  | 46541850  | 25  | 46541837  | 12 | 12  | 0    |
| 10 | 46544575  | 46544600  | 25  | 46544587  | 12 | 12  | 0    |
| 10 | 60397425  | 60397700  | 275 | 60397562  | 18 | 161 | 8.8  |
| 10 | 63894925  | 63894950  | 25  | 63894937  | 13 | 13  | 2.2  |
| 10 | 71002450  | 71002475  | 25  | 71002462  | 12 | 12  | 0    |
| 10 | 71682875  | 71682925  | 50  | 71682887  | 13 | 25  | 0    |
| 10 | 72436250  | 72436325  | 75  | 72436262  | 12 | 36  | 0    |
| 10 | 73047000  | 73047175  | 175 | 73047112  | 13 | 84  | 0    |
| 10 | 73260225  | 73260250  | 25  | 73260237  | 12 | 12  | 2.2  |
| 10 | 75344750  | 75344775  | 25  | 75344762  | 12 | 12  | 0    |
| 10 | 77486275  | 77486350  | 75  | 77486312  | 14 | 38  | 0    |
| 10 | 79623225  | 79623325  | 100 | 79623262  | 14 | 55  | 6.6  |
| 10 | 79907525  | 79907550  | 25  | 79907537  | 12 | 12  | 0    |
| 10 | 79921600  | 79921725  | 125 | 79921637  | 14 | 66  | 0    |
| 10 | 82401775  | 82401825  | 50  | 82401787  | 12 | 24  | 0    |
| 10 | 89313975  | 89314100  | 125 | 89314062  | 13 | 59  | 0    |
| 10 | 90478175  | 90478200  | 25  | 90478187  | 13 | 13  | 0    |
| 10 | 92191125  | 92191150  | 25  | 92191137  | 12 | 12  | 0    |
| 10 | 97840400  | 97840525  | 125 | 97840412  | 17 | 76  | 10.9 |
| 10 | 98551525  | 98551575  | 50  | 98551537  | 12 | 24  | 4.4  |
| 10 | 98753225  | 98753250  | 25  | 98753237  | 12 | 12  | 0    |
| 10 | 98756300  | 98756400  | 100 | 98756362  | 14 | 52  | 0    |
| 10 | 99864400  | 99864425  | 25  | 99864412  | 12 | 12  | 0    |
| 10 | 105255975 | 105256025 | 50  | 105255987 | 12 | 24  | 0    |
| 10 | 105310800 | 105310900 | 100 | 105310812 | 13 | 50  | 0    |
| 10 | 105475075 | 105475125 | 50  | 105475087 | 12 | 24  | 4.4  |
| 10 | 105475975 | 105476200 | 225 | 105476087 | 19 | 148 | 0    |
| 10 | 105518100 | 105518300 | 200 | 105518162 | 13 | 98  | 2.2  |
| 10 | 113968925 | 113968950 | 25  | 113968937 | 12 | 12  | 0    |
| 10 | 115226400 | 115226475 | 75  | 115226437 | 14 | 39  | 0    |
| 10 | 115242825 | 115242875 | 50  | 115242837 | 12 | 24  | 0    |
| 10 | 121176925 | 121176950 | 25  | 121176937 | 12 | 12  | 0    |
| 10 | 123053775 | 123053875 | 100 | 123053837 | 13 | 50  | 0    |
| 10 | 123183525 | 123183550 | 25  | 123183537 | 12 | 12  | 2.2  |
| 10 | 125242100 | 125242125 | 25  | 125242112 | 12 | 12  | 2.2  |
| 10 | 127568200 | 127568275 | 75  | 127568212 | 12 | 36  | 0    |
| 10 | 127587650 | 127587675 | 25  | 127587662 | 12 | 12  | 0    |
| 10 | 127595425 | 127595450 | 25  | 127595437 | 12 | 12  | 2.2  |
| 10 | 127945000 | 127945100 | 100 | 127945087 | 13 | 48  | 0    |
| 10 | 127952600 | 127952800 | 200 | 127952712 | 15 | 102 | 4.4  |
| 10 | 132184650 | 132184700 | 50  | 132184662 | 14 | 26  | 4.4  |
| 10 | 133115225 | 133115250 | 25  | 133115237 | 12 | 12  | 2.2  |
| 10 | 133976850 | 133977025 | 175 | 133976912 | 14 | 88  | 0    |
| 10 | 134167400 | 134167450 | 50  | 134167412 | 12 | 24  | 0    |
| 10 | 134597375 | 134597400 | 25  | 134597387 | 12 | 12  | 0    |
| 10 | 134782375 | 134782500 | 125 | 134782487 | 13 | 60  | 0    |
| 10 | 134841375 | 134841500 | 125 | 134841412 | 14 | 65  | 0    |
| 10 | 135349050 | 135349075 | 25  | 135349062 | 12 | 12  | 2.2  |
| 13 | 18542250  | 18542300  | 50  | 18542262  | 13 | 25  | 4.4  |
| 13 | 18543775  | 18543800  | 25  | 18543787  | 13 | 13  | 2.2  |
| 13 | 19798700  | 19798825  | 125 | 19798712  | 12 | 59  | 8.8  |
| 13 | 19806300  | 19806325  | 25  | 19806312  | 12 | 12  | 0    |
| 13 | 19821000  | 19821100  | 100 | 19821012  | 15 | 54  | 0    |
| 13 | 19821350  | 19821425  | 75  | 19821362  | 12 | 35  | 0    |
| 13 | 21141425  | 21141450  | 25  | 21141437  | 12 | 12  | 2.2  |
| 13 | 22614500  | 22614575  | 75  | 22614562  | 13 | 37  | 0    |
| 13 | 23604150  | 23604175  | 25  | 23604162  | 12 | 12  | 0    |
| 13 | 24613225  | 24613250  | 25  | 24613237  | 12 | 12  | 2.2  |
| 13 | 24649750  | 24649775  | 25  | 24649762  | 12 | 12  | 0    |



|    |           |           |     |           |    |     |      |
|----|-----------|-----------|-----|-----------|----|-----|------|
| 13 | 24668950  | 24669025  | 75  | 24668962  | 13 | 38  | 0    |
| 13 | 26999275  | 26999400  | 125 | 26999337  | 15 | 66  | 10.9 |
| 13 | 27265750  | 27265775  | 25  | 27265762  | 12 | 12  | 0    |
| 13 | 29381750  | 29381775  | 25  | 29381762  | 12 | 12  | 0    |
| 13 | 30591850  | 30592000  | 150 | 30591887  | 16 | 80  | 8.8  |
| 13 | 39209400  | 39209475  | 75  | 39209412  | 12 | 36  | 0    |
| 13 | 39846325  | 39846350  | 25  | 39846337  | 13 | 13  | 2.2  |
| 13 | 40989750  | 40989850  | 100 | 40989787  | 13 | 50  | 0    |
| 13 | 41998225  | 41998250  | 25  | 41998237  | 12 | 12  | 2.2  |
| 13 | 43602875  | 43602975  | 100 | 43602912  | 13 | 49  | 4.4  |
| 13 | 45160425  | 45160475  | 50  | 45160437  | 12 | 24  | 0    |
| 13 | 48023100  | 48023125  | 25  | 48023112  | 12 | 12  | 0    |
| 13 | 52244000  | 52244075  | 75  | 52244037  | 14 | 40  | 0    |
| 13 | 57106575  | 57106750  | 175 | 57106587  | 12 | 74  | 0    |
| 13 | 57870250  | 57870300  | 50  | 57870262  | 13 | 25  | 4.4  |
| 13 | 71337300  | 71337325  | 25  | 71337312  | 12 | 12  | 2.2  |
| 13 | 77263025  | 77263150  | 125 | 77263037  | 13 | 60  | 0    |
| 13 | 98174125  | 98174150  | 25  | 98174137  | 12 | 12  | 2.2  |
| 13 | 98219325  | 98219350  | 25  | 98219337  | 12 | 12  | 0    |
| 13 | 98231825  | 98231950  | 125 | 98231837  | 12 | 60  | 0    |
| 13 | 98859150  | 98859175  | 25  | 98859162  | 12 | 12  | 0    |
| 13 | 99277875  | 99277900  | 25  | 99277887  | 12 | 12  | 2.2  |
| 13 | 101228825 | 101228850 | 25  | 101228837 | 13 | 13  | 0    |
| 13 | 105912550 | 105912700 | 150 | 105912612 | 13 | 73  | 0    |
| 13 | 105916500 | 105916550 | 50  | 105916512 | 13 | 25  | 0    |
| 13 | 108559850 | 108559875 | 25  | 108559862 | 12 | 12  | 0    |
| 13 | 109090650 | 109090675 | 25  | 109090662 | 13 | 13  | 0    |
| 13 | 109191575 | 109191625 | 50  | 109191587 | 12 | 24  | 0    |
| 13 | 109487050 | 109487125 | 75  | 109487062 | 13 | 37  | 0    |
| 13 | 109741250 | 109741400 | 150 | 109741362 | 15 | 79  | 0    |
| 13 | 109767450 | 109767575 | 125 | 109767487 | 15 | 66  | 0    |
| 13 | 109813500 | 109813575 | 75  | 109813512 | 12 | 36  | 0    |
| 13 | 109831250 | 109831375 | 125 | 109831287 | 13 | 62  | 0    |
| 13 | 109888800 | 109888825 | 25  | 109888812 | 12 | 12  | 2.2  |
| 13 | 109949300 | 109949325 | 25  | 109949312 | 12 | 12  | 0    |
| 13 | 110210525 | 110210675 | 150 | 110210537 | 12 | 66  | 10.9 |
| 13 | 110244100 | 110244200 | 100 | 110244162 | 14 | 53  | 0    |
| 13 | 110244700 | 110244775 | 75  | 110244712 | 12 | 36  | 6.6  |
| 13 | 110379775 | 110379825 | 50  | 110379787 | 12 | 24  | 0    |
| 13 | 110587725 | 110587775 | 50  | 110587737 | 12 | 24  | 0    |
| 13 | 110898500 | 110898525 | 25  | 110898512 | 12 | 12  | 0    |
| 13 | 111730825 | 111730900 | 75  | 111730862 | 13 | 37  | 0    |
| 13 | 111740225 | 111740350 | 125 | 111740262 | 16 | 74  | 0    |
| 13 | 112608625 | 112608800 | 175 | 112608662 | 13 | 84  | 0    |
| 13 | 112619225 | 112619300 | 75  | 112619262 | 15 | 42  | 6.6  |
| 13 | 112820800 | 112820900 | 100 | 112820862 | 13 | 49  | 2.2  |
| 13 | 113488375 | 113488400 | 25  | 113488387 | 12 | 12  | 0    |
| 13 | 113624400 | 113624450 | 50  | 113624412 | 12 | 24  | 0    |
| 12 | 31450     | 31550     | 100 | 31487     | 16 | 56  | 8.8  |
| 12 | 33275     | 33375     | 100 | 33287     | 15 | 55  | 2.2  |
| 12 | 34725     | 34825     | 100 | 34812     | 15 | 55  | 6.6  |
| 12 | 36350     | 36500     | 150 | 36462     | 17 | 87  | 0    |
| 12 | 216525    | 216600    | 75  | 216537    | 13 | 39  | 0    |
| 12 | 217625    | 217700    | 75  | 217637    | 14 | 40  | 0    |
| 12 | 247550    | 247575    | 25  | 247562    | 12 | 12  | 0    |
| 12 | 463625    | 463700    | 75  | 463687    | 14 | 39  | 0    |
| 12 | 489600    | 489625    | 25  | 489612    | 15 | 15  | 2.2  |
| 12 | 535850    | 536050    | 200 | 535912    | 13 | 99  | 6.6  |
| 12 | 545275    | 545300    | 25  | 545287    | 12 | 12  | 0    |
| 12 | 674625    | 674700    | 75  | 674687    | 15 | 41  | 4.4  |
| 12 | 1489025   | 1489050   | 25  | 1489037   | 12 | 12  | 2.2  |
| 12 | 1489275   | 1489350   | 75  | 1489287   | 13 | 38  | 4.4  |
| 12 | 1516700   | 1516850   | 150 | 1516762   | 14 | 79  | 0    |
| 12 | 1518950   | 1519050   | 100 | 1518987   | 13 | 51  | 0    |
| 12 | 1796225   | 1796300   | 75  | 1796237   | 14 | 41  | 6.6  |
| 12 | 1810425   | 1810475   | 50  | 1810437   | 12 | 24  | 4.4  |
| 12 | 1848750   | 1848850   | 100 | 1848787   | 13 | 48  | 0    |
| 12 | 1850350   | 1851250   | 900 | 1850637   | 26 | 652 | 85.3 |
| 12 | 1859650   | 1859750   | 100 | 1859662   | 14 | 49  | 0    |
| 12 | 1887150   | 1887225   | 75  | 1887187   | 14 | 39  | 0    |
| 12 | 2004000   | 2004050   | 50  | 2004012   | 13 | 25  | 4.4  |
| 12 | 2010175   | 2010300   | 125 | 2010212   | 13 | 60  | 0    |
| 12 | 2043775   | 2043900   | 125 | 2043787   | 13 | 63  | 10.9 |
| 12 | 2235175   | 2235250   | 75  | 2235237   | 20 | 48  | 0    |
| 12 | 2235475   | 2235550   | 75  | 2235487   | 15 | 42  | 6.6  |

|    |          |          |     |          |    |     |     |
|----|----------|----------|-----|----------|----|-----|-----|
| 12 | 2255000  | 2255025  | 25  | 2255012  | 13 | 13  | 0   |
| 12 | 2308775  | 2308825  | 50  | 2308812  | 13 | 25  | 0   |
| 12 | 2414750  | 2414850  | 100 | 2414812  | 13 | 49  | 6.6 |
| 12 | 2427475  | 2427500  | 25  | 2427487  | 12 | 12  | 0   |
| 12 | 2501125  | 2501175  | 50  | 2501137  | 12 | 24  | 0   |
| 12 | 2513175  | 2513200  | 25  | 2513187  | 13 | 13  | 0   |
| 12 | 2574250  | 2574300  | 50  | 2574262  | 12 | 24  | 0   |
| 12 | 2585200  | 2585225  | 25  | 2585212  | 12 | 12  | 0   |
| 12 | 2586150  | 2586200  | 50  | 2586162  | 12 | 24  | 4.4 |
| 12 | 2591175  | 2591275  | 100 | 2591187  | 13 | 51  | 0   |
| 12 | 2645075  | 2645125  | 50  | 2645087  | 12 | 24  | 0   |
| 12 | 2652300  | 2652400  | 100 | 2652337  | 13 | 49  | 0   |
| 12 | 3487950  | 3487975  | 25  | 3487962  | 12 | 12  | 2.2 |
| 12 | 3672575  | 3672600  | 25  | 3672587  | 12 | 12  | 0   |
| 12 | 3900400  | 3900425  | 25  | 3900412  | 12 | 12  | 0   |
| 12 | 3904000  | 3904125  | 125 | 3904087  | 15 | 68  | 8.8 |
| 12 | 4101225  | 4101250  | 25  | 4101237  | 13 | 13  | 2.2 |
| 12 | 4369700  | 4369725  | 25  | 4369712  | 12 | 12  | 0   |
| 12 | 4408675  | 4408825  | 150 | 4408787  | 15 | 81  | 0   |
| 12 | 4415075  | 4415225  | 150 | 4415187  | 15 | 81  | 0   |
| 12 | 4415500  | 4415525  | 25  | 4415512  | 12 | 12  | 0   |
| 12 | 4423275  | 4423300  | 25  | 4423287  | 12 | 12  | 2.2 |
| 12 | 5067700  | 5067725  | 25  | 5067712  | 12 | 12  | 0   |
| 12 | 5068600  | 5068775  | 175 | 5068612  | 14 | 89  | 8.8 |
| 12 | 5074175  | 5074375  | 200 | 5074187  | 12 | 81  | 8.8 |
| 12 | 5212825  | 5212875  | 50  | 5212837  | 14 | 27  | 0   |
| 12 | 5259550  | 5259575  | 25  | 5259562  | 12 | 12  | 2.2 |
| 12 | 5515050  | 5515075  | 25  | 5515062  | 12 | 12  | 0   |
| 12 | 5736050  | 5736100  | 50  | 5736062  | 12 | 24  | 0   |
| 12 | 5748025  | 5748075  | 50  | 5748037  | 12 | 24  | 0   |
| 12 | 5807725  | 5807800  | 75  | 5807737  | 14 | 39  | 0   |
| 12 | 5839500  | 5839525  | 25  | 5839512  | 12 | 12  | 0   |
| 12 | 5951975  | 5952000  | 25  | 5951987  | 12 | 12  | 0   |
| 12 | 6026050  | 6026075  | 25  | 6026062  | 12 | 12  | 2.2 |
| 12 | 6097450  | 6097550  | 100 | 6097512  | 14 | 53  | 0   |
| 12 | 6622950  | 6622975  | 25  | 6622962  | 12 | 12  | 0   |
| 12 | 7769725  | 7769775  | 50  | 7769737  | 13 | 26  | 0   |
| 12 | 8571725  | 8571825  | 100 | 8571762  | 14 | 53  | 0   |
| 12 | 9168575  | 9168600  | 25  | 9168587  | 12 | 12  | 2.2 |
| 12 | 9214425  | 9214600  | 175 | 9214437  | 17 | 101 | 2.2 |
| 12 | 9954650  | 9954675  | 25  | 9954662  | 12 | 12  | 0   |
| 12 | 10595250 | 10595300 | 50  | 10595262 | 12 | 24  | 0   |
| 12 | 11769975 | 11770025 | 50  | 11770012 | 13 | 25  | 4.4 |
| 12 | 13361325 | 13361450 | 125 | 13361362 | 15 | 70  | 0   |
| 12 | 13362575 | 13362625 | 50  | 13362587 | 13 | 25  | 0   |
| 12 | 13411525 | 13411550 | 25  | 13411537 | 12 | 12  | 2.2 |
| 12 | 13516150 | 13516200 | 50  | 13516162 | 12 | 24  | 0   |
| 12 | 13543350 | 13543425 | 75  | 13543362 | 12 | 36  | 2.2 |
| 12 | 13608075 | 13608100 | 25  | 13608087 | 12 | 12  | 0   |
| 12 | 13608600 | 13608750 | 150 | 13608712 | 13 | 70  | 4.4 |
| 12 | 13789675 | 13789750 | 75  | 13789687 | 13 | 37  | 6.6 |
| 12 | 14001900 | 14001925 | 25  | 14001912 | 12 | 12  | 0   |
| 12 | 14026500 | 14026575 | 75  | 14026562 | 14 | 38  | 2.2 |
| 12 | 14565450 | 14565550 | 100 | 14565462 | 12 | 46  | 6.6 |
| 12 | 17461100 | 17461150 | 50  | 17461112 | 12 | 24  | 0   |
| 12 | 19745275 | 19745300 | 25  | 19745287 | 12 | 12  | 0   |
| 12 | 21985875 | 21985900 | 25  | 21985887 | 14 | 14  | 2.2 |
| 12 | 21986325 | 21986400 | 75  | 21986337 | 13 | 38  | 0   |
| 12 | 25011425 | 25011525 | 100 | 25011462 | 13 | 49  | 0   |
| 12 | 26364550 | 26364575 | 25  | 26364562 | 12 | 12  | 2.2 |
| 12 | 29836650 | 29836700 | 50  | 29836687 | 13 | 25  | 0   |
| 12 | 30861050 | 30861075 | 25  | 30861062 | 13 | 13  | 2.2 |
| 12 | 30929600 | 30929675 | 75  | 30929612 | 13 | 38  | 6.6 |
| 12 | 34211325 | 34211350 | 25  | 34211337 | 12 | 12  | 0   |
| 12 | 34252900 | 34252925 | 25  | 34252912 | 12 | 12  | 2.2 |
| 12 | 34732825 | 34732975 | 150 | 34732837 | 22 | 95  | 0   |
| 12 | 36730300 | 36730500 | 200 | 36730312 | 16 | 114 | 0   |
| 12 | 44947575 | 44947750 | 175 | 44947587 | 12 | 77  | 4.4 |
| 12 | 44948775 | 44949050 | 275 | 44948962 | 19 | 165 | 0   |
| 12 | 46658200 | 46658325 | 125 | 46658287 | 13 | 61  | 6.6 |
| 12 | 46716900 | 46717050 | 150 | 46716987 | 14 | 77  | 0   |
| 12 | 49582025 | 49582050 | 25  | 49582037 | 12 | 12  | 2.2 |
| 12 | 52608275 | 52608350 | 75  | 52608287 | 12 | 36  | 0   |
| 12 | 55603900 | 55603925 | 25  | 55603912 | 12 | 12  | 0   |
| 12 | 88671525 | 88671550 | 25  | 88671537 | 12 | 12  | 0   |

|    |           |           |     |           |    |     |      |
|----|-----------|-----------|-----|-----------|----|-----|------|
| 12 | 93060625  | 93060700  | 75  | 93060662  | 13 | 38  | 4.4  |
| 12 | 100127500 | 100127525 | 25  | 100127512 | 12 | 12  | 0    |
| 12 | 113164150 | 113164250 | 100 | 113164237 | 16 | 55  | 8.8  |
| 12 | 113362950 | 113363025 | 75  | 113362987 | 13 | 38  | 2.2  |
| 12 | 113370400 | 113370450 | 50  | 113370412 | 12 | 24  | 4.4  |
| 12 | 123096825 | 123096850 | 25  | 123096837 | 12 | 12  | 0    |
| 12 | 123258050 | 123258075 | 25  | 123258062 | 12 | 12  | 0    |
| 12 | 123335450 | 123335525 | 75  | 123335512 | 13 | 37  | 0    |
| 12 | 123336225 | 123336400 | 175 | 123336262 | 14 | 88  | 0    |
| 12 | 123674075 | 123674175 | 100 | 123674137 | 15 | 55  | 0    |
| 12 | 123710050 | 123710125 | 75  | 123710062 | 14 | 40  | 0    |
| 12 | 123717075 | 123717575 | 500 | 123717187 | 17 | 293 | 35   |
| 12 | 123718000 | 123718150 | 150 | 123718137 | 18 | 91  | 8.8  |
| 12 | 123721775 | 123721875 | 100 | 123721812 | 16 | 58  | 0    |
| 12 | 123813250 | 123813325 | 75  | 123813287 | 13 | 37  | 0    |
| 12 | 129970650 | 129970825 | 175 | 129970662 | 12 | 78  | 0    |
| 12 | 130005975 | 130006000 | 25  | 130005987 | 12 | 12  | 0    |
| 12 | 130158825 | 130158950 | 125 | 130158862 | 14 | 66  | 6.6  |
| 12 | 130556275 | 130556300 | 25  | 130556287 | 12 | 12  | 0    |
| 12 | 130633575 | 130633700 | 125 | 130633637 | 14 | 61  | 0    |
| 12 | 130753200 | 130753275 | 75  | 130753212 | 13 | 38  | 0    |
| 12 | 131244175 | 131244225 | 50  | 131244187 | 12 | 24  | 2.2  |
| 12 | 131398400 | 131398450 | 50  | 131398412 | 14 | 26  | 0    |
| 12 | 131417200 | 131417350 | 150 | 131417237 | 14 | 76  | 0    |
| 12 | 131454250 | 131454275 | 25  | 131454262 | 12 | 12  | 0    |
| 12 | 131542250 | 131542575 | 325 | 131542462 | 15 | 167 | 0    |
| 12 | 131698650 | 131698675 | 25  | 131698662 | 12 | 12  | 0    |
| 12 | 131702350 | 131702425 | 75  | 131702362 | 13 | 38  | 0    |
| 12 | 131944125 | 131944175 | 50  | 131944137 | 13 | 26  | 4.4  |
| 15 | 18806175  | 18806225  | 50  | 18806187  | 13 | 25  | 4.4  |
| 15 | 18806775  | 18806800  | 25  | 18806787  | 12 | 12  | 2.2  |
| 15 | 19157200  | 19157275  | 75  | 19157262  | 18 | 48  | 0    |
| 15 | 19157525  | 19157575  | 50  | 19157537  | 13 | 26  | 4.4  |
| 15 | 19266075  | 19266275  | 200 | 19266187  | 17 | 112 | 0    |
| 15 | 19412200  | 19412250  | 50  | 19412212  | 13 | 25  | 0    |
| 15 | 22867875  | 22867925  | 50  | 22867887  | 12 | 24  | 0    |
| 15 | 25365675  | 25365725  | 50  | 25365687  | 13 | 25  | 0    |
| 15 | 25620750  | 25620775  | 25  | 25620762  | 12 | 12  | 2.2  |
| 15 | 29393925  | 29394100  | 175 | 29394012  | 15 | 95  | 2.2  |
| 15 | 29398125  | 29398150  | 25  | 29398137  | 12 | 12  | 2.2  |
| 15 | 31419675  | 31419700  | 25  | 31419687  | 12 | 12  | 0    |
| 15 | 48332225  | 48332250  | 25  | 48332237  | 12 | 12  | 2.2  |
| 15 | 58084500  | 58084675  | 175 | 58084537  | 17 | 104 | 0    |
| 15 | 61406325  | 61406375  | 50  | 61406337  | 13 | 25  | 2.2  |
| 15 | 67564700  | 67564900  | 200 | 67564762  | 15 | 103 | 15.3 |
| 15 | 67565275  | 67565475  | 200 | 67565387  | 17 | 110 | 0    |
| 15 | 67710575  | 67710600  | 25  | 67710587  | 12 | 12  | 0    |
| 15 | 67923350  | 67923375  | 25  | 67923362  | 12 | 12  | 0    |
| 15 | 67929400  | 67929525  | 125 | 67929437  | 14 | 65  | 0    |
| 15 | 68208425  | 68208450  | 25  | 68208437  | 12 | 12  | 0    |
| 15 | 68502500  | 68502550  | 50  | 68502512  | 12 | 24  | 0    |
| 15 | 68589250  | 68589400  | 150 | 68589287  | 15 | 80  | 0    |
| 15 | 71971250  | 71971300  | 50  | 71971262  | 12 | 24  | 0    |
| 15 | 71995675  | 71995700  | 25  | 71995687  | 12 | 12  | 0    |
| 15 | 72821825  | 72822025  | 200 | 72821912  | 17 | 115 | 10.9 |
| 15 | 77135300  | 77135325  | 25  | 77135312  | 12 | 12  | 0    |
| 15 | 77281475  | 77281525  | 50  | 77281512  | 13 | 25  | 0    |
| 15 | 77998700  | 77998725  | 25  | 77998712  | 12 | 12  | 0    |
| 15 | 80071500  | 80071525  | 25  | 80071512  | 13 | 13  | 2.2  |
| 15 | 80123575  | 80123700  | 125 | 80123612  | 15 | 68  | 0    |
| 15 | 81538550  | 81538600  | 50  | 81538562  | 12 | 24  | 0    |
| 15 | 86724525  | 86724550  | 25  | 86724537  | 12 | 12  | 0    |
| 15 | 87110825  | 87110875  | 50  | 87110862  | 13 | 25  | 4.4  |
| 15 | 87163375  | 87163450  | 75  | 87163387  | 15 | 43  | 4.4  |
| 15 | 87214250  | 87214275  | 25  | 87214262  | 12 | 12  | 0    |
| 15 | 90733400  | 90733450  | 50  | 90733412  | 13 | 25  | 0    |
| 15 | 94711825  | 94711850  | 25  | 94711837  | 12 | 12  | 2.2  |
| 15 | 98420025  | 98420050  | 25  | 98420037  | 12 | 12  | 0    |
| 15 | 98597200  | 98597225  | 25  | 98597212  | 12 | 12  | 0    |
| 14 | 18179725  | 18179800  | 75  | 18179737  | 13 | 39  | 6.6  |
| 14 | 18863075  | 18863100  | 25  | 18863087  | 12 | 12  | 0    |
| 14 | 22956925  | 22956975  | 50  | 22956937  | 12 | 24  | 0    |
| 14 | 30809300  | 30809325  | 25  | 30809312  | 12 | 12  | 0    |
| 14 | 31802125  | 31802500  | 375 | 31802137  | 13 | 168 | 15.3 |
| 14 | 49898050  | 49898125  | 75  | 49898062  | 12 | 36  | 0    |

|    |           |           |     |           |    |     |      |
|----|-----------|-----------|-----|-----------|----|-----|------|
| 14 | 51606325  | 51606400  | 75  | 51606362  | 13 | 37  | 0    |
| 14 | 65648550  | 65648575  | 25  | 65648562  | 12 | 12  | 0    |
| 14 | 68864875  | 68864975  | 100 | 68864887  | 13 | 49  | 8.8  |
| 14 | 70177575  | 70177625  | 50  | 70177612  | 14 | 26  | 4.4  |
| 14 | 75800100  | 75800300  | 200 | 75800212  | 19 | 119 | 0    |
| 14 | 75800525  | 75801075  | 550 | 75800587  | 22 | 361 | 30.6 |
| 14 | 90922750  | 90922775  | 25  | 90922762  | 12 | 12  | 0    |
| 14 | 91954300  | 91954400  | 100 | 91954337  | 13 | 50  | 0    |
| 14 | 94059675  | 94059700  | 25  | 94059687  | 12 | 12  | 2.2  |
| 14 | 94576275  | 94576500  | 225 | 94576312  | 14 | 118 | 10.9 |
| 14 | 95556075  | 95556100  | 25  | 95556087  | 12 | 12  | 0    |
| 14 | 98462450  | 98462475  | 25  | 98462462  | 12 | 12  | 2.2  |
| 14 | 99317500  | 99317525  | 25  | 99317512  | 12 | 12  | 0    |
| 14 | 99489750  | 99489825  | 75  | 99489762  | 12 | 35  | 6.6  |
| 14 | 100344725 | 100345000 | 275 | 100344887 | 17 | 154 | 6.6  |
| 14 | 100600400 | 100600475 | 75  | 100600412 | 12 | 35  | 0    |
| 14 | 101132500 | 101132550 | 50  | 101132512 | 12 | 24  | 0    |
| 14 | 102577775 | 102577825 | 50  | 102577812 | 13 | 25  | 0    |
| 14 | 104477475 | 104477550 | 75  | 104477487 | 13 | 38  | 0    |
| 14 | 104725425 | 104725525 | 100 | 104725437 | 13 | 51  | 0    |
| 14 | 104938075 | 104938125 | 50  | 104938087 | 12 | 24  | 0    |
| 14 | 105247525 | 105247550 | 25  | 105247537 | 12 | 12  | 0    |
| 14 | 105395850 | 105395975 | 125 | 105395912 | 16 | 72  | 0    |
| 17 | 58350     | 58425     | 75  | 58387     | 15 | 43  | 6.6  |
| 17 | 109075    | 109125    | 50  | 109112    | 13 | 25  | 2.2  |
| 17 | 130775    | 130900    | 125 | 130837    | 15 | 73  | 10.9 |
| 17 | 140725    | 140750    | 25  | 140737    | 13 | 13  | 0    |
| 17 | 174200    | 174275    | 75  | 174212    | 12 | 36  | 0    |
| 17 | 351350    | 351475    | 125 | 351437    | 15 | 70  | 6.6  |
| 17 | 359525    | 359600    | 75  | 359587    | 14 | 40  | 0    |
| 17 | 691500    | 691600    | 100 | 691512    | 13 | 50  | 8.8  |
| 17 | 694150    | 694350    | 200 | 694262    | 15 | 109 | 6.6  |
| 17 | 2830850   | 2830875   | 25  | 2830862   | 12 | 12  | 0    |
| 17 | 3376825   | 3376900   | 75  | 3376837   | 15 | 43  | 4.4  |
| 17 | 3377650   | 3377850   | 200 | 3377762   | 17 | 115 | 0    |
| 17 | 3378700   | 3378725   | 25  | 3378712   | 12 | 12  | 0    |
| 17 | 3379950   | 3379975   | 25  | 3379962   | 14 | 14  | 2.2  |
| 17 | 3384175   | 3384200   | 25  | 3384187   | 12 | 12  | 0    |
| 17 | 3390775   | 3390800   | 25  | 3390787   | 12 | 12  | 0    |
| 17 | 3398225   | 3398275   | 50  | 3398237   | 12 | 24  | 4.4  |
| 17 | 3555375   | 3555425   | 50  | 3555412   | 13 | 25  | 0    |
| 17 | 4360700   | 4360725   | 25  | 4360712   | 12 | 12  | 0    |
| 17 | 4922850   | 4922925   | 75  | 4922862   | 13 | 37  | 0    |
| 17 | 4980275   | 4980375   | 100 | 4980287   | 12 | 45  | 0    |
| 17 | 6495975   | 6496000   | 25  | 6495987   | 13 | 13  | 2.2  |
| 17 | 6519450   | 6519625   | 175 | 6519487   | 13 | 88  | 6.6  |
| 17 | 6522350   | 6522375   | 25  | 6522362   | 13 | 13  | 2.2  |
| 17 | 6529700   | 6529800   | 100 | 6529762   | 13 | 49  | 6.6  |
| 17 | 6534875   | 6535050   | 175 | 6534912   | 15 | 94  | 0    |
| 17 | 6536975   | 6537025   | 50  | 6536987   | 12 | 24  | 0    |
| 17 | 6547425   | 6547450   | 25  | 6547437   | 12 | 12  | 0    |
| 17 | 6550375   | 6550425   | 50  | 6550387   | 12 | 24  | 0    |
| 17 | 6636675   | 6636700   | 25  | 6636687   | 12 | 12  | 0    |
| 17 | 6675775   | 6675850   | 75  | 6675837   | 18 | 47  | 6.6  |
| 17 | 6909800   | 6909825   | 25  | 6909812   | 13 | 13  | 0    |
| 17 | 8241825   | 8241900   | 75  | 8241837   | 12 | 36  | 4.4  |
| 17 | 8722175   | 8722275   | 100 | 8722212   | 15 | 56  | 8.8  |
| 17 | 8900700   | 8900725   | 25  | 8900712   | 13 | 13  | 0    |
| 17 | 8915650   | 8915725   | 75  | 8915687   | 13 | 38  | 6.6  |
| 17 | 8930825   | 8931000   | 175 | 8930862   | 15 | 96  | 0    |
| 17 | 9432375   | 9432400   | 25  | 9432387   | 12 | 12  | 0    |
| 17 | 9748925   | 9748950   | 25  | 9748937   | 12 | 12  | 0    |
| 17 | 10695500  | 10695575  | 75  | 10695512  | 14 | 39  | 6.6  |
| 17 | 11613300  | 11613400  | 100 | 11613362  | 13 | 49  | 0    |
| 17 | 13449275  | 13449375  | 100 | 13449362  | 14 | 51  | 0    |
| 17 | 14153525  | 14153725  | 200 | 14153562  | 13 | 95  | 0    |
| 17 | 14830525  | 14830575  | 50  | 14830537  | 12 | 24  | 4.4  |
| 17 | 15772850  | 15772875  | 25  | 15772862  | 12 | 12  | 0    |
| 17 | 15789375  | 15789450  | 75  | 15789387  | 13 | 38  | 6.6  |
| 17 | 16412600  | 16412800  | 200 | 16412687  | 25 | 170 | 21.9 |
| 17 | 16428500  | 16428600  | 100 | 16428512  | 14 | 55  | 0    |
| 17 | 16442425  | 16442500  | 75  | 16442437  | 12 | 36  | 0    |
| 17 | 16450300  | 16450425  | 125 | 16450387  | 13 | 62  | 0    |
| 17 | 16769675  | 16769725  | 50  | 16769687  | 12 | 24  | 0    |
| 17 | 17477550  | 17477700  | 150 | 17477562  | 13 | 73  | 10.9 |

|    |          |          |     |          |    |     |      |
|----|----------|----------|-----|----------|----|-----|------|
| 17 | 18159525 | 18159575 | 50  | 18159537 | 19 | 38  | 4.4  |
| 17 | 19286975 | 19287100 | 125 | 19287037 | 14 | 64  | 10.9 |
| 17 | 19399225 | 19399375 | 150 | 19399362 | 16 | 86  | 8.8  |
| 17 | 19601750 | 19601775 | 25  | 19601762 | 12 | 12  | 0    |
| 17 | 19720600 | 19720775 | 175 | 19720637 | 16 | 103 | 0    |
| 17 | 19737025 | 19737050 | 25  | 19737037 | 12 | 12  | 0    |
| 17 | 19822850 | 19822900 | 50  | 19822862 | 12 | 24  | 0    |
| 17 | 19897575 | 19897600 | 25  | 19897587 | 13 | 13  | 0    |
| 17 | 20457825 | 20457850 | 25  | 20457837 | 12 | 12  | 2.2  |
| 17 | 20711800 | 20711975 | 175 | 20711862 | 17 | 102 | 6.6  |
| 17 | 21173825 | 21173900 | 75  | 21173887 | 15 | 42  | 0    |
| 17 | 21180725 | 21180800 | 75  | 21180737 | 12 | 36  | 2.2  |
| 17 | 21191600 | 21191625 | 25  | 21191612 | 12 | 12  | 2.2  |
| 17 | 21258675 | 21258725 | 50  | 21258687 | 15 | 27  | 2.2  |
| 17 | 21259725 | 21259800 | 75  | 21259787 | 14 | 38  | 2.2  |
| 17 | 21269475 | 21269525 | 50  | 21269487 | 13 | 26  | 0    |
| 17 | 21283250 | 21283300 | 50  | 21283262 | 13 | 26  | 0    |
| 17 | 21321500 | 21321700 | 200 | 21321537 | 19 | 128 | 0    |
| 17 | 21438100 | 21438200 | 100 | 21438162 | 13 | 48  | 0    |
| 17 | 21490125 | 21490175 | 50  | 21490137 | 13 | 26  | 2.2  |
| 17 | 21828525 | 21828650 | 125 | 21828587 | 13 | 63  | 0    |
| 17 | 22115525 | 22115625 | 100 | 22115537 | 13 | 50  | 4.4  |
| 17 | 22289025 | 22289175 | 150 | 22289162 | 21 | 92  | 2.2  |
| 17 | 22291575 | 22291600 | 25  | 22291587 | 14 | 14  | 2.2  |
| 17 | 23120100 | 23120150 | 50  | 23120112 | 12 | 24  | 4.4  |
| 17 | 23210275 | 23210375 | 100 | 23210337 | 14 | 50  | 0    |
| 17 | 23602600 | 23602675 | 75  | 23602662 | 13 | 36  | 6.6  |
| 17 | 25713925 | 25713975 | 50  | 25713937 | 15 | 29  | 0    |
| 17 | 30841200 | 30841350 | 150 | 30841287 | 15 | 82  | 0    |
| 17 | 31092100 | 31092275 | 175 | 31092162 | 13 | 86  | 6.6  |
| 17 | 31479125 | 31479175 | 50  | 31479162 | 13 | 25  | 4.4  |
| 17 | 31493400 | 31493425 | 25  | 31493412 | 12 | 12  | 0    |
| 17 | 35175900 | 35176125 | 225 | 35176012 | 14 | 116 | 0    |
| 17 | 35936550 | 35936600 | 50  | 35936562 | 12 | 24  | 0    |
| 17 | 36806150 | 36806275 | 125 | 36806187 | 13 | 61  | 0    |
| 17 | 36834200 | 36834275 | 75  | 36834212 | 13 | 37  | 0    |
| 17 | 39135925 | 39136100 | 175 | 39136087 | 14 | 89  | 0    |
| 17 | 39420925 | 39420950 | 25  | 39420937 | 12 | 12  | 2.2  |
| 17 | 40401625 | 40401725 | 100 | 40401637 | 15 | 56  | 8.8  |
| 17 | 41094775 | 41094800 | 25  | 41094787 | 12 | 12  | 0    |
| 17 | 41105550 | 41105600 | 50  | 41105562 | 13 | 25  | 0    |
| 17 | 42231125 | 42231150 | 25  | 42231137 | 12 | 12  | 2.2  |
| 17 | 42233275 | 42233450 | 175 | 42233287 | 15 | 96  | 0    |
| 17 | 42283575 | 42283625 | 50  | 42283587 | 12 | 24  | 0    |
| 17 | 42326325 | 42326350 | 25  | 42326337 | 13 | 13  | 0    |
| 17 | 42329075 | 42329100 | 25  | 42329087 | 12 | 12  | 0    |
| 17 | 42383425 | 42383475 | 50  | 42383437 | 13 | 25  | 4.4  |
| 17 | 42388175 | 42388325 | 150 | 42388237 | 14 | 76  | 4.4  |
| 17 | 42569450 | 42569650 | 200 | 42569537 | 59 | 356 | 59.1 |
| 17 | 42589500 | 42589550 | 50  | 42589512 | 28 | 49  | 6.6  |
| 17 | 42604475 | 42604500 | 25  | 42604487 | 17 | 17  | 2.2  |
| 17 | 42699700 | 42699775 | 75  | 42699737 | 14 | 38  | 0    |
| 17 | 43144575 | 43144725 | 150 | 43144637 | 14 | 77  | 0    |
| 17 | 43206825 | 43206875 | 50  | 43206837 | 12 | 24  | 0    |
| 17 | 43288225 | 43288300 | 75  | 43288237 | 12 | 35  | 6.6  |
| 17 | 44171400 | 44171500 | 100 | 44171412 | 13 | 49  | 0    |
| 17 | 44182175 | 44182200 | 25  | 44182187 | 12 | 12  | 0    |
| 17 | 44186650 | 44186850 | 200 | 44186712 | 16 | 118 | 8.8  |
| 17 | 44512275 | 44512400 | 125 | 44512287 | 13 | 58  | 0    |
| 17 | 44564650 | 44564925 | 275 | 44564762 | 27 | 220 | 26.3 |
| 17 | 44565175 | 44565350 | 175 | 44565212 | 14 | 94  | 6.6  |
| 17 | 44585050 | 44585200 | 150 | 44585112 | 13 | 75  | 0    |
| 17 | 44588950 | 44589025 | 75  | 44588962 | 12 | 35  | 6.6  |
| 17 | 44602775 | 44602825 | 50  | 44602812 | 13 | 25  | 4.4  |
| 17 | 44616500 | 44616600 | 100 | 44616562 | 14 | 51  | 6.6  |
| 17 | 44639400 | 44639525 | 125 | 44639512 | 16 | 69  | 0    |
| 17 | 44874600 | 44874625 | 25  | 44874612 | 12 | 12  | 0    |
| 17 | 44875100 | 44875200 | 100 | 44875187 | 13 | 48  | 2.2  |
| 17 | 44917650 | 44917825 | 175 | 44917687 | 14 | 92  | 15.3 |
| 17 | 44929725 | 44929775 | 50  | 44929737 | 12 | 24  | 4.4  |
| 17 | 45342450 | 45342475 | 25  | 45342462 | 12 | 12  | 2.2  |
| 17 | 45356975 | 45357000 | 25  | 45356987 | 12 | 12  | 0    |
| 17 | 45445550 | 45445625 | 75  | 45445562 | 12 | 35  | 6.6  |
| 17 | 45677375 | 45677425 | 50  | 45677387 | 12 | 24  | 2.2  |
| 17 | 46344625 | 46344650 | 25  | 46344637 | 12 | 12  | 2.2  |

|    |          |          |     |          |    |     |      |
|----|----------|----------|-----|----------|----|-----|------|
| 17 | 46769350 | 46769550 | 200 | 46769487 | 16 | 113 | 0    |
| 17 | 46783575 | 46783675 | 100 | 46783587 | 12 | 47  | 0    |
| 17 | 46799000 | 46799075 | 75  | 46799012 | 14 | 40  | 6.6  |
| 17 | 46829950 | 46829975 | 25  | 46829962 | 12 | 12  | 0    |
| 17 | 46853850 | 46854000 | 150 | 46853937 | 15 | 83  | 0    |
| 17 | 46913875 | 46913925 | 50  | 46913887 | 13 | 25  | 0    |
| 17 | 46925625 | 46925750 | 125 | 46925687 | 15 | 68  | 0    |
| 17 | 46937900 | 46938000 | 100 | 46937962 | 14 | 52  | 0    |
| 17 | 46956350 | 46956375 | 25  | 46956362 | 13 | 13  | 2.2  |
| 17 | 46986425 | 46986500 | 75  | 46986437 | 12 | 35  | 0    |
| 17 | 47132850 | 47132975 | 125 | 47132912 | 14 | 66  | 10.9 |
| 17 | 48768700 | 48768725 | 25  | 48768712 | 12 | 12  | 0    |
| 17 | 49224175 | 49224300 | 125 | 49224287 | 13 | 61  | 2.2  |
| 17 | 49256000 | 49256075 | 75  | 49256012 | 13 | 38  | 0    |
| 17 | 49433950 | 49434000 | 50  | 49433962 | 12 | 24  | 0    |
| 17 | 50269500 | 50269650 | 150 | 50269512 | 13 | 72  | 0    |
| 17 | 51053850 | 51053875 | 25  | 51053862 | 12 | 12  | 2.2  |
| 17 | 51211750 | 51211800 | 50  | 51211762 | 12 | 24  | 0    |
| 17 | 51267550 | 51267575 | 25  | 51267562 | 12 | 12  | 0    |
| 17 | 51371150 | 51371175 | 25  | 51371162 | 12 | 12  | 2.2  |
| 17 | 51513300 | 51513325 | 25  | 51513312 | 12 | 12  | 0    |
| 17 | 52052300 | 52052350 | 50  | 52052312 | 13 | 26  | 0    |
| 17 | 52097300 | 52097350 | 50  | 52097312 | 13 | 26  | 4.4  |
| 17 | 52104600 | 52104750 | 150 | 52104712 | 17 | 89  | 0    |
| 17 | 52175950 | 52176000 | 50  | 52175962 | 12 | 24  | 4.4  |
| 17 | 52176225 | 52176425 | 200 | 52176237 | 15 | 107 | 2.2  |
| 17 | 52194800 | 52194825 | 25  | 52194812 | 13 | 13  | 2.2  |
| 17 | 52218050 | 52218150 | 100 | 52218062 | 12 | 47  | 8.8  |
| 17 | 52321850 | 52321925 | 75  | 52321862 | 13 | 38  | 6.6  |
| 17 | 52322825 | 52322925 | 100 | 52322837 | 13 | 50  | 0    |
| 17 | 52582500 | 52582600 | 100 | 52582512 | 12 | 47  | 8.8  |
| 17 | 53128425 | 53128600 | 175 | 53128437 | 13 | 80  | 0    |
| 17 | 53148125 | 53148275 | 150 | 53148187 | 15 | 79  | 0    |
| 17 | 53179350 | 53179450 | 100 | 53179387 | 13 | 51  | 0    |
| 17 | 53201075 | 53201225 | 150 | 53201162 | 17 | 88  | 0    |
| 17 | 53222375 | 53222525 | 150 | 53222387 | 13 | 76  | 0    |
| 17 | 53549900 | 53550050 | 150 | 53549937 | 14 | 81  | 0    |
| 17 | 53664975 | 53665075 | 100 | 53665062 | 13 | 48  | 8.8  |
| 17 | 53677100 | 53677125 | 25  | 53677112 | 12 | 12  | 0    |
| 17 | 54187850 | 54187925 | 75  | 54187862 | 12 | 35  | 6.6  |
| 17 | 54344325 | 54344350 | 25  | 54344337 | 12 | 12  | 0    |
| 17 | 54997325 | 54997350 | 25  | 54997337 | 13 | 13  | 0    |
| 17 | 55861575 | 55861700 | 125 | 55861587 | 13 | 62  | 4.4  |
| 17 | 55924250 | 55924300 | 50  | 55924262 | 12 | 24  | 4.4  |
| 17 | 55990050 | 55990125 | 75  | 55990062 | 12 | 36  | 0    |
| 17 | 56888450 | 56888475 | 25  | 56888462 | 12 | 12  | 0    |
| 17 | 56902225 | 56902250 | 25  | 56902237 | 12 | 12  | 0    |
| 17 | 56915350 | 56915375 | 25  | 56915362 | 12 | 12  | 2.2  |
| 17 | 57023250 | 57023450 | 200 | 57023337 | 16 | 112 | 2.2  |
| 17 | 57025675 | 57025875 | 200 | 57025762 | 18 | 134 | 4.4  |
| 17 | 58127300 | 58127450 | 150 | 58127387 | 18 | 93  | 0    |
| 17 | 58204275 | 58204325 | 50  | 58204287 | 12 | 24  | 4.4  |
| 17 | 58204975 | 58205025 | 50  | 58204987 | 12 | 24  | 0    |
| 17 | 58205325 | 58205625 | 300 | 58205462 | 13 | 131 | 0    |
| 17 | 58210325 | 58210425 | 100 | 58210337 | 12 | 48  | 8.8  |
| 17 | 58296725 | 58296750 | 25  | 58296737 | 12 | 12  | 0    |
| 17 | 58297000 | 58297125 | 125 | 58297037 | 16 | 74  | 0    |
| 17 | 58297775 | 58297825 | 50  | 58297787 | 12 | 24  | 0    |
| 17 | 58936425 | 58936625 | 200 | 58936587 | 16 | 107 | 0    |
| 17 | 58939300 | 58939350 | 50  | 58939312 | 13 | 25  | 0    |
| 17 | 58940050 | 58940250 | 200 | 58940187 | 14 | 98  | 0    |
| 17 | 58967050 | 58967125 | 75  | 58967062 | 13 | 37  | 6.6  |
| 17 | 59700950 | 59701100 | 150 | 59700962 | 14 | 78  | 0    |
| 17 | 60651800 | 60651850 | 50  | 60651837 | 13 | 25  | 0    |
| 17 | 60864975 | 60865000 | 25  | 60864987 | 12 | 12  | 2.2  |
| 17 | 60865325 | 60865450 | 125 | 60865387 | 14 | 64  | 10.9 |
| 17 | 60891775 | 60891825 | 50  | 60891787 | 12 | 24  | 4.4  |
| 17 | 61839600 | 61839625 | 25  | 61839612 | 13 | 13  | 0    |
| 17 | 61872200 | 61872225 | 25  | 61872212 | 12 | 12  | 2.2  |
| 17 | 61934975 | 61935025 | 50  | 61934987 | 12 | 24  | 0    |
| 17 | 61979125 | 61979225 | 100 | 61979212 | 14 | 49  | 6.6  |
| 17 | 62124325 | 62124400 | 75  | 62124362 | 13 | 37  | 0    |
| 17 | 62207875 | 62207900 | 25  | 62207887 | 12 | 12  | 2.2  |
| 17 | 62224300 | 62224500 | 200 | 62224312 | 12 | 82  | 6.6  |
| 17 | 62237600 | 62237750 | 150 | 62237637 | 15 | 86  | 13.1 |

|    |          |          |     |          |    |     |      |
|----|----------|----------|-----|----------|----|-----|------|
| 17 | 62239050 | 62239350 | 300 | 62239337 | 14 | 134 | 15.3 |
| 17 | 62244725 | 62244825 | 100 | 62244762 | 14 | 51  | 0    |
| 17 | 62274375 | 62274425 | 50  | 62274387 | 12 | 24  | 0    |
| 17 | 62360150 | 62360175 | 25  | 62360162 | 12 | 12  | 0    |
| 17 | 62365850 | 62365925 | 75  | 62365887 | 14 | 40  | 6.6  |
| 17 | 62374000 | 62374125 | 125 | 62374012 | 13 | 62  | 0    |
| 17 | 62409900 | 62410075 | 175 | 62409987 | 13 | 80  | 0    |
| 17 | 62411425 | 62411575 | 150 | 62411512 | 13 | 74  | 0    |
| 17 | 62414750 | 62414925 | 175 | 62414887 | 13 | 78  | 0    |
| 17 | 62427250 | 62427425 | 175 | 62427337 | 15 | 94  | 0    |
| 17 | 62434775 | 62434900 | 125 | 62434812 | 13 | 59  | 0    |
| 17 | 62458175 | 62458275 | 100 | 62458187 | 15 | 55  | 0    |
| 17 | 62459175 | 62459350 | 175 | 62459237 | 15 | 91  | 0    |
| 17 | 62468150 | 62468350 | 200 | 62468312 | 17 | 110 | 4.4  |
| 17 | 62471350 | 62471450 | 100 | 62471362 | 16 | 59  | 0    |
| 17 | 62480925 | 62480975 | 50  | 62480937 | 13 | 25  | 2.2  |
| 17 | 62481300 | 62481425 | 125 | 62481312 | 12 | 54  | 0    |
| 17 | 63660150 | 63660175 | 25  | 63660162 | 12 | 12  | 0    |
| 17 | 63831950 | 63831975 | 25  | 63831962 | 14 | 14  | 2.2  |
| 17 | 63835850 | 63835875 | 25  | 63835862 | 13 | 13  | 2.2  |
| 17 | 63842375 | 63842450 | 75  | 63842387 | 13 | 38  | 4.4  |
| 17 | 63903550 | 63903575 | 25  | 63903562 | 12 | 12  | 2.2  |
| 17 | 63929350 | 63929425 | 75  | 63929362 | 14 | 38  | 6.6  |
| 17 | 64125375 | 64125400 | 25  | 64125387 | 12 | 12  | 0    |
| 17 | 64173750 | 64173825 | 75  | 64173762 | 13 | 37  | 0    |
| 17 | 64194525 | 64194600 | 75  | 64194537 | 15 | 41  | 6.6  |
| 17 | 64200425 | 64200450 | 25  | 64200437 | 12 | 12  | 0    |
| 17 | 64201675 | 64201750 | 75  | 64201737 | 21 | 55  | 6.6  |
| 17 | 64202175 | 64202250 | 75  | 64202187 | 12 | 36  | 2.2  |
| 17 | 64385250 | 64385375 | 125 | 64385287 | 14 | 64  | 10.9 |
| 17 | 64387500 | 64387650 | 150 | 64387512 | 19 | 99  | 4.4  |
| 17 | 64388400 | 64388625 | 225 | 64388512 | 21 | 158 | 15.3 |
| 17 | 65683000 | 65683125 | 125 | 65683012 | 13 | 63  | 0    |
| 17 | 67129050 | 67129125 | 75  | 67129062 | 13 | 38  | 0    |
| 17 | 67390925 | 67390975 | 50  | 67390937 | 12 | 24  | 0    |
| 17 | 67629400 | 67629425 | 25  | 67629412 | 12 | 12  | 0    |
| 17 | 67643825 | 67643875 | 50  | 67643862 | 13 | 25  | 0    |
| 17 | 67696350 | 67696425 | 75  | 67696412 | 13 | 37  | 0    |
| 17 | 67726525 | 67726600 | 75  | 67726537 | 13 | 37  | 2.2  |
| 17 | 67791775 | 67791850 | 75  | 67791787 | 12 | 36  | 0    |
| 17 | 67798175 | 67798225 | 50  | 67798212 | 13 | 25  | 4.4  |
| 17 | 67798550 | 67798600 | 50  | 67798562 | 13 | 26  | 0    |
| 17 | 67802100 | 67802125 | 25  | 67802112 | 12 | 12  | 0    |
| 17 | 67803600 | 67803800 | 200 | 67803612 | 12 | 90  | 0    |
| 17 | 67851025 | 67851050 | 25  | 67851037 | 12 | 12  | 0    |
| 17 | 67859650 | 67859725 | 75  | 67859687 | 14 | 40  | 0    |
| 17 | 67927925 | 67927975 | 50  | 67927937 | 13 | 25  | 0    |
| 17 | 68128375 | 68128450 | 75  | 68128437 | 15 | 42  | 2.2  |
| 17 | 68128675 | 68128775 | 100 | 68128712 | 15 | 53  | 0    |
| 17 | 68137000 | 68137100 | 100 | 68137012 | 13 | 51  | 0    |
| 17 | 68218750 | 68218900 | 150 | 68218812 | 16 | 92  | 0    |
| 17 | 68302275 | 68302375 | 100 | 68302287 | 13 | 48  | 8.8  |
| 17 | 68487450 | 68487525 | 75  | 68487462 | 12 | 35  | 0    |
| 17 | 68579125 | 68579225 | 100 | 68579137 | 13 | 51  | 0    |
| 17 | 68651775 | 68651850 | 75  | 68651787 | 15 | 42  | 0    |
| 17 | 68674950 | 68675025 | 75  | 68674962 | 12 | 34  | 0    |
| 17 | 68677400 | 68677425 | 25  | 68677412 | 13 | 13  | 0    |
| 17 | 68684625 | 68684675 | 50  | 68684637 | 13 | 25  | 0    |
| 17 | 68958650 | 68958725 | 75  | 68958662 | 12 | 35  | 6.6  |
| 17 | 68960925 | 68961025 | 100 | 68960937 | 12 | 48  | 0    |
| 17 | 68967100 | 68967125 | 25  | 68967112 | 12 | 12  | 0    |
| 17 | 68967900 | 68967950 | 50  | 68967937 | 14 | 26  | 0    |
| 17 | 68968750 | 68968800 | 50  | 68968762 | 12 | 24  | 0    |
| 17 | 68980050 | 68980200 | 150 | 68980162 | 13 | 72  | 0    |
| 17 | 68990650 | 68990675 | 25  | 68990662 | 14 | 14  | 0    |
| 17 | 68993500 | 68993750 | 250 | 68993587 | 19 | 158 | 4.4  |
| 17 | 68995100 | 68995125 | 25  | 68995112 | 13 | 13  | 2.2  |
| 17 | 69003900 | 69004075 | 175 | 69004062 | 17 | 100 | 6.6  |
| 17 | 69005225 | 69005275 | 50  | 69005262 | 13 | 25  | 2.2  |
| 17 | 69011325 | 69011575 | 250 | 69011437 | 25 | 183 | 0    |
| 17 | 69014825 | 69014900 | 75  | 69014862 | 13 | 38  | 6.6  |
| 17 | 69031825 | 69031875 | 50  | 69031837 | 12 | 24  | 4.4  |
| 17 | 69034800 | 69035075 | 275 | 69034812 | 12 | 117 | 8.8  |
| 17 | 69035375 | 69035550 | 175 | 69035387 | 12 | 69  | 0    |
| 17 | 69036125 | 69036650 | 525 | 69036237 | 14 | 292 | 52.5 |

|    |          |          |      |          |    |     |      |
|----|----------|----------|------|----------|----|-----|------|
| 17 | 69036900 | 69037100 | 200  | 69037037 | 13 | 98  | 15.3 |
| 17 | 69037725 | 69037825 | 100  | 69037787 | 15 | 55  | 8.8  |
| 17 | 69038675 | 69038800 | 125  | 69038687 | 13 | 64  | 0    |
| 17 | 69042725 | 69042800 | 75   | 69042787 | 13 | 36  | 0    |
| 17 | 69056425 | 69056475 | 50   | 69056437 | 13 | 26  | 0    |
| 17 | 69060800 | 69060825 | 25   | 69060812 | 13 | 13  | 2.2  |
| 17 | 69069150 | 69069300 | 150  | 69069287 | 15 | 79  | 0    |
| 17 | 69082325 | 69082375 | 50   | 69082337 | 13 | 25  | 4.4  |
| 17 | 69110000 | 69110125 | 125  | 69110087 | 15 | 68  | 0    |
| 17 | 69111050 | 69111075 | 25   | 69111062 | 12 | 12  | 0    |
| 17 | 69111775 | 69111825 | 50   | 69111787 | 12 | 24  | 4.4  |
| 17 | 69162025 | 69162150 | 125  | 69162062 | 15 | 69  | 0    |
| 17 | 69162675 | 69162850 | 175  | 69162762 | 15 | 95  | 0    |
| 17 | 69215325 | 69215375 | 50   | 69215362 | 13 | 25  | 0    |
| 17 | 69237275 | 69237300 | 25   | 69237287 | 12 | 12  | 0    |
| 17 | 69239725 | 69239800 | 75   | 69239737 | 12 | 36  | 6.6  |
| 17 | 69249075 | 69249275 | 200  | 69249187 | 13 | 86  | 0    |
| 17 | 69270175 | 69270225 | 50   | 69270187 | 13 | 25  | 4.4  |
| 17 | 69272950 | 69272975 | 25   | 69272962 | 12 | 12  | 0    |
| 17 | 69327075 | 69327125 | 50   | 69327087 | 12 | 24  | 4.4  |
| 17 | 69338550 | 69338600 | 50   | 69338562 | 13 | 26  | 4.4  |
| 17 | 69339450 | 69339575 | 125  | 69339537 | 14 | 63  | 2.2  |
| 17 | 69344350 | 69344400 | 50   | 69344362 | 12 | 24  | 4.4  |
| 17 | 69359950 | 69359975 | 25   | 69359962 | 14 | 14  | 2.2  |
| 17 | 69361400 | 69361475 | 75   | 69361412 | 17 | 45  | 0    |
| 17 | 69381125 | 69381225 | 100  | 69381162 | 14 | 52  | 0    |
| 17 | 69408775 | 69408800 | 25   | 69408787 | 12 | 12  | 2.2  |
| 17 | 69480350 | 69480375 | 25   | 69480362 | 12 | 12  | 0    |
| 17 | 69491025 | 69491125 | 100  | 69491112 | 13 | 48  | 6.6  |
| 17 | 69523075 | 69523350 | 275  | 69523262 | 18 | 167 | 17.5 |
| 17 | 69533725 | 69533800 | 75   | 69533737 | 12 | 36  | 0    |
| 17 | 69543275 | 69543325 | 50   | 69543287 | 12 | 24  | 0    |
| 17 | 69564450 | 69564625 | 175  | 69564487 | 14 | 92  | 8.8  |
| 17 | 69593200 | 69593375 | 175  | 69593262 | 15 | 98  | 0    |
| 17 | 69609500 | 69609550 | 50   | 69609512 | 12 | 24  | 0    |
| 17 | 69615025 | 69615075 | 50   | 69615062 | 13 | 25  | 0    |
| 17 | 69621825 | 69621875 | 50   | 69621837 | 12 | 24  | 4.4  |
| 17 | 69627825 | 69627900 | 75   | 69627837 | 12 | 35  | 4.4  |
| 17 | 69636400 | 69636475 | 75   | 69636412 | 12 | 36  | 0    |
| 17 | 69637800 | 69637900 | 100  | 69637837 | 13 | 50  | 6.6  |
| 17 | 69638200 | 69638350 | 150  | 69638312 | 16 | 84  | 6.6  |
| 17 | 69641725 | 69641775 | 50   | 69641737 | 13 | 26  | 0    |
| 17 | 69643900 | 69643925 | 25   | 69643912 | 12 | 12  | 0    |
| 17 | 69667325 | 69667350 | 25   | 69667337 | 13 | 13  | 0    |
| 17 | 69668525 | 69668600 | 75   | 69668562 | 13 | 37  | 0    |
| 17 | 69670975 | 69671125 | 150  | 69671037 | 15 | 82  | 0    |
| 17 | 69679125 | 69679150 | 25   | 69679137 | 12 | 12  | 0    |
| 17 | 69812450 | 69812475 | 25   | 69812462 | 14 | 14  | 2.2  |
| 17 | 69813200 | 69813225 | 25   | 69813212 | 13 | 13  | 2.2  |
| 17 | 69820175 | 69820475 | 300  | 69820287 | 21 | 203 | 0    |
| 17 | 69829425 | 69830175 | 750  | 69829912 | 19 | 410 | 17.5 |
| 17 | 69845500 | 69845525 | 25   | 69845512 | 12 | 12  | 2.2  |
| 17 | 69925450 | 69925675 | 225  | 69925637 | 16 | 130 | 0    |
| 17 | 69932750 | 69932925 | 175  | 69932812 | 15 | 91  | 13.1 |
| 17 | 69939350 | 69939400 | 50   | 69939387 | 16 | 30  | 0    |
| 17 | 69947000 | 69947100 | 100  | 69947012 | 16 | 57  | 8.8  |
| 17 | 69947475 | 69947550 | 75   | 69947487 | 12 | 34  | 4.4  |
| 17 | 69948325 | 69948400 | 75   | 69948337 | 13 | 38  | 0    |
| 17 | 70021775 | 70022550 | 775  | 70021962 | 18 | 409 | 37.2 |
| 17 | 70031300 | 70031325 | 25   | 70031312 | 12 | 12  | 0    |
| 17 | 70033650 | 70033675 | 25   | 70033662 | 12 | 12  | 2.2  |
| 17 | 70064225 | 70064275 | 50   | 70064237 | 12 | 24  | 2.2  |
| 17 | 70071000 | 70071025 | 25   | 70071012 | 12 | 12  | 0    |
| 17 | 70134225 | 70134275 | 50   | 70134237 | 15 | 29  | 2.2  |
| 17 | 70178875 | 70178950 | 75   | 70178887 | 12 | 36  | 0    |
| 17 | 70237125 | 70237250 | 125  | 70237187 | 15 | 65  | 0    |
| 17 | 70238225 | 70238275 | 50   | 70238262 | 16 | 31  | 0    |
| 17 | 70449575 | 70449775 | 200  | 70449662 | 18 | 116 | 10.9 |
| 17 | 70463575 | 70463725 | 150  | 70463687 | 15 | 75  | 0    |
| 17 | 70464400 | 70464550 | 150  | 70464512 | 13 | 72  | 0    |
| 17 | 71201450 | 71201575 | 125  | 71201487 | 13 | 60  | 6.6  |
| 17 | 71203825 | 71203875 | 50   | 71203837 | 12 | 24  | 0    |
| 17 | 71208175 | 71209175 | 1000 | 71208437 | 20 | 562 | 63.5 |
| 17 | 71540025 | 71540075 | 50   | 71540037 | 14 | 27  | 4.4  |
| 17 | 71541000 | 71541150 | 150  | 71541087 | 17 | 84  | 0    |



|    |          |          |     |          |    |     |      |
|----|----------|----------|-----|----------|----|-----|------|
| 17 | 71747550 | 71747625 | 75  | 71747587 | 13 | 38  | 6.6  |
| 17 | 72151375 | 72151400 | 25  | 72151387 | 12 | 12  | 0    |
| 17 | 72420250 | 72420275 | 25  | 72420262 | 12 | 12  | 0    |
| 17 | 72482275 | 72482550 | 275 | 72482412 | 25 | 218 | 17.5 |
| 17 | 72485125 | 72485150 | 25  | 72485137 | 12 | 12  | 0    |
| 17 | 72489925 | 72490100 | 175 | 72490062 | 13 | 78  | 10.9 |
| 17 | 72535650 | 72535700 | 50  | 72535687 | 13 | 25  | 4.4  |
| 17 | 72682100 | 72682150 | 50  | 72682112 | 14 | 27  | 0    |
| 17 | 72781925 | 72781950 | 25  | 72781937 | 12 | 12  | 2.2  |
| 17 | 72818425 | 72818450 | 25  | 72818437 | 12 | 12  | 2.2  |
| 17 | 73036825 | 73036875 | 50  | 73036862 | 13 | 25  | 4.4  |
| 17 | 73039600 | 73039800 | 200 | 73039612 | 14 | 102 | 0    |
| 17 | 73042250 | 73042550 | 300 | 73042362 | 19 | 172 | 2.2  |
| 17 | 73055925 | 73056025 | 100 | 73056012 | 13 | 47  | 0    |
| 17 | 73061475 | 73061600 | 125 | 73061537 | 13 | 60  | 0    |
| 17 | 73070400 | 73070750 | 350 | 73070512 | 18 | 190 | 8.8  |
| 17 | 73071200 | 73071475 | 275 | 73071337 | 21 | 180 | 8.8  |
| 17 | 73073725 | 73073775 | 50  | 73073737 | 13 | 26  | 0    |
| 17 | 73084075 | 73084125 | 50  | 73084087 | 13 | 25  | 0    |
| 17 | 73121425 | 73121450 | 25  | 73121437 | 14 | 14  | 0    |
| 17 | 73126425 | 73126700 | 275 | 73126587 | 17 | 156 | 10.9 |
| 17 | 73149025 | 73149100 | 75  | 73149037 | 12 | 36  | 0    |
| 17 | 73149950 | 73150025 | 75  | 73149962 | 16 | 41  | 0    |
| 17 | 73162000 | 73162200 | 200 | 73162087 | 19 | 123 | 6.6  |
| 17 | 73163700 | 73163825 | 125 | 73163762 | 13 | 62  | 4.4  |
| 17 | 73164825 | 73164850 | 25  | 73164837 | 12 | 12  | 0    |
| 17 | 73184775 | 73184800 | 25  | 73184787 | 12 | 12  | 0    |
| 17 | 73198975 | 73199125 | 150 | 73198987 | 13 | 70  | 13.1 |
| 17 | 73206300 | 73206350 | 50  | 73206312 | 13 | 25  | 4.4  |
| 17 | 73207125 | 73207200 | 75  | 73207187 | 18 | 49  | 4.4  |
| 17 | 73208450 | 73208475 | 25  | 73208462 | 16 | 16  | 2.2  |
| 17 | 73209475 | 73209525 | 50  | 73209487 | 12 | 24  | 0    |
| 17 | 73212250 | 73212350 | 100 | 73212262 | 13 | 50  | 8.8  |
| 17 | 73226125 | 73226375 | 250 | 73226212 | 18 | 158 | 6.6  |
| 17 | 73230650 | 73230725 | 75  | 73230687 | 14 | 39  | 0    |
| 17 | 73231700 | 73231800 | 100 | 73231762 | 15 | 55  | 2.2  |
| 17 | 73232975 | 73233650 | 675 | 73233512 | 22 | 443 | 17.5 |
| 17 | 73240875 | 73240925 | 50  | 73240887 | 13 | 25  | 4.4  |
| 17 | 73241400 | 73241425 | 25  | 73241412 | 13 | 13  | 0    |
| 17 | 73241750 | 73241775 | 25  | 73241762 | 12 | 12  | 0    |
| 17 | 73242125 | 73242175 | 50  | 73242137 | 14 | 28  | 0    |
| 17 | 73249325 | 73249525 | 200 | 73249412 | 14 | 100 | 2.2  |
| 17 | 73249975 | 73250325 | 350 | 73250262 | 13 | 154 | 0    |
| 17 | 73253950 | 73253975 | 25  | 73253962 | 12 | 12  | 2.2  |
| 17 | 73256900 | 73256950 | 50  | 73256912 | 12 | 24  | 0    |
| 17 | 73262275 | 73262425 | 150 | 73262287 | 12 | 70  | 0    |
| 17 | 73263075 | 73263600 | 525 | 73263362 | 16 | 276 | 2.2  |
| 17 | 73264750 | 73265025 | 275 | 73264887 | 18 | 164 | 10.9 |
| 17 | 73265650 | 73265825 | 175 | 73265687 | 16 | 104 | 6.6  |
| 17 | 73300650 | 73300700 | 50  | 73300662 | 12 | 24  | 4.4  |
| 17 | 73305550 | 73305650 | 100 | 73305612 | 13 | 50  | 2.2  |
| 17 | 73312600 | 73312625 | 25  | 73312612 | 13 | 13  | 0    |
| 17 | 73345525 | 73345600 | 75  | 73345537 | 16 | 46  | 0    |
| 17 | 73346225 | 73346350 | 125 | 73346337 | 14 | 63  | 0    |
| 17 | 73348650 | 73348775 | 125 | 73348662 | 13 | 61  | 2.2  |
| 17 | 73368375 | 73368600 | 225 | 73368537 | 20 | 149 | 17.5 |
| 17 | 73379975 | 73380025 | 50  | 73379987 | 12 | 24  | 0    |
| 17 | 73380600 | 73380925 | 325 | 73380637 | 20 | 207 | 17.5 |
| 17 | 73383400 | 73383475 | 75  | 73383437 | 17 | 45  | 4.4  |
| 17 | 73385700 | 73385750 | 50  | 73385712 | 15 | 28  | 2.2  |
| 17 | 73391950 | 73392000 | 50  | 73391962 | 12 | 24  | 4.4  |
| 17 | 73392700 | 73392800 | 100 | 73392737 | 13 | 51  | 0    |
| 17 | 73410425 | 73410550 | 125 | 73410437 | 14 | 65  | 6.6  |
| 17 | 73413950 | 73414075 | 125 | 73413987 | 15 | 67  | 6.6  |
| 17 | 73414350 | 73414525 | 175 | 73414362 | 12 | 79  | 8.8  |
| 17 | 73417625 | 73417650 | 25  | 73417637 | 12 | 12  | 0    |
| 17 | 73452450 | 73452475 | 25  | 73452462 | 12 | 12  | 0    |
| 17 | 73457375 | 73457475 | 100 | 73457387 | 15 | 57  | 6.6  |
| 17 | 73459800 | 73460150 | 350 | 73459887 | 19 | 236 | 35   |
| 17 | 73461100 | 73461300 | 200 | 73461162 | 17 | 115 | 2.2  |
| 17 | 73781825 | 73781850 | 25  | 73781837 | 12 | 12  | 0    |
| 17 | 73845175 | 73845200 | 25  | 73845187 | 12 | 12  | 0    |
| 17 | 73956350 | 73956450 | 100 | 73956387 | 13 | 51  | 0    |
| 17 | 73986475 | 73986525 | 50  | 73986487 | 12 | 24  | 0    |
| 17 | 74037050 | 74037100 | 50  | 74037062 | 13 | 25  | 4.4  |

|    |          |          |     |          |    |     |      |
|----|----------|----------|-----|----------|----|-----|------|
| 17 | 74040550 | 74040575 | 25  | 74040562 | 12 | 12  | 2.2  |
| 17 | 74041925 | 74041950 | 25  | 74041937 | 12 | 12  | 0    |
| 17 | 74043050 | 74043075 | 25  | 74043062 | 13 | 13  | 0    |
| 17 | 74050475 | 74050500 | 25  | 74050487 | 12 | 12  | 0    |
| 17 | 74057375 | 74057400 | 25  | 74057387 | 12 | 12  | 0    |
| 17 | 74057850 | 74057900 | 50  | 74057862 | 13 | 26  | 0    |
| 17 | 74058200 | 74058225 | 25  | 74058212 | 13 | 13  | 0    |
| 17 | 74066125 | 74066250 | 125 | 74066187 | 15 | 67  | 8.8  |
| 17 | 74068500 | 74068600 | 100 | 74068537 | 16 | 63  | 0    |
| 17 | 74069375 | 74069425 | 50  | 74069412 | 15 | 29  | 2.2  |
| 17 | 74070500 | 74070525 | 25  | 74070512 | 12 | 12  | 2.2  |
| 17 | 74071950 | 74072050 | 100 | 74071987 | 13 | 49  | 0    |
| 17 | 74074175 | 74074200 | 25  | 74074187 | 12 | 12  | 2.2  |
| 17 | 74153725 | 74153750 | 25  | 74153737 | 12 | 12  | 2.2  |
| 17 | 74172000 | 74172075 | 75  | 74172012 | 14 | 39  | 0    |
| 17 | 74458600 | 74458725 | 125 | 74458637 | 14 | 65  | 10.9 |
| 17 | 74561200 | 74561225 | 25  | 74561212 | 13 | 13  | 2.2  |
| 17 | 74629050 | 74629100 | 50  | 74629062 | 13 | 25  | 4.4  |
| 17 | 74631650 | 74631875 | 225 | 74631662 | 15 | 116 | 8.8  |
| 17 | 74632425 | 74632625 | 200 | 74632537 | 17 | 116 | 0    |
| 17 | 74637150 | 74637175 | 25  | 74637162 | 13 | 13  | 2.2  |
| 17 | 74638625 | 74638875 | 250 | 74638737 | 17 | 142 | 4.4  |
| 17 | 74646525 | 74646625 | 100 | 74646587 | 15 | 56  | 4.4  |
| 17 | 74738525 | 74738675 | 150 | 74738662 | 13 | 70  | 6.6  |
| 17 | 74749175 | 74749200 | 25  | 74749187 | 12 | 12  | 0    |
| 17 | 74753950 | 74754075 | 125 | 74753987 | 15 | 70  | 4.4  |
| 17 | 74827850 | 74827925 | 75  | 74827862 | 13 | 39  | 4.4  |
| 17 | 74828675 | 74828700 | 25  | 74828687 | 12 | 12  | 2.2  |
| 17 | 74843250 | 74843400 | 150 | 74843312 | 15 | 84  | 0    |
| 17 | 74860275 | 74860425 | 150 | 74860387 | 15 | 76  | 0    |
| 17 | 74860675 | 74860750 | 75  | 74860712 | 14 | 40  | 6.6  |
| 17 | 74891375 | 74891900 | 525 | 74891662 | 17 | 270 | 15.3 |
| 17 | 74900200 | 74900400 | 200 | 74900312 | 13 | 94  | 0    |
| 17 | 74915700 | 74915725 | 25  | 74915712 | 12 | 12  | 0    |
| 17 | 74947375 | 74947400 | 25  | 74947387 | 12 | 12  | 2.2  |
| 17 | 74955050 | 74955125 | 75  | 74955062 | 15 | 43  | 2.2  |
| 17 | 74956300 | 74956325 | 25  | 74956312 | 13 | 13  | 0    |
| 17 | 74977400 | 74977450 | 50  | 74977412 | 12 | 24  | 0    |
| 17 | 74987700 | 74987750 | 50  | 74987712 | 12 | 24  | 0    |
| 17 | 75005800 | 75005900 | 100 | 75005837 | 13 | 50  | 8.8  |
| 17 | 75052225 | 75052325 | 100 | 75052237 | 12 | 47  | 2.2  |
| 17 | 75053075 | 75053150 | 75  | 75053112 | 14 | 39  | 6.6  |
| 17 | 75255700 | 75255725 | 25  | 75255712 | 12 | 12  | 2.2  |
| 17 | 75260975 | 75261150 | 175 | 75261087 | 20 | 122 | 2.2  |
| 17 | 75279750 | 75279900 | 150 | 75279762 | 15 | 81  | 0    |
| 17 | 75323475 | 75323675 | 200 | 75323487 | 13 | 95  | 0    |
| 17 | 75413325 | 75413350 | 25  | 75413337 | 12 | 12  | 2.2  |
| 17 | 75415700 | 75415800 | 100 | 75415712 | 13 | 49  | 2.2  |
| 17 | 75477850 | 75477900 | 50  | 75477862 | 12 | 24  | 0    |
| 17 | 75741425 | 75741450 | 25  | 75741437 | 12 | 12  | 2.2  |
| 17 | 76057675 | 76057800 | 125 | 76057762 | 14 | 64  | 10.9 |
| 17 | 76074600 | 76074625 | 25  | 76074612 | 13 | 13  | 0    |
| 17 | 76075225 | 76075425 | 200 | 76075337 | 18 | 112 | 8.8  |
| 17 | 76075925 | 76075950 | 25  | 76075937 | 12 | 12  | 0    |
| 17 | 76111575 | 76111850 | 275 | 76111762 | 21 | 211 | 4.4  |
| 17 | 76189400 | 76189500 | 100 | 76189412 | 12 | 46  | 4.4  |
| 17 | 76502500 | 76502625 | 125 | 76502587 | 15 | 66  | 4.4  |
| 17 | 76518425 | 76518600 | 175 | 76518587 | 25 | 138 | 2.2  |
| 17 | 76722875 | 76723100 | 225 | 76722987 | 15 | 117 | 13.1 |
| 17 | 76726350 | 76726450 | 100 | 76726362 | 15 | 55  | 4.4  |
| 17 | 76726775 | 76726950 | 175 | 76726862 | 21 | 128 | 0    |
| 17 | 76758250 | 76758450 | 200 | 76758312 | 18 | 119 | 2.2  |
| 17 | 76832875 | 76832925 | 50  | 76832887 | 13 | 26  | 4.4  |
| 17 | 76837825 | 76838000 | 175 | 76837937 | 17 | 103 | 0    |
| 17 | 77014250 | 77014300 | 50  | 77014262 | 14 | 26  | 4.4  |
| 17 | 77092650 | 77092750 | 100 | 77092712 | 15 | 56  | 6.6  |
| 17 | 77222950 | 77223150 | 200 | 77223037 | 17 | 114 | 15.3 |
| 17 | 77225075 | 77225100 | 25  | 77225087 | 12 | 12  | 2.2  |
| 17 | 77832775 | 77832825 | 50  | 77832812 | 18 | 34  | 4.4  |
| 17 | 77869475 | 77869675 | 200 | 77869512 | 14 | 100 | 4.4  |
| 17 | 77870025 | 77870325 | 300 | 77870212 | 17 | 169 | 6.6  |
| 17 | 78211325 | 78211475 | 150 | 78211462 | 23 | 90  | 13.1 |
| 17 | 78211850 | 78211900 | 50  | 78211862 | 14 | 26  | 4.4  |
| 17 | 78231050 | 78231075 | 25  | 78231062 | 12 | 12  | 0    |
| 17 | 78274775 | 78274800 | 25  | 78274787 | 12 | 12  | 0    |

|    |          |          |     |          |    |     |      |
|----|----------|----------|-----|----------|----|-----|------|
| 17 | 78292350 | 78292800 | 450 | 78292537 | 21 | 275 | 2.2  |
| 17 | 78351425 | 78351450 | 25  | 78351437 | 12 | 12  | 2.2  |
| 17 | 78378825 | 78378850 | 25  | 78378837 | 12 | 12  | 0    |
| 17 | 78495050 | 78495175 | 125 | 78495162 | 14 | 65  | 0    |
| 17 | 78509025 | 78509075 | 50  | 78509062 | 13 | 25  | 4.4  |
| 17 | 78535375 | 78535500 | 125 | 78535462 | 14 | 65  | 10.9 |
| 17 | 78553850 | 78553950 | 100 | 78553887 | 14 | 54  | 8.8  |
| 17 | 78556200 | 78556250 | 50  | 78556237 | 14 | 26  | 0    |
| 17 | 78569150 | 78569425 | 275 | 78569162 | 14 | 139 | 0    |
| 16 | 904500   | 904650   | 150 | 904537   | 15 | 81  | 0    |
| 16 | 1725925  | 1726075  | 150 | 1725962  | 15 | 78  | 0    |
| 16 | 3346175  | 3346375  | 200 | 3346187  | 12 | 87  | 4.4  |
| 16 | 3398475  | 3398500  | 25  | 3398487  | 12 | 12  | 2.2  |
| 16 | 5402950  | 5402975  | 25  | 5402962  | 12 | 12  | 0    |
| 16 | 11557900 | 11558050 | 150 | 11557912 | 13 | 71  | 2.2  |
| 16 | 20530475 | 20530525 | 50  | 20530487 | 12 | 24  | 0    |
| 16 | 22580850 | 22580975 | 125 | 22580937 | 13 | 62  | 10.9 |
| 16 | 22581400 | 22581425 | 25  | 22581412 | 13 | 13  | 0    |
| 16 | 22583200 | 22583275 | 75  | 22583212 | 13 | 39  | 0    |
| 16 | 22595050 | 22595075 | 25  | 22595062 | 12 | 12  | 0    |
| 16 | 26989675 | 26989700 | 25  | 26989687 | 12 | 12  | 0    |
| 16 | 27100125 | 27100150 | 25  | 27100137 | 12 | 12  | 0    |
| 16 | 31292200 | 31292325 | 125 | 31292212 | 13 | 61  | 0    |
| 16 | 33477975 | 33478025 | 50  | 33477987 | 12 | 24  | 4.4  |
| 16 | 33534900 | 33535000 | 100 | 33534912 | 15 | 56  | 8.8  |
| 16 | 33829675 | 33829950 | 275 | 33829887 | 31 | 269 | 35   |
| 16 | 33842425 | 33842525 | 100 | 33842437 | 13 | 49  | 6.6  |
| 16 | 33843025 | 33843050 | 25  | 33843037 | 22 | 22  | 4.4  |
| 16 | 33844525 | 33844825 | 300 | 33844562 | 26 | 214 | 41.6 |
| 16 | 33845525 | 33845700 | 175 | 33845587 | 15 | 93  | 2.2  |
| 16 | 33845950 | 33846250 | 300 | 33845962 | 35 | 337 | 32.8 |
| 16 | 33849900 | 33850500 | 600 | 33850187 | 55 | 840 | 151  |
| 16 | 33850950 | 33850975 | 25  | 33850962 | 28 | 28  | 4.4  |
| 16 | 33851525 | 33851625 | 100 | 33851612 | 14 | 52  | 6.6  |
| 16 | 33852150 | 33852175 | 25  | 33852162 | 12 | 12  | 2.2  |
| 16 | 33856250 | 33856450 | 200 | 33856412 | 19 | 127 | 8.8  |
| 16 | 33859125 | 33859150 | 25  | 33859137 | 13 | 13  | 2.2  |
| 16 | 33873300 | 33873350 | 50  | 33873337 | 17 | 31  | 4.4  |
| 16 | 33883175 | 33883225 | 50  | 33883187 | 12 | 24  | 0    |
| 16 | 44944175 | 44944350 | 175 | 44944187 | 29 | 138 | 4.4  |
| 16 | 44945575 | 44945600 | 25  | 44945587 | 12 | 12  | 0    |
| 16 | 44946000 | 44946425 | 425 | 44946187 | 13 | 186 | 32.8 |
| 16 | 44946650 | 44946775 | 125 | 44946662 | 22 | 97  | 15.3 |
| 16 | 44948800 | 44948825 | 25  | 44948812 | 13 | 13  | 0    |
| 16 | 44949725 | 44949750 | 25  | 44949737 | 12 | 12  | 2.2  |
| 16 | 44950550 | 44950950 | 400 | 44950762 | 70 | 666 | 70   |
| 16 | 44952025 | 44952075 | 50  | 44952037 | 17 | 32  | 4.4  |
| 16 | 44954000 | 44954175 | 175 | 44954062 | 27 | 154 | 13.1 |
| 16 | 44962425 | 44962450 | 25  | 44962437 | 16 | 16  | 2.2  |
| 16 | 44963875 | 44964250 | 375 | 44964062 | 30 | 307 | 50.3 |
| 16 | 44964475 | 44964650 | 175 | 44964487 | 17 | 114 | 0    |
| 16 | 44974450 | 44974650 | 200 | 44974612 | 34 | 169 | 24.1 |
| 16 | 44992800 | 44993175 | 375 | 44992987 | 40 | 394 | 17.5 |
| 16 | 47700200 | 47700225 | 25  | 47700212 | 12 | 12  | 0    |
| 16 | 48271975 | 48272125 | 150 | 48272087 | 14 | 76  | 0    |
| 16 | 48363600 | 48363625 | 25  | 48363612 | 12 | 12  | 2.2  |
| 16 | 49303525 | 49303600 | 75  | 49303562 | 13 | 38  | 6.6  |
| 16 | 65119500 | 65119575 | 75  | 65119512 | 13 | 37  | 0    |
| 16 | 69409675 | 69409825 | 150 | 69409687 | 12 | 71  | 0    |
| 16 | 69421175 | 69421325 | 150 | 69421187 | 15 | 84  | 13.1 |
| 16 | 69440150 | 69440175 | 25  | 69440162 | 14 | 14  | 2.2  |
| 16 | 69475450 | 69475600 | 150 | 69475537 | 15 | 77  | 8.8  |
| 16 | 69546775 | 69546925 | 150 | 69546837 | 15 | 80  | 6.6  |
| 16 | 69554125 | 69554450 | 325 | 69554262 | 18 | 193 | 8.8  |
| 16 | 69565275 | 69565350 | 75  | 69565287 | 13 | 38  | 0    |
| 16 | 69566375 | 69566400 | 25  | 69566387 | 12 | 12  | 0    |
| 16 | 69570150 | 69570225 | 75  | 69570212 | 16 | 43  | 6.6  |
| 16 | 69604525 | 69604650 | 125 | 69604637 | 13 | 59  | 0    |
| 16 | 69605850 | 69605875 | 25  | 69605862 | 12 | 12  | 0    |
| 16 | 69615650 | 69615775 | 125 | 69615687 | 14 | 67  | 8.8  |
| 16 | 69749300 | 69749375 | 75  | 69749337 | 14 | 40  | 0    |
| 16 | 77667975 | 77668025 | 50  | 77667987 | 12 | 24  | 4.4  |
| 16 | 82843150 | 82843200 | 50  | 82843162 | 12 | 24  | 0    |
| 16 | 82844325 | 82844375 | 50  | 82844337 | 12 | 24  | 0    |
| 16 | 83404950 | 83405150 | 200 | 83405012 | 14 | 106 | 0    |

|    |          |          |     |          |    |     |      |
|----|----------|----------|-----|----------|----|-----|------|
| 16 | 83944175 | 83944425 | 250 | 83944337 | 21 | 178 | 13.1 |
| 16 | 83974000 | 83974075 | 75  | 83974012 | 13 | 37  | 0    |
| 16 | 84524925 | 84524950 | 25  | 84524937 | 12 | 12  | 2.2  |
| 16 | 84974225 | 84974275 | 50  | 84974237 | 12 | 24  | 0    |
| 16 | 85063175 | 85063225 | 50  | 85063187 | 14 | 28  | 4.4  |
| 16 | 85129650 | 85129700 | 50  | 85129687 | 13 | 25  | 0    |
| 16 | 85186975 | 85187025 | 50  | 85186987 | 12 | 24  | 0    |
| 16 | 85230725 | 85230750 | 25  | 85230737 | 12 | 12  | 2.2  |
| 16 | 85233800 | 85233875 | 75  | 85233837 | 14 | 38  | 0    |
| 16 | 85300650 | 85300675 | 25  | 85300662 | 12 | 12  | 2.2  |
| 16 | 85301575 | 85301600 | 25  | 85301587 | 13 | 13  | 0    |
| 16 | 85303725 | 85303750 | 25  | 85303737 | 12 | 12  | 0    |
| 16 | 85397475 | 85397550 | 75  | 85397512 | 15 | 41  | 0    |
| 16 | 85421400 | 85421425 | 25  | 85421412 | 12 | 12  | 2.2  |
| 16 | 85467750 | 85467775 | 25  | 85467762 | 12 | 12  | 2.2  |
| 16 | 85511150 | 85511200 | 50  | 85511187 | 13 | 25  | 0    |
| 16 | 85589775 | 85589800 | 25  | 85589787 | 15 | 15  | 0    |
| 16 | 85722825 | 85722875 | 50  | 85722862 | 13 | 25  | 0    |
| 16 | 86221225 | 86221325 | 100 | 86221287 | 13 | 50  | 0    |
| 16 | 86409575 | 86409600 | 25  | 86409587 | 12 | 12  | 0    |
| 16 | 86470575 | 86470925 | 350 | 86470812 | 17 | 184 | 0    |
| 16 | 86894500 | 86894550 | 50  | 86894512 | 12 | 24  | 4.4  |
| 16 | 86896400 | 86896575 | 175 | 86896487 | 15 | 92  | 0    |
| 16 | 86975075 | 86975200 | 125 | 86975187 | 14 | 63  | 0    |
| 16 | 86976450 | 86976625 | 175 | 86976587 | 13 | 80  | 0    |
| 16 | 86989700 | 86989750 | 50  | 86989737 | 13 | 25  | 0    |
| 16 | 86990000 | 86990075 | 75  | 86990037 | 14 | 39  | 0    |
| 16 | 86991000 | 86991200 | 200 | 86991112 | 19 | 121 | 0    |
| 16 | 86992175 | 86992375 | 200 | 86992312 | 15 | 103 | 0    |
| 16 | 87134200 | 87134425 | 225 | 87134312 | 19 | 142 | 0    |
| 16 | 87135975 | 87136000 | 25  | 87135987 | 12 | 12  | 0    |
| 16 | 87594550 | 87594575 | 25  | 87594562 | 12 | 12  | 0    |
| 16 | 88648725 | 88648750 | 25  | 88648737 | 12 | 12  | 2.2  |
| 19 | 1467400  | 1467450  | 50  | 1467412  | 12 | 24  | 0    |
| 19 | 2666250  | 2666325  | 75  | 2666287  | 13 | 38  | 0    |
| 19 | 3789025  | 3789100  | 75  | 3789037  | 12 | 36  | 0    |
| 19 | 8043550  | 8043575  | 25  | 8043562  | 12 | 12  | 2.2  |
| 19 | 9131925  | 9131950  | 25  | 9131937  | 12 | 12  | 2.2  |
| 19 | 14598725 | 14598775 | 50  | 14598737 | 12 | 24  | 0    |
| 19 | 32425650 | 32425675 | 25  | 32425662 | 12 | 12  | 2.2  |
| 19 | 32429800 | 32429925 | 125 | 32429837 | 15 | 72  | 10.9 |
| 19 | 32431675 | 32431800 | 125 | 32431712 | 13 | 64  | 10.9 |
| 19 | 34572375 | 34572550 | 175 | 34572487 | 14 | 87  | 2.2  |
| 19 | 35989650 | 35989700 | 50  | 35989687 | 14 | 26  | 0    |
| 19 | 37453550 | 37453625 | 75  | 37453587 | 13 | 38  | 6.6  |
| 19 | 38407900 | 38407950 | 50  | 38407937 | 13 | 25  | 0    |
| 19 | 39117000 | 39117125 | 125 | 39117112 | 16 | 70  | 0    |
| 19 | 41428875 | 41428900 | 25  | 41428887 | 12 | 12  | 0    |
| 19 | 41514325 | 41514350 | 25  | 41514337 | 12 | 12  | 0    |
| 19 | 41711725 | 41711800 | 75  | 41711762 | 13 | 37  | 6.6  |
| 19 | 42476025 | 42476200 | 175 | 42476062 | 13 | 90  | 15.3 |
| 19 | 43000275 | 43000300 | 25  | 43000287 | 12 | 12  | 0    |
| 19 | 44698775 | 44698825 | 50  | 44698787 | 12 | 24  | 0    |
| 19 | 47116000 | 47116200 | 200 | 47116087 | 18 | 127 | 0    |
| 19 | 49016250 | 49016275 | 25  | 49016262 | 12 | 12  | 0    |
| 19 | 49098025 | 49098050 | 25  | 49098037 | 13 | 13  | 0    |
| 19 | 49691650 | 49691675 | 25  | 49691662 | 13 | 13  | 2.2  |
| 19 | 51231750 | 51231825 | 75  | 51231762 | 12 | 35  | 0    |
| 19 | 51282350 | 51282425 | 75  | 51282387 | 13 | 37  | 6.6  |
| 19 | 51285800 | 51285825 | 25  | 51285812 | 12 | 12  | 0    |
| 19 | 51332550 | 51332675 | 125 | 51332612 | 14 | 65  | 8.8  |
| 19 | 56065825 | 56065925 | 100 | 56065862 | 15 | 56  | 8.8  |
| 19 | 59276500 | 59276525 | 25  | 59276512 | 12 | 12  | 0    |
| 19 | 61607750 | 61607925 | 175 | 61607787 | 15 | 94  | 0    |
| 19 | 62394250 | 62394425 | 175 | 62394312 | 15 | 92  | 2.2  |
| 19 | 62819200 | 62819275 | 75  | 62819212 | 13 | 39  | 0    |
| 19 | 63385625 | 63385725 | 100 | 63385637 | 13 | 48  | 8.8  |
| 19 | 63387075 | 63387200 | 125 | 63387087 | 13 | 61  | 10.9 |
| 19 | 63433125 | 63433200 | 75  | 63433137 | 13 | 39  | 0    |
| 19 | 63702725 | 63702800 | 75  | 63702737 | 14 | 39  | 2.2  |
| 18 | 101800   | 101950   | 150 | 101812   | 23 | 127 | 21.9 |
| 18 | 16765875 | 16765900 | 25  | 16765887 | 12 | 12  | 2.2  |
| 18 | 16766425 | 16766475 | 50  | 16766437 | 18 | 30  | 2.2  |
| 18 | 16766850 | 16766925 | 75  | 16766862 | 24 | 71  | 8.8  |
| 18 | 16767300 | 16767425 | 125 | 16767362 | 18 | 86  | 10.9 |

|    |          |          |     |          |    |     |      |
|----|----------|----------|-----|----------|----|-----|------|
| 18 | 19476375 | 19476400 | 25  | 19476387 | 12 | 12  | 0    |
| 18 | 32381025 | 32381075 | 50  | 32381037 | 14 | 27  | 0    |
| 18 | 41433425 | 41433450 | 25  | 41433437 | 12 | 12  | 0    |
| 18 | 44506975 | 44507025 | 50  | 44506987 | 12 | 24  | 0    |
| 18 | 45765000 | 45765100 | 100 | 45765037 | 13 | 50  | 0    |
| 18 | 48528325 | 48528425 | 100 | 48528337 | 12 | 45  | 0    |
| 18 | 52901875 | 52901900 | 25  | 52901887 | 12 | 12  | 2.2  |
| 18 | 53172475 | 53172500 | 25  | 53172487 | 12 | 12  | 0    |
| 18 | 54908400 | 54908475 | 75  | 54908412 | 12 | 36  | 0    |
| 18 | 54927800 | 54927825 | 25  | 54927812 | 12 | 12  | 0    |
| 18 | 55285950 | 55286000 | 50  | 55285962 | 12 | 24  | 0    |
| 18 | 55403325 | 55403350 | 25  | 55403337 | 12 | 12  | 0    |
| 18 | 68320950 | 68321000 | 50  | 68320962 | 12 | 24  | 0    |
| 18 | 70200850 | 70200900 | 50  | 70200862 | 12 | 24  | 0    |
| 18 | 70245800 | 70245900 | 100 | 70245837 | 13 | 49  | 0    |
| 18 | 70247175 | 70247200 | 25  | 70247187 | 12 | 12  | 0    |
| 18 | 71985975 | 71986000 | 25  | 71985987 | 13 | 13  | 0    |
| 18 | 73039825 | 73039900 | 75  | 73039837 | 14 | 41  | 6.6  |
| 18 | 73381150 | 73381250 | 100 | 73381187 | 13 | 49  | 8.8  |
| 18 | 74426425 | 74426450 | 25  | 74426437 | 12 | 12  | 0    |
| 18 | 74578150 | 74578200 | 50  | 74578162 | 12 | 24  | 0    |
| 18 | 74587825 | 74587850 | 25  | 74587837 | 12 | 12  | 0    |
| 18 | 75226700 | 75226800 | 100 | 75226712 | 13 | 51  | 0    |
| 18 | 75336325 | 75336525 | 200 | 75336512 | 16 | 115 | 0    |
| 18 | 75374800 | 75374925 | 125 | 75374837 | 13 | 63  | 0    |
| 18 | 75432975 | 75433175 | 200 | 75433087 | 15 | 106 | 0    |
| 18 | 75435225 | 75435250 | 25  | 75435237 | 12 | 12  | 0    |
| 18 | 75480825 | 75480875 | 50  | 75480837 | 12 | 24  | 0    |
| 18 | 75521725 | 75521750 | 25  | 75521737 | 12 | 12  | 0    |
| 18 | 75594075 | 75594100 | 25  | 75594087 | 12 | 12  | 2.2  |
| 18 | 75630975 | 75631025 | 50  | 75631012 | 13 | 25  | 0    |
| 18 | 75678125 | 75678650 | 525 | 75678237 | 15 | 262 | 30.6 |
| 18 | 75738950 | 75738975 | 25  | 75738962 | 12 | 12  | 0    |

**Table S2 - Summary of bound regions**

**SETDB1 (10E-12) in WM451Lu**

| CHROM | START    | END      | LENGTH | PEAK POS | PEAK HEIGHT | TOTAL TARGET COUNTS | TOTAL BACKGROUND COUNTS |
|-------|----------|----------|--------|----------|-------------|---------------------|-------------------------|
| 20    | 46200    | 46325    | 125    | 46212    | 11          | 55                  | 0                       |
| 20    | 66525    | 66600    | 75     | 66562    | 14          | 37                  | 1.7                     |
| 20    | 225950   | 225975   | 25     | 225962   | 13          | 13                  | 1.7                     |
| 20    | 270525   | 270725   | 200    | 270637   | 19          | 129                 | 0                       |
| 20    | 276750   | 276775   | 25     | 276762   | 15          | 15                  | 2.6                     |
| 20    | 472550   | 472675   | 125    | 472562   | 18          | 80                  | 14.9                    |
| 20    | 674450   | 674575   | 125    | 674537   | 18          | 69                  | 0                       |
| 20    | 744925   | 744950   | 25     | 744937   | 12          | 12                  | 1.7                     |
| 20    | 1344600  | 1344775  | 175    | 1344737  | 35          | 189                 | 30.6                    |
| 20    | 1352200  | 1352225  | 25     | 1352212  | 12          | 12                  | 0.9                     |
| 20    | 1352575  | 1352600  | 25     | 1352587  | 14          | 14                  | 2.6                     |
| 20    | 1431200  | 1431600  | 400    | 1431262  | 17          | 251                 | 0                       |
| 20    | 1432250  | 1432300  | 50     | 1432262  | 11          | 22                  | 3.5                     |
| 20    | 1739925  | 1740000  | 75     | 1739937  | 12          | 36                  | 3.5                     |
| 20    | 1740500  | 1740600  | 100    | 1740512  | 12          | 46                  | 4.4                     |
| 20    | 1819125  | 1819175  | 50     | 1819137  | 16          | 32                  | 5.2                     |
| 20    | 1819650  | 1819925  | 275    | 1819762  | 16          | 141                 | 5.2                     |
| 20    | 1893350  | 1893375  | 25     | 1893362  | 11          | 11                  | 1.7                     |
| 20    | 1935325  | 1935350  | 25     | 1935337  | 11          | 11                  | 1.7                     |
| 20    | 2078100  | 2078200  | 100    | 2078162  | 13          | 50                  | 5.2                     |
| 20    | 2280825  | 2280875  | 50     | 2280837  | 13          | 26                  | 1.7                     |
| 20    | 2316075  | 2316175  | 100    | 2316112  | 17          | 62                  | 3.5                     |
| 20    | 2316700  | 2316775  | 75     | 2316712  | 11          | 33                  | 1.7                     |
| 20    | 2381125  | 2381250  | 125    | 2381137  | 12          | 59                  | 7                       |
| 20    | 2399225  | 2399450  | 225    | 2399337  | 19          | 137                 | 25.3                    |
| 20    | 2447525  | 2447550  | 25     | 2447537  | 11          | 11                  | 0.9                     |
| 20    | 2769075  | 2769225  | 150    | 2769087  | 14          | 71                  | 0                       |
| 20    | 3102725  | 3102750  | 25     | 3102737  | 11          | 11                  | 0                       |
| 20    | 3137950  | 3138050  | 100    | 3137987  | 23          | 85                  | 13.1                    |
| 20    | 3381225  | 3381375  | 150    | 3381262  | 15          | 76                  | 12.2                    |
| 20    | 3697625  | 3697700  | 75     | 3697637  | 11          | 33                  | 2.6                     |
| 20    | 3736825  | 3736850  | 25     | 3736837  | 19          | 19                  | 3.5                     |
| 20    | 3784150  | 3784275  | 125    | 3784162  | 15          | 69                  | 1.7                     |
| 20    | 4064700  | 4064750  | 50     | 4064712  | 12          | 24                  | 0                       |
| 20    | 4076150  | 4076175  | 25     | 4076162  | 12          | 12                  | 0                       |
| 20    | 4247375  | 4247425  | 50     | 4247387  | 11          | 22                  | 0                       |
| 20    | 4542975  | 4543000  | 25     | 4542987  | 11          | 11                  | 1.7                     |
| 20    | 4573725  | 4574150  | 425    | 4573962  | 26          | 317                 | 7                       |
| 20    | 4612000  | 4612100  | 100    | 4612012  | 12          | 48                  | 7                       |
| 20    | 4938900  | 4938925  | 25     | 4938912  | 14          | 14                  | 1.7                     |
| 20    | 4994225  | 4994300  | 75     | 4994262  | 12          | 35                  | 4.4                     |
| 20    | 5125250  | 5125275  | 25     | 5125262  | 12          | 12                  | 0.9                     |
| 20    | 5847925  | 5848025  | 100    | 5847937  | 11          | 44                  | 0                       |
| 20    | 6420900  | 6421250  | 350    | 6421087  | 24          | 244                 | 5.2                     |
| 20    | 6951425  | 6951475  | 50     | 6951437  | 11          | 22                  | 0                       |
| 20    | 8618950  | 8619100  | 150    | 8619037  | 18          | 82                  | 0                       |
| 20    | 8782425  | 8782475  | 50     | 8782437  | 11          | 22                  | 3.5                     |
| 20    | 8796200  | 8796250  | 50     | 8796212  | 12          | 24                  | 0                       |
| 20    | 8996800  | 8996825  | 25     | 8996812  | 11          | 11                  | 1.7                     |
| 20    | 9115250  | 9115375  | 125    | 9115287  | 16          | 66                  | 5.2                     |
| 20    | 10363650 | 10363750 | 100    | 10363737 | 12          | 40                  | 0.9                     |
| 20    | 10392800 | 10392900 | 100    | 10392812 | 11          | 44                  | 3.5                     |
| 20    | 10403900 | 10403925 | 25     | 10403912 | 11          | 11                  | 0.9                     |
| 20    | 10846475 | 10846550 | 75     | 10846537 | 22          | 54                  | 2.6                     |
| 20    | 10879250 | 10879300 | 50     | 10879262 | 12          | 24                  | 1.7                     |
| 20    | 10976400 | 10976475 | 75     | 10976412 | 11          | 33                  | 0                       |
| 20    | 11305675 | 11305800 | 125    | 11305687 | 11          | 55                  | 0                       |
| 20    | 11364650 | 11364850 | 200    | 11364687 | 14          | 108                 | 1.7                     |
| 20    | 11403575 | 11403650 | 75     | 11403587 | 11          | 33                  | 0                       |
| 20    | 11472275 | 11472325 | 50     | 11472287 | 11          | 22                  | 3.5                     |
| 20    | 11819375 | 11819400 | 25     | 11819387 | 11          | 11                  | 0.9                     |
| 20    | 11841075 | 11841175 | 100    | 11841162 | 15          | 57                  | 5.2                     |
| 20    | 11941000 | 11941025 | 25     | 11941012 | 11          | 11                  | 1.7                     |
| 20    | 12042350 | 12042475 | 125    | 12042387 | 14          | 66                  | 9.6                     |
| 20    | 12082400 | 12082550 | 150    | 12082412 | 15          | 90                  | 13.1                    |
| 20    | 13134175 | 13134250 | 75     | 13134187 | 11          | 33                  | 2.6                     |
| 20    | 13180075 | 13180225 | 150    | 13180162 | 17          | 90                  | 11.4                    |
| 20    | 13713725 | 13713775 | 50     | 13713737 | 19          | 34                  | 5.2                     |
| 20    | 13859000 | 13859175 | 175    | 13859012 | 30          | 145                 | 9.6                     |
| 20    | 13923750 | 13923775 | 25     | 13923762 | 11          | 11                  | 1.7                     |

|    |          |          |     |          |    |     |      |
|----|----------|----------|-----|----------|----|-----|------|
| 20 | 14316175 | 14316200 | 25  | 14316187 | 12 | 12  | 1.7  |
| 20 | 15165525 | 15165550 | 25  | 15165537 | 12 | 12  | 1.7  |
| 20 | 16208175 | 16208200 | 25  | 16208187 | 11 | 11  | 1.7  |
| 20 | 16658400 | 16658425 | 25  | 16658412 | 14 | 14  | 1.7  |
| 20 | 16689725 | 16689750 | 25  | 16689737 | 11 | 11  | 0    |
| 20 | 16988575 | 16988650 | 75  | 16988587 | 11 | 33  | 0.9  |
| 20 | 17611275 | 17611300 | 25  | 17611287 | 11 | 11  | 1.7  |
| 20 | 17612100 | 17612200 | 100 | 17612112 | 12 | 47  | 2.6  |
| 20 | 17622350 | 17622425 | 75  | 17622362 | 11 | 33  | 0    |
| 20 | 17778625 | 17778750 | 125 | 17778662 | 15 | 69  | 3.5  |
| 20 | 17816000 | 17816300 | 300 | 17816112 | 14 | 142 | 22.7 |
| 20 | 17897225 | 17897400 | 175 | 17897287 | 21 | 127 | 14   |
| 20 | 18066375 | 18066725 | 350 | 18066387 | 15 | 151 | 15.7 |
| 20 | 18425950 | 18426000 | 50  | 18425962 | 14 | 27  | 4.4  |
| 20 | 19471800 | 19471850 | 50  | 19471812 | 11 | 22  | 0    |
| 20 | 19512625 | 19512700 | 75  | 19512637 | 11 | 33  | 0    |
| 20 | 19645225 | 19645400 | 175 | 19645287 | 14 | 93  | 0    |
| 20 | 19686325 | 19686350 | 25  | 19686337 | 17 | 17  | 2.6  |
| 20 | 19713725 | 19713900 | 175 | 19713762 | 14 | 85  | 7    |
| 20 | 19778175 | 19778200 | 25  | 19778187 | 12 | 12  | 1.7  |
| 20 | 19860850 | 19861050 | 200 | 19860937 | 15 | 95  | 5.2  |
| 20 | 19874475 | 19874575 | 100 | 19874487 | 12 | 48  | 3.5  |
| 20 | 19923150 | 19923300 | 150 | 19923162 | 12 | 60  | 4.4  |
| 20 | 19981275 | 19981325 | 50  | 19981312 | 14 | 26  | 3.5  |
| 20 | 20059175 | 20059325 | 150 | 20059212 | 13 | 73  | 7    |
| 20 | 20342825 | 20342850 | 25  | 20342837 | 11 | 11  | 0.9  |
| 20 | 21232575 | 21232600 | 25  | 21232587 | 11 | 11  | 1.7  |
| 20 | 22878850 | 22878875 | 25  | 22878862 | 12 | 12  | 1.7  |
| 20 | 22911125 | 22911225 | 100 | 22911137 | 11 | 44  | 0    |
| 20 | 22912500 | 22912525 | 25  | 22912512 | 11 | 11  | 1.7  |
| 20 | 22931075 | 22931100 | 25  | 22931087 | 11 | 11  | 0    |
| 20 | 23164100 | 23164300 | 200 | 23164212 | 20 | 118 | 7    |
| 20 | 23258100 | 23258225 | 125 | 23258137 | 12 | 56  | 4.4  |
| 20 | 23797900 | 23797950 | 50  | 23797912 | 11 | 22  | 0    |
| 20 | 24793475 | 24793625 | 150 | 24793487 | 15 | 90  | 5.2  |
| 20 | 24917175 | 24917225 | 50  | 24917187 | 11 | 22  | 0    |
| 20 | 24961950 | 24961975 | 25  | 24961962 | 12 | 12  | 1.7  |
| 20 | 24968925 | 24968950 | 25  | 24968937 | 11 | 11  | 0.9  |
| 20 | 24985525 | 24985550 | 25  | 24985537 | 11 | 11  | 1.7  |
| 20 | 25176850 | 25176900 | 50  | 25176862 | 12 | 24  | 2.6  |
| 20 | 25331200 | 25331575 | 375 | 25331362 | 25 | 278 | 28   |
| 20 | 25382100 | 25382125 | 25  | 25382112 | 11 | 11  | 0.9  |
| 20 | 25443350 | 25443800 | 450 | 25443662 | 28 | 325 | 8.7  |
| 20 | 25552575 | 25552625 | 50  | 25552587 | 17 | 32  | 5.2  |
| 20 | 25553025 | 25553050 | 25  | 25553037 | 12 | 12  | 0.9  |
| 20 | 25788675 | 25788825 | 150 | 25788787 | 14 | 76  | 10.5 |
| 20 | 25938050 | 25938125 | 75  | 25938062 | 11 | 33  | 0    |
| 20 | 26137225 | 26137275 | 50  | 26137262 | 22 | 42  | 7.9  |
| 20 | 26137900 | 26137925 | 25  | 26137912 | 70 | 70  | 14   |
| 20 | 29565700 | 29566025 | 325 | 29565887 | 21 | 208 | 8.7  |
| 20 | 29612700 | 29612825 | 125 | 29612712 | 12 | 58  | 1.7  |
| 20 | 29621400 | 29621425 | 25  | 29621412 | 11 | 11  | 1.7  |
| 20 | 29622275 | 29622300 | 25  | 29622287 | 11 | 11  | 1.7  |
| 20 | 29664425 | 29664450 | 25  | 29664437 | 11 | 11  | 1.7  |
| 20 | 29726675 | 29727200 | 525 | 29726737 | 20 | 264 | 35.8 |
| 20 | 29774250 | 29774275 | 25  | 29774262 | 12 | 12  | 0.9  |
| 20 | 29775225 | 29775400 | 175 | 29775362 | 18 | 114 | 11.4 |
| 20 | 29888625 | 29888650 | 25  | 29888637 | 11 | 11  | 1.7  |
| 20 | 29931700 | 29931825 | 125 | 29931712 | 12 | 55  | 7    |
| 20 | 30160825 | 30161025 | 200 | 30160987 | 24 | 147 | 20.1 |
| 20 | 30378775 | 30378850 | 75  | 30378787 | 12 | 36  | 0    |
| 20 | 30576600 | 30576700 | 100 | 30576637 | 20 | 74  | 14   |
| 20 | 30712225 | 30712400 | 175 | 30712312 | 14 | 90  | 1.7  |
| 20 | 30872075 | 30872100 | 25  | 30872087 | 11 | 11  | 0    |
| 20 | 31061175 | 31061250 | 75  | 31061187 | 14 | 38  | 6.1  |
| 20 | 31101925 | 31101975 | 50  | 31101937 | 12 | 24  | 0.9  |
| 20 | 31715700 | 31715725 | 25  | 31715712 | 11 | 11  | 1.7  |
| 20 | 31772000 | 31772050 | 50  | 31772012 | 11 | 22  | 1.7  |
| 20 | 31788450 | 31788800 | 350 | 31788637 | 42 | 372 | 40.2 |
| 20 | 31862500 | 31862625 | 125 | 31862562 | 20 | 84  | 8.7  |
| 20 | 31960175 | 31960275 | 100 | 31960187 | 11 | 44  | 4.4  |
| 20 | 31999275 | 31999475 | 200 | 31999287 | 19 | 140 | 11.4 |
| 20 | 32044525 | 32044550 | 25  | 32044537 | 18 | 18  | 3.5  |
| 20 | 32072825 | 32073025 | 200 | 32072912 | 23 | 157 | 12.2 |
| 20 | 32680900 | 32681025 | 125 | 32680912 | 14 | 66  | 0    |

|    |          |          |     |          |    |     |      |
|----|----------|----------|-----|----------|----|-----|------|
| 20 | 32764425 | 32764450 | 25  | 32764437 | 11 | 11  | 1.7  |
| 20 | 32886075 | 32886225 | 150 | 32886087 | 16 | 88  | 5.2  |
| 20 | 33006550 | 33006700 | 150 | 33006562 | 14 | 70  | 14   |
| 20 | 33007200 | 33007250 | 50  | 33007212 | 14 | 25  | 3.5  |
| 20 | 33218050 | 33218125 | 75  | 33218062 | 12 | 36  | 1.7  |
| 20 | 33462800 | 33462975 | 175 | 33462937 | 13 | 81  | 9.6  |
| 20 | 33592850 | 33592975 | 125 | 33592937 | 23 | 94  | 8.7  |
| 20 | 33667425 | 33667450 | 25  | 33667437 | 11 | 11  | 0    |
| 20 | 33668150 | 33668200 | 50  | 33668162 | 14 | 28  | 5.2  |
| 20 | 33750575 | 33750725 | 150 | 33750612 | 14 | 78  | 5.2  |
| 20 | 33823050 | 33823225 | 175 | 33823087 | 20 | 125 | 11.4 |
| 20 | 34461450 | 34461500 | 50  | 34461462 | 14 | 28  | 3.5  |
| 20 | 34463525 | 34463550 | 25  | 34463537 | 11 | 11  | 0.9  |
| 20 | 34522950 | 34523050 | 100 | 34522987 | 28 | 89  | 9.6  |
| 20 | 34524100 | 34524150 | 50  | 34524112 | 11 | 22  | 3.5  |
| 20 | 34524675 | 34524700 | 25  | 34524687 | 11 | 11  | 0    |
| 20 | 34527750 | 34527850 | 100 | 34527762 | 13 | 50  | 7    |
| 20 | 34634775 | 34634825 | 50  | 34634787 | 11 | 22  | 2.6  |
| 20 | 34653775 | 34653800 | 25  | 34653787 | 12 | 12  | 0.9  |
| 20 | 34667350 | 34667375 | 25  | 34667362 | 22 | 22  | 4.4  |
| 20 | 34835650 | 34835800 | 150 | 34835762 | 20 | 106 | 13.1 |
| 20 | 35157725 | 35157750 | 25  | 35157737 | 11 | 11  | 1.7  |
| 20 | 36175100 | 36175250 | 150 | 36175237 | 15 | 77  | 3.5  |
| 20 | 36179550 | 36179725 | 175 | 36179637 | 13 | 82  | 8.7  |
| 20 | 36214825 | 36214875 | 50  | 36214837 | 11 | 22  | 1.7  |
| 20 | 36226600 | 36226725 | 125 | 36226712 | 17 | 75  | 7    |
| 20 | 36304625 | 36305025 | 400 | 36304812 | 76 | 710 | 31.5 |
| 20 | 36348700 | 36348800 | 100 | 36348787 | 20 | 75  | 12.2 |
| 20 | 36350000 | 36350075 | 75  | 36350012 | 14 | 40  | 0    |
| 20 | 36399500 | 36399875 | 375 | 36399662 | 55 | 518 | 15.7 |
| 20 | 36508650 | 36508775 | 125 | 36508712 | 18 | 85  | 13.1 |
| 20 | 36988400 | 36988500 | 100 | 36988412 | 16 | 50  | 8.7  |
| 20 | 39022700 | 39022800 | 100 | 39022712 | 11 | 44  | 3.5  |
| 20 | 39023825 | 39024025 | 200 | 39023962 | 18 | 127 | 12.2 |
| 20 | 39206600 | 39206625 | 25  | 39206612 | 12 | 12  | 0.9  |
| 20 | 39267450 | 39267575 | 125 | 39267537 | 16 | 74  | 9.6  |
| 20 | 39455725 | 39455775 | 50  | 39455737 | 11 | 22  | 1.7  |
| 20 | 39661875 | 39662225 | 350 | 39662037 | 62 | 521 | 11.4 |
| 20 | 40071975 | 40072175 | 200 | 40072112 | 19 | 122 | 0    |
| 20 | 40890800 | 40890900 | 100 | 40890887 | 13 | 46  | 0.9  |
| 20 | 41519875 | 41520100 | 225 | 41520037 | 24 | 160 | 15.7 |
| 20 | 41520375 | 41520400 | 25  | 41520387 | 12 | 12  | 0.9  |
| 20 | 41576450 | 41576475 | 25  | 41576462 | 11 | 11  | 1.7  |
| 20 | 41638175 | 41638200 | 25  | 41638187 | 12 | 12  | 0.9  |
| 20 | 41973375 | 41973400 | 25  | 41973387 | 12 | 12  | 0    |
| 20 | 42013050 | 42013150 | 100 | 42013087 | 13 | 48  | 3.5  |
| 20 | 42389175 | 42389200 | 25  | 42389187 | 12 | 12  | 0    |
| 20 | 42643750 | 42643800 | 50  | 42643787 | 13 | 24  | 1.7  |
| 20 | 42749975 | 42750000 | 25  | 42749987 | 11 | 11  | 0    |
| 20 | 42766600 | 42766625 | 25  | 42766612 | 11 | 11  | 0    |
| 20 | 43028325 | 43028375 | 50  | 43028337 | 14 | 28  | 2.6  |
| 20 | 43117125 | 43117225 | 100 | 43117137 | 11 | 44  | 7    |
| 20 | 43173025 | 43173050 | 25  | 43173037 | 11 | 11  | 1.7  |
| 20 | 43291625 | 43291675 | 50  | 43291637 | 13 | 26  | 3.5  |
| 20 | 43462675 | 43462950 | 275 | 43462812 | 40 | 317 | 9.6  |
| 20 | 43996525 | 43996650 | 125 | 43996537 | 14 | 66  | 11.4 |
| 20 | 44151925 | 44152150 | 225 | 44152012 | 24 | 166 | 21.8 |
| 20 | 44263025 | 44263175 | 150 | 44263062 | 15 | 84  | 14   |
| 20 | 44437925 | 44437975 | 50  | 44437937 | 12 | 24  | 0    |
| 20 | 44563375 | 44563800 | 425 | 44563537 | 28 | 325 | 0    |
| 20 | 44575700 | 44575725 | 25  | 44575712 | 11 | 11  | 1.7  |
| 20 | 44697700 | 44697750 | 50  | 44697712 | 12 | 24  | 1.7  |
| 20 | 44700375 | 44700450 | 75  | 44700387 | 22 | 58  | 7    |
| 20 | 44700750 | 44700775 | 25  | 44700762 | 19 | 19  | 3.5  |
| 20 | 44802350 | 44802400 | 50  | 44802362 | 13 | 26  | 1.7  |
| 20 | 44934700 | 44934900 | 200 | 44934762 | 13 | 95  | 6.1  |
| 20 | 44990875 | 44990950 | 75  | 44990887 | 11 | 31  | 5.2  |
| 20 | 44999950 | 44999975 | 25  | 44999962 | 11 | 11  | 0    |
| 20 | 45187775 | 45187825 | 50  | 45187812 | 12 | 23  | 0    |
| 20 | 45336525 | 45336625 | 100 | 45336587 | 13 | 46  | 0    |
| 20 | 45371150 | 45371200 | 50  | 45371162 | 11 | 22  | 1.7  |
| 20 | 45418625 | 45418800 | 175 | 45418712 | 14 | 90  | 16.6 |
| 20 | 45420275 | 45420300 | 25  | 45420287 | 11 | 11  | 1.7  |
| 20 | 45489475 | 45489575 | 100 | 45489512 | 13 | 48  | 3.5  |
| 20 | 45527200 | 45527275 | 75  | 45527237 | 13 | 37  | 0    |



|    |          |          |     |          |    |     |      |
|----|----------|----------|-----|----------|----|-----|------|
| 20 | 45563625 | 45563825 | 200 | 45563662 | 17 | 116 | 3.5  |
| 20 | 45583325 | 45583350 | 25  | 45583337 | 11 | 11  | 1.7  |
| 20 | 46218800 | 46218825 | 25  | 46218812 | 11 | 11  | 0    |
| 20 | 46777125 | 46777325 | 200 | 46777287 | 20 | 135 | 20.1 |
| 20 | 46778250 | 46778350 | 100 | 46778337 | 21 | 64  | 7    |
| 20 | 46825825 | 46825850 | 25  | 46825837 | 11 | 11  | 1.7  |
| 20 | 46874325 | 46874400 | 75  | 46874337 | 14 | 42  | 0    |
| 20 | 47331050 | 47331075 | 25  | 47331062 | 13 | 13  | 0    |
| 20 | 47337000 | 47337125 | 125 | 47337037 | 13 | 57  | 4.4  |
| 20 | 47763925 | 47764000 | 75  | 47763987 | 14 | 38  | 5.2  |
| 20 | 47764400 | 47764450 | 50  | 47764412 | 11 | 22  | 0.9  |
| 20 | 47774775 | 47774875 | 100 | 47774787 | 13 | 48  | 7    |
| 20 | 47797500 | 47797525 | 25  | 47797512 | 12 | 12  | 0    |
| 20 | 47938425 | 47938625 | 200 | 47938612 | 20 | 144 | 22.7 |
| 20 | 47956400 | 47956475 | 75  | 47956412 | 12 | 34  | 2.6  |
| 20 | 48029025 | 48029100 | 75  | 48029037 | 11 | 33  | 2.6  |
| 20 | 48040400 | 48040425 | 25  | 48040412 | 15 | 15  | 2.6  |
| 20 | 48135650 | 48135675 | 25  | 48135662 | 11 | 11  | 0    |
| 20 | 48163225 | 48163350 | 125 | 48163237 | 11 | 55  | 9.6  |
| 20 | 48165750 | 48165775 | 25  | 48165762 | 13 | 13  | 1.7  |
| 20 | 48293225 | 48293275 | 50  | 48293262 | 14 | 25  | 3.5  |
| 20 | 48463875 | 48464050 | 175 | 48463887 | 15 | 95  | 1.7  |
| 20 | 48484850 | 48484875 | 25  | 48484862 | 11 | 11  | 0.9  |
| 20 | 48490975 | 48491100 | 125 | 48490987 | 14 | 66  | 4.4  |
| 20 | 48596050 | 48596075 | 25  | 48596062 | 11 | 11  | 0    |
| 20 | 48745100 | 48745250 | 150 | 48745162 | 13 | 72  | 9.6  |
| 20 | 48774950 | 48775050 | 100 | 48774962 | 17 | 54  | 6.1  |
| 20 | 49060950 | 49061050 | 100 | 49060962 | 12 | 48  | 0    |
| 20 | 49083775 | 49083825 | 50  | 49083812 | 14 | 26  | 4.4  |
| 20 | 49267250 | 49267575 | 325 | 49267462 | 29 | 288 | 11.4 |
| 20 | 49350150 | 49350175 | 25  | 49350162 | 11 | 11  | 0.9  |
| 20 | 49354100 | 49354125 | 25  | 49354112 | 11 | 11  | 0.9  |
| 20 | 49475350 | 49475550 | 200 | 49475537 | 20 | 116 | 20.1 |
| 20 | 49481550 | 49481625 | 75  | 49481562 | 12 | 34  | 2.6  |
| 20 | 49560175 | 49560300 | 125 | 49560262 | 15 | 65  | 7    |
| 20 | 49609425 | 49609500 | 75  | 49609437 | 11 | 31  | 5.2  |
| 20 | 49681500 | 49681550 | 50  | 49681512 | 13 | 26  | 2.6  |
| 20 | 49800375 | 49800400 | 25  | 49800387 | 12 | 12  | 1.7  |
| 20 | 50270850 | 50271100 | 250 | 50270987 | 17 | 139 | 2.6  |
| 20 | 51673775 | 51673825 | 50  | 51673787 | 11 | 22  | 1.7  |
| 20 | 51757975 | 51758000 | 25  | 51757987 | 12 | 12  | 0    |
| 20 | 51877200 | 51877225 | 25  | 51877212 | 11 | 11  | 1.7  |
| 20 | 51943275 | 51943450 | 175 | 51943312 | 15 | 95  | 13.1 |
| 20 | 51989875 | 51989900 | 25  | 51989887 | 11 | 11  | 0    |
| 20 | 51991300 | 51991375 | 75  | 51991312 | 11 | 33  | 0    |
| 20 | 52183425 | 52183475 | 50  | 52183462 | 15 | 29  | 5.2  |
| 20 | 52361750 | 52361800 | 50  | 52361762 | 11 | 22  | 0    |
| 20 | 54026150 | 54026225 | 75  | 54026162 | 11 | 33  | 5.2  |
| 20 | 54040750 | 54041125 | 375 | 54040937 | 32 | 304 | 3.5  |
| 20 | 54208850 | 54209250 | 400 | 54209062 | 57 | 605 | 17.5 |
| 20 | 54274150 | 54274175 | 25  | 54274162 | 11 | 11  | 0    |
| 20 | 54476900 | 54476950 | 50  | 54476912 | 14 | 28  | 5.2  |
| 20 | 54711675 | 54712250 | 575 | 54711812 | 27 | 423 | 58.5 |
| 20 | 54773825 | 54773975 | 150 | 54773862 | 16 | 80  | 10.5 |
| 20 | 54774350 | 54774525 | 175 | 54774412 | 14 | 81  | 9.6  |
| 20 | 54789550 | 54789575 | 25  | 54789562 | 11 | 11  | 0.9  |
| 20 | 54789900 | 54789975 | 75  | 54789912 | 13 | 35  | 5.2  |
| 20 | 54804000 | 54804075 | 75  | 54804012 | 11 | 33  | 0    |
| 20 | 54804925 | 54804975 | 50  | 54804937 | 11 | 22  | 1.7  |
| 20 | 54943475 | 54943750 | 275 | 54943562 | 16 | 146 | 13.1 |
| 20 | 54995350 | 54995975 | 625 | 54995537 | 27 | 447 | 37.6 |
| 20 | 55009400 | 55009475 | 75  | 55009437 | 12 | 35  | 5.2  |
| 20 | 55033100 | 55033300 | 200 | 55033212 | 19 | 129 | 4.4  |
| 20 | 55387900 | 55387925 | 25  | 55387912 | 11 | 11  | 0    |
| 20 | 55508500 | 55508525 | 25  | 55508512 | 14 | 14  | 2.6  |
| 20 | 55521850 | 55521925 | 75  | 55521912 | 13 | 37  | 3.5  |
| 20 | 56008475 | 56008525 | 50  | 56008512 | 14 | 26  | 3.5  |
| 20 | 56025675 | 56025700 | 25  | 56025687 | 15 | 15  | 2.6  |
| 20 | 56026025 | 56026125 | 100 | 56026087 | 24 | 90  | 14   |
| 20 | 56051675 | 56051775 | 100 | 56051712 | 15 | 52  | 0    |
| 20 | 56174375 | 56174400 | 25  | 56174387 | 12 | 12  | 0    |
| 20 | 56202250 | 56202375 | 125 | 56202312 | 12 | 56  | 0    |
| 20 | 56218375 | 56218450 | 75  | 56218387 | 14 | 42  | 3.5  |
| 20 | 56250375 | 56250650 | 275 | 56250537 | 21 | 175 | 21   |
| 20 | 56368125 | 56368175 | 50  | 56368137 | 11 | 22  | 1.7  |

|    |          |          |     |          |    |     |      |
|----|----------|----------|-----|----------|----|-----|------|
| 20 | 56624850 | 56625350 | 500 | 56625187 | 16 | 247 | 36.7 |
| 20 | 56625725 | 56625850 | 125 | 56625737 | 12 | 56  | 5.2  |
| 20 | 56630600 | 56630650 | 50  | 56630612 | 12 | 23  | 3.5  |
| 20 | 56632225 | 56632325 | 100 | 56632287 | 16 | 54  | 4.4  |
| 20 | 56659525 | 56659550 | 25  | 56659537 | 14 | 14  | 2.6  |
| 20 | 56660900 | 56661000 | 100 | 56660912 | 11 | 44  | 5.2  |
| 20 | 56772800 | 56772850 | 50  | 56772812 | 11 | 22  | 0    |
| 20 | 57050425 | 57050550 | 125 | 57050462 | 14 | 68  | 11.4 |
| 20 | 57051200 | 57051225 | 25  | 57051212 | 14 | 14  | 2.6  |
| 20 | 57212975 | 57213125 | 150 | 57213112 | 16 | 83  | 10.5 |
| 20 | 57236850 | 57237050 | 200 | 57236912 | 17 | 108 | 10.5 |
| 20 | 57844300 | 57844325 | 25  | 57844312 | 11 | 11  | 0.9  |
| 20 | 58487100 | 58487225 | 125 | 58487112 | 13 | 63  | 4.4  |
| 20 | 58769875 | 58769925 | 50  | 58769887 | 12 | 24  | 3.5  |
| 20 | 59201850 | 59201900 | 50  | 59201862 | 12 | 24  | 1.7  |
| 20 | 59394125 | 59394175 | 50  | 59394162 | 13 | 25  | 1.7  |
| 20 | 59761950 | 59762350 | 400 | 59762062 | 17 | 198 | 14   |
| 20 | 59763625 | 59763750 | 125 | 59763637 | 11 | 55  | 0.9  |
| 20 | 59934150 | 59934350 | 200 | 59934212 | 18 | 118 | 9.6  |
| 20 | 60075075 | 60075100 | 25  | 60075087 | 11 | 11  | 1.7  |
| 20 | 60121675 | 60121725 | 50  | 60121687 | 12 | 24  | 0.9  |
| 20 | 60150375 | 60150500 | 125 | 60150412 | 15 | 63  | 8.7  |
| 20 | 60166050 | 60166175 | 125 | 60166062 | 11 | 49  | 7    |
| 20 | 60169725 | 60169750 | 25  | 60169737 | 12 | 12  | 0.9  |
| 20 | 60201650 | 60201725 | 75  | 60201662 | 12 | 36  | 2.6  |
| 20 | 60273925 | 60274000 | 75  | 60273937 | 11 | 33  | 3.5  |
| 20 | 60301950 | 60302125 | 175 | 60302062 | 20 | 120 | 12.2 |
| 20 | 60329175 | 60329200 | 25  | 60329187 | 11 | 11  | 0    |
| 20 | 60391450 | 60391525 | 75  | 60391462 | 12 | 36  | 5.2  |
| 20 | 60400025 | 60400125 | 100 | 60400037 | 12 | 44  | 5.2  |
| 20 | 60754100 | 60754225 | 125 | 60754112 | 18 | 74  | 7    |
| 20 | 60799475 | 60799525 | 50  | 60799487 | 11 | 22  | 0.9  |
| 20 | 60853350 | 60853475 | 125 | 60853362 | 12 | 60  | 6.1  |
| 20 | 60907850 | 60907875 | 25  | 60907862 | 11 | 11  | 1.7  |
| 20 | 60960025 | 60960175 | 150 | 60960037 | 22 | 118 | 13.1 |
| 20 | 60963900 | 60963975 | 75  | 60963912 | 14 | 42  | 5.2  |
| 20 | 60977425 | 60977750 | 325 | 60977662 | 22 | 213 | 17.5 |
| 20 | 60993250 | 60993275 | 25  | 60993262 | 15 | 15  | 1.7  |
| 20 | 61110950 | 61110975 | 25  | 61110962 | 11 | 11  | 1.7  |
| 20 | 61332450 | 61332600 | 150 | 61332487 | 15 | 78  | 7.9  |
| 20 | 61338100 | 61338175 | 75  | 61338137 | 23 | 63  | 7.9  |
| 20 | 61340325 | 61340400 | 75  | 61340337 | 12 | 36  | 5.2  |
| 20 | 61755125 | 61755150 | 25  | 61755137 | 11 | 11  | 1.7  |
| 20 | 61760025 | 61760275 | 250 | 61760062 | 30 | 260 | 28   |
| 20 | 61808375 | 61808400 | 25  | 61808387 | 14 | 14  | 1.7  |
| 20 | 61846850 | 61846900 | 50  | 61846862 | 11 | 22  | 0    |
| 20 | 61921675 | 61921725 | 50  | 61921687 | 15 | 28  | 1.7  |
| 20 | 61955675 | 61955725 | 50  | 61955687 | 11 | 22  | 0    |
| 20 | 62082400 | 62082475 | 75  | 62082412 | 14 | 40  | 3.5  |
| 20 | 62125475 | 62125500 | 25  | 62125487 | 12 | 12  | 1.7  |
| 20 | 62164625 | 62164675 | 50  | 62164662 | 19 | 33  | 5.2  |
| 20 | 62222250 | 62222350 | 100 | 62222287 | 15 | 57  | 3.5  |
| 20 | 62247250 | 62247450 | 200 | 62247437 | 16 | 112 | 0    |
| 20 | 62290750 | 62290875 | 125 | 62290812 | 14 | 62  | 3.5  |
| 20 | 62387875 | 62387975 | 100 | 62387912 | 24 | 80  | 1.7  |
| 21 | 10166375 | 10166475 | 100 | 10166437 | 15 | 52  | 0    |
| 21 | 14523700 | 14523775 | 75  | 14523737 | 12 | 35  | 2.6  |
| 21 | 16389050 | 16389125 | 75  | 16389062 | 11 | 33  | 0    |
| 21 | 17757800 | 17757900 | 100 | 17757862 | 16 | 60  | 9.6  |
| 21 | 17806750 | 17806800 | 50  | 17806787 | 12 | 23  | 3.5  |
| 21 | 18102400 | 18102750 | 350 | 18102587 | 24 | 225 | 10.5 |
| 21 | 18449950 | 18450000 | 50  | 18449962 | 11 | 22  | 0    |
| 21 | 20447750 | 20447775 | 25  | 20447762 | 11 | 11  | 0    |
| 21 | 23507250 | 23507450 | 200 | 23507312 | 15 | 103 | 5.2  |
| 21 | 26029425 | 26029450 | 25  | 26029437 | 11 | 11  | 1.7  |
| 21 | 26468425 | 26468475 | 50  | 26468437 | 11 | 22  | 3.5  |
| 21 | 27026775 | 27026825 | 50  | 27026787 | 11 | 22  | 3.5  |
| 21 | 27075225 | 27075300 | 75  | 27075262 | 12 | 35  | 0    |
| 21 | 27881325 | 27881375 | 50  | 27881337 | 12 | 24  | 1.7  |
| 21 | 28894400 | 28894525 | 125 | 28894412 | 15 | 67  | 4.4  |
| 21 | 29179475 | 29179625 | 150 | 29179487 | 26 | 115 | 12.2 |
| 21 | 29313400 | 29313575 | 175 | 29313487 | 19 | 106 | 9.6  |
| 21 | 29439750 | 29439875 | 125 | 29439762 | 11 | 55  | 4.4  |
| 21 | 29820900 | 29821075 | 175 | 29820987 | 15 | 93  | 0    |
| 21 | 30780525 | 30780925 | 400 | 30780812 | 31 | 342 | 14   |

|    |          |          |     |          |    |     |      |
|----|----------|----------|-----|----------|----|-----|------|
| 21 | 32630375 | 32630400 | 25  | 32630387 | 17 | 17  | 1.7  |
| 21 | 32869675 | 32869750 | 75  | 32869687 | 11 | 33  | 2.6  |
| 21 | 33118625 | 33118650 | 25  | 33118637 | 11 | 11  | 0    |
| 21 | 33359025 | 33359075 | 50  | 33359037 | 13 | 25  | 3.5  |
| 21 | 33581600 | 33581650 | 50  | 33581612 | 11 | 22  | 0    |
| 21 | 33619325 | 33619400 | 75  | 33619337 | 16 | 40  | 5.2  |
| 21 | 33661575 | 33661975 | 400 | 33661837 | 35 | 385 | 0    |
| 21 | 33746300 | 33746325 | 25  | 33746312 | 12 | 12  | 0    |
| 21 | 33900150 | 33900250 | 100 | 33900162 | 11 | 44  | 0    |
| 21 | 34218425 | 34218600 | 175 | 34218437 | 18 | 96  | 7    |
| 21 | 34317250 | 34317450 | 200 | 34317337 | 17 | 124 | 14   |
| 21 | 34460775 | 34461050 | 275 | 34460912 | 19 | 159 | 2.6  |
| 21 | 34829000 | 34829100 | 100 | 34829012 | 13 | 48  | 7    |
| 21 | 35261825 | 35261925 | 100 | 35261837 | 12 | 45  | 3.5  |
| 21 | 35858275 | 35858300 | 25  | 35858287 | 22 | 22  | 3.5  |
| 21 | 35900900 | 35901225 | 325 | 35901037 | 19 | 205 | 14   |
| 21 | 36016525 | 36016550 | 25  | 36016537 | 12 | 12  | 0    |
| 21 | 36218450 | 36218500 | 50  | 36218462 | 11 | 22  | 1.7  |
| 21 | 36322775 | 36322800 | 25  | 36322787 | 11 | 11  | 1.7  |
| 21 | 36354375 | 36354500 | 125 | 36354487 | 16 | 68  | 7.9  |
| 21 | 36363150 | 36363400 | 250 | 36363262 | 17 | 134 | 0    |
| 21 | 36364175 | 36364225 | 50  | 36364187 | 13 | 24  | 2.6  |
| 21 | 36435850 | 36435875 | 25  | 36435862 | 12 | 12  | 1.7  |
| 21 | 36583675 | 36583875 | 200 | 36583712 | 26 | 173 | 8.7  |
| 21 | 36953075 | 36953125 | 50  | 36953087 | 13 | 24  | 2.6  |
| 21 | 37367050 | 37367075 | 25  | 37367062 | 11 | 11  | 0    |
| 21 | 37515475 | 37515525 | 50  | 37515487 | 14 | 28  | 5.2  |
| 21 | 38517775 | 38518050 | 275 | 38517887 | 22 | 190 | 0    |
| 21 | 38523025 | 38523425 | 400 | 38523237 | 62 | 569 | 14   |
| 21 | 39302350 | 39302425 | 75  | 39302362 | 11 | 33  | 0    |
| 21 | 41543575 | 41543600 | 25  | 41543587 | 11 | 11  | 1.7  |
| 21 | 41548100 | 41548225 | 125 | 41548212 | 12 | 55  | 0    |
| 21 | 41578350 | 41578425 | 75  | 41578362 | 11 | 33  | 5.2  |
| 21 | 41757050 | 41757200 | 150 | 41757112 | 13 | 64  | 1.7  |
| 21 | 41759900 | 41760000 | 100 | 41759937 | 20 | 74  | 13.1 |
| 21 | 42407100 | 42407200 | 100 | 42407187 | 18 | 55  | 6.1  |
| 21 | 42410650 | 42410800 | 150 | 42410662 | 18 | 100 | 0.9  |
| 21 | 42898425 | 42898450 | 25  | 42898437 | 11 | 11  | 0    |
| 21 | 43545375 | 43545500 | 125 | 43545412 | 21 | 95  | 8.7  |
| 21 | 43565125 | 43565200 | 75  | 43565137 | 11 | 33  | 0    |
| 21 | 44062175 | 44062225 | 50  | 44062187 | 11 | 22  | 0    |
| 21 | 44134475 | 44134500 | 25  | 44134487 | 11 | 11  | 1.7  |
| 21 | 44255400 | 44255500 | 100 | 44255412 | 12 | 48  | 0    |
| 21 | 44669250 | 44669325 | 75  | 44669262 | 12 | 36  | 5.2  |
| 21 | 45072825 | 45072875 | 50  | 45072837 | 11 | 22  | 0    |
| 21 | 45105825 | 45106000 | 175 | 45105862 | 14 | 93  | 10.5 |
| 21 | 45119525 | 45119575 | 50  | 45119537 | 12 | 24  | 3.5  |
| 21 | 45350750 | 45350825 | 75  | 45350762 | 11 | 33  | 1.7  |
| 21 | 46219400 | 46219475 | 75  | 46219462 | 12 | 34  | 5.2  |
| 21 | 46307700 | 46307725 | 25  | 46307712 | 11 | 11  | 0    |
| 21 | 46838650 | 46838925 | 275 | 46838787 | 24 | 198 | 9.6  |
| 21 | 46864350 | 46864475 | 125 | 46864362 | 11 | 55  | 0    |
| 21 | 46866275 | 46866300 | 25  | 46866287 | 11 | 11  | 0.9  |
| 21 | 46870275 | 46870300 | 25  | 46870287 | 11 | 11  | 0.9  |
| 22 | 15874125 | 15874175 | 50  | 15874137 | 11 | 22  | 2.6  |
| 22 | 15975600 | 15975625 | 25  | 15975612 | 12 | 12  | 1.7  |
| 22 | 16425725 | 16425750 | 25  | 16425737 | 11 | 11  | 0    |
| 22 | 16814025 | 16814050 | 25  | 16814037 | 11 | 11  | 1.7  |
| 22 | 17333425 | 17333475 | 50  | 17333437 | 11 | 22  | 3.5  |
| 22 | 17490500 | 17490525 | 25  | 17490512 | 13 | 13  | 0.9  |
| 22 | 17658600 | 17658625 | 25  | 17658612 | 11 | 11  | 0.9  |
| 22 | 17684200 | 17684550 | 350 | 17684387 | 51 | 452 | 37.6 |
| 22 | 18031000 | 18031225 | 225 | 18031087 | 22 | 154 | 3.5  |
| 22 | 18104700 | 18104775 | 75  | 18104712 | 11 | 33  | 0    |
| 22 | 18156200 | 18156225 | 25  | 18156212 | 12 | 12  | 0    |
| 22 | 18222900 | 18222925 | 25  | 18222912 | 15 | 15  | 2.6  |
| 22 | 18415775 | 18415950 | 175 | 18415787 | 14 | 93  | 0    |
| 22 | 18447250 | 18447425 | 175 | 18447337 | 15 | 93  | 13.1 |
| 22 | 18484675 | 18484775 | 100 | 18484687 | 11 | 44  | 0    |
| 22 | 19102675 | 19102825 | 150 | 19102762 | 22 | 116 | 18.3 |
| 22 | 19167250 | 19167300 | 50  | 19167262 | 11 | 22  | 1.7  |
| 22 | 19180650 | 19180725 | 75  | 19180712 | 16 | 42  | 3.5  |
| 22 | 19204425 | 19204525 | 100 | 19204462 | 18 | 67  | 8.7  |
| 22 | 19686225 | 19686275 | 50  | 19686262 | 14 | 25  | 4.4  |
| 22 | 19698250 | 19698300 | 50  | 19698262 | 13 | 24  | 2.6  |

|    |          |          |     |          |    |     |       |
|----|----------|----------|-----|----------|----|-----|-------|
| 22 | 20336425 | 20336800 | 375 | 20336462 | 25 | 210 | 11.4  |
| 22 | 20637650 | 20637675 | 25  | 20637662 | 11 | 11  | 1.7   |
| 22 | 20841400 | 20841500 | 100 | 20841412 | 15 | 57  | 10.5  |
| 22 | 21137350 | 21137675 | 325 | 21137487 | 15 | 148 | 20.1  |
| 22 | 21143525 | 21143900 | 375 | 21143662 | 76 | 699 | 18.3  |
| 22 | 21162950 | 21163075 | 125 | 21163037 | 15 | 63  | 7     |
| 22 | 21192800 | 21192850 | 50  | 21192812 | 12 | 24  | 1.7   |
| 22 | 21194200 | 21194450 | 250 | 21194312 | 17 | 145 | 0     |
| 22 | 21367875 | 21368000 | 125 | 21367887 | 12 | 60  | 2.6   |
| 22 | 21719125 | 21719150 | 25  | 21719137 | 12 | 12  | 0     |
| 22 | 21888150 | 21888225 | 75  | 21888162 | 12 | 36  | 0     |
| 22 | 22441900 | 22441925 | 25  | 22441912 | 11 | 11  | 1.7   |
| 22 | 22453475 | 22453550 | 75  | 22453487 | 12 | 36  | 0     |
| 22 | 22511050 | 22511200 | 150 | 22511162 | 23 | 118 | 7     |
| 22 | 22518900 | 22518950 | 50  | 22518912 | 12 | 24  | 2.6   |
| 22 | 22529225 | 22529350 | 125 | 22529237 | 12 | 60  | 7.9   |
| 22 | 22597350 | 22597800 | 450 | 22597462 | 29 | 370 | 7     |
| 22 | 22643550 | 22643575 | 25  | 22643562 | 11 | 11  | 0.9   |
| 22 | 22764825 | 22764875 | 50  | 22764837 | 11 | 22  | 0.9   |
| 22 | 23281825 | 23282050 | 225 | 23281837 | 32 | 153 | 26.2  |
| 22 | 23314600 | 23314725 | 125 | 23314662 | 17 | 73  | 2.6   |
| 22 | 23754550 | 23754575 | 25  | 23754562 | 11 | 11  | 1.7   |
| 22 | 23994900 | 23995100 | 200 | 23994987 | 14 | 89  | 0     |
| 22 | 24130400 | 24130425 | 25  | 24130412 | 12 | 12  | 0     |
| 22 | 24251525 | 24251625 | 100 | 24251537 | 12 | 48  | 4.4   |
| 22 | 25086900 | 25086950 | 50  | 25086912 | 11 | 22  | 1.7   |
| 22 | 26158050 | 26158075 | 25  | 26158062 | 11 | 11  | 0     |
| 22 | 26547550 | 26547575 | 25  | 26547562 | 12 | 12  | 1.7   |
| 22 | 26646350 | 26646425 | 75  | 26646362 | 11 | 33  | 0     |
| 22 | 27609050 | 27609250 | 200 | 27609162 | 21 | 137 | 14    |
| 22 | 28032350 | 28032375 | 25  | 28032362 | 12 | 12  | 1.7   |
| 22 | 28279550 | 28279625 | 75  | 28279587 | 15 | 41  | 4.4   |
| 22 | 28329550 | 28329700 | 150 | 28329612 | 19 | 94  | 7.9   |
| 22 | 28550950 | 28551000 | 50  | 28550962 | 11 | 22  | 1.7   |
| 22 | 28922125 | 28922150 | 25  | 28922137 | 14 | 14  | 1.7   |
| 22 | 28939075 | 28939150 | 75  | 28939137 | 14 | 36  | 4.4   |
| 22 | 28955125 | 28955150 | 25  | 28955137 | 11 | 11  | 1.7   |
| 22 | 28969650 | 28969750 | 100 | 28969662 | 12 | 47  | 4.4   |
| 22 | 29051425 | 29051450 | 25  | 29051437 | 13 | 13  | 0     |
| 22 | 29059025 | 29059250 | 225 | 29059087 | 19 | 128 | 12.2  |
| 22 | 29067125 | 29067150 | 25  | 29067137 | 15 | 15  | 2.6   |
| 22 | 29116950 | 29117150 | 200 | 29117062 | 21 | 134 | 10.5  |
| 22 | 29361150 | 29361175 | 25  | 29361162 | 16 | 16  | 2.6   |
| 22 | 29694900 | 29695375 | 475 | 29695037 | 51 | 696 | 131.9 |
| 22 | 29696100 | 29696225 | 125 | 29696187 | 12 | 55  | 4.4   |
| 22 | 29703425 | 29703475 | 50  | 29703437 | 12 | 24  | 1.7   |
| 22 | 29976950 | 29977050 | 100 | 29977012 | 12 | 46  | 3.5   |
| 22 | 30125150 | 30125275 | 125 | 30125187 | 16 | 66  | 8.7   |
| 22 | 30222275 | 30222300 | 25  | 30222287 | 14 | 14  | 2.6   |
| 22 | 30481075 | 30481175 | 100 | 30481087 | 11 | 44  | 0     |
| 22 | 30615900 | 30615950 | 50  | 30615912 | 11 | 22  | 0     |
| 22 | 30740150 | 30740225 | 75  | 30740162 | 13 | 37  | 2.6   |
| 22 | 30952450 | 30952550 | 100 | 30952487 | 13 | 48  | 5.2   |
| 22 | 31101600 | 31101650 | 50  | 31101612 | 11 | 22  | 0     |
| 22 | 31247150 | 31247250 | 100 | 31247212 | 13 | 47  | 1.7   |
| 22 | 31253925 | 31254300 | 375 | 31254237 | 21 | 219 | 38.4  |
| 22 | 31305275 | 31305350 | 75  | 31305287 | 11 | 33  | 4.4   |
| 22 | 31387000 | 31387150 | 150 | 31387012 | 11 | 58  | 1.7   |
| 22 | 31387525 | 31387550 | 25  | 31387537 | 12 | 12  | 1.7   |
| 22 | 31432100 | 31432425 | 325 | 31432237 | 16 | 161 | 0     |
| 22 | 31449600 | 31449700 | 100 | 31449687 | 31 | 104 | 19.2  |
| 22 | 31488275 | 31488375 | 100 | 31488287 | 13 | 50  | 1.7   |
| 22 | 31627575 | 31627725 | 150 | 31627587 | 12 | 72  | 8.7   |
| 22 | 31730025 | 31730225 | 200 | 31730087 | 19 | 128 | 1.7   |
| 22 | 32074750 | 32075025 | 275 | 32074912 | 24 | 197 | 7     |
| 22 | 32076375 | 32076550 | 175 | 32076487 | 20 | 120 | 19.2  |
| 22 | 32647625 | 32647700 | 75  | 32647662 | 13 | 37  | 4.4   |
| 22 | 32697450 | 32697600 | 150 | 32697512 | 13 | 69  | 1.7   |
| 22 | 32697825 | 32697975 | 150 | 32697862 | 12 | 65  | 9.6   |
| 22 | 32873575 | 32873600 | 25  | 32873587 | 11 | 11  | 0     |
| 22 | 32996125 | 32996175 | 50  | 32996137 | 11 | 22  | 0     |
| 22 | 34126300 | 34126375 | 75  | 34126312 | 12 | 36  | 4.4   |
| 22 | 34157200 | 34157275 | 75  | 34157237 | 14 | 38  | 4.4   |
| 22 | 34172500 | 34172575 | 75  | 34172537 | 13 | 36  | 5.2   |
| 22 | 34353700 | 34353725 | 25  | 34353712 | 11 | 11  | 0.9   |

|    |          |          |     |          |    |     |      |
|----|----------|----------|-----|----------|----|-----|------|
| 22 | 34965625 | 34965675 | 50  | 34965662 | 16 | 30  | 3.5  |
| 22 | 35047800 | 35047950 | 150 | 35047837 | 16 | 86  | 11.4 |
| 22 | 35171425 | 35171575 | 150 | 35171562 | 14 | 63  | 11.4 |
| 22 | 35196050 | 35196175 | 125 | 35196087 | 15 | 65  | 9.6  |
| 22 | 35213025 | 35213300 | 275 | 35213187 | 24 | 200 | 0    |
| 22 | 35502775 | 35502825 | 50  | 35502787 | 13 | 26  | 1.7  |
| 22 | 35815125 | 35815150 | 25  | 35815137 | 11 | 11  | 1.7  |
| 22 | 36035800 | 36035825 | 25  | 36035812 | 11 | 11  | 1.7  |
| 22 | 36134350 | 36134400 | 50  | 36134362 | 12 | 23  | 3.5  |
| 22 | 36158550 | 36158775 | 225 | 36158587 | 18 | 134 | 12.2 |
| 22 | 36292850 | 36292875 | 25  | 36292862 | 12 | 12  | 0.9  |
| 22 | 36295325 | 36295350 | 25  | 36295337 | 11 | 11  | 0.9  |
| 22 | 36331200 | 36331225 | 25  | 36331212 | 11 | 11  | 0.9  |
| 22 | 36422775 | 36422850 | 75  | 36422837 | 14 | 38  | 7    |
| 22 | 36570625 | 36570825 | 200 | 36570662 | 24 | 137 | 23.6 |
| 22 | 36695200 | 36695350 | 150 | 36695212 | 14 | 82  | 8.7  |
| 22 | 36756450 | 36756500 | 50  | 36756462 | 11 | 22  | 1.7  |
| 22 | 36764125 | 36764175 | 50  | 36764137 | 11 | 22  | 1.7  |
| 22 | 36778175 | 36778225 | 50  | 36778187 | 16 | 30  | 5.2  |
| 22 | 36898650 | 36898675 | 25  | 36898662 | 12 | 12  | 1.7  |
| 22 | 36901275 | 36901325 | 50  | 36901312 | 13 | 24  | 3.5  |
| 22 | 36988075 | 36988100 | 25  | 36988087 | 14 | 14  | 2.6  |
| 22 | 37187625 | 37187650 | 25  | 37187637 | 12 | 12  | 1.7  |
| 22 | 37364875 | 37364975 | 100 | 37364887 | 12 | 48  | 1.7  |
| 22 | 37407825 | 37407875 | 50  | 37407862 | 17 | 28  | 1.7  |
| 22 | 37427400 | 37427450 | 50  | 37427412 | 15 | 30  | 4.4  |
| 22 | 37468700 | 37468775 | 75  | 37468712 | 12 | 36  | 3.5  |
| 22 | 37557425 | 37557500 | 75  | 37557437 | 13 | 35  | 5.2  |
| 22 | 37879150 | 37879175 | 25  | 37879162 | 13 | 13  | 0    |
| 22 | 37971325 | 37971375 | 50  | 37971337 | 12 | 24  | 1.7  |
| 22 | 38034650 | 38034725 | 75  | 38034662 | 15 | 45  | 7.9  |
| 22 | 38037875 | 38038000 | 125 | 38037962 | 13 | 58  | 4.4  |
| 22 | 38045350 | 38045775 | 425 | 38045512 | 38 | 447 | 55.9 |
| 22 | 38075525 | 38075575 | 50  | 38075537 | 12 | 24  | 3.5  |
| 22 | 38245050 | 38245125 | 75  | 38245062 | 12 | 36  | 0.9  |
| 22 | 38398075 | 38398150 | 75  | 38398137 | 12 | 34  | 3.5  |
| 22 | 38672700 | 38672900 | 200 | 38672887 | 22 | 145 | 6.1  |
| 22 | 38694675 | 38694725 | 50  | 38694687 | 12 | 24  | 1.7  |
| 22 | 38722800 | 38723000 | 200 | 38722962 | 16 | 114 | 7.9  |
| 22 | 39313400 | 39313525 | 125 | 39313412 | 12 | 60  | 0    |
| 22 | 39378425 | 39378550 | 125 | 39378462 | 13 | 63  | 7.9  |
| 22 | 39394875 | 39395100 | 225 | 39394937 | 24 | 182 | 12.2 |
| 22 | 39437625 | 39437775 | 150 | 39437762 | 22 | 91  | 7.9  |
| 22 | 39474400 | 39474525 | 125 | 39474412 | 11 | 53  | 0    |
| 22 | 39874200 | 39874275 | 75  | 39874212 | 11 | 33  | 0    |
| 22 | 39923725 | 39923750 | 25  | 39923737 | 11 | 11  | 1.7  |
| 22 | 40174150 | 40174275 | 125 | 40174237 | 25 | 105 | 15.7 |
| 22 | 40194825 | 40194850 | 25  | 40194837 | 18 | 18  | 2.6  |
| 22 | 40243925 | 40243950 | 25  | 40243937 | 12 | 12  | 0.9  |
| 22 | 40414100 | 40414125 | 25  | 40414112 | 12 | 12  | 1.7  |
| 22 | 40537600 | 40537700 | 100 | 40537612 | 11 | 44  | 0    |
| 22 | 40672975 | 40673000 | 25  | 40672987 | 24 | 24  | 4.4  |
| 22 | 40805525 | 40805625 | 100 | 40805537 | 12 | 48  | 3.5  |
| 22 | 40815700 | 40815875 | 175 | 40815837 | 20 | 113 | 15.7 |
| 22 | 40830425 | 40830600 | 175 | 40830512 | 18 | 103 | 0    |
| 22 | 40841325 | 40841525 | 200 | 40841412 | 19 | 119 | 0    |
| 22 | 40897875 | 40897925 | 50  | 40897912 | 13 | 24  | 0    |
| 22 | 41404625 | 41404800 | 175 | 41404737 | 18 | 104 | 5.2  |
| 22 | 41473825 | 41473950 | 125 | 41473837 | 12 | 50  | 0    |
| 22 | 41589775 | 41589875 | 100 | 41589787 | 12 | 48  | 0    |
| 22 | 41684600 | 41684700 | 100 | 41684612 | 11 | 44  | 2.6  |
| 22 | 41688650 | 41688825 | 175 | 41688762 | 16 | 92  | 2.6  |
| 22 | 41822400 | 41822700 | 300 | 41822562 | 21 | 175 | 3.5  |
| 22 | 41869375 | 41869400 | 25  | 41869387 | 15 | 15  | 2.6  |
| 22 | 41913575 | 41913650 | 75  | 41913637 | 17 | 43  | 4.4  |
| 22 | 41917325 | 41917350 | 25  | 41917337 | 12 | 12  | 0    |
| 22 | 42188575 | 42188625 | 50  | 42188587 | 13 | 24  | 3.5  |
| 22 | 42639325 | 42639400 | 75  | 42639387 | 13 | 35  | 0    |
| 22 | 42682550 | 42682725 | 175 | 42682612 | 17 | 98  | 13.1 |
| 22 | 43036950 | 43036975 | 25  | 43036962 | 12 | 12  | 0.9  |
| 22 | 43221175 | 43221250 | 75  | 43221212 | 13 | 35  | 0    |
| 22 | 43386400 | 43386800 | 400 | 43386612 | 44 | 494 | 0    |
| 22 | 43468000 | 43468025 | 25  | 43468012 | 12 | 12  | 1.7  |
| 22 | 43472225 | 43472300 | 75  | 43472237 | 25 | 75  | 13.1 |
| 22 | 43533900 | 43533950 | 50  | 43533912 | 11 | 22  | 1.7  |

|    |          |          |     |          |    |     |      |
|----|----------|----------|-----|----------|----|-----|------|
| 22 | 43540025 | 43540350 | 325 | 43540337 | 19 | 172 | 28.8 |
| 22 | 43977175 | 43977200 | 25  | 43977187 | 15 | 15  | 2.6  |
| 22 | 44017350 | 44017650 | 300 | 44017487 | 15 | 147 | 6.1  |
| 22 | 44038450 | 44038475 | 25  | 44038462 | 15 | 15  | 2.6  |
| 22 | 44065550 | 44065600 | 50  | 44065562 | 11 | 22  | 0    |
| 22 | 44312900 | 44312950 | 50  | 44312912 | 11 | 22  | 0    |
| 22 | 44627375 | 44627500 | 125 | 44627437 | 14 | 65  | 1.7  |
| 22 | 44784900 | 44785075 | 175 | 44785037 | 15 | 86  | 2.6  |
| 22 | 44788800 | 44788825 | 25  | 44788812 | 11 | 11  | 1.7  |
| 22 | 44843700 | 44843775 | 75  | 44843762 | 14 | 38  | 4.4  |
| 22 | 44902375 | 44902500 | 125 | 44902387 | 11 | 55  | 0    |
| 22 | 45050600 | 45050625 | 25  | 45050612 | 11 | 11  | 1.7  |
| 22 | 45129800 | 45129825 | 25  | 45129812 | 11 | 11  | 0    |
| 22 | 45313525 | 45313550 | 25  | 45313537 | 14 | 14  | 2.6  |
| 22 | 45346375 | 45346600 | 225 | 45346412 | 22 | 154 | 0    |
| 22 | 45356100 | 45356250 | 150 | 45356162 | 14 | 80  | 7    |
| 22 | 45530675 | 45530850 | 175 | 45530712 | 16 | 99  | 1.7  |
| 22 | 45537050 | 45537075 | 25  | 45537062 | 22 | 22  | 3.5  |
| 22 | 45590600 | 45590625 | 25  | 45590612 | 11 | 11  | 1.7  |
| 22 | 45709200 | 45709225 | 25  | 45709212 | 11 | 11  | 0    |
| 22 | 45795625 | 45796150 | 525 | 45796087 | 20 | 281 | 21   |
| 22 | 45927425 | 45927450 | 25  | 45927437 | 12 | 12  | 0.9  |
| 22 | 47266875 | 47267000 | 125 | 47266987 | 16 | 70  | 4.4  |
| 22 | 47311075 | 47311200 | 125 | 47311187 | 19 | 82  | 12.2 |
| 22 | 47380425 | 47380450 | 25  | 47380437 | 12 | 12  | 0    |
| 22 | 47484900 | 47485000 | 100 | 47484912 | 17 | 62  | 3.5  |
| 22 | 48155575 | 48155650 | 75  | 48155587 | 12 | 32  | 3.5  |
| 22 | 48242400 | 48242575 | 175 | 48242537 | 24 | 127 | 18.3 |
| 22 | 48526950 | 48527125 | 175 | 48527037 | 13 | 85  | 0    |
| 22 | 48546950 | 48547275 | 325 | 48547137 | 29 | 272 | 35.8 |
| 22 | 48808400 | 48808425 | 25  | 48808412 | 12 | 12  | 1.7  |
| 22 | 49056925 | 49057050 | 125 | 49057037 | 12 | 56  | 4.4  |
| 22 | 49283250 | 49283325 | 75  | 49283262 | 11 | 33  | 2.6  |
| 22 | 49295025 | 49295100 | 75  | 49295037 | 11 | 33  | 2.6  |
| 22 | 49406250 | 49406300 | 50  | 49406262 | 11 | 22  | 1.7  |
| 22 | 49413350 | 49413375 | 25  | 49413362 | 11 | 11  | 1.7  |
| 22 | 49480000 | 49480075 | 75  | 49480012 | 12 | 36  | 1.7  |
| 1  | 1224500  | 1224550  | 50  | 1224512  | 12 | 24  | 2.6  |
| 1  | 1493000  | 1493175  | 175 | 1493062  | 15 | 95  | 14   |
| 1  | 1999650  | 1999725  | 75  | 1999662  | 11 | 33  | 0    |
| 1  | 2155950  | 2156050  | 100 | 2156012  | 17 | 58  | 7    |
| 1  | 2344575  | 2344625  | 50  | 2344587  | 11 | 22  | 0    |
| 1  | 2558225  | 2558275  | 50  | 2558237  | 11 | 22  | 0.9  |
| 1  | 4218600  | 4218650  | 50  | 4218612  | 12 | 23  | 0    |
| 1  | 5999125  | 5999200  | 75  | 5999137  | 12 | 36  | 3.5  |
| 1  | 6342475  | 6342575  | 100 | 6342487  | 13 | 46  | 4.4  |
| 1  | 6537225  | 6537250  | 25  | 6537237  | 18 | 18  | 3.5  |
| 1  | 7773775  | 7773975  | 200 | 7773812  | 17 | 118 | 0    |
| 1  | 7958075  | 7958150  | 75  | 7958087  | 12 | 36  | 2.6  |
| 1  | 7986800  | 7986875  | 75  | 7986812  | 12 | 36  | 3.5  |
| 1  | 8722075  | 8722225  | 150 | 8722087  | 13 | 74  | 5.2  |
| 1  | 9249350  | 9249425  | 75  | 9249362  | 11 | 33  | 0    |
| 1  | 9249800  | 9249825  | 25  | 9249812  | 11 | 11  | 1.7  |
| 1  | 9271750  | 9271825  | 75  | 9271762  | 11 | 33  | 0    |
| 1  | 9424200  | 9424275  | 75  | 9424262  | 14 | 38  | 7    |
| 1  | 9424650  | 9424675  | 25  | 9424662  | 11 | 11  | 1.7  |
| 1  | 9701600  | 9701750  | 150 | 9701637  | 14 | 74  | 3.5  |
| 1  | 10057000 | 10057250 | 250 | 10057062 | 18 | 136 | 3.5  |
| 1  | 11045775 | 11045975 | 200 | 11045862 | 18 | 118 | 4.4  |
| 1  | 11170625 | 11170650 | 25  | 11170637 | 12 | 12  | 1.7  |
| 1  | 11390600 | 11390625 | 25  | 11390612 | 12 | 12  | 0    |
| 1  | 11892350 | 11892400 | 50  | 11892362 | 13 | 26  | 3.5  |
| 1  | 12144850 | 12144900 | 50  | 12144862 | 11 | 22  | 2.6  |
| 1  | 12545800 | 12546000 | 200 | 12545987 | 13 | 70  | 7    |
| 1  | 12622875 | 12623150 | 275 | 12623037 | 30 | 240 | 0    |
| 1  | 15411675 | 15411725 | 50  | 15411687 | 11 | 22  | 1.7  |
| 1  | 15423400 | 15423550 | 150 | 15423437 | 14 | 72  | 1.7  |
| 1  | 16034925 | 16035100 | 175 | 16034962 | 25 | 157 | 18.3 |
| 1  | 16046375 | 16046450 | 75  | 16046387 | 12 | 36  | 3.5  |
| 1  | 16164475 | 16164625 | 150 | 16164487 | 12 | 70  | 7.9  |
| 1  | 16812550 | 16812575 | 25  | 16812562 | 11 | 11  | 0.9  |
| 1  | 17095825 | 17095975 | 150 | 17095837 | 22 | 104 | 11.4 |
| 1  | 17104750 | 17104900 | 150 | 17104787 | 20 | 101 | 11.4 |
| 1  | 17288775 | 17288825 | 50  | 17288787 | 14 | 26  | 3.5  |
| 1  | 17751025 | 17751100 | 75  | 17751062 | 12 | 35  | 3.5  |

|   |          |          |     |          |    |     |      |
|---|----------|----------|-----|----------|----|-----|------|
| 1 | 17954250 | 17954450 | 200 | 17954337 | 16 | 111 | 14.9 |
| 1 | 17958300 | 17958475 | 175 | 17958412 | 14 | 90  | 9.6  |
| 1 | 19629250 | 19629325 | 75  | 19629262 | 12 | 36  | 0    |
| 1 | 19849775 | 19849900 | 125 | 19849837 | 12 | 57  | 4.4  |
| 1 | 21577850 | 21578000 | 150 | 21577912 | 13 | 69  | 0    |
| 1 | 21994100 | 21994325 | 225 | 21994212 | 21 | 158 | 4.4  |
| 1 | 22139325 | 22139350 | 25  | 22139337 | 11 | 11  | 1.7  |
| 1 | 23163425 | 23163550 | 125 | 23163437 | 11 | 55  | 4.4  |
| 1 | 23561000 | 23561050 | 50  | 23561012 | 11 | 22  | 0    |
| 1 | 23561275 | 23561650 | 375 | 23561462 | 44 | 430 | 0    |
| 1 | 23739025 | 23739200 | 175 | 23739137 | 13 | 82  | 8.7  |
| 1 | 23761550 | 23761575 | 25  | 23761562 | 11 | 11  | 1.7  |
| 1 | 23998775 | 23998800 | 25  | 23998787 | 16 | 16  | 2.6  |
| 1 | 23999800 | 23999925 | 125 | 23999812 | 11 | 55  | 0    |
| 1 | 24840925 | 24841000 | 75  | 24840937 | 14 | 42  | 0    |
| 1 | 25158800 | 25158825 | 25  | 25158812 | 11 | 11  | 1.7  |
| 1 | 25300525 | 25300575 | 50  | 25300562 | 13 | 24  | 1.7  |
| 1 | 25366750 | 25366875 | 125 | 25366812 | 15 | 67  | 1.7  |
| 1 | 25743950 | 25743975 | 25  | 25743962 | 11 | 11  | 1.7  |
| 1 | 26218900 | 26218925 | 25  | 26218912 | 12 | 12  | 0    |
| 1 | 26754775 | 26754800 | 25  | 26754787 | 11 | 11  | 1.7  |
| 1 | 27192350 | 27192400 | 50  | 27192362 | 11 | 22  | 3.5  |
| 1 | 27591200 | 27591300 | 100 | 27591212 | 12 | 48  | 7    |
| 1 | 27849600 | 27849625 | 25  | 27849612 | 12 | 12  | 1.7  |
| 1 | 27924525 | 27924575 | 50  | 27924537 | 11 | 22  | 2.6  |
| 1 | 28030325 | 28030500 | 175 | 28030437 | 20 | 113 | 5.2  |
| 1 | 28113900 | 28113925 | 25  | 28113912 | 15 | 15  | 2.6  |
| 1 | 28513250 | 28513275 | 25  | 28513262 | 11 | 11  | 0    |
| 1 | 28780775 | 28780975 | 200 | 28780862 | 20 | 129 | 9.6  |
| 1 | 28842150 | 28842200 | 50  | 28842162 | 11 | 22  | 3.5  |
| 1 | 28847150 | 28847225 | 75  | 28847187 | 15 | 44  | 7.9  |
| 1 | 28847650 | 28847750 | 100 | 28847662 | 12 | 45  | 7    |
| 1 | 29578525 | 29578875 | 350 | 29578687 | 44 | 391 | 12.2 |
| 1 | 30337900 | 30338175 | 275 | 30338062 | 23 | 174 | 7    |
| 1 | 30681050 | 30681100 | 50  | 30681062 | 11 | 22  | 0    |
| 1 | 31002150 | 31002175 | 25  | 31002162 | 11 | 11  | 0    |
| 1 | 31070000 | 31070075 | 75  | 31070062 | 12 | 34  | 0    |
| 1 | 31542000 | 31542050 | 50  | 31542012 | 11 | 22  | 3.5  |
| 1 | 31703750 | 31704175 | 425 | 31703912 | 45 | 473 | 0    |
| 1 | 32251750 | 32251775 | 25  | 32251762 | 12 | 12  | 0.9  |
| 1 | 32417875 | 32418025 | 150 | 32417912 | 13 | 75  | 0    |
| 1 | 32460575 | 32460650 | 75  | 32460587 | 17 | 43  | 5.2  |
| 1 | 32479275 | 32479300 | 25  | 32479287 | 12 | 12  | 1.7  |
| 1 | 32589250 | 32589275 | 25  | 32589262 | 11 | 11  | 0    |
| 1 | 32888525 | 32888725 | 200 | 32888587 | 16 | 106 | 1.7  |
| 1 | 33302550 | 33302725 | 175 | 33302687 | 17 | 94  | 5.2  |
| 1 | 33399425 | 33399500 | 75  | 33399437 | 15 | 43  | 3.5  |
| 1 | 33539825 | 33539875 | 50  | 33539837 | 13 | 26  | 3.5  |
| 1 | 33578575 | 33578675 | 100 | 33578587 | 13 | 48  | 3.5  |
| 1 | 33635425 | 33635450 | 25  | 33635437 | 11 | 11  | 0    |
| 1 | 33672250 | 33672275 | 25  | 33672262 | 11 | 11  | 0    |
| 1 | 36007675 | 36007750 | 75  | 36007687 | 11 | 33  | 5.2  |
| 1 | 36639525 | 36639550 | 25  | 36639537 | 11 | 11  | 0.9  |
| 1 | 36688800 | 36688825 | 25  | 36688812 | 13 | 13  | 1.7  |
| 1 | 37022700 | 37022725 | 25  | 37022712 | 12 | 12  | 0.9  |
| 1 | 38589625 | 38589750 | 125 | 38589637 | 12 | 60  | 0    |
| 1 | 40335325 | 40335425 | 100 | 40335337 | 12 | 48  | 7    |
| 1 | 40701150 | 40701675 | 525 | 40701312 | 16 | 278 | 0    |
| 1 | 40747025 | 40747075 | 50  | 40747037 | 12 | 23  | 1.7  |
| 1 | 41132225 | 41132550 | 325 | 41132337 | 24 | 248 | 1.7  |
| 1 | 41856350 | 41856375 | 25  | 41856362 | 11 | 11  | 0.9  |
| 1 | 43055075 | 43055125 | 50  | 43055087 | 12 | 24  | 3.5  |
| 1 | 43410425 | 43410450 | 25  | 43410437 | 15 | 15  | 2.6  |
| 1 | 44451625 | 44451775 | 150 | 44451637 | 12 | 68  | 8.7  |
| 1 | 44570150 | 44570300 | 150 | 44570212 | 16 | 86  | 4.4  |
| 1 | 44910625 | 44910700 | 75  | 44910687 | 13 | 35  | 5.2  |
| 1 | 44959775 | 44959900 | 125 | 44959787 | 11 | 55  | 1.7  |
| 1 | 44960125 | 44960325 | 200 | 44960137 | 11 | 84  | 5.2  |
| 1 | 45224975 | 45225075 | 100 | 45224987 | 14 | 54  | 9.6  |
| 1 | 45576050 | 45576075 | 25  | 45576062 | 11 | 11  | 0.9  |
| 1 | 45822100 | 45822200 | 100 | 45822187 | 20 | 75  | 12.2 |
| 1 | 46436850 | 46437000 | 150 | 46436912 | 15 | 81  | 4.4  |
| 1 | 46442950 | 46443125 | 175 | 46442987 | 15 | 88  | 0    |
| 1 | 46477125 | 46477425 | 300 | 46477287 | 24 | 192 | 6.1  |
| 1 | 46485850 | 46486000 | 150 | 46485912 | 20 | 107 | 18.3 |

|   |           |           |     |           |    |     |      |
|---|-----------|-----------|-----|-----------|----|-----|------|
| 1 | 46541700  | 46541775  | 75  | 46541737  | 13 | 35  | 5.2  |
| 1 | 46791150  | 46791175  | 25  | 46791162  | 11 | 11  | 1.7  |
| 1 | 47417450  | 47417475  | 25  | 47417462  | 12 | 12  | 1.7  |
| 1 | 47807275  | 47807300  | 25  | 47807287  | 13 | 13  | 0    |
| 1 | 49435500  | 49435700  | 200 | 49435537  | 15 | 93  | 4.4  |
| 1 | 52209250  | 52209300  | 50  | 52209262  | 11 | 22  | 0    |
| 1 | 52293275  | 52293375  | 100 | 52293287  | 11 | 44  | 3.5  |
| 1 | 52455225  | 52455255  | 300 | 52455337  | 14 | 151 | 0    |
| 1 | 53444400  | 53444650  | 250 | 53444537  | 22 | 164 | 0    |
| 1 | 54004175  | 54004300  | 125 | 54004187  | 12 | 60  | 0    |
| 1 | 54076650  | 54076775  | 125 | 54076712  | 27 | 116 | 21.8 |
| 1 | 54511525  | 54511575  | 50  | 54511562  | 14 | 27  | 3.5  |
| 1 | 54817875  | 54817900  | 25  | 54817887  | 12 | 12  | 1.7  |
| 1 | 55126225  | 55126250  | 25  | 55126237  | 12 | 12  | 1.7  |
| 1 | 55204325  | 55204400  | 75  | 55204387  | 12 | 34  | 2.6  |
| 1 | 59982100  | 59982200  | 100 | 59982162  | 12 | 46  | 7    |
| 1 | 61203550  | 61203750  | 200 | 61203662  | 22 | 146 | 9.6  |
| 1 | 61963525  | 61963550  | 25  | 61963537  | 12 | 12  | 1.7  |
| 1 | 62538250  | 62538400  | 150 | 62538337  | 14 | 73  | 7.9  |
| 1 | 63761425  | 63761625  | 200 | 63761537  | 18 | 122 | 16.6 |
| 1 | 63914150  | 63914225  | 75  | 63914162  | 12 | 36  | 0    |
| 1 | 63918025  | 63918125  | 100 | 63918037  | 12 | 47  | 0    |
| 1 | 64055575  | 64055675  | 100 | 64055587  | 14 | 50  | 0    |
| 1 | 64469400  | 64469750  | 350 | 64469512  | 25 | 256 | 0    |
| 1 | 66213950  | 66214200  | 250 | 66214012  | 20 | 160 | 7    |
| 1 | 67305950  | 67306200  | 250 | 67306037  | 16 | 137 | 5.2  |
| 1 | 67677800  | 67677850  | 50  | 67677812  | 12 | 24  | 0    |
| 1 | 67756800  | 67756825  | 25  | 67756812  | 11 | 11  | 0    |
| 1 | 68469625  | 68469725  | 100 | 68469637  | 11 | 44  | 0    |
| 1 | 69909975  | 69910075  | 100 | 69909987  | 12 | 43  | 0.9  |
| 1 | 70443825  | 70444050  | 225 | 70443937  | 25 | 181 | 14   |
| 1 | 71319500  | 71319575  | 75  | 71319537  | 16 | 44  | 7.9  |
| 1 | 74964500  | 74964525  | 25  | 74964512  | 11 | 11  | 0    |
| 1 | 76024175  | 76024325  | 150 | 76024237  | 15 | 82  | 5.2  |
| 1 | 78325150  | 78325225  | 75  | 78325162  | 11 | 33  | 0    |
| 1 | 78749625  | 78749975  | 350 | 78749787  | 14 | 180 | 0    |
| 1 | 84744850  | 84745025  | 175 | 84744862  | 13 | 74  | 3.5  |
| 1 | 84843475  | 84843875  | 400 | 84843687  | 33 | 362 | 7    |
| 1 | 85130875  | 85130900  | 25  | 85130887  | 12 | 12  | 1.7  |
| 1 | 85946600  | 85946775  | 175 | 85946637  | 12 | 68  | 4.4  |
| 1 | 86615625  | 86615950  | 325 | 86615762  | 22 | 221 | 0    |
| 1 | 87393925  | 87393950  | 25  | 87393937  | 11 | 11  | 1.7  |
| 1 | 88856700  | 88856800  | 100 | 88856712  | 12 | 44  | 3.5  |
| 1 | 89763350  | 89763425  | 75  | 89763362  | 11 | 33  | 0    |
| 1 | 90233100  | 90233125  | 25  | 90233112  | 11 | 11  | 0.9  |
| 1 | 91326500  | 91326525  | 25  | 91326512  | 11 | 11  | 0    |
| 1 | 91411625  | 91411650  | 25  | 91411637  | 12 | 12  | 1.7  |
| 1 | 91785700  | 91785825  | 125 | 91785712  | 12 | 60  | 4.4  |
| 1 | 93317200  | 93317225  | 25  | 93317212  | 11 | 11  | 0.9  |
| 1 | 93317525  | 93317600  | 75  | 93317537  | 15 | 43  | 1.7  |
| 1 | 93500975  | 93501000  | 25  | 93500987  | 11 | 11  | 0    |
| 1 | 94232000  | 94232100  | 100 | 94232062  | 13 | 48  | 3.5  |
| 1 | 94966200  | 94966275  | 75  | 94966212  | 11 | 33  | 2.6  |
| 1 | 97294825  | 97295150  | 325 | 97294987  | 18 | 182 | 6.1  |
| 1 | 101128000 | 101128275 | 275 | 101128162 | 21 | 168 | 0.9  |
| 1 | 106217175 | 106217350 | 175 | 106217212 | 17 | 95  | 0    |
| 1 | 106326400 | 106326450 | 50  | 106326437 | 13 | 25  | 0    |
| 1 | 107400825 | 107400950 | 125 | 107400887 | 14 | 60  | 5.2  |
| 1 | 109090475 | 109090500 | 25  | 109090487 | 11 | 11  | 1.7  |
| 1 | 109434925 | 109435125 | 200 | 109435012 | 18 | 119 | 15.7 |
| 1 | 109607675 | 109607875 | 200 | 109607762 | 20 | 135 | 20.1 |
| 1 | 109618625 | 109618875 | 250 | 109618812 | 26 | 197 | 13.1 |
| 1 | 110467875 | 110467975 | 100 | 110467962 | 16 | 55  | 0    |
| 1 | 110694825 | 110694900 | 75  | 110694837 | 11 | 33  | 0    |
| 1 | 110900675 | 110900725 | 50  | 110900687 | 12 | 24  | 3.5  |
| 1 | 111307450 | 111307875 | 425 | 111307862 | 14 | 164 | 19.2 |
| 1 | 111308200 | 111308625 | 425 | 111308362 | 46 | 553 | 17.5 |
| 1 | 112084025 | 112084050 | 25  | 112084037 | 13 | 13  | 1.7  |
| 1 | 112740375 | 112740400 | 25  | 112740387 | 12 | 12  | 0.9  |
| 1 | 113163350 | 113163450 | 100 | 113163387 | 13 | 49  | 3.5  |
| 1 | 114802500 | 114802800 | 300 | 114802612 | 32 | 274 | 7    |
| 1 | 116777700 | 116777775 | 75  | 116777762 | 18 | 44  | 7    |
| 1 | 116829600 | 116829625 | 25  | 116829612 | 13 | 13  | 0.9  |
| 1 | 116833600 | 116833675 | 75  | 116833612 | 11 | 33  | 3.5  |
| 1 | 116834825 | 116834850 | 25  | 116834837 | 11 | 11  | 1.7  |



|   |           |           |     |           |    |     |      |
|---|-----------|-----------|-----|-----------|----|-----|------|
| 1 | 117087700 | 117087950 | 250 | 117087787 | 24 | 199 | 0    |
| 1 | 117254825 | 117254900 | 75  | 117254837 | 12 | 33  | 5.2  |
| 1 | 117909025 | 117909050 | 25  | 117909037 | 11 | 11  | 0    |
| 1 | 118001450 | 118001475 | 25  | 118001462 | 12 | 12  | 1.7  |
| 1 | 120045800 | 120046150 | 350 | 120045987 | 22 | 207 | 0    |
| 1 | 121185625 | 121185650 | 25  | 121185637 | 14 | 14  | 2.6  |
| 1 | 121187100 | 121187125 | 25  | 121187112 | 18 | 18  | 3.5  |
| 1 | 143580225 | 143580300 | 75  | 143580237 | 11 | 33  | 0    |
| 1 | 143726100 | 143726250 | 150 | 143726237 | 19 | 87  | 6.1  |
| 1 | 143726525 | 143726850 | 325 | 143726712 | 33 | 282 | 32.3 |
| 1 | 143770075 | 143770125 | 50  | 143770087 | 11 | 22  | 1.7  |
| 1 | 144110750 | 144110800 | 50  | 144110762 | 11 | 22  | 2.6  |
| 1 | 144185800 | 144185825 | 25  | 144185812 | 11 | 11  | 0.9  |
| 1 | 145022375 | 145022400 | 25  | 145022387 | 11 | 11  | 0    |
| 1 | 145023325 | 145023350 | 25  | 145023337 | 12 | 12  | 1.7  |
| 1 | 145180700 | 145180725 | 25  | 145180712 | 12 | 12  | 1.7  |
| 1 | 145616400 | 145616725 | 325 | 145616587 | 23 | 226 | 2.6  |
| 1 | 145639000 | 145639050 | 50  | 145639012 | 11 | 22  | 2.6  |
| 1 | 147490500 | 147490675 | 175 | 147490537 | 30 | 159 | 21   |
| 1 | 148474950 | 148474975 | 25  | 148474962 | 14 | 14  | 2.6  |
| 1 | 148560400 | 148560600 | 200 | 148560587 | 15 | 101 | 12.2 |
| 1 | 149382975 | 149383100 | 125 | 149382987 | 12 | 60  | 4.4  |
| 1 | 149779600 | 149779625 | 25  | 149779612 | 13 | 13  | 0    |
| 1 | 149976700 | 149976900 | 200 | 149976787 | 23 | 136 | 3.5  |
| 1 | 150002525 | 150002775 | 250 | 150002637 | 20 | 157 | 0.9  |
| 1 | 150287375 | 150287425 | 50  | 150287387 | 12 | 24  | 3.5  |
| 1 | 150427975 | 150428000 | 25  | 150427987 | 11 | 11  | 0.9  |
| 1 | 150893325 | 150893375 | 50  | 150893337 | 11 | 22  | 3.5  |
| 1 | 151998525 | 151998550 | 25  | 151998537 | 11 | 11  | 0    |
| 1 | 152012350 | 152012400 | 50  | 152012387 | 16 | 30  | 4.4  |
| 1 | 152162775 | 152162800 | 25  | 152162787 | 11 | 11  | 0.9  |
| 1 | 152202575 | 152202675 | 100 | 152202612 | 15 | 49  | 7.9  |
| 1 | 152459825 | 152459875 | 50  | 152459837 | 14 | 28  | 4.4  |
| 1 | 152735650 | 152735675 | 25  | 152735662 | 11 | 11  | 0    |
| 1 | 152738750 | 152738850 | 100 | 152738762 | 13 | 46  | 1.7  |
| 1 | 153195100 | 153195150 | 50  | 153195112 | 14 | 28  | 5.2  |
| 1 | 153222275 | 153222375 | 100 | 153222287 | 16 | 58  | 9.6  |
| 1 | 153412500 | 153412575 | 75  | 153412512 | 17 | 41  | 4.4  |
| 1 | 153429875 | 153429950 | 75  | 153429887 | 11 | 33  | 1.7  |
| 1 | 153445300 | 153445350 | 50  | 153445312 | 12 | 24  | 0.9  |
| 1 | 153464150 | 153464350 | 200 | 153464237 | 20 | 126 | 4.4  |
| 1 | 154352475 | 154352650 | 175 | 154352537 | 16 | 98  | 2.6  |
| 1 | 154366275 | 154366350 | 75  | 154366287 | 12 | 36  | 3.5  |
| 1 | 154366725 | 154366775 | 50  | 154366737 | 11 | 22  | 3.5  |
| 1 | 154452950 | 154453225 | 275 | 154453212 | 29 | 283 | 47.2 |
| 1 | 154605825 | 154605925 | 100 | 154605837 | 11 | 44  | 6.1  |
| 1 | 154741675 | 154741700 | 25  | 154741687 | 14 | 14  | 1.7  |
| 1 | 155168325 | 155168375 | 50  | 155168362 | 13 | 25  | 1.7  |
| 1 | 156386175 | 156386375 | 200 | 156386262 | 21 | 132 | 7.9  |
| 1 | 157236375 | 157236400 | 25  | 157236387 | 12 | 12  | 0.9  |
| 1 | 157251925 | 157252050 | 125 | 157252037 | 13 | 56  | 7    |
| 1 | 158161425 | 158161625 | 200 | 158161537 | 15 | 96  | 14   |
| 1 | 158498675 | 158498700 | 25  | 158498687 | 12 | 12  | 0.9  |
| 1 | 158917925 | 158917975 | 50  | 158917962 | 13 | 25  | 3.5  |
| 1 | 159282500 | 159282700 | 200 | 159282662 | 12 | 87  | 7    |
| 1 | 159390275 | 159390300 | 25  | 159390287 | 11 | 11  | 1.7  |
| 1 | 159636400 | 159636425 | 25  | 159636412 | 11 | 11  | 1.7  |
| 1 | 159723000 | 159723150 | 150 | 159723012 | 12 | 66  | 4.4  |
| 1 | 160428325 | 160428350 | 25  | 160428337 | 11 | 11  | 0.9  |
| 1 | 161136050 | 161136225 | 175 | 161136212 | 13 | 82  | 11.4 |
| 1 | 161284425 | 161284475 | 50  | 161284437 | 11 | 22  | 0    |
| 1 | 163703400 | 163703425 | 25  | 163703412 | 11 | 11  | 1.7  |
| 1 | 166172200 | 166172300 | 100 | 166172237 | 13 | 50  | 0    |
| 1 | 166173075 | 166173125 | 50  | 166173087 | 14 | 28  | 3.5  |
| 1 | 166688325 | 166688375 | 50  | 166688337 | 11 | 22  | 0    |
| 1 | 168129850 | 168129900 | 50  | 168129887 | 13 | 24  | 1.7  |
| 1 | 169378050 | 169378100 | 50  | 169378062 | 12 | 24  | 0    |
| 1 | 169665050 | 169665100 | 50  | 169665062 | 11 | 22  | 0    |
| 1 | 170062750 | 170063100 | 350 | 170062912 | 29 | 271 | 10.5 |
| 1 | 170594850 | 170594925 | 75  | 170594862 | 12 | 35  | 0    |
| 1 | 171148600 | 171148875 | 275 | 171148712 | 21 | 155 | 8.7  |
| 1 | 171873525 | 171873550 | 25  | 171873537 | 11 | 11  | 1.7  |
| 1 | 172601375 | 172601400 | 25  | 172601387 | 11 | 11  | 0    |
| 1 | 173387000 | 173387150 | 150 | 173387012 | 11 | 66  | 1.7  |
| 1 | 173742375 | 173742475 | 100 | 173742387 | 14 | 52  | 0    |

|   |           |           |      |           |    |      |      |
|---|-----------|-----------|------|-----------|----|------|------|
| 1 | 176127575 | 176127725 | 150  | 176127587 | 12 | 68   | 1.7  |
| 1 | 178491650 | 178491750 | 100  | 178491662 | 11 | 44   | 1.7  |
| 1 | 178738550 | 178738600 | 50   | 178738562 | 16 | 30   | 5.2  |
| 1 | 180719875 | 180719900 | 25   | 180719887 | 11 | 11   | 0    |
| 1 | 181025125 | 181025150 | 25   | 181025137 | 11 | 11   | 1.7  |
| 1 | 181707875 | 181708025 | 150  | 181707887 | 18 | 100  | 0    |
| 1 | 182526000 | 182526225 | 225  | 182526087 | 29 | 216  | 0    |
| 1 | 182791000 | 182791075 | 75   | 182791012 | 11 | 33   | 2.6  |
| 1 | 182865200 | 182865225 | 25   | 182865212 | 11 | 11   | 1.7  |
| 1 | 182990775 | 182990800 | 25   | 182990787 | 11 | 11   | 1.7  |
| 1 | 182995525 | 182995650 | 125  | 182995562 | 16 | 71   | 11.4 |
| 1 | 183263200 | 183263325 | 125  | 183263212 | 15 | 59   | 1.7  |
| 1 | 183574800 | 183574900 | 100  | 183574862 | 15 | 54   | 0    |
| 1 | 183735750 | 183735850 | 100  | 183735787 | 16 | 58   | 0.9  |
| 1 | 183954600 | 183954700 | 100  | 183954612 | 12 | 48   | 3.5  |
| 1 | 184026775 | 184026825 | 50   | 184026787 | 11 | 22   | 0    |
| 1 | 184611550 | 184611625 | 75   | 184611562 | 15 | 40   | 4.4  |
| 1 | 190049400 | 190049600 | 200  | 190049462 | 19 | 125  | 0    |
| 1 | 190437075 | 190437300 | 225  | 190437212 | 22 | 150  | 0    |
| 1 | 192269475 | 192269625 | 150  | 192269537 | 13 | 70   | 8.7  |
| 1 | 194771625 | 194771775 | 150  | 194771662 | 15 | 76   | 0    |
| 1 | 195317175 | 195317275 | 100  | 195317187 | 13 | 42   | 0    |
| 1 | 197032625 | 197032750 | 125  | 197032687 | 13 | 59   | 0    |
| 1 | 197173150 | 197173175 | 25   | 197173162 | 11 | 11   | 0    |
| 1 | 198959950 | 198960100 | 150  | 198959962 | 12 | 71   | 5.2  |
| 1 | 199390625 | 199390750 | 125  | 199390637 | 11 | 53   | 0    |
| 1 | 199570875 | 199570975 | 100  | 199570887 | 11 | 44   | 1.7  |
| 1 | 199683950 | 199683975 | 25   | 199683962 | 12 | 12   | 1.7  |
| 1 | 199685200 | 199685325 | 125  | 199685262 | 13 | 59   | 0    |
| 1 | 199687050 | 199687075 | 25   | 199687062 | 11 | 11   | 0    |
| 1 | 201163050 | 201163100 | 50   | 201163062 | 13 | 26   | 0    |
| 1 | 202031200 | 202031325 | 125  | 202031262 | 17 | 77   | 8.7  |
| 1 | 202232775 | 202232975 | 200  | 202232787 | 16 | 102  | 0    |
| 1 | 202337075 | 202337125 | 50   | 202337112 | 14 | 26   | 3.5  |
| 1 | 202352225 | 202352325 | 100  | 202352237 | 15 | 54   | 6.1  |
| 1 | 202602750 | 202602775 | 25   | 202602762 | 11 | 11   | 0    |
| 1 | 202999550 | 202999625 | 75   | 202999562 | 12 | 35   | 3.5  |
| 1 | 203358175 | 203358200 | 25   | 203358187 | 11 | 11   | 1.7  |
| 1 | 203391975 | 203392000 | 25   | 203391987 | 11 | 11   | 0.9  |
| 1 | 205118525 | 205118600 | 75   | 205118537 | 13 | 39   | 0    |
| 1 | 205130975 | 205131075 | 100  | 205130987 | 13 | 51   | 3.5  |
| 1 | 205603325 | 205603350 | 25   | 205603337 | 12 | 12   | 1.7  |
| 1 | 207807625 | 207807775 | 150  | 207807762 | 21 | 102  | 11.4 |
| 1 | 207987750 | 207987850 | 100  | 207987812 | 15 | 56   | 7    |
| 1 | 208474575 | 208474600 | 25   | 208474587 | 12 | 12   | 1.7  |
| 1 | 210142125 | 210142175 | 50   | 210142137 | 12 | 24   | 0    |
| 1 | 210697900 | 210698100 | 200  | 210697987 | 16 | 110  | 19.2 |
| 1 | 211065775 | 211066100 | 325  | 211065962 | 22 | 201  | 0    |
| 1 | 211965450 | 211965500 | 50   | 211965462 | 11 | 22   | 3.5  |
| 1 | 215380500 | 215380600 | 100  | 215380562 | 14 | 50   | 2.6  |
| 1 | 216150725 | 216150775 | 50   | 216150737 | 12 | 24   | 1.7  |
| 1 | 216747575 | 216747950 | 375  | 216747762 | 43 | 414  | 27.1 |
| 1 | 217557800 | 217557825 | 25   | 217557812 | 12 | 12   | 1.7  |
| 1 | 217934975 | 217935050 | 75   | 217934987 | 11 | 33   | 0    |
| 1 | 218936825 | 218936850 | 25   | 218936837 | 12 | 12   | 0    |
| 1 | 220226350 | 220226375 | 25   | 220226362 | 11 | 11   | 0    |
| 1 | 222797725 | 222797775 | 50   | 222797737 | 12 | 24   | 1.7  |
| 1 | 222981375 | 222981400 | 25   | 222981387 | 12 | 12   | 1.7  |
| 1 | 223013450 | 223014450 | 1000 | 223013662 | 66 | 1055 | 40.2 |
| 1 | 223152300 | 223152425 | 125  | 223152312 | 14 | 68   | 0    |
| 1 | 223601700 | 223601750 | 50   | 223601712 | 12 | 23   | 0    |
| 1 | 224032000 | 224032100 | 100  | 224032087 | 14 | 50   | 7.9  |
| 1 | 224317800 | 224317900 | 100  | 224317812 | 11 | 44   | 2.6  |
| 1 | 224337675 | 224337850 | 175  | 224337712 | 14 | 89   | 11.4 |
| 1 | 224657200 | 224657275 | 75   | 224657212 | 12 | 36   | 4.4  |
| 1 | 224887225 | 224887275 | 50   | 224887237 | 11 | 22   | 1.7  |
| 1 | 225064650 | 225064725 | 75   | 225064712 | 12 | 34   | 1.7  |
| 1 | 225117900 | 225117925 | 25   | 225117912 | 15 | 15   | 2.6  |
| 1 | 225909375 | 225909500 | 125  | 225909387 | 11 | 47   | 0    |
| 1 | 226349150 | 226349200 | 50   | 226349162 | 12 | 24   | 3.5  |
| 1 | 227473175 | 227473275 | 100  | 227473187 | 12 | 46   | 0    |
| 1 | 227711125 | 227711200 | 75   | 227711137 | 11 | 33   | 2.6  |
| 1 | 228292725 | 228292800 | 75   | 228292737 | 12 | 36   | 0    |
| 1 | 228369925 | 228370075 | 150  | 228369962 | 16 | 76   | 5.2  |
| 1 | 228784275 | 228784300 | 25   | 228784287 | 11 | 11   | 1.7  |

|   |           |           |     |           |    |     |      |
|---|-----------|-----------|-----|-----------|----|-----|------|
| 1 | 229701475 | 229701875 | 400 | 229701637 | 32 | 369 | 17.5 |
| 1 | 230951500 | 230951700 | 200 | 230951687 | 16 | 108 | 7    |
| 1 | 232701750 | 232701925 | 175 | 232701762 | 12 | 74  | 8.7  |
| 1 | 233186675 | 233186700 | 25  | 233186687 | 11 | 11  | 0    |
| 1 | 233900150 | 233900450 | 300 | 233900287 | 18 | 172 | 5.2  |
| 1 | 234151075 | 234151150 | 75  | 234151087 | 11 | 33  | 0    |
| 1 | 234176400 | 234176450 | 50  | 234176412 | 12 | 24  | 2.6  |
| 1 | 234358875 | 234358925 | 50  | 234358887 | 11 | 22  | 3.5  |
| 1 | 234371475 | 234371500 | 25  | 234371487 | 11 | 11  | 0.9  |
| 1 | 234852500 | 234852650 | 150 | 234852537 | 14 | 74  | 0    |
| 1 | 235833000 | 235833150 | 150 | 235833012 | 12 | 72  | 10.5 |
| 1 | 238173800 | 238173900 | 100 | 238173887 | 12 | 45  | 0    |
| 1 | 241651375 | 241651400 | 25  | 241651387 | 11 | 11  | 0    |
| 1 | 242079000 | 242079050 | 50  | 242079037 | 12 | 23  | 0    |
| 1 | 242385225 | 242385250 | 25  | 242385237 | 13 | 13  | 1.7  |
| 1 | 242533200 | 242533225 | 25  | 242533212 | 11 | 11  | 0    |
| 1 | 242534175 | 242534300 | 125 | 242534187 | 14 | 57  | 11.4 |
| 1 | 242552325 | 242552475 | 150 | 242552362 | 15 | 84  | 3.5  |
| 1 | 242552875 | 242553225 | 350 | 242552887 | 11 | 129 | 25.3 |
| 1 | 242803775 | 242803900 | 125 | 242803812 | 14 | 69  | 0    |
| 1 | 242806125 | 242806500 | 375 | 242806262 | 36 | 371 | 0    |
| 1 | 243065225 | 243065300 | 75  | 243065287 | 20 | 48  | 5.2  |
| 1 | 243437025 | 243437275 | 250 | 243437112 | 20 | 169 | 3.5  |
| 1 | 244745300 | 244745675 | 375 | 244745487 | 42 | 418 | 14   |
| 1 | 245198500 | 245198575 | 75  | 245198512 | 13 | 35  | 0    |
| 1 | 245308725 | 245308875 | 150 | 245308812 | 13 | 72  | 12.2 |
| 1 | 245386700 | 245386750 | 50  | 245386712 | 12 | 24  | 0    |
| 1 | 246141550 | 246141625 | 75  | 246141562 | 11 | 33  | 0    |
| 1 | 247098825 | 247098850 | 25  | 247098837 | 12 | 12  | 0.9  |
| 3 | 4995375   | 4995500   | 125 | 4995412   | 15 | 73  | 6.1  |
| 3 | 4996225   | 4996275   | 50  | 4996237   | 11 | 22  | 1.7  |
| 3 | 5003175   | 5003250   | 75  | 5003187   | 11 | 31  | 0    |
| 3 | 5003950   | 5003975   | 25  | 5003962   | 12 | 12  | 0.9  |
| 3 | 5043450   | 5043475   | 25  | 5043462   | 11 | 11  | 1.7  |
| 3 | 9228000   | 9228075   | 75  | 9228037   | 14 | 40  | 5.2  |
| 3 | 9766250   | 9766275   | 25  | 9766262   | 11 | 11  | 0    |
| 3 | 9881325   | 9881525   | 200 | 9881387   | 18 | 120 | 10.5 |
| 3 | 10262050  | 10262250  | 200 | 10262162  | 17 | 108 | 10.5 |
| 3 | 10264800  | 10264825  | 25  | 10264812  | 12 | 12  | 0.9  |
| 3 | 10266125  | 10266150  | 25  | 10266137  | 12 | 12  | 0.9  |
| 3 | 10349650  | 10349675  | 25  | 10349662  | 12 | 12  | 0.9  |
| 3 | 11289075  | 11289125  | 50  | 11289112  | 14 | 26  | 0    |
| 3 | 11660400  | 11660425  | 25  | 11660412  | 11 | 11  | 0.9  |
| 3 | 13469275  | 13469375  | 100 | 13469287  | 16 | 50  | 7    |
| 3 | 13629375  | 13629475  | 100 | 13629437  | 13 | 46  | 0    |
| 3 | 13831550  | 13831750  | 200 | 13831737  | 13 | 93  | 3.5  |
| 3 | 14697575  | 14697625  | 50  | 14697587  | 12 | 24  | 0    |
| 3 | 14901300  | 14901475  | 175 | 14901387  | 14 | 90  | 2.6  |
| 3 | 15407575  | 15407625  | 50  | 15407587  | 12 | 24  | 1.7  |
| 3 | 15672775  | 15673200  | 425 | 15672987  | 58 | 649 | 14.9 |
| 3 | 15999325  | 15999400  | 75  | 15999337  | 12 | 36  | 0.9  |
| 3 | 16076075  | 16076125  | 50  | 16076087  | 12 | 24  | 1.7  |
| 3 | 18742300  | 18742450  | 150 | 18742387  | 16 | 90  | 0    |
| 3 | 25806600  | 25806725  | 125 | 25806612  | 19 | 81  | 6.1  |
| 3 | 28365225  | 28365375  | 150 | 28365287  | 13 | 74  | 2.6  |
| 3 | 31998325  | 31998350  | 25  | 31998337  | 14 | 14  | 2.6  |
| 3 | 32256200  | 32256400  | 200 | 32256262  | 17 | 120 | 10.5 |
| 3 | 32418500  | 32418525  | 25  | 32418512  | 12 | 12  | 0.9  |
| 3 | 37876825  | 37876950  | 125 | 37876862  | 13 | 62  | 1.7  |
| 3 | 37925750  | 37926100  | 350 | 37925937  | 57 | 524 | 45.4 |
| 3 | 38021800  | 38021900  | 100 | 38021812  | 13 | 47  | 4.4  |
| 3 | 38155225  | 38155250  | 25  | 38155237  | 11 | 11  | 0.9  |
| 3 | 38343850  | 38344325  | 475 | 38344162  | 22 | 313 | 12.2 |
| 3 | 38449350  | 38449725  | 375 | 38449512  | 48 | 462 | 0    |
| 3 | 38512925  | 38513025  | 100 | 38512937  | 12 | 46  | 6.1  |
| 3 | 40270975  | 40271075  | 100 | 40270987  | 12 | 48  | 0    |
| 3 | 41134200  | 41134225  | 25  | 41134212  | 14 | 14  | 2.6  |
| 3 | 42931500  | 42931650  | 150 | 42931587  | 14 | 73  | 0    |
| 3 | 42990700  | 42990850  | 150 | 42990737  | 14 | 77  | 1.7  |
| 3 | 43970600  | 43970725  | 125 | 43970612  | 11 | 55  | 5.2  |
| 3 | 44778050  | 44778100  | 50  | 44778062  | 12 | 24  | 3.5  |
| 3 | 46314375  | 46314450  | 75  | 46314412  | 14 | 37  | 3.5  |
| 3 | 46355500  | 46355525  | 25  | 46355512  | 11 | 11  | 1.7  |
| 3 | 47798675  | 47798725  | 50  | 47798687  | 12 | 24  | 0    |
| 3 | 48284950  | 48285000  | 50  | 48284962  | 12 | 24  | 1.7  |

|   |          |          |     |          |    |     |       |
|---|----------|----------|-----|----------|----|-----|-------|
| 3 | 48285675 | 48285725 | 50  | 48285687 | 12 | 24  | 3.5   |
| 3 | 48579150 | 48579325 | 175 | 48579212 | 14 | 87  | 3.5   |
| 3 | 48630000 | 48630400 | 400 | 48630162 | 45 | 454 | 0     |
| 3 | 48676050 | 48676075 | 25  | 48676062 | 18 | 18  | 2.6   |
| 3 | 48752500 | 48752575 | 75  | 48752537 | 14 | 40  | 4.4   |
| 3 | 49019950 | 49020100 | 150 | 49019962 | 23 | 111 | 14.9  |
| 3 | 49105925 | 49105975 | 50  | 49105937 | 11 | 22  | 1.7   |
| 3 | 49246100 | 49246175 | 75  | 49246112 | 11 | 31  | 0     |
| 3 | 49370850 | 49370925 | 75  | 49370862 | 13 | 37  | 3.5   |
| 3 | 49531900 | 49532000 | 100 | 49531937 | 13 | 50  | 3.5   |
| 3 | 49686450 | 49686575 | 125 | 49686462 | 24 | 89  | 6.1   |
| 3 | 50149900 | 50149950 | 50  | 50149912 | 11 | 22  | 0     |
| 3 | 50273750 | 50273875 | 125 | 50273762 | 13 | 63  | 2.6   |
| 3 | 50334050 | 50334075 | 25  | 50334062 | 15 | 15  | 2.6   |
| 3 | 50340800 | 50340900 | 100 | 50340812 | 14 | 54  | 6.1   |
| 3 | 50363225 | 50363325 | 100 | 50363262 | 16 | 56  | 4.4   |
| 3 | 50581750 | 50581850 | 100 | 50581762 | 13 | 47  | 4.4   |
| 3 | 52297100 | 52297125 | 25  | 52297112 | 12 | 12  | 1.7   |
| 3 | 56691925 | 56692125 | 200 | 56692087 | 16 | 109 | 18.3  |
| 3 | 60706975 | 60707000 | 25  | 60706987 | 11 | 11  | 0     |
| 3 | 60711175 | 60711450 | 275 | 60711212 | 17 | 162 | 10.5  |
| 3 | 60736350 | 60736450 | 100 | 60736387 | 15 | 52  | 0     |
| 3 | 60815925 | 60816275 | 350 | 60816087 | 24 | 235 | 9.6   |
| 3 | 60944700 | 60944900 | 200 | 60944787 | 16 | 111 | 6.1   |
| 3 | 60945850 | 60945875 | 25  | 60945862 | 12 | 12  | 0     |
| 3 | 60951275 | 60951375 | 100 | 60951312 | 13 | 50  | 0     |
| 3 | 61143500 | 61143625 | 125 | 61143512 | 12 | 56  | 6.1   |
| 3 | 61197425 | 61197450 | 25  | 61197437 | 12 | 12  | 0.9   |
| 3 | 61212275 | 61212450 | 175 | 61212287 | 28 | 138 | 16.6  |
| 3 | 61439275 | 61439450 | 175 | 61439387 | 13 | 83  | 3.5   |
| 3 | 61522175 | 61522300 | 125 | 61522287 | 45 | 168 | 28.8  |
| 3 | 61574800 | 61574850 | 50  | 61574812 | 12 | 24  | 3.5   |
| 3 | 61627175 | 61627250 | 75  | 61627187 | 14 | 42  | 0     |
| 3 | 61644950 | 61645025 | 75  | 61644987 | 14 | 40  | 2.6   |
| 3 | 61753875 | 61753900 | 25  | 61753887 | 12 | 12  | 0     |
| 3 | 61789775 | 61789900 | 125 | 61789862 | 14 | 63  | 7     |
| 3 | 61790350 | 61790375 | 25  | 61790362 | 12 | 12  | 1.7   |
| 3 | 61807575 | 61807625 | 50  | 61807587 | 11 | 22  | 1.7   |
| 3 | 61855850 | 61856000 | 150 | 61855937 | 16 | 88  | 8.7   |
| 3 | 61988500 | 61988525 | 25  | 61988512 | 11 | 11  | 0     |
| 3 | 62049800 | 62049850 | 50  | 62049812 | 11 | 22  | 1.7   |
| 3 | 62130400 | 62130800 | 400 | 62130737 | 17 | 191 | 34.1  |
| 3 | 62131175 | 62131200 | 25  | 62131187 | 13 | 13  | 1.7   |
| 3 | 62280100 | 62280475 | 375 | 62280212 | 81 | 773 | 110.1 |
| 3 | 62670275 | 62670300 | 25  | 62670287 | 12 | 12  | 0     |
| 3 | 62671300 | 62671325 | 25  | 62671312 | 11 | 11  | 0.9   |
| 3 | 62682575 | 62682750 | 175 | 62682587 | 14 | 79  | 6.1   |
| 3 | 62836550 | 62836575 | 25  | 62836562 | 13 | 13  | 0.9   |
| 3 | 62883725 | 62883875 | 150 | 62883787 | 12 | 67  | 8.7   |
| 3 | 62900750 | 62900850 | 100 | 62900787 | 13 | 46  | 2.6   |
| 3 | 62909575 | 62909625 | 50  | 62909587 | 11 | 22  | 0.9   |
| 3 | 63282725 | 63282825 | 100 | 63282737 | 11 | 44  | 0.9   |
| 3 | 63289150 | 63289300 | 150 | 63289262 | 20 | 99  | 12.2  |
| 3 | 63670425 | 63670475 | 50  | 63670437 | 19 | 38  | 4.4   |
| 3 | 63872250 | 63872275 | 25  | 63872262 | 11 | 11  | 1.7   |
| 3 | 63920850 | 63920900 | 50  | 63920862 | 12 | 24  | 3.5   |
| 3 | 63984325 | 63984350 | 25  | 63984337 | 13 | 13  | 1.7   |
| 3 | 63992575 | 63992600 | 25  | 63992587 | 12 | 12  | 0     |
| 3 | 63992850 | 63993050 | 200 | 63993012 | 13 | 90  | 4.4   |
| 3 | 64009575 | 64009775 | 200 | 64009687 | 15 | 100 | 5.2   |
| 3 | 64016350 | 64016400 | 50  | 64016362 | 11 | 22  | 1.7   |
| 3 | 64019250 | 64019300 | 50  | 64019262 | 11 | 22  | 1.7   |
| 3 | 64067500 | 64067550 | 50  | 64067512 | 11 | 22  | 1.7   |
| 3 | 64070725 | 64070925 | 200 | 64070762 | 12 | 90  | 1.7   |
| 3 | 64102275 | 64102300 | 25  | 64102287 | 11 | 11  | 0.9   |
| 3 | 64111675 | 64111800 | 125 | 64111762 | 14 | 63  | 1.7   |
| 3 | 64121000 | 64121150 | 150 | 64121112 | 16 | 84  | 3.5   |
| 3 | 64147875 | 64147975 | 100 | 64147937 | 17 | 58  | 6.1   |
| 3 | 64149750 | 64149875 | 125 | 64149837 | 18 | 71  | 11.4  |
| 3 | 64150275 | 64150300 | 25  | 64150287 | 11 | 11  | 1.7   |
| 3 | 64150675 | 64150700 | 25  | 64150687 | 18 | 18  | 3.5   |
| 3 | 64154300 | 64154475 | 175 | 64154312 | 12 | 82  | 0     |
| 3 | 64172700 | 64172800 | 100 | 64172712 | 11 | 42  | 4.4   |
| 3 | 64181550 | 64181650 | 100 | 64181562 | 15 | 58  | 7     |
| 3 | 64214475 | 64214500 | 25  | 64214487 | 12 | 12  | 0.9   |

|   |          |          |     |          |    |     |      |
|---|----------|----------|-----|----------|----|-----|------|
| 3 | 64223750 | 64223825 | 75  | 64223762 | 13 | 37  | 2.6  |
| 3 | 64228725 | 64228850 | 125 | 64228762 | 13 | 61  | 3.5  |
| 3 | 64273425 | 64273450 | 25  | 64273437 | 11 | 11  | 1.7  |
| 3 | 64301525 | 64301600 | 75  | 64301562 | 13 | 36  | 1.7  |
| 3 | 64303550 | 64303600 | 50  | 64303562 | 11 | 22  | 3.5  |
| 3 | 64305350 | 64305575 | 225 | 64305512 | 20 | 149 | 10.5 |
| 3 | 64315275 | 64315325 | 50  | 64315287 | 11 | 22  | 0    |
| 3 | 64346675 | 64346700 | 25  | 64346687 | 12 | 12  | 0.9  |
| 3 | 64347100 | 64347175 | 75  | 64347112 | 12 | 34  | 4.4  |
| 3 | 64421625 | 64421650 | 25  | 64421637 | 11 | 11  | 0.9  |
| 3 | 64428000 | 64428150 | 150 | 64428112 | 15 | 76  | 9.6  |
| 3 | 64444825 | 64444850 | 25  | 64444837 | 11 | 11  | 1.7  |
| 3 | 64445100 | 64445150 | 50  | 64445137 | 16 | 30  | 5.2  |
| 3 | 64459575 | 64459700 | 125 | 64459587 | 11 | 57  | 10.5 |
| 3 | 64494925 | 64494950 | 25  | 64494937 | 11 | 11  | 0.9  |
| 3 | 64547875 | 64547975 | 100 | 64547887 | 12 | 48  | 7    |
| 3 | 64580875 | 64580925 | 50  | 64580887 | 11 | 22  | 1.7  |
| 3 | 64723675 | 64723800 | 125 | 64723787 | 13 | 55  | 3.5  |
| 3 | 64777975 | 64778050 | 75  | 64777987 | 14 | 40  | 5.2  |
| 3 | 64824525 | 64824550 | 25  | 64824537 | 12 | 12  | 0.9  |
| 3 | 64839175 | 64839275 | 100 | 64839187 | 16 | 56  | 7    |
| 3 | 64893700 | 64893900 | 200 | 64893812 | 17 | 119 | 8.7  |
| 3 | 64948975 | 64949125 | 150 | 64949062 | 16 | 78  | 7.9  |
| 3 | 64953775 | 64953900 | 125 | 64953787 | 13 | 63  | 2.6  |
| 3 | 64967525 | 64967600 | 75  | 64967537 | 18 | 46  | 8.7  |
| 3 | 65011475 | 65011625 | 150 | 65011512 | 15 | 81  | 0    |
| 3 | 65067725 | 65067900 | 175 | 65067762 | 16 | 92  | 6.1  |
| 3 | 65114950 | 65114975 | 25  | 65114962 | 12 | 12  | 0.9  |
| 3 | 65206350 | 65206550 | 200 | 65206462 | 16 | 96  | 2.6  |
| 3 | 65226675 | 65226925 | 250 | 65226787 | 17 | 135 | 0    |
| 3 | 65299525 | 65299725 | 200 | 65299637 | 23 | 149 | 26.2 |
| 3 | 65632000 | 65632075 | 75  | 65632012 | 12 | 36  | 0    |
| 3 | 65633725 | 65633850 | 125 | 65633787 | 13 | 57  | 8.7  |
| 3 | 65742950 | 65743000 | 50  | 65742962 | 11 | 22  | 1.7  |
| 3 | 65921700 | 65921850 | 150 | 65921787 | 15 | 79  | 0    |
| 3 | 65922575 | 65922950 | 375 | 65922687 | 15 | 193 | 27.1 |
| 3 | 66000500 | 66000550 | 50  | 66000537 | 18 | 31  | 5.2  |
| 3 | 66099200 | 66099600 | 400 | 66099462 | 46 | 486 | 39.3 |
| 3 | 66101650 | 66102150 | 500 | 66101787 | 41 | 614 | 31.5 |
| 3 | 66554825 | 66555025 | 200 | 66554962 | 16 | 101 | 13.1 |
| 3 | 66614500 | 66614600 | 100 | 66614512 | 12 | 46  | 7    |
| 3 | 66655025 | 66655075 | 50  | 66655037 | 12 | 24  | 3.5  |
| 3 | 66953300 | 66953325 | 25  | 66953312 | 11 | 11  | 1.7  |
| 3 | 67105225 | 67105250 | 25  | 67105237 | 17 | 17  | 2.6  |
| 3 | 67123225 | 67123400 | 175 | 67123312 | 15 | 91  | 1.7  |
| 3 | 67591175 | 67591200 | 25  | 67591187 | 11 | 11  | 1.7  |
| 3 | 67593000 | 67593025 | 25  | 67593012 | 11 | 11  | 1.7  |
| 3 | 67780475 | 67780650 | 175 | 67780637 | 19 | 101 | 11.4 |
| 3 | 67941925 | 67942125 | 200 | 67941987 | 24 | 166 | 21.8 |
| 3 | 68123425 | 68123450 | 25  | 68123437 | 12 | 12  | 0    |
| 3 | 68616900 | 68617000 | 100 | 68616912 | 11 | 44  | 3.5  |
| 3 | 68911200 | 68911300 | 100 | 68911287 | 15 | 50  | 8.7  |
| 3 | 69145950 | 69145975 | 25  | 69145962 | 12 | 12  | 1.7  |
| 3 | 69231675 | 69231750 | 75  | 69231687 | 12 | 36  | 5.2  |
| 3 | 69271575 | 69271650 | 75  | 69271587 | 12 | 36  | 2.6  |
| 3 | 69313650 | 69313700 | 50  | 69313662 | 14 | 28  | 5.2  |
| 3 | 69417775 | 69417800 | 25  | 69417787 | 12 | 12  | 0    |
| 3 | 69440400 | 69440425 | 25  | 69440412 | 11 | 11  | 1.7  |
| 3 | 69460950 | 69461000 | 50  | 69460962 | 12 | 24  | 3.5  |
| 3 | 69496075 | 69496100 | 25  | 69496087 | 11 | 11  | 1.7  |
| 3 | 69502400 | 69502425 | 25  | 69502412 | 12 | 12  | 1.7  |
| 3 | 69518100 | 69518125 | 25  | 69518112 | 12 | 12  | 1.7  |
| 3 | 69523650 | 69523675 | 25  | 69523662 | 12 | 12  | 1.7  |
| 3 | 69626175 | 69626300 | 125 | 69626187 | 13 | 61  | 6.1  |
| 3 | 69655825 | 69655850 | 25  | 69655837 | 11 | 11  | 1.7  |
| 3 | 69679300 | 69679450 | 150 | 69679412 | 22 | 112 | 14   |
| 3 | 69702650 | 69702700 | 50  | 69702662 | 14 | 28  | 4.4  |
| 3 | 69740775 | 69740800 | 25  | 69740787 | 11 | 11  | 1.7  |
| 3 | 69844225 | 69844375 | 150 | 69844312 | 13 | 70  | 10.5 |
| 3 | 69885100 | 69885325 | 225 | 69885212 | 20 | 157 | 18.3 |
| 3 | 69938775 | 69938850 | 75  | 69938837 | 16 | 44  | 7    |
| 3 | 69953050 | 69953325 | 275 | 69953187 | 21 | 181 | 14   |
| 3 | 69970375 | 69970450 | 75  | 69970387 | 12 | 36  | 4.4  |
| 3 | 70041825 | 70042025 | 200 | 70041962 | 17 | 123 | 8.7  |
| 3 | 70054175 | 70054900 | 725 | 70054337 | 40 | 563 | 87.4 |

|   |          |          |     |          |    |      |      |
|---|----------|----------|-----|----------|----|------|------|
| 3 | 70058400 | 70058425 | 25  | 70058412 | 35 | 35   | 7    |
| 3 | 70059475 | 70059575 | 100 | 70059512 | 14 | 54   | 7    |
| 3 | 70060800 | 70060850 | 50  | 70060837 | 21 | 40   | 7    |
| 3 | 70061250 | 70061300 | 50  | 70061262 | 15 | 30   | 5.2  |
| 3 | 70061975 | 70062000 | 25  | 70061987 | 11 | 11   | 0.9  |
| 3 | 70068175 | 70068225 | 50  | 70068187 | 12 | 24   | 1.7  |
| 3 | 70074925 | 70075050 | 125 | 70074987 | 14 | 66   | 0    |
| 3 | 70120200 | 70120250 | 50  | 70120212 | 13 | 24   | 3.5  |
| 3 | 70129875 | 70129900 | 25  | 70129887 | 14 | 14   | 2.6  |
| 3 | 70130550 | 70130575 | 25  | 70130562 | 12 | 12   | 0    |
| 3 | 70130800 | 70130850 | 50  | 70130812 | 14 | 26   | 3.5  |
| 3 | 70131250 | 70131275 | 25  | 70131262 | 14 | 14   | 2.6  |
| 3 | 70132550 | 70132575 | 25  | 70132562 | 12 | 12   | 1.7  |
| 3 | 70171175 | 70171200 | 25  | 70171187 | 11 | 11   | 0.9  |
| 3 | 70171550 | 70171600 | 50  | 70171587 | 12 | 23   | 0    |
| 3 | 70172150 | 70172350 | 200 | 70172312 | 18 | 111  | 18.3 |
| 3 | 70184975 | 70185175 | 200 | 70185162 | 31 | 144  | 20.1 |
| 3 | 70844175 | 70844750 | 575 | 70844462 | 96 | 1111 | 26.2 |
| 3 | 71003175 | 71003450 | 275 | 71003262 | 16 | 137  | 0    |
| 3 | 71011075 | 71011200 | 125 | 71011087 | 11 | 55   | 0    |
| 3 | 71065200 | 71066150 | 950 | 71065562 | 40 | 907  | 138  |
| 3 | 71082375 | 71082425 | 50  | 71082387 | 11 | 22   | 1.7  |
| 3 | 71104375 | 71104400 | 25  | 71104387 | 11 | 11   | 0    |
| 3 | 71131825 | 71131850 | 25  | 71131837 | 12 | 12   | 0    |
| 3 | 71137600 | 71137800 | 200 | 71137712 | 17 | 119  | 0.9  |
| 3 | 71160000 | 71160050 | 50  | 71160012 | 11 | 22   | 0    |
| 3 | 71262350 | 71262425 | 75  | 71262362 | 13 | 39   | 5.2  |
| 3 | 71437075 | 71437100 | 25  | 71437087 | 12 | 12   | 0.9  |
| 3 | 71437825 | 71437850 | 25  | 71437837 | 14 | 14   | 2.6  |
| 3 | 71440050 | 71440250 | 200 | 71440062 | 20 | 148  | 22.7 |
| 3 | 71441475 | 71441550 | 75  | 71441487 | 12 | 36   | 5.2  |
| 3 | 71727375 | 71727400 | 25  | 71727387 | 11 | 11   | 0.9  |
| 3 | 71740400 | 71740475 | 75  | 71740412 | 11 | 33   | 5.2  |
| 3 | 71753550 | 71753675 | 125 | 71753612 | 16 | 70   | 5.2  |
| 3 | 71822600 | 71822800 | 200 | 71822612 | 15 | 92   | 5.2  |
| 3 | 71960700 | 71960725 | 25  | 71960712 | 11 | 11   | 1.7  |
| 3 | 71992825 | 71993125 | 300 | 71992912 | 21 | 203  | 13.1 |
| 3 | 72029500 | 72029525 | 25  | 72029512 | 12 | 12   | 1.7  |
| 3 | 72087075 | 72087175 | 100 | 72087137 | 17 | 57   | 1.7  |
| 3 | 72207850 | 72207925 | 75  | 72207862 | 15 | 38   | 4.4  |
| 3 | 72259325 | 72259375 | 50  | 72259337 | 11 | 22   | 1.7  |
| 3 | 72356675 | 72356900 | 225 | 72356762 | 19 | 147  | 0    |
| 3 | 72404200 | 72404375 | 175 | 72404312 | 18 | 106  | 14   |
| 3 | 72477600 | 72477650 | 50  | 72477612 | 15 | 30   | 4.4  |
| 3 | 72479425 | 72479450 | 25  | 72479437 | 12 | 12   | 1.7  |
| 3 | 72493200 | 72493425 | 225 | 72493237 | 13 | 85   | 7    |
| 3 | 72493650 | 72493900 | 250 | 72493887 | 31 | 225  | 30.6 |
| 3 | 72574750 | 72574775 | 25  | 72574762 | 11 | 11   | 0.9  |
| 3 | 72580925 | 72581100 | 175 | 72580937 | 15 | 94   | 5.2  |
| 3 | 72587125 | 72587300 | 175 | 72587137 | 12 | 79   | 10.5 |
| 3 | 72619175 | 72619225 | 50  | 72619187 | 14 | 26   | 3.5  |
| 3 | 72664200 | 72664225 | 25  | 72664212 | 11 | 11   | 0    |
| 3 | 72679175 | 72679200 | 25  | 72679187 | 12 | 12   | 1.7  |
| 3 | 72735850 | 72735975 | 125 | 72735862 | 12 | 60   | 0.9  |
| 3 | 72746200 | 72746250 | 50  | 72746212 | 22 | 41   | 7    |
| 3 | 72746700 | 72746750 | 50  | 72746712 | 19 | 38   | 7    |
| 3 | 72762575 | 72762675 | 100 | 72762587 | 11 | 44   | 2.6  |
| 3 | 72773250 | 72773375 | 125 | 72773262 | 11 | 49   | 8.7  |
| 3 | 72796475 | 72796700 | 225 | 72796637 | 18 | 143  | 15.7 |
| 3 | 72980825 | 72981000 | 175 | 72980887 | 15 | 96   | 6.1  |
| 3 | 72990450 | 72990550 | 100 | 72990512 | 14 | 50   | 3.5  |
| 3 | 72993700 | 72993750 | 50  | 72993712 | 12 | 24   | 3.5  |
| 3 | 73015450 | 73015550 | 100 | 73015462 | 11 | 43   | 3.5  |
| 3 | 73024200 | 73024325 | 125 | 73024312 | 21 | 89   | 17.5 |
| 3 | 73024925 | 73024950 | 25  | 73024937 | 14 | 14   | 2.6  |
| 3 | 73128550 | 73128725 | 175 | 73128612 | 23 | 137  | 8.7  |
| 3 | 73129275 | 73129400 | 125 | 73129312 | 20 | 96   | 12.2 |
| 3 | 73227175 | 73227275 | 100 | 73227187 | 13 | 49   | 7    |
| 3 | 73242900 | 73242925 | 25  | 73242912 | 15 | 15   | 2.6  |
| 3 | 73569250 | 73569375 | 125 | 73569262 | 12 | 59   | 7.9  |
| 3 | 73664250 | 73664325 | 75  | 73664262 | 11 | 33   | 0.9  |
| 3 | 73740950 | 73740975 | 25  | 73740962 | 11 | 11   | 1.7  |
| 3 | 73766000 | 73766300 | 300 | 73766162 | 22 | 194  | 27.1 |
| 3 | 73778075 | 73778200 | 125 | 73778087 | 11 | 55   | 0    |
| 3 | 73859275 | 73859500 | 225 | 73859287 | 18 | 121  | 10.5 |

|   |           |           |      |           |    |      |      |
|---|-----------|-----------|------|-----------|----|------|------|
| 3 | 73876100  | 73876125  | 25   | 73876112  | 11 | 11   | 0.9  |
| 3 | 73898275  | 73898325  | 50   | 73898287  | 12 | 24   | 2.6  |
| 3 | 73918200  | 73918275  | 75   | 73918212  | 11 | 32   | 5.2  |
| 3 | 73953375  | 73953675  | 300  | 73953512  | 37 | 345  | 26.2 |
| 3 | 73980525  | 73980675  | 150  | 73980587  | 17 | 85   | 3.5  |
| 3 | 73998750  | 73999125  | 375  | 73998937  | 29 | 324  | 27.1 |
| 3 | 74316200  | 74316275  | 75   | 74316237  | 14 | 40   | 1.7  |
| 3 | 74799450  | 74799625  | 175  | 74799562  | 16 | 97   | 0    |
| 3 | 75868775  | 75870350  | 1575 | 75869812  | 76 | 2094 | 0.9  |
| 3 | 76279500  | 76279550  | 50   | 76279512  | 11 | 22   | 1.7  |
| 3 | 76442800  | 76442975  | 175  | 76442937  | 16 | 92   | 0    |
| 3 | 76445775  | 76445800  | 25   | 76445787  | 12 | 12   | 0.9  |
| 3 | 76501025  | 76501075  | 50   | 76501037  | 11 | 22   | 1.7  |
| 3 | 76515600  | 76515625  | 25   | 76515612  | 13 | 13   | 1.7  |
| 3 | 76573425  | 76573475  | 50   | 76573437  | 11 | 22   | 0    |
| 3 | 76683100  | 76683275  | 175  | 76683112  | 12 | 84   | 3.5  |
| 3 | 77194450  | 77194475  | 25   | 77194462  | 12 | 12   | 0.9  |
| 3 | 77814125  | 77814325  | 200  | 77814187  | 17 | 113  | 0    |
| 3 | 78522100  | 78522300  | 200  | 78522262  | 22 | 131  | 7    |
| 3 | 78797700  | 78797875  | 175  | 78797837  | 18 | 111  | 11.4 |
| 3 | 78970325  | 78970400  | 75   | 78970337  | 11 | 33   | 0    |
| 3 | 84060900  | 84061125  | 225  | 84061062  | 23 | 159  | 11.4 |
| 3 | 84247650  | 84247725  | 75   | 84247662  | 12 | 34   | 0.9  |
| 3 | 84981000  | 84981200  | 200  | 84981062  | 22 | 144  | 17.5 |
| 3 | 85090425  | 85090450  | 25   | 85090437  | 12 | 12   | 0.9  |
| 3 | 88170875  | 88170925  | 50   | 88170887  | 14 | 27   | 1.7  |
| 3 | 88320325  | 88320450  | 125  | 88320437  | 17 | 68   | 0    |
| 3 | 88324450  | 88324575  | 125  | 88324512  | 14 | 64   | 0    |
| 3 | 88927425  | 88927550  | 125  | 88927437  | 14 | 66   | 0    |
| 3 | 89181150  | 89181250  | 100  | 89181187  | 14 | 50   | 7    |
| 3 | 89246125  | 89246225  | 100  | 89246212  | 18 | 60   | 3.5  |
| 3 | 89303950  | 89304100  | 150  | 89303987  | 14 | 76   | 12.2 |
| 3 | 90224650  | 90224675  | 25   | 90224662  | 12 | 12   | 0.9  |
| 3 | 90316800  | 90317225  | 425  | 90316937  | 32 | 383  | 61.2 |
| 3 | 90433975  | 90434000  | 25   | 90433987  | 11 | 11   | 0    |
| 3 | 95627800  | 95627900  | 100  | 95627837  | 13 | 48   | 4.4  |
| 3 | 99790525  | 99790600  | 75   | 99790537  | 11 | 33   | 0    |
| 3 | 99795075  | 99795100  | 25   | 99795087  | 11 | 11   | 1.7  |
| 3 | 99980350  | 99980475  | 125  | 99980437  | 15 | 63   | 4.4  |
| 3 | 100360675 | 100361000 | 325  | 100360812 | 18 | 184  | 0.9  |
| 3 | 100600250 | 100600400 | 150  | 100600262 | 13 | 78   | 5.2  |
| 3 | 101006825 | 101006900 | 75   | 101006887 | 14 | 37   | 2.6  |
| 3 | 101019175 | 101019325 | 150  | 101019237 | 18 | 86   | 14   |
| 3 | 101019550 | 101019650 | 100  | 101019562 | 16 | 56   | 7    |
| 3 | 101381350 | 101381675 | 325  | 101381562 | 17 | 157  | 10.5 |
| 3 | 101462300 | 101462325 | 25   | 101462312 | 12 | 12   | 0.9  |
| 3 | 101602425 | 101602500 | 75   | 101602487 | 18 | 44   | 1.7  |
| 3 | 103153100 | 103153125 | 25   | 103153112 | 11 | 11   | 0    |
| 3 | 103353525 | 103353725 | 200  | 103353612 | 19 | 142  | 0    |
| 3 | 105369225 | 105369300 | 75   | 105369237 | 11 | 33   | 1.7  |
| 3 | 105568675 | 105568875 | 200  | 105568762 | 20 | 131  | 0    |
| 3 | 105778625 | 105778675 | 50   | 105778637 | 11 | 22   | 0    |
| 3 | 105780025 | 105780425 | 400  | 105780262 | 47 | 499  | 0    |
| 3 | 107321450 | 107321600 | 150  | 107321487 | 15 | 86   | 8.7  |
| 3 | 108262625 | 108262700 | 75   | 108262637 | 12 | 36   | 3.5  |
| 3 | 108264500 | 108264675 | 175  | 108264512 | 13 | 85   | 0    |
| 3 | 108446000 | 108446025 | 25   | 108446012 | 11 | 11   | 0    |
| 3 | 109790975 | 109791000 | 25   | 109790987 | 18 | 18   | 3.5  |
| 3 | 112171275 | 112171350 | 75   | 112171287 | 12 | 36   | 3.5  |
| 3 | 112272875 | 112272900 | 25   | 112272887 | 11 | 11   | 1.7  |
| 3 | 112863575 | 112863825 | 250  | 112863737 | 23 | 184  | 6.1  |
| 3 | 113495675 | 113495825 | 150  | 113495787 | 13 | 70   | 0    |
| 3 | 113503725 | 113504300 | 575  | 113503912 | 47 | 609  | 29.7 |
| 3 | 113504850 | 113505050 | 200  | 113504962 | 20 | 134  | 24.5 |
| 3 | 113517800 | 113517950 | 150  | 113517887 | 12 | 68   | 0    |
| 3 | 113639375 | 113639475 | 100  | 113639412 | 14 | 50   | 3.5  |
| 3 | 113845250 | 113845300 | 50   | 113845262 | 11 | 22   | 0    |
| 3 | 114221425 | 114221450 | 25   | 114221437 | 11 | 11   | 1.7  |
| 3 | 115585800 | 115585900 | 100  | 115585862 | 17 | 63   | 7.9  |
| 3 | 116359325 | 116359575 | 250  | 116359387 | 18 | 143  | 15.7 |
| 3 | 116365525 | 116365600 | 75   | 116365537 | 12 | 36   | 0    |
| 3 | 117380725 | 117380850 | 125  | 117380737 | 12 | 60   | 0    |
| 3 | 117680575 | 117680750 | 175  | 117680687 | 16 | 100  | 0    |
| 3 | 118340800 | 118340900 | 100  | 118340812 | 16 | 55   | 5.2  |
| 3 | 119571500 | 119571625 | 125  | 119571537 | 13 | 61   | 0    |

|   |           |           |     |           |    |     |      |
|---|-----------|-----------|-----|-----------|----|-----|------|
| 3 | 120484250 | 120484400 | 150 | 120484287 | 19 | 90  | 11.4 |
| 3 | 120531925 | 120531975 | 50  | 120531937 | 11 | 22  | 1.7  |
| 3 | 120665100 | 120665150 | 50  | 120665137 | 18 | 30  | 3.5  |
| 3 | 121241225 | 121241525 | 300 | 121241362 | 29 | 261 | 7    |
| 3 | 121247050 | 121247225 | 175 | 121247137 | 15 | 87  | 0    |
| 3 | 121356475 | 121356850 | 375 | 121356562 | 16 | 217 | 15.7 |
| 3 | 121632800 | 121632825 | 25  | 121632812 | 12 | 12  | 0    |
| 3 | 121697575 | 121697650 | 75  | 121697612 | 13 | 35  | 2.6  |
| 3 | 121727700 | 121727775 | 75  | 121727712 | 11 | 33  | 0    |
| 3 | 121753675 | 121753750 | 75  | 121753712 | 13 | 35  | 1.7  |
| 3 | 123036500 | 123036600 | 100 | 123036537 | 13 | 50  | 7    |
| 3 | 123238575 | 123238775 | 200 | 123238637 | 19 | 133 | 0    |
| 3 | 123774425 | 123774700 | 275 | 123774587 | 41 | 330 | 27.1 |
| 3 | 124323975 | 124324125 | 150 | 124323987 | 13 | 72  | 0    |
| 3 | 124792200 | 124792625 | 425 | 124792387 | 47 | 514 | 8.7  |
| 3 | 124897500 | 124897650 | 150 | 124897512 | 13 | 75  | 4.4  |
| 3 | 125893675 | 125893725 | 50  | 125893687 | 12 | 24  | 0.9  |
| 3 | 126233800 | 126233825 | 25  | 126233812 | 12 | 12  | 0.9  |
| 3 | 127676450 | 127676475 | 25  | 127676462 | 12 | 12  | 0.9  |
| 3 | 128113250 | 128113400 | 150 | 128113262 | 14 | 79  | 7.9  |
| 3 | 128558125 | 128558475 | 350 | 128558287 | 22 | 238 | 2.6  |
| 3 | 128936350 | 128936375 | 25  | 128936362 | 12 | 12  | 1.7  |
| 3 | 128977125 | 128977325 | 200 | 128977162 | 16 | 88  | 0    |
| 3 | 129092575 | 129092750 | 175 | 129092712 | 15 | 88  | 0    |
| 3 | 129383000 | 129383075 | 75  | 129383012 | 11 | 33  | 0    |
| 3 | 129480850 | 129480875 | 25  | 129480862 | 12 | 12  | 0    |
| 3 | 129655575 | 129655650 | 75  | 129655587 | 14 | 38  | 0.9  |
| 3 | 130055950 | 130056275 | 325 | 130056112 | 21 | 195 | 10.5 |
| 3 | 130061025 | 130061500 | 475 | 130061262 | 89 | 984 | 6.1  |
| 3 | 130080250 | 130080275 | 25  | 130080262 | 11 | 11  | 0.9  |
| 3 | 130080775 | 130080900 | 125 | 130080787 | 16 | 70  | 7.9  |
| 3 | 130228550 | 130228675 | 125 | 130228562 | 14 | 64  | 6.1  |
| 3 | 130362675 | 130362825 | 150 | 130362712 | 17 | 94  | 10.5 |
| 3 | 130517775 | 130517850 | 75  | 130517787 | 11 | 33  | 0    |
| 3 | 130600925 | 130600950 | 25  | 130600937 | 11 | 11  | 0.9  |
| 3 | 130604000 | 130604075 | 75  | 130604012 | 12 | 33  | 5.2  |
| 3 | 130813600 | 130813825 | 225 | 130813662 | 20 | 164 | 21.8 |
| 3 | 131118900 | 131119425 | 525 | 131119212 | 61 | 804 | 0    |
| 3 | 131130950 | 131131100 | 150 | 131130987 | 14 | 81  | 0    |
| 3 | 131168900 | 131168925 | 25  | 131168912 | 12 | 12  | 1.7  |
| 3 | 132274375 | 132274600 | 225 | 132274562 | 17 | 124 | 0    |
| 3 | 133193525 | 133193625 | 100 | 133193587 | 12 | 46  | 0    |
| 3 | 134657225 | 134657300 | 75  | 134657262 | 13 | 37  | 5.2  |
| 3 | 134668800 | 134669000 | 200 | 134668937 | 15 | 106 | 6.1  |
| 3 | 134738475 | 134738500 | 25  | 134738487 | 11 | 11  | 1.7  |
| 3 | 135452500 | 135452575 | 75  | 135452537 | 12 | 35  | 2.6  |
| 3 | 135568000 | 135568125 | 125 | 135568037 | 12 | 59  | 6.1  |
| 3 | 135687775 | 135687825 | 50  | 135687787 | 11 | 22  | 1.7  |
| 3 | 137493150 | 137493225 | 75  | 137493162 | 12 | 36  | 0    |
| 3 | 137953775 | 137953800 | 25  | 137953787 | 11 | 11  | 1.7  |
| 3 | 138004575 | 138004600 | 25  | 138004587 | 11 | 11  | 0    |
| 3 | 139194325 | 139194350 | 25  | 139194337 | 12 | 12  | 1.7  |
| 3 | 139969650 | 139969950 | 300 | 139969712 | 27 | 231 | 0    |
| 3 | 140120925 | 140121025 | 100 | 140120937 | 11 | 44  | 0    |
| 3 | 140137250 | 140137400 | 150 | 140137287 | 13 | 76  | 0    |
| 3 | 140546000 | 140546100 | 100 | 140546012 | 11 | 44  | 7    |
| 3 | 142143150 | 142143300 | 150 | 142143187 | 16 | 83  | 3.5  |
| 3 | 142665925 | 142666000 | 75  | 142665937 | 12 | 36  | 0    |
| 3 | 144201300 | 144201375 | 75  | 144201312 | 11 | 33  | 0    |
| 3 | 144202900 | 144203050 | 150 | 144202962 | 17 | 92  | 8.7  |
| 3 | 145173000 | 145173025 | 25  | 145173012 | 11 | 11  | 1.7  |
| 3 | 149471175 | 149471225 | 50  | 149471187 | 11 | 22  | 0    |
| 3 | 150287175 | 150287325 | 150 | 150287187 | 25 | 112 | 12.2 |
| 3 | 150652550 | 150652700 | 150 | 150652562 | 12 | 64  | 1.7  |
| 3 | 150779775 | 150779800 | 25  | 150779787 | 14 | 14  | 2.6  |
| 3 | 150899050 | 150899100 | 50  | 150899062 | 11 | 22  | 0    |
| 3 | 151031450 | 151031650 | 200 | 151031587 | 21 | 131 | 9.6  |
| 3 | 151307775 | 151307800 | 25  | 151307787 | 11 | 11  | 1.7  |
| 3 | 151433700 | 151433750 | 50  | 151433712 | 11 | 22  | 1.7  |
| 3 | 153469300 | 153469525 | 225 | 153469362 | 17 | 120 | 7    |
| 3 | 156253050 | 156253250 | 200 | 156253087 | 13 | 97  | 0    |
| 3 | 157874500 | 157874550 | 50  | 157874512 | 11 | 22  | 0    |
| 3 | 158080075 | 158080175 | 100 | 158080112 | 13 | 46  | 0    |
| 3 | 158375650 | 158375825 | 175 | 158375662 | 14 | 90  | 4.4  |
| 3 | 158581550 | 158581725 | 175 | 158581662 | 18 | 108 | 7.9  |



|   |           |           |     |           |    |     |      |
|---|-----------|-----------|-----|-----------|----|-----|------|
| 3 | 159844850 | 159844875 | 25  | 159844862 | 11 | 11  | 1.7  |
| 3 | 161005050 | 161005100 | 50  | 161005062 | 12 | 24  | 3.5  |
| 3 | 161021900 | 161021950 | 50  | 161021912 | 12 | 24  | 2.6  |
| 3 | 161766425 | 161766450 | 25  | 161766437 | 12 | 12  | 1.7  |
| 3 | 163085450 | 163085500 | 50  | 163085487 | 14 | 25  | 0    |
| 3 | 167562100 | 167562200 | 100 | 167562112 | 12 | 46  | 5.2  |
| 3 | 167732225 | 167732525 | 300 | 167732362 | 21 | 172 | 15.7 |
| 3 | 169456300 | 169456325 | 25  | 169456312 | 11 | 11  | 0    |
| 3 | 170960800 | 170961125 | 325 | 170960937 | 23 | 237 | 0    |
| 3 | 170969950 | 170970000 | 50  | 170969962 | 15 | 27  | 4.4  |
| 3 | 171422525 | 171422725 | 200 | 171422662 | 25 | 155 | 16.6 |
| 3 | 171968975 | 171969125 | 150 | 171969062 | 15 | 78  | 0    |
| 3 | 172109200 | 172109425 | 225 | 172109312 | 22 | 160 | 26.2 |
| 3 | 172661225 | 172661450 | 225 | 172661287 | 17 | 129 | 8.7  |
| 3 | 172770575 | 172770650 | 75  | 172770612 | 15 | 43  | 4.4  |
| 3 | 173347925 | 173348000 | 75  | 173347937 | 11 | 33  | 0    |
| 3 | 173848525 | 173848550 | 25  | 173848537 | 12 | 12  | 0    |
| 3 | 174302175 | 174302250 | 75  | 174302187 | 13 | 37  | 0    |
| 3 | 174595975 | 174596225 | 250 | 174595987 | 12 | 92  | 7.9  |
| 3 | 177019450 | 177019475 | 25  | 177019462 | 12 | 12  | 0    |
| 3 | 177119750 | 177119875 | 125 | 177119787 | 13 | 63  | 0    |
| 3 | 177714200 | 177714450 | 250 | 177714287 | 26 | 202 | 0    |
| 3 | 178206550 | 178206775 | 225 | 178206637 | 20 | 152 | 10.5 |
| 3 | 178437425 | 178437525 | 100 | 178437437 | 11 | 44  | 3.5  |
| 3 | 178560425 | 178560675 | 250 | 178560562 | 18 | 144 | 21   |
| 3 | 178797950 | 178798075 | 125 | 178797962 | 14 | 66  | 8.7  |
| 3 | 178828650 | 178828975 | 325 | 178828837 | 16 | 165 | 5.2  |
| 3 | 178829450 | 178829475 | 25  | 178829462 | 11 | 11  | 1.7  |
| 3 | 179076375 | 179076525 | 150 | 179076387 | 12 | 72  | 2.6  |
| 3 | 180188225 | 180188550 | 325 | 180188387 | 29 | 251 | 0    |
| 3 | 180462175 | 180462250 | 75  | 180462187 | 11 | 33  | 0    |
| 3 | 180745450 | 180745675 | 225 | 180745537 | 23 | 166 | 17.5 |
| 3 | 180745950 | 180745975 | 25  | 180745962 | 11 | 11  | 0.9  |
| 3 | 181155250 | 181155300 | 50  | 181155262 | 11 | 22  | 0    |
| 3 | 181802350 | 181802500 | 150 | 181802437 | 20 | 103 | 12.2 |
| 3 | 182089475 | 182089850 | 375 | 182089662 | 27 | 270 | 0    |
| 3 | 182655275 | 182655350 | 75  | 182655287 | 14 | 42  | 6.1  |
| 3 | 182657875 | 182657950 | 75  | 182657887 | 15 | 39  | 0    |
| 3 | 183565000 | 183565200 | 200 | 183565187 | 15 | 96  | 3.5  |
| 3 | 184136425 | 184136500 | 75  | 184136437 | 11 | 33  | 0    |
| 3 | 184442925 | 184443275 | 350 | 184443112 | 23 | 244 | 7    |
| 3 | 184660900 | 184661050 | 150 | 184660962 | 12 | 66  | 3.5  |
| 3 | 184761075 | 184761100 | 25  | 184761087 | 11 | 11  | 1.7  |
| 3 | 184853750 | 184854075 | 325 | 184853937 | 36 | 318 | 21   |
| 3 | 186108650 | 186108775 | 125 | 186108737 | 16 | 74  | 2.6  |
| 3 | 186699750 | 186699850 | 100 | 186699762 | 14 | 56  | 1.7  |
| 3 | 186703850 | 186704000 | 150 | 186703862 | 11 | 66  | 7    |
| 3 | 186856850 | 186856900 | 50  | 186856862 | 11 | 22  | 0    |
| 3 | 187137975 | 187138050 | 75  | 187137987 | 13 | 35  | 1.7  |
| 3 | 187160650 | 187160675 | 25  | 187160662 | 11 | 11  | 0    |
| 3 | 187309300 | 187309400 | 100 | 187309312 | 12 | 45  | 3.5  |
| 3 | 187310700 | 187310800 | 100 | 187310712 | 12 | 48  | 5.2  |
| 3 | 187561825 | 187561850 | 25  | 187561837 | 12 | 12  | 0.9  |
| 3 | 187923050 | 187923100 | 50  | 187923062 | 11 | 22  | 0    |
| 3 | 187983775 | 187983800 | 25  | 187983787 | 18 | 18  | 2.6  |
| 3 | 188025550 | 188025600 | 50  | 188025562 | 12 | 24  | 1.7  |
| 3 | 188339825 | 188339900 | 75  | 188339837 | 13 | 37  | 5.2  |
| 3 | 188345800 | 188345850 | 50  | 188345812 | 11 | 22  | 3.5  |
| 3 | 188410625 | 188410675 | 50  | 188410637 | 11 | 22  | 3.5  |
| 3 | 188452325 | 188452425 | 100 | 188452337 | 11 | 44  | 3.5  |
| 3 | 188519625 | 188519700 | 75  | 188519662 | 14 | 38  | 4.4  |
| 3 | 189585750 | 189585925 | 175 | 189585837 | 14 | 86  | 0    |
| 3 | 190333050 | 190333100 | 50  | 190333062 | 12 | 24  | 1.7  |
| 3 | 191625075 | 191625150 | 75  | 191625087 | 12 | 35  | 2.6  |
| 3 | 191693750 | 191693825 | 75  | 191693762 | 12 | 36  | 2.6  |
| 3 | 191734200 | 191734375 | 175 | 191734212 | 24 | 127 | 14   |
| 3 | 191766700 | 191767025 | 325 | 191766862 | 26 | 229 | 34.9 |
| 3 | 191845350 | 191845400 | 50  | 191845362 | 11 | 22  | 1.7  |
| 3 | 192625900 | 192625975 | 75  | 192625912 | 11 | 33  | 0    |
| 3 | 194773125 | 194773275 | 150 | 194773137 | 15 | 80  | 13.1 |
| 3 | 194915125 | 194915325 | 200 | 194915212 | 17 | 111 | 0    |
| 3 | 195160950 | 195161175 | 225 | 195161087 | 27 | 190 | 10.5 |
| 3 | 195203825 | 195204325 | 500 | 195203887 | 25 | 309 | 28   |
| 3 | 195270025 | 195270400 | 375 | 195270212 | 30 | 318 | 0.9  |
| 3 | 195279975 | 195280000 | 25  | 195279987 | 12 | 12  | 0    |

|   |           |           |     |           |    |     |      |
|---|-----------|-----------|-----|-----------|----|-----|------|
| 3 | 195336550 | 195336600 | 50  | 195336562 | 15 | 26  | 0    |
| 3 | 195337450 | 195337500 | 50  | 195337462 | 11 | 22  | 2.6  |
| 3 | 195338150 | 195338175 | 25  | 195338162 | 11 | 11  | 0.9  |
| 3 | 195472100 | 195472175 | 75  | 195472112 | 17 | 46  | 5.2  |
| 3 | 195473250 | 195473350 | 100 | 195473312 | 12 | 45  | 3.5  |
| 3 | 195874600 | 195874775 | 175 | 195874612 | 12 | 82  | 5.2  |
| 3 | 195887850 | 195887875 | 25  | 195887862 | 11 | 11  | 1.7  |
| 3 | 196073950 | 196074100 | 150 | 196074062 | 14 | 74  | 1.7  |
| 3 | 196074375 | 196074400 | 25  | 196074387 | 11 | 11  | 0.9  |
| 3 | 196188450 | 196188675 | 225 | 196188562 | 19 | 139 | 5.2  |
| 3 | 196521075 | 196521300 | 225 | 196521212 | 20 | 152 | 0    |
| 3 | 197499350 | 197499375 | 25  | 197499362 | 12 | 12  | 0.9  |
| 3 | 197718050 | 197718250 | 200 | 197718187 | 19 | 116 | 0    |
| 3 | 197730975 | 197731475 | 500 | 197731162 | 67 | 730 | 17.5 |
| 3 | 197740225 | 197740350 | 125 | 197740237 | 11 | 53  | 8.7  |
| 3 | 197877725 | 197877850 | 125 | 197877737 | 14 | 62  | 1.7  |
| 3 | 197968025 | 197968175 | 150 | 197968087 | 13 | 72  | 1.7  |
| 3 | 198232475 | 198232525 | 50  | 198232487 | 11 | 22  | 0.9  |
| 3 | 198238850 | 198238950 | 100 | 198238887 | 13 | 49  | 7    |
| 3 | 198242700 | 198242750 | 50  | 198242737 | 16 | 30  | 5.2  |
| 3 | 198454300 | 198454425 | 125 | 198454312 | 11 | 49  | 0    |
| 3 | 198667600 | 198667725 | 125 | 198667687 | 25 | 101 | 14   |
| 3 | 198667950 | 198668025 | 75  | 198667962 | 14 | 40  | 7    |
| 3 | 199169750 | 199169800 | 50  | 199169762 | 11 | 22  | 1.7  |
| 2 | 1148675   | 1148800   | 125 | 1148687   | 13 | 60  | 4.4  |
| 2 | 1171125   | 1171325   | 200 | 1171162   | 18 | 129 | 4.4  |
| 2 | 1738850   | 1738875   | 25  | 1738862   | 14 | 14  | 1.7  |
| 2 | 2362600   | 2362650   | 50  | 2362612   | 14 | 26  | 1.7  |
| 2 | 2596125   | 2596300   | 175 | 2596262   | 34 | 196 | 23.6 |
| 2 | 2736550   | 2736700   | 150 | 2736637   | 15 | 73  | 0    |
| 2 | 3024675   | 3024700   | 25  | 3024687   | 12 | 12  | 0    |
| 2 | 3362875   | 3362975   | 100 | 3362937   | 13 | 48  | 0.9  |
| 2 | 3425150   | 3425225   | 75  | 3425162   | 11 | 33  | 0    |
| 2 | 3444575   | 3444775   | 200 | 3444687   | 15 | 102 | 7    |
| 2 | 3561600   | 3561675   | 75  | 3561612   | 13 | 38  | 1.7  |
| 2 | 3584000   | 3584025   | 25  | 3584012   | 14 | 14  | 2.6  |
| 2 | 3677500   | 3677675   | 175 | 3677612   | 14 | 86  | 5.2  |
| 2 | 3934125   | 3934175   | 50  | 3934137   | 11 | 22  | 0    |
| 2 | 4460725   | 4460775   | 50  | 4460737   | 11 | 22  | 1.7  |
| 2 | 5601800   | 5601975   | 175 | 5601837   | 14 | 74  | 0.9  |
| 2 | 6502300   | 6502350   | 50  | 6502312   | 11 | 22  | 3.5  |
| 2 | 6902800   | 6903325   | 525 | 6903112   | 81 | 941 | 14   |
| 2 | 7032800   | 7033000   | 200 | 7032837   | 22 | 133 | 15.7 |
| 2 | 7066075   | 7066200   | 125 | 7066112   | 15 | 69  | 5.2  |
| 2 | 7588550   | 7588825   | 275 | 7588637   | 17 | 144 | 0    |
| 2 | 8751025   | 8751075   | 50  | 8751037   | 14 | 26  | 2.6  |
| 2 | 9237000   | 9237200   | 200 | 9237112   | 16 | 106 | 11.4 |
| 2 | 9248525   | 9248550   | 25  | 9248537   | 11 | 11  | 1.7  |
| 2 | 9688925   | 9689100   | 175 | 9689037   | 24 | 135 | 21.8 |
| 2 | 9916075   | 9916350   | 275 | 9916162   | 16 | 133 | 0.9  |
| 2 | 10093675  | 10093825  | 150 | 10093762  | 14 | 76  | 14   |
| 2 | 10180250  | 10180275  | 25  | 10180262  | 11 | 11  | 1.7  |
| 2 | 10193750  | 10193875  | 125 | 10193787  | 16 | 72  | 9.6  |
| 2 | 10227875  | 10228000  | 125 | 10227987  | 17 | 67  | 8.7  |
| 2 | 10342425  | 10342475  | 50  | 10342437  | 11 | 22  | 1.7  |
| 2 | 10388075  | 10388125  | 50  | 10388087  | 14 | 28  | 1.7  |
| 2 | 10470175  | 10470300  | 125 | 10470187  | 11 | 55  | 0    |
| 2 | 10491950  | 10492075  | 125 | 10492062  | 14 | 60  | 4.4  |
| 2 | 11213450  | 11213500  | 50  | 11213462  | 12 | 24  | 3.5  |
| 2 | 11801975  | 11802000  | 25  | 11801987  | 11 | 11  | 1.7  |
| 2 | 12226025  | 12226050  | 25  | 12226037  | 11 | 11  | 0    |
| 2 | 12226675  | 12226700  | 25  | 12226687  | 12 | 12  | 1.7  |
| 2 | 12281300  | 12281725  | 425 | 12281487  | 42 | 430 | 7.9  |
| 2 | 12397000  | 12397100  | 100 | 12397012  | 12 | 48  | 5.2  |
| 2 | 12397950  | 12398150  | 200 | 12398012  | 18 | 118 | 14   |
| 2 | 12762950  | 12763400  | 450 | 12763237  | 19 | 237 | 12.2 |
| 2 | 12914575  | 12914600  | 25  | 12914587  | 11 | 11  | 0    |
| 2 | 15619275  | 15619325  | 50  | 15619287  | 11 | 22  | 2.6  |
| 2 | 16120875  | 16120900  | 25  | 16120887  | 11 | 11  | 0    |
| 2 | 16801900  | 16801950  | 50  | 16801912  | 12 | 24  | 3.5  |
| 2 | 17515525  | 17515850  | 325 | 17515662  | 27 | 246 | 5.2  |
| 2 | 18068300  | 18068575  | 275 | 18068462  | 25 | 207 | 0    |
| 2 | 18881225  | 18881250  | 25  | 18881237  | 11 | 11  | 1.7  |
| 2 | 19184875  | 19184975  | 100 | 19184937  | 14 | 50  | 8.7  |
| 2 | 19411275  | 19411325  | 50  | 19411287  | 12 | 24  | 2.6  |

|   |          |          |     |          |    |     |      |
|---|----------|----------|-----|----------|----|-----|------|
| 2 | 19926850 | 19926875 | 25  | 19926862 | 12 | 12  | 0.9  |
| 2 | 20431375 | 20431400 | 25  | 20431387 | 11 | 11  | 0.9  |
| 2 | 20642625 | 20642650 | 25  | 20642637 | 11 | 11  | 0    |
| 2 | 20644950 | 20645150 | 200 | 20645087 | 16 | 115 | 12.2 |
| 2 | 20886450 | 20886550 | 100 | 20886462 | 16 | 54  | 8.7  |
| 2 | 21612225 | 21612525 | 300 | 21612362 | 29 | 243 | 18.3 |
| 2 | 22658625 | 22659100 | 475 | 22658937 | 18 | 248 | 7    |
| 2 | 22920375 | 22920425 | 50  | 22920387 | 12 | 24  | 0    |
| 2 | 23057375 | 23057400 | 25  | 23057387 | 11 | 11  | 0    |
| 2 | 23174300 | 23174400 | 100 | 23174312 | 12 | 48  | 0    |
| 2 | 23626825 | 23627075 | 250 | 23626837 | 11 | 89  | 14.9 |
| 2 | 24152950 | 24153025 | 75  | 24152962 | 19 | 47  | 6.1  |
| 2 | 24568725 | 24568775 | 50  | 24568737 | 11 | 22  | 3.5  |
| 2 | 25049125 | 25049225 | 100 | 25049137 | 14 | 56  | 7    |
| 2 | 25274525 | 25274575 | 50  | 25274537 | 14 | 26  | 3.5  |
| 2 | 26862050 | 26862200 | 150 | 26862162 | 25 | 126 | 13.1 |
| 2 | 27126775 | 27126875 | 100 | 27126862 | 17 | 57  | 4.4  |
| 2 | 27148775 | 27148825 | 50  | 27148787 | 12 | 24  | 3.5  |
| 2 | 27659225 | 27659475 | 250 | 27659387 | 19 | 157 | 15.7 |
| 2 | 27659900 | 27660000 | 100 | 27659912 | 11 | 44  | 7    |
| 2 | 27825350 | 27825425 | 75  | 27825362 | 11 | 33  | 0    |
| 2 | 27848175 | 27848200 | 25  | 27848187 | 16 | 16  | 2.6  |
| 2 | 28036850 | 28037000 | 150 | 28036862 | 12 | 66  | 0    |
| 2 | 28232050 | 28232275 | 225 | 28232187 | 19 | 126 | 12.2 |
| 2 | 28404525 | 28404550 | 25  | 28404537 | 11 | 11  | 0    |
| 2 | 28435400 | 28435425 | 25  | 28435412 | 12 | 12  | 1.7  |
| 2 | 28467425 | 28467500 | 75  | 28467437 | 13 | 39  | 5.2  |
| 2 | 28624575 | 28624825 | 250 | 28624762 | 13 | 110 | 18.3 |
| 2 | 28625250 | 28625275 | 25  | 28625262 | 11 | 11  | 1.7  |
| 2 | 28661175 | 28661200 | 25  | 28661187 | 14 | 14  | 2.6  |
| 2 | 29087575 | 29087600 | 25  | 29087587 | 11 | 11  | 1.7  |
| 2 | 29152425 | 29152600 | 175 | 29152512 | 18 | 107 | 12.2 |
| 2 | 29156775 | 29156950 | 175 | 29156837 | 12 | 80  | 0.9  |
| 2 | 29765200 | 29765275 | 75  | 29765212 | 12 | 36  | 0    |
| 2 | 30102675 | 30102700 | 25  | 30102687 | 12 | 12  | 1.7  |
| 2 | 30461725 | 30461750 | 25  | 30461737 | 12 | 12  | 0.9  |
| 2 | 30523950 | 30524225 | 275 | 30524037 | 17 | 160 | 5.2  |
| 2 | 30788175 | 30788250 | 75  | 30788187 | 12 | 35  | 2.6  |
| 2 | 31069350 | 31069400 | 50  | 31069362 | 12 | 24  | 3.5  |
| 2 | 31772425 | 31772700 | 275 | 31772537 | 42 | 325 | 18.3 |
| 2 | 32435325 | 32435475 | 150 | 32435412 | 15 | 79  | 7    |
| 2 | 33354400 | 33354525 | 125 | 33354462 | 16 | 72  | 13.1 |
| 2 | 33784850 | 33785000 | 150 | 33784862 | 11 | 64  | 1.7  |
| 2 | 33841800 | 33842050 | 250 | 33841887 | 15 | 124 | 0    |
| 2 | 35298925 | 35299225 | 300 | 35299062 | 24 | 193 | 22.7 |
| 2 | 35489125 | 35489225 | 100 | 35489162 | 14 | 50  | 7    |
| 2 | 37244850 | 37244950 | 100 | 37244862 | 14 | 50  | 0    |
| 2 | 37311875 | 37311900 | 25  | 37311887 | 12 | 12  | 0.9  |
| 2 | 37474600 | 37474675 | 75  | 37474662 | 18 | 44  | 7    |
| 2 | 37476900 | 37476950 | 50  | 37476912 | 14 | 28  | 2.6  |
| 2 | 37737775 | 37737825 | 50  | 37737787 | 12 | 24  | 0.9  |
| 2 | 37956250 | 37956375 | 125 | 37956287 | 15 | 73  | 11.4 |
| 2 | 38062925 | 38063000 | 75  | 38062962 | 13 | 36  | 1.7  |
| 2 | 38493225 | 38493350 | 125 | 38493312 | 13 | 58  | 7.9  |
| 2 | 38623700 | 38623900 | 200 | 38623787 | 17 | 111 | 2.6  |
| 2 | 39440075 | 39440450 | 375 | 39440262 | 25 | 272 | 6.1  |
| 2 | 39518100 | 39518175 | 75  | 39518112 | 13 | 38  | 2.6  |
| 2 | 39602550 | 39602625 | 75  | 39602562 | 12 | 36  | 0    |
| 2 | 39723000 | 39723025 | 25  | 39723012 | 12 | 12  | 0    |
| 2 | 41575725 | 41575925 | 200 | 41575837 | 20 | 136 | 6.1  |
| 2 | 42047625 | 42047775 | 150 | 42047637 | 11 | 66  | 6.1  |
| 2 | 42249750 | 42249825 | 75  | 42249762 | 13 | 36  | 4.4  |
| 2 | 42250400 | 42250450 | 50  | 42250412 | 14 | 28  | 1.7  |
| 2 | 42963925 | 42963950 | 25  | 42963937 | 12 | 12  | 1.7  |
| 2 | 43102325 | 43102450 | 125 | 43102362 | 15 | 68  | 8.7  |
| 2 | 43102900 | 43103200 | 300 | 43103037 | 26 | 231 | 28.8 |
| 2 | 43364975 | 43365375 | 400 | 43365212 | 24 | 291 | 8.7  |
| 2 | 43405875 | 43406225 | 350 | 43406062 | 27 | 277 | 8.7  |
| 2 | 43414350 | 43414475 | 125 | 43414412 | 13 | 61  | 0    |
| 2 | 44156525 | 44156550 | 25  | 44156537 | 11 | 11  | 0.9  |
| 2 | 44442300 | 44442425 | 125 | 44442312 | 18 | 72  | 12.2 |
| 2 | 45345550 | 45345650 | 100 | 45345562 | 13 | 47  | 0    |
| 2 | 45749850 | 45749875 | 25  | 45749862 | 11 | 11  | 1.7  |
| 2 | 45795525 | 45795550 | 25  | 45795537 | 12 | 12  | 0.9  |
| 2 | 46153150 | 46153225 | 75  | 46153162 | 11 | 29  | 3.5  |

|   |          |          |     |          |    |     |      |
|---|----------|----------|-----|----------|----|-----|------|
| 2 | 46378700 | 46378800 | 100 | 46378712 | 12 | 48  | 0.9  |
| 2 | 46414625 | 46414775 | 150 | 46414737 | 19 | 102 | 15.7 |
| 2 | 46615825 | 46616275 | 450 | 46616012 | 31 | 370 | 19.2 |
| 2 | 46778975 | 46779150 | 175 | 46779137 | 14 | 87  | 10.5 |
| 2 | 47069800 | 47069825 | 25  | 47069812 | 11 | 11  | 1.7  |
| 2 | 47115375 | 47115475 | 100 | 47115412 | 14 | 50  | 7.9  |
| 2 | 47166900 | 47167100 | 200 | 47166937 | 31 | 208 | 29.7 |
| 2 | 47851800 | 47852075 | 275 | 47851912 | 33 | 258 | 7    |
| 2 | 48287725 | 48287775 | 50  | 48287737 | 12 | 24  | 1.7  |
| 2 | 48394900 | 48395100 | 200 | 48394987 | 17 | 112 | 2.6  |
| 2 | 48469400 | 48469475 | 75  | 48469412 | 12 | 35  | 2.6  |
| 2 | 48501475 | 48501550 | 75  | 48501487 | 12 | 34  | 5.2  |
| 2 | 51695675 | 51695825 | 150 | 51695687 | 12 | 70  | 0    |
| 2 | 52728650 | 52728800 | 150 | 52728762 | 17 | 79  | 5.2  |
| 2 | 53010300 | 53010425 | 125 | 53010312 | 12 | 54  | 0    |
| 2 | 53503675 | 53503750 | 75  | 53503687 | 11 | 33  | 3.5  |
| 2 | 54197350 | 54197500 | 150 | 54197387 | 15 | 78  | 0    |
| 2 | 54492525 | 54492550 | 25  | 54492537 | 12 | 12  | 0    |
| 2 | 54604350 | 54604400 | 50  | 54604362 | 12 | 24  | 3.5  |
| 2 | 54655175 | 54655325 | 150 | 54655237 | 13 | 74  | 10.5 |
| 2 | 54851600 | 54851750 | 150 | 54851612 | 12 | 72  | 0    |
| 2 | 54984875 | 54984900 | 25  | 54984887 | 11 | 11  | 1.7  |
| 2 | 55130175 | 55130250 | 75  | 55130187 | 12 | 36  | 5.2  |
| 2 | 55599850 | 55599875 | 25  | 55599862 | 11 | 11  | 1.7  |
| 2 | 57094275 | 57094300 | 25  | 57094287 | 12 | 12  | 0    |
| 2 | 60961775 | 60961875 | 100 | 60961812 | 14 | 50  | 1.7  |
| 2 | 61618525 | 61618775 | 250 | 61618712 | 15 | 121 | 14   |
| 2 | 61858900 | 61858925 | 25  | 61858912 | 11 | 11  | 0    |
| 2 | 61895875 | 61895900 | 25  | 61895887 | 11 | 11  | 0    |
| 2 | 61986550 | 61986575 | 25  | 61986562 | 12 | 12  | 1.7  |
| 2 | 62412975 | 62413175 | 200 | 62413062 | 18 | 126 | 0    |
| 2 | 62492075 | 62492225 | 150 | 62492137 | 16 | 88  | 9.6  |
| 2 | 63382150 | 63382350 | 200 | 63382237 | 22 | 148 | 0    |
| 2 | 64100200 | 64100375 | 175 | 64100287 | 14 | 88  | 8.7  |
| 2 | 65069275 | 65069325 | 50  | 65069287 | 12 | 24  | 0    |
| 2 | 65124725 | 65125000 | 275 | 65124812 | 17 | 157 | 0.9  |
| 2 | 66754100 | 66754225 | 125 | 66754187 | 13 | 58  | 0    |
| 2 | 67793350 | 67793450 | 100 | 67793362 | 12 | 48  | 1.7  |
| 2 | 67961100 | 67961125 | 25  | 67961112 | 19 | 19  | 3.5  |
| 2 | 67961400 | 67961500 | 100 | 67961462 | 15 | 52  | 7    |
| 2 | 67998425 | 67998450 | 25  | 67998437 | 11 | 11  | 0.9  |
| 2 | 68332975 | 68333075 | 100 | 68333012 | 14 | 53  | 3.5  |
| 2 | 68400725 | 68400925 | 200 | 68400737 | 11 | 78  | 4.4  |
| 2 | 68438700 | 68438800 | 100 | 68438712 | 11 | 44  | 2.6  |
| 2 | 68547100 | 68547225 | 125 | 68547112 | 13 | 63  | 3.5  |
| 2 | 68777000 | 68777350 | 350 | 68777162 | 21 | 214 | 14.9 |
| 2 | 68830250 | 68830275 | 25  | 68830262 | 11 | 11  | 0.9  |
| 2 | 68909775 | 68909950 | 175 | 68909787 | 24 | 138 | 26.2 |
| 2 | 68920125 | 68920325 | 200 | 68920212 | 24 | 163 | 16.6 |
| 2 | 69233675 | 69233875 | 200 | 69233762 | 19 | 121 | 14   |
| 2 | 69517900 | 69517925 | 25  | 69517912 | 11 | 11  | 1.7  |
| 2 | 69857100 | 69857200 | 100 | 69857112 | 11 | 44  | 0    |
| 2 | 70167300 | 70167425 | 125 | 70167312 | 14 | 63  | 0    |
| 2 | 70169925 | 70170150 | 225 | 70170037 | 15 | 109 | 14   |
| 2 | 70203825 | 70203950 | 125 | 70203937 | 12 | 56  | 7.9  |
| 2 | 70215850 | 70215925 | 75  | 70215862 | 13 | 35  | 5.2  |
| 2 | 70271475 | 70271525 | 50  | 70271487 | 17 | 28  | 3.5  |
| 2 | 70338200 | 70338300 | 100 | 70338212 | 12 | 48  | 0    |
| 2 | 70372850 | 70372925 | 75  | 70372862 | 11 | 33  | 3.5  |
| 2 | 71357150 | 71357175 | 25  | 71357162 | 11 | 11  | 0    |
| 2 | 71634600 | 71634625 | 25  | 71634612 | 12 | 12  | 1.7  |
| 2 | 73294875 | 73295000 | 125 | 73294887 | 14 | 65  | 8.7  |
| 2 | 74472575 | 74472675 | 100 | 74472587 | 14 | 54  | 8.7  |
| 2 | 74587900 | 74587925 | 25  | 74587912 | 11 | 11  | 1.7  |
| 2 | 74924600 | 74924700 | 100 | 74924612 | 14 | 50  | 4.4  |
| 2 | 74998475 | 74998675 | 200 | 74998587 | 17 | 107 | 13.1 |
| 2 | 75039075 | 75039125 | 50  | 75039087 | 15 | 30  | 3.5  |
| 2 | 75628525 | 75628550 | 25  | 75628537 | 12 | 12  | 0    |
| 2 | 75727125 | 75727275 | 150 | 75727137 | 11 | 60  | 9.6  |
| 2 | 77660275 | 77660375 | 100 | 77660287 | 12 | 45  | 2.6  |
| 2 | 78110125 | 78110400 | 275 | 78110212 | 26 | 223 | 0    |
| 2 | 78126625 | 78126950 | 325 | 78126812 | 19 | 169 | 29.7 |
| 2 | 78535600 | 78535700 | 100 | 78535612 | 11 | 44  | 0    |
| 2 | 82871400 | 82871550 | 150 | 82871462 | 13 | 70  | 1.7  |
| 2 | 84927075 | 84927200 | 125 | 84927112 | 14 | 64  | 0.9  |

|   |           |           |     |           |    |     |      |
|---|-----------|-----------|-----|-----------|----|-----|------|
| 2 | 84932950  | 84933125  | 175 | 84932962  | 20 | 106 | 4.4  |
| 2 | 84962650  | 84962725  | 75  | 84962687  | 12 | 35  | 0    |
| 2 | 85045800  | 85046000  | 200 | 85045912  | 16 | 112 | 15.7 |
| 2 | 85050925  | 85050950  | 25  | 85050937  | 11 | 11  | 1.7  |
| 2 | 85327025  | 85327075  | 50  | 85327037  | 12 | 24  | 0    |
| 2 | 85618575  | 85618700  | 125 | 85618587  | 13 | 59  | 3.5  |
| 2 | 85620450  | 85620600  | 150 | 85620562  | 19 | 95  | 7.9  |
| 2 | 85798050  | 85798175  | 125 | 85798137  | 17 | 71  | 12.2 |
| 2 | 85798650  | 85798850  | 200 | 85798712  | 16 | 113 | 0    |
| 2 | 85833700  | 85833725  | 25  | 85833712  | 12 | 12  | 1.7  |
| 2 | 85852900  | 85853000  | 100 | 85852912  | 15 | 53  | 8.7  |
| 2 | 85924325  | 85924375  | 50  | 85924337  | 12 | 24  | 1.7  |
| 2 | 86001525  | 86001775  | 250 | 86001637  | 19 | 149 | 0    |
| 2 | 86023175  | 86023300  | 125 | 86023237  | 15 | 59  | 7    |
| 2 | 86077850  | 86077875  | 25  | 86077862  | 12 | 12  | 0    |
| 2 | 86128950  | 86129050  | 100 | 86128962  | 11 | 44  | 3.5  |
| 2 | 86148775  | 86148800  | 25  | 86148787  | 11 | 11  | 0.9  |
| 2 | 86150275  | 86150300  | 25  | 86150287  | 12 | 12  | 0    |
| 2 | 86521175  | 86521200  | 25  | 86521187  | 11 | 11  | 0    |
| 2 | 86521550  | 86521725  | 175 | 86521612  | 26 | 147 | 22.7 |
| 2 | 86581000  | 86581250  | 250 | 86581162  | 24 | 188 | 0    |
| 2 | 86643825  | 86643875  | 50  | 86643837  | 13 | 24  | 3.5  |
| 2 | 86742000  | 86742250  | 250 | 86742112  | 23 | 175 | 14   |
| 2 | 88683775  | 88683800  | 25  | 88683787  | 14 | 14  | 2.6  |
| 2 | 88896350  | 88896500  | 150 | 88896487  | 14 | 68  | 0    |
| 2 | 90977525  | 90977550  | 25  | 90977537  | 11 | 11  | 0.9  |
| 2 | 91178800  | 91178825  | 25  | 91178812  | 16 | 16  | 2.6  |
| 2 | 94899925  | 94899950  | 25  | 94899937  | 14 | 14  | 1.7  |
| 2 | 95087175  | 95087275  | 100 | 95087187  | 15 | 56  | 3.5  |
| 2 | 95179000  | 95179200  | 200 | 95179012  | 17 | 121 | 0    |
| 2 | 95195425  | 95195525  | 100 | 95195487  | 16 | 54  | 3.5  |
| 2 | 95236625  | 95236750  | 125 | 95236637  | 14 | 64  | 7.9  |
| 2 | 95244275  | 95244950  | 675 | 95244637  | 20 | 379 | 8.7  |
| 2 | 95363750  | 95363850  | 100 | 95363837  | 16 | 49  | 4.4  |
| 2 | 95376925  | 95376950  | 25  | 95376937  | 11 | 11  | 0    |
| 2 | 95556000  | 95556275  | 275 | 95556162  | 23 | 186 | 11.4 |
| 2 | 96364175  | 96364200  | 25  | 96364187  | 12 | 12  | 0    |
| 2 | 96437200  | 96437400  | 200 | 96437387  | 13 | 83  | 13.1 |
| 2 | 96468425  | 96468625  | 200 | 96468512  | 18 | 113 | 0.9  |
| 2 | 96791350  | 96791400  | 50  | 96791362  | 11 | 22  | 1.7  |
| 2 | 96888275  | 96888400  | 125 | 96888287  | 11 | 53  | 7.9  |
| 2 | 96905375  | 96905475  | 100 | 96905412  | 14 | 50  | 1.7  |
| 2 | 96957550  | 96957600  | 50  | 96957562  | 12 | 24  | 1.7  |
| 2 | 96982500  | 96982700  | 200 | 96982662  | 19 | 122 | 2.6  |
| 2 | 97854550  | 97854575  | 25  | 97854562  | 12 | 12  | 0    |
| 2 | 98304075  | 98304100  | 25  | 98304087  | 11 | 11  | 0    |
| 2 | 98523475  | 98523525  | 50  | 98523512  | 12 | 23  | 0    |
| 2 | 99124100  | 99124250  | 150 | 99124162  | 17 | 83  | 8.7  |
| 2 | 99124800  | 99124825  | 25  | 99124812  | 13 | 13  | 1.7  |
| 2 | 99164000  | 99164100  | 100 | 99164037  | 15 | 52  | 7.9  |
| 2 | 99863475  | 99863600  | 125 | 99863537  | 19 | 78  | 8.7  |
| 2 | 100245675 | 100245925 | 250 | 100245762 | 20 | 163 | 8.7  |
| 2 | 100263000 | 100263075 | 75  | 100263012 | 12 | 36  | 3.5  |
| 2 | 100275150 | 100275275 | 125 | 100275162 | 18 | 82  | 12.2 |
| 2 | 100351750 | 100351900 | 150 | 100351787 | 13 | 72  | 0    |
| 2 | 100545925 | 100545975 | 50  | 100545937 | 12 | 24  | 0    |
| 2 | 100563850 | 100563875 | 25  | 100563862 | 12 | 12  | 1.7  |
| 2 | 100604500 | 100604600 | 100 | 100604537 | 13 | 48  | 3.5  |
| 2 | 100606975 | 100607000 | 25  | 100606987 | 12 | 12  | 1.7  |
| 2 | 100627750 | 100627950 | 200 | 100627837 | 17 | 110 | 0    |
| 2 | 100740925 | 100740950 | 25  | 100740937 | 11 | 11  | 0    |
| 2 | 100984975 | 100985050 | 75  | 100984987 | 29 | 85  | 14.9 |
| 2 | 101134475 | 101134500 | 25  | 101134487 | 11 | 11  | 0.9  |
| 2 | 101248625 | 101248825 | 200 | 101248762 | 17 | 110 | 0    |
| 2 | 101498675 | 101498750 | 75  | 101498712 | 14 | 40  | 3.5  |
| 2 | 102784125 | 102784350 | 225 | 102784212 | 22 | 166 | 0    |
| 2 | 105111025 | 105111075 | 50  | 105111037 | 11 | 22  | 3.5  |
| 2 | 105113075 | 105113225 | 150 | 105113087 | 21 | 81  | 10.5 |
| 2 | 105379675 | 105379775 | 100 | 105379687 | 14 | 53  | 3.5  |
| 2 | 105575100 | 105575175 | 75  | 105575162 | 12 | 33  | 5.2  |
| 2 | 105869150 | 105869250 | 100 | 105869162 | 12 | 48  | 0    |
| 2 | 105871725 | 105871750 | 25  | 105871737 | 11 | 11  | 0    |
| 2 | 105952625 | 105952675 | 50  | 105952662 | 13 | 24  | 0    |
| 2 | 105990650 | 105990775 | 125 | 105990687 | 16 | 70  | 8.7  |
| 2 | 106841775 | 106841975 | 200 | 106841887 | 16 | 107 | 0    |

|   |           |           |     |           |    |     |      |
|---|-----------|-----------|-----|-----------|----|-----|------|
| 2 | 108387950 | 108388125 | 175 | 108388012 | 13 | 87  | 6.1  |
| 2 | 108635550 | 108635675 | 125 | 108635562 | 11 | 55  | 7    |
| 2 | 108930175 | 108930525 | 350 | 108930337 | 23 | 229 | 0    |
| 2 | 109192250 | 109192325 | 75  | 109192262 | 13 | 37  | 0    |
| 2 | 110327325 | 110327400 | 75  | 110327337 | 16 | 46  | 5.2  |
| 2 | 111591400 | 111591450 | 50  | 111591412 | 15 | 30  | 3.5  |
| 2 | 111833325 | 111833375 | 50  | 111833362 | 12 | 23  | 0    |
| 2 | 112496300 | 112496325 | 25  | 112496312 | 12 | 12  | 1.7  |
| 2 | 112506150 | 112506275 | 125 | 112506187 | 14 | 57  | 5.2  |
| 2 | 112506800 | 112506850 | 50  | 112506812 | 13 | 25  | 1.7  |
| 2 | 113114750 | 113114925 | 175 | 113114787 | 18 | 100 | 17.5 |
| 2 | 113192150 | 113192175 | 25  | 113192162 | 11 | 11  | 0    |
| 2 | 113238925 | 113239000 | 75  | 113238937 | 13 | 39  | 5.2  |
| 2 | 113355475 | 113355675 | 200 | 113355562 | 14 | 103 | 0    |
| 2 | 114078200 | 114078475 | 275 | 114078312 | 52 | 419 | 73.4 |
| 2 | 114280650 | 114280675 | 25  | 114280662 | 12 | 12  | 0    |
| 2 | 115403250 | 115403450 | 200 | 115403337 | 16 | 112 | 5.2  |
| 2 | 115831675 | 115831825 | 150 | 115831762 | 16 | 87  | 0    |
| 2 | 115848500 | 115848850 | 350 | 115848687 | 21 | 197 | 0    |
| 2 | 116152275 | 116152325 | 50  | 116152287 | 11 | 22  | 0    |
| 2 | 117646150 | 117646275 | 125 | 117646162 | 15 | 68  | 0    |
| 2 | 118008050 | 118008125 | 75  | 118008062 | 11 | 33  | 0    |
| 2 | 118491125 | 118491350 | 225 | 118491237 | 25 | 176 | 7    |
| 2 | 118534250 | 118534300 | 50  | 118534262 | 11 | 22  | 0    |
| 2 | 119218975 | 119219050 | 75  | 119219012 | 14 | 40  | 0    |
| 2 | 120173275 | 120173400 | 125 | 120173287 | 14 | 63  | 10.5 |
| 2 | 120179275 | 120179525 | 250 | 120179362 | 26 | 211 | 21   |
| 2 | 120233725 | 120233850 | 125 | 120233737 | 15 | 57  | 9.6  |
| 2 | 120732025 | 120732100 | 75  | 120732037 | 12 | 36  | 0    |
| 2 | 121101200 | 121101250 | 50  | 121101212 | 12 | 24  | 0    |
| 2 | 121149900 | 121149975 | 75  | 121149912 | 14 | 36  | 1.7  |
| 2 | 121549200 | 121549300 | 100 | 121549262 | 13 | 48  | 5.2  |
| 2 | 122005125 | 122005150 | 25  | 122005137 | 11 | 11  | 0    |
| 2 | 122036250 | 122036300 | 50  | 122036262 | 12 | 24  | 3.5  |
| 2 | 122156750 | 122157125 | 375 | 122156937 | 39 | 396 | 7    |
| 2 | 122312025 | 122312050 | 25  | 122312037 | 11 | 11  | 0    |
| 2 | 122343375 | 122343475 | 100 | 122343462 | 14 | 50  | 3.5  |
| 2 | 122359000 | 122359200 | 200 | 122359012 | 17 | 95  | 13.1 |
| 2 | 123569475 | 123569525 | 50  | 123569487 | 11 | 22  | 1.7  |
| 2 | 124771025 | 124771050 | 25  | 124771037 | 11 | 11  | 0    |
| 2 | 127132050 | 127132200 | 150 | 127132087 | 13 | 73  | 7    |
| 2 | 127305900 | 127305975 | 75  | 127305937 | 14 | 39  | 0.9  |
| 2 | 127349325 | 127349500 | 175 | 127349387 | 12 | 80  | 12.2 |
| 2 | 127542125 | 127542250 | 125 | 127542137 | 11 | 55  | 6.1  |
| 2 | 128126075 | 128126100 | 25  | 128126087 | 11 | 11  | 0.9  |
| 2 | 128284750 | 128284775 | 25  | 128284762 | 12 | 12  | 1.7  |
| 2 | 128294175 | 128294500 | 325 | 128294312 | 66 | 578 | 21   |
| 2 | 128511000 | 128511350 | 350 | 128511187 | 32 | 304 | 14   |
| 2 | 128516950 | 128517450 | 500 | 128517312 | 31 | 374 | 3.5  |
| 2 | 128754825 | 128754850 | 25  | 128754837 | 11 | 11  | 0.9  |
| 2 | 128943225 | 128943650 | 425 | 128943437 | 47 | 513 | 14   |
| 2 | 129977075 | 129977100 | 25  | 129977087 | 11 | 11  | 0.9  |
| 2 | 130815925 | 130816050 | 125 | 130815962 | 16 | 72  | 7    |
| 2 | 130860575 | 130860775 | 200 | 130860587 | 12 | 86  | 7    |
| 2 | 131298925 | 131298950 | 25  | 131298937 | 11 | 11  | 0    |
| 2 | 132142800 | 132143150 | 350 | 132142937 | 16 | 179 | 4.4  |
| 2 | 132739300 | 132739325 | 25  | 132739312 | 12 | 12  | 1.7  |
| 2 | 132752600 | 132752675 | 75  | 132752612 | 12 | 34  | 2.6  |
| 2 | 132821800 | 132821850 | 50  | 132821812 | 18 | 33  | 5.2  |
| 2 | 133256875 | 133256900 | 25  | 133256887 | 12 | 12  | 1.7  |
| 2 | 134248925 | 134249075 | 150 | 134248937 | 13 | 77  | 1.7  |
| 2 | 134254250 | 134254325 | 75  | 134254262 | 12 | 36  | 0    |
| 2 | 134544225 | 134544575 | 350 | 134544337 | 18 | 211 | 34.9 |
| 2 | 134548775 | 134549000 | 225 | 134548962 | 17 | 122 | 16.6 |
| 2 | 134884850 | 134885050 | 200 | 134884912 | 18 | 123 | 1.7  |
| 2 | 134885950 | 134886025 | 75  | 134885987 | 15 | 42  | 5.2  |
| 2 | 134965425 | 134965475 | 50  | 134965437 | 13 | 25  | 1.7  |
| 2 | 135180300 | 135180325 | 25  | 135180312 | 11 | 11  | 0.9  |
| 2 | 135180700 | 135180725 | 25  | 135180712 | 12 | 12  | 1.7  |
| 2 | 136350425 | 136350600 | 175 | 136350462 | 14 | 80  | 4.4  |
| 2 | 136837525 | 136837575 | 50  | 136837537 | 11 | 22  | 0    |
| 2 | 138438725 | 138438825 | 100 | 138438812 | 12 | 45  | 5.2  |
| 2 | 144207150 | 144207175 | 25  | 144207162 | 11 | 11  | 0.9  |
| 2 | 144991650 | 144991700 | 50  | 144991662 | 13 | 26  | 0.9  |
| 2 | 145398825 | 145399000 | 175 | 145398962 | 24 | 126 | 11.4 |

|   |           |           |     |           |    |     |      |
|---|-----------|-----------|-----|-----------|----|-----|------|
| 2 | 145416275 | 145416450 | 175 | 145416412 | 12 | 72  | 0    |
| 2 | 145512075 | 145512275 | 200 | 145512112 | 15 | 111 | 7    |
| 2 | 145674450 | 145674625 | 175 | 145674462 | 14 | 96  | 10.5 |
| 2 | 149088350 | 149088375 | 25  | 149088362 | 11 | 11  | 0    |
| 2 | 149119150 | 149119225 | 75  | 149119162 | 14 | 42  | 5.2  |
| 2 | 150711650 | 150711975 | 325 | 150711837 | 33 | 303 | 0.9  |
| 2 | 150841475 | 150841700 | 225 | 150841587 | 25 | 192 | 7    |
| 2 | 150868250 | 150868275 | 25  | 150868262 | 11 | 11  | 0    |
| 2 | 151143250 | 151143625 | 375 | 151143437 | 45 | 428 | 2.6  |
| 2 | 151757775 | 151757800 | 25  | 151757787 | 12 | 12  | 0.9  |
| 2 | 151800625 | 151800650 | 25  | 151800637 | 11 | 11  | 0.9  |
| 2 | 152392525 | 152392575 | 50  | 152392537 | 11 | 22  | 0    |
| 2 | 152765525 | 152765600 | 75  | 152765537 | 15 | 37  | 7    |
| 2 | 152805400 | 152805450 | 50  | 152805412 | 11 | 22  | 0    |
| 2 | 153027525 | 153027625 | 100 | 153027562 | 13 | 47  | 0    |
| 2 | 153164875 | 153165000 | 125 | 153164962 | 14 | 64  | 11.4 |
| 2 | 153490900 | 153491000 | 100 | 153490962 | 14 | 52  | 9.6  |
| 2 | 154153250 | 154153450 | 200 | 154153337 | 20 | 132 | 10.5 |
| 2 | 155969300 | 155969750 | 450 | 155969437 | 30 | 355 | 14   |
| 2 | 156384075 | 156384250 | 175 | 156384112 | 13 | 82  | 0    |
| 2 | 156964950 | 156965075 | 125 | 156964962 | 12 | 58  | 0    |
| 2 | 157488825 | 157489075 | 250 | 157488912 | 15 | 121 | 0    |
| 2 | 157940200 | 157940500 | 300 | 157940312 | 21 | 196 | 0    |
| 2 | 159532650 | 159532800 | 150 | 159532662 | 15 | 92  | 13.1 |
| 2 | 160652625 | 160652850 | 225 | 160652712 | 21 | 158 | 14.9 |
| 2 | 160858325 | 160858625 | 300 | 160858362 | 15 | 160 | 7    |
| 2 | 160932825 | 160932950 | 125 | 160932837 | 16 | 80  | 5.2  |
| 2 | 161146025 | 161146050 | 25  | 161146037 | 11 | 11  | 0    |
| 2 | 161725075 | 161725200 | 125 | 161725087 | 11 | 55  | 4.4  |
| 2 | 161844950 | 161844975 | 25  | 161844962 | 12 | 12  | 1.7  |
| 2 | 162145400 | 162145450 | 50  | 162145412 | 12 | 24  | 0    |
| 2 | 165639750 | 165639925 | 175 | 165639762 | 13 | 87  | 12.2 |
| 2 | 166518975 | 166519075 | 100 | 166518987 | 15 | 58  | 7    |
| 2 | 167162625 | 167162725 | 100 | 167162712 | 14 | 49  | 0    |
| 2 | 167308175 | 167308375 | 200 | 167308237 | 17 | 118 | 9.6  |
| 2 | 170148850 | 170148975 | 125 | 170148912 | 17 | 75  | 3.5  |
| 2 | 170562350 | 170562375 | 25  | 170562362 | 12 | 12  | 0    |
| 2 | 171482450 | 171482525 | 75  | 171482512 | 14 | 36  | 2.6  |
| 2 | 171539375 | 171539425 | 50  | 171539387 | 11 | 22  | 0    |
| 2 | 171810300 | 171810400 | 100 | 171810387 | 14 | 48  | 3.5  |
| 2 | 171988900 | 171989150 | 250 | 171988987 | 25 | 187 | 9.6  |
| 2 | 172087550 | 172087675 | 125 | 172087612 | 12 | 57  | 6.1  |
| 2 | 172191800 | 172192025 | 225 | 172191887 | 16 | 124 | 7    |
| 2 | 172196100 | 172196375 | 275 | 172196187 | 29 | 253 | 1.7  |
| 2 | 172252325 | 172252450 | 125 | 172252437 | 15 | 58  | 11.4 |
| 2 | 172668100 | 172668150 | 50  | 172668112 | 12 | 24  | 3.5  |
| 2 | 172668575 | 172668725 | 150 | 172668612 | 14 | 76  | 10.5 |
| 2 | 172670375 | 172670425 | 50  | 172670387 | 13 | 24  | 3.5  |
| 2 | 172766300 | 172766425 | 125 | 172766387 | 12 | 57  | 0.9  |
| 2 | 172989850 | 172989900 | 50  | 172989862 | 11 | 22  | 1.7  |
| 2 | 173035000 | 173035200 | 200 | 173035087 | 14 | 96  | 7    |
| 2 | 173053625 | 173053650 | 25  | 173053637 | 12 | 12  | 0.9  |
| 2 | 173098675 | 173098750 | 75  | 173098687 | 14 | 36  | 1.7  |
| 2 | 173128575 | 173128650 | 75  | 173128637 | 12 | 34  | 1.7  |
| 2 | 173871625 | 173871775 | 150 | 173871687 | 17 | 86  | 6.1  |
| 2 | 173880450 | 173880750 | 300 | 173880587 | 25 | 236 | 10.5 |
| 2 | 173906275 | 173906300 | 25  | 173906287 | 13 | 13  | 0    |
| 2 | 173919050 | 173919275 | 225 | 173919187 | 20 | 139 | 0    |
| 2 | 173928025 | 173928200 | 175 | 173928087 | 13 | 79  | 12.2 |
| 2 | 174022300 | 174022325 | 25  | 174022312 | 11 | 11  | 1.7  |
| 2 | 174371375 | 174371400 | 25  | 174371387 | 11 | 11  | 0    |
| 2 | 174462475 | 174462675 | 200 | 174462587 | 22 | 138 | 0    |
| 2 | 175352925 | 175352950 | 25  | 175352937 | 12 | 12  | 0.9  |
| 2 | 175958925 | 175959250 | 325 | 175959062 | 24 | 234 | 1.7  |
| 2 | 176508975 | 176509050 | 75  | 176509012 | 12 | 35  | 2.6  |
| 2 | 176762475 | 176762500 | 25  | 176762487 | 12 | 12  | 1.7  |
| 2 | 177064450 | 177064525 | 75  | 177064487 | 16 | 47  | 7.9  |
| 2 | 179024425 | 179024575 | 150 | 179024437 | 14 | 78  | 11.4 |
| 2 | 179028025 | 179028050 | 25  | 179028037 | 11 | 11  | 0    |
| 2 | 179051950 | 179051975 | 25  | 179051962 | 11 | 11  | 1.7  |
| 2 | 180033625 | 180033925 | 300 | 180033762 | 17 | 165 | 11.4 |
| 2 | 180580175 | 180580275 | 100 | 180580237 | 15 | 50  | 3.5  |
| 2 | 180742475 | 180742650 | 175 | 180742562 | 17 | 97  | 4.4  |
| 2 | 180798325 | 180798400 | 75  | 180798337 | 14 | 42  | 7.9  |
| 2 | 182370700 | 182370750 | 50  | 182370712 | 12 | 24  | 0    |

|   |           |           |     |           |    |     |      |
|---|-----------|-----------|-----|-----------|----|-----|------|
| 2 | 182527325 | 182527475 | 150 | 182527412 | 12 | 69  | 9.6  |
| 2 | 183493675 | 183493800 | 125 | 183493687 | 12 | 52  | 7    |
| 2 | 183697175 | 183697375 | 200 | 183697237 | 18 | 123 | 13.1 |
| 2 | 183697650 | 183697700 | 50  | 183697662 | 14 | 28  | 1.7  |
| 2 | 187901650 | 187901675 | 25  | 187901662 | 11 | 11  | 0    |
| 2 | 188972250 | 188972450 | 200 | 188972337 | 17 | 106 | 0    |
| 2 | 189567150 | 189567300 | 150 | 189567162 | 11 | 64  | 0    |
| 2 | 189586825 | 189586925 | 100 | 189586837 | 11 | 44  | 0    |
| 2 | 190234525 | 190234675 | 150 | 190234612 | 17 | 91  | 8.7  |
| 2 | 191593225 | 191593350 | 125 | 191593312 | 29 | 112 | 8.7  |
| 2 | 191950300 | 191950350 | 50  | 191950312 | 12 | 24  | 3.5  |
| 2 | 192211550 | 192211650 | 100 | 192211612 | 13 | 46  | 5.2  |
| 2 | 193073975 | 193074000 | 25  | 193073987 | 12 | 12  | 1.7  |
| 2 | 196230300 | 196230325 | 25  | 196230312 | 11 | 11  | 1.7  |
| 2 | 196656600 | 196656650 | 50  | 196656612 | 12 | 24  | 0    |
| 2 | 196703375 | 196703775 | 400 | 196703612 | 77 | 720 | 21   |
| 2 | 196744475 | 196744500 | 25  | 196744487 | 11 | 11  | 0    |
| 2 | 197866875 | 197867075 | 200 | 197866887 | 12 | 87  | 3.5  |
| 2 | 197953950 | 197954000 | 50  | 197953962 | 11 | 22  | 0    |
| 2 | 198007675 | 198007800 | 125 | 198007687 | 14 | 64  | 9.6  |
| 2 | 198026000 | 198026025 | 25  | 198026012 | 15 | 15  | 2.6  |
| 2 | 198056625 | 198056800 | 175 | 198056737 | 21 | 119 | 10.5 |
| 2 | 198714875 | 198714925 | 50  | 198714887 | 12 | 24  | 1.7  |
| 2 | 200176800 | 200176825 | 25  | 200176812 | 17 | 17  | 2.6  |
| 2 | 200321900 | 200321950 | 50  | 200321912 | 11 | 22  | 0.9  |
| 2 | 200447225 | 200447425 | 200 | 200447237 | 17 | 118 | 1.7  |
| 2 | 200490050 | 200490200 | 150 | 200490062 | 14 | 79  | 0    |
| 2 | 200879375 | 200879500 | 125 | 200879487 | 13 | 58  | 3.5  |
| 2 | 200981350 | 200981375 | 25  | 200981362 | 12 | 12  | 0.9  |
| 2 | 201751250 | 201751400 | 150 | 201751262 | 13 | 74  | 0    |
| 2 | 202838900 | 202838925 | 25  | 202838912 | 11 | 11  | 1.7  |
| 2 | 203207700 | 203207800 | 100 | 203207712 | 17 | 55  | 7.9  |
| 2 | 203587375 | 203587450 | 75  | 203587412 | 16 | 44  | 1.7  |
| 2 | 203811500 | 203811525 | 25  | 203811512 | 11 | 11  | 1.7  |
| 2 | 204258150 | 204258250 | 100 | 204258162 | 12 | 47  | 0    |
| 2 | 207338350 | 207338525 | 175 | 207338412 | 21 | 121 | 8.7  |
| 2 | 207900900 | 207900950 | 50  | 207900912 | 11 | 22  | 0    |
| 2 | 208598400 | 208598425 | 25  | 208598412 | 11 | 11  | 0.9  |
| 2 | 208967350 | 208967500 | 150 | 208967437 | 26 | 128 | 11.4 |
| 2 | 213436175 | 213436375 | 200 | 213436287 | 24 | 151 | 13.1 |
| 2 | 214036750 | 214036775 | 25  | 214036762 | 11 | 11  | 0    |
| 2 | 214097150 | 214097325 | 175 | 214097237 | 16 | 101 | 4.4  |
| 2 | 215115450 | 215115525 | 75  | 215115462 | 12 | 36  | 2.6  |
| 2 | 215383125 | 215383150 | 25  | 215383137 | 11 | 11  | 1.7  |
| 2 | 216313525 | 216313725 | 200 | 216313562 | 16 | 116 | 0    |
| 2 | 216346750 | 216346825 | 75  | 216346762 | 11 | 33  | 5.2  |
| 2 | 217021975 | 217022075 | 100 | 217021987 | 13 | 49  | 1.7  |
| 2 | 217070875 | 217070900 | 25  | 217070887 | 11 | 11  | 0    |
| 2 | 217735725 | 217735775 | 50  | 217735737 | 16 | 31  | 2.6  |
| 2 | 217852425 | 217852600 | 175 | 217852537 | 16 | 101 | 7    |
| 2 | 218106600 | 218106700 | 100 | 218106612 | 13 | 44  | 1.7  |
| 2 | 218128100 | 218128225 | 125 | 218128112 | 13 | 65  | 8.7  |
| 2 | 218132100 | 218132125 | 25  | 218132112 | 11 | 11  | 1.7  |
| 2 | 218478275 | 218478475 | 200 | 218478387 | 15 | 94  | 11.4 |
| 2 | 218616325 | 218616375 | 50  | 218616362 | 13 | 24  | 1.7  |
| 2 | 218864850 | 218864950 | 100 | 218864937 | 13 | 49  | 9.6  |
| 2 | 219141450 | 219141575 | 125 | 219141562 | 19 | 82  | 4.4  |
| 2 | 219420800 | 219420875 | 75  | 219420812 | 11 | 33  | 4.4  |
| 2 | 220110825 | 220110975 | 150 | 220110837 | 15 | 79  | 14   |
| 2 | 220254775 | 220254850 | 75  | 220254787 | 11 | 33  | 1.7  |
| 2 | 221676925 | 221677100 | 175 | 221676987 | 15 | 94  | 8.7  |
| 2 | 221701050 | 221701125 | 75  | 221701062 | 11 | 33  | 0    |
| 2 | 222213875 | 222214025 | 150 | 222213887 | 11 | 66  | 0    |
| 2 | 223282350 | 223282400 | 50  | 223282362 | 14 | 28  | 3.5  |
| 2 | 223295300 | 223295450 | 150 | 223295387 | 13 | 72  | 9.6  |
| 2 | 223295825 | 223295900 | 75  | 223295837 | 11 | 33  | 5.2  |
| 2 | 223306500 | 223306600 | 100 | 223306512 | 14 | 54  | 6.1  |
| 2 | 223307400 | 223307425 | 25  | 223307412 | 11 | 11  | 1.7  |
| 2 | 223360525 | 223360550 | 25  | 223360537 | 11 | 11  | 0.9  |
| 2 | 223675050 | 223675100 | 50  | 223675062 | 13 | 24  | 3.5  |
| 2 | 224296950 | 224296975 | 25  | 224296962 | 11 | 11  | 0    |
| 2 | 224419750 | 224419850 | 100 | 224419762 | 11 | 44  | 2.6  |
| 2 | 224428900 | 224428975 | 75  | 224428912 | 12 | 35  | 0    |
| 2 | 224468525 | 224468600 | 75  | 224468562 | 12 | 34  | 5.2  |
| 2 | 224517125 | 224517300 | 175 | 224517187 | 14 | 94  | 0    |



|   |           |           |     |           |    |     |      |
|---|-----------|-----------|-----|-----------|----|-----|------|
| 2 | 224677900 | 224677925 | 25  | 224677912 | 11 | 11  | 0.9  |
| 2 | 225309425 | 225309475 | 50  | 225309462 | 12 | 23  | 0.9  |
| 2 | 225640525 | 225640575 | 50  | 225640537 | 12 | 24  | 0    |
| 2 | 226915000 | 226915050 | 50  | 226915012 | 11 | 22  | 0    |
| 2 | 227371900 | 227371950 | 50  | 227371912 | 11 | 22  | 3.5  |
| 2 | 227442450 | 227442550 | 100 | 227442512 | 13 | 46  | 0    |
| 2 | 228391750 | 228391775 | 25  | 228391762 | 12 | 12  | 1.7  |
| 2 | 231394400 | 231394500 | 100 | 231394412 | 12 | 46  | 3.5  |
| 2 | 231481675 | 231481750 | 75  | 231481737 | 20 | 54  | 7    |
| 2 | 231510425 | 231510550 | 125 | 231510487 | 13 | 59  | 0    |
| 2 | 231613650 | 231613675 | 25  | 231613662 | 12 | 12  | 0.9  |
| 2 | 231620550 | 231620725 | 175 | 231620712 | 21 | 124 | 24.5 |
| 2 | 231625925 | 231626025 | 100 | 231625987 | 16 | 60  | 9.6  |
| 2 | 231800525 | 231800650 | 125 | 231800587 | 13 | 57  | 5.2  |
| 2 | 231936375 | 231936450 | 75  | 231936387 | 12 | 36  | 0    |
| 2 | 231938400 | 231938425 | 25  | 231938412 | 13 | 13  | 1.7  |
| 2 | 231961475 | 231961675 | 200 | 231961537 | 31 | 202 | 31.5 |
| 2 | 231983450 | 231983500 | 50  | 231983462 | 13 | 26  | 1.7  |
| 2 | 232118550 | 232118575 | 25  | 232118562 | 13 | 13  | 1.7  |
| 2 | 232177850 | 232177900 | 50  | 232177862 | 12 | 24  | 1.7  |
| 2 | 232216225 | 232216425 | 200 | 232216262 | 14 | 92  | 7    |
| 2 | 232239275 | 232239500 | 225 | 232239462 | 18 | 125 | 13.1 |
| 2 | 232246000 | 232246025 | 25  | 232246012 | 11 | 11  | 1.7  |
| 2 | 232280125 | 232280175 | 50  | 232280137 | 17 | 33  | 5.2  |
| 2 | 232497250 | 232497275 | 25  | 232497262 | 11 | 11  | 0    |
| 2 | 232534175 | 232534200 | 25  | 232534187 | 12 | 12  | 1.7  |
| 2 | 233671125 | 233671175 | 50  | 233671137 | 13 | 24  | 0    |
| 2 | 234000175 | 234000325 | 150 | 234000287 | 13 | 70  | 0    |
| 2 | 234548625 | 234548700 | 75  | 234548662 | 13 | 37  | 4.4  |
| 2 | 234713400 | 234713475 | 75  | 234713412 | 13 | 33  | 1.7  |
| 2 | 235161600 | 235161625 | 25  | 235161612 | 11 | 11  | 0    |
| 2 | 235169500 | 235169525 | 25  | 235169512 | 12 | 12  | 0    |
| 2 | 235270850 | 235270900 | 50  | 235270862 | 11 | 22  | 0    |
| 2 | 235437425 | 235437475 | 50  | 235437437 | 12 | 24  | 1.7  |
| 2 | 235563175 | 235563250 | 75  | 235563237 | 12 | 34  | 2.6  |
| 2 | 235722700 | 235722800 | 100 | 235722712 | 15 | 57  | 1.7  |
| 2 | 235836325 | 235836350 | 25  | 235836337 | 12 | 12  | 1.7  |
| 2 | 236843200 | 236843275 | 75  | 236843212 | 12 | 35  | 0    |
| 2 | 237801125 | 237801225 | 100 | 237801187 | 17 | 57  | 4.4  |
| 2 | 237896950 | 237897000 | 50  | 237896962 | 11 | 22  | 0    |
| 2 | 237995625 | 237995650 | 25  | 237995637 | 11 | 11  | 1.7  |
| 2 | 238065050 | 238065075 | 25  | 238065062 | 11 | 11  | 0    |
| 2 | 238161600 | 238161625 | 25  | 238161612 | 12 | 12  | 0    |
| 2 | 238177250 | 238177375 | 125 | 238177287 | 15 | 68  | 4.4  |
| 2 | 238273825 | 238273875 | 50  | 238273862 | 14 | 26  | 1.7  |
| 2 | 238453825 | 238454025 | 200 | 238453937 | 20 | 124 | 5.2  |
| 2 | 238535725 | 238536175 | 450 | 238535987 | 37 | 445 | 28.8 |
| 2 | 238756850 | 238756875 | 25  | 238756862 | 11 | 11  | 0.9  |
| 2 | 238761300 | 238761375 | 75  | 238761312 | 13 | 36  | 3.5  |
| 2 | 238793950 | 238794125 | 175 | 238794112 | 15 | 87  | 5.2  |
| 2 | 238812550 | 238812575 | 25  | 238812562 | 13 | 13  | 0    |
| 2 | 239159950 | 239159975 | 25  | 239159962 | 14 | 14  | 1.7  |
| 2 | 239511775 | 239511800 | 25  | 239511787 | 11 | 11  | 0    |
| 2 | 240505750 | 240505925 | 175 | 240505837 | 18 | 108 | 3.5  |
| 2 | 240558125 | 240558325 | 200 | 240558287 | 20 | 131 | 0    |
| 2 | 240639825 | 240639950 | 125 | 240639862 | 12 | 58  | 0    |
| 2 | 241022950 | 241023000 | 50  | 241022962 | 12 | 23  | 0    |
| 2 | 241024750 | 241024800 | 50  | 241024787 | 13 | 24  | 3.5  |
| 2 | 241025100 | 241025175 | 75  | 241025162 | 14 | 38  | 0    |
| 2 | 241221900 | 241222125 | 225 | 241221987 | 24 | 165 | 7    |
| 2 | 241534975 | 241535050 | 75  | 241534987 | 12 | 36  | 1.7  |
| 2 | 242046500 | 242046575 | 75  | 242046512 | 11 | 33  | 2.6  |
| 2 | 242227575 | 242227625 | 50  | 242227612 | 12 | 23  | 0    |
| 2 | 242269250 | 242269325 | 75  | 242269262 | 12 | 36  | 5.2  |
| 2 | 242311300 | 242311375 | 75  | 242311337 | 14 | 38  | 5.2  |
| 2 | 242558625 | 242558725 | 100 | 242558712 | 15 | 52  | 0    |
| 5 | 271175    | 271250    | 75  | 271187    | 12 | 36  | 2.6  |
| 5 | 495525    | 495600    | 75  | 495537    | 11 | 33  | 5.2  |
| 5 | 555450    | 555650    | 200 | 555487    | 13 | 91  | 11.4 |
| 5 | 666250    | 666525    | 275 | 666437    | 20 | 172 | 7    |
| 5 | 1383750   | 1383950   | 200 | 1383912   | 16 | 108 | 14.9 |
| 5 | 1509400   | 1509425   | 25  | 1509412   | 11 | 11  | 0    |
| 5 | 5397175   | 5397275   | 100 | 5397187   | 12 | 45  | 0.9  |
| 5 | 5462475   | 5462675   | 200 | 5462612   | 17 | 120 | 0    |
| 5 | 8101275   | 8101300   | 25  | 8101287   | 12 | 12  | 0    |

|   |           |           |     |           |    |     |      |
|---|-----------|-----------|-----|-----------|----|-----|------|
| 5 | 8523600   | 8523925   | 325 | 8523737   | 22 | 213 | 0    |
| 5 | 8858875   | 8858925   | 50  | 8858912   | 13 | 25  | 0    |
| 5 | 9296275   | 9296300   | 25  | 9296287   | 11 | 11  | 0    |
| 5 | 9490825   | 9490975   | 150 | 9490962   | 15 | 83  | 13.1 |
| 5 | 15894925  | 15895100  | 175 | 15895012  | 17 | 100 | 5.2  |
| 5 | 16548525  | 16548650  | 125 | 16548562  | 13 | 60  | 0    |
| 5 | 17074750  | 17074775  | 25  | 17074762  | 12 | 12  | 1.7  |
| 5 | 17171800  | 17171850  | 50  | 17171812  | 14 | 28  | 3.5  |
| 5 | 17176400  | 17176600  | 200 | 17176412  | 19 | 132 | 3.5  |
| 5 | 26529025  | 26529225  | 200 | 26529112  | 19 | 136 | 15.7 |
| 5 | 28049000  | 28049200  | 200 | 28049137  | 19 | 121 | 0    |
| 5 | 31422125  | 31422150  | 25  | 31422137  | 11 | 11  | 0    |
| 5 | 31895050  | 31895300  | 250 | 31895112  | 20 | 165 | 0    |
| 5 | 32621150  | 32621250  | 100 | 32621187  | 17 | 60  | 4.4  |
| 5 | 36278075  | 36278225  | 150 | 36278187  | 15 | 77  | 5.2  |
| 5 | 38228875  | 38228975  | 100 | 38228962  | 12 | 42  | 0    |
| 5 | 39659350  | 39659425  | 75  | 39659362  | 11 | 33  | 0    |
| 5 | 40871150  | 40871200  | 50  | 40871187  | 24 | 46  | 8.7  |
| 5 | 42185400  | 42185425  | 25  | 42185412  | 18 | 18  | 3.5  |
| 5 | 42428925  | 42428950  | 25  | 42428937  | 11 | 11  | 0    |
| 5 | 42796150  | 42796200  | 50  | 42796162  | 12 | 24  | 0    |
| 5 | 43045950  | 43046000  | 50  | 43045962  | 14 | 26  | 1.7  |
| 5 | 43078625  | 43078650  | 25  | 43078637  | 15 | 15  | 1.7  |
| 5 | 43638350  | 43638375  | 25  | 43638362  | 11 | 11  | 0    |
| 5 | 43982000  | 43982225  | 225 | 43982137  | 21 | 158 | 0    |
| 5 | 44978700  | 44978725  | 25  | 44978712  | 11 | 11  | 0    |
| 5 | 51276225  | 51276300  | 75  | 51276287  | 12 | 34  | 0    |
| 5 | 51862850  | 51862900  | 50  | 51862862  | 12 | 24  | 0    |
| 5 | 53852225  | 53852350  | 125 | 53852262  | 12 | 54  | 6.1  |
| 5 | 53932975  | 53933075  | 100 | 53933012  | 13 | 46  | 0    |
| 5 | 55813450  | 55813550  | 100 | 55813462  | 12 | 48  | 0    |
| 5 | 56655500  | 56655525  | 25  | 56655512  | 12 | 12  | 0    |
| 5 | 56655750  | 56655900  | 150 | 56655787  | 13 | 76  | 7    |
| 5 | 56656700  | 56656800  | 100 | 56656712  | 12 | 48  | 3.5  |
| 5 | 56715225  | 56715375  | 150 | 56715337  | 14 | 78  | 0    |
| 5 | 56726575  | 56726675  | 100 | 56726587  | 12 | 46  | 0    |
| 5 | 56789250  | 56789275  | 25  | 56789262  | 11 | 11  | 1.7  |
| 5 | 58623650  | 58623675  | 25  | 58623662  | 12 | 12  | 0    |
| 5 | 59044875  | 59045075  | 200 | 59044987  | 17 | 118 | 7    |
| 5 | 59100325  | 59100350  | 25  | 59100337  | 11 | 11  | 0.9  |
| 5 | 59900325  | 59900550  | 225 | 59900437  | 19 | 138 | 0    |
| 5 | 60325075  | 60325175  | 100 | 60325137  | 15 | 52  | 0    |
| 5 | 60493950  | 60494225  | 275 | 60494037  | 15 | 124 | 6.1  |
| 5 | 60663600  | 60663850  | 250 | 60663687  | 31 | 247 | 2.1  |
| 5 | 61637375  | 61637475  | 100 | 61637387  | 11 | 44  | 5.2  |
| 5 | 65134400  | 65134575  | 175 | 65134487  | 19 | 110 | 2.6  |
| 5 | 65476325  | 65476450  | 125 | 65476337  | 12 | 57  | 3.5  |
| 5 | 67546800  | 67547000  | 200 | 67546887  | 16 | 104 | 10.5 |
| 5 | 68264425  | 68264625  | 200 | 68264612  | 17 | 116 | 0    |
| 5 | 71639750  | 71639825  | 75  | 71639762  | 11 | 33  | 2.6  |
| 5 | 71732575  | 71732800  | 225 | 71732662  | 14 | 118 | 0    |
| 5 | 73230975  | 73231000  | 25  | 73230987  | 12 | 12  | 1.7  |
| 5 | 73232575  | 73232625  | 50  | 73232587  | 11 | 22  | 0    |
| 5 | 76360775  | 76360825  | 50  | 76360787  | 14 | 28  | 0    |
| 5 | 78943750  | 78943775  | 25  | 78943762  | 12 | 12  | 1.7  |
| 5 | 79731300  | 79731350  | 50  | 79731312  | 11 | 22  | 0    |
| 5 | 79983850  | 79984050  | 200 | 79983862  | 17 | 103 | 7.9  |
| 5 | 82405100  | 82405125  | 25  | 82405112  | 11 | 11  | 1.7  |
| 5 | 83427675  | 83427775  | 100 | 83427687  | 11 | 44  | 0    |
| 5 | 86599225  | 86599275  | 50  | 86599237  | 13 | 26  | 1.7  |
| 5 | 86599700  | 86599725  | 25  | 86599712  | 11 | 11  | 0.9  |
| 5 | 87995400  | 87995525  | 125 | 87995412  | 12 | 59  | 6.1  |
| 5 | 89122125  | 89122200  | 75  | 89122187  | 12 | 34  | 0    |
| 5 | 94978650  | 94978675  | 25  | 94978662  | 12 | 12  | 1.7  |
| 5 | 96545300  | 96545375  | 75  | 96545337  | 14 | 37  | 5.2  |
| 5 | 97713375  | 97713575  | 200 | 97713462  | 20 | 125 | 14.9 |
| 5 | 99412975  | 99413000  | 25  | 99412987  | 11 | 11  | 0    |
| 5 | 99472500  | 99472625  | 125 | 99472512  | 11 | 55  | 0    |
| 5 | 100263625 | 100263775 | 150 | 100263712 | 14 | 76  | 0    |
| 5 | 102229075 | 102229225 | 150 | 102229162 | 12 | 69  | 5.2  |
| 5 | 103084675 | 103084725 | 50  | 103084687 | 11 | 22  | 0    |
| 5 | 106902850 | 106902875 | 25  | 106902862 | 12 | 12  | 0.9  |
| 5 | 107746050 | 107746125 | 75  | 107746112 | 21 | 60  | 9.6  |
| 5 | 108091600 | 108091625 | 25  | 108091612 | 11 | 11  | 0.9  |
| 5 | 110455750 | 110455800 | 50  | 110455762 | 14 | 28  | 2.6  |

|   |           |           |     |           |    |     |      |
|---|-----------|-----------|-----|-----------|----|-----|------|
| 5 | 111347650 | 111347825 | 175 | 111347712 | 16 | 94  | 3.5  |
| 5 | 111927050 | 111927325 | 275 | 111927212 | 24 | 187 | 0    |
| 5 | 112106825 | 112106950 | 125 | 112106862 | 14 | 61  | 0    |
| 5 | 112224600 | 112224650 | 50  | 112224612 | 14 | 28  | 0    |
| 5 | 113456025 | 113456275 | 250 | 113456162 | 24 | 186 | 0    |
| 5 | 114800500 | 114800625 | 125 | 114800537 | 12 | 58  | 0    |
| 5 | 114908650 | 114909075 | 425 | 114908887 | 35 | 398 | 11.4 |
| 5 | 116025100 | 116025250 | 150 | 116025187 | 12 | 65  | 10.5 |
| 5 | 116035100 | 116035125 | 25  | 116035112 | 13 | 13  | 0    |
| 5 | 117077225 | 117077425 | 200 | 117077287 | 15 | 108 | 0    |
| 5 | 117588200 | 117588325 | 125 | 117588287 | 16 | 72  | 0    |
| 5 | 118631600 | 118631675 | 75  | 118631662 | 16 | 45  | 2.6  |
| 5 | 121418000 | 121418075 | 75  | 121418037 | 14 | 38  | 2.6  |
| 5 | 122400275 | 122400775 | 500 | 122400312 | 13 | 198 | 23.6 |
| 5 | 123300250 | 123300475 | 225 | 123300287 | 16 | 127 | 9.6  |
| 5 | 126211500 | 126211525 | 25  | 126211512 | 12 | 12  | 0.9  |
| 5 | 131189175 | 131189350 | 175 | 131189212 | 15 | 94  | 9.6  |
| 5 | 131624375 | 131624550 | 175 | 131624487 | 16 | 98  | 7.9  |
| 5 | 131631775 | 131631800 | 25  | 131631787 | 11 | 11  | 1.7  |
| 5 | 131898800 | 131898850 | 50  | 131898812 | 11 | 22  | 0    |
| 5 | 132170925 | 132171050 | 125 | 132171037 | 15 | 61  | 8.7  |
| 5 | 132229800 | 132229925 | 125 | 132229862 | 13 | 59  | 6.1  |
| 5 | 132787500 | 132787600 | 100 | 132787537 | 14 | 52  | 5.2  |
| 5 | 133403200 | 133403225 | 25  | 133403212 | 11 | 11  | 0.9  |
| 5 | 133477975 | 133478175 | 200 | 133478037 | 20 | 128 | 5.2  |
| 5 | 133914350 | 133914400 | 50  | 133914387 | 14 | 26  | 1.7  |
| 5 | 134012025 | 134012075 | 50  | 134012037 | 11 | 22  | 1.7  |
| 5 | 134289550 | 134289750 | 200 | 134289562 | 55 | 384 | 66.4 |
| 5 | 134290825 | 134290850 | 25  | 134290837 | 23 | 23  | 4.4  |
| 5 | 137118100 | 137118125 | 25  | 137118112 | 11 | 11  | 1.7  |
| 5 | 137541575 | 137541625 | 50  | 137541587 | 12 | 24  | 3.5  |
| 5 | 137828750 | 137828800 | 50  | 137828762 | 14 | 27  | 1.7  |
| 5 | 138626325 | 138626425 | 100 | 138626337 | 11 | 44  | 6.1  |
| 5 | 138637450 | 138637600 | 150 | 138637487 | 14 | 77  | 8.7  |
| 5 | 138993125 | 138993175 | 50  | 138993137 | 12 | 24  | 3.5  |
| 5 | 139036975 | 139037025 | 50  | 139036987 | 11 | 22  | 1.7  |
| 5 | 139070075 | 139070150 | 75  | 139070087 | 13 | 39  | 3.5  |
| 5 | 139071300 | 139071375 | 75  | 139071312 | 13 | 37  | 0    |
| 5 | 139761350 | 139761475 | 125 | 139761437 | 13 | 58  | 3.5  |
| 5 | 140051300 | 140051425 | 125 | 140051387 | 16 | 71  | 6.1  |
| 5 | 140679975 | 140680250 | 275 | 140680087 | 19 | 158 | 7    |
| 5 | 140854100 | 140854225 | 125 | 140854137 | 13 | 60  | 0    |
| 5 | 141041525 | 141041625 | 100 | 141041562 | 13 | 48  | 3.5  |
| 5 | 141283775 | 141283800 | 25  | 141283787 | 11 | 11  | 1.7  |
| 5 | 141684950 | 141685025 | 75  | 141684962 | 16 | 41  | 7    |
| 5 | 141685400 | 141685625 | 225 | 141685562 | 20 | 148 | 14.9 |
| 5 | 141716125 | 141716325 | 200 | 141716137 | 12 | 88  | 3.5  |
| 5 | 142034400 | 142034575 | 175 | 142034487 | 12 | 80  | 7.9  |
| 5 | 142744825 | 142745000 | 175 | 142744862 | 15 | 89  | 0    |
| 5 | 142765225 | 142765400 | 175 | 142765262 | 16 | 97  | 13.1 |
| 5 | 143185100 | 143185125 | 25  | 143185112 | 11 | 11  | 0    |
| 5 | 145137775 | 145137925 | 150 | 145137787 | 12 | 72  | 7.9  |
| 5 | 148398025 | 148398050 | 25  | 148398037 | 11 | 11  | 0.9  |
| 5 | 148588900 | 148588950 | 50  | 148588912 | 12 | 24  | 0    |
| 5 | 148705000 | 148705150 | 150 | 148705037 | 17 | 78  | 3.5  |
| 5 | 148826350 | 148826425 | 75  | 148826387 | 13 | 37  | 3.5  |
| 5 | 149300725 | 149300875 | 150 | 149300787 | 13 | 66  | 0    |
| 5 | 149613750 | 149613825 | 75  | 149613762 | 11 | 33  | 0    |
| 5 | 149837175 | 149837300 | 125 | 149837187 | 11 | 53  | 0    |
| 5 | 150118900 | 150119025 | 125 | 150118912 | 11 | 55  | 3.5  |
| 5 | 150255750 | 150255900 | 150 | 150255812 | 13 | 69  | 2.6  |
| 5 | 150374725 | 150374750 | 25  | 150374737 | 11 | 11  | 0    |
| 5 | 150584000 | 150584050 | 50  | 150584012 | 11 | 22  | 1.7  |
| 5 | 153301100 | 153301325 | 225 | 153301212 | 19 | 131 | 0    |
| 5 | 153970250 | 153970275 | 25  | 153970262 | 11 | 11  | 0    |
| 5 | 154218250 | 154218325 | 75  | 154218287 | 14 | 38  | 5.2  |
| 5 | 154245800 | 154245875 | 75  | 154245812 | 12 | 36  | 0    |
| 5 | 155835675 | 155835700 | 25  | 155835687 | 12 | 12  | 0    |
| 5 | 157275800 | 157275825 | 25  | 157275812 | 11 | 11  | 1.7  |
| 5 | 158086750 | 158086825 | 75  | 158086762 | 11 | 31  | 4.4  |
| 5 | 158240325 | 158240400 | 75  | 158240337 | 11 | 33  | 0    |
| 5 | 158459650 | 158459675 | 25  | 158459662 | 11 | 11  | 0.9  |
| 5 | 158567650 | 158567700 | 50  | 158567662 | 11 | 22  | 0    |
| 5 | 158569275 | 158569325 | 50  | 158569287 | 11 | 22  | 3.5  |
| 5 | 159039850 | 159039900 | 50  | 159039862 | 11 | 22  | 0    |

|   |           |           |     |           |    |     |      |
|---|-----------|-----------|-----|-----------|----|-----|------|
| 5 | 159525075 | 159525100 | 25  | 159525087 | 12 | 12  | 1.7  |
| 5 | 159714875 | 159714900 | 25  | 159714887 | 11 | 11  | 0.9  |
| 5 | 159715125 | 159715150 | 25  | 159715137 | 12 | 12  | 0.9  |
| 5 | 163492125 | 163492275 | 150 | 163492162 | 17 | 85  | 7    |
| 5 | 168153775 | 168153800 | 25  | 168153787 | 15 | 15  | 1.7  |
| 5 | 168245425 | 168245625 | 200 | 168245487 | 15 | 105 | 14.9 |
| 5 | 169056525 | 169056975 | 450 | 169056887 | 22 | 265 | 16.6 |
| 5 | 169210125 | 169210225 | 100 | 169210162 | 14 | 52  | 0    |
| 5 | 169690800 | 169690900 | 100 | 169690812 | 12 | 48  | 2.6  |
| 5 | 169693400 | 169693500 | 100 | 169693412 | 11 | 42  | 3.5  |
| 5 | 170748050 | 170748250 | 200 | 170748162 | 17 | 125 | 7    |
| 5 | 171048850 | 171048950 | 100 | 171048862 | 14 | 50  | 7    |
| 5 | 171339225 | 171339425 | 200 | 171339387 | 20 | 132 | 0    |
| 5 | 171411900 | 171412000 | 100 | 171411912 | 17 | 65  | 7    |
| 5 | 171412225 | 171412250 | 25  | 171412237 | 12 | 12  | 1.7  |
| 5 | 171504000 | 171504100 | 100 | 171504012 | 12 | 48  | 7    |
| 5 | 171634750 | 171634950 | 200 | 171634837 | 14 | 103 | 8.7  |
| 5 | 171724250 | 171724550 | 300 | 171724437 | 25 | 222 | 7.9  |
| 5 | 172318525 | 172318650 | 125 | 172318537 | 11 | 55  | 0    |
| 5 | 172460975 | 172461075 | 100 | 172461012 | 13 | 46  | 1.7  |
| 5 | 172951800 | 172952000 | 200 | 172951862 | 18 | 112 | 3.5  |
| 5 | 173049225 | 173049275 | 50  | 173049237 | 12 | 23  | 2.6  |
| 5 | 173247575 | 173247600 | 25  | 173247587 | 26 | 26  | 4.4  |
| 5 | 174469100 | 174469275 | 175 | 174469137 | 13 | 84  | 12.2 |
| 5 | 175056100 | 175056200 | 100 | 175056137 | 15 | 54  | 7    |
| 5 | 175896875 | 175896950 | 75  | 175896887 | 12 | 36  | 0    |
| 5 | 175933825 | 175933900 | 75  | 175933887 | 14 | 38  | 0    |
| 5 | 177716275 | 177716300 | 25  | 177716287 | 11 | 11  | 0    |
| 5 | 177986600 | 177986775 | 175 | 177986637 | 14 | 87  | 7    |
| 5 | 178002150 | 178002425 | 275 | 178002262 | 22 | 169 | 3.5  |
| 5 | 178071775 | 178071875 | 100 | 178071862 | 13 | 46  | 0    |
| 5 | 178910700 | 178910850 | 150 | 178910812 | 15 | 82  | 3.5  |
| 5 | 179058175 | 179058375 | 200 | 179058237 | 12 | 91  | 4.4  |
| 5 | 179536900 | 179537050 | 150 | 179536937 | 16 | 89  | 7    |
| 5 | 180170200 | 180170325 | 125 | 180170312 | 14 | 62  | 8.7  |
| 5 | 180548875 | 180548950 | 75  | 180548887 | 12 | 36  | 0    |
| 5 | 180605600 | 180605625 | 25  | 180605612 | 11 | 11  | 0    |
| 4 | 1344500   | 1344525   | 25  | 1344512   | 11 | 11  | 1.7  |
| 4 | 4468750   | 4468825   | 75  | 4468762   | 12 | 36  | 0    |
| 4 | 5027550   | 5027575   | 25  | 5027562   | 11 | 11  | 0    |
| 4 | 6111275   | 6111325   | 50  | 6111287   | 11 | 22  | 0    |
| 4 | 6762525   | 6762725   | 200 | 6762587   | 17 | 108 | 0    |
| 4 | 8116625   | 8116800   | 175 | 8116637   | 16 | 101 | 0    |
| 4 | 23545050  | 23545150  | 100 | 23545087  | 13 | 48  | 1.7  |
| 4 | 24348500  | 24348575  | 75  | 24348512  | 12 | 36  | 0    |
| 4 | 24834600  | 24834825  | 225 | 24834637  | 18 | 140 | 0    |
| 4 | 25519550  | 25519725  | 175 | 25519587  | 15 | 82  | 4.4  |
| 4 | 35237725  | 35237875  | 150 | 35237762  | 14 | 80  | 0    |
| 4 | 37407350  | 37407725  | 375 | 37407587  | 12 | 154 | 3.5  |
| 4 | 37797850  | 37797975  | 125 | 37797887  | 14 | 66  | 8.7  |
| 4 | 38340975  | 38341150  | 175 | 38341062  | 17 | 96  | 8.7  |
| 4 | 39044375  | 39044525  | 150 | 39044387  | 21 | 104 | 8.7  |
| 4 | 40621375  | 40621425  | 50  | 40621412  | 12 | 23  | 2.6  |
| 4 | 40913325  | 40913450  | 125 | 40913362  | 14 | 61  | 4.4  |
| 4 | 44340625  | 44340700  | 75  | 44340637  | 11 | 33  | 0    |
| 4 | 44790150  | 44790175  | 25  | 44790162  | 11 | 11  | 0    |
| 4 | 47160400  | 47160475  | 75  | 47160412  | 12 | 35  | 4.4  |
| 4 | 47535150  | 47535175  | 25  | 47535162  | 12 | 12  | 0    |
| 4 | 52403675  | 52403800  | 125 | 52403687  | 12 | 52  | 8.7  |
| 4 | 53444350  | 53444475  | 125 | 53444387  | 12 | 56  | 3.5  |
| 4 | 53680575  | 53680700  | 125 | 53680587  | 11 | 55  | 0    |
| 4 | 54393475  | 54393775  | 300 | 54393637  | 24 | 213 | 0    |
| 4 | 55219800  | 55219825  | 25  | 55219812  | 13 | 13  | 0.9  |
| 4 | 55345025  | 55345150  | 125 | 55345062  | 14 | 68  | 7    |
| 4 | 55438250  | 55438300  | 50  | 55438262  | 12 | 24  | 0    |
| 4 | 55745425  | 55745725  | 300 | 55745612  | 21 | 167 | 3.5  |
| 4 | 60146125  | 60146175  | 50  | 60146137  | 13 | 26  | 1.7  |
| 4 | 63430325  | 63430400  | 75  | 63430337  | 11 | 33  | 1.7  |
| 4 | 64779050  | 64779300  | 250 | 64779212  | 26 | 200 | 1.7  |
| 4 | 68208900  | 68209100  | 200 | 68208962  | 18 | 120 | 0    |
| 4 | 68898325  | 68898375  | 50  | 68898362  | 14 | 26  | 4.4  |
| 4 | 69894100  | 69894125  | 25  | 69894112  | 12 | 12  | 0.9  |
| 4 | 69958425  | 69958450  | 25  | 69958437  | 11 | 11  | 0    |
| 4 | 72017800  | 72017850  | 50  | 72017812  | 11 | 22  | 0    |
| 4 | 72077950  | 72078050  | 100 | 72078012  | 19 | 70  | 4.4  |

|   |           |           |     |           |    |     |      |
|---|-----------|-----------|-----|-----------|----|-----|------|
| 4 | 74792925  | 74793025  | 100 | 74792937  | 12 | 48  | 0    |
| 4 | 77131000  | 77131025  | 25  | 77131012  | 12 | 12  | 0.9  |
| 4 | 77288550  | 77288650  | 100 | 77288637  | 16 | 57  | 5.2  |
| 4 | 77604075  | 77604250  | 175 | 77604087  | 16 | 85  | 0    |
| 4 | 78216200  | 78216250  | 50  | 78216237  | 15 | 27  | 4.4  |
| 4 | 78473000  | 78473025  | 25  | 78473012  | 11 | 11  | 1.7  |
| 4 | 83513050  | 83513075  | 25  | 83513062  | 11 | 11  | 0    |
| 4 | 83634250  | 83634350  | 100 | 83634337  | 13 | 46  | 7    |
| 4 | 84518650  | 84519000  | 350 | 84518787  | 31 | 302 | 6.1  |
| 4 | 88074950  | 88074975  | 25  | 88074962  | 11 | 11  | 0.9  |
| 4 | 88865600  | 88865675  | 75  | 88865637  | 14 | 37  | 0    |
| 4 | 89260150  | 89260475  | 325 | 89260337  | 24 | 227 | 0    |
| 4 | 90759475  | 90759600  | 125 | 90759487  | 12 | 60  | 8.7  |
| 4 | 95466100  | 95466200  | 100 | 95466112  | 12 | 46  | 1.7  |
| 4 | 99283825  | 99283850  | 25  | 99283837  | 11 | 11  | 1.7  |
| 4 | 101160125 | 101160175 | 50  | 101160137 | 11 | 22  | 0.9  |
| 4 | 101302250 | 101302700 | 450 | 101302362 | 20 | 254 | 5.2  |
| 4 | 101363675 | 101363800 | 125 | 101363712 | 13 | 62  | 8.7  |
| 4 | 105239850 | 105240050 | 200 | 105239912 | 22 | 143 | 0    |
| 4 | 106849275 | 106849400 | 125 | 106849287 | 16 | 70  | 5.2  |
| 4 | 108489975 | 108490125 | 150 | 108490012 | 13 | 70  | 9.6  |
| 4 | 108860975 | 108861150 | 175 | 108861037 | 13 | 88  | 10.5 |
| 4 | 109293575 | 109293875 | 300 | 109293737 | 25 | 214 | 13.1 |
| 4 | 109701300 | 109701525 | 225 | 109701337 | 16 | 129 | 11.4 |
| 4 | 110319875 | 110319950 | 75  | 110319887 | 11 | 33  | 0    |
| 4 | 113084575 | 113084675 | 100 | 113084587 | 11 | 44  | 3.5  |
| 4 | 113777225 | 113778025 | 300 | 113777912 | 12 | 132 | 7    |
| 4 | 117155550 | 117155950 | 400 | 117155837 | 16 | 179 | 7.9  |
| 4 | 119732300 | 119732375 | 75  | 119732312 | 14 | 40  | 0.9  |
| 4 | 119826000 | 119826025 | 25  | 119826012 | 13 | 13  | 0.9  |
| 4 | 120353250 | 120353275 | 25  | 120353262 | 13 | 13  | 0.9  |
| 4 | 123873400 | 123873425 | 25  | 123873412 | 11 | 11  | 1.7  |
| 4 | 123938750 | 123938775 | 25  | 123938762 | 11 | 11  | 0    |
| 4 | 125980650 | 125980850 | 200 | 125980787 | 17 | 114 | 0    |
| 4 | 126101675 | 126102075 | 400 | 126101912 | 30 | 325 | 14.9 |
| 4 | 128037800 | 128037850 | 50  | 128037837 | 12 | 23  | 0    |
| 4 | 128227300 | 128227350 | 50  | 128227312 | 11 | 22  | 0    |
| 4 | 128693025 | 128693100 | 75  | 128693037 | 11 | 33  | 0    |
| 4 | 129517725 | 129517900 | 175 | 129517837 | 18 | 103 | 0    |
| 4 | 131040350 | 131040400 | 50  | 131040362 | 11 | 22  | 0    |
| 4 | 133824625 | 133824750 | 125 | 133824637 | 11 | 55  | 0    |
| 4 | 134289000 | 134289175 | 175 | 134289062 | 18 | 109 | 0.9  |
| 4 | 137378125 | 137378300 | 175 | 137378237 | 13 | 83  | 0    |
| 4 | 139503375 | 139503450 | 75  | 139503387 | 13 | 37  | 0    |
| 4 | 139527775 | 139527875 | 100 | 139527862 | 12 | 45  | 0    |
| 4 | 141294950 | 141295150 | 200 | 141295112 | 19 | 118 | 8.7  |
| 4 | 143546500 | 143546675 | 175 | 143546637 | 13 | 77  | 3.5  |
| 4 | 146238800 | 146238825 | 25  | 146238812 | 12 | 12  | 1.7  |
| 4 | 147079450 | 147079500 | 50  | 147079487 | 16 | 30  | 3.5  |
| 4 | 149125975 | 149126050 | 75  | 149125987 | 11 | 33  | 2.6  |
| 4 | 151138875 | 151138925 | 50  | 151138887 | 12 | 23  | 0    |
| 4 | 151167925 | 151167975 | 50  | 151167937 | 11 | 22  | 0    |
| 4 | 152689450 | 152689500 | 50  | 152689462 | 12 | 24  | 0    |
| 4 | 152901600 | 152901700 | 100 | 152901637 | 15 | 57  | 5.2  |
| 4 | 153892675 | 153892725 | 50  | 153892687 | 12 | 24  | 0    |
| 4 | 155021675 | 155021900 | 225 | 155021812 | 21 | 147 | 0    |
| 4 | 155848725 | 155848775 | 50  | 155848737 | 11 | 22  | 3.5  |
| 4 | 157309775 | 157309800 | 25  | 157309787 | 12 | 12  | 0    |
| 4 | 164334375 | 164334600 | 225 | 164334437 | 19 | 145 | 0    |
| 4 | 165183800 | 165183925 | 125 | 165183812 | 11 | 55  | 1.7  |
| 4 | 169361400 | 169361425 | 25  | 169361412 | 12 | 12  | 0    |
| 4 | 169399700 | 169400025 | 325 | 169399862 | 19 | 188 | 5.2  |
| 4 | 170228150 | 170228225 | 75  | 170228162 | 11 | 33  | 3.5  |
| 4 | 170770075 | 170770125 | 50  | 170770112 | 14 | 27  | 2.6  |
| 4 | 171150950 | 171150975 | 25  | 171150962 | 11 | 11  | 1.7  |
| 4 | 171185400 | 171185475 | 75  | 171185412 | 14 | 41  | 4.4  |
| 4 | 171973825 | 171974025 | 200 | 171973962 | 17 | 110 | 0    |
| 4 | 174527500 | 174527850 | 350 | 174527687 | 24 | 254 | 36.7 |
| 4 | 175022775 | 175022800 | 25  | 175022787 | 11 | 11  | 0    |
| 4 | 178113350 | 178113550 | 200 | 178113487 | 13 | 93  | 5.2  |
| 4 | 178456200 | 178456400 | 200 | 178456337 | 12 | 85  | 0    |
| 4 | 185426400 | 185426450 | 50  | 185426412 | 13 | 24  | 2.6  |
| 4 | 185540450 | 185540475 | 25  | 185540462 | 12 | 12  | 0    |
| 4 | 185953750 | 185953825 | 75  | 185953762 | 12 | 36  | 0    |
| 4 | 186584125 | 186584275 | 150 | 186584162 | 15 | 86  | 5.2  |

|   |           |           |     |           |    |     |      |
|---|-----------|-----------|-----|-----------|----|-----|------|
| 4 | 186745800 | 186745825 | 25  | 186745812 | 12 | 12  | 0    |
| 4 | 187302425 | 187302550 | 125 | 187302462 | 14 | 62  | 7    |
| 4 | 187610125 | 187610475 | 350 | 187610287 | 16 | 171 | 0    |
| 4 | 190820675 | 190820875 | 200 | 190820737 | 20 | 138 | 7    |
| 7 | 244525    | 244675    | 150 | 244537    | 14 | 76  | 9.6  |
| 7 | 732200    | 732375    | 175 | 732287    | 19 | 110 | 7    |
| 7 | 1467025   | 1467075   | 50  | 1467037   | 11 | 22  | 3.5  |
| 7 | 1509525   | 1509550   | 25  | 1509537   | 11 | 11  | 0    |
| 7 | 1643475   | 1643550   | 75  | 1643487   | 12 | 34  | 0    |
| 7 | 2066300   | 2066500   | 200 | 2066312   | 12 | 62  | 0    |
| 7 | 2320075   | 2320175   | 100 | 2320087   | 12 | 48  | 1.7  |
| 7 | 2659150   | 2659225   | 75  | 2659162   | 11 | 33  | 5.2  |
| 7 | 4980175   | 4980200   | 25  | 4980187   | 12 | 12  | 0.9  |
| 7 | 5051800   | 5051975   | 175 | 5051837   | 17 | 118 | 21   |
| 7 | 5070625   | 5070850   | 225 | 5070787   | 21 | 159 | 0    |
| 7 | 5071075   | 5071300   | 225 | 5071112   | 17 | 129 | 7    |
| 7 | 5403425   | 5403500   | 75  | 5403462   | 14 | 38  | 5.2  |
| 7 | 5536875   | 5536900   | 25  | 5536887   | 11 | 11  | 0    |
| 7 | 6110775   | 6110800   | 25  | 6110787   | 11 | 11  | 1.7  |
| 7 | 6681250   | 6681450   | 200 | 6681287   | 20 | 146 | 0    |
| 7 | 6697300   | 6697550   | 250 | 6697412   | 19 | 168 | 0    |
| 7 | 6697775   | 6698175   | 400 | 6697812   | 15 | 211 | 0    |
| 7 | 6713150   | 6713300   | 150 | 6713187   | 17 | 86  | 7.9  |
| 7 | 6735725   | 6735925   | 200 | 6735737   | 12 | 84  | 0    |
| 7 | 7160150   | 7160250   | 100 | 7160162   | 11 | 44  | 0    |
| 7 | 7188350   | 7188375   | 25  | 7188362   | 14 | 14  | 0    |
| 7 | 10946300  | 10946500  | 200 | 10946362  | 22 | 138 | 0    |
| 7 | 15590875  | 15591075  | 200 | 15590962  | 21 | 136 | 0    |
| 7 | 16652100  | 16652175  | 75  | 16652112  | 11 | 33  | 0    |
| 7 | 20336600  | 20336625  | 25  | 20336612  | 18 | 18  | 3.5  |
| 7 | 20494300  | 20494375  | 75  | 20494362  | 12 | 34  | 1.7  |
| 7 | 22089575  | 22089775  | 200 | 22089737  | 14 | 98  | 4.4  |
| 7 | 25115500  | 25115525  | 25  | 25115512  | 11 | 11  | 0    |
| 7 | 25131325  | 25131450  | 125 | 25131412  | 12 | 53  | 4.4  |
| 7 | 25186375  | 25186450  | 75  | 25186387  | 11 | 33  | 2.6  |
| 7 | 25858050  | 25858075  | 25  | 25858062  | 11 | 11  | 0.9  |
| 7 | 27378425  | 27378475  | 50  | 27378437  | 11 | 22  | 0    |
| 7 | 28810700  | 28810725  | 25  | 28810712  | 11 | 11  | 0    |
| 7 | 28917650  | 28917725  | 75  | 28917662  | 12 | 36  | 0    |
| 7 | 28943400  | 28943450  | 50  | 28943412  | 11 | 22  | 0    |
| 7 | 30290425  | 30290450  | 25  | 30290437  | 12 | 12  | 0.9  |
| 7 | 30555125  | 30555200  | 75  | 30555137  | 11 | 33  | 5.2  |
| 7 | 32898275  | 32898350  | 75  | 32898337  | 18 | 48  | 3.5  |
| 7 | 32954500  | 32954700  | 200 | 32954662  | 13 | 93  | 0    |
| 7 | 33069100  | 33069150  | 50  | 33069112  | 11 | 22  | 3.5  |
| 7 | 33076425  | 33076725  | 300 | 33076562  | 32 | 266 | 0    |
| 7 | 33988100  | 33988125  | 25  | 33988112  | 12 | 12  | 0.9  |
| 7 | 38184150  | 38184200  | 50  | 38184187  | 12 | 23  | 2.6  |
| 7 | 38522275  | 38522350  | 75  | 38522287  | 11 | 33  | 0    |
| 7 | 39720975  | 39721125  | 150 | 39721012  | 15 | 81  | 0    |
| 7 | 39955600  | 39955750  | 150 | 39955687  | 19 | 100 | 14   |
| 7 | 40141125  | 40141250  | 125 | 40141137  | 12 | 58  | 6.1  |
| 7 | 44078425  | 44078500  | 75  | 44078437  | 12 | 34  | 0.9  |
| 7 | 44715850  | 44715925  | 75  | 44715862  | 12 | 36  | 2.6  |
| 7 | 45403875  | 45404025  | 150 | 45403912  | 14 | 78  | 0    |
| 7 | 45409650  | 45409850  | 200 | 45409687  | 23 | 150 | 0    |
| 7 | 46474900  | 46475250  | 350 | 46475087  | 24 | 239 | 5.2  |
| 7 | 46765900  | 46765950  | 50  | 46765912  | 11 | 22  | 1.7  |
| 7 | 47073350  | 47073425  | 75  | 47073362  | 12 | 36  | 1.7  |
| 7 | 47094900  | 47095050  | 150 | 47094962  | 13 | 70  | 0    |
| 7 | 47125450  | 47125500  | 50  | 47125462  | 11 | 22  | 0    |
| 7 | 47683300  | 47683500  | 200 | 47683387  | 16 | 108 | 7    |
| 7 | 47998250  | 47998375  | 125 | 47998287  | 20 | 78  | 10.5 |
| 7 | 48080750  | 48080875  | 125 | 48080812  | 14 | 66  | 4.4  |
| 7 | 48150650  | 48150775  | 125 | 48150662  | 11 | 55  | 0    |
| 7 | 51158375  | 51158500  | 125 | 51158462  | 13 | 58  | 0    |
| 7 | 51182550  | 51182575  | 25  | 51182562  | 11 | 11  | 0    |
| 7 | 51189500  | 51189575  | 75  | 51189512  | 12 | 34  | 2.6  |
| 7 | 55974875  | 55974975  | 100 | 55974937  | 14 | 52  | 0    |
| 7 | 56043200  | 56043225  | 25  | 56043212  | 12 | 12  | 0    |
| 7 | 57532900  | 57533050  | 150 | 57532912  | 11 | 57  | 0    |
| 7 | 61623675  | 61623825  | 150 | 61623687  | 13 | 73  | 10.5 |
| 7 | 63717675  | 63717850  | 175 | 63717687  | 15 | 98  | 0    |
| 7 | 63892250  | 63892275  | 25  | 63892262  | 11 | 11  | 1.7  |
| 7 | 64104300  | 64104350  | 50  | 64104312  | 13 | 26  | 2.6  |

|   |          |          |     |          |    |     |      |
|---|----------|----------|-----|----------|----|-----|------|
| 7 | 64104600 | 64104625 | 25  | 64104612 | 14 | 14  | 2.6  |
| 7 | 64506475 | 64506675 | 200 | 64506562 | 15 | 98  | 0    |
| 7 | 65368225 | 65368250 | 25  | 65368237 | 11 | 11  | 1.7  |
| 7 | 65730800 | 65730825 | 25  | 65730812 | 11 | 11  | 0.9  |
| 7 | 65731900 | 65731950 | 50  | 65731912 | 13 | 24  | 3.5  |
| 7 | 65756675 | 65756750 | 75  | 65756737 | 16 | 41  | 5.2  |
| 7 | 66354450 | 66354575 | 125 | 66354487 | 15 | 67  | 3.5  |
| 7 | 66816050 | 66816125 | 75  | 66816062 | 11 | 33  | 0    |
| 7 | 69282700 | 69282750 | 50  | 69282712 | 11 | 22  | 0    |
| 7 | 70736400 | 70736500 | 100 | 70736437 | 14 | 49  | 0.9  |
| 7 | 70989175 | 70989200 | 25  | 70989187 | 12 | 12  | 1.7  |
| 7 | 71664925 | 71665175 | 250 | 71665087 | 26 | 209 | 0    |
| 7 | 71838850 | 71839050 | 200 | 71838962 | 21 | 118 | 0    |
| 7 | 72394775 | 72394800 | 25  | 72394787 | 11 | 11  | 0.9  |
| 7 | 72735675 | 72735700 | 25  | 72735687 | 12 | 12  | 1.7  |
| 7 | 73055050 | 73055150 | 100 | 73055062 | 12 | 48  | 1.7  |
| 7 | 73091675 | 73091700 | 25  | 73091687 | 14 | 14  | 2.6  |
| 7 | 73145275 | 73145450 | 175 | 73145337 | 17 | 103 | 12.2 |
| 7 | 73150100 | 73150500 | 400 | 73150337 | 33 | 368 | 21   |
| 7 | 75273800 | 75274125 | 325 | 75273987 | 25 | 262 | 0    |
| 7 | 75759150 | 75759175 | 25  | 75759162 | 11 | 11  | 1.7  |
| 7 | 75772325 | 75772425 | 100 | 75772362 | 13 | 48  | 0    |
| 7 | 75777625 | 75777750 | 125 | 75777712 | 14 | 63  | 4.4  |
| 7 | 75860200 | 75860250 | 50  | 75860212 | 12 | 24  | 2.6  |
| 7 | 76676775 | 76677075 | 300 | 76676912 | 34 | 277 | 10.5 |
| 7 | 76794550 | 76794675 | 125 | 76794637 | 14 | 62  | 0    |
| 7 | 76961475 | 76961525 | 50  | 76961487 | 11 | 22  | 0    |
| 7 | 78998650 | 78998725 | 75  | 78998687 | 14 | 40  | 2.6  |
| 7 | 80386050 | 80386150 | 100 | 80386112 | 16 | 60  | 3.5  |
| 7 | 80409675 | 80409700 | 25  | 80409687 | 12 | 12  | 0    |
| 7 | 82022150 | 82022325 | 175 | 82022237 | 17 | 86  | 4.4  |
| 7 | 83713275 | 83713300 | 25  | 83713287 | 14 | 14  | 2.6  |
| 7 | 85154325 | 85154475 | 150 | 85154387 | 16 | 82  | 6.1  |
| 7 | 85204875 | 85205025 | 150 | 85204937 | 15 | 77  | 3.5  |
| 7 | 85213125 | 85213325 | 200 | 85213162 | 15 | 106 | 11.4 |
| 7 | 86672225 | 86672450 | 225 | 86672287 | 19 | 146 | 0    |
| 7 | 86713075 | 86713100 | 25  | 86713087 | 11 | 11  | 0    |
| 7 | 86795525 | 86795925 | 400 | 86795712 | 38 | 405 | 9.6  |
| 7 | 88013450 | 88013575 | 125 | 88013462 | 13 | 61  | 3.5  |
| 7 | 88605575 | 88605650 | 75  | 88605587 | 11 | 33  | 0    |
| 7 | 89603325 | 89603525 | 200 | 89603337 | 13 | 95  | 4.4  |
| 7 | 89813650 | 89813725 | 75  | 89813662 | 12 | 36  | 5.2  |
| 7 | 89814000 | 89814125 | 125 | 89814037 | 20 | 89  | 9.6  |
| 7 | 89931525 | 89931750 | 225 | 89931537 | 12 | 97  | 3.5  |
| 7 | 90910625 | 90910725 | 100 | 90910637 | 11 | 44  | 1.7  |
| 7 | 91996150 | 91996300 | 150 | 91996162 | 15 | 85  | 15.7 |
| 7 | 92185500 | 92185525 | 25  | 92185512 | 12 | 12  | 0.9  |
| 7 | 93649400 | 93649525 | 125 | 93649437 | 13 | 61  | 2.6  |
| 7 | 93650625 | 93650700 | 75  | 93650637 | 11 | 33  | 5.2  |
| 7 | 94098875 | 94098900 | 25  | 94098887 | 11 | 11  | 0.9  |
| 7 | 94122450 | 94122625 | 175 | 94122537 | 14 | 90  | 6.1  |
| 7 | 94345225 | 94345525 | 300 | 94345387 | 24 | 210 | 0.9  |
| 7 | 94566500 | 94566575 | 75  | 94566512 | 11 | 33  | 2.6  |
| 7 | 94949975 | 94950050 | 75  | 94950012 | 15 | 37  | 0.9  |
| 7 | 95225625 | 95225650 | 25  | 95225637 | 13 | 13  | 0.9  |
| 7 | 95765225 | 95765425 | 200 | 95765362 | 14 | 100 | 12.2 |
| 7 | 95993850 | 95993875 | 25  | 95993862 | 11 | 11  | 1.7  |
| 7 | 96180275 | 96180675 | 400 | 96180487 | 32 | 364 | 14.9 |
| 7 | 96584575 | 96584675 | 100 | 96584662 | 19 | 62  | 7.9  |
| 7 | 96584975 | 96585025 | 50  | 96584987 | 16 | 32  | 3.5  |
| 7 | 96600575 | 96600600 | 25  | 96600587 | 12 | 12  | 0.9  |
| 7 | 97722650 | 97722675 | 25  | 97722662 | 12 | 12  | 1.7  |
| 7 | 97822075 | 97822225 | 150 | 97822162 | 14 | 76  | 7    |
| 7 | 98021200 | 98021325 | 125 | 98021212 | 13 | 63  | 0    |
| 7 | 98472450 | 98472600 | 150 | 98472487 | 18 | 84  | 0    |
| 7 | 98745675 | 98745725 | 50  | 98745712 | 14 | 26  | 3.5  |
| 7 | 98901500 | 98901525 | 25  | 98901512 | 15 | 15  | 2.6  |
| 7 | 98966825 | 98967150 | 325 | 98967012 | 38 | 351 | 11.4 |
| 7 | 98993700 | 98993775 | 75  | 98993712 | 14 | 38  | 5.2  |
| 7 | 99355725 | 99355825 | 100 | 99355787 | 13 | 46  | 5.2  |
| 7 | 99452200 | 99452325 | 125 | 99452212 | 13 | 61  | 5.2  |
| 7 | 99506800 | 99507300 | 500 | 99507237 | 23 | 333 | 37.6 |
| 7 | 99514600 | 99514675 | 75  | 99514612 | 11 | 33  | 5.2  |
| 7 | 99517450 | 99517550 | 100 | 99517462 | 16 | 58  | 3.5  |
| 7 | 99604500 | 99604550 | 50  | 99604537 | 14 | 27  | 4.4  |

|   |           |           |     |           |    |     |      |
|---|-----------|-----------|-----|-----------|----|-----|------|
| 7 | 99865250  | 99865425  | 175 | 99865312  | 24 | 126 | 10.5 |
| 7 | 100141550 | 100141600 | 50  | 100141562 | 17 | 31  | 3.5  |
| 7 | 100239050 | 100239075 | 25  | 100239062 | 11 | 11  | 1.7  |
| 7 | 100615075 | 100615100 | 25  | 100615087 | 11 | 11  | 0    |
| 7 | 100648225 | 100648600 | 375 | 100648262 | 51 | 632 | 45.4 |
| 7 | 100751425 | 100751500 | 75  | 100751437 | 11 | 33  | 0.9  |
| 7 | 100844025 | 100844050 | 25  | 100844037 | 11 | 11  | 1.7  |
| 7 | 101007050 | 101007250 | 200 | 101007162 | 17 | 114 | 6.1  |
| 7 | 101013450 | 101013650 | 200 | 101013512 | 19 | 129 | 0.9  |
| 7 | 101015825 | 101015900 | 75  | 101015862 | 14 | 40  | 5.2  |
| 7 | 101595375 | 101595450 | 75  | 101595387 | 11 | 33  | 2.6  |
| 7 | 101599875 | 101599900 | 25  | 101599887 | 12 | 12  | 1.7  |
| 7 | 101600650 | 101600725 | 75  | 101600662 | 13 | 37  | 5.2  |
| 7 | 101686050 | 101686150 | 100 | 101686112 | 15 | 56  | 7.9  |
| 7 | 102287325 | 102287475 | 150 | 102287337 | 12 | 70  | 1.7  |
| 7 | 102288075 | 102288200 | 125 | 102288187 | 12 | 56  | 0    |
| 7 | 102411375 | 102411625 | 250 | 102411487 | 38 | 285 | 8.7  |
| 7 | 102772075 | 102772125 | 50  | 102772087 | 11 | 22  | 1.7  |
| 7 | 102960900 | 102961000 | 100 | 102960912 | 14 | 54  | 3.5  |
| 7 | 103626675 | 103626825 | 150 | 103626762 | 13 | 67  | 1.7  |
| 7 | 103635700 | 103635800 | 100 | 103635737 | 13 | 48  | 2.6  |
| 7 | 103648000 | 103648025 | 25  | 103648012 | 12 | 12  | 0    |
| 7 | 103692100 | 103692300 | 200 | 103692162 | 17 | 110 | 0    |
| 7 | 104204625 | 104204650 | 25  | 104204637 | 12 | 12  | 0.9  |
| 7 | 104222675 | 104222850 | 175 | 104222837 | 13 | 70  | 10.5 |
| 7 | 104223100 | 104223150 | 50  | 104223112 | 12 | 24  | 3.5  |
| 7 | 104232200 | 104232400 | 200 | 104232212 | 13 | 97  | 7.9  |
| 7 | 104233650 | 104233700 | 50  | 104233662 | 11 | 22  | 3.5  |
| 7 | 104243575 | 104243600 | 25  | 104243587 | 11 | 11  | 0.9  |
| 7 | 104276250 | 104276300 | 50  | 104276262 | 12 | 24  | 3.5  |
| 7 | 104356725 | 104356750 | 25  | 104356737 | 14 | 14  | 1.7  |
| 7 | 104358850 | 104358875 | 25  | 104358862 | 12 | 12  | 1.7  |
| 7 | 104373000 | 104373075 | 75  | 104373012 | 21 | 51  | 7    |
| 7 | 104391725 | 104391925 | 200 | 104391787 | 14 | 102 | 7    |
| 7 | 104411950 | 104412025 | 75  | 104411962 | 13 | 39  | 4.4  |
| 7 | 104441700 | 104441775 | 75  | 104441712 | 11 | 33  | 5.2  |
| 7 | 104606175 | 104606250 | 75  | 104606187 | 12 | 36  | 0    |
| 7 | 104950025 | 104950175 | 150 | 104950062 | 13 | 70  | 8.7  |
| 7 | 105139300 | 105139850 | 550 | 105139587 | 66 | 788 | 34.9 |
| 7 | 105203350 | 105203400 | 50  | 105203362 | 11 | 22  | 1.7  |
| 7 | 105203700 | 105203750 | 50  | 105203712 | 11 | 22  | 3.5  |
| 7 | 106163450 | 106163500 | 50  | 106163462 | 11 | 22  | 0    |
| 7 | 106250050 | 106250200 | 150 | 106250112 | 16 | 88  | 12.2 |
| 7 | 106252575 | 106252600 | 25  | 106252587 | 11 | 11  | 1.7  |
| 7 | 106257125 | 106257500 | 375 | 106257362 | 23 | 246 | 0    |
| 7 | 106788000 | 106788200 | 200 | 106788037 | 17 | 116 | 0.9  |
| 7 | 106991200 | 106991275 | 75  | 106991212 | 13 | 39  | 5.2  |
| 7 | 106991600 | 106991750 | 150 | 106991612 | 18 | 90  | 15.7 |
| 7 | 107374225 | 107374275 | 50  | 107374237 | 11 | 22  | 0    |
| 7 | 107375125 | 107375200 | 75  | 107375137 | 11 | 33  | 5.2  |
| 7 | 107429750 | 107429775 | 25  | 107429762 | 14 | 14  | 2.6  |
| 7 | 107560275 | 107560300 | 25  | 107560287 | 12 | 12  | 0    |
| 7 | 107768700 | 107768725 | 25  | 107768712 | 12 | 12  | 0.9  |
| 7 | 107984525 | 107984550 | 25  | 107984537 | 12 | 12  | 0    |
| 7 | 107996950 | 107996975 | 25  | 107996962 | 12 | 12  | 1.7  |
| 7 | 111224125 | 111224325 | 200 | 111224187 | 25 | 179 | 14.9 |
| 7 | 111358025 | 111358150 | 125 | 111358037 | 11 | 49  | 3.5  |
| 7 | 111369925 | 111370400 | 475 | 111370187 | 48 | 579 | 0    |
| 7 | 111501875 | 111501975 | 100 | 111501887 | 11 | 44  | 0    |
| 7 | 111512050 | 111512100 | 50  | 111512062 | 11 | 22  | 0    |
| 7 | 111818575 | 111818650 | 75  | 111818612 | 14 | 38  | 0    |
| 7 | 111819225 | 111819450 | 225 | 111819287 | 18 | 139 | 7    |
| 7 | 111851100 | 111851150 | 50  | 111851112 | 12 | 24  | 1.7  |
| 7 | 111912075 | 111912100 | 25  | 111912087 | 12 | 12  | 1.7  |
| 7 | 114350100 | 114350125 | 25  | 114350112 | 12 | 12  | 0.9  |
| 7 | 114633800 | 114634025 | 225 | 114633887 | 23 | 159 | 4.4  |
| 7 | 115614750 | 115615025 | 275 | 115614862 | 19 | 159 | 7.9  |
| 7 | 115783100 | 115783150 | 50  | 115783112 | 12 | 24  | 0    |
| 7 | 116025675 | 116025850 | 175 | 116025762 | 15 | 92  | 10.5 |
| 7 | 116058525 | 116058550 | 25  | 116058537 | 11 | 11  | 0    |
| 7 | 116098975 | 116099025 | 50  | 116098987 | 11 | 22  | 3.5  |
| 7 | 116357900 | 116358000 | 100 | 116357937 | 13 | 48  | 0.9  |
| 7 | 116380850 | 116381000 | 150 | 116380862 | 23 | 138 | 20.1 |
| 7 | 116546275 | 116546325 | 50  | 116546287 | 11 | 22  | 3.5  |
| 7 | 117153975 | 117154000 | 25  | 117153987 | 11 | 11  | 0    |



|   |           |           |     |           |    |     |      |
|---|-----------|-----------|-----|-----------|----|-----|------|
| 7 | 117156450 | 117156475 | 25  | 117156462 | 11 | 11  | 1.7  |
| 7 | 117908575 | 117908825 | 250 | 117908737 | 17 | 130 | 17.5 |
| 7 | 120415025 | 120415050 | 25  | 120415037 | 12 | 12  | 1.7  |
| 7 | 120932700 | 120933175 | 475 | 120933037 | 32 | 357 | 21   |
| 7 | 120938100 | 120938525 | 425 | 120938362 | 53 | 547 | 14   |
| 7 | 121032125 | 121032150 | 25  | 121032137 | 12 | 12  | 0    |
| 7 | 121077725 | 121077825 | 100 | 121077762 | 13 | 50  | 6.1  |
| 7 | 122844925 | 122845200 | 275 | 122845037 | 29 | 225 | 0    |
| 7 | 122932575 | 122932625 | 50  | 122932587 | 12 | 24  | 2.6  |
| 7 | 122984925 | 122985075 | 150 | 122984962 | 16 | 85  | 13.1 |
| 7 | 123146875 | 123147075 | 200 | 123146912 | 14 | 107 | 3.5  |
| 7 | 123175925 | 123176100 | 175 | 123175962 | 14 | 84  | 9.6  |
| 7 | 123449850 | 123450025 | 175 | 123449887 | 17 | 100 | 13.1 |
| 7 | 123580200 | 123580350 | 150 | 123580212 | 12 | 66  | 7    |
| 7 | 124991550 | 124991575 | 25  | 124991562 | 11 | 11  | 1.7  |
| 7 | 125306525 | 125306700 | 175 | 125306662 | 19 | 103 | 18.3 |
| 7 | 126155425 | 126155475 | 50  | 126155437 | 11 | 22  | 3.5  |
| 7 | 126774925 | 126774975 | 50  | 126774937 | 12 | 24  | 0    |
| 7 | 126873925 | 126874150 | 225 | 126874087 | 24 | 156 | 24.5 |
| 7 | 127265225 | 127265325 | 100 | 127265262 | 13 | 46  | 0    |
| 7 | 127387375 | 127387425 | 50  | 127387387 | 11 | 22  | 0    |
| 7 | 127472950 | 127472975 | 25  | 127472962 | 11 | 11  | 1.7  |
| 7 | 127622275 | 127622300 | 25  | 127622287 | 11 | 11  | 0    |
| 7 | 127834050 | 127834075 | 25  | 127834062 | 12 | 12  | 0.9  |
| 7 | 128310900 | 128311000 | 100 | 128310962 | 14 | 52  | 7.9  |
| 7 | 128321150 | 128321175 | 25  | 128321162 | 11 | 11  | 1.7  |
| 7 | 128519075 | 128519200 | 125 | 128519087 | 21 | 80  | 4.4  |
| 7 | 129070375 | 129070425 | 50  | 129070387 | 11 | 22  | 3.5  |
| 7 | 129278775 | 129278875 | 100 | 129278787 | 11 | 44  | 0    |
| 7 | 129398000 | 129398025 | 25  | 129398012 | 11 | 11  | 0.9  |
| 7 | 129478275 | 129478300 | 25  | 129478287 | 15 | 15  | 2.6  |
| 7 | 129632625 | 129632900 | 275 | 129632637 | 14 | 114 | 21   |
| 7 | 129717825 | 129717975 | 150 | 129717862 | 13 | 76  | 0    |
| 7 | 129777700 | 129777725 | 25  | 129777712 | 11 | 11  | 1.7  |
| 7 | 129867575 | 129867825 | 250 | 129867687 | 23 | 184 | 9.6  |
| 7 | 130158575 | 130158675 | 100 | 130158612 | 16 | 60  | 8.7  |
| 7 | 130232450 | 130232575 | 125 | 130232462 | 11 | 49  | 6.1  |
| 7 | 130236975 | 130237025 | 50  | 130236987 | 11 | 22  | 0.9  |
| 7 | 130250900 | 130250950 | 50  | 130250912 | 14 | 26  | 1.7  |
| 7 | 130251200 | 130251300 | 100 | 130251212 | 13 | 52  | 0    |
| 7 | 130301950 | 130302150 | 200 | 130302112 | 17 | 105 | 15.7 |
| 7 | 130310100 | 130310300 | 200 | 130310187 | 16 | 111 | 4.4  |
| 7 | 130443375 | 130443575 | 200 | 130443537 | 16 | 102 | 17.5 |
| 7 | 130454875 | 130454900 | 25  | 130454887 | 12 | 12  | 1.7  |
| 7 | 130590775 | 130590825 | 50  | 130590787 | 12 | 24  | 0    |
| 7 | 130672325 | 130672575 | 250 | 130672412 | 22 | 159 | 21   |
| 7 | 130673575 | 130673600 | 25  | 130673587 | 11 | 11  | 1.7  |
| 7 | 131167950 | 131167975 | 25  | 131167962 | 12 | 12  | 0    |
| 7 | 131522575 | 131522750 | 175 | 131522612 | 17 | 115 | 5.2  |
| 7 | 132219575 | 132219600 | 25  | 132219587 | 11 | 11  | 0    |
| 7 | 132443675 | 132443850 | 175 | 132443762 | 15 | 91  | 0    |
| 7 | 132543225 | 132543275 | 50  | 132543237 | 12 | 24  | 1.7  |
| 7 | 133273450 | 133273475 | 25  | 133273462 | 11 | 11  | 1.7  |
| 7 | 133313625 | 133313675 | 50  | 133313637 | 11 | 22  | 3.5  |
| 7 | 133457275 | 133457300 | 25  | 133457287 | 11 | 11  | 0    |
| 7 | 133548450 | 133548625 | 175 | 133548512 | 14 | 88  | 10.5 |
| 7 | 133757975 | 133758025 | 50  | 133757987 | 12 | 24  | 3.5  |
| 7 | 133794475 | 133794525 | 50  | 133794512 | 13 | 24  | 3.5  |
| 7 | 134231400 | 134231625 | 225 | 134231537 | 22 | 171 | 17.5 |
| 7 | 134588725 | 134588775 | 50  | 134588737 | 11 | 22  | 3.5  |
| 7 | 136961825 | 136961900 | 75  | 136961887 | 14 | 37  | 3.5  |
| 7 | 137053000 | 137053200 | 200 | 137053112 | 17 | 120 | 0.9  |
| 7 | 137167725 | 137167900 | 175 | 137167787 | 15 | 100 | 0    |
| 7 | 137366400 | 137366550 | 150 | 137366412 | 13 | 74  | 2.6  |
| 7 | 137522350 | 137522400 | 50  | 137522387 | 12 | 23  | 3.5  |
| 7 | 137523550 | 137523950 | 400 | 137523737 | 72 | 703 | 9.6  |
| 7 | 137555775 | 137555875 | 100 | 137555787 | 11 | 44  | 3.5  |
| 7 | 137583050 | 137583400 | 350 | 137583112 | 15 | 157 | 1.7  |
| 7 | 137592925 | 137593075 | 150 | 137592962 | 14 | 79  | 0.9  |
| 7 | 137686325 | 137686350 | 25  | 137686337 | 13 | 13  | 0    |
| 7 | 137705100 | 137705350 | 250 | 137705187 | 20 | 156 | 19.2 |
| 7 | 137764850 | 137765200 | 350 | 137765037 | 43 | 391 | 3.5  |
| 7 | 137795550 | 137795600 | 50  | 137795562 | 11 | 22  | 3.5  |
| 7 | 137863025 | 137863325 | 300 | 137863162 | 42 | 343 | 25.3 |
| 7 | 137892300 | 137892425 | 125 | 137892337 | 13 | 62  | 0    |

|   |           |           |     |           |    |     |      |
|---|-----------|-----------|-----|-----------|----|-----|------|
| 7 | 138283625 | 138283700 | 75  | 138283637 | 13 | 35  | 0    |
| 7 | 138429875 | 138430025 | 150 | 138429937 | 16 | 80  | 8.7  |
| 7 | 138675250 | 138675575 | 325 | 138675537 | 51 | 458 | 30.6 |
| 7 | 138675975 | 138676225 | 250 | 138676137 | 21 | 170 | 16.6 |
| 7 | 138695225 | 138695450 | 225 | 138695287 | 17 | 130 | 11.4 |
| 7 | 138982250 | 138982600 | 350 | 138982412 | 22 | 239 | 10.5 |
| 7 | 139123250 | 139123275 | 25  | 139123262 | 11 | 11  | 1.7  |
| 7 | 139350275 | 139350300 | 25  | 139350287 | 11 | 11  | 1.7  |
| 7 | 139409725 | 139409850 | 125 | 139409762 | 13 | 61  | 4.4  |
| 7 | 139599200 | 139599300 | 100 | 139599237 | 14 | 51  | 0    |
| 7 | 139738150 | 139738200 | 50  | 139738162 | 11 | 22  | 3.5  |
| 7 | 140474875 | 140474900 | 25  | 140474887 | 15 | 15  | 2.6  |
| 7 | 141084425 | 141084450 | 25  | 141084437 | 18 | 18  | 3.5  |
| 7 | 141807800 | 141807900 | 100 | 141807862 | 12 | 46  | 0.9  |
| 7 | 142670525 | 142670575 | 50  | 142670537 | 14 | 25  | 3.5  |
| 7 | 144304700 | 144304775 | 75  | 144304712 | 11 | 33  | 0    |
| 7 | 145443950 | 145443975 | 25  | 145443962 | 12 | 12  | 1.7  |
| 7 | 145838225 | 145838400 | 175 | 145838312 | 14 | 86  | 0    |
| 7 | 148357150 | 148357175 | 25  | 148357162 | 12 | 12  | 0.9  |
| 7 | 148418475 | 148418500 | 25  | 148418487 | 11 | 11  | 0.9  |
| 7 | 148454400 | 148454425 | 25  | 148454412 | 12 | 12  | 0.9  |
| 7 | 148537575 | 148537725 | 150 | 148537612 | 16 | 88  | 7    |
| 7 | 148676725 | 148677150 | 425 | 148676762 | 16 | 220 | 0    |
| 7 | 148701275 | 148701300 | 25  | 148701287 | 12 | 12  | 0.9  |
| 7 | 148857125 | 148857550 | 425 | 148857312 | 36 | 397 | 14   |
| 7 | 149038825 | 149039025 | 200 | 149038912 | 20 | 135 | 0    |
| 7 | 149070175 | 149070275 | 100 | 149070187 | 11 | 44  | 2.6  |
| 7 | 149175000 | 149175050 | 50  | 149175012 | 11 | 22  | 0    |
| 7 | 149711675 | 149711775 | 100 | 149711687 | 12 | 48  | 2.6  |
| 7 | 149729500 | 149729550 | 50  | 149729512 | 12 | 24  | 3.5  |
| 7 | 150417000 | 150417150 | 150 | 150417087 | 16 | 79  | 10.5 |
| 7 | 150509250 | 150509275 | 25  | 150509262 | 11 | 11  | 1.7  |
| 7 | 150576525 | 150576650 | 125 | 150576537 | 12 | 60  | 0    |
| 7 | 150790550 | 150790700 | 150 | 150790612 | 14 | 75  | 3.5  |
| 7 | 150796450 | 150796575 | 125 | 150796537 | 16 | 75  | 8.7  |
| 7 | 150796800 | 150796850 | 50  | 150796812 | 15 | 30  | 3.5  |
| 7 | 150848225 | 150848450 | 225 | 150848312 | 22 | 151 | 6.1  |
| 7 | 151040400 | 151040500 | 100 | 151040412 | 15 | 58  | 7.9  |
| 7 | 151064475 | 151064550 | 75  | 151064487 | 12 | 32  | 4.4  |
| 7 | 151353375 | 151353475 | 100 | 151353387 | 14 | 50  | 6.1  |
| 7 | 152006300 | 152006350 | 50  | 152006312 | 12 | 24  | 0    |
| 7 | 152032875 | 152032925 | 50  | 152032887 | 11 | 22  | 0    |
| 7 | 152061275 | 152061650 | 375 | 152061512 | 38 | 400 | 28   |
| 7 | 152790400 | 152790600 | 200 | 152790537 | 14 | 88  | 0    |
| 7 | 152897275 | 152897400 | 125 | 152897362 | 12 | 56  | 0    |
| 7 | 154357200 | 154357225 | 25  | 154357212 | 11 | 11  | 0.9  |
| 7 | 154628175 | 154628300 | 125 | 154628187 | 22 | 92  | 14   |
| 7 | 154652600 | 154652725 | 125 | 154652662 | 13 | 59  | 7    |
| 7 | 154653000 | 154653175 | 175 | 154653037 | 14 | 86  | 12.2 |
| 7 | 154705400 | 154705600 | 200 | 154705512 | 17 | 121 | 16.6 |
| 7 | 154941525 | 154941600 | 75  | 154941537 | 12 | 36  | 3.5  |
| 7 | 156543550 | 156543575 | 25  | 156543562 | 11 | 11  | 0    |
| 7 | 156821800 | 156821825 | 25  | 156821812 | 11 | 11  | 0    |
| 7 | 158193025 | 158193175 | 150 | 158193112 | 13 | 75  | 0    |
| 7 | 158225875 | 158225900 | 25  | 158225887 | 14 | 14  | 1.7  |
| 7 | 158349550 | 158349700 | 150 | 158349662 | 16 | 89  | 10.5 |
| 6 | 93575     | 93675     | 100 | 93587     | 11 | 42  | 3.5  |
| 6 | 1110275   | 1110300   | 25  | 1110287   | 12 | 12  | 1.7  |
| 6 | 1472300   | 1472325   | 25  | 1472312   | 12 | 12  | 0    |
| 6 | 1472625   | 1472675   | 50  | 1472637   | 14 | 26  | 1.7  |
| 6 | 2561900   | 2562325   | 425 | 2562187   | 16 | 218 | 0    |
| 6 | 2846275   | 2846325   | 50  | 2846287   | 12 | 24  | 3.5  |
| 6 | 2969325   | 2969375   | 50  | 2969337   | 15 | 28  | 4.4  |
| 6 | 3013975   | 3014050   | 75  | 3013987   | 11 | 33  | 0    |
| 6 | 3660200   | 3660300   | 100 | 3660212   | 12 | 45  | 5.2  |
| 6 | 3771550   | 3771650   | 100 | 3771562   | 12 | 48  | 7    |
| 6 | 4329325   | 4329575   | 250 | 4329437   | 18 | 134 | 0    |
| 6 | 4433625   | 4434000   | 375 | 4433862   | 38 | 376 | 7    |
| 6 | 4555425   | 4555625   | 200 | 4555612   | 21 | 100 | 11.4 |
| 6 | 4575075   | 4575325   | 250 | 4575162   | 24 | 199 | 0    |
| 6 | 4948975   | 4949200   | 225 | 4949037   | 28 | 200 | 21.8 |
| 6 | 5151375   | 5151425   | 50  | 5151387   | 12 | 24  | 0    |
| 6 | 5206550   | 5206700   | 150 | 5206662   | 16 | 84  | 4.4  |
| 6 | 5495775   | 5496050   | 275 | 5495887   | 40 | 322 | 14   |
| 6 | 5522775   | 5522800   | 25  | 5522787   | 12 | 12  | 0    |

|   |          |          |     |          |    |     |      |
|---|----------|----------|-----|----------|----|-----|------|
| 6 | 6632800  | 6632825  | 25  | 6632812  | 11 | 11  | 0.9  |
| 6 | 8009650  | 8009750  | 100 | 8009712  | 16 | 57  | 9.6  |
| 6 | 8380900  | 8380925  | 25  | 8380912  | 11 | 11  | 1.7  |
| 6 | 9369375  | 9369750  | 375 | 9369562  | 34 | 372 | 10.5 |
| 6 | 9970875  | 9971200  | 325 | 9971012  | 21 | 205 | 0.9  |
| 6 | 10180875 | 10180900 | 25  | 10180887 | 12 | 12  | 0    |
| 6 | 10201500 | 10201850 | 350 | 10201662 | 22 | 220 | 0    |
| 6 | 10629425 | 10629550 | 125 | 10629487 | 14 | 62  | 4.4  |
| 6 | 10803025 | 10803125 | 100 | 10803087 | 15 | 51  | 6.1  |
| 6 | 10831175 | 10831225 | 50  | 10831187 | 12 | 24  | 2.6  |
| 6 | 11252750 | 11252825 | 75  | 11252812 | 14 | 38  | 6.1  |
| 6 | 14080925 | 14081025 | 100 | 14080962 | 15 | 55  | 0    |
| 6 | 14913200 | 14913375 | 175 | 14913262 | 19 | 118 | 8.7  |
| 6 | 15493825 | 15493950 | 125 | 15493862 | 13 | 59  | 0    |
| 6 | 16061400 | 16061525 | 125 | 16061437 | 14 | 69  | 8.7  |
| 6 | 16381625 | 16381775 | 150 | 16381712 | 18 | 85  | 1.7  |
| 6 | 17287750 | 17287850 | 100 | 17287812 | 14 | 52  | 2.6  |
| 6 | 18016050 | 18016125 | 75  | 18016062 | 11 | 33  | 0    |
| 6 | 18932025 | 18932300 | 275 | 18932162 | 30 | 230 | 6.1  |
| 6 | 19624400 | 19624450 | 50  | 19624412 | 14 | 26  | 4.4  |
| 6 | 20235675 | 20235750 | 75  | 20235687 | 11 | 33  | 1.7  |
| 6 | 22893350 | 22893400 | 50  | 22893362 | 12 | 24  | 0    |
| 6 | 24829200 | 24829250 | 50  | 24829237 | 12 | 23  | 0    |
| 6 | 24829650 | 24829800 | 150 | 24829662 | 12 | 72  | 7    |
| 6 | 24840250 | 24840275 | 25  | 24840262 | 12 | 12  | 0    |
| 6 | 24883225 | 24883275 | 50  | 24883237 | 14 | 28  | 5.2  |
| 6 | 26135425 | 26135500 | 75  | 26135437 | 12 | 36  | 2.6  |
| 6 | 26163975 | 26164000 | 25  | 26163987 | 11 | 11  | 0    |
| 6 | 26164475 | 26164575 | 100 | 26164537 | 15 | 54  | 3.5  |
| 6 | 26526400 | 26526600 | 200 | 26526437 | 17 | 123 | 0    |
| 6 | 26628850 | 26628950 | 100 | 26628862 | 13 | 48  | 1.7  |
| 6 | 26768025 | 26768050 | 25  | 26768037 | 13 | 13  | 1.7  |
| 6 | 27464825 | 27465075 | 250 | 27464837 | 15 | 135 | 9.6  |
| 6 | 27528325 | 27528525 | 200 | 27528487 | 16 | 102 | 0    |
| 6 | 27868025 | 27868125 | 100 | 27868087 | 12 | 45  | 7    |
| 6 | 27949025 | 27949225 | 200 | 27949162 | 16 | 107 | 3.5  |
| 6 | 28263900 | 28264175 | 275 | 28264037 | 22 | 178 | 0    |
| 6 | 28402250 | 28402350 | 100 | 28402262 | 12 | 46  | 0    |
| 6 | 28941550 | 28941575 | 25  | 28941562 | 12 | 12  | 1.7  |
| 6 | 29873075 | 29873400 | 325 | 29873262 | 53 | 450 | 0    |
| 6 | 30053000 | 30053075 | 75  | 30053062 | 14 | 40  | 3.5  |
| 6 | 30693275 | 30693450 | 175 | 30693437 | 19 | 113 | 18.3 |
| 6 | 30760250 | 30760400 | 150 | 30760262 | 12 | 70  | 0.9  |
| 6 | 30828375 | 30828550 | 175 | 30828387 | 19 | 115 | 10.5 |
| 6 | 30845000 | 30845025 | 25  | 30845012 | 19 | 19  | 2.6  |
| 6 | 30845275 | 30845375 | 100 | 30845287 | 17 | 65  | 5.2  |
| 6 | 30845750 | 30845775 | 25  | 30845762 | 11 | 11  | 1.7  |
| 6 | 30856450 | 30856500 | 50  | 30856462 | 12 | 24  | 0    |
| 6 | 30857600 | 30857625 | 25  | 30857612 | 13 | 13  | 1.7  |
| 6 | 30904800 | 30905000 | 200 | 30904987 | 12 | 72  | 2.6  |
| 6 | 30935500 | 30935675 | 175 | 30935612 | 13 | 81  | 8.7  |
| 6 | 30962125 | 30962175 | 50  | 30962137 | 11 | 22  | 0.9  |
| 6 | 30983800 | 30983825 | 25  | 30983812 | 14 | 14  | 2.6  |
| 6 | 31205475 | 31205600 | 125 | 31205487 | 11 | 55  | 0    |
| 6 | 31412750 | 31412875 | 125 | 31412787 | 13 | 61  | 0    |
| 6 | 31617575 | 31617650 | 75  | 31617587 | 14 | 38  | 5.2  |
| 6 | 31623425 | 31623450 | 25  | 31623437 | 11 | 11  | 0.9  |
| 6 | 31728550 | 31728725 | 175 | 31728562 | 14 | 87  | 8.7  |
| 6 | 31756375 | 31756400 | 25  | 31756387 | 12 | 12  | 1.7  |
| 6 | 31897550 | 31897600 | 50  | 31897562 | 14 | 26  | 1.7  |
| 6 | 31910325 | 31910350 | 25  | 31910337 | 17 | 17  | 1.7  |
| 6 | 32331450 | 32331475 | 25  | 32331462 | 11 | 11  | 1.7  |
| 6 | 33045900 | 33046000 | 100 | 33045987 | 14 | 48  | 4.4  |
| 6 | 33046800 | 33046825 | 25  | 33046812 | 11 | 11  | 1.7  |
| 6 | 33276325 | 33276350 | 25  | 33276337 | 12 | 12  | 1.7  |
| 6 | 33347800 | 33348000 | 200 | 33347912 | 23 | 151 | 25.3 |
| 6 | 34235800 | 34235925 | 125 | 34235812 | 11 | 50  | 0    |
| 6 | 35544125 | 35544250 | 125 | 35544212 | 18 | 82  | 6.1  |
| 6 | 35984650 | 35984725 | 75  | 35984662 | 12 | 36  | 0    |
| 6 | 36437100 | 36437150 | 50  | 36437112 | 11 | 22  | 0    |
| 6 | 36498925 | 36499125 | 200 | 36499037 | 17 | 117 | 15.7 |
| 6 | 36669725 | 36669850 | 125 | 36669812 | 13 | 62  | 3.5  |
| 6 | 36897500 | 36897550 | 50  | 36897512 | 11 | 22  | 3.5  |
| 6 | 36924725 | 36924800 | 75  | 36924737 | 12 | 36  | 5.2  |
| 6 | 36926925 | 36926950 | 25  | 36926937 | 14 | 14  | 2.6  |

|   |           |           |     |           |    |     |      |
|---|-----------|-----------|-----|-----------|----|-----|------|
| 6 | 37245075  | 37245250  | 175 | 37245187  | 17 | 97  | 8.7  |
| 6 | 37398375  | 37398425  | 50  | 37398387  | 12 | 24  | 0    |
| 6 | 37444900  | 37445050  | 150 | 37444937  | 13 | 72  | 6.1  |
| 6 | 38715825  | 38715875  | 50  | 38715837  | 11 | 22  | 0    |
| 6 | 39219075  | 39219200  | 125 | 39219162  | 12 | 57  | 5.2  |
| 6 | 40068875  | 40069100  | 225 | 40068962  | 28 | 207 | 5.2  |
| 6 | 40367450  | 40367500  | 50  | 40367462  | 11 | 22  | 1.7  |
| 6 | 41290550  | 41290575  | 25  | 41290562  | 11 | 11  | 0    |
| 6 | 42181050  | 42181075  | 25  | 42181062  | 11 | 11  | 0    |
| 6 | 42623275  | 42623350  | 75  | 42623312  | 13 | 37  | 3.5  |
| 6 | 43593400  | 43593425  | 25  | 43593412  | 11 | 11  | 0    |
| 6 | 44731325  | 44731400  | 75  | 44731337  | 11 | 33  | 0.9  |
| 6 | 45453525  | 45453725  | 200 | 45453637  | 17 | 109 | 3.5  |
| 6 | 47137250  | 47137325  | 75  | 47137287  | 12 | 35  | 2.6  |
| 6 | 47554100  | 47554175  | 75  | 47554112  | 12 | 36  | 0    |
| 6 | 53321950  | 53322050  | 100 | 53321962  | 17 | 58  | 7.9  |
| 6 | 56925875  | 56925950  | 75  | 56925887  | 12 | 36  | 0    |
| 6 | 56971875  | 56971950  | 75  | 56971887  | 11 | 33  | 0    |
| 6 | 56986075  | 56986225  | 150 | 56986187  | 15 | 76  | 13.1 |
| 6 | 57289375  | 57289450  | 75  | 57289387  | 11 | 33  | 1.7  |
| 6 | 63420575  | 63420750  | 175 | 63420712  | 16 | 98  | 8.7  |
| 6 | 64339825  | 64339975  | 150 | 64339887  | 13 | 68  | 6.1  |
| 6 | 66928325  | 66928450  | 125 | 66928412  | 13 | 60  | 0    |
| 6 | 66940250  | 66940450  | 200 | 66940362  | 18 | 127 | 3.5  |
| 6 | 68722975  | 68723150  | 175 | 68723112  | 14 | 84  | 0.9  |
| 6 | 74420575  | 74420675  | 100 | 74420637  | 18 | 64  | 9.6  |
| 6 | 76332850  | 76333025  | 175 | 76332987  | 17 | 95  | 0    |
| 6 | 79322700  | 79322850  | 150 | 79322737  | 13 | 69  | 0    |
| 6 | 80000975  | 80001275  | 300 | 80001162  | 21 | 194 | 11.4 |
| 6 | 80304075  | 80304275  | 200 | 80304112  | 21 | 129 | 6.1  |
| 6 | 81188800  | 81188950  | 150 | 81188812  | 15 | 89  | 0    |
| 6 | 81666675  | 81666725  | 50  | 81666687  | 13 | 26  | 0    |
| 6 | 83798375  | 83798525  | 150 | 83798412  | 14 | 80  | 1.7  |
| 6 | 84634125  | 84634300  | 175 | 84634187  | 16 | 99  | 5.2  |
| 6 | 86409475  | 86409600  | 125 | 86409487  | 13 | 64  | 3.5  |
| 6 | 86445150  | 86445300  | 150 | 86445162  | 16 | 83  | 11.4 |
| 6 | 86574450  | 86574550  | 100 | 86574462  | 11 | 44  | 0    |
| 6 | 88798000  | 88798225  | 225 | 88798087  | 25 | 187 | 2.6  |
| 6 | 90404925  | 90404950  | 25  | 90404937  | 12 | 12  | 1.7  |
| 6 | 92732500  | 92732600  | 100 | 92732562  | 14 | 52  | 0    |
| 6 | 96295725  | 96295875  | 150 | 96295737  | 12 | 72  | 5.2  |
| 6 | 97407375  | 97407475  | 100 | 97407412  | 14 | 50  | 0    |
| 6 | 97837875  | 97837900  | 25  | 97837887  | 11 | 11  | 0.9  |
| 6 | 98697600  | 98697700  | 100 | 98697662  | 15 | 54  | 0    |
| 6 | 100123425 | 100123475 | 50  | 100123437 | 16 | 28  | 3.5  |
| 6 | 100158225 | 100158400 | 175 | 100158262 | 14 | 86  | 10.5 |
| 6 | 104898900 | 104898975 | 75  | 104898937 | 15 | 39  | 0    |
| 6 | 107415500 | 107415600 | 100 | 107415512 | 14 | 50  | 4.4  |
| 6 | 107669625 | 107669825 | 200 | 107669712 | 16 | 109 | 12.2 |
| 6 | 107854025 | 107854075 | 50  | 107854062 | 13 | 24  | 0    |
| 6 | 107875600 | 107875875 | 275 | 107875737 | 22 | 166 | 7    |
| 6 | 108140725 | 108140800 | 75  | 108140737 | 11 | 33  | 2.6  |
| 6 | 108276225 | 108276300 | 75  | 108276262 | 17 | 50  | 4.4  |
| 6 | 108722850 | 108722900 | 50  | 108722887 | 16 | 27  | 3.5  |
| 6 | 109810275 | 109810325 | 50  | 109810287 | 12 | 24  | 3.5  |
| 6 | 109882700 | 109882750 | 50  | 109882712 | 11 | 22  | 3.5  |
| 6 | 109885150 | 109885275 | 125 | 109885237 | 15 | 66  | 0    |
| 6 | 109941925 | 109942025 | 100 | 109941962 | 13 | 46  | 0    |
| 6 | 110187675 | 110187700 | 25  | 110187687 | 11 | 11  | 0.9  |
| 6 | 110566425 | 110566775 | 350 | 110566612 | 13 | 158 | 5.2  |
| 6 | 110983000 | 110983050 | 50  | 110983037 | 14 | 26  | 4.4  |
| 6 | 111969000 | 111969050 | 50  | 111969012 | 11 | 22  | 1.7  |
| 6 | 112135825 | 112135875 | 50  | 112135837 | 11 | 22  | 3.5  |
| 6 | 112217175 | 112217200 | 25  | 112217187 | 11 | 11  | 0    |
| 6 | 113695825 | 113695900 | 75  | 113695837 | 11 | 33  | 0    |
| 6 | 119002075 | 119002375 | 300 | 119002237 | 14 | 134 | 0    |
| 6 | 119228300 | 119228325 | 25  | 119228312 | 11 | 11  | 0    |
| 6 | 119938500 | 119938600 | 100 | 119938512 | 12 | 48  | 0    |
| 6 | 125283550 | 125283625 | 75  | 125283562 | 15 | 41  | 0    |
| 6 | 125583675 | 125583700 | 25  | 125583687 | 11 | 11  | 0    |
| 6 | 125816600 | 125816650 | 50  | 125816612 | 11 | 22  | 0    |
| 6 | 126000350 | 126000425 | 75  | 126000387 | 13 | 37  | 0    |
| 6 | 126702850 | 126702975 | 125 | 126702862 | 14 | 69  | 12.2 |
| 6 | 127017975 | 127018000 | 25  | 127017987 | 12 | 12  | 0.9  |
| 6 | 131526850 | 131526950 | 100 | 131526912 | 12 | 46  | 2.6  |

|   |           |           |     |           |    |     |      |
|---|-----------|-----------|-----|-----------|----|-----|------|
| 6 | 131991250 | 131991275 | 25  | 131991262 | 23 | 23  | 4.4  |
| 6 | 132128000 | 132128250 | 250 | 132128162 | 17 | 135 | 6.1  |
| 6 | 132537750 | 132538050 | 300 | 132537912 | 26 | 217 | 8.7  |
| 6 | 133535425 | 133535600 | 175 | 133535562 | 15 | 84  | 0    |
| 6 | 133972750 | 133972775 | 25  | 133972762 | 13 | 13  | 1.7  |
| 6 | 134373250 | 134373275 | 25  | 134373262 | 12 | 12  | 0    |
| 6 | 134761350 | 134761425 | 75  | 134761412 | 15 | 37  | 2.6  |
| 6 | 134854375 | 134854400 | 25  | 134854387 | 11 | 11  | 0.9  |
| 6 | 136652175 | 136652250 | 75  | 136652212 | 17 | 46  | 6.1  |
| 6 | 136652650 | 136652725 | 75  | 136652662 | 12 | 34  | 5.2  |
| 6 | 136934025 | 136934150 | 125 | 136934037 | 13 | 59  | 0    |
| 6 | 137185950 | 137185975 | 25  | 137185962 | 14 | 14  | 2.6  |
| 6 | 137194750 | 137194950 | 200 | 137194937 | 15 | 101 | 10.5 |
| 6 | 138946175 | 138946200 | 25  | 138946187 | 11 | 11  | 0.9  |
| 6 | 139737300 | 139737500 | 200 | 139737412 | 23 | 151 | 21.8 |
| 6 | 140383075 | 140383275 | 200 | 140383237 | 17 | 97  | 0    |
| 6 | 141307700 | 141307800 | 100 | 141307712 | 13 | 52  | 0    |
| 6 | 143056050 | 143056100 | 50  | 143056062 | 11 | 22  | 3.5  |
| 6 | 143243100 | 143243200 | 100 | 143243112 | 11 | 44  | 2.6  |
| 6 | 143813675 | 143813750 | 75  | 143813687 | 11 | 33  | 1.7  |
| 6 | 144205925 | 144205950 | 25  | 144205937 | 11 | 11  | 0.9  |
| 6 | 144565850 | 144566000 | 150 | 144565987 | 12 | 61  | 0    |
| 6 | 144648550 | 144648600 | 50  | 144648562 | 11 | 22  | 1.7  |
| 6 | 146326925 | 146326975 | 50  | 146326962 | 13 | 24  | 1.7  |
| 6 | 147328125 | 147328225 | 100 | 147328137 | 11 | 44  | 0    |
| 6 | 148373475 | 148373550 | 75  | 148373512 | 13 | 37  | 0.9  |
| 6 | 148422725 | 148422925 | 200 | 148422762 | 14 | 99  | 0.9  |
| 6 | 148761400 | 148761450 | 50  | 148761412 | 11 | 22  | 1.7  |
| 6 | 150601225 | 150601250 | 25  | 150601237 | 11 | 11  | 0.9  |
| 6 | 150660250 | 150660375 | 125 | 150660262 | 13 | 61  | 0    |
| 6 | 151027025 | 151027050 | 25  | 151027037 | 11 | 11  | 0    |
| 6 | 151399200 | 151399225 | 25  | 151399212 | 11 | 11  | 1.7  |
| 6 | 152337225 | 152337275 | 50  | 152337237 | 11 | 22  | 0    |
| 6 | 153495575 | 153495650 | 75  | 153495587 | 13 | 39  | 0    |
| 6 | 154873575 | 154873625 | 50  | 154873587 | 11 | 22  | 0    |
| 6 | 155335575 | 155335675 | 100 | 155335587 | 11 | 44  | 0    |
| 6 | 155677825 | 155677850 | 25  | 155677837 | 11 | 11  | 0    |
| 6 | 157471125 | 157471150 | 25  | 157471137 | 12 | 12  | 0    |
| 6 | 159211100 | 159211225 | 125 | 159211137 | 13 | 57  | 8.7  |
| 6 | 161324550 | 161324750 | 200 | 161324612 | 20 | 108 | 3.5  |
| 6 | 165515550 | 165515875 | 325 | 165515687 | 20 | 210 | 13.1 |
| 6 | 166255575 | 166255750 | 175 | 166255687 | 18 | 104 | 6.1  |
| 6 | 166273900 | 166274025 | 125 | 166274012 | 22 | 93  | 14   |
| 6 | 166319600 | 166319625 | 25  | 166319612 | 11 | 11  | 0.9  |
| 6 | 166366200 | 166366450 | 250 | 166366312 | 20 | 152 | 9.6  |
| 6 | 166435250 | 166435675 | 425 | 166435487 | 37 | 406 | 17.5 |
| 6 | 167382825 | 167382850 | 25  | 167382837 | 11 | 11  | 0    |
| 6 | 167453525 | 167453600 | 75  | 167453537 | 13 | 37  | 0    |
| 6 | 167904850 | 167904875 | 25  | 167904862 | 12 | 12  | 0    |
| 6 | 168139775 | 168139850 | 75  | 168139787 | 11 | 33  | 0    |
| 6 | 168151175 | 168151225 | 50  | 168151187 | 11 | 22  | 3.5  |
| 6 | 168183475 | 168183625 | 150 | 168183537 | 16 | 80  | 0    |
| 6 | 169212650 | 169212700 | 50  | 169212662 | 11 | 22  | 1.7  |
| 6 | 169232750 | 169232850 | 100 | 169232837 | 13 | 48  | 0    |
| 6 | 170386175 | 170386250 | 75  | 170386212 | 12 | 35  | 2.6  |
| 9 | 4186925   | 4187125   | 200 | 4187012   | 18 | 124 | 0    |
| 9 | 13024400  | 13024475  | 75  | 13024412  | 12 | 36  | 2.6  |
| 9 | 23872575  | 23872625  | 50  | 23872587  | 11 | 22  | 0    |
| 9 | 28431125  | 28431200  | 75  | 28431137  | 13 | 35  | 0    |
| 9 | 28829275  | 28829425  | 150 | 28829287  | 12 | 72  | 0    |
| 9 | 33806525  | 33806625  | 100 | 33806587  | 14 | 54  | 4.4  |
| 9 | 34410275  | 34410300  | 25  | 34410287  | 11 | 11  | 0    |
| 9 | 34447450  | 34447475  | 25  | 34447462  | 11 | 11  | 1.7  |
| 9 | 34603075  | 34603125  | 50  | 34603087  | 12 | 24  | 1.7  |
| 9 | 35593925  | 35594075  | 150 | 35593987  | 16 | 87  | 11.4 |
| 9 | 35647975  | 35648000  | 25  | 35647987  | 11 | 11  | 1.7  |
| 9 | 35654425  | 35654525  | 100 | 35654437  | 14 | 51  | 0.9  |
| 9 | 35915025  | 35915200  | 175 | 35915087  | 15 | 87  | 5.2  |
| 9 | 36783400  | 36783600  | 200 | 36783512  | 14 | 102 | 0    |
| 9 | 37069350  | 37069650  | 300 | 37069512  | 34 | 262 | 20.1 |
| 9 | 37109925  | 37110250  | 325 | 37110062  | 23 | 236 | 14.9 |
| 9 | 37582575  | 37582750  | 175 | 37582587  | 12 | 76  | 10.5 |
| 9 | 37985125  | 37985150  | 25  | 37985137  | 12 | 12  | 0.9  |
| 9 | 38160825  | 38160850  | 25  | 38160837  | 12 | 12  | 0    |
| 9 | 38375100  | 38375225  | 125 | 38375137  | 13 | 59  | 0    |

|   |           |           |     |           |    |     |      |
|---|-----------|-----------|-----|-----------|----|-----|------|
| 9 | 38662200  | 38662250  | 50  | 38662212  | 11 | 22  | 1.7  |
| 9 | 66198300  | 66198500  | 200 | 66198387  | 17 | 118 | 11.4 |
| 9 | 71117750  | 71117850  | 100 | 71117812  | 13 | 49  | 0    |
| 9 | 72133475  | 72133550  | 75  | 72133487  | 12 | 35  | 0    |
| 9 | 72369625  | 72369750  | 125 | 72369687  | 15 | 67  | 0    |
| 9 | 79319825  | 79320075  | 250 | 79319962  | 21 | 152 | 12.2 |
| 9 | 79994450  | 79994550  | 100 | 79994462  | 12 | 48  | 0    |
| 9 | 80176875  | 80176900  | 25  | 80176887  | 12 | 12  | 1.7  |
| 9 | 82837625  | 82837825  | 200 | 82837737  | 16 | 113 | 13.1 |
| 9 | 83100175  | 83100200  | 25  | 83100187  | 11 | 11  | 0.9  |
| 9 | 83179725  | 83179750  | 25  | 83179737  | 11 | 11  | 1.7  |
| 9 | 83367200  | 83367350  | 150 | 83367237  | 15 | 79  | 4.4  |
| 9 | 83369450  | 83369475  | 25  | 83369462  | 12 | 12  | 1.7  |
| 9 | 84293350  | 84293400  | 50  | 84293362  | 11 | 22  | 0    |
| 9 | 84293850  | 84293875  | 25  | 84293862  | 11 | 11  | 0    |
| 9 | 87547225  | 87547250  | 25  | 87547237  | 12 | 12  | 0.9  |
| 9 | 87990625  | 87990825  | 200 | 87990762  | 15 | 106 | 14   |
| 9 | 88889925  | 88890050  | 125 | 88889962  | 13 | 59  | 3.5  |
| 9 | 89247050  | 89247400  | 350 | 89247162  | 19 | 212 | 5.2  |
| 9 | 89260300  | 89260325  | 25  | 89260312  | 14 | 14  | 2.6  |
| 9 | 89516425  | 89516475  | 50  | 89516437  | 11 | 22  | 0.9  |
| 9 | 89849000  | 89849250  | 250 | 89849087  | 20 | 157 | 21   |
| 9 | 91115925  | 91116075  | 150 | 91115987  | 17 | 90  | 5.2  |
| 9 | 91253250  | 91253425  | 175 | 91253362  | 13 | 80  | 12.2 |
| 9 | 93732475  | 93732875  | 400 | 93732712  | 34 | 379 | 8.7  |
| 9 | 94127700  | 94127725  | 25  | 94127712  | 13 | 13  | 0.9  |
| 9 | 94472225  | 94472300  | 75  | 94472237  | 11 | 33  | 1.7  |
| 9 | 94914575  | 94914600  | 25  | 94914587  | 11 | 11  | 1.7  |
| 9 | 95140650  | 95140675  | 25  | 95140662  | 11 | 11  | 0    |
| 9 | 95676525  | 95676575  | 50  | 95676537  | 12 | 24  | 0    |
| 9 | 96673400  | 96673450  | 50  | 96673412  | 11 | 22  | 0    |
| 9 | 97115225  | 97115275  | 50  | 97115237  | 12 | 24  | 0.9  |
| 9 | 97312000  | 97312050  | 50  | 97312012  | 11 | 22  | 1.7  |
| 9 | 97526900  | 97527100  | 200 | 97527012  | 20 | 122 | 15.7 |
| 9 | 97677825  | 97677900  | 75  | 97677837  | 14 | 42  | 6.1  |
| 9 | 97851525  | 97851725  | 200 | 97851687  | 13 | 80  | 7.9  |
| 9 | 98620700  | 98620900  | 200 | 98620762  | 14 | 102 | 0    |
| 9 | 101205875 | 101206000 | 125 | 101205937 | 13 | 57  | 0    |
| 9 | 101626150 | 101626200 | 50  | 101626162 | 12 | 24  | 0    |
| 9 | 102514525 | 102514550 | 25  | 102514537 | 11 | 11  | 0    |
| 9 | 103200450 | 103200575 | 125 | 103200562 | 15 | 63  | 7    |
| 9 | 103201850 | 103201900 | 50  | 103201862 | 11 | 22  | 0    |
| 9 | 107099075 | 107099175 | 100 | 107099137 | 12 | 46  | 0.9  |
| 9 | 110638025 | 110638050 | 25  | 110638037 | 12 | 12  | 1.7  |
| 9 | 113388150 | 113388200 | 50  | 113388162 | 11 | 22  | 0    |
| 9 | 113698600 | 113698725 | 125 | 113698662 | 20 | 90  | 14   |
| 9 | 114683750 | 114683950 | 200 | 114683812 | 21 | 136 | 0    |
| 9 | 115023350 | 115023400 | 50  | 115023362 | 11 | 22  | 3.5  |
| 9 | 115980150 | 115980175 | 25  | 115980162 | 11 | 11  | 1.7  |
| 9 | 116027625 | 116027700 | 75  | 116027687 | 13 | 35  | 3.5  |
| 9 | 116389550 | 116389575 | 25  | 116389562 | 12 | 12  | 0.9  |
| 9 | 117175800 | 117175925 | 125 | 117175812 | 16 | 74  | 7.9  |
| 9 | 118679300 | 118679325 | 25  | 118679312 | 12 | 12  | 0    |
| 9 | 120538725 | 120538875 | 150 | 120538762 | 13 | 72  | 2.6  |
| 9 | 122181775 | 122181950 | 175 | 122181887 | 15 | 90  | 0    |
| 9 | 122382525 | 122382550 | 25  | 122382537 | 11 | 11  | 0.9  |
| 9 | 122515725 | 122515750 | 25  | 122515737 | 12 | 12  | 0    |
| 9 | 123081350 | 123081450 | 100 | 123081362 | 11 | 44  | 7    |
| 9 | 123091625 | 123091700 | 75  | 123091637 | 11 | 33  | 3.5  |
| 9 | 123172550 | 123172725 | 175 | 123172637 | 25 | 135 | 16.6 |
| 9 | 124715425 | 124715450 | 25  | 124715437 | 14 | 14  | 2.6  |
| 9 | 124742725 | 124742950 | 225 | 124742837 | 19 | 136 | 7    |
| 9 | 125370425 | 125370450 | 25  | 125370437 | 11 | 11  | 0.9  |
| 9 | 126007850 | 126007900 | 50  | 126007862 | 13 | 26  | 0    |
| 9 | 126054300 | 126054475 | 175 | 126054412 | 13 | 81  | 1.7  |
| 9 | 126884475 | 126884525 | 50  | 126884487 | 11 | 22  | 1.7  |
| 9 | 127548350 | 127548575 | 225 | 127548437 | 26 | 174 | 21.8 |
| 9 | 127811175 | 127811450 | 275 | 127811337 | 22 | 188 | 19.2 |
| 9 | 128961275 | 128961625 | 350 | 128961437 | 29 | 305 | 9.6  |
| 9 | 129246650 | 129246725 | 75  | 129246662 | 14 | 42  | 0    |
| 9 | 129347825 | 129347850 | 25  | 129347837 | 13 | 13  | 1.7  |
| 9 | 129371450 | 129371475 | 25  | 129371462 | 11 | 11  | 0.9  |
| 9 | 129752525 | 129752575 | 50  | 129752537 | 11 | 22  | 3.5  |
| 9 | 130143200 | 130143225 | 25  | 130143212 | 12 | 12  | 1.7  |
| 9 | 130173475 | 130173575 | 100 | 130173487 | 13 | 50  | 7    |

|   |           |           |     |           |    |     |      |
|---|-----------|-----------|-----|-----------|----|-----|------|
| 9 | 130458950 | 130459075 | 125 | 130459012 | 14 | 64  | 0    |
| 9 | 130526625 | 130526700 | 75  | 130526687 | 16 | 40  | 2.6  |
| 9 | 130683875 | 130683925 | 50  | 130683887 | 15 | 30  | 5.2  |
| 9 | 130942375 | 130942425 | 50  | 130942387 | 14 | 26  | 1.7  |
| 9 | 130966850 | 130966925 | 75  | 130966862 | 14 | 38  | 0    |
| 9 | 131215175 | 131215225 | 50  | 131215187 | 11 | 22  | 3.5  |
| 9 | 131298400 | 131298475 | 75  | 131298412 | 14 | 40  | 2.6  |
| 9 | 131428325 | 131428375 | 50  | 131428337 | 12 | 24  | 1.7  |
| 9 | 131539800 | 131539900 | 100 | 131539812 | 11 | 44  | 0    |
| 9 | 131626200 | 131626250 | 50  | 131626212 | 11 | 22  | 1.7  |
| 9 | 131766000 | 131766150 | 150 | 131766087 | 17 | 88  | 11.4 |
| 9 | 132976950 | 132977075 | 125 | 132977012 | 13 | 59  | 8.7  |
| 9 | 133945075 | 133945175 | 100 | 133945137 | 14 | 50  | 3.5  |
| 9 | 134124450 | 134124475 | 25  | 134124462 | 11 | 11  | 1.7  |
| 9 | 134440200 | 134440250 | 50  | 134440212 | 12 | 24  | 3.5  |
| 9 | 135218500 | 135218550 | 50  | 135218512 | 12 | 24  | 1.7  |
| 9 | 135272975 | 135273150 | 175 | 135273037 | 18 | 112 | 17.5 |
| 9 | 135452625 | 135452675 | 50  | 135452637 | 12 | 24  | 0    |
| 9 | 135770225 | 135770250 | 25  | 135770237 | 11 | 11  | 1.7  |
| 9 | 135921000 | 135921150 | 150 | 135921037 | 14 | 75  | 8.7  |
| 9 | 136439000 | 136439125 | 125 | 136439012 | 13 | 60  | 2.6  |
| 9 | 137676575 | 137676775 | 200 | 137676687 | 20 | 128 | 0    |
| 9 | 137679675 | 137679975 | 300 | 137679812 | 24 | 219 | 0    |
| 9 | 138141225 | 138141275 | 50  | 138141237 | 12 | 24  | 0.9  |
| 9 | 138359725 | 138359975 | 250 | 138359787 | 18 | 156 | 17.5 |
| 9 | 138360375 | 138360425 | 50  | 138360387 | 12 | 24  | 3.5  |
| 9 | 138611125 | 138611150 | 25  | 138611137 | 12 | 12  | 0    |
| 9 | 138941800 | 138942025 | 225 | 138941937 | 17 | 128 | 1.7  |
| 9 | 138964525 | 138964550 | 25  | 138964537 | 11 | 11  | 1.7  |
| 9 | 139371500 | 139371700 | 200 | 139371537 | 17 | 116 | 0    |
| 9 | 139717000 | 139717075 | 75  | 139717012 | 12 | 35  | 0.9  |
| 8 | 185400    | 185925    | 525 | 185812    | 18 | 264 | 0    |
| 8 | 426675    | 426700    | 25  | 426687    | 11 | 11  | 0.9  |
| 8 | 839925    | 839975    | 50  | 839937    | 11 | 22  | 3.5  |
| 8 | 2063100   | 2063225   | 125 | 2063112   | 12 | 59  | 0    |
| 8 | 2993375   | 2993525   | 150 | 2993387   | 12 | 70  | 0.9  |
| 8 | 6333200   | 6333325   | 125 | 6333237   | 15 | 67  | 8.7  |
| 8 | 6553900   | 6554050   | 150 | 6554012   | 15 | 75  | 8.7  |
| 8 | 6645700   | 6645750   | 50  | 6645712   | 11 | 22  | 3.5  |
| 8 | 8253400   | 8253675   | 275 | 8253562   | 32 | 252 | 17.5 |
| 8 | 8401325   | 8401350   | 25  | 8401337   | 11 | 11  | 0    |
| 8 | 9380200   | 9380325   | 125 | 9380212   | 11 | 55  | 0    |
| 8 | 10823600  | 10823725  | 125 | 10823687  | 15 | 63  | 0    |
| 8 | 11096475  | 11096575  | 100 | 11096512  | 20 | 73  | 10.5 |
| 8 | 11466850  | 11466875  | 25  | 11466862  | 11 | 11  | 0.9  |
| 8 | 11697325  | 11697350  | 25  | 11697337  | 12 | 12  | 1.7  |
| 8 | 12905825  | 12905950  | 125 | 12905887  | 17 | 73  | 7    |
| 8 | 12989250  | 12989375  | 125 | 12989287  | 13 | 60  | 0    |
| 8 | 15441950  | 15442125  | 175 | 15441962  | 14 | 94  | 0    |
| 8 | 15884650  | 15884775  | 125 | 15884662  | 11 | 55  | 7    |
| 8 | 17530425  | 17530450  | 25  | 17530437  | 11 | 11  | 1.7  |
| 8 | 17752550  | 17752575  | 25  | 17752562  | 12 | 12  | 0    |
| 8 | 18042725  | 18042925  | 200 | 18042887  | 17 | 120 | 5.2  |
| 8 | 18880400  | 18880575  | 175 | 18880537  | 13 | 80  | 0.9  |
| 8 | 19719700  | 19719775  | 75  | 19719712  | 14 | 42  | 3.5  |
| 8 | 20155925  | 20156150  | 225 | 20155962  | 13 | 106 | 9.6  |
| 8 | 20170100  | 20170175  | 75  | 20170112  | 11 | 33  | 2.6  |
| 8 | 22054475  | 22054575  | 100 | 22054487  | 12 | 46  | 5.2  |
| 8 | 22266275  | 22266400  | 125 | 22266362  | 14 | 62  | 4.4  |
| 8 | 22306625  | 22306675  | 50  | 22306637  | 12 | 24  | 3.5  |
| 8 | 22465650  | 22465750  | 100 | 22465737  | 17 | 59  | 7    |
| 8 | 22466200  | 22466225  | 25  | 22466212  | 12 | 12  | 0.9  |
| 8 | 22467375  | 22467525  | 150 | 22467462  | 21 | 106 | 7    |
| 8 | 22579000  | 22579075  | 75  | 22579012  | 12 | 36  | 3.5  |
| 8 | 22663925  | 22664025  | 100 | 22663937  | 14 | 54  | 6.1  |
| 8 | 22933125  | 22933200  | 75  | 22933187  | 22 | 54  | 7.9  |
| 8 | 23513925  | 23513950  | 25  | 23513937  | 12 | 12  | 0    |
| 8 | 27662050  | 27662075  | 25  | 27662062  | 12 | 12  | 1.7  |
| 8 | 27688100  | 27688125  | 25  | 27688112  | 12 | 12  | 1.7  |
| 8 | 28314700  | 28314975  | 275 | 28314812  | 18 | 164 | 5.2  |
| 8 | 28514425  | 28514525  | 100 | 28514437  | 11 | 44  | 3.5  |
| 8 | 28522425  | 28522625  | 200 | 28522587  | 19 | 114 | 7    |
| 8 | 29083325  | 29083400  | 75  | 29083337  | 11 | 33  | 0    |
| 8 | 29550975  | 29551050  | 75  | 29550987  | 11 | 33  | 3.5  |
| 8 | 29578825  | 29578925  | 100 | 29578837  | 12 | 45  | 1.7  |

|   |          |          |     |          |    |     |      |
|---|----------|----------|-----|----------|----|-----|------|
| 8 | 29665850 | 29665950 | 100 | 29665912 | 14 | 50  | 3.5  |
| 8 | 29666300 | 29666325 | 25  | 29666312 | 11 | 11  | 0    |
| 8 | 29813825 | 29814025 | 200 | 29813912 | 16 | 116 | 0    |
| 8 | 30257100 | 30257150 | 50  | 30257112 | 12 | 24  | 3.5  |
| 8 | 30705075 | 30705150 | 75  | 30705137 | 16 | 44  | 6.1  |
| 8 | 33462075 | 33462300 | 225 | 33462137 | 19 | 148 | 10.5 |
| 8 | 34868950 | 34869100 | 150 | 34869062 | 14 | 76  | 6.1  |
| 8 | 37671875 | 37671925 | 50  | 37671887 | 11 | 22  | 1.7  |
| 8 | 37771825 | 37771875 | 50  | 37771837 | 12 | 24  | 1.7  |
| 8 | 37969625 | 37970000 | 375 | 37969762 | 30 | 310 | 7    |
| 8 | 38034375 | 38034425 | 50  | 38034387 | 13 | 26  | 3.5  |
| 8 | 38153100 | 38153200 | 100 | 38153187 | 13 | 45  | 3.5  |
| 8 | 38913625 | 38913675 | 50  | 38913637 | 12 | 23  | 3.5  |
| 8 | 41805475 | 41805600 | 125 | 41805487 | 11 | 53  | 3.5  |
| 8 | 42028975 | 42029025 | 50  | 42028987 | 11 | 22  | 3.5  |
| 8 | 42186600 | 42186625 | 25  | 42186612 | 13 | 13  | 1.7  |
| 8 | 43214875 | 43215025 | 150 | 43214912 | 22 | 105 | 13.1 |
| 8 | 43234425 | 43234450 | 25  | 43234437 | 11 | 11  | 0.9  |
| 8 | 48444525 | 48444675 | 150 | 48444587 | 15 | 79  | 4.4  |
| 8 | 49825925 | 49826050 | 125 | 49826012 | 14 | 60  | 0    |
| 8 | 49828175 | 49828250 | 75  | 49828212 | 13 | 36  | 0    |
| 8 | 49828775 | 49828825 | 50  | 49828812 | 13 | 25  | 0    |
| 8 | 49978825 | 49978950 | 125 | 49978862 | 17 | 71  | 10.5 |
| 8 | 51130575 | 51130700 | 125 | 51130637 | 12 | 58  | 3.5  |
| 8 | 51404325 | 51404525 | 200 | 51404412 | 18 | 123 | 5.2  |
| 8 | 51654925 | 51654950 | 25  | 51654937 | 11 | 11  | 0    |
| 8 | 51691750 | 51691775 | 25  | 51691762 | 11 | 11  | 0    |
| 8 | 53389175 | 53389275 | 100 | 53389212 | 14 | 50  | 3.5  |
| 8 | 53621900 | 53621925 | 25  | 53621912 | 11 | 11  | 0    |
| 8 | 54252550 | 54252750 | 200 | 54252662 | 15 | 105 | 3.5  |
| 8 | 54347925 | 54348125 | 200 | 54347962 | 12 | 90  | 12.2 |
| 8 | 54611400 | 54611450 | 50  | 54611437 | 12 | 23  | 0    |
| 8 | 54940050 | 54940100 | 50  | 54940087 | 15 | 26  | 2.6  |
| 8 | 54955725 | 54955825 | 100 | 54955762 | 14 | 52  | 4.4  |
| 8 | 54991850 | 54991925 | 75  | 54991862 | 11 | 33  | 5.2  |
| 8 | 55020425 | 55020450 | 25  | 55020437 | 11 | 11  | 1.7  |
| 8 | 55097425 | 55097600 | 175 | 55097537 | 21 | 122 | 18.3 |
| 8 | 57149700 | 57149800 | 100 | 57149762 | 18 | 62  | 8.7  |
| 8 | 58852775 | 58852800 | 25  | 58852787 | 13 | 13  | 0    |
| 8 | 61174525 | 61174550 | 25  | 61174537 | 13 | 13  | 0.9  |
| 8 | 61373050 | 61373225 | 175 | 61373137 | 15 | 82  | 4.4  |
| 8 | 61680250 | 61680550 | 300 | 61680387 | 17 | 152 | 5.2  |
| 8 | 61727050 | 61727150 | 100 | 61727062 | 14 | 54  | 0    |
| 8 | 62098700 | 62098750 | 50  | 62098712 | 11 | 22  | 0    |
| 8 | 62655425 | 62655625 | 200 | 62655512 | 17 | 120 | 0    |
| 8 | 62898650 | 62898775 | 125 | 62898662 | 12 | 58  | 0.9  |
| 8 | 63137950 | 63138100 | 150 | 63137962 | 12 | 68  | 0    |
| 8 | 64121700 | 64121800 | 100 | 64121737 | 13 | 50  | 0    |
| 8 | 65807000 | 65807100 | 100 | 65807062 | 13 | 46  | 0    |
| 8 | 65862050 | 65862075 | 25  | 65862062 | 11 | 11  | 0    |
| 8 | 65998425 | 65998775 | 350 | 65998587 | 20 | 181 | 0.9  |
| 8 | 66718300 | 66718425 | 125 | 66718337 | 14 | 66  | 0    |
| 8 | 66733975 | 66734175 | 200 | 66734062 | 21 | 135 | 14.9 |
| 8 | 67188950 | 67189050 | 100 | 67188987 | 15 | 55  | 7    |
| 8 | 67579975 | 67580075 | 100 | 67580012 | 14 | 52  | 2.6  |
| 8 | 67582175 | 67582225 | 50  | 67582187 | 11 | 22  | 3.5  |
| 8 | 67635675 | 67635800 | 125 | 67635762 | 16 | 72  | 10.5 |
| 8 | 68000325 | 68000525 | 200 | 68000387 | 16 | 118 | 14   |
| 8 | 69969900 | 69970025 | 125 | 69969912 | 11 | 55  | 0    |
| 8 | 70589800 | 70589975 | 175 | 70589812 | 11 | 77  | 0    |
| 8 | 70738750 | 70738800 | 50  | 70738762 | 11 | 22  | 0    |
| 8 | 70782375 | 70782475 | 100 | 70782462 | 12 | 41  | 7    |
| 8 | 70835900 | 70835950 | 50  | 70835912 | 12 | 24  | 3.5  |
| 8 | 70845450 | 70845525 | 75  | 70845462 | 11 | 33  | 2.6  |
| 8 | 70870500 | 70870625 | 125 | 70870562 | 15 | 65  | 1.7  |
| 8 | 71744125 | 71744275 | 150 | 71744262 | 22 | 110 | 20.1 |
| 8 | 71896450 | 71896625 | 175 | 71896487 | 14 | 97  | 12.2 |
| 8 | 72163225 | 72163350 | 125 | 72163312 | 17 | 77  | 13.1 |
| 8 | 73021325 | 73021400 | 75  | 73021337 | 12 | 36  | 0    |
| 8 | 73351275 | 73351400 | 125 | 73351312 | 17 | 72  | 2.6  |
| 8 | 75051000 | 75051150 | 150 | 75051012 | 15 | 86  | 10.5 |
| 8 | 75246175 | 75246500 | 325 | 75246312 | 23 | 226 | 7    |
| 8 | 76059650 | 76059725 | 75  | 76059662 | 13 | 39  | 1.7  |
| 8 | 76083950 | 76084100 | 150 | 76084037 | 16 | 82  | 0    |
| 8 | 76327750 | 76328075 | 325 | 76327887 | 17 | 153 | 4.4  |



|   |           |           |     |           |    |     |      |
|---|-----------|-----------|-----|-----------|----|-----|------|
| 8 | 78644725  | 78644800  | 75  | 78644737  | 11 | 32  | 1.7  |
| 8 | 79740900  | 79741000  | 100 | 79740912  | 12 | 42  | 0    |
| 8 | 80901325  | 80901375  | 50  | 80901362  | 16 | 28  | 3.5  |
| 8 | 80951800  | 80951950  | 150 | 80951862  | 14 | 76  | 3.5  |
| 8 | 80955000  | 80955150  | 150 | 80955087  | 16 | 86  | 14.9 |
| 8 | 81038275  | 81038300  | 25  | 81038287  | 15 | 15  | 2.6  |
| 8 | 81104375  | 81104400  | 25  | 81104387  | 11 | 11  | 0.9  |
| 8 | 81688350  | 81688400  | 50  | 81688362  | 12 | 24  | 1.7  |
| 8 | 81993825  | 81993875  | 50  | 81993837  | 12 | 23  | 0    |
| 8 | 82122850  | 82122950  | 100 | 82122862  | 15 | 54  | 3.5  |
| 8 | 82412850  | 82412925  | 75  | 82412887  | 13 | 37  | 0    |
| 8 | 82439525  | 82439550  | 25  | 82439537  | 12 | 12  | 0.9  |
| 8 | 82756075  | 82756100  | 25  | 82756087  | 12 | 12  | 0.9  |
| 8 | 85827550  | 85827750  | 200 | 85827662  | 16 | 106 | 0    |
| 8 | 86206925  | 86207025  | 100 | 86206937  | 11 | 44  | 2.6  |
| 8 | 87139375  | 87139400  | 25  | 87139387  | 11 | 11  | 0.9  |
| 8 | 87177125  | 87177250  | 125 | 87177162  | 12 | 57  | 5.2  |
| 8 | 87423800  | 87423875  | 75  | 87423812  | 17 | 43  | 7.9  |
| 8 | 87473350  | 87473375  | 25  | 87473362  | 11 | 11  | 0    |
| 8 | 88139625  | 88139925  | 300 | 88139812  | 19 | 182 | 0    |
| 8 | 88167250  | 88167275  | 25  | 88167262  | 12 | 12  | 0.9  |
| 8 | 88650975  | 88651325  | 350 | 88651137  | 28 | 255 | 0    |
| 8 | 88787375  | 88787750  | 375 | 88787562  | 48 | 466 | 2.6  |
| 8 | 89018550  | 89018575  | 25  | 89018562  | 14 | 14  | 2.6  |
| 8 | 89026975  | 89027175  | 200 | 89027137  | 17 | 111 | 0    |
| 8 | 89043525  | 89043600  | 75  | 89043537  | 12 | 34  | 0    |
| 8 | 89091950  | 89092150  | 200 | 89092012  | 18 | 126 | 1.7  |
| 8 | 89098975  | 89099000  | 25  | 89098987  | 11 | 11  | 0    |
| 8 | 89506450  | 89506600  | 150 | 89506537  | 12 | 68  | 0.9  |
| 8 | 90890400  | 90890650  | 250 | 90890537  | 21 | 153 | 0.9  |
| 8 | 91065775  | 91065800  | 25  | 91065787  | 16 | 16  | 2.6  |
| 8 | 91697900  | 91698225  | 325 | 91698062  | 28 | 255 | 7    |
| 8 | 91726600  | 91726625  | 25  | 91726612  | 13 | 13  | 0.9  |
| 8 | 91747525  | 91747550  | 25  | 91747537  | 12 | 12  | 0    |
| 8 | 92356925  | 92357025  | 100 | 92356937  | 11 | 42  | 5.2  |
| 8 | 94959900  | 94960375  | 475 | 94960037  | 17 | 256 | 28   |
| 8 | 94961600  | 94961725  | 125 | 94961612  | 12 | 56  | 0    |
| 8 | 94989525  | 94989625  | 100 | 94989612  | 14 | 50  | 7    |
| 8 | 95022325  | 95022525  | 200 | 95022462  | 17 | 114 | 6.1  |
| 8 | 95976025  | 95976100  | 75  | 95976037  | 11 | 33  | 5.2  |
| 8 | 95976975  | 95977000  | 25  | 95976987  | 11 | 11  | 0    |
| 8 | 96183975  | 96184450  | 475 | 96184362  | 24 | 277 | 22.7 |
| 8 | 96214525  | 96214600  | 75  | 96214537  | 12 | 34  | 0    |
| 8 | 96767000  | 96767175  | 175 | 96767087  | 18 | 91  | 0    |
| 8 | 97726275  | 97726550  | 275 | 97726362  | 19 | 164 | 23.6 |
| 8 | 97729600  | 97729675  | 75  | 97729612  | 12 | 35  | 0    |
| 8 | 98477600  | 98477700  | 100 | 98477687  | 12 | 43  | 0.9  |
| 8 | 98623825  | 98623875  | 50  | 98623837  | 11 | 22  | 0    |
| 8 | 98663825  | 98663900  | 75  | 98663887  | 13 | 35  | 0    |
| 8 | 98857750  | 98857875  | 125 | 98857787  | 14 | 68  | 5.2  |
| 8 | 99866075  | 99866300  | 225 | 99866237  | 19 | 136 | 6.1  |
| 8 | 101641100 | 101641125 | 25  | 101641112 | 11 | 11  | 1.7  |
| 8 | 101914250 | 101914275 | 25  | 101914262 | 11 | 11  | 1.7  |
| 8 | 102176750 | 102176875 | 125 | 102176787 | 12 | 57  | 4.4  |
| 8 | 102189850 | 102189950 | 100 | 102189937 | 14 | 47  | 3.5  |
| 8 | 102190875 | 102191225 | 350 | 102190887 | 31 | 237 | 44.6 |
| 8 | 102495800 | 102495850 | 50  | 102495812 | 12 | 23  | 0    |
| 8 | 102837675 | 102837925 | 250 | 102837762 | 21 | 159 | 11.4 |
| 8 | 103610225 | 103610400 | 175 | 103610287 | 14 | 86  | 15.7 |
| 8 | 103682475 | 103682625 | 150 | 103682487 | 26 | 96  | 12.2 |
| 8 | 103887675 | 103887775 | 100 | 103887712 | 13 | 49  | 7    |
| 8 | 104213950 | 104214075 | 125 | 104214062 | 12 | 53  | 4.4  |
| 8 | 104352700 | 104353275 | 575 | 104352937 | 52 | 633 | 17.5 |
| 8 | 105103300 | 105103400 | 100 | 105103312 | 15 | 54  | 4.4  |
| 8 | 105418450 | 105418650 | 200 | 105418587 | 13 | 89  | 10.5 |
| 8 | 105499350 | 105499400 | 50  | 105499362 | 11 | 22  | 2.6  |
| 8 | 105688900 | 105689200 | 300 | 105689087 | 17 | 160 | 23.6 |
| 8 | 107141950 | 107142000 | 50  | 107141987 | 14 | 26  | 1.7  |
| 8 | 107755275 | 107755525 | 250 | 107755387 | 19 | 156 | 4.4  |
| 8 | 109524825 | 109524900 | 75  | 109524887 | 17 | 45  | 3.5  |
| 8 | 109525125 | 109525150 | 25  | 109525137 | 14 | 14  | 2.6  |
| 8 | 109903150 | 109903400 | 250 | 109903237 | 26 | 193 | 1.7  |
| 8 | 110415600 | 110415625 | 25  | 110415612 | 12 | 12  | 1.7  |
| 8 | 110621375 | 110621475 | 100 | 110621462 | 20 | 65  | 7    |
| 8 | 110623050 | 110623125 | 75  | 110623062 | 11 | 33  | 2.6  |

|   |           |           |     |           |    |     |      |
|---|-----------|-----------|-----|-----------|----|-----|------|
| 8 | 111880100 | 111880300 | 200 | 111880137 | 19 | 123 | 4.4  |
| 8 | 113698250 | 113698275 | 25  | 113698262 | 11 | 11  | 1.7  |
| 8 | 116063075 | 116063150 | 75  | 116063087 | 11 | 33  | 3.5  |
| 8 | 116074725 | 116074800 | 75  | 116074737 | 12 | 34  | 0    |
| 8 | 116533400 | 116533425 | 25  | 116533412 | 12 | 12  | 1.7  |
| 8 | 117454650 | 117454825 | 175 | 117454737 | 17 | 101 | 12.2 |
| 8 | 117802475 | 117802600 | 125 | 117802487 | 11 | 47  | 7.9  |
| 8 | 117912975 | 117913175 | 200 | 117913037 | 16 | 114 | 0    |
| 8 | 118728000 | 118728075 | 75  | 118728012 | 11 | 33  | 0    |
| 8 | 120359300 | 120359475 | 175 | 120359387 | 16 | 88  | 0    |
| 8 | 121154825 | 121154850 | 25  | 121154837 | 11 | 11  | 0.9  |
| 8 | 121454325 | 121454450 | 125 | 121454337 | 12 | 56  | 0    |
| 8 | 121638825 | 121638975 | 150 | 121638837 | 12 | 70  | 0    |
| 8 | 121988375 | 121988425 | 50  | 121988387 | 11 | 22  | 1.7  |
| 8 | 122014425 | 122014600 | 175 | 122014462 | 15 | 83  | 7.9  |
| 8 | 122037875 | 122037925 | 50  | 122037887 | 11 | 22  | 0    |
| 8 | 122052600 | 122052875 | 275 | 122052737 | 18 | 148 | 15.7 |
| 8 | 122300500 | 122300900 | 400 | 122300662 | 51 | 535 | 21.8 |
| 8 | 123313950 | 123314125 | 175 | 123313962 | 11 | 72  | 0    |
| 8 | 123583525 | 123583650 | 125 | 123583537 | 12 | 58  | 0    |
| 8 | 124123325 | 124123375 | 50  | 124123337 | 11 | 22  | 3.5  |
| 8 | 124123625 | 124123700 | 75  | 124123662 | 18 | 50  | 9.6  |
| 8 | 124598500 | 124598650 | 150 | 124598512 | 20 | 92  | 13.1 |
| 8 | 124599250 | 124599300 | 50  | 124599262 | 11 | 22  | 0.9  |
| 8 | 124601700 | 124601900 | 200 | 124601762 | 14 | 100 | 4.4  |
| 8 | 124775600 | 124775650 | 50  | 124775612 | 11 | 22  | 1.7  |
| 8 | 124794100 | 124794175 | 75  | 124794112 | 13 | 37  | 2.6  |
| 8 | 124836000 | 124836200 | 200 | 124836137 | 15 | 101 | 7.9  |
| 8 | 125608875 | 125608900 | 25  | 125608887 | 12 | 12  | 0    |
| 8 | 125928900 | 125929025 | 125 | 125928987 | 16 | 71  | 4.4  |
| 8 | 126054925 | 126055000 | 75  | 126054937 | 11 | 33  | 2.6  |
| 8 | 126058125 | 126058625 | 500 | 126058262 | 36 | 504 | 0    |
| 8 | 126254700 | 126254750 | 50  | 126254737 | 12 | 23  | 0    |
| 8 | 126270550 | 126270675 | 125 | 126270637 | 14 | 63  | 0.9  |
| 8 | 126307875 | 126307900 | 25  | 126307887 | 14 | 14  | 2.6  |
| 8 | 126371000 | 126371025 | 25  | 126371012 | 12 | 12  | 0.9  |
| 8 | 126415400 | 126415475 | 75  | 126415412 | 11 | 33  | 0    |
| 8 | 126451150 | 126451350 | 200 | 126451237 | 20 | 134 | 14   |
| 8 | 126494025 | 126494100 | 75  | 126494037 | 20 | 60  | 10.5 |
| 8 | 126495350 | 126495375 | 25  | 126495362 | 11 | 11  | 0.9  |
| 8 | 126510925 | 126511425 | 500 | 126511287 | 20 | 253 | 10.5 |
| 8 | 126513350 | 126513450 | 100 | 126513437 | 14 | 47  | 3.5  |
| 8 | 126689500 | 126689550 | 50  | 126689512 | 11 | 22  | 1.7  |
| 8 | 126793575 | 126793775 | 200 | 126793737 | 19 | 129 | 6.1  |
| 8 | 127047425 | 127047450 | 25  | 127047437 | 12 | 12  | 0.9  |
| 8 | 127592000 | 127592025 | 25  | 127592012 | 12 | 12  | 1.7  |
| 8 | 127679625 | 127679750 | 125 | 127679687 | 13 | 60  | 0    |
| 8 | 127685400 | 127685575 | 175 | 127685437 | 19 | 118 | 0    |
| 8 | 127905700 | 127905800 | 100 | 127905737 | 13 | 48  | 6.1  |
| 8 | 127913650 | 127913725 | 75  | 127913662 | 12 | 36  | 5.2  |
| 8 | 127915050 | 127915175 | 125 | 127915112 | 16 | 74  | 6.1  |
| 8 | 127915550 | 127915575 | 25  | 127915562 | 11 | 11  | 1.7  |
| 8 | 127920950 | 127921225 | 275 | 127921062 | 18 | 156 | 8.7  |
| 8 | 127921550 | 127921725 | 175 | 127921612 | 16 | 103 | 8.7  |
| 8 | 128050025 | 128050100 | 75  | 128050062 | 12 | 34  | 1.7  |
| 8 | 128433575 | 128433625 | 50  | 128433587 | 12 | 24  | 0    |
| 8 | 128654800 | 128654850 | 50  | 128654812 | 12 | 24  | 1.7  |
| 8 | 128874425 | 128874575 | 150 | 128874437 | 12 | 64  | 1.7  |
| 8 | 128891325 | 128891350 | 25  | 128891337 | 11 | 11  | 0.9  |
| 8 | 128980750 | 128980950 | 200 | 128980837 | 22 | 140 | 13.1 |
| 8 | 130153075 | 130153150 | 75  | 130153087 | 13 | 35  | 0    |
| 8 | 130617375 | 130617575 | 200 | 130617462 | 16 | 112 | 14.9 |
| 8 | 130633875 | 130634225 | 350 | 130634062 | 29 | 315 | 16.6 |
| 8 | 130685025 | 130685400 | 375 | 130685212 | 33 | 317 | 0.9  |
| 8 | 130714850 | 130714975 | 125 | 130714887 | 14 | 65  | 11.4 |
| 8 | 130723650 | 130723675 | 25  | 130723662 | 11 | 11  | 0    |
| 8 | 130750950 | 130751225 | 275 | 130751087 | 15 | 140 | 22.7 |
| 8 | 130767075 | 130767100 | 25  | 130767087 | 15 | 15  | 2.6  |
| 8 | 130768150 | 130768275 | 125 | 130768212 | 14 | 63  | 5.2  |
| 8 | 130880025 | 130880075 | 50  | 130880037 | 14 | 28  | 1.7  |
| 8 | 131076675 | 131076725 | 50  | 131076687 | 11 | 22  | 3.5  |
| 8 | 131420550 | 131420725 | 175 | 131420587 | 14 | 91  | 13.1 |
| 8 | 131757175 | 131757375 | 200 | 131757287 | 15 | 95  | 2.6  |
| 8 | 131910475 | 131910725 | 250 | 131910537 | 19 | 144 | 9.6  |
| 8 | 132090600 | 132090775 | 175 | 132090612 | 17 | 93  | 0    |

|   |           |           |     |           |    |     |      |
|---|-----------|-----------|-----|-----------|----|-----|------|
| 8 | 132898050 | 132898075 | 25  | 132898062 | 12 | 12  | 0    |
| 8 | 133138100 | 133138200 | 100 | 133138112 | 12 | 44  | 2.6  |
| 8 | 133139500 | 133139550 | 50  | 133139512 | 11 | 22  | 2.6  |
| 8 | 133141025 | 133141075 | 50  | 133141037 | 12 | 24  | 3.5  |
| 8 | 133413500 | 133413700 | 200 | 133413612 | 17 | 112 | 6.1  |
| 8 | 134378600 | 134378700 | 100 | 134378637 | 13 | 48  | 0    |
| 8 | 134378925 | 134378975 | 50  | 134378962 | 13 | 25  | 1.7  |
| 8 | 134444800 | 134444900 | 100 | 134444812 | 11 | 44  | 0    |
| 8 | 134457300 | 134457325 | 25  | 134457312 | 12 | 12  | 1.7  |
| 8 | 134586075 | 134586225 | 150 | 134586137 | 14 | 72  | 4.4  |
| 8 | 134586675 | 134586850 | 175 | 134586787 | 12 | 78  | 10.5 |
| 8 | 135159100 | 135159125 | 25  | 135159112 | 12 | 12  | 0    |
| 8 | 135794925 | 135795100 | 175 | 135794937 | 11 | 81  | 14.9 |
| 8 | 135913700 | 135913775 | 75  | 135913762 | 14 | 34  | 5.2  |
| 8 | 137007725 | 137007775 | 50  | 137007737 | 11 | 22  | 1.7  |
| 8 | 137112775 | 137112800 | 25  | 137112787 | 12 | 12  | 0.9  |
| 8 | 138001125 | 138001175 | 50  | 138001137 | 12 | 23  | 0    |
| 8 | 138670425 | 138670450 | 25  | 138670437 | 11 | 11  | 0    |
| 8 | 138696075 | 138696150 | 75  | 138696087 | 11 | 31  | 3.5  |
| 8 | 139754225 | 139754425 | 200 | 139754312 | 21 | 126 | 6.1  |
| 8 | 140329700 | 140329750 | 50  | 140329712 | 11 | 22  | 3.5  |
| 8 | 141543900 | 141543975 | 75  | 141543912 | 19 | 47  | 8.7  |
| 8 | 141590400 | 141590425 | 25  | 141590412 | 13 | 13  | 1.7  |
| 8 | 141591275 | 141591425 | 150 | 141591412 | 26 | 141 | 24.5 |
| 8 | 141725100 | 141725125 | 25  | 141725112 | 12 | 12  | 1.7  |
| 8 | 142155000 | 142155050 | 50  | 142155012 | 12 | 24  | 3.5  |
| 8 | 142408825 | 142408925 | 100 | 142408837 | 12 | 48  | 3.5  |
| 8 | 142526175 | 142526200 | 25  | 142526187 | 11 | 11  | 0.9  |
| 8 | 143407650 | 143407925 | 275 | 143407737 | 18 | 164 | 0    |
| 8 | 143575550 | 143575650 | 100 | 143575562 | 11 | 44  | 0    |
| 8 | 143732175 | 143732225 | 50  | 143732187 | 11 | 22  | 0    |
| 8 | 144126050 | 144126425 | 375 | 144126237 | 42 | 401 | 18.3 |
| 8 | 144168750 | 144168825 | 75  | 144168762 | 13 | 39  | 3.5  |
| 8 | 144289025 | 144289075 | 50  | 144289062 | 13 | 25  | 3.5  |
| 8 | 144399250 | 144399325 | 75  | 144399262 | 12 | 36  | 5.2  |
| 8 | 144435225 | 144435300 | 75  | 144435237 | 15 | 39  | 5.2  |
| 8 | 144520725 | 144520775 | 50  | 144520737 | 11 | 22  | 3.5  |
| 8 | 144803600 | 144804125 | 525 | 144803737 | 27 | 372 | 7    |
| 8 | 144822500 | 144822900 | 400 | 144822712 | 48 | 500 | 0    |
| 8 | 144990325 | 144990425 | 100 | 144990412 | 18 | 64  | 8.7  |
| 8 | 145025475 | 145025500 | 25  | 145025487 | 11 | 11  | 1.7  |
| 8 | 145074400 | 145074575 | 175 | 145074412 | 14 | 86  | 2.6  |
| 8 | 145074975 | 145075000 | 25  | 145074987 | 14 | 14  | 2.6  |
| 8 | 145093125 | 145093150 | 25  | 145093137 | 11 | 11  | 0    |
| 8 | 145205200 | 145205250 | 50  | 145205212 | 11 | 22  | 3.5  |
| 8 | 145215350 | 145215550 | 200 | 145215412 | 13 | 94  | 0    |
| 8 | 145645425 | 145645450 | 25  | 145645437 | 12 | 12  | 1.7  |
| 8 | 145861800 | 145861850 | 50  | 145861812 | 11 | 22  | 0    |
| 8 | 145904000 | 145904200 | 200 | 145904137 | 14 | 102 | 7    |
| 8 | 145918600 | 145918650 | 50  | 145918612 | 11 | 22  | 0    |
| 8 | 145988975 | 145989025 | 50  | 145988987 | 16 | 30  | 3.5  |
| 8 | 146038325 | 146039050 | 725 | 146038487 | 43 | 801 | 31.5 |
| 8 | 146049500 | 146049625 | 125 | 146049537 | 19 | 89  | 7.9  |
| 8 | 146126725 | 146126925 | 200 | 146126737 | 12 | 86  | 8.7  |
| 8 | 146127775 | 146128250 | 475 | 146128187 | 16 | 205 | 24.5 |
| 8 | 146173075 | 146173850 | 775 | 146173162 | 25 | 480 | 0.9  |
| 8 | 146248575 | 146248775 | 200 | 146248637 | 19 | 125 | 7    |
| X | 9924050   | 9924300   | 250 | 9924187   | 17 | 132 | 1.7  |
| X | 10047600  | 10047950  | 350 | 10047712  | 27 | 268 | 4.4  |
| X | 16167650  | 16167725  | 75  | 16167662  | 11 | 33  | 5.2  |
| X | 23711100  | 23711225  | 125 | 23711112  | 13 | 57  | 4.4  |
| X | 26581175  | 26581275  | 100 | 26581187  | 11 | 44  | 0    |
| X | 46289850  | 46289875  | 25  | 46289862  | 12 | 12  | 0.9  |
| X | 47403675  | 47403700  | 25  | 47403687  | 11 | 11  | 0    |
| X | 48910350  | 48910475  | 125 | 48910462  | 13 | 59  | 2.6  |
| X | 52966950  | 52967000  | 50  | 52966962  | 12 | 24  | 3.5  |
| X | 54401725  | 54401925  | 200 | 54401837  | 15 | 107 | 11.4 |
| X | 96097725  | 96097750  | 25  | 96097737  | 11 | 11  | 0    |
| X | 96578600  | 96578625  | 25  | 96578612  | 11 | 11  | 0.9  |
| X | 101658200 | 101658225 | 25  | 101658212 | 11 | 11  | 0    |
| X | 110244825 | 110244900 | 75  | 110244837 | 12 | 34  | 3.5  |
| X | 118889800 | 118889850 | 50  | 118889837 | 14 | 26  | 1.7  |
| X | 123151700 | 123151800 | 100 | 123151737 | 15 | 56  | 0    |
| X | 126774100 | 126774125 | 25  | 126774112 | 12 | 12  | 0    |
| X | 135790525 | 135790650 | 125 | 135790562 | 14 | 66  | 7    |

|    |           |           |     |           |    |     |      |
|----|-----------|-----------|-----|-----------|----|-----|------|
| X  | 147557675 | 147557725 | 50  | 147557687 | 12 | 24  | 0    |
| X  | 149209675 | 149209725 | 50  | 149209687 | 11 | 22  | 0    |
| X  | 149808275 | 149808450 | 175 | 149808387 | 17 | 95  | 12.2 |
| X  | 150316000 | 150316100 | 100 | 150316012 | 11 | 44  | 3.5  |
| X  | 151860750 | 151860950 | 200 | 151860912 | 19 | 132 | 12.2 |
| X  | 152713250 | 152713300 | 50  | 152713262 | 11 | 22  | 2.6  |
| X  | 153282850 | 153282975 | 125 | 153282887 | 13 | 61  | 2.6  |
| X  | 153372525 | 153372625 | 100 | 153372537 | 12 | 42  | 7    |
| X  | 154764025 | 154764050 | 25  | 154764037 | 11 | 11  | 1.7  |
| 11 | 179775    | 179825    | 50  | 179812    | 17 | 32  | 2.6  |
| 11 | 180100    | 180200    | 100 | 180112    | 29 | 101 | 17.5 |
| 11 | 364350    | 364400    | 50  | 364362    | 11 | 22  | 2.6  |
| 11 | 459875    | 459950    | 75  | 459887    | 15 | 41  | 1.7  |
| 11 | 605750    | 605775    | 25  | 605762    | 11 | 11  | 1.7  |
| 11 | 685475    | 685500    | 25  | 685487    | 11 | 11  | 1.7  |
| 11 | 700850    | 700950    | 100 | 700862    | 12 | 48  | 6.1  |
| 11 | 802075    | 802175    | 100 | 802087    | 12 | 48  | 0    |
| 11 | 828575    | 828675    | 100 | 828612    | 14 | 52  | 0    |
| 11 | 1289000   | 1289025   | 25  | 1289012   | 12 | 12  | 0    |
| 11 | 1683625   | 1683800   | 175 | 1683762   | 13 | 82  | 0    |
| 11 | 1738500   | 1738875   | 375 | 1738762   | 15 | 168 | 16.6 |
| 11 | 1932150   | 1932325   | 175 | 1932162   | 13 | 81  | 0    |
| 11 | 2710350   | 2710550   | 200 | 2710437   | 14 | 96  | 12.2 |
| 11 | 2907075   | 2907125   | 50  | 2907087   | 11 | 22  | 3.5  |
| 11 | 2908575   | 2908600   | 25  | 2908587   | 12 | 12  | 1.7  |
| 11 | 2999125   | 2999150   | 25  | 2999137   | 11 | 11  | 0    |
| 11 | 3147125   | 3147150   | 25  | 3147137   | 18 | 18  | 3.5  |
| 11 | 3147500   | 3147675   | 175 | 3147537   | 15 | 99  | 0    |
| 11 | 3337350   | 3337475   | 125 | 3337387   | 15 | 64  | 0    |
| 11 | 6331350   | 6331525   | 175 | 6331362   | 12 | 70  | 13.1 |
| 11 | 6659950   | 6660025   | 75  | 6659987   | 13 | 37  | 0    |
| 11 | 6660950   | 6661025   | 75  | 6661012   | 15 | 41  | 3.5  |
| 11 | 7549625   | 7549750   | 125 | 7549637   | 12 | 60  | 0.9  |
| 11 | 7629575   | 7629600   | 25  | 7629587   | 12 | 12  | 0    |
| 11 | 8201550   | 8201675   | 125 | 8201612   | 13 | 57  | 0.9  |
| 11 | 9029925   | 9030075   | 150 | 9029937   | 12 | 72  | 0    |
| 11 | 9193025   | 9193125   | 100 | 9193037   | 11 | 44  | 0    |
| 11 | 9591725   | 9591750   | 25  | 9591737   | 11 | 11  | 0.9  |
| 11 | 10022925  | 10023125  | 200 | 10023012  | 15 | 99  | 0    |
| 11 | 10835700  | 10835800  | 100 | 10835712  | 12 | 48  | 4.4  |
| 11 | 10877875  | 10877925  | 50  | 10877887  | 14 | 26  | 2.6  |
| 11 | 12079025  | 12079100  | 75  | 12079037  | 12 | 36  | 2.6  |
| 11 | 12615250  | 12615325  | 75  | 12615262  | 11 | 33  | 1.7  |
| 11 | 12671100  | 12671150  | 50  | 12671112  | 11 | 22  | 3.5  |
| 11 | 14132225  | 14132375  | 150 | 14132262  | 14 | 76  | 0    |
| 11 | 14315075  | 14315175  | 100 | 14315112  | 14 | 53  | 0    |
| 11 | 14621550  | 14621675  | 125 | 14621612  | 14 | 66  | 4.4  |
| 11 | 14869675  | 14869725  | 50  | 14869687  | 14 | 28  | 4.4  |
| 11 | 14870475  | 14870600  | 125 | 14870537  | 13 | 59  | 7    |
| 11 | 16090125  | 16090150  | 25  | 16090137  | 11 | 11  | 1.7  |
| 11 | 17349775  | 17350075  | 300 | 17349912  | 21 | 180 | 0    |
| 11 | 18095925  | 18096100  | 175 | 18095937  | 12 | 75  | 11.4 |
| 11 | 19654875  | 19655200  | 325 | 19654887  | 14 | 126 | 17.5 |
| 11 | 19655475  | 19655525  | 50  | 19655487  | 11 | 22  | 0    |
| 11 | 19690225  | 19690250  | 25  | 19690237  | 12 | 12  | 1.7  |
| 11 | 19692625  | 19692650  | 25  | 19692637  | 11 | 11  | 0    |
| 11 | 20090575  | 20090750  | 175 | 20090612  | 12 | 83  | 6.1  |
| 11 | 24676050  | 24676250  | 200 | 24676137  | 16 | 110 | 6.1  |
| 11 | 26343475  | 26343625  | 150 | 26343587  | 16 | 88  | 4.4  |
| 11 | 27341150  | 27341175  | 25  | 27341162  | 12 | 12  | 0    |
| 11 | 27905400  | 27905525  | 125 | 27905437  | 12 | 52  | 0    |
| 11 | 31936200  | 31936325  | 125 | 31936212  | 12 | 60  | 0    |
| 11 | 34086250  | 34086300  | 50  | 34086262  | 11 | 22  | 0    |
| 11 | 34309550  | 34309625  | 75  | 34309587  | 14 | 38  | 2.6  |
| 11 | 34877725  | 34878025  | 300 | 34877862  | 33 | 286 | 0    |
| 11 | 35066750  | 35066825  | 75  | 35066762  | 11 | 33  | 0    |
| 11 | 35144825  | 35144850  | 25  | 35144837  | 11 | 11  | 1.7  |
| 11 | 35485800  | 35485825  | 25  | 35485812  | 11 | 11  | 0    |
| 11 | 35501575  | 35501625  | 50  | 35501587  | 11 | 22  | 0    |
| 11 | 35641250  | 35641350  | 100 | 35641287  | 15 | 49  | 7    |
| 11 | 35940450  | 35940500  | 50  | 35940462  | 11 | 22  | 0    |
| 11 | 35969975  | 35970025  | 50  | 35969987  | 11 | 22  | 0    |
| 11 | 35982800  | 35982900  | 100 | 35982812  | 12 | 47  | 0    |
| 11 | 36129225  | 36129275  | 50  | 36129237  | 11 | 22  | 0    |
| 11 | 36500450  | 36500625  | 175 | 36500462  | 13 | 72  | 0    |

|    |          |          |     |          |    |     |      |
|----|----------|----------|-----|----------|----|-----|------|
| 11 | 36795675 | 36795825 | 150 | 36795787 | 15 | 77  | 2.6  |
| 11 | 37372575 | 37372600 | 25  | 37372587 | 11 | 11  | 0    |
| 11 | 37507425 | 37507475 | 50  | 37507462 | 12 | 23  | 0    |
| 11 | 38204925 | 38205025 | 100 | 38204987 | 12 | 45  | 0    |
| 11 | 38426650 | 38426675 | 25  | 38426662 | 11 | 11  | 0.9  |
| 11 | 43858750 | 43858775 | 25  | 43858762 | 11 | 11  | 1.7  |
| 11 | 44045100 | 44045175 | 75  | 44045112 | 12 | 35  | 3.5  |
| 11 | 44073625 | 44073725 | 100 | 44073637 | 14 | 51  | 3.5  |
| 11 | 46617725 | 46617750 | 25  | 46617737 | 12 | 12  | 1.7  |
| 11 | 47134625 | 47134750 | 125 | 47134687 | 13 | 57  | 1.7  |
| 11 | 47960225 | 47960250 | 25  | 47960237 | 14 | 14  | 0.9  |
| 11 | 48013275 | 48013300 | 25  | 48013287 | 14 | 14  | 0    |
| 11 | 56351475 | 56351675 | 200 | 56351537 | 16 | 113 | 7    |
| 11 | 57191725 | 57192000 | 275 | 57191837 | 15 | 144 | 6.1  |
| 11 | 58169800 | 58170200 | 400 | 58169862 | 14 | 186 | 7    |
| 11 | 58441375 | 58441550 | 175 | 58441387 | 11 | 77  | 0    |
| 11 | 58668700 | 58668900 | 200 | 58668812 | 20 | 136 | 10.5 |
| 11 | 58788925 | 58788975 | 50  | 58788937 | 11 | 22  | 2.6  |
| 11 | 59081475 | 59081500 | 25  | 59081487 | 11 | 11  | 0.9  |
| 11 | 60885650 | 60885700 | 50  | 60885662 | 13 | 26  | 1.7  |
| 11 | 60893875 | 60894025 | 150 | 60893912 | 19 | 103 | 8.7  |
| 11 | 60916450 | 60916600 | 150 | 60916562 | 12 | 66  | 0.9  |
| 11 | 61421375 | 61421500 | 125 | 61421487 | 14 | 60  | 8.7  |
| 11 | 61529675 | 61529700 | 25  | 61529687 | 12 | 12  | 1.7  |
| 11 | 61649825 | 61650000 | 175 | 61649862 | 14 | 86  | 4.4  |
| 11 | 61747325 | 61747400 | 75  | 61747337 | 14 | 40  | 0    |
| 11 | 62069625 | 62069650 | 25  | 62069637 | 12 | 12  | 0.9  |
| 11 | 62077275 | 62077375 | 100 | 62077287 | 14 | 56  | 2.6  |
| 11 | 62115525 | 62115625 | 150 | 62115637 | 16 | 81  | 5.2  |
| 11 | 62329625 | 62329650 | 25  | 62329637 | 13 | 13  | 1.7  |
| 11 | 62365950 | 62365975 | 25  | 62365962 | 17 | 17  | 1.7  |
| 11 | 63195600 | 63195850 | 250 | 63195712 | 13 | 112 | 6.1  |
| 11 | 63337100 | 63337225 | 125 | 63337112 | 14 | 70  | 5.2  |
| 11 | 64635950 | 64635975 | 25  | 64635962 | 12 | 12  | 1.7  |
| 11 | 64906575 | 64906600 | 25  | 64906587 | 11 | 11  | 0.9  |
| 11 | 64996175 | 64996300 | 125 | 64996212 | 13 | 63  | 8.7  |
| 11 | 65176775 | 65176850 | 75  | 65176787 | 11 | 33  | 0    |
| 11 | 65187550 | 65187600 | 50  | 65187562 | 12 | 24  | 3.5  |
| 11 | 65436075 | 65436150 | 75  | 65436087 | 16 | 44  | 7    |
| 11 | 65746975 | 65747000 | 25  | 65746987 | 11 | 11  | 0.9  |
| 11 | 66140125 | 66140375 | 250 | 66140212 | 14 | 116 | 7    |
| 11 | 66140900 | 66141100 | 200 | 66141012 | 19 | 128 | 0    |
| 11 | 66269150 | 66269275 | 125 | 66269212 | 14 | 64  | 5.2  |
| 11 | 66812225 | 66812250 | 25  | 66812237 | 11 | 11  | 0.9  |
| 11 | 67775950 | 67775975 | 25  | 67775962 | 12 | 12  | 1.7  |
| 11 | 67790475 | 67790600 | 125 | 67790537 | 12 | 57  | 3.5  |
| 11 | 67793825 | 67793900 | 75  | 67793837 | 13 | 39  | 4.4  |
| 11 | 67984125 | 67984150 | 25  | 67984137 | 12 | 12  | 0    |
| 11 | 68449725 | 68449900 | 175 | 68449787 | 16 | 98  | 8.7  |
| 11 | 68579200 | 68579325 | 125 | 68579212 | 13 | 59  | 0    |
| 11 | 68864025 | 68864075 | 50  | 68864037 | 13 | 26  | 0    |
| 11 | 68876275 | 68876350 | 75  | 68876287 | 15 | 42  | 7    |
| 11 | 68883925 | 68884125 | 200 | 68884037 | 17 | 111 | 0    |
| 11 | 68984750 | 68984925 | 175 | 68984787 | 21 | 131 | 6.1  |
| 11 | 69079250 | 69079275 | 25  | 69079262 | 14 | 14  | 2.6  |
| 11 | 69082675 | 69082700 | 25  | 69082687 | 11 | 11  | 1.7  |
| 11 | 69134150 | 69134625 | 475 | 69134237 | 27 | 318 | 28   |
| 11 | 69160450 | 69160625 | 175 | 69160512 | 27 | 158 | 16.6 |
| 11 | 69163200 | 69163325 | 125 | 69163312 | 12 | 52  | 5.2  |
| 11 | 69283150 | 69283250 | 100 | 69283162 | 13 | 46  | 1.7  |
| 11 | 69322525 | 69322550 | 25  | 69322537 | 11 | 11  | 1.7  |
| 11 | 69323725 | 69323875 | 150 | 69323762 | 15 | 82  | 3.5  |
| 11 | 69364475 | 69364500 | 25  | 69364487 | 11 | 11  | 0.9  |
| 11 | 69473900 | 69474250 | 350 | 69474062 | 31 | 286 | 41.9 |
| 11 | 69538175 | 69538250 | 75  | 69538187 | 12 | 36  | 0    |
| 11 | 69562000 | 69562475 | 475 | 69562262 | 30 | 391 | 28   |
| 11 | 69688350 | 69688400 | 50  | 69688362 | 14 | 28  | 3.5  |
| 11 | 69720600 | 69720650 | 50  | 69720612 | 12 | 24  | 0.9  |
| 11 | 69723250 | 69723325 | 75  | 69723262 | 13 | 38  | 4.4  |
| 11 | 69726075 | 69726175 | 100 | 69726087 | 12 | 48  | 3.5  |
| 11 | 69734100 | 69734275 | 175 | 69734237 | 23 | 130 | 13.1 |
| 11 | 69756950 | 69757050 | 100 | 69757037 | 23 | 81  | 14.9 |
| 11 | 69836700 | 69836775 | 75  | 69836762 | 16 | 42  | 5.2  |
| 11 | 69838550 | 69838650 | 100 | 69838562 | 13 | 50  | 7    |
| 11 | 69843125 | 69843200 | 75  | 69843137 | 11 | 33  | 2.6  |

|    |          |          |     |          |    |     |      |
|----|----------|----------|-----|----------|----|-----|------|
| 11 | 69846675 | 69846775 | 100 | 69846737 | 14 | 50  | 7    |
| 11 | 69859175 | 69859200 | 25  | 69859187 | 11 | 11  | 0.9  |
| 11 | 69939300 | 69939350 | 50  | 69939312 | 14 | 28  | 1.7  |
| 11 | 69972900 | 69973125 | 225 | 69972937 | 39 | 273 | 19.2 |
| 11 | 69997050 | 69997100 | 50  | 69997062 | 12 | 24  | 0    |
| 11 | 70001250 | 70001400 | 150 | 70001312 | 18 | 97  | 18.3 |
| 11 | 70014775 | 70014850 | 75  | 70014787 | 11 | 33  | 0    |
| 11 | 70128600 | 70128700 | 100 | 70128687 | 16 | 56  | 7.9  |
| 11 | 70466325 | 70466650 | 325 | 70466512 | 46 | 405 | 7    |
| 11 | 70630000 | 70630150 | 150 | 70630087 | 21 | 111 | 10.5 |
| 11 | 70662325 | 70662350 | 25  | 70662337 | 11 | 11  | 0.9  |
| 11 | 70792025 | 70792075 | 50  | 70792037 | 12 | 24  | 0    |
| 11 | 71388200 | 71388400 | 200 | 71388312 | 15 | 108 | 19.2 |
| 11 | 71429225 | 71429425 | 200 | 71429237 | 12 | 86  | 8.7  |
| 11 | 71429950 | 71430025 | 75  | 71429962 | 14 | 40  | 5.2  |
| 11 | 71487575 | 71487650 | 75  | 71487587 | 12 | 34  | 0.9  |
| 11 | 71492575 | 71492600 | 25  | 71492587 | 15 | 15  | 2.6  |
| 11 | 71607400 | 71607425 | 25  | 71607412 | 12 | 12  | 0.9  |
| 11 | 71611025 | 71611125 | 100 | 71611037 | 11 | 40  | 6.1  |
| 11 | 71640350 | 71640375 | 25  | 71640362 | 14 | 14  | 2.6  |
| 11 | 71783775 | 71783800 | 25  | 71783787 | 12 | 12  | 0.9  |
| 11 | 71819900 | 71819925 | 25  | 71819912 | 14 | 14  | 2.6  |
| 11 | 71843275 | 71843300 | 25  | 71843287 | 11 | 11  | 1.7  |
| 11 | 72030525 | 72030575 | 50  | 72030562 | 13 | 24  | 3.5  |
| 11 | 72031700 | 72031850 | 150 | 72031812 | 15 | 75  | 11.4 |
| 11 | 72057975 | 72058000 | 25  | 72057987 | 11 | 11  | 0.9  |
| 11 | 72058500 | 72058550 | 50  | 72058512 | 16 | 32  | 5.2  |
| 11 | 72121775 | 72121800 | 25  | 72121787 | 12 | 12  | 0.9  |
| 11 | 72142725 | 72142750 | 25  | 72142737 | 11 | 11  | 0.9  |
| 11 | 72151550 | 72151575 | 25  | 72151562 | 11 | 11  | 0    |
| 11 | 72155600 | 72155625 | 25  | 72155612 | 14 | 14  | 1.7  |
| 11 | 72174325 | 72174350 | 25  | 72174337 | 12 | 12  | 0.9  |
| 11 | 72182375 | 72182400 | 25  | 72182387 | 11 | 11  | 1.7  |
| 11 | 72222225 | 72222275 | 50  | 72222237 | 11 | 22  | 1.7  |
| 11 | 72227275 | 72227575 | 300 | 72227437 | 16 | 147 | 12.2 |
| 11 | 72344100 | 72344125 | 25  | 72344112 | 16 | 16  | 2.6  |
| 11 | 72416625 | 72416925 | 300 | 72416762 | 26 | 224 | 15.7 |
| 11 | 72532325 | 72532500 | 175 | 72532337 | 13 | 73  | 10.5 |
| 11 | 72637200 | 72637225 | 25  | 72637212 | 11 | 11  | 0.9  |
| 11 | 72700450 | 72700650 | 200 | 72700512 | 20 | 146 | 15.7 |
| 11 | 72701450 | 72701550 | 100 | 72701487 | 20 | 62  | 7    |
| 11 | 72703050 | 72703100 | 50  | 72703062 | 32 | 62  | 11.4 |
| 11 | 72710250 | 72710325 | 75  | 72710262 | 12 | 36  | 0.9  |
| 11 | 72724050 | 72724075 | 25  | 72724062 | 15 | 15  | 2.6  |
| 11 | 72762075 | 72762100 | 25  | 72762087 | 12 | 12  | 1.7  |
| 11 | 72762675 | 72762825 | 150 | 72762787 | 14 | 76  | 0    |
| 11 | 72986625 | 72986725 | 100 | 72986662 | 16 | 59  | 9.6  |
| 11 | 72987400 | 72987425 | 25  | 72987412 | 16 | 16  | 2.6  |
| 11 | 73149625 | 73149750 | 125 | 73149712 | 17 | 78  | 7    |
| 11 | 73150175 | 73150200 | 25  | 73150187 | 16 | 16  | 2.6  |
| 11 | 73219000 | 73219050 | 50  | 73219012 | 11 | 22  | 0    |
| 11 | 73245225 | 73245250 | 25  | 73245237 | 16 | 16  | 2.6  |
| 11 | 73263775 | 73263875 | 100 | 73263787 | 12 | 48  | 6.1  |
| 11 | 73409125 | 73409325 | 200 | 73409187 | 14 | 102 | 5.2  |
| 11 | 73457200 | 73457275 | 75  | 73457237 | 13 | 37  | 2.6  |
| 11 | 73459775 | 73460100 | 325 | 73459912 | 19 | 189 | 21.8 |
| 11 | 73644900 | 73645000 | 100 | 73644912 | 11 | 44  | 0.9  |
| 11 | 73710150 | 73710175 | 25  | 73710162 | 11 | 11  | 0    |
| 11 | 73838325 | 73838425 | 100 | 73838337 | 13 | 48  | 0    |
| 11 | 73893625 | 73893775 | 150 | 73893712 | 15 | 76  | 1.7  |
| 11 | 73932850 | 73932925 | 75  | 73932887 | 14 | 40  | 1.7  |
| 11 | 74072850 | 74072875 | 25  | 74072862 | 11 | 11  | 1.7  |
| 11 | 74137550 | 74137575 | 25  | 74137562 | 12 | 12  | 0.9  |
| 11 | 74215650 | 74215950 | 300 | 74215687 | 15 | 145 | 4.4  |
| 11 | 74259775 | 74259950 | 175 | 74259862 | 12 | 74  | 2.6  |
| 11 | 74320975 | 74321050 | 75  | 74320987 | 12 | 36  | 0    |
| 11 | 74413975 | 74414025 | 50  | 74413987 | 12 | 24  | 1.7  |
| 11 | 74421425 | 74421500 | 75  | 74421437 | 11 | 33  | 0.9  |
| 11 | 74523700 | 74523800 | 100 | 74523712 | 11 | 44  | 2.6  |
| 11 | 74700600 | 74700675 | 75  | 74700662 | 14 | 38  | 2.6  |
| 11 | 74788050 | 74788125 | 75  | 74788062 | 11 | 33  | 2.6  |
| 11 | 74788675 | 74788700 | 25  | 74788687 | 12 | 12  | 1.7  |
| 11 | 74951250 | 74951300 | 50  | 74951262 | 12 | 23  | 3.5  |
| 11 | 75044925 | 75045100 | 175 | 75045062 | 15 | 86  | 3.5  |
| 11 | 75156975 | 75157025 | 50  | 75156987 | 11 | 22  | 2.6  |

|    |           |           |     |           |    |     |      |
|----|-----------|-----------|-----|-----------|----|-----|------|
| 11 | 75190450  | 75190525  | 75  | 75190462  | 12 | 34  | 0.9  |
| 11 | 75723750  | 75724100  | 350 | 75723912  | 31 | 291 | 18.3 |
| 11 | 75968725  | 75968750  | 25  | 75968737  | 16 | 16  | 1.7  |
| 11 | 76078800  | 76078825  | 25  | 76078812  | 12 | 12  | 1.7  |
| 11 | 76088000  | 76088200  | 200 | 76088062  | 17 | 120 | 4.4  |
| 11 | 76133575  | 76133775  | 200 | 76133662  | 23 | 148 | 21   |
| 11 | 76136950  | 76136975  | 25  | 76136962  | 11 | 11  | 0.9  |
| 11 | 76194200  | 76194350  | 150 | 76194212  | 14 | 78  | 3.5  |
| 11 | 76445575  | 76445825  | 250 | 76445662  | 29 | 220 | 5.2  |
| 11 | 76991575  | 76991600  | 25  | 76991587  | 12 | 12  | 0.9  |
| 11 | 77203750  | 77203775  | 25  | 77203762  | 11 | 11  | 0.9  |
| 11 | 77243425  | 77243750  | 325 | 77243562  | 18 | 175 | 16.6 |
| 11 | 77468575  | 77468725  | 150 | 77468637  | 14 | 80  | 7.9  |
| 11 | 77528675  | 77528725  | 50  | 77528687  | 16 | 32  | 5.2  |
| 11 | 77578225  | 77578250  | 25  | 77578237  | 11 | 11  | 1.7  |
| 11 | 77661575  | 77661650  | 75  | 77661587  | 12 | 36  | 1.7  |
| 11 | 77791575  | 77791950  | 375 | 77791787  | 36 | 349 | 7    |
| 11 | 77806850  | 77806875  | 25  | 77806862  | 12 | 12  | 0.9  |
| 11 | 77983050  | 77983125  | 75  | 77983087  | 14 | 38  | 0    |
| 11 | 77984275  | 77984325  | 50  | 77984287  | 14 | 28  | 3.5  |
| 11 | 78318750  | 78318800  | 50  | 78318762  | 11 | 22  | 1.7  |
| 11 | 80769650  | 80769675  | 25  | 80769662  | 11 | 11  | 0    |
| 11 | 82544250  | 82544325  | 75  | 82544262  | 11 | 33  | 0    |
| 11 | 85243475  | 85243625  | 150 | 85243487  | 14 | 80  | 5.2  |
| 11 | 85334075  | 85334175  | 100 | 85334112  | 12 | 47  | 0.9  |
| 11 | 85342150  | 85342275  | 125 | 85342187  | 13 | 59  | 0    |
| 11 | 85463175  | 85463250  | 75  | 85463187  | 12 | 35  | 0    |
| 11 | 85540775  | 85540875  | 100 | 85540787  | 11 | 44  | 6.1  |
| 11 | 86131975  | 86132175  | 200 | 86132037  | 17 | 112 | 7    |
| 11 | 87710650  | 87710725  | 75  | 87710687  | 13 | 38  | 1.7  |
| 11 | 92298300  | 92298500  | 200 | 92298337  | 22 | 140 | 0    |
| 11 | 92570925  | 92571000  | 75  | 92570962  | 13 | 37  | 5.2  |
| 11 | 93034225  | 93034350  | 125 | 93034312  | 17 | 65  | 7.9  |
| 11 | 93515525  | 93515925  | 400 | 93515637  | 12 | 158 | 0    |
| 11 | 94198375  | 94198425  | 50  | 94198387  | 11 | 22  | 0    |
| 11 | 94678175  | 94678275  | 100 | 94678212  | 12 | 47  | 4.4  |
| 11 | 94959375  | 94959575  | 200 | 94959462  | 15 | 104 | 0    |
| 11 | 95137700  | 95137725  | 25  | 95137712  | 11 | 11  | 0.9  |
| 11 | 95161875  | 95162075  | 200 | 95161937  | 16 | 112 | 0    |
| 11 | 95443325  | 95443400  | 75  | 95443337  | 12 | 36  | 5.2  |
| 11 | 95712175  | 95712350  | 175 | 95712262  | 18 | 100 | 4.4  |
| 11 | 96840175  | 96840325  | 150 | 96840187  | 12 | 68  | 0    |
| 11 | 100012875 | 100012950 | 75  | 100012887 | 11 | 33  | 0    |
| 11 | 100115750 | 100115850 | 100 | 100115762 | 12 | 45  | 6.1  |
| 11 | 100208025 | 100208075 | 50  | 100208037 | 11 | 22  | 0.9  |
| 11 | 100379575 | 100379700 | 125 | 100379612 | 12 | 58  | 0    |
| 11 | 100534225 | 100534375 | 150 | 100534287 | 15 | 75  | 2.6  |
| 11 | 101979150 | 101979250 | 100 | 101979162 | 13 | 50  | 0    |
| 11 | 102099400 | 102099450 | 50  | 102099412 | 12 | 24  | 0    |
| 11 | 104026225 | 104026375 | 150 | 104026237 | 14 | 82  | 8.7  |
| 11 | 104733050 | 104733250 | 200 | 104733062 | 15 | 110 | 7.9  |
| 11 | 105398300 | 105398475 | 175 | 105398387 | 15 | 87  | 7    |
| 11 | 105452800 | 105452875 | 75  | 105452812 | 14 | 40  | 0    |
| 11 | 107575050 | 107575200 | 150 | 107575187 | 15 | 70  | 6.1  |
| 11 | 107598375 | 107598400 | 25  | 107598387 | 13 | 13  | 0.9  |
| 11 | 108517025 | 108517200 | 175 | 108517112 | 17 | 96  | 6.1  |
| 11 | 111401075 | 111401275 | 200 | 111401212 | 18 | 120 | 14   |
| 11 | 111823350 | 111823475 | 125 | 111823437 | 13 | 57  | 0    |
| 11 | 111966125 | 111966225 | 100 | 111966137 | 12 | 46  | 0    |
| 11 | 112163100 | 112163300 | 200 | 112163112 | 12 | 88  | 3.5  |
| 11 | 115184275 | 115184550 | 275 | 115184437 | 31 | 241 | 0    |
| 11 | 117638575 | 117638675 | 100 | 117638612 | 13 | 46  | 6.1  |
| 11 | 117777500 | 117777550 | 50  | 117777512 | 16 | 31  | 4.4  |
| 11 | 117811100 | 117811150 | 50  | 117811112 | 11 | 22  | 1.7  |
| 11 | 118290025 | 118290050 | 25  | 118290037 | 11 | 11  | 1.7  |
| 11 | 118304125 | 118304150 | 25  | 118304137 | 11 | 11  | 1.7  |
| 11 | 118406850 | 118406975 | 125 | 118406962 | 12 | 56  | 7    |
| 11 | 119994425 | 119994625 | 200 | 119994587 | 20 | 135 | 4.4  |
| 11 | 120498525 | 120498550 | 25  | 120498537 | 11 | 11  | 0.9  |
| 11 | 120840625 | 120840775 | 150 | 120840662 | 17 | 101 | 18.3 |
| 11 | 120888750 | 120888850 | 100 | 120888762 | 12 | 46  | 3.5  |
| 11 | 121098800 | 121098950 | 150 | 121098812 | 14 | 76  | 10.5 |
| 11 | 121957250 | 121957300 | 50  | 121957287 | 13 | 24  | 3.5  |
| 11 | 123078200 | 123078225 | 25  | 123078212 | 12 | 12  | 1.7  |
| 11 | 124499400 | 124499575 | 175 | 124499487 | 15 | 87  | 5.2  |

|    |           |           |     |           |    |     |      |
|----|-----------|-----------|-----|-----------|----|-----|------|
| 11 | 124638750 | 124638900 | 150 | 124638762 | 25 | 102 | 12.2 |
| 11 | 124694975 | 124695025 | 50  | 124694987 | 12 | 24  | 0    |
| 11 | 124723350 | 124723400 | 50  | 124723362 | 13 | 24  | 3.5  |
| 11 | 124928425 | 124928775 | 350 | 124928587 | 24 | 246 | 5.2  |
| 11 | 125001400 | 125001550 | 150 | 125001487 | 18 | 93  | 6.1  |
| 11 | 125731600 | 125731625 | 25  | 125731612 | 13 | 13  | 1.7  |
| 11 | 127294250 | 127294450 | 200 | 127294287 | 13 | 91  | 0    |
| 11 | 127406875 | 127406900 | 25  | 127406887 | 12 | 12  | 1.7  |
| 11 | 127654975 | 127655075 | 100 | 127655037 | 13 | 46  | 0    |
| 11 | 127665550 | 127665600 | 50  | 127665562 | 12 | 23  | 2.6  |
| 11 | 127690075 | 127690250 | 175 | 127690112 | 18 | 105 | 6.1  |
| 11 | 127880350 | 127880425 | 75  | 127880362 | 12 | 36  | 4.4  |
| 11 | 127897825 | 127897875 | 50  | 127897837 | 12 | 24  | 3.5  |
| 11 | 129588300 | 129588375 | 75  | 129588337 | 13 | 35  | 1.7  |
| 11 | 130291675 | 130291850 | 175 | 130291737 | 18 | 116 | 7    |
| 11 | 131123525 | 131123625 | 100 | 131123587 | 13 | 46  | 3.5  |
| 11 | 131442850 | 131442875 | 25  | 131442862 | 11 | 11  | 0    |
| 11 | 133599300 | 133599325 | 25  | 133599312 | 12 | 12  | 0    |
| 11 | 134243825 | 134243900 | 75  | 134243837 | 12 | 36  | 0.9  |
| 10 | 132575    | 132675    | 100 | 132612    | 15 | 52  | 5.2  |
| 10 | 430600    | 430700    | 100 | 430687    | 14 | 50  | 7    |
| 10 | 825600    | 825625    | 25  | 825612    | 11 | 11  | 0.9  |
| 10 | 1085225   | 1085250   | 25  | 1085237   | 15 | 15  | 2.6  |
| 10 | 3021675   | 3021725   | 50  | 3021687   | 14 | 26  | 0    |
| 10 | 4050775   | 4050975   | 200 | 4050887   | 13 | 97  | 3.5  |
| 10 | 4220450   | 4220525   | 75  | 4220462   | 13 | 38  | 1.7  |
| 10 | 4348700   | 4348875   | 175 | 4348787   | 17 | 100 | 8.7  |
| 10 | 4687500   | 4687825   | 325 | 4687662   | 40 | 344 | 7    |
| 10 | 4858050   | 4858300   | 250 | 4858212   | 26 | 206 | 25.3 |
| 10 | 5197800   | 5197875   | 75  | 5197862   | 16 | 42  | 0    |
| 10 | 5579925   | 5579975   | 50  | 5579937   | 11 | 22  | 3.5  |
| 10 | 5766350   | 5766425   | 75  | 5766412   | 18 | 48  | 7.9  |
| 10 | 6321350   | 6321550   | 200 | 6321462   | 18 | 114 | 9.6  |
| 10 | 6462400   | 6462550   | 150 | 6462462   | 15 | 74  | 0    |
| 10 | 7901175   | 7901225   | 50  | 7901187   | 11 | 22  | 0    |
| 10 | 11957050  | 11957125  | 75  | 11957062  | 12 | 33  | 4.4  |
| 10 | 14092000  | 14092050  | 50  | 14092012  | 12 | 24  | 1.7  |
| 10 | 14708675  | 14708750  | 75  | 14708687  | 13 | 39  | 0    |
| 10 | 14960250  | 14960400  | 150 | 14960362  | 13 | 69  | 7.9  |
| 10 | 17070225  | 17070250  | 25  | 17070237  | 11 | 11  | 0    |
| 10 | 17344525  | 17344800  | 275 | 17344687  | 30 | 236 | 0    |
| 10 | 17537500  | 17537625  | 125 | 17537562  | 13 | 59  | 7    |
| 10 | 18988025  | 18988050  | 25  | 18988037  | 12 | 12  | 0.9  |
| 10 | 21862750  | 21862850  | 100 | 21862762  | 17 | 60  | 5.2  |
| 10 | 22558400  | 22558525  | 125 | 22558412  | 17 | 69  | 7    |
| 10 | 25441025  | 25441225  | 200 | 25441087  | 18 | 130 | 14.9 |
| 10 | 26153625  | 26153650  | 25  | 26153637  | 12 | 12  | 0    |
| 10 | 27833300  | 27833325  | 25  | 27833312  | 12 | 12  | 1.7  |
| 10 | 29174050  | 29174250  | 200 | 29174112  | 19 | 135 | 3.5  |
| 10 | 29268475  | 29268625  | 150 | 29268562  | 15 | 78  | 4.4  |
| 10 | 29304975  | 29305150  | 175 | 29305087  | 14 | 87  | 0    |
| 10 | 29672675  | 29673250  | 575 | 29672887  | 18 | 285 | 14   |
| 10 | 30312150  | 30312300  | 150 | 30312162  | 14 | 78  | 4.4  |
| 10 | 32333400  | 32333425  | 25  | 32333412  | 11 | 11  | 0.9  |
| 10 | 32385600  | 32385700  | 100 | 32385687  | 13 | 49  | 3.5  |
| 10 | 35772775  | 35773075  | 300 | 35772962  | 29 | 249 | 11.4 |
| 10 | 36868100  | 36868125  | 25  | 36868112  | 12 | 12  | 1.7  |
| 10 | 38294125  | 38294150  | 25  | 38294137  | 12 | 12  | 0    |
| 10 | 38447100  | 38447350  | 250 | 38447187  | 19 | 134 | 0    |
| 10 | 41702450  | 41702475  | 25  | 41702462  | 11 | 11  | 0    |
| 10 | 41719275  | 41719300  | 25  | 41719287  | 11 | 11  | 1.7  |
| 10 | 41719675  | 41719700  | 25  | 41719687  | 22 | 22  | 3.5  |
| 10 | 41720700  | 41720725  | 25  | 41720712  | 11 | 11  | 0.9  |
| 10 | 41859125  | 41859175  | 50  | 41859137  | 12 | 24  | 0    |
| 10 | 42335675  | 42335800  | 125 | 42335737  | 16 | 70  | 0    |
| 10 | 42597950  | 42598050  | 100 | 42598012  | 14 | 47  | 1.7  |
| 10 | 43223325  | 43223350  | 25  | 43223337  | 14 | 14  | 2.6  |
| 10 | 44680225  | 44680275  | 50  | 44680237  | 13 | 26  | 3.5  |
| 10 | 44774700  | 44774850  | 150 | 44774712  | 13 | 60  | 0    |
| 10 | 47093300  | 47093325  | 25  | 47093312  | 11 | 11  | 1.7  |
| 10 | 58364400  | 58364600  | 200 | 58364437  | 15 | 107 | 0.9  |
| 10 | 59815125  | 59815225  | 100 | 59815162  | 18 | 66  | 8.7  |
| 10 | 62430850  | 62430875  | 25  | 62430862  | 12 | 12  | 1.7  |
| 10 | 63922750  | 63922775  | 25  | 63922762  | 12 | 12  | 0    |
| 10 | 64070500  | 64070625  | 125 | 64070512  | 12 | 51  | 6.1  |



|    |           |           |     |           |    |     |      |
|----|-----------|-----------|-----|-----------|----|-----|------|
| 10 | 64945225  | 64945375  | 150 | 64945287  | 16 | 80  | 0    |
| 10 | 66710525  | 66710625  | 100 | 66710587  | 12 | 44  | 0    |
| 10 | 67044875  | 67044900  | 25  | 67044887  | 12 | 12  | 0    |
| 10 | 69193850  | 69193950  | 100 | 69193862  | 12 | 48  | 2.6  |
| 10 | 69707625  | 69707700  | 75  | 69707637  | 13 | 37  | 2.6  |
| 10 | 70971400  | 70971450  | 50  | 70971412  | 11 | 22  | 1.7  |
| 10 | 71216600  | 71216625  | 25  | 71216612  | 11 | 11  | 0    |
| 10 | 72546400  | 72546600  | 200 | 72546537  | 20 | 132 | 6.1  |
| 10 | 73280800  | 73280925  | 125 | 73280912  | 16 | 68  | 6.1  |
| 10 | 73318975  | 73319050  | 75  | 73319037  | 12 | 34  | 2.6  |
| 10 | 73446250  | 73446300  | 50  | 73446262  | 11 | 22  | 0    |
| 10 | 75215225  | 75215300  | 75  | 75215237  | 13 | 34  | 3.5  |
| 10 | 77011875  | 77012050  | 175 | 77011937  | 20 | 122 | 1.7  |
| 10 | 77194500  | 77194650  | 150 | 77194612  | 13 | 66  | 0    |
| 10 | 77204875  | 77204950  | 75  | 77204887  | 11 | 33  | 5.2  |
| 10 | 77939425  | 77939500  | 75  | 77939437  | 11 | 33  | 5.2  |
| 10 | 79073975  | 79074000  | 25  | 79073987  | 11 | 11  | 1.7  |
| 10 | 79318350  | 79318400  | 50  | 79318362  | 11 | 22  | 0    |
| 10 | 79724450  | 79724525  | 75  | 79724487  | 12 | 35  | 4.4  |
| 10 | 80404250  | 80404375  | 125 | 80404262  | 11 | 55  | 7    |
| 10 | 80830400  | 80830550  | 150 | 80830462  | 12 | 68  | 8.7  |
| 10 | 82194425  | 82194500  | 75  | 82194437  | 11 | 33  | 4.4  |
| 10 | 82286000  | 82286025  | 25  | 82286012  | 14 | 14  | 2.6  |
| 10 | 82437075  | 82437275  | 200 | 82437162  | 15 | 107 | 11.4 |
| 10 | 88150425  | 88150450  | 25  | 88150437  | 11 | 11  | 1.7  |
| 10 | 88428875  | 88429050  | 175 | 88428887  | 11 | 67  | 6.1  |
| 10 | 89868050  | 89868075  | 25  | 89868062  | 11 | 11  | 0    |
| 10 | 89988500  | 89988600  | 100 | 89988512  | 11 | 44  | 7    |
| 10 | 90740375  | 90740450  | 75  | 90740387  | 14 | 42  | 7.9  |
| 10 | 91886425  | 91886700  | 275 | 91886562  | 26 | 204 | 13.1 |
| 10 | 92773475  | 92773525  | 50  | 92773487  | 11 | 22  | 0    |
| 10 | 93306925  | 93306975  | 50  | 93306937  | 13 | 26  | 0.9  |
| 10 | 93353575  | 93353725  | 150 | 93353687  | 13 | 66  | 0    |
| 10 | 93636900  | 93636950  | 50  | 93636937  | 12 | 23  | 3.5  |
| 10 | 94157175  | 94157200  | 25  | 94157187  | 11 | 11  | 1.7  |
| 10 | 94324000  | 94324125  | 125 | 94324087  | 15 | 65  | 9.6  |
| 10 | 94464025  | 94464100  | 75  | 94464087  | 13 | 35  | 5.2  |
| 10 | 94876375  | 94876450  | 75  | 94876387  | 11 | 33  | 0    |
| 10 | 97839450  | 97839475  | 25  | 97839462  | 11 | 11  | 0.9  |
| 10 | 98551250  | 98551375  | 125 | 98551362  | 20 | 82  | 15.7 |
| 10 | 98819675  | 98820125  | 450 | 98819762  | 44 | 416 | 23.6 |
| 10 | 99510750  | 99510775  | 25  | 99510762  | 12 | 12  | 1.7  |
| 10 | 100096625 | 100096850 | 225 | 100096787 | 18 | 125 | 5.2  |
| 10 | 100238625 | 100238800 | 175 | 100238737 | 13 | 81  | 11.4 |
| 10 | 100998725 | 100998900 | 175 | 100998737 | 14 | 88  | 1.7  |
| 10 | 101371150 | 101371300 | 150 | 101371187 | 14 | 75  | 1.7  |
| 10 | 101481950 | 101482175 | 225 | 101482012 | 34 | 227 | 16.6 |
| 10 | 101578525 | 101578575 | 50  | 101578537 | 12 | 24  | 0    |
| 10 | 102036675 | 102036700 | 25  | 102036687 | 11 | 11  | 1.7  |
| 10 | 102097475 | 102097525 | 50  | 102097487 | 11 | 22  | 0    |
| 10 | 102122950 | 102123000 | 50  | 102122962 | 12 | 24  | 0    |
| 10 | 102231275 | 102231300 | 25  | 102231287 | 12 | 12  | 0    |
| 10 | 103047500 | 103047525 | 25  | 103047512 | 12 | 12  | 0    |
| 10 | 103114600 | 103114800 | 200 | 103114637 | 29 | 149 | 23.6 |
| 10 | 103530150 | 103530225 | 75  | 103530162 | 13 | 38  | 5.2  |
| 10 | 104170675 | 104170900 | 225 | 104170762 | 18 | 133 | 9.6  |
| 10 | 104200000 | 104200125 | 125 | 104200012 | 15 | 73  | 5.2  |
| 10 | 104395800 | 104395900 | 100 | 104395812 | 15 | 58  | 5.2  |
| 10 | 105429000 | 105429050 | 50  | 105429012 | 11 | 22  | 3.5  |
| 10 | 105668175 | 105668300 | 125 | 105668237 | 14 | 62  | 0.9  |
| 10 | 105716750 | 105716800 | 50  | 105716762 | 12 | 24  | 0    |
| 10 | 105870900 | 105870925 | 25  | 105870912 | 11 | 11  | 1.7  |
| 10 | 105996725 | 105996925 | 200 | 105996737 | 12 | 88  | 0    |
| 10 | 108901925 | 108902125 | 200 | 108902037 | 21 | 140 | 11.4 |
| 10 | 111975975 | 111976075 | 100 | 111976037 | 27 | 93  | 17.5 |
| 10 | 112075975 | 112076000 | 25  | 112075987 | 16 | 16  | 2.6  |
| 10 | 112148075 | 112148100 | 25  | 112148087 | 11 | 11  | 1.7  |
| 10 | 113238825 | 113238850 | 25  | 113238837 | 11 | 11  | 0    |
| 10 | 114662200 | 114662400 | 200 | 114662212 | 12 | 81  | 2.6  |
| 10 | 114858275 | 114858450 | 175 | 114858337 | 15 | 87  | 0.9  |
| 10 | 115603900 | 115603925 | 25  | 115603912 | 11 | 11  | 1.7  |
| 10 | 116326700 | 116326825 | 125 | 116326712 | 12 | 60  | 0    |
| 10 | 118532675 | 118532800 | 125 | 118532737 | 14 | 64  | 0    |
| 10 | 118587725 | 118587825 | 100 | 118587737 | 11 | 44  | 0    |
| 10 | 118709700 | 118709750 | 50  | 118709737 | 12 | 23  | 2.6  |

|    |           |           |     |           |    |     |      |
|----|-----------|-----------|-----|-----------|----|-----|------|
| 10 | 119125450 | 119125475 | 25  | 119125462 | 12 | 12  | 1.7  |
| 10 | 120914825 | 120914875 | 50  | 120914837 | 11 | 22  | 1.7  |
| 10 | 121245825 | 121245950 | 125 | 121245837 | 11 | 53  | 4.4  |
| 10 | 121394650 | 121394725 | 75  | 121394662 | 11 | 33  | 2.6  |
| 10 | 121622650 | 121622700 | 50  | 121622662 | 12 | 24  | 0.9  |
| 10 | 121716850 | 121716875 | 25  | 121716862 | 11 | 11  | 0    |
| 10 | 122600625 | 122600650 | 25  | 122600637 | 12 | 12  | 1.7  |
| 10 | 122893275 | 122893375 | 100 | 122893287 | 11 | 44  | 1.7  |
| 10 | 124092350 | 124092425 | 75  | 124092362 | 11 | 33  | 0    |
| 10 | 124628900 | 124629050 | 150 | 124628962 | 18 | 99  | 11.4 |
| 10 | 126097625 | 126097675 | 50  | 126097637 | 14 | 26  | 3.5  |
| 10 | 126350625 | 126350675 | 50  | 126350637 | 14 | 26  | 4.4  |
| 10 | 127397900 | 127398075 | 175 | 127397937 | 27 | 158 | 14   |
| 10 | 127398400 | 127398475 | 75  | 127398412 | 12 | 36  | 0    |
| 10 | 127632300 | 127632675 | 375 | 127632487 | 24 | 259 | 6.1  |
| 10 | 128342475 | 128342600 | 125 | 128342562 | 16 | 68  | 0    |
| 10 | 129752600 | 129752775 | 175 | 129752662 | 13 | 81  | 0    |
| 10 | 129753050 | 129753150 | 100 | 129753087 | 15 | 56  | 7    |
| 10 | 131799525 | 131799600 | 75  | 131799537 | 12 | 36  | 5.2  |
| 10 | 131971025 | 131971100 | 75  | 131971062 | 13 | 35  | 0    |
| 10 | 133322375 | 133322400 | 25  | 133322387 | 11 | 11  | 0    |
| 10 | 134942225 | 134942300 | 75  | 134942237 | 11 | 33  | 5.2  |
| 10 | 135183875 | 135183925 | 50  | 135183887 | 12 | 24  | 0    |
| 13 | 19757750  | 19757975  | 225 | 19757862  | 17 | 117 | 0    |
| 13 | 20037500  | 20037825  | 325 | 20037687  | 25 | 232 | 0.9  |
| 13 | 21844500  | 21844600  | 100 | 21844512  | 11 | 42  | 0    |
| 13 | 22938750  | 22938800  | 50  | 22938787  | 16 | 28  | 1.7  |
| 13 | 23554325  | 23554425  | 100 | 23554337  | 12 | 48  | 4.4  |
| 13 | 23621400  | 23621425  | 25  | 23621412  | 11 | 11  | 0    |
| 13 | 23621725  | 23621875  | 150 | 23621862  | 12 | 62  | 3.5  |
| 13 | 24759625  | 24759800  | 175 | 24759687  | 13 | 79  | 3.5  |
| 13 | 25658550  | 25658900  | 350 | 25658712  | 31 | 287 | 33.2 |
| 13 | 26402575  | 26402625  | 50  | 26402587  | 12 | 24  | 3.5  |
| 13 | 26723650  | 26723725  | 75  | 26723662  | 16 | 42  | 3.5  |
| 13 | 26896425  | 26896625  | 200 | 26896512  | 17 | 114 | 0    |
| 13 | 26922425  | 26922600  | 175 | 26922587  | 19 | 104 | 15.7 |
| 13 | 26998975  | 26999175  | 200 | 26998987  | 11 | 77  | 8.7  |
| 13 | 27227150  | 27227300  | 150 | 27227162  | 12 | 72  | 0    |
| 13 | 29615100  | 29615150  | 50  | 29615112  | 14 | 28  | 3.5  |
| 13 | 30277825  | 30277975  | 150 | 30277837  | 13 | 68  | 3.5  |
| 13 | 30634475  | 30634600  | 125 | 30634587  | 12 | 54  | 1.7  |
| 13 | 30788150  | 30788225  | 75  | 30788162  | 12 | 36  | 0    |
| 13 | 32011175  | 32011300  | 125 | 32011187  | 17 | 65  | 9.6  |
| 13 | 32050200  | 32050250  | 50  | 32050212  | 14 | 26  | 1.7  |
| 13 | 32608800  | 32608950  | 150 | 32608887  | 14 | 75  | 2.6  |
| 13 | 32800900  | 32801075  | 175 | 32800962  | 18 | 102 | 12.2 |
| 13 | 33106625  | 33106675  | 50  | 33106637  | 11 | 22  | 0    |
| 13 | 33290100  | 33290150  | 50  | 33290112  | 13 | 24  | 1.7  |
| 13 | 33833700  | 33833850  | 150 | 33833787  | 16 | 84  | 0    |
| 13 | 34220350  | 34220375  | 25  | 34220362  | 12 | 12  | 0    |
| 13 | 35542100  | 35542125  | 25  | 35542112  | 12 | 12  | 0    |
| 13 | 39424925  | 39425000  | 75  | 39424937  | 11 | 33  | 0    |
| 13 | 40393700  | 40393725  | 25  | 40393712  | 11 | 11  | 1.7  |
| 13 | 40532600  | 40532625  | 25  | 40532612  | 14 | 14  | 2.6  |
| 13 | 40604950  | 40604975  | 25  | 40604962  | 11 | 11  | 1.7  |
| 13 | 40620725  | 40621150  | 425 | 40620962  | 37 | 417 | 0    |
| 13 | 42495800  | 42495950  | 150 | 42495912  | 17 | 84  | 3.5  |
| 13 | 43467275  | 43467375  | 100 | 43467312  | 14 | 53  | 0    |
| 13 | 43582700  | 43582775  | 75  | 43582762  | 13 | 35  | 2.6  |
| 13 | 43715725  | 43715875  | 150 | 43715812  | 17 | 89  | 7    |
| 13 | 43804175  | 43804200  | 25  | 43804187  | 12 | 12  | 0.9  |
| 13 | 44235925  | 44236050  | 125 | 44236012  | 19 | 85  | 13.1 |
| 13 | 44389775  | 44390075  | 300 | 44389787  | 14 | 141 | 11.4 |
| 13 | 44390875  | 44391000  | 125 | 44390937  | 13 | 61  | 0    |
| 13 | 44461700  | 44461725  | 25  | 44461712  | 11 | 11  | 0.9  |
| 13 | 46047350  | 46047375  | 25  | 46047362  | 11 | 11  | 0    |
| 13 | 46269775  | 46269800  | 25  | 46269787  | 12 | 12  | 0    |
| 13 | 47263350  | 47263500  | 150 | 47263362  | 11 | 66  | 5.2  |
| 13 | 48893800  | 48893825  | 25  | 48893812  | 12 | 12  | 0    |
| 13 | 48935500  | 48935625  | 125 | 48935512  | 11 | 55  | 4.4  |
| 13 | 49097350  | 49097375  | 25  | 49097362  | 12 | 12  | 1.7  |
| 13 | 49552525  | 49552700  | 175 | 49552537  | 11 | 75  | 0    |
| 13 | 49554425  | 49554450  | 25  | 49554437  | 11 | 11  | 1.7  |
| 13 | 50122700  | 50122750  | 50  | 50122712  | 11 | 22  | 0    |
| 13 | 50519925  | 50519975  | 50  | 50519937  | 12 | 23  | 0    |

|    |           |           |     |           |    |     |      |
|----|-----------|-----------|-----|-----------|----|-----|------|
| 13 | 51336675  | 51336725  | 50  | 51336687  | 11 | 22  | 0    |
| 13 | 51498450  | 51498525  | 75  | 51498462  | 11 | 33  | 0    |
| 13 | 51539400  | 51539675  | 275 | 51539537  | 28 | 245 | 4.4  |
| 13 | 59517025  | 59517175  | 150 | 59517087  | 15 | 86  | 2.6  |
| 13 | 62482375  | 62482575  | 200 | 62482437  | 20 | 128 | 3.5  |
| 13 | 62907825  | 62908025  | 200 | 62907912  | 21 | 132 | 14   |
| 13 | 69962525  | 69962800  | 275 | 69962612  | 16 | 144 | 0    |
| 13 | 72912550  | 72912700  | 150 | 72912562  | 12 | 70  | 0    |
| 13 | 74320575  | 74320700  | 125 | 74320587  | 13 | 60  | 0    |
| 13 | 74607625  | 74607700  | 75  | 74607662  | 13 | 36  | 2.6  |
| 13 | 75009750  | 75009925  | 175 | 75009812  | 17 | 99  | 1.7  |
| 13 | 75141700  | 75141725  | 25  | 75141712  | 12 | 12  | 1.7  |
| 13 | 75558925  | 75559175  | 250 | 75559037  | 23 | 173 | 0.9  |
| 13 | 76431800  | 76432150  | 350 | 76431962  | 22 | 222 | 0    |
| 13 | 76799375  | 76799450  | 75  | 76799387  | 11 | 31  | 5.2  |
| 13 | 79255200  | 79255250  | 50  | 79255212  | 11 | 22  | 1.7  |
| 13 | 79521075  | 79521200  | 125 | 79521087  | 13 | 62  | 1.7  |
| 13 | 84929950  | 84929975  | 25  | 84929962  | 12 | 12  | 0    |
| 13 | 85147700  | 85147825  | 125 | 85147787  | 12 | 57  | 0    |
| 13 | 88484350  | 88484525  | 175 | 88484412  | 16 | 102 | 6.1  |
| 13 | 89497850  | 89498075  | 225 | 89497887  | 15 | 118 | 0    |
| 13 | 90467700  | 90467800  | 100 | 90467712  | 11 | 44  | 0    |
| 13 | 94051675  | 94051750  | 75  | 94051687  | 11 | 33  | 3.5  |
| 13 | 94836350  | 94836425  | 75  | 94836387  | 13 | 37  | 0    |
| 13 | 94909575  | 94909675  | 100 | 94909587  | 15 | 56  | 0    |
| 13 | 96418275  | 96418700  | 425 | 96418462  | 24 | 318 | 0    |
| 13 | 96708275  | 96708325  | 50  | 96708287  | 14 | 28  | 3.5  |
| 13 | 97426250  | 97426325  | 75  | 97426262  | 11 | 33  | 0.9  |
| 13 | 97742925  | 97743100  | 175 | 97742962  | 15 | 86  | 8.7  |
| 13 | 98948950  | 98949000  | 50  | 98948987  | 14 | 26  | 4.4  |
| 13 | 99859525  | 99859725  | 200 | 99859537  | 17 | 118 | 6.1  |
| 13 | 100107750 | 100107825 | 75  | 100107812 | 13 | 35  | 0    |
| 13 | 106018275 | 106018350 | 75  | 106018287 | 14 | 42  | 7.9  |
| 13 | 106036225 | 106036375 | 150 | 106036237 | 12 | 72  | 4.4  |
| 13 | 107665950 | 107665975 | 25  | 107665962 | 12 | 12  | 0.9  |
| 13 | 108883100 | 108883250 | 150 | 108883137 | 15 | 79  | 0    |
| 13 | 109395875 | 109395975 | 100 | 109395887 | 11 | 44  | 1.7  |
| 13 | 109577075 | 109577150 | 75  | 109577087 | 11 | 33  | 2.6  |
| 13 | 112417475 | 112417500 | 25  | 112417487 | 12 | 12  | 0    |
| 13 | 112470125 | 112470150 | 25  | 112470137 | 12 | 12  | 0    |
| 13 | 112484325 | 112484350 | 25  | 112484337 | 11 | 11  | 0.9  |
| 13 | 112857575 | 112857625 | 50  | 112857587 | 12 | 24  | 2.6  |
| 13 | 113546200 | 113546250 | 50  | 113546212 | 11 | 22  | 0.9  |
| 13 | 113602600 | 113602625 | 25  | 113602612 | 11 | 11  | 0.9  |
| 13 | 113847975 | 113848125 | 150 | 113848037 | 21 | 105 | 15.7 |
| 12 | 179250    | 179325    | 75  | 179262    | 12 | 35  | 0    |
| 12 | 433100    | 433125    | 25  | 433112    | 13 | 13  | 1.7  |
| 12 | 438925    | 439000    | 75  | 438937    | 11 | 33  | 1.7  |
| 12 | 521050    | 521075    | 25  | 521062    | 15 | 15  | 2.6  |
| 12 | 521425    | 521475    | 50  | 521437    | 13 | 25  | 1.7  |
| 12 | 553900    | 554250    | 350 | 553987    | 15 | 178 | 19.2 |
| 12 | 677750    | 678100    | 350 | 677862    | 20 | 217 | 6.1  |
| 12 | 929350    | 929375    | 25  | 929362    | 14 | 14  | 0.9  |
| 12 | 1400650   | 1400800   | 150 | 1400687   | 14 | 77  | 0    |
| 12 | 1572250   | 1572325   | 75  | 1572262   | 12 | 36  | 2.6  |
| 12 | 1983850   | 1983950   | 100 | 1983862   | 14 | 56  | 5.2  |
| 12 | 2670575   | 2670600   | 25  | 2670587   | 14 | 14  | 2.6  |
| 12 | 2939525   | 2939700   | 175 | 2939562   | 13 | 84  | 8.7  |
| 12 | 3097525   | 3097650   | 125 | 3097587   | 14 | 66  | 7.9  |
| 12 | 3108850   | 3108875   | 25  | 3108862   | 20 | 20  | 3.5  |
| 12 | 3225625   | 3225675   | 50  | 3225637   | 11 | 22  | 0.9  |
| 12 | 3385250   | 3385650   | 400 | 3385412   | 33 | 360 | 17.5 |
| 12 | 3577750   | 3577825   | 75  | 3577762   | 11 | 33  | 0    |
| 12 | 3626400   | 3626475   | 75  | 3626412   | 16 | 44  | 7.9  |
| 12 | 3629550   | 3629600   | 50  | 3629562   | 12 | 24  | 3.5  |
| 12 | 4518025   | 4518125   | 100 | 4518062   | 14 | 54  | 2.6  |
| 12 | 4584200   | 4584475   | 275 | 4584362   | 16 | 139 | 7    |
| 12 | 5075350   | 5075400   | 50  | 5075362   | 11 | 22  | 0    |
| 12 | 6028350   | 6028425   | 75  | 6028362   | 12 | 36  | 0.9  |
| 12 | 6028675   | 6028725   | 50  | 6028687   | 12 | 23  | 3.5  |
| 12 | 6072575   | 6072675   | 100 | 6072662   | 13 | 46  | 4.4  |
| 12 | 6315950   | 6315975   | 25  | 6315962   | 15 | 15  | 2.6  |
| 12 | 6350500   | 6350575   | 75  | 6350512   | 11 | 33  | 0    |
| 12 | 6440800   | 6440825   | 25  | 6440812   | 11 | 11  | 0.9  |
| 12 | 6511725   | 6511800   | 75  | 6511737   | 12 | 34  | 0    |

|    |          |          |     |          |    |     |      |
|----|----------|----------|-----|----------|----|-----|------|
| 12 | 6527550  | 6527650  | 100 | 6527612  | 13 | 46  | 0    |
| 12 | 6703225  | 6703450  | 225 | 6703412  | 22 | 148 | 15.7 |
| 12 | 6744075  | 6744225  | 150 | 6744112  | 15 | 81  | 10.5 |
| 12 | 6745050  | 6745125  | 75  | 6745062  | 12 | 36  | 5.2  |
| 12 | 6852975  | 6853025  | 50  | 6852987  | 11 | 22  | 3.5  |
| 12 | 6917375  | 6917625  | 250 | 6917537  | 26 | 198 | 37.6 |
| 12 | 6941100  | 6941125  | 25  | 6941112  | 12 | 12  | 1.7  |
| 12 | 6949950  | 6950025  | 75  | 6949987  | 12 | 35  | 2.6  |
| 12 | 6996550  | 6996575  | 25  | 6996562  | 14 | 14  | 2.6  |
| 12 | 8014675  | 8014700  | 25  | 8014687  | 11 | 11  | 0.9  |
| 12 | 8659175  | 8659300  | 125 | 8659237  | 13 | 61  | 0    |
| 12 | 8931350  | 8931475  | 125 | 8931362  | 14 | 69  | 0    |
| 12 | 8993750  | 8993950  | 200 | 8993812  | 23 | 155 | 19.2 |
| 12 | 9378725  | 9378750  | 25  | 9378737  | 11 | 11  | 0.9  |
| 12 | 9390150  | 9390175  | 25  | 9390162  | 11 | 11  | 0    |
| 12 | 9398075  | 9398350  | 275 | 9398162  | 14 | 122 | 7.9  |
| 12 | 9411050  | 9411125  | 75  | 9411062  | 14 | 40  | 2.6  |
| 12 | 9416475  | 9416550  | 75  | 9416487  | 12 | 36  | 0    |
| 12 | 9695300  | 9695600  | 300 | 9695437  | 16 | 152 | 14   |
| 12 | 9717800  | 9717850  | 50  | 9717812  | 14 | 28  | 5.2  |
| 12 | 9954650  | 9954975  | 325 | 9954837  | 35 | 307 | 14   |
| 12 | 10197175 | 10197275 | 100 | 10197212 | 13 | 50  | 7    |
| 12 | 10278275 | 10278500 | 225 | 10278312 | 24 | 181 | 0    |
| 12 | 11215525 | 11215650 | 125 | 11215537 | 23 | 104 | 7.9  |
| 12 | 12052700 | 12052825 | 125 | 12052812 | 15 | 61  | 9.6  |
| 12 | 12054425 | 12054450 | 25  | 12054437 | 11 | 11  | 0    |
| 12 | 12401250 | 12401375 | 125 | 12401337 | 14 | 61  | 10.5 |
| 12 | 12608375 | 12608500 | 125 | 12608387 | 12 | 56  | 7.9  |
| 12 | 12829825 | 12829850 | 25  | 12829837 | 12 | 12  | 0.9  |
| 12 | 12943975 | 12944075 | 100 | 12944012 | 15 | 56  | 7    |
| 12 | 12960300 | 12960325 | 25  | 12960312 | 11 | 11  | 0    |
| 12 | 12966525 | 12966600 | 75  | 12966537 | 14 | 36  | 4.4  |
| 12 | 13250150 | 13250175 | 25  | 13250162 | 12 | 12  | 1.7  |
| 12 | 14395800 | 14395850 | 50  | 14395812 | 11 | 22  | 0    |
| 12 | 14409825 | 14410050 | 225 | 14410012 | 14 | 95  | 4.4  |
| 12 | 14865450 | 14865550 | 100 | 14865462 | 12 | 46  | 0    |
| 12 | 15323625 | 15323725 | 100 | 15323637 | 16 | 53  | 6.1  |
| 12 | 15833675 | 15833750 | 75  | 15833737 | 21 | 49  | 7    |
| 12 | 15834000 | 15834125 | 125 | 15834012 | 23 | 95  | 12.2 |
| 12 | 16058750 | 16058800 | 50  | 16058762 | 14 | 26  | 1.7  |
| 12 | 19483325 | 19483525 | 200 | 19483362 | 18 | 118 | 9.6  |
| 12 | 19627700 | 19627800 | 100 | 19627712 | 13 | 48  | 3.5  |
| 12 | 21481925 | 21481950 | 25  | 21481937 | 11 | 11  | 1.7  |
| 12 | 21701650 | 21701825 | 175 | 21701787 | 14 | 85  | 4.4  |
| 12 | 22067700 | 22068025 | 325 | 22067837 | 22 | 221 | 0    |
| 12 | 23995125 | 23995200 | 75  | 23995137 | 14 | 42  | 0.9  |
| 12 | 24065075 | 24065225 | 150 | 24065162 | 18 | 96  | 11.4 |
| 12 | 24114400 | 24114425 | 25  | 24114412 | 12 | 12  | 0.9  |
| 12 | 25429825 | 25429900 | 75  | 25429837 | 11 | 33  | 2.6  |
| 12 | 25483200 | 25483225 | 25  | 25483212 | 11 | 11  | 0.9  |
| 12 | 25736775 | 25736800 | 25  | 25736787 | 12 | 12  | 0.9  |
| 12 | 25755200 | 25755300 | 100 | 25755237 | 12 | 47  | 0    |
| 12 | 26157150 | 26157275 | 125 | 26157187 | 13 | 59  | 4.4  |
| 12 | 26157600 | 26157625 | 25  | 26157612 | 11 | 11  | 1.7  |
| 12 | 26319275 | 26319300 | 25  | 26319287 | 11 | 11  | 0.9  |
| 12 | 26329825 | 26329925 | 100 | 26329887 | 12 | 44  | 0    |
| 12 | 26364000 | 26364025 | 25  | 26364012 | 11 | 11  | 1.7  |
| 12 | 27597600 | 27597625 | 25  | 27597612 | 11 | 11  | 0    |
| 12 | 27648800 | 27649400 | 600 | 27649012 | 39 | 623 | 28   |
| 12 | 27755000 | 27755150 | 150 | 27755037 | 15 | 74  | 7.9  |
| 12 | 28628300 | 28628500 | 200 | 28628362 | 18 | 114 | 14   |
| 12 | 28651600 | 28651625 | 25  | 28651612 | 11 | 11  | 0    |
| 12 | 28824975 | 28825050 | 75  | 28824987 | 11 | 33  | 0.9  |
| 12 | 29788000 | 29788125 | 125 | 29788037 | 14 | 61  | 3.5  |
| 12 | 30316750 | 30317100 | 350 | 30316912 | 32 | 311 | 1.7  |
| 12 | 31370400 | 31370675 | 275 | 31370537 | 17 | 139 | 14   |
| 12 | 31652550 | 31652750 | 200 | 31652612 | 15 | 108 | 0    |
| 12 | 31703625 | 31703650 | 25  | 31703637 | 13 | 13  | 1.7  |
| 12 | 31726425 | 31726725 | 300 | 31726587 | 43 | 375 | 62.9 |
| 12 | 31773750 | 31773800 | 50  | 31773762 | 11 | 22  | 1.7  |
| 12 | 31951200 | 31951225 | 25  | 31951212 | 12 | 12  | 0.9  |
| 12 | 31959750 | 31959825 | 75  | 31959762 | 11 | 33  | 0    |
| 12 | 31967100 | 31967500 | 400 | 31967212 | 28 | 328 | 13.1 |
| 12 | 31997050 | 31997225 | 175 | 31997062 | 13 | 76  | 0.9  |
| 12 | 32088125 | 32088500 | 375 | 32088337 | 48 | 475 | 21   |

|    |          |          |     |          |    |     |      |
|----|----------|----------|-----|----------|----|-----|------|
| 12 | 32547200 | 32547225 | 25  | 32547212 | 11 | 11  | 1.7  |
| 12 | 32713875 | 32714075 | 200 | 32713987 | 16 | 105 | 0.9  |
| 12 | 32723475 | 32723500 | 25  | 32723487 | 12 | 12  | 0    |
| 12 | 32799450 | 32799625 | 175 | 32799537 | 16 | 107 | 19.2 |
| 12 | 34066775 | 34066800 | 25  | 34066787 | 11 | 11  | 1.7  |
| 12 | 34724550 | 34724725 | 175 | 34724712 | 14 | 86  | 13.1 |
| 12 | 38206925 | 38206975 | 50  | 38206937 | 11 | 22  | 0    |
| 12 | 41426375 | 41426450 | 75  | 41426437 | 12 | 34  | 0    |
| 12 | 44407225 | 44407375 | 150 | 44407262 | 13 | 71  | 5.2  |
| 12 | 44671825 | 44671875 | 50  | 44671837 | 12 | 24  | 3.5  |
| 12 | 45519000 | 45519150 | 150 | 45519037 | 14 | 78  | 3.5  |
| 12 | 46233450 | 46233600 | 150 | 46233462 | 15 | 88  | 7.9  |
| 12 | 46459200 | 46459400 | 200 | 46459287 | 17 | 114 | 7    |
| 12 | 46637900 | 46637925 | 25  | 46637912 | 11 | 11  | 0.9  |
| 12 | 46681600 | 46681625 | 25  | 46681612 | 11 | 11  | 0.9  |
| 12 | 48302800 | 48302875 | 75  | 48302812 | 11 | 33  | 3.5  |
| 12 | 48507575 | 48507625 | 50  | 48507587 | 13 | 26  | 1.7  |
| 12 | 48705625 | 48705775 | 150 | 48705687 | 16 | 84  | 0.9  |
| 12 | 49178325 | 49178375 | 50  | 49178362 | 15 | 27  | 0    |
| 12 | 49706375 | 49706475 | 100 | 49706387 | 11 | 44  | 3.5  |
| 12 | 49919175 | 49919375 | 200 | 49919287 | 18 | 122 | 8.7  |
| 12 | 51777025 | 51777075 | 50  | 51777037 | 13 | 26  | 3.5  |
| 12 | 52665675 | 52665775 | 100 | 52665712 | 13 | 48  | 6.1  |
| 12 | 52712700 | 52712850 | 150 | 52712712 | 14 | 74  | 7.9  |
| 12 | 52960500 | 52960525 | 25  | 52960512 | 14 | 14  | 2.6  |
| 12 | 54398250 | 54398325 | 75  | 54398312 | 12 | 34  | 0    |
| 12 | 54798200 | 54798225 | 25  | 54798212 | 13 | 13  | 1.7  |
| 12 | 54837850 | 54837875 | 25  | 54837862 | 13 | 13  | 0    |
| 12 | 54947425 | 54947450 | 25  | 54947437 | 12 | 12  | 0.9  |
| 12 | 55129050 | 55129075 | 25  | 55129062 | 12 | 12  | 0.9  |
| 12 | 55544375 | 55544650 | 275 | 55544537 | 20 | 169 | 0.9  |
| 12 | 55566550 | 55566600 | 50  | 55566562 | 11 | 22  | 2.6  |
| 12 | 55768600 | 55768675 | 75  | 55768612 | 17 | 45  | 5.2  |
| 12 | 55791675 | 55791750 | 75  | 55791687 | 12 | 36  | 5.2  |
| 12 | 56145150 | 56145200 | 50  | 56145162 | 12 | 24  | 0    |
| 12 | 56301975 | 56302125 | 150 | 56302012 | 19 | 96  | 10.5 |
| 12 | 56569225 | 56569325 | 100 | 56569287 | 12 | 46  | 7    |
| 12 | 56957475 | 56957575 | 100 | 56957487 | 11 | 44  | 0    |
| 12 | 57102150 | 57102200 | 50  | 57102162 | 12 | 24  | 1.7  |
| 12 | 57189100 | 57189150 | 50  | 57189112 | 11 | 22  | 0    |
| 12 | 59967625 | 59967825 | 200 | 59967712 | 16 | 116 | 7    |
| 12 | 60350825 | 60350900 | 75  | 60350837 | 11 | 33  | 0    |
| 12 | 60940375 | 60940475 | 100 | 60940412 | 16 | 58  | 10.5 |
| 12 | 61312675 | 61312700 | 25  | 61312687 | 11 | 11  | 0.9  |
| 12 | 61382675 | 61382700 | 25  | 61382687 | 12 | 12  | 0    |
| 12 | 63849350 | 63849475 | 125 | 63849362 | 11 | 55  | 1.7  |
| 12 | 64164100 | 64164275 | 175 | 64164187 | 15 | 92  | 0    |
| 12 | 64311850 | 64311875 | 25  | 64311862 | 11 | 11  | 1.7  |
| 12 | 64370400 | 64370600 | 200 | 64370537 | 17 | 116 | 13.1 |
| 12 | 64503850 | 64503900 | 50  | 64503862 | 12 | 24  | 3.5  |
| 12 | 64572925 | 64573100 | 175 | 64572987 | 27 | 168 | 14.9 |
| 12 | 66341500 | 66341550 | 50  | 66341512 | 13 | 24  | 0    |
| 12 | 67012450 | 67012525 | 75  | 67012462 | 14 | 42  | 7    |
| 12 | 67734375 | 67734400 | 25  | 67734387 | 11 | 11  | 0    |
| 12 | 68037525 | 68037600 | 75  | 68037537 | 12 | 36  | 0    |
| 12 | 70116450 | 70116650 | 200 | 70116487 | 18 | 120 | 7.9  |
| 12 | 73700350 | 73700425 | 75  | 73700412 | 14 | 38  | 0    |
| 12 | 74711725 | 74711775 | 50  | 74711737 | 11 | 22  | 0.9  |
| 12 | 75266575 | 75266600 | 25  | 75266587 | 11 | 11  | 0.9  |
| 12 | 75798075 | 75798125 | 50  | 75798087 | 11 | 22  | 0    |
| 12 | 81276100 | 81276300 | 200 | 81276287 | 16 | 96  | 6.1  |
| 12 | 81276550 | 81276650 | 100 | 81276562 | 23 | 74  | 13.1 |
| 12 | 81712025 | 81712050 | 25  | 81712037 | 12 | 12  | 0.9  |
| 12 | 81928275 | 81928475 | 200 | 81928387 | 16 | 112 | 7    |
| 12 | 82628900 | 82629000 | 100 | 82628937 | 12 | 45  | 0    |
| 12 | 88269975 | 88270025 | 50  | 88269987 | 14 | 26  | 0.9  |
| 12 | 88272000 | 88272200 | 200 | 88272062 | 13 | 93  | 0    |
| 12 | 88293675 | 88293825 | 150 | 88293762 | 15 | 73  | 0    |
| 12 | 88443875 | 88444000 | 125 | 88443987 | 37 | 143 | 24.5 |
| 12 | 89135000 | 89135050 | 50  | 89135012 | 11 | 22  | 1.7  |
| 12 | 91518025 | 91518200 | 175 | 91518112 | 15 | 92  | 0    |
| 12 | 91847500 | 91847575 | 75  | 91847512 | 11 | 33  | 5.2  |
| 12 | 91871825 | 91871975 | 150 | 91871837 | 15 | 74  | 0    |
| 12 | 91895450 | 91895800 | 350 | 91895687 | 15 | 161 | 2.6  |
| 12 | 92853125 | 92853200 | 75  | 92853137 | 11 | 33  | 0    |

|    |           |           |      |           |    |      |      |
|----|-----------|-----------|------|-----------|----|------|------|
| 12 | 95090350  | 95090525  | 175  | 95090437  | 14 | 85   | 4.4  |
| 12 | 97357925  | 97358050  | 125  | 97357937  | 11 | 49   | 2.6  |
| 12 | 97409175  | 97409225  | 50   | 97409187  | 12 | 24   | 1.7  |
| 12 | 99603275  | 99603625  | 350  | 99603462  | 43 | 386  | 7    |
| 12 | 100741875 | 100742075 | 200  | 100742012 | 15 | 99   | 10.5 |
| 12 | 103150650 | 103150825 | 175  | 103150712 | 14 | 86   | 0    |
| 12 | 103152925 | 103153150 | 225  | 103153037 | 19 | 150  | 7    |
| 12 | 103375400 | 103375525 | 125  | 103375462 | 14 | 65   | 7.9  |
| 12 | 103411500 | 103411650 | 150  | 103411537 | 15 | 76   | 0.9  |
| 12 | 103496025 | 103496175 | 150  | 103496162 | 12 | 67   | 7.9  |
| 12 | 103743125 | 103743250 | 125  | 103743137 | 12 | 60   | 0    |
| 12 | 104632475 | 104632625 | 150  | 104632487 | 13 | 72   | 5.2  |
| 12 | 105692850 | 105692900 | 50   | 105692862 | 12 | 23   | 3.5  |
| 12 | 107445025 | 107445050 | 25   | 107445037 | 11 | 11   | 1.7  |
| 12 | 107650250 | 107650275 | 25   | 107650262 | 12 | 12   | 0.9  |
| 12 | 108495525 | 108495550 | 25   | 108495537 | 11 | 11   | 0.9  |
| 12 | 108685725 | 108685750 | 25   | 108685737 | 11 | 11   | 0    |
| 12 | 108704275 | 108704300 | 25   | 108704287 | 11 | 11   | 0.9  |
| 12 | 108822425 | 108822525 | 100  | 108822437 | 12 | 46   | 4.4  |
| 12 | 108921125 | 108921275 | 150  | 108921237 | 16 | 79   | 7.9  |
| 12 | 109001825 | 109001950 | 125  | 109001937 | 14 | 59   | 8.7  |
| 12 | 109325775 | 109325800 | 25   | 109325787 | 12 | 12   | 1.7  |
| 12 | 109424400 | 109424600 | 200  | 109424412 | 31 | 175  | 14   |
| 12 | 110056200 | 110056375 | 175  | 110056312 | 12 | 74   | 0    |
| 12 | 110226825 | 110227125 | 300  | 110226962 | 46 | 370  | 17.5 |
| 12 | 110331450 | 110331525 | 75   | 110331462 | 12 | 34   | 3.5  |
| 12 | 110332400 | 110332525 | 125  | 110332512 | 18 | 81   | 6.1  |
| 12 | 110935025 | 110935100 | 75   | 110935037 | 14 | 39   | 0    |
| 12 | 111031100 | 111031275 | 175  | 111031112 | 13 | 79   | 3.5  |
| 12 | 111500025 | 111500100 | 75   | 111500037 | 11 | 33   | 0    |
| 12 | 111501325 | 111501350 | 25   | 111501337 | 11 | 11   | 0    |
| 12 | 112194325 | 112194450 | 125  | 112194362 | 13 | 63   | 5.2  |
| 12 | 112257025 | 112257175 | 150  | 112257062 | 14 | 80   | 8.7  |
| 12 | 113721850 | 113722025 | 175  | 113721887 | 16 | 98   | 17.5 |
| 12 | 114024850 | 114024950 | 100  | 114024862 | 11 | 44   | 0    |
| 12 | 115660275 | 115660325 | 50   | 115660312 | 13 | 24   | 3.5  |
| 12 | 118763800 | 118763950 | 150  | 118763862 | 15 | 78   | 8.7  |
| 12 | 118799675 | 118799700 | 25   | 118799687 | 11 | 11   | 1.7  |
| 12 | 119213500 | 119213550 | 50   | 119213512 | 11 | 22   | 2.6  |
| 12 | 119258675 | 119258875 | 200  | 119258687 | 16 | 112  | 7    |
| 12 | 119260075 | 119260125 | 50   | 119260087 | 11 | 22   | 0    |
| 12 | 119352825 | 119352975 | 150  | 119352887 | 16 | 82   | 0    |
| 12 | 119569300 | 119569350 | 50   | 119569312 | 14 | 26   | 3.5  |
| 12 | 119608850 | 119609050 | 200  | 119609012 | 13 | 89   | 13.1 |
| 12 | 120051850 | 120051875 | 25   | 120051862 | 12 | 12   | 0    |
| 12 | 121474150 | 121474175 | 25   | 121474162 | 12 | 12   | 1.7  |
| 12 | 121997275 | 121997675 | 400  | 121997562 | 21 | 277  | 43.7 |
| 12 | 122440300 | 122440350 | 50   | 122440312 | 12 | 24   | 3.5  |
| 12 | 123164725 | 123164900 | 175  | 123164737 | 11 | 72   | 8.7  |
| 12 | 123447350 | 123447400 | 50   | 123447387 | 13 | 24   | 1.7  |
| 12 | 123560650 | 123560675 | 25   | 123560662 | 11 | 11   | 0.9  |
| 12 | 123568650 | 123568675 | 25   | 123568662 | 12 | 12   | 0    |
| 12 | 123782425 | 123782500 | 75   | 123782437 | 11 | 33   | 0    |
| 12 | 123822425 | 123822525 | 100  | 123822437 | 14 | 53   | 2.6  |
| 12 | 123872500 | 123872525 | 25   | 123872512 | 11 | 11   | 0    |
| 12 | 123965225 | 123965325 | 100  | 123965237 | 11 | 44   | 7    |
| 12 | 125120225 | 125120400 | 175  | 125120312 | 16 | 101  | 0    |
| 12 | 125189925 | 125190050 | 125  | 125189987 | 14 | 64   | 0    |
| 12 | 125411200 | 125411225 | 25   | 125411212 | 11 | 11   | 0    |
| 12 | 129826925 | 129827200 | 275  | 129826962 | 17 | 150  | 14   |
| 12 | 132012300 | 132012475 | 175  | 132012412 | 14 | 86   | 0    |
| 12 | 132013000 | 132013425 | 425  | 132013187 | 28 | 340  | 0    |
| 12 | 132144050 | 132144450 | 400  | 132144212 | 18 | 202  | 0    |
| 12 | 132144725 | 132145800 | 1075 | 132145187 | 51 | 1226 | 10.5 |
| 12 | 132192700 | 132193225 | 525  | 132193037 | 23 | 263  | 7    |
| 12 | 132289175 | 132289325 | 150  | 132289187 | 13 | 65   | 0.9  |
| 15 | 19166975  | 19167050  | 75   | 19167012  | 13 | 36   | 5.2  |
| 15 | 19180750  | 19180825  | 75   | 19180787  | 12 | 34   | 5.2  |
| 15 | 19962550  | 19962750  | 200  | 19962687  | 12 | 78   | 0    |
| 15 | 21438850  | 21438900  | 50   | 21438862  | 11 | 22   | 3.5  |
| 15 | 22866750  | 22866900  | 150  | 22866862  | 13 | 64   | 0    |
| 15 | 23466625  | 23466700  | 75   | 23466637  | 11 | 33   | 0.9  |
| 15 | 23647075  | 23647100  | 25   | 23647087  | 11 | 11   | 0    |
| 15 | 27206750  | 27206875  | 125  | 27206762  | 11 | 54   | 8.7  |
| 15 | 27801900  | 27802100  | 200  | 27802037  | 15 | 95   | 1.7  |

|    |          |          |     |          |    |     |      |
|----|----------|----------|-----|----------|----|-----|------|
| 15 | 29168025 | 29168050 | 25  | 29168037 | 11 | 11  | 0    |
| 15 | 30751500 | 30751550 | 50  | 30751512 | 12 | 24  | 2.6  |
| 15 | 30778375 | 30778500 | 125 | 30778387 | 13 | 63  | 0    |
| 15 | 32117900 | 32118000 | 100 | 32117937 | 15 | 52  | 0    |
| 15 | 32181425 | 32181450 | 25  | 32181437 | 17 | 17  | 2.6  |
| 15 | 32234125 | 32234275 | 150 | 32234237 | 19 | 84  | 6.1  |
| 15 | 32240950 | 32241125 | 175 | 32240987 | 13 | 82  | 4.4  |
| 15 | 32972575 | 32972650 | 75  | 32972612 | 13 | 36  | 0    |
| 15 | 34659050 | 34659075 | 25  | 34659062 | 12 | 12  | 1.7  |
| 15 | 35180250 | 35180300 | 50  | 35180287 | 13 | 25  | 2.6  |
| 15 | 36151950 | 36152000 | 50  | 36151987 | 12 | 23  | 0    |
| 15 | 37544875 | 37544925 | 50  | 37544887 | 12 | 24  | 0    |
| 15 | 38184650 | 38184700 | 50  | 38184662 | 15 | 28  | 1.7  |
| 15 | 39310450 | 39310675 | 225 | 39310537 | 20 | 146 | 12.2 |
| 15 | 39412425 | 39412500 | 75  | 39412437 | 14 | 38  | 0    |
| 15 | 39447075 | 39447125 | 50  | 39447087 | 12 | 24  | 0    |
| 15 | 39700850 | 39700975 | 125 | 39700912 | 15 | 70  | 8.7  |
| 15 | 39959650 | 39959750 | 100 | 39959662 | 12 | 48  | 7    |
| 15 | 40628225 | 40628275 | 50  | 40628237 | 12 | 24  | 3.5  |
| 15 | 41264900 | 41265000 | 100 | 41264937 | 12 | 47  | 6.1  |
| 15 | 41440900 | 41441025 | 125 | 41440912 | 12 | 60  | 0    |
| 15 | 41450575 | 41450750 | 175 | 41450612 | 12 | 78  | 5.2  |
| 15 | 41572400 | 41572475 | 75  | 41572412 | 11 | 33  | 1.7  |
| 15 | 41856275 | 41856425 | 150 | 41856337 | 14 | 74  | 0    |
| 15 | 41904425 | 41904450 | 25  | 41904437 | 12 | 12  | 1.7  |
| 15 | 43102975 | 43103100 | 125 | 43103012 | 13 | 63  | 1.7  |
| 15 | 43321850 | 43322075 | 225 | 43321962 | 23 | 158 | 5.2  |
| 15 | 45463900 | 45464000 | 100 | 45463937 | 14 | 54  | 2.6  |
| 15 | 47047475 | 47047525 | 50  | 47047487 | 11 | 22  | 0    |
| 15 | 47056250 | 47056275 | 25  | 47056262 | 11 | 11  | 0    |
| 15 | 47173375 | 47173475 | 100 | 47173387 | 11 | 44  | 0.9  |
| 15 | 47700325 | 47700525 | 200 | 47700362 | 16 | 121 | 23.6 |
| 15 | 47705050 | 47705250 | 200 | 47705087 | 13 | 86  | 5.2  |
| 15 | 47746500 | 47746525 | 25  | 47746512 | 11 | 11  | 0    |
| 15 | 50815075 | 50815100 | 25  | 50815087 | 11 | 11  | 0.9  |
| 15 | 53349850 | 53349900 | 50  | 53349862 | 11 | 22  | 0.9  |
| 15 | 53398800 | 53398825 | 25  | 53398812 | 11 | 11  | 0.9  |
| 15 | 54311600 | 54311900 | 300 | 54311762 | 19 | 173 | 0    |
| 15 | 54436300 | 54436500 | 200 | 54436437 | 15 | 103 | 7    |
| 15 | 54544675 | 54544775 | 100 | 54544737 | 19 | 63  | 4.4  |
| 15 | 55786025 | 55786050 | 25  | 55786037 | 11 | 11  | 1.7  |
| 15 | 56349625 | 56349675 | 50  | 56349637 | 12 | 24  | 1.7  |
| 15 | 56412000 | 56412050 | 50  | 56412012 | 11 | 22  | 0.9  |
| 15 | 56521775 | 56521950 | 175 | 56521862 | 15 | 97  | 3.5  |
| 15 | 56850675 | 56850900 | 225 | 56850812 | 19 | 142 | 10.5 |
| 15 | 58207025 | 58207050 | 25  | 58207037 | 12 | 12  | 0.9  |
| 15 | 58450675 | 58450875 | 200 | 58450837 | 22 | 142 | 23.6 |
| 15 | 59021750 | 59021800 | 50  | 59021762 | 11 | 22  | 0    |
| 15 | 61421175 | 61421275 | 100 | 61421187 | 11 | 44  | 4.4  |
| 15 | 61580900 | 61580975 | 75  | 61580912 | 13 | 37  | 0    |
| 15 | 64436050 | 64436075 | 25  | 64436062 | 11 | 11  | 0    |
| 15 | 66357100 | 66357200 | 100 | 66357162 | 14 | 50  | 1.7  |
| 15 | 67840325 | 67840350 | 25  | 67840337 | 11 | 11  | 1.7  |
| 15 | 68539775 | 68539900 | 125 | 68539837 | 13 | 59  | 2.6  |
| 15 | 68987450 | 68987675 | 225 | 68987537 | 16 | 119 | 0    |
| 15 | 69884475 | 69884675 | 200 | 69884562 | 17 | 115 | 2.6  |
| 15 | 69901450 | 69901500 | 50  | 69901462 | 11 | 22  | 3.5  |
| 15 | 70235350 | 70235375 | 25  | 70235362 | 11 | 11  | 0    |
| 15 | 72863100 | 72863150 | 50  | 72863112 | 11 | 22  | 2.6  |
| 15 | 72961950 | 72962125 | 175 | 72962062 | 14 | 86  | 1.7  |
| 15 | 72987025 | 72987050 | 25  | 72987037 | 12 | 12  | 0.9  |
| 15 | 73222000 | 73222200 | 200 | 73222037 | 15 | 99  | 0    |
| 15 | 73719550 | 73719575 | 25  | 73719562 | 11 | 11  | 1.7  |
| 15 | 74390800 | 74390975 | 175 | 74390887 | 15 | 93  | 12.2 |
| 15 | 75124825 | 75124850 | 25  | 75124837 | 12 | 12  | 1.7  |
| 15 | 75500075 | 75500125 | 50  | 75500087 | 12 | 24  | 0    |
| 15 | 75586975 | 75587075 | 100 | 75587062 | 14 | 51  | 8.7  |
| 15 | 75617650 | 75617775 | 125 | 75617737 | 13 | 57  | 0    |
| 15 | 77059125 | 77059150 | 25  | 77059137 | 12 | 12  | 1.7  |
| 15 | 77223725 | 77223800 | 75  | 77223737 | 11 | 33  | 0    |
| 15 | 77485825 | 77485975 | 150 | 77485912 | 13 | 69  | 7.9  |
| 15 | 77995200 | 77995500 | 300 | 77995337 | 27 | 215 | 4.4  |
| 15 | 77999675 | 77999800 | 125 | 77999737 | 15 | 66  | 7    |
| 15 | 79014600 | 79014675 | 75  | 79014612 | 12 | 36  | 0    |
| 15 | 79094500 | 79094525 | 25  | 79094512 | 12 | 12  | 0    |

|    |           |           |     |           |    |     |      |
|----|-----------|-----------|-----|-----------|----|-----|------|
| 15 | 79094925  | 79095050  | 125 | 79094987  | 14 | 66  | 4.4  |
| 15 | 79346125  | 79346150  | 25  | 79346137  | 12 | 12  | 1.7  |
| 15 | 81445525  | 81445875  | 350 | 81445687  | 37 | 351 | 17.5 |
| 15 | 82965700  | 82965725  | 25  | 82965712  | 12 | 12  | 1.7  |
| 15 | 82975525  | 82975550  | 25  | 82975537  | 11 | 11  | 1.7  |
| 15 | 82999325  | 82999350  | 25  | 82999337  | 11 | 11  | 1.7  |
| 15 | 83675575  | 83675750  | 175 | 83675587  | 16 | 108 | 12.2 |
| 15 | 84345725  | 84345750  | 25  | 84345737  | 12 | 12  | 0    |
| 15 | 86993600  | 86993625  | 25  | 86993612  | 12 | 12  | 1.7  |
| 15 | 87114100  | 87114175  | 75  | 87114112  | 11 | 33  | 5.2  |
| 15 | 88458875  | 88459100  | 225 | 88458987  | 16 | 115 | 1.7  |
| 15 | 88528875  | 88528975  | 100 | 88528962  | 13 | 46  | 0    |
| 15 | 88723625  | 88723825  | 200 | 88723712  | 18 | 120 | 0    |
| 15 | 89061550  | 89061575  | 25  | 89061562  | 12 | 12  | 1.7  |
| 15 | 89338725  | 89338750  | 25  | 89338737  | 12 | 12  | 0.9  |
| 15 | 90442275  | 90442375  | 100 | 90442287  | 11 | 44  | 7    |
| 15 | 91175850  | 91176000  | 150 | 91175862  | 11 | 57  | 6.1  |
| 15 | 91293800  | 91294175  | 375 | 91293987  | 21 | 240 | 0    |
| 15 | 91646600  | 91646725  | 125 | 91646662  | 15 | 68  | 6.1  |
| 15 | 92028650  | 92028800  | 150 | 92028737  | 17 | 80  | 0.9  |
| 15 | 92309900  | 92310025  | 125 | 92309987  | 12 | 57  | 0    |
| 15 | 94187700  | 94187850  | 150 | 94187787  | 15 | 76  | 13.1 |
| 15 | 96593300  | 96593325  | 25  | 96593312  | 11 | 11  | 0.9  |
| 15 | 97190900  | 97191025  | 125 | 97190962  | 16 | 70  | 0    |
| 15 | 97226725  | 97226900  | 175 | 97226762  | 15 | 85  | 1.7  |
| 15 | 97825025  | 97825175  | 150 | 97825037  | 14 | 78  | 10.5 |
| 15 | 100165450 | 100165475 | 25  | 100165462 | 11 | 11  | 0    |
| 14 | 20290300  | 20290475  | 175 | 20290362  | 18 | 116 | 0    |
| 14 | 20609025  | 20609050  | 25  | 20609037  | 12 | 12  | 1.7  |
| 14 | 20630525  | 20630650  | 125 | 20630562  | 13 | 55  | 6.1  |
| 14 | 22597050  | 22597150  | 100 | 22597062  | 12 | 48  | 3.5  |
| 14 | 23171200  | 23171225  | 25  | 23171212  | 11 | 11  | 0.9  |
| 14 | 23576925  | 23576950  | 25  | 23576937  | 12 | 12  | 0.9  |
| 14 | 23632925  | 23633025  | 100 | 23632937  | 11 | 44  | 2.6  |
| 14 | 27073000  | 27073125  | 125 | 27073037  | 13 | 61  | 0    |
| 14 | 29404550  | 29404675  | 125 | 29404587  | 13 | 63  | 4.4  |
| 14 | 31309325  | 31309450  | 125 | 31309337  | 11 | 53  | 0    |
| 14 | 31507800  | 31507825  | 25  | 31507812  | 12 | 12  | 1.7  |
| 14 | 33873400  | 33873450  | 50  | 33873412  | 11 | 22  | 0    |
| 14 | 34521575  | 34521650  | 75  | 34521612  | 13 | 36  | 0    |
| 14 | 36745375  | 36745425  | 50  | 36745387  | 12 | 24  | 0    |
| 14 | 38595175  | 38595225  | 50  | 38595187  | 11 | 22  | 0    |
| 14 | 44792225  | 44792325  | 100 | 44792287  | 22 | 80  | 9.6  |
| 14 | 46321250  | 46321325  | 75  | 46321262  | 11 | 33  | 0    |
| 14 | 49389300  | 49389325  | 25  | 49389312  | 14 | 14  | 1.7  |
| 14 | 50828850  | 50828875  | 25  | 50828862  | 11 | 11  | 1.7  |
| 14 | 50981500  | 50981650  | 150 | 50981612  | 18 | 87  | 9.6  |
| 14 | 51112650  | 51112700  | 50  | 51112662  | 12 | 24  | 1.7  |
| 14 | 51144375  | 51144475  | 100 | 51144387  | 16 | 56  | 5.2  |
| 14 | 53710325  | 53710400  | 75  | 53710337  | 12 | 36  | 0    |
| 14 | 53933525  | 53933650  | 125 | 53933537  | 11 | 53  | 0    |
| 14 | 54807750  | 54807775  | 25  | 54807762  | 12 | 12  | 1.7  |
| 14 | 54849000  | 54849200  | 200 | 54849012  | 14 | 92  | 9.6  |
| 14 | 55156925  | 55157000  | 75  | 55156937  | 11 | 33  | 3.5  |
| 14 | 55876700  | 55876775  | 75  | 55876712  | 12 | 36  | 2.6  |
| 14 | 58070075  | 58070225  | 150 | 58070187  | 15 | 81  | 10.5 |
| 14 | 59859900  | 59860000  | 100 | 59859962  | 13 | 48  | 7    |
| 14 | 60680625  | 60680825  | 200 | 60680712  | 20 | 143 | 12.2 |
| 14 | 61752950  | 61753075  | 125 | 61752962  | 12 | 60  | 0    |
| 14 | 63079750  | 63079825  | 75  | 63079762  | 12 | 36  | 4.4  |
| 14 | 63178750  | 63178850  | 100 | 63178812  | 16 | 54  | 3.5  |
| 14 | 63877375  | 63877475  | 100 | 63877437  | 13 | 46  | 0    |
| 14 | 63930050  | 63930075  | 25  | 63930062  | 12 | 12  | 0    |
| 14 | 64466625  | 64466650  | 25  | 64466637  | 12 | 12  | 0.9  |
| 14 | 64509100  | 64509175  | 75  | 64509112  | 13 | 35  | 5.2  |
| 14 | 64525025  | 64525125  | 100 | 64525037  | 11 | 44  | 4.4  |
| 14 | 65743225  | 65743300  | 75  | 65743237  | 11 | 33  | 0    |
| 14 | 66777025  | 66777200  | 175 | 66777162  | 12 | 73  | 7.9  |
| 14 | 67029900  | 67030075  | 175 | 67029987  | 18 | 98  | 0    |
| 14 | 67221450  | 67221525  | 75  | 67221462  | 12 | 36  | 0    |
| 14 | 67638175  | 67638525  | 350 | 67638337  | 23 | 235 | 6.1  |
| 14 | 68311550  | 68311675  | 125 | 68311587  | 12 | 59  | 7.9  |
| 14 | 68312325  | 68312500  | 175 | 68312412  | 13 | 83  | 10.5 |
| 14 | 69263425  | 69263475  | 50  | 69263437  | 11 | 22  | 2.6  |
| 14 | 69896250  | 69896325  | 75  | 69896262  | 11 | 33  | 1.7  |



|    |           |           |      |           |    |     |      |
|----|-----------|-----------|------|-----------|----|-----|------|
| 14 | 69979375  | 69979450  | 75   | 69979387  | 11 | 33  | 0    |
| 14 | 70480525  | 70480650  | 125  | 70480537  | 12 | 57  | 8.7  |
| 14 | 70742950  | 70743325  | 375  | 70743212  | 15 | 172 | 0.9  |
| 14 | 74030325  | 74030350  | 25   | 74030337  | 11 | 11  | 1.7  |
| 14 | 74587900  | 74587950  | 50   | 74587912  | 15 | 28  | 3.5  |
| 14 | 74752500  | 74752525  | 25   | 74752512  | 11 | 11  | 0    |
| 14 | 75687725  | 75687875  | 150  | 75687862  | 12 | 61  | 7    |
| 14 | 76400225  | 76400300  | 75   | 76400237  | 12 | 34  | 0    |
| 14 | 76441125  | 76441200  | 75   | 76441137  | 11 | 31  | 5.2  |
| 14 | 76577850  | 76578100  | 250  | 76577962  | 16 | 123 | 14.9 |
| 14 | 76627775  | 76627850  | 75   | 76627837  | 14 | 37  | 0    |
| 14 | 79915425  | 79915550  | 125  | 79915437  | 11 | 55  | 0    |
| 14 | 80757600  | 80757700  | 100  | 80757612  | 16 | 58  | 6.1  |
| 14 | 87142275  | 87142325  | 50   | 87142312  | 12 | 23  | 0    |
| 14 | 87157475  | 87157800  | 325  | 87157637  | 23 | 218 | 1.7  |
| 14 | 87185825  | 87186050  | 225  | 87185912  | 19 | 136 | 10.5 |
| 14 | 88952250  | 88952375  | 125  | 88952262  | 13 | 64  | 11.4 |
| 14 | 89739675  | 89739750  | 75   | 89739687  | 11 | 33  | 0    |
| 14 | 89775375  | 89775525  | 150  | 89775412  | 15 | 77  | 0    |
| 14 | 90211700  | 90211750  | 50   | 90211712  | 12 | 24  | 3.5  |
| 14 | 90375475  | 90375500  | 25   | 90375487  | 11 | 11  | 0    |
| 14 | 92163850  | 92163925  | 75   | 92163862  | 14 | 38  | 6.1  |
| 14 | 92329975  | 92330000  | 25   | 92329987  | 11 | 11  | 1.7  |
| 14 | 92514825  | 92515050  | 225  | 92514887  | 26 | 178 | 8.7  |
| 14 | 92572875  | 92572975  | 100  | 92572887  | 11 | 44  | 6.1  |
| 14 | 95097275  | 95097375  | 100  | 95097362  | 14 | 50  | 0    |
| 14 | 96333325  | 96333475  | 150  | 96333387  | 13 | 70  | 5.2  |
| 14 | 96447175  | 96447325  | 150  | 96447187  | 11 | 64  | 5.2  |
| 14 | 99912675  | 99912750  | 75   | 99912712  | 12 | 35  | 2.6  |
| 14 | 101258475 | 101258550 | 75   | 101258487 | 11 | 33  | 1.7  |
| 14 | 101268525 | 101268550 | 25   | 101268537 | 11 | 11  | 0    |
| 14 | 101277000 | 101277350 | 350  | 101277162 | 36 | 327 | 7    |
| 14 | 101310150 | 101310275 | 125  | 101310187 | 20 | 86  | 0.9  |
| 14 | 101799150 | 101799250 | 100  | 101799162 | 12 | 48  | 2.6  |
| 14 | 102641600 | 102641650 | 50   | 102641612 | 11 | 22  | 0    |
| 14 | 102740925 | 102741025 | 100  | 102740937 | 11 | 44  | 2.6  |
| 14 | 102921225 | 102921250 | 25   | 102921237 | 12 | 12  | 0.9  |
| 14 | 103073200 | 103073250 | 50   | 103073212 | 11 | 22  | 1.7  |
| 14 | 103073675 | 103073700 | 25   | 103073687 | 11 | 11  | 0.9  |
| 14 | 103163775 | 103163825 | 50   | 103163787 | 12 | 24  | 2.6  |
| 14 | 103614225 | 103614325 | 100  | 103614237 | 12 | 48  | 7    |
| 14 | 104516600 | 104516625 | 25   | 104516612 | 12 | 12  | 0.9  |
| 14 | 104558850 | 104559000 | 150  | 104558987 | 15 | 82  | 15.7 |
| 14 | 104560475 | 104560650 | 175  | 104560562 | 13 | 80  | 7.9  |
| 14 | 104837125 | 104837175 | 50   | 104837137 | 11 | 22  | 0    |
| 14 | 104936300 | 104936400 | 100  | 104936312 | 12 | 48  | 5.2  |
| 14 | 105836100 | 105836275 | 175  | 105836187 | 16 | 92  | 0    |
| 14 | 105944575 | 105944600 | 25   | 105944587 | 11 | 11  | 0.9  |
| 14 | 106190925 | 106191000 | 75   | 106190937 | 11 | 33  | 5.2  |
| 17 | 278550    | 278700    | 150  | 278587    | 15 | 83  | 0    |
| 17 | 451625    | 451800    | 175  | 451762    | 15 | 90  | 1.7  |
| 17 | 452450    | 452475    | 25   | 452462    | 12 | 12  | 0    |
| 17 | 785675    | 785750    | 75   | 785687    | 12 | 36  | 3.5  |
| 17 | 846825    | 847000    | 175  | 846987    | 21 | 129 | 19.2 |
| 17 | 890150    | 890175    | 25   | 890162    | 16 | 16  | 2.6  |
| 17 | 1047525   | 1047650   | 125  | 1047562   | 16 | 79  | 12.2 |
| 17 | 1263350   | 1263625   | 275  | 1263512   | 24 | 178 | 19.2 |
| 17 | 1287500   | 1287525   | 25   | 1287512   | 12 | 12  | 0    |
| 17 | 1367025   | 1367150   | 125  | 1367037   | 14 | 68  | 13.1 |
| 17 | 1567475   | 1567575   | 100  | 1567487   | 13 | 50  | 6.1  |
| 17 | 1679575   | 1679675   | 100  | 1679637   | 13 | 48  | 6.1  |
| 17 | 2225375   | 2225525   | 150  | 2225437   | 16 | 80  | 5.2  |
| 17 | 2251525   | 2251700   | 175  | 2251537   | 16 | 104 | 10.5 |
| 17 | 2808325   | 2808400   | 75   | 2808337   | 12 | 36  | 0    |
| 17 | 2898800   | 2899125   | 325  | 2898987   | 42 | 368 | 59.4 |
| 17 | 4109025   | 4109200   | 175  | 4109112   | 17 | 107 | 5.2  |
| 17 | 4415825   | 4415925   | 100  | 4415837   | 22 | 71  | 12.2 |
| 17 | 4753475   | 4753500   | 25   | 4753487   | 11 | 11  | 1.7  |
| 17 | 4784075   | 4784100   | 25   | 4784087   | 13 | 13  | 0.9  |
| 17 | 4812600   | 4812750   | 150  | 4812687   | 15 | 83  | 14.9 |
| 17 | 4831950   | 4832025   | 75   | 4831962   | 11 | 33  | 0    |
| 17 | 4936300   | 4936750   | 450  | 4936587   | 29 | 339 | 2.6  |
| 17 | 4941550   | 4941575   | 25   | 4941562   | 11 | 11  | 0    |
| 17 | 4956050   | 4956175   | 125  | 4956087   | 19 | 87  | 7    |
| 17 | 5025525   | 5026825   | 1300 | 5026187   | 33 | 779 | 28   |

|    |          |          |     |          |    |     |      |
|----|----------|----------|-----|----------|----|-----|------|
| 17 | 5027275  | 5027425  | 150 | 5027362  | 16 | 83  | 0    |
| 17 | 5036000  | 5036025  | 25  | 5036012  | 11 | 11  | 1.7  |
| 17 | 5263475  | 5263525  | 50  | 5263487  | 12 | 24  | 2.6  |
| 17 | 5331075  | 5331125  | 50  | 5331087  | 14 | 27  | 4.4  |
| 17 | 5653700  | 5653925  | 225 | 5653812  | 17 | 128 | 0    |
| 17 | 6315550  | 6315575  | 25  | 6315562  | 12 | 12  | 1.7  |
| 17 | 6859125  | 6859175  | 50  | 6859137  | 11 | 22  | 3.5  |
| 17 | 6866750  | 6866775  | 25  | 6866762  | 11 | 11  | 1.7  |
| 17 | 6912500  | 6912600  | 100 | 6912512  | 13 | 46  | 0    |
| 17 | 7124825  | 7124975  | 150 | 7124962  | 24 | 124 | 22.7 |
| 17 | 7299800  | 7299825  | 25  | 7299812  | 12 | 12  | 1.7  |
| 17 | 7359500  | 7359550  | 50  | 7359512  | 12 | 24  | 0    |
| 17 | 7382100  | 7382375  | 275 | 7382212  | 26 | 208 | 11.4 |
| 17 | 7427400  | 7427725  | 325 | 7427712  | 24 | 257 | 33.2 |
| 17 | 7531500  | 7531525  | 25  | 7531512  | 14 | 14  | 2.6  |
| 17 | 7699950  | 7699975  | 25  | 7699962  | 11 | 11  | 0.9  |
| 17 | 7759875  | 7759925  | 50  | 7759887  | 12 | 24  | 1.7  |
| 17 | 8001050  | 8001100  | 50  | 8001062  | 11 | 22  | 3.5  |
| 17 | 8030525  | 8030550  | 25  | 8030537  | 15 | 15  | 1.7  |
| 17 | 8032425  | 8032475  | 50  | 8032437  | 11 | 22  | 2.6  |
| 17 | 8054525  | 8054600  | 75  | 8054537  | 19 | 49  | 8.7  |
| 17 | 8064850  | 8065025  | 175 | 8064887  | 14 | 90  | 5.2  |
| 17 | 8132350  | 8132400  | 50  | 8132362  | 13 | 26  | 3.5  |
| 17 | 8132825  | 8132850  | 25  | 8132837  | 11 | 11  | 1.7  |
| 17 | 8135300  | 8135325  | 25  | 8135312  | 11 | 11  | 0.9  |
| 17 | 8228000  | 8228050  | 50  | 8228012  | 12 | 24  | 3.5  |
| 17 | 8252700  | 8252725  | 25  | 8252712  | 12 | 12  | 1.7  |
| 17 | 8508050  | 8508075  | 25  | 8508062  | 11 | 11  | 1.7  |
| 17 | 8517975  | 8518050  | 75  | 8517987  | 11 | 33  | 5.2  |
| 17 | 8636050  | 8636325  | 275 | 8636137  | 18 | 163 | 7    |
| 17 | 8703200  | 8703400  | 200 | 8703387  | 16 | 100 | 9.6  |
| 17 | 9897925  | 9898025  | 100 | 9897937  | 12 | 48  | 6.1  |
| 17 | 9927550  | 9927700  | 150 | 9927687  | 13 | 65  | 0    |
| 17 | 9959550  | 9959650  | 100 | 9959612  | 13 | 48  | 7    |
| 17 | 10719550 | 10719650 | 100 | 10719562 | 11 | 44  | 3.5  |
| 17 | 13324925 | 13325150 | 225 | 13325062 | 24 | 180 | 0    |
| 17 | 13614000 | 13614025 | 25  | 13614012 | 11 | 11  | 0    |
| 17 | 14144725 | 14144825 | 100 | 14144787 | 13 | 48  | 3.5  |
| 17 | 14730750 | 14730925 | 175 | 14730812 | 21 | 122 | 7.9  |
| 17 | 15299600 | 15299675 | 75  | 15299612 | 11 | 33  | 0    |
| 17 | 15301700 | 15301725 | 25  | 15301712 | 14 | 14  | 0.9  |
| 17 | 15765050 | 15765125 | 75  | 15765062 | 14 | 40  | 6.1  |
| 17 | 16130500 | 16130525 | 25  | 16130512 | 11 | 11  | 1.7  |
| 17 | 16131175 | 16131200 | 25  | 16131187 | 12 | 12  | 0.9  |
| 17 | 16225700 | 16225725 | 25  | 16225712 | 11 | 11  | 0    |
| 17 | 16262600 | 16262850 | 250 | 16262762 | 25 | 181 | 14   |
| 17 | 16283025 | 16283050 | 25  | 16283037 | 14 | 14  | 2.6  |
| 17 | 16379825 | 16379850 | 25  | 16379837 | 21 | 21  | 1.7  |
| 17 | 16418100 | 16418175 | 75  | 16418112 | 11 | 33  | 0    |
| 17 | 16841925 | 16842000 | 75  | 16841937 | 14 | 38  | 7    |
| 17 | 16986750 | 16986875 | 125 | 16986762 | 11 | 53  | 3.5  |
| 17 | 17081575 | 17081650 | 75  | 17081587 | 12 | 36  | 5.2  |
| 17 | 17094050 | 17094150 | 100 | 17094062 | 12 | 48  | 0    |
| 17 | 17125250 | 17125300 | 50  | 17125262 | 11 | 22  | 1.7  |
| 17 | 17196775 | 17196825 | 50  | 17196787 | 16 | 30  | 4.4  |
| 17 | 17395625 | 17395650 | 25  | 17395637 | 11 | 11  | 0.9  |
| 17 | 17435725 | 17435800 | 75  | 17435737 | 14 | 40  | 5.2  |
| 17 | 17457925 | 17458000 | 75  | 17457937 | 12 | 34  | 2.6  |
| 17 | 17523100 | 17523125 | 25  | 17523112 | 12 | 12  | 0.9  |
| 17 | 17569775 | 17569800 | 25  | 17569787 | 12 | 12  | 1.7  |
| 17 | 17596550 | 17596675 | 125 | 17596637 | 29 | 121 | 17.5 |
| 17 | 17681675 | 17681750 | 75  | 17681687 | 14 | 38  | 2.6  |
| 17 | 17816875 | 17816900 | 25  | 17816887 | 11 | 11  | 0.9  |
| 17 | 18027125 | 18027250 | 125 | 18027162 | 13 | 63  | 4.4  |
| 17 | 18158725 | 18158800 | 75  | 18158762 | 21 | 55  | 7.9  |
| 17 | 18159250 | 18159575 | 325 | 18159412 | 27 | 289 | 46.3 |
| 17 | 18506100 | 18506200 | 100 | 18506112 | 13 | 51  | 0.9  |
| 17 | 19287075 | 19287425 | 350 | 19287187 | 20 | 211 | 22.7 |
| 17 | 19463675 | 19463725 | 50  | 19463687 | 11 | 22  | 0    |
| 17 | 19492750 | 19492800 | 50  | 19492762 | 16 | 28  | 3.5  |
| 17 | 19821850 | 19821875 | 25  | 19821862 | 16 | 16  | 1.7  |
| 17 | 19822550 | 19822925 | 375 | 19822737 | 27 | 284 | 3.5  |
| 17 | 20018875 | 20018925 | 50  | 20018887 | 12 | 24  | 2.6  |
| 17 | 20102625 | 20102675 | 50  | 20102637 | 11 | 22  | 0    |
| 17 | 20836975 | 20837000 | 25  | 20836987 | 11 | 11  | 0.9  |

|    |          |          |     |          |    |     |      |
|----|----------|----------|-----|----------|----|-----|------|
| 17 | 21058100 | 21058150 | 50  | 21058112 | 12 | 24  | 2.6  |
| 17 | 21126225 | 21126375 | 150 | 21126312 | 13 | 72  | 0    |
| 17 | 21192775 | 21192825 | 50  | 21192787 | 11 | 22  | 2.6  |
| 17 | 22126800 | 22126925 | 125 | 22126862 | 14 | 64  | 2.6  |
| 17 | 22185725 | 22185875 | 150 | 22185737 | 12 | 72  | 10.5 |
| 17 | 22608175 | 22608250 | 75  | 22608212 | 13 | 35  | 0    |
| 17 | 23302075 | 23302225 | 150 | 23302087 | 12 | 72  | 5.2  |
| 17 | 23302875 | 23302975 | 100 | 23302887 | 11 | 44  | 0    |
| 17 | 23613425 | 23613475 | 50  | 23613437 | 13 | 26  | 1.7  |
| 17 | 23670000 | 23670100 | 100 | 23670012 | 11 | 44  | 7    |
| 17 | 24266050 | 24266150 | 100 | 24266087 | 12 | 47  | 7    |
| 17 | 24302800 | 24302925 | 125 | 24302837 | 14 | 64  | 4.4  |
| 17 | 25282450 | 25282525 | 75  | 25282512 | 18 | 46  | 6.1  |
| 17 | 26948025 | 26948050 | 25  | 26948037 | 14 | 14  | 2.6  |
| 17 | 27701275 | 27701400 | 125 | 27701312 | 14 | 64  | 4.4  |
| 17 | 27780800 | 27781000 | 200 | 27780862 | 20 | 126 | 5.2  |
| 17 | 27843200 | 27843225 | 25  | 27843212 | 12 | 12  | 0.9  |
| 17 | 28173825 | 28173975 | 150 | 28173962 | 16 | 74  | 8.7  |
| 17 | 30502075 | 30502100 | 25  | 30502087 | 19 | 19  | 3.5  |
| 17 | 32033075 | 32033250 | 175 | 32033212 | 14 | 83  | 7.9  |
| 17 | 34087100 | 34087175 | 75  | 34087112 | 12 | 36  | 0    |
| 17 | 34456750 | 34456975 | 225 | 34456912 | 15 | 117 | 0    |
| 17 | 34479300 | 34479325 | 25  | 34479312 | 11 | 11  | 0.9  |
| 17 | 35233525 | 35233800 | 275 | 35233662 | 17 | 149 | 0    |
| 17 | 35935325 | 35935375 | 50  | 35935337 | 11 | 22  | 0    |
| 17 | 38752450 | 38752625 | 175 | 38752562 | 15 | 91  | 1.7  |
| 17 | 38781350 | 38781675 | 325 | 38781537 | 26 | 234 | 3.5  |
| 17 | 38794150 | 38794175 | 25  | 38794162 | 15 | 15  | 2.6  |
| 17 | 38813200 | 38813525 | 325 | 38813362 | 38 | 307 | 1.7  |
| 17 | 38916575 | 38916600 | 25  | 38916587 | 18 | 18  | 3.5  |
| 17 | 39377050 | 39377125 | 75  | 39377087 | 15 | 41  | 6.1  |
| 17 | 39425725 | 39425800 | 75  | 39425737 | 14 | 38  | 4.4  |
| 17 | 39447700 | 39447825 | 125 | 39447812 | 18 | 75  | 10.5 |
| 17 | 39520150 | 39520225 | 75  | 39520162 | 11 | 33  | 2.6  |
| 17 | 39936225 | 39936275 | 50  | 39936237 | 13 | 24  | 1.7  |
| 17 | 40209775 | 40209800 | 25  | 40209787 | 12 | 12  | 0.9  |
| 17 | 40342825 | 40343000 | 175 | 40342912 | 13 | 82  | 12.2 |
| 17 | 40750350 | 40750375 | 25  | 40750362 | 23 | 23  | 4.4  |
| 17 | 42354925 | 42355225 | 300 | 42355087 | 19 | 184 | 36.7 |
| 17 | 42355450 | 42355475 | 25  | 42355462 | 19 | 19  | 2.6  |
| 17 | 42613975 | 42614050 | 75  | 42613987 | 11 | 33  | 5.2  |
| 17 | 42695050 | 42695075 | 25  | 42695062 | 15 | 15  | 2.6  |
| 17 | 42727975 | 42728025 | 50  | 42727987 | 18 | 35  | 6.1  |
| 17 | 42755650 | 42755775 | 125 | 42755687 | 13 | 61  | 2.6  |
| 17 | 42924975 | 42925225 | 250 | 42925012 | 30 | 232 | 17.5 |
| 17 | 43127125 | 43127150 | 25  | 43127137 | 11 | 11  | 1.7  |
| 17 | 43254475 | 43254500 | 25  | 43254487 | 11 | 11  | 1.7  |
| 17 | 43254975 | 43255150 | 175 | 43255137 | 13 | 71  | 5.2  |
| 17 | 43273850 | 43273875 | 25  | 43273862 | 16 | 16  | 2.6  |
| 17 | 43402950 | 43402975 | 25  | 43402962 | 12 | 12  | 1.7  |
| 17 | 43403625 | 43403650 | 25  | 43403637 | 21 | 21  | 3.5  |
| 17 | 43411125 | 43411300 | 175 | 43411162 | 14 | 88  | 5.2  |
| 17 | 43423450 | 43423475 | 25  | 43423462 | 11 | 11  | 0    |
| 17 | 43434825 | 43434925 | 100 | 43434837 | 11 | 43  | 3.5  |
| 17 | 43469725 | 43469875 | 150 | 43469787 | 16 | 82  | 12.2 |
| 17 | 43535725 | 43535775 | 50  | 43535737 | 11 | 22  | 0    |
| 17 | 43918975 | 43919125 | 150 | 43919037 | 14 | 76  | 7    |
| 17 | 43976750 | 43976950 | 200 | 43976887 | 15 | 100 | 19.2 |
| 17 | 44042750 | 44042775 | 25  | 44042762 | 11 | 11  | 0    |
| 17 | 44110775 | 44110825 | 50  | 44110787 | 11 | 22  | 3.5  |
| 17 | 44224925 | 44224950 | 25  | 44224937 | 11 | 11  | 0    |
| 17 | 44376575 | 44376700 | 125 | 44376687 | 12 | 56  | 0    |
| 17 | 44377150 | 44377300 | 150 | 44377162 | 12 | 68  | 9.6  |
| 17 | 44608650 | 44608700 | 50  | 44608662 | 11 | 22  | 0    |
| 17 | 44617825 | 44617900 | 75  | 44617837 | 11 | 33  | 0    |
| 17 | 44819925 | 44819950 | 25  | 44819937 | 12 | 12  | 0    |
| 17 | 44876125 | 44876200 | 75  | 44876137 | 11 | 33  | 2.6  |
| 17 | 45006350 | 45006375 | 25  | 45006362 | 11 | 11  | 1.7  |
| 17 | 45109700 | 45109750 | 50  | 45109712 | 11 | 22  | 2.6  |
| 17 | 45220450 | 45220550 | 100 | 45220462 | 11 | 44  | 6.1  |
| 17 | 45430150 | 45430250 | 100 | 45430212 | 14 | 52  | 0    |
| 17 | 45565725 | 45565775 | 50  | 45565737 | 11 | 22  | 0.9  |
| 17 | 45584000 | 45584050 | 50  | 45584012 | 11 | 22  | 3.5  |
| 17 | 45642775 | 45642925 | 150 | 45642812 | 20 | 110 | 16.6 |
| 17 | 45658075 | 45658250 | 175 | 45658187 | 12 | 77  | 0    |

|    |          |          |     |          |    |     |      |
|----|----------|----------|-----|----------|----|-----|------|
| 17 | 45699250 | 45699275 | 25  | 45699262 | 12 | 12  | 0.9  |
| 17 | 45805225 | 45805250 | 25  | 45805237 | 15 | 15  | 0    |
| 17 | 45890275 | 45890475 | 200 | 45890412 | 17 | 106 | 5.2  |
| 17 | 46367650 | 46367700 | 50  | 46367687 | 18 | 34  | 6.1  |
| 17 | 46972575 | 46972600 | 25  | 46972587 | 12 | 12  | 1.7  |
| 17 | 47394200 | 47394275 | 75  | 47394212 | 11 | 33  | 0.9  |
| 17 | 49482675 | 49482850 | 175 | 49482712 | 16 | 103 | 3.5  |
| 17 | 51042650 | 51042775 | 125 | 51042662 | 14 | 68  | 12.2 |
| 17 | 51183475 | 51183675 | 200 | 51183512 | 18 | 129 | 16.6 |
| 17 | 51752800 | 51752975 | 175 | 51752912 | 16 | 92  | 16.6 |
| 17 | 52194800 | 52194925 | 125 | 52194812 | 11 | 55  | 0.9  |
| 17 | 52256400 | 52256825 | 425 | 52256662 | 57 | 596 | 25.3 |
| 17 | 52308925 | 52309025 | 100 | 52308937 | 11 | 43  | 2.6  |
| 17 | 52676100 | 52676125 | 25  | 52676112 | 11 | 11  | 1.7  |
| 17 | 52839450 | 52839650 | 200 | 52839462 | 20 | 131 | 0.9  |
| 17 | 52859250 | 52859375 | 125 | 52859337 | 12 | 57  | 0    |
| 17 | 52875825 | 52875850 | 25  | 52875837 | 11 | 11  | 1.7  |
| 17 | 52906175 | 52906200 | 25  | 52906187 | 11 | 11  | 0.9  |
| 17 | 52980600 | 52980625 | 25  | 52980612 | 12 | 12  | 0.9  |
| 17 | 53294600 | 53294775 | 175 | 53294687 | 14 | 83  | 0    |
| 17 | 53306025 | 53306075 | 50  | 53306037 | 11 | 22  | 1.7  |
| 17 | 53306825 | 53306950 | 125 | 53306862 | 15 | 68  | 11.4 |
| 17 | 53381025 | 53381125 | 100 | 53381062 | 13 | 48  | 2.6  |
| 17 | 53381525 | 53381825 | 300 | 53381662 | 50 | 465 | 62.9 |
| 17 | 53417775 | 53417800 | 25  | 53417787 | 11 | 11  | 0    |
| 17 | 53439100 | 53439200 | 100 | 53439112 | 15 | 50  | 0.9  |
| 17 | 53440275 | 53440300 | 25  | 53440287 | 18 | 18  | 3.5  |
| 17 | 53651900 | 53651925 | 25  | 53651912 | 12 | 12  | 1.7  |
| 17 | 53849450 | 53849475 | 25  | 53849462 | 13 | 13  | 0.9  |
| 17 | 53849825 | 53849900 | 75  | 53849862 | 16 | 44  | 6.1  |
| 17 | 54091300 | 54091550 | 250 | 54091437 | 20 | 154 | 0    |
| 17 | 54124625 | 54124825 | 200 | 54124787 | 14 | 99  | 7    |
| 17 | 54344000 | 54344225 | 225 | 54344112 | 19 | 136 | 0    |
| 17 | 54589100 | 54589150 | 50  | 54589112 | 11 | 22  | 1.7  |
| 17 | 54642025 | 54642050 | 25  | 54642037 | 11 | 11  | 1.7  |
| 17 | 54788950 | 54788975 | 25  | 54788962 | 11 | 11  | 0    |
| 17 | 54842325 | 54842425 | 100 | 54842362 | 14 | 47  | 0    |
| 17 | 54997600 | 54997650 | 50  | 54997612 | 48 | 92  | 16.6 |
| 17 | 55051350 | 55051900 | 550 | 55051537 | 16 | 282 | 53.3 |
| 17 | 55052175 | 55052200 | 25  | 55052187 | 11 | 11  | 0.9  |
| 17 | 55139375 | 55139550 | 175 | 55139512 | 24 | 147 | 27.1 |
| 17 | 55275375 | 55275400 | 25  | 55275387 | 11 | 11  | 0.9  |
| 17 | 55567725 | 55567750 | 25  | 55567737 | 18 | 18  | 1.7  |
| 17 | 55737325 | 55737475 | 150 | 55737412 | 16 | 85  | 14   |
| 17 | 55865175 | 55865350 | 175 | 55865337 | 18 | 109 | 0.9  |
| 17 | 55924100 | 55924225 | 125 | 55924112 | 12 | 58  | 2.6  |
| 17 | 55990000 | 55990375 | 375 | 55990212 | 26 | 272 | 19.2 |
| 17 | 56611550 | 56611625 | 75  | 56611562 | 11 | 33  | 2.6  |
| 17 | 56744500 | 56744650 | 150 | 56744512 | 14 | 74  | 13.1 |
| 17 | 56750725 | 56750800 | 75  | 56750762 | 14 | 40  | 6.1  |
| 17 | 56755925 | 56756025 | 100 | 56755962 | 13 | 50  | 0.9  |
| 17 | 56810600 | 56810650 | 50  | 56810612 | 13 | 25  | 1.7  |
| 17 | 56927050 | 56927075 | 25  | 56927062 | 12 | 12  | 0    |
| 17 | 58124500 | 58124600 | 100 | 58124512 | 15 | 55  | 0.9  |
| 17 | 58125850 | 58125950 | 100 | 58125862 | 16 | 60  | 9.6  |
| 17 | 58139800 | 58139825 | 25  | 58139812 | 11 | 11  | 0.9  |
| 17 | 58255775 | 58255825 | 50  | 58255787 | 11 | 22  | 0    |
| 17 | 58397150 | 58397175 | 25  | 58397162 | 12 | 12  | 1.7  |
| 17 | 58426725 | 58426750 | 25  | 58426737 | 11 | 11  | 1.7  |
| 17 | 58671025 | 58671050 | 25  | 58671037 | 11 | 11  | 0    |
| 17 | 58836325 | 58836425 | 100 | 58836362 | 14 | 50  | 3.5  |
| 17 | 59203900 | 59204025 | 125 | 59203962 | 13 | 61  | 0    |
| 17 | 59271875 | 59271900 | 25  | 59271887 | 13 | 13  | 1.7  |
| 17 | 59274825 | 59274925 | 100 | 59274837 | 12 | 48  | 3.5  |
| 17 | 59279875 | 59280200 | 325 | 59280137 | 40 | 413 | 31.5 |
| 17 | 59500375 | 59500425 | 50  | 59500387 | 11 | 22  | 1.7  |
| 17 | 59561800 | 59561825 | 25  | 59561812 | 12 | 12  | 0    |
| 17 | 59596475 | 59596600 | 125 | 59596587 | 14 | 62  | 4.4  |
| 17 | 59633400 | 59633500 | 100 | 59633412 | 12 | 45  | 7    |
| 17 | 59634125 | 59634150 | 25  | 59634137 | 13 | 13  | 0    |
| 17 | 59694625 | 59694650 | 25  | 59694637 | 18 | 18  | 3.5  |
| 17 | 59757650 | 59757750 | 100 | 59757662 | 12 | 48  | 7    |
| 17 | 59864475 | 59864875 | 400 | 59864712 | 38 | 401 | 6.1  |
| 17 | 59923900 | 59924025 | 125 | 59923962 | 15 | 69  | 4.4  |
| 17 | 60133775 | 60133850 | 75  | 60133787 | 11 | 33  | 4.4  |

|    |          |          |     |          |    |     |      |
|----|----------|----------|-----|----------|----|-----|------|
| 17 | 60412450 | 60412575 | 125 | 60412462 | 11 | 53  | 0    |
| 17 | 60549975 | 60550150 | 175 | 60549987 | 18 | 114 | 12.2 |
| 17 | 60655400 | 60655450 | 50  | 60655412 | 11 | 22  | 0    |
| 17 | 61355850 | 61356025 | 175 | 61355887 | 16 | 110 | 0    |
| 17 | 62793100 | 62793250 | 150 | 62793112 | 14 | 67  | 3.5  |
| 17 | 62902050 | 62902075 | 25  | 62902062 | 14 | 14  | 1.7  |
| 17 | 63144650 | 63144675 | 25  | 63144662 | 13 | 13  | 1.7  |
| 17 | 63328775 | 63328925 | 150 | 63328862 | 13 | 70  | 12.2 |
| 17 | 63800600 | 63800700 | 100 | 63800687 | 12 | 41  | 6.1  |
| 17 | 63801850 | 63802050 | 200 | 63801912 | 17 | 122 | 8.7  |
| 17 | 63839675 | 63839900 | 225 | 63839812 | 23 | 172 | 0    |
| 17 | 63888650 | 63888675 | 25  | 63888662 | 14 | 14  | 2.6  |
| 17 | 63891425 | 63891825 | 400 | 63891437 | 24 | 303 | 35.8 |
| 17 | 63894300 | 63894325 | 25  | 63894312 | 12 | 12  | 1.7  |
| 17 | 63896875 | 63896950 | 75  | 63896887 | 14 | 42  | 7.9  |
| 17 | 63907975 | 63908000 | 25  | 63907987 | 19 | 19  | 3.5  |
| 17 | 64099250 | 64099300 | 50  | 64099287 | 14 | 26  | 3.5  |
| 17 | 64329700 | 64329900 | 200 | 64329787 | 18 | 116 | 0    |
| 17 | 64417000 | 64417075 | 75  | 64417012 | 14 | 38  | 5.2  |
| 17 | 64747550 | 64747625 | 75  | 64747562 | 13 | 35  | 5.2  |
| 17 | 65206125 | 65206225 | 100 | 65206162 | 14 | 52  | 7    |
| 17 | 65240625 | 65240725 | 100 | 65240637 | 12 | 48  | 0.9  |
| 17 | 65241625 | 65241700 | 75  | 65241637 | 11 | 33  | 5.2  |
| 17 | 65330000 | 65330100 | 100 | 65330012 | 11 | 44  | 3.5  |
| 17 | 65378050 | 65378225 | 175 | 65378062 | 17 | 101 | 11.4 |
| 17 | 65648200 | 65648225 | 25  | 65648212 | 11 | 11  | 0    |
| 17 | 65991450 | 65991500 | 50  | 65991462 | 11 | 22  | 0.9  |
| 17 | 67915025 | 67915050 | 25  | 67915037 | 12 | 12  | 0    |
| 17 | 68001750 | 68001775 | 25  | 68001762 | 11 | 11  | 0    |
| 17 | 68036775 | 68036825 | 50  | 68036787 | 14 | 26  | 1.7  |
| 17 | 68084050 | 68084125 | 75  | 68084087 | 16 | 45  | 7    |
| 17 | 68086625 | 68086650 | 25  | 68086637 | 12 | 12  | 1.7  |
| 17 | 68121375 | 68121525 | 150 | 68121437 | 14 | 80  | 11.4 |
| 17 | 68123275 | 68123325 | 50  | 68123312 | 14 | 26  | 4.4  |
| 17 | 68125375 | 68125400 | 25  | 68125387 | 11 | 11  | 1.7  |
| 17 | 68139825 | 68139975 | 150 | 68139862 | 17 | 89  | 9.6  |
| 17 | 68140350 | 68140375 | 25  | 68140362 | 11 | 11  | 1.7  |
| 17 | 68166050 | 68166100 | 50  | 68166062 | 12 | 24  | 3.5  |
| 17 | 68171250 | 68171425 | 175 | 68171287 | 13 | 84  | 0    |
| 17 | 68227775 | 68227900 | 125 | 68227787 | 19 | 85  | 14   |
| 17 | 68332875 | 68333325 | 450 | 68333212 | 17 | 209 | 15.7 |
| 17 | 68700850 | 68700875 | 25  | 68700862 | 11 | 11  | 1.7  |
| 17 | 68739775 | 68739925 | 150 | 68739837 | 19 | 90  | 6.1  |
| 17 | 68791525 | 68791625 | 100 | 68791537 | 11 | 44  | 0    |
| 17 | 68857725 | 68857750 | 25  | 68857737 | 11 | 11  | 0.9  |
| 17 | 69228000 | 69228025 | 25  | 69228012 | 15 | 15  | 1.7  |
| 17 | 69593200 | 69593350 | 150 | 69593237 | 13 | 74  | 0    |
| 17 | 69618425 | 69618475 | 50  | 69618437 | 11 | 22  | 3.5  |
| 17 | 69638150 | 69638175 | 25  | 69638162 | 11 | 11  | 0    |
| 17 | 69718275 | 69718400 | 125 | 69718287 | 17 | 79  | 7    |
| 17 | 69722500 | 69722575 | 75  | 69722512 | 13 | 37  | 2.6  |
| 17 | 69723375 | 69723400 | 25  | 69723387 | 12 | 12  | 1.7  |
| 17 | 69735375 | 69735450 | 75  | 69735437 | 12 | 34  | 5.2  |
| 17 | 69945475 | 69945725 | 250 | 69945562 | 28 | 214 | 0    |
| 17 | 70077400 | 70077475 | 75  | 70077437 | 12 | 34  | 2.6  |
| 17 | 70179050 | 70179100 | 50  | 70179062 | 11 | 22  | 0    |
| 17 | 70299300 | 70299350 | 50  | 70299312 | 11 | 22  | 1.7  |
| 17 | 70495950 | 70496075 | 125 | 70495962 | 12 | 58  | 3.5  |
| 17 | 70662400 | 70662425 | 25  | 70662412 | 12 | 12  | 1.7  |
| 17 | 70690500 | 70691100 | 600 | 70690662 | 32 | 394 | 14   |
| 17 | 70713100 | 70713175 | 75  | 70713162 | 38 | 88  | 15.7 |
| 17 | 70769350 | 70769400 | 50  | 70769387 | 18 | 29  | 5.2  |
| 17 | 70778475 | 70778575 | 100 | 70778537 | 16 | 53  | 7    |
| 17 | 71293800 | 71293825 | 25  | 71293812 | 11 | 11  | 1.7  |
| 17 | 71339825 | 71339925 | 100 | 71339862 | 13 | 46  | 4.4  |
| 17 | 71404475 | 71404575 | 100 | 71404487 | 11 | 44  | 7    |
| 17 | 71536475 | 71536500 | 25  | 71536487 | 12 | 12  | 1.7  |
| 17 | 71611750 | 71611775 | 25  | 71611762 | 12 | 12  | 1.7  |
| 17 | 71674150 | 71674175 | 25  | 71674162 | 12 | 12  | 0.9  |
| 17 | 71861575 | 71861600 | 25  | 71861587 | 12 | 12  | 1.7  |
| 17 | 71893650 | 71893925 | 275 | 71893762 | 16 | 144 | 21   |
| 17 | 72031025 | 72031050 | 25  | 72031037 | 11 | 11  | 1.7  |
| 17 | 72037600 | 72037650 | 50  | 72037612 | 21 | 42  | 7    |
| 17 | 72078650 | 72078700 | 50  | 72078662 | 11 | 22  | 0.9  |
| 17 | 72178825 | 72178975 | 150 | 72178862 | 18 | 101 | 12.2 |

|    |          |          |     |          |    |     |      |
|----|----------|----------|-----|----------|----|-----|------|
| 17 | 72509850 | 72509875 | 25  | 72509862 | 12 | 12  | 0.9  |
| 17 | 72606400 | 72606425 | 25  | 72606412 | 12 | 12  | 0.9  |
| 17 | 72675375 | 72675825 | 450 | 72675562 | 44 | 495 | 3.5  |
| 17 | 72682200 | 72682700 | 500 | 72682462 | 55 | 628 | 2.1  |
| 17 | 72762600 | 72762625 | 25  | 72762612 | 12 | 12  | 1.7  |
| 17 | 72792850 | 72792875 | 25  | 72792862 | 11 | 11  | 0.9  |
| 17 | 72796525 | 72796550 | 25  | 72796537 | 11 | 11  | 1.7  |
| 17 | 72824850 | 72824950 | 100 | 72824862 | 11 | 44  | 3.5  |
| 17 | 72828925 | 72829050 | 125 | 72828937 | 11 | 49  | 1.7  |
| 17 | 72830375 | 72830475 | 100 | 72830462 | 12 | 45  | 2.6  |
| 17 | 72865625 | 72865700 | 75  | 72865637 | 11 | 33  | 0    |
| 17 | 72916875 | 72916900 | 25  | 72916887 | 12 | 12  | 0.9  |
| 17 | 72960900 | 72961000 | 100 | 72960962 | 14 | 50  | 6.1  |
| 17 | 72964775 | 72964800 | 25  | 72964787 | 11 | 11  | 1.7  |
| 17 | 72980125 | 72980325 | 200 | 72980162 | 15 | 96  | 4.4  |
| 17 | 73024600 | 73024875 | 275 | 73024737 | 28 | 242 | 45.4 |
| 17 | 73390300 | 73390325 | 25  | 73390312 | 11 | 11  | 0.9  |
| 17 | 73635750 | 73635775 | 25  | 73635762 | 14 | 14  | 2.6  |
| 17 | 73636725 | 73636875 | 150 | 73636762 | 15 | 84  | 5.2  |
| 17 | 73721775 | 73721825 | 50  | 73721787 | 13 | 24  | 3.5  |
| 17 | 73864125 | 73864150 | 25  | 73864137 | 11 | 11  | 0.9  |
| 17 | 73865325 | 73865350 | 25  | 73865337 | 11 | 11  | 1.7  |
| 17 | 73906000 | 73906050 | 50  | 73906012 | 11 | 22  | 0    |
| 17 | 73929900 | 73930025 | 125 | 73929912 | 12 | 60  | 0    |
| 17 | 74181375 | 74181475 | 100 | 74181387 | 12 | 48  | 0.9  |
| 17 | 74225525 | 74225650 | 125 | 74225537 | 15 | 66  | 7.9  |
| 17 | 74314225 | 74314325 | 100 | 74314262 | 12 | 47  | 2.6  |
| 17 | 74370725 | 74370750 | 25  | 74370737 | 11 | 11  | 1.7  |
| 17 | 74479150 | 74479175 | 25  | 74479162 | 11 | 11  | 1.7  |
| 17 | 74984225 | 74984250 | 25  | 74984237 | 11 | 11  | 1.7  |
| 17 | 75432075 | 75432175 | 100 | 75432087 | 11 | 44  | 0    |
| 17 | 75522425 | 75522575 | 150 | 75522512 | 14 | 71  | 6.1  |
| 17 | 75539475 | 75539575 | 100 | 75539487 | 15 | 47  | 6.1  |
| 17 | 75549475 | 75549950 | 475 | 75549737 | 78 | 844 | 5.2  |
| 17 | 75633575 | 75633600 | 25  | 75633587 | 11 | 11  | 0    |
| 17 | 75740800 | 75740900 | 100 | 75740887 | 14 | 49  | 1.7  |
| 17 | 75749025 | 75749050 | 25  | 75749037 | 11 | 11  | 1.7  |
| 17 | 76004300 | 76004325 | 25  | 76004312 | 12 | 12  | 0    |
| 17 | 76063125 | 76063200 | 75  | 76063162 | 13 | 35  | 2.6  |
| 17 | 76075975 | 76076025 | 50  | 76075987 | 11 | 22  | 3.5  |
| 17 | 76238250 | 76238275 | 25  | 76238262 | 12 | 12  | 0    |
| 17 | 76238700 | 76238900 | 200 | 76238787 | 19 | 128 | 6.1  |
| 17 | 76239750 | 76239850 | 100 | 76239762 | 12 | 48  | 7    |
| 17 | 76950925 | 76951000 | 75  | 76950937 | 12 | 33  | 0.9  |
| 17 | 76997275 | 76997375 | 100 | 76997287 | 12 | 48  | 2.6  |
| 17 | 77036400 | 77036650 | 250 | 77036487 | 16 | 127 | 3.5  |
| 17 | 77131175 | 77131225 | 50  | 77131212 | 20 | 35  | 5.2  |
| 17 | 77226450 | 77226500 | 50  | 77226462 | 11 | 22  | 0    |
| 17 | 77261975 | 77262025 | 50  | 77261987 | 11 | 22  | 1.7  |
| 17 | 77412075 | 77412100 | 25  | 77412087 | 21 | 21  | 3.5  |
| 17 | 77422975 | 77423100 | 125 | 77423012 | 16 | 68  | 7    |
| 17 | 77442875 | 77442900 | 25  | 77442887 | 12 | 12  | 1.7  |
| 17 | 77479600 | 77479725 | 125 | 77479712 | 16 | 67  | 7.9  |
| 17 | 77487975 | 77488025 | 50  | 77487987 | 12 | 24  | 1.7  |
| 17 | 77515150 | 77515250 | 100 | 77515162 | 11 | 44  | 3.5  |
| 17 | 77524650 | 77524850 | 200 | 77524762 | 16 | 109 | 0    |
| 17 | 77768225 | 77768250 | 25  | 77768237 | 19 | 19  | 3.5  |
| 17 | 77781925 | 77781950 | 25  | 77781937 | 11 | 11  | 1.7  |
| 17 | 77843050 | 77843100 | 50  | 77843062 | 11 | 22  | 0    |
| 17 | 77848825 | 77848875 | 50  | 77848837 | 17 | 32  | 4.4  |
| 17 | 77849250 | 77849350 | 100 | 77849312 | 14 | 54  | 2.6  |
| 17 | 77909950 | 77910025 | 75  | 77909962 | 13 | 37  | 5.2  |
| 17 | 77922000 | 77922050 | 50  | 77922012 | 13 | 24  | 3.5  |
| 17 | 77923725 | 77923875 | 150 | 77923787 | 15 | 80  | 3.5  |
| 17 | 77948025 | 77948175 | 150 | 77948112 | 13 | 68  | 7.9  |
| 17 | 78045875 | 78045900 | 25  | 78045887 | 15 | 15  | 2.6  |
| 17 | 78245750 | 78245950 | 200 | 78245812 | 15 | 109 | 0    |
| 17 | 78284650 | 78284950 | 300 | 78284812 | 18 | 167 | 8.7  |
| 17 | 78292150 | 78292250 | 100 | 78292187 | 14 | 50  | 0    |
| 17 | 78513950 | 78514050 | 100 | 78513962 | 11 | 44  | 0.9  |
| 17 | 78514425 | 78514450 | 25  | 78514437 | 11 | 11  | 1.7  |
| 17 | 78537350 | 78537375 | 25  | 78537362 | 16 | 16  | 2.6  |
| 17 | 78603375 | 78603450 | 75  | 78603387 | 11 | 33  | 1.7  |
| 17 | 78623275 | 78623425 | 150 | 78623312 | 13 | 76  | 0.9  |
| 16 | 376900   | 376950   | 50  | 376912   | 11 | 22  | 2.6  |

|    |          |          |     |          |    |     |      |
|----|----------|----------|-----|----------|----|-----|------|
| 16 | 601225   | 601325   | 100 | 601237   | 15 | 59  | 5.2  |
| 16 | 626550   | 626575   | 25  | 626562   | 12 | 12  | 0    |
| 16 | 1460900  | 1461175  | 275 | 1461162  | 14 | 113 | 16.6 |
| 16 | 1601850  | 1601900  | 50  | 1601887  | 13 | 25  | 3.5  |
| 16 | 1773400  | 1773450  | 50  | 1773412  | 11 | 22  | 1.7  |
| 16 | 2138050  | 2138075  | 25  | 2138062  | 12 | 12  | 0.9  |
| 16 | 2829025  | 2829075  | 50  | 2829037  | 14 | 28  | 5.2  |
| 16 | 2864675  | 2864750  | 75  | 2864687  | 11 | 33  | 2.6  |
| 16 | 2901775  | 2901825  | 50  | 2901812  | 14 | 26  | 2.6  |
| 16 | 2954050  | 2954075  | 25  | 2954062  | 11 | 11  | 0.9  |
| 16 | 3178625  | 3178700  | 75  | 3178637  | 12 | 36  | 0    |
| 16 | 3213950  | 3214200  | 250 | 3214112  | 18 | 142 | 0    |
| 16 | 3254400  | 3254875  | 475 | 3254737  | 18 | 255 | 39.3 |
| 16 | 3273450  | 3273475  | 25  | 3273462  | 11 | 11  | 1.7  |
| 16 | 3286050  | 3286100  | 50  | 3286062  | 11 | 22  | 0.9  |
| 16 | 3295275  | 3295425  | 150 | 3295387  | 20 | 104 | 7.9  |
| 16 | 3307275  | 3307650  | 375 | 3307462  | 21 | 240 | 0    |
| 16 | 3372825  | 3373400  | 575 | 3373162  | 54 | 738 | 0    |
| 16 | 3398525  | 3398975  | 450 | 3398712  | 48 | 541 | 7    |
| 16 | 3862550  | 3862725  | 175 | 3862662  | 16 | 88  | 6.1  |
| 16 | 4188750  | 4188825  | 75  | 4188762  | 11 | 33  | 1.7  |
| 16 | 4263900  | 4263925  | 25  | 4263912  | 11 | 11  | 1.7  |
| 16 | 4528900  | 4529100  | 200 | 4528912  | 28 | 155 | 17.5 |
| 16 | 4591275  | 4591375  | 100 | 4591312  | 14 | 54  | 2.6  |
| 16 | 8557900  | 8557950  | 50  | 8557912  | 12 | 24  | 0    |
| 16 | 10387075 | 10387250 | 175 | 10387112 | 17 | 100 | 14.9 |
| 16 | 10448675 | 10448875 | 200 | 10448812 | 21 | 135 | 4.4  |
| 16 | 10560725 | 10560850 | 125 | 10560762 | 18 | 73  | 0    |
| 16 | 10962775 | 10962825 | 50  | 10962787 | 11 | 22  | 0    |
| 16 | 10973175 | 10973200 | 25  | 10973187 | 11 | 11  | 1.7  |
| 16 | 11350875 | 11350900 | 25  | 11350887 | 11 | 11  | 0    |
| 16 | 11522450 | 11522500 | 50  | 11522462 | 11 | 22  | 3.5  |
| 16 | 11557725 | 11557775 | 50  | 11557737 | 11 | 22  | 1.7  |
| 16 | 14004575 | 14004600 | 25  | 14004587 | 12 | 12  | 1.7  |
| 16 | 14334100 | 14334200 | 100 | 14334112 | 11 | 44  | 0    |
| 16 | 15015625 | 15015700 | 75  | 15015637 | 12 | 36  | 1.7  |
| 16 | 15515475 | 15515625 | 150 | 15515562 | 13 | 70  | 2.6  |
| 16 | 15982800 | 15982975 | 175 | 15982837 | 17 | 88  | 1.7  |
| 16 | 17406950 | 17407125 | 175 | 17406962 | 18 | 104 | 17.5 |
| 16 | 18720225 | 18720325 | 100 | 18720312 | 16 | 54  | 3.5  |
| 16 | 19559000 | 19559175 | 175 | 19559012 | 12 | 84  | 0    |
| 16 | 20426150 | 20426175 | 25  | 20426162 | 13 | 13  | 0    |
| 16 | 20666225 | 20666250 | 25  | 20666237 | 11 | 11  | 0    |
| 16 | 22107800 | 22107825 | 25  | 22107812 | 11 | 11  | 0    |
| 16 | 22631500 | 22631550 | 50  | 22631512 | 11 | 22  | 0    |
| 16 | 23646975 | 23647025 | 50  | 23646987 | 12 | 24  | 3.5  |
| 16 | 23707775 | 23707875 | 100 | 23707787 | 11 | 44  | 0    |
| 16 | 23870825 | 23870925 | 100 | 23870862 | 14 | 54  | 4.4  |
| 16 | 24300425 | 24300450 | 25  | 24300437 | 11 | 11  | 0    |
| 16 | 24456375 | 24456500 | 125 | 24456462 | 13 | 60  | 6.1  |
| 16 | 25025800 | 25025975 | 175 | 25025862 | 18 | 114 | 15.7 |
| 16 | 27122275 | 27122450 | 175 | 27122337 | 17 | 104 | 6.1  |
| 16 | 28765575 | 28765600 | 25  | 28765587 | 11 | 11  | 0    |
| 16 | 29209750 | 29209875 | 125 | 29209837 | 17 | 73  | 3.5  |
| 16 | 29724250 | 29724325 | 75  | 29724262 | 11 | 33  | 3.5  |
| 16 | 29892150 | 29892325 | 175 | 29892212 | 17 | 95  | 6.1  |
| 16 | 29940650 | 29940675 | 25  | 29940662 | 12 | 12  | 0.9  |
| 16 | 29989200 | 29989250 | 50  | 29989212 | 18 | 36  | 7    |
| 16 | 30015750 | 30016125 | 375 | 30015937 | 42 | 419 | 7    |
| 16 | 30319425 | 30319475 | 50  | 30319437 | 11 | 22  | 0.9  |
| 16 | 30363850 | 30363975 | 125 | 30363862 | 16 | 77  | 9.6  |
| 16 | 30477075 | 30477125 | 50  | 30477087 | 12 | 24  | 1.7  |
| 16 | 30516925 | 30517125 | 200 | 30517037 | 18 | 114 | 4.4  |
| 16 | 30569250 | 30569425 | 175 | 30569262 | 19 | 109 | 15.7 |
| 16 | 30876425 | 30876525 | 100 | 30876437 | 14 | 54  | 1.7  |
| 16 | 30951975 | 30952025 | 50  | 30951987 | 11 | 22  | 2.6  |
| 16 | 33829850 | 33829950 | 100 | 33829937 | 12 | 43  | 7    |
| 16 | 33842400 | 33842625 | 225 | 33842437 | 12 | 98  | 11.4 |
| 16 | 44950775 | 44950950 | 175 | 44950787 | 12 | 83  | 12.2 |
| 16 | 44954050 | 44954075 | 25  | 44954062 | 11 | 11  | 0.9  |
| 16 | 46096500 | 46096650 | 150 | 46096637 | 18 | 91  | 10.5 |
| 16 | 49000850 | 49000950 | 100 | 49000862 | 11 | 44  | 0    |
| 16 | 49263100 | 49263450 | 350 | 49263287 | 31 | 299 | 6.1  |
| 16 | 51777300 | 51777350 | 50  | 51777337 | 16 | 29  | 0    |
| 16 | 52965175 | 52965300 | 125 | 52965187 | 13 | 65  | 0    |

|    |          |          |     |          |    |     |      |
|----|----------|----------|-----|----------|----|-----|------|
| 16 | 53187625 | 53187750 | 125 | 53187637 | 11 | 55  | 0    |
| 16 | 53389900 | 53390025 | 125 | 53389987 | 12 | 56  | 0    |
| 16 | 54891550 | 54891575 | 25  | 54891562 | 11 | 11  | 1.7  |
| 16 | 55707550 | 55707650 | 100 | 55707562 | 11 | 44  | 1.7  |
| 16 | 56225125 | 56225175 | 50  | 56225137 | 12 | 24  | 0    |
| 16 | 56640700 | 56640800 | 100 | 56640712 | 12 | 45  | 7    |
| 16 | 56983975 | 56984050 | 75  | 56984037 | 17 | 42  | 4.4  |
| 16 | 62769725 | 62769925 | 200 | 62769787 | 17 | 110 | 0    |
| 16 | 65144000 | 65144250 | 250 | 65144162 | 18 | 142 | 14.9 |
| 16 | 65701525 | 65701550 | 25  | 65701537 | 11 | 11  | 0.9  |
| 16 | 66112525 | 66112575 | 50  | 66112562 | 17 | 28  | 1.7  |
| 16 | 66902200 | 66902225 | 25  | 66902212 | 14 | 14  | 2.6  |
| 16 | 67120200 | 67120250 | 50  | 67120212 | 12 | 24  | 3.5  |
| 16 | 67155475 | 67156075 | 600 | 67155512 | 17 | 270 | 5.2  |
| 16 | 67778200 | 67778225 | 25  | 67778212 | 11 | 11  | 1.7  |
| 16 | 68121975 | 68122050 | 75  | 68122012 | 13 | 35  | 4.4  |
| 16 | 68317450 | 68317500 | 50  | 68317462 | 12 | 24  | 0    |
| 16 | 68751125 | 68751225 | 100 | 68751162 | 13 | 50  | 3.5  |
| 16 | 69317500 | 69317575 | 75  | 69317512 | 12 | 34  | 0    |
| 16 | 69332350 | 69332450 | 100 | 69332362 | 16 | 54  | 0.9  |
| 16 | 69395625 | 69395900 | 275 | 69395762 | 27 | 212 | 6.1  |
| 16 | 69559550 | 69559650 | 100 | 69559562 | 11 | 44  | 1.7  |
| 16 | 69880750 | 69880875 | 125 | 69880787 | 13 | 60  | 3.5  |
| 16 | 70781200 | 70781275 | 75  | 70781237 | 14 | 39  | 0    |
| 16 | 71749250 | 71749300 | 50  | 71749262 | 11 | 22  | 0    |
| 16 | 73713450 | 73713650 | 200 | 73713537 | 16 | 111 | 0    |
| 16 | 73829725 | 73829750 | 25  | 73829737 | 11 | 11  | 1.7  |
| 16 | 73836650 | 73836675 | 25  | 73836662 | 14 | 14  | 1.7  |
| 16 | 74025600 | 74025650 | 50  | 74025612 | 12 | 23  | 1.7  |
| 16 | 78249625 | 78249650 | 25  | 78249637 | 11 | 11  | 0.9  |
| 16 | 80224275 | 80224475 | 200 | 80224362 | 19 | 130 | 12.2 |
| 16 | 82489875 | 82489975 | 100 | 82489937 | 12 | 46  | 3.5  |
| 16 | 82631850 | 82632375 | 525 | 82631862 | 22 | 311 | 43.7 |
| 16 | 82633075 | 82633150 | 75  | 82633087 | 13 | 35  | 2.6  |
| 16 | 83241500 | 83241550 | 50  | 83241512 | 11 | 22  | 1.7  |
| 16 | 83542100 | 83542225 | 125 | 83542112 | 12 | 60  | 1.7  |
| 16 | 83900750 | 83901000 | 250 | 83900937 | 21 | 171 | 21.8 |
| 16 | 83946050 | 83946175 | 125 | 83946112 | 13 | 61  | 0    |
| 16 | 84011500 | 84011525 | 25  | 84011512 | 12 | 12  | 1.7  |
| 16 | 85427775 | 85427925 | 150 | 85427787 | 14 | 82  | 6.1  |
| 16 | 85975200 | 85975250 | 50  | 85975212 | 11 | 22  | 2.6  |
| 16 | 86239175 | 86239325 | 150 | 86239262 | 13 | 68  | 1.7  |
| 16 | 86500550 | 86500600 | 50  | 86500562 | 14 | 28  | 1.7  |
| 16 | 87046375 | 87046475 | 100 | 87046437 | 19 | 64  | 7.9  |
| 16 | 87119650 | 87119800 | 150 | 87119712 | 13 | 72  | 0    |
| 16 | 87137250 | 87137450 | 200 | 87137262 | 13 | 96  | 0    |
| 16 | 88565950 | 88566150 | 200 | 88566012 | 20 | 130 | 12.2 |
| 16 | 88630150 | 88630200 | 50  | 88630162 | 13 | 24  | 0    |
| 16 | 88640925 | 88641050 | 125 | 88640937 | 14 | 64  | 11.4 |
| 19 | 485150   | 485225   | 75  | 485187   | 13 | 37  | 5.2  |
| 19 | 921825   | 922025   | 200 | 921912   | 16 | 111 | 5.2  |
| 19 | 1121100  | 1121125  | 25  | 1121112  | 11 | 11  | 1.7  |
| 19 | 1206675  | 1206850  | 175 | 1206762  | 17 | 110 | 12.2 |
| 19 | 1213200  | 1213350  | 150 | 1213212  | 11 | 58  | 11.4 |
| 19 | 1225350  | 1225425  | 75  | 1225362  | 16 | 48  | 7.9  |
| 19 | 1315275  | 1315325  | 50  | 1315287  | 12 | 23  | 1.7  |
| 19 | 1316475  | 1316500  | 25  | 1316487  | 12 | 12  | 1.7  |
| 19 | 1334875  | 1335125  | 250 | 1334887  | 15 | 71  | 5.2  |
| 19 | 1358375  | 1358400  | 25  | 1358387  | 11 | 11  | 0.9  |
| 19 | 1405025  | 1405075  | 50  | 1405037  | 12 | 24  | 3.5  |
| 19 | 1454475  | 1454525  | 50  | 1454487  | 12 | 24  | 3.5  |
| 19 | 1604125  | 1604175  | 50  | 1604137  | 13 | 26  | 3.5  |
| 19 | 1856750  | 1856800  | 50  | 1856762  | 12 | 23  | 1.7  |
| 19 | 2103025  | 2103075  | 50  | 2103037  | 12 | 24  | 1.7  |
| 19 | 2187600  | 2187625  | 25  | 2187612  | 11 | 11  | 0.9  |
| 19 | 2220175  | 2220225  | 50  | 2220187  | 13 | 26  | 3.5  |
| 19 | 2335025  | 2335100  | 75  | 2335037  | 11 | 33  | 5.2  |
| 19 | 2378575  | 2378650  | 75  | 2378587  | 11 | 31  | 4.4  |
| 19 | 2500550  | 2500575  | 25  | 2500562  | 11 | 11  | 0.9  |
| 19 | 2770625  | 2770775  | 150 | 2770762  | 14 | 75  | 2.6  |
| 19 | 2785450  | 2785500  | 50  | 2785487  | 12 | 23  | 1.7  |
| 19 | 2792075  | 2792475  | 400 | 2792412  | 20 | 240 | 37.6 |
| 19 | 2828625  | 2829200  | 575 | 2828762  | 18 | 305 | 0    |
| 19 | 2884475  | 2884725  | 250 | 2884637  | 35 | 280 | 0    |
| 19 | 2896250  | 2896275  | 25  | 2896262  | 11 | 11  | 1.7  |



|    |          |          |     |          |    |     |      |
|----|----------|----------|-----|----------|----|-----|------|
| 19 | 3486350  | 3486375  | 25  | 3486362  | 11 | 11  | 0    |
| 19 | 4197850  | 4198000  | 150 | 4197862  | 18 | 90  | 15.7 |
| 19 | 4279475  | 4279500  | 25  | 4279487  | 13 | 13  | 0.9  |
| 19 | 4351075  | 4351125  | 50  | 4351087  | 11 | 22  | 3.5  |
| 19 | 4351600  | 4351725  | 125 | 4351687  | 20 | 94  | 12.2 |
| 19 | 4590100  | 4590200  | 100 | 4590162  | 14 | 50  | 1.7  |
| 19 | 5485950  | 5486150  | 200 | 5486087  | 21 | 147 | 0    |
| 19 | 5741825  | 5741875  | 50  | 5741837  | 11 | 22  | 3.5  |
| 19 | 6150475  | 6150500  | 25  | 6150487  | 13 | 13  | 0.9  |
| 19 | 6237675  | 6238000  | 325 | 6237712  | 12 | 124 | 7    |
| 19 | 6243125  | 6243400  | 275 | 6243237  | 34 | 260 | 28.8 |
| 19 | 6376625  | 6376950  | 325 | 6376687  | 23 | 205 | 22.7 |
| 19 | 7020575  | 7020650  | 75  | 7020587  | 15 | 43  | 3.5  |
| 19 | 7034000  | 7034500  | 500 | 7034187  | 33 | 407 | 0    |
| 19 | 7506075  | 7506175  | 100 | 7506087  | 12 | 44  | 7    |
| 19 | 8040275  | 8040525  | 250 | 8040362  | 19 | 162 | 8.7  |
| 19 | 8211325  | 8211400  | 75  | 8211362  | 13 | 35  | 2.6  |
| 19 | 8783150  | 8783400  | 250 | 8783237  | 17 | 147 | 0    |
| 19 | 9281925  | 9281975  | 50  | 9281937  | 12 | 24  | 0    |
| 19 | 9314375  | 9314575  | 200 | 9314462  | 17 | 116 | 0    |
| 19 | 9495675  | 9495875  | 200 | 9495737  | 19 | 133 | 0    |
| 19 | 9510425  | 9510450  | 25  | 9510437  | 18 | 18  | 3.5  |
| 19 | 9511025  | 9511050  | 25  | 9511037  | 11 | 11  | 0    |
| 19 | 9593000  | 9593475  | 475 | 9593387  | 22 | 302 | 51.5 |
| 19 | 9645625  | 9645775  | 150 | 9645662  | 15 | 79  | 0    |
| 19 | 9757650  | 9757700  | 50  | 9757662  | 11 | 22  | 3.5  |
| 19 | 10241400 | 10241500 | 100 | 10241412 | 12 | 48  | 7    |
| 19 | 10242450 | 10242475 | 25  | 10242462 | 11 | 11  | 1.7  |
| 19 | 10673675 | 10673800 | 125 | 10673712 | 15 | 69  | 1.7  |
| 19 | 10689200 | 10689300 | 100 | 10689212 | 14 | 54  | 0    |
| 19 | 10808075 | 10808150 | 75  | 10808137 | 15 | 38  | 5.2  |
| 19 | 10808375 | 10808475 | 100 | 10808412 | 26 | 98  | 11.4 |
| 19 | 10842375 | 10842425 | 50  | 10842387 | 12 | 24  | 2.6  |
| 19 | 11114975 | 11115100 | 125 | 11115012 | 14 | 62  | 7    |
| 19 | 11578475 | 11578550 | 75  | 11578512 | 13 | 35  | 3.5  |
| 19 | 11852500 | 11852625 | 125 | 11852562 | 13 | 61  | 0    |
| 19 | 11903000 | 11903050 | 50  | 11903012 | 12 | 24  | 3.5  |
| 19 | 11921100 | 11921175 | 75  | 11921112 | 15 | 45  | 7.9  |
| 19 | 11921600 | 11921650 | 50  | 11921612 | 11 | 22  | 1.7  |
| 19 | 11951450 | 11951475 | 25  | 11951462 | 12 | 12  | 0    |
| 19 | 12112325 | 12112375 | 50  | 12112362 | 13 | 24  | 1.7  |
| 19 | 12134850 | 12134900 | 50  | 12134862 | 12 | 24  | 1.7  |
| 19 | 12498925 | 12499075 | 150 | 12498962 | 15 | 83  | 0    |
| 19 | 12499325 | 12499475 | 150 | 12499362 | 13 | 72  | 5.2  |
| 19 | 12653425 | 12653600 | 175 | 12653462 | 16 | 102 | 5.2  |
| 19 | 12694375 | 12694450 | 75  | 12694412 | 13 | 37  | 2.6  |
| 19 | 12719650 | 12719675 | 25  | 12719662 | 12 | 12  | 1.7  |
| 19 | 12750150 | 12750200 | 50  | 12750162 | 14 | 28  | 4.4  |
| 19 | 12855700 | 12855975 | 275 | 12855762 | 18 | 173 | 1.7  |
| 19 | 12890925 | 12890975 | 50  | 12890937 | 15 | 30  | 5.2  |
| 19 | 12917375 | 12917450 | 75  | 12917437 | 23 | 57  | 7    |
| 19 | 12955575 | 12955775 | 200 | 12955612 | 17 | 118 | 7    |
| 19 | 12957075 | 12957175 | 100 | 12957087 | 11 | 42  | 4.4  |
| 19 | 13447275 | 13447325 | 50  | 13447287 | 11 | 22  | 0    |
| 19 | 13602025 | 13602250 | 225 | 13602137 | 21 | 160 | 14   |
| 19 | 13719450 | 13719475 | 25  | 13719462 | 11 | 11  | 0    |
| 19 | 14089000 | 14089025 | 25  | 14089012 | 11 | 11  | 1.7  |
| 19 | 14690325 | 14690750 | 425 | 14690437 | 24 | 318 | 11.4 |
| 19 | 15097475 | 15097550 | 75  | 15097487 | 15 | 38  | 7    |
| 19 | 15137450 | 15137475 | 25  | 15137462 | 11 | 11  | 0    |
| 19 | 15527675 | 15527700 | 25  | 15527687 | 11 | 11  | 1.7  |
| 19 | 16193050 | 16193250 | 200 | 16193162 | 22 | 151 | 12.2 |
| 19 | 16767600 | 16767750 | 150 | 16767662 | 20 | 108 | 12.2 |
| 19 | 16853950 | 16854250 | 300 | 16854087 | 31 | 262 | 12.2 |
| 19 | 17051975 | 17052025 | 50  | 17052012 | 13 | 25  | 0.9  |
| 19 | 17075175 | 17075275 | 100 | 17075187 | 14 | 54  | 0.9  |
| 19 | 17079525 | 17079550 | 25  | 17079537 | 11 | 11  | 0    |
| 19 | 17109375 | 17109400 | 25  | 17109387 | 14 | 14  | 2.6  |
| 19 | 17254300 | 17254375 | 75  | 17254337 | 12 | 35  | 2.6  |
| 19 | 17837800 | 17837825 | 25  | 17837812 | 12 | 12  | 0    |
| 19 | 18223825 | 18223925 | 100 | 18223837 | 11 | 44  | 3.5  |
| 19 | 18346225 | 18346425 | 200 | 18346262 | 22 | 162 | 7.9  |
| 19 | 18408800 | 18408900 | 100 | 18408812 | 13 | 48  | 5.2  |
| 19 | 18565450 | 18565575 | 125 | 18565487 | 14 | 61  | 1.7  |
| 19 | 18650000 | 18650075 | 75  | 18650012 | 16 | 46  | 5.2  |

|    |          |          |      |          |    |      |      |
|----|----------|----------|------|----------|----|------|------|
| 19 | 19292175 | 19292200 | 25   | 19292187 | 12 | 12   | 1.7  |
| 19 | 19487675 | 19487725 | 50   | 19487687 | 12 | 24   | 0    |
| 19 | 19704850 | 19704950 | 100  | 19704887 | 15 | 49   | 7    |
| 19 | 21494150 | 21494375 | 225  | 21494262 | 22 | 162  | 0    |
| 19 | 21922550 | 21922725 | 175  | 21922687 | 15 | 79   | 5.2  |
| 19 | 22119125 | 22119375 | 250  | 22119212 | 22 | 170  | 0    |
| 19 | 23976650 | 23976825 | 175  | 23976812 | 30 | 150  | 9.6  |
| 19 | 32425675 | 32425775 | 100  | 32425687 | 16 | 54   | 9.6  |
| 19 | 32429775 | 32429950 | 175  | 32429787 | 21 | 89   | 9.6  |
| 19 | 33816475 | 33816600 | 125  | 33816487 | 12 | 60   | 4.4  |
| 19 | 33850250 | 33850325 | 75   | 33850287 | 13 | 37   | 0    |
| 19 | 33875200 | 33875275 | 75   | 33875237 | 13 | 35   | 1.7  |
| 19 | 34321975 | 34322225 | 250  | 34322162 | 18 | 143  | 4.4  |
| 19 | 34873550 | 34873950 | 400  | 34873762 | 36 | 384  | 14   |
| 19 | 34923225 | 34923250 | 25   | 34923237 | 11 | 11   | 0    |
| 19 | 35632950 | 35633075 | 125  | 35632987 | 15 | 63   | 8.7  |
| 19 | 35973900 | 35973925 | 25   | 35973912 | 12 | 12   | 0.9  |
| 19 | 38402125 | 38402150 | 25   | 38402137 | 14 | 14   | 1.7  |
| 19 | 39088300 | 39088450 | 150  | 39088312 | 11 | 58   | 5.2  |
| 19 | 39859875 | 39860100 | 225  | 39859962 | 18 | 133  | 9.6  |
| 19 | 39941825 | 39942475 | 650  | 39941912 | 17 | 298  | 7    |
| 19 | 40109675 | 40109725 | 50   | 40109687 | 11 | 22   | 1.7  |
| 19 | 40297350 | 40297400 | 50   | 40297387 | 12 | 23   | 3.5  |
| 19 | 40322325 | 40322350 | 25   | 40322337 | 12 | 12   | 1.7  |
| 19 | 40347275 | 40347475 | 200  | 40347387 | 13 | 90   | 7    |
| 19 | 40360250 | 40360375 | 125  | 40360337 | 13 | 61   | 0    |
| 19 | 40399850 | 40399900 | 50   | 40399862 | 12 | 24   | 0    |
| 19 | 40571450 | 40571475 | 25   | 40571462 | 12 | 12   | 1.7  |
| 19 | 40576225 | 40576300 | 75   | 40576237 | 11 | 33   | 0    |
| 19 | 40738375 | 40738425 | 50   | 40738387 | 11 | 22   | 0    |
| 19 | 40940400 | 40940425 | 25   | 40940412 | 11 | 11   | 0    |
| 19 | 41311250 | 41311450 | 200  | 41311287 | 15 | 101  | 10.5 |
| 19 | 41322175 | 41322225 | 50   | 41322187 | 11 | 22   | 1.7  |
| 19 | 41420050 | 41420075 | 25   | 41420062 | 11 | 11   | 0    |
| 19 | 41514500 | 41514525 | 25   | 41514512 | 11 | 11   | 0    |
| 19 | 41729625 | 41729750 | 125  | 41729662 | 13 | 62   | 0    |
| 19 | 41821725 | 41821925 | 200  | 41821812 | 19 | 132  | 5.2  |
| 19 | 41902375 | 41902900 | 525  | 41902712 | 27 | 345  | 7    |
| 19 | 41932950 | 41933150 | 200  | 41933012 | 13 | 100  | 0    |
| 19 | 41955550 | 41955600 | 50   | 41955562 | 16 | 28   | 3.5  |
| 19 | 42311250 | 42311500 | 250  | 42311387 | 15 | 119  | 6.1  |
| 19 | 42425975 | 42426325 | 350  | 42426187 | 16 | 186  | 7    |
| 19 | 42985950 | 42986050 | 100  | 42985962 | 11 | 44   | 0    |
| 19 | 43186125 | 43186300 | 175  | 43186162 | 14 | 92   | 6.1  |
| 19 | 43317250 | 43317275 | 25   | 43317262 | 12 | 12   | 0.9  |
| 19 | 43819575 | 43819600 | 25   | 43819587 | 11 | 11   | 0.9  |
| 19 | 43859150 | 43859175 | 25   | 43859162 | 11 | 11   | 1.7  |
| 19 | 43876550 | 43876750 | 200  | 43876662 | 18 | 114  | 7.9  |
| 19 | 44034150 | 44034175 | 25   | 44034162 | 11 | 11   | 1.7  |
| 19 | 44594350 | 44594375 | 25   | 44594362 | 11 | 11   | 0.9  |
| 19 | 44680500 | 44680525 | 25   | 44680512 | 11 | 11   | 1.7  |
| 19 | 45618725 | 45618850 | 125  | 45618737 | 18 | 80   | 10.5 |
| 19 | 45642275 | 45642400 | 125  | 45642337 | 13 | 57   | 1.7  |
| 19 | 45768150 | 45768175 | 25   | 45768162 | 11 | 11   | 0    |
| 19 | 45803825 | 45803925 | 100  | 45803837 | 11 | 44   | 1.7  |
| 19 | 45860575 | 45860625 | 50   | 45860587 | 12 | 24   | 0    |
| 19 | 46595425 | 46595450 | 25   | 46595437 | 12 | 12   | 1.7  |
| 19 | 46729150 | 46729325 | 175  | 46729187 | 16 | 90   | 2.6  |
| 19 | 46861975 | 46862025 | 50   | 46862012 | 12 | 23   | 0    |
| 19 | 47308150 | 47308200 | 50   | 47308162 | 12 | 24   | 3.5  |
| 19 | 47521100 | 47521175 | 75   | 47521112 | 12 | 36   | 0    |
| 19 | 47988975 | 47989125 | 150  | 47989037 | 13 | 68   | 0    |
| 19 | 48424900 | 48425050 | 150  | 48424962 | 15 | 80   | 0    |
| 19 | 48486650 | 48486875 | 225  | 48486712 | 17 | 119  | 7    |
| 19 | 48722925 | 48723050 | 125  | 48722962 | 15 | 63   | 3.5  |
| 19 | 49147225 | 49147400 | 175  | 49147287 | 18 | 98   | 11.4 |
| 19 | 49206575 | 49206750 | 175  | 49206662 | 14 | 86   | 0    |
| 19 | 49337225 | 49337375 | 150  | 49337262 | 15 | 78   | 0    |
| 19 | 49352700 | 49352825 | 125  | 49352762 | 13 | 58   | 0    |
| 19 | 49360950 | 49361000 | 50   | 49360962 | 14 | 26   | 3.5  |
| 19 | 49672500 | 49673500 | 1000 | 49672837 | 51 | 1242 | 0    |
| 19 | 50085475 | 50085725 | 250  | 50085637 | 17 | 141  | 4.4  |
| 19 | 50601575 | 50601600 | 25   | 50601587 | 12 | 12   | 1.7  |
| 19 | 50664300 | 50664325 | 25   | 50664312 | 12 | 12   | 0    |
| 19 | 51058075 | 51058225 | 150  | 51058087 | 14 | 82   | 4.4  |

|    |          |          |      |          |    |     |      |
|----|----------|----------|------|----------|----|-----|------|
| 19 | 51072175 | 51072200 | 25   | 51072187 | 13 | 13  | 0.9  |
| 19 | 51484775 | 51484950 | 175  | 51484837 | 13 | 85  | 7    |
| 19 | 51849600 | 51849750 | 150  | 51849687 | 13 | 74  | 0    |
| 19 | 52051800 | 52051975 | 175  | 52051887 | 17 | 104 | 12.2 |
| 19 | 52193700 | 52193775 | 75   | 52193712 | 11 | 31  | 5.2  |
| 19 | 52243850 | 52243875 | 25   | 52243862 | 11 | 11  | 1.7  |
| 19 | 52291525 | 52291550 | 25   | 52291537 | 12 | 12  | 0    |
| 19 | 52576075 | 52576100 | 25   | 52576087 | 11 | 11  | 0    |
| 19 | 53399200 | 53399225 | 25   | 53399212 | 12 | 12  | 1.7  |
| 19 | 53520775 | 53520800 | 25   | 53520787 | 11 | 11  | 0    |
| 19 | 53719425 | 53719550 | 125  | 53719462 | 13 | 63  | 4.4  |
| 19 | 53830225 | 53830275 | 50   | 53830237 | 12 | 24  | 1.7  |
| 19 | 54286725 | 54286750 | 25   | 54286737 | 12 | 12  | 0.9  |
| 19 | 54345425 | 54345550 | 125  | 54345437 | 11 | 51  | 0.9  |
| 19 | 54417275 | 54417300 | 25   | 54417287 | 12 | 12  | 1.7  |
| 19 | 54564075 | 54564275 | 200  | 54564162 | 17 | 101 | 2.6  |
| 19 | 54674100 | 54674125 | 25   | 54674112 | 12 | 12  | 1.7  |
| 19 | 54775775 | 54775800 | 25   | 54775787 | 17 | 17  | 1.7  |
| 19 | 54785850 | 54785875 | 25   | 54785862 | 12 | 12  | 0    |
| 19 | 54837025 | 54837050 | 25   | 54837037 | 11 | 11  | 1.7  |
| 19 | 54860450 | 54860500 | 50   | 54860462 | 11 | 22  | 0    |
| 19 | 55071775 | 55071975 | 200  | 55071812 | 13 | 93  | 12.2 |
| 19 | 55221325 | 55221425 | 100  | 55221337 | 16 | 54  | 5.2  |
| 19 | 55681900 | 55681975 | 75   | 55681912 | 12 | 33  | 0    |
| 19 | 55692225 | 55692250 | 25   | 55692237 | 11 | 11  | 0    |
| 19 | 55988750 | 55988950 | 200  | 55988862 | 19 | 127 | 7    |
| 19 | 55990400 | 55990450 | 50   | 55990412 | 11 | 22  | 0    |
| 19 | 55999800 | 55999825 | 25   | 55999812 | 11 | 11  | 1.7  |
| 19 | 56084075 | 56084250 | 175  | 56084162 | 15 | 94  | 0    |
| 19 | 56589550 | 56589600 | 50   | 56589587 | 15 | 29  | 5.2  |
| 19 | 56766200 | 56766275 | 75   | 56766212 | 11 | 33  | 2.6  |
| 19 | 56883925 | 56884025 | 100  | 56883937 | 13 | 48  | 7    |
| 19 | 57166750 | 57166925 | 175  | 57166837 | 14 | 90  | 0    |
| 19 | 57181925 | 57182050 | 125  | 57181962 | 13 | 61  | 7    |
| 19 | 57202975 | 57203100 | 125  | 57203037 | 14 | 64  | 0    |
| 19 | 57223300 | 57223425 | 125  | 57223337 | 16 | 69  | 7    |
| 19 | 57290875 | 57290950 | 75   | 57290887 | 15 | 41  | 5.2  |
| 19 | 57310450 | 57310975 | 525  | 57310787 | 22 | 331 | 0    |
| 19 | 57334675 | 57334700 | 25   | 57334687 | 12 | 12  | 1.7  |
| 19 | 57464675 | 57464775 | 100  | 57464737 | 15 | 57  | 7.9  |
| 19 | 57669050 | 57669125 | 75   | 57669062 | 13 | 37  | 2.6  |
| 19 | 59037700 | 59037725 | 25   | 59037712 | 11 | 11  | 0    |
| 19 | 59667275 | 59667300 | 25   | 59667287 | 12 | 12  | 1.7  |
| 19 | 60218175 | 60218200 | 25   | 60218187 | 16 | 16  | 2.6  |
| 19 | 60355175 | 60355300 | 125  | 60355187 | 11 | 55  | 3.5  |
| 19 | 60419825 | 60420000 | 175  | 60419837 | 18 | 101 | 19.2 |
| 19 | 60588425 | 60588525 | 100  | 60588512 | 16 | 58  | 11.4 |
| 19 | 60589150 | 60589175 | 25   | 60589162 | 12 | 12  | 1.7  |
| 19 | 60610975 | 60611250 | 275  | 60611137 | 23 | 177 | 21   |
| 19 | 60664650 | 60664775 | 125  | 60664662 | 11 | 53  | 0.9  |
| 19 | 60679525 | 60679575 | 50   | 60679537 | 13 | 26  | 3.5  |
| 19 | 60707100 | 60707150 | 50   | 60707112 | 14 | 28  | 3.5  |
| 19 | 60803100 | 60803300 | 200  | 60803187 | 19 | 130 | 5.2  |
| 19 | 61323650 | 61323775 | 125  | 61323712 | 14 | 67  | 12.2 |
| 19 | 61780950 | 61780975 | 25   | 61780962 | 12 | 12  | 0    |
| 19 | 62009650 | 62009750 | 100  | 62009662 | 11 | 44  | 0    |
| 19 | 62483125 | 62483150 | 25   | 62483137 | 11 | 11  | 0.9  |
| 19 | 62483500 | 62483550 | 50   | 62483512 | 15 | 27  | 3.5  |
| 19 | 62554350 | 62554425 | 75   | 62554362 | 19 | 48  | 6.1  |
| 19 | 62638125 | 62638325 | 200  | 62638262 | 14 | 97  | 0    |
| 19 | 62676925 | 62676975 | 50   | 62676937 | 11 | 22  | 0    |
| 19 | 62702900 | 62703075 | 175  | 62702987 | 17 | 112 | 14   |
| 19 | 62741575 | 62741625 | 50   | 62741612 | 12 | 23  | 1.7  |
| 19 | 62769475 | 62769950 | 475  | 62769637 | 36 | 442 | 3.5  |
| 19 | 62775700 | 62775875 | 175  | 62775787 | 14 | 81  | 0    |
| 19 | 62802975 | 62803125 | 150  | 62803037 | 15 | 76  | 9.6  |
| 19 | 62818650 | 62818875 | 225  | 62818712 | 26 | 197 | 0    |
| 19 | 62885000 | 62885175 | 175  | 62885062 | 15 | 94  | 6.1  |
| 19 | 62949850 | 62950400 | 550  | 62949987 | 20 | 259 | 25.3 |
| 19 | 62972650 | 62972950 | 300  | 62972787 | 18 | 168 | 21   |
| 19 | 63181750 | 63182000 | 250  | 63181837 | 16 | 126 | 0    |
| 19 | 63331050 | 63331775 | 725  | 63331337 | 25 | 478 | 7    |
| 19 | 63400075 | 63400575 | 500  | 63400337 | 33 | 414 | 0    |
| 19 | 63464975 | 63466350 | 1375 | 63465437 | 34 | 920 | 0    |
| 19 | 63498000 | 63498150 | 150  | 63498012 | 16 | 93  | 9.6  |

|    |          |          |     |          |    |     |      |
|----|----------|----------|-----|----------|----|-----|------|
| 19 | 63508275 | 63508300 | 25  | 63508287 | 11 | 11  | 1.7  |
| 19 | 63590075 | 63590125 | 50  | 63590087 | 15 | 30  | 3.5  |
| 18 | 634775   | 634950   | 175 | 634787   | 14 | 94  | 2.6  |
| 18 | 3592875  | 3592900  | 25  | 3592887  | 12 | 12  | 0    |
| 18 | 9978900  | 9978925  | 25  | 9978912  | 12 | 12  | 0.9  |
| 18 | 11947075 | 11947200 | 125 | 11947187 | 12 | 52  | 0.9  |
| 18 | 12365900 | 12365975 | 75  | 12365912 | 11 | 33  | 2.6  |
| 18 | 16766850 | 16766925 | 75  | 16766862 | 13 | 39  | 3.5  |
| 18 | 18634675 | 18634775 | 100 | 18634712 | 13 | 49  | 1.7  |
| 18 | 18970900 | 18970925 | 25  | 18970912 | 11 | 11  | 0.9  |
| 18 | 19706725 | 19706750 | 25  | 19706737 | 12 | 12  | 1.7  |
| 18 | 21730275 | 21730350 | 75  | 21730312 | 13 | 35  | 2.6  |
| 18 | 21924925 | 21925025 | 100 | 21924962 | 13 | 46  | 7    |
| 18 | 22060425 | 22060600 | 175 | 22060487 | 15 | 99  | 4.4  |
| 18 | 22409225 | 22409325 | 100 | 22409237 | 14 | 56  | 10.5 |
| 18 | 27612500 | 27612550 | 50  | 27612537 | 14 | 26  | 0.9  |
| 18 | 27808025 | 27808250 | 225 | 27808087 | 28 | 204 | 0    |
| 18 | 27812700 | 27812775 | 75  | 27812712 | 11 | 31  | 1.7  |
| 18 | 30875225 | 30875250 | 25  | 30875237 | 11 | 11  | 1.7  |
| 18 | 31186425 | 31186450 | 25  | 31186437 | 12 | 12  | 0    |
| 18 | 31331750 | 31331775 | 25  | 31331762 | 11 | 11  | 1.7  |
| 18 | 37974800 | 37974875 | 75  | 37974837 | 12 | 35  | 1.7  |
| 18 | 39348925 | 39349050 | 125 | 39348937 | 12 | 60  | 0    |
| 18 | 42965125 | 42965200 | 75  | 42965137 | 12 | 36  | 0    |
| 18 | 44507400 | 44507700 | 300 | 44507562 | 20 | 173 | 12.2 |
| 18 | 44537150 | 44537200 | 50  | 44537162 | 11 | 22  | 1.7  |
| 18 | 46757450 | 46757675 | 225 | 46757637 | 20 | 157 | 0    |
| 18 | 46976825 | 46976850 | 25  | 46976837 | 11 | 11  | 1.7  |
| 18 | 46978675 | 46978850 | 175 | 46978687 | 33 | 197 | 28   |
| 18 | 47378075 | 47378250 | 175 | 47378087 | 14 | 88  | 0    |
| 18 | 49863200 | 49863375 | 175 | 49863262 | 16 | 103 | 5.2  |
| 18 | 51230775 | 51230800 | 25  | 51230787 | 11 | 11  | 0    |
| 18 | 53453800 | 53453825 | 25  | 53453812 | 12 | 12  | 0    |
| 18 | 54607450 | 54607725 | 275 | 54607562 | 23 | 186 | 0    |
| 18 | 55601525 | 55601700 | 175 | 55601562 | 14 | 84  | 5.2  |
| 18 | 55717550 | 55717750 | 200 | 55717712 | 16 | 96  | 0    |
| 18 | 57498100 | 57498125 | 25  | 57498112 | 11 | 11  | 0    |
| 18 | 58507075 | 58507100 | 25  | 58507087 | 11 | 11  | 0    |
| 18 | 58817800 | 58817825 | 25  | 58817812 | 11 | 11  | 0.9  |
| 18 | 58979900 | 58980025 | 125 | 58979912 | 12 | 60  | 7    |
| 18 | 60940550 | 60940750 | 200 | 60940562 | 12 | 83  | 0.9  |
| 18 | 65398500 | 65398575 | 75  | 65398512 | 12 | 36  | 0    |
| 18 | 65537200 | 65537425 | 225 | 65537337 | 25 | 174 | 0    |
| 18 | 66024175 | 66024200 | 25  | 66024187 | 11 | 11  | 0.9  |
| 18 | 66045625 | 66045950 | 325 | 66045812 | 39 | 338 | 0    |
| 18 | 66054000 | 66054025 | 25  | 66054012 | 11 | 11  | 1.7  |
| 18 | 66090050 | 66090175 | 125 | 66090062 | 15 | 63  | 0.9  |
| 18 | 66261100 | 66261550 | 450 | 66261337 | 42 | 525 | 7    |
| 18 | 67831725 | 67831800 | 75  | 67831737 | 11 | 33  | 3.5  |
| 18 | 68188925 | 68189100 | 175 | 68188962 | 12 | 83  | 1.7  |
| 18 | 70276475 | 70276500 | 25  | 70276487 | 14 | 14  | 2.6  |
| 18 | 70368000 | 70368200 | 200 | 70368062 | 14 | 107 | 8.7  |
| 18 | 70415875 | 70415950 | 75  | 70415887 | 16 | 40  | 6.1  |
| 18 | 71021375 | 71021400 | 25  | 71021387 | 11 | 11  | 0    |
| 18 | 71194500 | 71194650 | 150 | 71194537 | 16 | 84  | 0    |
| 18 | 71204450 | 71204525 | 75  | 71204512 | 14 | 36  | 0    |
| 18 | 72527825 | 72527850 | 25  | 72527837 | 11 | 11  | 0    |
| 18 | 72612550 | 72612750 | 200 | 72612712 | 16 | 108 | 17.5 |
| 18 | 72854875 | 72855025 | 150 | 72854887 | 14 | 76  | 7.9  |
| 18 | 72955525 | 72955725 | 200 | 72955587 | 16 | 118 | 0    |
| 18 | 72956075 | 72956250 | 175 | 72956087 | 12 | 74  | 12.2 |
| 18 | 73541150 | 73541175 | 25  | 73541162 | 12 | 12  | 0.9  |
| 18 | 75883525 | 75884050 | 525 | 75883812 | 69 | 851 | 7    |
| 18 | 75894600 | 75894675 | 75  | 75894612 | 14 | 40  | 2.6  |

Supplementary Table S3: SETDB1 Expression and Binding Data in WM451Lu Cells

| Gene Name | ProbeSet ID        | AVG EGFP    | AVG SETDB1  | SETDB1/EGFP | Avg Ttest   | Induced/Repressed | Bound by SETDB1 in WM451Lu (1=bound, 0=not bound) |
|-----------|--------------------|-------------|-------------|-------------|-------------|-------------------|---------------------------------------------------|
| QPCT      | 8041508            | 12.3075     | 12.21040333 | 0.992110773 | 7.12E-07    | Repressed         | 0                                                 |
| BDH1      | 8093219            | 6.867536333 | 6.325328667 | 0.921047718 | 2.60E-05    | Repressed         | 1                                                 |
| POU4F2    | 8097687            | 6.193530667 | 6.382392333 | 1.030493377 | 3.63E-05    | Induced           | 0                                                 |
| MBD1      | 8023323            | 8.960416    | 8.873939333 | 0.990349034 | 5.67E-05    | Repressed         | 1                                                 |
| ACOT9     | 8171802            | 10.54864667 | 10.44094    | 0.989789528 | 9.54E-05    | Repressed         | 0                                                 |
| PEMT      | 8013120            | 9.637615    | 9.591883333 | 0.995254877 | 0.00150402  | Repressed         | 1                                                 |
| MANBA     | 8102006            | 8.049226667 | 7.661365    | 0.951813797 | 0.00154082  | Repressed         | 0                                                 |
| C5orf13   | 8113504            | 7.322137667 | 6.810607333 | 0.930139208 | 0.00179623  | Repressed         | 0                                                 |
| CD83      | 8116983            | 8.743821667 | 8.785067667 | 1.004717159 | 0.000204638 | Induced           | 0                                                 |
| BBS5      | 8046147            | 9.151408    | 8.619676667 | 0.941896227 | 0.000209187 | Repressed         | 0                                                 |
| PARP2     | 7973036            | 10.32691    | 10.28197333 | 0.995648585 | 0.000223786 | Repressed         | 0                                                 |
| C10orf90  | 7936996            | 10.08341    | 9.709891    | 0.962957075 | 0.000232491 | Repressed         | 0                                                 |
| TCL6      | 7976523            | 5.07136     | 5.352794    | 1.055494779 | 0.000249542 | Induced           | 0                                                 |
| MED16     | 8032106            | 8.221313    | 8.310593333 | 1.01085962  | 0.000278651 | Induced           | 0                                                 |
| SCPEP1    | 8008646            | 9.680007667 | 9.26331     | 0.956952754 | 0.00028634  | Repressed         | 0                                                 |
| SUCLG2    | 8008664            | 12.01588333 | 11.78001    | 0.980369872 | 0.00029244  | Repressed         | 1                                                 |
| FAM69A    | 7917728            | 9.070553667 | 8.515075667 | 0.938760298 | 0.000305603 | Repressed         | 0                                                 |
| ZFYVE16   | 8106602            | 11.05795333 | 10.82262667 | 0.978718786 | 0.000307376 | Repressed         | 1                                                 |
| LAMP2     | 8174779            | 11.67709    | 11.62836    | 0.995826871 | 0.000340695 | Repressed         | 0                                                 |
| HIST1H4D  | 8124413            | 9.240256333 | 8.554191333 | 0.925752601 | 0.000364803 | Repressed         | 1                                                 |
| C11orf17  | 7938301            | 8.865415    | 8.648936    | 0.975581628 | 0.000375875 | Repressed         | 0                                                 |
| TNFAIP1   | 8005847            | 7.986848667 | 7.841506667 | 0.981802335 | 0.000404739 | Repressed         | 0                                                 |
| C3orf63   | 8088219            | 9.794169667 | 9.716561    | 0.992076034 | 0.000413235 | Repressed         | 0                                                 |
| TRMT12    | 8148263            | 9.470697    | 9.031176    | 0.953591483 | 0.000421136 | Repressed         | 0                                                 |
| INTS7     | 7924119            | 10.58118667 | 10.70936667 | 1.01403062  | 0.000424573 | Induced           | 0                                                 |
| SLMO1     | 8020226            | 7.068160667 | 7.279210333 | 1.029859206 | 0.000442079 | Induced           | 0                                                 |
| IFRD2     | 8087576            | 9.012149667 | 8.797284333 | 0.97615826  | 0.000443424 | Repressed         | 1                                                 |
| CCNY      | 7927008            | 8.949265    | 8.686616    | 0.970651333 | 0.000465562 | Repressed         | 1                                                 |
| NMSCE1    | 8000413            | 10.34318667 | 10.09693667 | 0.976192057 | 0.00049855  | Repressed         | 0                                                 |
| CLUAP1    | 7992917            | 8.151206667 | 7.560551667 | 0.927537722 | 0.000530973 | Repressed         | 0                                                 |
| SLOC16A13 | 8004266            | 6.631972333 | 6.474941333 | 0.976322127 | 0.000553746 | Repressed         | 0                                                 |
| TINF2     | 7978208            | 8.472373333 | 8.164116333 | 0.963616216 | 0.000638136 | Repressed         | 0                                                 |
| PIK3R1    | 8105778            | 10.01764433 | 10.19803333 | 1.018007128 | 0.000645163 | Induced           | 0                                                 |
| ADAM11    | 8007675            | 7.064164333 | 7.211309333 | 1.020829782 | 0.000652387 | Induced           | 1                                                 |
| E1F3J     | 7983350            | 10.99358333 | 10.83667    | 0.985726825 | 0.000692506 | Repressed         | 1                                                 |
| PHLDA1    | 7965040            | 12.77174667 | 12.93257333 | 1.012592378 | 0.000708031 | Induced           | 1                                                 |
| STOML3    | 7971126            | 4.653485    | 4.86358     | 1.045147884 | 0.000721776 | Induced           | 0                                                 |
| SRL       | 7999093            | 5.804975    | 5.999136    | 1.033447345 | 0.000726801 | Induced           | 1                                                 |
| CEBPG     | 8027566            | 9.586144    | 9.833659    | 1.025820079 | 0.000735387 | Induced           | 1                                                 |
| KIAA1598  | 7936529            | 10.25724667 | 9.855011    | 0.96078522  | 0.000752882 | Repressed         | 1                                                 |
| LEAP2     | 8108006            | 7.064666667 | 7.397664667 | 1.047135699 | 0.000754361 | Induced           | 1                                                 |
| ARL9      | 8095246            | 6.868559667 | 6.650311333 | 0.968225022 | 0.000776767 | Repressed         | 0                                                 |
| AVPR2     | 8170794            | 6.327654    | 6.552477    | 1.03553023  | 0.000777875 | Induced           | 0                                                 |
| PPY       | 8015884            | 6.240983    | 6.399420333 | 1.025386599 | 0.000779967 | Induced           | 1                                                 |
| FAM114A1  | 8094609            | 9.693313333 | 9.263737333 | 0.955683265 | 0.000788162 | Repressed         | 0                                                 |
| DAPK2     | 7989596            | 7.056109    | 7.340455    | 1.040297847 | 0.000794025 | Induced           | 0                                                 |
| DEFA1     | 8149116/8149126/81 | 5.815378    | 5.910927    | 1.016430402 | 0.000816741 | Induced           | 0                                                 |
| DEFA3     | 8149116/8149126/81 | 5.815378    | 5.910927    | 1.016430402 | 0.000816741 | Induced           | 0                                                 |
| FAM82B    | 8151644            | 9.596098    | 9.254663333 | 0.964419427 | 0.000818918 | Repressed         | 1                                                 |
| SYP       | 8172573            | 5.915759667 | 6.113758667 | 1.03346975  | 0.000828957 | Induced           | 0                                                 |
| CRNKL1    | 8065256            | 9.796175667 | 9.720923667 | 0.992318227 | 0.000885614 | Repressed         | 1                                                 |
| SR140     | 8083183            | 11.72625    | 11.86129667 | 1.011516612 | 0.000897166 | Induced           | 1                                                 |
| DGKI      | 8143154            | 6.292418667 | 6.624052333 | 1.052703687 | 0.000926724 | Induced           | 1                                                 |
| LINGO2    | 8160546            | 4.523668    | 4.896712    | 1.082464938 | 0.000927685 | Induced           | 1                                                 |
| SMYD3     | 7925589            | 7.004465    | 6.624017333 | 0.945684979 | 0.000986001 | Repressed         | 1                                                 |
| BCL2A1    | 7990818            | 10.28917    | 9.921273667 | 0.964244314 | 0.000997772 | Repressed         | 1                                                 |
| PTPRM     | 8019988            | 8.805937    | 8.459627333 | 0.960673161 | 0.001003983 | Repressed         | 0                                                 |
| STMN4     | 8149898            | 5.794405333 | 6.129991    | 1.057915463 | 0.001007272 | Induced           | 0                                                 |
| GSTA4     | 8127094            | 7.240334    | 6.720497    | 0.928202622 | 0.001048012 | Repressed         | 0                                                 |
| PALB2     | 8000329            | 9.139039667 | 8.897458    | 0.973565968 | 0.001057128 | Repressed         | 0                                                 |
| NUDT1     | 8131101            | 8.320113667 | 8.183990333 | 0.983639246 | 0.001066321 | Repressed         | 1                                                 |
| HIST4H4   | 7961483            | 6.385583333 | 5.917272333 | 0.926664831 | 0.00109434  | Repressed         | 0                                                 |
| MRPL16    | 7948424            | 9.423444    | 9.201377667 | 0.978434695 | 0.001094808 | Repressed         | 0                                                 |
| ESR2      | 7979583            | 5.382211333 | 5.560419    | 1.033110492 | 0.001111563 | Induced           | 0                                                 |
| TUSC3     | 8144726            | 10.81413667 | 10.57159667 | 0.97757195  | 0.001133216 | Repressed         | 1                                                 |
| PHLDB1    | 7944302            | 7.861913    | 7.643914    | 0.972271507 | 0.001140948 | Repressed         | 0                                                 |
| HIBADH    | 8138776            | 9.604406    | 9.203965    | 0.958306531 | 0.001159463 | Repressed         | 1                                                 |
| CHCHD8    | 7950294            | 10.25918333 | 10.04746    | 0.979362555 | 0.001171669 | Repressed         | 1                                                 |
| LGTN      | 7923889            | 9.170774333 | 8.750557667 | 0.954178715 | 0.001259613 | Repressed         | 0                                                 |
| KIF9      | 8086729            | 4.788481    | 5.034794    | 1.051438665 | 0.001292207 | Induced           | 0                                                 |
| CCDC81    | 7942941            | 4.961431    | 5.123216    | 1.032608536 | 0.001321833 | Induced           | 0                                                 |
| ABCD4     | 7980115            | 8.020441    | 7.844929333 | 0.978116956 | 0.00133315  | Repressed         | 0                                                 |
| KIF1A     | 8060134            | 6.253400667 | 6.499711    | 1.039388222 | 0.001414354 | Induced           | 0                                                 |
| TTC3      | 8068522            | 9.520672333 | 9.097507    | 0.955552999 | 0.001416517 | Repressed         | 1                                                 |
| C18orf26  | 8021297            | 3.872031    | 3.730183    | 0.963365996 | 0.001424274 | Repressed         | 0                                                 |
| CD109     | 8120719            | 10.85738667 | 10.51441    | 0.968410753 | 0.00143823  | Repressed         | 1                                                 |
| PVRL3     | 8081548            | 10.04715667 | 10.18716    | 1.013934622 | 0.001466582 | Induced           | 1                                                 |
| MRS2      | 8117194            | 9.780948    | 9.629213333 | 0.984486712 | 0.001474371 | Repressed         | 0                                                 |
| HP1BP3    | 7913300            | 10.02722667 | 9.59575     | 0.956969491 | 0.0014947   | Repressed         | 0                                                 |
| ZDHHC2    | 8144758            | 8.184317    | 8.299415667 | 1.01406332  | 0.00151492  | Induced           | 0                                                 |
| HMBOX1    | 8145636            | 7.503199667 | 7.171713333 | 0.95582067  | 0.001515401 | Repressed         | 0                                                 |
| NCAM1     | 7943892            | 7.687510333 | 7.036394333 | 0.915302098 | 0.001522017 | Repressed         | 0                                                 |
| MCRS1     | 7963064            | 8.775439    | 8.439841333 | 0.961757165 | 0.001546083 | Repressed         | 0                                                 |
| NAPG      | 8020149            | 9.306563    | 8.865102    | 0.95256455  | 0.001577265 | Repressed         | 0                                                 |
| STX10     | 8034631            | 9.056847    | 8.871782667 | 0.979566362 | 0.001591777 | Repressed         | 1                                                 |
| ALKBH6    | 8036242            | 9.045948    | 8.924841667 | 0.98661209  | 0.001623958 | Repressed         | 0                                                 |
| LSAMP     | 8089714            | 8.170709    | 7.456117    | 0.912542229 | 0.001628863 | Repressed         | 1                                                 |
| KRBA2     | 8012466            | 7.367774    | 7.017878333 | 0.952509989 | 0.001659377 | Repressed         | 0                                                 |
| CORO2A    | 8162744            | 7.444393667 | 7.005338667 | 0.94102206  | 0.001671832 | Repressed         | 0                                                 |
| PROZ      | 7970251            | 5.249433667 | 5.502934333 | 1.048291051 | 0.001686311 | Induced           | 1                                                 |
| MTIF3     | 7970704            | 8.824182333 | 8.578002333 | 0.972101664 | 0.001692558 | Repressed         | 1                                                 |
| ASPM      | 7923086            | 9.943542    | 9.729005667 | 0.978424556 | 0.001706133 | Repressed         | 0                                                 |
| RENBP     | 8175933            | 9.662718    | 9.342768    | 0.966888199 | 0.001731343 | Repressed         | 1                                                 |
| FGFR1OP   | 8123342            | 8.829411    | 8.853895    | 1.002773005 | 0.001732251 | Induced           | 0                                                 |
| TMEM50A   | 7899005            | 10.67498333 | 10.82652    | 1.014195494 | 0.001743152 | Induced           | 0                                                 |
| TRAK1     | 8079037            | 8.377261333 | 7.806437667 | 0.931860349 | 0.001760497 | Repressed         | 0                                                 |

|           |         |             |             |             |             |           |   |
|-----------|---------|-------------|-------------|-------------|-------------|-----------|---|
| CTSL1     | 8156228 | 10.66231333 | 10.42404    | 0.977652755 | 0.001767612 | Repressed | 0 |
| SGCE      | 8141035 | 10.78147    | 10.58334333 | 0.981623409 | 0.001776244 | Repressed | 1 |
| PKRCE     | 8041763 | 8.684219    | 8.202696667 | 0.944552028 | 0.00178243  | Repressed | 1 |
| TIMELSS   | 7964145 | 8.509932333 | 8.169590667 | 0.960006537 | 0.001830596 | Repressed | 0 |
| MPST      | 8072777 | 8.482387333 | 8.388408    | 0.988920651 | 0.001834661 | Repressed | 0 |
| DEFB127   | 8060314 | 3.748152667 | 3.396963333 | 0.906303354 | 0.001838122 | Repressed | 0 |
| BRCA1     | 8015769 | 10.2513     | 9.998778667 | 0.975366897 | 0.001855478 | Repressed | 0 |
| TFPI2     | 8141016 | 9.938168    | 10.48517    | 1.05040527  | 0.001863267 | Induced   | 0 |
| DNM1L     | 7954752 | 11.36256667 | 11.27228    | 0.992054025 | 0.001881084 | Repressed | 1 |
| COMMD3    | 7926596 | 9.451647667 | 9.260434333 | 0.979769312 | 0.001890987 | Repressed | 1 |
| CD93      | 8065359 | 5.801398333 | 5.832282333 | 1.005323544 | 0.001898546 | Induced   | 0 |
| APOA5     | 7951853 | 5.649447333 | 5.560555667 | 0.984265423 | 0.00191382  | Repressed | 0 |
| HPS3      | 8083282 | 10.53147333 | 10.40150333 | 0.987658897 | 0.0019168   | Repressed | 0 |
| C12orf41  | 7962811 | 9.594814    | 9.799453333 | 1.021328119 | 0.001922278 | Induced   | 0 |
| FAM98B    | 7982574 | 8.555147667 | 8.190654333 | 0.957394852 | 0.001926151 | Repressed | 1 |
| INSR      | 8033362 | 7.594581    | 7.355659    | 0.968540463 | 0.001939066 | Repressed | 0 |
| DNAJB2    | 8048523 | 7.979681    | 8.237701333 | 1.032334668 | 0.001956222 | Induced   | 0 |
| RSL1D1    | 7995520 | 12.30687333 | 12.40331    | 1.007836001 | 0.001986522 | Induced   | 0 |
| IFLTD1    | 7961875 | 3.539276333 | 3.603022667 | 1.018011121 | 0.001993597 | Induced   | 0 |
| CCDC52    | 8089627 | 7.498265    | 7.051789    | 0.940456092 | 0.002032629 | Repressed | 0 |
| RGAG1     | 8169378 | 5.076572333 | 5.23851     | 1.031899017 | 0.002043953 | Induced   | 0 |
| RIPK2     | 8147206 | 10.5784     | 10.22509667 | 0.966601439 | 0.002061298 | Repressed | 0 |
| RAB40A    | 8174246 | 6.784450667 | 7.117992333 | 1.049162664 | 0.002063302 | Induced   | 0 |
| KTELC1    | 8081853 | 8.38994     | 8.003862333 | 0.953983262 | 0.002129443 | Repressed | 1 |
| ZFAND5    | 8161747 | 11.23399667 | 11.11373    | 0.989618417 | 0.002133192 | Repressed | 0 |
| LOC642587 | 7909422 | 5.359188    | 5.705459667 | 1.064612711 | 0.002163824 | Induced   | 0 |
| PIOD2     | 8091283 | 9.456091667 | 9.319429    | 0.985547658 | 0.002168176 | Repressed | 0 |
| ZSWIM4    | 8026198 | 7.325831    | 7.512747333 | 1.025514694 | 0.002211951 | Induced   | 1 |
| B3GNT4    | 7959402 | 6.872465667 | 6.886609333 | 1.032093633 | 0.002253627 | Induced   | 0 |
| CTSK      | 7919815 | 10.24234333 | 9.773511667 | 0.954226132 | 0.002264452 | Repressed | 0 |
| SPTAN1    | 8158317 | 9.949746667 | 10.14834667 | 1.019960307 | 0.002273384 | Induced   | 1 |
| TGFA      | 8052872 | 8.376484    | 8.923084333 | 1.065254149 | 0.002273524 | Induced   | 0 |
| LYPLA1    | 8150830 | 10.78375333 | 10.57752667 | 0.98087617  | 0.002275016 | Repressed | 0 |
| TTL11     | 8163916 | 6.716276    | 6.953533333 | 1.035325727 | 0.002276777 | Induced   | 0 |
| WWTR1     | 8091422 | 11.40792667 | 11.54885    | 1.012353107 | 0.002277324 | Induced   | 1 |
| SERPINA12 | 7981098 | 4.971223    | 5.227995333 | 1.051651743 | 0.002278132 | Induced   | 0 |
| MYL6B     | 7956200 | 8.487296    | 8.295362    | 0.97738573  | 0.002278497 | Repressed | 1 |
| EGR3      | 8149720 | 8.435384667 | 8.132289667 | 0.964068621 | 0.002302296 | Repressed | 1 |
| ITPKB     | 7924760 | 8.861430667 | 8.546608667 | 0.96447278  | 0.00230405  | Repressed | 1 |
| KLK3      | 8030753 | 6.240121667 | 6.521994667 | 1.045171074 | 0.002314187 | Induced   | 0 |
| CD68      | 8004510 | 10.5575     | 10.18701333 | 0.964907728 | 0.00231573  | Repressed | 0 |
| C1orf162  | 7903980 | 6.603580667 | 6.958733333 | 1.053781832 | 0.002318697 | Induced   | 0 |
| BTBD10    | 7946680 | 9.457400333 | 9.233816    | 0.976358796 | 0.002356377 | Repressed | 0 |
| LAMA1     | 8022176 | 8.333751    | 8.052848    | 0.966293329 | 0.002401608 | Repressed | 0 |
| HIST1H3A  | 8117330 | 8.536113    | 8.112471667 | 0.950370698 | 0.002419295 | Repressed | 0 |
| PGCP      | 8147469 | 8.565405    | 7.917871667 | 0.924401317 | 0.002444754 | Repressed | 1 |
| PPEF1     | 8166314 | 7.319336    | 6.763430333 | 0.924049713 | 0.002460596 | Repressed | 0 |
| ZNF74     | 8071382 | 8.316939333 | 8.198320667 | 0.985737702 | 0.002468865 | Repressed | 0 |
| SPTB      | 7979615 | 6.082951333 | 6.304449333 | 1.036412917 | 0.002483282 | Induced   | 0 |
| DNBD1     | 8003560 | 7.896780667 | 8.115731    | 1.027726531 | 0.002496368 | Induced   | 0 |
| BPHL      | 8116635 | 7.980603    | 7.724324333 | 0.967887305 | 0.002514044 | Repressed | 0 |
| WNT8B     | 7929822 | 5.601343667 | 5.868797667 | 1.047748186 | 0.002541622 | Induced   | 1 |
| SNX25     | 8098581 | 9.689603    | 9.548476667 | 0.985435282 | 0.002548953 | Repressed | 0 |
| HCCS      | 8165995 | 10.76647667 | 10.96981667 | 1.018886401 | 0.002558346 | Induced   | 0 |
| OR2A2     | 8136973 | 5.058249667 | 5.401844333 | 1.067927582 | 0.002558878 | Induced   | 0 |
| IVNS1ABP  | 7922889 | 11.72631    | 11.15250667 | 0.951067017 | 0.002570799 | Repressed | 0 |
| CA8       | 8150978 | 11.12392    | 10.51861667 | 0.945585429 | 0.002571165 | Repressed | 1 |
| MAP4K2    | 7949172 | 6.924336    | 6.669319333 | 0.963170957 | 0.002613997 | Repressed | 0 |
| CDCA3     | 7960702 | 8.403706    | 8.048087    | 0.957683075 | 0.002631056 | Repressed | 0 |
| LAMC1     | 7908041 | 9.877036333 | 9.569387667 | 0.968852128 | 0.002640758 | Repressed | 1 |
| MTHFD1    | 7975045 | 10.97529    | 10.8085     | 0.984803135 | 0.002654852 | Repressed | 1 |
| RPRM      | 8055941 | 6.015031667 | 6.366361667 | 1.05840867  | 0.002677392 | Induced   | 0 |
| ADAM17    | 8050190 | 10.12931333 | 10.03470333 | 0.990659781 | 0.002688404 | Repressed | 1 |
| HMHA1     | 8024170 | 7.420993    | 7.517096333 | 1.012950199 | 0.002689455 | Induced   | 0 |
| LYSMD1    | 7919923 | 7.299486667 | 7.089933667 | 0.971292091 | 0.00271322  | Repressed | 0 |
| TMEM17    | 8052585 | 7.623883667 | 7.149159667 | 0.937731998 | 0.002738864 | Repressed | 0 |
| SPIRE1    | 8022356 | 9.031944    | 8.713496333 | 0.964742068 | 0.002756953 | Repressed | 0 |
| GPSM2     | 7903565 | 9.922242    | 9.556714667 | 0.963160813 | 0.002784875 | Repressed | 0 |
| MKL1      | 8076241 | 8.63202     | 8.675037333 | 1.004983461 | 0.002786475 | Induced   | 1 |
| PLCL2     | 8078187 | 7.532299333 | 7.229818    | 0.959842099 | 0.002794068 | Repressed | 0 |
| ABRA      | 8152291 | 6.018717667 | 6.129884333 | 1.018470158 | 0.002833542 | Induced   | 0 |
| ATG12     | 8113651 | 9.429348    | 9.632082    | 1.02150032  | 0.002847373 | Induced   | 0 |
| FAM108C1  | 7985310 | 9.925243333 | 10.05960333 | 1.013527124 | 0.002847662 | Induced   | 0 |
| FRMD6     | 7974316 | 10.94029667 | 10.723      | 0.980137955 | 0.002874192 | Repressed | 1 |
| FRMPD4    | 8166028 | 4.734218    | 4.949050333 | 1.045378631 | 0.002907375 | Induced   | 0 |
| GPR61     | 7903694 | 6.431904    | 6.811939333 | 1.059085977 | 0.002918965 | Induced   | 1 |
| LRRC8E    | 8025347 | 7.058374    | 7.178973667 | 1.017086041 | 0.002940676 | Induced   | 0 |
| CCDC45    | 8009255 | 11.04997333 | 11.20482    | 1.014013307 | 0.002981522 | Induced   | 1 |
| DARS2     | 7907466 | 10.75504333 | 10.45967333 | 0.972536605 | 0.002985981 | Repressed | 0 |
| SNRPD1    | 8020411 | 10.18691667 | 10.15037333 | 0.996412719 | 0.002998069 | Repressed | 0 |
| KRTAP5-8  | 7942255 | 9.013321    | 9.242958    | 1.025477513 | 0.003008154 | Induced   | 0 |
| NIP7      | 7996934 | 11.50068667 | 11.44484    | 0.995144058 | 0.003048852 | Repressed | 0 |
| AIM1      | 8121277 | 9.901039    | 9.484128333 | 0.957892231 | 0.003051419 | Repressed | 0 |
| CCL2      | 8006433 | 4.978912667 | 5.186183    | 1.041629638 | 0.00310007  | Induced   | 0 |
| KLHD2     | 7974229 | 9.753619333 | 9.543541    | 0.9784615   | 0.003131404 | Repressed | 0 |
| C9orf37   | 8165630 | 7.603409    | 7.272231333 | 0.956443529 | 0.003139917 | Repressed | 1 |
| FAM120AOS | 8162466 | 8.490144333 | 8.272206333 | 0.974330472 | 0.003153835 | Repressed | 0 |
| MYO10     | 8111153 | 11.09745333 | 10.68649667 | 0.962968381 | 0.003160158 | Repressed | 1 |
| COMMD10   | 8107458 | 9.086464333 | 8.566916667 | 0.942821801 | 0.003178641 | Repressed | 0 |
| OGT       | 8168316 | 9.785285667 | 9.490879333 | 0.969913363 | 0.003188481 | Repressed | 0 |
| COL6A3    | 8059905 | 6.080012667 | 6.326844    | 1.040597174 | 0.003202235 | Induced   | 1 |
| ATM       | 7943620 | 10.24525    | 10.06745333 | 0.982645942 | 0.003291667 | Repressed | 1 |
| SLFN11    | 8014233 | 5.544597333 | 5.889720333 | 1.062244917 | 0.003304667 | Induced   | 0 |
| TES       | 8135576 | 11.89311333 | 12.29189    | 1.033530048 | 0.003330135 | Induced   | 1 |
| ICAM1     | 8025601 | 9.909118333 | 9.983999333 | 1.007556777 | 0.003340995 | Induced   | 1 |
| PYDC1     | 8001037 | 5.569363667 | 5.721175333 | 1.02725835  | 0.003354493 | Induced   | 0 |
| ZNF184    | 8124502 | 8.035215667 | 8.264137667 | 1.028489839 | 0.003385648 | Induced   | 1 |
| ZNF200    | 7998931 | 7.669723667 | 8.001468    | 1.043253753 | 0.003395937 | Induced   | 1 |
| ST6GAL1   | 8084717 | 7.987788667 | 7.420108333 | 0.928931478 | 0.003399663 | Repressed | 1 |

|          |                   |             |             |             |             |           |   |
|----------|-------------------|-------------|-------------|-------------|-------------|-----------|---|
| ARFGEF2  | 8063242           | 10.85394    | 10.88232    | 1.002614719 | 0.003409742 | Induced   | 1 |
| ITIHL5L  | 8173106           | 6.287259667 | 6.473478667 | 1.029618468 | 0.00341658  | Induced   | 0 |
| TMEFM108 | 8082767           | 3.926547667 | 4.047415667 | 1.030782257 | 0.003418179 | Induced   | 0 |
| MAOA     | 8166925           | 7.376102667 | 7.038573333 | 0.954240152 | 0.003420233 | Repressed | 0 |
| DHPS     | 8034454           | 9.317787333 | 8.949591333 | 0.96048461  | 0.003462487 | Repressed | 1 |
| CCDC111  | 8098556           | 8.658831667 | 8.475091    | 0.97877997  | 0.003466478 | Repressed | 0 |
| IGFBP5   | 8058857           | 10.63606333 | 9.631552333 | 0.905556128 | 0.003483573 | Repressed | 0 |
| BRP44L   | 8130732           | 9.482006667 | 9.119438667 | 0.961762524 | 0.003524903 | Repressed | 0 |
| LDB1     | 7935968           | 9.322898667 | 9.107876333 | 0.976936107 | 0.003526039 | Repressed | 0 |
| FBSD2    | 7950248           | 9.232523    | 8.944521    | 0.96880571  | 0.003537859 | Repressed | 1 |
| SFRS3    | 8119080           | 11.25941667 | 11.13733333 | 0.989157224 | 0.003545861 | Repressed | 1 |
| KCNJ2    | 8009502           | 7.742899    | 8.430079333 | 1.088749748 | 0.003559707 | Induced   | 0 |
| DUI37L   | 8019376           | 9.487311667 | 9.203461    | 0.970081022 | 0.00356038  | Repressed | 1 |
| EDEM2    | 8065855           | 9.131036    | 8.859366667 | 0.970247699 | 0.003586266 | Repressed | 0 |
| BCL7C    | 8000948           | 8.558833667 | 8.514       | 0.994761708 | 0.003589875 | Repressed | 0 |
| HSPA4L   | 8097335           | 8.575205667 | 8.165373    | 0.952207249 | 0.003622662 | Repressed | 0 |
| ARL5B    | 7926531           | 10.04939067 | 10.32127667 | 1.027054974 | 0.003682725 | Induced   | 1 |
| STARD6   | 8023394           | 3.188871    | 3.134630333 | 0.982990636 | 0.00373549  | Repressed | 0 |
| SULT1C2  | 8044212           | 7.322600667 | 6.471303    | 0.883743808 | 0.003768476 | Repressed | 0 |
| IL1R1    | 8043995           | 5.219219    | 5.01766     | 0.961381387 | 0.00376783  | Repressed | 0 |
| SCAMP1   | 8106479           | 9.876099667 | 9.547086333 | 0.966685904 | 0.003780607 | Repressed | 1 |
| FANCL    | 8052382           | 9.533482    | 9.021168333 | 0.946261642 | 0.003801491 | Repressed | 1 |
| PIM2     | 8172471           | 8.022446667 | 8.218766    | 1.024471254 | 0.003805147 | Induced   | 0 |
| GMEB2    | 8067709           | 7.774650667 | 7.866907333 | 1.011866342 | 0.003806664 | Induced   | 0 |
| ZNF37A   | 7927071           | 8.305693333 | 8.035139333 | 0.967425477 | 0.003812475 | Repressed | 1 |
| TME67    | 8147313           | 8.806582667 | 8.101492667 | 0.919936027 | 0.00383471  | Repressed | 0 |
| SIGLEC7  | 8030789           | 5.850450667 | 6.087626333 | 1.040539726 | 0.003837226 | Induced   | 0 |
| TBD10    | 7999008           | 7.132132    | 7.077444333 | 0.992332213 | 0.00387567  | Repressed | 0 |
| KRT77    | 7963502           | 6.269786333 | 6.538072    | 1.042790241 | 0.003886615 | Induced   | 0 |
| RORB     | 8155864           | 8.779101667 | 8.183287    | 0.932132616 | 0.003891341 | Repressed | 0 |
| HIST1H1D | 8124430           | 10.53729667 | 9.898418667 | 0.839369838 | 0.003900973 | Repressed | 0 |
| THAP10   | 7990086           | 7.757260333 | 7.997172    | 1.030927371 | 0.003925823 | Induced   | 0 |
| MOGAT1   | 8048725           | 4.421607333 | 4.659240667 | 1.053743654 | 0.003939062 | Induced   | 1 |
| CNGA4    | 7938082           | 5.763352333 | 5.968839    | 1.035654018 | 0.003944485 | Induced   | 0 |
| PVRIG    | 8134777           | 6.339883333 | 6.647849667 | 1.048576025 | 0.003953002 | Induced   | 1 |
| POPCD3   | 8128565           | 10.10211    | 9.937908667 | 0.983745838 | 0.003959904 | Repressed | 0 |
| PTHLH    | 7962000           | 6.126806333 | 6.291705    | 1.026914294 | 0.003969967 | Induced   | 0 |
| SCP2     | 7901513           | 8.834208    | 8.486412667 | 0.960630842 | 0.003974355 | Repressed | 0 |
| PEX11B   | 7904755           | 8.062530333 | 7.740131333 | 0.960012678 | 0.003992254 | Repressed | 0 |
| SHH      | 8144078           | 6.812567333 | 6.93823     | 1.018445714 | 0.004014127 | Induced   | 0 |
| IL12A    | 8083690           | 6.865050333 | 6.882773667 | 1.002581676 | 0.004030079 | Induced   | 0 |
| NAT12    | 7974576           | 9.306973333 | 9.460338    | 1.016478468 | 0.004031498 | Induced   | 0 |
| DOCK10   | 8059413           | 9.782378333 | 9.315707667 | 0.952294764 | 0.004115092 | Repressed | 1 |
| MED11    | 8003922           | 8.137283    | 7.525957    | 0.92487345  | 0.004127229 | Repressed | 0 |
| SLC38A10 | 8019149           | 9.447408    | 9.212067333 | 0.975089393 | 0.004133916 | Repressed | 0 |
| FKBP2    | 7940914           | 9.203495667 | 9.015410333 | 0.979563707 | 0.004145308 | Repressed | 0 |
| ZNF234   | 8029392           | 7.791875    | 7.387014667 | 0.948040705 | 0.004193861 | Repressed | 1 |
| HBEFG    | 8114572           | 9.343267    | 9.612480333 | 1.028813619 | 0.004211766 | Induced   | 0 |
| CD58     | 7918902           | 10.32460667 | 10.14585667 | 0.982686992 | 0.004229338 | Repressed | 0 |
| RHOBTB1  | 7933821           | 7.475906333 | 7.244911333 | 0.969101405 | 0.004233026 | Repressed | 0 |
| PHF3     | 8120441           | 10.02720367 | 9.879687    | 0.985288354 | 0.004236559 | Repressed | 0 |
| SYNPR    | 8080855           | 4.022760333 | 4.307282333 | 1.070728051 | 0.004254445 | Induced   | 1 |
| ATP7B    | 7971731           | 7.776256333 | 7.428072333 | 0.955224727 | 0.004279818 | Repressed | 0 |
| GULP1    | 8046906           | 9.295915667 | 8.939771667 | 0.961688121 | 0.0042846   | Repressed | 1 |
| KIFAP3   | 7922268           | 9.939871333 | 9.858403667 | 0.991803952 | 0.004290029 | Repressed | 0 |
| CKAP2L   | 8054702           | 10.76740667 | 10.53931667 | 0.978816626 | 0.004297858 | Repressed | 1 |
| PARP8    | 8105191           | 8.975696667 | 9.058516333 | 1.009227102 | 0.004310724 | Induced   | 0 |
| ZBTB4    | 8012212           | 7.946016333 | 7.834388333 | 0.985951703 | 0.004312942 | Repressed | 1 |
| C4orf34  | 8099912           | 8.525693333 | 9.040106    | 1.060336755 | 0.004314443 | Induced   | 0 |
| CPA4     | 8136200           | 5.323551333 | 5.632857667 | 1.058101503 | 0.004321609 | Induced   | 1 |
| CHCHD2   | 8139758           | 12.02441    | 11.97554333 | 0.995936045 | 0.004328389 | Repressed | 0 |
| HBP1     | 7961390           | 10.37985    | 10.26908667 | 0.989329004 | 0.004391822 | Repressed | 1 |
| RASSF3   | 7956819           | 9.052891667 | 8.842175    | 0.976723828 | 0.004398787 | Repressed | 1 |
| TEX13B   | 8174375           | 6.345369    | 6.710190667 | 1.057494161 | 0.004407134 | Induced   | 0 |
| CACNA1S  | 7923271           | 5.603737667 | 5.799907667 | 1.035006992 | 0.004444099 | Induced   | 0 |
| NRM      | 8178399/8179683/8 | 7.979034889 | 7.858597111 | 0.984922639 | 0.004459233 | Repressed | 0 |
| CLDN1    | 8092726           | 4.921294333 | 5.239582    | 1.064675601 | 0.004476412 | Induced   | 0 |
| BTNL3    | 8110620           | 4.271583667 | 4.436282667 | 1.038556894 | 0.004479098 | Induced   | 0 |
| LXN      | 8091715           | 8.510762    | 7.80367     | 0.916917898 | 0.004482319 | Repressed | 0 |
| BEST1    | 7940582           | 8.140898333 | 7.729624    | 0.949480473 | 0.004524667 | Repressed | 1 |
| ZSCAN2   | 8031908           | 7.766101667 | 7.575522333 | 0.975460103 | 0.004543582 | Repressed | 0 |
| SCNN1G   | 7994058           | 5.738922333 | 5.828840333 | 1.015668098 | 0.004545444 | Induced   | 0 |
| C10orf10 | 7933204           | 6.476380333 | 6.665174667 | 1.029151212 | 0.004557871 | Induced   | 0 |
| BBX      | 8081465           | 11.08087    | 11.13127333 | 1.00454868  | 0.004565031 | Induced   | 1 |
| NEK1     | 8103646           | 8.284304    | 7.935548    | 0.957901593 | 0.004574694 | Repressed | 1 |
| CDH19    | 8023710           | 9.217256667 | 8.676487333 | 0.941330772 | 0.004600709 | Repressed | 0 |
| CDKN2B   | 8160452           | 9.437661333 | 9.795224    | 1.037886787 | 0.004628722 | Induced   | 0 |
| DCD      | 7963845           | 6.042710333 | 6.227508667 | 1.030582027 | 0.004678351 | Induced   | 0 |
| CHORDC1  | 7950983           | 11.05384667 | 11.21615333 | 1.014683275 | 0.00468547  | Induced   | 0 |
| SERPIN2  | 8021635           | 10.48373    | 11.24567    | 1.072678331 | 0.004686436 | Induced   | 0 |
| F2RL1    | 8106403           | 8.600932    | 8.489054667 | 0.986992417 | 0.004718586 | Repressed | 0 |
| SOS2     | 7978932           | 9.774471    | 10.03556333 | 1.026711659 | 0.004727844 | Induced   | 0 |
| CITED1   | 8173524           | 9.730464    | 9.501980667 | 0.976518763 | 0.004728456 | Repressed | 0 |
| TXN      | 8163185           | 11.98081333 | 11.8097     | 0.98571772  | 0.004732475 | Repressed | 0 |
| KIF15    | 8079237           | 8.747424667 | 8.550092333 | 0.977441094 | 0.004739253 | Repressed | 1 |
| KCNAB1   | 8083546           | 8.408805667 | 7.601795    | 0.904027909 | 0.004748857 | Repressed | 1 |
| S100B    | 8071036           | 9.586164    | 8.950326333 | 0.933671314 | 0.004778591 | Repressed | 1 |
| PPP1CC   | 7966368           | 12.61051667 | 12.70491    | 1.007485287 | 0.004806037 | Induced   | 0 |
| USP43    | 8004905           | 6.626109    | 7.090197667 | 1.070039395 | 0.004813776 | Induced   | 1 |
| FOS      | 7975779           | 9.682846    | 10.06598    | 1.039568325 | 0.004828603 | Induced   | 1 |
| WDR5B    | 8089993           | 8.202486333 | 7.887388    | 0.961585022 | 0.004854983 | Repressed | 0 |
| EZH2     | 8143663           | 10.73202    | 10.90267    | 1.015901014 | 0.004859372 | Induced   | 0 |
| ITGB3    | 8007931           | 10.85619667 | 10.37843333 | 0.955991647 | 0.004867286 | Repressed | 1 |
| GPR97    | 7996100           | 6.293323    | 6.560953667 | 1.042526129 | 0.004887132 | Induced   | 0 |
| GPRC5D   | 7961386           | 4.930765    | 4.741298    | 0.961574522 | 0.004896122 | Repressed | 0 |
| C1QC     | 7898799           | 6.04194     | 6.385572667 | 1.056874558 | 0.004901399 | Induced   | 0 |
| EPHA3    | 8081081           | 10.55295    | 10.10371667 | 0.957430545 | 0.004904221 | Repressed | 1 |
| POLA2    | 7941214           | 9.572587    | 9.380895    | 0.979974901 | 0.004915302 | Repressed | 1 |
| C6orf182 | 8121392           | 7.730579    | 7.444331    | 0.962971984 | 0.004919471 | Repressed | 0 |

|           |                   |             |             |             |             |           |   |
|-----------|-------------------|-------------|-------------|-------------|-------------|-----------|---|
| CDCD114   | 8038048           | 6.677615333 | 6.824849    | 1.022048839 | 0.004926627 | Induced   | 0 |
| DNA5E1L2  | 7992584           | 6.447882333 | 6.585623667 | 1.021362259 | 0.004932527 | Induced   | 0 |
| TUBG2     | 8007312           | 8.289741    | 8.145008333 | 0.982540749 | 0.00495060  | Repressed | 0 |
| GDF11     | 7956026           | 7.910081333 | 7.512455667 | 0.949731785 | 0.004952665 | Repressed | 0 |
| CPM       | 7964834           | 7.380453667 | 6.665570333 | 0.903138294 | 0.00496499  | Repressed | 0 |
| NEUROG3   | 7934083           | 5.926858667 | 6.197846333 | 1.045721972 | 0.004966935 | Induced   | 0 |
| LOC201229 | 8013567           | 4.071032    | 3.687385    | 0.905761733 | 0.004978234 | Repressed | 1 |
| CPD       | 8006123           | 9.373705    | 9.262547    | 0.988141509 | 0.004983464 | Repressed | 0 |
| FAM105A   | 8104570           | 6.305373333 | 6.570926667 | 1.042115402 | 0.004984703 | Induced   | 0 |
| C3AR1     | 7960874           | 6.801241333 | 6.257465333 | 0.920047536 | 0.005008606 | Repressed | 0 |
| KRT23     | 8015133           | 5.354465333 | 5.694154667 | 1.063440383 | 0.005008778 | Induced   | 0 |
| TEP1      | 7977511           | 7.556176333 | 7.449975    | 0.985945096 | 0.005015106 | Repressed | 0 |
| CDK5RAP2  | 8163733           | 8.976141    | 8.740905667 | 0.973793267 | 0.005055591 | Repressed | 1 |
| ZCCHC9    | 8106702           | 10.77721333 | 10.46951333 | 0.97144902  | 0.005055847 | Repressed | 0 |
| CD47      | 8089299           | 10.36502333 | 10.19979    | 0.984058566 | 0.005079134 | Repressed | 0 |
| OR1L4     | 8157686           | 4.579949    | 4.756285667 | 1.038501884 | 0.005079385 | Induced   | 0 |
| ROBO4     | 7952453           | 6.715671333 | 6.968386    | 1.037630589 | 0.005114852 | Induced   | 0 |
| PECI      | 8123695           | 8.780696333 | 8.651859333 | 0.985327246 | 0.005152058 | Repressed | 0 |
| C21orf91  | 8069574           | 10.77010333 | 10.90567333 | 1.012502073 | 0.005154568 | Induced   | 1 |
| PANX1     | 7943218           | 9.805433    | 9.52184     | 0.971077973 | 0.00516913  | Repressed | 1 |
| CEP70     | 8090988           | 7.727719667 | 7.048720667 | 0.912134623 | 0.005172791 | Repressed | 0 |
| NCR2      | 8119435           | 6.600496667 | 6.826467667 | 1.034234984 | 0.005176461 | Induced   | 0 |
| OR5A51    | 7939959           | 3.958122    | 4.190834    | 1.058793539 | 0.00518278  | Induced   | 0 |
| DIS3      | 7971967           | 10.50493    | 10.66986333 | 1.015700565 | 0.005196473 | Induced   | 0 |
| CNGA3     | 8043782           | 6.229776667 | 6.461659    | 1.037221613 | 0.005204932 | Induced   | 0 |
| DLI       | 8135464           | 11.88319667 | 11.77867333 | 0.991204106 | 0.005257859 | Repressed | 1 |
| BICC1     | 7927681           | 8.066573333 | 7.829577    | 0.970619949 | 0.005276107 | Repressed | 1 |
| OXSM      | 8078300           | 9.036886    | 8.820223    | 0.976024595 | 0.005286084 | Repressed | 1 |
| KIAA1737  | 7975926           | 8.333238333 | 7.843322667 | 0.94120945  | 0.005307412 | Repressed | 1 |
| LENEP     | 7905848           | 6.811929667 | 7.040493    | 1.033655339 | 0.005320305 | Induced   | 0 |
| CA2       | 8147132           | 6.520350333 | 7.182937    | 1.101618262 | 0.005365452 | Induced   | 0 |
| RNASE1    | 7977615           | 6.575259667 | 6.806902    | 1.035229382 | 0.005368706 | Induced   | 0 |
| ADC       | 7899851           | 6.734422667 | 6.915718    | 1.026920694 | 0.005414524 | Induced   | 0 |
| HIST1H2AB | 8124391           | 10.31198333 | 9.739571    | 0.944490568 | 0.005463996 | Repressed | 0 |
| SETDB1    | 7905258           | 8.487645333 | 9.888189667 | 1.165009762 | 0.005469706 | Induced   | 0 |
| HIST1H1C  | 8124397           | 8.849039    | 8.298521333 | 0.937787858 | 0.005496171 | Repressed | 1 |
| HORMAD1   | 7919787           | 3.514579    | 3.329897667 | 0.947452786 | 0.00554342  | Repressed | 0 |
| DET1      | 7991216           | 7.416805333 | 7.196163667 | 0.970251118 | 0.005548812 | Repressed | 0 |
| NCF2      | 7922773           | 5.012786333 | 5.185265    | 1.034407744 | 0.005550188 | Induced   | 0 |
| MRPL14    | 8126653           | 8.853102    | 8.650200333 | 0.977081291 | 0.00555455  | Repressed | 0 |
| LY6G5C    | 8178554/8125007   | 6.107728333 | 6.537919667 | 1.070433776 | 0.005556553 | Induced   | 1 |
| FEM1A     | 8024898           | 8.877188    | 8.670003667 | 0.97666104  | 0.005576786 | Repressed | 0 |
| WFDC10B   | 8066574           | 6.108468    | 6.314907    | 1.033795544 | 0.00558199  | Induced   | 0 |
| ACRBP     | 7960642           | 5.962252667 | 6.195850667 | 1.039179487 | 0.005599696 | Induced   | 0 |
| SLC39A8   | 8101992           | 9.36025     | 9.692975667 | 1.035546665 | 0.0056279   | Induced   | 0 |
| LCTL      | 7989937           | 5.791904333 | 5.764442333 | 0.995258554 | 0.005657909 | Repressed | 0 |
| KIAA1586  | 8120378           | 8.868123667 | 8.588322    | 0.968448606 | 0.005662417 | Repressed | 0 |
| MAT2A     | 8043187           | 12.04552    | 11.78887333 | 0.97866936  | 0.005760537 | Repressed | 1 |
| C12orf32  | 7953130           | 9.488582667 | 9.303429    | 0.980486689 | 0.005794229 | Repressed | 0 |
| NLRP3     | 7911178           | 5.80996     | 6.101336667 | 1.050151235 | 0.005815583 | Induced   | 0 |
| OR10H5    | 8026488           | 5.730335333 | 5.943172667 | 1.037142213 | 0.005823258 | Induced   | 0 |
| SLC25A3   | 7957746           | 11.82351667 | 11.79339    | 0.997451971 | 0.005861078 | Repressed | 0 |
| LIFE      | 8037186           | 6.762298667 | 6.920344667 | 1.023371639 | 0.005870926 | Induced   | 0 |
| PRELID2   | 8114845           | 8.344068667 | 7.817631    | 0.936908757 | 0.005886552 | Repressed | 1 |
| MYRIP     | 8078933           | 5.903899667 | 6.156904333 | 1.042853822 | 0.005895825 | Induced   | 1 |
| MYBL1     | 8151101           | 9.402123667 | 9.858006    | 1.048487166 | 0.00592852  | Induced   | 0 |
| CPVL      | 8138805           | 7.635927667 | 7.084341333 | 0.927764332 | 0.005953238 | Repressed | 0 |
| ZNF117    | 8139832           | 5.592756    | 5.808053333 | 1.038495749 | 0.005978538 | Induced   | 0 |
| RNASEH2A  | 8026051           | 9.817005    | 9.653298667 | 0.983324208 | 0.005985267 | Repressed | 1 |
| CLU       | 8149927           | 6.083881333 | 6.15885     | 1.012322506 | 0.005990009 | Induced   | 0 |
| PPFIA3    | 8030220           | 6.971587333 | 6.867475    | 0.985066194 | 0.005998962 | Repressed | 1 |
| SLC39A11  | 8018082           | 10.15805333 | 9.598999    | 0.944964422 | 0.006004831 | Repressed | 1 |
| C6orf81   | 8118981           | 6.481517667 | 6.690299333 | 1.032211849 | 0.006033762 | Induced   | 0 |
| NOX5      | 7984488           | 4.922098333 | 5.061924333 | 1.028407803 | 0.006034904 | Induced   | 0 |
| SPESP1    | 7984488           | 4.922098333 | 5.061924333 | 1.028407803 | 0.006034904 | Induced   | 0 |
| HIST1H2AC | 8117372           | 10.05670433 | 9.775815667 | 0.972069511 | 0.006039489 | Repressed | 0 |
| AHSA2     | 8042195           | 8.125436    | 7.667456333 | 0.943636296 | 0.00606686  | Repressed | 0 |
| CEP110    | 8157534           | 8.30846     | 7.955497333 | 0.957517679 | 0.006079686 | Repressed | 0 |
| CD59      | 7947425           | 11.39864333 | 11.10905333 | 0.974594345 | 0.00608519  | Repressed | 1 |
| P4HA1     | 7934278           | 10.82496667 | 10.48636667 | 0.968720458 | 0.006086578 | Repressed | 0 |
| NAE1      | 8001876           | 11.05453667 | 10.95972    | 0.991422828 | 0.006103424 | Repressed | 0 |
| VIP       | 8122865           | 3.586313667 | 3.783466    | 1.054973533 | 0.006116368 | Induced   | 0 |
| SLC39A6   | 8022927           | 10.9325     | 10.70377    | 0.979077979 | 0.006121359 | Repressed | 0 |
| SLC38A6   | 7974816           | 8.39230667  | 8.018235    | 0.955424103 | 0.006122202 | Repressed | 0 |
| TIMM50    | 8028705           | 12.73573333 | 12.63830333 | 0.992349871 | 0.00614329  | Repressed | 0 |
| NIN       | 7979044/8115099   | 7.880623667 | 7.905866167 | 1.010755925 | 0.006147077 | Induced   | 0 |
| OVGP1     | 7918504           | 6.294391333 | 6.612578    | 1.050550824 | 0.006151874 | Induced   | 1 |
| CHST2     | 8083214           | 8.443477667 | 8.633164333 | 1.022465467 | 0.006156504 | Induced   | 0 |
| RRAD      | 8001918           | 6.027187333 | 6.326864    | 1.049720815 | 0.006168948 | Induced   | 0 |
| SMOC2     | 8123446           | 5.458318667 | 5.691689667 | 1.042765107 | 0.006199571 | Induced   | 1 |
| TPD52     | 8151475/8151471   | 9.426894334 | 9.105838167 | 0.966092329 | 0.006210327 | Repressed | 0 |
| FYCO1     | 8086572           | 8.524837333 | 8.234023333 | 0.96588627  | 0.006219683 | Repressed | 0 |
| PRR11     | 8008784           | 10.68486667 | 10.39004667 | 0.972407704 | 0.006234013 | Repressed | 1 |
| ID3       | 7913655           | 6.753467    | 7.083960667 | 1.048936889 | 0.006252896 | Induced   | 1 |
| SH3BP4    | 8049435           | 8.829264    | 8.578399333 | 0.971587137 | 0.006261561 | Repressed | 1 |
| DBH       | 8159096           | 6.416141667 | 6.721910667 | 1.047656211 | 0.006269579 | Induced   | 0 |
| VAV3      | 7918157           | 6.416223    | 5.983479333 | 0.932554765 | 0.006278668 | Repressed | 0 |
| DYNLT1    | 8130499           | 9.282781333 | 8.845611333 | 0.952905279 | 0.006282056 | Repressed | 0 |
| HMGCR     | 8106280           | 11.25916    | 11.72317333 | 1.041212074 | 0.006294251 | Induced   | 0 |
| FAHD2A    | 8043564/8054045   | 9.306435667 | 8.9572445   | 0.962433853 | 0.006296613 | Repressed | 0 |
| PHF11     | 7969129           | 6.679349    | 6.082897667 | 0.910702176 | 0.006319666 | Repressed | 0 |
| FXYD3     | 8027748           | 10.60455333 | 10.05356367 | 0.948042162 | 0.006346572 | Repressed | 1 |
| IRF2BP2   | 7925161           | 10.32779667 | 10.53399667 | 1.019965536 | 0.00635668  | Induced   | 1 |
| CDSN      | 8179716/8178442/8 | 6.767859111 | 6.974272667 | 1.030487212 | 0.00636744  | Induced   | 1 |
| FBP1      | 8162502           | 5.525845    | 5.784902    | 1.046880975 | 0.006375169 | Induced   | 0 |
| TMED4     | 8139411           | 9.620837667 | 9.257284333 | 0.962211884 | 0.006378188 | Repressed | 0 |
| GFM1      | 8083630           | 10.35520667 | 10.19592    | 0.984617722 | 0.006383472 | Repressed | 1 |
| GNLV      | 8043236           | 6.03323     | 6.194449333 | 1.026721894 | 0.0063905   | Induced   | 0 |
| PDGFRB    | 8115099           | 6.157438667 | 6.436353    | 1.045297135 | 0.006418697 | Induced   | 0 |



|           |                 |             |             |             |             |           |   |
|-----------|-----------------|-------------|-------------|-------------|-------------|-----------|---|
| PITPNC1   | 8009353         | 9.518508667 | 9.160939333 | 0.962434311 | 0.006419641 | Repressed | 1 |
| HDX       | 8173848         | 5.941649667 | 6.093757333 | 1.025600242 | 0.006422791 | Induced   | 0 |
| MCFD2     | 8051998         | 10.59266    | 10.71182333 | 1.011249614 | 0.0064235   | Induced   | 0 |
| CYP46A1   | 7976681         | 6.523414333 | 6.742216333 | 1.033541025 | 0.006426008 | Induced   | 1 |
| B3GALNT1  | 8091780         | 7.807914333 | 7.563335667 | 0.968675544 | 0.006426282 | Repressed | 0 |
| SCAMOL    | 8098195         | 10.77145    | 11.21628333 | 1.041297442 | 0.006470007 | Induced   | 0 |
| NOX3      | 8130447         | 4.486803333 | 4.837624    | 1.078189446 | 0.006491664 | Induced   | 1 |
| PLEKHF1   | 8027398         | 8.456821    | 8.652255333 | 1.023109669 | 0.006501149 | Induced   | 1 |
| CNTR0B    | 8004741         | 8.345686667 | 8.161272333 | 0.977903037 | 0.006504022 | Repressed | 0 |
| ASB8      | 7962783         | 8.128992    | 7.779943    | 0.95706122  | 0.006508749 | Repressed | 0 |
| MAGED2    | 8167815         | 10.27365    | 9.863797333 | 0.960106421 | 0.006518805 | Repressed | 0 |
| IMPACT    | 8020668         | 9.371689333 | 9.152544667 | 0.976616311 | 0.00652252  | Repressed | 0 |
| CHMP1A    | 8003467         | 9.367725667 | 9.662167667 | 1.031431535 | 0.0065486   | Induced   | 0 |
| Ctorf51   | 8134827         | 7.268854333 | 7.473123667 | 1.028101998 | 0.00654981  | Induced   | 0 |
| SCCPDH    | 7911155         | 10.45253333 | 10.11690667 | 0.9678904   | 0.00658395  | Repressed | 1 |
| NRCAM     | 8142270         | 8.493416    | 7.913928333 | 0.931772132 | 0.006595441 | Repressed | 0 |
| WBP2      | 8018482         | 10.61636    | 10.44647333 | 0.983997654 | 0.006627842 | Repressed | 0 |
| SDCCAG8   | 7911017         | 7.967121    | 7.656700667 | 0.961037327 | 0.006642393 | Repressed | 1 |
| NSMAF     | 8150928         | 9.712087    | 9.228361333 | 0.950193438 | 0.006670268 | Repressed | 0 |
| PECR      | 8058637         | 8.472955333 | 8.038047    | 0.948670999 | 0.006670373 | Repressed | 0 |
| ERLIN2    | 8145835         | 7.732929667 | 7.473487    | 0.966449628 | 0.006673859 | Repressed | 0 |
| LYVE1     | 7946579         | 3.736532333 | 3.837174    | 1.02693451  | 0.006690667 | Induced   | 0 |
| FOXS1     | 8065576         | 6.518079667 | 6.750824333 | 1.035707552 | 0.006730039 | Induced   | 0 |
| TTL8      | 8076882         | 5.911519333 | 6.001023    | 1.015140552 | 0.006742922 | Induced   | 1 |
| RSF1      | 7950606         | 10.95651333 | 11.08962667 | 1.012149242 | 0.006747191 | Induced   | 1 |
| CLCF1     | 7949754         | 7.519858667 | 7.674698333 | 1.020590768 | 0.006747702 | Induced   | 0 |
| SFRS1     | 8016898         | 12.19866    | 12.12907667 | 0.994295822 | 0.00676462  | Repressed | 1 |
| PRDM11    | 7939569         | 6.493283667 | 6.714741333 | 1.034105651 | 0.006783976 | Induced   | 0 |
| TA13      | 7918284         | 10.55503333 | 10.63827667 | 1.007886601 | 0.00681471  | Induced   | 1 |
| C11orf2   | 7941136         | 8.319783333 | 8.087335333 | 0.972060811 | 0.006815311 | Repressed | 0 |
| C6orf142  | 8120300         | 4.601894    | 5.077533333 | 1.103357299 | 0.006843611 | Induced   | 0 |
| SNRPB2    | 8061075         | 12.14739333 | 12.02367    | 0.989814824 | 0.006847058 | Repressed | 1 |
| SMYD2     | 7909689         | 8.289556667 | 7.977187333 | 0.962317727 | 0.006935147 | Repressed | 0 |
| FAM110A   | 8060370         | 8.054688    | 8.117529333 | 1.007801833 | 0.006949628 | Induced   | 1 |
| CRB1      | 7908508         | 5.155870667 | 5.323969    | 1.032603287 | 0.006955295 | Induced   | 0 |
| HOMEZ     | 7977955         | 6.976028    | 6.812277667 | 0.976526709 | 0.006955413 | Repressed | 0 |
| Ctorf44   | 8139244         | 10.72474667 | 10.2738     | 0.957952698 | 0.00696146  | Repressed | 0 |
| PIP4K2B   | 8014723         | 9.453652667 | 9.266169333 | 0.980168159 | 0.006978103 | Repressed | 0 |
| HIST1H2B1 | 8117429         | 6.305673333 | 5.950984    | 0.94375076  | 0.007021688 | Repressed | 0 |
| PLXNA4    | 8142997         | 6.332804    | 6.495517    | 1.025693674 | 0.007022367 | Induced   | 1 |
| WDR306    | 7983306         | 9.222097    | 9.052577    | 0.981618064 | 0.007023734 | Repressed | 1 |
| PLI2      | 8071566         | 8.927577333 | 8.575235667 | 0.960533339 | 0.007024317 | Repressed | 1 |
| SLC26A2   | 8109194         | 9.483481667 | 9.162953    | 0.966201372 | 0.00702519  | Repressed | 0 |
| FGL1      | 8149521         | 3.549601    | 3.694252333 | 1.040751435 | 0.00702965  | Induced   | 0 |
| RRAS2     | 7946697         | 9.026570667 | 9.228904667 | 1.022415379 | 0.007030183 | Induced   | 1 |
| APOD      | 8092970         | 11.72173667 | 11.21032667 | 0.956370799 | 0.00705503  | Repressed | 0 |
| NNT       | 8105153         | 9.822779333 | 9.339001333 | 0.950749377 | 0.007076997 | Repressed | 1 |
| FAM119B   | 7956631         | 7.811176667 | 7.966559333 | 1.019892351 | 0.007078927 | Induced   | 0 |
| FAM149A   | 8096620         | 5.787329    | 5.887285333 | 1.017271583 | 0.007106241 | Induced   | 1 |
| DGAT1     | 8153684/8153939 | 8.690519333 | 8.545206667 | 0.983279173 | 0.007121625 | Repressed | 0 |
| RPN2      | 8062349         | 12.12115667 | 12.06364667 | 0.995255403 | 0.007123739 | Repressed | 1 |
| ACAD9     | 8082444         | 8.880578667 | 8.2886      | 0.93334008  | 0.007152741 | Repressed | 1 |
| PDCL3     | 8043902         | 9.848934667 | 9.469619333 | 0.961486664 | 0.007156878 | Repressed | 1 |
| TDRD3     | 7969341         | 10.61270667 | 10.13024    | 0.954538773 | 0.007182991 | Repressed | 0 |
| HEATR4    | 7980024         | 5.658465667 | 5.855153667 | 1.034759953 | 0.007222791 | Induced   | 1 |
| ZNF367    | 8162601         | 8.588689333 | 8.741435667 | 1.017784592 | 0.007224501 | Induced   | 0 |
| SERPINA10 | 7981051         | 5.647925667 | 5.815092667 | 1.029597946 | 0.007247513 | Induced   | 0 |
| FAM47C    | 8166703         | 6.179971333 | 6.422314    | 1.039214206 | 0.007249313 | Induced   | 0 |
| PMCH      | 7965867         | 3.258051333 | 3.030102333 | 0.930035172 | 0.007307384 | Repressed | 0 |
| B3GNT2    | 8042211         | 9.898758333 | 9.813021667 | 0.991338644 | 0.007317014 | Repressed | 1 |
| ENDOD1    | 7943293         | 9.196673333 | 8.735779667 | 0.949884741 | 0.007331963 | Repressed | 0 |
| MT1H      | 7995829         | 6.512669333 | 6.756763667 | 1.037479921 | 0.007344335 | Induced   | 0 |
| ATAD2     | 8152668         | 11.39365    | 11.5343     | 1.012344595 | 0.007344919 | Induced   | 0 |
| ACTL7B    | 8163019         | 7.15119     | 7.402523333 | 1.035145666 | 0.00736275  | Induced   | 0 |
| Ctorf54   | 7905147         | 6.630880667 | 6.422312667 | 0.968545958 | 0.007398934 | Repressed | 0 |
| HISPPD1   | 8107164         | 9.860918    | 9.623305333 | 0.975903596 | 0.007404132 | Repressed | 0 |
| IGSF11    | 8089729         | 8.404284667 | 7.921008667 | 0.942496474 | 0.007425462 | Repressed | 1 |
| ZNF99     | 8035836         | 3.454204333 | 3.402727333 | 0.985097292 | 0.007490073 | Repressed | 0 |
| MUPCDH    | 7945475         | 6.257093    | 6.521962667 | 1.042331106 | 0.007503735 | Induced   | 0 |
| DUSP5     | 7930413         | 9.387689667 | 9.631609    | 1.025985079 | 0.007545013 | Induced   | 0 |
| PTAFR     | 7914184         | 6.712543333 | 6.934408333 | 1.033052301 | 0.007547453 | Induced   | 1 |
| PTGER4    | 8105067         | 6.802301667 | 7.064061667 | 1.038481093 | 0.00754775  | Induced   | 0 |
| C6orf204  | 8129193         | 8.105835333 | 7.676445333 | 0.947027051 | 0.007568808 | Repressed | 1 |
| PAK4      | 8028583         | 8.961686333 | 8.896587333 | 0.992735854 | 0.007593125 | Repressed | 0 |
| CUEDC2    | 7936011         | 8.090231333 | 7.900350667 | 0.976529637 | 0.007597609 | Repressed | 0 |
| PLP1      | 8169061         | 11.52337    | 11.22524    | 0.974128228 | 0.007617224 | Repressed | 0 |
| OR1E2     | 8011341         | 3.521316667 | 3.672781333 | 1.043013645 | 0.007626482 | Induced   | 0 |
| JAG2      | 7981538         | 7.137713333 | 7.379380667 | 1.033857809 | 0.007629559 | Induced   | 0 |
| APCDD1L   | 8067270         | 6.861833667 | 7.032505667 | 1.024872652 | 0.007637258 | Induced   | 0 |
| ZNF92     | 8133089         | 8.352005667 | 8.607399    | 1.030578683 | 0.007675723 | Induced   | 1 |
| USH1C     | 7946903         | 5.963872333 | 6.247662    | 1.047584799 | 0.007680669 | Induced   | 0 |
| PPM1H     | 7964646         | 7.026247    | 6.948117    | 0.988800266 | 0.007689256 | Repressed | 1 |
| B4GALT6   | 8022747         | 7.924413333 | 7.356289667 | 0.928307164 | 0.007689582 | Repressed | 0 |
| PARDB6    | 8063410         | 9.933081    | 10.34193    | 1.041160341 | 0.007691881 | Induced   | 1 |
| LYRM5     | 7954460         | 9.094540333 | 8.814300667 | 0.969185945 | 0.007692125 | Repressed | 0 |
| HIST1H2AH | 8117543         | 7.236164333 | 6.875492333 | 0.950157019 | 0.007693291 | Repressed | 0 |
| ORC2L     | 8058161         | 9.810481667 | 9.405845    | 0.958754658 | 0.007693909 | Repressed | 0 |
| SAT1      | 8166469         | 11.80745    | 11.66046    | 0.98755108  | 0.007712132 | Repressed | 1 |
| FKBP7     | 8057045         | 8.330393    | 7.879167    | 0.945833768 | 0.007718617 | Repressed | 1 |
| IL9R      | 8171052/8176972 | 7.029636667 | 7.154294    | 1.017733112 | 0.007725003 | Induced   | 0 |
| IRAK4     | 7954969         | 8.801512667 | 8.470268    | 0.96236503  | 0.007727052 | Repressed | 0 |
| PCDH17    | 7969330         | 6.133431667 | 6.258527    | 1.020395651 | 0.007763417 | Induced   | 0 |
| PLUS7L    | 7962427         | 9.334922    | 9.063902    | 0.970967085 | 0.007773452 | Repressed | 0 |
| SMARCC2   | 7963988         | 9.057538    | 8.631649333 | 0.952979643 | 0.007778659 | Repressed | 1 |
| ADRA1D    | 8064779         | 6.823084333 | 7.1302      | 1.045011266 | 0.00778537  | Induced   | 0 |
| ATPAF1    | 7915870         | 7.639158    | 7.498984    | 0.981650596 | 0.007798753 | Repressed | 0 |
| KLKB1     | 8098654         | 5.017769333 | 5.504451333 | 1.096991704 | 0.007827286 | Induced   | 0 |
| TSEN34    | 8031145         | 8.965891    | 9.019121    | 1.005936945 | 0.007865518 | Induced   | 0 |
| TMEM98    | 8006415         | 9.800459333 | 9.312961    | 0.950257604 | 0.007880302 | Repressed | 1 |

|              |                    |             |             |             |             |           |   |
|--------------|--------------------|-------------|-------------|-------------|-------------|-----------|---|
| SORL1        | 7944667            | 8.170670333 | 7.276445667 | 0.890556756 | 0.007903363 | Repressed | 1 |
| GPRCS5A      | 7954065            | 9.491834667 | 9.136909667 | 0.962607334 | 0.007932042 | Repressed | 1 |
| SNX14        | 8127943            | 9.608246333 | 9.361743667 | 0.974344677 | 0.007932241 | Repressed | 0 |
| TRIM15       | 8117849/8177760/81 | 6.730963    | 6.911290667 | 1.026790768 | 0.007941523 | Induced   | 0 |
| C15orf44     | 7989834            | 10.49686667 | 10.37646667 | 0.988529911 | 0.007950172 | Repressed | 1 |
| RARRES3      | 7940775            | 5.405351667 | 5.611744667 | 1.038183085 | 0.00797932  | Induced   | 0 |
| NADK         | 7911600            | 8.536619    | 8.423081    | 0.986699887 | 0.007992773 | Repressed | 0 |
| CD5          | 7940409            | 5.723758667 | 6.093420333 | 1.064583727 | 0.008002212 | Induced   | 0 |
| ERBB3        | 7956120            | 9.192656    | 8.749898667 | 0.951835755 | 0.008045681 | Repressed | 0 |
| IDH3G        | 8175844            | 10.51779667 | 10.29651    | 0.978960739 | 0.008049582 | Repressed | 1 |
| ACA2         | 8023261            | 9.202737    | 9.096841667 | 0.988493061 | 0.008065323 | Repressed | 0 |
| C8orf59      | 8151587            | 8.919368667 | 8.860850667 | 0.993439222 | 0.008080141 | Repressed | 0 |
| C7orf47      | 8141517            | 8.534121667 | 8.421668333 | 0.986823092 | 0.008103314 | Repressed | 0 |
| C14orf4      | 7980338            | 9.588310333 | 9.837542333 | 1.025993318 | 0.008110155 | Induced   | 1 |
| E1F4EBP1     | 8145889            | 9.333996333 | 9.139822667 | 0.979197156 | 0.008135379 | Repressed | 1 |
| AASS         | 8142554            | 9.287750333 | 8.648716    | 0.931196004 | 0.008161206 | Repressed | 0 |
| ID12         | 7931748            | 4.545252667 | 4.845072333 | 1.065963256 | 0.008172519 | Induced   | 0 |
| PRKAB1       | 7959123            | 9.090226333 | 9.167769    | 1.008530334 | 0.008189161 | Induced   | 0 |
| ENOSF1       | 8021966            | 7.756388667 | 7.384298333 | 0.95202789  | 0.008213735 | Repressed | 0 |
| BCAR3        | 7917754            | 7.680016333 | 7.432476667 | 0.967768341 | 0.008239761 | Repressed | 1 |
| TNP1         | 8058866            | 5.904712    | 6.261123333 | 1.060360494 | 0.008269656 | Induced   | 1 |
| OSBP19       | 7901385            | 10.14745667 | 9.98075     | 0.983571581 | 0.008278281 | Repressed | 0 |
| LUM          | 7965403            | 7.559989    | 6.210322333 | 0.821472403 | 0.008279654 | Repressed | 0 |
| GLTSD2       | 7965941            | 6.655329333 | 6.366630333 | 0.95662138  | 0.008312537 | Repressed | 0 |
| VRK3         | 8038515            | 9.137337667 | 8.983460333 | 0.9831595   | 0.008324278 | Repressed | 1 |
| KIAA0368     | 8163275            | 10.50770667 | 10.47377333 | 0.996770624 | 0.008326637 | Repressed | 0 |
| DIP2C        | 7931683            | 8.032941667 | 7.686694333 | 0.956896571 | 0.008332135 | Repressed | 1 |
| KLF5         | 7969414            | 9.491038    | 9.840954333 | 1.036868078 | 0.008349424 | Induced   | 0 |
| C8orf42      | 8148973            | 8.615405    | 8.560469    | 0.993623515 | 0.008351537 | Repressed | 1 |
| CHML         | 7925500            | 9.505167    | 9.195414    | 0.967412145 | 0.00835773  | Repressed | 0 |
| ZC3HC1       | 8142899            | 9.996665333 | 10.13864667 | 1.01420287  | 0.008362087 | Induced   | 1 |
| ACADSB       | 7931168            | 8.020861    | 7.402921    | 0.922958396 | 0.008363509 | Repressed | 0 |
| C20orf197    | 8063785            | 5.321783    | 5.541895333 | 1.041360637 | 0.008414093 | Induced   | 1 |
| CFDP1        | 8002865            | 7.771844333 | 7.607184333 | 0.978813266 | 0.008415133 | Repressed | 1 |
| MLH3         | 7980246            | 8.474206667 | 8.031222333 | 0.947725569 | 0.008430684 | Repressed | 1 |
| C13orf34     | 7969374            | 9.259986    | 8.989814667 | 0.970823786 | 0.008431607 | Repressed | 0 |
| MAGEC1       | 8170273            | 4.967175667 | 5.194568    | 1.045779    | 0.008444945 | Induced   | 0 |
| KLF10        | 8152215            | 11.20223667 | 11.87698    | 1.060232912 | 0.008455814 | Induced   | 0 |
| FAF1         | 7915995            | 10.57545667 | 10.33235333 | 0.977012498 | 0.00846515  | Repressed | 1 |
| GD12         | 7931873            | 12.34312667 | 12.38515333 | 1.003404864 | 0.008471112 | Induced   | 1 |
| VEGFC        | 8103822            | 7.689645333 | 8.023891    | 1.043466981 | 0.008487558 | Induced   | 0 |
| SAMM50       | 8073645            | 11.47059333 | 11.32168333 | 0.987018108 | 0.008502729 | Repressed | 1 |
| IRX5         | 7995668            | 8.282020333 | 8.413928    | 1.015926991 | 0.008507464 | Induced   | 0 |
| SIGLEC5      | 8038877            | 6.669572667 | 7.060958667 | 1.05868232  | 0.008517941 | Induced   | 0 |
| GEFT         | 7956551            | 7.342755    | 7.186651333 | 0.97874045  | 0.008526203 | Repressed | 0 |
| HMGCS1       | 8111941            | 11.04861333 | 11.64088    | 1.05360552  | 0.008537284 | Induced   | 0 |
| GSTK1        | 8136849            | 9.008795333 | 8.565434667 | 0.950785799 | 0.008547735 | Repressed | 1 |
| TUBA1C       | 7955179            | 11.63743    | 11.48223    | 0.986663722 | 0.008550873 | Repressed | 0 |
| SLC45A2      | 8111417            | 10.38036333 | 9.902898667 | 0.954003087 | 0.008560205 | Repressed | 1 |
| CARHSP1      | 7999319            | 8.977242667 | 8.835290667 | 0.984187572 | 0.008586958 | Repressed | 0 |
| HIST1H2AE    | 8117408            | 7.679551    | 7.399195333 | 0.963493222 | 0.008636432 | Repressed | 0 |
| SLC25A6      | 8171111/8177003    | 10.98328333 | 10.91033    | 0.993357785 | 0.00864381  | Repressed | 0 |
| QARS         | 8087283            | 10.24258333 | 9.954518    | 0.971875715 | 0.008652712 | Repressed | 0 |
| ANKRD17      | 8100902            | 10.49138    | 10.57377    | 1.007853114 | 0.008659806 | Induced   | 0 |
| PIR          | 8171435            | 9.06009     | 8.466934333 | 0.93453093  | 0.008660244 | Repressed | 0 |
| RRAGD        | 8128123            | 10.75377333 | 10.58660667 | 0.984455069 | 0.008661647 | Repressed | 1 |
| PLAA         | 8160487            | 9.458433    | 9.329336333 | 0.986351157 | 0.008665839 | Repressed | 0 |
| ST6GALNAC6   | 8164304            | 8.101906667 | 8.198298333 | 1.011897405 | 0.008692498 | Induced   | 1 |
| FN3K         | 8010841            | 7.788436333 | 7.610042333 | 0.977095017 | 0.008695963 | Repressed | 1 |
| SPO11        | 8063551            | 3.570389667 | 3.537302    | 0.990732758 | 0.008707068 | Repressed | 0 |
| KYNU         | 8045539            | 8.629288333 | 9.03567     | 1.0470933   | 0.008723501 | Induced   | 1 |
| RCN2         | 7985089            | 10.77468    | 10.24675333 | 0.951003031 | 0.008733131 | Repressed | 0 |
| WFDC8        | 8066549            | 4.672601333 | 4.890854    | 1.046709028 | 0.008736109 | Induced   | 0 |
| RUFY3        | 8095545            | 8.924213    | 8.450446667 | 0.946912256 | 0.008761207 | Repressed | 0 |
| FUK          | 7997072            | 6.926038333 | 7.008972    | 1.011974185 | 0.008764965 | Induced   | 0 |
| TLX3         | 8109968            | 6.621316333 | 6.775877    | 1.023342891 | 0.008797383 | Induced   | 0 |
| ARHGAP21     | 7932554            | 9.633885    | 9.412061667 | 0.976974675 | 0.00880537  | Repressed | 0 |
| ARRDC4       | 7986350            | 9.816970333 | 10.56110333 | 1.075800677 | 0.008805633 | Induced   | 0 |
| NTHL1        | 7998692            | 8.796721667 | 8.634301667 | 0.981536303 | 0.008845911 | Repressed | 0 |
| PTGES2       | 8164362            | 7.884615667 | 7.848633    | 0.995436345 | 0.008868195 | Repressed | 0 |
| RG52         | 7908409            | 8.255304    | 8.735131667 | 1.058123561 | 0.008901859 | Induced   | 0 |
| MTERFD3      | 7966046            | 7.517234667 | 7.142341333 | 0.950128824 | 0.008913526 | Repressed | 0 |
| EYA1         | 8151310            | 8.036353667 | 7.770396    | 0.966905679 | 0.008923882 | Repressed | 0 |
| MRPS16       | 7934326            | 10.54007    | 10.39958667 | 0.986671499 | 0.008927647 | Repressed | 0 |
| C3orf67      | 8088436            | 8.508584667 | 7.611515667 | 0.894568952 | 0.008931015 | Repressed | 1 |
| PCK2         | 7973530            | 7.886507    | 7.693586    | 0.97553784  | 0.008935108 | Repressed | 1 |
| COP5B7       | 8049088            | 9.072317333 | 8.813474333 | 0.971468921 | 0.008955627 | Repressed | 0 |
| ANKRD27      | 8035905            | 10.21626667 | 9.96081     | 0.974995106 | 0.008959426 | Repressed | 0 |
| BCL2L13      | 8071119            | 9.947075333 | 9.740826333 | 0.979265363 | 0.008964612 | Repressed | 1 |
| RAB40C       | 7991917            | 7.928049    | 7.971580333 | 1.0054908   | 0.008970848 | Induced   | 1 |
| CARD11       | 8137874            | 6.099227    | 6.330556667 | 1.037927702 | 0.00897596  | Induced   | 0 |
| RPS-1022P6.2 | 8064868            | 9.045996    | 9.395835333 | 1.03867339  | 0.008975974 | Induced   | 0 |
| STAMPB       | 8042772            | 10.66079    | 10.54186    | 0.988844166 | 0.008989963 | Repressed | 1 |
| SH3PXD2A     | 7936115            | 7.892723667 | 7.585358667 | 0.961057169 | 0.009005601 | Repressed | 1 |
| CDC25A       | 8086880            | 9.683443667 | 9.956988667 | 1.028248731 | 0.009006431 | Induced   | 1 |
| KRTAP6-2     | 8069848            | 6.014348333 | 6.38163     | 1.061067575 | 0.009028437 | Induced   | 0 |
| KPNA2        | 8019737/8009417    | 13.116025   | 13.17050334 | 1.004153693 | 0.009053459 | Induced   | 0 |
| BPI          | 8062444            | 4.302604333 | 4.528344333 | 1.052465898 | 0.00906721  | Induced   | 1 |
| TSGA14       | 8142930            | 8.507504333 | 8.224609    | 0.966747553 | 0.009067349 | Repressed | 1 |
| HELT         | 8098571            | 6.458869667 | 6.715128333 | 1.039675466 | 0.009077142 | Induced   | 0 |
| C1orf63      | 7908525            | 6.373399667 | 6.273487333 | 0.984323542 | 0.009098625 | Repressed | 0 |
| KLHDC7B      | 8074106            | 6.613879667 | 6.867174333 | 1.038297441 | 0.009185613 | Induced   | 0 |
| SLFN21       | 8014241            | 8.4715      | 9.068694    | 1.070494481 | 0.009196184 | Induced   | 0 |
| LRTM2        | 7953032            | 6.883180667 | 7.121929667 | 1.034685854 | 0.009203823 | Induced   | 0 |
| RNASEH2B     | 7969179            | 9.314103333 | 9.096287667 | 0.976614425 | 0.009204434 | Repressed | 0 |
| CROT         | 8133938            | 8.158189    | 7.877146    | 0.96555081  | 0.009207237 | Repressed | 0 |
| RAB5A        | 8078214            | 11.46466    | 11.57727333 | 1.009822649 | 0.009224588 | Induced   | 0 |
| PKFEB3       | 7926037            | 9.818035    | 10.10848333 | 1.029583143 | 0.009226438 | Induced   | 0 |
| CRIP2        | 7977397            | 8.483756667 | 8.433450333 | 0.994070276 | 0.009231653 | Repressed | 0 |

|          |         |             |             |             |             |           |   |
|----------|---------|-------------|-------------|-------------|-------------|-----------|---|
| ARF6     | 7974249 | 10.44894333 | 10.50624    | 1.005483489 | 0.009232506 | Induced   | 0 |
| PRR7     | 8110382 | 7.81878667  | 8.002627333 | 1.023512423 | 0.009260646 | Induced   | 0 |
| LONP2    | 7995421 | 10.40189667 | 10.08001    | 0.969055002 | 0.009268626 | Repressed | 0 |
| YIPF6    | 8168018 | 10.29770333 | 10.38916333 | 1.008881592 | 0.009273612 | Induced   | 0 |
| C19orf50 | 8027018 | 9.73949667  | 9.812942667 | 1.007541047 | 0.009299245 | Induced   | 0 |
| RAD18    | 8085145 | 11.00676333 | 11.09384    | 1.007911196 | 0.009316781 | Induced   | 1 |
| NUP43    | 8130129 | 11.18776    | 10.97959333 | 0.981393356 | 0.009316913 | Repressed | 0 |
| TSLP     | 8107270 | 4.114081    | 3.838027667 | 0.932900365 | 0.009328352 | Repressed | 0 |
| SGSM2    | 8003733 | 8.11775333  | 7.730904333 | 0.952342731 | 0.009337927 | Repressed | 1 |
| FAHD2B   | 8054045 | 9.473891    | 9.141515667 | 0.964916703 | 0.009373286 | Repressed | 0 |
| LEMD3    | 7956842 | 9.024324    | 9.163584667 | 1.015431701 | 0.00940158  | Induced   | 1 |
| PRKG2    | 8101284 | 9.126487    | 8.391451667 | 0.919461307 | 0.009421211 | Repressed | 0 |
| NFE2     | 7963760 | 5.649204667 | 6.018130667 | 1.06530583  | 0.009422898 | Induced   | 0 |
| IL17B    | 8115014 | 6.553874333 | 6.805592667 | 1.038407562 | 0.009456249 | Induced   | 0 |
| ERO1L    | 7979179 | 10.79831333 | 10.47333333 | 0.969904559 | 0.009460954 | Repressed | 0 |
| CRHR2    | 8138865 | 5.691045333 | 5.891737    | 1.035264465 | 0.009461194 | Induced   | 0 |
| MRPS28   | 8151471 | 9.59154     | 9.184048333 | 0.957515512 | 0.009465497 | Repressed | 1 |
| ATP2B1   | 7965359 | 11.40888333 | 11.59479667 | 1.016295489 | 0.009491304 | Induced   | 0 |
| MYO1D    | 8014115 | 9.402807667 | 8.983672    | 0.955424413 | 0.009499049 | Repressed | 1 |
| SCFD2    | 8100347 | 9.310914333 | 8.877554333 | 0.953456773 | 0.009509631 | Repressed | 1 |
| MED13    | 8017312 | 11.06448333 | 11.24127333 | 1.015978152 | 0.009559264 | Induced   | 0 |
| UBB      | 8005166 | 13.48747667 | 13.40859333 | 0.994151365 | 0.009563531 | Repressed | 1 |
| IDH3A    | 7985134 | 12.04337    | 12.19998    | 1.013003835 | 0.009581211 | Induced   | 0 |
| EIF6     | 8065868 | 12.0266     | 12.13675333 | 1.009159142 | 0.00962249  | Induced   | 0 |
| DKK1     | 7927631 | 9.111495    | 9.699639667 | 1.064549744 | 0.00965624  | Induced   | 0 |
| RPS6KB1  | 8008887 | 9.915599333 | 9.867463    | 0.995145393 | 0.009664966 | Repressed | 0 |
| NFE2L3   | 8131944 | 8.349655333 | 7.933765333 | 0.950190758 | 0.00966659  | Repressed | 0 |
| PDE3B    | 7938629 | 9.080636333 | 8.714708    | 0.959702347 | 0.009678539 | Repressed | 1 |
| C1orf125 | 7907719 | 3.582784    | 3.706393667 | 1.03450101  | 0.009691598 | Induced   | 0 |
| DFFA     | 7912303 | 10.22777333 | 9.906015667 | 0.96854079  | 0.009719601 | Repressed | 0 |
| MAPK3    | 8000811 | 9.065181667 | 8.936440333 | 0.985798262 | 0.009727822 | Repressed | 0 |
| DPF2     | 7941243 | 11.22055333 | 11.40648667 | 1.016570781 | 0.009745796 | Induced   | 0 |
| DNM1     | 8033912 | 10.32900333 | 10.40039667 | 1.006911929 | 0.009749279 | Induced   | 0 |
| TMEM171  | 8106170 | 6.031651667 | 5.885929667 | 0.975840448 | 0.009753334 | Repressed | 0 |
| GRK7     | 8083129 | 5.224414667 | 5.530756667 | 1.058636617 | 0.009803304 | Induced   | 0 |
| CDC16    | 7970347 | 10.42302    | 10.11315667 | 0.970271252 | 0.009804946 | Repressed | 0 |
| PLA2G4D  | 7987792 | 6.275138333 | 6.599692667 | 1.051720666 | 0.009807686 | Induced   | 0 |
| OXC1     | 8111892 | 9.945924667 | 9.862062667 | 0.991568205 | 0.009825138 | Repressed | 0 |
| GALNT3   | 8056408 | 9.274243333 | 8.479592    | 0.914316316 | 0.009844288 | Repressed | 0 |
| B3GNT1   | 7949615 | 7.192524333 | 6.752790333 | 0.938862355 | 0.009844334 | Repressed | 0 |
| UEVLD    | 7947027 | 10.54127333 | 10.64012333 | 1.009377425 | 0.009902653 | Induced   | 0 |
| ROCK2    | 8050302 | 10.53238333 | 10.70826667 | 1.016699291 | 0.009910923 | Induced   | 0 |
| PABPC5   | 8188650 | 6.356176667 | 6.230333667 | 0.980201463 | 0.009924908 | Repressed | 0 |
| WDR77    | 7918517 | 10.26495333 | 9.961331333 | 0.970421492 | 0.00993066  | Repressed | 0 |
| DMXL1    | 8107474 | 7.834799    | 7.563278    | 0.965344229 | 0.009932905 | Repressed | 0 |
| SNAPC1   | 7974870 | 10.96474667 | 11.18074667 | 1.019699498 | 0.009986291 | Induced   | 0 |
| FAM117A  | 8016590 | 7.445496667 | 7.574479    | 1.017323537 | 0.009995315 | Induced   | 0 |
| NEFM     | 8145361 | 5.623367    | 5.716486667 | 1.016559415 | 0.010001359 | Induced   | 0 |
| MGAT5    | 8045349 | 10.63479    | 10.13019667 | 0.952552581 | 0.010026946 | Repressed | 1 |
| RNF144A  | 8040090 | 10.60881333 | 10.22708333 | 0.964017653 | 0.010033702 | Repressed | 1 |
| MMP20    | 7951224 | 9.394138    | 8.919537333 | 0.949479062 | 0.010037974 | Repressed | 1 |
| OR11H4   | 7973034 | 3.705823667 | 3.488979    | 0.941704278 | 0.010097548 | Repressed | 0 |
| CH25H    | 7934916 | 5.565648    | 5.877849667 | 1.056094397 | 0.010105113 | Induced   | 0 |
| ZNF213   | 7992854 | 7.591527333 | 7.762527667 | 1.022525155 | 0.010115578 | Induced   | 0 |
| LCN2     | 8158167 | 6.249684    | 6.616418    | 1.058680407 | 0.010127296 | Induced   | 0 |
| SCRN1    | 8138824 | 10.21905667 | 10.40591    | 1.018284793 | 0.010164596 | Induced   | 1 |
| PAPOLG   | 8042119 | 10.43549    | 10.66745    | 1.022227993 | 0.01017822  | Induced   | 0 |
| TNR      | 7922482 | 5.624237333 | 6.02399     | 1.071076778 | 0.01018037  | Induced   | 1 |
| TMEM102  | 8004404 | 8.875483    | 8.571553667 | 0.965756305 | 0.01018198  | Repressed | 0 |
| EIF4E3   | 8088803 | 7.98741     | 8.371864667 | 1.048132582 | 0.010224428 | Induced   | 1 |
| SH3PX2B  | 8115814 | 8.883627    | 8.55932     | 0.963493852 | 0.010230673 | Repressed | 1 |
| PIP4K2A  | 7932530 | 10.04587833 | 10.15436    | 1.010798624 | 0.010241103 | Induced   | 0 |
| WDR41    | 8112746 | 10.24504    | 10.26952    | 1.002389449 | 0.010242498 | Induced   | 1 |
| FOSL2    | 8041048 | 9.612467333 | 9.923648667 | 1.03237268  | 0.010266179 | Induced   | 1 |
| MBTD1    | 8016789 | 8.819754    | 8.658071    | 0.981668083 | 0.010281681 | Repressed | 0 |
| HIST1H3C | 8117339 | 7.394569    | 7.152882    | 0.967315607 | 0.010284687 | Repressed | 0 |
| GSN      | 8157582 | 10.49071333 | 10.04859833 | 0.957856536 | 0.01029089  | Repressed | 1 |
| BARD1    | 8058695 | 9.994185667 | 10.15633667 | 1.016224533 | 0.010300406 | Induced   | 1 |
| NDRG3    | 8066051 | 9.421906333 | 8.989854    | 0.954143852 | 0.010367508 | Repressed | 0 |
| HERPUD1  | 7995895 | 10.45752    | 10.73892    | 1.026717616 | 0.010370318 | Induced   | 0 |
| SYT7     | 7948588 | 6.664646667 | 6.81899     | 1.023158517 | 0.010388193 | Induced   | 1 |
| EREG     | 8095728 | 7.126016    | 7.781021333 | 1.091917466 | 0.010390939 | Induced   | 0 |
| C2CD2    | 8070538 | 9.032683    | 8.499062    | 0.940923311 | 0.010405106 | Repressed | 1 |
| ITGB4    | 8009951 | 6.178644667 | 6.257100333 | 1.012697876 | 0.010429982 | Induced   | 0 |
| GUCA2A   | 7915404 | 6.789892    | 7.105537    | 1.046487485 | 0.01046141  | Induced   | 0 |
| SIRT1    | 7927814 | 10.48946667 | 10.75334667 | 1.025156665 | 0.010497998 | Induced   | 0 |
| ADD3     | 7930380 | 8.784746667 | 8.538905667 | 0.972015015 | 0.010513397 | Repressed | 0 |
| CBX5     | 7963750 | 9.642392667 | 9.407673    | 0.975657529 | 0.010517476 | Repressed | 1 |
| CTSL2    | 8162652 | 8.424537    | 8.096431    | 0.961053527 | 0.01052788  | Repressed | 0 |
| GTPBP2   | 8126629 | 8.519264    | 8.153534667 | 0.957070313 | 0.010532966 | Repressed | 0 |
| EHD4     | 7987772 | 9.654838333 | 9.808931667 | 1.015960219 | 0.010649596 | Induced   | 0 |
| P4HA3    | 7950374 | 6.159633667 | 6.332447    | 1.028055781 | 0.010650418 | Induced   | 1 |
| SETDB2   | 7969114 | 9.895667    | 9.783461333 | 0.988661132 | 0.010674112 | Repressed | 1 |
| RPL39L   | 8092654 | 8.961288    | 8.818013667 | 0.984011859 | 0.010696463 | Repressed | 1 |
| LAMA2    | 8121949 | 7.500908667 | 7.071058    | 0.942693521 | 0.010705973 | Repressed | 0 |
| C2orf28  | 8040831 | 10.14082667 | 9.845713    | 0.970898461 | 0.010712517 | Repressed | 0 |
| RLBP1L1  | 814618  | 5.568436    | 5.831208667 | 1.047189672 | 0.01071989  | Induced   | 0 |
| KHDRBS3  | 8148448 | 9.636645    | 9.878517    | 1.025099192 | 0.010720605 | Induced   | 1 |
| OGDHL    | 7933537 | 7.352647667 | 7.181364333 | 0.976704537 | 0.010723781 | Repressed | 0 |
| GGH      | 8151032 | 10.29826667 | 10.00634333 | 0.971098793 | 0.010723887 | Repressed | 1 |
| NP       | 7973067 | 11.13581667 | 11.24714667 | 1.009997471 | 0.010748381 | Induced   | 1 |
| DMXL2    | 7988789 | 10.26133    | 10.42273667 | 1.015729605 | 0.010749549 | Induced   | 0 |
| RNF126   | 8032076 | 8.861612667 | 8.976078333 | 1.012917024 | 0.010768322 | Induced   | 0 |
| FPGT     | 7902308 | 8.901289667 | 8.249526333 | 0.926778775 | 0.010777055 | Repressed | 0 |
| ACAT2    | 8123137 | 9.921261667 | 10.16488    | 1.024555177 | 0.010790443 | Induced   | 0 |
| RC3TB1   | 7971602 | 9.664520333 | 9.344964667 | 0.966935176 | 0.010795045 | Repressed | 0 |
| ADCY1    | 8132667 | 8.069198    | 7.922719667 | 0.981847225 | 0.01080391  | Repressed | 0 |
| SPC24    | 8034122 | 7.792469333 | 7.525801    | 0.965778713 | 0.010822776 | Repressed | 0 |
| PIDIA4   | 8143684 | 10.80419667 | 10.58017667 | 0.979265464 | 0.010840655 | Repressed | 1 |

|          |                   |             |              |             |             |           |   |
|----------|-------------------|-------------|--------------|-------------|-------------|-----------|---|
| CAMK2D   | 8102415           | 9.301756    | 8.972397333  | 0.964591775 | 0.01085671  | Repressed | 0 |
| ANTXR1   | 8042439           | 9.082261667 | 8.825469333  | 0.971725949 | 0.010862847 | Repressed | 1 |
| GNP3     | 7966321           | 9.942618667 | 9.691641667  | 0.974757455 | 0.010880571 | Repressed | 1 |
| RHD10    | 8146921           | 9.724622333 | 10.009437333 | 1.029288027 | 0.010938607 | Induced   | 1 |
| RNF130   | 8116372           | 9.904565333 | 9.559285     | 0.965139274 | 0.010945208 | Repressed | 1 |
| PKFB2    | 7909285           | 8.632428667 | 8.239571333  | 0.954490521 | 0.010946228 | Repressed | 0 |
| MBD4     | 8090577           | 9.812236    | 9.670562333  | 0.985561531 | 0.010973649 | Repressed | 1 |
| PHF7     | 8080306           | 7.315097    | 7.205304     | 0.984990903 | 0.010994671 | Repressed | 0 |
| WNK3     | 8173059           | 6.523776333 | 6.365778     | 0.975781154 | 0.010998878 | Repressed | 1 |
| FTHL17   | 8171917           | 6.490572    | 6.656513     | 1.025566468 | 0.011003381 | Induced   | 0 |
| CDC2L5   | 8132417           | 9.600598    | 9.742177     | 1.014746894 | 0.01100709  | Induced   | 1 |
| GS2      | 8003844           | 8.813959    | 8.631078333  | 0.979251019 | 0.011009559 | Repressed | 0 |
| CRYBA1   | 8006019           | 5.447942    | 5.594158     | 1.026838759 | 0.011032089 | Induced   | 0 |
| TMSL3    | 8067007/8158240/8 | 11.1288525  | 10.8122425   | 0.971314999 | 0.011035573 | Repressed | 0 |
| TMSB4X   | 8067007/8158240/8 | 11.1288525  | 10.8122425   | 0.971314999 | 0.011035573 | Repressed | 0 |
| C1orf71  | 7911138           | 8.270059667 | 8.012899     | 0.968903529 | 0.011040372 | Repressed | 0 |
| PIGB     | 7983811           | 8.248821667 | 7.897031667  | 0.957352697 | 0.01109611  | Repressed | 1 |
| SLC6A15  | 7965206           | 10.40209    | 10.12755667  | 0.973607868 | 0.011102868 | Repressed | 0 |
| ZNHIT3   | 8006627           | 9.884770667 | 9.792424     | 0.990657682 | 0.011117738 | Repressed | 1 |
| STK32B   | 8093858           | 8.244877    | 7.954507333  | 0.964781807 | 0.011118861 | Repressed | 0 |
| PSMB7    | 8164067           | 12.20536667 | 12.14620333  | 0.995152679 | 0.011138152 | Repressed | 0 |
| TNIK     | 8092095           | 9.655763    | 9.315246667  | 0.964734394 | 0.011146681 | Repressed | 1 |
| MX2      | 8068697           | 4.974988    | 5.158207667  | 1.036828163 | 0.011178212 | Induced   | 1 |
| FRRS1    | 7917954           | 8.445987    | 7.835468     | 0.927714902 | 0.011178926 | Repressed | 0 |
| TFB1M    | 8130438           | 10.07537333 | 9.679405667  | 0.960699455 | 0.011181519 | Repressed | 1 |
| OSGEPL1  | 8057689           | 9.241546    | 8.751814333  | 0.947007604 | 0.011200987 | Repressed | 0 |
| MAP2K5   | 7984408           | 8.221436333 | 7.947103     | 0.966631946 | 0.011314717 | Repressed | 0 |
| GPR126   | 8122365           | 9.656698    | 9.246015     | 0.957471695 | 0.011332173 | Repressed | 0 |
| SRPK2    | 8142036           | 10.64745667 | 10.51144     | 0.987225431 | 0.011338683 | Repressed | 1 |
| HPS4     | 8075063           | 10.47164667 | 10.053461    | 0.960064956 | 0.011358394 | Repressed | 1 |
| GALNT12  | 8156770           | 6.833296    | 6.383281667  | 0.934143884 | 0.011368661 | Repressed | 0 |
| SLC35E1  | 8035177           | 9.104948    | 9.012034667  | 0.989795292 | 0.011371504 | Repressed | 1 |
| UNC93A   | 8123388           | 5.745848333 | 6.006957667  | 1.04544313  | 0.01138251  | Induced   | 0 |
| CAMSA1   | 8165046           | 9.544458667 | 9.36837      | 0.981550691 | 0.011387018 | Repressed | 0 |
| IL8      | 8095680           | 7.307360333 | 8.252666333  | 1.12936354  | 0.011400535 | Induced   | 0 |
| ADRBK2   | 8072015           | 9.589350333 | 8.966797     | 0.934035851 | 0.011411333 | Repressed | 1 |
| C1orf103 | 7918467           | 10.56593    | 10.75654333  | 1.018040374 | 0.011424272 | Induced   | 1 |
| OR51G2   | 7946011           | 5.447324667 | 5.647046667  | 1.036664237 | 0.011476974 | Induced   | 0 |
| HINT3    | 8121886           | 9.026410667 | 8.809947     | 0.976018855 | 0.011492359 | Repressed | 0 |
| RARG     | 7963631           | 7.909534    | 7.881793     | 0.996492714 | 0.011502201 | Repressed | 1 |
| RRRF1    | 7912157           | 11.48919333 | 11.71498333  | 1.019652381 | 0.011516671 | Induced   | 0 |
| AP1S3    | 8059350           | 9.735472    | 9.355891667  | 0.961010588 | 0.011521857 | Repressed | 1 |
| PAPA     | 8073826           | 7.717863333 | 7.133666     | 0.92430582  | 0.011569641 | Repressed | 0 |
| GPR37    | 8142687           | 6.886479    | 6.699520333  | 0.972851341 | 0.011570281 | Repressed | 0 |
| C20orf72 | 8061129           | 11.815566   | 11.76694667  | 1.013024341 | 0.011595495 | Induced   | 1 |
| PARP14   | 8082100           | 9.225652    | 9.280893333  | 1.005987797 | 0.011597328 | Induced   | 0 |
| TMEM145  | 8029219           | 6.670414    | 6.833183     | 1.024401634 | 0.011642066 | Induced   | 0 |
| SEMA6A   | 8113666           | 9.833571    | 8.904297333  | 0.905499877 | 0.011687586 | Repressed | 1 |
| TM4SF1   | 8094141           | 11.35826667 | 10.68983     | 0.941149765 | 0.011713454 | Repressed | 1 |
| NDUF52   | 7906703           | 10.98537    | 10.83557     | 0.986363682 | 0.011735121 | Repressed | 0 |
| PTPRJ    | 7939839           | 9.260626667 | 8.567932333  | 0.925200058 | 0.011759114 | Repressed | 1 |
| P2RX2    | 7960099           | 6.486905333 | 6.730687333  | 1.037580632 | 0.01176331  | Induced   | 0 |
| TMEM33   | 8094830           | 10.85979667 | 10.78199333  | 0.992835655 | 0.01183087  | Repressed | 0 |
| METTL1   | 8171876/7964548   | 7.7847565   | 7.283734     | 0.934185681 | 0.011858463 | Repressed | 0 |
| GM2A     | 8109344           | 10.031183   | 9.641871667  | 0.961189888 | 0.011858564 | Repressed | 1 |
| ID1      | 7931754           | 11.40458    | 11.74691333  | 1.03001718  | 0.011865334 | Induced   | 1 |
| ETFB     | 8038792           | 9.282939    | 9.060556667  | 0.976043973 | 0.011875638 | Repressed | 0 |
| JAK2     | 8154178           | 7.424854667 | 6.975412     | 0.939467816 | 0.011915441 | Repressed | 0 |
| UBTD2    | 8115806           | 9.114231333 | 9.004405     | 0.987950017 | 0.011925468 | Repressed | 1 |
| MDH1     | 8042259           | 11.56711    | 11.31836     | 0.978495067 | 0.011940438 | Repressed | 0 |
| NRG3     | 7928736           | 7.821093    | 7.301074     | 0.9335107   | 0.011952169 | Repressed | 0 |
| PCGF1    | 8053187           | 8.986072333 | 8.688968333  | 0.966937279 | 0.011968445 | Repressed | 1 |
| FNIL2    | 8045736           | 10.12494667 | 9.917662     | 0.979527332 | 0.011978082 | Repressed | 1 |
| C7orf23  | 8140730           | 9.872586667 | 9.675845333  | 0.980071957 | 0.011994961 | Repressed | 1 |
| NMRAL1   | 7999149           | 8.615925333 | 8.422084     | 0.977501972 | 0.012031609 | Repressed | 1 |
| ARID5B   | 7927732           | 9.705634667 | 10.09815333  | 1.040442349 | 0.012068495 | Induced   | 1 |
| CDC43    | 8016088           | 10.23625    | 10.08617     | 0.985338381 | 0.012075562 | Repressed | 1 |
| TMM8B    | 7951679           | 9.420077    | 9.577305667  | 1.016690805 | 0.012081569 | Induced   | 0 |
| C11orf51 | 7950128           | 10.13197    | 9.637438     | 0.951190933 | 0.012095928 | Repressed | 0 |
| C11orf31 | 7940070           | 8.508548667 | 8.317352333  | 0.977528913 | 0.012123454 | Repressed | 0 |
| GFP11    | 8052762           | 11.71541333 | 11.87478667  | 1.013603731 | 0.01213277  | Induced   | 0 |
| DXH36    | 8091562           | 10.76999667 | 10.84899667  | 1.007335193 | 0.012171554 | Induced   | 0 |
| ZNF160   | 8039034/8036224   | 8.5980125   | 8.766600333  | 1.018746647 | 0.012178275 | Induced   | 0 |
| PLSCR1   | 8091327           | 11.11245667 | 10.84881667  | 0.976275273 | 0.012186122 | Repressed | 1 |
| OXNAD1   | 8078173           | 9.405250667 | 9.257972333  | 0.984340839 | 0.012186135 | Repressed | 0 |
| DDX5     | 8017634           | 12.37287    | 12.35714667  | 0.998729209 | 0.01227867  | Repressed | 0 |
| UST      | 8122660           | 8.701106333 | 8.377178667  | 0.962771669 | 0.012289815 | Repressed | 0 |
| C1orf114 | 7922152           | 4.665772    | 4.83273      | 1.035783575 | 0.012290295 | Induced   | 0 |
| C12orf5  | 7953211           | 10.1979     | 10.25086     | 1.005193226 | 0.012292602 | Induced   | 0 |
| INHBC    | 7956423           | 5.417288    | 5.636823     | 1.04052489  | 0.012297833 | Induced   | 0 |
| DDX17    | 8076077           | 11.88839667 | 11.69482667  | 0.983717737 | 0.012301424 | Repressed | 0 |
| C11orf65 | 7951521           | 5.265987    | 5.030187667  | 0.955222196 | 0.012364949 | Repressed | 0 |
| KLF13    | 7982326           | 8.685050667 | 8.823985667  | 1.015997028 | 0.012366718 | Induced   | 0 |
| PRPS1    | 8169240           | 11.19515667 | 11.32451333  | 1.011554699 | 0.01238421  | Induced   | 0 |
| GHSR     | 8092165           | 6.533473333 | 6.712597     | 1.0274163   | 0.012390537 | Induced   | 0 |
| PPM1D    | 8008922           | 9.60447     | 9.737058333  | 1.013804857 | 0.012410044 | Induced   | 0 |
| CNN2     | 8107408           | 8.691902667 | 7.963633667  | 0.916212937 | 0.012415939 | Repressed | 0 |
| FAM40A   | 7903827           | 8.821150667 | 8.513883667  | 0.965167016 | 0.012430343 | Repressed | 0 |
| TMEM164  | 8169365           | 8.038138333 | 7.560504667  | 0.940579069 | 0.012445522 | Repressed | 0 |
| TTLL4    | 8048411           | 9.774839    | 9.597270333  | 0.981834108 | 0.012454561 | Repressed | 1 |
| OR7D4    | 8033740           | 6.719781333 | 6.929116333  | 1.031152055 | 0.012485163 | Induced   | 0 |
| PREL1    | 7908924           | 6.233796    | 6.490048     | 1.041106895 | 0.012493686 | Induced   | 0 |
| MAGED1   | 8167656           | 10.64232    | 10.41610333  | 0.97874367  | 0.012509948 | Repressed | 1 |
| CD99L2   | 8175647           | 7.684113667 | 7.312088333  | 0.951585134 | 0.012520887 | Repressed | 1 |
| PCGF3    | 8093398           | 7.713578667 | 7.569426     | 0.981311883 | 0.012525524 | Repressed | 0 |
| IMP2     | 8089185           | 4.632387667 | 4.949        | 1.068347547 | 0.012532128 | Induced   | 1 |
| LSM7     | 8032480           | 9.267985667 | 9.092556333  | 0.981071471 | 0.012537471 | Repressed | 1 |
| STIL     | 7915926           | 9.644474333 | 9.707274333  | 1.006511501 | 0.012548198 | Induced   | 0 |
| MBNL2    | 7969677           | 10.47257667 | 10.70846667  | 1.022524543 | 0.012581908 | Induced   | 1 |

|          |                    |             |             |             |             |           |   |
|----------|--------------------|-------------|-------------|-------------|-------------|-----------|---|
| PRKAB2   | 7919305            | 8.753148    | 8.943496333 | 1.021746272 | 0.012617101 | Induced   | 0 |
| TMTc4    | 7972579            | 8.590809333 | 8.183412333 | 0.952577576 | 0.012621253 | Repressed | 1 |
| WDR31    | 8163491            | 6.967990667 | 7.083624    | 1.016594932 | 0.012656308 | Induced   | 0 |
| CCDC77   | 7952914            | 9.73511333  | 9.377899333 | 0.96330684  | 0.012674107 | Repressed | 0 |
| PKD1L1   | 8139534            | 5.776608333 | 5.923746    | 1.02547129  | 0.012680303 | Induced   | 1 |
| TM4SF20  | 8059525            | 4.044952    | 4.142801    | 1.024190398 | 0.012703187 | Induced   | 0 |
| HIST1H4B | 8124385            | 9.031508    | 8.611072    | 0.953447863 | 0.012720576 | Repressed | 1 |
| PLCB3    | 7940924            | 7.637513    | 7.504032333 | 0.982523019 | 0.012725203 | Repressed | 0 |
| STRA6    | 7990309            | 6.055504    | 6.296436667 | 1.039787385 | 0.01272525  | Induced   | 0 |
| OR4D6    | 7940175            | 5.180189333 | 5.308899333 | 1.024846582 | 0.01274591  | Induced   | 0 |
| TNFAIP8  | 8107520            | 6.775537333 | 6.59274     | 0.973020984 | 0.01279495  | Repressed | 1 |
| ZBTB1    | 7975068            | 9.623373    | 9.918649333 | 1.030683247 | 0.012861749 | Induced   | 0 |
| DBNL     | 8132539            | 8.424970667 | 8.152926333 | 0.967709759 | 0.012882374 | Repressed | 0 |
| TMEM9B   | 7946439            | 9.223225667 | 8.941140667 | 0.969415798 | 0.01292643  | Repressed | 1 |
| KRT18    | 7969574/815472577  | 10.78146844 | 11.04311111 | 1.024269513 | 0.012956663 | Induced   | 0 |
| TMSB10   | 8043100            | 12.31085    | 12.19852    | 0.990875528 | 0.012970343 | Repressed | 1 |
| IRF1     | 8114010            | 6.818501    | 7.170032333 | 1.051555515 | 0.013012284 | Induced   | 0 |
| WHSC1L1  | 8150287            | 9.900494333 | 9.766389667 | 0.98645475  | 0.013021345 | Repressed | 1 |
| TBC1D5   | 8085689            | 8.317271667 | 8.097380667 | 0.973562124 | 0.013057056 | Repressed | 0 |
| PRICKLE1 | 7962375            | 6.430338333 | 6.746524    | 1.049170922 | 0.013062352 | Induced   | 0 |
| ZNF740   | 7955721            | 8.510317    | 8.125995333 | 0.954840499 | 0.013096066 | Repressed | 0 |
| LRP8     | 7916282            | 8.351007    | 8.052297667 | 0.964230741 | 0.013114917 | Repressed | 1 |
| KIAA0319 | 8124240            | 5.354677    | 5.585219333 | 1.043054387 | 0.01311652  | Induced   | 0 |
| IFIT81   | 7958620            | 8.302349333 | 7.470947    | 0.899859389 | 0.013145142 | Repressed | 0 |
| PLA2G3   | 8075468            | 6.375533667 | 6.539519333 | 1.025721089 | 0.01314662  | Induced   | 0 |
| C6orf108 | 8126524            | 8.140686    | 7.817045333 | 0.960244055 | 0.013158793 | Repressed | 0 |
| HMCN1    | 7908204            | 8.378805    | 8.009269667 | 0.955896416 | 0.013162309 | Repressed | 1 |
| HIST1H4L | 8124534            | 10.42155333 | 10.24215    | 0.982785356 | 0.013203049 | Repressed | 1 |
| ITGBL1   | 7969861            | 8.334550667 | 7.899824    | 0.947840419 | 0.013222464 | Repressed | 0 |
| C10orf11 | 7928534            | 8.045742333 | 7.686621333 | 0.95365088  | 0.013238021 | Repressed | 1 |
| DENND2D  | 7918487            | 6.913683667 | 6.654648    | 0.962532902 | 0.01331711  | Repressed | 0 |
| SNCA     | 8101762            | 11.36843    | 11.11961333 | 0.978113366 | 0.013319099 | Repressed | 0 |
| C3orf59  | 8092765            | 10.08913667 | 10.31592667 | 1.022478633 | 0.013353944 | Induced   | 1 |
| USH2A    | 7924233            | 4.621720667 | 4.783354333 | 1.034972617 | 0.013355412 | Induced   | 1 |
| ZBTB10   | 8147040            | 9.510016    | 9.760069667 | 1.026293717 | 0.013362695 | Induced   | 0 |
| WDR26    | 7924582            | 10.01473333 | 9.915204667 | 0.990061776 | 0.013421035 | Repressed | 0 |
| PRPF4B   | 8116664            | 9.826073    | 9.638752    | 0.980918013 | 0.0134284   | Repressed | 0 |
| ZCCHC8   | 7967287            | 9.792841    | 9.937334333 | 1.014754996 | 0.013487244 | Induced   | 1 |
| TFAP2D   | 8120184            | 4.283406333 | 4.210944    | 0.983083012 | 0.013505546 | Repressed | 0 |
| TBC1D14  | 8093976            | 9.668314667 | 9.148143667 | 0.946198379 | 0.013521853 | Repressed | 0 |
| TN3A2    | 8117435            | 8.968403    | 8.448693667 | 0.942051073 | 0.013555824 | Repressed | 1 |
| DIP2B    | 7953756            | 9.983704667 | 9.687365667 | 0.970317732 | 0.01357771  | Repressed | 1 |
| ALS2CR4  | 8058258            | 8.877567    | 8.593014667 | 0.967947036 | 0.013584506 | Repressed | 0 |
| ROPN1    | 8090152/8082261    | 7.313088167 | 6.7677115   | 0.924988943 | 0.013608137 | Repressed | 0 |
| ROPN1B   | 8090152/8082261    | 7.313088167 | 6.7677115   | 0.924988943 | 0.013608137 | Repressed | 0 |
| FIG4     | 8121429            | 8.665901    | 8.141635667 | 0.939502501 | 0.013612707 | Repressed | 1 |
| HPDL     | 7901087            | 7.769847667 | 7.126426    | 0.917189925 | 0.013614265 | Repressed | 1 |
| SLC44A1  | 8157038            | 10.85431667 | 10.2041     | 0.940096029 | 0.013630809 | Repressed | 1 |
| TMTc1    | 7962058            | 8.220367667 | 7.729425    | 0.940272286 | 0.013711552 | Repressed | 1 |
| C19orf42 | 8035193            | 9.998710667 | 9.789995333 | 0.979125775 | 0.013714303 | Repressed | 1 |
| GLA      | 8174076            | 9.960529667 | 9.696115667 | 0.973453821 | 0.013721312 | Repressed | 0 |
| HIST1H3H | 8117583/8117589    | 8.370080667 | 7.822643667 | 0.934163487 | 0.013736006 | Repressed | 1 |
| FNIP2    | 8098103            | 9.831302    | 10.09015    | 1.026328964 | 0.013782723 | Induced   | 0 |
| SPAG7    | 8011765            | 9.142797    | 8.822819333 | 0.96502212  | 0.013793267 | Repressed | 1 |
| PIF      | 7928589            | 10.76998667 | 10.96364    | 1.017980833 | 0.013798022 | Induced   | 1 |
| TMEM123  | 7951207            | 11.36592667 | 11.19005667 | 0.984526559 | 0.013818095 | Repressed | 0 |
| NSDHL    | 8170590            | 10.05529    | 10.22878333 | 1.017253936 | 0.013841413 | Induced   | 0 |
| ADAM23   | 8047788            | 8.054206667 | 7.507095    | 0.932071315 | 0.0138662   | Repressed | 0 |
| TPD52L2  | 8064191            | 10.51527333 | 10.72996667 | 1.020417285 | 0.013892662 | Induced   | 1 |
| SP3      | 8056798            | 9.800452    | 9.971749667 | 1.017478548 | 0.013916877 | Induced   | 0 |
| KIAA0564 | 7971246            | 8.328026333 | 8.028171667 | 0.96399451  | 0.013919221 | Repressed | 0 |
| C20orf26 | 8061272            | 7.828206667 | 7.521247667 | 0.960788082 | 0.013929904 | Repressed | 1 |
| LSM4     | 8035449            | 10.74596333 | 10.80911    | 1.005876315 | 0.013941191 | Induced   | 1 |
| ATG4D    | 8025659            | 8.814344    | 8.874288333 | 1.006800771 | 0.013960054 | Induced   | 0 |
| CST1     | 8065412            | 8.175768    | 7.689564333 | 0.940531132 | 0.013962828 | Repressed | 0 |
| ATP6V0A1 | 8007228            | 9.417788333 | 8.971438    | 0.95260561  | 0.013976791 | Repressed | 0 |
| FUT10    | 8150165            | 7.688546    | 7.453578333 | 0.969439259 | 0.013979775 | Repressed | 0 |
| ATP6V0D2 | 8147145            | 11.69256667 | 11.25601667 | 0.962664314 | 0.013981226 | Repressed | 1 |
| CAPN2    | 7909987            | 10.67694667 | 10.61308333 | 0.994018577 | 0.013981555 | Repressed | 0 |
| ECM1     | 7905220            | 9.113624333 | 8.659686333 | 0.950191276 | 0.013996962 | Repressed | 1 |
| DEP2     | 8002194            | 6.338545667 | 6.494966    | 1.024677638 | 0.014004362 | Induced   | 0 |
| DZIP1    | 7972336            | 8.372887667 | 8.147690333 | 0.973103982 | 0.01400767  | Repressed | 0 |
| ZNF57    | 8024532            | 8.484023667 | 8.663864    | 1.021197528 | 0.014034348 | Induced   | 0 |
| FIGNL1   | 8139632            | 9.687548    | 9.372877333 | 0.967518028 | 0.014077619 | Repressed | 1 |
| GATA3    | 7926105            | 7.252921    | 7.553133    | 1.041391875 | 0.014091271 | Induced   | 0 |
| EIF2C4   | 7900009            | 8.034916    | 7.791069667 | 0.969651664 | 0.014110998 | Repressed | 0 |
| CHMP2A   | 8039796            | 10.51386667 | 10.27254333 | 0.977047138 | 0.014112832 | Repressed | 0 |
| KIAA1143 | 7978542/8086498    | 9.951334502 | 9.771607    | 0.981937195 | 0.014125149 | Repressed | 1 |
| METRNL   | 8010897            | 7.838518    | 8.223158667 | 1.049070585 | 0.014126866 | Induced   | 1 |
| RPS20    | 8150872            | 12.34998667 | 12.21105667 | 0.988750595 | 0.014147485 | Repressed | 1 |
| MDGA1    | 8126102            | 6.818488    | 6.462442667 | 0.947782363 | 0.01417238  | Repressed | 1 |
| PARP9    | 8090018            | 8.843279333 | 8.413469667 | 0.951397027 | 0.014200948 | Repressed | 1 |
| MTR      | 7910752            | 8.463955333 | 8.227038667 | 0.972008753 | 0.014279916 | Repressed | 0 |
| POLC3    | 8040278            | 9.682087333 | 9.50389     | 0.981595153 | 0.014280181 | Repressed | 1 |
| C6orf218 | 8123876            | 11.21643667 | 10.51801    | 0.937731858 | 0.014295449 | Repressed | 1 |
| EPDR1    | 8132369            | 9.404016    | 9.531853    | 1.013593873 | 0.014326872 | Induced   | 1 |
| ZNF658B  | 8161346/8161326/81 | 6.860551    | 6.617911444 | 0.964631363 | 0.014338121 | Repressed | 0 |
| ZNF658   | 8161346/8161326/81 | 6.860551    | 6.617911444 | 0.964631363 | 0.014338121 | Repressed | 0 |
| CCNE1    | 8027402            | 8.826322    | 8.593137667 | 0.973580804 | 0.014345367 | Repressed | 1 |
| CBG      | 8159491            | 7.146187667 | 7.511833    | 1.051166489 | 0.014388762 | Induced   | 0 |
| RNF175   | 8103244            | 8.587502667 | 8.237402333 | 0.959231415 | 0.014395835 | Repressed | 0 |
| COG6     | 7988711            | 10.51123333 | 10.37728    | 0.987256174 | 0.014425319 | Repressed | 0 |
| C2orf49  | 8044127            | 9.788825    | 9.670214    | 0.98788302  | 0.01442746  | Repressed | 1 |
| ARF4     | 8088339            | 12.21435    | 12.34248333 | 1.010490393 | 0.014429288 | Induced   | 0 |
| MF12     | 8093171            | 9.477552    | 9.114241667 | 0.961666226 | 0.014441071 | Repressed | 1 |
| C11orf49 | 7939723            | 7.326347667 | 6.880288    | 0.939115684 | 0.014452117 | Repressed | 1 |
| C1orf172 | 7914003            | 6.853951    | 7.058414333 | 1.029831455 | 0.01445248  | Induced   | 0 |
| DSCR4    | 8070286            | 5.805816333 | 6.032586333 | 1.039059107 | 0.014463739 | Induced   | 0 |
| MGRN1    | 7992998            | 8.241774333 | 8.313256    | 1.008673092 | 0.014486979 | Induced   | 1 |

|           |                    |             |             |             |             |           |   |
|-----------|--------------------|-------------|-------------|-------------|-------------|-----------|---|
| MAN2B2    | 8093916            | 6.758891    | 6.839714667 | 1.011958125 | 0.01449101  | Induced   | 0 |
| BMPER     | 8132250            | 5.700649    | 5.862319667 | 1.028360046 | 0.014494348 | Induced   | 1 |
| NFKB1     | 8081386            | 9.60999667  | 9.349099    | 0.972851126 | 0.014558282 | Repressed | 0 |
| KCNMB1    | 8115756            | 5.87075     | 6.003062667 | 1.022537609 | 0.014565101 | Induced   | 0 |
| C13orf18  | 7971486            | 7.453690333 | 6.804612667 | 0.912918616 | 0.014578159 | Repressed | 1 |
| TBC1D8    | 8054308            | 8.378068    | 8.176432    | 0.975932876 | 0.014583536 | Repressed | 1 |
| MYO1E     | 7989277            | 10.70913    | 10.46849333 | 0.977529765 | 0.01462961  | Repressed | 1 |
| TM9SF4    | 8061685            | 10.08696367 | 9.738757333 | 0.965479569 | 0.01463076  | Repressed | 1 |
| SP8       | 8138474            | 6.271297    | 6.388508333 | 1.018690126 | 0.014714887 | Induced   | 0 |
| STX1A     | 8140113            | 8.471258    | 8.682668333 | 1.024956191 | 0.014729307 | Induced   | 1 |
| KRTAP9-9  | 8007123/8007134/80 | 6.684837333 | 6.870668222 | 1.027626873 | 0.014736866 | Induced   | 0 |
| KRTAP9-8  | 8007123/8007134/80 | 6.684837333 | 6.870668222 | 1.027626873 | 0.014736866 | Induced   | 0 |
| KRTAP9-4  | 8007123/8007134/80 | 6.684837333 | 6.870668222 | 1.027626873 | 0.014736866 | Induced   | 0 |
| C1orf31   | 7910630            | 9.079437    | 8.915228667 | 0.98191426  | 0.01473711  | Repressed | 0 |
| GSTZ1     | 7975956            | 8.672665333 | 8.399030667 | 0.968448608 | 0.014759575 | Repressed | 0 |
| AEBP1     | 8132557            | 8.97102     | 8.66763     | 0.966181103 | 0.014770507 | Repressed | 1 |
| CACNG7    | 8031076            | 6.581882333 | 6.883238667 | 1.045785737 | 0.014777114 | Induced   | 0 |
| TRIB3     | 8060344            | 8.960447333 | 9.333188667 | 1.041598518 | 0.014853953 | Induced   | 0 |
| CCDC28A   | 8122327            | 8.474846    | 8.331374667 | 0.983070921 | 0.014857716 | Repressed | 0 |
| UPP1      | 8132725            | 10.34326    | 10.51606333 | 1.016706854 | 0.01485854  | Induced   | 0 |
| USP50     | 7988705            | 4.242402667 | 4.426334    | 1.043355463 | 0.014862856 | Induced   | 0 |
| ROPN1L    | 8104492            | 6.306198667 | 6.635835667 | 1.052271902 | 0.014863792 | Induced   | 0 |
| IRX3      | 8001449            | 8.931679    | 9.072921    | 1.0158136   | 0.014864879 | Induced   | 0 |
| UBE2L6    | 7948274            | 8.631952333 | 8.551964    | 0.99073346  | 0.014878471 | Repressed | 0 |
| GABRG1    | 8100097            | 3.961297333 | 4.160783333 | 1.050358755 | 0.014879979 | Induced   | 0 |
| AGTR2     | 8169492            | 3.877925333 | 4.179215    | 1.077693519 | 0.014900211 | Induced   | 0 |
| ZNF330    | 8097543            | 10.99781333 | 11.18322667 | 1.016859109 | 0.01495364  | Induced   | 1 |
| FAM46A    | 8127778            | 10.15719333 | 10.33196    | 1.017206197 | 0.014958248 | Induced   | 0 |
| TXNIP     | 7904726            | 13.00688333 | 13.37227333 | 1.028092049 | 0.014960845 | Induced   | 1 |
| FANGC     | 8160935            | 8.143683333 | 7.927919667 | 0.973507787 | 0.015006582 | Repressed | 0 |
| SLC10A3   | 8176109            | 8.456718    | 8.784460333 | 1.038755263 | 0.015034057 | Induced   | 1 |
| CADM4     | 8037363            | 7.829205333 | 7.636946    | 0.975443314 | 0.015040728 | Repressed | 0 |
| HIST1H4F  | 8117422            | 10.53686    | 10.15047333 | 0.963329999 | 0.015069035 | Repressed | 0 |
| EML3      | 7948718            | 7.868397    | 7.586408    | 0.964161824 | 0.015079105 | Repressed | 1 |
| HGF11     | 8117172            | 6.920355333 | 7.175325    | 1.036843436 | 0.015085918 | Induced   | 0 |
| UACA      | 7990054            | 8.217828    | 8.048808333 | 0.979432562 | 0.015103022 | Repressed | 0 |
| NCAPD3    | 7952830            | 10.12619667 | 9.824290667 | 0.970185647 | 0.015112057 | Repressed | 1 |
| ETS1      | 7952601            | 11.56351333 | 11.45778333 | 0.990856585 | 0.015133292 | Repressed | 1 |
| OPN1MW2   | 8170825/8170816    | 6.0930325   | 6.378412334 | 1.046842176 | 0.015138823 | Induced   | 0 |
| ZC3H14    | 7976101            | 9.989182    | 10.11722667 | 1.012818334 | 0.015139362 | Induced   | 0 |
| ZNF563    | 8034370            | 3.699367667 | 3.826481333 | 1.034360917 | 0.015185047 | Induced   | 0 |
| LHFP13    | 8135262            | 6.138972667 | 6.405259667 | 1.043376476 | 0.015186956 | Induced   | 1 |
| FAM64A    | 8004167            | 8.924705667 | 8.503251333 | 0.952776669 | 0.015216923 | Repressed | 0 |
| GLS       | 8047097            | 12.00885333 | 12.23207333 | 1.018587953 | 0.015275307 | Induced   | 0 |
| STX17     | 8156861            | 8.515824333 | 8.219952667 | 0.965256251 | 0.015276281 | Repressed | 0 |
| GAPDHS    | 8027864            | 8.171895    | 7.947602667 | 0.972553204 | 0.015278768 | Repressed | 0 |
| OAF       | 7944530            | 8.834366667 | 8.717486    | 0.986769774 | 0.015279018 | Repressed | 1 |
| GRAMD4    | 8073890            | 8.541208    | 8.17592     | 0.957232279 | 0.015353981 | Repressed | 1 |
| PCCA      | 7969835            | 8.059219333 | 7.684689667 | 0.953527798 | 0.015355558 | Repressed | 1 |
| ASIP      | 8061982            | 6.729254333 | 6.960150333 | 1.034312271 | 0.015356664 | Induced   | 0 |
| CTSB      | 8149330            | 11.61256333 | 11.39177    | 0.980986684 | 0.015359499 | Repressed | 0 |
| HIST1H2AI | 8117583/8117580    | 9.354226667 | 8.905432    | 0.951495943 | 0.01538009  | Repressed | 0 |
| RRAGC     | 7915160            | 10.03304333 | 10.14689    | 1.011347172 | 0.015397545 | Induced   | 0 |
| KPTN      | 8037898            | 6.604213333 | 6.463584333 | 0.978706169 | 0.01540013  | Repressed | 0 |
| PCTP      | 8008598            | 9.03103     | 8.906042667 | 0.986160235 | 0.015411723 | Repressed | 1 |
| GPC6      | 7969613            | 10.41828333 | 9.880716333 | 0.948401576 | 0.015414992 | Repressed | 1 |
| ANAPC4    | 8094408            | 7.824737    | 7.200523667 | 0.920225647 | 0.015427569 | Repressed | 1 |
| ABCC10    | 8119801            | 7.122824333 | 7.357062333 | 1.032885551 | 0.01544391  | Induced   | 0 |
| BRAP      | 7966427            | 10.7134     | 10.96981    | 1.023933579 | 0.015453651 | Induced   | 0 |
| DDAH1     | 7917347            | 6.612322    | 7.059786    | 1.067671236 | 0.015460943 | Induced   | 0 |
| CCNB1     | 8105828            | 11.55696667 | 11.35320333 | 0.982368788 | 0.015468272 | Repressed | 0 |
| KCNJ14    | 8030044            | 6.795656667 | 6.917369333 | 1.017910361 | 0.015470672 | Induced   | 0 |
| RHOT1     | 8006345            | 9.627682667 | 9.517047    | 0.988508588 | 0.015487424 | Repressed | 0 |
| OLFML2B   | 7921882            | 5.429650333 | 5.540738    | 1.020459451 | 0.015496301 | Induced   | 0 |
| TTC19     | 8005141            | 9.730242    | 9.503989667 | 0.976747512 | 0.01549975  | Repressed | 0 |
| FAM148B   | 7989473            | 7.891686333 | 8.259243    | 1.046575174 | 0.015521796 | Induced   | 0 |
| JARID2    | 8116998            | 9.724771667 | 9.435950333 | 0.970300451 | 0.015572124 | Repressed | 1 |
| SEMA3E    | 8140650            | 5.44566     | 5.197881333 | 0.954499791 | 0.015610098 | Repressed | 0 |
| RAD51L1   | 7975292            | 8.639157667 | 8.373524    | 0.969252365 | 0.015634989 | Repressed | 1 |
| MRPS14    | 7922462            | 9.038843    | 8.652706667 | 0.957280336 | 0.015636164 | Repressed | 0 |
| SIRPA     | 8060418            | 9.950017333 | 9.580572    | 0.96286988  | 0.015664619 | Repressed | 1 |
| TMEM88    | 8004691            | 6.532749333 | 6.684254667 | 1.023191665 | 0.015713688 | Induced   | 1 |
| ZMYM2     | 7967900            | 11.06349    | 11.22797    | 1.014866918 | 0.015733223 | Induced   | 0 |
| PAM       | 8107133            | 8.843608    | 8.568263    | 0.968865083 | 0.015752367 | Repressed | 1 |
| ERCC6L    | 8173506            | 9.23141     | 8.992296    | 0.974097781 | 0.015759786 | Repressed | 0 |
| ANGPTL2   | 8164200            | 9.056514    | 8.673129    | 0.957667487 | 0.015786953 | Repressed | 0 |
| PPF1BP2   | 7938231            | 6.992494667 | 6.899656667 | 0.986723193 | 0.015802497 | Repressed | 1 |
| MAP1LC3B  | 7959023/7997740    | 9.6799295   | 9.834599    | 1.015977803 | 0.015819936 | Induced   | 1 |
| C6orf153  | 8119661            | 9.077135667 | 8.92546     | 0.98329036  | 0.015831713 | Repressed | 0 |
| NNMT      | 7943998            | 9.141945    | 9.738845    | 1.065292451 | 0.015860348 | Induced   | 0 |
| C6orf72   | 8122689            | 9.490844667 | 9.365608667 | 0.986804546 | 0.015878154 | Repressed | 0 |
| NHLRC2    | 7930614            | 9.551732333 | 9.482223667 | 0.992722926 | 0.01587916  | Repressed | 1 |
| ZNF280D   | 7989159            | 7.986256333 | 7.639146667 | 0.956536623 | 0.015952209 | Repressed | 0 |
| RCCD1     | 7986186            | 8.098352333 | 7.869118333 | 0.971693748 | 0.01595693  | Repressed | 0 |
| FAM113A   | 8064557            | 8.135893333 | 7.923583    | 0.973904484 | 0.015962251 | Repressed | 1 |
| CIT       | 7966878            | 10.26274667 | 9.944122333 | 0.968953308 | 0.01597001  | Repressed | 1 |
| NIPSNAP3A | 8157021            | 7.133235    | 6.637915333 | 0.930561706 | 0.0159955   | Repressed | 0 |
| METTL6    | 8085571            | 9.235274667 | 9.114207667 | 0.986890807 | 0.016009735 | Repressed | 0 |
| JHDM1D    | 8143341            | 8.885736667 | 9.174406333 | 1.032486858 | 0.01602847  | Induced   | 0 |
| DCTN5     | 7994102            | 10.61595333 | 10.71719333 | 1.009536591 | 0.016069574 | Induced   | 0 |
| TRAF3IP2  | 8128939            | 9.574945333 | 8.992810667 | 0.939202299 | 0.016089374 | Repressed | 0 |
| ARF1      | 7910229            | 11.73507667 | 11.84330667 | 1.009222777 | 0.01609281  | Induced   | 1 |
| CIB3      | 8035110            | 5.916833667 | 6.15247     | 1.039824735 | 0.016124479 | Induced   | 0 |
| RHOBTB3   | 8106986            | 10.67329    | 10.76146    | 1.008260808 | 0.016133962 | Induced   | 0 |
| OR3A3     | 8003812            | 6.432791333 | 6.818127333 | 1.059901834 | 0.016162693 | Induced   | 0 |
| NXK3-1    | 8149811            | 8.180963333 | 8.422719333 | 1.029551043 | 0.016166908 | Induced   | 1 |
| EDNRB     | 7972157/8053467    | 7.731700333 | 7.542104834 | 0.986736208 | 0.016179054 | Repressed | 0 |
| AFTPH     | 8042291            | 9.824071667 | 9.939347    | 1.011733967 | 0.016183923 | Induced   | 0 |
| MLANA     | 8154285            | 12.63228667 | 12.46013333 | 0.986371958 | 0.016291955 | Repressed | 0 |



|             |                 |             |             |             |             |           |   |
|-------------|-----------------|-------------|-------------|-------------|-------------|-----------|---|
| FAM20B      | 7907680         | 10.106671   | 9.806925    | 0.970341767 | 0.01799583  | Repressed | 0 |
| ITR         | 8020795         | 6.066184333 | 6.237094333 | 1.028174218 | 0.018006239 | Induced   | 1 |
| DSG4        | 8020740         | 4.632936    | 4.746888333 | 1.024596138 | 0.018018853 | Induced   | 0 |
| GOLM1       | 8162117         | 10.50685667 | 10.28612667 | 0.978991814 | 0.018024005 | Repressed | 0 |
| DHRS7       | 7979473         | 10.25199333 | 10.05070433 | 0.980365867 | 0.018040504 | Repressed | 0 |
| CAMK2A      | 8115122         | 7.036316333 | 7.270927667 | 1.03334292  | 0.018100109 | Induced   | 1 |
| SFXN4       | 7936641         | 9.922854    | 9.761704333 | 0.983759746 | 0.018100684 | Repressed | 1 |
| EML2        | 8037621         | 8.280984667 | 7.848750333 | 0.947803993 | 0.01812317  | Repressed | 1 |
| C1orf21     | 7908161         | 9.388200333 | 8.94235     | 0.952509499 | 0.018133658 | Repressed | 1 |
| TRIM36      | 8113577         | 7.357074333 | 7.525257667 | 1.022860083 | 0.018138504 | Induced   | 0 |
| NMT2        | 7932227         | 8.341858    | 8.194435333 | 0.982327358 | 0.018161069 | Repressed | 0 |
| PRKAR1A     | 8009457         | 12.91957333 | 13.03347333 | 1.008816081 | 0.018161487 | Induced   | 1 |
| HECTD2      | 7929145         | 7.597643333 | 7.767226667 | 1.022320518 | 0.018165055 | Induced   | 1 |
| OSBP        | 7948379         | 10.43269333 | 10.59226    | 1.015294868 | 0.018193372 | Induced   | 1 |
| SERPINA4    | 7976481         | 5.673966333 | 5.867408667 | 1.034092965 | 0.018202759 | Induced   | 0 |
| C2orf64     | 8054131         | 8.732983333 | 8.520588    | 0.975678949 | 0.018211362 | Repressed | 0 |
| TULP4       | 8123044         | 8.693324333 | 8.345863667 | 0.960031324 | 0.018225179 | Repressed | 0 |
| CDK4        | 7964522         | 11.10293    | 10.82667333 | 0.97511858  | 0.018286973 | Repressed | 0 |
| AOC2        | 8007414         | 6.96824     | 7.271402333 | 1.043506299 | 0.018306809 | Induced   | 0 |
| PAK7        | 8064952         | 5.323536333 | 5.441467667 | 1.022152818 | 0.018316351 | Induced   | 0 |
| CTGF        | 8129562         | 8.617345333 | 8.990856667 | 1.04334413  | 0.018332974 | Induced   | 0 |
| BIN3        | 8149707         | 10.29945333 | 9.757142    | 0.94734562  | 0.01835928  | Repressed | 1 |
| GPR158      | 7926715         | 8.100602667 | 7.343547667 | 0.906543373 | 0.018385561 | Repressed | 0 |
| RAE11L      | 8130173         | 7.281564    | 7.511911    | 1.031634275 | 0.018436052 | Induced   | 0 |
| EMILIN2     | 8019912         | 9.713616333 | 9.260720333 | 0.95337514  | 0.018442641 | Repressed | 0 |
| KIAA0247    | 7975361         | 7.451618333 | 7.291470667 | 0.978508337 | 0.018464417 | Repressed | 1 |
| CXorf23     | 8171708         | 6.907980667 | 6.678006333 | 0.966708892 | 0.018511908 | Repressed | 0 |
| B3GNT7      | 8049075         | 6.702714333 | 7.087121333 | 1.057350945 | 0.018517374 | Induced   | 1 |
| C12orf49    | 7966738         | 9.856393667 | 9.537606    | 0.987698548 | 0.018521029 | Repressed | 1 |
| PSMB1       | 8130952         | 11.00780667 | 11.07555333 | 1.00615442  | 0.01855342  | Induced   | 0 |
| ARHGEF1     | 8029147         | 8.489543    | 8.418078    | 0.991581997 | 0.018554461 | Repressed | 0 |
| IER2        | 8028163         | 10.43784333 | 10.84534667 | 1.039040951 | 0.018569118 | Induced   | 0 |
| HOMER1      | 8112841         | 8.921334667 | 8.542959333 | 0.957587587 | 0.018617584 | Repressed | 0 |
| SLC4A1AP    | 8041015         | 11.60016667 | 11.7574     | 1.013554403 | 0.018621149 | Induced   | 0 |
| APFH        | 8079772         | 9.772156333 | 9.504344333 | 0.97259438  | 0.018671057 | Repressed | 1 |
| DDOST       | 7913256         | 10.39675667 | 10.20887333 | 0.981928659 | 0.018706401 | Repressed | 0 |
| PSMA1       | 7946728         | 11.60691333 | 11.48443333 | 0.989447668 | 0.018712772 | Repressed | 0 |
| FEM1C       | 8113616         | 9.922914    | 9.743849    | 0.981954394 | 0.018727932 | Repressed | 1 |
| GPC1        | 8049670         | 8.265561667 | 8.413005333 | 1.017838312 | 0.018782241 | Induced   | 1 |
| ZNF607      | 8036436         | 5.640447333 | 5.544282333 | 0.98295082  | 0.01878787  | Repressed | 0 |
| CKAP4       | 7966035         | 9.547715    | 9.457831    | 0.99058581  | 0.018790915 | Repressed | 0 |
| PSYFIP1     | 8019243         | 6.277038    | 6.467221333 | 1.030298261 | 0.018879513 | Induced   | 0 |
| PSMB4       | 7905395         | 12.38274667 | 12.19900333 | 0.985161343 | 0.018880835 | Repressed | 0 |
| HGS         | 8010638         | 9.828881    | 9.681290333 | 0.984983981 | 0.018883037 | Repressed | 1 |
| PARP4       | 7970602         | 10.50735667 | 10.21364    | 0.972046569 | 0.018884454 | Repressed | 0 |
| ITGBGALNAC3 | 7902425         | 7.329110667 | 6.954475    | 0.948883885 | 0.018937229 | Repressed | 1 |
| CSF3        | 8006999         | 7.953543    | 8.069591    | 1.01459073  | 0.018941163 | Induced   | 0 |
| COX7C       | 8106776         | 10.1119667  | 9.695731667 | 0.958910403 | 0.01895127  | Repressed | 0 |
| PAX9        | 7973974         | 8.266369667 | 8.054058667 | 0.974316295 | 0.018959033 | Repressed | 0 |
| MRPL53      | 8053165         | 10.16263667 | 9.865371333 | 0.970749192 | 0.018959036 | Repressed | 1 |
| CHD1L       | 7904883         | 9.760247    | 9.620090333 | 0.985640049 | 0.018967376 | Repressed | 1 |
| VCP         | 8160914         | 11.39801667 | 11.29081    | 0.99059427  | 0.019047479 | Repressed | 0 |
| FASTK       | 8143863         | 8.892013    | 8.840011    | 0.99415183  | 0.019050225 | Repressed | 1 |
| DHX32       | 7936949         | 9.639746    | 9.226249    | 0.95710499  | 0.019072149 | Repressed | 0 |
| SLFN5       | 8006531         | 10.64114667 | 10.88318333 | 1.022745356 | 0.019115434 | Induced   | 0 |
| KCNB1       | 8066921         | 5.868395333 | 6.088644    | 1.037531327 | 0.019118351 | Induced   | 1 |
| STK32A      | 8108981         | 7.424434333 | 6.724845333 | 0.905772081 | 0.019126584 | Repressed | 0 |
| FAM71E1     | 8038565/8030706 | 7.2424785   | 7.283853333 | 1.01099801  | 0.019155231 | Induced   | 0 |
| C19orf63    | 8038565/8030706 | 7.2424785   | 7.283853333 | 1.01099801  | 0.019155231 | Induced   | 0 |
| CLCC1       | 7903565/7918255 | 9.588663    | 9.244538667 | 0.964145593 | 0.019174486 | Repressed | 0 |
| UTP6        | 8014081         | 11.75807333 | 11.83472667 | 1.006519209 | 0.019192934 | Induced   | 0 |
| GALNT11     | 8137448         | 9.077378333 | 8.607817333 | 0.948271298 | 0.019197005 | Repressed | 1 |
| NT5C1A      | 7915238         | 6.562509667 | 6.760796    | 1.030215016 | 0.019213834 | Induced   | 0 |
| CAP2        | 8117054         | 9.429887    | 9.041661    | 0.95883026  | 0.019218632 | Repressed | 1 |
| PCBP4       | 8087806         | 7.790775667 | 7.516241667 | 0.96476166  | 0.019219758 | Repressed | 0 |
| TBC1D16     | 8019031         | 10.25547667 | 9.910631333 | 0.966374519 | 0.019220709 | Repressed | 1 |
| SRPX        | 8172043         | 11.13748    | 10.63708    | 0.955070626 | 0.019254459 | Repressed | 1 |
| THRSP       | 7942793         | 6.129561333 | 6.365604333 | 1.038508955 | 0.019260741 | Induced   | 0 |
| MPPED2      | 7947274         | 7.499300667 | 7.068459333 | 0.942549132 | 0.019306327 | Repressed | 1 |
| SLC23A2     | 8064808         | 9.719763    | 9.283569    | 0.95512298  | 0.019311164 | Repressed | 1 |
| CTSZ        | 8067279         | 10.52577333 | 10.43183    | 0.991074923 | 0.019319796 | Repressed | 0 |
| HLX         | 7909890         | 7.343723333 | 7.644699333 | 1.040984115 | 0.019352538 | Induced   | 0 |
| HIVEP3      | 7915392         | 5.846735    | 6.151462667 | 1.052119288 | 0.019353483 | Induced   | 1 |
| DENND3      | 8148476         | 6.213216    | 6.363308333 | 1.024156948 | 0.019374522 | Induced   | 0 |
| HPS5        | 7946988         | 9.875029333 | 9.732184333 | 0.985534727 | 0.019387076 | Repressed | 0 |
| CARS2       | 7972810         | 10.01879433 | 9.766112667 | 0.974779234 | 0.019394524 | Repressed | 1 |
| C20orf70    | 8061847         | 5.447486333 | 5.708508333 | 1.047916045 | 0.019398161 | Induced   | 0 |
| ST3GAL5     | 8053484         | 9.8305      | 9.451430667 | 0.961439466 | 0.019410908 | Repressed | 1 |
| TMEM190     | 8031475         | 7.338855333 | 7.610967667 | 1.037361011 | 0.019447298 | Induced   | 0 |
| CALCOCO2    | 8008113         | 10.15166333 | 10.01059933 | 0.986104346 | 0.019466139 | Repressed | 0 |
| NUBPL       | 7973826         | 7.924583    | 7.450858    | 0.940220829 | 0.019476827 | Repressed | 1 |
| ITGB8       | 8131666         | 10.57568667 | 9.77839667  | 0.924558374 | 0.019485089 | Repressed | 1 |
| CCR10       | 8015681         | 6.655005667 | 6.987752    | 1.049999406 | 0.019492929 | Induced   | 0 |
| CGN         | 7905406         | 6.98508     | 7.148277    | 1.023363655 | 0.019498747 | Induced   | 1 |
| CLEC3B      | 8079305         | 7.576321    | 7.839715667 | 1.03476551  | 0.019508454 | Induced   | 0 |
| AHCY        | 8065738         | 10.80950667 | 10.55794    | 0.976727276 | 0.019553857 | Repressed | 0 |
| MITF        | 8080938         | 12.02032667 | 11.51104333 | 0.95763149  | 0.01956674  | Repressed | 1 |
| NDUFV2      | 8039068/8020058 | 9.406142    | 9.247933667 | 0.983180355 | 0.019588942 | Repressed | 0 |
| DNAJC12     | 7933933         | 6.584243667 | 6.207491333 | 0.94277971  | 0.019593914 | Repressed | 0 |
| KCTD8       | 8100070         | 7.26385     | 7.397087    | 1.018342477 | 0.019678013 | Induced   | 0 |
| HSD11B1L    | 8024956         | 6.721489    | 6.812512333 | 1.013542138 | 0.01968067  | Induced   | 0 |
| DDX54       | 7958948/7966570 | 8.873049834 | 8.997249167 | 1.014974994 | 0.019713961 | Induced   | 1 |
| ASTE1       | 8090664         | 6.948539667 | 6.662411333 | 0.958821803 | 0.01971816  | Repressed | 0 |
| GPD2        | 8045816         | 11.48820333 | 11.33531333 | 0.986691566 | 0.019722554 | Repressed | 0 |
| EXOC2       | 8123524         | 9.041230333 | 8.817004667 | 0.975199651 | 0.01973958  | Repressed | 1 |
| ARRDC3      | 8113073         | 9.908740667 | 10.61623667 | 1.071401203 | 0.019807089 | Induced   | 0 |
| ZNF205      | 7992845         | 7.780620667 | 7.940011667 | 1.020485641 | 0.019817984 | Induced   | 0 |
| SAMD5       | 8122634         | 6.776694333 | 7.206579    | 1.063435747 | 0.019835317 | Induced   | 0 |
| PI3         | 8062927         | 6.721443    | 6.894520333 | 1.025750026 | 0.019852153 | Induced   | 0 |



|           |                    |             |             |             |             |           |   |
|-----------|--------------------|-------------|-------------|-------------|-------------|-----------|---|
| KBTBD8    | 8080911            | 9.487657333 | 9.651322667 | 1.017250342 | 0.019859572 | Induced   | 1 |
| LRR8C8D   | 7902883            | 10.01631167 | 9.659275333 | 0.96435451  | 0.019892683 | Repressed | 0 |
| TNFSF9    | 8025053            | 7.561671667 | 7.767496333 | 1.027219466 | 0.019896329 | Induced   | 0 |
| GPR152    | 7949796            | 6.791133333 | 6.936794667 | 1.021448752 | 0.019908049 | Induced   | 0 |
| PNMT      | 8006900            | 6.616756667 | 6.830536333 | 1.03230883  | 0.019926779 | Induced   | 0 |
| PARP16    | 7989759            | 7.639908    | 7.437592333 | 0.973518573 | 0.019947584 | Repressed | 0 |
| IL18      | 7951686            | 3.025103667 | 2.962554667 | 0.979323353 | 0.019955072 | Repressed | 0 |
| LTBR      | 7953321            | 9.414792333 | 9.199053333 | 0.977085103 | 0.019968958 | Repressed | 0 |
| FAM122B   | 8175269            | 8.455161667 | 8.233833667 | 0.973823327 | 0.019975037 | Repressed | 0 |
| RNF145    | 8115562            | 9.902032333 | 10.03964333 | 1.013897248 | 0.019992043 | Induced   | 1 |
| NGLY1     | 8085852            | 10.63520667 | 10.76158333 | 1.01188286  | 0.019993902 | Induced   | 1 |
| RSRC1     | 8083605            | 10.008727   | 9.867562333 | 0.985895842 | 0.020023869 | Repressed | 0 |
| EH3       | 8041225            | 5.825305667 | 5.990911    | 1.028428608 | 0.020069006 | Induced   | 0 |
| TBX19     | 7907146            | 6.737331333 | 6.948394667 | 1.031327439 | 0.020133832 | Induced   | 0 |
| ZNF34     | 8153896            | 6.811206    | 6.872224667 | 1.00895857  | 0.020141806 | Induced   | 1 |
| PLCG1     | 8062623            | 10.21129333 | 10.09553333 | 0.988663532 | 0.020175877 | Repressed | 1 |
| MED26     | 8035187            | 8.148574333 | 8.325234333 | 1.021679866 | 0.020185022 | Induced   | 0 |
| TYROBP    | 8036224            | 7.964081333 | 8.020348333 | 1.007067625 | 0.020206429 | Induced   | 0 |
| OTUB2     | 7976425            | 7.115764667 | 6.791345667 | 0.954408414 | 0.020261012 | Repressed | 1 |
| ANKH      | 8111101            | 8.316811    | 8.049254333 | 0.967829416 | 0.020267889 | Repressed | 0 |
| SNMPD1    | 7938100            | 8.356463333 | 8.189212667 | 0.979985472 | 0.020288988 | Repressed | 0 |
| TMEM106B  | 8131539            | 9.372155333 | 8.949666667 | 0.954920864 | 0.020292631 | Repressed | 0 |
| GNS       | 7964701            | 10.26810333 | 9.961595667 | 0.970149534 | 0.020302136 | Repressed | 0 |
| C2orf15   | 8043835            | 4.003041    | 4.16272     | 1.039889424 | 0.020322366 | Induced   | 1 |
| C10orf76  | 7935951            | 9.385942667 | 9.125626667 | 0.972265332 | 0.020383302 | Repressed | 1 |
| C17orf46  | 8016187            | 5.151002    | 5.636051333 | 1.021949101 | 0.020438222 | Induced   | 0 |
| GBX2      | 8059864            | 8.760872667 | 8.940336    | 1.020484641 | 0.020441077 | Induced   | 1 |
| PNPLA4    | 8171229            | 8.835058333 | 8.765109667 | 0.992082829 | 0.020446752 | Repressed | 0 |
| BLVRB     | 8036913            | 8.774569333 | 8.883785333 | 1.012446879 | 0.02045812  | Induced   | 1 |
| KIF14     | 7923189            | 8.677386    | 8.46544     | 0.975471185 | 0.020487447 | Repressed | 0 |
| C19orf46  | 8036242/8036232    | 7.623196    | 7.624138    | 1.00322391  | 0.020496375 | Induced   | 0 |
| C11orf24  | 7949948            | 9.568082    | 9.279055    | 0.969792587 | 0.020503294 | Repressed | 1 |
| FASLG     | 7907430            | 5.460635667 | 5.613795    | 1.028047895 | 0.020526643 | Induced   | 0 |
| CYP4A11   | 7915902            | 4.767606333 | 5.178311    | 1.086144836 | 0.020538811 | Induced   | 0 |
| ASCL4     | 7958396            | 4.999652333 | 5.149697    | 1.03001102  | 0.020540224 | Induced   | 0 |
| SMARCB1   | 8071768            | 9.68936     | 9.489892    | 0.979413707 | 0.020555064 | Repressed | 1 |
| HSD17B7   | 7906904            | 8.228140667 | 8.613116    | 1.046787646 | 0.020612199 | Induced   | 0 |
| FOLH1     | 7948058/7942998    | 3.926463667 | 4.1286225   | 1.050939475 | 0.020666384 | Induced   | 0 |
| H12D1A    | 8169792            | 4.567346667 | 4.695256    | 1.028005173 | 0.020704691 | Induced   | 0 |
| TBC1D10B  | 8000856            | 7.835439333 | 7.802771    | 0.995830695 | 0.020738441 | Repressed | 0 |
| FARP1     | 7969736            | 9.767412667 | 9.523317333 | 0.975009213 | 0.020751223 | Repressed | 1 |
| SOX8      | 7992125            | 7.532487333 | 7.705987333 | 1.02303356  | 0.0207619   | Induced   | 1 |
| PTPN5     | 7947076            | 6.28892     | 6.584467667 | 1.04699498  | 0.020765054 | Induced   | 0 |
| C9orf135  | 8155747            | 3.819075667 | 3.966549667 | 1.038615103 | 0.020794858 | Induced   | 0 |
| GHFN      | 7975167            | 9.381567333 | 9.177602667 | 0.978258999 | 0.020805235 | Repressed | 0 |
| THADA     | 8051820            | 9.514115667 | 9.284857333 | 0.975903348 | 0.020814641 | Repressed | 1 |
| OSBPL1A   | 8022572            | 8.847947333 | 8.533574667 | 0.964469424 | 0.020844563 | Repressed | 0 |
| SRRD      | 8072113            | 10.20021    | 9.878679333 | 0.968478035 | 0.020849621 | Repressed | 1 |
| HSDL2     | 8157233            | 9.043425    | 8.719773    | 0.964211347 | 0.020880685 | Repressed | 0 |
| ANKZF1    | 8048489            | 8.558427    | 8.399196333 | 0.981394868 | 0.020903984 | Repressed | 1 |
| SNAP23    | 7983111            | 10.15758667 | 9.751371333 | 0.960008677 | 0.020910888 | Repressed | 0 |
| DPYSL5    | 8040725            | 5.534925333 | 5.744348    | 1.037836584 | 0.020912007 | Induced   | 1 |
| CLTA      | 8155203            | 10.1247     | 10.14432667 | 1.001938494 | 0.020914352 | Induced   | 0 |
| STAT2     | 7964119            | 8.265856667 | 7.619074667 | 0.921752575 | 0.020931117 | Repressed | 0 |
| SH3BP2    | 8093624            | 6.860272    | 7.027587333 | 1.024389023 | 0.020993183 | Induced   | 0 |
| PON2      | 8141076            | 10.97862    | 10.74962667 | 0.979141884 | 0.021002124 | Repressed | 0 |
| SLC43A2   | 8011093            | 7.980551    | 8.375671667 | 1.049510449 | 0.021015686 | Induced   | 0 |
| ING5      | 8077226/8049906    | 8.3703265   | 8.089109167 | 0.966448374 | 0.02102266  | Repressed | 1 |
| HSP90AB1  | 8119993            | 12.86751667 | 12.81157667 | 0.995652619 | 0.021043456 | Repressed | 0 |
| PFND6     | 8118661/8178207/81 | 9.876619333 | 9.511416333 | 0.963023481 | 0.0210485   | Repressed | 0 |
| UBE2E2    | 8078252            | 8.012246667 | 7.849302333 | 0.979663091 | 0.021054619 | Repressed | 0 |
| PRDM7     | 8003571            | 9.659481333 | 9.044312    | 0.936314455 | 0.021102074 | Repressed | 0 |
| RBBP5     | 7923712            | 9.312674667 | 9.482826667 | 1.018271013 | 0.021114384 | Induced   | 1 |
| SNAI2     | 8150698            | 12.25684    | 12.18504667 | 0.99414259  | 0.021115787 | Repressed | 1 |
| GF1B      | 8158939            | 6.55911     | 6.778267333 | 1.033412663 | 0.021122935 | Induced   | 0 |
| CCDC14    | 8090133            | 9.607918333 | 9.392117333 | 0.977539255 | 0.021153876 | Repressed | 0 |
| MAP3K12   | 7963670            | 8.264871    | 7.998157333 | 0.96772924  | 0.021185556 | Repressed | 0 |
| HIST1H2BL | 8124510            | 7.59179     | 7.277843    | 0.958646512 | 0.021190005 | Repressed | 1 |
| GIYD1     | 7994582/7994781    | 8.8463135   | 9.008804667 | 1.018373993 | 0.02124085  | Induced   | 0 |
| GIYD2     | 7994582/7994781    | 8.8463135   | 9.008804667 | 1.018373993 | 0.02124085  | Induced   | 0 |
| SULT1A4   | 7994582/7994781    | 8.8463135   | 9.008804667 | 1.018373993 | 0.02124085  | Induced   | 0 |
| SULT1A3   | 7994582/7994781    | 8.8463135   | 9.008804667 | 1.018373993 | 0.02124085  | Induced   | 0 |
| TTC30B    | 8056995            | 5.884655333 | 5.432665667 | 0.92319182  | 0.021244503 | Repressed | 0 |
| GEMIN6    | 8041553            | 8.991958333 | 8.817179667 | 0.980562781 | 0.021250348 | Repressed | 1 |
| MANSC1    | 7961365            | 7.561201667 | 7.299762333 | 0.965423574 | 0.021250997 | Repressed | 1 |
| PPM1K     | 8101701            | 7.961405333 | 8.165326333 | 1.025613694 | 0.021258607 | Induced   | 0 |
| F11R      | 7921713            | 7.232770333 | 7.073754333 | 0.97801451  | 0.021281261 | Repressed | 0 |
| HES6      | 8059989            | 9.134194667 | 8.933230333 | 0.977998681 | 0.021289773 | Repressed | 1 |
| EGR2      | 7933872            | 8.773500667 | 9.133296    | 1.041009324 | 0.02131338  | Induced   | 1 |
| PCF11     | 7942839            | 10.70648    | 10.95154    | 1.022888942 | 0.021314953 | Induced   | 1 |
| SCT       | 7945498            | 7.449333667 | 7.772057667 | 1.043322533 | 0.021324907 | Induced   | 0 |
| MYO9B     | 8026638            | 8.946084667 | 8.703200333 | 0.972850209 | 0.021331331 | Repressed | 1 |
| ZNF697    | 7919051            | 8.93841     | 9.095209    | 1.017542158 | 0.021357814 | Induced   | 0 |
| ZFP42     | 8098690            | 4.271115    | 4.403643667 | 1.031029056 | 0.021380012 | Induced   | 0 |
| MSRA      | 8144557            | 7.618535333 | 7.440341667 | 0.976610509 | 0.021393264 | Repressed | 0 |
| USP9Y     | 8176578            | 4.480918333 | 4.300799333 | 0.959803106 | 0.021454799 | Repressed | 0 |
| CINP      | 7981364            | 8.189354333 | 7.805530333 | 0.953131348 | 0.021466708 | Repressed | 0 |
| NARS2     | 7950683            | 11.20272333 | 10.89636667 | 0.972653376 | 0.021468057 | Repressed | 0 |
| HIST1H3B  | 8124388            | 11.60621667 | 11.33865333 | 0.97694655  | 0.02147783  | Repressed | 0 |
| DRP2      | 8168817            | 5.409369333 | 5.61337     | 1.037712468 | 0.02158194  | Induced   | 0 |
| SNAPC3    | 8154394            | 9.146636    | 8.967968    | 0.980466261 | 0.021636767 | Repressed | 0 |
| AHR       | 8131614            | 10.04857133 | 10.23061667 | 1.018116539 | 0.02164961  | Induced   | 0 |
| HOXD13    | 8046524            | 10.38909667 | 10.21857    | 0.983393487 | 0.02170261  | Repressed | 0 |
| HSPA9     | 8114455            | 12.50508667 | 12.59046    | 1.006827088 | 0.021738861 | Induced   | 1 |
| SLC2A9    | 8099326            | 5.139196    | 5.287990333 | 1.028952843 | 0.021779699 | Induced   | 0 |
| TRPV4     | 7966234            | 8.539428    | 8.233318333 | 0.964153376 | 0.021781851 | Repressed | 0 |
| CCDC104   | 8042066            | 8.232269333 | 7.972665333 | 0.968465075 | 0.02178265  | Repressed | 1 |
| SCMH1     | 7915363            | 8.065132333 | 7.540544333 | 0.934956058 | 0.021798055 | Repressed | 0 |
| EMD       | 8170850            | 10.07561333 | 9.850575    | 0.977665049 | 0.021802932 | Repressed | 1 |

|           |                 |             |             |              |             |           |   |
|-----------|-----------------|-------------|-------------|--------------|-------------|-----------|---|
| CD300LG   | 8007537         | 7.101877667 | 7.295710667 | 1.027293205  | 0.021809783 | Induced   | 0 |
| SPOCD1    | 7914467         | 6.751992    | 6.837642    | 1.012685145  | 0.021817068 | Induced   | 0 |
| TMEM106A  | 8019622/8007483 | 7.482542334 | 7.305186334 | 0.976296198  | 0.021823986 | Repressed | 1 |
| DDP6      | 8137485         | 5.310591333 | 5.575135667 | 1.049814478  | 0.021850478 | Induced   | 1 |
| RTP2      | 8092886         | 6.3136177   | 6.488956333 | 1.027771614  | 0.021858186 | Induced   | 0 |
| PPP1R1C   | 8046746         | 5.970898    | 6.192637    | 1.037136625  | 0.021858573 | Induced   | 1 |
| FRMD5     | 7988260         | 8.894496667 | 8.402759333 | 0.944714428  | 0.021877168 | Repressed | 1 |
| PDI5A     | 8082133         | 9.157791    | 8.779062667 | 0.958644139  | 0.021881696 | Repressed | 1 |
| TCXET1D1  | 7902158         | 6.383795333 | 6.221351    | 0.974553643  | 0.021909744 | Repressed | 0 |
| RICS      | 7952641         | 7.934647    | 7.586269667 | 0.956094161  | 0.021922145 | Repressed | 0 |
| LGALS3    | 7974461         | 10.74226333 | 10.61857667 | 0.988485977  | 0.021930834 | Repressed | 0 |
| PDHB      | 8088384         | 9.126185    | 8.753016333 | 0.959110114  | 0.021937701 | Repressed | 1 |
| C19orf55  | 8028016         | 6.952264333 | 7.046498667 | 1.013554481  | 0.021956819 | Induced   | 1 |
| KCNJ8     | 7961702         | 5.248175333 | 5.585386    | 1.064252935  | 0.021981188 | Induced   | 0 |
| HEATR6    | 8017186         | 9.877647333 | 9.674696667 | 0.979453542  | 0.021991939 | Repressed | 1 |
| PNMA5     | 8175763         | 6.005490333 | 6.202950667 | 1.032879969  | 0.022024888 | Induced   | 0 |
| CACNA1I   | 8073152         | 6.737517333 | 6.923986667 | 1.027676268  | 0.022040671 | Induced   | 1 |
| WDSUB1    | 8056047         | 8.680040333 | 8.205483    | 0.94532775   | 0.022082157 | Repressed | 0 |
| E1F4E1B   | 8110218         | 8.012497667 | 8.208703    | 1.024487412  | 0.022113273 | Induced   | 0 |
| PRPS1L1   | 8138436         | 6.013626    | 6.174909333 | 1.026819648  | 0.02211444  | Induced   | 0 |
| MAML2     | 7951133         | 7.83102     | 7.322790333 | 0.935100451  | 0.022115001 | Repressed | 1 |
| HIST1H1B  | 8124527         | 12.05801    | 11.62361667 | 0.963974708  | 0.022156629 | Repressed | 1 |
| SESN3     | 7951077         | 8.591327    | 8.051319    | 0.937144984  | 0.022160231 | Repressed | 0 |
| ZNF273    | 8133062         | 8.472027    | 8.706635333 | 1.027692114  | 0.022167641 | Induced   | 0 |
| CEACAM3   | 8029107         | 6.849386333 | 6.955150333 | 1.015441383  | 0.022194467 | Induced   | 0 |
| CSF2RB    | 8072757         | 6.233619333 | 6.459244667 | 1.036194917  | 0.022201003 | Induced   | 1 |
| MPN2      | 7910211         | 5.586966333 | 5.890059333 | 1.054250014  | 0.022213443 | Induced   | 0 |
| ALG10     | 7954777/7954789 | 9.0700575   | 8.838364667 | 0.974454913  | 0.022220907 | Repressed | 1 |
| ALG10B    | 7954777/7954789 | 9.0700575   | 8.838364667 | 0.974454913  | 0.022220907 | Repressed | 0 |
| CEP27     | 8104220         | 8.088580667 | 7.899388667 | 0.978609988  | 0.022222842 | Repressed | 1 |
| MPDZ      | 8160088         | 9.283802333 | 9.023900667 | 0.972004825  | 0.022228402 | Repressed | 0 |
| GLT8D4    | 8080964         | 10.42742333 | 9.561033333 | 0.916912336  | 0.022272561 | Repressed | 1 |
| CP5F4     | 8134599         | 9.472027667 | 9.111757    | 0.961964779  | 0.022297287 | Repressed | 1 |
| LCN12     | 8159501         | 7.172747    | 7.350876667 | 1.024834233  | 0.022301118 | Induced   | 0 |
| NDUF88    | 7935810         | 10.56918333 | 10.47176333 | 0.990782637  | 0.022319444 | Repressed | 1 |
| NAT13     | 8089652         | 12.74577333 | 12.79479667 | 1.003846242  | 0.022344969 | Induced   | 0 |
| SDCBP     | 8146550         | 12.74022333 | 12.66884333 | 0.994397272  | 0.022355344 | Repressed | 0 |
| CCDC125   | 8177628/8112439 | 8.381190167 | 8.087324334 | 0.964932234  | 0.022355974 | Repressed | 1 |
| SEC61A2   | 7926189         | 8.974557333 | 9.110632333 | 1.015162308  | 0.022359818 | Induced   | 0 |
| PRPSAP1   | 8018694         | 10.13681667 | 9.941075667 | 0.980690092  | 0.022365871 | Repressed | 1 |
| AP3M1     | 7934513         | 10.37639    | 10.16319    | 0.979453355  | 0.02237831  | Repressed | 0 |
| PLEKHG4   | 7996516         | 7.296829667 | 7.090216333 | 0.971684506  | 0.022408998 | Repressed | 0 |
| FNBP1L    | 7903092         | 10.15565    | 10.03822    | 0.988436978  | 0.022410498 | Repressed | 0 |
| PITX3     | 7935983         | 6.645962333 | 6.818674667 | 1.025987558  | 0.022412264 | Induced   | 0 |
| C1orf161  | 7904244         | 5.305043667 | 5.784033    | 1.090289423  | 0.022471331 | Induced   | 0 |
| C12orf62  | 7953558         | 8.600398    | 8.396692667 | 0.976314429  | 0.02248274  | Repressed | 0 |
| EYA3      | 7914153         | 8.998328    | 8.582491    | 0.953787304  | 0.02249452  | Repressed | 0 |
| TPTE      | 8069472         | 7.5943      | 7.317365667 | 0.963533922  | 0.022496208 | Repressed | 0 |
| C21orf29  | 8070757         | 6.906580667 | 7.044498    | 1.019968975  | 0.022502122 | Induced   | 0 |
| PRF1      | 7934161         | 6.115982667 | 6.412016667 | 1.048403342  | 0.022513738 | Induced   | 0 |
| Gp6       | 8039294         | 6.809312667 | 6.943846333 | 1.019757305  | 0.022592924 | Induced   | 1 |
| C8orf125  | 8162902         | 6.664802667 | 6.494052    | 0.974380237  | 0.022623578 | Repressed | 0 |
| GPR56     | 7996081         | 10.65159    | 10.25125    | 0.962415001  | 0.022650387 | Repressed | 1 |
| GCK       | 8139314         | 6.622748    | 6.830882333 | 1.031427186  | 0.022650422 | Induced   | 1 |
| RBL2      | 7995631         | 8.648657333 | 8.080492333 | 0.934305988  | 0.022680291 | Repressed | 0 |
| DCT       | 7972259         | 11.11024    | 10.72901667 | 0.96568721   | 0.022700668 | Repressed | 1 |
| TFG       | 8081316         | 11.01661    | 11.05095    | 1.003117111  | 0.022705162 | Induced   | 0 |
| C14orf83  | 7979721         | 6.782445667 | 5.957195    | 0.878325503  | 0.022708486 | Repressed | 1 |
| DNAI2     | 8009585         | 6.747953667 | 7.035612    | 1.042628973  | 0.022726187 | Induced   | 1 |
| CTTN      | 7942204         | 11.17128333 | 10.92097667 | 0.977593741  | 0.022727037 | Repressed | 1 |
| RAB5B     | 7956088         | 10.13517333 | 9.757932    | 0.962778995  | 0.022731893 | Repressed | 1 |
| NUDCD3    | 8139356         | 8.125962    | 7.907520667 | 0.973118096  | 0.022735364 | Repressed | 0 |
| PGS1      | 8010271         | 9.335957333 | 9.164132333 | 0.981595353  | 0.022735936 | Repressed | 1 |
| MRPS7     | 8009784         | 10.55352    | 10.52021    | 0.9966843707 | 0.022737895 | Repressed | 1 |
| EVL       | 8018579         | 7.224467333 | 7.556697333 | 1.045986781  | 0.022756382 | Induced   | 1 |
| CDX4      | 8168395         | 5.335447    | 5.394339667 | 1.011038001  | 0.022780185 | Induced   | 0 |
| COL4A3    | 8048782         | 5.952899    | 6.122332333 | 1.028462323  | 0.022811498 | Induced   | 0 |
| MPDU1     | 8004521         | 11.61671333 | 11.52361333 | 0.991985685  | 0.02283927  | Repressed | 1 |
| ZFP106    | 7987892         | 10.47252    | 10.07332333 | 0.961881508  | 0.022844997 | Repressed | 1 |
| ENP5      | 8126750         | 5.905605667 | 5.404749333 | 0.915189675  | 0.022866566 | Repressed | 0 |
| ATG10     | 8106709         | 7.290020333 | 6.993026    | 0.95926015   | 0.022892772 | Repressed | 0 |
| APLN      | 8175016         | 7.014733    | 7.285283    | 1.038568824  | 0.022933148 | Induced   | 0 |
| P4HB      | 8019250         | 12.25949333 | 12.20173333 | 0.995288549  | 0.022943676 | Repressed | 1 |
| STX7      | 8129590         | 10.60408667 | 10.30330333 | 0.971635149  | 0.022980005 | Repressed | 0 |
| ZC3H12C   | 7943715         | 9.394612667 | 9.682947    | 1.030691455  | 0.023006741 | Induced   | 0 |
| PAPSS2    | 7928944         | 9.21145     | 8.724588333 | 0.947146034  | 0.023010089 | Repressed | 0 |
| WISP1     | 8148435         | 6.424722333 | 6.676872667 | 1.039246884  | 0.023028959 | Induced   | 1 |
| CCDC137   | 8010629         | 9.75599     | 9.894179667 | 1.014164597  | 0.023042179 | Induced   | 1 |
| THRA      | 8007008/8014956 | 8.964866    | 8.998866499 | 1.001830888  | 0.023056608 | Induced   | 0 |
| NR1D1     | 8007008/8014956 | 8.964866    | 8.998866499 | 1.001830888  | 0.023056608 | Induced   | 0 |
| LYRM7     | 8107859         | 7.612747    | 7.105680667 | 0.933392462  | 0.023071564 | Repressed | 1 |
| ADPRHL1   | 7972902         | 5.354872667 | 5.576612333 | 1.041408952  | 0.023072697 | Induced   | 0 |
| EYA4      | 8122150         | 10.47256667 | 10.17770333 | 0.971844215  | 0.023118911 | Repressed | 1 |
| NARFL     | 7998336         | 7.286440333 | 7.410162333 | 1.016979759  | 0.023121251 | Induced   | 0 |
| KNCN      | 7915841         | 7.188193333 | 7.379582333 | 1.026625466  | 0.023139638 | Induced   | 1 |
| FTL       | 8030171         | 11.22497333 | 10.93854333 | 0.97448279   | 0.02315626  | Repressed | 0 |
| G0S2      | 7909441         | 7.534951667 | 7.854232333 | 1.042373287  | 0.02316373  | Induced   | 0 |
| C10orf104 | 7928300         | 9.336574333 | 9.419326    | 1.008863172  | 0.023164145 | Induced   | 0 |
| BTNL8     | 8110606/8116537 | 5.236617167 | 5.432004334 | 1.037311273  | 0.023203939 | Induced   | 0 |
| KDELC1    | 7972682         | 8.737293667 | 8.246192    | 0.943792473  | 0.023214093 | Repressed | 0 |
| YTHDF1    | 8067593         | 11.02658667 | 11.14407667 | 1.010655156  | 0.02324545  | Induced   | 0 |
| MAP2      | 8047926         | 4.559489333 | 4.812205667 | 1.055426456  | 0.023251518 | Induced   | 1 |
| DNAH11    | 8131719         | 4.624206    | 4.687595    | 1.013708083  | 0.023254323 | Induced   | 0 |
| RBM12B    | 8151788         | 9.397306    | 9.615009667 | 1.023166604  | 0.023259101 | Induced   | 0 |
| TFDP3     | 8175209         | 4.748103    | 4.818871    | 1.014904479  | 0.023269497 | Induced   | 0 |
| SERPINF2  | 8003656         | 6.449203    | 6.474655    | 1.003946534  | 0.023315026 | Induced   | 0 |
| GPRIN3    | 8101757         | 5.934448667 | 5.844724667 | 0.98488082   | 0.023325121 | Repressed | 0 |
| SIRT5     | 8116956         | 8.659909333 | 8.562856    | 0.9887928    | 0.023328386 | Repressed | 0 |
| C21orf58  | 8071020         | 6.500907333 | 6.620770667 | 1.018437939  | 0.023370821 | Induced   | 0 |

|          |                 |             |             |             |             |           |   |
|----------|-----------------|-------------|-------------|-------------|-------------|-----------|---|
| MLLT11   | 7905329         | 8.164508    | 7.722262667 | 0.945833192 | 0.023457116 | Repressed | 0 |
| DCPS     | 7945101         | 9.580239667 | 9.229657667 | 0.963405717 | 0.023461301 | Repressed | 1 |
| AKT2     | 8036840         | 8.719333333 | 8.482263    | 0.972810956 | 0.023462922 | Repressed | 1 |
| FBXL4    | 8128356         | 8.937393    | 8.747387667 | 0.978740407 | 0.023470583 | Repressed | 0 |
| LSR      | 8027793         | 8.516209    | 8.757451333 | 1.028327432 | 0.023501499 | Induced   | 1 |
| VPREB1   | 8071646         | 5.140757667 | 5.292399333 | 1.029497922 | 0.023523641 | Induced   | 0 |
| KIF3C    | 8050894         | 9.240792667 | 8.809696667 | 0.953348591 | 0.023561042 | Repressed | 1 |
| BOLA1    | 7905088/7905092 | 10.34037567 | 10.15002584 | 0.98251687  | 0.023566684 | Repressed | 0 |
| PTER     | 7926356         | 9.638961    | 9.799635333 | 1.016669259 | 0.023568821 | Induced   | 0 |
| GPM6B    | 8171359         | 10.33069    | 10.00938033 | 0.96889756  | 0.023584453 | Repressed | 0 |
| DEK      | 8124144         | 11.69756333 | 11.78511    | 1.00748418  | 0.023619467 | Induced   | 0 |
| BLVRA    | 8132515         | 10.62065333 | 10.32246333 | 0.971923573 | 0.023657941 | Repressed | 0 |
| SNIP1    | 7915008         | 9.341238667 | 9.556103333 | 1.023001732 | 0.023674011 | Induced   | 0 |
| PLCB4    | 8060897         | 8.774338333 | 8.593953333 | 0.979441755 | 0.023702805 | Repressed | 1 |
| C20orf29 | 8060698         | 8.009860667 | 8.116449    | 1.01330714  | 0.023706115 | Induced   | 1 |
| SCRN3    | 8046502         | 7.751096333 | 7.363286667 | 0.949967121 | 0.023710848 | Repressed | 0 |
| CUX2     | 7958726         | 6.504088667 | 6.648763333 | 1.022243649 | 0.023733193 | Induced   | 1 |
| RBM24    | 8117045         | 6.278807    | 6.076721333 | 0.96781464  | 0.023739562 | Repressed | 0 |
| GTF2E2   | 8150103         | 10.44352333 | 10.15122667 | 0.972011681 | 0.02375454  | Repressed | 0 |
| C2orf51  | 8043407         | 5.837881    | 5.965883667 | 1.021961232 | 0.023778005 | Induced   | 0 |
| TM7SF3   | 7961983         | 10.34281667 | 10.08698333 | 0.975264636 | 0.023791797 | Repressed | 0 |
| PRKX     | 8171182         | 7.925618    | 7.656073333 | 0.965990707 | 0.023803358 | Repressed | 0 |
| MMP25    | 7992811         | 6.457421333 | 6.797578333 | 1.05267691  | 0.023803737 | Induced   | 0 |
| UMPS     | 8082229         | 10.81642667 | 10.60459    | 0.980415282 | 0.023831804 | Repressed | 0 |
| RABAC1   | 8037071         | 9.665783667 | 9.410195    | 0.973557378 | 0.023834476 | Repressed | 0 |
| THBS1    | 7982597         | 8.991901667 | 9.523702    | 1.059142143 | 0.023840455 | Induced   | 0 |
| ASAH1    | 8149534         | 12.00593667 | 11.87711333 | 0.989270031 | 0.023887615 | Repressed | 0 |
| CEACAM5  | 8029086         | 5.056756667 | 5.304172667 | 1.048927804 | 0.023919797 | Induced   | 0 |
| TOP2A    | 8014974         | 10.50560333 | 10.39629667 | 0.989595394 | 0.023961745 | Repressed | 0 |
| EPM2AIP1 | 8086141         | 8.280802    | 8.002472667 | 0.966388602 | 0.023997855 | Repressed | 0 |
| HSPBAP1  | 8090030         | 8.032547    | 8.23839     | 1.025626118 | 0.024052794 | Induced   | 0 |
| PAQR6    | 7920928         | 6.310141    | 6.539914667 | 1.036413397 | 0.024076484 | Induced   | 0 |
| CRYZL1   | 8070141         | 8.671973333 | 8.477215    | 0.977541636 | 0.024108682 | Repressed | 1 |
| ZNF521   | 8022612         | 9.093979667 | 8.982010333 | 0.987687532 | 0.024110663 | Repressed | 1 |
| SOLE     | 8148280         | 11.39296667 | 11.76659667 | 1.032794794 | 0.024124348 | Induced   | 0 |
| SCN3A    | 8056376         | 3.947692    | 4.058536333 | 1.028078263 | 0.024143856 | Induced   | 0 |
| UROD     | 7901073         | 10.82323667 | 10.59885    | 0.979083275 | 0.024174251 | Repressed | 0 |
| SCARB2   | 8101158         | 11.12137    | 10.95218333 | 0.984787246 | 0.024188797 | Repressed | 0 |
| CRY1     | 7966052         | 9.259949333 | 9.466851667 | 1.022343787 | 0.024193605 | Induced   | 1 |
| ARMCX3   | 8168875         | 8.825635667 | 8.576233667 | 0.971741186 | 0.024235144 | Repressed | 0 |
| THNSL1   | 7926708         | 8.514934333 | 8.183393667 | 0.961063626 | 0.024236017 | Repressed | 0 |
| RAB27A   | 7989023         | 11.65643667 | 11.32860333 | 0.971875339 | 0.024245964 | Repressed | 1 |
| DAPK1    | 8156199         | 8.841739333 | 8.653155333 | 0.978671165 | 0.024313941 | Repressed | 0 |
| HIST1H4J | 8117598/8124521 | 9.617267669 | 9.262351667 | 0.963215846 | 0.024323987 | Repressed | 0 |
| HIST1H4K | 8117598/8124521 | 9.617267669 | 9.262351667 | 0.963215846 | 0.024323987 | Repressed | 0 |
| DEFB131  | 8094139         | 4.399099667 | 4.186136333 | 0.951589337 | 0.024349915 | Repressed | 0 |
| GYG2     | 8165817         | 8.258426    | 7.497693667 | 0.907884101 | 0.024418175 | Repressed | 0 |
| ARMC5    | 7995193         | 6.940081    | 7.094024    | 1.02218173  | 0.02442493  | Induced   | 0 |
| BNIP1    | 7905308         | 5.744732667 | 6.085307667 | 1.059284743 | 0.024445563 | Induced   | 0 |
| GHR      | 8105121         | 8.657068667 | 7.854051333 | 0.907241427 | 0.024453708 | Repressed | 0 |
| COX15    | 7935647         | 10.06683667 | 10.18138333 | 1.011378616 | 0.024466323 | Induced   | 1 |
| ATP1B3   | 8083136         | 10.00177433 | 9.758250667 | 0.975651953 | 0.024510052 | Repressed | 0 |
| CD151    | 7937508         | 9.794650667 | 9.597861333 | 0.979908489 | 0.024530856 | Repressed | 1 |
| BDP1     | 8106025/8177560 | 9.525885167 | 9.632823334 | 1.011226845 | 0.024549198 | Induced   | 0 |
| DENND4A  | 7989849         | 8.637312333 | 8.269683    | 0.957437068 | 0.024561626 | Repressed | 0 |
| CYB5A    | 8023855         | 10.12306    | 9.816094333 | 0.969676593 | 0.024590341 | Repressed | 1 |
| CCNB2    | 7983969         | 10.76602    | 10.59780333 | 0.984375223 | 0.024604192 | Repressed | 0 |
| LIG3     | 8006479         | 9.447659667 | 9.13507     | 0.966959789 | 0.024632934 | Repressed | 0 |
| LIMA1    | 7963187         | 10.99324667 | 11.35687667 | 1.03307758  | 0.024644546 | Induced   | 0 |
| RASA2    | 8083094         | 7.855062    | 7.501691333 | 0.955013637 | 0.024656706 | Repressed | 0 |
| RYBP     | 8088820         | 12.00753    | 12.24166333 | 1.019498876 | 0.024671943 | Induced   | 1 |
| NIF3L1   | 8047356         | 9.647688667 | 9.337386333 | 0.967836614 | 0.024728003 | Repressed | 0 |
| AKNA     | 8163569         | 7.234236667 | 7.434589    | 1.027695021 | 0.024743705 | Induced   | 0 |
| CCDC99   | 8109830         | 10.62343333 | 10.49740667 | 0.988136917 | 0.024755567 | Repressed | 1 |
| ACBD6    | 7922656         | 7.793779333 | 7.325922333 | 0.939970458 | 0.024765211 | Repressed | 1 |
| ICK      | 8127109         | 8.402579667 | 8.020354333 | 0.954510954 | 0.024791382 | Repressed | 0 |
| MST1R    | 8087547         | 5.840882333 | 6.217952    | 1.06455697  | 0.02482788  | Induced   | 0 |
| SLC35F2  | 7951485         | 11.30023667 | 11.49581667 | 1.017307802 | 0.024829482 | Induced   | 0 |
| CRYL1    | 7970455         | 8.167020333 | 7.771533333 | 0.951575118 | 0.024850086 | Repressed | 0 |
| RAB8B    | 7984112         | 10.89929667 | 10.69436    | 0.981197258 | 0.024862636 | Repressed | 1 |
| HIBCH    | 8057719         | 9.725722    | 9.094985    | 0.93514754  | 0.024923231 | Repressed | 1 |
| HUS1     | 8139592         | 8.851571667 | 8.610840333 | 0.972803549 | 0.024946469 | Repressed | 0 |
| PUM2     | 8050565         | 11.64863333 | 11.74905    | 1.008620468 | 0.024954018 | Induced   | 0 |
| PRICKLE2 | 8088550         | 8.428112    | 8.047832667 | 0.954879654 | 0.024958835 | Repressed | 1 |
| KIN      | 7932000         | 10.37296    | 10.24115333 | 0.987293244 | 0.0249891   | Repressed | 0 |
| ETF1     | 8114443         | 10.56522    | 10.65995667 | 1.008966843 | 0.024994655 | Induced   | 0 |
| WIPI1    | 8017850         | 12.55867    | 12.49039333 | 0.994563384 | 0.025048876 | Repressed | 1 |
| C4orf6   | 8093872         | 4.973363333 | 5.411453    | 1.088087203 | 0.025098139 | Induced   | 0 |
| FAM73A   | 7902476         | 9.673096333 | 9.424053    | 0.974254021 | 0.025180949 | Repressed | 1 |
| RAB12    | 8020029         | 7.809683667 | 7.639265667 | 0.978181135 | 0.025214012 | Repressed | 0 |
| DYSF     | 8042637         | 5.822261    | 6.065996    | 1.041882803 | 0.025216331 | Induced   | 1 |
| HSPA12B  | 8060660         | 7.360505667 | 7.493267667 | 1.018037076 | 0.025239798 | Induced   | 0 |
| LYZL6    | 8014334         | 4.858939333 | 4.811029333 | 0.990139823 | 0.025242443 | Repressed | 0 |
| GADD45A  | 7902227         | 10.51787    | 11.01650333 | 1.047408205 | 0.025249246 | Induced   | 1 |
| ADCY3    | 8050766         | 9.129659333 | 8.962981667 | 0.981743276 | 0.025269202 | Repressed | 1 |
| ANKRD44  | 8057990         | 8.669475667 | 7.997746333 | 0.922517882 | 0.025269291 | Repressed | 0 |
| OR10H1   | 8035078         | 5.130966333 | 5.290395667 | 1.03107199  | 0.025284747 | Induced   | 0 |
| MCHR1    | 8073296         | 6.481333667 | 6.691257333 | 1.032388962 | 0.025303164 | Induced   | 0 |
| PRKAG3   | 8058997         | 6.206532667 | 6.359012333 | 1.024567609 | 0.025315056 | Induced   | 0 |
| MDM2     | 7956989         | 10.01823667 | 9.902300667 | 0.988427504 | 0.025315421 | Repressed | 0 |
| EPRS     | 7924351         | 11.31636667 | 11.23013333 | 0.992379769 | 0.025321627 | Repressed | 0 |
| MRPS6    | 8068353         | 10.44945    | 10.34662333 | 0.99015961  | 0.025332034 | Repressed | 1 |
| BDKRB1   | 7976567         | 6.093234667 | 6.245106    | 1.024924583 | 0.02533384  | Induced   | 0 |
| C9orf93  | 8154416         | 6.349157667 | 6.058435    | 0.954210829 | 0.025349233 | Repressed | 0 |
| RBBP7    | 8171516         | 11.4225     | 11.17147333 | 0.978023492 | 0.025353345 | Repressed | 0 |
| OIT3     | 7928330         | 6.047056667 | 6.132434667 | 1.014118935 | 0.025353498 | Induced   | 0 |
| DIAPH2   | 8168691         | 8.363962333 | 8.109797333 | 0.969611891 | 0.025358776 | Repressed | 1 |
| BCH1     | 8091867         | 6.132207333 | 4.987396333 | 0.813311759 | 0.025387776 | Repressed | 0 |
| GNPTAB   | 7965812         | 10.01965667 | 9.426853    | 0.94083593  | 0.025392374 | Repressed | 1 |

|          |                 |             |             |             |             |           |   |
|----------|-----------------|-------------|-------------|-------------|-------------|-----------|---|
| MRPL1    | 8095894         | 9.260138    | 8.849046667 | 0.955606349 | 0.025441661 | Repressed | 0 |
| HPN      | 8027728         | 6.160758667 | 6.434627    | 1.04445367  | 0.025470827 | Induced   | 0 |
| LY9      | 7906622         | 6.069944667 | 6.168171    | 1.01618241  | 0.025505938 | Induced   | 0 |
| ATP9B    | 8021832         | 7.190989    | 7.003593    | 0.973940163 | 0.025529976 | Repressed | 0 |
| MMS19    | 7935474         | 9.297971333 | 9.067648667 | 0.975228718 | 0.02554097  | Repressed | 0 |
| TBC1D1   | 8094574         | 8.921906333 | 8.680736333 | 0.972968781 | 0.025553047 | Repressed | 1 |
| C7orf58  | 8135734         | 8.203766333 | 7.967415333 | 0.97118994  | 0.02557036  | Repressed | 1 |
| KIF26A   | 7972716         | 7.31967     | 7.53236     | 1.029057321 | 0.025596443 | Induced   | 0 |
| MAP4K5   | 7978997         | 9.671528    | 9.448356    | 0.976924846 | 0.025610844 | Repressed | 0 |
| PLEKHA4  | 8038225         | 8.229753333 | 8.486329667 | 1.031176674 | 0.025613173 | Induced   | 1 |
| SMARCD1  | 7955331         | 9.243650333 | 8.909884667 | 0.963892439 | 0.025658705 | Repressed | 0 |
| SLC38A11 | 8056363         | 4.491537667 | 4.635131667 | 1.031969898 | 0.025744255 | Induced   | 1 |
| PPP2R2B  | 8114900         | 5.405204333 | 5.696429333 | 1.053878629 | 0.025771033 | Induced   | 0 |
| TRPM8    | 8049394         | 6.018118333 | 5.391143333 | 0.895818765 | 0.025792303 | Repressed | 1 |
| MET      | 8135601         | 9.232154333 | 8.687273    | 0.940980045 | 0.025808557 | Repressed | 1 |
| TBC1D7   | 8123961         | 10.31150333 | 9.832811333 | 0.953576895 | 0.025821645 | Repressed | 0 |
| MTAP     | 8154635         | 8.937760667 | 8.541520667 | 0.955666748 | 0.025835511 | Repressed | 0 |
| CDC6     | 8007071         | 11.66239333 | 11.82150667 | 1.013643283 | 0.025839829 | Induced   | 1 |
| VAMP5    | 8043203         | 9.111172333 | 9.039096    | 0.992089236 | 0.02584101  | Repressed | 0 |
| C1orf123 | 7916262         | 9.768797667 | 9.396301333 | 0.961868764 | 0.025843938 | Repressed | 0 |
| LCE1E    | 7905519         | 7.660162    | 7.996333    | 1.043885625 | 0.02584466  | Induced   | 0 |
| MAG1     | 8088602         | 8.463288667 | 8.101767333 | 0.957283587 | 0.02586748  | Repressed | 1 |
| IF144    | 7902553         | 3.871368667 | 3.664517333 | 0.94656894  | 0.025869542 | Repressed | 0 |
| SORD     | 7983393         | 10.71723667 | 10.55582333 | 0.984938904 | 0.02587801  | Repressed | 1 |
| MCOLN2   | 7917283         | 8.513493    | 8.353941667 | 0.981259005 | 0.025898361 | Repressed | 0 |
| PRRG2    | 8030393         | 5.548140667 | 5.716451    | 1.030363649 | 0.025915046 | Induced   | 1 |
| KRTAP5-6 | 7937709         | 6.110535    | 6.319154667 | 1.034140982 | 0.025940975 | Induced   | 0 |
| RNF128   | 8169174         | 7.061159    | 6.774224667 | 0.959364414 | 0.026000072 | Repressed | 0 |
| PCCB     | 8082886         | 10.92600333 | 10.82022333 | 0.990318509 | 0.026004206 | Repressed | 1 |
| SLCSA1   | 8072587         | 5.034869    | 5.117712667 | 1.016453987 | 0.026007441 | Induced   | 1 |
| ILDR1    | 8089970         | 6.406487667 | 6.787583333 | 1.059485897 | 0.026054589 | Induced   | 0 |
| NSMCE4A  | 7936777         | 9.527513333 | 9.330133667 | 0.979283192 | 0.026063991 | Repressed | 1 |
| STC1     | 8149825         | 8.895877    | 9.362881    | 1.052496679 | 0.026075331 | Induced   | 0 |
| NEU3     | 7942562         | 8.730403    | 8.337980333 | 0.955051025 | 0.026089291 | Repressed | 0 |
| COASY    | 8007272         | 9.483550667 | 9.453094667 | 0.996788545 | 0.026090213 | Repressed | 0 |
| UBASH3B  | 7944722         | 9.084045667 | 8.734758333 | 0.961549364 | 0.026095769 | Repressed | 1 |
| SALL1    | 8001387         | 8.828545    | 8.999279333 | 1.019338898 | 0.026103522 | Induced   | 0 |
| GPR25    | 7908637         | 7.735648667 | 7.865577333 | 1.016796092 | 0.026106442 | Induced   | 0 |
| MTHFS    | 7990810         | 8.933265333 | 8.696351667 | 0.973479612 | 0.026116763 | Repressed | 1 |
| SPEG     | 8048551         | 6.739073    | 6.89161     | 1.022634715 | 0.026123996 | Induced   | 1 |
| MGST1    | 7954196         | 7.555384    | 7.448097333 | 0.985799972 | 0.026124238 | Repressed | 1 |
| PEBP4    | 8149725         | 6.389563333 | 6.627158333 | 1.037184857 | 0.02613601  | Induced   | 1 |
| BAG1     | 8180647         | 7.986218    | 8.268940667 | 1.035401321 | 0.026160004 | Induced   | 0 |
| PIN4     | 8168366         | 6.732674    | 6.823872667 | 1.013545683 | 0.026189775 | Induced   | 0 |
| MNT      | 8011262         | 8.094182333 | 8.028970333 | 0.991943349 | 0.026225764 | Repressed | 1 |
| TRPC1    | 8083166         | 7.916708667 | 7.817141    | 0.987423098 | 0.026254589 | Repressed | 0 |
| GNRHR    | 8100655         | 4.144013667 | 4.270968    | 1.030635597 | 0.026338051 | Induced   | 0 |
| TMEM19   | 7957167         | 8.875142667 | 8.382107667 | 0.944447654 | 0.02633944  | Repressed | 0 |
| PRKAG2   | 8143961         | 8.1399      | 7.970592667 | 0.979200318 | 0.02634457  | Repressed | 0 |
| SLCSA3   | 8068353/8068361 | 10.81266334 | 10.64494    | 0.984672568 | 0.026363481 | Repressed | 1 |
| SHANK1   | 8038598         | 7.104118333 | 7.211681667 | 1.015140983 | 0.026378712 | Induced   | 1 |
| C20orf96 | 8064322         | 7.149436    | 6.785015667 | 0.9490281   | 0.026405456 | Repressed | 1 |
| FCN2     | 8159211         | 7.693224667 | 7.954819    | 1.03400321  | 0.026413149 | Induced   | 0 |
| CR1M1    | 8041447         | 8.128238667 | 8.379947667 | 1.030967226 | 0.026523973 | Induced   | 0 |
| DARC     | 7906435         | 5.330644    | 5.58182     | 1.04711926  | 0.026556029 | Induced   | 0 |
| JUB      | 7977854         | 8.070752    | 8.369158    | 1.036973754 | 0.026577503 | Induced   | 1 |
| EIF5A2   | 8092073         | 9.724373333 | 9.940261333 | 1.022200711 | 0.026598805 | Induced   | 1 |
| ETHE1    | 8037322         | 8.756601667 | 8.668005667 | 0.989882376 | 0.026635064 | Repressed | 1 |
| RTF1     | 7982904         | 9.035008333 | 8.935052    | 0.988936775 | 0.026648188 | Repressed | 0 |
| AREG     | 8095744/8095736 | 6.212837834 | 6.687581333 | 1.079061534 | 0.026658181 | Induced   | 0 |
| RLBP1    | 7991246         | 8.121297    | 7.696249667 | 0.947662629 | 0.026672619 | Repressed | 0 |
| BTG1     | 7965423         | 11.73764333 | 11.82148667 | 1.007143115 | 0.026719331 | Induced   | 1 |
| TMOD2    | 7983734         | 6.987767333 | 6.656448333 | 0.952585857 | 0.02673376  | Repressed | 1 |
| SFTPB    | 8053467         | 6.069938333 | 6.307374    | 1.039116652 | 0.026780191 | Induced   | 0 |
| FREM2    | 7968678         | 4.188872667 | 4.445227667 | 1.061199043 | 0.026813065 | Induced   | 0 |
| CSPG4    | 7990545         | 7.535224333 | 7.173216667 | 0.951957944 | 0.026827586 | Repressed | 1 |
| SHCBP1   | 8001133         | 11.27800333 | 11.22085667 | 0.994932909 | 0.026858998 | Repressed | 0 |
| POLR1E   | 8155268         | 10.56685    | 10.49066667 | 0.992790346 | 0.026878829 | Repressed | 0 |
| ACTR1B   | 8054077         | 8.144828667 | 7.783420667 | 0.955627305 | 0.026898659 | Repressed | 1 |
| AADAT    | 8103706         | 7.870318333 | 7.641250333 | 0.970894697 | 0.026913065 | Repressed | 1 |
| DEFA5    | 8149142         | 5.473584333 | 5.638096    | 1.030055564 | 0.026920516 | Induced   | 0 |
| BAMBI    | 7926875         | 12.25369    | 12.10847667 | 0.98814942  | 0.026947364 | Repressed | 0 |
| CYP26C1  | 7929315         | 7.216524667 | 7.384135667 | 1.023226    | 0.026965293 | Induced   | 0 |
| YPEL2    | 8008819         | 7.398609    | 6.976115    | 0.942895482 | 0.026981419 | Repressed | 1 |
| ZNF284   | 8029368         | 7.510954667 | 7.640848333 | 1.017293896 | 0.027000093 | Induced   | 0 |
| ALG2     | 8162827         | 10.03141333 | 10.23606667 | 1.020401246 | 0.027008649 | Induced   | 0 |
| SNX27    | 7905444         | 9.789187333 | 9.688350333 | 0.989699145 | 0.027013736 | Repressed | 0 |
| HOXB7    | 8016468         | 5.661866333 | 5.807797    | 1.025774304 | 0.027033959 | Induced   | 1 |
| GLIPR1L1 | 7957245         | 3.789878333 | 3.721003    | 0.981826505 | 0.027062443 | Repressed | 0 |
| CASP2    | 8136869         | 9.702806    | 9.942229667 | 1.024675714 | 0.027100597 | Induced   | 0 |
| CCDC150  | 8047187         | 6.371513667 | 6.036209667 | 0.947374515 | 0.027123768 | Repressed | 0 |
| RFPL4B   | 8121553         | 4.396882667 | 4.205444333 | 0.956460441 | 0.027191742 | Repressed | 0 |
| LSM1     | 8150266         | 9.836807    | 9.976287    | 1.014178991 | 0.027238786 | Induced   | 1 |
| PPP1R14C | 8122734         | 7.319388667 | 7.512352    | 1.026363313 | 0.027240996 | Induced   | 1 |
| RAB23    | 8127346         | 9.683392667 | 9.791650667 | 1.011179759 | 0.027249069 | Induced   | 0 |
| TPP2     | 7969881         | 10.50164333 | 10.6187     | 1.011146509 | 0.027260663 | Induced   | 0 |
| MLPH     | 8049487         | 10.07932333 | 9.838154333 | 0.976072898 | 0.027368444 | Repressed | 1 |
| ZHX3     | 8066279         | 7.837183    | 7.432844    | 0.94840761  | 0.02738141  | Repressed | 1 |
| MSTO1    | 7906021/7906056 | 8.137036667 | 7.691692333 | 0.94525343  | 0.027418846 | Repressed | 0 |
| DPP7     | 8165438         | 9.641010333 | 9.538788333 | 0.989397169 | 0.027482048 | Repressed | 0 |
| PLEKHA6  | 7923635         | 6.663102333 | 6.783514333 | 1.018071462 | 0.027515907 | Induced   | 1 |
| INADL    | 7901804         | 6.881417333 | 6.562475    | 0.953651651 | 0.027524698 | Repressed | 0 |
| KIF18A   | 7947248         | 9.387535667 | 9.007204667 | 0.959485533 | 0.027550317 | Repressed | 0 |
| ME1      | 8127854         | 9.015902    | 8.770687333 | 0.972801982 | 0.027579934 | Repressed | 0 |
| TWSG1    | 8020990         | 8.310561    | 8.038871333 | 0.967307903 | 0.027581693 | Repressed | 0 |
| ARMC1    | 8151066         | 10.43426333 | 10.35659667 | 0.992556574 | 0.027596908 | Repressed | 1 |
| MRPL2    | 8126512         | 11.03908333 | 11.06677667 | 1.002508662 | 0.027688554 | Induced   | 0 |
| C1orf222 | 7911643         | 5.623228333 | 5.818178667 | 1.034668756 | 0.027684917 | Induced   | 0 |
| PPM1E    | 8008768         | 6.615829    | 6.981079    | 1.055208501 | 0.027704422 | Induced   | 1 |

|           |                 |             |             |             |             |           |   |
|-----------|-----------------|-------------|-------------|-------------|-------------|-----------|---|
| PDE5A     | 8102532         | 5.01382     | 5.192172333 | 1.035572145 | 0.027723038 | Induced   | 0 |
| CCPG1     | 7983811/7989037 | 8.265832167 | 8.030716667 | 0.971526569 | 0.027809072 | Repressed | 0 |
| TEX10     | 8162850         | 11.14245667 | 11.23604    | 1.008398806 | 0.027815432 | Induced   | 0 |
| POP5      | 7967084         | 9.194709667 | 8.728101    | 0.949252485 | 0.027817971 | Repressed | 0 |
| MAP3K6    | 7914042         | 8.287787333 | 8.049947667 | 0.971302393 | 0.027829387 | Repressed | 1 |
| FZD1      | 8134117         | 7.832860333 | 7.960435667 | 1.016287196 | 0.027843172 | Induced   | 1 |
| NR2C1     | 7956551/7955523 | 7.953463167 | 7.814150333 | 0.982217052 | 0.027851792 | Repressed | 0 |
| TALDO1    | 7937465         | 10.65024333 | 10.47388333 | 0.983440754 | 0.027878766 | Repressed | 1 |
| PMP2      | 8151525         | 8.146635    | 7.595108333 | 0.932300064 | 0.027888205 | Repressed | 0 |
| TTC15     | 8040018         | 7.828731    | 7.514858    | 0.959907551 | 0.027899751 | Repressed | 1 |
| ERBB2IP   | 8105681         | 10.98973667 | 10.93606667 | 0.995116352 | 0.027909262 | Repressed | 0 |
| HIST1H4C  | 8117368         | 12.28276667 | 12.05745667 | 0.981656413 | 0.027914573 | Repressed | 0 |
| CYP27A1   | 8048432         | 8.626877    | 8.344048667 | 0.967215444 | 0.027915481 | Repressed | 0 |
| RBM34     | 7925184         | 10.49245    | 10.62623333 | 1.012750438 | 0.027944044 | Induced   | 0 |
| DEPDC1B   | 8112260         | 9.022788667 | 8.604516333 | 0.953642676 | 0.027955823 | Repressed | 0 |
| GDF15     | 8027002         | 11.73318667 | 11.96159    | 1.019466437 | 0.027985496 | Induced   | 1 |
| ITGB1BP1  | 8050176         | 10.67956    | 10.48819333 | 0.982081035 | 0.028007847 | Repressed | 0 |
| SESTD1    | 8057394         | 10.03005767 | 9.484743    | 0.945631951 | 0.02805219  | Repressed | 0 |
| MYOZ1     | 7934434         | 4.743863333 | 4.937213667 | 1.04075799  | 0.028053375 | Induced   | 0 |
| NR4A3     | 8156848         | 9.761083667 | 10.01747333 | 1.026266517 | 0.028063367 | Induced   | 1 |
| HIK2      | 8143307         | 9.765813    | 9.31701     | 0.954043458 | 0.028104882 | Repressed | 1 |
| KCTD14    | 7950641         | 8.934614667 | 8.705228    | 0.974326071 | 0.02816347  | Repressed | 1 |
| GATAD1    | 8134201         | 9.628848667 | 9.707412333 | 1.008159196 | 0.028185412 | Induced   | 0 |
| ARV1      | 7910494         | 10.52735667 | 10.27138333 | 0.975684938 | 0.02819324  | Repressed | 0 |
| SASH1     | 8122637         | 9.257828    | 8.985355667 | 0.970568439 | 0.028207386 | Repressed | 1 |
| TPP1      | 7946228         | 9.19305     | 9.099626    | 0.98983754  | 0.028216701 | Repressed | 0 |
| C6orf125  | 8125775         | 8.782176667 | 8.462422    | 0.963590499 | 0.028231672 | Repressed | 1 |
| UNG       | 7958455         | 9.427289333 | 9.520466333 | 1.009883753 | 0.028256305 | Induced   | 0 |
| SDHB      | 7912928         | 11.62792667 | 11.49553667 | 0.988614479 | 0.028262617 | Repressed | 0 |
| SNAPC5    | 7989924         | 9.852064333 | 9.58942     | 0.973341188 | 0.028324746 | Repressed | 1 |
| DDX19B    | 7997048         | 9.917977    | 9.795514667 | 0.987652489 | 0.028369653 | Repressed | 0 |
| ATRN      | 8060627         | 10.11987667 | 9.967052667 | 0.98489863  | 0.028413285 | Repressed | 0 |
| ZNF532    | 8021442         | 8.788364667 | 8.649374    | 0.984184695 | 0.028429324 | Repressed | 1 |
| SLC16A7   | 7956658         | 7.564133333 | 7.167496667 | 0.947563501 | 0.02843127  | Repressed | 0 |
| C6        | 8111864         | 4.351575    | 4.573661333 | 1.051035851 | 0.028453802 | Induced   | 0 |
| TRAPP6A   | 8037505         | 8.211164    | 8.131599667 | 0.990310225 | 0.028478542 | Repressed | 0 |
| FAM23A    | 7926403/7926445 | 6.221205667 | 6.461157333 | 1.038569962 | 0.028486985 | Induced   | 0 |
| FAM23B    | 7926403/7926445 | 6.221205667 | 6.461157333 | 1.038569962 | 0.028486985 | Induced   | 0 |
| FKBP15    | 8163452         | 9.512170333 | 9.352073667 | 0.983169281 | 0.02850392  | Repressed | 1 |
| CASP3     | 8103922         | 9.566829667 | 9.739928333 | 1.018093629 | 0.02850722  | Induced   | 0 |
| DBP       | 8038117         | 8.291208667 | 8.459049    | 1.020243168 | 0.028643359 | Induced   | 1 |
| POLE2     | 7978846         | 8.572809667 | 8.205477    | 0.957151426 | 0.028653118 | Repressed | 0 |
| PIK3C2A   | 7946815         | 9.716001    | 9.871701667 | 1.01602518  | 0.028675215 | Induced   | 0 |
| PRPF3     | 7905171         | 10.8419     | 10.96359333 | 1.011224355 | 0.02868022  | Induced   | 1 |
| GAB2      | 7950671         | 9.911216    | 9.091120333 | 0.917255797 | 0.028701035 | Repressed | 1 |
| WDR78     | 7916789         | 5.342348667 | 5.780452667 | 1.082005879 | 0.028745039 | Induced   | 0 |
| C1orf173  | 7917019         | 4.316004    | 4.518360333 | 1.046885113 | 0.028777318 | Induced   | 0 |
| RIPK3     | 7978312         | 5.426048667 | 5.639341    | 1.039308961 | 0.028799321 | Induced   | 0 |
| TIGD2     | 8096411         | 7.863193    | 7.320671333 | 0.931004915 | 0.028810166 | Repressed | 1 |
| TMCO6     | 8108579         | 7.317023    | 7.020582333 | 0.959486164 | 0.028820263 | Repressed | 0 |
| NGFRAP1   | 8169028         | 9.386843667 | 9.233518333 | 0.983665933 | 0.028851071 | Repressed | 0 |
| PSRC1     | 7918300         | 7.743408333 | 7.498825    | 0.968375252 | 0.028858209 | Repressed | 0 |
| KIAA1217  | 7926679         | 7.152991667 | 7.466388    | 1.043813323 | 0.028871688 | Induced   | 0 |
| PTTG1IP   | 8070819         | 12.11383667 | 12.20707333 | 1.007696708 | 0.028884135 | Induced   | 1 |
| CSPG5     | 8086799         | 6.033209333 | 6.183142667 | 1.024851339 | 0.028917082 | Induced   | 0 |
| FBXL3     | 7972062         | 11.0713667  | 11.23729    | 1.014989458 | 0.028937408 | Induced   | 0 |
| GMPPA     | 8048595         | 9.618901    | 9.358281667 | 0.972905498 | 0.028960462 | Repressed | 0 |
| THSD7A    | 8138231         | 5.623935333 | 5.876968    | 1.044992101 | 0.028977596 | Induced   | 0 |
| ENTHD1    | 8076231         | 5.464909667 | 5.258868333 | 0.962297394 | 0.028991709 | Repressed | 1 |
| TAF11     | 8125859         | 8.554464333 | 8.421639    | 0.984472981 | 0.02899416  | Repressed | 1 |
| LRR1TM4   | 8053315         | 5.249816    | 5.436568333 | 1.03557312  | 0.029013451 | Induced   | 0 |
| PIGK      | 7917088         | 8.999945333 | 8.779621667 | 0.975519444 | 0.029014735 | Repressed | 0 |
| IL24      | 7909271         | 7.152938333 | 7.732927667 | 1.081084067 | 0.02905069  | Induced   | 1 |
| CSMD1     | 8148992         | 5.489303    | 5.638641333 | 1.027205336 | 0.029065556 | Induced   | 1 |
| RPL30     | 8151935         | 12.57908    | 12.51108    | 0.994594199 | 0.029070741 | Repressed | 0 |
| ORAOV1    | 7950016/7950012 | 8.481142835 | 8.717996999 | 1.026466885 | 0.029103469 | Induced   | 1 |
| ASXL1     | 8061725         | 8.911542333 | 8.838378333 | 0.991789973 | 0.029114155 | Repressed | 0 |
| ANXA2     | 7989335         | 12.31723667 | 12.42599333 | 1.008829632 | 0.029121713 | Induced   | 1 |
| PROM2     | 8043522         | 6.155438    | 6.350572333 | 1.031701129 | 0.02912731  | Induced   | 0 |
| ORS1V1    | 7946031         | 5.705848333 | 5.913776    | 1.036441149 | 0.029165441 | Induced   | 0 |
| RBM5      | 8079869         | 9.961963333 | 10.22239667 | 1.026142772 | 0.029193342 | Induced   | 0 |
| MRPL49    | 7941164         | 10.13743333 | 10.40186333 | 1.026084512 | 0.029236907 | Induced   | 0 |
| NOD1      | 8138842         | 6.516079333 | 6.266088    | 0.961634701 | 0.029280036 | Repressed | 0 |
| SLC24A4   | 7972623         | 5.926638333 | 6.076136333 | 1.025224755 | 0.02928686  | Induced   | 0 |
| BCKDK     | 7995040         | 7.996858    | 7.470665    | 0.934200032 | 0.029294411 | Repressed | 0 |
| OR1Q1     | 8157679         | 4.072886    | 4.278807333 | 1.050559071 | 0.029295681 | Induced   | 0 |
| ALG13     | 8169419/8169412 | 7.2253755   | 7.001203    | 0.967727245 | 0.029296209 | Repressed | 0 |
| ARFIP1    | 8097813         | 10.17620667 | 10.26419    | 1.008645985 | 0.029361288 | Induced   | 0 |
| PROS1     | 8089011/8089015 | 9.065845667 | 8.5512145   | 0.942397906 | 0.02936217  | Repressed | 0 |
| CCDC53    | 7965846         | 8.402533333 | 7.8565      | 0.93501563  | 0.029407822 | Repressed | 0 |
| SLC26A4   | 8135436         | 6.684225    | 6.28797     | 0.940717884 | 0.029414319 | Repressed | 1 |
| C14orf179 | 7975851         | 8.038228667 | 7.895999667 | 0.982305928 | 0.02944637  | Repressed | 0 |
| PKD3      | 8166511         | 8.390713    | 8.015426    | 0.955273527 | 0.029453174 | Repressed | 0 |
| PSMB3     | 8006812         | 11.99596333 | 11.83426333 | 0.986520466 | 0.02950457  | Repressed | 0 |
| CASP9     | 7912646/7898184 | 7.2448265   | 7.248052667 | 1.004007643 | 0.02959474  | Induced   | 0 |
| IL31      | 7967226         | 4.975437    | 5.139794    | 1.033033681 | 0.029605516 | Induced   | 0 |
| HLA-DOA   | 8125545/8180093 | 6.4633255   | 6.661287334 | 1.030999113 | 0.029618372 | Induced   | 0 |
| KLHL11    | 8015456         | 9.553560667 | 9.705194    | 1.015871918 | 0.029625978 | Induced   | 0 |
| DMPK      | 8037657         | 7.938310333 | 8.284114    | 1.043561369 | 0.029634226 | Induced   | 0 |
| TRMT11    | 8121895         | 7.87812     | 7.563061667 | 0.960008437 | 0.029708428 | Repressed | 1 |
| COL19A1   | 8120501         | 7.63846     | 7.195515    | 0.942011217 | 0.02971041  | Repressed | 0 |
| SPATS1    | 8120011         | 7.863412333 | 7.534903667 | 0.958223141 | 0.029720289 | Repressed | 0 |
| DNAH5     | 8111019         | 4.696979667 | 4.839609    | 1.030366181 | 0.029765205 | Induced   | 0 |
| IGFL1     | 8029779         | 5.997295667 | 6.215823    | 1.036437645 | 0.029799918 | Induced   | 0 |
| IRS1      | 8059470         | 7.593125    | 7.943537    | 1.046148588 | 0.029801956 | Induced   | 1 |
| IFT88     | 7967933         | 9.079431333 | 8.857756    | 0.975584888 | 0.029824645 | Repressed | 1 |
| PSME3     | 8007397         | 10.80932    | 10.68366333 | 0.988375155 | 0.02985496  | Repressed | 0 |
| HSD3B7    | 7995007         | 6.872162    | 7.073920333 | 1.029358786 | 0.029882939 | Induced   | 0 |
| CCT8      | 8069753         | 11.39355333 | 11.45352    | 1.00526321  | 0.029890873 | Induced   | 0 |

|          |                 |             |             |             |             |           |   |
|----------|-----------------|-------------|-------------|-------------|-------------|-----------|---|
| PSAP     | 7934196         | 12.16062667 | 12.02129    | 0.988541983 | 0.029899509 | Repressed | 1 |
| SIRT6    | 8032770         | 8.158513667 | 8.372500333 | 1.026228634 | 0.029924867 | Induced   | 0 |
| RIMS4    | 8066451         | 7.128595333 | 7.388740667 | 1.036493211 | 0.029937607 | Induced   | 0 |
| VKORC1   | 8000998         | 10.80257667 | 10.64474667 | 0.985389597 | 0.029940584 | Repressed | 0 |
| SAMSN1   | 8069541         | 3.515331333 | 3.385555667 | 0.963082949 | 0.029957866 | Repressed | 0 |
| UBE2G2   | 8070799         | 9.891818333 | 9.766091667 | 0.987289833 | 0.029976401 | Repressed | 0 |
| ZBTB2    | 8130185         | 8.606614667 | 8.497127333 | 0.987278699 | 0.029979979 | Repressed | 1 |
| DDX3X    | 8166876         | 12.01131333 | 12.1642     | 1.012728555 | 0.029984018 | Induced   | 0 |
| DCLRE1B  | 7904131         | 8.274741667 | 8.159093667 | 0.986023975 | 0.030035239 | Repressed | 0 |
| EZH1     | 8015685         | 7.643479333 | 7.342503    | 0.960623125 | 0.030041905 | Repressed | 0 |
| CHN2     | 8132013         | 8.650492667 | 8.755880333 | 1.012182851 | 0.030056167 | Induced   | 1 |
| TFAP2A   | 8123868/8116831 | 7.7564285   | 7.494641167 | 0.966782999 | 0.030099279 | Repressed | 1 |
| NCKAP1L  | 7955908         | 4.493706333 | 4.629874333 | 1.030301936 | 0.030101681 | Induced   | 1 |
| POLB     | 8146198         | 10.17026333 | 9.813828667 | 0.964953251 | 0.030126134 | Repressed | 0 |
| DCXR     | 8019357         | 11.11206667 | 10.94000333 | 0.984515632 | 0.030161577 | Repressed | 0 |
| CXCL1    | 8095697         | 7.730358667 | 8.004848667 | 1.035508055 | 0.030222376 | Induced   | 0 |
| IL12RB2  | 7902205         | 8.310376333 | 7.970953    | 0.959156683 | 0.030227794 | Repressed | 1 |
| TNFSF11  | 7968851         | 5.103989667 | 5.251084333 | 1.028819546 | 0.030233869 | Induced   | 0 |
| SERPINB8 | 8021653         | 9.290291667 | 9.624908333 | 1.036017886 | 0.030284607 | Induced   | 0 |
| AMZ2     | 8009432         | 11.07776667 | 10.92188333 | 0.985928271 | 0.030290018 | Repressed | 0 |
| HPCAL1   | 8040238         | 10.90160667 | 11.15557667 | 1.023296566 | 0.030313335 | Induced   | 1 |
| SGOL2    | 8047288         | 9.35489     | 9.135771667 | 0.976577134 | 0.030336449 | Repressed | 0 |
| EFHA1    | 7970546         | 9.775071667 | 9.555483333 | 0.977535885 | 0.030357968 | Repressed | 0 |
| SDSL     | 7959002         | 7.846398    | 8.118720667 | 1.034706711 | 0.030366441 | Induced   | 0 |
| GH2      | 8017480         | 5.172767    | 5.350228667 | 1.034306913 | 0.030370475 | Induced   | 0 |
| VPS36    | 7971820         | 9.144918    | 8.940276667 | 0.977622398 | 0.030388915 | Repressed | 0 |
| JPH1     | 8151423         | 9.678714    | 9.445906667 | 0.97594646  | 0.030394605 | Repressed | 1 |
| C2orf53  | 8051024         | 5.958348667 | 6.231087333 | 1.045774204 | 0.030401059 | Induced   | 0 |
| LSM11    | 8109585         | 8.266513333 | 8.229453667 | 0.995516893 | 0.030406328 | Repressed | 0 |
| C9orf72  | 8160531         | 7.491802    | 7.028425    | 0.938173838 | 0.030409708 | Repressed | 0 |
| ZNF174   | 7992897         | 7.733536667 | 7.509158667 | 0.970986366 | 0.030444483 | Repressed | 0 |
| E2F1     | 8065710         | 8.414337333 | 8.497818    | 1.009921241 | 0.030453732 | Induced   | 1 |
| SYDE2    | 7917322         | 5.018313    | 5.494383    | 1.094866542 | 0.030467481 | Induced   | 0 |
| ZNF669   | 7925677         | 7.275231667 | 7.469202    | 1.02666174  | 0.03047802  | Induced   | 0 |
| FOR      | 7914112         | 6.930134667 | 7.117473333 | 1.027032471 | 0.030478919 | Induced   | 0 |
| MRPS27   | 8112570         | 10.27418    | 10.09788667 | 0.982841129 | 0.030480554 | Repressed | 1 |
| OR13F1   | 8157012         | 5.161593    | 5.462008    | 1.058201993 | 0.030490938 | Induced   | 0 |
| ZNF608   | 8113761         | 9.911935    | 10.09030667 | 1.017995645 | 0.030524905 | Induced   | 0 |
| BTN2A2   | 8117447         | 9.059589    | 8.737435    | 0.96444055  | 0.03053708  | Repressed | 0 |
| CRISPLD2 | 7997642         | 5.533988333 | 5.796551667 | 1.047445589 | 0.030621419 | Induced   | 0 |
| AP1B1    | 8075217         | 9.951643667 | 9.844880333 | 0.989271789 | 0.030643508 | Repressed | 1 |
| PDE4B    | 7902104         | 8.977412    | 9.315803333 | 1.03769364  | 0.030648542 | Induced   | 1 |
| ALDH3A2  | 8005638         | 10.22863333 | 9.971553    | 0.9748666   | 0.030656157 | Repressed | 1 |
| IL2RA    | 7931914         | 5.572997    | 5.778092333 | 1.036801623 | 0.03068226  | Induced   | 0 |
| TBL1Y    | 8176442         | 5.986471333 | 6.144158333 | 1.026340559 | 0.030710339 | Induced   | 0 |
| C3orf22  | 8090388         | 5.710053    | 5.958747333 | 1.04355377  | 0.030790729 | Induced   | 0 |
| SPHK1    | 8010061         | 9.799665    | 10.007252   | 1.021183071 | 0.030791629 | Induced   | 1 |
| CPO      | 8047829         | 4.425524333 | 4.463936667 | 1.008679725 | 0.030809322 | Induced   | 0 |
| LARGE    | 8075637         | 8.700134667 | 8.404090333 | 0.965972442 | 0.03081965  | Repressed | 1 |
| KIF12    | 8163548         | 7.0815      | 7.155144333 | 1.010399539 | 0.030843508 | Induced   | 0 |
| TBC1D21  | 7984759         | 6.111321667 | 6.228258333 | 1.019134432 | 0.030892357 | Induced   | 0 |
| C7orf41  | 8132055         | 7.703812    | 7.193952333 | 0.933817224 | 0.030929545 | Repressed | 0 |
| ARCN1    | 7944285         | 11.30908667 | 11.38619667 | 1.006818411 | 0.030937087 | Induced   | 0 |
| TAC1     | 8134420         | 3.756901    | 3.960092667 | 1.054084914 | 0.030972434 | Induced   | 0 |
| TLCD1    | 8013771         | 7.639294    | 7.262757333 | 0.950710541 | 0.030986656 | Repressed | 0 |
| RGS17    | 8130394         | 8.545083333 | 8.371105667 | 0.979640027 | 0.031003764 | Repressed | 1 |
| PRKD3    | 8051547         | 9.128938667 | 8.802042667 | 0.964191237 | 0.031004108 | Repressed | 1 |
| ATP8B    | 8018288         | 11.96457667 | 11.8553     | 0.99086665  | 0.031065468 | Repressed | 0 |
| RNASE7   | 7973149         | 5.594564    | 5.866386    | 1.048586807 | 0.031076161 | Induced   | 0 |
| DLG4     | 8012054         | 6.360414    | 6.214811667 | 0.977108041 | 0.031087707 | Repressed | 1 |
| ZFR      | 8111360         | 11.19711667 | 11.35198333 | 1.013830942 | 0.031111298 | Induced   | 0 |
| FLJ10357 | 7973158         | 8.013541333 | 7.753073667 | 0.967496559 | 0.031111569 | Repressed | 1 |
| RMI1     | 8156126         | 9.037144333 | 8.992112333 | 0.99501701  | 0.031112877 | Repressed | 1 |
| DDX3Y    | 8176624         | 5.020126333 | 5.274246667 | 1.050620306 | 0.031119716 | Induced   | 0 |
| GTFR1RD1 | 8133477         | 7.631893667 | 7.504858333 | 0.983354677 | 0.031125114 | Repressed | 0 |
| STARD10  | 7950235         | 10.35345667 | 9.919861333 | 0.958120718 | 0.031135995 | Repressed | 1 |
| UBTD1    | 7929649         | 8.658208    | 8.868807    | 1.024323624 | 0.031140931 | Induced   | 0 |
| RNF10    | 7959173         | 9.958008    | 9.874869667 | 0.991651108 | 0.031164951 | Repressed | 1 |
| HRAS     | 7945436         | 9.523337    | 9.663521333 | 1.014720085 | 0.031166236 | Induced   | 0 |
| ARRB2    | 8003903         | 9.176957667 | 8.876703667 | 0.967281749 | 0.03121358  | Repressed | 0 |
| FILIP1   | 8127646         | 4.741087    | 5.098275    | 1.075338841 | 0.031215755 | Induced   | 0 |
| SERPINA5 | 7976488         | 5.543072333 | 5.863417333 | 1.057791957 | 0.031217093 | Induced   | 0 |
| RANBP17  | 8109938         | 4.579262333 | 4.421819    | 0.965618189 | 0.031221472 | Repressed | 0 |
| AMPH     | 8139131         | 5.318181333 | 5.518345    | 1.037637616 | 0.031239119 | Induced   | 1 |
| LY96     | 8146934         | 5.125056    | 4.483948333 | 0.874907188 | 0.031240437 | Repressed | 1 |
| TMEM126B | 7942879         | 9.375461667 | 9.226824    | 0.984146096 | 0.031268953 | Repressed | 0 |
| MAN1A1   | 8129254         | 6.378717667 | 6.625162    | 1.038635404 | 0.031271388 | Induced   | 0 |
| TOB1     | 8016739         | 11.26473    | 11.55737667 | 1.025979022 | 0.031303571 | Induced   | 0 |
| NFS1     | 8065992         | 9.554445667 | 9.353521333 | 0.978970592 | 0.031309317 | Repressed | 1 |
| NAV1     | 7908694         | 8.854615    | 8.577406667 | 0.98689335  | 0.03134606  | Repressed | 0 |
| RPS8     | 7901038         | 12.27917667 | 12.16776333 | 0.990926645 | 0.031353353 | Repressed | 0 |
| FCGR2C   | 7906767         | 7.816818    | 7.709786333 | 0.986307515 | 0.031357636 | Repressed | 0 |
| POLD4    | 7949746         | 8.446257667 | 8.239326333 | 0.975500234 | 0.031360367 | Repressed | 0 |
| MFSD9    | 8054356         | 7.883938    | 8.005623667 | 1.015434663 | 0.03141785  | Induced   | 0 |
| COL4A5   | 8169294         | 5.419695667 | 5.709551333 | 1.053481908 | 0.031421341 | Induced   | 0 |
| DNA2     | 7934026         | 8.475248667 | 8.326649667 | 0.982466709 | 0.031435719 | Repressed | 1 |
| PCSK6    | 7991602         | 7.255585    | 7.175087    | 0.988905374 | 0.031451864 | Repressed | 1 |
| DUSP10   | 7924450         | 10.54320333 | 10.35084333 | 0.981755071 | 0.031457229 | Repressed | 0 |
| ZNF141   | 8093336         | 7.919392333 | 7.793908333 | 0.984154845 | 0.031470986 | Repressed | 0 |
| TNMF9F2  | 7969796         | 11.53733    | 11.49500667 | 0.996331618 | 0.031483389 | Repressed | 1 |
| SOAT1    | 7907702         | 11.75373667 | 11.52432667 | 0.980481952 | 0.031488511 | Repressed | 0 |
| TOR1A    | 8164587         | 9.869166667 | 9.630916667 | 0.975859157 | 0.031562    | Repressed | 1 |
| IPP      | 7915775         | 9.027648333 | 8.515584333 | 0.943276036 | 0.031592075 | Repressed | 0 |
| RNF113B  | 7972438         | 6.152227    | 6.331327667 | 1.029111518 | 0.031634501 | Induced   | 0 |
| ZNF280C  | 8175076         | 8.656554667 | 8.916704    | 1.030052295 | 0.031639965 | Induced   | 0 |
| XRCC1    | 8037331         | 8.534198667 | 8.241295    | 0.965678832 | 0.031683415 | Repressed | 0 |
| RAB31P   | 7957072         | 6.783581333 | 6.675269    | 0.984033164 | 0.031697381 | Repressed | 1 |
| RFX5     | 7919971         | 8.965236333 | 8.471417333 | 0.944918463 | 0.031698269 | Repressed | 0 |
| RIF1     | 8045697         | 11.52221667 | 11.60884667 | 1.007518519 | 0.031704646 | Induced   | 0 |

|          |                    |             |             |             |             |           |   |
|----------|--------------------|-------------|-------------|-------------|-------------|-----------|---|
| ITPR2    | 7961900            | 8.781776    | 8.42033333  | 0.958841735 | 0.031708979 | Repressed | 1 |
| ANGPTL4  | 8025402            | 7.427862    | 7.613610333 | 1.025006971 | 0.031753575 | Induced   | 0 |
| CRYM     | 8000117            | 6.873956667 | 6.955940667 | 1.011926755 | 0.031802715 | Induced   | 0 |
| RBP5     | 7960764            | 7.406397667 | 7.670759667 | 1.035693736 | 0.031806996 | Induced   | 0 |
| DNAJB8   | 8090464            | 5.775184667 | 6.020329667 | 1.042447993 | 0.031812155 | Induced   | 0 |
| FAM18B   | 8005501            | 10.82205667 | 10.90388333 | 1.007561101 | 0.03182566  | Induced   | 0 |
| MESDC1   | 7985349            | 8.973894667 | 8.746095    | 0.974615295 | 0.031832031 | Repressed | 1 |
| PICK1    | 8072989            | 7.660219333 | 7.492728333 | 0.97813496  | 0.031833145 | Repressed | 1 |
| GPR179   | 8014666            | 6.115989667 | 6.511263333 | 1.064629551 | 0.031860045 | Induced   | 0 |
| ALAS2    | 8173135            | 6.197925    | 6.467511667 | 1.043496278 | 0.031882161 | Induced   | 0 |
| RTN2     | 8037594            | 7.452102    | 7.350787333 | 0.986404552 | 0.031898445 | Repressed | 0 |
| CKLF     | 7996290            | 7.966425    | 7.877291    | 0.988811292 | 0.031909615 | Repressed | 1 |
| CMTM1    | 7996290            | 7.966425    | 7.877291    | 0.988811292 | 0.031909615 | Repressed | 1 |
| PRPH     | 7955184            | 6.629716    | 6.887546333 | 1.038890102 | 0.031924884 | Induced   | 0 |
| CCDC103  | 8007707            | 5.604433333 | 5.757835    | 1.046035923 | 0.0319325   | Induced   | 0 |
| IL1RAP   | 8084794            | 11.78217667 | 11.63666667 | 0.98764999  | 0.031934287 | Repressed | 1 |
| USP51    | 8173174            | 7.71109     | 7.521928333 | 0.975468881 | 0.031948443 | Repressed | 1 |
| FLJ10213 | 8080980            | 7.133102    | 6.591283333 | 0.924041649 | 0.031951548 | Repressed | 0 |
| C17orf61 | 8012207            | 8.212714667 | 7.789464    | 0.948463975 | 0.03197223  | Repressed | 0 |
| MMRN2    | 7934842            | 5.913095    | 6.076959667 | 1.027712165 | 0.032008076 | Induced   | 0 |
| SLC25A12 | 8056766            | 9.561135667 | 9.315978333 | 0.974358973 | 0.032060556 | Repressed | 0 |
| SLTM     | 7989253            | 10.52638667 | 10.68020667 | 1.014612802 | 0.032069893 | Induced   | 1 |
| RILPL1   | 7967463            | 7.667808    | 7.516919333 | 0.980321799 | 0.032086937 | Repressed | 0 |
| RRN3     | 7999608/7994565/80 | 11.20252    | 11.41631833 | 1.019048378 | 0.032092752 | Induced   | 0 |
| TMEM203  | 8165642/8165486    | 9.075270334 | 8.691543167 | 0.957783058 | 0.032094324 | Repressed | 0 |
| SPARC    | 8115327            | 11.96613    | 11.73557333 | 0.980732562 | 0.032118019 | Repressed | 1 |
| CRYZ     | 7917037/7902345    | 10.48030667 | 10.26173667 | 0.979140868 | 0.032127384 | Repressed | 1 |
| RABL2A   | 8044669/8077171    | 8.3101565   | 8.0889055   | 0.97338138  | 0.032208153 | Repressed | 0 |
| RABL2B   | 8044669/8077171    | 8.3101565   | 8.0889055   | 0.97338138  | 0.032208153 | Repressed | 0 |
| ZDHHC7   | 8003180            | 8.856325333 | 8.643875667 | 0.976011533 | 0.032224907 | Repressed | 0 |
| HSPA4    | 8108015            | 11.82934667 | 11.90001333 | 1.005973844 | 0.032228498 | Induced   | 0 |
| C1orf128 | 7988894            | 9.125317    | 9.298034    | 1.018927233 | 0.032278332 | Induced   | 0 |
| LAT2     | 8133442            | 6.497887    | 6.586473667 | 1.01363315  | 0.032280961 | Induced   | 0 |
| RAB3A    | 8035398/8026982    | 8.735860669 | 8.806416835 | 1.008746392 | 0.032371293 | Induced   | 1 |
| PNRC2    | 7898910/8039933    | 12.25389    | 12.33997    | 1.007024708 | 0.032376061 | Induced   | 0 |
| IL4      | 8107977            | 4.508218    | 4.312696    | 0.95662987  | 0.03238596  | Repressed | 0 |
| SC5DL    | 7944656            | 10.7363     | 11.02060667 | 1.02648088  | 0.032395876 | Induced   | 0 |
| PRNP     | 8060758            | 12.85101333 | 13.0019     | 1.011741227 | 0.032411065 | Induced   | 1 |
| RTTN     | 8023766            | 8.634214333 | 8.474514333 | 0.981503818 | 0.032425046 | Repressed | 1 |
| MSI2     | 8008682            | 9.943924667 | 9.627408    | 0.968169845 | 0.032435462 | Repressed | 1 |
| EHF42    | 8144742            | 5.785849333 | 5.483903333 | 0.947813021 | 0.032441798 | Repressed | 0 |
| MSN      | 8167965            | 11.42469333 | 11.19829333 | 0.980183276 | 0.032471229 | Repressed | 0 |
| C1orf69  | 7910261            | 7.742309333 | 7.908418333 | 1.02145471  | 0.032471547 | Induced   | 0 |
| RAP2B    | 8083457            | 9.396828    | 9.131063333 | 0.971717619 | 0.032480628 | Repressed | 0 |
| PPP2R2D  | 7931405            | 7.329256667 | 7.033950667 | 0.959708602 | 0.032487992 | Repressed | 0 |
| LRBA     | 8103106            | 8.792745667 | 8.528359667 | 0.969931349 | 0.032489353 | Repressed | 0 |
| RTN4R    | 8074558            | 8.687550333 | 8.834538667 | 1.016919422 | 0.032491501 | Induced   | 1 |
| DTX3     | 7956539            | 6.827015    | 6.673434667 | 0.977504029 | 0.032499159 | Repressed | 0 |
| TTL      | 8044462            | 10.49096    | 10.30853667 | 0.982611378 | 0.032518787 | Repressed | 1 |
| LMBRD1   | 8127425            | 8.774736667 | 8.480972667 | 0.966521616 | 0.032556091 | Repressed | 0 |
| KIF20A   | 8108301            | 9.269312333 | 8.895577    | 0.95968036  | 0.032563408 | Repressed | 1 |
| RDM1     | 8014326            | 5.350812    | 5.547547    | 1.036767317 | 0.032601955 | Induced   | 0 |
| VCPIP1   | 8151118            | 10.55980667 | 10.75938333 | 1.018899652 | 0.032601998 | Induced   | 0 |
| SLC30A1  | 7924092            | 9.571023333 | 9.668533333 | 1.010188043 | 0.032613433 | Induced   | 0 |
| RPS9     | 8031152            | 11.60499333 | 11.44275333 | 0.986019811 | 0.032632769 | Repressed | 0 |
| AUTS2    | 8133233            | 7.572254667 | 7.399825667 | 0.977228843 | 0.032633865 | Repressed | 1 |
| VPS41    | 8139165            | 10.52056    | 10.27345333 | 0.976512023 | 0.032647616 | Repressed | 1 |
| ENO2     | 7953532            | 10.17374333 | 9.897057333 | 0.972803914 | 0.032648884 | Repressed | 0 |
| ENPP2    | 8152522            | 5.849122333 | 5.475745    | 0.936165238 | 0.032655722 | Repressed | 1 |
| BATF3    | 7924166            | 7.717439333 | 7.801512333 | 1.010893898 | 0.032664242 | Induced   | 0 |
| MTRF1    | 7971222            | 9.765442667 | 9.680864667 | 0.991339051 | 0.032675624 | Repressed | 0 |
| CHEK2    | 8075164            | 9.596188667 | 9.233677333 | 0.962223405 | 0.032682306 | Repressed | 1 |
| VANGL1   | 7904211            | 8.763626333 | 8.310585667 | 0.948304429 | 0.032688662 | Repressed | 1 |
| NTSE     | 8120967            | 10.87833    | 11.11858333 | 1.022085498 | 0.032713458 | Induced   | 1 |
| ZNF267   | 7995258            | 10.4000667  | 10.63138667 | 1.022248063 | 0.032744046 | Induced   | 1 |
| PDGFRL   | 8144802            | 8.632403667 | 8.369849333 | 0.969585026 | 0.032754388 | Repressed | 1 |
| MXD1     | 8042503/8042495    | 9.898293002 | 10.07312867 | 1.019931942 | 0.032804211 | Induced   | 0 |
| EEF2K    | 7993946            | 7.780376333 | 7.478841    | 0.96124412  | 0.032826371 | Repressed | 0 |
| NRG4     | 7990555            | 3.639453667 | 3.830488333 | 1.05248993  | 0.032832702 | Induced   | 0 |
| ARMXC2   | 8174092            | 7.949989667 | 7.844499    | 0.986730717 | 0.032880115 | Repressed | 0 |
| C17orf62 | 8019507            | 8.239848667 | 8.027099333 | 0.974180432 | 0.032882534 | Repressed | 1 |
| HIVEP2   | 8129953            | 10.1342     | 10.21928    | 1.008395335 | 0.032886081 | Induced   | 1 |
| NUCB1    | 8030133            | 8.839503667 | 8.482725    | 0.959638156 | 0.032886986 | Repressed | 0 |
| ZNF79    | 8158022            | 7.654837333 | 7.542876333 | 0.985373824 | 0.032888519 | Repressed | 1 |
| HIST1H4I | 8117537            | 7.247617333 | 6.79237     | 0.937186621 | 0.032937721 | Repressed | 0 |
| ACSBG1   | 7985134/7990683    | 8.979251667 | 9.171617    | 1.025784718 | 0.032956949 | Induced   | 1 |
| BECN1    | 8015715            | 9.767106667 | 9.585821    | 0.981439164 | 0.032977789 | Repressed | 0 |
| SAP18    | 7967976            | 11.48779667 | 11.62827667 | 1.012228629 | 0.032979691 | Induced   | 0 |
| ACCN4    | 8048611            | 4.943197    | 5.113071    | 1.034365209 | 0.032989643 | Induced   | 1 |
| TOMM22   | 7930870/8073032    | 11.445995   | 11.28723834 | 0.985806672 | 0.032992961 | Repressed | 1 |
| PDK2     | 8008263            | 7.949191667 | 7.617634333 | 0.958290434 | 0.033014836 | Repressed | 1 |
| MAF7     | 8129783            | 6.025412333 | 6.399314    | 1.062054121 | 0.033047481 | Induced   | 0 |
| EXT2     | 7939524            | 9.008994667 | 8.750674667 | 0.971326434 | 0.03310987  | Repressed | 1 |
| OSR2     | 8147573            | 6.991951667 | 7.092463667 | 1.014375385 | 0.033140146 | Induced   | 0 |
| SAA4     | 7946977            | 4.606667667 | 4.984823333 | 1.082088767 | 0.033171497 | Induced   | 0 |
| AKAP8L   | 8035023            | 11.08903    | 11.39498667 | 1.027590931 | 0.033183468 | Induced   | 0 |
| OTUD7    | 7919699            | 10.07193667 | 9.946721667 | 0.987567932 | 0.033186291 | Repressed | 0 |
| C21orf63 | 8068202            | 7.58304     | 7.749047    | 1.02189188  | 0.033197031 | Induced   | 1 |
| MTSS1    | 8152764            | 5.92523     | 6.064886667 | 1.02356983  | 0.033208732 | Induced   | 1 |
| SFTD3    | 8045083            | 8.238431    | 8.012245333 | 0.972545055 | 0.033233073 | Repressed | 0 |
| ZNF80    | 8089694            | 4.615456333 | 4.918080667 | 1.065567587 | 0.033242852 | Induced   | 0 |
| DHCR24   | 7916432            | 10.34697333 | 10.67948    | 1.032135645 | 0.033255244 | Induced   | 1 |
| NLN      | 8105663            | 8.501784667 | 8.466301667 | 0.995826406 | 0.033268117 | Repressed | 1 |
| USE1     | 8026679            | 9.412162    | 9.251015667 | 0.982878925 | 0.033374855 | Repressed | 0 |
| PLD3     | 8028791            | 8.754688    | 8.422644667 | 0.962072511 | 0.033395366 | Repressed | 0 |
| LATS2    | 7970498            | 9.622386667 | 9.817448333 | 1.020271651 | 0.033431711 | Induced   | 0 |
| E1F4G3   | 7913319            | 9.416996    | 9.222716    | 0.979369217 | 0.033436068 | Repressed | 1 |
| MGAT3    | 8073129            | 6.347313333 | 6.558005333 | 1.033193887 | 0.033446612 | Induced   | 0 |
| HOXD10   | 8046536            | 5.449191333 | 5.774733333 | 1.059741341 | 0.033485797 | Induced   | 0 |

|           |                 |             |             |             |             |           |   |
|-----------|-----------------|-------------|-------------|-------------|-------------|-----------|---|
| ERP1      | 8159992         | 7.987445667 | 7.380989667 | 0.92407385  | 0.033506826 | Repressed | 0 |
| GRP6      | 8121454         | 7.581629667 | 7.836901333 | 1.033669762 | 0.033507765 | Induced   | 0 |
| PKKRIP1   | 8135162         | 8.967286667 | 9.150723667 | 1.020456244 | 0.033534379 | Induced   | 1 |
| USP13     | 8084100         | 9.063210333 | 8.827782667 | 0.974023811 | 0.033591686 | Repressed | 0 |
| TJP1      | 7986977         | 9.870492333 | 10.00308233 | 1.013432967 | 0.033618856 | Induced   | 1 |
| ZFP3      | 8004081         | 4.117894333 | 4.295557333 | 1.043144138 | 0.033624876 | Induced   | 1 |
| DUSP22    | 8116548         | 7.346541333 | 7.036173667 | 0.957753227 | 0.033653109 | Repressed | 1 |
| CHST4     | 7997152         | 5.173077333 | 5.477264667 | 1.058802008 | 0.033681882 | Induced   | 0 |
| TTIC13    | 7925003         | 8.446350667 | 8.100234667 | 0.959021829 | 0.033693949 | Repressed | 0 |
| NDUFA2    | 8114618         | 9.105821667 | 8.806380333 | 0.967115397 | 0.033731348 | Repressed | 0 |
| RNMTL1    | 8003621         | 10.03345433 | 10.16525667 | 1.013136287 | 0.033778169 | Induced   | 0 |
| OR8D2     | 7952394         | 4.794350333 | 4.949843667 | 1.032432618 | 0.033810519 | Induced   | 0 |
| TCEAL8    | 8174228         | 8.456192    | 8.230428667 | 0.97330201  | 0.033829887 | Repressed | 0 |
| CD9       | 7953291         | 10.88719667 | 10.73676    | 0.98618224  | 0.03390006  | Repressed | 1 |
| LDLRAD1   | 7916364         | 6.302492667 | 6.496669    | 1.03080945  | 0.033901739 | Induced   | 0 |
| ULK2      | 8013399         | 7.654482333 | 7.290286    | 0.952420514 | 0.033902651 | Repressed | 1 |
| GALNT2    | 7910427         | 10.36843    | 10.17417    | 0.98126428  | 0.03392656  | Repressed | 1 |
| COMMD2    | 8091432         | 10.003248   | 9.907265667 | 0.990404883 | 0.033929742 | Repressed | 0 |
| OR1A2     | 8003802         | 4.955651667 | 5.201277667 | 1.049564823 | 0.033934116 | Induced   | 0 |
| MED17     | 7943176         | 10.13596333 | 10.2749     | 1.013707298 | 0.033964631 | Induced   | 0 |
| TNNC1     | 8087925         | 5.859314667 | 6.166717667 | 1.052463986 | 0.03396973  | Induced   | 0 |
| FOXN3     | 7980680         | 6.929472667 | 6.451100667 | 0.930965598 | 0.033975511 | Repressed | 1 |
| SFXN3     | 7929919         | 8.712262    | 8.390988333 | 0.963123966 | 0.033989122 | Repressed | 1 |
| HADHA     | 805908          | 11.47352    | 11.41280333 | 0.994708105 | 0.033998917 | Repressed | 0 |
| MRV1      | 7945589         | 6.335916    | 6.631153    | 1.046597367 | 0.03400832  | Induced   | 0 |
| VGF       | 8141664         | 12.18846    | 12.04667    | 0.98828482  | 0.034063938 | Repressed | 1 |
| TBC1D9    | 8102912         | 9.351516333 | 9.142262333 | 0.977623522 | 0.034110352 | Repressed | 1 |
| SERINC1   | 8129317         | 11.35518667 | 11.47514    | 1.010563748 | 0.034122192 | Induced   | 0 |
| CACHD1    | 7901993         | 9.154096667 | 8.958450333 | 0.978627456 | 0.03414204  | Repressed | 0 |
| MOSC2     | 7909866         | 4.484353    | 4.640533    | 1.034827767 | 0.034166904 | Induced   | 0 |
| PYCARD    | 8001030         | 8.786738667 | 8.55279     | 0.973374801 | 0.034185601 | Repressed | 0 |
| HEXIM1    | 8007745         | 9.987993667 | 10.35829333 | 1.03707448  | 0.034198923 | Induced   | 0 |
| GABRA5    | 7982102         | 9.443574667 | 8.929401333 | 0.945553103 | 0.034218979 | Repressed | 0 |
| TC1E1     | 8126674         | 6.298886    | 6.508568333 | 1.033288796 | 0.034226962 | Induced   | 0 |
| GMD5      | 8123562         | 8.704769667 | 8.306493333 | 0.954246195 | 0.034252309 | Repressed | 1 |
| SLC35B2   | 8126658         | 8.987682667 | 8.858992667 | 0.985681515 | 0.034280119 | Repressed | 0 |
| NUDT7     | 7997332         | 7.644506667 | 7.265568    | 0.950429938 | 0.034283742 | Repressed | 0 |
| UFSP2     | 8103998/8098604 | 7.90616     | 7.6830455   | 0.972433022 | 0.034356998 | Repressed | 1 |
| SEMA3C    | 8140534         | 9.619766    | 9.344545333 | 0.971390087 | 0.034358329 | Repressed | 1 |
| FST       | 8105302         | 7.045772    | 7.314136667 | 1.038088753 | 0.034376659 | Induced   | 0 |
| TUBD1     | 8017150         | 8.110752    | 7.828306    | 0.965176349 | 0.034379598 | Repressed | 0 |
| ATP13A5   | 8092769         | 4.834169    | 4.993449333 | 1.032948855 | 0.034403419 | Induced   | 0 |
| STAR      | 8150253         | 5.921863    | 6.129204333 | 1.035047812 | 0.034406843 | Induced   | 0 |
| USP45     | 8128409         | 7.460547333 | 7.251555667 | 0.971987087 | 0.034429373 | Repressed | 0 |
| PVR       | 8029437         | 9.724805667 | 9.962085333 | 1.024399425 | 0.034433581 | Induced   | 0 |
| TMC8      | 8010212         | 7.270178667 | 7.425533667 | 1.021368801 | 0.034540614 | Induced   | 1 |
| C20orf177 | 8063755         | 8.261938    | 7.879922    | 0.953761938 | 0.034563179 | Repressed | 1 |
| EHD1      | 7949264         | 8.029886667 | 8.287943667 | 1.032137066 | 0.034568835 | Induced   | 0 |
| MOCS2     | 8112020         | 8.944525    | 8.434379    | 0.942965557 | 0.03457173  | Repressed | 0 |
| REEP3     | 7927786/7927799 | 9.496308333 | 9.2442875   | 0.973254616 | 0.034592935 | Repressed | 1 |
| RUNX2     | 8120043         | 8.118652333 | 8.290056333 | 1.021112371 | 0.034607527 | Induced   | 1 |
| CCBL2     | 7917482         | 9.326935    | 8.894670333 | 0.953654157 | 0.034639308 | Repressed | 1 |
| PKRDI1    | 7978407         | 8.837815    | 8.340046667 | 0.943677444 | 0.03464111  | Repressed | 1 |
| SLC25A25  | 8158147         | 8.28743     | 8.736647    | 1.054204621 | 0.034646952 | Induced   | 0 |
| PHC1      | 7963869/7953812 | 8.967440834 | 8.813467833 | 0.982829846 | 0.034709192 | Repressed | 0 |
| ADAMTS5   | 8069689         | 6.315436667 | 6.423698    | 1.017142335 | 0.034728667 | Induced   | 0 |
| SOX5      | 7961798         | 7.302598    | 6.836105667 | 0.936119675 | 0.034759492 | Repressed | 0 |
| KCNIP1    | 8109912         | 5.322481667 | 5.610026    | 1.054024485 | 0.034777661 | Induced   | 1 |
| MMWD      | 8037679         | 8.304638    | 8.481191667 | 1.021259646 | 0.03479054  | Induced   | 0 |
| MYO5A     | 7988921         | 9.504242    | 9.006268667 | 0.94760515  | 0.034801221 | Repressed | 1 |
| PEX19     | 7921571         | 9.660537667 | 9.508274    | 0.984238593 | 0.034844319 | Repressed | 0 |
| RSRC2     | 7967304         | 10.1155     | 10.34752333 | 1.022937406 | 0.034868428 | Induced   | 1 |
| MAPKBP1   | 7982985         | 7.380099333 | 7.286186667 | 0.987274878 | 0.034908834 | Repressed | 0 |
| VARS      | 8125091/8178609 | 9.479590667 | 9.353584    | 0.986707584 | 0.034943762 | Repressed | 0 |
| IRAK1     | 8175977         | 8.887825333 | 8.737859333 | 0.983126806 | 0.034968779 | Repressed | 1 |
| SLC25A15  | 7968734         | 9.546608    | 9.404212667 | 0.985084196 | 0.035019323 | Repressed | 0 |
| ERG       | 8070297         | 4.997042667 | 5.236792667 | 1.047978378 | 0.035030958 | Induced   | 0 |
| INSM1     | 8061303         | 7.645975    | 7.852518    | 1.027013298 | 0.035074245 | Induced   | 0 |
| VGLL1     | 8170179         | 5.780957667 | 5.980095667 | 1.034447234 | 0.035092584 | Induced   | 0 |
| RPS6KA2   | 8130739         | 7.548226    | 7.010818    | 0.928776907 | 0.03512096  | Repressed | 0 |
| HTR1B     | 8127692         | 6.363851667 | 6.630553333 | 1.041908844 | 0.035125891 | Induced   | 0 |
| SIRPB1    | 8064471         | 6.214973    | 6.645278    | 1.069236825 | 0.035188169 | Induced   | 0 |
| KDR       | 8100393         | 6.774826667 | 6.377713333 | 0.941383986 | 0.035212296 | Repressed | 0 |
| TMEM144   | 8098041         | 6.743251    | 6.028982    | 0.894076463 | 0.035265055 | Repressed | 0 |
| NLRP6     | 7937305         | 6.19545333  | 6.457048667 | 1.042223423 | 0.035270432 | Induced   | 0 |
| MXI1      | 7930398         | 9.179653333 | 8.980705    | 0.97832725  | 0.035291464 | Repressed | 1 |
| EIF4E     | 8101839         | 6.454820667 | 6.562416    | 1.016668989 | 0.035322559 | Induced   | 0 |
| TGFβ2     | 7909789         | 7.483921667 | 7.413973333 | 0.990653519 | 0.035349099 | Repressed | 0 |
| C17orf63  | 8013776         | 8.568737667 | 8.473736    | 0.988912992 | 0.035378942 | Repressed | 0 |
| MPZL1     | 7907092         | 10.57855    | 10.64688333 | 1.006649932 | 0.035435313 | Induced   | 0 |
| CTPS      | 7900510         | 10.68128333 | 10.39606333 | 0.973297216 | 0.035441239 | Repressed | 0 |
| GUCY2F    | 8174448         | 4.654880667 | 5.148878    | 1.106124597 | 0.035455468 | Induced   | 0 |
| RASA3     | 7972946         | 8.733411    | 8.442395667 | 0.96667793  | 0.035460669 | Repressed | 1 |
| RIOK3     | 8020508         | 10.49972333 | 10.67358667 | 1.016558849 | 0.035492437 | Induced   | 0 |
| HIST1H2BO | 8117614         | 6.737411333 | 6.506650667 | 0.965749358 | 0.035495466 | Repressed | 0 |
| TIRAP     | 7945086         | 6.080043    | 5.93314     | 0.975838493 | 0.035558372 | Repressed | 0 |
| FAM55C    | 8081375         | 9.339518333 | 8.970547667 | 0.960493609 | 0.035580601 | Repressed | 0 |
| RHOB      | 8040473         | 9.713114333 | 9.799088    | 1.008851298 | 0.035611824 | Induced   | 0 |
| C11orf1   | 7943779         | 9.120697667 | 8.907599    | 0.976635705 | 0.035628375 | Repressed | 0 |
| ZNF550    | 8039655         | 8.205612    | 8.612281333 | 1.049559903 | 0.035639925 | Induced   | 1 |
| COL9A3    | 8063970         | 8.898287667 | 8.981413    | 1.009341722 | 0.035642269 | Induced   | 0 |
| GART      | 8070102         | 11.82411667 | 11.79353333 | 0.997413478 | 0.035643393 | Repressed | 0 |
| ZC3H12B   | 8167957         | 4.718845    | 4.599322333 | 0.974671203 | 0.035644701 | Repressed | 0 |
| ATP10A    | 7986789         | 7.725277667 | 7.252859333 | 0.938847721 | 0.035731966 | Repressed | 1 |
| NTRK1     | 7906244         | 7.164690667 | 7.344177667 | 1.025051605 | 0.035733305 | Induced   | 1 |
| SHC2      | 8032037         | 6.949687667 | 7.080635333 | 1.018842238 | 0.03576302  | Induced   | 0 |
| DIAPH1    | 8114658         | 9.737516    | 9.640961    | 0.990084227 | 0.035763232 | Repressed | 1 |
| KIF16B    | 8065089         | 9.148457    | 8.732739    | 0.954558676 | 0.035799034 | Repressed | 1 |
| ASPH      | 8150988         | 9.026299    | 8.758657    | 0.970348645 | 0.035805524 | Repressed | 1 |



|          |                 |             |             |             |             |           |   |
|----------|-----------------|-------------|-------------|-------------|-------------|-----------|---|
| WISP2    | 8062864         | 7.507282333 | 7.809054333 | 1.040197236 | 0.035828475 | Induced   | 1 |
| PSEN2    | 7910146         | 8.757897    | 8.476992    | 0.967925519 | 0.03584609  | Repressed | 1 |
| CORO6    | 8013947         | 6.369198    | 6.61832     | 1.039113559 | 0.03585071  | Induced   | 0 |
| MYBBP1A  | 8011640         | 9.824439333 | 9.592762667 | 0.976418332 | 0.035856642 | Repressed | 0 |
| PTH      | 7946687         | 3.619854333 | 3.531125    | 0.975488148 | 0.035893123 | Repressed | 0 |
| SLC11A2  | 7963212         | 9.22297333  | 8.987942333 | 0.974588219 | 0.035933534 | Repressed | 1 |
| GNAI3    | 7903703         | 11.12404667 | 11.19007667 | 1.00593579  | 0.035936724 | Induced   | 1 |
| CIB4     | 8050993         | 4.989945667 | 5.236068333 | 1.049323717 | 0.035943028 | Induced   | 1 |
| DSCC1    | 8152582         | 9.96283     | 9.75775     | 0.979415487 | 0.035944147 | Repressed | 0 |
| PDYN     | 8064495         | 4.797655    | 4.922970667 | 1.026120191 | 0.035956693 | Induced   | 0 |
| ATAD2B   | 8050658         | 8.189197667 | 8.593856667 | 1.049413754 | 0.036013784 | Induced   | 1 |
| U2F35    | 7942798         | 7.309994667 | 7.177244667 | 0.981839932 | 0.036022652 | Repressed | 1 |
| C22orf28 | 8075585         | 12.26168333 | 12.28846    | 1.002183768 | 0.036044765 | Induced   | 0 |
| KY       | 8090872         | 5.850648667 | 6.110600667 | 1.044431313 | 0.036085523 | Induced   | 0 |
| BLM      | 7986068         | 9.698124667 | 9.649496667 | 0.994985835 | 0.036088443 | Repressed | 1 |
| YKT6     | 8132580         | 11.21309333 | 11.37914667 | 1.014808878 | 0.036089273 | Induced   | 0 |
| PCSK1N   | 8172447         | 8.151923667 | 8.391722667 | 1.029416247 | 0.036106919 | Induced   | 0 |
| TANC1    | 8045889         | 10.13841    | 9.906268333 | 0.977102754 | 0.036118376 | Repressed | 1 |
| HAS2     | 8152617         | 9.900715    | 9.684417    | 0.978153295 | 0.036130145 | Repressed | 1 |
| PLTP     | 8066619         | 9.098350333 | 8.737591667 | 0.960349002 | 0.036141645 | Repressed | 0 |
| SLC27A3  | 7905664         | 10.32024    | 9.936306333 | 0.96279799  | 0.036176138 | Repressed | 1 |
| PLSCR3   | 8012207/8012197 | 7.6903265   | 7.359761834 | 0.957638746 | 0.036212144 | Repressed | 0 |
| CHD4     | 7960594         | 11.49573    | 11.59663333 | 1.008777462 | 0.036282306 | Induced   | 0 |
| FAM71C   | 7957790         | 4.249684667 | 4.548039667 | 1.070206386 | 0.0362893   | Induced   | 0 |
| LPCAT2   | 7995697         | 9.302238333 | 8.966464667 | 0.963903992 | 0.036295222 | Repressed | 0 |
| GZMB     | 7978366         | 6.291142    | 6.592904667 | 1.047966278 | 0.036324533 | Induced   | 0 |
| ARL15    | 8112033         | 6.415549667 | 6.044071333 | 0.942097193 | 0.036339609 | Repressed | 1 |
| MAP3K2   | 8054997         | 9.916288333 | 9.857408333 | 0.994062294 | 0.036347506 | Repressed | 0 |
| FAM40B   | 8136115         | 8.153859    | 7.926495667 | 0.972115862 | 0.036393825 | Repressed | 0 |
| ZNF791   | 8026007         | 8.687424333 | 8.900619667 | 1.024540684 | 0.036430601 | Induced   | 1 |
| ERAP1    | 8113250         | 8.258923333 | 7.947625333 | 0.962307678 | 0.036466569 | Repressed | 0 |
| FOXN1    | 8005894         | 5.688103    | 5.825713667 | 1.024192717 | 0.036498221 | Induced   | 0 |
| NCALD    | 8152119         | 6.798242    | 6.502133    | 0.956443298 | 0.036518327 | Repressed | 1 |
| TDIRD7   | 8156688         | 8.419957    | 8.125004333 | 0.964969813 | 0.036541989 | Repressed | 0 |
| LMX1B    | 8157922         | 7.228810667 | 7.474153667 | 1.033939608 | 0.036559145 | Induced   | 1 |
| ZFAND6   | 7985259         | 10.79374    | 10.67881333 | 0.98935247  | 0.036602768 | Repressed | 0 |
| MCM4     | 8146357         | 11.32496667 | 11.36571667 | 1.003598245 | 0.036663099 | Induced   | 0 |
| RPL31    | 8043932         | 9.189447    | 8.997334667 | 0.979094244 | 0.036710951 | Repressed | 1 |
| GMPR     | 8117034         | 8.788874    | 8.440050333 | 0.960310767 | 0.036720372 | Repressed | 1 |
| GSR      | 8150112         | 11.16980333 | 10.99402667 | 0.984263226 | 0.036760597 | Repressed | 1 |
| LPO      | 8008736         | 5.890067    | 5.992025    | 1.01731016  | 0.036763109 | Induced   | 1 |
| PCDHGA1  | 8108757         | 5.643911333 | 5.699348    | 1.009822384 | 0.036820354 | Induced   | 0 |
| PCDHGA2  | 8108757         | 5.643911333 | 5.699348    | 1.009822384 | 0.036820354 | Induced   | 0 |
| PCDHGA3  | 8108757         | 5.643911333 | 5.699348    | 1.009822384 | 0.036820354 | Induced   | 1 |
| PCDHGB1  | 8108757         | 5.643911333 | 5.699348    | 1.009822384 | 0.036820354 | Induced   | 1 |
| PCDHGA4  | 8108757         | 5.643911333 | 5.699348    | 1.009822384 | 0.036820354 | Induced   | 0 |
| PCDHGB2  | 8108757         | 5.643911333 | 5.699348    | 1.009822384 | 0.036820354 | Induced   | 0 |
| PCDHGA5  | 8108757         | 5.643911333 | 5.699348    | 1.009822384 | 0.036820354 | Induced   | 0 |
| PCDHGB3  | 8108757         | 5.643911333 | 5.699348    | 1.009822384 | 0.036820354 | Induced   | 0 |
| PCDHGA6  | 8108757         | 5.643911333 | 5.699348    | 1.009822384 | 0.036820354 | Induced   | 1 |
| PCDHGA7  | 8108757         | 5.643911333 | 5.699348    | 1.009822384 | 0.036820354 | Induced   | 1 |
| PCDHGB4  | 8108757         | 5.643911333 | 5.699348    | 1.009822384 | 0.036820354 | Induced   | 0 |
| PCDHGA8  | 8108757         | 5.643911333 | 5.699348    | 1.009822384 | 0.036820354 | Induced   | 0 |
| PCDHGB5  | 8108757         | 5.643911333 | 5.699348    | 1.009822384 | 0.036820354 | Induced   | 0 |
| PCDHGA9  | 8108757         | 5.643911333 | 5.699348    | 1.009822384 | 0.036820354 | Induced   | 0 |
| PCDHGB6  | 8108757         | 5.643911333 | 5.699348    | 1.009822384 | 0.036820354 | Induced   | 0 |
| PCDHGA10 | 8108757         | 5.643911333 | 5.699348    | 1.009822384 | 0.036820354 | Induced   | 0 |
| PCDHGB7  | 8108757         | 5.643911333 | 5.699348    | 1.009822384 | 0.036820354 | Induced   | 0 |
| PCDHGA11 | 8108757         | 5.643911333 | 5.699348    | 1.009822384 | 0.036820354 | Induced   | 0 |
| PCDHGA12 | 8108757         | 5.643911333 | 5.699348    | 1.009822384 | 0.036820354 | Induced   | 1 |
| PCDHGC3  | 8108757         | 5.643911333 | 5.699348    | 1.009822384 | 0.036820354 | Induced   | 1 |
| PCDHGC4  | 8108757         | 5.643911333 | 5.699348    | 1.009822384 | 0.036820354 | Induced   | 1 |
| PCDHGC5  | 8108757         | 5.643911333 | 5.699348    | 1.009822384 | 0.036820354 | Induced   | 0 |
| KCNQ5    | 8120654         | 9.018818333 | 8.911537333 | 0.988104761 | 0.036853905 | Repressed | 0 |
| AXL      | 8029006         | 7.021602    | 7.188744667 | 1.023804064 | 0.036862027 | Induced   | 0 |
| GNB4     | 8092251         | 10.70980667 | 10.49087333 | 0.979557676 | 0.036916762 | Repressed | 1 |
| RUSC1    | 7905999         | 7.611133    | 7.735830333 | 1.016383544 | 0.036946298 | Induced   | 0 |
| CCNG1    | 8109697         | 9.869314333 | 9.357888667 | 0.948180223 | 0.036952693 | Repressed | 0 |
| NGFR     | 8008201         | 8.972634667 | 9.427251    | 1.050666984 | 0.036968525 | Induced   | 1 |
| SNX7     | 7903203         | 8.110177    | 7.894345    | 0.973387511 | 0.036993957 | Repressed | 0 |
| SERPINI1 | 8083779         | 5.428186667 | 5.470680333 | 1.007828336 | 0.037004682 | Induced   | 1 |
| PRKAR1B  | 8137675         | 7.365001667 | 7.556702    | 1.026028553 | 0.037010401 | Induced   | 0 |
| DTNB     | 8050846         | 8.474888667 | 8.258238667 | 0.974436242 | 0.037037569 | Repressed | 0 |
| PFN2     | 8091446         | 10.03771467 | 9.863313    | 0.982625361 | 0.037149057 | Repressed | 0 |
| TMEM185A | 8175621         | 9.661921    | 9.782189333 | 1.012447663 | 0.037161614 | Induced   | 0 |
| SLC2A8   | 8158009         | 7.175934333 | 7.385895333 | 1.029259047 | 0.037169382 | Induced   | 0 |
| BCL6     | 8092691         | 10.51697    | 10.79446    | 1.026384976 | 0.037169483 | Induced   | 1 |
| C20orf46 | 8064415         | 5.660565333 | 5.757197    | 1.017071028 | 0.037173062 | Induced   | 0 |
| NFIX     | 8026139         | 8.465640667 | 8.584931333 | 1.014091156 | 0.0371846   | Induced   | 0 |
| PPP2R1B  | 7951614         | 10.55788    | 10.64259333 | 1.008023707 | 0.037204241 | Induced   | 0 |
| SCOC     | 8097521         | 9.085354333 | 8.847494333 | 0.973819403 | 0.037211251 | Repressed | 0 |
| TMEM20   | 7929363         | 8.642435333 | 8.606282667 | 0.995816843 | 0.037225092 | Repressed | 0 |
| NXPH3    | 8008208         | 7.398511667 | 7.612226667 | 1.028886215 | 0.037234158 | Induced   | 1 |
| PTPN3    | 8163149         | 8.606353    | 8.297061667 | 0.964062439 | 0.037240762 | Repressed | 1 |
| SOX6     | 7946757         | 9.502725667 | 9.327513    | 0.981561852 | 0.03726166  | Repressed | 1 |
| TMEM70   | 8146930         | 9.345517333 | 9.556816333 | 1.022609663 | 0.037288406 | Induced   | 1 |
| CCDC11   | 8023314         | 6.046627333 | 6.148931667 | 1.016919239 | 0.037290131 | Induced   | 0 |
| ARID3C   | 8160849         | 5.892487    | 6.244863333 | 1.059800952 | 0.037301627 | Induced   | 1 |
| PTPN18   | 8045182         | 8.143302333 | 7.787927    | 0.956359801 | 0.03732304  | Repressed | 0 |
| LIG4     | 7972737         | 8.611723    | 8.447911    | 0.980978023 | 0.037405949 | Repressed | 1 |
| HAVCR2   | 8115464         | 4.718256667 | 4.922772    | 1.043345751 | 0.037416009 | Induced   | 0 |
| KCNMB2   | 8084002         | 4.492024667 | 4.695536    | 1.045305035 | 0.037430135 | Induced   | 0 |
| ORMDL2   | 7956031         | 8.452379333 | 8.193529    | 0.969375448 | 0.037430543 | Repressed | 0 |
| FNDC8    | 8006504         | 5.549782333 | 5.757003    | 1.037338521 | 0.037437795 | Induced   | 0 |
| TRAF5    | 7909545         | 8.088242667 | 7.953741667 | 0.983370801 | 0.037444579 | Repressed | 1 |
| FYN      | 8128956         | 10.18082    | 9.989211667 | 0.981179479 | 0.037449501 | Repressed | 1 |
| BNIP2    | 7989323         | 10.68888333 | 10.58250667 | 0.990047916 | 0.037485311 | Repressed | 0 |
| OR2Z1    | 8025450         | 5.818896667 | 6.330417667 | 1.087906497 | 0.037502572 | Induced   | 0 |
| XRXG     | 7921955         | 7.880447333 | 7.144542    | 0.9066163   | 0.037522809 | Repressed | 0 |

|           |                    |             |             |             |             |           |   |
|-----------|--------------------|-------------|-------------|-------------|-------------|-----------|---|
| RPS15     | 8024299            | 12.67365333 | 12.55802667 | 0.990876611 | 0.037589124 | Repressed | 0 |
| TMEM38B   | 8157092            | 9.958461    | 9.826984667 | 0.986797525 | 0.03759802  | Repressed | 0 |
| MRPS9     | 8044111            | 9.943801667 | 9.820775667 | 0.987627871 | 0.037617092 | Repressed | 0 |
| FKBP9     | 8132214            | 8.054842    | 7.633179333 | 0.947651032 | 0.037625171 | Repressed | 1 |
| LOH12CR1  | 7954012            | 8.443469667 | 8.021660667 | 0.950043167 | 0.037673113 | Repressed | 1 |
| TPST1     | 8133155            | 9.916018667 | 10.03743667 | 1.012244632 | 0.037708228 | Induced   | 1 |
| ELMO2     | 8066716            | 9.934538    | 10.08312333 | 1.014956441 | 0.037719811 | Induced   | 1 |
| VPS13A    | 8155946            | 8.377718667 | 8.212439333 | 0.980271558 | 0.037724223 | Repressed | 0 |
| METTL3    | 7977749            | 9.983924667 | 9.540210333 | 0.955557123 | 0.037736957 | Repressed | 0 |
| CLRN3     | 7937016            | 3.996706333 | 4.318406    | 1.080491194 | 0.037738567 | Induced   | 0 |
| SERPINA3  | 7976496            | 5.797133    | 5.440118333 | 0.938415305 | 0.037762578 | Repressed | 1 |
| C10orf72  | 7933488            | 5.723565333 | 5.871063    | 1.025770243 | 0.037784285 | Induced   | 0 |
| REC8      | 7973629            | 6.098038    | 6.346723    | 1.04078115  | 0.037796838 | Induced   | 0 |
| PBK       | 8149955            | 11.19408    | 11.03064333 | 0.985399723 | 0.037824505 | Repressed | 0 |
| NUFIP2    | 8013908            | 11.46809667 | 11.58289    | 1.010009798 | 0.037825121 | Induced   | 0 |
| HSPB6     | 8036151            | 6.662118667 | 6.858019333 | 1.02940516  | 0.03786576  | Induced   | 1 |
| MGST2     | 8097513            | 9.074845667 | 8.806498667 | 0.97042958  | 0.03788516  | Repressed | 0 |
| GMF2      | 8112622            | 9.612323333 | 9.462713333 | 0.984435605 | 0.037889303 | Repressed | 0 |
| CLIC1     | 8125059/81798278   | 11.54507778 | 11.58610556 | 1.003554151 | 0.037897124 | Induced   | 0 |
| PRDX4     | 8166455            | 10.63412    | 10.46676    | 0.984261979 | 0.037910584 | Repressed | 1 |
| SRGAP1    | 7956759            | 9.075793333 | 8.955186    | 0.986711097 | 0.037955817 | Repressed | 1 |
| SCAPER    | 7990582            | 8.235498667 | 7.999907667 | 0.971393232 | 0.03796173  | Repressed | 0 |
| RRAS      | 8038407            | 8.480923667 | 8.302077333 | 0.978911927 | 0.03800405  | Repressed | 1 |
| PDSS1     | 7926807            | 10.29012    | 10.22769667 | 0.993933663 | 0.038007077 | Repressed | 0 |
| MAGEA4    | 8170531            | 4.600411    | 5.067006    | 1.101424634 | 0.038007482 | Induced   | 0 |
| RAD54L    | 7901192            | 7.691020667 | 7.190475333 | 0.934918218 | 0.03801418  | Repressed | 1 |
| PTTG2     | 8094596            | 4.084524667 | 3.934998667 | 0.963392068 | 0.038045531 | Repressed | 0 |
| TMEM168   | 8142407            | 10.17541667 | 9.899661333 | 0.972899848 | 0.038059625 | Repressed | 0 |
| OLF2      | 8033818            | 7.442163333 | 7.569284667 | 1.017081234 | 0.038086266 | Induced   | 0 |
| CBR1      | 8068401            | 9.249460333 | 9.100884667 | 0.983936829 | 0.038141998 | Repressed | 1 |
| SSR4      | 8170775            | 10.17337333 | 10.13325667 | 0.9960567   | 0.038145996 | Repressed | 1 |
| PTK2B     | 8145490            | 6.665042667 | 6.786568667 | 1.018233342 | 0.038212463 | Induced   | 0 |
| EFHC1     | 8120222            | 7.518315333 | 7.316189    | 0.973115475 | 0.038234644 | Repressed | 0 |
| DAM2      | 8119357            | 8.243573    | 7.976300333 | 0.967578055 | 0.038244104 | Repressed | 0 |
| P2RX7     | 7959251            | 8.802646333 | 8.656657667 | 0.983415366 | 0.03825748  | Repressed | 1 |
| HDHD2     | 8023165            | 9.252677667 | 8.847344667 | 0.956192897 | 0.038280068 | Repressed | 0 |
| APBP2     | 8017235            | 10.80105667 | 10.96988333 | 1.015630569 | 0.038328624 | Induced   | 1 |
| CDKN3     | 7974404            | 9.519000667 | 9.210908667 | 0.967633997 | 0.038339123 | Repressed | 1 |
| ITGB7     | 7963614            | 6.301257333 | 6.419073    | 1.018697168 | 0.038400013 | Induced   | 0 |
| FRK       | 8129071            | 6.248691    | 5.797190333 | 0.92774476  | 0.038400344 | Repressed | 0 |
| CLNS1A    | 7950597            | 10.82588333 | 10.59262    | 0.978453182 | 0.038400813 | Repressed | 0 |
| RPN1      | 8090940            | 11.81646333 | 11.69080667 | 0.989365967 | 0.03842284  | Repressed | 1 |
| C2orf56   | 8041495            | 10.53936667 | 10.41747667 | 0.988434789 | 0.038442618 | Repressed | 1 |
| SEMA5A    | 8110932            | 8.793052333 | 8.567716667 | 0.974373442 | 0.038495663 | Repressed | 1 |
| MAPK13    | 8119016            | 6.075381667 | 6.330487333 | 1.041990064 | 0.03859812  | Induced   | 0 |
| CHSY3     | 8107850            | 6.425793    | 6.084375667 | 0.946867673 | 0.038600236 | Repressed | 0 |
| RBM25     | 7975521            | 10.36304    | 10.47609667 | 1.010909604 | 0.038644266 | Induced   | 1 |
| GABRA3    | 8175696            | 4.538486333 | 4.638062667 | 1.021940428 | 0.038654374 | Induced   | 0 |
| C6orf115  | 8122336            | 8.76507     | 8.604544667 | 0.98168579  | 0.038672707 | Repressed | 0 |
| TPP2      | 7973142            | 4.565361333 | 4.761058333 | 1.04286561  | 0.038684639 | Induced   | 0 |
| CDC14A    | 7903334            | 8.603424    | 8.909466333 | 1.035572155 | 0.038746461 | Induced   | 0 |
| PRKAA2    | 7901720            | 5.250352667 | 5.412460667 | 1.03087564  | 0.038787793 | Induced   | 0 |
| TNS3      | 8139500            | 7.187774333 | 6.911237667 | 0.961526802 | 0.038798922 | Repressed | 0 |
| CREB3     | 8155096            | 8.784765667 | 8.841039    | 1.006405787 | 0.038833055 | Induced   | 1 |
| KCTD20    | 8119067            | 8.859292333 | 8.457762    | 0.954676929 | 0.038837514 | Repressed | 0 |
| BACH2     | 8128247            | 6.813409    | 6.876258    | 1.00922431  | 0.038858837 | Induced   | 1 |
| CASP7     | 7930577            | 8.628337333 | 8.9151      | 1.033234986 | 0.038889288 | Induced   | 0 |
| ABCB6     | 8059111            | 7.268999333 | 6.863615667 | 0.944231159 | 0.038943718 | Repressed | 0 |
| GPR128    | 8081298            | 3.600568667 | 3.910272333 | 1.086015209 | 0.038952274 | Induced   | 0 |
| C1orf52   | 7917331            | 8.679382667 | 8.886740667 | 1.02389087  | 0.038977731 | Induced   | 1 |
| OSBP10    | 8085984            | 10.34659    | 10.13789667 | 0.979829747 | 0.039009968 | Repressed | 1 |
| WDR20     | 7976957            | 8.122137    | 8.250957667 | 1.01586044  | 0.039018361 | Induced   | 0 |
| SLCO5A1   | 8151223            | 8.988660333 | 8.586867333 | 0.955300013 | 0.039018445 | Repressed | 1 |
| SAFB2     | 8032974            | 9.979390333 | 10.24791333 | 1.026907756 | 0.039034653 | Induced   | 0 |
| FBXL7     | 8104592            | 7.497288    | 7.233118333 | 0.964764637 | 0.039040822 | Repressed | 1 |
| C1orf201  | 7913787            | 8.080603667 | 7.861296333 | 0.972860031 | 0.039042587 | Repressed | 0 |
| TTF2      | 7904314            | 10.10028667 | 9.87744     | 0.9779366   | 0.03905488  | Repressed | 0 |
| RND2      | 8007454            | 5.918994667 | 6.300435667 | 1.064443545 | 0.039100452 | Induced   | 1 |
| RASGRP3   | 8041422            | 7.162387667 | 6.842298    | 0.955309642 | 0.039111577 | Repressed | 1 |
| AP3B2     | 7990987            | 5.997047    | 6.084246    | 1.014540323 | 0.039111904 | Induced   | 1 |
| C6orf42   | 8111584            | 7.192600667 | 6.808907    | 0.94665439  | 0.039120001 | Repressed | 0 |
| DHFR      | 8022640/8112902/80 | 10.05926956 | 9.775582778 | 0.971799693 | 0.039170492 | Repressed | 1 |
| IGF2AS    | 7937774            | 6.775366667 | 6.862428333 | 1.012849735 | 0.03917326  | Induced   | 0 |
| G3BP1     | 8109368            | 12.63393667 | 12.69107667 | 1.004522739 | 0.039181017 | Induced   | 0 |
| PKP3      | 7937363            | 6.717961667 | 7.016631333 | 1.044458376 | 0.039200355 | Induced   | 0 |
| C6orf40   | 8146225            | 8.567927333 | 8.596423667 | 1.003325931 | 0.039236027 | Induced   | 0 |
| ZNF256    | 8039706            | 7.814387667 | 8.012106333 | 1.025301876 | 0.039275392 | Induced   | 0 |
| CLEC4A    | 7953723            | 5.114149    | 5.318734    | 1.040003723 | 0.039278487 | Induced   | 0 |
| RPP40     | 8123717            | 8.800387333 | 8.561303667 | 0.972832597 | 0.039285114 | Repressed | 1 |
| BAALC     | 8147756            | 8.162844    | 7.585707333 | 0.929297109 | 0.039298372 | Repressed | 1 |
| HIST2H2AB | 7919642            | 12.02844667 | 11.83480667 | 0.983901496 | 0.039298624 | Repressed | 0 |
| TMEM139   | 8136863            | 5.875403667 | 6.213540667 | 1.05755128  | 0.039352022 | Induced   | 0 |
| YTHDC1    | 8100714            | 10.92800333 | 11.05209667 | 1.011355536 | 0.039354546 | Induced   | 1 |
| PREX1     | 8066848            | 9.518887667 | 8.997222667 | 0.945196853 | 0.039361084 | Repressed | 1 |
| WDR59     | 8002802            | 8.768542333 | 8.525535667 | 0.972286538 | 0.039464937 | Repressed | 0 |
| BIRC3     | 7943413            | 5.927638    | 6.278059667 | 1.059116577 | 0.039494869 | Induced   | 0 |
| IHH       | 8059067            | 6.746362333 | 7.056741    | 1.046006818 | 0.03950599  | Induced   | 0 |
| FAM126B   | 8058182            | 9.861178    | 10.20692667 | 1.035061599 | 0.039507593 | Induced   | 0 |
| C1orf210  | 7915500            | 5.491763667 | 5.810551    | 1.058048261 | 0.039532657 | Induced   | 0 |
| S100A14   | 7920297            | 6.52898     | 6.653841    | 1.01912412  | 0.039532939 | Induced   | 0 |
| COL24A1   | 7917370            | 5.250623667 | 5.493051    | 1.04617115  | 0.039549359 | Induced   | 0 |
| GOT1      | 7935627            | 11.02365    | 11.17281667 | 1.013531513 | 0.039550957 | Induced   | 0 |
| NAV2      | 7938834            | 9.233708333 | 8.982635    | 0.972809047 | 0.039564155 | Repressed | 1 |
| PMEPA1    | 8067233            | 9.413735333 | 9.631864    | 1.023171319 | 0.03957608  | Induced   | 1 |
| GANC      | 7983054            | 7.333051    | 6.977194667 | 0.951472268 | 0.039586257 | Repressed | 0 |
| CAPN3     | 7983054            | 7.333051    | 6.977194667 | 0.951472268 | 0.039586257 | Repressed | 0 |
| GPDI1L    | 8078386            | 8.868120667 | 8.342070667 | 0.94068078  | 0.039586484 | Repressed | 1 |
| PKHA1     | 8173551            | 8.293206    | 7.780104    | 0.938129838 | 0.039588093 | Repressed | 0 |
| CACNA1H   | 7992147            | 7.821015    | 7.772465667 | 0.993792451 | 0.039592562 | Repressed | 0 |

|               |                    |             |             |             |             |           |   |
|---------------|--------------------|-------------|-------------|-------------|-------------|-----------|---|
| IGSF1         | 8175121            | 4.847924    | 4.968745    | 1.024922214 | 0.039597403 | Induced   | 0 |
| ASB13         | 7931863            | 8.166952    | 7.951951    | 0.973674267 | 0.039599417 | Repressed | 0 |
| ATG4B         | 8049888/8077211    | 10.08591167 | 10.268475   | 1.018100221 | 0.039678513 | Induced   | 1 |
| PLEKH01       | 7905116            | 8.778757667 | 8.514028    | 0.96984429  | 0.039735268 | Repressed | 0 |
| ZNF135        | 8031857            | 5.967649667 | 6.210577333 | 1.040707428 | 0.039739466 | Induced   | 0 |
| C1orf187      | 7897737            | 7.621833    | 7.770248    | 1.01947235  | 0.039790809 | Induced   | 0 |
| CADPS2        | 8142585            | 7.296244667 | 6.952109333 | 0.95283391  | 0.039849524 | Repressed | 1 |
| RAN           | 8117888/7959882    | 11.50736667 | 11.50613    | 1.000226287 | 0.039867797 | Induced   | 0 |
| HS6ST3        | 7969665            | 5.504219    | 5.694232    | 1.034521337 | 0.039878217 | Induced   | 0 |
| ARHGAP28      | 8019964            | 5.365865    | 5.005234667 | 0.932791762 | 0.03988959  | Repressed | 0 |
| PLEKHG1       | 8122756            | 6.285319667 | 5.799592667 | 0.922720398 | 0.039940226 | Repressed | 1 |
| RAE1          | 8063566            | 12.24384333 | 12.3528     | 1.008898894 | 0.039986531 | Induced   | 0 |
| DLEC1         | 8078690            | 6.24628     | 6.425981    | 1.028769283 | 0.039992859 | Induced   | 0 |
| WNT11         | 7905534            | 6.820518667 | 7.038887333 | 1.032016431 | 0.040016094 | Induced   | 1 |
| SLC43A1       | 7948249            | 8.734101667 | 8.900617    | 1.019064964 | 0.040030608 | Induced   | 0 |
| ITPA          | 8060611            | 10.03265    | 10.17565667 | 1.014254127 | 0.040179662 | Induced   | 1 |
| CNNM1         | 7929732            | 5.057538    | 5.281960333 | 1.04437383  | 0.040184057 | Induced   | 0 |
| HRH1          | 8077851            | 8.151405    | 8.554604333 | 1.049463784 | 0.040223209 | Induced   | 0 |
| C1orf156      | 7922243            | 8.036       | 7.726852    | 0.961529617 | 0.04024881  | Repressed | 0 |
| NLGN1         | 8083968            | 9.400447667 | 9.118754333 | 0.970034051 | 0.040254151 | Repressed | 1 |
| OR6K2         | 7921420            | 4.715065    | 4.951802667 | 1.050208781 | 0.040294325 | Induced   | 0 |
| FKBP11        | 7962895            | 8.144857    | 7.975479333 | 0.979204341 | 0.040304402 | Repressed | 1 |
| RPL22L1       | 8092067            | 8.962876    | 8.575648333 | 0.956796494 | 0.040344523 | Repressed | 0 |
| SH3BP5        | 8085556            | 9.609848    | 9.263861    | 0.963996621 | 0.040344982 | Repressed | 1 |
| RP11-529I10.4 | 7929976            | 8.202218667 | 7.808105667 | 0.95195044  | 0.040393485 | Repressed | 0 |
| SPZ1          | 8106597            | 4.202719333 | 3.991879333 | 0.949832481 | 0.040396718 | Repressed | 0 |
| GJA10         | 8121132            | 5.227096    | 5.482062    | 1.048777753 | 0.040422576 | Induced   | 0 |
| SPRY4         | 8114797            | 9.413812667 | 9.792745333 | 1.040252837 | 0.040460596 | Induced   | 1 |
| C11orf41      | 7939237/7939215    | 8.384492834 | 8.064578667 | 0.96152002  | 0.040485766 | Repressed | 1 |
| PRMT2         | 8069450            | 8.762449667 | 8.542429    | 0.974890507 | 0.040509087 | Repressed | 1 |
| GADD45B       | 8024485            | 8.862757    | 9.326685333 | 1.052345826 | 0.040510906 | Induced   | 1 |
| TRIM44        | 7993968            | 9.177687333 | 9.119285333 | 0.993636523 | 0.040513039 | Repressed | 1 |
| ABI2          | 8047659            | 10.08221    | 9.898649333 | 0.981793608 | 0.040544187 | Repressed | 0 |
| KNG1          | 8084679            | 4.467153    | 4.637623333 | 1.038160845 | 0.040577645 | Induced   | 1 |
| LIPG          | 8021169            | 5.881161    | 6.183983    | 1.051490173 | 0.040601074 | Induced   | 1 |
| RABGGTA       | 7978239            | 7.818225667 | 7.650365667 | 0.978529655 | 0.040608755 | Repressed | 0 |
| CCL16         | 8014342            | 5.119233    | 5.272392667 | 1.029918479 | 0.040679779 | Induced   | 0 |
| RUNDC1        | 8007435            | 9.247677667 | 8.948062333 | 0.967601019 | 0.040684409 | Repressed | 0 |
| CAMTA2        | 8011774            | 7.716852667 | 7.55289     | 0.978752665 | 0.040688948 | Repressed | 1 |
| RNF125        | 8020806            | 8.856960333 | 8.451693    | 0.954243068 | 0.040688952 | Repressed | 1 |
| GATA2         | 8090469            | 7.077635    | 7.329969667 | 1.035652399 | 0.040694624 | Induced   | 0 |
| KRT40         | 8015152/8019604    | 5.301706    | 5.477783667 | 1.033211511 | 0.040695475 | Induced   | 0 |
| JAM3          | 7945262            | 9.818596667 | 9.941199667 | 1.012486815 | 0.040720913 | Induced   | 0 |
| MXD4          | 8098995            | 7.291391667 | 7.452440333 | 1.022087507 | 0.040745633 | Induced   | 0 |
| SNRPF         | 7957649            | 8.792821333 | 8.600599333 | 0.978138757 | 0.040782222 | Repressed | 0 |
| GPR89A        | 7904930/7904853/77 | 9.265842889 | 9.166496333 | 0.989279838 | 0.040806437 | Repressed | 0 |
| GPR89C        | 7904930/7904853/77 | 9.265842889 | 9.166496333 | 0.989279838 | 0.040806437 | Repressed | 0 |
| GPR89B        | 7904930/7904853/77 | 9.265842889 | 9.166496333 | 0.989279838 | 0.040806437 | Repressed | 0 |
| CCDC34        | 7947189            | 8.119064333 | 7.966076333 | 0.981156942 | 0.040867672 | Repressed | 1 |
| NUDT12        | 8113413            | 8.590211    | 8.212327667 | 0.956010006 | 0.04086902  | Repressed | 0 |
| C15orf52      | 7987511            | 7.186669667 | 7.421720667 | 1.032706526 | 0.040875843 | Induced   | 0 |
| COG2          | 7910446            | 9.641340333 | 9.534641333 | 0.988933178 | 0.040875855 | Repressed | 1 |
| TNS1          | 8058869            | 9.51549     | 9.126549333 | 0.959125524 | 0.040907072 | Repressed | 1 |
| RCOR1         | 7977003            | 10.07582    | 10.25712333 | 1.017993904 | 0.040937141 | Induced   | 0 |
| CDH6          | 8104663            | 4.891326667 | 5.081705333 | 1.038921683 | 0.040942982 | Induced   | 0 |
| PPOX          | 7906688            | 6.724201    | 6.493791667 | 0.965734318 | 0.041016401 | Repressed | 0 |
| MSC           | 8151334            | 8.652484    | 8.187615    | 0.946273348 | 0.041030861 | Repressed | 1 |
| SCGB1D2       | 7940630            | 4.619224    | 4.650378333 | 1.006744495 | 0.041162125 | Induced   | 0 |
| LRI62         | 7904086            | 8.511733667 | 8.675719    | 1.019265797 | 0.041174097 | Induced   | 0 |
| CHST6         | 8002882            | 8.264977333 | 7.904295    | 0.956360155 | 0.041179026 | Repressed | 0 |
| B3GNT8        | 8037032            | 6.252154    | 6.32698     | 1.011968035 | 0.041212392 | Induced   | 0 |
| TOLLIP        | 7945620            | 8.769686    | 8.919460333 | 1.017078643 | 0.041220878 | Induced   | 1 |
| FAM72B        | 7919591/8039928/77 | 11.06598084 | 10.94013167 | 0.98862696  | 0.04124356  | Repressed | 0 |
| FAM72A        | 7919591/8039928/77 | 11.06598084 | 10.94013167 | 0.98862696  | 0.04124356  | Repressed | 0 |
| SLC37A2       | 7944931            | 7.587948    | 7.397307667 | 0.974875904 | 0.041281172 | Repressed | 1 |
| DEFA4         | 8149109            | 5.541704333 | 5.686314    | 1.0260948   | 0.041286175 | Induced   | 0 |
| CAPG          | 8053417            | 12.29148333 | 12.18832    | 0.991606926 | 0.041307214 | Repressed | 0 |
| JAKMIP2       | 8114938            | 3.573267    | 3.616775667 | 1.012176159 | 0.04130898  | Induced   | 0 |
| PFM1B         | 8041713            | 9.575566333 | 9.444452333 | 0.986307442 | 0.041315888 | Repressed | 1 |
| AP4M1         | 8134712            | 8.427752667 | 8.067702333 | 0.957278014 | 0.041370488 | Repressed | 1 |
| COG2          | 8142945            | 7.635058667 | 7.304861    | 0.956752439 | 0.041393533 | Repressed | 0 |
| TSGA13        | 8142945            | 7.635058667 | 7.304861    | 0.956752439 | 0.041393533 | Repressed | 0 |
| USP54         | 7934411            | 7.710764333 | 7.341189333 | 0.952070251 | 0.041399243 | Repressed | 0 |
| BHMT          | 8106504            | 5.503916667 | 5.646114667 | 1.025835784 | 0.041404201 | Induced   | 1 |
| SLMAP         | 8080685            | 9.273502333 | 9.065811333 | 0.977603823 | 0.041493076 | Repressed | 1 |
| C2orf48       | 8040231            | 6.415027333 | 6.797251333 | 1.059582599 | 0.041493785 | Induced   | 1 |
| FSHB          | 7939080            | 5.531375    | 5.370027    | 0.970830399 | 0.041531467 | Repressed | 0 |
| JUNB          | 8026047            | 9.133264667 | 9.313886333 | 1.019776244 | 0.041549137 | Induced   | 0 |
| KCNIP4        | 8095993            | 4.206985333 | 4.381151667 | 1.04139932  | 0.041568893 | Induced   | 0 |
| HLA-DOB       | 8178841/8180034/81 | 7.426463133 | 7.134105467 | 0.96234879  | 0.041577464 | Repressed | 0 |
| TAP2          | 8178841/8180034/81 | 7.426463133 | 7.134105467 | 0.96234879  | 0.041577464 | Repressed | 1 |
| PIK3R3        | 7915787            | 10.28746333 | 9.980997333 | 0.97020976  | 0.041598957 | Repressed | 0 |
| ERGIC1        | 8109999            | 9.371728    | 9.049505    | 0.965617547 | 0.041609857 | Repressed | 0 |
| ZNF30         | 8027692            | 6.034252    | 5.683994333 | 0.941955081 | 0.041635438 | Repressed | 1 |
| C3orf31       | 8085350            | 9.052058333 | 8.997810333 | 0.994007109 | 0.041654078 | Repressed | 0 |
| KLK14         | 8038770            | 6.651429333 | 6.788875667 | 1.02066418  | 0.041656167 | Induced   | 0 |
| SPC25         | 8056572            | 9.624164    | 9.328034333 | 0.969230609 | 0.041657526 | Repressed | 0 |
| CD38          | 8094240            | 5.617562    | 5.72046     | 1.018317199 | 0.041697578 | Induced   | 0 |
| PATZ1         | 8075493/8120783    | 8.571964334 | 8.320839    | 0.970630558 | 0.041722817 | Repressed | 0 |
| PRKCC         | 7931930            | 5.968763    | 5.874028667 | 0.984128314 | 0.041775144 | Repressed | 0 |
| KCTD7         | 8133167/8133176    | 10.01794683 | 9.909138999 | 0.985299977 | 0.041809247 | Repressed | 1 |
| RABGEF1       | 8133167/8133176    | 10.01794683 | 9.909138999 | 0.985299977 | 0.041809247 | Repressed | 0 |
| RING1         | 8118634/8178244    | 8.5492625   | 8.208353667 | 0.960128307 | 0.041825217 | Repressed | 1 |
| RASA1         | 8106784            | 10.47768    | 10.80760333 | 1.031488205 | 0.041837141 | Induced   | 1 |
| ANXA1         | 8155849            | 8.906550667 | 9.334443667 | 1.048042504 | 0.041848416 | Induced   | 0 |
| SELL          | 7922219            | 5.044889333 | 5.176577667 | 1.026103315 | 0.041938556 | Induced   | 0 |
| GK            | 8166632/8174103    | 9.719360665 | 9.2852745   | 0.954893237 | 0.041971337 | Repressed | 0 |
| WNT16         | 8135763            | 5.871792333 | 6.072333333 | 1.034153286 | 0.041987449 | Induced   | 0 |
| DCLRE1A       | 7936408            | 8.578849667 | 8.323783333 | 0.970268003 | 0.042042379 | Repressed | 1 |

|           |                    |             |             |             |             |           |   |
|-----------|--------------------|-------------|-------------|-------------|-------------|-----------|---|
| UCN2      | 8086981            | 9.389930667 | 9.017488667 | 0.960336022 | 0.042045802 | Repressed | 1 |
| NAB1      | 8047086            | 8.387943667 | 8.08838     | 0.9642864   | 0.042051338 | Repressed | 0 |
| NPM3      | 7935903            | 9.354692333 | 9.06846     | 0.969402272 | 0.04215743  | Repressed | 0 |
| TAF4B     | 8020702            | 8.203235333 | 7.918433333 | 0.965281747 | 0.042229338 | Repressed | 1 |
| PPARGC1A  | 8099633            | 8.327147667 | 7.763974667 | 0.932369039 | 0.042262758 | Repressed | 0 |
| FOXB2     | 8155842            | 8.158971333 | 8.352848    | 1.023762391 | 0.042275788 | Induced   | 0 |
| MTMR4     | 8017019            | 10.095893   | 9.686829667 | 0.959482204 | 0.042284881 | Repressed | 0 |
| PRR13     | 7955810/8036808    | 10.57961167 | 10.52556834 | 0.99489202  | 0.042377238 | Repressed | 0 |
| HNRNPK    | 8162047            | 12.42765667 | 12.48389    | 1.004524854 | 0.042412646 | Induced   | 1 |
| GSTO1     | 7930304            | 11.79614333 | 11.59464    | 0.982917863 | 0.042417966 | Repressed | 1 |
| POLR2A    | 8004431            | 10.18678    | 10.36907333 | 1.017895089 | 0.042474659 | Induced   | 1 |
| OVOS2     | 7953873/7961026/79 | 10.36189089 | 10.08373756 | 0.975518939 | 0.042475612 | Repressed | 0 |
| POLR3G    | 8106820            | 11.20247333 | 11.02655    | 0.984296027 | 0.042481214 | Repressed | 1 |
| SMURF2    | 8017651            | 10.12597667 | 10.24702    | 1.011953744 | 0.042496177 | Induced   | 0 |
| TSHZ1     | 8021768            | 7.531449    | 7.257488    | 0.963624397 | 0.042509834 | Repressed | 0 |
| GZMM      | 8023977            | 6.822961333 | 7.142779333 | 1.046873782 | 0.042522856 | Induced   | 1 |
| CCND1     | 7950012/7942123    | 9.4679945   | 9.619845334 | 1.016661273 | 0.042524941 | Induced   | 1 |
| LRRC28    | 7986394            | 8.552189667 | 8.143996    | 0.952270274 | 0.042537391 | Repressed | 0 |
| FGFR2     | 7936734            | 5.550151333 | 5.763507    | 1.038441414 | 0.042547393 | Induced   | 0 |
| CCR1      | 8086600            | 6.950851333 | 6.498326    | 0.934896416 | 0.042594546 | Repressed | 1 |
| TUBA1B    | 7963046            | 10.98199667 | 10.89148667 | 0.991758329 | 0.042595161 | Repressed | 1 |
| NAMPT     | 7933084/8142120    | 12.58345834 | 12.66672667 | 1.006623273 | 0.042603769 | Induced   | 0 |
| NDUF55    | 7902228            | 11.40168667 | 11.04592333 | 0.968797307 | 0.042632068 | Repressed | 0 |
| KCTD10    | 7966202            | 9.879051667 | 10.06174667 | 1.018493172 | 0.042679936 | Induced   | 0 |
| HSPBP1    | 8039440            | 9.235284333 | 9.369443    | 1.01452675  | 0.042680959 | Induced   | 0 |
| MYO18B    | 8072039            | 6.102726    | 6.306056667 | 1.033318007 | 0.0427094   | Induced   | 1 |
| LPXN      | 7948332            | 11.39371667 | 11.41964667 | 1.002275816 | 0.04272387  | Induced   | 1 |
| CNP       | 8007188/8015490    | 10.37150467 | 10.26309617 | 0.989268259 | 0.042753527 | Repressed | 0 |
| ATP4A     | 8036110            | 5.880230333 | 6.185784667 | 1.051962987 | 0.042760273 | Induced   | 1 |
| SIGLEC14  | 8038885            | 6.394108667 | 6.540132667 | 1.022837272 | 0.042784059 | Induced   | 0 |
| FGD2      | 8119132            | 6.008804667 | 6.210867333 | 1.033627764 | 0.042788332 | Induced   | 0 |
| OR4X2     | 7939867            | 4.571043667 | 4.770180667 | 1.043564887 | 0.042798049 | Induced   | 0 |
| PCDH82    | 8108883            | 7.496214667 | 7.10662     | 0.948027814 | 0.042807975 | Repressed | 1 |
| FGD5      | 8078066            | 5.681630333 | 5.785848333 | 1.018342974 | 0.042879608 | Induced   | 1 |
| SYT9      | 7938213            | 5.008975667 | 5.169945333 | 1.032136244 | 0.04288978  | Induced   | 0 |
| OSTM1     | 8128669            | 9.997396667 | 9.817255667 | 0.981981209 | 0.042894517 | Repressed | 1 |
| MRFAP1    | 8093936            | 10.41288667 | 10.56458    | 1.014567846 | 0.042919498 | Induced   | 0 |
| ECD       | 7934301            | 10.60171667 | 10.36377667 | 0.977556465 | 0.042934977 | Repressed | 0 |
| OR4K17    | 7973024            | 4.545604667 | 4.680176667 | 1.029604862 | 0.042944481 | Induced   | 0 |
| AKR1CL2   | 7925904            | 7.901008667 | 7.772994667 | 0.983797765 | 0.042994028 | Repressed | 1 |
| R3HDM1    | 8062813            | 6.078598667 | 6.337806667 | 1.04298589  | 0.043007188 | Induced   | 1 |
| CAPZB     | 7913169            | 11.34943667 | 11.24083667 | 0.990431243 | 0.04304668  | Repressed | 1 |
| DMBX1     | 7901247            | 7.252146    | 7.328844    | 1.010548326 | 0.043110241 | Induced   | 0 |
| AMOTL2    | 8090852            | 7.532103    | 8.050396    | 1.068811194 | 0.043150166 | Induced   | 1 |
| MRPL27    | 8016699            | 10.07376333 | 9.907899667 | 0.983353508 | 0.043158892 | Repressed | 1 |
| MIDN      | 8024228            | 9.562047333 | 9.873687333 | 1.032591347 | 0.043170535 | Induced   | 1 |
| MMP21     | 7939629            | 5.635974333 | 5.890517    | 1.045163915 | 0.043233604 | Induced   | 0 |
| TRIP13    | 8104234            | 9.774813    | 9.532904    | 0.975251803 | 0.043253482 | Repressed | 1 |
| DHRS13    | 8013804            | 8.420235    | 8.108457    | 0.962972767 | 0.043277608 | Repressed | 0 |
| SNF5      | 8030944            | 3.023402667 | 3.204572    | 1.05992233  | 0.043286872 | Induced   | 1 |
| FCRLA     | 7906786            | 8.801163333 | 8.422477333 | 0.956973188 | 0.043310328 | Repressed | 0 |
| PCM1      | 8144812            | 10.89519333 | 11.01867    | 1.011333132 | 0.043310571 | Induced   | 0 |
| SLC25A16  | 7934050            | 8.107161333 | 7.859279333 | 0.969424316 | 0.043312255 | Repressed | 0 |
| FGD4      | 7954729            | 8.417585    | 8.108339667 | 0.963261989 | 0.043322045 | Repressed | 1 |
| FGD1      | 8173086            | 8.087838    | 7.916677    | 0.978837237 | 0.043359109 | Repressed | 0 |
| PPTC7     | 7966345            | 10.62455667 | 10.67659667 | 1.004898087 | 0.043382256 | Induced   | 0 |
| C12orf52  | 7959850            | 8.489160333 | 8.410812667 | 0.990770858 | 0.043389207 | Repressed | 1 |
| PXMP3     | 8151436            | 7.854605667 | 7.401212    | 0.942276712 | 0.043408446 | Repressed | 1 |
| ZNF609    | 7984203            | 8.453905667 | 8.227561    | 0.973226024 | 0.043429529 | Repressed | 0 |
| FCGR2A    | 7906767/7906757    | 6.388300334 | 6.182858667 | 0.962522207 | 0.043444443 | Repressed | 0 |
| CUTC      | 7929768            | 9.341316333 | 9.003120333 | 0.963795681 | 0.043504111 | Repressed | 1 |
| SIM2      | 8068496            | 6.144910333 | 6.462475667 | 1.051679409 | 0.043544719 | Induced   | 1 |
| TTC14     | 8084128            | 9.200887    | 8.878884333 | 0.965003084 | 0.043576183 | Repressed | 1 |
| PRDX1     | 7915733            | 12.38265667 | 12.32213667 | 0.995112519 | 0.043580382 | Repressed | 1 |
| BCL10     | 7917338            | 8.822303333 | 8.986057333 | 1.018561366 | 0.043613565 | Induced   | 0 |
| RRM1      | 7937915            | 11.13177333 | 11.04645    | 0.992335154 | 0.043628226 | Repressed | 0 |
| DDX59     | 7923221            | 7.505220333 | 7.298810333 | 0.972497809 | 0.043638667 | Repressed | 0 |
| ACBL5     | 8040774            | 7.893768    | 7.542884667 | 0.955549323 | 0.043672794 | Repressed | 1 |
| SLC10A6   | 8101609            | 5.746932    | 5.990843667 | 1.042442066 | 0.043681476 | Induced   | 0 |
| SGSH      | 8019061            | 7.868508333 | 7.673871333 | 0.975263799 | 0.043730514 | Repressed | 0 |
| CHCHD6    | 8082305            | 9.406459667 | 8.991749333 | 0.955912177 | 0.043733118 | Repressed | 1 |
| HNRPLL    | 8051605            | 9.018198667 | 8.97419     | 0.995120016 | 0.043763735 | Repressed | 1 |
| SERHL     | 8073585            | 7.142765    | 7.081420667 | 0.991411683 | 0.043782675 | Repressed | 0 |
| SPATA6    | 7915955            | 7.257962    | 6.927713667 | 0.954498476 | 0.043891411 | Repressed | 0 |
| FUCA1     | 7913694            | 9.275212333 | 9.561103    | 1.030823086 | 0.043948312 | Induced   | 0 |
| CENPJ     | 7970624            | 9.564247    | 9.535854333 | 0.997031375 | 0.043972642 | Repressed | 0 |
| TPRG1L    | 7897172            | 8.696619333 | 8.761957667 | 1.007513073 | 0.043990133 | Induced   | 0 |
| TBD11     | 7958377/7958352    | 4.255002667 | 4.418134167 | 1.044343308 | 0.044043416 | Induced   | 0 |
| C14orf159 | 7976216            | 7.377966    | 7.06323     | 0.957341088 | 0.044065911 | Repressed | 0 |
| NAGA      | 8076403            | 9.387657333 | 8.959595    | 0.954401581 | 0.04407748  | Repressed | 1 |
| WDR35     | 8050507            | 10.00171667 | 9.937604333 | 0.993589867 | 0.044087622 | Repressed | 0 |
| FTN       | 8150704            | 7.811561667 | 7.39558     | 0.946747951 | 0.044095468 | Repressed | 0 |
| LDHB      | 7961693            | 13.12273333 | 13.05953    | 0.995183676 | 0.044139312 | Repressed | 1 |
| HHIP      | 8097628            | 5.889125    | 6.038127333 | 1.025301269 | 0.044144361 | Induced   | 0 |
| PROKR2    | 8064859            | 5.205548    | 5.590767667 | 1.074001751 | 0.044168707 | Induced   | 0 |
| UNC5D     | 8145799            | 5.799008667 | 5.920721667 | 1.020988587 | 0.044214175 | Induced   | 0 |
| MRPL19    | 8042962            | 9.567372333 | 9.465087    | 0.989308942 | 0.044300869 | Repressed | 1 |
| THOC7     | 8088526            | 12.30438667 | 12.17962667 | 0.989860527 | 0.044324124 | Repressed | 1 |
| GLT8D1    | 8087985            | 9.048362667 | 8.713141667 | 0.962952303 | 0.044340823 | Repressed | 0 |
| LEPREL2   | 7953450            | 7.497272    | 7.326263    | 0.977190503 | 0.044344924 | Repressed | 1 |
| HIST2H2AC | 7905088/7905079/7  | 11.88736444 | 11.68823444 | 0.983309956 | 0.044371567 | Repressed | 0 |
| PRKCG     | 8031057            | 6.120436333 | 6.394480333 | 1.044775239 | 0.044464903 | Induced   | 0 |
| TSPAN31   | 7956613            | 9.057904    | 8.648693333 | 0.954822808 | 0.044483432 | Repressed | 0 |
| PER2      | 8059996            | 8.134516333 | 8.49408     | 1.044202218 | 0.044505512 | Induced   | 0 |
| YIPF5     | 8114829            | 10.28833333 | 10.45194333 | 1.015902479 | 0.044511217 | Induced   | 0 |
| FADS3     | 7948630            | 8.566995667 | 8.370889333 | 0.977109089 | 0.044535324 | Repressed | 1 |
| MTBPS1    | 8003089            | 9.934696    | 9.607336    | 0.967048816 | 0.044545371 | Repressed | 0 |
| JTB       | 7920409            | 10.56020333 | 10.21090333 | 0.966922985 | 0.04456234  | Repressed | 0 |
| PCBD1     | 7934178            | 9.534921333 | 9.107429    | 0.955165615 | 0.044574353 | Repressed | 0 |

|           |                    |             |             |             |             |           |   |
|-----------|--------------------|-------------|-------------|-------------|-------------|-----------|---|
| SLAMF1    | 7921652            | 4.200541667 | 4.315632667 | 1.027399085 | 0.044586473 | Induced   | 0 |
| DOHH      | 8032595            | 8.470597    | 8.695015333 | 1.026493804 | 0.04458945  | Induced   | 0 |
| TAP11     | 8095506            | 8.269606    | 7.998751333 | 0.967246968 | 0.044638087 | Repressed | 0 |
| C22orf32  | 8073578            | 8.923262    | 8.757059667 | 0.981374263 | 0.044660085 | Repressed | 1 |
| SNAPIN    | 7905598            | 8.258274    | 7.864883333 | 0.952364057 | 0.044690089 | Repressed | 0 |
| NRN1      | 8123739            | 9.040903667 | 8.653595667 | 0.957160477 | 0.044690161 | Repressed | 0 |
| INPP4B    | 8102950            | 11.59521    | 11.48235    | 0.99026667  | 0.044707147 | Repressed | 1 |
| HGFRLP3   | 7991070            | 9.812597333 | 9.885278    | 1.007406873 | 0.044709469 | Induced   | 0 |
| TCX1D2    | 8093096            | 7.141396    | 7.363014333 | 1.031032915 | 0.044714316 | Induced   | 0 |
| TDKHK     | 7920057            | 8.073550333 | 7.561192    | 0.936538659 | 0.044747759 | Repressed | 1 |
| ITGB3BP   | 7916727            | 9.747206667 | 9.424851333 | 0.96692844  | 0.044762323 | Repressed | 1 |
| ANKRD49   | 7943231            | 8.420066667 | 8.181090667 | 0.971618277 | 0.044797569 | Repressed | 0 |
| GPR133    | 7959893            | 5.92137     | 6.192231    | 1.045742962 | 0.044828095 | Induced   | 1 |
| COL5B     | 8043718            | 10.12652    | 9.947899    | 0.982361068 | 0.044844662 | Repressed | 0 |
| COL12A1   | 8127563            | 6.1995      | 6.424272667 | 1.03625658  | 0.044853453 | Induced   | 0 |
| WDFY1     | 8059361            | 11.29567667 | 11.02492    | 0.976030062 | 0.044856976 | Repressed | 1 |
| RANBP3    | 8033075            | 9.834714333 | 9.653417667 | 0.98156564  | 0.04485714  | Repressed | 0 |
| KLHL6     | 8092392            | 7.028617667 | 6.812133333 | 0.969475451 | 0.0449041   | Repressed | 1 |
| SMPD2     | 8121418            | 8.658677333 | 8.395691667 | 0.969627501 | 0.044921736 | Repressed | 0 |
| HES1      | 8084880            | 9.524535    | 9.918146333 | 1.041326042 | 0.044971587 | Induced   | 1 |
| POLR2I    | 8036276            | 9.003005333 | 8.800991667 | 0.97756153  | 0.044984354 | Repressed | 0 |
| AVP11     | 7935521            | 10.76833667 | 11.20914333 | 1.040935446 | 0.044995733 | Induced   | 1 |
| GSK3B     | 8089801            | 10.65575333 | 10.47138    | 0.982697297 | 0.045028277 | Repressed | 1 |
| PROP1     | 8116162            | 6.593536333 | 6.820561333 | 1.034431447 | 0.045029637 | Induced   | 0 |
| ZNF127    | 8067113            | 10.72224667 | 10.90888667 | 1.0174068   | 0.045039883 | Induced   | 0 |
| GCN1L1    | 7966938            | 9.54047     | 9.31618     | 0.976490676 | 0.045067702 | Repressed | 0 |
| TUBGCP4   | 7983206            | 8.882576667 | 8.626111667 | 0.971127294 | 0.045076791 | Repressed | 1 |
| OXA1L     | 7973314            | 11.24850333 | 11.08095333 | 0.985104685 | 0.045103369 | Repressed | 0 |
| PACTR2    | 8122426            | 7.573902667 | 7.274146    | 0.96042243  | 0.045125699 | Repressed | 1 |
| CCL4L2    | 8006621/8019651/80 | 5.115738556 | 5.338273334 | 1.043501079 | 0.04512718  | Induced   | 0 |
| CCL4L1    | 8006621/8019651/80 | 5.115738556 | 5.338273334 | 1.043501079 | 0.04512718  | Induced   | 0 |
| BUB1      | 8054580            | 10.97820333 | 10.78816333 | 0.982689333 | 0.04516373  | Repressed | 1 |
| WNT7A     | 8085475            | 7.000225667 | 7.120985    | 1.017250777 | 0.045168382 | Induced   | 0 |
| TMEM38A   | 8026579            | 7.542121667 | 7.759434333 | 1.028813201 | 0.04517862  | Induced   | 1 |
| MMP16     | 8151686/8151684    | 8.069782334 | 7.452095834 | 0.923433795 | 0.045211908 | Repressed | 1 |
| CHIA      | 7903945            | 5.903704    | 6.05619     | 1.025828869 | 0.045228934 | Induced   | 0 |
| DCUN1D2   | 7972912            | 9.017635    | 9.199909    | 1.02021306  | 0.045254902 | Induced   | 1 |
| HIST1H2BB | 8124394            | 7.407294667 | 7.011711333 | 0.946595437 | 0.045257223 | Repressed | 0 |
| PGAM1     | 8173729/8176282/79 | 11.03467467 | 10.95569867 | 0.992825775 | 0.04526556  | Repressed | 0 |
| PGAM4     | 8173729/8176282/79 | 11.03467467 | 10.95569867 | 0.992825775 | 0.04526556  | Repressed | 0 |
| MYBP1     | 7923534            | 6.474763667 | 6.958097    | 1.074648799 | 0.045291683 | Induced   | 0 |
| SNX4      | 8090256            | 10.70673667 | 10.62309333 | 0.992187785 | 0.045298189 | Repressed | 0 |
| EXOSC3    | 8161242            | 10.63938667 | 10.52486667 | 0.989236222 | 0.045301126 | Repressed | 0 |
| C11orf54  | 7943162            | 9.136573667 | 8.914463667 | 0.975690012 | 0.04530392  | Repressed | 0 |
| ENP1      | 8122099            | 10.4288     | 10.66367667 | 1.022521926 | 0.045317964 | Induced   | 0 |
| DGAT2     | 7942613            | 7.488761    | 7.805761333 | 1.042330144 | 0.045328047 | Induced   | 1 |
| CNPY2     | 7964076            | 9.511842667 | 9.233122667 | 0.970697581 | 0.045328931 | Repressed | 0 |
| RNASEN    | 8111286            | 9.565064333 | 9.235773667 | 0.965573607 | 0.04536308  | Repressed | 1 |
| VAX1      | 7936552            | 6.933000667 | 7.070276333 | 1.019800325 | 0.045364886 | Induced   | 0 |
| TUSC4     | 8087669            | 7.871290667 | 7.633206333 | 0.969752822 | 0.045376652 | Repressed | 1 |
| TFDP2     | 8091103            | 8.417653    | 8.005364    | 0.951020908 | 0.045379412 | Repressed | 0 |
| C1orf58   | 7909931            | 10.81557667 | 10.70891333 | 0.990137989 | 0.045389533 | Repressed | 0 |
| CTHRC1    | 8147777            | 9.733477667 | 9.509075    | 0.976945273 | 0.045407525 | Repressed | 0 |
| DNAH7     | 8057821            | 4.343195667 | 4.435679667 | 1.021293998 | 0.045419297 | Induced   | 0 |
| SERINC5   | 8112865            | 10.64704667 | 10.37581667 | 0.97452533  | 0.045506001 | Repressed | 1 |
| NFIL3     | 8162276            | 9.712885    | 9.898988333 | 1.019160459 | 0.045523259 | Induced   | 0 |
| ZIM3      | 8039625            | 4.717622    | 4.957891333 | 1.050930179 | 0.045539058 | Induced   | 0 |
| RPS6KC1   | 7909661            | 8.550513    | 8.253370667 | 0.965248596 | 0.045590903 | Repressed | 0 |
| KIAA0146  | 8146336            | 8.435867333 | 8.091200333 | 0.959142672 | 0.045606719 | Repressed | 1 |
| QPCTL     | 8029744            | 8.997852667 | 8.766903    | 0.974332802 | 0.045608123 | Repressed | 1 |
| GTPBP8    | 8081676            | 8.853448    | 8.694173333 | 0.982009872 | 0.045618161 | Repressed | 0 |
| MS4A10    | 7940341            | 5.38642     | 5.646412667 | 1.048268176 | 0.04562742  | Induced   | 0 |
| SLLC39A3  | 8032525            | 7.678025    | 7.410935667 | 0.965213797 | 0.045665881 | Repressed | 0 |
| CST9      | 8065400            | 5.562088333 | 5.721288    | 1.028622283 | 0.045673126 | Induced   | 0 |
| RPL29     | 8086148/8087830    | 11.42240667 | 11.25043783 | 0.984562122 | 0.045677339 | Repressed | 0 |
| C17orf75  | 8014100            | 9.392287667 | 9.274492667 | 0.987458327 | 0.04569373  | Repressed | 1 |
| ZNF350    | 8038919            | 8.167523667 | 8.513858    | 1.042403836 | 0.045701091 | Induced   | 1 |
| ABCF2     | 8143905            | 10.14474333 | 10.09660667 | 0.995255014 | 0.045714632 | Repressed | 0 |
| IL21R     | 7994292            | 6.100673333 | 6.303106333 | 1.033182075 | 0.045715629 | Induced   | 1 |
| LRPAP1    | 8099073            | 10.44905333 | 10.1666     | 0.972968524 | 0.045717816 | Repressed | 0 |
| PIGM      | 7921526            | 8.297987333 | 7.795742667 | 0.939473917 | 0.045723576 | Repressed | 0 |
| RXFP4     | 7906069            | 6.400758333 | 6.487371333 | 1.013531678 | 0.045774654 | Induced   | 0 |
| SNRPA     | 8028916            | 9.848065667 | 9.639236333 | 0.978794888 | 0.045776896 | Repressed | 1 |
| WDR12     | 8058373            | 11.73768333 | 11.66667667 | 0.993950538 | 0.045785727 | Repressed | 0 |
| STAT4     | 8057771            | 4.861968333 | 5.151535    | 1.059557497 | 0.045791199 | Induced   | 0 |
| PURB      | 8139430            | 10.11028333 | 9.964605333 | 0.985591106 | 0.045892747 | Repressed | 0 |
| ZNF559    | 8025478            | 9.002491333 | 9.234385667 | 1.025758907 | 0.045908544 | Induced   | 1 |
| CRYAB     | 7951662            | 5.357282667 | 5.258652333 | 0.981589485 | 0.045930225 | Repressed | 0 |
| HRK       | 7966746            | 9.967080667 | 10.16874667 | 1.020233206 | 0.045951657 | Induced   | 1 |
| OLFM1     | 7938225            | 3.759882    | 3.958175    | 1.052739155 | 0.045965324 | Induced   | 0 |
| C9orf123  | 8160036            | 8.714474333 | 8.431448333 | 0.96752231  | 0.04600689  | Repressed | 1 |
| NPPB      | 7912520            | 6.808406333 | 6.841706    | 1.035303469 | 0.046058733 | Induced   | 0 |
| TTC31     | 8042874            | 7.239502333 | 6.933243333 | 0.957696125 | 0.046067667 | Repressed | 1 |
| CRTAP     | 8078450            | 10.44500667 | 10.11254667 | 0.968170437 | 0.046084322 | Repressed | 0 |
| MAGOHB    | 7961208            | 9.379627    | 9.237992333 | 0.984899755 | 0.046084936 | Repressed | 1 |
| XAF1      | 8004184            | 5.498574333 | 5.641462333 | 1.025986372 | 0.046085859 | Induced   | 0 |
| NAALADL1  | 7949344            | 6.691017667 | 6.912467    | 1.033096511 | 0.046085955 | Induced   | 0 |
| PRKAA1    | 8117796            | 10.76004    | 10.78307333 | 1.002140636 | 0.046102015 | Induced   | 0 |
| RND1      | 7962884            | 5.797642333 | 6.052705    | 1.043994205 | 0.046123013 | Induced   | 0 |
| ZNF114    | 8030002            | 8.932285333 | 8.838562667 | 0.989507426 | 0.04613054  | Repressed | 0 |
| LZTS1     | 8149612            | 8.935357667 | 8.636051    | 0.966503113 | 0.046143641 | Repressed | 1 |
| BLCAP     | 8066195            | 10.077678   | 10.22752667 | 1.014869364 | 0.046171536 | Induced   | 0 |
| CCDC88A   | 8052289            | 10.92418    | 10.82198667 | 0.990645217 | 0.046172369 | Repressed | 0 |
| ACBD3     | 7924701            | 11.57446333 | 11.68689    | 1.009713337 | 0.046190939 | Induced   | 0 |
| PKLR      | 7920744            | 6.359415    | 6.568791    | 1.032923783 | 0.046195913 | Induced   | 0 |
| SAR1B     | 8114193            | 10.93034333 | 10.72897    | 0.981576669 | 0.046229573 | Repressed | 1 |
| C1orf57   | 7910591            | 8.622627667 | 8.364312333 | 0.970042156 | 0.04626181  | Repressed | 0 |
| VASH2     | 7909642            | 6.46539     | 6.622591667 | 1.024314336 | 0.046389265 | Induced   | 0 |
| SGSM3     | 8073259            | 7.442678333 | 7.111007    | 0.955436562 | 0.046413997 | Repressed | 1 |

|          |                    |             |             |             |             |           |   |
|----------|--------------------|-------------|-------------|-------------|-------------|-----------|---|
| RNASE8   | 7973156            | 5.047065333 | 5.164894667 | 1.023346108 | 0.046458087 | Induced   | 0 |
| FURIN    | 7986092            | 8.138415667 | 7.994424667 | 0.982307244 | 0.046474677 | Repressed | 0 |
| SCARB1   | 7967544            | 9.801376333 | 9.537128    | 0.973039671 | 0.046486623 | Repressed | 1 |
| FAM118A  | 8073752            | 9.304358333 | 9.18748     | 0.987438324 | 0.046488884 | Repressed | 0 |
| FAM49B   | 8152845            | 10.62831    | 10.57333667 | 0.994827651 | 0.046489635 | Repressed | 0 |
| ATP6V1B1 | 8042537            | 6.660766333 | 6.942568667 | 1.042307795 | 0.046532675 | Induced   | 0 |
| SCG5     | 7982366            | 6.094857333 | 6.348233    | 1.041572042 | 0.046582989 | Induced   | 1 |
| PRKCA    | 8009301            | 6.548806    | 6.343686    | 0.96867826  | 0.046588928 | Repressed | 1 |
| FMNL3    | 7963092/7955250    | 7.915571667 | 7.614862833 | 0.962269633 | 0.046593116 | Repressed | 1 |
| ERAF     | 7995237            | 4.788683    | 4.932008667 | 1.02993008  | 0.04660237  | Induced   | 0 |
| APOBEC3B | 8073062            | 11.08954333 | 10.96393    | 0.988672813 | 0.046658491 | Repressed | 1 |
| OPA1     | 8084844            | 11.91643    | 11.73859    | 0.985076067 | 0.046658935 | Repressed | 1 |
| FABP3    | 7914342            | 6.352758    | 6.600186    | 1.038948123 | 0.046668663 | Induced   | 0 |
| RUFY1    | 8110499            | 8.968016    | 9.044383    | 1.008515484 | 0.046760813 | Induced   | 1 |
| C9orf80  | 8163428            | 9.511703    | 9.549797333 | 1.004004996 | 0.046814342 | Induced   | 0 |
| MSA12    | 7940299            | 4.124578667 | 4.294255333 | 1.041137939 | 0.046839974 | Induced   | 0 |
| SORBS2   | 8104066/8104035    | 6.3868275   | 6.525482333 | 1.015449602 | 0.046858    | Induced   | 1 |
| RBMS2    | 7956261            | 7.981485333 | 7.601488    | 0.952390148 | 0.046881406 | Repressed | 0 |
| PMS1     | 8047038/8057700    | 9.950341667 | 9.872293334 | 0.992190902 | 0.046881605 | Repressed | 1 |
| LRRC21   | 8147079            | 9.102838333 | 8.931116333 | 0.981135335 | 0.046926974 | Repressed | 1 |
| TMEM206  | 7924150            | 7.96094     | 7.570967667 | 0.951014286 | 0.046960534 | Repressed | 1 |
| BRSK1    | 8031441            | 8.290002    | 8.226917333 | 0.992390271 | 0.046972787 | Repressed | 0 |
| DMBT1    | 7931108            | 5.432883333 | 5.577857    | 1.02668448  | 0.046973782 | Induced   | 0 |
| MYL1     | 8058604            | 4.840267333 | 4.923959    | 1.017290712 | 0.047042904 | Induced   | 0 |
| DHRSTC   | 8012591            | 5.827362333 | 5.916519333 | 1.015299718 | 0.047058725 | Induced   | 0 |
| KIF25    | 8123437            | 6.546192667 | 6.661332667 | 1.01758885  | 0.047077637 | Induced   | 1 |
| OR10A7   | 7955983            | 4.736319667 | 4.922052667 | 1.039214625 | 0.04708645  | Induced   | 0 |
| EIF2B3   | 7915640            | 9.599073    | 9.293374667 | 0.968153348 | 0.047093123 | Repressed | 1 |
| GPR113   | 8050924/8040655    | 8.934161167 | 9.055014502 | 1.015606491 | 0.047108436 | Induced   | 0 |
| BTBD8    | 7902965            | 5.683207    | 5.385172    | 0.950905026 | 0.047159963 | Repressed | 0 |
| SPG7     | 7997909            | 7.883949333 | 7.737175333 | 0.981383188 | 0.047165772 | Repressed | 0 |
| GPR88    | 7903355            | 7.898255333 | 8.007792667 | 1.013868548 | 0.047167928 | Induced   | 0 |
| GKNR1    | 7899101            | 6.176290333 | 6.436540333 | 1.042136944 | 0.047185459 | Induced   | 0 |
| FAM83A   | 8148184            | 6.516062667 | 6.760817    | 1.037561691 | 0.047224107 | Induced   | 0 |
| CUBN     | 7932326            | 6.881902667 | 6.678117333 | 0.970388228 | 0.047229077 | Repressed | 1 |
| FBXL2    | 8078461            | 6.623103667 | 6.32968     | 0.955696954 | 0.047249921 | Repressed | 1 |
| GTF2F2   | 7968915            | 10.04831467 | 9.869944333 | 0.982248731 | 0.047257272 | Repressed | 0 |
| TYW3     | 7902345            | 10.49017    | 10.31401333 | 0.983207454 | 0.04728736  | Repressed | 1 |
| HNRNPR   | 7913571            | 11.69176667 | 11.54234667 | 0.987220067 | 0.047353254 | Repressed | 0 |
| DOCK7    | 7916669            | 10.08957667 | 9.775024    | 0.968823998 | 0.047370683 | Repressed | 1 |
| REEP4    | 8149673            | 9.005458333 | 8.879351667 | 0.985996641 | 0.047374618 | Repressed | 1 |
| SNX10    | 8131957            | 9.590621667 | 9.118448    | 0.950767147 | 0.04738859  | Repressed | 0 |
| STARD4   | 8113491            | 10.17836667 | 10.45933667 | 1.027604625 | 0.047388632 | Induced   | 0 |
| NKD1     | 7995525            | 6.792780333 | 7.047646333 | 1.03752013  | 0.047436058 | Induced   | 1 |
| APH1A    | 7919729            | 8.920095667 | 8.593581    | 0.963395609 | 0.047476402 | Repressed | 0 |
| ZNF711   | 8168589            | 5.180945667 | 5.40385     | 1.04302387  | 0.047501427 | Induced   | 0 |
| DDX1     | 8040386            | 12.71807    | 12.79336333 | 1.005920185 | 0.047537478 | Induced   | 0 |
| RFTN2    | 8058063            | 5.803649333 | 5.210152333 | 0.897737274 | 0.04759023  | Repressed | 1 |
| RBM39    | 8066009            | 12.36077    | 12.43037333 | 1.005630987 | 0.047604521 | Induced   | 0 |
| GJA1     | 8121749            | 5.155570333 | 5.409960333 | 1.049342746 | 0.047609746 | Induced   | 0 |
| AMDHD1   | 7957654            | 6.658901    | 6.958268    | 1.044957419 | 0.047622287 | Induced   | 0 |
| DGCR2    | 8074349            | 8.39608     | 8.590491333 | 1.023155012 | 0.047637622 | Induced   | 1 |
| SIP1     | 8160238            | 8.017846667 | 7.80762     | 0.973780159 | 0.047672478 | Repressed | 1 |
| CLIP4    | 8041179            | 10.54548667 | 10.28718333 | 0.975505793 | 0.047672844 | Repressed | 0 |
| UGT2B10  | 8095390/8100768    | 5.7235935   | 5.526095334 | 0.964437135 | 0.0476752   | Repressed | 0 |
| PPAP2B   | 7916493            | 9.330880333 | 9.068378    | 0.971867356 | 0.047697553 | Repressed | 0 |
| PTPRZ1   | 8135774            | 5.972007667 | 5.395051667 | 0.903389943 | 0.047726025 | Repressed | 0 |
| TOP1     | 8062603            | 11.59991    | 11.70697667 | 1.009229957 | 0.047754619 | Induced   | 0 |
| SCGB2A2  | 7940636            | 4.18063     | 4.391428    | 1.050422544 | 0.04776192  | Induced   | 0 |
| STK38    | 8126018            | 8.816699    | 9.030859    | 1.02429027  | 0.047768256 | Induced   | 0 |
| DNAJB6   | 8137627            | 10.25898    | 10.43039667 | 1.016708939 | 0.04779095  | Induced   | 1 |
| TAS2R5   | 8136647            | 6.337488333 | 7.063618    | 1.114576884 | 0.047800333 | Induced   | 0 |
| MRAS     | 8082965            | 8.62213     | 8.346227667 | 0.968000676 | 0.047814226 | Repressed | 0 |
| C10orf18 | 7925978            | 10.70401    | 10.84010667 | 1.01271455  | 0.047836205 | Induced   | 1 |
| NR113    | 7921840            | 5.502961667 | 5.725732333 | 1.040481959 | 0.047865503 | Induced   | 0 |
| NRBF2    | 7927775            | 9.271479333 | 9.372715    | 1.010919041 | 0.047901441 | Induced   | 1 |
| KPNA6    | 7899688            | 10.24763667 | 10.04372667 | 0.980101754 | 0.047923778 | Repressed | 0 |
| BPNT1    | 7924388            | 9.559234333 | 9.310101    | 0.973937941 | 0.04794312  | Repressed | 0 |
| MAG      | 8027824            | 5.318898    | 5.538828667 | 1.041348916 | 0.047949009 | Induced   | 1 |
| PAK6     | 7982688            | 5.806578667 | 6.061639    | 1.043926096 | 0.047961294 | Induced   | 0 |
| SCGB1A1  | 7940654            | 6.718084667 | 6.843786333 | 1.018710938 | 0.048016526 | Induced   | 0 |
| ZNF1874  | 8031871            | 8.293470333 | 8.486209667 | 1.023239889 | 0.048056341 | Induced   | 1 |
| ARMC9    | 8049044            | 9.477741333 | 9.184971667 | 0.969109764 | 0.048067677 | Repressed | 1 |
| HAS1     | 8038890            | 7.401630667 | 7.748736    | 1.046895792 | 0.048096473 | Induced   | 0 |
| KATNAL1  | 7970844            | 8.423275333 | 8.130863    | 0.965285198 | 0.04812297  | Repressed | 0 |
| MOBK12B  | 8160521            | 7.918189333 | 7.834515333 | 0.989432685 | 0.04816921  | Repressed | 1 |
| PKMT2    | 8106689            | 5.373937    | 5.627362333 | 1.047158226 | 0.04817393  | Induced   | 0 |
| PPA2     | 8102141            | 7.323016667 | 7.051872333 | 0.962973683 | 0.04823746  | Repressed | 0 |
| NRP1     | 7932985            | 7.145827333 | 7.639661667 | 1.06910807  | 0.048239504 | Induced   | 1 |
| BTBD9    | 8126121            | 7.003615333 | 6.762345667 | 0.965506697 | 0.048250669 | Repressed | 1 |
| ZFYVE20  | 8085537            | 7.756487    | 7.569655667 | 0.975914182 | 0.048284298 | Repressed | 0 |
| MAPK11   | 8076978            | 7.405353667 | 7.458319333 | 1.007152348 | 0.048288138 | Induced   | 1 |
| SF3A1    | 8075343            | 10.68446333 | 10.77343333 | 1.008327044 | 0.048288976 | Induced   | 1 |
| TP53BP2  | 7924526            | 9.885113667 | 9.841184    | 0.995555978 | 0.048322827 | Repressed | 0 |
| MRE11A   | 7951046            | 8.754236333 | 8.420652    | 0.961894525 | 0.048327452 | Repressed | 0 |
| C7orf53  | 8135532            | 6.550255    | 7.198222667 | 1.08982251  | 0.048329266 | Induced   | 1 |
| VEPH1    | 8091678            | 5.724979667 | 5.122025    | 0.894680034 | 0.048363736 | Repressed | 1 |
| RGPD7    | 8054676/8044304/80 | 11.81064222 | 11.97705444 | 1.014091719 | 0.048398129 | Induced   | 0 |
| CCRNL4   | 8097461            | 10.1463     | 10.38271333 | 1.023300448 | 0.048425525 | Induced   | 1 |
| SCNN1D   | 7896882            | 6.820148    | 7.089029667 | 1.039424609 | 0.048435532 | Induced   | 0 |
| GTF2A1   | 7980523            | 10.38147333 | 10.5256     | 1.013883065 | 0.048446388 | Induced   | 1 |
| FFAR1    | 8027854            | 7.16193     | 7.329101    | 1.023341613 | 0.048460341 | Induced   | 0 |
| CEP57    | 7943297            | 9.801457333 | 9.710811333 | 0.990751783 | 0.048509325 | Repressed | 1 |
| WDR4     | 8070615            | 9.399294667 | 9.114704333 | 0.969722161 | 0.048518421 | Repressed | 1 |
| PAK11P1  | 8116848            | 11.06627    | 10.98652667 | 0.992794019 | 0.048533518 | Repressed | 1 |
| ACP5     | 8034304            | 8.468116    | 8.069399333 | 0.95291554  | 0.048538735 | Repressed | 0 |
| ACSM3    | 7993756            | 5.979602333 | 5.391113333 | 0.901583924 | 0.048542973 | Repressed | 1 |
| CALCB    | 7938646            | 6.040609667 | 6.115585333 | 1.012411937 | 0.048637653 | Induced   | 0 |
| TLE6     | 8024537            | 6.322112    | 6.514058667 | 1.030361162 | 0.048677112 | Induced   | 0 |

|           |                   |             |             |             |             |           |   |
|-----------|-------------------|-------------|-------------|-------------|-------------|-----------|---|
| LAMP3     | 8092348           | 6.171237333 | 5.810619    | 0.941564663 | 0.048716333 | Repressed | 0 |
| ACTA2     | 7934906/7929026   | 6.3313      | 6.8581615   | 1.080845267 | 0.048732774 | Induced   | 0 |
| SENP6     | 8120758           | 10.29673333 | 10.35166    | 1.005334378 | 0.048742389 | Induced   | 0 |
| GRSF1     | 8100834           | 11.18706667 | 11.23315333 | 1.004119638 | 0.048749842 | Induced   | 0 |
| RTKN      | 8053142           | 8.357095333 | 7.961312333 | 0.952641081 | 0.048780223 | Repressed | 0 |
| HIST1H2BH | 8117426           | 10.63953333 | 10.22537333 | 0.961073481 | 0.04878574  | Repressed | 1 |
| CNOT1     | 8001693           | 11.07481667 | 11.14109    | 1.005984147 | 0.048792687 | Induced   | 0 |
| GGT7      | 8065798           | 8.431394    | 8.318964667 | 0.986665392 | 0.04883813  | Repressed | 1 |
| C11orf61  | 7952445           | 8.988926667 | 9.423359    | 1.048329723 | 0.048883751 | Induced   | 0 |
| MESDC2    | 7990830           | 8.863945    | 8.772397    | 0.989671867 | 0.048896621 | Repressed | 1 |
| TUFM      | 8000603           | 10.53283333 | 10.40924667 | 0.988266532 | 0.048943893 | Repressed | 1 |
| FAM124B   | 8059387           | 5.636208    | 5.939591667 | 1.053827621 | 0.048958251 | Induced   | 0 |
| ACPL2     | 8083075           | 8.828663667 | 8.694543333 | 0.984808535 | 0.048965553 | Repressed | 0 |
| LSG1      | 8092905           | 11.05041    | 11.28176667 | 1.020936478 | 0.048996697 | Induced   | 1 |
| VDAC3     | 8146216           | 11.82836667 | 11.81204667 | 0.998620266 | 0.049065469 | Repressed | 0 |
| TRIM14    | 8162729           | 7.197998    | 6.974088667 | 0.968892832 | 0.049125562 | Repressed | 0 |
| OR1S1     | 7940114           | 3.577315    | 3.454993333 | 0.965806291 | 0.049172433 | Repressed | 0 |
| DHRS4     | 7973458/7973448   | 9.893648    | 9.656652334 | 0.976046569 | 0.049188086 | Repressed | 0 |
| DHRS4L2   | 7973458/7973448   | 9.893648    | 9.656652334 | 0.976046569 | 0.049188086 | Repressed | 0 |
| C9orf85   | 8155794           | 8.679772667 | 8.751811333 | 1.008299003 | 0.049192327 | Induced   | 0 |
| CRELD1    | 8077712           | 7.731395667 | 7.521273333 | 0.972822199 | 0.049204018 | Repressed | 0 |
| AP3M2     | 8146159           | 10.88577    | 10.69919333 | 0.982860499 | 0.049225674 | Repressed | 0 |
| RPA2      | 7914141           | 9.919867667 | 10.06466    | 1.014596196 | 0.049261195 | Induced   | 1 |
| LCE1A     | 7905528           | 7.762575667 | 7.925003    | 1.020924412 | 0.04927977  | Induced   | 0 |
| TNFSF10   | 8092169           | 3.861627667 | 3.949743667 | 1.022818357 | 0.049328631 | Induced   | 0 |
| ITPK1     | 7980970           | 8.472014    | 8.632942    | 1.018995247 | 0.049374455 | Induced   | 1 |
| NCAPH     | 8043602           | 10.73869333 | 10.66822667 | 0.99343806  | 0.04939228  | Repressed | 1 |
| ARD1B     | 8101253           | 5.634591333 | 5.932452333 | 1.052862929 | 0.04939888  | Induced   | 0 |
| FNIP1     | 8113914           | 9.985544667 | 10.17406    | 1.018878823 | 0.049456887 | Induced   | 0 |
| FAM133B   | 8105504/8055978/8 | 10.05146667 | 10.22312244 | 1.017096047 | 0.049496036 | Induced   | 0 |
| UBE2E3    | 8046685/8166124   | 7.817267167 | 7.594751    | 0.972222323 | 0.049505852 | Repressed | 0 |
| ITK       | 8109507           | 5.357555667 | 5.318573    | 0.992723796 | 0.049529626 | Repressed | 0 |
| AMELX     | 8166006           | 4.049353    | 4.195030667 | 1.035975541 | 0.049536978 | Induced   | 0 |
| BLOC1S1   | 7956013           | 7.851382667 | 7.400434333 | 0.942564469 | 0.049584724 | Repressed | 1 |
| GCNT2     | 8116835           | 5.901475667 | 5.508652    | 0.933436366 | 0.049595484 | Repressed | 1 |
| IL11      | 8039484           | 8.526103333 | 8.732371667 | 1.024192568 | 0.049608288 | Induced   | 0 |
| OLIG3     | 8129872           | 6.124219    | 6.491824667 | 1.060024905 | 0.049614325 | Induced   | 0 |
| CLN5      | 7969488           | 8.140390667 | 8.014818333 | 0.984574164 | 0.049647925 | Repressed | 0 |
| C5orf35   | 8105456           | 7.971616333 | 7.663602    | 0.961361119 | 0.049663721 | Repressed | 1 |
| CCL1      | 8014160           | 5.625108    | 5.917500333 | 1.051979861 | 0.049679919 | Induced   | 0 |
| GINS2     | 8003204           | 9.243121    | 8.950196333 | 0.968308901 | 0.04968632  | Repressed | 1 |
| HIST2H4B  | 7905067/7919627   | 9.508173333 | 9.155074    | 0.962863599 | 0.049711479 | Repressed | 0 |
| HIST2H4A  | 7905067/7919627   | 9.508173333 | 9.155074    | 0.962863599 | 0.049711479 | Repressed | 0 |
| ACSM2A    | 7999965/7993737   | 4.675042167 | 4.978281167 | 1.064827025 | 0.049715357 | Induced   | 0 |
| ACSM2B    | 7999965/7993737   | 4.675042167 | 4.978281167 | 1.064827025 | 0.049715357 | Induced   | 0 |
| HIST3H2A  | 7924888           | 7.916340333 | 7.75578     | 0.979717859 | 0.049724879 | Repressed | 0 |
| MYSM1     | 7915692           | 10.23315667 | 10.37337    | 1.013701865 | 0.049736036 | Induced   | 0 |
| MMP3      | 7951284           | 6.145834667 | 6.414546333 | 1.043722567 | 0.049740196 | Induced   | 0 |
| U2AF1     | 8070655           | 11.81483667 | 11.86282    | 1.004061278 | 0.049754801 | Induced   | 0 |
| ALOX12B   | 8012309           | 6.184757667 | 6.477255    | 1.047293257 | 0.049760493 | Induced   | 0 |
| CBX1      | 8016402           | 9.565409333 | 9.650747333 | 1.008921521 | 0.049793754 | Induced   | 1 |
| RHPN1     | 8148621           | 6.592188    | 6.889538667 | 1.045106521 | 0.049802321 | Induced   | 1 |
| GPR180    | 7969626           | 10.009706   | 9.818551333 | 0.980903069 | 0.049830901 | Repressed | 1 |
| SJMF2     | 8132964           | 10.72407    | 10.51141333 | 0.980170153 | 0.049836156 | Repressed | 1 |
| LCT       | 8055406           | 5.307421333 | 5.575185333 | 1.050450866 | 0.049849596 | Induced   | 0 |
| VPS53     | 8010924/8010918   | 9.761755667 | 9.5316735   | 0.976472549 | 0.049876955 | Repressed | 1 |
| MBOAT2    | 8050160           | 8.726305333 | 8.347562    | 0.956597515 | 0.049878614 | Repressed | 1 |
| RAPGEF3   | 7962625/7962623   | 6.667137667 | 6.917608    | 1.037648402 | 0.049990737 | Induced   | 1 |
| PLD2      | 8003962           | 7.586043333 | 7.312947    | 0.964000162 | 0.049999412 | Repressed | 0 |

**Table S4 - Summarized immunohistochemistry data**

| <b>Polyclonal Antibody Data</b>             |            |
|---------------------------------------------|------------|
| <b>Malignant Melanomas (n=91)</b>           |            |
| # Low (Score 0-4)                           | 15 (16.5%) |
| # Medium (Score 5-8)                        | 12 (13.2%) |
| # High (Score 9-12)                         | 64 (70.3%) |
| <b>Nevi (n=20)</b>                          |            |
| # Low (Score 0-4)                           | 4 (20%)    |
| # Medium (Score 5-8)                        | 13 (65%)   |
| # High (Score 9-12)                         | 3 (15%)    |
| <b>Melanocytes of non-nevic skin (n=20)</b> |            |
| # Low (Score 0-4)                           | 13 (65%)   |
| # Medium (Score 5-8)                        | 6 (30%)    |
| # High (Score 9-12)                         | 1 (5%)     |

| <b>Monoclonal Antibody Data</b>             |            |
|---------------------------------------------|------------|
| <b>Malignant Melanomas (n=91)</b>           |            |
| # Low (Score 0-4)                           | 8 (8.8%)   |
| # Medium (Score 5-8)                        | 13 (14.3%) |
| # High (Score 9-12)                         | 70 (76.9%) |
| <b>Nevi (n=20)</b>                          |            |
| # Low (Score 0-4)                           | 5 (25%)    |
| # Medium (Score 5-8)                        | 11 (55%)   |
| # High (Score 9-12)                         | 4 (20%)    |
| <b>Melanocytes of non-nevic skin (n=19)</b> |            |
| # Low (Score 0-4)                           | 12 (63.2%) |
| # Medium (Score 5-8)                        | 6 (31.6%)  |
| # High (Score 9-12)                         | 1 (5.3%)   |

**Kappa Values:**

For entire data set (both antibodies): 0.73  
 Weighted kappa: 0.725



Table S5 - Immunohistochemistry raw data

| Catalog # | Position | Gender | Age | Organ      | Pathology                                                 | Stage | TNM      | Type       | Intensity (Polyclonal) | Quantity (Polyclonal) | Score (Polyclonal) | Group (Polyclonal) | Intensity (Monoclonal) | Quantity (Monoclonal) | Score (Monoclonal) | Group (Polyclonal) |
|-----------|----------|--------|-----|------------|-----------------------------------------------------------|-------|----------|------------|------------------------|-----------------------|--------------------|--------------------|------------------------|-----------------------|--------------------|--------------------|
| ME1003    | A1       | F      | 80  | Skin       | Malignant melanoma of head and neck                       | III   | T4N1M0   | Malignant  | 3                      | 4                     | 12                 | H                  | 3                      | 4                     | 12                 | H                  |
| ME1003    | A2       | M      | 60  | Skin       | Malignant melanoma of left buttocks                       | III   | T4N1M0   | Malignant  | 1.5                    | 4                     | 6                  | M                  | 1.5                    | 4                     | 6                  | M                  |
| ME1003    | A3       | F      | 16  | Skin       | Malignant melanoma of back                                | II    | T4N0M0   | Malignant  | 2.5                    | 4                     | 10                 | H                  | 2                      | 3                     | 6                  | M                  |
| ME1003    | A4       | M      | 74  | Skin       | Malignant melanoma of left foot                           | II    | T4N0M0   | Malignant  | 2.5                    | 4                     | 10                 | H                  | 2.5                    | 4                     | 10                 | H                  |
| ME1003    | A5       | M      | 55  | Skin       | Malignant melanoma of sole                                | II    | T4N0M0   | Malignant  | 2.5                    | 4                     | 10                 | H                  | 1                      | 4                     | 4                  | L                  |
| ME1003    | A6       | M      | 51  | Skin       | Malignant melanoma of shoulder                            | II    | T4N0M0   | Malignant  | 3                      | 4                     | 12                 | H                  | 3                      | 4                     | 12                 | H                  |
| ME1003    | A7       | F      | 63  | Skin       | Malignant melanoma of left foot                           | II    | T4N0M0   | Malignant  | 3                      | 4                     | 12                 | H                  | 2.5                    | 4                     | 10                 | H                  |
| ME1003    | A8       | F      | 46  | Skin       | Malignant melanoma of thigh                               | II    | T4N0M0   | Malignant  | 1.5                    | 4                     | 6                  | M                  | 2                      | 4                     | 8                  | M                  |
| ME1003    | A9       | F      | 32  | Skin       | Malignant melanoma (sparse) of right leg                  | II    | T4N0M0   | Malignant  | 0                      | 0                     | 0                  | L                  | 2                      | 4                     | 8                  | M                  |
| ME1003    | A10      | M      | 42  | Skin       | Malignant melanoma of left heel                           | IV    | T3N2M1   | Malignant  | 3                      | 4                     | 12                 | H                  | 2                      | 4                     | 8                  | M                  |
| ME1003    | B1       | M      | 42  | Skin       | Malignant melanoma of right sole                          | II    | T2N0M0   | Malignant  | 3                      | 4                     | 12                 | H                  | 3                      | 4                     | 12                 | H                  |
| ME1003    | B2       | M      | 50  | Skin       | Malignant melanoma of left shoulder                       | II    | T4N0M0   | Malignant  | 3                      | 4                     | 12                 | H                  | 2.5                    | 4                     | 10                 | H                  |
| ME1003    | B3       | M      | 41  | Skin       | Malignant melanoma of left leg                            | II    | T3N0M0   | Malignant  | 2.5                    | 4                     | 10                 | H                  | 3                      | 4                     | 12                 | H                  |
| ME1003    | B4       | F      | 86  | Skin       | Malignant melanoma of left sole                           | II    | T4N0M0   | Malignant  | 2.5                    | 4                     | 10                 | H                  | 3                      | 4                     | 12                 | H                  |
| ME1003    | B5       | M      | 57  | Skin       | Malignant melanoma of left shoulder                       | II    | T4N0M0   | Malignant  | 3                      | 4                     | 12                 | H                  | 2.5                    | 4                     | 10                 | H                  |
| ME1003    | B6       | F      | 54  | Skin       | Malignant melanoma of left sole                           | II    | T4N0M0   | Malignant  | 3                      | 4                     | 12                 | H                  | 3                      | 4                     | 12                 | H                  |
| ME1003    | B7       | F      | 42  | Skin       | Malignant melanoma of left thumb                          | II    | T4N0M0   | Malignant  | 3                      | 4                     | 12                 | H                  | 3                      | 4                     | 12                 | H                  |
| ME1003    | B8       | F      | 58  | Skin       | Malignant melanoma of left buttocks                       | II    | T4N0M0   | Malignant  | 3                      | 4                     | 12                 | H                  | 3                      | 4                     | 12                 | H                  |
| ME1003    | B9       | M      | 38  | Skin       | Malignant melanoma of right abdominal wall                | III   | T4N1M0   | Malignant  | 3                      | 4                     | 12                 | H                  | 3                      | 4                     | 12                 | H                  |
| ME1003    | B10      | F      | 52  | Skin       | Malignant melanoma of left heel                           | II    | T3N0M0   | Malignant  | 2.5                    | 4                     | 10                 | H                  | 3                      | 4                     | 12                 | H                  |
| ME1003    | C1       | M      | 40  | Skin       | Malignant melanoma of right chest wall                    | II    | T4N0M0   | Malignant  | 2.5                    | 4                     | 10                 | H                  | 3                      | 4                     | 12                 | H                  |
| ME1003    | C2       | F      | 59  | Skin       | Malignant melanoma of anus                                | II    | T4N0M0   | Malignant  | 3                      | 4                     | 12                 | H                  | 3                      | 4                     | 12                 | H                  |
| ME1003    | C3       | F      | 77  | Skin       | Malignant melanoma of left sole                           | I     | T1N0M0   | Malignant  | 3                      | 4                     | 12                 | H                  | 3                      | 4                     | 12                 | H                  |
| ME1003    | C4       | F      | 62  | Skin       | Malignant melanoma of right thumb                         | II    | T4N0M0   | Malignant  | 0                      | 0                     | 0                  | L                  | 3                      | 4                     | 12                 | H                  |
| ME1003    | C5       | F      | 66  | Skin       | Malignant melanoma of chest wall                          | II    | T4N0M0   | Malignant  | no tumor               | no tumor              | no tumor           | no tumor           | no tumor               | no tumor              | no tumor           | no tumor           |
| ME1003    | C6       | M      | 25  | Skin       | Malignant melanoma of heel                                | II    | T4N0M0   | Malignant  | 3                      | 4                     | 12                 | H                  | 3                      | 4                     | 12                 | H                  |
| ME1003    | C7       | F      | 38  | Skin       | Malignant melanoma of right toe                           | II    | T4N0M0   | Malignant  | 1                      | 1                     | 1                  | L                  | 2                      | 1                     | 2                  | L                  |
| ME1003    | C8       | F      | 34  | Vulva      | Malignant melanoma                                        | II    | T4N0M0   | Malignant  | 2.5                    | 4                     | 10                 | H                  | 2.5                    | 4                     | 10                 | H                  |
| ME1003    | C9       | M      | 52  | Skin       | Malignant melanoma of right heel                          | IV    | T4N1M1   | Malignant  | 3                      | 4                     | 12                 | H                  | 3                      | 4                     | 12                 | H                  |
| ME1003    | C10      | M      | 51  | Skin       | Malignant melanoma of left buttocks                       | III   | T4N1M0   | Malignant  | 1.5                    | 3                     | 4.5                | M                  | 2                      | 3                     | 6                  | M                  |
| ME1003    | D1       | M      | 36  | Skin       | Malignant melanoma of back                                | II    | T3N0M0   | Malignant  | 0                      | 0                     | 0                  | L                  | 1                      | 4                     | 4                  | L                  |
| ME1003    | D2       | F      | 45  | Skin       | Malignant melanoma of left thigh                          | II    | T2N0M0   | Malignant  | 3                      | 4                     | 12                 | H                  | 3                      | 4                     | 12                 | H                  |
| ME1003    | D3       | M      | 51  | Skin       | Malignant melanoma of right outer                         | II    | T4N0M0   | Malignant  | 2.5                    | 4                     | 10                 | H                  | 3                      | 4                     | 12                 | H                  |
| ME1003    | D4       | F      | 61  | Skin       | Malignant melanoma of left foot                           | II    | T4N0M0   | Malignant  | 3                      | 4                     | 12                 | H                  | 3                      | 4                     | 12                 | H                  |
| ME1003    | D5       | M      | 66  | Skin       | Malignant melanoma of right thigh                         | II    | T4N0M0   | Malignant  | 3                      | 4                     | 12                 | H                  | 3                      | 4                     | 12                 | H                  |
| ME1003    | D7       | M      | 65  | Skin       | Malignant melanoma of scalp                               | II    | T4N0M0   | Malignant  | 2.5                    | 4                     | 10                 | H                  | 2.5                    | 4                     | 10                 | H                  |
| ME1003    | D8       | M      | 45  | Skin       | Malignant melanoma of perianal                            | II    | T4N0M0   | Malignant  | 1.5                    | 4                     | 6                  | M                  | 3                      | 4                     | 12                 | H                  |
| ME1003    | D9       | F      | 73  | Skin       | Malignant melanoma of right thumb                         | II    | T3N0M0   | Malignant  | 2.5                    | 4                     | 10                 | H                  | 3                      | 3                     | 9                  | H                  |
| ME1003    | D10      | F      | 41  | Vulva      | Malignant melanoma                                        | II    | T4N0M0   | Malignant  | 1                      | 4                     | 4                  | L                  | 1.5                    | 2                     | 3                  | L                  |
| ME1003    | E1       | F      | 72  | Vulva      | Malignant melanoma                                        | I     | T1N0M0   | Malignant  | 3                      | 4                     | 12                 | H                  | 2.5                    | 4                     | 10                 | H                  |
| ME1003    | E2       | F      | 72  | Skin       | Malignant melanoma of right cheek                         | II    | T4N0M0   | Malignant  | 2.5                    | 4                     | 10                 | H                  | 2.5                    | 4                     | 10                 | H                  |
| ME1003    | E3       | F      | 46  | Skin       | Malignant melanoma (sparse) with necrosis of right thumb  | II    | T4N0M0   | Malignant  | 2.5                    | 4                     | 10                 | H                  | 2.5                    | 4                     | 10                 | H                  |
| ME1003    | E4       | F      | 17  | Skin       | Malignant melanoma of right upper arm                     | II    | T2N0M0   | Malignant  | 3                      | 4                     | 12                 | H                  | 3                      | 4                     | 12                 | H                  |
| ME1003    | E5       | M      | 53  | Skin       | Malignant melanoma of right sole                          | II    | T4N0M0   | Malignant  | 3                      | 4                     | 12                 | H                  | 3                      | 4                     | 12                 | H                  |
| ME1003    | E6       | F      | 56  | Skin       | Malignant melanoma of left leg                            | II    | T3N0M0   | Malignant  | 3                      | 4                     | 12                 | H                  | 3                      | 4                     | 12                 | H                  |
| ME1003    | E7       | M      | 70  | Skin       | Malignant melanoma of right sole                          | II    | T4N0M0   | Malignant  | 3                      | 4                     | 12                 | H                  | 3                      | 4                     | 12                 | H                  |
| ME1003    | E8       | M      | 65  | Skin       | Malignant melanoma with necrosis of right thumb           | II    | T4N0M0   | Malignant  | 1                      | 2                     | 2                  | L                  | 3                      | 4                     | 12                 | H                  |
| ME1003    | E9       | M      | 76  | Skin       | Malignant melanoma of right medial malleolus              | II    | T4N0M0   | Malignant  | 1.5                    | 4                     | 6                  | M                  | 2                      | 3                     | 6                  | M                  |
| ME1003    | E10      | F      | 54  | Skin       | Malignant melanoma of left heel                           | II    | T4N0M0   | Malignant  | 2.5                    | 4                     | 10                 | H                  | 2                      | 4                     | 8                  | M                  |
| ME1003    | F1       | M      | 49  | Skin       | Malignant melanoma of left foot                           | III   | T4N2M0   | Malignant  | 0                      | 0                     | 0                  | L                  | 3                      | 4                     | 12                 | H                  |
| ME1003    | F2       | M      | 55  | Skin       | Malignant melanoma of right buttocks                      | II    | T4N0M0   | Malignant  | 2.5                    | 3                     | 7.5                | M                  | 2                      | 3                     | 6                  | M                  |
| ME1003    | F3       | M      | 74  | Skin       | Malignant melanoma of left sole                           | II    | T4N0M0   | Malignant  | 3                      | 4                     | 12                 | H                  | 3                      | 4                     | 12                 | H                  |
| ME1003    | F4       | M      | 65  | Skin       | Malignant melanoma of right sole                          | II    | T2N0M0   | Malignant  | 3                      | 4                     | 12                 | H                  | 3                      | 4                     | 12                 | H                  |
| ME1003    | F5       | M      | 31  | Skin       | Malignant melanoma of scalp                               | II    | T4N0M0   | Malignant  | 0                      | 0                     | 0                  | L                  | 3                      | 4                     | 12                 | H                  |
| ME1003    | F6       | F      | 41  | Skin       | Malignant melanoma of scalp                               | II    | T4N0M0   | Malignant  | 3                      | 4                     | 12                 | H                  | 3                      | 4                     | 12                 | H                  |
| ME482     | A1       | M      | 70  | Skin       | Malignant melanoma of prefrons                            | II    | T3N0M0   | Malignant  | 0                      | 0                     | 0                  | L                  | 3                      | 4                     | 12                 | H                  |
| ME482     | A2       | F      | 46  | Skin       | Malignant melanoma of right halluces                      | II    | T4N0M0   | Malignant  | 2.5                    | 4                     | 10                 | H                  | 2.5                    | 4                     | 10                 | H                  |
| ME482     | A5       | M      | 80  | Skin       | Malignant melanoma of right sole of foot                  | II    | T4N0M0   | Malignant  | 2.5                    | 4                     | 10                 | H                  | 2.5                    | 4                     | 10                 | H                  |
| ME482     | A6       | M      | 40  | Skin       | Malignant melanoma of right sole of foot                  | II    | T3N0M0   | Malignant  | 2.5                    | 4                     | 10                 | H                  | 2.5                    | 4                     | 10                 | H                  |
| ME482     | B2       | M      | 36  | Skin       | Malignant melanoma of right chest wall                    | II    | T4aN0M0  | Malignant  | 2                      | 1                     | 2                  | L                  | 3                      | 4                     | 12                 | H                  |
| ME482     | B5       | F      | 74  | Skin       | Malignant melanoma of right heel                          | II    | T2N0M0   | Malignant  | 2.5                    | 4                     | 10                 | H                  | 2.5                    | 4                     | 10                 | H                  |
| ME482     | C1       | F      | 53  | Skin       | Malignant melanoma of back                                | II    | T3N0M0   | Malignant  | 3                      | 4                     | 12                 | H                  | 3                      | 4                     | 12                 | H                  |
| ME482     | C2       | M      | 78  | Skin       | Malignant melanoma of right leg                           | II    | T4bN0M0  | Malignant  | 3                      | 4                     | 12                 | H                  | 2.5                    | 4                     | 10                 | H                  |
| ME482     | C3       | M      | 76  | Skin       | Malignant melanoma of right cheeks                        | II    | T3N0M0   | Malignant  | 2.5                    | 4                     | 10                 | H                  | 2.5                    | 4                     | 10                 | H                  |
| ME482     | C6       | M      | 61  | Skin       | Malignant melanoma of left armpit                         | IV    | T4bN0M1a | Malignant  | 3                      | 4                     | 12                 | H                  | 2.5                    | 4                     | 10                 | H                  |
| ME482     | D5       | M      | 61  | Skin       | Malignant melanoma of right groin                         | II    | T3N0M0   | Malignant  | 2.5                    | 4                     | 10                 | H                  | 2.5                    | 4                     | 10                 | H                  |
| ME482     | E1       | M      | 52  | Skin       | Malignant melanoma of right sole of foot                  | I     | T2N0M0   | Malignant  | 3                      | 4                     | 12                 | H                  | 2.5                    | 4                     | 10                 | H                  |
| ME482     | E2       | M      | 56  | Skin       | Malignant melanoma of left heel                           | II    | T3N0M0   | Malignant  | 2.5                    | 4                     | 10                 | H                  | 2.5                    | 4                     | 10                 | H                  |
| ME482     | E5       | M      | 55  | Skin       | Malignant melanoma of back                                | II    | T3N0M0   | Malignant  | 2.5                    | 4                     | 10                 | H                  | 3                      | 4                     | 12                 | H                  |
| ME482     | E6       | M      | 51  | Skin       | Malignant melanoma of chest wall                          | II    | T4N0M0   | Malignant  | 2                      | 4                     | 6                  | M                  | 2.5                    | 4                     | 10                 | H                  |
| ME482     | F2       | F      | 43  | Skin       | Malignant melanoma of jaw bones                           | II    | T4N0M0   | Malignant  | 3                      | 4                     | 12                 | H                  | 3                      | 4                     | 12                 | H                  |
| ME482     | F6       | M      | 52  | Skin       | Malignant melanoma of abdominal part                      | II    | T4N0M0   | Malignant  | 1.5                    | 4                     | 6                  | M                  | 1.5                    | 4                     | 6                  | M                  |
| ME1003    | F7       | F      | 63  | Lymph node | Metastatic malignant melanoma of right groin              | -     | -        | Metastasis | 3                      | 4                     | 12                 | H                  | 3                      | 4                     | 12                 | H                  |
| ME1003    | F8       | M      | 48  | Lymph node | Metastatic malignant melanoma of right groin              | -     | -        | Metastasis | 3                      | 4                     | 12                 | H                  | 3                      | 4                     | 12                 | H                  |
| ME1003    | F9       | F      | 55  | Lymph node | Metastatic malignant melanoma with necrosis of left groin | -     | -        | Metastasis | 2.5                    | 3                     | 7.5                | M                  | 2.5                    | 3                     | 7.5                | M                  |
| ME1003    | F10      | M      | 44  | Lymph node | Metastatic malignant melanoma of right outer              | -     | -        | Metastasis | 1.5                    | 4                     | 6                  | M                  | 0                      | 0                     | 0                  | L                  |
| ME1003    | G1       | M      | 72  | Lymph node | Metastatic malignant melanoma of right groin              | -     | -        | Metastasis | 0                      | 0                     | 0                  | L                  | 3                      | 4                     | 12                 | H                  |
| ME1003    | G2       | F      | 47  | Lymph node | Metastatic malignant melanoma of right outer              | -     | -        | Metastasis | 0                      | 0                     | 0                  | L                  | 2                      | 4                     | 8                  | L                  |
| ME1003    | G3       | M      | 63  | Lymph node | Metastatic malignant melanoma of right neck               | -     | -        | Metastasis | 0                      | 0                     | 0                  | L                  | 3                      | 4                     | 12                 | M                  |
| ME1003    | G4       | F      | 40  | Lymph node | Metastatic malignant melanoma of right groin              | -     | -        | Metastasis | 3                      | 4                     | 12                 | H                  | 3                      | 4                     | 12                 | H                  |
| ME1003    | G5       | M      | 70  | Lymph node | Metastatic malignant melanoma of right outer              | -     | -        | Metastasis | 2                      | 3                     | 6                  | M                  | 2                      | 3                     | 6                  | M                  |
| ME1003    | G6       | M      | 56  | Lymph node | Metastatic malignant melanoma of left preauricula         | -     | -        | Metastasis | 3                      | 4                     | 12                 | H                  | 3                      | 4                     | 12                 | H                  |
| ME1003    | G7       | M      | 68  | Lymph node | Metastatic malignant melanoma of right neck               | -     | -        | Metastasis | 1.5                    | 4                     | 6                  | M                  | 2.5                    | 4                     | 10                 | H                  |

|                  |     |   |    |            |                                                             |   |   |            |           |           |           |           |           |           |           |          |
|------------------|-----|---|----|------------|-------------------------------------------------------------|---|---|------------|-----------|-----------|-----------|-----------|-----------|-----------|-----------|----------|
| ME1003           | G8  | F | 72 | Lymph node | Metastatic malignant melanoma of left groin                 | - | - | Metastasis | 3         | 4         | 12        | H         | 2.5       | 4         | 10        | H        |
| ME1003           | G9  | F | 41 | Lymph node | Metastatic malignant melanoma of left groin                 | - | - | Metastasis | 0         | 0         | 0         | L         | 2.5       | 4         | 10        | H        |
| ME1003           | G10 | F | 61 | Lymph node | Metastatic malignant melanoma of right groin                | - | - | Metastasis | 0         | 0         | 0         | L         | 2         | 2         | 4         | L        |
| ME1003           | H1  | F | 42 | Lymph node | Metastatic malignant melanoma of groin                      | - | - | Metastasis | 3         | 4         | 12        | H         | 2.5       | 4         | 10        | H        |
| ME1003           | H2  | F | 43 | Lymph node | Metastatic malignant melanoma of groin                      | - | - | Metastasis | 3         | 3         | 9         | H         | 3         | 4         | 12        | H        |
| ME1003           | H3  | F | 56 | Lymph node | Metastatic malignant melanoma of right groin                | - | - | Metastasis | 2.5       | 4         | 10        | H         | 2.5       | 4         | 10        | H        |
| ME1003           | H4  | F | 56 | Lymph node | Metastatic malignant melanoma of groin                      | - | - | Metastasis | 3         | 4         | 12        | H         | 3         | 4         | 12        | H        |
| ME1003           | H5  | F | 49 | Lymph node | Metastatic malignant melanoma of neck                       | - | - | Metastasis | 3         | 4         | 12        | H         | 3         | 4         | 12        | H        |
| ME1003           | H6  | F | 41 | Lymph node | Metastatic malignant melanoma of left groin                 | - | - | Metastasis | 2.5       | 4         | 10        | H         | 3         | 4         | 12        | H        |
| ME1003           | H8  | F | 29 | Skin       | Atypical melanophoric nevus of left shoulder                | - | - | Benign     | 2         | 3         | 6         | M         | 3         | 3         | 9         | H        |
| ME1003           | H9  | F | 36 | Skin       | Intradermal nevus of left abdominal wall                    | - | - | Benign     | 2.5       | 4         | 10        | H         | 3         | 4         | 12        | H        |
| ME1003           | H10 | F | 35 | Skin       | Intradermal nevus of chest wall                             | - | - | Benign     | 1         | 1         | 1         | L         | 0         | 0         | 0         | L        |
| ME1003           | I1  | F | 23 | Skin       | Compound nevus of right waist                               | - | - | Benign     | 3         | 4         | 12        | H         | 2.5       | 4         | 10        | H        |
| ME1003           | I2  | M | 25 | Skin       | Compound nevus of left leg                                  | - | - | Benign     | 2         | 3         | 6         | M         | 3         | 2         | 6         | M        |
| ME1003           | I3  | M | 20 | Skin       | Intradermal nevus of left shoulder                          | - | - | Benign     | 1.5       | 3         | 4.5       | M         | 2         | 3         | 6         | M        |
| ME1003           | I4  | M | 19 | Skin       | Intradermal nevus of right cheek                            | - | - | Benign     | 2         | 3         | 6         | M         | 2         | 3         | 6         | M        |
| ME1003           | I5  | F | 10 | Skin       | Atypical melanophoric nevus of right dorsum of foot         | - | - | Benign     | 2         | 3         | 6         | M         | 2         | 3         | 6         | M        |
| ME1003           | I6  | F | 2  | Skin       | Intradermal nevus of frontal region                         | - | - | Benign     | 2         | 3         | 6         | M         | 2         | 3         | 6         | M        |
| ME1003           | I7  | M | 6  | Skin       | Compound nevus of left face                                 | - | - | Benign     | 2         | 2         | 4         | L         | 1         | 3         | 3         | L        |
| ME1003           | I8  | M | 51 | Skin       | Intradermal nevus of face                                   | - | - | Benign     | 2         | 3         | 6         | M         | 2         | 3         | 6         | M        |
| ME1003           | I9  | M | 25 | Skin       | Intradermal nevus (sparse) of scalp                         | - | - | Benign     | 2         | 3         | 6         | M         | 2         | 3         | 6         | M        |
| ME1003           | I10 | M | 46 | Skin       | Intradermal nevus of back                                   | - | - | Benign     | 2         | 3         | 6         | M         | 1         | 1         | 1         | L        |
| ME1003           | J1  | F | 2  | Skin       | Intradermal nevus of left leg                               | - | - | Benign     | 1         | 4         | 4         | L         | 2         | 2         | 4         | L        |
| ME1003           | J2  | M | 42 | Skin       | Intradermal nevus of face                                   | - | - | Benign     | 2         | 3         | 6         | M         | 2         | 3         | 6         | M        |
| ME1003           | J3  | M | 11 | Skin       | Intradermal nevus of left thigh                             | - | - | Benign     | 1         | 2         | 2         | L         | 2         | 2         | 4         | L        |
| ME1003           | J4  | F | 30 | Skin       | Compound nevus of right buttocks                            | - | - | Benign     | 1.5       | 4         | 6         | M         | 2         | 3         | 6         | M        |
| ME1003           | J6  | M | 39 | Skin       | Compound nevus of scalp                                     | - | - | Benign     | 2         | 4         | 6         | M         | 3         | 6         | 6         | M        |
| ME1003           | J7  | F | 7  | Skin       | Junctional nevus of right forearm                           | - | - | Benign     | 3         | 3         | 9         | H         | 3         | 3         | 9         | H        |
| ME1003           | J8  | M | 50 | Skin       | Compound nevus of upper arm                                 | - | - | Benign     | 1.5       | 3         | 4.5       | M         | 2         | 3         | 6         | M        |
| Melanocyte Data: |     |   |    |            |                                                             |   |   |            |           |           |           |           |           |           |           |          |
| ME482            | A3  | M | 31 | Skin       | Adjacent normal skin tissue of femoribus internus           | - | - | NAT        | 3         | 1         | 3         | L         | 2         | 2         | 4         | L        |
| ME482            | A4  | M | 51 | Skin       | Adjacent normal skin tissue of left upper abdominal wall    | - | - | NAT        | 3         | 1         | 3         | L         | 2         | 2         | 4         | L        |
| ME482            | A7  | F | 40 | Skin       | Normal skin tissue of abdominal part                        | - | - | Normal     | 3         | 1         | 3         | L         | 3         | 1         | 3         | L        |
| ME482            | A8  | M | 70 | Skin       | Adjacent normal skin tissue of face                         | - | - | NAT        | 2         | 2         | 4         | L         | 2         | 2         | 4         | L        |
| ME482            | B3  | M | 37 | Skin       | Normal skin tissue of abdominal part                        | - | - | Normal     | 1         | 1         | 1         | L         | 2         | 1         | 2         | L        |
| ME482            | B4  | M | 37 | Skin       | Normal skin tissue of abdominal part                        | - | - | Normal     | 3         | 2         | 6         | M         | 3         | 2.5       | 7.5       | M        |
| ME482            | B7  | F | 45 | Skin       | Adjacent normal skin tissue of superciliary arch            | - | - | NAT        | 3         | 4         | 12        | H         | 3         | 4         | 12        | H        |
| ME482            | B8  | M | 41 | Skin       | Adjacent normal skin tissue of left leg                     | - | - | NAT        | 2         | 2         | 4         | L         | 2         | 2         | 4         | L        |
| ME482            | C3  | M | 37 | Skin       | Normal skin tissue                                          | - | - | Normal     | 3         | 1         | 3         | L         | 3         | 1         | 3         | L        |
| ME482            | C4  | M | 37 | Skin       | Normal skin tissue of abdominal part (sparse)               | - | - | Normal     | 2         | 2         | 4         | L         | 2         | 2         | 4         | L        |
| ME482            | C7  | F | 40 | Skin       | Normal skin tissue of scalp (sebaceous glands tissue)       | - | - | Normal     | no tissue | no tissue | no tissue | no tissue | no tissue | no tissue | no tissue | no tumor |
| ME482            | C8  | F | 40 | Skin       | Normal skin tissue of abdominal part                        | - | - | Normal     | 3         | 3         | 3         | L         | 3         | 3         | 9         | M        |
| ME482            | D3  | M | 37 | Skin       | Normal skin tissue                                          | - | - | Normal     | 2         | 2         | 4         | L         | 2         | 1         | 2         | L        |
| ME482            | D4  | M | 37 | Skin       | Normal skin tissue                                          | - | - | Normal     | no tissue | no tissue | no tissue | no tissue | no tissue | no tissue | no tissue | no tumor |
| ME482            | D7  | M | 61 | Skin       | Normal skin tissue of right groin                           | - | - | NAT        | 0         | 0         | 0         | L         | 2         | 1         | 2         | L        |
| ME482            | D8  | M | 35 | Skin       | Normal skin tissue                                          | - | - | NAT        | 3         | 3         | 9         | M         | 3         | 2         | 6         | M        |
| ME482            | E3  | M | 37 | Skin       | Normal skin tissue                                          | - | - | Normal     | 3         | 2         | 6         | M         | 3         | 2         | 6         | M        |
| ME482            | E4  | M | 37 | Skin       | Normal skin tissue of scalp                                 | - | - | Normal     | no tissue | no tissue | no tissue | no tissue | no tissue | no tissue | no tissue | no tumor |
| ME482            | E7  | M | 55 | Skin       | Adjacent normal skin tissue of back                         | - | - | NAT        | 2         | 1         | 2         | L         | 2         | 2         | 4         | L        |
| ME482            | E8  | M | 37 | Skin       | Normal skin tissue of abdominal part                        | 2 | - | Normal     | 2         | 2         | 4         | L         | 2         | 2         | 4         | L        |
| ME482            | F3  | F | 61 | Skin       | Adjacent normal skin tissue of left sole of foot (keratose) | - | - | NAT        | no tissue | no tissue | no tissue | no tissue | no tissue | no tissue | no tissue | no tumor |
| ME482            | F4  | M | 37 | Skin       | Normal skin tissue of abdominal part                        | - | - | Normal     | 3         | 2         | 6         | M         | 3         | 2         | 6         | M        |
| ME482            | F7  | M | 37 | Skin       | Normal skin tissue of abdominal part                        | - | - | Normal     | 2         | 2         | 6         | M         | 2         | 3         | 6         | M        |
| ME482            | F8  | M | 19 | Skin       | Normal skin tissue of abdominal part                        | - | - | Normal     | 3         | 3         | 9         | M         | NT        | NT        | NT        | NT       |
